# Supplementary material for: Crumbs organizes the transport machinery by regulating apical levels of PI(4,5)P2 in Drosophila
Source: eLife. 2019 Nov 7;8:e50900. doi: 10.7554/eLife.50900 (PMC6881148; doi:10.7554/eLife.50900)
Supplement: Figure 1—figure supplement 1—source data 1. [file elife-50900-fig1-figsupp1-data1.xlsx]

## Sheet: Sheet1
Salivary gland length (mm) measured in live glands expressing PLCdelta-PH-EGFP
Control	crbRNAi	sdtRNAi
502.94	309.082	265.953
354.06	293.525	300.132
313.25	361.562	303.148
354.62	330.102	297.42
360.54	342.885	307.412
317.73	318.156	291.028
325.58	386.381	254.775
391.28	297.899	318.16
409.269	443.143	291.121
584.085	325.801	253.955
286.833	425.369	297.626
337.991	281.862
530.648	345.62
605.129	515.951
325.287	257.138
312.725	299.849
541.707	336.121
395.967	366.834
	257.363
	343.517
