# Supplementary material for: Crumbs organizes the transport machinery by regulating apical levels of PI(4,5)P2 in Drosophila
Source: eLife. 2019 Nov 7;8:e50900. doi: 10.7554/eLife.50900 (PMC6881148; doi:10.7554/eLife.50900)
Supplement: Figure 1—figure supplement 1—source data 2. [file elife-50900-fig1-figsupp1-data2.xlsx]

## Sheet: Figure 1 Figure Supplement 1
	Original counts
	Experiment 1
		w*;;fkhGAL4/+			w*;;+/UAS-sdtRNAi			w*;;fkhGAL4/UAS-sdtRNAi
	Time (hours after egg laying)	# of pupae found	percentage	accumulative percentage	total count of pupae	percentage	accumulative percentage	total count of pupae	percentage	accumulative percentage
	72	0	0	0	0	0	0	0	0	0
	96	12	50	50	5	20.8333	20.8333	6	13.9535	13.9535
	99	8	33.3333	83.3333	7	29.1667	50	10	23.2558	37.2093
	105	2	8.33333	91.6667	3	12.5	62.5	13	30.2326	67.4419
	113	1	4.16667	95.8333	3	12.5	75	8	18.6047	86.0465
	137	1	4.16667	100	4	16.6667	91.6667	6	13.9535	100
	164	0	0	100	0	0	91.6667	0	0	100
	194	0	0	100	2	8.33333	100	0	0	100
	total number of animals	24			24			43
	Experiment 2
	Time (hours after egg laying)	w*;;fkhGAL4/+			w*;;+/UAS-sdtRNAi			w*;;fkhGAL4/UAS-sdtRNAi
		total count of pupae	percentage	accumulative percentage	total count of pupae	percentage	accumulative percentage	total count of pupae	percentage	accumulative percentage
	72	0	0	0	0	0	0	0	0	0
	96	2	8	8	13	56.5217	56.5217	1	5	5
	99	8	32	40	5	21.7391	78.2609	3	15	20
	105	4	16	56	3	13.0435	91.3043	11	55	75
	113	4	16	72	1	4.34783	95.6522	1	5	80
	137	7	28	100	1	4.34783	100	3	15	95
	164	0	0	100	0	0	100	1	5	100
	194	0	0	100	0	0	100	0	0	100
	toal number of animals	25			23			20
	Experiment 3
	Time (hours after egg laying)	w*;;fkhGAL4/+			w*;;+/UAS-sdtRNAi			w*;;fkhGAL4/UAS-sdtRNAi
		total count of pupae	percentage	accumulative percentage	total count of pupae	percentage	accumulative percentage	total count of pupae	percentage	accumulative percentage
	72	0	0	0	0	0	0	0	0	0
	96	14	51.8519	51.8519	12	85.7143	85.7143	1	8.33333	8.33333
	99	3	11.1111	62.963	0	0	85.7143	1	8.33333	16.6667
	105	7	25.9259	88.8889	0	0	85.7143	3	25	41.6667
	113	2	7.40741	96.2963	0	0	85.7143	1	8.33333	50
	137	1	3.7037	100	2	14.2857	100	5	41.6667	91.6667
	164	0	0	100	0	0	100	0	0	91.6667
	194	0	0	100	0	0	100	1	8.33333	100
	toal number of animals	27			14			12
	Summary
		w*;;fkhGAL4/+
	Time (hours after egg laying)	Exp 1	Exp 2	Exp 3	Average
	72	0	0	0	0
	96	50	8	51.8519	36.6173
	99	83.3333	40	62.963	62.0988
	105	91.6667	56	88.8889	78.8519
	113	95.8333	72	96.2963	88.0432
	137	100	100	100	100
	164	100	100	100	100
	194	100	100	100	100
		w*;;+/UAS-sdtRNAi
	Time (hours after egg laying)	Exp 1	Exp 2	Exp 3	Average
	72	0	0	0	0
	96	20.8333	56.5217	85.7143	54.3565
	99	50	78.2609	85.7143	71.3251
	105	62.5	91.3043	85.7143	79.8395
	113	75	95.6522	85.7143	85.4555
	137	91.6667	100	100	97.2222
	164	91.6667	100	100	97.2222
	194	100	100	100	100
		w*;;fkhGAL4/UAS-sdtRNAi
	Time (hours after egg laying)	Exp 1	Exp 2	Exp 3	Average
	72	0	0	0	0
	96	13.9535	5	8.33333	9.09561
	99	37.2093	20	16.6667	24.6253
	105	67.4419	75	41.6667	61.3695
	113	86.0465	80	50	72.0155
	137	100	95	91.6667	95.5556
	164	100	100	91.6667	97.2222
	194	100	100	100	100
	Data for graph
	Time (hours after egg laying)	w*;;fkhGAL4/+	w*;;+/UAS-sdtRNAi	w*;;fkhGAL4/UAS-sdtRNAi
	72	0	0	0
	96	36.6173	54.3565	9.09561
	99	62.0988	71.3251	24.6253
	105	78.8519	79.8395	61.3695
	113	88.0432	85.4555	72.0155
	137	100	97.2222	95.5556
	164	100	97.2222	97.2222
	194	100	100	100
