# Supplementary material for: Crumbs organizes the transport machinery by regulating apical levels of PI(4,5)P2 in Drosophila
Source: eLife. 2019 Nov 7;8:e50900. doi: 10.7554/eLife.50900 (PMC6881148; doi:10.7554/eLife.50900)
Supplement: Figure 1—figure supplement 1—source data 4. [file elife-50900-fig1-figsupp1-data4.xlsx]

## Sheet: Image6
X0	Y0	Y1	Y2	Y3	Y4	Y5	Y6	Y7	Y8	Y9	Y10	Y11	Y12	Y13	Y14	Y15	Y16	Y17	Y18	Y19	Y20	Y21	Y22	Y23		Ap-Ba	Average int
0	7.93167	9.2392	10.884	10.576	9.2762	7.4842	10.0528	11.0134	25.908	32.6923	18.7873	29.321	34.291	20.8027	20.1996	14.8761	23.5374	31.8649	21.314	24.0105	21.9846	25.5651	19.6133	12.8078		0	18.918
0.119	5.66146	11.084	12.2564	15.4776	14.2127	7.8634	13.8177	10.5128	29.217	33.3716	28.9062	37.8324	42.8467	19.3268	23.9353	19.0268	33.2232	27.1432	23.8907	25.2301	27.6306	29.7553	19.815	14.3056		0.00628748	21.9309
0.2381	6.11341	12.6045	16.1956	16.0047	18.7738	13.5617	12.9729	13.6191	29.4622	45.6471	36.3984	56.0493	32.3537	25.5501	25.7611	14.1157	35.8094	28.7558	30.4695	28.4546	32.1721	33.3795	21.3059	18.0023		0.0125802	25.1472
0.3571	7.83317	12.9663	19.7047	16.5955	8.2659	24.3431	26.6831	14.5006	29.3461	57.2943	48.196	47.2934	39.2245	24.6111	24.4763	26.2955	41.7192	31.2146	28.8764	33.6371	27.2823	41.6617	23.182	14.3409		0.0188677	27.8977
0.4761	4.62385	16.1727	16.6963	17.5522	16.6916	19.7901	16.7327	18.7926	39.6142	64.9494	51.3283	55.0131	37.8311	25.7761	29.4819	24.9043	43.3153	40.0294	34.7462	40.2095	32.0834	37.0229	33.5444	18.5063		0.0251552	30.642
0.5952	1.55134	10.8758	15.6351	18.0531	16.4225	21.9439	18.6018	15.1327	44.9473	60.0959	56.0958	59.1055	45.6685	20.9968	36.7742	28.4125	58.5738	44.4485	36.6068	44.5419	38.4538	41.0126	29.2883	18.8093		0.031448	32.5853
0.7142	5.69267	13.9122	17.2781	18.6229	21.3585	23.755	24.8928	16.8945	55.8044	62.3215	48.0435	66.9402	32.1196	30.1369	39.6614	29.8978	57.2944	49.6364	36.6723	46.3454	46.7738	36.682	33.209	17.2775		0.0377355	34.6343
0.8332	4.31159	10.968	11.081	19.4131	22.449	29.5883	21.0715	25.1779	63.0605	66.8336	45.3859	64.5284	27.6895	20.3441	35.8443	33.1053	52.3375	64.7354	42.2517	43.5215	40.468	44.8562	28.7978	16.7439		0.0440229	34.7735
0.9523	6.09465	18.6641	11.7609	17.5862	18.0659	31.2931	23.1959	19.6633	62.1184	68.6442	64.8263	71.7749	27.2108	30.3323	30.6226	38.1119	65.4682	67.9135	39.2196	41.8252	40.5528	45.5261	47.3309	16.1839		0.0503157	37.6661
1.0713	6.94383	13.0507	10.4621	22.4736	20.4061	27.0441	23.3263	19.0605	60.9268	69.9497	61.7378	73.5158	31.3492	26.5324	33.9752	29.1118	63.0007	80.4903	44.7671	46.125	39.0835	34.1947	43.7926	21.1335		0.0566032	37.6022
1.1903	3.43941	6.8586	12.3982	18.4006	17.1842	27.3061	17.1902	23.072	63.5465	65.4803	66.3664	59.0424	27.3844	23.5967	30.692	29.6911	64.6704	76.5726	43.438	58.4934	41.6305	41.6944	43.6489	9.7668		0.0628907	36.3152
1.3094	1.9125	14.2591	10.9125	20.8296	14.5189	26.7635	18.214	23.9232	60.1414	66.6711	57.2853	51.1539	33.9907	20.8346	23.8433	25.8035	59.1755	74.2445	43.1242	50.1735	42.8983	48.1919	46.7188	9.6025		0.0691834	35.2161
1.4284	2.72357	10.6143	14.3714	22.6725	16.8217	24.634	17.7595	19.8313	70.6995	54.8108	50.3746	40.6139	37.6214	21.6494	30.6193	23.795	48.285	66.7317	40.6129	53.4839	39.5998	38.4781	41.8895	10.6132		0.0754709	33.3044
1.5474	3.76635	16.2798	11.8243	18.1844	15.0651	22.8677	16.1369	21.1478	67.7438	46.3799	53.8323	33.7714	43.2003	22.2678	22.31	30.2096	46.3465	56.5324	37.9307	53.9427	52.562	29.9799	43.3066	9.3249		0.0817584	32.288
1.6665	5.00925	10.9317	8.5738	20.6751	14.601	14.9378	15.9332	18.4593	54.2394	35.5651	46.7535	26.4166	51.1742	17.9171	26.7713	32.3107	54.0048	62.8459	44.8782	37.5079	52.5124	31.1333	33.8053	7.7893		0.0880511	30.1978
1.7855	4.70439	13.8806	9.2248	20.5442	19.2285	12.8347	18.6531	25.762	55.9463	48.2063	37.7339	30.1663	58.1205	15.4857	23.2405	33.9274	45.5835	72.042	44.4362	36.7396	58.2241	38.9131	41.9604	10.4959		0.0943386	32.3356
1.9046	4.37988	12.7805	16.2522	18.677	17.4446	20.5857	15.642	23.0833	68.6754	36.9722	37.4038	25.4736	48.762	23.4182	26.5769	31.1282	49.649	68.7737	54.8837	37.0778	53.983	34.8214	43.1298	8.5729		0.100631	32.4228
2.0236	4.65468	9.5644	9.2483	8.4833	14.0492	15.189	12.1984	20.0905	65.4413	36.5287	30.3763	33.4235	49.0889	14.8798	23.1199	29.9264	35.0053	66.3647	54.5265	44.8615	46.6412	29.8741	43.4923	8.1382		0.106919	29.3819
2.1426	6.23685	10.0355	9.7413	8.8664	17.3329	12.69	18.7093	16.8276	56.272	39.9906	28.1136	29.4582	53.8324	20.7316	29.679	30.2132	40.2246	74.9098	54.4391	34.5277	39.1316	38.6664	37.311	7.8015		0.113206	29.8226
2.2617	5.85638	12.4195	10.6502	10.7199	7.1376	12.044	16.1146	17.7212	62.5094	48.4968	37.8408	28.2823	47.9147	12.5284	19.4903	37.6428	35.4243	63.7734	51.9472	27.7588	35.0261	25.5694	31.841	7.3446		0.119499	27.7522
2.3807	6.62594	9.4774	7.5943	7.7178	11.1672	15.4261	13.0909	16.3126	52.6274	29.9079	30.5341	31.6357	44.6495	15.6471	24.2526	28.27	32.1974	66.9237	43.4154	21.2398	36.0677	25.7878	39.025	7.3159		0.125787	25.7046
2.4997	5.21488	11.6591	5.7002	11.8708	16.4166	8.6868	14.8696	16.4015	62.0073	34.5098	38.063	29.0706	41.2059	18.2735	19.3046	22.0687	33.8788	72.0005	55.893	29.9989	31.4028	34.7445	38.3619	8.5897		0.132074	27.508
2.6188	6.77453	12.257	8.048	9.809	14.0228	11.1652	15.6033	18.3392	51.5994	43.2488	32.3484	32.0847	35.2756	22.0072	13.7511	19.1497	31.071	70.6664	45.8704	24.17	29.9837	27.6411	35.5951	7.5105		0.138367	25.7497
2.7378	7.66921	12.0298	7.8485	8.2968	12.258	14.0673	17.9478	19.8288	33.6091	33.4389	32.2067	35.2914	30.624	16.5091	17.8399	24.4655	29.6682	73.6611	50.6581	21.3692	27.2031	26.4051	34.6761	7.177		0.144654	24.7812
2.8568	8.14409	8.5908	11.0087	12.8682	9.4683	9.7219	12.096	12.9668	26.5857	40.9432	34.648	26.2545	17.3862	11.932	13.3933	22.8876	25.514	57.0838	50.0368	19.9093	31.1546	31.0281	37.9764	7.3928		0.150942	22.458
2.9759	5.67631	8.8507	9.2405	15.0867	7.763	8.0559	8.4648	24.7115	24.1161	31.4076	27.7225	28.6417	21.2424	7.7584	14.4292	21.3363	29.4046	56.0597	43.2817	22.9118	23.5744	24.5122	32.8092	9.39		0.157235	21.102
3.0949	7.59403	7.8099	9.6779	14.8167	10.1487	11.15	6.378	19.2293	26.872	19.6021	26.5775	20.5496	14.6448	12.55	18.0221	18.6687	27.8562	54.5074	40.1257	25.8023	29.0374	23.3019	30.4794	7.0214		0.163522	20.101
3.2139	6.87896	6.3776	10.9589	13.5049	9.1931	9.2174	9.7685	24.3163	21.4049	24.3922	27.467	26.2132	17.9402	14.6857	11.7426	18.2229	26.3682	42.3392	47.9799	22.5601	21.5813	29.9623	25.0207	8.7318		0.16981	19.8678
3.333	9.50671	7.1646	7.8424	8.9391	8.3599	8.3829	9.144	15.6972	19.6524	25.8213	21.2648	33.7227	12.8231	13.311	13.7274	19.206	24.2839	43.6282	39.3207	16.7133	20.5447	25.6981	31.0755	8.8343		0.176102	18.5277
3.452	4.24628	5.5418	4.8206	5.2413	9.6765	8.6443	6.6396	17.2557	18.9103	28.8435	18.527	21.7621	13.439	16.9622	16.1551	17.535	24.9744	54.4831	33.8348	18.1346	23.442	25.875	31.3084	5.8525		0.18239	18.0044
3.571	8.91174	1.9118	9.2984	10.8168	8.4536	8.343	6.4082	22.4141	13.665	29.3276	24.5568	25.4726	16.9321	20.8663	17.5696	14.7275	24.505	53.6874	34.6568	18.0824	22.2884	27.644	34.5277	7.8769		0.188677	19.2893
3.6901	7.34184	4.0386	6.5554	10.3192	5.3495	13.5031	10.7802	11.9517	12.1338	22.5487	25.1696	25.9093	13.7527	15.509	11.0731	10.7859	20.002	50.2849	28.7146	18.7313	25.3929	27.4712	38.3342	6.61		0.19497	17.5943
3.8091	4.62215	4.1296	10.5354	11.2437	8.3068	10.4256	12.517	13.286	16.1986	28.4526	16.6393	24.5905	13.0596	11.6877	15.8553	16.8222	27.8223	55.09	22.6953	18.8919	20.1468	28.3224	26.5228	7.3367		0.201257	17.7167
3.9281	5.3462	7.221	8.6017	10.1147	7.6063	9.2897	12.9721	14.4422	10.5907	24.3918	16.3619	19.1673	10.5228	8.9526	16.4019	11.2003	20.699	49.0562	26.1432	14.4715	23.5632	25.2668	36.0726	7.8891		0.207545	16.5144
4.0472	5.98862	4.5054	8.7513	11.2357	9.3017	8.3372	10.5651	14.0576	12.6669	26.6232	18.4722	16.4326	9.4627	10.6705	10.7244	10.4176	24.5088	50.4609	27.4311	17.4184	19.3912	26.053	35.5052	7.7171		0.213838	16.5291
4.1662	8.97776	6.6961	9.1426	12.1888	8.3543	6.4455	8.2468	17.085	13.1243	25.0554	12.0961	16.0357	8.8197	10.1643	9.6282	12.0353	24.9459	41.6472	24.211	18.114	27.3774	37.088	34.3762	9.5046		0.220125	16.7233
4.2852	5.84816	7.1068	7.6591	11.0166	8.5382	7.1042	5.9618	14.5405	17.2454	32.1097	17.7231	23.6397	10.6833	11.0294	12.4574	13.9404	19.5738	48.454	18.5944	14.2522	23.8816	33.818	40.0163	8.7875		0.226413	17.2492
4.4043	6.09394	5.7933	9.5192	10.1182	5.5087	5.132	5.06	16.6366	13.1407	29.0956	19.9139	21.8712	11.3839	11.7389	12.6034	16.197	22.567	41.787	17.3524	12.6402	27.3218	27.4192	28.1998	7.5325		0.232705	16.0261
4.5233	8.46595	4.5615	11.5607	14.8018	9.6315	5.4296	6.7203	9.1355	13.8112	22.4364	15.3161	19.9808	8.9288	15.3199	9.0617	15.2665	21.1442	42.7223	17.1488	14.467	21.2973	31.987	23.3803	8.8273		0.238993	15.4751
4.6423	9.32774	7.1248	11.0492	11.5567	15.0089	5.8503	9.5369	12.97	15.1895	26.6115	14.5666	18.6755	6.9002	10.2466	7.2079	13.0187	17.4591	41.0126	16.9223	16.4643	23.4113	30.5363	22.9885	5.1516		0.24528	15.3661
4.7614	3.91744	4.3556	9.3511	12.7786	10.8938	4.3115	6.8581	10.0073	17.6907	22.198	14.6483	18.8632	7.6467	16.8122	11.8568	16.3034	20.1834	35.613	15.4502	11.6724	28.1842	32.7979	17.4504	3.4148		0.251573	14.7191
4.8804	5.24972	4.841	11.7728	9.3606	12.2443	3.1951	7.6829	15.4213	12.2677	23.4294	6.8453	13.7303	13.3612	11.1044	9.1856	17.5395	16.7031	27.1589	14.5178	23.7433	21.5077	30.4513	23.8429	7.9183		0.257861	14.2948
4.9995	7.73406	5.6927	6.7499	8.4532	8.7051	5.6818	5.5302	14.3222	14.6837	13.0139	10.0203	22.8425	8.897	14.017	10.1576	11.5133	11.017	24.6673	13.8494	16.7726	21.7918	29.1339	19.4817	7.3795		0.264153	13.0045
5.1185	10.4215	5.6382	12.2726	5.5419	9.4093	3.4514	13.1057	9.2657	14.5635	16.2671	11.0315	15.4383	7.6589	7.7821	13.1373	10.926	16.3053	23.7226	16.2319	25.5729	14.9444	31.5381	15.229	11.0348		0.270441	13.3538
5.2375	6.53228	6.8112	10.696	8.2236	13.8837	6.4851	8.5445	8.1567	11.557	11.5351	9.6872	10.6772	11.2991	11.1011	10.9916	8.2363	17.4072	27.6068	10.9127	25.9058	17.3709	29.869	10.2801	6.6096		0.276728	12.5158
5.3566	6.72595	8.6996	13.5362	8.5009	8.541	7.017	6.2373	13.1089	9.5297	12.6461	9.1292	8.0506	16.3442	8.8548	15.112	5.6284	16.3263	28.9759	15.6352	21.5852	11.6438	33.8185	17.3461	8.6336		0.283021	12.9844
5.4756	3.11316	9.5589	8.2189	8.7911	11.0447	5.4193	6.9011	11.4521	7.218	15.2833	7.2815	5.4351	12.8583	12.2519	14.3551	11.1035	9.626	28.1696	18.5101	29.0554	16.706	35.137	10.5518	6.316		0.289309	12.6816
5.5946	2.48086	6.2977	9.4723	9.5695	9.2621	3.839	8.5351	10.0011	6.6894	11.689	7.9263	13.8848	9.6348	9.7237	9.4002	9.9061	10.3803	26.9748	13.9624	27.719	13.3924	30.6816	9.9336	8.066		0.295596	11.6426
5.7137	3.67445	8.9551	9.0647	7.2721	3.884	4.6767	11.4424	11.511	8.6609	13.2074	3.5238	9.8054	17.1602	11.094	12.7873	9.0068	13.9003	29.0784	12.1947	29.9407	23.7865	27.0947	7.6726	9.1688		0.301889	12.4401
5.8327	5.01121	7.4036	9.4462	6.4304	9.2547	4.1077	11.0407	14.5602	6.9725	13.0093	6.683	11.9074	25.5806	8.3536	10.2328	5.35	12.5953	34.3895	13.3868	21.1036	21.8247	28.7311	8.7457	6.5493		0.308176	12.6112
5.9517	5.15105	10.1033	9.378	7.983	11.0618	3.2523	11.7751	11.168	8.2486	11.4161	5.4699	10.1872	15.2751	10.7153	8.1928	8.3101	20.379	21.6723	18.512	21.609	21.5179	24.4831	5.765	8.5592		0.314464	12.091
6.0708	4.64689	10.479	7.4247	6.8755	12.3477	4.3547	5.591	15.0198	8.6106	10.4496	4.0738	10.8634	18.6192	11.8741	7.0306	12.0653	13.6073	19.6846	15.7122	18.5938	19.4017	23.6664	6.8874	8.0466		0.320757	11.4969
6.1898	4.98055	9.8993	9.8311	9.3784	13.379	5.4478	7.6688	10.9781	7.2864	7.2614	3.7623	6.3829	13.6519	12.2494	5.5551	15.5071	15.4362	24.6588	14.2572	21.9415	19.3252	21.1488	8.9218	5.7812		0.327044	11.4454
6.3088	7.14775	7.1753	4.7602	9.4173	11.867	6.4928	5.7804	10.8197	8.1347	9.6782	3.9867	7.0707	14.9049	7.5106	10.4344	11.2185	15.3346	22.3037	12.1607	11.9318	18.9833	16.4065	7.7587	7.9933		0.333332	10.3863
6.4279	7.6654	11.7128	7.4064	6.5531	9.5671	7.3014	7.4596	8.4845	9.706	11.9161	5.7875	5.8198	12.7998	12.3768	9.0623	9.7716	15.2944	32.1594	11.5682	17.7857	21.7243	18.3416	11.3853	6.5392		0.339624	11.5912
6.5469	5.46379	11.1995	3.2777	8.8083	12.1472	5.2091	8.2213	8.2666	7.4403	7.0414	5.7076	6.7622	10.7857	10.8438	9.9883	10.5261	17.3281	28.2413	11.1352	12.9121	18.005	21.0947	9.2278	4.6943		0.345912	10.597
6.6659	8.63287	7.7617	1.8201	3.6554	11.8431	3.8525	11.6935	6.8002	3.5944	6.472	4.2822	7.1755	13.1509	11.4471	8.2166	8.8372	11.0459	24.9106	14.4635	14.7287	24.6527	18.5711	9.1943	6.5771		0.352199	10.1408
6.785	5.6544	5.9488	1.1447	3.7657	12.38	2.4016	6.7516	6.1352	6.5176	5.9194	3.0405	8.5263	14.7763	11.3087	6.1498	13.5716	12.9768	29.3465	14.6507	7.4154	22.552	22.0117	11.5537	5.1004		0.358492	9.98331
6.904	4.07074	4.6899	1.0366	4.8588	15.1773	1.6074	6.8618	6.9791	4.6514	7.6706	2.7858	8.764	8.0209	7.7571	8.1143	12.1681	10.5	36.1849	11.8474	10.3822	26.6895	19.3191	7.9964	4.2642		0.36478	9.68323
7.023	6.09582	5.8607	3.5486	8.1206	9.6622	3.7455	5.0992	4.349	5.8788	8.1751	1.1169	4.8741	6.3819	10.0911	5.3611	10.3404	8.3224	26.0954	12.2643	15.9992	19.6098	20.7696	4.2226	2.4223		0.371067	8.68361
7.1421	6.06179	5.3243	3.891	5.2258	7.84	9.6091	6.2835	4.9388	6.6689	3.0507	4.8584	6.8732	9.4317	6.6002	8.2263	11.1488	8.8933	22.6773	15.0438	10.5603	19.1964	13.4075	8.051	3.5267		0.37736	8.6412
7.2611	7.00834	6.7888	3.5502	1.2854	9.0631	6.4348	7.117	4.8523	7.7848	3.626	1.3918	5.8401	12.0864	4.5546	7.683	13.8854	8.3474	19.8916	8.8164	21.2061	18.6207	18.359	6.5969	5.7869		0.383647	8.77404
7.3801	6.95044	3.6111	1.0715	4.3971	7.1463	7.4557	8.463	6.9929	8.0679	2.231	2.0941	7.7452	13.5422	6.972	4.4829	8.1062	13.6225	18.6876	10.0138	14.5395	15.9299	14.3196	4.8818	6.3249		0.389935	8.23538
7.4992	3.10296	2.971	0.4773	4.4059	10.6085	6.7503	5.9641	9.7756	9.6598	4.7649	3.5921	5.7631	12.1231	9.0649	3.5389	9.7439	10.6816	26.1081	6.1223	10.8824	18.4563	16.4556	4.8637	3.3196		0.396228	8.29983
7.6182	4.16499	2.8854	1.7754	3.8592	7.6639	8.4398	2.3009	9.0846	6.2644	3.8617	3.0742	4.0939	11.9031	7.3598	2.2326	11.7384	6.6433	22.5709	9.6438	11.4172	24.5632	18.325	6.1562	4.6128		0.402515	8.10978
7.7372	3.74154	4.6166	1.0331	5.895	3.9143	6.1059	3.7793	8.2441	11.3495	4.1623	4.1714	2.6922	3.7207	4.9695	6.016	10.6528	12.9964	15.9689	16.0393	14.2173	18.993	21.1728	6.3461	5.7869		0.408802	8.19104
7.8563	2.90159	4.1906	0.6906	3.5892	2.7818	6.6996	6.5163	6.1713	6.7702	2.7941	1.8558	6.5142	7.3462	6.1718	4.7918	11.0193	13.1917	14.5884	14.496	13.3504	21.3895	20.921	9.4428	2.4614		0.415095	7.94357
7.9753	6.37541	1.4229	0.2409	5.6191	7.1025	4.987	3.0075	6.4471	9.7962	4.3997	2.3319	5.7213	6.5473	5.1919	5.2427	8.7948	13.6744	11.2625	12.6894	11.1276	23.7065	17.9413	5.337	3.4106		0.421383	7.59906
8.0943	3.12015	4.7105	2.267	9.4554	5.3947	3.6431	5.3757	4.2947	6.5372	3.344	3.6211	4.7879	5.7935	3.6565	5.3314	9.2147	15.397	12.3438	9.3546	8.3328	18.0043	20.8944	4.1328	4.7022		0.42767	7.23789
8.2134	4.27337	2.9681	3.5826	5.5649	4.1996	4.7507	5.0326	7.2398	7.6474	5.797	1.3563	7.2692	9.87	4.3206	3.9233	8.2978	11.6862	10.8113	9.8793	7.15	12.3356	16.2818	5.3101	2.823		0.433963	6.76544
8.3324	2.30103	1.5621	2.2189	2.7875	4.7304	4.3446	4.7197	8.382	6.4651	1.8728	2.9249	6.3139	10.869	5.2215	5.5461	6.4922	14.4506	9.7602	7.9952	5.817	12.5357	18.3777	4.3669	3.2674		0.44025	6.38843
8.4515	4.13205	2.3913	2.0386	3.1058	7.9028	3.7486	2.4175	8.5645	8.297	4.5582	2.1155	4.7607	7.5124	6.2136	6.0322	7.3706	11.3174	14.6437	9.2834	7.7131	18.4199	18.2687	3.7246	3.6065		0.446543	7.00578
8.5705	5.39625	3.3643	1.8139	3.6118	10.2583	4.9934	4.7585	5.3976	3.9693	4.1451	1.6966	4.4338	4.6059	6.3946	2.6449	7.6257	7.2838	10.0068	12.5612	12.6055	23.6681	16.6582	4.9938	2.5583		0.452831	6.89357
8.6895	3.68643	5.6995	3.7072	2.7269	8.2491	4.4957	4.7062	6.1713	4.4199	1.9255	1.2645	2.9311	10.0669	5.9461	3.1882	7.0171	10.1948	20.6778	10.8286	10.6399	25.5378	21.512	7.5329	4.4326		0.459118	7.81492
8.8086	6.03296	1.2517	1.3092	3.0227	12.2572	5.0118	7.8251	5.5855	4.5513	1.1852	1.9933	3.8773	9.97	5.6246	4.909	6.8735	10.2049	15.2345	11.0638	6.0443	25.5728	12.5814	7.4278	4.613		0.465411	7.25095
8.9276	3.62183	2.761	2.054	2.9272	7.4112	3.4023	4.9499	4.7384	5.0459	3.6615	2.4366	2.2604	9.4193	7.7348	4.6807	6.4131	10.2845	12.3676	10.2449	11.0389	25.0082	15.1497	5.0861	2.2267		0.471698	6.87186
9.0466	5.52915	3.987	4.6047	1.6644	5.5822	2.1302	3.9519	5.1695	5.2926	3.3949	3.4076	2.6307	3.2135	5.2316	7.6872	5.091	11.0197	15.1574	11.8245	9.4387	22.2778	12.9807	5.9888	4.9568		0.477986	6.75886
9.1657	5.27554	3.2274	1.3927	1.1941	8.8767	3.2095	7.4095	7.276	6.0075	3.254	1.5303	2.3636	4.6983	7.8687	4.7609	6.3081	8.8432	15.723	9.778	8.9153	24.0055	12.1557	5.5654	4.9672		0.484279	6.85859
9.2847	4.69283	3.8762	2.2653	1.8557	10.1209	4.8532	4.0579	8.6434	6.8026	1.5024	0.5399	4.7849	4.33	4.6337	8.3642	6.3116	7.855	17.2717	10.828	6.3	21.5694	18.954	4.494	2.2829		0.490566	6.96624
9.4037	7.29753	4.0932	1.4861	2.0222	11.126	4.8129	6.9455	11.6706	5.5663	2.88	1.0545	1.2608	7.9545	6.9621	6.5225	4.5685	7.3801	19.3861	8.3063	8.4736	26.1844	14.4532	4.439	3.7149		0.496854	7.44003
9.5228	5.64217	3.2333	3.0421	2.747	7.0033	2.7785	4.0306	2.0341	6.4471	2.9433	1.3603	1.4435	6.2689	5.5208	3.9934	3.4431	13.1645	21.3535	7.9116	6.366	27.9459	14.3326	3.5339	1.9085		0.503146	6.602
9.6418	3.26875	1.042	2.3066	1.3334	6.7687	3.173	4.4409	2.8724	8.9652	1.4555	2.3685	2.0112	9.7789	5.9962	4.6333	2.699	8.9527	15.3451	9.8639	8.7281	27.6657	14.1788	2.2817	4.5293		0.509434	6.44412
9.7608	2.42537	2.3134	1.3587	0.1315	3.5473	5.4351	5.1982	3.5122	4.8614	2.7545	0.841	1.2865	7.29	5.9429	3.6315	4.5518	5.4945	11.7953	8.036	9.0134	25.8711	13.3951	4.3986	4.3101		0.515721	5.72481
9.8799	2.95562	1.0829	3.1079	1.3711	5.2077	2.5913	3.3574	3.8829	6.9568	2.4508	0.372	1.2424	6.7443	4.6747	3.6277	3.1807	11.3214	13.9236	12.3185	4.5043	19.5015	13.1995	3.2756	2.2783		0.522014	5.54704
9.9989	4.33329	0.7071	2.0996	2.119	8.3982	4.5815	5.0625	5.3568	3.6634	2.0509	2.4488	2.3166	5.4125	5.2845	2.4376	5.219	11.0982	11.7447	8.4958	7.662	20.904	14.1441	3.2098	2.7933		0.528302	5.89763
10.1179	3.33415	2.3652	2.1109	1.129	4.0212	1.5555	4.6546	3.9791	3.1801	3.81	2.5124	1.9794	6.7364	3.7878	1.8917	5.9931	7.7666	10.4272	7.017	13.3294	10.738	19.3372	3.3727	2.1401		0.534589	5.2987
10.237	2.85866	1.3665	2.0589	1.4903	1.8372	2.9227	5.3567	3.3844	4.0866	2.2098	0.839	1.6627	7.1572	8.1287	5.3987	5.7364	5.7453	7.1229	8.7614	5.9485	11.0176	12.6843	5.8016	2.3046		0.540882	4.82836
10.356	3.46377	1.7536	0.7609	2.4549	2.2809	2.5497	3.3206	1.9208	2.725	4.9432	2.262	2.8974	5.992	2.775	4.6512	6.6345	8.8252	7.7005	4.3425	8.9154	13.5054	8.9309	8.2566	3.2452		0.547169	4.79613
10.475	3.09971	3.0892	1.4206	2.369	5.3323	5.109	5.83	3.7564	4.9782	1.7431	1.6661	2.8979	4.4792	6.4429	7.1409	4.3922	6.7914	6.6775	8.2912	12.1508	14.9272	7.3098	3.4148	3.0566		0.553457	5.26525
10.5941	3.71948	1.8591	2.1604	1.3424	3.443	3.8771	5.2417	8.0925	5.2113	5.7071	1.4846	1.1448	5.0822	7.2536	3.558	3.8475	9.298	7.5417	6.8433	10.9449	12.0434	12.6877	6.0521	3.1822		0.55975	5.48409
10.7131	2.55115	2.7013	2.7336	1.4599	7.6994	4.5035	5.9279	4.209	7.8575	3.8424	1.2555	3.2941	2.8447	7.2442	4.5156	4.3299	10.8881	6.8485	8.1302	7.5119	15.5307	9.6928	7.6024	2.9634		0.566037	5.6724
10.8321	5.33642	0.5324	4.1137	2.6349	4.817	4.9962	1.1179	4.5818	3.7381	2.677	2.8223	4.0077	2.8766	4.1068	3.4494	5.3193	4.6976	8.7209	11.6234	8.6097	10.7402	9.7922	4.5638	2.7632		0.572325	4.94327
10.9512	3.90051	2.6492	0.8019	1.4069	4.0736	4.8338	3.7098	4.0538	8.448	3.6975	2.0958	2.9405	2.3418	6.5366	6.4001	5.4175	6.1553	8.0149	3.3358	13.0306	9.7355	8.3252	4.5663	1.7258		0.578617	4.92486
11.0702	2.21704	1.6722	3.1759	1.4937	3.7305	2.2527	3.4591	5.5268	4.7172	5.2301	2.8135	3.7511	3.8243	4.7476	3.9958	3.305	9.8753	6.4382	9.3214	7.1207	9.7336	12.2574	4.4417	2.6999		0.584905	4.90836
11.1892	2.83502	1.6185	1.2984	1.2376	2.5635	3.1419	3.1715	3.9624	3.195	3.7475	1.7838	2.1483	7.3077	5.0506	1.6356	3.6331	9.7418	8.0767	8.9098	7.6865	11.3937	9.0099	4.2642	7.0935		0.591192	4.7711
11.3083	4.90465	1.6786	2.3013	2.4381	5.2869	7.2756	3.1637	1.6535	5.7505	2.1006	3.1067	2.2156	2.4829	5.6357	3.5524	2.4291	6.0754	4.017	5.4098	6.5804	9.7405	15.6363	1.5093	4.1781		0.597485	4.54678
11.4273	4.38013	1.1335	2.0118	3.1717	4.3672	2.2268	1.5627	3.1774	4.0645	3.6196	2.1498	1.8893	1.3964	3.4627	3.504	7.2945	5.3326	6.4591	6.8181	7.5855	9.7697	18.0311	3.4966	2.1413		0.603772	4.54358
11.5463	9.03157	4.5814	1.9581	1.451	3.6818	2.8098	2.0146	3.4553	2.3574	1.9017	1.248	3.2717	4.2492	3.6893	2.4408	6.6052	7.815	5.9193	3.2258	7.4089	13.1269	15.6842	3.5001	2.3759		0.61006	4.74179
11.6654	7.22435	2.6785	2.6573	0.9923	2.5586	3.0363	3.6395	2.9846	3.5756	2.5915	1.6069	1.9313	5.1415	2.9694	4.024	4.1931	7.2167	4.9035	6.956	5.0285	11.0514	13.705	7.1492	2.8642		0.616353	4.61164
11.7844	10.5156	0.4795	2.3423	0.9204	3.2999	3.2066	1.8744	3.1995	3.6026	0.6844	2.3187	1.208	6.9353	2.2859	2.3945	4.5649	6.4463	6.5927	6.2145	8.1606	12.5907	9.9297	6.3236	2.9658		0.62264	4.54402
11.9035	9.12176	2.1163	2.0872	0.5872	1.5994	2.7729	2.8986	1.0143	5.355	2.7425	2.0357	2.5629	4.2174	1.8729	4.0875	6.7244	5.2893	9.1969	8.249	3.3549	8.8519	14.4042	4.6089	4.2521		0.628933	4.58347
12.0225	5.93244	2.92	0.9886	1.3915	1.4278	2.1908	2.9645	2.2134	4.028	4.1448	2.1131	2.9252	4.622	4.1165	3.293	3.2436	7.7815	7.086	10.2613	3.4359	9.521	12.7013	5.0071	4.989		0.63522	4.5541
12.1415	3.817	4.629	0.7228	3.1256	2.2405	5.4531	2.9291	4.5211	4.3995	2.4882	0.8799	2.0582	6.1954	3.4896	2.8783	4.6876	7.454	6.6931	8.5675	5.608	9.8356	9.1983	3.9519	4.4098		0.641508	4.59305
12.2606	5.68435	4.9228	1.655	3.1248	1.6983	4.1507	2.3233	2.4901	3.9352	3.6295	1.2467	2.0459	2.4913	2.215	6.7296	2.9446	8.9572	7.178	10.3945	7.5086	7.8212	10.7735	3.934	7.4828		0.647801	4.80571
12.3796	3.95217	1.8906	1.4786	1.2218	2.5137	3.4263	2.8795	5.945	6.3563	3.8431	2.0212	4.6562	5.2517	1.9506	4.5798	2.1203	6.1472	8.144	10.2202	6.5877	11.6486	12.6074	1.8437	2.0355		0.654088	4.72172
12.4986	3.655	2.0706	2.2514	2.1647	3.0716	4.8722	3.22	4.4925	2.9706	3.0294	3.5114	3.7361	7.1739	5.1849	3.8224	2.0054	8.6927	7.5218	9.6567	5.2517	9.6534	12.981	4.8716	3.6899		0.660376	4.98129
12.6177	5.24039	2.7931	2.6433	2.057	2.9603	2.9263	3.1313	3.5761	2.5167	2.9538	1.7479	1.1483	4.4246	6.0473	3.8319	2.9358	7.4203	7.5375	6.8175	6.6773	8.0294	10.9697	1.8872	1.2254		0.666668	4.2291
12.7367	5.02708	1.1695	1.9035	1.8376	2.9935	3.3636	4.8918	4.9267	3.432	4.2428	0.9281	2.7051	2.8281	4.7981	2.3309	3.2854	8.9052	9.2883	10.7988	5.539	7.4086	9.2713	4.1069	3.4604		0.672956	4.56009
12.8557	3.95622	2.4582	2.6071	1.0623	3.5117	2.3493	3.83	4.2492	4.9004	2.7129	0.5825	1.6257	4.1761	4.4548	1.2882	3.6097	8.874	9.7121	7.8197	8.0858	9.5558	6.7778	2.6885	2.6597		0.679243	4.31449
12.9748	2.71379	2.6699	1.9813	1.4086	3.5037	5.1531	3.2056	3.43	3.5579	3.0909	1.5588	2.2926	6.2314	2.5031	3.7894	4.2439	6.8794	5.4883	7.1133	12.8966	4.0146	9.3743	1.5729	3.5457		0.685536	4.25913
13.0938	3.69732	0.7555	1.7199	3.0096	3.2694	6.952	4.7043	3.5172	4.5314	1.5167	1.6558	3.8772	6.0271	4.4918	1.5555	4.2025	6.0787	7.9606	5.8701	11.8718	8.8566	10.7909	3.118	2.7142		0.691824	4.69767
13.2128	5.09809	1.3307	0.6669	3.3272	6.3229	3.3155	3.0815	4.8687	2.5451	2.3342	3.0757	2.4192	5.0782	4.4395	4.2334	6.7931	3.8918	8.9053	4.5195	12.7613	7.2306	9.1445	6.9197	4.6041		0.698111	4.87111
13.3319	5.88558	1.8197	1.0598	1.4296	2.4388	2.1409	4.7829	4.3521	5.7941	3.0998	2.8133	1.8123	2.5517	5.2361	1.8381	5.7245	4.6794	6.1749	8.2924	11.4497	7.7813	8.5064	4.6847	2.1461		0.704404	4.43726
13.4509	8.26761	1.4573	1.3229	2.4291	3.3434	1.2583	2.8786	1.8414	2.7638	4.8188	1.8931	4.7178	2.8384	2.6159	4.9997	5.6319	4.6681	7.1	6.0866	11.7968	9.0217	5.9376	6.3744	3.3577		0.710691	4.47587
13.5699	5.85626	3.2972	1.6973	1.114	7.879	4.8071	4.1607	1.7164	2.8664	5.2075	1.9942	2.4779	3.6698	3.0546	7.0271	6.348	4.0281	4.7169	5.3085	8.6287	5.0634	2.9017	7.926	1.6602		0.716979	4.30862
13.689	5.93041	2.5042	1.7601	0.9955	3.5254	5.8228	3.8173	3.3179	2.0005	3.9937	2.6855	2.9367	4.0351	3.1649	4.9835	3.5989	3.5283	6.0797	5.3922	9.1477	4.6463	2.6054	6.2634	4.4843		0.723272	4.05082
13.808	2.90858	1.2419	1.6457	2.6548	3.1592	2.3509	4.0656	5.0124	6.1721	4.3581	2.1306	2.0999	5.2015	3.2601	2.4001	5.3557	7.0668	3.3972	3.0136	10.8366	6.5671	3.3139	4.6793	1.9877		0.729559	3.95331
13.927	3.8213	3.0142	2.5337	2.675	2.2265	3.7914	2.5224	6.0474	2.7553	4.6079	4.0721	1.4498	3.8944	3.4113	2.9687	2.6943	7.7097	3.7697	5.4355	10.8389	7.2202	2.9883	5.4264	3.274		0.735847	4.13118
14.0461	2.02538	1.7506	0.6983	0.8589	3.6494	2.5637	4.7689	4.2432	2.6831	3.8421	1.5397	0.8701	1.7454	1.4782	6.6297	3.8121	4.1088	5.4998	4.9183	10.4709	8.5699	5.3983	5.0735	3.3178		0.742139	3.7715
14.1651	3.02714	5.132	0.5347	1.4247	2.8394	2.1562	4.8814	3.07	3.5008	5.8633	0.4345	1.2903	0.8709	4.2486	5.4394	0.7105	8.8143	4.256	6.283	11.1341	10.7024	3.8618	7.6646	3.0972		0.748427	4.21822
14.2841	3.67793	3.7474	1.9128	1.5135	1.2975	3.1941	4.7777	1.9194	2.4309	2.2367	2.8338	2.2719	3.5255	4.8758	4.8443	2.1035	7.7892	5.0706	4.6757	9.8089	8.5823	7.3397	5.5267	3.0577		0.754714	4.12556
14.4032	4.25339	2.8234	1.4184	3.2944	3.0482	4.8759	6.3941	5.4416	5.9107	3.9852	2.2891	4.3554	2.3261	4.0014	2.3024	3.8151	6.2323	3.7666	5.4757	9.7406	10.2874	6.1104	4.051	4.1742		0.761007	4.59887
14.5222	2.81324	1.9382	1.6148	1.5853	1.3512	1.9957	5.7211	3.3742	4.0888	3.7494	3.2661	1.4916	4.1347	1.7364	2.6552	2.3564	9.1394	3.3463	8.0374	11.1022	10.248	9.7571	4.5371	4.7934		0.767295	4.36805
14.6412	5.64889	2.6313	1.7431	1.0395	2.4551	3.5998	6.6977	5.9039	3.1557	3.4664	2.0528	2.4839	2.8611	1.9166	3.9583	2.6542	5.2275	6.379	3.4497	8.1657	5.0345	9.4852	2.7502	3.5207		0.773582	4.0117
14.7603	3.85105	3.645	0.7425	0.613	4.9762	4.9923	3.4024	2.889	5.5704	5.3159	1.3129	3.5229	2.604	3.5805	2.3232	5.6651	8.5299	8.058	5.4041	3.3054	10.3341	6.4033	3.6112	2.935		0.779875	4.31614
14.8793	2.42771	2.2238	1.4881	1.0919	3.9657	4.2322	6.4652	2.9241	6.2114	5.4214	4.4038	3.3994	3.2557	4.5008	4.6896	3.1344	6.1812	3.5051	8.2038	4.5368	8.5906	8.5917	2.7831	1.6273		0.786162	4.32728
14.9984	4.50042	1.8899	1.8476	2.8024	3.1131	4.7511	4.6744	6.6482	2.3984	9.0517	4.0072	4.4845	3.5333	2.1695	4.2304	2.4283	5.3986	4.3351	4.8289	4.4907	8.5618	5.9792	2.8371	1.9922		0.792455	4.20642
15.1174	1.79085	3.645	2.8073	2.3101	2.7196	3.9015	5.8889	3.3519	2.8583	6.9409	3.5021	3.458	3.1902	4.4928	3.8297	3.1253	8.6209	2.7914	10.3644	5.9243	11.6684	6.8226	2.9587	1.6058		0.798743	4.52371
15.2364	4.9231	1.8527	1.4711	3.4196	1.8973	4.568	5.3579	3.9447	3.7521	4.8585	2.6034	0.9541	2.456	5.3404	4.2046	3.9334	5.1358	5.9086	6.5055	5.0489	9.9945	4.8479	5.7151	3.1445		0.80503	4.24324
15.3555	4.33532	4.2558	0.8284	2.9925	1.7691	4.152	5.7198	7.7372	7.1533	5.5798	7.5288	3.782	3.2906	2.578	1.6509	4.5372	7.05	3.8447	6.4212	6.722	8.5793	5.2735	2.7058	1.7792		0.811323	4.59443
15.4745	3.74771	1.6622	1.6652	5.1342	2.6132	5.1466	10.0008	6.8646	5.1734	7.2031	8.7964	7.5729	1.7132	1.7426	4.3875	4.1155	4.6574	6.5465	3.9143	8.7658	8.8848	7.4122	4.0378	1.9252		0.81761	5.15346
15.5935	5.22148	1.9939	2.0533	3.9096	0.7367	2.4886	4.9975	4.3477	6.3326	10.0502	5.2881	3.3465	3.6767	3.3178	0.5683	3.2114	6.9107	5.5435	12.2081	5.8844	5.3514	8.6213	2.4451	2.1931		0.823898	4.61242
15.7126	5.04086	2.0297	0.7547	4.9278	4.9043	4.2118	5.7851	5.0117	5.1659	9.0509	6.4139	3.4864	4.5766	3.4099	1.1566	1.7422	3.1398	6.0127	9.0318	8.8259	7.8219	5.5153	3.9102	2.7814		0.83019	4.77947
15.8316	3.37011	2.9755	1.2634	1.6306	2.5675	5.4167	6.572	5.1102	4.0529	8.1197	4.901	3.3089	2.107	3.2598	1.831	3.3238	5.2748	4.2266	8.2253	7.9992	12.5176	5.3487	3.8412	1.7088		0.836478	4.53968
15.9506	4.7085	4.4569	1.3226	1.3931	4.8111	6.419	6.4365	5.3472	5.2943	10.9141	9.1042	3.4567	3.2	2.6228	3.3622	1.3487	3.5742	4.827	6.7094	9.4628	8.4858	3.4485	3.9305	0.7814		0.842765	4.80906
16.0697	8.79892	3.4886	2.743	2.7281	5.1654	4.1783	3.9734	2.5163	7.4902	9.5724	6.5281	3.5792	3.9512	2.8194	1.3841	4.4438	4.1707	6.3647	8.2105	4.4335	7.6746	2.6722	3.5562	1.2851		0.849058	4.65533
16.1887	7.66812	3.2216	1.8979	2.0654	1.6857	3.2673	6.5243	4.2598	3.2632	5.6021	7.5797	1.5778	5.573	2.9397	1.528	3.9347	3.4238	4.9331	5.2838	7.9774	11.5269	5.4025	4.3878	1.7602		0.855346	4.47016
16.3077	4.67843	3.3145	2.0399	0.8948	1.5004	4.454	3.9873	3.1089	5.0093	6.1625	5.4277	2.1311	2.8101	3.8132	1.6221	4.6086	2.1065	4.3595	6.1159	6.7445	8.6136	3.1236	2.3015	1.367		0.861633	3.76229
16.4268	4.97234	3.9387	3.5373	4.5182	3.1183	6.1213	4.4851	7.8726	5.5333	3.2839	4.0116	3.7305	3.4777	3.3225	2.6778	4.1207	4.1139	6.9257	7.601	2.935	8.1233	3.5748	9.3037	0.1672		0.867926	4.64443
16.5458	2.17941	2.6383	3.5165	3.2404	5.1887	4.3269	5.0262	7.2757	4.0189	5.5907	4.0858	5.0947	5.8305	2.4997	3.4964	4.0962	3.3491	6.6828	7.9873	5.2176	7.3568	5.7871	7.9199	1.1834		0.874213	4.73288
16.6648	3.07911	4.2604	3.3059	3.9399	3.4696	2.8147	4.2073	3.3422	3.4869	8.0681	7.7647	3.5832	4.6301	2.204	4.2781	5.6872	3.6427	5.1201	8.4703	7.4148	8.9856	3.4811	5.9221	0.2877		0.880501	4.64358
16.7839	3.90928	3.7725	4.8678	5.8758	4.399	2.9992	3.0414	5.3918	8.2711	8.1634	4.5088	5.9168	5.8054	1.6732	4.159	3.2152	3.2533	6.7459	4.8742	5.4334	5.6878	6.2071	3.5733	0.4847		0.886794	4.67622
16.9029	5.35017	3.4783	4.9008	6.3434	3.4763	2.7273	5.5867	6.0577	2.6756	6.9494	9.0607	4.4706	5.0339	3.392	5.8263	4.711	1.3269	5.581	7.3188	4.0605	6.3152	4.7923	7.7897	1.8975		0.893081	4.96342
17.0219	4.21417	2.886	6.9591	7.3849	3.7757	4.2755	3.1602	5.1514	2.0906	9.7558	9.1159	4.0483	3.5527	2.3503	6.5004	4.6387	2.7767	4.0393	7.7658	3.4235	5.351	5.6596	5.8045	0.8594		0.899369	4.81414
17.141	6.10293	2.9618	4.6138	4.6495	2.491	6.255	1.7624	3.8414	1.8156	10.2527	9.0205	3.3613	2.5589	2.7448	5.5043	6.3342	1.6276	8.1713	3.336	4.4149	8.074	4.5215	3.7461	2.3396		0.905661	4.60421
17.26	3.48377	6.7898	3.367	5.5302	3.7805	3.6957	2.564	5.8281	3.9357	5.4274	7.4555	6.1021	2.6613	4.3872	5.2836	2.1926	4.9611	7.5759	5.4624	4.5362	6.2774	8.5666	2.7186	0.7647		0.911949	4.72281
17.379	4.06798	4.6984	4.361	6.0993	2.0194	2.9973	4.6182	4.1263	5.1787	7.4514	4.2106	3.0425	7.4761	4.3146	3.164	2.3938	2.1859	6.1369	8.1883	6.2037	3.9469	4.9131	2.6299	0.6903		0.918236	4.37977
17.4981	5.26536	5.8819	5.4176	5.207	3.2988	2.9745	3.6332	8.1316	2.604	11.8327	6.2494	3.0558	3.4871	5.9196	4.7813	3.9225	2.2938	2.844	5.6034	5.2266	3.6329	7.5563	2.1023	2.241		0.924529	4.71511
17.6171	4.04706	1.8279	3.2699	8.3715	5.7772	2.8533	2.5528	4.6292	1.7966	5.8649	7.0995	4.6923	3.3194	3.3097	4.6163	2.3385	4.0054	3.5219	7.7884	6.9039	6.5514	6.3986	2.2374	1.1478		0.930817	4.3717
17.7361	5.13373	5.1504	3.4738	9.4292	2.1351	4.59	1.6747	7.1917	2.8232	5.2193	4.4669	4.3828	4.5149	2.903	4.647	3.3605	4.8275	5.6394	5.3644	6.5404	5.5526	5.3326	1.7209	1.6547		0.937104	4.4887
17.8552	3.33546	5.2534	4.2044	10.2074	4.7982	3.3399	2.0487	4.925	3.6423	8.3484	4.347	4.6851	5.0894	4.8959	6.1539	5.7664	4.829	5.0606	4.9199	5.9066	5.6863	5.7606	1.8277	2.6723		0.943397	4.90433
17.9742	3.87721	5.1643	6.3869	9.6943	5.1538	4.2575	4.5048	7.0391	4.7804	6.3187	4.9678	4.3806	6.0548	1.9537	4.9254	4.8765	3.8529	2.4986	6.1431	9.0754	6.0098	8.7572	1.6624	3.2969		0.949684	5.23467
18.0932	5.9739	3.973	3.392	10.4583	3.5724	3.9528	1.5826	4.6544	2.7644	4.8182	7.2756	3.2492	4.1881	2.3082	6.2687	3.9893	3.5544	6.2064	6.0855	9.8139	4.9463	5.193	1.3698	1.878		0.955972	4.64452
18.2123	9.94536	2.8597	3.5234	12.55	6.653	4.125	4.1646	7.9131	2.9139	4.9131	3.126	3.8851	3.9603	1.9276	3.125	4.5332	4.626	4.1711	4.2685	9.3376	4.0344	3.9793	1.9715	1.4161		0.962265	4.74679
18.3313	7.63219	4.4611	4.1457	12.7845	4.6337	4.244	4.1714	9.6136	3.9728	5.3074	3.8975	2.5023	5.2797	5.0087	5.1456	4.6679	3.0423	2.9262	4.2227	4.5284	6.4979	3.0136	2.6623	0.5311		0.968552	4.78719
18.4504	7.91012	2.3939	4.6653	11.657	5.6617	3.85	1.2398	10.8803	3.1586	4.8018	6.8773	1.4868	5.4806	4.5233	7.2058	2.4038	3.9434	3.9951	4.1887	3.8031	6.4527	2.9957	2.2044	0.4452		0.974845	4.67602
18.5694	6.1392	3.3518	8.1529	9.9067	3.8749	3.8798	3.1119	13.5023	2.6167	3.9494	4.7095	4.2093	5.729	1.2707	4.1639	4.2835	4.9369	5.303	5.7464	8.6683	4.4736	5.6026	1.7801	2.2813		0.981132	5.06849
18.6884	6.9958	6.3857	2.8591	6.0177	9.3362	4.0912	2.8278	6.5291	3.6102	3.9594	4.9695	4.9439	5.9803	3.3211	2.4765	1.9794	4.4488	6.5534	3.3987	3.7348	3.5043	5.8862	1.092	0.9927		0.98742	4.41224
18.8075	6.47838	4.9466	5.0347	4.0146	4.9114	3.1576	4.6925	6.4018	3.5138	3.5703	3.8695	4.5796	5.719	4.0548	1.9077	3.3405	5.3424	4.0484	2.0702	7.6254	3.5661	3.148	0.7812	0.8965		0.993713	4.06962
18.9265	4.06104	3.2701	3.7822	4.6191	6.161	2.7031	3.9763	6.8215	2.8873	7.0983	3.9128	4.0846	3.8193	2.9053	2.1554	2.846	5.0452	7.4593	3.7403	4.6011	3.0681	2.9664	3.5607	1.7299		1	4.0531

## Sheet: Image5
X0	Y0	Y1	Y2	Y3	Y4	Y5	Y6	Y7	Y8	Y9	Y10	Y11	Y12	Y13	Y14	Y15	Y16	Y17	Y18	Y19	Y20	Y21	Y22	Y23	Y24	Y25	Y26		Ap-Ba	Average int
0	62.874	65.797	80.967	48.9998	82.005	80.223	79.176	78.349	83.509	94.001	81.925	71.4728	61.639	79.446	77.523	77.201	67	71.212	68.9529	78.549	76.213	101.723	62.006	55.8196	52.6879	72.3101	66.3204		0	73.2556
0.119	59.8904	81.021	77.225	62.2997	73.78	108.844	81.34	88.636	95.744	106.495	86.593	79.4856	64.936	88.962	92.301	78.775	64.742	70.588	75.2141	76.89	80.347	109.135	58.3317	60.2108	52.8382	72.8505	71.2087		0.00534603	78.4698
0.2381	59.0768	90.195	84.239	58.6595	91.431	105.118	73.605	98.313	103.753	114.58	88.541	79.7325	65.316	94.871	98.942	84.238	68.052	64.026	90.9008	73.582	82.497	126.009	65.2265	61.0858	56.2769	66.9669	52.5466		0.0106966	81.3993
0.3571	61.776	91.756	95.678	70.1978	94.339	127.726	95.285	102.749	118.701	109.96	92.331	78.7654	80.228	107.213	116.617	86.701	83.275	64.761	88.4499	69.077	89.173	152.111	73.8574	60.4913	44.6987	72.4238	65.5667		0.0160426	88.6633
0.4761	55.6888	105.712	95.805	67.7797	103.194	136.977	92.326	114.23	108.436	97.748	116.437	76.5213	89.698	113.114	116.64	80.63	78.27	73.207	98.9198	72.067	99.599	162.436	65.1324	53.2945	51.009	67.8034	63.8245		0.0213886	90.9815
0.5952	66.5595	115.907	92.341	64.783	107.884	156.608	102.411	126.808	113.922	103.481	128.363	72.3088	87.003	114.428	119.705	89.674	84.795	73.557	86.6078	78.513	109.758	168.16	77.1304	53.5734	52.1633	77.382	58.2327		0.0267391	95.6318
0.7142	59.5836	116.958	110.221	73.8508	101.056	153.433	92.032	140.864	113.188	110.081	104.296	78.59	96.504	118.733	128.822	101.521	89.562	87.372	93.7761	79.315	129.774	184.32	83.1995	52.4257	50.7519	80.245	71.581		0.0320852	100.076
0.8332	57.3863	123.12	104.002	84.6837	96.569	163.367	112.186	136.333	112.552	107.766	121.75	65.574	101.483	130.919	124.902	126.807	97.436	109.304	93.6958	97.541	158.982	177.438	85.5526	54.9097	58.5118	66.6384	70.0816		0.0374312	105.166
0.9523	52.2808	115.579	115.438	81.6523	93.299	148.036	105.1	132.298	111.546	106.395	110.533	67.0882	93.69	123.858	126.68	143.1	100.578	117.125	95.5904	98.729	158.623	165.769	85.5015	52.0081	52.0859	70.3942	65.66		0.0427817	103.283
1.0713	58.0948	120.782	117.013	82.1229	95.128	151.475	95.001	130.944	108.577	96.526	100.665	69.828	81.738	126.915	125.079	131.679	96.698	119.174	84.1826	100.827	168.714	166.842	83.6399	66.0661	45.521	65.5665	54.7017		0.0481278	101.611
1.1903	53.1254	115.503	123.98	85.3736	81.97	141.086	87.804	132.563	108.068	106.687	90.109	65.5068	77.536	149.916	125.243	128.144	109.521	120.931	80.5745	99.68	161.651	168.528	86.5636	75.3275	53.6611	71.2022	72.1744		0.0534738	102.683
1.3094	48.062	116.774	133.576	83.8035	76.078	144.036	94.986	119.71	96.239	103.049	92.965	50.4185	74.53	149.926	121.263	120.918	102.632	116.055	80.5746	99.699	155.607	175.206	77.6884	62.2009	56.5703	63.6985	66.9987		0.0588243	99.3802
1.4284	39.5629	130.299	136.821	77.8008	74.186	144.534	99.343	99.948	104.772	106.495	76.376	44.932	74.109	154.801	116.098	100.758	106.762	119.292	65.4881	105.761	146.09	176.84	72.7911	72.1313	46.7493	47.7473	72.5525		0.0641704	96.7793
1.5474	33.4412	121.805	137.899	78.3341	71.984	154.127	110.64	101.368	93.156	98.989	68.46	38.9853	77.587	147.141	110.57	98.5	94.201	116.434	66.5414	93.21	129.692	188.802	82.1652	70.2531	46.2025	51.2417	78.1674		0.0695164	94.811
1.6665	35.4536	104.182	113.359	74.7848	75.487	164.465	98.651	100.268	103.471	113.484	59.951	33.3895	83.07	129.148	133.644	82.931	85.441	109.402	72.8077	91.271	114.348	185.236	89.2357	66.0283	51.1663	53.444	74.4397		0.0748669	92.5392
1.7855	29.1929	106.991	112.708	67.4351	67.524	144.177	96.553	88.245	96.637	104.984	59.991	38.122	86.071	129.578	117.258	81.153	77.108	112.401	71.1649	97.116	115.359	174.932	95.7823	57.7695	50.8385	48.6896	65.3984		0.0802129	88.6363
1.9046	31.3374	99.269	91.176	69.4499	66.917	145.151	98.948	78.158	98.276	108.535	56.155	33.8687	86.46	141.502	109.204	81.73	74.402	121.406	73.6502	89.092	101.485	168.836	81.5771	59.2101	44.9128	65.0187	69.5216		0.0855635	86.8611
2.0236	28.3544	88.358	90.423	66.4067	55.468	139.553	108.329	65.832	110.817	105.12	62.098	29.5236	90.625	144.565	100.805	76.116	62.176	123.549	64.8739	89.53	99.133	160.218	78.03	56.3195	46.2993	68.7493	56.912		0.0909095	84.0068
2.1426	27.6985	81.083	73.036	64.1295	53.314	125.007	116.771	63.21	98.672	106.993	54.476	31.8732	86.849	132.439	92.784	56.538	53.773	127.866	56.4519	89.058	93.212	156.38	88.2888	53.7379	41.4151	65.5626	58.7594		0.0962555	79.6066
2.2617	23.5376	82.744	64.08	56.8946	47.323	131.592	112.351	67.685	107.169	114.146	50.119	27.6389	87.839	141.005	95.539	48.366	59.151	136.636	54.6858	73.734	75.4	151.111	92.5414	56.4797	40.5213	69.1253	64.5074		0.101606	78.9601
2.3807	26.8754	68.636	58.989	53.8533	43.799	119.088	91.004	60.426	100.262	101.307	54.521	30.4744	86.257	128.317	86.22	52.561	58.615	128.852	48.4896	66.738	56.891	161.838	97.1645	44.0881	31.1461	54.5014	62.8519		0.106952	73.1024
2.4997	28.6109	60.732	56.224	52.0328	50.225	126.342	85.923	61.556	103.09	103.856	56.004	32.8746	76.751	121.195	89.723	47.378	46.342	118.525	45.43	66.744	74.011	130.072	86.65	43.8616	35.9892	50.5366	66.2926		0.112298	70.9989
2.6188	29.9515	58.863	47.098	52.9318	47.054	125.815	91.903	52.355	102.811	87.679	53.671	32.7695	74.961	117.285	89.037	41.199	43.821	121.431	47.575	67.98	86.888	117.59	93.8535	40.4982	33.2893	51.8483	56.6945		0.117649	69.1427
2.7378	25.2185	52.249	47.894	43.8424	44.873	112.668	86.498	51.418	99.984	93.352	41.886	30.6368	80.954	117.671	83.214	44.99	46.448	102.586	40.4822	70.416	85.918	124.196	89.2071	34.2792	27.5778	44.8471	50.5417		0.122995	65.6981
2.8568	26.7305	57.222	46.828	51.5061	37.966	106.687	95.209	51.344	107.015	82.686	40.696	30.7274	78.058	109.785	72.663	43.253	42.849	84.004	34.002	69.096	69.108	114.278	82.5861	31.7319	18.2875	45.5204	48.3645		0.128341	62.1557
2.9759	27.0783	46.116	42.487	51.3678	29.99	99.742	76.349	49.888	103.058	79.08	38.397	31.9007	72.724	90.196	73.519	44.557	39.537	79.361	28.8885	53.402	66.622	111.208	80.8623	30.9143	22.6373	43.772	54.9705		0.133691	58.0972
3.0949	21.7748	52.262	44.518	50.757	32.917	97.095	80.105	57.204	93.926	66.633	40.925	26.632	77.652	101.286	78.138	47.966	41.604	79.235	24.6515	69.401	53.823	106.898	79.2252	31.0452	17.6738	35.2662	44.352		0.139037	57.5172
3.2139	19.6851	49.91	44.362	55.5204	35.977	96.44	80.83	50.109	86.787	79.13	40.898	28.6017	79.706	103.618	88.075	46.28	48.948	72.829	25.3645	65.07	60.632	94.569	77.5595	30.0071	22.649	39.1997	40.2121		0.144383	57.8877
3.333	28.7971	51.518	36.627	53.0247	36.882	90.62	75.832	49.099	97.622	76.94	43.036	27.347	74.358	94.464	96.72	48.837	61.859	74.161	29.8741	67.496	61.669	78.85	72.5141	35.4066	23.1495	37.713	26.3245		0.149734	57.4348
3.452	20.1964	55.869	36.249	60.5876	33.141	80.748	72.535	45.222	95.208	68.163	43.241	26.9577	64.73	90.971	95.801	44.84	62.001	76.9	32.4638	57.116	60.049	69.469	70.3363	38.2679	27.4937	31.0385	25.5464		0.15508	55.0052
3.571	21.4735	54.278	39.716	55.956	33.364	80.589	65.414	48.558	93.186	67.466	35.151	20.2328	66.58	88.514	98.258	45.424	55.386	74.482	27.055	47.733	61.541	69.29	77.004	28.0965	18.8256	34.7161	20.9418		0.160426	52.9345
3.6901	28.8311	50.317	49.506	44.3551	33.119	71.777	62.882	50.938	93.299	57.406	42.071	27.2539	53.423	82.836	87.418	39.116	46.469	65.772	25.4351	50.072	63.648	66.578	70.9336	30.2862	18.1103	30.1146	23.4575		0.165776	50.5713
3.8091	24.5617	52.899	45.69	40.0847	31.248	75.303	68.65	48.425	94.332	56.428	42.17	31.1072	51.065	85.456	87.469	41.334	47.112	59.201	29.2516	52.344	78.231	56.677	75.7787	44.6812	22.1462	27.293	23.9203		0.171122	51.5874
3.9281	23.851	58.726	57.385	39.0628	33.023	62.703	69.163	42.141	86.393	49.723	40.455	29.811	49.45	67.829	77.379	34.405	46.742	48.541	28.9903	55.35	62.613	46.636	73.6428	48.6901	20.1579	20.8015	25.4569		0.176468	48.1156
4.0472	23.3359	55.642	53.504	37.9157	35.504	49.281	63.01	54.01	70.16	45.838	39.991	23.0621	53.432	64.04	82.02	32.931	43.271	56.647	37.1307	54.753	79.098	48.042	73.5547	37.0229	24.3334	26.2589	14.7129		0.181819	47.3519
4.1662	20.742	64.307	57.509	37.2515	36.441	49.468	60.932	60.118	66.182	43.162	36.814	27.2211	47.864	72.233	79.025	33.77	41.448	59.322	39.0121	49.377	82.99	43.88	68.8538	38.967	23.9413	32.1175	16.2927		0.187165	47.7497
4.2852	18.9128	60.983	47.104	36.4452	34.887	54.734	57.379	48.972	68.026	37.003	41.983	29.0553	46.046	55.676	77.168	31.109	40.188	48.246	40.9655	50.862	79.41	49.569	72.549	34.3492	29.744	35.4787	13.3625		0.192511	45.9336
4.4043	21.0031	63.428	51.173	40.9295	34.796	53.396	59.459	47.882	65.429	35.662	38.127	22.6569	37.155	47.11	64.267	30.727	36.612	46.476	35.1564	49.215	61.625	41.738	65.0477	38.811	26.4653	31.9619	13.3048		0.197862	42.9487
4.5233	20.9214	65.071	49.902	35.7986	35.598	41.793	60.547	44.737	68.288	32.565	32.717	21.452	34.859	55.84	66.885	32.873	38.342	45.305	40.8924	58.507	73.152	51.735	61.3809	42.043	24.9547	34.8431	13.5721		0.203208	43.8731
4.6423	17.3567	53.547	39.954	24.2779	37.894	44.794	61.541	51.095	66.458	26.886	37.536	25.127	34.567	52.837	60.505	36.505	44.477	48.967	45.1359	56.031	61.082	60.437	58.9168	39.2656	26.2647	33.6544	13.7885		0.208554	42.9222
4.7614	20.8241	57.911	50.86	30.3605	26.619	45.751	56.192	47.159	70.667	25.287	40.44	20.7072	28.053	62.004	54.269	31.98	41.404	46.345	43.2531	57.638	55.621	51.192	54.6931	35.6551	21.2861	26.8357	16.2129		0.213904	41.4526
4.8804	19.7019	57.104	53.825	26.9332	23.243	38.136	60.728	46.523	68.066	31.558	46.98	28.5286	26.725	57.1	47.863	31.502	33.84	37.206	42.5805	53.648	55.581	50.313	51.8545	36.7322	23.2871	28.9579	12.4913		0.21925	40.4077
4.9995	17.4688	43.816	49.004	32.9506	27.233	36.752	54.988	49.891	54.852	30.613	39.336	22.7425	24.427	51.012	44.028	27.719	43.859	34.505	37.5238	47.189	39.324	59.068	43.6945	35.0264	21.7937	30.8345	10.3554		0.224601	37.4076
5.1185	21.0576	41.077	36.701	22.8345	23.421	34.965	57.449	45.205	55.449	26.437	37.362	25.6828	26.479	52.075	38.701	27.307	43.597	29.958	36.9916	43.756	39.605	78.688	37.2808	35.978	26.2142	24.478	15.2216		0.229947	36.4434
5.2375	15.3108	41.089	36.305	26.4256	27.096	34.041	61.071	35.89	59.208	20.647	41.766	26.512	27.115	58.992	41.793	19.968	44.466	36.357	37.2554	45.839	40.325	96.958	36.792	34.9322	26.3158	25.6992	11.4197		0.235293	37.3922
5.3566	17.6134	60.052	34.176	26.0864	22.458	36.024	53.128	38.925	62.559	26.522	42.125	29.8621	22.727	44.454	29.657	26.765	41.014	32.118	42.3604	41.132	36.027	89.921	27.0108	39.7109	26.2475	19.8434	10.6212		0.240643	36.2644
5.4756	20.1663	54.507	27.804	20.3338	19.885	29.862	56.239	39.4	62.236	29.13	33.777	31.7574	31.507	40.129	28.231	25.419	41.775	35.253	35.3943	36.858	31.373	100.053	36.4023	27.0774	28.5015	21.1674	20.2744		0.245989	35.7227
5.5946	17.6848	45.019	30.814	23.017	19.914	29.785	60.14	35.542	60.518	30.595	38.689	35.8832	29.269	40.587	33.413	26.099	24.816	41.163	43.0523	39.063	37.334	87.443	43.8824	29.5679	32.9038	20.0186	19.2937		0.251335	36.1299
5.7137	14.2224	51.893	31.206	22.0782	19.397	25.124	58.756	45.6	47.321	22.527	30.591	32.6938	25.511	39.893	36.578	27.329	27.334	37.181	51.1705	52.154	41.183	96.086	42.4058	33.4019	31.1946	19.2	16.8057		0.256686	36.2532
5.8327	21.6341	49.487	24.246	23.6467	18.229	24.331	54.457	43.637	55.406	19.597	34.382	32.7782	28.697	43.547	32.726	24.52	31.367	43.38	52.5952	58.109	35.127	92.026	53.8733	29.3836	38.0918	21.5384	17.8223		0.262032	37.2087
5.9517	16.2201	50.469	27.646	21.1758	18.176	31.869	42.792	53.486	47.616	20.678	31.92	31.6122	27.61	35.921	33.891	29.435	31.821	41.249	39.8001	49.72	40.499	86.4	56.4394	26.182	34.5092	22.3669	14.4427		0.267378	35.7017
6.0708	21.6434	60.308	32.973	18.9241	17.66	28.204	40.771	51.628	47.837	27.689	36.401	28.1572	26.284	36.428	36.835	24.009	27.702	33.856	28.241	47.691	51.216	88.891	47.6686	31.6049	28.3984	18.6668	14.4211		0.272728	35.3374
6.1898	16.2098	70.67	35.565	17.467	17.234	30.504	42.861	56.703	57.98	25.283	35.685	35.5452	31.473	31.474	36.872	21.855	28.673	28.258	33.0017	40.495	50.375	72.2	55.9692	33.9399	28.7996	19.4383	17.8943		0.278075	36.0157
6.3088	20.6708	50.913	40.846	20.7228	13.542	27.518	42.999	56.555	48.953	28.953	22.745	29.7046	28.785	33.955	36.057	20.949	27.429	32.3	29.7445	40.796	53.245	60.098	56.6127	22.8468	27.5162	19.3974	14.843		0.283421	33.6554
6.4279	21.8002	42.989	31.572	19.5298	17.325	24.45	35.814	54.556	45.233	29.788	23.928	31.5482	29.092	34.89	33.393	19.113	26.293	33.777	27.2026	36.049	58.45	60.092	53.3849	18.9857	22.6067	19.6312	16.8121		0.288771	32.1595
6.5469	21.9511	40.633	21.295	21.3273	16.451	26.712	25.799	58.139	37.856	24.392	27.199	23.7515	21.533	35.602	35.264	17.379	34.055	24.097	33.7373	28.549	42.83	60.356	53.4496	26.1075	26.1632	21.0139	19.3739		0.294117	30.5562
6.6659	15.6036	33.886	33.541	19.3095	12.866	26.783	23.96	64.257	39.175	18.41	29.138	27.2294	27.312	39.852	30.322	21.659	31.263	23.454	27.7908	26.444	40.59	59.214	54.5066	25.1271	37.4336	18.5273	23.214		0.299463	30.7729
6.785	18.8474	29.86	33.025	15.5931	15.402	14.398	23.951	63.893	39.752	21.475	29.714	29.6412	21.051	39.486	44.002	24.211	28.672	26.913	34.4329	26.773	53.008	69.463	58.2816	26.5537	34.0055	22.412	22.2598		0.304814	32.1139
6.904	18.2517	26.92	32.909	15.9581	15.15	18.475	25.183	74.418	36.833	29.339	23.211	25.8111	21.757	32.921	39.749	24.5	39.135	30.595	44.0153	19.522	48.407	82.623	54.6621	24.9877	33.9539	18.3436	20.4014		0.31016	32.5197
7.023	17.3109	29.3	40.655	15.8294	16.021	22.325	22.801	67.512	39.334	21.924	19.775	21.2214	20.608	34.895	39.817	24.652	37.835	30.274	59.0339	24.755	43.04	72.731	48.3165	23.4473	30.2204	18.1595	18.0708		0.315506	31.8468
7.1421	14.4544	27.681	39.104	16.9556	14.279	26.456	23.568	58.186	38.073	23.331	29.302	27.411	17.924	38.352	34.464	23.238	43.718	27.868	50.0166	24.107	43.851	70.716	56.9409	19.1173	33.2835	16.5344	14.34		0.320856	31.6027
7.2611	15.7374	30.827	38.057	19.626	12.02	25.766	26.713	63.017	43.054	17.328	31.055	26.4795	19.768	31.011	32.202	22.724	42.558	28.341	40.8422	21.481	40.613	62.84	52.7826	17.8217	30.2812	20.2606	18.0565		0.326202	30.7875
7.3801	11.0269	24.135	38.81	21.5765	11.567	23.469	19.602	48.544	56.899	17.832	23.924	26.3453	18.541	30.594	34.479	19.174	31.934	28.59	38.0813	20.515	32.67	39.565	46.8818	21.5242	21.3719	15.5508	15.4121		0.331548	27.3561
7.4992	15.2663	27.629	33.456	23.0203	12.06	21.131	18.231	52.141	46.042	24.152	27.413	23.8161	16.213	23.327	27.911	17.57	36.426	21.083	44.01	16.897	26.304	29.252	36.843	23.2713	26.539	9.782	14.6732		0.336899	25.7207
7.6182	16.6866	20.455	32.114	23.8142	15.933	27.342	18.196	50.867	46.148	20.164	21.751	22.2809	18.835	25.655	31.917	12.841	33.776	21.102	48.1333	15.356	22.261	20.488	37.1751	23.5411	24.8604	15.025	13.7876		0.342245	25.2039
7.7372	14.003	19.392	26.243	22.7978	12.716	25.215	22.752	51.014	52.556	23.303	26.419	33.8444	17.454	31.715	25.234	22.185	28.474	25.756	48.0141	16.506	25.103	19.359	40.9784	20.2798	25.7606	11.7139	12.7058		0.347591	25.9813
7.8563	14.8414	17.765	32.447	16.2199	11.916	21.539	25.789	58.102	36.83	19.788	23.013	28.9024	18.28	27.583	26.196	23.036	29.978	20.031	45.0472	18.602	23.907	14.614	43.2385	20.8112	17.6616	10.3723	14.3772		0.352941	24.4773
7.9753	13.4001	21.931	27.223	18.9594	12.718	18.264	24.625	52.264	48.946	16.43	17.261	19.563	19.794	23.965	32.677	26.616	20.612	19.362	42.7197	16.787	19.487	12.035	35.5697	22.4398	21.1267	13.576	13.7244		0.358287	23.4102
8.0943	17.9586	19.961	24.81	19.1709	16.817	17.42	21.107	52.821	30.123	17.048	15.13	18.5618	17.874	23.251	40.778	23.851	25.413	16.444	36.4921	14.402	16.925	9.754	34.0828	19.0719	26.3864	13.1825	14.6848		0.363634	22.3526
8.2134	14.0549	19.826	25.638	25.2286	22.173	12.831	22.36	63.366	35.531	14.687	13.21	14.4447	10.825	19.888	44.101	27.85	27.53	18.396	35.2493	18.461	23.962	8.742	28.3988	16.1892	22.5629	8.9163	10.833		0.368984	22.4168
8.3324	14.4158	21.26	22.517	21.7392	17.571	10.852	22.04	57.732	27.414	16.991	13.252	14.2892	17.483	20.98	31.193	27.473	26.501	16.683	32.7779	18.005	21.838	11.791	21.8867	15.7841	29.2714	12.7251	6.7837		0.37433	21.1574
8.4515	19.2259	20.933	19.574	23.1367	15.933	13.402	17.666	53.816	28.815	15.988	22.988	14.5985	15.082	21.863	33.646	24.131	22.081	17.826	37.106	20.647	28.401	8.994	20.9408	12.1785	25.2029	10.1125	8.0592		0.379681	21.198
8.5705	14.6701	21.875	29.406	22.2406	15.983	14.217	21.048	52.424	28.74	14.472	12.964	12.8979	15.939	25.172	28.796	28.402	25.564	26.136	33.207	19.063	31.552	10.065	24.1354	15.0298	27.2234	9.5656	8.7085		0.385027	21.8332
8.6895	11.9215	19.966	16.919	24.8488	17.517	13.399	19.776	58.991	23.021	13.758	19.306	11.5232	15.486	24.289	30.675	26.528	24.515	21.56	24.4544	17.931	26.511	5.97	16.5794	18.9447	28.0499	10.5709	11.5127		0.390373	20.5379
8.8086	18.9798	15.606	23.991	20.5935	13.563	11.281	15.684	64.773	26.3	17.538	24.038	11.0584	12.654	19.934	24.707	25.785	19.744	24.824	20.9334	15.313	21.639	5.142	15.4603	22.4273	26.3231	8.4332	11.9296		0.395723	19.9502
8.9276	18.9087	19.762	28.725	21.4242	16.641	13.581	15.073	59.982	37.81	11.548	19.544	8.4196	9.078	22.047	29.432	30.505	20.358	29.988	16.856	12.405	22.307	5.614	18.4586	15.7337	18.9344	9.4713	11.4234		0.401069	20.1493
9.0466	18.783	18.247	18.205	21.4446	16.972	12.55	13.608	43.495	34.519	14.334	11.018	10.8356	10.97	27.04	29.173	27.415	21.897	24.566	22.583	20.703	17.78	8.05	15.8345	20.6606	26.0156	10.4896	12.3463		0.406415	19.6124
9.1657	15.7195	18.947	16.89	17.0592	17.482	14.747	14.886	45.814	34.114	10.626	12.735	7.4355	11.624	16.853	27.366	18.625	19.374	31.747	18.5558	18.513	21.489	5.845	16.1915	20.2293	27.3433	6.7	12.3618		0.411766	18.4916
9.2847	21.0026	18.462	17.751	21.0204	16.999	19.111	12.252	39.303	48.932	9.769	16.876	6.1123	17.097	19.041	22.328	19.529	26.797	26.068	22.6971	16.981	19.127	6.206	10.4174	21.2796	26.1324	9.2965	12.6493		0.417112	19.3791
9.4037	15.8983	16.975	20.229	24.9626	15.35	14.356	13.37	35.756	44.115	14.177	16.921	7.8123	14.758	21.69	19.814	26.034	26.095	22.102	33.405	14.224	18.544	9.065	11.2523	25.4248	26.1931	8.7291	14.3939		0.422458	19.6906
9.5228	10.7239	15.037	16.069	18.5679	18.006	16.991	18.432	41.467	46.159	9.227	15.974	8.1643	9.845	18.186	19.021	19.875	29.435	14.471	27.7282	22.44	14.419	4.865	8.5467	23.5363	18.8835	10.3754	13.8886		0.427808	18.1605
9.6418	12.1385	13.572	14.998	18.0725	17.471	16.64	12.459	47.116	46.682	9.809	12.626	10.2333	12.566	17.126	16.867	19.52	25.856	18.533	22.7399	23.624	17.85	7.534	10.4786	21.3142	18.6155	6.8503	16.2887		0.433154	18.0585
9.7608	14.6217	13.022	18.615	16.4484	25.322	20.001	20.444	55.75	36.209	14.589	17.114	7.6013	16.097	16.644	18.552	20.55	26.346	20.717	17.6806	25.436	20.496	3.143	6.7825	20.9218	13.7498	7.9027	11.2646		0.4385	18.7415
9.8799	14.6252	12.862	18.197	16.638	16.577	17.754	18.517	65.074	38.8	14.253	17.006	8.0735	14.081	12.685	15.248	20.194	27.683	23.806	27.5824	30.162	21.888	2.73	6.7893	19.4618	10.9404	7.7645	11.2765		0.443851	18.9137
9.9989	11.7574	11.452	12.863	17.169	15.068	17.372	17.297	64.123	46.797	12.049	18.297	7.0149	13.825	18.633	15.007	19.565	26.917	19.011	25.4259	29.792	19.156	2.867	6.042	21.7007	17.2685	8.876	10.1639		0.449197	18.7226
10.1179	10.8382	15.275	14.735	14.889	15.478	14.586	12.569	63.265	50.058	15.083	15.032	4.8183	11.527	17.572	12.234	25.644	23.718	19.164	25.7376	26.601	22.478	3.167	3.1682	21.6518	13.6223	13.8383	11.6368		0.454543	18.4588
10.237	10.0688	13.68	14.22	18.1897	11.552	12.326	14.052	62.541	46.084	17.936	9.815	5.3	11.662	17.508	20.409	20.421	30.416	21.761	24.8012	19.786	20.356	6.073	6.9771	20.717	9.4694	12.4945	11.1394		0.459894	18.1391
10.356	10.3514	14.45	11.196	20.2755	11.194	10.028	12.85	54.033	49.436	14.154	9.661	4.3016	10.22	22.515	15.725	21.341	27.568	27.345	24.1548	11.597	12.818	4.426	6.3151	18.9957	6.2491	11.0572	4.7236		0.46524	16.5549
10.475	14.1424	17.091	12.424	21.4855	8.61	14.866	9.779	50.779	54.06	11.955	14.262	4.4673	8.045	20.663	15.546	17.523	35.462	35.284	19.3505	21.292	12.505	5.066	5.689	24.4802	13.5441	10.4661	7.3865		0.470586	18.0083
10.5941	15.5593	13.549	16.444	19.5678	9.657	14.653	13.864	43.464	46.061	9.039	12.345	4.7951	10.493	19.86	12.436	16.15	35.737	39.364	18.978	25.415	14.761	2.508	2.8431	23.7189	8.0134	12.051	7.706		0.475936	17.3716
10.7131	17.2735	9.974	12.81	21.7904	8.049	11.924	15.955	37.806	45.413	10.887	6.908	3.6402	15.182	18.639	12.872	14.578	30.002	30.423	13.3981	16.838	17.042	5.067	3.8558	20.29	8.6818	8.8805	11.508		0.481282	15.9143
10.8321	17.4304	9.136	7.75	20.164	6.865	16.514	15.23	43.2	52.439	9.931	12.336	5.0193	16.258	19.15	12.428	19.34	22.974	23.207	18.0378	19.6	18.734	2.691	5.3886	20.3592	8.9664	7.0929	10.1257		0.486628	16.3099
10.9512	17.8628	7.993	8.423	15.5726	9.022	15.163	11.593	42.535	49.542	12.095	7.262	5.5968	10.357	11.774	11.717	18.886	22.05	26.312	21.5318	19.119	16.228	4.021	4.7723	22.4441	12.5421	4.4658	12.813		0.491979	15.6183
11.0702	21.5343	7.514	8.889	16.2467	11.888	13.636	13.266	51.937	51.332	17.533	7.158	3.5231	10.577	11.774	17.571	19.482	19.889	29.085	20.9173	11.991	12.36	4.752	5.0406	20.9367	12.2181	5.583	12.3768		0.497325	16.2597
11.1892	16.9393	6.065	10.109	17.5886	7.993	12.528	13.656	47.576	38.411	16.085	9.565	4.7104	11.506	14.378	12.475	12.825	24.049	24.047	26.488	13.159	13.479	3.025	3.8817	15.8814	14.6249	8.5992	12.0251		0.502671	15.247
11.3083	21.1679	6.691	8.405	12.5537	11.673	12.734	11.757	35.853	35.181	15.467	6.356	2.6662	10.386	12.407	17.525	17.301	25.661	25.612	25.406	13.838	16.227	2.707	3.6648	17.3271	13.2136	9.759	9.3343		0.508021	14.8472
11.4273	15.6007	7.1	4.957	16.4472	9.458	12.306	14.722	37.608	35.504	26.591	2.29	5.7111	12.271	13.486	14.971	19.666	22.707	19.705	21.2522	11.83	15.44	1.933	4.3264	13.3893	14.9281	8.7827	12.76		0.513367	14.6571
11.5463	16.8742	10.594	7.028	17.2219	9.279	8.112	13.236	35.289	29.27	24.033	2.42	5.3337	12.563	15.225	9.023	20.574	21.913	22.569	14.1257	11.337	17.455	3.776	5.8689	14.5595	8.8515	6.7969	15.904		0.518713	14.0456
11.6654	14.0891	10.185	6.723	14.9347	8.766	11.874	17.454	31.694	35.983	18.858	4.165	1.8472	9.783	12.624	11.074	23.915	15.456	19.428	13.8545	12.451	14.159	4.094	1.7638	14.9167	7.2456	9.0205	9.6473		0.524064	13.1854
11.7844	12.4826	6.846	7.708	10.5615	10.572	10.105	13.323	21.739	34.669	17.109	6.394	3.4709	11.823	10.207	10.201	23.056	22.854	18.982	14.8249	10.424	10.157	3.766	2.7716	13.465	11.4819	7.3387	6.8369		0.52941	12.3396
11.9035	12.129	8.395	7.175	7.8033	11.113	15.879	13.084	15.834	35.805	15.944	5.272	5.3815	11.776	10.756	11.607	16.723	28.008	15.683	12.119	16.603	11.792	3.897	3.3957	12.2023	7.8959	9.9243	7.6553		0.53476	12.3649
12.0225	11.0149	7.872	5.46	13.0983	8.639	14.848	10.147	13.406	25.74	17.706	5.508	3.3771	5.794	11.851	9.7	12.484	35.102	19.859	11.4473	13.266	11.029	2.983	3.004	10.462	9.0428	10.0139	9.3978		0.540106	11.5649
12.1415	14.3782	6.694	7.023	11.2981	7.069	9.793	10.404	13.942	29.121	16.611	3.82	1.597	8.016	14.199	8.701	6.961	36.416	17.532	13.0414	10.125	11.165	2.042	4.5815	11.4047	8.4993	8.2193	6.7091		0.545453	11.0875
12.2606	20.0186	6.841	6.04	11.8944	11.04	7.695	9.281	11.969	22.536	18.502	4.68	2.6217	7.103	10.355	9.405	9.49	33.748	17.744	12.7414	10.571	8.125	2.602	4.6481	12.6499	9.5623	5.7136	6.1611		0.550803	10.8792
12.3796	17.5918	4.759	5.344	10.2705	12.293	10.474	10.866	14.66	22.03	21.729	3.102	3.9307	4.623	12.35	8.953	8.606	26.737	24.012	6.7118	10.412	12.567	1.87	4.0047	13.6343	11.0652	5.9202	5.9457		0.556149	10.906
12.4986	23.954	9.684	8.43	10.0182	6.383	12.152	7.051	18.599	26.434	21.673	5.55	1.9835	4.525	11.357	7.859	8.607	27.317	22.919	10.4919	17.18	9.912	2.053	3.8688	13.0697	12.2732	6.9856	6.0696		0.561495	11.7185
12.6177	15.2632	7.57	6.597	12.5014	9.325	6.777	6.652	23.826	21.586	12.614	5.712	2.6176	6.481	14.391	11.01	10.054	34.237	23.312	9.6226	13.997	12.378	1.836	4.0753	11.0743	7.6298	7.0731	9.4634		0.566846	11.3954
12.7367	13.9441	7.02	5.967	10.8858	7.688	5.009	8.551	24.782	24.042	11.011	3.921	2.779	5.28	15.328	7.414	10.797	43.068	26.171	7.7593	6.46	13.678	1.3	2.57	14.5165	8.3514	6.6102	12.7321		0.572192	11.3939
12.8557	16.0421	8.925	5.509	10.2332	6.556	7.297	7.406	25.456	17.85	12.027	4.719	2.3153	2.52	12.977	7.762	9.056	40.639	20.647	8.8251	10.517	13.98	2.108	4.03	14.4448	12.4102	11.0282	9.7431		0.577538	11.2971
12.9748	17.0508	9.666	6.123	8.7845	9.715	7.813	9.16	28.305	19.546	8.916	2.845	2.6954	3.94	15.399	7.462	10.404	33.603	21.962	8.3336	9.517	17.467	1.52	2.7857	14.7491	12.4739	11.9415	8.2351		0.582888	11.4968
13.0938	12.6874	7.148	6.113	9.9573	9.99	8.696	10.769	25.919	22.086	7.46	3.472	4.5384	4.724	14.849	6.752	5.259	20.65	21.059	6.464	7.673	15.091	3.25	3.2886	16.1046	11.9557	11.6044	10.6345		0.588234	10.6739
13.2128	20.151	4.735	4.914	8.9409	12.382	10.126	13.4	33.563	22.12	11.172	5.404	2.6363	5.75	16.069	11.375	9.098	23.778	25.916	8.7666	8.694	20.576	3.149	3.1974	12.6522	10.4732	13.4096	7.9817		0.59358	12.2381
13.3319	17.436	6.35	6.577	6.2478	9.129	10.451	9.958	33.615	16.373	8.704	3.872	3.1288	3.962	16.986	6.553	9.227	22.365	21.596	13.9795	9.295	15.343	2.622	4.6072	15.982	10.2688	11.0202	7.4149		0.598931	11.2246
13.4509	13.7286	4.627	8.097	5.7434	11.875	10.482	7.852	39.312	15.937	10.828	4.022	3.4389	5.551	15.712	7.469	8.804	19.888	23.951	18.5371	9.379	10.484	3.425	1.6548	16.0149	10.0579	7.793	7.0803		0.604277	11.1757
13.5699	16.2663	5.551	7.107	9.3595	11.106	9.913	6.155	41.402	16.084	10.1	3.279	3.6018	4.998	13.531	7.116	9.275	10.06	15.67	18.0047	10.51	13.578	3.56	2.2363	15.7873	12.12	5.0958	7.8315		0.609623	10.7147
13.689	16.3795	6.527	1.816	7.3349	8.332	6.078	9.476	40.707	18.464	9.253	5.064	3.5561	3.167	11.095	4.407	7.772	8.702	13.359	16.6334	12.629	11.338	3.887	5.3497	10.3103	13.9893	4.5029	5.9291		0.614973	9.85401
13.808	17.8185	5.561	4.667	9.8054	8.815	4.833	8.559	29.638	15.719	11.666	5.044	1.6285	7.596	7.65	5.722	11.271	11.878	10.99	17.2768	12.227	7.919	4.838	3.3523	8.2127	10.3071	6.9511	5.3095		0.620319	9.45389
13.927	16.354	5.517	5.628	13.7295	9.052	8.054	5.242	27.207	16.368	15.07	5.28	2.6038	4.459	9.838	3.681	10.156	10.867	10.45	16.4712	15.493	5.813	3.913	3.2807	12.8609	11.4399	13.4446	9.0459		0.625665	10.0488
14.0461	13.647	5.29	4.899	8.3064	11.76	8.028	7.608	27.441	12.826	12.543	3.876	2.8529	1.19	9.31	8.69	9.457	12.927	11.215	14.3657	13.403	7.796	2.493	4.1074	8.8022	11.0117	10.8395	10.9935		0.631016	9.46957
14.1651	12.3972	4.714	2.949	2.6428	8.292	8.109	3.721	27.151	13.493	10.073	5.66	1.9168	2.192	11.961	5.459	10.7	13.805	9.945	15.4766	14.612	6.411	2.24	2.9583	13.3079	15.4048	13.4274	9.9475		0.636362	9.22097
14.2841	14.1804	5.929	3.673	6.184	10.526	6.514	5.19	31.849	17.728	9.153	3.138	1.6967	5.169	15.254	4.837	9.709	13.696	8.161	20.9568	20.639	7.597	2.933	2.4509	5.8687	9.52	11.4709	15.2387		0.641708	9.97267
14.4032	14.3968	6.879	4.35	5.8769	12.778	4.993	4.649	29.938	19.844	6.299	4.181	3.209	7.189	12.877	4.089	8.272	13.143	10.561	21.6256	26.339	10.125	3.661	2.4114	6.7046	9.157	13.6581	11.9897		0.647059	10.3406
14.5222	16.9538	7.119	4.047	5.3403	11.774	7.68	5.362	36.307	17.952	11.427	2.753	1.7157	5.31	12.847	5.099	5.709	14.944	12.288	18.2787	20.805	8.202	2.796	1.3171	4.6686	8.3495	18.199	11.2309		0.652405	10.3139
14.6412	12.5718	7.324	3.897	7.1488	10.697	7.613	6.014	37.576	17.714	10.317	3.016	2.645	7.018	12.812	6.605	5.989	11.267	14.866	18.2122	15.425	9.455	3.63	3.0288	5.523	10.5717	16.2151	10.1103		0.657751	10.269
14.7603	10.9508	5.637	4.131	3.2216	5.069	6.284	3.825	26.811	18.472	7.612	5.116	3.2186	7.351	10.839	7.985	6.634	11.081	10.473	13.4013	12.205	15.29	4.155	3.2713	7.1703	9.0681	15.407	8.1977		0.663101	8.99543
14.8793	8.8722	4.718	6.269	5.8519	6.157	6.221	7.419	28.658	18.168	7.431	3.021	2.9507	9.174	7.605	10.322	6.467	12.566	11.636	12.9748	11.284	16.134	1.565	3.3391	6.1413	8.886	12.9691	7.7517		0.668447	9.05747
14.9984	10.86	2.783	3.347	5.6078	7.569	3.864	7.879	32.197	22.379	10.443	2.712	1.8563	3.799	11.435	4.095	6.187	16.132	6.59	12.9618	11.265	18.063	2.812	2.8688	6.8888	8.2165	19.2908	6.6688		0.673798	9.21373
15.1174	13.6276	7.488	3.789	4.5973	10.905	6.647	7.377	24.466	23.719	11.045	3.266	1.9754	2.182	9.238	4.295	7.552	15.047	8.016	16.2825	11.918	14.25	4.817	2.7989	5.9983	11.492	16.5332	3.9249		0.679144	9.37952
15.2364	12.7496	7.716	6.147	3.0079	9.959	4.172	5.479	23.094	23.709	6.683	1.621	1.9632	4.449	10.574	4.294	7.804	11.804	9.377	12.2243	11.033	10.739	2.591	3.1606	7.3879	8.0453	18.575	6.3464		0.68449	8.69279
15.3555	10.7938	6.12	4.404	3.8776	5.491	6.136	4.477	28.459	30.931	8.023	3.093	0.9192	4.826	11.365	5.951	7.214	19.518	12.168	13.8409	9.517	11.923	2.49	2.5023	5.6626	8.0738	15.0857	2.0729		0.68984	9.07166
15.4745	11.4362	6.336	2.583	4.4802	9.512	5.997	4.419	24.074	22.623	12.335	3.062	2.9744	3.908	9.129	5.326	4.804	17.739	10.875	12.9941	8.15	15.786	2.108	2.8298	5.1774	11.2668	11.4463	6.4618		0.695186	8.80863
15.5935	9.5508	4.528	2.092	3.1879	10.345	5.485	7.079	29.592	21.225	9.245	2.387	2.2372	2.747	13.845	4.349	8.965	18.779	12.069	17.9228	9.03	13.068	2.797	2.2433	6.5046	9.0729	15.3966	9.12		0.700532	9.3653
15.7126	6.7873	7.834	1.321	3.2487	7.749	9.076	7.517	36.743	21.19	8.569	3.522	1.3942	3.565	10.701	4.648	6.911	24.796	9.102	10.7475	12.578	14.177	3.54	2.1127	5.277	7.7415	11.0618	8.1517		0.705883	9.26153
15.8316	8.7269	8.987	1.603	3.4785	7.436	9.25	4.46	30.097	18.265	12.628	4.209	2.6368	5.369	8.268	4.025	9.657	25.411	10.484	14.5747	6.617	14.272	1.888	3.794	6.0668	5.198	10.5625	8.8345		0.711229	9.14069
15.9506	11.6799	9.032	3.703	5.3864	7.721	4.36	5.558	25.376	22.883	11.748	4.022	4.6253	7.77	11.508	5.21	11.455	20.697	10.56	10.892	10.981	16.806	3.13	3.4901	5.1593	7.2387	11.1114	11.1779		0.716575	9.75115
16.0697	11.2607	5.535	3.002	5.2982	8.107	8.101	5.695	31.27	22.786	8.625	5.314	2.8786	4.538	10.249	4.606	9.848	15.687	8.986	11.5713	10.195	13.002	6.384	3.4612	5.5101	8.1591	7.5725	7.6848		0.721925	9.08617
16.1887	13.6996	4.879	2.816	3.7443	7.14	7.336	5.477	42.509	17.462	9.887	2.914	2.5029	5.645	8.704	5.33	15.557	16.249	9.425	10.4313	6.582	11.92	2.924	2.6749	6.4962	8.1998	6.6583	8.8306		0.727272	9.11089
16.3077	15.6708	5.124	2.766	4.6529	7.399	5.528	3.782	44.163	11.299	8.951	2.602	5.0117	5.86	10.206	8.372	12.719	10.205	8.231	12.29	8.561	9.389	3.874	3.1021	6.9438	7.9959	8.7426	14.0014		0.732618	9.16453
16.4268	10.6446	5.106	2.765	1.5604	6.115	6.094	4.977	46.728	20.377	10.24	3.775	2.2542	5.477	11.264	4.483	10.238	10.929	14.568	12.3031	10.371	7.617	2.783	2.5343	6.8376	6.1718	6.8589	9.7039		0.737968	8.9917
16.5458	8.8155	3.89	3.687	3.8279	7.045	4.762	3.127	43.389	17.281	10.567	4.659	2.0536	5.46	9.291	8.58	8.934	10.367	16.788	12.1738	14.098	7.354	4.835	1.3405	6.9451	8.4235	5.2884	5.38		0.743314	8.82823
16.6648	7.7998	6.415	2.333	6.2917	5.84	5.457	7.805	36.71	12.921	13.902	4.425	2.5487	4.097	9.125	8.475	11.545	13.751	16.394	11.005	10.994	8.5	4.402	2.0733	9.4339	10.4766	8.5097	6.1727		0.74866	9.16305
16.7839	8.8068	6.71	3.023	5.1112	8.735	5.644	4.375	39.16	12.771	10.374	4.76	2.0182	4.58	8.416	4.947	10.878	14.475	11.143	14.2313	11.384	7.203	4.005	2.038	7.4763	12.1541	8.3167	5.592		0.754011	8.82695
16.9029	9.8729	5.066	3.431	4.7202	9.239	6.864	4.446	28.764	14.899	13.904	3.693	2.9771	7.012	10.24	7.892	14.617	15.002	13.393	11.1198	9.253	6.641	3.82	2.7515	5.0967	6.5815	8.5462	8.2319		0.759357	8.81755
17.0219	9.3155	6.858	1.063	3.7698	8.721	6.719	4.279	19.284	16.982	10.822	4.725	3.3163	5.108	7.394	8.608	14.329	11.402	16.492	9.1419	12.573	6.633	2.068	4.4949	6.1248	10.5373	10.6063	6.6022		0.764703	8.4433
17.141	9.0378	5.928	1.401	6.3631	6.258	5.95	6.496	13.174	15.56	10.512	3.727	3.5731	8.432	5.842	8.633	17.059	7.66	19.366	13.7129	13.874	6.486	3.445	2.7292	4.6639	6.7922	9.869	6.4707		0.770053	8.25981
17.26	7.5625	4.985	3.846	4.0279	8.143	5.529	4.188	9.692	13.796	9.954	1.843	3.2706	7.767	8.578	13.912	13.251	8.377	15.746	10.7318	16.879	6.096	5.585	3.8938	5.6109	9.0981	10.469	13.547		0.775399	8.38439
17.379	8.1581	4.171	2.853	4.7191	7.212	6.35	5.536	8.282	11.166	8.308	3.447	2.3837	5.566	10.805	16.627	17.912	10.486	14.038	11.7421	17.954	7.68	3.7	4.2573	7.1548	9.4245	13.1941	11.1546		0.780745	8.67709
17.4981	9.0031	6.562	2.99	2.3605	9.76	7.264	10.627	8.193	9.558	8.986	0.38	2.3142	5.024	6.949	16.976	17.007	11.399	13.819	8.2736	16.461	8.386	1.915	2.0356	5.0423	8.0927	7.8531	12.3584		0.786096	8.13294
17.6171	9.9007	10.237	2.369	3.5478	7.083	6.399	7.298	7.774	11.905	10.723	1.561	2.221	3.944	8.713	17.215	14.557	12.021	13.574	7.7103	13.009	13.694	2.268	1.7074	6.378	9.0473	9.3566	7.9601		0.791442	8.22864
17.7361	5.897	7.678	6.82	2.6206	8.277	8.908	4.751	7.296	9.826	8.883	1.516	1.3478	8.043	7.512	17.255	16.603	6.183	17.05	10.2665	14.371	12.401	2.759	2.8436	6.7875	7.0832	10.3761	11.217		0.796788	8.31746
17.8552	6.3045	6.252	4.868	4.2778	7.71	9.977	7.795	7.812	12.168	11.052	3.217	0.8318	10.054	6.156	13.852	19.044	6.207	13.187	9.2228	16.305	14.042	3.69	1.7465	7.986	6.9091	7.5537	6.7962		0.802138	8.33394
17.9742	8.5152	6.501	2.788	3.852	10.051	6.068	6.289	6.236	10.773	7.526	3.835	2.9245	7.388	5.623	11.832	14.076	6.656	12.434	9.0828	17.465	10.68	2.328	2.2806	7.127	9.0758	6.0036	6.3485		0.807484	7.54663
18.0932	6.2512	3.813	1.469	3.6439	10.883	5.904	2.87	11.375	11.025	7.959	2.987	4.9412	6.61	4.611	9.986	16.716	8.314	14.411	7.9519	17.495	10.823	5.79	1.5376	4.7014	7.7676	8.4536	5.3744		0.81283	7.5431
18.2123	7.4118	4.392	2.502	4.5566	12.037	4.875	4.364	8.008	14.739	8.534	3.481	1.8798	7.201	7.235	8.817	11.751	8.414	7.495	14.8498	17.306	8.168	6.269	0.6809	5.6386	4.9867	6.043	5.9338		0.818181	7.31737
18.3313	7.0303	8.105	3.437	4.9719	11.719	5.104	4.65	8.526	11.062	8.914	3.683	2.6589	9.989	13.201	8.771	11.639	9.042	8.517	11.2925	9.132	4.594	3.451	1.322	8.2134	7.6061	5.2681	6.9092		0.823527	7.36327
18.4504	6.8876	10.165	5.978	5.7073	10.073	5.065	3.953	6.479	10.735	9.639	2.884	2.3374	6.928	15.051	5.818	11.747	13.276	9.402	7.3939	10.087	6.564	3.568	4.6268	8.8974	10.0986	11.7229	7.226		0.828878	7.86333
18.5694	5.7206	5.087	3.762	5.0807	6.848	5.641	3.644	8.306	15.714	9.951	3.115	1.9244	11.239	9.018	8.527	11.838	11.573	6.545	7.5467	7.726	8.556	5.469	5.1688	7.6068	7.6067	15.8638	4.9791		0.834224	7.55765
18.6884	7.9745	6.839	2.873	6.2881	6.362	5.056	3.233	10.447	12.551	10.582	3.035	1.8114	6.585	10.715	9.614	16.589	13.013	8.493	8.1712	10.428	9.075	7.315	1.7829	7.9808	5.794	13.9241	7.1884		0.83957	7.91557
18.8075	6.0316	7.23	2.449	4.5214	5.095	4.721	3.379	7.128	12.353	9.159	2.274	2.0823	8.74	10.246	14.402	11.256	10.615	8.083	6.2827	7.578	14.112	9.293	5.4758	6.3707	8.3388	13.2867	5.5409		0.84492	7.63126
18.9265	5.2725	6.201	3.592	8.5861	3.924	4.81	3.038	4.025	11.399	10.185	5.757	4.3426	8.505	14.18	14.479	8.207	12.992	12.095	14.1264	8.99	16.715	6.731	2.7802	10.1203	8.1752	11.4227	6.974		0.850266	8.43056
19.0455	8.81	5.81	3.479	4.0971	4.493	2.404	4.733	7.208	14.653	10.338	5.839	3.4672	10.324	15.101	10.263	9.282	18.98	11.905	10.0393	10.785	11.138	9.101	5.2186	11.0828	7.3618	8.9957	7.009		0.855612	8.58954
19.1646	6.0833	4.299	5.564	5.961	4.623	6.028	4.386	7.751	11.049	9.405	5.121	2.2946	10.765	12.987	7.569	10.993	9.836	11.359	9.3036	9.763	12.301	14.692	4.2458	8.8008	9.8184	12.488	5.3369		0.860963	8.25272
19.2836	8.6818	5.121	5.947	7.1643	5.281	3.343	3.11	10.424	12.964	8.178	4.764	4.8403	10.638	12.313	5.873	13.155	12.712	8.836	8.4885	12.291	13.044	15.904	5.7279	8.8661	8.6848	8.7712	4.9039		0.866309	8.51951
19.4026	7.4415	5.163	2.92	6.6979	5.094	3.824	2.905	10.569	10.118	11.398	3.534	2.8528	10.454	14.871	6.825	15.946	19.059	11.375	10.393	9.404	12.021	14.531	7.8351	9.7782	7.9885	6.6883	8.4506		0.871655	8.81989
19.5217	7.6105	6.368	3.039	6.4559	4.103	3.662	1.962	5.683	13.835	7.099	4.055	2.1981	10.301	13.788	5.756	18.534	20.103	12.538	8.1882	8.102	12.811	15.129	4.5189	13.0203	9.0873	10.6517	8.6527		0.877005	8.7871
19.6407	8.432	5.296	3.03	8.8534	5.824	6.869	2.103	5.624	11.244	9.247	4.851	2.3303	9.358	12.347	4.37	19.629	21.289	10.036	11.4754	12.056	8.366	21.209	5.7084	8.1544	6.6492	8.5958	9.3154		0.882351	8.97268
19.7597	8.4601	6.513	3.652	12.0961	4.35	5.906	3.879	3.871	9.596	6.074	3.438	1.8079	9.659	10.743	5.676	22.257	21.736	10.507	11.8249	10.41	9.02	16.748	7.2065	7.4123	6.7609	9.4554	7.9289		0.887697	8.77733
19.8788	8.1983	6.079	6.031	11.5216	4.225	7.476	2.757	3.766	8.062	6.673	4.447	1.7492	4.857	8.731	7.201	19.853	19.087	7.85	9.5479	10.035	6.195	24.827	8.1248	9.1416	8.5143	6.6595	9.2798		0.893048	8.55144
19.9978	6.882	7.165	7.805	14.711	5.956	6.285	2.776	4.22	11.121	12.025	7.412	4.4444	4.848	8.321	11.03	15.875	15.282	6.133	10.6843	6.662	4.718	26.93	7.0141	10.7896	9.8516	11.8978	7.7795		0.898394	9.20809
20.1168	6.724	5.685	5.913	9.0089	5.56	5.475	3.182	7.693	14.305	13.306	5.651	4.1437	9.34	10.352	8.126	17.961	15.107	7.941	13.7049	5.766	4.862	33.368	6.6386	12.3953	4.6332	13.3413	9.5142		0.90374	9.61841
20.2359	8.1312	10.052	7.755	11.1194	7.435	4.619	4.055	7.76	13.581	9.703	5.019	4.5871	8.663	10.153	7.435	13.434	15.721	9.844	7.9073	5.196	4.182	38.328	7.0316	14.4571	6.8496	8.9419	8.719		0.909091	9.65479
20.3549	8.7636	6.084	7.192	10.2931	5.61	3.138	3.291	6.831	11.523	8.105	5.426	3.2049	10.793	8.782	8.835	13.978	11.255	8.397	9.6286	5.416	5.753	22.576	9.3212	9.4172	7.4786	11.5861	10.5688		0.914437	8.63878
20.4739	4.5277	7.182	8.309	9.5229	4.842	6.027	2.669	5.369	9.458	7.766	5.001	5.8997	12.749	10.278	5.67	17.573	11.397	8.997	9.9346	4.851	4.909	16.189	7.3828	11.8603	5.7085	10.5038	8.3238		0.919783	8.25556
20.593	8.0002	8.912	7.02	11.0562	7.585	4.573	0.954	5.065	10.275	8.921	7.291	5.182	10.523	6.3	6.825	15.21	11.655	12.972	6.7991	4.972	5.233	10.088	4.5058	19.1556	4.9476	8.0451	3.9665		0.925133	8.00119
20.712	6.768	8.002	4.611	8.9987	8.438	4.457	3.012	3.122	6.271	6.55	8.544	5.6025	10.016	7.111	7.045	13.263	12.443	7.968	4.6141	1.932	2.774	6.355	5.5139	17.2539	6.505	8.3676	4.1182		0.930479	7.02429
20.831	5.9621	5.481	3.955	6.9981	6.782	8.389	1.787	3.619	10.91	4.072	4.327	6.3106	9.734	8.083	7.774	13.558	15.093	9.785	4.7346	1.405	2.429	7.887	7.0515	12.2444	5.565	8.556	3.6933		0.935825	6.89576
20.9501	4.5764	5.421	7.795	3.6794	5.941	6.566	1.858	5.916	10.165	6.267	7.603	7.4735	9.233	9.308	7.975	12.495	12.821	6.639	4.9548	0.802	1.34	9.144	6.4119	10.0664	5.3488	11.0245	2.3085		0.941176	6.78271
21.0691	7.0686	5.791	8.67	4.0807	6.986	5.946	1.245	4.981	6.733	3.852	9.366	6.9872	7.601	6.228	8.784	10.027	14.144	4.405	2.031	2.047	1.129	5.05	5.7876	10.2574	5.3995	7.3548	2.213		0.946522	6.08018
21.1881	7.4671	3.394	3.035	4.9592	7.284	4.288	0.332	4.038	12.387	6.053	7.362	8.3213	8.433	7.108	12.082	9.684	10.047	3.9	2.3799	3.624	0.979	6.303	4.3563	11.077	5.1324	7.4132	1.165		0.951868	6.02239
21.3072	6.9898	7.81	6.703	3.8105	6.567	5.838	2.622	3.23	9.116	3.414	7.449	6.8555	9.856	8.885	11.342	8.471	6.529	2.997	2.679	2.331	1.521	4.24	3.3392	8.0903	5.7054	3.984	3.2599		0.957218	5.69017
21.4262	6.5753	7.129	5.61	8.7581	7.268	6.205	4.076	2.791	9.766	1.922	8.776	6.3866	10.448	13.062	7.794	8.819	7.849	0.72	1.2934	1.842	1.016	3.817	4.6625	7.4169	5.6748	0.9119	1.8901		0.962564	5.64739
21.5452	3.2812	6.91	5.374	7.3687	6.226	2.766	2.356	4.23	8.748	6.43	6.473	8.0456	9.177	12.522	8.583	11.415	10.126	1.924	0.6652	2.225	0.711	2.646	3.0621	5.6991	5.8135	2.2243	2.3466		0.96791	5.45734
21.6643	4.2847	5.743	3.883	5.7039	8.133	8.707	0.625	4.031	10.143	6.078	7.052	10.2703	5.802	11.153	8.404	8.171	7.605	1.044	0.6238	1.413	1.771	2.967	2.7586	5.7608	4.3445	3.5102	1.3898		0.973261	5.23599
21.7833	3.4533	4.145	6.165	7.1259	8.516	6.585	1.901	2.021	10.952	3.727	6.907	7.0971	10.155	15.074	8.367	9.884	3.137	0.01	2.2712	2.326	0.497	2.66	0.2934	6.5486	3.3772	3.8845	0.1791		0.978607	5.08368
21.9024	2.3167	3.494	7.73	7.4748	7.536	3.639	2.741	4.709	8.083	3.153	6.422	4.919	9.066	11.547	6.353	11.59	2.873	0.598	3.0152	1.775	1.148	1.239	0.2248	4.1846	5.5563	2.3371	0.5877		0.983957	4.60416
22.0214	1.9639	4.082	4.232	6.0158	5.699	6.187	3.733	2.85	8.581	1.317	4.586	5.0145	6.403	11.506	9.678	8.647	5.994	0.908	2.5824	0.893	1.391	0.847	1.9191	3.2391	5.7298	1.3618	1.4472		0.989303	4.32621
22.1404	5.1205	4.656	4.205	5.3546	7.67	5.743	5.07	2.606	6.949	1.709	7.274	7.673	9.959	8.264	9.165	10.46	4.907	1.03	2.3737	1.464	1.63	1.202	2.6123	4.5279	5.0106	3.1124	1.315		0.994649	4.85419
22.2595	4.5464	5.496	2.783	5.6624	6.351	9.448	5.098	0.942	4.077	4.499	6.84	7.6393	10.132	5.915	6.546	14.455	3.99	0.791	1.3484	1.843	1.367	0.762	0.6051	1.1083	2.6652	1.2443	0.7188		1	4.32864

## Sheet: Image4
X0	Y0	Y1	X2	Y2	Y3	Y4	Y5	Y6	Y7	Y8	Y9	Y10	Y11	Y12	Y13	Y14	Y15	Y16	Y17	Y18	Y19	Y20	Y21	Y22		Ap-Ba	Average int
0	68.8954	64.9691	0	59.8379	78.088	59.803	65.1562	69.564	62.6924	36.975	39.8104	54.3136	61.992	55.2065	26.9433	31.5105	36.062	57.7357	45.7583	33.1582	40.5236	49.8298	54.6213	65.8372		0	50.8035
0.119	77.0165	55.0236	0.119	66.0639	74.4115	70.515	57.6173	49.376	56.3887	32.191	39.8764	64.2212	75.218	55.0911	18.5125	26.8466	30.6879	57.8139	46.4049	35.5836	38.6767	43.8636	54.952	61.4419		0.00653405	49.4964
0.2381	69.2049	52.9794	0.2381	58.0137	66.4973	60.526	46.6562	49.698	51.5177	36.8454	33.8244	74.4473	79.432	56.7474	15.3934	28.0618	28.7816	75.5691	49.2877	38.1063	40.0072	45.2314	52.0579	66.9613		0.0130736	49.0036
0.3571	59.8864	57.5118	0.3571	50.7349	73.699	57.081	53.5371	48.655	50.9521	26.6144	38.5705	76.8554	97.825	54.7766	15.0516	28.2463	22.321	72.4309	69.8669	37.8797	41.9547	44.8576	45.2444	71.7223		0.0196076	49.8597
0.4761	57.9054	47.1654	0.4761	49.9793	72.8311	51.507	46.8613	49.835	45.5126	28.4005	40.437	80.3445	103.706	55.871	17.355	29.4816	22.7225	63.7159	68.7808	39.3086	35.4621	32.7867	52.1946	68.7851		0.0261417	48.3927
0.5952	63.9288	42.1452	0.5952	47.8934	58.0434	46.082	41.4698	47.388	43.447	32.8565	33.2222	73.7497	90.608	69.719	12.3834	28.6467	20.8695	69.3577	66.6248	44.1377	48.8279	39.6681	40.7311	66.6356		0.0326812	47.0429
0.7142	50.7769	45.3135	0.7142	48.9608	52.5541	51.419	46.4707	52.851	41.3313	36.4207	38.7613	80.7235	80.115	72.0849	14.5694	19.1205	16.9641	74.8761	61.4466	41.0811	49.3976	43.908	44.1942	61.988		0.0392153	46.9184
0.8332	56.5866	49.8558	0.8332	51.3767	57.8825	55.774	47.6025	50.18	36.7854	31.9803	39.1606	92.49	75.28	73.7774	13.5227	16.6792	18.4311	58.5453	53.0095	32.425	50.4321	37.9689	53.173	58.1511		0.0457493	46.3293
0.9523	62.0777	63.189	0.9523	52.9193	58.8041	63.732	44.0599	49.997	40.7594	36.0739	27.3604	92.4011	53.796	91.2222	12.9122	12.0228	10.6192	54.9106	60.3369	37.4838	51.3981	49.4679	52.4715	60.5225		0.0522888	47.4787
1.0713	63.6175	67.9084	1.0713	62.4338	48.6703	71.819	53.2231	68.412	40.2889	31.4472	31.0596	94.9782	43.514	80.1938	12.5509	12.6194	16.757	39.0086	55.7704	35.325	50.2979	47.3321	54.018	46.9928		0.0588229	47.0546
1.1903	56.635	68.2735	1.1903	71.9852	47.9482	70.114	49.7418	84.429	34.724	32.9388	24.3652	91.9595	39.075	77.2868	13.3896	16.0655	13.0082	32.9913	64.8865	29.9837	40.0334	46.8286	54.8139	45.1749		0.0653569	46.1601
1.3094	66.0724	78.0597	1.3094	76.0938	51.7854	84.69	59.0921	97.031	31.8689	38.635	19.0457	79.6592	35.416	67.7849	11.6705	10.1332	12.0322	36.0435	58.8947	35.3784	42.2815	42.5551	59.2745	51.6706		0.0718965	47.7699
1.4284	72.2304	66.6723	1.4284	67.3939	40.0229	100.259	79.9936	101.472	36.1355	44.6077	22.5968	71.9893	26.31	56.048	8.0143	9.1552	9.6795	33.3245	49.5665	32.4318	32.8899	36.6833	46.4739	46.9065		0.0784305	45.5119
1.5474	79.1176	68.3191	1.5474	69.1565	51.9312	102.997	78.4639	77.493	35.2246	37.1219	19.3118	76.1185	22.932	56.3403	8.7244	11.1841	14.5653	32.5149	56.3262	36.21	31.2705	38.7369	39.4495	51.1114		0.0849646	45.6737
1.6665	77.8992	66.086	1.6665	60.7863	59.454	89.585	82.4554	65.665	27.2439	39.744	20.4848	61.0532	20.832	51.0041	8.2731	7.8726	9.544	25.8879	47.0185	40.7074	32.4116	24.8471	49.9571	49.3477		0.0915041	42.4928
1.7855	65.3988	62.9196	1.7855	51.6226	54.6696	74.687	85.0272	59.606	25.5275	35.8745	22.4367	55.6057	14.736	56.9184	10.4798	8.3931	7.4924	23.7266	57.514	30.1207	34.7684	28.5461	48.9054	49.5911		0.0980381	40.2647
1.9046	56.6042	57.9122	1.9046	55.0109	56.2514	59.33	59.6519	63.01	28.9439	28.3935	19.1723	44.7486	14.391	53.8826	9.8216	7.5928	7.0506	24.727	61.9197	35.3521	31.5891	29.6335	41.6175	56.2033		0.104578	37.6964
2.0236	57.0988	52.4892	2.0236	45.1467	44.7258	47.671	43.1556	67.761	31.0795	26.6802	16.0179	38.8289	13.777	56.3674	6.9097	7.6524	7.2721	28.4662	51.451	37.5911	28.2203	32.6007	43.8415	58.967		0.111112	35.2414
2.1426	54.7907	50.9052	2.1426	35.1979	50.7773	37.32	49.8492	83.06	40.2998	21.5487	18.5305	30.8098	17.29	59.3303	9.4842	7.6467	6.9361	27.2798	49.6129	36.3737	30.0574	25.2723	37.4244	54.6139		0.117646	34.8564
2.2617	39.4536	43.0452	2.2617	28.951	48.9968	33.902	48.252	86.154	39.8425	17.4465	14.1227	37.735	19.664	67.8115	9.87	5.8621	9.8678	16.0298	50.4871	37.1999	26.1529	21.7453	36.8083	49.6644		0.124185	32.9719
2.3807	35.5104	36.52	2.3807	22.9328	49.3581	34.96	39.4944	96.501	39.0132	14.8827	16.3857	44.9097	14.331	81.1107	12.9054	3.5244	11.3481	16.0667	56.3556	36.5241	27.0337	26.1013	43.1844	46.0924		0.130719	33.6428
2.4997	41.4745	33.1473	2.4997	20.0651	35.9495	39.863	46.4209	81.549	43.1592	15.2297	13.6016	44.2739	13.497	71.815	12.052	5.7897	7.3198	9.4677	43.5145	36.8557	22.4331	21.3021	48.1169	47.1576		0.137253	31.5231
2.6188	36.9781	23.5772	2.6188	16.714	35.7042	40.672	37.9869	77.153	35.9323	20.3606	15.6691	48.4597	18.156	61.6976	9.4183	4.5592	8.1479	8.8494	45.1164	26.673	19.1373	14.7807	45.9337	37.5986		0.143793	28.8289
2.7378	32.7751	20.241	2.7378	12.9037	34.0803	35.431	30.8904	71.328	31.7156	14.1144	16.0667	51.2884	12.092	59.5443	14.154	2.797	4.9943	8.658	52.8047	25.3416	16.3054	19.7893	43.0754	37.0544		0.150327	27.091
2.8568	29.8188	11.4948	2.8568	11.1163	33.0132	22.613	30.0731	66.433	30.3955	12.437	18.1266	41.5625	14.507	52.5735	10.8551	3.8462	3.8868	10.1164	41.3967	21.3789	16.206	19.2281	40.0471	31.7646		0.156861	23.9895
2.9759	19.3818	9.6238	2.9759	12.457	28.2386	28.436	20.8266	45.174	30.2397	6.1263	14.1999	32.5006	12.741	56.0291	8.7478	3.1016	6.8904	10.2172	44.7212	23.1343	13.9411	21.1112	43.1624	28.8774		0.163401	21.7856
3.0949	16.8148	13.4894	3.0949	13.7647	26.8904	29.91	19.4498	29.74	25.9701	7.2157	7.0034	28.079	10.676	50.8731	9.2315	2.7932	6.6788	9.522	41.2454	17.8189	15.2956	19.4953	37.3563	27.3323		0.169935	19.5725
3.2139	21.3556	13.1759	3.2139	20.0574	27.8796	27.007	20.5156	27.147	19.6375	8.6166	7.4536	28.0646	8.203	44.7526	11.8217	0.9058	6.8063	8.6921	42.4411	22.6062	14.4857	13.6534	28.086	28.7323		0.176469	18.9713
3.333	20.2585	6.6074	3.333	16.2243	30.0378	26.021	18.8936	15.065	16.009	5.4984	8.4483	28.2382	9.216	37.279	7.9497	3.7521	5.337	5.0304	33.8075	20.3305	16.6593	17.2385	29.9887	23.0707		0.183008	16.8456
3.452	15.908	6.9209	3.452	15.016	28.8546	26.214	23.7369	10.846	24.4093	6.6646	12.01	31.4607	12.8	27.2104	8.704	6.6818	8.0259	10.2304	25.6291	18.8327	14.9848	11.9284	22.228	23.0187		0.189542	16.4903
3.571	21.4761	6.8813	3.571	15.5123	25.3806	25.69	18.6722	15.483	20.7271	11.3728	8.7301	40.7116	12.308	24.2683	9.0726	5.4702	7.408	5.9026	27.6929	16.0649	12.2238	12.7749	22.4281	22.2411		0.196076	16.336
3.6901	19.8085	8.3903	3.6901	18.0326	23.3516	25.668	18.5791	9.248	14.378	12.8695	10.1093	42.5207	13.566	19.8053	10.1532	5.827	4.6893	6.272	30.7955	13.9292	13.309	11.9475	27.0469	31.8316		0.202616	16.4924
3.8091	17.9566	6.8588	3.8091	22.69	17.5298	20.67	13.1908	9.23	13.9922	12.1298	13.9822	45.3341	11.761	22.3593	5.7269	5.5599	6.8148	5.9941	34.387	13.7785	10.4844	11.0774	28.175	28.2732		0.20915	15.9069
3.9281	22.4666	7.9929	3.9281	22.0391	17.4325	20.686	14.1136	11.939	10.6274	11.0692	8.5216	51.4584	11.736	22.2781	7.9394	3.4395	7.6696	6.5978	42.6445	14.3876	11.552	10.2644	26.1753	23.8734		0.215684	16.2847
4.0472	20.9828	11.1261	4.0472	17.987	19.5228	23.325	18.2685	9.14	14.0927	13.1153	7.4193	41.4571	12.047	27.7322	8.7325	2.8452	6.1385	9.7697	33.3627	13.8653	14.0243	14.008	23.6679	21.2979		0.222223	16.1656
4.1662	22.6779	14.3679	4.1662	18.6196	15.6469	23.066	15.0546	8.812	14.7546	10.2882	9.8602	60.8175	14.135	24.3402	5.996	5.8038	3.8401	7.2292	24.7444	13.3391	12.2933	17.39	23.258	34.5217		0.228757	16.8759
4.2852	17.2368	9.5758	4.2852	14.8488	14.3395	17.403	20.2533	11.336	10.501	10.1753	10.0654	53.5369	11.415	28.2899	4.497	4.3953	7.058	7.1931	31.9845	11.5902	11.6671	14.0859	18.4809	22.7315		0.235292	15.2894
4.4043	18.5408	13.2852	4.4043	25.0768	17.7307	16.134	23.6226	7.99	12.9722	10.6232	14.6085	48.3605	12.176	32.3691	7.5462	5.086	5.9844	9.4505	35.0973	8.8957	14.2268	12.719	16.0982	25.727		0.241831	16.6135
4.5233	21.9279	12.4239	4.5233	23.8093	14.6432	16.181	16.3782	6.256	17.7096	10.7878	12.4417	37.4051	10.404	24.6992	10.1793	4.6677	6.4226	6.6865	33.5209	9.731	11.5296	8.0448	22.0771	25.6199		0.248365	15.3362
4.6423	23.582	15.4178	4.6423	34.2263	13.3946	17.821	20.1943	7.091	15.8485	10.3747	10.658	33.864	8.284	29.3107	5.5912	6.1174	2.939	5.7149	27.4855	9.9272	11.7341	10.1659	19.9698	25.0021		0.254899	15.3898
4.7614	23.0632	17.4272	4.7614	28.087	23.2787	21.085	18.9477	6.909	12.041	10.5214	9.119	26.564	12.772	30.8734	6.3016	6.1908	8.0266	5.8469	24.1741	11.1862	8.5988	16.6238	19.5735	23.3158		0.261439	15.637
4.8804	18.6579	12.4739	4.8804	27.0966	19.1668	15.436	21.2131	9.558	10.7356	9.2512	7.0373	24.5838	12.018	24.3767	8.9166	3.7268	4.4891	6.4549	15.7796	17.3172	8.3854	12.5182	15.0672	26.6649		0.267973	13.9919
4.9995	19.3083	15.5566	4.9995	21.2384	16.9352	16.517	17.6684	8.719	11.2474	8.7632	10.153	20.8767	14.153	20.8533	9.1964	4.2943	8.9934	8.99	16.6444	10.4679	6.4477	9.9179	15.3657	25.147		0.274512	13.4356
5.1185	21.6729	19.8149	5.1185	24.2982	13.9831	12.151	19.3168	10.989	10.205	5.5299	8.1804	20.9191	16.981	24.0328	6.5555	4.5503	7.5275	6.8121	14.2368	12.7854	7.3696	7.6771	16.6613	24.2681		0.281046	13.4015
5.2375	24.8902	17.6929	5.2375	25.2891	16.9453	11.321	25.1722	6.848	12.8088	7.0479	8.0273	26.2941	14.533	14.3341	8.0443	3.069	5.6709	8.1711	12.9253	14.4507	9.5032	9.4749	16.9891	27.5755		0.28758	13.8465
5.3566	20.7045	14.5291	5.3566	15.0141	13.4902	14.608	23.8324	10.176	11.4432	10.5838	9.7166	22.9421	14.3	15.6311	7.0234	3.7643	5.6413	12.5362	14.8986	10.8812	5.5436	13.0021	18.5255	18.5387		0.29412	13.0284
5.4756	17.888	13.5885	5.4756	14.7337	14.9937	20.708	20.5752	12.72	9.9215	9.6841	6.3661	24.5736	18.309	18.5674	7.2254	4.9519	6.3231	12.4702	9.7393	9.2135	8.8027	12.8746	25.7458	22.1342		0.300654	13.6494
5.5946	22.7456	20.4389	5.5946	8.9822	21.6683	20.426	17.9965	16.242	10.1531	9.7687	7.7519	19.121	21.424	19.9708	9.2508	7.1579	6.1235	10.0901	7.151	12.5534	6.3285	10.0826	22.9697	27.0696		0.307188	14.2109
5.7137	19.0413	24.5354	5.7137	9.6605	20.1424	16.127	16.505	13.986	8.9438	9.7571	6.9777	19.6842	17.725	15.9676	10.4568	6.9828	7.1183	13.4324	8.8805	12.6014	8.8831	11.2592	22.2165	23.2197		0.313728	13.7424
5.8327	28.5599	25.3764	5.8327	10.4668	21.396	13.92	18.3166	10.807	11.1495	9.3189	5.3961	23.2491	17.721	20.865	6.1641	5.1677	7.9501	13.2374	6.3526	11.8074	8.1931	8.7858	17.18	19.5458		0.320262	13.615
5.9517	29.984	34.1508	5.9517	8.6696	16.6455	12.166	23.1044	12.049	8.1029	9.4575	11.6378	24.9904	18.266	17.1164	4.9255	8.5398	3.9773	13.599	8.356	15.5833	7.3047	5.7916	14.6421	19.782		0.326796	13.9497
6.0708	20.3281	26.6749	6.0708	10.3529	19.8643	15.942	14.9676	11.607	6.9546	10.1521	8.9457	24.5847	20.573	21.8644	6.072	6.4768	4.5319	13.2396	9.5745	14.9151	6.3589	9.78	17.9783	20.8995		0.333335	13.6962
6.1898	18.6583	25.6469	6.1898	8.4493	14.6443	15.012	13.0614	12.524	8.1249	11.7128	8.8278	26.525	29.526	21.0571	11.7993	5.0456	2.9082	14.4927	6.0783	11.7749	5.4883	8.6521	13.4221	23.9309		0.339869	13.4813
6.3088	21.2811	18.6743	6.3088	6.6714	15.1403	11.123	15.3999	10.9	7.2967	11.547	7.9798	27.8462	25.143	21.0231	10.6447	4.8603	3.8752	16.2202	8.5114	21.4968	4.6385	7.837	13.9617	24.3907		0.346403	13.4488
6.4279	16.7098	22.5913	6.4279	5.4399	14.5208	12.4	16.969	8.724	6.7542	12.8123	9.4758	28.4813	18.215	23.5303	9.4162	4.3295	4.7817	17.255	7.3152	21.9815	3.8951	5.8702	14.5177	20.1813		0.352943	13.0248
6.5469	17.8594	24.7016	6.5469	5.6151	7.7169	9.98	15.8917	14.298	5.2475	10.7647	8.2674	31.4461	17.072	23.1855	8.4917	4.8315	6.336	15.432	6.6478	13.9427	4.1806	6.694	13.0977	25.7705		0.359477	12.6674
6.6659	21.2566	15.3911	6.6659	5.2251	8.5092	13.242	14.8316	17.003	6.2802	10.4138	7.6958	30.1776	14.326	28.7107	11.9918	6.5495	4.5492	11.0082	8.3828	12.6559	3.0134	4.5424	12.9056	26.1604		0.366011	12.562
6.785	17.2686	11.0695	6.785	5.1653	7.8364	12.93	16.6566	12.897	5.3838	7.8331	7.4881	27.4422	11.719	23.8578	14.1837	5.8189	3.4929	11.7472	9.5137	14.9056	3.5704	9.1098	12.6861	30.5153		0.37255	12.0782
6.904	18.4926	8.8575	6.904	6.8599	9.9722	12.684	24.381	8.169	4.4845	12.2408	5.5965	30.4487	7.977	18.7708	18.2713	4.6086	3.7959	9.9118	10.8686	19.9015	5.3576	6.9654	12.25	29.6148		0.379084	12.391
7.023	21.3645	6.7128	7.023	4.1359	9.2369	10.328	27.322	11.051	2.4188	11.2792	7.1537	28.0432	10.002	18.1635	13.5532	7.5771	2.7346	17.3118	6.7866	15.0675	3.2028	5.55	12.1831	27.4895		0.385619	11.9038
7.1421	20.5545	3.8658	7.1421	4.1166	12.4147	9.872	32.3774	7.574	4.4545	7.2054	5.5478	21.7463	12.314	16.2174	8.0127	4.422	2.7561	16.3282	7.8362	13.4942	3.6115	4.0347	15.9643	26.674		0.392158	11.189
7.2611	19.1693	4.8569	7.2611	3.3495	5.8268	12.309	30.3743	6.599	2.9876	7.092	8.0764	22.7575	8.303	16.0818	10.9705	5.7366	2.5354	8.4387	5.2398	14.7313	3.7152	5.5012	12.9423	29.4616		0.398692	10.5965
7.3801	21.2882	5.7908	7.3801	3.4518	6.9404	12.676	20.9727	5.622	4.1388	6.7055	3.2731	16.0394	7.95	16.3789	10.2719	10.1096	1.2827	6.8827	4.7083	13.7914	4.1928	8.3124	12.0605	31.4762		0.405226	10.0707
7.4992	25.5277	5.0888	7.4992	4.683	6.8574	8.687	16.1179	5.767	4.1046	5.6649	4.0804	11.6099	10.196	21.0023	12.9748	9.2973	3.0354	3.8909	6.4415	11.2615	2.7522	4.4226	9.9096	31.6972		0.411766	9.69038
7.6182	25.9009	3.0553	7.6182	2.1729	7.1338	12.054	14.0877	4.751	3.0139	5.735	5.6425	10.9148	8.202	16.2369	12.9397	7.1331	4.3381	2.5135	5.2957	11.1319	2.4551	5.2401	6.3153	30.2383		0.4183	8.92165
7.7372	25.3529	3.3392	7.7372	3.5045	8.2418	16.916	16.3398	6.51	2.5304	4.3947	7.4738	11.8089	7.965	9.1402	10.6359	10.5887	2.1424	3.0718	4.0711	7.7591	2.2765	3.7556	8.2321	25.6375		0.424834	8.72605
7.8563	24.3792	3.6578	7.8563	3.3986	5.0438	9.993	11.3823	5.419	3.5748	7.3421	5.4601	11.886	7.792	9.4021	10.5104	8.5361	2.512	3.0841	5.4385	14.1028	3.4342	7.5825	7.9311	26.2126		0.431373	8.58048
7.9753	24.5915	5.3459	7.9753	2.925	7.7303	12.59	9.1377	4.942	3.6893	5.7327	7.9437	11.3787	9.151	13.7674	8.0116	9.3606	3.7175	1.4739	2.0362	11.7403	2.6771	3.1602	5.0384	21.9245		0.437907	8.16837
8.0943	15.4335	3.8795	8.0943	4.5429	5.9744	10.054	10.4437	6.379	3.443	8.1411	6.4807	8.583	10.833	8.4796	8.769	9.6644	1.1513	3.2986	3.1805	14.3886	2.6282	2.4198	6.941	21.3705		0.444441	7.69057
8.2134	9.6925	4.781	8.2134	5.8655	6.8447	9.935	13.9342	4.231	3.2677	4.842	3.8585	7.3803	7.096	7.8587	6.7437	9.5763	0.8446	5.8162	2.8156	12.2943	3.0343	3.506	7.4961	17.9176		0.450981	6.99355
8.3324	11.5443	6.0033	8.3324	3.6323	8.0831	10.515	11.6082	3.904	4.2165	2.5854	3.5751	8.2907	5.398	6.5469	9.5586	5.2527	1.5854	3.7023	6.4531	12.3711	5.0904	3.4468	5.8207	19.3385		0.457515	6.95228
8.4515	10.542	4.321	8.4515	4.4013	10.8344	10.425	9.7212	3.522	1.7849	1.9487	3.2734	11.3904	6.249	10.0388	8.1073	7.9955	2.9708	3.1308	6.7574	10.227	3.4376	3.3278	6.0546	17.0986		0.464055	6.91712
8.5705	8.3475	5.6781	8.5705	3.4544	8.1703	13.003	9.4046	4.67	1.1859	4.8779	5.3914	9.1338	6.46	7.726	13.0571	6.4485	2.3072	3.8229	7.1001	7.5081	2.5355	4.4081	2.4447	13.0304		0.470589	6.614
8.6895	11.8857	4.0359	8.6895	4.6888	7.1539	13.751	14.7366	6.973	1.2721	4.142	5.1173	7.2974	7.101	6.6341	16.9745	3.6347	1.4469	3.4087	6.2597	7.1067	3.3381	2.8948	4.0941	10.4623		0.477123	6.79578
8.8086	12.6519	4.3036	8.8086	3.4618	7.9972	8.518	9.9841	4.387	0.8894	4.3667	4.0049	9.0425	4.477	8.9827	12.0979	3.3195	3.1983	4.1464	5.9915	9.6068	3.055	2.8631	6.875	10.6874		0.483662	6.40485
8.9276	11.9194	4.0221	8.9276	3.1186	4.7997	11.655	8.8192	3.764	2.0875	4.1916	6.3872	12.0102	5.315	9.5349	10.1932	4.8936	1.4331	2.5588	6.2722	6.5598	2.7145	3.5825	5.1294	12.0746		0.490196	6.33182
9.0466	12.4282	3.7908	9.0466	3.622	5.2431	10.701	8.0945	1.996	2.5821	4.608	5.3565	12.4401	5.276	9.4137	13.5461	3.4224	3.2948	4.6003	7.2035	7.3829	4.0973	2.3931	5.5965	13.1718		0.49673	6.6378
9.1657	14.7996	5.4557	9.1657	4.4603	4.4453	7.714	9.3807	4.063	2.3818	3.4727	2.7825	13.2645	4.721	9.5298	9.8441	6.0155	4.8959	3.0297	9.7515	5.887	2.4841	6.344	3.8149	16.4336		0.50327	6.83904
9.2847	13.1763	5.6342	9.2847	0.93	6.4893	11.439	8.5733	4.647	1.5392	1.8456	4.4367	21.3026	1.729	7.7961	11.6754	3.7357	2.4125	2.4872	13.0351	6.6736	1.5862	3.3029	3.9835	13.4444		0.509804	6.71498
9.4037	14.0587	3.8055	9.4037	3.3829	4.1791	13.929	8.2096	4.59	1.2303	4.6269	5.0078	15.5661	2.437	4.8312	11.2224	6.9233	0.3945	1.7279	9.1801	11.3654	3.169	2.2575	3.5568	14.9905		0.516338	6.66855
9.5228	13.9809	6.6882	9.5228	3.9152	4.1625	12.177	8.1257	3.249	1.1269	7.7166	2.3606	10.3679	1.218	5.4809	9.9236	8.0244	2.6436	1.1214	8.4082	5.0554	2.8572	3.5178	2.1169	9.4729		0.522877	5.96807
9.6418	12.1039	2.392	9.6418	2.0875	3.4142	9.475	8.7877	4.539	1.2446	5.2222	4.4208	10.8996	3.918	6.4419	7.1378	4.8705	2.7542	2.0244	7.5819	5.3456	1.1537	4.4383	2.1451	7.4424		0.529411	5.39509
9.7608	12.0181	3.9086	9.7608	1.0071	3.0856	7.371	8.4302	3.357	1.687	3.3323	3.7042	11.9537	3.658	4.5352	10.1942	5.6427	2.3791	3.4726	6.1056	5.8351	0.8867	2.2049	3.2775	9.2394		0.535945	5.29361
9.8799	12.9904	3.3758	9.8799	2.3639	6.4252	8.79	13.2632	1.46	3.5549	3.894	5.7513	10.71	2.933	8.7358	11.9469	5.373	0.5441	1.8599	5.3703	7.425	1.8143	2.5753	3.7308	10.9607		0.542485	6.07199
9.9989	12.5608	4.4541	9.9989	1.6898	1.7846	9.261	7.6688	2.695	2.8485	2.6141	5.0444	8.1293	3	8.2916	9.7315	5.7813	2.2123	1.553	4.962	8.9392	4.1986	5.1121	3.0894	8.2402		0.549019	5.57752
10.1179	13.5277	4.9801	10.1179	2.0756	5.139	5.485	11.5664	1.903	4.0683	3.4462	3.6653	8.566	1.797	5.4745	10.5249	3.4119	1.2237	1.2785	4.0379	11.6272	2.2383	2.9313	4.8072	7.3283		0.555553	5.46755
10.237	10.0311	6.4175	10.237	3.8123	8.6647	8.16	13.5201	2.948	3.0223	3.3114	3.9241	12.5229	2.658	3.4309	7.8499	4.6647	2.7932	2.632	3.6571	14.6262	0.9112	5.1037	4.1296	6.4641		0.562093	6.06217
10.356	11.1601	4.7713	10.356	2.2671	9.4849	7.891	9.0848	1.596	1.9341	1.7905	5.0509	9.5501	2.726	3.013	4.3737	3.8329	2.3308	2.925	6.2462	15.5499	1.6788	2.027	4.4015	8.0637		0.568627	5.50439
10.475	13.5481	3.3039	10.475	1.7065	8.781	9.198	6.7329	2.829	2.0838	2.8114	2.7887	9.4152	4.36	3.7432	7.7747	5.4327	2.5774	3.4947	5.4815	12.3938	2.2002	1.5426	2.2956	9.8865		0.575161	5.61902
10.5941	12.1832	7.4222	10.5941	3.6094	4.9965	11.047	4.0198	3.304	2.2592	3.5766	4.5118	10.9456	4.344	1.2403	7.8075	4.5338	2.5959	2.6101	8.0688	7.5651	1.5204	2.6138	2.5003	8.2727		0.5817	5.50592
10.7131	14.2944	5.5362	10.7131	2.494	5.2084	11.135	5.5082	1.967	3.6022	3.2571	6.6827	10.8661	3.496	2.6982	9.6457	4.1392	0.8961	4.0158	5.9641	10.261	1.6364	2.8952	4.4599	8.8678		0.588234	5.84333
10.8321	10.4225	6.2772	10.8321	3.592	4.9757	15.295	6.3735	1.19	1.8665	5.8606	3.7514	9.7845	5.744	6.3949	6.8192	2.9191	3.8245	2.8568	6.351	11.8249	1.8764	4.0557	3.6011	12.0924		0.594768	6.19088
10.9512	9.2202	8.8634	10.9512	3.5983	2.1185	13.102	6.6442	2.157	1.5493	4.296	2.7927	10.7496	4.395	4.2727	12.1004	3.2434	2.2757	3.0534	7.2729	11.471	2.5146	1.5992	2.8701	10.3766		0.601308	5.89531
11.0702	7.6914	10.1475	11.0702	3.0825	1.8976	14.212	6.6049	3.566	1.9106	2.9448	4.3102	10.0108	3.699	4.7248	12.1628	4.6622	1.6959	1.8695	8.241	7.7379	2.9422	3.1201	2.4692	12.3859		0.607842	5.96496
11.1892	10.0525	10.2544	11.1892	2.3447	2.1309	9.485	7.8434	4.516	1.6636	2.9214	10.5746	9.5978	7.004	4.1939	5.7749	2.5307	0.9528	1.4767	12.7485	11.947	1.5278	2.817	4.3768	13.5696		0.614376	6.31222
11.3083	8.0591	8.2251	11.3083	5.2262	6.198	8.019	5.7367	4.374	1.2515	3.2945	5.1151	13.5312	2.63	3.9411	4.6515	2.978	0.687	1.1944	8.9251	7.5672	2.7958	0.9138	2.6528	9.4614		0.620916	5.36403
11.4273	8.9349	10.6717	11.4273	3.4066	5.1755	7.399	5.3088	4.215	2.9498	2.9014	4.6106	11.0364	2.529	3.1597	5.6056	3.1587	1.3221	1.6055	8.2493	7.9422	3.3439	1.0378	4.3082	8.733		0.62745	5.37633
11.5463	7.8255	8.7777	11.5463	3.461	3.1181	9.477	7.4406	1.357	4.7257	2.5682	3.5709	10.8602	4.345	1.5273	8.2002	5.1152	2.3812	2.2735	8.954	7.162	1.7404	1.9166	4.4341	11.167		0.633984	5.58103
11.6654	7.3888	12.4929	11.6654	3.1376	4.0307	7.367	6.8197	1.934	3.7496	2.2681	4.9102	6.5952	4.317	3.5443	5.2443	5.0004	0.7722	2.9071	7.6511	9.2968	2.659	1.8967	3.5005	9.4714		0.640523	5.35917
11.7844	7.4015	11.599	11.7844	5.2033	4.9235	9.165	8.1317	2.668	2.4842	4.0028	5.6959	6.6908	3.974	3.2433	5.0738	5.2801	1.4888	3.5594	4.1811	11.347	2.7505	2.4982	4.6031	11.2255		0.647057	5.79062
11.9035	9.6611	12.9642	11.9035	4.0934	4.0652	9.68	7.155	4.182	2.664	3.4753	8.0726	8.0909	3.729	3.6591	9.2082	5.4092	3.3644	3.4765	8.2811	14.0613	3.6049	3.8711	5.9813	8.015		0.653597	6.61118
12.0225	10.8124	9.1464	12.0225	2.6768	3.5022	5.339	7.2401	3.934	1.0572	3.878	6.5988	9.0417	2.083	3.2238	11.6233	4.9952	2.1541	0.9823	5.5071	13.4591	3.622	3.0797	3.7328	8.2961		0.660131	5.75032
12.1415	5.9095	8.7115	12.1415	1.7973	4.8172	7.131	5.68	4.793	1.7001	2.9203	8.7794	6.2361	1.207	4.2566	12.1932	5.4716	2.3109	0.5441	5.4592	11.8188	3.5686	1.8544	3.463	10.2435		0.666665	5.54199
12.2606	7.4569	6.7052	12.2606	2.1013	9.4356	7.138	7.4614	3.668	1.8466	2.2948	6.9142	7.5856	2.004	1.8495	12.4169	2.8624	1.8599	1.4024	4.4782	15.0946	4.2158	4.2479	2.0029	7.0239		0.673204	5.59694
12.3796	14.758	8.4077	12.3796	2.4061	4.3236	6.957	8.1946	3.593	2.313	2.7892	8.9359	8.0075	4.624	1.1367	10.7202	3.4221	1.9334	2.2496	8.8822	14.084	1.846	1.8573	2.8688	8.8788		0.679738	6.06535
12.4986	8.8776	8.9528	12.4986	3.1739	7.4731	6.977	5.6717	2.444	1.2226	3.0969	9.7982	8.0444	2.491	2.3762	11.9974	3.6014	2.4212	1.8449	6.4902	15.3113	3.0975	4.1547	1.2401	7.9203		0.686272	5.88237
12.6177	8.1603	5.5402	12.6177	3.7194	6.6232	6.854	5.8187	3.456	1.5743	2.676	8.8281	4.2377	3.008	5.0513	8.5693	5.0289	2.6834	2.1895	6.766	8.9711	1.8816	3.4559	3.5261	12.7065		0.692812	5.58097
12.7367	5.0962	7.0895	12.7367	3.2652	4.8966	11.05	10.4646	3.727	2.1628	0.2163	8.4652	5.5226	2.818	2.832	9.6928	6.9418	2.7564	1.0138	6.116	6.0577	1.937	2.5449	3.6163	6.9982		0.699346	5.33407
12.8557	6.3166	7.1484	12.8557	2.714	6.3838	9.674	9.6033	7.041	2.491	1.4393	3.8749	7.7506	4.106	4.1046	8.9496	6.3976	3.5981	1.9417	7.3818	7.4146	3.6986	3.5808	4.0883	4.6801		0.70588	5.7181
12.9748	4.8216	5.6685	12.9748	2.7314	6.4276	8.825	9.5275	4.397	2.9601	2.4037	8.1857	4.1345	3.455	3.5918	7.5076	7.4405	3.4684	1.3154	5.228	8.2999	4.2453	2.7372	2.964	7.7503		0.71242	5.46087
13.0938	3.853	4.7552	13.0938	4.2135	5.8781	6.761	7.6753	2.267	2.5279	3.8486	7.2409	4.6266	4.234	4.0929	4.0634	8.4996	1.6136	0.7266	4.5835	10.0399	4.0761	2.4933	2.9966	9.1844		0.718954	5.13937
13.2128	4.417	4.0805	13.2128	6.6303	6.3893	7.592	12.1076	5.928	3.916	2.5754	9.269	5.2059	2.319	4.5327	3.3112	4.7632	2.3592	3.3326	7.4585	12.5985	5.4829	2.2174	2.5883	6.2692		0.725488	5.77319
13.3319	2.5156	7.9016	13.3319	2.6976	8.5541	8.091	11.2729	4.003	3.0262	3.1784	10.7071	4.5157	1.84	5.8829	8.8746	9.2217	1.9218	3.9131	11.5976	11.3288	1.4649	5.2546	2.7091	8.7776		0.732027	6.35758
13.4509	2.4913	7.6418	13.4509	7.4636	6.4917	5.421	5.6181	7.804	1.1364	3.1426	6.8574	6.5401	2.729	2.3948	6.4488	6.9453	2.645	5.4544	5.8354	10.9499	4.2035	2.6103	3.1486	11.0638		0.738561	5.77032
13.5699	3.2462	5.0721	13.5699	6.275	9.6182	5.616	6.369	6.357	3.0025	1.9911	7.661	6.1574	2.287	3.7284	5.8479	4.3737	2.8731	7.1577	5.876	8.2459	3.0671	1.9425	2.6827	6.2932		0.745095	5.38794
13.689	3.5598	6.7051	13.689	6.895	5.8644	4.981	6.3221	4.934	4.2277	4.6264	7.3392	9.2048	2.363	3.806	3.3963	7.3301	2.8207	4.6531	6.6308	7.513	3.4592	3.1963	2.3029	4.6639		0.751635	5.43682
13.808	3.6389	5.8369	13.808	4.2238	9.3732	5.828	4.7373	5.425	2.0756	4.2469	4.4651	5.4229	4.135	3.4325	4.5611	5.5255	3.4207	5.7578	6.2666	11.6628	1.1427	2.2261	2.7896	6.5796		0.758169	5.27423
13.927	4.7243	3.7626	13.927	3.5076	6.6529	6.891	9.0219	6.371	1.3179	3.694	5.6351	4.9857	4.147	1.897	6.0171	5.0818	2.1863	2.9507	5.7589	9.6459	3.9435	3.6101	2.8647	4.9979		0.764703	5.14966
14.0461	1.4735	4.7138	14.0461	4.0803	6.4116	7.723	8.5755	7.106	0.7982	7.0223	5.2717	5.4652	4.428	3.7306	8.7763	6.3438	2.8215	2.8296	10.2816	10.5429	4.5977	2.2522	5.0096	11.3365		0.771243	6.06823
14.1651	2.5724	5.7018	14.1651	3.6935	8.8877	6.536	7.792	11.384	1.9091	2.8964	5.442	6.677	4.368	3.3961	6.6899	8.0947	0.7465	1.0529	6.3489	7.8722	3.6207	3.6645	2.4599	10.22		0.777777	5.67464
14.2841	2.6669	3.8683	14.2841	5.0181	12.4919	9.038	6.4977	6.711	2.5661	5.5464	9.6999	3.305	3.988	3.691	5.6932	5.5235	3.032	2.7248	6.6368	10.9921	4.9535	2.8904	1.7703	8.3148		0.784311	5.91266
14.4032	4.8106	2.3564	14.4032	7.3191	10.3318	5.882	6.5936	8.094	2.8616	4.2237	7.6409	1.6699	2.182	2.4987	5.0553	10.7108	1.9472	2.6711	7.0599	10.5699	6.1024	2.3892	3.527	8.6313		0.79085	5.81382
14.5222	4.1521	3.2148	14.5222	5.8296	11.7312	4.702	5.0772	5.955	3.0865	3.1289	8.98	4.9132	3.626	3.3721	4.9772	8.2196	2.526	2.8975	6.6127	12.3424	6.1653	4.872	4.7053	11.3659		0.797384	6.12395
14.6412	4.143	6.0575	14.6412	5.8761	13.1409	6.412	7.5929	3.128	2.7107	3.4996	8.1641	4.4475	4.03	2.5241	8.1433	5.4271	3.1381	4.0837	8.1455	14.3717	6.7237	2.2083	3.5613	8.0451		0.803918	6.25897
14.7603	6.2133	5.0389	14.7603	2.4665	14.0512	4.635	7.6913	7.8	6.2108	2.6717	5.4912	7.9405	4.342	3.527	7.6669	4.9905	2.1514	3.3537	8.8566	11.0622	7.8761	2.3939	5.6439	6.813		0.810458	6.402
14.8793	6.0465	4.8856	14.8793	2.6329	6.3278	5.02	4.6799	8.091	4.248	3.1456	5.6433	7.7492	3.298	2.7338	11.4749	6.3785	2.4349	2.307	9.7564	13.7066	7.6567	2.6272	4.8831	9.1909		0.816992	6.24155
14.9984	6.6954	2.8489	14.9984	3.8232	6.0174	3.841	4.8169	13.607	8.0247	3.0469	6.2824	3.6923	4.559	2.7671	11.7736	5.6079	3.5827	2.665	6.6359	12.0986	15.0039	2.0104	4.1207	8.9137		0.823531	6.55971
15.1174	5.3192	2.0633	15.1174	3.4635	4.0074	2.556	4.1351	12.32	7.8347	3.5446	3.5776	2.9736	4.938	4.0188	7.2813	4.0329	3.7591	4.5455	7.3995	11.7292	18.0152	3.4308	5.9131	6.6024		0.830065	6.19076
15.2364	5.278	4.7367	15.2364	2.6608	4.8028	2.086	3.0703	4.991	4.5554	6.7803	4.1944	2.3617	3.868	4.4908	11.7232	3.1911	2.5065	4.3726	9.8159	13.0133	16.8799	3.4988	5.8322	5.5994		0.836599	6.0644
15.3555	4.1669	4.8394	15.3555	4.1658	4.0024	2.357	4.3249	4.343	5.6053	8.9862	2.5025	2.4655	4.863	3.5209	8.4774	4.064	3.9379	4.1327	9.7388	10.7893	16.3969	4.3251	4.1032	6.701		0.843139	6.00686
15.4745	7.1321	3.6745	15.4745	3.5179	4.0087	3.88	1.9164	6.039	5.0626	8.0636	1.8721	3.1788	7.827	4.9815	7.914	5.5	1.9711	4.0274	10.996	8.4623	14.4314	3.3207	5.4651	6.6818		0.849673	6.05827
15.5935	4.2926	4.1623	15.5935	5.4643	4.4731	4.412	3.5345	9.018	8.2898	9.3133	2.4614	2.9019	6.445	6.334	9.4162	6.2143	3.3049	2.1148	8.4592	10.6451	14.6	4.7595	5.2402	5.2472		0.856207	6.52905
15.7126	5.7652	1.9276	15.7126	7.1234	2.3989	3.421	2.9437	8.218	3.7195	7.1836	3.5814	3.4003	5.333	5.8147	10.0869	4.9991	6.2535	3.7758	7.7826	14.8589	7.3079	2.35	5.523	7.5914		0.862747	6.128
15.8316	4.7918	6.1602	15.8316	6.8754	3.8765	2.638	3.0442	5.569	11.0607	10.2177	1.5431	1.1038	6.36	6.9314	14.586	3.8797	3.0375	2.9941	5.6295	8.5311	7.5492	2.1371	5.4862	5.8614		0.869281	6.07063
15.9506	4.3059	3.9381	15.9506	5.9782	7.6656	3.506	2.4623	3.01	8.2204	9.3537	2.2354	2.1488	6.19	8.3486	15.6335	4.8584	2.3355	5.7316	3.3641	5.9491	8.3509	5.6315	5.3521	5.7078		0.875815	6.09284
16.0697	7.5229	4.6335	16.0697	6.1587	6.7764	3.661	4.4869	2.062	5.9479	9.0502	0.8727	3.0406	6.952	5.8528	14.204	6.0589	2.9728	3.6792	7.0982	8.3714	10.0945	5.9286	5.0371	6.4861		0.882354	6.37575
16.1887	3.7761	3.8651	16.1887	6.2371	5.0657	5.879	3.3294	2.824	5.824	6.7447	0.5855	2.4243	6.602	7.0596	10.1255	6.285	2.1975	1.5786	7.235	10.8615	10.8448	4.7509	5.0593	6.3857		0.888888	5.90537
16.3077	5.5709	6.1593	16.3077	6.0491	4.1177	4.164	2.0685	2.4	4.9097	4.4265	0.8615	0.7874	8.723	8.8778	9.7179	4.8793	4.6433	3.3487	3.2881	8.9129	11.2539	4.857	9.5407	6.7136		0.895422	5.94077
16.4268	4.3562	4.3736	16.4268	9.7943	5.7718	6.841	4.0191	3.296	1.3491	2.8484	0.2923	0.3153	6.732	5.5485	7.2303	5.8974	4.527	5.8563	2.0828	8.1231	8.3968	6.4277	6.4989	6.8834		0.901962	5.57867
16.5458	7.6889	8.6054	16.5458	9.8396	6.2508	6.855	3.6634	4.132	1.2052	2.0294	1.4107	0.0067	7.902	3.7918	9.3313	4.5266	6.6731	3.1678	4.3793	6.9068	7.5042	5.7931	9.1139	9.3442		0.908496	6.11113
16.6648	6.4711	5.8336	16.6648	10.6642	3.4127	6.584	1.6765	1.238	1.7825	1.7134	0.9654	0	10.018	8.9199	8.0136	5.0961	9.5895	4.7445	4.0503	8.1598	7.84	5.9862	14.2927	12.5449		0.91503	6.5109
16.7839	11.2059	4.6847	16.7839	8.4711	5.8463	5.968	2.4339	2.838	1.1655	0.6457	1.4046	1.6978	8.905	9.0696	6.8913	3.3906	8.2271	5.7549	2.8451	7.0369	6.1864	4.3748	10.5255	8.5439		0.921569	6.03735
16.9029	4.6634	8.1005	16.9029	10.3156	5.296	4.559	3.0158	4.246	2.5825	3.1917	1.4969	0.8312	7.214	7.9411	9.3093	5.5521	9.6123	5.0805	4.7318	6.3476	4.0827	4.0379	13.7265	10.6506		0.928104	6.39533
17.0219	6.9748	4.1032	17.0219	8.2419	6.4831	4.72	1.9116	4.381	1.7926	0.8051	1.159	1.2525	12.041	9.5635	7.0981	4.0314	8.714	9.9011	5.9056	4.0747	6.2252	4.3457	14.3048	9.3404		0.934638	6.43301
17.141	7.9584	5.2444	17.141	8.0452	5.43	4.234	3.2479	2.405	1.8852	0.8166	0.8264	1.338	7.717	7.93	7.7231	7.148	5.3828	8.9082	4.6092	4.4458	6.3794	8.9283	10.209	9.5786		0.941177	6.14715
17.26	7.1296	8.2307	17.26	6.6852	8.4238	4.614	1.9874	0.582	0.968	0.4892	0	1.3503	5.585	9.0041	6.14	8.0127	4.4628	10.2107	5.4893	5.7208	7.0408	6.4874	6.1353	12.5144		0.947711	6.02181
17.379	8.0973	7.3326	17.379	5.054	7.9443	8.072	4.5998	1.473	1.4097	1.1999	0.0829	1.1624	3.378	6.7954	5.1897	9.2846	9.1178	10.256	8.5456	6.7626	3.8102	3.8229	3.7856	11.772		0.954245	6.09697
17.4981	6.0052	7.0986	17.4981	6.6766	6.7261	7.519	4.8283	2.069	2.1076	1.6815	0.6142	0.2452	2.256	4.3434	7.6718	9.3477	5.6531	10.3109	4.941	4.9104	3.2465	4.9151	5.0673	9.5187		0.960785	5.63547
17.6171	4.918	7.9435	17.6171	6.4643	10.9113	5.245	2.0461	4.026	1.5095	0.5104	0.6662	0.27	2.283	4.4371	9.5721	7.1503	6.2997	7.034	4.1022	2.7462	2.9416	5.1909	3.832	11.1184		0.967319	5.36812
17.7361	6.2178	11.6179	17.7361	7.5658	8.7898	4.153	4.0335	3.42	1.9217	1.3293	1.0681	0.8076	1.135	4.0161	6.083	7.8943	4.5199	7.5398	2.7533	1.3976	3.051	4.704	3.7152	10.1681		0.973853	5.23491
17.8552	11.4587	11.9568	17.8552	10.0982	12.7377	4.671	5.3261	4.191	3.4303	0.3674	0.2364	0.9195	1.335	2.8995	5.1465	5.5825	5.5863	7.9998	1.734	2.604	3.7208	6.5371	4.5582	11.9942		0.980392	5.95609
17.9742	7.4768	9.5521	17.9742	8.1807	7.1882	7.664	3.5524	3.85	4.7318	0.7088	0.4965	1.0647	1.307	1.3748	7.5053	3.646	6.5903	8.7987	1.8405	0.849	1.7825	3.6427	6.6774	6.9691		0.986926	5.14265
18.0932	8.0621	12.1166	18.0932	9.8345	7.3411	5.078	0.9279	5.172	1.1768	2.6578	0.3109	0.4967	0.693	1.4571	5.8218	4.0395	8.2297	6.6933	6.2333	1.3352	1.4814	6.4834	4.4473	6.3816		0.99346	5.19017
18.2123	5.4943	11.5003	18.2123	8.9425	9.1005	7.961	1.8149	4.614	2.0964	0.453	1.2469	0.732	0.298	0.982	3.6017	4.7427	5.7569	8.9567	2.4243	2.6321	1.1827	7.1936	2.3853	5.7872		1	4.9213

## Sheet: Image14
X0	Y0	Y1	Y2	Y3	Y4	Y5	Y6	Y7	Y8	Y9	Y10	Y11	Y12	Y13	Y14	Y15	Y16	Y17	Y18	Y19		Ap-Ba	Average int.
0	47.4258	65.227	60.287	60.7673	48.349	41.034	53.401	69.858	56.135	62.288	58.288	43.817	53.472	58.161	53.584	44.505	68.197	61.387	54.933	61.731		0	56.1424
0.119	43.644	71.081	65.81	55.3842	53.28	39.752	52.288	74.008	53.61	58.461	67.187	46.842	57.386	55.929	58.212	45.021	59.559	57.77	65.64	59.798		0.00515314	57.0331
0.2381	39.0321	83.88	76.582	58.107	52.125	46.115	52.885	76.716	52.342	60.201	59.594	45.67	63.856	40.701	53.916	49.281	67.868	65.499	65.583	62.199		0.0103106	58.6076
0.3571	53.6689	94.402	87.558	58.7082	61.642	49.087	63.155	83.574	65.75	63.06	72.379	48.697	63.432	58.867	55.568	59.671	72.251	63.069	78.667	69.405		0.0154638	66.1306
0.4761	47.3541	105.208	94.514	61.8335	59.164	45.35	67.609	98.693	80.461	76.084	84.685	62.342	66.918	58.804	59.411	67.446	72.091	63.583	68.859	80.407		0.0206169	71.0408
0.5952	46.8286	118.551	107.329	75.5534	71.29	51.213	73.199	91.37	72.727	83.801	107.202	54.776	88.076	68.307	70.346	69.004	74.723	69.345	82.808	86.345		0.0257744	78.1397
0.7142	50.8752	118.312	105.79	82.0502	79.208	60.367	73.394	90.021	96.109	89.333	103.857	77.209	94.74	87.753	82.608	101.181	70.078	77.521	91.089	70.221		0.0309275	85.0858
0.8332	52.4252	122.753	99.496	91.7262	91.054	67.261	84.764	93.778	121.977	104.796	120.125	100.814	103.789	101.679	108.442	100.856	80.962	82.318	85.756	72.047		0.0360807	94.3409
0.9523	52.6776	106.971	104.467	89.8829	106.841	76.505	80.077	99.841	127.894	127.548	127.537	136.276	119.403	118.439	120.779	114.003	77.677	110.378	103.108	74.083		0.0412381	103.719
1.0713	63.8868	110.837	98.447	85.1863	115.125	83.935	104.367	112.063	117.473	142.681	137.885	149.374	120.914	125.953	140.107	103.703	70.77	110.927	111.23	83.956		0.0463913	109.441
1.1903	65.7171	101.648	107.004	79.7177	110.162	105.837	102.199	99.908	142.183	146.375	130.164	128.065	134.073	118.222	134.05	117.204	73.259	107.226	103.543	87.572		0.0515444	109.706
1.3094	63.1239	106.901	101.541	68.3526	107.393	108.028	115.511	92.908	121.99	133.881	123.689	117.253	120.433	125.331	129.963	92.661	81.79	105.751	114.664	82.153		0.0567019	105.666
1.4284	66.4563	120.38	105.812	52.8122	98.587	123.419	117	81.157	115.218	121.832	118.254	110.227	112.011	135.044	120.755	87.312	86.689	95.168	104.292	89.197		0.061855	103.081
1.5474	55.4699	118.737	98.058	62.4188	104.8	124.574	120.884	84.866	123.518	126.281	113.483	105.096	112.588	128.687	108.518	101.445	103.458	102.113	108.936	83.362		0.0670082	104.365
1.6665	57.0838	112.13	95.435	60.6673	119.768	127.665	102.591	71.481	112.545	118.745	105.248	100.229	109.641	128.18	104.001	90.81	94.767	109.46	106.106	88.403		0.0721657	100.748
1.7855	55.9674	98.249	90.148	52.4165	115.266	120.004	108.651	81.488	118.072	118.379	103.242	107.194	102.263	133.555	120.264	91.115	90.313	111.8	107.375	99.68		0.0773188	101.272
1.9046	54.5	86.221	86.733	48.1209	117.007	117.473	107.11	96.761	108.93	108.669	103.46	101.604	100.573	132.371	110.408	77.897	96.473	109.549	106.653	110.486		0.0824763	99.0499
2.0236	46.1823	95.713	79.191	45.0106	111.982	127.161	107.873	74.365	113.502	100.855	102.731	93.689	84.757	123.455	115.537	68.979	87.553	119.264	116.631	113.577		0.0876294	96.4004
2.1426	37.2089	88.643	77.68	50.8807	106.023	126.289	115.179	75.504	100.4	103.601	93.505	73.257	82.906	137.438	109.548	63.207	92.643	105.828	110.138	113.129		0.0927826	93.1504
2.2617	35.1266	104.39	71.748	49.4484	103.122	130.577	110.945	72.372	91.382	97.726	93.213	71.885	71.469	135.768	102.076	59.781	91.783	112.626	96.312	120.915		0.09794	91.1332
2.3807	33.9383	103.038	76.143	49.2623	92.462	124.81	98.845	61.974	88.537	86.77	87.182	71.786	67.784	112.138	100.983	67.235	93.3	120.815	107.768	111.445		0.103093	87.8108
2.4997	28.5451	97.65	74.656	49.4854	67.749	121.018	95.955	59.399	80.976	91.708	74.682	67.666	52.84	102.451	112.714	64.595	83.539	134.071	102.002	103.653		0.108246	83.2677
2.6188	26.5625	90.463	72.2	46.817	74.452	125.199	99.567	59.5	88.586	79.275	72.52	59.721	46.332	96.973	113.628	67.261	87.045	122.29	93.161	105.428		0.113404	81.349
2.7378	27.6088	99.568	79.717	50.0208	64.766	128.838	90.754	57.355	91.37	67.435	65.783	57.962	37.811	89.464	84.384	72.161	82.776	116.93	95.784	101.844		0.118557	78.1166
2.8568	19.9642	90.56	77.494	54.1464	58.377	121.215	100.173	66.452	83.147	54.096	50.226	58.353	38.821	100.207	93.75	70.828	88.516	122.959	93.377	101.455		0.12371	77.2058
2.9759	28.7477	95.728	66.463	58.033	47.502	124.083	100.091	48.904	70.771	56.21	54.185	52.532	40.165	92.047	89.449	67.656	81.389	110.174	95.085	110.547		0.128868	74.4881
3.0949	31.9676	96.74	62.361	56.8893	35.261	120.358	92.689	46.466	77.055	44.89	47.833	56.49	47.622	92.606	86.695	72.858	80.315	100.738	86.227	115.868		0.134021	72.5964
3.2139	29.933	95.913	58.906	50.8012	41.632	100.526	82.72	52.096	63.978	30.962	42.131	50.726	44.297	93.242	84.292	73.965	89.938	98.561	89.965	104.698		0.139174	68.9641
3.333	21.6863	95.949	61.491	52.3199	36.858	84.214	73.749	49.946	55.744	28.689	36.764	54.6	36.589	94.479	80.712	61.821	70.712	86.693	95.65	99.2		0.144331	63.8933
3.452	20.7579	94.959	57.531	63.4544	25.756	90.258	62.511	42.43	53.446	31.783	39.246	51.441	42	106.801	79.228	55.828	65.824	77.594	75.624	94.085		0.149484	61.5279
3.571	19.5699	84.004	61.259	60.1965	38.664	80.61	61.184	38.101	41.36	28.155	30.448	49.448	39.26	99.655	82.827	60.066	64.011	70.661	62.239	97.809		0.154638	58.4764
3.6901	19.6357	69.768	53.695	55.08	33.704	77.958	58.692	33.627	41.43	27.799	31.401	41.947	47.35	88.099	86.144	49.199	49.716	70.66	63.914	90.91		0.159795	54.5364
3.8091	25.9082	75.976	53.004	48.0238	28.592	71.716	56.212	30.602	36.284	26.051	29.969	44.797	40.889	86.686	77.454	39.461	49.701	66.861	57.453	104.816		0.164948	52.5228
3.9281	27.9113	68.747	56.374	46.4644	25.457	70.642	49.166	27.769	32.286	25.821	31.879	47.728	55.226	78.606	71.24	51.717	48.792	71.319	43.895	98.946		0.170101	51.4993
4.0472	20.8908	74.316	48.976	36.5965	25.308	55.762	52.81	24.84	37.528	25.666	29.095	40.417	66.101	69.467	66.775	50.058	51.3	63.139	45.174	93.175		0.175259	48.8697
4.1662	20.8002	62.83	50.756	38.1258	25.24	49.044	59.365	31.986	29.278	40.528	33.695	37.456	66.578	62.606	57.358	38.878	46.108	73.859	41.513	88.289		0.180412	47.7146
4.2852	22.2283	48.641	47.476	36.6959	28.699	45.278	70.723	36.315	33.626	49.124	30.617	43.985	65.623	68.204	62.705	41.993	37.702	68.126	40.867	78.013		0.185565	47.8321
4.4043	20.9035	44.313	47.517	34.3036	26.105	38.12	77.535	32.63	33.906	48.573	33.677	39.078	66.103	59.02	42.682	37.37	33.161	43.969	32.629	79.034		0.190723	43.5315
4.5233	20.0654	41.6	41.549	32.4057	16.551	37.672	66.411	33.614	33.664	48.678	33.785	40.903	68.119	55.403	51.745	36.606	34.954	46.086	32.637	68.991		0.195876	42.072
4.6423	16.6332	61.156	47.537	34.5231	23.609	39.973	56.599	28.9	30.98	55.325	33.648	42.433	76.935	37.95	46.167	28.68	32.916	43.038	27.813	65.986		0.201029	41.5401
4.7614	19.0953	48.892	36.275	38.2267	19.994	38.63	48.373	22.951	36.163	64.126	25.228	43.781	71.545	35.1	41.912	31.252	38.413	47.751	27.583	66.741		0.206186	40.1016
4.8804	15.9428	36.732	34.972	33.9034	20.338	42.828	37.543	19.566	40.487	54.157	23.053	36.465	68.4	32.411	37.261	24.943	33.985	42.067	33.069	53.309		0.21134	36.0716
4.9995	21.4232	32.984	32.322	27.2318	18.79	35.177	41.285	22.623	45.22	40.656	20.794	27.054	57.073	24.134	43.354	20.721	32.233	41.082	25.259	45.009		0.216497	32.7212
5.1185	21.9605	36.501	32.405	22.0444	14.366	35.08	38.809	26.565	45.883	40.835	18.23	28.898	49.199	31.303	40.201	27.234	31.82	36.74	24.131	42.275		0.22165	32.224
5.2375	14.0748	30.929	39.239	25.2517	16.651	30.14	40.53	28.166	48.973	41.415	19.799	32.661	46.125	26.148	35.848	23.936	32.185	47.699	30.186	35.637		0.226803	32.2797
5.3566	17.1379	43.235	36.074	24.7598	22.004	37.364	38.437	26.802	39.485	38.121	23.359	32.025	46.163	23.888	35.447	24.558	24.775	46.723	22.585	30.999		0.231961	31.6971
5.4756	13.4626	43.924	36.993	30.9811	25.922	42.237	40.671	25.914	38.752	34.914	23.659	41.726	50.59	21.7	39.265	22.392	29.295	49.459	26.182	34.731		0.237114	33.6385
5.5946	12.3166	42.281	30.39	32.5958	26.852	42.758	27.687	34.058	37.575	38.31	16.757	45.882	52.657	20.266	45.923	17.787	28.169	45.115	23.286	36.879		0.242267	32.8772
5.7137	15.8198	37.654	28.205	38.1597	27.057	39.981	24.905	35.039	33.353	37.871	19.35	46.852	52.248	20.259	44.597	20.568	30.428	46.502	24.69	35.73		0.247425	32.9634
5.8327	13.3709	50.967	34.707	31.8719	21.686	37.289	30.738	31.385	31.546	35.546	21.991	33.706	61.501	17.381	29.18	16.795	34.484	44.968	32.829	43.092		0.252578	32.7517
5.9517	10.2154	35.279	37.088	32.8255	29.336	37.299	30.14	28.781	34.422	32.426	25.563	38.852	55.49	16.816	30.351	20.973	34.297	45.238	32.432	46.436		0.257731	32.713
6.0708	10.9956	32.411	32.234	28.5025	29.645	39.773	26.757	29.116	35.708	33.31	29.138	34.646	46.496	18.401	30.128	16.285	38.462	42.628	30.501	48.094		0.262888	31.6616
6.1898	9.852	33.674	34.77	29.0758	25.615	40.398	36.728	20.827	36.507	31.094	30.553	33.271	48.65	21.796	26.371	21.275	44.544	48.732	34.385	54.126		0.268041	33.1122
6.3088	9.0361	38.502	32.357	32.3185	29.979	40.958	38.934	18.395	51.191	25.096	22.243	34.065	37.196	14.446	30.46	22.246	43.441	35.195	50.678	65.265		0.273195	33.6001
6.4279	5.9315	30.241	31.24	29.6246	36.589	32.455	34.65	23.557	47.118	22.947	19.397	30.485	32.284	16.561	26.424	20.868	46.837	32.807	44.302	65.629		0.278352	31.4974
6.5469	10.5591	32.905	29.725	25.9741	30.293	35.757	28.089	22.409	46.706	25.304	16.702	42.514	32.034	19.499	33.368	19.121	47.829	28.948	43.213	65.216		0.283505	31.8083
6.6659	10.9923	24.932	26.88	20.9206	33.088	43.739	34.208	13.309	47.603	23.231	18.911	37.27	23.581	18.677	31.776	23.295	42.019	36.87	44.563	58.402		0.288658	30.7133
6.785	9.9512	24.693	29.901	18.0965	39.316	40.748	31.9	13.211	41.02	23.767	15.954	39.008	22.167	24.006	21.989	23.177	34.442	40.769	50.039	50.665		0.293816	29.741
6.904	7.5522	22.469	27.615	20.3853	36.221	33.769	22.316	14.178	43.378	22.935	18.134	41.283	22.365	26.922	25.125	19.307	34.749	32.235	42.413	49.827		0.298969	28.1589
7.023	7.4926	19.814	26.706	12.6678	30.867	40.554	25.873	17.886	35.778	12.873	18.686	31.733	21.414	19.81	25.828	26.666	26.751	32.958	39.912	44.455		0.304122	25.9362
7.1421	12.1924	15.201	31.051	13.1146	29.274	46.303	26.104	21.348	28.687	13.03	16.411	28.81	26.24	22.948	29.652	28.229	26.547	35.11	45.378	48.606		0.30928	27.2118
7.2611	11.9599	19.216	31.438	12.4904	33.696	39.751	30.104	19.224	25.574	15.286	14.5	29.942	23.739	24.616	21.82	28.901	29.115	34.183	39.489	47.452		0.314433	26.6248
7.3801	12.5694	16.227	23.89	11.3321	27.217	40.68	34.516	13.006	22.288	14.736	17.088	27.775	30.188	22.447	20.381	24.416	26.155	40.076	36.576	45.033		0.319586	25.3298
7.4992	10.4991	19.518	22.323	10.7487	22.568	32.879	30.594	13.356	28.298	13.752	14.774	22.053	28.075	21.046	21.622	16.814	20.275	36.151	40.779	46.584		0.324743	23.6354
7.6182	14.1402	18.502	24.136	14.3282	25.826	31.353	31.98	13.584	32.281	12.255	14.53	27.699	31.221	21.977	21.855	17.206	17.429	36.121	26.293	56.699		0.329896	24.4708
7.7372	11.7709	21.79	24.72	15.286	22.845	32.107	26.784	11.36	33.11	14.145	16.596	25.296	26.638	21.379	18.977	26.64	17.586	38.285	29.658	48.027		0.33505	24.15
7.8563	11.7034	25.879	25.649	15.6654	24.746	30.191	21.843	9.425	28.768	17.822	11.869	25.169	24.503	16.709	19.442	33.523	18.526	31.022	25.307	56.223		0.340207	23.6992
7.9753	15.1691	24.095	24.272	15.0134	26.367	26.013	20.289	4.253	29.103	16.684	15.192	25.057	22.029	19.997	20.449	36.206	24.689	33.676	25.714	46.687		0.34536	23.5477
8.0943	9.4355	16.829	29.836	16.0656	30.906	29.549	22.672	4.961	19.77	14.452	16.369	23.002	26.422	26.866	17.953	34.157	27.816	39.499	20.422	48.24		0.350513	23.7611
8.2134	11.978	27.394	19.365	23.9934	25.245	28.778	20.031	6.307	18.431	17.101	14.83	18.92	24.737	18.235	25.534	36.032	28.458	36.381	21.645	50.481		0.355671	23.6938
8.3324	10.4887	35.931	26.095	20.2113	21.589	25.195	14.046	9.928	17.563	16.787	16.087	18.432	23.005	16.572	19.168	31.167	26.75	45.345	20.175	45.738		0.360824	23.0137
8.4515	9.0217	26.035	22.599	22.3391	22.22	19.007	13.157	7.511	16.942	19.147	20.762	16.021	23.221	15.641	23.757	27.21	24.305	31.975	21.662	45.786		0.365981	21.4159
8.5705	11.3842	22.448	17.977	28.3692	25.61	17.621	12.653	12.866	21.911	18.267	15.958	12.111	22.23	18.16	26.016	27.004	20.809	25.59	22.361	46.568		0.371135	21.2957
8.6895	11.7848	27.219	16.622	26.1593	23.142	17.575	15.434	12.912	14.293	23.611	18.316	11.654	30.684	19.109	22.612	19.268	26.679	26.535	25.453	37.362		0.376288	21.3212
8.8086	8.7253	26.152	15.177	27.1238	25.262	17.6	13.331	15.372	11.254	23.648	13.653	15.475	23.211	17.955	16.022	22.828	19.277	26.365	24.194	50.987		0.381445	20.6806
8.9276	9.2714	23.996	15.606	23.1876	22.004	19.919	14.397	16.092	10.084	25.188	13.479	13.926	17.682	23.872	19.56	23.027	21.178	14.573	21.698	46.438		0.386598	19.7589
9.0466	10.923	16.072	14.652	13.1201	20.002	17.098	11.491	18.409	10.906	18.943	15.301	14.336	17.238	17.203	14.123	22.062	20.409	19.264	22.201	31.383		0.391752	17.2568
9.1657	8.7927	12.906	11.985	12.4888	19.683	15.483	9.813	20.596	10.675	17.251	18.795	13.78	20.496	16.118	10.321	24.367	20.435	17.624	19.369	34.379		0.396909	16.7679
9.2847	7.8049	18.871	12.168	15.7912	22.286	13.276	6.517	15.241	13.898	18.477	17.366	16.179	18.95	23.54	11.182	21.3	14.05	14.105	22.262	31.819		0.402062	16.7542
9.4037	10.1583	14.16	13.691	14.6733	20.245	14.349	6.888	18.207	10.784	19.234	17.22	16.324	15.923	17.269	10.181	18.815	14.575	10.314	19.725	23.726		0.407215	15.3231
9.5228	13.3863	15.785	13.621	10.6407	21.528	13.06	8.683	17.239	12.862	22.869	9.595	16.091	20.874	14.53	11.338	17.053	14.351	7.66	21.668	24.541		0.412373	15.3688
9.6418	11.8745	15.728	14.146	14.4738	18.015	13.387	8.447	17.491	10.116	24.577	12.788	11.023	22.79	14.79	7.732	16.201	21.531	13.546	19.405	25.595		0.417526	15.6828
9.7608	8.9475	10.392	17.888	15.9921	17.775	16.322	7.7	13.452	11.901	14.823	10.745	9.158	26.085	16.473	14.757	19.382	23.936	12.322	17.495	31.555		0.422679	15.855
9.8799	7.0616	14.011	21.396	12.7078	13.427	17.175	5.231	15.438	12.236	12.9	9.335	9.618	24.314	21.71	16.115	15.796	20.511	13.616	17.158	34.286		0.427837	15.7021
9.9989	8.8513	12.885	26.318	15.0175	22.811	9.561	6.268	9.117	11.35	16.91	7.344	10.169	27.215	14.959	15.141	15.008	22.279	8.843	15.848	40.701		0.43299	15.8298
10.1179	10.4968	10.655	25.067	19.6491	17.458	11.044	6.935	7.299	19.364	12.471	10.933	10.604	21.768	14.041	17.244	20.708	17.942	9.022	15.394	33.53		0.438143	15.5812
10.237	6.1603	13.062	23.43	18.0836	17.766	10.453	7.335	12.35	19.944	17.339	9.913	7.325	25.707	15.101	18.683	19.793	19.199	10.217	13.118	29.329		0.4433	15.7154
10.356	5.5573	12.634	29.731	14.5493	21.773	8.596	6.24	11.522	16.143	13.559	7.661	8.529	22.197	13.774	11.235	20.135	13.966	9.392	13.507	35.613		0.448453	14.8157
10.475	9.1602	9.425	33.383	15.0345	22.268	7.463	10.924	8.65	14.465	11.06	8.854	5.808	13.499	20.056	17.639	24.965	13.032	5.976	13.526	30.38		0.453607	14.7784
10.5941	10.1796	10.718	32.204	17.2505	26.404	6.133	7.06	6.293	15.379	13.233	10.763	6.411	10.266	13.888	15.762	28.341	11.738	10.077	11.948	27.119		0.458764	14.5584
10.7131	6.6672	13.364	33.526	12.1603	18.405	8.857	4.874	7.247	11.141	10.508	6.381	7.065	6.711	13.259	14.189	25.65	14.679	7.658	9.515	30.707		0.463917	13.1282
10.8321	5.9084	15.049	27.934	10.7156	24.874	9.25	3.524	7.704	10.461	8.998	10.171	7.19	11.539	10.589	17.926	31.893	15.114	9.503	13.611	24.559		0.46907	13.8256
10.9512	4.9125	12.329	24.519	8.9013	17.187	10.138	3.918	6.158	11.273	9.915	10.233	4.832	8.767	13.286	21.719	22.111	14.838	9.359	10.743	24.071		0.474228	12.4605
11.0702	3.5239	16.102	18.745	8.0177	15.327	7.229	4.819	6.402	9.037	9.622	7.224	5.277	7.747	8.567	20.689	23.571	22.692	11.405	10.099	19.651		0.479381	11.7873
11.1892	4.6199	13.241	18.511	8.0295	15.419	6.412	3.052	6.268	10.99	7.034	11.013	4.119	9.456	8.004	15.742	19.74	24.858	11.35	9.769	19.429		0.484534	11.3528
11.3083	4.3753	16.915	18.123	5.7904	14.692	5.287	2.86	7.39	8.49	6.776	15.023	3.486	8.063	6.387	19.507	22.14	22.602	9.281	6.387	21.848		0.489692	11.2711
11.4273	3.1374	17.173	15.987	4.7506	9.341	4.576	2.551	6.712	7.456	4.752	12.439	5.622	9.429	5.367	19.502	24.368	18.872	4.819	11.691	17.739		0.494845	10.3142
11.5463	5.2236	18.295	14.483	6.6335	9.823	6.057	1.854	4.74	7.394	7.591	10.249	5.215	6.905	7.223	23.875	16.194	14.904	9.6	11.477	15.45		0.499998	10.1593
11.6654	6.1774	15.35	14.329	11.8248	11.945	4.528	2.227	5.982	7.121	7.967	8.208	2.882	3.242	7.452	24.49	15.965	14.341	8.417	9.545	17.041		0.505155	9.95171
11.7844	11.7459	12.07	14.551	8.6761	10.666	3.169	2.27	5.406	9.517	10.293	9.201	1.713	5.41	7.958	19.884	16.67	16.931	6.364	11.186	19.073		0.510308	10.1377
11.9035	6.6605	10.324	14.422	8.4485	8.751	5.642	3.166	5.668	7.843	7.586	10.093	4.328	2.217	12.625	25.806	23.619	12.996	6.781	12.17	21.67		0.515466	10.5408
12.0225	6.9174	12.05	11.277	9.7024	13.739	5.668	3.618	5.804	9.311	12.404	5.53	3.492	2.15	8.453	25.375	24.352	10.359	8.997	9.429	14.891		0.520619	10.1759
12.1415	6.4472	10.823	18.406	11.5459	13.286	5.898	2.05	6.309	7.695	9.576	9.351	5.159	2.71	11.224	22.964	22.191	12.117	5.78	7.201	15.933		0.525772	10.3333
12.2606	7.3466	12.332	14.19	12.8479	8.681	3.578	1.183	9.124	12.41	10.983	4.793	3.957	4.04	8.638	22.866	15.871	11.914	6.591	6.401	9.782		0.53093	9.37643
12.3796	6.1363	7.133	12.988	11.1336	9.569	5.33	2.324	10.981	10.325	14.209	5.428	4.707	3.635	8.002	16.781	17.01	18.512	9.002	8.663	10.496		0.536083	9.61824
12.4986	5.9976	5.915	13.34	9.5311	10.351	5.866	2.553	13.544	8.341	15.653	6.118	2.234	6.603	9.15	17.703	12.528	17.78	11.87	8.493	8.563		0.541236	9.60668
12.6177	6.5826	6.717	15.878	12.9336	6.798	6.369	3.726	10.626	7.405	10.042	8.453	0.948	5.723	8.126	17.4	16.716	22.596	7.814	3.999	7.216		0.546393	9.30341
12.7367	7.6811	6.538	12.681	14.4267	6.249	4.173	5.966	8.305	7.867	7.444	6.701	1.427	3.983	7.509	14.539	20.491	20.978	4.457	4.507	11.02		0.551547	8.84714
12.8557	6.7297	6.203	11.608	13.2805	5.768	1.976	7.554	10.602	10.781	11.372	8.144	1.49	4.512	8.928	15.626	14.348	16.504	5.606	6.205	13.044		0.5567	9.01406
12.9748	5.7338	7.822	12.166	9.9462	4.791	0.865	3.54	12.137	8.132	13.21	6.771	4.091	7.734	10.059	17.657	14.642	14.583	5.232	5.858	11.422		0.561857	8.8196
13.0938	9.8068	10.107	11.443	11.764	5.485	3.147	4.108	10.264	5.038	9.978	6.227	1.749	5.712	14.803	14.022	10.95	12.337	3.409	8.346	13.348		0.56701	8.60219
13.2128	7.7134	9.474	13.101	13.5341	3.529	1.777	5.135	9.685	4.416	10.133	5.517	2.219	6.566	10.814	9.208	9.335	16.341	4.535	5.869	11.569		0.572163	8.02352
13.3319	9.5099	8.141	15.889	13.1468	3.527	4.124	1.283	7.202	4.839	6.292	8.01	6.149	3.489	9.867	8.093	8.986	20.225	7.421	5.539	6.915		0.577321	7.93239
13.4509	6.9967	9.134	14.98	11.082	4.697	2.582	1.891	11.356	4.118	6.56	6.498	3.769	5.266	8.075	13.287	7.626	22.123	7.088	5.706	7.664		0.582474	8.02494
13.5699	5.5491	5.9	14.999	10.6543	3.851	3.211	2.239	8.476	5.507	10.895	5.88	6.359	6.242	4.098	10.384	9.736	22.859	6.792	6.022	8.881		0.587627	7.92672
13.689	8.7515	9.196	14.364	11.5327	6.522	3.866	2.383	9.512	6.853	10.984	4.887	4.249	3.949	4.884	9.225	9.811	19.641	4.986	5.775	8.564		0.592785	7.99676
13.808	5.2738	13.334	14.582	11.3246	4.279	3.812	2.455	9.202	10.076	7.482	4.798	3.344	6.115	10.35	10.89	9.567	19.614	8.724	6.412	9.683		0.597938	8.56587
13.927	6.2262	14.242	20.068	12.7783	5.037	2.417	1.05	9.04	10.43	8.715	5.25	2.928	1.595	9.362	17.945	9.511	14.886	9.343	4.205	10.497		0.603091	8.77627
14.0461	6.3538	13.419	14.486	11.0086	3.338	2.79	1.059	9.676	7.397	9.041	4.102	3.315	3.99	9.934	15.878	13.174	18.986	8.44	4.321	10.09		0.608248	8.53992
14.1651	5.8236	10.784	13.156	11.2289	3.689	1.064	3.3	8.248	8.738	7.922	7.216	5.55	2.581	10.242	14.518	13.385	15.582	8.563	1.204	13.162		0.613402	8.29782
14.2841	6.2004	13.057	13.697	11.5221	5.499	2.579	3.42	8.423	4.926	7.849	6.854	5.73	2.418	6.153	13.075	10.592	17.681	8.318	4.014	10.288		0.618555	8.11478
14.4032	5.8936	13.793	14.355	10.1973	7.491	3.437	2.881	5.955	5.851	6.608	5.457	5.385	5.219	5.802	16.521	17.314	15.091	13.866	3.526	17.664		0.623712	9.11534
14.5222	2.8498	11.88	11.898	6.2348	6.938	3.109	3.516	9.409	7.808	6.822	5.91	6.217	2.987	14.539	13.26	14.921	15.019	11.288	2.674	19.352		0.628865	8.83158
14.6412	4.1238	9.488	18.66	7.9849	6.37	0.705	2.561	8.537	6.983	7.201	7.214	5.263	3.177	12.311	13.071	13.492	12.445	10.937	3.824	26.137		0.634019	9.02424
14.7603	2.7966	14.838	21.147	8.6506	7.043	2.463	3.068	8.726	11.084	8.13	5.83	5.41	2.361	9.822	11.036	16.839	11.584	7.103	6.28	17.022		0.639176	9.06166
14.8793	3.7752	10.002	22.891	9.4838	5.59	1.5	1.405	7.878	8.771	8.699	5.299	3.717	3.279	12.757	11.783	21.105	11.809	8.389	5.865	12.29		0.644329	8.8144
14.9984	1.5172	9.529	26.588	5.4254	10.163	0.862	1.408	9.706	5.868	4.123	5.105	3.404	4.857	11.963	15.13	18.352	12.446	12.219	5.181	6.401		0.649487	8.51238
15.1174	4.5901	3.877	27.614	8.4232	3.428	1.893	3.181	10.333	4.47	4.598	4.672	3.697	2.257	12.8	16.641	16.498	12.445	17.353	4.641	3.443		0.65464	8.34272
15.2364	6.1022	6.82	24.566	8.5318	3.548	0.575	2.188	9.01	5.592	9.254	4.587	3.834	4.714	16.784	17.406	13.353	10.535	8.309	5.838	4.993		0.659793	8.327
15.3555	5.7099	10.411	27.991	10.3179	3.615	1.286	2.406	6.676	7.232	7.657	2.006	4.841	2.712	11.881	14.96	11.929	10.991	9.905	3.612	5.999		0.66495	8.10689
15.4745	2.9008	10.53	22.573	12.9583	3.958	3.848	1.946	5.109	8.592	8.295	2.754	4.231	3.916	9.343	14.575	16.119	9.266	12.377	4.242	6.617		0.670104	8.2075
15.5935	2.7013	10.579	22.249	11.5654	2.841	2.684	1.835	6.858	6.033	8.032	3.719	6.267	3.408	9.283	8.612	12.884	7.469	16.058	6.532	8.292		0.675257	7.89508
15.7126	5.978	11.429	20.125	16.1795	3.511	1.861	1.478	6.509	4.692	4.178	3.299	3.289	4.393	15.606	7.609	13.444	9.602	15.428	7.498	6.868		0.680414	8.14882
15.8316	4.5116	5.956	15.621	11.9114	4.803	2.819	3.466	7.018	10.541	6.847	5.427	4.652	2.889	8.223	10.434	12.216	5.756	9.004	9.405	11.944		0.685567	7.6722
15.9506	2.4751	7.115	15.084	10.8923	2.881	3.832	3.715	4.097	9.593	6.772	4.93	4.423	3.895	8.978	8.945	8.144	8.265	9.958	7.44	9.182		0.69072	7.03082
16.0697	4.1592	9.503	13.035	13.6654	5.714	1.585	4.2	5.071	7.437	3.499	3.327	5.113	3.251	7.535	10.966	9.77	12.046	9.741	8.909	7.425		0.695878	7.29758
16.1887	3.8304	5.197	16.16	8.6631	4.249	0.807	1.931	4.542	5.595	6.336	3.165	5.06	3.914	10.346	7.565	6.049	9.845	9.901	11.726	4.678		0.701031	6.47798
16.3077	6.1436	5.608	17.157	12.0332	3.688	2.104	3.693	6.326	7.254	6.812	8.099	4.816	3.441	8.759	4.772	6.076	12.587	7.541	10.776	5.646		0.706184	7.16659
16.4268	6.0847	7.488	13.469	11.1711	4.134	1.591	5.065	7.255	4.998	7.025	9.173	4.287	5.719	11.961	7.317	11.843	9.931	10.188	7.928	11.04		0.711342	7.88339
16.5458	3.5284	8.096	10.205	10.086	3.092	2.138	3.328	5.134	5.605	6.807	13.172	6.321	7.06	12.181	9.72	10.311	6.878	9.196	8.8	8.615		0.716495	7.51367
16.6648	3.1528	7.815	11.608	8.9001	3.829	3.928	3.87	5.245	2.807	9.651	9.168	8.459	5.241	14.317	7.824	11.081	6.061	12.097	6.658	6.321		0.721648	7.40164
16.7839	3.2756	6.156	11.971	6.0915	3.402	3.634	3.482	5.564	4.542	8.274	4.692	5.05	6.418	16.116	8.026	13.258	11.133	11.76	6.351	8.879		0.726805	7.40375
16.9029	3.4756	6.613	12.334	8.2116	3.182	2.025	4.27	7.871	6.368	6.698	7.648	5.043	3.589	13.904	9.518	14.143	8.894	12.355	6.702	6.444		0.731959	7.46441
17.0219	6.067	6.176	7.973	7.5299	5.011	1.901	3.81	7.858	4.29	8.692	7.596	4.585	3.06	19.865	13.352	13.576	11.311	15.528	5.255	5.989		0.737112	7.97125
17.141	4.5766	8.472	7.851	7.6276	5.502	3.551	4.276	6.169	7.401	7.439	11.118	3.153	2.535	12.313	12.101	17.845	9.768	10.058	6.339	9.01		0.742269	7.85526
17.26	3.7435	4.246	8.755	12.6621	5.252	2.709	2.63	8.978	4.579	12.411	11.59	3.656	4.481	10.31	9.711	14.514	5.475	8.223	5.619	7.524		0.747422	7.35343
17.379	5.1793	6.283	10.526	6.8619	9.323	2.674	4.73	8.927	2.67	7.957	9.377	3.403	5.358	14.455	16.305	19.4	7.087	11.247	5.295	5.74		0.752575	8.13991
17.4981	7.3062	7.306	11.899	7.1597	8.876	0.637	4.512	4.055	6.028	6.175	8.101	4.764	8.038	11.696	13.496	19.749	9.838	9.853	7.244	4.87		0.757733	8.08014
17.6171	5.6044	8.708	10.335	10.7812	6.812	3.142	4.599	4.066	5.307	5.75	6.214	6.507	5.95	18.453	15.95	12.697	7.147	9.428	8.893	6.728		0.762886	8.15358
17.7361	4.5363	11.677	11.926	7.9196	10.236	4.544	3.054	6.088	8.642	3.706	5.847	6.423	4.168	18.055	12.797	20.828	8.782	10.526	11.719	8.912		0.768039	9.0193
17.8552	4.7052	10.714	8.197	7.7419	16.143	3.968	3.738	8.711	3.768	3.852	5.294	4.79	7.267	23.937	8.452	18.197	10.108	8.023	10.927	8.321		0.773197	8.8427
17.9742	5.0972	8.584	6.313	8.9168	14.381	3.635	5.351	8.12	5.444	6.653	8.108	7.792	4.844	17.883	9.795	11.232	5.546	8.797	13.394	7.401		0.77835	8.36435
18.0932	5.7951	16.23	6.35	9.2787	10.998	3.644	6.278	6.66	6.684	5.669	6.776	6.125	5.65	14.516	8.799	9.713	5.97	7.694	12.894	8.261		0.783503	8.19924
18.2123	7.1237	20.687	7.687	6.4441	10.242	3.394	3.07	7.23	3.486	7.13	7.858	6.306	6.819	14.788	8.812	8.929	4.864	9.345	12.918	12.704		0.78866	8.49184
18.3313	5.8412	11.593	7.544	6.5106	6.536	4.434	2.871	7.102	2.797	4.209	5.414	8.548	5.449	14.484	7.966	11.264	6.558	14.215	14.973	14.478		0.793814	8.13934
18.4504	7.4857	16.117	8.148	10.0823	7.891	4.041	3.05	8.113	5.924	3.512	5.09	6.189	6.907	10.993	6.175	8.514	8.53	17.852	14.01	11.151		0.798971	8.48875
18.5694	6.349	14.603	6.073	6.5799	8.289	4.127	4.692	5.382	7.012	5.526	6.129	9.95	7.398	15.671	7.799	10.145	5.913	15.749	15.105	7.014		0.804124	8.47529
18.6884	4.7671	10.865	7.09	9.4654	13.285	1.506	2.054	5.733	7.092	8.155	8.07	6.989	7.982	12.828	7.231	10.301	4.293	13.19	10.302	8.267		0.809277	7.97327
18.8075	5.1701	10.352	7.666	8.9139	17.131	3.53	6.648	6.299	6.13	7.902	8.544	7.075	4.504	9.479	7.117	9.812	8.76	9.849	12.457	7.473		0.814435	8.2406
18.9265	8.8811	8.496	5.612	6.3409	10.492	5.534	3.599	5.653	9.317	12.665	16.517	4.056	5.017	8.904	11.965	9.965	8.038	7.871	4.819	6.527		0.819588	8.01345
19.0455	6.512	6.461	8.145	5.6472	16.645	4.705	2.901	5.1	7.434	9.795	20.859	8.681	5.131	7.037	11.239	12.812	6.439	11.567	6.32	4.561		0.824741	8.39956
19.1646	5.9501	5.593	8.954	6.1926	15.315	3.022	3.678	6.192	6.804	12.119	23.597	7.971	7.799	2.56	12.377	9.202	7.114	10.364	7.11	5.111		0.829899	8.35124
19.2836	4.7544	6.767	12.604	4.3317	11.102	5.883	4.806	4.976	4.744	14.096	28.578	8.356	7.245	4.617	15.033	9.077	6.253	15.226	6.529	6.44		0.835052	9.0709
19.4026	4.123	6.145	12.082	5.6394	10.106	4.028	4.598	6.002	3.854	10.599	15.764	4.709	6.465	3.152	15.201	7.635	5.879	13.394	6.588	9.893		0.840205	7.79282
19.5217	3.8966	6.588	17.333	8.2405	9.531	2.984	5.294	4.916	11.573	12.448	8.899	4.371	7.467	3.18	19.136	11.107	5.269	12.521	4.176	9.653		0.845362	8.42915
19.6407	2.3719	8.303	17.996	7.4782	13.035	3.677	8.487	6.665	7.753	12.751	9.077	6.553	10.947	4.6	14.501	13.349	3.488	7.285	5.116	13.421		0.850516	8.8427
19.7597	3.0543	7.985	13.988	6.3495	9.087	4.302	14.28	5.982	5.37	13.34	8.514	8.019	9.401	5.325	10.498	11.069	8.728	9.989	5.286	9.341		0.855669	8.49539
19.8788	5.4522	12.722	17.278	5.9455	6.258	2.708	13.947	7.302	5.168	7.013	9.604	5.938	9.826	6.219	11.325	13.908	13.401	9.554	5.696	9.487		0.860826	8.93759
19.9978	6.6269	11.153	15.283	9.5484	7.505	3.097	11.673	6.355	6.207	10.894	9.936	6.395	8.173	5.242	10.822	13.1	9.867	8.595	7.486	7.8		0.865979	8.78791
20.1168	5.0431	7.72	15.077	11.047	7.219	2.198	10.092	17.132	5.395	9.63	10.976	5.81	8.873	4.354	9.735	17.234	11.383	8.33	4.869	5.74		0.871132	8.89286
20.2359	5.064	6.083	17.145	6.7026	3.961	1.655	11.06	16.81	5.141	7.292	12.472	6.258	9.808	5.783	12.982	23.025	10.845	8.78	6.713	5.481		0.87629	9.15303
20.3549	3.8762	7.549	9.46	6.3838	8.56	3.735	15.118	15.882	7.226	8.619	6.925	5.493	9.52	6.504	8.228	12.945	8.594	12.685	11.25	9.911		0.881443	8.9232
20.4739	2.7934	11.866	12.924	7.5074	4.713	7.793	7.117	14.055	9.324	7.514	5.412	6.041	8.654	5.694	9.165	9.484	9.269	9.497	9.331	9.446		0.886596	8.37999
20.593	3.8241	13.833	13.348	6.2537	6.614	7.133	9.182	12.832	13.161	9.868	7.459	3.913	4.658	5.934	10.953	8.309	7.649	10.167	10.884	7.049		0.891754	8.65119
20.712	2.7993	9.084	7.85	5.7806	4.793	4.335	8.581	11.119	9.292	9.448	4.514	5.892	4.285	7.976	6.477	9.506	5.802	5.987	16.829	7.788		0.896907	7.4069
20.831	5.6368	7.414	8.295	8.0342	5.49	8.526	6	13.762	10.535	6.695	4.514	7.061	11.335	6.128	5.696	7.192	7.748	5.609	18.587	9.061		0.90206	8.16595
20.9501	5.0563	8.709	8.369	8.3103	6.233	11.395	8.148	10.858	6.939	6.754	6.826	6.176	13.164	6.47	3.044	4.423	9.326	6.901	12.863	7.618		0.907217	7.87913
21.0691	5.0766	5.621	5.749	8.8397	8.933	5.071	9.996	11.116	9.595	8.253	5.841	5.763	11.123	2.737	2.814	8.282	4.576	5.547	5.912	9.463		0.912371	7.01541
21.1881	3.7135	3.543	6.606	9.5933	6.786	5.123	8.359	8.039	8.822	9.612	3.316	7.328	7.253	6.785	7.616	7.455	8.105	5.586	7.22	6.281		0.917524	6.85709
21.3072	2.5814	3.497	7.158	5.8573	12.31	6.322	10.302	12.295	7.097	6.903	4.067	8.858	6.17	7.001	6.991	4.526	9.355	10.903	13.146	6.654		0.922681	7.59968
21.4262	4.9185	5.474	8.364	7.1703	10.975	8.664	8.81	12.294	10.636	3.673	6.568	12.066	8.615	4.894	8.446	7.098	8.912	13.466	8.24	4.564		0.927834	8.19239
21.5452	6.222	4.575	4.841	6.0029	8.546	4.988	7.027	8.139	8.569	4.639	5.051	11.402	8.705	6.193	8.735	7.028	8.855	11.46	8.547	7.986		0.932987	7.37554
21.6643	3.9766	7.377	4.185	9.7463	11.343	8.342	10.854	9.782	7.605	5.109	6.574	8.56	8.566	7.862	11.562	7.244	12.987	8.659	11.717	12.483		0.938145	8.72669
21.7833	1.1091	2.878	4.169	4.9803	7.432	13.315	12.224	3.575	6.676	6.438	7.214	10.622	8.283	6.941	6.137	6.11	7.911	8.896	5.672	6.881		0.943298	6.87317
21.9024	5.1772	2.287	4.714	5.1841	9.835	13.102	9.562	2.312	2.292	4.674	5.012	10.945	10.745	3.589	4.577	3.502	1.968	7.955	6.425	5.548		0.948456	5.97026
22.0214	10.029	4.863	5.433	3.9522	8.522	11.158	7.536	5.256	4.611	5.654	5.298	7.858	8.255	4.267	5.931	1.587	5.819	10.988	7.144	6.449		0.953609	6.53051
22.1404	6.1521	3.434	3.922	7.0334	9.125	9.84	4.987	2.398	4.461	6.228	6.318	9.404	9.904	7.996	6.622	2.856	5.287	13.055	8.853	4.992		0.958762	6.64338
22.2595	4.8495	4.2	3.022	7.7286	10.072	10.136	7.488	1.883	3.359	7.175	11.488	11.27	7.444	6.457	5.984	1.654	2.126	11.698	11.533	6.396		0.963919	6.79815
22.3785	6.57	3.478	2.896	5.7134	11.352	15.802	7.034	2.086	3.402	5.018	13.18	9.526	8.022	7.526	2.749	1.98	2.443	12.495	12.408	11.127		0.969072	7.24037
22.4975	3.9538	1.971	1.614	6.2141	11.624	10.883	5.619	4.484	1.156	4.548	13.445	7.342	7.236	4.63	3.122	2.98	3.386	10.309	13.497	6.458		0.974226	6.22359
22.6166	5.024	0.683	3.33	5.1133	8.057	8.758	7.384	3.278	1.512	3.348	14.201	8.347	8.534	3.226	2.145	2.432	2.599	10.485	8.963	4.99		0.979383	5.62046
22.7356	3.1857	1.127	3.236	4.3149	11.406	8.793	7.971	1.777	1.866	1.553	11.044	5.855	5.743	3.055	1.51	1.761	1.629	9.147	10.449	4.883		0.984536	5.01528
22.8546	3.2083	0.92	1.912	4.9637	9.888	10.922	4.929	3.137	2.121	3.429	11.026	7.581	6.581	2.104	1.542	1.955	0.699	5.945	6.744	2.525		0.989689	4.6066
22.9737	1.6506	2.181	1.258	3.0548	7.083	5.597	6.47	0.857	3.777	2.936	9.166	12.686	6.596	2.558	3.701	2.156	0.111	4.713	4.457	3.894		0.994847	4.24512
23.0927	0.4526	1.42	1.427	2.7987	8.134	5.921	3.139	4.057	1.134	2.577	9.974	13.128	8.555	1.684	2.786	1.715	0.873	7.043	4.524	1.962		1	4.16522

## Sheet: Image13
X0	Y0	Y1	Y2	Y3	Y4	Y5	Y6	Y7	Y8	Y9	Y10	Y11	Y12	Y13	Y14	Y15	Y16	Y17	Y18	Y19	Y20	Y21	Y22		Ap-Ba	Average int.
0	93.8558	121.886	123.097	80.749	66.2134	105.415	115.101	129	140.997	118.641	127.913	118.677	132.402	102.904	94.302	96.123	74.1096	87.6595	103.036	67.0874	72.2906	77.2875	75.8017		0	101.067
0.119	94.5686	123.186	126.565	84.206	70.5697	88.536	111.868	124.098	143.369	116.746	121.454	127.74	115.416	104.824	96.617	107.555	69.2807	73.4755	87.538	64.3307	65.1071	68.9431	69.4073		0.00462828	98.0609
0.2381	86.87	116.677	122.203	94.935	64.7253	89.262	136.365	125.777	158.832	109.307	122.994	111.147	106.631	106.468	99.794	103.907	71.9676	63.3748	71.053	71.6843	61.8157	69.1848	79.0127		0.00926045	97.5647
0.3571	80.3903	109.525	132.661	93.335	60.33	83.983	134.326	135.421	144.781	106.392	108.7	103.254	120.455	100.082	101.841	93.936	82.8345	64.4377	73.225	73.1674	50.2381	77.6363	80.473		0.0138887	96.1489
0.4761	89.5975	98.107	124.047	80.816	66.7166	67.534	132.128	138.903	153.063	105.93	113.334	98.625	101.009	104.012	127.213	101.655	84.943	63.5752	75.02	59.032	49.3108	67.2494	77.0657		0.018517	94.7342
0.5952	80.6546	91.653	132.061	77.593	72.0096	74.434	124.155	136.59	156.762	103.5	103.172	106.492	104.711	105.518	137.414	105.598	72.1092	56.8828	60.793	58.7734	40.9233	52.8173	71.9399		0.0231492	92.459
0.7142	83.122	98.864	126.15	82.622	71.0757	73.407	123.655	141.245	163.26	104.114	98.863	89.383	93.416	96.586	150.818	106.799	70.3074	55.4762	62.421	54.3211	40.0097	53.074	64.9922		0.0277775	91.4774
0.8332	81.7442	83.072	130.666	87.349	70.3273	68.801	110.566	151.46	158.073	108.248	106.66	82.512	74.781	104.394	160.225	103.915	57.872	48.664	58.728	56.1844	38.4802	55.9931	69.6025		0.0324057	89.9269
0.9523	84.1983	85.903	120.36	68.74	65.4247	76.286	97.001	160.968	162.755	124.729	96.909	79.883	68.004	117.345	156.321	115.057	58.7581	42.5068	59.415	59.0493	33.4254	56.3425	55.0951		0.0370379	88.8903
1.0713	75.8592	90.439	120.165	74.118	60.8328	87.835	89.419	180.473	165.508	131.603	84.694	77.447	64.986	121.109	173.193	119.246	51.4836	46.1511	51.443	54.2679	32.3316	51.4437	52.7575		0.0416662	89.4263
1.1903	65.9464	77.598	127.936	76.611	57.5347	84.839	95.137	202.374	180.969	114.963	78.599	76.541	56.624	131.516	175.62	131.949	50.3976	39.3308	51.585	51.5044	31.4668	58.3585	53.5039		0.0462945	90.0393
1.3094	69.0609	77.891	133.633	80.564	54.631	99.056	91.104	202.54	187.303	118.815	69.719	61.901	64.391	130.128	188.071	141.74	57.6939	42.6876	46.282	55.2242	33.7455	54.0008	58.1785		0.0509266	92.1026
1.4284	68.0226	80.882	130.388	83.334	59.1412	95.27	101.32	182.207	187.762	111.28	72.555	50.197	56.28	113.259	197.59	160.464	58.1008	39.3565	46.643	56.7735	39.6926	56.4227	62.2046		0.0555549	91.702
1.5474	67.0764	77.197	115.493	85.307	56.5448	104.458	101.575	169.397	166.351	116.172	62.103	55.453	50.037	107.344	181.716	161.663	49.8502	27.7361	43.165	58.1281	36.0846	47.6827	65.9924		0.0601832	87.2403
1.6665	62.5052	69.67	108.617	80.313	53.3945	90.316	94.456	138.326	156.087	115.75	57.288	51.478	46.387	115.242	181.281	149.779	51.3909	32.3969	36.863	52.0986	34.9102	48.9724	62.672		0.0648154	82.1823
1.7855	65.2693	74.065	112.237	101.847	51.4749	81.828	88.748	107.47	155.101	115.918	61.981	62.497	43.544	112.916	171.581	152.153	39.9408	38.9465	38.682	52.9538	23.2419	51.2508	66.0797		0.0694436	81.2924
1.9046	59.8355	76.545	138.51	108.507	41.8281	96.008	91.324	98.463	150.609	118.059	74.642	63.308	45.478	108.976	175.464	139.465	37.9386	28.625	37.05	47.4538	20.8165	46.6154	65.3804		0.0740758	81.3435
2.0236	54.7052	66.31	164.838	128.346	43.0882	106.722	93.6	73.265	146.056	108.374	77.403	63.355	50.082	94.327	168.208	131.655	39.7409	27.1619	40.787	52.8825	24.9721	43.599	66.1218		0.0787041	81.113
2.1426	51.4238	57.36	170.437	114.547	43.0455	110.436	103.267	79.334	131.579	112.381	59.386	58.468	47.242	102.009	167.014	132.958	49.4638	25.8146	33.492	53.0895	24.5815	51.5017	58.5661		0.0833324	79.8868
2.2617	66.0874	48.139	169.856	109.693	47.5605	106.687	98.009	63.868	133.291	113.368	56.964	46.657	42.888	97.139	162.362	136	38.4105	22.6172	40.033	47.3671	21.9813	52.1741	60.4637		0.0879645	77.4616
2.3807	68.4741	52.378	184.932	100.355	31.1368	109.188	91.444	57.584	105.381	91.529	62.329	37.009	38.348	101.577	134.807	118.153	42.8151	25.1022	46.848	42.6297	23.3809	47.3611	52.3942		0.0925928	72.3981
2.4997	51.6708	58.002	164.675	98.412	35.9066	98.136	97.35	55.326	84.978	73.002	54.114	45.081	37.492	91.615	123.061	110.971	46.3118	24.5072	40.597	46.7823	26.3854	43.9903	50.6679		0.0972211	67.7841
2.6188	54.7371	52.998	141.553	80.569	37.4775	91.009	104.893	51.286	79.08	66.498	48.064	47.245	31.189	86.878	108.621	100.259	47.6521	32.8195	40.412	55.8781	18.9914	49.9129	55.2794		0.101853	64.4914
2.7378	49.9557	47.8	143.681	77.149	38.3592	82.561	97.716	44.922	81.622	63.221	43.974	45.829	26.511	92.281	97.984	89.374	52.585	39.645	39.927	48.7464	15.2966	53.4069	47.5406		0.106482	61.7429
2.8568	48.5093	49.91	141.723	79.769	34.7467	77.836	101.618	52.146	75.295	61.431	41.393	40.669	28.282	83.259	96.892	95.707	52.0638	33.9476	43.142	47.9762	19.6538	47.8494	47.1969		0.11111	60.9137
2.9759	50.8625	45.473	152.285	79.543	26.5093	69.921	104.531	54.335	70.916	55.76	42.896	32.934	26.07	81.473	95.542	102.299	44.6271	26.1487	42.787	40.8143	22.2404	46.0096	37.5527		0.115742	58.7622
3.0949	45.1863	43.313	140.494	68.632	25.3202	75.439	106.653	48.866	78.814	56.167	36.146	27.958	21.817	90.976	86.075	94.899	33.6546	27.8714	31.906	42.7927	18.6321	51.5068	32.7295		0.12037	55.9065
3.2139	43.0104	47.973	116.992	75.262	25.9465	72.168	109.749	57.001	85.524	52.911	38.533	27.586	20.468	87.787	67.957	77.706	38.67	24.6916	33.771	29.9552	23.0729	50.5719	36.3421		0.124999	54.0717
3.333	47.1592	51.935	110.594	79.209	24.2517	80.619	111.601	60.43	77.21	53.468	26.463	22.267	20.124	85.294	65.857	78.517	54.4688	18.6477	33.009	28.3158	23.0576	30.3875	38.4479		0.129631	53.1014
3.452	38.956	48.557	107.216	73.661	26.1839	82.485	110.07	58.921	79.194	59.939	34.104	23.76	20.273	73.994	61.806	80.331	52.8719	20.8728	24.841	34.6475	21.772	25.365	34.2062		0.134259	51.9142
3.571	37.3611	42.653	99.637	76.994	23.9157	80.344	115.595	57.416	81.916	54.105	36.183	25.055	19.905	63.625	56.215	72.617	44.0498	24.1238	26.444	24.2772	22.0508	30.0092	31.0892		0.138887	49.8079
3.6901	30.2433	35.648	92.477	80.427	24.6266	86.307	111.062	54.477	87.601	59.953	39.831	35.249	20.443	56.725	58.451	77.642	41.0362	26.799	24.553	24.3164	26.1216	29.4535	29.1565		0.143519	50.113
3.8091	37.5464	29.506	94.277	75.059	22.8657	64.403	128.244	52.218	84.541	61.803	28.254	28.533	20.758	59.375	45.066	62.072	43.7536	30.1066	21.064	28.5368	17.6735	33.3985	30.0832		0.148148	47.7886
3.9281	26.0715	25.145	85.393	79.946	19.0489	64.805	135.321	43.161	80.242	66.445	31.363	23.294	20.645	71.869	42.42	61.132	39.5406	28.139	22.041	24.7042	17.0274	26.7526	24.7915		0.152776	46.0564
4.0472	30.246	25.793	81.983	71.365	23.3377	60.494	129.794	50.313	77.029	62.325	33.051	22.011	10.178	82.509	46.75	43.822	38.5445	26.2626	23.031	18.1872	18.975	22.6923	28.4268		0.157408	44.6574
4.1662	28.5397	34.219	82.576	69.628	26.3848	61.189	124.72	49.19	79.25	70.155	27.817	17.017	11.051	88.802	42.516	39.234	43.7227	24.8154	27.019	17.1676	20.1464	25.6544	29.7458		0.162036	45.2417
4.2852	32.8984	36.961	84.357	53.845	18.606	60.163	122	52.204	69.208	67.76	28.83	13.39	10.752	73.201	42.201	45.44	38.05	28.8883	15.805	15.6403	23.9413	22.8339	28.1561		0.166665	42.8318
4.4043	24.1907	34.432	86.696	52.641	19.1375	63.535	114.007	49.914	76.034	54.686	24.535	17.849	14.349	76.322	45.087	35.606	47.6992	31.1352	16.357	15.7848	22.993	22.4915	33.2462		0.171297	42.5534
4.5233	23.4154	37.75	90.151	51.96	23.0436	67.48	123.922	50.917	90.436	65.489	26.997	17.748	16.719	66.039	43.996	38.054	34.4911	33.8512	16.351	16.6769	20.534	21.2205	26.1236		0.175925	43.6246
4.6423	16.5811	33.416	87.056	54.564	18.8387	53.28	135.431	49.661	89.326	69.527	27.506	16.186	11.656	56.388	61.526	41.2	25.5785	33.8528	15.65	13.0599	16.4769	23.3779	21.8389		0.180553	42.2599
4.7614	18.0385	36.37	84.64	66.219	22.2495	51.546	124.659	50.419	85.919	62.3	24.9	10.61	15.169	67.277	63.012	35.819	28.7164	22.6818	16.257	15.1639	27.2925	20.9412	26.0292		0.185186	42.4447
4.8804	19.2599	46.973	87.803	54.314	18.9794	52.245	112.441	45.133	77.899	55.795	25.014	12.201	14.999	65.512	72.512	38.452	23.7409	17.0575	13.653	23.5496	21.7997	16.31	24.0282		0.189814	40.8553
4.9995	15.6509	35.14	88.905	48.785	21.874	45.357	98.027	52.038	89.703	53.52	22.551	15.543	13.779	60.901	70.243	34.034	21.311	21.727	15.397	20.2464	16.5297	16.6859	23.5		0.194446	39.1934
5.1185	17.6922	32.93	89	50.604	23.8357	37.799	106.211	54.952	97.175	52.48	17.797	10.239	15.346	57.877	54.866	33.824	23.0049	19.679	20.217	17.8925	21.2818	17.3468	18.5527		0.199074	38.7219
5.2375	18.7809	33.849	88.936	61.576	18.6178	34.152	90.827	49.912	87.531	47.938	17.588	8.199	16.273	49.817	53.911	37.839	20.2136	21.4622	18.843	20.5627	27.0624	12.2094	17.3251		0.203703	37.1054
5.3566	20.6468	36.464	84.24	64.793	25.5062	27.967	87.215	52.69	78.169	48.324	17.196	10.569	20.378	50.151	48.309	38.989	22.1688	22.8665	19.939	20.3416	18.5969	11.9481	21.0547		0.208335	36.8923
5.4756	15.6671	43.692	94.057	59.116	24.6905	26.098	84.632	64.788	66.179	38.283	19.101	13.639	22.726	40.39	52.992	38.795	30.7991	14.5811	18.54	27.6935	15.5281	14.6342	14.4002		0.212963	36.5662
5.5946	16.7936	51.446	86.371	63.951	24.6707	32.389	94.992	70.375	72.652	38.997	24.019	15.571	15.997	35.774	47.011	34.927	27.2366	15.2288	17.207	31.234	19.685	14.7375	20.8197		0.217591	37.9167
5.7137	24.8653	50.422	88.583	63.47	23.3697	31.729	108.175	75.359	79.134	39.022	21.142	7.205	17.813	38.998	62.964	38.674	28.6704	18.3576	18.781	24.8597	24.4772	17.8474	22.4752		0.222224	40.278
5.8327	23.8047	41.954	80.943	58.952	20.8332	35.857	105.817	73.196	72.436	31.831	21.15	8.543	13.58	31.287	54.793	40.317	35.6823	17.9471	16.148	30.8004	16.8553	14.3413	21.7315		0.226852	37.7739
5.9517	14.5526	46.275	70.707	51.678	25.3525	44.923	106.358	73.2	65.813	28.891	18.853	13.271	17.978	27.285	58.773	49.765	29.8103	19.181	16.433	25.2435	21.7314	12.8881	25.1753		0.23148	37.5712
6.0708	10.3596	51.467	58.469	60.289	20.4394	38.292	104.787	78.721	65.132	31.798	20.277	14.553	16.607	23.947	62.936	51.939	24.3351	19.1488	16.836	20.6772	19.8446	10.475	23.3157		0.236112	36.7237
6.1898	10.3232	54.779	67.886	55.737	16.1848	30.845	94.325	88.445	67.473	22.882	19.362	9.785	18.525	25.532	71.706	42.518	27.3896	19.6462	22.142	20.8154	20.634	15.3933	22.3578		0.240741	36.7255
6.3088	16.2933	50.536	57.169	57.785	15.5535	33.631	78.666	103.634	73.692	21.905	17.82	14.142	25.875	24.993	65.595	57.567	28.2684	19.5918	21.006	23.194	23.6182	13.7601	25.1791		0.245369	37.8032
6.4279	14.9529	45.325	52.326	51.396	14.0686	27.424	74.26	76.482	74.738	21.777	16.719	14.92	16.248	23.983	65.03	53.964	21.3999	17.0873	21.234	23.5298	22.4009	12.7877	23.1953		0.250001	34.1412
6.5469	15.5347	41.953	47.511	53.583	16.8321	25.994	70.364	72.304	63.785	22.255	13.326	12.966	12.19	27.042	63.111	49.016	26.0236	23.2479	20.645	22.6035	16.1907	11.8442	20.229		0.254629	32.5457
6.6659	17.121	48.324	50.447	45.733	16.5192	22.99	59.732	74.243	67.211	21.064	15.26	15.377	16.173	32.196	59.168	45.818	29.6634	20.9677	17.62	19.2057	17.6905	15.3589	21.507		0.259258	32.5821
6.785	15.3502	53.113	56.837	40.847	20.0321	23.713	58.633	62.722	63.56	22.28	15.834	14.013	17.454	30.605	49.294	46.539	32.3686	25.7842	12.301	18.2084	25.3606	12.5263	16.1646		0.26389	31.893
6.904	16.5568	51.975	57.981	47.431	19.8403	23.484	47.386	61.583	65.042	20.371	12.145	15.262	12.895	34.73	48.781	48.041	30.6118	20.5636	18.638	21.0489	16.7965	11.9434	18.3962		0.268518	31.3697
7.023	14.2511	57.486	51.312	43.481	16.238	20.65	41.986	61.366	78.031	20.239	13.534	15.168	17.171	42.634	35.909	49.668	30.2145	18.1223	14.195	21.2449	13.0937	12.0266	17.2698		0.273146	30.6648
7.1421	15.3499	64.016	43.526	46.897	19.0847	23.379	35.813	57.404	71.54	21.837	10.572	19.554	11.799	47.811	30.091	40.443	25.9087	15.9172	14.139	20.1002	14.0348	11.4312	21.3704		0.277778	29.653
7.2611	14.3375	55.606	38.977	45.062	18.0662	19.36	35.249	57.195	74.693	20.936	11.601	14.987	16.198	45.077	32.27	41.867	21.1151	23.2875	19.711	16.5022	14.8977	9.5962	27.8732		0.282407	29.3245
7.3801	17.066	54.402	44.791	50.771	19.597	15.173	38.762	50.821	77.757	25.322	12.594	10.279	13.688	42.789	27.659	35.475	35.1818	16.764	18.161	18.0202	12.7867	9.9626	21.8452		0.287035	29.116
7.4992	18.1663	53.575	46.853	47.3	21.3656	19.477	34.527	52.641	84.55	29.507	9.014	17.285	15.92	35.856	32.356	34.219	32.3408	18.6489	12.981	12.6083	18.377	12.2516	21.5777		0.291667	29.626
7.6182	22.6015	64.213	43.107	38.931	22.084	21.092	35.977	58.007	69.609	24.314	11.146	18.773	12.664	49.372	36.423	29.806	31.1108	21.1365	16.475	16.0548	16.2691	9.3074	27.8248		0.296295	30.2738
7.7372	16.9558	76.948	38.528	46.962	26.6243	14.958	44.818	62.446	65.206	27.334	10.22	10.969	14.126	47.252	32.718	23.994	33.9787	17.7198	15.24	17.5977	11.1897	10.3879	31.7392		0.300924	30.344
7.8563	13.3246	72.269	40.868	57.851	19.1589	16.848	35.653	58.411	72.013	19.029	10.153	8.709	11.337	57.394	29.315	18.885	30.138	19.6473	17.006	13.3384	12.162	10.9167	29.2231		0.305556	29.2891
7.9753	14.1698	71.205	44.523	74.762	28.4143	15.712	31.413	46.177	78.929	26.128	17.345	10.179	12.636	51.978	35.743	22.15	22.444	17.2125	20.966	16.1152	12.8527	14.0909	24.0252		0.310184	30.8335
8.0943	14.2749	69.235	43.747	70.516	26.7071	13.899	39.213	43.745	82.801	28.845	15.587	13.747	10.974	44.8	32.195	25.714	22.5527	17.8612	15.918	12.3329	15.0152	12.556	17.0288		0.314812	29.968
8.2134	11.6539	69.969	39.369	65.886	22.4399	10.28	36.9	50.814	76.837	34.53	9.41	9.5	14.453	36.806	35.394	21.255	27.3678	23.9742	16.886	15.0581	11.5481	10.5915	16.2886		0.319445	29.0092
8.3324	14.1194	71.997	39.583	54.173	30.3197	14.423	35.587	49.778	91.602	22.468	12.608	8.481	14.591	42.902	37.845	21.385	36.4822	24.2834	21.269	13.0491	14.0162	7.4174	15.1767		0.324073	30.1546
8.4515	17.5632	67.519	44.003	54.672	26.9669	17.528	29.12	50.669	79.314	24.145	11.94	12.241	15.123	32	32.719	23.093	36.7332	23.656	20.213	14.9637	13.2783	11.875	16.7837		0.328705	29.3965
8.5705	15.1552	53.922	46.45	63.759	21.7427	18.271	28.399	33.752	89.803	18.052	10.9	10.975	13.388	22.867	25.246	19.439	41.4803	21.5758	13.41	14.8667	14.2237	11.9542	13.4101		0.333333	27.0888
8.6895	17.3649	50.15	53.44	63.097	18.1155	27.1	35.422	37.033	100.03	19.865	12.757	12.269	11.84	28.297	24.565	18.207	34.1704	23.3472	20.201	11.773	15.0696	12.9652	13.5333		0.337962	28.7223
8.8086	17.3521	40.92	59.587	57.525	26.833	21.764	33.614	40.754	107.004	22.408	14.955	13.421	15.273	22.153	21.657	22.279	35.416	23.3578	16.147	15.6595	14.0173	15.8429	19.4256		0.342594	29.4507
8.9276	15.2008	40.598	51.616	57.667	20.9627	16.49	30.133	40.174	93.613	22.545	12.575	13.599	14.283	23.008	17.815	24.861	34.9831	18.9239	10.934	12.384	12.0075	17.7595	15.2996		0.347222	26.8449
9.0466	18.1286	39.113	42.176	61.863	25.3517	18.06	39.872	44.57	94.639	28.792	10.082	14.132	11.762	15.282	15.959	23.5	29.0421	18.3048	11.246	9.1703	14.2421	11.4044	16.4276		0.35185	26.6574
9.1657	15.4465	42.271	38.195	62.864	23.824	21.563	37.836	59.544	76.634	29.536	14.972	8.329	12.575	13.358	14.809	31.88	29.2067	16.9342	13.574	10.3576	13.5383	11.6469	15.4957		0.356483	26.7126
9.2847	19.3178	37.361	33.12	58.693	29.3066	22.421	48.159	77.975	81.518	22.65	11.235	7.025	14.112	13.751	13.92	45.311	28.7917	19.331	12.113	9.39	9.0957	10.4896	9.7754		0.361111	27.6027
9.4037	12.755	37.22	30.292	44.673	24.6546	16.489	36.059	82.806	71.669	25.212	10.235	8.907	13.294	22.431	14.906	53.563	29.0391	13.9678	10.787	10.3138	15.1616	7.7733	12.1863		0.365739	26.278
9.5228	15.0205	47.666	27.867	43.066	26.5613	17.355	26.356	83.067	68.329	29.232	13.729	11.315	12.644	18.392	16.552	59.481	27.3171	18.0539	7.164	16.9526	10.0332	5.6765	9.7492		0.370371	26.5904
9.6418	17.4966	50.542	28.69	36.025	27.1752	19.326	33.586	77.238	73.682	26.145	12.325	10.222	13.587	16.398	16.502	53.017	27.797	20.6049	10.789	13.5414	12.8604	4.2492	13.5941		0.375	26.7562
9.7608	11.6358	45.239	31.327	32.318	36.3986	20.87	31.628	72.52	83.497	23.757	7.877	7.846	14.178	10.429	17.058	45.623	32.9868	16.6538	10.175	15.3025	10.7336	8.8843	10.4777		0.379628	25.9746
9.8799	10.15	49.167	29.361	37.035	35.8557	20.191	24.865	73.402	81.063	29.341	12.577	10.692	16.582	5.537	15.97	37.516	25.3137	19.6495	6.785	15.2265	12.3543	5.6191	9.2992		0.38426	25.3718
9.9989	11.2888	56.499	27.515	33.189	34.1547	18.053	23.267	72.54	81.71	26.064	10.655	10.861	14.591	5.088	11.769	45.869	26.8518	15.3431	6.561	17.073	16.8976	4.5398	14.6198		0.388888	25.4348
10.1179	11.7234	56.77	21.423	30.624	32.8826	14.85	24.023	66.213	80.219	32.413	8.227	7.831	11.435	4.553	16.403	38.55	31.5502	16.3356	13.004	22.8101	15.248	6.0904	8.7029		0.393517	24.8644
10.237	9.7468	45.552	22.555	31.91	38.1959	16.491	24.128	62.533	84.587	32.228	12.48	11.197	10.899	6.15	8.727	39.145	41.0824	19.3957	16.032	16.7807	17.2709	6.2059	11.2195		0.398149	25.4136
10.356	11.0738	42.724	24.875	33.792	46.2701	19.354	27.64	63.948	73.274	32.398	12.33	12.058	14.556	4.243	10.908	42.342	57.5535	12.8905	12.452	12.0873	15.5073	6.4143	8.5313		0.402777	25.9662
10.475	10.4761	43.495	32.216	39.555	53.7451	17.332	31.381	72.188	74.23	29.277	12.262	12.379	12.525	8.665	14.291	36.362	60.3467	15.461	6.546	7.1983	15.3038	5.5047	13.0741		0.407405	27.1223
10.5941	10.5397	43.725	35.062	30.771	46.6335	12.896	28.257	87.449	83.584	33.055	10.214	16.135	8.933	10.477	13.864	26.726	74.8834	14.4285	9.717	10.4813	16.5991	8.7632	13.0044		0.412037	28.0956
10.7131	14.3129	44.085	33.042	29.435	31.5127	18.839	24.222	94.925	83.628	24.238	9.67	12.136	10.599	8.594	9.493	32.221	59.1594	11.5994	12.215	11.5027	15.0373	7.4155	9.6333		0.416666	26.4137
10.8321	10.7559	36.508	28.575	27.902	23.8217	14.459	25.091	75.219	81.318	25.567	13.287	12.686	10.053	6.48	15.543	28.676	54.5137	13.2012	6.432	7.0866	18.3275	6.1452	10.8952		0.421294	24.0236
10.9512	12.6207	40.967	27.507	23.221	30.2519	13.994	23.079	76.701	70.509	20.481	13.179	7.61	9.992	5.031	14.256	26.814	42.0649	9.9745	6.565	10.2768	17.5795	6.1098	10.6047		0.425926	22.5821
11.0702	8.7382	42.661	26.084	18.594	26.4593	16.02	22.518	77.928	73.577	25.456	10.485	6.565	10.065	3.5	14.718	18.855	36.1754	9.669	11.474	7.896	18.4084	8.3876	8.2224		0.430554	21.8459
11.1892	12.1544	39.149	24.423	21.676	30.2617	17.841	33.488	71.872	64.462	23.948	10.624	8.986	9.48	5.305	13.474	25.724	36.2319	10.7129	8.346	8.8172	13.4092	9.5065	12.4304		0.435183	22.2749
11.3083	10.7412	44.044	18.857	19.792	30.3264	18.78	21.765	70.97	64.912	24.839	7.326	10.432	9.613	7.062	13.381	26.554	24.0599	10.9892	4.888	9.2699	13.284	7.8353	13.7741		0.439815	21.0215
11.4273	13.6495	35.76	16.588	22.103	28.6023	15.584	19.998	89.84	61.01	23.261	10.077	12.595	9.131	5.091	7.995	19.598	23.0245	8.092	1.971	5.4929	15.0538	5.6519	14.5365		0.444443	20.2046
11.5463	11.8351	43.874	17.411	26.997	33.8355	14.594	20.813	85.6	55.16	16.441	10.735	14.808	4.992	2.233	6.789	27.526	25.4127	13.2785	2.978	5.1053	16.8554	8.7316	7.5336		0.449071	20.5886
11.6654	19.2573	35.201	13.967	29.258	37.8609	12.975	24.141	71.506	61.108	16.288	11.346	7.923	8.039	5.586	7.342	24.791	18.2827	15.8584	3.437	6.0362	9.9166	10.1005	8.6075		0.453704	19.949
11.7844	19.1636	32.75	14.276	25.414	30.0479	14.331	23.251	60.006	63.36	17.898	14.147	9.476	8.955	7.09	6.844	18.605	16.7436	13.1606	4.66	5.0584	17.2288	10.0328	10.8267		0.458332	19.275
11.9035	20.9146	39.143	12.901	22.463	28.3319	13.543	26.132	56.98	56.125	14.919	12.111	9.305	7.542	4.182	6.355	20.305	20.3481	13.293	5.32	4.7424	11.0472	12.334	9.7187		0.462964	18.6111
12.0225	28.5618	28.963	14.588	20.531	36.4183	12.36	30.11	52.296	51.963	16.412	8.019	8.677	7.01	5.161	9.078	26.862	18.7006	14.8755	4.645	4.4193	13.3007	7.0886	6.4234		0.467592	18.5419
12.1415	35.0739	28.852	10.118	15.184	43.79	11.257	31.3	40.931	51.956	16.251	9.499	8.889	11.926	6.414	7.379	27.733	20.6125	15.2085	4.045	5.9119	14.0815	6.8716	4.3583		0.472221	18.5931
12.2606	36.3206	26.289	7.634	19.952	57.3183	12.759	41.065	33.283	45.676	16.344	10.944	7.433	9.747	4.344	9.859	28.286	21.668	11.2939	1.579	3.6443	12.8936	3.8704	7.9508		0.476853	18.7023
12.3796	38.1988	25.832	5.965	18.609	54.2417	13.056	40.726	27.663	35.803	10.855	11.004	7.595	9.799	5.581	8.245	27.721	18.3412	13.4751	4.717	3.8639	14.8472	8.0885	8.7431		0.481481	17.9552
12.4986	36.9023	24.479	8.61	14.618	57.0591	14.912	37.5	31.826	29.623	13.848	10.212	8.56	7.859	4.51	7.109	36.249	30.1239	14.1117	3.852	3.0596	13.5232	9.1411	11.0622		0.486109	18.6413
12.6177	38.0101	27.06	13.841	13.133	65.9341	14.622	33.084	25.817	28.397	11.608	9.041	6.292	7.531	4.041	7.615	34.267	23.0595	12.0103	4.007	3.4106	12.9497	5.5094	11.8574		0.490741	17.9607
12.7367	31.3986	16.344	10.841	12.764	73.4782	12.954	31.304	21.95	39.28	11.361	7.165	8.54	9.451	4.093	7.073	34.666	24.0485	12.2727	3.389	4.867	12.2394	8.0295	7.338		0.49537	17.602
12.8557	26.1739	16.742	9.562	9.989	78.0405	12.898	38.56	18.926	46.034	6.514	10.356	8.14	8.531	10.077	7.031	29.262	23.1176	12.9256	3.753	4.34	13.4877	6.0674	12.0608		0.499998	17.9386
12.9748	26.5093	17.983	10.367	14.832	83.1587	13.976	25.182	22.186	45.797	9.604	8.664	8.567	7.957	6.413	9.852	28.971	14.8946	7.1379	1.538	4.8223	8.8846	7.5908	17.0568		0.50463	17.4758
13.0938	20.7348	17.177	12.66	12.298	81.4381	14.585	21.671	26.699	44.299	10.188	8.832	8.858	10.888	10.928	8.466	27.259	23.7478	8.5653	3.354	4.7317	10.8254	8.147	20.7164		0.509259	18.1334
13.2128	22.3075	13.67	10.061	9.758	75.4985	14.956	24.924	34.311	49.086	9.409	10.808	8.902	5.469	7.573	8.152	27.037	17.4587	10.362	4.744	3.9331	12.4848	4.3407	13.3638		0.513887	17.3308
13.3319	28.5298	10.962	10.577	14.807	62.1672	17.817	24.732	39.978	53.499	11.191	8.418	6.924	6.354	9.943	7.863	24.945	20.9051	9.0476	2.724	1.9984	11.3584	5.8417	16.0671		0.518519	17.6804
13.4509	29.2572	7.532	10.957	13.518	60.2342	16.718	26.175	30.363	46.566	11.208	12.145	7.778	4.874	8.425	6.896	26.349	23.107	9.8263	3.276	3.7597	9.2775	7.3629	17.9845		0.523147	17.1126
13.5699	31.6514	8.863	11.478	12.557	45.574	14.795	22.051	32.03	58.026	10.129	11.33	4.364	5.812	10.811	4.957	24.211	19.5123	8.6664	2.407	4.7658	9.1164	5.8991	19.0109		0.527776	16.4355
13.689	31.0324	5.503	9.116	13.22	44.6703	13.346	19.083	30.724	69.173	11.03	6.523	6.053	6.193	9.43	4.484	24.499	18.5527	11.9674	4.864	4.4198	9.448	6.6761	17.4676		0.532408	16.412
13.808	32.0358	5.164	11.95	11.149	26.2625	10.413	20.498	30.773	66.532	11.114	7.999	6.531	4.257	10.029	5.633	21.196	17.5828	8.4214	1.886	2.9211	10.4259	5.7614	11.4624		0.537036	14.7825
13.927	26.332	5.612	10.083	11.966	22.5972	11.994	23.025	46.828	68.618	8.06	7.309	6.981	3.239	7.599	6.289	22.454	17.2007	8.3168	2.511	4.7694	10.0656	6.8946	15.2207		0.541664	15.3898
14.0461	28.5251	6.526	8.638	13.292	19.4401	10.324	18.762	48.314	77.418	10.104	8.152	6.239	2.722	6.157	4.906	19.515	15.1267	8.1542	3.79	3.1776	8.7005	3.9004	11.6673		0.546296	14.937
14.1651	26.6354	3.884	8.439	13.499	23.6084	13.551	22.18	44.339	80.148	10.764	6.753	7.074	2.819	5.88	6.225	19.82	13.3437	7.3554	3.839	2.8467	11.3048	2.3411	9.3352		0.550925	15.0428
14.2841	31.0548	5.138	7.231	12.593	31.5515	13.669	21.792	45.782	83.647	9.378	5.432	8.212	5.195	6.932	7.007	24.058	14.2418	8.0327	4.505	3.8922	6.4029	5.3116	9.9412		0.555553	16.1304
14.4032	24.6556	6.271	6.959	10.849	26.7811	16.128	16.403	44.122	72.761	10.42	8.899	8.02	5.082	7.377	5.059	26.193	18.6519	8.9972	3.279	1.7029	6.5278	4.5835	8.4622		0.560185	15.1384
14.5222	22.5951	6.062	5.001	12.658	22.0568	13.251	17.813	58.5	82.391	10.689	11.404	7.313	6.686	7.23	4.915	26.763	13.3269	7.037	3.881	2.5386	10.0351	4.9687	12.3422		0.564813	16.0634
14.6412	27.5279	7.745	6.655	11.995	19.3772	13.169	12.876	59.981	90.956	13.886	8.516	6.374	6.082	6.71	8.384	20.253	20.2519	8.0592	2.667	3.116	13.3874	6.6237	15.6905		0.569442	16.9688
14.7603	25.5655	6.011	6.613	15.964	20.1893	13.605	12.265	66.142	102.3	9.242	6.57	10.985	5.402	8.093	9.571	18.842	15.3276	4.5872	2.416	1.6035	12.8591	5.254	12.9605		0.574074	17.0595
14.8793	18.1325	7.82	8.336	9.3	13.2325	13.335	11.886	68.13	110.054	11.364	9.018	8.604	4.103	6.233	5.361	15.367	13.4859	6.1113	5.345	4.2387	9.3756	8.9386	15.3008		0.578702	16.6553
14.9984	18.319	9.031	6.573	13.593	15.1722	10.687	8.973	59.298	104.362	11.85	6.295	12.075	9.17	8.829	5.978	14.113	13.9299	5.9197	6.024	2.2879	10.2023	8.7053	13.1109		0.583334	16.2825
15.1174	19.154	6.985	7.097	9.239	15.7654	10.985	10.648	66.284	108.058	12.868	8.718	8.467	8.43	10.696	10.951	15.699	12.5903	8.0503	2.531	2.0715	12.4312	9.2506	15.235		0.587963	17.0524
15.2364	17.6609	5.037	6.999	13.128	24.1262	12.69	8.045	54.583	98.883	13.502	6.993	6.758	7.795	13.289	17.234	12.996	13.6568	6.3712	4.361	0.5406	10.2576	9.4496	10.6512		0.592591	16.3047
15.3555	22.4958	5.577	3.447	7.762	27.973	8.136	11.766	41.466	101.295	11.697	6.815	5.687	8.816	15.239	10.587	10.344	11.5545	5.6984	3.287	2.3013	7.4004	8.7418	10.8421		0.597223	15.1708
15.4745	28.1488	5.48	4.739	8.922	25.914	9.919	12.082	29.265	85.461	9.268	9.55	6.524	11.609	12.908	8.112	13.399	9.7541	8.4834	2.85	2.2879	10.1498	9.1475	10.1302		0.601851	14.5262
15.5935	29.4329	3.815	6.396	9.354	34.3422	13.075	15.076	28.033	91.966	9.307	6.469	7.961	12.361	13.108	5.18	13.906	9.7519	7.3965	4.553	2.5359	12.2321	12.7939	10.9649		0.60648	15.6526
15.7126	35.7342	4.814	5.157	9.724	31.5765	9.955	11.553	20.994	92.175	7.017	7.208	8.223	12.011	15.182	8.479	15.422	12.8608	7.7016	2.962	1.4701	16.8146	6.8353	17.8036		0.611112	15.7249
15.8316	31.0244	2.536	2.71	7.732	38.4369	11.146	10.604	22.781	92.403	8.523	6.229	4.191	12.071	15.136	9.043	17.768	9.4465	9.9111	2.622	4.0903	18.252	4.5915	16.1682		0.61574	15.5398
15.9506	34.8705	2.972	2.916	9.047	23.7675	12.675	9.488	23.23	90.426	6.039	9.031	5.433	10.394	18.62	8.537	13.637	11.3599	10.5555	4.388	2.3909	15.7253	8.3618	15.2222		0.620368	15.1777
16.0697	32.8878	2.526	4.489	12.62	22.5245	11.284	12.579	15.401	77.504	5.266	9.419	7.028	6.386	16.23	6.884	19.853	10.6052	9.7256	5.083	1.6886	14.7053	8.542	13.3199		0.625	14.1979
16.1887	26.4531	2.885	2.451	9.932	18.5017	10.045	18.076	15.329	56.79	6.754	9.866	6.151	4.806	21.295	10.636	23.205	11.269	7.9264	5.755	1.8365	13.684	9.3429	10.3386		0.629629	13.1882
16.3077	25.826	3.747	1.858	5.746	11.537	10.526	14.593	14.029	58.622	11.367	6.602	7.861	5.274	22.186	8.626	29.866	9.7197	14.0684	5.854	1.64	11.9743	10.95	9.7371		0.634257	13.1395
16.4268	27.27	6.04	3.073	4.322	13.1743	12.82	13.875	22.207	50.561	9.748	7.585	8.463	8.328	15.014	10.459	36.043	12.1344	14.9759	4.399	3.1772	11.1418	13.7646	7.1599		0.638889	13.7276
16.5458	22.8918	4.353	3.518	9.47	12.1917	11.482	15.795	22.305	39.209	8.111	7.397	6.39	6.787	18.934	10.431	29.953	9.7659	13.3359	2.857	1.7637	11.8374	9.8378	8.4837		0.643517	12.4826
16.6648	26.7464	4.486	5.506	8.999	15.8916	6.142	11.532	22.214	28.794	12.801	9.04	8.764	6.727	13.094	12.023	35.858	10.8723	12.2984	2.955	1.6941	8.14	10.9364	11.4352		0.648146	12.4761
16.7839	18.5526	4.265	3.938	6.226	16.2557	8.455	15.416	19.459	29.877	11.298	8.437	5.935	4.096	18.624	10.296	38.58	13.9054	16.4135	2.858	0.6431	8.6867	8.8608	10.4748		0.652778	12.2414
16.9029	12.4344	6.184	2.202	8.027	20.6325	6.538	10.344	15.433	24.104	9.763	7.862	4.579	3.052	11.761	6.918	38.014	9.8883	12.3456	3.724	2.5459	10.0936	10.4664	11.6154		0.657406	10.8055
17.0219	12.8013	5.353	3.191	5.659	26.014	8.849	14.681	17.313	24.735	7.475	7.319	3.493	6.14	15.895	8.341	31.723	11.7986	9.7468	2.669	2.1044	10.5051	9.7588	12.6011		0.662034	11.2246
17.141	16.4969	9.85	3.053	6.749	21.5226	11.697	14.65	12.319	25.086	5.514	6.632	4.696	4.706	11.356	12.291	30.465	11.8289	11.0473	4.53	1.7463	12.137	7.3563	8.3083		0.666667	11.0451
17.26	15.1992	6.612	4.638	8.584	25.0177	9.642	15.496	11.423	26.522	5.878	11.666	7.113	4.625	8.955	7.78	33.136	13.0035	8.5943	3.579	2.6399	10.9089	7.0297	7.7959		0.671295	11.1234
17.379	15.9566	6.152	4.216	8.489	31.8569	6.426	15.577	11.747	34.388	6.488	8.372	4.12	6.972	9.435	13.981	35.051	9.6262	11.7587	2.443	3.498	12.1957	7.3783	3.9194		0.675923	11.7412
17.4981	27.219	3.35	3.962	8.177	32.448	6.754	16.796	12.547	36.29	5.913	5.779	5.657	5.172	10.076	19.192	24.489	8.7022	15.9026	2.943	2.489	11.0047	6.5169	6.777		0.680555	12.0938
17.6171	26.695	2.484	7.25	7.334	49.3189	10.243	11.16	12.35	28.558	6.049	6.602	4.452	6.083	7.66	27.221	26.375	10.1181	13.9752	3.862	3.4555	14.7185	4.9861	5.8524		0.685184	12.9045
17.7361	25.419	3.475	3.509	6.739	57.4131	7.381	15.817	16.036	27.468	4.263	6.536	4.03	7.711	6.891	22.099	16.381	10.4052	17.2276	5.133	2.667	12.3772	5.6936	7.4866		0.689812	12.7025
17.8552	22.4525	4.783	3.508	9.927	54.9742	9.353	17.623	15.495	24.075	4.283	7.258	2.58	7.133	9.491	18.124	17.307	8.6453	9.581	3.571	2.9013	10.7562	5.8307	8.5783		0.694444	12.097
17.9742	21.6009	2.427	5.013	7.471	43.8357	10.556	15.59	14.319	19.373	5.493	3.791	2.368	5.259	11.561	25.081	17.296	8.1454	7.1927	4.047	1.5307	9.2103	6.4716	11.4894		0.699072	11.2662
18.0932	25.9581	3.672	6.026	5.63	37.5045	7.265	16.878	17.125	19.501	7.776	6.166	6.234	5.504	11.27	24.781	26.122	6.1723	13.6118	5.62	3.8587	10.4314	4.6957	12.8093		0.703701	12.3744
18.2123	13.8164	4.541	5.233	6.152	40.8213	8.298	11.668	20.51	16.311	6.704	4.928	5.531	8.859	12.054	22.702	27.558	8.0532	7.8574	3.69	4.1426	12.6935	6.944	9.5892		0.708333	11.6807
18.3313	13.5479	4.64	2.81	8.218	27.3179	7.601	13.407	16.774	11.87	4.725	5.178	5.432	10.253	15.933	17.639	25.624	10.084	8.4991	4.142	2.899	15.8308	7.4273	6.681		0.712961	10.7188
18.4504	15.7823	5.731	3.016	7.913	19.0385	7.841	14.027	18.793	14.015	6.091	9.048	4.905	7.753	10.831	21.185	23.839	10.1546	10.2716	2.881	4.3215	12.7569	3.7861	7.4413		0.717593	10.4966
18.5694	15.741	5.6	4.39	16.367	25.7922	6.394	10.355	15.022	19.931	4.906	6.48	2.913	12.364	10.154	16.297	20.587	9.3333	12.2538	6.403	2.7242	15.2836	4.1809	8.6525		0.722222	10.9619
18.6884	20.1424	4.999	4.761	10.33	21.195	9.595	14.592	16.34	17.231	3.62	6.229	4.987	10.332	19.757	17.084	16.671	8.128	9.0661	5.019	3.8048	11.6371	5.2261	5.0099		0.72685	10.6851
18.8075	23.8724	5.293	5.068	8.357	24.3224	6.265	10.001	22.873	29.737	7.657	6.512	3.984	8.753	19.058	21.72	13.375	10.1717	6.804	4.973	3.3703	9.6047	8.5316	8.4547		0.731482	11.6851
18.9265	24.4123	5.3	5.53	8.624	24.0452	7.216	9.128	17.746	31.402	5.337	4.981	5.511	7.252	20.559	16.803	16.772	8.5045	7.9821	6.86	1.4742	12.4223	7.8287	12.3587		0.73611	11.6543
19.0455	27.602	4.656	3.241	10.782	21.7252	7.117	13.883	14.683	30.314	5.554	4.412	4.317	8.313	16.157	17.541	14.57	10.5913	12.7465	6.932	3.6304	10.5928	3.2875	6.5126		0.740739	11.2678
19.1646	24.8533	7.388	4.048	9.253	19.431	9.942	13.2	11.754	26.377	2.977	7.399	6.55	6.444	7.663	18.648	13.811	12.2602	10.0921	3.391	6.0128	8.1795	4.7931	6.2285		0.745371	10.465
19.2836	26.3317	8.258	6.029	5.629	14.2323	5.136	13.625	11.249	18.434	3.205	6.621	10.23	4.646	9.651	13.288	13.462	8.5729	6.1876	4.381	3.2506	11.7765	5.2357	9.016		0.749999	9.49771
19.4026	24.2947	6.929	4.672	8.851	14.5899	6.418	10.855	10.63	13.27	4.681	6.937	7.627	6.48	7.954	15.045	13.308	8.0384	10.5981	5.156	5.578	10.5488	4.8724	7.4976		0.754627	9.34047
19.5217	24.8001	2.886	3.644	13.133	18.4873	7.543	8.256	11.103	18.88	4.674	4.355	6.77	6.756	8.269	18.342	19.694	12.1325	9.9318	7.603	4.9573	7.2546	4.0802	8.1529		0.759259	10.0741
19.6407	29.6794	4.006	4.289	9.618	15.797	6.482	9.014	11.248	17.027	8.84	7.162	7.402	4.778	2.937	18.006	16.921	10.5143	5.8009	6.141	3.5299	11.9862	3.4409	7.0769		0.763888	9.63898
19.7597	34.2651	9.829	3.811	8.795	14.1214	8.614	6.208	11.734	11.619	5.662	6.496	4.676	7.631	4.349	14.92	21.244	9.9616	6.3108	8.922	3.3291	7.5652	3.3419	4.3627		0.768516	9.46817
19.8788	34.1015	9	6.824	12.613	15.393	4.507	7.895	13.029	10.811	5.853	5.735	4.844	6.147	4.773	17.673	21.726	8.3567	4.7685	7.457	3.197	10.5638	3.9002	3.6535		0.773148	9.68788
19.9978	32.1334	6.794	5.388	13.732	23.2332	6.643	4.271	7.576	9.797	6.739	6.891	6.54	3.655	2.67	17.983	26.94	7.8373	5.5088	8.841	4.5501	8.301	5.1836	9.2098		0.777776	10.0181
20.1168	27.0357	10.279	5.487	9.101	31.4013	4.838	5.956	9.864	9.918	4.192	5.789	5.376	3.329	5.949	15.152	21.008	7.9467	6.556	8.207	5.6771	9.0221	3.6091	5.3631		0.782405	9.61113
20.2359	21.8189	8.242	6.123	7.923	26.5667	3.309	5.26	9.745	17.418	4.087	7.514	4.65	3.476	5.03	15.638	18.084	8.8113	9.2575	5.833	6.0212	5.5624	2.6017	6.6582		0.787037	9.11434
20.3549	13.1017	11.494	4.354	13.19	31.9166	2.736	7.698	6.415	15.119	4.625	4.969	6.744	3.956	6.462	15.287	15.833	7.3635	5.6794	4.392	7.01	7.922	5.1381	4.1701		0.791665	8.93806
20.4739	10.9149	9.193	3.59	13.839	34.227	4.432	6.894	6.572	9.406	6.162	4.165	6.252	5.218	5.076	16.778	15.32	10.1882	7.3765	6.97	5.1679	3.972	3.4435	3.3667		0.796293	8.63147
20.593	12.8252	11.981	8.251	14.264	27.5302	5.054	6.014	13.034	8.202	4.654	5.811	5.072	4.831	5.48	16.102	16.466	9.1711	6.2468	3.429	5.3344	5.5739	2.6577	6.9453		0.800926	8.90998
20.712	16.2143	9.485	8.976	18.595	21.6462	3.497	9.889	7.671	9.98	5.861	5.575	8.328	4.687	10.556	11.427	14.812	9.7544	5.0071	9.261	7.9833	5.5293	3.7903	5.9278		0.805554	9.32403
20.831	26.0622	13.005	8.116	15.554	22.4497	2.849	7.154	7.757	5.352	4.126	4.634	6.275	3.784	8.137	13.649	16.864	7.0985	6.0091	8.207	15.8142	5.6237	6.3719	5.3326		0.810182	9.575
20.9501	29.6716	12.343	11.285	15.273	22.8888	3.012	13.143	10.26	8.744	5.545	6.298	6.719	8.291	3.646	10.727	12.613	11.8934	4.3918	11.513	10.2899	4.1852	5.3908	9.2515		0.814814	10.3207
21.0691	30.4532	8.614	12.158	13.86	17.0005	5.024	9.214	3.963	6.766	8.893	4.608	5.742	10.254	7.42	15.935	9.783	8.3664	6.1796	13.821	10.1315	9.5453	2.4397	8.1262		0.819443	9.92597
21.1881	25.9342	11.421	6.983	11.715	27.0009	5.496	7.133	4.637	7.537	9.387	5.061	6.177	8.228	7.088	16.768	11.06	8.2956	7.4033	11.768	12.8577	7.2983	1.7386	12.895		0.824071	10.1688
21.3072	20.1538	11.811	7.474	13.997	18.9871	3.834	5.152	7.422	7.947	10.637	7.713	5.065	7.995	6.981	14.068	11.595	7.4799	4.5179	13.186	12.7427	6.3013	2.6027	14.2448		0.828703	9.64814
21.4262	18.8652	12.416	11.84	8.371	15.4685	3.342	3.816	6.043	7.223	5.987	8.455	9.049	7.566	6.69	18.369	9.967	4.6547	5.379	9.661	10.2418	6.4416	2.262	9.2816		0.833331	8.75606
21.5452	14.5626	14.585	11.059	15.981	8.8929	7.408	3.899	6.794	3.951	7.515	6.31	4.455	6.079	5.821	13.88	6.934	9.1864	6.0381	12.584	9.9332	7.2734	0.7858	11.1702		0.83796	8.4825
21.6643	8.1357	17.183	13.237	14.142	7.314	2.92	7.842	6.244	3.408	6.7	6.894	4.757	8.34	7.309	13.807	8.867	5.9024	5.6292	10.467	11.1234	6.0395	1.887	9.6142		0.842592	8.16358
21.7833	9.7175	19.251	12.433	10.444	3.0818	4.613	5.558	3.741	3.012	6.366	5.176	10.922	12.294	7.543	17.61	5.597	4.7424	5.3622	9.887	10.7031	5.6406	3.0068	4.1982		0.84722	7.8652
21.9024	10.1089	22.753	12.601	14.357	4.3394	2.758	9.195	3.096	5.376	5.906	3.063	6.367	5.984	6.975	17.398	4.408	4.1747	4.2243	8.077	8.347	3.1663	2.3908	1.7915		0.851852	7.25465
22.0214	10.5861	24.855	13.632	10.315	5.3479	4.059	6.057	7.541	7.267	3.437	6.244	7.606	6.611	3.642	15.115	4.77	1.9172	5.3242	3.805	6.2555	2.3041	1.3278	1.0221		0.856481	6.91482
22.1404	8.4195	14.274	18.554	8.322	4.3826	7.354	5.965	10.024	2.95	1.894	5.491	10.098	5.087	4.102	13.396	4.042	4.7945	3.7716	3.049	6.8239	1.5419	1.6175	3.2518		0.861109	6.48719
22.2595	9.6152	18.127	24.214	7.429	6.318	4.73	7.962	4.2	4.632	3.363	2.606	6.896	6.357	3.814	10.056	4.707	3.2552	4.4724	2.151	6.7434	0.7437	2.1483	2.0663		0.865741	6.3742
22.3785	10.2645	18.165	20.691	11.154	5.6188	3.228	8.033	3.192	5.028	6.716	3.861	4.228	3.348	5.277	9.846	3.4	2.9883	2.1174	1.911	6.6256	2.0722	1.9338	2.0749		0.870369	6.16407
22.4975	6.949	15.102	23.209	12.716	6.4996	6.644	6.979	5.761	6.689	3.295	5.601	5.479	4.741	2.9	8.794	1.959	2.3512	0.9348	0.336	6.6176	1.8585	0.8779	1.9813		0.874998	6.01195
22.6166	5.9261	17.141	18.889	11.72	7.1004	4.175	5.548	6.995	9.568	2.804	5.923	5.803	4.8	3.263	6.828	6.431	1.9981	1.3748	0.786	4.8035	2.7109	3.2822	4.4374		0.87963	6.18728
22.7356	6.9976	14.595	23.389	10.432	2.6651	9.348	8.177	8.037	4.861	3.275	5.676	2.673	4.529	3.549	5.38	2.842	2.0943	3.3667	1.371	3.4156	3.519	1.4025	2.1222		0.884258	5.81378
22.8546	12.6741	18.417	24.129	11.893	3.1875	6.485	10.224	6.604	3.572	7.412	3.954	5.141	5.1	2.216	3.086	1.363	2.6273	2.3431	2.424	3.9524	4.6812	1.5891	2.6921		0.888886	6.33769
22.9737	10.1117	20.496	29.19	12.373	2.9348	6.938	7.79	6.802	3.86	4.114	4.972	4.032	4.548	1.515	6.669	0.922	0.8381	0.9171	1.219	4.3344	2.8903	2.1502	1.464		0.893518	6.13394
23.0927	9.9714	20.694	32.443	9.968	3.8768	4.432	6.756	8.054	4.295	4.044	2.675	3.519	5.907	3.02	4.813	1.878	1.3479	2.6616	0.965	0.7016	1.2737	1.8431	1.7479		0.898147	5.95161
23.2117	8.2384	17.739	29.241	10.198	5.6566	5.438	5.994	4.599	4.417	3.26	5.203	3.906	3.818	4.071	2.937	1.866	0.8304	3.4162	1.067	1.3792	0.4653	2.2886	2.9503		0.902775	5.60778
23.3308	9.2795	14.578	28.724	8.277	4.2054	6.159	5.703	5.461	3.451	3.208	4.634	6.043	4.188	2.082	2.661	2.952	0.2879	3.3084	1.511	3.1048	0.1861	5.1394	2.4141		0.907407	5.54598
23.4498	7.4424	12.727	19.282	8.573	4.2697	5.402	5.616	4.494	2.79	3.524	4.173	2.081	3.581	4.15	1.754	3.268	1.2088	1.0429	2.441	2.1139	1.6731	2.449	1.0541		0.912035	4.57
23.5688	6.2302	9.94	20.125	7.38	6.1327	6.274	5	4.25	3.968	4.809	5.055	3.15	1.467	2.775	2.031	1.635	0.4063	1.8557	2.478	2.1752	1.578	1.3132	3.0024		0.916664	4.4796
23.6879	2.4713	8.998	25.273	4.867	1.5191	5.088	3.393	2.773	3.599	2.67	5.147	4.062	2.665	2.73	1.516	1.901	0.7457	0.8038	1.548	1.3464	0.6226	1.426	1.5129		0.921296	3.7686
23.8069	3.4989	9.468	27.999	7.625	3.8521	5.179	2.817	3.247	2.576	4.304	5.918	4.028	3.344	5.581	2.529	1.108	0.3169	0.6441	1.287	2.3538	1.5415	0.7947	1.004		0.925924	4.392
23.9259	4.1192	8.759	26.729	5.733	3.1839	3.747	3.959	4.061	2.502	5.234	3.882	7.171	2.999	3.068	2.145	1.328	0.8802	1.7754	1.051	1.5653	2.8372	1.0768	2.0749		0.930552	4.34265
24.045	5.3216	10.3	19.062	6.046	3.2646	4.221	2.631	4.012	3.28	2.328	3.468	6.133	2.159	1.891	2.291	0.516	0.7969	1.3927	1.694	1.4254	1.3902	0.8969	1.3038		0.935185	3.73148
24.164	7.022	5.464	10.6	6.367	5.1159	2.678	4.442	3.571	2.887	5.001	6.262	7.983	1.697	2.836	2.006	1.923	0.2436	1.0136	1.994	0.767	2.5538	0.817	1.3353		0.939813	3.67736
24.283	4.7967	11.057	11.398	6.339	3.5339	2.463	6.434	2.767	3.719	2.511	4.174	3.661	3.693	2.179	0.759	2.534	1.0801	1.8104	1.403	0.6954	1.5232	1.7864	0.7395		0.944441	3.5242
24.4021	4.7303	11.351	9.257	7.443	3.1579	3.824	7.087	2.408	4.858	3.38	5.062	5.984	1.657	1.834	1.71	1.934	0.8233	1.2158	1.315	1.8101	1.9898	1.4829	1.6015		0.949073	3.73546
24.5211	5.693	9.318	8.022	4.477	1.3573	4.951	4.12	2.109	4.037	3.753	4.507	4.613	1.08	1.597	2.319	1.311	1.3976	0.9465	1.273	0.9912	1.9411	0.7414	0.5429		0.953702	3.09122
24.6401	5.4479	7.094	5.967	4.005	2.1646	3.392	3.865	3.355	3.868	2.849	2.016	5.557	2.715	0.908	2.546	2.374	0.5745	2.0589	3.321	1.0481	1.4989	1.1568	0.6921		0.95833	2.97712
24.7592	5.0348	3.848	6.144	6.494	3.133	3.521	5.96	1.96	2.891	3.367	2.17	4.002	2.862	1.865	3.19	2.358	1.5168	2.1356	1.468	2.2722	1.9739	2.4386	0.2749		0.962962	3.08173
24.8782	3.6717	3.73	5.738	4.087	3.5836	4.016	8.914	3.625	2.689	4.885	2.328	3.578	4.938	1.646	0.546	1.963	2.8564	1.5737	0.593	0.916	2.0931	1.6831	1.1365		0.96759	3.07783
24.9972	4.854	5.305	7.116	4.419	2.0651	3.116	5.058	6.087	2.509	3.106	2.971	4.858	3.271	3.503	0.413	4.223	4.1137	2.5291	1.17	0.5985	2.2187	1.4743	2.4893		0.972219	3.36816
25.1163	3.9244	5.572	5.02	4.482	3.2976	5.31	5.647	2.501	2.584	2.633	1.883	3.175	3.557	3.137	1.299	1.414	2.5102	1.1404	0.585	0.5817	0.9111	0.1889	1.7902		0.976851	2.74537
25.2353	6.0804	4.858	3.482	3.051	1.282	3.891	6.407	3.274	3.751	3.882	4.493	7.269	4.738	4.791	3.242	0.8	1.1488	2.2038	1.104	1.2722	1.5778	1.3761	0.8886		0.981479	3.2549
25.3544	5.9272	6.491	2.414	6.462	0.7428	2.743	3.788	3.772	4.884	1.503	4.315	6.417	4.977	1.398	2.711	2.429	1.218	2.5128	0.675	0.9696	1.2327	3.4784	0.5026		0.986111	3.11144
25.4734	10.5337	5.988	5.771	5.666	1.0141	1.432	4.738	2.655	3.125	3.357	4.49	5.443	3.311	1.836	3.451	1.626	1.887	2.5469	0.732	0.4927	3.1137	1.8813	0.2928		0.99074	3.27753
25.5924	5.0318	5.858	3.379	7.097	2.1138	0.785	4.32	4.924	4.179	3.585	5.792	3.715	4.275	2.185	2.655	2.104	3.1681	1.6682	1.384	0.5475	1.9068	1.0418	0.2973		0.995368	3.13097
25.7115	5.0183	6.626	4.955	3.529	3.0989	0.437	2.949	3.543	2.427	4.264	4.771	6.033	4.303	2.362	2.404	1.159	2.3305	2.4564	0.888	1.1212	0.463	0.2149	2.5974		1	2.95437

## Sheet: Image12
X0	Y0	Y1	Y2	Y3	Y4	Y5	Y6	Y7	Y8	Y9	Y10	Y11	Y12	Y13	Y14	Y15	Y16	Y17	Y18	Y19	Y20	Y21	Y22		Ap-Ba	Average int.
0	66.754	65.2688	55.1669	42.7468	45.1985	45.6421	63.7832	48.2625	82.837	65.081	67.6089	55.1767	48.7278	50.4202	67.3022	64.396	58.1768	56.3963	87.284	121.986	65.047	64.7441	65.236		0	63.1845
0.119	78.918	68.4524	53.1557	49.6856	42.327	38.2848	64.3408	55.4764	84.359	66.497	56.1358	57.0395	48.1131	48.5701	66.9338	48.59	45.6659	66.6602	96.1178	128.398	68.207	72.7492	68.921		0.00480629	64.0695
0.2381	84.416	61.2251	52.1142	58.6241	42.658	40.1686	67.7413	50.7488	79.108	78.838	58.7641	57.5287	50.9884	51.2714	63.3394	64.013	58.9606	64.2439	83.0706	121.069	84.709	69.3713	61.8574		0.00961663	65.4273
0.3571	88.319	68.7028	47.8212	55.9653	40.9406	40.8483	52.5913	46.1694	71.707	83.403	64.9759	49.5215	46.7321	57.0685	59.8014	69.141	61.4977	64.182	74.9444	116.223	84.917	63.8254	62.3989		0.0144229	63.9868
0.4761	92.119	69.0741	43.3057	50.7267	37.6499	47.2623	58.149	38.4638	73.471	93.634	63.3416	44.6547	49.7252	48.5784	62.4195	66.648	58.0575	66.3522	69.6246	129.043	95.006	54.0236	58.2688		0.0192292	63.8956
0.5952	83.405	70.8683	48.2438	41.2703	35.6514	46.4553	55.1481	46.5799	88.22	98.141	68.1779	54.3219	58.6541	61.8627	64.3613	60.639	67.8406	71.1859	75.1368	126.791	94.077	57.4873	66.7238		0.0240395	67.0105
0.7142	82.795	57.6763	52.25	40.9122	39.8376	41.8924	57.2496	42.8476	99.674	105.784	58.5777	62.4409	58.3763	71.939	73.4542	72.65	75.5735	79.172	74.2645	115.486	102.791	49.8717	66.888		0.0288458	68.8002
0.8332	87.302	57.2089	48.7454	46.4212	35.712	41.7075	52.7742	57.9647	105.36	101.916	61.7635	54.7475	68.0975	77.7227	90.5771	73.729	74.2452	69.7011	74.643	108.837	107.885	38.231	79.2578		0.0336521	70.1978
0.9523	92.004	66.1305	44.0106	39.3148	39.0811	46.164	45.7811	53.9963	111.69	117.34	68.7155	56.8559	73.3263	78.0789	88.7505	66.899	73.0064	71.2032	72.3142	120.213	109.997	52.4347	86.2896		0.0384625	72.7651
1.0713	101.515	65.2984	45.7508	37.8032	32.7506	45.9226	48.3523	47.8794	118.692	111.714	64.1012	59.743	73.8759	78.4138	87.2952	84.897	82.7284	70.6664	78.0848	122.924	100.982	44.5642	82.0576		0.0432688	73.3049
1.1903	93.19	75.7363	35.9489	45.9085	31.6181	39.8212	42.4658	51.6899	122.059	107.664	70.0819	57.518	81.4178	74.4558	87.8693	98.013	81.0958	72.3174	70.1893	111.002	103.808	40.8159	82.2749		0.0480751	72.9113
1.3094	107.464	68.1021	36.8161	34.2424	30.1329	46.157	44.3023	56.1255	126.286	119.185	65.9961	68.5422	88.2689	76.2661	98.5738	106.539	87.0708	70.4052	69.8616	98.91	92.855	49.8716	82.5158		0.0528854	74.9778
1.4284	94.743	77.9274	27.3626	27.5544	29.9371	44.6761	50.9286	55.9663	123.593	122.329	77.9858	63.8755	77.6101	69.371	93.7379	112.346	88.0135	76.7414	68.8312	113.689	99.86	50.4312	74.9504		0.0576917	74.8896
1.5474	104.389	83.2353	27.8977	29.423	24.8023	49.9679	48.4286	58.7459	117.812	137.243	73.3214	59.7821	81.4702	68.4731	84.3664	110.883	83.8286	81.0631	74.9015	116.564	102.72	42.4838	69.0155		0.062498	75.2529
1.6665	105.86	66.4757	26.7368	34.8675	23.4085	46.9242	39.8687	57.1686	132.533	138.27	66.2011	52.8146	72.2613	60.847	88.396	109.164	87.587	79.0688	65.7502	114.892	101.823	52.2316	68.8887		0.0673083	73.5669
1.7855	102.292	67.7951	30.1699	29.3745	29.6962	43.3098	41.8685	50.7355	138.224	138.998	66.523	50.3961	69.5053	56.4781	86.9099	107.261	79.3763	78.0224	76.932	121.406	93.365	43.3827	65.5091		0.0721146	72.5013
1.9046	101.71	69.3676	29.0979	31.2049	20.959	43.5793	41.0993	49.6926	124.67	137.902	65.8153	47.7972	58.1388	36.9762	85.3846	113.198	84.422	82.2169	75.7516	109.886	86.26	46.5537	76.6904		0.0769249	70.3641
2.0236	104.854	84.1622	31.4123	26.8616	22.8897	40.0864	39.4623	58.025	142.391	137.723	62.2447	53.1861	53.0845	38.329	81.2075	110.264	78.3487	71.9289	69.2126	119.159	98.737	51.7586	77.6839		0.0817312	71.8701
2.1426	92.055	75.7327	30.0338	23.2331	28.7089	39.4568	44.7382	52.4911	140.385	137.34	58.8994	51.735	52.4591	35.0975	82.3603	109.454	76.3818	53.4649	69.3374	118.771	102.338	38.2406	81.8902		0.0865375	69.3306
2.2617	90.145	71.8869	29.6712	26.2139	23.8215	46.0374	38.8406	66.0107	139.582	138.093	59.3353	54.6394	52.2496	35.8912	74.0311	108.969	60.5047	55.5761	75.4474	112.168	90.338	32.2147	80.2958		0.0913479	67.9114
2.3807	105.795	79.1617	29.8946	33.0572	20.709	38.8153	43.3384	58.0503	137.552	136.898	69.6362	58.4613	51.4916	31.5383	76.1442	95.029	60.1044	48.2772	67.9583	107.44	93.876	37.9852	83.6012		0.0961542	68.0354
2.4997	90.291	85.4176	19.7103	29.7922	22.2594	41.9286	39.8509	60.9908	129.821	138.58	64.6822	51.4817	49.6943	29.1254	58.9687	105.014	51.4137	44.7967	53.7644	113.335	88.234	36.0342	73.2128		0.10096	64.2782
2.6188	104.541	85.4342	25.318	21.8271	24.1574	34.5481	42.234	50.9043	125.132	130.508	66.6497	52.1517	36.0821	22.817	55.6232	101.049	42.9857	47.7741	56.3821	114.762	93.462	38.8983	77.7538		0.105771	63.0867
2.7378	96.837	85.7154	23.7305	30.1849	20.0597	38.5975	34.0792	50.2912	135.282	130.017	59.3391	52.6999	36.4533	22.5258	50.0357	89.443	39.9359	43.7815	51.4317	100.928	85.365	41.2498	77.6489		0.110577	60.6797
2.8568	99.305	73.0653	24.7205	27.3309	16.5042	32.0716	31.3933	56.2372	141.882	144.694	62.0413	44.2217	30.2106	22.2118	49.4878	91.299	41.0012	40.6157	57.8021	117.035	94.239	35.5663	74.6312		0.115383	61.1986
2.9759	107.227	86.8027	22.1425	17.2721	14.7006	27.2212	27.4375	41.1399	145.436	145.82	57.5856	40.6926	25.5177	19.7039	46.1366	100.227	29.9709	39.3861	52.4187	112.965	77.445	39.3922	78.9194		0.120194	58.9374
3.0949	100.584	88.9468	19.9559	21.021	16.2176	29.7091	31.7876	49.2171	153.002	138.593	57.5447	56.658	21.5234	19.6699	47.228	92.739	30.5668	41.1604	46.0827	116.292	68.564	38.7689	81.6321		0.125	59.455
3.2139	107.515	98.3896	22.645	25.5657	19.1165	27.6284	30.5005	47.0626	145.71	126.354	72.4171	54.0512	21.9078	14.9762	39.4071	88.171	24.8995	32.1944	49.0814	116.846	66.797	39.6568	64.9992		0.129806	58.0823
3.333	86.074	92.2922	21.962	18.2985	24.4308	38.9666	38.4661	47.2392	143.61	133.325	70.3545	41.6897	28.6651	19.2006	41.9669	84.848	24.6677	22.8456	36.6187	115.924	72.136	33.1089	53.2971		0.134617	56.0864
3.452	102.85	77.0745	21.1078	18.4798	21.5467	34.1347	35.9359	43.2525	137.384	128.201	58.7822	35.873	27.5172	16.8668	36.2823	68.55	25.513	29.678	41.2012	116.653	68.336	33.5475	65.0038		0.139423	54.077
3.571	93.266	89.4096	24.6596	20.3246	18.9709	31.585	30.582	44.5218	133.579	128.823	43.7049	37.403	33.6288	14.1969	30.6464	65.217	23.9529	32.7304	52.66	113.55	67.243	42.6384	68.1164		0.144229	53.9743
3.6901	92.753	80.1151	22.8246	16.7614	17.333	26.189	31.8281	37.7156	125.681	116.445	39.0106	39.1508	32.1374	17.0729	30.2508	65.745	20.5476	31.096	49.1852	112.407	54.646	40.7195	61.7256		0.14904	50.4931
3.8091	103.633	65.1307	20.7007	21.3223	16.1957	23.3087	25.7271	37.7901	120.921	117.958	36.5988	39.6438	25.2304	19.2544	26.1909	60.899	25.6572	25.2453	44.7584	105.578	45.518	34.8556	59.2076		0.153846	47.8837
3.9281	93.524	60.8058	25.7516	14.4751	20.9248	21.5867	23.8563	27.323	116.326	103.864	33.5095	33.5396	20.3557	20.6916	25.5787	51.533	31.5801	29.3229	43.2703	112.051	37.036	34.3461	52.9343		0.158652	44.9646
4.0472	84.745	64.1343	15.8835	17.3636	18.2859	31.4657	25.5782	33.526	112.119	104.395	26.6982	23.9788	20.6212	21.7615	26.9811	52.828	23.7955	28.505	39.872	106.511	33.643	38.1673	57.6484		0.163462	43.8481
4.1662	76.361	55.9694	23.8327	20.5525	15.8105	34.1265	28.1819	28.9337	93.889	85.968	26.2403	25.091	25.5028	21.6672	25.7453	46.601	30.0959	26.4619	46.7948	113.441	35.668	38.9598	52.74		0.168269	42.5493
4.2852	88.489	52.695	20.7287	21.7687	16.4132	32.4054	22.9868	27.178	93.06	88.931	23.1533	35.8702	15.1961	22.8601	24.8918	52.915	30.378	25.8603	47.9325	101.848	32.497	29.3416	49.2794		0.173075	41.5947
4.4043	75.878	54.7227	21.6066	18.5996	14.5696	21.8674	22.4967	28.5	83.825	81.975	25.7458	25.5242	20.4727	21.9169	24.3136	61.939	27.7653	26.5508	49.307	110.044	34.951	32.5361	49.4802		0.177885	40.6342
4.5233	69.08	60.2561	19.1319	24.8116	17.561	21.7449	26.7929	27.8902	79.182	80.316	30.8786	19.0426	17.3716	19.1384	21.7515	64.91	32.6068	28.6452	53.3918	112.181	37.991	33.7893	50.0149		0.182692	41.2382
4.6423	56.998	43.7647	29.8463	24.9	20.1464	23.1391	28.2957	25.4512	73.525	81.892	20.3771	25.1487	16.4269	26.6599	21.0435	69.003	54.127	25.695	64.5087	121.685	47.842	27.7543	48.6684		0.187498	42.4738
4.7614	52.015	49.6147	20.692	19.1742	15.8853	20.495	24.8596	22.8855	68.001	69.956	28.286	18.9534	18.1635	29.39	31.4522	81.405	53.8257	21.4444	59.9193	123.439	37.833	23.5373	38.2101		0.192308	40.4103
4.8804	42.755	53.5533	21.4458	14.2647	9.4998	18.1451	22.6226	22.4356	55.149	74.291	31.7705	19.6716	20.0531	21.2925	31.3571	66.97	54.3522	25.5944	55.2914	116.232	23.674	22.7641	39.8294		0.197115	37.5224
4.9995	37.867	50.9277	25.7303	21.5518	9.5646	19.2762	24.7143	18.1433	47.782	59.681	34.9073	15.5133	16.6277	21.7628	22.7156	70.951	58.9676	30.1579	55.7721	105.344	29.204	24.2034	38.8951		0.201925	36.533
5.1185	42.672	51.5128	25.9842	20.8325	9.345	24.5492	18.5974	24.0395	45.056	64.103	27.8626	13.133	20.7413	26.5982	25.9843	60.733	49.3217	33.661	44.4199	94.197	27.148	16.6478	38.4424		0.206731	35.0253
5.2375	48.889	37.0589	21.9098	21.5326	11.685	29.3398	18.8532	21.4947	36.643	55.754	25.2013	11.1219	17.6681	21.3099	20.9505	70.071	47.5139	33.1167	43.1882	82.417	24.208	18.3431	30.3181		0.211538	32.5473
5.3566	54.789	34.3032	20.1653	19.9677	11.2588	24.219	14.8876	18.7445	47.15	46.694	20.6664	10.8244	19.0475	20.3757	20.7741	59.833	39.5198	27.2501	47.4323	85.663	25.14	15.0274	41.0676		0.216348	31.5131
5.4756	53.289	34.3612	18.6363	16.4861	15.3523	28.9506	18.7648	19.4565	38.04	38.028	23.8213	10.5502	22.4951	21.2627	19.9481	54.877	34.9667	23.7184	43.663	67.224	33.453	14.7606	34.3222		0.221154	29.8447
5.5946	49.749	47.9798	16.6841	14.6902	12.3755	15.6866	18.1715	22.6092	37.749	36.121	25.04	9.5889	14.0234	20.1119	17.6507	58.168	35.1793	22.3337	44.6665	69.037	28.354	15.772	36.0077		0.22596	29.0326
5.7137	44.168	44.6878	11.729	11.8372	13.6102	16.927	15.7889	23.3173	43.494	39.119	32.7534	10.8357	12.9204	17.4385	18.8624	58.662	39.2178	23.7296	37.2539	61.604	25.563	10.3869	35.417		0.230771	28.2314
5.8327	35.221	42.755	17.3862	18.6308	12.3337	18.6873	15.1605	20.9709	37.492	44.957	28.9182	11.0106	19.3677	16.0714	20.9327	40.457	42.5401	21.9883	40.4681	64.534	38.234	12.508	34.0739		0.235577	28.4651
5.9517	37.674	34.8509	14.744	16.6672	13.378	16.0539	14.4441	19.1511	30.507	37.944	32.426	9.7758	21.8813	16.4023	21.2183	37.81	48.2625	23.4208	32.9973	59.748	34.903	14.3337	28.3663		0.240383	26.8243
6.0708	31.948	41.5142	21.1836	14.4981	10.2204	11.4095	20.1223	20.5013	33.306	35.182	28.8483	12.5747	17.4684	16.3898	19.8085	41.026	43.0809	15.6712	39.4859	53.446	32.779	15.5292	26.2358		0.245194	26.1839
6.1898	42.79	39.3666	26.1068	11.2107	8.7884	12.3713	24.6359	19.2278	32.21	42.07	31.7105	13.0153	17.2992	13.9309	19.6376	36.104	44.3259	15.5673	42.024	53.663	38.602	10.6161	26.7795		0.25	27.0458
6.3088	51.048	39.088	24.8778	11.9424	8.2837	12.3355	13.668	16.0414	30.439	46.725	29.0702	12.5867	18.4507	11.789	25.4315	37.886	40.1633	14.2362	43.4111	60.36	40.926	17.2882	25.3297		0.254806	27.4512
6.4279	50.039	44.7298	23.3081	11.0781	9.1394	11.2904	15.517	14.8235	35.666	44.902	26.3432	16.1781	11.6723	9.9003	19.9999	33.856	32.3048	14.5881	41.0846	48.631	45.917	19.9432	20.8081		0.259617	26.1617
6.5469	51.318	34.7974	21.3857	9.2765	7.4294	12.9005	19.4914	14.6167	37.576	49.137	25.5341	10.927	16.6908	15.2964	19.247	37.976	35.9987	13.0409	31.6145	35.46	47.499	14.27	26.7377		0.264423	25.5748
6.6659	49.582	35.4352	17.4931	12.4737	8.5039	10.875	21.7534	14.6901	42.166	52.308	26.2435	13.9926	14.5603	13.8815	12.4455	39.405	32.5291	15.8067	32.1342	33.582	48.868	18.0588	27.2183		0.269229	25.8263
6.785	49.248	38.5329	14.2283	9.3112	8.1182	7.9349	19.8192	14.5014	37.041	52.214	33.3333	17.2825	14.2592	13.2506	10.8742	54.49	36.191	13.7632	33.2135	27.981	40.007	19.3003	28.43		0.27404	25.7967
6.904	49.464	29.444	17.5424	6.0472	6.2787	11.4271	11.5267	15.8199	37.094	46.202	25.3916	13.8977	12.4388	10.5138	9.8265	53.24	38.1007	14.4932	43.5217	23.694	41.263	22.1759	34.4331		0.278846	24.9494
7.023	53.145	28.3582	13.8511	6.1102	7.9662	10.5709	10.319	15.1562	40.57	42.389	17.2096	14.9381	10.7234	8.1641	10.1984	48.044	38.5537	17.5985	46.3869	25.591	35.986	20.2583	35.9982		0.283652	24.2646
7.1421	49.065	33.1803	11.1277	9.5402	6.7098	8.5958	12.7671	15.044	42.39	43.281	17.6123	12.6073	9.8829	14.167	7.2907	47.267	36.0084	12.8484	46.0117	23.457	40.387	15.9146	35.8189		0.288462	23.9554
7.2611	45.38	28.7576	12.6915	8.9812	6.4044	10.9952	16.7711	13.1329	39.627	39.451	15.0545	15.6716	16.9452	16.8603	9.4507	44.788	38.5468	19.258	47.3418	17.188	40.51	19.0479	26.6647		0.293269	23.8921
7.3801	38.173	28.9082	12.0162	6.2335	10.0136	8.6378	13.5585	12.2924	41.253	36.236	15.5709	7.8973	16.243	14.2981	6.1694	37.887	39.4107	24.8558	43.1249	16.669	42.488	19.7188	28.0138		0.298075	22.5943
7.4992	41.578	20.5347	11.2569	7.595	13.569	15.6914	12.0754	12.4075	39.953	47.33	19.7549	13.4737	11.4922	14.28	10.6107	41.466	38.1661	17.6895	39.9292	19.445	44.43	25.9688	28.3676		0.302885	23.7854
7.6182	47.916	25.1966	11.6804	8.8103	13.3586	8.862	13.8151	11.6336	34.392	38.187	18.4975	15.6335	12.5997	13.1472	10.9314	33.055	33.9905	22.4877	41.6562	14.739	46.406	29.6938	28.416		0.307692	23.2654
7.7372	42.015	23.5505	10.3377	14.0973	11.1744	12.8448	13.1752	14.7293	27.914	41.329	12.5142	12.6879	20.0499	11.2512	11.4338	25.063	32.1896	20.7087	29.2586	10.471	35.128	31.539	24.8932		0.312498	21.2328
7.8563	37.124	19.3553	11.1671	14.9064	14.6189	9.8487	13.7091	18.1104	23.735	39.757	15.2863	9.263	13.5069	12.5736	9.4803	23.431	38.8144	29.5737	23.7324	12.803	36.241	29.9015	23.7031		0.317308	20.8975
7.9753	30.75	17.8344	10.9964	14.155	11.479	11.3473	15.4552	13.7428	30.426	32.04	18.0349	10.3997	12.2941	13.1687	10.3716	22.532	45.1969	26.8818	21.5966	13.021	34.437	22.6862	24.9005		0.322115	20.1629
8.0943	40.663	21.1854	11.2515	11.6307	13.1726	10.764	12.5739	10.4662	29.657	30.389	18.8415	15.4216	13.7779	14.9171	6.3814	24.871	32.4996	17.9567	23.1999	16.366	33.13	23.0397	18.027		0.326921	19.5732
8.2134	36.094	22.5637	9.9027	10.9311	8.7993	10.852	7.7979	10.3314	29.086	28.806	23.1836	13.9945	11.7775	11.9446	7.3073	24.298	33.0492	22.7278	20.4463	19.846	27.757	21.2086	16.7437		0.331731	18.6717
8.3324	31.256	22.1198	8.2882	10.5479	6.7874	11.5678	8.1277	12.2146	41.688	24.164	25.1828	8.2581	10.2351	16.493	7.2983	17.684	37.0776	20.3008	12.7458	12.308	39.483	32.6749	19.1264		0.336538	18.9404
8.4515	24.796	19.2511	14.0641	6.1667	15.1435	7.3796	10.0066	14.7687	50.886	29.873	38.6918	10.6452	7.5421	14.2804	10.2575	13.609	39.1117	24.6622	13.8128	15.7	42.831	28.6848	22.6446		0.341348	20.6438
8.5705	26.908	25.768	10.0058	10.1538	14.1327	9.4868	13.803	13.6326	49.27	32.623	47.8849	11.7919	10.46	14.4026	8.5903	17.578	40.4433	23.9854	9.2366	15.866	45.9	29.9369	23.4039		0.346154	21.968
8.6895	24.636	24.6523	9.1738	11.5687	8.6449	6.3085	15.4354	15.8795	49.849	31.273	61.8952	9.8163	9.9968	13.8854	9.6089	21.138	39.6681	16.0168	6.7669	14.313	36.856	20.5436	29.8961		0.35096	21.2097
8.8086	18.438	28.0999	10.9165	14.1359	5.1993	7.3806	14.1119	20.5152	52.862	26.56	59.3371	12.4602	10.2126	11.1396	7.8133	26.34	34.3992	19.5924	5.8025	21.448	32.832	21.6399	26.9475		0.355771	21.2254
8.9276	22.795	37.9265	13.0134	16.1642	8.3177	6.3165	13.7832	18.7373	48.495	25.418	56.4673	8.6463	8.9062	10.317	9.6611	31.072	30.0088	14.4484	5.7167	20.154	24.125	19.0258	23.228		0.360577	20.5541
9.0466	20.152	35.3897	14.2854	12.4423	7.772	7.8801	12.5103	17.2766	45.841	29.877	58.109	7.4353	7.1562	9.0258	8.9186	32.984	27.8509	11.2034	6.4547	20.227	22.089	17.2003	27.7519		0.365383	19.9927
9.1657	27.153	28.9088	17.2838	12.0541	9.5241	4.9673	21.3475	18.1691	47.673	28.007	50.9424	8.6178	6.0769	7.2833	8.1767	23.088	23.98	15.3595	4.8546	22.824	19.564	12.5419	20.6154		0.370194	19.0875
9.2847	25.151	30.0808	22.6932	13.3301	9.8423	6.3469	16.2205	16.3854	45.834	25.473	38.0207	12.0404	8.5377	9.7063	7.0307	14.358	27.5022	10.4297	5.209	26.323	15.941	17.6756	20.3456		0.375	18.4555
9.4037	32.912	28.9642	15.8387	12.397	9.3018	6.8014	17.6531	11.3903	45.334	26.011	42.6703	9.5132	9.6775	9.3551	9.1737	15.255	20.7915	7.3397	3.0444	20.572	21.767	17.1588	20.6185		0.379806	17.98
9.5228	38.061	25.6955	14.4218	9.8237	9.9657	4.0432	17.5653	13.2615	41.265	29.69	43.5683	11.2198	10.2602	10.0549	6.748	12.495	23.463	6.5221	5.8489	15.311	17.696	12.6021	14.7194		0.384617	17.1435
9.6418	34.899	26.9731	15.0171	11.8546	7.1897	4.9258	22.1389	18.7492	44.544	30.079	31.5905	8.6823	10.9254	6.988	7.9324	10.529	20.149	8.5507	3.5734	17.589	15.97	23.0428	12.7255		0.389423	17.1573
9.7608	32.599	34.856	19.4026	9.9959	7.363	4.8873	15.6113	15.2236	47.014	31.097	30.9225	7.7013	6.3705	6.1554	7.9227	13.806	21.3184	8.9221	3.046	18.345	16.094	35.3055	13.0605		0.394229	17.6965
9.8799	36.313	30.0556	15.5127	8.5186	7.1431	4.3858	16.664	13.926	47.905	31.167	29.5329	8.7968	5.493	6.0973	8.8236	10.681	21.248	8.5338	2.5139	15.988	13.398	31.8363	16.4137		0.39904	16.9977
9.9989	38.904	29.1872	22.8364	8.6836	6.0189	3.7506	10.9719	13.1272	51.356	34.51	17.636	8.5196	7.6171	5.6965	10.8257	8.634	18.962	6.6424	3.4149	18.878	17.099	25.0268	20.4008		0.403846	16.8999
10.1179	38.037	36.4066	24.5839	9.3595	8.6959	3.5861	14.6998	8.8286	43.314	26.972	14.9754	10.6157	11.2308	7.7312	9.7971	11.866	23.5015	5.7873	3.0847	16.584	19.348	28.0335	20.6614		0.408652	17.2913
10.237	33.532	29.6005	15.954	8.6837	6.5202	3.1727	14.9891	15.0014	50.69	26.361	17.6009	5.881	9.9978	5.7449	11.8161	15.31	23.3233	4.7213	3.5034	21.583	17.633	23.3146	25.091		0.413462	16.9576
10.356	30.506	26.5867	15.347	6.9542	8.653	5.3044	18.5244	14.3776	43.862	31.532	13.2044	7.4302	12.1748	5.2711	12.1555	19.802	19.4478	7.7244	3.3343	19.142	18.296	15.4141	25.8472		0.418269	16.5605
10.475	23.9	33.4958	10.2782	11.0842	5.7255	6.3464	15.4193	8.2019	35.598	27.851	13.2797	5.5812	11.2727	5.8588	10.1199	15.15	26.5361	7.5079	3.0978	16.093	19.679	20.7315	17.9433		0.423075	15.2501
10.5941	22.86	33.9913	7.9348	8.1037	4.6241	5.9918	17.5305	10.8463	33.457	24.64	13.2972	6.8951	10.3147	7.7805	8.3864	9.622	25.7723	8.9973	2.0115	18.323	12.95	15.998	21.1711		0.427885	14.413
10.7131	26.623	25.1824	8.9853	9.8196	5.6537	6.5723	19.3404	13.4451	42.189	22.104	18.6555	5.6775	8.179	6.4784	13.0976	12.191	22.242	5.9227	2.1034	13.256	14.201	9.5344	20.6389		0.432692	14.4388
10.8321	20.221	29.5331	14.3254	6.7019	5.3315	5.3454	14.1766	11.0007	38.655	26.018	18.1366	7.6371	8.2107	5.329	7.9101	13.45	15.8533	4.5358	2.4387	14.438	16.487	11.5564	21.8868		0.437498	13.8773
10.9512	17.316	20.3011	11.75	9.8953	5.0264	6.4269	13.8852	8.4413	44.483	28.546	15.0019	6.5276	8.9777	7.771	9.5218	15.358	16.3836	4.6025	2.3893	15.121	12.232	10.6003	13.3304		0.442308	13.2125
11.0702	16.159	15.5575	10.2407	8.8233	7.2391	11.2687	16.6039	11.169	34.692	23.767	18.0279	8.3836	9.1701	7.4884	9.1778	13.933	19.6626	3.7861	2.7343	11.973	7.121	12.8099	21.7315		0.447115	13.1095
11.1892	14.564	10.2743	8.1068	7.3619	8.0132	5.7328	10.0471	11.4475	37.979	16.682	14.6613	12.224	11.8828	5.2815	7.4066	11.48	13.4945	5.9961	1.5693	15.128	10.633	11.0391	26.6929		0.451921	12.0738
11.3083	15.201	11.4581	10.6636	6.881	4.4899	2.6063	9.798	15.0043	45.845	21.077	15.7868	9.0521	8.5311	8.4717	10.6928	11.92	15.7287	5.8697	2.5397	14.698	9.994	12.8975	25.3525		0.456731	12.8069
11.4273	13.677	8.6093	12.9029	8.5127	4.0874	3.6837	13.8667	9.3614	39.64	14.294	16.9408	8.9819	11.7622	7.7561	6.872	8.907	14.173	4.1254	2.8854	9.508	10.753	12.1927	20.7955		0.461538	11.4908
11.5463	14.132	10.4925	10.6747	11.7485	5.1611	3.3486	11.8832	11.4685	37.355	14.679	22.1359	10.887	6.356	16.5109	5.9801	7.378	10.7587	1.3765	0.8738	8.162	10.99	11.7016	23.2915		0.466344	11.6237
11.6654	14.603	5.5094	10.3848	6.6743	3.9959	4.3753	7.6083	8.3192	35.4	10.875	18.3327	7.954	5.6001	12.0481	8.4744	10.604	12.0753	2.5896	2.0061	8.592	13.562	11.9087	20.3757		0.471154	10.516
11.7844	14.277	4.0425	13.31	4.6098	5.0293	4.8678	5.91	9.9755	33.974	12.024	17.4363	9.721	6.7398	9.1851	7.309	7.982	9.4396	2.7174	2.9849	6.365	18.07	10.7484	19.5605		0.47596	10.273
11.9035	12.446	1.8379	7.8825	4.3416	5.3202	3.9647	8.0842	9.6122	33.015	13.142	13.534	7.5684	7.6662	6.1474	4.6631	7.597	11.5638	2.8002	3.669	8.807	20.869	13.14	21.6169		0.480771	9.96906
12.0225	9.599	1.8431	8.126	7.1124	2.8084	2.8406	6.3851	8.878	28.27	10.766	15.8699	7.8462	3.2522	6.0767	4.7386	9.307	11.2712	2.3572	4.4829	5.16	18.002	11.965	21.5444		0.485577	9.0653
12.1415	14.034	4.578	7.8026	7.7851	2.5163	4.5939	11.9983	11.7947	24.854	12.057	15.3879	9.4522	8.0351	6.5407	6.1686	6.4	7.4429	3.8553	2.905	6.317	21.88	16.0002	13.5205		0.490383	9.82258
12.2606	12.991	3.0477	8.74	6.4275	3.7338	4.0059	12.6543	11.4381	18.888	13.497	14.5894	7.4261	4.7993	3.6991	6.7973	5.57	15.4296	3.2818	1.4039	3.548	12.947	11.7247	11.032		0.495194	8.59441
12.3796	10.535	3.8674	6.9904	7.7812	3.8208	5.9428	7.9893	12.5079	17.669	14.402	15.2243	7.6368	3.3251	4.8174	5.7142	8.266	12.8323	4.204	1.6548	4.406	9.225	8.9682	13.7551		0.5	8.32761
12.4986	11.326	4.676	6.1451	7.1857	1.8964	1.1227	12.9939	9.0265	14.79	14.894	8.2121	6.1975	3.894	4.102	4.1617	6.53	14.2191	4.211	0.9408	3.33	7.33	7.7126	13.377		0.504806	7.31627
12.6177	9.309	5.6781	9.5052	3.8579	1.872	1.4653	13.3737	10.8526	17.055	15.406	10.9227	4.6614	8.5817	4.8118	9.5332	7.287	18.9085	4.9538	1.8523	3.816	11.493	6.5558	11.2769		0.509617	8.39256
12.7367	9.897	6.7401	9.3622	5.5072	2.0929	1.4116	12.9483	7.6603	19.213	16.63	10.2216	5.3186	10.7491	2.6643	7.7133	6.695	14.5951	3.8044	0.8525	5.142	13.391	5.5587	9.1428		0.514423	8.14396
12.8557	2.062	5.8242	10.6838	5.4616	1.5654	3.0171	12.2239	11.9397	22.736	20.33	11.4191	3.0582	9.2937	4.0618	3.6572	9.282	18.0232	3.6167	1.0471	2.052	9.075	3.8339	8.243		0.519229	7.93507
12.9748	4.429	1.2825	10.3083	5.9353	2.1622	2.8766	13.0584	10.6523	28.293	26.387	9.7617	3.8082	8.6707	4.4554	4.3507	8.661	13.2929	3.2024	1.5096	1.599	7.969	3.2461	6.8834		0.52404	7.9476
13.0938	2.75	2.1195	8.9303	6.2325	3.343	4.323	8.5546	8.8862	22.601	28.489	7.544	5.5516	6.7112	4.0912	5.9965	14.618	13.8697	1.0291	2.7449	1.759	6.597	4.1207	7.6538		0.528846	7.76156
13.2128	5.254	4.8419	12.4914	5.912	3.0202	2.9318	10.5742	9.9336	19.714	30.851	8.8948	3.9569	13.4391	3.7285	5.5277	13.562	12.5379	2.9924	1.4082	3.405	10.193	4.3852	13.4149		0.533652	8.82477
13.3319	6.154	3.6008	12.2251	4.3518	2.7119	3.3896	7.7792	11.8754	13.651	32.799	9.4542	4.8027	10.4031	2.5868	3.6344	11.225	11.2768	2.5745	0.8869	3.071	9.84	6.5421	14.385		0.538462	8.22697
13.4509	4.152	3.9822	12.2601	4.6515	3.3394	3.9312	10.1599	9.6084	19.596	23.994	14.3587	5.5693	7.4594	1.3678	5.3299	10.521	16.1348	2.1739	1.5386	1.344	12.578	7.7488	17.3527		0.543269	8.65877
13.5699	2.514	1.7265	8.4004	7.603	1.4264	2.4856	10.8509	8.7876	28.659	14.561	11.2998	4.1103	8.8374	2.9379	5.1172	7.937	14.5386	2.053	2.5298	2.504	19.052	9.6799	20.0998		0.548075	8.59613
13.689	4.734	3.9767	10.1533	6.2452	1.6956	6.5366	10.2111	9.0807	28.005	13.304	13.3478	6.4056	9.2547	3.5331	8.0452	7.266	19.01	3.5985	0.9471	2.609	17.307	6.8247	21.575		0.552885	9.28982
13.808	4.834	2.3372	11.2321	7.0813	1.6612	3.0613	6.1897	7.0676	31.055	11.576	9.6756	4.6478	6.2477	3.8586	8.7366	4.585	17.794	2.4289	1.3231	2.66	20.006	6.4125	28.8882		0.557692	8.84171
13.927	4.355	7.3516	8.974	6.7134	2.3056	1.855	4.9096	9.0934	28.884	11.06	18.8404	8.0473	4.0646	2.5085	7.769	4.221	19.4344	1.961	2.4724	2.307	20.367	6.071	28.4384		0.562498	9.21755
14.0461	3.303	2.8393	10.5282	6.3896	1.3308	2.8229	3.9149	7.777	23.004	13.167	22.6482	5.3747	3.1755	2.1173	4.1377	8.358	20.5772	2.9767	1.6821	1.122	10.825	10.6826	27.9636		0.567308	8.55293
14.1651	3.185	2.0848	6.5098	6.5729	3.376	1.0469	4.7745	7.5726	16.619	13.349	18.5831	8.2348	4.4756	3.6315	5.0209	8.463	24.85	3.6687	3.3623	2.063	15.508	9.9912	18.5625		0.572115	8.32631
14.2841	2.159	4.9427	5.4485	3.4713	1.7347	2.8032	5.2428	6.9542	21.44	12.259	27.0764	6.7202	7.6349	4.8545	4.8987	8.858	23.1764	2.6887	0.7477	2.644	17.007	11.1705	14.7459		0.576921	8.63819
14.4032	4.261	1.3952	6.0792	3.5056	1.2981	1.0673	7.9456	8.7224	18.91	10.734	39.8486	8.7431	4.92	4.097	6.8098	5.16	17.9605	2.97	0.6332	3.323	8.121	8.8847	12.0629		0.581731	8.1501
14.5222	3.141	0.8461	6.3298	4.5501	1.5051	3.3647	10.1825	7.4104	16.915	11.359	38.9697	6.7324	5.5806	3.3592	7.8097	6.426	16.3295	1.2698	1.1084	2.221	9.351	8.6574	15.8068		0.586538	8.22718
14.6412	4.193	1.5082	5.8634	5.2643	1.7229	1.6786	7.3711	12.1875	21.434	9.491	33.8815	6.1024	8.6538	3.0148	7.8949	7.408	15.6541	2.172	0.5163	0.944	7.993	7.9336	14.0225		0.591344	8.1263
14.7603	6.311	1.8511	6.9253	2.601	3.8613	1.9045	6.7939	6.3817	20.499	8.463	20.5987	8.7913	5.3826	2.1506	5.9492	7.582	16.0688	4.6072	0.9733	2.037	5.636	6.5324	14.8757		0.596154	7.25116
14.8793	1.736	2.8769	7.8247	2.0689	3.1711	1.5108	4.5464	4.2909	22.124	10.576	23.5207	5.5368	7.6326	4.3108	6.0318	14.12	15.0772	2.6587	1.8684	3.028	5.27	7.2292	9.9883		0.60096	7.26079
14.9984	2.301	1.6672	7.4482	2.2861	2.5392	2.4848	7.2793	5.3538	22.504	13.651	20.2069	11.4839	7.584	4.475	7.8413	11.064	15.3108	1.3017	1.5988	3.131	4.924	7.4192	16.8717		0.605771	7.85769
15.1174	2.229	2.5262	6.8242	3.6311	3.0914	3.0989	6.9051	5.8742	24.208	23.287	19.9017	8.2823	6.6542	2.9513	8.0721	7.325	23.0137	1.9022	2.5168	1.081	5.257	11.0921	21.7977		0.610577	8.76183
15.2364	2.495	2.3735	10.6666	5.4675	1.3976	1.8588	2.7659	5.6433	29.191	19.501	20.805	7.9567	3.1991	5.528	5.1625	10.225	26.1465	4.2036	3.2547	0.771	5.471	12.6126	12.3507		0.615383	8.6542
15.3555	2.244	2.1303	8.9373	5.4847	1.2611	1.3053	3.2383	6.4939	29.03	10.85	17.2489	6.9769	6.122	5.7933	5.1701	6.099	29.9335	2.0676	1.6289	1.531	4.808	13.8341	13.2454		0.620194	8.06233
15.4745	1.392	1.4464	7.0211	2.874	0.9476	1.2327	6.1747	7.7182	20.203	14.248	30.0878	1.357	5.6888	5.7044	5.6209	9.278	27.2345	1.4045	0.9946	1.501	3.236	12.2553	17.7879		0.625	8.06123
15.5935	1.332	1.5899	6.7659	3.5769	1.7815	2.0747	7.2446	6.5496	20.075	14.969	26.6268	3.3368	5.5677	4.7016	6.7429	8.371	35.1295	4.547	1.259	3.11	2.544	12.6869	14.3638		0.629806	8.47592
15.7126	3.652	3.3331	9.8267	2.7867	1.4826	2.5253	1.3989	6.9394	13.782	11.488	23.2087	5.9708	7.0913	7.3127	3.942	7.302	30.2116	3.1238	1.4864	2.209	3.387	9.496	15.8361		0.634617	7.73009
15.8316	1.85	4.3618	11.7829	2.6283	1.4571	1.9295	5.9908	6.4018	12.952	13.089	20.5738	5.3788	6.4975	3.964	8.3311	3.637	27.8415	3.4292	1.7549	2.599	4.59	10.3331	17.5582		0.639423	7.77962
15.9506	2.449	1.3364	9.3757	1.3129	1.825	0.3492	4.7893	7.4053	12.064	16.958	10.7447	4.4547	6.1498	3.9301	6.6068	5.816	20.6093	2.6994	0.9879	1.336	3.422	11.0884	12.1054		0.644229	6.42675
16.0697	2.963	1.4783	11.3295	1.3877	0.2682	3.6833	4.6548	9.2499	8.852	19.275	9.2536	3.4085	8.4812	3.8111	3.042	4.052	19.4729	5.3359	2.0713	0.899	4.941	11.2969	14.4454		0.64904	6.68054
16.1887	1.163	2.3203	10.7414	2.4141	2.1337	2.7667	5.0343	5.347	14.46	17.478	9.0563	9.0125	5.5222	4.4511	4.6319	5.733	13.325	3.4874	1.3676	1.45	4.762	11.7711	14.2666		0.653846	6.63892
16.3077	1.761	0.991	11.8404	6.0514	1.9701	1.8081	6.4942	4.7931	17.04	19.763	11.8882	5.7557	4.688	3.4378	5.3229	3.265	15.6627	3.6956	2.9095	2.008	4.407	11.7865	10.6564		0.658652	6.86937
16.4268	1.352	1.425	10.6413	1.9353	0.7131	1.7072	7.1586	4.513	13.892	16.932	10.1045	4.5281	5.2234	5.4534	5.6781	7.32	15.1443	4.7034	1.67	0.516	2.753	10.0112	11.3126		0.663462	6.29076
16.5458	2.694	2.9388	10.2039	1.1283	1.179	2.2004	6.0839	3.9041	9.958	15.336	12.7283	3.3932	8.9527	6.3226	5.1805	9.461	10.2501	6.8808	1.1176	0.915	7.132	16.0207	7.9192		0.668269	6.60435
16.6648	2.57	3.5722	10.559	3.5424	1.8598	1.9824	5.3997	3.5213	9.266	20.036	10.1887	2.9751	7.3373	5.3625	8.3529	5.363	9.361	4.247	0.657	1.444	7.638	18.1043	8.8396		0.673075	6.61649
16.7839	1.985	2.7526	10.4296	3.8045	1.1341	2.6209	5.3421	6.2078	5.015	21.111	16.8576	5.0216	5.3906	5.8746	3.9792	4.512	9.5152	5.964	1.9555	1.784	5.425	11.057	7.83		0.677885	6.32908
16.9029	2.427	1.3759	7.3233	3.1965	1.8019	2.0695	5.4771	6.6995	10.905	14.871	14.3987	2.0344	7.5845	6.2168	4.6989	5.99	9.7483	4.1666	1.0403	2.218	8.997	10.7673	6.7898		0.682692	6.12162
17.0219	1.912	1.5957	9.8191	3.7087	1.1233	1.7364	5.1102	7.5476	15.626	19.264	14.2605	3.8239	7.4802	7.5528	8.819	2.534	6.1694	5.3746	2.3676	1.525	8.212	5.7647	8.4367		0.687498	6.51145
17.141	0.545	2.4544	8.1146	4.5244	1.4045	1.3468	7.4468	3.7551	14.444	21.395	17.2519	4.0747	6.3854	8.033	3.7763	4.996	7.0664	6.4307	1.3704	2.981	6.462	4.5143	6.7932		0.692308	6.32895
17.26	1.14	1.4819	4.9197	2.9801	2.6307	1.3897	7.15	7.5226	17.378	19.919	17.7519	3.0195	3.3293	3.0051	5.5753	4.514	6.2812	8.5193	2.2974	2.104	5.808	3.3271	10.5385		0.697115	6.19923
17.379	2.493	2.1587	4.5457	5.0897	0.151	2.4971	7.1986	9.963	15.433	14.39	17.5146	4.1728	4.1685	4.8803	8.0045	7.519	9.0779	7.8213	1.8899	2.62	7.112	4.9908	9.2906		0.701921	6.65139
17.4981	3.69	2.3388	4.8637	3.1333	0.9591	1.4553	8.3449	6.7474	16.535	13.243	18.1822	4.898	6.0221	6.8009	5.9898	5.003	10.2234	12.6619	3.2123	1.842	4.159	6.6546	11.381		0.706731	6.88438
17.6171	0.743	1.6845	3.3472	1.394	2.0893	1.9823	7.4842	6.4452	16.167	14.5	8.9538	5.1733	4.5887	4.5516	5.7052	3.753	12.1562	15.3425	2.3387	1.413	4.859	6.026	9.1996		0.711538	6.08249
17.7361	2.526	1.2857	5.185	2.2839	2.2454	1.6232	5.6434	6.295	16.201	16.447	9.8101	3.1731	4.7032	2.3225	5.2519	5.067	14.296	14.7616	3.4349	1.06	7.525	4.0447	12.9482		0.716344	6.4406
17.8552	1.865	0.6474	6.5205	4.9299	1.4592	1.2411	5.782	6.7004	15.917	14.991	7.5643	5.5824	4.9097	4.4475	5.908	10.175	17.4929	10.1639	1.087	1.647	3.288	6.9301	11.968		0.721154	6.57467
17.9742	1.568	1.9734	8.0077	3.1156	1.6238	2.4623	6.1654	5.6375	14.546	20.851	6.4785	7.2716	6.7925	4.226	6.7235	5.803	20.8867	14.2762	1.3513	2.48	5.071	4.5043	10.0298		0.72596	7.03674
18.0932	2.518	1.4608	6.4078	4.7114	1.0675	1.9436	3.5299	4.205	11.713	19.159	5.2779	6.2949	5.6737	1.9395	5.521	3.445	19.0231	12.9668	1.5804	2.797	6.135	6.6463	13.659		0.730767	6.42068
18.2123	1.749	2.0151	5.2459	3.3677	2.3234	2.6099	4.5577	2.8217	10.313	15.513	6.7805	4.8275	4.8993	4.1356	6.4459	5.813	14.3095	11.3084	1.8516	2.292	8.134	4.2109	9.0795		0.735577	5.85235
18.3313	2.398	1.7338	6.6346	4.7993	1.9301	2.036	5.6395	5.3328	12.789	17.036	5.4275	3.2602	5.7911	5.0757	4.8774	7.579	11.3929	13.4214	1.1442	1.799	4.091	4.7037	9.6202		0.740383	6.02228
18.4504	2.453	1.5906	7.5993	3.5744	1.393	2.939	3.4491	7.3749	13.211	14.586	4.5308	5.4311	6.8747	5.1861	7.1127	9.099	8.6029	15.1875	0.8817	1.808	4.501	4.2236	10.3716		0.745194	6.17309
18.5694	3.404	0.386	11.4305	4.6871	2.6147	2.7795	5.4951	5.878	11.009	10.88	8.4562	5.0146	7.2181	3.1471	7.0924	8.472	11.9504	14.1654	1.0102	1.702	7.908	6.2095	7.9271		0.75	6.47117
18.6884	2.822	2.1533	10.7216	2.5566	1.7151	0.9134	3.3233	9.5104	10.801	11.578	5.0438	4.4616	4.2904	4.4775	5.5847	9.609	8.0809	16.8859	0.7916	1.645	4.319	8.4692	10.7516		0.754806	6.10891
18.8075	3.108	3.142	16.5724	3.3214	1.6542	1.0872	5.0251	7.1182	16.458	15.448	5.5696	6.0982	4.8736	3.6975	7.8685	10.338	5.7937	19.2543	1.5592	2.618	4.693	4.2802	7.3945		0.759617	6.8249
18.9265	3.135	1.6356	16.9754	2.1545	2.6073	0.7886	7.0122	4.513	15.52	10.749	8.6403	7.2106	5.1282	5.5516	7.0655	6.783	8.6179	16.094	1.297	3.2	3.112	12.9758	7.3662		0.764423	6.87533
19.0455	4.957	3.1616	21.5166	1.5963	2.3128	1.7828	4.639	5.432	15.896	13.837	9.2976	6.4994	6.622	10.1967	4.9431	4.884	9.1034	11.7727	2.9412	3.556	4.908	11.9113	6.6435		0.769229	7.32217
19.1646	3.751	3.1536	19.0647	2.2542	2.4077	0.5386	5.2565	7.1371	19.838	11.426	9.625	5.3526	7.3384	8.6365	5.6662	6.342	7.9443	11.3779	2.7475	1.82	8.717	8.0355	4.904		0.77404	7.10149
19.2836	2.607	3.7232	21.0842	3.2661	0.6534	0.2565	3.8842	9.024	19.478	11.236	8.3276	6.0299	6.9741	6.1102	6.7498	5.735	10.9006	8.3651	2.713	1.183	5.01	5.8754	6.5399		0.778846	6.7707
19.4026	4.307	2.991	23.8048	0.8237	2.0518	0.2934	2.8989	8.3626	18.254	11.95	7.1103	9.0059	7.0214	4.4008	4.4029	2.711	14.2595	5.2899	3.0115	2.232	3.511	6.9808	7.6188		0.783652	6.66491
19.5217	4.218	1.7535	23.18	0.993	1.2814	1.638	2.6095	9.3471	17.746	10.385	7.9146	8.484	8.5957	5.0863	7.4528	4.123	14.2507	8.1386	3.2722	2.522	6.232	7.8069	8.3606		0.788462	7.19091
19.6407	2.015	2.2678	20.9488	2.3118	0.4913	1.4859	3.2759	5.0162	11.277	10.05	9.0944	6.4825	10.3064	3.6165	2.4194	6.857	12.3034	11.2385	4.0332	2.628	8.451	7.9476	8.6141		0.793269	6.6579
19.7597	1.432	2.7809	19.2938	4.3188	0.7296	0.9918	4.3877	3.843	14.918	10.684	9.7796	4.2131	7.9027	4.7424	4.4576	3.436	18.5309	8.3518	4.5999	1.056	8.302	9.3813	8.3778		0.798075	6.80481
19.8788	1.257	3.885	17.9426	3.792	2.5722	2.2406	4.6024	1.738	12.403	14.907	9.7938	5.8646	4.2593	7.8339	2.9248	4.082	8.1712	14.5187	3.151	2.853	5.969	5.3264	6.2897		0.802885	6.36423
19.9978	2.835	4.6611	18.1039	2.4499	1.7871	0.9599	2.9709	6.2823	9.071	10.259	7.0474	7.8972	5.2991	9.5341	4.0903	5.437	4.2629	12.7633	4.8016	0.783	4.905	5.8445	6.9217		0.807692	6.04205
20.1168	2.901	2.8149	16.3864	2.9944	2.4762	1.225	5.2056	3.3065	6.998	8.17	4.0692	7.1399	8.1661	9.7137	2.6483	5.924	5.3349	12.5291	7.5544	0.53	6.744	4.4294	9.1868		0.812498	5.93251
20.2359	4.041	1.8134	13.4537	5.3049	2.3624	3.0253	4.3299	1.3048	5.026	7.994	7.3552	6.5799	9.3524	8.4557	5.4737	5.283	7.1415	11.1879	5.6212	1.656	7.178	7.4587	9.7016		0.817308	6.13479
20.3549	4.174	1.2301	12.8122	3.139	1.3313	3.9963	3.7171	1.1833	4.625	7.538	4.1173	6.3174	10.6718	7.8876	4.6521	5.079	8.5271	9.2367	6.8859	2.426	7.744	6.5743	11.6754		0.822115	5.89308
20.4739	5.587	1.8468	11.8462	3.3283	1.344	5.3675	4.946	2.8409	4.542	3.77	2.7996	5.4252	15.2964	5.4	3.0228	6.376	6.7784	11.5213	8.245	2.208	9.538	8.9664	10.5621		0.826921	6.15469
20.593	3.6	4.8493	12.613	6.6573	1.6836	5.0918	5.3552	2.3635	5.364	5.266	3.9998	3.8686	10.3025	3.1248	3.2344	5.826	5.9125	10.9668	6.7475	1.206	8.656	6.7476	5.5607		0.831731	5.60856
20.712	5.592	3.3336	6.4731	5.724	1.3028	4.8501	4.5107	4.3847	4.924	3.162	3.8827	3.12	7.927	3.722	2.5917	3.722	7.5177	9.6043	6.667	2.364	6.075	4.2611	7.4756		0.836538	4.92118
20.831	4.919	2.4105	8.6723	4.2923	3.5702	4.2973	4.2229	2.7256	4.814	3.632	3.9702	4.2754	4.5393	3.3334	3.3828	3.451	5.9338	11.9026	7.7725	1.915	7.861	3.8607	5.7168		0.841344	4.84655
20.9501	5.209	2.3333	7.4732	5.6304	2.1294	2.9145	5.3952	1.606	7.546	7.119	2.4503	4.3856	3.3953	3.0526	2.9552	5.614	3.2583	13.7301	12.3938	2.917	7.239	5.9739	7.0508		0.846154	5.29443
21.0691	5.391	3.341	5.3066	7.1875	0.8077	2.9376	6.0629	1.5524	4.984	8.159	0.9437	3.3267	7.3963	3.1806	1.1386	2.611	4.9615	9.9689	10.9836	1.128	9.758	7.4566	10.2363		0.85096	5.16607
21.1881	4.195	3.8397	7.4771	7.9531	0.492	0.9722	8.3199	0.5373	3.899	5.622	1.7444	2.6035	5.4396	3.6211	1.7231	1.879	3.1808	9.9897	13.8991	0.918	5.709	5.6379	6.3977		0.855767	4.61088
21.3072	4.472	4.4145	6.9282	10.8667	0.6662	2.9269	6.752	0.6576	4.815	6.41	1.5389	1.3279	4.7604	1.1663	1.6733	3.328	2.8302	8.2286	11.6003	4.891	6.869	6.8605	8.5312		0.860577	4.89194
21.4262	6.238	4.017	5.3576	7.2924	1.2105	3.6329	5.2452	0.3937	4.051	4.962	0.658	1.5833	1.4166	2.3723	2.2245	3.466	2.7529	6.2741	7.79	3.951	4.527	4.6601	8.2097		0.865383	4.01243
21.5452	7.524	4.1868	10.8393	5.817	1.4007	3.0443	7.6029	1.4541	4.606	6.032	1.2773	1.6776	1.9423	2.4441	1.682	1.581	5.6315	6.6176	10.8426	1.902	4.892	4.0454	5.1155		0.87019	4.44165
21.6643	8.742	4.2059	11.0243	6.0699	2.8049	3.283	4.6422	0.0286	3.006	4.666	1.0419	0.7855	0.3859	1.2222	0.6272	0.79	3.0148	11.1624	9.5066	2.745	5.439	4.6675	5.859		0.875	4.16173
21.7833	7.259	7.6452	11.6609	7.7269	2.8287	3.5295	5.5368	0.4442	5.259	4.955	1.6525	4.1742	1.4003	0.8755	1.3465	1.278	1.9122	7.4623	12.1631	3.246	7.833	4.4906	6.4457		0.879806	4.83153
21.9024	3.516	5.0374	10.9112	3.7118	1.5564	6.1155	4.2008	1.9116	3.882	5.099	2.2121	1.1549	2.8305	0.7344	0.7435	2.177	1.2719	10.2171	8.4321	6.884	4.926	5.1949	5.7728		0.884617	4.2823
22.0214	7.12	3.5666	8.5858	1.9407	1.0992	5.3443	4.5419	1.4454	1.384	6.154	0.1837	1.8764	1.3055	0.8006	1.3863	0.328	2.0157	8.9052	8.6164	4.266	4.211	5.9351	4.0229		0.889423	3.69716
22.1404	4.005	5.268	13.2327	1.9007	0.7727	4.8858	3.3571	2.2162	1.746	5.776	0.1299	1.5547	1.0591	1.5187	1.9161	0.306	1.4112	5.2194	12.1045	5.395	7.08	6.672	3.1235		0.894229	3.94132
22.2595	3.167	5.98	12.8088	3.4352	2.3339	6.0429	1.7778	1.4815	1.488	5.898	1.1152	0.0323	1.884	1.2061	1.2289	0.868	2.2449	4.2203	13.2567	5.254	6.924	7.2708	3.2882		0.89904	4.05246
22.3785	3.387	7.2125	11.761	2.3663	2.6757	7.1507	3.1549	2.707	1.061	2.433	0.4636	1.0965	1.1405	0.781	0.5764	1.283	1.412	1.6978	9.437	6.258	6.312	9.3377	2.7622		0.903846	3.75943
22.4975	3.662	5.3296	4.6248	4.3128	3.035	8.5716	3.5403	1.1812	1.923	1.895	1.0377	1.5611	1.5335	1.6433	0.5104	0.298	1.3537	1.7679	9.5354	5.143	3.059	4.5383	1.8244		0.908652	3.12526
22.6166	1.476	6.0415	7.0319	3.6691	2.6562	6.9063	6.0602	0.3054	3.998	2.381	0.6376	0.0272	1.0859	2.0969	1.0732	0.588	1.3381	4.5463	8.0436	5.807	6.067	1.8369	2.3402		0.913462	3.30493
22.7356	2.214	6.6623	5.0789	3.5826	5.1412	7.9565	5.0845	0.9769	1.186	1.637	0.2781	0.195	0.713	0.9297	0.9739	1.882	0.4344	2.2471	6.6725	6.025	5.371	1.5562	1.0808		0.918269	2.95124
22.8546	2.954	5.6332	2.4227	4.1894	2.7846	7.6121	3.3257	0.4875	1.125	1.376	0.5441	1.0222	0.9428	0.5185	0.9984	0.904	0.358	0.7694	2.8158	5.642	4.842	2.7878	1.8929		0.923075	2.43253
22.9737	1.772	7.1417	3.6283	4.5983	3.3283	5.9398	3.0757	0.5117	1.429	2.042	1.157	1.026	0.0159	0.7079	1.4238	1.288	0.5864	1.353	2.5364	6.16	6.198	2.203	1.8047		0.927885	2.60552
23.0927	1.961	3.8904	6.2335	6.3292	5.0952	6.1631	2.9807	1.1662	1.146	0.648	0.7232	0.8397	1.6014	0.858	0.4526	1.269	1.0937	3.8526	1.9384	10.252	2.693	1.2663	1.6357		0.932692	2.78647
23.2117	1.763	2.5038	6.6682	4.9767	5.0435	5.9549	6.6923	0.9332	0.527	0	0.2051	0.8843	0.2161	1.2396	1.9023	0.33	1.3523	2.7746	4.1504	7.826	4.059	1.4347	1.1669		0.937498	2.72191
23.3308	1.244	5.9695	6.3235	3.3411	4.6149	7.4987	3.057	0.3343	1.362	0.765	0.3506	0.2003	0.2876	0.7122	2.1721	0.182	0.9515	2.8116	0.6916	6.253	6.308	2.6084	1.7368		0.942308	2.59894
23.4498	2.508	5.9912	3.4757	1.7358	6.0913	4.1999	3.5618	1.6618	1.636	1.808	1.468	0.3945	1.8781	1.1083	1.3664	0.347	0.9035	2.2854	0	7.414	3.027	3.0195	1.4415		0.947115	2.49229
23.5688	3.462	4.6137	5.3322	2.2585	6.0871	4.1291	2.1959	0.6773	1.202	1.794	0.3462	0.1484	0.9073	1.4748	1.1141	0.872	0.8362	2.8415	0.4427	4.494	3.962	0.9148	0.7423		0.951921	2.21079
23.6879	2.168	2.6653	5.7504	5.0277	6.1357	5.4121	1.3308	0.7048	0.466	2.456	0.1439	0.5165	2.1966	0.077	0.5712	2.521	0.5648	0.3639	0.5896	6.133	2.416	0.363	0.2961		0.956731	2.12476
23.8069	3.741	4.4773	2.562	7.9068	8.6847	7.0118	2.273	1.3366	1.822	0.989	0.8373	0.2053	0.4905	0.4203	1.7243	1.033	0.1347	0.0479	1.1236	4.156	2.396	0.4925	2.4702		0.961538	2.44938
23.9259	2.473	4.2236	2.4185	4.7058	10.9088	12.1742	1.0767	0.8008	1.877	0.991	1.6493	0.9118	0.7077	0.2136	0.4689	0.917	0.5245	1.0761	1.664	5.125	3.367	1.5435	2.6948		0.966344	2.71794
24.045	3.788	3.5825	2.836	4.052	7.102	14.3221	2.9707	1.3886	0.135	0.628	0.6001	0.5565	0.0515	0.1567	0.9736	1.109	1.388	0.8391	1.7155	2.673	1.84	1.4682	0.4887		0.971154	2.37673
24.164	2.029	2.8813	3.1568	4.4006	6.634	14.7482	1.5011	0.5158	1.491	0.708	0.8166	0.942	0.6153	0.7327	0.1504	1.399	0.0668	1.9632	2.27	1.798	2.193	0.6571	0.0441		0.97596	2.24843
24.283	1.279	1.7727	2.8508	7.6137	5.6214	15.2497	1.5095	0.6004	1.05	0.492	0	0.702	0.3073	0.5212	0	0.066	0.0435	0.3519	0.5566	4.237	2.547	1.9591	0.0286		0.980767	2.14606
24.4021	2.042	2.2902	2.9678	4.5303	3.5345	10.4299	4.6487	0.9507	0.25	0.7	0.215	0.312	0.5545	0.8846	0.0028	0.33	0.4067	0.8662	1.1159	3.627	0.927	0.7758	0.6576		0.985577	1.8704
24.5211	2.579	0.6634	5.0679	5.9901	6.4446	12.7652	3.4952	1.73	0.581	1.945	0.6895	1.319	0.618	0.7533	1.1214	0.377	0.5709	0.9075	1.3004	1.979	0.279	1.6277	1.2192		0.990383	2.34884
24.6401	2.408	2.8737	4.905	6.2026	5.1068	9.0548	1.9851	1.222	0.311	1.422	0.4015	1.3488	1.0578	0	0.2089	0.236	0.2819	0.3267	0.4191	1.457	0.557	1.1718	0.781		0.99519	1.90167
24.7592	2.918	2.1025	1.9537	4.8906	2.7108	6.9912	2.3249	1.875	0.942	0.218	0.3129	0.6122	0.2836	0.6318	0	0.556	0.1534	0.0401	0.9529	0.238	1.096	0.7179	0.1426		1	1.42018

## Sheet: Sheet1
Image4				Image5				Image6				Image12				Image13				Image14				Distance	Image4	Image5	Image6	Image12	Image13	Image14
Ap-Ba	Average int			Ap-Ba	Average int			Ap-Ba	Average int			Ap-Ba	Average int.			Ap-Ba	Average int.			Ap-Ba	Average int.			0	50.8035	73.2556	18.918	63.1845	101.067	56.1424
0	50.8035			0	73.2556			0	18.918			0	63.1845			0	101.067			0	56.1424			0.05	48.3695	92.8382	29.355	68.3776	93.4915	80.8534
0.00653405	49.4964			0.00534603	78.4698			0.00628748	21.9309			0.00480629	64.0695			0.00462828	98.0609			0.00515314	57.0331			0.1	44.078	89.0645	33.7103	70.8	78.8087	98.2676
0.0130736	49.0036			0.0106966	81.3993			0.0125802	25.1472			0.00961663	65.4273			0.00926045	97.5647			0.0103106	58.6076			0.15	32.0222	62.704	26.6448	56.7231	53.6526	71.9885
0.0196076	49.8597			0.0160426	88.6633			0.0188677	27.8977			0.0144229	63.9868			0.0138887	96.1489			0.0154638	66.1306			0.2	18.8104	47.8962	19.0254	41.1769	41.7718	47.7909
0.0261417	48.3927			0.0213886	90.9815			0.0251552	30.642			0.0192292	63.8956			0.018517	94.7342			0.0206169	71.0408			0.25	15.9828	38.2381	16.0753	29.4713	37.2392	33.7326
0.0326812	47.0429			0.0267391	95.6318			0.031448	32.5853			0.0240395	67.0105			0.0231492	92.459			0.0257744	78.1397			0.3	13.9001	33.9775	12.8647	24.932	30.6721	30.8942
0.0392153	46.9184			0.0320852	100.076			0.0377355	34.6343			0.0288458	68.8002			0.0277775	91.4774			0.0309275	85.0858			0.35	13.5655	28.3884	11.295	20.6565	28.8559	24.6125
0.0457493	46.3293			0.0374312	105.166			0.0440229	34.7735			0.0336521	70.1978			0.0324057	89.9269			0.0360807	94.3409			0.4	11.6823	21.4451	8.8013	18.4718	26.0877	19.8072
0.0522888	47.4787	48.3695		0.0427817	103.283			0.0503157	37.6661	29.355		0.0384625	72.7651			0.0370379	88.8903			0.0412381	103.719			0.45	8.39586	18.8229	7.2531	14.7184	23.102	15.4652
0.0588229	47.0546			0.0481278	101.611			0.0566032	37.6022			0.0432688	73.3049			0.0416662	89.4263			0.0463913	109.441			0.5	6.68659	16.427	7.07043	10.2489	18.2998	11.8809
0.0653569	46.1601			0.0534738	102.683	92.8382		0.0628907	36.3152			0.0480751	72.9113			0.0462945	90.0393			0.0515444	109.706	80.8534		0.55	5.89467	12.5155	5.47526	8.28122	16.3257	9.77107
0.0718965	47.7699			0.0588243	99.3802			0.0691834	35.2161			0.0528854	74.9778	68.3776		0.0509266	92.1026	93.4915		0.0567019	105.666			0.6	5.803	11.352	4.97431	8.25922	16.1229	8.36823
0.0784305	45.5119			0.0641704	96.7793			0.0754709	33.3044			0.0576917	74.8896			0.0555549	91.702			0.061855	103.081			0.65	5.79494	9.93213	4.64443	7.73901	13.9589	8.66548
0.0849646	45.6737			0.0695164	94.811			0.0817584	32.288			0.062498	75.2529			0.0601832	87.2403			0.0670082	104.365			0.7	5.68376	9.2115	4.54377	6.45227	11.7616	7.68488
0.0915041	42.4928			0.0748669	92.5392			0.0880511	30.1978			0.0673083	73.5669			0.0648154	82.1823			0.0721657	100.748			0.75	5.61801	9.11815	4.12939	6.39584	10.7685	7.61533
0.0980381	40.2647			0.0802129	88.6363			0.0943386	32.3356			0.0721146	72.5013			0.0694436	81.2924			0.0773188	101.272			0.8	5.78452	8.39946	4.32443	6.78966	9.40923	8.42545
0.104578	37.6964	44.078		0.0855635	86.8611			0.100631	32.4228	33.7103		0.0769249	70.3641			0.0740758	81.3435			0.0824763	99.0499			0.85	6.25657	7.77583	4.70175	5.59939	9.04405	8.34597
0.111112	35.2414			0.0909095	84.0068			0.106919	29.3819			0.0817312	71.8701			0.0787041	81.113			0.0876294	96.4004			0.9	6.01315	8.83413	4.60515	4.24389	6.18039	8.5794
0.117646	34.8564			0.0962555	79.6066			0.113206	29.8226			0.0865375	69.3306			0.0833324	79.8868			0.0927826	93.1504			0.95	6.21921	7.48396	4.6827	2.72299	4.07805	7.30199
0.124185	32.9719			0.101606	78.9601	89.0645		0.119499	27.7522			0.0913479	67.9114			0.0879645	77.4616			0.09794	91.1332			1	5.34982	5.02531	4.54478	2.16044	3.09794	5.61758
0.130719	33.6428			0.106952	73.1024			0.125787	25.7046			0.0961542	68.0354			0.0925928	72.3981			0.103093	87.8108	98.2676
0.137253	31.5231			0.112298	70.9989			0.132074	27.508			0.10096	64.2782	70.8001		0.0972211	67.7841			0.108246	83.2677
0.143793	28.8289			0.117649	69.1427			0.138367	25.7497			0.105771	63.0867			0.101853	64.4914	78.8087		0.113404	81.349
0.150327	27.091	32.0222		0.122995	65.6981			0.144654	24.7812			0.110577	60.6797			0.106482	61.7429			0.118557	78.1166
0.156861	23.9895			0.128341	62.1557			0.150942	22.458	26.6448		0.115383	61.1986			0.11111	60.9137			0.12371	77.2058
0.163401	21.7856			0.133691	58.0972			0.157235	21.102			0.120194	58.9374			0.115742	58.7622			0.128868	74.4881
0.169935	19.5725			0.139037	57.5172			0.163522	20.101			0.125	59.455			0.12037	55.9065			0.134021	72.5964
0.176469	18.9713			0.144383	57.8877			0.16981	19.8678			0.129806	58.0823			0.124999	54.0717			0.139174	68.9641
0.183008	16.8456			0.149734	57.4348			0.176102	18.5277			0.134617	56.0864			0.129631	53.1014			0.144331	63.8933
0.189542	16.4903			0.15508	55.0052	62.704		0.18239	18.0044			0.139423	54.077			0.134259	51.9142			0.149484	61.5279
0.196076	16.336			0.160426	52.9345			0.188677	19.2893			0.144229	53.9743			0.138887	49.8079			0.154638	58.4764	71.9885
0.202616	16.4924	18.8104		0.165776	50.5713			0.19497	17.5943			0.14904	50.4931			0.143519	50.113			0.159795	54.5364
0.20915	15.9069			0.171122	51.5874			0.201257	17.7167	19.0254		0.153846	47.8837	56.7231		0.148148	47.7886			0.164948	52.5228
0.215684	16.2847			0.176468	48.1156			0.207545	16.5144			0.158652	44.9646			0.152776	46.0564	53.6526		0.170101	51.4993
0.222223	16.1656			0.181819	47.3519			0.213838	16.5291			0.163462	43.8481			0.157408	44.6574			0.175259	48.8697
0.228757	16.8759			0.187165	47.7497			0.220125	16.7233			0.168269	42.5493			0.162036	45.2417			0.180412	47.7146
0.235292	15.2894			0.192511	45.9336			0.226413	17.2492			0.173075	41.5947			0.166665	42.8318			0.185565	47.8321
0.241831	16.6135			0.197862	42.9487			0.232705	16.0261			0.177885	40.6342			0.171297	42.5534			0.190723	43.5315
0.248365	15.3362			0.203208	43.8731	47.8962		0.238993	15.4751			0.182692	41.2382			0.175925	43.6246			0.195876	42.072
0.254899	15.3898	15.9828		0.208554	42.9222			0.24528	15.3661			0.187498	42.4738			0.180553	42.2599			0.201029	41.5401	47.7909
0.261439	15.637			0.213904	41.4526			0.251573	14.7191	16.0753		0.192308	40.4103			0.185186	42.4447			0.206186	40.1016
0.267973	13.9919			0.21925	40.4077			0.257861	14.2948			0.197115	37.5224			0.189814	40.8553			0.21134	36.0716
0.274512	13.4356			0.224601	37.4076			0.264153	13.0045			0.201925	36.533	41.1769		0.194446	39.1934			0.216497	32.7212
0.281046	13.4015			0.229947	36.4434			0.270441	13.3538			0.206731	35.0253			0.199074	38.7219			0.22165	32.224
0.28758	13.8465			0.235293	37.3922			0.276728	12.5158			0.211538	32.5473			0.203703	37.1054	41.7718		0.226803	32.2797
0.29412	13.0284			0.240643	36.2644			0.283021	12.9844			0.216348	31.5131			0.208335	36.8923			0.231961	31.6971
0.300654	13.6494			0.245989	35.7227			0.289309	12.6816			0.221154	29.8447			0.212963	36.5662			0.237114	33.6385
0.307188	14.2109	13.9001		0.251335	36.1299	38.2381		0.295596	11.6426			0.22596	29.0326			0.217591	37.9167			0.242267	32.8772
0.313728	13.7424			0.256686	36.2532			0.301889	12.4401	12.8647		0.230771	28.2314			0.222224	40.278			0.247425	32.9634
0.320262	13.615			0.262032	37.2087			0.308176	12.6112			0.235577	28.4651			0.226852	37.7739			0.252578	32.7517	33.7326
0.326796	13.9497			0.267378	35.7017			0.314464	12.091			0.240383	26.8243			0.23148	37.5712			0.257731	32.713
0.333335	13.6962			0.272728	35.3374			0.320757	11.4969			0.245194	26.1839			0.236112	36.7237			0.262888	31.6616
0.339869	13.4813			0.278075	36.0157			0.327044	11.4454			0.25	27.0458	29.4713		0.240741	36.7255			0.268041	33.1122
0.346403	13.4488			0.283421	33.6554			0.333332	10.3863			0.254806	27.4512			0.245369	37.8032			0.273195	33.6001
0.352943	13.0248	13.5655		0.288771	32.1595			0.339624	11.5912			0.259617	26.1617			0.250001	34.1412	37.2392		0.278352	31.4974
0.359477	12.6674			0.294117	30.5562			0.345912	10.597			0.264423	25.5748			0.254629	32.5457			0.283505	31.8083
0.366011	12.562			0.299463	30.7729			0.352199	10.1408	11.295		0.269229	25.8263			0.259258	32.5821			0.288658	30.7133
0.37255	12.0782			0.304814	32.1139	33.9775		0.358492	9.98331			0.27404	25.7967			0.26389	31.893			0.293816	29.741
0.379084	12.391			0.31016	32.5197			0.36478	9.68323			0.278846	24.9494			0.268518	31.3697			0.298969	28.1589
0.385619	11.9038			0.315506	31.8468			0.371067	8.68361			0.283652	24.2646			0.273146	30.6648			0.304122	25.9362	30.8942
0.392158	11.189			0.320856	31.6027			0.37736	8.6412			0.288462	23.9554			0.277778	29.653			0.30928	27.2118
0.398692	10.5965			0.326202	30.7875			0.383647	8.77404			0.293269	23.8921			0.282407	29.3245			0.314433	26.6248
0.405226	10.0707	11.6823		0.331548	27.3561			0.389935	8.23538			0.298075	22.5943			0.287035	29.116			0.319586	25.3298
0.411766	9.69038			0.336899	25.7207			0.396228	8.29983			0.302885	23.7854	24.932		0.291667	29.626			0.324743	23.6354
0.4183	8.92165			0.342245	25.2039			0.402515	8.10978	8.8013		0.307692	23.2654			0.296295	30.2738			0.329896	24.4708
0.424834	8.72605			0.347591	25.9813			0.408802	8.19104			0.312498	21.2328			0.300924	30.344	30.6721		0.33505	24.15
0.431373	8.58048			0.352941	24.4773	28.3884		0.415095	7.94357			0.317308	20.8975			0.305556	29.2891			0.340207	23.6992
0.437907	8.16837			0.358287	23.4102			0.421383	7.59906			0.322115	20.1629			0.310184	30.8335			0.34536	23.5477
0.444441	7.69057			0.363634	22.3526			0.42767	7.23789			0.326921	19.5732			0.314812	29.968			0.350513	23.7611
0.450981	6.99355	8.39586		0.368984	22.4168			0.433963	6.76544			0.331731	18.6717			0.319445	29.0092			0.355671	23.6938	24.6125
0.457515	6.95228			0.37433	21.1574			0.44025	6.38843			0.336538	18.9404			0.324073	30.1546			0.360824	23.0137
0.464055	6.91712			0.379681	21.198			0.446543	7.00578			0.341348	20.6438			0.328705	29.3965			0.365981	21.4159
0.470589	6.614			0.385027	21.8332			0.452831	6.89357	7.2531		0.346154	21.968			0.333333	27.0888			0.371135	21.2957
0.477123	6.79578			0.390373	20.5379			0.459118	7.81492			0.35096	21.2097	20.6565		0.337962	28.7223			0.376288	21.3212
0.483662	6.40485			0.395723	19.9502			0.465411	7.25095			0.355771	21.2254			0.342594	29.4507			0.381445	20.6806
0.490196	6.33182			0.401069	20.1493	21.4451		0.471698	6.87186			0.360577	20.5541			0.347222	26.8449			0.386598	19.7589
0.49673	6.6378			0.406415	19.6124			0.477986	6.75886			0.365383	19.9927			0.35185	26.6574	28.8559		0.391752	17.2568
0.50327	6.83904	6.68659		0.411766	18.4916			0.484279	6.85859			0.370194	19.0875			0.356483	26.7126			0.396909	16.7679
0.509804	6.71498			0.417112	19.3791			0.490566	6.96624			0.375	18.4555			0.361111	27.6027			0.402062	16.7542	19.8072
0.516338	6.66855			0.422458	19.6906			0.496854	7.44003			0.379806	17.98			0.365739	26.278			0.407215	15.3231
0.522877	5.96807			0.427808	18.1605			0.503146	6.602	7.07043		0.384617	17.1435			0.370371	26.5904			0.412373	15.3688
0.529411	5.39509			0.433154	18.0585			0.509434	6.44412			0.389423	17.1573			0.375	26.7562			0.417526	15.6828
0.535945	5.29361			0.4385	18.7415			0.515721	5.72481			0.394229	17.6965			0.379628	25.9746			0.422679	15.855
0.542485	6.07199			0.443851	18.9137			0.522014	5.54704			0.39904	16.9977			0.38426	25.3718			0.427837	15.7021
0.549019	5.57752			0.449197	18.7226			0.528302	5.89763			0.403846	16.8999	18.4718		0.388888	25.4348			0.43299	15.8298
0.555553	5.46755	5.89467		0.454543	18.4588	18.8229		0.534589	5.2987			0.408652	17.2913			0.393517	24.8644			0.438143	15.5812
0.562093	6.06217			0.459894	18.1391			0.540882	4.82836			0.413462	16.9576			0.398149	25.4136			0.4433	15.7154
0.568627	5.50439			0.46524	16.5549			0.547169	4.79613			0.418269	16.5605			0.402777	25.9662	26.0877		0.448453	14.8157
0.575161	5.61902			0.470586	18.0083			0.553457	5.26525	5.47526		0.423075	15.2501			0.407405	27.1223			0.453607	14.7784	15.4652
0.5817	5.50592			0.475936	17.3716			0.55975	5.48409			0.427885	14.413			0.412037	28.0956			0.458764	14.5584
0.588234	5.84333			0.481282	15.9143			0.566037	5.6724			0.432692	14.4388			0.416666	26.4137			0.463917	13.1282
0.594768	6.19088			0.486628	16.3099			0.572325	4.94327			0.437498	13.8773			0.421294	24.0236			0.46907	13.8256
0.601308	5.89531	5.803		0.491979	15.6183			0.578617	4.92486			0.442308	13.2125			0.425926	22.5821			0.474228	12.4605
0.607842	5.96496			0.497325	16.2597			0.584905	4.90836			0.447115	13.1095			0.430554	21.8459			0.479381	11.7873
0.614376	6.31222			0.502671	15.247			0.591192	4.7711			0.451921	12.0738	14.7184		0.435183	22.2749			0.484534	11.3528
0.620916	5.36403			0.508021	14.8472	16.427		0.597485	4.54678			0.456731	12.8069			0.439815	21.0215			0.489692	11.2711
0.62745	5.37633			0.513367	14.6571			0.603772	4.54358	4.97431		0.461538	11.4908			0.444443	20.2046			0.494845	10.3142
0.633984	5.58103			0.518713	14.0456			0.61006	4.74179			0.466344	11.6237			0.449071	20.5886			0.499998	10.1593
0.640523	5.35917			0.524064	13.1854			0.616353	4.61164			0.471154	10.516			0.453704	19.949	23.102		0.505155	9.95171	11.8809
0.647057	5.79062			0.52941	12.3396			0.62264	4.54402			0.47596	10.273			0.458332	19.275			0.510308	10.1377
0.653597	6.61118	5.79494		0.53476	12.3649			0.628933	4.58347			0.480771	9.96906			0.462964	18.6111			0.515466	10.5408
0.660131	5.75032			0.540106	11.5649			0.63522	4.5541			0.485577	9.0653			0.467592	18.5419			0.520619	10.1759
0.666665	5.54199			0.545453	11.0875			0.641508	4.59305			0.490383	9.82258			0.472221	18.5931			0.525772	10.3333
0.673204	5.59694			0.550803	10.8792	12.5155		0.647801	4.80571			0.495194	8.59441			0.476853	18.7023			0.53093	9.37643
0.679738	6.06535			0.556149	10.906			0.654088	4.72172	4.64443		0.5	8.32761	10.2489		0.481481	17.9552			0.536083	9.61824
0.686272	5.88237			0.561495	11.7185			0.660376	4.98129			0.504806	7.31627			0.486109	18.6413			0.541236	9.60668
0.692812	5.58097			0.566846	11.3954			0.666668	4.2291			0.509617	8.39256			0.490741	17.9607			0.546393	9.30341
0.699346	5.33407			0.572192	11.3939			0.672956	4.56009			0.514423	8.14396			0.49537	17.602			0.551547	8.84714	9.77107
0.70588	5.7181	5.68376		0.577538	11.2971			0.679243	4.31449			0.519229	7.93507			0.499998	17.9386			0.5567	9.01406
0.71242	5.46087			0.582888	11.4968			0.685536	4.25913			0.52404	7.9476			0.50463	17.4758	18.2998		0.561857	8.8196
0.718954	5.13937			0.588234	10.6739			0.691824	4.69767			0.528846	7.76156			0.509259	18.1334			0.56701	8.60219
0.725488	5.77319			0.59358	12.2381			0.698111	4.87111			0.533652	8.82477			0.513887	17.3308			0.572163	8.02352
0.732027	6.35758			0.598931	11.2246			0.704404	4.43726	4.54377		0.538462	8.22697			0.518519	17.6804			0.577321	7.93239
0.738561	5.77032			0.604277	11.1757	11.352		0.710691	4.47587			0.543269	8.65877			0.523147	17.1126			0.582474	8.02494
0.745095	5.38794			0.609623	10.7147			0.716979	4.30862			0.548075	8.59613			0.527776	16.4355			0.587627	7.92672
0.751635	5.43682	5.61801		0.614973	9.85401			0.723272	4.05082			0.552885	9.28982	8.28122		0.532408	16.412			0.592785	7.99676
0.758169	5.27423			0.620319	9.45389			0.729559	3.95331			0.557692	8.84171			0.537036	14.7825			0.597938	8.56587
0.764703	5.14966			0.625665	10.0488			0.735847	4.13118			0.562498	9.21755			0.541664	15.3898			0.603091	8.77627	8.36823
0.771243	6.06823			0.631016	9.46957			0.742139	3.7715			0.567308	8.55293			0.546296	14.937			0.608248	8.53992
0.777777	5.67464			0.636362	9.22097			0.748427	4.21822			0.572115	8.32631			0.550925	15.0428	16.3257		0.613402	8.29782
0.784311	5.91266			0.641708	9.97267			0.754714	4.12556	4.12939		0.576921	8.63819			0.555553	16.1304			0.618555	8.11478
0.79085	5.81382			0.647059	10.3406			0.761007	4.59887			0.581731	8.1501			0.560185	15.1384			0.623712	9.11534
0.797384	6.12395			0.652405	10.3139	9.93213		0.767295	4.36805			0.586538	8.22718			0.564813	16.0634			0.628865	8.83158
0.803918	6.25897	5.78452		0.657751	10.269			0.773582	4.0117			0.591344	8.1263			0.569442	16.9688			0.634019	9.02424
0.810458	6.402			0.663101	8.99543			0.779875	4.31614			0.596154	7.25116			0.574074	17.0595			0.639176	9.06166
0.816992	6.24155			0.668447	9.05747			0.786162	4.32728			0.60096	7.26079	8.25922		0.578702	16.6553			0.644329	8.8144
0.823531	6.55971			0.673798	9.21373			0.792455	4.20642			0.605771	7.85769			0.583334	16.2825			0.649487	8.51238
0.830065	6.19076			0.679144	9.37952			0.798743	4.52371			0.610577	8.76183			0.587963	17.0524			0.65464	8.34272	8.66548
0.836599	6.0644			0.68449	8.69279			0.80503	4.24324	4.32443		0.615383	8.6542			0.592591	16.3047			0.659793	8.327
0.843139	6.00686			0.68984	9.07166			0.811323	4.59443			0.620194	8.06233			0.597223	15.1708			0.66495	8.10689
0.849673	6.05827			0.695186	8.80863			0.81761	5.15346			0.625	8.06123			0.601851	14.5262	16.1229		0.670104	8.2075
0.856207	6.52905	6.25657		0.700532	9.3653			0.823898	4.61242			0.629806	8.47592			0.60648	15.6526			0.675257	7.89508
0.862747	6.128			0.705883	9.26153	9.2115		0.83019	4.77947			0.634617	7.73009			0.611112	15.7249			0.680414	8.14882
0.869281	6.07063			0.711229	9.14069			0.836478	4.53968			0.639423	7.77962			0.61574	15.5398			0.685567	7.6722
0.875815	6.09284			0.716575	9.75115			0.842765	4.80906			0.644229	6.42675			0.620368	15.1777			0.69072	7.03082
0.882354	6.37575			0.721925	9.08617			0.849058	4.65533			0.64904	6.68054			0.625	14.1979			0.695878	7.29758
0.888888	5.90537			0.727272	9.11089			0.855346	4.47016	4.70175		0.653846	6.63892	7.73901		0.629629	13.1882			0.701031	6.47798	7.68488
0.895422	5.94077			0.732618	9.16453			0.861633	3.76229			0.658652	6.86937			0.634257	13.1395			0.706184	7.16659
0.901962	5.57867	6.01315		0.737968	8.9917			0.867926	4.64443			0.663462	6.29076			0.638889	13.7276			0.711342	7.88339
0.908496	6.11113			0.743314	8.82823			0.874213	4.73288			0.668269	6.60435			0.643517	12.4826			0.716495	7.51367
0.91503	6.5109			0.74866	9.16305			0.880501	4.64358			0.673075	6.61649			0.648146	12.4761			0.721648	7.40164
0.921569	6.03735			0.754011	8.82695	9.11815		0.886794	4.67622			0.677885	6.32908			0.652778	12.2414	13.9589		0.726805	7.40375
0.928104	6.39533			0.759357	8.81755			0.893081	4.96342			0.682692	6.12162			0.657406	10.8055			0.731959	7.46441
0.934638	6.43301			0.764703	8.4433			0.899369	4.81414			0.687498	6.51145			0.662034	11.2246			0.737112	7.97125
0.941177	6.14715			0.770053	8.25981			0.905661	4.60421	4.60515		0.692308	6.32895			0.666667	11.0451			0.742269	7.85526
0.947711	6.02181			0.775399	8.38439			0.911949	4.72281			0.697115	6.19923			0.671295	11.1234			0.747422	7.35343
0.954245	6.09697	6.21921		0.780745	8.67709			0.918236	4.37977			0.701921	6.65139	6.45227		0.675923	11.7412			0.752575	8.13991	7.61533
0.960785	5.63547			0.786096	8.13294			0.924529	4.71511			0.706731	6.88438			0.680555	12.0938			0.757733	8.08014
0.967319	5.36812			0.791442	8.22864			0.930817	4.3717			0.711538	6.08249			0.685184	12.9045			0.762886	8.15358
0.973853	5.23491			0.796788	8.31746			0.937104	4.4887			0.716344	6.4406			0.689812	12.7025			0.768039	9.0193
0.980392	5.95609			0.802138	8.33394	8.39946		0.943397	4.90433			0.721154	6.57467			0.694444	12.097			0.773197	8.8427
0.986926	5.14265			0.807484	7.54663			0.949684	5.23467			0.72596	7.03674			0.699072	11.2662			0.77835	8.36435
0.99346	5.19017			0.81283	7.5431			0.955972	4.64452	4.6827		0.730767	6.42068			0.703701	12.3744	11.7616		0.783503	8.19924
1	4.9213	5.34982		0.818181	7.31737			0.962265	4.74679			0.735577	5.85235			0.708333	11.6807			0.78866	8.49184
				0.823527	7.36327			0.968552	4.78719			0.740383	6.02228			0.712961	10.7188			0.793814	8.13934
				0.828878	7.86333			0.974845	4.67602			0.745194	6.17309			0.717593	10.4966			0.798971	8.48875
				0.834224	7.55765			0.981132	5.06849			0.75	6.47117	6.39584		0.722222	10.9619			0.804124	8.47529	8.42545
				0.83957	7.91557			0.98742	4.41224			0.754806	6.10891			0.72685	10.6851			0.809277	7.97327
				0.84492	7.63126			0.993713	4.06962			0.759617	6.8249			0.731482	11.6851			0.814435	8.2406
				0.850266	8.43056			1	4.0531	4.54478		0.764423	6.87533			0.73611	11.6543			0.819588	8.01345
				0.855612	8.58954	7.77583						0.769229	7.32217			0.740739	11.2678			0.824741	8.39956
				0.860963	8.25272							0.77404	7.10149			0.745371	10.465			0.829899	8.35124
				0.866309	8.51951							0.778846	6.7707			0.749999	9.49771			0.835052	9.0709
				0.871655	8.81989							0.783652	6.66491			0.754627	9.34047	10.7685		0.840205	7.79282
				0.877005	8.7871							0.788462	7.19091			0.759259	10.0741			0.845362	8.42915
				0.882351	8.97268							0.793269	6.6579			0.763888	9.63898			0.850516	8.8427	8.34597
				0.887697	8.77733							0.798075	6.80481			0.768516	9.46817			0.855669	8.49539
				0.893048	8.55144							0.802885	6.36423	6.78966		0.773148	9.68788			0.860826	8.93759
				0.898394	9.20809							0.807692	6.04205			0.777776	10.0181			0.865979	8.78791
				0.90374	9.61841	8.83413						0.812498	5.93251			0.782405	9.61113			0.871132	8.89286
				0.909091	9.65479							0.817308	6.13479			0.787037	9.11434			0.87629	9.15303
				0.914437	8.63878							0.822115	5.89308			0.791665	8.93806			0.881443	8.9232
				0.919783	8.25556							0.826921	6.15469			0.796293	8.63147			0.886596	8.37999
				0.925133	8.00119							0.831731	5.60856			0.800926	8.90998	9.40923		0.891754	8.65119
				0.930479	7.02429							0.836538	4.92118			0.805554	9.32403			0.896907	7.4069
				0.935825	6.89576							0.841344	4.84655			0.810182	9.575			0.90206	8.16595	8.5794
				0.941176	6.78271							0.846154	5.29443			0.814814	10.3207			0.907217	7.87913
				0.946522	6.08018							0.85096	5.16607	5.59939		0.819443	9.92597			0.912371	7.01541
				0.951868	6.02239	7.48396						0.855767	4.61088			0.824071	10.1688			0.917524	6.85709
				0.957218	5.69017							0.860577	4.89194			0.828703	9.64814			0.922681	7.59968
				0.962564	5.64739							0.865383	4.01243			0.833331	8.75606			0.927834	8.19239
				0.96791	5.45734							0.87019	4.44165			0.83796	8.4825			0.932987	7.37554
				0.973261	5.23599							0.875	4.16173			0.842592	8.16358			0.938145	8.72669
				0.978607	5.08368							0.879806	4.83153			0.84722	7.8652			0.943298	6.87317
				0.983957	4.60416							0.884617	4.2823			0.851852	7.25465	9.04405		0.948456	5.97026
				0.989303	4.32621							0.889423	3.69716			0.856481	6.91482			0.953609	6.53051	7.30199
				0.994649	4.85419							0.894229	3.94132			0.861109	6.48719			0.958762	6.64338
				1	4.32864	5.02531						0.89904	4.05246			0.865741	6.3742			0.963919	6.79815
												0.903846	3.75943	4.24389		0.870369	6.16407			0.969072	7.24037
												0.908652	3.12526			0.874998	6.01195			0.974226	6.22359
												0.913462	3.30493			0.87963	6.18728			0.979383	5.62046
												0.918269	2.95124			0.884258	5.81378			0.984536	5.01528
												0.923075	2.43253			0.888886	6.33769			0.989689	4.6066
												0.927885	2.60552			0.893518	6.13394			0.994847	4.24512
												0.932692	2.78647			0.898147	5.95161			1	4.16522	5.61758
												0.937498	2.72191			0.902775	5.60778	6.18039
												0.942308	2.59894			0.907407	5.54598
												0.947115	2.49229			0.912035	4.57
												0.951921	2.21079	2.72299		0.916664	4.4796
												0.956731	2.12476			0.921296	3.7686
												0.961538	2.44938			0.925924	4.392
												0.966344	2.71794			0.930552	4.34265
												0.971154	2.37673			0.935185	3.73148
												0.97596	2.24843			0.939813	3.67736
												0.980767	2.14606			0.944441	3.5242
												0.985577	1.8704			0.949073	3.73546
												0.990383	2.34884			0.953702	3.09122	4.07805
												0.99519	1.90167			0.95833	2.97712
												1	1.42018	2.16044		0.962962	3.08173
																0.96759	3.07783
																0.972219	3.36816
																0.976851	2.74537
																0.981479	3.2549
																0.986111	3.11144
																0.99074	3.27753
																0.995368	3.13097
																1	2.95437	3.09794
