# Supplementary material for: Crumbs organizes the transport machinery by regulating apical levels of PI(4,5)P2 in Drosophila
Source: eLife. 2019 Nov 7;8:e50900. doi: 10.7554/eLife.50900 (PMC6881148; doi:10.7554/eLife.50900)
Supplement: Figure 1—source data 1. [file elife-50900-fig1-data1.xlsx]

## Sheet: Figure 1
	Original counts
	Experiment 1
		w*;;fkhGAL4/+			w*;;+/UAS-crbRNAi,UAS-Dicer			w*;;fkhGAL4/UAS-crbRNAi,UAS-Dicer
	Time (hours after egg laying)	# of pupae found	percentage	accumulative percentage	# of pupae found	percentage	accumulative percentage	# of pupae found	percentage	accumulative percentage
	72	0	0	0	0	0	0	0	0	0
	96	12	50	50	13	61.9048	61.9048	1	3.7037	3.7037
	99	8	33.3333	83.3333	3	14.2857	76.1905	2	7.40741	11.1111
	105	2	8.33333	91.6667	5	23.8095	100	8	29.6296	40.7407
	113	1	4.16667	95.8333	0	0	100	9	33.3333	74.0741
	137	1	4.16667	100	0	0	100	7	25.9259	100
	164	0	0	100	0	0	100	0	0	100
	194	0	0	100	0	0	100	0	0	100
	total number of animals	24			21			27
	Experiment 2
		w*;;fkhGAL4/+			w*;;+/UAS-crbRNAi,UAS-Dicer			w*;;fkhGAL4/UAS-crbRNAi,UAS-Dicer
	Time (hours after egg laying)	# of pupae found	percentage	accumulative percentage	# of pupae found	percentage	accumulative percentage	# of pupae found	percentage	accumulative percentage
	72	0	0	0	0	0	0	0	0	0
	96	6	20.6897	20.6897	4	13.7931	13.8	4	26.6667	26.6667
	99	6	20.6897	41.3793	7	24.1379	37.9379	7	46.6667	73.3333
	105	7	24.1379	65.5172	5	17.2414	55.1793	3	20	93.3333
	113	1	3.44828	68.9655	4	13.7931	68.9724	1	6.66667	100
	137	9	31.0345	100	9	31.0345	100.007	0	0	100
	164	0	0	100	0	0	100.007	0	0	100
	194	0	0	100	0	0	100.007	0	0	100
	toal number of animals	29			29			15
	Experiment 3
		w*;;fkhGAL4/+			w*;;+/UAS-crbRNAi,UAS-Dicer			w*;;fkhGAL4/UAS-crbRNAi,UAS-Dicer
	Time (hours after egg laying)	# of pupae found	percentage	accumulative percentage	# of pupae found	percentage	accumulative percentage	# of pupae found	percentage	accumulative percentage
	72	0	0	0	0	0	0	0	0	0
	96	14	51.8519	51.8519	12	92.3077	92.3077	0	0	0
	99	3	11.1111	62.963	0	0	92.3077	1	2.94118	2.94118
	105	7	25.9259	88.8889	1	7.69231	100	5	14.7059	17.6471
	113	2	7.40741	96.2963	0	0	100	6	17.6471	35.2941
	137	1	3.7037	100	0	0	100	19	55.8824	91.1765
	164	0	0	100	0	0	100	1	2.94118	94.1176
	194	0	0	100	0	0	100	2	5.88235	100
	toal number of animals	27			13			34
	Summary
		w*;;fkhGAL4/+
	Time (hours after egg laying)	Exp 1	Exp 2	Exp 3	Average
	72	0	0	0	0
	96	50	20.6897	51.8519	40.8472
	99	83.3333	41.3793	62.963	62.5585
	105	91.6667	65.5172	88.8889	82.0243
	113	95.8333	68.9655	96.2963	87.0317
	137	100	100	100	100
	164	100	100	100	100
	194	100	100	100	100
		w*;;+/UAS-crbRNAi,UAS-Dicer
	Time (hours after egg laying)	Exp 1	Exp 2	Exp 3	Average
	72	0	0	0	0
	96	61.9048	13.8	92.3077	56.0042
	99	76.1905	37.9379	92.3077	68.812
	105	100	55.1793	100	85.0598
	113	100	68.9724	100	89.6575
	137	100	100.007	100	100.002
	164	100	100.007	100	100.002
	194	100	100.007	100	100.002
		w*;;fkhGAL4/UAS-crbRNAi,UAS-Dicer
	Time (hours after egg laying)	Exp 1	Exp 2	Exp 3	Average
	72	0	0	0	0
	96	3.7037	26.6667	0	10.1235
	99	11.1111	73.3333	2.94118	29.1285
	105	40.7407	93.3333	17.6471	50.5737
	113	74.0741	100	35.2941	69.7894
	137	100	100	91.1765	97.0588
	164	100	100	94.1176	98.0392
	194	100	100	100	100
	Data for graph
	Time (hours after egg laying)	w*;;fkhGAL4/+	w*;;+/UAS-crbRNAi,UAS-Dicer	w*;;fkhGAL4/UAS-crbRNAi,UAS-Dicer
	72	0	0	0
	96	40.8472	56.0042	10.1235
	99	62.5585	68.812	29.1285
	105	82.0243	85.0598	50.5737
	113	87.0317	89.6575	69.7894
	137	100	100.002	97.0588
	164	100	100.002	98.0392
	194	100	100.002	100
