# Supplementary material for: Crumbs organizes the transport machinery by regulating apical levels of PI(4,5)P2 in Drosophila
Source: eLife. 2019 Nov 7;8:e50900. doi: 10.7554/eLife.50900 (PMC6881148; doi:10.7554/eLife.50900)
Supplement: Figure 1—source data 2. [file elife-50900-fig1-data2.xlsx]

## Sheet: Image12
X0	Y0	Y1	Y2	Y3	Y4	Y5	Y6	Y7	Y8	Y9	Y10	Y11	Y12	Y13	Y14	Y15	Y16	Y17			Ap-Ba	Av int
0	20.5679	16.9341	19.7568	20.7132	23.8751	23.0029	12.3218	20.4516	28.7304	25.4545	23.132	30.0309	29.4983	31.1382	40.6159	36.4616	24.4546	25.829			0	25.1649
0.119	17.866	8.0053	24.3723	19.0909	17.4099	17.6129	19.7635	25.1122	24.6117	14.0237	21.9738	28.2451	23.7373	31.3422	29.0782	31.2975	29.4393	24.5736			0.00552327	22.642
0.2381	22.6529	11.6549	25.8331	25.6965	22.818	15.7032	14.7275	26.4522	21.2395	22.6862	20.6664	30.419	19.7187	29.6954	31.578	28.3147	25.5542	23.7349			0.0110512	23.2858
0.3571	17.4622	12.1176	17.9238	18.8149	25.8956	14.7168	16.8888	24.2444	22.8964	19.4169	26.8085	26.7636	24.9314	34.5578	25.3283	20.2684	32.2444	29.4398			0.0165745	22.8178
0.4761	16.7849	16.0098	14.9302	25.8925	22.8849	19.6966	22.4375	21.4146	33.9265	22.6751	20.3539	22.6726	25.5158	33.4766	25.5033	23.5631	15.4675	24.0828			0.0220977	22.6271
0.5952	15.4413	17.2852	16.2313	31.6696	16.5244	20.5039	23.7377	19.9135	25.1663	16.9392	19.5881	21.7856	22.2637	26.3901	23.3436	30.0239	27.4524	22.6653			0.0276256	22.0514
0.7142	13.2134	17.122	18.5763	32.3126	16.7541	19.8419	17.4795	20.1553	20.4831	24.9801	29.0486	31.8313	26.5733	30.3196	17.7949	31.2018	31.2228	24.7796			0.0331489	23.5383
0.8332	17.3583	25.3525	29.469	33.4962	15.3264	18.9144	24.7509	23.9291	29.9456	23.1287	14.9027	25.7142	20.4784	22.3842	18.9474	21.2894	21.6311	20.1091			0.0386722	22.6182
0.9523	17.374	17.8246	16.9722	22.1364	16.4344	9.7115	23.2174	22.8285	28.7153	23.0483	14.4563	20.5848	16.5086	27.3312	19.9741	24.26	20.975	21.9832			0.0442001	20.2409
1.0713	14.7118	18.5961	17.3704	18.7723	14.0942	13.0357	20.7438	25.5265	16.8456	23.5016	13.5326	17.2123	22.3532	27.9187	24.6688	21.2726	28.8494	15.2786			0.0497234	19.6825
1.1903	13.5669	18.0247	15.3232	17.7459	17.3987	20.5541	24.1804	18.2186	26.9164	24.0653	17.1475	25.8251	21.8425	26.8085	20.1985	19.7535	23.7762	16.1918			0.0552466	20.4188
1.3094	18.7986	20.0631	13.7766	17.4867	11.0131	20.9776	15.1147	23.3421	35.628	20.6157	21.9918	20.8489	23.5172	29.537	24.8584	22.6465	20.0046	25.8126			0.0607746	21.4463
1.4284	21.5629	14.0641	13.7199	14.2276	12.7408	17.3827	13.8698	20.321	21.5832	19.182	10.8416	16.417	14.0741	32.573	17.1331	16.4662	15.6592	14.6671			0.0662978	17.027
1.5474	23.4195	14.6882	12.7162	13.3918	8.8425	13.7678	12.2309	24.1329	34.7816	28.5056	14.8325	29.4602	13.6375	19.2759	20.4792	23.0327	18.5537	10.5584			0.0718211	18.6837
1.6665	21.0665	18.4077	16.2704	14.1782	7.9076	14.3225	14.4032	18.0073	19.7701	23.4451	15.7467	12.7961	23.4535	22.5482	22.8748	18.2307	16.1728	19.3931			0.077349	17.7219
1.7855	23.624	14.2663	9.8492	11.8843	14.6786	12.3288	7.972	20.1546	16.6556	24.1376	21.6643	11.9275	18.1417	26.667	16.5001	23.422	16.3657	21.0063			0.0828723	17.2914
1.9046	21.6365	13.0245	16.008	11.2007	11.1236	15.3439	11.1211	33.8185	22.956	15.0482	21.7881	11.7768	14.4445	17.1843	25.0877	19.7898	12.1888	13.187			0.0884002	17.0404
2.0236	12.5564	11.873	17.6228	13.338	11.618	17.0766	10.9546	23.0878	22.9512	15.3578	25.6603	15.7625	15.494	17.895	20.852	22.0187	14.9048	20.1629			0.0939235	17.177
2.1426	17.5922	12.5929	23.998	12.258	12.3687	9.8076	12.4127	18.1428	22.6637	18.6275	22.3798	13.8251	9.656	17.487	15.6586	13.6279	13.4714	12.3737			0.0994467	15.4969
2.2617	13.1462	16.3597	18.2262	14.3121	5.5851	8.4771	6.8791	27.457	23.5178	10.3997	13.7293	9.9574	10.9181	16.2054	19.4297	16.4816	14.4938	17.5463			0.104975	14.6179
2.3807	11.8016	16.2565	17.9515	10.3404	6.6414	12.9682	13.1191	27.7933	23.4799	17.1897	16.7052	13.1892	10.379	16.1382	21.9177	14.8579	18.4085	10.4155			0.110498	15.5307
2.4997	16.8873	18.2335	18.2127	10.0957	7.1788	11.8784	6.7313	26.9065	20.563	11.8666	13.0025	19.1151	9.5389	14.7404	13.1929	18.8494	12.7974	12.2349			0.116021	14.557
2.6188	10.1448	23.3623	13.9835	13.7753	14.2558	11.4183	12.0257	12.4112	20.025	16.6241	19.8333	14.9063	7.5065	17.6454	17.3356	12.4189	14.4748	17.705			0.121549	14.9918
2.7378	8.8625	19.2772	10.0493	10.4395	10.5443	12.0307	7.7802	12.1644	19.4452	18.9504	15.479	11.1696	9.384	19.3253	15.3716	14.9183	16.4962	15.6884			0.127072	13.7431
2.8568	7.5247	16.809	18.6021	8.0525	13.3002	12.4862	8.8597	17.8016	16.254	13.7616	17.0126	12.5035	11.4443	12.2121	16.0466	19.2081	22.7173	12.9714			0.132596	14.3093
2.9759	8.9284	13.9909	15.1613	7.7506	11.9167	9.0404	10.076	14.0786	14.6931	12.9883	16.9828	12.7004	14.4057	14.6733	18.0104	18.7751	13.8406	13.5555			0.138124	13.4205
3.0949	4.8813	8.8842	18.3362	11.5533	15.5053	11.8359	6.2264	19.3671	15.8675	8.4642	18.9559	15.2854	6.6956	17.1907	12.9247	13.114	13.2948	15.6968			0.143647	13.0044
3.2139	9.5788	6.2719	18.8622	4.6367	15.1884	4.417	9.5886	22.7193	13.6809	10.5688	19.2365	19.165	13.5823	10.2429	20.1659	18.4201	13.1821	19.5804			0.14917	13.8382
3.333	18.8004	8.8737	15.9052	9.0449	11.8462	10.1761	8.3063	16.3229	20.4665	18.5581	13.6	17.9923	13.2474	11.9586	14.8274	13.9648	12.6925	13.8224			0.154698	13.9114
3.452	12.754	8.497	14.9253	11.5153	12.7671	10.3081	6.7961	14.7715	19.7767	18.9211	19.4406	16.7773	10.8912	15.824	18.4296	13.9279	16.7877	15.1481			0.160221	14.3477
3.571	13.9458	16.0086	12.653	12.2596	9.0281	7.6508	4.8792	13.7318	14.4937	27.5574	13.2603	19.6536	7.3513	10.5113	18.0059	12.3304	13.2609	14.1815			0.165745	13.3757
3.6901	9.7295	14.8111	20.1491	8.1042	10.1434	9.9619	5.7955	16.8157	22.9478	22.2352	12.3624	19.548	5.8188	17.1216	12.7302	13.7383	11.1919	14.096			0.171272	13.7389
3.8091	8.4978	17.779	23.2073	6.7852	4.7871	6.8812	4.9075	9.606	16.2458	14.0678	10.9374	22.8215	8.7866	13.8416	10.4542	12.9177	14.129	11.2792			0.176796	12.1073
3.9281	6.5264	12.2679	21.8422	6.9814	6.4802	8.5796	11.0355	12.7847	12.547	16.2586	15.6857	22.3611	10.3818	16.6351	20.727	9.3656	10.2177	14.7752			0.182319	13.0807
4.0472	10.1206	18.9033	14.9331	11.3044	12.7213	12.2416	4.1767	16.2972	11.4936	15.6112	11.2751	16.3192	9.5133	7.7269	13.0727	20.0645	17.5129	13.5664			0.187847	13.1586
4.1662	11.0763	12.5995	13.6346	10.366	7.6663	8.6813	5.0238	14.2673	13.8956	14.0584	11.9203	16.8691	11.2992	10.865	14.3142	8.5425	16.1592	11.8344			0.19337	11.8374
4.2852	13.6239	16.115	18.7107	10.845	10.2233	7.2101	4.8536	17.4746	18.8218	11.6645	17.7496	21.7536	14.0533	11.5409	17.6389	12.8065	13.7493	12.9266			0.198893	13.9867
4.4043	9.4078	10.5023	14.9805	8.6428	8.5963	7.4152	5.8326	10.1512	18.5283	9.5576	16.1615	17.0413	10.6761	7.3145	18.0846	12.7262	8.5941	10.5356			0.204421	11.3749
4.5233	15.3013	8.0979	13.0439	10.3146	9.0302	7.8166	3.9017	10.4756	18.4525	13.4053	23.3965	17.0413	11.273	8.5562	16.014	14.8135	10.8758	14.1041			0.209945	12.5508
4.6423	12.918	3.5428	10.3382	7.4514	13.0014	7.6214	7.2247	7.0132	21.6261	12.5178	17.1729	21.2189	17.2503	11.7594	15.092	11.6282	15.9232	17.3139			0.215468	12.8119
4.7614	15.967	5.6539	8.7483	14.4778	7.311	10.4504	4.0699	8.5737	16.7982	15.7391	12.2698	27.998	14.606	10.4458	11.6532	13.0782	10.7228	15.1551			0.220996	12.4288
4.8804	16.5698	9.3473	9.6959	9.4894	8.5547	5.3903	4.0094	12.2162	21.4627	13.9457	21.6055	26.7254	6.7147	9.1842	17.7716	16.2068	9.2695	18.9297			0.226519	13.1716
4.9995	16.9053	9.7148	10.5736	10.3638	8.3966	10.7934	5.0181	14.7266	18.7778	20.7913	14.4667	23.4639	8.6408	7.7014	18.0705	16.8592	13.9589	9.8793			0.232047	13.2834
5.1185	11.181	11.8965	12.8945	16.0332	6.4172	10.9297	8.8534	12.2537	19.3991	16.5806	10.8489	28.6544	7.4039	11.3339	18.1758	12.4903	12.8324	14.36			0.23757	13.4744
5.2375	13.7321	13.3734	13.085	10.6944	8.0139	9.8724	7.1466	8.2297	13.0548	17.6519	16.9641	25.4651	8.5438	17.4221	18.2584	11.4296	12.0621	12.7985			0.243094	13.211
5.3566	8.9568	9.3244	13.8359	9.3707	6.8418	10.3515	14.7993	13.1443	19.2579	27.8432	14.1483	23.8546	11.2996	14.7016	16.4134	20.0438	14.3777	10.4003			0.248622	14.387
5.4756	9.44	5.473	13.0444	11.0219	9.1575	9.1755	15.1587	6.1371	20.8004	23.5914	19.8201	23.166	9.4334	15.3334	21.8272	15.5278	16.0604	10.722			0.254145	14.1606
5.5946	19.3686	5.7408	14.0005	9.2554	11.1039	15.8721	10.1186	8.7784	15.1131	16.4619	15.5692	16.4882	8.1964	13.7092	17.8988	21.2492	14.5111	8.4087			0.259668	13.4358
5.7137	15.3591	10.1833	12.1558	12.3955	9.6562	7.85	10.1967	11.0665	28.4337	20.4693	16.2767	23.8818	8.632	15.0261	21.6945	17.202	14.2069	8.5755			0.265196	14.6256
5.8327	8.5924	10.3804	9.5507	7.7103	7.0334	10.4677	12.5744	10.2766	21.5446	18.9076	22.3157	16.8832	4.128	7.0961	18.2073	17.1121	13.8551	11.1057			0.270719	12.6523
5.9517	13.7435	7.2767	15.5426	11.2221	3.9181	6.9718	12.747	6.2237	19.9927	16.6358	11.2136	14.2066	9.0022	11.2288	14.6545	14.8531	13.4287	10.2682			0.276243	11.8405
6.0708	10.6171	9.3406	14.6925	9.0848	4.6871	12.2861	12.5606	6.4968	9.9542	15.9332	17.1946	20.525	8.1815	13.833	19.6485	18.0681	11.1422	11.6378			0.28177	12.5491
6.1898	9.3177	10.6712	18.7191	14.0464	6.575	10.5266	12.208	5.7937	19.7692	24.4779	14.8509	14.5375	11.2082	8.6756	27.7724	18.7	12.1985	11.9658			0.287294	14.0008
6.3088	14.0747	13.2246	21.6901	17.6351	9.6022	6.8798	13.3569	9.2943	14.4994	18.101	16.7378	20.3368	7.8833	8.424	23.6246	15.7436	11.6302	14.3328			0.292817	14.2817
6.4279	18.7733	11.6288	13.3873	10.3276	10.0962	9.4932	14.7766	6.1631	12.4001	13.7513	20.6883	16.3455	6.2043	8.6979	18.5624	14.0495	9.9823	13.5442			0.298345	12.7151
6.5469	14.9644	12.6625	9.077	11.539	6.4826	11.1668	4.5974	7.7022	14.8395	10.0154	19.067	15.0845	7.3684	8.021	19.7916	17.9765	9.8003	17.2729			0.303868	12.0794
6.6659	27.6457	12.6974	19.6843	11.2699	9.8009	8.3998	8.1903	7.1661	15.1659	15.8941	20.0259	18.2728	6.8489	14.3238	11.9973	17.3638	8.6072	10.8672			0.309391	13.5678
6.785	20.896	12.0154	13.8845	11.2531	6.5718	5.0937	11.7989	4.0841	20.7077	16.0255	17.3868	16.2757	8.811	10.5567	18.2133	17.3437	10.0407	12.0529			0.314919	12.9451
6.904	15.9989	13.5536	14.3489	8.4745	9.117	7.6066	15.3631	4.0528	13.9916	19.3618	18.6312	14.0398	8.4536	8.6103	22.2522	12.2701	7.0528	12.879			0.320443	12.5588
7.023	19.4362	15.2996	15.5216	8.6327	10.6391	5.7358	8.1413	5.2904	16.5945	17.596	12.7853	10.5978	12.4204	10.7407	11.784	24.2406	8.6736	11.0961			0.325966	12.5125
7.1421	17.1998	14.2449	16.4113	8.2764	10.1627	7.6159	9.2775	8.8477	14.7494	6.8086	17.6225	10.7617	13.0954	7.5338	12.9431	16.7772	7.807	11.5052			0.331494	11.7578
7.2611	20.4715	11.6957	12.8484	11.1353	6.6237	9.7669	9.4286	9.9644	21.4013	11.9686	16.8991	12.1116	9.7404	7.0489	13.3345	20.9652	14.2542	14.3195			0.337017	12.9988
7.3801	21.5638	20.9278	14.3114	12.1259	8.6776	8.8582	9.2947	9.381	12.8868	15.3857	13.5672	16.8839	6.832	10.2487	12.7635	20.9892	12.4397	7.5951			0.34254	13.0407
7.4992	24.8871	18.3967	13.9402	12.1943	6.7163	10.0776	7.627	11.1383	18.3215	11.0813	15.5707	16.6503	10.3722	14.1268	19.3088	17.906	14.277	12.3738			0.348068	14.1648
7.6182	14.1266	19.886	11.1389	7.8948	11.8509	7.9999	7.1659	8.3268	17.9133	9.6592	23.1252	13.2639	12.1788	9.5763	13.7928	16.529	12.6449	7.3706			0.353592	12.4691
7.7372	11.263	15.5834	18.2511	9.6864	9.4224	8.7209	6.3698	8.0648	33.7385	14.7847	21.7316	12.7718	11.3234	9.234	11.4858	12.8322	19.4708	12.3996			0.359115	13.7297
7.8563	11.9865	23.0901	16.4433	10.8055	6.167	10.8763	10.6215	8.8425	25.9846	13.762	9.0404	16.0126	3.5146	8.4917	12.0902	13.554	16.2066	15.7331			0.364643	12.9568
7.9753	12.298	13.8731	18.0976	12.77	5.3954	9.42	8.3564	5.4013	21.7314	8.4381	11.6617	13.2744	3.66	11.7418	14.3506	12.6869	17.4851	12.8234			0.370166	11.8592
8.0943	9.6567	10.4793	11.6164	14.0595	11.5217	10.5482	14.3768	6.5216	24.3403	12.6581	13.0031	16.6345	9.4634	11.6675	19.9548	17.0646	12.8132	10.6459			0.375689	13.1681
8.2134	13.9602	9.5836	11.4642	7.2969	11.4348	15.6714	7.1923	7.4289	21.9013	16.6006	11.7665	9.4622	14.8174	13.8491	14.0729	20.2977	17.3127	9.2294			0.381217	12.9634
8.3324	25.6296	14.1398	15.3333	9.7509	7.381	14.396	3.4865	6.1881	13.8282	19.6322	15.9829	15.3595	9.068	11.1109	12.6118	11.2415	8.3956	7.1086			0.38674	12.258
8.4515	14.0778	11.6065	14.3499	11.6219	12.5825	4.9924	8.3291	5.3634	13.9538	17.5058	14.553	10.5305	7.7281	9.758	10.371	9.5335	9.6395	15.5787			0.392268	11.2264
8.5705	15.3808	17.8978	10.147	14.3385	11.5265	9.944	10.3781	4.8567	10.7238	14.7041	28.8663	13.6839	8.0896	12.6429	11.474	11.1589	6.7069	15.738			0.397792	12.681
8.6895	10.3035	14.1221	15.5337	9.0173	3.7706	7.2829	6.1865	6.4934	9.846	19.87	20.6072	14.1812	8.4441	12.6554	10.0375	19.2334	7.7822	11.4285			0.403315	11.4886
8.8086	19.3769	14.831	12.5056	11.7158	7.5526	9.1282	7.549	10.5173	13.8471	13.6831	14.489	13.7125	5.7006	13.4494	9.8738	11.7935	8.9116	9.515			0.408843	11.564
8.9276	19.9293	16.2462	11.6268	17.0596	8.5834	12.7743	8.7763	3.582	10.0488	14.5188	17.9154	11.327	5.5613	13.6547	9.7866	12.1314	18.2415	10.9345			0.414366	12.3721
9.0466	16.317	13.6335	17.361	13.9936	7.5052	7.5662	5.581	6.8633	11.3059	21.4994	14.7273	8.0556	6.3392	15.8431	13.9853	12.0334	7.866	10.2065			0.419889	11.7046
9.1657	14.1304	13.9212	13.5588	16.7771	1.8778	6.8991	7.4611	6.2131	10.4467	20.7902	14.6252	9.8706	9.7107	11.6471	7.3935	13.8769	12.1568	9.2147			0.425417	11.1428
9.2847	21.5777	18.1315	17.6044	11.2611	6.0377	8.9453	9.203	3.8434	8.8672	11.5776	21.6987	7.6119	7.7828	9.4113	10.6396	9.031	9.9586	7.645			0.430941	11.1571
9.4037	19.9534	18.3872	12.1966	12.6678	12.3413	7.4188	7.5016	9.793	7.1167	9.951	12.355	6.337	5.6265	12.014	8.6135	12.3976	12.0899	14.5778			0.436464	11.1855
9.5228	19.4729	18.6383	21.8681	19.8654	11.9082	9.4817	8.4418	5.3322	9.7672	13.4958	12.9482	11.3819	10.8057	5.7853	11.3737	9.8436	8.0261	11.5186			0.441992	12.2197
9.6418	9.7614	13.5076	13.0057	13.8046	8.5994	4.986	8.2595	5.033	15.4592	9.544	12.2413	13.7859	14.6987	6.5243	6.8711	11.2577	9.4372	10.1208			0.447515	10.3832
9.7608	23.466	17.8044	12.5719	11.2425	10.8565	4.9708	10.5488	11.9059	11.9897	6.3023	20.3489	10.9531	6.0966	3.4862	8.2543	11.3312	13.037	7.7711			0.453038	11.2743
9.8799	15.1287	21.5489	20.7511	12.8853	8.9105	5.6925	11.3846	8.8217	9.1693	8.8068	23.6849	16.3294	10.2241	8.3188	6.7683	9.9344	14.1978	12.0269			0.458566	12.4769
9.9989	11.9237	14.1036	10.8897	17.9555	13.1523	6.0778	11.5079	8.0134	10.9504	9.5946	19.3785	12.7036	12.319	4.1036	8.2179	8.1194	12.6351	11.8743			0.464089	11.3067
10.1179	8.9213	16.049	13.8309	13.389	6.8542	5.3173	5.3879	8.6113	12.1793	14.8443	21.469	12.6452	12.6086	4.8652	9.4243	10.5385	12.5163	13.398			0.469613	11.2694
10.237	10.6859	19.2141	6.4539	14.0152	5.838	2.512	9.2626	6.2908	9.558	11.8916	19.4353	15.7413	14.4147	7.5369	11.2096	15.8967	15.7148	13.0767			0.475141	11.5971
10.356	12.8574	18.6273	6.8706	13.4257	7.5245	4.6339	7.8248	4.4381	5.7938	5.6585	18.4459	11.5864	13.6119	7.7264	9.5765	11.1515	15.1389	15.3783			0.480664	10.5706
10.475	13.2539	12.5409	10.9626	12.2564	7.1127	3.3361	3.1047	8.5647	8.9544	11.4474	20.3447	10.316	11.6322	9.5849	15.2025	14.0407	9.2472	13.125			0.486187	10.8348
10.5941	15.6803	11.6917	16.6137	8.102	10.6065	2.1769	5.5064	4.7187	11.1763	11.1821	17.3028	12.9349	7.2869	11.0349	9.4648	15.9365	11.9252	12.3166			0.491715	10.8698
10.7131	11.6902	12.5709	11.8148	4.4441	7.9585	4.3919	2.8919	4.7626	3.2232	12.4981	21.696	13.6849	10.6589	14.1124	12.705	11.1644	18.115	10.6504			0.497238	10.5018
10.8321	7.882	11.7943	14.8638	8.2204	8.9451	8.931	3.1115	5.9485	7.8713	7.1115	20.3422	11.0888	14.214	13.0007	9.1772	14.4812	18.3916	12.9057			0.502762	11.0156
10.9512	11.8787	9.6785	13.0166	13.1663	7.6235	1.314	6.3311	7.6653	10.9486	13.6318	18.4616	12.7263	9.9564	11.3333	9.0684	8.6188	17.3625	10.9543			0.50829	10.7631
11.0702	13.4245	16.9579	11.6882	10.8035	9.128	4.19	5.5847	9.2289	6.0993	15.5937	21.6451	8.6988	8.5701	19.0073	8.2984	11.8556	11.5174	13.1119			0.513813	11.4113
11.1892	17.9449	11.3085	23.1157	16.7507	8.1313	4.2428	4.7377	7.4216	6.5482	16.7745	14.0715	10.7878	9.8455	16.5746	7.9385	12.8692	13.1108	8.2858			0.519336	11.6922
11.3083	11.3001	7.0451	14.2639	12.7356	7.6896	6.3881	3.5018	6.4863	12.1749	6.4921	10.3758	10.4354	11.7281	15.8035	12.7681	17.4655	11.5349	9.4582			0.524864	10.4248
11.4273	17.3348	5.9004	19.1722	18.1482	11.506	3.996	2.1831	11.3409	12.1425	7.8768	14.0468	12.3386	15.1006	12.9274	9.8522	13.5118	12.2767	11.13			0.530387	11.7103
11.5463	16.1861	8.8471	17.0508	9.9453	8.3116	3.4437	4.9937	6.5555	8.226	11.3309	10.996	6.2389	11.8276	20.0341	11.8323	19.0643	16.8289	12.4588			0.535911	11.3429
11.6654	15.1456	15.7603	9.4839	19.0264	6.3923	5.402	5.3814	10.8756	9.65	7.5517	8.2463	10.6829	13.4186	18.4814	11.6385	9.2986	8.2082	10.8882			0.541438	10.8629
11.7844	19.917	10.9104	13.9268	15.1479	10.5427	6.076	4.0599	13.8943	9.1252	10.8037	11.2687	13.2961	10.0371	15.7875	10.074	8.3749	12.3906	5.8219			0.546962	11.1919
11.9035	18.4392	16.1759	15.0766	12.3787	7.7516	5.8931	7.1568	16.1219	4.2523	13.1784	14.2593	7.9339	2.9868	14.6989	11.3886	10.4684	15.393	11.1596			0.55249	11.3729
12.0225	12.4095	24.1397	14.1276	10.0273	8.094	6.9851	3.0043	13.5226	5.3606	11.4907	10.3684	12.3398	7.1929	16.712	9.6209	8.334	7.6305	5.9348			0.558013	10.4053
12.1415	14.5571	15.8355	15.7516	14.9868	4.216	2.6186	2.2068	9.038	7.1633	8.4611	11.719	8.7449	7.8298	10.5301	9.3197	8.7334	10.5688	3.6878			0.563536	9.22046
12.2606	11.7993	10.3178	15.7322	15.9509	3.3763	3.7904	3.6586	11.6162	8.9803	7.1182	9.5897	6.0102	9.5501	21.5645	8.9034	7.1282	11.0617	5.3924			0.569064	9.53002
12.3796	8.1939	10.3004	9.4797	11.1375	6.1905	6.0858	5.8106	9.9081	5.1475	11.254	10.4912	11.3387	9.6249	13.0919	9.0596	10.9684	9.6856	3.3728			0.574587	8.95228
12.4986	7.6657	12.3222	5.2278	11.8568	5.5147	4.2475	5.9005	7.5483	3.5039	4.7958	5.2902	9.0285	9.5334	10.2806	11.1926	9.658	9.6277	3.3363			0.580111	7.58503
12.6177	9.5648	9.2995	11.7498	15.3826	2.0082	2.5974	3.5314	7.702	8.4615	9.7829	10.6563	6.5611	11.439	7.4615	5.6913	12.1209	7.8462	2.9339			0.585639	8.04391
12.7367	10.2821	10.8351	12.0059	13.9427	6.4802	2.1437	4.4971	9.8906	11.0398	4.6829	7.4433	5.7003	11.9033	6.9213	7.3928	10.6614	12.2374	4.6575			0.591162	8.4843
12.8557	15.6071	7.7337	7.7641	17.9868	4.884	1.8644	6.0669	11.1239	6.4277	10.0446	3.9127	8.0569	9.8696	12.2268	4.5543	11.906	9.1957	6.0488			0.596685	8.62633
12.9748	13.1993	13.4995	11.009	13.119	7.2901	4.4044	5.186	9.0342	7.9211	6.4083	8.3049	4.4046	15.5299	10.1344	1.7015	13.1742	18.0139	3.8607			0.602213	9.23306
13.0938	12.4164	20.09	8.9308	15.6981	6.8554	6.027	5.2082	8.4641	9.7446	7.6335	13.1226	6.3026	11.3488	8.3143	5.0376	9.2169	20.6454	3.2621			0.607736	9.90658
13.2128	12.3942	13.5737	10.4699	7.6873	5.8813	3.3656	3.3534	5.803	10.6587	10.6511	8.6203	7.9156	8.6876	9.9545	6.9557	9.6225	16.1584	5.2353			0.61326	8.72156
13.3319	15.5544	18.0704	11.6216	13.1032	4.2833	4.6384	2.7863	7.0965	11.9195	6.3064	6.788	10.242	11.9926	6.5081	5.6634	9.676	11.6238	2.9739			0.618787	8.93599
13.4509	11.1162	14.5711	11.2346	14.1408	6.4954	4.1859	2.1284	9.0571	16.0708	10.7285	13.4198	17.4358	16.0056	1.7572	5.6297	7.6828	17.772	1.8856			0.624311	10.0732
13.5699	21.0616	12.2972	9.6053	20.1209	6.2911	2.8151	3.9704	9.311	10.6284	9.009	9.5045	19.178	9.9556	2.8398	3.6376	10.9219	20.1998	4.37			0.629834	10.3176
13.689	8.5085	15.1664	8.8611	12.0245	6.6677	5.9217	4.54	13.2573	8.463	7.2843	11.9826	19.4849	12.0292	3.6648	7.2233	12.7722	21.2313	7.7003			0.635362	10.3768
13.808	8.8414	14.2667	13.162	10.9226	3.7614	3.0404	2.9784	13.6957	9.9835	13.5734	10.663	19.5545	8.875	4.4211	9.4834	6.9666	19.5045	3.8699			0.640885	9.86464
13.927	17.4253	11.9956	12.1181	15.5056	2.1685	4.2812	3.7765	10.6656	6.8225	7.0229	15.3583	19.7857	8.8261	0.9115	7.5674	10.5347	18.5444	2.3823			0.646408	9.76068
14.0461	11.188	15.0632	9.0892	11.8338	5.3043	4.4367	8.8505	12.2122	7.928	4.257	13.3481	16.4601	7.9949	1.6041	11.3024	11.5702	19.3581	3.8499			0.651936	9.75837
14.1651	13.2424	15.5742	15.284	12.9236	4.1038	4.8703	3.531	6.6068	7.5185	5.1332	11.224	18.6967	9.9268	3.9964	9.5301	7.9135	17.7234	5.8603			0.65746	9.64772
14.2841	7.6819	9.081	6.5939	12.6433	4.3649	5.9399	5.964	15.3014	4.9769	5.3749	9.4058	13.8705	7.1965	7.9045	9.09	10.5062	7.8003	3.2145			0.662983	8.16169
14.4032	11.5627	4.2434	10.0861	7.5248	4.3934	2.8536	6.5161	12.3627	4.79	5.4879	15.9813	13.5849	5.3758	2.5336	7.7015	17.3598	12.0748	3.0458			0.668511	8.19323
14.5222	7.5931	5.5879	11.1174	8.6669	3.6677	3.0225	3.7078	9.0332	9.7342	5.4619	14.705	10.8217	6.2588	5.5868	6.7854	6.9439	16.2112	3.6276			0.674034	7.69628
14.6412	9.87	5.7547	15.0217	9.1843	8.1749	3.409	6.8291	12.2137	4.0187	6.1288	9.0493	14.2912	7.1035	5.3612	7.622	6.8417	10.6236	4.1869			0.679557	8.09357
14.7603	7.8927	5.0168	6.4381	8.5866	3.3016	2.7176	2.6217	10.0053	3.5724	10.8618	8.7439	8.4788	10.7368	8.3353	7.8766	13.3763	12.4824	3.8658			0.685085	7.49503
14.8793	11.4621	4.4299	8.8661	11.6513	5.3404	0.8595	7.2014	14.9348	5.2068	7.3437	8.9578	10.8974	13.532	5.0209	8.4817	7.6527	13.9673	2.6418			0.690609	8.24709
14.9984	7.4785	9.2357	8.567	8.9222	9.6209	1.9199	5.2026	8.7963	7.1602	9.8524	6.0768	8.0524	12.7324	5.2576	7.9275	10.4773	12.3993	2.1944			0.696136	7.88186
15.1174	10.0035	6.7353	8.5097	8.5281	7.1106	4.8848	3.6299	8.8486	5.9873	5.6947	5.3046	8.1325	10.176	8.0795	7.9223	12.6049	15.1279	2.6811			0.70166	7.77563
15.2364	6.5448	6.9114	13.9565	7.0436	6.3992	5.1119	5.0555	5.7778	5.6069	5.9623	7.9882	9.8148	8.5167	5.9317	4.5236	6.2655	16.1394	4.2148			0.707183	7.32026
15.3555	12.4002	7.6884	10.3909	9.0099	7.4037	2.7398	5.6485	6.3537	4.3289	3.3636	3.3518	10.1686	11.3183	7.7847	6.8602	6.3814	12.7462	3.816			0.712711	7.31971
15.4745	4.3083	10.0586	11.4806	8.4825	6.687	2.0102	6.6282	8.3815	4.0359	5.2219	8.0228	9.3289	7.6872	6.0269	9.306	4.0453	15.6258	1.8746			0.718234	7.17846
15.5935	8.3196	8.3248	5.1798	9.0246	8.1223	3.5127	5.9112	9.0345	5.0009	8.2894	6.419	15.0653	8.6381	9.1482	4.2587	6.1627	16.0194	4.4761			0.723757	7.82818
15.7126	9.2176	8.9376	7.358	9.2787	8.2722	2.9768	2.7234	6.8702	3.3026	8.6298	7.5664	14.4028	9.2876	10.3159	4.6562	5.329	17.21	5.6236			0.729285	7.88658
15.8316	14.3998	6.1263	6.3137	10.5889	4.3781	3.2892	5.4988	3.4983	8.2271	8.3378	5.2065	12.4016	10.3096	12.8326	3.893	5.5327	22.5535	8.3441			0.734809	8.42953
15.9506	8.3917	7.3972	3.9392	5.7723	5.0114	2.4636	4.4906	3.7339	6.707	10.6394	5.0752	17.8892	9.6366	9.1918	5.3451	3.508	23.6378	7.6081			0.740332	7.80212
16.0697	8.5961	7.9134	6.3355	3.7991	8.4015	1.058	5.8198	1.8012	9.0359	8.5352	3.9975	12.5082	12.8771	11.0744	6.3322	8.0029	19.3456	4.8978			0.74586	7.79619
16.1887	6.6986	6.1391	6.9575	7.4336	7.7355	2.853	7.3163	2.3994	10.0579	6.758	3.1754	8.6023	5.686	8.811	7.3557	4.7797	16.392	6.2333			0.751383	6.96579
16.3077	9.016	7.4941	5.0878	8.9916	6.5646	3.209	5.3029	6.0645	8.2464	5.0479	4.4832	14.8766	9.6322	8.502	7.3477	4.9357	19.7568	2.0431			0.756906	7.58901
16.4268	10.4708	12.801	6.5591	5.3317	9.4962	3.4644	5.697	7.9354	11.8203	6.6413	3.2547	12.5989	9.6112	11.1316	10.9721	4.8064	17.2114	2.3416			0.762434	8.45251
16.5458	10.1217	8.3243	4.3722	8.976	6.9932	3.6561	5.05	3.5887	7.174	5.1236	4.4107	9.0686	5.6968	12.328	5.3581	1.8616	13.901	6.604			0.767958	6.81159
16.6648	8.8578	3.3287	5.8432	8.469	5.7229	1.6732	8.4588	7.6741	6.1993	5.0328	6.8672	9.8297	13.0212	9.57	3.6726	4.3137	11.5193	3.4185			0.773481	6.85956
16.7839	9.5504	6.9866	6.0524	6.9623	3.2949	6.1389	5.8881	4.9195	9.0618	1.8935	3.7496	11.9413	9.3357	12.4474	6.4826	2.6496	8.5929	3.2006			0.779009	6.61934
16.9029	13.444	8.6418	1.4567	11.982	7.891	3.5057	1.6493	2.9091	9.5437	2.6922	3.9506	7.141	11.8562	15.8132	5.2197	3.0275	8.1501	1.298			0.784532	6.67621
17.0219	11.6237	5.4133	5.4073	17.0716	9.3069	2.3558	3.1661	4.6176	8.5019	7.252	1.8824	8.7334	8.291	15.1626	6.3642	3.3559	5.5085	3.4237			0.790055	7.07988
17.141	12.3154	7.8441	1.3001	11.7304	9.903	3.3656	3.1866	6.9317	5.8836	4.6899	6.2187	9.3825	7.8258	8.9461	8.5515	2.8701	8.9698	3.934			0.795583	6.88049
17.26	7.846	4.2662	1.4384	9.8131	7.5532	2.962	4.9837	10.1272	4.6163	4.6106	4.7737	12.8808	13.4277	4.6658	7.2754	4.1457	6.6315	1.9525			0.801107	6.33166
17.379	10.7285	4.9755	6.4035	8.3046	8.5909	7.106	4.3351	6.1154	6.2258	3.6722	5.2194	10.2711	7.7087	6.8591	4.8021	5.7451	11.347	7.0957			0.80663	6.97254
17.4981	10.2411	3.4896	7.0239	6.8301	11.304	3.9997	7.1539	6.8829	7.0984	6.216	5.2049	9.2443	5.8231	5.2579	4.0539	2.3489	8.7465	5.9064			0.812158	6.49031
17.6171	7.9665	6.0515	2.8517	4.0506	9.7334	6.601	3.1698	4.6584	10.2887	4.5795	5.9113	8.073	8.1046	7.9723	5.3927	2.1345	8.5155	5.1902			0.817681	6.18029
17.7361	2.138	8.2365	5.5953	7.7758	14.0509	4.5331	2.0782	5.3269	9.5273	5.1274	4.3223	9.4064	4.4397	5.9961	8.1625	1.0854	8.5549	8.5112			0.823204	6.38155
17.8552	5.8215	4.0412	8.2424	5.4303	14.795	2.7627	3.4114	6.0755	4.5748	5.7457	9.3981	6.4142	3.2561	7.3159	3.5959	6.612	8.1242	9.4197			0.828732	6.39092
17.9742	4.0222	7.4412	5.5054	10.7268	13.2506	2.082	4.8394	7.2587	5.9433	2.9939	6.5379	9.6459	6.0744	7.789	7.6424	9.372	6.3034	4.1263			0.834255	6.75304
18.0932	8.3636	2.4702	3.7609	6.4503	12.5652	1.956	4.7586	12.804	9.0281	4.6205	9.3983	6.0561	5.3642	10.5783	5.2105	4.0702	5.0866	2.5204			0.839779	6.39233
18.2123	6.651	5.0385	3.3133	8.1235	10.6469	3.2841	5.3087	5.7113	5.0537	5.7602	6.1336	6.1513	3.6773	9.2975	4.2989	2.7168	7.1386	5.6645			0.845307	5.77609
18.3313	8.1278	5.8151	5.6434	9.7246	11.8555	4.2391	4.2106	9.8073	9.1057	6.9217	10.6637	6.6058	5.4518	13.5381	4.836	2.5024	5.5492	3.3821			0.85083	7.10999
18.4504	8.9893	4.8416	11.3154	4.5558	9.3937	4.3009	6.4356	7.2473	5.4496	3.0223	10.9943	5.71	6.388	16.2013	6.5822	3.5366	5.49	8.4108			0.856358	7.15915
18.5694	5.9891	6.5929	8.0138	8.6087	7.2198	2.0576	3.7924	3.5238	8.2711	3.8652	10.5146	6.1722	4.8017	14.6667	8.1003	5.1293	7.641	8.817			0.861881	6.87651
18.6884	8.7766	3.1004	7.4292	4.2562	4.9384	6.6086	5.8109	2.961	7.5853	4.0639	9.2152	6.5346	11.5836	16.4887	7.231	3.4454	8.5107	9.8725			0.867404	7.13401
18.8075	6.6256	3.4826	7.1826	5.7947	5.9922	4.1478	5.3016	7.3895	5.0877	6.0422	11.9823	9.7635	8.9077	14.0641	6.8425	1.8171	10.2028	6.8768			0.872932	7.08352
18.9265	7.1007	5.6836	5.16	6.2501	6.4214	6.7298	6.6446	1.6319	7.4069	5.9739	9.6753	5.6332	9.6872	14.9588	4.0292	3.7875	11.2729	8.2405			0.878456	7.01597
19.0455	4.9718	3.3578	5.4289	5.4814	8.1949	3.0957	8.2708	4.1742	4.3423	5.1498	12.5439	7.9969	11.6123	11.7014	7.6376	3.145	9.0387	9.2737			0.883979	6.96762
19.1646	4.5304	3.3652	6.6323	9.4775	7.1474	3.9881	8.3252	3.9869	2.7946	4.89	11.6228	8.1934	8.2729	12.1811	6.8933	2.4566	8.6475	11.6414			0.889507	6.94703
19.2836	3.622	9.0116	8.6319	8.3092	8.032	5.6682	9.77	8.1244	3.6901	6.8045	8.9197	9.7619	13.2052	13.0972	5.3113	5.3901	10.5687	4.0287			0.89503	7.88593
19.4026	4.5037	7.1672	7.3479	11.262	4.7956	4.4305	5.2682	3.9383	11.2042	4.024	8.1956	9.5655	10.2938	15.9169	6.2519	5.6006	6.143	6.2409			0.900553	7.34166
19.5217	3.9192	8.8611	5.9548	5.1519	10.6673	5.3605	4.7475	3.093	5.9183	5.676	4.0042	8.3479	10.4495	8.8273	3.7685	4.8795	7.9166	4.0054			0.906081	6.19714
19.6407	4.2689	6.4886	8.4343	5.1034	4.4384	8.0878	5.1895	5.9306	3.9846	6.0911	4.3113	6.8199	5.5276	8.1007	4.4642	4.2544	6.9604	3.3294			0.911604	5.65473
19.7597	2.3677	5.537	5.6441	6.985	3.3695	7.587	3.3858	6.2237	3.3308	6.804	3.7109	8.1294	6.4256	12.691	4.4985	4.8146	7.7006	4.5855			0.917128	5.76615
19.8788	4.197	2.3061	3.7856	11.7061	4.1769	4.9079	2.9836	8.0123	3.4125	5.8201	4.3222	6.6929	5.7485	5.8581	0.5567	2.766	10.9983	5.4914			0.922656	5.2079
19.9978	4.5134	0.8646	6.3877	10.978	7.8746	6.9153	3.7929	6.5083	3.1696	5.793	9.1992	5.104	5.2934	7.9726	3.1708	2.554	7.4544	5.3838			0.928179	5.71831
20.1168	2.2872	2.4713	12.0349	5.8734	4.9418	9.0615	12.8273	2.9745	4.8872	6.5398	8.5258	6.8513	4.8693	8.5383	2.7888	4.3923	7.8668	3.1181			0.933702	6.15831
20.2359	4.6857	2.873	11.2975	11.8715	6.2266	8.3042	4.9537	4.2748	3.516	6.4283	4.5378	6.3046	6.2075	2.639	2.6703	2.1056	7.2137	2.6041			0.93923	5.48411
20.3549	1.7554	1.9076	5.6052	11.6798	6.2813	10.9818	5.3943	9.8574	3.1233	7.5487	4.4222	9.8214	5.1849	2.0746	1.4893	1.898	8.4397	1.3064			0.944753	5.48729
20.4739	3.0697	2.7168	4.5677	8.8246	7.2884	6.5376	8.8313	8.2707	5.3656	5.9771	5.0579	11.2898	4.6263	2.2732	0.6054	1.9826	8.3276	5.9465			0.950277	5.64216
20.593	1.4585	3.8241	3.5907	12.21	2.8113	6.4838	8.345	8.4643	9.2172	3.4795	5.4218	5.5349	6.1511	4.9464	1.3362	4.1954	5.001	4.0596			0.955805	5.36282
20.712	2.6335	2.5769	4.2694	5.4083	4.078	6.1246	5.0393	3.7308	4.8794	3.08	6.2353	11.9697	3.61	2.7421	3.433	4.6805	7.1841	4.2198			0.961328	4.77193
20.831	2.7592	2.1765	6.1079	6.3602	4.5341	11.0402	3.9349	6.2143	9.4421	4.8287	7.6657	11.8168	5.8868	2.0699	1.9205	3.3834	6.1094	2.59			0.966851	5.49114
20.9501	3.4944	2.2014	4.2163	4.2516	3.52	9.9065	7.0404	8.3314	5.3337	2.304	7.1289	7.7163	9.78	1.9406	0.5031	1.1746	7.1492	7.6582			0.972379	5.20281
21.0691	1.977	2.2017	1.4558	4.4909	2.6149	6.955	5.9445	8.9815	5.3198	1.6089	14.0646	8.3988	5.9396	0.6313	0	1.092	4.6447	3.2046			0.977902	4.41809
21.1881	1.533	0.856	1.9134	3.1246	2.6342	9.229	8.3449	6.4869	6.4855	2.7738	9.9012	4.0079	5.7521	1.6861	0	0.4871	12.1181	5.4034			0.983426	4.59651
21.3072	2.2499	0.5792	1.6488	3.1678	6.8301	10.8297	4.7625	12.2387	6.5229	7.1998	9.3702	8.0128	2.0283	1.412	0	3.0365	4.9815	3.9527			0.988953	4.93463
21.4262	1.5004	1.3374	1.6672	2.1904	4.3725	8.0791	3.1705	10.3097	7.4212	3.3823	13.5603	12.7306	2.6559	0.1151	0.6193	1.0391	7.6919	2.6619			0.994477	4.69471
21.5452	1.8548	1.4442	0.9998	2.7988	6.3897	6.2639	4.0154	5.7101	7.6492	3.1479	13.1175	7.3432	2.3174	0.3246	1.7902	1.4641	5.808	2.0748			1	4.13964

## Sheet: Image11
X0	Y0	Y1	Y2	Y3	Y4	Y5	Y6	Y7	Y8	Y9	Y10	Y11	Y12	Y13	Y14	Y15	Y16	Y17	Y18			Ap-Ba	Av int
0	6.1297	2.8014	6.1937	6.8842	9.9157	5.6087	4.8634	6.1274	5.00273	9.1802	4.652	6.1671	6.3296	5.545	5.1574	11.925	8.4086	9.0574	14.6718			0	7.08532
0.119	7.9849	5.5661	6.0112	8.1478	8.6439	3.1237	4.6885	11.3349	6.07019	4.0759	4.3138	2.001	3.8614	10.86	10.8676	10.7876	10.4907	10.0195	7.8671			0.00549291	7.19557
0.2381	4.4559	6.0756	6.6163	6.5093	8.4209	4.3119	7.1242	5.7556	4.75886	7.3789	3.0692	4.5035	6.631	7.8777	6.9835	9.1745	11.9045	13.672	10.9382			0.0109904	7.1664
0.3571	5.8125	6.3574	7.2255	4.3275	4.1093	7.7388	6.2498	1.9666	5.90139	10.0669	3.7652	1.4652	4.4975	8.1712	3.3805	11.4819	12.2007	8.0656	13.889			0.0164833	6.66697
0.4761	3.9332	4.0691	5.8595	3.2588	4.3101	12.2277	7.5729	9.2645	6.23566	7.4392	2.8297	3.5502	3.7002	6.7779	4.3359	10.0228	10.1976	13.5454	10.4887			0.0219762	6.82206
0.5952	3.0263	7.9212	3.9347	5.435	4.6328	5.5224	7.5188	8.2576	6.15814	11.3896	5.1517	3.0139	3.9956	7.5958	5.3326	11.6315	5.2666	9.7478	17.1735			0.0274738	6.9845
0.7142	6.9674	2.8282	9.7344	8.782	5.4886	4.4718	2.9272	4.2994	5.15641	5.7564	10.6764	7.8022	6.4449	3.8176	4.525	7.9911	9.0921	10.4497	13.0462			0.0329667	6.85563
0.8332	8.7144	3.8745	4.4527	8.53	8.2577	5.0299	5.6172	6.888	2.81866	3.8081	6.8996	4.3197	5.1394	6.7108	15.0567	7.2872	9.3705	10.7205	12.598			0.0384596	7.16282
0.9523	6.9066	10.2571	9.9612	5.7516	4.902	9.096	6.0401	5.2389	9.82106	5.9954	5.7892	4.7679	4.8211	6.8955	8.9857	7.8473	12.4255	10.0698	6.89			0.0439571	7.498
1.0713	5.1425	4.7486	5.0487	5.5341	3.9623	2.8227	5.6479	6.6644	3.74062	3.9257	6.3959	5.1282	3.9038	3.5951	9.255	9.03	5.7604	11.3134	12.2476			0.04945	5.993
1.1903	3.1954	5.5637	7.8444	10.7376	5.8112	7.3011	6.2941	2.3338	3.99778	6.0573	3.7775	6.1847	3.5207	5.1225	11.9264	7.3698	16.5556	8.6096	12.3213			0.0549429	7.08024
1.3094	4.3665	6.7046	7.3491	5.3716	6.6777	6.8864	5.7529	6.6706	6.23142	4.8929	9.3994	8.382	7.0998	10.8698	10.1753	8.0549	11.7829	12.0776	14.1151			0.0604404	8.04529
1.4284	10.5625	4.5842	8.2625	5.5962	6.0168	3.5803	5.2435	5.423	5.13957	3.6638	6.5964	9.9657	4.6088	2.2791	11.1939	9.4588	7.5745	10.735	15.8489			0.0659334	7.17545
1.5474	3.549	5.6422	8.4136	9.2735	9.9432	6.8308	6.81	5.1784	8.56645	5.7198	10.3632	5.8724	2.8814	4.2465	8.3295	7.1401	4.776	8.2822	11.2302			0.0714263	7.00255
1.6665	5.0079	6.439	9.4859	6.5129	8.0274	5.0258	9.7921	3.406	5.64187	7.7678	5.2129	3.508	3.6045	6.3578	11.1011	5.1656	6.2344	9.1385	13.9634			0.0769238	6.91541
1.7855	7.6703	4.7162	4.5203	7.1214	6.1298	2.926	6.38	7.0014	6.04909	4.5255	5.7471	6.2277	2.9088	5.1027	7.7448	6.9835	7.533	7.3841	9.3141			0.0824167	6.10452
1.9046	6.8184	4.7436	6.1268	5.4514	7.4878	5.6288	5.3904	5.5234	5.30645	2.668	7.719	5.6892	4.5925	7.8226	6.2466	2.8403	7.5413	7.7038	13.2571			0.0879142	6.23987
2.0236	5.2212	4.793	6.7538	4.328	9.7107	2.4055	8.5791	5.8725	5.21002	2.5961	6.7469	7.5956	5.1415	7.0804	6.5108	6.4994	7.2115	9.1849	8.2581			0.0934071	6.29995
2.1426	4.812	5.2747	9.053	6.0579	5.249	4.5292	4.4813	5.6231	3.68624	2.9265	8.4396	4.0545	2.38	8.7854	7.1382	8.9388	3.7069	3.4185	9.872			0.0989	5.70668
2.2617	4.7512	10.1574	7.4452	6.5152	4.4976	2.3866	4.6969	3.81	3.25897	4.8009	7.1685	4.7657	4.0774	4.752	9.2019	9.2767	5.4961	8.5768	15.3817			0.104398	6.3693
2.3807	9.5272	8.1818	6.6579	4.5191	5.9971	4.1281	7.2803	4.7147	4.28261	5.2788	4.6595	3.4862	9.1316	6.1229	9.2028	7.4841	7.038	6.4418	11.5786			0.10989	6.61648
2.4997	6.0892	5.7381	5.6469	4.5024	5.6981	8.1493	8.0088	3.6251	5.94472	5.2222	3.5643	9.372	3.9164	8.6686	8.942	6.869	9.3254	8.7803	8.235			0.115383	6.64725
2.6188	11.6332	9.3172	2.6778	5.5775	8.6808	9.829	3.7246	4.2536	2.64044	8.016	6.6449	6.0113	4.2412	5.7893	7.5737	9.3515	12.3909	6.3333	10.0404			0.120881	7.09088
2.7378	13.2286	7.1159	5.6666	5.9125	7.4212	3.398	10.4274	9.0626	5.89861	2.5492	8.7645	3.7719	4.5258	5.8701	5.7129	8.0392	10.2894	8.0662	7.3702			0.126374	7.00478
2.8568	9.877	10.5464	5.8339	7.2936	5.0179	3.7603	6.8693	7.2038	2.55959	2.4931	7.2316	3.0674	4.2359	4.7962	10.0455	5.4686	5.7903	8.1749	6.9903			0.131867	6.17135
2.9759	9.8675	9.7136	6.9621	4.2154	5.911	7.1068	7.9008	8.4989	6.0962	7.9481	7.2716	3.1823	7.8372	5.4291	9.7831	9.0404	7.2921	10.3686	8.7546			0.137364	7.53576
3.0949	12.6096	3.982	4.5823	5.2145	8.3839	6.1257	5.7952	5.9654	7.15171	4.494	4.6488	4.1664	6.2112	5.2145	9.8745	3.8042	10.4867	12.302	16.7346			0.142857	7.24985
3.2139	9.7986	6.8423	5.1401	3.7335	4.8324	4.5828	3.7124	7.71	6.3841	4.2822	7.4172	3.1441	3.4332	6.5611	10.9267	8.169	6.5585	11.6396	14.2511			0.14835	6.79573
3.333	5.4321	3.5698	4.8609	5.1025	3.401	8.1627	6.1988	3.8498	5.30689	4.1881	8.5322	3.5045	5.9135	6.5871	5.7645	3.871	7.5645	9.6607	13.4921			0.153848	6.05067
3.452	12.2775	3.6857	3.7754	6.3857	6.645	5.9007	3.9104	6.0417	8.19136	3.004	4.8717	5.2312	7.2559	8.7707	5.2938	10.0539	6.3762	11.4017	7.9598			0.15934	6.68591
3.571	7.5772	4.7517	7.4982	7.7389	8.6876	6.9018	4.259	4.9651	8.85559	4.0821	2.2161	8.8785	5.637	7.33	7.0297	8.8268	8.7544	6.3702	13.7639			0.164833	7.05915
3.6901	9.435	10.3336	9.1827	6.2854	4.352	5.1259	5.7838	4.183	4.0939	5.3123	4.61	5.1057	5.9576	8.8995	16.1027	7.7923	7.8579	4.8088	12.9518			0.170331	7.27231
3.8091	7.2572	8.2042	4.2518	6.9482	7.0841	5.3882	4.822	4.7223	5.63259	3.5736	8.1441	11.317	5.6441	8.2448	11.3103	9.7973	10.5464	6.0553	11.2297			0.175824	7.37754
3.9281	5.0823	8.7409	8.1028	5.5242	6.2145	8.9734	6.2484	6.0531	4.75695	2.8357	8.2247	5.6049	6.3069	12.2422	14.6458	8.8247	13.2873	11.4679	11.4328			0.181317	8.13523
4.0472	8.7215	9.6301	10.5492	5.0773	4.4342	6.0691	7.4676	6.5896	6.41578	3.7362	3.021	10.8276	8.1547	7.655	10.4121	8.7634	6.8972	8.3966	5.7306			0.186814	7.29204
4.1662	8.8311	13.1066	8.1035	6.1051	3.7222	14.3224	6.2959	9.0779	8.7361	5.4425	2.5088	7.3586	6.6545	9.2606	10.8133	8.927	8.2168	12.1301	7.4262			0.192307	8.26522
4.2852	7.7415	9.0401	7.6905	7.0323	5.2881	5.6209	6.0422	8.235	7.0285	2.8471	5.3191	10.2188	7.457	8.532	14.8683	12.0412	13.8031	8.9919	8.2368			0.1978	8.21234
4.4043	7.0577	10.0432	10.9886	6.3255	8.296	8.8389	3.9979	6.3635	3.44294	2.9604	5.2248	5.8747	3.6763	11.8518	13.6837	7.783	10.4414	9.7701	9.8735			0.203298	7.71021
4.5233	11.2011	13.1276	10.4313	7.605	4.0183	5.6946	5.9101	5.2614	1.60887	3.936	4.5423	6.305	6.5743	13.0198	14.7705	9.9202	8.2687	13.7649	9.6492			0.20879	8.18996
4.6423	8.0695	6.3688	7.316	7.3544	6.1153	7.6934	4.4647	7.297	2.24747	6.1002	6.1791	7.2471	7.4451	9.6006	10.9905	10.1474	8.0168	13.6702	12.2809			0.214283	7.82129
4.7614	5.3133	9.2724	7.1381	5.65	5.7068	4.7569	5.4106	2.8724	7.04195	6.0187	5.3598	7.1485	6.4721	10.0815	5.5447	11.0243	8.641	6.8853	11.8689			0.219781	6.95828
4.8804	11.0143	13.1448	8.2264	8.7086	5.959	4.1205	6.9052	5.4593	6.82857	3.0539	6.0234	7.2842	6.7498	6.6653	9.0271	12.5597	5.6179	11.2688	16.4369			0.225274	8.16072
4.9995	8.0436	9.3832	11.8443	7.2644	5.7372	5.5223	8.8194	8.7681	4.73794	3.2211	4.8925	5.2114	8.4857	12.2427	11.3006	8.6541	7.9187	13.6823	12.8695			0.230771	8.34732
5.1185	9.8972	12.6782	4.7149	4.3142	6.5394	6.0825	8.5492	5.4086	3.10998	2.1553	4.8867	2.3231	10.7933	11.6961	12.412	7.0713	9.4495	14.8781	9.7884			0.236264	7.72358
5.2375	14.1844	8.8552	7.5936	7.547	7.5711	11.013	7.544	5.5637	2.66589	2.9292	1.3117	3.6275	12.1861	9.0224	7.1684	9.1772	13.3329	8.8362	8.9065			0.241757	7.844
5.3566	11.714	12.3982	4.6903	6.5135	6.2731	5.1801	5.6575	7.0599	4.97749	7.2992	5.7133	8.5787	3.3773	9.9222	8.6668	8.92	5.5045	11.3514	13.0526			0.247255	7.72895
5.4756	10.6353	11.0303	8.0227	5.2942	10.2113	6.7555	5.5531	4.3224	6.56197	4.2863	4.3768	8.564	5.3692	9.0438	4.3538	7.2742	8.5701	9.1491	11.1687			0.252748	7.39699
5.5946	8.9652	7.1345	6.1057	7.6838	6.4905	4.1809	3.8566	3.8793	2.15043	5.3941	6.274	6.0641	5.7275	11.1345	12.137	7.0145	12.2154	8.9226	14.5127			0.258241	7.36018
5.7137	8.6456	15.887	6.0093	9.0831	2.9988	7.047	5.9904	6.393	1.40922	8.1101	4.0874	2.3385	10.6914	10.0458	15.2791	7.555	11.9244	14.07	13.7851			0.263738	8.49212
5.8327	8.1699	14.6317	9.6128	13.2507	8.3689	7.2669	7.2348	10.3	6.9917	3.4776	5.65	7.928	9.9868	10.8925	8.6291	10.184	8.952	12.3201	17.8513			0.269231	9.56309
5.9517	6.8476	15.1286	8.061	8.1397	11.7851	6.0026	7.2853	5.5195	4.05059	4.6095	6.018	4.061	6.4278	9.7479	7.4676	13.3621	10.1156	15.0322	15.6521			0.274724	8.70073
6.0708	8.9426	8.2644	9.7251	7.641	10.4994	5.6273	8.3188	5.0317	5.40995	5.2646	1.6763	4.1754	5.2837	7.7113	6.0551	11.3418	18.7362	12.4267	16.3067			0.280221	8.33884
6.1898	7.0555	11.6572	8.3323	9.505	11.09	6.1223	4.6322	2.5227	6.28771	4.4834	2.5586	4.306	6.0933	7.4246	8.4384	10.1547	11.4416	11.96	8.2335			0.285714	7.48942
6.3088	3.9184	8.6216	7.4124	7.4796	6.9736	5.2683	6.3321	1.4245	5.99315	5.2656	5.0031	4.4671	6.1036	8.9464	9.295	9.4539	16.1283	15.3326	10.2074			0.291207	7.5593
6.4279	7.9202	12.9687	9.7886	10.5437	6.1942	7.016	6.5258	6.0467	2.94592	2.9498	5.9263	3.1808	7.9356	8.8159	9.8178	6.2008	9.8226	11.6389	10.4161			0.296705	7.71865
6.5469	8.9482	12.5652	7.7055	7.4524	11.4483	5.3515	5.9246	6.0117	2.57493	4.2405	4.2453	7.939	9.5102	10.5034	9.6268	7.4547	12.3648	10.7875	10.6704			0.302198	8.175
6.6659	8.7718	12.3843	8.2424	5.7447	8.0483	5.1473	11.4766	4.0582	3.85093	6.7463	4.1875	4.9042	6.6483	6.043	7.4025	6.9147	13.8591	8.4691	11.866			0.307691	7.61922
6.785	9.7138	9.1437	15.8197	9.6327	6.0233	3.2769	13.3253	6.3815	2.27684	3.0816	7.7369	3.2731	7.5627	8.0159	7.8681	6.78	8.1505	11.9966	15.2842			0.313188	8.17597
6.904	9.0123	8.0611	18.4444	10.0228	12.8233	4.1423	4.5976	5.8772	5.16862	4.2323	10.324	5.1132	8.7228	6.9547	6.5807	5.7566	10.9403	8.0537	11.7292			0.318681	8.23985
7.023	9.2239	10.9567	12.8286	7.4377	6.6789	7.7201	3.391	4.2174	4.89857	4.4886	3.9035	5.1916	7.4465	8.138	10.4319	7.1803	7.6043	9.8042	12.6865			0.324174	7.59096
7.1421	7.4538	8.9707	9.0856	10.8839	9.7076	2.8534	3.2477	2.7962	5.92169	5.579	2.9403	2.7251	10.4885	7.3119	12.2935	4.4938	7.8844	10.0599	13.0787			0.329671	7.25135
7.2611	13.5881	5.5316	11.897	10.4225	6.3584	4.8946	10.8346	7.3846	5.37877	3.1896	3.892	1.7258	9.8958	10.208	6.0617	7.1064	10.7095	8.53	12.8733			0.335164	7.92012
7.3801	7.5572	8.1342	9.1264	6.3528	8.6924	5.4318	4.4068	6.0749	2.72319	4.1115	5.5254	6.4791	3.9244	9.9346	10.5774	7.0818	7.8018	7.4363	16.0213			0.340657	7.23123
7.4992	9.7543	7.3773	10.9896	6.8738	10.6797	6.812	3.3295	5.4724	4.1881	4.6426	7.6285	2.6467	7.2892	6.6864	5.8628	7.2211	8.2792	12.9182	10.8758			0.346155	7.34354
7.6182	15.6218	9.9309	13.7711	14.7969	4.2267	5.3658	5.206	3.277	5.5824	3.8456	1.7144	3.0835	5.3503	7.798	6.669	6.3033	7.4533	10.7958	12.4538			0.351648	7.53924
7.7372	15.6469	6.1601	9.52	5.3753	5.9196	1.8602	4.7964	3.1664	5.46736	3.6552	3.3148	4.5137	1.5328	7.0033	8.335	9.4549	3.629	12.1156	11.3396			0.357141	6.46348
7.8563	14.1379	8.4845	16.4442	6.9706	6.3593	5.5815	8.1288	4.2486	7.42294	1.451	3.8559	4.1059	5.1035	14.3562	8.0836	4.5986	4.3651	15.4486	9.4327			0.362638	7.81997
7.9753	18.0913	8.457	11.2547	6.395	5.1215	6.096	4.0521	4.5547	2.28022	4.506	2.9662	4.071	7.3661	3.7312	10.5509	3.7015	9.0491	13.4394	11.8446			0.368131	7.23834
8.0943	13.7158	7.2557	6.8542	5.9132	6.41	3.187	6.9037	2.9267	2.6065	4.5843	6.0901	6.0539	6.1065	8.1432	5.8331	4.9171	8.0459	17.326	5.3124			0.373624	6.74659
8.2134	12.7187	8.1943	9.5279	8.4874	1.815	5.6975	4.3741	2.4902	6.11971	3.9357	4.9268	4.8355	4.968	5.8425	6.1132	2.7115	3.2768	12.2893	10.1869			0.379121	6.23742
8.3324	11.0892	10.3543	10.5677	6.2802	3.0822	7.464	4.2391	7.1436	2.58035	2.2478	3.8308	2.631	7.6853	4.9004	8.6323	4.2296	8.8646	8.0766	14.4614			0.384614	6.75581
8.4515	10.9473	12.2387	10.9939	3.5315	3.3266	5.1008	4.5799	4.1292	4.74305	5.7723	3.6584	6.3785	6.1048	5.8207	7.8084	5.9079	9.4256	11.1428	18.5379			0.390112	7.37622
8.5705	10.4559	16.1969	7.1836	4.1725	5.0431	6.6538	10.6023	3.8812	2.77627	2.5009	0.9643	1.5741	7.9327	5.2435	13.9252	3.6848	8.4894	9.2496	16.0326			0.395605	7.18751
8.6895	8.2584	9.4867	4.5792	8.2679	5.72	7.2303	4.4345	1.8239	5.29534	4.0362	2.6881	3.0071	8.4067	7.5043	10.4726	8.4202	11.1751	8.162	13.9285			0.401098	6.99458
8.8086	7.8248	10.2498	7.3835	7.1952	3.3547	7.7088	6.7063	1.657	5.97929	1.9183	3.6336	2.1465	9.0077	7.686	9.8122	9.2591	7.3251	9.6536	12.9676			0.406595	6.91943
8.9276	6.3658	6.9976	8.0379	9.3025	7.6864	4.9475	6.1445	5.2874	5.23585	5.3823	3.4574	4.4956	10.423	3.2285	5.2431	7.0619	7.9601	10.1613	11.0761			0.412088	6.76288
9.0466	9.3933	10.9551	8.5051	5.4101	6.4095	3.8488	4.6161	2.2432	2.77102	6.0529	3.7667	3.3325	9.5432	10.2014	4.7546	6.5003	9.3087	8.0886	12.8292			0.417581	6.76475
9.1657	7.3771	11.046	3.6736	7.3359	5.3171	3.7157	4.7446	2.2799	3.27225	5.2288	3.3835	3.4609	4.1648	4.9514	8.8171	2.6549	15.3753	8.2529	15.8117			0.423079	6.36123
9.2847	11.493	10.146	6.8397	9.4586	4.4295	2.8505	2.8572	1.7632	2.63488	4.8663	2.8019	4.6088	7.3232	5.0783	5.8254	4.1021	12.869	10.7748	16.1696			0.428571	6.67853
9.4037	9.7272	7.8239	6.2014	2.4049	7.1507	5.5771	5.282	0.9535	1.03443	5.2772	6.192	2.5163	7.1778	7.0891	9.3169	6.3297	11.8214	8.9639	11.7187			0.434064	6.45043
9.5228	9.2854	5.8822	9.6579	9.3475	6.4275	8.8725	4.4133	1.8223	2.38956	3.4284	5.0407	5.6559	4.5865	5.0577	6.3171	6.8885	11.7902	11.0796	11.1081			0.439562	6.79215
9.6418	14.3829	14.2739	10.9841	7.7525	6.5369	4.0851	6.3274	2.8407	1.95568	2.5294	3.494	4.6268	5.9729	5.5384	5.4205	6.5943	12.0548	17.5112	12.901			0.445055	7.67276
9.7608	8.6377	12.0549	6.3768	8.24	4.5269	8.1932	2.8928	2.0941	2.91279	3.7265	3.0596	4.0649	5.3208	9.2639	4.8038	8.1669	9.8917	12.4839	12.0957			0.450548	6.77931
9.8799	7.4472	10.1613	10.2558	6.1395	10.5345	7.4108	3.5611	2.594	1.31615	4.0278	4.7569	2.3688	5.9981	6.9201	5.874	4.0967	5.7358	15.6806	11.4948			0.456045	6.65126
9.9989	5.1044	10.7392	11.7578	8.7322	6.6112	6.7556	4.1426	4.2606	1.12348	6.3532	4.051	3.3661	11.6664	7.5369	3.5886	4.4274	6.9127	8.3277	15.6831			0.461538	6.90211
10.1179	5.2992	10.3618	6.4744	11.6781	7.3058	5.4607	1.3974	3.0321	1.01426	5.0456	4.1968	3.2414	8.2189	4.1466	3.9778	1.6356	4.7598	6.0234	16.5155			0.467031	5.77817
10.237	5.376	5.4261	9.0143	11.4209	3.8239	7.7255	5.8724	1.113	3.54911	2.941	2.632	3.7303	6.3671	7.8325	5.9169	5.8748	6.4592	15.3849	7.094			0.472529	6.18705
10.356	5.8134	6.5469	11.4806	6.1433	8.3538	7.5094	4.0341	4.4947	5.38061	4.1753	4.1173	5.7103	8.0745	7.3506	4.3283	4.5851	8.8805	14.2091	9.1679			0.478021	6.86083
10.475	6.6545	12.7954	4.8332	5.6967	7.6856	7.5875	1.6966	1.0443	1.96316	7.3467	4.4347	3.4346	8.2796	5.9938	4.6196	2.907	5.5287	11.3926	8.5569			0.483514	5.91848
10.5941	5.5592	8.0614	13.1192	9.2894	7.3606	9.3062	2.2567	0.3269	3.3065	6.0138	2.2952	6.6933	11.1981	10.0966	6.7182	2.5291	5.6983	13.5551	12.5688			0.489012	7.1554
10.7131	9.8298	10.1564	11.9083	5.1332	5.2869	5.5219	3.6151	1.4674	1.76673	7.2018	1.9395	6.9059	5.3083	4.3192	2.8072	1.9497	6.5041	14.2554	9.771			0.494505	6.08673
10.8321	6.6211	7.417	9.942	7.4802	5.3323	8.6166	5.3386	1.0608	2.50465	5.5304	2.9412	6.0238	8.8904	10.2451	3.9963	1.6995	6.1076	9.7322	7.055			0.499998	6.13341
10.9512	6.9201	8.9688	9.3473	5.6651	8.1517	5.5073	3.552	1.497	2.25449	4.9596	5.4214	6.5333	7.6754	9.4464	4.7298	3.4634	8.2304	13.4237	9.1347			0.505495	6.57273
11.0702	8.6641	11.6641	9.88	2.5867	4.7308	5.1065	2.0136	3.0002	3.63119	2.5632	1.713	6.5396	5.5197	7.6351	4.1253	1.8902	8.8072	9.9065	4.6859			0.510988	5.50857
11.1892	10.394	10.8499	7.1831	8.5289	5.4119	6.5374	2.3027	0.1086	3.88216	2.7978	1.1452	3.9818	8.3002	5.8389	2.7984	3.1192	6.4658	11.1298	4.2137			0.516481	5.52576
11.3083	7.5347	8.9927	6.9256	4.7456	7.294	9.0112	3.9354	2.5112	3.84215	6.7316	3.3677	7.562	8.8465	11.4	3.4859	1.5914	10.3216	12.1943	8.3941			0.521979	6.77303
11.4273	9.0444	11.0941	7.9024	4.7012	6.3743	4.5377	5.9472	0.4665	1.13668	7.5566	2.0742	4.2063	5.9542	6.0401	3.9988	4.5596	3.8518	14.1637	5.021			0.527471	5.71741
11.5463	9.3895	8.542	10.5086	4.2637	3.2601	5.633	3.976	3.3702	1.88866	4.1963	4.4015	7.8508	7.0552	8.4547	5.2702	3.096	5.1531	15.1621	5.9512			0.532964	6.18015
11.6654	10.3803	6.7765	11.6164	2.5682	4.0071	6.8563	2.2536	3.8919	5.51374	2.1371	5.3273	7.3748	4.7964	9.2926	5.2718	1.8492	4.395	15.1639	6.1115			0.538462	6.08335
11.7844	12.3709	7.756	16.1481	2.0718	1.8453	5.6578	3.5609	1.4192	3.87698	5.1795	6.1099	2.7015	8.4413	8.9866	1.4617	2.2002	2.7563	10.6756	7.4131			0.543955	5.82277
11.9035	9.8707	6.717	7.9993	4.353	6.6069	4.9221	2.3637	1.4435	3.66334	8.7861	5.0604	2.1687	4.8654	11.3454	2.4527	2.4009	4.2249	5.9029	14.8035			0.549452	5.78687
12.0225	12.5227	12.0526	7.5037	7.1811	7.8637	4.3531	2.7227	3.8179	0.98771	5.492	1.2637	6.0387	8.994	10.9779	3.3282	3.6659	3.1808	10.1643	6.3834			0.554945	6.23653
12.1415	13.1934	6.2805	10.9451	4.2718	7.1252	4.9535	2.1842	2.6052	0.51787	3.91	7.895	2.5008	4.2261	8.6654	2.5467	1.5888	3.089	7.527	3.8007			0.560438	5.14875
12.2606	14.8524	8.0093	12.8425	5.2647	5.1045	7.0012	5.1205	0.9996	3.31702	6.4434	7.089	0.8834	8.3231	12.6629	3.4479	1.8552	2.9671	8.8919	12.5046			0.565936	6.71475
12.3796	20.636	8.9089	6.7353	7.8155	6.0331	9.4852	3.0633	2.7604	2.12414	4.6853	7.2763	3.6021	7.5482	4.4718	1.555	1.5258	2.6528	10.4265	8.1625			0.571429	6.2878
12.4986	23.8886	11.961	8.4046	7.6021	8.2663	7.3043	1.1229	0.4102	4.27395	3.8893	10.4744	4.6986	3.7122	4.4508	3.4694	2.2916	3.5701	6.5559	6.8476			0.576921	6.48389
12.6177	13.2581	13.543	14.3314	4.535	9.0105	4.9933	0.9996	0.1644	4.84233	6.8619	10.5997	3.5596	9.345	4.5727	2.769	3.0183	3.7578	2.6993	6.0923			0.582419	6.2607
12.7367	20.2413	13.7209	9.1323	4.3376	11.589	5.7718	1.989	0.8866	1.74636	3.6149	8.5654	4.5868	8.4289	9.7798	3.493	2.9716	2.7293	5.11	6.8151			0.587912	6.60577
12.8557	11.797	12.6712	13.0521	8.4974	13.8666	6.6477	1.5693	0.8244	2.03299	4.4924	9.7529	6.2923	5.5269	5.2396	3.261	1.8378	3.2359	10.1174	5.7322			0.593405	6.65511
12.9748	15.2214	14.9887	12.4246	9.6792	9.3927	12.5864	1.3035	0.8987	2.39134	3.5301	7.2927	3.2668	8.4473	1.8675	3.0281	1.3644	4.0258	10.7342	9.6802			0.598902	6.95388
13.0938	19.0337	12.2698	9.9109	7.8488	7.5354	5.5464	2.4879	1.639	1.93901	1.8324	2.8265	6.7062	6.107	3.3162	3.2337	0.2984	3.799	6.716	6.5295			0.604395	5.76715
13.2128	17.3826	12.5799	10.0803	5.9798	9.0488	6.5385	0.7716	4.0304	3.30937	5.0172	3.2643	6.5085	11.3482	9.4152	5.7846	1.2227	2.5136	7.321	5.0717			0.609888	6.69412
13.3319	8.6208	13.0579	8.1904	7.8183	6.4932	6.8507	0.1778	2.6481	3.18057	3.1185	5.5495	3.9737	8.8382	5.5777	3.0958	5.9031	5.4851	8.3816	5.6739			0.615386	5.92815
13.4509	7.8153	14.5192	6.6341	8.6378	6.8139	2.5223	2.4498	3.5865	3.84326	5.6304	6.252	6.609	8.3855	6.1896	2.0927	3.3705	3.7749	7.612	5.0634			0.620879	5.88432
13.5699	10.4248	14.5624	8.4198	6.1285	11.3505	6.317	4.028	2.5737	4.98891	3.68	3.0493	7.5285	10.4427	3.5711	1.2023	2.4631	3.584	3.8781	4.8603			0.626371	5.95016
13.689	6.4526	10.9269	9.2357	9.5166	12.7175	4.97	2.2657	1.3231	2.07986	4.2843	4.4325	7.4959	5.1548	6.8196	1.0315	1.5206	0.9276	5.5849	5.2557			0.631869	5.36818
13.808	7.4124	10.3367	12.1614	6.1703	11.2007	4.3103	1.8883	0.6473	5.44823	4.9589	3.2559	8.2014	2.6367	4.1709	1.249	1.0102	0.8648	7.8472	5.7212			0.637362	5.23641
13.927	7.086	11.5214	16.6108	5.6862	9.768	4.5235	3.1986	1.277	1.99555	5.3871	3.8663	4.3921	6.1082	8.6659	2.9925	0.8212	5.2371	2.8778	7.45			0.642855	5.76133
14.0461	5.6066	11.6159	12.8632	7.1162	11.0078	4.9603	4.1709	0.1465	2.456	4.0295	3.6235	7.8643	6.2002	4.3725	0.6294	1.7705	0.8169	7.908	5.9156			0.648352	5.42494
14.1651	10.0011	5.0431	11.6857	8.1045	5.6792	9.309	2.0286	0.7588	4.77105	4.7569	5.1669	4.0143	7.1156	4.5161	2.3865	2.3925	2.5513	8.9889	6.71			0.653845	5.5779
14.2841	8.8245	9.2825	11.3426	10.3527	7.3417	5.712	2.5749	1.1926	2.19846	7.8972	6.4253	3.9317	7.1442	5.6327	0.884	3.7138	3.4709	6.4049	2.7818			0.659338	5.63729
14.4032	5.76	10.1465	12.9723	9.1557	3.9581	4.4086	2.8647	0.9526	2.99196	7.7847	3.4405	5.3654	7.9546	6.0185	4.1761	1.4476	0.9802	8.1864	5.5018			0.664836	5.47717
14.5222	4.8831	12.0419	13.2223	6.4425	8.4287	4.1134	4.1732	1.777	5.20327	6.0387	6.6745	4.5957	9.6335	6.5736	3.91	4.0073	1.2098	8.1118	7.958			0.670329	6.26307
14.6412	3.3846	4.543	10.0656	10.4134	5.1745	5.3542	3.0347	1.6145	4.04493	2.886	4.4117	5.4516	4.7276	6.8201	3.6013	3.2022	6.1869	9.2275	5.3293			0.675822	5.23545
14.7603	4.6462	12.3038	11.9008	9.8092	10.1168	6.179	0.5996	3.921	6.08335	2.1051	5.8976	2.4104	4.3058	4.6605	2.0526	1.0812	2.9806	13.719	3.9467			0.681319	5.72207
14.8793	9.529	8.2933	8.719	12.8846	10.1623	6.448	2.2091	1.2265	3.64513	6.2379	3.6198	5.1626	6.9135	3.1719	1.1722	4.5519	1.3276	13.1479	6.2756			0.686812	6.03673
14.9984	6.6911	8.6242	11.1207	13.2332	8.6377	3.8319	2.5087	1.7849	1.40307	2.132	4.4524	4.5194	5.0129	5.8832	3.5796	1.955	2.3059	8.5034	6.0165			0.692309	5.37872
15.1174	8.0634	9.7169	10.4847	10.3097	10.7905	3.6117	2.9283	2.9021	4.00035	3.4056	1.991	1.8399	7.0614	6.345	2.6644	2.5589	3.1117	7.1607	6.1389			0.697802	5.5308
15.2364	9.5139	11.3166	8.0441	6.8313	11.7905	3.5895	4.5121	3.53	3.61399	2.8699	1.1842	2.3976	6.1813	4.2322	4.0304	1.8829	2.7533	10.5461	3.0921			0.703295	5.36379
15.3555	8.2037	11.371	7.1597	5.122	5.531	9.063	3.9269	2.2264	4.33792	5.4548	4.7883	2.9278	2.5639	4.8974	5.2928	2.6607	6.0476	6.9442	2.6799			0.708793	5.32626
15.4745	12.6996	11.1809	8.3826	4.9718	11.9587	5.0256	2.4685	1.4091	2.89647	2.4452	5.5131	3.5142	6.6536	2.9535	0.6706	1.9671	4.8042	9.5856	9.0553			0.714286	5.6924
15.5935	9.2859	6.756	7.7035	9.2756	6.7138	3.2151	3.0504	4.0956	1.65215	7.2774	5.6972	3.5404	7.9652	6.1625	1.9367	3.3993	3.7932	5.8704	6.2789			0.719779	5.45628
15.7126	10.7988	10.4731	4.8133	7.7625	6.5645	7.7177	4.7258	1.4225	1.60282	6.4295	2.8359	4.0128	6.7275	6.3798	2.1498	3.6429	3.9015	5.3198	10.0038			0.725276	5.64654
15.8316	11.0072	8.1904	8.7765	4.8777	7.7394	4.2418	2.849	2.5786	4.86994	3.5793	2.4536	5.1841	7.6478	5.2288	5.4227	1.4383	3.1352	4.9496	7.7728			0.730769	5.36541
15.9506	8.2724	10.1324	7.7507	5.7327	10.1209	4.1308	2.3982	0.9037	3.75447	4.9289	1.6739	4.2602	10.0735	5.8376	2.0156	3.3562	5.0012	8.8983	9.2518			0.736262	5.71018
16.0697	7.9286	14.0985	8.0177	5.173	13.329	2.2311	2.5552	1.441	3.71805	5.4381	3.1856	3.6342	7.5208	5.2482	2.5054	2.8279	2.7248	8.3492	11.2575			0.741759	5.85178
16.1887	14.8549	11.0236	4.7644	7.7304	7.7224	5.2554	3.4467	1.4292	2.34796	3.6936	3.5511	3.2923	10.2892	5.3403	2.613	3.0072	3.1905	11.5485	9.9798			0.747252	6.05687
16.3077	7.5662	7.0969	5.5314	5.6022	10.6039	4.6749	2.8033	1.2211	1.18238	7.448	5.1498	2.8996	10.2497	5.7912	1.3752	0.4464	2.5743	5.4455	11.6943			0.752745	5.22928
16.4268	6.9429	3.8887	5.1992	12.0165	4.6788	4.356	4.7414	0.7223	2.63076	7.6913	8.0009	2.7865	5.7373	5.8111	3.4589	1.268	5.6611	15.2171	4.7383			0.758243	5.55511
16.5458	8.0394	14.1727	10.5075	10.3847	4.7645	4.3954	3.1441	0.7461	2.5674	5.6427	7.471	4.3715	4.3241	3.8436	5.6369	2.2638	2.8501	12.8021	5.4622			0.763736	5.96788
16.6648	6.2347	5.2371	5.8782	7.4909	7.4474	4.4489	1.5098	1.9607	1.18438	6.4362	3.7461	3.632	3.5354	4.2063	0.8939	3.4471	1.637	21.6095	4.7376			0.769229	5.01438
16.7839	4.392	4.4831	5.7848	6.8705	10.8116	2.3826	2.4544	2.7026	3.52241	5.8739	8.2657	4.111	6.3009	6.9097	4.5672	3.0578	2.869	19.3846	5.5528			0.774726	5.80508
16.9029	10.4706	4.3822	8.8678	5.6813	7.741	2.4999	0.4763	2.3484	3.62466	3.628	4.7149	5.3275	10.9094	3.5758	2.695	0.8095	3.8293	8.8912	5.6295			0.780219	5.05801
17.0219	4.3652	7.9426	8.2239	4.5746	8.4501	3.2957	0.5297	1.2889	2.51272	2.8477	3.1073	4.7461	7.8172	2.5262	2.6442	4.4025	2.3322	7.3142	6.3235			0.785712	4.48655
17.141	4.4601	4.8233	10.1942	7.5935	6.4908	6.3709	1.9772	1.8867	1.56516	2.3028	6.1879	4.7208	7.636	6.4548	3.5913	2.3611	2.5494	6.1143	6.5969			0.79121	4.9409
17.26	4.7377	5.8473	8.0886	3.9096	9.9802	5.5429	1.9119	1.037	2.77869	2.0856	9.1454	5.4362	5.3987	4.6227	2.491	1.0851	3.3809	11.5471	8.1418			0.796702	5.11413
17.379	2.8268	3.251	8.2304	8.4351	5.4824	4.985	1.7635	1.2993	6.30162	3.2461	4.5058	3.6658	6.5103	1.2843	2.9837	2.1743	6.8484	10.7555	4.7523			0.802195	4.70009
17.4981	6.7027	3.0769	9.2602	4.823	4.1697	3.5517	0.2147	2.7547	8.30556	6.8402	6.6426	5.7153	7.878	3.1216	2.8672	1.4159	6.5118	10.3773	2.736			0.807693	5.10342
17.6171	5.1089	5.069	7.0884	6.4755	3.3803	6.9344	1.6313	3.3674	3.58037	5.3471	10.6735	7.7196	7.4603	0.7418	2.1023	2.2276	2.4065	6.0792	3.1218			0.813186	4.76396
17.7361	4.8635	5.655	5.5966	3.8723	1.3647	4.4046	1.7159	0.4204	6.75334	3.5729	6.5901	2.1815	6.2238	4.4714	7.8427	1.3334	3.9898	10.0981	4.9211			0.818679	4.51953
17.8552	8.2442	7.7774	7.0289	4.6868	5.1407	3.4658	1.8975	2.0127	2.77117	3.7094	5.9204	4.451	7.4652	4.3408	2.0108	2.5825	3.0209	4.8009	4.1956			0.824176	4.50119
17.9742	3.6281	8.5766	5.6908	5.5752	4.7977	2.9786	2.3776	3.9883	4.75493	5.9163	5.7427	5.3668	6.5468	2.6909	4.6176	4.582	3.1639	5.9954	3.5555			0.829669	4.76556
18.0932	7.7035	6.3638	5.2893	9.0348	4.5055	6.4778	2.447	4.3849	3.84175	4.3099	9.2607	4.8833	4.9185	1.9499	3.9667	1.9229	3.9752	2.6872	4.6838			0.835162	4.87402
18.2123	7.7588	2.8197	3.3436	7.709	3.2115	3.3873	1.5954	1.0013	3.34869	5.5717	8.4618	6.0174	6.2893	7.4034	4.6951	3.5004	6.4033	6.8602	5.7822			0.84066	5.00843
18.3313	6.0893	8.8738	3.4715	6.6854	3.3661	2.6864	4.2369	1.4358	2.74871	5.8816	10.9217	5.5625	6.4639	6.206	1.4507	0.7367	4.4579	11.6106	4.4098			0.846152	5.12081
18.4504	1.8606	9.2962	5.6554	3.4404	6.5963	3.6832	2.1088	5.0762	6.13546	3.854	14.8255	8.4964	6.4095	3.7987	2.2114	1.2705	3.5306	9.4389	5.6752			0.85165	5.44017
18.5694	5.9994	10.006	3.2289	8.2482	3.4657	7.3414	3.1419	3.4832	4.14299	5.1871	7.8913	6.1723	2.95	5.7348	3.5559	1.7864	9.2785	6.8664	4.3747			0.857143	5.41343
18.6884	5.7272	10.1865	5.8425	8.1431	2.0974	3.915	3.6558	2.8067	4.0394	4.8789	4.2835	2.8799	4.3023	5.847	3.8545	3.2247	6.0111	10.5765	2.9379			0.862636	5.01105
18.8075	4.5566	8.7587	6.5012	5.9103	2.6256	2.2541	3.0917	6.8564	5.59378	10.0056	4.9074	5.1715	5.8722	5.9464	6.4732	4.0545	6.1217	11.4896	3.1259			0.868133	5.75349
18.9265	3.2757	9.7984	7.0163	10.0782	2.4128	4.9823	4.1092	7.4184	8.66404	2.626	2.6421	6.6071	2.3268	4.9689	7.2406	3.219	8.2016	5.8268	1.3847			0.873626	5.41047
19.0455	3.0236	11.1004	4.8015	6.5253	5.3534	4.1288	4.5022	3.5148	5.44733	2.7969	5.0613	3.4456	7.3441	3.814	5.9507	3.6942	11.2752	7.9014	4.0094			0.879119	5.45738
19.1646	5.0972	13.8231	3.6266	9.58	4.1658	4.3848	3.6344	4.8354	4.72003	5.2057	4.9309	2.9627	1.9718	4.6993	4.7943	3.2428	8.186	6.2673	3.1636			0.884617	5.22588
19.2836	5.5442	8.451	3.4887	6.8139	5.4052	5.4223	2.1701	3.1431	4.5497	3.7306	2.3881	5.4553	2.8542	5.5251	4.6599	5.6826	8.7858	4.0084	7.1717			0.89011	5.01315
19.4026	3.9482	9.7931	5.1104	5.9767	2.6223	8.9782	3.6212	0.4035	4.79981	3.9073	2.3883	2.3573	7.2116	5.9502	3.297	7.8701	3.2756	8.6153	4.7776			0.895602	4.99493
19.5217	4.0128	7.4743	3.9402	6.5325	7.4018	8.1629	7.3883	1.0362	8.12392	5.4332	2.2968	1.8876	5.7582	5.7432	5.603	10.4779	10.5965	8.4689	7.8164			0.9011	6.21866
19.6407	3.8591	5.5767	6.7803	10.3343	7.4745	4.0526	3.1148	1.8142	4.30268	5.2033	0.8553	0.8462	5.4808	9.6713	3.8987	10.2167	8.5799	6.5411	8.2549			0.906593	5.62407
19.7597	5.4957	7.0389	2.225	5.4196	10.4662	12.5592	3.4433	2.7736	5.60482	3.0271	1.2044	0.2352	4.9885	5.1344	5.5247	6.4184	4.3312	9.9904	8.062			0.912086	5.47066
19.8788	4.8923	6.4595	6.3964	5.2749	8.0153	4.3866	4.03	1.4912	4.0547	3.4607	1.2442	1.1613	1.9836	4.0984	2.5191	6.7861	6.2876	11.4874	10.964			0.917583	4.99965
19.9978	4.1657	5.3042	5.9002	3.4189	6.3778	6.8094	1.6197	2.3785	2.88813	2.8652	2.9493	1.235	0.7504	4.5402	3.0584	10.7092	6.3505	5.5701	4.295			0.923076	4.27294
20.1168	3.6116	1.3663	6.3108	6.1064	10.8737	4.7862	4.3339	1.9065	3.89335	4.0902	1.0365	1.6098	1.4138	6.7799	4.8707	9.9592	5.8676	11.7943	6.3113			0.928569	5.10116
20.2359	2.0132	4.7506	8.704	6.1669	11.1944	4.8223	6.1402	5.3152	3.71093	2.8387	0.5465	1.2857	1.0034	4.4018	3.4435	5.9999	5.5695	13.5481	8.1761			0.934067	5.24373
20.3549	3.174	3.0769	4.433	3.9451	10.6279	5.455	0.7191	3.4812	2.1921	0.7474	0.8011	1.418	1.4353	2.0661	4.2858	7.4578	8.1872	11.7084	9.3947			0.93956	4.45295
20.4739	0.9897	2.9618	0.3065	2.2922	10.4478	4.2349	0.2487	2.9366	0.63586	3.2377	0.3066	0.4038	1.6971	0.4682	5.2644	11.0433	8.2278	7.3456	11.2286			0.945052	3.90932
20.593	2.1777	4.3303	2.2031	3.4986	10.172	4.8619	4.0192	0.4343	0.40645	1.2185	0.3443	0	2.3152	1.0635	2.7941	9.7219	4.4811	7.3449	10.8321			0.95055	3.80101
20.712	2.4094	2.0698	3.7015	1.9116	6.5197	3.6487	2.3702	0.6506	0.15585	0.8295	3.1641	0.0592	0.8369	1.913	1.0395	10.0903	5.4675	9.4449	7.0456			0.956043	3.33304
20.831	0.2373	2.1832	2.9781	1.4681	3.0694	3.2415	2.1327	0.8106	0.00091	2.3593	0.5907	0.5699	1.0732	1.9672	2.206	6.2457	4.9831	5.2794	7.7			0.961536	2.58402
20.9501	0.4855	2.4278	2.3804	0.1002	4.6328	5.9553	2.3222	3.6807	0.78453	1.0911	0.7256	1.0471	0	0.5844	4.2341	12.3903	6.2504	4.5397	3.9248			0.967033	3.02931
21.0691	1.2242	1.546	1.0449	3.1456	2.0444	1.2194	2.4889	5.3256	3.404	2.9253	3.1523	0.348	1.8226	2.0984	2.941	1.647	5.7059	5.0308	7.8266			0.972526	2.89163
21.1881	0.9458	9.145e-05	1.1498	0.4258	3.5502	3.3789	3.17	1.7148	1.69549	0.6089	1.7597	0.0284	0.5596	0.6915	1.2741	1.8034	3.1474	3.6846	5.2646			0.978019	1.83437
21.3072	0.518	1.248	2.3903	0.0596	2.4387	0.5859	0.7241	0.8783	0.1058	2.6478	1.5513	1.1172	0.6768	0.7591	2.0728	1.849	3.0404	4.5354	5.4325			0.983517	1.71742
21.4262	0.3702	1.7296	1.9843	1.2071	1.2622	3.8433	1.767	0.8377	0.01021	0.2303	0.9107	1.9427	0.7634	1.1252	1.0195	2.9375	1.1984	6.4886	6.8155			0.98901	1.91807
21.5452	2.1946	1.2089	0.9731	2.9224	2.2514	1.4716	1.4601	0.8722	0	1.4623	0.3908	0.9922	0.0806	1.5564	0.2666	0.2603	1.3832	1.6002	1.2164			0.994502	1.18754
21.6643	3.3659	1.5393	0.4377	0.9233	0.6064	2.2506	0.0832	1.8037	0	1.7566	0.9475	0.1458	0.3907	0.4437	0	0.6873	0.6195	3.8821	1.0641			1	1.10249

## Sheet: Image10
X0	Y0	Y1	Y2	Y3	Y4	Y5	Y6	Y7	Y8	Y9	Y10	Y11	Y12	Y13	Y14	Y15	Y16			Ap-Ba	Av int
0	6.7997	6.2935	7.2387	5.5716	9.2411	6.0752	7.4615	7.0856	8.6864	6.4392	9.1751	6.3438	8.5231	4.1286	8.0616	7.1734	11.4546			0	7.39722
0.119	6.4192	4.4765	6.8329	8.7907	5.3524	5.6172	5.6827	5.611	9.2847	10.104	9.1645	8.8846	10.4045	2.2425	7.3655	6.3455	10.5881			0.00595065	7.24509
0.2381	11.4206	8.3538	10.7841	7.349	6.8818	6.9985	6.619	5.7737	8.9935	9.127	7.225	6.6928	11.9513	5.5209	10.9007	5.622	10.4017			0.0119063	8.27149
0.3571	6.7817	8.9559	8.0093	9.0386	14.1314	7.4313	5.1461	4.8412	8.0078	8.1609	6.8766	3.6869	12.2767	7.5702	6.8501	6.8811	9.5487			0.017857	7.89379
0.4761	7.3525	8.4732	8.3226	6.887	6.3797	12.9524	6.5232	5.2662	3.9894	7.1561	9.3423	5.1004	4.8746	15.6336	9.4333	6.5795	16.3969			0.0238076	8.27429
0.5952	11.0082	8.6446	7.6141	6.9011	7.9023	11.7861	6.387	9.18	4.1139	11.1773	7.2254	6.9048	9.8581	6.4852	9.2559	5.3349	11.2776			0.0297633	8.29744
0.7142	14.6058	9.6875	4.2829	9.5572	6.8692	6.4609	4.4282	4.4336	3.7791	7.4405	7.1033	3.4119	7.9976	12.4662	10.3087	6.7182	7.7413			0.0357139	7.48777
0.8332	10.3828	9.1172	5.3079	8.2362	5.6004	7.2022	6.5148	4.1024	8.4539	6.6323	9.2184	3.0264	11.2368	6.5168	12.0529	9.5198	10.285			0.0416646	7.84742
0.9523	9.2752	7.8947	5.9246	11.7386	7.9672	8.4025	8.113	6.5827	7.4665	5.9765	7.1958	5.9877	6.6912	10.8163	10.3824	8.0467	14.5421			0.0476202	8.41198
1.0713	7.6457	11.8098	8.1733	10.65	9.1654	5.1064	7.072	6.2667	14.586	6.4087	10.523	8.0413	7.9408	11.0078	9.5896	6.9585	13.256			0.0535709	9.07065
1.1903	10.0746	19.7857	9.6	11.214	11.9267	6.0429	6.587	8.812	11.4086	4.9205	10.294	6.5532	7.8248	11.0135	6.8025	8.4132	10.4643			0.0595215	9.51397
1.3094	11.0354	13.8456	13.1945	11.3635	9.9232	8.8975	10.0508	11.5071	9.4543	9.2167	6.0893	5.3565	6.6515	8.0247	6.3013	11.5816	16.0455			0.0654772	9.91406
1.4284	13.2862	16.6391	10.5537	5.3938	11.7595	11.0574	5.5215	7.8886	5.6424	7.581	6.3898	10.4059	9.5292	9.9467	9.8851	10.8203	15.8346			0.0714279	9.89028
1.5474	19.5904	17.7282	12.2566	4.7265	11.4363	13.8119	3.8513	13.0654	4.0886	4.3597	7.9026	3.546	6.7158	7.9507	6.9998	9.9697	15.5827			0.0773785	9.62248
1.6665	14.1123	15.4413	18.8235	9.0426	9.661	6.4264	3.0217	7.585	2.4976	8.6229	7.7812	7.3337	7.3979	9.8112	9.4782	9.8781	17.9896			0.0833342	9.70025
1.7855	14.7425	18.1391	16.5313	8.3037	8.3589	5.9684	5.4205	8.7624	5.4473	8.8661	9.3232	7.7929	5.0203	12.0637	8.102	12.2419	18.4965			0.0892848	10.2106
1.9046	18.44	14.9549	13.9347	8.0633	10.6015	7.5878	5.0751	9.5798	10.1277	7.5529	8.6295	4.9194	9.3474	10.8703	9.6244	11.0559	24.3749			0.0952405	10.867
2.0236	10.5437	17.8407	22.2087	9.0543	11.1919	9.5743	5.6601	17.6043	8.1888	10.4544	7.1515	5.8944	9.9156	7.0198	11.0267	13.2531	20.1134			0.101191	11.5703
2.1426	9.8743	15.306	15.4164	13.116	12.1999	15.3248	10.1665	15.1081	9.2848	10.7917	6.6784	9.1196	11.9284	8.225	9.4527	12.6706	13.1272			0.107142	11.6347
2.2617	17.0659	13.381	11.0982	12.16	13.9789	7.9726	11.8118	15.8747	8.9883	10.5545	4.9183	8.3006	10.1768	9.7682	10.4358	12.9485	11.6539			0.113097	11.2405
2.3807	19.4466	14.4438	10.0773	12.7043	11.5525	5.467	8.8167	12.0674	6.5233	9.6228	7.6546	8.8702	9.746	12.0688	14.1325	15.3856	10.7814			0.119048	11.1389
2.4997	14.1125	12.9351	11.9982	13.123	19.0248	8.2372	11.1844	9.5267	9.2998	14.5551	7.3536	3.6075	7.4624	7.5929	14.5373	12.4065	12.3974			0.124999	11.1385
2.6188	11.9287	15.5702	13.049	10.6575	18.8596	10.6698	5.7233	8.5097	8.8175	10.2915	9.0833	6.2353	11.9404	12.0174	11.2563	10.2283	8.1492			0.130954	10.7639
2.7378	18.7317	15.9364	15.9762	10.4508	15.5969	8.0339	7.1993	10.2598	11.2656	7.6741	9.6562	5.0828	10.2331	10.1804	14.5745	17.3932	13.7279			0.136905	11.8808
2.8568	15.9166	15.7935	15.2394	13.5365	13.8238	11.0326	8.6265	9.6042	5.5567	10.2584	5.2626	3.1699	11.0551	9.0885	10.336	14.1058	17.974			0.142856	11.1988
2.9759	11.3962	12.911	14.4095	15.8158	11.1929	8.6579	11.1017	10.0121	4.8044	8.463	8.036	2.8943	10.1458	10.4262	10.4185	15.1249	14.1434			0.148811	10.5855
3.0949	8.2245	11.6987	12.1201	9.2443	8.2027	8.6362	6.7473	12.169	6.048	9.3269	11.0168	3.3278	13.5669	8.4888	10.9128	9.5139	19.9839			0.154762	9.95462
3.2139	13.2947	10.0925	6.9567	12.5452	12.6926	10.6755	10.0431	8.4743	7.8062	11.2844	8.816	6.8692	10.5147	7.2909	9.1901	10.5274	19.2448			0.160713	10.3717
3.333	15.9294	9.6685	7.9359	16.7194	11.0189	10.2333	10.2319	13.1652	8.7514	10.5056	14.1099	5.7103	8.4191	8.4743	8.6347	6.3042	19.2174			0.166668	10.8841
3.452	10.7919	10.9623	13.5338	13.4254	5.9403	10.1285	10.7265	13.1058	6.2185	11.0586	7.5413	4.8073	11.3302	7.8732	9.4254	5.4501	19.4066			0.172619	10.1015
3.571	11.2784	8.8702	12.1022	16.7684	6.2713	8.9451	13.4044	12.3712	5.7835	13.4982	9.3184	6.6826	12.6305	11.4504	13.2553	8.8877	13.6574			0.17857	10.8927
3.6901	9.933	8.3737	13.1173	10.0859	12.0293	9.6312	12.2107	16.0487	6.2387	13.4058	5.5035	6.4195	11.578	7.4441	10.8512	9.5926	15.2444			0.184525	10.4534
3.8091	12.6267	8.7492	12.8479	9.1823	11.7189	6.0928	10.2823	11.3569	6.3763	6.9234	9.3927	6.3506	8.2028	9.3973	12.8843	10.1155	19.9328			0.190476	10.1431
3.9281	11.7267	17.2162	11.1516	12.0304	12.4205	6.7577	10.2554	9.9998	4.9194	8.0337	8.3398	8.9002	7.8965	8.2213	12.6368	9.6482	15.8249			0.196427	10.3517
4.0472	16.9934	14.2244	12.1383	10.761	13.4384	10.0194	12.302	10.0658	10.7561	8.1744	7.5436	6.9106	8.721	5.7555	9.2923	6.9078	13.9678			0.202382	10.4689
4.1662	12.0059	12.0037	6.6326	11.2672	12.7951	16.3715	15.5005	9.3252	10.2807	10.8665	9.1111	8.3823	7.1405	7.8246	9.4681	8.4344	13.8435			0.208333	10.662
4.2852	10.6284	13.2714	6.6187	10.1608	14.1894	10.386	10.1875	5.4225	7.5429	12.5521	5.6415	4.8976	5.4639	8.4274	11.2349	10.1482	11.3864			0.214284	9.30351
4.4043	7.7156	15.0122	10.1333	11.0075	9.4373	13.0846	9.2933	11.585	5.8622	11.0785	10.7005	5.9986	7.4745	6.1524	6.8461	6.6622	17.1522			0.220239	9.71741
4.5233	10.9526	12.1442	10.3696	13.4561	7.1398	10.0311	10.6759	10.705	5.1625	9.2688	9.5491	5.188	7.7662	9.5492	12.0292	5.7258	11.642			0.22619	9.49148
4.6423	11.7348	9.5955	8.1912	10.196	9.6186	10.5695	11.1614	9.1894	8.0755	7.9722	6.4856	3.7712	5.8833	9.4914	11.4659	10.0814	14.9827			0.232141	9.32151
4.7614	13.439	12.9202	10.2566	8.1655	8.5424	7.6158	10.1872	10.7823	4.1573	14.7328	4.3522	6.689	6.9979	6.6173	11.9113	9.2888	9.9985			0.238096	9.21495
4.8804	13.1705	11.3113	9.0206	8.8718	13.4391	7.7979	8.8331	7.87	6.8614	14.2433	6.4493	8.235	6.7653	6.1286	14.4616	13.7313	9.0812			0.244047	9.78066
4.9995	10.205	13.3638	13.1667	11.9106	11.7787	6.3739	11.6323	6.7588	8.2336	12.3662	8.4539	6.0708	10.5994	5.2775	7.8054	7.9323	9.02			0.250003	9.46758
5.1185	7.359	13.4391	14.8385	10.4869	11.7648	7.0847	10.149	6.5989	10.3565	10.8584	7.5971	8.3035	7.9931	8.0784	10.9106	7.7164	10.9299			0.255953	9.6744
5.2375	10.9681	9.4391	9.8269	5.6927	10.5461	7.7535	4.3935	7.6523	7.6476	12.5376	4.0235	6.8572	10.434	8.6482	13.8932	8.8299	9.3079			0.261904	8.73243
5.3566	13.3033	10.6519	8.9936	5.7066	8.4944	9.014	6.3116	7.2157	6.0384	11.0626	5.8614	9.8684	8.1569	9.5859	14.9091	8.0109	6.3993			0.267859	8.79906
5.4756	15.003	9.7203	14.1306	10.2206	12.9345	16.2933	4.209	7.0573	11.2089	6.8764	6.4698	7.1118	10.0625	9.2904	7.2494	9.2383	9.9832			0.27381	9.82702
5.5946	11.7235	8.0102	14.3217	10.4378	8.6049	15.1014	4.3687	7.6682	12.1358	13.9761	8.8081	6.9933	10.2865	9.9477	5.475	8.5968	7.0314			0.279761	9.61689
5.7137	8.2129	7.3671	9.9292	11.1981	10.6872	8.4319	7.993	8.2661	3.6484	18.946	8.4496	8.7911	6.678	9.6997	4.7965	6.7401	8.2947			0.285716	8.71351
5.8327	5.2413	8.8995	11.2591	11.4909	11.7568	12.0789	7.6609	10.0066	5.3512	14.0982	5.404	7.9571	11.4732	6.7731	10.5613	10.6281	11.9207			0.291667	9.56241
5.9517	11.7899	7.4658	10.6921	10.1874	12.6952	13.6872	6.09	9.4595	9.515	13.8386	5.4593	8.647	11.7471	6.3988	8.9159	7.486	11.6334			0.297618	9.74754
6.0708	9.2358	5.1042	11.8023	11.1206	11.7616	9.247	7.0638	5.529	7.0399	13.7263	9.6259	7.4932	11.2098	3.1022	6.4684	5.4802	8.0724			0.303573	8.41662
6.1898	7.1522	5.9615	9.1067	9.7547	12.3076	8.4255	5.5005	7.3624	9.7653	14.2085	9.7567	7.0223	13.6779	7.1663	6.1888	8.7456	14.0681			0.309524	9.18651
6.3088	7.1286	7.0358	8.2019	9.0224	9.3508	4.9711	4.8524	7.8706	4.5997	10.7453	7.5443	7.5556	11.0632	9.7963	9.7531	7.777	14.2607			0.315475	8.32522
6.4279	8.4578	8.3067	10.1058	8.7058	11.7259	7.134	6.7178	11.7901	7.1032	15.579	11.0297	8.5546	10.2881	9.8948	9.405	8.6613	7.2528			0.32143	9.45367
6.5469	8.6275	7.7089	4.6161	8.0729	11.4062	7.7047	6.5832	9.9695	8.5706	18.2153	10.0842	10.6292	10.1778	6.5388	9.1923	12.1009	8.7942			0.327381	9.35249
6.6659	9.7735	5.3535	7.0313	12.1237	17.2098	7.2396	7.1336	7.4995	14.2807	13.699	12.7678	9.7412	13.3926	8.9593	8.7325	6.8197	8.0712			0.333332	9.98991
6.785	8.8928	7.4952	11.0588	6.5269	15.8986	6.3179	10.4874	10.5769	9.99	14.1953	7.5843	11.1871	14.3859	10.372	12.843	9.375	12.0832			0.339287	10.5453
6.904	6.4899	13.4136	10.0318	6.4882	11.7111	13.4204	8.9102	8.9453	7.5631	14.7085	8.5434	6.6095	11.0237	8.5912	20.562	10.0358	8.6055			0.345238	10.3325
7.023	9.0386	8.339	7.2323	4.3946	13.0741	12.8642	11.5668	3.8923	6.4728	9.2004	4.9336	7.5861	16.0205	8.3887	15.6584	11.5196	10.0156			0.351189	9.42339
7.1421	11.0497	10.3563	10.0231	5.8035	8.6901	8.8158	8.4504	9.3848	9.775	6.6697	7.0857	6.7493	11.799	9.5276	17.2556	10.0246	9.0987			0.357144	9.44464
7.2611	12.4512	6.7387	10.3269	3.4427	5.0889	7.9014	9.7304	9.3886	10.5114	9.3623	7.2829	8.3139	12.5943	8.0744	17.6101	7.8081	8.5172			0.363095	9.12608
7.3801	9.7392	9.9297	12.1797	6.4362	5.9358	11.3649	6.1404	9.911	4.9735	11.3302	11.1108	11.4891	7.2505	7.4653	11.8817	11.0316	10.7039			0.369046	9.3455
7.4992	10.7111	7.0272	8.5147	4.9163	6.2287	12.2347	10.1495	7.9652	6.8433	12.7116	11.4114	6.6258	3.7882	10.9004	10.3752	8.9501	8.9373			0.375001	8.72298
7.6182	8.1838	6.1399	5.8313	6.3348	8.5248	7.6423	10.3325	7.4687	8.0217	12.8009	11.5947	8.7869	4.6733	17.1945	11.1528	9.6248	9.4757			0.380952	9.04608
7.7372	6.0466	7.4572	5.235	6.4064	11.091	7.7649	14.1587	5.9958	6.1525	12.5009	14.5568	8.7263	7.4681	14.3242	10.1101	7.3018	6.9713			0.386903	8.95692
7.8563	9.7175	5.4801	8.0108	7.9341	8.9367	10.5329	10.3574	8.1399	6.5725	13.2809	8.2551	9.2486	5.4504	14.63	9.8356	3.8201	5.6501			0.392858	8.57957
7.9753	10.5639	6.1655	8.8942	10.0831	6.4962	10.712	8.4212	3.6729	8.345	12.4992	8.6141	4.6361	7.8791	12.806	15.083	3.8631	6.0967			0.398809	8.51949
8.0943	6.9543	6.6455	5.8739	8.5955	10.1315	7.7144	9.3641	6.5141	5.74	8.2161	8.1485	7.9518	8.3058	6.3731	18.7054	6.0474	5.9093			0.40476	8.07004
8.2134	4.019	6.431	6.3952	9.5851	11.4157	8.2352	6.1363	8.826	8.9615	9.9783	9.2382	3.9404	1.9032	5.7376	10.8687	7.1252	9.3088			0.410715	7.53561
8.3324	5.4514	7.5992	4.1113	9.538	10.8519	8.6246	6.9831	7.5105	10.7856	7.9543	5.6397	3.7207	3.557	8.1162	12.5262	4.9417	6.6732			0.416666	7.32851
8.4515	5.5017	3.6023	8.6946	7.1888	6.8774	7.4753	11.2852	7.3778	5.8076	7.6701	2.7032	4.8692	4.4209	7.49	16.9112	5.9575	6.5633			0.422621	7.08212
8.5705	4.6857	2.8118	5.8165	5.9922	7.3268	10.19	10.1283	8.4204	5.7831	5.3283	8.6096	6.3333	4.6233	7.0181	10.9944	4.4121	6.5113			0.428572	6.76384
8.6895	8.3476	7.3916	7.1852	7.6094	7.434	8.1013	10.8174	11.1599	7.7938	5.6616	5.5749	2.7869	2.9235	6.6459	8.5957	2.7708	2.28			0.434523	6.65174
8.8086	6.1191	9.1594	6.9194	5.9657	9.6323	10.0265	12.5278	11.9833	10.9941	4.0901	7.436	2.9474	1.6789	13.177	9.3313	3.1736	1.9724			0.440478	7.47849
8.9276	7.1786	9.1287	7.9163	9.2081	10.4086	6.2817	8.1236	6.6964	12.1325	4.8133	9.599	5.3648	1.8201	7.571	13.787	5.6038	4.0666			0.446429	7.62942
9.0466	10.553	10.7085	5.4368	11.5157	8.5691	8.1831	10.1206	11.2641	10.1895	9.7094	9.2386	5.117	3.7586	4.0898	13.2851	6.2424	2.812			0.45238	8.28196
9.1657	10.1418	8.8233	8.7876	12.3985	12.3197	8.7074	7.3069	5.1152	9.2023	8.7874	7.5644	2.417	6.8638	4.464	12.161	2.821	4.5299			0.458335	7.78889
9.2847	7.5604	8.2895	10.1023	6.4657	8.7833	7.482	5.0807	8.9041	12.3163	10.737	4.3652	3.1745	4.4417	18.9753	13.2793	3.1884	5.1913			0.464286	8.13747
9.4037	7.8712	3.1881	10.9192	6.1531	19.6032	2.4142	6.1259	7.7387	11.6665	9.5923	8.154	4.8921	6.5722	16.4673	14.5641	3.7714	5.2554			0.470237	8.52641
9.5228	6.4925	3.1734	13.5568	7.6186	17.373	6.3701	4.2225	7.0525	8.5321	8.6949	5.6025	0.5317	9.1328	10.5771	13.9416	5.245	4.4844			0.476192	7.80009
9.6418	4.5349	6.1711	15.2769	9.2433	13.8157	11.3483	9.599	8.9619	8.5795	7.7997	8.0604	2.6474	4.4585	10.9207	9.0525	4.7474	1.1768			0.482143	8.02318
9.7608	10.0779	3.17	13.0429	5.5669	9.0946	12.337	14.1409	7.658	9.5248	11.9816	3.8298	4.2766	4.5618	16.5983	14.1994	5.0862	2.9606			0.488094	8.71219
9.8799	8.8198	3.8533	5.2208	5.2492	9.4409	14.9199	12.5672	8.5243	9.1056	8.3522	5.8981	5.6217	2.6554	13.5059	11.4356	2.2922	5.4531			0.494049	7.81854
9.9989	7.9456	4.0308	8.9256	9.3658	8.5587	6.8254	8.2752	10.9167	8.9187	6.1145	4.1666	4.8922	5.8366	12.185	16.8942	3.0812	2.368			0.5	7.60593
10.1179	7.0892	4.5673	8.016	3.9778	7.3152	6.3157	5.2454	13.33	10.4238	10.4021	5.8517	3.6804	5.5359	8.9212	12.2164	5.0217	1.8719			0.505951	7.04598
10.237	7.499	9.6727	9.0309	3.9308	3.2155	11.4805	5.5363	17.839	9.9039	8.4205	5.963	3.1473	3.8742	9.4972	13.359	3.0772	3.8905			0.511906	7.60809
10.356	6.3241	5.7354	11.3522	7.2945	6.624	13.8643	4.942	13.9823	14.9611	7.9013	9.0313	4.0147	0.829	9.9339	12.5445	4.2919	4.6002			0.517857	8.13098
10.475	4.2729	7.1035	7.6453	4.9434	10.3552	11.7358	7.0589	14.2745	10.1558	8.8485	8.807	5.0961	1.9046	8.1872	11.5424	6.0528	4.2609			0.523808	7.77911
10.5941	6.8842	6.7856	6.1963	6.9802	9.6233	11.9399	8.0567	12.4783	10.3666	5.1834	5.1068	1.4877	1.998	8.2753	14.0501	3.3964	3.1248			0.529763	7.17256
10.7131	6.692	5.5977	5.6246	6.1014	10.2963	10.9438	8.0607	17.2163	9.66	6.8617	4.9431	2.6653	1.4295	10.381	16.5016	2.9453	2.8786			0.535714	7.57641
10.8321	7.0743	7.0933	4.6792	3.8691	10.8623	6.286	6.1795	18.6074	9.7616	7.7075	5.1272	2.1467	3.5339	9.6951	13.439	2.8994	1.976			0.541665	7.11397
10.9512	7.415	11.5323	6.1611	7.9292	13.7809	7.1097	6.9502	18.4132	12.1079	6.4472	3.7353	4.2241	3.6142	5.7869	10.3459	1.5376	5.1223			0.54762	7.77724
11.0702	6.8547	9.5081	3.4676	5.8298	13.3998	8.2505	6.5143	14.987	9.1981	7.7634	8.511	3.8256	3.3101	6.3542	10.5607	2.7368	7.3014			0.553571	7.55136
11.1892	8.7069	10.4005	3.8843	5.25	10.8249	7.3116	7.1459	11.4248	5.8847	7.3077	4.0737	5.4923	3.0175	5.5133	8.6524	5.7463	6.2859			0.559522	6.87781
11.3083	11.8211	11.3336	5.3361	4.1872	8.9778	5.4077	9.228	14.002	8.7439	10.7852	2.4831	2.3345	2.3753	8.315	7.0802	2.4624	5.3612			0.565477	7.07261
11.4273	6.448	3.5886	5.6304	6.2004	10.9565	9.8658	9.4586	15.6042	6.3175	9.6468	3.2534	2.6322	2.638	6.1991	10.4803	2.4834	2.8947			0.571428	6.72341
11.5463	11.1139	4.7956	3.5389	8.5165	9.046	6.1729	10.2867	13.2394	9.279	5.2922	5.5611	4.651	2.2338	7.487	10.7821	2.5046	5.2426			0.577379	7.04372
11.6654	9.8945	10.3132	3.5802	7.742	13.6235	8.083	11.0995	9.0564	9.2177	4.7203	9.3666	2.9952	3.0016	6.4632	8.271	2.6521	3.9386			0.583334	7.29521
11.7844	7.4067	6.1596	2.9861	4.5109	10.9396	6.2451	8.9769	7.7944	5.5199	5.1017	5.0382	3.386	2.3773	5.417	7.2247	3.2334	3.2984			0.589285	5.62446
11.9035	9.6527	4.9913	3.6264	7.8886	11.3038	7.0309	8.7385	5.5461	8.1875	8.7049	3.2508	1.8424	1.7767	0.8305	8.0972	4.5012	2.8881			0.59524	5.81515
12.0225	6.2449	4.8876	3.7926	4.1583	7.9596	8.9746	8.8356	10.8306	12.9392	8.9507	5.3636	0.8376	2.7065	2.0224	9.7633	2.9777	5.6042			0.601191	6.28524
12.1415	6.2912	7.7867	5.7459	7.0592	12.1906	12.5982	9.6661	8.7169	5.8734	10.491	5.9658	3.6213	2.6453	9.8971	8.7983	6.2709	6.3522			0.607142	7.6453
12.2606	7.9409	7.4128	6.6876	5.4864	12.3832	7.619	8.8936	13.0057	4.4629	7.9302	4.7639	5.5266	3.2854	6.7306	6.2264	3.6274	2.9853			0.613097	6.76282
12.3796	6.0608	4.5383	5.6375	3.9426	14.3835	8.5586	6.0953	9.8305	5.5434	5.9997	4.97	1.591	4.6049	4.1364	5.119	4.0875	4.3815			0.619048	5.85179
12.4986	6.4812	3.6808	3.4236	5.7594	8.8151	9.3251	2.9213	9.299	5.2382	6.9682	6.1503	4.8805	1.8793	6.4272	8.341	2.0524	3.4084			0.624999	5.59124
12.6177	4.2209	2.8756	9.873	6.2427	7.3965	12.4826	4.3542	11.7258	9.3062	8.1434	5.8475	5.2639	1.7915	4.1769	5.122	4.3941	7.3641			0.630954	6.50476
12.7367	3.999	5.2013	7.5999	3.4727	6.5745	10.8221	10.0011	13.8909	8.6894	13.4509	5.6958	3.1675	3.839	5.3684	8.4793	4.2006	3.2123			0.636905	6.92145
12.8557	6.7111	6.2331	3.4126	3.5047	10.5587	11.2571	5.1784	13.042	11.6231	8.3082	6.0772	1.8064	4.1761	6.5928	5.9534	4.8969	2.7505			0.642856	6.59308
12.9748	7.2946	6.8035	5.1375	4.1513	9.7947	17.2739	2.7541	9.6323	8.6742	5.767	6.153	1.471	6.2475	8.4399	6.8724	4.1509	3.5455			0.648811	6.71549
13.0938	6.2774	4.1367	7.3677	7.9757	4.9577	14.1685	5.076	10.2824	11.224	7.1945	7.0706	3.1958	1.7984	9.766	9.461	2.0225	2.6359			0.654762	6.74181
13.2128	4.8487	5.7717	3.8175	5.3779	6.2945	11.4226	7.652	9.3114	9.0389	9.4907	6.5118	3.0823	0.4134	11.8239	4.2326	4.3326	0.7205			0.660713	6.12606
13.3319	6.6344	5.4209	6.3809	2.8547	8.9953	14.7759	10.8304	11.7752	10.1959	9.6756	5.6188	2.2558	1.7487	13.9703	5.7181	5.2522	2.1662			0.666668	7.30996
13.4509	7.3558	5.0494	2.3046	4.7386	9.5846	16.9045	9.829	9.3501	3.5606	7.8034	6.3303	2.6738	2.748	11.4291	10.8925	2.6211	5.2287			0.672619	6.96495
13.5699	5.5737	8.1721	3.5861	4.446	10.1182	10.6168	12.0124	12.0646	5.6904	10.5038	5.1533	2.1176	3.0169	11.3507	5.9026	3.5072	4.8068			0.67857	6.97878
13.689	3.1837	5.5318	3.8863	3.2721	7.3617	11.5065	19.9454	13.0959	7.3101	11.359	5.9588	2.5431	3.4233	9.2892	5.9032	4.4897	5.231			0.684525	7.2524
13.808	3.7262	5.4732	3.0979	1.809	7.4435	7.4563	12.5913	7.3743	5.4896	8.9507	6.0649	4.7773	3.3261	10.1458	9.1876	4.5303	4.9816			0.690476	6.26033
13.927	8.3146	7.3832	3.1573	2.4473	9.6665	6.1068	15.429	9.3518	4.3903	8.9381	6.2435	5.4082	4.0297	14.0742	6.5125	2.6647	4.5784			0.696427	6.98212
14.0461	8.0451	4.9022	2.369	5.6488	7.5036	7.6507	15.5905	7.6572	6.8735	6.7716	4.7995	2.8229	1.9506	8.13	3.2403	2.5571	3.6763			0.702382	5.89346
14.1651	6.9601	6.8475	2.6716	8.3303	7.6849	4.6756	10.4184	9.2275	5.1614	2.6416	3.9458	3.3011	2.4623	7.2442	7.4441	2.2681	1.6163			0.708333	5.46475
14.2841	5.3545	6.6051	2.4884	11.1312	7.3975	7.2111	12.5211	8.6462	5.3418	5.3098	4.7463	2.9683	4.2722	6.5531	8.974	2.6336	4.2984			0.714284	6.26192
14.4032	7.4936	5.7187	2.9341	5.084	10.6328	5.3225	10.2451	6.6533	5.5632	6.1016	2.9882	3.3813	4.6851	5.9351	8.4817	1.6926	5.5607			0.720239	5.79256
14.5222	6.35	8.4999	4.3183	3.9783	9.7391	6.0096	6.8487	5.0883	7.4795	9.952	5.5429	4.8857	3.2771	10.4821	10.5293	2.8644	5.8516			0.72619	6.5704
14.6412	6.8025	6.8411	4.8195	8.3861	6.4248	5.3881	8.4293	8.5843	5.8269	9.0024	4.8477	2.5108	4.5241	10.6112	9.0305	1.7252	3.0802			0.732141	6.28439
14.7603	4.1775	7.9034	5.9608	8.6685	2.8465	10.9115	7.0621	12.2252	10.591	6.9469	3.2033	0.9076	3.3022	7.8727	11.8574	3.287	3.0787			0.738096	6.51778
14.8793	6.2905	7.9095	3.0489	7.4796	6.3051	10.6989	5.5336	8.725	8.4935	2.8956	2.3809	2.7643	5.3258	10.4321	8.6899	4.4197	2.6804			0.744047	6.12196
14.9984	8.6567	5.1636	3.5953	5.1236	6.1123	12.4987	9.5826	7.6573	5.5343	11.313	5.0229	3.3782	4.5638	9.5002	9.4933	1.1296	4.9457			0.750003	6.66301
15.1174	7.8565	6.3986	3.8166	10.8259	6.8074	5.0576	6.665	11.1358	6.5356	9.2992	5.5904	3.1708	7.4849	12.0404	12.5549	3.3913	4.3662			0.755953	7.23512
15.2364	3.5903	8.2223	5.3927	4.2186	5.9137	6.9972	8.3746	7.3377	5.3073	15.1798	4.8035	3.7038	6.2296	12.2129	11.5392	3.7451	2.9082			0.761904	6.8045
15.3555	4.7808	4.1442	4.5998	6.1519	7.6545	7.8267	7.8585	6.5826	5.4367	15.7044	4.641	3.9828	1.707	9.8064	12.856	3.7007	1.4735			0.767859	6.40632
15.4745	4.1715	5.6045	3.7305	4.5431	10.7566	10.2544	9.1589	10.4821	7.0589	14.9104	4.3393	4.345	3.8218	9.054	10.6357	2.6304	2.7335			0.77381	6.95474
15.5935	5.58	2.2931	4.7232	7.9304	8.2547	6.9265	7.2847	4.8896	6.3625	14.3954	5.6291	1.6971	4.5423	8.0486	12.1747	2.5594	3.0325			0.779761	6.25434
15.7126	6.536	3.9858	6.0063	10.4145	3.2976	6.739	11.7615	9.1134	4.6237	9.1543	11.0078	2.7956	2.2846	7.1918	10.574	2.0558	2.4251			0.785716	6.46864
15.8316	6.9358	7.081	4.3083	10.2882	7.0733	7.3045	11.3166	8.4726	7.9928	6.9067	10.1968	4.1975	3.7851	7.9038	7.8596	2.0144	2.8214			0.791667	6.85049
15.9506	7.9972	7.533	3.7211	7.2998	6.066	5.4823	6.9966	7.0027	5.5891	14.3356	5.9431	3.5205	2.5406	6.1205	9.9307	2.181	2.4086			0.797618	6.15696
16.0697	5.1578	5.9563	3.4859	4.0285	6.7356	4.8129	8.2021	11.424	5.5636	7.2046	3.0801	4.8012	5.4049	5.4344	8.7353	2.6328	2.2657			0.803573	5.58386
16.1887	4.5268	6.9882	4.0724	6.116	4.0562	6.5188	12.0669	5.0284	6.2001	7.2029	4.927	2.0661	5.4701	6.2362	17.6477	3.5429	1.0579			0.809524	6.10145
16.3077	6.2144	6.0432	4.0025	4.5602	6.9078	6.3798	10.3149	7.7068	4.6737	6.7446	5.3407	3.7396	2.102	4.8535	12.1155	5.9515	2.0946			0.815475	5.86737
16.4268	7.7356	8.1079	7.4596	3.5966	6.6189	7.552	12.5572	7.9366	7.4534	6.7967	8.5809	2.1065	4.1803	5.4953	4.5488	4.2083	1.6514			0.82143	6.26976
16.5458	5.0634	6.4718	9.2429	5.3278	5.0365	9.0942	10.7702	5.8188	6.062	8.5328	11.7548	2.808	4.1034	8.1608	10.5046	1.3005	1.6228			0.827381	6.56914
16.6648	4.7038	5.8537	3.9581	5.5463	6.4643	6.3037	9.2622	5.9109	5.5262	7.051	6.2917	4.5365	4.3873	6.1166	6.5285	2.7269	3.4257			0.833332	5.56432
16.7839	8.4837	4.363	4.3843	7.1351	6.3492	7.01	10.1945	5.9758	5.0905	7.823	8.5482	2.0436	1.8186	5.7474	10.5549	2.5543	5.7796			0.839287	6.10916
16.9029	7.825	4.4671	8.2959	5.0505	7.2245	4.9216	10.5443	4.7915	6.1132	6.1505	8.6	3.5168	3.8187	4.5084	9.4931	3.985	3.3195			0.845238	6.0368
17.0219	2.2975	9.1539	4.5119	5.5231	7.4146	5.2095	13.3712	6.0417	4.5331	5.8364	7.2876	3.8302	8.637	5.3379	8.7098	3.3573	2.8253			0.851189	6.11047
17.141	5.9815	7.7642	5.4969	8.4789	7.941	5.1859	6.0442	7.2789	6.2159	6.8229	3.3561	1.9557	5.532	6.4387	7.7603	3.4203	3.5041			0.857144	5.83397
17.26	7.9785	5.7953	10.4793	6.9821	10.0829	5.4017	9.8844	6.2062	6.5564	6.0464	7.0565	3.9048	4.0983	8.1982	9.1754	3.1505	2.3104			0.863095	6.66514
17.379	1.8488	5.7158	5.2426	6.9446	4.9091	8.7692	7.3105	3.0353	5.151	5.9716	11.2229	3.0772	2.8973	8.1929	7.4247	4.3586	2.7974			0.869046	5.58056
17.4981	0.7111	6.3895	6.7609	3.7031	9.6533	8.5835	9.49	5.2562	6.2655	11.5789	9.7811	2.7395	2.9691	6.8637	7.3195	4.5295	5.6266			0.875001	6.36594
17.6171	2.5321	5.9286	4.0014	2.7839	9.3279	3.2864	7.9375	7.3946	10.7809	9.038	4.622	5.9109	5.3505	9.0501	12.3097	2.6219	3.4967			0.880952	6.25724
17.7361	3.7606	5.7564	4.9266	5.5482	9.7352	5.6715	11.753	4.0929	6.6566	12.0073	7.3825	5.2789	5.8638	8.7849	10.5928	7.8049	3.9222			0.886903	7.03166
17.8552	2.4074	7.5762	9.426	6.483	8.3187	9.1706	10.6695	4.7137	7.7474	11.2185	8.2504	5.6315	3.7471	5.928	9.2724	5.4789	1.5954			0.892858	6.91969
17.9742	4.0063	6.5162	5.9341	9.7135	6.6752	6.0521	9.6674	4.4292	10.2126	10.4835	5.6261	7.6468	5.0827	4.6915	4.7536	6.269	4.1491			0.898809	6.58288
18.0932	3.0122	5.9504	9.2749	6.126	6.7105	5.8475	10.3182	9.889	10.3749	5.2291	7.8828	10.0281	4.8971	12.1631	8.748	7.912	3.0879			0.90476	7.49716
18.2123	3.0132	4.8294	8.2797	6.5422	4.4707	4.1018	7.8213	5.3923	13.1423	7.7807	8.253	8.9592	5.9817	12.3093	4.8342	5.5059	4.6325			0.910715	6.81467
18.3313	3.2035	2.0565	4.27	4.1013	7.8506	6.71	11.6116	4.6555	13.3056	6.1036	8.7832	10.5262	9.0353	15.0654	5.3014	4.6114	3.8526			0.916666	7.12022
18.4504	3.7587	4.2478	7.3112	3.9467	9.3787	3.133	13.9065	4.1925	10.0646	10.0294	7.8697	8.1148	6.0541	11.5555	7.5696	7.9194	1.7321			0.922621	7.10496
18.5694	3.0701	3.4571	6.4499	4.8213	8.3225	5.7567	10.6274	7.4557	12.3462	8.0569	11.4724	11.7694	4.2868	12.8926	10.6196	5.6748	3.6957			0.928572	7.69265
18.6884	2.1785	2.8113	7.6904	8.8956	9.7573	4.1558	4.0522	8.4873	11.0811	1.9296	16.5776	8.7393	6.8866	16.7554	12.2068	5.3947	4.4695			0.934523	7.76876
18.8075	5.007	2.936	6.3744	3.7146	12.6944	4.8923	4.5236	8.3935	9.5403	4.0118	12.2643	7.8859	8.0739	12.0347	8.7317	5.8873	5.7698			0.940478	7.21974
18.9265	3.1821	4.055	7.2866	4.7931	6.944	5.6841	6.5841	6.5591	14.7324	4.3052	14.0028	8.519	13.3414	8.7328	12.0275	9.9967	8.4842			0.946429	8.19001
19.0455	3.1655	4.7773	6.9349	7.6272	5.0696	7.2715	6.8056	6.345	12.6687	6.4249	6.8678	8.0596	6.9553	12.4421	10.5983	9.4068	8.7947			0.95238	7.65969
19.1646	1.9904	4.5498	4.4427	8.8818	3.4567	3.6086	7.0484	4.7272	9.5846	4.804	9.0235	10.5421	6.4732	9.7513	9.4366	6.8563	5.1023			0.958335	6.48703
19.2836	2.6271	4.4313	4.5372	4.0611	10.2245	5.4337	8.0101	4.3127	6.0726	3.1175	3.1096	9.0517	8.6195	7.3815	10.3388	5.6276	7.14			0.964286	6.12332
19.4026	0.7217	4.4611	5.1238	5.7687	8.9714	5.7405	6.5209	8.2878	9.1876	4.3309	5.0865	6.3298	7.8823	3.8607	10.0029	5.9989	9.3659			0.970237	6.33185
19.5217	2.2415	4.7953	6.2913	9.0382	5.6721	5.6645	9.635	8.1093	9.7156	2.9026	5.4424	7.8396	3.9032	6.1421	9.8194	6.3984	8.3867			0.976192	6.58807
19.6407	4.7908	4.9779	3.1114	4.3762	6.3639	7.3501	13.5922	7.4071	5.2126	4.0886	5.3492	4.4687	3.899	4.8801	7.388	6.2568	10.9186			0.982143	6.14301
19.7597	3.7315	3.2769	5.3543	5.684	5.8621	4.927	14.362	9.6805	6.878	3.7265	3.668	4.1628	2.5158	4.0982	4.8327	10.977	13.2715			0.988094	6.29464
19.8788	3.4529	1.5371	6.9042	6.4581	7.1857	6.9614	12.1403	7.254	8.3935	4.341	2.9224	6.2288	4.4147	4.6847	6.118	9.104	11.1889			0.994049	6.42881
19.9978	2.9894	2.5453	4.1417	6.8366	2.4067	6.8644	10.3189	8.1312	5.9261	3.9915	7.6565	3.5622	4.9252	5.1432	3.6396	7.1442	12.5699			1	5.81133

## Sheet: Image9
X0	Y0	Y1	Y2	Y3	Y4	Y5	Y6	Y7	Y8	Y9	Y10	Y11	Y12	Y13	Y14			Ap-Ba	Average int
0	4.1222	3.2173	5.8578	4.6762	2.3853	1.4936	5.144	3.3777	2.84396	1.36095	2.82005	3.7399	3.818	4.4202	4.326			0	3.57354
0.119	4.5367	6.4954	6.8828	4.9348	4.6414	2.7082	3.3591	1.6274	0.9412	2.28815	3.04844	3.0767	3.541	5.2725	2.7246			0.00724426	3.73856
0.2381	3.8411	2.7727	7.36	3.4256	3.4564	2.9524	3.4449	2.7735	3.91856	2.28471	1.01543	1.838	6.2174	2.9282	5.5775			0.0144946	3.58709
0.3571	5.2195	3.7954	6.4086	3.4117	4.0372	3.4062	1.3115	3.0862	4.08062	5.33564	1.40562	2.888	4.1264	3.6316	3.6318			0.0217389	3.7184
0.4761	6.5536	6.1746	6.188	5.7935	2.5795	3.0059	2.1175	2.6735	0.67296	5.49837	2.21084	2.6119	6.4102	4.2445	4.1447			0.0289831	4.05864
0.5952	8.5486	4.3077	4.1119	6.5051	2.2853	2.6786	1.395	4.2842	1.19395	3.8474	3.46011	1.0769	6.9322	5.014	5.923			0.0362335	4.10426
0.7142	4.2155	5.1445	7.4043	8.979	6.1936	3.7162	3.0124	7.9805	3.69726	4.03249	4.93471	3.4834	6.015	7.5726	2.4311			0.0434777	5.25417
0.8332	6.387	4.1113	7.8827	4.0404	3.3527	5.0709	3.9276	6.0507	4.67228	2.79454	2.81017	5.138	7.8016	3.7885	1.6502			0.050722	4.63191
0.9523	6.1677	4.9654	5.2932	5.2562	5.8558	1.834	7.46	7.5563	4.98092	1.36674	2.42247	3.9653	6.9807	3.8808	3.2206			0.0579723	4.74708
1.0713	5.3875	3.9914	4.8194	3.3024	6.3358	6.458	8.2357	5.0815	2.61712	3.42795	1.5267	3.2061	5.7772	7.0693	4.1219			0.0652166	4.7572
1.1903	6.1675	3.5739	8.1018	5.4151	4.7268	7.8898	5.4438	5.4213	3.22366	4.61253	1.87649	4.9516	8.5291	7.8871	5.5991			0.0724609	5.56131
1.3094	8.7467	4.4119	5.391	5.3677	3.0149	3.436	7.1947	4.7292	2.90453	1.29358	1.37545	3.9091	5.5035	5.5121	6.2864			0.0797112	4.60512
1.4284	6.7223	3.8423	4.4718	3.99	2.7564	5.0676	9.3284	4.0389	7.61624	5.76762	2.27691	4.1765	5.383	7.0176	4.7714			0.0869555	5.14846
1.5474	7.6259	4.4725	4.8425	5.8447	3.8985	5.5588	5.4426	2.7096	5.32236	4.63964	1.3295	5.4677	2.5342	5.986	2.6721			0.0941997	4.55644
1.6665	8.8489	4.3124	2.5351	5.3366	7.0824	4.1576	3.0323	5.1597	4.29805	1.5197	4.70038	4.4605	5.9772	5.3327	2.9089			0.10145	4.64416
1.7855	10.6139	3.5469	4.4799	6.642	2.8435	6.2067	5.1483	6.4201	6.35145	4.1925	3.29451	4.7608	4.9585	3.2232	7.1606			0.108694	5.32286
1.9046	12.6462	3.6195	2.881	6.433	4.2479	6.815	10.1194	4.3561	6.76718	2.23422	1.97796	2.4452	5.0804	5.3393	3.1173			0.115945	5.20531
2.0236	10.1787	7.416	5.8317	5.7776	6.8692	7.3789	3.7345	5.0394	5.27417	3.78204	2.24713	3.1815	5.3943	3.3922	6.5417			0.123189	5.46927
2.1426	7.1792	4.2681	6.4385	7.525	6.9737	8.7174	5.5117	7.22	4.50074	2.38992	3.36614	2.2959	7.2493	6.9136	3.565			0.130433	5.60761
2.2617	6.5442	3.8419	6.2794	7.5821	6.3763	6.7514	6.4035	5.5432	5.02424	1.24719	5.4294	4.0779	7.9842	5.566	6.0221			0.137684	5.64487
2.3807	5.2955	4.9979	6.003	7.256	6.5686	5.3387	6.2396	8.846	9.3819	6.22108	5.17274	3.8248	4.5285	6.8027	2.5421			0.144928	5.93461
2.4997	8.5475	10.583	7.5986	9.2464	6.2648	5.8025	5.8878	8.135	6.72217	5.09147	4.81278	5.5846	4.3191	6.5419	3.3774			0.152172	6.56767
2.6188	11.1403	4.0923	6.4715	6.301	11.2372	6.8991	4.6661	8.034	2.58673	6.967	6.856	2.4347	5.743	6.415	2.4547			0.159422	6.15324
2.7378	6.8309	8.0707	6.4391	4.0814	10.0321	6.845	4.0095	6.0449	6.4932	3.16637	6.41362	7.963	5.7221	4.5042	2.6748			0.166667	5.95273
2.8568	11.5342	6.984	5.6247	7.1435	4.5881	6.7894	6.8027	7.4001	6.51694	5.01216	3.53894	5.8427	4.6236	5.966	1.954			0.173911	6.0214
2.9759	10.6252	6.238	6.9601	6.8693	9.1173	7.5999	9.5698	5.0444	4.32155	4.36163	1.75563	5.4719	5.3636	4.9414	1.2735			0.181161	5.96755
3.0949	6.2863	8.7036	6.7501	5.3419	9.1427	6.6511	6.0999	9.1425	4.73864	4.88325	4.76426	6.7014	6.7866	5.4107	2.1523			0.188406	6.23702
3.2139	10.4383	7.7609	3.7969	8.3486	5.6111	6.0033	6.7886	6.9611	5.72042	5.29734	5.0008	5.2483	6.614	4.9263	6.292			0.19565	6.32053
3.333	9.2571	4.3602	5.8919	6.8117	8.109	9.0267	4.6982	14.4146	4.93938	1.66984	6.51726	3.825	5.9006	5.4508	4.5265			0.2029	6.35992
3.452	5.818	9.3383	5.8779	7.1933	5.3564	7.6088	9.8495	8.0819	3.35986	2.90744	1.89253	7.9423	7.7153	3.1243	2.066			0.210144	5.87546
3.571	6.3452	8.8099	8.3581	8.2924	6.4592	7.0742	4.0415	13.4997	3.52813	1.72079	3.15319	7.9785	4.7185	6.5867	5.7315			0.217389	6.41983
3.6901	9.1816	8.9334	5.1409	5.7302	5.0941	6.9675	6.5463	10.3264	2.47395	2.38211	1.44642	4.8688	6.2893	4.1049	4.5133			0.224639	5.59995
3.8091	7.2928	5.3644	6.1441	6.0452	10.4663	6.9595	7.4342	5.1845	4.98935	4.16986	1.7437	4.1772	8.1623	4.0523	4.6192			0.231883	5.78699
3.9281	5.4518	8.3233	8.6287	7.9214	10.4634	3.8719	7.2493	6.3651	6.43621	0.76556	3.77608	3.3068	4.1985	8.6711	7.1013			0.239128	6.1687
4.0472	6.6762	6.2694	6.4855	10.7841	8.7324	4.1218	5.4412	9.3104	3.95706	1.13765	1.79181	2.5959	5.7296	3.4279	4.0704			0.246378	5.36875
4.1662	9.0657	9.6938	7.0066	11.2158	8.4395	6.9241	5.0418	8.0816	3.16752	3.73292	4.08561	4.7197	9.0016	3.529	3.7388			0.253622	6.49627
4.2852	4.6512	10.5784	5.6384	6.8288	7.336	7.6213	5.3635	5.9619	2.54274	4.83068	5.71994	3.0037	7.0677	3.4311	2.5259			0.260866	5.54008
4.4043	5.6352	7.2216	8.8244	5.7035	4.885	8.1077	6.9298	6.1376	4.54455	2.72212	1.6364	6.2529	4.3009	3.8735	4.6323			0.268117	5.42716
4.5233	7.148	9.0322	5.1465	11.2802	6.456	6.6363	9.3727	6.2297	5.2031	4.18087	5.38542	3.8976	5.0191	3.2466	4.0483			0.275361	6.15217
4.6423	5.4013	7.6765	6.4459	7.3227	7.351	2.724	6.0027	5.7386	2.58838	2.70412	7.91811	7.9383	9.2738	2.4071	3.8203			0.282605	5.68752
4.7614	3.3983	6.6219	7.8604	7.1809	9.8867	6.4359	5.9813	5.0387	2.44586	3.33168	2.79717	3.0158	5.844	3.8734	4.2172			0.289856	5.19528
4.8804	6.8191	4.3195	7.3092	9.5739	8.2855	6.2853	5.2202	6.6062	3.43787	3.15608	1.64859	5.3729	3.5826	6.0527	7.4462			0.2971	5.67439
4.9995	6.0111	3.8049	5.1326	5.94	5.1124	7.5564	5.5613	8.2546	4.7221	1.7203	3.78678	6.8504	4.1998	4.6242	5.9806			0.30435	5.28383
5.1185	5.3246	6.3672	8.9384	7.9893	8.3564	6.3166	5.7446	4.6531	4.07704	6.39876	5.18147	5.0711	6.2655	3.8399	2.9536			0.311594	5.83184
5.2375	6.8464	5.1007	5.8771	8.8337	11.133	5.55	7.3988	8.5596	5.40188	1.86788	7.48477	6.9796	3.5099	4.7588	6.5827			0.318839	6.39232
5.3566	6.2624	6.8739	5.2232	9.9622	9.9696	7.6754	8.9173	7.0322	7.7951	2.1332	7.57876	6.182	5.9321	3.1607	4.4654			0.326089	6.6109
5.4756	4.7059	8.4602	7.5415	12.044	6.9805	8.132	4.6354	8.258	4.26383	2.42598	6.29262	2.3476	5.6407	4.1187	4.1687			0.333333	6.00104
5.5946	5.4169	7.3665	7.5445	8.2192	8.7404	9.0713	6.2688	5.595	3.63413	6.38865	9.50568	5.8471	8.9642	4.1214	3.1922			0.340578	6.6584
5.7137	6.1572	6.8941	5.9744	11.8768	5.2005	5.0876	6.601	7.2643	4.51442	4.58169	9.21847	9.4625	7.3964	4.5608	3.8157			0.347828	6.57373
5.8327	4.214	8.0766	6.4736	9.8748	3.1316	7.9224	7.5198	5.4877	2.54793	4.08702	8.8054	7.0397	10.0412	6.2999	4.6891			0.355072	6.41405
5.9517	4.6274	10.4468	5.9168	6.4371	4.473	9.2148	6.5773	4.8527	1.80726	3.87639	6.59554	10.7974	10.0672	4.9222	3.7356			0.362316	6.28983
6.0708	3.2587	9.7615	5.5643	7.099	6.2269	10.5232	7.3854	8.5636	4.69627	3.58775	5.31134	8.4298	10.0639	6.5531	3.6327			0.369567	6.7105
6.1898	1.7785	6.9492	6.6989	6.2977	5.9465	8.5924	7.5926	7.1885	4.41853	2.77563	1.90549	7.3938	6.705	6.0267	5.0138			0.376811	5.68555
6.3088	3.2002	14.147	4.1001	7.3261	4.3439	5.5892	5.7132	6.4801	4.76431	3.81439	2.39585	4.2731	9.6553	2.7252	5.866			0.384055	5.62626
6.4279	3.2192	13.0143	3.7017	4.3258	4.0348	9.1446	9.2982	13.0195	3.40987	3.42137	4.09188	8.84	7.9994	6.5631	6.1321			0.391306	6.68105
6.5469	5.1314	7.847	8.5538	5.7616	1.5363	6.6733	4.4074	9.663	3.0568	4.33473	3.43514	5.094	6.3407	2.791	8.8026			0.39855	5.56192
6.6659	2.5218	9.3757	4.2791	5.6734	3.3534	9.703	4.4604	7.7729	2.43068	3.30379	4.24524	7.7818	7.3049	6.4276	7.4652			0.405794	5.73993
6.785	2.88	5.3885	9.9825	8.5043	2.9118	10.9409	5.1601	7.2609	6.90075	2.7657	2.82246	5.3609	7.9075	4.1732	6.392			0.413045	5.95677
6.904	2.1098	5.9828	7.1643	9.5169	3.9341	9.2098	8.1072	6.1509	7.01522	2.95093	5.58696	4.8204	5.7436	6.3054	12.7446			0.420289	6.48953
7.023	1.9833	7.8744	4.53	5.6561	3.2591	11.9472	6.0108	7.5136	3.40358	4.39924	3.61952	5.9638	9.4826	8.5801	6.987			0.427533	6.08069
7.1421	3.1888	9.7562	6.3531	6.5696	4.6517	15.8985	4.3614	7.4911	5.16543	5.66794	5.14483	7.0624	7.2572	7.824	8.3317			0.434783	6.98159
7.2611	3.6568	3.4351	7.3485	4.8787	3.4654	13.1278	7.5389	3.1751	2.41496	2.79674	5.50195	5.985	11.2193	10.8469	4.6896			0.442028	6.00538
7.3801	2.1519	6.8624	9.8293	6.9485	5.5164	14.4187	6.278	7.1328	5.42127	3.50786	3.04222	7.0128	11.5605	6.7513	6.8248			0.449272	6.88392
7.4992	1.9716	7.5743	7.3833	4.466	4.1423	16.248	6.0642	6.5895	4.5747	1.86243	2.82416	8.5905	8.7511	10.1899	6.5043			0.456522	6.51575
7.6182	4.2847	7.2478	6.9103	4.2488	5.2838	10.9064	8.7832	5.7383	5.4083	4.45931	3.96662	7.4544	6.3431	2.809	6.3652			0.463767	6.01395
7.7372	3.5427	9.8416	7.4774	7.6157	4.9961	6.7888	5.0176	5.7229	3.05648	3.97199	1.8925	9.886	6.5912	4.2131	7.1221			0.471011	5.84908
7.8563	2.5363	12.5598	8.1798	6.1998	2.7391	6.3885	6.7888	4.5665	3.17063	3.14988	0.98557	12.8602	6.2951	2.5053	4.2927			0.478261	5.54787
7.9753	2.3206	9.6855	7.588	4.7825	5.5645	10.2209	7.708	4.3734	2.97409	1.329	2.16935	9.7251	6.1442	6.1594	4.2329			0.485505	5.66516
8.0943	3.9809	9.0671	7.1672	3.9211	4.0342	7.1477	8.3471	6.6628	5.46917	4.23512	2.29073	10.8342	4.6127	5.3536	2.6538			0.49275	5.71849
8.2134	1.7671	10.1959	8.2047	5.5966	7.1883	8.5518	9.3754	4.3974	5.45733	1.77938	3.59903	5.7811	7.2148	5.134	6.5868			0.5	6.05531
8.3324	1.7106	14.9198	7.3303	5.5456	3.1999	9.7412	5.5036	2.2801	5.18361	5.63348	3.16609	9.7446	3.5083	6.854	3.8154			0.507244	5.87577
8.4515	2.3113	14.9079	9.2247	5.5599	1.825	9.5819	5.039	7.5089	3.04894	3.22607	2.04576	9.2662	5.0873	7.5632	5.4265			0.514495	6.10817
8.5705	1.8178	12.42	7.5786	4.7536	3.2725	4.3196	8.0369	9.0604	2.3286	2.08932	2.23244	4.0782	6.3396	7.4906	3.7974			0.521739	5.3077
8.6895	1.7728	10.6155	8.4208	3.4639	2.8939	5.7928	6.6105	9.3752	3.72297	1.94668	3.92502	2.8209	4.6148	9.453	3.8957			0.528983	5.2883
8.8086	3.0195	9.3226	8.2978	3.2848	5.8173	6.3438	9.196	4.9098	3.64409	2.68628	4.09112	3.7031	6.3439	10.897	4.7074			0.536233	5.75097
8.9276	4.0501	7.1626	8.1795	4.6216	4.5598	9.8724	5.7705	5.4135	0.83051	1.82327	2.66644	3.5953	3.3985	9.1929	3.4426			0.543478	4.97197
9.0466	1.7209	5.4603	6.9388	6.1596	8.452	9.469	5.3713	6.8405	3.01092	1.78354	1.4558	6.5683	5.8362	13.6144	1.2127			0.550722	5.59295
9.1657	2.8446	3.0921	6.5828	5.7878	5.8028	6.0573	7.2903	4.8652	1.70128	1.70744	2.78701	8.134	3.73	7.5649	4.3781			0.557972	4.82171
9.2847	2.3983	9.1766	7.9023	10.4362	7.996	6.139	4.9458	6.0032	1.91203	3.13833	3.06168	3.6475	4.6057	7.3779	4.4759			0.565217	5.54776
9.4037	4.1834	3.8251	8.6049	8.3091	7.2231	2.3343	4.6743	5.628	1.6342	0.49965	4.51824	5.7317	4.808	9.6716	2.8063			0.572461	4.96346
9.5228	2.7494	5.7947	10.4504	6.2695	4.4019	7.316	4.2036	6.4056	3.89853	0.37616	2.18542	3.8031	4.1363	8.9872	4.503			0.579711	5.03205
9.6418	0.7133	8.6965	6.1083	6.3675	8.5355	7.9366	5.3613	7.8334	3.23233	0.87568	1.74547	2.4079	1.1331	8.5523	4.6128			0.586955	4.9408
9.7608	2.2355	5.2713	4.5529	11.0361	10.7754	3.5035	4.1492	8.5559	1.64058	3.74776	2.12117	5.4464	5.4962	6.8913	2.3062			0.5942	5.18196
9.8799	1.7057	6.2432	8.1103	6.6925	8.015	5.0571	6.3297	6.4017	1.54334	2.11486	2.08519	2.8702	6.6047	4.8833	5.5842			0.60145	4.9494
9.9989	5.1652	8.3052	8.2626	10.4205	8.4822	5.8115	4.8403	4.4336	1.56141	1.5204	1.93384	3.3752	3.278	5.8914	2.6414			0.608694	5.06152
10.1179	2.4191	4.9566	4.4827	9.1434	6.5685	5.6922	3.6669	5.8641	1.11273	3.57292	2.98245	2.2467	3.43	2.567	2.6121			0.615939	4.08783
10.237	3.3459	6.1648	6.5702	6.7374	7.5446	5.846	8.0516	8.7546	0.86617	1.94148	1.63576	3.584	3.9277	6.6721	2.7062			0.623189	4.95657
10.356	3.0769	4.3167	4.3743	13.3848	6.0108	7.3028	8.432	5.8325	1.94079	1.84042	2.36031	3.0619	8.1232	5.2687	2.5165			0.630433	5.18951
10.475	3.3839	4.8661	5.5982	7.4086	4.0049	6.8665	5.9385	4.2811	1.55489	1.32647	0.74282	5.979	6.8186	5.5762	3.9391			0.637677	4.55233
10.5941	2.7545	1.6576	6.5456	9.051	2.4423	6.9211	9.5397	6.0032	3.05554	1.2962	1.62669	3.3586	5.6374	3.1011	2.5461			0.644928	4.36911
10.7131	1.9408	7.0272	9.5488	12.1798	5.2068	4.699	9.7209	4.4475	1.91997	1.82887	6.1025	1.0072	5.3577	3.7676	3.0326			0.652172	5.18582
10.8321	3.3375	4.1535	7.0977	9.9129	7.0716	11.0489	5.6924	4.3151	3.26533	2.45907	3.0944	4.2981	2.9708	3.4963	4.7816			0.659416	5.13301
10.9512	1.5706	3.5726	6.5306	8.0719	2.6026	5.7864	4.8383	1.5008	2.49268	1.47663	3.80497	5.9697	4.4905	2.8623	1.4781			0.666667	3.80325
11.0702	3.6912	2.7094	6.3712	15.4046	6.2517	5.4894	5.1718	3.8669	2.51948	1.91347	1.81389	7.8664	7.1886	1.821	2.0158			0.673911	4.93966
11.1892	1.9881	5.0105	7.8258	6.6668	4.6861	5.8952	4.9846	3.7637	1.06185	1.41474	1.83089	4.6513	3.4074	3.5258	1.3136			0.681155	3.86843
11.3083	4.425	3.0968	9.3024	8.9825	5.3109	7.5514	6.2143	4.0446	3.02964	1.78184	2.02566	2.7323	6.0486	3.828	2.0855			0.688406	4.6973
11.4273	1.0865	5.9331	7.4914	8.7025	3.3103	7.7611	4.0048	2.8407	2.486	1.55098	1.88806	5.3984	4.3064	3.214	1.5003			0.69565	4.0983
11.5463	1.4808	3.9548	11.3755	7.8801	4.0155	7.3876	4.2795	4.6184	2.20677	2.70054	4.8159	5.4765	6.1722	1.8032	3.4342			0.702894	4.77343
11.6654	2.2376	3.2376	7.9699	9.677	6.3813	11.0235	3.2875	5.2275	2.30816	0.42007	0.52604	3.9224	5.4502	2.5164	2.1038			0.710144	4.41926
11.7844	2.1346	5.5055	10.1431	5.3888	6.6398	11.7191	3.6384	3.8308	2.39752	1.73818	0.58252	1.7931	5.8824	2.0256	3.5307			0.717389	4.46334
11.9035	4.9841	6.2154	9.3463	10.5367	3.3854	9.7718	6.9695	5.1527	2.16165	0.53708	1.07743	3.1723	5.2882	3.6317	1.8364			0.724639	4.93778
12.0225	4.7081	4.3172	8.0097	11.5524	8.4125	6.9516	3.8008	7.2708	1.12611	0.57072	2.19405	2.9889	5.5186	3.7276	3.486			0.731883	4.97567
12.1415	1.4919	7.546	9.1324	7.1951	12.1997	9.6668	4.2698	4.4031	1.79403	3.8558	0.65582	6.0528	5.7253	4.1651	2.4197			0.739128	5.37156
12.2606	3.1913	3.1828	9.1272	4.8656	10.6255	10.8088	5.3772	2.3727	1.779	0.43228	2.20972	3.7923	8.1843	3.2209	2.8684			0.746378	4.80253
12.3796	3.2309	6.0553	6.2373	12.3297	10.0278	10.214	3.3928	3.4704	1.52026	2.84719	1.62407	2.929	6.0777	6.5176	1.3852			0.753622	5.19061
12.4986	1.135	7.7865	3.459	4.3715	9.3636	10.7828	4.9265	1.355	0.69578	2.01769	1.15509	4.9698	6.4149	4.8997	2.6881			0.760866	4.4014
12.6177	2.7602	3.9893	8.2201	6.2756	5.6732	10.5799	6.6778	4.9927	0.86384	2.62441	1.57533	5.1433	6.8713	5.4533	0.7888			0.768117	4.83261
12.7367	3.2997	2.6866	2.4579	5.1189	11.4086	10.9158	7.5148	3.647	1.41142	1.37268	1.46215	3.211	13.7178	6.3305	1.7207			0.775361	5.08504
12.8557	3.5418	5.474	7.5415	5.9025	6.5241	10.4336	5.1998	5.6981	0.85429	4.30778	1.51611	4.5743	5.8862	4.1811	1.944			0.782605	4.90528
12.9748	3.2883	3.394	5.6237	11.2135	8.5134	5.1818	7.9815	4.4381	1.96836	3.2412	3.10657	3.5107	8.501	7.8574	0.6981			0.789856	5.23451
13.0938	1.3908	2.394	4.7111	11.432	5.5335	9.0383	10.0398	4.6718	1.40311	0.78357	2.89693	2.7267	6.2129	3.3366	1.0299			0.7971	4.50673
13.2128	2.0547	2.5867	4.906	6.3541	6.9068	9.4176	9.6998	5.249	2.8661	0.39148	1.24674	1.7803	7.1173	7.5835	1.8774			0.804344	4.66917
13.3319	2.8188	3.3191	4.3006	5.3688	7.2799	6.4159	8.3234	5.9837	0.30878	1.936	2.62942	2.9843	5.6499	3.5173	3.4021			0.811594	4.28253
13.4509	1.4458	2.7122	5.8911	9.8616	7.477	8.7379	8.4454	5.4307	3.82126	2.83176	1.5969	3.3425	5.6555	2.7413	1.5069			0.818839	4.76652
13.5699	2.1019	3.5355	6.3184	7.1745	7.8517	5.698	5.0164	3.0992	2.10088	2.27083	3.35343	1.7503	8.3816	4.6894	1.6172			0.826083	4.33062
13.689	1.9905	5.2946	7.3232	6.9754	10.9203	7.574	8.1176	3.001	1.32406	1.02234	4.25451	2.6149	6.205	3.7049	1.8693			0.833333	4.81277
13.808	1.8411	4.2594	3.4429	3.932	5.9982	6.4316	9.9967	8.4793	2.38412	2.12452	5.86542	1.0091	8.3496	3.771	2.5217			0.840578	4.69378
13.927	0.9153	4.3854	3.5974	5.504	6.7566	5.1125	13.3099	4.1978	3.45213	0.62113	1.80374	4.4801	3.4897	3.5515	4.0432			0.847822	4.34803
14.0461	3.9872	2.6364	4.0559	3.7879	6.513	8.8181	8.5917	5.397	1.27822	1.92599	2.16752	4.9226	5.5408	4.726	2.0833			0.855072	4.42878
14.1651	2.8817	0.3615	5.3741	5.2186	7.7699	5.4456	9.4244	5.4966	1.15827	3.06179	6.08114	2.6636	4.2793	6.8531	2.9259			0.862316	4.5997
14.2841	7.2481	5.7561	4.2052	4.0218	4.4754	6.4608	9.2069	5.3167	2.61927	1.23356	4.54103	3.1777	5.5349	5.1178	3.1803			0.869561	4.80637
14.4032	3.5135	7.1686	5.9444	7.6508	5.0725	5.2286	7.3146	7.1447	1.44942	4.79966	3.30127	2.9254	5.2337	6.4146	4.2866			0.876811	5.16322
14.5222	5.9791	8.8049	8.4056	3.136	6.8403	8.2337	8.4927	3.6678	3.57549	1.30754	3.17535	2.4667	4.1416	4.2191	3.5472			0.884055	5.06621
14.6412	11.1894	7.8238	5.987	6.2979	7.183	3.7066	8.594	7.7783	5.40083	3.02389	4.86334	2.0459	5.6793	4.0352	3.0299			0.8913	5.77589
14.7603	8.7822	8.84	6.4084	6.0243	3.5652	1.6879	9.2246	4.481	2.9718	2.45369	3.27595	3.651	3.7766	4.1559	5.9534			0.89855	5.0168
14.8793	8.3803	9.5768	7.2181	2.5969	4.5016	1.2035	5.0054	7.9492	2.64912	2.54815	6.56371	6.1138	4.3786	5.5003	4.7574			0.905794	5.26286
14.9984	7.8092	6.8872	7.6604	3.89	9.2235	1.5671	5.7506	6.3346	3.92167	4.29422	2.41575	3.3333	4.2179	4.3599	5.396			0.913045	5.13742
15.1174	7.2235	5.2317	7.4751	6.2968	7.8759	0.8393	4.7727	6.223	6.0653	4.96601	2.62749	0.6208	3.7448	4.5504	9.1519			0.920289	5.17765
15.2364	7.7175	7.0316	8.4763	6.628	4.7575	0.0432	2.467	4.4037	1.67041	7.24087	0.75307	3.3183	5.8767	7.245	4.8406			0.927533	4.83132
15.3555	5.0395	8.5079	8.8137	2.3778	2.1974	0	2.0749	2.2153	1.56233	4.97842	0.38522	2.6774	3.9999	2.8156	7.7404			0.934783	3.69238
15.4745	6.7116	3.5967	6.5888	4.6983	0.9005	0.1488	1.1276	5.8577	1.82665	6.25899	1.25912	0.6413	3.6929	5.0053	12.4566			0.942028	4.05139
15.5935	5.6395	3.2001	5.2693	7.4866	2.7484	1.0986	1.3153	1.8769	3.11986	7.8647	0.1661	2.7644	0.9047	2.9915	8.2079			0.949272	3.64359
15.7126	4.8771	7.091	5.4207	0.6277	0.8777	2.437	1.3924	1.2904	2.05975	2.61851	0.5021	2.552	1.9779	0.5385	6.4388			0.956522	2.71344
15.8316	4.9065	5.3645	1.8354	1.8205	1.0223	2.0375	1.4041	0.8017	1.62503	2.45375	0.87144	0.8203	2.244	4.3598	8.9892			0.963767	2.70373
15.9506	5.3624	4.4931	2.433	2.2169	1.7405	0.5771	1.1534	3.4154	1.54795	1.96351	0.16726	0.6653	2.6876	3.1006	7.2464			0.971011	2.58469
16.0697	2.9772	4.3835	2.4553	1.1779	1.2348	0.5876	0.7333	2.7395	0.74604	2.4718	3.00884	1.2531	2.4277	3.6815	5.1993			0.978261	2.33849
16.1887	2.6606	2.7112	3.5628	0.4151	2.1	0.3563	1.3045	1.3646	1.14157	2.06445	0.57069	1.6965	1.1399	2.3292	4.6781			0.985505	1.87303
16.3077	3.0824	4.595	4.395	0.2151	0.2848	0.5715	0.0994	1.807	0.00358	2.14271	1.61353	1.112	0.0635	0.9587	1.4453			0.99275	1.49263
16.4268	1.0784	5.8091	1.1802	0.9482	1.0714	0.0776	0.6778	2.934	1.27519	0.84958	0.60309	0.4944	0.6744	1.745	4.9207			1	1.6226

## Sheet: Image8
X0	Y0	Y1	Y2	Y3	Y4	Y5	Y6	Y7	Y8	Y9	Y10	Y11	Y12	Y13	Y14	Y15	Y16			Ap-Ba	Average int
0	4.9275	8.8037	8.8957	4.2394	5.5431	7.6576	5.4532	3.3501	4.977	6.1758	3.89414	3.1066	6.099	9.0344	6.6113	4.3961	5.79981			0	5.82144
0.119	8.3005	9.1156	7.958	7.7745	5.8923	9.0859	4.8988	4.703	3.3504	3.274	3.40206	2.6935	4.24127	8.1493	7.6815	4.2644	4.70576			0.00523408	5.8524
0.2381	8.9392	9.6039	5.8899	6.0247	6.2128	5.1194	5.9397	2.9769	4.3148	3.567	3.38671	4.8511	5.52745	11.1153	5.7599	5.3795	5.53706			0.0104726	5.8909
0.3571	8.17	6.3431	7.4266	8.3833	5.8447	7.091	5.3842	4.3324	6.9305	3.1192	4.96715	4.752	6.11887	9.5534	5.5854	5.3921	5.71012			0.0157066	6.18259
0.4761	6.5076	6.8911	6.8704	5.4016	6.5873	5.7538	7.9045	4.2472	4.9471	4.8997	4.20841	4.5927	6.43687	7.5082	8.298	7.8882	3.79177			0.0209407	6.0432
0.5952	7.9975	7.6531	11.2779	8.4084	6.5154	9.7299	7.1173	4.9448	5.6831	7.5036	4.62831	3.5048	6.18393	4.437	5.3653	6.9282	5.49361			0.0261792	6.66895
0.7142	6.4736	8.0884	7.6914	6.527	6.2375	5.2385	5.8454	9.1033	4.0833	5.7883	3.38893	5.266	6.37061	4.5696	5.4651	3.9958	2.5315			0.0314133	5.68613
0.8332	9.3824	11.5188	5.958	7.3277	11.5794	5.3572	5.1648	6.209	7.7338	6.178	2.62482	5.2835	9.8805	2.9041	7.5739	2.6104	2.96457			0.0366474	6.48535
0.9523	10.7799	8.4935	4.6224	6.805	9.2341	4.2712	8.9847	5.4225	5.6487	5.0057	1.26626	3.3941	9.51033	4.5117	4.6495	3.3225	4.42595			0.0418859	5.90283
1.0713	11.5477	12.7213	3.0472	5.7569	7.2836	4.191	5.323	5.7796	6.9139	3.342	1.63446	3.4519	8.28704	5.2041	6.0898	6.6794	2.8144			0.0471199	5.88631
1.1903	10.0172	10.3031	5.7639	10.5362	7.5463	3.996	7.4277	5.2847	6.1548	6.6189	4.83694	3.5063	9.21333	4.1488	3.7141	6.5237	2.43227			0.052354	6.35437
1.3094	10.2855	10.4679	7.6351	8.1832	8.7889	6.693	6.4131	5.9967	7.153	5.8103	2.30271	4.7132	8.98013	6.6223	8.1882	5.1722	2.12041			0.0575925	6.79564
1.4284	11.9249	13.5887	10.9762	5.8435	6.1472	8.1972	5.5047	5.7074	4.3394	8.5374	3.02768	5.3242	9.30141	8.2632	9.0014	3.0034	2.65678			0.0628266	7.13792
1.5474	10.6234	13.1709	7.6095	6.7389	4.3886	5.4242	7.5395	4.8474	5.9687	7.2668	4.26902	2.3082	7.63632	4.6292	6.0029	4.7514	4.46163			0.0680607	6.33156
1.6665	9.3518	17.3063	9.3082	5.8741	5.9888	5.5069	5.3757	5.0745	5.839	7.5345	4.66706	5.2618	6.95078	4.7529	2.6273	5.2535	4.25818			0.0732991	6.52537
1.7855	13.656	11.4418	7.7939	9.013	7.2873	5.6559	6.6531	3.9467	4.3496	5.9773	4.50978	5.777	5.53093	6.2743	3.9047	4.0301	2.62003			0.0785332	6.37773
1.9046	12.4474	12.3761	6.2348	7.498	5.4636	5.4309	4.3833	5.6235	7.2901	6.1683	2.63461	5.6173	5.60356	3.8111	4.907	5.8211	2.00221			0.0837717	6.07723
2.0236	9.4121	8.1985	8.654	7.1994	3.3747	7.5759	5.7276	5.5347	5.2509	9.999	5.32897	3.2704	6.32341	4.8161	3.8108	7.4828	2.11296			0.0890058	6.1219
2.1426	9.267	11.7268	10.4714	14.1534	4.9077	10.6357	4.4018	5.7506	6.6046	7.2996	5.38415	4.1913	7.09528	4.7039	5.3742	4.6854	3.78338			0.0942399	7.08448
2.2617	9.7265	11.3759	8.8455	10.054	6.489	6.8151	7.3741	4.8812	8.3774	4.0664	4.23607	1.9039	9.30443	4.3469	5.6674	9.0555	2.41181			0.0994784	6.76065
2.3807	11.1796	11.063	7.0975	6.7122	8.1848	6.9236	7.9742	7.0948	4.7702	4.7572	3.66951	3.8694	6.81745	4.5609	6.6369	7.1179	2.51574			0.104712	6.52617
2.4997	12.4134	14.1887	8.6286	9.3364	7.5216	9.1066	8.9729	7.5716	5.5057	4.6767	3.11654	5.1607	8.9157	5.3423	3.6425	7.6367	3.71533			0.109947	7.37953
2.6188	10.8667	12.6187	6.685	9.3814	6.6914	4.888	10.7071	8.7147	4.4953	4.8175	1.5972	2.7385	8.03443	6.1068	4.3644	9.7043	3.43501			0.115185	6.8145
2.7378	8.2434	13.9792	8.811	9.5535	8.5374	8.4701	7.3649	8.3217	4.9347	6.1792	3.56215	3.0697	4.35608	3.8758	3.7844	7.5818	2.68232			0.120419	6.66514
2.8568	11.2056	12.2295	10.2184	9.533	8.6215	6.6151	6.6987	7.9519	7.1469	6.0279	4.77958	3.1995	9.437	4.3744	4.7667	6.084	3.60611			0.125653	7.20563
2.9759	10.955	13.4559	14.2639	11.3664	4.4103	6.9005	9.6228	8.3127	8.7241	2.9794	2.83784	3.0506	9.35117	3.3535	7.1925	6.4078	2.32601			0.130892	7.38297
3.0949	12.8425	13.1188	11.9207	10.6451	4.9736	5.4167	7.2823	9.6106	9.0183	3.635	3.65858	5.0539	5.23229	4.6551	6.3073	6.1104	4.04045			0.136126	7.26598
3.2139	11.1369	15.3446	10.3483	9.9644	5.2165	5.1311	5.8637	9.254	6.6071	5.3887	5.96444	6.0579	7.95777	6.5717	3.6051	9.9708	3.00026			0.14136	7.49313
3.333	13.3822	15.1272	11.8173	10.8223	5.2353	6.4053	5.3016	10.8052	5.1893	7.2274	4.09831	3.8864	8.69125	6.1629	4.8907	5.9809	3.46305			0.146598	7.55804
3.452	15.8882	14.6131	11.1663	10.4877	7.2615	4.3678	6.9949	12.7588	5.4602	4.3525	5.66695	2.3549	5.2898	3.1677	4.3927	7.676	4.44608			0.151832	7.43207
3.571	14.1677	13.9524	11.4533	12.7382	8.4288	6.9591	6.7425	11.4284	6.3405	3.8818	5.27909	0.7163	5.84945	3.0579	3.4812	8.912	3.77234			0.157066	7.48006
3.6901	18.695	14.9732	10.202	10.7369	9.9183	5.6571	8.9465	16.579	6.2225	4.9677	3.41396	2.8557	6.6073	7.6618	5.6775	10.1732	2.78239			0.162305	8.59236
3.8091	13.5521	16.8099	13.0951	10.9146	5.6528	7.2349	6.5517	12.6394	7.136	4.2971	3.0747	6.1573	6.42847	6.0069	4.9668	12.0831	3.40439			0.167539	8.2356
3.9281	13.13	16.3478	16.2344	9.6301	5.5346	8.963	6.5731	10.3315	4.576	4.9683	1.38419	4.2569	9.30657	5.841	4.0032	9.1524	3.64319			0.172773	7.87507
4.0472	16.8478	18.4135	12.5071	8.6937	7.232	4.9109	7.0686	10.1016	3.3183	4.0081	2.91445	4.1577	6.49725	6.0556	3.7816	10.5738	4.93239			0.178012	7.76555
4.1662	11.969	11.635	17.2353	13.0193	5.7204	5.489	6.3718	9.5657	4.693	5.4169	3.60585	4.1144	5.98028	5.7532	5.1434	7.7082	4.33205			0.183246	7.51487
4.2852	10.3802	8.6744	14.298	11.7161	5.4304	7.5537	6.6813	9.1945	9.2463	2.7436	2.79086	4.552	6.42299	9.197	5.7697	8.4796	5.85254			0.18848	7.58725
4.4043	9.7925	8.8465	23.2958	9.7217	6.0166	6.0241	6.3187	8.8556	7.0276	4.4875	3.26901	1.9241	7.27076	6.9656	6.9462	13.4419	3.56054			0.193718	7.86851
4.5233	8.354	8.7353	20.3956	10.7436	9.473	5.1826	6.6489	10.8043	5.8588	3.8815	2.8176	3.4602	6.43962	5.8264	5.4682	7.9286	3.43108			0.198952	7.37937
4.6423	11.7723	10.2805	21.8981	9.8187	7.7984	5.9864	7.4149	10.4785	7.7705	2.8807	3.54019	2.9489	5.2968	7.4342	6.0112	7.227	7.34263			0.204186	7.99411
4.7614	13.9722	12.9927	18.0835	10.0833	8.6751	5.3667	6.419	8.085	6.2602	3.9238	4.05086	3.7614	4.12744	8.7847	4.8259	10.0949	4.59664			0.209425	7.88843
4.8804	13.4844	13.555	17.5657	11.1303	7.2791	4.7872	5.3007	11.1588	4.0255	4.2302	1.65404	2.9728	4.38313	7.2795	4.8578	9.7774	4.79411			0.214659	7.54328
4.9995	10.9282	12.9055	18.9846	10.3041	6.6334	6.1794	3.6996	9.1693	5.3785	3.8083	3.00377	1.7493	5.15325	5.5664	4.6062	8.8173	3.91923			0.219897	7.10626
5.1185	9.6439	9.2059	22.2405	6.5913	9.7836	6.4337	5.1996	12.5173	8.6745	2.2116	4.64379	5.0046	6.25137	3.3964	7.6743	6.4706	3.25017			0.225132	7.5996
5.2375	11.7599	12.257	15.4454	10.5876	8.2404	7.374	3.5069	10.7931	5.678	1.9109	3.42967	6.1719	5.0221	4.6773	6.0173	7.3771	2.55618			0.230366	7.22381
5.3566	9.3506	14.0678	14.3171	7.7379	7.2655	7.3705	3.8721	10.4563	6.4154	3.7884	3.69349	1.8958	5.29369	5.2965	8.7669	9.1279	4.51098			0.235604	7.24864
5.4756	8.527	11.6549	16.1234	7.0726	5.1945	3.7267	5.8224	9.0085	4.9607	3.884	3.35143	0.9998	6.5416	5.4291	7.3596	7.1625	5.69338			0.240838	6.61836
5.5946	7.4919	8.6151	16.6316	8.1401	8.2261	5.9041	5.8392	9.8427	6.138	3.6154	1.5122	2.1593	5.01472	6.2645	4.3216	7.0793	3.60139			0.246072	6.49395
5.7137	7.2297	9.1301	18.9491	6.4108	8.1151	5.7	3.7094	10.3375	5.4642	3.2506	1.52673	3.7449	4.87682	7.5148	2.7923	6.837	3.48877			0.251311	6.41634
5.8327	13.9052	9.4552	17.8152	8.588	6.0965	6.937	6.6705	8.2309	6.0359	4.4086	3.77053	5.3226	6.50923	3.3467	4.7268	6.8256	5.21734			0.256545	7.28599
5.9517	8.0175	10.6118	17.4908	7.2846	6.3305	6.6397	3.2749	8.5314	4.8035	3.2456	3.54566	3.0673	6.61535	3.634	5.5515	6.1916	7.2158			0.261779	6.59127
6.0708	8.1973	7.7504	19.433	12.2552	7.6716	6.1649	3.907	4.8238	5.2817	2.7883	3.91713	4.0107	6.60163	3.2245	5.0308	6.9792	4.49045			0.267017	6.61927
6.1898	10.252	7.6787	13.2859	8.2052	6.7225	7.6322	5.2667	8.9065	4.0975	2.1953	1.9026	2.8971	2.71238	3.7808	5.0604	7.9859	5.0668			0.272251	6.09697
6.3088	8.4295	12.6962	12.4047	7.7672	7.014	6.8492	4.9619	12.2394	5.6817	2.5683	3.09486	3.8021	4.14451	3.3507	3.4671	7.9042	5.98387			0.277486	6.60938
6.4279	11.3128	11.7376	12.941	7.7657	7.6196	6.1269	2.5409	11.6164	7.1354	4.1216	3.56864	2.637	4.79494	2.5541	4.8378	8.1054	5.59872			0.282724	6.76556
6.5469	7.2239	13.7613	10.4057	8.6282	6.3677	6.3465	6.391	8.4146	5.3519	5.3451	2.42485	4.7813	2.36524	4.4732	3.3028	6.085	6.04538			0.287958	6.3361
6.6659	6.2848	10.5532	19.077	9.1396	4.7117	6.3561	3.7463	9.4677	4.0033	3.1082	1.45397	3.3628	6.21331	5.9787	4.6826	7.0097	7.35594			0.293192	6.61794
6.785	9.1984	10.998	17.0885	7.4046	6.6266	2.6678	2.577	5.5166	6.3918	3.9985	1.54858	2.4629	3.51031	4.385	3.1209	9.0402	5.59494			0.298431	6.00768
6.904	5.9575	11.9	13.4694	3.9465	5.9209	3.3216	6.6151	4.197	5.3592	7.5877	2.52358	3.2447	5.32122	5.4295	4.0552	4.7768	2.75611			0.303665	5.66953
7.023	9.3767	14.9916	11.2872	7.4641	4.8744	4.3251	3.5286	5.768	6.9104	5.2172	3.29834	3.6757	3.14413	7.1654	5.7301	3.1192	7.00323			0.308899	6.28702
7.1421	6.9874	12.9696	10.3504	8.7073	2.2342	6.5521	3.9275	6.3183	6.3294	9.3181	4.53819	1.9573	4.7202	5.2047	4.8682	7.2202	5.44191			0.314137	6.33206
7.2611	6.6246	10.9238	10.0277	5.9403	3.6934	7.8004	3.5358	5.5528	3.2964	5.2463	3.27151	3.6582	8.20884	6.3969	3.9379	3.7597	7.35382			0.319371	5.83696
7.3801	7.9632	12.6371	13.7788	4.8124	4.9979	2.7778	5.4085	6.546	6.293	6.3219	2.36129	2.7764	5.02599	3.679	4.5733	4.3042	8.42			0.324605	6.03981
7.4992	6.4495	12.5508	12.1752	5.4585	4.6216	3.7113	3.1475	8.1091	5.0822	3.8919	1.95805	1.6227	2.82709	3.717	4.6905	6.9546	8.31147			0.329844	5.60465
7.6182	6.2705	13.1175	9.4063	3.1475	6.2655	5.1236	3.3506	7.3078	5.0833	5.9992	2.58723	3.0284	5.0436	3.8018	4.2547	3.9377	9.22786			0.335078	5.70312
7.7372	5.5816	19.928	9.3962	3.7012	4.6457	2.1609	3.7095	6.3976	2.8309	6.6351	1.25723	3.079	7.69939	5.9666	3.1209	3.4598	10.328			0.340312	5.87633
7.8563	5.4919	12.0437	8.7641	6.3462	5.6876	4.3473	3.1078	5.3717	4.0416	5.565	2.69882	3.4378	5.57799	3.7061	4.5421	5.786	10.6805			0.345551	5.71742
7.9753	5.2488	12.0365	10.0207	7.8476	5.876	3.146	4.1489	3.3963	4.9673	5.7281	2.21717	1.2519	4.57068	6.6489	6.2285	5.4487	5.55261			0.350785	5.5491
8.0943	7.5266	12.2366	10.1857	6.7927	4.9947	3.3749	5.8557	5.2979	4.4446	6.6252	1.07146	1.0903	4.02306	3.9869	5.5969	5.0257	9.33324			0.356019	5.73307
8.2134	7.4204	9.0121	6.3115	7.1719	6.7785	3.9088	7.6975	4.9722	3.4363	5.1554	2.59546	0.8333	5.85728	4.9705	7.4912	4.0322	8.18913			0.361257	5.63727
8.3324	4.2825	10.3946	7.7703	10.621	5.5756	3.9312	5.1653	3.9269	4.2468	5.7456	2.64038	2.7345	3.35796	4.7844	5.6604	5.3804	6.30966			0.366491	5.44279
8.4515	4.3831	11.3568	8.4547	7.4286	3.4636	4.4532	4.6688	5.5592	4.279	4.8083	1.89623	2.395	6.72113	3.7011	5.3317	5.1293	5.62217			0.37173	5.27364
8.5705	2.6112	14.4895	9.7023	7.3586	1.9919	6.0329	5.5891	5.834	6.7854	2.7076	2.42969	0.5823	6.10784	1.8974	5.9914	5.0606	4.79817			0.376964	5.29235
8.6895	4.4484	15.2193	8.2671	7.066	4.5584	3.8456	3.1473	8.5416	7.8133	2.4914	2.59307	1.2024	4.51793	5.002	4.9083	2.7289	5.08971			0.382198	5.37887
8.8086	4.8615	10.907	10.1197	10.5135	4.9692	3.5955	2.3835	7.3573	6.3794	6.0107	5.25635	1.2836	5.26548	3.0698	4.1598	3.7184	7.55163			0.387436	5.72955
8.9276	4.1287	13.8537	7.4557	8.6405	4.1192	3.4523	2.473	6.0958	9.0925	4.8334	2.37206	1.8144	2.93279	4.4407	2.7305	4.3921	8.31299			0.392671	5.3612
9.0466	4.3532	13.0891	5.7759	10.0689	2.2059	3.0908	2.6497	4.4039	4.989	6.5168	2.43542	1.8423	5.80958	3.9854	3.075	5.5553	6.48109			0.397905	5.07808
9.1657	6.1627	13.7557	11.0038	6.3449	5.0342	3.6664	3.6498	5.2406	4.7492	4.7753	1.37417	2.1035	2.86697	3.9655	4.8273	2.6359	4.918			0.403143	5.122
9.2847	4.1166	10.2443	9.0819	6.2883	3.801	3.117	3.6416	3.5191	8.2666	5.931	1.45549	1.4352	3.7367	2.6775	5.6514	4.0078	4.10636			0.408377	4.76929
9.4037	3.7476	13.5904	3.5287	6.3521	3.1342	1.1126	7.0993	1.799	5.3657	2.9668	3.51672	1.1527	4.93284	6.4275	5.289	5.9876	5.58738			0.413611	4.79942
9.5228	3.3188	9.2112	5.2277	8.0288	4.5763	2.8039	6.2482	4.2641	4.6247	4.135	2.62279	1.8578	3.38822	8.5721	3.3405	6.254	3.26664			0.41885	4.80828
9.6418	3.8801	9.3128	6.4767	6.4658	3.0209	2.2523	2.8818	4.7407	4.0666	3.2506	2.70074	1.7422	4.37137	6.1017	6.5522	6.3916	2.94463			0.424084	4.5384
9.7608	3.7461	14.1656	9.0517	9.3436	3.6024	2.665	4.2506	3.2681	4.1591	4.7685	2.25291	2.1332	4.94382	3.2723	6.2504	5.0178	4.3816			0.429318	5.13369
9.8799	4.2343	10.7676	10.058	6.2647	2.5786	2.3522	4.478	5.8447	3.052	5.842	1.66293	1.7908	2.81889	3.4601	7.0144	5.0445	3.15425			0.434556	4.73047
9.9989	3.3712	13.8193	6.086	6.08	2.7701	1.9342	3.4568	4.7244	2.7012	3.1322	1.86482	1.7181	3.50328	3.2002	5.541	5.7768	4.43178			0.43979	4.35949
10.1179	4.0387	15.3507	6.347	8.3118	2.8158	1.6189	2.5249	4.4014	2.8028	1.4856	1.44928	3.2934	2.6771	5.5578	5.3614	7.7927	6.73025			0.445025	4.85644
10.237	5.8179	15.6318	7.9102	6.4183	4.3026	3.2446	2.9049	4.9754	3.2453	2.4295	2.9256	1.6909	7.28283	5.269	4.5812	6.5697	3.78671			0.450263	5.2345
10.356	2.5392	20.0808	5.1347	3.4347	2.1506	2.5391	4.4847	5.0997	2.7063	3.239	3.45676	1.3901	7.30538	5.4817	5.6702	3.4125	5.54202			0.455497	4.92162
10.475	2.6971	19.6216	6.4349	4.5509	3.1524	1.002	3.4359	4.5189	2.001	2.6424	3.05914	3.2121	3.64397	5.3483	4.7478	7.3131	4.65653			0.460731	4.82577
10.5941	3.0237	21.2497	8.9532	3.646	3.0626	1.9766	3.2678	4.6919	2.4204	3.3516	1.79886	1.3838	4.23553	4.3025	5.0601	4.3154	5.15515			0.46597	4.81734
10.7131	4.5156	19.5138	3.8966	5.8429	2.9963	1.4454	3.3465	4.3589	2.831	4.934	1.10972	2.9639	6.56579	7.4391	7.3162	5.6406	3.40982			0.471204	5.18389
10.8321	4.5927	20.3253	5.9255	6.3029	2.6134	1.8059	4.5559	3.5346	5.0084	3.8351	1.54308	1.8691	3.58233	6.5036	7.4869	2.2259	4.48102			0.476438	5.0701
10.9512	3.4583	18.5707	7.6531	5.7187	3.0691	1.296	3.2926	5.5503	6.4654	4.1292	2.51451	1.2874	3.71455	5.2193	7.5959	1.5557	5.40393			0.481676	5.08792
11.0702	7.3009	13.5255	7.4873	6.4592	3.9022	4.2507	3.4783	3.9008	6.0069	4.939	2.37285	1.6565	4.21056	4.7514	6.1066	3.6177	3.45603			0.48691	5.1425
11.1892	4.6851	17.8184	6.5622	5.7831	4.3584	3.7857	4.4072	3.1796	5.289	4.1451	1.80737	1.5833	4.3859	6.2303	5.9493	6.1637	4.05839			0.492144	5.30542
11.3083	4.3596	18.8388	7.6016	7.3129	4.3341	2.776	3.078	3.734	5.8816	5.5876	1.67276	2.5512	2.52358	9.5682	5.1979	6.9798	6.23403			0.497383	5.77833
11.4273	5.0297	16.1976	11.7345	5.0161	2.3335	1.8053	2.8616	6.5197	5.7501	5.5338	1.35507	2.3866	3.81803	8.2662	5.3619	6.0895	5.99757			0.502617	5.6504
11.5463	3.9176	14.3032	7.4044	6.484	1.8861	2.4691	3.747	7.044	2.8431	2.6806	1.03602	1.4718	2.72052	8.1672	6.9472	5.018	3.49356			0.507851	4.80196
11.6654	5.1901	16.751	9.9364	6.7993	2.1764	2.9434	1.3416	2.9077	2.5514	5.6639	1.77733	1.4559	1.78893	6.9819	6.5905	3.2018	3.39487			0.51309	4.79132
11.7844	2.474	12.4543	8.5502	5.1285	3.0519	2.803	2.858	6.0683	2.5516	4.8464	1.17452	2.1847	2.22547	5.5951	7.5443	2.4798	2.38066			0.518324	4.37475
11.9035	2.3352	12.0635	7.8651	5.7361	2.2867	3.3034	1.7475	5.2892	2.7362	3.5297	1.34704	2.1607	3.34149	5.0963	3.8891	2.2642	6.55424			0.523562	4.20857
12.0225	5.3529	13.9527	7.2308	6.4905	2.9319	2.9093	2.133	7.2634	4.4344	3.1384	0.53002	2.558	2.52103	4.9124	4.4499	5.056	3.65583			0.528796	4.67768
12.1415	4.8872	9.3334	5.7951	7.9416	3.5029	2.465	4.3451	7.1581	5.2755	4.8059	1.05405	2.3026	2.87467	4.6749	5.9823	5.0815	4.94389			0.53403	4.84845
12.2606	4.2956	7.2009	5.6848	6.3386	3.1008	4.4552	2.2108	6.6111	3.292	6.6917	2.07299	3.667	6.64974	6.8712	7.291	5.451	6.54606			0.539269	5.20179
12.3796	4.1359	8.2463	4.1336	6.959	2.623	3.3078	2.3524	2.9738	2.7619	4.27	1.92046	2.0379	2.79625	5.3007	7.4562	4.2626	4.3801			0.544503	4.11282
12.4986	1.4855	9.332	6.2405	6.5681	2.3361	2.443	3.2487	5.3175	2.7577	4.7173	2.49109	1.6504	2.93816	7.907	5.8151	4.77	3.83824			0.549737	4.34449
12.6177	1.5684	16.0695	5.6562	4.8884	4.0631	3.1704	2.9882	4.7536	5.8458	5.7761	2.46734	2.0836	2.94528	5.7843	7.5402	4.3308	2.93102			0.554975	4.87425
12.7367	3.4289	12.733	10.949	4.3829	3.4549	1.6104	1.7603	7.0203	4.3236	4.1259	4.40183	3.6939	4.1552	7.4053	7.5075	3.602	5.00767			0.56021	5.26839
12.8557	3.2106	12.4578	9.2252	4.3235	1.3601	2.7414	1.7614	2.6314	5.3857	2.5768	1.24456	1.0078	3.72111	6.8114	11.4889	7.4527	4.60477			0.565444	4.82383
12.9748	1.9487	10.9996	7.2838	6.3248	2.2859	2.0961	5.0181	7.1011	5.1208	4.2592	2.13212	1.5324	4.56046	7.9574	13.9547	5.4431	2.51108			0.570682	5.32526
13.0938	3.5502	17.5116	7.5435	8.9552	3.3035	2.1695	6.291	7.15	2.8166	5.0265	3.27847	2.8344	1.48493	7.0677	8.1612	5.7785	4.66076			0.575916	5.74021
13.2128	3.5607	13.7468	6.3716	6.0099	3.7058	1.8696	2.5895	4.9243	4.6406	5.6936	1.50172	2.2313	3.25672	8.1565	10.47	6.4012	4.5798			0.58115	5.27704
13.3319	2.2284	15.3056	10.4223	6.6265	2.4713	3.1911	2.8783	3.1217	6.283	3.998	1.55582	2.0127	1.67626	7.3447	11.4577	6.8516	5.57564			0.586389	5.47062
13.4509	3.1205	10.8482	6.6558	7.5509	0.607	2.9442	3.5623	8.187	7.7369	4.1294	2.36926	1.2845	4.74876	7.6621	9.662	4.8258	5.62415			0.591623	5.38346
13.5699	4.6767	13.6881	5.3462	3.843	1.5491	2.2166	1.8574	7.0281	9.4179	3.8322	1.83503	0.7494	2.45889	3.4236	11.0975	4.2872	3.97657			0.596857	4.78138
13.689	2.2304	14.7	8.6161	4.5994	3.7514	2.7223	1.0055	5.9435	4.8864	4.2523	2.26558	1.2534	2.8473	3.9189	8.1011	4.3378	6.18691			0.602095	4.80108
13.808	4.2241	10.2892	7.7191	4.4108	2.7915	1.7663	2.3102	5.9672	7.1603	3.9435	2.80533	0.9355	5.68572	5.3135	7.1232	4.1068	6.61891			0.607329	4.89242
13.927	3.6195	10.7575	6.7194	6.9192	2.6726	2.3615	1.9957	5.1046	6.1785	1.9465	1.11297	0.9258	5.54456	5.3859	6.0183	5.1445	3.82314			0.612564	4.48413
14.0461	4.973	12.0381	5.0004	10.0743	2.2204	3.4027	1.8553	3.8808	6.0987	2.2232	2.35803	2.3094	5.84931	7.3359	9.5305	4.4043	3.82044			0.617802	5.13969
14.1651	4.2895	9.3945	7.3365	7.7615	2.0963	2.5962	4.0152	4.5373	4.9322	3.5484	1.25654	1.7292	3.8309	8.5755	9.1553	2.8147	3.08563			0.623036	4.76208
14.2841	3.5592	9.2895	7.1965	6.2859	2.3864	4.0018	3.0796	4.8875	5.6811	1.5361	1.4204	1.7702	7.12879	6.4109	10.4726	6.0996	4.82302			0.62827	5.06054
14.4032	5.4265	14.4645	8.2593	4.1096	2.609	2.6372	1.6545	4.5413	3.9221	2.2085	2.19161	1.3659	5.95799	6.5294	7.8716	9.9916	6.07505			0.633509	5.28327
14.5222	6.9594	8.7382	8.8977	5.2632	2.1898	1.4136	3.1389	6.5431	3.6711	3.8007	2.68027	1.8783	6.80219	4.6804	8.2617	6.004	3.92437			0.638743	4.991
14.6412	4.6369	12.0072	8.7157	8.0978	0.74	2.124	1.9748	6.8673	2.9637	4.5333	2.08657	3.343	8.81223	7.2763	8.5613	4.8423	6.58873			0.643977	5.53948
14.7603	7.6343	7.8635	8.2456	3.6075	1.4097	1.3482	2.1418	5.321	4.1659	6.6601	1.67374	3.2022	4.25408	11.5364	6.1487	6.6395	5.54156			0.649215	5.14081
14.8793	7.3972	10.3161	6.1319	3.8533	1.8932	1.8193	1.4834	5.4634	5.8784	5.3805	2.01485	1.4695	3.84434	7.6562	9.4779	6.469	2.6858			0.654449	4.89613
14.9984	7.1989	9.2696	7.8676	4.1642	1.3295	3.1215	2.2525	4.7833	4.7021	5.8001	1.4372	2.9642	3.48553	4.4141	10.6855	5.7896	3.7475			0.659688	4.88311
15.1174	4.9235	12.6525	4.6007	5.4417	1.2287	2.2205	3.4227	4.7685	4.4468	5.3505	1.29119	3.1068	3.51161	5.3647	11.5952	9.8332	4.98214			0.664922	5.22006
15.2364	7.0539	10.8939	4.6754	3.2762	1.4734	1.0207	2.757	2.8635	3.0163	5.4525	0.82763	1.766	3.4446	5.2346	7.21	6.8805	4.967			0.670156	4.28313
15.3555	3.8153	9.1889	6.364	2.3518	2.3679	1.061	2.3568	4.7195	3.3295	3.2408	1.87676	2.109	3.70296	6.8169	4.8998	8.3697	3.35804			0.675395	4.11345
15.4745	4.1259	7.5609	5.6367	1.5086	1.786	1.291	2.7773	4.3198	6.8842	4.2249	2.41863	1.0279	3.266	6.0534	4.1338	7.3185	1.80269			0.680629	3.89037
15.5935	5.4961	9.792	6.3208	5.4719	3.3653	1.7792	3.122	4.0327	6.3741	4.3109	1.9879	0.9501	3.02731	5.6562	2.7368	9.0306	3.62947			0.685863	4.53432
15.7126	5.1162	8.6248	6.7876	6.224	3.9741	2.5646	5.0102	2.2964	3.7626	2.1751	2.74866	1.2882	2.83316	6.1293	5.8216	7.729	3.91924			0.691101	4.52969
15.8316	7.1939	10.1087	6.6117	7.6239	1.9414	2.5252	3.7216	5.2591	3.8674	3.9023	5.29464	2.4661	4.56109	4.1482	4.9485	11.4344	2.89456			0.696335	5.20604
15.9506	6.8476	11.6797	7.9348	5.2194	3.6498	4.9377	2.8522	1.9801	6.2759	5.7126	2.03744	0.4568	2.17881	3.9625	3.4633	9.2434	3.67617			0.701569	4.8299
16.0697	5.6067	12.1391	5.5738	4.1774	2.726	2.5788	4.7732	2.7231	5.0574	2.2334	4.03334	1.8999	4.65875	5.8128	5.0536	7.2174	4.68225			0.706808	4.76158
16.1887	5.2948	11.0329	3.5838	6.0664	3.2175	4.3359	2.0748	3.6303	8.1055	3.0034	3.15532	3.1669	4.15161	7.6201	8.0499	6.7698	4.381			0.712042	5.15529
16.3077	5.9269	7.954	3.0787	4.3595	3.9961	2.1447	2.7344	2.8791	6.2163	3.4839	4.26274	2.8921	4.80914	4.3551	4.0257	4.2763	5.64186			0.717276	4.29627
16.4268	3.8954	12.6526	2.997	4.3712	4.7074	1.2503	2.4258	3.0223	4.8756	1.4532	3.91339	2.5944	4.19998	3.9972	6.1503	4.2799	3.07251			0.722514	4.10932
16.5458	4.0812	10.7748	6.6671	2.6567	4.4386	1.7923	2.0919	2.7954	1.45	3.1197	4.39808	2.7092	3.65266	6.9382	3.8203	3.257	2.35648			0.727749	3.94115
16.6648	6.6959	9.0276	6.3589	3.7159	2.6284	3.661	1.9408	3.1133	5.199	6.7187	4.2454	0.6382	5.46985	5.5032	4.9977	5.0957	2.0901			0.732983	4.53527
16.7839	7.5608	9.6663	3.4355	2.5936	3.8377	2.2829	2.1788	2.4542	5.7507	3.6042	3.91556	1.7641	5.02326	3.596	5.9737	6.2984	4.25531			0.738221	4.36418
16.9029	4.4223	11.5798	5.0603	3.7386	3.6373	2.9139	4.9192	3.4263	4.9	2.6721	3.16059	3.4539	5.48743	6.5188	6.6721	4.1551	2.5493			0.743455	4.66277
17.0219	5.6593	14.5202	7.6283	5.2959	2.3636	2.5836	2.6316	3.4699	5.2574	3.3797	3.86567	3.0533	3.93072	4.4452	8.1992	6.5398	4.68972			0.748689	5.14783
17.141	7.2979	11.4796	8.4655	2.116	3.4241	2.0273	2.7208	3.7872	5.0485	6.0299	6.30792	7.4471	3.72046	4.6844	7.6881	5.9387	2.50533			0.753928	5.33464
17.26	8.5853	12.3792	6.9614	2.4241	3.2228	0.7997	6.4007	4.3258	3.2318	3.9306	5.34372	3.7184	4.76481	5.4375	7.4308	6.527	1.85506			0.759162	5.13757
17.379	10.3803	8.9336	5.8768	5.3773	3.8708	1.623	5.2902	5.0548	6.0547	6.3531	4.43141	3.9468	5.61719	5.7236	8.4181	5.9278	2.43219			0.764396	5.60657
17.4981	8.9887	9.4919	5.7951	3.8864	4.0691	1.9547	2.9065	3.7891	5.6263	4.318	3.7256	5.7701	6.62306	6.8078	8.238	2.416	3.56784			0.769634	5.17495
17.6171	9.2944	6.3235	4.4291	3.9871	3.1383	1.6765	2.4222	4.8922	7.2861	6.843	7.95792	4.9534	5.4907	4.7721	10.3344	2.1954	3.50251			0.774868	5.26464
17.7361	13.3081	9.3269	7.1926	3.8989	4.4029	2.6391	2.189	5.3022	10.8213	6.0245	6.65675	5.0279	6.26136	4.6058	8.0874	6.8798	5.69359			0.780103	6.37165
17.8552	10.3602	9.4568	5.9617	2.7553	4.4062	1.8904	1.9412	3.3493	6.3583	2.7989	7.40167	4.2217	7.50484	9.0005	7.1137	3.586	4.80782			0.785341	5.46556
17.9742	13.4704	6.3957	4.6418	2.8467	3.2592	2.8922	3.9223	4.0824	5.6768	5.208	6.66932	6.8403	8.41908	7.3623	9.5683	3.5368	3.334			0.790575	5.77209
18.0932	15.5514	7.4783	4.7484	3.4965	3.2432	3.34	3.6107	4.7947	4.8294	4.8149	4.63442	6.637	5.89176	4.0775	7.707	6.4377	1.80325			0.795809	5.47624
18.2123	17.0283	6.2385	7.79	7.445	4.2005	1.6249	2.6672	4.6316	5.6342	5.8802	5.39367	6.8471	7.42272	4.6052	7.6462	7.6689	1.85457			0.801048	6.15169
18.3313	17.4407	9.881	6.3621	2.1752	3.9762	2.6066	4.4036	6.565	6.1212	5.1844	6.32563	5.9105	6.86243	9.1265	5.1279	5.4724	4.12738			0.806282	6.33346
18.4504	20.1534	9.9872	7.2046	4.3136	3.267	2.5054	3.0653	6.0668	5.6414	8.3161	6.14541	7.7556	5.27165	8.8652	8.4171	4.9272	3.05252			0.81152	6.76209
18.5694	19.7532	7.9174	3.5779	2.5707	2.7204	3.4688	5.1567	7.5427	8.8321	9.0191	7.73522	4.7786	6.34251	8.1321	9.4111	4.3487	2.95953			0.816754	6.72157
18.6884	15.0219	9.5302	5.9578	5.1526	2.822	4.0038	2.5105	4.8762	8.8736	8.204	4.74711	8.4051	8.03916	7.1313	7.846	4.5842	5.33639			0.821988	6.64952
18.8075	10.7709	6.3927	6.2405	7.3812	4.7349	2.4451	2.9851	3.3625	11.2426	7.284	8.18528	11.8676	8.86437	5.5818	5.7451	9.7832	2.85134			0.827227	6.80695
18.9265	11.3504	7.5828	4.8296	4.3307	5.493	2.0524	4.2858	4.8562	6.0541	7.569	6.99581	8.7967	7.59546	9.0554	6.5207	9.1135	3.61333			0.832461	6.47617
19.0455	10.0914	6.1682	4.2126	5.3014	4.9025	3.1521	5.8229	5.3723	4.0298	10.7497	4.39976	8.015	5.97724	4.3076	6.6777	6.5096	2.61877			0.837695	5.78286
19.1646	10.8358	4.4043	4.0577	5.7035	4.2238	4.3002	5.1172	5.4239	3.3863	8.1801	4.86744	6.9761	7.45574	5.7058	5.6616	4.8335	3.17955			0.842934	5.5478
19.2836	11.4822	4.4917	3.2904	4.594	4.3211	3.8766	3.6251	6.5421	5.5068	10.1037	3.73039	9.2037	6.49365	6.5571	6.0832	8.1619	5.7946			0.848168	6.10931
19.4026	7.571	4.336	2.3136	6.5258	3.3007	2.0765	4.5397	7.039	4.6477	5.9775	5.05825	12.2772	6.251	3.3157	5.5229	9.9543	5.37293			0.853402	5.65175
19.5217	7.0126	5.1314	4.7239	3.9813	3.3642	4.1777	2.5476	5.4953	4.4022	5.3537	4.41152	9.4337	6.55199	6.1166	3.3789	10.0658	2.35222			0.85864	5.20592
19.6407	6.4048	4.3637	1.8368	5.3012	1.8746	2.7275	6.545	7.0124	6.2125	5.8704	4.7396	7.4911	8.92748	7.1462	6.7606	6.7882	4.81549			0.863874	5.5775
19.7597	7.8298	5.5768	1.6399	6.32	3.8701	2.3407	6.0432	9.8477	6.2022	5.7758	5.04868	8.3424	2.66469	4.6358	6.9547	10.4883	7.23529			0.869108	5.93036
19.8788	5.9898	7.7915	2.0306	4.3932	5.8593	1.8561	5.8913	5.0749	2.8142	4.035	7.69637	5.3333	5.60141	4.5933	5.361	10.8687	7.80922			0.874347	5.47054
19.9978	5.1582	4.3121	0.6318	3.3697	5.5565	2.4548	6.1998	5.1484	2.3155	6.523	4.13104	4.2691	6.81706	6.5253	5.0748	8.9971	7.08227			0.879581	4.9745
20.1168	6.0906	4.7322	1.585	4.4476	5.415	4.4498	6.3696	7.7145	5.6014	5.6641	9.49183	8.1419	4.57955	5.4904	7.2311	5.7567	5.44521			0.884815	5.77685
20.2359	4.2352	4.6296	2.1186	6.0123	4.2585	2.3284	4.8113	8.0203	7.4792	6.7902	8.96819	7.4314	7.23632	3.8649	4.3557	3.712	4.64778			0.890053	5.34705
20.3549	2.8158	4.0493	2.0551	4.821	3.5986	4.6242	5.3583	9.077	4.7737	7.738	4.72593	8.423	4.88342	6.5992	3.7176	4.1091	7.56441			0.895288	5.23139
20.4739	4.8	2.0522	2.3346	3.9368	5.1477	4.1569	3.1378	4.0934	3.9523	3.6023	4.4486	5.8744	6.50367	7.7268	5.0558	3.6897	8.23192			0.900522	4.63205
20.593	6.9723	1.9005	2.4378	4.8908	5.882	2.3386	4.3589	8.0773	5.3536	5.0614	7.4423	8.3752	6.0776	5.3831	3.7361	4.2578	5.28715			0.90576	5.16661
20.712	2.0367	1.9327	1.0035	4.9795	3.3555	2.3523	5.6355	4.5825	6.1781	6.1866	6.97568	5.9619	3.62878	3.847	4.5928	8.3138	6.83804			0.910994	4.61182
20.831	2.1602	0.9384	0.9523	4.3186	5.6242	2.8978	4.1407	7.1331	4.5383	3.8349	6.73745	6.1559	5.63677	6.1935	6.0561	5.8278	5.96957			0.916228	4.65386
20.9501	3.2167	0.1256	0.663	3.3526	5.6509	2.5931	4.2576	5.9875	7.3005	2.9808	6.69457	5.0061	7.02123	4.7688	3.9637	3.4275	7.53796			0.921467	4.38519
21.0691	2.0345	1.5844	0.6961	4.3255	6.6989	2.2069	5.2828	4.3369	4.3932	6.4093	5.78547	3.9733	3.53674	3.274	3.6162	6.0139	7.45409			0.926701	4.21307
21.1881	1.8388	1.8061	1.5013	2.4474	3.636	3.4064	6.2792	3.6116	5.3393	7.9547	5.96519	4.0529	7.0729	5.6707	5.2603	4.7946	6.50413			0.931935	4.53774
21.3072	0.6245	0.4589	2.2914	2.3776	2.8899	2.1148	4.2821	3.3998	3.2091	11.984	5.65151	4.9591	5.57213	3.6909	2.3661	7.3334	4.91153			0.937173	4.00687
21.4262	1.051	1.1478	1.1374	0.9572	1.8979	1.5979	4.7334	3.5456	4.4588	6.3758	3.57193	3.7788	5.67261	2.3434	3.6852	5.0468	3.5867			0.942408	3.21107
21.5452	0.3286	1.2261	2.1418	0.8988	0.911	2.8173	3.2166	4.6594	6.9178	6.8356	3.74071	6.1344	3.52302	2.302	2.1296	2.4242	4.97065			0.947642	3.24574
21.6643	0.9628	0.9873	0.5734	0.2381	0.8318	1.8265	2.688	4.0902	4.8663	7.742	8.25164	4.1561	4.88114	0.6949	1.6624	1.9891	5.12799			0.95288	3.03351
21.7833	1.1862	0.8318	1.0727	0.179	0.744	1.2544	2.092	2.9273	5.5952	6.3192	8.35151	3.006	3.45939	1.294	1.2763	4.0271	4.34955			0.958114	2.82151
21.9024	1.5101	2.8697	1.4428	1.3327	1.0238	1.7689	1.8335	3.1928	5.6304	8.5673	7.55676	4.4523	2.55244	0.8648	1.5327	4.4504	3.7523			0.963353	3.1961
22.0214	0.68	0.6777	0.6008	0.7754	0.9929	1.9489	1.7441	2.3698	2.9017	5.0773	7.96397	3.3424	1.14622	1.5577	1.5996	1.656	3.07183			0.968587	2.24155
22.1404	0.789	0.3775	0.6217	0.7628	0.8829	1.0256	2.0356	1.5882	2.2456	5.413	4.28819	2.226	0.77425	0.6506	1.5507	2.0411	4.02157			0.973821	1.84084
22.2595	0.79	0.2504	1.8684	0.7281	1.2818	0.7892	1.1489	2.0816	1.8476	5.9423	4.80571	3.3745	0.67263	2.4845	1.5424	2.9768	6.13817			0.979059	2.27782
22.3785	1.0944	1.3041	1.5284	0.6519	0.9209	1.1591	0.4499	1.3543	5.0746	4.1202	4.7117	1.926	1.49017	1.6028	1.1824	2.2973	4.18406			0.984293	2.0619
22.4975	0.8691	1.323	0.0971	0.68	1.2913	0.2442	0.2161	1.903	3.8204	2.857	5.0207	1.3699	0.75363	0.502	0.6674	2.1425	3.79678			0.989527	1.62083
22.6166	0.605	1.4293	0.481	0.6002	0.4724	0.1277	1.162	1.9279	0.8782	4.038	1.90312	1.1815	0.39005	0.5148	0.8749	2.1004	3.15611			0.994766	1.28486
22.7356	0.7828	0.7751	1.575	0.677	1.5474	1.0466	0.7121	0.736	1.2888	1.9822	1.87557	1.5943	0.64124	1.2886	0.4647	2.1712	3.7353			1	1.3467

## Sheet: Image7
X0	Y0	Y1	Y2	Y3	Y4	Y5	Y6	Y7	Y8	Y9	Y10	Y11	Y12	Y13	Y14			Ap-Ba	Average int
0	8.3967	10.4529	7.8105	9.3441	7.2485	21.3505	9.5142	6.2475	9.0405	10.2697	10.8898	9.8339	8.2806	19.1178	10.6697			0	10.5645
0.119	7.1168	10.2846	4.3761	11.673	12.4444	14.5853	8.1184	6.5836	7.8226	7.8799	11.4278	15.5637	8.7356	17.7212	11.9265			0.00526162	10.4173
0.2381	7.2561	7.9146	6.3489	13.3273	14.5417	16.0395	5.4657	5.1834	6.6029	8.678	8.0902	14.7686	9.0213	16.2621	14.4806			0.0105277	10.2654
0.3571	7.9344	7.891	6.5059	12.1753	15.2828	17.8825	6.6647	5.4281	7.4564	8.7624	9.0853	10.9657	7.0463	11.9468	13.4152			0.0157893	9.89619
0.4761	8.0382	6.1558	6.8413	8.8829	13.232	15.3887	7.582	6.4737	6.3926	10.6544	5.2494	7.5537	7.9898	17.4978	10.5716			0.0210509	9.23359
0.5952	11.2135	8.1459	5.9495	12.7016	13.719	16.7238	5.7849	4.3961	3.1979	8.398	8.3098	13.2263	9.1941	16.7437	7.8029			0.026317	9.70047
0.7142	6.3572	14.5642	7.9711	12.9802	16.4861	13.5715	8.8686	4.6942	4.9861	6.8504	8.1854	13.7763	6.6872	14.3795	10.0145			0.0315786	10.0248
0.8332	4.398	10.8725	9.0564	10.2205	15.2695	10.2266	10.0864	7.0684	8.1191	10.265	6.9014	7.9414	4.5869	10.287	14.4611			0.0368402	9.31735
0.9523	6.123	12.8671	8.6478	7.1002	10.5761	8.7245	10.9822	9.8371	6.5267	5.3372	10.8405	8.7991	6.0433	10.509	11.9379			0.0421062	8.99011
1.0713	6.7757	14.0993	8.4391	6.9082	9.4196	10.1028	7.0786	6.0424	3.6229	9.3471	6.7233	11.1491	7.6738	11.5412	12.668			0.0473679	8.77274
1.1903	6.2333	16.0136	7.7768	8.7751	13.0978	17.5112	8.4691	4.9861	6.2415	6.2307	7.9843	10.245	9.8018	9.8887	12.7113			0.0526295	9.73109
1.3094	4.7919	10.8417	6.7336	5.4686	11.0377	11.3434	5.7194	6.8544	8.3995	4.6338	8.6298	14.7863	10.7918	9.5714	15.4445			0.0578955	9.00319
1.4284	7.16	7.6782	6.6666	10.4538	13.2979	10.1139	10.3452	7.4149	9.8178	8.3995	6.8199	10.9402	8.0412	8.1482	14.7247			0.0631572	9.3348
1.5474	6.0929	6.1017	5.6866	11.3224	6.418	10.5294	10.4138	6.2113	9.4168	12.2517	8.1318	11.9415	5.9626	6.5257	15.3057			0.0684188	8.82079
1.6665	6.1843	10.2982	6.7203	7.1007	8.8148	12.9425	8.2331	8.0753	8.0907	7.4826	7.5398	15.0909	4.6371	9.085	12.9012			0.0736848	8.87977
1.7855	6.7695	9.0908	8.9368	5.1994	11.8643	13.8845	3.5375	6.3139	6.6051	7.1318	4.2979	13.1778	10.9867	8.7968	13.4866			0.0789464	8.67196
1.9046	9.7517	11.5587	8.0112	5.0796	9.2601	17.4636	4.2948	4.5181	8.2658	10.1203	4.6756	12.5968	9.1005	8.0658	10.7172			0.0842125	8.89865
2.0236	6.7966	11.9076	6.119	6.6773	8.1592	13.1571	3.8481	5.6408	8.7639	9.9375	8.471	13.288	7.1147	10.2256	13.0438			0.0894741	8.87668
2.1426	7.6711	10.4851	8.8563	6.5584	6.2474	12.6886	5.344	7.1146	7.7296	11.024	5.8258	11.57	9.932	14.5613	16.6769			0.0947357	9.48567
2.2617	4.1324	9.2328	7.4495	7.3148	7.2855	12.1565	6.0281	6.2356	9.4041	10.3025	4.9002	12.0781	10.4921	10.7906	12.8122			0.100002	8.70767
2.3807	6.41	9.4325	8.752	6.3008	7.3751	13.5913	4.7172	9.8441	7.3208	9.4976	8.2694	11.4022	12.0547	13.7466	11.6732			0.105263	9.35917
2.4997	7.9354	8.8525	10.1151	5.6964	4.669	14.2626	10.2975	7.3736	8.6311	7.2069	8.3784	14.1691	11.8024	10.8414	10.5406			0.110525	9.3848
2.6188	10.231	8.0879	7.2149	8.1724	9.8871	12.6941	9.0253	5.7298	11.4691	10.6342	10.1963	9.4386	9.0001	9.6811	13.4741			0.115791	9.6624
2.7378	10.6172	11.0864	8.0838	8.3548	6.0423	17.0119	9.007	9.0091	12.4342	7.8256	8.919	11.1051	8.2837	9.2914	10.2517			0.121053	9.82155
2.8568	11.0196	7.6055	8.0715	9.9582	6.7996	15.4726	9.0301	14.7228	11.5815	10.4302	9.7811	12.4787	11.0323	8.139	12.6255			0.126314	10.5832
2.9759	9.9851	12.101	6.8818	10.8416	7.9784	17.2846	7.6047	15.6883	11.2907	8.5773	10.4242	12.1328	10.729	11.2332	10.5112			0.13158	10.8843
3.0949	4.233	9.8685	6.279	12.6984	5.8724	15.2009	7.8017	14.466	9.3114	9.8651	13.0017	16.8407	7.6383	6.882	14.4893			0.136842	10.2966
3.2139	8.8138	10.5214	7.3813	8.7576	8.7868	11.3639	8.5705	9.7983	8.0525	8.8378	7.7812	16.1486	5.0989	12.0054	10.247			0.142104	9.47767
3.333	9.6547	10.3201	10.0511	6.4936	7.4001	9.7467	6.8815	13.254	14.0175	10.7687	9.1682	16.053	9.8199	12.4914	8.1263			0.14737	10.2831
3.452	6.0397	7.9962	7.8801	11.0559	8.4012	15.2996	9.2707	9.568	14.2971	12.3687	10.1692	13.133	9.8407	9.6489	10.6462			0.152631	10.3743
3.571	10.8817	7.2482	11.0917	9.7298	6.6754	10.2152	8.4625	8.7212	11.9606	8.3318	9.7816	15.566	10.7389	9.3421	14.6662			0.157893	10.2275
3.6901	10.3531	8.1789	9.4562	8.7489	11.3247	11.5578	9.3224	9.9997	13.5955	8.893	9.9503	11.6994	14.5165	6.2585	14.4615			0.163159	10.5544
3.8091	7.4035	9.4298	7.7085	10.0871	8.3546	13.4001	6.779	9.78	10.6237	9.5079	11.7155	12.4768	14.3201	4.0863	11.0788			0.168421	9.78345
3.9281	8.628	10.1415	9.4999	8.8131	6.2441	11.4271	9.0201	10.9245	9.7236	10.4589	10.334	18.7685	12.4483	7.4711	10.5129			0.173682	10.2944
4.0472	11.2686	9.6554	11.2267	6.6659	8.7805	9.3158	11.54	11.2208	6.9021	9.0989	8.991	19.6639	14.4823	8.0961	10.0331			0.178948	10.4627
4.1662	11.5151	7.9367	12.0225	9.9293	8.5681	6.9377	10.8574	14.4007	8.8458	11.6032	10.2096	18.1894	10.9018	12.7558	15.4043			0.18421	11.3385
4.2852	7.0802	9.8535	8.9969	14.5366	7.1341	7.5635	12.5824	15.0533	12.7307	9.5353	12.0083	19.4141	13.0737	11.2793	13.2835			0.189471	11.6084
4.4043	9.8523	9.6391	8.6873	9.986	8.0557	11.2726	12.914	9.5656	11.8944	9.8063	12.8088	23.5607	12.536	10.7976	8.9154			0.194737	11.3528
4.5233	10.601	12.57	10.9534	9.8127	11.7874	6.8696	13.181	8.049	9.2788	13.7724	13.3677	21.7008	11.9018	7.6458	10.7669			0.199999	11.4839
4.6423	12.1885	12.8612	8.1127	8.057	11.2619	9.7466	14.6173	9.2857	9.1677	12.0008	16.2624	19.3176	12.3187	9.5457	9.2079			0.205261	11.5968
4.7614	12.1553	16.8876	9.6258	9.6866	7.9807	8.4331	10.6977	13.2822	13.5437	13.921	15.2466	19.0739	13.2038	12.208	9.0735			0.210527	12.3346
4.8804	10.5622	19.5044	10.5812	9.6231	7.2726	8.7037	13.8207	11.5659	11.8375	16.0064	15.9742	22.7224	15.543	12.6671	11.1732			0.215788	13.1705
4.9995	9.0253	20.1991	9.9819	13.0907	9.7472	11.4582	12.7276	9.0611	6.4059	13.2974	18.7203	22.3294	14.615	12.3142	15.3541			0.221054	13.2218
5.1185	10.2983	21.7695	11.7592	10.4195	11.7131	9.3044	13.6711	7.9808	7.7042	11.2511	18.5308	21.9269	16.6329	12.1463	17.2617			0.226316	13.4913
5.2375	12.6882	17.9418	10.8803	7.5911	10.3591	11.8674	10.8991	10.78	10.3938	14.2904	20.6657	18.2591	17.2779	10.0162	8.3336			0.231578	12.8162
5.3566	16.0805	14.677	14.1195	10.3373	12.9398	10.5685	10.4147	11.6968	7.8675	13.9952	18.599	14.033	18.7298	9.3582	10.9432			0.236844	12.9573
5.4756	11.5878	21.6569	14.4128	9.6676	6.3351	10.4094	11.824	10.2096	6.8646	12.5497	12.1886	20.254	15.2845	10.1031	10.7386			0.242105	12.2724
5.5946	8.6916	21.9339	15.4763	13.8737	6.6122	12.6547	8.2947	8.7261	9.0179	12.8336	13.0731	23.0695	11.8568	11.4582	14.1401			0.247367	12.7808
5.7137	8.8828	19.4393	12.8353	11.5635	7.4072	10.5756	13.8642	6.2675	8.9285	12.0795	17.6805	24.3662	10.4782	11.056	19.1726			0.252633	12.9731
5.8327	7.9309	14.7745	12.9515	13.8172	10.1439	11.2609	11.2012	8.9968	11.6304	12.4387	18.2293	17.0497	13.9811	11.9786	15.0225			0.257895	12.7605
5.9517	8.2869	17.8618	11.0532	14.1758	13.0302	10.0811	9.266	8.4571	11.8607	11.0802	17.0901	23.1034	13.3381	11.3015	11.512			0.263156	12.7665
6.0708	11.1384	18.2655	10.0137	17.2484	11.8478	10.9073	15.3104	9.0731	9.5327	7.1159	15.2047	17.5018	13.0538	19.2672	19.2099			0.268422	13.646
6.1898	13.8775	21.2288	14.7029	11.8971	9.1337	14.4161	10.2831	10.6186	12.3987	10.1501	17.1402	16.7082	14.5824	17.1703	16.9692			0.273684	14.0851
6.3088	12.6675	14.9474	10.0634	8.8999	11.235	15.1417	10.8131	12.086	13.4057	9.7834	13.5732	18.1352	19.1746	14.2878	14.2459			0.278946	13.2307
6.4279	7.6552	11.126	7.7526	14.6464	12.1051	10.229	10.8981	8.2923	11.8771	8.4646	14.3628	21.941	11.259	12.5369	11.3019			0.284212	11.6299
6.5469	8.0261	11.5491	13.3698	12.6709	13.8262	16.2339	13.7942	7.6426	14.268	6.855	10.9444	14.3054	11.6217	17.4704	13.4351			0.289473	12.4009
6.6659	9.485	15.2814	9.3826	12.9108	16.5212	14.2701	14.3655	10.0881	7.238	7.056	11.3064	8.2982	15.9943	18.4961	15.0452			0.294735	12.3826
6.785	7.6298	15.7245	9.3557	9.965	18.552	18.1623	10.9953	9.0084	9.7866	9.3135	9.7124	12.3573	16.0772	17.6397	15.499			0.300001	12.6519
6.904	6.9803	14.6416	12.0271	9.9864	18.5244	16.0819	11.9234	9.0578	13.407	7.3839	9.8976	10.3951	17.1301	14.1385	16.1509			0.305263	12.5151
7.023	9.2372	10.637	9.6577	17.5344	12.6549	9.2616	17.8826	10.9436	12.4596	13.6439	9.6119	15.4741	17.2547	15.8925	21.9827			0.310524	13.6086
7.1421	9.5267	10.7145	9.6364	12.6115	12.7589	12.3201	11.0814	11.6891	13.3367	6.6582	13.9221	12.2917	17.358	18.4525	18.5565			0.31579	12.7276
7.2611	9.0226	11.4802	13.9804	11.5453	13.3841	15.1177	9.3816	10.9248	8.2489	9.2423	10.0706	8.9089	16.0319	17.7725	16.9759			0.321052	12.1392
7.3801	8.3564	12.0141	12.3153	14.9592	10.0397	15.6054	9.469	11.6667	12.2732	9.6776	9.2452	12.7294	19.1165	17.9382	21.3693			0.326313	13.1183
7.4992	8.7661	17.2611	11.6114	13.7378	17.8759	15.4331	7.9405	13.2162	13.4223	6.0129	8.0711	8.9852	17.5666	12.4137	20.3076			0.331579	12.8414
7.6182	6.9032	12.1794	12.7685	12.2608	13.7707	14.1329	9.8838	10.6284	10.7796	7.6135	10.0773	12.2536	17.8635	14.1483	27.1286			0.336841	12.8261
7.7372	5.1186	11.4753	11.4957	13.8928	13.8572	10.9616	10.6031	9.257	14.4727	8.4484	9.4661	12.6424	15.2216	17.4949	27.8857			0.342103	12.8195
7.8563	4.1029	11.2081	10.8333	19.8293	14.8591	11.4173	10.498	10.0879	10.9023	7.9715	11.3885	11.9977	13.078	16.6835	22.2939			0.347369	12.4768
7.9753	5.0069	11.098	13.4768	16.0158	13.0987	11.0327	8.4576	9.0643	12.5219	7.7941	15.7869	10.7897	13.0436	16.8868	22.0262			0.35263	12.4067
8.0943	5.052	13.0962	12.3667	15.1524	12.2348	14.102	10.0824	13.2051	10.6764	10.3589	12.755	12.0576	12.3426	19.1291	20.7138			0.357892	12.8883
8.2134	7.0998	10.3702	12.676	13.0759	12.0622	13.9056	9.7199	9.6588	9.6237	7.6646	9.4487	7.7061	8.8778	15.9014	18.976			0.363158	11.1178
8.3324	8.3007	9.6634	11.6558	13.8987	10.0327	8.2035	9.402	8.8666	3.9208	4.8031	13.6232	8.9489	7.8354	14.052	16.4055			0.36842	9.97415
8.4515	7.8262	8.9751	8.9972	14.7822	7.4062	15.2644	6.5492	7.2391	5.6505	4.7019	15.3616	9.5554	9.1866	13.7981	14.0306			0.373686	9.95495
8.5705	8.2439	7.7927	8.0408	8.0905	11.9486	10.7757	6.7717	10.0786	5.6333	10.131	14.4442	10.7795	12.3053	11.7365	16.0963			0.378947	10.1912
8.6895	8.4413	8.4244	8.88	7.5527	11.6963	11.3068	7.8958	10.8405	6.7374	12.2441	13.2454	11.1074	11.4472	13.7799	17.5251			0.384209	10.7416
8.8086	7.73	7.9563	7.9013	10.4806	10.2178	13.5782	13.3751	9.1124	6.5553	8.5484	13.9237	9.8753	9.1797	16.9637	21.6899			0.389475	11.1392
8.9276	9.0651	9.1518	9.5734	5.84	5.6666	14.7136	16.0151	11.1022	8.0225	9.0906	14.4657	13.3513	15.4168	12.0418	14.4488			0.394737	11.1977
9.0466	9.3341	8.476	7.7699	6.4855	9.4214	9.4436	11.6165	11.3427	8.6294	8.8038	10.5469	9.665	19.3064	14.3204	17.3716			0.399998	10.8355
9.1657	9.823	5.4136	7.0258	4.7882	9.0042	7.673	8.6639	8.9504	6.8805	10.4201	12.3018	10.5989	17.6828	14.9144	22.5405			0.405264	10.4454
9.2847	8.4974	7.1431	8.8658	4.5978	8.0875	8.2757	12.8474	9.9241	4.8274	12.2621	13.5813	16.1073	15.5028	13.2526	13.5319			0.410526	10.4869
9.4037	6.6754	7.176	8.6127	5.0924	9.3857	8.9614	13.7956	10.484	3.6299	15.2288	10.7827	13.4276	21.6666	13.9986	9.5051			0.415788	10.5615
9.5228	11.6002	7.5398	6.6517	2.7028	9.6467	5.923	13.7202	7.8588	3.6997	9.2375	12.7614	10.384	22.3875	14.1235	12.6713			0.421054	10.0605
9.6418	8.0541	5.7586	6.9488	3.7638	9.2149	8.5532	13.8435	4.4538	5.5184	7.4798	10.7014	13.1478	17.5714	17.5895	14.5961			0.426315	9.81301
9.7608	6.2412	9.2956	6.4063	5.0207	8.4172	7.1614	16.6094	7.155	5.3799	7.0735	5.5514	12.24	14.5378	14.3798	12.8095			0.431577	9.21858
9.8799	4.283	10.49	5.9211	3.5629	10.6221	8.5156	11.6774	5.2674	5.0167	10.2781	11.5399	11.7015	21.9182	11.7723	20.5553			0.436843	10.2081
9.9989	6.3549	9.3691	7.2201	2.4911	9.3824	7.8151	14.8287	6.9359	5.0518	8.5484	7.4739	11.8972	24.4945	11.4983	14.5515			0.442104	9.86086
10.1179	4.3346	6.8873	6.7572	4.6365	8.7379	9.0355	13.2846	6.5306	8.8006	7.9394	7.3783	10.0723	25.2004	11.998	16.2038			0.447366	9.85313
10.237	5.2812	6.4877	8.7162	2.7963	6.3564	7.6639	11.9243	6.1003	9.0826	14.2939	8.6909	8.264	27.0498	10.3167	17.1475			0.452632	10.0114
10.356	6.3788	4.7275	7.3609	2.6938	8.5996	5.7681	9.0524	5.393	7.0597	13.1138	8.9974	11.6985	23.3538	11.198	18.5937			0.457894	9.59927
10.475	7.2915	7.1682	5.0529	3.0717	8.2164	6.893	7.5793	5.1149	8.8413	12.0141	8.8769	11.8362	19.8605	11.8997	13.7844			0.463155	9.16673
10.5941	6.3011	8.5023	7.6614	3.759	4.6008	7.4401	8.0357	5.9506	10.2589	7.7578	15.1098	11.4181	19.9247	6.5314	11.4307			0.468421	8.97883
10.7131	7.1586	5.2517	7.1725	4.1083	5.0552	3.3044	14.9761	4.727	13.1685	6.7432	13.272	11.1321	17.3805	11.6173	17.2369			0.473683	9.48695
10.8321	10.6055	8.6148	9.1347	3.6306	4.618	8.0125	11.8979	3.7041	18.5692	10.0978	10.4697	6.8179	12.8143	9.8345	15.3043			0.478945	9.60839
10.9512	9.4541	8.6028	4.9664	3.1685	3.7118	11.0111	12.6127	5.5098	17.7302	8.3024	11.8236	8.6609	19.0315	9.9794	10.6663			0.484211	9.6821
11.0702	7.9127	6.4619	4.5637	2.5221	6.1324	7.9765	8.2473	5.7511	14.882	7.6344	9.7157	9.2039	12.4913	6.476	6.9702			0.489472	7.79608
11.1892	4.2143	8.2346	6.0956	4.0211	4.5306	7.3199	8.3398	5.6274	16.8397	5.6381	8.3488	9.4553	10.3903	5.9965	12.6601			0.494734	7.84747
11.3083	6.6438	6.6596	5.8031	3.3245	4.872	9.8962	8.9453	8.1247	14.5351	8.117	8.2864	10.7092	11.5165	7.7834	11.3245			0.5	8.43609
11.4273	6.8584	7.2068	5.6169	3.7539	6.6364	11.1468	7.3241	7.5918	13.2839	12.2142	8.6286	13.6671	6.2477	6.5311	13.7671			0.505262	8.69832
11.5463	7.271	7.0384	4.1025	3.1767	7.306	13.1491	6.9806	5.7986	10.218	9.7943	10.6807	8.192	12.45	10.8188	12.1819			0.510523	8.61057
11.6654	8.525	4.2698	4.0419	4.6948	8.9612	10.5556	8.2956	6.8092	8.5191	12.718	7.1613	7.0322	12.622	7.8814	14.3912			0.515789	8.43189
11.7844	8.7451	7.0818	5.7795	1.585	6.8903	7.1034	10.7328	4.0905	7.3001	8.3115	13.2703	9.4291	17.9159	6.9035	9.9694			0.521051	8.34055
11.9035	10.4308	8.0765	4.8062	2.8445	6.8962	13.6353	11.8742	7.2215	7.7057	9.3578	13.4837	11.0055	21.176	6.2538	10.7325			0.526317	9.70001
12.0225	6.626	5.9087	5.8971	3.886	9.4336	14.4328	8.4214	9.9359	10.3687	11.1176	15.3683	11.1129	18.6305	7.3735	14.9401			0.531579	10.2302
12.1415	4.6037	10.8196	2.1003	6.0387	5.9921	10.6935	10.9756	7.7042	12.2037	10.3305	11.0604	13.6154	15.8045	8.5623	14.9409			0.53684	9.69636
12.2606	6.0593	8.0501	4.3611	4.5294	6.7773	16.7619	11.9488	7.2674	11.8063	13.6427	10.1731	10.7202	15.68	6.4663	12.4066			0.542106	9.7767
12.3796	5.9492	10.5381	6.5602	2.1453	6.4897	12.6297	12.3597	7.4969	6.8227	12.3379	10.3478	10.5168	19.5793	5.7642	12.9867			0.547368	9.50161
12.4986	9.5161	10.1798	6.4399	3.4881	5.255	9.3065	11.797	7.7457	8.7681	11.9492	13.2062	10.122	17.6712	9.2424	12.3702			0.552629	9.80383
12.6177	8.3751	10.1184	5.1741	2.4486	3.8578	8.6751	9.4132	5.2415	6.858	10.2892	8.5804	8.2774	13.5577	3.6817	11.451			0.557896	7.73328
12.7367	6.6271	13.541	6.2999	2.1424	6.3105	13.7729	13.8061	4.0043	5.3241	10.4289	8.3695	10.0824	10.8042	5.4534	9.5898			0.563157	8.4371
12.8557	11.1996	13.8043	4.2645	2.0161	6.5972	13.3564	11.7823	5.3318	7.2633	13.5424	7.1996	9.5726	13.1185	6.4052	7.731			0.568419	8.87899
12.9748	9.3826	13.1674	3.4549	3.0728	8.1139	10.1203	14.2136	2.9711	5.3843	6.9119	6.3809	8.0544	10.9763	4.5127	8.4198			0.573685	7.67579
13.0938	8.3914	9.6952	4.0166	4.3591	6.1531	9.2131	13.7329	4.0564	6.3103	9.7776	6.8455	8.1883	12.4256	4.5008	5.9641			0.578946	7.57533
13.2128	6.6089	9.5297	3.4672	3.992	3.4411	9.9455	6.2002	3.3582	5.0266	12.9661	5.1837	9.6931	13.1628	6.7662	6.8965			0.584208	7.08252
13.3319	9.4543	9.6053	5.0235	4.082	4.5884	7.7933	8.2872	7.3523	6.4787	13.2811	3.8178	10.4535	10.5566	3.3444	5.3333			0.589474	7.29678
13.4509	7.5976	7.2357	5.1829	2.5616	3.0918	7.3199	8.383	5.5916	5.3477	13.4141	3.5494	7.5218	11.1967	4.0437	9.2436			0.594736	6.75207
13.5699	7.8995	9.2625	7.0586	2.3192	4.2399	7.573	6.953	5.216	4.3341	12.4372	3.7477	7.9883	9.2961	3.397	5.4387			0.599997	6.47739
13.689	7.5902	8.0596	3.6937	3.0193	5.2828	13.1456	5.2461	4.4767	5.533	10.079	4.1934	9.4597	15.3567	1.8764	6.4042			0.605263	6.89443
13.808	6.0803	13.1916	3.641	1.5894	4.3951	12.3655	7.5707	2.4044	5.0943	9.2922	4.5254	9.6824	10.8493	3.7497	8.4833			0.610525	6.86097
13.927	5.4743	8.4143	3.7564	3.1378	5.4787	13.8916	9.656	5.6237	5.7542	10.4767	6.1992	6.0869	12.5599	4.718	6.9842			0.615787	7.21413
14.0461	9.6502	12.5227	6.2128	3.7913	4.1624	16.1893	10.1511	3.8071	7.1684	10.1667	5.995	11.955	10.9684	4.6992	5.5616			0.621053	8.20008
14.1651	7.6052	11.8695	4.6845	4.3356	4.1703	11.6891	10.3324	4.7583	5.794	11.6852	4.1821	12.0698	14.0299	6.5091	8.0552			0.626314	8.11801
14.2841	8.7123	8.3632	4.9257	3.9212	4.8303	8.8583	8.3516	3.8353	5.4939	14.1264	4.4726	9.8502	12.8432	3.9946	9.8737			0.631576	7.49683
14.4032	12.3197	15.8132	2.5707	1.981	2.776	11.9008	7.9594	4.0524	6.4998	7.8201	4.2252	10.9757	12.0761	5.1067	6.0904			0.636842	7.47781
14.5222	9.9648	12.0358	7.2643	1.8741	2.9907	19.1872	9.6319	5.4445	3.4504	7.0462	7.0044	15.2174	14.7452	4.607	7.7689			0.642104	8.54885
14.6412	7.4819	8.6839	4.8178	3.1136	3.5268	14.9098	7.9864	4.8341	5.4232	6.1701	8.6575	11.0583	17.9173	5.4954	9.4693			0.647365	7.96969
14.7603	9.7422	8.2197	3.8974	5.4194	2.6093	16.9312	6.6547	4.0461	6.9029	4.9451	8.1739	9.4264	19.5307	5.7757	8.8051			0.652631	8.07199
14.8793	8.93	10.6601	2.4404	6.2763	3.5217	17.0336	9.5648	3.3934	4.9377	3.6838	8.2176	11.1209	19.8138	5.6589	9.4197			0.657893	8.31151
14.9984	9.7257	10.451	5.2583	2.5516	5.1677	12.8306	8.319	3.6081	3.7332	3.047	9.3341	11.1272	16.6458	6.853	4.526			0.663159	7.54522
15.1174	9.258	11.2823	3.6971	3.0534	7.1796	10.7787	7.7009	2.3699	4.8007	6.7246	11.5161	9.2756	17.5964	6.7654	3.61			0.668421	7.70725
15.2364	10.3704	6.6518	4.7372	3.4162	7.1373	16.8331	6.8029	5.1275	3.3955	5.3057	10.4046	5.7388	16.9223	5.4461	6.4931			0.673682	7.65217
15.3555	8.9683	7.6376	3.8505	3.3345	3.5753	13.4826	12.0997	4.6964	4.9632	6.5206	9.7699	7.5954	14.9517	5.1233	6.783			0.678948	7.5568
15.4745	5.1179	9.4244	3.8117	3.4891	2.1526	12.275	7.5891	7.2876	2.7614	7.335	10.9	8.853	15.0557	3.2759	9.4996			0.68421	7.2552
15.5935	6.9541	10.7309	2.2903	3.2583	5.8647	13.3219	6.1899	5.093	2.9873	5.0687	8.9926	10.0936	12.7745	5.9493	10.3137			0.689471	7.32552
15.7126	5.7895	8.3951	3.6105	4.5525	7.5332	8.9433	9.0432	7.7412	2.6146	7.5858	9.5815	8.0579	12.4819	6.2849	13.0994			0.694737	7.68763
15.8316	6.7821	11.6045	5.3446	5.181	7.1518	7.5525	8.9423	4.307	3.4117	7.4167	9.7094	9.8711	15.2203	4.4861	10.6847			0.699999	7.84439
15.9506	5.3292	13.6977	6.0322	3.4537	4.2088	7.4447	5.7864	5.4415	1.3228	7.065	6.3298	8.8941	15.0218	4.1512	11.0503			0.705261	7.01528
16.0697	5.0405	10.3661	3.5022	2.8924	3.2655	6.3999	7.045	4.6972	5.7201	7.0662	4.2051	11.7048	7.8362	7.967	6.4878			0.710527	6.27973
16.1887	4.3416	7.8991	4.5252	5.3313	6.0137	7.6351	6.1793	5.1904	5.3132	6.1857	5.3629	7.2519	6.6535	6.7603	9.7147			0.715788	6.29053
16.3077	3.5894	14.7584	5.138	5.7976	3.9656	9.5076	6.345	3.6496	3.5715	7.0046	6.9707	11.0771	11.0228	5.3665	8.9046			0.72105	7.11127
16.4268	2.0466	13.6241	6.5624	4.3265	4.8662	9.8017	4.2308	2.9718	4.319	6.4963	3.6979	7.889	14.7266	6.6533	5.8599			0.726316	6.53814
16.5458	5.7595	11.3396	3.9315	4.9588	3.2986	8.6844	8.4168	5.3868	3.296	5.5984	4.2259	7.5557	14.6635	7.3176	1.7567			0.731578	6.41265
16.6648	6.5118	9.9684	4.177	4.6569	8.5986	10.4677	7.6929	2.9891	4.1807	2.7514	3.7311	8.2993	17.8071	5.3177	4.0612			0.736839	6.74739
16.7839	6.127	10.9655	4.7194	4.543	5.8549	9.8229	5.7116	6.7864	3.1853	5.7179	8.6971	7.6583	18.4028	7.4268	4.0749			0.742105	7.31292
16.9029	3.3022	11.0814	4.3617	4.9252	6.2255	9.5932	7.342	8.6337	8.3718	5.446	12.6016	5.4911	21.6396	7.7895	5.3122			0.747367	8.14111
17.0219	4.2037	10.3084	4.8984	5.759	5.8598	10.0101	6.6482	6.268	4.3858	8.6771	6.763	6.5997	17.5865	6.4126	4.0053			0.752629	7.22571
17.141	5.6077	8.3005	6.8615	4.748	8.4751	13.04	6.1869	9.3752	4.0929	7.2793	9.4872	5.4883	19.383	6.2123	3.6455			0.757895	7.87889
17.26	3.5535	11.9298	5.4581	6.5321	8.5207	8.763	5.8832	5.7997	4.2105	6.3718	7.6725	6.7163	15.5931	5.2643	4.8726			0.763156	7.14275
17.379	6.7332	12.416	6.5142	3.4388	8.5456	12.6383	7.9903	5.9023	6.303	4.9371	9.8796	6.7589	18.9875	4.7477	6.5686			0.768418	8.15741
17.4981	6.0091	10.1043	4.5061	4.3117	8.7035	8.959	4.5099	4.9451	7.0877	6.4508	11.0937	10.8148	17.8485	7.6219	4.5698			0.773684	7.83573
17.6171	4.5507	10.2416	5.3812	3.1777	9.0375	10.4821	6.5708	8.2101	7.8285	11.7562	14.2705	9.3824	19.8064	4.8591	4.0266			0.778946	8.63876
17.7361	4.2211	10.1271	6.118	4.3621	12.0464	8.9704	6.0998	5.1569	6.6835	6.7788	11.1427	8.6089	17.1874	9.0657	5.1739			0.784207	8.11618
17.8552	6.5737	13.6807	7.6642	2.6189	12.3887	11.72	9.3234	6.4489	6.2033	7.366	10.8589	7.3065	11.3698	5.4154	10.039			0.789473	8.59849
17.9742	6.9389	9.3592	9.927	5.73	14.631	11.1163	10.4172	4.1955	5.3836	8.7779	9.7117	6.7587	13.75	10.4993	6.5518			0.794735	8.91654
18.0932	8.9109	9.9627	11.0238	9.3819	17.9359	13.4376	11.4452	4.5387	5.287	9.5375	6.6202	6.4206	8.9228	9.3827	6.3755			0.799996	9.27887
18.2123	5.9957	12.5924	13.6539	6.8876	14.4042	10.1387	10.5185	6.6018	5.169	8.5126	10.4083	5.4173	8.6659	6.2473	6.181			0.805263	8.75961
18.3313	6.458	13.179	9.3261	3.9325	14.9859	8.4274	10.9714	4.7972	8.5999	11.1585	10.0588	7.233	12.0446	8.3821	7.6339			0.810524	9.14589
18.4504	6.5069	11.1561	9.4048	2.8087	13.3824	13.1851	9.283	4.3885	5.312	13.2151	12.7089	8.4505	10.7641	5.9219	6.5179			0.81579	8.86706
18.5694	12.0563	6.152	11.3207	5.9417	13.6146	8.5336	8.2749	4.5948	6.2256	11.3405	8.8048	9.5712	11.1644	6.8451	5.6128			0.821052	8.6702
18.6884	6.456	9.5289	9.3458	5.6289	11.8395	8.1526	12.7732	6.0836	6.0218	8.5833	8.305	11.9152	17.0271	7.7321	7.263			0.826313	9.1104
18.8075	6.1427	9.6768	8.3562	6.2203	7.5473	8.9178	10.527	6.5691	5.1144	6.4972	7.1645	9.9433	11.9684	6.2891	9.6718			0.831579	8.04039
18.9265	4.7572	8.0842	13.0823	9.059	8.4819	7.103	9.5149	5.1359	4.6385	5.9847	4.5453	9.9781	15.8107	6.2428	12.9796			0.836841	8.35987
19.0455	5.3317	16.1073	12.3214	8.3507	8.066	11.1069	9.345	5.9672	6.4263	6.5499	5.734	10.1214	12.8245	11.1998	7.3955			0.842103	9.12317
19.1646	6.7278	9.3744	9.8485	5.306	6.4589	15.1923	6.1262	5.5714	11.7724	6.0764	7.4279	9.3441	13.8925	9.6515	9.2633			0.847369	8.80224
19.2836	6.5038	11.3427	12.7646	5.859	5.9464	12.2315	8.2805	6.8424	9.8835	5.9682	7.8874	10.1782	15.3251	9.9694	8.1551			0.85263	9.14252
19.4026	5.7125	12.8691	15.674	7.2873	10.4358	8.2776	12.1151	7.4381	7.2832	8.4985	6.141	7.8586	14.6499	6.335	6.858			0.857892	9.16225
19.5217	7.043	12.8795	7.7253	8.299	10.3363	9.3242	9.1038	5.5327	7.4906	4.5853	6.3211	7.789	11.1795	13.1729	8.8532			0.863158	8.64236
19.6407	5.4677	12.0796	4.9091	4.8003	8.1704	8.346	10.9421	4.5041	7.6657	8.1295	8.008	6.6949	21.1735	14.1508	10.9104			0.86842	9.06347
19.7597	3.2809	11.9261	6.83	6.2954	5.9927	8.5543	9.2546	6.6519	7.9598	11.7761	7.7942	5.0345	17.0595	10.6496	11.5714			0.873681	8.70873
19.8788	3.1275	13.6419	4.0125	9.6299	9.907	7.0607	6.9808	6.7058	11.1454	9.2836	6.6995	5.2942	21.7912	7.5528	12.1991			0.878947	9.00213
19.9978	2.8547	13.4537	6.0383	9.6834	6.4713	6.9711	6.3584	9.5571	3.7652	10.5945	6.8375	6.4566	16.9657	8.8992	9.6376			0.884209	8.30295
20.1168	3.7871	10.6401	8.1917	4.3711	3.4172	7.5422	7.9704	8.1699	4.9536	8.9563	9.0961	6.3889	14.9106	10.9858	7.3489			0.889471	7.78199
20.2359	4.3145	12.7085	3.1955	4.3209	4.1436	5.8509	10.9178	17.1889	8.2367	8.8886	8.2014	7.0049	13.9553	9.6126	9.3406			0.894737	8.52538
20.3549	3.1008	12.6295	4.5144	6.6022	5.4356	6.8295	9.0135	12.3205	5.0593	7.2841	6.3628	6.4634	11.9646	8.6973	7.2614			0.899998	7.56926
20.4739	5.6527	5.4312	5.9171	5.4396	2.6544	4.8735	8.0732	13.2303	6.3183	9.7002	4.4127	7.9747	7.5489	8.6665	10.042			0.90526	7.06235
20.593	6.8342	7.7537	3.4092	4.4335	1.9614	4.1584	7.4409	15.6806	7.1685	8.4222	5.7443	5.092	12.7507	8.1584	13.6961			0.910526	7.51361
20.712	4.4346	8.6289	3.9427	2.951	3.6603	6.1064	9.5619	13.6011	4.7449	4.2719	7.7895	5.9266	12.7939	12.9695	9.2875			0.915788	7.37805
20.831	4.3939	7.3028	6.1627	1.9828	1.6846	6.0239	5.7941	16.2563	6.1787	4.662	7.0246	6.8484	11.439	10.1272	11.2533			0.921049	7.14229
20.9501	3.3604	6.6557	4.6049	2.7294	0.7148	4.4842	8.8214	16.3578	5.8302	7.563	5.8047	3.6922	9.0992	11.5251	10.39			0.926315	6.77553
21.0691	4.2712	5.3833	3.1449	2.6737	2.1669	3.649	11.1313	14.8755	5.6666	8.5155	9.798	3.8389	9.4391	16.1428	8.631			0.931577	7.28851
21.1881	5.8194	2.9937	1.3283	1.7688	1.971	2.4219	8.1855	11.3433	5.2884	7.0361	7.1681	4.1916	13.7283	19.0025	8.1838			0.936838	6.69538
21.3072	6.5781	4.9742	0.9661	2.2528	3.1478	3.0393	10.0919	10.9792	5.655	8.6188	8.3191	6.349	9.1497	17.1462	8.9746			0.942104	7.08279
21.4262	5.0568	2.6495	4.6197	4.4957	1.3989	1.8549	8.8887	8.3678	4.8386	11.8929	5.7591	2.4027	14.2656	15.4789	9.8981			0.947366	6.79119
21.5452	3.6957	2.1649	2.0097	3.0563	0.6281	1.3667	7.9904	5.5298	3.0531	7.5831	6.5218	2.9171	12.4051	16.6616	8.2979			0.952628	5.59209
21.6643	1.8996	2.8981	2.0238	0.5355	0.0828	1.6232	7.8293	6.5427	7.3804	6.2441	4.7985	4.8836	9.4183	17.7797	9.921			0.957894	5.59071
21.7833	2.0377	1.3668	2.1019	2.1998	0.5755	2.4649	9.9567	10.5684	9.1324	4.7251	2.8688	4.161	10.6047	19.4635	7.7191			0.963155	5.99642
21.9024	2.0539	2.1551	1.5342	2.2747	0.5834	2.0584	7.8037	8.1198	6.7786	5.9337	2.5346	5.9849	9.4996	15.053	8.8109			0.968421	5.4119
22.0214	2.2494	0.1388	2.3628	2.0131	0.8639	1.3041	8.9058	14.7181	8.0184	5.0523	2.8166	3.3694	5.2437	12.9587	9.2784			0.973683	5.28623
22.1404	0.6853	1.0159	3.0849	0.3729	0.4384	3.5137	6.7042	18.4289	7.9615	4.6278	2.6803	2.9439	6.7974	11.9025	11.4761			0.978945	5.50891
22.2595	1.2627	1.3254	1.9559	1.6729	0.3025	0.9131	7.0007	11.8511	6.9165	2.7447	2.462	1.3323	7.061	14.8074	12.1269			0.984211	4.91567
22.3785	0.6793	1.4854	1.7077	2.5253	1.2357	0.9407	8.4407	15.4888	5.1017	2.6267	3.6348	1.9273	8.1701	12.8496	9.0953			0.989472	5.06061
22.4975	0.5632	2.4636	1.9392	0.1826	1.2283	0.5971	7.9579	10.4384	5.5677	2.4977	2.2288	2.9176	6.1615	9.4021	9.4774			0.994734	4.24154
22.6166	1.2601	1.2903	1.7007	0.5685	1.0442	0.1089	5.394	7.0645	5.4754	2.5183	2.9475	1.1865	8.6051	15.515	10.656			1	4.35567

## Sheet: Image6
X0	Y0	Y1	Y2	Y3	Y4	Y5	Y6	Y7	Y8	Y9	Y10	Y11	Y12	Y13	Y14			Ap-Ba	Average int
0	9.3242	8.2654	4.9914	6.6225	9.1124	12.8715	7.4577	8.7744	6.2509	10.2632	4.6595	11.869	8.2195	15.3427	18.333			0	9.49049
0.119	6.6635	7.1067	7.752	6.6164	8.7734	10.3641	10.1956	9.4318	7.4009	8.03	7.7439	7.4187	10.5034	11.9273	21.6597			0.0066206	9.43916
0.2381	8.3913	6.7764	4.8059	5.829	5.2991	9.9073	14.8923	9.3379	5.4358	13.0138	10.938	9.6677	11.1571	14.0364	18.9706			0.0132468	9.89724
0.3571	7.7711	5.8937	7.4107	6.9318	3.4234	10.7761	11.293	6.3344	6.7023	8.3732	10.4286	12.0737	10.2438	11.315	21.6758			0.0198674	9.37644
0.4761	5.7489	6.2431	7.3593	5.6767	5.7459	12.6573	11.0449	8.1234	8.8179	6.1481	11.2478	11.2666	13.3163	8.6677	16.7942			0.026488	9.25721
0.5952	3.535	5.781	5.5583	5.0453	8.8672	9.9054	9.3831	11.5421	11.0909	7.9824	9.7512	8.8768	13.2419	11.9795	22.6125			0.0331141	9.67684
0.7142	4.9214	7.6937	4.1607	7.4253	9.5795	8.4324	10.4832	12.6645	5.5084	8.0311	10.1533	8.8596	11.6747	14.9071	20.0063			0.0397347	9.63341
0.8332	6.0909	9.7548	3.7825	7.434	6.7398	6.8621	9.0004	12.8331	5.1332	8.1092	15.5583	9.1887	9.0802	18.0562	17.1479			0.0463553	9.65142
0.9523	5.9193	7.9728	5.3656	9.3401	8.423	8.5581	9.6409	9.9127	5.6887	7.7089	11.5355	12.7468	12.1734	16.4651	13.8454			0.0529815	9.68642
1.0713	6.6538	7.8728	6.8611	7.7648	9.1782	10.6572	11.4713	10.0087	6.5147	5.3538	9.5947	10.0587	12.2309	15.4708	13.0047			0.0596021	9.51308
1.1903	9.1329	6.8104	8.667	5.9685	7.6578	10.146	11.4241	12.0978	7.7789	7.8093	10.5214	10.5641	10.3762	17.0482	11.0711			0.0662227	9.80491
1.3094	7.1997	5.258	7.9792	6.7798	7.861	8.3157	9.3496	10.1335	7.8447	8.8689	9.6285	9.0571	12.5248	19.7407	14.0227			0.0728489	9.63759
1.4284	10.7073	4.6117	7.5657	7.519	7.6575	11.0159	7.0487	12.902	8.151	7.5227	12.1044	4.2787	13.5269	20.4681	18.5733			0.0794695	10.2435
1.5474	9.13	5.8384	11.7784	6.0749	7.1894	12.24	11.6464	11.5787	9.4631	9.9602	14.2054	8.2041	13.8638	24.0808	17.5752			0.0860901	11.5219
1.6665	9.5043	6.8797	6.7983	8.4985	5.2107	9.634	12.9673	12.8805	9.1873	7.9177	13.6253	10.9885	13.8475	23.5848	13.7278			0.0927162	11.0168
1.7855	8.4398	7.5238	6.5474	9.4315	5.8009	12.3732	14.0778	14.0256	12.2768	8.6252	12.8348	10.2726	9.8709	17.196	21.5238			0.0993368	11.388
1.9046	7.8334	6.2247	9.5889	8.624	7.5339	11.499	15.4812	16.5224	12.395	8.7524	14.2567	14.0752	13.9491	18.7644	21.6238			0.105963	12.4749
2.0236	5.6946	7.8185	6.6352	8.8752	7.9476	11.1475	14.9357	16.1553	9.3788	7.3454	12.9251	12.4219	14.666	21.6281	18.502			0.112584	11.7385
2.1426	7.771	6.6134	11.1508	7.3216	11.6512	12.2388	15.4727	15.6392	9.8032	9.8596	13.6154	12.4422	11.4543	20.3947	19.0598			0.119204	12.2992
2.2617	8.323	6.8656	11.5458	8.6108	11.6566	13.0713	15.3905	9.8997	11.3398	9.4731	11.4862	12.8571	13.4869	21.345	20.8217			0.12583	12.4115
2.3807	12.0277	7.1867	9.0269	12.273	7.6959	10.4421	15.6945	10.2822	12.4666	10.4491	10.6373	10.1486	15.673	17.91	18.2804			0.132451	12.0129
2.4997	13.1055	8.3012	8.3397	7.1724	6.8378	12.7529	15.0514	10.537	8.8282	9.3472	10.6418	11.7126	18.1895	19.2399	16.4334			0.139072	11.766
2.6188	10.147	9.2748	9.9779	7.6921	6.6403	12.6841	13.1083	11.4374	8.4476	9.363	13.7536	11.7154	21.0795	14.344	14.6653			0.145698	11.622
2.7378	9.1523	6.5647	10.0397	8.5057	5.411	11.1604	12.9339	13.1226	10.8089	9.7625	16.2023	14.3773	16.0706	16.3267	13.7737			0.152318	11.6142
2.8568	6.838	5.377	9.1345	7.6399	5.9322	11.5986	13.5686	11.9649	10.3553	9.2667	8.394	13.9891	14.9174	12.7871	11.1196			0.158939	10.1922
2.9759	9.1499	7.4751	8.7735	12.0449	7.3995	12.8183	10.1337	8.7028	11.6813	10.5232	12.9667	8.8063	18.6945	16.0957	16.562			0.165565	11.4552
3.0949	12.7235	7.0233	11.3461	9.1722	6.2896	6.7377	11.9084	11.9976	11.807	8.3537	12.3582	12.2545	23.7226	12.9517	17.0154			0.172186	11.7108
3.2139	10.6579	9.6091	11.3505	6.9872	9.6963	8.6235	11.0398	16.4741	8.5444	7.5978	9.7086	9.6511	23.4596	11.8902	17.0852			0.178806	11.4917
3.333	8.812	9.0069	9.52	8.0618	9.7725	14.5557	14.9894	14.7998	8.2825	11.9544	10.6265	13.695	21.0822	13.2724	13.5619			0.185432	12.1329
3.452	14.0558	8.4702	8.5333	10.3473	7.1565	7.4413	19.9223	12.7046	13.1581	12.7536	10.5606	16.6467	20.5837	12.5357	11.1281			0.192053	12.3999
3.571	13.8353	10.4922	10.7001	7.4953	7.3859	10.2765	13.6705	11.1295	12.0895	10.3403	10.0707	15.602	16.3213	10.3045	15.7544			0.198674	11.6979
3.6901	13.7584	7.6142	6.7272	5.7644	7.1988	11.9602	9.6081	11.3156	9.3858	9.1325	8.9635	15.0449	17.1537	9.073	14.4831			0.2053	10.4789
3.8091	14.5902	7.1954	7.4898	6.7835	7.4123	11.2359	18.7908	13.8586	10.6189	8.5004	10.3504	14.9394	18.6587	12.0046	10.7195			0.21192	11.5432
3.9281	14.1155	11.3109	10.9123	5.4779	7.846	12.567	18.2681	13.3709	7.7053	9.4861	10.4979	12.1249	13.2849	11.825	11.6029			0.218541	11.3597
4.0472	14.3594	9.7486	14.4978	4.3558	7.3889	13.6285	11.6197	8.7805	10.7086	9.9617	8.8195	14.7984	18.3599	13.6139	10.4889			0.225167	11.4087
4.1662	15.1999	9.6623	13.2258	5.7643	7.4966	8.1893	17.6606	14.6976	12.8731	11.022	9.3108	15.3411	18.3414	14.8369	15.2148			0.231788	12.5891
4.2852	15.7599	9.6963	7.8335	4.7944	8.2231	11.6233	13.753	14.5511	8.8741	7.8586	8.8289	12.5511	16.2591	12.4851	13.1477			0.238408	11.0826
4.4043	16.1342	11.3564	6.9077	6.6383	7.733	10.5791	11.6408	10.3461	7.2722	10.2146	8.8929	14.2497	21.1892	12.8985	10.3632			0.245035	11.0944
4.5233	10.7774	8.1759	6.0403	5.2117	5.4568	12.3373	13.1136	7.983	8.2266	12.3104	9.0033	13.8359	21.2586	14.1138	16.7684			0.251655	10.9742
4.6423	11.3073	9.183	7.1556	5.989	6.6915	11.4992	10.7527	9.2954	11.8438	8.6094	9.8654	19.2853	12.238	14.6019	20.8183			0.258276	11.2757
4.7614	13.4102	11.8048	8.4567	8.0424	8.2773	9.6197	13.3506	9.2863	8.3125	5.9763	11.3802	14.9427	17.3029	11.8075	23.956			0.264902	11.7284
4.8804	9.908	10.8663	10.3296	6.9046	7.8657	9.5874	15.3036	7.489	7.5448	9.2082	14.045	19.9046	19.4688	10.4931	22.0484			0.271523	12.0645
4.9995	10.8487	9.7583	6.8956	5.6729	7.9799	8.9107	14.4362	6.8677	6.2713	6.76	9.9765	12.0741	13.2446	13.0184	20.6783			0.278149	10.2262
5.1185	8.1504	12.2383	5.8645	4.2766	10.6315	11.1301	15.6148	7.6788	7.2117	7.442	9.0005	17.3781	12.4795	11.7178	20.716			0.284769	10.7687
5.2375	9.3593	12.1542	6.8515	7.2588	7.8768	7.5292	8.4726	7.6645	7.2129	10.6081	13.1245	17.7152	14.4432	8.4951	20.5099			0.29139	10.6184
5.3566	11.3849	9.5781	6.3427	6.0854	7.6127	7.804	11.2977	8.2343	9.8973	11.4489	12.297	19.4613	15.4104	10.5976	18.3769			0.298016	11.0553
5.4756	8.6647	7.9315	6.9667	5.3436	7.8592	9.46	10.1691	9.0526	7.5206	10.7715	16.0943	16.5417	11.3516	12.1097	18.0242			0.304637	10.5241
5.5946	10.0693	8.8057	7.4953	4.6228	9.0517	10.5399	10.2285	8.1367	7.432	8.3462	17.5771	23.5206	12.4734	11.6317	13.3257			0.311257	10.8838
5.7137	8.0151	6.9286	9.4901	7.6457	7.9166	8.6769	14.1936	6.8961	5.6385	9.0575	19.9117	20.8966	13.7278	11.3632	15.3361			0.317883	11.0463
5.8327	12.0126	7.8612	8.0163	6.4308	7.5434	11.0134	15.7569	9.121	6.2047	11.3804	23.8385	19.0736	14.6664	7.9166	17.9804			0.324504	11.9211
5.9517	12.1939	6.1677	7.0842	6.8993	7.1798	12.8218	11.2244	12.6635	6.3453	9.5376	18.2665	19.2906	10.8703	5.7112	10.8093			0.331125	10.471
6.0708	11.0905	7.3268	5.4714	7.4564	7.3022	10.9172	12.2091	9.9103	7.8907	10.1571	19.5483	18.9994	8.4965	12.5159	10.7356			0.337751	10.6685
6.1898	9.6866	7.1935	5.3089	7.0861	6.6786	12.3437	10.9668	10.5319	5.4522	8.8536	13.1592	22.3543	8.7837	11.5421	12.7081			0.344371	10.1766
6.3088	9.4284	9.3071	4.4916	6.1463	10.7614	11.2498	13.4466	7.3695	4.2795	11.6299	11.0936	19.1353	9.1823	19.646	12.061			0.350992	10.6152
6.4279	9.2792	12.2411	4.3687	4.149	6.6357	7.7269	7.5566	6.8734	8.8135	10.0378	14.902	23.2243	10.8611	13.7579	13.0295			0.357618	10.2304
6.5469	9.8812	9.2249	4.5268	6.3558	6.843	6.8855	8.6309	8.4035	5.0118	12.9647	10.3347	22.6775	13.1601	16.639	15.3228			0.364239	10.4575
6.6659	6.3633	8.5467	5.4893	6.5483	6.1034	8.2964	10.4979	6.8179	5.0076	10.5757	11.6205	16.1886	11.3778	12.2925	18.2169			0.370859	9.59619
6.785	8.2012	8.2397	6.861	5.6181	7.9173	9.9566	12.9176	9.2429	7.7703	9.7129	9.399	15.7476	6.6769	11.2618	16.9839			0.377486	9.76712
6.904	9.2065	7.1118	8.8003	5.5303	8.0667	8.4554	9.3677	9.9348	7.0882	8.7523	9.8477	18.7787	7.2697	7.2694	14.8443			0.384106	9.35492
7.023	11.2229	11.0335	7.3881	3.9898	5.2664	5.8905	11.1967	7.1296	9.0445	8.2351	5.8129	21.3952	6.6059	5.9478	16.6924			0.390727	9.12342
7.1421	7.9543	10.0853	6.2671	4.2166	7.839	6.0944	10.7537	7.1065	8.339	8.9087	7.1586	20.776	5.8325	6.014	15.1758			0.397353	8.83477
7.2611	8.3659	6.7008	9.1192	6.4856	6.7611	9.3158	10.6149	8.3649	8.5019	8.5301	6.3421	20.7269	9.2851	5.9416	14.8375			0.403973	9.32623
7.3801	7.9308	10.1271	9.7268	3.7925	8.6648	6.2328	8.548	7.959	9.3771	6.1336	6.0985	15.2943	7.3375	4.4144	12.7125			0.410594	8.28998
7.4992	5.6556	8.34	7.1737	6.1371	5.9591	6.447	8.7785	9.273	9.3605	6.5826	6.4398	13.5977	5.107	7.1208	11.0086			0.41722	7.79873
7.6182	8.3001	7.74	5.1243	6.0012	4.0918	5.1675	10.7902	10.2324	5.9756	5.239	5.6806	15.5371	4.8719	5.2654	5.1938			0.423841	7.01406
7.7372	8.3844	10.5815	6.3958	5.0891	4.2088	4.5546	6.821	6.8964	6.6753	3.6392	6.1561	15.5363	6.8444	6.4378	5.5773			0.430461	6.91987
7.8563	7.5945	9.0217	7.0903	4.6123	4.3951	6.8629	7.0944	6.0419	6.5055	8.88	7.1261	15.0562	5.5881	4.0127	8.9174			0.437088	7.25327
7.9753	7.4946	7.7106	7.4153	5.8851	5.7986	7.7444	7.4246	6.8709	6.4028	9.3022	11.3497	14.3065	5.0584	4.9561	9.3808			0.443708	7.80671
8.0943	10.2645	8.4543	7.113	5.1783	5.6003	7.2733	7.8759	10.0647	6.2913	8.5123	5.801	13.2851	4.5826	2.4217	5.6053			0.450329	7.22157
8.2134	9.7778	9.1942	7.0578	8.5877	9.2718	4.5905	5.9665	6.2575	7.5615	8.2614	7.754	12.9747	3.2455	5.0316	4.3534			0.456955	7.32573
8.3324	9.3634	6.3873	5.9097	7.4294	8.7303	3.8013	7.1862	8.0733	5.0057	13.4132	9.0645	12.959	3.1933	6.0247	6.1801			0.463576	7.51476
8.4515	7.5329	4.2626	8.7653	7.1211	7.3272	3.0276	12.6685	5.3163	5.0629	9.2687	7.0543	10.0776	4.8332	4.1856	11.237			0.470202	7.18272
8.5705	14.1032	5.3045	7.3673	8.2681	8.3075	5.9874	14.2533	4.7935	8.8112	7.7389	10.5558	10.0216	6.6585	6.022	7.116			0.476822	8.35392
8.6895	13.8253	7.9485	5.6664	6.6894	8.7167	4.5661	12.0731	7.0457	10.7809	6.3055	9.691	7.7523	6.9253	4.1598	9.4838			0.483443	8.10865
8.8086	10.3783	8.6155	5.2316	4.7105	7.4796	4.5292	12.2665	9.9711	12.3051	5.6243	8.1275	7.0899	4.8163	4.9454	11.0936			0.490069	7.81229
8.9276	10.4776	10.2002	6.4917	4.7389	6.4633	4.5793	9.7205	7.4057	13.1511	4.8748	7.6712	8.1717	6.5854	3.5812	9.5903			0.49669	7.58019
9.0466	8.413	7.335	4.3942	3.1068	5.9591	5.8787	7.6825	7.1057	5.9636	5.2283	8.3665	9.2626	5.8738	3.5928	9.6919			0.50331	6.52363
9.1657	9.2142	7.4991	5.4608	5.0274	6.1001	8.1739	7.2383	8.8046	5.532	5.215	7.3018	7.8779	6.6425	4.112	11.1005			0.509936	7.02001
9.2847	5.9865	9.9085	5.6933	5.0683	9.8066	8.5781	4.3765	8.027	7.6548	5.5822	9.7487	5.6611	6.258	3.761	10.3705			0.516557	7.09874
9.4037	8.2766	7.9455	5.9233	5.3926	7.4551	8.6845	7.7885	7.9974	9.3258	4.4499	8.0754	9.1683	5.0599	3.6428	7.6322			0.523178	7.12119
9.5228	5.7493	8.8402	6.0389	8.4681	5.9255	9.4936	5.6627	6.4404	11.2413	5.7834	6.957	6.3035	2.4812	3.9909	6.8121			0.529804	6.67921
9.6418	7.0278	7.4721	4.324	9.5043	7.4335	9.8611	5.097	8.2235	12.7983	6.5938	6.9856	6.947	5.2133	3.5867	2.9012			0.536424	6.93128
9.7608	8.3146	6.2245	4.1082	6.3142	5.7063	10.8822	5.3467	6.4617	14.062	4.4439	8.2713	7.9897	6.4239	5.4299	6.7464			0.543045	7.11503
9.8799	8.9046	8.4799	4.3891	9.7257	11.129	8.8618	8.5411	7.2989	12.7266	6.6786	7.3703	5.6988	7.5593	5.2594	7.9809			0.549671	8.04027
9.9989	9.1514	6.4518	6.377	7.4201	6.638	8.7027	7.4339	8.337	10.2774	3.6671	6.2366	9.4472	4.8251	3.146	7.898			0.556292	7.06729
10.1179	9.0096	5.5038	6.2233	5.1893	7.2277	6.2435	7.4464	8.1021	11.8067	3.4494	8.9391	9.7758	9.1914	4.7615	7.3517			0.562912	7.34809
10.237	11.0677	6.1315	4.5876	6.7512	10.0021	8.855	9.0256	9.3534	11.2039	4.8618	11.1494	9.2734	6.0001	5.0996	4.6651			0.569539	7.86849
10.356	10.2522	3.9704	3.5442	6.653	5.1848	10.3857	7.7811	10.4366	11.5377	5.9123	6.9098	9.3805	4.3535	2.4226	6.9521			0.576159	7.0451
10.475	11.8785	6.617	4.4509	7.8497	6.5666	7.2321	7.9692	12.0673	11.4279	3.5369	8.5522	11.2209	5.0083	2.561	6.5592			0.58278	7.56651
10.5941	13.4918	6.7865	3.6228	4.709	3.0901	6.9755	8.2856	12.2942	11.7896	4.3529	5.8162	13.5353	5.5867	1.5151	6.5218			0.589406	7.22487
10.7131	8.5134	7.0621	2.1121	5.1971	3.4326	7.5256	5.275	11.9537	9.1573	2.1433	8.7418	11.9319	6.4738	0.71	5.2125			0.596027	6.36281
10.8321	10.089	6.1727	1.5668	8.1537	7.7301	12.7589	6.3587	11.8215	9.9703	1.6613	11.3373	9.7838	5.4575	1.5672	3.6096			0.602647	7.20256
10.9512	8.9524	6.7114	4.6494	6.8088	6.7178	10.8337	9.2543	14.8061	8.2068	2.1401	8.0232	12.3071	3.7672	2.9635	4.3268			0.609273	7.36457
11.0702	5.4587	8.0556	2.7617	10.6565	5.4768	5.0606	9.7615	12.5222	7.9777	4.3893	6.1768	12.8509	5.1954	5.3876	7.1124			0.615894	7.25625
11.1892	8.2717	6.5433	3.4175	7.0132	6.4507	5.9756	9.7341	7.9368	5.9347	4.5964	9.3597	11.323	5.986	1.8449	5.2943			0.622514	6.64546
11.3083	6.6161	9.5742	3.7671	4.0414	5.8521	7.4999	9.4731	10.4868	7.3752	4.1768	10.1647	9.9925	4.4075	1.7841	5.3087			0.629141	6.70135
11.4273	7.0675	6.2939	5.5523	5.5603	4.7832	8.7725	13.6384	12.4406	6.3452	5.6587	12.9348	8.6084	5.1254	2.9748	8.028			0.635761	7.5856
11.5463	4.918	4.7086	2.7783	6.4529	5.7019	9.0867	11.8097	11.3759	7.5034	6.3295	9.5333	9.808	6.3368	2.714	7.5044			0.642382	7.10409
11.6654	6.489	7.5129	5.8724	8.3383	2.5809	7.7535	8.3378	8.2799	5.9526	4.7133	7.9844	9.6682	5.0642	3.5404	5.3986			0.649008	6.49909
11.7844	5.5793	7.7479	5.1954	6.167	4.8507	8.6726	11.0158	12.4139	7.2826	5.2522	11.1569	14.3846	4.7722	2.4825	6.9297			0.655629	7.59355
11.9035	6.7275	10.3514	3.5963	3.3137	4.5862	9.5915	10.9195	6.4717	10.3948	4.0201	12.5536	15.1541	5.3917	2.4076	3.7655			0.662255	7.28301
12.0225	5.3113	8.8585	7.5086	5.6611	2.7887	8.0023	5.6583	8.683	6.9287	3.0817	10.2245	10.6761	3.8119	6.1795	5.2122			0.668875	6.57243
12.1415	3.9593	10.3595	7.246	7.0896	5.2623	7.1612	4.8135	10.3326	5.8783	2.4143	12.2473	11.0795	4.8281	3.1926	6.1428			0.675496	6.80046
12.2606	3.7221	9.6922	5.4833	8.6337	5.2231	5.8513	5.7436	15.771	6.3326	6.1254	9.6079	8.994	7.4489	3.2287	7.0536			0.682122	7.26076
12.3796	4.6747	12.536	6.123	6.1847	3.4536	6.8545	3.4285	16.3224	7.775	5.8539	9.7673	9.6162	5.8431	4.2757	7.117			0.688743	7.32171
12.4986	6.4187	7.1637	5.0906	4.0088	6.7083	5.7918	4.8855	15.9501	7.3527	4.3971	9.2292	12.4908	4.2966	1.8287	5.0558			0.695363	6.71123
12.6177	9.9654	5.2655	6.2984	10.5534	5.0622	6.7145	5.8025	12.1612	6.7209	5.1631	5.5358	11.3109	3.4023	2.9296	6.0613			0.70199	6.86313
12.7367	8.509	6.3956	5.2226	6.9214	4.4359	9.4151	6.5659	15.2408	6.8322	4.6998	6.4883	13.8302	4.4444	2.6262	6.407			0.70861	7.20229
12.8557	5.2386	7.3023	5.7718	5.4207	3.8369	10.446	5.7823	19.6941	5.7337	3.7749	11.4039	14.6704	5.8705	3.0394	4.99			0.715231	7.5317
12.9748	4.5451	6.4441	5.234	6.7037	4.8265	11.7001	6.3448	18.8285	9.1549	5.2622	4.7239	18.238	8.4074	2.0396	7.8624			0.721857	8.02101
13.0938	6.8068	10.3054	6.3916	7.5775	2.3987	7.1481	9.2034	19.8446	6.4214	8.3508	8.9382	10.6633	7.186	1.8452	4.6159			0.728477	7.84646
13.2128	6.7648	14.1245	7.5023	5.4264	5.332	7.6834	7.7541	15.1075	10.3817	7.154	8.8922	12.4631	6.2889	2.1846	5.4495			0.735098	8.16727
13.3319	9.5755	8.1241	5.7106	5.8155	6.3068	6.3305	8.1381	15.2916	9.7204	7.5753	8.0478	11.9112	5.4315	4.5012	4.4605			0.741724	7.79604
13.4509	6.746	6.7276	7.3064	4.728	6.0518	5.3628	5.7915	11.4432	8.7393	4.2311	6.0502	6.2962	5.4617	3.6296	4.3295			0.748345	6.19299
13.5699	4.1028	10.4308	6.3551	2.6557	4.952	8.7411	7.1574	11.3637	10.8531	6.2043	6.4267	8.1962	5.6504	3.7113	5.0109			0.754965	6.78743
13.689	8.6167	9.6167	7.8778	4.4612	4.3799	10.4311	7.2616	6.426	14.1042	6.338	5.0453	9.005	6.7695	4.1805	3.8706			0.761592	7.22561
13.808	7.0315	7.9235	7.7294	4.1242	4.6436	5.3748	5.3018	8.507	12.537	4.111	5.795	8.3768	8.478	3.3388	6.4456			0.768212	6.64787
13.927	7.6558	9.4171	6.2758	4.8155	5.7319	6.3727	4.7853	10.6571	11.0956	5.6948	4.1583	7.6052	6.1651	4.0545	7.5176			0.774833	6.80015
14.0461	7.1502	6.616	5.2655	5.4053	6.4426	7.421	5.5768	11.4229	9.3798	5.646	4.141	10.9964	5.3639	3.903	10.3604			0.781459	7.00605
14.1651	7.0601	4.219	2.1521	5.5915	7.6174	7.3627	7.4907	12.0942	5.3896	5.0377	4.0974	9.7792	6.9835	4.8895	8.7095			0.78808	6.56494
14.2841	8.0081	8.5454	4.614	5.7079	5.6554	9.7139	6.5272	11.6759	10.7074	5.9583	5.2214	10.8887	6.3379	7.1904	9.2623			0.7947	7.73428
14.4032	8.114	8.882	5.8882	5.2975	4.4326	10.1129	7.8877	7.9594	11.2127	3.5662	6.2218	13.221	6.6274	3.8544	11.2957			0.801326	7.63823
14.5222	8.7851	12.4455	2.2939	4.6866	5.5935	9.7346	9.1053	6.7173	13.7686	4.5391	5.2749	12.8316	3.8535	3.4759	6.8361			0.807947	7.32943
14.6412	10.9464	9.1368	3.3784	2.666	6.0575	8.8815	10.3799	6.417	10.7222	8.6189	5.0159	13.2146	5.086	3.7172	5.0063			0.814568	7.28297
14.7603	10.3777	5.0592	4.1504	4.7145	3.4198	11.6847	9.2273	7.561	10.32	4.4358	4.6127	14.6537	7.1016	6.5475	7.1848			0.821194	7.40338
14.8793	8.8163	5.2086	3.8876	4.9333	5.394	12.225	9.9249	9.2752	10.0129	4.9816	3.4946	11.3918	7.8352	6.2894	4.6157			0.827814	7.21907
14.9984	9.5774	6.3783	3.0098	6.8575	7.0027	8.5834	7.6166	5.229	9.5368	4.563	5.512	10.6707	6.6447	4.7043	3.4406			0.83444	6.62179
15.1174	9.8409	9.1669	3.6739	6.2674	9.2235	10.0054	8.2257	4.0929	9.5903	3.7415	10.9128	13.3169	12.0743	4.5789	7.064			0.841061	8.11835
15.2364	10.9987	8.3967	1.5422	7.1445	9.418	15.0272	9.08	7.1513	10.3949	7.2203	9.6373	15.8577	8.9242	7.0991	5.7872			0.847682	8.91195
15.3555	14.0738	9.7101	2.9739	6.7221	10.3909	6.8714	8.7228	10.9015	9.2553	6.374	9.4158	10.8178	6.5592	7.3135	7.7086			0.854308	8.52071
15.4745	9.9255	12.6959	4.7342	3.0489	5.6838	6.593	4.038	9.6298	7.4657	7.2686	10.2641	12.9209	7.8407	5.9463	11.8747			0.860928	7.99534
15.5935	10.743	11.2504	4.1484	6.0863	7.4152	6.3828	10.6472	5.2097	5.9535	8.1312	11.1475	10.5057	9.0112	9.4657	4.7641			0.867549	8.05746
15.7126	9.304	9.1478	2.724	5.0495	9.9021	3.9134	11.4088	6.4196	7.1332	9.4411	9.2358	13.4053	7.7163	6.1624	9.2579			0.874175	8.01475
15.8316	9.3617	10.4731	1.9599	5.5796	11.2594	7.7338	9.4568	7.0878	10.266	6.5424	10.1521	6.8552	11.7589	10.7435	10.1933			0.880796	8.62823
15.9506	5.4833	10.1115	3.0164	4.1382	7.0422	7.8356	8.9082	8.6753	7.9158	3.5347	7.9004	10.5992	10.5054	12.6211	11.2008			0.887416	7.96587
16.0697	5.7045	8.6277	3.2496	3.8492	6.7097	6.0044	8.9114	9.5584	8.7055	2.9176	10.0353	11.9693	12.8118	12.6424	9.8267			0.894043	8.10157
16.1887	8.8399	8.1349	2.4239	4.7967	8.8507	4.242	9.5681	7.7119	5.858	6.7393	10.8415	12.1628	9.0192	11.3099	14.8668			0.900663	8.35771
16.3077	6.9462	7.5059	1.4007	5.2279	7.2894	4.9116	9.3246	4.3289	8.8914	7.8846	9.9858	7.739	9.8249	9.2028	13.9325			0.907284	7.62641
16.4268	4.7084	6.2099	0.9067	4.1188	7.3885	9.2665	7.5371	7.1958	7.1205	11.4454	11.4774	10.2102	11.5559	9.2654	12.2213			0.91391	8.04185
16.5458	4.9494	4.8003	1.978	2.3903	7.7783	7.9637	8.299	5.3477	4.686	9.258	7.316	10.9196	16.8266	10.6493	11.018			0.920531	7.61201
16.6648	5.6233	8.8714	1.7767	5.9699	4.3844	7.1451	10.386	6.2271	7.9133	8.7788	11.6875	9.4512	14.7734	8.4919	13.6932			0.927151	8.34488
16.7839	5.6556	7.5134	4.1538	4.9944	5.2276	8.3483	7.384	6.9819	9.4747	9.7388	8.866	11.5949	15.3758	9.0806	12.5184			0.933777	8.46055
16.9029	5.4643	5.8408	1.0238	4.2802	4.8021	5.7068	7.5624	5.7824	3.8036	11.5043	7.6309	7.754	15.4431	9.7467	16.5442			0.940398	7.52597
17.0219	5.0995	2.5848	0.9514	3.8428	5.2792	4.0414	8.3425	1.7421	7.8848	7.6372	7.4232	7.0436	13.1638	9.4719	14.4145			0.947019	6.59485
17.141	3.2628	1.9976	1.0163	2.2691	4.3682	4.8446	7.0981	5.6411	7.7334	6.0976	7.0138	5.5709	16.9746	11.4903	10.1833			0.953645	6.37078
17.26	3.3331	0.8679	0.7498	2.6404	3.8881	3.6272	8.3146	6.893	11.1339	9.7388	7.9939	5.1445	13.4174	11.8818	8.7402			0.960265	6.55764
17.379	3.746	1.7962	0.0239	3.5142	0.8098	3.1301	5.9157	4.8599	6.8963	11.9831	9.8144	6.2422	15.5475	10.3811	10.5127			0.966886	6.34487
17.4981	2.4939	2.2233	1.2645	2.0147	2.2051	2.141	3.5406	3.4879	7.517	10.8447	8.6997	8.199	16.3246	10.2551	10.2696			0.973512	6.09871
17.6171	3.3066	0.9321	2.4804	0.8375	0.8401	2.1808	5.8411	4.657	8.7526	15.6599	7.331	8.7957	22.7528	9.3966	13.1788			0.980133	7.12953
17.7361	2.7603	1.6168	0.9306	1.4611	2.2908	2.3603	5.9125	4.7903	6.8311	9.3339	5.6351	6.958	14.3533	11.9142	12.1086			0.986753	5.95046
17.8552	1.9849	1.8193	0.0334	1.0612	2.4256	3.3774	3.3461	2.8543	6.8361	7.1018	7.4391	5.5256	10.6646	13.1545	9.7082			0.993379	5.15547
17.9742	2.3834	0.9674	0.9996	1.7056	1.5248	1.6477	1.9977	4.3381	6.7263	7.734	5.3029	7.5404	9.3892	12.7537	9.4173			1	4.96187

## Sheet: Sheet1
Image6				Image7				Image8				Image9				Image10				Image11				Image12				Distance	Image6	Image7	Image8	Image9	Image10	Image11	Image12
Ap-Ba	Average int			Ap-Ba	Average int			Ap-Ba	Average int			Ap-Ba	Average int			Ap-Ba	Av int			Ap-Ba	Av int			Ap-Ba	Av int			0	9.49049	10.5645	5.82144	3.57354	7.39722	7.08532	25.1649
0	9.49049			0	10.5645			0	5.82144			0	3.57354			0	7.39722			0	7.08532			0	25.1649			0.05	9.56763	9.71941	6.07041	4.08332	8.01971	6.9555	22.2807
0.0066206	9.43916			0.00526162	10.4173			0.00523408	5.8524			0.00724426	3.73856			0.00595065	7.24509			0.00549291	7.19557			0.00552327	22.642			0.1	10.7001	8.96435	6.57387	4.85997	10.1611	6.651	17.3892
0.0132468	9.89724			0.0105277	10.2654			0.0104726	5.8909			0.0144946	3.58709			0.0119063	8.27149			0.0109904	7.1664			0.0110512	23.2858			0.15	11.9235	10.0127	7.24411	5.67889	11.0596	6.79586	14.1452
0.0198674	9.37644			0.0157893	9.89619			0.0157066	6.18259			0.0217389	3.7184			0.017857	7.89379			0.0164833	6.66697			0.0165745	22.8178			0.2	11.4449	10.8703	7.82928	6.14463	10.4584	7.55666	13.0009
0.026488	9.25721			0.0210509	9.23359			0.0209407	6.0432			0.0289831	4.05864			0.0238076	8.27429			0.0219762	6.82206			0.0220977	22.6271			0.25	11.436	12.8909	7.12652	5.95942	9.61988	7.79679	13.2755
0.0331141	9.67684			0.026317	9.70047			0.0261792	6.66895			0.0362335	4.10426			0.0297633	8.29744			0.0274738	6.9845			0.0276256	22.0514			0.3	11.0327	12.8069	6.45997	5.56578	9.23221	8.15526	13.1311
0.0397347	9.63341			0.0315786	10.0248			0.0314133	5.68613			0.0434777	5.25417			0.0357139	7.48777			0.0329667	6.85563			0.0331489	23.5383			0.35	10.8261	12.7738	5.88294	6.35461	9.57613	7.65683	12.8906
0.0463553	9.65142			0.0368402	9.31735			0.0366474	6.48535			0.050722	4.63191	4.08332		0.0416646	7.84742			0.0384596	7.16282			0.0386722	22.6182			0.4	9.58632	10.8486	5.40488	6.04215	8.86792	6.97999	12.4813
0.0529815	9.68642	9.56763		0.0421062	8.99011			0.0418859	5.90283			0.0579723	4.74708			0.0476202	8.41198			0.0439571	7.498			0.0442001	20.2409			0.45	7.47203	9.96734	4.80333	6.41623	7.34396	6.79794	11.4448
0.0596021	9.51308			0.0473679	8.77274			0.0471199	5.88631			0.0652166	4.7572			0.0535709	9.07065	8.01971		0.04945	5.993			0.0497234	19.6825			0.5	7.55024	8.83115	5.17833	5.80831	8.05159	6.42462	11.1603
0.0662227	9.80491			0.0526295	9.73109	9.71941		0.052354	6.35437	6.07041		0.0724609	5.56131			0.0595215	9.51397			0.0549429	7.08024	6.9555		0.0552466	20.4188	22.2807		0.55	7.13413	9.43514	4.59576	5.55655	7.52841	5.95938	11.1969
0.0728489	9.63759			0.0578955	9.00319			0.0575925	6.79564			0.0797112	4.60512			0.0654772	9.91406			0.0604404	8.04529			0.0607746	21.4463			0.6	7.23121	7.48037	5.17455	5.06245	6.5922	6.31975	8.89785
0.0794695	10.2435			0.0631572	9.3348			0.0628266	7.13792			0.0869555	5.14846			0.0714279	9.89028			0.0659334	7.17545			0.0662978	17.027			0.65	7.09375	7.77315	5.01896	4.77181	6.59197	5.75839	9.74616
0.0860901	11.5219			0.0684188	8.82079			0.0680607	6.33156			0.0941997	4.55644			0.0773785	9.62248			0.0714263	7.00255			0.0718211	18.6837			0.7	6.97325	7.5901	4.61001	4.47334	6.72101	5.62723	8.13245
0.0927162	11.0168			0.0736848	8.87977			0.0732991	6.52537			0.10145	4.64416	4.85997		0.0833342	9.70025			0.0769238	6.91541			0.077349	17.7219			0.75	7.44315	6.89549	4.63083	4.88011	6.2096	5.59278	7.61409
0.0993368	11.388			0.0789464	8.67196			0.0785332	6.37773			0.108694	5.32286			0.0892848	10.2106			0.0824167	6.10452			0.0828723	17.2914			0.8	7.08816	8.33232	5.60233	4.80496	6.52389	5.18246	7.03336
0.105963	12.4749	10.7001		0.0842125	8.89865			0.0837717	6.07723			0.115945	5.20531			0.0952405	10.867			0.0879142	6.23987			0.0884002	17.0404			0.85	7.67596	8.80686	6.28415	4.52329	6.07856	4.89968	6.49412
0.112584	11.7385			0.0894741	8.87668			0.0890058	6.1219			0.123189	5.46927			0.101191	11.5703	10.1611		0.0934071	6.29995			0.0939235	17.177			0.9	8.16013	8.38209	5.34957	5.09872	6.52603	5.38872	7.15682
0.119204	12.2992			0.0947357	9.48567			0.0942399	7.08448			0.130433	5.60761			0.107142	11.6347			0.0989	5.70668			0.0994467	15.4969			0.95	7.57216	6.91771	4.10655	4.17817	7.44634	4.76394	5.70179
0.12583	12.4115			0.100002	8.70767	8.96435		0.0994784	6.76065			0.137684	5.64487			0.113097	11.2405			0.104398	6.3693	6.651		0.104975	14.6179	17.3892		1	6.02837	5.15196	2.0769	2.10253	6.27601	2.17754	4.84581
0.132451	12.0129			0.105263	9.35917			0.104712	6.52617	6.57387		0.144928	5.93461			0.119048	11.1389			0.10989	6.61648			0.110498	15.5307
0.139072	11.766			0.110525	9.3848			0.109947	7.37953			0.152172	6.56767	5.67889		0.124999	11.1385			0.115383	6.64725			0.116021	14.557
0.145698	11.622			0.115791	9.6624			0.115185	6.8145			0.159422	6.15324			0.130954	10.7639			0.120881	7.09088			0.121549	14.9918
0.152318	11.6142	11.9235		0.121053	9.82155			0.120419	6.66514			0.166667	5.95273			0.136905	11.8808			0.126374	7.00478			0.127072	13.7431
0.158939	10.1922			0.126314	10.5832			0.125653	7.20563			0.173911	6.0214			0.142856	11.1988			0.131867	6.17135			0.132596	14.3093
0.165565	11.4552			0.13158	10.8843			0.130892	7.38297			0.181161	5.96755			0.148811	10.5855			0.137364	7.53576			0.138124	13.4205
0.172186	11.7108			0.136842	10.2966			0.136126	7.26598			0.188406	6.23702			0.154762	9.95462	11.0596		0.142857	7.24985			0.143647	13.0044
0.178806	11.4917			0.142104	9.47767			0.14136	7.49313			0.19565	6.32053			0.160713	10.3717			0.14835	6.79573			0.14917	13.8382
0.185432	12.1329			0.14737	10.2831			0.146598	7.55804			0.2029	6.35992	6.14463		0.166668	10.8841			0.153848	6.05067	6.79586		0.154698	13.9114	14.1452
0.192053	12.3999			0.152631	10.3743	10.0127		0.151832	7.43207	7.24411		0.210144	5.87546			0.172619	10.1015			0.15934	6.68591			0.160221	14.3477
0.198674	11.6979			0.157893	10.2275			0.157066	7.48006			0.217389	6.41983			0.17857	10.8927			0.164833	7.05915			0.165745	13.3757
0.2053	10.4789	11.4449		0.163159	10.5544			0.162305	8.59236			0.224639	5.59995			0.184525	10.4534			0.170331	7.27231			0.171272	13.7389
0.21192	11.5432			0.168421	9.78345			0.167539	8.2356			0.231883	5.78699			0.190476	10.1431			0.175824	7.37754			0.176796	12.1073
0.218541	11.3597			0.173682	10.2944			0.172773	7.87507			0.239128	6.1687			0.196427	10.3517			0.181317	8.13523			0.182319	13.0807
0.225167	11.4087			0.178948	10.4627			0.178012	7.76555			0.246378	5.36875			0.202382	10.4689	10.4584		0.186814	7.29204			0.187847	13.1586
0.231788	12.5891			0.18421	11.3385			0.183246	7.51487			0.253622	6.49627	5.95942		0.208333	10.662			0.192307	8.26522			0.19337	11.8374
0.238408	11.0826			0.189471	11.6084			0.18848	7.58725			0.260866	5.54008			0.214284	9.30351			0.1978	8.21234			0.198893	13.9867
0.245035	11.0944			0.194737	11.3528			0.193718	7.86851			0.268117	5.42716			0.220239	9.71741			0.203298	7.71021	7.55666		0.204421	11.3749	13.0009
0.251655	10.9742	11.436		0.199999	11.4839			0.198952	7.37937			0.275361	6.15217			0.22619	9.49148			0.20879	8.18996			0.209945	12.5508
0.258276	11.2757			0.205261	11.5968	10.8703		0.204186	7.99411	7.82928		0.282605	5.68752			0.232141	9.32151			0.214283	7.82129			0.215468	12.8119
0.264902	11.7284			0.210527	12.3346			0.209425	7.88843			0.289856	5.19528			0.238096	9.21495			0.219781	6.95828			0.220996	12.4288
0.271523	12.0645			0.215788	13.1705			0.214659	7.54328			0.2971	5.67439			0.244047	9.78066			0.225274	8.16072			0.226519	13.1716
0.278149	10.2262			0.221054	13.2218			0.219897	7.10626			0.30435	5.28383	5.56578		0.250003	9.46758	9.61988		0.230771	8.34732			0.232047	13.2834
0.284769	10.7687			0.226316	13.4913			0.225132	7.5996			0.311594	5.83184			0.255953	9.6744			0.236264	7.72358			0.23757	13.4744
0.29139	10.6184			0.231578	12.8162			0.230366	7.22381			0.318839	6.39232			0.261904	8.73243			0.241757	7.844			0.243094	13.211
0.298016	11.0553			0.236844	12.9573			0.235604	7.24864			0.326089	6.6109			0.267859	8.79906			0.247255	7.72895			0.248622	14.387
0.304637	10.5241	11.0327		0.242105	12.2724			0.240838	6.61836			0.333333	6.00104			0.27381	9.82702			0.252748	7.39699	7.79679		0.254145	14.1606	13.2755
0.311257	10.8838			0.247367	12.7808			0.246072	6.49395			0.340578	6.6584			0.279761	9.61689			0.258241	7.36018			0.259668	13.4358
0.317883	11.0463			0.252633	12.9731	12.8909		0.251311	6.41634	7.12652		0.347828	6.57373			0.285716	8.71351			0.263738	8.49212			0.265196	14.6256
0.324504	11.9211			0.257895	12.7605			0.256545	7.28599			0.355072	6.41405	6.35461		0.291667	9.56241			0.269231	9.56309			0.270719	12.6523
0.331125	10.471			0.263156	12.7665			0.261779	6.59127			0.362316	6.28983			0.297618	9.74754			0.274724	8.70073			0.276243	11.8405
0.337751	10.6685			0.268422	13.646			0.267017	6.61927			0.369567	6.7105			0.303573	8.41662	9.23221		0.280221	8.33884			0.28177	12.5491
0.344371	10.1766			0.273684	14.0851			0.272251	6.09697			0.376811	5.68555			0.309524	9.18651			0.285714	7.48942			0.287294	14.0008
0.350992	10.6152	10.8261		0.278946	13.2307			0.277486	6.60938			0.384055	5.62626			0.315475	8.32522			0.291207	7.5593			0.292817	14.2817
0.357618	10.2304			0.284212	11.6299			0.282724	6.76556			0.391306	6.68105			0.32143	9.45367			0.296705	7.71865			0.298345	12.7151
0.364239	10.4575			0.289473	12.4009			0.287958	6.3361			0.39855	5.56192			0.327381	9.35249			0.302198	8.175	8.15526		0.303868	12.0794	13.1311
0.370859	9.59619			0.294735	12.3826			0.293192	6.61794			0.405794	5.73993	6.04215		0.333332	9.98991			0.307691	7.61922			0.309391	13.5678
0.377486	9.76712			0.300001	12.6519			0.298431	6.00768			0.413045	5.95677			0.339287	10.5453			0.313188	8.17597			0.314919	12.9451
0.384106	9.35492			0.305263	12.5151	12.8069		0.303665	5.66953	6.45997		0.420289	6.48953			0.345238	10.3325			0.318681	8.23985			0.320443	12.5588
0.390727	9.12342			0.310524	13.6086			0.308899	6.28702			0.427533	6.08069			0.351189	9.42339	9.57613		0.324174	7.59096			0.325966	12.5125
0.397353	8.83477			0.31579	12.7276			0.314137	6.33206			0.434783	6.98159			0.357144	9.44464			0.329671	7.25135			0.331494	11.7578
0.403973	9.32623	9.58632		0.321052	12.1392			0.319371	5.83696			0.442028	6.00538			0.363095	9.12608			0.335164	7.92012			0.337017	12.9988
0.410594	8.28998			0.326313	13.1183			0.324605	6.03981			0.449272	6.88392			0.369046	9.3455			0.340657	7.23123			0.34254	13.0407
0.41722	7.79873			0.331579	12.8414			0.329844	5.60465			0.456522	6.51575	6.41623		0.375001	8.72298			0.346155	7.34354			0.348068	14.1648
0.423841	7.01406			0.336841	12.8261			0.335078	5.70312			0.463767	6.01395			0.380952	9.04608			0.351648	7.53924	7.65683		0.353592	12.4691	12.8906
0.430461	6.91987			0.342103	12.8195			0.340312	5.87633			0.471011	5.84908			0.386903	8.95692			0.357141	6.46348			0.359115	13.7297
0.437088	7.25327			0.347369	12.4768			0.345551	5.71742			0.478261	5.54787			0.392858	8.57957			0.362638	7.81997			0.364643	12.9568
0.443708	7.80671			0.35263	12.4067	12.7738		0.350785	5.5491	5.88294		0.485505	5.66516			0.398809	8.51949			0.368131	7.23834			0.370166	11.8592
0.450329	7.22157	7.47203		0.357892	12.8883			0.356019	5.73307			0.49275	5.71849			0.40476	8.07004	8.86792		0.373624	6.74659			0.375689	13.1681
0.456955	7.32573			0.363158	11.1178			0.361257	5.63727			0.5	6.05531	5.80831		0.410715	7.53561			0.379121	6.23742			0.381217	12.9634
0.463576	7.51476			0.36842	9.97415			0.366491	5.44279			0.507244	5.87577			0.416666	7.32851			0.384614	6.75581			0.38674	12.258
0.470202	7.18272			0.373686	9.95495			0.37173	5.27364			0.514495	6.10817			0.422621	7.08212			0.390112	7.37622			0.392268	11.2264
0.476822	8.35392			0.378947	10.1912			0.376964	5.29235			0.521739	5.3077			0.428572	6.76384			0.395605	7.18751			0.397792	12.681
0.483443	8.10865			0.384209	10.7416			0.382198	5.37887			0.528983	5.2883			0.434523	6.65174			0.401098	6.99458	6.97999		0.403315	11.4886	12.4813
0.490069	7.81229			0.389475	11.1392			0.387436	5.72955			0.536233	5.75097			0.440478	7.47849			0.406595	6.91943			0.408843	11.564
0.49669	7.58019			0.394737	11.1977			0.392671	5.3612			0.543478	4.97197			0.446429	7.62942			0.412088	6.76288			0.414366	12.3721
0.50331	6.52363	7.55024		0.399998	10.8355			0.397905	5.07808			0.550722	5.59295	5.55655		0.45238	8.28196	7.34396		0.417581	6.76475			0.419889	11.7046
0.509936	7.02001			0.405264	10.4454	10.8486		0.403143	5.122	5.40488		0.557972	4.82171			0.458335	7.78889			0.423079	6.36123			0.425417	11.1428
0.516557	7.09874			0.410526	10.4869			0.408377	4.76929			0.565217	5.54776			0.464286	8.13747			0.428571	6.67853			0.430941	11.1571
0.523178	7.12119			0.415788	10.5615			0.413611	4.79942			0.572461	4.96346			0.470237	8.52641			0.434064	6.45043			0.436464	11.1855
0.529804	6.67921			0.421054	10.0605			0.41885	4.80828			0.579711	5.03205			0.476192	7.80009			0.439562	6.79215			0.441992	12.2197
0.536424	6.93128			0.426315	9.81301			0.424084	4.5384			0.586955	4.9408			0.482143	8.02318			0.445055	7.67276			0.447515	10.3832
0.543045	7.11503			0.431577	9.21858			0.429318	5.13369			0.5942	5.18196			0.488094	8.71219			0.450548	6.77931	6.79794		0.453038	11.2743	11.4448
0.549671	8.04027			0.436843	10.2081			0.434556	4.73047			0.60145	4.9494	5.06245		0.494049	7.81854			0.456045	6.65126			0.458566	12.4769
0.556292	7.06729	7.13413		0.442104	9.86086			0.43979	4.35949			0.608694	5.06152			0.5	7.60593	8.05159		0.461538	6.90211			0.464089	11.3067
0.562912	7.34809			0.447366	9.85313			0.445025	4.85644			0.615939	4.08783			0.505951	7.04598			0.467031	5.77817			0.469613	11.2694
0.569539	7.86849			0.452632	10.0114			0.450263	5.2345	4.80333		0.623189	4.95657			0.511906	7.60809			0.472529	6.18705			0.475141	11.5971
0.576159	7.0451			0.457894	9.59927	9.96734		0.455497	4.92162			0.630433	5.18951			0.517857	8.13098			0.478021	6.86083			0.480664	10.5706
0.58278	7.56651			0.463155	9.16673			0.460731	4.82577			0.637677	4.55233			0.523808	7.77911			0.483514	5.91848			0.486187	10.8348
0.589406	7.22487			0.468421	8.97883			0.46597	4.81734			0.644928	4.36911			0.529763	7.17256			0.489012	7.1554			0.491715	10.8698
0.596027	6.36281			0.473683	9.48695			0.471204	5.18389			0.652172	5.18582	4.77181		0.535714	7.57641			0.494505	6.08673			0.497238	10.5018
0.602647	7.20256	7.23121		0.478945	9.60839			0.476438	5.0701			0.659416	5.13301			0.541665	7.11397			0.499998	6.13341			0.502762	11.0156	11.1603
0.609273	7.36457			0.484211	9.6821			0.481676	5.08792			0.666667	3.80325			0.54762	7.77724			0.505495	6.57273	6.42462		0.50829	10.7631
0.615894	7.25625			0.489472	7.79608			0.48691	5.1425			0.673911	4.93966			0.553571	7.55136	7.52841		0.510988	5.50857			0.513813	11.4113
0.622514	6.64546			0.494734	7.84747			0.492144	5.30542			0.681155	3.86843			0.559522	6.87781			0.516481	5.52576			0.519336	11.6922
0.629141	6.70135			0.5	8.43609			0.497383	5.77833			0.688406	4.6973			0.565477	7.07261			0.521979	6.77303			0.524864	10.4248
0.635761	7.5856			0.505262	8.69832			0.502617	5.6504	5.17833		0.69565	4.0983			0.571428	6.72341			0.527471	5.71741			0.530387	11.7103
0.642382	7.10409			0.510523	8.61057	8.83115		0.507851	4.80196			0.702894	4.77343	4.47334		0.577379	7.04372			0.532964	6.18015			0.535911	11.3429
0.649008	6.49909			0.515789	8.43189			0.51309	4.79132			0.710144	4.41926			0.583334	7.29521			0.538462	6.08335			0.541438	10.8629
0.655629	7.59355	7.09375		0.521051	8.34055			0.518324	4.37475			0.717389	4.46334			0.589285	5.62446			0.543955	5.82277			0.546962	11.1919
0.662255	7.28301			0.526317	9.70001			0.523562	4.20857			0.724639	4.93778			0.59524	5.81515			0.549452	5.78687			0.55249	11.3729	11.1969
0.668875	6.57243			0.531579	10.2302			0.528796	4.67768			0.731883	4.97567			0.601191	6.28524	6.5922		0.554945	6.23653	5.95938		0.558013	10.4053
0.675496	6.80046			0.53684	9.69636			0.53403	4.84845			0.739128	5.37156			0.607142	7.6453			0.560438	5.14875			0.563536	9.22046
0.682122	7.26076			0.542106	9.7767			0.539269	5.20179			0.746378	4.80253			0.613097	6.76282			0.565936	6.71475			0.569064	9.53002
0.688743	7.32171			0.547368	9.50161			0.544503	4.11282			0.753622	5.19061	4.88011		0.619048	5.85179			0.571429	6.2878			0.574587	8.95228
0.695363	6.71123			0.552629	9.80383	9.43514		0.549737	4.34449	4.59576		0.760866	4.4014			0.624999	5.59124			0.576921	6.48389			0.580111	7.58503
0.70199	6.86313	6.97325		0.557896	7.73328			0.554975	4.87425			0.768117	4.83261			0.630954	6.50476			0.582419	6.2607			0.585639	8.04391
0.70861	7.20229			0.563157	8.4371			0.56021	5.26839			0.775361	5.08504			0.636905	6.92145			0.587912	6.60577			0.591162	8.4843
0.715231	7.5317			0.568419	8.87899			0.565444	4.82383			0.782605	4.90528			0.642856	6.59308			0.593405	6.65511			0.596685	8.62633
0.721857	8.02101			0.573685	7.67579			0.570682	5.32526			0.789856	5.23451			0.648811	6.71549			0.598902	6.95388			0.602213	9.23306	8.89785
0.728477	7.84646			0.578946	7.57533			0.575916	5.74021			0.7971	4.50673			0.654762	6.74181	6.59197		0.604395	5.76715	6.31975		0.607736	9.90658
0.735098	8.16727			0.584208	7.08252			0.58115	5.27704			0.804344	4.66917	4.80496		0.660713	6.12606			0.609888	6.69412			0.61326	8.72156
0.741724	7.79604			0.589474	7.29678			0.586389	5.47062			0.811594	4.28253			0.666668	7.30996			0.615386	5.92815			0.618787	8.93599
0.748345	6.19299			0.594736	6.75207			0.591623	5.38346			0.818839	4.76652			0.672619	6.96495			0.620879	5.88432			0.624311	10.0732
0.754965	6.78743	7.44315		0.599997	6.47739			0.596857	4.78138			0.826083	4.33062			0.67857	6.97878			0.626371	5.95016			0.629834	10.3176
0.761592	7.22561			0.605263	6.89443	7.48037		0.602095	4.80108	5.17455		0.833333	4.81277			0.684525	7.2524			0.631869	5.36818			0.635362	10.3768
0.768212	6.64787			0.610525	6.86097			0.607329	4.89242			0.840578	4.69378			0.690476	6.26033			0.637362	5.23641			0.640885	9.86464
0.774833	6.80015			0.615787	7.21413			0.612564	4.48413			0.847822	4.34803			0.696427	6.98212			0.642855	5.76133			0.646408	9.76068
0.781459	7.00605			0.621053	8.20008			0.617802	5.13969			0.855072	4.42878	4.52329		0.702382	5.89346	6.72101		0.648352	5.42494			0.651936	9.75837	9.74616
0.78808	6.56494			0.626314	8.11801			0.623036	4.76208			0.862316	4.5997			0.708333	5.46475			0.653845	5.5779	5.75839		0.65746	9.64772
0.7947	7.73428			0.631576	7.49683			0.62827	5.06054			0.869561	4.80637			0.714284	6.26192			0.659338	5.63729			0.662983	8.16169
0.801326	7.63823	7.08816		0.636842	7.47781			0.633509	5.28327			0.876811	5.16322			0.720239	5.79256			0.664836	5.47717			0.668511	8.19323
0.807947	7.32943			0.642104	8.54885			0.638743	4.991			0.884055	5.06621			0.72619	6.5704			0.670329	6.26307			0.674034	7.69628
0.814568	7.28297			0.647365	7.96969			0.643977	5.53948			0.8913	5.77589			0.732141	6.28439			0.675822	5.23545			0.679557	8.09357
0.821194	7.40338			0.652631	8.07199	7.77315		0.649215	5.14081			0.89855	5.0168			0.738096	6.51778			0.681319	5.72207			0.685085	7.49503
0.827814	7.21907			0.657893	8.31151			0.654449	4.89613	5.01896		0.905794	5.26286	5.09872		0.744047	6.12196			0.686812	6.03673			0.690609	8.24709
0.83444	6.62179			0.663159	7.54522			0.659688	4.88311			0.913045	5.13742			0.750003	6.66301	6.2096		0.692309	5.37872			0.696136	7.88186
0.841061	8.11835			0.668421	7.70725			0.664922	5.22006			0.920289	5.17765			0.755953	7.23512			0.697802	5.5308			0.70166	7.77563	8.13245
0.847682	8.91195			0.673682	7.65217			0.670156	4.28313			0.927533	4.83132			0.761904	6.8045			0.703295	5.36379	5.62723		0.707183	7.32026
0.854308	8.52071	7.67596		0.678948	7.5568			0.675395	4.11345			0.934783	3.69238			0.767859	6.40632			0.708793	5.32626			0.712711	7.31971
0.860928	7.99534			0.68421	7.2552			0.680629	3.89037			0.942028	4.05139			0.77381	6.95474			0.714286	5.6924			0.718234	7.17846
0.867549	8.05746			0.689471	7.32552			0.685863	4.53432			0.949272	3.64359			0.779761	6.25434			0.719779	5.45628			0.723757	7.82818
0.874175	8.01475			0.694737	7.68763			0.691101	4.52969			0.956522	2.71344	4.17817		0.785716	6.46864			0.725276	5.64654			0.729285	7.88658
0.880796	8.62823			0.699999	7.84439			0.696335	5.20604			0.963767	2.70373			0.791667	6.85049			0.730769	5.36541			0.734809	8.42953
0.887416	7.96587			0.705261	7.01528	7.5901		0.701569	4.8299	4.61001		0.971011	2.58469			0.797618	6.15696			0.736262	5.71018			0.740332	7.80212
0.894043	8.10157			0.710527	6.27973			0.706808	4.76158			0.978261	2.33849			0.803573	5.58386	6.52389		0.741759	5.85178			0.74586	7.79619
0.900663	8.35771	8.16013		0.715788	6.29053			0.712042	5.15529			0.985505	1.87303			0.809524	6.10145			0.747252	6.05687			0.751383	6.96579	7.61409
0.907284	7.62641			0.72105	7.11127			0.717276	4.29627			0.99275	1.49263			0.815475	5.86737			0.752745	5.22928	5.59278		0.756906	7.58901
0.91391	8.04185			0.726316	6.53814			0.722514	4.10932			1	1.6226	2.10253		0.82143	6.26976			0.758243	5.55511			0.762434	8.45251
0.920531	7.61201			0.731578	6.41265			0.727749	3.94115							0.827381	6.56914			0.763736	5.96788			0.767958	6.81159
0.927151	8.34488			0.736839	6.74739			0.732983	4.53527							0.833332	5.56432			0.769229	5.01438			0.773481	6.85956
0.933777	8.46055			0.742105	7.31292			0.738221	4.36418							0.839287	6.10916			0.774726	5.80508			0.779009	6.61934
0.940398	7.52597			0.747367	8.14111			0.743455	4.66277							0.845238	6.0368			0.780219	5.05801			0.784532	6.67621
0.947019	6.59485			0.752629	7.22571	6.89549		0.748689	5.14783							0.851189	6.11047	6.07856		0.785712	4.48655			0.790055	7.07988
0.953645	6.37078	7.57216		0.757895	7.87889			0.753928	5.33464	4.63083						0.857144	5.83397			0.79121	4.9409			0.795583	6.88049
0.960265	6.55764			0.763156	7.14275			0.759162	5.13757							0.863095	6.66514			0.796702	5.11413			0.801107	6.33166	7.03336
0.966886	6.34487			0.768418	8.15741			0.764396	5.60657							0.869046	5.58056			0.802195	4.70009	5.18246		0.80663	6.97254
0.973512	6.09871			0.773684	7.83573			0.769634	5.17495							0.875001	6.36594			0.807693	5.10342			0.812158	6.49031
0.980133	7.12953			0.778946	8.63876			0.774868	5.26464							0.880952	6.25724			0.813186	4.76396			0.817681	6.18029
0.986753	5.95046			0.784207	8.11618			0.780103	6.37165							0.886903	7.03166			0.818679	4.51953			0.823204	6.38155
0.993379	5.15547			0.789473	8.59849			0.785341	5.46556							0.892858	6.91969			0.824176	4.50119			0.828732	6.39092
1	4.96187	6.02837		0.794735	8.91654			0.790575	5.77209							0.898809	6.58288			0.829669	4.76556			0.834255	6.75304
				0.799996	9.27887			0.795809	5.47624							0.90476	7.49716	6.52603		0.835162	4.87402			0.839779	6.39233
				0.805263	8.75961	8.33232		0.801048	6.15169	5.60233						0.910715	6.81467			0.84066	5.00843			0.845307	5.77609
				0.810524	9.14589			0.806282	6.33346							0.916666	7.12022			0.846152	5.12081			0.85083	7.10999	6.49412
				0.81579	8.86706			0.81152	6.76209							0.922621	7.10496			0.85165	5.44017	4.89968		0.856358	7.15915
				0.821052	8.6702			0.816754	6.72157							0.928572	7.69265			0.857143	5.41343			0.861881	6.87651
				0.826313	9.1104			0.821988	6.64952							0.934523	7.76876			0.862636	5.01105			0.867404	7.13401
				0.831579	8.04039			0.827227	6.80695							0.940478	7.21974			0.868133	5.75349			0.872932	7.08352
				0.836841	8.35987			0.832461	6.47617							0.946429	8.19001			0.873626	5.41047			0.878456	7.01597
				0.842103	9.12317			0.837695	5.78286							0.95238	7.65969	7.44634		0.879119	5.45738			0.883979	6.96762
				0.847369	8.80224			0.842934	5.5478							0.958335	6.48703			0.884617	5.22588			0.889507	6.94703
				0.85263	9.14252	8.80686		0.848168	6.10931							0.964286	6.12332			0.89011	5.01315			0.89503	7.88593
				0.857892	9.16225			0.853402	5.65175	6.28415						0.970237	6.33185			0.895602	4.99493			0.900553	7.34166	7.15682
				0.863158	8.64236			0.85864	5.20592							0.976192	6.58807			0.9011	6.21866	5.38872		0.906081	6.19714
				0.86842	9.06347			0.863874	5.5775							0.982143	6.14301			0.906593	5.62407			0.911604	5.65473
				0.873681	8.70873			0.869108	5.93036							0.988094	6.29464			0.912086	5.47066			0.917128	5.76615
				0.878947	9.00213			0.874347	5.47054							0.994049	6.42881			0.917583	4.99965			0.922656	5.2079
				0.884209	8.30295			0.879581	4.9745							1	5.81133	6.27601		0.923076	4.27294			0.928179	5.71831
				0.889471	7.78199			0.884815	5.77685											0.928569	5.10116			0.933702	6.15831
				0.894737	8.52538			0.890053	5.34705											0.934067	5.24373			0.93923	5.48411
				0.899998	7.56926			0.895288	5.23139											0.93956	4.45295			0.944753	5.48729
				0.90526	7.06235	8.38209		0.900522	4.63205	5.34957										0.945052	3.90932			0.950277	5.64216	5.70179
				0.910526	7.51361			0.90576	5.16661											0.95055	3.80101	4.76394		0.955805	5.36282
				0.915788	7.37805			0.910994	4.61182											0.956043	3.33304			0.961328	4.77193
				0.921049	7.14229			0.916228	4.65386											0.961536	2.58402			0.966851	5.49114
				0.926315	6.77553			0.921467	4.38519											0.967033	3.02931			0.972379	5.20281
				0.931577	7.28851			0.926701	4.21307											0.972526	2.89163			0.977902	4.41809
				0.936838	6.69538			0.931935	4.53774											0.978019	1.83437			0.983426	4.59651
				0.942104	7.08279			0.937173	4.00687											0.983517	1.71742			0.988953	4.93463
				0.947366	6.79119			0.942408	3.21107											0.98901	1.91807			0.994477	4.69471
				0.952628	5.59209	6.91771		0.947642	3.24574											0.994502	1.18754			1	4.13964	4.84581
				0.957894	5.59071			0.95288	3.03351	4.10655										1	1.10249	2.17754
				0.963155	5.99642			0.958114	2.82151
				0.968421	5.4119			0.963353	3.1961
				0.973683	5.28623			0.968587	2.24155
				0.978945	5.50891			0.973821	1.84084
				0.984211	4.91567			0.979059	2.27782
				0.989472	5.06061			0.984293	2.0619
				0.994734	4.24154			0.989527	1.62083
				1	4.35567	5.15196		0.994766	1.28486
								1	1.3467	2.0769
