# Supplementary material for: Crumbs organizes the transport machinery by regulating apical levels of PI(4,5)P2 in Drosophila
Source: eLife. 2019 Nov 7;8:e50900. doi: 10.7554/eLife.50900 (PMC6881148; doi:10.7554/eLife.50900)
Supplement: Figure 1—source data 3. [file elife-50900-fig1-data3.xlsx]

## Sheet: Image9
X0	Y0	Y1	Y2	Y3	Y4	Y5	Y6	Y7	Y8	Y9	Y10	Y11	Y12	Y13	Y14	Y15	Y16	Y17	Y18	Y19	Y20	Y21			Ap-Ba	Av int
0	57.6382	102.077	110.99	110.588	135.919	121.486	125.504	104.383	102.035	108.345	110.257	113.338	112.041	121.543	142.551	140.751	113.832	104.028	138.456	125.741	146.926	123.458			0	116.904
0.119	61.1914	90.9806	98.291	112.764	97.001	117.762	109.064	90.806	97.258	97.319	96.888	107.445	107.982	123.938	127.752	126.76	119.365	104.039	136.413	122.63	141.38	135.09			0.00719216	110.096
0.2381	69.0944	87.3011	87.512	98.424	95.431	112.065	100.757	91.93	80.051	86.558	97.738	120.65	101.588	134.826	141.329	127.867	112.797	101.856	143.862	125.498	157.112	139.304			0.0143904	109.707
0.3571	61.8417	102.249	81.728	101.711	94.026	109.426	109.475	82.569	74.313	88.966	79.233	104.514	110.34	141.139	156.517	125.025	129.783	124.746	155.164	122.025	152.162	141.889			0.0215825	111.311
0.4761	55.9201	78.525	80.655	119.896	91.512	109.303	110.079	97.635	72.239	87.729	81.568	115.488	111.051	155.273	171.775	118.942	130.21	123.198	145.748	126.736	147.374	140.429			0.0287747	112.331
0.5952	72.6323	67.879	86.754	154.916	124.386	113.453	117.863	103.187	63.923	101.369	79.889	126.243	115.859	168.372	177.598	130.672	148.719	127.91	158.081	136.373	170.484	122.897			0.0359729	121.339
0.7142	72.9311	73.803	104.389	150.031	127.883	143.667	124.75	105.121	75.691	82.092	77.842	145.11	133.509	184.949	173.351	131.414	149.756	127.255	178.599	144.432	164.848	120.574			0.043165	126.909
0.8332	73.6592	64.3732	113.303	140.065	147.622	147.529	146.334	109.257	84.754	68.013	89.453	164.372	142.015	184.456	166.497	142.728	163.07	144.864	188.173	120.594	182.348	136.714			0.0503572	132.736
0.9523	71.6208	59.8777	114.589	138.257	139.805	151.787	163.491	109.822	80.534	77.394	73.191	175.612	151.49	191.733	192.81	138.448	159.777	146.901	178.862	140.133	170.319	144.735			0.0575554	135.054
1.0713	64.7479	63.286	109.953	127.658	139.358	153.581	160.999	107.774	85.288	71.521	80.592	172.858	168.645	187.949	184.423	136.772	169.408	154.553	175.274	122.542	173.089	136.125			0.0647475	133.927
1.1903	70.103	73.8087	117.233	120.258	146.471	164.789	177.666	119.189	83.209	71.124	81.758	189.116	172.929	181.8	211.75	135.151	170.032	164.186	179.247	107.321	170.299	134.743			0.0719397	138.281
1.3094	64.5053	64.7354	119.937	117.491	134.101	186.679	167.686	116.597	89.601	74.473	89.886	176.114	170.76	198.72	205.011	136.569	166.562	172.082	178.998	106.947	165.323	148.547			0.0791379	138.697
1.4284	60.3271	63.7597	113.976	128.773	133.16	165.937	150.551	111.668	89.888	78.247	77.259	177.024	176.8	191.595	197.735	148.001	172.195	178.509	184.303	111.495	134.547	142.201			0.0863301	135.816
1.5474	53.9937	53.7557	131.137	127.674	140.088	184.893	138.73	133.337	92.52	65.865	79.558	196.858	190.303	194.594	202.855	140.509	180.228	176.074	183.916	120.531	126.237	153.878			0.0935222	139.433
1.6665	55.4949	50.266	116.489	120.535	133.273	190.375	142.212	147.417	87.368	71.697	78.819	179.173	191.498	178.064	198.399	140.223	186.457	179.666	182.653	110.519	122.861	144.49			0.10072	136.725
1.7855	50.8172	48.943	111.61	109.419	117.897	177.377	138.331	142.898	101.608	67.736	67.387	159.471	183.174	190.646	193.158	141.525	182.142	180.786	184.345	99.608	110.996	152.795			0.107913	132.394
1.9046	45.178	45.4068	111.709	103.174	124.074	182.015	134.648	136.413	105.089	61.05	68.861	177.269	171.701	184.883	183.435	141.542	175.777	159.549	178.529	76.782	91.503	126.245			0.115111	126.583
2.0236	53.8805	35.6833	91.943	121.622	127.293	182.923	149.486	131.854	96.36	65.059	69.566	180.178	178.237	172.944	177.266	125.097	168.091	172.889	186.68	73.112	75.375	123.74			0.122303	125.422
2.1426	56.6914	26.7166	76.697	133.638	114.035	182.937	153.676	133.071	78.649	66.927	68.976	194.569	179.097	188.057	187.155	127.005	172.298	185.966	172.825	69.373	62.812	125.858			0.129495	125.319
2.2617	39.333	27.8947	81.265	120.594	120.198	187.309	160.971	128.034	76.664	50.321	54.593	183.433	165.066	175.782	198.098	134.853	167.263	168.027	168.519	51.701	66.178	128.264			0.136693	120.653
2.3807	39.0236	29.9008	74.713	131.805	119.145	185.396	176.942	131.989	84.119	59.59	63.249	189.803	173.68	173.772	187.891	131.834	160.979	168.94	167.292	63.676	50.944	125.804			0.143885	122.295
2.4997	44.0458	32.7304	73.839	119.707	124.973	181.022	177.747	139.681	77.369	49.567	56.973	185.203	182.2	180.441	194.792	139.319	173.985	160.241	170.655	67.638	57.332	121.159			0.151078	123.21
2.6188	37.3694	24.843	67.494	112.681	122.456	189.513	170.463	141.415	64.711	51.47	70.225	166.726	173.788	168.105	187.478	141.043	181.169	156.439	168.215	60.867	41.823	107.698			0.158276	118.454
2.7378	34.5776	26.0823	46.762	122.01	117.107	197.01	170.258	127.743	76.294	49.524	67.749	159.412	177.894	160.185	193.061	151.737	185.992	156.307	174.445	66.398	45.684	99.286			0.165468	118.433
2.8568	31.139	26.643	40.873	89.092	105.92	184.715	165.819	136.968	63.116	49.558	69.375	176.945	161.24	171.917	206.798	149.269	199.93	155.724	182.596	57.796	38.96	105.468			0.17266	116.812
2.9759	30.6426	21.0513	34.208	79.745	102.73	176.731	175.578	146.269	56.891	44.912	58.454	172.619	163.206	158.164	193.345	166.402	204.715	151.256	173.32	59.386	42.063	100.792			0.179858	114.204
3.0949	26.4229	26.5131	35.684	77.251	116.765	172.477	175.71	138.96	55.647	49.957	52.726	148.435	159.134	155.035	198.737	179.521	210.029	126.779	166.103	61.927	41.38	89.509			0.18705	112.032
3.2139	23.0024	23.2021	39.687	68.42	105.063	181.555	196.274	135.551	60.096	41.232	47.966	146.643	152.195	152.399	188.321	183.363	198.548	125.992	147.844	63.453	52.59	78.35			0.194243	109.625
3.333	28.7005	26.7485	38.09	59.636	104.18	162.339	165.085	129.775	56.512	33.894	42.661	133.404	160.551	148.651	177.843	176.538	186.271	123.624	130.639	67.837	58.993	76.103			0.201441	104.003
3.452	24.1724	24.5234	53.806	72.932	118.242	162.07	156.711	117.297	46.576	33.46	40.543	128.566	169.777	152.797	167.514	173.638	187.462	99.222	136.284	70.348	48	54.739			0.208633	101.758
3.571	28.469	22.334	49.073	69.185	107.557	163.936	150.501	106.113	42.737	31.557	32.299	124.231	154.703	151.692	179.035	190.571	175.498	95.537	129.423	57.608	48.105	67.942			0.215825	99.0048
3.6901	25.6442	22.444	54.991	66.117	111.625	153.803	141.018	106.678	41.212	32.313	31.223	119.983	154.298	147.682	162.818	186.761	152.971	74.111	129.929	51.369	41.813	65.408			0.223023	94.2823
3.8091	29.6211	18.7512	56.25	75.158	97.563	151.677	125.125	110.934	45.985	29.344	28.472	115.236	154.526	142.784	177.915	191.081	114.876	75.182	142.258	56.657	46.007	51.554			0.230216	92.5889
3.9281	28.7634	17.4821	55.772	75.771	100.319	145.173	124.042	112.047	32.329	23.699	33.759	105.124	112.698	140.999	177.985	187.92	97.236	61.761	127.125	46.375	54.743	47.782			0.237408	86.7684
4.0472	29.4236	21.4791	54.195	66.048	91.216	136.154	118.115	107.541	30.714	25.849	34.241	82.761	104.925	138.667	180.956	178.29	74.138	72.036	114.691	45.424	40.818	44.657			0.244606	81.4699
4.1662	29.4775	22.6958	52.728	65.901	75.214	131.698	107.304	94.656	34.349	30.939	34.409	94.356	108.083	145.003	180.333	171.839	66.675	65.145	114.105	40.503	51.498	46.533			0.251798	80.1566
4.2852	31.3098	25.1344	44.148	50.952	72.911	117.322	98.119	90.346	25.272	27.478	35.379	80.634	100.468	149.652	174.485	160.863	66.603	55.227	109.003	40.721	64.407	46.001			0.25899	75.7471
4.4043	32.81	21.3823	33.046	52.248	75.799	118.01	102.906	87.523	31.107	26.452	24.983	72.936	82.893	137.105	181.185	165.209	80.205	50.862	101.026	34.834	58.989	48.415			0.266188	73.633
4.5233	22.3059	20.1419	28.246	54.282	71.258	122.928	85.776	67.561	29.285	33.628	25.196	67.694	70.184	135.016	189.135	168.5	63.931	59.102	108.392	46.253	50.597	39.263			0.273381	70.8489
4.6423	23.5269	15.7866	27.601	42.465	74.608	112.369	87.09	68.42	29.914	27.836	29.582	67.138	69.154	112.633	185.905	152.45	64.468	65.317	101.726	44.699	44.865	28.962			0.280573	67.1143
4.7614	24.0449	21.4642	32.355	37.864	69.062	104.722	89.685	67.908	26.276	26.73	18.073	71.932	65.271	98.698	197.008	151.221	60.254	56.393	106.126	50.353	43.056	39.095			0.287771	66.2541
4.8804	26.8603	21.3362	31.523	38.038	61.115	97.677	95.722	70.713	21.495	24.767	22.252	69.547	80.563	90.628	178.998	146.912	53.872	45.072	100.311	46.738	43.68	33.379			0.294963	63.6908
4.9995	21.7949	25.6506	29.835	47.244	56.517	85.611	104.687	59.359	22.219	26.646	29.553	60.739	75.611	81.396	157.065	140.478	56.985	53.691	97.263	47.914	37.006	29.167			0.302161	61.2014
5.1185	21.158	19.3323	26.354	39.469	48.597	67.95	95.547	53.467	19.437	23.077	26.194	63.621	81.269	78.316	155.743	143.923	51.48	54.068	95.614	45.477	42.066	23.531			0.309353	57.9859
5.2375	20.8151	19.2918	27.766	40.909	46.227	67.332	97.145	52.732	27.595	26.627	16.605	63.569	71.661	76.697	164.195	140.92	57.891	57.979	98.196	45.886	38.303	31.472			0.316546	58.6279
5.3566	17.1461	20.7585	25.411	46.448	37.464	66.802	92.081	54.671	18.36	16.29	21.321	49.252	85.364	73.64	155.595	131.019	60.18	43.161	102.941	46.132	33.971	31.677			0.323744	55.8948
5.4756	21.1313	18.9447	25.861	50.501	46.765	58.408	83.086	44.838	20.258	21.3	17.082	43.518	88.989	62.533	161.083	136.032	54.958	46.033	92.836	34.624	22.015	29.85			0.330936	53.6657
5.5946	20.4832	17.9576	33.977	48.007	39.066	52.157	80.301	32.953	23.417	17.739	16.569	44.932	92.801	62.24	158.138	124.038	57.745	43.182	89.033	37.983	25.004	36.334			0.338128	52.4571
5.7137	27.5016	16.391	33.452	47.43	32.538	52.925	79.841	36.451	18.633	22.825	11.819	41.75	87.759	57.263	162.711	115.768	62.738	49.927	75.994	41.373	34.478	29.333			0.345326	51.7682
5.8327	18.2045	13.968	38.462	41.066	44.43	54.664	75.609	32.608	18.808	21.208	17.47	33.335	105.303	47.794	161.176	121.868	51.994	43.56	76.437	40.207	35.137	25.804			0.352518	50.8688
5.9517	16.6297	19.4489	43.892	37.34	41.82	57.687	89.909	31.191	20.541	18.312	21.347	33.243	116.108	37.073	143.529	112.58	51.99	35.377	70.583	40.414	34.562	31.666			0.359711	50.2383
6.0708	22.2238	16.2969	36.473	41.729	53.299	58.118	99.316	28.242	19.917	21.812	19.638	40.626	95.575	41.87	149.31	103.401	62.181	37.387	64.779	36.966	35.06	35.86			0.366909	50.9127
6.1898	26.7049	17.0175	26.085	45.103	46.755	73.579	90.813	25.808	20.161	17.605	19.144	41.724	96.745	40.735	153.318	110.318	53.573	36.561	56.636	46.841	38.025	30.227			0.374101	50.6127
6.3088	28.9513	20.4756	23.765	38.893	48.789	62.859	90.996	26.852	11.194	25.886	15.001	29.722	101.062	39.516	146.721	101	50.571	45.513	64.88	58.602	38.188	31.941			0.381293	50.0626
6.4279	29.1318	20.0157	32.39	33.602	54.312	60.871	91.022	23.561	11.611	23.931	10.63	23.241	105.984	42.362	132.929	86.593	72.04	36.267	57.77	52.489	40.911	30.079			0.388491	48.7156
6.5469	23.9595	20.3557	41.327	36.718	49.099	54.135	77.156	27.428	12.387	25.654	18.727	28.782	112.362	44.268	120.971	88.178	82.935	42.263	65.827	58.485	28.184	23.163			0.395683	49.1984
6.6659	29.8944	14.9591	44.218	38.287	40.878	54.401	60.31	27.226	20.121	19.119	27.541	35.615	102.976	39.756	111.844	82.47	95.239	37.599	59.346	45.131	23.046	16.358			0.402876	46.6516
6.785	34.9508	9.2519	40.728	37.555	44.514	52.072	51.923	24.362	19.368	19.214	26.792	37.002	109.34	50.468	103.322	77.59	91.946	48.049	57.996	39.691	20.922	22.488			0.410074	46.3429
6.904	34.2721	16.262	37.831	36.859	41.007	41.691	41.235	22.843	19.592	18.63	27.608	44.03	103.992	49.248	97.538	89.364	82.471	43.23	65.361	42.365	17.039	20.013			0.417266	45.1128
7.023	33.263	10.3483	34.119	41.862	34.344	52.187	34.683	22.472	13.791	11.41	35.799	40.475	98.954	45.327	97.744	79.485	74.203	40.54	60.68	48.59	17.154	13.711			0.424458	42.7791
7.1421	27.1518	8.4192	28.051	36.264	34.029	53.428	36.19	20.278	23.111	13.319	24.144	40.9	95.433	50.708	81.858	78.223	55.033	42.637	67.744	49.48	19.201	10.192			0.431656	40.7179
7.2611	22.1421	8.0302	26.431	38.387	31.984	40.435	30.268	23.972	19.023	18.039	18.527	31.371	99.219	45.576	74.763	70.714	40.333	45.98	57.234	47.861	22.027	15.642			0.438849	37.6345
7.3801	16.9964	10.4398	29.139	30.086	32.025	41.379	33.422	24.923	20.414	19.464	22.767	38.82	89.184	37.446	86.41	58.486	38.502	56.397	64.481	47.412	23.4	11.012			0.446041	37.8457
7.4992	12.5204	6.799	34.954	27.695	28.69	35.868	28.286	27.456	18.757	12.735	18.378	37.571	89.147	34.986	70.18	63.027	36.325	61.068	61.296	51.705	20.213	8.643			0.453239	35.7409
7.6182	12.4509	7.654	31.673	30.286	24.286	24.611	25.286	26.714	14.391	13.531	20.483	45.192	76.599	41.872	51.293	55.151	38.028	56.591	64.707	53.353	16.286	11.064			0.460431	33.7046
7.7372	17.1834	10.8116	24.376	27.837	20.615	24.925	19.71	23.415	13.214	22.915	18.496	38.524	57.494	45.598	42.203	69.897	26.986	60.594	66.869	46.508	18.128	8.465			0.467623	32.0347
7.8563	10.9077	12.939	18.591	31.843	23.577	20.143	24.032	16.923	12.921	16.406	18.518	37.362	52.624	40.611	36.01	59.083	34.707	51.263	68.552	48.973	17.342	15.1			0.474821	30.3831
7.9753	11.8731	10.5203	27.428	31.69	18.682	24.882	20.274	23.607	15.249	12.632	19.121	43.052	50.111	34.325	39.07	35.714	24.119	53.713	66.335	53.885	15.634	9.331			0.482014	29.1476
8.0943	13.5215	15.6644	24.378	29.223	22.456	16.43	27.474	26.108	19.703	18.743	22.654	43.072	46.385	41.357	34.97	32.68	19.757	43.288	54.859	50.28	13.244	9.969			0.489206	28.4644
8.2134	13.5346	14.2351	18.32	36.274	30.215	14.121	28.809	25.195	15.708	14.831	14.436	34.356	46.271	38.092	34.701	30.923	15.428	34.386	50.961	53.672	14.018	10.923			0.496404	26.7914
8.3324	10.9587	9.866	19.545	40.026	30.702	14.612	32.24	17.585	16.092	16.837	13.107	34.724	48.23	36.274	31.447	34.937	13.209	26.016	48.328	50.701	17.742	6.44			0.503596	25.8918
8.4515	10.724	11.2289	25.087	44.928	24.806	15.234	26.77	18.175	16.12	22.416	11.735	23.972	41.434	34.601	38.667	39.971	13.395	23.331	46.153	63.858	14.878	7.682			0.510794	26.1439
8.5705	9.6835	13.7386	22.99	50.73	20.522	17.603	21.824	15.282	19.289	22.13	16.513	27.188	34.498	42.852	45.177	43.749	11.465	25.498	44.355	50.804	17	5.999			0.517986	26.3132
8.6895	15.029	10.4864	21.533	44.044	18.629	13.957	16.199	18.017	19.71	14.016	15.112	27.382	26.862	38.413	32.053	41.294	11.699	17.07	44.939	41.555	21.898	5.369			0.525179	23.4212
8.8086	10.6774	12.3635	17.577	52.55	18.787	14.607	16.403	20.395	22.384	9.543	16.928	22.38	22.62	28.961	25.041	41.145	6.43	14.181	45.121	43.829	14.74	3.498			0.532377	21.8255
8.9276	11.6788	12.2965	14.252	45.128	20.618	15.989	23.558	21.398	13.932	14.387	13.947	20.771	28.541	35.404	22.648	51.997	6.949	9.707	46.428	39.516	15.815	3.577			0.539569	22.2062
9.0466	12.2715	13.5678	17.79	39.484	17.723	18.376	25.441	21.96	9.314	14.502	14.193	26.376	29.005	20.811	21.976	48.416	7.638	13.202	60.724	39.98	15.058	5.783			0.546761	22.436
9.1657	14.1877	12.3467	16.826	39.449	14.81	15.317	27.111	24.263	9.69	14.859	17.44	24.32	24.229	14.2	33.827	46.915	11.184	10.236	68.34	35.983	15.657	6.592			0.553959	22.6265
9.2847	8.3506	15.3642	14.944	28.195	16.027	12.831	31.78	18.424	10.016	11.795	20.34	20.037	18.717	15.288	28.902	39.571	5.718	8.468	56.336	33.817	23.09	2.929			0.561151	20.0427
9.4037	6.8864	12.3652	14.84	38.282	11.898	9.863	29.924	9.945	7.894	13.759	20.019	12.809	30.173	9.636	25.638	38.017	6.432	12.701	49.203	45.143	20.333	3.946			0.568344	19.5321
9.5228	11.8677	11.5315	15.08	35.768	12.169	7.15	27.667	16.484	9.74	17.58	18.254	15.217	15.733	14.123	23.378	31.186	10.907	10.083	39.548	34.003	11.467	6.206			0.575542	17.961
9.6418	12.4555	16.7975	24.348	25.632	7.557	9.336	28.695	17.223	9.236	23.127	19.272	19.061	19.38	11.724	21.97	35.16	8.09	8.444	27.325	24.763	17.581	7.127			0.582734	17.9229
9.7608	9.7554	13.7882	15.805	18.306	6.36	12.079	28.364	14.924	7.363	12.606	15.771	23.465	19.667	9.218	21.552	30.174	5.246	8.518	29.174	31.245	12.516	2.775			0.589926	15.8487
9.8799	8.5443	12.974	16.464	21.074	8.416	10.269	24.556	11.463	11.789	18.246	14.09	16.66	19.063	7.909	18.487	22.575	7.212	6.587	29.557	32.242	20.815	4.564			0.597124	15.6162
9.9989	10.2768	15.5471	14.446	17.434	10.454	9.543	17.192	17.992	9.931	13.636	12.967	14.743	17.552	5.753	22.322	26.641	6.024	10.103	22.518	25.416	16.103	2.028			0.604317	14.4828
10.1179	9.9988	17.7341	10.972	16.888	10.295	12.047	15.031	19.937	7.277	14.939	17.772	13.269	14	9.866	28.722	20.169	9.588	12.357	20.696	22.252	18.754	3.308			0.611509	14.8124
10.237	10.2864	12.0356	7.754	17.76	4.161	9.203	16.735	14.994	7.063	19.299	20.919	14.473	9.945	8.19	23.078	15.865	3.588	8.127	20.619	24.167	22.257	6.026			0.618707	13.4793
10.356	10.4408	14.9363	15.206	16.419	6.832	3.887	13.746	16.93	6.93	14.042	19.158	11.173	8.494	8.795	24.468	13.039	3.492	5.414	29.742	19.835	17.69	2.933			0.625899	12.891
10.475	14.8996	11.0913	15.071	12.111	7.333	3.97	19.433	22.565	4.858	12.138	14.996	14.069	6.804	10.196	24.692	17.714	3.347	8.31	22.022	22.343	16.186	3.343			0.633091	13.0678
10.5941	10.3289	10.4769	14.567	17.336	8.226	7.069	23.46	19.799	6.059	20.398	15.714	14.747	7.621	12.099	29.467	14.996	4.576	14.511	16.039	18.386	15.051	5.275			0.640289	13.9183
10.7131	8.1889	12.5515	13.02	24.57	8.966	3.761	19.293	18.697	6.123	17.147	14.927	11.081	8.021	8.907	24.924	15.709	4.339	14.562	19.305	17.787	23.084	3.161			0.647482	13.5511
10.8321	10.4249	9.663	11.198	19.059	7.379	7.49	26.616	11.289	7.858	14.166	18.015	14.358	7.164	7.943	28.201	15.522	5.291	19.446	15.783	19.847	18.601	7.415			0.654674	13.7604
10.9512	12.6676	12.208	12.715	21.389	3.392	6.019	20.062	11.918	7.594	16.493	24.962	11.525	6.475	14.216	25.889	12.125	3.324	13.501	13.267	19.151	19.186	7.808			0.661872	13.4494
11.0702	11.5337	12.4358	11.213	21.734	4.978	9.15	25.026	10.767	8.956	10.183	17.815	8.317	5.268	11.915	23.861	17.295	6.224	8.713	15.955	16.682	18.467	8.143			0.669064	12.9378
11.1892	15.7293	11.7542	23.671	15.621	13.938	7.695	25.53	16.862	11.464	7.586	17.181	17.156	2.302	10.814	23.795	10.731	6.4	8.536	10.258	20.148	19.97	9.417			0.676256	13.9345
11.3083	13.8238	10.0926	18.197	11.344	8.001	9.1	20.665	13.372	9.302	9.678	14.79	8.763	5.366	12.039	25.676	14.563	7.693	13.046	8.475	22.578	17.914	8.647			0.683454	12.8693
11.4273	15.3262	15.2829	18.628	16.656	5.53	15.473	17.763	12.36	5.797	12.359	16.389	7.956	8.746	9.07	29.837	14.071	6.069	14.609	10.084	21.084	18.534	5.243			0.690647	13.494
11.5463	6.9633	6.9991	16.552	14.485	9.955	11.397	13.01	10.97	6.119	8.489	12.082	8.499	6.296	11.562	30.525	13.463	4.621	12.063	13.459	18.29	18.446	10.207			0.697839	12.0206
11.6654	7.6449	11.6317	23.097	11.154	9.458	8.758	16.897	15.753	3.943	11.671	10.943	12.259	5.147	11.804	31.845	10.242	4.491	8.763	12.655	16.383	18.209	5.041			0.705037	12.1723
11.7844	8.1618	16.8404	23.203	9.443	5.835	6.185	14.69	12.508	7.265	12.207	13.027	6.054	7.862	8.231	23.536	13.205	4.939	9.449	11.634	24.7	18.92	6.271			0.712229	12.0076
11.9035	6.4772	11.7688	26.619	11.667	5.922	6.696	20.781	12.92	5.893	10.466	10.899	7.769	7.465	9.104	19.448	14.675	4.578	7.996	16.582	20.574	18.546	5.759			0.719427	11.9366
12.0225	7.361	12.0955	19.868	9.63	9.764	9.205	16.996	11.739	7.436	15.873	16.039	6.535	8.71	7.139	21.492	17.37	6.642	14.346	15.254	18.951	15.735	7.202			0.726619	12.5174
12.1415	11.0231	8.3848	19.497	16.574	5.864	6.761	15.059	10.197	9.923	12.075	15.965	6.637	10.083	2.13	19.793	12.481	6.403	11.464	17.127	16.697	23.261	4.957			0.733812	11.9253
12.2606	8.3324	9.1232	19.524	17.55	9.793	12.164	21.616	10.297	7.409	7.947	15.219	9.05	11.19	4.869	18.156	13.562	2.905	11.731	25.248	17.601	21.967	4.37			0.74101	12.7102
12.3796	4.6183	8.7661	18.822	8.323	8.682	10.821	21.224	11.139	7.172	9.19	10.327	4.29	8.183	6.291	20.662	14.584	3.845	7.253	28.415	22.407	18.493	4.577			0.748202	11.7311
12.4986	5.1344	6.7467	22.562	7.088	7.156	7.491	24.787	9.663	11.567	8.865	10.583	7.84	7.649	5.246	11.415	12.076	5.563	6.269	26.81	20.938	13.502	3.887			0.755394	11.0381
12.6177	7.3308	10.4126	17.463	18.326	7.715	11.933	20.368	10.618	9.925	10.002	14.122	6.711	6.765	5.261	9.143	9.429	7.578	5.263	28.85	30.761	14.977	5.515			0.762592	12.2031
12.7367	10.1048	8.1079	14.54	19.84	5.723	8.325	25.981	10.394	13.896	8.914	14.569	8.314	6.224	3.177	11.402	12.877	5.949	7.191	29.472	22.639	15.85	9.537			0.769784	12.4103
12.8557	4.0512	7.4322	14.693	17.663	4.705	10.993	20.196	13.155	15.541	7.612	19.122	6.703	7.149	7.42	14.038	9.923	8.037	4.565	28.188	20.675	12.478	7.773			0.776977	11.9142
12.9748	4.848	7.7179	13.328	17.991	5.658	9.747	19.092	11.698	15.232	11.885	22.811	6.417	3.827	9.014	18.352	13.75	7.971	5.71	30.183	24.485	9.993	6.274			0.784175	12.5447
13.0938	3.3994	7.2086	12.017	17.295	7.321	15.686	18.412	11.268	12.759	18.616	18.932	9.98	8.921	7.5	19.478	14.006	9.074	6.937	19.584	25.876	13.676	3.241			0.791367	12.7812
13.2128	3.6358	9.5315	8.648	17.087	7.622	14.293	21.013	9.476	14.464	21.653	22.221	4.153	9.057	6.192	19.615	18.198	8.301	8.02	17.951	23.059	12.105	5.312			0.798559	12.8003
13.3319	6.441	5.3902	10.869	15.098	7.889	11.506	15.908	7.96	16.981	20.681	21.952	6.345	8.303	7.113	19.897	14.442	11.268	6.568	10.594	21.802	10.25	8.415			0.805757	12.076
13.4509	9.8539	4.9174	7.8	13.76	12.541	9.789	20.271	7.298	17.577	21.343	17.568	7.884	7.804	7.215	24.443	15.91	7	8.759	9.485	23.169	6.024	5.235			0.81295	12.0748
13.5699	7.3952	4.7983	8.34	16.176	13.638	9.925	17.28	7.683	13.9	15.14	22.48	4.056	9.517	5.141	27.462	15.456	13.022	6.138	9.872	24.36	8.738	4.394			0.820142	12.0414
13.689	7.2506	6.7467	4.36	15.168	10.253	4.938	17.823	10.638	15.714	11.538	21.512	7.76	8.845	8.777	24.997	10.589	9.546	7.624	8.75	20.815	7.702	8.239			0.82734	11.3448
13.808	4.4397	8.4764	9.066	13.788	7.112	11.794	18.041	10.344	14.736	11.961	16.715	5.66	7.339	8.522	29.399	7.714	10.803	5.436	12.709	25.109	8.988	8.153			0.834532	11.6502
13.927	5.3494	5.28	12.148	17.807	9.461	10.377	15.867	10.016	15.246	12.98	21.153	7.828	9.024	5.176	21.073	7.757	12.254	8.112	10.214	20.537	10.096	8.793			0.841724	11.6613
14.0461	5.1644	6.4205	7.653	12.792	5.954	14.768	16.465	12.817	11.973	12.234	20.507	3.268	6.184	8.42	15.766	7.828	18.478	9.717	7.12	21.044	9.003	8.262			0.848922	10.9926
14.1651	9.2374	3.9368	13.157	9.895	8.94	11.432	21.368	13.579	9.217	13.399	15.118	8.819	8.644	11.201	13.476	6.223	18.996	7.601	8.175	16.582	10.731	11.064			0.856115	11.3996
14.2841	5.8606	9.3601	13.744	13.528	8.308	8.842	19.391	8.903	10.609	10.718	19.873	7.034	8.999	7.97	7.74	8.727	17.821	9.159	12.761	15.037	7.632	12.158			0.863307	11.0988
14.4032	8.7752	11.0012	13.966	17.021	4.911	14.918	33.532	7.125	7.944	13.329	20.225	13.415	5.199	11.49	9.268	10.556	12.438	6.377	9.759	18.464	12.371	12.651			0.870505	12.488
14.5222	9.6572	6.8757	16.409	14.354	8.39	8.425	28.817	13.49	8.309	11.761	16.603	18.389	4.335	13.46	12.427	10.698	17.252	14.172	6.869	13.145	11.68	9.646			0.877697	12.5075
14.6412	12.4269	9.4944	19.727	12.007	7.69	9.938	21.167	11.909	9.382	11.141	19.056	19.577	6.916	8.646	9.995	13.433	17.319	10.888	6.664	16.31	12.048	10.431			0.884889	12.553
14.7603	9.2184	17.3764	13.98	16.525	10.443	10.53	20.185	11.85	8.256	12.512	17.646	12.876	7.74	8.612	9.25	16.273	12.791	13.549	9.185	6.368	16.88	9.883			0.892087	12.3604
14.8793	8.5275	14.4834	15.623	12.94	12.559	10.399	19.83	12.479	7.751	16.299	21.708	15.763	9.34	10.929	11.704	14.225	14.835	9.892	6.572	8.042	15.181	17.897			0.89928	13.0445
14.9984	9.3408	11.0479	14.337	12.55	15.28	7.345	19.851	14.266	8.371	10.453	16.016	13.761	11.749	6.298	8.462	17.349	18.361	9.567	6.836	14.314	18.944	14.607			0.906478	12.6866
15.1174	6.4015	14.0606	15.707	14.448	10.744	5.867	19.542	12.767	9.311	9.116	19.626	14.934	7.914	7.186	9.087	14.853	14.47	13.811	4.729	11.417	14.094	13.994			0.91367	12.0036
15.2364	6.1747	16.4103	21.505	13.911	10.993	5.214	15.723	10.408	5.466	16.012	15.592	18.021	11.363	7.077	12.228	19.016	17.331	11.458	3.794	4.967	11.4	9.037			0.920862	11.9591
15.3555	8.5552	10.355	19.297	11.949	11.05	12.841	11.298	9.532	6.08	15.836	25.553	16.59	14.711	10.005	10.129	17.269	16.15	11.574	3.371	3.166	15.078	13.051			0.92806	12.4291
15.4745	7.7114	15.4677	22.899	12.711	13.497	11.968	12.156	10.721	5.459	5.159	20.455	18.509	12.568	6.437	11.928	16.333	7.486	4.483	2.89	5.089	8.73	12.024			0.935252	11.1219
15.5935	6.6387	12.273	18.108	13.086	14.999	9.167	15.384	6.15	11.42	8.536	19.999	18.691	8.51	5.649	13.148	17.471	6.27	8.893	5.334	2.585	11.228	8.24			0.942445	10.99
15.7126	7.2801	10.0201	17	14.755	14.644	10.046	12.665	6.305	12.898	8.915	13.341	17.214	5.585	5.596	11.037	19.538	10.824	11.573	3.9	2.76	18.711	9.581			0.949643	11.0995
15.8316	7.2767	13.5716	21.127	14.794	15.085	8.199	9.807	6.636	8.833	8.28	13.173	20.429	7.943	9.182	10.942	19.428	13.845	6.857	2.35	2.359	14.175	14.439			0.956835	11.306
15.9506	8.311	21.2434	17.32	12.301	19.752	16.077	14.74	6.787	18.475	8.56	18.627	16.5	12.366	8.159	13.156	16.638	10.932	6.59	0.674	1.369	5.82	14.517			0.964027	12.2234
16.0697	12.8769	14.1273	20.794	13.26	20.436	11.221	15.199	4.356	13.546	8.525	9.266	21.644	8.207	12.699	15.449	13.672	4.75	8.81	4.126	5.217	10.625	15.513			0.971225	12.0145
16.1887	8.5976	8.7314	19.18	14.536	21.14	11.553	10.321	4.618	15.172	9.477	10.44	18.081	6.869	8.957	12.358	14.481	7.536	4.799	3.521	2.545	5.227	22.299			0.978417	10.929
16.3077	5.9006	7.0892	15.92	18.158	12.911	17.403	13.883	3.348	7.477	5.813	9.124	12.772	7.802	20.455	18.468	18.724	6.474	1.305	3.762	3.287	4.914	19.879			0.98561	10.6759
16.4268	4.1107	6.3941	10.831	11.66	13.02	10.466	21.07	2.264	9.412	5.632	9.232	18.409	8.675	16.808	18.251	17.248	4.045	2.692	2.555	0.959	4.393	14.221			0.992808	9.65217
16.5458	6.9271	5.2204	10.864	14.156	14.507	13.486	9.553	7.455	6.418	3.081	9.098	16.892	10.364	18.136	22.028	18.421	3.604	2.56	2.178	0.424	8.112	8.63			1	9.64157

## Sheet: Image8
X0	Y0	Y1	Y2	Y3	Y4	Y5	Y6	Y7	Y8	Y9	Y10	Y11	Y12	Y13	Y14	Y15	Y16	Y17			Ap-Ba	Av int
0	55.4419	67.0866	60.5391	82.6218	86.2131	62.7281	57.8318	89.113	87.249	92.179	80.786	77.953	74.8517	86.6463	97.5562	67.2906	88.2319	90.576			0	78.0497
0.119	47.128	76.6038	54.4476	79.6165	69.8828	53.5146	53.2381	101.94	93.105	106.604	81.793	83.078	85.9606	101.553	83.5656	57.0209	83.5041	95.8567			0.0053176	78.2451
0.2381	54.3065	68.8328	58.949	67.9375	69.1187	51.7943	49.6761	106.44	81.228	109.322	83.973	76.888	79.4856	79.3577	82.0478	64.6411	85.3061	80.3845			0.0106397	74.9827
0.3571	40.4271	87.161	57.7323	68.8764	68.6011	53.1618	51.4083	120.797	85.167	116.523	89.162	78.51	78.0873	78.4379	76.6707	60.0691	91.3044	90.6356			0.0159573	77.374
0.4761	53.9296	91.8539	46.2075	47.2385	59.7671	57.0845	66.7154	131.388	99.266	123.913	93.581	82.547	74.867	74.7142	71.7195	53.1865	81.6101	79.0116			0.0212749	77.1445
0.5952	48.1436	79.3444	44.5134	50.052	61.5292	60.0083	67.7339	139.649	108.782	122.282	89.023	82.054	70.3015	86.5563	63.4178	60.0004	83.5435	87.7396			0.026597	78.0374
0.7142	42.4506	79.5826	53.2465	47.1565	50.6967	63.7481	84.008	156.51	109.193	140.394	86.03	81.223	76.2981	73.1965	70.1614	48.1274	76.4242	86.6062			0.0319146	79.1696
0.8332	41.1448	83.0699	50.6471	56.5457	60.153	61.7469	80.6907	146.485	117.902	150.878	76.011	90.13	72.7574	57.2931	77.7508	59.9028	62.9138	91.078			0.0372322	79.8389
0.9523	53.8354	67.2578	54.858	49.1	61.3481	74.0014	85.9786	146.609	105.962	151.88	80.289	79.615	64.7048	64.5191	75.2536	55.4838	56.0194	75.7867			0.0425542	77.9168
1.0713	45.6902	63.6596	56.2577	53.4023	51.8703	73.5628	85.182	145.534	130.275	174.674	88.066	77.931	72.9899	56.7189	60.9159	57.1846	65.8961	83.951			0.0478718	80.209
1.1903	41.9971	70.1442	47.3625	54.0667	55.5092	57.5524	83.3793	147.576	129.212	170.598	89.391	76.775	76.3885	54.1939	62.5548	50.0761	45.4074	82.4587			0.0531894	77.4802
1.3094	55.7054	77.7932	54.8977	56.1436	46.1983	52.1447	74.5528	142.001	105.285	161.84	84.662	107.345	72.9969	57.6257	66.014	65.724	56.6797	78.2475			0.0585115	78.6587
1.4284	44.1387	70.4077	49.6982	63.4929	55.2223	60.5877	70.0957	136.802	123.072	170.897	91.404	113.822	73.8476	58.8076	69.4115	55.188	46.9445	72.8977			0.0638291	79.2632
1.5474	55.7449	64.9781	55.8959	64.2948	54.4353	62.7104	66.8381	119.537	111.529	181.529	99.399	104.967	73.8126	58.4093	67.0014	60.4582	39.9102	81.4127			0.0691467	79.0479
1.6665	53.768	76.7724	50.0574	59.7051	49.1681	53.2795	50.5716	108.963	129.894	169.143	104.787	99.122	68.588	66.7695	72.9705	57.3518	33.643	67.046			0.0744688	76.2
1.7855	41.5136	81.2202	46.9853	64.9515	41.9625	55.0071	51.673	101.428	118.588	163.698	93.233	98.258	73.4727	68.1097	82.1752	53.2591	39.5633	63.6054			0.0797864	74.3724
1.9046	48.0688	68.6709	57.3561	62.3525	44.7654	41.0069	53.2675	82.449	113.438	181.013	101.391	94.276	65.7286	52.5089	64.5717	62.2066	33.3135	53.0036			0.0851085	71.0771
2.0236	39.9788	68.8909	50.8811	61.9423	46.3481	37.3721	43.4429	82.313	120.314	178.516	101.978	79.432	75.4214	50.1716	67.243	51.3499	37.7866	57.7438			0.0904261	69.507
2.1426	34.745	59.6936	63.3196	49.9293	40.2919	42.2035	42.7663	89.379	117.897	175.878	110.097	66.528	58.3057	51.2387	70.1195	50.5996	37.9462	48.7861			0.0957437	67.2069
2.2617	26.4915	63.6839	68.1671	47.0963	23.1838	35.4236	47.6479	70.421	132.701	169.773	118.118	64.983	42.2521	46.5492	70.158	53.301	39.0442	47.3262			0.101066	64.7956
2.3807	32.7048	45.8929	65.6036	45.2041	22.6224	38.8896	47.7562	76.466	123.044	172.993	133.969	61.446	59.8536	43.3003	66.4	44.6938	36.4071	60.4808			0.106383	65.4293
2.4997	31.7939	55.9681	53.0178	53.1097	24.7487	29.0408	44.8261	74.71	127.494	174.665	137.703	57.055	47.1032	42.3529	65.428	49.0771	28.3558	50.7916			0.111701	63.7356
2.6188	29.8026	57.8654	60.8353	49.8874	26.3328	37.3785	47.8175	81.659	121.509	176.457	136.181	61.572	58.6624	29.7142	47.2248	40.6721	30.8445	45.3795			0.117023	63.3219
2.7378	28.8114	56.3057	48.915	52.2904	25.1663	31.8285	54.3259	81.016	116.806	159.486	144.816	61.2	58.7481	29.9649	31.2942	42.1076	14.4795	49.3693			0.122341	60.385
2.8568	30.4891	52.7065	57.8386	44.2682	29.7094	23.5007	45.1694	77.886	120.867	151.768	123.198	47.259	45.391	24.3791	33.6858	46.2591	13.7131	42.8976			0.127658	56.1659
2.9759	21.4042	50.5788	57.7606	54.0795	17.2611	15.6311	47.2639	75.5	127.128	161.693	115.24	36.978	43.3922	29.6284	34.0588	50.4746	22.5882	30.6855			0.13298	55.0748
3.0949	20.0894	41.4429	50.7398	52.079	19.4763	19.7767	36.6113	64.612	107.425	157.813	129.393	34.552	48.2677	35.376	30.6742	40.4531	19.2908	43.9851			0.138298	52.8921
3.2139	26.5712	49.7097	52.3107	50.4622	13.0314	18.8861	39.4691	66.02	89.325	160.931	115.196	28.017	38.837	26.5444	27.9746	52.052	29.4342	33.2855			0.143616	51.0032
3.333	20.7188	60.3937	40.9669	41.1354	21.1186	23.4662	32.1661	63.08	89.528	162.687	109.471	38.217	42.7908	29.08	32.0135	41.3665	39.125	26.0836			0.148938	50.7449
3.452	28.1176	47.5983	32.8813	41.0621	16.4733	18.1604	34.1847	58.516	72.762	160.774	86.192	32.771	40.4229	24.954	35.77	35.0966	20.0991	35.4895			0.154255	45.6292
3.571	26.4426	47.0047	40.5409	39.5902	26.3904	15.9631	27.4465	41.799	73.738	149.262	83.628	34.133	32.0571	20.6184	30.9115	39.1509	22.0789	27.9622			0.159573	43.2621
3.6901	26.0701	42.8235	30.5139	42.3353	22.9061	11.1771	28.2427	40.606	82.937	131.812	71.376	19.886	33.6256	26.5561	30.1433	32.643	32.5765	17.4441			0.164895	40.2041
3.8091	30.1137	38.0038	26.9785	37.1626	26.0593	16.6831	26.5712	47.781	80.292	146.069	78.451	26.92	34.992	21.5267	27.7133	34.3904	31.451	21.9186			0.170212	41.8376
3.9281	34.7605	45.1576	26.4953	39.7133	25.5804	9.0792	25.4542	45.471	73.306	141.241	61.059	28.122	35.761	18.4808	30.9889	38.2378	27.6275	27.473			0.17553	40.7782
4.0472	34.8768	45.3284	32.3716	37.3067	26.3607	14.3369	26.4003	42.045	75.123	127.48	61.972	24.091	31.4118	19.812	30.8134	41.8924	16.003	19.2409			0.180852	39.2703
4.1662	31.8978	30.1751	32.3444	51.5885	28.1903	16.7571	20.4476	35.229	71.712	105.728	56.424	17.854	34.7265	15.6007	34.719	39.873	23.5151	25.6878			0.18617	37.3594
4.2852	47.0362	40.7885	38.0147	41.2521	29.6504	18.4538	19.8877	42.825	56.045	113.737	48.487	26.14	27.7681	17.4209	28.3397	49.581	28.9993	34.634			0.191487	39.3922
4.4043	30.049	32.2525	25.5931	41.0949	25.9981	16.0394	14.4829	35.122	56.647	93.425	47.743	30.831	28.7764	28.4152	34.9151	36.4691	27.6801	41.8001			0.196809	35.963
4.5233	28.2035	32.6828	24.0595	33.1755	26.2833	15.8337	20.3161	35.196	58.251	97.215	45.372	23.697	27.9304	25.0019	31.9254	36.1817	27.652	36.7639			0.202127	34.7634
4.6423	27.3545	31.2071	30.1239	28.8603	35.2175	13.5986	22.5858	44.757	57.027	87.175	48.643	19.948	28.3034	17.5513	36.7996	49.9338	22.945	33.4824			0.207445	35.3063
4.7614	36.0439	24.5072	26.8796	21.7036	30.8553	12.8145	24.3183	43.255	55.066	92.697	44.701	20.359	31.8041	17.0607	37.5348	35.1971	23.3705	28.4533			0.212767	33.7012
4.8804	35.963	26.9154	29.3842	25.3799	24.5679	15.2207	20.636	39.436	75.05	85.009	53.408	24.607	31.6476	19.1744	30.5404	39.5315	21.8475	23.5686			0.218084	34.5493
4.9995	39.7022	28.7231	26.9386	19.0704	33.1923	10.3157	17.5718	43.653	70.315	63.576	44.757	18.911	29.5697	15.3855	31.5627	30.7371	24.4977	28.2353			0.223406	32.0397
5.1185	40.6456	31.9003	15.6683	28.5053	29.0564	8.4091	25.8996	39.63	73.833	55.601	36.148	14.676	27.315	16.7383	33.3293	29.5805	25.3916	27.196			0.228724	31.0846
5.2375	29.0944	32.8463	14.4471	30.643	26.3064	17.1281	24.7516	47.768	70.656	55.37	47.438	18.627	26.5043	24.6414	27.2618	23.5599	24.5102	22.0876			0.234042	31.3134
5.3566	35.0921	40.401	20.4243	34.2279	34.385	14.0114	29.5827	35.377	68.699	51.475	42.952	18.34	17.5316	22.7473	35.8596	23.3161	18.848	19.9331			0.239364	31.2891
5.4756	28.8057	25.8667	17.5526	26.2531	22.7678	14.5947	23.2258	24.114	87.285	63.514	43.371	18.024	20.6099	27.5678	30.0635	31.8484	17.0658	20.4262			0.244681	30.1642
5.5946	25.6175	20.5926	16.6391	32.2473	16.9701	9.9211	18.4455	40.72	84.509	59.32	48.49	19.153	24.0914	19.4597	34.566	28.0544	26.5996	27.1268			0.249999	30.6957
5.7137	20.3365	26.6772	13.5992	16.0516	22.193	18.5748	23.8377	39.121	72.517	56.156	43.101	14.973	23.052	19.2152	24.9056	28.0319	21.9971	21.6384			0.255321	28.1099
5.8327	17.0722	22.687	10.196	14.9352	18.0109	11.6721	17.491	26.435	71.861	51.711	38	12.287	16.9556	26.3648	25.3135	20.8644	26.6575	23.1822			0.260639	25.0942
5.9517	19.0593	22.3466	13.2626	17.0402	18.2205	17.0318	25.9668	29.6	62.052	48.988	43.327	18.11	19.337	27.8313	30.0177	18.1327	20.9515	23.4501			0.265956	26.3736
6.0708	23.0696	19.9481	12.4096	22.2202	18.4878	20.3314	14.9789	26.899	73.398	51.11	40.834	10.343	32.9042	24.3179	21.0855	19.3166	27.4403	20.475			0.271278	26.6427
6.1898	22.8708	16.3046	12.5838	18.059	24.0605	18.2578	17.3755	25.924	67.441	43.041	35.95	20.607	27.3865	25.773	27.0454	22.7422	29.4711	22.4163			0.276596	26.5172
6.3088	16.1889	17.365	13.9001	17.5868	17.8386	13.7382	17.7736	22.81	62.156	50.501	36.447	17.533	18.5038	30.6857	26.7792	27.8265	28.7604	22.0492			0.281913	25.4691
6.4279	14.2091	19.0029	13.1912	14.0001	22.7916	25.1034	20.0799	18.562	56.506	49.876	38.29	14.525	18.3173	27.7201	24.0488	28.8925	26.9119	23.8144			0.287236	25.3246
6.5469	18.2337	17.4857	17.2705	19.4915	20.4685	21.6271	15.7468	22.067	46.5	36.616	38.058	21.398	17.785	15.3053	23.424	25.8976	25.7501	28.1883			0.292553	23.9618
6.6659	23.8436	17.0971	16.7367	17.9208	15.1061	13.1994	11.3327	27.801	46.79	34.348	40.077	20.334	18.8262	24.7994	21.4053	22.4393	24.2584	24.4908			0.297871	23.3781
6.785	22.1578	22.4612	16.7497	22.8587	17.3023	14.2735	14.5217	20.762	43.582	34.71	31.357	16.412	21.6177	19.8789	22.271	26.263	19.7998	22.7241			0.303193	22.7612
6.904	18.5906	18.937	15.8872	18.1123	12.8551	14.87	16.9354	22.669	41.021	30.621	34.783	24.249	22.2058	19.937	22.2069	25.3361	19.7712	22.69			0.30851	22.3154
7.023	25.5408	16.9967	16.285	17.5679	13.2188	14.7104	20.3969	25.309	43.892	34.557	47.422	24.419	19.66	15.8526	18.8233	28.7415	20.669	20.5915			0.313828	23.5919
7.1421	17.0357	12.7717	16.8519	20.0251	19.6612	8.3963	19.4117	20.038	44.939	41.238	39.393	20.48	19.2345	14.3734	21.613	29.0345	20.0675	23.1919			0.31915	22.6531
7.2611	18.1722	16.677	14.983	16.5129	10.646	7.1071	17.0232	17.649	31.403	34.601	45.497	20.696	25.3117	17.1377	20.1582	15.6592	18.4586	19.2292			0.324468	20.3846
7.3801	19.8056	21.2639	7.5092	16.2007	13.3087	9.1861	18.0196	16.054	26.933	29.588	39.801	18.752	17.6267	14.6857	17.4905	19.788	24.8903	21.6228			0.329785	19.5848
7.4992	20.7233	18.0351	17.0724	17.5536	11.1389	12.8652	13.2357	15.655	30.591	28.101	40.5	17.257	20.7495	12.3211	15.9107	25.5437	24.1692	13.6547			0.335107	19.7265
7.6182	19.8425	11.3215	12.1319	14.7916	11.4838	8.5538	21.0726	15.461	38.538	22.601	25.742	20.694	20.6279	13.8721	15.3559	33.6511	19.5706	17.2771			0.340425	19.0327
7.7372	20.6252	11.609	11.1772	21.7409	15.1021	7.4213	14.7869	12.307	35.565	19.954	31.876	18.938	22.2867	13.8262	8.1096	18.7451	20.3429	27.3032			0.345743	18.4287
7.8563	19.3648	10.2959	10.3484	20.6569	17.9902	4.3463	15.5387	14.975	40.444	17.23	28.408	17.143	16.1883	13.9043	12.0352	28.0496	20.3223	23.9577			0.351065	18.3999
7.9753	19.0025	18.1748	9.7947	13.2866	13.213	5.5157	8.7292	12.785	33.476	14.544	23.806	14.077	22.4093	12.8926	10.1889	17.1371	16.2244	23.4272			0.356382	16.038
8.0943	12.4251	10.7576	12.1571	13.1328	17.7775	8.0365	11.8701	16.474	34.448	19.85	27.513	12.038	20.701	13.0396	12.3096	17.297	16.1385	22.0132			0.3617	16.5544
8.2134	14.8112	12.1791	8.4212	10.1452	17.4198	4.885	6.7511	13.222	46.296	14.308	34.254	15.358	24.3491	10.3503	10.3561	17.0395	15.1259	26.273			0.367022	16.7525
8.3324	16.1561	9.0865	5.2671	12.5595	15.8505	3.8801	10.2846	9.325	37.106	19.703	32.882	19.809	29.569	7.916	7.8528	13.2786	20.238	30.3996			0.37234	16.7313
8.4515	8.5408	6.4333	5.7033	15.373	17.4333	4.2021	8.7798	16.277	39.349	28.092	27.658	20.263	18.7344	9.603	9.2663	15.9744	18.1267	27.5325			0.377662	16.519
8.5705	13.7771	11.4774	7.6972	16.0297	19.207	3.9186	9.9419	11.899	31.363	33.178	30.516	24.079	18.4142	9.0254	9.6184	17.2094	19.7386	30.203			0.382979	17.6274
8.6895	13.3726	10.4334	7.9344	11.1481	16.0597	3.8344	7.1147	13.033	33.613	30.196	32.851	15.869	14.8994	8.7121	13.2804	20.0126	15.2577	25.3849			0.388297	16.2781
8.8086	12.2064	8.9057	9.6017	17.2765	19.5687	2.538	6.1092	12.338	28.123	24.598	25.976	15.611	13.9491	7.5252	7.2847	15.7517	19.5089	34.3897			0.393619	15.6256
8.9276	8.6803	6.8538	11.9907	13.3742	16.7861	3.7273	10.4015	12.406	27.955	22.57	22.369	11.618	13.5455	6.5333	10.1364	16.5112	16.2487	26.8772			0.398936	14.3658
9.0466	11.8677	9.7258	11.0479	11.5492	12.8758	3.1844	5.7618	11.614	23.309	18.301	23.057	14.557	19.323	8.8914	12.429	15.5642	9.4091	28.4816			0.404254	13.9416
9.1657	13.7278	10.6901	13.1001	12.2199	12.8507	4.178	4.289	12.786	24.958	15.166	21.325	15.317	12.1015	9.303	7.9882	14.7259	12.5076	32.8847			0.409576	13.8955
9.2847	13.7952	8.1846	15.2316	11.1941	10.4994	4.7361	7.6204	10.329	23.962	19.625	19.066	16.443	16.4096	9.6568	8.7288	10.6745	13.1513	28.2774			0.414894	13.7547
9.4037	10.5775	15.4871	12.1916	14.3878	11.4149	3.5736	10.5439	12.368	29.813	16.825	15.864	13.411	13.8916	8.9973	6.0705	10.838	13.8747	25.9487			0.420211	13.671
9.5228	16.4164	11.6879	12.8538	11.8579	7.3726	6.3742	5.5648	14.916	30.079	19.643	19.678	12.502	13.3529	10.8791	8.6471	12.9127	17.3746	21.6173			0.425533	14.0961
9.6418	12.4574	6.6593	12.9295	13.1287	10.9612	3.7927	4.7112	7.111	26.631	17.132	16.999	13.769	20.2419	7.5697	7.6396	15.9356	13.2113	23.1146			0.430851	12.9997
9.7608	13.01	8.0776	12.5079	10.3011	11.4704	2.6418	6.3583	10.927	20.833	12.905	16.854	7.68	13.3338	8.2326	4.6273	20.6698	14.8387	24.8181			0.436169	12.227
9.8799	14.3173	9.3476	10.2278	11.6602	9.5756	4.9689	8.5621	10.854	22.403	10.12	24.217	11.928	11.0014	6.3356	5.9696	15.0718	13.0693	19.2722			0.441491	12.1612
9.9989	10.897	7.9368	11.2827	13.45	9.0879	5.2702	7.4972	10.206	23.831	15.775	23.646	10.602	14.2097	4.9163	4.8931	12.9928	13.0095	17.7294			0.446808	12.0685
10.1179	9.446	6.7142	10.5999	13.1098	7.0983	5.2176	7.4395	12.654	17.864	14.027	16.593	15.267	16.4767	8.1178	3.5589	13.7503	13.1966	21.5817			0.452126	11.8173
10.237	9.0176	5.4789	8.3814	15.1933	10.3548	5.6667	7.1632	8.633	17.841	15.285	13.542	16.101	12.5425	7.7157	5.5466	14.3002	8.6408	23.3276			0.457448	11.374
10.356	7.3215	6.1322	7.9407	12.6068	10.5267	3.8958	9.4653	11.268	21.308	16.58	19.801	13.939	10.5375	4.5288	7.7955	10.5412	13.1285	22.8221			0.462766	11.6744
10.475	11.4715	8.4877	6.9657	15.5756	10.4675	3.8197	7.2202	14.765	30.014	15.613	21.641	14.145	16.5873	6.9102	3.6604	13.0749	18.053	23.8058			0.468083	13.4599
10.5941	9.799	12.0606	10.2959	13.2515	11.0209	3.3086	4.2106	12.22	24.646	19.397	28.058	16.429	17.7398	4.321	6.2598	12.7672	16.9159	21.5459			0.473405	13.5693
10.7131	9.5945	9.8195	8.2332	13.1339	11.2972	4.6774	3.375	21.079	22.355	16.45	21.697	13.282	14.5084	6.2848	2.9365	14.5172	14.039	20.513			0.478723	12.6551
10.8321	10.1964	11.2936	7.2117	11.1834	11.924	5.2725	9.2751	14.018	33.994	21.63	18.358	9.927	18.649	2.646	4.9006	8.5501	18.9302	24.8855			0.48404	13.4914
10.9512	12.3365	11.6501	9.6178	13.0777	12.9194	2.8007	5.074	14.109	21.633	26.47	25.036	15.511	11.8681	7.1444	5.829	4.221	17.9657	19.6988			0.489363	13.1646
11.0702	9.957	8.2968	10.3153	14.041	9.0165	5.5556	8.2421	17.059	23.122	24.859	21.365	18.715	13.8363	5.7941	5.3489	7.6116	19.8574	26.9038			0.49468	13.8831
11.1892	7.4964	4.4102	11.1846	10.5311	13.2407	3.8959	4.1935	17.87	20.066	21.462	17.717	19.566	19.3712	6.3062	1.7801	10.3937	19.1154	21.2151			0.499998	12.7675
11.3083	7.0296	5.6006	11.7598	11.7933	12.8076	4.1196	8.5179	15.662	23.442	22.297	18.097	12.988	13.208	6.3455	3.2371	8.8438	20.4213	17.4233			0.50532	12.4219
11.4273	8.8177	6.7357	6.3592	9.5273	10.3563	2.7539	5.3443	18.678	19.735	18.233	26.148	12.857	12.122	6.8425	3.4135	8.5124	12.2861	14.6979			0.510637	11.3011
11.5463	6.1825	8.727	11.228	15.2821	8.5307	1.2179	5.1872	17.894	14.607	11.248	11.35	9.798	10.739	4.7049	6.665	11.7937	13.1371	15.9323			0.515955	10.2347
11.6654	5.7823	6.393	9.9208	15.1295	12.7464	4.2742	3.8826	17.706	19.521	8.201	14.872	9.398	15.7408	6.7366	4.6717	7.8716	19.7803	14.1822			0.521277	10.9339
11.7844	8.789	7.9974	10.0981	13.4453	12.5592	3.2487	7.759	20.169	16.087	8.252	18.543	8.72	17.0709	7.1147	6.3793	5.7661	19.8841	18.4234			0.526595	11.6837
11.9035	9.7226	5.5571	8.39	10.8629	13.5084	4.052	5.0646	19.596	17.739	10.675	14.092	10.864	15.5451	5.8961	3.5035	10.2998	15.788	19.8782			0.531917	11.1686
12.0225	7.621	6.0151	6.9349	10.0106	13.295	4.5579	8.8449	17.424	17.03	12.82	13.466	11.799	17.0899	5.085	4.4884	14.6175	25.194	16.2234			0.537234	11.8065
12.1415	10.8883	7.531	8.5351	14.949	10.7014	4.9631	4.4646	13.861	18.132	13.122	19.564	12.503	19.3085	3.6528	4.5717	11.1614	24.3034	12.5017			0.542552	11.9286
12.2606	12.9784	7.4212	9.1595	10.488	9.6768	3.7075	5.5302	10.157	18.501	8.469	22.025	15.273	10.7214	8.8885	3.1804	9.3884	15.9789	8.9132			0.547874	10.581
12.3796	6.7719	5.905	14.6237	10.863	16.1497	2.678	3.9053	17.028	17.96	4.373	14.856	15.338	15.5455	4.1045	3.3649	10.9817	15.7503	19.1406			0.553192	11.0744
12.4986	10.8658	1.745	6.5433	9.5345	14.0882	5.9347	4.4296	14.536	28.624	5.238	16.886	18.176	15.9064	5.7443	4.2423	9.4101	14.8818	23.3581			0.558509	11.6747
12.6177	13.0057	8.7267	7.3556	19.0092	7.5504	2.6177	4.5831	11.911	30.3	11.877	17.398	21.465	11.5667	5.9878	4.9117	9.6189	15.425	24.9882			0.563831	12.6832
12.7367	10.7876	9.3699	8.4964	11.9326	10.3848	1.8885	5.5387	9.008	26.563	9.456	15.734	18.328	14.0024	3.4829	7.4164	12.4315	17.7225	17.9473			0.569149	11.6939
12.8557	6.4081	7.9921	7.2785	13.2047	16.6338	7.2026	3.5253	15.531	23.553	10.822	22.678	16.906	12.0717	2.4282	5.8418	7.146	17.1235	17.3268			0.574467	11.8707
12.9748	9.6906	9.0163	5.0977	9.7586	9.1159	4.6831	3.5999	14.977	24.43	13.998	20.296	16.96	10.8849	2.9508	2.874	5.9441	21.0423	19.1464			0.579789	11.3592
13.0938	8.4315	2.8971	7.5155	11.4719	12.4505	4.6049	4.9883	20.188	27.492	7.462	13.529	14.994	10.9628	6.982	7.0743	4.5803	17.8871	17.0703			0.585106	11.1434
13.2128	9.6262	4.4278	4.7022	14.3802	9.5027	4.2076	4.6843	26.154	21.926	8.817	14.517	13.403	17.9121	4.5618	7.0121	5.8608	13.0227	21.1707			0.590424	11.4382
13.3319	11.8216	5.2527	9.2518	9.1238	14.7224	7.0812	6.6865	23.763	22.871	12.479	14.377	17.822	11.0789	4.433	2.9022	10.7782	12.1787	24.3447			0.595746	12.276
13.4509	11.8317	6.0584	8.3729	13.5284	10.1286	3.3647	3.9126	19.541	21.473	15.574	10.816	21.926	13.5137	5.3921	4.2167	7.0648	11.9374	16.2092			0.601064	11.3812
13.5699	9.6092	4.6364	6.5097	10.5035	8.4904	6.6905	8.2083	17.851	17.285	13.862	13.079	16.474	12.2975	4.6285	3.131	4.7301	7.7405	22.387			0.606381	10.4508
13.689	14.2479	5.2588	5.0651	7.7848	11.4755	8.2751	6.6429	14.724	17.242	12.249	13.614	11.032	12.0234	4.1298	7.3415	5.0455	10.1498	18.9239			0.611703	10.2903
13.808	5.6671	3.2597	4.9241	6.3811	13.0713	7.1836	8.1894	14.303	17.354	12.828	12.384	16.174	14.0507	4.6144	5.4656	3.0966	12.8744	26.2969			0.617021	10.451
13.927	6.6452	3.8416	5.0408	8.2699	12.3733	6.6518	4.5748	16.921	15.807	14.338	13.924	10.687	11.6725	2.1832	4.2933	6.5386	14.9546	17.6723			0.622338	9.79938
14.0461	4.2723	3.9394	5.74	7.9015	9.8904	7.7535	4.0998	14.897	18.879	12.587	19.322	8.366	6.8508	4.9459	4.6323	7.0111	11.8982	23.1427			0.62766	9.78494
14.1651	14.3742	2.315	5.5918	6.515	10.2844	4.6049	8.3173	14.621	12.295	10.43	15.015	10.732	11.3711	2.9443	6.77	7.5605	13.3072	23.6341			0.632978	10.0379
14.2841	9.6551	2.2225	7.8462	7.5018	10.4008	7.1464	6.3868	11.723	15.537	10.336	18.547	11.988	15.5953	3.9926	2.9057	4.4409	13.7326	28.7593			0.638296	10.4843
14.4032	8.604	7.0331	7.3722	7.8306	5.8867	4.5561	7.2258	9.643	13.008	22.082	16.353	13.635	12.8893	4.7976	8.1437	3.8331	17.7377	18.6597			0.643618	10.5161
14.5222	6.4793	8.7146	10.3687	8.1081	8.8761	5.5053	4.6238	16.362	15.957	21.932	16.859	15.518	11.0673	3.6555	9.8239	4.7072	19.7101	17.8497			0.648935	11.451
14.6412	5.439	6.2301	8.7942	7.8567	11.6396	6.9676	6.2101	26.593	11.886	22.143	13.988	16.109	16.793	6.6822	5.3474	4.9071	9.2354	24.5334			0.654253	11.7419
14.7603	7.2441	5.9113	3.877	7.2296	10.8492	7.6072	3.7202	23.306	11.418	24.55	12.577	13.41	16.8441	5.6117	7.336	5.6044	13.8782	19.8317			0.659575	11.1559
14.8793	7.8308	3.1675	5.497	7.9897	10.0042	5.6812	4.9293	17.662	9.552	18.746	15.921	10.878	10.3311	6.5161	6.3865	6.0389	18.589	19.5941			0.664893	10.2952
14.9984	8.3537	2.0861	6.5369	8.07	8.4915	3.9501	8.0788	14.901	16.507	15.665	15.572	11.855	11.3	5.5121	3.7929	6.7196	17.7825	19.5732			0.670215	10.2637
15.1174	8.4593	3.6339	6.6482	9.8777	6.1615	1.7289	8.5915	14.431	9.341	9.971	12.612	11.799	13.543	6.6275	7.9336	6.8174	25.3429	28.1788			0.675532	10.6499
15.2364	6.5048	4.4419	6.2511	6.6107	4.4048	5.0384	6.7532	12.395	10.083	12.259	10.83	12.522	13.12	5.0931	7.9877	7.3399	14.2526	22.0542			0.68085	9.33008
15.3555	5.0234	4.6296	10.2502	9.7735	14.4142	5.2595	8.9285	9.793	9.412	12.516	17.533	10.025	14.6773	8.399	7.5802	9.8653	13.8501	22.1125			0.686172	10.7801
15.4745	4.6716	2.805	5.6853	7.1789	10.9434	3.2663	5.7113	13.714	11.628	12.641	19.842	12.412	16.6169	5.881	4.3045	10.4656	9.8661	19.4711			0.69149	9.83911
15.5935	6.0837	4.1219	4.0517	11.5133	9.8412	3.6737	7.8792	7.411	13.07	10.689	17.991	14.864	14.7644	7.817	4.8045	7.1701	11.8116	27.6432			0.696807	10.2889
15.7126	9.0137	2.4246	8.5829	8.225	8.4009	3.3424	7.9608	9.274	13.934	15.075	19.099	15.509	22.658	6.322	4.552	5.6844	9.2174	25.9517			0.702129	10.8459
15.8316	5.6682	5.6547	6.7883	9.3488	5.78	4.6778	6.9884	12.069	18.154	18.585	20.562	8.987	22.0312	7.0801	4.7879	3.3162	7.6744	20.7369			0.707447	10.4939
15.9506	5.2497	2.2443	5.1104	7.243	6.2084	4.4699	6.4398	13.349	21.66	22.534	17.405	12.29	22.4121	8.3732	5.8952	7.6154	10.2934	24.9858			0.712764	11.321
16.0697	8.3542	2.729	2.8523	5.5137	6.8473	7.4909	8.3599	8.94	21.241	21.453	18.017	12.606	17.6834	8.5138	4.9534	10.9432	11.6557	12.6215			0.718087	10.5986
16.1887	10.8048	4.9714	4.5985	7.0735	6.1151	4.2393	7.6626	9.805	15.05	26.36	14.413	14.347	12.5818	5.0943	8.1761	7.6798	14.5479	16.0031			0.723404	10.5291
16.3077	9.0756	2.9621	8.6732	12.1692	5.5741	4.2856	8.5125	11.014	15.923	18.616	12.794	10.349	17.0827	6.8751	7.0393	6.1561	12.7233	19.5775			0.728722	10.5224
16.4268	4.8227	2.8671	1.5112	8.0102	8.1391	5.5572	9.0336	13.649	16.237	16.121	8.601	11.681	12.2239	5.9094	6.8549	4.6231	19.2593	17.2083			0.734044	9.57272
16.5458	7.6691	2.8043	5.103	9.3942	8.5139	4.2025	12.4752	8.573	15.566	18.451	13.528	10.602	17.83	3.1684	6.2826	8.7898	18.1934	23.4071			0.739361	10.8085
16.6648	11.8367	4.4362	7.6607	10.3487	8.2091	3.1915	10.2045	9.392	14.896	15.207	11.679	12.3	14.5523	4.5401	7.1423	7.2295	11.8962	30.0664			0.744679	10.8216
16.7839	9.564	3.5706	9.4141	5.8129	8.7156	5.7082	11.2496	11.747	16.788	12.712	12.347	9.754	13.2892	5.2588	6.6231	9.5527	21.3953	29.0144			0.750001	11.2509
16.9029	8.7605	7.979	3.776	10.9498	7.7166	4.5656	10.11	10.585	11.299	21.044	13.142	9.974	14.8118	3.86	5.0827	7.8001	24.0983	22.7184			0.755319	11.0152
17.0219	4.2373	6.5368	2.9523	9.3803	12.4663	4.1363	10.2045	9.639	14.9	20.991	13.933	6.227	16.2814	4.751	8.2017	9.1673	16.1078	19.2229			0.760636	10.5187
17.141	7.8773	5.911	9.9093	13.1228	15.0281	3.6844	12.2172	11.129	11.732	20.425	11.954	7.986	16.895	4.8731	3.5212	6.7953	12.6766	19.3121			0.765958	10.8361
17.26	9.2541	4.7747	10.958	9.0081	7.573	4.6364	13.8539	9.866	15.395	17.194	14.37	11.126	15.1726	10.5937	3.6414	11.5649	11.3918	20.5925			0.771276	11.1648
17.379	9.8012	6.3755	6.1992	10.7794	11.7544	5.8758	12.6232	7.255	16.037	12.669	13.422	16.781	10.4039	9.6463	4.7597	7.6394	8.8688	19.8746			0.776594	10.5981
17.4981	7.8695	4.202	3.6293	7.1461	7.4272	6.635	19.3184	11.355	15.144	17.83	11.055	11.177	13.2451	9.0878	8.9347	4.099	8.859	22.1305			0.781916	10.508
17.6171	7.3771	8.1167	6.5236	8.4525	9.4959	5.4404	17.6188	15.048	12.757	17.405	9.127	11.468	11.9145	9.9391	2.6047	6.378	10.1204	12.151			0.787233	10.1076
17.7361	4.9309	5.0818	9.6568	6.4739	9.2476	6.2736	5.3807	9.811	14.191	15.862	7.909	11.674	11.5475	11.7309	3.4045	9.0481	10.1524	16.1343			0.792551	9.36167
17.8552	5.8928	5.1397	5.9474	5.2798	6.178	6.7625	10.8431	9.855	11.904	11.769	5.646	8.181	16.5424	10.8024	5.1762	11.6052	8.1732	18.9957			0.797873	9.14963
17.9742	2.0111	5.0029	5.534	7.2493	5.1612	6.4404	8.6153	12.054	5.844	9.181	13.945	11.644	11.5682	14.1381	9.3714	12.6525	10.3678	12.1691			0.803191	9.05274
18.0932	3.1173	5.0626	5.3305	8.438	6.5278	12.5853	9.7517	11.535	4.469	15.505	13.459	10.988	10.9334	14.8973	7.4958	7.9941	12.7703	14.2969			0.808508	9.73094
18.2123	4.2663	6.8806	9.1404	8.4969	8.3908	5.1809	14.2829	7.241	3.586	12.045	9.199	8.049	12.3511	16.7119	12.9968	10.7477	9.7089	9.8215			0.81383	9.39426
18.3313	4.6813	5.9502	6.8087	9.5315	6.6486	5.555	12.3441	9.513	7.656	14.964	8.876	7.903	12.6846	12.1161	9.9306	13.9086	12.6464	11.8426			0.819148	9.64224
18.4504	6.5977	5.115	10.119	8.2395	8.6648	8.2539	8.7076	8.438	7.92	8.098	4.76	9.451	6.4557	12.5661	12.1209	17.106	16.8291	7.332			0.82447	9.26524
18.5694	2.4049	7.613	8	8.6533	13.4602	6.6662	10.02	7.344	6.864	9.467	3.993	6.516	12.0252	14.8527	14.4157	17.0991	11.1887	6.9237			0.829788	9.30593
18.6884	5.6515	8.2644	10.9073	8.6095	14.2707	6.6701	8.6713	7.633	7.696	10.498	4.603	5.101	12.3828	15.1	12.5342	9.8839	16.0901	10.079			0.835105	9.70254
18.8075	7.6972	4.2915	12.2981	8.1771	18.1524	6.7555	5.0065	7.949	4.478	8.87	6.485	5.879	14.294	20.5258	13.44	13.8842	17.1481	7.9182			0.840427	10.1805
18.9265	3.6159	7.2942	6.8531	6.9897	11.7127	8.5677	3.3899	8.603	2.326	6.867	5.709	7.089	10.7011	18.4052	14.7842	20.6089	17.9318	7.0833			0.845745	9.36287
19.0455	3.4282	5.3479	6.8187	10.1158	15.9809	9.2515	4.9694	4.865	6.014	7.091	6.753	5.637	12.3755	14.3008	14.8642	18.085	23.9781	4.797			0.851062	9.70406
19.1646	4.3789	8.139	5.443	7.6801	6.7274	6.3651	4.0315	4.45	4.99	8.242	5.567	3.419	14.616	15.3679	18.4855	17.5121	24.2708	2.4424			0.856384	9.00709
19.2836	7.6591	5.847	11.6509	4.167	7.5555	4.8609	6.311	3.887	4.861	5.412	5.849	9.042	12.3444	20.2856	20.5068	14.5391	26.9714	6.4943			0.861702	9.90244
19.4026	7.0917	6.198	5.3501	4.7489	8.7014	9.1727	5.2035	4.483	3.304	3.386	4.334	9.055	5.3398	17.3989	19.3074	11.1464	29.4672	5.0481			0.86702	8.81867
19.5217	5.0816	10.0261	5.8285	3.6388	6.5057	8.5486	3.5675	4.54	4.706	5.034	2.617	4.795	4.2232	12.6591	20.7104	22.0964	16.1138	4.5018			0.872342	8.06631
19.6407	9.3636	6.9925	9.4232	4.6819	5.7852	6.7276	5.3677	7.407	4.221	8.019	1.988	4.536	4.0147	5.7532	14.9609	17.3453	15.9337	5.6928			0.877659	7.67852
19.7597	6.5442	6.1034	8.8588	7.094	9.9908	3.5271	4.5527	5.155	3.205	5.871	6.644	4.042	4.4034	7.8765	11.2044	13.1491	10.9228	2.6132			0.882977	6.7643
19.8788	6.0988	5.0761	7.0585	3.3549	6.2738	3.933	3.3594	7.108	4.221	3.712	4.871	1.628	4.9922	6.7885	11.5825	14.7406	9.648	4.8161			0.888299	6.07013
19.9978	7.2672	5.4293	10.5626	3.2952	4.2755	6.2988	3.2113	4.94	2.902	2.356	3.574	2.693	5.4762	10.1824	6.6305	16.4574	6.5861	4.7492			0.893617	5.93815
20.1168	4.6534	6.302	6.3377	11.5291	5.3896	4.5743	2.958	3.845	2.649	2.005	3.212	6.945	3.1429	9.3772	7.2797	13.6166	4.7671	5.2879			0.898934	5.77064
20.2359	6.9142	9.7698	7.4953	6.3374	3.9537	3.4681	5.7846	2.423	1.54	2.366	7.467	5.677	4.4399	5.079	11.0665	19.5662	5.7901	3.5712			0.904256	6.26161
20.3549	11.1924	4.9321	6.8836	4.2701	4.8978	6.0158	8.4711	8.849	3.19	3.167	7.859	5.724	4.1793	3.1952	7.8372	11.1178	4.6642	1.6038			0.909574	6.00274
20.4739	5.9766	4.2324	2.9893	3.2855	4.9715	3.6146	8.568	7.421	5.659	3.363	5.135	7.853	2.4364	6.0246	6.4051	12.6624	5.5508	4.0056			0.914892	5.5641
20.593	4.6521	5.9279	6.6176	3.0731	6.1744	4.3354	2.7615	5.032	6.553	4.91	4.229	2.215	3.3475	4.8912	9.0782	16.677	6.2716	4.6384			0.920214	5.63249
20.712	3.3832	4.9994	3.5238	11.2141	5.5826	5.6742	4.8607	8.258	2.911	1.083	6.007	3.672	6.5165	2.7424	7.4091	12.123	6.4608	2.1656			0.925531	5.47702
20.831	2.0865	4.4799	2.8735	7.6225	5.2566	5.2896	7.5407	2.352	3.245	1.316	5.309	4.194	5.7961	4.1983	6.8068	14.6675	5.3801	5.2278			0.930849	5.20233
20.9501	5.2062	4.1819	7.8115	4.736	7.3322	4.1728	5.114	3.833	3.99	3.338	4.051	3.862	7.2362	6.0004	5.1222	15.9144	7.4967	3.326			0.936171	5.70692
21.0691	2.325	1.7409	5.2558	1.8232	4.0828	3.5589	4.435	7.076	4.732	4.837	3.449	7.693	2.8444	2.0434	5.059	9.6877	7.1036	2.5699			0.941488	4.46203
21.1881	1.9996	0.9866	7.8681	3.1814	4.5975	6.2285	6.2855	2.511	6.125	3.542	6.281	6.87	2.9199	6.2254	6.3259	8.2004	3.6064	1.4011			0.946806	4.73085
21.3072	5.3982	3.163	3.16	7.2906	5.9231	6.8564	9.0956	4.113	5.386	3.518	4.837	3.996	3.5318	1.9608	7.3854	7.8811	3.1779	6.3845			0.952128	5.16991
21.4262	4.2332	3.5268	3.9926	3.3768	7.6162	5.5639	9.8205	3.791	9.731	4.473	6.784	5.146	4.044	2.4605	5.5085	7.0858	6.4794	5.8608			0.957446	5.52744
21.5452	3.0743	1.5864	1.8019	6.2449	5.4504	6.8567	4.8247	5.007	8.864	7.951	4.617	5.186	4.054	3.9905	4.3326	4.5685	3.143	5.6722			0.962763	4.84584
21.6643	4.6682	2.3283	5.0039	9.0915	8.6874	8.4043	4.3245	5.464	6.385	4.524	5.521	5.899	2.1757	2.7226	1.7079	4.2677	3.9397	7.0749			0.968085	5.12164
21.7833	5.4715	4.0988	7.4464	6.418	6.5845	7.5664	4.8004	9.34	4.525	3.29	8.18	6.751	4.649	2.6304	3.1588	4.1221	3.5692	4.0653			0.973403	5.37038
21.9024	5.2223	4.6455	3.3654	7.7189	7.4165	7.6512	7.8976	7.58	7.971	5.208	6.712	6.086	4.4901	3.5492	3.7277	5.3789	1.5123	6.104			0.978725	5.67981
22.0214	6.5492	5.4587	1.9471	4.8	7.7972	9.2513	7.9087	6.478	8.988	4.837	4.643	4.197	3.5016	6.3364	5.2042	3.9048	8.6101	6.9115			0.984043	5.96243
22.1404	5.4967	3.1585	4.3019	2.9279	6.3134	10.0331	9.8013	6.847	7.023	3.971	5.182	3.87	3.2946	5.063	2.1524	2.7782	3.5179	8.125			0.98936	5.21427
22.2595	7.6997	2.7969	6.6508	4.1383	4.894	7.494	4.0921	4.995	8.821	4.093	3.258	4.971	2.8812	4.0657	6.2147	3.8218	5.1526	9.7233			0.994682	5.32017
22.3785	5.0043	6.3849	5.5274	5.3442	7.7712	8.7649	2.7895	5.155	8.698	4.655	5.161	6.636	3.7475	4.7526	6.8678	3.9854	4.712	15.1941			1	6.17504

## Sheet: Image7
X0	Y0	Y1	Y2	Y3	Y4	Y5	Y6	Y7	Y8	Y9	Y10	Y11	Y12	Y13	Y14	Y15	Y16	Y17	Y18	Y19	Y20			Ap-Ba	Av int
0	80.237	78.5263	59.8684	80.5	93.763	85.684	94.053	95.3421	86.3947	87.7368	98.0263	76.2895	80.974	91.737	77.289	83.263	98.211	78.3947	70.5	89.7368	89.5			0	84.5727
0.119	109.5	71.1579	75.3421	85.974	96.868	79.289	82.711	75.1579	87.3158	92.1579	94.6579	65.6579	79.079	72.974	84.632	77	90.816	80.0263	70.8684	84.4211	85.9474			0.00746053	82.9311
0.2381	93.105	79.2368	73.0789	82.421	112.711	81.921	73.316	82.5526	88.4474	59.1053	79.1053	80.7895	60.868	84.816	87.158	75.289	91.237	82.5263	95.0789	77.7632	64.4211			0.0149273	81.188
0.3571	88.421	90.6316	56.6842	74.079	93.079	93.789	88.105	78.1053	86.0789	88.8684	69.1316	76.1842	62.842	72.789	92.184	74.211	90.421	67.9474	72.7895	74.4737	90.4474			0.0223879	80.0601
0.4761	80.474	72.3158	66.9737	74.132	126.579	72.5	100.789	65.9737	77.6579	78.3684	81.3158	90.3158	79.263	88.395	102.895	78.711	80.553	82.0789	83.6316	71.7105	68.7368			0.0298484	82.0652
0.5952	75.158	92.6579	65.3158	91.632	105.711	88.842	76.711	78	79.9474	75.4474	85.4211	72.1053	87.395	93.211	111.447	93.158	88.158	67.1579	72.8421	84.4474	75.0526			0.0373152	83.8009
0.7142	100.868	84.9211	63.1316	88.053	93.026	89.658	90.605	74.6053	64.1579	52.8947	68.1579	65.8158	88.947	88.395	117.237	108.947	116.737	92.8684	70.4737	65.0526	59.4211			0.0447757	83.0463
0.8332	88.5	79.8684	77.3684	93.395	94.395	67.789	84.474	77.8947	57.2632	66.3684	57.8684	80.6053	109.947	98.184	129.632	118.816	84.5	79.7632	77.5263	49.1053	72.8684			0.0522363	83.1491
0.9523	82.237	83.6053	77.3684	98.263	110.921	86.132	85.711	67.2368	56.6316	60.8947	58.4737	64.2632	134.842	134.263	120	126.158	102.526	84.6053	61.1053	55.8421	69.7368			0.0597031	86.7055
1.0713	109.763	73.8684	62.5789	105.763	111.632	64.474	84.737	62.5789	42.3947	51.0789	72.2368	61.5526	142.605	142.605	131.763	153.605	131.105	100.632	80	62.9474	65.1842			0.0671636	91.1002
1.1903	78.447	69.6053	89.9474	132.237	120.632	66.789	83.868	55.7895	60.1842	53.3421	67.8684	42.5789	140.237	152.763	125.026	150.105	142.947	86.4474	72.7895	57.2368	59.0263			0.0746242	90.8508
1.3094	84.5	72.3947	72.6316	111.211	113.289	73.132	83.421	46.2632	37.4474	63.1053	50.6316	41.8684	142.342	126.895	129.053	162.553	148.921	74.8684	98	57.0789	77.1579			0.082091	88.8935
1.4284	93.605	68.3158	71.7895	99.132	127.263	76	105.658	46.3421	43.7632	52.7105	62.7895	46.4474	150.395	137.868	119.316	144	142.079	79.6316	76.5	60.8684	76.5			0.0895515	89.5702
1.5474	95.842	86.6316	74.3421	90.053	100.237	70.421	100.289	52.2895	32.2895	42.1842	56.2105	31.7895	156.711	142.5	116.947	128.421	123.763	82.0789	84.8684	59.5	75			0.097012	85.8271
1.6665	88.763	93.1316	60.0789	99.237	99.947	73.763	96.368	37.4737	35.7368	57.3947	65.9474	41.3684	160.395	121.737	114.868	130.237	131.421	87.4211	79.4737	44.4211	80.2368			0.104479	85.6867
1.7855	67.289	89.2895	65.5263	100.053	94.105	66.395	99.632	57.5263	37.7632	42.5	59.8684	39.1316	142.763	120.316	121.5	125.316	99.289	69.0263	84.7895	55.2895	80.6842			0.111939	81.812
1.9046	80.895	90.7368	67.8421	107.763	99.816	72.684	115.132	51.7105	35.5789	28.7895	57.8947	31.5263	132.5	113.526	115.342	111.789	98.026	87.1316	91.6579	48.4211	76.6053			0.119406	81.6842
2.0236	71.868	75.8158	76.2632	131.342	84.974	91.526	122.263	44.8421	40.6842	45.8947	55.6053	31.1579	118.579	101.447	112.974	86.053	86.421	91.5263	71.2105	47.6842	55.8421			0.126867	78.2844
2.1426	71.158	80	88.6053	113.263	95.921	72.658	131.289	65.6053	42.2105	36.5789	62.2632	31.1316	120.421	92.921	115.395	63.158	91.789	93.2105	68.6842	43.7368	60.6053			0.134327	78.124
2.2617	63.553	75.3158	81.5	112.079	82.658	108.816	119.868	69.7105	45.0789	34.5	52.8947	36.9737	127.026	74.711	90.447	66.368	97.816	67.4474	54.7105	55.3684	80			0.141794	76.0401
2.3807	71.263	78.4474	68.1053	99.395	76.947	106.211	122.289	61.1579	36.6842	32.3947	43.7632	33.2368	103.658	68.868	76.5	44.368	79.816	75.1316	54.7368	34.6316	75.0789			0.149255	68.6992
2.4997	46.921	49.1842	52.3158	105.553	55.763	120.079	109.684	76.6053	58.1842	37.4737	49.8421	35.6316	93.079	70.579	80.684	46.816	76.105	71.2105	50.5526	38.9474	71.2105			0.156715	66.4962
2.6188	48.316	60.3158	62.1053	94.526	73.237	122.421	124.974	75.1316	46.3158	37.9474	36.6579	40.8421	69.579	58.553	70.447	36.974	71.763	61.9211	54.2105	31.9474	57.7368			0.164182	63.6153
2.7378	51.368	50.4737	43.8421	85.395	60.053	120.921	151.816	76.0263	58.9474	28.3947	31.7368	32.7895	71.105	48.289	59.842	33.895	59.684	65.9474	34.5263	43.6842	58.0263			0.171642	60.322
2.8568	62.105	54.2105	44.3158	88.868	52.5	120.211	119.947	74.6316	56.3421	25.1316	49.0263	47.0789	58.921	53.132	66.789	35.421	69.711	55.3421	34.7368	38.2368	66.6842			0.179103	60.6353
2.9759	51.632	30.1316	34.8684	66.474	42.579	126.289	115.605	93.3158	51.0526	26.8947	44.3684	43.3684	67.763	57.132	63.395	42.868	77.711	51.0526	35.0789	27.7895	60.0263			0.18657	57.5902
3.0949	54.974	43.1579	28.6842	65.342	24.553	106.658	86.105	93.9737	47.7632	27.8684	42.4737	48.9211	85.789	37.158	48.342	33.553	65.605	49	30.9211	22.3684	88.9474			0.19403	53.9123
3.2139	55.816	40.8684	25.3947	43.447	41.526	91.132	88.237	88.1053	53.8947	26.5526	45.3421	45.0526	63.789	60.263	58.895	37	70.395	41.2632	31.6842	31.2895	68.9737			0.201491	52.8058
3.333	51.895	52.3684	30.7105	49.921	34.974	93.947	79.079	97.5789	63.8421	21.7368	40.6842	45.3421	61.763	33.421	50.553	35.026	61.684	51.7895	39.0526	24.6053	75.1579			0.208958	52.1491
3.452	65.5	41	23.1316	46.684	28.605	88.263	59.868	92.3158	49.0263	23.6053	45.2632	42.7105	48.342	52.5	52.789	40.684	54.868	33.3158	32.1316	38.2105	68.1842			0.216418	48.9047
3.571	53.132	37.8158	21.8421	37.079	27.737	86.921	55.868	80.8158	42.6842	28.9211	37.8158	34.2632	40.342	45.842	49.105	48.132	44.237	40.9737	35.0526	30.3158	69.0526			0.223879	45.1404
3.6901	36.184	31.7105	20.3684	39.526	32.632	73.474	57.316	78.7105	54.8684	18.8947	36.3158	41.0263	47.921	36.5	45	34.895	47.342	29.8421	37.1579	25.2895	65.2632			0.231346	42.3923
3.8091	44.316	34.3158	24.0789	36.632	29.237	72.658	56.5	78.8421	44.8684	25.1842	22.8158	27.6579	32.421	35.711	50.105	32.5	32.895	41.3947	45.7632	24.1579	47.8158			0.238806	39.9938
3.9281	37.368	37.1579	23.4737	39.5	27.579	70	61.974	81.8158	45.6053	14.6842	31.5789	36.2895	51.447	25	46.158	34.158	41.026	38.9211	32.7105	23.8947	57			0.246267	40.8258
4.0472	45.632	51.9737	22.6053	35.763	30.5	71.211	51.895	54.9211	46.7105	26.7105	20.8947	34.3421	45.579	38.158	40.053	32.368	30.474	40.1842	32.4211	26.1316	68.8684			0.253733	40.3522
4.1662	36.105	52.1579	15.7368	23.263	33.132	53.105	61.026	62.2368	60.2105	10.6053	26.6842	38.8947	34.921	28.763	34.368	30.658	30.026	44.7368	32.8158	25.5263	57.6316			0.261194	37.743
4.2852	32.368	41.6842	21.5	26	42.184	44.395	56.895	57.5	59.6579	19.6053	27.4737	27.8684	34.579	34.395	52.447	39.079	43.132	39.9737	30.3158	33.1579	60.8421			0.268654	39.2882
4.4043	26.895	40.3421	20.8421	26.763	50.5	56.026	55.711	61.5	61.6579	16.9211	28.1579	24.7895	40	24.737	42.737	40.421	25.474	23.9737	36	29.1842	65.4737			0.276121	38.0051
4.5233	24.553	29.1842	18	28.605	47.711	46.5	64.579	48.6579	71.6316	17.3421	36.2632	26.4211	36.605	32.711	33.184	33.632	26.368	30.1842	38.7895	43.7632	50.8158			0.283582	37.4048
4.6423	29.263	43.2632	19.2895	24.053	43.158	54.132	60.289	51.0526	63	20.2632	33.7368	24.7105	24.026	26.526	30.947	51.632	30.474	31.8947	36.4737	27.3947	51.4737			0.291042	37.0025
4.7614	35.789	23.8421	20.3421	28.842	44.526	59.289	69.868	42.9474	64.0526	14.9211	24.7895	29.3158	28	23.658	31.289	45.026	24.289	36	50.6316	31.5	31.2632			0.298509	36.1991
4.8804	31.342	24.4474	15.6053	42.5	35.842	51.368	56.158	37.9211	58.4211	28.5789	30	17.3158	27.579	24.447	28.316	41.474	25.868	23.1579	31.7105	31.5526	36.5526			0.30597	33.3408
4.9995	30.421	19.9737	8.6316	42.526	27.974	51.553	67.737	42.6842	25.5263	12.8684	24.9474	8.9474	23.053	28.868	27.579	48.263	27.579	31.8947	39.1316	35.1053	44.3684			0.313436	31.8872
5.1185	23.158	22.2895	14.1316	24.658	44.105	52.421	62.842	42.3947	35.6842	21.7895	23.1316	13.2895	25.868	20.816	32.842	40.368	39.395	27.2368	33.6579	26.1842	29.1316			0.320897	31.2092
5.2375	28.974	16.9474	14.1053	19.079	39.368	58.342	59.421	29.5789	40.7105	22.9737	21.8158	18.5789	29.579	24.816	23.237	40.211	32.974	30.5789	25.6842	20.2632	18.5			0.328358	29.3208
5.3566	27.368	15.6053	13.8684	14.658	53.605	40.605	70.737	28.7105	37.3421	19.6579	22.2368	18.8158	22.632	18.895	45.579	33.421	35.974	24.7895	28.6316	27.3158	20.0263			0.335824	29.5464
5.4756	26.053	19.1053	11.2895	23.132	35.368	38.895	51.474	25.7105	42.1842	11.4211	11.8158	28.0526	14.763	25.132	25.658	36.421	23.868	37.0263	28.7105	29.1579	17.0789			0.343285	26.777
5.5946	20.842	13.2895	15.5263	23.368	29.605	40.921	45.947	29.5789	39.8947	10.9737	17.8684	28.7368	27.368	28.079	25.632	21.868	38.605	24.9211	33.9211	28.0789	20.1316			0.350745	26.9122
5.7137	29.632	18.5263	22.7368	26.158	33.737	25.789	45.447	27.8947	30.7368	18.1579	14.5526	20.6579	16	25.842	22.105	19.368	35.711	23.1316	31.5526	29.0789	21.4211			0.358212	25.6303
5.8327	24.526	13.6579	14.5	15.763	23.263	32.816	39.368	19.5263	35.7632	14.5789	6.2895	25.9737	21.711	30.974	23.368	18.184	46.053	21.8421	18.5789	20.9737	21.0526			0.365673	23.2744
5.9517	16.474	24.3421	14.5526	21.132	33.053	39.947	48.737	22.8684	24.3158	13.0526	13.1053	32.5	18.579	29.132	33.526	13.658	39.579	23.6053	22.7895	25.7895	20.3947			0.373133	25.292
6.0708	16.605	13.7632	11.3421	9.553	22.658	32.289	36.658	20.9211	28.0526	9.2105	7.3684	35.0789	24.895	14.447	32.737	17.053	23	26.3158	17.2632	27.1316	14.8684			0.3806	21.01
6.1898	21.921	14.6053	18.2105	8.895	25.947	22.447	36.842	19.5	28.5	11.8684	11.7632	35.2895	31.711	19.368	33.026	14.026	27.395	27.4737	27.8158	27.3158	26.8947			0.388061	23.3721
6.3088	19.132	11.1842	18.6842	16.421	25.605	24.421	52.263	22.6316	23.0263	13.5263	13.5	32.6842	31.842	10.132	19.526	18.842	31.184	33.2368	16.4211	21.2368	22.1842			0.395521	22.7468
6.4279	33.895	22.2632	13.2632	13.947	22.868	14.395	50.421	18.1316	29.3158	13.4737	12.7632	20.6842	39.395	14.526	34.579	20.553	32.711	17.7632	19.2368	15.6579	19.2105			0.402988	22.8121
6.5469	37.026	21.5	21.4737	17.132	24.921	18.053	50.947	24.1053	27.8421	12.2368	12.1316	18.8947	37.553	12.789	27.553	17.579	19.579	13.8947	25	15.7105	21.3684			0.410449	22.7281
6.6659	33.368	28.4211	22.5789	13.447	47.947	23.316	39	16.8421	21.7105	4	3.7895	16.7105	23.289	7.053	25.842	12.947	24.132	23.5	22.0789	18.3684	21.1579			0.417909	21.4047
6.785	37.737	19.6842	16.4737	15.289	32.658	19.789	42.237	15.5526	30.8421	10	8.7368	13.9211	20.921	18.447	19.184	22.816	20.342	17.7632	21.6316	26.6053	19.7105			0.425376	21.4448
6.904	36.316	26.9737	20.7895	9.316	47.184	12.947	34.263	20.7105	26.6579	8.2105	6.7895	12.1316	17.474	19.711	23.526	18.237	25.211	21.1316	22.3947	31.5526	17.6579			0.432836	21.866
7.023	38.263	17.6579	14.2368	20.474	35.263	14	36.5	24.0263	22.2105	14.1842	14.0263	11.8684	16.5	21.974	27.395	16.605	24.053	19.0789	19.7368	19.5	12.5526			0.440297	20.9574
7.1421	24.316	17.5789	18.3684	13.211	36.895	14.763	14.395	14.9737	17.8947	8.9737	5.5789	13.6053	26.684	11.211	22.316	20.842	14.974	19.1842	22.8947	16.8684	15.7105			0.447764	17.678
7.2611	32.316	14.3684	13.2105	14.474	26.474	20.132	23.342	16.5263	18.8421	8.5789	5.5789	13.1316	13.763	18.553	15.132	20.289	22.763	16.8421	20.3421	18.4211	14.4737			0.455224	17.5026
7.3801	27.132	8.6579	12.3158	13.237	27.895	19.816	22.763	27.2632	23.6316	6.4211	15.3421	13.7368	12.895	17.105	11.105	21.579	15.395	18.0263	26.4737	19.2105	15.5526			0.462685	17.8835
7.4992	30.079	9.0263	15.7895	15.737	19.711	17.579	24.605	19.5	22.5526	5.6842	1.6842	15.0263	22.053	8.895	15.5	23.184	17.895	15.7105	18.8947	20.8684	9.3158			0.470152	16.6329
7.6182	26.079	6.6579	14.2895	13	18.711	12.526	27.711	24.9737	25.5	7.6579	6.0789	12.4211	13.184	9.553	11.105	19.737	13.684	17.4474	23.4211	12.9737	7.6316			0.477612	15.4449
7.7372	24.026	10.1579	9.5	14.816	19.947	18.447	37.368	19.0526	22.1842	5.2105	9.3684	14.3684	22.895	10.342	20.263	22.684	25.763	17.6316	23.8421	22.4737	13.1579			0.485073	18.2618
7.8563	25.737	5.9211	4.6842	15.184	21.474	13.342	28.316	18.4737	20.0526	10.1579	6.5789	19.0526	7.816	7.132	14.684	25.342	22.026	24.9211	14.2105	27.9211	9.1842			0.492539	16.2958
7.9753	25.368	5.5263	10.5	18.158	16.342	8.447	23.368	20	13.1316	4	11.1579	17.9737	16.711	7.105	11.053	26.658	30.789	20.7368	16.2632	16.6842	11.9211			0.5	15.8045
8.0943	18.237	4.7368	6.6316	7.553	21.105	14.053	26.5	20.3158	19.3684	10.8421	7.3947	9.6579	17.658	5.632	15.474	22.211	27.737	27.8684	16.4211	16.9737	3.1579			0.507461	15.2156
8.2134	18.211	8.3947	11.3684	18.289	20.237	14.921	33.526	24.0526	16.4737	8.4474	4.5	12.3158	6.053	8.947	13.947	20.5	32.579	25.9737	13.8684	22.5526	10.7632			0.514927	16.4724
8.3324	18.079	5.5526	9.9737	10.316	17.263	13.342	26.895	17.3421	23.8421	12.2895	7.4737	9.6579	13.474	10.053	14.053	24.684	29.289	14.7368	16.7895	20.2895	7.3947			0.522388	15.371
8.4515	16.658	9.4474	14.5526	13.711	16.947	14.868	31.737	20.3947	20.1579	6.7105	8.1579	11.1579	12.579	10.632	7.105	16.947	32.895	13.7368	12.8684	16.5526	8			0.529855	15.0388
8.5705	13.447	5.8158	11.8421	5.316	14.395	18.605	28.658	22.6316	14.9211	5.2632	3.8421	8.6842	14.184	2.632	20.921	23.263	34.289	27.6316	15.8158	12.8421	4.3684			0.537315	14.7318
8.6895	18.605	4.3684	10.7368	11.421	16.026	26.974	13.763	35.4474	15.4737	6.0789	10	9.7368	13.368	12.263	13.132	23.737	29.763	15.6316	15.0789	17.2632	7.9737			0.544776	15.5639
8.8086	16.316	5.6316	8.8158	13.474	19.026	20.289	17.026	23.0789	16.7632	6	6.3684	10.1053	18.395	7.5	11.289	17.842	31.789	13.6579	15.5789	11.7632	11.3947			0.552243	14.3859
8.9276	12.263	5.5	8.1579	14.921	21.632	21.921	13.816	26.8421	17.2895	4.6842	3.6842	8.7368	19.974	3.474	12.132	24.079	33.316	14.3947	15.0263	11.5263	7.5789			0.559703	14.3309
9.0466	11.5	6.5789	11.2105	15.289	29.237	24.342	12.553	24.8947	16.6579	7.1316	6.1842	8.5789	20.368	7.632	13.289	18.763	37.579	18.5263	25.0526	15.4211	11			0.567164	16.2757
9.1657	14.895	3.6579	11.1053	10.263	21.132	16.947	18.632	26.2895	19.9211	8.2895	2.0263	12.9737	17.763	11	13.684	12.526	22.211	21.5	29.6579	14.0263	5.3421			0.57463	14.9449
9.2847	15.632	6.9474	11.9211	6.684	17.711	11.711	12.053	16.7368	10.8947	5.6842	7.4474	13.7632	16.026	6.395	19.026	7.895	18.868	25.4474	35.7895	9	10.8158			0.582091	13.6404
9.4037	10.342	8.5789	7.1053	9.395	16.921	16.395	25.895	18.7895	16.3947	2.2105	5.2105	15.1579	17.789	6.711	13.447	16.947	19.605	17.6842	34.2368	13.2895	7.8947			0.589551	14.2857
9.5228	16.447	8.2105	7.4211	6.763	14.921	12.789	17.474	17.6316	13.8684	2.3684	6.2895	16.0526	10.342	6.684	12.526	11.316	16.868	16.9211	28.8947	6.9737	7.1579			0.597018	12.2819
9.6418	17.711	5.9474	5.2632	15.579	23.263	11.053	18.421	21.6842	17.5789	11.6579	4.1579	11.6579	15.737	7.421	15	13.026	14.132	7.5263	16.5789	8.8421	5.8684			0.604479	12.767
9.7608	9.158	4.4737	13.4737	9.447	11.605	15.711	20.711	21.2368	21.4737	4.7895	4.8947	20.8158	10.316	7.105	16.342	17.5	17.526	15.7368	14.5	8.3158	7.2895			0.611939	12.9724
9.8799	11.5	12.0789	7.1316	10.868	15.553	16.105	19.658	23.3684	22.2632	8.6842	4.3158	12.6579	8.816	3.684	14.289	20.184	16.895	17.9474	19	11.6316	5.7895			0.619406	13.4486
9.9989	11.342	5.1842	9.9474	6.421	13.868	15.632	15.447	26.1053	19.8947	13.4474	10.3684	7.4211	11.368	10.5	11	13.921	15.684	6.3947	11.8421	14.9737	5.6579			0.626867	12.2105
10.1179	8.158	20.5789	10.2368	7.947	14.289	13.158	21.868	17.5	20.9211	11.3947	2.6842	11.3947	9.553	8.974	7.632	20.579	10.263	13.6053	11.0526	7.4737	10.5263			0.634327	12.3709
10.237	7.763	19.7895	4.3421	8.079	9.684	13.763	20.553	18.6053	30.0789	8.0263	2.2368	11.4737	14	10.684	9.053	24.842	18	14.8947	12.1579	7.3158	6.7895			0.641794	12.9586
10.356	8.105	11.9737	9.8684	8.368	16.026	17.605	17.895	11.1842	34.9737	7.3158	2.2632	10.4211	11.474	7.526	9.737	20.947	14.395	19.7632	9.3421	14.7895	10.6316			0.649255	13.0764
10.475	3.842	10.0526	7.5263	12.368	21.447	12.5	17.921	9.1053	21.7368	5.0263	6.1316	6.8684	13.684	6.132	14.842	21.947	17.5	18.6053	13.0263	6.8684	7.3158			0.656715	12.1165
10.5941	5.132	15.5526	8.6579	9.658	14.763	14.342	20	10.8421	22.5789	3.8421	6	8.0789	16.079	4.842	15.868	19.921	22.684	16.4737	15.2368	7.6579	4.7895			0.664182	12.5238
10.7131	11	8.6053	10.4474	9.711	19.553	19.079	16.184	16.4474	18.3947	5.3684	4.3684	26.0526	10.053	12.368	8.237	21.974	13.789	9.3421	22.2895	15.6579	7.3947			0.671642	13.6341
10.8321	5.342	8.4474	9.9474	10.658	24.5	18.421	18.816	13.8947	19.2895	3.6316	8.3684	9.4737	12.316	8.947	19.289	21.237	13.447	13.7368	20.4474	12.7632	6.3421			0.679103	13.3007
10.9512	5.737	6.8684	13.2632	11.632	17.553	18.132	16.132	8.0526	20.2895	8.7368	4.3158	12.2368	12.053	12.579	16.105	27.737	13.474	14	14.0526	11.3158	8.1579			0.68657	12.9725
11.0702	8.211	12.0263	5.8421	9.263	30.105	20.026	18.711	8.7368	23.7632	6.5526	2.5263	15.1579	15.921	6.789	7.579	19.053	12.895	13.5789	16.3421	4.8421	9.6053			0.69403	12.7394
11.1892	14.526	9.6842	13.9211	6.421	16.737	19.158	15.895	19.4737	17.1842	4.8947	3.1842	14.0526	11.026	6.763	15.211	13.105	18.842	18.9737	13.7368	9.3947	7.6316			0.701491	12.8484
11.3083	10.421	12.2895	9.3947	10.868	16.632	12.316	14.789	10.4737	16.5	5.4211	3.4211	15.4737	7.816	9.132	19.711	23.632	3.684	16.3947	14.6053	11.7368	4.8421			0.708958	11.8835
11.4273	6.237	11.5789	2.9474	9.868	18.816	16.368	7	12.2632	15.6579	7.7895	6.5526	15.5526	12.684	7.921	23.158	31.316	13.263	17.1316	19.4211	13.2895	4.9474			0.716418	13.0363
11.5463	11.263	7.6316	6.6316	3.684	21.5	16.658	9.263	8.4211	10.3421	9.1053	10.1053	12.7105	17.553	14.842	16.447	21.842	15.526	27.7895	19.5526	13.5	4.8158			0.723879	13.2944
11.6654	7.342	11.5526	1.5789	7.684	16.289	9.763	10.605	15	16.3158	15.3158	4.3421	13.2895	18.316	4.947	22.789	19.447	14.763	14.1053	10.7895	20.2632	3.0263			0.731346	12.263
11.7844	5.184	7	1.3684	7.789	24.211	10.474	9.5	11.8158	22.6316	13.4211	5.5789	10.1053	17.421	7.474	36.737	23.421	10.553	17.4211	10.6053	11.9737	9.2105			0.738806	13.0427
11.9035	6.763	5.8684	6.3158	6.658	16.263	9.816	12.158	18.1842	14.5263	13.0789	9.4474	13.9737	18.421	7.395	40.421	13.053	8.763	20.4737	13.7105	14.7632	3.7105			0.746273	13.0364
12.0225	5.342	4.1842	6.5789	6.053	21	12.447	8.053	13.4474	22.9737	9.6842	9.2895	12.0789	23.974	11.789	35.553	13.421	15.474	17.7895	20.0526	11.4737	6.9474			0.753733	13.6955
12.1415	2.816	12.2105	10.5789	5.158	30.132	11.289	17.579	12.9737	17.5	8.7368	3.7895	17.1579	21.789	7.632	36.737	21.579	15.474	19.7632	18.6053	11.9474	6.4737			0.761194	14.7582
12.2606	3.789	8.1842	15.5263	10.105	20.105	11.553	11.737	13.8947	21.9474	8.2895	3.7632	9	17.5	8.289	60.263	15.921	11.789	10.2105	23.4737	12.2895	8.8947			0.768661	14.5964
12.3796	6.105	6.7368	12.2632	9.5	12.105	10.895	11.395	13.8158	20.6579	10.8947	3.8684	9.3158	20.684	10.263	29.553	20.158	10.184	7.2632	24.9474	13.7105	5.6316			0.776121	12.8546
12.4986	5.789	3.6316	6.1316	9.658	13.789	14.526	10.263	9.0526	22.4474	9.0526	10.7368	17.3947	22.658	5.342	38.842	15.921	13	19.8421	27.4737	16.2105	4.4211			0.783582	14.1039
12.6177	3.316	10.0526	12.7895	12.789	19.526	13.632	11.237	22.0263	25.1579	14.2632	4.9737	11.5526	20.974	9.211	23.842	13.868	19.605	25.3684	24.0526	9.5263	7.3947			0.791049	15.0075
12.7367	0.684	6.7368	6.3158	12.211	16.237	13.789	10.395	22.1842	18.5	11.9474	7.0263	10.6842	24.184	5.263	26.658	16.289	15.553	21.9211	27.3684	11.2895	4.4737			0.798509	13.7957
12.8557	5.368	2.4737	5.6316	15.711	22.789	14.868	10.368	11.6842	22.1579	8.4474	6.9474	16.7368	18.605	9.079	21	17.921	23.474	28.6316	29.1842	10.4737	8.3684			0.80597	14.7581
12.9748	3.684	1.9211	8.8421	11.737	22.026	14.763	9.632	13.7105	24.2895	10.9737	12.9737	12.8947	24.158	8.658	18.579	18.526	14.395	19.7368	22.7368	9.8421	5.9474			0.813436	13.8108
13.0938	5.737	4.7105	4.7368	11.237	13.026	10.895	8.553	20.7632	20.6579	15.3684	9.3421	11	17.237	11.763	22.789	12.842	11.105	13.7105	21.7632	8.5263	4.8947			0.820897	12.4123
13.2128	2.053	1.8684	7.5789	8.368	13.658	9.079	14.816	17.2632	19.4737	12.1579	14.8158	12.8684	12.921	13.474	23.737	18.184	12.632	13.3421	31.8684	13.7632	4.9737			0.828358	13.2807
13.3319	3.316	2.0263	4.4737	7.632	9.579	6.421	8.184	16.8684	15.7105	9.1053	10.1316	15.7368	14.684	9.158	20.947	16.816	12.053	21.1053	29.3947	13.5	7.2895			0.835824	12.1015
13.4509	5	0.8421	3.6842	8.5	9.053	13.211	16.789	29.4474	14.2105	9.8158	7.7368	11.0526	18.632	7.447	28.711	18.053	11.263	13.8421	25.3158	6.7105	7.2105			0.843285	12.6918
13.5699	2.316	3.1579	6.1579	11.263	14.605	23.447	13.263	21.5	15.2895	14.6842	8.1053	12.7632	20	10.474	25.105	20.105	12.158	28.8158	21.0263	16.3158	7.5263			0.850745	14.6704
13.689	2.316	0.7895	5.1053	11	6.605	20.711	19.605	17.8684	13.7895	9.4474	14.3158	12.4737	10.789	10.868	24.263	25.026	15.816	21.9737	24.8684	14.1316	5.6579			0.858212	13.6867
13.808	0.789	1.8421	4	8.737	11.947	17.579	17.868	28.6316	18.5789	14.7368	12.3158	14.8947	13.105	10.184	20.974	21.395	14.395	15.6316	22.8158	15.2105	10.5526			0.865673	14.104
13.927	0.211	0	6.3158	8.237	7.237	14.711	18.789	22.2105	21.2105	23.1842	9.0263	17.8684	10.342	15.605	5.553	17.579	13.526	23.3158	18.6053	12.1579	10.1316			0.873133	13.1341
14.0461	1.053	1.9737	2.1053	5.237	3.421	11.553	14.526	26.1053	18.6579	7.7368	11.6842	18.1053	19.237	14.974	15.632	22.395	7.947	13.7368	23.8421	25.4737	13.5526			0.8806	13.2833
14.1651	2.368	1.6316	4.0263	3.947	6.5	11.079	24.526	27.1316	18.5526	13.9737	20.7368	7.8947	13.368	10.026	15.158	19.289	18.053	16.0526	22.3947	9.5789	16.8421			0.888061	13.4824
14.2841	3.737	2.1316	1.4474	9	3	7.289	18.237	22.7105	15.3158	12.2105	10.3158	11.6316	15.842	9.579	18	15.368	14.947	14.8421	21.3421	14.8158	12.6316			0.895521	12.114
14.4032	1.526	1.2105	3.3684	12.342	9.947	6.263	19.974	15.6579	18.7368	18.4474	19.0526	8.6316	13.053	14.658	13	17.842	10.868	24.1316	19.1579	13.4211	9.4211			0.902988	12.8909
14.5222	3.684	2.2632	3.9737	7.763	4.395	6.684	14.237	16.0526	12.0789	20.7105	7.2105	18.8947	15.105	7.842	13.342	10.737	16.789	16.7105	13.5263	14.5789	13.6316			0.910449	11.4385
14.6412	6.895	2.9474	1.2105	5.816	6.789	10.474	11.105	15.1316	10.6053	16.7105	12.8947	14.4211	11.605	8.105	14.553	10.395	15.132	11	20.4474	15.0789	9.7895			0.917909	11.005
14.7603	0.263	1.0526	1.6579	6.632	4.947	3.158	21	13.4211	11.7105	14.3421	13.2895	12.3158	7.605	11.947	16.632	16.842	16.053	13.6316	20.1053	20.0526	10.3947			0.925376	11.2882
14.8793	0.605	2.6842	2.5789	4.605	8.921	6.816	18.026	13.9474	9.0789	22.0526	12.7105	8.9474	6.789	10.526	7.211	10.263	13.395	12.9737	14.8421	14.4211	20.3158			0.932836	10.5576
14.9984	0.684	1.6316	0.6316	6.605	7.079	7.605	20.895	7.3421	11.4474	9.6316	6.6842	10.2105	6.974	7.816	12.632	8.921	11.5	9.0526	14.9474	12.1842	15.3158			0.940303	9.03762
15.1174	0.947	0.7368	4.6842	2.684	4.474	7.868	14.789	16.3421	9.8158	9.4474	8.6316	5.2632	3.395	6.053	14.132	12.553	10.368	3.8421	18.5263	9.7105	13.7895			0.947764	8.47869
15.2364	0.132	3.1579	1.0263	3.368	2.474	2.579	17.316	12.8421	8.2632	10.8421	9.3158	5.7368	6.579	6.605	6.105	7.132	8.105	7.1579	14.2368	12.6842	11.3684			0.955224	7.47745
15.3555	0.079	1.6842	2.5789	4.789	1.342	3.684	13.105	7.0263	12.3421	11.3158	11.8421	6.5263	1.947	10.079	7.026	9.921	7.658	6.6842	12.5526	7.2105	10.9211			0.962691	7.15781
15.4745	0	0.5789	1.1053	2.895	1.316	4.342	8.947	5.4474	9.6842	11.3684	10.1579	5.5789	2.921	5	5.053	4.395	9.053	12.1842	15.6053	9.3158	8.8158			0.970152	6.36972
15.5935	0.105	0.8947	0	2	2.789	3.789	16.5	5.7105	8.7368	9.1316	9.6316	1.9737	4.895	6.421	2.053	6.421	0.763	9.6053	5.9737	7.1316	12.1579			0.977612	5.55635
15.7126	1.211	3.3684	1.6842	2.368	3.763	2.921	10.368	7.1053	11.1579	5.1579	2	0.8947	7.211	10.684	7.105	7.474	5.5	7.2105	6.5	6.5	8.9737			0.985079	5.67417
15.8316	2.211	1.4737	1.7368	1.684	1.342	3.421	9.579	7.4211	7.4737	4.1579	4.2105	0.8421	9.342	7.684	3.763	7.789	4.368	7.2895	12.4211	4.3158	9.1842			0.992539	5.3195
15.9506	2.368	3.5526	0.4737	2.895	1.211	1.579	4.947	5.2105	12.9737	2.6316	2.9474	5.8947	5.842	4.079	5.316	3.211	3.474	5.3947	5.7368	3.8421	3.7105			1	4.15668

## Sheet: Image5
X0	Y0	Y1	Y2	Y3	Y4	Y5	Y6	Y7	Y8	Y9	Y10	Y11	Y12	Y13	Y14	Y15	Y16	Y17	Y18	Y19	Y20	Y21	Y22	Y23	Y24	Y25			Ap-Ba	Average int
0	39.526	50.289	50.289	46.553	56.184	45.0789	61.3158	37.6053	24.842	49.526	36.395	36.447	52.026	45.7368	45.395	42.5263	39.8947	60.684	68.395	43.658	47.868	38.526	26.395	30.5526	43.8158	44.3684			0	44.7651
0.119	49.921	37	42	63.553	37.737	35.2895	44.3158	34.3947	27.842	52.237	46.789	37.816	43.711	36.8158	44.737	49.8421	51.4211	64.632	62.868	53.579	43.632	43.526	28.711	37.3947	36.2895	47.9474			0.0061332	44.3847
0.2381	52.026	53.711	46.132	44.895	52.026	50.7895	52	41.1842	24.868	53.211	49.316	33.211	37.895	41.8421	55.474	50.4474	44.1842	47.342	55.526	46.026	45.947	44.158	22.105	37.6842	39.6316	43.7368			0.0122716	44.8219
0.3571	45.447	50.579	53.974	51.263	62.211	65.0789	48.8684	44.8421	27.868	59.079	57.632	41.368	53.395	45.0526	51.184	60.2632	52.8947	66.053	54.184	43.947	48.579	53.684	31.026	36.5789	41.6316	41.1316			0.0184047	49.5313
0.4761	45.342	44.079	63.079	53.868	60.263	55.6842	60.0526	34.2895	35.763	63.605	45.079	43.447	57.605	44.6579	56.421	51.9737	51.6842	51.158	55.342	57.211	48.211	60.711	51.5	28.3947	38.3684	45.1842			0.0245379	50.1144
0.5952	48.211	61.289	62.053	58.237	58.737	74.4737	60.0526	45.7105	44.842	50.316	54.158	34.974	45.447	45.1053	71.368	54.4737	43.6579	61.974	63.974	60.474	58.184	56.316	45.289	27.8421	27.3158	51.1579			0.0306763	52.5243
0.7142	56	59.342	65.632	72.237	66.5	72.6316	66.6842	38.3684	39.553	55.342	56.079	51.632	67.579	46.7105	66.053	55.1053	58.2895	72.263	71.842	65.763	63.842	71.605	44.868	36.1842	37.5263	49.2632			0.0368095	57.9575
0.8332	83.5	58.053	77.658	76.974	78.184	83.0789	57.3684	60.6053	61.447	62.605	69.816	39.895	55.421	55.9474	61.368	66.7632	63.9211	80.526	86.211	62.263	66.737	61.605	52.211	42.6316	38.2105	42.5789			0.0429427	63.2915
0.9523	96.684	74.026	83.368	66.684	85.868	78.5789	65.7895	61.3421	59.711	78.868	70.474	43.316	71.711	55.1842	71.842	72.6842	59.6316	81.053	90.421	76.158	62.658	76.474	45.553	48.7895	38.7632	55.1053			0.0490811	68.1053
1.0713	119.026	88.632	111.632	95.263	82.737	66.4474	60.4737	55.8947	79.474	79.132	85.605	51.158	64.842	87.1316	64.395	79.0526	65.1579	84.237	100.368	86	64.237	70.789	58.053	48.3947	38.0263	54.7368			0.0552142	74.6498
1.1903	130.526	108.658	150	98.763	99.421	75.6579	71.1316	60.5263	64.842	79.947	112.974	63.947	81.237	64.8947	87.579	67.8421	53.5526	97.553	115.105	92	75.395	81.289	72.368	47.3421	39.4737	51.8684			0.0613474	82.4574
1.3094	142.737	133.526	167.263	135.474	112.158	73.0263	63.7105	70.5526	73.974	82.632	111.289	63.684	84.184	81.3421	93.184	74	70.5526	116.342	108.605	101.684	71.079	92.395	63.974	46.6579	49.1316	56.2632			0.0674858	89.9777
1.4284	173.842	149.947	183.947	139.921	110.921	71.5263	64.7895	93.1316	56.5	93.816	116.816	71.447	95.789	68.7895	111.763	82.1842	74.5789	120.816	103.842	117.5	86.763	90.368	74.132	51.3684	50.4211	61.0263			0.073619	96.7671
1.5474	190.342	165.447	215.079	136.526	116.158	81.1053	63.7895	89.5263	67.053	90.921	111.395	78.684	103.184	81.1579	104.868	71.3684	72.6316	93.053	113	102.5	83.105	94.211	70.947	48.1842	48.2895	51.2895			0.0797522	97.839
1.6665	189.132	178.079	205.237	134.737	109.658	82.7632	61.8421	74.7895	80.421	108.737	115.895	90.605	107.211	88.6053	108.184	68.8158	63.9211	105.447	111.658	101.368	96.421	87.553	78.868	56.8947	54.5789	52.1579			0.0858906	100.522
1.7855	182.947	177.395	206.395	129.316	123.342	71.0263	70	76.5789	71.053	87.895	117.5	96.658	103.421	77.0263	121.368	68	64	108.395	122.789	116.184	93.211	87.263	97.789	61.6316	47.2895	55.9211			0.0920237	101.323
1.9046	193.684	195.842	222.684	141.974	132.026	71.2368	62.5263	68.5526	70.474	102.921	140.132	117.5	126.342	78.0789	112.289	71.0789	57.2895	111.842	141.895	110.474	87.737	112.553	99.026	57.9211	45.4737	50.9737			0.0981621	107.02
2.0236	192.763	182.5	228.526	146.211	135.053	85.7105	72.5789	80.5526	89.658	104.289	118.816	130.895	112.053	83.0526	117.579	74	64.2105	97.053	145.605	104.5	97.158	121.789	85.5	51.7632	47.6316	58.6316			0.104295	108.772
2.1426	206.053	207.579	233	149.289	123.316	92.5789	70.5789	65.9474	74.526	114.342	126.789	134.763	110.447	84.3947	108.658	70.0263	58.7368	101.842	149.289	129.921	100.763	122.447	105.553	57.8947	51.2632	59.9211			0.110428	111.92
2.2617	214.816	211.5	222.184	132.026	120.289	81.1316	72.2105	84.5263	82.184	110.658	152.342	166.368	115.316	84.6316	91.289	66.0526	59.0263	121.105	150.316	115.763	100.5	122.553	94.237	43.7368	58.6316	47.1316			0.116567	112.328
2.3807	210.842	217.658	225.684	143.263	112	82.7368	57.8684	69.8421	87.816	126.711	140.974	170.237	108.026	80.9737	91.184	79.1579	55.1053	126.579	141.947	121	128.947	109.579	100.474	48.4211	49.4211	51.0263			0.1227	112.98
2.4997	213.263	218.132	238.079	165.684	102.895	78.0789	53.4737	79.2368	94.447	112.395	158.632	167.868	104.263	71.9474	84.368	57.5263	64.1053	130.974	148.237	111.947	114.763	118.079	92.842	46.9474	48.6053	55.7632			0.128833	112.79
2.6188	221.184	223.763	227.5	151.132	91.421	71.0263	71.6316	65.9737	105.605	131.974	166.447	173.053	115.447	79.2368	80.816	58.4737	70.2632	114.447	149.263	114.974	117.737	120.421	112.632	54.7105	50.4211	56.9474			0.134972	115.25
2.7378	225.211	224.658	229.342	157.632	99.237	84.4737	67.5789	82.8947	103.816	131.816	163	180.526	117.921	81.4737	74.868	43.7368	61.6842	140.316	175.026	116.789	98.211	110.605	106.684	52.5	48.0789	69.6053			0.141105	117.219
2.8568	218.526	214.105	230.737	153.789	83.658	59.0526	70.4211	78.2105	109.079	138.868	146.947	175.632	137.737	72.9737	82.237	53.8947	65.4211	134.974	164.026	125.711	108.579	96.763	112.763	49.7368	43.0263	52.4737			0.147238	114.59
2.9759	212.342	212.816	227	175.237	80.816	51.1842	60.1053	70.5526	95.579	136.211	133.316	186.579	133.342	82.0263	83.342	58.0526	67.5789	124	157.289	119.737	110.842	107.921	103.5	50.9737	43.3947	62.7368			0.153376	113.326
3.0949	194.579	212.974	223.684	182.526	78.763	46.9737	73.3684	62.5	78.632	116	144.711	181.316	132.737	74.7895	56.553	69.6053	71.6579	130.132	145.263	124.895	105.842	106.895	103.711	49.4474	46.6053	58.9474			0.15951	110.504
3.2139	192.789	222.316	228.447	174.974	66.421	48.4737	68.4474	76.9737	92.974	128.789	133.553	166.711	139	73.4737	65.947	76.7368	68.0263	137.842	157.868	107.526	117.684	123.026	95.421	45.9211	43.0526	51.2895			0.165643	111.68
3.333	191.5	211.763	223.474	178.053	78.289	41.2105	69.7105	63.0263	80.237	126.605	144.868	168.684	127.711	68.6842	54.263	82.1316	68	130.184	150.474	106.053	101.158	117.184	82.526	46.8947	38.7105	57.7368			0.171781	108.044
3.452	194.526	218.158	220.921	190.105	63.368	36.8947	65.2368	68.8684	90.053	142.316	144.658	166.132	130.974	85.1579	53.816	90.2368	80.7368	138.316	149.658	113.789	93.816	109.632	99.368	45.1579	46.2368	59.5			0.177914	111.447
3.571	175.368	209.158	209.211	179.921	72.711	35.8421	60.2632	62.8684	76.5	113.763	148.105	160.579	121.316	71.7632	57.132	79.9737	63.6842	145.711	141.737	122.316	100.474	109.211	95.447	55.1053	38.3947	68.5263			0.184047	106.734
3.6901	174.526	208	208.605	179.421	68.789	37.7895	64.4211	67.1316	88	124.158	160.368	121.974	154.184	62.5526	48.105	70.0526	83.7895	115.105	145.921	131.289	85.605	101.421	85.237	55.0789	39.1053	61.9474			0.190186	105.484
3.8091	153.868	191.079	195.289	180.526	65.921	36.9211	76.7895	74.7632	68.553	142.816	137.368	147.026	155.211	67.6842	47.447	64	73.7895	106.763	123.105	114.263	100.263	106.263	72.895	52.0789	36.3158	48.3947			0.196319	101.515
3.9281	136.237	156.921	182.158	177.447	64.289	50.9737	72.3158	53.6842	84.895	133.579	143.289	122.395	150.5	64.1316	50.658	75.5789	75.3158	105.974	131.079	121.526	90.711	85.184	82.553	47.2632	30.5789	60.9474			0.202452	98.084
4.0472	139.132	155.526	181.105	153.105	57.553	57.4474	76.8158	57.6842	71.737	132.605	150.395	101.553	129.579	67.0526	45.921	67.2105	63.6053	111.211	144.026	111.079	85.368	70.105	61.737	51.5789	36.9737	59.8947			0.208591	93.8462
4.1662	119.474	133.605	143.974	154.368	52.211	39.1316	70	72.5	78.658	118.5	134.447	109.868	131.579	58.0263	44.342	56.7105	53.2632	104.368	126.132	142.842	72.395	55.105	67.842	54.6316	41.7895	68.4474			0.214724	88.6235
4.2852	108.474	120.605	134.053	142.974	48.263	38	56.0789	68.8684	78.132	123.368	145.105	88.289	111	45.7895	31.395	65.0263	58.8684	105	121.263	146.763	71.316	60.211	64.447	51.6842	24.6316	59.4474			0.220857	83.4251
4.4043	102.763	106.474	146.816	130.658	46.842	20.8947	69.2895	74.7632	69.158	135.184	109.658	75.658	117.316	47.8158	44.421	61.8684	50.8158	94.842	109	140.237	62.947	40.921	60	61.9474	36.7632	56.4211			0.226995	79.749
4.5233	105.895	94.842	109.053	106.684	52.237	24.1579	75.7105	59.3421	76.474	134.763	119.263	65.184	96.632	57.4211	55.026	60.3158	57.9474	86.711	99.632	143.079	61.921	42.842	43.368	53.1053	35.8684	65.1316			0.233129	76.2541
4.6423	100.237	90.263	119	115.895	56.5	23.6842	72.8947	54.5263	77.684	104.5	112.263	57.658	95.026	51.1053	52.974	50.3158	58.4474	79.184	123.474	139.5	61.789	40.553	45.842	47.0526	24.4737	52.0263			0.239262	73.3411
4.7614	106.816	103.579	88.026	89.105	42.579	21.0526	64.5789	45.8684	62.868	104.237	94.895	54.658	93	36	52.237	49.7105	60.4474	79.263	119.105	130.026	49.579	41.105	41.342	48.7895	28.6316	47.2895			0.2454	67.4919
4.8804	113.579	89.974	72.105	95.526	46.895	17.6316	45.2895	49.4211	55.158	102.579	83.526	58.368	111.053	41.1579	55.368	38.5789	64.7895	63.789	105.711	120.395	45.158	35.368	46.579	43.1842	31.1053	40.7895			0.251533	64.3492
4.9995	108.789	108.842	62.605	85.895	40.158	17.8947	48.1053	46.3421	56.132	108.105	82.395	64.526	77.947	42.7632	65.553	39.5789	54.7368	71.553	109.763	115.211	51.763	34.632	48.816	48.3158	40.5	44.2632			0.257672	64.4302
5.1185	120.395	112.395	47.895	91.105	46.316	19.5263	38.5526	38.5263	51.184	102.026	77.184	54.158	85.211	34.3947	52.974	43.4737	51.7632	69.553	107.158	112.079	42.289	34.211	45.237	57.2632	30.7105	42.8421			0.263805	61.8624
5.2375	122.263	116.974	61.921	66.974	42.526	23.8421	47.4211	38.1316	50.816	75.316	73.789	54.737	67.553	36.1316	48.895	43.9737	43.3947	68.211	106.763	101.842	49.947	33.658	39.447	46.5263	37.2368	33.0526			0.269938	58.8978
5.3566	108.974	119.816	51.763	61.789	35.842	23.1316	42.8158	30.1579	46.789	70.474	71.237	54.211	64.711	33.3684	46.684	53.5526	53.3947	68	110.658	88.342	43.816	39.974	39.526	53.2368	34.2105	26.3947			0.276076	56.6488
5.4756	128.605	119.658	40.737	56.158	37.026	24.7895	41.3947	25.5526	35.105	63.605	50.237	53.684	52.632	32.9211	53.447	45.1316	42.7632	69.842	90.237	82.368	53.105	38.605	40.868	41.5526	40.3684	30.7105			0.28221	53.504
5.5946	115.947	120.526	44.605	49.974	27.316	34.2368	37	26.2632	36.342	68.816	53.132	41.868	50.789	33.1842	48.789	37.8158	34.5789	56.658	94.474	82.789	48.079	40.605	40.368	32.6579	43.3947	22.9737			0.288343	50.8916
5.7137	141.395	125.289	46.974	46.263	28.158	30.4211	37.0789	26.8684	42.184	68.553	49.789	35.974	44.658	30.7105	42.816	27.4737	32.0526	78.447	106.184	65.737	45.316	37.447	37.368	37.9474	40.1316	30.7368			0.294481	51.3836
5.8327	145.553	129.026	34.079	43.868	13.395	28.8158	38.3421	32.9211	41.816	49.895	50.105	30.816	57.368	42.7632	39.026	37.6842	35.8421	58.289	127.579	71.316	49.105	47.921	35.816	32.8421	43.7632	28.6842			0.300614	51.7935
5.9517	136.526	135.053	50.184	30.289	24.816	30.3421	30.4737	34.0789	28.289	44.789	40.868	42.684	55	37.4474	46.711	39.1053	26.8158	73.921	119.632	80.447	37.342	61.263	28.263	32.7105	51.7368	22.6053			0.306748	51.592
6.0708	138.395	122.053	59.079	31.263	27.316	30	32.2368	19.4474	37.895	39.421	46.158	41.789	39.658	43.1316	54.395	38.5263	23.3684	60.395	115.395	66.053	38.447	64.474	34.237	34.2105	47.6316	22.6316			0.312886	50.2926
6.1898	110.184	118.605	43.526	39.079	22.395	21.6316	42.8158	36.6053	34.684	43.263	56.816	41.816	39.395	29.9474	42.158	42.9474	19.7632	71.289	107.921	70.079	39.553	55.789	23.684	31.9474	44.0526	26.7895			0.319019	48.336
6.3088	112.605	112.553	64.395	45.737	12.868	25.9211	35.6316	32.2368	33.263	39.632	44.474	38.263	52.421	30.6579	40.868	40.2632	16.4474	57.842	103.105	58.974	41.289	72.342	34.868	30.8421	42.5526	26.9474			0.325152	47.9615
6.4279	106.395	110.658	64.5	46.684	14.526	30.7895	42.6053	26.8158	40.632	37.842	37.026	42.868	46.5	29.2368	48.421	32.4211	19.5	65.974	101.526	79.053	27.526	82.868	30.605	28.9211	39.1053	28.5789			0.331291	48.5222
6.5469	83.421	89.553	64.184	45.421	19.158	20.5	28.8421	34.8421	26.211	36.053	34.105	31.632	42.263	33.2105	43.368	30.0526	20.0526	66.579	84.579	69.263	35.684	76.316	31.684	31.4474	29.5	29.4211			0.337424	43.7439
6.6659	66.342	56.289	74.947	43.263	22.711	24.4737	33.1316	29.6842	33.237	33.684	31.474	32.684	44.263	34.5	37.447	39.2895	22.2632	52.974	89.342	67.684	41.526	67.947	33.316	28.4211	30.1316	32.5			0.343557	42.4433
6.785	42.789	73.368	67.368	44.711	21.737	30.8947	26.8421	31	36.553	28.816	25.789	31.895	40.474	31.1316	40.079	39.0526	18.6579	54.632	78.974	72.395	37.816	63.395	29.553	39.6842	32.9474	25.8421			0.349695	41.0153
6.904	39.579	41.289	65.316	35.474	21.211	29.1579	32.0789	26.3421	29.921	33.053	30.237	37.237	38.053	33.7632	34	33.1316	12.7105	42.316	71.526	58.526	35.947	67.921	27.579	39.3684	22.0526	26.7632			0.355829	37.0982
7.023	33.368	41.474	69.895	27.711	24	34.3158	30.5263	25.8947	23.421	43.211	29.289	49.842	31.421	41.3947	35.395	32.9737	15.8947	35.368	75.474	57.605	33.789	65.789	24.763	42.3684	29.6316	24.5			0.361962	37.666
7.1421	18.447	29.421	64.342	27.026	14.684	20.3421	22.9211	23.0789	22.079	50.316	23.842	36.684	40.158	29.9737	38.237	43.1842	18.7632	46.763	67.132	51.132	27.737	70.816	28.579	35.7368	19.2895	24.8158			0.3681	34.4423
7.2611	25.5	31.553	61.632	26.684	23.474	20.7632	27.5	19.5526	24.316	39.842	28.526	40.632	38.5	28	31.211	36.2895	15.0526	36.921	61.974	49.211	27.974	56.658	23.368	27.4211	20.8684	20.3158			0.374233	32.4515
7.3801	19.816	26.579	48.158	37.105	20.105	24.9737	31.6842	15.4474	20.658	32.763	24.263	36.263	34.237	31.9474	28.711	33.7632	14.7105	38.132	57.658	49.474	33.974	44.316	28.184	31.5	25.5	28.2368			0.380367	31.4677
7.4992	14.342	20.342	41.816	35.842	25.263	21.8947	21.6316	17.7105	23.579	38.737	39.026	39.632	30.711	25.3421	23.447	34.9737	10.7632	32.105	49.974	47.553	30.921	38.868	21.421	27.3421	28.6316	26.0789			0.386505	29.5364
7.6182	16.447	18.079	47.079	23.316	33.5	23	30.9211	20.5263	24.947	42.842	40.895	33.789	40.421	23.2632	24.474	41.2632	13.8947	37.395	51.921	37.316	26.421	44.395	19.132	23.8158	29.7895	27.4211			0.392638	30.6255
7.7372	12.263	17.447	31.5	31.263	20.684	18.8421	25.0263	22.6053	32.526	32.553	37.737	32.158	36.184	15.9474	22.947	22.4211	19.9474	28.789	50.658	30.605	26.289	35.895	23.579	32.0263	20.9474	30.0789			0.398771	27.343
7.8563	13.105	17.474	31.974	36.789	21.711	31.4737	27.3158	23.4474	35.632	35.132	24.5	33.395	38.158	31.0526	22.947	22.5	16.8158	35.342	50.684	27.263	18.553	42.737	29.026	24.4474	15.5789	32.3684			0.40491	28.4393
7.9753	12.211	8.842	34.842	55	35.211	18.3158	21.9737	18.4737	27.368	30.763	22	35.947	39.474	21.9211	19.684	29.2368	18.4737	28.263	50.158	28.026	28.895	44.895	21.105	24.3158	25.9474	32.1579			0.411043	28.2115
8.0943	14.105	8.105	30.158	57.132	31.158	21.5789	28.5526	19.5	21.842	37.579	17.263	40.184	29.263	24.8947	18.158	23.8684	19.3421	29.526	53.211	33.395	27.921	41.526	21.605	23.8158	16.5	32.5789			0.417176	27.7986
8.2134	10	11.5	27.263	51.079	27.579	23.6579	21.3421	19.1842	23.342	41.632	17.158	32.079	41.868	22.3684	14.868	24	25.3947	28.5	41.026	26.632	31.5	41.342	18.947	20.1842	14.4737	38.1053			0.423314	26.7317
8.3324	11.763	12.342	24.842	45.395	32.974	32.3421	22.5526	17.0526	20.579	28.053	11.132	29.184	39.816	23.6579	17.789	18.8158	18.7632	22.579	45.789	17.447	28.658	29.711	17.158	28.4211	24.2895	32.2105			0.429448	25.1276
8.4515	12.421	12.921	35.026	53.184	22.132	42.6842	23.6053	11.0526	16.553	31.5	16.947	28.158	28.289	19.9737	13.974	27.9211	21.3684	33.474	45.421	22.105	25.605	29.763	15.658	33.8158	14.9211	30.5263			0.435586	25.7308
8.5705	11.079	10.368	26.737	46.342	23.553	42.4211	23.3158	11	21.737	29.763	22.211	24	29.263	20.0526	20.974	15.6316	23.4211	29.553	38.105	24.105	23.947	29.184	14.921	32.8158	19.1053	20.3684			0.441719	24.3836
8.6895	8.105	7.895	26.711	58.737	21.816	41.4474	29.2632	9	19.763	23.421	11.579	17.868	34.474	16.2105	22.737	24.2632	15.8421	21.947	39.5	16.868	23.842	32.789	28.947	28.2632	11.6316	26.2632			0.447852	23.8147
8.8086	5.447	8.184	29.447	49.342	20.395	49.7368	28.2632	11.2105	25.763	31.447	7.553	9.263	40.395	22.4737	17.895	22.7368	20.9211	21.105	37.658	22.289	22.132	39.842	28.105	26.5	13.2632	20.9737			0.453991	24.3208
8.9276	7.447	10.079	24.921	46.605	17.632	53.2895	25.4737	15.5526	25.289	30.737	9.105	15.842	26.921	26.3421	24.789	19.3684	10.7632	20.026	31.632	19.079	26.263	33.579	28.553	28.3421	12.7895	18.5789			0.460124	23.423
9.0466	6.605	10.684	22.921	49.895	19.842	33.7895	18.6842	15.9211	23.974	29.316	12	12.868	22.368	26.8684	22.553	17.6316	15.6316	30.158	14.895	17.684	28.711	39.026	28.447	35.2368	10.3947	20.3421			0.466257	22.5557
9.1657	6.263	9.289	19.579	56	17.421	28.0789	25.3684	13.2368	21.711	29.974	6.368	12.316	29.5	27.4211	19.526	18.7105	13.9211	25.553	26	16.947	20.263	32.316	20.184	25	7.3421	25.0263			0.472395	21.2814
9.2847	5.053	3.395	28.026	63.658	17.447	26.4474	26.2895	13.3947	27.474	32.395	6.5	10.395	24.974	18.2632	28.053	16.6579	11.2895	23.053	22.684	15.289	18.132	29.158	20.526	28.4211	5.7105	15.5789			0.478529	20.7025
9.4037	9.868	5.553	29.105	53.395	17.263	23.1316	20.5789	16.6053	35.553	26.816	8.684	6.184	16.763	28.2105	26.737	19.8947	20.2105	27.763	28.974	15.132	14.447	39.368	30.895	25.5263	7.0789	16.0526			0.484662	21.915
9.5228	5.974	5.263	22.868	55.947	23.053	19.1842	21.5263	14.1579	45.474	35.711	6.342	12.053	21.684	30.3684	19.026	19.6053	14.1053	39.763	36.395	14.184	19.079	45.053	36.158	24.1316	5.1316	10.1842			0.4908	23.1701
9.6418	9.105	8.105	23.263	44.763	12.316	23.7368	27.9211	14.1579	36.105	37.211	8.579	7.921	24	24.4211	16.342	20.3421	12.4737	33.658	31.026	11.921	19.184	48.105	18.316	19.1579	6.5263	18.0263			0.496933	21.4109
9.7608	10.974	10.342	26.737	42.158	15.737	25.7105	18.2105	20.3421	37.5	29.842	7.684	10.158	18.684	33.4474	21.711	14.0263	17.6316	40.605	34.237	19.053	21.289	41.342	20.711	17.7105	6.5263	9.4737			0.503067	21.994
9.8799	10.632	10.342	24.342	38.579	17.684	23.6842	21.5	12.7105	47.816	23.132	9.421	7.474	14.079	30.5263	18.947	21.6579	13.9211	25.211	30.553	19.263	16.421	32.263	27.579	22.3947	6.0789	13.2895			0.509205	20.75
9.9989	9.947	11.974	18.026	34.132	16.079	21.9737	28.4474	16.2105	42.316	25.553	4.947	5.5	16.211	32.8158	18.921	12.6316	16.4211	29	28.711	15.711	16.684	34.605	27.237	16.8158	4.6842	13.3947			0.515338	19.9596
10.1179	7.632	5.868	22.368	33.105	16.947	18.0789	22.7895	11.6842	41.263	19.658	9.395	6.079	14.632	41.8684	16.632	14.4737	17.9474	25.395	26.526	19.158	14.737	47.184	31.658	12.6579	4.8947	13.8158			0.521471	19.8634
10.237	7.105	8.079	24.211	33.789	11.921	20.4211	17.9737	14.4737	35.026	12.368	4.579	9.263	16.816	29.2895	21.316	12.9211	19.3421	23.079	29.316	12	15.368	46.368	24.658	11.7105	5.0526	18.6053			0.52761	18.6558
10.356	7.789	7.553	20.868	26.579	12.842	14.6316	32.8421	13.5	47.868	17.895	6.711	4.132	22.237	33.2895	15.789	13.0789	17.9474	24.842	31.158	12.605	14.579	41.158	20.763	12.3421	5.8947	7.0789			0.533743	18.6913
10.475	10.211	9.447	15.658	25.526	23.237	14.4211	21.8421	20.4211	45.921	12.789	7.316	5.395	15.474	35.8158	14.763	17.4211	15.6053	19.605	34.921	15.026	16.237	42.474	21	13.7895	4.4737	5.3684			0.539876	18.6215
10.5941	7.158	8	21.158	22.184	20.842	15.1053	32.3158	14.2632	36.842	23.053	5.553	4.289	18.132	39.9737	17.105	14.1842	13.0526	19.684	29.395	9.711	19.816	41.026	21.211	19.5789	4	5.5789			0.546014	18.5851
10.7131	3.5	5.921	19.895	19.737	30.184	14.6842	27.2368	9.5263	39.632	14.158	6.711	6.579	17.132	28.0526	20	11.6053	18.6842	14.105	27.816	15.316	17.711	45.632	15.289	13.2105	3.3421	8.5			0.552148	17.4677
10.8321	8.947	7.816	22.368	20.947	27.553	12.7895	25.6053	11.9211	29.184	18.105	6.842	4.342	10.579	36.2368	17.342	12.9211	11.7105	14.211	23.421	14.026	10.816	48.105	20.421	10.4474	3.3684	8.0526			0.558281	16.8491
10.9512	5.553	8.658	18.211	20.737	29.816	17.8158	22.2895	13.7368	24.421	10.789	5.526	5.105	9	25.8421	14.789	9.8421	14.9211	11.447	32.947	13.237	21.711	57.237	16.079	11.0263	4.8421	3.8421			0.564419	16.5162
11.0702	3.974	7.211	15.632	19.763	23.316	19	25.7368	14.2895	22.868	16.974	6.263	3.263	16.579	26.9211	11.263	13.6842	22.0789	16.658	35.053	16.158	30.211	55.684	16.342	13.3158	3.1842	6.7368			0.570552	17.7754
11.1892	10.816	6.105	17.921	19.579	18.789	15.5	19.5263	15.9211	26.026	15.974	5.421	2.553	13.632	27.6316	16.974	15.1579	12.7105	17.289	32.289	19.158	27	60.289	23.342	10.2368	5.1316	9.6053			0.576686	17.8684
11.3083	6.658	5.447	21.421	15.079	26.553	12.0526	21.6316	16.5789	30.289	10.816	3.421	2.632	12.632	23.7895	22.132	10.3947	12.6842	17.079	36.105	12.132	30.737	52.737	16.184	10.0789	5.7368	4.4737			0.582824	16.9029
11.4273	3.5	6.526	18.105	21.632	23.553	14.1579	24.9211	14.0526	33.342	20.526	3.5	5.105	15.289	17.3158	8.395	8.1316	10.9211	20.947	39.211	18.132	33.684	40.395	21.105	5.4211	3.7632	5.2105			0.588957	16.8016
11.5463	6.763	6.263	23.368	22.579	16.711	21.5526	18.3684	13.5526	29.289	12.132	4.737	9.316	11.158	10.8158	12.289	12.6316	11.8947	17.395	32.868	16.395	42.026	37.895	13.079	6.2105	5.2368	6.3947			0.59509	16.1893
11.6654	3.263	4.184	23.316	20.895	18.658	16.2368	19.3158	27.5	30.184	17.895	2.026	3.684	14.026	13.8421	8.763	10.3684	10.5526	12.816	36.816	15.658	49.079	28.026	17.605	4.1579	4.0789	2.4211			0.601229	15.9757
11.7844	4.553	3.447	33.237	23.079	18.868	18.1579	18.2895	14.6053	29.026	15.368	3.737	4	11.447	13.2368	15.789	13.7895	15.1579	11.579	36.132	18.026	32.921	36.711	22.737	3.8421	4.8421	5.6842			0.607362	16.4716
11.9035	4.947	5.368	41.447	20.368	27.263	15.7105	23.1053	22.9211	23.632	12.947	2.974	6.211	11.658	14.1579	13.605	12.2895	13.5	17.763	33.921	18.895	42.711	19.605	21.895	8.0789	3.9474	5.0263			0.6135	17.0749
12.0225	5.895	5.237	37.868	15.053	28.263	17.2105	19.1316	27.2105	21.974	18.737	4.658	5.132	14.842	11.9737	14.263	14.4737	16	15.868	26.684	16.5	56.526	21.184	15.342	9.0526	3.8158	3.5263			0.619633	17.17
12.1415	9.658	7.842	45.211	13.368	29.658	21.2895	18.1316	21.7105	22.342	12.421	4.658	3.368	18.184	18.1579	9.579	15.1842	13.1053	17.684	26.316	24.5	45.789	19.789	13.553	4.7105	2.8684	6.2105			0.625767	17.1265
12.2606	5.605	6.684	61.684	25.632	26.842	24.2632	23.6579	17.3684	19.974	10.447	5	3.737	14.605	17.3421	10.105	20.2105	13.7105	24.579	14.632	24.263	53.605	19.974	15.632	8.5526	2.8947	4.6053			0.631905	18.2925
12.3796	4.211	4.368	41.763	21.947	28.342	37.2895	25.8421	10.1842	18.342	10.974	2.263	5.684	8.5	14.4211	13.579	18.4211	16.8421	24.789	13.868	27.711	36	15.342	14.316	8.4474	4.5263	6.6053			0.638038	16.7145
12.4986	9.632	4.895	49.711	15.816	22.342	24.8158	27.2368	11.8421	18.395	5.289	2.816	4.474	7.868	15.6053	12.947	20.0789	14.1579	21.316	15.5	36.026	36.342	10.895	15.526	5.5789	2.4474	8.7895			0.644171	16.167
12.6177	3.553	5.211	50.316	21.026	38.132	31.9737	25.3684	11.9474	16.579	10.974	4.658	1.553	7.579	17.5	13.974	17.1053	11.4211	11.895	14.842	31.184	27.895	7.789	15.816	10.9211	4.9211	3.6842			0.65031	16.0699
12.7367	4.684	7.342	44.105	17.184	28.316	28.6053	21.3421	14.2895	17.684	7.974	0.368	3.947	5.895	18.3421	13.921	17.0789	15.2105	15	13.974	35.658	27.263	11.737	13.947	6.2105	2.2632	6.1053			0.656443	15.3249
12.8557	3.237	4.947	51.079	24.079	21.737	29.1842	21.3421	18.1579	20.632	7.368	2.342	4.026	13.184	12.8158	14.132	16.5	11.9211	15.5	11.974	24.868	28.789	15.184	17.947	4.8947	6.2105	3.6842			0.662576	15.6052
12.9748	1.605	10.711	49.237	32.395	18.974	15.0263	13.4211	17.5263	16.816	6.368	3.421	3.868	8.447	15.2368	9.947	14.0526	13.3684	11.895	16.605	26.105	27.105	29.474	12.289	4.5789	2.0526	6.5			0.668715	14.8856
13.0938	5.632	4.079	52.053	27.474	24.447	20.8684	13.0263	15.7895	23.263	5.974	5.053	2.474	15.842	15.3947	16.474	19.7368	15.3947	12.105	17.974	30.211	29.737	21.447	12.184	1.2368	2.9474	6.3947			0.674848	16.0466
13.2128	4.421	10.053	49.053	24.105	22.421	17.7368	19.2368	17.5	25.789	9.132	3.211	2.105	16.711	12.3684	20.737	13.5263	7.2895	12.816	21.895	26.289	35.211	20.658	19.105	4.3947	2.4737	3.8684			0.680981	16.2349
13.3319	5.632	10.289	46	22.368	26.132	20.5	10.4474	20.4737	13.421	7.237	4.184	4.211	11.211	19.8684	18.053	13.5526	11.0789	12	15.342	37.026	25.211	17.868	10.842	5	3.3158	4.0789			0.687119	15.2055
13.4509	6	6.316	36.316	35.5	27.868	13.6053	14.5526	13.8684	18.289	8.921	3.553	2.974	17.184	15.3421	15.553	12.8421	13.3684	17.237	16.105	25.526	25.184	26.158	12.026	7.6316	4.6842	3.9474			0.693252	15.4059
13.5699	6.605	4.526	36.553	32.816	16.158	12.3158	10.0789	14.3158	17.184	4.553	5.184	6.342	19.132	14.3158	16.184	17.0526	11.9211	19.605	16.289	36.711	26	21.053	16.105	2.6053	9.2105	3.2632			0.699386	15.2338
13.689	6.316	7.605	34.158	32.947	25.763	14.5789	15.9211	15.4211	15.895	4.026	2.263	4.158	21.711	11.8684	21	14.5789	8.4474	16.895	22.553	31.368	24.395	21.132	8.237	5.6316	2.0263	4.5789			0.705524	15.1336
13.808	6.158	5.026	29.763	33.237	26.105	14.7105	12.8421	11.2105	24.447	6.079	2.711	2.026	21.711	15.2105	18.737	10.7632	8.6842	16.684	17.5	26.921	37.711	18.974	7.763	6.2368	4.7632	7			0.711657	15.1144
13.927	4.605	6.842	32.368	38.816	21.184	16.4474	10.7632	13.7105	16.605	6.895	4	4.158	12.526	19.0526	13.289	12.7895	7.4474	13.368	21.658	24.579	34.395	19.974	10.737	5.3947	4.5	4.9737			0.71779	14.6568
14.0461	5.105	5.263	33.158	21.132	24.579	12.6842	13.3684	13.1842	21.237	7.105	3.605	4.316	10.763	16.4474	14.711	16.2632	12.2632	15.289	26.553	37.974	30.132	20.447	10.395	7.7895	4	7.1579			0.723929	15.1893
14.1651	4.395	8.421	25.395	22.421	23.447	11.2105	13.6316	11.1842	21.447	9.421	2.921	3.947	10.053	17.0263	14.026	8.7368	13.1579	18.237	17.737	31.605	23.842	26.368	16.737	6.8421	4.5263	4			0.730062	14.2591
14.2841	7.789	9.5	23.895	24.211	17.289	14.1316	17.3684	13.4474	12.684	8.632	2.789	6	13.105	19.8158	13.421	11.6316	15.5	13.474	13.947	25.211	23.211	23.211	17.632	6.7368	8.0526	7.0526			0.736195	14.2207
14.4032	7.289	9.711	28.368	26.421	14.895	9.3947	13.7105	13.5	14.789	8.974	2.789	3.5	11	23.5789	13.053	13.8947	10.3158	16.474	13.316	30.342	22.895	21.105	18.579	9.4211	5.6316	3.0263			0.742334	14.0759
14.5222	7.053	7.395	29.474	28.079	14.553	14.2895	9.2105	9.9737	16.921	6.263	1.842	2.053	12.211	20.2105	13.447	17.5526	9.3684	14.184	20	18.921	22.763	23.868	9.895	9.0263	3.8158	5.3684			0.748467	13.3745
14.6412	5.342	9.263	37.368	16.289	18.816	26.6316	13.9737	16.1316	24.5	7.579	4.579	4.211	13.289	17.4474	11.184	19.3684	12.2632	17.868	14.447	22.605	19.895	21.711	15.237	7.5	4.5789	4.6053			0.7546	14.8724
14.7603	5.842	5.447	42.263	24.658	22.053	20.4474	10.7632	16.0789	13.105	9.105	4.974	4.447	12.763	20.6842	8.474	19.9737	15.3947	10.316	15.579	22.658	12.921	21.553	10.842	5.6053	4.4211	4.6842			0.760738	14.0405
14.8793	10.158	11.053	36.579	24.737	17.947	22.1842	17.0263	15.2105	23.289	9.263	2.579	3.684	10.632	21.8947	11.132	16.6053	9.3947	6.763	16.105	15.105	27.158	10.605	12	5.9737	2.4474	5.1053			0.766871	14.0243
14.9984	5.421	13.053	54.816	27.737	25.211	18.6842	17.3421	9.4474	23.421	13.5	2.132	5.816	9.658	24.7105	12.763	14.5263	12.5263	10.211	16.289	21.316	19.026	18.395	15.895	7.4737	4.3421	3.2368			0.77301	15.6519
15.1174	4.132	13.026	46.974	27.211	17.895	15.4211	9.8947	13.1579	24.474	12.816	4.289	4.395	13.789	13.1842	12.289	15.1579	10.3947	8.816	17.026	29.421	20.868	9.789	16.579	9.2368	5.2632	5.1053			0.779143	14.6386
15.2364	6.711	7.368	45.658	31.184	16.342	28.6316	8.8684	13.2895	26.737	13.316	4.632	5.105	15.816	16.5789	7.684	12.3158	9.8158	8.289	10.684	16.316	11.921	13.816	14.474	8.2105	3.6579	4.7895			0.785276	13.9312
15.3555	8.921	14.342	53.474	21.026	17.263	21.5263	12.1316	10.1842	45.868	17.342	6.132	3.184	15.342	10.2368	6.316	8.7368	12.6842	11.184	9.211	16.737	16.553	12.526	24.579	8.7105	3.8421	7.7895			0.791415	15.2247
15.4745	5.263	14.237	66.184	20.289	17.368	17.3947	16.9474	15.5	37.816	11.947	4.553	4.237	22.053	18.9737	7.237	6.3158	9.2368	11.079	10.026	26.684	15.079	7.605	15.579	8.4737	2.9474	7.4211			0.797548	15.4018
15.5935	5.579	17.158	66	18.5	19.579	17.4474	14.0789	18.8158	37.842	17.132	2.947	3	19.421	19	10.632	9.4474	8.7895	9.026	18.237	32.237	22.184	5.605	20.711	6.9474	4	6.2368			0.803681	16.5597
15.7126	5.789	18.711	60.816	18.579	13.158	11.1316	8.3421	15.8684	26.289	19.526	4.658	2.474	17.526	23.2632	11.316	7.3684	8.5526	9.368	23.684	24.711	19.158	12.921	22	10	1.9211	6.8421			0.809819	15.5374
15.8316	7.763	22.526	54.684	14.263	19.079	12.7632	9.3947	22.3684	34.763	16.684	2.526	3.711	22.632	23.0789	11.763	9.6842	11.6842	11.658	25.947	21.763	23.579	7.053	20.316	8.3947	1.8421	5.1316			0.815953	16.3482
15.9506	6.816	19.184	58.658	14.763	15.395	16.7632	11.8421	19.8158	27.184	24.184	4.316	2.342	22.184	29.4474	8.816	4.3684	10.7368	8.079	30.158	15.526	20.737	11.921	17.658	6.9737	4.4737	2.8421			0.822086	15.9686
16.0697	12.184	22.211	46.5	21.763	22.447	16.4474	16.6842	14.2105	32.211	14.395	2.395	5.684	24.5	26.5789	8.105	10.8947	6.1579	9.737	28.474	18.763	28.316	11.868	26.711	12.5526	4.3421	5.2105			0.828224	17.2824
16.1887	9.474	22.316	47.079	17.632	14.711	13.4474	6.8421	15.2895	26.237	10.789	4.684	5.974	18.053	31.7895	9.579	10	12.8421	7.868	28.763	23.237	29.447	15.105	21.237	7.4474	10.7895	7.5263			0.834357	16.4676
16.3077	6.921	24.921	33.211	17.921	15.974	14.1579	10.8684	18.6053	18.342	16.079	4.947	5.211	28.158	30.1053	12.553	7.8947	9	11.737	23.079	11.868	17.737	11.316	17.053	9.5789	8.0526	4.4474			0.84049	14.9899
16.4268	8.868	35.289	32.263	10.526	14.368	11.0526	12.0526	20.7895	20.316	26.947	6.368	5.316	21.842	25.7895	10.368	12.0263	11.0263	9.763	20.237	20.5	23.684	17.289	19.5	5.7632	3.7368	4.2105			0.846629	15.7651
16.5458	10.211	42.763	29.553	17.132	15.553	9.9737	10.1579	20.8684	21.974	19.816	6.526	1.947	20.789	27.1579	9.395	7.4737	12.3158	12.026	19.237	21.079	17.211	12.763	15.158	8.9737	2.9211	2.2895			0.852762	15.2025
16.6648	15.158	31.579	23.5	15.579	13.342	8.9211	11.8947	20.0263	16.921	17.895	2.684	6.053	20.632	20.6316	7.789	6.9211	11.8158	15.184	15.5	14.132	25.868	15.211	13.737	12	4.9474	7.9737			0.858895	14.4575
16.7839	11.079	37.974	17.632	21.579	20.211	12.1842	8.0526	17.5526	14.526	19.868	2.553	3.342	18.474	20.0526	7.368	6.8158	16.0526	11.342	17.263	14.789	14.579	16.289	12.263	10.8421	5.8684	9.7895			0.865034	14.167
16.9029	15.395	37.368	17.553	12.579	12.079	13.2632	11.2632	18.2105	15.737	16.789	5.632	4.605	13.868	14.2632	10.105	7.5263	10.4474	9.132	18.263	15	23.079	16.447	8.579	12.5	6.7105	5.4737			0.871167	13.5334
17.0219	21.711	36.658	24.289	10.895	11.684	5.2632	3.4211	12.0263	15.868	24.105	5.474	7.579	23.632	15.8684	10.421	10.9211	9.2368	9.658	21.579	6.184	19.553	18.684	11.5	18.4737	7.8158	12.7105			0.8773	14.4312
17.141	24.711	31.895	20.711	13.605	17.5	8.7632	5.8158	11.6053	12.474	26.342	4.211	5.605	27.947	19.5789	9.947	13.5263	13.1053	7.711	22.711	12.868	25.895	15.816	16.789	14.6579	7.3947	5.3684			0.883438	15.2521
17.26	21.605	35.105	17.947	13.842	23.842	8.0526	6.8947	12.8684	9.395	24.974	6.026	4.421	30	17.1579	11.947	10.1579	15.7105	7.974	22.316	7.737	20.5	18.632	15.579	19.9737	5.7895	4.6316			0.889572	15.1184
17.379	30	25.079	20.368	8.632	23.763	10.5	5.0263	12.5263	9.5	26.158	5.605	2.842	33.079	19	11.474	8	14.7632	8.474	17.474	9.079	17.5	20.211	19	21.2105	4	8.6579			0.895705	15.0739
17.4981	22.816	22.868	19.263	10.974	22.184	11.7632	7.6316	17.0263	10.316	16.895	2.526	7.105	32.211	19.1316	9.842	7.7368	17.8947	11.868	20.658	8.026	19.342	15.974	14.816	22.2895	6.4737	8.8947			0.901843	14.8664
17.6171	16.605	16.868	14.237	8.5	16.684	11.7105	3.6579	10.6842	12.816	19.605	5.895	4.684	28.526	19.8158	15.947	9	22.4737	11.974	14.5	9.447	20.579	20.816	14.632	13.2895	4.7368	11.7368			0.907976	13.8239
17.7361	18.737	19.132	11.5	7.316	14.316	10.5526	9.5789	16.6053	8.658	19.237	7.526	8.974	25.184	21.3158	10.368	7.6579	15.0789	11.868	13.5	10.553	14.289	21.579	9.816	18.4474	1.8947	11.2895			0.914109	13.2682
17.8552	13.974	19.105	11.158	9.395	16.263	11.3684	6.2632	8.5789	13.211	20.947	5.842	7.763	24.711	12.3684	11.842	14.2895	19.0526	10.553	14.789	8.263	9.053	18.342	9.105	12.1842	6.2632	8.8684			0.920248	12.4443
17.9742	9.605	20.579	10.421	6.053	12.132	5.9474	8.4211	3.9211	11.289	20.026	6.447	5.895	25	22.4211	13.184	16.5	21.1053	11.237	12.289	5.342	13.342	22.553	12.711	13.5526	9.6842	9.8421			0.926381	12.6731
18.0932	6.579	16.789	10.632	4.526	10.763	8.1053	4.1579	7.6053	15.789	20.316	9.395	11.526	27.895	15.9474	12.553	15.8947	12.5	9.447	14.526	12.711	15.342	13.158	13.474	12.3421	7.8684	12.2632			0.932514	12.3887
18.2123	6.474	16.526	2.974	3.842	5.263	4.2105	7.2632	6.6579	11.579	31.763	11.579	9.816	19.658	13.7368	10.237	20.2368	15.9737	9.711	12.658	12.263	13.105	14.237	10.868	13.7632	8.1842	16			0.938653	11.8684
18.3313	3	12.237	3.632	2.842	6.526	4.4737	3.6842	4.7895	11.263	18.711	10.447	9.711	23.816	16.3684	9.474	9.5263	14.3947	12.158	20.316	12.474	7.737	20.684	11.289	17.7368	11.5	18.2632			0.944786	11.4251
18.4504	2.158	8.395	1.842	2.158	3	4.2895	3.5263	5.9474	18.132	18.158	9.579	18	16	15.9737	7.5	18.1579	9.0789	10.421	14.895	13.789	12.211	12.237	14.605	18.3158	14.0526	15.1316			0.950924	11.0598
18.5694	5.368	4.684	1.211	2.895	4.579	4.8684	1.7895	6.0526	17.895	17.947	20.868	9.184	13.526	19.8158	10.5	7.3158	14.2368	8.553	17.132	15.237	8.763	13.237	14.158	9.1316	9.2895	17.0263			0.957057	10.587
18.6884	1.026	4.868	3.895	1.395	2.342	4	2.0263	3.4737	15.842	18.868	16.816	14.158	14.553	15.8421	7.711	8.7368	9.6842	3.632	11.132	11.737	9.974	6.947	12.237	13.4737	13.8158	16.8158			0.963191	9.42313
18.8075	1.263	6.053	2.737	1.316	7.053	2.3421	2.2105	4.6053	5.868	9.579	22.026	16.368	6.026	12.2895	6.105	6.3684	7.6842	7	9.632	9.974	14.184	13.974	8.105	16.7368	13.5526	20.9474			0.969329	8.99999
18.9265	1.158	4.579	1.816	2.579	2.5	1.1053	3.4737	2.7368	9.184	9.658	20.132	20.474	8.421	6.0789	5	4.3947	6.6579	6.316	9.526	8.053	7.816	13.026	8.447	18.4211	11.2895	16.3421			0.975462	8.04558
19.0455	0.868	1.553	1.763	1.895	0.553	2.9474	3.6842	3.2632	3.763	6.632	13.895	13.947	7.342	6.9474	8.947	3.5	4.1053	5.158	11.553	10.395	11.737	8.211	9.263	17.8947	9.2632	17.6053			0.981595	7.18022
19.1646	0.579	4.342	0.421	3.526	1.947	1.2105	2.5789	0.5263	5.184	3.842	12.289	13.289	6.632	3.8684	4.395	6.7895	5.4474	8.684	11.079	8.5	12	13.105	7.921	17.5	17.9474	18.5263			0.987734	7.3896
19.2836	1.158	2.316	0.684	0.474	1.895	0.6316	1.6316	1.9737	1.342	4.921	12.079	12.974	3.263	2.6579	5.684	2.2105	4.4211	5.158	13.763	9.553	6.342	13.684	16.211	24.8684	20.8158	19.2105			0.993867	7.3047
19.4026	2.474	2.053	3.737	3.658	0.947	0.7368	1.6842	2.6842	3.711	3.684	15.421	14.842	4.789	2.4737	2.947	1.3684	2.6579	5.5	7.605	9.421	5.868	11.289	6.263	16.9474	21.5263	22.0789			1	6.78334

## Sheet: Image4
X0	Y0	Y1	Y2	Y3	Y4	Y5	Y6	Y7	Y8	Y9	Y10	Y11	Y12	Y13	Y14	Y15	Y16	Y17	Y18	Y19	Y20	Y21	Y22	Y23	Y24	Y25			Ap-Ba	Average int
0	69.098	47.245	31.1118	51.7412	70.163	98.401	50.573	45.9008	45.0033	43.111	47.4076	23.0092	28.7763	16.0434	26.9095	29.9439	27.9616	26.523	29.338	28.266	28.775	34.591	62.726	53.753	31.1426	33.1768			0	41.565
0.119	83.782	46.554	35.0314	46.9513	77.405	102.767	63.017	37.8488	39.8152	39.808	48.9578	23.7293	37.4212	22.6892	20.5711	26.6201	24.2897	44.22	23.006	45.206	33.934	40.967	52.212	52.754	23.9124	43.7349			0.00504905	43.7386
0.2381	82.172	36.953	39.5229	34.1749	79.077	111.601	57.502	41.5045	36.3578	59.64	47.1367	25.5557	44.3687	21.6736	26.79	30.0188	28.9761	46.349	25.299	41.278	35.544	46.882	58.076	57.059	32.3761	38.5867			0.0101023	45.5567
0.3571	90.594	49.193	37.6194	32.039	72.078	105.6	60.595	37.6125	34.6813	50.01	48.007	32.5099	47.4845	22.5343	26.9322	35.3851	23.5049	62.911	28.221	51.419	37.894	41.482	50.355	59.382	35.319	32.1473			0.0151514	46.3658
0.4761	98.788	47.163	39.0925	49.8619	90.03	101.561	52.221	37.6491	37.5157	56.107	51.8886	32.4364	58.7964	25.8814	36.857	28.1154	22.9115	55.035	42.993	68.785	37.172	54.99	65.067	54.301	34.0511	28.8104			0.0202004	50.3108
0.5952	100.732	46.009	41.3346	43.6451	95.393	99.328	50.782	41.1813	37.7263	55.855	54.7308	28.0453	59.1874	29.9292	30.5384	30.75	28.1943	68.265	57.823	71.277	51.184	52.324	61.299	61.184	30.6399	32.0953			0.0252537	52.2867
0.7142	103.009	41.243	51.7165	44.6921	90.642	95.858	53.665	34.215	33.7526	58.834	53.1988	38.6546	66.4821	38.5988	41.8063	32.7711	35.5589	71.423	59.819	71.807	55.087	50.974	64.342	75.28	32.0638	31.685			0.0303028	54.8915
0.8332	105.869	46.788	52.9916	44.1961	102.321	105.228	42.016	39.7908	32.4912	71.131	54.0648	38.3505	66.2334	52.8436	43.4311	30.3853	34.5253	76.678	69.34	89.489	52.805	63.579	56.151	74.509	33.7011	33.1327			0.0353518	58.1554
0.9523	114.954	47.838	56.753	41.4921	102.276	112.5	41.617	45.5459	28.7731	59.713	45.8535	32.4975	73.4615	53.7641	45.6943	30.9944	47.7182	66.369	88.342	97.992	68.427	53.878	61.025	68.073	27.2617	44.9592			0.0404051	59.9143
1.0713	111.342	51.678	57.8847	46.8273	110.375	108.13	37.384	47.2419	29.56	70.283	46.7655	36.8032	75.4095	62.2829	45.7589	32.2012	49.805	90.474	83.893	109.667	66.331	56.97	71.98	83.042	32.7939	41.9469			0.0454542	63.7242
1.1903	124.063	67.458	63.5117	44.49	112.909	121.132	44.783	52.6948	32.55	66.446	48.2651	45.8879	93.5704	53.5912	47.3159	40.7915	55.3929	84.499	87.705	110.109	72.67	63.962	65.646	73.39	35.3872	41.1946			0.0505032	67.2852
1.3094	140.229	66.161	63.4896	50.7064	111.591	111.863	40.121	56.8861	36.6082	77.225	44.5254	42.4692	88.2442	51.5333	43.0732	40.4467	50.5067	85.279	86.974	117.551	94.259	70.061	68.794	78.282	32.0371	38.0808			0.0555565	68.7306
1.4284	143.52	56.215	71.3752	47.706	108.652	118.351	42.73	53.0639	40.4429	78.931	65.6087	41.4009	85.8007	64.1984	43.0618	46.3307	51.6854	76.104	99.803	120.084	104.487	54.91	85.098	87.691	31.105	50.7233			0.0606055	71.8877
1.5474	149.352	63.831	54.0407	51.1318	125.475	117.372	43.252	61.4167	42.7118	80.443	56.3096	50.5023	94.0321	63.4274	44.8235	40.7392	49.1568	94.688	112.588	123.551	105.302	55.446	78.93	86.397	35.7184	53.3096			0.0656546	74.3826
1.6665	156.24	83.137	80.6749	52.7828	106.224	101.972	50.914	65.6102	54.3987	83.812	50.2183	52.2631	88.8622	50.8525	54.4094	45.1396	54.2072	86.377	114.403	131.32	104.109	63.224	107.954	92.007	43.7928	50.2749			0.0707079	77.8915
1.7855	162.664	92.631	77.739	61.8263	112.333	101.083	58.412	50.6387	46.0895	91.802	56.9063	49.371	76.9614	56.6641	48.9426	57.646	57.8489	86.019	113.607	140.289	132.653	69.362	92.649	90.839	58.483	50.8498			0.0757569	80.5504
1.9046	157.759	86.866	84.3119	47.9861	105.939	96.026	63.321	48.392	60.2861	77.649	56.1777	41.9808	88.1998	63.7846	62.2166	45.6663	48.5915	104.712	128.627	140.889	126.562	86.708	92.623	96.122	49.8977	51.5091			0.0808102	81.2617
2.0236	153.842	105.9	77.5439	57.5437	91.767	88.227	72.329	58.2489	52.3204	72.584	49.6281	45.537	86.7031	56.5212	57.7999	54.3627	45.4411	94.998	106.044	137.33	117.759	93.792	93.695	104.576	55.0608	53.9985			0.0858593	80.1366
2.1426	177.269	98.685	82.8151	59.0416	102.159	100.778	85.929	59.3377	52.9365	88.856	49.8723	46.1316	87.947	67.3482	65.1403	57.119	61.8832	93.638	124.988	138.398	107.032	90.127	108.258	108.152	56.1762	44.0693			0.0909083	85.1572
2.2617	168.499	96.245	63.9113	59.225	112.739	117.364	93.675	40.9053	51.4894	80.254	44.7733	49.1462	84.7309	68.7388	73.8921	60.7067	60.4272	102.71	117.482	158.567	107.707	90.424	112.47	120.105	65.7253	39.6547			0.0959616	86.2141
2.3807	168.973	120.333	73.3933	57.9564	127.279	106.99	83.1	54.2741	44.9077	85.353	46.8083	40.6432	81.7114	69.5405	77.425	47.7095	54.0243	120.818	126.038	151.641	108.264	91.533	106.505	114.014	60.5856	42.7948			0.101011	87.0237
2.4997	164.624	117.8	75.4904	45.4476	131.314	139.428	85.618	53.885	37.175	88.036	41.9662	32.215	81.2822	71.6338	50.037	57.0168	47.9403	106.996	134.637	145.403	116.223	100.967	106.092	118.924	59.1503	35.5971			0.10606	86.3423
2.6188	179.21	126.701	70.2013	47.6007	116.699	125.335	87.411	56.6851	45.1671	90.599	52.6472	42.0301	79.6181	77.8509	59.0266	57.2981	47.5693	118.196	118.983	122.979	110.148	92.168	106.543	122.959	58.2351	37.0364			0.111113	86.496
2.7378	178.282	136.806	64.4771	39.3615	124.801	120.89	83.348	48.6042	43.1857	104.533	61.1659	40.4389	71.0449	74.9427	50.8134	60.2301	55.1961	119.941	113.228	132.069	109.415	82.62	97.642	123.882	62.2502	36.8294			0.116162	85.9999
2.8568	184.273	130.09	79.5926	43.5855	120.123	109.739	83.322	52.551	59.696	102.683	65.7935	37.7475	73.2178	66.3397	60.8695	60.0654	43.0453	115.593	116.095	122.698	111.281	78.635	96.828	127.299	64.3859	32.5392			0.121211	86.0803
2.9759	157.537	113.067	74.0913	38.5748	141.107	108.364	90.866	53.6577	43.0802	108.501	70.502	49.5155	76.3681	71.2914	51.9278	51.8466	59.4428	115.798	122.243	124.684	122.022	75.593	85.363	117.526	58.7407	32.9519			0.126264	85.1793
3.0949	158.204	128.88	83.3746	51.3713	133.632	104.958	83.115	51.1532	39.4987	87.595	69.8129	39.1021	68.3454	83.4628	51.7547	51.3968	46.7766	114.089	107.037	123.732	116.502	68.315	92.5	119.019	66.6829	46.5265			0.131313	84.1091
3.2139	171.267	123.588	70.4597	51.4309	104.321	98.013	93.332	46.1847	35.5185	108.054	76.6928	47.7909	64.0335	66.5377	45.9157	49.4396	48.3832	110.78	117.627	128.327	127.556	65.095	81.35	111.273	58.295	33.1901			0.136362	82.0944
3.333	165.019	114.816	67.9604	48.9515	119.757	104.503	100.326	50.1305	28.9859	118.192	59.8981	47.5363	69.9119	73.4088	52.0814	42.6473	37.8718	108.826	113.923	123.138	108.959	72.379	84.241	114.933	57.9683	42.4349			0.141416	81.8769
3.452	164.142	87.348	75.0971	51.1337	125.321	99.401	103.836	56.9469	34.2422	115.289	73.7978	49.0783	74.0235	77.8145	48.8591	47.8765	47.9234	115.544	116.084	111.388	104.59	84.236	92.436	112.132	56.9509	45.0532			0.146465	83.4825
3.571	147.037	88.174	63.1804	48.3524	120.993	90.476	90.95	58.0326	27.5961	98.033	70.1929	40.915	64.8661	73.2411	58.512	43.8041	42.331	104.931	99.441	106.588	118.257	101.685	81.374	100.106	60.8136	54.0085			0.151514	78.9958
3.6901	139.003	89.279	62.0385	32.5445	117.685	88.694	94.783	50.7618	22.7125	106.6	75.6897	45.4149	73.6577	65.5715	46.3507	40.1819	42.3214	91.449	96.952	112.68	123.815	103.931	77.448	87.965	60.2805	51.3498			0.156567	76.8907
3.8091	158.08	85.516	66.1139	35.3481	115.152	104.32	99.967	52.1302	30.8434	84.499	82.4127	48.2127	72.9659	69.1328	45.1032	35.8306	45.962	103.689	104.355	106.581	134.139	94.943	86.03	91.895	50.0565	53.4802			0.161616	79.1061
3.9281	145.936	90.956	73.2619	28.927	105.936	88.773	108.754	59.1874	21.0912	97.129	72.4767	55.3439	69.5553	68.2695	35.7784	33.9873	40.9387	98.276	91.937	101.624	126.375	100.192	91.213	73.766	58.444	52.5848			0.166665	76.5659
4.0472	140.338	82.315	68.8761	31.4117	105.574	88.383	103.454	51.2928	21.0309	105.084	72.9671	35.9789	75.1981	63.0241	30.9955	27.6317	46.7896	104.082	91.609	80.995	119.495	80.734	100.07	60.142	60.4127	51.5305			0.171719	73.0544
4.1662	143.36	76.599	60.7009	31.3996	99.793	87.09	113.61	50.1188	13.93	95.966	74.6437	38.4126	68.5706	71.6654	28.2397	23.3092	36.755	100.171	77.164	86.661	128.089	66.963	86.17	59.634	52.1269	46.4666			0.176768	69.908
4.2852	151.096	80.63	49.2061	31.8827	101.047	79.709	103.58	50.6581	12.547	100.417	56.5875	43.7913	75.0747	66.9792	41.691	28.1234	38.2689	94.971	72.992	77.62	139.938	75.66	73.214	51.22	43.1541	40.1183			0.181817	68.4683
4.4043	146.556	71.219	54.4348	22.6384	95.896	77.446	103.064	49.3406	18.7503	80.797	69.004	40.553	67.9255	72.8144	30.1357	23.4044	35.8343	93.825	72.194	69.011	124.007	68.518	76.941	40.6	49.9367	42.3772			0.18687	65.2778
4.5233	140.853	70.701	52.7338	26.557	86.072	81.177	108.88	52.8588	22.9673	82.755	58.0485	44.075	58.7077	61.2951	25.2544	29.817	30.2483	78.795	74.547	64.964	128.107	63.923	84.855	48.859	42.4094	28.4386			0.191919	63.3807
4.6423	128.918	71.822	48.9177	31.9435	92.238	63.531	87.079	55.5285	23.1248	87.499	60.837	32.3257	64.1673	55.2732	25.5063	24.4115	40.2276	78.699	51.925	59.934	125.262	73.699	72.267	44.775	41.4087	20.6162			0.196968	60.0745
4.7614	125.584	66.364	39.8504	31.6455	107.515	77.626	90.944	51.7699	24.1624	82.306	61.0642	30.9931	56.8556	52.2786	27.9798	25.4062	26.345	72.358	51.947	57.422	119.785	76.318	48.289	40.162	40.425	23.1624			0.202021	58.0215
4.8804	111.442	66.907	39.9182	29.7991	104.133	63.886	92.301	54.5584	24.92	75.993	55.8685	36.7489	67.7819	47.036	29.963	27.0106	19.2337	68.181	40.716	61.492	100.555	79.293	46.774	35.256	51.1884	20.4471			0.20707	55.8232
4.9995	113.464	58.375	35.2955	19.739	103.218	59.587	96.585	56.896	26.4705	76.482	51.4059	35.8546	60.8742	48.4054	26.9054	21.4654	25.3536	67.535	33.997	55.98	98.991	78.529	36.255	37.337	46.2287	23.7072			0.212124	53.6514
5.1185	111.28	60.129	43.8262	17.0464	97.252	45.28	85.382	62.5239	24.6808	64.439	46.2576	41.092	61.9113	35.4525	33.3258	31.9736	23.0603	66.897	20.335	55.55	105.779	79.335	40.143	33.478	42.4569	17.7024			0.217173	51.7919
5.2375	112.391	61.362	40.0687	9.2028	97.402	58.229	94.136	58.5419	26.9814	64.815	44.9337	38.7064	58.9593	42.8448	30.2958	22.1286	14.1488	67.701	30.418	49.688	92.615	69.833	27.789	40.042	44.2351	22.7588			0.222222	50.778
5.3566	115.033	53.34	46.2016	19.7066	75.267	43.16	84.529	59.845	21.1332	50.358	43.1773	34.3259	43.3803	41.9443	21.1264	31.2958	27.3674	62.814	29.314	43.291	94.307	70.926	35.053	38.608	47.953	18.9661			0.227275	48.1701
5.4756	105.958	50.525	40.4288	16.3368	87.548	49.681	83.897	62.8182	20.1765	55.265	37.7058	30.0749	43.6298	38.4174	26.2933	35.0069	22.9795	58.082	25.916	43.763	101.543	64.699	35.646	42.416	49.0456	21.1596			0.232324	48.0389
5.5946	118.621	61.283	43.3884	15.9025	102.194	40.857	84.702	57.4812	18.3847	48.345	32.1285	27.172	34.2255	38.1256	25.4292	33.382	21.9941	47.876	39.77	28.5	89.373	62.845	37.611	39.799	40.5131	17.3237			0.237373	46.4318
5.7137	98.65	67.844	34.0348	8.4852	89.651	39.859	79.582	56.9298	21.8418	49.626	30.0295	34.3708	33.7809	44.6588	26.4989	31.9944	25.7872	41.245	29.869	36.324	80.689	68.566	33.552	47.021	49.9646	21.3832			0.242426	45.4707
5.8327	109.483	54.327	35.4002	11.4913	65.537	39.104	76.338	53.5266	22.7526	45.55	26.2731	35.3517	32.7519	45.6415	31.4025	23.6756	23.3924	38.498	29.76	43.45	68.259	62.563	31.418	43.405	40.1537	17.3538			0.247475	42.5715
5.9517	88.973	64.124	39.4295	10.7375	72.111	35.963	65.505	58.3621	22.8308	40.186	23.2692	28.2691	31.7772	38.6383	26.2123	19.8808	25.6539	36.526	31.842	37.916	84.837	66.588	27.892	38.931	36.5119	16.6426			0.252525	41.1388
6.0708	79.644	53.364	37.4788	16.8018	54.441	35.243	69.606	52.9527	23.1461	36.177	25.6944	26.1605	30.2346	43.9165	26.9344	20.193	25.7688	36.024	23.267	30.276	73.461	65.038	30.613	37.688	36.184	20.0131			0.257578	38.8585
6.1898	85.768	46.495	27.2769	10.835	50.165	43.71	61.897	56.582	19.455	29.916	17.4138	21.2562	25.5769	33.8528	20.0084	14.3728	28.8072	36.358	26.625	34.401	66.109	63.132	28.183	38.066	34.13	20.6024			0.262627	36.1921
6.3088	85.717	49.067	33.1924	7.9981	35.734	34.589	44.584	51.6439	21.9951	24.286	21.9092	26.2349	21.4539	27.0342	18.8852	22.5775	23.3214	44.383	20.73	28.478	67.874	69.989	32.661	30.379	29.4524	23.9691			0.267676	34.5438
6.4279	68.728	42.63	26.5285	13.3089	41.487	34.694	55.178	51.387	27.9411	21.541	17.4735	28.5311	24.5062	36.0665	18.1724	19.1105	20.5738	38.94	27.32	22.935	68.056	50.872	23.71	48.486	28.6589	17.291			0.272729	33.6202
6.5469	70.903	36.803	28.4287	15.6971	37.969	23.264	42.864	47.6549	20.0589	24.072	12.0247	24.6852	17.6196	30.9056	21.4684	11.2659	28.1967	33.429	33.228	28.762	58.607	48.475	27.428	48.609	39.6309	18.7053			0.277778	31.9521
6.6659	81.326	36.511	22.2305	9.7193	32.016	26.058	44.652	50.7329	18.4151	25.917	17.2335	34.9438	20.0147	34.2844	23.1031	16.2133	18.7456	44.649	32.522	36.009	49.308	43.655	19.314	48.738	40.2548	13.8228			0.282827	32.3226
6.785	66.157	35.326	22.8533	12.9167	28.891	28.342	42.181	51.2597	20.883	26.656	19.3708	25.4072	14.4894	28.781	19.1131	12.7797	18.601	32.039	42.391	36.763	48.251	42.848	14.857	52.796	32.4846	24.0547			0.287881	30.7882
6.904	60.363	36.101	28.9889	10.3305	22.428	33.636	39.809	47.793	25.8471	21.676	13.9478	27.8971	19.9387	21.9331	24.2998	16.3663	18.5076	38.341	43.891	36.857	33.365	44.439	21.433	50.721	32.554	22.8784			0.29293	30.5516
7.023	57.552	28.48	17.8656	13.7156	23.792	28.477	35.812	53.105	35.0476	18.837	13.4557	28.802	14.0898	27.1928	21.6977	16.9513	16.0869	46.234	41.077	37.913	28.769	43.162	17.982	44.999	25.1231	24.7776			0.297979	29.2691
7.1421	50.823	30.563	16.947	13.3832	22.105	28.76	39.159	50.6383	25.9292	23.529	14.9549	24.6819	12.7537	27.6399	21.7612	13.0247	17.6781	41.332	49.106	44.456	47.273	50.789	20.862	52.004	29.8965	22.4531			0.303032	30.4809
7.2611	47.322	27.381	20.3019	10.6572	26.27	29.551	35.208	53.9392	32.5741	22.009	15.1702	33.8624	20.0077	28.9066	18.8428	11.423	14.5491	38.122	43.153	35.03	30.801	45.869	25.165	33.381	25.3394	27.0276			0.308081	28.9178
7.3801	42.304	37.435	22.1632	11.8241	31.068	24.942	36.957	63.3452	33.2779	14.312	11.85	31.7858	21.7408	18.3415	22.5766	17.3308	15.7852	37.575	53.402	33.997	30.018	37.439	26.977	29.052	17.7175	21.6333			0.31313	28.6481
7.4992	32.094	30.558	17.0686	13.9438	30.098	26.164	48.138	58.4658	35.3092	13.626	13.0274	39.8387	16.3704	19.6039	27.8803	14.3423	17.7552	34.368	44.676	32.76	38.445	38.516	38.072	32.143	17.1188	24.5489			0.318183	29.0358
7.6182	48.207	26.913	14.8532	12.1737	25.948	20.829	42.688	57.1751	34.6724	16.11	10.5216	26.8059	18.968	21.4003	19.0329	11.4072	17.6521	34.134	41.704	21.82	43.103	45.584	37.6	25.131	26.4347	22.327			0.323232	27.8152
7.7372	38.367	31.552	15.5708	12.7956	23.519	17.21	32.913	60.7298	29.8252	15.993	11.6161	32.438	16.6372	23.2093	26.363	12.5687	24.2858	39.028	40.286	22.094	40.756	44.599	34.456	28.801	23.1437	23.6261			0.328281	27.784
7.8563	28.607	25.837	12.7801	16.4301	26.669	17.664	35.602	53.3435	30.3193	8.964	6.4024	29.8351	17.5294	19.2697	24.6217	12.8025	17.8684	35.954	42.117	30.279	35.507	41.786	39.161	26.791	21.6979	25.459			0.333335	26.2807
7.9753	23.842	36.334	8.8861	13.0042	34.726	14.235	36.957	57.6559	30.5694	10.998	7.9004	28.1134	18.4801	23.3378	21.6176	12.0137	13.1419	36.223	43.954	22.806	31.718	47.656	26.69	31.168	16.1659	30.3363			0.338384	26.0973
8.0943	22.321	29.706	9.2097	22.3756	25.676	12.961	41.819	56.3319	29.2284	12.477	5.7198	29.7362	20.9537	19.8905	22.7055	11.964	17.1903	24.931	39.848	16.59	30.806	41.326	33.919	22.056	19.8796	22.5063			0.343433	24.6972
8.2134	30.075	30.603	10.5544	19.413	16.563	20.262	31.907	61.7066	25.3237	13.06	8.9312	33.0463	24.0261	20.8622	24.8295	11.9393	13.8688	28.283	41.202	20.797	29.199	34.64	30.225	27.019	21.8337	29.5346			0.348486	25.3732
8.3324	21.634	35.506	14.3936	23.4437	24.121	20.087	34.184	55.7497	29.2611	18.527	13.4015	23.5922	22.9121	15.4389	25.5716	9.5318	12.8578	26.441	32.265	22.311	30.693	34.639	37.238	25.664	19.5414	32.8293			0.353535	25.4552
8.4515	23.753	26.159	9.6513	19.9792	20.369	19.046	30.963	46.3979	29.4851	12.638	12.3356	28.3449	25.0375	20.7231	19.9996	10.373	18.6125	30.24	34.566	31.818	19.985	35.859	32.556	30.365	21.9225	31.9339			0.358588	24.7351
8.5705	25.2	27.431	13.4427	19.0106	24.925	18.766	35.511	47.1154	23.5005	14.087	11.2826	25.3734	15.8875	23.278	19.5769	16.1907	15.4952	26.196	27.142	26.611	21.81	33.558	25.796	27.719	23.8535	22.6457			0.363638	23.5156
8.6895	23.533	32.503	13.7309	16.9383	26.146	20.872	29.236	48.8732	27.5688	17.093	16.4683	29.9938	17.8448	18.9798	16.5038	12.8104	12.8506	25.066	31.084	24.449	23.168	34.1	29.123	30.527	38.0526	24.3527			0.368687	24.6872
8.8086	25.628	30.859	10.2168	26.6169	15.751	20.495	29.1	44.13	23.2095	10.684	12.129	22.0529	23.6995	20.2994	19.046	11.6802	14.3809	28.279	37.34	33.89	22.537	26.196	23.721	22.29	37.1616	21.3433			0.37374	23.5668
8.9276	26.571	25.461	11.7406	20.4959	18.51	25.94	23.892	36.579	19.7398	12.54	12.5514	20.7172	19.9934	22.1816	16.5044	13.1053	12.1947	23.448	32.332	28.534	24.55	26.647	26.325	18.724	23.0537	12.9454			0.378789	21.3568
9.0466	28.218	22.084	11.3741	18.6656	20.101	27.053	35.053	29.8166	19.4444	14.221	9.4048	20.5411	17.0688	16.6416	9.2415	14.8378	10.9077	26.604	29.589	26.909	22.121	23.215	24.77	16.416	23.0846	21.3234			0.383838	20.7195
9.1657	30.308	26.493	12.3065	14.038	17.682	19.105	25.774	27.2831	20.5165	9.044	6.8521	26.6094	15.7717	18.4505	18.1337	12.5587	12.66	20.89	38.223	19.429	25.384	26.349	27.299	12.908	25.8906	21.4629			0.388891	20.4393
9.2847	27.785	25.128	13.1936	14.8775	22.452	19.394	26.901	33.0784	17.5942	10.626	6.0258	29.0884	20.8513	17.9374	16.422	11.8923	10.6941	24.997	31.396	35.846	29.744	32.016	32.661	18.774	25.7295	20.8777			0.39394	22.1532
9.4037	29.067	21.365	14.1393	15.8389	19.134	17.644	30.793	36.692	22.2937	12.122	6.1339	24.1715	23.5479	17.6165	15.4444	13.4135	10.8249	29.506	27.846	28.786	34.239	35.932	30.684	20.191	32.1518	21.0053			0.398989	22.7147
9.5228	29.842	25.988	6.1746	11.7538	18.096	15.103	32.378	30.5666	19.7583	12.017	9.1707	16.2	19.809	22.2373	15.1295	12.5591	13.699	29.386	25.644	31.803	26.243	37.211	27.456	23.552	25.7616	21.7396			0.404043	21.5107
9.6418	24.904	28.068	5.6176	17.8675	22.522	21.893	32.724	34.5282	23.1215	12.177	7.86	20.7861	22.6011	19.6437	15.2598	14.427	14.0792	31.144	32.196	29.365	29.545	30.81	28.016	31.56	20.4148	24.8359			0.409092	22.9218
9.7608	23.762	20.82	8.6961	10.7568	10.335	16.884	38.31	30.5615	17.2869	11.666	5.8299	20.9064	21.4048	15.9609	13.4525	12.1985	11.7159	34.901	36.949	47.008	31.111	33.886	31.844	27.295	15.4073	20.8742			0.414141	21.9163
9.8799	24.71	22.141	8.3859	10.4541	13.508	15.551	29.595	37.033	18.3321	12.369	9.0622	18.3546	18.7535	14.1621	15.0087	9.3441	11.7362	37.479	27.995	32.267	22.412	34.835	37.638	28.151	13.4622	22.9902			0.419194	20.9896
9.9989	25.364	23.451	9.4327	10.9953	12.507	24.867	31.532	33.5575	21.0067	7.353	9.99	15.2382	26.3904	12.8632	11.0411	11.1261	10.0748	26.052	31.098	42.597	21.177	34.337	38.247	27.555	20.8697	20.6392			0.424243	21.5139
10.1179	23.321	21.971	13.8708	12.8717	13.837	19.237	35.454	36.0775	11.5881	12.778	9.2359	17.6226	28.8629	17.6894	13.0073	9.5247	12.0445	26.298	30.304	40.186	20.213	32.043	43.429	23.018	15.0964	22.6711			0.429292	21.6251
10.237	15.588	26.643	10.2271	10.0405	12.49	13.571	44.779	37.3095	12.7162	17.079	5.461	14.6744	27.7781	10.7179	17.2502	7.3225	14.8958	32.43	36.342	42.107	17.856	37.018	36.759	21.554	9.0914	18.9499			0.434345	21.1789
10.356	16.394	17.369	9.0317	9.6212	17.112	14.389	39.023	34.6668	17.2485	22.475	9.1925	17.8995	23.1241	13.1719	13.9133	8.1984	10.5538	30.305	31.547	43.463	13.687	50.272	26.983	22.717	16.3401	22.8465			0.439394	21.2132
10.475	13.661	19.911	12.3413	7.5275	15.989	16.261	39.213	26.2747	12.966	18.135	9.562	10.182	22.8381	12.0973	12.6641	14.4151	10.0844	26.912	35.461	30.317	16.452	44.269	23.596	23.861	24.2524	18.1427			0.444444	19.8994
10.5941	14.235	21.736	11.1176	12.7043	19.99	9.977	38.022	21.3369	14.9432	18.486	7.4354	13.7036	20.6388	16.3031	10.2933	11.2715	11.3505	35.025	36.041	31.399	14.401	49.794	19.426	20.933	20.6489	15.645			0.449497	19.8791
10.7131	14.36	24.793	8.1587	12.4422	11.205	14.629	35.785	17.8833	12.5796	16.38	7.9102	8.3275	20.9415	14.4948	13.4388	10.1858	9.6039	32.122	46.914	24.176	12.92	37.663	22.404	26.702	15.3663	14.6595			0.454546	18.694
10.8321	16.583	31.721	5.6863	15.6036	11.932	13.537	46.963	11.6961	11.3843	14.07	6.0872	11.6142	23.6569	14.5903	20.0994	11.3924	8.2555	24.699	27.144	25.789	17.681	39.379	22.555	24.668	16.6261	12.3424			0.459595	18.6829
10.9512	14.316	26.98	7.7938	10.0772	9.873	14.525	36.235	8.7785	13.7226	9.894	9.0171	12.1642	22.2377	16.5905	14.8946	6.4851	7.5381	22.235	30.25	20.536	14.193	24.596	26.883	25.102	18.9764	17.8742			0.464648	16.9911
11.0702	14.627	27.275	8.1666	12.0409	11.529	11.433	40.911	12.4822	5.0006	20.107	11.6749	13.5389	17.6793	12.2985	11.7589	10.3801	9.3258	25.799	29.913	23.811	11.244	22.893	19.462	26.077	17.6483	16.3369			0.469697	17.0543
11.1892	18.653	25.371	12.991	7.0731	15.088	13.996	37.329	7.7822	11.7891	21.468	11.358	11.4703	16.758	15.8499	14.2844	8.3674	4.7124	23.621	21.685	15.958	15.745	29.529	23.197	19.106	18.6958	11.2349			0.474746	16.6582
11.3083	25.083	19.661	11.8471	10.5965	14.577	14.324	28.053	8.3902	10.831	23.904	10.6545	8.7302	18.4114	13.1213	8.4579	12.4909	7.662	21.13	20.469	17.856	11.391	21.564	34.19	18.081	20.335	17.5277			0.4798	16.513
11.4273	12.565	21.912	14.1166	8.9985	14.701	10.928	37.594	11.158	11.8479	19.124	7.8058	8.9545	19.6007	14.9175	12.5202	7.9179	9.4598	19.604	16.63	19.491	16.129	23.949	33.945	15.864	13.7649	13.0536			0.484849	16.0212
11.5463	15.83	24.461	10.0426	11.9935	16.103	14.501	28.078	6.5933	14.7089	15.021	6.6067	11.4724	11.9037	16.2458	9.6903	6.9969	4.6483	26.724	17.882	15.917	13.101	28.525	27.587	15.055	15.7199	14.7061			0.489898	15.389
11.6654	20.692	25.041	13.7183	12.3593	14.123	8.511	26.19	8.8882	9.9275	15.604	7.9328	9.2641	13.8642	12.546	10.4174	7.3903	6.1737	19.009	14.97	15.392	21.043	19.469	26.692	15.948	17.0284	14.8215			0.494951	14.8852
11.7844	17.484	25.795	13.0008	9.8467	11.462	11.101	25.321	6.6548	6.9042	17.196	8.3243	9.3175	16.0121	16.1436	11.8765	8.0193	6.6289	20.813	20.835	6.522	11.768	23.345	33.272	14.314	12.8057	16.5296			0.5	14.6651
11.9035	20.394	21.156	15.0916	11.4566	14.084	15.699	15.671	5.2913	9.2901	21.475	9.853	14.0407	15.5691	15.9678	9.9702	11.1555	6.7041	24.827	17.817	8.779	15.162	14.325	31.445	16.921	19.2749	17.6662			0.505053	15.3495
12.0225	19.401	28.618	15.0424	12.1617	7.202	12.348	17.331	10.731	9.2762	15.757	6.1097	18.0496	12.5923	18.3288	15.8177	5.5025	4.3587	20.144	19.695	8.277	12.5	22.545	36.411	19.531	14.4988	12.8604			0.510102	15.1958
12.1415	15.502	34.897	11.9968	7.0928	7.311	13.247	17.265	7.5273	9.8265	13.679	8.2976	10.6407	14.0376	16.9577	13.2236	7.5375	6.1258	16.379	17.684	10.239	10.018	21.822	36.816	17.101	19.5586	8.4589			0.515151	14.3554
12.2606	10.257	33.204	10.9943	8.4019	14.037	6.186	15.963	4.6783	8.0904	12.96	12.448	17.1641	10.0306	19.6037	10.9037	5.0204	5.6091	22.174	15.192	11.954	15.912	27.676	29.661	18.054	15.1785	18.7253			0.520205	14.6184
12.3796	12.906	26.478	10.9882	8.1795	12.306	12.216	18.529	5.6906	5.8005	13.87	12.3226	13.578	8.2167	15.605	10.8863	7.4441	4.1776	18.793	12.833	7.643	10.855	16.444	30.254	18.386	9.7796	25.1416			0.525254	13.4355
12.4986	11.452	27.113	13.2287	8.4134	9.852	14.884	8.735	5.194	9.4572	13.552	10.3119	10.4687	8.6422	12.6198	8.0119	7.7804	6.2719	17.79	18.499	7.525	7.533	19.346	22.058	14.837	12.3366	19.8678			0.530303	12.53
12.6177	14.272	28.8	12.768	11.8459	6.488	10.323	10.146	8.1909	5.2671	7.78	9.323	9.1974	13.8458	14.5571	9.3223	8.7784	3.5822	17.47	16.581	8.63	5.48	18.429	15.542	17.877	9.0015	29.1924			0.535356	12.4112
12.7367	9.472	18.066	8.5426	7.5772	10.507	9.71	8.972	7.4295	7.8213	9.021	8.6894	6.7192	16.3432	18.3607	8.9381	6.9603	5.4993	17.327	17.931	11.519	9.155	18.555	16.299	22.531	10.3307	17.4313			0.540405	11.9118
12.8557	10.269	17.843	14.4216	8.3759	12.234	9.98	8.312	4.36	11.2419	6.718	9.3001	6.6522	11.5362	18.4726	6.7091	10.4271	6.7763	19.518	13.873	7.425	6.919	15.337	16.262	14.126	12.417	15.7048			0.545454	11.3543
12.9748	9.065	17.589	8.4549	8.4634	14.881	13.729	6.731	6.3405	11.7795	8.335	7.1292	7.7313	12.9853	18.4443	7.6666	8.6206	2.6219	13.628	15.636	5.122	8.636	9.937	12.425	15.601	7.5689	13.1401			0.550507	10.4716
13.0938	15.163	20.667	7.6868	5.3036	17.239	13.017	7.652	6.9359	8.5283	10.728	8.0558	8.5225	11.2748	15.3284	6.4356	8.1186	2.838	14.521	9.365	7.955	7.772	14.546	13.339	11.636	10.5692	11.8028			0.555556	10.5769
13.2128	15.185	20.09	9.7011	6.7211	15.985	11.491	9.09	7.5072	9.9431	7.526	8.3672	8.4011	13.4702	14.6903	12.1047	6.4983	4.5913	12.06	14.969	7.472	5.991	23.212	8.921	12.021	10.5442	11.7081			0.560606	11.087
13.3319	14.916	21.509	10.6292	9.4357	15.535	13.286	6.966	8.3357	11.5145	9.59	9.433	8.4981	17.0248	14.2195	5.6	6.245	3.4738	21.519	15.827	5.44	10.238	22.211	18.45	11.583	6.9505	11.3801			0.565659	11.9158
13.4509	19.669	18.995	8.0107	4.8158	6.601	16.274	9.082	7.8204	9.1183	7.33	10.0478	9.2058	25.5135	13.384	9.5981	4.09	3.9487	10.526	10.589	4.177	9.297	18.299	13.679	13.79	9.971	9.3963			0.570708	10.8934
13.5699	12.766	15.028	11.6384	8.4065	6.579	20.283	9.148	7.6422	8.7475	12.079	7.0952	10.3085	21.2487	9.2518	3.7006	3.9178	6.5041	18.378	11.935	5.356	8.304	25.592	16.231	11.419	9.0811	14.9248			0.575757	11.3679
13.689	11.349	11.898	10.087	6.9083	13.324	17.591	11.874	6.1158	7.2106	11.243	11.1439	12.516	21.4722	13.5323	9.4316	8.2102	4.2195	15.74	12.452	7.47	5.668	15.836	13.086	6.746	11.0762	14.0354			0.58081	11.1629
13.808	9.252	17.469	8.0331	8.1564	8.886	15.465	13.221	5.1066	8.3601	6.792	4.2788	9.0807	22.6519	8.6529	8.3316	5.1848	3.1448	12.483	10.131	8.682	8.281	19.604	16.732	15.134	15.5755	12.3416			0.585859	10.8089
13.927	9.349	14.963	9.3738	10.0288	9.986	10.824	11.964	6.6141	7.7687	7.355	5.5657	8.7086	16.1505	10.9151	12.1973	4.4206	6.8184	13.381	8.382	8.318	6.34	18.158	14.685	12.938	17.9639	19.5176			0.590908	10.8725
14.0461	11.161	14.43	6.7307	5.6547	6.795	13.147	14.118	7.9717	4.8819	8.963	4.415	7.7839	15.9295	9.2528	10.363	3.8414	3.3313	10.557	9.741	5.229	4.685	16.813	7.778	9.632	19.0554	9.6282			0.595962	9.3034
14.1651	6.638	15.473	10.0338	8.0721	7.841	15.984	15.084	6.8597	8.5478	7.332	8.2192	5.4616	16.1175	10.7973	7.6881	5.2873	4.3471	12.095	4.816	5.566	8.979	17.143	9.508	12.374	17.3675	19.0089			0.601011	10.2554
14.2841	6.113	23.74	16.5014	3.3196	11.526	12.746	15.886	3.7178	8.7166	6.891	6.7626	6.8402	16.0888	12.3693	7.2763	5.6868	4.5645	13.134	8.619	6.966	5.374	20.134	14.166	8.288	14.1121	14.2515			0.60606	10.5304
14.4032	11.857	15.39	18.7083	4.8684	9.03	12.304	17.267	5.3374	13.007	8.91	3.9778	7.154	17.0416	7.0495	6.9512	6.0936	2.0598	9.117	9.746	4.342	8.975	14.216	12.233	8.999	21.5086	21.315			0.611113	10.6715
14.5222	5.901	17.729	12.5677	7.7776	8.507	10.617	15.928	4.4851	11.0922	5.096	6.7765	11.397	12.1319	10.4603	6.0972	4.7606	1.3607	9.288	6.473	6.775	8.734	20.02	7.359	9.763	20.8321	13.6714			0.616162	9.83078
14.6412	7.176	30.66	11.229	7.1569	6.23	16.279	18.588	5.2477	5.6776	6.474	7.5866	7.1959	13.3524	7.8941	7.4126	3.3078	5.1039	11.014	13.091	4.859	5.436	12.876	10.856	8.799	18.3688	10.6041			0.621211	10.0952
14.7603	8.842	19.76	12.3706	8.4807	10.082	14.876	15.374	9.3492	9.0924	9.043	6.2273	12.1931	9.1445	13.4192	7.6865	6.4214	2.8063	8.907	10.268	6.899	8.279	13.739	7.866	10.888	10.3943	6.9791			0.626264	9.97645
14.8793	5.164	27.222	12.7914	8.3124	8.033	16.514	11.233	4.7961	6.3352	7.957	7.3684	7.2501	10.9038	11.045	6.5671	3.6295	2.0974	12.01	8.18	7.549	6.64	14.92	7.213	12.846	10.8428	9.4587			0.631313	9.49534
14.9984	7.538	17.897	9.8953	6.8351	4.564	13.539	11.368	8.1593	9.514	6.124	5.8738	7.0741	7.5964	7.287	6.7108	6.7106	5.5435	13.436	9.638	3.675	8.406	15.265	14.954	12.661	13.5664	13.18			0.636367	9.50043
15.1174	10.329	20.961	11.0988	3.4462	5.373	13.547	9.498	5.9422	7.9269	6.709	7.8983	4.3859	6.986	11.3214	7.101	3.9204	5.6194	7.476	10.508	3.758	7.413	18.568	9.438	11.94	20.6573	9.4175			0.641416	9.27843
15.2364	11.029	14.838	8.4685	2.0591	1.228	9.799	12.518	7.5811	9.5142	7.383	5.506	9.9097	7.84	11.2719	7.839	4.0068	6.5162	8.838	5.937	4.953	3.146	11.856	14.664	15.613	16.3135	10.9325			0.646465	8.82925
15.3555	9.75	15.734	5.3941	4.8012	4.236	8.067	6.354	8.6606	6.2026	4.226	6.7293	5.9632	8.9299	10.0362	5.9675	8.2733	3.5667	13.66	6.391	4.748	7.098	15.153	9.583	9.497	10.8628	14.4367			0.651518	8.24312
15.4745	12.66	20.077	9.8984	7.3449	6.941	9.351	9.886	4.9935	6.5269	11.909	5.3281	9.1585	8.9282	9.3529	9.4863	5.1758	2.4407	11.179	10.773	8.337	5.863	12.38	10.978	8.408	14.055	10.7503			0.656567	9.31467
15.5935	13.246	23.166	6.0695	3.462	2.44	5.934	8.958	4.6009	9.9368	5.359	7.76	8.8583	7.9906	11.6601	5.4605	5.4838	3.989	12.768	4.394	5.129	6.079	12.175	14.233	9.812	18.5927	14.284			0.661616	8.91697
15.7126	11.578	12.481	8.028	6.5614	9.175	8.627	10.885	6.7093	11.3718	8.133	9.1217	9.6666	8.7074	10.3798	10.2852	5.022	6.0039	14.758	7.261	4.886	6.34	12.102	19.697	10.186	12.6923	6.5507			0.666669	9.50804
15.8316	13.24	12.795	4.7187	5.7358	8.61	8.055	9.983	2.3187	11.4442	7.74	6.0966	12.4772	10.3759	13.9074	11.2785	7.477	4.6093	17.906	7.066	4.197	5.461	12.046	13.892	10.454	14.5778	13.2525			0.671719	9.60441
15.9506	15.116	22.37	10.6214	6.3748	7.389	5.627	9.087	5.1018	7.9082	9.384	7.9942	6.7712	6.0406	10.6962	5.8012	1.4597	3.7999	10.108	9.405	4.38	7.02	8.958	12.277	11.557	11.727	15.9008			0.676768	8.95673
16.0697	17.824	20.722	3.9783	5.7136	4.819	12.307	11.506	6.4231	7.8997	8.27	8.9613	8.7515	5.8805	9.466	8.6684	5.2407	2.9385	10.209	8.847	2.572	6.046	11.726	12.961	13.205	13.8768	11.8807			0.681821	9.25743
16.1887	13.904	14.501	7.0895	5.7199	7.291	11.388	6.413	2.6174	8.2197	7.587	4.6824	11.1611	6.1042	6.5496	8.059	2.9644	2.4202	13.026	8.786	2.273	4.813	12.796	8.84	10.554	15.5011	11.3804			0.68687	8.25542
16.3077	16.741	17.139	8.4471	4.9792	6.197	10.701	7.467	4.514	12.1393	8.482	5.7038	8.1069	5.7776	10.3752	5.3125	3.2091	6.7247	10.643	5.141	3.808	5.059	13.74	9.857	13.525	14.7112	14.8166			0.691919	8.97374
16.4268	14.48	23.84	8.6054	6.1436	7.181	14.32	11.603	5.5224	16.4422	6.165	7.8502	9.936	6.5746	8.1832	4.4153	3.281	4.573	8.606	6.007	3.758	4.717	11.165	15.007	18.872	20.8408	14.6166			0.696972	10.1041
16.5458	10.759	17.74	4.8935	6.7766	7.348	9.87	11.218	7.2376	9.7692	5.437	3.9738	7.3901	7.0128	13.8463	4.4802	7.0381	1.9681	6.875	5.372	6.918	3.903	16.937	14.361	21.963	12.0733	17.765			0.702021	9.34329
16.6648	10.163	15.855	9.6247	2.8332	6.575	10.231	9.26	5.9816	8.083	8.183	6.4943	8.2146	6.0143	12.1548	7.6529	5.3216	2.6708	6.411	3.704	4.639	6.139	14.927	8.337	29.742	15.735	17.0795			0.70707	9.3087
16.7839	11.274	16.346	9.8419	4.8857	7.717	11.897	10.743	7.014	9.068	7.631	9.6262	8.5387	7.9933	11.9473	6.113	7.757	8.9468	4.644	5.01	7.762	5.444	13.137	9.046	13.537	10.5271	18.9638			0.712124	9.43888
16.9029	17.196	18.094	10.1933	2.8825	7.265	10.533	11.73	6.7701	9.3945	6.653	5.7839	7.7328	6.0541	12.9825	4.702	4.3621	5.5213	4.574	8.711	4.017	3.021	16.27	15.243	18.024	11.9371	12.5604			0.717173	9.31568
17.0219	13.381	14.692	7.7777	7.7733	5.109	12.289	9.069	6.1708	16.243	6.858	3.5471	7.959	6.1943	10.7076	7.1786	4.066	2.4721	7.22	10.155	3.68	8.018	13.43	12.675	14.561	19.4533	11.5365			0.722222	9.31601
17.141	10.476	15.461	9.1064	5.0285	4.009	6.533	13.481	6.6327	8.3161	8.17	2.0119	13.2142	6.3854	5.3515	8.328	4.8615	1.0514	8.182	14.449	5.495	9.358	13.198	16.367	13.806	17.8787	14.024			0.727275	9.27597
17.26	14.432	14.481	6.4551	5.2935	9.181	11.88	16.867	4.735	13.694	6.806	5.1274	11.7538	7.4518	8.9777	5.1241	4.5418	4.3635	11.252	19.539	6.73	7.721	14.049	14.428	9.477	23.6188	13.0681			0.732324	10.4249
17.379	18.295	17.187	6.4322	7.3808	1.961	11.244	13.589	3.9701	11.1411	7.146	4.7117	7.4582	8.2475	5.7064	7.6175	3.8088	3.7204	11.73	17.091	4.875	4.754	17.568	13.513	10.578	18.7988	15.6944			0.737373	9.77765
17.4981	15.862	19.402	7.0995	5.809	2.039	8.998	19.882	8.5002	10.2234	6.792	6.8527	5.4799	9.0828	5.9144	9.1082	6.4666	3.0718	6.183	15.973	5.363	3.245	9.22	6.373	9.463	22.1271	10.6348			0.742426	9.19867
17.6171	13.098	14.815	7.6108	5.502	2.105	11.268	19.252	6.9811	11.9258	6.52	4.5314	8.7507	10.6757	7.7102	8.438	3.9745	4.7422	3.544	15.204	4.859	5.243	14.473	14.288	6.773	22.7458	14.2723			0.747475	9.58856
17.7361	12.818	10.901	6.411	7.4636	5.486	7.788	14.94	5.1422	8.4903	4.142	6.7507	8.1929	7.407	8.7242	7.0712	6.4229	3.2074	6.484	20.839	6.1	5.677	12.924	15.361	8.663	18.8724	9.002			0.752525	9.04926
17.8552	14.054	15.03	5.9467	3.4008	5.487	11.22	22.033	11.95	13.7635	5.829	9.6424	7.0358	6.1736	10.6882	5.1361	4.5243	3.3573	5.951	19.797	4.022	9.328	12.146	14.549	10.221	20.7904	11.0732			0.757578	10.1211
17.9742	11.23	14.811	13.235	2.5527	11.113	10.439	24.356	9.7044	10.434	6.478	5.9644	5.9105	10.7514	5.5845	11.6562	6.6099	4.9642	8.314	25.896	3.842	5.983	11.207	13.083	10.099	18.5654	12.7579			0.762627	10.5978
18.0932	13.746	8.648	8.419	7.0261	5.031	9.838	20.62	15.0114	12.5929	5.598	6.7284	11.4528	6.6472	10.2312	9.5761	2.7582	4.6922	4.028	15.557	4.173	5.136	16.255	13.77	7.127	16.7751	11.5688			0.767676	9.73102
18.2123	9.733	15.01	8.529	4.6325	9.298	10.187	14.456	19.1826	12.0456	5.948	4.2756	7.5287	9.5631	4.4643	6.5162	4.8937	3.4471	5.804	20.916	5.946	5.109	11.585	18.201	10.711	14.4526	15.0212			0.772729	9.90216
18.3313	10.827	14.407	12.0964	3.0725	10.33	5.838	18.887	11.8326	9.3485	5.725	7.8661	7.3431	5.7435	11.2274	7.8477	2.044	2.6892	8.193	20.064	8.531	5.837	7.026	15.328	7.219	18.0169	13.1828			0.777778	9.63549
18.4504	4.231	7.898	12.2474	5.9167	5.305	11.183	12.753	15.3821	10.6791	9.118	7.3827	5.1739	11.9295	10.9893	10.3525	4.4291	5.1936	7.361	22.252	4.878	4.386	7.295	19.267	11.045	12.7584	19.2619			0.782832	9.94878
18.5694	8.481	9.925	8.492	4.1979	4.17	11.002	18.028	14.99	11.1106	6.199	2.4959	4.3744	5.6037	9.7998	6.4239	7.3535	4.9739	4.099	20.524	5.56	9.165	12.475	25.665	13.874	13.4468	20.0835			0.787881	10.0967
18.6884	8.378	11.637	7.2775	7.0533	7.547	5.866	22.617	6.8796	11.2896	6.731	4.768	9.503	6.3735	4.3341	9.2351	4.9959	2.7193	3.996	18.539	4.4	8.199	10.536	15.538	25.182	12.7083	12.4392			0.79293	9.56702
18.8075	6.799	11.388	11.6973	4.4355	4.866	7.98	16.218	14.5848	14.757	8.319	6.3087	6.4186	7.3049	6.4201	9.3634	5.2487	2.8933	3.06	14.924	3.209	7.78	11.301	21.877	26.595	13.7009	19.8939			0.797983	10.2824
18.9265	9.484	13.512	13.0651	2.7656	8.553	5.802	11.689	19.7311	14.8241	7.702	8.0322	6.1573	8.0553	9.3006	9.5631	2.9809	2.8059	1.777	19.418	6.188	10.821	9.784	15.489	15.742	13.1489	22.5321			0.803032	10.3432
19.0455	14.512	14.514	10.6646	5.1543	8.964	7.836	23.388	21.4688	14.6108	3.439	4.0853	4.393	6.4304	9.6687	7.7479	4.1569	3.8164	2.302	13.569	5.799	9.76	10.996	17.447	15.515	12.9341	16.3108			0.808081	10.3647
19.1646	19.334	13.911	11.9156	4.6972	6.329	5.72	19.546	20.1821	10.3406	6.793	3.5715	9.3926	3.9736	8.8527	7.7628	3.9947	7.4451	3.945	13.085	7.796	7.999	13.975	17.035	15.326	9.7519	14.9501			0.813134	10.2932
19.2836	16.824	8.392	11.4431	7.5127	4.714	9.246	13.098	20.7976	12.5713	4.64	5.215	7.6142	8.8204	6.8186	7.8238	3.2077	1.6386	7.105	14.767	8.485	10.11	14.473	17.494	17.071	11.4526	14.8026			0.818183	10.236
19.4026	13.465	13.856	8.4363	5.7615	4.363	5.587	10.129	23.7869	11.0997	4.082	3.8039	7.2087	10.9593	8.2966	7.3728	4.6961	3.5071	5.042	9.539	11.571	12.7	13.411	25.975	17.083	10.8952	16.0783			0.823232	10.3348
19.5217	12.921	8.802	9.6623	10.8028	8.375	4.143	11.761	23.9305	10.6094	5.22	4.8288	7.7549	11.7849	8.0491	5.131	5.1431	4.5317	5.024	15.225	10.649	17.842	16.707	19.008	22.457	12.5237	13.4149			0.828286	11.0116
19.6407	19.695	11.089	11.8434	9.9864	8.609	7.516	12.502	20.8626	9.3068	4.197	3.8597	6.5424	10.5608	10.8296	7.5739	9.6044	4.3434	5.686	12.671	14.532	12.261	17.32	17.912	15.262	11.6818	12.5936			0.833335	11.1093
19.7597	16.738	14.827	15.3101	6.5715	7.377	10.108	9.969	23.1114	12.886	4.652	5.8039	5.0227	14.2697	7.8856	4.9151	7.3403	7.5998	5.98	9.02	13.669	14.457	13.134	17.364	21.962	12.8918	15.0088			0.838384	11.4567
19.8788	20.153	17.171	13.5066	6.824	7.096	7.142	19.003	15.9482	10.0503	5.114	7.0991	15.6624	10.4049	6.0822	7.9623	4.6845	4.4333	5.543	8.475	14.346	15.86	15.856	18.913	30.574	14.1862	15.9992			0.843437	12.2342
19.9978	16.779	12.948	8.0456	6.9197	8.48	4.627	14.465	14.0573	10.7578	9.778	5.5757	9.8424	18.0491	8.8105	6.7676	6.288	7.3476	4.339	10.679	14.592	17.867	18.284	11.212	24.081	11.3235	15.9206			0.848486	11.4552
20.1168	16.926	10.864	11.32	8.1138	4.05	5.197	22.209	17.6743	11.2336	7.008	4.4839	4.7354	11.3654	8.9326	7.3698	8.1101	1.3347	5.031	9.388	6.024	16.435	16.78	14.599	21.301	14.4282	16.8074			0.853535	10.8354
20.2359	18.108	14.254	13.1956	8.7342	2.442	1.816	20.29	20.8873	11.0104	8.664	6.1625	8.5345	16.2262	10.5023	6.4053	10.3822	4.7518	3.317	15.442	9.124	19.147	19.707	13.494	25.875	10.1635	14.335			0.858588	12.0373
20.3549	20.277	11.132	13.538	9.8286	3.093	8.631	16.752	13.9579	16.5526	5.662	9.1986	9.7989	13.4845	11.0839	5.0347	8.4391	6.676	7.612	5.954	12.243	31.305	19.522	21.225	18.621	5.8385	15.2767			0.863638	12.336
20.4739	19.106	10.863	17.092	10.9348	6.745	6.733	20.466	21.2047	21.7575	8.491	7.297	7.0618	13.4594	14.6883	5.1824	11.9957	5.5726	3.793	7.995	19.025	24.488	20.641	15.154	12.449	9.806	19.6314			0.868687	13.1397
20.593	21.274	5.545	12.4782	10.5251	4.519	8.388	20.136	18.8233	13.5809	7.678	8.1847	8.5969	11.7817	13.3694	5.7538	13.2626	6.6538	3.815	10.17	12.796	24.239	24.282	11.2	10.323	6.5774	15.8594			0.87374	11.9159
20.712	17.101	11.339	10.6452	10.7406	7.302	6.821	19.749	20.7674	15.1758	9	10.5928	6.229	12.438	12.2176	4.4864	11.0196	7.5181	6.079	10.646	24.1	31.84	15.107	10.094	6.576	6.4382	22.3807			0.878789	12.554
20.831	13.426	8.517	6.171	11.8706	7.834	7.037	15.383	27.311	16.7533	7.909	10.0845	5.0438	22.008	16.2585	6.0898	8.2861	6.2512	5.066	6.821	24.473	30.919	17.262	14.325	6.137	8.4117	18.757			0.883838	12.631
20.9501	11.439	13.276	8.814	7.7208	5.292	10.294	16.829	18.3857	16.3412	5.359	8.9186	8.8592	14.5952	18.5462	3.6948	7.2644	6.0212	4.87	15.803	24.938	21.809	13.127	16.148	6.237	6.1398	15.0761			0.888891	11.7615
21.0691	17.378	12.686	7.1456	10.2296	8.908	11.969	16.297	17.0286	14.3692	3.236	4.0123	6.9008	13.1296	18.19	10.0775	11.0177	5.1254	7.451	13.589	22.595	20.373	10.07	12.488	4.549	4.1208	12.6111			0.89394	11.3672
21.1881	14.047	13.996	8.9933	13.1926	9.649	11.988	16.164	13.1399	13.2748	5.9	6.7929	4.9236	11.911	10.7385	9.4614	10.1768	8.5501	4.884	12.779	19.256	22.087	9.053	14.433	3.188	7.1263	6.8982			0.898989	10.8694
21.3072	19.698	9.532	11.3048	8.2	5.742	8.632	16.408	12.4406	14.5724	4.055	8.0727	11.6872	10.0976	16.1137	7.7592	9.1048	8.9332	5.213	10.796	18.702	11.818	12.184	12.641	4.744	4.4577	9.5894			0.904043	10.4807
21.4262	11.385	9.596	8.9132	8.5215	7.972	7.879	14.883	9.1912	14.3417	9.491	4.295	8.2117	9.0122	14.5066	7.2206	5.5456	6.3008	2.308	17.699	16.091	15.747	12.066	12.67	4.492	6.0601	11.0658			0.909092	9.82558
21.5452	15.163	9.501	7.2143	8.0936	9.137	12.433	13.739	10.1346	7.0478	8.395	9.7938	6.6262	8.2218	14.3244	9.1981	5.1999	8.3923	4.418	10.346	16.584	17.515	8.33	10.758	4.61	4.5739	4.453			0.914141	9.39241
21.6643	10.367	10.815	9.8347	7.5536	7.137	12.529	11.988	6.5729	12.458	7.88	5.2333	7.996	5.8036	14.0595	10.6041	11.089	3.6046	4.466	7.635	19.392	20.238	12.11	4.559	4.718	4.3478	7.4043			0.919194	9.24598
21.7833	16.694	8.269	10.2853	6.4372	8.78	12.791	8.182	6.3759	11.7252	6.239	8.2984	6.4974	6.6337	14.9327	8.9631	4.5021	3.555	4.15	8.075	10.745	10.694	6.631	5.046	6.466	3.659	4.0687			0.924243	8.02676
21.9024	19.777	8.342	11.3762	5.442	4.757	13.408	7	3.6283	13.8798	2.374	4.937	3.8557	9.9101	12.0081	4.9131	5.5063	6.9043	4.673	7.814	10.474	12.281	5.155	7.667	4.539	1.9481	4.7067			0.929296	7.58757
22.0214	23.695	3.981	6.7432	8.2607	11.045	13.363	6.293	2.1621	8.404	3.422	8.1304	4.1006	9.4087	15.4387	7.4336	5.9166	7.7571	3.506	7.313	12.119	6.975	6.558	4.703	2.643	1.3785	2.9935			0.934345	7.45168
22.1404	20.023	10.607	16.4123	6.9603	7.999	12.629	2.696	3.2023	4.2143	1.909	5.3617	4.7587	12.5516	8.4919	10.0162	5.7151	8.3803	2.96	6.191	8.28	8.535	7.615	5.622	2.08	1.2525	2.3362			0.939394	7.18459
22.2595	12.933	9.188	7.3467	12.7852	9.699	17.262	2.503	2.7331	5.0406	3.525	8.3099	7.7934	10.5973	7.3484	6.2821	5.8073	9.863	4.327	7.359	12.338	5.87	8.322	3.007	3.505	1.3378	3.9512			0.944448	7.27054
22.3785	16.33	4.685	7.1913	6.0635	8.295	8.076	1.499	3.2519	3.1458	1.887	5.632	8.2144	10.5608	9.4136	7.4527	1.6572	10.4521	8.223	5.881	6.906	8.536	4.064	2.594	2.228	5.483	2.9808			0.949497	6.18089
22.4975	23.264	6.663	7.5258	13.2964	10.673	6.778	3.923	2.8787	4.4092	2.827	9.7902	4.1089	6.7339	7.9516	4.8345	1.8081	9.264	6.152	8.972	12.202	4.952	4.307	2.411	3.17	2.4062	5.5678			0.954546	6.80267
22.6166	20.811	7.888	10.37	10.0041	5.108	12.295	2.16	0.6967	2.1229	4.624	4.41	7.5318	6.7594	8.3652	6.8054	3.6733	10.7563	6.96	6.923	9.413	4.047	5.057	2.347	0.14	2.4214	4.7801			0.959599	6.40268
22.7356	20.95	7.318	8.508	11.3951	4.978	12.447	1.22	2.1637	3.5095	3.733	4.7765	7.4442	7.8075	5.0571	6.8966	5.3861	11.1615	8.069	5.627	11.098	5.96	2.671	0.793	1.001	3.8571	3.1468			0.964648	6.4221
22.8546	22.063	8.517	7.1693	7.8977	3.793	7.468	2.258	2.4683	2.551	2.766	5.4932	6.1122	8.0852	7.5246	6.1152	2.1316	8.6052	9.986	4.721	7.618	4.501	1.662	1.854	2.346	3.2868	4.057			0.969697	5.80963
22.9737	16.308	8.73	6.3142	9.0627	5.857	4.434	1.777	1.4615	2.0691	2.909	6.0372	4.4924	5.6447	9.1289	7.063	2.2209	3.351	10.089	6.899	11.366	4.989	4.882	3.099	1.415	3.1548	1.8684			0.974751	5.56242
23.0927	11.467	5.541	5.2359	6.9026	10.25	6.839	2.522	1.2653	3.5447	4.923	3.627	4.3793	4.3536	5.6662	0.792	4.3436	3.587	8.326	6.138	6.345	2.917	2.807	3.91	4.19	3.8894	2.6034			0.9798	4.86019
23.2117	14.892	7.73	3.9947	4.7822	9.856	3.896	1.697	3.2756	3.7797	4.614	2.0871	1.5639	4.3797	4.9704	2.1404	1.5806	3.7358	12.728	8.99	9.073	2.611	3.18	1.61	1.196	1.7071	1.3358			0.984849	4.66946
23.3308	10.186	5.898	3.8961	3.221	7.421	4.495	2.28	1.1198	1.7342	6.302	3.056	1.4632	7.6116	4.9768	3.1725	2.4885	4.1537	9.085	5.82	10.1	2.33	5.138	2.777	0.487	0.7578	1.7524			0.989902	4.29702
23.4498	13.072	4.843	3.0865	3.4892	4.762	6.185	2.007	3.8383	2.7667	6.565	2.2611	4.8634	5.1931	5.4897	2.1469	2.1125	1.1564	10.196	8.266	7.073	2.715	3.618	3.972	2.896	1.9987	2.0911			0.994951	4.48706
23.5688	12.071	3.661	5.1488	3.4557	4.208	4.001	3.269	3.1427	2.0323	5.269	5.0995	3.2696	4.4614	10.0037	4.5362	1.408	3.0851	7.124	7.26	8.516	2.292	3.682	4.871	2.591	1.0883	4.1242			1	4.60271

## Sheet: Image3
X0	Y0	Y1	Y2	Y3	Y4	Y5	Y6	Y7	Y8	Y9	Y10	Y11	Y12	Y13	Y14	Y15	Y16	Y17	Y18	Y19	Y20	Y21			Ap-Ba	Average int
0	58.739	51.45	47.1594	46.6814	48.7731	55.611	45.573	55.963	30.317	29.461	25.167	20.912	26.599	23.7206	61.305	72.08	111.128	78.013	39.2252	32.4732	32.2486	55.898			0	47.659
0.119	63.673	53.685	46.9378	44.7718	58.6814	56.73	52.338	47.996	29.47	35.345	30.282	25.4	28.64	19.1027	63.306	104.772	131.801	87.845	46.629	37.557	27.9946	71.048			0.00454414	52.9093
0.2381	69.142	62.95	44.2634	52.287	59.0821	70.088	62.485	39.511	32.589	33.981	38.831	23.412	24.127	20.4387	64.391	99.081	132.661	99.264	47.5939	35.6561	35.9008	76.281			0.00909209	55.6371
0.3571	63.007	59.641	45.8345	37.8275	55.6708	69.642	67.65	39.009	33.164	46.845	51.894	21.879	22.412	24.8093	71.898	109.643	128.251	96.101	53.1507	31.8516	30.1023	89.618			0.0136362	56.8137
0.4761	64.122	66.712	46.6597	37.79	56.5848	69.471	82.232	39.41	28.109	48.227	51.083	26.073	17.839	20.7409	69.047	115.981	141.583	91.614	37.5955	33.6887	33.3575	79.603			0.0181804	57.1601
0.5952	74.426	60.167	38.8057	41.1888	68.717	81.487	96.257	47.896	33.165	51.484	56.115	32.218	17.764	17.9379	67.667	101.362	151.665	88.697	51.2074	38.3428	32.6389	88.715			0.0227283	60.8147
0.7142	75.145	66.356	34.0557	43.4787	56.8193	89.504	105.847	58.854	31.215	46.74	68.213	37.121	28.926	18.1895	80.815	114.438	147.559	90.334	48.523	28.9041	37.7907	91.28			0.0272724	63.6413
0.8332	88.805	82.033	34.9709	42.5372	57.1201	74.627	102.585	60.739	36.89	51.923	81.521	47.647	28.23	16.5129	74.855	101.572	171.411	97.291	63.946	23.9902	39.6223	90.722			0.0318166	66.7978
0.9523	88.832	78	35.9177	41.1996	56.6501	94.486	117.28	58.548	36.072	52.94	90.253	61.682	23.532	18.1363	82.999	109.315	166.624	105.063	61.2126	28.7752	29.0574	99.424			0.0363645	69.8181
1.0713	104.542	81.286	37.5777	34.0723	56.8125	89.845	125.168	49.584	33.641	61.55	96.656	75.427	33.366	16.9155	89.47	110.688	177.193	112.954	58.4848	26.7976	32.9294	87.209			0.0409087	72.3713
1.1903	122.356	75.831	37.4489	39.8562	53.4979	93.683	130.835	63.791	38.269	62.552	100.255	81.848	41.077	16.9181	102.384	105.013	167.866	104.302	62.1527	30.8699	39.1208	101.242			0.0454528	75.9622
1.3094	122.105	69.282	35.859	40.3662	49.629	100.912	141.508	75.751	43.676	66.231	119.959	93.965	57.406	14.4485	79.587	113.657	170.174	117.474	53.4643	37.0069	36.5258	109.352			0.0500008	79.4699
1.4284	127.399	76.294	42.7071	41.0328	55.0537	95.331	165.116	94.074	48.486	60.482	128.876	107.587	76.142	15.1223	88.293	119.611	160.043	120.464	58.3482	31.6589	25.9156	91.183			0.0545449	83.1463
1.5474	140.377	78.422	42.6936	40.7339	58.7741	103.724	146.775	104.716	56.283	68.12	114.572	127.824	84.759	10.1173	93.539	120.802	167.623	123.364	51.9094	40.511	31.9142	95.229			0.059089	86.4901
1.6665	159.883	76.754	37.9232	48.1822	56.4815	101.367	144.62	110.325	75.392	78.271	109.754	123.726	95.365	13.3913	82.841	123.469	169.462	118.968	69.0037	39.0516	31.4714	90.939			0.063637	88.9382
1.7855	167.383	87.046	32.784	40.7109	53.7508	104.63	160.61	123.64	89.423	88.861	122.867	131.44	94.951	10.8264	85.178	123.618	177.722	119.361	53.2692	42.7909	24.3829	82.472			0.0681811	91.7144
1.9046	185.419	93.765	44.1204	50.6203	46.4857	122.014	172.699	141.991	113.672	102.474	125.665	128.794	109.254	13.3916	79.64	110.319	174.531	127.261	55.7162	47.2886	26.3708	83.565			0.0727291	97.9571
2.0236	187.568	112.767	42.0405	53.487	55.6024	122.586	153.544	142.546	123.057	111.067	135.457	127.745	106.166	11.9265	81.422	95.326	170.365	116.825	65.656	45.3754	32.7541	88.814			0.0772732	99.1862
2.1426	207.044	106.882	42.14	45.3875	64.2594	113.509	154.322	149.933	127.211	112.424	131.076	155.474	100.376	11.9612	67.062	108.519	183.286	115.663	70.2593	55.0428	28.1767	78.954			0.0818173	101.316
2.2617	203	98.925	40.089	51.3532	67.8037	132.979	171.031	170.523	135.037	115.104	140.376	157.441	98.098	9.4367	59.761	106.442	164.503	123.668	73.4176	61.7314	31.1095	108.836			0.0863653	105.485
2.3807	203.484	87.413	64.7699	59.1802	58.8662	143.212	165.419	169.711	111.758	134.58	127.93	147.317	115.28	9.0207	58.021	111.008	158.496	134.083	88.9452	49.5591	39.0071	112.496			0.0909094	106.798
2.4997	216.938	84.939	72.9047	57.9854	63.481	136.553	149.185	184.341	104.683	144.158	119.788	160.785	106.522	8.1585	56.649	126.615	156.185	147.317	79.6092	51.2229	44.1159	102.461			0.0954536	107.936
2.6188	217.378	86.58	63.8617	55.3499	62.2075	151.529	165.717	179.071	130.162	143.64	115.534	149.509	99.689	8.3815	44.645	136.857	159.795	136.082	96.794	58.7788	37.8032	106.585			0.100002	109.361
2.7378	221.79	90.513	61.0103	54.208	59.5187	134.459	167.715	180.675	132.636	143.217	153.225	146.288	105.9	7.4033	32.391	140.462	159.829	158.695	77.2713	62.8747	44.9027	105.263			0.104546	110.92
2.8568	212.429	107.997	66.0529	57.0137	77.4599	145.894	167.404	175.383	145.813	151.908	139.918	168.288	107.247	12.2335	30.713	141.354	152.597	146.681	85.852	70.8726	51.3137	125.334			0.10909	115.444
2.9759	219.421	106.268	71.3408	58.8774	74.1218	141.578	168.082	176.641	136.504	134.675	161.322	166.245	91.85	9.5495	26.581	145.553	167.611	158.701	94.6737	62.6526	54.3095	105.621			0.113638	115.099
3.0949	219.76	98.321	74.3327	65.8787	61.4626	158.266	160.779	192.665	122.17	145.863	167.935	159.177	116.95	10.3886	34.909	147.578	175.73	155.442	91.7413	71.1242	37.1005	124.084			0.118182	117.803
3.2139	216.75	103	70.6397	70.2977	73.6335	147.787	165.837	200.649	123.022	162.555	168.611	164.145	101.979	9.7067	25.275	154.891	183.864	173.375	92.1506	84.7166	38.4755	136.683			0.122726	121.275
3.333	223.217	96.019	73.4591	67.6373	74.6343	156.903	151.395	206.144	111.018	156.801	167.692	174.631	98.815	5.4989	23.037	164.982	179.342	155.251	74.5391	82.7355	39.4599	111.641			0.127274	117.948
3.452	210.622	100.298	77.2218	87.2794	80.8532	151.364	151.865	204.455	115.462	148.027	161.813	180.274	104.045	12.4066	19.325	161.483	180.556	164.701	87.9342	80.9213	40.4301	114.276			0.131818	119.801
3.571	211.686	99.025	67.7013	71.8085	82.5019	156.23	155.775	193.522	102.397	140.627	151.774	185.241	109.429	8.5146	16.311	170.711	194.389	164.104	89.1222	70.6482	43.8307	128.543			0.136362	118.813
3.6901	213.009	98.161	75.8705	77.4024	85.7001	146.023	133.611	200.245	97.055	140.731	163.697	175.165	103.271	5.0313	15.666	177.312	186.992	160.267	92.1393	73.6256	39.6857	132.926			0.14091	117.89
3.8091	213.547	96.382	79.0918	87.9187	85.1596	150.055	144.17	187.057	90.636	153.829	164.426	177.481	106.586	4.2127	17.284	165.978	175.485	164.303	86.5552	70.7805	37.3426	120.475			0.145454	117.216
3.9281	223.595	91.023	76.8455	80.8451	88.9778	142.44	152.704	172.979	95.071	155.151	158.883	175.041	112.163	7.1581	20.812	152.739	170.29	163.397	96.3158	87.3733	32.9038	132.899			0.149998	117.709
4.0472	218.508	78.341	67.8721	77.8743	88.7563	119.489	157.131	172.315	83.749	154.093	153.18	174.859	108.119	6.9746	13.673	178.502	168.056	147.367	99.0578	85.2622	24.6967	153.35			0.154546	115.056
4.1662	215.231	99.485	67.0839	75.8526	79.2671	123.673	146.514	144.514	63.537	168.358	163.985	169.336	116.079	9.1701	15.96	180.404	171.994	154.999	88.6194	76.959	20.7413	134.271			0.159091	113.002
4.2852	223.073	103.396	64.966	74.101	82.0014	103.664	143.922	152.577	58.099	166.243	162.237	184.985	125.603	7.9557	14.931	189.612	181.896	148.66	91.5574	88.4024	27.6302	137.963			0.163635	115.158
4.4043	215.176	109.188	73.6838	65.6768	80.357	94.49	141.182	130.154	61.333	166.885	161.925	167.092	141.074	8.4547	12.774	172.453	181.839	152.731	93.1888	82.5965	34.2388	138.06			0.168183	112.934
4.5233	212.088	116.175	80.1196	69.5391	74.0147	84.524	146.678	124.834	55.176	160.721	158.338	160.532	132.006	5.5079	15.105	151.83	189.639	147.322	96.2108	65.9899	32.8406	147.541			0.172727	110.306
4.6423	212.323	116.838	70.8536	71.2711	76.9419	64.273	142.641	113.659	45.376	159.162	154.032	152.291	139.005	5.4064	10.478	161.117	177.481	134.806	82.1988	76.9721	27.1951	144.324			0.177271	106.302
4.7614	220.061	113.22	67.1844	62.4774	70.6539	54.839	137.337	108.599	40.586	162.162	139.562	142.29	130.957	7.1334	10.04	173.32	172.429	137.132	78.5475	78.3208	34.7657	134.32			0.181819	103.452
4.8804	211.344	108.552	50.5701	52.3705	74.7557	39.628	128.667	95.826	28.779	147.17	138.218	143.313	108.136	6.1504	9.043	151.76	167.183	126.548	86.201	68.9925	36.4773	129.325			0.186363	95.8641
4.9995	215.33	102.984	51.8733	41.0848	61.8601	35.585	145.038	109.275	22.286	129.647	144.447	141.202	112.901	6.5286	10.822	150.981	157.913	135.502	88.1693	65.867	31.4639	135.107			0.190911	95.2667
5.1185	215.45	110.616	51.1378	40.4784	45.8138	40.377	139.354	98.133	25.726	112.536	142.463	133.216	129.107	12.3411	11.89	154.733	167.218	131.054	81.1662	76.9822	35.9429	140.644			0.195455	95.29
5.2375	202.763	115.781	41.0759	36.4861	42.7779	44.851	130.967	94.85	23.243	111.267	139.132	125.492	121.317	5.7343	14.846	152.593	156.118	125.496	75.5172	61.6643	44.0715	152.633			0.199999	91.758
5.3566	207.501	108.556	29.995	29.6789	37.3723	43.05	98.308	92.859	22.678	103.962	134.466	131.523	132.681	6.8905	10.347	152.295	157.863	128.032	90.8719	60.1643	34.1318	140.822			0.204547	88.8204
5.4756	203.138	99.211	31.2928	30.4881	45.1261	43.73	100.093	95.873	22.286	103.637	128.105	127.254	145.094	9.1865	8.498	134.919	142.108	118.718	80.2965	53.1866	35.2025	139.613			0.209091	86.2298
5.5946	196.852	95.258	22.8437	20.7057	37.0964	42.214	91.3	89.706	20.042	98.214	115.066	126.473	140.554	8.546	8.862	125.885	153.957	115.766	80.8541	51.6381	36.6228	140.646			0.213635	82.6864
5.7137	202.875	82.447	19.7166	21.9315	31.7409	43.674	88.659	83.426	24.824	85.42	113.672	116.831	132.106	8.8207	9.688	120.488	143.013	114.907	77.1133	42.933	36.209	130.577			0.218183	78.6851
5.8327	195.023	67.961	20.4384	22.0002	28.4341	38.44	83.009	72.932	24.573	99.302	91.838	112.409	133.628	8.3447	8.229	119.163	139.043	134.073	70.5026	46.7203	32.123	141.306			0.222728	76.7951
5.9517	200.617	74.315	12.2393	20.4433	20.5861	35.15	70.284	64.475	24.295	90.473	98.592	119.93	133.19	10.0394	10.122	106.551	152.573	126.062	66.1641	37.3054	28.9463	135.922			0.227272	74.467
6.0708	200.493	61.313	16.8501	16.6682	25.1756	40.879	62.384	72.552	25.25	78.915	103.249	111.73	134.624	5.3075	4.44	102.98	156.666	123.872	60.9184	35.094	29.5759	116.878			0.23182	72.0825
6.1898	199.374	48.468	12.5353	15.4546	27.1341	58.98	52.859	60.849	30.168	63.064	105.209	104.994	107.237	7.8718	4.084	108.732	154.8	121.713	70.2854	36.1061	29.0397	117.902			0.236364	69.8573
6.3088	182.527	62.139	14.9452	17.336	25.988	48.982	42.195	77.474	32.505	52.965	89.965	113.169	96.125	4.0306	11.142	115.027	159.949	113.433	67.6862	38.0514	37.686	104.955			0.240908	68.558
6.4279	194.112	55.257	8.4592	13.5362	23.6749	40.238	54.431	76.716	29.55	58.776	102.341	101.328	86.027	8.2643	9.962	99.187	154.633	114.098	52.8839	28.7224	38.5765	102.561			0.245456	66.0607
6.5469	197.357	44.361	9.115	15.0799	20.7217	49.104	47.6	74.405	32.401	58.629	107.226	105.538	82.157	13.1266	3.372	97.143	130.582	117.723	57.7301	21.5483	39.1651	89.386			0.25	64.2487
6.6659	199.853	48.026	11.8408	13.2352	19.9238	40.535	48.53	86.516	25.711	46.254	103.709	90.491	71.512	8.9225	7.63	95.1	128.818	128.442	50.1885	24.6337	37.5511	78.455			0.254544	62.0853
6.785	182.877	40.657	14.7646	13.7586	16.9796	47.791	39.057	99.068	25.003	54.219	106.782	83.148	79.477	10.7792	8.074	93.197	123.406	121.864	51.0489	29.3125	29.989	71.242			0.259092	61.0225
6.904	171.767	37.446	9.4778	13.5622	14.6528	58.735	52.305	82.943	34.257	55.228	109.422	82.227	69.3	5.3721	10.015	80.722	107.1	120.1	46.9701	19.1856	29.9519	55.16			0.263636	57.5409
7.023	153.393	37.457	8.6919	16.4263	17.8271	78.971	62.152	81.731	23.405	56.15	102.371	84.232	76.67	10.496	7.69	71.058	110.947	121.744	40.0844	33.3526	28.9795	51.237			0.26818	57.9575
7.1421	160.287	35.799	9.4743	13.6189	21.0585	67.568	61.222	70.312	17.138	51.697	112.059	89.912	80.3	7.0297	8.485	67.001	86.996	117.008	46.45	32.9668	23.1808	38.05			0.272728	55.346
7.2611	161.608	27.633	8.0114	13.3327	25.9902	63.416	46.925	61.154	18.011	48.751	112.373	90.394	62.261	12.9662	7.289	74.178	72.75	117.829	46.8749	20.469	26.9749	27.565			0.277272	52.1253
7.3801	154.535	29.506	11.5353	15.6973	26.3055	60.839	33.691	58.532	14.523	38.718	106.656	91.189	66.057	10.0113	9.442	55.76	63.309	115.839	31.4449	26.05	21.7293	22.371			0.281817	48.3518
7.4992	160.548	21.139	8.1771	24.0705	20.4686	80.617	39.63	56.668	15.996	38.501	113.089	81.873	61.64	9.1369	10.045	62.035	62.509	115.953	32.3315	19.2365	25.6643	24.079			0.286365	49.2458
7.6182	170.138	20.654	9.4484	15.9317	18.0876	83.22	40.025	58.845	17.305	37.814	113.6	79.443	64.967	10.618	8.658	53.874	63.18	96.979	33.4472	23.9483	27.4395	17.325			0.290909	48.4067
7.7372	164.715	15.839	7.4433	12.2398	18.0185	81.595	53.654	54.867	20.427	48.117	114.563	69.845	70.086	10.7882	9.729	53.682	66.32	102.418	41.1485	18.7008	16.671	20.943			0.295453	48.7186
7.8563	143.723	20.632	9.8855	12.631	14.8362	76.135	38.208	48.35	15.367	59.005	109.874	64.122	64.602	6.2403	4.948	45.709	54.76	92.778	50.2418	25.7893	22.4166	18.528			0.300001	45.3992
7.9753	117.566	20.48	8.7922	14.4939	11.8544	81.945	43.522	47.058	22.35	59.277	115.13	63.67	64.012	8.0186	11.071	43.932	42.909	82.281	44.1394	35.8058	18.9564	24.481			0.304545	44.6248
8.0943	118.393	19.851	7.9524	15.4914	10.5295	66.177	36.479	49.348	26.563	66.401	117.891	55.344	61.443	12.3103	4.185	43.291	44.175	77.159	56.0741	27.2201	17.8431	15.437			0.309089	43.1617
8.2134	105.168	16.843	9.5762	7.9286	15.1439	62.005	32.272	47.753	16.922	59.811	127.384	63.828	61.058	12.1604	7.606	34.775	47.978	82.275	62.2259	22.6002	22.429	17.376			0.313637	42.5054
8.3324	102.73	17.479	12.6212	11.5244	22.1349	69.265	33.039	46.912	21.701	57.93	139.408	57.789	57.431	15.167	8.327	29.235	39.79	67.924	69.5467	30.523	23.8336	15.867			0.318181	43.1899
8.4515	89.932	19.548	13.8773	11.0553	19.0709	86.199	38.809	47.926	13.443	42.965	121.23	60.521	48.193	13.4355	10.251	25.184	41.778	64.789	70.6303	28.1799	17.8699	14.498			0.322729	40.8811
8.5705	90.73	16.943	11.3021	8.8906	11.6072	89.194	34.774	48.523	15.338	44.534	117.46	44.215	38.824	10.6146	7.761	25.588	48.267	58.546	63.5972	23.0672	23.9067	18.1			0.327273	38.7174
8.6895	77.433	15.878	13.6881	11.0862	20.5968	99.575	43.324	47.452	15.691	50.986	124.082	42.167	48.102	10.5873	7.159	19.72	52.023	56.755	57.824	27.8198	26.4745	18.03			0.331817	40.2934
8.8086	65.231	19.356	12.9398	8.7995	14.7459	94.182	45.579	35.622	17.022	41.653	122.18	48.911	51.169	6.8772	3.928	24.672	62.745	53.507	46.6924	35.5009	27.8965	19.316			0.336365	39.0239
8.9276	52.572	17.163	9.8781	10.9343	18.1062	102.545	47.765	46.898	13.952	38.733	98.663	61.165	49.298	10.1648	10.178	17.543	54.047	50.907	49.2486	32.8854	30.8504	19.558			0.340909	38.3207
9.0466	40.304	16.603	7.5461	12.3959	16.5336	120.997	60.722	41.546	14.466	41.15	100.665	67.262	71.293	14.7892	6.854	20.82	33.248	48.357	42.4925	32.6204	36.601	15.5			0.345454	39.2166
9.1657	38.228	18.988	10.0378	14.2026	16.3782	123.972	61.195	32.109	20.644	49.772	105.111	78.415	69.884	12.9786	4.947	20.468	37.518	59.502	41.8361	30.5502	33.4241	21.662			0.350002	40.9919
9.2847	41.476	18.543	5.1293	14.3735	14.6065	99.078	56.285	43.188	22.151	45.443	110.391	68.098	67.767	11.6243	7.775	21.277	26.966	55.71	39.3729	27.3977	23.8728	18.754			0.354546	38.149
9.4037	37.964	14.879	10.6775	14.226	13.5276	102.341	48.67	36.947	25.016	46.298	98.243	65.371	65.728	16.7808	6.575	20.419	28.35	51.355	31.895	19.2037	24.0656	20.979			0.35909	36.3414
9.5228	47.383	18.573	6.5632	8.6964	18.1286	90.401	47.927	35.413	26.095	39.203	107.951	60.634	77.616	15.3504	5.676	18.302	28.211	48.458	29	25.1532	33.808	20.647			0.363638	36.7814
9.6418	37.821	12.179	5.1026	15.0347	15.3614	85.839	50.153	30.905	19.608	35.916	96.343	75.721	65.958	16.4027	6.333	15.783	26.951	55.749	41.1557	27.0412	26.1845	23.461			0.368182	35.6819
9.7608	36.479	8.151	4.5256	12.3931	12.7181	92.103	40.228	37.214	22.925	38.638	94.176	70.114	59.352	11.8867	9.077	14.963	17.491	59.761	37.7438	23.4848	22.3166	32.132			0.372726	34.4488
9.8799	35.648	16.397	4.0233	13.7911	8.8954	85.376	31.037	42.214	18.365	33.082	93.986	75.413	54.713	6.1858	7.235	16.579	21.476	58.913	34.4516	24.3293	25.8188	29.076			0.377274	33.5002
9.9989	40.419	13.102	5.3276	10.0029	14.7509	95.512	44.394	50.697	20.395	31.213	93.443	69.343	66.988	13.2944	7.703	9.646	20.283	49.614	37.915	27.8456	30.6496	39.101			0.381818	35.9836
10.1179	45.246	13.827	4.8589	10.4467	11.3377	76.672	43.784	54.346	24.926	22.384	77.138	66.288	71.226	11.8755	7.253	10.874	16.635	53.751	31.1837	24.537	28.9518	29.085			0.386362	33.483
10.237	40.456	11.492	3.2411	9.1205	7.6817	67.236	44.607	55.137	25.821	31.018	77.928	66.741	57.37	12.8641	4.442	9.729	26.666	48.71	32.3912	18.3986	25.9841	28.564			0.39091	32.0727
10.356	39.043	11.773	4.7245	5.0511	8.8461	57.122	60.057	49.605	26.728	30.154	66.319	65.621	72.077	11.8171	7.678	8.465	33.681	61.246	30.9522	19.3151	22.8182	32.13			0.395454	32.9647
10.475	37.007	13.578	3.1859	8.0042	4.6284	51.473	56.861	52.049	21.814	23.191	72.969	79.874	75.767	11.9389	9.204	12.807	40.07	62.627	35.5328	22.5508	15.2167	25.993			0.399998	33.4701
10.5941	37.036	10.946	3.5952	9.4634	6.0705	49.477	45.746	57.502	19.281	17.892	63.137	77.19	65.03	8.2823	4.053	12.698	36.046	49.609	26.4339	20.5005	11.6537	21.674			0.404546	29.6962
10.7131	39.277	11.123	3.6715	6.9121	15.0289	45.587	52.242	64.932	18.296	22.809	50.578	85.277	60.181	10.8771	5.527	6.695	43.531	37.905	24.2315	24.4406	10.5472	30.635			0.409091	30.4684
10.8321	53.185	10.445	1.2815	8.5054	10.553	33.409	37.637	55.353	13.238	21.181	55.126	66.932	61.768	13.9775	8.145	8.543	43.751	32.356	22.1156	17.8725	14.1395	27.341			0.413635	28.0389
10.9512	48.397	11.48	4.2049	3.0982	9.1413	37.607	36.237	53.865	14.802	18.559	58.65	80.836	53.966	11.4448	10.832	8.945	36.397	31.796	33.1588	20.5449	17.3546	24.676			0.418183	28.4542
11.0702	53.556	12.735	4.2848	6.4667	8.5846	40.02	23.268	50.887	12.283	23.812	66.458	81.003	49.098	11.5499	8.846	7.846	37.843	29.574	41.9711	26.6464	14.2352	23.67			0.422727	28.8472
11.1892	46.383	13.482	3.13	7.3219	7.5314	39.998	30.119	40.264	13.576	20.174	71.191	65.725	46.132	11.6694	8.118	10.805	28.698	27.854	40.7316	30.0722	13.8765	31.625			0.427271	27.658
11.3083	38.008	8.453	3.4716	5.5406	7.6392	54.182	29.434	52.03	12.584	25.705	75.858	79.528	40.522	14.0968	11.292	11.385	33.852	28.146	41.9293	20.7451	16.0421	25.074			0.431819	28.8872
11.4273	24.548	13.389	1.4189	4.0742	11.1644	48.897	25.644	45.522	16	25.252	73.609	71.443	46.915	11.329	9.072	8.207	35.154	21.739	40.7248	26.8795	13.9019	30.495			0.436363	27.5172
11.5463	32.682	8.703	2.3463	5.2767	9.1064	36.609	29.791	40.9	21.131	35.277	67.827	62.19	41.706	10.1216	9.116	9.211	29.042	35.899	37.7324	23.8678	7.1202	27.827			0.440907	26.5219
11.6654	27.798	10.227	2.1723	6.3399	7.8338	37.183	33.59	42.275	14.083	30.025	48.672	65.197	38.182	11.119	4.963	6.127	30.705	33.015	33.5189	24.7468	13.5675	27.515			0.445455	24.948
11.7844	30.441	11.33	1.0754	4.5095	8.8344	30.439	31.25	41.034	16.558	28.787	47.084	79.089	44.053	13.9896	6.537	8.674	26.98	31.888	40.4471	27.8126	8.8224	33.128			0.449999	26.0347
11.9035	17.911	5.983	3.3005	5.0688	5.4612	26.633	30.602	41.446	7.313	23.754	53.032	63.611	38.473	10.3947	8.954	10.684	22.611	30.224	36.5571	31.1883	15.5582	26.684			0.454547	23.4293
12.0225	13.963	3.651	1.8545	6.9743	7.3668	30.488	34.42	37.612	12.938	25.783	40.303	56.32	34.316	11.3814	9.695	8.037	14.719	32.537	32.3071	25.0388	11.0309	32.277			0.459091	21.9551
12.1415	18.493	7.443	1.6671	5.2376	11.4172	35.552	31.013	34.72	12.93	20.684	42.996	60.472	38.734	8.3338	7.291	8.657	17.918	23.894	31.59	28.1571	10.6982	32.768			0.463635	22.303
12.2606	16.412	6.041	3.3301	7.3358	13.9207	33.328	33.411	33.232	16.675	21.944	38.997	77.411	35.312	10.5548	5.939	6.823	11.844	24.259	27.5825	34.0777	12.8425	28.835			0.468183	22.7321
12.3796	18.321	4.455	1.9366	4.0539	13.406	38.17	31.255	25.392	17.234	22.65	40.32	77.46	29.674	12.726	9.629	6.748	17.78	20.499	31.2302	34.6274	13.3027	20.93			0.472728	22.3545
12.4986	17.021	4.365	2.0798	1.2788	12.4305	40.773	37.976	27.922	24.657	26.396	49.007	68.665	27.428	11.3853	11.155	7.409	11.96	19.843	21.0325	32.52	7.962	26.267			0.477272	22.2515
12.6177	17.372	3.327	3.5396	5.2272	15.241	40.372	37.119	28.822	21.188	18.819	49.529	68.719	31.432	17.0653	9.502	4.266	12.339	20.131	29.052	36.4794	10.8619	18.6			0.48182	22.682
12.7367	18.527	2.68	2.8459	3.6514	13.0954	41.255	47.339	29.713	20.168	32.954	50.291	78.407	29.531	16.1604	6.859	6.053	12.924	17.274	28.2182	31.6876	7.0074	20.953			0.486364	23.527
12.8557	16.387	5.296	1.6436	4.1773	11.9737	40.275	51.381	27.568	27.323	27.739	42.235	81.155	31.561	11.7642	8.021	8.161	14.732	19.949	29.8208	20.0152	7.2228	20.491			0.490908	23.1314
12.9748	9.995	3.538	4.2477	5.1676	9.2149	30.878	52.885	32.278	25.088	36.057	34.507	74.281	27.339	16.8644	4.725	8.467	14.574	22.294	29.1901	24.8186	5.8056	19.439			0.495456	22.3479
13.0938	11.637	5.713	2.3008	3.7365	10.1724	29.311	47.126	24.937	34.85	32.87	38.813	65.238	22.731	20.1983	10.571	8.519	14.153	21.76	26.7329	22.4704	12.7495	15.885			0.5	21.9307
13.2128	22.15	4.95	2.6173	4.4593	7.8351	33.988	59.94	23.595	40.353	30.302	45.18	56.394	33.319	12.9738	8.884	5.512	13.279	25.149	23.4042	25.9002	10.0171	14.417			0.504544	22.9372
13.3319	15.457	2.959	1.285	4.0881	9.311	33.903	52.802	24.32	37.139	26.298	53.322	60.958	27.059	12.3105	8.577	4.503	9.886	18.864	26.4534	19.7461	8.9541	15.06			0.509092	21.5116
13.4509	10.505	2.539	2.1256	4.4897	8.9216	33.893	47.052	23.549	35.882	22.643	47.091	55.416	25.901	19.7274	9.17	6.355	18.434	18.623	17.9233	23.8771	6.0007	13.816			0.513636	20.6334
13.5699	11.212	3.344	3.1873	2.0804	8.7399	30.021	40.999	25.304	30.407	19.785	43.225	50.046	28.597	17.9122	9.453	8.681	11.816	24.777	19.5132	19.4364	7.967	16.685			0.51818	19.6904
13.689	12.241	2.862	1.6636	4.6912	11.4413	33.328	39.765	24.444	23.408	16.268	46.8	44.081	29.153	14.7817	10.863	8.527	13.291	21.397	21.4233	18.2877	8.5795	12.154			0.522728	19.0659
13.808	8.416	3.86	4.5184	4.1193	8.6499	26.928	43.386	22.405	20.219	14.652	66.852	39.162	23.754	14.3854	6.129	6.355	14.006	31.185	17.5965	21.8008	6.475	9.95			0.527272	18.8547
13.927	10.466	3.591	2.9629	3.6053	6.6561	22.584	50.034	23.261	18.695	13.639	57.647	44.519	34.165	16.1026	6.678	8.727	12.919	30.219	20.5164	21.5183	3.8831	10.877			0.531817	19.2393
14.0461	11.954	2.162	2.2252	2.2222	11.231	22.044	50.424	18.183	17.872	12.296	59.016	49.454	32.798	19.3303	7.1	7.336	9.406	24.486	15.7327	24.5072	11.4912	10.378			0.536365	19.1659
14.1651	8.053	3.501	2.6502	3.6031	10.1638	23.35	50.293	16.375	20.561	11.723	60.226	48.953	27.611	17.2675	4.535	6.526	9.966	22.24	13.7381	19.3888	10.7974	6.706			0.540909	18.1013
14.2841	5.837	1.967	1.8488	3.6621	9.8615	20.698	48.435	21.741	20.554	9.613	58.517	40.711	32.746	16.3353	6.153	6.389	6.655	30.624	13.42	22.8383	7.5715	7.188			0.545453	17.8803
14.4032	11.508	4.388	2.4207	1.2094	7.6723	24.522	52.445	17.337	16.212	11.375	59.241	41.153	26.182	14.6708	3.064	6.041	4.457	27.557	16.2026	19.8678	9.8663	8.73			0.550001	17.551
14.5222	8.732	3.015	1.6898	3.0818	10.2045	20.308	47.398	19.639	15.139	18.655	63.423	34.571	31.247	12.7676	2.316	3.601	6.434	28.221	19.5068	22.3602	9.1976	9.36			0.554545	17.7667
14.6412	8.219	3.286	1.5828	6.5919	7.3859	15.545	35.281	19.098	11.377	13.454	54.904	28.215	31.732	11.7359	4.855	7.007	4.084	23.502	12.9461	28.0576	5.5869	12.282			0.559089	15.7604
14.7603	5.854	0.982	0.9111	5.5746	7.3129	13.891	48.251	17.159	12.707	11.469	58.879	22.856	33.376	11.1968	6.624	6.177	9.358	21.744	9.4783	16.1542	5.6559	13.628			0.563637	15.4199
14.8793	6.915	2.433	1.679	2.8039	4.7395	17.409	50.963	20.161	15.948	12.762	52.416	27.611	32.669	16.4948	5.282	5.807	9.461	27.989	11.8476	18.8636	4.1369	13.661			0.568181	16.4569
14.9984	5.2	0.547	4.3637	4.9546	4.6251	14.565	47.727	22.864	13.333	11.365	62.111	30.466	32.858	9.4106	6.379	6.865	4.121	24.901	12.1113	20.3255	8.9754	11.535			0.572729	16.3456
15.1174	6.712	1.977	2.6639	5.535	4.9997	14.946	52.566	25.805	15.27	14.097	63.887	29.117	24.5	9.8337	5.617	6.011	5.894	25.397	13.0589	11.7153	11.0537	6.33			0.577273	16.2266
15.2364	6.714	2.719	4.0521	2.2565	6.3054	16.753	62.307	40.503	15.863	11.903	79.597	38.183	23.822	9.3624	3.937	4.267	5.915	24.769	12.528	14.5749	11.1358	6.537			0.581817	18.3638
15.3555	5.139	1.355	2.4949	2.8156	8.2138	16.758	58.08	37.879	14.141	10.654	66.645	28.719	26.79	9.3303	6.159	7.084	5.757	25.689	16.0335	19.9238	6.5845	6.941			0.586365	17.4176
15.4745	6.966	2.157	1.4333	4.2246	8.7465	18.085	62.591	31.965	14.718	9.087	67.199	28.434	25.6	16.7923	5.176	5.803	4.77	21.75	16.9091	17.8882	4.6817	6.906			0.590909	17.3583
15.5935	4.258	3.832	2.3929	3.8958	11.1068	21.542	56.687	32.078	9.1	11.769	72.237	30.352	36.376	10.6605	6.474	5.407	5.245	18.547	16.0893	20.5237	6.9172	5.628			0.595454	17.7781
15.7126	6.248	2.509	4.0311	5.3362	10.6796	18.461	41.109	30.775	10.528	6.886	67.626	25.252	31.519	9.6323	8.963	5.949	7.289	13.344	15.3714	16.3695	4.8869	6.043			0.600002	15.8549
15.8316	8.126	2.344	2.6819	5.589	11.9297	30.759	57.993	28.33	8.501	10.926	56.147	28.213	40.831	12.6535	3.933	4.418	5.94	12.754	19.5421	12.9119	7.5052	5.996			0.604546	17.1829
15.9506	6.221	2.499	1.9728	6.2044	9.6637	32.979	55.899	35.589	15.575	9.88	52.434	30.316	35.032	12.5086	4.652	7.856	4.016	13.003	19.1181	21.2951	8.4702	6.202			0.60909	17.7903
16.0697	11.173	2.934	2.0111	4.0592	8.7199	32.72	57.536	38.458	13.635	14.571	49.813	33.745	34.383	8.5277	4.132	6.111	3.612	10.815	11.001	15.5599	6.9713	5.174			0.613638	17.0755
16.1887	8.254	3.751	5.1472	2.5527	7.2135	32.991	53.463	43.013	13.253	10.304	40.114	36.531	37.035	11.6327	3.196	5.249	8.969	11.184	10.988	13.2322	7.6501	1.323			0.618182	16.6839
16.3077	10.849	1.066	1.5367	3.0878	6.5832	29.077	53.42	40.687	10.787	13.343	39.103	31.898	32.462	9.3117	4.749	7.067	8.234	13.175	14.8932	15.6591	6.0322	3.978			0.622726	16.2272
16.4268	8.82	0.785	2.2061	3.2114	5.3093	28.381	51.048	38.134	16.075	13.986	24.065	33.739	36.002	10.1472	7.345	5.327	8.702	12.656	16.6394	13.0342	4.3854	4.293			0.627274	15.6496
16.5458	5.101	2.973	2.8949	2.8265	10.867	35.461	36.489	31.398	16.504	7.982	22.595	25.698	33.365	9.6155	5.421	5.126	5.353	10.216	21.1257	15.8529	9.5497	6.854			0.631818	14.694
16.6648	5.614	3.593	2.8581	4.2904	9.0138	25.384	52.527	27.86	13.393	8.455	25.543	28.435	23.354	5.8514	3.709	3.796	3.67	9.9	17.7331	18.0781	6.0045	7.213			0.636362	13.9216
16.7839	6.841	2.105	0.5771	3.2495	8.8873	25.469	45.741	30.359	12.872	8.117	39.756	36.179	20.604	11.9613	3.949	7.569	2.425	11.585	22.1951	16.3409	5.4003	6.152			0.64091	14.9243
16.9029	9.347	1.158	2.2543	2.3121	7.9713	33.785	54.825	28.538	10.645	11.937	37.322	36.24	17.012	11.0438	4.094	5.246	5.144	5.683	16.0292	26.5954	9.7201	6.556			0.645454	15.6117
17.0219	9.771	1.621	3.3569	4.3117	6.2686	19.038	35.099	25.593	15.39	5.471	37.946	36.517	23.459	8.3035	5.211	5.592	3.479	8.324	14.8487	16.1543	7.5272	1.921			0.649998	13.4183
17.141	11.699	1.455	2.1396	3.2126	9.3982	27.222	34.364	26.934	12.605	9.172	31.924	26.278	22.454	8.7807	4.027	2.264	7.178	12.13	16.6727	18.5587	6.6695	5.846			0.654546	13.6811
17.26	8.038	2.114	2.5138	4.7941	4.602	22.406	28.652	22.391	12.484	5.069	36.928	30.289	23.24	7.8525	7.248	4.386	6.686	12.16	11.4694	22.5285	6.5559	8.979			0.659091	13.2448
17.379	10.426	1.58	1.7852	5.5845	7.8688	22.62	22.933	20.94	11.436	6.819	27.32	30.103	21.072	7.1731	5.736	3.288	4.396	10.056	10.1699	27.5265	6.0577	6.594			0.663635	12.3402
17.4981	9.159	1.267	0.9389	5.1965	9.8141	23.916	32.271	26.773	16.434	7.629	30.203	32.135	24.542	10.0351	9.326	5.679	4.431	6.94	13.1119	30.0049	6.2743	6.649			0.668183	14.215
17.6171	7.913	2.417	1.9605	5.7448	8.1391	19.354	33.816	25.015	12.644	7.356	30.42	32.415	22.181	7.9867	9.592	3.83	5.186	7.547	12.4063	27.1542	4.8766	8.575			0.672727	13.4786
17.7361	5.971	1.178	0.9452	4.145	7.6132	14.331	27.604	14.891	20.278	7.546	28.927	28.83	19.751	9.2538	7.809	3.215	5.312	6.551	14.0846	28.9142	8.9355	4.28			0.677271	12.2893
17.8552	10.099	0.712	1.2366	1.8207	13.2959	17.797	32.376	9.348	15.381	8.606	27.623	26.26	21.474	6.4417	5.701	4.295	4.221	6.225	14.8021	23.5094	11.248	6.271			0.681819	12.2156
17.9742	6.143	1.937	2.348	7.1175	6.7948	14.851	27.397	9.835	17.175	13.058	27.532	29.041	20.742	9.0281	7.209	4.694	3.57	8.689	17.8472	25.0378	4.8516	4.495			0.686363	12.2451
18.0932	4.742	3.547	5.2193	6.2253	3.7961	14.652	18.779	16.281	17.626	16.17	26.59	22.43	25.794	7.2009	5.541	2.645	3.681	8.003	18.2324	23.6241	4.5541	10.756			0.690907	12.095
18.2123	3.837	2.115	3.9956	7.4122	4.985	15.146	29.089	15.74	20.34	13.299	20.675	26.616	18.097	12.7595	2.859	4.417	5.856	10.812	19.7301	21.5835	4.8487	6.797			0.695455	12.3186
18.3313	4.47	4.453	1.9546	6.5655	5.8528	15.601	26.272	14.892	19.2	16.29	14.61	40.774	15.309	19.9141	5.064	5.336	5.385	7.448	24.9834	22.0172	7.0738	4.231			0.699999	13.0771
18.4504	10.417	3.248	3.2909	5.7623	3.4287	15.509	28.693	21.312	20.612	16.408	21.727	37.786	13.124	13.4454	5.432	3.936	7.215	4.656	24.0237	19.8423	5.7646	4.936			0.704547	13.2077
18.5694	13.892	2.64	1.9418	8.3132	7.281	20.772	24.393	18.548	13.861	11.193	25.921	44.608	19.543	16.6678	6.177	4.996	4.302	8.285	27.487	22.6471	5.9032	7.04			0.709091	14.3824
18.6884	8.347	1.251	2.6028	6.4637	5.4104	14.415	25.532	27.257	16.169	11.152	20.876	48.85	16.709	18.8872	8.001	4.697	4.299	6.128	17.6169	16.9696	6.3236	8.519			0.713635	13.4762
18.8075	7.608	0.874	3.9543	7.531	7.2255	15.461	25.221	20.704	16.696	9.497	23.401	56.745	13.495	15.6029	8.817	1.929	1.975	6.21	23.8526	10.6945	7.0685	4.952			0.718183	13.1597
18.9265	7.41	1.542	3.6024	4.8086	3.4172	11.816	33.051	21.103	12.619	10.167	22.985	55.285	17.524	12.0765	6.805	3.818	3.278	4.281	25.5849	20.3494	7.5949	6.964			0.722728	13.4583
19.0455	5.489	1.114	2.6931	3.7418	4.0111	8.678	30.165	20.498	11.481	14.529	19.95	77.394	18.065	14.8757	6.205	3.155	3.775	7.598	20.7325	21.0073	8.237	5.288			0.727272	14.031
19.1646	5.75	2.78	3.4801	4.5532	7.3324	9.158	25.931	26.278	12.489	14.296	17.876	82.516	17.109	13.0302	7.784	1.449	6.53	4.507	27.5997	17.5878	6.0046	6.828			0.73182	14.585
19.2836	6.818	2.815	3.0682	6.2878	3.719	9.524	22.343	22.332	9.022	10.05	20.333	64.124	15.319	12.1374	7.455	4.504	3.357	7.007	24.1228	18.3451	7.0358	4.324			0.736364	12.9111
19.4026	4.036	3.138	3.2606	6.4013	4.2841	5.749	16.48	24.86	5.98	12.529	28.212	72.186	16.423	10.5628	8.174	4.994	3.162	7.809	21.6458	16.6731	6.3313	6.087			0.740908	13.1354
19.5217	8.944	2.676	2.7572	4.4813	2.6008	4.585	17.374	24.89	8.573	15.99	20.918	66.041	13.99	6.2467	5.413	5.961	3.068	6.457	18.7644	12.8261	5.6719	7.21			0.745456	12.0654
19.6407	7.15	1.157	4.0864	4.6262	3.6615	9.05	11.844	24.52	12.811	15.807	30.358	72.199	11.778	11.3321	6.052	4.435	4.036	7.048	14.8731	12.2184	8.3404	5.629			0.75	12.8642
19.7597	10.705	1.019	3.0942	7.6235	3.8842	5.31	14.885	16.724	6.627	11.825	31.537	56.529	13.281	11.0029	6.494	2.995	3.926	8.21	17.3642	10.5607	7.7735	7.038			0.754544	11.7458
19.8788	7.208	4.337	4.8931	4.2081	3.2378	6.894	10.808	15.849	4.767	7.738	33.196	47.406	12.509	11.7188	5.056	6.618	5.623	6.464	18.7988	10.6083	7.5345	5.635			0.759092	10.9594
19.9978	5.867	3.143	7.011	4.4362	6.0986	4.105	11.36	12.524	10.644	11.325	22.633	36.238	13.201	7.9949	4.609	3.264	2.543	9.046	21.0567	11.7915	4.4105	6.317			0.763636	9.98265
20.1168	6.841	1.851	3.7213	9.7024	6.9057	6.484	7.555	9.149	7.15	10.614	32.965	29.183	14.015	10.2541	7.287	3.885	5.158	11.469	19.3632	14.4972	7.2234	8.304			0.76818	10.6171
20.2359	6.829	3.612	6.2875	4.9772	6.4848	5.032	6.149	15.445	10.397	9.379	22.118	29.133	16.312	10.251	4.544	4.541	3.416	6.833	15.7497	10.2041	10.2422	6.78			0.772728	9.75984
20.3549	5.052	2.089	6.282	4.82	4.7238	4.805	3.067	11.037	10.483	10.374	18.515	25.004	17.403	10.8513	6.714	2.231	2.826	7.243	15.101	6.7744	10.9212	10.923			0.777272	8.96544
20.4739	5.853	1.632	4.4629	7.0057	10.6822	5.312	4.25	10.478	6.153	9.396	21.715	27.979	17.471	8.9718	7.158	3.393	2.232	5.621	18.3831	10.4807	11.444	7.369			0.781817	9.4292
20.593	8.262	1.195	8.4144	8.3071	4.5781	4.105	4.125	5.224	3.932	10.238	16.88	28.703	15.421	8.8858	3.281	6.35	3.2	6.844	15.94	10.2353	10.8232	8.819			0.786365	8.8074
20.712	6.931	3.57	6.5603	8.4306	5.2121	4.055	3.415	5.026	4.985	9.217	15.197	36.665	15.309	6.1889	3.442	5.02	2.197	8.4	13.7052	12.2816	12.2012	13.405			0.790909	9.15518
20.831	7.544	1.024	3.9467	5.4515	3.0364	3.395	3.14	5.494	1.662	12.741	10.382	32.086	21.008	5.1022	2.863	3.287	4.629	4.611	10.4316	12.1269	10.3154	12.354			0.795453	8.02867
20.9501	7.215	5.477	4.0679	6.1847	4.1683	1.687	3.72	2.961	3.052	7.012	11.789	30.902	21.383	5.7808	2.246	2.817	3.465	3.721	15.1294	11.7936	12.0805	9.878			0.800001	8.0241
21.0691	7.926	2.776	7.2228	8.646	1.5469	1.879	6.566	3.632	1.702	7.866	15.93	29.556	18.789	6.8577	4.918	4.042	5.393	3.696	12.2713	10.5925	10.4633	13.225			0.804545	8.43166
21.1881	7.258	3.248	7.0075	4.3551	2.6879	3.862	5.071	3.42	2.944	7.457	13.326	24.225	15.42	8.0991	4.62	5.272	3.477	3.6	9.3434	10.9334	13.3268	8.619			0.809089	7.61692
21.3072	4.697	2.923	5.0115	8.0495	1.8314	1.718	1.556	1.403	1.693	6.418	13.819	19.2	17.327	7.6503	3.853	5.021	2.902	5.748	7.557	14.023	20.9526	7.928			0.813637	7.33097
21.4262	5.946	5.449	6.7777	7.5091	2.0257	2.04	2.441	1.08	2.387	4.94	10.667	16.424	12.995	7.1049	5.466	2.948	4.305	3.89	10.5787	10.3264	17.0234	12.765			0.818181	7.0495
21.5452	7.61	3.5	5.5567	1.3783	3.1634	2.398	2.602	2.95	2.25	6.439	12.526	14.364	14.849	9.8433	4.566	3.708	5.517	4.839	11.4113	9.4988	25.5112	7.13			0.822725	7.34595
21.6643	4.792	4.486	4.8791	1.1266	1.2448	1.132	0.338	2.78	1.559	6.019	18.144	18.36	14.342	5.226	3.046	4.348	4.047	4.995	9.6207	7.0783	15.7779	6.829			0.827273	6.37138
21.7833	6.369	2.605	3.8978	0.7002	0.0978	1.261	2.331	1.04	0.463	7.458	16.223	16.467	19.793	6.6293	3.758	5.08	4.666	5.148	11.6763	8.2726	21.7888	9.589			0.831817	7.05972
21.9024	5.196	3.378	2.4576	1.7753	0.0317	1.564	0.998	0.901	1.149	2.66	9.666	13.635	17.509	7.3924	5.605	3.83	4.266	4.957	3.1477	11.6103	19.9465	8.079			0.836365	5.89793
22.0214	7.26	5.641	0.8981	0.4975	0.6032	2.144	0.901	1.109	0.578	2.723	18.925	13.017	8.404	7.2035	5.454	4.793	5.707	3.897	6.5133	10.6573	23.2951	10.297			0.840909	6.38718
22.1404	5.942	6.048	1.0111	1.2945	1.2464	2.157	0.241	1.883	1.21	2.185	14.433	13.202	9.379	4.6837	3.999	4.357	5.854	8.588	5.6498	12.3785	18.0714	12.726			0.845454	6.20634
22.2595	4.915	4.786	3.7036	0.4141	1.5692	0.715	0.251	1.305	1.299	5.749	17.097	17.364	7.597	4.5783	5.264	2.17	4.967	7.635	6.2245	9.6335	16.9655	13.136			0.850002	6.24267
22.3785	4.598	7.265	1.079	0.2283	0.3264	1.041	3.27	2.081	0.793	2.954	19.445	16.537	8.278	4.2677	4.146	4.887	4.651	9.448	7.1038	6.3773	15.9359	11.204			0.854546	6.17802
22.4975	4.149	5.612	1.5886	0.1291	0.7231	0.519	1.788	0.498	0.03	1.948	17.416	14.435	11.157	4.8543	2.79	3.201	5.052	10.274	8.8852	7.5956	18.4124	12.598			0.85909	6.07524
22.6166	3.259	7.834	2.1514	0.1681	0.8557	0.472	0.513	0.556	0.847	1.125	13.21	11.78	9.611	7.0037	4.2	3.37	1.918	8.204	10.4569	5.6082	15.7612	12.067			0.863638	5.49869
22.7356	3.094	10.023	1.0259	0.1944	1.3204	0.408	0.888	1.057	0.372	3.126	15.378	8.411	10.64	9.8756	3.106	3.371	5.516	7.456	5.8684	3.4317	11.5944	16.62			0.868182	5.58076
22.8546	4.807	6.147	0.889	0.2715	1.7766	0.931	0.534	1.109	0.825	0.377	16.611	10.341	10.837	3.9114	7.671	4.059	4.22	3.318	8.6884	5.3384	9.2781	14.004			0.872726	5.2702
22.9737	4.373	6.681	0.73	0.3474	0.3171	0.048	0.419	1.276	0.864	0.207	13.539	10.129	10.275	6.0336	5.31	4.392	2.82	2.39	6.9608	5.775	6.209	9.834			0.877274	4.49681
23.0927	6.795	4.225	1.1723	0.2459	1.3658	0.558	1.663	0.56	0.325	1.232	18.116	14.609	6.616	3.4863	3.072	2.432	4.115	4.037	5.3121	2.9497	4.6935	10.413			0.881818	4.45425
23.2117	4.408	3.066	0.657	0.39	1.5324	0.021	0.263	1.043	0.528	1.416	20.893	12.059	12.866	6.8101	5.525	5.849	2.913	4.272	5.0343	0.8866	5.0749	16.462			0.886362	5.08951
23.3308	3.746	4.311	0.0497	0.7491	0.864	0	0.537	1.526	0.49	1.782	18.931	13.663	8.396	7.3227	3.131	4.406	2.989	6.35	2.444	1.4016	7.1845	13.777			0.89091	4.72957
23.4498	2.248	3.962	0.8762	0.5537	0.3104	0	0.526	0.677	0.326	0.422	16.565	12.687	6.126	5.1632	4.381	5.02	3.294	3.956	4.4731	1.0109	6.2472	13.984			0.895454	4.21858
23.5688	5.151	2.587	1.01	0.3957	0.522	2.052	0.682	0.195	0.359	0.548	16.258	13.883	7.924	7.0133	4.319	7.521	2.704	4.531	2.8624	1.4393	4.4879	12.314			0.899998	4.48903
23.6879	6.111	1.097	0.8169	0.7946	0.2263	0.197	1.031	0.627	0.696	0.699	10.512	11.325	7.79	6.8059	7.83	6.439	3.948	7.432	3.6016	1.8765	4.9109	12.051			0.904546	4.4008
23.8069	3.607	1.901	0.7163	0.9129	0	0.402	1.466	1.354	0.552	0.894	8.833	14.937	8.042	8.6865	7.441	6.79	3.946	6.345	3.5046	1.1114	1.8923	9.965			0.909091	4.24086
23.9259	2.086	1.233	0.4741	0.2844	0.4423	0.19	0.522	1.044	0.079	0.994	8.438	15.164	7.284	5.4466	4.2	5.123	2.614	5.208	1.5282	0.8176	2.5976	14.688			0.913635	3.65717
24.045	2.754	0.986	0.079	0.1987	0.5051	0.53	1.658	0.901	0	0.318	8.386	13.73	3.729	3.7305	4.323	5.14	1.282	4.955	3.9755	0.3664	2.6451	12.875			0.918183	3.32124
24.164	2.061	0.28	0.2434	0.4837	0	1.603	1.058	1.994	0.174	0.321	5.443	14.137	2.719	3.7278	4.54	8.062	1.873	5.603	1.6417	0.609	1.6223	11.871			0.922727	3.18486
24.283	1.125	1.274	0.0453	0.5214	0	0.51	0.384	0.308	0.194	0.783	4.917	18.105	2.304	1.5999	6.135	10	3.4	6.385	2.7463	2.4406	2.9509	14.269			0.927271	3.65443
24.4021	2.258	0.327	1.2704	0.3784	0.8826	0.582	1.271	0.598	0.015	0	3.698	17.535	2.206	2.6781	6.239	9.966	3.015	3.764	1.6295	0.7099	0.5614	12.49			0.931819	3.2761
24.5211	1.676	1.042	1.5849	0.2802	0.7237	0.144	0.267	1.003	0.621	0.002	3.643	12.64	1.477	0.5895	4.946	5.918	3.227	2.022	0.7132	0.2248	0.6104	12.355			0.936363	2.53226
24.6401	0.586	1.68	0.2573	0.6131	0.3409	0.75	1.141	0.598	0.947	1.165	2.591	12.244	1.078	3.5218	4.405	5.182	1.905	4.744	0.5778	0.4654	1.5585	10.948			0.940907	2.60449
24.7592	2.103	0.683	0.3849	0.9192	0	0.964	0.54	0.037	0.965	0.57	3.808	7.702	2.303	2.229	5.036	8.367	3.56	6.739	0.8104	1.2741	0.9393	7.032			0.945455	2.58936
24.8782	2.505	0.699	0.3633	1.1186	0	0.005	0.452	0	0.42	0.012	5.676	6.194	2.246	3.21	1.66	4.683	3.952	2.088	1.0709	1.1841	0.4361	8.64			0.949999	2.11886
24.9972	0.69	1.118	1.7604	0.6742	0.0481	0.195	1.162	0.158	0.66	0.755	3.586	8.761	1.161	3.0632	1.479	4.258	5.343	2.25	1.5049	0.0517	2.9787	6.452			0.954543	2.18678
25.1163	0.515	1.192	0.1676	0.4475	0.0225	1.147	0.295	0.178	0.719	1.075	2.252	3.771	2.14	2.2562	2.873	5.352	4.454	4.235	1.592	0.5675	1.0021	5.028			0.959091	1.87643
25.2353	1.618	0.759	1.1979	0.8129	0.0994	1.239	0.002	0.248	0.313	0.7	2.277	4.794	1.626	1.494	1.884	3.246	2.803	2.318	2.0287	0.9036	0.9682	3.906			0.963635	1.60171
25.3544	0.872	0.623	0.09	0.185	0.6734	0.193	0.695	1.107	0.063	0.069	2.626	5.867	1.513	1.2377	2.127	1.548	4.719	1.84	0.5214	1.1026	0.2949	4.342			0.968183	1.46859
25.4734	0.415	0.729	0.2596	0.3902	0.5921	0.295	0.092	0.066	1.495	1.2	3.708	5.913	1.134	2.8549	2.204	6.589	3.711	3.865	0.0965	0.4155	0	1.353			0.972728	1.69899
25.5924	1.522	2.121	1.3338	0.0298	0.1521	0.942	0.366	1.265	0.934	2.154	1.955	4.563	1.581	1.4895	2.092	4.692	6.789	3.663	0.2807	0.5043	0.0845	1.106			0.977272	1.8009
25.7115	0.914	0.276	0.3339	0.2493	0	0.318	0.773	0.592	0.341	1.372	1.174	4.154	2.294	2.7479	0.763	6.426	3.612	0.859	0.0162	1.0744	1.3714	1.15			0.98182	1.4005
25.8305	1.291	0.021	0	0.1205	0.375	0.551	0.606	0.719	0.063	1.14	0.576	1.535	2.013	0.2721	0.578	4.952	8.072	1.75	1.1578	1.2141	0.5816	1.22			0.986364	1.30946
25.9495	1.151	0.803	0.4504	0.4003	0.3047	0.379	0.146	0.108	0	0.622	1.423	2.482	1.26	1.6682	1.087	8.809	6.048	0.683	0.3581	0.8092	1.2633	0.975			0.990908	1.41955
26.0686	0.071	1.18	1.7082	0.8789	0.0418	0.388	0.913	0.724	0	1.974	2.582	3.051	0.622	1.513	0.853	6.216	3.63	2.095	0.2716	0.747	1.0646	0.577			0.995456	1.41369
26.1876	0.974	0.585	1.055	0.9987	1.8507	0.124	1.021	0.972	0.465	1.274	0.577	2.541	0.139	0.2964	1.09	8.283	2.719	2.941	1.5567	0.6362	1.2545	0.368			1	1.44187

## Sheet: Image2
X0	Y0	Y1	Y2	Y3	Y4	Y5	Y6	Y7	Y8	Y9	Y10	Y11	Y12	Y13	Y14	Y15	Y16	Y17	Y18			Ap-Ba	Average int
0	43.699	50.03	36.5015	38.343	49.519	59.855	49.037	46.355	42.898	38.338	44.208	37.3829	34.384	26.2155	32.4153	29.37	49.785	67.738	55.54			0	43.7692
0.119	46.511	54.779	48.1435	40.057	49.053	53.553	43.452	38.133	38.417	29.587	35.487	43.9648	36.36	24.888	27.6948	32.855	49.559	64.618	65.676			0.00515314	43.3046
0.2381	64.521	53.984	39.9951	40.728	60.788	54.723	54.386	49.163	39.233	43.823	41.852	37.6639	36.038	28.8722	29.2431	40.243	61.213	61.815	67.499			0.0103106	47.6728
0.3571	57.405	63.269	38.7042	44.09	48.574	53.793	60.844	50.826	40.636	46.022	42.83	41.7136	26.548	29.0005	27.1585	38.098	51.549	53.529	76.217			0.0154638	46.8846
0.4761	57.581	68.773	44.511	48.995	44.671	55.253	64.392	42.462	39.559	42.451	37.467	40.3063	33.066	31.527	33.5068	42.783	55.145	52.944	72.974			0.0206169	47.8088
0.5952	51.158	71.011	45.1077	50.682	57.141	70.83	55.158	41.529	48.761	40.991	34.013	32.0237	31.961	34.0724	34.91	43.614	54.895	68.949	90.121			0.0257744	50.3646
0.7142	55.115	66.008	55.2615	55.257	52.377	63.894	47.009	49.48	50.241	37.852	45.872	38.7918	36.901	30.1161	43.2634	43.754	66.436	81.018	85.651			0.0309275	52.8578
0.8332	55.187	84.14	53.5512	60.592	63.598	69.07	59.599	52.126	52.746	42.215	37.548	46.4813	36.822	38.9136	39.0857	43.834	65.664	104.162	80.196			0.0360807	57.1332
0.9523	64.644	82.322	56.809	62.866	58.062	68.528	70.787	47.675	57.931	37.17	38.447	42.1828	43.711	44.3851	33.0464	48.632	70.737	121.589	94.559			0.0412381	60.2149
1.0713	64.945	88.309	60.7557	61.541	49.118	81.354	87.355	68.515	55.607	45.172	47.856	43.18	48.764	50.6607	43.3139	57.297	74.719	141.32	107.817			0.0463913	67.2421
1.1903	91.469	95.089	67.7773	70.811	62.759	96.238	76.623	63.684	76.028	48.005	41.887	43.1713	55.61	53.2012	48.9636	52.61	74.023	135.566	111.292			0.0515444	71.832
1.3094	88.664	99.905	63.7922	62.829	71.361	90.564	94.031	80.776	80.456	40.291	42.102	42.1145	56.093	49.1871	47.6286	53.119	80.658	144.84	114.919			0.0567019	73.8595
1.4284	94.301	96.583	69.4278	73.953	76.452	94.552	114.888	85.352	90.244	50.199	54.07	46.7674	72.981	59.9761	68.4729	64.7	86.593	152.889	120.335			0.061855	82.7756
1.5474	93.897	90.702	76.3204	79.907	86.122	108.529	126.183	101.665	95.043	52.879	65.007	41.1189	60.936	64.5861	73.8234	77.903	88.186	161.799	106.406			0.0670082	86.8954
1.6665	106.394	96.734	78.4127	82.423	84.398	109.373	142.29	121.014	109.634	71.475	89.806	42.9647	68.503	64.8298	76.6061	68.539	83.613	157.725	122.017			0.0721657	93.5132
1.7855	91.678	98.074	84.9532	91.066	95.788	127.943	154.163	139.986	101.434	99.447	95.455	54.3394	69.542	71.2757	74.7915	67.237	90.296	159.614	122.284			0.0773188	99.4404
1.9046	100.653	94.086	84.5245	101.557	93.896	147.69	161.091	152.246	120.148	112.134	118.325	46.8886	81.405	70.7076	74.6542	74.857	88.762	168.512	117.706			0.0824763	105.781
2.0236	109.299	109.281	89.1646	83.989	110.362	131.592	149.269	161.692	125.427	115.733	121.27	50.1897	81.946	70.788	69.6317	81.438	99.516	161.258	107.072			0.0876294	106.785
2.1426	107.574	110.338	61.9649	97.076	103.803	131.955	141.326	178.789	117.059	119.773	115.443	67.6699	86.281	84.4036	77.7178	87.446	109.125	161.365	112.94			0.0927826	109.055
2.2617	97.449	93.214	68.7752	99.025	106.072	140.666	142.66	178.394	119.601	108.823	123.503	65.6984	98.831	83.581	84.7755	86.911	109.098	151.817	110.051			0.09794	108.892
2.3807	98.661	98.738	58.637	79.336	99.849	148.163	137.122	188.731	112.008	99.12	113.232	76.1542	93.222	73.8418	73.0221	78.797	107.724	138.413	88.711			0.103093	103.341
2.4997	109.541	106.885	56.7454	86.127	108.895	137.081	130.798	178.891	102.326	115.915	130.383	59.0412	98.539	83.3298	73.83	84.068	109.566	129.501	90.571			0.108246	104.844
2.6188	95.174	102.102	62.2552	88.037	104.536	119.539	125.682	174.224	87.152	102.843	125.142	62.8687	124.148	87.1509	77.6214	86.727	108.963	136.268	94.613			0.113404	103.423
2.7378	88.104	98.557	66.8748	81.376	96.352	122.901	107.122	176.626	66.39	89.009	133.099	60.7096	117.498	69.8928	72.5862	96.4	123.629	147.301	76.535			0.118557	99.5243
2.8568	76.065	87.684	58.6712	70.996	88.624	127.389	103.729	174.084	65.943	72.947	115.91	55.3141	109.6	64.2957	82.5908	92.652	126.943	148.139	73.253			0.12371	94.4647
2.9759	79.033	65.595	44.2852	71.27	93.875	120.774	103.149	175.96	50.545	67.903	127.525	61.4389	103.131	62.7243	87.1831	98.863	122.655	142.819	77.688			0.128868	92.443
3.0949	73.213	70.971	41.4977	58.665	88.163	121.137	99.734	163.687	50.036	40.904	124.071	59.4092	107.244	76.6311	93.0185	91.893	121.236	144.326	75.264			0.134021	89.5316
3.2139	54.137	56.318	51.3651	54.647	71.314	110.006	88.11	141.146	52.287	36.867	121.709	53.8866	87.682	53.0192	100.202	99.558	130.891	136.944	73.965			0.139174	82.8449
3.333	44.848	60.778	37.2145	41.429	74.958	104.073	77.575	116.215	53.272	38.149	114.421	62.3888	86.204	47.6868	93.8055	95.981	147.033	135.451	77.746			0.144331	79.4331
3.452	43.614	45.211	39.6197	44.011	75.947	96.729	75.108	106.123	51.621	30.867	113.067	59.5608	84.771	54.3366	75.7464	106.879	136.897	113.301	78.714			0.149484	75.3749
3.571	42.841	36.537	30.0502	40.002	75.13	86.203	59.787	94.884	58.044	22.57	104.211	55.2	69.581	37.8276	74.9431	100.933	134.655	95.742	76.303			0.154638	68.1813
3.6901	41.629	38.132	24.8941	37.327	87.231	92.115	52.517	85.277	52.196	15.903	117.007	50.6913	65.469	46.4634	70.8384	113.13	142.763	93.168	89.589			0.159795	69.2811
3.8091	29.793	28.311	23.9372	41.6	75.222	86.062	49.59	56.855	53.128	14.346	110.108	41.5537	59.263	35.9582	68.0025	93.519	149.046	105.89	99.284			0.164948	64.2878
3.9281	34.91	24.146	27.0672	38.698	85.514	75.181	41.045	44.222	39.174	15.066	119.998	44.2978	48.806	34.453	77.7512	89.34	133.815	122.147	100.937			0.170101	62.9773
4.0472	35.117	24.057	28.3874	33.566	67.931	77.694	35.215	33.748	44.127	17.547	113.206	41.0208	38.749	31.8857	70.2371	75.992	127.37	130.441	114.34			0.175259	60.0332
4.1662	38.592	28.423	27.7248	41.958	71.515	64.093	37.746	28.067	29.654	17.181	121.364	38.9821	38.285	27.1064	73.2298	67.615	126.415	150.231	127.374			0.180412	60.8187
4.2852	33.778	22.756	18.5063	41.271	65.521	51.265	34.949	20.937	38.659	15.537	122.544	52.6803	38.323	35.5573	68.9731	66.73	105.604	136.234	146.577			0.185565	58.758
4.4043	35.452	21.165	17.7016	35.195	73.726	56.606	31.414	21.72	40.464	19.553	117.834	53.7534	35.119	33.9	68.9872	58.856	106.824	123.762	122.796			0.190723	56.5699
4.5233	32.546	28.18	14.6237	31.277	55.22	52.676	31.834	21.182	25.505	11.956	124.094	49.7503	37.842	31.815	58.6509	45.256	92.961	122.587	129.065			0.195876	52.4748
4.6423	39.437	30.192	18.4827	32.639	56.59	62.236	30.986	24.628	29.669	14.145	111.856	44.1528	41.256	23.6325	67.4372	51.795	114.228	111.969	126.484			0.201029	54.3061
4.7614	32.914	35.53	23.2559	32.109	53.706	60.519	33.087	21.198	21.498	11.677	106.518	47.779	41.095	28.89	68.9099	34.659	96.253	107.888	117.732			0.206186	51.3273
4.8804	31.604	24.393	21.4717	26.782	55.437	47.987	28.307	22.482	20.819	19.796	94.806	39.5535	28.687	22.0222	60.0279	33.701	90.708	120.027	101.956			0.21134	46.872
4.9995	31.936	21.768	27.3955	28.822	55.795	42.844	26.538	27.488	25.571	24.073	94.94	35.2289	23.116	13.5169	73.2143	30.386	82.289	104.119	93.516			0.216497	45.3977
5.1185	34.802	23.763	28.7905	24.39	43.11	34.855	28.989	27.441	27.272	25.999	104.425	26.009	16.522	17.0041	68.5143	22.164	88.459	102.201	75.577			0.22165	43.173
5.2375	28.906	26.902	24.8254	27.468	40.638	34.27	35.685	35.039	33.648	29.314	85.893	34.4005	10.986	16.6446	66.3798	22.052	72.311	90.289	63.38			0.226803	41.0016
5.3566	23.171	21.634	23.2568	23.88	48.032	34.76	35.023	29.913	35.71	28.777	81.77	30.2403	13.203	18.1198	56.6621	25.597	79.14	84.273	48.979			0.231961	39.0601
5.4756	32.936	27.184	24.7203	20.317	50.833	33.201	35.903	23.839	34.337	25.468	73.209	30.5402	14.786	13.2732	53.2563	23.332	77.723	72.174	46.756			0.237114	37.5678
5.5946	31.722	23.051	28.9747	23.205	56.816	30.635	46.012	26.66	32.599	18.82	66.981	24.6821	13.278	20.3493	51.232	21.342	69.261	73.065	40.456			0.242267	36.7969
5.7137	29.683	28.97	28.0076	16.26	60.673	25.577	48.507	26.808	32.468	17.034	56.813	22.072	11.926	15.7071	45.7283	17.915	68.771	65.688	45.469			0.247425	34.9514
5.8327	22.022	23.861	26.2787	18.705	52.276	29.888	47.836	28.259	35.954	21.917	51.8	28.4597	13.992	14.5066	45.0905	21.779	60.849	57.813	53.593			0.252578	34.4673
5.9517	26.482	31.842	28.7019	22.643	35.917	37.396	37.747	27.834	33.604	16.24	45.345	36.8219	17.739	15.5476	38.1996	24.745	55.75	65.865	64.51			0.257731	34.8911
6.0708	32.57	27.838	35.7355	16.298	38.711	29.552	31.238	31.763	31.987	10.62	36.836	30.5166	14.43	29.7228	35.3874	19.441	65.02	59.1	67.634			0.262888	33.9158
6.1898	30.02	37.661	32.7482	13.267	40.912	24.844	36.083	33.467	20.931	11.424	34.164	26.5403	13.224	31.897	32.4824	22.83	56.261	57.938	73.061			0.268041	33.145
6.3088	26.597	42.919	37.2048	18.904	38.895	30.635	42.829	43.799	20.041	10.09	30.083	27.1509	16.196	35.9062	26.6659	21.739	52.923	58.097	71.97			0.273195	34.3497
6.4279	25.149	40.894	41.5144	28.41	40.424	31.815	36.882	38.757	22.307	11.45	19.615	26.4075	12.921	30.3586	41.5089	19.889	62.022	62.447	68.462			0.278352	34.8018
6.5469	16.864	40.6	33.1844	21.222	42.319	30.156	42.309	38.86	21.239	11.562	20.013	24.7171	15.802	35.5524	30.8037	24.513	58.089	54.228	60.14			0.283505	32.746
6.6659	14.167	37.587	29.7769	23.169	33.992	24.714	40.975	30.528	21.839	7.562	19.844	23.2741	14.377	32.2921	29.2587	22.475	53.767	68.527	49.308			0.288658	30.3912
6.785	16.877	29.257	38.629	20.73	33.68	26.65	50.177	19.249	16.475	6.968	17.254	20.4475	16.022	31.0619	26.9075	26.781	55.243	66.724	47.115			0.293816	29.8025
6.904	22.133	39.354	36.3151	21.881	29.938	33.689	49.071	21.551	15.598	9.736	10.305	28.7849	16.377	35.2139	27.4407	31.298	55.762	40.254	44.611			0.298969	29.9638
7.023	20.972	37.555	34.6521	29.437	24.815	30.43	55.901	24.525	10.165	7.046	10.542	27.0414	18.28	38.317	33.3358	26.418	57.809	52.747	46.572			0.304122	30.8716
7.1421	18.169	30.947	41.5019	34.911	28.612	31.035	49.611	27.834	10.075	6.088	9.35	20.2482	22.843	38.1625	28.5225	26.083	54.205	57.374	38.283			0.30928	30.2029
7.2611	18.385	35.661	26.6884	33.097	29.539	28.895	46.296	41.133	11.166	6.271	10.976	14.7333	14.116	33.193	30.2262	19.902	51.468	40.06	41.743			0.314433	28.0815
7.3801	14.199	28.648	38.1298	40.564	33.658	29.48	39.741	38.522	9.875	7.883	16.519	23.1216	20.224	27.4448	38.2411	22.212	51.295	38.67	38.447			0.319586	29.3092
7.4992	13.121	19.494	32.1113	44.356	31.973	23.555	47.868	38.063	6.141	11.547	14.125	33.7242	18.302	26.3429	40.3942	18.223	49.098	50.148	38.373			0.324743	29.3137
7.6182	14.461	26.155	27.9946	43.41	33.442	29.071	33.29	39.1	6.88	8.154	9.592	30.0339	16.507	30.758	31.6177	21.642	43.692	50.134	29.853			0.329896	27.673
7.7372	9.946	30.534	32.8391	48.943	41.54	32.805	39.475	36.581	7.331	4.74	11.408	20.762	19.28	35.8822	26.465	20.626	49.905	45.402	28.961			0.33505	28.6013
7.8563	7.296	25.524	29.3369	52.93	42.863	30.064	38.835	29.524	5.298	7.536	9.823	27.5214	20.745	26.1883	35.8426	20.248	48.832	39.241	29.763			0.340207	27.7585
7.9753	12.281	30.729	27.5137	38.659	31.816	27.28	28.948	40.62	5.633	9.196	7.667	24.0438	18.396	26.6972	35.7768	19.04	43.665	31.796	36.894			0.34536	26.1396
8.0943	11.376	27.432	23.9446	48.527	38.428	30.594	26.489	33.283	5.04	6.958	4.749	14.8805	16.839	27.0783	38.4224	17.107	41.861	35.069	38.001			0.350513	25.5831
8.2134	11.444	18.339	19.8801	38.803	35.6	29.917	25.883	21.922	5.609	6.299	3.795	16.7911	19.717	29.034	39.2189	15.274	40.07	32.782	27.233			0.355671	23.0322
8.3324	15.092	18.621	22.8112	31.235	20.012	26.835	34.225	25.552	8.123	9.005	7.147	18.9226	21.194	20.8973	33.6553	13.241	40.165	41.731	29.495			0.360824	23.0505
8.4515	12.803	18.501	16.5446	30.042	25.255	21.422	26.587	29.933	5.344	5.612	6.998	13.5624	22.505	23.6597	28.1129	16.653	36.016	49.832	32.521			0.365981	22.2055
8.5705	18.414	18.73	14.178	34.596	27.212	23.303	27.382	26.237	6.487	6.957	5.568	13.8504	21.173	27.0118	34.9896	19.86	38.923	48.296	35.511			0.371135	23.6147
8.6895	24.055	22.802	15.4626	32.124	24.641	18.131	29.316	18.677	4.865	5.053	7.297	20.5961	27.971	31.2019	33.8831	18.78	37.615	50.254	37.896			0.376288	24.2432
8.8086	19.63	22.65	14.9101	23.49	21.469	16.576	20.732	16.643	6.119	5.947	10.288	24.9334	29.109	23.2681	24.4121	24.544	39.666	48.023	34.656			0.381445	22.4771
8.9276	23.645	18.203	11.7074	21.328	22.232	19.936	25.398	19.38	1.816	3.215	4.692	24.7518	23.054	23.0041	29.49	23.077	32.08	44.866	41.899			0.386598	21.7776
9.0466	23.058	28.23	13.032	19.619	19.148	23.172	23.691	23.782	4.333	3.558	11.326	28.6568	25.494	19.4226	31.0446	16.128	37.949	40.061	38.65			0.391752	22.6503
9.1657	19.535	28	17.7156	20.827	22.531	21.58	22.053	24.776	6.014	5.055	5.534	24.6591	22.801	16.6793	31.819	18.689	44.248	41.766	35.394			0.396909	22.6145
9.2847	17.707	26.096	16.9687	22.311	24.34	26.158	24.799	19.842	5.675	6.16	9.778	28.6264	23.518	20.3757	28.7926	17.226	42.073	50.204	27.204			0.402062	23.045
9.4037	14.599	23.307	13.7284	35.626	32.351	31.76	19.053	17.195	4.124	5.941	5.473	20.6249	21.219	17.4839	29.3442	19.915	41.624	43.08	27.754			0.407215	22.3264
9.5228	20.213	24.854	22.7447	38.643	35.644	32.333	17.362	15.597	4.959	2.45	6.685	19.7389	19.937	19.9518	22.0179	15.381	39.195	47.656	22.736			0.412373	22.5315
9.6418	16.963	24.128	17.1587	43.804	28.421	36.664	8.031	22.426	5.047	2.345	8.49	23.6384	19.636	17.4658	20.154	16.837	44.191	40.613	14.662			0.417526	21.6145
9.7608	9.508	22.157	15.7711	30.748	33.286	36.632	15.854	18.331	2.346	3.254	10.688	21.331	18.069	20.6328	21.4023	17.615	34.724	48.001	13.129			0.422679	20.7094
9.8799	11.977	24.086	16.9706	29.806	23.701	30.381	19.316	20.806	2.348	6.649	6.251	26.8798	21.019	20.0956	18.1759	18.155	40.507	44.765	19.744			0.427837	21.1386
9.9989	17.705	20.498	28.4717	26.317	29.009	20.23	10.386	24.728	2.306	2.909	3.186	33.3857	17.83	21.7551	18.933	17.01	36.342	33.637	17.838			0.43299	20.1303
10.1179	21.457	24.022	26.3998	26.044	25.251	19.167	10.8	25.666	5.042	2.155	4.381	36.1491	14.654	13.3733	17.0373	18.07	26.423	30.632	11.916			0.438143	18.8758
10.237	17.542	23.932	23.479	22.805	28.306	19.947	15.008	17.291	4.387	3.451	6.429	27.921	18.726	17.2249	17.0483	21.029	34.717	32.456	11.761			0.4433	19.1295
10.356	21.325	16.806	19.8033	17.549	30.167	21.467	19.692	21.27	8.33	2.378	4.88	23.6676	23.579	10.4292	15.9889	21.109	31.195	34.076	10.52			0.448453	18.6438
10.475	24.387	15.997	14.9169	16.443	33.999	22.298	20.72	19.928	8.102	4.549	7.52	18.2051	18.149	14.2692	15.9624	20.598	34.109	37.244	15.437			0.453607	19.0965
10.5941	23.692	12.293	12.9833	9.679	31.951	24.33	18.949	23.743	6.058	5.074	6.457	19.6352	24.703	11.2854	14.1916	13.951	37.194	34.488	14.151			0.458764	18.1478
10.7131	16.731	19.981	11.1188	13.29	27.345	21.69	17.101	20.446	4.151	3.482	5.365	19.6828	23.799	21.4828	17.3465	18.016	32.749	30.41	14.153			0.463917	17.8074
10.8321	18.647	24.592	11.2587	18.402	25.72	25.081	17.096	21.592	6.955	2.68	4.173	22.1392	22.375	18.0714	14.0334	22.378	42.702	28.492	13.27			0.46907	18.9294
10.9512	19.864	22.721	9.1931	22.758	22.35	28.461	13.256	20.262	5.903	1.329	2.645	22.8447	18.521	17.5544	15.0246	17.321	41.535	30.85	13.015			0.474228	18.1794
11.0702	18.648	22.959	10.7356	19.752	21.665	23.365	15.669	25.402	4.601	5.405	6.734	22.2539	24.56	16.2323	15.076	17.202	45.464	24.989	11.28			0.479381	18.5259
11.1892	14.369	20.961	7.5988	14.146	24.898	17.161	12.732	15.148	6.252	4.252	5.915	17.8607	20.793	27.705	17.7415	19.068	36.758	29.597	8.062			0.484534	16.8957
11.3083	10.31	15.745	16.2532	18.377	26.645	18.323	14.68	17.456	5.196	5.296	5.924	21.4129	25.214	24.8106	17.1016	17.739	26.452	24.896	10.961			0.489692	16.9891
11.4273	16.395	15.932	18.9543	18.941	33.525	18.813	16.288	18.898	4.665	1.898	5.302	23.4103	23.096	17.4264	19.0684	17.076	33.203	33.296	9.779			0.494845	18.2088
11.5463	15.581	16.866	18.948	17.74	25.38	19.522	15.08	18.899	5.92	4.333	7.228	28.4733	23.178	19.3054	27.7908	19.232	21.209	37.411	6.012			0.499998	18.3215
11.6654	12.249	13.242	17.8535	20.078	28.034	23.879	20.057	23.249	5.198	4.729	6.398	25.448	24.843	16.8632	21.3315	18.164	19.604	30.751	6.34			0.505155	17.8059
11.7844	13.815	24.474	20.5451	16.402	25.909	16.845	20.426	24.962	13.103	1.989	5.464	36.5212	21.575	20.4179	16.4939	13.447	21.473	23.282	12.173			0.510308	18.3851
11.9035	22.738	20.673	29.0043	20.72	22.096	21.872	22.998	20.158	4.246	0.752	10.341	42.8199	17.861	10.3904	23.0451	15.038	28.234	22.99	11.853			0.515466	19.3595
12.0225	16.468	20.274	27.3946	28.473	23.343	16.369	17.934	17.411	7.637	3.208	6.189	28.6318	19.508	16.1425	17.5224	10.54	34.374	24.481	8.734			0.520619	18.1386
12.1415	10.744	17.909	32.8309	24.862	21.287	20.905	17.11	22.825	10.211	4.702	5.875	26.5807	21.722	17.4115	16.4924	8.681	28.591	18.433	7.858			0.525772	17.6332
12.2606	15.062	21.836	31.4773	19.407	19.518	22.462	16.058	31.687	5.7	3.853	5.199	26.2168	18.049	19.8721	26.941	16.423	29.993	15.184	8.348			0.53093	18.594
12.3796	14.899	31.786	23.308	17.63	17.047	21.468	14.803	33.303	6.533	3.893	6.074	26.4333	22.61	24.9383	28.8247	16.907	21.338	18.024	11.611			0.536083	19.0226
12.4986	14.974	39.695	20.5592	13.623	13.012	20.581	15.163	25.249	8.291	5.602	5.261	25.8891	21.977	17.93	22.5891	16.927	25.186	22.605	7.693			0.541236	18.0424
12.6177	15.384	37.353	18.395	13.994	13.766	24.902	16.652	29.577	3.827	4.863	5.21	26.1057	17.297	18.7565	23.8867	12.628	23.358	23.06	4.774			0.546393	17.5678
12.7367	7.884	35.712	13.6958	12.651	14.614	24.147	13.99	33.919	6.825	3.204	3.578	18.3399	10.279	17.359	17.4177	12.576	24.052	30.349	8.921			0.551547	16.2902
12.8557	8.59	31.751	13.0371	13.873	21.239	16.435	21.474	23.483	7.44	2.381	7.915	32.9088	19.66	15.0019	19.2348	15.684	19.161	29.627	6.582			0.5567	17.1304
12.9748	14.412	27.099	15.5401	11.747	24.923	14.805	14.972	19.638	9.297	2.124	6.267	35.285	15.172	13.9975	20.514	14.336	24.637	34.488	6.837			0.561857	17.1627
13.0938	9.228	24.685	12.9381	13.747	29.728	14.914	17.55	14.725	8.512	3.179	6.353	34.3379	16.726	21.222	27.7638	15.52	27.798	31.157	6.28			0.56701	17.7034
13.2128	8.64	17.264	11.8883	8.218	27.975	10.496	12.477	17.279	4.128	2.808	6.371	39.5539	15.598	19.9653	28.1185	7.239	23.137	29.141	7.88			0.572163	15.6935
13.3319	10.481	20.645	9.392	7.108	28.819	14.569	15.225	23.957	5.651	4.091	6.444	30.8913	13.402	20.4204	20.4661	8.98	20.817	39.477	10.861			0.577321	16.4051
13.4509	12.767	23.832	14.1134	10.983	22.37	22.056	16.6	18.331	7.468	4.656	6.015	28.3095	15.384	18.318	19.8941	12.446	19.427	38.334	5.231			0.582474	16.6597
13.5699	12.087	29.025	18.1081	11.552	19.074	19.539	15.037	18.526	9.026	4.123	8.936	30.8527	15.416	16.0623	22.0068	9.805	19.016	42.518	6.472			0.587627	17.2201
13.689	12.57	24.739	14.0604	14.146	14.058	21.808	13.036	22.718	6.486	5.935	4.59	27.2989	15.917	14.2144	15.3937	12.295	21.57	50.245	7.933			0.592785	16.7902
13.808	11.079	18.926	12.0807	10.758	17.388	24.427	12.992	26.769	8.021	3.001	5.915	20.9322	14.286	15.5445	19.3034	16.792	17.216	41.019	8.407			0.597938	16.0451
13.927	9.876	18.319	11.0869	10.378	25.446	26.851	10.152	20.631	5.484	3.177	6.173	17.356	13.588	17.6375	14.6843	15.701	21.496	42.374	8.024			0.603091	15.7071
14.0461	14.753	16.206	24.8069	10.223	20.97	28.298	10.052	26.27	8.99	1.976	7.397	19.5613	15.493	18.8749	14.2099	19.776	21.268	39.665	10.835			0.608248	17.3487
14.1651	14.767	13.928	26.5296	12.988	26.809	30.32	9.914	24.888	6.582	2.209	10.23	18.9572	15.917	22.1917	12.1662	17.449	22.019	33.945	5.873			0.613402	17.2465
14.2841	12.934	14.965	22.732	14.138	28.006	28.409	10.753	17.534	6.773	5.269	9.296	22.9747	10.644	24.5894	20.2663	11.739	22.167	26.213	7.63			0.618555	16.6859
14.4032	10.473	14.336	31.0583	17.198	23.34	22.475	14.007	17.666	9.206	5.615	9.585	21.0798	16.488	28.0559	16.891	14.506	27.038	15.538	8.728			0.623712	17.0149
14.5222	15.482	10.571	27.7805	15.308	20.171	27.964	12.09	19.316	7.206	7.103	9.71	20.7949	14.47	21.9458	17.5693	12.797	28.937	24.029	7.188			0.628865	16.8649
14.6412	12.497	13.172	25.316	20.299	18.419	26.532	13.241	26.918	9.147	7.844	8.63	20.1603	15.675	22.7409	18.2345	12.091	21.27	16.678	7.638			0.634019	16.658
14.7603	8.775	20.367	20.2771	24.479	23.831	25.135	15.71	22.716	7.812	6.792	8.27	19.9555	10.889	29.5064	11.8759	15.923	26.827	18.882	7.43			0.639176	17.1291
14.8793	10.611	17.746	23.4566	20	21.086	20.758	11.953	20.077	10.515	8.076	13.124	22.7263	13.29	17.5957	12.085	16.97	24.652	19.577	6.169			0.644329	16.3404
14.9984	13.797	21.172	18.0932	22.018	21.842	15.373	10.577	28.663	17.105	5.126	10.738	25.1654	18.243	18.5945	17.109	11.698	19.165	13.817	7.674			0.649487	16.63
15.1174	13.663	18.424	18.2003	19.47	22.499	11.618	12.891	20.227	20.003	6.549	11.38	23.8184	18.067	17.5075	13.4239	13.064	16.574	11.262	8.524			0.65464	15.6403
15.2364	10.732	12.79	16.6226	15.516	23.78	15.92	9.413	18.521	17.831	4.274	10.958	32.4502	16.958	12.622	15.3342	15.126	15.456	12.674	5.592			0.659793	14.8721
15.3555	7.082	13.4	18.9971	17.114	19.637	10.951	8.243	25.644	17.186	8.989	18.311	23.2316	16.283	14.1734	9.8917	14.278	22.863	10.395	6.968			0.66495	14.9283
15.4745	8.768	13.73	11.8093	15.07	17.324	11.349	8.572	24.509	12.924	5.875	15.932	21.7263	18.509	14.7381	9.3298	17.973	16.537	12.135	4.883			0.670104	13.7733
15.5935	7.884	14.307	13.6402	8.927	14.74	6.497	12.446	25.495	13.978	10.717	18.481	22.5283	24.877	10.8226	10.6011	9.698	18.619	10.894	4.89			0.675257	13.6864
15.7126	6.005	10.63	15.932	18.517	15.261	7.912	8.529	26.487	15.946	7.505	25.019	25.256	27.521	17.0429	11.1853	15.916	13.8	13.946	3.952			0.680414	15.0717
15.8316	5.761	12.61	15.7251	26.256	16.805	11.103	10.26	27.721	15.451	8.17	21.503	22.0087	23.498	20.6553	7.8407	11.163	13.158	11.703	2.952			0.685567	14.9655
15.9506	3.999	9.597	15.8754	21.004	13.03	7.126	8.033	21.511	15.987	8.615	22.215	25.6849	26.639	16.8999	12.6333	16.189	17.221	12.299	3.697			0.69072	14.645
16.0697	7.104	10.437	15.0913	24.702	11.338	5.157	5.745	14.301	12.685	8.858	14.067	24.7581	25.04	21.7922	17.9771	18.165	17.976	13.452	3.709			0.695878	14.3345
16.1887	7.339	5.989	9.7154	19.508	13.576	6.862	9.498	14.839	10.082	6.407	13.67	23.8671	23.145	19.3887	23.68	16.97	13.546	20.652	5.252			0.701031	13.894
16.3077	4.012	6.374	10.7655	19.804	12.401	8.219	11.507	13.047	15.611	9.154	18.646	18.1088	21.135	25.3056	21.9799	19.771	17.811	16.945	5.375			0.706184	14.5248
16.4268	4.924	4.09	7.8883	25.464	7.971	6.467	4.467	17.208	14.304	11.211	19.993	24.8039	18.311	17.594	17.2879	20.351	17.457	19.104	1.838			0.711342	13.7228
16.5458	1.876	5.121	9.0526	19.483	9.368	4.814	2.875	14.226	15.54	7.938	23.326	24.808	20.897	17.9915	12.6987	19.588	15.401	23.882	2.964			0.716495	13.2553
16.6648	2.874	4.322	5.3992	19.106	8.343	2.66	5.611	6.761	23.067	13.831	25.392	22.2651	21.666	17.3681	16.9887	16.82	16.976	23.744	3.532			0.721648	13.5119
16.7839	2.446	5.205	8.5435	15.445	11.148	5.388	4.066	10.437	17.266	22.346	18.406	18.9045	16.149	17.7617	23.8869	22.779	15.572	18.63	4.384			0.726805	13.6191
16.9029	0.888	3.652	5.65	13.791	7.618	5.378	3.507	7.698	15.403	29.796	18.504	17.1505	16.118	10.9975	19.561	17.964	19.079	20.971	4.507			0.731959	12.5386
17.0219	3.092	3.746	3.3512	11.684	4.741	6.472	3.247	4.654	15.378	29.118	19.682	20.9096	17.314	15.691	21.8403	19.435	14.031	13.014	6.79			0.737112	12.3258
17.141	2.45	2.224	4.0651	10.863	7.053	5.45	2.242	3.983	10.716	31.894	19.752	21.5607	16.814	16.8294	18.2277	19.13	16.065	14.59	3.204			0.742269	11.9533
17.26	3.364	1.537	3.3902	9.104	2.238	2.692	3.367	5.301	7.356	30.953	17.761	11.7337	16.048	14.5211	15.0572	13.875	14.508	14.969	4.05			0.747422	10.0961
17.379	3.749	2.14	4.4797	7.228	3.23	3.344	3.667	2.879	6.46	33.624	14.552	11.7696	15.357	14.9706	17.9493	17.129	20.626	16.303	5.517			0.752575	10.7881
17.4981	1.204	3.183	5.7262	6.365	3.942	1.462	2.123	2.783	6.996	45.805	21.444	13.9331	17.042	12.43	16.164	12.444	20.849	20.024	5.293			0.757733	11.5375
17.6171	1.165	0.931	5.9736	6.724	4.616	3.619	1.971	2.301	6.527	27.403	16.147	14.1646	15.81	14.1694	16.0084	19.006	22.619	20.735	7.663			0.762886	10.9238
17.7361	1.939	0.465	0.9034	7.703	2.819	3.95	3.028	0.302	6.835	24.126	19.662	15.3857	18.662	7.396	13.1013	19.912	18.626	18.932	6.938			0.768039	10.0361
17.8552	1.101	1.467	1.0166	6.782	4.246	0.689	1.321	1.437	3.341	22.066	15.757	9.6138	16.497	11.9202	12.8441	20.129	16.233	21.609	5.502			0.773197	9.13535
17.9742	1.416	3.301	3.3096	5.979	3.305	1.228	2.01	3.537	3.641	18.176	18.27	11.2216	14.244	15.9045	14.7889	21.136	17.478	24.011	5.858			0.77835	9.93761
18.0932	0.802	2.264	1.1358	5.404	3.202	1.941	1.748	2.186	2.437	10.717	11.955	4.271	10.441	19.7265	13.3194	17.271	16.884	15.801	8.632			0.783503	7.90198
18.2123	1.853	0.811	2.4486	2.929	3.52	2.158	1.429	1.59	3.826	16.504	4.765	2.5531	16.399	16.0245	16.8498	20.466	16.751	15.344	8.255			0.78866	8.13032
18.3313	1.901	1.816	2.7735	3.148	2.853	2.895	1.704	2.178	2.952	14.649	3.074	3.7253	13.538	23.7442	18.8881	19.219	20.603	21.784	6.294			0.793814	8.82837
18.4504	1.008	1.508	1.9785	2.992	0.973	1.643	1.201	1.666	3.662	7.192	2.942	2.267	10.535	22.8377	17.4872	15.223	11.11	18.637	6.98			0.798971	6.93907
18.5694	0.39	3.184	0.6883	3.13	1.683	0.4	1.325	2.744	1.458	4.473	5.471	1.1741	6.478	22.9986	15.0099	13.732	13.143	17.515	8.455			0.804124	6.49747
18.6884	2.009	1.391	0.9966	2.726	1.852	0.705	2.823	2.183	2.649	5.606	3.025	1.7996	5.497	15.7293	18.3507	11.185	21.87	22.356	4.271			0.809277	6.68548
18.8075	1.212	1.424	2.4637	3.827	0.142	1.563	0.448	2.37	1.275	5.045	3.37	2.5159	6.343	14.8466	20.1799	14.577	16.937	21.973	6.541			0.814435	6.68701
18.9265	2.773	1.424	2.6085	1.329	2.625	0.457	1.873	1.291	0.754	3.317	3.327	3.4901	4.509	18.949	21.6474	12.922	15.054	23.375	8.613			0.819588	6.85989
19.0455	0.461	2.522	1.0369	2.064	2.372	0.871	1.721	1.707	1.802	4.432	2.315	0.7276	3.862	8.4663	21.3923	15.313	12.816	21.427	9.719			0.824741	6.05406
19.1646	1.202	1.633	1.1471	2.546	1.601	0.183	0.472	2.054	2.5	3.611	3.005	1.399	3.968	10.0869	17.6794	12.48	12.89	29.323	13.038			0.829899	6.35886
19.2836	1.112	1.341	0.0204	1.209	0.563	0.322	0.793	1.245	1.946	1.261	2.898	0.6327	5.242	10.325	20.2787	9.953	12.733	32.796	13.699			0.835052	6.22999
19.4026	0.841	0.207	0.371	0.822	0.804	1.052	0.915	2.817	0.892	3.985	2.033	1.0555	2.89	7.1114	21.1585	10.75	9.452	25.083	19.271			0.840205	5.86897
19.5217	1.046	0.345	1.0665	1.273	3.471	0.651	0.403	3.155	1.92	2.928	0.885	0.9978	1.757	5.6365	21.6144	12.778	11.97	31.258	11.218			0.845362	6.01964
19.6407	1.501	1.634	1.6634	0.472	1.975	1.211	1.555	1.408	2.475	2.232	2.704	0.5411	1.341	3.5716	14.5465	11.003	9.14	32.415	13.435			0.850516	5.51703
19.7597	0.453	0.77	1.7717	1.194	0.707	1.883	2.238	3.661	1.848	1.393	2.962	1.6115	2.041	5.0972	15.9004	10.292	9.523	22.562	9.778			0.855669	5.03609
19.8788	2.484	2.087	3.2308	1.425	1.692	1.392	2.067	2.627	1.275	2.28	2.389	2.3868	1.633	1.0814	11.7698	9.415	13.279	26.096	11.639			0.860826	5.27625
19.9978	0.834	0.363	0.8373	2.442	0.984	0.556	3.416	2.559	0.796	2.509	1.491	2.2648	2.248	3.768	15.109	7.427	13.616	18.513	10.432			0.865979	4.74553
20.1168	1.854	2.269	1.625	2.761	1.29	1.858	1.561	2.336	1.667	1.332	1.305	2.9821	2.761	1.3296	15.7092	5.234	18.214	16.989	11.857			0.871132	4.99652
20.2359	0.97	2.042	2.4374	1.881	0.286	1.092	3.359	1.887	0.953	2.681	3.559	3.1351	2.674	2.7317	12.4032	5.427	11.839	18.079	18.485			0.87629	5.04849
20.3549	2.308	0.277	0.9928	2.431	2.115	2.003	1.102	1.018	0.822	2.083	1.263	1.4635	2.698	1.3198	12.3155	8.456	16.192	16.21	22.565			0.881443	5.13866
20.4739	2.972	1.837	1.309	1.195	1.761	1.205	1.709	1.797	0.903	4.007	0.43	1.5539	0.884	1.3768	13.6025	6.961	23.879	13.789	25.902			0.886596	5.63543
20.593	0.468	1.091	1.2135	1.345	0.991	2.695	3.091	1.829	1.469	1.309	0.874	1.0151	1.7	2.1139	17.9766	6.141	14.97	16.888	23.17			0.891754	5.28158
20.712	2.473	1.311	0.8873	0.187	0.87	2.375	0.023	1.31	2.604	0.749	1.976	2.7873	1.276	3.5989	11.7548	3.927	15.418	14.399	24.742			0.896907	4.87728
20.831	2.542	0.632	1.7478	1.734	1.571	1.982	1.556	1.32	2.083	2.709	1.176	1.7527	1.096	2.3141	8.7928	2.787	12.168	13.733	25.117			0.90206	4.56913
20.9501	1.092	1.767	1.9293	0.897	1.954	1.749	0.968	1.095	2.661	0.534	1.125	2.4324	0.343	0.5146	4.5691	3.247	10.306	11.181	22.181			0.907217	3.71292
21.0691	1.799	2.984	2.8678	2.303	2.248	2.039	1.833	2.835	4.108	2.413	1.474	2.1305	1.311	0.2875	6.1208	1.25	6.965	12.819	21.185			0.912371	4.15645
21.1881	0.746	1.004	1.403	0.533	1.911	1.397	5.097	3.248	3.556	2.549	1.326	2.375	1.304	2.7185	2.562	1.499	7.688	10.383	19.273			0.917524	3.71434
21.3072	2.915	2.99	2.1975	0.214	3.216	2.025	3.063	1.677	2.207	0.743	2.769	0.0879	1.425	2.2433	1.5266	2.153	6.176	5.437	14.023			0.922681	3.00465
21.4262	1.758	1.016	0.7086	2.713	2.44	1.673	1.871	0.22	0.867	2.171	2.227	2.4042	1.461	1.6342	2.0849	2.81	5.756	6.886	16.7			0.927834	3.0211
21.5452	2.287	1.83	1.4423	0.43	2.293	2.589	1.39	1.747	2.259	3.431	0.594	2.9811	1.979	1.1887	4.0375	3.337	3.337	5.672	16.589			0.932987	3.12703
21.6643	1.488	2.481	0.8955	2.051	0.935	2.05	3.066	0.653	0.495	1.94	1.524	2.6273	1.956	1.764	3.8111	1.662	3.785	3.778	17.776			0.938145	2.88094
21.7833	1.033	0.815	2.2376	1.021	0.778	2.283	1.834	1.093	1.334	3.875	1.462	2.0306	3.274	0.5457	2.911	1.54	0.875	4.425	16.788			0.943298	2.63973
21.9024	0.749	3.384	0.7838	1.854	1.523	1.101	2.09	2.392	1.334	1.433	0.35	0.8348	3.1	2.5156	1.1649	1.534	1.612	5.912	15.233			0.948456	2.57369
22.0214	1.094	0.853	0.044	0.896	1.406	0.907	2.218	1.492	1.145	2.597	3.905	0.8508	1.351	1.4602	1.1812	0.92	3.128	5.096	10.603			0.953609	2.16564
22.1404	0.808	1.716	1.5593	1.778	1.401	1.823	1.579	2.431	2.391	0.445	1.729	2.6285	1.384	1.92	2.4415	3.082	2.287	4.347	13.217			0.958762	2.57723
22.2595	1.686	0.356	2.719	1.838	0.53	2.244	2.745	1.57	0.899	0.85	1	1.7539	3.014	1.3923	2.6437	2.397	2.528	7.466	7.97			0.963919	2.4001
22.3785	0.256	2.069	0.6048	2.196	1.051	0.713	1.001	0.812	2.773	0.852	1.744	3.767	1.426	2.9575	2.128	2.731	3.675	7.008	10.103			0.969072	2.51933
22.4975	1.226	2.318	3.7186	1.54	0.749	2.352	0.833	2.844	2.568	0.133	1.113	0.9698	0.35	3.5648	1.7639	2.469	2.107	2.33	8.972			0.974226	2.20637
22.6166	1.174	0.955	1.789	1.363	0.964	1.787	1.552	3.473	0.765	0.496	1.885	1.5253	1.583	2.4643	2.5047	1.038	1.87	3.44	8.997			0.979383	2.08554
22.7356	1.438	0.944	1.5598	1.14	2.468	1.636	2.047	1.207	2.761	1.221	1.666	1.5943	1.183	1.7741	2.0607	1.237	0.729	1.448	6.781			0.984536	1.83657
22.8546	0.992	0.778	2.7811	3.057	2.136	2.044	2.135	2.821	3.196	1.04	0.845	1.7868	0.899	2.9975	2.1045	0.765	0.455	3.72	7.379			0.989689	2.20694
22.9737	1.012	2.569	1.5563	1.344	2.802	1.051	0.695	2.648	1.796	1.788	0.484	1.7341	0.2	0.5698	2.9404	0.971	1.58	5.904	4.485			0.994847	1.90156
23.0927	1.542	1.463	3.0234	4.005	2.766	1.26	1.125	1.882	0.245	2.158	1.374	3.0542	0.634	0.9564	1.7171	1.93	2.211	1.931	3.697			1	1.94601

## Sheet: Sheet1
Image2				Image3				Image4				Image5				Image7				Image8				Image9					Distance	Image2	Image3	Image4	Image5	Image7	Image8	Image9
Ap-Ba	Average int			Ap-Ba	Average int			Ap-Ba	Average int			Ap-Ba	Average int			Ap-Ba	Av int			Ap-Ba	Av int			Ap-Ba	Av int				0	43.7692	47.659	41.565	44.7651	84.5727	78.0497	116.904
0	43.7692			0	47.659			0	41.565			0	44.7651			0	84.5727			0	78.0497			0	116.904				0.05	53.5531	63.2545	53.0722	55.0146	83.0577	78.0407	117.667
0.00515314	43.3046			0.00454414	52.9093			0.00504905	43.7386			0.0061332	44.3847			0.00746053	82.9311			0.0053176	78.2451			0.00719216	110.096				0.1	97.0339	98.0299	79.3236	98.0849	88.6547	73.3476	136.848
0.0103106	47.6728			0.00909209	55.6371			0.0101023	45.5567			0.0122716	44.8219			0.0149273	81.188			0.0106397	74.9827			0.0143904	109.707				0.15	89.0065	117.081	84.0656	113.8	75.8772	56.4382	125.125
0.0154638	46.8846			0.0136362	56.8137			0.0151514	46.3658			0.0184047	49.5313			0.0223879	80.0601			0.0159573	77.374			0.0215825	111.311				0.2	59.9452	102.559	69.0748	106.686	58.1468	39.2034	113.366
0.0206169	47.8088			0.0181804	57.1601			0.0202004	50.3108			0.0245379	50.1144			0.0298484	82.0652			0.0212749	77.1445			0.0287747	112.331				0.25	41.0615	73.9671	48.3866	78.385	44.2512	31.8253	90.8613
0.0257744	50.3646			0.0227283	60.8147			0.0252537	52.2867			0.0306763	52.5243			0.0373152	83.8009			0.026597	78.0374			0.0359729	121.339				0.3	32.4878	53.2909	32.8579	56.1765	36.9977	25.0581	68.3557
0.0309275	52.8578			0.0272724	63.6413			0.0303028	54.8915			0.0368095	57.9575			0.0447757	83.0463			0.0319146	79.1696			0.043165	126.909				0.35	27.5695	40.9933	27.0104	45.6672	28.7547	20.4575	54.4669
0.0360807	57.1332			0.0318166	66.7978			0.0353518	58.1554			0.0429427	63.2915			0.0522363	83.1491			0.0372322	79.8389			0.0503572	132.736	117.667			0.4	22.8531	34.3811	22.5399	31.4965	23.0846	16.0434	49.4845
0.0412381	60.2149			0.0363645	69.8181			0.0404051	59.9143			0.0490811	68.1053			0.0597031	86.7055	83.0577		0.0425542	77.9168			0.0575554	135.054				0.45	20.4196	27.3459	20.9831	25.7649	20.5116	12.9657	40.882
0.0463913	67.2421			0.0409087	72.3713			0.0454542	63.7242			0.0552142	74.6498	55.0146		0.0671636	91.1002			0.0478718	80.209			0.0647475	133.927				0.5	17.9811	22.5215	16.3178	22.0566	16.7206	12.8461	29.4882
0.0515444	71.832	53.5531		0.0454528	75.9622			0.0505032	67.2852	53.0722		0.0613474	82.4574			0.0746242	90.8508			0.0531894	77.4802	78.0407		0.0719397	138.281				0.55	18.1148	19.5119	13.1633	19.0743	15.2542	11.1903	23.5675
0.0567019	73.8595			0.0500008	79.4699	63.2545		0.0555565	68.7306			0.0674858	89.9777			0.082091	88.8935			0.0585115	78.6587			0.0791379	138.697				0.6	16.6517	16.7954	10.8244	16.8598	14.0752	11.7245	17.3438
0.061855	82.7756			0.0545449	83.1463			0.0606055	71.8877			0.073619	96.7671			0.0895515	89.5702			0.0638291	79.2632			0.0863301	135.816				0.65	16.7559	15.5717	9.64509	16.8859	12.7363	10.5008	13.64
0.0670082	86.8954			0.059089	86.4901			0.0656546	74.3826			0.0797522	97.839			0.097012	85.8271			0.0691467	79.0479			0.0935222	139.433				0.7	14.4634	12.7934	9.22348	15.4529	13.0031	10.3832	12.9825
0.0721657	93.5132			0.063637	88.9382			0.0707079	77.8915			0.0858906	100.522			0.104479	85.6867	88.6547		0.0744688	76.2			0.10072	136.725	136.848			0.75	12.6336	13.4069	9.46943	14.4704	12.8931	10.6576	11.9809
0.0773188	99.4404			0.0681811	91.7144			0.0757569	80.5504			0.0920237	101.323			0.111939	81.812			0.0797864	74.3724			0.107913	132.394				0.8	8.98676	9.58863	10.0226	14.9341	14.2678	10.2312	12.39
0.0824763	105.781			0.0727291	97.9571			0.0808102	81.2617			0.0981621	107.02			0.119406	81.6842			0.0851085	71.0771			0.115111	126.583				0.85	6.25344	6.90366	10.9331	15.9452	13.2363	9.58762	11.595
0.0876294	106.785			0.0772732	99.1862			0.0858593	80.1366			0.104295	108.772	98.0849		0.126867	78.2844			0.0904261	69.507			0.122303	125.422				0.9	5.0605	5.04012	11.9093	14.6125	13.1681	7.42779	12.3913
0.0927826	109.055			0.0818173	101.316			0.0909083	85.1572			0.110428	111.92			0.134327	78.124			0.0957437	67.2069			0.129495	125.319				0.95	3.09965	3.03331	7.89687	12.3689	9.8976	5.3276	11.5584
0.09794	108.892			0.0863653	105.485			0.0959616	86.2141			0.116567	112.328			0.141794	76.0401			0.101066	64.7956	73.3476		0.136693	120.653				1	2.18663	1.54317	5.23481	8.2142	5.70571	5.46856	10.8561
0.103093	103.341	97.0339		0.0909094	106.798			0.101011	87.0237	79.3236		0.1227	112.98			0.149255	68.6992			0.106383	65.4293			0.143885	122.295
0.108246	104.844			0.0954536	107.936			0.10606	86.3423			0.128833	112.79			0.156715	66.4962	75.8772		0.111701	63.7356			0.151078	123.21	125.125
0.113404	103.423			0.100002	109.361	98.0299		0.111113	86.496			0.134972	115.25			0.164182	63.6153			0.117023	63.3219			0.158276	118.454
0.118557	99.5243			0.104546	110.92			0.116162	85.9999			0.141105	117.219			0.171642	60.322			0.122341	60.385			0.165468	118.433
0.12371	94.4647			0.10909	115.444			0.121211	86.0803			0.147238	114.59			0.179103	60.6353			0.127658	56.1659			0.17266	116.812
0.128868	92.443			0.113638	115.099			0.126264	85.1793			0.153376	113.326	113.8		0.18657	57.5902			0.13298	55.0748			0.179858	114.204
0.134021	89.5316			0.118182	117.803			0.131313	84.1091			0.15951	110.504			0.19403	53.9123			0.138298	52.8921			0.18705	112.032
0.139174	82.8449			0.122726	121.275			0.136362	82.0944			0.165643	111.68			0.201491	52.8058	58.1468		0.143616	51.0032			0.194243	109.625
0.144331	79.4331			0.127274	117.948			0.141416	81.8769			0.171781	108.044			0.208958	52.1491			0.148938	50.7449			0.201441	104.003	113.366
0.149484	75.3749			0.131818	119.801			0.146465	83.4825			0.177914	111.447			0.216418	48.9047			0.154255	45.6292	56.4382		0.208633	101.758
0.154638	68.1813	89.0065		0.136362	118.813			0.151514	78.9958	84.0656		0.184047	106.734			0.223879	45.1404			0.159573	43.2621			0.215825	99.0048
0.159795	69.2811			0.14091	117.89			0.156567	76.8907			0.190186	105.484			0.231346	42.3923			0.164895	40.2041			0.223023	94.2823
0.164948	64.2878			0.145454	117.216			0.161616	79.1061			0.196319	101.515			0.238806	39.9938			0.170212	41.8376			0.230216	92.5889
0.170101	62.9773			0.149998	117.709			0.166665	76.5659			0.202452	98.084	106.686		0.246267	40.8258			0.17553	40.7782			0.237408	86.7684
0.175259	60.0332			0.154546	115.056	117.081		0.171719	73.0544			0.208591	93.8462			0.253733	40.3522	44.2512		0.180852	39.2703			0.244606	81.4699
0.180412	60.8187			0.159091	113.002			0.176768	69.908			0.214724	88.6235			0.261194	37.743			0.18617	37.3594			0.251798	80.1566	90.8613
0.185565	58.758			0.163635	115.158			0.181817	68.4683			0.220857	83.4251			0.268654	39.2882			0.191487	39.3922			0.25899	75.7471
0.190723	56.5699			0.168183	112.934			0.18687	65.2778			0.226995	79.749			0.276121	38.0051			0.196809	35.963			0.266188	73.633
0.195876	52.4748			0.172727	110.306			0.191919	63.3807			0.233129	76.2541			0.283582	37.4048			0.202127	34.7634	39.2034		0.273381	70.8489
0.201029	54.3061	59.9452		0.177271	106.302			0.196968	60.0745			0.239262	73.3411			0.291042	37.0025			0.207445	35.3063			0.280573	67.1143
0.206186	51.3273			0.181819	103.452			0.202021	58.0215	69.0748		0.2454	67.4919			0.298509	36.1991			0.212767	33.7012			0.287771	66.2541
0.21134	46.872			0.186363	95.8641			0.20707	55.8232			0.251533	64.3492	78.385		0.30597	33.3408	36.9977		0.218084	34.5493			0.294963	63.6908
0.216497	45.3977			0.190911	95.2667			0.212124	53.6514			0.257672	64.4302			0.313436	31.8872			0.223406	32.0397			0.302161	61.2014	68.3557
0.22165	43.173			0.195455	95.29			0.217173	51.7919			0.263805	61.8624			0.320897	31.2092			0.228724	31.0846			0.309353	57.9859
0.226803	41.0016			0.199999	91.758			0.222222	50.778			0.269938	58.8978			0.328358	29.3208			0.234042	31.3134			0.316546	58.6279
0.231961	39.0601			0.204547	88.8204	102.559		0.227275	48.1701			0.276076	56.6488			0.335824	29.5464			0.239364	31.2891			0.323744	55.8948
0.237114	37.5678			0.209091	86.2298			0.232324	48.0389			0.28221	53.504			0.343285	26.777			0.244681	30.1642			0.330936	53.6657
0.242267	36.7969			0.213635	82.6864			0.237373	46.4318			0.288343	50.8916			0.350745	26.9122			0.249999	30.6957			0.338128	52.4571
0.247425	34.9514			0.218183	78.6851			0.242426	45.4707			0.294481	51.3836			0.358212	25.6303	28.7547		0.255321	28.1099	31.8253		0.345326	51.7682
0.252578	34.4673	41.0615		0.222728	76.7951			0.247475	42.5715			0.300614	51.7935	56.1765		0.365673	23.2744			0.260639	25.0942			0.352518	50.8688	54.4669
0.257731	34.8911			0.227272	74.467			0.252525	41.1388	48.3866		0.306748	51.592			0.373133	25.292			0.265956	26.3736			0.359711	50.2383
0.262888	33.9158			0.23182	72.0825			0.257578	38.8585			0.312886	50.2926			0.3806	21.01			0.271278	26.6427			0.366909	50.9127
0.268041	33.145			0.236364	69.8573			0.262627	36.1921			0.319019	48.336			0.388061	23.3721			0.276596	26.5172			0.374101	50.6127
0.273195	34.3497			0.240908	68.558			0.267676	34.5438			0.325152	47.9615			0.395521	22.7468			0.281913	25.4691			0.381293	50.0626
0.278352	34.8018			0.245456	66.0607			0.272729	33.6202			0.331291	48.5222			0.402988	22.8121	23.0846		0.287236	25.3246			0.388491	48.7156
0.283505	32.746			0.25	64.2487	73.9671		0.277778	31.9521			0.337424	43.7439			0.410449	22.7281			0.292553	23.9618			0.395683	49.1984
0.288658	30.3912			0.254544	62.0853			0.282827	32.3226			0.343557	42.4433			0.417909	21.4047			0.297871	23.3781			0.402876	46.6516	49.4845
0.293816	29.8025			0.259092	61.0225			0.287881	30.7882			0.349695	41.0153			0.425376	21.4448			0.303193	22.7612	25.0581		0.410074	46.3429
0.298969	29.9638			0.263636	57.5409			0.29293	30.5516			0.355829	37.0982	45.6672		0.432836	21.866			0.30851	22.3154			0.417266	45.1128
0.304122	30.8716	32.4878		0.26818	57.9575			0.297979	29.2691			0.361962	37.666			0.440297	20.9574			0.313828	23.5919			0.424458	42.7791
0.30928	30.2029			0.272728	55.346			0.303032	30.4809	32.8579		0.3681	34.4423			0.447764	17.678			0.31915	22.6531			0.431656	40.7179
0.314433	28.0815			0.277272	52.1253			0.308081	28.9178			0.374233	32.4515			0.455224	17.5026	20.5116		0.324468	20.3846			0.438849	37.6345
0.319586	29.3092			0.281817	48.3518			0.31313	28.6481			0.380367	31.4677			0.462685	17.8835			0.329785	19.5848			0.446041	37.8457
0.324743	29.3137			0.286365	49.2458			0.318183	29.0358			0.386505	29.5364			0.470152	16.6329			0.335107	19.7265			0.453239	35.7409	40.882
0.329896	27.673			0.290909	48.4067			0.323232	27.8152			0.392638	30.6255			0.477612	15.4449			0.340425	19.0327			0.460431	33.7046
0.33505	28.6013			0.295453	48.7186			0.328281	27.784			0.398771	27.343			0.485073	18.2618			0.345743	18.4287			0.467623	32.0347
0.340207	27.7585			0.300001	45.3992	53.2909		0.333335	26.2807			0.40491	28.4393	31.4965		0.492539	16.2958			0.351065	18.3999	20.4575		0.474821	30.3831
0.34536	26.1396			0.304545	44.6248			0.338384	26.0973			0.411043	28.2115			0.5	15.8045	16.7206		0.356382	16.038			0.482014	29.1476
0.350513	25.5831			0.309089	43.1617			0.343433	24.6972			0.417176	27.7986			0.507461	15.2156			0.3617	16.5544			0.489206	28.4644
0.355671	23.0322	27.5695		0.313637	42.5054			0.348486	25.3732			0.423314	26.7317			0.514927	16.4724			0.367022	16.7525			0.496404	26.7914
0.360824	23.0505			0.318181	43.1899			0.353535	25.4552	27.0104		0.429448	25.1276			0.522388	15.371			0.37234	16.7313			0.503596	25.8918	29.4882
0.365981	22.2055			0.322729	40.8811			0.358588	24.7351			0.435586	25.7308			0.529855	15.0388			0.377662	16.519			0.510794	26.1439
0.371135	23.6147			0.327273	38.7174			0.363638	23.5156			0.441719	24.3836			0.537315	14.7318			0.382979	17.6274			0.517986	26.3132
0.376288	24.2432			0.331817	40.2934			0.368687	24.6872			0.447852	23.8147			0.544776	15.5639			0.388297	16.2781			0.525179	23.4212
0.381445	22.4771			0.336365	39.0239			0.37374	23.5668			0.453991	24.3208	25.7649		0.552243	14.3859	15.2542		0.393619	15.6256			0.532377	21.8255
0.386598	21.7776			0.340909	38.3207			0.378789	21.3568			0.460124	23.423			0.559703	14.3309			0.398936	14.3658			0.539569	22.2062
0.391752	22.6503			0.345454	39.2166			0.383838	20.7195			0.466257	22.5557			0.567164	16.2757			0.404254	13.9416	16.0434		0.546761	22.436
0.396909	22.6145			0.350002	40.9919	40.9933		0.388891	20.4393			0.472395	21.2814			0.57463	14.9449			0.409576	13.8955			0.553959	22.6265	23.5675
0.402062	23.045	22.8531		0.354546	38.149			0.39394	22.1532			0.478529	20.7025			0.582091	13.6404			0.414894	13.7547			0.561151	20.0427
0.407215	22.3264			0.35909	36.3414			0.398989	22.7147			0.484662	21.915			0.589551	14.2857			0.420211	13.671			0.568344	19.5321
0.412373	22.5315			0.363638	36.7814			0.404043	21.5107	22.5399		0.4908	23.1701			0.597018	12.2819			0.425533	14.0961			0.575542	17.961
0.417526	21.6145			0.368182	35.6819			0.409092	22.9218			0.496933	21.4109			0.604479	12.767	14.0752		0.430851	12.9997			0.582734	17.9229
0.422679	20.7094			0.372726	34.4488			0.414141	21.9163			0.503067	21.994	22.0566		0.611939	12.9724			0.436169	12.227			0.589926	15.8487
0.427837	21.1386			0.377274	33.5002			0.419194	20.9896			0.509205	20.75			0.619406	13.4486			0.441491	12.1612			0.597124	15.6162
0.43299	20.1303			0.381818	35.9836			0.424243	21.5139			0.515338	19.9596			0.626867	12.2105			0.446808	12.0685			0.604317	14.4828	17.3438
0.438143	18.8758			0.386362	33.483			0.429292	21.6251			0.521471	19.8634			0.634327	12.3709			0.452126	11.8173	12.9657		0.611509	14.8124
0.4433	19.1295			0.39091	32.0727			0.434345	21.1789			0.52761	18.6558			0.641794	12.9586			0.457448	11.374			0.618707	13.4793
0.448453	18.6438			0.395454	32.9647			0.439394	21.2132			0.533743	18.6913			0.649255	13.0764			0.462766	11.6744			0.625899	12.891
0.453607	19.0965	20.4196		0.399998	33.4701			0.444444	19.8994			0.539876	18.6215			0.656715	12.1165	12.7363		0.468083	13.4599			0.633091	13.0678
0.458764	18.1478			0.404546	29.6962	34.3811		0.449497	19.8791			0.546014	18.5851			0.664182	12.5238			0.473405	13.5693			0.640289	13.9183
0.463917	17.8074			0.409091	30.4684			0.454546	18.694	20.9831		0.552148	17.4677	19.0743		0.671642	13.6341			0.478723	12.6551			0.647482	13.5511
0.46907	18.9294			0.413635	28.0389			0.459595	18.6829			0.558281	16.8491			0.679103	13.3007			0.48404	13.4914			0.654674	13.7604	13.64
0.474228	18.1794			0.418183	28.4542			0.464648	16.9911			0.564419	16.5162			0.68657	12.9725			0.489363	13.1646			0.661872	13.4494
0.479381	18.5259			0.422727	28.8472			0.469697	17.0543			0.570552	17.7754			0.69403	12.7394			0.49468	13.8831			0.669064	12.9378
0.484534	16.8957			0.427271	27.658			0.474746	16.6582			0.576686	17.8684			0.701491	12.8484	13.0031		0.499998	12.7675			0.676256	13.9345
0.489692	16.9891			0.431819	28.8872			0.4798	16.513			0.582824	16.9029			0.708958	11.8835			0.50532	12.4219	12.8461		0.683454	12.8693
0.494845	18.2088			0.436363	27.5172			0.484849	16.0212			0.588957	16.8016			0.716418	13.0363			0.510637	11.3011			0.690647	13.494
0.499998	18.3215			0.440907	26.5219			0.489898	15.389			0.59509	16.1893			0.723879	13.2944			0.515955	10.2347			0.697839	12.0206
0.505155	17.8059	17.9811		0.445455	24.948			0.494951	14.8852			0.601229	15.9757	16.8598		0.731346	12.263			0.521277	10.9339			0.705037	12.1723	12.9825
0.510308	18.3851			0.449999	26.0347			0.5	14.6651	16.3178		0.607362	16.4716			0.738806	13.0427			0.526595	11.6837			0.712229	12.0076
0.515466	19.3595			0.454547	23.4293	27.3459		0.505053	15.3495			0.6135	17.0749			0.746273	13.0364			0.531917	11.1686			0.719427	11.9366
0.520619	18.1386			0.459091	21.9551			0.510102	15.1958			0.619633	17.17			0.753733	13.6955	12.8931		0.537234	11.8065			0.726619	12.5174
0.525772	17.6332			0.463635	22.303			0.515151	14.3554			0.625767	17.1265			0.761194	14.7582			0.542552	11.9286			0.733812	11.9253
0.53093	18.594			0.468183	22.7321			0.520205	14.6184			0.631905	18.2925			0.768661	14.5964			0.547874	10.581			0.74101	12.7102
0.536083	19.0226			0.472728	22.3545			0.525254	13.4355			0.638038	16.7145			0.776121	12.8546			0.553192	11.0744	11.1903		0.748202	11.7311
0.541236	18.0424			0.477272	22.2515			0.530303	12.53			0.644171	16.167			0.783582	14.1039			0.558509	11.6747			0.755394	11.0381	11.9809
0.546393	17.5678			0.48182	22.682			0.535356	12.4112			0.65031	16.0699	16.8859		0.791049	15.0075			0.563831	12.6832			0.762592	12.2031
0.551547	16.2902	18.1148		0.486364	23.527			0.540405	11.9118			0.656443	15.3249			0.798509	13.7957			0.569149	11.6939			0.769784	12.4103
0.5567	17.1304			0.490908	23.1314			0.545454	11.3543			0.662576	15.6052			0.80597	14.7581	14.2678		0.574467	11.8707			0.776977	11.9142
0.561857	17.1627			0.495456	22.3479			0.550507	10.4716	13.1633		0.668715	14.8856			0.813436	13.8108			0.579789	11.3592			0.784175	12.5447
0.56701	17.7034			0.5	21.9307	22.5215		0.555556	10.5769			0.674848	16.0466			0.820897	12.4123			0.585106	11.1434			0.791367	12.7812
0.572163	15.6935			0.504544	22.9372			0.560606	11.087			0.680981	16.2349			0.828358	13.2807			0.590424	11.4382			0.798559	12.8003
0.577321	16.4051			0.509092	21.5116			0.565659	11.9158			0.687119	15.2055			0.835824	12.1015			0.595746	12.276			0.805757	12.076	12.39
0.582474	16.6597			0.513636	20.6334			0.570708	10.8934			0.693252	15.4059			0.843285	12.6918			0.601064	11.3812	11.7245		0.81295	12.0748
0.587627	17.2201			0.51818	19.6904			0.575757	11.3679			0.699386	15.2338			0.850745	14.6704			0.606381	10.4508			0.820142	12.0414
0.592785	16.7902			0.522728	19.0659			0.58081	11.1629			0.705524	15.1336	15.4529		0.858212	13.6867	13.2363		0.611703	10.2903			0.82734	11.3448
0.597938	16.0451			0.527272	18.8547			0.585859	10.8089			0.711657	15.1144			0.865673	14.104			0.617021	10.451			0.834532	11.6502
0.603091	15.7071	16.6517		0.531817	19.2393			0.590908	10.8725			0.71779	14.6568			0.873133	13.1341			0.622338	9.79938			0.841724	11.6613
0.608248	17.3487			0.536365	19.1659			0.595962	9.3034			0.723929	15.1893			0.8806	13.2833			0.62766	9.78494			0.848922	10.9926
0.613402	17.2465			0.540909	18.1013			0.601011	10.2554	10.8244		0.730062	14.2591			0.888061	13.4824			0.632978	10.0379			0.856115	11.3996	11.595
0.618555	16.6859			0.545453	17.8803			0.60606	10.5304			0.736195	14.2207			0.895521	12.114			0.638296	10.4843			0.863307	11.0988
0.623712	17.0149			0.550001	17.551	19.5119		0.611113	10.6715			0.742334	14.0759			0.902988	12.8909	13.1681		0.643618	10.5161			0.870505	12.488
0.628865	16.8649			0.554545	17.7667			0.616162	9.83078			0.748467	13.3745			0.910449	11.4385			0.648935	11.451			0.877697	12.5075
0.634019	16.658			0.559089	15.7604			0.621211	10.0952			0.7546	14.8724	14.4704		0.917909	11.005			0.654253	11.7419	10.5008		0.884889	12.553
0.639176	17.1291			0.563637	15.4199			0.626264	9.97645			0.760738	14.0405			0.925376	11.2882			0.659575	11.1559			0.892087	12.3604
0.644329	16.3404			0.568181	16.4569			0.631313	9.49534			0.766871	14.0243			0.932836	10.5576			0.664893	10.2952			0.89928	13.0445
0.649487	16.63			0.572729	16.3456			0.636367	9.50043			0.77301	15.6519			0.940303	9.03762			0.670215	10.2637			0.906478	12.6866	12.3913
0.65464	15.6403	16.7559		0.577273	16.2266			0.641416	9.27843			0.779143	14.6386			0.947764	8.47869			0.675532	10.6499			0.91367	12.0036
0.659793	14.8721			0.581817	18.3638			0.646465	8.82925			0.785276	13.9312			0.955224	7.47745	9.8976		0.68085	9.33008			0.920862	11.9591
0.66495	14.9283			0.586365	17.4176			0.651518	8.24312	9.64509		0.791415	15.2247			0.962691	7.15781			0.686172	10.7801			0.92806	12.4291
0.670104	13.7733			0.590909	17.3583			0.656567	9.31467			0.797548	15.4018			0.970152	6.36972			0.69149	9.83911			0.935252	11.1219
0.675257	13.6864			0.595454	17.7781			0.661616	8.91697			0.803681	16.5597	14.9341		0.977612	5.55635			0.696807	10.2889			0.942445	10.99
0.680414	15.0717			0.600002	15.8549	16.7954		0.666669	9.50804			0.809819	15.5374			0.985079	5.67417			0.702129	10.8459	10.3832		0.949643	11.0995
0.685567	14.9655			0.604546	17.1829			0.671719	9.60441			0.815953	16.3482			0.992539	5.3195			0.707447	10.4939			0.956835	11.306	11.5584
0.69072	14.645			0.60909	17.7903			0.676768	8.95673			0.822086	15.9686			1	4.15668	5.70571		0.712764	11.321			0.964027	12.2234
0.695878	14.3345			0.613638	17.0755			0.681821	9.25743			0.828224	17.2824							0.718087	10.5986			0.971225	12.0145
0.701031	13.894	14.4634		0.618182	16.6839			0.68687	8.25542			0.834357	16.4676							0.723404	10.5291			0.978417	10.929
0.706184	14.5248			0.622726	16.2272			0.691919	8.97374			0.84049	14.9899							0.728722	10.5224			0.98561	10.6759
0.711342	13.7228			0.627274	15.6496			0.696972	10.1041			0.846629	15.7651							0.734044	9.57272			0.992808	9.65217
0.716495	13.2553			0.631818	14.694			0.702021	9.34329	9.22348		0.852762	15.2025	15.9452						0.739361	10.8085			1	9.64157	10.8561
0.721648	13.5119			0.636362	13.9216			0.70707	9.3087			0.858895	14.4575							0.744679	10.8216
0.726805	13.6191			0.64091	14.9243			0.712124	9.43888			0.865034	14.167							0.750001	11.2509	10.6576
0.731959	12.5386			0.645454	15.6117			0.717173	9.31568			0.871167	13.5334							0.755319	11.0152
0.737112	12.3258			0.649998	13.4183			0.722222	9.31601			0.8773	14.4312							0.760636	10.5187
0.742269	11.9533			0.654546	13.6811	15.5717		0.727275	9.27597			0.883438	15.2521							0.765958	10.8361
0.747422	10.0961			0.659091	13.2448			0.732324	10.4249			0.889572	15.1184							0.771276	11.1648
0.752575	10.7881	12.6336		0.663635	12.3402			0.737373	9.77765			0.895705	15.0739							0.776594	10.5981
0.757733	11.5375			0.668183	14.215			0.742426	9.19867			0.901843	14.8664	14.6125						0.781916	10.508
0.762886	10.9238			0.672727	13.4786			0.747475	9.58856			0.907976	13.8239							0.787233	10.1076
0.768039	10.0361			0.677271	12.2893			0.752525	9.04926	9.46943		0.914109	13.2682							0.792551	9.36167
0.773197	9.13535			0.681819	12.2156			0.757578	10.1211			0.920248	12.4443							0.797873	9.14963
0.77835	9.93761			0.686363	12.2451			0.762627	10.5978			0.926381	12.6731							0.803191	9.05274	10.2312
0.783503	7.90198			0.690907	12.095			0.767676	9.73102			0.932514	12.3887							0.808508	9.73094
0.78866	8.13032			0.695455	12.3186			0.772729	9.90216			0.938653	11.8684							0.81383	9.39426
0.793814	8.82837			0.699999	13.0771			0.777778	9.63549			0.944786	11.4251							0.819148	9.64224
0.798971	6.93907			0.704547	13.2077	12.7934		0.782832	9.94878			0.950924	11.0598	12.3689						0.82447	9.26524
0.804124	6.49747	8.98676		0.709091	14.3824			0.787881	10.0967			0.957057	10.587							0.829788	9.30593
0.809277	6.68548			0.713635	13.4762			0.79293	9.56702			0.963191	9.42313							0.835105	9.70254
0.814435	6.68701			0.718183	13.1597			0.797983	10.2824			0.969329	8.99999							0.840427	10.1805
0.819588	6.85989			0.722728	13.4583			0.803032	10.3432	10.0226		0.975462	8.04558							0.845745	9.36287
0.824741	6.05406			0.727272	14.031			0.808081	10.3647			0.981595	7.18022							0.851062	9.70406	9.58762
0.829899	6.35886			0.73182	14.585			0.813134	10.2932			0.987734	7.3896							0.856384	9.00709
0.835052	6.22999			0.736364	12.9111			0.818183	10.236			0.993867	7.3047							0.861702	9.90244
0.840205	5.86897			0.740908	13.1354			0.823232	10.3348			1	6.78334	8.2142						0.86702	8.81867
0.845362	6.01964			0.745456	12.0654			0.828286	11.0116											0.872342	8.06631
0.850516	5.51703	6.25344		0.75	12.8642	13.4069		0.833335	11.1093											0.877659	7.67852
0.855669	5.03609			0.754544	11.7458			0.838384	11.4567											0.882977	6.7643
0.860826	5.27625			0.759092	10.9594			0.843437	12.2342											0.888299	6.07013
0.865979	4.74553			0.763636	9.98265			0.848486	11.4552											0.893617	5.93815
0.871132	4.99652			0.76818	10.6171			0.853535	10.8354	10.9331										0.898934	5.77064
0.87629	5.04849			0.772728	9.75984			0.858588	12.0373											0.904256	6.26161	7.42779
0.881443	5.13866			0.777272	8.96544			0.863638	12.336											0.909574	6.00274
0.886596	5.63543			0.781817	9.4292			0.868687	13.1397											0.914892	5.5641
0.891754	5.28158			0.786365	8.8074			0.87374	11.9159											0.920214	5.63249
0.896907	4.87728			0.790909	9.15518			0.878789	12.554											0.925531	5.47702
0.90206	4.56913	5.0605		0.795453	8.02867			0.883838	12.631											0.930849	5.20233
0.907217	3.71292			0.800001	8.0241	9.58863		0.888891	11.7615											0.936171	5.70692
0.912371	4.15645			0.804545	8.43166			0.89394	11.3672											0.941488	4.46203
0.917524	3.71434			0.809089	7.61692			0.898989	10.8694											0.946806	4.73085
0.922681	3.00465			0.813637	7.33097			0.904043	10.4807	11.9093										0.952128	5.16991	5.3276
0.927834	3.0211			0.818181	7.0495			0.909092	9.82558											0.957446	5.52744
0.932987	3.12703			0.822725	7.34595			0.914141	9.39241											0.962763	4.84584
0.938145	2.88094			0.827273	6.37138			0.919194	9.24598											0.968085	5.12164
0.943298	2.63973			0.831817	7.05972			0.924243	8.02676											0.973403	5.37038
0.948456	2.57369			0.836365	5.89793			0.929296	7.58757											0.978725	5.67981
0.953609	2.16564	3.09965		0.840909	6.38718			0.934345	7.45168											0.984043	5.96243
0.958762	2.57723			0.845454	6.20634			0.939394	7.18459											0.98936	5.21427
0.963919	2.4001			0.850002	6.24267	6.90366		0.944448	7.27054											0.994682	5.32017
0.969072	2.51933			0.854546	6.17802			0.949497	6.18089											1	6.17504	5.46856
0.974226	2.20637			0.85909	6.07524			0.954546	6.80267	7.89687
0.979383	2.08554			0.863638	5.49869			0.959599	6.40268
0.984536	1.83657			0.868182	5.58076			0.964648	6.4221
0.989689	2.20694			0.872726	5.2702			0.969697	5.80963
0.994847	1.90156			0.877274	4.49681			0.974751	5.56242
1	1.94601	2.18663		0.881818	4.45425			0.9798	4.86019
				0.886362	5.08951			0.984849	4.66946
				0.89091	4.72957			0.989902	4.29702
				0.895454	4.21858			0.994951	4.48706
				0.899998	4.48903			1	4.60271	5.23481
				0.904546	4.4008	5.04012
				0.909091	4.24086
				0.913635	3.65717
				0.918183	3.32124
				0.922727	3.18486
				0.927271	3.65443
				0.931819	3.2761
				0.936363	2.53226
				0.940907	2.60449
				0.945455	2.58936
				0.949999	2.11886
				0.954543	2.18678	3.03331
				0.959091	1.87643
				0.963635	1.60171
				0.968183	1.46859
				0.972728	1.69899
				0.977272	1.8009
				0.98182	1.4005
				0.986364	1.30946
				0.990908	1.41955
				0.995456	1.41369
				1	1.44187	1.54317
