# Supplementary material for: Crumbs organizes the transport machinery by regulating apical levels of PI(4,5)P2 in Drosophila
Source: eLife. 2019 Nov 7;8:e50900. doi: 10.7554/eLife.50900 (PMC6881148; doi:10.7554/eLife.50900)
Supplement: Figure 2—source data 1. [file elife-50900-fig2-data1.xlsx]

## Sheet: Sheet1
	Control 1					Control 2					Control 3					Control 4					Control 5					Control 6									Control 7
	Cell 1	Cell 2	Cell 3	Cell 4		Cell 1	Cell 2	Cell 3	Cell 4		Cell 1	Cell 2	Cell 3	Cell 4		Cell 1	Cell 2	Cell 3	Cell 4		Cell 1	Cell 2	Cell 3	Cell 4		Cell 1	Cell 2	Cell 3	Cell 4	Cell 5	Cell 6	Cell 7	Cell 8		Cell 1	Cell 2	Cell 3	Cell 4	Cell 5	Cell 6	Cell 7	Cell 8
Apical	53	66	85	113		42	83	107	45		94	38	104	69		71	51	54	93		73	63	73	52		28	55	63	72	30	59	58	51		54	34	29	43	34	90	32	27
	92	48	27	74		34	39	103	69		83	63	66	71		101	43	46	43		58	95	97	88		31	37	37	53	73	77	21	31		33	60	26	51	71	32	27	75
	70	63	56	97		81	42	44	27		65	65	55	71		89	44	69	30		56	87	72	67		33	27	38	81	72	46	23	34		32	45	59	45	42	84	34	71
	135	105	39	68		30	25	46	52		81	66	81	82		58	62	52	39		46	71	70	131		24	37	30	29	74	51	35	12		32	87	58	65	27	26	90	70
	111	54	80	48		23	60	96	40		43	64	85	81		85	80	57	47		89	52	93	81		45	27	37	35	39	52	47	78		37	58	21	50	17	49	62	98
Average	92.2	67.2	57.4	80		42	49.8	79.2	46.6		73.2	59.2	78.2	74.8		80.8	56	55.6	50.4		64.4	73.6	81	83.8		32.2	36.6	41	54	57.6	57	36.8	41.2		37.6	56.8	38.6	50.8	38.2	56.2	49	68.2
Laeral	23	13	44	33		46	47	39	38		13	4	10	9		6	6	7	24		29	13	4	11		18	16	0	14	7	29	2	16		20	8	14	14	5	2	5	4
	24	30	37	43		40	16	63	44		10	5	6	3		11	1	6	17		51	14	13	2		8	9	15	6	1	10	7	0		11	2	6	0	17	4	7	12
	11	32	46	44		22	18	41	67		28	11	16	8		9	5	3	14		20	13	16	12		11	8	3	12	1	1	1	11		1	9	5	4	3	11	9	5
	11	24	42	56		33	21	29	14		12	6	8	20		1	2	8	4		18	9	14	12		2	3	5	10	6	4	18	4		6	9	8	0	6	5	7	10
	8	9	18	44		21	29	29	33		10	6	20	8		3	0	7	15		17	14	26	17		7	0	7	9	7	9	8	16		6	10	8	15	7	11	5	18
Average	15.4	21.6	37.4	44		32.4	26.2	40.2	39.2		14.6	6.4	12	9.6		6	2.8	6.2	14.8		27	12.6	14.6	10.8		9.2	7.2	6	10.2	4.4	10.6	7.2	9.4		8.8	7.6	8.2	6.6	7.6	6.6	6.6	9.8
Ratio Ap/La	5.98701	3.11111	1.53476	1.81818		1.2963	1.90076	1.97015	1.18878		5.0137	9.25	6.51667	7.79167		13.4667	20	8.96774	3.40541		2.38519	5.84127	5.54795	7.75926		3.5	5.08333	6.83333	5.29412	13.0909	5.37736	5.11111	4.38298		4.27273	7.47368	4.70732	7.69697	5.02632	8.51515	7.42424	6.95918
	crb KD 1					crb KD 2					crb KD 3					crb KD 4					crb KD 5							crb KD 6
	Cell 1	Cell 2	Cell 3	Cell 4		Cell 1	Cell 2	Cell 3	Cell 4		Cell 1	Cell 2	Cell 3	Cell 4		Cell 1	Cell 2	Cell 3	Cell 4		Cell 1	Cell 2	Cell 3	Cell 4	Cell 5	Cell 6		Cell 1	Cell 2	Cell 3	Cell 4	Cell 5	Cell 6
Apical	16	40	51	35		28	33	50	54		87	60	12	30		50	21	59	55		21	17	17	44	37	27		12	24	57	34	28	29
	24	28	27	25		68	17	48	44		68	76	20	34		47	26	47	63		15	34	15	6	33	16		20	32	33	22	19	30
	18	9	21	19		40	20	42	35		45	52	24	76		82	32	52	50		16	34	18	10	2	9		19	24	14	33	14	30
	17	14	17	16		30	17	27	35		61	24	17	60		42	22	46	82		32	24	5	44	31	34		36	22	14	34	12	44
	20	15	27	14		41	20	43	43		57	43	28	64		45	34	55	40		39	37	7	65	34	22		55	30	15	29	7	63
Average	19	21.2	28.6	21.8		41.4	21.4	42	42.2		63.6	51	20.2	52.8		53.2	27	51.8	58		24.6	29.2	12.4	33.8	27.4	21.6		28.4	26.4	26.6	30.4	16	39.2
Laeral	18	10	12	12		17	17	4	6		23	21	7	10		16	6	21	7		12	9	8	5	32	18		24	22	21	30	13	8
	7	14	24	15		5	15	22	25		33	19	12	9		23	11	4	6		17	18	7	12	28	28		52	15	18	19	23	25
	15	22	10	12		14	20	28	4		53	23	4	17		17	7	14	15		21	10	25	25	2	14		11	12	25	23	21	23
	12	6	7	23		16	11	10	9		11	24	12	20		6	7	30	3		21	10	13	11	1	27		6	10	0	9	32	15
	21	3	34	16		7	18	12	20		12	7	10	15		19	17	19	24		8	48	13	11	5	19		16	17	5	20	36	17
Average	14.6	11	17.4	15.6		11.8	16.2	15.2	12.8		26.4	18.8	9	14.2		16.2	9.6	17.6	11		15.8	19	13.2	12.8	13.6	21.2		21.8	15.2	13.8	20.2	25	17.6
Ratio Ap/La	1.30137	1.92727	1.64368	1.39744		3.50847	1.32099	2.76316	3.29688		2.40909	2.71277	2.24444	3.71831		3.28395	2.8125	2.94318	5.27273		1.55696	1.53684	0.939394	2.64062	2.01471	1.01887		1.30275	1.73684	1.92754	1.50495	0.64	2.22727
	sdt KD 1					sdt KD 2					sdt KD 3					sdt KD 4					sdt KD 5					sdt KD 6
	Cell 1	Cell 2	Cell 3	Cell 4		Cell 1	Cell 2	Cell 3	Cell 4		Cell 1	Cell 2	Cell 3	Cell 4		Cell 1	Cell 2	Cell 3	Cell 4		Cell 1	Cell 2	Cell 3	Cell 4		Cell 1	Cell 2	Cell 3	Cell 4	Cell 5
Apical	165	121	83	114		45	13	9	43		40	65	36	46		18	44	36	46		34	27	21	8		23	50	60	21	33		29	27	40	51	41	71
	77	110	101	123		15	37	28	32		41	55	59	39		60	26	28	20		23	16	23	29		29	29	33	19	51		36	31	64	49	44	59
	133	75	118	105		23	52	27	50		38	52	59	22		21	22	22	37		29	5	11	16		18	20	36	23	33		56	42	62	47	26	90
	96	54	55	76		22	52	13	41		39	27	48	34		25	24	21	46		14	23	29	25		26	37	46	24	41		45	32	53	44	23	47
	112	87	83	30		56	47	28	60		84	29	49	15		29	28	46	30		13	14	14	29		31	25	43	38	34		33	34	60	28	27	44
Average	116.6	89.4	88	89.6		32.2	40.2	21	45.2		48.4	45.6	50.2	31.2		30.6	28.8	30.6	35.8		22.6	17	19.6	21.4		25.4	32.2	43.6	25	38.4		39.8	33.2	55.8	43.8	32.2	62.2
Laeral	17	11	12	26		26	19	42	17		50	56	29	53		13	34	29	46		9	0	7	1		5	6	11	9	18		7	0	29	17	6	31
	13	6	14	13		18	14	11	14		41	32	77	95		21	56	48	59		6	9	10	4		10	13	12	10	10		12	18	10	26	11	39
	7	39	29	32		9	2	10	7		24	18	31	53		13	48	28	24		20	7	1	5		7	3	7	11	32		17	18	22	3	15	17
	20	26	28	34		12	11	21	15		42	28	22	21		11	13	16	33		5	9	1	15		11	4	6	7	4		23	12	5	10	7	6
	53	13	16	34		15	7	4	10		31	23	37	25		25	15	19	21		8	7	11	23		4	13	8	9	15		18	11	17	9	12	8
Average	22	19	19.8	27.8		16	10.6	17.6	12.6		37.6	31.4	39.2	49.4		16.6	33.2	28	36.6		9.6	6.4	6	9.6		7.4	7.8	8.8	9.2	15.8		15.4	11.8	16.6	13	10.2	20.2
Ratio Ap/La	5.3	4.70526	4.44444	3.22302		2.0125	3.79245	1.19318	3.5873		1.28723	1.45223	1.28061	0.631579		1.84337	0.86747	1.09286	0.978142		2.35417	2.65625	3.26667	2.22917		3.43243	4.12821	4.95455	2.71739	2.43038		2.58442	2.81356	3.36145	3.36923	3.15686	3.07921

## Sheet: Graph
	Control	crb KD	sdt KD
	5.98701	1.30137	5.3
	3.11111	1.92727	4.70526
	1.53476	1.64368	4.44444
	1.81818	1.39744	3.22302
	1.2963	3.50847	2.0125
	1.90076	1.32099	3.79245
	1.97015	2.76316	1.19318
	1.18878	3.29688	3.5873
	5.0137	2.40909	1.28723
	9.25	2.71277	1.45223
	6.51667	2.24444	1.28061
	7.79167	3.71831	0.631579
	13.4667	3.28395	1.84337
	20	2.8125	0.86747
	8.96774	2.94318	1.09286
	3.40541	5.27273	0.978142
	2.38519	1.55696	2.35417
	5.84127	1.53684	2.65625
	5.54795	0.939394	3.26667
	7.75926	2.64062	2.22917
	3.5	2.01471	3.43243
	5.08333	1.01887	4.12821
	6.83333	1.30275	4.95455
	5.29412	1.73684	2.71739
	13.0909	1.92754	2.43038
	5.37736	1.50495	2.58442
	5.11111	0.64	2.81356
	4.38298	2.22727	3.36145
	4.27273		3.36923
	7.47368		3.15686
	4.70732		3.07921
	7.69697
	5.02632
	8.51515
	7.42424
	6.95918

## Sheet: sdt KD 1
ROI	Area	Mean	Min	Max	X	Y	Ch	Slice
1	0.000	165	165	165	15019	27280	3	13
2	0.000	77	77	77	16615	27353	3	13
3	0.000	133	133	133	18139	27498	3	13
4	0.000	96	96	96	19299	27498	3	13
5	0.000	112	112	112	20896	27498	3	13
6	0.000	17	17	17	23363	26555	3	13
7	0.000	13	13	13	23798	24741	3	13
8	0.000	7	7	7	24378	23725	3	13
9	0.000	20	20	20	25249	22564	3	13
10	0.000	53	53	53	26047	21041	3	13
11	0.000	121	121	121	31779	29167	3	13
12	0.000	110	110	110	33375	29457	3	13
13	0.000	75	75	75	34971	29820	3	13
14	0.000	54	54	54	36858	30038	3	13
15	0.000	87	87	87	38454	30038	3	13
16	0.000	11	11	11	31851	27716	3	13
17	0.000	6	6	6	31996	26265	3	13
18	0.000	39	39	39	32577	24668	3	13
19	0.000	26	26	26	33085	23072	3	13
20	0.000	13	13	13	33302	21476	3	13
21	0.000	83	83	83	16615	33593	3	13
22	0.000	101	101	101	17993	33375	3	13
23	0.000	118	118	118	19880	32940	3	13
24	0.000	55	55	55	21331	33157	3	13
25	0.000	83	83	83	23000	33302	3	13
26	0.000	12	12	12	23653	35624	3	13
27	0.000	14	14	14	23435	37148	3	13
28	0.000	29	29	29	23217	38381	3	13
29	0.000	28	28	28	23145	40413	3	13
30	0.000	16	16	16	22855	41936	3	13
31	0.000	114	114	114	39470	34391	3	13
32	0.000	123	123	123	40485	34101	3	13
33	0.000	105	105	105	42154	33955	3	13
34	0.000	76	76	76	43460	34173	3	13
35	0.000	30	30	30	45564	34536	3	13
36	0.000	26	26	26	38817	36205	3	13
37	0.000	13	13	13	38817	38018	3	13
38	0.000	32	32	32	38599	39905	3	13
39	0.000	34	34	34	37728	41356	3	13
40	0.000	34	34	34	36930	42880	3	13

## Sheet: sdt KD 2
ROI	Area	Mean	Min	Max	X	Y	Ch	Slice
1	0.000	45	45	45	8707	28732	3	22
2	0.000	15	15	15	9686	28351	3	22
3	0.000	23	23	23	10448	28351	3	22
4	0.000	22	22	22	11264	28568	3	22
5	0.000	56	56	56	12189	29058	3	22
6	0.000	26	26	26	13386	30582	3	22
7	0.000	18	18	18	14311	33139	3	22
8	0.000	9	9	9	15617	34608	3	22
9	0.000	12	12	12	16706	36350	3	22
10	0.000	15	15	15	17740	37329	3	22
11	0.000	13	13	13	21059	23834	3	22
12	0.000	37	37	37	22256	23997	3	22
13	0.000	52	52	52	23290	23997	3	22
14	0.000	52	52	52	24814	24324	3	22
15	0.000	47	47	47	26011	24487	3	22
16	0.000	19	19	19	26174	26936	3	22
17	0.000	14	14	14	26174	28623	3	22
18	0.000	2	2	2	26500	29983	3	22
19	0.000	11	11	11	26500	31343	3	22
20	0.000	7	7	7	27643	33085	3	22
21	0.000	9	9	9	11808	22202	3	22
22	0.000	28	28	28	12842	22419	3	22
23	0.000	27	27	27	14039	23399	3	22
24	0.000	13	13	13	15291	23997	3	22
25	0.000	28	28	28	17740	24215	3	22
26	0.000	42	42	42	12352	18556	3	22
27	0.000	11	11	11	12352	17141	3	22
28	0.000	10	10	10	13060	15672	3	22
29	0.000	21	21	21	13822	14039	3	22
30	0.000	4	4	4	14366	12080	3	22
31	0.000	43	43	43	39125	24542	3	22
32	0.000	32	32	32	40485	24596	3	22
33	0.000	50	50	50	41791	24542	3	22
34	0.000	41	41	41	42608	23997	3	22
35	0.000	60	60	60	43478	23508	3	22
36	0.000	17	17	17	42825	21603	3	22
37	0.000	14	14	14	42227	20134	3	22
38	0.000	7	7	7	42118	18773	3	22
39	0.000	15	15	15	41955	17032	3	22
40	0.000	10	10	10	42118	14910	3	22

## Sheet: sdt KD 3
ROI	Area	Mean	Min	Max	X	Y	Ch	Slice
1	0.000	40	40	40	16905	25684	3	8
2	0.000	41	41	41	18139	25394	3	8
3	0.000	38	38	38	19372	25031	3	8
4	0.000	39	39	39	20823	24523	3	8
5	0.000	84	84	84	22419	23798	3	8
6	0.000	50	50	50	15236	24088	3	8
7	0.000	41	41	41	14221	22855	3	8
8	0.000	24	24	24	12770	21476	3	8
9	0.000	42	42	42	11464	19590	3	8
10	0.000	31	31	31	10230	17340	3	8
11	0.000	65	65	65	32069	21331	3	8
12	0.000	55	55	55	33375	20968	3	8
13	0.000	52	52	52	34681	20823	3	8
14	0.000	27	27	27	36060	20388	3	8
15	0.000	29	29	29	37293	19880	3	8
16	0.000	56	56	56	31126	20098	3	8
17	0.000	32	32	32	31126	18284	3	8
18	0.000	18	18	18	30836	16978	3	8
19	0.000	28	28	28	30183	15527	3	8
20	0.000	23	23	23	29239	13858	3	8
21	0.000	36	36	36	13132	34391	3	8
22	0.000	59	59	59	14511	34391	3	8
23	0.000	59	59	59	15962	34246	3	8
24	0.000	48	48	48	17340	34028	3	8
25	0.000	49	49	49	19299	33810	3	8
26	0.000	29	29	29	12334	36422	3	8
27	0.000	77	77	77	13205	39397	3	8
28	0.000	31	31	31	13205	42227	3	8
29	0.000	22	22	22	13205	43895	3	8
30	0.000	37	37	37	13640	46652	3	8
31	0.000	46	46	46	52167	28006	3	8
32	0.000	39	39	39	50208	28006	3	8
33	0.000	22	22	22	48466	28514	3	8
34	0.000	34	34	34	46580	29530	3	8
35	0.000	15	15	15	45346	30400	3	8
36	0.000	53	53	53	44476	32940	3	8
37	0.000	95	95	95	45201	34463	3	8
38	0.000	53	53	53	46145	36785	3	8
39	0.000	21	21	21	47233	38599	3	8
40	0.000	25	25	25	50135	40268	3	8

## Sheet: sdt KD 4
ROI	Area	Mean	Min	Max	X	Y	Ch	Slice
1	0.000	18	18	18	6095	24886	3	13
2	0.000	60	60	60	8126	24741	3	13
3	0.000	21	21	21	9940	25104	3	13
4	0.000	25	25	25	11826	25321	3	13
5	0.000	29	29	29	13858	24814	3	13
6	0.000	13	13	13	15236	22564	3	13
7	0.000	21	21	21	15817	20460	3	13
8	0.000	13	13	13	16252	18284	3	13
9	0.000	11	11	11	17195	16470	3	13
10	0.000	25	25	25	18139	14221	3	13
11	0.000	44	44	44	20315	24741	3	13
12	0.000	26	26	26	22057	25104	3	13
13	0.000	22	22	22	24015	24741	3	13
14	0.000	24	24	24	25321	24741	3	13
15	0.000	28	28	28	26627	24233	3	13
16	0.000	34	34	34	28151	22419	3	13
17	0.000	56	56	56	28514	20243	3	13
18	0.000	48	48	48	28659	19009	3	13
19	0.000	13	13	13	29094	17413	3	13
20	0.000	15	15	15	28586	14729	3	13
21	0.000	36	36	36	34246	24378	3	13
22	0.000	28	28	28	35914	24596	3	13
23	0.000	22	22	22	37220	24886	3	13
24	0.000	21	21	21	38381	24886	3	13
25	0.000	46	46	46	39324	24378	3	13
26	0.000	29	29	29	39252	22274	3	13
27	0.000	48	48	48	39252	20315	3	13
28	0.000	28	28	28	38671	17631	3	13
29	0.000	16	16	16	37801	15672	3	13
30	0.000	19	19	19	37075	13423	3	13
31	0.000	46	46	46	31198	34681	3	13
32	0.000	20	20	20	33012	34028	3	13
33	0.000	37	37	37	34318	33810	3	13
34	0.000	46	46	46	35842	33955	3	13
35	0.000	30	30	30	38164	34391	3	13
36	0.000	46	46	46	30328	36350	3	13
37	0.000	59	59	59	30618	37801	3	13
38	0.000	24	24	24	30691	39252	3	13
39	0.000	33	33	33	30908	41429	3	13
40	0.000	21	21	21	31634	43533	3	13

## Sheet: sdt KD 5
ROI	Area	Mean	Min	Max	X	Y	Ch	Slice
1	0.000	34	34	34	12189	29820	3	17
2	0.000	23	23	23	12987	28659	3	17
3	0.000	29	29	29	14366	27643	3	17
4	0.000	14	14	14	16325	27208	3	17
5	0.000	13	13	13	18211	27788	3	17
6	0.000	9	9	9	11173	32940	3	17
7	0.000	6	6	6	10593	35624	3	17
8	0.000	20	20	20	10665	38962	3	17
9	0.000	5	5	5	10883	41791	3	17
10	0.000	8	8	8	11826	45056	3	17
11	0.000	27	27	27	25902	27788	3	17
12	0.000	16	16	16	26918	26845	3	17
13	0.000	5	5	5	28151	26410	3	17
14	0.000	23	23	23	30545	26192	3	17
15	0.000	14	14	14	32722	27498	3	17
16	0.000	0	0	0	35334	31271	3	17
17	0.000	9	9	9	34899	34246	3	17
18	0.000	7	7	7	34173	36858	3	17
19	0.000	9	9	9	33738	40050	3	17
20	0.000	7	7	7	33375	43170	3	17
21	0.000	21	21	21	6530	24959	3	17
22	0.000	23	23	23	8416	26192	3	17
23	0.000	11	11	11	10230	26482	3	17
24	0.000	29	29	29	12552	26192	3	17
25	0.000	14	14	14	14656	24306	3	17
26	0.000	7	7	7	7038	20460	3	17
27	0.000	10	10	10	8126	17123	3	17
28	0.000	1	1	1	8561	14946	3	17
29	0.000	1	1	1	8779	11464	3	17
30	0.000	11	11	11	9577	7763	3	17
31	0.000	8	8	8	28732	23363	3	17
32	0.000	29	29	29	30110	24378	3	17
33	0.000	16	16	16	31489	23943	3	17
34	0.000	25	25	25	33593	23145	3	17
35	0.000	29	29	29	34608	21549	3	17
36	0.000	1	1	1	27716	19445	3	17
37	0.000	4	4	4	27498	16180	3	17
38	0.000	5	5	5	26918	12334	3	17
39	0.000	15	15	15	28079	9940	3	17
40	0.000	23	23	23	28586	7110	3	17

## Sheet: sdt KD 6
ROI	Area	Mean	Min	Max	X	Y	Ch	Slice
1	0.000	23	23	23	104821	237491	1	73
2	0.000	29	29	29	103610	235415	1	73
3	0.000	18	18	18	102572	233166	1	73
4	0.000	26	26	26	101708	231264	1	73
5	0.000	31	31	31	101362	228496	1	73
6	0.000	5	5	5	104475	227458	1	73
7	0.000	10	10	10	106724	226939	1	73
8	0.000	7	7	7	110702	226766	1	73
9	0.000	11	11	11	113470	225901	1	73
10	0.000	4	4	4	117275	225556	1	73
11	0.000	50	50	50	99978	226593	1	73
12	0.000	29	29	29	99286	225037	1	73
13	0.000	20	20	20	98421	222615	1	73
14	0.000	37	37	37	98421	220193	1	73
15	0.000	25	25	25	98940	218637	1	73
16	0.000	6	6	6	101881	217599	1	73
17	0.000	13	13	13	105686	217945	1	73
18	0.000	3	3	3	108972	217945	1	73
19	0.000	4	4	4	111394	217253	1	73
20	0.000	13	13	13	114507	216388	1	73
21	0.000	60	60	60	97556	216907	1	73
22	0.000	33	33	33	96691	215523	1	73
23	0.000	36	36	36	96345	213966	1	73
24	0.000	46	46	46	96172	212064	1	73
25	0.000	43	43	43	96518	209642	1	73
26	0.000	11	11	11	99113	207566	1	73
27	0.000	12	12	12	101708	207048	1	73
28	0.000	7	7	7	104302	206356	1	73
29	0.000	6	6	6	106724	205664	1	73
30	0.000	8	8	8	110183	205664	1	73
31	0.000	21	21	21	112951	247869	1	73
32	0.000	19	19	19	111567	246658	1	73
33	0.000	23	23	23	110529	244928	1	73
34	0.000	24	24	24	109318	243718	1	73
35	0.000	38	38	38	107935	241642	1	73
36	0.000	9	9	9	116237	247177	1	73
37	0.000	10	10	10	118313	245620	1	73
38	0.000	11	11	11	120043	244064	1	73
39	0.000	7	7	7	122291	242334	1	73
40	0.000	9	9	9	125232	240431	1	73
41	0.000	33	33	33	90983	225901	1	73
42	0.000	51	51	51	90983	223826	1	73
43	0.000	33	33	33	91156	221577	1	73
44	0.000	41	41	41	90983	219156	1	73
45	0.000	34	34	34	89427	217599	1	73
46	0.000	18	18	18	86659	216561	1	73
47	0.000	10	10	10	83891	217426	1	73
48	0.000	32	32	32	81124	218464	1	73
49	0.000	4	4	4	78356	219502	1	73
50	0.000	15	15	15	74551	220885	1	73

## Sheet: Sheet7
ROI	Area	Mean	Min	Max	X	Y	Ch	Slice
1	0.000	29	29	29	154522	104360	1	79
2	0.000	36	36	36	155329	105974	1	79
3	0.000	56	56	56	156251	108165	1	79
4	0.000	45	45	45	158096	109664	1	79
5	0.000	33	33	33	160287	110587	1	79
6	0.000	7	7	7	162594	107819	1	79
7	0.000	12	12	12	164669	105859	1	79
8	0.000	17	17	17	166053	103668	1	79
9	0.000	23	23	23	168014	101016	1	79
10	0.000	18	18	18	169974	98594	1	79
11	0.000	27	27	27	148871	112547	1	79
12	0.000	31	31	31	151524	113008	1	79
13	0.000	42	42	42	153945	113931	1	79
14	0.000	32	32	32	155790	115545	1	79
15	0.000	34	34	34	157405	117621	1	79
16	0.000	0	0	0	138724	123156	1	79
17	0.000	18	18	18	140799	121542	1	79
18	0.000	18	18	18	142990	119351	1	79
19	0.000	12	12	12	144720	116814	1	79
20	0.000	11	11	11	146565	114392	1	79
21	0.000	40	40	40	171588	120158	1	79
22	0.000	64	64	64	173549	122580	1	79
23	0.000	62	62	62	175048	124194	1	79
24	0.000	53	53	53	177239	126039	1	79
25	0.000	60	60	60	179545	126846	1	79
26	0.000	29	29	29	181159	125232	1	79
27	0.000	10	10	10	182313	122234	1	79
28	0.000	22	22	22	182889	119697	1	79
29	0.000	5	5	5	184273	116122	1	79
30	0.000	17	17	17	185080	112893	1	79
31	0.000	51	51	51	189923	129268	1	79
32	0.000	49	49	49	191538	130997	1	79
33	0.000	47	47	47	193383	132035	1	79
34	0.000	44	44	44	196266	132035	1	79
35	0.000	28	28	28	199379	131805	1	79
36	0.000	17	17	17	190846	126039	1	79
37	0.000	26	26	26	191768	123271	1	79
38	0.000	3	3	3	193037	120504	1	79
39	0.000	10	10	10	194305	116929	1	79
40	0.000	9	9	9	195458	113931	1	79
41	0.000	41	41	41	172280	128691	1	79
42	0.000	44	44	44	174241	128691	1	79
43	0.000	26	26	26	176316	130767	1	79
44	0.000	23	23	23	177931	132266	1	79
45	0.000	27	27	27	178738	133534	1	79
46	0.000	6	6	6	177469	135379	1	79
47	0.000	11	11	11	176201	137340	1	79
48	0.000	15	15	15	174702	139531	1	79
49	0.000	7	7	7	172972	142298	1	79
50	0.000	12	12	12	170435	146219	1	79
51	0.000	71	71	71	191422	137570	1	79
52	0.000	59	59	59	193959	137916	1	79
53	0.000	90	90	90	196842	138608	1	79
54	0.000	47	47	47	199379	139185	1	79
55	0.000	44	44	44	201685	140569	1	79
56	0.000	31	31	31	200994	144028	1	79
57	0.000	39	39	39	199610	145873	1	79
58	0.000	17	17	17	198457	147718	1	79
59	0.000	6	6	6	197303	150370	1	79
60	0.000	8	8	8	196035	154176	1	79

## Sheet: crb KD 1
ROI	Area	Mean	Min	Max	X	Y	Ch	Slice
1	0.000	16	16	16	2013	32922	3	11
2	0.000	24	24	24	3211	33194	3	11
3	0.000	18	18	18	4897	33411	3	11
4	0.000	17	17	17	6475	33683	3	11
5	0.000	20	20	20	7727	33792	3	11
6	0.000	18	18	18	8543	35261	3	11
7	0.000	7	7	7	8652	36948	3	11
8	0.000	15	15	15	8543	38526	3	11
9	0.000	12	12	12	8598	40757	3	11
10	0.000	21	21	21	8598	42281	3	11
11	0.000	40	40	40	14148	35316	3	11
12	0.000	28	28	28	15672	35316	3	11
13	0.000	9	9	9	17304	35534	3	11
14	0.000	14	14	14	18501	36132	3	11
15	0.000	15	15	15	19699	36676	3	11
16	0.000	10	10	10	20569	38145	3	11
17	0.000	14	14	14	20406	39560	3	11
18	0.000	22	22	22	20406	40866	3	11
19	0.000	6	6	6	20460	41900	3	11
20	0.000	3	3	3	20732	43641	3	11
21	0.000	51	51	51	27861	36839	3	11
22	0.000	27	27	27	29004	37057	3	11
23	0.000	21	21	21	30473	37112	3	11
24	0.000	17	17	17	31452	36785	3	11
25	0.000	27	27	27	32541	36404	3	11
26	0.000	12	12	12	33738	39016	3	11
27	0.000	24	24	24	34500	40921	3	11
28	0.000	10	10	10	35370	42390	3	11
29	0.000	7	7	7	36839	43641	3	11
30	0.000	34	34	34	38363	45002	3	11
31	0.000	35	35	35	2775	15073	3	11
32	0.000	25	25	25	4571	15400	3	11
33	0.000	19	19	19	6584	16597	3	11
34	0.000	16	16	16	8054	18012	3	11
35	0.000	14	14	14	9523	18665	3	11
36	0.000	12	12	12	9904	17087	3	11
37	0.000	15	15	15	9904	15781	3	11
38	0.000	12	12	12	10013	14203	3	11
39	0.000	23	23	23	10121	12624	3	11
40	0.000	16	16	16	10502	10339	3	11

[truncated: 12 more sheets: crb KD 2, crb KD 3, crb KD 4, crb KD 5, crb KD 6, control 1, control 2, control 3, control 4, control 5, Control6, Control7]
