# Supplementary material for: Crumbs organizes the transport machinery by regulating apical levels of PI(4,5)P2 in Drosophila
Source: eLife. 2019 Nov 7;8:e50900. doi: 10.7554/eLife.50900 (PMC6881148; doi:10.7554/eLife.50900)
Supplement: Figure 2—source data 2. [file elife-50900-fig2-data2.xlsx]

## Sheet: Sheet2
	Control 1					Control 2					Control 3					Control 4					Control 5					Control 6					Control 7					Control 8					Control 9					Control 10
	Cell 1	Cell 2	Cell 3	Cell 4		Cell 1	Cell 2	Cell 3	Cell 4		Cell 1	Cell 2	Cell 3	Cell 4		Cell 1	Cell 2	Cell 3	Cell 4		Cell 1	Cell 2	Cell 3	Cell 4		Cell 1	Cell 2	Cell 3	Cell 4		Cell 1	Cell 2	Cell 3	Cell 4		Cell 1	Cell 2	Cell 3	Cell 4		Cell 1	Cell 2	Cell 3	Cell 4		Cell 1	Cell 2	Cell 3	Cell 4
Apical	113	61	84	32		76	88	82	33		74	60	105	63		78	43	25	72		92	49	94	136		54	55	36	57		113	179	113	105		158	216	125	128		61	79	130	59		222	247	159	123
	130	42	59	36		35	56	38	103		31	104	67	61		78	110	67	94		53	52	61	94		78	94	55	51		84	63	73	88		120	237	232	137		88	37	67	92		243	131	116	68
	81	43	89	24		29	112	59	146		70	60	46	62		55	48	56	92		30	116	21	20		21	46	58	128		52	132	14	66		190	182	247	117		69	30	79	103		189	106	179	57
	70	72	99	18		43	113	48	190		77	73	60	112		64	50	18	183		124	70	36	105		61	61	64	64		55	46	45	54		236	73	212	192		46	111	34	142		219	40	79	62
	66	89	101	27		98	96	29	70		94	60	53	91		36	57	52	128		82	53	104	141		57	34	60	161		49	46	87	82		81	76	85	42		63	48	90	101		241	123	165	114
Average	92	61.4	86.4	27.4		56.2	93	51.2	108.4		69.2	71.4	66.2	77.8		62.2	61.6	43.6	113.8		76.2	68	63.2	99.2		54.2	58	54.6	92.2		70.6	93.2	66.4	79		157	156.8	180.2	123.2		65.4	61	80	99.4		222.8	129.4	139.6	84.8
Laeral	25	25	9	30		6	23	14	39		17	12	31	57		0	16	8	8		0	5	4	4		18	3	10	1		4	8	22	5		8	32	7	26		3	10	13	24		151	42	99	8
	139	65	100	78		18	15	79	16		10	36	27	52		4	28	16	19		6	23	15	0		11	34	43	20		53	101	12	17		26	26	17	21		9	29	19	27		19	20	33	19
	126	163	118	50		4	36	23	60		14	12	31	23		109	80	5	34		38	41	9	30		76	3	52	28		18	55	88	41		19	162	16	14		38	13	55	76		13	26	18	46
	97	123	44	19		20	41	15	11		13	15	13	18		117	63	38	49		11	25	61	21		27	3	1	24		10	37	13	17		51	11	31	26		40	44	17	17		9	161	14	14
	26	17	54	25		13	18	7	8		48	49	13	74		56	25	7	73		74	100	18	116		48	25	13	16		9	6	12	22		25	14	5	12		34	10	4	13		21	8	28	21
Average	82.6	78.6	65	40.4		12.2	26.6	27.6	26.8		20.4	24.8	23	44.8		57.2	42.4	14.8	36.6		25.8	38.8	21.4	34.2		36	13.6	23.8	17.8		18.8	41.4	29.4	20.4		25.8	49	15.2	19.8		24.8	21.2	21.6	31.4		42.6	51.4	38.4	21.6
Ratio Ap/La	1.1138	0.78117	1.32923	0.678218		4.60656	3.49624	1.85507	4.04478		3.39216	2.87903	2.87826	1.73661		1.08741	1.45283	2.94595	3.10929		2.95349	1.75258	2.95327	2.90058		1.50556	4.26471	2.29412	5.17978		3.75532	2.25121	2.2585	3.87255		6.08527	3.2	11.8553	6.22222		2.6371	2.87736	3.7037	3.16561		5.23005	2.51751	3.63542	3.92593
	crb KD 1					crb KD 2					crb KD 3					crb KD 4					crb KD 5					crb KD 6					crb KD 7					crb KD 8					crb KD 9					crb KD 10
	Cell 1	Cell 2	Cell 3	Cell 4		Cell 1	Cell 2	Cell 3	Cell 4		Cell 1	Cell 2	Cell 3	Cell 4		Cell 1	Cell 2	Cell 3	Cell 4		Cell 1	Cell 2	Cell 3	Cell 4		Cell 1	Cell 2	Cell 3	Cell 4		Cell 1	Cell 2	Cell 3	Cell 4		Cell 1	Cell 2	Cell 3	Cell 4		Cell 1	Cell 2	Cell 3	Cell 4		Cell 1	Cell 2	Cell 3	Cell 4
Apical	122	21	19	65		41	38	30	39		17	61	15	52		42	36	32	8		40	56	33	2		179	31	41	30		25	41	58	45		35	51	95	38		19	22	44	14		59	14	75	27
	55	40	48	41		17	23	41	6		17	80	23	93		36	23	43	28		155	46	8	19		77	29	36	20		9	17	4	61		33	20	14	16		59	13	13	64		30	42	14	29
	43	12	14	38		15	22	35	5		13	31	62	83		12	19	3	25		65	52	27	21		46	71	97	93		13	23	15	8		7	47	16	22		14	8	31	12		40	50	22	31
	92	21	38	46		51	11	39	6		13	7	136	42		44	18	47	9		55	74	6	33		40	169	11	31		17	16	22	7		29	20	29	22		2	102	5	9		6	21	0	48
	97	32	54	85		64	19	38	9		12	17	72	33		6	103	54	41		41	43	20	48		84	73	77	68		56	33	34	26		10	79	39	100		27	13	11	22		17	25	20	33
Average	81.8	25.2	34.6	55		37.6	22.6	36.6	13		14.4	39.2	61.6	60.6		28	39.8	35.8	22.2		71.2	54.2	18.8	24.6		85.2	74.6	52.4	48.4		24	26	26.6	29.4		22.8	43.4	38.6	39.6		24.2	31.6	20.8	24.2		30.4	30.4	26.2	33.6
Laeral	11	21	23	19		35	25	6	82		11	32	8	9		18	18	5	1		8	42	77	60		7	10	23	19		11	22	55	23		13	20	20	32		47	39	15	61		155	111	18	5
	1	11	25	21		10	21	27	64		6	14	14	36		88	16	11	14		124	23	1	24		149	62	34	8		27	68	87	21		24	20	12	128		46	13	27	8		19	33	31	18
	33	9	7	14		29	59	38	30		11	19	76	65		11	27	23	11		43	23	29	35		106	103	26	31		10	22	59	155		55	82	55	55		109	120	30	48		14	44	76	17
	72	35	29	55		92	66	61	22		13	6	31	34		13	28	3	19		50	45	17	45		25	83	21	4		51	23	24	74		43	30	31	17		27	37	26	60		20	24	14	3
	17	29	34	43		89	36	12	37		34	60	29	8		12	46	0	2		34	50	3	49		155	73	15	15		53	61	44	18		35	39	12	53		14	44	33	14		65	14	126	36
Average	26.8	21	23.6	30.4		51	41.4	28.8	47		15	26.2	31.6	30.4		28.4	27	8.4	9.4		51.8	36.6	25.4	42.6		88.4	66.2	23.8	15.4		30.4	39.2	53.8	58.2		34	38.2	26	57		48.6	50.6	26.2	38.2		54.6	45.2	53	15.8
Ratio Ap/La	3.05224	1.2	1.4661	1.80921		0.737255	0.545894	1.27083	0.276596		0.96	1.49618	1.94937	1.99342		0.985915	1.47407	4.2619	2.3617		1.37452	1.48087	0.740157	0.577465		0.963801	1.12689	2.20168	3.14286		0.789474	0.663265	0.494424	0.505155		0.670588	1.13613	1.48462	0.694737		0.497942	0.624506	0.793893	0.633508		0.556777	0.672566	0.49434	2.12658

## Sheet: Graph
	Control	crb KD
	1.1138	3.05224
	0.78117	1.2
	1.32923	1.4661
	0.678218	1.80921
	4.60656	0.737255
	3.49624	0.545894
	1.85507	1.27083
	4.04478	0.276596
	3.39216	0.96
	2.87903	1.49618
	2.87826	1.94937
	1.73661	1.99342
	1.08741	0.985915
	1.45283	1.47407
	2.94595	4.2619
	3.10929	2.3617
	2.95349	1.37452
	1.75258	1.48087
	2.95327	0.740157
	2.90058	0.577465
	1.50556	0.963801
	4.26471	1.12689
	2.29412	2.20168
	5.17978	3.14286
	3.75532	0.789474
	2.25121	0.663265
	2.2585	0.494424
	3.87255	0.505155
	6.08527	0.670588
	3.2	1.13613
	11.8553	1.48462
	6.22222	0.694737
	2.6371	0.497942
	2.87736	0.624506
	3.7037	0.793893
	3.16561	0.633508
	5.23005	0.556777
	2.51751	0.672566
	3.63542	0.49434
	3.92593	2.12658
	4.72892
	7.71681
	1.85849
	4.125

## Sheet: crb KD 10
ROI	Area	Mean	Min	Max	X	Y	Ch	Slice
1	0.000	59	59	59	13752	23195	1	43
2	0.000	30	30	30	15310	24203	1	43
3	0.000	40	40	40	18611	25395	1	43
4	0.000	6	6	6	22278	25487	1	43
5	0.000	17	17	17	24753	25028	1	43
6	0.000	155	155	155	26862	22370	1	43
7	0.000	19	19	19	26862	18702	1	43
8	0.000	14	14	14	27137	15494	1	43
9	0.000	20	20	20	27687	11276	1	43
10	0.000	65	65	65	29062	7334	1	43
11	0.000	14	14	14	28512	24937	1	43
12	0.000	42	42	42	30254	26312	1	43
13	0.000	50	50	50	32546	26587	1	43
14	0.000	21	21	21	35388	26679	1	43
15	0.000	25	25	25	38322	25853	1	43
16	0.000	111	111	111	41439	23195	1	43
17	0.000	33	33	33	42356	20536	1	43
18	0.000	44	44	44	43639	17511	1	43
19	0.000	24	24	24	44464	15127	1	43
20	0.000	14	14	14	45289	12010	1	43
21	0.000	75	75	75	24112	43089	1	43
22	0.000	14	14	14	25945	42081	1	43
23	0.000	22	22	22	28145	41897	1	43
24	0.000	0	0	0	31262	41897	1	43
25	0.000	20	20	20	33096	42631	1	43
26	0.000	18	18	18	35755	44831	1	43
27	0.000	31	31	31	36763	48315	1	43
28	0.000	76	76	76	37863	51799	1	43
29	0.000	14	14	14	39514	53632	1	43
30	0.000	126	126	126	41347	56107	1	43
31	0.000	27	27	27	35571	41439	1	43
32	0.000	29	29	29	37680	40064	1	43
33	0.000	31	31	31	40614	39330	1	43
34	0.000	48	48	48	45106	39605	1	43
35	0.000	33	33	33	49048	40797	1	43
36	0.000	5	5	5	51432	44923	1	43
37	0.000	18	18	18	50515	46756	1	43
38	0.000	17	17	17	49048	49140	1	43
39	0.000	3	3	3	47856	51248	1	43
40	0.000	36	36	36	47123	53174	1	43

## Sheet: crb KD 9
ROI	Area	Mean	Min	Max	X	Y	Ch	Slice
1	0.000	19	19	19	3209	14669	1	52
2	0.000	59	59	59	4951	15769	1	52
3	0.000	14	14	14	7609	16594	1	52
4	0.000	2	2	2	9993	17052	1	52
5	0.000	27	27	27	12102	17052	1	52
6	0.000	47	47	47	13660	15494	1	52
7	0.000	46	46	46	13110	13293	1	52
8	0.000	109	109	109	12743	11185	1	52
9	0.000	27	27	27	12652	8801	1	52
10	0.000	14	14	14	12560	6234	1	52
11	0.000	22	22	22	23561	20903	1	52
12	0.000	13	13	13	25762	22278	1	52
13	0.000	8	8	8	28237	23745	1	52
14	0.000	102	102	102	31262	24845	1	52
15	0.000	13	13	13	34471	25853	1	52
16	0.000	39	39	39	36488	23745	1	52
17	0.000	13	13	13	36855	21453	1	52
18	0.000	120	120	120	37038	19436	1	52
19	0.000	37	37	37	36855	16686	1	52
20	0.000	44	44	44	37222	12743	1	52
21	0.000	44	44	44	33829	44097	1	52
22	0.000	13	13	13	36213	42447	1	52
23	0.000	31	31	31	38413	40980	1	52
24	0.000	5	5	5	41806	40430	1	52
25	0.000	11	11	11	44923	40889	1	52
26	0.000	15	15	15	32821	46481	1	52
27	0.000	27	27	27	33463	49598	1	52
28	0.000	30	30	30	33554	52715	1	52
29	0.000	26	26	26	33829	57299	1	52
30	0.000	33	33	33	35113	59958	1	52
31	0.000	14	14	14	47948	40339	1	52
32	0.000	64	64	64	48956	39422	1	52
33	0.000	12	12	12	51523	38780	1	52
34	0.000	9	9	9	54732	38963	1	52
35	0.000	22	22	22	57024	40614	1	52
36	0.000	61	61	61	58216	43822	1	52
37	0.000	8	8	8	59041	46298	1	52
38	0.000	48	48	48	59683	49598	1	52
39	0.000	60	60	60	60508	52807	1	52
40	0.000	14	14	14	60783	54916	1	52

## Sheet: crb KD 8
ROI	Area	Mean	Min	Max	X	Y	Ch	Slice
1	0.000	35	35	35	13018	21911	1	52
2	0.000	33	33	33	16502	24020	1	52
3	0.000	7	7	7	19161	24478	1	52
4	0.000	29	29	29	22278	24203	1	52
5	0.000	10	10	10	24937	23195	1	52
6	0.000	13	13	13	27320	19344	1	52
7	0.000	24	24	24	27962	16961	1	52
8	0.000	55	55	55	28695	14210	1	52
9	0.000	43	43	43	28970	10910	1	52
10	0.000	35	35	35	30437	8068	1	52
11	0.000	51	51	51	29429	22553	1	52
12	0.000	20	20	20	31721	24478	1	52
13	0.000	47	47	47	35113	25395	1	52
14	0.000	20	20	20	40064	24570	1	52
15	0.000	79	79	79	42906	22461	1	52
16	0.000	20	20	20	46298	20261	1	52
17	0.000	20	20	20	46848	17511	1	52
18	0.000	82	82	82	48040	14944	1	52
19	0.000	30	30	30	47398	12560	1	52
20	0.000	39	39	39	46664	11185	1	52
21	0.000	95	95	95	18519	44097	1	52
22	0.000	14	14	14	21361	42722	1	52
23	0.000	16	16	16	24937	40705	1	52
24	0.000	29	29	29	29521	41622	1	52
25	0.000	39	39	39	33371	42722	1	52
26	0.000	20	20	20	35571	46206	1	52
27	0.000	12	12	12	36580	48498	1	52
28	0.000	55	55	55	37130	50332	1	52
29	0.000	31	31	31	37497	52349	1	52
30	0.000	12	12	12	39789	55374	1	52
31	0.000	38	38	38	44739	42447	1	52
32	0.000	16	16	16	47490	41072	1	52
33	0.000	22	22	22	49782	40430	1	52
34	0.000	22	22	22	53174	40430	1	52
35	0.000	100	100	100	56933	41439	1	52
36	0.000	32	32	32	59866	44097	1	52
37	0.000	128	128	128	61425	47490	1	52
38	0.000	55	55	55	62342	50973	1	52
39	0.000	17	17	17	62617	53357	1	52
40	0.000	53	53	53	64358	56016	1	52

## Sheet: crb KD 7
ROI	Area	Mean	Min	Max	X	Y	Ch	Slice
1	0.000	25	25	25	13752	16410	1	44
2	0.000	9	9	9	15310	17877	1	44
3	0.000	13	13	13	17419	19436	1	44
4	0.000	17	17	17	20536	19436	1	44
5	0.000	56	56	56	22736	19894	1	44
6	0.000	11	11	11	25303	18611	1	44
7	0.000	27	27	27	26862	17052	1	44
8	0.000	10	10	10	29521	13752	1	44
9	0.000	51	51	51	30712	11735	1	44
10	0.000	53	53	53	32454	9443	1	44
11	0.000	41	41	41	36121	25853	1	44
12	0.000	17	17	17	37955	27229	1	44
13	0.000	23	23	23	40339	28237	1	44
14	0.000	16	16	16	42906	28695	1	44
15	0.000	33	33	33	44739	29429	1	44
16	0.000	22	22	22	46848	25945	1	44
17	0.000	68	68	68	46848	24020	1	44
18	0.000	22	22	22	46940	21545	1	44
19	0.000	23	23	23	47398	17144	1	44
20	0.000	61	61	61	47490	14760	1	44
21	0.000	58	58	58	17602	42264	1	44
22	0.000	4	4	4	19528	41530	1	44
23	0.000	15	15	15	22186	41806	1	44
24	0.000	22	22	22	24753	42081	1	44
25	0.000	34	34	34	27137	43272	1	44
26	0.000	55	55	55	29062	45289	1	44
27	0.000	87	87	87	30621	48865	1	44
28	0.000	59	59	59	33371	52349	1	44
29	0.000	24	24	24	35021	56107	1	44
30	0.000	44	44	44	36121	59041	1	44
31	0.000	45	45	45	36763	42356	1	44
32	0.000	61	61	61	38413	41164	1	44
33	0.000	8	8	8	39697	40155	1	44
34	0.000	7	7	7	41714	38963	1	44
35	0.000	26	26	26	44281	38872	1	44
36	0.000	23	23	23	46023	41989	1	44
37	0.000	21	21	21	46206	44739	1	44
38	0.000	155	155	155	46206	47581	1	44
39	0.000	74	74	74	46481	49415	1	44
40	0.000	18	18	18	46940	54182	1	44

## Sheet: crb KD 6
ROI	Area	Mean	Min	Max	X	Y	Ch	Slice
1	0.000	179	179	179	21278	22236	1	46
2	0.000	77	77	77	24249	23386	1	46
3	0.000	46	46	46	27316	24057	1	46
4	0.000	40	40	40	30000	24537	1	46
5	0.000	84	84	84	32779	24824	1	46
6	0.000	7	7	7	21278	19457	1	46
7	0.000	149	149	149	22428	16390	1	46
8	0.000	106	106	106	23674	14089	1	46
9	0.000	25	25	25	24824	11693	1	46
10	0.000	155	155	155	24632	8722	1	46
11	0.000	31	31	31	45910	27699	1	46
12	0.000	29	29	29	49361	28562	1	46
13	0.000	71	71	71	53770	29712	1	46
14	0.000	169	169	169	57124	30191	1	46
15	0.000	73	73	73	60095	30671	1	46
16	0.000	10	10	10	45239	24920	1	46
17	0.000	62	62	62	46389	22236	1	46
18	0.000	103	103	103	46581	18882	1	46
19	0.000	83	83	83	45910	16677	1	46
20	0.000	73	73	73	44856	13514	1	46
21	0.000	41	41	41	5847	45623	1	46
22	0.000	36	36	36	8530	44568	1	46
23	0.000	97	97	97	11502	43227	1	46
24	0.000	11	11	11	15048	42747	1	46
25	0.000	77	77	77	19073	43035	1	46
26	0.000	23	23	23	22045	46198	1	46
27	0.000	34	34	34	23099	49073	1	46
28	0.000	26	26	26	24537	51086	1	46
29	0.000	21	21	21	25112	53195	1	46
30	0.000	15	15	15	26741	56070	1	46
31	0.000	30	30	30	34600	40735	1	46
32	0.000	20	20	20	36134	40159	1	46
33	0.000	93	93	93	37763	39968	1	46
34	0.000	31	31	31	39297	39680	1	46
35	0.000	68	68	68	40926	39776	1	46
36	0.000	19	19	19	42076	41981	1	46
37	0.000	8	8	8	42939	44377	1	46
38	0.000	31	31	31	43897	46485	1	46
39	0.000	4	4	4	44473	49169	1	46
40	0.000	15	15	15	45719	52236	1	46

## Sheet: crb KD 5
ROI	Area	Mean	Min	Max	X	Y	Ch	Slice
1	0.000	40	40	40	12460	25687	1	53
2	0.000	155	155	155	17540	26837	1	53
3	0.000	65	65	65	23099	26837	1	53
4	0.000	55	55	55	27987	26070	1	53
5	0.000	41	41	41	32396	24728	1	53
6	0.000	8	8	8	35655	21565	1	53
7	0.000	124	124	124	36805	17061	1	53
8	0.000	43	43	43	37380	14185	1	53
9	0.000	50	50	50	37380	11502	1	53
10	0.000	34	34	34	36421	7668	1	53
11	0.000	56	56	56	37284	24920	1	53
12	0.000	46	46	46	43418	25591	1	53
13	0.000	52	52	52	47923	25783	1	53
14	0.000	74	74	74	50798	25112	1	53
15	0.000	43	43	43	53865	23866	1	53
16	0.000	42	42	42	55591	19648	1	53
17	0.000	23	23	23	55303	16677	1	53
18	0.000	23	23	23	54920	13131	1	53
19	0.000	45	45	45	54728	9680	1	53
20	0.000	50	50	50	53865	6326	1	53
21	0.000	33	33	33	15719	37476	1	53
22	0.000	8	8	8	19361	36805	1	53
23	0.000	27	27	27	22332	36613	1	53
24	0.000	6	6	6	25112	36613	1	53
25	0.000	20	20	20	27604	37188	1	53
26	0.000	77	77	77	28275	40447	1	53
27	0.000	1	1	1	27987	44473	1	53
28	0.000	29	29	29	27795	48211	1	53
29	0.000	17	17	17	28850	51565	1	53
30	0.000	3	3	3	29425	54057	1	53
31	0.000	2	2	2	31725	36421	1	53
32	0.000	19	19	19	36326	35559	1	53
33	0.000	21	21	21	38913	34792	1	53
34	0.000	33	33	33	43131	34696	1	53
35	0.000	48	48	48	46294	35655	1	53
36	0.000	60	60	60	46677	39968	1	53
37	0.000	24	24	24	45719	44089	1	53
38	0.000	35	35	35	45143	47540	1	53
39	0.000	45	45	45	44473	50607	1	53
40	0.000	49	49	49	43706	53865	1	53

## Sheet: crb KD 4
ROI	Area	Mean	Min	Max	X	Y	Ch	Slice
1	0.000	42	42	42	2204	21757	1	51
2	0.000	36	36	36	7188	23386	1	51
3	0.000	12	12	12	12556	24345	1	51
4	0.000	44	44	44	17444	24537	1	51
5	0.000	6	6	6	22428	23003	1	51
6	0.000	18	18	18	24920	18594	1	51
7	0.000	88	88	88	25016	15335	1	51
8	0.000	11	11	11	24824	13131	1	51
9	0.000	13	13	13	25016	9105	1	51
10	0.000	12	12	12	25016	5463	1	51
11	0.000	36	36	36	27029	21757	1	51
12	0.000	23	23	23	32013	23195	1	51
13	0.000	19	19	19	38051	23291	1	51
14	0.000	18	18	18	43227	23386	1	51
15	0.000	103	103	103	47156	22620	1	51
16	0.000	18	18	18	49361	19073	1	51
17	0.000	16	16	16	49361	15335	1	51
18	0.000	27	27	27	49648	11885	1	51
19	0.000	28	28	28	50127	8626	1	51
20	0.000	46	46	46	50511	4217	1	51
21	0.000	32	32	32	7764	40830	1	51
22	0.000	43	43	43	11597	40255	1	51
23	0.000	3	3	3	16198	39105	1	51
24	0.000	47	47	47	19361	39297	1	51
25	0.000	54	54	54	22715	39297	1	51
26	0.000	5	5	5	8147	43322	1	51
27	0.000	11	11	11	9968	47252	1	51
28	0.000	23	23	23	12364	51086	1	51
29	0.000	3	3	3	14377	54057	1	51
30	0.000	0	0	0	16102	56933	1	51
31	0.000	8	8	8	27220	37667	1	51
32	0.000	28	28	28	30958	36613	1	51
33	0.000	25	25	25	35367	36613	1	51
34	0.000	9	9	9	39201	37955	1	51
35	0.000	41	41	41	42172	38722	1	51
36	0.000	1	1	1	44952	41693	1	51
37	0.000	14	14	14	44760	44856	1	51
38	0.000	11	11	11	45143	48402	1	51
39	0.000	19	19	19	46006	51853	1	51
40	0.000	2	2	2	47252	56837	1	51

## Sheet: crb KD 3
ROI	Area	Mean	Min	Max	X	Y	Ch	Slice
1	0.000	17	17	17	14901	34862	1	34
2	0.000	17	17	17	17080	34652	1	34
3	0.000	13	13	13	18907	34652	1	34
4	0.000	13	13	13	21227	35003	1	34
5	0.000	12	12	12	24179	36479	1	34
6	0.000	11	11	11	12300	37182	1	34
7	0.000	6	6	6	10894	38377	1	34
8	0.000	11	11	11	9418	39782	1	34
9	0.000	13	13	13	8083	41610	1	34
10	0.000	34	34	34	6396	43859	1	34
11	0.000	61	61	61	27482	37674	1	34
12	0.000	80	80	80	29380	37252	1	34
13	0.000	31	31	31	31278	36760	1	34
14	0.000	7	7	7	35284	36830	1	34
15	0.000	17	17	17	37393	38096	1	34
16	0.000	32	32	32	25092	39993	1	34
17	0.000	14	14	14	24038	41610	1	34
18	0.000	19	19	19	23195	43437	1	34
19	0.000	6	6	6	22351	44984	1	34
20	0.000	60	60	60	21648	46038	1	34
21	0.000	15	15	15	18275	15252	1	34
22	0.000	23	23	23	20735	16517	1	34
23	0.000	62	62	62	23124	16728	1	34
24	0.000	136	136	136	25866	17712	1	34
25	0.000	72	72	72	27271	17712	1	34
26	0.000	8	8	8	28466	15533	1	34
27	0.000	14	14	14	28466	14198	1	34
28	0.000	76	76	76	29239	12371	1	34
29	0.000	31	31	31	30223	10543	1	34
30	0.000	29	29	29	30786	9137	1	34
31	0.000	52	52	52	29521	18415	1	34
32	0.000	93	93	93	31067	19680	1	34
33	0.000	83	83	83	32613	20594	1	34
34	0.000	42	42	42	34441	21156	1	34
35	0.000	33	33	33	36971	20102	1	34
36	0.000	9	9	9	39290	17572	1	34
37	0.000	36	36	36	40696	16096	1	34
38	0.000	65	65	65	41540	14901	1	34
39	0.000	34	34	34	42664	12652	1	34
40	0.000	8	8	8	43578	10824	1	34

[truncated: 13 more sheets: crb KD 2, crb KD 1, Control 11, Control 10, Control 9, Control 8, Control 7, Control 6, Control 5, Control 4, Control 3, Control 2, Control 1]
