# Supplementary material for: Crumbs organizes the transport machinery by regulating apical levels of PI(4,5)P2 in Drosophila
Source: eLife. 2019 Nov 7;8:e50900. doi: 10.7554/eLife.50900 (PMC6881148; doi:10.7554/eLife.50900)
Supplement: Figure 2—source data 3. [file elife-50900-fig2-data3.xlsx]

## Sheet: Sheet1
# of microvilli/mm
Control										crbRNAi
	Cell1					average					Cell1					average
Adjacent to the membrane	9	9	8	9	9	8.8				Adjacent to the membrane	3	5	1	3	2	2.8
1 mm above	10	9	8	8	9	8.8				1 mm above	2	5	3	2	4	3.2
Control										crbRNAi
	Cell2					average					Cell2					average
Adjacent to the membrane	6	8	7	8	6	7				Adjacent to the membrane	6	8	6	5	4	5.8
1 mm above	8	10	8	7	5	7.6				1 mm above	1	1	1	0	2	1
Control										crbRNAi
	Cell3					average					Cell3					average
Adjacent to the membrane	7	9	9	10	11	9.2				Adjacent to the membrane	5	5	4	4	6	4.8
1 mm above	9	9	8	8	9	8.6				1 mm above	3	3	3	3	1	2.6
Control										crbRNAi
	Cell4					average					Cell4					average
Adjacent to the membrane	10	11	9	10	9	9.8				Adjacent to the membrane	6	7	7	6	5	6.2
1 mm above	8	11	10	9	10	9.6				1 mm above	6	7	7	5	5	6
Control										crbRNAi
	Cell5					average					Cell5					average
Adjacent to the membrane	9	9	8	8	8	8.4				Adjacent to the membrane	1	2	3	3	2	2.2
1 mm above	10	6	8	8	8	8				1 mm above	4	2	4	0	3	2.6
Control										crbRNAi
	Cell6					average					Cell6					average
Adjacent to the membrane	6	6	7	7	6	6.4				Adjacent to the membrane	4	3	6	7	3	4.6
1 mm above	6	7	7	6	6	6.4				1 mm above	2	2	4	2	2	2.4
Control										crbRNAi
	Cell7					average					Cell7					average
Adjacent to the membrane	7	8	8	7	7	7.4				Adjacent to the membrane	5	4	2	3	3	3.4
1 mm above	5	6	7	8	5	6.2				1 mm above	4	5	4	1	1	3
Control										crbRNAi
	Cell8					average					Cell8					average
Adjacent to the membrane	7	8	7	7	6	7				Adjacent to the membrane	4	3	3	3	3	3.2
1 mm above	7	6	7	7	7	6.8				1 mm above	4	1	3	1	1	2

## Sheet: Sheet2
Control (adjacent to apical membrane)	Control (1 μm above apical membrane)	crbRNAi (adjacent to apical membrane)	crbRNAi (1 μm above apical membrane)
8.8	8.8	2.8	3.2
7	7.6	5.8	1
9.2	8.6	4.8	2.6
9.8	9.6	6.2	6
8.4	8	2.2	2.6
6.4	6.4	4.6	2.4
7.4	6.2	3.4	3
7	6.8	3.2	2
8	7.75	4.125	2.85
110	113.548	35	41.2903
87.5	98.0645	72.5	12.9032
115	110.968	60	33.5484
122.5	123.871	77.5	77.4194
105	103.226	27.5	33.5484
80	82.5806	57.5	30.9677
92.5	80	42.5	38.7097
87.5	87.7419	40	25.8065
