# Supplementary material for: Crumbs organizes the transport machinery by regulating apical levels of PI(4,5)P2 in Drosophila
Source: eLife. 2019 Nov 7;8:e50900. doi: 10.7554/eLife.50900 (PMC6881148; doi:10.7554/eLife.50900)
Supplement: Figure 3—figure supplement 1—source data 1. [file elife-50900-fig3-figsupp1-data1.xlsx]

## Sheet: Image43
X0	Y0	Y1	Y2	Y3	Y4	Y5	Y6	Y7	Y8	Y9	Y10	Y11	Y12	Y13	Y14	Y15	Y16	Y17	Y18	Y19	Y20	Y21	Y22	Y23	Y24	Y25		Ap-basal	Avg intensity
0	24.686	27.355	23.7242	23.169	17.944	22.1559	23.945	23.1605	24.0997	24.6711	19.7844	20.3998	19.5289	30.5592	31.6271	23.9134	13.3141	10.7728	9.2873	7.435	18.5005	22.6564	17.4498	49.3636	88.4205	51.9771		0	25.7654
0.1191	31.8474	31.5508	24.4345	21.34	19.551	31.6689	29.717	27.4472	26.0667	25.3575	26.5134	26.0322	21.1178	30.1382	37.9148	24.4065	12.1974	9.5516	9.751	11.0829	22.2213	27.9127	21.1747	53.0688	80.2828	53.854		0.0053173	28.3154
0.2383	24.7503	28.8325	25.2572	22.855	19.728	33.5759	36.834	27.4862	24.9848	26.2863	32.5838	29.033	29.2255	31.124	40.4794	28.5645	13.8212	12.8541	8.6231	13.304	24.0796	30.2042	21.4237	54.0658	81.3083	53.1068		0.0106391	29.7843
0.3574	22.7167	27.251	27.7203	20.994	24.404	42.2856	45.517	29.6912	25.6779	27.8338	35.0882	31.7054	27.7064	29.331	32.4306	27.6086	17.6272	14.9988	11.1076	13.2225	25.0422	30.6691	23.2134	65.7988	75.5946	52.369		0.0159564	31.0617
0.4766	25.0696	31.6239	30.2068	30.34	28.804	53.6066	48.494	26.0447	27.814	30.4429	36.3233	37.9681	33.1677	31.3423	32.6523	24.9839	22.192	13.3293	7.639	19.0172	36.7045	42.3275	29.3018	66.963	79.0232	46.1084		0.0212781	34.2881
0.5957	32.2126	29.5253	34.016	32.503	32.615	57.9135	49.771	33.1318	25.882	30.2796	36.1079	39.3796	35.574	33.4086	33.274	27.6262	21.8742	18.8784	9.4753	17.5879	33.2463	40.4181	35.6332	61.8175	70.9276	47.6822		0.0265954	35.4139
0.7148	34.5785	29.2865	32.952	43.822	34.934	71.0542	60.353	36.5784	30.455	31.4019	37.1995	38.6649	34.8969	31.6103	32.6137	27.9725	21.2917	25.7178	8.8052	17.2498	33.3237	44.5643	30.0337	65.7461	66.3151	44.3588		0.0319127	37.1454
0.834	30.9973	27.4977	41.1858	51.264	43.968	70.9737	77.148	46.8402	37.484	36.5453	38.4583	35.3639	36.9001	30.5212	36.1897	36.4291	30.3535	25.8237	9.1857	24.4715	32.265	46.5369	24.0982	63.0414	66.9922	43.6718		0.0372345	40.1618
0.9531	36.8899	28.1115	42.4442	55.301	50.906	69.4192	70.303	53.0664	36.062	35.1706	35.4546	39.3251	47.7399	34.8304	36.1035	40.0851	27.3815	28.6747	14.1684	32.2403	34.8409	43.8209	28.5379	60.3358	66.3845	50.3554		0.0425518	42.2289
1.0723	44.4101	33.8264	45.5402	53.508	47.966	67.2467	86.442	75.1387	40.3439	40.1687	45.4246	32.5951	37.9082	33.6749	39.703	36.9373	26.0537	26.3389	18.959	29.7886	33.6239	39.1873	35.427	73.0319	58.3867	47.4113		0.0478735	44.1939
1.1914	42.7687	35.9672	43.9161	54.451	55.639	61.2608	87.93	82.7702	46.0733	37.9851	54.3022	40.4459	44.9263	39.0586	35.0641	41.508	29.9048	26.3569	20.0623	28.6798	34.4465	42.123	33.2727	70.0946	60.2894	52.5739		0.0531908	46.2258
1.3106	48.6148	35.2968	36.925	57.581	61.074	67.1862	77.269	83.4469	47.7292	41.4641	49.8365	42.6043	52.7169	38.8158	34.2038	47.2373	28.0177	31.9618	22.8872	30.4633	40.1961	45.1182	37.5969	71.8954	67.1822	51.3853		0.0585126	48.0271
1.4297	41.9317	38.5204	32.6483	65.023	64.555	58.1807	74.02	84.3903	38.8709	56.7558	59.4227	49.011	53.8817	33.6926	43.3622	52.2128	26.8035	37.1298	28.6027	27.8362	52.6533	51.2014	34.7304	65.8245	63.8101	52.64		0.0638299	49.5273
1.5488	44.0507	43.7571	35.0001	61.165	67.524	64.4675	75.496	79.6516	44.8266	56.4214	74.7539	54.0476	56.8203	35.7162	41.8647	52.6888	25.3957	32.5946	33.3039	33.261	40.6946	56.0146	40.0036	72.9179	73.4334	47.6024		0.0691472	51.672
1.668	45.5299	40.2062	44.0361	59.138	62.751	65.7446	72.671	78.1172	48.1019	58.3067	72.5395	55.5489	56.7589	35.9965	43.4271	58.3686	31.4532	30.5472	42.9186	26.8784	46.1789	51.5133	47.9629	77.2361	67.7191	45.857		0.0744689	52.5195
1.7871	48.8346	49.9878	38.3143	50.975	65.33	61.5861	60.951	88.754	41.6487	60.932	70.0157	61.8211	67.9377	30.0208	44.1917	61.7994	34.3058	28.998	47.2125	33.9242	47.0433	54.8314	39.1743	68.8475	59.363	49.0691		0.0797862	52.5334
1.9063	49.7657	44.7412	45.3145	53.683	69.19	55.1453	57.027	75.5482	46.7128	72.8219	74.896	71.688	66.3498	33.0183	47.9329	59.8468	34.1191	30.9843	38.5571	36.6171	41.3719	50.8406	36.7347	62.0243	71.5689	47.953		0.085108	52.8636
2.0254	44.3984	48.3938	49.763	59.402	67.687	50.694	67.375	93.5132	47.9222	74.6998	77.9788	76.5776	73.7009	40.7518	47.9108	61.5188	37.7276	33.8471	46.066	44.292	45.5213	49.9692	40.5739	68.1381	78.3983	46.6163		0.0904253	56.6707
2.1445	43.6228	45.5466	51.8205	68.092	75.42	59.9259	70.743	84.9598	50.0156	72.916	76.4581	72.7615	76.9858	42.7955	38.7864	60.425	46.5445	40.8857	49.2465	42.1462	47.7828	55.3605	41.2301	74.2698	67.8176	46.4152		0.0957426	57.8067
2.2637	44.3979	46.5937	56.7754	68.056	82.821	59.9434	75.577	89.2849	54.8885	73.1309	75.2155	73.1334	69.7006	36.8048	41.5927	53.77	58.1175	41.6502	43.8511	52.6432	54.5874	57.0681	37.7474	69.8328	72.8373	38.6247		0.101064	58.7941
2.3828	39.8164	40.3663	56.908	75.446	80.943	68.0599	80.081	89.1519	60.7223	69.0928	76.7054	73.3242	68.6557	33.0142	50.057	62.8468	56.6059	42.1958	53.6703	51.0782	54.6703	66.7588	45.0867	78.8638	78.6114	40.9096		0.106382	61.2939
2.502	41.7951	41.5371	58.9476	77.12	87.742	77.3968	75.259	83.6847	59.2486	68.0196	74.7095	70.1075	75.7239	33.45	50.8818	62.6768	57.6984	45.6612	51.7971	63.1335	55.5911	61.7187	41.8986	77.5814	82.5514	36.3792		0.111703	62.0119
2.6211	48.2572	39.5999	60.8848	93.2	93.284	86.2175	80.565	92.0041	63.4829	61.1375	64.7559	65.8256	67.9451	35.0491	43.6311	59.6215	59.5495	50.6957	50.4181	62.2566	57.3084	52.965	35.7217	82.405	69.4315	41.0921		0.117021	62.204
2.7402	41.6613	39.4958	58.9303	92.433	96.835	89.3697	88.919	99.3277	56.3608	56.287	69.6137	61.2482	71.933	35.6465	46.3261	62.0851	71.159	55.8349	41.7165	57.9952	53.0294	57.5246	36.5813	82.1599	81.26	36.8939		0.122338	63.101
2.8594	36.3222	41.483	53.6714	101.216	98.067	92.156	92.788	86.9673	52.8875	51.8611	65.0611	55.0181	69.9736	35.7806	45.0495	62.3051	76.3419	59.2787	47.4446	65.9988	64.1781	60.0576	43.302	87.4625	78.6354	29.5225		0.12766	63.5704
2.9785	42.7332	32.9011	51.1468	88.098	114.789	99.4804	106.035	92.1726	52.1897	50.2353	62.2618	56.6593	65.1006	43.604	47.8852	67.4945	83.8064	59.4395	58.189	66.3581	63.2283	60.2271	47.8923	75.969	73.1821	26.7207		0.132977	64.9153
3.0977	36.784	34.1718	54.362	86.25	101.472	92.0931	102.754	92.4915	56.6097	51.7434	64.535	53.8597	65.8009	42.0894	42.3977	57.1742	81.6478	63.6517	59.125	62.726	56.5311	54.4673	54.2228	96.1641	64.9291	26.8421		0.138299	63.6498
3.2168	39.2321	27.315	54.9173	79.183	98.397	95.0168	92.839	99.576	60.8779	42.7125	54.3838	58.01	62.644	33.2095	41.3196	56.6427	74.8224	60.1719	48.8662	61.5647	55.529	60.9479	46.4827	89.0905	74.5031	28.8236		0.143616	61.4261
3.336	34.1244	30.7269	41.344	80.231	95.895	95.6688	97.607	95.2601	64.1507	47.4162	49.8979	55.9103	58.1559	35.3408	39.1221	56.4089	75.2693	60.8625	56.4558	59.1641	58.9994	59.8854	52.967	87.7158	77.5703	27.4517		0.148938	61.2924
3.4551	35.6476	32.9535	46.2472	87.973	97.484	92.6801	95.568	91.7477	57.4105	43.864	47.4922	54.4399	53.903	34.1416	44.1354	52.9735	78.5167	60.6866	58.8022	50.5998	53.7789	60.1849	47.1261	91.8965	77.1991	32.2459		0.154255	60.7576
3.5742	33.9264	31.0873	40.9448	89.133	95.442	92.1463	101.362	85.0985	53.5477	40.6705	48.1459	50.6113	58.728	35.5223	38.6299	53.3926	72.4782	59.5172	62.8332	48.5404	56.0188	57.2573	54.5594	96.8642	84.3995	26.2416		0.159572	60.273
3.6934	36.2714	28.0369	36.5331	89.331	88.75	87.0945	91.975	79.1897	56.6051	31.4954	44.6796	55.5479	46.5485	36.9647	37.431	50.5082	68.48	50.9169	63.0252	55.6758	56.6812	64.6157	52.277	76.7831	81.1805	35.0303		0.164894	57.7549
3.8125	31.875	21.9746	30.433	94.639	88.37	87.0846	78.634	85.2954	57.2029	35.5999	40.8609	63.9609	46.0136	35.1194	37.4567	57.5611	76.0096	54.6788	67.6695	56.1119	61.2792	67.4565	58.7255	79.2953	75.6929	35.8693		0.170212	58.6488
3.9317	26.2232	20.5874	33.1785	92.085	88.004	83.7824	76.092	91.8729	52.8751	25.8578	39.5708	56.2853	50.0622	36.4713	37.6547	53.8946	71.3633	54.7312	77.2606	61.9575	63.7737	64.3784	49.5759	94.7806	78.0299	29.7488		0.175533	58.0807
4.0508	21.1093	22.7063	27.5066	76.61	90.34	80.514	67.214	84.4192	51.6381	24.8878	35.0152	54.2666	48.2407	30.0396	42.8897	56.7149	76.4736	60.3897	73.2514	67.7991	61.1708	65.2477	53.6229	92.2958	84.0369	30.3412		0.180851	56.8747
4.1699	22.7517	20.3519	26.2894	77.656	81.864	79.4691	64.125	73.2569	46.4068	21.0699	31.7069	48.5766	42.3126	29.4439	40.2922	46.4176	70.3227	62.8273	72.9325	60.6681	70.9369	69.8655	54.2915	93.1777	87.8893	27.4389		0.186168	54.7054
4.2891	25.2417	19.4835	23.0436	76.22	83.351	81.5536	65.413	71.3837	47.3711	24.6127	34.1289	47.7042	43.1056	26.9025	38.1127	44.2542	64.0901	57.2428	68.3749	69.5344	71.9741	78.9654	51.2071	89.0715	85.3595	28.9565		0.19149	54.4869
4.4082	20.9364	19.6997	26.2869	68.088	86.766	85.042	68.504	69.4797	36.094	26.717	37.3203	49.9206	42.496	26.0568	31.4184	50.0295	62.9758	50.5157	61.9055	71.7909	83.3695	77.6469	48.3586	88.7719	78.2573	31.3603		0.196807	53.8388
4.5274	19.5342	14.5509	24.1488	76.134	83.964	77.8766	63.073	65.5543	44.2226	23.9762	27.4995	49.2216	43.3046	29.297	23.9264	40.717	60.7479	46.3451	58.9182	70.742	89.111	76.9961	51.1637	90.2742	73.586	34.7359		0.202129	52.2931
4.6465	16.6619	14.9171	19.3925	62.052	88.783	70.7539	60.441	58.3374	42.6656	19.702	30.1446	49.629	42.6004	26.0679	26.4644	32.2855	67.9846	47.8891	68.1018	79.3708	87.9873	76.4261	52.5258	86.7591	76.1457	31.1642		0.207446	51.3559
4.7657	14.03	11.822	20.9781	67.238	90.303	73.6747	58.161	58.4183	42.226	23.2562	27.8533	56.772	42.2084	25.2239	24.9205	34.5812	62.9937	47.3827	69.6819	80.124	90.4491	72.6533	59.1497	74.6383	75.4553	36.521		0.212768	51.566
4.8848	8.6774	9.8509	23.5526	65.41	89.626	74.278	64.327	52.1066	38.2411	23.8663	37.9728	47.3898	38.5652	18.671	28.9214	35.5303	66.53	45.5653	67.0423	75.1831	83.2786	72.4567	55.602	77.8696	70.3783	36.3607		0.218085	50.279
5.0039	8.3062	10.7019	25.3879	64.395	80.751	66.5446	54.447	44.8158	37.2805	25.8717	27.6407	42.7243	37.4377	21.8887	26.1223	34.2257	68.9398	39.5112	70.165	74.1371	92.1788	69.8998	44.7378	80.8515	79.2983	38.0712		0.223402	48.7051
5.1231	6.9919	11.0308	26.8582	62.591	85.015	66.7832	52.99	45.187	28.8679	24.838	29.6993	51.0534	34.9711	20.9771	29.2663	30.9318	61.5773	41.9938	79.109	68.6552	89.251	71.3231	43.6022	73.4727	72.4553	36.2829		0.228724	47.9144
5.2422	4.3393	11.9572	24.4623	59.718	86.565	59.0399	59.876	43.8267	30.0328	29.496	29.9361	44.913	31.485	19.6277	23.2366	22.8767	62.4237	40.8784	68.5417	79.4424	83.2432	64.6109	40.9922	74.0372	73.0852	36.1254		0.234041	46.3373
5.3614	4.4966	10.3457	22.0141	58.507	97.821	61.7585	56.825	45.3615	29.3994	32.4318	25.2106	45.1581	29.9218	23.2182	24.6711	23.9757	65.1368	37.3896	58.35	77.8548	73.4303	67.1363	36.2218	81.1599	75.7915	43.4558		0.239363	46.4247
5.4805	5.2348	10.382	21.0007	54.05	90.179	56.7083	55.703	49.6909	30.5494	29.2508	24.704	46.2294	32.7977	22.3498	20.2325	21.7544	70.4795	37.2988	58.4342	74.243	78.6957	62.2459	45.3964	73.1619	75.7886	40.5716		0.24468	45.6589
5.5996	3.3296	8.8019	16.8855	59.662	103.107	53.7901	49.631	41.7284	25.0558	27.1785	22.1179	42.0395	32.0971	17.2276	20.6392	22.6709	65.6878	40.9321	55.6668	67.3303	79.8576	61.7271	44.2165	71.9117	64.3775	39.8943		0.249998	43.7524
5.7188	5.4387	15.5281	16.9198	43.304	98.083	65.9836	47.864	33.849	25.0369	23.9025	22.1444	36.0104	29.4002	19.7979	16.7685	20.1186	59.5653	42.3526	54.1495	69.2271	80.435	68.8651	32.344	68.7034	58.3333	38.6941		0.25532	42.0315
5.8379	3.8757	11.2553	19.888	40.274	94.581	53.725	38.953	32.5502	19.732	19.5777	20.2629	32.5126	30.5896	11.798	20.4462	19.6104	62.527	30.9595	39.3339	80.2847	81.159	61.2207	32.3393	72.979	60.7738	39.4679		0.260637	39.6414
5.9571	4.3635	10.3948	23.185	44.6	87.976	55.4193	34.819	29.6603	19.1672	14.983	19.5052	34.2233	26.1038	14.0044	13.7404	23.2528	68.8965	33.9597	32.1355	76.9614	80.8494	62.9728	32.3532	62.8969	68.3979	38.0595		0.265959	38.957
6.0762	6.4331	11.4078	24.6607	36.993	79.013	53.6095	33.663	34.1936	20.7427	19.9466	15.0995	26.4236	29.6574	13.6435	10.8799	19.035	70.3991	32.5188	33.0897	78.6357	76.4853	65.9605	25.6494	71.6716	58.1732	43.3626		0.271276	38.1288
6.1953	5.7347	7.839	25.5868	37.337	74.178	54.8542	37.363	32.7961	18.2158	17.7918	17.7556	27.6276	26.7362	10.1993	7.9587	17.6806	58.0942	35.3674	34.0563	84.0509	79.465	66.1528	23.804	63.6803	53.4533	36.6227		0.276593	36.7077
6.3145	4.8457	9.5701	25.7914	43.295	75.51	51.033	30.446	33.2016	20.023	12.0927	13.1277	21.9282	33.1308	8.8023	6.9204	15.3283	59.1295	31.5673	23.859	79.2071	88.8756	62.18	26.9138	74.1276	49.7932	35.2403		0.281915	35.9977
6.4336	5.7876	7.0293	32.245	41.279	68.26	49.6065	26.825	31.8424	15.0333	10.5885	13.9794	23.027	22.7102	10.6045	5.4592	12.4361	56.0013	27.5679	20.051	79.4391	78.4822	61.0744	22.1308	68.3124	56.2469	39.2682		0.287232	34.0495
6.5528	5.0177	10.1882	24.9614	36.289	61.305	46.6415	25.523	30.261	15.0015	10.6906	10.4318	18.1293	19.8038	9.6999	8.3354	12.9765	45.1363	31.248	20.4879	77.3578	78.6166	60.5962	20.4778	65.3132	51.6547	35.847		0.292554	31.9997
6.6719	4.3651	11.557	28.0254	38.747	48.588	41.3885	28.485	28.6921	14.2721	9.5721	8.8192	15.9343	22.3973	7.1056	7.9397	14.2972	48.2929	29.7732	19.8891	77.1062	74.1124	58.2738	26.0013	55.4234	50.8686	32.3772		0.297871	30.8578
6.7911	5.3643	11.048	24.7253	39.908	46.913	48.5161	21.522	26.7348	19.8829	11.2079	6.0009	17.8281	21.0673	10.2651	6.4205	14.4598	50.8814	29.2812	20.7631	65.8313	79.4085	58.6024	22.771	56.785	48.5474	31.6379		0.303193	30.6297
6.9102	6.1687	9.0747	24.0908	38.799	47.979	45.8566	21.248	28.8168	24.5005	7.3111	7.3181	14.3145	25.1267	7.3683	3.7916	12.4908	40.6564	28.6882	16.9465	64.3527	71.4726	55.8254	17.1719	55.9107	50.9329	33.4561		0.30851	29.218
7.0293	10.7544	7.9038	25.0021	33.449	41.302	42.2404	21.096	23.4645	28.5846	8.8828	7.5138	20.4369	25.9839	5.5094	5.0418	13.6134	32.8661	22.7926	11.8485	57.2972	76.2285	46.3303	20.6187	51.4542	42.593	27.9458		0.313828	27.3367
7.1485	8.551	8.3833	25.8462	34.819	46.373	44.9033	18.337	21.3888	29.3791	11.3984	5.9068	21.0241	22.2858	7.4331	8.5399	11.5067	31.0155	26.0135	12.0748	49.8607	83.0298	41.4851	19.9181	58.3573	40.6185	26.5245		0.319149	27.499
7.2676	10.5787	7.7327	27.0398	30.763	43.548	51.137	16.967	23.0399	25.8624	11.9921	10.8248	19.2966	30.0927	7.2716	8.4059	9.6288	35.6603	21.3829	12.2699	46.1872	85.6801	40.4559	17.2903	48.5603	42.2881	16.2908		0.324467	26.9326
7.3868	8.6518	5.2561	25.613	36.502	45.263	45.6525	12.648	26.4342	27.2272	9.1892	11.6746	17.0577	25.2722	11.839	8.1512	14.5907	27.6904	18.0934	12.1048	48.422	91.8779	30.8863	12.9334	43.6623	41.2766	15.0809		0.329788	25.8866
7.5059	6.3792	4.7199	22.9916	35.003	45.606	39.2167	15.47	20.6688	26.6633	8.0056	12.0016	21.2599	23.2152	9.9389	6.7876	12.6259	27.5807	16.9392	11.9269	53.9724	90.2505	29.6197	15.9307	48.39	40.8078	15.2117		0.335106	25.4301
7.625	11.1425	6.4457	17.6426	32.203	37.113	33.7067	14.433	15.2248	24.2485	7.8267	16.2658	20.1824	28.4638	9.4149	7.864	12.7832	27.8752	10.4995	11.4412	52.1784	81.9278	33.721	19.0805	51.1045	44.619	18.9298		0.340423	24.8591
7.7442	7.253	3.3938	13.8832	32.838	33.625	28.7049	14.762	13.6755	22.5184	12.6031	18.2439	28.52	20.9688	9.8544	9.6244	13.7663	29.1787	12.6314	11.2184	45.7251	78.4131	30.4165	17.42	43.9765	34.6434	20.9102		0.345745	23.4142
7.8633	6.9471	4.1208	15.3226	29.045	29.845	23.8203	16.491	15.1276	23.839	10.683	20.8212	33.3692	20.5784	10.6673	10.1638	14.3734	31.203	13.4049	12.8493	45.6636	76.6291	29.6949	13.2227	35.2498	36.6366	15.6447		0.351062	22.9005
7.9825	6.4555	5.6375	13.6612	38.487	25.519	17.0667	14.89	17.0025	20.1618	10.6485	21.1774	27.79	21.6882	9.3707	8.4938	14.6447	25.4348	11.4366	7.0707	43.4726	71.5913	33.6578	13.0334	45.5174	36.5673	12.0653		0.356384	22.0208
8.1016	4.2907	5.3796	13.5369	35.535	24.456	17.525	14.019	13.1873	13.688	10.3287	19.7324	26.238	18.5801	12.6699	9.172	16.5883	29.0328	14.9985	8.2237	45.1173	55.2949	31.0833	14.0359	39.9841	40.6377	15.5321		0.361701	21.1103
8.2207	3.1711	5.2405	17.3269	34.627	16.147	17.0326	17.155	15.9282	16.1018	11.9871	21.0741	25.7021	17.1326	13.7751	10.4369	17.7943	33.0418	13.5392	7.4614	49.5708	54.201	24.0503	16.0013	37.9667	43.879	11.4356		0.367018	21.2223
8.3399	3.3194	5.3718	13.7791	34.065	13.827	11.7256	19.375	15.3167	22.6645	12.0433	21.27	22.64	17.5355	10.7544	7.0972	18.1868	23.9828	13.153	8.6955	43.3886	41.241	22.1152	11.5473	46.2033	40.7974	12.4901		0.37234	19.7148
8.459	1.8795	5.4693	13.5205	31.575	8.837	8.9242	16.801	13.8548	22.926	12.4315	23.0712	26.8393	14.4496	10.5304	13.5819	19.8452	21.2361	15.0982	9.6362	32.578	40.7676	27.7771	12.2849	39.3321	36.0807	21.3225		0.377658	19.2558
8.5782	2.3542	6.6659	14.8466	37.285	7.463	7.5609	21.555	17.1093	18.4956	10.3036	24.1263	20.1367	11.1357	11.7633	11.1885	18.7299	26.9421	19.4876	8.0476	33.477	34.4754	23.4886	15.4183	38.269	28.2016	15.2341		0.382979	18.6062
8.6973	1.8	3.163	15.8334	28.308	6.363	6.5568	21.435	19.1395	20.2789	7.7342	26.1422	20.3351	11.7534	13.4208	12.2018	17.4508	25.8914	19.8139	10.3672	19.5914	29.0121	21.416	12.4183	33.1001	23.2062	18.3113		0.388297	17.1171
8.8165	2.1693	4.097	17.4108	26.932	8.792	4.4566	18.102	18.8454	19.0327	8.3733	24.1748	25.9212	7.63	9.3598	14.9687	16.6347	23.048	21.1942	8.5902	23.3603	27.9766	18.4674	14.344	27.6932	22.6853	23.3465		0.393618	16.831
8.9356	2.4222	4.8539	13.6868	28.034	7.414	2.9447	16.932	17.8392	17.8967	9.4637	19.005	20.7987	7.6622	9.5037	14.2441	19.8904	18.713	25.4853	10.2416	14.933	27.4776	19.3346	16.4725	31.3867	18.9021	21.3182		0.398936	16.0329
9.0547	1.9374	6.9885	13.1285	28.99	6.117	3.1916	16.08	15.7202	20.3773	9.356	21.9568	14.8359	8.3781	9.4375	12.0567	21.4311	18.4389	31.253	9.8312	20.0019	28.2456	16.9172	13.0618	30.3583	19.1428	25.7244		0.404253	16.2676
9.1739	2.1935	8.4054	14.4835	24.184	5.131	2.7977	14.057	12.0681	18.2988	7.5512	26.1558	17.7666	6.9979	7.1519	13.3524	17.8796	18.2938	33.5825	9.4173	17.7853	26.9113	17.149	11.3668	32.3761	17.4295	29.297		0.409575	15.8493
9.293	2.239	7.2688	14.149	22.982	6.555	2.9315	12.538	15.6942	16.1855	5.4857	21.063	13.7233	10.1025	9.7804	14.4037	21.4986	14.3837	33.4836	9.8628	13.54	25.0601	12.7173	10.4764	33.7874	27.7177	29.2477		0.414892	15.6491
9.4122	1.2025	3.8751	10.3189	20.698	6.853	3.1707	7.411	17.3965	14.1619	10.0493	10.199	15.9414	9.3345	11.6045	11.295	17.5274	14.3868	37.7954	7.7651	19.7577	31.3001	15.5743	10.2283	25.8319	29.7053	25.5458		0.420214	14.9588
9.5313	1.7539	6.6907	10.2711	18.769	5.843	5.7261	10.23	18.4609	14.808	9.9949	12.032	11.686	9.0098	9.8984	16.0401	13.0336	15.9644	29.4627	9.2753	17.0141	32.4476	12.0712	8.9982	18.8068	19.9111	25.1428		0.425531	13.9747
9.6504	1.8099	6.3959	10.526	16.25	4.311	3.5114	8.14	24.1261	14.7162	8.7176	12.8754	8.2458	6.697	11.109	13.8117	12.5885	6.9951	24.9449	12.9585	18.5102	26.9997	7.9242	10.0294	26.5361	18.0739	16.7365		0.430848	12.8285
9.7696	1.2887	7.7795	11.889	15.809	4.127	4.0313	7.188	32.0797	18.0516	10.3719	9.3325	6.2023	8.2471	7.006	16.4972	12.1792	6.1977	33.382	9.722	16.3872	27.3142	8.5065	13.0364	24.3052	20.9044	11.2917		0.43617	13.1972
9.8887	0.971	6.9548	14.4298	15.096	2.385	2.3527	8.103	30.0637	15.3447	9.0643	7.5489	5.4245	9.6736	11.0394	11.7952	12.4893	5.8346	30.443	11.3885	16.162	28.4524	9.2044	12.3587	19.0332	17.8732	9.4101		0.441487	12.4191
10.0079	1.5297	7.1925	9.8238	18.28	3.754	3.9727	9.071	31.1641	14.0629	6.9763	8.4928	6.4353	7.558	11.6688	11.0826	13.1846	6.4584	22.1049	8.8553	16.7959	25.5587	9.9861	7.363	20.6046	17.7521	13.3896		0.446809	12.043
10.127	2.0038	6.3708	10.2269	15.041	3.873	4.6842	9.986	28.2521	18.6933	6.6304	5.4418	6.19	11.1287	7.9597	11.9082	12.0752	7.4524	17.7005	7.1576	15.7489	24.0979	10.0286	9.4787	17.5341	21.9498	9.5827		0.452126	11.5845
10.2462	1.6726	5.0897	11.3423	13.255	2.951	3.479	8.987	26.5908	21.2089	8.4059	4.6586	5.5261	9.2321	7.2854	13.0274	13.6809	4.258	16.4827	11.5352	20.4767	20.9027	12.5377	10.1219	14.6079	14.849	6.4909		0.457448	11.1021
10.3653	1.3144	4.6255	10.2173	15.961	2.102	2.6349	6.802	31.5861	21.7319	12.3961	3.8591	5.3126	8.7119	7.596	9.7037	10.8706	5.0048	12.7831	15.099	13.9041	27.247	10.0567	11.4006	14.6419	14.995	8.4518		0.462766	11.1157
10.4844	1.4221	4.7041	12.7178	12.082	4.286	1.8459	8.955	16.8953	19.4946	7.3169	4.8683	5.6293	7.122	7.2575	8.7217	13.4715	5.3828	9.1844	15.7449	14.4833	23.4605	12.6866	9.994	13.4693	11.5172	8.453		0.468083	10.0448
10.6036	1.7332	5.3151	9.8428	9.392	3.927	2.9526	11.05	15.7877	13.8579	8.1368	2.2115	6.0665	4.7443	7.8467	9.0244	15.3738	3.9097	7.9216	16.6589	11.6703	20.3015	11.4497	10.6318	14.3818	12.9351	6.2121		0.473405	9.35903
10.7227	1.0136	3.391	8.1687	9.712	3.405	1.9136	8.744	15.4272	18.1208	9.1886	4.8158	4.3901	4.2562	8.7986	8.7439	11.601	2.4423	9.393	17.1234	12.1546	20.1792	8.6542	10.7461	13.3619	13.3243	4.376		0.478722	8.97866
10.8419	0.8329	3.6448	12.6345	9.144	3.649	1.8474	7.302	21.2615	16.8314	6.2863	5.2321	3.0779	5.9789	10.4435	10.6659	13.2565	5.3545	5.0081	19.3972	14.3272	20.0669	11.0229	10.9117	11.8198	13.1051	4.693		0.484044	9.53058
10.961	1.1488	4.2572	12.8288	8.685	2.318	4.5253	7.438	18.3499	18.8845	7.3882	2.4434	4.3386	5.153	6.3623	10.5012	13.3567	3.7327	4.411	21.9729	15.5332	17.3473	8.3837	10.7729	8.4313	13.7899	4.0112		0.489361	9.09096
11.0801	0.9955	4.2815	10.8787	7.397	2.511	3.7145	5.605	17.0726	20.3455	8.3027	3.5849	5.2558	6.0166	8.4985	9.4367	13.2513	3.2414	5.2382	22.3979	13.4287	15.5792	9.3066	11.0118	12.119	16.1285	4.9558		0.494678	9.25211
11.1993	0.1423	4.4556	10.9214	7.178	2.107	2.2095	3.585	19.9127	17.5272	11.026	2.7125	3.6309	4.4015	8.776	8.8304	11.8425	2.3664	5.3127	17.0922	11.7379	12.6061	8.4695	9.8996	12.3626	12.2996	5.3308		0.5	8.336
11.3184	1.1975	4.2786	12.5547	5.811	3.981	2.2269	3.392	14.7139	19.6101	8.4405	3.5597	2.4843	5.5574	7.6892	11.4573	12.7297	3.0737	6.7323	14.1912	11.6859	11.3907	9.8856	8.7962	13.3929	8.5841	5.0496		0.505317	8.17177
11.4376	1.252	5.2909	8.9335	8.285	2.029	1.8461	3.989	17.2637	18.7701	6.7762	2.3366	4.3878	4.6378	7.2696	9.3513	12.6669	3.4278	4.1698	11.7018	10.6394	8.9303	8.4434	11.628	13.0389	11.3539	6.7916		0.510639	7.89271
11.5567	0.7525	3.7537	7.8939	8.096	1.329	3.4455	3.737	17.1146	18.3467	8.5334	2.1855	2.5358	3.4793	9.9252	8.0682	9.4472	2.8228	8.3478	12.2925	9.9344	7.9282	7.0211	9.3888	12.3009	9.7487	6.0295		0.515956	7.47916
11.6758	0.9193	4.6459	12.0687	5.917	2.908	2.6018	5.868	12.803	17.6819	10.193	3.4909	2.6939	4.5809	11.0885	6.5992	10.4289	3.2757	4.1347	6.3029	9.6752	9.1392	9.3279	9.3517	12.262	9.5726	6.6057		0.521274	7.46679
11.795	1.325	1.6048	10.0044	3.095	2.575	2.6106	6.405	11.9006	19.7147	5.9962	1.5492	3.4242	4.8097	5.9829	6.2815	11.101	2.7521	3.3384	6.1335	8.626	8.0533	11.557	10.4775	8.3689	9.6712	7.021		0.526595	6.70687
11.9141	1.8513	1.4701	8.9077	5.934	2.099	3.849	3.597	13.8277	18.2055	7.3887	2.0518	1.1124	3.3284	5.8507	7.0281	9.78	2.3263	4.5298	6.3843	7.8373	9.7078	9.002	13.1465	10.8666	9.6367	4.1741		0.531913	6.68818
12.0333	0.6296	1.5124	10.1215	7.362	0.963	2.0291	3.775	14.0976	18.5152	9.4777	2.1016	2.3718	2.4976	7.2235	7.2783	13.437	3.0541	3.0419	6.0948	5.8314	11.3442	9.0997	14.4553	7.9132	6.4919	3.6128		0.537234	6.70508
12.1524	0.58	2.82	11.1343	6.739	1.713	2.2176	2.794	13.1143	14.0606	5.9269	2.9755	0.8204	3.1953	7.7932	5.9222	10.8111	1.8744	4.5132	5.5913	7.0996	7.6982	8.052	18.8345	10.3413	8.0058	3.4401		0.542552	6.46415
12.2716	0.6264	3.6487	12.7077	6.91	2.213	5.1128	3.919	13.1426	14.8788	5.3419	2.1332	1.4755	2.0261	6.5858	8.1866	7.4295	3.0948	3.0692	6.4574	9.2146	10.6606	11.1936	14.3571	6.903	6.871	2.9556		0.547874	6.58133
12.3907	0.3765	3.5004	10.581	8.3	2.297	2.6842	4.376	15.8323	15.6206	4.0835	2.5504	1.3368	2.3091	7.8969	6.7124	7.0838	2.1048	2.7995	4.9541	7.0112	11.368	10.6849	16.9524	7.9258	3.7717	2.9693		0.553191	6.38779
12.5098	0.0004	3.2478	9.0914	7.958	2.486	1.957	2.019	13.6365	17.2439	7.6732	1.663	1.1799	2.7582	8.1085	8.6336	6.7364	2.2253	2.4636	6.0715	7.9885	10.0834	7.8738	16.7208	9.413	5.4213	2.6994		0.558508	6.35975
12.629	0.0743	2.5468	11.17	5.402	2.711	1.836	2.274	12.592	16.1468	7.0743	2.7399	0.6961	2.2205	8.2024	7.7251	6.4881	2.3269	2.4675	5.8008	8.2428	10.424	9.2414	14.8777	6.8501	4.7757	3.8631		0.56383	6.10651
12.7481	1.406	2.3514	12.2853	7.822	2.978	2.6608	2.382	14.9163	15.166	5.5511	2.9504	0.3557	1.0335	9.1382	7.0279	6.0743	3.625	2.7051	7.1756	9.3205	12.8407	9.1189	11.8661	7.8956	3.8358	4.2634		0.569147	6.41329
12.8673	1.4042	1.834	11.3597	6.392	3.482	2.8238	4.932	11.5572	18.6292	9.6644	3.1839	1.1414	2.1831	7.941	8.3275	10.2146	1.6487	1.8679	6.7045	7.4573	14.4569	8.8392	10.6854	7.7329	2.6795	2.8171		0.574469	6.5369
12.9864	0.3689	3.611	11.4998	5.826	2.645	2.9807	3.985	8.9338	18.3783	7.7548	1.4373	0.9895	1.5295	4.9374	8.2968	9.0716	0.6465	2.799	7.2126	6.7078	15.4531	8.4026	11.715	8.6644	5.1053	2.7495		0.579786	6.21928
13.1055	1.1977	6.8698	8.923	3.741	1.308	2.9158	5.591	12.7782	13.6451	7.9646	1.7538	0.8623	0.3047	6.3166	7.1355	5.8947	1.0957	3.6643	4.0532	7.0458	12.1692	7.4044	13.0628	9.2987	6.007	1.8342		0.585104	5.87835
13.2247	1.063	6.0589	7.8069	3.87	2.754	0.8542	3.203	13.6956	15.0618	6.2387	2.1964	0.4781	1.9035	8.4788	7.0982	6.2972	3.1983	1.8366	4.9953	7.784	10.6515	7.4657	13.1095	11.5466	4.6479	3.0939		0.590425	5.97645
13.3438	0.463	3.6369	7.6263	5.101	1.752	0.6591	2.658	11.601	18.3546	6.3317	1.5039	1.0085	1.4027	5.1978	9.3317	7.3832	2.1932	1.3088	4.2155	8.9624	11.6356	8.5156	12.6352	8.2825	5.9479	2.8524		0.595743	5.79079
13.463	0.8633	1.7081	7.0836	5.168	2.035	1.7786	4.177	14.3591	16.8932	6.7629	0.737	2.3167	2.2497	6.1411	8.244	8.682	2.0963	1.1566	4.1499	8.2741	12.747	7.371	16.2832	7.1449	5.5391	4.3345		0.601064	6.0883
13.5821	1.9699	3.0592	7.9456	4.594	3.075	2.3842	5.384	11.5877	13.3067	6.6092	1.4455	0.8069	2.0186	8.1521	7.3493	6.3625	2.8254	2.2558	5.723	9.3827	12.2395	6.0753	15.9614	8.1171	4.5559	3.7431		0.606382	6.03575
13.7012	0.3641	3.3675	10.5085	6.026	3.243	2.9674	3.994	10.57	19.1668	6.8942	1.805	1.4617	3.1906	6.3079	9.3085	9.6613	1.7135	1.4521	2.8594	11.2986	9.205	7.2554	14.7065	6.4028	2.7135	1.6712		0.611699	6.08133
13.8204	0.0665	4.5846	9.683	4.631	2.127	1.9478	4.073	15.2023	19.5938	6.784	1.6766	0.612	2.7092	8.0406	10.4487	7.7804	1.7789	1.744	3.3295	8.7556	9.4322	4.7023	12.9039	6.9055	4.7774	1.9621		0.617021	6.00969
13.9395	0.4196	5.8244	7.8898	5.026	3.164	1.5647	4.738	20.2892	18.4023	4.3577	0.7528	1.1888	2.385	8.857	7.9762	9.1526	0.9335	2.1632	4.4501	11.1776	9.6579	7.7046	11.2954	9.5703	3.3985	1.6405		0.622338	6.30691
14.0587	1.1054	4.9955	6.8239	6.537	2.918	1.4817	4.753	18.6747	15.3222	3.4353	0.9739	0.3629	2.7711	8.0943	7.6606	8.9529	1.6466	2.5881	4.2317	10.3501	9.1149	6.5821	7.8432	6.1395	4.5995	3.1176		0.62766	5.8106
14.1778	1.7188	4.9723	7.8732	7.238	1.956	3.8345	4.729	16.9646	18.2057	5.729	0.6831	1.1793	0.7994	6.0618	9.1265	7.9268	3.0708	2.6537	4.2404	9.8122	8.5921	5.7696	9.8597	6.4721	2.3636	1.959		0.632977	5.91505
14.297	1.721	4.0035	6.7791	5.156	2.792	1.907	5.728	15.7184	19.074	5.3948	0.6286	2.177	4.1752	9.4457	8.3831	7.6003	2.0636	2.1432	5.4132	6.382	10.5081	5.466	8.4787	6.5065	2.2694	3.3037		0.638299	5.893
14.4161	1.4577	4.7946	8.6223	8.337	1.982	2.7773	5.594	14.1227	15.8604	5.5983	0.7957	1.4381	3.4423	4.9099	11.6347	9.7892	0.9916	2.4666	4.1171	6.8846	10.4725	7.5244	6.6623	6.2649	2.5746	1.8545		0.643616	5.80651
14.5352	0.3511	5.123	8.4128	9.17	0.856	1.3042	6.211	16.604	18.486	6.1451	1.398	0.5246	0.0936	5.6311	10.0805	13.3927	1.2466	2.6218	6.0533	10.1749	11.3199	6.482	9.4602	4.2182	1.2274	2.0964		0.648933	6.10325
14.6544	0.9045	3.6872	9.5304	10.342	2.946	2.2108	4.133	12.3328	17.0429	4.285	0.9045	0.8134	0.4372	7.7402	7.7661	12.7384	1.9204	1.5341	3.2632	9.883	14.3459	7.8389	9.7474	4.0414	0.3816	2.0156		0.654255	5.87638
14.7735	1.6808	3.9863	8.3128	9.252	3.806	2.3941	7.682	14.397	14.1425	7.1289	1.9886	1.4249	1.1517	7.8743	6.8032	12.2993	0.611	2.6132	3.5524	9.3926	14.9065	10.6415	9.0174	5.644	1.6452	1.1348		0.659572	6.28781
14.8927	1.086	4.2589	7.9707	12.86	3.136	3.3097	6.091	13.774	14.7722	9.9208	2.1815	0.6879	2.8782	10.6999	10.7915	13.1975	0.6648	1.7293	4.2152	11.1967	14.8935	10.6289	7.5648	6.6552	1.6537	1.6261		0.664894	6.86323
15.0118	0.0004	5.7834	8.899	16.204	3.137	3.2425	6.154	16.6554	14.0255	6.3704	1.1099	1.6525	1.5035	7.1991	11.6071	9.0903	1.9315	0.9267	4.5407	7.8056	11.3275	8.4178	7.4997	3.2735	1.461	1.2823		0.670212	6.19617
15.1309	0.1914	4.4056	6.9472	16.518	3.7	2.8011	5.126	14.804	15.3978	8.856	2.1184	1.1368	1.7668	4.9017	11.3475	6.2711	1.2417	1.8864	1.6533	7.029	6.8725	9.6972	4.9775	4.2197	0.8451	1.654		0.675529	5.62945
15.2501	0.9558	6.7102	8.9722	14.141	2.657	2.7104	7.841	15.7397	14.6843	4.5155	1.2079	0.572	1.9918	7.1578	6.9295	7.0727	0.5874	2.5351	3.3012	10.7167	8.4764	11.4404	8.9075	4.6697	0.893	0.5054		0.680851	5.99583
15.3692	0.8148	4.4	5.5957	12.73	5.48	1.9386	5.503	17.17	16.8592	6.7232	1.0747	1.4225	4.1995	4.5474	4.9133	6.1977	0.4413	0.7202	3.919	11.4914	7.3343	10.6157	9.7865	2.8043	1.4842	1.6565		0.686168	5.76242
15.4884	2.2165	2.8103	6.2552	11.258	2.824	3.0611	6.528	18.2797	15.2975	8.8824	0.9678	1.0691	1.3556	8.2922	7.4163	9.1956	0.3584	0.8511	4.2473	8.1986	8.4836	11.5202	7.9062	4.414	2.0865	1.895		0.69149	5.98732
15.6075	0.9805	4.5487	8.4305	12.772	2.008	2.1193	10.918	13.3528	11.4814	9.864	0.5555	1.259	1.9235	6.9443	8.7715	8.164	0.7372	1.3326	5.0872	8.0988	7.7855	12.5981	8.9742	4.0557	1.3105	1.8862		0.696807	5.99842
15.7266	1.1328	3.8776	13.2014	12.528	1.919	1.9915	5.997	15.1066	10.7902	7.0801	1.0457	1.146	1.8917	5.5014	5.1357	6.0778	1.0778	2.1353	3.622	7.1098	6.7596	8.8176	7.5519	5.0857	2.1347	1.5673		0.702124	5.39555
15.8458	1.8577	4.1063	7.1414	16.226	2.251	2.6393	9.659	14.4293	10.5659	7.5218	0.4051	0.5779	2.4127	6.8143	5.9975	6.575	1.0756	1.6724	5.2965	9.4322	8.6078	11.1941	8.3549	3.0306	0.845	2.0764		0.707446	5.79868
15.9649	2.0638	4.3967	6.0583	15.639	2.698	2.5706	10.417	15.3391	12.7174	7.0936	1.4808	0.6865	2.3636	8.6006	6.3787	6.5401	1.022	0.8277	3.4999	9.948	9.1094	11.0265	11.6779	1.593	1.68	0.7726		0.712763	6.00772
16.0841	1.9016	3.7165	8.3887	12.644	4.584	1.5329	12.498	15.4323	13.4616	8.4911	2.6916	1.1334	3.406	10.7729	6.015	9.1925	1.6495	0.9898	5.9789	10.7808	7.2206	9.5667	9.6728	4.2994	1.0744	2.3455		0.718085	6.51694
16.2032	1.8844	2.6604	6.5892	11.167	3.494	2.5938	11.414	16.241	14.8388	7.4832	3.535	1.6836	3.7247	8.1126	8.3219	7.8159	0.7466	2.6367	4.9594	6.1787	5.9498	11.3966	7.2832	4.0256	1.2083	1.5543		0.723402	6.05764
16.3224	2.1536	2.2328	9.4432	15.566	2.478	3.4723	10.27	11.8621	13.1207	6.2797	2.7229	4.0468	4.573	4.2964	6.3083	7.5234	0.726	1.4918	5.5223	4.0565	9.4594	7.5128	7.9589	2.8799	1.3479	1.1722		0.728724	5.71065
16.4415	1.865	5.8413	8.2896	12.068	2.105	5.0934	10.765	13.5064	7.5287	4.9961	2.2395	2.7804	3.7992	4.3411	8.0093	8.2712	0.6236	1.3431	4.3728	7.5929	4.9551	12.3082	8.34	3.0124	0.2529	0.888		0.734041	5.58416
16.5606	1.4294	2.4096	9.5776	13.178	2.9	5.6077	14.59	11.9068	11.9755	6.8661	3.1313	0.8608	3.3089	5.6998	6.7887	10.1818	0.8382	1.0745	4.1372	6.5253	6.0885	9.7035	12.696	2.8452	0.7759	0.8353		0.739359	5.99737
16.6798	2.3952	4.0306	8.303	12.736	2.317	4.175	9.646	12.3407	9.5042	6.0033	4.3654	1.6648	4.4219	4.3973	5.2667	8.0242	0.8239	1.2895	5.1303	6.264	5.8528	5.815	9.5609	4.4874	1.4644	1.0597		0.74468	5.43612
16.7989	2.6289	5.4853	8.1675	12.75	4.317	5.095	11.568	13.4472	11.46	6.8343	3.4042	1.6811	5.0683	4.9413	7.9431	6.8831	1.3859	1.3936	4.9942	6.6178	4.8866	8.7012	9.139	2.4267	1.2258	2.1243		0.749998	5.94498
16.9181	3.5519	7.9453	7.5612	12.783	2.966	5.3628	10.437	15.4716	12.1562	7.4845	4.6011	2.0067	5.1965	5.9605	7.9286	9.5579	1.642	0.0614	3.5095	6.1241	4.9812	9.1456	8.2418	2.452	0.3938	1.6597		0.75532	6.12238
17.0372	1.9186	7.2046	9.3991	15.714	3.371	5.7227	8	14.7045	8.3325	7.472	2.1089	1.196	5.8255	5.0137	8.2743	8.5497	1.1002	0.903	6.0692	7.6528	6.8541	9.6235	6.8129	3.3023	1.0158	0.1892		0.760637	6.0127
17.1563	1.9029	3.8063	5.8027	15.499	5.278	4.9871	12.099	10.9462	8.5921	5.0553	3.787	0.3265	4.0555	5.4395	4.9771	6.2171	0.4678	1.414	7.8855	5.1609	5.6016	12.6358	7.5092	3.5791	1.9917	1.0647		0.765954	5.61852
17.2755	2.1217	4.6287	7.5866	11.514	6.291	4.5589	7.687	12.9232	8.6468	4.5641	3.1467	0.9862	5.404	6.0265	6.8627	6.1327	1.3186	1.0716	7.0177	9.5323	6.2482	10.3995	5.5457	2.7406	1.0189	1.5632		0.771276	5.59758
17.3946	2.3071	4.1301	5.3048	12.916	6.233	7.4884	9.978	10.9312	5.5193	6.4379	5.623	1.246	6.065	5.3513	7.0775	5.5628	0.1302	0.8028	8.7395	9.4716	6.9188	11.0233	7.9339	1.5398	0.756	0.4789		0.776593	5.76793
17.5138	2.4248	3.535	9.0944	11.83	4.415	7.1298	9.275	12.7693	5.7674	5.9851	4.7092	0.8942	4.8928	7.1523	6.304	5.1176	0.5836	1.6285	6.1011	8.6716	6.7522	6.5137	8.4785	1.0478	1.2075	0.9404		0.781915	5.50849
17.6329	4.2442	3.0581	4.9619	13.495	4.965	8.8172	9.684	12.5493	4.223	6.5837	6.0002	0.906	4.0621	6.4961	5.3705	5.0838	0.3374	0.8775	7.402	7.2012	11.3822	6.8077	7.8377	1.7895	0.9572	1.0425		0.787232	5.62058
17.7521	3.4047	4.0194	7.3278	15.358	5.163	7.4604	6.692	10.4552	6.5023	4.9768	4.7193	1.4863	5.2185	6.6033	6.0304	4.1855	0.8579	2.154	6.723	7.2593	10.46	8.6697	8.3013	2.4176	1.6709	0.923		0.792554	5.73229
17.8712	3.1062	3.8686	4.3142	11.059	6.487	6.9728	8.313	9.5898	8.245	4.6577	5.8132	2.2782	5.1358	4.2803	5.3191	6.226	1.027	2.7592	8.5272	6.6807	10.4149	5.915	8.2597	2.5037	2.5671	0.3501		0.797871	5.56425
17.9903	3.8037	4.3161	4.6844	14.515	5.438	11.3247	13.13	7.8037	8.2761	5.918	6.4047	3.0101	8.4576	4.1537	4.3949	7.4892	0.9616	1.5993	5.4054	6.6637	11.0146	7.1203	8.7877	2.3831	1.3003	0.9411		0.803189	6.12681
18.1095	3.3075	2.8842	5.9731	14.045	8.227	12.4864	8.477	9.4603	6.024	3.5557	5.3863	3.5205	7.0615	4.6028	5.4341	4.5912	1.4512	0.9879	9.3028	5.19	7.8865	8.9956	5.7013	2.1569	0.4269	1.1095		0.80851	5.70174
18.2286	3.3025	3.7073	7.0315	10.808	9.049	13.1343	10.281	7.8787	7.7122	2.7018	4.4603	4.436	7.0664	3.4753	5.2471	6.4363	2.0566	1.0245	6.0277	5.0171	10.8814	7.0252	7.991	2.8207	0.5223	0.6005		0.813828	5.79595
18.3478	5.8718	3.0899	5.5337	10.917	8.423	20.0448	11.678	6.8622	3.6885	4.1284	4.937	3.8252	5.7625	3.403	6.8462	9.0981	0.5598	0.9726	5.101	6.3576	12.0016	10.9099	9.9378	3.2067	1.5429	1.6156		0.819149	6.39672
18.4669	5.6238	2.6867	7.4322	11.192	8.294	15.9988	10.448	8.4142	2.1278	7.2834	5.8948	5.9286	6.1478	8.2114	4.0775	6.0552	1.5639	1.8213	6.2545	6.1034	10.9125	9.8502	6.4287	1.5557	1.0018	0.464		0.824467	6.22201
18.586	2.7658	3.4435	4.3002	9.822	11.373	12.2015	14.735	7.7195	3.4596	5.3075	7.2946	4.2236	5.775	6.8073	3.9696	4.5671	2.1291	1.9195	4.7242	5.5057	11.9864	8.5033	6.3556	1.3956	1.4586	0.5187		0.829784	5.85621
18.7052	4.1663	2.0619	5.2565	9.494	8.007	12.9423	9.393	8.5486	4.602	2.9263	4.1385	3.0758	5.9852	5.7429	5.1799	7.4475	1.9597	1.855	2.6447	5.9044	10.7892	12.6816	4.9882	3.0287	0.824	2.1885		0.835106	5.60891
18.8243	3.7673	2.3956	6.4531	10.217	7.382	12.9602	7.708	7.4579	2.2201	2.7489	4.5185	4.5334	4.0582	5.6335	4.9432	6.5717	4.2165	0.9866	6.35	5.7357	12.0575	7.253	3.8171	3.3849	1.1481	1.9892		0.840423	5.40412
18.9435	2.8195	2.5928	5.3073	11.218	8.496	13.152	7.224	7.8585	2.9808	1.2487	4.4566	4.1746	4.6519	6.1567	8.0221	6.7176	1.3524	1.3741	10.5243	6.1185	11.3844	6.6511	4.1877	3.605	1.6047	1.3613		0.845745	5.58618
19.0626	2.9171	3.3323	7.7201	9.021	8.106	14.7732	6.841	6.4959	2.2237	1.1807	4.99	4.3046	4.498	6.2276	7.5658	8.2519	0.5769	2.0264	7.0361	3.1134	8.4695	9.1708	3.9919	2.8911	1.088	1.3002		0.851062	5.31205
19.1817	2.3585	1.9496	3.8507	8.565	12.05	15.4786	7.288	6.2558	1.4964	0.8369	3.9564	5.6601	5.1504	3.122	6.5474	7.0614	1.4304	3.0385	5.378	6.0329	7.9655	9.0623	4.9945	1.7609	0.6631	1.748		0.856379	5.14236
19.3009	3.4509	0.9724	2.6593	9.14	11.695	17.4966	6.651	4.5765	1.0599	0.6321	2.5372	7.4256	5.8811	2.9231	4.7423	6.7036	1.6457	2.5645	9.1583	5.7439	6.7491	7.6094	7.8385	1.9931	0.0059	1.5613		0.861701	5.1314
19.42	1.1715	1.4337	1.866	9.167	9.654	12.9582	6.215	4.8624	0.6678	0.5832	2.6661	7.0344	6.2317	4.544	6.3311	8.1365	3.5428	5.2961	9.1557	5.4438	6.3239	8.8044	4.1068	2.613	0.5776	2.6919		0.867018	5.07995
19.5392	0.8501	0.7548	1.8622	9.641	9.9	14.1731	8.434	5.0988	0.5881	0.7946	1.8021	5.7775	2.4612	5.6315	5.2598	9.1987	4.8681	3.176	5.0897	4.4653	7.9014	7.3445	3.6147	2.2463	1.165	0.9488		0.87234	4.73259
19.6583	0.3427	0.139	1.4009	5.593	9.437	11.6877	9.84	6.3583	0.0239	1.3913	1.8298	4.4037	4.5984	5.4741	4.3765	8.5891	1.783	2.2554	9.4113	4.8383	7.1882	7.7821	4.6558	2.8818	2.437	0.6872		0.877658	4.59252
19.7775	0.6554	0.4015	2.1613	5.807	11.601	13.0831	5.264	4.0788	0.2602	0.2833	0.7048	5.3719	3.6794	3.8	5.474	7.0188	2.9579	3.1556	8.9738	6.5615	7.3301	6.5404	4.0018	4.1479	2.2176	0.5028		0.882979	4.46284
19.8966	0.6154	0.83	1.7742	6.826	11.319	9.504	6.828	2.2779	1.2008	0.1074	1.3253	5.2146	3.967	5.8392	6.2107	6.2466	5.604	4.3658	6.0355	9.3492	8.2092	5.9945	3.3512	1.6868	1.3334	1.2745		0.888297	4.51116
20.0157	0.0866	0.7868	3.378	7.702	7.868	8.0705	6.506	2.4396	1.0854	0.4467	0.3409	1.8612	3.3911	5.6292	6.4244	5.203	6.757	2.8697	5.0699	10.9845	5.8229	7.6406	2.1093	2.7181	0.5368	1.4816		0.893614	4.12345
20.1349	0.4767	0.1623	0.7444	4.025	11.568	6.8604	4.535	3.04	0.0369	1.7628	0.2356	2.7939	5.1195	4.1165	4.2989	4.9635	6.7057	6.4475	6.9148	6.8677	4.6363	4.9008	2.9881	3.0256	1.2138	1.9205		0.898936	3.86001
20.254	0.2058	0	1.0263	2.802	9.351	3.323	1.95	1.1141	0.5297	0.7916	0.6243	1.8334	2.5536	1.4705	5.6742	8.0594	4.5647	5.7236	7.497	5.6333	6.496	5.4415	3.8944	3.8838	2.0622	2.4574		0.904253	3.42165
20.3732	0.0548	0.1011	0.5829	2.829	9.778	3.0344	1.423	0.7467	0.3007	0	0.6328	1.7539	3.5629	1.139	4.336	9.8371	6.8469	5.4922	6.5208	5.7248	7.3398	5.2445	3.1136	5.6193	0.7127	0.7446		0.909575	3.36429
20.4923	0.2196	0.2191	0.6404	2.179	7.078	3.4899	1.483	1.2245	0.2603	0.0149	0	1.1557	3.0305	1.9092	4.7289	7.5183	6.0379	8.0695	5.3709	7.2945	8.8682	5.0284	1.1482	3.8081	0.0573	0.7385		0.914892	3.13742
20.6114	0	0.1241	0	1.827	4.861	3.8874	1.498	0.5814	0.0477	0.4396	0.457	2.2311	2.1851	2.2145	6.2016	9.2332	5.598	8.9271	6.9583	6.3404	6.1849	5.6832	1.5999	4.515	0.1443	1.2833		0.920209	3.1932
20.7306	0	0	0.7816	2.601	4.515	2.5396	0.928	0.9186	0	0.8467	0.1419	1.3321	0.7799	1.123	4.6482	6.4405	5.4772	11.4769	5.9477	4.5329	4.1653	6.6842	2.0896	5.5207	0.2496	3.2801		0.925531	2.96232
20.8497	0.1519	0.0399	0.5868	1.128	3.771	3.5383	0.493	0.4497	0.4835	0.7977	0.6712	0.2393	2.4201	1.0782	2.175	4.5145	5.11	8.2818	4.181	5.9205	7.0018	7.4282	2.2168	2.3172	0.7148	0.6506		0.930848	2.55234
20.9689	0.0306	0.2379	0.0205	2.356	1.845	0.8665	0.631	0.2966	0.3499	0.1074	1.2659	0.0087	1.681	0.2655	1.7723	5.8433	6.4114	7.4627	5.5816	6.4534	6.4553	6.4442	4.811	3.5069	1.5765	2.1003		0.93617	2.63005
21.088	0.1373	0.0004	0.1735	0.652	2.265	0.666	1.294	0.7583	0	0.0146	0.0469	0.2204	0.1796	0.3704	2.6461	4.7323	3.5991	6.2031	5.5343	5.8155	3.6075	5.0725	5.2792	2.2756	2.5447	1.6309		0.941487	2.14305
21.2071	0.0871	0.2316	0.6697	0.058	1.784	0.6988	1.946	0.467	0.3058	0.0936	0.2533	0.4703	0.9161	0.6295	2.3025	6.1394	6.8278	8.5112	3.7401	5.893	5.2034	5.7774	5.0947	2.6295	1.5551	1.2899		0.946805	2.44518
21.3263	0.8573	0.1637	0.4697	0.252	1.408	0.8141	1.406	0.0937	0.3095	0	0.8414	0.4902	0.6006	0	0.8639	3.9653	3.3778	7.0483	2.5651	4.4936	5.3985	3.6007	4.5923	3.9334	0.9481	0.8331		0.952126	1.89717
21.4454	0.1337	0.0227	0.1873	0.264	0.628	0.0014	1.758	0.0847	0.218	0	0.3028	0.0621	1.5156	0.0452	0.783	2.7708	3.5001	7.8653	3.5851	3.0227	6.1442	1.9902	1.6637	4.0079	0.911	1.3982		0.957444	1.64868
21.5646	0.1903	0	0	0.86	1.442	0.1483	0.073	0.3041	0.0004	0	0	0	1.2295	0.524	0.1955	2.0383	2.1268	6.4566	5.2736	3.9571	5.5401	3.9594	1.9263	4.3989	1.9119	1.3666		0.962766	1.68933
21.6837	0.2316	0	0.0336	0.611	1.987	0.4923	0.518	0	0.1055	0	0	0	0.0034	0.1724	0.2565	1.8411	3.2541	4.8821	5.9813	4.26	3.4062	3.1698	3.3521	4.179	2.9838	0.6015		0.968083	1.62778
21.8029	0	0	0.0219	0.677	0.865	0.9374	0.523	0	0.0051	0	0.0291	0	0.0806	0.2338	0	2.724	1.3995	4.4936	5.3813	5.0277	3.6055	2.223	4.8187	2.6694	2.4428	1.3277		0.973405	1.5187
21.922	0	0	0	0.319	0.799	0.0375	0.003	0.1885	0.0629	0	0.2487	0	0.5014	0	0.1729	0.5797	1.0939	3.2665	4.5443	5.5966	5.4064	3.0121	6.5922	2.7413	1.4955	2.5365		0.978722	1.50761
22.0411	0	0	0	0.874	0.402	0.8877	0	1.0437	0.326	0	0.482	0.1597	0.3	0.3422	0.1049	1.3431	1.8002	2.9517	5.6579	5.6941	6.3117	2.1381	6.3204	4.1362	2.1572	2.9626		0.984039	1.78444
22.1603	0	0.0232	0	0.217	0.187	1.0415	0	0.1012	0	0	0.0736	0.3087	0.1908	0.9871	0.2039	1.709	1.3401	2.7997	4.0349	4.4556	2.7612	2.973	9.316	4.546	2.957	1.1399		0.989361	1.59102
22.2794	0.0903	0.4513	0	0.182	0.998	0.6214	0	0	0	0	0	0.2985	0.6614	0.004	0.0183	0.31	0.6251	2.3017	1.431	3.3752	3.2286	2.1522	5.6649	6.6945	2.6654	0.4509		0.994678	1.23941
22.3986	0.2987	0.5638	0	0.227	0.477	0.2084	0	0	0	0	0.0283	0.0107	0.1801	0.6817	0	1.0032	0.5085	2.555	2.4216	4.2498	5.0752	0.7479	2.2904	4.9637	2.1378	2.0325		1	1.17928

## Sheet: Image42
X0	Y0	Y1	Y2	Y3	Y4	Y5	Y6	Y7	Y8	Y9	Y10	Y11	Y12	Y13	Y14	Y15	Y16	Y17	Y18	Y19	Y20	Y21	Y22	Y23	Y24	Y25	Y26	Y27	Y28	Y29	Y30	Y31	Y32	Y33		Ap-basal	Avg intensity
0	7.54	10.62	11.1131	21.032	13.267	13.546	12.2514	17.265	16.534	8.363	21.732	10.611	12.964	25.1105	19.1613	13.083	18.3459	8.2247	15.4298	5.5277	7.0603	9.6905	12.026	9.522	17.198	17.9213	8.1142	17.855	16.2031	5.2911	18.6119	23.9054	46.3928	28.672		0	15.2996
0.1191	8.863	18.732	14.9499	21.311	15.783	12.693	17.4445	26.242	17.491	8.861	18.708	15.414	20.889	31.1214	26.9074	17.842	23.034	14.526	22.8611	5.6589	6.7227	9.3574	12.709	9.212	12.4416	19.2941	14.7993	20.6	21.268	7.3531	22.086	23.328	48.2322	33.358		0.00561604	18.238
0.2383	17.456	20.824	16.713	23.414	16.481	18.029	15.2123	20.258	18.054	14.181	25.798	10.031	24.484	29.4628	20.4516	24.78	24.1541	17.8593	32.6678	10.3054	5.0375	7.2817	14.864	13.668	19.1667	20.1391	12.6616	20.506	24.0411	7.4618	22.9796	24.979	40.2604	33.735		0.0112368	19.6293
0.3574	10.911	21.058	12.9847	29.339	23.052	17.571	20.6519	34.48	22.795	15.802	25.479	13.568	27.35	43.0005	31.1079	29.104	27.8149	19.8965	29.6714	12.9324	7.0541	14.4121	10.392	15.525	19.0498	18.246	18.7564	16.5086	28.9951	9.4879	33.8697	34.3089	48.6797	33.057		0.0168528	22.8503
0.4766	21.426	33.006	19.7309	28.291	30.807	28.768	26.8393	42.751	30.876	18.837	27.928	19.109	34.871	36.2529	38.3104	28.685	33.1497	22.8489	40.8876	11.9392	11.8791	12.4994	12.91	20.165	21.7971	19.6962	18.8875	19.7904	28.5895	13.575	36.1355	42.1842	46.4065	37.189		0.0224736	26.9711
0.5957	23.382	29.952	29.7487	27.772	39.302	34.2	23.1851	55.241	38.669	24.553	29.33	20.336	44.475	43.4515	46.0253	37.473	40.5589	30.5808	44.5289	15.8096	14.9102	11.1201	17.762	16.259	22.5158	24.1289	20.0645	23.7979	34.4723	15.3693	32.845	46.8222	38.1801	46.92		0.0280896	30.6983
0.7148	30.944	27.761	38.7576	25.623	41.941	40.037	37.0001	54.69	43.888	29.743	41.503	18.262	51.106	38.8516	50.9988	43.186	30.5189	35.5702	46.6579	20.1468	14.3259	10.7416	16.103	25.439	30.1867	34.225	29.5274	26.0189	36.3912	22.0033	39.2164	54.761	43.8314	44.356		0.0337057	34.5386
0.834	46.092	29.935	34.2346	48.332	45.569	48.117	48.3628	67.545	51.142	36.489	43.831	27.804	59.014	46.044	57.1571	48.626	32.63	41.5332	52.0776	18.2582	12.8156	15.8345	19.148	30.064	39.428	37.8191	25.0634	30.7855	46.4719	28.02	49.0937	53.3383	39.1898	47.889		0.0393265	39.9339
0.9531	43.837	38.293	53.345	48.523	45.064	59.353	50.9098	72.712	46.072	49.667	59.434	31.06	63.561	47.5334	51.0923	55.519	32.0091	34.3873	52.361	23.0608	18.1242	18.1004	25.631	35.489	49.6101	54.1046	27.8049	27.6131	45.7859	29.0523	38.7147	59.2554	53.4252	55.775		0.0449425	44.0082
1.0723	47.391	39.729	45.9402	60.618	51.981	57.704	64.633	66.559	52.284	52.238	60.535	36.643	74.095	56.936	55.4451	63.762	38.6781	41.2038	64.5261	27.2825	16.3587	22.4528	23.334	46.287	48.4337	57.5461	28.0106	28.7203	53.1735	24.7942	43.4839	70.8981	58.7313	59.842		0.0505633	48.2426
1.1914	43.96	48.8	46.1929	61.506	57.676	76.979	72.8485	77.055	66.212	57.591	78.504	49.893	101.4	48.7197	50.1182	61.304	33.199	43.2716	65.9122	21.5551	21.8726	23.0522	38.41	48.211	46.4059	60.8286	30.7051	42.3005	64.1655	34.3085	51.2372	64.4068	49.2503	67.481		0.0561793	53.098
1.3106	41.509	45.018	42.374	81.196	63.835	88.818	63.5146	72.859	77.277	63.56	90.894	57.574	98.436	50.3598	58.8498	69.648	40.6055	50.5555	61.5799	24.1028	12.6398	23.2607	49.372	53.634	50.7292	59.9094	32.7865	38.7796	77.2626	38.9044	53.3692	72.05	60.7347	57.627		0.0618001	56.5772
1.4297	48.978	39.812	56.0343	75.441	90.961	86.794	63.9449	83.726	84.069	68.678	105.123	56.405	114.998	49.142	67.3418	83.326	40.1527	41.0423	70.5086	34.3029	16.1047	24.9005	46.174	58.59	47.7081	52.8614	33.2919	51.6164	73.8398	44.096	51.2437	72.3508	53.4106	58.876		0.0674161	60.1719
1.5488	53.965	43.906	52.1338	104.891	96.461	112.458	67.4017	118.343	92.168	76.26	114.875	65.226	115.949	58.3199	65.2689	80.908	53.2636	49.3967	80.5182	36.8203	19.8027	23.3469	49.613	58.437	60.7807	67.6924	32.2208	52.2235	66.8396	50.3178	60.1859	72.4419	66.5785	74.629		0.0730321	67.4601
1.668	63.75	55.077	62.6764	102.091	91.109	110.721	71.8181	106.702	107.273	89.477	124.807	80.095	120.791	62.0897	77.7459	83.977	51.2012	50.312	61.9244	33.8756	20.0083	24.4525	56.351	73.359	50.2314	70.2009	35.8388	49.7163	65.531	56.521	62.9734	60.846	59.3098	81.896		0.0786529	69.8456
1.7871	69.66	63.634	59.5104	122.444	99.458	124.723	74.1412	116.884	118.654	102.102	116.823	84.063	113.28	54.5537	76.5449	94.823	55.4636	47.4325	57.349	39.5859	19.442	30.5234	61.294	87.339	66.2056	74.9925	47.0583	57.4279	55.927	62.1981	55.4028	62.6051	66.1807	87.365		0.0842689	74.2674
1.9063	76.43	74.825	68.5226	124.866	108.038	115.69	69.783	132.216	132.276	110.152	110.375	85.537	106.486	67.1931	71.5342	104.342	57.0296	61.7294	58.977	45.0008	16.2654	31.8858	61.242	93.494	69.5914	73.9563	48.1484	54.0462	65.7129	70.6918	64.8805	60.8663	58.4161	84.619		0.0898897	77.4947
2.0254	93.688	85.917	72.7759	139.685	113.065	115.367	72.5476	129.11	133.867	115.751	104.118	105.523	99.532	70.0742	78.2216	104.627	46.5374	57.2461	49.5157	44.5674	19.8869	27.6312	78.129	99.713	64.361	74.4965	49.7792	61.9242	64.9195	67.4279	61.1615	73.2493	54.9441	81.097		0.0955058	79.7193
2.1445	109.032	77.563	81.2718	147.392	106.952	129.057	72.2579	127.185	129.533	122.146	124.483	105.817	87.667	59.6046	70.0145	104.503	44.5266	49.9806	55.0543	41.4184	15.6321	30.5046	94.246	117.431	67.3033	76.2924	56.5438	66.1688	60.328	70.154	52.8589	70.009	46.7426	80.887		0.101122	80.8988
2.2637	112.235	84.653	93.1492	161.781	109.403	115.96	59.6997	105.888	143.967	110.746	125.509	102.209	94.952	51.4066	73.5174	112.337	41.8698	49.4336	44.1362	39.6285	14.8622	28.4993	103.292	124.974	69.3741	70.82	54.8756	61.1827	82.2978	67.2991	45.9213	82.3355	51.2765	88.954		0.106743	81.719
2.3828	118.25	85.901	98.9838	161.073	90.643	112.041	57.9162	96.583	118.895	128.974	120.305	103.271	91.13	39.4921	67.5072	93.087	34.8897	50.2076	47.9379	38.4721	15.4303	26.0751	86.48	140.355	74.9898	58.9984	60.2222	71.4691	74.039	74.1295	47.3653	74.3764	59.314	82.298		0.112359	79.4442
2.502	107.029	95.882	87.8287	161.965	98.853	115.613	58.294	89.3	134.748	122.203	124.875	99.441	77.628	29.4229	73.271	97.644	27.2505	46.6195	42.2173	33.4056	19.9171	27.1106	108.338	146.827	68.1601	62.8159	57.4658	72.4469	77.0919	85.9818	46.0994	75.7419	48.0248	105.001		0.117979	80.1327
2.6211	102.727	106.656	101.019	144.586	102.935	111.445	49.3276	89.103	129.718	111.085	115.765	88.625	72.164	32.7723	59.5048	108.846	29.5498	37.0698	40.2935	30.133	13.8086	26.0538	101.646	137.853	59.9795	62.1821	58.4874	70.1904	72.51	81.6383	43.8837	75.8466	46.5541	90.154		0.123595	76.5916
2.7402	103.936	95.5	101.645	149.559	86.28	94.609	40.5405	84.557	106.162	91.138	116.137	90.037	77.618	28.0083	56.6434	97.678	26.0676	40.7373	43.1304	21.7689	11.7715	25.23	94.559	147.187	61.4036	61.1975	45.3751	67.7203	61.929	69.1704	35.558	74.1334	53.6823	97.726		0.129211	72.3057
2.8594	97.657	89.242	94.9946	156.425	81.684	85.162	41.1771	77.812	104.867	101.232	108.91	82.748	67.786	26.3973	45.6127	99.865	26.8201	32.402	39.2496	23.6545	9.9315	29.2836	101.598	128.322	61.0944	49.9846	36.3035	61.8081	58.1996	79.2911	46.9155	82.5945	49.5601	78.951		0.134832	69.3393
2.9785	97.25	80.372	81.9102	139.739	74.661	87.678	38.1551	91.761	90.651	106.817	97.147	71.588	67.106	23.9717	41.9951	95.931	20.5791	33.6953	34.7159	23.0734	9.2259	24.7033	99.839	109.178	58.9328	53.8362	34.8304	51.7217	53.9563	63.2071	34.6852	73.2558	45.4592	79.484		0.140448	64.4445
3.0977	103.556	64.952	83.4417	162.79	82.431	96.576	29.9763	77.775	75.14	95.389	92.1	68.337	62.303	28.8261	39.4216	76.3	25.721	26.0953	41.91	15.826	11.6814	25.0835	96.287	85.823	46.1015	43.5273	33.862	47.1116	39.2962	78.2557	37.0734	61.3214	40.5586	77.348		0.146069	60.947
3.2168	95.32	52.598	67.0424	137.567	70.343	78.463	26.0438	64.22	71.248	86.133	70.143	79.219	53.036	23.8514	26.107	76.285	18.0836	24.6205	41.8175	15.9507	10.3696	23.618	92.807	83.269	42.9919	53.2248	28.2864	42.4656	31.4329	65.7566	32.6551	56.2097	47.4157	76.37		0.151685	54.8519
3.336	96.523	58.558	56.6205	126.597	67.087	70.285	23.6981	69.327	65.198	93.254	90.806	66.013	40.828	26.2676	25.6154	69.507	25.8456	23.2918	42.6894	13.5715	9.1197	20.9649	80.512	72.773	33.4197	45.5737	27.9367	22.9282	33.5586	68.8428	26.1227	36.274	44.2148	61.604		0.157306	51.042
3.4551	103.508	54.567	53.2505	121.94	62.879	66.418	26.1688	51.856	61.763	81.714	83.428	55.775	49.013	21.4742	18.2177	70.276	24.2874	22.3705	33.5092	17.5857	11.4405	18.5217	68.737	58.346	31.3587	48.0297	26.7674	20.0491	20.6648	66.0081	26.3472	33.7645	49.1272	62.858		0.162922	47.7065
3.5742	91.541	46.905	42.4047	107.534	55.397	69.199	29.1732	62.217	40.852	78.009	79.383	56.725	51.462	17.9587	21.4342	67.856	20.2542	20.4466	38.4533	13.4146	7.0443	10.0506	63.148	45.588	31.7669	39.9794	23.7546	22.4727	19.427	55.2202	28.869	38.6359	42.2683	60.177		0.168538	44.0889
3.6934	78.464	49.337	50.6526	100.828	57.654	67.623	19.8062	61.429	45.382	83.644	67.478	44.358	45.755	16.4166	18.3446	53.696	18.9123	19.8619	28.7455	19.0828	12.5092	13.6258	61.309	46.656	33.9019	30.8542	26.4886	14.5397	14.9172	66.7463	28.7815	34.7424	33.5324	43.373		0.174159	41.4543
3.8125	81.669	35.25	34.5106	95.646	56.044	60.674	26.9378	56.836	47.308	75.076	72.613	45.552	35.077	16.53	17.8861	48.055	28.8356	21.3257	23.126	14.0265	10.8681	12.4791	52.187	37.958	33.3166	26.2855	22.005	13.3813	11.0778	62.2134	20.3005	25.9538	32.5469	40.892		0.179775	38.0719
3.9317	84.656	29.67	26.3469	72.678	57.09	40.553	25.4829	58.903	35.894	76.273	68.064	31.38	30.155	16.5889	19.5312	51.73	36.3599	23.8094	23.5361	15.5388	12.4441	14.2592	45.398	29.514	29.4075	22.8829	22.4283	14.7843	13.2938	51.4333	20.0205	23.1598	30.7482	36.63		0.185395	35.0189
4.0508	86.161	30.455	27.0591	68.905	52.611	39.731	18.0855	56.723	33.817	71.939	66.322	26.991	24.423	16.1302	15.9818	51.297	32.5735	25.7756	22.7859	13.7928	17.3884	12.122	47.7	39.022	22.9553	29.97	14.4508	14.6288	14.8214	60.4758	16.4328	24.6331	24.4431	35.791		0.191012	34.0116
4.1699	78.266	37.755	40.2007	57.328	48.057	30.097	24.5225	39.873	27.004	71.807	52.187	25.519	31.533	17.5642	14.0463	46.231	38.0406	21.5964	20.1841	8.4695	15.5278	4.8849	34.75	29.853	29.0638	25.8725	19.1775	17.8384	18.5336	48.5506	18.1857	20.0688	26.0358	26.175		0.196628	31.3176
4.2891	76.188	22.395	32.2664	51.283	37.042	24.494	20.5403	39.06	25.327	65.251	54.493	27.612	23.111	19.0074	15.9721	37.608	21.6843	18.8503	25.6172	10.0987	13.3648	10.7891	43.648	27.685	28.7563	25.0869	20.7733	12.5109	16.7943	49.368	15.0487	27.773	39.7301	31.035		0.202248	29.7136
4.4082	63.017	24.811	23.9864	41.292	47.882	27.403	21.0824	39.299	26.646	65.323	49.791	30.393	24.709	13.8377	17.3652	32.578	21.8291	21.3591	19.0934	12.498	15.5635	11.3871	26.925	26.725	27.0962	32.8693	22.8035	8.4642	16.9128	48.2938	16.6629	28.2746	25.158	24.202		0.207864	28.1039
4.5274	58.686	30.172	17.2706	37.631	41.183	24.458	18.3515	37.84	26.265	49.483	30.106	32.17	19.536	17.695	16.8473	33.536	21.3156	32.5878	24.755	10.5574	22.6632	7.0063	20.707	22.598	29.8663	27.853	18.7612	17.2768	11.605	48.2729	12.7901	20.8433	30.1174	23.009		0.213485	26.2887
4.6465	59.98	21.027	17.8091	37.224	31.231	22.217	21.1324	39.064	27.238	55.536	25.63	27.812	16.292	23.0255	14.8837	27.424	18.1193	18.0633	19.7561	10.5461	16.9699	11.467	22.13	24.573	29.1986	31.6253	15.2059	11.6355	14.8899	40.2465	12.9067	20.3407	27.5624	15.9		0.219101	24.3724
4.7657	52.901	23.392	18.1315	30.287	24.285	21.384	22.4259	34.935	21.043	61.715	22.645	28.526	13.111	19.213	15.3796	26.352	13.9343	15.9123	16.5517	11.096	14.3737	12.6738	16.198	28.801	32.4803	24.8498	13.7796	15.5564	12.1757	37.8965	14.3647	23.0827	23.5776	25.418		0.224722	23.1897
4.8848	56.108	23.655	27.7701	33.033	24.134	27.729	20.0437	34.953	22.1	49.68	25.057	27.979	16.172	23.8202	15.469	19.297	11.7356	19.7037	15.1369	10.1313	11.499	9.5232	21.211	23.744	30.3691	18.3139	16.1738	10.3214	12.3063	27.3359	11.5486	18.6142	18.6386	20.55		0.230338	22.1723
5.0039	40.471	20.211	19.1345	26.594	25.697	23.62	15.5759	28.501	23.104	53.162	18.43	23.731	11.54	14.6681	15.5292	19.688	11.8431	19.3731	19.8172	9.9149	10.3604	9.0768	17.456	25.973	30.5104	18.7455	17.8329	18.1278	17.4548	33.1484	11.2003	17.4394	20.0693	20.798		0.235954	20.847
5.1231	36.638	18.998	17.634	26.785	26.897	28.249	18.4023	33.075	24.677	45.466	18.97	21.953	18.036	15.0189	14.6456	18.967	9.8713	18.8155	16.6805	7.0603	11.1268	10.3338	21.001	28.231	33.8422	23.7494	18.2437	15.3966	12.6571	27.7275	13.401	14.5524	16.8756	16.83		0.241575	20.612
5.2422	36.064	21.522	19.9208	22.814	28.388	29.181	17.5121	30.06	24.446	53.637	20.891	30.337	13.968	15.2391	16.3344	20.583	12.9149	25.332	18.7881	8.8825	8.3517	12.1978	24.165	27.591	28.9353	18.2271	14.9419	17.5436	16.9065	18.2175	12.2554	22.0792	17.5302	13.759		0.247191	21.1622
5.3614	32.037	16.214	26.7848	20.521	23.568	18.16	21.2946	26.917	23.486	45.316	21.651	25.287	20.598	17.1903	19.6314	18.061	13.7014	18.0123	12.2164	15.6881	10.8171	10.6148	15.329	20.094	25.7557	23.2556	21.7877	18.7576	13.1505	15.8499	13.4286	16.2225	15.44	15.071		0.252812	19.762
5.4805	33.607	18.397	31.5087	23.717	27.546	21.678	19.9774	22.303	18.945	38.663	25.651	20.534	19.081	13.5046	26.7322	18.829	10.8748	19.0822	14.1337	7.8805	4.6223	6.8518	20.041	15.377	30.1208	22.0962	13.5458	10.8984	15.2612	18.1733	7.0354	15.0132	13.5785	14.504		0.258428	18.8166
5.5996	36.803	20.19	23.2577	18.297	32.457	24.919	18.2538	19.443	27.056	38.043	23.05	25.904	12.382	14.7107	17.5179	17.235	11.8872	11.8498	11.3549	9.0167	9.7817	11.1292	18.118	25.579	26.6434	21.2182	18.1478	17.2825	12.5171	13.151	8.8627	23.9478	10.3072	16.622		0.264044	19.0275
5.7188	34.301	18.262	22.7929	26.16	27.205	24.036	20.4584	21.827	24.223	31.41	18.882	19.461	18.848	14.6528	23.5652	17.189	11.1134	15.6106	19.7525	8.333	6.8716	7.5568	22.918	23.407	23.5477	25.6266	16.1907	17.5649	13.8578	16.1762	12.8447	14.7849	14.1113	19.868		0.269664	19.2179
5.8379	25.411	26.293	20.281	25.339	34.284	19.417	23.6879	24.88	17.572	23.425	16.012	22.324	21.797	12.5178	25.0566	18.252	16.3752	21.0505	12.9654	4.5741	5.7227	10.4038	22.894	20.1	22.9636	25.601	13.0732	13.2126	14.1754	15.3784	9.4584	15.8284	19.7398	16.442		0.27528	18.7208
5.9571	30.364	21.756	20.4798	22.411	24.888	18.82	21.0726	27.599	19.392	25.545	14.478	18.087	17.122	15.7586	21.8067	16.896	11.7852	27.079	17.8755	4.709	7.2374	9.5922	19.776	19.541	16.0649	29.1526	21.9723	11.84	11.1123	13.7587	5.825	14.2275	20.8809	20.172		0.280901	18.2082
6.0762	26.947	17.586	19.0048	27.174	27.542	20.099	26.4071	25.639	19.863	36.884	17.892	16.069	17.178	9.7219	23.7651	13.917	10.347	19.1915	17.8723	4.4385	7.6633	9.9718	17.638	17.454	25.046	22.9841	23.8171	13.6148	13.9849	14.5649	8.7101	20.851	15.6805	16.388		0.286517	18.409
6.1953	31.429	23.044	24.9583	26.125	25.858	19.508	28.3951	23.065	19.528	33.119	16.283	19.031	14.986	8.7107	15.7543	15.114	17.4422	18.2276	13.8499	4.7008	6.6859	8.9002	16.004	18.564	19.0954	19.4373	20.856	14.0114	15.4031	12.9936	9.2633	15.7639	15.875	14.916		0.292133	17.8499
6.3145	20.634	28.194	22.677	15.621	22.696	14.094	23.8255	27.291	16.768	33.769	17.551	15.115	12.262	14.5339	19.9038	16.669	14.3913	18.7412	14.1433	3.4422	9.6031	10.5086	14.46	20.253	17.0168	17.0919	26.3137	12.1879	15.2409	11.2002	8.7007	14.2029	17.1049	12.566		0.297754	17.0227
6.4336	22.254	26.258	20.5971	12.802	25.765	22.236	28.6902	26.521	11.578	29.754	15.041	18.88	12.561	15.0906	21.0045	15.537	15.3744	20.608	14.5426	7.2482	8.8719	8.6954	13.923	21.501	15.6137	15.4885	19.4351	13.0091	12.5293	12.5609	11.5573	17.6406	14.868	17.344		0.30337	17.2171
6.5528	25.904	23.591	16.922	23.5	24.131	19.44	22.6	29.391	18.44	23.984	17.52	21.364	11.748	15.0573	19.659	11.407	18.5068	20.1607	14.5411	7.7318	12.6095	16.4779	13.559	17.424	19.5275	16.6287	19.4134	12.9601	15.2908	17.6952	9.7269	16.893	21.2713	14.861		0.308991	17.9393
6.6719	27.779	19.822	13.2144	23.849	25.491	19.74	26.7943	28.355	15.208	22.159	19.899	19.884	20.446	23.0438	28.3817	18.049	14.7197	23.7407	23.0906	7.7824	8.6523	12.7283	13.141	17.188	21.1116	15.8962	17.9893	12.307	14.159	17.5962	10.9918	12.6165	24.0625	13.821		0.314607	18.6385
6.7911	26.288	18.789	15.747	20.445	24.511	16.453	19.4402	24.932	15.823	29.777	14.671	14.673	13.256	25.6305	22.0619	18.341	19.8515	17.207	16.6984	8.818	10.3719	14.5229	17.829	16.352	16.8767	20.4247	17.5883	16.6469	16.497	17.269	9.8887	15.9231	21.9542	13.354		0.320228	17.9092
6.9102	26.865	18.283	16.901	14.396	29.417	14.348	15.4688	22.277	14.481	21.18	16.081	23.476	10.705	19.8543	20.8916	18.966	15.1288	18.7185	16.149	8.9002	7.1065	9.441	11.973	18.233	12.6191	14.4059	22.3812	16.117	14.8359	13.3338	10.2611	12.9596	19.7349	14.526		0.325844	16.4828
7.0293	22.405	17.275	24.2519	15.869	19.607	19.353	12.8098	17.679	16.849	29.719	21.884	23.396	16.777	13.8996	17.4362	20.606	16.1766	14.3646	12.293	11.1725	3.8108	9.4917	22	23.292	17.9109	17.0191	12.4243	12.6797	13.976	22.1803	9.4993	16.9196	15.6479	12.168		0.33146	16.8483
7.1485	22.451	16.826	19.9575	13.871	22.589	15.163	19.1139	21.489	15.763	21.681	18.589	18.97	18.685	19.7474	24.2487	16.096	10.0956	14.844	16.5439	11.1762	5.2907	11.3325	19.967	19.186	16.7811	20.0122	17.8022	14.0189	13.9832	17.5319	9.6695	13.8159	18.8186	16.118		0.337081	16.8302
7.2676	18.009	21.829	20.3679	15.484	16.715	15.218	10.564	20.556	16.788	22.152	16.805	13.364	11.378	16.885	25.5555	15.661	6.5655	18.217	11.091	6.5219	6.5847	13.0288	16.395	23.707	18.9061	15.362	11.3912	15.5265	15.5382	19.2747	6.5664	19.8991	18.8032	17.996		0.342697	15.8443
7.3868	19.032	19.286	20.0298	14.657	20.466	19.493	7.8114	13.285	14.953	24.389	18.861	13.29	8.781	15.4455	15.4926	13.921	9.3382	12.3148	8.7556	7.531	3.4235	6.4481	17.997	21.13	16.6085	17.8037	8.3065	6.1163	12.6817	15.6996	11.0781	19.5207	19.5847	16.804		0.348317	14.4216
7.5059	15.751	25.953	20.8821	11.917	25.584	19.803	8.6861	9.313	15.872	17.411	17.464	15.62	13.228	18.4203	17.1496	15.771	5.8465	18.0953	9.639	7.8616	3.6339	6.8369	14.365	23.141	15.3714	14.9499	13.3526	15.8804	9.8431	26.4925	7.1156	22.5638	16.7853	12.124		0.353933	15.0801
7.625	21.111	20.27	18.8799	21.35	17.005	17.506	6.3261	10.206	19.337	20.551	17.639	15.256	11.841	12.4553	14.038	12.345	4.2574	12.6143	7.6612	7.4028	4.7848	9.2302	18.632	27.587	11.783	22.2383	16.1873	12.2634	6.5975	20.3307	9.9427	20.7518	15.4402	16.055		0.359549	14.7022
7.7442	20.017	13.753	18.6448	22.512	20.117	14.673	4.483	8.675	21.753	18.683	28.928	15.294	12.373	14.6897	11.6451	7.266	4.9357	9.6484	14.5795	8.0391	3.7283	5.0781	16.628	27.582	14.6054	14.5598	14.4415	12.1715	9.1108	26.5174	9.7624	18.13	16.0779	17.214		0.36517	14.5975
7.8633	17.264	19.859	17.5268	16.564	16.088	17.225	2.2605	7.738	18.859	15.028	20.71	15.26	14.215	15.1455	12.5863	12.074	3.8326	5.9656	10.2513	7.0219	6.2372	5.2923	13.969	24.208	10.5424	15.2297	13.1719	12.2079	12.952	26.0162	8.3165	16.4334	15.7631	21.98		0.370786	13.7587
7.9825	11.328	21.883	13.8755	23.696	21.442	13.469	3.4982	6.953	14.475	20.99	26.657	12.259	12.356	14.4435	15.5344	12.072	5.0908	2.9709	13.8097	8.3807	4.8703	9.3982	15.321	21.187	19.376	14.7112	11.8612	13.1064	12.7742	18.4156	6.3715	11.4263	15.5017	19.472		0.376407	13.7934
8.1016	14.018	18.205	11.9788	15.125	20.469	8.209	4.7212	6.501	19.217	18.31	21.671	16.913	10.022	10.6041	14.9855	8.58	4.2836	4.0295	12.6504	4.7643	3.3233	10.5004	20.295	19.282	19.1874	16.0327	9.3185	10.2082	13.87	20.6534	9.9857	15.0003	16.0826	9.327		0.382023	12.8919
8.2207	18.598	21.04	12.7359	16.436	18.66	14.43	6.979	3.023	17.74	19.881	14.13	16.044	13.541	9.8997	11.5468	8.279	5.4598	3.1371	12.2361	6.7627	4.8589	6.9954	16.109	21.352	13.0571	16.8614	12.8833	9.2177	15.6798	21.0034	7.1244	16.7064	18.8481	14.504		0.387639	13.1106
8.3399	17.579	13.759	16.2263	16.414	21.307	12.99	2.0818	4.235	12.781	17.918	13.06	20.123	11.688	9.4136	14.0147	6.54	4.9067	9.0835	12.2634	8.5155	6.0677	8.0817	16.958	18.723	14.1585	9.1112	12.0942	13.6049	17.7031	14.3501	7.7125	12.5617	17.0998	13.644		0.39326	12.5521
8.459	16.648	16.515	17.4001	16.92	16.027	11.819	2.729	4.415	8.9	21.12	18.132	20.359	9.395	11.1134	14.8764	6.141	2.0957	3.5735	10.2006	5.6656	9.0741	4.6352	22.317	14.522	14.9622	15.4321	12.9593	10.1463	17.3786	16.2163	7.5582	9.2193	14.576	8.849		0.398876	12.1144
8.5782	14.739	11.446	13.8657	17.036	16.681	14.372	3.7024	3.409	11.229	17.826	14.133	20.896	15.593	11.5835	13.5608	10.087	5.2054	2.7137	11.8247	6.0514	7.8649	6.5214	19.305	15.902	12.0838	14.1272	10.6936	13.9734	12.6646	13.2701	6.2535	14.1428	14.6094	8.055		0.404497	11.9242
8.6973	17.557	11.839	14.5915	15.103	23.622	11.137	2.5891	4.337	12.324	14.669	14.251	18.942	18.711	10.7705	8.8198	8.021	3.3743	4.6365	10.5244	6.9977	2.9004	6.4607	19.005	18.94	13.9089	8.9858	8.7656	8.9435	11.4344	15.6086	6.8504	12.9941	18.3572	12.996		0.410113	11.7343
8.8165	16.312	11.771	13.0769	12.61	20.238	15.209	1.8529	2.072	10.307	14.042	13.149	17.494	10.966	7.7754	9.1458	8.334	6.0484	3.1211	6.6934	7.7127	3.3557	7.4907	17.654	15.641	15.0885	17.6281	16.0212	9.7536	17.5148	12.1377	10.6744	13.8538	17.128	9.996		0.415733	11.5255
8.9356	13.054	22.65	14.1643	12.529	23.844	11.028	4.6624	1.768	13.338	16.784	18.638	16.301	13.744	10.5513	11.0477	7.398	3.0239	4.7709	6.3958	6.0501	6.1597	7.5746	14.544	16.04	17.5815	15.9966	11.8971	7.2582	13.1762	10.0669	7.841	8.1548	12.5854	11.109		0.421349	11.5214
9.0547	16.352	13.981	17.3382	16.092	22.65	10.998	5.5844	5.749	10.814	19.958	14.518	17.991	11.919	8.7167	10.8102	6.963	3.9256	3.6599	7.904	5.184	4.4101	9.1177	15.188	13.5	13.2712	16.3495	10.8325	5.1428	13.4083	13.6021	8.3517	15.1957	17.0481	15.81		0.426965	11.8334
9.1739	11.443	14.353	15.7427	11.819	15.828	12.479	4.3168	2.489	6.649	19.143	16.49	16.36	20.586	9.1046	16.4191	7.3	2.7728	4.3555	4.2756	7.6789	3.1118	6.4172	15.535	15.42	18.2679	16.3775	11.6066	5.9829	10.9187	14.0598	5.5695	11.2849	18.0155	9.369		0.432586	11.2218
9.293	9.434	14.624	22.1178	20.794	16.885	13.757	2.8264	2.144	8.702	26.694	14.725	12.18	24.653	7.2262	15.7103	5.654	2.0778	2.4594	8.3331	3.3127	6.9107	5.3834	20.386	8.933	12.2256	14.8432	14.5182	7.1462	6.6985	13.9757	4.1109	8.0056	19.0016	10.497		0.438202	11.3807
9.4122	16.263	12.521	13.3833	13.066	14.187	13.067	2.9691	3.984	8.057	15.865	16.292	17.417	22.339	8.3959	13.3369	7.228	2.587	3.6818	7.2038	5.1758	2.3443	8.9487	20.592	12.058	11.6247	13.7064	11.8906	7.9882	5.9601	8.739	8.4085	8.5593	17.3458	12.517		0.443823	10.8148
9.5313	11.654	13.305	18.4905	17.493	11.686	12.618	2.4301	2.624	6.844	17.997	15.114	19.559	16.164	8.7797	10.5711	5.536	1.768	3.4242	5.7406	3.7997	3.3374	7.3875	22.635	13.584	12.2384	14.6396	9.9465	5.2212	7.2432	11.4376	7.4889	9.1292	20.7702	10.89		0.449439	10.6337
9.6504	8.349	11.604	16.6977	15.682	18.562	12.041	2.2343	1.372	11.497	16.8	17.424	11.05	16.391	9.3108	12.5445	5.452	1.1304	3.3832	6.5755	6.7659	4.4077	7.0798	14.451	11.063	10.1911	12.7642	11.9592	8.2133	6.4094	10.4668	8.7691	9.4772	23.2122	12.723		0.455055	10.4722
9.7696	9.065	15.316	15.749	12.911	12.105	10.548	1.2509	1.977	10.866	14.192	19.267	18.053	17.68	8.2291	13.3244	5.937	2.7496	2.8646	4.737	6.5446	1.861	4.4012	11.085	10.456	7.3153	10.7898	13.6419	13.3825	7.106	10.73	12.3515	7.5403	18.1416	9.942		0.460676	10.0621
9.8887	14.038	17.164	20.7103	15.067	17.167	12.54	2.8923	1.992	12.391	14.94	14.485	14.741	19.541	6.5133	11.8974	4.23	3.0597	2.2172	9.537	4.8986	3.3605	3.4744	15.982	11.872	5.8977	14.4554	13.3246	6.3138	8.0669	15.2297	12.2521	8.9764	17.8098	14.575		0.466292	10.9298
10.0079	10.933	16.55	22.9058	11.432	16.796	9.655	5.784	1.224	10.866	16.142	20.442	13.207	18.171	10.1017	14.0179	8.267	3.4398	3.7386	7.7875	5.0346	4.0446	5.7608	17.87	14.132	7.7101	10.0845	12.8518	6.5254	6.6366	11.607	8.0112	11.351	18.5282	13.348		0.471913	11.0281
10.127	9.956	11.796	15.6155	16.59	17.177	7.934	2.2122	2.473	8.549	13.292	16.766	14.076	14.048	9.7955	11.1841	5.66	3.4292	3.5378	5.3399	5.583	2.9301	7.1422	11.358	12.096	4.8976	8.8306	12.7441	9.0033	7.8992	12.1941	11.5469	9.2731	17.135	13.605		0.477529	9.87263
10.2462	9.319	9.982	16.7391	16.132	19.393	6.404	1.9371	2.126	9.556	12.299	15.307	11.401	10.71	10.0881	11.7184	4.706	3.5871	3.256	6.5547	5.6286	3.1416	5.0248	13.239	14.018	5.3322	9.1896	15.9619	6.781	9.0939	11.6565	9.0277	10.8366	15.3185	13.755		0.48315	9.68295
10.3653	12.343	15.048	14.2079	16.629	17.672	8.487	0.8964	2.378	9.096	16.543	18.025	13.354	14.908	5.6095	9.1906	4.98	2.2663	1.3302	7.6264	5.3266	2.8403	6.915	12.561	15.946	4.0107	7.0083	12.2183	4.6879	8.1572	10.8152	14.5354	10.4481	19.7737	14.68		0.488766	10.0151
10.4844	13.872	12.76	14.2914	16.103	14.894	8.873	1.9364	3.799	6.153	22.772	21.814	12.124	13.089	6.6505	10.9165	3.479	3.6482	2.8499	11.7226	3.8368	2.7488	4.8877	13.013	14.952	8.6543	8.0286	14.4974	4.0276	6.0854	17.3384	9.4381	12.8849	14.2636	16.065		0.494382	10.3667
10.6036	14.176	11.408	15.0275	15.156	14.792	5.438	1.3228	5.079	8.558	20.001	13.061	13.339	8.451	9.0873	8.0244	4.621	1.3328	3.0491	6.5864	6.2542	3.7638	6.6362	13.188	12.724	3.5003	7.7663	11.4309	7.0572	6.4109	10.2668	11.5623	10.8919	19.243	18.295		0.500002	9.63239
10.7227	14.038	8.816	13.4633	15.584	11.796	4.069	1.3143	3.189	8.98	19.729	14.753	22.298	10.146	6.6173	11.877	5.61	3.1936	1.8173	6.5385	4.6598	2.5777	4.1824	11.719	12.52	5.0479	7.5353	9.807	7.0751	5.5871	10.8117	12.6633	10.2205	15.7205	17.403		0.505618	9.45175
10.8419	9.507	13.93	16.3121	12.538	11.902	6.456	3.5574	4.395	7.775	19.385	13.125	14.108	9.648	8.2187	12.1752	4.373	2.6498	3.0975	8.5356	3.642	1.8686	8.2644	12.784	15.97	5.5235	4.2257	8.8971	4.0428	5.9309	9.3197	15.5459	12.525	14.6572	15.997		0.511239	9.43771
10.961	15.072	14.681	10.5659	12.673	16.49	4.577	3.6541	3.3	5.725	18.8	20.689	14.586	13.165	9.2789	9.2596	5.022	2.1805	1.8813	5.9459	3.4889	4.4086	7.9381	10.738	13.778	3.9	8.2644	12.3304	9.8997	4.1256	7.9689	13.7111	10.202	20.961	17.044		0.516855	9.89132
11.0801	12.289	16.871	13.1433	12.375	15.395	8.111	1.6828	3.043	10.267	16.982	15.664	15.7	16.306	7.9439	11.1241	4.678	2.5545	1.4332	5.72	3.6671	2.3776	4.2894	12.022	13.223	3.5427	6.3198	14.2189	5.8287	5.2621	9.1169	10.9869	10.4327	16.5786	14.222		0.522471	9.51092
11.1993	13.918	18.804	11.5632	11.514	17.247	5.674	2.7734	1.79	7.896	20.162	14.357	18.369	8.39	4.9448	12.1891	7.287	3.2954	1.0905	4.7919	3.234	2.1736	3.6969	13.334	9.678	4.3349	5.2253	12.1845	6.6908	4.0846	9.0174	9.7988	10.0098	21.3257	16.943		0.528092	9.34669
11.3184	17.357	16.048	10.1309	15.259	20.323	4.575	3.7255	2.622	7.561	22.382	18.786	15.665	10.268	12.1721	11.2999	5.608	3.331	1.5998	6.2145	3.6444	0.446	6.1632	11.287	13.765	2.603	3.5132	8.174	7.696	4.2644	7.9818	10.445	11.0185	14.3927	15.434		0.533708	9.58106
11.4376	10.304	14.414	11.197	12.034	15.644	6.997	2.1117	1.72	5.999	18.976	16.969	16.906	10.104	6.7049	11.6178	6.01	3.7828	1.337	6.6922	5.5654	2.8678	6.0126	6.532	12.65	4.9413	5.0508	11.9931	7.3554	1.7383	7.94	10.6933	12.581	21.9431	14.268		0.539329	9.16625
11.5567	14.747	15.541	9.3134	13.656	17.556	5.578	2.0905	0.932	9.048	13.605	10.456	18.449	16.076	7.5088	13.4387	4.18	2.6997	1.2979	5.3948	4.2531	3.3396	4.1961	7.267	11.705	4.7697	1.7857	12.395	3.7482	4.868	9.8762	10.6234	10.8831	19.1349	18.692		0.544945	9.09132
11.6758	14.257	15.807	11.8145	10.241	16.636	5.897	1.4894	2.33	4.925	12.872	18.121	20.634	13.072	6.483	13.5084	5.039	1.9354	3.4884	10.7282	4.1437	1.4992	4.6195	14.835	10.073	3.961	3.7094	11.8659	5.77	5.4706	5.178	11.2694	11.0841	22.6559	14.838		0.550561	9.41915
11.795	13.732	10.198	11.9546	10.056	19.344	5.505	1.9142	3.029	7.128	15.229	16.123	12.906	12.657	8.6501	9.5156	3.604	1.2101	4.6707	7.1014	4.4543	2.1883	5.2546	8.279	9.668	2.5526	4.4476	12.024	2.9672	2.3764	11.1769	9.8497	11.957	21.3884	12.057		0.556182	8.68143
11.9141	17.933	13.231	7.9019	14.244	15.411	5.912	2.3553	1.974	5.429	15.555	14.644	15.43	15.121	5.9561	9.9602	5.861	1.9609	1.8567	4.6571	5.4823	1.4209	4.3879	11.905	10.458	4.9226	3.383	10.5668	6.371	3.9079	10.9371	12.7835	9.1754	21.9491	13.566		0.561798	9.01793
12.0333	13.762	13.236	13.387	17.162	19.351	6.919	1.8719	2.761	8.558	18.58	15.062	13.754	11.874	6.1241	9.7398	7.859	2.4303	1.6727	4.2533	1.5235	2.6296	5.8737	10.466	10.293	5.9777	2.9114	8.9932	5.8163	3.2472	7.6399	13.4632	10.0962	19.8876	18.693		0.567418	9.29025
12.1524	12.525	10.813	11.021	14.006	12.088	6.27	0.2457	1.783	6.833	17.832	14.111	17.72	9.745	5.3311	10.1321	3.403	1.7854	1.6994	8.3593	4.1111	0.9395	3.4442	13.156	5.939	6.8409	2.1749	12.2125	6.5232	3.0202	10.2203	12.128	9.9377	19.3954	15.99		0.573035	8.58047
12.2716	11.469	14.801	8.6917	15.015	18.834	5.026	3.8596	2.687	7.723	20.465	18.411	12.888	9.68	6.7159	11.8221	4.215	2.5106	2.6172	9.3525	3.5752	1.6787	5.8826	10.944	8.964	2.6685	4.1416	12.1326	6.4753	2.2091	9.1432	8.5028	11.1062	17.0633	13.095		0.578655	8.95193
12.3907	13.531	13.561	10.4792	13.02	15.658	5.549	2.5799	1.739	9.683	18.618	12.734	12.965	11.961	7.3995	9.5036	6.482	3.1058	1.1233	6.2877	4.8772	2.1145	5.2986	12.26	6.579	3.8287	3.1668	6.8893	4.3485	1.0621	9.5069	8.876	9.2096	17.2238	17.514		0.584271	8.49221
12.5098	13.547	13.731	13.6001	10.969	12.256	4.01	1.7898	2.988	7.859	17.585	15.635	15.799	11.147	7.3257	10.6285	7.3	5.9295	1.7213	6.473	3.4589	2.2333	1.5039	11.888	9.638	2.5096	3.2548	6.7806	6.9995	1.8696	10.5481	7.4787	12.9418	15.3969	16.603		0.589887	8.62937
12.629	11.315	20.147	9.0186	16.318	14.569	4.945	2.8699	2.011	9.077	18.877	9.599	15.907	10.266	7.562	16.1851	8.193	2.1196	1.2304	4.2785	2.7305	0.4906	2.0036	10.693	7.751	3.8989	3.1856	12.8784	6.303	2.0204	7.7544	8.3668	10.9704	13.5465	17.898		0.595508	8.67586
12.7481	14.06	18.435	9.3189	11.895	12.289	6.335	1.5666	2.809	3.639	14.664	15.2	15.828	10.955	8.7383	9.3684	7.933	3.1486	1.3031	6.0486	1.7708	1.7585	5.28	6.952	5.909	3.6096	5.2324	9.7898	4.9813	3.0048	7.0842	10.6981	12.126	11.7978	24.065		0.601124	8.45864
12.8673	17.476	17.616	7.9177	15.787	12.565	7.708	0.4735	1.258	5.111	11.749	14.647	13.591	16.859	4.1986	6.9752	5.493	2.1992	3.5646	5.4039	4.0086	4.3605	5.3149	10.366	8.312	3.4088	3.9652	12.8581	5.1623	0.4173	4.013	10.4327	7.73	15.354	21.272		0.606745	8.45789
12.9864	12.151	19.599	11.966	17.157	10.749	7.504	1.3129	2.655	7.521	18.235	14.011	15.574	16.914	8.9061	8.5936	6.306	3.8986	1.9161	6.9706	5.3322	3.9591	6.2594	11.075	8.314	2.107	2.5014	10.7669	3.9646	0.7092	8.6105	9.5903	10.3173	18.1386	17.779		0.612361	9.15778
13.1055	9.948	17.516	9.1699	19.971	13.18	10.318	2.1912	2.5	7.137	13.921	12.992	17.588	9.619	6.6525	10.4421	11.388	3.8788	3.8503	3.6915	2.8461	1.7812	2.7021	12.966	7.245	2.2617	3.2765	9.5218	4.8837	1.1378	5.7006	7.9533	7.8829	20.5457	19.024		0.617977	8.69655
13.2247	11.034	17.427	11.7916	22.536	10.406	5.821	5.1617	3.78	8.724	14.424	10.195	13.736	16.446	9.1075	10.3216	10.688	1.7014	3.6971	5.1773	2.2309	1.9356	8.6062	13.332	5.03	4.6592	2.2083	8.1871	3.5055	3.2834	6.5966	11.1682	10.6715	19.2345	18.555		0.623598	9.15821
13.3438	15.509	17.341	6.7791	28.725	19.439	6.238	2.1354	2.574	5.427	16.883	14.987	14.014	12.744	12.1197	14.7471	8.542	2.9384	2.34	7.9985	3.9444	1.2956	4.3442	12.117	3.515	1.9014	1.4758	9.2569	3.3997	1.1323	6.7169	10.0919	10.2096	15.4027	17.437		0.629214	9.22711
13.463	13.648	14.381	13.9214	19.275	10.466	6.669	2.0988	1.962	9.377	11.043	15.199	18.869	14.236	12.1182	10.1115	6.914	2.4158	0.8265	8.5959	2.2616	4.7697	2.1348	14.722	3.17	1.34	2.1868	9.4826	5.8289	2.1251	4.2238	14.003	11.2629	18.1604	20.887		0.634835	9.07899
13.5821	10.175	12.192	13.192	25.929	18.587	10.695	3.653	2.508	12.563	12.551	13.155	12.495	10.669	11.799	9.3434	11.632	4.3365	4.7936	5.9439	4.3397	1.1734	3.3564	14.554	7.832	1.3473	4.1255	6.4139	5.7714	0.6722	3.8037	10.9135	7.3378	13.9392	13.347		0.640451	8.97469
13.7012	12.505	12.153	19.2972	20.199	16.543	7.635	4.1707	3.148	6.591	16.799	7.205	12.748	11.112	8.4114	6.7811	10.384	2.9468	2.4617	4.534	1.552	1.7289	3.2311	7.308	7.282	1.8353	3.4235	9.4922	4.3718	1.4538	2.7619	16.2842	7.2464	13.5591	14.194		0.646067	8.27497
13.8204	14.49	11.031	16.3926	15.854	21.384	12.706	1.4294	2.514	7.44	14.651	15.193	14.579	9.445	8.5249	9.5602	8.242	3.4369	3.7613	4.5194	1.5441	1.8972	5.8252	10.804	7.905	0.7197	2.4882	4.5893	5.2494	1.4554	5.4834	14.164	6.2925	14.8215	15.225		0.651687	8.63581
13.9395	14.357	11.672	13.8178	20.391	11.717	11.773	2.8676	3.448	8.492	14.011	14.924	13.247	16.282	7.9051	12.5912	7.937	3.2648	2.4904	6.5576	4.6562	3.986	3.9225	12.534	3.544	1.8904	4.8422	9.0285	4.2977	3.7715	3.2842	10.6829	10.1262	12.1068	12.93		0.657303	8.80437
14.0587	15.046	9.943	11.8782	12.684	15.272	11.27	1.4474	1.31	5.497	12.293	13.55	18.645	18.219	8.6338	7.9529	6.441	2.1678	3.3142	3.8577	4.2993	1.264	3.8835	14.102	4.849	0.5862	1.1613	10.4764	3.5362	3.3433	4.0811	14.696	5.3214	13.4187	12.158		0.662924	8.13525
14.1778	9.313	9.666	8.3907	18.919	14.609	15.204	2.6531	3.525	9.79	17.698	14.408	22.208	11.551	15.7023	8.2801	7.166	1.9338	3.1935	3.4507	4.2172	1.6603	5.5141	11.827	5.734	1.4602	2.3378	9.9226	7.2451	2.794	5.6725	8.5264	9.3534	15.844	9.863		0.66854	8.81273
14.297	13.619	14.196	10.1895	16.69	15.808	12.156	2.2085	1.887	10.561	19.501	12.471	13.536	10.766	13.7079	8.7916	9.6	4.4905	3.5219	2.9315	3.0062	1.5157	2.5988	14.391	7.881	1.9783	3.761	10.5137	4.738	0.9912	1.9071	10.1728	8.3776	8.7558	15.732		0.674161	8.61625
14.4161	14.49	10.672	9.54	21.167	16.979	7.147	3.9364	2.019	14.276	17.867	11.065	18.69	11.535	10.6904	9.2903	8.341	4.5	1.3705	4.243	1.8954	3.7147	5.7036	14.803	6.596	2.8011	2.2063	10.2903	2.3231	3.4675	2.3179	8.5167	7.6672	13.4435	13.187		0.679777	8.728
14.5352	13.13	12.915	9.2086	19.681	18.568	8.078	1.5397	3.713	11.932	17.6	10.846	17.086	12.578	8.3812	7.3993	7.422	4.0925	4.2731	5.6142	1.0442	3.2616	4.0727	8.764	4.41	1.2073	1.4173	5.7686	4.2914	2.1088	1.4027	9.6768	7.3425	7.518	11.745		0.685393	7.88496
14.6544	14.849	10.969	5.8418	18.268	20.116	8.27	3.6984	3.948	12.982	18.245	13.547	12.611	12.955	12.8143	13.439	3.804	4.6307	3.4172	5.1511	4.0781	5.1648	4.7197	9.973	4.555	2.3968	3.4766	11.6803	4.6141	2.3418	1.377	7.5586	7.9912	12.8661	14.589		0.691014	8.73349
14.7735	15.502	8.088	13.9174	14.728	19.74	9.509	4.0959	3.499	11.407	15.021	12.454	12.744	10.58	14.3391	11.2744	6.201	5.7068	0.2564	3.4032	3.786	1.1459	5.7479	12.64	2.663	3.501	2.8734	8.1983	7.2089	1.7854	2.6136	7.1292	8.4945	15.0576	13.596		0.69663	8.49726
14.8927	11.555	12.806	12.6778	19.009	12.948	8.828	3.2125	2.634	8.433	14.032	10.361	13.084	11.208	12.131	10.363	9.123	4.4969	2.7178	2.2372	2.1387	2.9014	2.9878	10.443	3.493	1.0575	3.4968	5.8184	3.4858	1.4084	2.54	10.3909	5.2236	8.1572	11.817		0.702251	7.5652
15.0118	14.719	11.323	18.6245	11.461	17.752	11.095	2.9501	1.877	14.343	14.11	12.068	16.453	10.173	9.8947	11.2045	10.087	3.7206	3.4638	3.2545	3.7695	4.226	3.5129	10.439	3.768	1.6597	2.2494	8.5919	6.4214	2.4255	2.694	8.8435	7.4539	10.1337	11.171		0.707867	8.4098
15.1309	12.218	13.897	13.4314	16.057	17.791	11.561	2.833	2.959	12.279	12.844	13.584	14.06	9.948	13.1302	6.6195	7.968	6.518	4.967	6.8651	2.5233	5.4573	4.6604	12.93	5.082	2.3932	4.1855	6.7428	5.9142	0.7138	2.4501	12.2099	11.5298	5.6962	13.4		0.713483	8.68879
15.2501	13.894	11.4	14.2146	13.049	16.659	15.184	2.2699	1.129	11.806	18.019	10.008	10.908	12.084	14.502	8.3804	4.871	3.7815	3.6145	2.1347	2.7242	3.9215	1.7371	9.004	6.067	1.6377	2.0515	9.1484	2.7831	1.007	3.3337	7.903	9.5331	9.3585	15.602		0.719104	8.0506
15.3692	11.257	11.53	12.2405	15.483	15.043	13.804	2.7976	1.965	10.75	16.865	10.787	11.913	6.989	11.4738	8.0092	4.926	4.9246	5.072	2.8777	4.6972	2.9264	5.0146	8.087	6.066	0.7813	2.0605	9.2431	6.1702	0.2922	4.4031	9.2852	8.4001	13.9772	14.693		0.72472	8.08249
15.4884	15.515	10.212	10.9002	13.722	17.971	10.964	4.2933	0.864	10.267	12.789	9.796	14.399	11.743	13.7653	7.7759	5.971	3.9564	2.7878	1.4539	4.3285	4.9564	3.9868	11.125	6.394	2.3242	2.3703	11.4073	5.1974	2.8354	1.9297	8.7728	8.0009	8.9391	13.023		0.73034	8.08049
15.6075	13.128	11.292	15.92	14.061	15.897	12.748	2.9822	2.219	13.147	14.946	15.262	10.801	7.466	16.3666	4.8644	5.26	6.2211	3.3706	3.3045	3.0831	2.3658	3.6994	5.999	6.204	0.8662	2.1382	8.0631	7.3804	1.3034	1.9134	7.0445	8.8551	6.7113	13.138		0.735956	7.88298
15.7266	12.97	10.974	13.0981	12.712	17.611	11.285	4.4026	1.974	15.718	13.549	11.658	16.096	12.822	12.1408	9.6472	6.428	2.7459	2.788	2.1419	3.3962	3.5398	5.3902	7.575	4.577	0.8917	4.1451	7.9121	7.7977	2.3873	4.6106	7.6632	9.8723	13.1024	11.673		0.741572	8.39103
15.8458	14.731	9.885	15.2355	15.145	20.18	15.361	2.6368	1.207	10.753	12.609	11.146	11.533	6.871	14.6632	7.4997	5.613	1.775	3.4996	1.4248	2.9785	3.2652	4.8188	9.343	9.599	2.594	3.0206	7.3133	5.1841	2.9972	2.4916	8.796	11.4559	11.0876	13.181		0.747193	8.23219
15.9649	13.826	13.465	11.438	19.341	15.046	11.815	5.662	2.395	13.963	17.949	9.842	10.767	10.162	13.3434	8.1445	6.369	3.8883	0.8845	2.7573	3.5767	2.0141	5.9493	9.503	4.722	2.0662	1.4377	8.291	6.1389	2.7088	1.6123	8.6093	11.8622	8.5528	9.059		0.752809	8.1518
16.0841	17.57	13.177	10.6803	11.49	14.178	12.042	4.2607	3.908	12.585	15.114	14.981	8.926	13.511	11.9199	9.658	3.51	1.2102	1.5497	2.6898	0.6117	6.7902	3.1613	12.889	7.42	2.0706	2.3702	7.3278	6.3879	1.6733	2.3601	7.2435	12.843	7.3107	13.086		0.75843	8.13253
16.2032	14.653	8.216	13.4764	13.683	17.517	10.634	4.0174	1.272	13.21	20.504	12.944	14.234	10.033	11.8231	6.0389	4.382	0.6276	1.4111	2.1343	3.1902	3.4189	3.6632	10.816	5.745	1.1309	7.005	9.6816	5.6438	1.8651	2.6978	7.1265	8.6065	8.4893	11.799		0.764046	7.99087
16.3224	9.155	10.877	15.3146	11.978	18.689	12.116	3.4895	4.64	15.118	10.661	9.059	9.468	7.935	16.4791	5.7767	4.745	1.5441	2.1165	3.892	1.2822	4.1443	3.9178	11.464	5.685	1.6696	4.3263	7.6646	4.3722	2.1135	1.4905	7.1978	6.4055	9.7721	10.302		0.769667	7.49591
16.4415	11.82	10.014	11.0064	17.847	17.187	16.171	4.3017	2.513	9.854	13.059	11.493	15.525	5.693	8.4226	5.1456	4.792	1.8689	2.019	2.2536	2.0193	3.9461	1.058	5.711	5.951	3.8176	3.1818	7.5821	4.7595	1.1579	4.6986	8.0022	10.8833	7.809	11.035		0.775283	7.42936
16.5606	14.015	13.105	11.3653	19.262	17.247	13.514	7.1381	3.628	15.089	16.258	12.606	10.768	7.85	8.6231	5.9909	3.969	1.8151	0.5106	1.0208	2.432	2.1809	2.345	6.037	4.879	1.8082	1.8513	11.4251	5.1185	0.4531	5.1033	6.0501	9.4147	5.9488	11.05		0.780899	7.64329
16.6798	16.997	12.648	9.9536	18.303	18.199	15.051	6.2568	3.865	14.788	16.587	10.12	7.087	10.106	9.9199	6.7872	2.942	0.824	2.7494	1.7441	2.2038	2.6855	2.4929	7.782	7.189	3.9883	3.6869	9.1879	3.573	2.7824	5.1991	11.8198	12.343	10.4694	7.106		0.78652	8.15991
16.7989	9.845	14.016	15.2649	17.024	23.68	20.113	10.1463	2.481	10.771	12.68	8.034	11.189	6.149	8.8759	3.5456	3.909	2.1964	1.505	2.9441	2.6077	1.0882	5.177	7.902	4.426	2.4184	3.7184	4.2744	6.4399	2.6073	4.148	9.0221	11.2013	8.9525	9.22		0.792136	7.86978
16.9181	11.072	15.434	15.9181	18.327	21.363	24.011	8.8468	5.266	18.164	10.284	12.267	9.4	9.473	8.8835	7.2298	3.079	0.5443	2.0568	1.3131	2.7308	3.793	2.837	9.097	7.021	3.3356	3.2888	5.39	5.4405	2.6694	3.6444	8.427	7.0098	8.883	6.775		0.797756	8.33161
17.0372	12.934	10.279	10.9417	17.792	23.375	22.07	7.228	5.834	12.984	10.746	12.828	11.666	12.446	9.0701	3.8191	1.56	1.8986	1.4169	0.8132	2.9987	2.5401	4.9289	9.401	3.639	4.2176	3.0504	5.809	7.3402	2.4251	3.0826	12.0124	10.6601	9.2327	6.194		0.803372	8.15392
17.1563	15.543	15.967	15.6822	6.401	15.725	23.33	11.1241	10.574	13.649	14.677	16.134	10.39	7.137	8.0359	3.4717	0.789	0.7096	1.5723	0.6311	0.0974	2.6464	4.921	7.054	6.072	1.6673	2.615	8.0105	4.6549	1.9157	1.1861	9.214	7.4211	6.3279	5.224		0.808988	7.66383
17.2755	11.644	12.845	13.0951	13.74	15.224	20.195	11.4366	13.553	13.777	14.478	10.749	9.662	7.61	7.3953	5.7436	2.291	0.6998	1.7812	1.4651	1.8552	0.9387	3.0434	10.258	5.544	2.4378	4.8882	5.6286	4.0266	2.9529	2.6155	6.6703	10.1439	8.3384	7.598		0.814609	7.77424
17.3946	7.106	9.386	22.2053	12.561	14.466	15.894	10.3842	14.099	12.955	17.524	11.092	14.937	6.432	9.1201	2.7212	0.482	0.7275	1.4758	0.7554	1.4286	1.9088	2.419	5.027	6.637	2.9412	4.2108	8.1778	5.0912	1.278	2.1323	6.3559	5.643	8.3398	9.904		0.820225	7.52406
17.5138	15.2	11.481	16.9219	14.719	12.139	13.048	10.7371	9.79	11.941	14.392	15.072	11.046	6.029	9.8046	4.3475	3.994	0.0999	3.4423	1.9216	2.7267	3.8997	3.0562	4.746	9.279	2.1745	3.3768	5.0348	3.9494	1.3513	4.1125	5.2845	7.4226	7.9939	8.449		0.825846	7.61714
17.6329	10.618	15.39	17.9778	13.198	16.727	16.699	10.3115	11.358	16.56	11.79	10.72	8.749	7.894	5.9668	4.5485	1.379	1.7892	0.528	1.7799	1.6863	3.7396	4.1852	9.058	7.275	1.8063	1.9804	4.8112	5.3704	1.1747	3.8255	5.7465	8.4411	7.418	5.886		0.831462	7.54082
17.7521	11.293	13.139	12.5597	14.268	20.595	14.861	16.3281	11.163	13.894	13	12.607	10.707	9.736	8.4197	2.1632	1.243	0.888	0.8447	0.3304	1.5989	2.617	4.5617	8.644	7.098	3.5324	4.5173	6.7525	3.2735	3.7006	2.1454	8.1006	5.6557	9.7529	6.932		0.837083	7.85066
17.8712	14.842	8.048	21.3499	11.468	15.364	13.817	13.9049	15.217	17.766	14.308	12.775	10.145	7.267	4.7529	3.3712	0.297	1.249	1.2208	1.4017	0.7658	2.0305	4.8847	12.13	9.952	6.3992	4.1739	8.8453	4.6989	3.7341	2.3082	6.6516	9.2635	7.9224	7.388		0.842699	8.22684
17.9903	9.566	15.257	21.54	15.036	15.815	18.739	15.6505	15.703	14.162	13.083	11.27	11.546	8.362	5.1023	2.6213	0.313	0.9302	0.9756	1.2187	1.2202	2.5181	4.8125	6.433	11.79	4.8813	1.4439	9.7607	4.2559	2.1181	3.7678	7.3491	6.5295	8.2954	5.961		0.848315	8.17727
18.1095	18.198	9.969	14.6517	12.174	20.508	17.86	13.1434	16.82	16.129	9.523	11.843	13.84	7.876	4.9596	1.076	1.674	0.3405	0.0441	1.6034	1.1432	2.8199	4.401	7.172	10.943	6.3927	2.3575	4.2475	4.0075	3.061	2.9394	11.3721	4.4267	7.5935	8.928		0.853936	8.05993
18.2286	9.237	13.02	18.3959	12.118	15.116	14.352	13.3528	15.082	12.466	16.02	11.036	8.571	7.953	4.6204	2.0182	2.154	0.3906	0.7588	1.2866	1.5528	3.5153	2.0705	6.167	6.389	5.398	2.1415	5.9773	4.2795	4.0521	1.3945	8.0814	12.44	4.5865	9.604		0.859552	7.51758
18.3478	11.778	9.168	22.6491	15.141	18.916	18.207	12.3264	13.084	13.579	8.813	10.66	5.131	6.701	3.1427	0.8701	1.786	0.3248	0.9153	0.6133	1.196	2.5716	3.6905	7.55	7.346	7.0229	6.8349	10.3887	3.6019	4.1679	5.8031	9.5754	9.1422	7.1332	16.43		0.865173	8.12529
18.4669	12.939	8.984	19.5843	15.607	16.071	11.804	8.404	13.706	17.059	13.467	7.999	10.731	6.812	2.1137	2.1129	0.452	0.8828	0.2541	1.9253	1.3353	3.2157	4.1484	5.418	5.063	7.261	4.8948	6.4153	3.0215	2.8005	3.0449	6.9961	10.7924	9.0712	13.896		0.870789	7.59654
18.586	18.9	8.984	15.0603	15.62	12.886	9.626	12.1547	17.35	18.226	10.531	12.079	9.075	8.048	7.5271	1.3564	0.568	0.0884	0.7479	1.2039	2.0118	2.7839	3.7951	4.613	3.972	6.7272	3.6928	5.3707	4.5298	7.4351	3.2102	5.5924	10.9757	7.7747	18.721		0.876405	7.97756
18.7052	14.797	8.648	12.8942	11.573	16.605	10.894	13.8858	13.984	12.267	12.318	5.33	5.218	2.935	6.5506	1.7761	0.183	1.8397	0.9746	0.8913	0.7104	0.2081	4.1491	5.132	5.532	3.8402	6.0539	5.7865	4.0641	5.3653	6.6819	10.6654	8.0439	12.2674	21.097		0.882025	7.44593
18.8243	13.526	12.946	15.7445	14.32	19.108	6.881	13.5713	11.897	14.752	9.126	7.553	6.824	2.785	2.9639	2.579	0.61	0.37	0.0257	0.6575	1.0455	0.6732	4.4992	8.56	4.432	6.4329	2.8579	4.3049	1.5346	2.8284	4.9818	6.2311	9.6683	5.7407	18.277		0.887641	7.00904
18.9435	16.301	12.93	12.1493	13.67	12.629	13.245	15.5219	12.516	16.466	11.07	6.227	6.959	3.394	2.2326	1.3142	0.296	0.24	0.0517	0.7225	0.0362	0.6087	2.6216	6.551	8.567	9.3009	2.0064	6.7201	2.945	3.1301	2.8563	6.1125	9.0543	7.8089	20.921		0.893262	7.26986
19.0626	15.89	14.038	13.357	15.32	15.851	13.906	11.5935	12.352	13.51	7.839	8.968	4.332	3.286	1.1061	1.9578	0	1.3661	1.0134	0.0031	0.9767	2.0669	2.2718	7.488	11.318	9.9172	4.932	3.5008	0.8029	3.2834	8.28	5.8736	11.5115	7.5377	13.875		0.898878	7.33307
19.1817	13.392	13.068	13.4777	13.681	14.813	10.286	16.8724	8.2	12.383	8.784	7.987	8.421	1.744	2.2694	0.5476	0.489	0.3651	0.1569	0.0289	0.1528	3.2384	1.7353	4.706	7.318	7.705	2.7594	4.697	1.0035	2.4683	4.8213	7.4027	8.683	5.8833	19.156		0.904494	6.72635
19.3009	6.659	13.986	13.8916	9.651	15.656	14.347	13.4918	9.147	11.368	11.267	7.542	4.645	0.923	3.1437	0.8204	0.149	0.0512	0.0165	0.5372	0.9792	1.6435	1.6812	2.313	9.463	3.0134	3.1732	3.0351	4.0771	5.1209	3.0596	5.2364	6.1015	6.2782	14.697		0.910115	6.09308
19.42	8.64	9.498	13.7351	10.886	13.635	14.742	15.5256	8.513	14.823	12.195	7.806	2.987	1.339	1.1771	1.8863	0.243	0.5567	0.5909	0.3	1.187	0.5102	1.3003	2.368	5.866	2.6898	3.798	3.7516	1.8773	2.3492	3.3078	7.8955	7.4301	7.4758	7.146		0.915731	5.82445
19.5392	9.029	8.291	13.3328	9.432	16.943	9.835	12.2852	9.14	8.213	10.842	5.887	2.942	2.51	1.7588	0.15	0.399	0.1143	1.2816	0.7777	0.629	1.0419	2.3197	5.12	8.741	7.6369	1.3161	2.5778	2.9276	1.5411	5.2351	5.349	4.9947	9.8376	13.734		0.921352	5.76956
19.6583	6.389	8.218	9.3411	10.96	8.87	11.398	12.8436	8.447	7.995	8.552	8.074	2.634	0.81	0.6539	0.874	0.913	0.0248	0.1578	0.233	1.5041	0.3473	1.1444	3.769	5.529	5.0581	3.872	2.3244	1.3946	2.9533	6.1448	5.3264	6.3421	6.8191	13.216		0.926968	5.09214
19.7775	7.765	10.06	7.5717	9.381	14.051	8.635	13.0331	4.767	7.825	10.592	4.388	2.069	0.535	1.5108	0.3431	0.619	0.2715	0.8341	0.4334	1.1427	1.0431	0.0448	1.493	6.902	3.3873	2.3587	3.2337	2.0114	5.2359	3.876	5.3005	5.8354	10.3169	13.867		0.932589	5.02156
19.8966	10.235	6.521	12.6159	13.058	9.937	13.654	10.7695	4.464	4.727	13.438	2.27	1.886	1.053	0.7733	0.9123	0.731	0.3705	0.3066	0.0029	0.6524	0.8861	3.5489	2.915	5.551	4.8045	1.79	4.1799	3.3355	4.4274	6.7159	3.4649	4.4092	9.341	10.972		0.938205	5.13879
20.0157	6.808	9.358	15.604	8.704	7.507	13.158	7.134	3.65	3.702	7.864	1.929	1.211	1.07	0.0433	1.1013	0.012	0.0123	0	0.1535	0.3678	1.3411	1.1826	2.722	4.075	6.4893	2.1297	1.3588	1.8194	4.4886	6.2134	5.18	5.4289	8.5308	6.042		0.943821	4.30561
20.1349	3.863	11.624	11.69	8.777	7.76	15.339	10.0152	2.481	3.705	6.111	0.517	0.006	0.903	1.0839	0.0554	0.685	0.2876	0.2652	0.5063	0.9472	1.5264	0.6585	2.348	7.277	3.4367	2.2085	2.131	0.5031	1.1649	3.9398	5.8742	6.061	8.1063	8.793		0.949441	4.13677
20.254	2.923	9.991	14.7243	11.202	5.161	12.514	7.6874	2.161	3.23	2.925	1.469	0.272	0.01	0.5243	0.5909	0.358	1.5311	0.0157	1.8502	0.5873	0.8781	1.1148	3.483	4.543	4.5496	3.4368	1.8914	2.8914	1.0191	2.9155	6.7907	5.8261	7.0008	4.886		0.955058	3.85157
20.3732	1.868	3.41	8.6877	7.808	7.83	11.588	6.5198	3.26	2.068	3.42	0.751	0.031	0.269	1.4487	0	0.048	0.4266	0.0525	0.5847	0.8888	0.4544	2.0848	0.931	2.268	5.153	1.3995	1.4091	2.2842	0.8818	5.5336	4.8303	4.8314	6.7878	6.094		0.960678	3.11479
20.4923	3.301	5.028	11.6104	6.439	4.031	10.918	4.9097	1.698	5.365	1.824	0.679	1.998	0.159	0.653	0.9486	1.65	0.0201	0.2114	0.9102	0.1893	0.4827	0.4075	2.355	4.403	4.8158	2.6011	0.8703	1.0991	0.9304	2.684	3.2466	2.7596	4.3713	7.726		0.966294	2.97927
20.6114	2.335	6.296	8.9479	7.267	3.944	6.902	6.4446	0.229	3.734	0.917	1.316	1.221	0.785	0.4204	0.3519	0.057	0	0.3441	0.7548	1.4225	0.9434	0.2266	2.152	2.494	2.925	2.2899	1.732	1.334	2.2867	3.264	1.5017	4.3131	4.8586	6.03		0.97191	2.64824
20.7306	1.491	3.284	7.3491	5.799	4.145	4.155	2.5192	0.097	0.766	0.103	0.709	0.084	0.0001684	0.4927	0.984	1.05	0	0	0.647	0.3756	0.8362	0.7142	3.153	1.643	0.9552	1.8481	1.8172	1.9726	2.1345	2.861	3.7829	2.2882	10.4461	7.655		0.977531	2.23994
20.8497	2.426	4.557	9.1767	0.888	2.298	4.046	2.2027	0.423	2.231	0.457	0.862	1.025	0.742	1.7383	0.0044	0.053	0	0.1592	0.7296	0.4745	0.8327	0.0012	1.834	2.783	1.6206	2.5993	1.6282	0.3221	0.3954	2.7173	4.2653	3.9484	6.0839	12.835		0.983147	2.24588
20.9689	0.64	3.092	4.284	1.439	1.534	3.901	2.4801	0.629	1.383	1.083	2.275	0.654	0.369	0.1087	0.0686	0.589	0	0.0075	1.0549	1.1318	0.0701	0.4453	0.714	2.492	2.3797	2.0923	0.0844	1.3299	0.2141	3.1714	3.6032	6.4525	6.1407	6.113		0.988768	1.8243
21.088	0.875	0.055	4.5607	0.808	1.54	1.41	2.5675	0.569	0.462	0.127	1.16	0.541	0.524	0.7572	0.9376	0.598	0	0.0004	0.0331	1.2597	0.3671	0.0911	0.634	2.549	1.3866	1.2271	1.2128	0.7639	1.24	2.4137	1.6209	3.0296	5.127	5.054		0.994384	1.33829
21.2071	0.619	0.718	2.0062	0.763	0.688	0.658	2.6724	0.382	0.399	0.028	1.011	0.119	0.062	0.8961	0.7803	0.07	0	0.025	0.9627	1.1474	0.2246	0.6099	2.65	0.602	2.1368	1.9152	0.5212	4.4214	2.6716	2.6212	0.6615	3.7955	4.3217	3.882		1	1.32476

## Sheet: Image12
X0	Y0	Y1	Y2	Y3	Y4	Y5	Y6	Y7	Y8	Y9	Y10	Y11	Y12	Y13	Y14	Y15	Y16	Y17	Y18	Y19	Y20	Y21	Y22	Y23	Y24	Y25	Y26	Y27	Y28	Y29	Y30		Ap-basal	Avg intensity
0	24.889	58.333	42.278	49.1667	55.222	57.611	53.889	44.333	43.833	48.222	27.833	25.556	25.6667	14.6667	11.5	19.444	11.8889	17.1111	20.944	15.6667	9.3333	18.8333	38.778	44.2778	21.5	21.889	56.2222	55.5	100.611	9.2778	10.1667		0	34.0143
0.1191	20.333	58.611	40.333	40.2778	48.222	62.167	64.722	54.944	48.389	52.333	37.611	46.111	23.6667	17.7222	14.1111	20.111	15.1111	20	27.333	20.8333	19.3889	22.7222	41.222	58	17.3889	39.944	59.3889	73.333	101.722	13.3889	18.7222		0.00588032	38.6504
0.2383	23.889	78.722	46.611	49.0556	60.722	66.333	73	46.611	57.333	48.667	46.056	44.944	33.2222	28.7778	14.9444	26.333	17.7778	22.5556	31.056	16.8889	16.9444	26.3889	42.5	62.0556	20.8333	30.667	60.4444	68.667	115.222	11.8889	21.5556		0.0117656	42.2796
0.3574	27.222	94.5	55.611	68.7222	61.167	75.722	85.944	59.556	62.722	54.833	39.667	57.389	45.7778	22.1111	18.6111	32.111	16.5	27.3889	30.611	24.4444	23.3889	27.9444	56.222	60.6667	21	49	73.5	62.333	118.278	13.2222	21.1667		0.0176459	47.9785
0.4766	27	92.833	47.111	48.2778	66	75.444	78.5	80.167	71.722	61.5	43.222	72.389	33.7222	23.0556	17	37.889	21.5556	40	50	44.1667	28.5556	41.3889	63	54.2778	22.7222	48.722	72.7222	74.556	106.611	19	21.2778		0.0235312	51.1093
0.5957	47.167	96.833	59	52.8333	68.333	79	88.056	83.611	74.056	70.444	56.222	79.444	39.6667	31.5	20.5	40.778	23.1667	45.5	70.611	45.3333	34.6667	41.7222	55	58.3889	28.6667	66.444	78.0556	89.056	103.556	24.5556	30.0556		0.0294115	57.491
0.7148	39.167	107.833	63.167	47.4444	78.278	87.778	77.778	84.333	75.833	93.5	69.722	78.5	44.9444	35.6667	24.8889	65.778	30.0556	59.4444	84.222	47.7222	53.9444	52.1111	72.111	59	27.2222	67.5	78.8889	76.889	100.111	24.3333	31.2778		0.0352918	62.5627
0.834	42.278	107.444	80.778	45.8889	86.389	88.167	79.833	105.111	100.333	104.444	70.5	77.5	39.1667	33.2778	20.4444	82.278	28.3889	72.6667	102.333	55.7222	66.6667	49.3333	69.722	64.8889	26.7778	84.667	90.1111	90.611	98.333	33.2778	39.4444		0.0411771	68.9283
0.9531	50.5	127.389	76.833	54.3889	101.778	102.778	85	114.111	112.944	132.611	86.222	97.5	46.3333	36.6667	34.3333	102	39.5	95.9444	100.389	57.3333	72	54.7778	76.722	58.5	27.7222	81.222	88.4444	94.722	89	27.3333	37		0.0470574	76.1935
1.0723	63.611	122.222	88.111	61	104.889	97.944	95.333	150.833	96.278	142.778	79.389	91.556	55.0556	41.8333	45.1667	104.944	44.6667	88.2778	102.556	64	95.1111	62.5556	80.056	67.4444	43.2778	84.556	89.2778	106.556	95.278	38.3333	31.1667		0.0529426	81.7438
1.1914	74.167	112.889	85.389	68.8333	112.056	89.722	86.667	135	117.944	145.333	107.167	97.167	66.1111	57.3333	48.6667	111.833	60.1111	100.833	97.944	55.1667	91.2222	50.0556	90.333	62.2222	36.5556	82.444	88.1667	100.167	86.056	34.7222	42.8889		0.0588229	83.7151
1.3106	80.389	136.111	88.056	62.5556	96.889	98.944	95.222	143.611	128.833	155.833	117.889	101.5	75.1111	56.7778	51.7778	116.778	68	95.7778	101.944	59.2222	96.6667	62.7778	89.611	62.5556	42.5	95.667	88.1667	96.611	108.111	36.2778	39.3889		0.0647082	88.6953
1.4297	98.389	127.222	97.222	64.1111	111.056	105.611	97	155.944	146.444	161.167	123.944	103.278	76.6667	50.5	51.7778	107.222	81.9444	85.2222	95.556	60.4444	86.2778	75.6111	108.444	58.5556	40.8333	94.778	94.5	116.889	91.333	43.2778	46.2222		0.0705885	92.1756
1.5488	102.611	134.5	94.167	61.5556	115.556	107.389	103.444	158.611	144.833	160.222	133.667	107.778	79.7778	47.8889	57.9444	115.778	89.2222	81.1667	83.778	58.0556	90.1667	78.0556	104.722	46.4444	50.4444	94.833	85.3333	105.667	100.111	58.9444	46.6111		0.0764688	93.5251
1.668	116.944	141.222	102.389	70.6111	133.778	106.889	104.111	150.111	138.778	167.778	147.722	109.222	86.1111	47.9444	52.1111	110.889	79.3333	70.8889	79.5	59.2222	102.167	82.7222	118.833	40.2222	41.8333	99.722	88.9444	109.278	88.444	55.0556	35.8889		0.0823541	94.7957
1.7871	117.667	132.167	87.833	62.5556	147.889	97.889	101.944	149.611	163	162.167	149.444	116.222	90.3333	50.3889	57.7778	125.611	82	63.4444	74.056	49.6111	81.8889	82.1667	99.833	41.2778	50.3889	115.5	90.3333	114.722	91.833	62.5556	39.2222		0.0882344	95.2043
1.9063	107.889	148.944	95.333	60.4444	148	99.611	111.167	141.722	152.722	164.944	141.389	105.111	84.0556	42.2778	62.1111	107.833	68.1111	47.0556	69.722	55.3333	90.1111	90.5	108.389	51.6111	57.3889	116.5	101.944	106.556	92.944	71.5	35.1111		0.0941197	94.7204
2.0254	117.611	133.778	98.278	65.3889	153.111	127.611	108.611	135.5	134.167	156.056	129.111	115.889	68.0556	51.5556	60.0556	105.889	69.5	38.6667	62.444	55.4444	84.1667	80.2222	97.333	40.6667	49.3333	133.778	91.5	94.389	77.056	69.3889	42.4444		0.1	91.8387
2.1445	119.056	142.5	94.167	70.9444	142.444	112.778	109.444	113.833	136.722	172.944	139	122.722	83.5	58.2778	62.3889	112.556	59	38.7778	66.944	56.0556	86.8889	71.7778	97.722	33	62.9444	126.667	86.2778	108.167	88.167	75.7778	42.5556		0.10588	93.3548
2.2637	115.5	146.889	89.056	76.0556	135.944	133.444	114.833	106.611	121.833	170	166.556	128.944	62.6667	69.1667	53.2778	105.167	56.8333	34	51.5	47.2778	85	77.7778	88.611	29.1111	68.0556	137.833	100.056	96.444	98.667	74	43.7222		0.111766	93.0591
2.3828	109.556	159.611	90.722	75.3333	138.056	139.833	115.278	114	129.944	180.167	154.333	102.889	55.8333	85.4444	55.3333	91.944	55.3333	34.8889	45.222	48.7778	84.6111	69.0556	91.667	35	56.2778	130.444	95.3889	108.611	94.611	86.5	48.1667		0.117646	92.9946
2.502	120.167	142.333	78.5	68.3889	140.278	137.722	113.778	91.111	134.444	186.611	157.833	122	54.3889	84.2778	51.5	85.444	55.4444	26.3333	39.5	36.3333	79.2222	85.3333	78.611	28.6667	58.8889	133.667	98.5	116.278	94.056	77.4444	38.8333		0.123531	90.8351
2.6211	130.556	132.278	86	80.2778	137.889	148.611	118.778	95.333	114.889	185.556	148.278	119.889	43.3333	72.1111	53.0556	79.722	48.3889	25.2778	34.833	38.1667	72.8333	66.6667	91.5	25.4444	63.1667	123.833	102.389	117.111	100.667	75.5	41.5		0.129411	89.4785
2.7402	138.833	139.444	79.333	79.8889	142.944	160.5	136.556	95.556	113.389	172.167	157.556	114.667	38.5	72.2778	48.5556	72.556	41.8333	19.6667	31.944	34.9444	71	64.2778	78.722	29.5556	68.6111	135.056	87.5556	117.833	96.444	84.2222	44.3333		0.135292	89.3136
2.8594	137.389	128.278	72.444	77.7222	146.556	152.111	128.167	94.833	99.167	178.278	163.389	108.889	33.5556	67.0556	50.5556	73.611	36.6111	22.9444	29.833	27.8889	57.5556	73.9444	63.833	22.8889	80.4444	132	90	136.667	95.278	84.7222	45.9444		0.141177	87.5018
2.9785	130.556	127.611	70.278	75.7778	141.889	158.722	123.056	91	93.833	172.722	158.5	103.611	31.7778	59.3333	44.5	69.833	29.1667	20.0556	29.278	22.0556	64.5	62.1111	70.111	16.6111	71.1111	118.278	87.6667	147.167	104.611	79.6111	46		0.147057	84.5592
3.0977	128.556	133.222	58.5	67.5556	133.889	157.389	136.167	103.111	89.056	177.611	137.333	113.167	28.6667	50.1111	44.8333	61.389	36	15.2778	23.722	25.7222	53.2778	57.8333	56	24.6111	69.4444	116.5	85	162.556	93.056	73.5	53.5556		0.152943	82.794
3.2168	127.944	133.889	64.833	62.5	149	175.778	127.444	92.278	73	175.944	136.056	91.611	25.6667	42.8333	38.6667	67.111	35.5556	19.2222	19.333	23.5	52.1667	53.7222	56	14.6111	88.2222	116.556	83.7778	159.556	82.889	79.1111	43.3333		0.158823	81.0358
3.336	127.278	134.556	67.5	58.1111	133.444	170.611	131.667	95.278	80.722	169.944	134.667	100.944	22.5	39.7222	37	65.944	29.7778	16.8333	18.944	12.1667	45.4444	47.2778	56.167	14.7778	71.6111	96.944	76.7778	150.778	100.389	69	52		0.164708	78.3476
3.4551	129.444	138.667	67.056	69	139.056	167.389	130	91.444	64.833	172.111	110.278	95.889	18.0556	44.5	46	55.278	28.7778	19.2222	18.056	18.5556	46.7778	39.2222	58.889	15.3333	75.6667	101.444	75.2778	166.944	86.222	66.3889	45.2778		0.170589	77.4534
3.5742	141.167	126.389	66.722	67.1667	126.222	153.389	132.722	77.944	80.444	170.167	90.333	88.833	26.6111	31	33.5556	55.5	27.3333	16.5	20.056	14.7222	46.7778	30.5	43.722	16.3889	78.1667	95.278	60.0556	157	83.778	66.9444	47.6111		0.176469	73.3226
3.6934	129.611	130.611	65.167	54.2778	138.556	141.222	118.5	77	84	174.444	89.556	100.167	23.7778	25.6111	36.3333	51.167	19.7778	12	17.944	12.7778	32.0556	24.6667	40.389	13.3333	86.7778	91.167	77.1667	164.111	89.778	62.3889	53.6111		0.182354	72.1918
3.8125	123.333	138.778	65.333	47.8333	114.333	134.111	120.778	86.222	84.056	166.889	90.833	93.278	25.2778	29.2778	31.2778	53.278	17.7778	11.4444	13.667	18.3889	28.8889	24.1111	39.444	11.5	64.3333	109.111	70.3333	155.5	74.889	68.0556	46.7222		0.188234	69.6469
3.9317	130.5	135.944	67.722	51.6667	119	120.5	107.167	97.222	86.167	167.778	73.611	82.833	29.3889	27.8889	26.3889	53.278	17	15.3889	19.5	10	23.1667	17.4444	42.222	10.3889	73.7778	111.333	75.9444	166.056	72.278	56.0556	52.4444		0.19412	69.034
4.0508	108.056	123.667	60.278	55.8333	121.222	123.222	98.056	71.111	88.722	159.5	72.333	76.833	25.7222	34.5	27.1667	35.333	27	18.7778	17.111	18.3889	17.8333	14.8333	32	14.3333	75.6667	107.111	79.5	171.111	83.611	62.8889	61.5		0.2	67.2007
4.1699	114.556	121.556	51.722	53.4444	109.278	128.278	92.167	63.389	91.167	160.833	64.278	60	31.5556	23.7778	28.8889	27.111	19.3333	12.1667	24.833	7.1667	11.1111	19.6667	32.444	10.1667	75.7778	105.167	82.3333	164.222	75.389	57.5556	50.2778		0.20588	63.5359
4.2891	103.167	126.444	46.111	50	88.889	129.722	76.444	63.5	78.278	157.722	62.278	48.389	23.7222	29.9444	21.6667	26	22.6667	16.2778	20	5.6667	16.2778	16.5	29.167	10.1111	55.7222	108	89.2778	166.778	62.278	59.5556	53.2222		0.211766	60.1219
4.4082	106.944	124.333	50.889	38.1111	85.722	122.833	63.056	50.222	66.833	134.611	55.333	52.222	29.6111	23.7222	25.1667	27.5	21.7778	18.1667	18.556	8.9444	11.6111	17.1111	28	10.2778	58.2778	112.389	85.6667	167.056	57.389	58.4444	54.5		0.217646	57.5896
4.5274	104.833	129.778	39	31.2778	75.389	100.722	44.444	46.333	73	136.111	64.389	48.5	22.9444	30.2222	18.5556	27.111	18.0556	13.1667	14.722	9.3889	10.5	14	27.778	9.7778	55.4444	95.889	85.8889	166.222	80	54.5	38.6667		0.223531	54.4068
4.6465	101.111	119.556	35.5	32.7222	60.5	104.111	48.222	31.778	58.444	124.722	50.722	41.056	21.7778	18.7778	18.8889	20.667	22.7778	13.5	11.333	4.3333	13.2222	13	23.056	8.3333	51.3889	78.167	83.8889	163.611	70	61.5556	39.8333		0.229411	49.8889
4.7657	98.889	110.333	33.5	26.4444	54.722	84.778	35.444	35.944	67.222	116.167	57.389	43.778	25.6667	30.2222	27.5	17.5	20.1667	15.1111	10.944	9.5556	7.7222	10.5	17.667	9	46.8333	83.889	90.9444	147.778	56.444	55.7778	39.1667		0.235297	47.9677
4.8848	93.833	105.944	30.167	19.1667	51.889	81.778	21.889	30.167	65.833	97.222	52.278	43.833	27.7778	25	20.9444	22.944	24.8889	20.3889	11.222	6.1111	13.1667	11.9444	13.222	10.5556	44.1111	68.333	70.0556	152.167	64.444	60.5556	40		0.241177	45.2204
5.0039	105.611	101.889	29.667	19.6667	35.722	67.556	22	42.111	69.611	79.944	47.722	36	20.1667	28.6667	20.2222	22.5	16.7778	16.7778	12.722	5.3889	12.4444	8.7778	23.389	14.5	36.0556	69.333	79.5	159.5	58.5	44.7222	42.7222		0.247057	43.5537
5.1231	83.222	97.722	26.389	27.1667	38.944	80.778	32.333	33.611	67.889	72.111	44.556	47.5	21.7222	33.1111	19.5556	19.889	26.7222	20.5	8.778	5.2778	11.9444	12.1667	17.389	7.2222	38.2222	68.111	68.1111	128.167	44.778	51.7778	35.2778		0.252943	41.6434
5.2422	88.056	74.778	26.056	17.7222	31.167	70.944	24.389	30.444	45.333	66.111	43.056	41.167	24.6111	33.5	17.4444	20.5	23.1667	16.9444	14	7.5556	11.1667	13.1111	10	6.5556	29.7222	62.111	65.8333	120.833	48.5	41.1111	41.7778		0.258823	37.6667
5.3614	90.222	76.5	25.111	16.3889	43.389	71.5	22.611	32.333	55.556	50.944	39.167	35.389	25.4444	22.0556	18.5	16.333	32.7222	17.6111	15.611	6.9444	4.8889	8.5556	8.944	10.2222	31.0556	67.222	60.3333	128.389	39.556	48.1111	32.7778		0.264708	37.2383
5.4805	95.556	66.389	29.889	16.2222	35.833	71.111	26.889	34.833	47.111	48.889	38.667	41.111	25.8333	23.3333	14.0556	16.278	27.8889	21.3889	11.556	4.3889	7.4444	11.7778	14.722	10.6111	34.0556	65.056	64.6667	138.222	38.778	36.0556	30.5556		0.270589	37.0699
5.5996	92	65.222	19.556	15.1111	41.167	61.778	23.611	34.056	43.556	40.278	42.222	36.889	19.7222	28.8333	11.3889	17.167	25.6111	13.7222	8.278	8.0556	7.6111	8.7778	11.056	8.4444	20.9444	65.389	70.0556	128	37.556	41	38.3333		0.276469	35.0126
5.7188	77.833	47.333	23.611	16.2222	38.333	69.611	25.611	30.611	33.722	29.833	36.222	31.222	28.6111	34.3333	7.6667	17.611	27.6111	17.7222	14.056	6.9444	8.5556	13.5	13.333	7.8333	23.7778	68.5	57.5	131.833	21.167	28.6667	40.9444		0.282354	33.2365
5.8379	89.444	45.222	19.667	9.5556	41.556	68.5	20.5	23.556	34.722	29.778	33.944	34.389	18.6667	28.5556	12.8333	20.444	17.5	11.2778	17.611	3.1111	10	10.3333	11	12	23.6111	56.5	59.0556	133.889	22.222	46.3333	40.4444		0.288234	32.4588
5.9571	92.722	36.944	20.944	13.8889	36.889	74.278	20.944	20.889	34.278	34.944	38.944	27.667	22.6111	23.3889	10.6111	22.056	23	15.1667	9.5	6.7778	8.4444	12.0556	12.111	7.1111	29.2222	49.667	45.1111	121.667	19.5	30.3889	35.6667		0.29412	30.8835
6.0762	101.056	40.722	21.889	11.5556	34.889	54.667	25.222	24.889	32.167	33	34	20.278	17.5	19.7778	13.5556	18.889	21.1111	14.0556	13.667	6.8889	5.7778	9.5	11.333	10.1667	28.3889	48.056	39.0556	118.667	16.889	33.2222	35.1111		0.3	29.5467
6.1953	94.833	34.778	20.611	9.0556	33.333	63.333	19.778	21.222	25.167	25	33.611	31.333	19.6667	17.3333	12.6111	16.833	16.0556	10.2778	11.889	5.7778	7.3333	8.2222	10.5	8	32.1667	33.667	38.3333	125.667	16	26.8333	36.6667		0.30588	27.9319
6.3145	107.056	25.444	16.667	11.6667	24.611	48.389	19.5	17.833	23.222	22.667	32.944	24.667	23.3333	20.1111	13.8889	14.444	19.7222	12.7222	4.389	6.8889	4.5	10.7778	14.222	5.1111	28.4444	48.944	35.2222	122.056	12.056	27.3889	32.7778		0.311766	26.828
6.4336	83.167	22.722	17.944	9.6667	23.167	37	18.889	18.556	26.778	20.167	19.222	28.111	21.0556	13.3889	11.3333	17.667	12.3889	9	9.556	6.4444	5.2778	13.6667	11.778	7.8333	31.7778	43.333	33.7222	118.889	12.944	25.7222	29.3889		0.317646	24.5341
6.5528	108.444	25.111	15.222	9.1111	19	45.944	21.444	19.444	18.556	20.111	22.667	25.611	18.8889	18.3889	7.8333	10.389	15.4444	12.6111	12.5	5.9444	9.5556	9.1111	16.667	10.1111	26.5556	43.056	33.2778	103.722	10.944	25.1111	29.4444		0.323531	24.8458
6.6719	109.722	23.111	17.056	7.7222	17.167	38.944	16.222	18.778	15.333	24.222	25.056	24.611	19.1667	11.9444	10.0556	10.833	17.1111	7.2778	10.722	4.3889	7.2778	7.8889	15.833	5.8889	22.5	35.056	28.6111	81	10.556	19.3889	26.2222		0.329411	22.2473
6.7911	109.167	16.056	8.5	10.2222	15.556	38.278	19.722	20.444	27.889	25.611	17.111	23.833	15.5556	17.3333	11.1111	12.5	14.1111	11.1111	7.944	7.4444	5.7222	11.4444	15.111	5.5	24.6667	24.333	31.5556	86.389	17.444	19.7222	25.5556		0.335297	22.482
6.9102	98.333	11.722	11.333	12.3889	16.222	38.556	23	21.833	18.111	20.778	16.056	14.222	19.5556	14.8889	14.6111	12.556	18.0556	9.6667	12.833	6.0556	6.1111	12.7778	11.333	8.0556	21.3333	29.5	27.8333	67	8	17.3333	22.5556		0.341177	20.7294
7.0293	108.167	12.556	13.167	14.4444	17.778	28.778	12.778	21.222	22.111	22.056	18.333	19.833	16.2778	8.6111	11.9444	14.167	18.4444	11.6667	14.222	5.7778	6.6667	12.6111	9.833	8.6111	18.4444	27.611	30.7778	68.889	11.667	25.4444	17.0556		0.347057	20.966
7.1485	99.389	11.611	11.611	8.8889	14.111	24.722	20.722	21.611	22.333	31.389	14.611	18.889	11	11.7222	12.5	13.444	21.8333	11.3333	14.278	5.8889	7.8889	13.4444	11.167	6.4444	13.1667	21.556	32.8333	49.167	10.111	16.4444	19.0556		0.352943	19.457
7.2676	87.944	8.778	8.889	5.6667	15.389	24.111	25.944	18	20.5	19.667	20.167	18.444	18.2778	15.7778	14.7222	15.556	11	12.9444	10.5	4.5	4.5556	8.8889	10.333	7.6111	21.2222	18.222	26.9444	50.333	10.944	12.6111	15.5556		0.358823	18.1935
7.3868	75.889	7.611	13.667	6.8333	15.389	23.667	18.722	23.444	18.389	19.111	16.5	13.5	14.9444	17.2222	14.3333	17.444	14.7778	8.9444	9.5	7.7778	6.7778	9.6111	9.944	10.1111	16.8333	21.556	28.3333	38.278	10.389	16.3889	14.8333		0.364708	17.4426
7.5059	58.444	11.222	9.5	8.7222	17.778	21.667	23.222	18.222	22.722	26.444	16.944	16.167	16.4444	11.2222	13.8889	14.444	11	8.6111	17	6.5556	6.7778	7.8333	8.222	9.5	18.7778	16.889	16.5556	33.778	13.056	19.3889	15.1667		0.370589	16.6505
7.625	58	6.944	8.389	9.1667	8.222	17	20.944	26.611	20.389	21.944	17.667	12.278	15.1111	14.7778	14.1667	12.556	12.1667	12.1667	11.667	6.2222	6.1111	8.3333	6.889	14.1667	13.3333	20.333	20.3889	30.944	7.667	13.4444	11.7222		0.376469	15.4749
7.7442	39.167	8.556	10	9.7222	8.111	13.444	17.333	25.556	26.944	25.333	13.222	12.278	10.2778	9.7222	11.1111	9.778	14.6667	7.3889	11.556	5.7222	7.1111	10.8889	6.333	12.0556	14.4444	19.611	26.7222	31.889	6.778	13.4444	12.6111		0.382354	14.5735
7.8633	42.444	13	7.611	12.7222	15.222	15.444	28.444	23.222	14.5	21.389	21.056	9.389	16.1111	12.1111	12.1667	11.5	11.8889	10.6111	14.778	3.8889	6.5	11.2222	5.222	9.1667	13.1111	21.889	26.2778	30.778	9.889	12.6111	21.7222		0.388234	15.6738
7.9825	33.778	8.833	6.333	8.7778	13.222	17.056	22.278	21.889	19.611	19.889	14.611	11.111	15	18	14.8333	16.389	12.3889	11.1667	12.111	6.2778	8.5556	9.2222	4.167	10.7222	8.7778	20.056	25.4444	23.833	10.889	10.8333	13		0.39412	14.4857
8.1016	33.389	7.278	7.167	11.4444	11.944	13.444	17.611	25.333	19.833	18.167	19.333	11.611	14.3889	13.6111	8.8333	11.222	12.3333	6.5	12.5	7.4444	8.2222	6.1111	5.778	6.6111	18.7222	16.722	25.3889	22.444	6.778	14.8889	9.8889		0.4	13.7078
8.2207	34.889	8.778	9.222	10.5	9.111	11.444	25.333	22.444	16.833	25.722	19.722	11.722	14.9444	12.3889	13.4444	15.333	10.4444	11.4444	12.667	5.0556	7.3333	8.2778	4.5	6.7222	13.3889	22.778	19.3333	18.5	9.222	15.3889	13.2778		0.40588	14.1988
8.3399	26.722	10	6.333	15.2778	8.667	13.833	22.333	25.833	19.222	26.667	15.333	14	15.3889	13.7222	11.0556	13	12.6111	12.3333	15	4.8333	9	7.2778	4.444	4.7778	17.6667	16.778	19	21.222	9.056	14.3333	10.6667		0.411766	14.077
8.459	22.278	11.611	7.278	12.5	7.611	11.5	16.556	22.333	18.611	20.222	12.333	9.667	13.5556	12.6111	8	13.556	6.9444	7.2222	8.944	7.5	9.4444	6.1667	5.556	6.7778	18.4444	24.444	27.2222	21.833	9.667	13.9444	14.7222		0.417646	13.1953
8.5782	28.944	6.167	5.167	12.1667	9.056	15.278	20.111	23.167	16.444	21.167	13.833	10.333	9.3889	13.1667	9.1667	8.333	11.8889	10.9444	13.222	8.1667	4.4444	9.5556	4.167	5.4444	6.3889	28	27.9444	23.167	9.444	12.2222	14.4444		0.423531	13.2688
8.6973	21.278	8.222	13.278	14.0556	6.667	16.444	28.056	17.167	14.111	19.722	19.167	12.222	9.1667	10.3889	6.6667	12.056	11	11.5556	13.611	4.2778	12.4444	7.6111	4.778	4.8889	7.4444	23.056	34.7222	18.444	10.278	12.9444	18.8889		0.429411	13.6972
8.8165	12	8.889	8.889	10.5556	8.389	17.333	19.278	18.444	12.778	24.889	14.222	10.722	13.0556	10	6.5556	12.278	12.1111	11.2222	10.333	3.8889	11.8333	6.4444	2.722	4.1667	10.8333	30.556	27.7778	20.722	5.611	10.9444	15		0.435297	12.6595
8.9356	21.556	7.611	10.333	12.5	13.556	14.5	18.944	17.278	9.333	22.333	16.611	11.667	13.3333	12.0556	6.6111	14.722	12.0556	5.6667	15	5.9444	11.1667	5.2222	4.833	6.6111	13.1667	23.611	36	18.222	7.667	11.8333	16.2222		0.441177	13.4247
9.0547	21	9.444	11.056	12.2222	4.556	17.167	18.722	15.278	10.944	17.333	14.556	14.222	11.6667	8.9444	8.1111	11.167	8.1667	9.4444	13.611	5.1111	7.3333	8.1667	1.056	3.2222	10.8889	24.611	26.8889	17.889	6.278	10	16.6111		0.447057	12.1183
9.1739	16.056	7.944	5.556	10	5.056	14.5	19.833	15.333	8.222	17.167	15.167	12.167	12.7222	7.6111	9.3889	13.111	11.2222	11.4444	8.333	3.5	10	5.3333	2.111	5.5	13.6111	22.056	30.8889	15.278	9.056	12.2222	14.0556		0.452943	11.7563
9.293	20.722	8.667	4.611	9.8889	7.056	14.222	21.889	18.333	8.056	17.722	18.167	8.667	11.2222	8.2778	8.8333	11.167	12.8889	11.2778	10.722	5.6667	11.6111	5.9444	1.833	4.1111	14.4444	21.5	29.3889	16.167	9.889	17.9444	17.8333		0.458823	12.5395
9.4122	17.889	8.056	9.167	9.8889	10.556	13.722	21.167	15.056	5.5	17.167	11.5	9.222	13.3333	9.6667	9.1111	13.889	9.9444	8.2778	8.389	4.2222	9.2222	8.2778	2.389	4.1111	17	21.444	24.5556	19.667	9.111	11.5	13.0556		0.464708	11.8083
9.5313	15.389	6.444	4.056	10.5556	12.222	12.722	19.056	12.333	6.111	12.944	18.556	12.111	15.0556	6.7778	8.7222	13.056	9.1111	8.1111	7.222	6.6111	8.2222	10.2222	2.167	3.6667	16.7222	24.667	28.1667	13.944	11.111	11.8889	15.1111		0.470589	11.7115
9.6504	13.444	3.111	4.222	5.2222	6.778	13.833	19.778	11.278	5.833	15.944	15.5	9.667	13.6667	5.7222	11.2778	14.667	13.2222	6.6111	9.722	5.6667	7.6667	4.6111	2.333	2.3333	21.3333	20.611	25.6667	17.389	9.167	12.1111	8.8333		0.476469	10.8781
9.7696	15.667	3.944	4.889	4.5556	5.278	18.778	15.889	14	6.333	12.778	16.611	6.556	13.1667	7.4444	8.6111	8.444	11.1111	9	9.444	9.3889	9.7222	6.7778	2.333	4.6111	14.3333	29.778	16.8333	15.444	11.5	13.1111	13.1111		0.482354	10.9498
9.8887	14	2.5	1.5	3.7222	8.389	11.222	19.667	12.889	5.111	12.5	11.333	11.556	13.7778	9.3333	10.3333	14.056	10.4444	8.3333	8.056	4.2778	6	3.7778	1.722	2.5	15.4444	24.5	23.9444	14.333	7.667	12.1111	13.9444		0.488234	10.2886
10.0079	15.056	4.222	3.611	5.1667	4.722	9.889	13.722	9.944	4.389	10.056	12.444	11.333	9.8889	4.8889	12.5556	12.167	11.7222	7.6667	7.278	7.2222	11.1111	4.0556	2.944	3.0556	13.3889	27.833	21.1111	13.222	7.611	13.0556	15.0556		0.49412	10.0125
10.127	12.722	4.778	1.111	6.6111	5.278	11	13.833	7.333	3.778	8.556	17.611	10.389	11.1111	7.2778	6.1667	13.833	10.8333	6.1111	12.5	4.9444	10.3333	5.0556	0.056	3.2778	13.7222	28.944	23.2778	15.167	6.833	13.6111	11.3333		0.5	9.91576
10.2462	12.667	2.556	2.167	7	3.611	11.333	16.833	11.5	4.111	10.611	11.056	7.944	8.2778	6.7222	6.3333	10.667	11.1667	3.5556	12.667	8.2222	7.4444	5.6111	1.889	6.3333	15.8889	18.056	20.2222	14.556	7.611	10.5556	7.1667		0.505885	9.1721
10.3653	8.278	1.556	5.056	7.9444	6.167	10.722	16.611	5.944	2.111	9.611	13.889	8.167	13.2222	6.2222	9.1667	11.333	11.2778	6.8333	10.278	2.6667	9.3333	2.9444	3.056	4.3889	13.2778	23.167	18.3333	12.333	11.833	9.2222	11.2222		0.511766	9.23121
10.4844	11.889	3.722	3.389	9	5.889	9.389	23.944	8.833	3.167	7.444	17.778	12.611	8.2778	6.5556	12.2778	9.667	14.7222	1.6667	9.944	2.0556	6.1667	3.4444	1.167	3.6667	15.3889	13.167	20.4444	11.667	12.333	10.6667	8.7222		0.517646	9.32438
10.6036	8.667	2.611	0.111	7.1111	7.056	10.333	16	7.278	3.778	10.778	18.389	6.889	9.3889	9.0556	10.6111	12	9.1667	5.3333	9.778	3.8333	8.2222	2.1667	0.667	5.2222	15.4444	17.111	21.6111	18.389	7.722	10.5556	13.7778		0.523531	9.32442
10.7227	5.667	2.556	1.222	7.8889	4.556	11.889	20.167	7.056	3	9.5	22.056	14.333	7.3333	11.2778	8.5	14.056	13.4444	8	9.333	5.1667	5.7778	3.6111	1.333	5	19.7222	14.944	23.7222	15.889	8.611	9.9444	14.3333		0.529411	9.99645
10.8419	9.611	2.167	0.833	4.6111	3.722	7.611	18.833	7.833	2.611	11.333	17.722	11.111	8.7222	4.7222	7.3333	13.833	12.0556	5.6111	11.833	6.4444	10.1667	3.1667	1.833	4.8889	16.6667	16.778	14.3333	12.111	4.556	6.7778	7.5556		0.535297	8.62537
10.961	12.722	2.389	1.222	6.8889	8.444	11.889	15.278	10.056	3.5	5.333	16	4.833	7.6667	6.6667	8.7778	12.889	9.8889	4.7778	8.944	5	3.3889	1.5	1.944	5.6667	11.3889	23.778	19.3333	15.111	5.5	10.8889	9.1667		0.541177	8.73652
11.0801	4.333	0.556	1.056	5.3333	3.5	13.556	22.611	4.889	2.944	6.889	17.944	10.444	8.0556	7.9444	9.8889	11.778	8.9444	3.0556	5.5	2.5	10.4444	3.4444	1.944	2.7778	16.4444	16.611	11.5	12.833	7.556	10.7778	8		0.547057	8.19532
11.1993	5.5	1.556	0.833	5.1111	7.111	14.833	19.111	8.778	3.722	6.222	20.5	13.444	7.1667	10.8333	8	15.167	13.5556	6.8889	5.556	8.8889	6.5556	4.1111	1.611	5.8333	16.0556	17.833	16.1111	9.111	6.5	15.8889	9.1111		0.552943	9.4032
11.3184	9.778	1.278	0.667	8.0556	12.333	10	20.167	6.778	3.333	4.167	18.167	9.611	9.8889	7.1667	8.7222	15.444	8.7222	6.1111	6.056	4.6111	10	1.7778	0.667	5.3889	17.8889	16.111	12.6667	11.389	6.889	12.6111	6.9444		0.558823	8.81905
11.4376	7.333	2	3.333	6.0556	5.333	11.167	18.556	5.778	3.556	7.722	22.167	14.444	11.3889	8.2222	9.3889	11.222	14.3333	4.3889	7.167	9.1667	9.2778	3.1111	1.389	5.6111	12.5	13.167	10.7222	16.389	3.111	11.8333	4.2778		0.564708	8.84232
11.5567	6.111	2.111	0.833	2.7222	6.889	14	21.444	5.056	4	6.333	13.833	11.056	9.1667	5.8333	10.7222	15.056	9.2222	4.8333	9.333	5.2222	10.2778	2.5556	1.722	7.7778	12.8333	14.889	12.2222	13.667	2.889	13.3333	10.3333		0.570589	8.58959
11.6758	7.722	1.667	1.444	4.7778	4.889	10.611	23.889	4.111	2	6.667	18.167	11	9.5	9.6111	13.3889	13.167	7.7778	7.6667	7.278	6.3333	8.8333	3.8333	2.333	7.2222	16.0556	16.667	15.5	15.111	4.833	12	8.8889		0.576469	9.12725
11.795	7.222	1.611	2.5	5.9444	8.889	11.278	18.611	4.611	3	6	14	9.444	9.0556	8	9	15.222	13.7222	2.8333	8.722	4.9444	10.3889	1.8333	3.389	5	18.3889	17.111	15.1111	12.5	4.111	13.3889	6.7222		0.582354	8.79207
11.9141	6.389	1.444	0.5	5.1667	6	12.111	26.833	6.5	2.611	6.611	21.556	10.278	10.1667	7.5556	6.9444	12	11.9444	5.8333	6.556	2.0556	9.0556	1.0556	0.333	7.1111	14.7778	18.889	15.9444	7.833	6.944	16.2778	7.1667		0.588234	8.85302
12.0333	7.889	0.778	0.611	4.7222	6.056	9.222	23.278	5	3.778	5.944	22.5	14.278	9.2222	7.5	8.6111	13.611	9.2778	4.2222	14.278	5.6667	7.6667	1.7222	2.333	4.6111	14.6667	22.889	19.7778	13.167	5.278	9.2222	8.1111		0.59412	9.22226
12.1524	4.778	1.778	1.167	2	7.5	11.667	17.389	3.222	0	5.833	16.5	11.611	9.8889	10.1667	8.2222	15.722	7.7222	4.0556	9.056	3.8333	5.3889	0.5	0.611	5.9444	14.5556	14.667	13.7222	12.722	4.889	8.3889	5.1667		0.6	7.69895
12.2716	4.333	1.056	0.278	5.4444	7.611	10	22.667	3.778	2.778	2.944	20.556	8.278	11.8889	6.2778	10.5556	8.778	10.8889	4.8889	9.667	3.8333	8.7222	1.3333	1.389	6.7222	22.3333	15.889	12.8889	9.333	7.722	17.6667	8.6111		0.605885	8.68105
12.3907	7.056	1.556	0.944	3.7778	7.333	11.889	22.833	7.278	2.444	4.333	17	13.667	9.0556	5.8333	6.3333	13.611	8.7222	3.9444	6.611	5.0556	9.2222	1	0.889	4.1111	15.7778	18.333	18.6111	7.944	4.111	10.2222	4.7222		0.611766	8.20067
12.5098	6.444	1.222	1.5	2.5556	3.278	9.667	20.556	4.167	1.333	2.333	18.278	14.056	10.3889	8.7778	10.3333	9.333	10	3.6111	7.611	6.9444	8.3889	0.1111	0.5	6.9444	12.9444	17.667	8.0556	14.111	3.778	6.0556	6.1111		0.617646	7.64697
12.629	7.222	1.833	1.278	1.3889	4.889	11.389	15.889	5.278	1.778	4.722	15.056	16.722	11.2222	8.1111	7.5	11.722	6.8889	4.8889	8.222	5.5556	8.8889	2.7778	2.167	5.1111	16.1667	18.556	12.5556	10.778	4.389	9.4444	6.2778		0.623531	8.02155
12.7481	9.944	1.389	0.722	2.8333	5.722	12.333	16.889	2.056	2.556	4.556	18.889	13.056	11.3889	8.2222	6.8333	14.111	10.1111	5.2222	5.278	4.8889	9.3333	3.5	0.889	7.8889	18.2778	14.278	12.7222	11.944	4.611	8.5	7.7778		0.629411	8.28138
12.8673	3.667	0.556	0.278	2.8333	7.667	9.944	15.889	3.611	1.222	4.667	18.056	13.722	5.6111	10.3889	7.1667	12.389	12.1667	2.8889	10	4.5	14.0556	1.4444	1.556	5.6667	20.6667	16.778	17.6111	9.722	6.611	5.5556	11.1667		0.635297	8.32443
12.9864	4.944	0.889	4.444	1.5	4.278	11.278	21.333	1.167	1.889	2.333	17.444	15	8.1667	11.2222	7.7778	8.5	11.0556	6.2222	8.833	4.4444	9.7778	0.3889	2.722	3.6111	21.8333	16.667	12	6.389	4.611	7	2.8889		0.641177	7.76161
13.1055	4.778	1.556	1.611	2.8333	8.389	7.389	18.833	2.167	0.778	3.944	17.944	12.444	10.9444	11.5	7.6667	8.722	12.5	7.9444	6.611	3.9444	8.1667	1.5556	2.167	7.7222	16.2778	19.778	13.0556	9.611	3.333	8.8889	7.8889		0.647057	8.09496
13.2247	5.889	0.111	0.333	2.6111	7.556	7	21.444	2.5	1.611	2.167	17.833	12.611	10.1667	15.1667	10.3889	11.222	12.4444	4.3333	8.444	7	5.8889	2.3333	1.333	7.6111	18.2222	18.889	15.1667	9.278	0.722	6.3889	7.9444		0.652943	8.21321
13.3438	5.389	1	1.444	4.1111	8.333	14.389	18.778	3	1.111	3.222	16.278	13.722	5.1111	10.9444	13.2222	11.056	11.3889	3.6667	6.222	8.5	5.6667	2.0556	0.611	10.6667	18.7222	13.611	16.8333	10.278	3.167	10.5	5.4444		0.658823	8.33691
13.463	6.611	0.5	0.944	2.0556	6.222	8.111	13.167	2.056	1.833	3.333	17.167	14.333	6.2222	12.6667	10	9.889	10.1667	7.2222	8.5	8.7778	9.7778	2.1111	4.833	8.4444	15.7222	17.611	11.2222	9.111	4.833	8.6667	5.0556		0.664708	7.97307
13.5821	7.056	0.444	0.833	3.5556	6.722	7.722	17	2.778	1.222	4.944	21	12.889	9.6111	8.2222	10.7778	11.278	5.9444	3.2222	13.389	7.1667	6.0556	0.6111	2.167	6.7222	18.9444	19.167	9.1667	8.833	2.056	7.6111	8.1111		0.670589	7.91039
13.7012	4.278	1.444	1.556	2.0556	8.333	11.722	18	2.5	1.333	3.444	26.556	8.556	6.9444	9.3889	10.8333	11.222	6.8333	6.9444	8.056	6.7778	9	1.3889	1.611	5.4444	21	23.833	9.7222	10.778	3.611	9.6667	7.1111		0.676469	8.38529
13.8204	2.333	1	1.167	3.3333	4.111	11.222	16.333	2	2.333	2.889	24.556	12.444	12.2778	6.5	12	12.167	6.8889	3.7222	6.333	7.9444	8.6111	0.5556	1	8.2222	17.3333	13.5	13.2222	14	4.389	5.7222	8.1111		0.682354	7.94262
13.9395	6.222	0.444	0.778	3.0556	4.778	12.278	14.5	4	1.556	1.5	23.389	11.222	6.5	8.5556	8.6667	11.167	11.5	8.6667	8.889	7.7222	8	1.3889	1.278	8.5	19.3889	13.167	10.0556	9.944	1.833	8.2222	7.0556		0.688234	7.87816
14.0587	4	1.389	0.944	6	4	8.111	16.389	1.722	1.333	5.167	28.389	12.222	13.9444	7	9.8889	10.778	11.3333	4.9444	6.889	5.3889	5.7778	1.0556	2.111	10.4444	16.6667	16.056	7.7222	11.722	1.889	8.9444	8.9444		0.69412	8.10214
14.1778	5.722	1.111	0	1.7222	5.222	10.833	13.667	2.389	2.222	2.667	23.444	11.778	8.6667	5.0556	8.6667	7.833	10.3889	5.6111	9.611	6.3333	4.3333	2.1111	1.611	9.0556	15.4444	19.5	14.8889	9.833	0.833	7.1111	4.2778		0.7	7.48202
14.297	5.278	0.611	0.333	0.8889	4.889	12.333	13.556	0.778	2.278	4.5	24.611	13.556	5.2778	11.6111	7.9444	13.222	7.6667	8.6111	5.722	5.7222	7.1667	1.7222	2.222	18.2778	20.9444	13.889	11.1111	6.889	3.778	7.8889	9.3889		0.705885	8.15055
14.4161	6.5	1.611	1.611	2.1111	4.167	10.833	14.889	3.389	2.833	2.444	22.444	11.056	9.8333	7.6111	11.1667	10.389	8.1111	5.0556	9.889	8.6111	5.1111	2.0556	2.167	7.7778	24	14.111	12.3333	8.444	0.778	6.1111	9.2222		0.711766	7.95697
14.5352	6.333	1.222	0	3.7222	7.278	10.778	13.611	4.778	2.278	4.833	15.167	12.278	12.4444	10.7222	8.3889	9.167	12.2778	8.0556	9.722	11.6111	6.8889	2.2778	2.333	8.4444	16.2778	14.833	12.0556	11	2.556	10.3889	7.2222		0.717646	8.35306
14.6544	4.889	1.389	0.889	3.5556	7.056	10.056	10.889	2.722	1.889	2.778	14.5	11.222	6.8333	12.3333	9.1667	13.056	17.4444	2.6667	9.611	5.5556	8.5556	1.4444	2.889	10.8333	21.5556	13.222	8.6667	6.222	1.944	9.5556	4.5		0.723531	7.67386
14.7735	8.722	1.444	1.833	1.5	7.944	7.722	13.444	2.333	3.944	5.556	19.778	10.444	8.1111	8.3889	5.6111	10	10.6667	4.6111	6.333	3.6667	6.6667	1.8333	2	12.7222	16.4444	15	8.7222	6.944	1.611	5.6111	5.9444		0.729411	7.27587
14.8927	9.222	0.111	1	2.6667	7.167	13.333	16.222	2	0.611	3.944	18.278	12.278	11	8.7778	9.7222	10.167	10.3889	8.5	11.722	5.6111	7.5556	1.8889	2.722	13.5	20.6111	10.444	9.5556	7.111	3.611	8.5556	4.8333		0.735297	8.16483
15.0118	5.444	1.222	1.167	2.1111	7.167	13.611	14.889	2.833	2.5	0.889	15.333	13.056	11.5	8.4444	7.2222	7.5	14.6667	6.0556	13.278	6.6111	11.7222	2.2778	1.111	10.3333	20.5556	18.389	10.8889	3.667	2.056	7.1111	11.0556		0.741177	8.21508
15.1309	5.222	2	1.111	4.4444	5.444	14.833	13.111	3.833	1.333	2.556	18.167	11.944	15.4444	7.2222	4.3333	14.833	10.1111	5.5	10.778	5	7.3889	2.8333	0.667	11.0556	19.7222	12.444	7.6111	4	4.556	9.0556	9.1667		0.747057	7.92648
15.2501	3.611	0.722	0.889	0.6667	6.444	9.222	18.667	2.389	2.611	7.389	17.889	14.278	9.5556	8.5	7.5556	9.833	10.1667	4.1667	10.833	7.9444	5.1111	1.5556	2	12	17.2222	10.778	8.8333	5.444	1.889	4.2778	8.0556		0.752943	7.43546
15.3692	4	2.611	0.722	1.7222	7.722	10.389	19.056	1.611	1.556	4.5	18.944	20.944	11.8333	10.1111	11.0556	11.222	7.2778	8.4444	12.278	7.2222	5.1667	1.9444	0.833	10.7222	19.8333	11.889	8.1667	6.5	3.778	9.6111	4.2222		0.758823	8.25446
15.4884	3.222	0.944	0.278	0.6667	7.167	8.056	19.667	1.944	2.944	1.556	20.222	14.778	10.5556	6.7222	6.1667	9.222	9.1111	9.4444	9.111	6.9444	6.6667	3.0556	0	9.8333	18.1111	8.889	12.5	4.333	2.333	4.9444	4.0556		0.764708	7.20786
15.6075	4.889	0.889	0.056	2.4444	3.778	7.389	19.056	1.778	0.444	2.889	11.111	19.722	5.4444	11.9444	10.8333	11.278	6.1667	7.0556	9.778	5.7222	7.2778	0.3889	0.944	13.8333	17.5556	7.556	8.5556	1.278	1.278	7.1667	7		0.770589	6.95167
15.7266	7.889	0.778	0.611	1.2778	5	13.944	22.889	5	1.333	4.111	10.444	20.056	5.8889	7.6111	9.5556	15.944	9.3333	8.7778	11.278	4.8889	4.6667	2.0556	0	12.1111	13.7778	6	9.5	4.389	2.111	5.8333	7.5556		0.776469	7.56808
15.8458	4	2	2.056	2.6667	6.778	8.778	15.611	4.889	1	1.222	15.944	23.944	7.2222	11.3889	7.8889	13	9.6111	5.4444	8.167	5.5556	5.1111	2.3333	0.667	15.1667	15.2222	13.111	9.6667	4	0.722	7.2778	4.6111		0.782354	7.58244
15.9649	4.889	0.944	0.556	2.1667	7.556	10.722	17.611	2.278	1.389	4.556	11.444	20.278	4.9444	6.7222	5.0556	7.167	10.6667	7.1111	9.611	5.9444	6.7222	3.6111	3.056	12.5	16.5	7.222	6.7222	8	1.778	7.2778	8		0.788234	7.19359
16.0841	3.111	0.278	0.333	3.8889	7.278	9.111	16.667	3.833	2.278	3.889	20.667	18.667	6.6667	4.1667	7.0556	11	7.5556	7.7778	17.278	6.2222	6.2778	2.2778	5.056	11.9444	17.5556	12.444	6.3889	4	3.278	6.1667	6.8889		0.79412	7.74199
16.2032	3.833	1.444	1	3.4444	10.667	12.056	20.611	6.722	2.722	1.167	13.444	17	7.7222	8.8333	7.3333	10.167	9.8333	6.1111	9	8.3333	5	2.3333	2.944	12.9444	17.8333	14.444	7.7778	4.444	2.222	7.1111	6.7778		0.8	7.91212
16.3224	4.611	0.611	1.111	4.2778	6.5	10.722	25.944	6.333	2	3.611	11.722	18.778	5.9444	10.6667	8.3889	8	9.0556	9.9444	10.5	6.8889	7.6667	3.3333	2.333	14	20.2778	12.333	11.4444	4.278	1.278	5.6111	6.1667		0.805885	8.20425
16.4415	2.222	1.778	0.722	3.1111	8.556	14.556	13.389	7.833	2.5	8.444	16.056	17.167	8.7222	7.6667	9.7778	7.5	9.2778	8.2222	8.611	5.7778	4.2222	1.8333	1	16.2778	22.5	6.889	6.6111	3.722	1.222	8.2778	6		0.811766	7.75628
16.5606	5.944	0.944	1.278	0.5556	5.111	10.389	15.167	3.611	0.778	5.389	17.833	11.667	4.3333	8.6111	14.2222	8.111	12.2778	8.3333	8.056	8.9444	5.4444	3.7778	1.5	11.8333	20.7222	10.056	8.7222	4.667	0.944	10.7222	4.7778		0.817646	7.5717
16.6798	4.333	2.667	1.889	4.7222	9.889	11.722	14.944	4	1.556	3.111	16.389	16.278	8.6667	9.1667	9.0556	10.944	5.2222	7.7778	7.889	8.8333	4.4444	3.1667	3	15.3889	24.6667	9.611	14.1111	7	2.5	6.6667	7.0556		0.823531	8.27957
16.7989	5.111	1.333	0.278	2.6667	6.5	15.778	14.611	6.167	2.722	5.5	16.722	16.333	6.7222	5.9444	8.1111	8.889	10.6667	6.8889	9.667	7	4.4444	2.0556	4.444	16.0556	15.3333	9.556	8.3333	2.167	1.778	8.1667	7.1667		0.829411	7.64876
16.9181	3.778	1.333	1.389	2.6667	6.333	15.333	19.5	9.389	1.278	7.167	17.333	14	6.7222	13.8889	4.8889	7.667	7.3333	7.6111	7.889	6.5	7.0556	1.3333	1.778	11.1111	20.2778	9.556	6.8889	2.167	2.889	4.2222	9.2778		0.835297	7.69538
17.0372	2.611	3	0.5	2.7778	6.333	10.889	15.444	7.056	2	6.111	18.833	12.389	6.8889	9.1111	6	8.278	11.2222	10.9444	6.278	6.8889	4.7778	2.2222	4.389	10.1667	16	9.556	6.2778	4.167	1.722	7	5.3889		0.841177	7.26525
17.1563	3.667	0.278	1.611	2.2778	4.222	11.444	20.5	12.278	0.556	6.944	13.444	21.444	6.5556	10.4444	11.1667	5.778	9.7222	7.5	9.944	7.2778	4.5	4.3333	2.778	13.7778	19.8333	11.833	5.8889	1.444	1.556	5.2778	8.3333		0.847057	7.95516
17.2755	5.833	2.111	1.722	3.2222	6.333	9.5	19.778	11.056	3.833	9.333	14.056	12.611	8.9444	9.9444	11	6.056	11.3333	8.8889	6	5	5.7778	3.6111	3.833	11.2778	17.9444	11.778	8.7222	3.889	2.611	10.2222	6.5		0.852943	8.15231
17.3946	6.889	2.167	0.556	1.2222	6.333	10.222	21.167	10.833	2.278	6.944	15.278	17.167	6.9444	10.7222	7.5	5.167	9.3889	8.6667	9.833	4.7222	8.2778	4.6667	5.5	12.8889	23.7778	8.944	8.2778	2.389	1.333	8.2778	5		0.858823	8.17205
17.5138	1.278	1.944	2.056	3.1667	7.167	10.722	22.111	11.444	2.944	7.889	11.778	10.111	10.1667	10.1111	8.3333	5.611	8.1667	3.8333	5.444	3.7778	6.2778	6	3.611	9.7222	20.6111	5.444	9.9444	4.111	1.389	5.1111	5.7778		0.864708	7.29206
17.6329	6.5	2.111	1.111	2.8889	9.722	11.889	19.389	10.278	3.222	11.111	14.611	13.167	10.7222	6.8889	7.5556	4.111	10.9444	5.6667	9.389	4.3333	3.6667	6.8333	2.333	8.9444	26.8333	4.444	3.6667	0.944	2.889	8.4444	6.2222		0.870589	7.76877
17.7521	3.833	1.167	1.056	5.7778	5.611	10.167	10.722	13.333	0.667	9.222	17.333	14.222	12.4444	8.0556	5.4444	5.167	6.6667	8.2222	6.778	4.8333	6	6.7222	6.278	9	24.3333	12	6.6111	1.667	2.889	7.1111	5.6111		0.876474	7.70791
17.8712	6	4	2.111	4.4444	6.889	11.167	18.5	17.389	1.722	9.5	15.722	13.5	9.0556	8.6111	6.6667	6.778	8.5	7.5556	9.111	5.0556	3.0556	3.5556	5.778	12.3333	23.9444	7.611	7.8889	1.722	2.833	9.5	5.1111		0.882354	8.24551
17.9903	3.889	1.778	2.667	3.5	6.444	14.611	18.556	15.167	5.667	11.889	14.667	16.167	10.7222	8.7222	5.3889	7.889	7	1.6667	9.056	2.0556	3.1111	5.6667	3.889	13.7222	17.8889	5.778	8.6111	1.222	1.667	12.1667	6		0.888234	7.97501
18.1095	4.111	4.167	2.222	2.7222	9.278	10.833	17.778	12.333	3.556	8.222	11.222	12.056	9.6667	6.9444	8.5556	5.833	5.8333	7.1111	6.278	4.7778	3.6111	6.1667	6.333	8.9444	17.3889	6.833	7.5	1.722	5.222	7.2222	7.1111		0.89412	7.4695
18.2286	3.889	3.111	3.5	3.1667	5.833	11.222	12.944	13.389	3.833	11.556	10.278	10.833	7.0556	6.1111	7.5556	4.889	8.0556	7.5	6.333	5.7778	3.3333	4.2778	4.778	11.5	16.1667	10.111	6.8333	3.722	2.889	6.1667	5.9444		0.9	7.17918
18.3478	4.444	4.611	1.278	3.7778	6.667	9.389	12.111	12.611	6.389	17.333	13.333	14.556	12.6111	8.9444	9.5	6.5	5.8889	2.5	4.833	4.4444	5.2222	6.6667	7.944	9.2222	13.8333	5.111	7.9444	3.167	4.778	5.3333	4.6111		0.905885	7.59854
18.4669	3.944	4.833	1.889	3.8889	9.111	9.222	16.167	12.556	3.278	16.389	10.056	12.167	8.6667	4.4444	3.1111	7.444	6.0556	4.1667	4.167	4.8333	4.4444	4.1667	3.611	11.4444	18.1111	6.556	9.8333	2.167	4.778	9.6111	9.2778		0.911766	7.43195
18.586	2.556	3.667	5.111	6.5	6.444	10.167	11.222	17.056	4.722	19.222	10.278	10.778	8.5556	4.7222	8.2778	6.667	3.3333	6.8889	5.667	8	4.5	7.4444	6	9.5	13.4444	6.333	9.0556	0.722	2.667	6.3333	4.8333		0.917646	7.4409
18.7052	5.278	1.222	3.667	4.5	5.167	8.722	11.222	15.778	6.111	13.556	12.611	9.111	8.5556	5.9444	5.3889	3.833	3.6111	4.2222	7.778	5.1667	6.0556	6.8333	6.5	15.7222	19.1111	6.111	9.5556	1.167	5.444	9.8333	3.7222		0.923531	7.46775
18.8243	3.944	3.667	2.111	3.4444	5.944	11.556	11.556	23.333	10.167	17.5	10.722	10.444	6.6111	7.0556	7.1667	4.056	3.5556	3.5	5	4.3889	4.8889	4.5556	7	8.7222	15.5556	5.556	4.9444	0.611	5.667	8.7778	4.1111		0.929411	7.29393
18.9435	3.667	3.889	2.833	1.3333	4.833	10.667	20.167	13.5	11.556	15.722	11.056	10.056	7.8333	3.1667	5.3889	4.5	4.5	2.9444	6.167	5.8333	7.5	5	6.667	9.6111	17.2778	7.222	7.6667	3.278	4.278	7.0556	4.8889		0.935297	7.42123
19.0626	3.889	3.278	5.944	5.8889	5.167	8.889	12.5	20.111	9.944	12.333	10	11.778	4.6111	4.0556	5.8889	5.944	5.0556	3.3889	2.5	8.1111	5.1667	3.2778	4.722	5.1111	19.8889	8.833	5.8889	0.444	5.556	6.9444	2.2778		0.941177	7.01251
19.1817	3.944	3.889	3.556	2.9444	4.667	7.944	11.333	19.444	16.333	14	8.5	10.5	6.5	4.1667	5.5	3.444	6.1667	2.1667	2.833	5.9444	5.3333	3.1667	7.5	8.2222	22.1111	6.056	6.7222	2.722	3.778	4.8333	4.7778		0.947057	7.06447
19.3009	3.889	2.167	1.278	3.3333	3.889	8.611	14.944	20.611	11.556	6.111	9.056	7.833	4.6667	3.3333	3.6667	2.778	5	7.1667	3.667	5.2778	2.4444	4.6667	4.333	11.4444	15.3333	10.556	8.0556	2.111	5.722	7.0556	5.2222		0.952943	6.63802
19.42	1	0.556	1.111	1.7778	2.167	4.722	13.833	17.222	12.778	9.167	10.111	5	7	7.5556	4.5	2.556	3.3333	2.2222	3.556	6.5	2.8333	4.7778	3	10.2778	12.8333	10.444	7.1667	2.389	8.5	7.5	6.1667		0.958823	6.2115
19.5392	5	1.167	2.778	1.6667	2.111	6.278	9.222	17	17.889	9.889	10.833	4.722	5	5	3.7222	1.833	4.0556	2.8889	2.611	4.5556	3.8333	2.3333	3.611	9.4444	15.8333	5.833	7.9444	0.667	5.556	6.0556	6.6111		0.964708	5.99821
19.6583	2.778	1.611	2.722	1.8333	0.333	2.889	11.556	21.5	14.889	7.667	5.778	4.944	3.2778	3.1667	1.8333	2.556	2.0556	1.5	2.611	6.7778	4.1667	3.3889	4.778	6.7222	14.9444	6.056	8.2222	1.056	6.278	6.7222	3.5556		0.970589	5.4248
19.7775	0.833	0.333	2.111	0	3.444	2.944	14.389	14.556	16.944	8.444	3.833	1.889	2.6111	3.8333	2.3889	3.278	2.8889	2.7222	3.222	5.2778	5.8333	4.1667	2.389	11.1667	18.8889	8.889	10.1667	2.611	3.778	6.4444	1.0556		0.976474	5.52682
19.8966	0.833	1.889	1.333	0.2778	0.889	2.222	10.778	16.167	13.889	8.111	4.833	2.056	0.8889	3.2222	1.8889	1.333	3.7222	2.2222	2.389	4.6667	3.7778	5.8889	6.278	9.3889	12.5	7.444	8.6111	1.056	4.889	9.6111	5.5		0.982354	5.1147
20.0157	0.667	0.889	1.167	3.6111	0.944	2.556	7.556	14.889	17.5	7.5	4.222	2.611	1.5	2.8333	3.8889	1.5	4.3889	1.5	3.444	3.6667	3.7222	7.7222	5.944	7.5556	14.9444	7.278	7.5	2.111	5.167	7.8889	4.4444		0.988234	5.19715
20.1349	0.667	0.889	3.056	1.8889	1.167	0.167	9.5	11.778	16.333	7.389	7.556	2.556	0	3.0556	3.7778	1.333	1.5556	2.6667	1.833	1.9444	5.5556	4	7.222	12.3333	12.7778	8.889	5.8333	0.667	4.556	7.4444	3.2222		0.99412	4.89076
20.254	0.611	0.5	2.444	0.4444	0.722	1.611	7.056	12.222	14.778	6.278	3.389	2.556	0.2778	1.6667	4.6667	2.222	1.6111	5.2222	0.722	1.5556	3.9444	3.2778	2.722	10.8333	14.2222	3.056	6.1111	1.889	6.889	5.2778	3.5556		1	4.26883

## Sheet: Image11
X0	Y0	Y1	Y2	Y3	Y4	Y5	Y6	Y7	Y8	Y9	Y10	Y11	Y12	Y13	Y14	Y15	Y16	Y17	Y18	Y19	Y20	Y21	Y22	Y23		Ap-basal	Avg intensity
0	16.6544	22.118	19.1816	27.2858	7.6829	7.7881	10.2618	11.8677	15.8378	29.634	39.329	21.2055	13.2613	17.1715	13.0428	12.9356	16.4872	25.972	15.0357	21.505	6.535	5.083	8.9968	14.5492		0	16.6426
0.1191	21.017	24.9527	15.5642	26.9407	6.7352	10.2911	10.8751	11.8545	16.7186	32.837	42.577	24.1367	15.9443	16.4906	20.2752	14.7929	19.8559	31.08	19.3243	25.6	8.641	6.697	15.3686	15.5808		0.00571231	18.9229
0.2383	19.0126	24.591	17.7783	31.6607	7.7049	12.09	14.3377	11.1404	21.3557	26.657	39.681	24.2668	17.651	15.7	23.7056	13.833	23.5552	28.508	27.8342	26.545	11.866	9.87	15.5187	19.3428		0.0114294	20.1752
0.3574	22.3574	29.0141	21.8624	30.8271	7.8031	13.9314	17.4796	21.7713	22.4735	32.338	39.254	29.0328	21.6681	18.8138	31.086	18.9398	29.9629	35.133	23.8961	28.8	12.116	14.588	14.7686	21.7616		0.0171417	23.3199
0.4766	22.5845	34.6276	20.2853	29.6804	9.7506	15.9851	18.0267	23.4633	23.3408	33.606	40.705	29.2361	30.5959	18.3054	27.4721	21.5706	30.6323	34.838	24.9011	31.893	15.916	15.771	15.1373	26		0.0228588	24.7635
0.5957	26.3479	40.0037	20.2128	34.8215	10.901	17.341	22.2654	21.8433	25.1625	33.346	38.566	28.5187	32.9194	22.8477	29.0756	18.3978	32.0337	37.144	29.3476	34.876	28.255	27.629	16.6325	24.1312		0.0285712	27.1925
0.7148	22.9539	40.2723	20.6774	28.7633	12.3613	18.996	24.3587	26.2829	27.17	31.238	38.97	28.7711	31.1494	21.002	25.9015	22.0434	36.5464	40.302	29.7211	44.483	32.556	31.666	22.5848	28.4308		0.0342835	28.6334
0.834	29.513	36.8267	22.121	23.1767	14.0596	21.6512	24.8526	29.1625	27.0769	39.919	40.051	27.6671	31.3213	26.2609	28.8489	27.7514	33.424	43.084	33.9871	51.287	43.162	38.069	28.3554	36.2608		0.0400006	31.5787
0.9531	27.6022	44.273	24.3567	25.1147	14.8568	20.1562	37.0041	30.4419	31.4381	42.431	39.914	30.5718	32.7637	23.1655	30.2917	27.9606	36.3186	48.375	39.0509	50.702	47.136	42.06	29.6326	41.0177		0.0457129	34.0264
1.0723	31.1972	53.5175	24.8486	29.4392	17.4505	27.3237	45.3763	26.3947	36.2249	49.589	42.988	31.4847	39.2604	32.8403	30.1275	31.7503	39.29	55.853	37.2745	66.961	52.759	52.865	32.8275	43.493		0.05143	38.7973
1.1914	34.5284	61.4988	29.7843	28.644	17.332	30.5047	35.9704	32.7185	46.4242	48.268	39.973	33.2729	42.7883	35.5753	37.658	33.004	51.0994	58.088	37.3778	69.359	60.388	53.455	36.7156	47.7154		0.0571423	41.756
1.3106	30.6579	66.3841	35.398	28.8472	16.9962	35.8672	39.0136	34.334	37.5879	54.814	41.628	40.2608	47.9786	33.1967	44.2046	34.0089	45.6118	61.886	47.9702	65.792	63.28	59.535	45.4808	56.2495		0.0628594	44.4576
1.4297	36.3671	66.1187	35.9775	30.9795	12.4714	37.9496	46.7026	45.3597	45.1322	53.055	47.391	41.5423	53.839	41.9714	44.8144	32.9006	46.1059	66.727	50.036	61.748	61.974	71.164	44.4225	47.2637		0.0685717	46.7505
1.5488	33.5465	75.8891	45.1236	26.8383	17.9353	36.265	49.7551	48.6047	42.2921	57.534	53.391	41.8327	70.2185	56.6838	36.6549	35.4528	53.7887	70.543	47.1753	75.221	63.012	67.785	46.8419	53.2262		0.074284	50.2338
1.668	42.5514	76.408	45.3082	26.6582	21.9803	39.0652	58.2158	51.4385	54.4635	57.112	52.533	44.7898	72.9512	57.0085	37.5234	35.6661	55.8326	74.522	57.2466	79.829	71.297	69.104	44.5256	53.6906		0.0800012	53.3217
1.7871	43.455	76.3064	47.4106	29.9909	17.5206	40.7754	59.1704	51.2098	59.4436	74	61.641	51.85	72.8111	53.3793	42.8041	36.1166	55.7349	91.823	57.9297	80.962	86.162	70.441	49.0631	64.0014		0.0857135	57.2501
1.9063	45.911	77.5869	65.1219	33.4905	18.8071	44.8638	50.1056	50.1124	65.7739	84.384	70.179	43.3801	74.1592	53.5699	50.5956	46.316	61.3873	102.402	70.3088	79.766	79.101	86.017	48.2548	57.2001		0.0914306	60.7831
2.0254	52.4542	74.1306	67.6875	36.8879	25.1942	48.9021	55.872	61.517	69.6718	97.501	70.857	43.4454	71.0317	57.2001	51.072	48.3212	75.5354	101.469	70.5024	88.888	84.156	89.997	54.2242	58.7784		0.0971429	64.804
2.1445	53.4919	81.6013	79.7855	40.9868	28.4511	49.6834	55.1551	59.5093	67.3368	98.871	72.207	46.3932	71.3067	62.2977	51.0541	54.9142	78.5925	99.153	66.8575	89.489	84.962	88.163	57.2446	52.5135		0.102855	66.2508
2.2637	61.9452	96.3739	81.1389	43.4907	28.3852	55.4336	57.1527	60.8854	69.8186	101.45	79.592	53.5296	69.6725	62.0894	44.2139	47.0969	74.9847	113.198	67.5777	95.794	90.386	89.031	56.447	62.2816		0.108572	69.2487
2.3828	71.7328	96.2811	72.7286	57.1099	26.3272	50.4061	63.6405	57.8467	83.4151	105.511	79.06	62.4044	77.2136	56.2098	51.2934	57.926	76.2474	105.639	64.84	105.383	96.55	98.279	58.5321	62.9056		0.114285	72.3951
2.502	59.1211	91.7695	78.1429	57.4487	32.8732	50.1626	67.6234	51.3748	72.4132	108.346	74.978	59.3924	72.4205	64.3798	49.3763	53.0195	85.6937	100.963	70.8905	109.768	101.31	95.129	58.4545	61.0855		0.120002	71.9223
2.6211	57.9271	82.5673	77.5464	59.8622	41.227	50.268	67.8998	62.0664	78.6224	112.032	81.688	58.0326	71.8	62.9812	55.2374	48.4072	89.5354	103.65	65.4318	113.929	89.995	88.221	58.4979	51.3894		0.125714	72.0339
2.7402	64.6786	84.4789	81.424	54.4352	36.6851	54.0451	68.1594	55.2345	77.3359	107.359	80.556	65.4873	75.7706	64.682	51.2909	36.3641	92.3894	101.551	62.4204	112.217	106.886	93.74	56.403	58.1655		0.131426	72.5733
2.8594	59.3927	89.9545	81.4049	50.4342	35.2724	58.0537	61.5291	53.2104	83.4041	122.284	85.168	74.4363	74.5231	68.0993	52.1781	33.4903	95.7048	88.421	71.9912	112.602	102.747	98.586	64.8732	62.6986		0.137143	74.1858
2.9785	64.0093	80.1234	93.6201	57.1103	37.3057	55.1854	55.9215	54.4298	88.586	109.223	71.915	63.2827	70.7866	71.788	54.1513	34.5621	85.484	94.096	68.9198	113.234	104.244	98.032	66.5336	65.3491		0.142856	73.2455
3.0977	71.062	80.1658	80.6774	52.059	41.9411	52.2856	53.1781	55.8411	90.9479	103.474	84.188	60.5386	74.0976	64.0012	55.9854	47.7457	88.4766	91.414	73.1012	111.134	117.636	101.271	71.4494	60.2474		0.148573	74.2883
3.2168	63.3244	78.3076	79.1914	56.8006	43.6592	63.5612	54.6355	50.9174	92.7034	107.756	95.736	71.4345	68.602	66.9295	55.3647	46.2337	88.5393	93.066	69.9571	129.796	118.232	103.236	69.4185	52.8217		0.154285	75.8427
3.336	61.8107	92.1667	70.7218	63.667	52.9688	59.3016	65.3078	51.5678	84.1183	106.693	92.051	69.6784	68.2435	74.2739	58.298	46.1319	80.2392	96.398	77.3643	119.77	125.162	102.308	63.7209	50.2653		0.160002	76.3428
3.4551	58.6869	84.1217	77.5648	62.9187	51.0401	54.7524	64.6785	53.4462	84.8658	105.238	91.537	72.1552	74.5775	69.7126	64.7467	47.211	83.1811	93.787	70.7929	113.745	119.058	109.006	63.0114	48.4817		0.165715	75.7632
3.5742	58.0125	77.4134	81.0297	55.033	52.6883	57.3982	66.4636	52.5415	86.328	105.537	89.093	71.5418	70.5138	76.7165	60.085	47.4096	83.2441	91.216	77.7584	103.709	131.098	108.202	56.5252	39.639		0.171427	74.9665
3.6934	55.6172	87.5027	86.7752	61.7631	51.6663	59.3537	58.6308	55.9003	95.4427	103.659	85.471	67.8869	66.8973	80.1873	73.8537	51.4146	83.5696	96.53	83.6287	106.438	127.044	99.728	49.2095	38.6088		0.177144	76.1158
3.8125	66.9876	81.7259	87.1318	68.7552	54.2698	63.4953	55.9144	48.0685	96.5177	109.684	91.803	77.3091	54.763	82.1125	67.0086	48.8964	75.8751	96.97	84.3255	105.263	123.811	98.761	45.5015	39.6417		0.182856	76.0246
3.9317	69.4959	78.2273	92.8255	80.7239	46.5189	60.0319	60.6846	47.213	88.5075	104.639	93.448	83.1315	67.5813	78.7326	76.1074	48.8763	73.3659	84.783	75.8516	97.526	122.679	96.898	50.446	34.4448		0.188573	75.5308
4.0508	72.5382	77.2775	93.9345	77.9551	47.0819	53.3629	67.8416	43.1267	87.044	108.422	98.883	83.1796	68.5449	80.875	70.1584	38.2681	81.8357	88.2	77.7212	97.314	134.6	99.972	54.3252	35.7513		0.194286	76.5922
4.1699	72.0075	82.0011	97.0645	68.4109	52.1177	57.2099	64.5418	45.83	87.0704	110.646	92.372	85.2872	66.7436	73.3534	74.6326	42.1758	85.2421	90.364	68.8427	103.543	121.156	105.142	49.3972	37.0458		0.199998	76.3416
4.2891	65.1009	80.3298	88.7318	69.6615	50.1465	62.5356	62.1061	48.0397	81.4428	112.439	93.967	82.1549	72.6334	71.6029	64.5017	43.9493	75.306	85.609	73.7286	98.147	115.272	104.106	47.9397	30.1082		0.205715	74.1483
4.4082	67.5113	84.5196	96.5283	70.665	53.6149	54.6323	48.0875	46.35	87.4259	109.188	88.197	81.9415	76.1367	76.0665	73.7675	39.5465	74.4342	93.281	76.5639	110.754	118.279	81.708	46.1384	26.8618		0.211428	74.2583
4.5274	70.1919	93.2163	82.7705	67.6344	46.1954	54.7736	58.559	43.3745	85.9789	105.374	94.643	75.6842	70.5908	76.9239	82.6508	43.1822	75.4026	87.027	80.9184	108.692	111.502	91.108	43.0587	32.3106		0.217145	74.2401
4.6465	62.2809	92.8339	83.1464	73.3733	36.7622	55.5449	51.6549	43.7947	76.4358	103.828	91.871	70.1362	66.5359	80.1855	81.7112	52.7616	76.7646	93.09	79.1585	108.912	107.06	94.148	32.8563	24.723		0.222857	72.482
4.7657	76.6455	97.5377	79.7718	81.1539	41.8474	52.9621	48.0019	51.1529	80.7988	91.953	95.121	58.6955	60.9854	72.1508	81.1533	48.5538	79.5329	86.754	88.0873	98.748	117.462	92.472	40.7629	28.415		0.228574	72.9466
4.8848	68.5031	95.2098	84.8237	72.6682	42.151	59.7254	51.2894	50.438	69.3271	91.856	94.681	59.4135	67.5746	77.0397	78.7484	50.8517	77.3426	82.65	97.2389	107.066	118.423	83.121	30.1667	27.6672		0.234286	72.4157
5.0039	64.5487	96.3376	78.7751	72.244	38.8566	52.3161	51.8345	49.09	69.058	86.927	104.625	60.9565	61.8943	77.1714	68.7861	49.3837	71.8412	85.761	92.0123	101.864	117.757	81.276	33.4555	29.1616		0.239999	70.6639
5.1231	61.0754	87.2788	85.3613	70.0847	41.3733	54.9397	52.6506	56.0877	61.4072	83.048	109.769	51.3764	65.9486	87.9766	71.2836	42.8477	63.1597	88.509	90.2231	97.382	118.125	79.309	33.917	24.6022		0.245716	69.9056
5.2422	65.2399	81.3987	88.6353	66.7526	41.0417	52.5345	42.4904	51.4583	66.7308	97.764	108.312	58.2076	63.8997	81.1252	73.137	44.7311	59.6164	89.442	84.5973	94.78	114.518	72.148	25.675	21.2259		0.251428	68.5609
5.3614	63.267	91.4755	87.4089	61.8261	38.4326	46.3877	45.137	54.1526	64.6321	96.779	99.699	56.0928	60.3459	80.1321	83.2011	41.4193	63.5901	84.137	71.0348	99.949	105.941	72.551	21.7399	20.6759		0.257145	67.0836
5.4805	67.4174	85.7673	89.2155	72.8575	37.9223	49.696	48.0981	41.1215	59.2125	87.268	104.789	58.9064	49.4207	81.6505	82.9967	37.7759	55.9213	79.88	72.6492	94.38	105.523	71.298	27.9596	18.7234		0.262857	65.8521
5.5996	68.104	80.5902	79.0061	71.5775	39.2845	51.4076	48.9741	42.8054	54.6993	86.624	91.418	51.6623	52.2771	77.4423	75.2543	38.5884	56.0922	85.931	81.2469	94.728	112.072	62.319	24.7304	19.183		0.26857	64.4174
5.7188	64.4568	74.3824	83.4191	69.1662	38.0865	52.2731	44.1418	40.0971	48.0922	86.535	88.547	57.2372	47.8018	74.7137	66.956	31.4503	55.2895	86.135	84.0425	87.917	121.023	58.781	21.7161	18.0352		0.274287	62.5123
5.8379	64.1453	75.6898	75.897	64.1546	42.6103	52.4852	48.1521	42.1536	39.9647	90.605	92.006	55.9446	49.0778	74.3062	72.0116	39.0649	55.3231	93.977	73.3153	90.29	106.363	65.043	20.4763	16.2674		0.279999	62.4718
5.9571	60.2808	70.1954	76.0426	67.4448	40.4788	46.5752	43.6593	51.5028	43.1864	84.307	95.741	47.2514	47.7997	78.4016	61.9676	35.1369	57.4339	81.881	65.0564	87.744	95.31	71.249	19.2789	14.3356		0.285716	60.0942
6.0762	63.1446	72.358	89.1733	70.6038	31.9727	47.383	48.4556	49.238	41.1595	95.487	99.515	40.1527	44.4769	71.0113	59.3951	35.7523	63.0783	77.928	58.5643	86.09	98.876	70.637	19.1463	16.9978		0.291429	60.4415
6.1953	57.4241	71.7268	81.566	66.115	26.2384	50.5571	49.4332	36.473	39.004	83.93	85.685	40.0919	49.1497	78.1568	52.7682	37.8081	62.9726	76.117	54.0423	101.372	104.411	73.04	17.2769	13.7225		0.297141	58.7117
6.3145	57.2383	65.8105	75.935	70.9893	23.8757	43.9566	46.9653	31.9699	36.9887	67.46	67.778	33.745	52.6714	79.6374	47.5957	32.5127	68.7862	84.352	51.4131	92.724	101.38	64.148	14.5199	9.9802		0.302858	55.1014
6.4336	47.6919	64.867	60.8155	71.7495	22.3937	48.2838	49.8722	30.5528	28.7446	68.878	78.639	31.5215	51.416	79.9602	55.3042	29.2177	62.7833	75.888	56.9492	85.765	98.324	61.908	16.1125	12.6741		0.30857	53.763
6.5528	44.3487	65.1815	66.4244	66.8281	22.6742	39.1484	48.3828	31.345	30.7269	64.994	84.552	28.7039	41.5964	76.9011	54.7429	28.0707	58.2422	78.707	48.4668	86.343	105.801	65.189	16.387	13.4386		0.314287	52.7998
6.6719	47.8413	73.0015	64.5819	66.5109	21.1954	36.0053	46.0408	28.5804	28.1538	53.154	85.427	23.1042	37.3821	67.1816	48.3988	30.8382	43.8384	74.592	55.9981	74.591	98.135	64.714	9.7228	11.6395		0.32	49.6095
6.7911	37.9114	71.6578	67.3864	64.9702	23.3912	30.7015	44.2649	25.3791	31.0603	42.597	84.445	23.6553	38.6341	66.521	34.7426	28.5538	46.2913	74.647	40.899	61.622	105.096	60.515	8.8618	13.9157		0.325717	46.9883
6.9102	31.679	72.0218	67.8294	53.1775	24.2213	21.5828	39.991	25.226	24.8631	40.893	96.91	20.4831	31.4992	67.1608	36.1124	23.9614	44.816	73.177	41.8862	66.042	107.277	49.089	11.9406	11.9017		0.331429	45.1559
7.0293	30.3037	70.996	70.0919	48.2444	16.4036	20.2889	37.6105	23.8511	20.1794	43.688	86.857	16.1515	22.437	57.3098	34.2516	23.2694	42.2805	69.435	35.9176	61.746	94.895	49.215	12.1246	7.8792		0.337142	41.4761
7.1485	25.895	67.2811	65.8884	44.3599	13.7224	14.6057	37.0475	22.4373	23.8077	31.042	92.113	13.6758	22.4504	53.1575	21.2284	25.2487	28.9572	62.786	34.3741	52.417	98.159	53.194	13.4447	10.1149		0.342859	38.642
7.2676	25.7075	61.8147	56.5991	45.1652	12.5779	14.1311	35.0847	17.6136	17.9193	27.796	85.556	14.7337	17.4701	45.7451	22.1894	21.6064	31.1241	54.489	35.4732	43.479	88.614	39.94	16.2959	7.9891		0.348571	34.9631
7.3868	23.5396	56.3692	50.8634	40.0038	13.0365	15.5423	28.6062	18.2089	13.9084	28.225	82.723	13.1926	16.383	52.2019	23.4457	20.5314	27.7766	48.313	28.0894	42.169	85.337	36.481	12.1508	9.1557		0.354288	32.7606
7.5059	23.5731	41.7091	50.2398	39.4854	16.6152	17.1089	28.5336	19.5268	14.2267	20.824	80.124	14.8576	15.6673	48.3936	18.2053	17.9931	33.9615	36.867	26.135	34.18	74.127	34.915	13.365	10.4169		0.36	30.4605
7.625	24.8691	36.6672	35.5211	30.0227	12.3075	11.4504	23.0631	16.1245	16.0503	24.745	71.291	14.8109	15.9769	43.6917	16.3807	17.0253	26.1567	33.873	26.3493	32.037	55.526	24.583	14.0585	9.6642		0.365713	26.3435
7.7442	28.2204	32.8924	41.1201	28.3824	13.7392	8.5428	19.0848	16.0626	16.2361	20.497	62.027	14.0724	14.1513	41.3841	15.2048	14.3792	24.8496	34.858	24.2756	30.606	40.651	22.865	14.7542	10.1746		0.37143	24.5429
7.8633	23.5623	26.5264	36.7965	25.6227	11.7752	11.8981	16.0155	13.2762	14.6844	15.158	62.289	12.6726	13.6584	38.2148	11.0271	11.7031	27.2018	31.552	26.5318	27.578	35.022	20.099	13.0429	7.885		0.377142	22.2414
7.9825	19.1158	17.8836	38.5722	23.2816	9.8432	13.7413	12.6609	10.7709	14.0951	15.392	48.742	12.3982	11.5965	37.0591	13.6856	12.4449	19.8095	28.092	21.205	31.165	26.749	19.832	10.2696	7.8563		0.382859	19.8442
8.1016	12.9896	20.7201	34.6954	20.1432	9.9558	11.854	16.3917	12.7181	10.1731	18.707	44.091	11.5745	10.4045	29.6748	9.6624	11.509	18.7157	22.236	21.3835	32.068	30.575	19.846	13.3901	9.4962		0.388572	18.8739
8.2207	15.724	19.0153	28.605	17.8795	8.6098	9.8363	15.2836	11.6135	10.9679	14.527	42.975	11.4257	9.8168	23.9326	11.3393	12.3919	19.4193	18.721	26.9962	27.357	31.374	14.171	12.227	10.3567		0.394284	17.6902
8.3399	13.3833	17.3213	25.3701	19.5659	8.6888	8.729	11.8272	11.5927	12.468	13.639	42.296	13.2249	7.0728	20.1129	9.0311	18.8897	17.0737	20.856	24.8101	22.335	25.385	15.911	10.4971	10.4822		0.400001	16.6901
8.459	17.7355	15.1685	27.3411	17.3169	13.6331	10.3882	12.3235	5.0874	15.6325	18.504	30.327	17.078	9.0586	15.0742	8.9279	19.2387	14.3725	20.133	20.4446	24.732	26.402	15.341	9.2722	12.4864		0.405713	16.5008
8.5782	16.424	14.8872	24.1883	15.293	10.3328	6.4461	9.0405	6.652	13.4684	14.074	29.8	10.521	10.4575	10.8181	12.3101	12.4307	22.6516	21.237	24.2534	21.995	24.524	14.538	11.787	10.6464		0.41143	15.3657
8.6973	15.3952	14.5835	20.7067	18.3559	11.5973	8.4111	10.9636	7.6224	16.4328	18.248	22.074	11.3484	7.6032	11.2208	11.5949	11.964	18.9813	18.682	25.4106	20.786	24.507	16.615	10.3774	10.8012		0.417143	15.1784
8.8165	12.9348	9.8599	18.4323	15.4227	11.0085	9.1191	12.2457	7.4717	11.4241	18.371	20.936	14.7506	8.8195	8.1625	8.5992	9.1822	14.6503	16.747	18.8596	23.913	17.557	14.926	14.6891	9.1128		0.42286	13.6331
8.9356	11.5875	10.8424	14.4407	15.6075	10.8552	7.4013	13.034	9.8704	12.6743	16.216	19.004	13.4315	9.3114	7.609	6.1543	8.625	18.6986	18.654	21.495	20.856	15.943	13.863	12.597	9.4695		0.428572	13.26
9.0547	10.753	14.2853	16.8855	16.2562	12.0102	9.706	8.1484	7.9267	12.4157	15.127	16.52	11.3353	9.5946	10.4674	11.8687	11.4658	22.2347	16.026	22.2132	23.474	21.165	17.936	15.8133	10.8889		0.434284	14.3549
9.1739	11.3178	11.2326	14.8333	18.3436	6.887	7.3115	9.2245	7.6561	10.2777	14.056	13.079	9.1231	6.101	10.5964	9.5037	8.8766	18.4963	13.691	15.0766	22.908	22.384	13.037	15.3075	11.2451		0.440002	12.5236
9.293	11.684	12.1901	15.5325	9.6075	7.1222	3.6007	11.1938	5.7697	13.3397	16.139	14.341	10.5073	5.9124	9.9533	12.5619	10.9764	15.635	14.564	17.2356	24.167	22.293	13.535	14.3949	10.2215		0.445714	12.6032
9.4122	8.7316	12.9875	14.854	11.3318	6.034	4.5452	13.9227	6.2585	10.2565	14.936	13.834	10.0942	3.625	10.4144	12.1195	11.2451	17.617	18.864	15.7522	23.17	15.414	12.887	12.4512	13.1654		0.451431	12.2713
9.5313	7.4958	12.3287	10.0723	17.2194	5.0547	3.7563	8.43	10.0159	8.6373	13.046	11.549	10.0723	2.8353	6.9099	14.1399	10.3692	16.0445	19.113	17.4598	19.57	15.98	18.553	14.4708	11.0113		0.457143	11.8389
9.6504	9.6717	12.6494	11.8021	13.8951	6.6723	4.7457	7.5612	9.2565	12.2094	11.421	10.911	7.3314	3.4537	7.562	10.0476	12.9183	14.8547	15.314	14.5374	18.169	18.636	18.608	13.8091	12.5167		0.462856	11.6064
9.7696	12.8706	9.5539	10.071	10.2355	7.0754	2.8037	9.4228	9.9223	8.727	11.868	14.364	10.9979	2.2488	6.9185	13.9008	10.1194	25.1766	18.616	19.7752	24.339	13.509	12.567	13.1428	13.7236		0.468573	12.1645
9.8887	11.0474	7.6899	10.4683	15.1735	4.7552	3.3523	12.6138	10.9242	9.0865	11.403	16.438	8.6965	1.9359	5.3133	14.6256	7.7195	22.2687	16.856	16.4249	20.228	15.832	12.69	12.7958	10.0059		0.474285	11.5977
10.0079	8.1949	9.0164	10.285	14.6454	5.5032	2.1906	9.3241	10.6464	11.3749	12.428	11.1	11.0099	1.8669	4.8715	10.8678	7.621	17.7338	14.864	19.3099	16.156	18.296	15.011	11.468	13.172		0.480002	11.1232
10.127	9.1383	10.9447	11.2495	16.021	7.1052	3.2757	5.8057	8.7313	8.4888	15.499	10.9	5.5872	1.0001	5.2652	8.5456	6.9563	13.9049	12.485	13.5333	17.667	16.616	20.582	10.5964	13.9802		0.485714	10.5783
10.2462	10.3915	7.7133	14.957	13.0558	7.2196	3.5803	5.2257	7.8011	10.6301	13.045	10.665	6.7423	2.5512	4.175	6.5104	10.1443	14.9594	14.981	17.0409	15.922	16.044	17.931	13.6599	10.7061		0.491432	10.6522
10.3653	9.1291	7.3129	13.0539	11.5521	6.7599	1.9635	4.3995	10.0557	9.5434	10.588	11.72	8.3447	2.8156	1.9934	6.1515	8.1099	12.7706	12.013	20.1194	14.317	18.049	16.651	17.6024	8.5851		0.497144	10.15
10.4844	7.4263	8.2717	12.9673	12.7752	4.9789	1.8056	4.3705	6.7338	9.7019	11.889	11.273	9.3849	2.2121	2.0201	7.4253	10.1005	17.6114	10.053	16.145	13.156	14.332	18.44	13.8526	7.2578		0.502856	9.75766
10.6036	8.6232	12.5487	12.5195	13.5421	6.8947	2.6592	3.7822	8.9435	13.2389	10.648	10.209	6.602	1.8046	2.6156	4.5188	9.0043	11.8218	11.798	12.1153	15.393	12.723	19.087	11.1517	7.7925		0.508573	9.58486
10.7227	7.9311	10.0219	14.2898	12.9966	7.2164	3.0332	3.5098	11.2724	10.5059	11.284	9.622	6.5154	2.1322	2.85	5.2486	8.4702	10.4272	17.352	15.331	13.421	15.051	17.904	10.6098	8.7835		0.514286	9.82413
10.8419	7.9686	10.3254	13.9786	12.7134	4.8963	2.4737	3.1725	8.1251	8.0417	12.124	8.784	6.522	2.5708	3.7413	4.262	7.2723	14.4108	15.787	12.1684	14.125	12.828	19.595	12.3148	10.0823		0.520003	9.51179
10.961	9.4154	9.6957	15.4553	11.011	5.1783	0.8262	1.8085	5.9306	7.6571	11.264	5.726	12.3037	1.701	2.4258	5.0555	6.9252	10.5694	19.776	10.7018	22.561	13.521	21.438	14.0669	7.4477		0.525715	9.68588
11.0801	8.4392	9.6239	13.9796	12.5724	4.6361	0.5843	1.6459	6.1807	6.9394	10.578	7.003	9.765	2.0317	2.1936	4.7664	8.6319	11.8342	14.752	16.1221	17.458	17.821	24.07	15.6976	8.1225		0.531427	9.81035
11.1993	9.49	9.2465	14.9455	10.2163	5.7698	1.1138	2.6353	5.7283	4.2127	14.096	8.195	7.2297	2.3514	1.1585	4.7852	6.5668	10.3763	14.131	18.9395	16.224	15.895	20.564	13.5241	9.6685		0.537144	9.46097
11.3184	8.1513	8.565	11.8097	11.3779	4.2047	1.4781	1.4601	5.1485	5.4004	12.983	7.141	7.3049	0.8872	1.3663	3.6584	8.8814	13.7234	17.855	18.1109	13.418	17.633	19.234	15.6315	10.1238		0.542857	9.39781
11.4376	10.78	9.6426	13.4111	10.8409	2.8707	0.9991	1.3481	3.9729	9.3177	13.824	7.592	6.9905	0.5277	1.2767	4.7632	11.5122	10.4634	15.031	15.6228	15.408	16.935	16.293	14.7162	8.0212		0.548574	9.25667
11.5567	11.023	7.3931	11.3202	9.0641	1.6849	0.9633	0.9326	3.1863	8.7434	10.153	9.617	5.8579	1.6828	2.9439	3.9864	8.5831	9.038	13.417	14.8477	12.293	11.046	14.437	10.4759	11.7581		0.554286	8.10199
11.6758	12.1327	11.0072	10.5585	7.4285	2.911	0.3907	1.5586	4.3642	5.5085	15.626	5.291	6.8478	1.7551	0.876	3.2728	11.9412	11.1904	13.333	18.1394	11.886	13.906	16.61	15.6741	11.8881		0.559998	8.9207
11.795	10.7949	15.1588	10.4573	12.4605	2.8041	1.2564	1.2839	4.4089	8.7403	14.745	6.634	6.063	1.2726	1.2919	2.3225	9.307	13.2598	14.223	15.8455	9.325	14.087	13.139	15.027	11.6113		0.565716	8.97995
11.9141	12.1951	11.371	8.3891	11.2648	5.2455	0.4961	2.0122	4.4582	8.63	15.034	8.47	4.4321	0.5947	1.8002	3.0868	8.4596	9.6585	14.726	19.3699	12.449	15.199	16.133	10.7506	8.6289		0.571428	8.86893
12.0333	11.0259	13.2079	9.9261	9.0694	4.8153	0.2676	1.1842	4.6068	6.1173	11.436	7.964	6.6534	0.8045	1.3034	3.7637	9.611	10.8195	18.243	22.9772	13.704	12.645	13.801	10.9471	7.1171		0.577145	8.83377
12.1524	9.4447	11.1376	12.6006	5.3668	4.3602	1.1542	1.2046	4.0414	7.9528	12.209	10.321	3.8863	0.5945	0.8025	1.6353	9.2026	11.1094	14.79	18.0709	16.709	14.872	14.225	13.7156	10.3881		0.582857	8.74142
12.2716	10.116	9.9021	12.4927	7.7061	3.0345	1.033	1.1478	3.758	10.4634	13.185	7.494	5.4436	1.3723	0.9076	2.3756	9.9035	7.8367	12.865	16.8271	15.209	21.431	16.512	11.4498	13.6459		0.588574	9.00465
12.3907	11.0696	9.5947	11.2416	10.5415	2.0218	2.0333	1.2015	3.594	10.3256	13.367	10.162	5.6129	0.4831	1.9977	2.7664	8.5631	10.8277	16.983	17.1013	14.083	18.355	14.265	15.7388	11.9292		0.594287	9.32745
12.5098	12.1814	8.6766	13.3094	9.8813	2.1531	0.4781	0.8142	2.9401	8.5471	12.42	8.972	6.2354	1.353	1.7439	1.7487	7.3967	9.4588	13.929	15.2359	16.602	16.603	15.75	11.9906	9.3713		0.599999	8.65798
12.629	11.1253	10.3729	11.7947	8.8936	2.12	0.88	0.6332	3.5832	6.8004	9.873	8.049	4.5487	0.7585	0.9392	1.9528	7.2103	10.0946	17.688	12.3084	11.13	10.506	16.987	13.6899	9.1277		0.605716	7.9611
12.7481	8.0384	8.1373	10.2629	7.8084	3.0593	1.3972	0.3798	1.8333	6.6448	10.748	8.149	3.2654	0.7181	1.0139	2.0129	5.818	10.1831	16.367	14.3856	13.498	10.957	17.035	15.6953	9.6477		0.611428	7.79398
12.8673	13.0941	8.4737	9.1105	6.9639	1.8717	1.134	0.7721	1.4768	5.6695	9.898	8.715	3.9727	0.2351	0.5248	2.0088	6.7889	9.179	13.496	13.3203	13.049	11.475	15.146	16.6483	11.2206		0.617146	7.67682
12.9864	12.2744	9.161	8.5487	10.7094	1.6766	0.6256	1.0331	2.4978	7.4076	7.153	10.591	5.4698	0.5216	1.9739	3.0447	9.3586	7.6502	12.392	13.4242	11.328	11.114	14.081	14.9319	10.8841		0.622858	7.82717
13.1055	15.9297	7.9005	10.3988	9.0816	2.457	1.6111	0.1203	3.1883	7.6243	8.874	9.787	3.9511	0.1705	0.6487	0.7344	6.8057	8.444	15.74	14.0567	12.939	12.725	13.156	11.757	9.5456		0.62857	7.8186
13.2247	10.8665	8.4844	9.9941	11.5247	3.1499	3.2245	0	0.2722	8.1222	8.733	6.768	3.9877	0.9743	0.7043	1.7292	7.7846	12.9325	14.655	14.2027	12.353	10.262	14.44	15.8328	8.1771		0.634287	7.88228
13.3438	10.9772	7.9529	12.9488	7.7687	2.539	1.0086	0.0378	1.5002	4.9747	9.323	5.714	3.1849	1.2655	1.8808	2.4472	9.4319	7.8659	16.5	18.9882	14.7	9.304	13.452	11.536	7.9902		0.64	7.63715
13.463	10.2267	10.2374	11.7685	5.92	1.8317	0.3321	0.5142	1.011	6.8591	8.003	8.203	3.7673	1.2958	1.1429	1.7544	6.5578	13.8444	16.991	14.3696	18.443	7.145	16.699	15.5876	12.5627		0.645717	8.1278
13.5821	9.3022	10.1099	9.4357	4.5687	2.219	0.1733	0.2148	1.8756	9.7583	8.054	6.952	4.1185	1.4289	1.8024	0.6317	5.1323	12.2365	15.528	13.8665	17.338	6.843	17.5	13.7156	11.4266		0.651429	7.67631
13.7012	9.2561	10.1971	11.9978	8.6555	1.4039	1.0711	0.6448	1.9237	6.0836	8.763	6.103	5.3739	0.8203	1.6105	0.426	7.8094	9.0881	12.397	15.1973	12.64	6.116	11.929	15.0625	11.351		0.657141	7.33003
13.8204	12.369	11.779	8.0214	7.4376	2.1878	1.0448	2.2382	2.6908	6.6841	8.38	7.377	6.7223	0.791	1.1107	1.0689	8.4544	9.91	14.009	15.4577	14.916	7.331	13.883	15.04	11.8699		0.662858	7.9489
13.9395	12.4882	9.632	6.0353	7.4289	3.1885	0.3416	1.6244	2.0695	8.3686	7.609	7.525	5.7667	1.7603	1.2692	1.8855	5.9098	9.5124	12.063	18.7893	15.464	9.041	15.775	18.426	12.9339		0.668571	8.12113
14.0587	8.9061	9.8096	8.2355	6.9456	2.6755	0.0465	1.7666	0.9719	6.692	8.62	8.407	5.4223	1.2199	1.4393	2.0776	8.3542	7.6682	14.376	15.9922	15.281	9.149	18.503	15.8238	11.0028		0.674288	7.89107
14.1778	8.5663	8.8169	10.7331	6.3994	3.3914	0.4839	0.5998	0.6333	8.0303	6.789	6.881	6.1493	0.5019	2.5246	2.0645	9.1958	9.0194	17.659	17.5771	11.572	7.047	17.867	14.1386	9.7721		0.68	7.7672
14.297	10.5471	7.5977	8.6012	6.8582	2.6343	1.57	0.9066	0.5885	8.2136	7.699	6.927	2.8155	1.2041	3.0375	0.7298	7.7437	6.3092	13.223	17.527	10.566	11.128	15.586	13.6185	6.1481		0.685717	7.15748
14.4161	9.7811	8.9942	8.6334	4.9483	2.3595	0.6763	1.3404	1.0209	8.7093	10.843	10.675	3.8916	1.0756	2.8063	0.9717	7.1193	5.2857	14.798	19.3598	12.044	7.353	12.08	13.114	8.7812		0.69143	7.3609
14.5352	12.2141	7.659	8.4329	6.455	2.7447	0.5424	0.2233	0.6128	7.1139	9.735	11.157	5.5446	0.5298	0.9165	1.2516	6.0218	8.4827	16.807	17.7361	12.219	5.08	11.558	16.092	10.2308		0.697142	7.47333
14.6544	9.7573	8.6551	8.3736	6.8908	3.6531	0.8758	0.5818	1.7531	4.7111	10.501	8.93	3.9037	0.6714	0.677	1.3111	6.1311	8.3692	14.782	22.511	12.102	6.226	13.928	14.1691	11.8936		0.702859	7.55658
14.7735	11.7519	9.2918	8.5473	8.4572	6.566	0.5903	0.3908	1.0898	5.5791	8.492	9.128	5.6229	1.3914	0.7583	1.1167	8.9169	8.0286	13.233	15.5873	7.336	6.479	17.627	14.1284	10.9628		0.708571	7.54469
14.8927	12.3339	7.6917	6.213	10.144	3.967	0.685	0.8921	1.189	7.6101	7.613	8.653	5.5474	1.0831	1.3924	1.412	4.009	4.8982	15.138	14.8109	8.921	6.226	12.451	18.3822	12.1639		0.714288	7.22612
15.0118	8.9199	8.6691	8.5399	8.1744	2.5609	1.3271	1.087	2.1251	8.0058	10.207	8.435	2.582	0.7811	0.9527	1.8012	8.4605	8.2727	13.855	18.3298	7.506	8.281	12.023	17.9775	17.378		0.720001	7.76049
15.1309	10.8633	11.1336	10.4755	9.8555	4.1996	0.7212	0.755	1.266	3.876	8.003	10.299	3.8054	0.6632	1.297	1.0076	7.3334	6.4741	9.24	17.7316	13.537	8.574	12.671	17.386	12.0603		0.725713	7.63451
15.2501	10.9818	10.8991	6.7766	7.6429	4.0443	0.8003	0.5289	1.8303	2.6589	9.17	8.262	5.0423	1.8646	2.0204	1.8462	8.8093	8.0155	11.873	14.2555	12.192	9.046	17.067	18.4365	16.0672		0.73143	7.92211
15.3692	7.4582	6.051	6.7042	8.2097	4.1968	0.7577	0.5566	1.6762	5.4535	7.677	8.257	6.6549	1.322	0.6589	2.165	7.1787	6.6832	15.549	14.4388	10.704	4.529	16	17.9677	19.0942		0.737143	7.49764
15.4884	9.4336	10.7413	6.6381	8.7791	5.1762	1.2896	1.3357	1.1816	10.5406	8.878	8.984	5.6757	0.6922	0.5145	2.0663	5.7686	9.5936	18.427	18.1399	12.686	5.404	16.505	18.3346	14.4733		0.74286	8.38577
15.6075	9.1702	8.699	8.1326	10.1718	4.2028	0.9563	1.6772	1.5288	8.4392	8.803	8.438	4.4248	0.9247	1.541	1.0545	8.5758	8.9514	15.517	16.8136	13.601	5.136	14.428	20.0911	15.6004		0.748572	8.20326
15.7266	11.7497	12.2982	7.0859	7.962	4.7848	0.6415	1.2087	0.9141	6.6459	5.28	10.924	3.5175	1.1524	1.1937	2.3112	9.8319	7.5058	14.915	17.4111	12.31	7.094	13.212	18.6323	12.8945		0.754284	7.97818
15.8458	9.44	12.0173	8.476	6.494	4.9978	1.052	1.0265	1.4951	5.8834	4.32	8.099	4.2035	2.6737	1.718	2.4221	6.5622	9.6965	18.504	16.4603	14.374	6.32	18.678	17.8	13.5255		0.760001	8.17662
15.9649	15.6497	9.4221	8.5495	9.6793	3.6213	0.7789	0.7708	1.3626	6.1175	7.527	6.338	3.1227	1.662	2.6268	2.6421	7.9745	9.8695	16.58	21.3791	11.709	6.898	16.045	14.5943	12.2621		0.765714	8.21591
16.0841	8.6846	13.1114	12.9437	8.0995	5.819	0.7953	0.9589	2.0259	5.1513	5.986	6.428	4.1391	1.7304	2.231	2.1948	6.2284	9.5403	10.304	18.3687	14.119	10.207	18.12	12.7924	16.296		0.771431	8.17811
16.2032	9.6384	9.8323	9.8573	7.7722	6.3658	0.2144	0.6598	2.2478	6.0266	6.48	10.976	4.7357	0.7212	1.5136	2.7742	7.8323	5.5864	14.525	17.7427	15.552	7.869	19.019	15.1237	13.1209		0.777143	8.17443
16.3224	9.8863	10.6768	10.6318	11.8161	6.0684	0.3329	1.5935	4.1563	7.6748	7.446	11.217	5.5751	0.6239	1.1638	2.9025	10.4505	7.1636	13.76	16.2726	11.348	5.702	21.49	18.6277	15.433		0.78286	8.83386
16.4415	7.2554	10.2376	8.4484	5.8038	5.4045	1.7556	0.3219	1.79	6.8678	7.168	7.059	6.3891	1.0631	0.717	2.9357	9.6292	7.3836	15.176	19.5864	12.676	9.149	13.536	20.0409	14.1501		0.788572	8.106
16.5606	10.2044	8.2293	7.03	7.4284	6.7121	2.7396	0.4807	1.8594	5.7169	7.08	9.914	6.0403	3.4195	0.9753	3.0601	7.5909	8.109	14.942	13.6057	13.278	10.951	17.764	16.7117	13.7335		0.794285	8.23233
16.6798	8.3013	8.4555	9.0828	9.9633	6.0147	2.2574	0.9191	3.1083	6.2842	9.279	7.796	5.665	1.5553	0.8821	3.9795	6.6463	10.3304	14.434	15.6934	11.579	9.877	16.322	19.9991	14.7596		0.800002	8.46601
16.7989	10.4879	10.5826	9.3197	9.4663	4.3288	1.4977	0.4558	4.6914	7.6963	5.179	6.747	7.4228	1.0458	0.4318	4.0127	8.5824	8.0413	14.039	19.8555	15.79	10.725	13.77	19.8629	12.9935		0.805714	8.62605
16.9181	9.8386	11.1128	9.1876	8.0211	5.4993	1.0111	0	3.4998	9.778	7.511	6.232	6.9243	2.1367	1.2927	5.266	8.3792	9.2131	12.923	18.7892	14.177	7.18	12.651	19.7916	14.2429		0.811431	8.52742
17.0372	12.1063	16.4743	7.2888	8.1646	5.2595	1.044	0.0224	2.8902	8.9636	6.446	6.641	6.9629	3.1294	1.5447	5.3979	7.6708	7.536	14.852	18.8347	14.126	12.158	16.018	19.4828	14.9725		0.817144	9.08277
17.1563	13.6383	10.9254	11.3837	10.9015	6.9088	1.1342	0.289	6.5664	8.1693	6.068	6.898	6.6456	0.7597	2.0796	7.3961	7.9754	5.7293	15.87	16.5473	13.881	13.875	16.025	15.2506	14.4464		0.822856	9.14015
17.2755	12.8342	13.3251	8.9808	8.9856	3.6651	3.1632	1.1207	4.8742	6.593	5.368	6.321	4.1934	1.3503	1.8247	4.5854	9.151	7.3744	16.231	16.7728	13.837	10.153	17.883	19.2304	11.1691		0.828573	8.70777
17.3946	8.6821	13.886	8.2508	8.9715	4.9445	1.0463	0.7943	4.0755	6.493	4.365	9.523	7.0638	4.3091	0.9	5.5144	7.9847	11.8283	17.304	22.6382	19.267	9.089	13.78	16.8117	12.187		0.834285	9.15455
17.5138	10.111	9.2122	7.9509	8.2749	6.9747	0.8496	1.1391	4.6197	7.6071	6.585	10.134	7.3119	1.5055	3.0983	5.9055	5.7297	9.3109	13.429	21.3748	18.731	13.157	11.507	13.6025	15.5531		0.840002	8.9031
17.6329	13.2573	9.8345	8.4032	8.5442	5.8537	2.0009	0.7474	4.5097	6.2022	5.441	6.05	7.8542	2.0922	1.7688	6.9466	6.6479	8.7512	14.049	17.7798	16.088	7.593	12.309	17.7455	14.0142		0.845715	8.52015
17.7521	10.8683	8.8099	8.8247	9.2197	8.393	1.0724	1.4052	4.7893	6.0398	3.959	5.867	5.6495	3.1251	0.7386	6.8924	10.7035	7.5007	15.785	19.0134	16.368	8.901	13.927	15.0628	16.353		0.851432	8.71951
17.8712	11.8118	13.2696	6.938	8.3732	8.2857	0.6608	2.4426	3.7474	8.2051	4.087	10.284	6.8832	5.2861	0.7023	7.3973	10.7078	6.7411	15.547	10.2897	15.341	11.477	12.255	15.1778	16.5324		0.857144	8.85179
17.9903	10.4402	9.3565	6.3474	4.1456	7.0121	0.7008	1.7989	6.3485	7.7437	5.862	9.913	8.3342	4.9728	2.6344	8.5199	9.1321	5.2466	16.317	13.7145	17.327	13.161	12.979	17.3445	13.99		0.862857	8.88924
18.1095	9.2729	12.1278	6.389	8.0071	8.7824	1.4473	1.8481	5.8477	6.6301	7.589	12.044	7.3034	6.1706	3.4961	7.2462	7.2497	10.2183	19.168	17.4781	17.776	12.649	12.178	15.9	13.646		0.868574	9.6027
18.2286	6.8501	11.8089	6.0684	5.7456	7.7402	2.3214	0.5763	4.238	6.0255	4.985	8.032	4.7038	9.3244	3.1858	6.5165	10.6413	7.1495	19.439	18.9693	19.575	10.653	11.773	14.1627	10.9675		0.874286	8.81051
18.3478	8.1553	11.3695	6.7279	8.3651	6.0543	7.4284	0.6889	7.4893	7.1817	6.013	11.845	7.7699	11.0034	2.9464	9.5135	8.9094	4.7807	16.464	19.6084	17.84	12.906	18.101	14.8068	10.0534		0.880003	9.83422
18.4669	10.2953	11.1671	8.6545	7.5841	6.1648	5.4263	1.9164	6.4026	5.349	8.425	8.065	11.4562	7.0023	2.6463	6.0955	9.1832	4.8167	17.215	19.8718	18.76	9.846	12.878	18.935	11.3603		0.885715	9.56318
18.586	8.4903	11.4935	9.2181	6.0496	5.46	7.1762	2.9258	8.0469	5.1867	7.996	9.383	10.7702	5.3502	4.6054	6.628	11.0554	7.9422	11.48	21.3986	17.901	13.753	16.699	15.1372	10.026		0.891428	9.75718
18.7052	7.2299	11.0953	8.8256	7.0167	5.277	6.669	3.7895	6.1968	7.095	4.205	8.217	10.3737	7.9065	6.5092	5.8984	12.703	10.726	11.531	18.3181	21.388	11.833	13.837	14.7484	9.6545		0.897145	9.62682
18.8243	9.181	9.7417	7.969	9.6322	6.5283	8.1748	3.1033	3.877	7.3981	4.502	11.018	11.0948	8.0827	7.7337	8.2594	10.1777	5.5734	16.362	19.7673	18.731	9.036	18.301	12.0451	7.3214		0.902857	9.73379
18.9435	12.0971	11.293	12.1666	6.7583	5.6551	6.4858	4.4608	5.5536	6.6935	8.265	6.601	6.6046	7.4483	6.6492	7.6114	8.3025	6.8351	14.32	17.2683	20.086	12.426	17.797	13.2969	5.8834		0.908574	9.6066
19.0626	9.3819	11.1269	7.0483	6.4259	7.0537	8.0257	4.7136	6.7178	6.7531	6.066	7.424	8.4123	5.6874	10.0359	8.1185	9.5773	8.3803	15.494	19.7591	15.215	14.994	15.43	13.3822	2.3665		0.914287	9.48289
19.1817	5.9755	10.7412	5.7896	4.8276	2.8681	6.4861	5.0384	5.2878	8.7251	6.859	9.559	8.4351	7.4227	8.8683	9.5913	9.5081	6.7684	17.201	19.1056	16.46	14.134	17.798	7.0091	4.1761		0.919999	9.1098
19.3009	9.353	10.3372	8.483	6.6783	3.5219	9.3289	4.904	5.6853	6.5873	8.343	8.977	6.675	6.7284	6.993	8.3871	6.0943	6.9205	16.808	15.8598	23.374	19.33	17.162	5.7868	1.4069		0.925716	9.32186
19.42	9.6309	9.414	7.9259	4.5099	7.0115	7.2668	4.3157	6.2696	5.1526	7.752	4.541	10.9936	7.0627	8.8636	5.8199	8.2181	4.4538	16.683	14.3238	22.711	18.876	16.091	3.9685	2.9958		0.931428	8.95211
19.5392	9.6975	7.8581	7.0058	6.5668	7.4685	7.0585	5.2632	5.8744	10.3877	9.807	7.769	7.3991	9.1242	9.1863	5.0016	5.9233	6.3249	18.203	13.638	19.076	19.578	17.261	6.0032	2.583		0.937145	9.33575
19.6583	8.3603	7.1862	5.2705	8.5551	5.4876	9.7029	7.9331	3.982	6.773	6.22	5.044	6.4823	11.1892	11.9921	5.1235	3.5623	9.6635	17.308	11.6911	16.459	16.953	13	4.0433	0.6042		0.942858	8.44109
19.7775	7.0138	7.8469	4.443	8.5932	4.7551	5.6699	7.6902	4.8979	8.2212	7.103	7.275	6.7212	8.618	9.6604	5.213	7.5756	7.3462	19.571	20.6125	17.01	20.018	10.175	3.4289	2.1148		0.948575	8.81557
19.8966	7.1563	8.7266	5.9958	5.7361	4.416	5.9303	5.8904	5.0553	8.5048	8.281	5.57	8.7053	6.8933	8.2969	4.8084	8.3858	6.9725	12.856	17.285	15.203	23.397	13.701	2.0494	1.1562		0.954287	8.37385
20.0157	2.8866	8.4463	6.7441	6.4236	2.3944	5.1624	6.8786	4.3302	6.4791	3.994	4.904	5.6141	7.1322	8.9138	5.3184	7.045	7.8423	18.125	14.9997	18.177	17.932	12.743	1.3981	1.5508		0.959999	7.72645
20.1349	2.9809	5.9979	7.4469	5.7296	1.2233	5.9385	7.2008	7.0959	5.6022	3.994	6.478	4.5102	7.5299	7.9205	4.915	7.3736	7.8212	19.479	9.0769	18.06	20.525	7.829	2.4014	2.0232		0.965717	7.4647
20.254	3.2419	3.9106	5.3002	6.6436	1.6014	6.9337	5.8525	3.4918	6.5746	4.855	6.542	6.3955	8.4879	4.7778	4.9628	3.7688	5.2266	12.56	7.445	18.437	27.015	5.744	2.3855	0.429		0.971429	6.77426
20.3732	0.775	2.5961	4.3594	6.6237	1.6275	4.1008	7.5341	4.0393	2.1584	6.788	9.265	4.8809	7.8174	7.3687	4.9234	4.372	7.5888	11.833	5.6148	13.176	22.028	5.687	1.7565	0.1002		0.977146	6.12558
20.4923	3.1143	2.59	5.4852	6.2708	0.9793	3.136	6.6078	4.2142	1.8157	4.848	10.896	4.9958	6.4314	8.4531	1.3079	2.8681	6.9097	6.747	5.139	12.745	23.478	4.103	1.6586	0.279		0.982858	5.62804
20.6114	2.8111	1.6694	6.6848	4.2509	1.1903	3.6483	4.271	2.0337	3.6216	6.319	8.319	5.6288	6.4259	5.8683	1.5022	1.4613	8.244	9.82	4.4261	12.911	22.638	3.093	0.6926	0.8696		0.988571	5.35
20.7306	1.328	0.9419	5.0182	4.6227	0.6388	3.6817	5.4495	1.4987	3.3842	7.27	5.832	7.7637	1.4273	5.9076	2.0155	1.5676	5.6104	5.531	4.5176	7.511	23.129	3.469	0.4522	1.2456		0.994288	4.57555
20.8497	1.446	1.3245	4.8603	5.3797	0.7755	3.6058	4.0587	4.0737	1.6353	6.287	9.401	7.6279	2.518	2.812	1.9276	1.649	3.6561	4.874	3.5421	8.043	20.587	1.662	0.8756	0.8385		1	4.31085

## Sheet: Image10
X0	Y0	Y1	Y2	Y3	Y4	Y5	Y6	Y7	Y8	Y9	Y10	Y11	Y12	Y13	Y14	Y15	Y16	Y17	Y18	Y19	Y20	Y21	Y22	Y23	Y24	Y25	Y26	Y27	Y28	Y29		Ap-basal	Avg intensity
0	16.529	31.481	29.676	19.923	21.787	16.2744	20.258	23.719	28.927	23.1196	26.423	31.391	24.4629	11.0607	19.229	17.9623	17.255	18.6156	12.3291	24.53	15.2829	22.8646	18.5833	19.0141	15.2439	14.877	24.002	20.6186	24.8809	16.6446		0	20.8988
0.1191	22.281	23.126	27.261	14.877	18.65	22.4712	21.725	29.483	23.241	23.283	19.2538	29.348	26.3133	15.5458	18.146	16.6932	20.557	23.7752	7.527	26.982	23.3686	19.2978	19.7897	19.1129	17.3593	14.58	24.7957	23.4265	27.3626	17.4933		0.00598595	21.2375
0.2383	20.039	24.729	26.99	22.563	20.923	23.6441	23.108	29.011	22.129	23.6652	18.9006	32.433	27.0346	17.9078	26.317	18.2927	24.996	23.652	10.6993	29.673	15.2664	25.7409	19.4533	19.7532	16.117	20.845	29.0767	23.4628	23.0664	21.4393		0.0119769	22.6976
0.3574	28.875	30.417	33.813	20.771	26.039	19.9345	38.111	35.485	33.802	16.9448	21.4132	34.487	30.3338	17.6703	24.973	20.9618	22.949	21.4583	12.8898	36.824	25.915	23.0004	22.1377	17.5862	19.3477	20.167	30.1011	32.9669	26.3816	24.6252		0.0179629	25.6794
0.4766	34.939	27.272	35.812	27.814	27.021	28.5241	39.034	34.428	35.386	23.2156	22.2332	33.076	36.2224	16.9747	23.481	24.0152	28.969	23.5722	14.3173	42.13	30.1916	22.277	21.7361	22.0454	23.3939	19.159	31.7411	45.7334	30.6162	27.2493		0.0239538	28.4193
0.5957	34.533	30.174	52.692	38.902	26.133	29.5743	35.619	46.105	40.496	29.1584	21.2164	36.931	45.6864	17.6874	25.237	21.2243	29.435	28.1908	13.7042	34.02	26.2078	23.0402	22.9455	25.1888	29.4696	28.025	34.7535	41.5882	27.8222	37.1338		0.0299398	31.0965
0.7148	39.339	32.41	46.595	29.237	30.327	25.6875	28.319	47.31	46.784	30.2692	20.1363	41.288	54.4496	26.1009	28.825	37.7737	38.101	29.5489	14.3758	39.623	33.851	21.7725	25.4411	31.9477	34.8486	26.67	35.0606	45.8883	38.6284	34.7951		0.0359257	33.8468
0.834	42.111	39.004	57.347	48.61	35.172	24.056	42.017	46.7	42.135	26.024	25.9633	44.924	49.9757	23.6374	36.041	38.128	52.265	31.149	22.3189	41.458	32.406	23.6246	26.2627	30.9866	32.5756	37.623	29.0482	54.0409	37.5964	45.3356		0.0419167	37.2845
0.9531	42.031	44.332	62.654	40.57	38.682	30.4675	47.695	43.811	39.697	30.2747	27.7699	45.422	45.2706	24.3802	51.429	41.8352	51.225	30.0681	20.3682	43.442	37.0329	19.0818	30.6662	34.4941	45.3853	38.212	34.0331	59.6046	44.292	45.9225		0.0479027	39.6716
1.0723	54.034	55.877	63.795	55.07	43.015	28.7024	47.948	51.961	47.095	29.3072	29.2559	55.282	60.5085	27.6159	53.237	56.1424	63.605	31.7186	23.333	49.233	37.8903	18.7833	36.6111	43.4694	51.1501	43.333	38.2922	49.3942	48.9786	55.875		0.0538936	45.0171
1.1914	58.767	60.562	68.369	51.799	47.067	39.9638	56.371	65.509	40.018	30.2366	36.5231	54.953	61.9613	34.7848	52.275	65.8222	68.933	29.7211	27.3332	60.136	34.2815	22.9445	40.271	42.8515	53.375	50.556	33.9912	62.4372	55.5367	69.8642		0.0598796	49.2405
1.3106	51.309	63.763	72.404	51.179	50.499	41.1708	60.291	67.731	43.647	39.94	39.1398	69.964	68.707	36.7753	68.261	73.965	88.175	31.5185	35.2438	63.751	32.6195	26.8043	37.6433	60.3752	71.2527	63.297	42.7689	67.109	70.7938	69.7516		0.0658706	55.3283
1.4297	58.015	67.245	68.835	60.755	60.232	45.8876	66.122	74.112	46.188	34.8355	41.5119	78.345	83.5348	38.7358	83.596	89.6853	83.71	29.9656	36.6117	70.275	35.7757	33.074	44.7692	61.1975	86.7236	64.967	41.3442	62.0624	81.2676	59.0764		0.0718565	59.6152
1.5488	55.91	70.396	70.24	66.156	67.127	46.8817	70.491	77.352	47.72	42.2381	43.9703	87.279	84.1081	53.0673	87.932	92.2266	97.294	32.8569	36.4643	84.583	39.4815	34.4309	53.9558	68.5025	86.5354	80.73	48.6293	62.0332	72.5682	66.1508		0.0778424	64.2437
1.668	64.074	77.664	69.824	64.609	57.117	50.3973	87.581	80.638	59.288	38.6626	34.8718	88.293	87.6552	58.3947	82.179	90.6664	110.115	34.9524	40.9547	96.616	36.8059	30.9326	52.1028	60.8248	88.5972	88.737	58.5453	57.0439	76.0181	75.4445		0.0838334	66.6535
1.7871	71.867	61.536	82.541	70.973	76.9	50.1145	90.082	88.674	52.939	42.2359	26.7392	95.484	91.5936	59.8677	86.326	85.7845	115.197	36.4965	44.3922	96.559	36.3234	39.4333	57.8081	61.6518	77.0068	94.211	55.336	61.5504	73.1404	64.0151		0.0898194	68.2259
1.9063	80.129	71.037	102.982	59.631	77.266	44.7866	87.943	92.784	58.806	34.3708	36.2711	99.672	89.1173	61.7756	91.957	84.3952	114.181	42.1376	46.6719	119.433	47.824	34.5412	63.0006	68.4918	93.8356	100.982	59.6094	54.9392	70.4289	60.0847		0.0958103	71.6362
2.0254	85.849	75.401	86.391	67.685	70.366	56.4355	110.57	100.373	75.35	36.8007	37.0487	87.071	86.5272	60.6419	105.249	83.0136	120.385	39.4537	53.4542	111.543	54.0825	43.0152	64.8721	57.0279	83.5545	100.059	62.8758	62.6643	65.4553	66.3638		0.101796	73.6526
2.1445	101.329	90.549	106.549	77.226	77.754	59.815	98.498	97.741	76.463	30.1856	33.845	110.442	88.1642	67.2135	97.186	58.0619	133.071	47.0987	64.44	110.319	48.706	37.1552	61.36	49.7405	87.1322	108.429	63.7856	49.2319	73.3588	57.9344		0.107782	75.4262
2.2637	100.848	90.971	107.182	77.174	81.902	64.7778	106.654	89.498	76.351	30.8107	36.4434	108.667	77.7923	66.6875	84.426	49.8044	126.955	40.4474	70.1436	119.82	45.6362	27.1437	55.8012	52.8365	80.0914	113.175	67.5338	46.8754	77.9908	59.9018		0.113773	74.478
2.3828	102.59	104.058	105.518	82.802	94.124	68.4957	103.223	118.764	84.739	28.762	44.2219	98.415	92.4113	56.0658	87.961	43.861	115.815	39.5612	77.1552	118.3	52.4797	29.4788	68.2517	57.2118	72.3277	110.762	63.0127	43.7883	78.7172	57.5744		0.119759	76.6816
2.502	98.353	112.507	106.708	95.42	106.515	68.3958	99.182	99.393	88.864	24.9633	46.2736	102.324	86.6712	80.7095	79.007	36.7908	118.535	43.3836	76.419	109.226	50.6847	31.2102	63.5866	57.0728	66.5175	105.318	66.8019	48.4897	78.7121	64.583		0.12575	77.0872
2.6211	108.829	99.474	124.896	108.827	101.064	62.2619	106.313	111.188	90.505	21.2683	43.8212	100.453	87.7338	64.1635	83.584	27.5695	130.824	48.8891	65.0861	114.17	42.325	25.7482	49.1414	48.2405	59.625	109.788	56.4064	56.1984	90.3437	63.2127		0.131736	76.7317
2.7402	102.156	104.525	119.168	108.2	105.282	62.646	87.161	107.95	101.851	17.6937	43.9995	81.686	87.0175	63.2189	92.677	27.1808	113.709	51.8858	59.5472	100.698	34.5305	28.9139	54.8539	35.7532	60.8852	105.001	52.59	50.6517	70.6338	67.0218		0.137722	73.3029
2.8594	105.361	102.553	112.147	114.143	99.604	66.1309	102.898	121.578	105.126	24.0761	37.6444	81.732	82.8307	55.6351	84.07	25.2372	134.072	53.8944	57.6071	98.163	39.7847	23.7819	59.8585	33.2781	52.7555	99.41	47.5544	48.2626	61.31	50.0147		0.143713	72.6838
2.9785	99.127	102.475	116.743	120.418	110.435	65.0157	90.953	111.853	91.136	25.3866	35.1806	97.37	72.1639	51.0177	93.26	22.8165	117.554	59.1477	50.8425	95.147	41.4354	23.6509	52.3995	41.7516	46.6678	84.445	48.1108	56.0769	57.2701	42.156		0.149699	70.7335
3.0977	112.345	96.255	117.527	110.66	86.047	63.2261	99.717	114.988	99.026	23.2272	32.5668	88.304	66.5605	47.6256	107.054	23.1442	114.18	57.2748	50.7744	92.993	40.1532	23.4453	53.995	24.0724	46.0231	81.649	39.3359	54.3849	49.6149	50.3127		0.15569	68.8827
3.2168	102.98	113.848	120.281	102.778	79.423	61.2793	88.296	107.049	85.057	24.5776	30.9578	89.007	57.3924	48.5828	105.798	25.5131	115.125	55.3576	43.7981	96.507	42.6682	20.9297	54.2708	26.2362	50.0896	76.237	37.1192	58.8826	51.7453	39.3745		0.161676	67.0387
3.336	107.946	107.755	121.289	114.099	69.619	58.8884	83.203	109.703	85.577	24.35	35.7855	69.734	51.7823	46.006	99.012	25.2479	117.103	48.4021	46.8051	88.909	46.2494	22.0329	46.1895	24.3044	51.3827	87.807	30.3033	60.3564	39.806	41.1479		0.167667	65.3599
3.4551	117.034	99.715	116.535	94.79	73.582	49.6683	79.341	93.975	81.748	22.3018	31.4224	75.415	52.5546	38.8074	86.861	27.3016	117.2	47.44	36.9389	86.134	40.481	22.6202	41.7096	22.0944	44.3515	84.431	24.9506	59.7308	38.1344	38.0861		0.173653	61.5118
3.5742	108.125	100.537	115.924	86.399	66.731	58.0382	81.932	92.142	74.714	27.3723	31.4739	61.354	48.3909	39.7013	68.979	26.5938	101.876	40.9836	43.3842	63.627	36.118	22.5589	44.0904	28.0167	52.2702	91.901	26.0154	56.6351	33.6868	42.9768		0.179639	59.0849
3.6934	125.194	86.873	108.29	77.802	55.623	54.0533	72.585	98.299	64.853	26.6363	31.2845	57.421	40.9171	32.7678	73.16	32.6688	81.997	39.744	39.0809	54.751	36.5059	22.9152	34.0712	22.324	42.1376	89.881	19.2592	38.9034	32.8479	35.8536		0.18563	54.29
3.8125	121.606	87.666	101.694	56.883	66.83	53.6319	65.474	83.299	59.704	31.1323	33.732	46.553	43.2911	29.5474	52.444	30.4573	79.861	34.0312	37.361	56.897	28.9495	21.298	33.5917	18.8344	42.3579	92.917	20.6118	46.572	35.5431	39.1681		0.191616	51.7313
3.9317	120.335	81.123	96.041	38.361	55.491	49.643	66.928	75.224	55.271	23.7024	31.0471	42.884	52.1852	25.5533	43.564	38.9045	69.063	29.6436	48.3394	42.766	26.7045	23.4457	33.0589	14.0927	41.6812	87.154	19.697	47.1698	25.2424	25.5107		0.197607	47.6609
4.0508	126.093	61.199	85.5	36.636	42.391	48.1801	58.592	74.5	55.571	29.5445	32.9149	37.929	37.1489	27.7876	45.313	30.9783	73.294	28.2117	48.5021	33.853	26.042	20.5318	34.7734	21.6262	34.0385	76.542	24.3621	42.649	25.3069	27.5038		0.203593	44.9172
4.1699	124.493	55.641	80.411	29.718	49.383	49.4886	50.762	65.322	49.756	28.4286	25.416	37.503	35.315	31.1302	31.46	27.5217	59.927	25.2289	48.3792	33.13	25.274	19.8053	37.5842	15.3496	33.1852	72.188	20.0196	41.9569	25.2976	25.4003		0.209579	41.8158
4.2891	134.338	50.501	64.064	29.278	47.167	59.2267	59.527	66.22	43.113	40.0863	29.6605	38.071	35.2785	27.4912	33.41	36.2257	60.114	24.747	47.5668	29.547	27.4691	18.1105	34.5523	20.9036	38.4574	53.898	21.2103	41.9752	25.6694	21.8408		0.215569	41.9906
4.4082	107.704	41.793	49.946	31.739	37.963	47.5088	55.779	71.019	43.87	31.5903	35.6577	34.637	32.9175	24.1321	22.545	26.1715	51.7	19.9851	40.5805	33.832	24.4882	17.0995	29.8928	20.7266	24.1838	32.734	15.7027	39.4839	19.2243	18.8791		0.221555	36.1162
4.5274	112.755	36.39	41.379	35.051	41.479	53.9801	63.918	63.19	46.489	32.1645	26.4055	28.605	31.8011	20.8125	24.593	24.4175	47.106	17.0414	42.1593	28.166	24.4428	17.1874	33.3551	17.1705	24.3076	37.503	17.4616	34.0531	17.0706	17.0865		0.227546	35.2514
4.6465	92.078	40.429	35.727	25.21	41.601	50.0341	47.215	55.105	37.522	36.5602	29.0294	31.236	27.5859	21.1372	25.572	27.6422	45.831	16.6359	42.6903	32.564	23.8656	18.1035	24.7054	20.2773	25.2986	23.657	22.095	37.5251	17.7832	16.4566		0.233532	33.0391
4.7657	91.23	36.149	28.742	30.716	36.679	49.5425	45.247	56.266	34.893	40.2916	24.6331	24.979	25.2122	23.4091	26.194	26.9301	39.151	14.347	34.2333	29.368	17.1464	16.4236	27.6536	17.2532	21.348	25.067	21.7913	32.6701	14.9823	12.5464		0.239523	30.8365
4.8848	93.429	36.741	26.979	28.336	34.701	48.0091	45.127	61.746	39.598	43.4708	29.7248	25.508	22.3774	17.9766	35.339	25.7531	49.701	22.9122	38.0556	27.857	18.0753	16.2995	27.8719	20.9605	24.9357	27.474	20.1482	28.1468	13.7764	18.2286		0.245509	32.3086
5.0039	106.254	42.134	28.127	36.346	29.434	47.2236	41.665	51.94	38.262	45.776	28.2919	28.92	22.5182	19.7501	32.78	29.6439	45.285	15.9367	36.2438	21.801	23.9501	16.7014	21.8941	15.8087	17.9976	26.136	18.5841	29.0181	16.0744	15.8381		0.251495	31.6778
5.1231	106.556	27.012	27.626	38.601	36.821	39.371	40.784	46.477	43.314	44.8175	22.3377	26.804	21.2667	12.3408	27.513	29.0963	37.327	22.2881	33.0087	17.374	22.7959	12.0003	27.5634	17.4221	16.5384	21.161	16.4163	25.902	11.7493	9.6695		0.257486	29.3985
5.2422	94.357	35.592	28.223	47.503	34.18	35.7844	29.341	43.843	33.936	52.299	18.5529	22.052	15.4087	13.7664	30.997	23.4987	33.266	11.7212	27.0374	20.591	18.1977	17.1496	20.2105	14.4472	18.3057	23.635	19.6009	25.4244	12.1649	10.4601		0.263472	27.7182
5.3614	102.241	28.589	24.248	56.056	31.819	35.392	23.175	45.575	33.327	55.9368	18.6086	17.537	16.7934	15.6684	23.291	23.0506	31.62	15.5962	29.6599	20.75	14.9996	19.6629	22.4038	17.0845	17.3873	19.085	15.5708	22.4881	12.2139	9.6239		0.269463	27.3151
5.4805	85.935	31.401	22.482	69.442	27.832	35.001	25.497	47.512	30.849	53.5787	18.7179	22.526	18.2149	13.7046	28.988	29.8419	38.305	15.034	21.4903	16.673	19.236	15.5245	17.9342	12.9345	20.6128	16.915	15.8671	22.7034	12.4172	10.7815		0.275449	27.265
5.5996	90.123	28.415	29.477	88.247	25.666	27.6711	27.411	43.335	29.289	44.4517	26.1062	17.885	15.1349	13.1585	20.229	23.3522	34.934	8.7061	19.9579	12.267	18.3349	16.4871	22.6536	15.6108	17.588	18.19	10.3718	23.0817	11.658	11.4768		0.281435	26.3756
5.7188	95.714	32.162	32.11	98.609	27.303	29.2505	25.518	45.392	25.738	49.301	18.6866	16.468	18.3539	11.6536	25.047	22.4911	29.456	9.9344	21.187	13.094	14.8489	15.1487	12.9349	16.0288	16.3276	19.003	14.6034	23.5914	10.0392	11.3372		0.287426	26.7111
5.8379	84.238	29.154	28.246	117.112	28.513	21.2296	24.966	38.246	28.073	36.4751	28.1689	15.658	21.5492	8.4597	22.807	18.0816	26.367	14.4461	27.63	15.754	17.0082	15.4769	15.5341	16.615	20.4348	14.69	10.676	20.1086	14.376	11.7354		0.293412	26.3943
5.9571	84.557	24.659	31.624	115.323	29.004	26.9687	25.611	43.332	26.225	30.9863	24.7168	20.371	22.3808	15.6508	17.929	25.6949	24.01	17.9971	22.2906	15.694	20.4031	13.9449	16.169	13.5666	16.8973	15.15	17.0131	23.1295	7.4019	11.6963		0.299403	26.6799
6.0762	88.158	23.259	27.641	112.681	27.246	20.3685	26.958	38.237	29.257	23.997	20.0887	19.499	19.4152	16.891	18.308	15.9407	25.251	12.6328	19.0866	14.431	20.2104	16.4344	16.1241	17.4217	16.2015	16.622	20.3799	20.0792	8.3824	16.8125		0.305389	25.6005
6.1953	86.651	25.872	30.813	95.589	36.343	21.674	28.896	32.145	31.616	31.1209	22.3659	16.13	21.9571	12.0724	27.074	15.0922	24.227	13.0161	21.9019	15.656	23.677	17.5132	9.1605	15.1048	14.509	15.49	19.6698	15.8275	9.3332	11.9592		0.311375	25.4152
6.3145	91.487	19.429	28.446	80.465	26.184	21.9935	27.52	30.099	24.611	32.0764	18.4836	16.956	22.9339	11.5384	28.441	17.1928	17.354	14.3106	21.4757	17.865	19.006	12.7921	10.7347	14.4201	12.6563	17.516	14.3122	21.3019	12.4871	18.2459		0.317366	24.0778
6.4336	76.641	20.503	32.017	77.961	33.877	22.3181	19.96	26.618	20.868	33.0048	15.8307	14.902	22.248	11.2142	23.825	13.2992	14.333	14.2036	23.3403	16.017	19.6846	14.0446	12.2437	8.7365	17.9611	15.803	11.8264	15.5843	12.9742	11.6591		0.323352	22.4499
6.5528	88.726	22.043	26.965	70.358	39.89	20.1039	17.992	22.236	24.736	28.6335	11.6724	18.835	24.8692	14.6954	23.518	15.4866	15.061	13.2599	30.6099	13.122	16.1567	10.4176	10.5808	7.2245	14.8436	17.976	12.7899	15.2266	11.7046	13.2008		0.329343	22.4311
6.6719	75	17.603	26.281	49.495	27.77	20.0514	13.838	21.941	24.65	29.6436	12.4296	21.813	23.1384	10.5034	17.976	21.9592	15.9	10.808	23.563	16.006	11.7427	12.0106	10.2509	12.6833	18.3965	17.139	14.063	16.4655	15.402	9.579		0.335329	20.6034
6.7911	68.451	20.804	23.39	45.946	25.411	21.9433	14.862	24.026	23.859	26.8735	15.4017	14.803	15.7323	14.0574	23.359	19.1013	17.969	11.2656	23.6156	18.569	13.4648	13.0168	9.3603	18.4923	14.1732	12.936	15.6155	18.3478	15.3204	11.2227		0.34132	20.3796
6.9102	73.093	22.055	22.204	42.637	23.113	16.1081	20.651	23.246	23.642	32.1097	11.0864	13.336	20.1843	12.9625	26.828	17.7678	12.762	13.5083	20.2004	12.014	12.9661	9.4515	13.4557	10.3961	15.9856	12.131	13.1759	18.5998	11.0839	12.8075		0.347306	19.6521
7.0293	51.646	20.724	18.903	28.711	24.473	16.7093	14.968	19.565	21.445	24.9671	8.7223	11.369	13.5192	14.8597	23.084	11.1837	11.521	13.3836	19.7305	11.61	11.7179	9.0821	11.5638	11.8345	13.0175	15.057	13.8666	20.9759	12.9751	10.9721		0.353292	17.0719
7.1485	45.825	21.671	14.579	21.491	24.215	14.7752	14.415	11.3	19.869	25.8907	10.811	17.362	14.0187	12.9091	18.899	11.1668	14.965	14.8137	14.2223	11.697	13.4679	10.8359	15.8906	10.6231	10.6639	17.646	10.5882	16.5173	13.9983	7.1979		0.359282	16.0775
7.2676	37.546	21.456	16.556	21.051	23.368	10.6183	16.685	16.032	17.07	21.3989	15.9052	15.394	15.4717	8.4781	18.795	17.4776	13.879	10.4994	16.0069	10.831	17.9848	8.9716	13.1906	9.6775	12.2176	14.19	16.9023	19.179	11.8552	12.2112		0.365268	16.03
7.3868	38.901	22.406	14.303	16.926	24.426	18.3573	16.442	15.19	15.189	14.8053	18.1317	15.727	13.1453	15.4418	26.275	24.1357	12.187	10.7002	20.546	6.826	18.0586	12.0795	9.6234	13.2832	13.8052	16.999	10.4547	17.1915	6.5004	13.934		0.371259	16.3997
7.5059	28.485	21.975	11.308	12.755	30.694	15.7015	12.402	13.838	18.098	12.372	11.8567	14.772	12.8663	12.7047	23.258	24.7963	12.244	17.0691	17.9184	13.718	11.3692	11.8876	16.7174	8.6201	11.457	13.864	13.3433	15.9657	11.514	12.8769		0.377245	15.5482
7.625	31.508	15.35	15.406	11.132	22.187	18.3806	15.225	10.621	14.636	10.1607	8.7292	12.646	13.6219	14.9309	20.574	21.7897	12.615	13.0758	17.3163	12.217	11.4973	12.0398	18.7899	6.2195	11.224	10.991	11.7006	17.8467	10.2778	10.8109		0.383231	14.4507
7.7442	28.121	22.018	8.609	10.768	16.946	21.5654	14.237	11.8	13.571	10.8795	12.2685	16.314	10.613	12.8777	18.319	20.9337	15.34	14.1915	13.6275	13.726	9.0446	9.2624	15.5595	10.1365	13.8553	14.506	13.5408	17.5978	7.8045	14.0986		0.389222	14.4044
7.8633	29.108	11.022	9.204	11.725	24.829	16.0849	14.099	8.807	14.894	14.4077	18.9673	12.94	9.6387	11.7446	19.298	23.6667	15.224	14.6023	11.251	16.558	14.2252	8.4717	18.5746	8.8507	12.1001	10.907	12.0364	13.3525	8.8776	9.8436		0.395208	14.177
7.9825	26.506	19.888	6.478	9.456	24.831	17.3484	11.388	14.493	13.557	7.4403	18.636	19.266	12.3901	12.0865	19.746	21.3078	14.633	11.4078	12.4151	14.235	10.3781	10.4928	14.5503	12.2374	11.256	14.285	8.9517	14.9556	12.0408	9.5505		0.401199	14.2069
8.1016	28.044	20.678	5.535	7.243	26.602	21.9644	8.872	10.683	13.258	10.6753	9.4506	15.939	13.8381	14.1481	22.225	20.0477	16.596	15.0439	15.6741	14.697	11.0907	10.7051	12.3229	11.6588	13.1384	13.551	9.5902	13.4644	9.8914	9.7794		0.407185	14.2135
8.2207	17.485	14.377	6.423	10.684	22.119	15.0278	14.863	11.85	14.686	13.3025	14.0994	15.219	12.2952	15.6164	21.843	13.7163	11.765	11.4653	9.3304	11.844	7.4515	12.2927	10.8121	11.0865	15.6217	12.663	9.7649	13.533	10.8983	12.0654		0.413171	13.14
8.3399	21.335	11.106	6.675	5.036	20.886	13.7693	12.633	10.011	15.718	5.3761	12.3331	17.032	11.0348	15.7102	16.987	11.4393	13.565	11.1174	13.6205	14.554	12.8482	10.5719	9.145	12.6016	13.5552	19.432	11.8789	19.5966	11.3094	10.7838		0.419162	13.0554
8.459	22.509	9.656	6.837	5.036	17.483	14.7114	13.284	12.164	19.372	10.024	12.1732	16.522	9.6893	14.6753	12.231	13.225	12.032	9.3726	12.9094	16.105	9.9351	10.6885	6.146	17.0154	12.1913	9.72	10.0364	15.656	9.1972	11.6378		0.425148	12.4078
8.5782	22.164	13.471	5.998	7.831	20.665	15.4065	14.706	10.955	16.321	6.6541	14.1518	13.396	9.6057	16.1501	13.305	13.1082	14.219	13.3279	11.5098	15.597	12.2748	11.3727	7.761	14.4312	13.2016	12.155	9.5196	15.8437	8.3767	12.7343		0.431139	12.8738
8.6973	20.668	11.111	8.246	5.54	16.025	14.2644	10.024	13.237	15.284	5.5342	15.1502	20.46	12.2394	13.4262	14.287	13.7259	16.837	14.9944	14.2738	17.269	9.4726	14.5906	13.9484	13.0113	10.8331	14.894	8.9919	19.7139	8.9307	9.5763		0.437125	13.2186
8.8165	22.073	10.615	9.66	3.714	13.752	11.0447	10.841	15.583	9.992	6.4108	16.1159	15.926	7.0679	13.9138	13.375	13.5938	8.053	11.1623	15.9218	13.99	11.1839	13.0707	12.6561	14.6655	9.1598	14.268	9.2998	15.6736	5.5397	9.4558		0.443116	11.9259
8.9356	16.6	10.459	4.645	6.056	14.487	11.0322	14.859	11.051	10.928	8.862	18.8442	12.776	7.4172	12.716	18.169	12.4304	13.244	14.9762	14.6222	16.945	6.8339	11.3729	8.5226	12.6374	9.8855	16.919	10.0325	13.2029	9.9847	10.3134		0.449102	12.0275
9.0547	19.321	11.521	6.504	4.912	18.926	14.5966	12.699	13.077	15.5	9.1779	14.7882	16.015	12.7986	13.2584	12.932	10.6657	11.391	9.6957	11.9911	9.752	9.6539	11.9681	4.9869	17.0139	15.1889	14.889	9.5848	16.0207	13.2912	5.4711		0.455088	12.253
9.1739	23.243	6.667	3.58	3.939	14.254	14.079	11.837	17.56	11.727	9.3095	17.0035	14.503	9.6621	11.805	17.13	12.2628	9.06	6.6868	11.9462	11.863	9.5239	11.4657	11.9316	12.6348	14.0271	13.169	9.6773	17.0211	10.3255	9.0643		0.461079	11.8986
9.293	26.411	11.407	5.483	2.96	18.133	11.4471	12.702	10.594	13.503	8.7965	22.5417	14.523	12.0019	10.7904	15.558	13.572	12.289	11.0496	12.7215	13.462	10.2853	8.8328	9.6068	14.3087	14.4671	10.687	7.9066	13.7907	12.5322	7.6441		0.467065	12.3336
9.4122	15.028	6.43	3.506	5.926	22.247	10.8687	13.694	11.757	16.245	7.6696	13.1124	15.136	9.7616	13.9233	14.034	10.7495	9.74	15.0406	13.9047	12.46	8.8202	4.586	9.9356	17.5832	16.819	13.264	13.0636	13.1163	7.5839	9.3204		0.473056	11.8442
9.5313	17.467	8.301	2.258	2.007	13.207	13.2247	11.955	13.716	12.32	5.8661	11.4917	16.307	10.3125	9.0318	17.332	10.6752	9.999	11.382	9.8097	9.277	8.7767	8.2132	8.8563	18.6259	12.8802	10.887	10.0571	8.8986	10.2129	7.2567		0.479042	10.6868
9.6504	16.433	4.597	1.919	3.757	16.828	16.7472	11.084	8.584	15.518	9.0563	12.5764	19.719	14.3508	12.727	8.258	10.4909	8.978	9.1939	11.6864	13.268	4.0025	9.3121	7.1703	12.4589	12.3616	9.559	10.4915	8.5905	9.1496	10.1349		0.485028	10.6334
9.7696	14.392	4.292	2.691	1.089	13.511	13.617	14.532	9.203	12.851	8.6836	12.8323	14.946	11.3911	8.967	9.524	10.8482	12.939	13.9742	13.0694	13.101	7.4702	10.6932	10.7258	12.2149	11.3361	10.813	11.4131	14.9221	7.9641	10.9117		0.491019	10.8306
9.8887	17.018	5.078	2.524	1.933	12.454	16.5335	10.923	9.793	16.595	7.5474	8.2225	15.043	11.7974	11.3964	9.145	15.2643	12.761	9.9598	10.8454	17.539	9.6996	6.0219	3.4895	12.5737	10.3011	11.378	8.6118	12.0236	7.2857	11.29		0.497005	10.5016
10.0079	12.153	4.561	2.69	2.564	13.876	17.5133	13.531	8.958	10.469	7.024	10.8908	16.164	9.9959	8.2343	7.107	9.9364	10.062	8.4817	12.1616	11.491	8.8119	12.1293	9.4766	12.3723	9.8353	12.206	13.7522	10.5729	8.8903	10.1619		0.502995	10.2024
10.127	18.312	3.342	0.944	3.098	11.901	17.3529	8.973	11.125	14.623	12.1158	11.7712	15.759	15.7931	12.3336	5.109	12.2772	11.231	7.0942	9.1022	9.588	11.3616	6.7196	10.1068	13.9158	9.042	13.164	8.2679	10.2085	14.0034	6.4706		0.508981	10.5035
10.2462	19.111	3.08	3.319	2.168	13.782	15.3146	11.537	15.136	12.37	8.8534	16.3959	16.002	12.9239	9.1606	6.616	11.1306	10.923	12.4801	12.2008	16.903	10.3786	5.9426	7.3594	9.479	10.1622	11.675	11.1586	12.0295	11.9713	7.7988		0.514972	10.9121
10.3653	19.061	4.204	1.284	2.542	11.98	13.7601	10.657	12.527	17.367	5.4926	9.912	19.5	13.5633	9.9279	4.663	7.3367	10.271	10.7232	13.6442	8.85	8.5481	8.8079	6.3101	8.0449	7.8489	11.849	8.2293	10.9704	13.9511	9.2647		0.520958	10.0363
10.4844	19.209	3.286	3.407	1.292	14.727	17.7095	12.364	13.548	18.052	8.8187	10.3102	19.513	7.2095	10.6265	5.934	10.4918	11.269	8.1335	11.4298	11.763	8.2728	9.221	9.0193	9.6797	9.7484	11.157	9.4965	9.7341	11.7413	7.9164		0.526944	10.5027
10.6036	16.464	3.214	1.594	3.228	11.383	13.5371	14.097	10.482	11.634	11.0379	12.51	13.83	7.8683	10.4902	5.936	11.946	11.743	10.9868	9.3105	12.045	11.4918	5.8574	8.6961	10.4983	10.9514	10.477	7.0598	10.4861	7.3152	10.0619		0.532935	9.87439
10.7227	13.965	1.159	1.237	1.306	14.178	12.1435	11.717	8.073	11.627	12.0496	9.6717	11.122	11.4643	11.6115	5.084	10.5515	16.208	10.4208	16.5927	9.188	5.3065	6.2712	6.2714	7.2119	10.9001	15.296	9.3897	8.6899	13.4889	8.8628		0.538921	9.70193
10.8419	14.625	4.672	3.184	2.586	9.825	11.0682	9.453	8.212	16.177	8.5998	12.9494	14.075	16.9278	8.4152	4.077	10.1789	17.191	7.3489	14.4285	9.752	6.6658	6.4684	5.4038	8.167	8.5807	16.258	7.8454	10.2087	10.7689	9.014		0.544912	9.77088
10.961	20.392	2.537	2.939	3.386	14.357	13.4606	9.071	12.148	11.963	10.3572	10.4863	18.086	12.7127	5.6487	3.126	8.3171	10.781	12.6454	11.221	15.236	7.9094	6.0406	4.4067	4.9245	8.5431	9.652	6.0245	12.6567	10.586	9.9055		0.550898	9.65067
11.0801	18.928	5.666	3.411	2.519	8.082	18.2767	12.599	9.924	16.87	9.4806	9.0272	10.873	9.4259	5.4417	3.561	11.5101	18.438	8.9503	11.9214	8.052	5.1243	6.33	4.9271	9.025	10.66	11.363	9.1237	15.3184	10.8908	7.0728		0.556884	9.75973
11.1993	11.791	3.712	1.463	1.858	12.916	15.2996	11.531	5.392	13.756	10.8065	11.9341	17.143	10.7957	6.1678	3.794	12.5928	13.22	12.7975	12.4021	8.096	5.4954	9.229	4.5461	8.0537	9.9196	7.881	8.7164	12.4034	10.3552	7.6836		0.562875	9.39172
11.3184	15.12	2.892	2.582	2.894	11.875	14.553	12.633	12.172	10.742	7.2732	13.4717	16.316	11.1112	3.1508	4.955	10.2297	9.713	11.7396	11.2198	12.878	4.0981	8.8132	3.0885	4.8505	8.8282	7.707	6.7535	17.8157	8.1731	5.5995		0.568861	9.10828
11.4376	20.208	3.95	1.511	1.605	13.545	13.1773	13.338	10.775	14.569	6.2494	11.2908	17.1	11.8482	3.1135	6.093	12.36	9.35	13.0374	15.1004	8.824	4.0056	5.1181	5.1496	5.5009	10.2865	12.242	3.7105	16.7652	9.0116	8.9283		0.574852	9.59211
11.5567	20.888	1.56	2.89	4.162	13.082	17.7528	10.803	6.296	14.543	6.1373	8.316	16.005	12.6954	4.2403	3.573	10.4215	7.43	9.7449	11.269	12.397	5.5608	5.602	2.0673	7.3329	8.8497	11.308	5.4314	15.565	13.1369	9.6191		0.580838	9.28931
11.6758	18.413	2.338	1.865	2.626	13.664	14.2907	10.958	7.185	9.551	7.828	10.1437	12.83	11.9197	4.1672	2.472	11.77	13.659	14.1491	9.9786	12.724	2.6852	6.525	4.3995	6.9661	9.9921	12.671	6.5599	12.1902	11.9683	11.4513		0.586824	9.26469
11.795	17.024	3.87	1.358	2.132	14.281	14.0522	17.5	6.491	14.222	6.616	6.8216	21.534	17.7578	4.075	1.353	9.1581	13.766	9.2378	12.5763	9.99	4.4449	5.6689	6.5132	5.3511	8.2153	13.263	7.8435	10.3262	9.0447	6.056		0.592815	9.35142
11.9141	17.32	2.396	1.318	1.778	13.986	18.0068	13.661	6.577	14.995	8.2272	6.823	21.696	14.8147	3.2763	3.575	12.6665	14.012	11.8261	14.7975	12.058	5.3962	6.6693	4.0229	4.5186	12.0211	7.6	7.4285	10.8195	11.0674	8.2733		0.598801	9.7209
12.0333	16.64	3.68	3.76	3.63	13.378	16.3299	12.23	8.805	16.036	12.3666	14.0196	19.906	13.6001	6.4347	1.355	13.2657	12.064	9.8792	11.0244	9.711	5.2717	6.3045	2.499	6.7801	9.9389	10.816	5.3946	10.8339	10.6503	7.9217		0.604792	9.81753
12.1524	19.409	2.448	2.359	3.122	18.574	17.5669	10.086	9.183	21.769	9.0741	11.9259	15.379	11.9838	2.7127	4.077	8.0929	10.151	16.6367	14.5158	8.995	8.5886	8.5243	3.6364	5.3893	9.4525	10.005	4.9549	8.7751	14.5042	9.7919		0.610778	10.0561
12.2716	20.281	5.345	2.379	1.153	15.935	19.5326	7.245	8.703	11.841	9.7804	8.7985	15.235	10.425	5.3773	1.601	8.2358	10.548	10.9763	12.0364	9.878	4.8898	9.5803	3.4129	3.7436	6.6235	10.327	5.4992	10.4684	6.477	8.0066		0.616769	8.81115
12.3907	21.72	2.379	1.933	0.961	13.444	12.8255	10.986	10.382	10.823	10.0624	11.3539	15.202	12.8562	2.315	3.373	13.5511	11.75	13.3247	12.8469	10.056	5.4226	7.0576	1.8254	10.5064	10.9747	9.014	8.0995	10.3951	10.1031	8.1742		0.622755	9.45724
12.5098	15.149	2.384	0.874	2.521	13.81	13.8426	11.206	13.159	8.597	11.3262	14.2672	14.62	12.3188	1.4278	1.41	8.8032	15.618	11.0262	11.2525	13.317	6.8873	5.6751	1.5361	4.6023	13.0108	14.075	7.9556	9.9217	8.6677	6.3817		0.628741	9.18809
12.629	13.819	4.421	0.967	1.307	11.345	16.824	10.349	9.761	12.713	10.0727	14.1088	14.227	12.0802	2.3415	2.902	13.5001	10.491	15.581	10.6743	13.532	5.4457	4.2075	2.5161	4.6059	9.2959	11.071	6.459	12.2031	11.3715	7.9618		0.634732	9.20514
12.7481	21.369	3.7	1.372	3.136	16.142	16.7339	8.784	15.284	13.829	9.0677	11.58	20.078	8.3013	1.3996	1.952	10.06	12.107	13.7073	19.2202	11.708	6.5495	7.2429	3.5589	6.8075	10.2293	13.459	8.8518	10.552	7.8305	5.9077		0.640718	10.0173
12.8673	14.678	3.258	2.091	2.834	15.068	15.8638	9.647	16.26	17.77	9.8209	11.4274	14.72	12.5158	2.411	2.42	11.2723	14.918	13.6886	16.1553	11.582	6.6007	7.9224	1.4904	4.6687	13.4585	13.596	6.4242	12.6396	10.5722	5.6245		0.646708	10.0466
12.9864	18.786	3.246	1.063	3.269	18.519	13.3449	8.104	15.111	11.37	11.2632	11.1311	14.447	11.988	3.4573	0.263	13.5464	11.562	12.2188	13.4313	17.463	8.6121	8.3468	0.5557	5.4411	10.1365	10.66	6.6112	7.1515	10.5391	8.3606		0.652694	9.66662
13.1055	12.59	3.159	2	0.811	14.236	16.6373	6.898	11.06	14.797	11.5157	11.6163	18.439	9.2017	1.6494	1.094	14.2885	13.698	16.8043	13.4078	16.882	8.6943	5.3099	1.0728	4.8521	10.4806	11.91	5.9539	9.1914	11.9797	9.7854		0.65868	9.66717
13.2247	19.298	4.548	2.539	1.255	11.902	17.9292	8.101	16.887	15.901	8.8175	12.0527	20.811	13.2605	2.6517	2.306	16.097	8.942	13.4603	13.7155	15.204	7.9958	5.3542	1.1374	5.5891	6.8247	11.116	6.4162	6.3982	12.8753	9.5852		0.664671	9.96568
13.3438	25.155	3.574	3.909	1.748	11.545	19.7666	8.098	11.411	17.855	10.8339	11.6316	15.08	7.3481	1.4356	1.986	14.0037	15.321	13.7457	10.6783	11.575	7.2875	3.7634	1.8753	4.6753	8.4335	13.262	5.5746	9.0361	15.6863	9.9564		0.670657	9.87503
13.463	24.076	1.885	2.423	1.555	11.225	13.8652	12.695	12.115	13.473	10.4254	14.0354	14.892	11.5521	1.8196	3.407	10.7798	11.189	11.2824	17.2193	11.088	4.9504	9.1232	2.4846	5.7391	8.1866	12.791	3.8288	8.7447	11.651	9.3478		0.676648	9.59498
13.5821	19.892	5.829	1.538	1.284	13.267	9.5232	8.725	10.024	11.634	9.0387	13.9447	11.091	8.0388	1.5808	1.117	12.5425	11.516	14.1833	12.0248	14.582	10.3172	9.6436	1.6467	4.4472	8.2255	9.452	5.6965	9.4484	11.1754	4.7368		0.682634	8.87217
13.7012	17.376	3.008	2.086	1.85	13.116	16.8855	10.662	13.768	12.709	10.0626	11.2354	16.714	11.9788	2.423	1.521	10.8061	10.94	16.496	12.754	11.858	11.2192	7.352	1.9374	3.2168	6.8423	9.889	5.3212	5.7203	8.7268	9.0281		0.68862	9.25008
13.8204	20.212	2.245	3.527	3.027	10.864	14.0877	8.087	14.333	12.35	14.4949	10.0211	14.801	12.9463	1.1032	0.698	9.8857	15.138	15.391	10.0876	14.055	8.1801	4.3671	3.2694	4.734	9.949	9.564	8.5123	7.4226	7.7287	6.8113		0.694611	9.2631
13.9395	14.37	1.517	3.174	1.53	16.25	14.1228	10.506	11.907	8.82	15.1701	12.3009	12.936	9.588	2.035	1.421	8.1598	11.561	11.5552	10.8702	12.123	6.9291	6.0208	2.852	5.3548	10.531	12.537	3.3488	7.3067	6.2472	7.5021		0.700597	8.61822
14.0587	15.317	3.214	1.805	1.951	17.493	11.1356	9.405	13.101	9.007	16.145	12.5049	18.002	10.0482	1.9516	0.435	7.8975	7.036	14.8154	15.7433	11.852	8.2197	5.2923	2.9077	4.9977	11.027	9.378	3.5949	5.0582	9.5019	8.3709		0.706588	8.90693
14.1778	22.688	4.835	2.431	3.389	17.062	11.0763	14.066	12.603	12.401	14.0307	15.0487	13.24	5.9856	1.2197	1.498	6.5323	13.433	9.2706	11.7547	13.44	7.0293	8.2797	2.367	4.0485	8.1616	11.083	5.3587	6.6535	8.7356	9.3708		0.712574	9.23641
14.297	17.441	3.987	4.536	6.086	15.315	12.1923	9.088	7.14	13.093	14.2897	10.1849	16.099	8.8442	2.407	2.712	8.5853	11.622	15.1518	14.1764	8.345	8.7741	9.2275	3.6164	3.8135	9.9187	11.029	7.3804	4.7004	7.4018	9.1935		0.718565	9.2117
14.4161	21.227	3.724	3.159	2.091	12.372	14.2121	8.582	9.714	15.881	10.6327	15.2395	14.398	6.7194	0.272	2.27	11.606	11.189	16.3208	12.0985	9.9	7.7136	9.3385	3.9854	3.1901	7.9296	12.919	5.898	7.3262	7.6929	8.6448		0.724551	9.2082
14.5352	16.511	4.508	3.09	1.698	16.029	11.6649	7.822	11.107	10.389	13.2907	13.3168	11.049	10.5332	2.5289	2.294	7.6672	13.37	11.7867	17.1854	10.887	8.2254	6.2382	4.1564	3.583	12.24	10.138	4.0476	6.7795	10.0853	6.6274		0.730537	8.96162
14.6544	20.492	6.855	1.547	1.849	14.314	11.5358	11.417	10.068	12.122	13.4362	12.7962	15.164	7.6007	0.9701	1.559	12.8262	9.777	17.0122	12.6812	11.895	6.621	11.8536	2.2033	5.2096	9.7079	14.026	5.4642	4.0721	8.3044	9.565		0.736528	9.43149
14.7735	16.993	4.03	2.748	3.824	15.432	12.9336	7.801	11.408	15.382	14.2928	9.5238	16.538	6.4623	1.606	1.236	7.8422	10.757	16.6301	11.5797	10.699	6.9709	8.6633	3.2176	4.6318	7.7531	19.588	4.8048	7.2949	9.23	8.0268		0.742514	9.26332
14.8927	15.372	6.575	1.583	3.066	18.146	13.6359	11.833	8.447	15.188	12.0082	7.766	14.752	9.2284	2.6424	1.285	10.0074	15.016	13.6555	15.1437	11.14	6.1866	4.7153	1.1609	5.2326	7.7375	16.998	7.7555	9.2045	11.6196	10.6959		0.748505	9.59323
15.0118	20.838	6.44	1.691	2.036	18.547	13.4831	10.003	8.245	9.803	9.1767	11.6289	17.747	11.3315	0.1515	2.593	11.2994	10.35	18.4058	8.8499	10.608	9.1003	6.9688	2.1641	4.238	6.8577	10.794	5.6058	6.4316	11.4811	9.0022		0.754491	9.19571
15.1309	16.135	7.529	1.091	2.666	17.84	14.5393	7.258	10.713	13.682	10.7368	10.6701	15.077	8.0768	2.7767	0.83	7.3157	8.919	14.7509	10.3802	12.735	7.2408	7.1063	2.9193	3.8349	6.42	13.548	5.111	7.3339	4.6642	6.423		0.760477	8.61076
15.2501	12.799	8.932	5.402	5.653	13.143	11.2041	8.868	9.282	13.48	9.7171	10.5051	13.915	10.0738	0.7579	2.552	11.1068	9.853	16.6577	11.6156	12.142	9.3246	7.2203	2.0096	3.8494	5.5581	9.946	6.0328	5.1247	7.6699	8.7471		0.766468	8.77139
15.3692	15.807	10.235	4.648	3.723	15.44	10.1572	12.111	11.256	11.971	15.2867	11.6158	13.863	12.1087	1.2016	0.932	8.3513	9.909	14.5545	9.7075	14.393	11.5554	8.5966	3.0888	4.7651	7.5003	10.213	6.6131	7.5502	7.8888	5.6608		0.772454	9.35678
15.4884	22.205	9.136	3.293	7.166	21.892	10.7685	8.882	8.46	11.635	19.2472	14.8949	15.693	4.8558	2.6837	0.264	7.2737	12.781	12.24	12.2847	17.575	7.1754	6.3897	3.2535	4.7432	5.2786	10.209	6.1284	5.3788	7.4157	8.4828		0.778445	9.58952
15.6075	17.033	10.446	3.096	5.898	16.318	11.5965	9.951	9.28	15.516	14.9085	11.3396	14.816	10.3158	1.0925	1.016	11.1491	14.525	14.7592	12.4267	13.899	8.2368	9.3685	2.2987	4.4612	8.6388	6.167	7.5038	9.0358	11.4353	6.5023		0.784431	9.76767
15.7266	17.179	9.59	5.253	5.879	14.281	12.0949	11.4	7.046	11.049	15.5111	10.3076	15.491	10.093	1.4882	0.801	9.8041	15.085	12.5813	13.483	9.798	9.4055	4.1496	4.0631	6.6018	6.8915	10.146	6.4906	6.2539	10.8106	8.1945		0.790416	9.37408
15.8458	21.171	13.64	2.452	4.448	14.176	8.453	9.969	11.833	17.242	14.8119	10.2028	9.17	8.4418	1.9361	0.959	8.3163	11.891	13.4488	16.121	15.153	9.4098	4.8265	3.0721	5.4558	7.248	9.115	5.8107	7.0321	7.6082	7.7244		0.796407	9.37128
15.9649	14.946	11.765	1.971	7.286	20.395	9.0478	13.326	7.802	17.599	14.9934	11.1528	11.918	7.0663	1.1619	1.616	11.5278	15.312	16.7142	11.2134	19.17	11.494	9.0695	5.9142	4.9675	8.2401	10.029	5.6023	6.0344	8.0514	8.2591		0.802393	10.1215
16.0841	14.923	14.988	3.717	9.983	18.751	10.3947	10.696	10.142	15.316	12.3301	12.1422	10.207	7.029	0.8002	1.951	10.7847	11.44	13.4766	12.5768	20.235	10.8503	11.3232	4.548	4.0712	6.6526	9.174	3.5449	6.6953	10.6662	11.6892		0.808384	10.0366
16.2032	19.121	10.371	4.716	10.244	15.14	10.7813	9.776	9.804	11.87	17.2495	9.8584	10.265	9.1356	1.2291	0.872	12.3295	12.458	12.4802	13.2997	12.538	9.6061	7.1768	1.3848	4.6114	11.546	9.699	5.9868	4.5198	8.9122	7.5448		0.81437	9.4842
16.3224	21.714	13.538	4.143	16.631	16.098	7.0823	7.659	11.267	10.587	14.6614	8.4062	12.288	9.7567	1.4758	1.254	6.2699	11.86	9.8722	17.561	10.693	7.3824	6.0167	3.2884	3.5218	9.301	7.34	7.8121	4.4434	9.6021	12.5508		0.820361	9.46921
16.4415	18.001	13.05	8.219	12.958	13.637	10.2272	11.693	14.701	13.672	12.7751	8.8115	11.276	9.2535	1.2954	2.036	10.4354	7.384	11.7307	13.9115	11.13	7.9763	8.0756	5.1477	5.9967	11.3041	10.118	7.0484	4.941	11.181	10.0745		0.826347	9.93535
16.5606	16.933	18.377	8.536	12.114	14.097	7.0846	6.653	8.132	11.669	14.2578	10.0182	9.932	7.2351	0.716	1.279	8.2145	10.653	12.9042	10.8251	13.706	10.4932	9.0954	6.7432	4.2927	8.8219	8.516	8.7472	4.9747	13.2838	11.7168		0.832333	9.66738
16.6798	22.922	15.401	11.249	18.995	15.699	8.9385	10.886	5.386	13.301	11.4776	15.6404	6.864	8.4821	1.7196	0.945	7.6967	9.906	14.2165	11.8693	12.533	7.9035	7.8473	5.848	3.8145	6.4135	13.494	5.8892	7.7077	12.4557	8.6548		0.838324	10.1385
16.7989	19.418	21.912	9.781	15.683	11.998	9.803	5.361	11.975	14.58	11.7299	10.0925	8.447	6.6714	0.0693	0.805	6.6158	13.717	13.6279	13.3526	17.804	10.0121	6.2145	2.2797	6.0708	7.7929	8.996	7.8667	4.6948	9.0052	9.1402		0.84431	9.85054
16.9181	17.989	15.366	15.867	20.179	13.86	12.4162	7.026	14.223	8.294	14.3139	11.6627	6.693	8.1149	2.5249	1.302	8.0002	12.251	9.5895	11.8908	13.558	11.326	7.7447	5.853	8.0406	6.3904	7.481	4.0933	9.4617	10.3498	13.2288		0.850301	10.303
17.0372	23.318	12.732	15.383	18.34	13.403	8.1454	4.849	7.988	12.505	14.6819	9.9707	10.486	6.8426	1.1789	4.172	10.2582	8.191	9.4305	8.8283	12.816	11.8696	7.6482	8.0156	7.4933	9.4578	8.521	10.2689	6.7775	10.1377	9.7525		0.856287	10.1154
17.1563	22.026	15.114	18.302	18.372	12.222	10.0832	5.335	11.736	12.679	16.5891	9.7735	13.178	11.7536	0.5381	3.273	5.8738	10.23	14.0286	7.3036	9.101	7.2917	8.1664	6.3748	6.296	7.6402	10.358	7.8461	6.1061	9.8497	10.3267		0.862273	10.2589
17.2755	16.715	13.182	13.17	16.722	10.816	9.7239	7.688	12.243	14.901	13.9441	13.4326	11.09	9.3534	0.7749	1.612	9.4514	11.122	12.7972	12.6146	11.356	7.3341	9.1006	8.2211	8.6848	8.7803	10.285	6.7643	5.4433	7.8924	9.9192		0.868264	10.1711
17.3946	15.466	14.342	13.759	22.829	13.002	8.699	5.071	14.275	9.42	18.6856	12.2669	9.981	5.7889	1.8019	2.891	9.1316	12.169	14.1353	10.1867	12.661	7.8766	7.6747	8.4111	7.0449	7.4625	10.824	6.2707	9.0835	11.4331	13.3696		0.87425	10.5338
17.5138	17.808	18.64	10.62	22.727	14.044	7.736	4.392	9.855	7.973	19.4162	11.3119	9.847	10.7177	2.221	2.82	10.5418	10.422	12.6716	9.2593	12.57	9.9343	6.7686	10.582	4.9383	5.876	8.586	7.9593	7.7269	8.261	11.6548		0.880241	10.2627
17.6329	15.686	13.17	16.404	18.402	12.008	6.22	6.586	10.698	9.802	12.8908	12.8623	10.432	8.2828	0.4255	0.776	11.1502	15.917	16.7135	10.4936	11.843	8.0391	7.3171	7.6151	7.5251	8.6145	10.923	7.9456	7.7936	9.0819	9.8921		0.886227	10.1837
17.7521	13.722	17.407	12.197	19.839	18.177	6.0584	4.059	11.311	8.316	9.1125	9.4817	9.582	8.3196	2.8031	2.735	9.0097	12.276	13.443	12.7876	13.867	11.0023	11.7904	4.3664	4.9294	8.5317	10.632	12.0094	11.4243	10.4317	12.2845		0.892218	10.3969
17.8712	16.998	16.372	12.988	15.187	12.122	8.9015	2.927	11.44	10.151	12.9727	11.5866	5.765	10.0888	3.6635	2.077	12.1258	14.097	16.3828	13.9482	13.118	7.4561	9.1246	4.8987	9.5055	10.9045	10.68	12.6849	6.3029	7.5746	13.0919		0.898204	10.5045
17.9903	13.101	13.013	13.766	16.771	11.814	5.082	2.541	7.84	9.789	15.7887	13.6157	9.429	8.842	3.5129	1.176	8.8793	11.151	18.6271	11.5824	11.48	10.9186	7.9531	10.1751	10.5252	11.0097	13.64	12.3471	7.772	10.0881	11.8995		0.90419	10.471
18.1095	13.14	13.644	18.459	17.88	10.013	5.4617	1.775	11.569	10.311	13.8966	15.0615	8.228	13.8565	2.9489	0.612	9.3198	11.076	12.7202	9.8124	12.436	6.1359	7.7609	9.3014	8.923	9.4529	9.35	14.1725	9.9977	10.6678	9.6328		0.910181	10.2539
18.2286	14.32	9.444	17.449	17.046	9.926	5.0337	3.217	7.416	13.599	10.6515	9.1204	10.537	12.1356	2.3859	3.666	11.503	13.887	14.5936	12.2418	10.344	10.0499	10.772	9.1996	7.085	10.9843	11.398	10.5406	6.2621	8.5472	9.1955		0.916167	10.085
18.3478	16.408	13.821	15.273	14.808	10.846	3.6216	1.66	7.721	10.494	10.3766	9.8234	9.151	12.7858	1.2845	1.447	9.783	11.524	12.5917	7.5516	10.471	9.5076	7.8527	9.4864	6.9397	10.59	8.845	8.7835	12.8066	14.0328	12.7059		0.922158	9.76641
18.4669	13.031	13.545	13.866	7.577	9.74	2.127	2.822	8.231	13.798	8.1928	14.0162	9.262	10.0445	1.2083	2.736	13.9783	18.477	13.4052	11.082	13.196	7.571	9.2717	8.3504	5.9465	8.0591	10.561	13.7553	11.4196	12.262	9.5157		0.928144	9.90159
18.586	13.241	9.488	11.651	7.293	7.072	1.8033	2.952	5.526	12.205	12.7647	9.8897	7.638	9.9091	0.7575	3.694	13.3137	13.325	10.0646	10.3694	13.324	10.6099	9.228	8.4467	9.2874	10.8913	10.56	10.8528	9.4994	12.266	10.3345		0.934129	9.27523
18.7052	8.96	7.016	4.934	15.074	5.835	2.603	2.204	8.653	10.726	12.0865	9.6368	9.093	7.762	1.4976	1.346	11.7069	14.107	16.9809	14.2307	10.289	11.5937	10.1561	8.7684	7.8838	8.8325	9.698	10.1442	6.6492	12.9141	10.4641		0.94012	9.06152
18.8243	7.729	3.276	8.459	6.662	5.752	1.0674	0.477	6.336	10.026	10.518	13.3053	10.722	9.0496	1.4707	3.987	13.5894	12.057	9.9947	9.4639	12.13	6.9323	8.5448	7.6027	7.3445	11.7984	9.139	10.4478	9.7405	9.3369	14.3903		0.946106	8.37831
18.9435	8.962	5.97	4.499	6.096	5.777	1.0472	1.528	2.81	11.828	10.7599	14.6845	7.327	9.5831	2.3729	6.055	12.4107	14.186	11.8445	8.2722	10.075	9.8989	10.7296	12.2204	6.3528	9.7999	10.859	11.2442	5.6626	13.1173	12.0585		0.952097	8.60104
19.0626	5.287	4.721	4.82	6.33	1.991	1.7959	0.584	3.104	12.26	10.0692	12.8419	6.625	8.7203	3.0397	6.93	11.3912	10.519	11.1668	9.199	5.363	8.2614	6.6703	9.8989	8.8944	9.0378	12.901	13.1532	9.8465	13.029	10.3958		0.958083	7.96154
19.1817	3.316	2.046	4.587	4.41	3.306	1.2663	0.836	1.914	10.579	7.1983	11.5202	7.531	10.8504	3.2506	10.068	9.2598	14.158	8.6546	13.2996	5.938	7.5954	12.7547	7.4361	5.9228	7.5403	6.86	10.9337	9.0385	7.553	9.0171		0.964069	7.28801
19.3009	2.869	1.71	2.67	3.786	1.868	1.6358	0.456	4.023	8.155	8.9052	10.3647	5.1	11.1798	2.0999	5.942	15.7279	18.508	10.4143	6.8707	14.2	9.2812	14.3722	5.1142	6.2145	4.7982	9.667	13.531	9.2045	12.0887	7.596		0.97006	7.61176
19.42	0.749	2.485	1.887	4.355	1.651	1.5385	1.149	1.625	5.564	11.6925	8.9342	9.827	6.6718	4.6351	5.095	13.6275	14.475	7.8058	7.8651	10.532	9.8555	10.0122	9.244	6.7381	7.0808	9.661	10.0704	12.3138	11.0413	10.9859		0.976046	7.30558
19.5392	3.697	2.045	3.187	2.506	1.184	2.357	1.053	0.921	5.895	9.2248	7.9873	6.491	6.947	5.2946	9.732	10.7728	14.329	11.3911	10.0368	11.482	10.6272	7.4628	6.7198	8.9253	9.6487	6.279	9.5483	12.5769	12.8179	7.8298		0.982037	7.29897
19.6583	1.377	0.878	2.377	2.272	2.792	1.4455	0.436	1.268	3.855	7.3427	7.1743	6.367	8.5726	3.586	8.237	11.3998	12.531	9.9177	8.6526	14.664	9.6671	7.4897	4.2606	9.6564	10.1334	7.315	8.1617	10.307	14.0709	7.9434		0.988023	6.80501
19.7775	1.888	1.517	0.78	0.43	2.11	0.2875	0.371	1.577	3.944	6.4462	7.7302	6.265	11.607	4.5847	9.062	12.4874	13.91	9.5656	9.2811	7.535	10.2659	9.2433	7.3893	9.0862	8.0632	7.352	7.2941	12.9637	8.6046	7.4319		0.994014	6.63576
19.8966	1.132	0.353	1.407	1.372	1.919	0.3569	0.355	0.86	3.257	3.8507	6.8102	6.521	7.0821	4.8905	9.669	13.2623	12.083	10.5781	11.4458	7.212	8.9566	8.3396	8.5085	7.4452	10.6797	8.028	7.646	11.0455	9.6398	5.8244		1	6.351

## Sheet: Image9
X0	Y0	Y1	Y2	Y3	Y4	Y5	Y6	Y7	Y8	Y9	Y10	Y11	Y12	Y13	Y14	Y15	Y16	Y17	Y18	Y19	Y20	Y21	Y22	Y23	Y24	Y25	Y26	Y27	Y28	Y29	Y30	Y31	Y32		Ap-basal	Avg intensity
0	36.423	55.228	57.872	52.599	42.2285	45.7114	19.3142	19.4128	26.9406	18.482	51.951	41.515	37.688	31.766	23.684	45.299	39.245	26.745	19.085	19.314	23.1413	39.982	37.2507	35.4726	51.839	34	49.041	73.3765	33.8411	41.232	48.8921	47.1602	47.9766		0	38.5972
0.1191	44.349	48.969	65.569	65.77	53.4478	47.8634	20.2267	19.6216	21.6077	28.101	47.537	52.559	36.722	26.477	28.374	41.105	36.456	29.589	16.894	29.099	24.7905	40.704	39.7187	37.449	53.121	42.334	57.047	69.8102	40.1423	40.6161	56.2922	44.1276	44.0895		0.00558465	40.9266
0.2383	45.997	67.298	56.965	71.411	54.0814	47.0472	23.9066	18.8602	25.2307	28.747	53.807	57.582	47.975	25.043	32.694	40.475	47.381	30.341	24.049	33.621	25.5453	40.129	41.3011	52.3931	63.577	53.24	56.004	80.974	39.9862	38.9544	68.7999	48.3271	49.0026		0.011174	45.1741
0.3574	45.939	63.977	70.567	74.783	51.8989	42.9336	24.4962	22.388	27.3464	28.841	53.906	55.746	44.213	25.444	28.315	54.089	44.678	30.487	25.7	41.033	27.5265	39.283	40.7883	46.6081	62.536	72.931	65.349	71.0365	43.5776	45.5472	68.8997	52.6523	45.0674		0.0167587	46.6237
0.4766	55.225	71.895	69.354	70.895	47.7279	45.9487	18.988	26.1125	31.7186	30.966	65.404	49.283	43.752	36.458	33.236	59.383	50.404	33.064	37.897	43.05	40.0341	52.57	48.3764	51.7264	67.463	79.336	69.574	70.8292	39.0202	46.3335	77.0853	48.6111	55.6746		0.022348	50.5271
0.5957	66.304	77.557	77.468	70.522	47.9837	54.6717	19.321	30.3036	30.0399	33.528	55.265	60.206	59.611	46.1	46.924	57.04	51.257	39.291	42.219	46.724	36.8525	57.428	51.7462	58.8452	81.307	82.478	70.774	74.0393	47.5541	50.0154	80.327	59.2479	56.7819		0.0279326	55.1434
0.7148	61.997	77.836	69.693	68.614	46.1206	60.9361	20.8223	30.2689	42.438	33.331	73.318	74.811	64.781	57.117	47.415	64.589	54.207	35.258	48.518	70.089	42.7948	66.452	67.1176	53.6578	93.968	99.422	70.559	76.8981	44.8861	66.2861	78.4198	44.3597	57.8804		0.0335173	59.5413
0.834	64.161	75.108	69.735	68.914	46.0891	64.5675	26.372	34.8281	41.2968	42.476	66.31	81.705	76.875	79.593	39.427	56.623	52.847	55.638	63.49	77.37	44.3038	61.517	57.8706	57.6319	102.995	104.017	79.044	69.8697	61.1294	57.8404	79.4564	51.2961	49.9257		0.0391066	62.434
0.9531	67.846	88.382	64.871	67.064	47.3848	78.8966	25.4957	37.194	39.2392	38.517	85.621	87.128	79.972	103.495	48.695	57.653	53.314	58.95	78.176	93.09	46.6892	61.308	62.4942	47.1949	83.932	93.716	79.81	70.5664	53.6181	72.5564	83.9692	57.4746	58.2785		0.0446913	65.8361
1.0723	71.66	93.049	75.616	73.167	55.9558	70.3271	23.9881	42.7859	52.4333	44.585	90.714	85.344	93.744	132.13	70.642	66.17	59.399	65.274	84.149	104.181	58.513	81.72	73.3361	67.0657	92.675	98.16	86.371	64.0788	48.9593	56.3964	89.7537	56.357	57.7414		0.0502806	72.3164
1.1914	75.645	85.276	74.386	92.917	45.3567	77.4077	28.2396	45.4909	51.7889	47.111	106.864	96.617	101.063	134.09	87.417	68.048	59.398	71.934	106.999	116.924	59.3388	82.167	79.9361	63.2587	98.21	107.114	79.65	72.257	51.0908	80.0737	85.5301	56.9511	60.331		0.0558653	77.2388
1.3106	69.371	89.644	81.694	85.612	57.3362	68.5312	33.943	49.2852	61.0641	55.984	97.893	111.789	104.383	141.523	108.69	86.605	59.288	87.538	118.633	103.01	58.0893	69.031	87.219	68.6023	92.347	118.102	79.501	65.4928	56.6686	81.6549	90.9012	57.5133	61.1578		0.0614546	80.5484
1.4297	75.006	98.759	88.497	99.683	56.9645	63.9064	34.7444	59.9415	67.1944	69.056	104.895	115.194	105.377	148.189	110.569	104.639	70.992	94.535	142.84	96.452	58.5339	77.716	91.0358	71.4812	102.745	110.875	91.243	69.5417	56.2633	82.9074	77.0075	50.2209	45.4977		0.0670393	84.6213
1.5488	63.775	100.55	97.218	103.033	49.0076	73.2833	37.4314	59.5758	73.9793	67.618	112.448	113.713	110.591	151.374	137.489	119.893	69.477	91.864	140.85	102.204	69.8789	82.663	78.6095	71.2283	100.022	112.131	85.786	80.1226	69.2852	76.0059	92.7148	60.8908	54.3657		0.0726239	88.1539
1.668	70.977	105.132	103.567	124.343	53.0669	63.9328	44.6763	77.5481	76.9455	73.771	125.91	111.314	111.262	139.129	120.639	128.648	74.386	117.237	134.941	101.67	85.0259	81.791	88.2567	66.8553	99.657	110.388	91.559	76.1483	68.4651	78.2055	87.5589	57.7894	58.3414		0.0782133	91.186
1.7871	79.239	116.099	116.326	111.206	70.7816	70.4727	54.5652	79.9185	78.3611	80.1	129.839	118.13	131.387	133.013	135.608	134.64	79.26	112.758	140.282	106.095	69.0284	85.483	83.4226	74.491	99.836	99.544	97.115	75.0973	68.7621	80.147	83.2229	68.1964	52.9439		0.0837979	94.4052
1.9063	78.213	110.675	110.406	124.135	75.126	67.4868	40.8285	87.1355	76.1747	86.177	115.968	127.384	124.222	138.796	147.327	140.97	88.602	116.045	153.312	95.941	77.1841	69.014	82.1545	83.0342	97.563	105.813	80.927	87.1245	79.4067	72.2361	97.9285	52.4711	51.1931		0.0893873	95.181
2.0254	89.177	121.722	132.774	109.898	78.4322	89.585	53.9607	92.9165	77.8374	87.196	125.006	105.116	106.557	150.086	131.818	147.586	85.844	121.396	144.903	110.718	89.0214	94.741	93.3686	77.8553	115.683	101.033	94.069	76.1245	91.8762	78.7829	96.1281	58.9996	50.8643		0.0949719	99.4265
2.1445	85.005	121.254	132.417	124.848	76.5382	75.4699	64.176	85.9176	74.3801	96.935	127.061	119.686	112.077	144.458	144.127	132.688	118.818	109.564	135.618	91.487	86.7959	94.553	84.3822	96.0341	102.987	112.011	97.31	78.2874	79.0552	73.9221	100.654	60.7483	52.7903		0.100557	99.7593
2.2637	76.745	114.893	154.148	124.266	93.1666	88.5142	69.0557	83.1497	94.425	103.831	125.13	121.879	112.359	142.136	148.098	115.378	106.627	103.497	144.364	91.666	80.5347	89.602	87.5247	93.5465	122.398	101.591	108.484	70.8651	82.7392	71.6487	93.6361	82.1051	53.1883		0.106146	101.551
2.3828	89.218	117.554	159.668	123.393	94.2414	81.349	73.4048	79.2275	79.682	99.626	117.445	110.088	109.837	139.915	155.728	109.154	94.882	103.666	131.225	93.35	77.2918	101.161	79.5418	99.7972	121.288	103.611	99.512	76.7634	81.582	83.7335	85.8624	56.9727	59.3732		0.111731	99.671
2.502	88.519	114.663	143.72	114.571	90.1433	85.7928	77.2759	82.1498	79.3297	116.226	94.369	107.05	109.578	130.707	132.8	123.264	112.884	115.816	138.324	85.443	84.0893	86.821	76.3933	89.2025	104.557	107.779	104.976	71.0582	77.2919	69.4825	90.2085	60.7327	55.8794		0.11732	97.609
2.6211	80.161	121.276	134.722	104.906	89.7026	82.3529	81.8364	81.7696	85.4407	98.474	110.145	101.477	100.852	127.057	157.422	112.532	84.176	97.25	134.488	89.094	83.2764	88.885	73.5531	81.9407	112.398	106.578	88.945	68.9106	78.4242	72.7291	87.0736	73.446	49.9909		0.122905	95.1904
2.7402	96.986	131.057	120.966	94.86	79.1343	85.9909	87.9854	72.0683	77.8306	100.859	109.866	86.706	86.749	125.643	135.666	119.389	94.245	114.086	134.657	80.844	78.6288	83.274	65.3301	75.999	102.932	93.11	93.361	73.4707	77.8127	68.8196	87.2901	60.7004	55.2617		0.128489	92.4721
2.8594	78.168	118.146	129.006	87.176	61.6954	80.2631	76.6229	84.6955	80.5085	118.979	113.302	92.901	89.821	111.005	146.637	107.02	85.373	108.47	146.854	79.559	80.7982	91.443	70.0168	75.6922	108.187	100.887	93.154	63.5218	78.2228	83.53	82.7439	64.4528	41.2939		0.134079	91.8226
2.9785	88.305	123.597	142.772	84.364	81.5919	72.1885	91.0494	75.05	73.5028	100.266	123.668	93.071	96.173	137.008	145.851	110.922	91.799	102.958	130.825	79.042	75.7334	94.501	67.6315	74.892	100.699	101.496	109.187	62.2232	80.2588	67.0595	86.3913	69.8496	51.2349		0.139663	93.4897
3.0977	94.607	122.991	129.566	81.813	75.9853	69.329	83.3538	82.7871	76.2468	80.943	120.156	81.59	84.054	133.138	151.665	96.656	86.548	107.655	129.65	82.682	65.0803	87.923	71.7678	72.1136	87.147	106.127	98.204	69.6401	80.2002	86.7768	81.2492	61.4315	49.0799		0.145253	90.5502
3.2168	89.895	129.681	139.449	76.336	83.5655	83.7353	82.2002	75.3523	77.4616	78.3	123.066	79.253	100.965	108.966	141.129	106.676	77.642	93.192	135.339	78.931	59.5798	87.446	55.313	72.969	101.929	121.053	96.56	69.5369	68.3044	71.5652	78.0272	57.0782	51.5459		0.150837	89.4558
3.336	89.15	124.026	145.543	78.657	86.9652	90.7709	86.4171	72.6354	67.9517	72.405	111.82	89.623	88.35	112.082	156.121	107.211	90.453	94.159	143.383	85.283	59.9603	83.068	58.6292	72.318	109.674	109.375	102.674	59.7481	58.4652	72.6113	82.8029	57.9771	47.0663		0.156427	89.9205
3.4551	85.622	113.196	136.79	84.906	68.4783	96.1061	74.091	71.3809	77.3801	74.758	115.526	83.456	85.999	112.683	154.758	112.999	103.585	94.696	115.466	74.673	65.7038	87.701	59.2469	61.1532	96.224	101.62	85.096	66.4737	62.545	69.8771	85.244	49.0823	51.0389		0.162011	87.1986
3.5742	83.991	122.82	140.03	70.089	76.7362	82.1863	84.1554	80.7252	84.022	83.843	103.231	96.806	97.414	106.914	144.003	120.871	96.75	93.018	120.186	72.268	63.5136	97.666	54.6767	69.6541	92.574	101.73	98.648	63.0621	50.8078	66.5272	74.3984	54.2968	38.5345		0.167596	87.459
3.6934	81.262	118.14	138.121	75.255	71.0868	81.8174	80.532	73.644	68.3839	72.691	116.275	84.358	87.733	102.666	142.111	105.11	89.35	84.121	106.003	65.107	64.5413	90.05	54.6059	53.5647	94.109	108.551	101.614	64.6517	43.5367	53.039	83.1792	59.2376	49.9084		0.173185	83.7684
3.8125	74.177	115.663	137.053	78.679	66.7778	80.1236	74.0464	72.1417	76.0431	72.258	95.839	88.725	88.503	88.121	125.339	104.382	81.291	81.657	87.033	58.793	72.1025	94.399	54.379	57.1197	97.471	96.339	104.014	54.9973	48.6044	60.8477	76.196	56.0904	45.12		0.17877	80.7371
3.9317	79.184	120.905	149.354	77.149	72.6772	82.5291	65.0155	86.2306	63.3707	68.694	95.467	92.368	79.1	106.142	124.566	102.92	70.843	83.734	89.538	65.022	57.2794	100.634	43.3241	50.3116	89.25	85.094	97.881	47.5888	45.7579	63.5131	73.9972	58.8754	36.5337		0.184359	79.5409
4.0508	95.459	114.31	151.87	77.927	69.3115	81.9789	72.5282	91.4785	70.8854	76.141	108.616	78.637	77.698	98.167	111.685	84.441	82.765	74.516	93.223	50.604	59.9593	82.819	50.2875	48.6661	88.616	86.741	79.706	47.5483	47.861	60.0257	64.9059	55.4856	34.6768		0.189944	77.8648
4.1699	77.396	114.048	149.014	85.286	66.2671	76.8265	73.5368	89.3273	67.7302	82.505	110.351	77.178	77.682	102.924	105.862	99.35	88.403	69.526	80.537	40.098	49.1931	83.448	44.3404	46.8154	85.942	96.974	74.55	48.5263	44.4677	66.9728	67.5409	59.2984	42.3715		0.195529	77.0996
4.2891	91.523	106.124	157.638	87.918	56.8979	76.903	80.4357	82.1783	73.1286	76.938	95.412	66.827	79.299	101.165	119.201	86.807	78.043	66.687	87.247	43.432	47.9726	65.207	51.862	37.405	84.202	96.08	78.645	57.0124	38.4031	56.9083	62.8937	56.4255	45.1338		0.201118	75.5138
4.4082	94.281	99.726	163.872	70.493	58.134	66.02	61.8853	79.1353	64.7119	81.163	95.24	66.861	63.478	101.531	111.159	97.349	71.702	73.594	75.738	48.144	46.2668	60.316	46.0777	35.4472	83.443	86.051	68	43.897	47.6789	47.8328	56.5224	48.9874	43.1071		0.206703	71.4498
4.5274	97.79	111.897	150.037	68.749	57.5324	74.4914	64.371	80.4194	68.5333	71.376	88.267	51.654	66.165	104.387	109.969	90.234	71.023	59.084	65.055	38.465	48.3634	56.106	41.5947	34.4313	77.754	76.931	76.326	47.9428	41.1714	53.6034	50.5481	60.5959	45.0005		0.212292	69.693
4.6465	85.796	106.022	155.512	71.114	65.3823	74.0076	58.2525	78.7142	57.2657	77.911	87.332	54.906	53.245	100.814	114.747	96.875	54.79	52.31	75.753	44.286	41.2301	69.308	32.1592	24.813	80.672	81.674	73.069	36.5821	33.7265	54.1763	56.9112	65.4837	46.0586		0.217877	68.5121
4.7657	84.969	114.277	146.026	67.947	44.5995	61.747	55.2872	79.2677	62.038	66.099	74.733	57.342	50.646	97.331	99.525	77.75	64.858	45.763	75.846	39.169	39.0224	72.255	32.2047	32.7491	83.197	74.874	79.273	33.2019	31.6462	44.4464	45.0786	54.3667	41.8744		0.223466	64.5276
4.8848	100.467	109.056	136.895	64.621	56.5501	56.0151	51.2521	71.4514	50.6648	74.144	60.605	45.547	56.512	97.758	87.146	82.903	53.931	42.87	69.018	53.593	33.8039	65.913	33.7379	23.9967	72.973	78.75	77.496	39.7804	40.1187	50.0306	40.0635	64.757	42.4318		0.229051	63.1773
5.0039	103.051	99.97	132.311	63.677	55.4898	47.431	49.6035	73.86	49.335	67.431	64.677	45.299	41.343	91.637	101.571	71.564	54.307	36.793	80.253	42.477	30.8441	70.277	27.6639	24.1076	85.078	83.181	67.157	35.54	34.8337	48.3127	53.96	59.4681	43.7392		0.234635	61.7043
5.1231	102.49	95.945	128.361	58.313	50.9136	54.1466	45.6415	57.1766	47.9068	61.268	61.86	46.483	38.168	87.195	100.369	65.8	54.948	39.415	69.514	37.432	24.8539	75.207	26.4003	27.1374	70.224	83.991	69.724	34.3231	34.933	37.2763	39.5094	58.4114	44.021		0.240225	58.4654
5.2422	99.771	96.626	127.011	60.17	47.42	52.3689	51.9061	50.4638	43.3498	69.92	63.577	40.88	34.662	88.69	99.168	64.535	46.077	31.28	71.918	36.542	23.6076	65.141	30.7579	32.6901	63.93	74.35	63.63	39.8372	41.6122	39.2002	57.8968	54.8193	40.799		0.245809	57.7154
5.3614	98.62	90.927	132.847	57.735	44.8803	40.4706	42.1258	53.1756	49.2376	58.459	54.278	38.801	42.919	95.029	89.368	62.875	45.994	40.219	78.154	35.309	25.6957	64.306	23.3532	27.0516	63.537	70.833	56.874	32.0751	30.3073	36.3985	46.5644	53.559	33.0489		0.251399	55.0008
5.4805	97.333	103.421	109.124	50.076	43.4347	46.7462	53.2603	58.1262	44.0307	45.152	43.264	36.223	30.877	87.736	91.624	63.802	40.461	40.977	74.848	27.153	29.4396	55.243	27.7338	27.3217	71.682	66.173	44.522	24.5901	30.3864	38.017	42.3526	52.8603	32.8135		0.256983	52.4486
5.5996	88.181	91.909	108.576	48.315	40.4143	39.0014	58.8501	42.8761	43.6188	46.532	41.319	34.241	28.608	95.257	95.325	62.048	47.433	45.351	56.757	26.517	27.0077	50.994	21.8237	33.246	50.655	61.971	44.917	31.6236	29.5507	34.1784	45.4662	43.9036	26.3217		0.262568	49.7815
5.7188	90.853	86.006	103.859	39.112	39.6982	37.6596	46.0075	41.701	46.938	40.59	41.5	33.953	26.466	83.483	86.776	63.146	39.701	34.186	70.607	28.933	26.0276	59.371	34.2392	29.1318	51.003	50.129	38.866	28.3623	27.211	31.1666	42.1647	38.9965	30.9123		0.268157	47.5381
5.8379	99.275	86.444	100.765	41.744	37.3322	35.4166	41.7816	43.2581	29.7136	29.005	33.155	28.374	26.05	83.26	84.209	49.75	42.847	37.683	68.108	24.993	25.1839	50.686	23.9128	19.4175	39.606	49.329	46.029	27.4299	30.3181	30.0196	43.4976	53.5181	27.8825		0.273742	45.1513
5.9571	97.223	77.907	95.975	40.335	35.7855	27.4728	36.021	39.3968	34.484	33.001	35.659	37.346	27.972	76.621	79.961	54.745	34.114	42.846	77.022	19.811	19.9247	48.23	21.5837	28.0662	42.668	59.188	40.426	28.813	27.3789	35.8713	38.0295	49.3814	29.1167		0.279331	44.6174
6.0762	89.205	78.358	79.866	37.51	30.3962	24.5661	40.8697	29.4295	27.3896	37.967	34.936	36.041	22.056	60.024	79.714	42.234	29.383	47.188	68.49	23.126	19.3463	54.564	27.3079	20.4951	47.017	47.561	44.092	27.3621	25.8745	31.1732	29.5311	48.0454	24.1946		0.284916	41.3731
6.1953	106.308	73.173	80.05	30.625	31.4928	20.5369	31.206	32.7033	27.5312	33.384	32.72	30.373	22.557	58.912	76.745	45.683	36.357	39.106	63.451	21.586	24.1165	45.977	25.9037	23.4221	45.819	45.108	36.786	30.0547	26.6643	34.3616	35.4301	45.4242	21.6105		0.2905	40.4599
6.3145	91.937	76.278	80.031	25.29	32.9938	20.303	30.0578	41.372	35.5977	29.918	33.384	24.301	23.031	57.735	60.563	50.261	32.786	40.286	59.458	23.007	14.8684	39.896	22.9594	23.8807	43.055	41.431	48.478	29.1794	28.8855	29.9064	34.4897	34.6745	22.4686		0.29609	38.8716
6.4336	84.862	68.302	73.83	30.644	23.0017	19.1741	26.5949	29.4251	22.5283	32.121	29.225	22.222	21.725	53.647	56.365	37.598	32.824	37.118	55.51	21.566	21.4971	47.194	18.3729	20.938	40.287	40.746	36.867	26.7	25.8024	30.0264	25.5826	40.7252	21.3791		0.301674	35.5879
6.5528	76.445	67.392	61.18	30.184	22.9405	20.4854	28.3231	24.6947	33.6912	34.086	24.547	27.029	23.185	51.032	46.665	31.463	34.238	41.317	48.498	17.571	18.4422	44.666	24.7463	23.416	46.953	42.788	44.09	28.1966	19.5648	28.4302	33.435	36.9993	25.3145		0.307264	35.2124
6.6719	97.383	52.953	52.819	22.895	17.256	16.2385	20.1233	29.0987	24.9297	33.07	26.859	27.16	18.398	33.705	47.285	23.451	28.946	46.298	40.139	21.699	15.1692	36.345	25.6303	16.7057	42.206	43.786	26.996	23.7045	21.26	25.0404	22.4714	38.7066	26.392		0.312848	31.6703
6.7911	87.206	56.609	41.996	22.722	20.9782	17.2955	32.6588	27.8332	17.616	25.512	19.137	20.655	23.929	35.358	36.611	31.424	25.521	42.526	42.844	22.507	15.6659	25.916	22.9985	22.157	33.801	46.504	46.084	17.4945	22.0534	24.2376	27.957	28.6684	21.3748		0.318438	30.4803
6.9102	71.898	56.343	36.221	15.847	22.8325	16.4595	21.7513	28.1117	18.0791	29.192	18.942	22.941	21.496	38.848	35.163	30.328	24.461	52.162	39.067	24.732	13.6636	27.8	26.7081	21.4877	42.806	33.156	35.829	18.523	26.008	21.2824	20.6896	38.6598	22.5212		0.324022	29.5154
7.0293	64.461	52.487	43.949	19.5	21.1093	13.2204	18.1287	39.7695	23.4305	31.97	18.909	18.616	26.564	37.89	39.427	29.001	23.696	43.41	39.756	19.943	12.6188	35.392	29.4653	26.6317	32.42	33.941	28.726	17.6262	21.701	21.7369	24.0125	32.3598	22.075		0.329607	29.2104
7.1485	56.944	57.624	33.156	15.463	21.8367	19.2298	23.4206	37.1643	22.8097	25.972	21.731	18.957	27.183	31.335	32.993	27.652	17.422	47.596	35.903	16.426	17.0281	25.556	28.0919	22.7286	37.415	41.824	30.917	19.287	27.8269	19.338	26.2496	40.2565	21.1793		0.335196	28.7429
7.2676	60.417	54.788	34.283	12.99	17.8769	19.6201	21.0631	30.1943	18.0517	25.476	12.001	20.856	21.776	29.551	34.353	39.129	15.094	40.332	35.112	24.944	13.1748	35.116	22.1882	20.5626	34.974	37.571	21.367	23.2891	16.4072	23.8944	22.0522	25.0067	24.4886		0.340781	26.9091
7.3868	50.46	49.297	29.779	11.296	23.3428	18.941	20.9263	34.7887	25.2856	26.749	19.52	21.168	19.738	31.35	28.201	21.687	21.798	32.575	25.623	17.027	15.0423	32.18	18.8358	23.0911	36.135	23.099	28.917	15.6046	18.2197	24.1536	21.4781	27.8444	20.0203		0.34637	25.278
7.5059	43.916	50.914	23.537	12.744	21.6499	15.3501	15.1487	29.0602	29.1535	22.151	26.9	23.565	18.493	32.789	35.056	15.853	18.661	27.11	30.88	20.527	16.7022	33.887	20.9687	27.4452	32.506	24.402	29.794	21.8667	15.114	21.6306	20.7002	21.3372	16.372		0.351955	24.7329
7.625	40.197	40.852	33.385	13.096	18.771	13.1677	20.2578	24.5303	23.7476	24.199	21.719	23.31	25.463	33.412	35.199	25.833	18.44	23.661	24.341	20.948	15.42	23.154	18.6443	19.471	38.605	22.381	24.879	14.6829	25.9602	21.4633	17.9959	20.5896	17.6555		0.35754	23.8009
7.7442	35.632	43.819	27.102	10.653	15.9423	14.3808	18.2956	30.1714	21.6766	21.725	16.263	22.798	22.905	30.318	36.334	20.908	16.555	29.626	25.84	17.938	14.0757	32.54	27.0125	27.0577	34.077	15.993	25.714	19.3943	21.5771	18.1941	21.6891	24.7273	15.2931		0.363129	23.522
7.8633	36.602	43.647	25.092	10.443	13.5873	16.3199	20.9159	25.0067	16.3253	19.53	25.337	23.327	17.575	27.117	31.455	24.546	19.231	23.536	22.641	16.44	14.145	27.157	19.8974	16.8025	33.1	25.723	26.553	19.5327	22.1443	24.4651	15.2485	22.4474	14.0525		0.368714	22.4225
7.9825	36.526	34.93	18.552	12.187	17.1394	11.9741	21.7727	25.7329	18.2702	25.59	28.289	19.734	16.97	27.007	30.822	18.167	20.259	23.156	27.858	20.755	21.8966	24.03	19.5382	14.6628	40.158	17.434	21.612	18.7829	20.4524	22.804	16.3718	25.5845	15.4604		0.374303	22.2569
8.1016	42.502	34.674	24.728	16.54	20.5805	20.1795	17.6318	17.8474	20.1016	22.24	35.278	22.864	16.429	27.148	32.967	22.026	14.685	20.081	21.883	20.541	16.6699	22.153	21.0213	18.6076	34.271	20.431	25.609	17.9624	16.7029	26.5793	19.6912	21.3749	13.1586		0.379888	22.5806
8.2207	35.619	38.227	17.166	14.302	15.9882	12.7713	21.0743	16.6352	15.8535	21.671	26.83	22.973	21.335	22.596	27.776	24.626	16.25	24.296	23.516	20.382	14.8901	25.053	22.1234	18.7729	36.651	19.148	20.941	21.3085	19.7194	23.7852	19.8427	25.2713	17.9081		0.385472	21.9789
8.3399	37.133	28.482	18.934	11.63	15.6903	13.3974	15.9321	17.6603	21.9856	19.886	27.506	21.669	19.239	23.241	18.115	26.125	12.896	22.261	27.585	17.173	15.8825	20.218	13.0252	18.8507	32.263	18.091	24.089	28.3531	21.3243	23.3957	16.4372	22.1544	16.5102		0.391062	20.8223
8.459	41.329	28.868	21.49	9.224	13.9612	15.3461	23.0868	18.1787	14.2358	20.958	27.734	26.628	18.431	26.831	21.732	27.717	14.381	18.912	25.101	12.557	15.2269	23.902	16.0023	19.1771	29.931	21.448	26.726	21.351	20.7888	23.8623	20.0335	23.2097	18.9497		0.396646	21.4336
8.5782	40.117	26.89	17.864	13.756	16.8643	10.8436	15.5552	13.3126	15.1268	17.646	24.503	20.911	19.357	25.833	21.508	19.59	13.29	25.421	24.689	18.386	15.8703	18.425	20.6329	26.1537	30.786	22.759	25.014	31.7817	19.5544	24.3156	14.8969	22.7064	15.159		0.402236	20.8945
8.6973	40.215	33.098	13.968	14.81	15.2374	14.2868	15.9793	16.9954	14.0785	20.977	30.355	24.958	13.96	26.785	25.253	16.841	16.011	19.865	23.645	11.873	13.7448	17.602	18.0356	20.2039	19.515	20.334	21.891	22.5605	17.0468	21.8315	15.6671	19.0366	12.0586		0.40782	19.6581
8.8165	34.649	26.194	19.031	15.454	13.1517	16.6066	16.1098	19.4482	16.8034	22.901	24.758	23.81	10.954	24.08	20.143	20.168	19.186	19.097	19.567	15.933	12.8721	15.4	18.7735	22.7538	21.448	16.829	20.891	25.1818	19.4342	18.0295	14.6404	21.7321	12.8246		0.41341	19.3592
8.9356	35.14	19.314	11.951	12.268	17.0164	14.8585	12.1429	16.2376	18.3956	22.833	21.398	29.155	15.999	25.655	21.522	22.975	16.289	16.036	22.849	20.059	13.6185	12.078	16.5061	21.4308	27.94	17.826	25.644	23.3722	17.237	17.2568	14.5393	18.3726	10.351		0.418994	19.0384
9.0547	27.532	24.281	17.299	13.915	15.6082	18.3162	11.216	20.3	16.6105	17.69	20.579	21.406	12.073	21.131	16.773	15.584	21.318	20.893	20.938	14.348	13.1618	20.586	12.929	24.6181	28.052	22.779	22.337	24.1871	18.772	20.7564	16.55	22.7074	15.8272		0.424579	19.1235
9.1739	33.795	16.597	12.783	14.126	22.38	14.4442	13.493	19.8601	19.757	20.765	21.076	16.653	10.574	22.021	17.873	24.59	25.583	21.451	19.126	16.429	17.278	17.103	17.7619	27.4487	23.162	16.96	26.786	27.2928	16.2973	20.5881	15.5418	18.6213	15.2017		0.430168	19.4975
9.293	31.258	18.301	12.896	13.888	17.4475	14.915	14.5666	19.4195	17.3476	16.884	17.663	13.809	13.529	26.74	17.503	16.994	18.868	11.516	23.028	16.984	17.1483	22.924	17.7242	21.9206	22.412	11.216	22.758	24.2441	18.9368	20.7773	20.9003	18.088	10.642		0.435753	18.2803
9.4122	25.981	16.476	14.06	15.94	15.4901	13.0467	15.2226	13.3293	17.9491	18.858	11.436	21.98	13.88	24.926	18.107	25.139	21.137	16.012	21.084	17.643	11.7166	20.013	14.3952	18.0676	25.682	18.462	25.29	25.0957	15.1294	24.5963	16.2861	20.9129	9.3809		0.441342	18.2644
9.5313	20.622	12.807	13.151	12.814	16.162	13.8276	14.7146	16.8799	17.9139	22.835	15.683	18.553	9.201	19.173	19.566	24.554	17.428	14.956	20.341	14.315	17.1559	15.258	18.0705	19.4759	22.737	18.915	13.974	20.1448	18.1619	20.545	19.5441	23.8409	12.8776		0.446927	17.4605
9.6504	25.259	19.12	13.848	13.299	18.348	13.1097	19.4041	18.105	20.0893	18.717	22.063	15.041	8.349	23.993	19.247	28.133	18.408	17.017	15.974	19.599	12.9476	12.784	22.0528	25.7297	16.229	20.081	22.232	19.0799	16.7574	21.3834	16.7504	16.6671	8.698		0.452512	18.1368
9.7696	31.065	17.036	15.709	14.907	10.9996	13.6602	18.194	21.3771	21.0885	24.161	22.615	14.63	9.343	17.613	20.963	25.402	16.819	22.176	16.55	14.614	9.2668	20.97	25.3212	25.7265	19.269	18.51	15.115	14.2689	12.2649	14.1786	16.2015	20.8581	8.9424		0.458101	17.8732
9.8887	28.046	16.702	15.308	15.432	10.1729	12.3224	27.7329	17.3087	24.3292	21.286	27.943	15.518	10.916	22.803	23.747	24.985	14.572	17.757	21.969	14.739	13.7713	15.114	17.2494	25.149	21.068	17.986	17.768	14.0812	19.2399	18.8724	15.9663	18.8848	9.6629		0.463686	18.4364
10.0079	19.628	23.199	10.571	11.323	10.9314	14.0665	18.2238	22.1434	24.8119	20.414	19.663	12.064	12.053	17.56	23.591	18.035	23.916	16.627	23.162	15.203	12.7898	14.346	20.3567	26.492	22.633	18.04	16.237	19.6426	11.3338	18.7214	16.7013	15.6266	7.8615		0.469275	17.5142
10.127	20.469	16.948	14.842	18.965	16.285	9.7063	15.1568	13.6051	19.8404	21.551	22.887	14.165	10.908	18.705	18.472	30.44	19.505	21.538	20.279	12.993	10.6919	20.591	19.3812	24.6544	20.378	18.549	20.194	14.1624	15.6429	20.0517	20.2599	17.3906	11.6751		0.47486	17.9055
10.2462	18.547	16.893	16.013	10.087	13.46	12.4257	15.8847	13.487	25.575	25.251	19.914	14.16	8.634	16.194	26.893	21.955	20.136	16.789	18.16	13.143	16.6819	16.8	14.9932	16.2092	20.215	23.414	19.46	13.6759	20.8326	14.0624	12.4414	18.1809	10.9475		0.480449	17.0156
10.3653	25.445	21.729	10.742	14.062	13.8614	16.9312	14.0947	17.4643	20.3272	24.496	18.065	14.825	6.465	17.209	21.238	17.33	19.503	13.655	20.67	15.918	13.6689	18.969	17.652	27.3481	19.969	17.994	16.702	14.1268	14.8331	17.1116	15.0052	19.5643	8.3401		0.486034	17.1308
10.4844	28.902	20.18	13.319	10.194	17.0182	16.7799	17.2006	17.1505	17.4153	24.339	19.049	16.551	4.825	19.207	28.277	17.463	25.997	13.278	17.784	17.704	19.0331	12.971	14.8292	22.8188	16.158	19.282	21.566	15.2807	18.4625	13.7235	18.1147	16.7983	9.4218		0.491618	17.6089
10.6036	21.094	24.746	16.861	12.891	14.0481	13.8176	14.4103	11.5425	23.2668	19.217	20.662	13.085	5.83	15.677	25.557	12.497	24.019	14.04	17.825	17.754	11.2383	16.546	15.5645	23.7957	25.454	21.992	18.381	11.6082	15.9653	15.2307	12.156	15.5493	12.4289		0.497208	16.8106
10.7227	21.048	18.816	18.156	12.129	14.0432	11.9178	19.2161	15.3052	18.5334	19.291	23.388	13.623	5.735	14.901	26.008	24.316	28.715	12.293	16.609	14.179	13.7227	17.037	17.8326	15.4011	21.016	22.28	19.777	14.9543	17.4613	12.7548	13.8681	19.2334	12.0288		0.502792	17.1391
10.8419	21.308	19.592	14.859	12.004	13.4716	13.0733	13.6863	17.5938	22.8853	19.966	21.621	14.03	7.084	14.491	23.894	14.503	25.535	17.893	14.749	16.374	13.0455	16.265	19.8406	21.2493	20.836	23.95	15.607	16.6541	20.2196	10.8799	10.915	16.5594	12.0793		0.508382	16.8701
10.961	31.06	25.566	12.368	9.237	9.6187	16.1674	19.2912	17.4018	19.5616	21.842	21.182	11.2	4.637	9.228	22.984	17.428	20.047	13.867	21.317	14.883	12.7283	9.444	14.4932	16.4359	16.142	23.987	19.734	14.1586	20.7939	13.115	13.1244	18.7868	8.4186		0.513966	16.3712
11.0801	25.804	17.258	15.485	11.511	10.8614	11.589	12.4614	16.9569	18.2517	22.122	20.009	11.765	5.35	11.628	23.375	16.002	17.817	11.613	23.979	15.557	13.1789	12.412	14.9344	20.3114	21.353	19.265	13.502	12.9174	16.3145	14.1383	9.7451	18.1787	12.4014		0.519551	15.6984
11.1993	20.91	21.534	13.176	14.763	12.4069	13.8043	13.1019	17.8748	18.3628	24.151	27.374	13.478	5.619	13.36	27.702	17.879	23.879	13.513	17.655	12.516	14.7886	13.889	13.2937	21.8632	18.55	15.178	22.904	14.9714	18.5326	10.4133	11.3634	15.8896	7.6373		0.52514	16.4344
11.3184	23.409	17.738	10.757	10.259	9.8798	11.6576	14.8424	14.7821	21.2016	15.476	23.828	10.427	3.711	13.711	25.015	17.161	22.418	14.169	18.693	13.396	16.2393	12.017	21.8624	14.9958	22.204	16.258	21.362	14.2111	16.462	9.0886	8.0323	15.852	8.5392		0.530725	15.4441
11.4376	23.171	19.966	13.936	13.304	10.251	15.6094	18.4151	13.0998	16.0436	13.213	23.256	18.543	5.164	9.979	22.332	22.284	19.262	17.706	23.718	18.666	10.6659	10.982	16.9291	16.8816	16.998	14.741	21.06	15.0499	17.9727	10.5811	8.5047	14.1879	8.8315		0.536314	15.7971
11.5567	29.747	17.015	14.345	13.744	13.7132	13.6284	21.8001	13.7619	24.3363	19.22	21.929	10.157	5.112	10.646	19.633	17.596	17.761	13.326	19.037	14.593	8.6642	11.441	16.2974	18.8045	20.089	17.032	22.035	17.0182	17.7288	15.1367	5.1213	16.2973	10.9758		0.541899	15.9922
11.6758	27.102	20.268	13.176	11.031	9.7614	16.4961	12.6724	16.7521	18.7817	18.154	29.018	16.081	3.054	10.651	20.747	16.684	18.454	15.659	18.041	18.025	14.098	12.832	15.6936	15.0318	19.245	14.408	16.765	22.1951	15.9249	10.2394	6.6627	14.6652	7.0622		0.547484	15.6191
11.795	28.959	21.879	12.348	9.681	9.219	12.1813	16.1149	16.1315	24.7248	21.078	24.27	9.795	6.444	9.173	18.502	15.902	19.644	22.518	16.824	20.494	15.7987	11.949	17.6997	18.859	19.491	10.516	14.699	18.5141	16.4165	9.0192	8.6456	18.2622	7.0435		0.553073	15.8423
11.9141	25.388	25.777	13.931	14.685	8.5698	12.6843	16.5996	17.828	20.9736	18.765	26.672	13.084	4.236	10.412	22.263	15.421	20.575	15.625	18.583	20.55	11.7597	8.433	17.0477	19.9899	19.931	14.626	11.619	18.3183	19.1249	10.1673	3.9487	13.0863	5.6786		0.558658	15.6471
12.0333	26.42	19.609	9.726	10.764	8.1471	14.3621	15.6889	24.3807	17.2282	24.317	19.567	12.469	4.249	9.181	18.619	23.179	17.546	17.096	16.565	16.676	10.7784	15.414	14.5048	16.3119	18.672	10.754	17.44	16.7151	16.0994	10.1952	5.0517	16.6502	9.1381		0.564247	15.258
12.1524	27.363	22.505	14.467	14.031	8.4246	13.8254	15.7057	16.4671	16.725	21.17	28.595	12.6	6.434	9.511	19.549	18.901	16.779	15.669	12.566	21.661	12.8775	11.335	16.2556	12.7633	15.627	6.33	17.106	18.2288	18.4018	9.5725	2.3514	15.1061	8.1414		0.569832	15.062
12.2716	27.597	17.378	18.462	12.398	7.8562	13.0576	14.666	15.8558	15.5946	19.578	23.306	10.476	4.037	7.256	17.23	16.239	24.834	15.843	18.214	17.136	16.7401	11.354	19.6751	17.5247	15.824	11.123	15.883	22.1946	12.9759	7.6361	2.0325	11.3958	6.3144		0.575421	14.7784
12.3907	28.048	18.362	20.219	9.157	8.1732	14.9087	19.0698	19.8291	20.2628	20.779	21.493	7.711	3.444	9.206	29.922	18.157	17.573	19.299	16.912	15.187	14.9096	12.984	15.0249	14.5303	16.773	12.081	16.142	18.2106	15.8635	8.3445	5.8834	14.2588	9.0488		0.581006	15.5081
12.5098	25.276	17.903	18.303	9.483	7.7757	17.934	17.6933	14.1301	17.3601	22.92	20.976	10.915	2.141	9.907	16.75	19.135	19.919	22.198	16.64	17.233	14.0935	12.807	13.6176	19.106	17.365	10.713	16.312	16.1758	18.5195	11.2286	5.7165	13.0166	10.0344		0.58659	15.2514
12.629	28.701	21.359	18.096	8.497	8.8505	13.59	14.2891	21.3866	15.5786	16.59	23.252	7.405	1.611	5.11	20.496	27.52	21.061	16.725	13.782	21.728	12.897	12.427	18.8094	23.9526	17.105	10.147	11.32	18.0502	21.0507	11.4104	4.2532	8.6656	10.6891		0.59218	15.3456
12.7481	26.995	18.965	16.164	9.501	9.7891	14.5814	13.316	15.3056	17.3296	16.963	15.702	7.163	7.412	9.311	19.379	18.156	21.274	16.958	11.202	23.224	13.8972	15.549	13.2207	10.4995	13.993	7.934	13.894	18.7387	13.8066	10.2179	3.8094	11.6638	13.2135		0.597764	14.216
12.8673	27.254	15.926	18.123	11.625	9.4658	18.0119	11.6069	16.5761	18.24	24.215	20.135	9.963	5.137	11.014	23.519	25.456	15.874	14.96	16.392	17.396	19.8401	8.453	19.3061	13.2992	14.46	10.576	16.48	14.8009	18.3259	4.2798	5.0505	13.2117	9.1711		0.603354	15.0953
12.9864	22.079	19.76	15.681	10.831	14.4412	14.8755	16.0009	18.2614	19.4457	25.07	20.98	11.184	2.034	10.024	15.593	17.3	19.458	15.949	12.109	17.043	18.3242	13.601	11.6159	21.9204	11.055	6.727	12.356	21.8943	19.0362	8.3082	3.082	9.8719	7.2724		0.608938	14.6419
13.1055	20.923	16.852	13.876	12.84	7.2054	17.9672	13.4295	22.5104	20.5322	21.855	25.306	9.531	2.732	5.228	15.776	15.304	20.266	16.584	10.605	15.482	14.9197	13.835	17.085	21.4855	13.966	5.964	9.49	18.7283	20.6573	7.1045	5.0445	8.1242	7.2657		0.614523	14.1962
13.2247	26.009	18.508	14.139	11.863	6.7125	11.4434	12.7068	19.5707	20.6922	24.68	22.349	9.6	2.186	5.419	16.253	18.658	21.362	18.065	11.012	16.534	17.1388	13.906	17.8074	20.6465	12.718	7.368	9.807	16.1063	16.3041	5.5154	1.671	12.2988	9.0495		0.620112	14.1848
13.3438	27.246	18.3	14.601	7.664	9.3908	12.2008	9.3457	19.2545	16.8259	21.988	19.353	14.009	5.919	8.989	17.883	21.616	22.114	19.146	13.849	21.996	14.0607	15.051	15.2039	16.5429	8.253	5.79	10.717	15.7982	10.1795	8.913	2.8564	7.1054	8.1826		0.625697	13.9498
13.463	16.189	18.709	12.544	16.117	15.1444	19.7327	13.9271	23.9544	18.839	23.234	21.827	12.302	6.389	9.2	21.424	19.131	15.277	20.224	15.405	22.185	13.6581	8.15	16.9853	14.2995	8.312	7.058	8.161	14.8533	19.9267	5.8313	2.8647	11.3122	10.0651		0.631286	14.6434
13.5821	22.689	16.671	12.789	15.53	12.1252	10.4755	18.1744	18.4211	17.4969	23.421	20.005	16.067	4.568	9.97	20.171	18.499	19.659	17.507	18.815	19.388	14.0175	10.524	18.9149	19.4044	13.402	5.59	13.108	16.3958	12.2223	6.2188	4.5438	8.0311	7.243		0.636871	14.6078
13.7012	20.469	12.365	14.28	16.229	20.1726	19.9091	14.3452	19.2394	12.135	26.816	21.966	16.458	3.278	8.7	20.189	28.403	19.631	20.399	11.951	24.989	14.5208	15.95	17.7128	17.0929	9.054	4.349	11.848	17.537	16.0267	7.7639	2.8136	6.9449	10.886		0.642456	15.2856
13.8204	14.876	14.668	14.186	8.646	14.5216	17.847	14.5606	18.208	18.2005	23.875	21.834	8.737	5.355	4.962	19.837	22.33	22.138	19.996	15.684	25.507	12.9853	14.471	16.3728	15.877	4.618	8.853	12.321	20.3689	16.1468	6.334	4.1414	8.6541	10.4157		0.648045	14.4705
13.9395	19.865	17.357	12.984	10.253	12.9846	13.008	16.1301	15.1679	18.9264	24.019	22.97	12.946	5.191	8.675	17.475	20.73	16.677	16.3	17.773	22.169	12.6148	10.982	18.7258	13.5372	10.033	5.343	15.075	16.201	15.0141	6.2365	2.015	6.7301	7.6267		0.65363	13.992
14.0587	15.586	15.515	11.373	14.245	7.8948	13.6361	18.878	24.2386	22.4963	21.022	20.021	18.954	5.647	5.142	21.689	16.845	19.13	17.709	18.104	22.319	14.9307	18.066	18.3725	18.2869	12.074	3.702	12.176	16.323	18.0602	6.7535	2.8894	6.3868	10.0505		0.659219	14.8035
14.1778	16.205	17.528	14.855	15.229	9.5676	13.675	17.8297	14.3879	19.2186	17.403	21.951	15.163	6.228	5.859	22.687	15.824	14.735	15.656	15.95	20.855	12.3492	14.169	21.9439	14.6875	9.435	4.926	14.563	19.2699	18.2048	8.6174	2.3333	7.7002	10.1412		0.664804	14.2166
14.297	21.155	17.411	13.989	11.413	7.7699	10.7655	12.4075	15.4217	19.6731	18.159	18.986	14.939	4.43	6.151	17.743	25.135	18.646	19.422	18.332	19.018	11.4126	14.828	17.463	17.7201	5.952	2.68	10.936	15.9832	19.772	5.4851	1.6177	10.7644	15.6309		0.670393	13.9761
14.4161	20.551	14.874	15.288	13.474	12.0392	13.6729	14.6096	17.4455	18.8737	16.52	21.957	15.704	4.146	5.969	21.293	22.026	18.977	19.145	19.062	20.679	16.2982	8.102	19.5224	20.0008	8.622	8.336	11.882	15.8812	11.7852	10.8882	1.3529	5.3572	8.5794		0.675978	14.3307
14.5352	16.695	13.877	11.618	10.947	11.4587	12.057	15.53	12.4854	20.112	26.643	18.121	14.089	2.21	10.602	20.171	24.163	20.473	12.4	14.897	18.962	9.7477	15.097	16.5954	16.659	6.868	7.634	13.305	15.3075	15.2549	7.516	4.0402	4.7381	10.9216		0.681562	13.6726
14.6544	17.96	13.642	12.581	12.189	10.2479	14.2163	13.6535	17.3273	11.4493	26.321	17.862	14.332	7.647	5.852	17.779	21.511	22.672	19.787	23.959	15.775	14.0326	16	18.962	13.775	8.696	1.421	10.539	15.1341	19.4214	6.933	2.1786	7.6131	9.0071		0.687152	13.9538
14.7735	16.052	12.054	13.402	12.274	10.3368	14.7183	15.9253	13.6331	16.079	19.654	15.06	18.834	5.062	9.838	21.593	23.58	15.232	15.526	15.423	21.345	19.1676	13.034	19.1649	15.6009	7.718	3.543	12.446	17.257	13.8907	4.9181	5.0426	3.2369	10.4655		0.692736	13.6699
14.8927	13.769	13.161	16.293	11.941	10.2591	17.4859	16.1758	12.8145	18.9509	22.744	14.684	16.255	4.701	8.973	17.965	16.195	18.61	19.222	14.722	18.522	8.785	11.894	19.1307	17.091	7.83	4.063	15.453	14.2307	13.7182	11.5259	2.3134	3.5099	8.7111		0.698326	13.3848
15.0118	17.292	19.418	13.284	10.08	6.2698	15.5605	16.0688	14.1413	14.6297	21.335	17.923	19.144	7.224	7.698	18.198	21.141	15.048	18.718	12.247	15.864	14.9194	16.545	17.4596	17.948	8.621	5.057	11.532	16.4346	21.5613	6.3966	8.3273	6.7066	10.7762		0.70391	14.0475
15.1309	19.798	12.005	11.439	9.967	5.8899	18.9257	19.3116	16.0543	14.668	24.567	18.194	17.099	5.036	7.367	16.842	24.289	16.137	13.915	10.258	20.233	15.7193	14.713	22.1596	17.476	10.269	4.804	12.517	18.3492	13.7667	8.3166	4.4489	4.7971	9.1484		0.709495	13.8933
15.2501	17.206	15.167	12.525	12.658	9.0394	12.8279	16.0668	9.7446	18.7668	16.091	19.425	15.39	8.651	7.535	22.076	20.598	18.828	18.405	14.155	16.946	18.3374	17.806	17.2515	19.0254	8.713	3.128	11.932	20.8988	18.695	8.4841	3.1418	1.9981	10.0579		0.715084	13.987
15.3692	22.399	14.659	14.451	10.557	10.4339	13.6476	21.4924	16.535	16.2686	21.757	20.82	16.648	9.956	8.075	14.702	23.445	18.512	17.48	13.914	22.995	12.9392	14.738	15.0491	19.1555	7.262	5.365	10.455	17.2975	18.767	6.9317	3.8691	6.8716	8.8763		0.720669	14.4341
15.4884	20.12	13.281	11.316	10.424	6.9052	19.3175	15.5815	10.5742	19.3538	15.988	16.54	23.151	10.254	8.717	14.276	16.6	17.763	19.529	15.472	18.08	14.1604	9.065	15.2579	14.1966	8.146	3.999	14.11	16.8526	17.004	5.1456	4.1252	7.3218	10.5978		0.726258	13.4311
15.6075	17.603	16.627	12.86	8.927	10.2052	13.817	27.7708	18.2222	19.4439	24.333	18.143	20.172	6.606	10.891	12.769	17.311	21.108	22.205	16.676	20.847	17.1735	13.618	14.9456	14.8531	10.055	2.856	15.891	17.4822	10.7733	8.1486	3.7576	7.0492	9.2194		0.731843	14.617
15.7266	19.507	11.367	13.536	6.016	8.6769	19.8783	16.7561	16.8576	19.9764	31.316	21.091	17.739	8.145	13.244	10.266	21.847	20.675	21.656	13.347	18.015	11.4025	11.48	17.2483	18.9388	12.336	5.92	13.325	26.3137	18.2795	8.9984	2.3327	5.3028	6.3659		0.737427	14.7926
15.8458	16.307	12.606	15.921	11.844	13.9395	19.4829	18.5604	18.6983	24.3267	24.38	21.21	22.867	6.369	12.34	13.686	16.054	24.013	20.621	12.037	14.356	12.5829	13.953	16.3943	12.253	11.193	6.459	18.347	16.4139	14.1147	7.818	2.1142	4.6511	10.6319		0.743017	14.7438
15.9649	18.299	13.699	7.96	13.4	11.4669	16.8137	18.5655	15.3147	22.2362	30.404	19.303	22.693	11.369	16.221	19.98	18.576	15.628	14.354	12.692	13.77	14.162	11.586	13.3449	21.8361	8.878	1.915	18.002	14.5693	20.5037	6.8246	1.6033	4.8774	8.4181		0.748601	14.5232
16.0841	17.885	11.663	12.242	12.58	8.887	24.4955	19.7441	18.4502	12.2567	28.935	18.761	21.041	12.538	12.778	13.999	22.658	18.285	20.182	18.623	21	12.581	12.892	15.6097	14.5146	8.028	3.41	14.078	20.3155	14.859	8.3292	3.2108	5.3715	13.3707		0.754191	14.9568
16.2032	24.061	15.222	11.107	12.494	11.3919	14.0275	11.285	17.3795	14.8987	33.213	21.402	21.328	16.691	16.377	17.767	26.15	14.958	18.588	14.576	11.989	15.9817	10.514	14.8224	15.2574	7.227	3.605	13.44	19.227	14.4297	11.4169	2.2894	4.4219	10.2647		0.759775	14.7819
16.3224	26.15	9.291	8.192	8.796	9.623	11.488	18.8546	15.8121	16.4796	24.102	20.667	19.845	16.153	15.78	13.767	24.469	18.704	21.486	16.126	15.479	11.5408	11.981	19.1166	17.5232	9.279	3.103	11.309	16.0606	20.0908	9.1548	2.2442	4.6338	9.0894		0.765365	14.4361
16.4415	22.231	13.723	12.167	11.732	12.7963	10.2436	16.962	17.6597	22.3512	26.062	15.624	19.931	18.594	12.575	12.822	17.114	16.553	18.055	11.335	16.411	6.4387	13.556	17.3336	15.8659	5.244	6.08	12.465	17.9365	15.2131	11.7189	2.859	5.1413	9.7339		0.770949	14.0766
16.5606	22.085	13.666	10.408	11.14	9.5855	13.9597	15.7382	16.4537	15.1469	27.869	17.824	25.358	21.372	14.914	18.248	22.939	10.486	25.538	16.874	18.592	15.1567	12.547	15.6151	19.9824	11.086	6.005	16.52	19.0361	16.9108	7.7249	3.0859	3.2908	8.5678		0.776534	15.2644
16.6798	20.019	10.687	8.809	14.017	8.7856	11.6186	16.4102	17.4183	20.6066	20.41	18.889	20.338	18.924	20.24	14.863	19.015	14.253	22.575	11.999	11.123	8.9142	12.299	11.7488	18.4462	7.805	5.385	17.066	19.0042	16.299	16.6765	2.542	5.4006	10.3642		0.782123	14.3318
16.7989	20.86	14.333	8.746	11.714	11.6244	13.4847	17.6202	22.6147	23.4105	19.652	17.377	22.801	16.117	19.791	15.737	15.707	13.959	20.464	12.983	14.291	10.7411	13.847	14.6694	15.8705	6.154	5.171	18.234	18.4128	13.6067	8.9496	1.624	3.0812	6.9232		0.787708	14.2597
16.9181	22.29	13.283	9.749	9.153	11.0778	11.3823	15.3189	18.5795	16.0772	10.671	17.892	22.16	17.257	22.519	17.121	17.572	18.948	19.001	18.773	17.71	13.1983	7.572	20.6262	20.2197	9.16	2.016	13.465	22.032	20.5502	11.0918	3.0349	5.5152	11.7697		0.793297	14.7511
17.0372	20.222	10.633	9.408	13.338	8.9021	13.7773	16.7007	12.3006	17.3737	14.229	14.208	15.264	18.08	22.541	16.443	18.897	14.947	18.06	17.969	13.352	13.6771	16.537	14.5284	21.1194	11.298	4.1	14.927	23.0872	11.409	12.7625	1.9881	3.8235	10.7639		0.798882	14.1414
17.1563	15.111	10.692	9.424	9.788	9.0575	11.3261	10.5935	13.928	15.6007	17.495	18.018	20.475	18.589	18.994	15.325	11.392	14.252	12.218	13.362	14.454	15.075	9.539	9.5416	16.7815	9.461	4.995	11.257	14.9481	18.2113	11.4822	4.9333	4.3823	7.6873		0.804467	12.6785
17.2755	14.005	11.238	9.342	6.798	11.0236	10.7058	17.6649	14.2018	15.2784	15.346	17.959	18.605	16.451	23.167	23.179	18.096	13.807	12.959	23.503	10.593	15.1781	12.873	14.2529	14.7836	10.673	7.445	13.169	17.3079	16.7045	13.0093	4.6752	5.4912	11.513		0.810056	13.9696
17.3946	21.495	9.214	9.525	10.468	11.0147	13.0002	17.8966	19.5861	13.768	11.848	18.709	19.533	19.025	19.322	24.735	11.737	14.174	13.997	17.704	11.083	17.6342	9.074	14.0908	17.0128	11.261	5.38	17.935	15.8499	16.8117	15.3635	3.7766	2.0793	11.5046		0.815641	14.1093
17.5138	15.403	14.319	11.086	10.055	6.9168	13.4835	17.1686	22.0858	10.1801	10.172	16.248	20.339	15.899	21.11	23.532	5.736	17.142	12.524	17.247	14.337	13.7597	10.258	10.2388	20.473	10.39	2.521	14.925	16.9804	16.9422	12.2166	4.7511	1.9359	11.2288		0.82123	13.3819
17.6329	20.925	11.123	10.512	10.955	13.8743	17.849	12.6428	21.326	12.0812	7.219	16.981	12.967	19.347	19.678	17.675	2.269	12.361	10.922	14.499	11.819	12.1619	10.966	10.5173	18.4582	11.575	2.605	11.992	17.4888	15.6867	13.6749	2.6655	1.6662	12.2414		0.826815	12.6886
17.7521	23.385	9.594	14.809	7.751	14.3053	16.478	16.7883	16.2235	11.1925	5.153	8.417	10.4	14.586	13.642	18.915	3.33	9.099	7.694	15.981	12.219	15.1562	11.035	8.8629	17.614	12.119	4.363	16.095	21.0654	24.0147	19.5146	2.4197	4.1951	10.365		0.832404	12.6298
17.8712	22.429	14.081	9.573	6.268	8.6547	12.2042	19.2166	12.8182	4.5206	2.789	5.88	9.993	12.019	14.26	21.546	4.06	5.78	6.45	13.926	19.154	16.7821	11.546	6.0465	18.0264	8.618	6.756	18.375	19.1729	19.3675	15.1561	1.9612	2.2571	8.2633		0.837989	11.453
17.9903	20.24	10.662	8.861	9.443	10.3632	14.8798	13.2223	14.9517	3.8951	3.671	3.792	6.311	10.579	10.724	13.357	2.382	3.721	4.645	13.539	13.683	16.1635	11.047	4.3489	21.3668	9.095	6.013	20.396	18.4252	17.8315	18.6773	1.3096	2.3474	6.6138		0.843573	10.5017
18.1095	17.078	13.732	8.515	7.865	11.6326	17.0846	16.0908	7.215	2.5486	1.299	1.475	1.619	10.546	16.076	8.949	2.54	3.151	1.76	15.901	11.688	14.9764	13.95	6.226	18.9736	12.838	6.179	22.654	16.951	17.8814	19.0565	2.1645	6.2096	10.4549		0.849163	10.463
18.2286	19.643	12.851	9.181	6.919	12.5264	13.3722	14.1567	4.8196	3.4992	1.937	2.788	2.432	2.747	14	5.925	3.059	5.253	3.689	17.376	9.225	13.522	11.061	7.5484	17.2105	10.039	7.344	15.503	18.2696	23.1302	15.7726	5.0821	4.5578	7.5286		0.854747	9.7566
18.3478	23.645	10.478	5.424	7.012	9.8186	16.1172	10.3403	2.7552	0.8447	1.648	4.364	1.862	2.724	12.238	5.372	1.594	2.28	1.217	17.874	8.654	14.4789	9.574	4.3335	18.9548	18.193	7.21	15.589	18.1766	21.0887	16.4658	2.6276	5.2103	11.5598		0.860337	9.38558
18.4669	17.487	7.66	4.49	5.725	7.6721	11.6653	6.7723	2.1716	2.5955	1.909	1.824	1.006	1.103	9.556	3.242	0.571	2.499	0.707	12.829	10.852	11.1197	13.278	5.5518	13.3988	9.181	7.885	14.438	22.4129	20.9267	17.3864	3.7571	3.0534	8.8123		0.865921	7.986
18.586	16.805	8.03	5.766	4.399	8.8076	10.6475	5.3366	1.8967	0.9727	0.515	2.179	1.372	1.264	6.124	2.209	0.201	1.472	0.701	11.84	5.384	12.8556	8.064	2.5624	20.9415	19.076	6.457	17.989	12.8472	17.526	11.6708	2.9327	3.5101	11.3099		0.871506	7.38377
18.7052	17.944	6.82	7.822	4.346	5.6066	7.8152	3.7605	0.8819	1.093	0.011	0.027	1.139	1.439	4.266	3.328	1.172	2.412	3.17	12.148	4.958	12.3069	13.012	2.2867	12.526	14.548	7.606	18.868	17.4952	23.6253	14.5111	4.853	3.9189	8.7096		0.877095	7.40685
18.8243	20.775	4.289	5.136	3.916	1.3155	4.8615	1.9909	0.7169	0.759	0.136	0.531	1.243	1.946	2.967	1.92	0.416	1.749	0.434	10.182	6.446	9.4241	4.286	2.513	16.9257	11.892	10.77	18.81	20.1433	14.9711	19.3019	2.083	3.812	6.9082		0.88268	6.47182
18.9435	19.124	5.428	3.973	2.673	0.6036	2.2117	1.6524	0.5791	0.788	1.724	1.927	0.764	1.028	4.345	1.052	1.479	0.708	0.707	6.229	2.685	10.1177	8.476	1.3691	12.7143	16.378	7.173	18.257	17.3218	18.0267	17.1246	4.4352	3.0478	12.502		0.888269	6.26133
19.0626	15.565	5.972	4.07	4.011	2.3455	1.8324	2.1289	1.4794	1.5584	0.058	2.236	0.029	0.499	1.104	0.66	0.663	1.05	0.029	3.121	1.812	6.4854	11.435	2.5304	10.0226	17.906	9.816	20.698	16.6657	19.6263	19.0815	5.1528	4.4789	8.6143		0.893854	6.14353
19.1817	16.338	5.172	2.756	5.451	1.5647	3.883	0.4648	1.7743	0.0458	0.927	0.478	0.548	0.546	4.387	1.46	0.117	0.717	1.589	1.52	0.91	4.4911	8.703	2.878	7.631	16.44	8.629	17.228	15.5543	17.0236	21.1781	4.3951	4.7848	9.385		0.899439	5.72635
19.3009	14.156	4.436	2.115	1.757	1.2897	1.6434	1.2326	0.4456	0.8217	0	0.245	1.535	0.01	1.763	1.204	0.389	0.388	0.608	3.624	2.306	5.2696	7.478	0.0491	7.2009	19.471	11.003	21.232	20.3976	14.6103	15.0254	4.0557	2.347	9.2413		0.905028	5.37424
19.42	11.798	3.874	2.304	2.343	1.6337	1.1212	0.8599	0.1184	0.3523	0.042	0.728	0.039	0.003	0.941	0.983	0.601	0.835	0.01	2.708	2.059	6.6251	4.972	1.2917	6.0748	15.893	10.536	15.721	21.3591	12.0052	20.13	2.565	2.1827	11.4104		0.910613	4.97332
19.5392	9.365	3.597	2.587	1.565	2.3073	1.3307	0.9821	0.7074	0.4373	0.959	2.183	0.389	0.705	1.201	0.185	0.117	0.611	0.163	2.6	1.375	3.5307	4.156	0.5515	6.0149	20.999	13.819	20.295	21.3533	14.8941	18.1958	4.2172	3.9921	9.8535		0.916202	5.31027
19.6583	6.662	2.604	0.681	1.003	1.7744	0.5249	0.4454	0.2959	0.1237	0.204	0.418	1.045	0.015	1.19	0.707	0.366	0.498	0.341	1.762	0.787	2.3422	3.512	0.8375	4.4054	19.031	8.84	19.869	20.1795	13.5807	15.3613	6.3171	2.4177	11.7693		0.921787	4.54273
19.7775	8.69	1.529	0.651	1.012	0.2362	0.4822	1.0205	0.034	0.4386	0.93	0.012	0.56	0	0.831	0.941	2.151	0.491	0.714	1.882	1.188	2.4944	4.47	1.1725	0.7949	22.553	12.281	18.992	15.7643	11.9357	15.3899	4.0753	2.8945	13.0106		0.927376	4.53399
19.8966	7.101	1.362	1.322	1.279	0.0307	0.9106	1.5778	0.0185	0.2251	0.867	0.323	0.002	0.161	2.659	0.216	0.521	0.024	0.331	2.031	1.695	1.5418	2.831	0.6125	1.496	20.731	12.411	18.675	15.7896	11.1163	16.7068	5.7246	5.092	11.8144		0.932961	4.46057
20.0157	4.943	1.165	0.948	0.719	1.5258	1.3083	1.0841	0.9081	1.0421	0.007	0.01	0.068	0.005	0.43	0	0.492	1.036	0.116	0.335	0.324	2.4025	4.266	0.8685	1.0808	15.834	9.022	17.437	14.9594	14.6712	12.7515	4.3184	4.503	11.1273		0.938545	3.93055
20.1349	3.729	2.307	1.212	0.001	0.1468	0.2046	0.0273	0.7221	0.1706	0.0004706	0	0.545	0	0.0003672	0.5	0.867	0	0	1.404	0.604	2.6816	2.307	0.9853	1.2402	20.403	16.484	19.216	17.9715	14.848	16.8455	6.6483	4.7708	12.4984		0.944135	4.52548
20.254	4.41	1.944	1.86	0.399	0.815	0.0705	0.3794	0.0424	0.0708	0.572	0.352	0.008	0	0	0.508	0.527	0.496	0	0.149	0.052	1.7478	2.029	0.0247	0.963	15.496	15.757	18.472	16.5831	12.1699	14.6435	3.3928	3.8244	14.0232		0.949719	3.99338
20.3732	4.563	0.226	0.332	0.453	0.4394	1.0727	0.0096	0.6452	0.6976	0.35	0.018	0	0.0004625	0.325	0.019	0.026	0.004	0	0.005	1.802	0.0373	2.457	0.0155	1.7376	15.971	16.158	20.011	20.3502	7.5992	24.2325	4.7838	5.3242	7.8178		0.955309	4.16615
20.4923	4.216	0.203	1.411	1.206	0.1829	0.0222	0.4417	1.0689	0.0091	0.27	0	0	0.055	0.008	0.012	0.816	0.013	0.003	0.055	0.195	1.7043	2.485	1.2491	1.3669	17.23	17.237	23.869	16.1167	6.8779	21.7995	4.9533	3.6571	14.9928		0.960893	4.35535
20.6114	3.744	0.301	0.067	0.954	0.0024	0	1.1458	0.6401	0	0.012	0	0	0.441	0.218	0.267	0.179	0.587	0.219	0.268	0.968	0.0664	2.119	0.0202	0.5848	23.526	23.615	21.744	19.8868	9.3518	21.066	8.2126	6.2732	14.7861		0.966478	4.88682
20.7306	2.195	0.765	1.139	0.654	0.4819	0.0097	0.0216	0.0125	0	0.108	0.609	0.016	0.004	0.497	0.809	0.919	0.13	0.017	0.705	0.087	0.6549	1.281	0.3455	2.0769	19.081	17.83	18.445	17.2243	7.0913	15.254	13.2342	4.1107	12.159		0.972067	4.18083
20.8497	1.387	0.013	1.284	0.537	0.0183	0.704	0.3769	0.3782	0	0.861	0.002	0.373	0.063	0.396	0.351	0.266	0.33	0.541	0.027	0.604	0.0697	0.937	1.8397	1.142	19.054	18.696	22.205	18.4043	4.681	16.8218	14.315	7.9468	14.1467		0.977652	4.50822
20.9689	3.374	1.26	0.236	1.493	0.7717	0.0138	0.0204	0.0005	0.3158	0.018	0.104	0.008	1	0	0.015	0.32	0.443	0.111	0.002	0.052	0.0136	0.427	0.0245	0.2939	17.317	21.769	14.778	19.0454	3.7624	20.4224	13.7449	8.1828	9.8751		0.983241	4.21861
21.088	1.957	0.072	0.678	0.54	0.9462	0.5576	0.6231	0.0551	0.0149	0.055	0.007	0	1.037	0	0.722	0.016	0.216	0.026	0	0.003	0.4308	0.131	0.2266	0.5404	17.98	21.732	18.641	11.3505	4.9416	17.6975	15.8916	6.4842	11.1208		0.988826	4.08163
21.2071	1.322	1.783	1.418	0.715	0.4438	0.0037	0.6463	0.0031	0	0.0007732	0.561	0.031	0.232	0	0.436	0.373	0.17	1.399	0.016	0	1.0788	0.507	0.653	0.0341	19.574	19.028	12.791	11.4486	6.0082	20.2234	18.0256	10.1688	11.6013		0.994411	4.2635
21.3263	0.657	0.771	0.015	0.333	0.2758	0.0031	0	0.108	0	0.002	0.181	1.024	0.0007799	0	0.005	0	1.428e-08	0.019	0.639	0	0.356	0.439	0.0087	1.3326	23.175	19.528	13.597	9.1611	2.1455	18.4986	21.0031	4.6735	11.3352		1	3.91779

## Sheet: Image8
X0	Y0	Y1	Y2	Y3	Y4	Y5	Y6	Y7	Y8	Y9	Y10	Y11	Y12	Y13	Y14	Y15	Y16	Y17	Y18	Y19	Y20	Y21	Y22	Y23	Y24	Y25	Y26	Y27	Y28	Y29	Y30	Y31	Y32		Ap-basal	Avg intensity
0	22.328	25.004	23.489	31.2331	23.57	26.334	42.935	26.765	16.9095	11.7137	15.4577	15.397	13.991	22.27	14.1371	24.3049	14.1363	23.059	19.3886	16.4185	51.067	35.6541	33.688	40.02	32.211	35.328	27.803	67.434	45.1029	30.4899	34.2171	29.844	49.595		0	28.5241
0.1191	22.059	30.761	30.338	42.0433	32.395	35.657	47.635	29.632	19.8341	10.6409	16.7418	17.258	12.679	21.591	14.5955	24.7572	23.9822	28.195	16.3616	16.0308	55.579	35.7889	37.525	45.407	40.704	37.951	30.015	76.727	53.235	33.8184	37.2458	36.652	44.884		0.00689416	32.0824
0.2383	28.616	41.878	36.073	42.9895	33.454	37.197	57.82	39.92	28.2618	15.8052	14.5373	19.198	16.334	25.778	21.9428	27.4354	27.6119	31.93	16.229	19.8182	52.897	37.2626	42.462	44.115	35.539	42.337	38.221	75.448	54.5991	22.7354	38.6986	33.221	50.939		0.0137941	34.888
0.3574	32.986	40.53	35.651	52.9887	40.706	32.481	65.832	44.058	28.0692	15.0469	24.2059	21.043	27.611	36.872	27.215	32.8581	27.9921	36.541	22.7089	16.9524	66.895	39.9599	44.623	40.783	43.417	49.966	39.678	84.021	55.7988	26.6509	40.8657	31.711	57.607		0.0206883	38.9189
0.4766	39.414	49.102	42.918	65.0141	41.213	38.434	70.426	50.295	26.9874	16.5103	25.8285	24.9	32.447	37.801	32.4482	43.589	35.1724	38.718	23.7169	18.9953	78.916	32.6505	51.772	43.801	54.827	49.745	44.354	87.52	52.5248	33.5091	42.8828	38.662	61.921		0.0275882	43.2429
0.5957	57.771	66.836	47.726	74.8564	58.356	45.931	77.588	66.944	34.5627	12.3946	25.9614	29.601	32.406	48.448	42.5048	46.1854	40.8325	39.294	31.0781	20.9271	79.669	48.7738	50.373	41.767	62.083	61.19	56.255	83.898	52.9976	31.6887	45.0058	43.4	73.654		0.0344824	49.423
0.7148	63.792	79.889	70.378	75.2508	81.008	54.552	87.906	78.871	45.3787	20.5445	29.8729	42.656	47.513	64.334	51.793	55.5281	43.2988	46.334	36.1689	25.6873	83.026	58.3307	55.728	44.171	62.844	66.068	48.539	92.178	55.1591	34.9357	46.2714	43.974	89.625		0.0413765	57.0184
0.834	84.099	100.567	76.331	74.1139	86.158	65.129	89.866	88.901	45.362	23.4412	28.9142	46.586	59.178	90.576	54.4422	59.476	45.6769	52.535	32.2547	33.0535	89.794	72.6603	56.984	52.328	73.153	55.679	51.551	102.653	59.6572	33.8646	47.597	57.599	84.112		0.0482765	62.8574
0.9531	99.256	97.939	78.446	78.1532	104.533	78.253	103.341	92.369	38.369	26.9581	38.1912	55.144	82.275	103.374	50.1157	58.6886	61.7361	58.915	41.0822	36.8168	108.895	72.9206	69.315	58.466	81.267	57.253	58.737	94.574	76.565	35.6089	56.3125	55.497	79.509		0.0551706	69.3599
1.0723	101.268	129.256	90.042	76.3945	127.936	91.891	107.267	83.284	48.4964	34.7727	45.0141	75.925	99.494	113.955	54.8445	59.2841	60.5509	65.093	45.3352	42.6327	104.88	83.1185	84.652	66.82	88.904	66.554	61.057	95.317	81.8291	36.9731	60.5184	59.853	90.206		0.0620706	76.7702
1.1914	106.832	163.104	107.17	74.7063	151.256	94.775	116.637	101.4	56.3785	32.4608	43.9264	90.165	108.988	106.644	55.6995	66.0696	64.3465	67.101	49.9025	53.9509	100.151	88.7751	96.074	77.697	96.546	57.947	62.789	90.479	73.0884	36.5076	59.4148	65.291	87.871		0.0689647	81.9438
1.3106	114.668	173.813	110.584	74.8541	155.309	105.276	112.503	97.501	49.7216	25.2512	41.0447	97.161	134.599	113.205	47.0382	66.7591	72.4066	80.103	48.4159	68.6957	106.792	90.587	102.937	66.973	90.708	69.63	62.958	105.567	71.5101	38.3818	65.7741	68.908	94.945		0.0758647	85.5933
1.4297	113.057	175.295	101.104	83.4266	156.639	117.496	116.31	108.065	46.7618	30.4759	47.1768	96.839	140.666	127.76	42.4194	72.7842	72.1135	101.544	63.5012	75.3014	103.299	88.128	112.142	66.418	103.596	84.553	70.996	89.183	65.1382	42.886	64.8883	71.883	90.973		0.0827588	89.1763
1.5488	99.395	175.277	113.805	75.151	150.287	126.135	122.564	101.627	54.0915	30.4006	41.4135	105.83	152.709	131.212	43.2593	78.1497	80.252	93.536	64.0177	80.458	94.42	96.1794	114.138	69.1	108.561	79.773	67.571	86.549	55.5329	53.7747	68.892	73.633	83.026		0.089653	90.0218
1.668	102.794	173.034	128.094	69.2697	150.27	131.391	124.433	93.09	46.5647	26.8806	42.7924	103.674	148.708	145.537	43.4211	76.0517	81.9558	99.502	62.7327	74.3922	93.197	88.7264	117.658	85.525	99.686	80.377	81.605	88.395	57.1377	54.7794	64.8411	79.882	93.198		0.0965529	91.1999
1.7871	94.334	168.284	111.65	75.734	153.076	126.186	123.139	97.498	39.1335	30.2311	42.7288	102.026	162.819	129.398	39.0922	70.7414	90.0824	92.673	63.3905	78.4059	84.869	79.5731	134.463	86.024	100.209	87.543	82.925	95.525	55.3199	53.1085	69.3873	78.4	93.401		0.103447	90.6476
1.9063	81.289	155.42	117.652	72.1343	141.135	128.027	125.064	99.779	36.6891	24.4846	40.2536	91.743	153.54	117.103	45.0051	67.8867	87.5692	98.392	65.4968	79.9265	74.723	76.0992	130.61	92.374	93.491	98.344	82.619	90.413	61.8818	54.4772	72.0035	77.403	85.928		0.110347	88.4532
2.0254	72.984	150.507	108.337	66.441	142.072	119.51	121.411	105.406	33.6228	21.1651	41.0144	91.595	132.607	116.2	42.7404	77.7282	94.8213	103.969	55.5752	75.9986	74.037	64.1652	126.584	88.532	107.66	91.51	91.781	94.652	65.3676	58.6949	76.602	68.556	96.808		0.117241	87.232
2.1445	72.969	154.114	91.344	59.57	137.605	116.69	114.52	90.122	38.07	19.8156	39.5232	107.789	141.669	128.413	39.5731	80.647	90.7489	114.235	55.7864	80.4902	71.444	60.7574	137.894	112.771	110.591	85.281	84.291	89.49	54.0073	53.1072	76.0192	78.61	108.069		0.124135	87.7584
2.2637	76.51	147.506	82.47	43.8189	139.036	104.605	126.428	78.867	34.5556	17.2124	33.1853	92.167	149.534	122.399	44.7368	75.604	91.7209	97.197	61.5755	69.7251	66.306	55.8735	157.932	127.956	106.795	113.633	88.879	90.458	53.7093	56.8054	87.4708	74.465	104.899		0.131035	87.092
2.3828	70.73	155.061	75.76	41.2137	138.096	115.057	105.905	72.08	25.5452	9.929	36.3706	81.147	137.338	124.542	47.6166	76.0229	90.3987	93.027	59.0219	67.7994	65.326	48.9922	153.469	126.684	116.108	139.038	91.497	97.194	46.1607	52.4305	94.3191	72.902	112.845		0.137929	86.0493
2.502	65.169	154.413	72.288	51.9328	136.44	94.122	110.931	65.322	33.6411	13.3518	34.7759	61.245	127.71	121.249	41.5092	80.2346	88.482	98.114	48.2219	70.3897	51.066	51.3427	154.906	131.488	110.697	152.052	88.498	88.636	44.1273	44.6242	95.6056	69.21	106.03		0.144829	83.5704
2.6211	59.402	150.49	67.757	43.1757	140.799	84.636	107.433	54.797	34.9788	9.8906	30.1082	68.012	129.514	100.055	41.6501	74.9116	78.3598	94.642	37.3146	75.1382	53.124	57.8655	148.323	137.484	125.469	161.538	94.133	83.643	37.3365	40.9182	94.651	80.957	101.845		0.151724	81.8288
2.7402	52.914	153.732	69.367	44.6248	125.218	80.295	116.878	51.282	26.0486	13.367	23.227	57.72	123.052	100.363	39.85	73.2059	82.0771	90.304	38.6119	75.6479	48.785	58.7342	138.411	137.406	112.234	174.342	91.323	74.754	36.4023	43.2636	86.2719	81.34	92.216		0.158618	79.1899
2.8594	48.329	159.26	52.954	41.1625	108.926	73.695	109.787	51.594	28.7455	11.7043	19.0832	50.184	114.397	101.301	41.3804	72.7443	87.7924	89.66	41.1141	70.2413	54.599	55.0609	143.217	137.896	127.423	176.443	97.554	68.425	33.2611	33.5301	78.4422	95.43	89.231		0.165518	77.7142
2.9785	55.417	161.703	47.731	35.5901	103.832	79.098	110.517	48.037	26.3138	10.0503	17.3496	49.557	119.088	94.395	33.8506	65.8175	85.8363	90.075	44.0899	69.4776	51.659	52.7614	151.227	131.899	134.459	179.369	109.001	77.384	32.3227	37.353	84.7832	93.403	92.935		0.172412	78.0722
3.0977	47.235	159.635	43.564	34.1439	82.561	78.776	107.617	47.213	23.0851	12.0599	20.4143	48.545	120.647	96.618	31.0327	63.7283	84.3047	83.157	40.7335	64.9879	50.584	46.8186	158.371	132.911	117.784	174.041	108.731	62.028	26.742	32.638	91.5304	97.485	90.18		0.179312	75.1486
3.2168	40.665	147.384	39.799	25.6584	69.111	72.417	106.362	55.011	29.0752	10.0477	12.9213	44.523	129.978	89.893	29.4759	69.4406	84.0659	68.064	40.0449	62.5498	46.936	56.5035	153.408	126.59	119.938	172.951	118.879	73.895	24.4923	27.2483	73.8211	93.916	86.863		0.186206	72.7857
3.336	40.423	143.69	41.028	25.7508	57.284	64.543	88.52	44.537	27.833	7.9669	13.0962	38.263	128.034	76.387	23.919	66.5453	82.3022	68.581	33.6662	59.977	45.774	47.0905	137.627	120.068	114.72	173.649	109.647	60.653	25.0994	26.9983	72.8068	88.399	81.171		0.193106	67.7591
3.4551	48.251	143.609	39.567	29.9732	50.161	56.189	83.014	35.793	19.2432	6.5901	15.3407	33.216	134.505	74.677	25.1145	61.0836	70.2935	67.762	32.6828	61.9628	47.697	53.7223	138.545	110.097	120.09	165.785	103.505	58.769	28.3907	30.0375	76.3873	86.786	78.044		0.2	66.2692
3.5742	42.846	123.502	45.164	32.0055	41.853	58.761	88.267	33.571	21.5548	8.1284	17.6354	26.771	127.779	73.273	24.3367	52.2349	56.912	56.978	23.7328	56.1101	42.892	50.0105	144.062	128.966	114.994	159.847	86.871	51.596	23.1843	27.8104	70.9633	100.498	79.708		0.206894	63.4187
3.6934	34.187	110.902	39.095	26.7833	30.717	56.742	92.404	37.484	17.6823	6.6608	12.4599	28.643	128.766	66.153	18.9704	49.1256	51.06	56.636	24.1405	52.6731	45.929	51.4547	138.786	129.618	113.877	156.505	95.16	55.118	23.8873	23.0202	59.1637	98.034	80.079		0.213794	60.9672
3.8125	37.066	103.85	41.715	29.2818	27.972	52.222	83.125	35.932	16.0778	8.2744	10.9804	20.946	101.166	62.697	19.2441	50.6526	47.1547	45.647	25.5837	59.7161	44.828	48.7228	124.615	131.303	118.1	133.014	86.455	54.5	30.7069	23.154	49.9843	98.093	74.653		0.220688	57.498
3.9317	41.29	91.329	40.466	28.0656	30.693	41.212	71.722	33.199	17.7123	8.058	8.051	16.556	94.321	65.345	20.413	48.0077	36.7214	45.734	20.2336	67.1208	39.875	53.2984	107.615	120.218	114.413	125.339	82.06	51.934	26.1482	26.6426	56.9204	103.259	67.236		0.227588	54.5821
4.0508	35.354	77.875	38.392	24.4536	21.402	34.932	68.066	32.467	20.3328	6.4599	10.992	15.249	85.035	56.375	16.3971	34.2558	41.4139	36.604	20.3524	60.5018	30.403	41.5913	105.804	106.24	109.41	106.507	79.82	46.971	33.6622	19.9405	45.57	101.34	55.852		0.234482	49.0916
4.1699	29.359	69.248	30.631	25.6203	18.634	33.34	74.688	31.218	15.8542	6.0559	9.4819	9.707	74.653	48.371	14.8955	34.1757	30.4922	26.769	22.0585	53.101	29.642	41.8164	92.257	98.604	101.731	84.559	70.682	43.754	29.8903	22.8326	46.9668	106.063	57.085		0.241377	44.9769
4.2891	29.168	60.496	25.732	22.7086	21.059	31.865	60.056	29.959	13.4889	8.9311	9.5711	11.35	70.14	45.362	13.8214	34.6564	23.205	31.327	18.9048	59.6129	27.029	35.7116	92.148	111.674	87.804	82.501	64.245	42.878	27.9189	27.9211	42.1553	96.592	49.835		0.248276	42.722
4.4082	21.53	42.336	27.315	19.3303	20.616	32.582	49.271	25.384	12.4759	6.601	8.5779	9.588	60.56	42.82	13.4949	25.5796	19.9861	27.269	16.3412	43.8008	25.852	33.3259	85.679	126.26	88.574	61.611	53.655	37.949	27.6226	27.4984	36.4767	101.998	49.273		0.255171	38.8253
4.5274	22.787	32.416	21.56	21.0934	23.513	25.498	57.995	26.002	10.0164	7.2176	8.3168	9.319	57.1	36.918	11.348	25.4697	16.9022	26.565	17.5746	45.6248	23.522	32.1759	85.746	110.441	85.558	50.348	45.102	42.24	29.9113	35.4265	38.9347	98.272	42.446		0.262071	37.0715
4.6465	26.537	29.765	14.866	17.8158	21.561	23.432	64.289	24.015	8.1727	4.4391	9.9237	9.303	41.632	36.421	12.8346	25.284	21.8723	24.497	19.1982	44.6905	21.048	27.9018	80.408	106.424	73.493	43.012	40.654	47.786	25.8311	35.5615	39.3551	94.068	43.981		0.268965	35.1537
4.7657	23.341	25.643	22.326	19.0319	21.536	25.199	47.408	19.592	7.2812	5.2208	12.0533	10.227	31.646	23.791	12.3067	24.057	21.0433	23.292	15.37	43.1938	16.847	22.654	80.507	115.179	60.504	36.251	38.875	48.412	21.063	25.6689	36.4786	90.452	38.387		0.275865	32.2678
4.8848	20.606	24.501	22.495	21.1586	17.938	19.785	41.53	17.653	9.1264	5.054	10.4748	9.814	26.69	21.065	10.6665	24.5519	21.5997	16.703	18.2407	42.4895	16.823	18.8105	73.119	108.834	56.588	27.379	29.069	46.759	25.8044	22.3951	35.9822	92.909	34.331		0.282759	30.0286
5.0039	16.203	21.375	16.039	20.7389	17.772	21.665	33.647	17.869	10.2496	5.7834	10.7361	9.118	21.653	16.222	8.8521	26.1694	27.3919	16.037	13.8522	35.7942	15.973	19.7366	71.266	106.619	60.01	24.36	31.478	44.19	21.0134	22.9527	33.719	81.225	37.23		0.289653	28.3921
5.1231	18.508	15.728	18.891	17.3091	18.374	20.207	32.633	16.842	11.2689	5.6194	6.6201	7.563	27.124	16.847	11.3962	21.2647	24.9653	19.993	12.1197	36.5029	15.722	29.2612	74.977	95.231	58.869	22.538	27.307	46.655	23.1869	24.6898	28.7915	76.482	32.461		0.296553	27.756
5.2422	15.876	15.454	19.009	14.9902	18.839	19.453	36.652	14.864	13.5759	4.6431	5.6931	9.365	26.97	11.407	10.3086	16.4728	28.2649	19.44	16.6576	29.3411	15.213	22.4206	73.536	93.734	59.58	26.861	30.139	36.558	24.5167	31.1857	31.1979	71.765	37.211		0.303447	27.3089
5.3614	17.815	18.597	11.122	13.7421	15.377	17.399	29.554	14.057	11.1018	5.2676	5.5095	15.543	21.31	14.023	10.5754	17.6748	34.0139	13.111	15.5262	28.0773	11.285	27.8023	65.878	95.502	57.794	22.776	32.857	35.899	23.7942	35.7839	32.4643	84.857	32.512		0.310347	26.9273
5.4805	19.409	15.537	15.018	12.8505	12.521	18.197	32.405	13.251	11.7073	5.4471	7.3739	12.962	21.424	12.045	11	17.2728	27.9881	14.037	16.2312	30.1552	11.516	26.7477	72.69	90.219	58.896	18.488	29.377	30.093	21.1685	26.5452	32.609	71.707	24.458		0.317241	25.4953
5.5996	17.878	12.132	20.578	12.0699	19.032	17.664	26.515	12.878	13.9533	6.1401	6.5616	10.534	18.81	9.702	10.0422	20.8573	33.801	16.892	15.8097	32.2253	12.919	20.8329	56.174	83.389	56.043	20.464	28.338	29.691	20.5343	24.7018	32.9689	77.132	25.311		0.324135	24.9265
5.7188	21.711	13.868	15.44	13.9134	22.147	16.551	25.169	15.11	13.4059	6.5228	6.9949	10.462	17.057	9.769	7.3036	21.5706	33.6654	13.594	13.5447	22.9211	14.448	20.2257	53.492	73.245	52.283	27.561	27.227	30.733	19.3779	28.1025	34.4579	74.093	25.167		0.331035	24.2768
5.8379	17.887	17.124	19.717	15.8144	16.54	14.283	22.807	13.717	9.2317	4.6536	8.868	9.401	14.089	9.237	8.8704	22.366	26.7783	13.923	13.9546	23.7856	10.84	18.4463	56.056	84.234	51.591	22.771	30.108	27.149	19.8764	27.9603	36.1436	72.129	33.868		0.337929	24.0673
5.9571	17.018	18.102	24.603	12.3294	13.356	15.412	18.771	15.295	8.5348	5.975	10.0856	11.196	16.517	11.103	9.1069	21.2645	28.7045	14.42	10.4778	26.1454	7.867	19.4924	50.384	72.396	47.121	23.161	32.85	25.69	16.0388	31.4409	32.172	61.366	29.74		0.344829	22.9738
6.0762	15.814	13.687	21.86	8.217	20.15	14.751	15.269	14.468	9.9749	6.5006	7.6407	16.354	15.415	10.054	10.9767	25.4017	22.5504	16.295	9.4718	24.4302	7.638	16.9028	53.675	68.551	48.959	20.289	31.316	26.764	21.8871	27.2389	36.883	62.549	30.153		0.351724	22.7905
6.1953	14.822	13.801	19.377	9.6954	14.074	12.692	15.528	12.114	11.0634	9.2631	8.7107	16.702	14.219	6.165	10.7077	17.0726	21.6758	16.997	7.7985	24.3659	10.574	11.6902	48.396	64.379	38.166	22.114	28.998	30.053	16.2902	26.7009	44.1453	52.609	32.519		0.358618	21.3175
6.3145	12.167	19.063	19.085	14.9466	14.251	9.317	17.023	15.324	12.649	6.9302	6.1212	17.826	11.671	7.946	8.1833	18.0335	24.0179	14.287	12.6532	20.6187	12.27	17.5858	50.619	59.382	32.556	20.159	34.407	22.966	21.0675	31.2538	40.4201	50.042	32.969		0.365518	21.4488
6.4336	12.867	18.563	16.31	13.3226	13.013	10.688	19.074	18.557	10.4424	6.2547	7.3121	15.959	11.924	8.374	9.3194	11.3708	16.2486	15.275	8.8532	20.0704	11.389	16.4109	34.619	56.86	32.888	23.499	31.286	21.121	19.7217	29.2879	34.4065	45.644	22.546		0.372412	19.4993
6.5528	10.531	17.565	14.229	12.9993	11.16	17.754	16.937	16.742	9.5494	4.6018	6.8279	9.079	15.212	9.072	10.619	11.3038	17.9257	15.703	9.5045	14.8172	11.057	15.9497	34.757	51.933	26.05	21.341	27.074	22.894	20.052	22.9949	29.8401	52.061	24.517		0.379312	18.5653
6.6719	11.148	21.076	13.896	12.1807	11.963	16.253	17.468	16.993	11.2165	5.2891	7.5678	12.746	11.494	9.995	13.9235	13.8121	15.6548	14.55	8.6815	12.9739	12.215	16.7565	39.604	55.415	27.627	22.644	25.649	30.521	26.1296	24.544	24.5904	44.774	23.076		0.386206	19.1645
6.7911	10.507	17.141	12.248	14.6082	10.657	11.876	19.714	15.058	10.7146	2.8879	9.3998	17.302	12.704	6.417	10.6982	17.3392	15.0678	15.214	6.8189	14.4858	11.333	15.7462	32.016	45.996	22.403	27.193	20.399	26.025	24.3222	24.2029	26.7183	39.271	25.606		0.393106	17.9421
6.9102	7.558	16.526	15.716	15.1054	10.741	14.279	17.554	17.879	12.3358	5.9458	9.3299	13.509	12.362	9.657	10.4424	13.9492	14.1731	15.202	7.6448	13.9253	10.011	14.4059	29.573	35.274	21.143	23.649	23.573	23.183	17.6355	22.589	33.8437	32.66	20.875		0.4	17.0379
7.0293	7.017	12.899	12.275	16.2063	13.675	15.032	17.605	15.747	11.7396	5.4997	4.7124	6.277	13.781	8.795	9.0213	14.496	14.0104	11.628	9.2919	11.9651	13.962	13.2337	29.698	29.972	22.376	23.114	27.75	23.428	23.4449	24.826	33.2289	31.66	15.449		0.406894	16.4793
7.1485	5.593	19.957	10.641	15.6421	12.859	17.924	20.179	17.184	9.923	5.6043	5.5474	7.947	14.94	11.059	9.6093	12.3033	12.4912	15.11	7.2759	9.3933	13.82	15.7523	25.542	30.572	23.124	19.678	22.594	25.174	28.3015	19.6957	31.7537	24.633	17.593		0.413794	16.3459
7.2676	7.064	18.872	10.456	16.5894	11.625	14.179	21.835	14.905	10.92	5.5462	5.7724	6.203	10.136	7.658	10.1906	11.2248	9.3878	11.299	8.5495	8.1613	9.39	14.5293	22.333	36.807	20.126	16.93	27.2	24.626	26.1048	23.4632	24.9091	27.613	16.144		0.420688	15.4773
7.3868	5.583	16.241	15.651	15.6722	10.463	12.222	25.337	15.976	11.3827	5.4693	6.3647	8.143	10.226	10.36	11.2474	10.1041	9.4237	15.105	7.1571	12.0915	11.789	13.7611	20.981	33.034	13.925	19.354	20.497	23.533	27.5973	22.4268	24.0127	25.333	16.7		0.427588	15.3686
7.5059	5.068	15.893	15.157	18.8599	12.418	13.317	23.323	13.958	10.9403	4.9789	3.9585	8.276	14.174	9.892	9.3871	10.2414	9.9066	11.876	7.8902	7.6811	8.66	11.116	19.828	30.265	12.121	18.905	19.153	25.422	28.3832	25.4687	27.2202	26.131	21.232		0.434482	15.1849
7.625	8.13	15.424	12.495	12.4167	13.512	8.71	21.761	16.195	11.3537	5.4302	4.9588	6.795	10.442	7.364	10.4222	10.1511	11.0627	8.727	9.5068	11.0252	10.076	12.7006	22.179	22.675	9.604	17.024	20.211	25.995	30.2945	19.0067	25.6471	22.188	25.3		0.441377	14.5086
7.7442	5.768	11.951	14.248	13.6271	7.8	10.656	17.562	11.961	9.1536	5.0865	5.9875	8.51	11.634	5.496	10.7831	6.9074	11.1701	13.734	8.5307	9.9613	8.26	12.7029	13.821	21.307	15.445	16.432	21.09	19.962	23.7749	16.5038	21.8021	23.48	23.14		0.448276	13.2802
7.8633	7.22	13.37	13.273	13.3149	9.807	14.071	16.164	16.774	7.6912	4.1679	3.5498	6.566	8.292	5.657	13.7931	6.659	8.173	10.084	7.0306	9.228	6.875	11.2927	13.967	18.181	16.747	16.473	12.287	15.08	19.8529	17.4848	27.0757	17.858	23.137		0.455171	12.4605
7.9825	7.48	14.722	14.629	10.1571	13.299	7.387	22.045	15.072	7.5384	5.0127	6.185	5.47	11.284	8.807	10.2458	9.4972	10.1426	10.157	7.3396	11.2318	6.73	12.1039	18.538	17.913	13.493	14.478	16.91	15.208	21.9504	12.0351	21.9267	18.33	21.287		0.462071	12.685
8.1016	3.86	17.582	14.117	13.3932	11.233	11.103	20.555	14.289	9.5203	4.6541	4.4268	4.534	10.368	9.194	8.0778	6.3293	8.6885	8.322	10.6917	10.1406	9.299	9.5688	18.51	17.318	13.031	14.131	16.701	12.467	15.8747	15.063	23.9184	18.659	19.814		0.468965	12.2859
8.2207	4.731	16.627	13.837	13.7411	11.871	11.26	19.207	15.449	7.5407	3.2435	5.5733	8.501	10.217	5.055	7.863	8.6777	7.6185	9.79	7.1204	7.6449	7.728	10.7106	13.896	16.117	13.346	10.522	12.954	16.406	16.5842	14.5464	23.3937	15.494	15.496		0.475859	11.5988
8.3399	9.044	15.01	15.898	11.2837	9.201	9.376	16.406	16.673	6.7005	3.2981	4.3611	8.841	8.047	10.18	7.3778	9.001	9.071	11.113	5.2639	9.1862	6.075	9.0859	15.098	15.361	16.6	10.32	14.172	13.73	14.5742	13.1852	24.8107	17.659	14.621		0.482759	11.5341
8.459	5.943	17.882	14.255	13.8723	11.046	8.192	15.792	20.377	5.4904	3.291	4.2924	10.682	6.335	8.643	11.0978	7.393	9.4956	7.51	7.1161	8.1286	7.986	10.4511	21.819	16.39	11.841	11.268	18.065	14.848	16.0229	13.6963	23.926	19.392	11.455		0.489653	11.9392
8.5782	4.013	14.422	13.953	15.185	9.895	7.04	9.002	15.643	4.1827	3.3052	6.5188	5.297	8.512	9.199	9.573	6.3952	9.4817	6.317	8.8088	6.1608	6.78	9.2904	15.772	14.921	14.466	9.944	16.584	17.569	12.4234	12.061	26.3295	14.187	9.307		0.496553	10.683
8.6973	6.9	15.133	12.684	11.6878	9.71	8.045	10.279	14.012	6.3547	3.3385	5.7434	3.654	10.313	9.444	8.1625	8.1636	9.6453	7.018	8.5355	7.2107	6.444	8.3798	16.903	16.777	11.929	13.048	20.971	19.62	10.4396	7.9032	21.3735	16.471	10.771		0.503447	10.8201
8.8165	5.889	14.781	16.07	14.9456	9.166	9.026	10.651	18.976	3.8001	2.134	3.9249	4.543	10.386	6.648	8.0324	9.4185	8.0728	6.828	4.3196	6.0032	8.695	7.4901	12.992	15.893	8.781	9.867	19.687	18.664	11.8481	12.9224	16.2804	16.935	9.846		0.510347	10.4096
8.9356	4.654	15.301	18.687	14.9856	8.911	8.635	11.478	15.532	7.8541	0.9885	2.6999	6.522	6.865	7.074	5.785	10.0536	10.6394	9.587	6.778	6.6898	7.428	10.7798	14.279	16.48	10.209	7.089	18.326	14.359	7.8011	15.1623	16.1177	14.64	8.19		0.517241	10.3206
9.0547	4.832	15.052	17.692	12.4352	6.794	7.513	14.326	18.018	8.4211	1.6632	1.8199	6.031	7.661	10.493	6.8651	9.9215	10.0181	10.089	6.1326	5.3146	5.808	10.6183	15.682	15.425	8.3	8.677	17.678	15.329	8.6372	14.183	14.7568	15.236	7.618		0.524135	10.274
9.1739	6.811	20.238	20.406	8.022	10.748	9.731	16.326	20.295	4.6026	1.8099	3.2799	6.949	9.012	8.854	7.0075	8.6016	11.4009	8.225	8.5573	3.9432	6.358	9.0594	16.335	20.334	8.281	10.968	18.489	14.061	9.5021	9.9581	16.1147	13.664	5.587		0.531035	10.7131
9.293	5.178	11.244	16.839	11.2411	12.213	9.382	12.918	16.421	3.0383	2.5991	3.1837	5.277	8.198	8.432	8.2545	7.9046	8.8955	5.654	8.2275	4.4877	6.392	13.6031	12.623	16.992	10.647	7.498	18.117	14.597	8.9544	8.2984	14.7457	11.756	6.77		0.537929	9.71459
9.4122	4.715	14.877	16.38	12.4741	14.365	12.689	9.722	16.902	4.7732	1.4859	6.0793	6.108	5.718	7.792	4.5679	8.8713	7.0514	6.17	7.714	2.8882	4.554	10.1122	8.473	13.852	7.533	7.526	16.896	14.124	9.0806	13.335	16.0325	12.707	7.543		0.544829	9.48823
9.5313	3.374	14.768	11.38	13.5951	13.904	7.118	9.485	15.447	5.1371	2.4145	2.1201	4.248	7.693	8.94	6.0788	8.8475	7.0211	6.594	5.5197	2.9996	5.931	9.4808	10.054	17.003	7.869	7.397	13.17	12.675	5.9315	15.6198	12.5391	14.531	9.659		0.551724	9.04681
9.6504	3.647	13.664	10.829	9.4836	14.492	9.401	7.841	14.255	5.5028	1.5163	2.3606	3.839	9.308	9.232	5.8477	6.4172	7.1981	8.624	6.6762	6.297	7.319	6.9412	17.192	18.223	8.441	5.896	16.882	13.362	8.3109	8.0997	17.4758	11.748	8.357		0.558618	9.2327
9.7696	6.091	15.791	11.664	9.3071	17.422	10.932	12.851	11.649	5.8497	1.3551	3.4423	5.087	5.343	6.708	6.4288	5.5305	6.2268	5.952	5.6952	2.985	5.787	6.6904	11.021	15.246	7.783	5.857	16.305	13.606	9.5301	5.9797	14.2576	11.53	6.795		0.565518	8.68783
9.8887	4.502	19.723	11.743	9.7037	11.884	9.114	12.697	18.153	5.194	1.3653	3.2808	4.945	8.379	5.309	5.9813	7.8251	6.8419	8.376	6.3154	4.3468	7.395	7.5979	12.872	16.244	6.771	6.047	11.081	14.25	10.5235	9.9319	13.4911	9.723	8.686		0.572412	9.09978
10.0079	1.903	15.43	13.228	11.3784	13.917	9.942	14.86	20.244	4.8028	1.1809	2.9509	5.887	9.057	7.302	7.1633	9.9241	7.4171	7.828	7.3943	5.4294	6.003	11.0579	13.82	12.448	6.728	8.098	15.071	12.694	7.1757	6.9181	11.4573	7.818	8.387		0.579312	9.23985
10.127	5.456	16.384	15.934	9.2431	14.5	12.199	12.811	15.204	3.1159	0.7996	2.136	3.018	9.403	7.085	5.0418	8.5132	5.5464	8.023	2.4269	4.9609	4.207	9.8506	7.327	11.12	12.123	5.295	15.058	11.588	8.7876	7.7059	9.2357	10.809	7.486		0.586206	8.55738
10.2462	4.161	17.989	11.555	10.5668	15.598	9.511	9.915	16.042	3.6966	1.2258	2.4104	6.088	8.594	6.776	3.8258	7.6352	9.1446	7.196	3.0448	4.9245	4.499	9.2389	10.536	7.249	10.55	4.683	12.819	15.989	13.6151	5.6569	8.9008	10.479	7.582		0.593106	8.53628
10.3653	5.438	16.079	10.298	13.8823	18.839	8.943	10.105	15.597	3.0432	0.1912	1.4644	10.362	8.412	7.513	6.3648	10.5166	6.0115	11.324	4.65	5.6508	6.21	6.3494	11.089	8.431	5.638	3.9	10.671	12.289	10.657	3.0763	7.9794	10.974	7.868		0.6	8.4793
10.4844	5.044	18.113	9.572	12.3711	16.103	8.158	8.275	13.919	3.9923	0.923	3.2449	4.109	9.342	6.307	4.8235	6.5609	5.0565	5.919	4.3405	3.7916	5.241	7.2173	9.715	12.474	4.283	6.696	11.738	13.74	15.2984	6.7508	8.1398	8.924	9.027		0.606894	8.15787
10.6036	4.308	19.859	11.744	13.5793	12.894	7.542	8.491	17.013	5.0472	1.8772	3.6537	4.309	7.462	9.222	5.0247	6.8843	5.6514	7.286	3.8595	5.3335	5.383	7.537	9.248	8.321	2.603	5.961	10.478	12.691	10.0511	8.6989	8.2546	9.631	6.839		0.613794	8.08295
10.7227	7.772	19.691	12.352	12.9196	10.484	10.861	6.471	16.196	3.2025	0.4705	3.0823	3.204	9.489	9.431	4.5683	7.9325	4.5446	9.519	4.1859	6.9797	4.988	8.4292	11.85	12.496	6.031	5.983	13.679	13.881	10.8098	8.6629	9.9263	11.447	7.164		0.620688	8.74858
10.8419	4.533	14.916	12.594	14.8338	12.135	11.207	9.042	16.52	1.5504	1.656	1.8012	2.283	6.846	7.762	8.1571	7.8818	5.0223	7.748	4.0074	4.6125	6.322	7.2184	11.778	13.564	6.719	6.228	10.37	9.935	11.2564	9.5188	8.0421	15.02	8.035		0.627588	8.45804
10.961	4.311	12.894	12.096	13.7769	13.787	9.703	9.716	12.527	2.9814	1.2182	0.855	4.249	5.957	5.619	5.4017	6.8901	7.9905	8.605	2.969	5.7568	7.252	6.9913	7.605	13.512	3.852	4.205	11.753	12.002	12.2443	9.5389	7.1649	15.46	11.092		0.634482	8.18109
11.0801	4.674	16.309	10.161	16.4827	11.246	9.419	10.287	12.485	2.7668	1.4259	0.415	2.863	4.212	7.576	4.8804	6.5904	4.6122	7.58	3.0639	5.5698	4.136	6.5266	8.257	9.5	2.428	6.271	9.93	9.441	10.2514	8.0113	11.2691	13.677	12.09		0.641377	7.70932
11.1993	4.679	15.889	13.953	13.6924	11.506	9.351	11.731	13.486	2.8131	1.2143	1.2133	4.597	4.947	5.135	4.4567	6.6622	6.1126	5.602	4.0826	3.3019	5.746	7.4736	8.605	10.563	3.206	4.383	7.538	8.845	11.3518	6.4623	8.227	9.537	7.03		0.648276	7.37554
11.3184	5.462	16.174	9.64	9.5992	11.284	10.462	11.082	14.307	2.9378	1.0643	1.7698	5.444	7.095	4.243	2.3053	4.2074	5.8305	9.017	1.7542	3.7299	2.755	5.7839	5.407	9.93	4.504	4.051	7.141	11.235	10.2742	6.0086	7.4453	11.949	4.906		0.655171	6.93328
11.4376	6.696	11.495	9.814	10.6488	8.779	15.118	10.011	12.258	4.8653	0.6495	1.5957	5.064	6.04	4.142	3.2111	5.0664	3.9275	6.979	4.1248	4.582	3.911	6.7906	7.364	9.647	5.016	4.883	8.896	9.756	12.0461	5.5425	10.8748	10.812	5.072		0.662071	7.14176
11.5567	5.6	14.852	8.722	12.7251	6.873	10.063	9.136	11.507	2.0027	0.9574	1.1126	4.103	5.17	4.678	3.4735	5.1526	7.7992	6.491	2.5106	3.2481	5.414	6.718	10.375	7.539	6.393	6.816	7.873	9.975	12.4068	4.3352	8.6635	9.039	7.296		0.668965	6.94001
11.6758	7.153	14.832	10.198	12.0597	7.755	10.767	9.979	13.2	2.8712	1.1607	2.3214	5.312	4.782	6.724	3.7619	3.9404	5.6507	6.869	4.4139	3.9835	2.82	4.4784	10.475	10.394	5.261	6.444	10.433	11.319	11.5982	5.7489	5.8605	7.041	8.386		0.675859	7.21192
11.795	5.907	12.775	8.568	12.4229	6.752	7.524	14.928	11.865	4.2979	0.7568	1.7706	4.54	6.299	8.373	5.175	4.5167	7.6	4.062	5.0714	3.874	3.607	4.961	11.386	10.439	3.674	5.239	11.044	9.506	12.5425	4.6893	9.4823	7.548	7.534		0.682759	7.23425
11.9141	6.517	14.505	8.205	12.9107	9.933	13.848	11.087	12.236	2.9754	0.3875	1.6394	3.487	5.896	7.702	3.7358	3.3039	6.7209	4.501	2.3298	2.7776	3.561	7.3046	8.917	8.924	3.886	4.499	8.132	6.955	9.365	6.6409	9.3137	8.026	6.255		0.689653	6.86295
12.0333	6.601	15.019	7.034	12.4723	8.391	8.564	12.912	15.453	4.7438	0.4882	0.1172	3.472	10.294	5.071	5.1101	3.851	6.0476	3.862	3.6726	2.747	2.476	6.6175	6.442	11.226	3.726	5.773	8.118	7.434	7.0255	5.6931	8.3066	4.382	6.551		0.696553	6.65738
12.1524	7.443	15.133	9.122	9.8587	6.618	7.469	9.872	11.186	3.3011	1.0469	1.3632	2.301	7.61	7.147	3.2315	6.6926	6.0944	6.906	4.3483	2.5501	3.118	4.5154	7.194	8.09	3.193	5.855	9.377	5.514	9.6975	4.4131	8.9307	6.994	5.92		0.703447	6.42744
12.2716	6.181	12.314	11.345	9.2875	5.073	8.492	9.291	9.116	4.7025	0.3202	1.6498	2.766	4.181	5.892	1.9333	6.9447	4.9022	7.52	2.805	2.9455	4.922	3.0231	9.359	6.606	4.402	6.385	6.19	9.247	7.1143	4.7898	8.8303	5.692	6.259		0.710347	6.07519
12.3907	6.914	12.179	13.529	8.6094	5.397	7.65	11.697	10.854	1.6895	1.777	1.0324	5.146	5.704	5.073	4.8769	4.6186	6.1474	5.846	2.542	3.6533	4.856	4.9576	8.214	7.156	3.717	6.62	9.389	9.783	5.1308	6.4718	7.5652	7.866	5.12		0.717241	6.41763
12.5098	10.19	15.211	13.824	10.8846	6.71	8.031	10.533	9.259	3.3826	1.6202	0.6623	2.37	5.513	5.231	5.8104	3.3926	4.7262	4.854	2.1015	2.6115	3.559	4.9949	6.665	6.409	3.278	4.372	7.735	8.654	5.4872	5.9256	9.5285	4.711	5.399		0.724135	6.17079
12.629	9.769	16.871	11.935	12.9491	7.295	6.613	8.417	11.669	2.4717	1.2714	0.2808	2.878	5.825	3.824	4.5682	2.7542	5.0742	2.937	0.9474	2.101	3.056	4.211	7.832	5.34	2.904	4.561	7.271	9.444	8.161	6.1059	9.8194	4.84	4.827		0.731035	6.02495
12.7481	11.594	12.067	10.584	12.4257	7.285	9.115	9.558	5.862	2.4192	1.5208	1.1317	2.043	6.301	2.84	4.7753	2.2298	4.1381	3.503	1.1347	2.5366	5.56	3.2935	7.662	5.006	4.038	4.899	5.061	8.549	9.5521	4.8155	8.7649	5.287	4.781		0.737929	5.76766
12.8673	10.123	16.518	10.231	10.2511	5.107	6.988	11.919	12.372	2.7877	2.064	0.8626	3.017	3.427	7.368	4.6794	4.7611	2.5334	3.652	2.3023	3.9839	2.037	3.6599	5.056	7.269	4.626	6.483	4.845	7.875	6.1783	6.8177	7.1343	4.046	5.857		0.744829	5.9646
12.9864	9.201	16.946	10.699	9.5695	4.568	9.787	10.656	8.32	1.1228	1.3885	0.5749	2.356	4.915	5.132	3.1449	4.3642	2.7563	3.665	3.7279	1.5581	0.801	3.8697	5.822	4.452	6.401	3.126	3.784	9.397	3.6746	5.7933	8.1614	6.671	5.388		0.751724	5.50888
13.1055	6.517	13.174	11.135	10.5996	3.452	10.428	5.284	8.928	0.9145	1.1555	0.8891	1.888	5.329	4.974	3.3615	5.0297	1.8828	2.492	2.3536	1.6431	3.399	4.702	5.434	4.23	3.717	2.682	4.816	7.834	6.0427	4.7802	8.9891	4.228	5.051		0.758618	5.07077
13.2247	10.619	14.566	10.574	12.4313	6.436	9.469	7.869	9.73	1.842	0.0534	0.8428	3.584	3.878	3.369	2.9533	6.0935	2.2885	2.852	2.2797	2.3933	3.173	1.4112	5.87	5.269	3.61	3.232	5.547	3.608	5.2997	5.3397	6.3329	5.376	6.186		0.765518	5.28419
13.3438	11.631	13.489	11.301	11.3632	6.814	9.828	10.733	7.081	3.0052	0.2472	0.7703	3.632	3.547	2.963	2.2119	5.0106	2.8852	2.876	5.4053	1.8345	1.977	1.0618	3.546	2.178	2.071	5.949	5.337	6.52	7.5116	3.4463	7.1962	7.267	5.381		0.772412	5.33546
13.463	9.655	12.464	8.815	9.8355	4.486	10.855	8.207	8.859	3.1067	0.1093	0.5457	4.775	4.013	4.365	2.0849	4.6172	3.9935	3.41	2.4757	1.4323	2.06	1.6043	5.777	4.809	3.661	4.171	4.573	11.725	4.0911	4.9451	5.0185	4.733	5.904		0.779312	5.18718
13.5821	8.488	11.995	8.77	11.7409	6.953	10.683	9.474	10.122	1.2229	0.4736	1.9678	2.156	4.768	3.593	3.2774	3.1944	2.1211	2.613	2.3753	0.9072	1.608	6.2029	5.388	6.955	3.663	4.521	5.438	9.554	4.5522	2.6677	4.3155	6.504	6.172		0.786206	5.28597
13.7012	9.092	15.27	11.646	12.085	7.86	9.852	10.022	6.308	1.3298	1.7926	0.5159	0.672	5.938	1.848	2.0642	1.9225	1.0449	1.755	2.1368	2.4374	2.856	3.648	7.478	5.687	2.576	3.583	4.92	4.785	4.5056	4.4928	4.8237	7.086	5.466		0.7931	5.07573
13.8204	9.227	11.492	9.516	13.6734	8.607	12.087	8.038	7.937	2.2158	1.2639	0.2923	2.034	4.128	3.458	2.1918	3.0632	1.4876	2.506	2.5066	1.629	3.077	3.9415	5.821	6.857	3.275	4.266	8.144	4.155	3.3718	5.293	4.8852	5.96	4.392		0.8	5.17552
13.9395	10.318	7.978	7.412	12.7453	9.652	6.797	9.479	7.521	1.2158	0.4599	0.8143	1.8	4.356	3.146	1.2841	2.5779	3.9655	1.737	2.6156	2.3483	1.279	3.0246	3.947	4.315	1.94	5.082	7.612	7.624	4.455	6.5086	6.2381	6.455	3.801		0.806894	4.86376
14.0587	10.115	9.119	6.65	11.882	6.84	9.098	11.032	7.799	1.1749	1.8669	1.6495	1.647	5.386	2.78	2.4229	1.7951	2.4458	1.671	0.7214	1.0723	0.785	1.2462	5.693	5.128	2.981	2.752	7.866	9.874	2.143	3.8254	5.0539	5.965	3.051		0.813794	4.65246
14.1778	11.606	8.095	8.489	11.028	4.09	7.323	12.881	7.61	0.8505	1.2514	1.0975	2.635	3.628	2.852	2.0135	1.4197	1.712	0.85	0.5531	2.7065	1.359	3.2367	3.855	5.202	2.416	2.859	8.101	7.921	5.9025	4.0664	5.9851	5.204	2.596		0.820688	4.58772
14.297	10.286	7.561	7.435	8.9765	6.021	5.263	11.046	6.989	2.1064	0.5369	0.6372	2.77	3.903	2.669	2.5231	0.7553	1.8689	1.587	0.6069	1.2043	3.517	2.3624	5.142	5.626	2.819	4.5	5.915	5.613	5.4005	3.9062	4.9551	4.884	3.049		0.827588	4.3162
14.4161	9.707	7.509	7.572	7.9932	6.738	7.298	11.063	8.26	1.9231	0.1592	1.1646	2.884	4.057	1.599	2.6551	1.2699	1.3802	0.657	1.6266	0.5125	3.106	1.1069	4.496	4.321	3.58	5.669	3.912	4.815	4.2084	5.6727	2.2913	6.227	5.452		0.834482	4.26926
14.5352	6.247	8.974	9.303	7.8666	3.341	7.925	7.729	6.48	2.0693	0.2812	1.7723	2.399	2.307	3.517	3.0632	2.0028	3.7261	1.823	1.2691	1.314	2.43	2.3507	3.527	5.888	1.887	3.308	6.75	8.398	5.5006	5.745	4.3252	3.831	4.501		0.841377	4.29852
14.6544	6.286	11.842	8.612	7.8915	4.661	7.128	8.501	5.509	1.3542	0.2896	1.3724	2.673	2.765	2.517	2.3265	2.7082	2.5635	2.868	0.6573	0.789	0.903	3.044	4.022	4.062	3.332	1.71	6.273	5.925	5.0353	4.7438	3.6765	4.559	2.863		0.848276	4.04433
14.7735	8.704	7.773	7.925	9.5965	4.89	7.897	7.399	4.732	1.2993	0.8534	0.6553	2.97	3.887	4.041	2.0831	2.0158	1.7094	1.534	2.2627	1.7182	0.871	1.6853	3.01	4.807	2.913	3.243	3.656	6.527	5.1162	5.3307	4.5305	2.161	2.813		0.855171	3.95786
14.8927	9.641	7.632	9.054	5.4193	6.068	8.858	7.058	4.78	2.3158	1.2185	1.4444	2.637	4.942	4.153	1.2537	1.4256	3.0218	1.342	0.8971	0.6339	0.654	0.9977	4.738	4.485	2.809	4.834	5.171	4.986	4.6926	3.7708	2.2006	2.681	4.021		0.862071	3.93442
15.0118	9.111	9.17	5.941	6.7453	7.682	7.163	5.89	4.245	1.906	0.9467	2.3999	2.865	4.467	4.176	2.1145	1.0951	2.6542	0.84	1.2636	1.7739	0.699	0.3129	4.953	5.009	1.968	2.675	4.765	4.196	3.5585	3.3667	4.5531	6.755	4.549		0.868965	3.93362
15.1309	6.445	5.686	5.318	6.3087	6.581	6.727	7.627	5.028	3.0471	0.6082	1.9027	3.239	3.931	1.59	2.0217	1.2394	1.3181	0.79	0.9439	0.8791	1.25	0.9799	4.23	5.4	2.593	1.837	4.414	2.96	6.1406	3.5314	3.768	4.176	6.392		0.875859	3.60312
15.2501	5.608	5.69	6.047	7.695	7.625	6.528	9.636	6.233	3.2622	1.5393	0.8364	1.584	3.277	1.902	3.0363	1.4351	1.0593	1.124	0.0262	0.3111	2.002	2.1285	4.11	3.619	2.743	3.374	2.981	5.439	3.8169	4.2649	2.9149	5.252	4.018		0.882759	3.67025
15.3692	5.979	7.147	7.605	8.3826	5.07	11.155	4.813	6.266	1.6455	0.8441	1.23	1.68	4.321	1.743	2.4263	1.6409	1.385	0.817	1.392	1.5302	1.855	1.8649	3.23	3.837	3.276	3.92	5.58	5.41	4.4313	3.9824	2.7737	3.964	5.282		0.889653	3.83269
15.4884	6.867	5.238	7.104	5.7565	4.58	9.527	6.72	7.57	2.2805	0.3651	0.5817	1.692	4.573	2.161	2.5508	1.1596	1.0369	0.552	0.8559	1.1598	0.992	1.6758	2.481	5.037	2.153	3.006	8.072	4.794	5.1696	3.8594	3.0082	1.427	3.776		0.896553	3.56915
15.6075	6.431	3.936	5.963	6.5601	7.622	13.861	9.448	6.973	1.463	0.3047	1.0659	1.454	3.516	3.2	1.0221	0.3632	1.5454	0.177	1.2296	0.8314	1.411	1.3116	4.206	6.046	2.416	2.218	7.968	4.522	3.3811	4.8945	4.1488	2.586	4.727		0.903447	3.8425
15.7266	8.684	3.273	6.337	7.0007	5.044	8.626	8.74	5.137	2.0218	0.3654	1.9717	2.451	3.204	1.644	1.191	0.6675	1.3087	0.444	1.1056	0.9669	1.231	2.4483	3.634	5.715	2.723	3.121	4.504	8.023	1.7662	4.1439	5.2914	2.728	3.119		0.910341	3.59488
15.8458	6.067	2.497	5.771	7.0356	3.399	6.143	9.531	5.903	2.7187	0.316	0.3764	1.898	4.35	0.971	0.9393	0.1396	0.5818	0.216	0.56	1.0655	1.57	0.9954	3.474	5.133	0.88	2.486	3.427	5.678	1.8764	2.6711	4.8226	3.183	2.517		0.917241	3.00583
15.9649	4.712	4.628	3.671	7.3386	5.428	10.266	7.114	6.639	2.9632	0.0704	0.6087	1.551	3.938	2.246	0.9887	1.1557	0.2915	1.257	0.3577	0.7287	1.008	1.0868	4.253	3.516	4.162	2.19	5.538	3.058	2.0324	3.2928	3.8715	3.511	3.308		0.924135	3.23578
16.0841	3.574	4.087	4.385	6.3942	6.186	14.033	8.317	4.651	2.5417	0.2995	0.8495	3.487	2.727	2.256	0.5618	1.1988	0.0945	1.069	0.536	0.7917	0.052	2.3966	3.928	3.798	4.006	2.947	4.217	3.083	2.8646	4.9983	3.8066	5.038	5.461		0.931035	3.47381
16.2032	1.483	2.463	4.414	6.0171	8.401	11.167	10.353	5.926	2.4509	0.2552	0.5423	2.322	2.298	1.086	0.8556	2.2195	1.3661	0.397	0.5753	0.9951	1.178	1.2944	2.649	5.42	4.01	4.114	5.389	5.486	2.3104	3.2469	2.0766	2.384	3.101		0.937929	3.28019
16.3224	1.766	0.949	4.58	4.6265	9.958	7.95	7.288	5.617	1.5842	0	0.5754	1.462	4.331	1.358	0.8805	1.1593	1.2451	0.692	0	0.0224	0.327	1.2331	1.962	3.437	4.739	4.727	3.909	4.376	4.8691	3.4851	2.2935	3.184	6.101		0.944829	3.05113
16.4415	4.043	0.865	4.232	7.2389	6.063	7.047	5.635	5.347	3.1196	0.5465	0.6541	2.977	3.728	1.926	0.7012	0.13	0.6164	0.091	0	0.3207	0.333	1.0424	1.217	4.591	2.684	4.91	2.258	3.768	1.9112	4.0439	3.7912	4.299	3.564		0.951724	2.83922
16.5606	2.882	1.975	3.001	5.4416	7.692	6.135	8.366	4.747	2.4113	0.6188	0.0225	3.505	3.186	4.265	0.4872	0.0523	1.0277	0.092	0.5311	0.2349	0.468	0.3323	3.313	4.089	4.568	3.844	2.448	2.538	1.4331	5.5368	3.4488	2.576	5.014		0.958618	2.91765
16.6798	1.636	1.855	2.742	4.7451	7.746	4.777	8.781	4.834	1.3085	0.7539	0.8582	3.087	4.893	1.518	0.2771	0.4154	0.384	0.519	0.2273	0.3915	0.187	1.341	3.011	3.614	3.07	5.897	2.796	1.892	1.9605	4.5663	2.8628	1.9	3.464		0.965518	2.67608
16.7989	3.135	2.262	1.845	5.765	6.28	6.578	8.177	6.308	1.7371	0.151	0.4951	1.02	3.03	1.404	0.418	0.1349	0.7209	0.152	0.6147	0.725	1.505	1.7596	3.114	2.82	1.881	3.64	5.803	2.583	3.3065	2.0233	2.7689	2.18	3.43		0.972412	2.65961
16.9181	1.502	2.748	2.113	5.677	5.224	6.811	9.062	4.63	2.7312	0.7525	0.4858	1.185	3.2	0.811	0.3747	1.0398	0.3869	0.071	0.3461	1.3715	0.223	1.068	1.555	2.069	2.95	3.7	3.85	2.529	2.3057	1.707	3.9387	2.903	2.592		0.979312	2.48221
17.0372	1.252	1.428	1.187	4.4731	5.127	6.154	7.048	4.726	2.6488	0.1555	0.6701	1.259	1.413	1.551	0.1593	0.1288	0.0352	0.415	0.0955	0.2476	0.315	1.0265	1.713	2.331	3.02	2.638	3.337	2.718	1.9743	2.625	2.4397	4.076	4.887		0.986206	2.22044
17.1563	1.285	0.7	0.87	5.1884	3.784	5.856	10.921	6.207	0.9999	0.586	0.6309	1.941	1.318	1.902	0.0953	0.0029	0.0531	0.085	0.463	0.1864	0.113	0.6425	1.293	6.208	4.367	3.487	3.245	4.828	2.4643	1.8059	3.8533	3.357	4.204		0.9931	2.51342
17.2755	0.714	1.212	2.158	3.6128	5.132	9.502	6.799	6.967	1.3422	1.7031	0.7549	2.507	1.844	1.032	0.3879	0.1467	0.3913	0	0	0.13	0.552	1.6067	2.939	3.304	3.906	4.886	5.636	2.804	3.0871	1.5488	2.6549	3.678	2.368		1	2.58504

## Sheet: Image7
X0	Y0	Y1	Y2	Y3	Y4	Y5	Y6	Y7	Y8	Y9	Y10	Y11	Y12	Y13	Y14	Y15	Y16	Y17	Y18	Y19	Y20	Y21	Y22	Y23	Y24	Y25	Y26	Y27	Y28		Ap-basal	Avg intensity
0	29.2179	13.7283	24.0071	15.6942	31.41	22.553	21.549	9.039	15.8259	19.99	32.539	20.757	21.327	24.805	23.927	8.366	10.9544	16.1828	17.1796	18.9291	18.6474	13.0416	16.9946	27.7266	29.9305	42.9085	27.985	45.538	42.2519		0	22.8623
0.1191	36.7581	19.4719	11.1273	17.8029	44.467	28.867	16.987	16.989	15.9483	18.283	37.822	25.809	22.111	33.535	17.169	7.7339	10.287	12.7928	17.9215	19.6339	18.2708	15.2042	18.7304	29.2581	34.1434	37.9013	34.0327	40.93	44.739		0.00555364	24.3009
0.2383	34.7488	14.6162	16.2681	18.8301	46.677	34.154	23.753	20.119	19.7999	22.739	44.601	25.248	25.721	42.172	21.351	11.4583	7.9942	19.0773	19.9847	24.5637	23.3303	15.8411	18.6395	38.5079	27.6695	35.1554	29.6295	53.95	53.326		0.0111119	27.2388
0.3574	35.8633	13.2613	21.4749	15.3246	48.899	44.317	28.818	17.362	23.7038	31.385	46.66	36.382	34.258	53.041	22.986	12.623	8.1879	16.7364	21.4492	28.3592	23.3218	10.7562	24.4496	36.9336	35.1115	40.5964	36.7051	49.043	40.4337		0.0166656	29.6015
0.4766	31.3908	15.3506	21.0804	15.6357	46.792	59.257	33.87	31.885	27.6261	44.642	52.311	43.509	47.092	58.794	30.587	22.7221	10.0506	18.6347	20.3412	33.9853	31.1215	17.1401	31.1271	40.9166	34.0221	38.3352	40.233	52.973	48.6022		0.0222239	34.4837
0.5957	41.0318	18.2955	20.2653	28.1274	60.204	73.465	51.828	27.292	31.137	49.315	57.613	60.095	52.577	68.285	46.471	16.321	7.7049	17.7304	22.8852	30.1047	38.7965	17.869	23.8596	37.4756	44.421	49.6081	43.5406	50.798	47.2019		0.0277775	39.1144
0.7148	41.4594	21.3472	19.2791	29.4823	66.213	85.956	73.189	39.898	42.8788	64.696	78.415	72.539	80.026	83.463	41.537	23.9663	8.963	17.6191	24.9662	29.6795	32.6731	20.5103	33.9939	55.5097	46.3533	41.689	44.4755	46.554	41.7654		0.0333312	45.1413
0.834	41.9846	24.3096	22.0706	25.3312	83.195	107.413	85.453	47.288	40.5636	74.337	90.617	94.504	92.678	105.01	62.213	28.1674	13.1996	20.4311	24.2856	33.6805	36.3543	21.5711	35.2345	56.9689	49.4136	47.7143	53.1408	59.396	47.8251		0.0388895	52.5638
0.9531	50.8669	25.8013	21.1096	24.072	100.156	128.411	91.526	52.748	51.7305	90.519	122.074	102.201	120.303	122.892	82.917	48.8458	15.8442	22.9622	24.7972	39.3784	40.2899	23.3215	40.075	68.7963	52.5048	46.7988	43.844	62.915	39.9108		0.0444431	60.6073
1.0723	52.9374	32.069	21.0567	26.165	97.333	128.767	104.462	61.394	59.8211	109.557	140.795	115.733	143.848	155.39	96.092	55.4082	9.3647	18.6972	19.2662	42.3048	43.4903	25.565	42.4162	64.2313	55.8302	54.6698	52.2602	69.525	48.4257		0.0500014	67.1336
1.1914	49.6733	32.222	25.6732	34.8461	132.607	152.972	118.084	66.777	74.2563	98.313	154.24	131.316	153.661	156.447	102.654	72.999	16.4094	21.3463	22.4868	51.8798	42.5134	31.7207	46.2513	72.3104	74.1438	57.5356	66.4235	73.559	44.6416		0.055555	75.1022
1.3106	53.521	40.321	21.9519	30.5547	123.25	163.435	134.023	92.003	82.907	95.411	156.376	160.76	175.827	159.304	100.376	82.6567	21.4701	23.1329	23.2789	49.285	44.1188	32.4978	50.4678	74.3191	72.5867	66.5749	51.7988	80.299	59.9311		0.0611133	80.0841
1.4297	56.5927	34.9905	27.6413	40.9521	135.887	133.082	129.181	93.113	79.925	96.966	156.278	176.31	168.77	168.268	100.581	82.4649	22.0319	25.021	19.746	51.4822	56.5885	37.6518	45.0346	83.185	70.7824	63.3659	56.7751	99.624	52.8375		0.066667	81.5562
1.5488	49.433	46.3221	30.5855	28.6171	125.024	153.307	144.975	86.069	93.0316	99.863	173.68	176.571	174.58	156.11	98.411	79.6023	24.4222	23.3533	31.5293	49.1427	64.0782	33.2727	43.7847	76.9524	75.1379	52.4499	48.8037	111.269	58.5874		0.0722206	83.0678
1.668	54.7399	46.214	27.8114	29.5554	125.158	160.14	148.871	92.672	84.2056	84.586	158.094	183.596	164.585	152.628	82.229	92.3802	34.6449	29.312	37.0757	56.8455	59.0028	30.7718	52.6744	97.9668	75.5502	59.3456	56.8114	98.61	60.3266		0.0777789	84.0139
1.7871	52.803	37.4938	23.9502	39.8996	125.547	169.634	118.723	103.655	90.9072	73.753	148.388	183.332	165.825	145.391	89.636	81.9605	29.5129	23.6119	39.8226	62.0502	62.3577	37.6283	54.3975	87.6754	66.8869	50.937	62.4618	109.243	71.244		0.0833326	83.0596
1.9063	54.9436	46.5648	33.0491	36.9195	111.772	163.437	132.012	99.059	86.7785	85.175	146.948	167.048	153.865	138.053	70.023	82.5401	29.362	26.0433	31.1247	53.9847	71.4562	33.6474	56.479	73.8801	76.2365	51.9082	52.8452	105.925	78.4078		0.0888909	81.0168
2.0254	48.0622	48.2689	25.6554	35.237	105.955	151.272	106.714	88.688	80.3002	74.501	131.198	174.306	131.778	130.373	68.481	77.7203	29.4137	30.6421	41.4257	50.4935	70.8313	31.2502	55.3814	76.3398	54.6476	45.1344	73.7469	109.777	76.0069		0.0944445	76.6759
2.1445	47.4752	46.1721	28.2249	39.2955	98.183	153.143	112.193	84.326	72.6522	80.615	125.045	180.762	135.801	122.514	60.454	64.299	27.3175	33.2123	38.6036	50.9638	69.9675	32.5492	58.9077	73.0328	55.4482	51.1055	58.1097	99.524	83.1477		0.0999981	75.2774
2.2637	59.7176	47.2954	34.8382	42.2324	98.89	151.085	97.667	84.687	77.2474	85.596	132.571	190.507	127.464	116.621	40.707	57.8973	31.6531	29.5008	46.5947	54.7701	75.0737	24.6311	56.494	65.182	50.9575	49.8386	74.446	100.488	98.4538		0.105556	75.9692
2.3828	54.9918	41.0915	33.0583	43.7428	86.836	149.347	103.962	81.028	83.2564	73.612	108.488	167.425	124.679	113.902	44.127	52.1937	30.7	26.31	38.6859	55.1257	69.7288	33.4673	50.3932	55.0607	51.0248	40.225	59.3202	90.495	96.387		0.11111	70.9884
2.502	53.1483	48.1403	27.8225	34.4355	74.408	145.608	89.593	79.06	77.9794	61.298	101.097	174.803	124.575	118.526	42.89	58.9099	25.9268	21.4616	33.6525	64.3141	69.3297	26.25	43.6995	59.7261	53.6009	40.6817	65.607	103.204	90.0013		0.116668	69.3017
2.6211	42.8289	46.607	25.651	37.4966	65.45	138.21	72.028	80.362	81.6628	65.967	86.171	165.916	120.988	107.455	35.113	51.5429	28.2766	23.6439	34.5333	64.4635	65.2025	28.2794	49.5059	57.4498	43.9197	39.6106	67.8848	85.013	88.3303		0.122222	65.5022
2.7402	55.2703	46.1822	28.6496	46.4733	63.846	114.578	78.472	74.058	69.8073	63.834	87.605	174.282	133.367	97.519	31.627	48.2681	30.7364	21.0902	33.2672	62.6434	66.4724	24.6343	39.2463	50.3338	38.3303	36.909	57.6376	69.61	90.7077		0.127776	63.2916
2.8594	60.2416	43.8625	27.0379	36.0368	53.169	117.868	76.741	67.276	76.677	76.737	76.213	172.264	127.362	105.187	39.237	50.7382	29.4001	24.4298	33.1339	70.3483	55.8995	23.3457	36.1651	48.4315	35.1307	31.4215	58.0676	74.566	88.5319		0.133334	62.6041
2.9785	55.8016	33.7822	23.0905	43.3546	58.036	104.839	72.729	71.646	67.0219	65.149	55.123	163.427	104.093	106.394	37.799	44.7208	28.2181	27.7465	40.3289	78.3876	63.3027	26.3731	33.4558	44.2058	42.2491	26.8403	52.1725	84.362	95.4524		0.138888	60.3483
3.0977	56.6925	40.0467	26.7115	40.9273	55.933	128.149	66.49	69.982	72.702	73.485	68.336	165.234	110.78	98.567	34.726	46.5775	29.9452	25.2353	41.0778	67.0039	61.7765	25.8319	29.1999	39.8912	32.2594	26.4682	49.7365	84.927	74.3211		0.144446	60.1039
3.2168	59.2319	42.9462	24.0152	37.7342	48.46	106.024	62.281	57.637	65.8445	54.872	65.647	163.459	87.967	99.818	40.622	48.9887	23.2444	18.0459	38.9505	63.0571	65.9517	23.8054	36.4704	36.5358	30.2305	28.264	43.5623	77.979	77.7891		0.15	56.1874
3.336	55.6431	33.4073	22.1647	32.3887	48.916	109.364	59.214	57.244	69.3773	56.726	53.119	173.441	101.343	97.004	53.205	46.038	22.4746	22.7524	33.0832	65.6387	60.5044	18.9322	36.3894	39.2657	38.1104	21.867	45.9007	75.447	74.0289		0.155558	55.9652
3.4551	55.505	35.8983	21.6254	41.5859	43.093	100.301	58.106	47.347	63.7451	54.613	59.361	162.843	92.054	104.761	43.594	41.32	19.053	23.1149	31.9501	68.886	59.1962	14.3284	33.7209	34.288	29.4032	28.8266	49.6035	71.208	72.75		0.161111	53.8649
3.5742	62.419	32.1992	22.9777	32.2436	45.451	97.438	52.323	56.208	60.683	45.599	51.961	147.383	78.548	122.929	45.137	46.4593	20.2926	18.1687	26.4276	65.1584	47.3265	21.4221	29.7453	36.8221	33.1065	30.6096	43.9073	64.81	69.0394		0.166665	51.9584
3.6934	64.0068	33.7509	19.6714	45.5434	40.127	81.929	49.797	56.666	57.1792	42.782	47.408	132.488	68.33	99.341	46.827	38.8419	18.0876	20.2231	30.4909	62.998	53.5997	20.8235	25.0178	34.9191	35.8048	22.2444	35.3607	62.203	63.1348		0.172223	48.6068
3.8125	51.7059	25.5189	16.3518	43.0884	40.271	86.521	41.176	47.551	54.9762	43.682	54.098	135.728	61.437	101.386	39.314	43.4344	12.043	17.177	27.3547	55.5856	44.7522	23.1389	21.9625	38.0049	27.7338	23.9617	37.9689	57.936	56.3556		0.177777	45.8695
3.9317	68.0818	26.1079	16.652	45.6328	35.692	87.119	45.094	47.088	39.445	35.696	44.795	105.032	51.352	110.455	36.749	43.1957	15.6446	14.7169	29.7532	58.4568	41.5729	16.9146	19.5693	31.6281	23.9499	25.8746	32.0854	66.044	49.2296		0.183335	43.5733
4.0508	56.1766	24.024	22.7104	42.1315	28.367	86.625	40.602	35.077	41.2538	37.251	33.227	95.308	63.129	89.36	41.118	52.746	10.7819	16.2178	20.5638	53.3563	37.6811	19.9307	17.2003	38.2796	25.7586	28.0273	39.1491	51.823	48.9188		0.188889	41.2688
4.1699	59.1456	26.9777	22.9403	38.6111	36.011	76.418	38.178	42.63	46.8025	33.268	27.862	84.065	64.125	95.112	38.871	49.6445	15.5798	13.7698	21.3816	60.7638	29.6268	16.1384	16.7949	31.9959	25.3468	23.8209	33.81	65.423	54.2089		0.194443	41.0111
4.2891	53.6443	18.3793	17.3704	37.1059	40.88	73.237	31.66	37.757	42.8176	40.332	31.979	64.654	63.324	97.675	23.104	50.1218	14.8931	12.8695	17.9175	51.193	29.1068	20.1958	22.5098	27.6203	25.4371	23.5997	35.509	57.337	41.0874		0.200001	38.0454
4.4082	45.6767	21.2046	16.1564	36.1128	41.198	68.307	37.824	31.758	33.0928	32.61	27.371	56.981	54.864	83.765	29.998	34.0308	13.0084	15.065	25.5564	47.1819	28.8758	23.2264	25.1074	29.3767	22.9407	26.306	35.976	54.372	38.9524		0.205555	35.755
4.5274	60.6064	16.8744	19.3029	32.5121	33.284	97.533	24.576	40.229	37.974	33.22	23.365	61.975	45.749	88.985	29.483	37.2144	14.1411	9.7625	20.3171	50.6593	25.8836	17.8162	15.954	27.559	25.1355	22.1365	29.7291	47.867	46.9386		0.211113	35.7511
4.6465	64.8224	18.38	13.5266	27.1577	32.034	72.691	27.785	29.18	32.4502	28.994	32.071	51.769	44.156	94.789	33.109	34.8434	8.8595	7.3615	18.725	49.0834	20.5265	17.9811	14.8408	23.9792	23.6718	23.7208	25.4839	48.033	41.7079		0.216667	33.1632
4.7657	57.1529	14.9162	12.5313	29.596	36.725	68.902	29.064	26.478	23.1885	37.716	29.463	46.474	46.343	75.26	31.407	35.7598	9.2704	13.8749	13.6964	48.2856	18.9423	15.0711	13.1395	22.9554	18.7073	22.5995	26.0147	45.698	34.1671		0.222225	31.1517
4.8848	54.2782	18.15	16.0995	24.0174	40.606	63.546	24.472	22.477	24.1556	30.186	21.888	47.178	42.042	74.581	34.525	39.263	13.4982	8.9049	21.9003	47.6857	22.4482	17.0959	16.6835	27.2551	19.6147	28.9073	28.3924	47.286	24.636		0.227778	31.0956
5.0039	64.3579	12.9808	18.7913	22.668	36.216	70.423	24.923	20.842	22.241	26.708	25.603	47.62	38.64	66.228	34.871	30.7616	11.064	8.8834	12.1844	49.6936	27.5273	9.1232	17.0155	22.2871	18.1527	30.1139	23.8876	40.626	34.2148		0.233332	29.9534
5.1231	60.6917	9.7811	19.514	27.9705	36.746	77.647	25.008	24.454	19.3134	27.62	22.151	43.084	32.802	67.956	46.426	28.2305	10.6801	4.7232	13.3122	50.0379	28.824	12.6844	12.5669	20.1337	19.6258	21.6631	33.1106	28.615	31.4168		0.23889	29.5444
5.2422	59.0333	8.6249	14.923	21.1638	29.154	63.693	21.027	20.981	24.88	29.664	17.25	41.479	40.352	62.051	33.47	19.1768	14.9344	8.2814	8.7743	43.0821	24.6314	9.4044	14.0457	17.5303	17.2178	20.3679	31.3937	27.165	36.8441		0.244444	26.9171
5.3614	55.3417	9.969	18.1698	20.8109	35.082	59.949	17.429	18.322	18.0576	28.29	20.983	37.779	43.535	53.129	33.604	30.8745	10.6644	7.8058	9.9156	39.0328	25.1465	7.0012	14.9021	16.8849	19.019	20.3299	25.3064	32.401	26.5394		0.250002	26.0784
5.4805	59.0619	7.9001	17.6151	18.5936	39.486	58.297	16.827	16.334	17.8309	26.485	22.908	38.501	38.821	54.068	33.316	21.409	8.8088	5.059	10.285	37.1982	15.3566	10.2109	16.1005	12.7856	27.8013	18.7381	30.1301	34.79	25.736		0.255556	25.5329
5.5996	47.2817	6.5786	21.1958	14.6877	41.934	47.552	18.481	19.457	23.4324	24.806	25.287	31.86	40.068	44.78	35.044	25.3131	10.4669	6.4404	10.5367	35.9661	19.76	11.6988	15.8535	18.2576	19.3138	16.7013	34.2007	27.161	29.4832		0.26111	24.9517
5.7188	61.3321	8.5247	20.5542	20.2026	37.407	50.671	17.114	17.558	20.0347	25.566	25.276	41.262	40.258	44.256	40.457	31.1836	9.8302	6.8115	9.1065	21.849	19.8827	9.6607	8.5448	15.1356	19.0031	16.8721	25.0208	32.35	25.4527		0.266668	24.8682
5.8379	53.145	5.1647	21.1809	22.0958	45.737	39.878	18.157	17.917	16.7292	32.108	20.205	34.663	36.915	47.998	38.605	36.9275	9.2726	4.2785	9.5459	31.0511	19.3776	10.6537	10.3531	18.4869	18.4965	15.2763	24.4752	26.001	31.3217		0.272222	24.6902
5.9571	46.4785	6.0345	23.1922	22.872	25.892	42.881	13.344	20.586	16.3657	27.527	20.574	34.66	32.842	41.419	42.933	30.624	10.4549	4.4315	9.0193	26.3352	23.0063	9.6696	15.8392	15.1664	18.6962	22.4349	25.6073	26.354	28.0579		0.27778	23.562
6.0762	38.4294	5.114	23.758	18.7299	34.029	42.174	15.344	16.695	15.8769	28.425	20.9	38.11	30.082	39.466	39.299	21.3043	7.0305	6.4834	8.286	24.076	22.2997	10.6868	10.9942	12.9614	15.6573	13.6605	19.8775	26.542	32.1791		0.283333	22.0162
6.1953	36.8138	5.3072	20.1201	20.7341	32.772	41.474	14.79	18.065	14.034	19.976	24.478	39.03	30.775	38.489	37.118	24.9736	11.9296	4.6355	3.4807	27.08	18.9109	14.2471	12.3835	12.4805	13.9455	17.0204	19.1757	27.478	25.8424		0.288887	21.64
6.3145	41.7062	6.6975	17.415	15.0971	29.686	38.328	12.901	14.494	18.2338	22.8	22.998	41.703	29.343	36.229	28.938	20.3505	11.8456	7.0081	3.5927	20.1795	21.7466	13.7952	10.9851	11.0028	15.2573	17.1248	18.5316	24.47	30.1633		0.294445	20.7801
6.4336	36.0479	4.0699	16.9494	15.6083	26.536	37.691	14.013	17.212	15.5309	24.542	26.22	38.102	23.158	33.115	26.263	20.8481	10.2224	4.1319	6.0545	22.4635	17.1422	17.8739	12.7273	14.7958	15.5675	15.394	18.4291	25.742	23.603		0.299999	20.0018
6.5528	30.0008	7.5817	13.2959	22.0253	25.437	31.537	14.811	12.93	18.8734	25.08	28.452	45.465	23.203	32.495	24.653	23.1927	10.8293	3.3376	9.4211	26.3759	22.2319	10.6379	11.593	12.2329	13.7117	14.2322	23.0591	28.629	30.2609		0.305557	20.5374
6.6719	27.0372	5.3445	16.912	19.6131	23.738	37.8	11.567	14.973	21.2153	19.331	26.127	41.946	27.741	25.364	33.149	20.852	9.0587	3.8504	3.2987	24.3618	18.8864	8.6707	11.8216	16.1049	13.8663	15.9125	19.6611	22.723	26.4297		0.311111	19.564
6.7911	25.5681	11.114	12.1588	26.2279	25.196	38.269	14.085	13.508	20.9431	25.719	28.216	45.456	23.761	35.798	31.98	22.578	10.3207	5.1522	7.3045	21.1232	16.5278	7.9361	12.3919	13.7558	16.4588	15.6529	17.1544	26.828	19.5219		0.316669	20.3692
6.9102	20.7866	11.8438	14.6727	16.396	24.159	27.59	15.642	13.284	17.9069	24.127	30.772	43.783	26.565	32.679	27.04	28.5372	11.1393	7.526	4.2559	21.2999	18.9149	6.7836	14.7491	15.4322	12.1592	17.425	29.2755	22.775	21.9642		0.322223	19.9822
7.0293	24.6533	5.4185	13.6533	23.2048	25.833	24.203	11.182	12.566	12.1243	22.652	30.381	31.79	24.972	28.682	29.768	24.1015	14.8309	6.7814	7.4466	15.6573	23.9115	10.0166	11.0544	13.3382	14.4853	15.0039	23.9154	28.045	31.5946		0.327777	19.354
7.1485	21.1262	6.9611	9.6818	25.6807	33.353	27.348	12.139	12.446	13.6775	27.002	21.225	35.621	34.969	30.768	29.121	18.9003	6.7189	5.1143	6.8087	21.0855	16.4963	11.6696	14.787	15.0262	17.3666	14.4722	28.4956	27.766	27.5429		0.333335	19.7714
7.2676	16.6189	6.0003	19.5077	24.6351	27.173	21.224	11.345	11.212	17.4846	26.206	27.632	30.75	27.941	33.359	28.552	18.8185	9.8463	4.9172	6.1918	17.3473	13.5237	9.172	13.0719	10.3979	14.9222	14.3276	26.3507	29.222	30.4183		0.338889	18.9023
7.3868	17.5293	6.2268	14.7572	20.3598	33.468	21.195	14.742	12.822	14.7789	23.043	21.294	29.475	35.369	26.098	31.679	26.2684	6.8047	5.6787	2.7218	16.9243	20.5996	7.118	13.1015	16.2568	13.2068	13.1071	20.2751	26.602	28.1838		0.344447	18.6098
7.5059	12.3469	4.5344	17.5943	21.5675	31.604	18.298	12.959	9.863	14.5605	24.62	19.775	21.213	34.093	29.942	33.794	19.7088	11.9384	5.9763	4.3253	19.7796	18.7528	11.6712	12.0637	18.5924	12.7494	13.896	23.4591	20.371	32.1907		0.35	18.3531
7.625	10.9326	3.9519	15.6571	19.2144	32.589	21.298	10.746	10.676	16.1477	17.883	17.719	25.46	20.384	37.605	32.471	21.2431	11.0575	5.916	6.82	22.7747	12.9667	7.2996	14.6781	14.6446	10.9644	13.5812	23.8525	27.575	36.9117		0.355554	18.0352
7.7442	14.7581	4.1552	13.4757	22.8297	24.406	22.191	11.473	11.161	17.8045	14.365	20.755	17.191	23.841	35.591	32.631	19.0977	7.1619	7.6648	5.2088	19.8229	19.1079	12.6046	14.1642	16.1061	10.8865	15.2446	22.9296	28.172	31.7398		0.361112	17.8117
7.8633	13.4211	3.5317	16.2065	13.6751	20.477	16.317	10.319	7.649	13.9357	19.631	14.515	11.96	21.165	33.163	32.014	23.5497	13.2101	6.8939	7.7931	23.4962	11.6147	6.9319	10.1202	15.6155	11.5627	12.4729	20.5393	35.164	30.9366		0.366666	16.4787
7.9825	16.3356	3.7835	17.3716	16.4343	25.84	12.938	13.853	10.925	14.5385	17.409	16.57	12.732	28.76	26.973	30.622	19.3113	11.0411	7.4574	6.6895	17.9767	11.8385	8.8914	10.7055	9.609	12.8041	12.4899	17.5859	24.852	34.5558		0.372224	16.2377
8.1016	14.3813	6.9675	16.2489	12.5132	18.392	16.407	9.941	10.292	9.4007	15.996	16.924	12.458	22.501	26.837	25.755	27.4613	10.1472	6.4938	6.6953	17.9662	14.0926	13.8012	13.0001	13.8264	11.1296	8.0816	17.8002	20.453	31.5817		0.377778	15.4326
8.2207	15.0099	6.7044	18.9912	13.8101	13.223	10.071	11.07	8.483	9.9203	20.81	14.668	12.218	24.077	27.252	29.293	25.1572	9.0936	4.8896	5.4127	19.7569	15.9501	12.0894	13.9949	13.8183	8.7155	9.5019	19.4056	24.453	35.5822		0.383332	15.6352
8.3399	11.5524	7.976	20.7282	13.3231	20.484	10.336	9.259	7.317	11.0993	22.559	15.63	8.685	21.805	22.483	26.162	29.9338	12.0017	6.4257	6.7243	21.7595	14.4993	11.3778	8.3132	14.1588	16.9485	15.7866	22.307	23.238	26.0543		0.38889	15.8251
8.459	13.8592	5.9379	16.8245	12.2317	18.496	15.827	11.846	10.154	10.194	20.419	14.249	8.235	24.58	27.502	29.483	28.0107	8.7877	4.8344	3.4368	17.5695	10.5912	11.6886	12.0715	19.9932	14.006	13.0893	23.436	21.809	37.1765		0.394444	16.0806
8.5782	10.3348	7.2836	18.2936	8.4519	19.008	12.73	12.827	5.727	11.4417	13.873	12.067	9.165	23.251	22.954	28.944	21.8986	11.86	6.3343	5.2468	14.1273	8.7803	7.0894	10.5818	12.1241	13.0273	14.6784	20.811	19.839	29.5878		0.400002	14.2185
8.6973	17.8294	5.4886	15.6553	6.7276	17.718	13.2	11.555	10.273	9.9139	18.195	12.396	5.778	21.346	25.767	22.446	23.4101	9.9543	5.4676	4.8584	14.4302	8.5455	10.8314	9.1184	14.5937	12.498	10.2605	22.6181	19.896	28.0655		0.405556	14.0978
8.8165	11.2873	5.6843	15.515	9.9705	16.272	11.458	10.445	12.329	11.7253	14.268	11.405	7.047	23.564	26.204	21.755	24.7586	8.6811	7.0795	5.4229	15.0721	7.4071	9.8793	12.5851	11.3504	10.561	14.3039	23.5839	23.771	36.5152		0.411114	14.4793
8.9356	13.642	6.3169	15.8374	7.9714	18.859	11.961	14.204	9.123	11.9475	18.981	7.941	5.035	22.888	26.539	24.782	31.702	9.0462	8.5966	5.8107	17.1136	9.5902	11.955	8.8731	11.0535	12.7227	12.5204	22.1986	15.955	33.296		0.416667	14.7056
9.0547	17.9152	12.0134	19.8836	4.4704	16.745	17.254	10.147	6.036	7.9171	19.548	5.843	3.373	18.505	23.538	22.724	25.222	11.8929	8.4297	4.4026	20.2952	12.5337	11.067	14.6396	9.4309	13.0529	15.3475	20.7659	16.182	29.5184		0.422221	14.4377
9.1739	13.7211	6.9954	16.2941	4.4172	13.693	13.041	8.074	6.926	8.026	13.125	4.568	5.838	20.566	26.409	21.663	26.0874	9.8056	8.0949	12.4917	19.2981	10.2604	9.23	12.8501	12.3434	16.3998	13.8244	20.7637	17.074	27.1486		0.427779	13.7596
9.293	15.2196	5.1852	20.1698	2.0987	15.78	13.943	10.834	8.727	7.3076	19.92	7.124	4.703	20.965	23.782	17.35	21.9258	12.2324	5.8595	5.7472	22.6141	9.29	9.6769	10.9932	15.0705	10.1703	18.156	23.6919	18.224	27.6404		0.433333	13.9449
9.4122	13.5083	3.961	11.4245	6.6584	11.082	12.018	8.154	7.627	8.2363	16.472	7.243	5.389	19.471	29.491	19.296	23.2468	12.7995	2.7088	7.9046	13.5549	11.3696	8.4697	13.0051	17.4353	8.9029	13.4801	19.7774	23.976	27.5837		0.438891	13.2499
9.5313	11.166	5.2775	17.0654	5.2477	14.098	13.721	9.126	6.136	11.1851	16.148	4.982	6.107	19.873	30.108	21.65	24.4274	13.7591	3.8671	8.5211	18.4261	13.1545	10.452	18.6443	14.9835	9.7878	11.2062	17.4423	20.24	26.4562		0.444445	13.9055
9.6504	9.974	8.5338	18.0854	5.466	7.628	15.6	5.792	7.798	8.7619	13.653	8.616	4.313	25.209	26.08	16.645	14.9493	11.7439	1.9736	5.2479	12.1046	10.9576	12.6795	11.2843	14.9488	9.5328	12.3481	14.3459	16.649	23.3017		0.449999	12.2146
9.7696	13.0303	7.8545	16.7193	7.3775	7.275	18.148	8.045	7.658	8.4417	16.203	5.301	6.771	19.276	21.465	22.873	19.7032	11.9099	2.5711	4.4266	17.6308	11.7178	7.4176	9.5849	16.1677	10.3973	13.4114	19.7175	21.276	25.0543		0.455557	13.0146
9.8887	10.3966	6.4818	11.5246	1.9801	7.746	14.952	11.319	4.269	7.1327	15.86	4.007	4.481	16.721	30.081	18.972	17.9379	11.6738	4.5132	8.5278	17.1721	10.2166	8.6254	11.6828	15.0228	10.5147	10.1947	21.512	19.694	24.0233		0.461111	12.3184
10.0079	13.7406	9.4069	13.7571	4.6406	5.039	11.386	10.025	5.974	4.7583	18.457	5.895	3.226	20.624	21.174	23.905	19.4835	12.6262	4.1506	4.4764	14.7166	14.1564	6.1747	12.9918	19.2282	8.764	10.0483	16.6779	25.171	22.8704		0.466669	12.536
10.127	8.2582	7.8998	10.5604	3.2438	8.548	12.968	10.469	5.108	5.9785	20.366	2.305	2.087	20.804	28.665	12.907	18.4438	9.0292	4.5678	5.4109	13.4076	10.0037	9.465	8.5121	15.9084	9.9402	9.0911	19.0273	29.987	26.971		0.472222	12.0666
10.2462	10.2327	10.2688	11.9194	1.5669	6.338	11.17	9.393	5.575	7.4809	18.338	5.776	3.383	17.687	21.3	14.156	16.3605	9.4399	5.3574	6.1015	14.512	10.7273	10.2189	10.5921	12.6983	12.993	12.9671	17.8282	25.033	18.6264		0.477781	11.6566
10.3653	11.8463	8.3783	11.9377	2.8684	4.631	12.864	11.092	2.661	5.9999	17.003	1.836	3.833	17.231	20.672	19.847	13.8537	10.6355	2.5822	4.2595	17.3959	6.3491	7.0686	11.0231	13.1878	12.0531	14.7072	23.4287	23.762	16.9929		0.483334	11.3793
10.4844	13.3082	9.0355	15.2117	2.9497	6.43	16.102	5.324	8.794	7.4228	20.716	4.108	3.032	14.277	18.693	17.514	13.6962	13.5615	3.6134	3.78	14.6193	8.294	9.1645	11.8852	14.5413	10.9461	10.9292	16.2606	21.536	13.5604		0.488888	11.3554
10.6036	15.2234	9.3771	13.1129	1.32	10.233	12.85	7.071	8.052	6.4233	13.779	5.575	1.016	12.964	19.533	14.858	15.0237	12.295	2.6835	3.3918	9.6774	9.3183	6.0667	10.0165	14.9844	14.3254	11.4726	16.7952	15.348	12.7794		0.494446	10.5367
10.7227	18.9699	8.4764	11.8815	2.5007	3.206	13.523	8.137	4.553	7.0518	19.438	5.363	3.112	14.098	18.986	16.029	19.81	9.5429	3.3721	2.6505	14.6166	11.1722	8.0193	13.7832	16.462	10.4673	14.1459	15.713	16.492	9.5426		0.5	11.0729
10.8419	16.2376	10.9409	11.7775	3.705	3.586	13.655	11.25	3.383	4.3034	16.44	3.898	2.537	15.043	18.916	9.528	20.2052	9.3404	5.0399	4.7945	14.7226	8.6113	9.0319	9.2351	14.9375	7.6655	10.0101	14.1092	13.315	9.2654		0.505558	10.1891
10.961	9.9367	10.8881	8.6948	2.7928	4.335	14.802	5.029	5.133	6.873	16.28	4.277	1.955	14.179	18.205	13.503	17.9045	9.2834	3.6356	5.0514	17.2312	10.3997	7.2026	13.7007	12.3936	12.2636	8.6704	16.8058	15.217	8.505		0.511112	10.1775
11.0801	10.701	7.3816	10.9033	1.9152	4.249	14.263	9.751	4.475	4.9532	11.108	5.056	4.207	18.211	15.958	11.197	17.1976	16.8083	1.221	3.3014	16.0517	5.3591	9.1435	15.3781	15.2241	9.9807	11.6419	18.3404	8.045	9.3722		0.516666	10.0481
11.1993	16.3349	9.7234	11.8653	3.7171	3.249	19.71	5.747	3.154	10.1462	14.266	4.127	2.817	11.176	17.037	12.059	27.0119	6.4637	4.597	3.7362	12.1145	6.5618	9.5936	14.4636	12.6362	10.4669	15.9209	11.3345	10.3	8.6733		0.522224	10.3104
11.3184	13.5443	11.9587	11.013	2.2105	8.053	16.276	8.02	5.284	5.2387	15.572	4.743	2.22	15.695	16.269	10.091	19.3178	10.0534	2.2303	4.7606	17.3818	7.9476	10.282	12.8026	12.9689	9.0326	11.9007	11.8264	9.425	3.5599		0.527778	9.98889
11.4376	16.1481	15.1396	11.2624	3.946	4.614	10.183	9.561	3.615	11.6356	10.883	5.194	3.626	13.144	18.953	11.822	20.0737	12.8649	3.3814	2.7752	14.7379	2.4817	10.6421	14.3971	12.2496	13.0048	12.5095	15.9093	7.731	4.9988		0.533336	10.2581
11.5567	11.7794	9.7266	12.3295	1.8214	1.697	16.254	6.736	4.397	9.2693	11.429	4.077	1.224	13.784	11.712	8.183	15.9281	14.8416	2.494	6.4977	8.9894	6.8211	9.2748	11.42	11.9828	10.4761	12.1563	11.157	5.598	6.0022		0.538889	8.89856
11.6758	11.3006	11.1023	7.7417	1.1115	3.098	14.205	6.274	2.714	6.5385	12.473	5.008	4.171	13.385	26.314	11.68	15.251	9.5537	2.734	7.3697	10.4239	4.3791	6.5632	11.578	15.9619	9.4326	12.1952	14.4758	6.449	6.1835		0.544443	9.29887
11.795	10.4183	14.277	7.0685	2.1197	5.778	16.93	7.461	3.393	8.188	11.085	2.516	2.227	12.942	13.09	8.386	19.9858	13.1741	2.0837	6.3545	14.0671	4.974	6.2591	13.0572	13.1412	7.8414	7.8103	16.7593	6.334	3.9861		0.550001	9.02439
11.9141	12.6477	14.4624	6.7883	1.01	2.872	13.109	6.509	4.216	6.5816	12.738	3.697	3.87	14.6	19.618	11.337	16.2151	10.2082	1.4385	3.8077	8.5975	5.646	7.6079	8.7294	14.7364	7.0999	8.7564	14.6279	4.438	5.8288		0.555555	8.68254
12.0333	16.925	9.6213	11.2167	0.7402	1.891	10.824	6.912	4.12	4.1021	11.075	7.121	2.893	9.563	25.261	8.821	15.8294	10.1329	2.5147	2.9809	13.1911	3.1835	8.1289	13.2019	15.7809	11.4644	6.6771	18.6118	6.201	4.1621		0.561113	9.07403
12.1524	14.4971	11.6457	7.7715	3.4794	3.568	12.76	5.244	4.605	4.9666	12.553	3.989	3.293	13.204	20.001	6.457	15.6613	13.0296	3.1043	4.5167	14.7929	5.4333	7.1089	8.9091	13.621	8.5619	10.7762	22.3287	2.228	7.2812		0.566667	9.15129
12.2716	8.5767	14.3615	11.3362	1.9827	4.128	11.086	8.046	10.657	8.5211	6.493	3.291	0.792	15.345	15.536	7.228	13.0861	12.0502	2.7724	2.9474	9.5387	3.681	5.7919	9.377	10.7489	6.7211	6.2222	19.2984	6.019	3.8859		0.572225	8.25932
12.3907	13.4531	12.4808	7.8187	4.2272	4.704	13.722	2.484	5.222	3.0781	9.104	4.679	2.692	10.902	16.658	7.327	11.7772	12.9805	2.3193	3.4223	14.7356	6.0654	8.3111	9.4995	13.118	7.1455	6.321	17.5634	5.622	4.3749		0.577779	8.33819
12.5098	12.0628	11.6765	6.3506	1.3798	3.456	14.054	9.254	4.885	3.4952	11.943	5.489	3.391	13.165	16.159	10.85	14.6266	9.9703	1.9581	3.1773	8.9915	5.2302	4.2259	9.0474	13.066	7.1326	9.0476	17.037	4.444	6.6037		0.583333	8.35066
12.629	17.386	13.2003	9.0852	0.8	6.116	13.079	8.383	5.78	5.8867	12.68	3.637	3.504	14.654	19.791	8.831	13.6147	14.2413	1.9726	6.5281	10.9804	3.7402	3.7379	11.8504	16.0149	10.7222	11.9445	17.2214	2.95	2.0723		0.588891	9.32428
12.7481	9.8824	13.8069	9.0358	0.3752	3.305	15.154	11.075	5.301	3.5206	11.938	4.245	3.463	19.935	20.737	10.863	16.9204	10.8421	3.5649	2.0046	8.0744	4.2834	3.2937	12.0875	11.1853	13.2432	5.6996	20.0069	7.906	4.9172		0.594444	9.19538
12.8673	10.1254	17.2512	14.6906	1.9087	4.125	10.083	5.577	6.809	5.5548	13.777	4.956	2.881	12.493	16.883	7.539	16.0795	13.4768	2.3003	3.381	13.6051	4.9385	5.2265	8.7948	12.6461	7.649	7.5732	13.3231	4.082	2.3796		0.600003	8.62446
12.9864	9.5502	14.4775	11.1281	0.4016	3.533	9.366	5.535	5.773	5.4432	9.731	4.165	3.94	17.83	15.529	13.26	10.149	10.6918	2.405	3.5379	11.9356	5.2109	3.8121	6.3258	13.2709	7.3024	10.0263	22.166	5.194	4.267		0.605556	8.48129
13.1055	12.8686	14.9815	12.9492	1.9082	1.845	14.665	5.068	3.586	7.3136	9.781	6.712	5.322	10.634	14.692	9.078	12.7114	8.5009	5.8918	3.9096	8.137	3.1924	3.1895	9.0443	14.1312	9.3435	12.1215	17.7197	3.294	1.6534		0.61111	8.42222
13.2247	15.578	17.9115	13.1332	1.0161	2.984	13.61	5.178	3.517	4.1128	13.287	5.927	2.072	17.137	16.203	6.732	17.6105	9.0879	1.1995	4.4201	11.7929	3.1805	3.5615	13.6845	10.8184	7.2089	10.7787	20.2782	5.235	3.0926		0.616668	8.97751
13.3438	11.84	13.6703	18.1953	2.7092	2.045	11.346	7.318	3.447	5.2314	10.967	5.195	3.249	15.049	12.306	9.698	13.1315	11.986	2.5546	1.89	10.2073	1.9006	5.555	8.2328	14.3117	10.4332	7.2131	12.0495	6.871	3.3317		0.622222	8.34256
13.463	14.9262	13.2271	11.7435	1.8967	1.707	16.225	12.156	5.415	4.3259	4.46	3.684	4.64	11.845	14.166	7.298	17.0486	12.6524	1.2141	1.7347	9.4587	1.8543	3.4248	13.0765	11.145	8.6641	10.2369	21.6559	3.317	2.8443		0.62778	8.48423
13.5821	13.6313	15.5173	9.3183	2.1653	1.804	14.284	9.067	5.994	3.8821	10.068	5.127	2.581	11.959	14.092	8.028	17.5433	10.9255	2.4529	6.261	8.8846	3.4035	3.854	11.997	11.4405	9.1642	11.2075	20.5018	5.829	4.9506		0.633334	8.8253
13.7012	12.0873	16.657	11.7443	2.4511	3.313	11.592	6.239	4.554	4.4593	10.831	3.696	4.21	13.064	20.148	11.655	12.0958	12.5439	3.982	4.7925	11.8267	2.0326	3.3083	9.4709	11.6735	6.7943	15.2902	15.7213	4.225	2.1672		0.638888	8.71121
13.8204	11.396	13.1884	9.3351	1.3953	1.856	8.211	6.9	8.024	6.0766	9.836	4.709	2.978	9.304	17.098	9.072	9.8793	9.2866	3.9559	2.9528	10.852	1.6995	5.5943	7.3528	10.6704	10.2114	11.0865	20.8368	2.141	3.5515		0.644446	7.91208
13.9395	18.7467	20.4411	11.963	3.7864	3.816	8.849	7.748	3.848	7.659	10.308	6.391	2.195	12.43	25.801	10.091	13.4509	12.9613	1.5285	4.2642	12.4019	3.53	3.6236	9.8762	12.1862	8.1797	11.8487	15.7149	4.212	2.9453		0.65	9.33781
14.0587	13.6536	20.5313	13.0983	2.4695	2.065	15.711	4.875	1.581	5.3849	8.207	4.815	3.935	16.574	19.788	11.9	14.59	14.4209	2.8052	1.9668	9.2651	2.5817	1.9589	8.2288	11.4844	9.08	8.1683	16.1025	5.587	2.9361		0.655558	8.75049
14.1778	17.0042	16.5038	15.7918	2.9533	3.686	11.71	7.577	4.339	4.1321	9.517	4.802	5.754	11.395	16.099	8.834	14.6206	10.8352	1.7421	4.1598	14.1997	0.9823	4.003	8.5068	11.6427	8.3664	7.2842	17.0456	4.065	2.8845		0.661111	8.63573
14.297	13.6998	23.411	11.5086	3.4588	5.822	8.562	12.029	2.409	7.6171	8.175	5.16	4.524	8.914	15.49	9.662	15.1252	10.2879	3.0257	2.0585	8.4431	1.5285	3.4742	6.8725	15.0668	9.4026	8.6323	16.3371	4.488	1.25		0.66667	8.49775
14.4161	12.6743	16.3949	10.2337	3.134	4.927	11.625	6.873	2.949	6.7052	8.56	6.293	2.94	11.233	15.208	16.599	16.7151	7.4948	2.5656	2.9607	13.1396	4.0679	2.1143	15.7586	13.6443	11.1379	9.6949	10.6328	2.583	2.6333		0.672223	8.67213
14.5352	13.3912	14.1444	9.5961	4.286	2.815	8.292	5.979	3.697	6.1274	5.884	6.056	4.202	9.666	12.015	12.974	13.1722	11.0732	1.2986	3.0455	7.9895	1.3526	2.6401	12.0672	11.8337	6.0475	10.7162	16.9385	5.336	2.8277		0.677777	7.77461
14.6544	12.3293	20.1438	9.1324	4.0713	4.47	8.878	6.626	3.521	6.1466	5.428	7.101	3.754	11.823	14.916	13.327	14.536	11.3599	4.0513	3.1194	8.4983	2.2287	3.8046	6.8606	8.0511	5.932	6.7602	16.7277	2.618	1.9243		0.683335	7.86688
14.7735	17.1442	19.4697	11.3875	2.4541	2.266	8.567	5.814	3.187	6.2483	7.909	9.332	1.871	9.538	14.17	18.75	13.8387	7.5875	3.3467	2.9582	8.5217	3.5138	4.3946	7.9645	11.0169	8.8704	11.1041	13.2416	3.946	3.6931		0.688889	8.34847
14.8927	12.7863	18.8384	13.8663	2.5319	3.126	8.558	3.359	4.285	7.6891	8.963	5.318	1.528	7.803	15.643	15.218	14.4822	8.6352	4.3597	3.7542	9.8071	1.0485	3.6957	10.7186	13.0296	11.9262	8.3192	13.1992	5.159	1.3572		0.694447	8.24154
15.0118	13.7952	17.433	11.9198	3.7382	3.494	12.36	4.045	2.207	6.9456	8.219	8.191	3.16	13.171	13.308	12.593	12.6145	7.2512	2.4234	3.4126	8.5594	2.3897	4.2092	9.3195	11.0101	9.2641	7.7095	13.5897	1.898	4.5907		0.700001	8.02832
15.1309	14.6708	17.0783	13.9537	2.9958	2.113	9.56	8.915	5.673	4.0328	8.272	7.594	4.132	9.866	9.147	12.729	13.3779	6.851	3.2572	4.8101	7.4776	3.589	2.7513	12.3897	10.6963	9.4907	6.1946	13.7742	2.862	3.1835		0.705555	7.9806
15.2501	17.3097	19.6256	16.8317	2.1235	2.181	8.198	7.77	3.925	3.8607	7.575	7.35	3.529	11.526	15.136	13.654	12.5179	7.3587	3.4213	2.1955	4.3064	0.5629	3.6479	9.6343	10.1306	6.3307	12.7807	8.9359	3.437	2.1289		0.711113	7.86151
15.3692	17.2522	16.6593	14.0319	5.9446	3.306	7.843	5.171	4.859	3.2553	5.932	7.779	6.958	10.741	14.807	9.275	13.3679	10.7843	1.8957	1.6891	7.4262	0.6841	2.345	8.8108	11.0142	11.3534	8.7037	12.4194	2.001	3.1691		0.716667	7.91304
15.4884	18.8181	15.2056	18.4078	2.8221	5.074	7.743	7.019	4.987	4.8285	5.398	5.312	5.289	8.465	13.303	11.205	15.1509	6.8609	1.6889	2.2214	9.9688	0.9553	3.4518	7.53	12.9808	13.59	10.5921	13.2296	1.189	4.838		0.722225	8.21119
15.6075	10.1789	22.3595	19.544	1.298	4.103	9.146	5.945	3.366	1.7244	7.331	7.021	4.517	8.073	13.573	12.29	16.8626	12.6903	1.9037	3.8281	9.3108	1.5994	2.8327	11.5778	12.9794	9.8337	8.9522	10.6828	4.02	2.402		0.727778	8.27398
15.7266	18.3591	18.1247	22.0682	2.135	6.916	11.721	6.212	4.248	3.2415	9.801	9.145	6.941	6.861	11.804	10.878	19.8606	5.432	2.0539	3.7947	6.4843	3.6639	3.0189	11.8512	9.4463	14.1694	7.448	12.8753	4.2	3.1204		0.733332	8.82326
15.8458	19.888	16.8361	24.3774	5.7434	4.25	9.755	9.25	3.753	3.1376	5.331	9.748	6.329	6.146	9.345	8.096	13.5462	7.1529	1.4538	2.3807	9.6534	0.7686	3.0019	5.9525	16.2569	10.0433	9.7465	16.0653	2.928	4.3799		0.73889	8.45915
15.9649	13.8488	20.0357	20.7823	5.992	4.556	12.501	7.554	6.322	3.7431	5.145	7.285	4.563	9.208	7.139	14.216	19.8958	8.2279	1.1937	3.6014	10.0113	0.189	1.847	10.4495	13.2699	11.6251	10.1641	13.6745	2.99	4.1304		0.744444	8.76416
16.0841	19.589	22.2596	21.6628	6.0645	7.37	13.03	7.137	4.569	4.4509	5.8	10.338	4.251	5.749	5.125	12.455	20.9079	10.5997	2.7895	2.217	12.0589	2.5803	3.5432	9.2418	14.8464	10.5495	12.3729	17.1775	1.968	3.0155		0.750002	9.43858
16.2032	23.924	22.5034	20.4179	5.4521	8.177	15.582	8.018	5.953	4.7925	6.362	8.23	3.333	9.222	8.204	12.134	16.8554	7.7938	4.0934	2.0619	7.5986	2.932	2.9036	8.1265	9.8869	10.2712	7.2409	12.9219	4.352	2.4095		0.755556	9.02595
16.3224	23.3448	21.6011	20.2982	3.372	5.69	16.018	4.054	2.765	4.6609	8.868	6.467	3.12	7.381	8.701	10.595	15.3737	7.8825	2.4343	2.4805	7.8146	1.0866	3.0619	7.9548	11.6011	9.3935	8.273	15.0605	3.499	2.5202		0.761114	8.46111
16.4415	23.0586	22.5909	20.0699	2.9847	7.467	11.257	3.867	5.612	3.8651	6.22	3.615	3.353	6.131	9.741	9.242	21.0434	9.1916	3.1816	2.9518	7.454	3.286	3.4468	8.7189	11.8929	4.6876	8.7134	14.1525	5.849	4.1836		0.766668	8.54577
16.5606	21.175	22.3	22.7936	10.31	9.179	12.961	5.772	5.148	4.5481	5.522	7.199	6.645	6.595	4.697	10.612	12.8267	8.9082	4.665	2.0245	8.1792	2.3128	2.5214	10.2334	7.0141	8.1084	7.2521	14.5872	5.989	2.5628		0.772222	8.71178
16.6798	20.7732	27.2715	19.8014	5.9806	11.56	12.289	6.209	7.491	6.2114	2.363	7.487	7.19	5.978	7.897	10.007	16.7162	3.9469	4.6158	3.2495	5.4855	1.663	2.8314	15.0766	12.8111	8.9464	9.0077	11.5211	3.663	1.8886		0.77778	8.96317
16.7989	23.3838	21.0054	17.5969	6.3906	11.035	16.237	6.689	5.818	4.3807	2.968	5.814	3.433	5.432	7.845	9.929	20.1187	6.9426	4.2678	2.3336	7.1836	1.9571	4.2473	11.4975	10.9924	10.4789	7.2352	15.3977	4.39	5.7188		0.783333	8.9903
16.9181	21.2053	18.1475	23.1636	8.208	15.142	9.728	5.383	3.884	4.2767	3.39	5.328	2.422	3.477	6.873	10.934	19.7622	7.4136	3.9126	1.774	8.7536	2.442	3.5452	9.1792	10.8273	9.2435	8.8278	15.7208	4.976	2.5051		0.788892	8.63603
17.0372	23.2505	17.6271	23.2802	9.1761	15.992	10.219	7.134	2.852	4.0366	3.836	6.637	2.394	3.311	5.768	12.153	14.6589	7.8648	5.239	2.029	9.785	1.488	2.6143	10.7795	10.7586	12.6104	7.7039	9.5571	3.224	2.6374		0.794445	8.57298
17.1563	23.2434	21.0617	21.1386	12.1296	17.898	11.516	5.987	4.122	2.2714	2.425	3.933	4.25	4.171	4.595	12.437	16.98	5.9172	3.2832	2.361	8.2462	1.7141	3.7864	8.9344	12.196	9.0281	8.8563	13.3037	5.585	5.8525		0.799999	8.86975
17.2755	21.9468	26.9257	20.6963	13.1586	12.796	10.599	4.01	4.773	2.7769	4.648	4.623	3.217	3.769	5.961	11.922	15.5101	3.629	6.2721	3.2669	8.5977	1.312	2.4478	5.6207	17.0984	7.7163	8.9789	19.0803	5.547	1.4697		0.805557	8.90928
17.3946	21.6616	22.1986	18.5255	13.5238	16.536	9.731	5.003	2.976	2.0431	2.102	1.556	3.726	3.196	4.964	7.212	10.2464	5.2265	1.6084	4.0776	6.3125	2.0169	3.9795	9.5815	9.008	13.169	7.5146	11.9961	2.63	3.1496		0.811111	7.77487
17.5138	26.4079	21.0442	15.58	19.4819	20.413	10.472	3.165	3.107	1.6006	2.761	2.369	3.914	3.603	5.831	6.228	13.8727	5.3361	2.7857	1.8918	9.5575	3.488	2.2927	9.3401	11.1812	11.7744	7.2862	15.0507	3.158	3.9737		0.816669	8.51608
17.6329	23.9514	21.379	22.9374	29.9943	20.145	14.102	4.445	4.344	2.0127	3.24	3.212	1.811	3.349	2.035	7.212	13.6213	9.4648	3.1637	1.5288	8.1755	1.9906	3.3424	12.6939	11.1545	12.1103	11.9124	15.0025	4.812	2.7685		0.822223	9.51417
17.7521	19.5441	22.1454	24.2442	19.1192	20.777	16.12	4.968	1.872	2.4779	2.333	3.731	1.84	2.779	4.024	7.946	11.5251	8.9045	5.377	2.5227	7.738	2.146	5.8208	7.6561	10.6499	8.1942	9.1536	16.8127	3.366	3.7014		0.827781	8.87892
17.8712	18.7602	30.2157	22.1062	19.46	21.57	13.285	4.865	3.442	1.6573	1.926	1.844	2.221	0.329	3.757	9.282	9.5379	6.6496	2.3539	3.5155	8.6784	1.6513	5.4308	6.4696	10.3749	12.2424	10.6985	16.2607	7.612	2.8465		0.833335	8.9325
17.9903	21.0355	25.9702	25.7241	24.1987	19.307	8.059	5.02	2.836	3.3797	1.293	2.608	0.803	2.149	2.233	5.624	6.7433	7.2271	3.1953	2.8379	5.667	2.5127	7.2318	7.094	11.533	9.6302	10.5902	10.5151	6.378	4.1404		0.838889	8.46677
18.1095	22.2936	23.3726	20.9869	24.771	23.053	13.17	8.36	3.719	1.6578	1.952	1.611	4.429	3.48	1.906	5.08	8.0076	4.153	3.6182	4.5258	7.9836	1.5349	7.1696	6.1012	11.2292	8.6075	6.8767	13.983	6.737	5.3087		0.844447	8.81648
18.2286	29.2374	27.7596	20.3832	22.4486	24.848	13.956	2.975	1.377	2.2833	3.201	1.383	1.926	0.424	0.657	2.975	7.1852	3.4156	2.5788	4.3008	4.7421	3.1547	6.4082	9.7257	12.5484	11.124	9.7054	18.0926	3.175	5.2646		0.85	8.87087
18.3478	22.001	21.7218	16.0044	22.5229	21.038	8.896	6.842	3.497	2.2668	1.169	2.977	1.133	2.445	1.767	3.675	4.6824	3.6121	3.8874	5.5395	5.5057	1.4896	5.7431	6.8191	9.4036	8.96	9.277	11.7126	4.583	4.8493		0.855559	7.72484
18.4669	19.217	24.8182	21.1037	30.8172	24.534	15.052	7.046	1.718	0.7948	0.367	1.622	0.963	1.678	2.07	3.166	8.8758	5.319	2.9145	5.2986	6.4599	2.8814	8.7353	7.529	13.0308	9.2903	10.8896	10.8336	7.026	4.1737		0.861112	8.90429
18.586	26.7816	22.5145	20.5688	22.6301	19.095	13.016	5.42	3.862	1.5263	1.077	0.446	1.382	0.826	2.888	3.587	7.4531	3.2525	3.2469	6.2125	5.9791	2.0573	8.6699	7.8591	15.0627	12.1422	7.109	15.6106	5.14	5.4459		0.866666	8.65038
18.7052	24.1466	20.549	19.9287	19.6004	22.961	10.749	6.058	1.984	0.7472	0.952	0.103	1.23	0.825	1.068	1.874	5.7936	3.1395	4.8273	2.0002	7.0576	5.2695	7.1875	6.7829	10.912	10.9037	9.9913	13.4475	3.936	6.8546		0.872224	7.96135
18.8243	20.3602	27.3951	19.3669	28.4208	21.269	11.786	8.466	2.751	0.6223	0.139	0.681	0.865	0.839	0.023	1.689	3.139	2.8349	1.5302	1.6755	5.8135	2.7659	8.6017	8.5183	13.3703	9.3456	10.6766	12.2942	6.328	4.0855		0.877778	8.12595
18.9435	15.818	25.9645	22.4674	17.1927	17.43	10.464	4.617	3	1.0299	0.319	0.528	0.884	0.858	1.666	1.345	6.2405	3.3957	3.394	3.3605	4.8	4.8819	9.5895	7.9407	11.1143	7.3937	8.1472	16.1416	4.725	5.8702		0.883336	7.60615
19.0626	22.2193	25.5457	23.1479	18.0171	18.915	14.27	7.513	4.251	2.2787	0.4	0.292	1.817	0.95	2.415	2.028	3.5125	3.5263	4.1497	2.2286	4.7836	3.0667	9.6918	4.2045	8.8851	9.2824	9.4269	10.5775	8.099	6.4354		0.88889	7.99758
19.1817	21.8143	30.1949	19.6527	17.4294	15.75	10.709	5.235	3.206	0.3925	1.422	0.506	0.832	0.028	0.086	2.565	1.6021	2.9497	2.2297	3.5053	4.3517	5.3112	5.773	6.8207	11.5775	8.5696	9.5444	10.2156	5.416	6.2271		0.894444	7.37643
19.3009	19.9485	28.1368	23.6891	23.1245	16.012	10.038	6.23	2.224	1.7313	0.093	1.473	1.717	0.564	0.685	1.157	2.4965	3.2136	2.9485	3.4527	6.086	5.124	9.5178	9.2923	8.6465	9.5417	6.8766	13.1071	9.356	4.5363		0.900002	7.96617
19.42	19.6685	21.9771	25.2354	20.2143	19.017	16.648	8.497	1.371	1.9576	0.906	0.128	0.064	0.653	1.198	0.347	3.0948	1.5613	4.0128	1.709	5.767	4.5158	7.6805	8.9984	12.76	7.3371	8.688	13.1857	7.212	3.0779		0.905556	7.84421
19.5392	21.5101	22.8929	26.619	24.8835	19.355	12.057	4.515	2.274	0.1907	1.513	0.563	0.526	0.918	1.983	0.658	2.2648	2.4552	3.0458	3.5128	6.6724	6.8973	10.6264	7.5811	15.6383	7.4891	7.3753	8.8678	6.783	4.6534		0.911114	8.08003
19.6583	18.6624	21.7132	28.0725	21.1812	18.557	7.285	4.255	2.903	0.5227	0.566	0.778	0.489	1.118	0.736	1.664	1.2396	2.4244	1.2106	1.6534	6.2064	6.38	8.0948	7.1167	12.857	11.8916	9.7218	10.1246	8.965	7.491		0.916667	7.72
19.7775	17.9069	19.9096	25.6864	24.6529	14.681	8.632	1.916	2.524	0.4698	1.138	0.087	1.295	0.601	0.593	0.393	0.7691	1.4498	2.1444	2.0362	4.338	7.0031	11.5848	6.4494	11.0807	8.4654	4.8851	11.7346	10.414	5.2316		0.922226	7.17489
19.8966	18.7247	18.7993	30.9394	21.3775	14.867	10.019	1.806	0.722	0.8668	0.139	1.24	0.467	0.015	0.011	0.293	0.7845	2.1031	0.9579	3.4458	5.0367	6.7179	13.2174	7.2494	9.2644	9.7501	8.3607	9.9644	7.361	10.5916		0.927779	7.41695
20.0157	19.2833	20.3967	30.5124	19.6711	15.573	11.666	0.631	0.033	1.269	0.491	0.894	0.035	0.678	0.434	1.367	0.0122	2.8976	1.4155	1.8611	4.4135	8.1235	9.1646	9.8961	9.2685	6.4818	5.1438	11.3782	10.075	7.469		0.933333	7.25982
20.1349	13.9691	15.9168	29.8844	18.6322	13.607	6.545	3.097	0.001	1.3796	0.003	1.66	0.488	0.807	0.443	0.468	0.7932	0.7067	0.7883	3.6806	2.9682	10.4301	10.1433	9.2671	10.5599	6.5983	8.7804	15.2402	7.199	7.3689		0.938891	6.9457
20.254	17.2695	18.4352	25.2992	15.6387	6.765	4.702	0.867	0.011	0.5475	0.041	0.529	1.679	0.536	0.418	0.572	3.0646	0.697	0.5383	0.4806	4.0396	7.9779	9.6668	6.4745	9.2312	9.8913	9.8406	5.9305	9.103	7.495		0.944445	6.129
20.3732	19.5429	16.8377	17.1318	18.4974	4.997	2.075	1.275	0.256	0.6152	1.572	0.015	0.539	0.978	0.155	0.213	0.7784	0.8695	1.4419	0.075	6.6583	9.6931	7.9824	11.7417	8.8545	10.9934	7.4742	9.517	11.247	6.4097		0.950003	6.15297
20.4923	15.0691	16.8107	17.9729	16.1437	5.505	2.721	0.837	2.518	0	2.092	0.155	1.27	1.561	0.006	0.056	0.7404	0.3059	1.1678	1.0039	5.6669	5.2858	10.4152	6.5328	13.1982	10.2105	8.6616	11.07	8.154	8.806		0.955557	5.99781
20.6114	12.4117	19.7719	18.4595	13.0087	8.598	2.014	0.618	0.23	0.0183	0.103	0.515	0.234	0.49	0.154	1.801	0.0459	0.894	0.7148	0.6659	5.2141	7.8474	8.9121	8.7151	9.3772	8.7579	7.0494	9.9643	4.795	10.3441		0.961111	5.5767
20.7306	18.3006	13.7037	15.4096	7.0251	3.559	0.748	0.471	0.107	1.1327	0.84	0.802	0.496	0.546	0.499	0.042	1.3489	0.2833	0.2694	1.1906	6.3239	10.4266	8.5879	9.6242	7.395	7.4701	8.7917	9.052	6.37	9.3304		0.966669	5.17744
20.8497	15.0578	19.7436	12.1975	4.4011	0.831	2.254	0.476	0	1.8665	0.737	0.787	1.416	0.003	0.185	0.565	0.255	1.146	0.8422	0.6801	4.6386	7.318	6.4639	5.9511	11.8011	6.9406	5.1884	11.0777	7.837	10.5869		0.972222	4.87059
20.9689	9.8064	19.6111	9.0529	5.1767	2.694	1.741	0.608	0	0.1242	1.619	0.855	0.298	0.052	0.165	0.517	0.6208	0.9234	1.0422	0.8187	1.5392	5.3954	6.0222	9.3675	13.1687	7.5733	6.049	7.7429	8.84	6.4381		0.977781	4.40902
21.088	8.4523	12.25	9.4679	0.8026	0.273	1.12	0	0	0.6838	0.399	1.635	0.339	0.224	0.011	0.042	0.5008	0.4823	1.5401	0.3315	1.6079	7.4134	6.1408	8.0014	9.0189	10.0242	6.3298	6.9176	7.069	10.4451		0.983334	3.8456
21.2071	6.8917	8.8227	2.8554	3.9793	0.681	0.967	0	0.000451	0.6686	1.038	0.124	1.233	0.335	0.643	0.02	0.2956	0.1383	0.4767	1.0815	1.0571	6.3589	5.4773	10.4358	7.6866	8.8438	5.7614	8.5047	5.07	9.1654		0.988888	3.40042
21.3263	7.0475	7.6792	6.0262	1.3497	0.671	0.231	0	0.716	0.3133	0.786	0.922	1.527	0.275	0.19	0.5	1.181	0.6723	1.0544	0.1377	3.686	4.877	6.9228	5.3219	7.0354	4.5926	6.2693	5.5148	8.017	7.3029		0.994446	3.13169
21.4454	2.2487	3.9975	2.7844	1.2956	1.201	0.871	0.683	0.228	0.0043	0.049	0.093	0.165	0.349	0.976	1.339	1.309	0.8075	0.4722	0.8578	1.4837	4.3599	9.7608	5.6957	9.7012	4.9935	6.1067	7.4783	6.243	8.026		1	2.88206

## Sheet: Image5
X0	Y0	Y1	Y2	Y3	Y4	Y5	Y6	Y7	Y8	Y9	Y10	Y11	Y12	Y13	Y14	Y15	Y16	Y17	Y18	Y19	Y20	Y21	Y22	Y23	Y24	Y25	Y26	Y27	Y28	Y29	Y30	Y31	Y32		Ap-basal	Avg intensity
0	40.684	41.7316	35.186	35.5434	23.205	14.541	15.186	56.541	23.374	21.2279	21.5897	23.218	45.085	34.328	37.175	22.059	25.506	22.9238	21.5511	25.9359	24.4897	29.8233	22.8692	17.6615	26.7721	32.053	27.979	22.256	20.014	24.026	33.491	30.891	22.716		0	27.9283
0.1191	43.236	44.2378	46.7801	27.4708	30.406	19.661	19.055	72.771	26.626	23.6613	24.6509	16.455	39.966	30.157	38.675	18.86	33.455	32.1653	26.7557	27.7251	26.2106	27.8577	28.7301	25.5962	28.465	31.766	23.446	24.851	28.061	33.663	33.64	29.598	22.068		0.0049734	30.5067
0.2383	49.23	49.0353	57.1363	31.5854	32.042	26.643	15.347	64.474	27.926	28.131	31.7005	22.24	45.758	38.402	46.883	32.007	24.901	24.8789	21.9824	26.4964	27.3107	35.6016	36.718	29.7591	31.6862	37.615	27.955	31.854	29.629	32.889	28.467	27.468	30.846		0.00995098	33.4727
0.3574	49.353	58.3377	42.001	28.6541	38.854	36.707	22.782	64.09	34.14	26.3537	46.4914	21.863	56.26	30.935	49.281	24.44	36.846	34.1273	24.2758	31.4339	30.4004	38.6264	35.0814	28.1649	33.1588	51.229	28.46	32.718	25.696	41.35	38.569	29.491	37.64		0.0149244	36.6003
0.4766	69.095	47.1312	46.8427	38.1597	54.407	38.938	28.701	80.481	40.82	38.3132	56.6501	25.132	73.201	36.679	47.376	26.095	47.918	37.5304	32.1887	31.5969	29.7343	51.1193	38.8895	39.0328	40.199	60.838	36.021	39.825	43.573	37.092	47.237	44.647	39.828		0.019902	43.7967
0.5957	69.448	62.1196	51.7009	42.5657	67.068	52.61	33.38	95.255	50.341	41.4879	65.7697	37.096	71.416	45.931	52.527	29.064	58.864	48.7592	42.1662	35.7077	37.1701	46.8709	42.9519	29.5168	33.917	73.532	42.862	40.434	42.276	48.182	54.284	45.908	42.755		0.0248754	49.5132
0.7148	78.065	65.7468	51.9045	38.9563	78.511	74.183	39.174	109.308	56.911	44.0419	77.1318	38.343	76.774	41.752	52.672	28.422	58.999	54.5134	39.6572	46.6553	51.5965	66.5018	56.7373	43.9803	43.25	71.836	53.032	41.274	53.077	46.132	52.02	43.826	54.418		0.0298488	55.4364
0.834	92.424	63.902	52.7192	43.7128	87.013	99.638	41.169	113.12	65.473	42.9626	79.8376	45.17	100.825	55.81	64.237	38.603	59.42	58.5405	47.2584	52.5723	54.4723	55.3684	54.3367	38.2743	51.0688	77.687	59.774	56.232	67.944	62.251	66.567	60.001	63.946		0.0348263	62.7979
0.9531	95.94	77.0716	53.0741	57.3927	103.511	101.786	51.926	120.373	60.763	47.5355	78.2622	52.005	94.882	61.989	55.584	34.004	80.932	69.8292	54.771	56.3794	63.0502	63.5615	61.9504	43.0453	59.3344	90.728	68.617	70.064	68.63	70.66	64.384	59.658	63.832		0.0397997	68.3493
1.0723	93.353	87.26	61.7087	65.6662	105.939	114.689	63.492	124.089	62.606	61.4087	87.6833	73.632	98.648	57.923	60.62	37.47	71.08	76.2137	61.541	67.914	70.1882	57.4602	64.6063	47.6843	58.9236	95.751	72.064	78.677	85.847	75.138	66.599	62.35	76.265		0.0447773	74.0755
1.1914	96.107	91.328	74.1967	59.7929	118.958	117.526	72.201	139.714	66.049	62.0211	86.3539	80.855	98.688	60.866	59.183	31.427	79.771	77.6433	54.3929	87.8227	66.3521	65.2348	63.9594	58.4496	58.6004	99.305	79.716	94.778	84.9	88.215	83.206	83.284	75.873		0.0497507	79.2961
1.3106	93.436	91.2394	69.2458	69.2762	131.984	123.956	87.767	138.847	63.213	63.9659	82.201	76.004	106.954	72.76	62.544	41.417	89.593	81.1573	70.3724	81.9942	78.1412	65.5295	66.2684	56.8579	65.4643	103.731	91.317	104.308	110.688	108.619	87.631	90.53	97.002		0.0547283	85.5762
1.4297	90.818	98.3783	74.7122	80.5043	133.758	136.44	99.488	159.659	87.568	69.0266	95.7888	68.956	121.853	79.764	60.038	42.599	88.027	74.9661	67.149	86.988	90.1098	55.1355	64.2414	72.331	82.2082	107.254	90.91	113.657	129.59	110.972	102.094	101.8	97.046		0.0597017	91.9342
1.5488	80.97	81.745	75.5449	83.366	141.481	131.062	118.278	142.773	88.21	75.1651	89.5911	83.67	133.997	81.033	64.137	50.334	94.803	80.0124	67.3239	81.9712	82.1502	55.7714	65.3763	63.3841	81.137	103.295	101.631	114.892	141.061	107.748	100.101	103.511	94.104		0.0646751	92.716
1.668	82.475	91.309	69.947	86.737	145.428	133.392	125.261	143.803	108.337	79.9228	83.1187	90.723	141.333	85.795	67.941	46.83	105.015	79.1352	75.3861	88.4021	89.6037	64.5858	57.5964	63.5485	83.2367	108.246	110.226	110.448	125.623	119.59	108.052	91.569	99.773		0.0696527	95.83
1.7871	80.891	95.6655	79.2726	82.2461	136.132	149.744	137.649	142.195	111.902	72.3381	79.2537	104.811	152.518	99.339	81.796	46.197	93.593	85.2422	72.4874	90.5319	87.9007	56.8583	65.8421	64.3013	86.149	122.875	107.451	126.499	139.359	130.02	109.071	85.192	100.995		0.0746261	99.2824
1.9063	98.047	90.7183	63.2844	77.9206	147.699	142.265	137.252	144.439	133.198	74.963	89.4641	91.748	129.76	106.694	80.401	50.504	109.452	91.8636	81.162	86.8955	90.4076	67.959	59.9082	57.9327	87.9314	105.669	96.379	111.446	134.159	130.986	116.85	102.939	99.335		0.0796036	99.6858
2.0254	87.68	93.4578	65.5626	94.2767	147.021	144.102	145.204	132.322	116.418	85.1111	97.1826	89.779	137.423	110.204	86.473	51.418	105.215	88.7721	83.6952	89.7153	73.5126	57.6147	57.703	70.3216	80.7933	108.876	107.262	98.997	128.536	127.059	101.118	94.402	97.04		0.084577	98.6142
2.1445	101.564	83.4587	70.4992	95.5712	134.658	156.244	140.78	138.979	135.248	83.9185	87.8323	91.794	128.046	113.877	90.644	70.369	107.531	88.1848	82.0428	88.8347	61.1	55.2491	62.3785	59.0267	91.203	105.957	112.176	102.897	139.084	120.25	101.545	75.456	103.735		0.0895504	99.398
2.2637	93.17	93.3509	62.6741	95.5792	143.766	151.243	137.753	127.859	127.27	78.8835	97.0849	97.027	133.242	107.12	81.62	66.987	117.135	83.5506	85.5369	97.3296	64.798	57.9532	64.791	63.2898	96.6892	117.614	114.825	91.431	129.13	113.189	90.11	73.894	94.406		0.094528	98.494
2.3828	90.861	84.3965	55.4028	88.1564	137.573	146.772	142.276	115.288	138.307	79.278	88.7952	78.412	131.944	108.482	93.657	79.86	108.602	86.3265	96.2493	78.8126	75.1058	47.783	56.2301	70.8607	94.2619	115.803	113.066	106.864	123.952	112.655	89.877	83.938	94.406		0.0995014	97.4016
2.502	92.814	71.2219	59.7867	91.4815	134.707	150.776	152.464	107.369	147.104	74.6201	86.0687	84.375	129.619	126.097	114.568	91.015	111.828	85.2143	82.8083	71.166	62.4977	66.2702	66.3842	73.8775	95.9326	113.754	103.532	94.387	116.728	117.588	81.271	77.481	90.543		0.104479	97.7379
2.6211	85.353	75.5339	60.1422	75.0086	114.595	140.56	138.295	104.2	138.484	82.1297	79.0069	85.312	135.187	130.78	100.031	91.15	103.039	88.7828	80.4469	74.0441	58.4615	65.2254	53.0355	59.7852	88.1161	112.385	101.204	92.648	111.061	111.596	87.882	79.532	92.852		0.109452	93.8141
2.7402	80.215	77.4102	58.6294	82.4825	115.612	142.508	147.285	98.311	137.783	75.1328	68.1332	76.757	126.569	117.466	114.161	110.94	106.688	80.5582	81.4931	74.6004	61.5543	65.9156	52.1007	72.4762	95.4419	102.761	81.035	91.115	108.555	103.771	77.005	79.874	87.167		0.114426	92.4699
2.8594	68.193	77.1765	64.1474	72.1266	122.74	134.538	138.89	90.557	131.013	74.8889	81.5798	76.553	113.877	125.885	115.947	102.525	104.898	77.9026	89.6515	68.4621	50.4623	57.3788	55.4384	60.9772	86.4307	91.11	92.573	87.197	120.996	107.1	72.943	69.559	87.065		0.119403	90.0237
2.9785	73.144	79.7831	58.5398	78.0473	119.231	129.724	133.246	95.492	135.417	76.0876	73.385	85.259	110.92	128.792	108.798	100.912	113.795	75.7929	76.2256	63.195	58.9336	48.1332	59.6721	59.3173	75.4457	95.285	98.707	84.366	113.875	92.594	62.671	71.366	95.717		0.124377	88.8445
3.0977	83.553	65.6857	57.7159	61.6913	115.037	134.137	122.889	96.822	133.144	71.0916	90.2948	85.943	101.962	117.163	113.021	98.19	97.052	77.7792	76.7679	62.8125	48.9016	58.6963	50.7203	58.3765	86.9611	95.796	88.687	82.34	108.959	81.411	73.901	67.342	90.477		0.129354	86.5249
3.2168	74.756	82.4259	48.0144	64.3195	117.07	128.299	122.389	81.517	127.291	64.6343	79.3034	90.447	87.077	108.163	112.499	100.689	101.406	79.0874	70.6534	74.2148	54.4573	55.2486	60.1468	59.6128	72.2755	85.714	86.226	79.944	105.715	89.108	63.301	59.623	78.563		0.134328	83.7634
3.336	71.919	70.3847	45.7214	59.2038	125.625	140.611	111.441	82.013	120.359	61.7788	71.306	77.667	94.226	120.442	111.063	105.471	100.23	77.0468	70.2591	56.3555	47.4287	47.7457	56.5958	53.1393	85.8185	89.829	89.886	81.864	99.209	82.797	65.072	64.058	80.087		0.139305	82.3228
3.4551	87.381	69.8491	48.5895	58.6346	106.532	128.845	92.919	84.069	117.431	58.3917	75.9362	72.483	74.757	116.722	103.901	107.716	84.467	76.2936	62.5241	49.0972	43.4389	58.2246	40.4845	38.0654	73.6507	107.419	87.338	80.795	82.591	74.306	56.002	53.326	70.615		0.144279	77.0544
3.5742	83.851	80.7562	55.1904	62.8542	116.443	131.6	117.249	92.333	125.697	67.8395	74.4023	84.997	62.26	122.385	104.199	100.929	95.298	63.042	61.5815	54.5886	44.4769	44.279	46.6382	55.9063	72.6542	98.428	100.113	80.568	81.124	72.506	46.147	70.601	77.214		0.149252	80.247
3.6934	77.808	72.3083	49.9626	70.3346	100.323	130.328	104.563	67.389	115.361	63.0027	71.5893	78.59	64.152	124.849	88.244	95.735	90.462	69.2783	59.9886	54.4385	46.6377	44.9684	42.7381	42.0144	61.9239	95.43	79.62	85.4	74.374	78.042	54.431	59.849	71.271		0.15423	75.3153
3.8125	65.442	67.0781	47.301	57.7033	81.656	129.471	109.907	66.551	97.005	47.6523	64.5641	76.853	60.684	112.746	89.961	86.589	91.053	64.1662	55.5713	44.4326	47.83	46.4839	44.4118	41.4347	63.9716	88.334	80.529	69.796	77.456	63.499	43.703	63.452	73.301		0.159203	70.3209
3.9317	67.438	72.6768	46.5118	60.2535	87.121	133.291	122.607	55.441	100.524	46.1298	78.9611	63.853	62.286	121.223	95.979	83.898	97.613	68.8437	54.3113	49.5032	39.3309	40.393	40.7813	48.5479	74.2538	95.846	75.232	70.707	68.5	71.995	42.188	59.368	78.999		0.164181	71.9578
4.0508	63.958	70.7088	44.461	52.6752	93.809	129.56	100.456	63.256	99.148	44.1265	74.0521	59.744	59.137	125.816	88.251	69.327	93.525	64.1915	40.1297	34.2671	35.0631	42.675	41.4162	41.0572	70.3398	85.141	76.226	65.188	68.441	64.246	43.466	74.564	72.793		0.169154	68.2186
4.1699	65.026	60.5078	42.9554	52.9009	94.823	113.244	106.814	57.36	95.683	45.3609	68.3795	50.33	55.706	116.714	95.941	88.213	109.15	63.7261	44.4068	44.4035	30.5188	32.5129	50.7927	45.8923	54.9155	77.525	58.804	62.516	60.159	69.272	36.912	74.245	65.012		0.174127	66.3855
4.2891	66.741	65.2859	42.1424	51.4004	99.84	108.159	84.92	61.113	94.087	35.6889	65.9377	57.01	49.751	116.798	90.619	73.323	102.928	47.645	41.2783	36.8618	35.9913	38.9938	37.6101	48.4009	60.3379	72.554	58.411	52.66	48.999	61.932	37.225	69.36	63.974		0.179105	62.969
4.4082	57.758	71.2967	44.1845	50.3586	104.17	112.695	93.346	53.533	104.861	35.997	59.8762	58.594	58.345	115.187	92.013	75.12	98.67	57.0003	48.3019	29.8673	25.6171	32.3537	34.6988	39.426	54.9779	70.278	64.445	53.404	52.361	51.192	38.488	64.762	56.042		0.184078	62.4006
4.5274	57.476	63.1426	52.8794	40.0319	92.025	114.545	85.556	46.101	97.845	34.2234	59.6896	53.209	43.223	109.108	80.987	77.746	107.41	55.7005	34.0448	37.8275	25.7493	34.016	47.0054	35.4284	54.4529	64.854	57.958	63.816	40.9	48.375	38.692	70.821	57.702		0.189056	60.077
4.6465	53.11	60.616	38.1899	30.5688	83.872	114.162	68.975	41.106	96.602	42.5433	43.997	38.227	50.457	87.876	80.568	75.883	90.304	57.3224	39.3568	34.7694	26.9408	34.0686	31.1024	41.0185	47.4098	56.602	55.758	53.838	44.423	44.855	42.94	59.854	52.145		0.194029	55.1352
4.7657	48.335	62.1126	45.2112	33.5468	97.804	103.621	62.574	36.816	93.071	42.1509	48.0621	47.099	45.31	100.918	76.089	73.082	91.088	54.3532	29.0248	28.2256	20.9274	35.7115	29.247	33.0062	47.9591	54.809	52.269	50.547	43.899	38.581	36.229	74.337	55.526		0.199007	54.2892
4.8848	42.122	52.3294	53.5349	32.8203	85.464	98.525	67.296	41.347	93.991	36.1104	36.7382	37.5	49.943	103.84	80.733	77.736	98.194	47.5242	32.5075	32.9523	18.1881	32.0538	28.1479	39.1851	51.0221	51.196	48.096	49.161	43.865	32.234	31.731	68.047	53.791		0.20398	52.9675
5.0039	47.939	57.9239	39.5319	32.2601	74.506	92.127	59.961	44.289	88.35	44.0429	37.1237	37.173	39.469	91.191	74.763	70.491	83.222	42.288	37.387	21.7315	22.8012	30.325	28.9735	30.4248	52.4003	44.876	46.58	45.169	33.106	27.553	31.615	53.93	58.357		0.208954	49.1479
5.1231	52.272	43.2958	40.8164	26.3199	72.675	95.199	52.714	37.344	85.234	32.7204	31.8679	31.568	38.149	89.421	61.821	74.391	87.953	38.0026	34.1591	23.3423	18.6442	36.7147	32.1813	34.6553	40.9569	46.743	49.205	50.565	30.494	26.1	24.791	56.898	44.017		0.213931	46.704
5.2422	43.324	40.3247	35.1078	19.0977	78.05	84.187	48.653	37.364	75.171	41.5742	28.1144	29.602	36.768	90.116	59.839	67.672	83.395	42.3317	24.549	29.5381	18.8903	29.5851	29.5513	28.0249	40.7665	35.319	50.097	44.478	33.814	23.992	26.245	49.426	35.669		0.218905	43.6557
5.3614	50.875	37.7252	30.1322	19.4502	61.943	81.542	51.444	31.524	69.78	36.5625	24.5026	24.18	28.965	68.343	62.635	67.38	79.467	33.4179	27.836	27.2152	22.1435	27.0824	34.0324	24.686	43.283	35.709	44.37	45.418	31.426	26.79	26.904	40.892	33.465		0.223882	40.9431
5.4805	44.567	26.2166	32.5257	17.8793	67.252	80.627	51.139	34.54	70.472	32.9586	32.4669	25.922	25.317	82.399	57.337	54.459	82.517	36.9171	19.1822	26.853	17.1018	31.4422	22.6928	25.2587	43.5323	29.443	41.913	42.804	31.499	21.825	20.834	32.613	29.419		0.228856	39.1492
5.5996	39.139	27.704	20.9449	22.8726	64.778	65.871	42.882	32.469	67.837	34.9503	24.9294	24.889	27.303	60.903	52.659	53.128	63.086	30.5182	24.8816	29.7186	20.5709	22.1879	25.7481	24.8044	38.7798	22.133	42.299	35.452	28.595	22.794	18.182	26.266	26.195		0.233829	35.3173
5.7188	39.064	21.0197	22.3152	21.6383	57.887	53.481	33.923	23.045	70.587	31.3624	25.6802	24.592	23.018	50.342	45.748	55.163	58.395	26.701	26.7381	22.1442	20.0517	29.2446	28.7695	22.8539	31.4527	23.694	40.112	41.553	25.747	25.316	20.252	25.792	30.746		0.238807	33.2857
5.8379	44.346	20.7367	21.031	17.5915	52.592	48.821	32.623	34.867	66.874	36.8128	19.823	20.372	21.844	72.64	53.638	48.063	48.129	29.5566	22.6917	22.7906	21.9159	23.093	24.0674	23.7127	28.4135	19.88	42.192	38.905	32.302	27.19	17.435	19.377	28.355		0.24378	32.8085
5.9571	33.982	19.2533	15.8516	22.2574	51.251	45.62	35.992	28.037	62.546	33.0361	20.4154	23.634	22.401	60.367	49.302	45.914	49.945	25.6767	26.7439	20.4059	18.6123	22.6596	24.4163	26.5283	22.0179	17.911	44.318	30.018	35.31	22.547	18.107	19.977	25.198		0.248758	30.9167
6.0762	34.617	15.1659	10.059	17.2238	43.746	46.884	30.299	34.44	60.292	25.3008	20.2	21.411	23.1	72.111	43.896	50.67	39.061	29.0734	23.5827	23.0181	18.0002	17.0522	15.144	20.3541	16.692	16.751	33.381	26.227	32.003	20.943	16.725	21.162	20.766		0.253731	28.4652
6.1953	25.787	14.2055	17.9658	12.3502	42.332	33.703	35.789	31.851	56.221	36.6241	22.7948	18.639	20.219	60.273	46.624	30.988	46.081	24.3704	22.6973	19.1903	17.4053	18.2237	13.2187	15.5764	24.0471	14.872	39.915	20.515	29.789	24.576	19.959	18.769	23.675		0.258704	27.2499
6.3145	24.995	13.4106	15.491	18.5213	42.697	35.424	30.36	32.167	55.155	36.6317	24.3866	23.095	17.167	51.962	39.708	33.503	35.742	24.0577	21.0782	22.2891	19.4865	15.6121	17.5811	17.2863	19.8403	17.058	32.925	25.451	20.851	18.827	22.027	20.28	19.755		0.263682	26.2067
6.4336	16.54	18.5278	15.6365	21.71	37.416	31.466	30.337	29.452	52.076	23.3837	18.4187	20.412	13.887	47.759	35.637	38.837	38.214	29.3222	29.1022	16.2353	15.7739	12.317	14.6492	18.3941	19.5234	16.769	30.95	23.177	28.911	24.864	20.007	18.303	16.908		0.268655	24.9975
6.5528	17.141	15.9928	17.7505	17.0091	33.181	25.842	23.975	30.883	52.012	25.8615	19.6977	20.136	20.613	53.781	36.006	36.343	34.686	20.6696	23.7361	18.6013	16.8345	12.6186	13.542	18.2162	19.3382	15.438	26.404	26.158	24.129	21.138	19.778	20.507	17.232		0.273633	24.0985
6.6719	18.666	9.9084	19.6928	19.7544	32.814	18.636	26.607	25.818	50.863	28.5621	18.8258	19.349	15.732	47.272	44.617	32.012	31.364	23.7722	33.6773	20.1963	19.7721	18.5279	8.281	18.7652	25.8809	16.209	27.558	24.603	18.457	22.413	22.998	21.166	20.826		0.278606	24.3514
6.7911	20.52	11.5384	14.74	14.4042	38.657	22.418	24.218	24.18	41.946	24.4621	13.6332	22.962	16.95	53.855	25.282	27.309	24.862	22.0869	28.5734	16.4529	18.6865	15.4768	10.021	16.9906	18.8578	13.78	25.03	26.79	21.999	18.849	22.534	18.301	19.714		0.283584	22.3054
6.9102	17.555	15.2697	15.4494	18.8064	33.341	22.216	23.203	22.262	44.66	25.3713	15.5628	17.956	14.019	41.051	23.582	25.982	19.33	20.8605	26.5092	21.2072	12.5034	14.0676	15.3051	14.9435	19.4237	11.905	23.697	24.34	25.615	18.695	17.195	13.967	14.959		0.288557	20.9336
7.0293	15.739	12.7132	7.7781	20.24	30.502	17.906	26.719	20.363	38.259	29.8445	18.524	15.088	16.285	35.037	18.875	24.447	17.991	29.1516	23.6252	14.9843	19.5014	17.3297	13.9573	17.0795	18.602	17.3	21.957	24.571	22.388	18.678	26.562	11.532	20.7		0.293531	20.7342
7.1485	12.452	11.8712	16.7697	15.191	33.478	21.429	21.753	24.92	32.923	21.7514	19.4687	12.439	13.351	27.895	22.409	27.404	22.446	21.782	23.0711	19.3979	18.6379	16.8459	12.5068	14.435	21.1182	12.256	18.391	19.728	22.756	23.095	22.591	13.422	21.24		0.298508	19.9765
7.2676	12.911	18.1714	17.9178	17.7099	27.338	24.167	29.702	25.098	40.06	24.1398	15.7454	12.537	14.58	31.908	17.293	21.116	21.225	24.5311	24.1662	24.8322	17.3329	17.7335	11.6467	14.1354	22.4736	21.226	15.645	14.49	20.506	17.654	17.111	16.306	22.987		0.303482	20.4362
7.3868	15.668	16.9825	10.883	15.4023	29.53	25.588	25.274	21.802	26.943	24.4503	12.9884	15.891	11.996	27.973	14.992	18.977	16.765	28.4145	20.0132	19.901	17.4547	21.4442	13.2884	17.8759	19.3449	19.34	21.433	16.504	23.693	19.24	18.757	17.63	20.213		0.308459	19.5955
7.5059	12.174	16.7246	14.1694	13.7532	32.18	26.628	29.488	17.599	25.683	18.9726	19.8612	17.724	21.158	26.115	23.958	21.491	19.595	26.218	25.8121	23.072	17.625	16.1484	12.8489	19.1067	21.5346	19.936	13.228	15.355	21.95	17.613	17.592	18.822	21.408		0.313433	20.168
7.625	15.257	17.23	13.7417	15.7006	28.674	27.8	29.452	20.546	24.221	24.695	9.7549	16.74	14.433	17.106	16.932	20.666	20.789	24.4441	24.2794	18.6136	18.0091	14.8353	14.6838	20.155	21.7371	18.233	19.599	15.521	21.677	11.497	23.923	17.257	20.135		0.318406	19.3436
7.7442	14.515	13.805	10.1591	15.9147	30.174	22.389	31.966	17.077	20.431	24.6706	19.753	17.525	21.723	19.245	16.221	18.18	22.546	20.2078	18.4809	19.1428	18.5349	10.9542	16.8224	14.3099	18.6495	17.074	18.465	14.231	30.344	13.22	19.478	14.897	18.986		0.323384	18.7907
7.8633	15.816	21.1562	12.0237	16.61	31.962	24.653	30.158	14.277	19.541	22.3682	15.8474	15.066	17.395	21.792	12.98	20.134	19.034	23.4598	21.9329	17.8815	22.053	13.362	11.8488	15.6537	15.709	18.639	15.814	17.296	20.571	15.6	16.084	13.484	21.878		0.328357	18.5479
7.9825	12.947	18.6783	18.4655	13.655	32.346	27.174	26.136	18.475	18.9	27.1416	17.3574	13.584	23.953	20.017	14.013	19.356	19.315	34.9269	17.0372	17.8697	17.6415	16.0481	12.1837	13.0375	13.7845	20.943	16.273	15.175	18.31	17.227	20.982	14.708	19.383		0.333335	19.0013
8.1016	13.936	15.1811	16.9102	10.3084	30.585	22.208	25.685	17.328	21.432	16.6577	11.1782	20.097	19.401	20.247	15.725	18.818	15.866	23.7207	15.2037	16.5273	17.3636	18.9768	9.4414	12.5453	18.7492	17.963	13.052	18.671	17.349	16.693	21.6	18.932	20.212		0.338308	17.8353
8.2207	13.575	19.8496	11.5077	11.0531	32.407	25.541	29.89	16.976	21.841	21.2723	18.9542	12.727	21.643	16.228	15.125	20.554	17.875	28.9708	17.2787	16.1019	18.1874	9.6035	15.1499	11.2454	11.9356	19.49	17.622	21.2	21.414	19.988	16.945	20.882	19.194		0.343282	18.5523
8.3399	12.236	14.3473	13.5067	8.455	30.231	22.736	30.843	14.963	19.074	30.0741	16.2699	19.151	20.086	18.816	16.036	15.422	15.906	22.7292	17.4276	13.329	18.5412	12.1378	8.3131	9.8243	15.1164	23.229	17.756	14.769	21.721	21.557	19.962	18.906	18.012		0.348259	17.9237
8.459	11.179	13.2408	12.7641	9.6885	25.195	16.9	23.033	22.11	22.961	16.546	15.1439	10.172	24.311	19.235	16.756	23.158	15.434	21.5732	14.7531	18.9393	15.8908	11.0603	8.4638	8.344	15.2583	20.394	16.343	22.279	21.261	18.404	18.101	17.836	14.868		0.353233	17.0181
8.5782	15.191	13.465	11.1546	12.6495	22.502	17.097	25.558	20.106	14.754	21.1583	14.4142	13.723	16.922	20.201	19.155	14.846	16.785	21.9785	15.2806	12.6779	18.3124	13.964	9.254	10.5751	18.0061	22.67	15.627	16.23	16.982	16.265	18.61	17.67	15.729		0.35821	16.6519
8.6973	13.597	16.4175	11.6938	12.513	18.923	22.754	25.906	19.423	22.734	16.9474	17.2322	14.979	20.851	16.444	14.116	19.558	13.13	20.518	15.5618	14.3292	21.8638	14.6929	13.5563	12.9046	19.1021	17.71	17.402	18.083	18.495	15.289	22.287	14.128	18.22		0.363183	17.314
8.8165	12.479	13.3016	11.4009	12.477	20.922	19.664	24.092	18.123	16.436	19.7308	14.2653	13.792	21.511	15.986	23.639	14.17	15.81	24.825	15.4601	14.9321	20.746	11.1745	10.3795	11.3156	19.0517	19.018	23.263	16.458	19.759	21.631	14.614	17.369	21.357		0.368161	17.2471
8.9356	8.386	11.9815	12.2115	13.7098	23.697	16.349	28.532	21.098	18.811	14.9495	17.1114	12.809	17.991	24.057	16.1	15.818	16.278	23.8434	12.9178	15.9535	14.8349	14.8813	8.7851	9.8061	10.9349	17.977	16.449	16.071	17.295	15.412	19.589	17.701	17.314		0.373134	16.3532
9.0547	13.79	12.5338	9.5549	9.2475	28.743	14.832	26.293	14.049	15.988	18.0343	21.7577	14.005	18.112	20.544	23.222	10.959	18.543	16.0496	13.166	17.7037	24.0183	10.1579	11.2959	14.1567	13.5837	13.772	17.583	15.094	20.912	21.007	21.154	15.815	19.483		0.378108	16.823
9.1739	13.558	9.2319	10.4219	12.707	22.317	13.279	24.278	17.637	16.927	13.6097	15.022	12.18	18.497	16.445	22.929	12.915	16.469	16.1797	11.9727	17.6067	19.6101	14.1433	5.9278	14.37	15.4568	9.677	19.503	15.037	18.428	18.524	15.937	14.946	18.771		0.383085	15.5913
9.293	14.056	11.3803	10.7197	13.9616	25.904	19.316	21.713	22.236	16.041	18.5748	20.984	13.212	13.687	16.166	19.115	16.964	15.856	22.2255	16.4772	15.1833	20.2305	14.1024	10.2962	11.7163	18.0109	16.901	18.474	14.564	19.341	13.735	21.157	15.974	20.066		0.388059	16.9194
9.4122	15.944	10.0977	10.088	13.6574	27.156	17.561	28.776	14.404	18.936	16.2465	19.8947	17.031	15.951	14.504	18.862	20.501	14.836	17.4172	10.8576	17.2058	20.4849	11.391	12.7978	10.7376	16.2658	17.515	15.556	16.118	15.66	14.982	16.965	15.418	12.368		0.393036	16.2481
9.5313	16.599	8.9962	15.8519	11.3349	19.634	18.516	17.778	20.126	18.411	18.9135	13.1747	18.541	13.913	20.499	13.036	15.621	16.316	28.0227	14.6285	20.0374	21.7832	11.0819	7.7506	6.4999	12.9431	19.98	20.051	19.894	23.187	15.877	16.69	13.626	23.22		0.39801	16.7434
9.6504	10.955	8.6483	6.441	13.8238	20.53	21.221	18.744	20.759	15.728	10.558	15.6873	16.417	9.772	17.66	17.923	12.531	13.823	18.8193	17.0176	17.4846	18.7694	13.6896	6.8127	9.7758	15.1485	16.7	11.308	18.396	15.318	15.61	20.507	16.223	19.15		0.402983	15.2106
9.7696	13.63	12.4954	7.4877	10.4866	18.972	15.671	17.413	18.232	21.592	16.8778	14.321	13.792	13.429	14.468	13.685	12.7	16.284	25.6403	18.0933	15.7675	13.0863	17.9953	8.1539	8.6214	19.1126	20.389	14.749	19.056	19.646	14.984	19.568	15.226	13.21		0.407961	15.6011
9.8887	8.849	6.426	4.4342	15.1946	26.357	20.695	12.439	12.527	17.517	14.499	13.8867	12.937	10.82	12.585	11.74	12.385	14.766	21.7855	17.2034	14.5966	21.7988	12.5855	6.6203	13.8122	20.6703	18.683	13.232	16.532	18.27	18.481	15.221	11.604	12.289		0.412934	14.5892
10.0079	13.766	9.74	6.4538	13.3885	28.155	16.488	13.064	16.215	18.448	17.9225	13.0583	17.096	13.579	15.759	19.005	12.167	11.124	20.9759	10.8613	15.9238	23.486	16.4695	5.2904	10.5607	18.3441	21.761	13.567	14.186	21.793	19.107	17.567	17.803	9.537		0.417912	15.5352
10.127	8.344	13.3298	2.937	11.229	25.374	17.541	14.843	21.337	19.193	18.6018	14.0794	18.678	7.931	12.56	12.665	13.067	14.829	21.8866	9.6152	14.5313	18.1492	13.3248	9.8367	11.0326	13.7271	17.042	13.214	11.547	18.476	17.805	14.974	11.247	14.46		0.422885	14.4669
10.2462	14.467	11.5314	3.3589	6.93	23.744	16.468	16.873	18.185	20.024	17.0049	13.8525	16.611	9.257	18.196	14.275	16.598	13.784	23.3465	11.7383	11.7264	18.4016	11.8741	11.7376	12.4355	17.6347	12.06	13.873	13.19	28.912	21.649	13.731	10.247	15.363		0.427863	15.1236
10.3653	11.02	6.8529	1.9137	10.1897	23.313	24.207	19.934	21.605	21.067	16.6495	15.7911	15.923	8	16.244	14.639	14.403	16.563	21.8066	12.2772	14.8382	21.5304	17.7999	10.5752	7.0152	16.7552	15.892	10.82	17.727	18.213	22.327	14.316	10.081	8.655		0.432836	15.1195
10.4844	11.601	8.0889	2.3504	10.5451	25.042	28.214	16.087	17.16	16.393	15.7638	16.8285	14.292	15.171	12.676	13.91	15.529	15.239	16.0886	12.9538	12.431	12.6611	11.1377	11.4237	10.3226	17.1188	16.78	12.559	20.981	17.307	17.629	15.476	12.525	15.254		0.43781	14.7739
10.6036	8.672	6.8732	5.3478	10.5226	19.979	28.734	18.224	19.283	20.503	17.6372	15.8091	16.608	10.993	13.712	15.001	14.44	18.353	18.113	14.0694	12.212	19.2835	12.8344	12.2419	11.8033	15.0372	17.542	10.762	19.625	18.705	16.594	15.856	12.491	14.73		0.442787	15.23
10.7227	8.038	6.4165	2.9088	5.7682	15.777	28.6	15.382	15.495	19.668	12.7239	14.43	10.772	13.485	13.36	14.402	12.046	16.927	20.7548	9.1702	13.4139	20.4403	9.221	11.5015	13.6351	16.1802	15.373	9.491	18.218	21.749	27.204	15.933	16.023	6.215		0.447761	14.2643
10.8419	7.648	6.7556	5.0198	9.9548	16.641	20.997	12.555	18.083	24.691	13.5456	12.226	16.55	11.01	13.748	15.626	11.303	19.047	18.7957	9.1822	12.5466	15.728	11.1691	8.3905	10.5111	12.9438	12.319	7.924	18.472	19.25	21.55	15.784	15.836	12.986		0.452738	13.9027
10.961	8.986	10.717	2.1835	6.3687	19.753	23.072	8.502	18.835	14.149	14.2359	9.7868	14.72	13.644	12.614	15.045	13.665	16.789	13.8008	10.755	13.2648	20.9888	14.3927	9.8334	17.336	11.6995	13.178	6.012	26.485	20.844	22.139	18.032	12.58	12.125		0.457711	14.1373
11.0801	10.459	6.853	2.9543	6.6196	16.683	20.814	8.788	22.516	17.095	10.7	12.645	11.906	13.917	10.901	9.503	10.542	15.837	17.0552	9.6454	11.0558	14.7807	12.3018	11.5966	13.0833	13.1768	8.903	7.597	17.823	11.671	18.794	20.205	11.459	9.358		0.462685	12.6436
11.1993	10.708	7.655	4.0686	7.8755	13.402	21.812	8.332	16.792	16.482	15.7318	15.5492	11.158	10.711	14.225	10.525	8.705	18.236	10.3422	9.205	11.1557	20.2769	16.8332	11.5472	13.5021	11.9312	11.55	9.503	23.975	13.766	20.853	13.002	15.321	11.194		0.467662	13.2099
11.3184	10.83	6.2302	3.2727	13.9512	17.601	20.851	5.994	17.245	14.207	14.3376	11.0881	11.118	14.942	16.221	10.76	8.012	14.873	14.9838	9.4886	18.9848	14.9467	19.9179	13.3048	11.6345	12.6661	12.659	5.192	12.461	16.508	22.308	16.883	13.741	10.35		0.472636	13.2595
11.4376	9.407	6.2695	4.5117	12.3935	12.2	15.918	5.145	14.856	13.96	12.4681	6.9102	11.278	13.072	11.733	10.295	12.906	14.128	14.9043	13.3528	12.1603	17.3705	17.0188	5.532	13.4739	16.2324	9.355	6.312	17.54	15.346	16.746	19.179	15.321	12.772		0.477613	12.4263
11.5567	6.636	6.4229	3.0975	8.9759	14.195	12.764	4.229	17.981	19.8	12.3238	7.7006	11.808	12.761	14.561	10.101	11.314	14.921	16.3943	9.8039	12.5431	18.7239	14.4563	5.6946	12.7306	12.0879	9.632	6.387	13.676	8.262	17.051	17.159	8.107	13.526		0.482587	11.6917
11.6758	9.053	8.3973	4.0388	7.7305	9.224	17.218	4.213	15.998	15.987	12.5093	13.7269	8.006	11.798	17.861	10.857	12.615	10.426	14.0733	10.5005	14.8684	17.9529	14.327	6.1803	14.5977	14.1671	9.551	5.654	18.663	14.148	15.13	20.634	12.999	9.409		0.48756	12.1974
11.795	10.3	1.6878	1.0936	10.375	16.876	19.35	7.159	17.939	19.453	13.9137	12.6856	4.106	12.058	13.582	9.043	11.943	13.981	15.1606	8.7641	16.1823	20.7644	11.8131	9.6978	15.5865	15.7756	7.412	6.686	16.679	16.3	21.014	17.664	13.698	9.621		0.492538	12.6777
11.9141	9.092	6.7183	3.037	7.0922	14.762	11.045	2.724	13.67	17.291	9.3898	9.7291	6.843	14.205	16.757	7.544	8.968	12.439	14.8638	12.1024	11.7816	21.1469	15.316	10.6644	15.5112	20.5214	8.732	7.279	10.602	15.091	17.236	14.188	13.47	8.63		0.497511	11.771
12.0333	9.17	5.1521	3.0376	9.5541	16.957	16.709	6.018	11.491	19.024	11.0271	9.3743	9.129	11.244	15.592	9.546	10.517	13.406	16.3911	10.0663	15.2835	13.3454	16.0135	10.5936	15.2996	14.6843	5.902	5.341	17.157	11.827	18.595	18.772	13.709	8.942		0.502489	12.087
12.1524	12.018	4.1057	2.7238	6.7033	16.751	14.732	4.022	14.726	24.795	11.5903	12.3432	3.102	8.785	12.222	5.921	10.684	9.806	13.4366	10.1209	11.437	13.2053	14.5252	7.9559	12.7065	13.8848	7.536	4.039	21.07	11.649	18.415	10.465	12.427	10.731		0.507462	11.1707
12.2716	7.653	5.0684	3.0379	9.0916	19.423	7.165	3.261	12.289	19.59	12.3839	13.1497	3.761	11.608	14.477	8.542	11.593	15.102	11.6478	11.2719	13.9186	13.9354	12.8595	6.0484	10.5209	14.3532	7.371	6.388	15.434	12.242	18.63	11.431	10.245	8.611		0.51244	10.9728
12.3907	7.573	4.9375	1.0738	7.0006	16.685	8.327	5.525	11.04	21.776	15.2333	12.5651	2.933	6.839	12.217	8.28	12.382	11.626	16.4368	9.7593	12.3324	17.9763	17.1281	8.5614	10.5415	17.2104	5.055	6.325	15.718	12.793	18.775	16.333	7.664	6.759		0.517413	11.0722
12.5098	8.118	4.3159	1.8517	4.5833	16.786	8.499	2.854	16.308	19.33	14.9719	12.0405	4.759	7.765	10.463	9.683	10.861	15.687	18.5437	10.8408	18.2155	21.1865	13.4401	11.4319	15.4617	14.3136	6.282	6.904	14.03	12.136	12.388	18.698	10.128	7.77		0.522387	11.5347
12.629	10.004	2.4672	1.2783	3.4148	18.354	7.66	2.697	10.004	21.378	8.9788	13.6781	4.359	7.372	10.391	7.135	11.911	16.779	13.5964	9.4162	14.4825	19.1692	13.4322	10.8555	12.3277	19.7745	3.162	7.962	11.722	13.53	12.941	16.561	11.747	7.669		0.527364	10.7942
12.7481	10.171	4.1932	3.6056	5.5079	15.808	8.341	3.545	12.465	18.915	13.9585	8.2946	4.535	8.63	11.274	10.894	10.001	11.289	15.0595	13.0851	17.3761	16.5457	13.9391	9.46	13.6378	18.7955	7.508	6.795	15.072	14.444	18.558	16.042	11.078	7.849		0.532338	11.4143
12.8673	13.509	2.6124	1.4644	8.581	19.042	8.086	2.836	14.982	16.867	11.736	9.4245	5.325	8.451	10.214	10.861	12.668	17.157	16.9376	11.7063	17.9304	17.376	11.7085	8.692	13.7167	14.6709	5.146	4.473	14.898	18.169	20.787	15.516	10.514	5.358		0.537315	11.5581
12.9864	10.037	4.4276	2.5656	4.2283	16.251	5.918	5.63	8.326	19.262	13.7801	9.8259	5.807	8.159	11.8	10.006	9.634	12.748	16.0211	9.1602	15.2309	20.3709	17.5915	8.8833	15.1441	18.1337	7.068	6.308	19.59	10.463	22.418	16.159	12.113	5.803		0.542289	11.4807
13.1055	8.045	3.6881	3.3186	7.5493	12.188	4.561	5.054	8.973	19.079	14.8549	5.5913	3.652	8.245	10.824	10.712	11.489	10.454	14.626	10.8904	9.7258	15.533	16.0493	11.3518	12.8895	13.847	6.735	8.064	19.821	17.325	23.256	17.798	10.102	6.093		0.547262	10.9814
13.2247	7.383	3.5263	1.8316	5.1684	15.986	6.082	3.085	9.614	19.449	12.7818	6.608	0.635	5.317	14.732	8.519	10.886	11.867	12.9351	13.6176	17.3089	19.2532	17.3491	13.1076	12.9268	17.0141	6.85	7.062	14.408	9.732	17.383	22.107	15.371	4.308		0.552239	11.0365
13.3438	13.738	2.5539	3.5852	6.1877	15.818	5.192	3.864	13.279	18.69	13.0172	9.4468	2.243	2.615	10.514	14.785	11.7	14.724	12.6709	15.3043	14.6742	11.8376	21.4749	8.0575	15.0302	16.7885	4.685	4.015	14.647	14.961	19.765	21.433	9.88	3.002		0.557213	11.2175
13.463	9.007	2.7239	3.5826	4.4836	17.542	2.877	4.74	6.428	18.42	14.263	11.4589	4.289	3.533	14.339	13.861	10.305	16.423	11.2512	12.5205	19.8935	16.7638	24.3684	8.9267	13.5447	17.0807	6.716	7.021	18.687	13.643	20.343	19.633	12.131	6.247		0.56219	11.7287
13.5821	8.384	2.9527	0.9774	3.4327	16.849	2.742	2.718	8.211	22.345	13.6304	6.3129	5.727	4.799	20.007	12.601	11.109	13.628	12.2284	12.7444	12.2691	18.5	21.6779	10.7905	13.0291	19.9871	3.815	8.967	13.193	13.011	24.076	20.601	9.079	10.361		0.567164	11.538
13.7012	9.997	0.8449	4.2855	2.8819	16.331	3.155	4.826	5.051	27.363	11.2505	10.9667	3.093	3.446	11.93	12.03	8.712	15.979	15.89	11.3253	18.0278	16.5131	22.0844	13.2978	18.2563	14.3169	4.23	6.83	12.175	14.571	17.764	16.719	12.453	2.357		0.572137	11.1804
13.8204	6.446	1.3271	1.1229	4.9142	20.199	4.09	3.18	3.165	19.112	9.0668	9.8079	2.349	4.169	12.825	5.421	8.717	13.101	10.8036	19.8833	12.2523	17.7298	20.5943	14.5485	13.2296	17.776	5.76	6.874	15.909	15.403	18.839	17.477	11.221	5.428		0.577115	10.6891
13.9395	8.751	3.3458	0.1531	6.6154	20.529	3.879	0.494	5.482	16.24	9.9471	9.2397	5.316	2.603	14.389	7.016	6.086	9.877	12.0888	13.9334	15.9947	13.4669	16.8689	14.7194	15.4356	16.3009	5.393	8.9	11.67	12.153	16.184	15.905	8.981	5.303		0.582088	10.0988
14.0587	10.543	2.9006	1.3017	5.1278	16.12	3.84	3.144	3.095	18.612	9.0899	6.2625	2.357	4.554	12.292	8.319	8.513	10.254	14.4516	16.8305	15.6758	17.0485	19.0522	11.8767	12.3324	13.0707	4.886	11.759	16.916	14.243	18.685	16.175	7.43	3.446		0.587066	10.3092
14.1778	9.69	3.2786	2.4126	3.8732	14.629	5.913	1.949	3.369	22.019	11.8317	9.0309	4.646	7.041	15.146	8.919	8.871	10.461	10.3889	19.4257	13.0937	18.822	18.2	11.7767	18.7671	12.1779	5.987	10.362	14.386	15.797	13.216	19.197	14.629	4.89		0.592039	11.0362
14.297	9.469	2.3826	0.2451	3.9827	16.114	2.826	1.51	5.734	23.917	13.6491	5.9514	2.812	3.611	12.436	11.477	11.178	13.605	13.2956	20.5405	12.3886	17.9806	21.2598	20.875	12.9253	15.1329	7.108	13.527	20.444	12.17	15.555	15.778	8.234	4.493		0.597017	11.2911
14.4161	9.352	1.6677	3.186	6.0446	15.368	4.378	1.225	3.758	20.123	9.6788	9.3882	3.324	2.025	13.859	8.847	8.582	13.042	12.4737	17.9751	14.4086	14.3653	21.998	15.1286	12.3324	13.649	7.942	13.313	20.639	12.662	15.747	15.311	12.055	4.031		0.60199	10.8448
14.5352	7.877	4.197	2.8444	7.5773	21.22	4.462	2.463	4.782	14.611	16.3443	8.9017	2.493	2.935	23.114	11.233	10.206	15.216	12.0016	18.7358	12.9114	18.3778	23.196	18.8555	13.5401	18.0942	3.63	13.549	15.777	18.553	19.812	12.39	13.538	4.081		0.606964	12.046
14.6544	12.839	1.0228	3.7296	3.3654	15.638	4.203	1.939	5.234	16.642	11.9937	8.3006	1.217	2.828	13.101	5.997	7.363	10.728	19.3338	19.0018	14.0307	18.1858	23.9953	16.9722	15.0403	14.8493	4.517	12.583	13.133	17.365	19.651	14.284	9.968	4.164		0.611941	11.0065
14.7735	5.868	2.6402	1.4971	1.2752	20.766	1.952	2.47	6.754	16.721	14.2661	8.0814	5.273	3.887	10.304	6.743	7.114	16.065	18.419	17.0875	15.2475	15.6678	16.4679	13.8838	16.0336	17.7822	5.89	13.234	17.006	18.997	17.305	13.827	10.758	4.055		0.616915	11.0103
14.8927	6.466	2.5796	2.868	1.9497	15.716	2.827	2.473	2.549	14.956	12.0783	6.5543	1.655	4.078	9.973	9.507	12.146	15.175	16.0766	17.2219	13.873	19.2762	13.1773	13.7595	13.2588	18.0215	7.516	11.121	18.985	18.422	15.039	16.872	9.841	0.979		0.621892	10.5149
15.0118	6.262	3.2083	1.3566	3.1316	11.971	1.666	3.115	4.314	18.276	13.1307	5.0715	2.421	3.637	13.791	6.998	9.286	10.116	15.6188	16.4485	11.7785	19.6451	18.5567	16.0945	13.6683	13.5826	4.517	10.598	18.821	20.458	21.331	12.716	8.13	3.968		0.626866	10.4147
15.1309	4.937	1.9918	1.5064	3.0133	17.087	5.444	0.887	7.872	15.25	12.6957	10.5563	3.183	5.769	12.542	10.195	9.497	15.632	25.4833	15.2396	16.8901	18.4783	20.4154	20.8188	14.2082	11.0242	10.623	15.429	19.834	18.719	22.193	20.106	14.179	3.252		0.631839	12.2713
15.2501	10.608	5.8905	2.275	4.2499	17.146	4.379	2.615	4.121	16.432	10.971	6.5135	1.098	4.545	8.303	7.9	7.348	16.024	21.4051	15.6306	11.9421	19.9874	18.7942	15.3736	12.9448	11.8699	9.792	15.551	17.167	14.23	17.214	17.49	13.302	3.132		0.636817	11.0983
15.3692	13.83	3.4465	2.1364	4.3087	15.351	4.837	2.301	4.219	17.605	10.7114	11.0146	2.537	1.215	8.894	9.256	7.002	11.41	17.7166	12.6349	19.115	16.6258	22.938	11.7942	18.7108	9.8677	11.745	14.361	20.291	16.977	17.676	18.105	11.419	3.809		0.64179	11.3291
15.4884	9.531	3.3436	2.1462	2.1162	17.7	2.359	1.73	5.871	18.878	15.4764	6.7646	2.899	4.445	11.641	12.853	6.158	15.543	18.905	17.5004	12.3748	15.2006	17.6555	13.3423	13.1373	18.9192	7.567	11.757	16.836	14.106	15.459	17.337	15.248	1.984		0.646767	11.1147
15.6075	11.14	4.4619	2.0075	1.1506	17.512	2.266	0.526	3.827	20.475	12.7461	9.1322	4.347	3.847	13.483	11.213	5.206	10.014	19.6049	13.6149	11.8703	18.8209	22.4616	18.1799	14.1545	11.9808	6.593	13.483	20.142	13.972	17.738	13.61	15.372	2.26		0.651741	11.1276
15.7266	9.523	3.9681	3.4402	7.1131	19.179	2.784	1.163	6.034	15.744	12.3855	6.1428	1.819	2.501	11.937	11.658	7.955	9.54	10.6678	14.9	17.7313	18.4149	24.3962	17.8794	15.3164	12.4782	7.14	17.861	17.857	11.168	16.294	12.927	11.042	4.045		0.656714	11.0001
15.8458	12.371	1.6903	3.8786	4.632	17.416	2.929	3.646	6.382	19.514	15.9797	5.626	1.12	3.904	16.365	12.69	4.885	12.848	15.6867	13.4683	15.189	17.0435	21.9899	15.3481	20.3976	17.5488	9.367	12.536	18.972	20.211	17.447	14.944	9.433	4.446		0.661692	11.8153
15.9649	11.654	4.4252	3.8963	5.2595	12.695	2.205	1.361	4.129	20.553	14.4436	8.5471	1.299	2.532	13.914	7.288	6.417	10.786	16.0915	19.6829	21.5373	20.4017	26.145	16.5075	19.3005	15.1944	12.576	10.986	21.575	18.819	12.628	18.3	11.964	5.283		0.666665	12.0726
16.0841	15.537	6.7469	3.2845	3.9383	15.594	2.42	1.503	3.258	20.665	9.4837	7.2085	1.797	2.912	10.35	9.89	4.852	16.227	16.1088	13.5885	16.9768	16.0633	25.5005	15.7397	16.4569	19.9929	12.283	12.99	25.776	18.111	18.164	17.03	10.324	5.844		0.671643	12.0187
16.2032	11.555	4.2671	1.0925	7.8486	17.031	5.495	0.581	2.383	24.907	13.8558	7.5951	4.617	3.518	8.548	10.744	6.565	16.384	13.7877	16.1378	16.4363	12.7432	25.565	14.8888	17.8462	15.8749	15.671	14.564	17.545	20.218	11.408	13.32	8.929	2.96		0.676616	11.6631
16.3224	15.412	3.357	2.95	7.0434	19.289	3.997	1.518	6.483	21.537	11.1223	17.6871	0.873	3.754	10.664	8.177	7.313	14.72	11.2219	17.9196	16.7714	16.7551	21.6603	19.542	17.0631	14.258	13.235	15.018	16.67	16.069	11.543	17.762	9.833	3.554		0.681594	11.9628
16.4415	13.609	3.4423	1.3048	7.1433	18.203	4.289	1.67	3.102	25.56	14.1961	6.9112	1.977	3.889	12.885	10.778	11.707	12.987	12.2778	18.0239	21.7684	16.4655	22.892	18.4164	11.1435	16.0043	12.052	12.172	20.199	15.138	17.914	13.469	12.453	4.177		0.686567	12.0673
16.5606	12.9	3.7953	3.6045	1.7453	10.164	3.012	2.682	3.307	27.604	18.6588	8.4166	3.329	4.506	8.747	5.266	8.866	9.966	15.1934	18.8823	16.6646	14.3167	22.5658	14.153	13.8052	14.1596	8.714	14.494	19.019	21.174	14.215	14.569	12.927	5.297		0.691541	11.4157
16.6798	12.252	2.6226	2.3406	6.3021	17.065	2.387	3.339	4.064	18.751	14.5298	9.0462	1.639	3.535	11.087	7.763	8.931	11.799	15.1501	16.2567	14.8354	16.5775	20.0852	20.3087	15.2202	15.1266	11.013	9.586	24.889	21.278	15.415	14.725	11.148	5.039		0.696518	11.6396
16.7989	12.828	5.4726	1.1008	4.0553	12.618	4.194	2.139	4.81	20.703	13.2626	9.9192	1.262	4.838	7.879	8.02	11.568	8.472	14.7205	12.0326	17.2684	19.9835	22.5171	9.1935	16.3261	14.8913	14.427	14.306	19.418	16.218	18.702	11.483	9.331	2.823		0.701492	11.1146
16.9181	12.755	4.5284	4.7406	5.55	11.333	3.072	1.91	6.726	31.079	12.886	10.4968	1.699	3.783	8.718	4.373	8.72	10.11	13.773	14.3983	15.4525	19.8962	17.8311	9.9564	14.1484	18.1092	13.279	15.402	22.346	21.899	24.558	13.448	13.239	3.436		0.706469	11.9288
17.0372	9.271	4.7447	5.5119	5.0189	16.361	3.112	1.916	7.365	19.333	13.0997	8.7404	1.714	3.003	14.137	7.413	7.226	14.304	13.4318	14.8691	16.905	19.2819	21.3171	14.6362	17.4627	16.9434	18.208	13.775	25.158	15.609	21.266	15.731	9.002	1.778		0.711443	12.0498
17.1563	13.051	7.3901	3.0006	3.7407	14.748	1.643	1.527	4.272	16.062	9.4461	9.3254	2.012	3.126	9.967	9.764	11.717	12.729	15.6064	16.2866	22.4575	12.5619	22.953	11.544	19.1731	16.9747	16.102	11.005	14.919	17.027	20.889	13.965	10.307	5.546		0.716416	11.5405
17.2755	12.673	4.8462	2.7797	5.7122	19.38	2.548	1.465	3.048	17.593	13.8354	8.9696	4.307	4.906	10.976	7.94	9.136	11.787	13.9683	9.431	21.9766	16.3475	17.7925	16.4739	9.9359	16.7727	12.595	13.543	20.872	18.93	16.312	13.436	8.888	6.372		0.721394	11.3803
17.3946	10.459	3.4861	1.0764	6.9941	18.347	4.473	1.681	7.015	19.799	15.6133	9.2568	3.588	3.728	11.665	6.813	4.858	7.748	16.3648	17.7833	13.2604	19.7009	22.2186	13.2526	11.0089	14.0038	11.888	12.736	17.34	24.759	17.462	15.256	9.933	7.066		0.726367	11.5344
17.5138	15.548	1.9517	2.0333	8.2656	17.153	4.421	1.896	3.82	17.008	10.142	9.4975	2.359	3.292	13.57	8.069	5.641	10.73	13.4117	15.1341	19.2302	22.3093	18.6466	16.3027	8.3764	17.4056	13.814	9.732	15.186	19.852	14.119	12.634	7.847	5.11		0.731345	11.0457
17.6329	9.009	6.1168	4.4862	5.4311	12.931	3.589	2.717	2.974	14.021	12.3076	14.685	3.094	3.024	11.003	9.842	6.933	13.759	17.9894	16.8404	24.751	19.5056	21.164	17.0733	13.4391	15.994	14.989	14.308	17.817	21.185	19.524	15.646	9.734	6.26		0.736318	12.1861
17.7521	11.572	6.8992	2.8837	6.2549	13.126	4.092	3.676	3.419	23.43	17.04	8.7851	1.949	2.972	13.807	10.017	8.126	11.787	13.5362	10.8891	21.8631	17.0979	20.1306	18.519	14.3451	16.5181	22.493	16.234	19.628	19.864	20.525	11.705	13.025	7.457		0.741296	12.5353
17.8712	9.88	6.4401	3.4448	10.6249	17.906	2.489	2.034	4.684	14.243	16.8315	15.1484	5.566	3.482	18.913	12.799	5.558	9.154	10.8345	11.2052	19.7845	25.3141	20.6476	19.1515	13.4752	12.8937	16.677	14.141	19.612	19.779	18.206	10.984	9.026	7.481		0.746269	12.3761
17.9903	7.89	8.103	5.7157	6.57	17.847	1.848	2.283	6.912	19.438	20.2105	15.7314	4.073	5.964	13.738	8.098	5.644	16.019	11.8792	13.4224	14.4335	22.8697	26.0652	13.0253	14.2795	17.0198	17.173	20.294	20.292	26.381	20.911	15.281	10.776	5.713		0.751242	13.2091
18.1095	9.318	7.9577	2.3083	12.2467	13.29	4.393	1.304	5.543	24.377	15.0279	14.8128	3.499	3.526	15.328	8.134	4.917	13.247	12.0651	15.0794	18.5006	19.6318	16.8641	15.6899	13.5924	18.0451	14.903	13.095	18.39	20.364	16.091	18.057	11.421	11.837		0.75622	12.5108
18.2286	8.988	8.188	5.907	12.9127	15.32	2.566	1.494	6.007	20.86	17.2805	11.9798	2.221	5.867	10.117	9.347	11.231	13.159	12.861	18.7119	17.0638	23.7257	24.9571	18.7743	16.5358	15.8608	15.737	18.449	22.511	14.441	15.178	13.822	8.294	12.084		0.761193	13.1046
18.3478	14.661	5.724	5.176	8.8032	11.885	5.081	2.324	3.605	20.54	20.3826	8.4025	3.522	3.471	14.094	13.618	7.738	15.876	17.7305	12.0514	14.3287	27.0482	28.4437	20.025	14.6585	16.923	16.734	17.181	14.549	14.855	18.611	9.912	13.108	14.449		0.766171	13.1973
18.4669	13.521	7.5426	2.77	11.6932	13.082	3.291	0.792	7.781	24.256	17.4943	13.7468	2.388	4.481	9.617	8.856	10.412	7.899	15.185	14.7496	20.3956	26.0482	27.247	18.1841	13.0585	13.3927	14.717	19.921	14.699	16.552	16.57	10.856	9.249	8.977		0.771144	12.7098
18.586	12.011	8.0241	1.9201	11.3031	18.75	8.249	3.394	7.56	27.097	15.9211	12.503	6.403	4.264	11.501	12.929	10.91	9.519	9.9933	18.2314	14.6281	26.4258	24.701	14.6759	15.405	16.5138	14.371	16.983	20.959	25.226	17.48	12.857	10.825	11.573		0.776118	13.7305
18.7052	13.553	7.0218	2.6732	11.3516	18.523	5.143	4.337	9.891	22.751	13.5699	15.6478	5.036	7.256	10.097	13.907	11.964	11.202	18.2826	18.2799	18.3662	24.2564	25.4098	17.5731	15.2102	8.3734	17.491	18.829	20.91	15.006	16.54	13.102	10.456	11.378		0.781095	13.739
18.8243	12.529	5.6784	2.0336	8.0912	12.212	7.272	3.89	8.243	27.018	15.2736	11.7393	6.265	7.048	11.57	9.603	13.244	15.013	10.7788	13.4737	17.7047	23.0337	19.327	17.3622	15.0011	12.6575	11.461	15.34	16.875	24.181	18.465	11.493	8.55	13.216		0.786069	12.8983
18.9435	12.171	10.9756	5.8492	12.1936	11.861	7.562	2.106	10.829	23.01	19.648	12.9304	2.773	4.391	13.13	11.047	11.702	13.326	14.9912	17.8131	14.3794	19.0959	21.2414	21.0291	12.7622	15.066	11.478	13.569	19.053	15.829	17.081	11.811	7.612	10.703		0.791046	13.0006
19.0626	12.303	14.9846	8.296	12.0167	12.583	10.857	2.819	8.496	20.419	11.2907	14.4337	9.406	6.61	13.594	13.352	10.742	9.321	17.0447	15.5979	16.3057	21.6666	21.8883	15.2927	12.9556	12.9217	16.431	14.426	14.71	21.602	18.541	14.696	9.759	8.311		0.79602	13.4446
19.1817	10.637	12.48	9.5471	12.3968	11.078	4.826	1.865	5.72	20.607	13.3972	13.1619	10.054	7.301	11.036	14.543	10.572	10.864	12.7515	19.7816	17.0535	18.5706	21.0248	18.0993	12.9964	13.4311	15.515	13.634	16.107	17.812	12.576	7.959	14.809	15.669		0.800993	12.9659
19.3009	18.459	10.7867	7.0199	8.6063	20.74	8.645	2.6	14.029	19.325	13.805	11.4724	5.103	11.271	11.58	10.186	12.526	12.657	16.5	16.1305	18.0034	18.9325	22.6723	23.9049	11.0725	16.0645	13.159	11.757	15.257	17.608	12.926	11.355	9.666	12.175		0.805971	13.515
19.42	15.986	10.0904	11.3553	11.1149	16.309	8.685	1.043	16.381	18.814	15.3676	12.4029	8.611	5.673	12.392	15.25	7.489	8.234	11.1463	18.8573	21.9397	21.7573	26.3271	13.4664	12.4896	14.482	11.588	18.513	16.002	18.475	14.781	4.762	13.602	10.337		0.810944	13.4462
19.5392	13.98	12.3329	12.0005	14.1219	16.986	9.845	3.569	12.459	16.845	20.9421	14.5095	6.394	8.848	16.079	13.939	8.557	13.431	11.1666	16.3306	22.4735	22.8086	20.7324	18.2249	12.9146	18.7558	10.42	17.577	15.618	16.987	9.933	4.765	7.493	10.272		0.815922	13.6761
19.6583	15.801	8.6125	11.5589	13.4648	15.815	5.392	3.948	13.12	18.254	15.7433	12.6133	8.551	9.098	11.896	13.441	8.841	13.115	9.72	17.0129	21.8724	19.6422	22.0196	16.8812	11.1798	12.0104	8.726	17.298	13.823	16.773	8.508	4.067	5.426	9.247		0.820895	12.5294
19.7775	13.259	15.4255	10.679	13.5565	19.421	11.328	2.747	14.516	23.362	15.3273	13.1365	10.261	7.84	12.983	13.918	10.045	15.92	6.9722	13.8464	20.6008	22.5576	24.6335	13.649	8.6487	15.2373	11.519	11.935	17.737	9.528	3.999	4.803	6.785	13.103		0.825873	13.0085
19.8966	9.111	10.0257	13.8011	17.2844	15.247	13.729	3.733	10.881	22.392	14.4801	9.0513	5.607	8.32	11.474	16.399	11.143	8.99	5.765	9.1918	19.5011	22.3112	25.8023	9.1845	12.4547	15.648	9.563	18.284	11.932	13.079	5.18	2.597	4.049	6.321		0.830846	11.8949
20.0157	15.094	12.2949	13.3147	16.2349	21.286	9.818	2.623	19.281	21.849	20.3125	10.9389	12.286	10.386	14.952	13.34	8.714	11.295	6.4787	10.0491	16.6473	21.7616	19.0775	10.5005	11.787	13.6564	11.298	17.939	15.008	8.42	2.454	2.278	2.83	12.13		0.835819	12.6162
20.1349	11.446	12.9245	11.1319	16.5166	15.344	14.661	3.619	18.81	26.542	20.5806	11.9301	10.104	12.449	5.946	18.182	8.593	9.805	5.3102	7.5371	18.002	19.3226	19.3531	10.7561	11.616	12.4874	9.999	18.428	15.108	8.044	2.189	3.404	2.447	7.012		0.840797	12.1091
20.254	12.293	8.8296	13.359	8.7719	18.763	13.548	3.905	21.366	19.884	14.6751	15.6656	12.478	11.197	15.24	13.778	8.247	10.196	2.5419	3.8266	13.3284	18.5144	16.1833	8.1925	7.5338	9.4705	6.975	16.577	12.4	5.234	1.024	0.76	2.665	8.323		0.84577	10.7802
20.3732	11.389	8.4636	9.3389	11.5549	15.569	18.097	6.91	20.918	20.886	12.9618	12.9677	11.8	12.953	12.616	11.143	9.951	11.196	2.1286	5.0837	9.9062	14.5546	11.3911	2.7841	8.4323	9.4333	7.375	11.5	13.509	6.175	1.329	0.936	2.008	7.736		0.850748	10.0908
20.4923	11.379	10.8402	15.7997	9.6695	15.461	18.752	6.239	19.281	20.76	14.4837	11.8268	14.066	10.306	11.134	12.683	6.794	7.676	1.299	3.0931	5.9398	12.0054	9.4631	3.5476	10.721	8.367	8.327	14.906	8.402	4.091	1.107	0.004	2.214	5.01		0.855721	9.56509
20.6114	7.191	10.937	12.6233	9.815	18.071	21.724	7.582	16.573	27.876	14.3755	12.1737	14.275	12.784	13.532	11.712	8.831	7.848	1.3487	1.8975	5.5869	8.8556	3.0676	0.8122	5.2045	4.548	4.886	10.884	6.341	4.165	1.682	1.98	0.937	6.738		0.860695	8.99568
20.7306	10.197	10.2229	7.8969	10.4845	18.048	20.393	10.528	18.53	25.777	19.8738	11.5194	11.215	10.596	13.389	14.507	6.722	6.918	0.9151	1.8262	5.0163	11.2662	3.7666	0.6658	3.6543	4.4539	3.776	7.878	3.074	2.694	0.555	0.461	1.303	6.066		0.865672	8.61178
20.8497	9.244	10.0016	11.5117	13.3498	15.7	26.773	12.06	15.31	21.45	19.553	11.5773	11.999	13.3	7.54	10.028	12.07	6.925	1.8358	1.2942	3.2806	5.1186	3.3873	0.1355	5.4366	4.9066	1.88	6.688	2.897	0.993	0.02	0.449	0.375	2.846		0.870646	8.17987
20.9689	9.575	12.1626	10.443	14.1446	17.505	16.624	9.461	15.474	19.89	16.3398	12.7632	9.708	10.89	10.806	12.101	7.8	5.118	0.8377	3.0454	0.707	3.4136	1.9738	1.3126	3.6901	2.6083	1.509	5.516	1.785	1.441	0.673	0.428	0.818	2.604		0.875623	7.36872
21.088	7.888	9.6197	10.5534	10.9527	17.247	24.091	17.947	16.935	17.424	15.9118	13.4645	9.283	9.408	14.17	10.666	10.421	4.135	1.754	3.6729	2.2142	4.518	1.6922	1.3697	4.4251	2.5426	0.505	2.609	2.111	0.657	0.717	0.98	2.45	1.197		0.880597	7.68278
21.2071	7.993	13.4808	9.1537	9.3918	14.989	24.994	21.61	20.652	12.263	19.3557	13.5561	7.511	9.09	9.439	6.181	9.177	5.207	1.1736	1.9258	0.9237	0.8652	1.8918	0.7928	0.4558	1.6334	0.618	1.696	3.508	0.113	0.381	1.222	0.351	3.298		0.88557	7.11798
21.3263	4.535	6.1381	14.6051	12.4759	15.66	24.557	28.32	18.283	17.013	17.4734	13.2154	11.2	13.236	13.767	8.555	6.798	3.455	0.4482	0.7132	1.5825	1.4818	1.0591	1.3771	1.3713	0.6137	1.166	2.146	1.427	0.025	0.98	0.373	0.914	1.617		0.890548	7.47218
21.4454	4.675	9.1267	11.7117	13.0989	15.476	25.094	20.053	17.436	19.091	15.402	11.9496	17.842	12.092	11.746	7.567	7.196	2.161	0.0968	0.3128	0.5058	1.9264	1.5584	1.4836	0.5433	0.4907	0.437	1.171	0.577	0.993	0.391	0.095	1.246	1.113		0.895521	7.11087
21.5646	2.248	6.6208	12.1186	13.348	14.5	22.124	21.553	26.211	16.455	17.8354	13.9075	11.816	9.232	12.421	4.257	6.64	2.094	0.3588	0.7864	0.7689	0.6232	1.1921	0.4893	1.5166	0.5064	0.733	0.913	1.397	0.476	0.049	0.476	1.526	1.959		0.900499	6.88339
21.6837	3.274	8.3375	7.4881	11.1981	16.514	22.1	24.168	20.48	16.273	17.7483	14.7585	15.748	13.013	14.875	3.94	4.038	2.784	1.6653	0.7239	0.284	0.9302	0.7281	0.8673	0.4966	0.0124	0.065	0.281	1.831	0.056	0.276	0.895	0.514	0.834		0.905472	6.88477
21.8029	1.586	11.692	6.6121	9.0201	14.466	18.374	17.654	16.324	17.804	12.332	10.1355	16.138	13.148	10.486	4.976	3.405	1.747	0.61	0.1659	0.0746	0.3943	0.6442	0.1681	0.699	0.12	0.958	0	0.786	1.828	0.208	0.561	2.08	0.527		0.91045	5.93102
21.922	0.908	4.2891	5.7234	6.933	10.563	18.925	18.101	15.903	19.008	19.2635	13.4752	16.87	10.046	13.327	2.981	1.388	1.807	0.3561	0.2324	0.3582	0.5994	1.8424	0.9112	1.1871	1.1465	2.033	0.313	0.014	0.095	0	0.006	0.02	1.314		0.915423	5.75574
22.0411	1.506	3.1214	6.2951	3.9977	15.029	23.362	16.157	19.346	17.642	20.0129	14.21	11.235	12.551	10.47	4.653	3.079	0.896	0.6943	0.8356	0.0496	1.8614	0.8527	0.5595	1.7171	0.0833	0.189	0.877	0.066	0.611	0.522	0	0.715	1.026		0.920396	5.88553
22.1603	0.386	5.2903	2.3186	5.8961	11.011	17.768	16.596	18.662	17.841	15.1672	9.187	12.584	12.294	8.514	1.801	3.357	0.959	0.0225	0.3834	1.1941	0.6469	0.5032	0.7535	0.5613	1.0036	1.464	0.06	0.306	0.755	0.916	0	1.516	0.319		0.925374	5.15263
22.2794	0.036	1.4028	1.6115	4.8521	13.729	16.717	15.355	18.876	19.421	15.9079	10.5332	12.175	15.303	11.134	2.342	1.483	2.624	0.1727	0.939	0.3775	1.7353	0.0217	0.4813	0.275	0.0518	0.463	0	0.533	0.986	0.027	0	0.333	0.794		0.930347	5.17251
22.3986	2.119	2.2618	1.2126	1.0811	11.17	15.879	19.309	16.876	21.186	11.6285	10.6236	15.712	13.11	10.896	2.432	0.674	1.084	0.8256	0.6946	0.3068	0.5701	0.765	0.5635	0.0527	0.0136	0.373	1.408	0.387	0.014	0.032	0.003	0.001	0.281		0.935325	4.95592
22.5177	0.462	1.5693	1.315	1.1962	12.65	19.646	15.647	16.236	16.56	12.0164	9.2384	12.362	13.491	11.396	0.513	2.276	1.079	1.103	0.0345	0.7682	0.4044	0.3831	1.0115	1.3433	0.3686	1.148	1.05	0.551	0	1.607	0.213	1.185	0.261		0.940298	4.82075
22.6368	0.532	1.2786	0.42	1.7124	14.629	17.996	19.805	9.163	14.618	8.3711	9.9182	12.258	7.953	10.597	2.145	0.335	1.829	0.0538	0.1683	0.0243	0.3219	0.5016	0.1095	0.7087	0.0083	0.354	0.002	0.0005148	0.639	0.028	1.005	0.231	0.017		0.945272	4.17373
22.756	0.024	0.9461	2.3663	1.2348	13.093	14.433	20.732	4.878	8.27	10.5172	11.7325	10.586	9.395	9.209	1.83	2.069	0.999	0.2674	0.169	0.2738	0.2386	0.1209	0.9312	1.9824	0.6809	0.943	0.567	0.372	1.206	0.204	0.101	0.386	0.082		0.950249	3.96485
22.8751	0.993	1.6844	1.8862	1.2028	10.255	13.658	17.582	4.577	11.224	6.4836	11.2871	9.685	8.342	6.549	1.07	3.056	0.584	0.1353	0.6607	0.6925	0.3894	0.335	0.443	0.8528	1.0341	0.324	0.055	0.53	0.465	1.416	1.016	0.388	0.784		0.955223	3.62545
22.9943	0.569	0.8353	0.6373	2.0237	10.626	16.427	19.009	3.307	10.711	3.3659	15.8707	14.376	9.403	2.869	0.701	1.997	1.487	1.1994	0.1992	0.1071	0.0196	0.8132	0.0508	1.6117	0.3123	0.002	0.155	2.313	0.326	0.102	0.108	1.329	0.47		0.9602	3.73737
23.1134	0.141	1.0583	0.415	1.0553	7.838	17.709	14.331	2.434	7.387	3.2834	7.691	10.824	7.278	3.229	1.163	1.264	1.452	1.9004	1.2357	0.538	0.8866	0.0126	0.4451	0.4538	0.0266	0.029	0.038	0.579	0.907	0	0.317	0.707	1.651		0.965174	2.97818
23.2325	0.689	2.4503	0.1254	0.1623	9.121	15.852	11.838	1.144	5.369	1.7999	9.1481	9.748	7.012	4.909	1.672	0.194	1.751	1.9591	2.0463	0.3389	1.0848	0.0016	1.4381	0.5452	0.165	0.02	1.018	0.615	0	0.002	1.095	0.09	0.347		0.970147	2.84094
23.3517	0.218	0.4308	1.1114	0.3325	5.56	19.509	10.466	2.724	3.148	1.2957	9.8321	8.086	3.286	3.851	0.734	1.112	1.07	1.657	0.7587	0.3906	0.7265	0.1605	0.101	0.822	0.0017	1.304	0.333	0.669	0.051	0.109	0.346	0.739	0.728		0.975125	2.47465
23.4708	0.305	0.125	0.3405	0.3532	6.769	11.151	5.106	0.288	1.471	0.0987	4.7304	12.491	1.094	2.734	0.005	1.286	1.551	0.7264	1.3171	0.2284	0.368	0.2189	1.1263	0.0262	0.0006	0.603	1.151	0.582	0.004	0.03	0.871	0.22	0.49		0.980098	1.75338
23.59	1.289	0.1156	0.1029	0.7635	3.442	14.635	4.051	1.513	2.816	0.9742	2.7722	7.251	2.183	1.66	0.107	0.185	1.034	0.3793	0.1755	0.1354	0.3427	0.9852	0.3479	0.0013	0.2223	0.038	0.889	0.109	0.435	0.581	0.497	0.596	1.38		0.985076	1.57603
23.7091	0.764	0.5917	0.01	1.4479	2.354	18.954	5.868	1.119	0.197	0.8168	1.5738	7.241	1.726	1.451	0.019	0.897	1.732	0.8666	0.7442	0.5457	0.631	0.815	0.3142	0.064	0.8919	0.258	0.504	0.203	2.143	0.362	1.126	0.228	0.307		0.990049	1.72018
23.8283	0.791	0.6562	0.2629	0.4847	1.105	12.314	2.534	1.271	0.872	0.6201	0.1823	4.678	1.497	1.713	1.08	0.743	1.835	1.9771	1.7655	0.319	0.0109	1.2787	0.6756	0.216	0.9807	2.516e-06	0.911	0.653	0.176	1.622	0.023	0.154	0.702		0.995027	1.33648
23.9474	1.656	0.5177	0.0199	0.2927	1.504	10.557	1.443	1.937	1.617	0.5464	1.6406	2.277	1.297	1.488	0.958	1.771	0.106	0.521	1.4224	0.7231	4.085e-09	0.5188	1.0296	0.3168	0.1078	0.762	1.7	1.069	1.194	1.381	0.159	1.155	0.279		1	1.27172

## Sheet: Image4
X0	Y0	Y1	Y2	Y3	Y4	Y5	Y6	Y7	Y8	Y9	Y10	Y11	Y12	Y13	Y14	Y15	Y16	Y17	Y18	Y19	Y20	Y21	Y22	Y23	Y24	Y25		Ap-basal	Avg intensity
0	11.5145	21.9053	18.0256	26.0854	9.3865	15.533	17.5605	10.875	15.667	11.6707	10.2615	11.3668	8.2386	15.7829	7.055	12.21	8.3107	11.512	10.0009	13.8794	8.1351	6.8201	7.029	9.0462	19.2883	15.151		0	12.7812
0.1191	12.1179	21.2396	16.9147	28.6663	11.396	17.2526	19.1848	16.858	15.1774	15.0745	10.0766	8.8713	17.0276	25.9237	13.117	9.453	14.4201	11.9393	14.2766	14.5136	9.6087	9.9415	6.058	7.345	23.605	13.186		0.00502339	14.7402
0.2383	12.8371	18.4941	22.9461	27.8748	7.7964	13.4888	22.4958	14.05	19.6628	10.5045	11.6791	9.3647	17.5631	25.7232	20.684	15.512	15.1093	16.7621	9.759	16.659	13.2625	7.5238	8.73	12.7037	21.1795	10.363		0.010051	15.4896
0.3574	10.6424	23.3398	23.3368	32.6105	11.5021	21.8977	21.2899	16.765	22.7788	17.2939	12.9678	11.3389	18.9346	24.5654	12.357	14.719	12.2364	12.5227	13.9358	15.7557	13.2384	8.5075	7.823	15.638	21.2351	12.112		0.0150744	16.5132
0.4766	16.2244	20.2207	28.8508	41.1276	8.676	15.9044	23.5421	20.835	23.0517	19.453	19.4057	17.0317	17.023	35.6865	12.206	19.358	19.5931	18.1381	15.2799	20.7411	14.353	8.0857	9.014	11.3428	19.9633	16.419		0.020102	18.9049
0.5957	15.0747	20.7285	29.4184	38.4988	14.7798	23.3447	32.5384	21.69	27.3139	24.0318	15.9572	17.426	17.5719	36.0149	14.219	23.674	26.7409	20.7707	15.1862	20.32	16.0952	10.9422	12.307	14.7537	22.7382	20.085		0.0251254	21.2393
0.7148	15.5134	30.9697	25.3575	41.8537	13.2137	25.1365	33.6579	25.292	28.6273	29.978	19.367	20.769	18.8539	40.4305	23.706	33.024	24.5299	18.0341	14.0629	28.608	18.5365	10.4692	16.283	11.7599	20.3112	22.577		0.0301488	23.497
0.834	16.7853	32.4718	38.1197	46.0883	18.7385	33.6093	35.1226	27.841	37.282	31.6909	25.4474	17.3597	23.1788	55.4925	21.342	33.537	31.9849	26.6785	16.9707	23.1172	14.3507	15.1575	23.032	20.1064	19.5781	36.385		0.0351764	27.7488
0.9531	16.7222	34.3314	30.3546	56.8252	15.2001	36.8209	39.8236	33.928	33.0835	28.6284	28.65	22.6253	34.4149	55.7332	29.653	36.563	37.4243	30.5173	26.4662	26.751	20.0766	19.1602	24.52	22.3087	29.4476	43.698		0.0401998	31.2972
1.0723	23.7626	33.632	40.9254	60.4302	14.4155	42.0709	46.7256	37.649	38.8588	37.8253	29.0436	28.4959	33.534	58.7205	33.017	40.356	45.0973	42.6117	27.6126	28.179	19.5066	24.6071	27.15	33.3852	32.3041	56.93		0.0452274	36.0325
1.1914	20.2004	36.3172	44.8239	73.245	25.1104	34.2477	54.6236	36.497	39.8262	36.0773	41.1072	31.7356	36.719	72.7846	36.896	53.167	64.9767	45.2885	32.8197	34.8733	23.5692	22.1773	48.092	42.233	43.1338	66.203		0.0502507	42.1825
1.3106	22.3635	33.064	63.0042	78.1999	25.0098	44.9022	66.3616	48.994	38.5342	52.6334	54.5331	36.4133	47.186	86.0747	37.739	64.774	65.8241	69.0015	39.6123	19.7353	24.912	30.4058	54.127	47.1441	50.049	66.225		0.0552784	48.724
1.4297	21.3276	43.9789	61.0975	76.482	31.9063	48.1575	75.9532	55.453	44.7324	47.8203	53.4124	34.7549	47.2144	95.8959	56.437	74.902	75.685	58.6969	46.9659	23.5531	23.6729	34.6633	67.043	50.909	54.3496	57.821		0.0603017	52.4187
1.5488	25.1986	42.0816	58.0168	86.7292	29.2939	46.4119	70.0709	59.538	43.3414	42.4362	65.5304	38.7059	45.8419	92.9766	72.553	90.087	78.3872	79.5459	41.1336	24.3507	25.4574	36.6004	72.552	60.342	71.7708	60.448		0.0653251	56.1308
1.668	24.4754	48.6602	73.2087	95.6987	34.1941	41.3957	77.635	78.082	56.0742	50.2334	64.3699	43.2239	38.153	87.7177	82.86	89.667	86.3912	82.9434	48.5788	19.9665	21.8174	34.7682	70.923	64.6917	74.4157	58.753		0.0703527	59.573
1.7871	22.9109	58.8795	65.7286	89.3768	31.9046	49.5509	83.9286	81.147	62.4471	51.1768	67.9869	39.0679	40.6882	95.0558	104.227	103.527	97.2988	86.5793	44.791	18.5204	28.3984	36.978	76.823	69.9761	77.7254	62.124		0.0753761	63.3392
1.9063	26.4124	63.9254	72.5347	93.3951	42.4774	51.6341	92.8402	97.274	60.7925	54.0817	63.4933	38.8963	39.9298	78.6999	111.531	122.246	96.0872	89.5337	44.1268	21.203	21.4971	37.705	87.463	54.4215	82.6208	67.444		0.0804037	65.8564
2.0254	30.2132	66.1254	69.1484	92.7632	44.8828	66.7632	90.2839	108.055	57.3569	47.783	52.2199	39.7644	30.5797	81.7935	126.826	118.278	93.5233	93.8662	41.1719	26.9949	20.2604	38.1278	85.12	50.8942	79.0748	83.455		0.0854271	66.7433
2.1445	27.7262	77.5227	62.4858	93.7235	44.6861	66.26	83.1155	108.449	58.9476	56.4048	62.4712	30.4238	37.9353	71.939	141.634	105.087	80.9024	92.2168	53.8117	24.7494	21.3556	37.1603	104.356	52.5361	84.6836	78.212		0.0904505	67.646
2.2637	29.5882	58.9933	72.6838	96.2458	56.9026	71.2086	79.139	96.564	53.7952	58.1415	62.1831	31.5444	32.5958	68.4777	146.014	109.412	87.6656	80.6847	60.7221	22.0386	19.6188	31.7238	103.28	48.8717	82.5804	90.069		0.0954781	67.3363
2.3828	26.6757	78.8408	73.385	90.1868	57.2707	72.209	81.3192	105.435	68.8358	46.5853	62.9393	31.7173	28.6513	67.0717	142.82	117.229	92.7129	92.7881	42.7685	20.862	16.3751	37.1536	106.42	36.7772	85.8947	78.024		0.100501	67.7288
2.502	36.3278	68.0277	72.3504	76.1055	64.7314	76.4229	87.2368	99.784	63.5256	51.9725	64.1561	28.2193	24.1554	50.3266	150.472	109.428	79.3148	94.2353	53.455	27.8251	16.7893	36.4612	105.736	32.0471	80.8789	85.293		0.105529	66.7414
2.6211	33.1778	79.663	74.4082	72.1511	74.2626	71.0275	81.4704	99.243	65.7206	48.8188	56.8976	23.4422	21.4685	43.8203	157.763	102.417	74.3957	96.1121	49.4826	17.1437	12.3502	36.7724	101.477	38.6559	77.5626	92.724		0.110552	65.478
2.7402	39.0614	78.1098	65.4187	71.4373	72.6195	57.281	84.166	100.737	59.4318	51.6288	54.2492	23.1283	23.2665	46.2234	145.455	96.452	59.0862	95.9668	60.5722	15.2412	15.5048	33.8891	106.404	33.2246	86.3937	89.989		0.115576	64.036
2.8594	38.7014	73.8988	60.02	68.0597	75.1042	71.4486	79.6398	103.627	73.3965	45.1074	59.7324	24.7103	20.9957	42.9397	156.902	86.264	53.3443	85.0546	51.5706	21.3241	20.7799	30.5204	99.981	26.5041	82.2865	87.479		0.120603	63.0535
2.9785	39.067	58.2482	64.4281	66.707	66.2599	62.92	73.4532	100.492	60.2123	51.807	59.6274	19.6377	27.0191	47.4386	148.509	75.795	52.0425	87.9313	46.6669	20.2084	12.0905	24.5015	82.959	26.4766	77.233	100.289		0.125627	59.6931
3.0977	45.7246	68.0181	62.587	69.8838	67.9357	58.1767	86.7774	97.53	68.6506	45.0108	54.2562	17.7112	12.2929	43.0208	133.429	83.216	49.9477	70.8727	40.8109	18.8634	16.6977	27.1074	87.499	25.4243	77.0024	94.095		0.130654	58.5593
3.2168	42.1329	70.2353	51.5705	62.1946	58.4983	58.8537	73.6532	97.175	66.6576	44.5422	47.2969	14.2513	13.6433	44.7365	126.302	63.366	52.7733	76.5203	33.9802	18.4976	15.74	22.8415	76.138	28.6	74.5059	89.17		0.135678	54.7645
3.336	43.4337	59.0639	54.0908	58.0389	58.1834	60.2136	83.1036	100.025	56.6804	41.7232	52.0876	15.2044	13.3986	45.1254	117.211	52.517	39.9157	65.3356	35.3844	24.119	13.9105	22.156	77.345	28.584	81.9249	90.658		0.140705	53.4398
3.4551	50.5117	60.1555	50.322	59.482	65.4547	50.5753	79.9293	108.739	54.7367	38.8757	51.5052	10.2995	13.6055	48.9601	116.233	45.226	42.3986	64.5144	30.0529	21.1208	13.7296	21.8341	64.596	31.2118	76.2324	101.527		0.145729	52.7626
3.5742	52.4521	60.2713	51.7775	62.524	56.2111	52.071	68.8295	97.499	47.2546	40.8349	60.8205	8.3359	10.887	47.365	110.038	46.208	37.3734	62.0581	42.3405	22.5335	15.6636	24.1558	58.859	25.707	71.7524	93.945		0.150752	51.068
3.6934	51.6948	56.0089	53.2743	57.4353	58.1599	47.0535	68.6353	90.976	47.4633	42.2398	60.9077	14.8919	9.4231	43.3487	102.031	36.723	37.1848	53.4291	43.1991	13.9763	12.9389	20.5646	68.847	27.7147	57.273	93.04		0.15578	48.7859
3.8125	56.4999	42.3392	49.7456	56.5996	50.5673	46.7432	83.8992	103.827	53.765	35.8945	58.5258	9.7079	11.1835	47.8782	94.46	25.391	43.1131	46.7769	35.4097	16.7248	13.7967	27.8694	59.346	23.3142	47.9863	105.614		0.160803	47.9607
3.9317	45.2993	48.9775	43.9459	49.6051	43.6682	33.119	76.836	96.91	44.0851	32.7667	51.1303	8.7255	9.8757	46.3374	83.092	28.749	31.4526	44.5675	29.6865	12.8079	13.5003	20.3476	49.235	24.2827	42.4373	97.49		0.165831	42.6512
4.0508	53.7459	47.6969	40.1892	48.5736	51.0403	36.4547	90.6385	102.105	41.986	41.8455	55.4973	7.8844	11.2829	57.0231	82.76	22.945	34.152	40.5742	40.5768	12.8793	14.3528	26.0897	49.888	26.1337	25.8497	93.006		0.170854	44.4296
4.1699	43.8571	42.9344	35.1052	44.0946	49.8198	30.066	73.5542	97.911	29.0487	33.6595	41.3878	5.7102	7.8711	54.4665	78.983	19.922	32.0593	39.7069	30.4838	17.5207	10.5739	16.1094	47.567	25.6636	27.0872	86.811		0.175878	39.3067
4.2891	43.3825	36.2916	34.7437	48.5483	45.1951	24.4015	69.2794	96.759	32.1097	30.6209	39.7091	7.2994	7.1463	43.595	57.582	21.772	34.2344	43.5649	33.7952	15.0238	12.0685	23.1087	39.84	24.0865	17.806	95.153		0.180905	37.5814
4.4082	43.008	46.9387	35.1765	44.1224	42.0779	17.7576	75.4682	90.781	31.1612	31.9232	47.6621	8.2	7.1449	59.125	64.863	22.535	29.87	41.3224	30.5978	14.2862	15.1759	25.7679	38.728	26.2799	22.9962	102.964		0.185929	39.0743
4.5274	46.2757	42.2864	31.4322	41.2338	40.1272	18.5076	77.4825	87.15	18.1754	33.0159	42.1009	6.3999	4.51	48.8834	51.594	20.141	29.1897	40.3726	35.7313	15.0027	6.7412	21.1666	31.211	33.6908	18.6223	103.8		0.190956	36.3402
4.6465	43.2951	38.6446	39.8948	38.0157	39.1064	13.4706	73.5247	87.745	20.0575	35.2261	36.3383	4.8184	6.3766	51.96	50.646	18.632	30.63	32.7613	39.8316	11.3716	9.1281	26.3899	29.611	32.0959	18.8844	97.877		0.19598	35.6282
4.7657	35.0194	40.9205	31.1899	36.4004	40.1619	14.811	80.3936	79.655	16.9609	30.5151	33.9797	7.2418	5.6763	48.5053	33.77	15.801	30.6926	37.7645	35.5648	14.6019	10.0029	24.8723	31.232	29.6133	19.8114	95.266		0.201007	33.8624
4.8848	36.0902	34.378	27.5177	27.4748	30.8678	21.0307	60.8917	84.919	16.5719	29.8688	36.6335	6.3494	6.595	50.6089	31.71	16.324	26.6972	28.4119	36.9966	14.9913	14.4157	20.9064	27.276	26.7622	23.8776	83.926		0.206031	31.6189
5.0039	38.4244	34.1937	24.7635	22.2546	35.7264	13.2103	62.258	86.028	17.4418	32.5992	29.2094	7.222	6.2699	46.5907	31.411	14.685	24.9506	26.4313	24.9225	9.8087	11.3333	16.223	24.902	26.226	23.2379	83.133		0.211054	29.7483
5.1231	38.0032	37.6603	29.7883	25.1033	29.2888	9.869	65.105	78.688	16.202	23.4204	30.7252	5.7462	7.4826	44.9654	30.109	18.01	23.5146	25.4464	25.0812	13.3884	13.9582	29.6159	30.927	29.5702	16.1902	78.274		0.216082	29.8513
5.2422	35.2297	34.7522	26.5823	16.8202	26.9416	13.5377	78.1557	75.599	13.853	21.3818	29.8671	4.817	6.4079	45.8414	24.726	12.758	19.7282	24.5593	24.8501	9.9001	11.6695	21.9532	24.755	27.9883	17.487	77.822		0.221105	27.9994
5.3614	24.4183	32.177	21.4691	19.1389	18.9029	11.8836	77.0061	77.822	11.0983	22.5843	35.8227	7.9383	4.4734	45.1209	28.025	15.344	25.2696	26.8267	22.7243	10.3556	10.965	16.6941	23.226	29.8873	19.4461	72.187		0.226133	27.3387
5.4805	21.8446	30.1486	21.0309	22.7947	18.7927	11.694	62.9213	77.318	11.7349	17.8307	32.3556	8.4316	7.6566	43.0958	21.191	12.674	28.2281	21.1601	19.7998	13.8471	12.0068	15.4351	28.731	28.6249	19.3431	72.125		0.231156	26.1852
5.5996	26.0382	30.8329	18.3312	20.1112	23.7767	11.4299	61.6972	64.321	17.2152	16.6151	28.9579	7.6959	6.6994	35.1314	17.076	13.476	16.3611	25.1206	21.6888	13.6194	12.0686	19.4036	25.004	26.588	21.1166	57.024		0.236179	24.5154
5.7188	22.4983	26.8814	16.6278	19.9021	24.048	9.6134	62.5337	70.745	10.7186	19.3004	24.3545	8.1124	9.5059	34.2238	16.486	13.603	17.8908	24.6825	24.4259	11.6143	11.4101	18.9957	30.8	31.2252	22.2355	72.808		0.241207	25.2016
5.8379	19.3245	32.8137	23.5856	23.2847	25.1215	12.3758	49.4829	65.756	9.4927	13.7874	23.4121	4.8138	5.2525	32.4361	19.353	11.921	15.0659	14.6515	13.1422	11.7102	14.3509	24.7831	29.55	28.2112	21.9382	60.226		0.24623	23.3016
5.9571	18.8318	28.9593	15.8167	24.3253	21.4329	6.9447	52.5237	55.576	12.6845	11.3714	21.209	5.1578	9.6986	27.1068	15.79	9.457	16.4135	16.3242	16.4827	10.6518	14.0732	22.6141	29.885	26.9997	20.9651	55.397		0.251258	21.7958
6.0762	23.6445	28.86	17.8491	17.9424	19.3636	13.5564	52.324	54.745	12.8076	14.9898	18.9963	3.9365	5.5323	26.3287	20.821	10.839	15.0185	15.0476	14.9765	9.7139	14.7731	17.5774	32.421	26.5514	20.3976	49.959		0.256281	21.4989
6.1953	22.1913	29.9393	13.4309	18.547	19.2081	9.5262	42.9986	55.077	12.9663	12.8827	18.2156	5.6762	5.9872	19.8726	16.137	11.993	18.5382	15.6959	12.5466	15.3108	18.208	21.0667	26.669	23.6248	20.2943	53.561		0.261305	20.7756
6.3145	21.8778	28.4124	10.7218	22.7677	14.6564	12.6195	39.1035	50.67	9.8838	12.2413	15.6786	4.1982	9.6185	24.9969	15.815	12.27	21.5295	12.8707	16.6735	8.2748	13.9164	18.5174	29.952	21.9541	22.9926	42.852		0.266332	19.8102
6.4336	18.401	26.5727	14.3562	24.9559	21.1122	10.978	39.3666	49.366	6.3141	12.251	15.8971	3.5969	5.1164	17.7692	12.529	10.753	18.7396	14.7676	10.0314	9.15	15.2682	20.389	35.941	23.4716	27.8465	46.776		0.271356	19.6814
6.5528	20.3902	19.9931	13.4565	16.7958	19.2587	10.9085	37.1983	48.352	9.8598	13.3473	10.6086	2.5953	6.2926	18.8101	15.314	12.34	12.7722	18.7595	12.4878	7.6661	19.7547	17.6765	32.062	23.2638	23.2093	37.041		0.276383	18.4698
6.6719	14.6973	15.4794	15.201	17.225	14.8276	9.7228	33.2556	43.869	15.1101	10.1423	12.2783	1.3664	6.8738	19.23	19.921	13.877	17.7514	21.0815	13.7043	12.1126	16.9284	16.358	29.606	21.3556	30.0123	30.163		0.281407	18.1596
6.7911	15.3242	25.5828	13.403	13.881	13.0863	8.3216	37.5294	39.984	10.2822	11.5744	15.0363	3.9232	7.1736	17.4953	16.121	14.22	17.6303	12.398	10.5435	9.0226	13.7689	14.497	28.614	24.3918	28.8171	28.914		0.286434	17.3667
6.9102	17.1044	19.1878	7.0263	14.5381	12.8745	10.7595	34.7149	39.873	7.9913	11.3964	13.7328	5.8927	5.8547	19.1827	14.469	13.031	15.6656	13.762	11.8533	12.9294	10.0539	11.8067	23.193	24.1182	22.2675	31.692		0.291458	16.345
7.0293	16.7005	14.5015	12.5199	13.2621	13.8451	13.5183	33.7047	33.474	11.2688	12.965	14.0267	4.0027	5.8502	21.1941	12.651	12.821	13.0287	11.379	10.1865	8.2373	10.9781	13.1455	24.865	27.5373	27.6435	29.792		0.296481	16.273
[truncated: 140 more rows]

[truncated: 2 more sheets: Image3, Sheet1]
