# Supplementary material for: Crumbs organizes the transport machinery by regulating apical levels of PI(4,5)P2 in Drosophila
Source: eLife. 2019 Nov 7;8:e50900. doi: 10.7554/eLife.50900 (PMC6881148; doi:10.7554/eLife.50900)
Supplement: Figure 3—figure supplement 1—source data 2. [file elife-50900-fig3-figsupp1-data2.xlsx]

## Sheet: Image45
X0	Y0	Y1	Y2	Y3	Y4	Y5	Y6	Y7	Y8	Y9	Y10	Y11	Y12	Y13	Y14	Y15	Y16	Y17	Y18	Y19	Y20	Y21	Y22	Y23	Y24	Y25	Y26	Y27	Y28	Y29	Y30	Y31	Y32		Ap-basal	Avg int
0	18.6904	19.8904	8.8084	10.6414	13.2306	9.2291	14.4625	13.7079	9.541	9.4986	8.99	6.2324	5.4034	1.5442	3.9734	2.6835	4.2496	1.8101	3.7569	3.7901	3.6193	6.2107	5.2301	3.359	5.8856	2.3299	1.9876	5.37838	6.0961	4.6851	0.8236	0.8236	1.71261		0	6.61441
0.1191	25.8886	15.0344	11.5645	15.664	13.4165	11.7598	20.8936	20.309	9.929	10.1295	6.9934	7.5123	6.2943	5.3087	5.2764	2.8637	5.0738	2.8172	5.1078	4.7791	3.4153	6.5509	7.0853	6.6048	2.5134	4.6085	3.9624	6.60809	5.9389	1.995	1.1326	2.9028	1.11491		0.00462803	7.91056
0.2383	28.5559	17.9072	16.3535	14.1912	16.5221	10.8427	19.2488	25.5025	19.009	12.688	13.2539	7.6423	6.3224	3.2875	2.9226	2.2374	4.7205	3.3757	8.0817	4.8154	2.3619	6.9812	5.3934	6.722	4.2879	2.4426	7.421	3.20067	6.7992	5.1244	6.0156	4.6429	1.37808		0.00925994	9.09852
0.3574	29.3293	23.1724	16.1812	20.5618	15.8479	12.4313	23.5585	30.0782	21.572	12.6476	18.665	9.2314	6.8995	5.7419	3.6726	3.1127	4.4803	3.1767	7.4392	7.2304	5.308	8.212	7.4158	9.775	5.7003	6.6201	7.0253	3.85769	6.7517	5.0748	3.334	5.811	1.75902		0.013888	10.6568
0.4766	29.7166	17.64	17.6394	16.7865	9.5762	14.3123	28.261	40.3708	31.526	22.2068	19.6445	9.9078	7.5393	6.3712	6.0093	1.6599	5.1622	3.24	13.4463	4.1483	4.067	10.2386	6.517	6.8369	7.4806	3.868	3.3439	4.04332	9.6867	7.0452	4.5558	5.6315	2.07185		0.0185199	11.5318
0.5957	29.8776	23.4382	22.5206	14.8748	15.6438	16.7148	27.0884	40.2116	45.512	28.8478	25.8716	9.6534	9.5571	6.2476	7.9678	2.4007	2.9584	3.3134	12.9397	5.9407	4.8815	11.5642	7.705	9.232	11.9874	5.8006	8.5294	6.41855	8.1468	5.5443	4.0566	3.7258	2.55935		0.0231479	13.3858
0.7148	40.1362	27.5905	21.6063	20.7299	15.0705	14.6543	31.9204	40.9822	39.488	31.7983	25.4602	8.478	10.0336	10.2636	11.8469	5.4093	11.0306	3.6584	9.2402	7.4877	5.8982	13.8026	9.9323	7.2527	7.8601	3.7373	4.0032	4.79832	6.5852	10.729	3.4259	3.0452	4.50049		0.0277759	14.3168
0.834	43.8328	31.3661	28.0655	14.7195	9.4622	13.4529	41.4491	48.6464	56.401	37.947	36.9075	12.2632	17.9036	12.1442	8.098	5.3929	7.0609	5.3619	14.1003	9.0985	6.3078	14.4823	12.5616	9.7081	11.1816	5.8113	3.2936	8.18433	10.0894	9.4731	3.4729	7.6698	1.63427		0.0324079	16.8953
0.9531	43.0395	33.9499	31.3547	18.5692	16.4838	15.2115	44.4199	48.0978	66.875	47.6075	39.2029	13.368	11.6206	13.2722	4.5867	7.1136	4.806	5.5368	14.4466	10.858	6.0975	20.5895	11.9571	13.3175	11.058	8.6939	4.6671	6.10769	10.9978	10.6196	4.1917	5.5551	1.59775		0.0370359	18.3597
1.0723	52.1386	37.7846	28.4913	24.2552	20.0082	14.7142	57.4319	68.0092	71.282	58.3687	47.9945	13.2892	15.2397	7.1011	9.3805	5.7356	6.8262	9.3432	10.8516	9.8375	4.1361	18.131	12.5106	12.485	14.9129	7.816	6.7993	3.44232	11.1912	4.9319	5.8643	9.9813	4.24591		0.0416678	20.7434
1.1914	51.6312	49.4314	32.404	25.2011	24.7861	18.6017	55.6233	72.0878	74.86	65.8177	37.9729	12.3929	13.3318	19.8664	6.9186	5.3407	10.3073	9.3762	12.884	12.6355	8.174	14.1431	16.1846	11.0652	13.4965	9.2092	5.6658	5.95446	9.9784	9.1291	8.7442	6.12	3.00684		0.0462958	22.1922
1.3106	59.8318	52.6498	27.1729	27.4247	18.3161	21.8632	52.5761	87.0835	96.454	71.2393	56.0102	14.6505	15.3007	10.5591	10.5367	9.97	7.3595	9.8239	9.7664	8.4795	10.8871	15.2327	17.9052	15.022	17.8489	7.453	7.7019	4.94134	6.5023	7.72	6.1877	7.5612	4.51338		0.0509277	24.1377
1.4297	53.7487	59.614	40.9848	29.2341	21.5887	20.6416	51.803	67.6613	106.47	77.7278	58.7124	16.1381	10.22	8.9559	7.6787	6.9863	7.3757	10.526	8.7222	9.904	8.1713	16.5186	18.8747	13.6437	14.0167	11.2133	8.0765	8.73552	9.4782	6.655	6.6179	8.7876	3.96641		0.0555558	24.5287
1.5488	54.4074	59.986	35.0645	29.216	23.1878	19.8256	65.9532	74.5262	118.119	89.5214	65.8233	18.1978	11.373	14.3347	13.5574	6.036	4.5479	11.436	13.0766	11.7529	12.1967	10.9998	13.522	16.189	20.1404	10.6608	4.2492	7.74505	11.6866	5.8192	9.312	14.2197	1.91718		0.0601838	26.6243
1.668	66.9114	59.4854	42.1778	28.8315	22.2081	15.5401	67.8846	71.3969	100.67	82.8908	69.8249	22.096	10.0702	14.4408	11.1603	9.2998	4.0565	8.2474	15.6636	12.154	13.6106	10.7291	12.7109	24.7617	20.2641	8.8605	9.8796	7.66354	8.1975	5.9606	9.1707	8.8666	5.63862		0.0648157	26.7068
1.7871	61.5918	59.8022	29.8085	24.258	20.5014	20.2607	87.0717	74.2668	112.122	78.2854	64.0191	15.1294	8.432	15.915	12.2782	9.9499	6.5335	11.2861	10.0887	13.2049	6.9092	12.2515	15.6171	17.2763	24.482	9.265	7.0486	9.04685	11.771	11.6264	10.495	12.2755	3.33896		0.0694437	26.8548
1.9063	50.7482	54.7541	25.7976	29.7327	19.9024	17.0116	71.5385	81.0283	120.257	79.6398	77.8022	11.133	12.905	14.94	9.8944	9.7137	8.9028	12.1657	11.9445	6.2303	10.9597	14.7613	20.1352	16.621	25.6085	11.3203	5.5883	7.41488	13.5824	10.417	12.7089	7.8393	4.12256		0.0740757	26.8825
2.0254	65.5227	64.2319	36.9686	28.2047	16.1616	15.5973	75.5274	78.102	103.1	66.9473	71.1844	14.952	7.127	15.7584	12.4047	7.9456	9.6887	10.9994	12.1417	14.125	11.6023	11.5564	14.0082	17.2432	23.4096	10.0997	10.413	5.10297	6.6877	9.6537	10.3865	9.8532	2.79183		0.0787037	26.3484
2.1445	51.2278	57.7428	32.2135	23.2126	20.0972	16.53	82.1299	67.0744	99.26	76.5142	62.0449	14.1269	11.7459	13.6341	6.4908	9.5439	7.459	9.8011	12.3364	9.18	11.3952	14.4418	14.7329	19.2399	18.7829	6.2651	6.9281	5.11315	10.8611	14.0577	9.7096	9.2557	5.75776		0.0833317	25.1184
2.2637	63.7742	53.8913	30.2767	22.8259	18.748	15.2421	72.5612	78.8737	96.92	74.0465	55.295	14.5846	10.7857	12.8111	8.2439	7.801	8.7123	9.4904	16.9544	7.4298	9.0435	17.9151	17.9207	22.1989	31.4906	9.2123	6.6394	4.7747	13.7464	10.8793	12.0155	9.8342	4.6818		0.0879636	25.7461
2.3828	48.8601	55.6725	24.4976	25.0114	11.1382	12.5468	75.9985	82.873	88.944	70.4419	64.3182	17.2094	10.5202	14.4553	8.7747	10.1098	6.336	9.3544	13.74	11.8227	13.9942	18.3393	15.4372	19.9737	28.4702	8.181	6.002	6.39667	11.2419	8.1601	13.5549	11.2623	5.9768		0.0925917	25.1398
2.502	43.9002	42.6597	30.2504	24.7867	15.6193	12.3691	65.982	74.2683	81.802	57.157	63.7284	17.5153	9.8688	7.8669	4.4175	3.9241	6.8666	8.0014	13.7585	8.5115	10.8357	18.8834	19.0906	17.0906	26.0881	8.5811	6.6236	7.43973	7.3586	11.7	16.5245	7.3207	4.68266		0.0972236	22.8931
2.6211	43.0014	44.6189	23.1501	20.4947	13.9063	14.6173	57.1131	69.8484	63.251	50.7286	55.2923	14.4569	10.2545	12.2157	4.228	7.9314	7.7767	7.4357	14.311	9.9992	10.212	18.5732	14.5444	24.7147	23.6496	7.7237	11.1149	6.41136	11.8244	8.2751	13.5459	12.7242	3.84325		0.101852	21.5693
2.7402	36.4944	42.4194	25.3692	20.1696	14.7563	14.6845	61.8545	71.7013	61.46	52.6568	52.0387	10.4824	5.9964	10.3573	7.7539	4.2458	6.2713	5.6116	8.5482	15.0731	17.5844	18.6874	20.573	23.504	23.4458	9.409	8.989	9.99266	9.1205	9.1078	16.007	9.8019	2.29934		0.10648	21.4081
2.8594	35.6167	37.76	17.4471	19.4401	13.3862	10.2645	69.3171	72.6642	53.24	47.3314	41.8314	15.4167	9.0216	11.6716	4.7897	3.7195	4.5387	7.8329	9.62	10.2701	15.304	18.6761	14.3947	22.1497	23.0212	7.5412	4.4046	9.92447	6.4769	10.9918	15.5417	9.7487	2.70753		0.111112	19.8807
2.9785	37.2111	33.1756	29.6319	19.0076	15.8211	10.3601	57.9356	66.6223	46.194	44.9372	50.1708	13.356	10.7606	12.9144	7.0393	5.8131	6.6517	6.7895	7.8435	9.4686	10.1282	14.2234	18.2738	21.473	15.1309	6.0593	5.8997	9.47919	8.9843	10.7834	13.967	6.5508	2.32486		0.11574	19.2419
3.0977	38.1745	40.874	23.5861	18.944	10.8676	11.767	61.3921	68.7688	42.872	51.9667	49.5621	16.48	6.8697	8.2146	5.1666	4.3367	3.1298	7.6142	10.4361	10.3722	8.8772	14.1925	10.1917	19.7455	19.3615	4.8092	6.2652	7.08496	8.8011	10.0196	13.0948	4.4969	4.10552		0.120371	18.8618
3.2168	42.988	42.3754	20.8654	13.0485	11.6965	8.451	51.9123	66.442	41.581	40.516	43.6487	12.0442	4.7996	8.6748	7.2632	3.6566	3.3653	9.3526	6.2533	10.659	9.576	22.1166	11.7351	19.2197	16.5955	7.9619	1.6923	7.42621	9.8583	9.7383	9.9198	4.881	3.03619		0.125	17.6773
3.336	29.8073	37.0736	20.5372	14.9605	18.2175	9.4332	53.2023	72.2171	40.926	42.7917	42.042	13.0249	7.9602	7.3509	3.6199	3.8346	3.9419	4.7145	8.2076	7.5377	9.4996	18.3132	11.6418	24.5979	22.6788	3.4968	6.444	7.34141	8.3362	8.977	13.183	5.0142	1.82972		0.129631	17.6592
3.4551	29.1143	39.5596	22.723	14.0788	10.4641	9.028	57.918	62.7482	46.768	37.7809	52.3742	11.4721	8.688	6.3861	5.7447	6.1641	2.6772	3.6112	6.9693	10.9388	12.8003	13.2132	11.9389	14.3938	13.1278	5.29	5.6619	5.73915	9.9077	6.6554	10.3313	5.634	4.73219		0.134259	17.1101
3.5742	24.5133	37.6959	20.3177	14.3292	9.0779	10.998	46.185	66.6537	50.294	40.0192	53.8434	12.3671	8.5881	7.0694	9.9395	3.3461	3.5776	4.7189	5.6292	9.87	11.0995	15.6384	11.85	13.8235	14.6027	6.0586	5.955	6.31625	6.2865	10.0281	8.5545	5.7949	3.57285		0.138887	16.9277
3.6934	28.1087	23.8139	16.9678	9.01	4.796	8.5196	45.3196	54.2534	34.169	36.4107	43.4049	7.8837	5.9344	5.9024	5.1228	3.5545	2.4614	2.7623	5.6268	8.3802	8.3101	15.8109	10.5	21.2745	11.9449	4.429	4.8306	7.65312	5.9695	7.8264	11.9582	5.28	3.53492		0.143519	14.2947
3.8125	25.6709	19.3177	18.7544	9.2834	5.5597	7.6632	47.8381	51.3313	36.319	42.8755	44.4958	14.3395	6.811	9.5707	3.2129	4.7946	3.8788	3.3764	3.3904	7.9338	5.4263	14.6296	12.3278	16.5192	10.1373	1.6813	5.4103	6.62454	8.2438	10.4415	7.7969	7.3024	1.93832		0.148147	14.3908
3.9317	23.4997	32.4379	16.7199	11.0323	5.3393	8.263	54.3748	44.0555	38.363	36.8963	45.9214	8.3896	4.6991	6.2428	5.682	5.197	2.6516	3.4109	6.6904	7.0878	5.1457	16.1455	9.8606	14.1111	10.1094	3.2506	3.2826	6.19708	9.3604	8.141	10.1541	13.2669	5.16806		0.152779	14.5802
4.0508	32.8414	28.379	16.5106	12.5131	3.9009	11.0123	57.6921	42.7449	40.426	29.1516	39.8037	8.1754	5.8572	4.1395	4.5112	3.5657	5.4189	3.3126	5.7291	5.1209	12.5154	13.4644	8.4139	8.6688	9.0237	4.26	5.0852	6.35305	10.5292	10.2448	9.6845	5.3666	3.54083		0.157407	14.1805
4.1699	34.5819	21.4137	14.6217	8.1036	4.9129	7.6793	41.0636	39.681	40.317	31.2825	38.4169	7.9364	6.0388	6.7307	2.0166	2.291	2.6169	3.0138	7.4323	6.8705	8.9845	19.0258	5.7748	12.9253	10.1831	2.6422	4.5096	6.64166	5.3168	2.9253	6.2654	8.0559	2.71026		0.162035	12.8176
4.2891	25.6769	19.8377	16.0729	10.9917	5.2671	8.3343	42.4442	42.2309	38.275	31.9681	42.5154	8.5266	7.2332	7.9618	3.3424	5.1716	1.8562	5.1456	4.9852	4.8751	9.7551	10.7584	9.9241	12.9048	6.1014	3.5381	5.7051	5.61275	4.6187	7.4911	7.0904	6.6327	3.2294		0.166667	12.9113
4.4082	20.9246	21.8455	14.8192	10.9149	6.1276	8.816	34.0686	31.5721	39.115	38.5737	39.5819	9.689	4.8202	5.3746	4.7974	2.8028	2.5209	7.7226	3.1022	7.8672	5.3955	14.1308	8.749	11.019	4.5806	2.8092	3.2886	5.79889	7.9024	12.4127	7.01	10.0501	5.42528		0.171295	12.5342
4.5274	18.6307	19.4593	14.7263	6.9514	5.9837	4.8927	32.628	32.3432	42.035	44.0224	33.3184	7.6281	4.1454	6.0171	7.2535	3.537	2.6925	2.3333	5.654	5.4671	4.4474	11.4246	7.1559	9.84	7.2141	3.4741	3.6437	4.25738	7.4313	10.3117	6.2536	9.5543	1.41211		0.175927	11.7012
4.6465	20.0002	25.2122	9.9111	5.695	4.6554	8.1579	30.0331	31.0923	38.841	39.7609	29.9117	7.6542	5.6532	5.0012	4.3027	3.0123	2.5824	3.9431	5.2511	5.0597	6.95	10.1272	7.8505	6.9002	5.5741	4.5052	2.8378	4.81521	9.1871	10.9417	5.7446	6.36	3.24688		0.180555	11.2355
4.7657	17.9489	23.2208	10.2437	5.6588	2.482	4.387	27.7367	31.6462	35.709	31.5114	30.2348	6.9628	5.6903	3.6933	5.5991	4.0373	1.5545	2.8924	3.796	5.2051	3.1453	8.9197	4.6109	3.9186	4.8743	4.3634	2.5622	5.63161	9.9197	9.6632	9.3946	7.2188	6.42336		0.185187	10.329
4.8848	17.3413	21.8152	13.1111	10.749	5.3734	3.3562	33.1713	29.0659	30.048	37.8967	40.2644	8.4716	3.9909	5.2407	2.8914	2.2232	2.3332	3.6116	6.367	4.4735	4.8932	8.5161	7.0127	6.9135	7.1351	1.4733	4.7119	3.95468	6.4967	11.4014	5.6279	8.1078	5.70965		0.189815	11.0227
5.0039	20.7177	18.5765	4.8557	6.6278	5.4997	8.881	25.9338	26.4565	28.912	33.9674	27.1346	7.5693	3.7116	4.7275	5.3313	2.4448	0.927	1.3538	4.8146	3.7431	5.1379	12.1796	5.4535	8.2308	4.2119	2.6667	3.3817	4.42934	9.1404	10.292	9.6646	7.9181	1.6175		0.194443	9.89423
5.1231	18.6473	17.5036	9.8284	5.2292	2.9585	3.5585	26.3798	23.9158	31.952	37.4337	26.451	10.3198	7.3299	5.14	4.4871	5.8886	1.4607	3.3982	4.5865	4.4203	7.6063	11.4295	3.5566	4.9528	5.0113	3.7311	1.9111	4.97896	9.2227	7.4098	7.2788	9.6184	3.0792		0.199075	10.0205
5.2422	17.8672	20.0255	6.8427	5.7565	7.1153	8.1636	28.6486	29.662	30.649	42.7009	21.8517	6.1448	6.7513	4.3594	1.6977	3.408	3.0824	1.4868	4.3292	3.9139	5.54	6.8947	6.7981	4.4857	5.4153	2.7724	2.2874	4.39488	7.7719	7.3515	8.4942	6.9617	3.6301		0.203703	9.9168
5.3614	22.916	24.3905	5.5901	3.4721	2.8837	6.1787	23.6887	26.1762	25.691	38.2502	16.3042	5.8952	4.3697	4.3293	3.1434	2.4135	1.7055	1.1795	4.0766	5.2515	4.6083	8.0512	7.7694	6.9487	7.0596	2.3532	2.8238	6.16291	6.3284	5.9262	4.2832	7.3502	3.71676		0.208335	9.12992
5.4805	20.1579	15.462	9.8409	6.2115	7.4402	4.8872	23.8846	34.8131	29.158	31.6687	16.0907	8.0747	4.3597	3.9571	2.968	2.1533	2.1385	1.883	4.1279	5.1408	1.8168	5.5189	5.6282	7.5625	5.404	0.665	0.9259	2.853	6.5376	7	5.4471	9.8092	3.08406		0.212963	8.99
5.5996	11.4591	21.4459	5.0855	8.2847	4.6545	3.2653	23.6073	30.4799	32.218	43.3103	14.874	6.1429	1.9136	3.6298	6.3268	1.9113	0.8399	3.0391	4.8785	2.8788	3.2774	11.1024	7.3706	6.433	7.1189	2.8086	1.7205	6.84113	7.1189	6.6942	3.9415	6.4577	6.57121		0.217591	9.32428
5.7188	19.1651	20.8078	6.0428	7.1016	6.2383	6.2916	21.5514	25.6447	28.246	25.9794	15.9425	6.1774	3.2796	4.3847	1.7155	2.1337	2.8438	2.6212	4.0043	1.8619	2.6634	5.5737	5.0156	5.7048	8.5186	3.7973	3.057	2.8665	8.8185	8.9633	6.3637	8.8338	7.38567		0.222223	8.77561
5.8379	20.6791	20.8513	4.0663	3.8755	4.989	4.1521	19.7715	21.303	28.408	25.6226	22.4208	9.312	4.7188	2.2553	0.4427	2.7535	1.3228	3.5724	4.1285	2.9052	5.3188	3.5307	5.0969	4.2809	8.7942	4.2579	2.0228	3.80514	10.4436	4.2531	5.0371	10.8645	2.18951		0.226851	8.40744
5.9571	20.3232	17.0745	6.5134	4.7508	6.0208	5.7229	18.4103	26.6103	29.898	26.6868	21.1755	11.2161	4.3699	3.6869	2.8404	2.8233	1.9171	5.0442	5.1792	3.5084	4.8903	7.9099	8.1853	4.5346	6.9982	3.2283	3.2631	2.79334	4.8099	7.0187	6.2143	8.0441	5.9976		0.231483	9.01999
6.0762	19.3616	17.805	7.1852	5.1068	4.7288	4.6604	16.2605	22.7959	24.184	25.3371	19.5872	8.7282	3.8251	4.3194	2.3647	2.7333	1.427	1.3104	4.8144	4.8473	5.7656	5.1018	5.1045	5.2949	5.6122	2.4373	1.1567	4.09347	5.7874	7.662	4.7613	9.6793	5.17007		0.236111	8.15178
6.1953	18.7939	16.125	6.5924	7.186	6.1677	5.1754	13.183	22.9465	22.461	19.0011	17.321	5.3968	6.6436	5.2215	3.7352	3.1763	1.905	2.4462	5.981	1.3463	5.3453	3.6229	3.7967	3.6138	6.5381	2.359	2.7986	5.22863	5.75	8.5648	7.9697	9.8498	5.39662		0.240739	7.92845
6.3145	16.8787	12.2956	4.4011	5.5321	5.4336	3.1922	12.2187	19.7823	20.75	14.1477	18.4844	6.8376	3.831	2.9929	1.8772	3.0862	2.5879	0.9408	1.5714	4.2805	5.5172	8.5532	1.7555	6.1271	9.6647	3.2153	4.5308	2.87885	6.4528	7.1382	5.7159	8.3809	5.59028		0.245371	7.17099
6.4336	20.5905	12.3472	5.3919	5.3903	3.0165	1.7641	16.0033	20.3276	21.962	25.2319	17.4881	6.867	4.8366	5.5646	3.0055	0.9883	2.6385	2.6007	1.5604	3.3481	5.7237	4.3577	3.9662	2.9258	4.1516	4.5795	2.9331	3.41154	4.9741	4.0209	8.7003	6.6899	2.62181		0.249999	7.2721
6.5528	13.887	18.3676	5.8733	3.7145	2.4922	2.9778	14.0159	21.6597	21.056	21.7202	17.0317	5.213	4.0809	4.9831	2.691	2.0495	1.3495	1.3982	4.1648	1.6898	4.7701	5.4314	5.1379	3.8639	4.1189	4.1773	4.5618	5.70911	8.057	7.6403	10.3367	3.2431	4.29216		0.254631	7.32592
6.6719	16.7926	11.0363	4.9225	7.32	4.9749	3.7581	17.2121	18.2683	26.439	29.1639	16.9259	9.9885	6.5898	3.6634	2.5709	1.5286	1.8049	2.7193	2.3314	2.1344	4.9786	6.9977	2.9899	6.4706	5.9424	3.2159	3.5075	2.29675	4.3422	5.3722	6.6486	5.8171	3.29759		0.259259	7.63703
6.7911	24.2907	12.0316	4.5359	3.8718	4.5248	3.3612	15.8526	28.0969	17.058	16.4598	15.5966	7.1092	3.3743	3.9637	4.6607	0.9737	1.6029	1.6316	4.1626	2.9376	5.4551	5.1092	6.1957	4.4396	4.6376	1.5408	3.2817	4.57665	8.3424	7.1827	8.9284	6.5393	4.39755		0.263891	7.47645
6.9102	30.9308	9.8733	5.8931	5.7642	4.1488	4.8585	18.7351	20.8414	20.532	24.2156	12.0843	7.4484	5.5783	1.8953	1.3185	1.9109	2.3974	2.5653	4.7251	3.2636	3.4488	4.4263	4.9757	6.6528	2.4835	1.5666	0.9679	1.57302	6.6473	11.0026	6.411	8.8803	4.03275		0.268519	7.63783
7.0293	24.1207	13.4308	2.4619	4.5498	4.9664	1.5801	15.2665	21.7167	16.435	22.9279	13.4827	5.9511	5.7232	2.0399	2.5005	2.9149	0.9797	2.0921	3.8691	2.6716	4.0073	6.1708	5.3677	2.9034	4.6775	3.5808	3.3334	3.92454	8.1149	6.3147	5.1289	8.933	2.54539		0.273147	7.1116
7.1485	17.2537	15.517	4.7532	4.2788	4.0687	2.4125	18.2149	19.9771	18.857	25.1953	17.351	6.2685	2.1741	2.3945	2.2432	3.4657	2.6736	0.7445	3.7541	5.0784	5.9495	6.0137	2.3363	5.0696	7.9979	1.8559	0.5054	3.57834	5.9185	6.1767	11.0608	3.7321	5.78484		0.277779	7.35319
7.2676	15.8168	13.0458	5.3975	3.542	6.9081	4.8177	16.1583	20.3216	12.519	22.8631	19.5153	7.1328	5.1066	3.8516	3.0368	1.3832	0.8489	2.9417	1.7011	4.2154	5.3576	3.9248	5.2454	2.8498	3.0064	5.8899	1.1697	3.59848	7.7402	4.2937	7.975	7.245	4.84067		0.282407	7.09879
7.3868	12.9878	9.9755	2.8876	1.9482	7.5973	3.2778	15.7361	21.8889	14.519	16.2675	16.0609	8.2917	3.6552	3.4244	3.5659	2.4695	4.0038	1.647	2.006	4.614	2.2801	4.0175	6.3551	4.5073	5.2299	3.5533	1.9895	5.07138	7.0935	7.1403	9.5923	5.5788	5.40347		0.287039	6.80717
7.5059	10.8507	11.034	3.6345	5.8359	4.5823	2.3512	20.4985	22.005	12.284	27.2337	13.3596	6.626	4.6032	2.4248	2.6453	2.727	0.994	3.5002	2.4226	3.0749	1.716	5.2593	4.382	4.1157	3.3847	3.813	1.6297	1.65912	5.3746	4.9749	9.2221	3.6762	5.14149		0.291667	6.57685
7.625	12.7674	10.866	7.7881	4.457	3.1945	5.5275	11.7683	18.5429	21.539	21.0851	19.593	6.6858	4.53	2.4013	1.8239	1.9027	3.4303	2.6613	4.5581	6.9614	2.4766	6.8478	2.9578	5.2614	5.0774	2.5437	2.2682	2.90779	3.1754	4.2138	6.2532	7.6432	2.028		0.296295	6.84054
7.7442	14.8261	12.3561	4.9678	2.471	3.8584	5.5188	10.2693	18.787	17.109	17.0453	19.5137	6.3053	2.9985	3.2001	1.8703	2.5503	1.8743	4.4425	1.7159	4.3052	3.8964	4.2173	4.0504	5.2347	3.9052	1.8829	1.2268	3.03625	5.1822	3.8818	7.6923	5.4269	4.1116		0.300927	6.35544
7.8633	11.3658	12.4041	4.9787	5.0842	2.729	4.2853	14.1683	13.9372	12.403	21.0381	19.3295	3.5169	5.8891	2.6451	0.9686	1.4625	1.2857	2.4875	1.7816	2.9816	3.5814	5.5846	5.0957	2.8528	4.5322	3.0565	2.1553	2.58256	3.9621	5.0886	5.2782	6.3828	6.09235		0.305555	6.09051
7.9825	15.7453	10.7711	3.4487	4.8454	3.7398	4.0415	14.1088	19.8501	10.143	14.4599	15.7198	4.6142	3.6851	3.4143	2.363	1.5984	1.434	1.0146	3.2198	4.8032	4.1163	3.0052	4.9016	2.4168	1.6054	3.9755	3.8981	2.58114	5.1132	7.0786	6.9525	3.7273	5.08346		0.310187	5.98409
8.1016	12.4849	11.3395	2.3001	4.1684	3.3869	4.2133	10.3525	19.3482	9.19	12.4163	19.689	3.9156	5.6367	3.4468	2.2283	1.5933	0.7992	4.2928	0.5129	4.2151	4.0036	7.1608	2.4385	5.4159	2.4727	2.0229	2.2169	3.50071	4.4337	8.3644	4.3732	6.237	9.13281		0.314815	5.97888
8.2207	8.1538	10.6758	6.849	4.8808	4.3085	5.6249	12.6235	14.6955	16.976	12.8401	17.8434	4.8302	5.455	3.7105	0.5332	2.5485	0.2226	2.07	1.7097	2.7061	3.5759	5.6894	4.2094	2.3949	4.3631	2.1661	3.0173	2.72977	5.7015	5.3381	5.7991	2.294	3.52887		0.319443	5.75953
8.3399	5.8508	12.1729	2.3675	4.5892	5.9725	4.9406	17.4373	17.181	13.956	12.2986	14.2745	5.8899	3.9492	2.431	4.1499	2.5304	1.3079	0.4166	1.2289	3.7225	4.2768	4.124	3.1417	3.6067	4.2231	3.7083	1.3555	5.4776	4.313	3.9046	3.9613	3.8465	6.82579		0.324075	5.74037
8.459	8.2998	8.2878	3.2235	2.5769	2.3424	6.6593	13.4992	14.729	17.638	15.8433	14.3034	5.0198	3.0593	3.1431	1.3015	1.4431	1.2899	2.2782	1.3767	1.5675	2.3257	3.577	3.5723	7.282	2.9295	1.578	2.6632	3.16282	3.9332	7.0753	6.0034	3.4058	2.27784		0.328703	5.38387
8.5782	9.1644	11.2308	3.1641	2.7396	4.1055	2.4866	17.1545	18.1129	16.497	10.9252	11.0622	5.6659	2.6409	4.2203	3.7094	2.3813	1.5961	1.4993	4.0265	4.5116	2.7649	5.2412	2.217	3.1492	2.8333	2.3039	1.8004	3.02646	2.4017	5.726	8.9463	5.7521	4.7348		0.333335	5.69065
8.6973	10.309	8.3073	4.0384	3.2174	1.8027	4.9168	15.5383	15.4118	18.051	16.546	14.0389	4.0173	4.7957	2.3847	2.9301	3.2485	1.4274	1.7117	3.43	1.5036	1.9242	4.0827	3.2631	4.1226	3.844	2.2666	2.7455	2.14143	3.6947	5.3179	3.2104	6.5451	3.66416		0.337963	5.58936
8.8165	9.6109	8.0977	3.7901	2.0227	1.9216	2.8978	13.5419	13.8872	19.274	10.7788	10.9453	3.2953	2.7935	3.1064	4.2444	1.9142	2.1912	1.0358	2.5031	3.3163	2.3769	9.8172	4.8616	1.5879	3.8069	3.0819	1.1646	2.41822	3.5268	3.5264	3.5593	5.9252	2.30557		0.342595	5.12505
8.9356	11.8299	10.4864	3.6631	3.6821	4.0399	1.646	15.9277	25.124	15.834	12.8476	13.5945	4.8899	4.0001	3.6402	1.2187	2.7601	0.3359	1.8176	2.2617	3.7095	3.1747	5.6597	4.2453	1.6377	5.2148	2.888	1.4102	2.64168	3.4621	4.9556	5.6931	5.5437	2.90717		0.347223	5.84069
9.0547	11.7186	5.2363	3.2265	0.9148	3.748	4.0679	12.6234	15.6386	20.129	20.9902	14.4272	7.7142	3.1597	2.5671	1.1245	2.2597	2.9374	1.7213	0.3777	5.1095	2.5969	3.6656	2.94	3.8488	3.351	2.4731	4.3921	3.33635	2.361	3.5555	5.3487	5.8343	2.29394		0.351851	5.62694
9.1739	12.1884	9.7754	4.3258	1.5491	1.9342	4.1603	14.7481	13.7165	16.768	14.52	13.7581	5.5624	2.2505	2.0053	3.588	1.1624	1.9093	2.967	1.1615	1.9861	4.426	3.0373	5.2329	5.048	2.4738	3.3986	1.9449	2.22267	4.1313	3.4553	3.264	7.3846	5.51714		0.356483	5.50221
9.293	10.4711	11.3357	2.7504	2.1724	2	5.3844	12.9993	14.4677	25.327	14.1127	13.4948	4.1769	4.0897	3.7985	2.8366	3.1495	1.0236	1.787	1.2835	2.3043	6.3987	3.7184	1.3207	3.6867	3.0342	1.7177	2.7163	3.6033	3.7931	7.1226	5.0011	4.0197	4.31734		0.361111	5.73985
9.4122	8.1946	4.8433	3.8729	0.9762	0.8367	4.3314	14.5296	19.1774	20.241	11.4893	12.2797	4.5886	2.9667	1.278	1.7918	1.9694	0.9849	1.49	2.311	2.8947	3.856	1.4244	3.7582	3.356	2.5449	1.9213	0.9539	4.5021	3.0419	5.3461	5.4015	3.8718	3.02421		0.365742	4.9712
9.5313	15.3795	9.6435	6.8311	2.0745	1.9599	2.8432	12.4675	14.4117	19.146	12.9317	10.608	4.1189	4.1197	1.6363	1.6849	0.9781	0.0252	0.491	0.4105	1.6632	4.4249	3.7109	4.2382	2.8647	2.2295	2.6463	2.0995	2.40739	4.6182	5.2576	3.8007	3.034	4.84304		0.370371	5.13937
9.6504	12.4581	7.7304	1.6947	1.0902	0.4634	5.5276	13.7143	12.016	11.653	10.3664	12.7419	4.5003	3.1247	1.7041	1.6075	2.1238	1.1554	3.5643	2.0555	3.3923	4.4339	1.2542	2.5389	5.6939	3.2895	1.3021	2.7131	0.22784	1.6788	2.6477	3.6842	4.7325	3.81946		0.374999	4.56667
9.7696	11.1157	11.755	5.5687	2.1447	2.01	2.7878	8.7336	15.2798	15.858	12.1005	11.0687	4.3433	3.5805	2.6882	2.7409	1.1626	2.011	0.8262	1.5898	2.4193	3.732	1.5227	2.2351	4.9517	3.0356	3.4429	1.7695	2.0461	5.8037	2.4717	4.8154	2.2826	4.94011		0.37963	4.93435
9.8887	10.6693	9.1797	3.9357	2.3959	0.9271	5.326	8.2434	16.939	10.363	10.8341	8.9662	5.9984	2.4647	2.7382	1.5183	2.2306	1.426	0.8747	1.8451	2.4558	2.4807	3.7581	0.9864	1.9822	5.533	3.6439	2.5849	1.71679	2.2565	5.7828	5.2757	6.0496	3.75116		0.384258	4.701
10.0079	11.209	7.4372	2.9096	1.0105	2.671	4.6405	7.3778	10.7253	15.539	12.9592	9.9919	4.1751	3.0098	2.032	1.6222	0.7494	1.2737	1.3705	0.5102	4.3801	3.0766	1.6147	0.116	1.1365	3.3209	3.7395	2.5615	1.37383	2.0375	6.6172	4.875	4.3851	3.35329		0.38889	4.35762
10.127	8.5439	10.7123	2.3946	0.8452	0.1121	2.8441	8.6276	14.9069	14.67	12.1587	14.0429	3.8354	3.4932	1.3409	2.404	1.9998	1.2394	0.3271	1.3447	2.6268	1.4917	2.3894	2.523	2.7682	3.8861	2.7812	2.1025	1.78974	1.7321	4.5065	4.1784	2.0972	5.64398		0.393518	4.43514
10.2462	8.4362	10.8428	3.0023	0.8041	3.5068	3.9772	11.2579	20.3501	17.467	12.333	13.5463	7.7509	1.8881	3.0529	3.5718	1.1602	1.8805	0.5321	0.2709	1.265	2.7061	2.7495	1.2501	3.2421	2.3141	5.5828	2.3284	1.16256	4.274	4.33	4.1324	4.2824	5.88615		0.39815	5.18596
10.3653	8.4783	9.6747	3.8475	1.0208	0.0987	5.0718	10.9165	23.4912	13.307	16.2648	14.4384	4.326	2.469	1.7727	3.38	0.7309	0.8909	0.5186	4.1064	4.8107	1.4813	2.4963	0.8133	3.3931	4.5743	1.6996	1.8712	1.5886	4.2093	3.5962	3.9519	3.0937	3.58808		0.402778	5.02945
10.4844	5.0049	7.4994	1.906	0.7763	0.4361	3.4549	10.01	11.8068	17.718	17.7956	17.6195	5.1651	3.8655	0.8393	2.8251	2.1181	0.2234	1.897	0.7621	3.0639	2.8157	3.6421	2.1077	2.1982	1.4206	2.4539	0.8826	0.7034	2.5801	8.4072	5.8356	3.7487	3.32209		0.407406	4.69409
10.6036	10.4167	8.3825	1.1789	1.443	0.7588	2.5105	6.397	10.9638	18.257	13.3914	15.397	4.477	1.9233	3.1845	2.0169	2.4281	1.2503	2.6517	0.4122	2.997	2.3693	0.6937	0.4802	0.638	5.6621	2.0975	0.9411	1.49653	2.9201	6.0318	2.5639	6.3982	2.83617		0.412038	4.4111
10.7227	5.8099	11.7894	2.2471	1.0409	1.1298	3.2203	9.9984	12.5004	19.159	21.1998	13.2965	6.2148	5.0595	1.6828	3.0955	1.7586	2.1761	1.6105	2.8322	2.2313	2.0644	2.6248	0.4174	2.7234	4.3162	1.6797	1.821	0.9134	2.3513	4.8173	3.4304	2.6873	2.10468		0.416666	4.84861
10.8419	9.6626	9.9017	3.9127	0.3182	0.7867	6.5107	9.9643	11.6181	17.116	17.7794	11.6844	3.4984	2.4176	1.1242	0.6381	2.2635	0.6371	1.615	1.8755	2.823	2.8728	2.387	0.8139	0.0348	3.1612	4.4066	1.5868	0.92646	2.0783	4.0999	4.8488	3.5575	4.47175		0.421298	4.58767
10.961	12.4184	7.6816	3.3695	0.1732	0.8795	4.3183	7.3257	8.9403	11.344	15.0257	19.1709	4.4363	2.1441	3.7285	3.2076	2.316	1.6228	0.8545	2.9133	2.6263	2.1409	2.6503	0.2684	0.5934	3.6001	3.5519	1.629	3.74376	1.6816	4.2242	2.6522	4.499	5.29956		0.425926	4.57669
11.0801	11.7776	7.6792	2.9347	1.7154	0.8317	3.0145	8.4514	8.8079	13.788	15.0801	11.8498	4.8054	3.1125	2.8497	1.6392	2.9727	0.3167	0.8346	2.4909	3.8701	3.5245	1.4211	0.591	1.4196	4.1416	3.3351	0.6321	2.14632	2.7435	5.3416	3.6296	3.6179	5.54744		0.430554	4.45192
11.1993	9.1964	6.878	2.9258	0.3604	0.6776	4.7557	8.8807	10.4223	12.771	22.8561	16.9461	4.0155	3.3566	3.0397	1.9415	1.3811	1.2725	0.5293	1.1863	4.1712	2.8684	1.8213	0.4066	1.4775	2.3644	3.2662	2.0884	2.46033	2.6047	2.6877	3.1339	2.0995	2.86768		0.435186	4.47607
11.3184	9.1639	9.3881	1.6804	0.626	0.1418	2.8406	6.3841	13.1064	10.057	12.6642	9.8704	6.7043	2.6014	3.507	2.9179	1.1832	0.9065	1.5914	0.5641	4.4523	2.739	1.6669	0.4405	2.0719	1.6909	3.1183	1.3838	2.05957	4.5953	3.8053	4.0058	1.9298	1.69621		0.439814	3.98649
11.4376	12.8579	8.038	1.4141	0	0.9774	2.0749	8.6081	14.0984	11.769	13.9834	13.2097	5.7405	3.6181	1.3677	2.0032	0.5477	0.7423	1.5309	2.1929	4.4851	3.9455	0.4346	0.2192	1.5564	3.9376	3.5896	1.1626	0.82077	2.1711	3.0446	1.7938	3.6041	2.57433		0.444446	4.18526
11.5567	8.3629	6.9789	3.005	0.348	0.4256	2.111	11.3448	14.8774	9.45	14.8091	13.7179	5.8548	3.8893	3.2732	2.1735	0.4376	2.458	1.7628	2.0853	3.0692	2.8663	1.0504	0.001	0.6653	2.4312	1.5337	3.3028	0.87339	3.2967	3.1592	1.8874	2.6608	2.49073		0.449074	4.14101
11.6758	9.3803	5.4883	2.8273	1.8183	1.8897	2.1492	8.6891	15.5246	11.348	11.0831	12.506	4.5531	0.7339	2.4923	2.7981	3.4238	2.9026	0.0117	1.4769	2.2157	3.6583	0.3428	0.8335	1.0719	4.103	2.2841	0.3332	3.77057	5.2923	6.7965	1.4782	3.2501	6.84677		0.453702	4.34464
11.795	15.3333	6.1059	0.5504	0.4306	2.5423	4.5547	8.3874	13.1293	9.895	14.4953	13.2769	4.8249	1.6256	1.5236	6.1179	1.3117	0.9818	0	1.3339	4.4383	2.211	1.9309	0.7177	0.4961	3.8049	2.9873	1.2333	1.1899	3.0499	6.5505	1.6299	2.4247	4.75419		0.458334	4.35876
11.9141	12.2633	5.0482	0.4824	0.8086	1.7728	1.937	6.0749	9.06	7.905	13.5666	15.7839	3.3347	2.8205	0.0868	1.8409	1.6628	1.9127	0.1064	1.6487	1.699	3.5104	1.6258	0.3746	0.1565	0.2804	4.2815	1.5171	1.94735	1.3894	3.825	1.7437	2.3219	7.35118		0.462962	3.64061
12.0333	11.4057	5.1463	0.97	0.1533	0.0024	3.1191	8.7133	11.1318	9.787	9.935	12.4455	4.0626	2.8908	4.3625	0.9055	2.6161	1.1169	0.8752	0.374	3.5296	2.9464	1.3954	0.2733	0.1137	4.1498	0.9593	1.0835	1.50857	3.6592	4.972	1.6817	3.3651	5.85599		0.467594	3.80323
12.1524	7.7723	5.4351	1.742	0.4962	0.0178	0.9269	7.8348	10.7036	14.076	14.0843	13.7879	6.6761	0.3146	1.7488	1.1267	2.2049	1.3812	1.3566	3.037	2.3628	1.8286	0.9364	1.0817	0.8532	2.6878	2.7972	1.5666	2.79855	3.1901	1.3716	3.8479	2.5988	6.24312		0.472222	3.90567
12.2716	6.5647	6.3635	2.8565	0.4358	2.0532	2.2899	6.5063	9.1503	7.123	8.9762	14.5876	4.2927	4.1603	1.8485	3.5237	1.2194	1.0716	0.2843	1.4266	2.8919	2.1764	0.0499	0.0104	0.7089	3.0637	1.7791	2.3067	2.17835	1.8007	4.0996	0.4276	1.135	5.78431		0.476854	3.42869
12.3907	7.0802	4.1519	1.2167	1.1559	0.8921	3.2533	7.3125	11.5411	8.458	11.0047	16.7307	5.7838	4.9914	3.9104	3.655	3.3044	0.0482	0.5697	1.6304	1.6461	4.458	0	0.0018	0.455	5.62	3.168	0.8485	1.77558	4.7626	3.37	0.6078	1.9588	9.53098		0.481482	4.08768
12.5098	11.0163	4.4314	2.2251	0.8302	0.5763	2.595	6.1836	10.9908	11.449	13.1496	10.539	4.2689	2.8093	2.6848	3.0108	0.8211	1.4571	0.0564	0.1506	1.5769	2.3648	0.1072	0.1571	0.3606	5.595	4.9548	0.3038	1.19589	1.2635	3.2012	1.2061	2.4128	7.72094		0.48611	3.68685
12.629	12.8258	6.2685	2.1173	0.9574	1.0161	0.8441	10.2849	13.1664	11.763	12.9738	14.8657	5.1615	2.8937	3.7964	2.3447	1.6732	0.0077	1.3393	0.8545	2.4772	3.0917	0.4773	1.3179	0.0244	2.4592	0.9927	0.6043	4.24873	5.7348	3.8924	1.1992	0.7047	6.1484		0.490742	4.19779
12.7481	12.4506	7.59	1.0925	0.7761	1.0594	1.9787	7.129	13.6173	11.761	15.2096	11.7968	2.5385	0.8467	1.7536	3.5332	4.7145	0.1163	0.3416	2.2525	1.2038	3.1389	0.8762	1.0279	0.698	1.9329	2.6188	2.4793	2.26862	3.308	1.521	1.1877	2.0106	3.60989		0.49537	3.89211
12.8673	8.5582	4.2702	3.2089	0.6934	1.5581	1.4766	10.0472	9.177	8.401	13.7259	17.8856	6.5346	1.9814	1.2692	1.4346	2.754	0.9057	0.37	0.9294	3.038	2.0294	0.4466	0.7733	0.5164	2.3867	1.711	1.7094	0.9238	2.4876	2.317	2.126	4.5384	1.97867		0.500002	3.70192
12.9864	10.0552	5.367	1.9032	0.689	0.8202	2.7067	5.1401	15.6094	10.828	10.6096	16.5034	4.0728	1.038	3.5696	0.9931	3.0179	1.3664	1.3003	1.206	5.1727	2.6589	1.0896	0.026	0.0391	2.4287	0.0633	1.382	0.60237	2.4509	2.3492	1.1999	0.2114	5.00686		0.50463	3.68112
13.1055	10.5646	3.8893	2.2631	0.0611	0.0067	1.319	6.973	10.6112	8.789	11.6488	16.1764	2.9164	1.5953	2.2172	2.0077	2.4595	0.423	0.627	1.589	1.984	2.5653	0.5804	0.3297	0.0074	2.3927	2.5075	1.446	1.22972	3.3744	2.7756	1.41	0.8004	1.58361		0.509258	3.30679
13.2247	10.5137	5.595	1.3652	2.5075	0	1.1552	8.2129	7.476	6.744	9.7704	13.1486	4.9556	2.3694	1.323	2.1058	1.016	0.902	0.3232	1.9262	2.7707	0.6625	0.9751	0.8559	0.276	6.1203	1.7947	1.7503	2.55375	2.7164	1.8662	1.5115	2.4755	3.50712		0.51389	3.37108
13.3438	6.8406	4.9046	0.0995	0.647	0.0438	1.8518	7.3696	9.5948	10.978	11.784	13.5453	2.7181	4.5467	1.5375	2.229	0.1144	0.5566	0.3278	1.8037	1.75	4.2641	0.0091	1.0948	1.1002	3.0344	3.5215	0.7182	3.23046	2.3193	1.3014	0.5851	2.5044	5.85132		0.518518	3.41749
13.463	14.5263	6.1651	1.5665	0.5814	0.684	2.4051	8.5084	9.9621	12.751	9.3706	10.4388	5.5952	2.2247	2.1647	1.7365	0.6816	0.1116	0.0696	1.235	0.7045	3.3178	0.8452	0.5315	0.0666	3.7226	2.2235	1.0459	4.7772	1.7751	4.7099	1.1474	2.0391	1.63683		0.52315	3.6158
13.5821	7.6898	8.2382	1.8685	0.795	0.593	2.2298	8.6729	10.7974	9.044	11.1548	11.7269	5.7362	3.1523	2.0916	1.6317	2.7459	0.5344	0.0553	1.8695	2.4378	2.2871	0.0535	0.3063	0.0527	5.1279	2.5913	2.9575	4.33933	1.6961	4.1614	1.56	1.5926	2.60214		0.527778	3.70887
13.7012	9.7688	8.1128	1.5673	0.0827	0.3111	0.9965	9.0715	11.5299	10.298	10.2478	11.6034	3.3125	2.1472	1.5833	3.6613	1.1701	0.7194	0.2234	0.8857	3.2504	2.3676	1.1893	1.6749	1.0025	1.7797	1.4463	1.362	1.39032	4.2882	2.4383	1.0957	1.4739	3.52187		0.532406	3.50223
13.8204	10.4354	5.7739	2.6502	0.3224	0.3331	1.9549	7.7573	8.8585	7.295	9.9054	12.9695	3.7344	2.3051	4.1601	1.1773	1.376	0.7994	1.662	0.7615	2.0548	2.7751	0.7355	0.1071	0.1112	1.9276	2.1219	1.3754	1.90285	2.6667	4.3058	0.0222	1.8399	4.54324		0.537038	3.35517
13.9395	9.895	5.2393	0.4428	0.1536	0.1297	0.8956	7.8058	8.3115	6.341	12.6075	10.1104	4.2479	1.2602	2.4058	3.8819	4.277	0.0732	0.3906	1.1937	2.5853	1.2708	0.0009	1.4719	0.111	4.2709	2.558	1.825	0.88671	3.4125	3.4474	1.387	1.2699	2.18252		0.541666	3.22249
14.0587	13.3384	6.2519	0.9643	0.013	0.5215	1.6039	13.5813	9.3295	5.992	14.2001	10.1804	5.8023	1.0942	1.4794	3.5687	0.6386	0.2072	0.0023	0.793	6.1428	1.4828	0.9298	0.7997	0.362	3.2186	3.3536	1.7969	2.82122	2.4384	2.3464	2.0893	0.6826	1.9055		0.546298	3.63429
14.1778	5.875	5.3496	0.9852	0.3693	0.0248	1.1418	8.2393	8.6463	7.9	9.8774	15.1352	4.6969	2.1888	1.3653	0.8104	2.7536	1.1869	0	3.0573	2.4482	4.7813	0.8402	0.7519	0.9695	1.986	3.5014	1.2951	2.65799	2.7	2.2034	0.482	2.3833	3.65541		0.550926	3.34118
14.297	9.6825	3.4461	1.3394	0.7555	0.3602	2.2842	6.4528	9.9703	9.398	16.5105	14.738	6.3033	1.3262	3.0856	2.3137	0.1344	0.1532	0	0.1214	5.3399	2.8441	1.2671	0.0288	1.2625	0.79	2.5814	2.2073	1.55959	3.275	3.1668	0.7778	1.5997	1.4292		0.555558	3.53044
14.4161	11.1522	3.7254	1.5898	1.2259	1.7586	2.1521	8.2256	5.8023	11.869	9.2037	14.9979	5.853	1.9082	2.1897	2.3959	1.4018	1.0083	0.7997	1.5339	2.1807	2.0778	0.5507	0.0184	1.1687	1.5552	2.327	1.6659	2.29392	2.8999	2.5833	1.4217	1.3032	3.64004		0.560186	3.46907
14.5352	11.2655	3.57	1.7582	0.1092	1.6795	1.4055	10.9124	4.8683	10.615	14.7435	12.1736	3.3754	1.8393	3.0532	0.8822	0.795	0.6249	0.1393	0.5115	2.7042	2.752	0.7573	1.3746	1.034	4.1358	2.8448	1.4399	2.58006	3.4642	5.0198	0.1184	1.1035	2.45041		0.564814	3.5182
14.6544	11.4668	4.4872	1.9283	2.0976	0.1624	2.692	4.8334	7.6882	10.074	17.6654	15.0283	4.7554	1.9505	4.3026	3.0208	0.822	0.4258	0.0057	0.3548	1.807	2.9524	1.1765	0.2133	0.5703	3.9195	2.7925	3.2631	2.06398	2.1756	4.6875	1.1913	1.2019	6.04989		0.569446	3.87351
14.7735	7.8873	2.7167	1.335	0.0573	1.5911	2.3305	8.0689	4.8083	6.012	16.7094	17.9568	7.7868	2.4702	3.3928	2.2	1.1236	0.3636	0.1736	1.2575	4.2005	4.2643	0.303	0.161	1.9668	2.5022	2.1793	2.1985	1.21491	2.9698	2.0915	2.5305	0.8287	1.78757		0.574074	3.55879
14.8927	11.8121	4.9581	2.5305	0.4354	1.9099	2.0828	4.8795	9.2249	10.465	16.7325	15.5097	5.864	1.9958	1.9423	3.4007	2.3085	0.3934	0.2677	0.4189	5.3696	0.5937	0.4883	0.1687	1.0794	3.3395	1.8982	0.8884	1.71505	2.1035	1.2891	0.9812	0.2236	3.6353		0.578706	3.6638
15.0118	13.068	6.6214	0.6449	0.0056	0.0768	2.3277	5.3041	6.2763	12.252	13.2331	16.416	3.5241	3.7416	3.5347	2.3039	1.7724	0.2872	1.1712	1.3345	6.2852	3.9205	0.5558	0.0099	0.1086	2.8694	1.36	1.3458	1.61962	4.291	2.3919	0.7222	0.3747	3.10801		0.583334	3.72297
15.1309	10.61	4.6206	2.3462	0.6662	0.6062	3.8655	5.5296	6.8196	9.097	14.3629	18.5217	2.6108	4.4686	2.2773	1.6114	3.5731	0.2545	1.3078	1.0151	4.4731	2.8123	1.1666	0.593	0.0025	3.4739	3.0065	1.4051	3.34307	1.8691	1.138	1.0113	0.7881	4.0028		0.587962	3.73483
15.2501	8.877	6.2659	2.1242	0.2802	0.9476	1.5769	4.753	8.714	8.458	12.4408	18.2194	2.8231	4.3689	0.8403	2.1054	1.6901	1.3364	0.0217	1.1345	3.0525	2.3089	0.6599	0.0167	1.24	3.3216	0.9612	0.3628	0.19391	1.6801	1.7557	0.5782	0.5326	3.87538		0.592594	3.25809
15.3692	11.0963	6.7736	1.0778	1.388	0	0.7412	5.4451	5.3843	7.727	11.3108	17.2869	2.3901	2.0681	3.0046	4.1756	0.9355	0.3158	0.165	0.5134	4.7032	3.119	1.4175	0.6438	0.0792	3.1472	2.2292	1.7941	1.49145	2.7189	3.6107	1.6107	0.6109	3.45179		0.597222	3.40687
15.4884	9.6848	6.2883	2.7887	1.0213	0	0.768	4.0822	10.3256	9.95	13.5602	10.3333	3.2583	7.9204	2.437	2.4471	2.735	0.2745	0	0.0602	2.3495	1.6165	1.2283	1.1976	1.2559	2.5903	1.6759	2.3973	0.4803	2.3389	2.869	1.2229	0.473	5.07671		0.601854	3.47597
15.6075	9.6407	5.7999	1.7312	0.0518	0.8153	0.9898	9.417	8.268	7.333	14.3385	12.6697	3.1442	3.3791	3.4842	3.7085	2.2528	0.1494	0.5705	3.34	1.8712	4.5439	0.065	0.3745	1.0565	3.9184	1.2268	1.644	3.33908	1.6254	0.9549	0	1.2903	0.97437		0.606482	3.45357
15.7266	8.9795	4.182	1.3037	0.3318	1.071	4.0575	5.1954	6.1065	8.995	10.1366	14.9112	4.0633	5.0602	4.2052	3.2486	2.2126	0.9319	0.7035	1.5907	3.6461	1.455	1.3028	1.094	0.0369	2.6818	2.1735	0.9716	1.2733	4.4106	2.4884	0	1.0908	2.2539		0.61111	3.39894
15.8458	10.2393	4.2257	1.1438	0.3303	0.3926	0.8171	9.4921	7.5913	4.766	8.5134	13.234	4.7793	4.4635	4.117	2.4036	2.0346	1.1426	0.3789	1.5774	2.0989	2.1766	0.1628	0	2.169	3.2327	1.0203	1.3559	0.40201	4.7813	2.0627	0.4099	0.038	0.83805		0.615742	3.10275
15.9649	10.1994	3.4157	1.2481	0.7701	0.1202	2.8827	7.6107	9.7366	9.393	6.7883	16.9612	4.1836	1.4722	2.9887	1.5151	2.5927	2.0476	0.0137	2.548	3.1111	1.9099	1.2685	0.3801	0.7831	2.3557	2.4216	1.4774	1.33538	3.3731	2.7643	0.0343	0.5292	2.54401		0.62037	3.35683
16.0841	10.6423	5.833	1.6103	0.3404	0.5394	2.4757	6.21	7.6208	11.288	9.3759	9.887	4.3123	4.1084	3.4813	0.6632	0.9605	0.7208	0.2314	0.5011	2.7722	5.0874	0.1635	1.0774	0.0106	3.3305	1.0184	1.1211	2.90534	3.2613	2.5255	0	1.2052	4.37373		0.625001	3.32285
16.2032	11.5011	8.7271	0.3577	1.2459	0.5545	3.7376	4.6301	9.5892	9.386	13.6497	10.3132	2.3358	3.4124	0.1775	2.8817	1.3382	0.1983	0.8242	1.2312	1.8384	3.2981	0.0532	0.4764	0.4713	5.4406	0.8257	1.815	1.6873	4.1606	2.26	0.115	1.0471	3.90077		0.629629	3.43881
16.3224	11.6341	4.3169	1.0137	0.8431	0.2669	2.8542	4.2927	9.8179	10.777	9.6527	8.3852	3.3105	2.954	4.2328	2.8594	2.9051	0.0731	0.033	1.2612	3.2487	2.8471	2.1565	0.3718	1.4722	2.1556	0.9491	1.4566	3.48125	0.9789	1.0891	0.6058	1.1191	3.26291		0.634261	3.23267
16.4415	7.3505	3.4903	0.8157	1.1399	0.9991	4.2789	5.793	6.261	12.529	10.8689	9.5055	3.241	5.1737	5.5776	3.478	1.66	0.1152	0.5782	0.491	4.3875	3.8748	0.744	0.3075	1.8732	4.5065	4.8778	2.1054	2.55354	3.0383	1.8249	0.0124	0.6146	2.48796		0.638889	3.53197
16.5606	12.4253	7.309	1.1344	0.0577	0.295	2.4281	5.1795	6.115	11.959	8.1022	12.1357	3.5498	4.9204	2.006	2.0248	0.9067	0.4574	0	4.4603	3.6638	2.0837	0.5394	0.1632	0.0285	1.7225	0.9585	1.2825	0.75886	2.6368	2.2897	0	0.5174	1.23063		0.643517	3.13157
16.6798	11.3841	5.5666	3.0481	0.6434	0.122	3.1149	6.1222	7.798	9.423	9.7719	17.1635	2.3635	3.7263	3.9953	2.7011	2.7589	1.5466	0	3.7394	1.6172	3.3019	0.9097	0.807	0.2632	3.8271	2.1712	1.7382	1.37544	3.7874	2.0783	0.8981	1.3094	4.10731		0.648149	3.73273
16.7989	9.6449	5.3223	2.4162	1.7926	1.3487	4.0688	3.1126	7.3299	7.328	8.1705	17.0164	4.8942	1.7101	4.5837	1.327	2.3985	1.3813	0	1.0529	5.1305	1.8395	0.1905	0.0003	0.2377	4.2803	1.1576	2.2626	1.37477	1.0568	2.169	0.058	1.5148	0.83529		0.652777	3.24261
16.9181	12.0991	3.1024	2.5402	1.1932	0.4071	3.6244	7.1167	7.6742	7.499	12.4428	11.8258	2.5435	4.8482	0.6258	2.8287	0.1694	0.2882	0.1051	1.1038	5.7735	3.8627	0.7488	0.6904	1.7406	1.9714	1.5526	1.9158	1.97028	2.3349	2.7507	1.5138	1.2489	4.25866		0.657409	3.46578
17.0372	11.3091	6.5082	0.6557	0.5654	0.4078	1.4504	6.302	8.4126	8.208	10.7076	11.4517	1.8312	1.7363	3.1273	2.6547	1.5747	0.9759	0.9796	1.2762	2.3271	0.7014	1.2078	0.388	1.0086	2.4899	2.4731	2.9841	2.03356	3.8155	0.9149	0.3075	2.6476	4.80848		0.662037	3.28006
17.1563	12.7638	5.4363	0.5923	2.4797	0.8909	3.9851	6.795	11.4001	10.519	11.0523	10.515	4.2964	4.2369	3.3561	2.2836	0.8977	0.7318	0.3587	1.7062	2.6675	1.4521	1.1334	0.2919	1.4826	2.9287	3.2474	2.5961	1.61656	1.9581	0.0364	0	0.1267	5.30165		0.666665	3.61018
17.2755	11.7412	4.6016	2.409	0.2433	0.5654	1.1946	6.3692	9.7426	10.413	10.2808	14.649	4.2358	2.9946	1.5824	1.3721	2.1458	0.1479	0.6484	1.7803	1.8199	2.1711	0.2966	0.1588	0.1545	1.8988	2.6876	0.8993	1.2267	2.4595	1.6663	0.6999	0.0412	2.55206		0.671297	3.20755
17.3946	12.3462	3.9204	2.5542	0	0.8099	3.1254	4.4081	4.8938	11.194	13.4352	12.6625	3.3276	2.8881	2.0996	1.8149	1.8018	0.693	0.4067	1.6822	2.7677	5.719	1.7243	0.9874	0.3997	1.7198	3.1927	0.7341	3.00603	2.0881	0.1149	0.3417	2.6008	1.72441		0.675925	3.36922
17.5138	11.8975	4.836	4.5985	0.3261	2.2097	4.6412	7.7661	7.1625	9.495	11.1437	12.1568	4.5957	4.5594	3.1254	0.5562	1.2232	0.4377	0.0016	0.0437	2.9895	2.7228	1.2052	0.1033	1.7603	3.8594	0.9789	0.5984	1.52565	1.6186	1.1288	0.0138	0.8342	2.53082		0.680557	3.41351
17.6329	9.863	2.0186	4.9965	0.0273	0.926	4.5179	8.7896	8.1023	7.899	7.7497	14.768	3.9982	1.3406	2.1705	1.0832	2.4168	0.6951	0.0571	0.74	1.8313	3.9208	1.0015	0.4886	0.6728	2.294	3.6971	1.5754	0.70347	2.0669	2.2057	0.0138	1.5672	5.3788		0.685185	3.32051
17.7521	9.8627	2.8903	3.5812	0.4611	0.8884	3.1296	5.0644	10.4389	7.37	10.7787	15.355	1.471	4.4114	2.7722	4.3314	1.5505	1.7466	0.1095	1.6123	3.3269	4.1486	0.8619	1.3582	2.1908	2.1964	3.8204	1.1737	1.43714	2.5557	0.6083	0.228	1.1143	1.90771		0.689817	3.47737
17.8712	7.8998	4.9295	4.5093	0.3232	0.6205	2.9857	6.8974	9.8259	8.313	11.869	15.2762	3.2554	5.3541	3.7386	1.8909	2.7136	3.2179	1.14	0.5216	4.8746	1.2076	0.8575	0.4585	2.4784	1.8918	2.7576	1.6258	0.2314	2.3493	1.2942	0.7986	0.8938	1.90097		0.694445	3.60308
17.9903	10.0815	4.2558	1.9011	1.6133	1.1976	4.5325	6.8089	8.5231	11.781	12.7962	16.4868	1.3195	2.6114	1.9517	1.024	1.2142	1.4483	0.104	2.7251	2.4075	1.689	0.4264	0.5043	4.0344	1.2504	3.7822	1.7847	0.60301	2.2554	1.7661	0.0155	1.1552	1.26727		0.699073	3.49447
18.1095	13.3185	3.5934	3.0323	1.2604	1.3088	4.9913	7.9957	9.2237	7.41	11.9683	16.7778	3.4506	3.1724	2.5026	1.7425	0.6112	1.2622	0.0212	2.2984	2.159	3.329	1.055	1.0516	2.2204	2.7708	1.7258	0.7554	3.38421	3.2602	0.5078	0.3853	1.5952	2.68015		0.703705	3.72185
18.2286	13.0136	3.8394	1.4972	0.9532	1.7504	8.5689	6.2447	10.2549	13.808	14.9954	14.672	4.2679	4.3933	4.4614	3.4701	2.4625	1.8787	1.1726	0.5415	1.2926	3.3797	0.4496	0	2.0465	2.5356	1.5755	2.1456	0.71648	1.76	2.3444	0.3314	2.3733	3.83666		0.708333	4.15252
18.3478	13.1161	4.0724	2.9027	1.5014	1.7827	4.0398	7.6188	6.9405	13.437	12.9847	11.9041	1.3832	4.562	2.4357	2.752	0.5414	0.4971	1.1856	0.2384	0.8253	1.0733	1.1937	0.1755	2.2353	1	2.7087	1.5408	2.62601	1.1129	0.3814	1.0374	0.9166	2.87505		0.712965	3.44235
18.4669	15.0223	5.5741	2.0872	1.4525	3.547	3.7342	6.8556	10.4622	6.569	12.332	14.6733	2.837	5.2658	2.4602	1.6885	1.6958	1.3302	1.0848	1.1098	2.0772	0.5759	2.1459	1.5767	2.7888	3.4547	2.5778	0.9931	0.76541	1.8851	1.3988	0.3408	2.2575	0.9471		0.717593	3.74443
18.586	14.5061	3.4923	3.8644	0.1376	4.9611	7.0878	6.2597	9.9975	11.173	14.5175	14.4771	2.4578	3.1525	2.6829	1.6819	1.889	0.7881	0.271	1.3768	1.9858	1.4428	1.891	0.9486	2.2293	1.501	3.0522	1.2682	1.10076	4.5088	0.6618	1.0155	0.842	3.6196		0.722221	3.96489
18.7052	13.5627	1.6993	2.1818	4.4075	2.8053	1.8768	7.2798	8.8044	10.179	9.6974	13.4201	2.5097	2.9171	3.6364	1.7346	2.4681	0.8918	0.2178	2.4769	1.6919	1.6337	2.9695	0.04	2.1529	2.8304	1.6621	0.9447	2.18825	1.6436	2.1447	0.0451	1.178	4.67479		0.726853	3.59291
18.8243	12.1545	1.6696	5.0328	3.595	3.7133	2.2606	10.3424	6.5393	11.921	13.132	11.7464	3.5033	2.6843	1.8658	0.4843	1.3337	0.7132	1.0416	2.8051	1.3493	1.0939	4.7184	0.8321	2.8522	2.1316	4.3486	1.7088	3.30522	2.3785	1.0396	0.8189	2.6841	4.83166		0.731481	3.95852
18.9435	11.8657	1.7391	1.1325	2.0531	2.2849	2.9741	11.0956	9.355	9.161	9.5581	10.8035	3.0798	2.1901	3.9278	0.8992	1.6206	1.8054	1.7678	1.8178	1.8508	3.2845	2.8469	1.5925	0.5522	3.5134	1.7628	0.4993	1.82387	3.4013	1.3994	0.0715	3.3311	4.30093		0.736113	3.61702
19.0626	12.164	6.101	1.2417	4.9514	2.5903	5.863	9.3614	7.1586	7.506	12.2367	8.4502	3.588	3.4601	2.2787	2.036	4.6188	2.2005	0.0381	0.7651	2.5925	1.4668	2.9297	2.9548	2.2389	2.3053	0.3606	1.848	0.93234	1.5552	1.28	0.5944	2.7893	3.62932		0.740741	3.7602
19.1817	6.3514	3.8393	1.6845	5.049	2.9752	3.9286	10.3824	10.4734	6.176	10.0741	15.591	2.5262	3.0708	2.8944	1.323	2.5395	1.8733	0.5399	1.6582	3.6838	2.1921	1.9191	3.7798	2.7759	3.0289	1.1984	0.83	1.24207	2.2075	1.4514	0.7016	3.145	1.72714		0.745369	3.72221
19.3009	16.3481	4.4015	2.0392	1.7182	1.7213	3.6903	10.7981	11.4887	10.725	12.8514	9.5479	1.2744	3.1616	4.3322	1.6355	1.3944	1.3389	0.0242	2.2808	4.2656	1.3764	1.5338	1.9893	2.8316	1.2463	2.149	2.2309	0.8686	2.7778	1.2416	0.3665	2.6503	3.65838		0.750001	3.93811
19.42	10.5185	4.7559	4.3445	3.8413	1.4532	4.1975	6.5214	11.1931	6.869	15.1695	16.2521	1.541	1.1424	2.9848	1.059	1.9416	2.1265	1.8681	3.0455	1.9809	2.969	4.465	2.0018	0.8709	2.4805	5.2382	2.1249	2.64588	2.7277	1.0797	0.4166	1.0972	4.53919		0.754629	4.10492
19.5392	11.9248	6.0719	2.9945	1.7578	3.6117	2.4222	6.6975	5.4929	8.274	9.3327	15.0633	3.2543	2.7605	2.307	1.9403	1.0632	1.4592	0.227	1.5496	3.7549	4.0162	1.7134	3.6115	3.397	3.6709	1.835	1.1873	3.58905	3.2019	2.0689	0.0169	4.7014	3.33053		0.759261	3.88786
19.6583	12.0023	3.3502	2.7377	1.6303	4.4286	3.0283	8.7189	6.7055	9.9	10.1737	14.9865	4.5782	2.7369	2.387	1.5008	0.8274	1.9033	0.5762	0.4804	3.0729	3.0567	1.9361	2.9373	0.7675	3.2002	2.1315	4.4771	2.42651	0.8458	1.3088	0.019	2.7159	3.58245		0.763889	3.79182
19.7775	14.481	4.4108	1.9347	3.1722	3.2097	5.6788	8.0866	9.4097	5.855	6.7577	11.6842	3.9648	2.2668	1.8297	2.6473	2.3514	2.0363	0.9482	0.2545	3.4259	2.3859	1.8492	2.0696	1.4848	3.0027	2.3196	1.6522	1.33302	2.9478	2.7846	0.8123	2.8157	4.65562		0.768521	3.77328
19.8966	13.9441	3.587	3.2919	4.2612	2.4694	5.2453	7.4039	8.8222	10.115	11.1011	9.1851	2.2102	2.5209	2.3951	1.9775	1.3826	2.2252	0.6514	3.5101	3.2972	1.0262	0.8573	2.7598	3.0061	2.0144	4.4117	2.5397	0.68801	3.0089	2.4991	0.2418	2.9881	4.68825		0.773149	3.94927
20.0157	12.5266	2.9067	2.1572	1.539	2.83	3.1118	7.1205	9.9953	9.065	14.1306	11.2528	2.0679	4.0175	2.052	1.3572	2.2526	2.9458	1.1222	2.2744	2.2598	2.2671	1.0353	1.2919	1.0688	4.1902	3.0228	3.4941	1.01729	2.0689	2.5311	1.3653	3.7133	8.32991		0.777777	4.01154
20.1349	8.3524	2.2716	3.5632	4.9539	2.431	4.073	8.2671	8.9667	10.237	13.9286	8.5383	1.7249	0.7334	2.5951	2.308	2.1956	1.7425	1.7354	2.9772	2.0781	1.7956	2.4034	1.5309	4.0399	0.7281	2.5578	2.0204	1.11507	1.7476	1.0636	0.7917	2.4219	4.43249		0.782409	3.6461
20.254	11.5226	6.5862	2.8712	2.9587	5.2748	1.9109	7.9296	8.4186	8.797	9.3885	13.8786	4.3587	4.9718	2.8193	0.9333	4.3295	0.6769	1.8882	2.1029	4.2345	1.4212	1.7742	2.658	3.205	1.9112	1.9189	1.2715	1.31662	3.6475	3.5261	1.6685	2.9134	5.24426		0.787037	4.19176
20.3732	14.8363	3.3833	3.001	4.489	2.2042	2.9684	9.896	9.0288	6.42	11.3564	12.5477	2.0807	4.8894	6.0221	2.5391	1.5329	0.8779	1.5065	3.3015	3.0335	3.7885	1.1303	2.5673	2.4085	2.7584	0.9056	0.3494	1.28106	2.1964	1.439	0.5867	3.5537	5.07779		0.791669	4.05931
20.4923	14.802	4.6572	4.4813	3.6374	2.7884	2.5609	6.83	7.9493	11.552	16.1355	12.3622	2.0112	2.2531	2.7886	2.232	1.5327	1.8872	0.3565	2.1896	3.0402	1.7463	2.7834	3.5368	3.7617	3.6552	1.9501	0.1777	0.08848	3.7201	1.0345	0.4263	1.6681	4.05568		0.796297	4.08035
20.6114	7.548	5.6316	4.9972	3.2208	3.3694	3.4612	10.2018	6.9041	13.286	14.9681	13.8013	5.4649	2.1375	3.6397	3.9412	1.1547	2.3831	0.1836	2.5809	0.6683	1.6438	1.9398	1.5489	3.1046	3.6696	1.9835	1.2606	0.97285	3.2052	1.4363	2.1029	2.745	3.85642		0.800925	4.21251
20.7306	10.9596	3.1253	0.8853	3.0914	2.8362	3.8197	8.7471	9.0964	7.604	16.2563	15.4139	2.3241	2.2157	3.0159	3.3955	1.3008	0.1395	0.0166	2.4287	2.5016	2.8065	1.7357	0.9203	1.6272	2.9733	0.5319	0.0165	1.3446	3.5914	0.5817	0.1385	2.8491	3.85525		0.805557	3.70138
20.8497	16.4329	4.2907	4.9634	3.7311	3.3279	3.4738	13.3154	8.2356	9.896	12.7879	11.8844	3.1734	0.9844	2.7738	0.3138	2.9348	2.5855	1.3822	3.6293	1.5509	3.6308	1.3016	0.9717	1.9279	2.9553	0.6542	0.0855	3.54546	3.3078	2.2328	1.4763	2.579	4.53022		0.810185	4.26866
20.9689	10.8679	2.9267	3.8043	4.3903	2.5623	1.1424	6.1755	7.4894	12.716	13.3548	16.2474	3.1678	3.9537	2.2535	2.4672	1.162	1.544	2.9369	0.351	0.9619	2.712	2.093	3.1429	2.6977	1.0434	0.3507	1.0664	1.28538	1.6619	0.9838	4.3661	3.517	4.25419		0.814817	3.92877
21.088	9.0809	5.5591	4.622	5.5751	2.3754	3.6489	4.046	11.0909	18.003	15.8932	17.1252	1.4812	4.3138	3.242	1.8015	0.1802	3.7611	1.4444	1.3601	1.7512	2.3347	4.0726	3.6124	2.3466	5.4624	0.7434	0.7725	1.81894	0.7192	1.1816	1.4523	3.1844	4.6342		0.819445	4.50577
21.2071	8.0339	4.4683	2.8222	4.684	5.1436	5.0622	5.967	11.4301	17.688	9.819	18.1468	2.5594	2.176	6.4557	3.1098	3.5167	1.165	1.2058	2.005	2.1409	1.5733	3.6449	4.6447	3.9086	2.1747	1.5922	0.5118	4.85014	2.6091	2.3509	2.405	3.7401	4.10485		0.824073	4.71848
21.3263	11.665	5.8356	6.9539	4.5375	3.5004	1.0397	5.6679	10.0541	13.3	11.6292	14.1009	4.0128	2.5419	5.1185	4.6486	1.1956	1.6998	2.5754	1.8522	2.3333	1.6819	1.8211	3.723	4.4928	2.248	1.3576	0.6252	1.70841	3.2567	2.1562	1.2456	3.3175	4.63007		0.828705	4.44019
21.4454	11.4234	6.3379	1.6255	7.2383	3.6427	0.7895	3.967	9.1194	12.344	16.9429	13.6188	3.9959	5.4664	1.8311	0.9791	2.4163	4.3008	1.1257	1.3087	2.6269	1.7966	2.2907	3.9239	2.1687	3.5078	0.0621	0.6224	1.03323	2.8692	1.2478	2.5951	4.6736	3.26942		0.833333	4.2776
21.5646	12.5333	4.017	1.3959	7.4726	2.2728	1.9884	3.1414	12.574	16.293	11.6465	12.8203	3.5884	3.4717	2.7229	5.0904	3.7821	2.5684	1.0156	1.3282	2.3344	0.719	2.2586	2.9665	1.7786	0.9566	1.5315	0.0488	1.4621	0.9865	1.9077	5.2584	4.689	1.16217		0.837965	4.17524
21.6837	9.361	4.8491	2.5665	4.3881	3.6741	1.263	2.3834	10.1441	8.646	12.5014	7.7084	0.9293	2.1936	3.3176	2.1682	2.4168	2.6281	0.3897	0.5468	1.1099	3.5781	1.6402	2.1579	1.1994	2.8956	0.6713	0.8255	0.09649	4.3709	3.0597	6.6822	2.7762	4.62771		0.842593	3.56868
21.8029	7.5423	6.7804	2.571	3.0995	1.9013	0.6557	2.0243	9.1677	12.356	9.3304	9.9953	3.4629	3.0713	1.15	1.6296	2.8583	3.174	1.133	2.501	1.2681	3.4448	0.9741	2.8332	3.3021	0.3233	0.4141	0.8331	2.14987	2.2793	3.8072	2.5219	3.2792	3.65972		0.847225	3.49982
21.922	8.8689	3.7639	4.44	0.8863	1.9128	0.0038	3.4819	9.0401	11.217	16.6159	12.9949	3.3944	0.8584	3.141	1.5417	1.5451	2.6133	1.3118	0.5977	2.2122	1.9848	3.0106	2.472	4.3064	2.0692	0.9621	0.0938	0.20136	3.8067	1.1153	4.2363	2.9208	5.25384		0.851853	3.72346
22.0411	9.2119	3.9492	3.4097	3.4655	2.1915	0.3959	2.036	12.215	16.445	10.7847	10.6136	4.8334	4.5418	1.878	2.8215	0.5493	1.2145	0.8454	1.9472	2.3157	2.5758	4.915	2.5339	3.1266	2.7952	0.0345	0.3184	0.61888	2.0438	1.6927	3.9911	0.6507	8.24762		0.856481	3.91542
22.1603	11.2549	2.5922	4.2998	0.9606	0.7913	0.1364	0.6261	10.5838	10.821	15.2166	6.7459	1.2968	1.5536	1.1384	2.7229	1.908	1.9535	2.0232	3.6334	2.5319	1.7708	1.0283	2.8249	2.8412	0.7396	0.0158	0.3753	0.52174	3.9374	3.5608	2.6788	0.655	3.57273		0.861113	3.2519
22.2794	12.954	5.0562	3.0055	3.1875	0.3084	0.0768	0.3482	13.5853	9.813	12.3885	3.7723	1.2434	1.2537	2.3301	1.7046	1.207	5.0322	1.4685	2.0929	4.4495	3.3115	2.5163	4.0422	1.1703	2.544	0.8518	0.0387	0.61581	1.5128	3.6174	5.1667	3.0287	5.98935		0.865741	3.62676
22.3986	9.7497	3.3755	3.2936	3.3448	0.6474	1.5285	0.2745	11.6506	12.995	15.9183	2.1455	1.4188	2.2573	1.3895	3.7681	2.1984	1.241	0.499	0.8532	1.5821	3.0914	4.3603	2.8302	3.1987	1.3076	0.1506	0.63	2.4065	2.9959	3.9584	1.0537	2.9551	7.27272		0.870372	3.52551
22.5177	11.5751	3.4049	4.5854	1.9362	0.3461	1.1705	1.4016	11.2666	13.667	12.844	3.4359	2.4963	4.6048	2.1354	2.0379	2.0903	1.8375	0.9714	0.5115	1.1485	2.1397	0.4197	1.8107	1.6245	0.9746	1.3807	0.0672	0.05915	3.1034	3.6576	2.3234	4.5429	5.39184		0.875	3.36249
22.6368	10.1512	2.4042	2.5838	3.6669	0.4299	0.3889	0.0101	9.2247	11.682	9.8977	3.3979	1.5698	3.1553	2.8125	3.2018	1.6868	1.0736	1.828	0.5422	4.4348	0.9529	2.1871	4.1273	0.5535	1.3704	0.4883	0	0.80938	1.3425	1.637	1.8645	1.8317	3.95101		0.879629	2.8866
22.756	9.9692	2.1249	4.2101	0.8155	0.0211	0.3271	0.0207	12.3514	12.667	14.9149	2.3878	1.4362	1.9675	1.7417	2.228	2.9054	1.6174	1.0362	3.4737	3.8178	0.9842	2.2098	2.4619	1.4721	0.0086	0.7658	0.0138	0.71986	1.9283	1.8451	1.5411	4.6804	5.69017		0.88426	3.16226
22.8751	9.0872	1.7541	3.1848	0.0066	0.0002	0	1.4911	8.3433	11.613	6.4235	2.2134	2.5388	3.3336	2.3267	3.2139	3.3118	2.3663	0.7778	2.1664	2.5224	0.2563	1.0712	3.1543	1.6583	1.321	0.0535	0.4861	0.41992	3.6119	1.3605	1.7661	3.2015	2.37548		0.888888	2.64882
22.9943	6.3673	1.3211	2.6962	0.382	0.3316	0.0802	2.0836	9.1713	11.797	10.8827	0.3304	1.6167	2.944	2.8692	1.8002	2.5636	1.1347	0.972	1.5301	1.1733	1.2738	1.2892	2.4125	3.1119	0.3614	0.6056	0	0.55489	4.1536	2.86	4.9992	3.8921	3.52979		0.89352	2.76034
23.1134	4.8712	0.81	3.1857	0.0256	0.4478	1.5686	0.4943	7.5277	8.674	10.882	0.2697	2.2167	3.3634	1.5075	4.4563	1.7533	1.6045	2.5261	1.6252	3.3041	1.4961	1.4425	1.0342	0.2313	0.5526	1.3888	0.0044	0.01614	3.2912	1.8886	4.3694	4.9513	3.37223		0.898148	2.58038
23.2325	2.1397	0.9669	1.6783	0.3635	0.0406	0.2476	0.0329	6.5236	15.087	12.2102	2.0044	0.4343	3.0298	1.2791	3.4116	1.1104	0.6574	3.2047	2.8176	1.7782	1.6328	2.7617	2.0107	0.9289	0.1622	0.3289	0.2734	0.5055	3.1566	0.7526	3.7882	4.2955	3.50716		0.902776	2.51885
23.3517	3.3915	0.3309	0.56	0.67	0.0002	0.26	0.4963	5.5116	11.161	8.6232	0.7644	1.2085	0.6012	4.7693	4.0878	3.1648	2.8352	2.1387	2.8208	2.777	0.7079	1.2001	3.8868	0.5218	0	0.7319	0	1.1109	4.4777	4.5533	3.6688	3.3117	3.05202		0.907408	2.52713
23.4708	4.6414	0.8697	1.4049	0.2188	0.2319	0.0177	0.2905	2.8847	11.204	5.8572	0.7975	0.0747	2.3084	2.2153	2.7435	0.9819	2.1687	0.5712	1.053	2.2485	2.425	1.7218	1.0629	0.199	0	0.5273	0.4857	0.03407	2.032	5.3958	1.8005	5.3033	3.14319		0.912036	2.0277
23.59	1.8104	0.2005	0.8893	0	0.1568	0	0.0088	3.7437	6.969	6.9683	0.9948	0.0073	1.3823	0.9658	2.1872	1.4627	0.975	1.3684	2.2772	1.7897	0.543	1.9937	0.8208	0.1563	0	0.234	0.0142	0	1.9326	2.1448	6.1225	2.5951	4.52258		0.916668	1.67384
23.7091	0.5762	0.0017	0.0089	0	0.0045	0.1288	0.048	2.8811	8.654	1.8219	1.1795	1.3348	3.3325	3.019	4.1885	0.3648	1.7896	3.7994	4.2303	1.9546	1.6285	0.2984	0.8129	0.0033	0.6846	1.0347	0	0.01462	0.702	5.1817	5.9449	2.0589	2.38896		0.921296	1.82035
23.8283	0.4498	0	0	0.3678	0.1066	0.0319	0.165	0.6906	10.656	4.4235	0.9458	1.3936	4.4388	3.9124	4.0703	1.5687	1.7109	2.0506	0.4774	0.8485	1.8363	1.4071	0.8663	0.1714	0.081	0.0055	0.0127	0.4298	4.359	4.107	1.5093	2.4036	7.17185		0.925928	1.89906
23.9474	1.3838	0	0.0546	0.521	0.2617	0.6629	0.7572	1.4424	7.191	4.0859	0.9827	0.4582	2.4287	2.7408	1.9592	1.5693	3.1786	1.466	1.1709	0.2448	0.5628	1.5015	0.8959	0.9193	1.0565	0.2723	0.6292	0	0.816	3.5933	1.5588	3.7571	3.80925		0.930556	1.57369
24.0665	0.5951	0	0.7234	6.246e-05	0.0161	0.2059	0.0147	0.6683	5.467	2.4431	0.0343	0.3633	0.5335	1.3357	2.3144	1.5726	1.4882	1.5603	0.5268	0.6904	0.0824	0.8574	0.4604	0.4387	1.2339	0.4577	0.5772	0.00892	1.6477	3.9283	4.92	3.3447	2.91408		0.935184	1.25529
24.1857	0.3065	0.0111	0.3315	0.1059	0	0.0063	0.0082	1.2872	5.076	1.4375	0.0001	0.6601	1.0616	1.855	2.9808	0.2576	0.8365	1.3699	0.0295	1.172	0.1749	1.0162	0.1069	0.0987	0.5896	0.7078	0.8292	1.15146	3.4379	5.4539	3.7478	2.7127	1.037		0.939816	1.2078
24.3048	1.2345	0.3895	0.6327	0.0552	0	0.7159	0.1029	0.068	4.399	1.8984	0.8518	0.0512	3.0022	1.859	1.8857	0.8121	2.1894	2.7762	2.1664	0.0945	0.4497	0.5231	0.365	0.5013	0.0499	0.0011	0.0814	0.67295	2.1404	2.2588	2.8305	2.2818	1.22305		0.944444	1.16859
24.424	0.0868	0.2661	0.0438	0.7277	0.0258	0	0.5985	2.6976	3.717	2.1697	1.3209	0.4535	0.8524	3.4979	1.9159	1.0411	0.3887	1.2097	2.1753	0.0035	0.3536	0.9734	0.2595	1.215	1.2763	0.0233	0.831	0.007	0.961	2.5539	2.765	3.3959	0.6434		0.949076	1.16516
24.5431	0.1781	0	0.7069	0.1579	1.1855	0	0.4415	0.2967	1.548	1.2066	0.038	0.029	1.3069	0.9869	1.6712	0.5965	0.1131	0.9653	0.4349	0.4151	0.0055	1.4879	0.9522	0.9845	0.2722	0.2905	0.4678	0.32628	0.6163	3.9162	2.9011	2.2279	1.9541		0.953704	0.869108
24.6622	0.4395	0	0.0073	0.0088	0.0109	0.0014	0.0156	0.2234	0.854	0.3076	0.094	0.058	0.3633	3.0084	1.9507	0.9352	1.196	4.1119	0.9513	0.9131	0.173	0.352	0.0388	0.043	1.146	0.163	0.6587	0.52958	1.0094	4.2735	3.7765	2.3718	0.29169		0.958332	0.917496
24.7814	0.4704	0	0.5572	0	0	0.0152	0	0.0059	1.021	0.7782	1.1158	1.2014	0.7163	1.8884	1.2782	0.4409	0.8977	1.3608	1.3467	0.8666	0.5362	0.0175	1.1128	0.629	0.3975	0.7163	0.0079	0.51103	0.1327	4.8996	2.8779	0.9028	2.80067		0.962964	0.894018
24.9005	0.3124	0	0.6952	0.1553	0	0	1.507e-05	1.0351	2.932	1.1546	0.0172	0.0183	1.1287	2.6911	1.8187	0.4761	0.0252	0.5196	1.8051	0.2389	0.2809	0.2751	0.6526	0.4455	0.53	0.346	0.2257	0.75541	0.7616	3.7882	3.4954	1.0892	0.2877		0.967592	0.847177
25.0197	0	0.0002	0.6921	0.0114	0.2078	0	0.0555	0.3843	1.472	0.4348	0	0	0.4305	1.0673	0.6306	0.0583	0.0028	3.1498	2.4845	0.0325	0.7565	1.365	0.0062	0.2162	0.1589	0.3806	0.391	0.64832	1.5584	3.0064	4.4326	0.9612	0.76034		0.972224	0.780487
25.1388	0	0.0024	0.161	0	0.4341	0	2.327e-05	0.1796	1.002	0.6453	0.0036	0	0.0638	0.5772	0.5733	0	0.2643	2.0096	1.1463	0.4498	0.5119	0.4991	0.0286	0.1605	0.4077	0.2716	0.5056	0.01529	1.1065	2.5654	4.1476	0.0257	1.04242		0.976852	0.569704
25.258	0.3542	0.1717	0.0058	0	0.0247	0	0.6296	0.0062	1.34	0.3855	0.1691	0	0.9893	1.3146	1.0444	0.6419	0.1245	0.4223	0.1382	2.1896	0.5812	0.049	0.4157	0.0065	0.211	0.2336	1.0994	0.6779	0.909	2.2411	1.9568	0.3158	1.32725		0.981484	0.605329
25.3771	0.0245	0.6556	0.0015	0	0.0061	0	0.0372	0.1111	0.325	0.3478	0.6606	0	0.5714	0.6299	0.208	1.339	0	1.827	3.2452	1.0499	0.0464	0.0166	1.2077	1.2819	0	0.052	0.0401	0.02893	0.0068	4.4412	3.5419	0.8045	0.02054		0.986112	0.682678
25.4962	0.0999	0.0082	1.204	0	0.2716	0	0	0.4913	0.006	0.5468	0	0	0.0396	0.6665	0.0144	0.0191	0.3776	1.1836	0.181	0.731	0.476	0.4216	0.0685	0.0542	0.1107	0.0036	0.8025	0	0	2.3169	2.1223	0.0639	0.88073		0.99074	0.398834
25.6154	0.2684	0.1029	0.0181	7.375e-05	0.2572	0	0	0.0139	0.6	0.0196	0	0	0	5.738e-05	0	0	0.0114	4.4425	0.4677	0.3364	1.637	0.0537	0	0.2197	0.8848	0.2747	0.1575	0	0.5011	2.7332	0.4294	0.9272	0.34247		0.995372	0.445424
25.7345	0.2783	0	0	0	0.179	0	0.0082	1.3853	0.785	0	0	0	0	0	0	0	0	0.8915	1.3678	0.5772	0.2675	2.022	0.5738	0.377	0.0366	0.0216	0	0	0.7714	2.8611	1.6316	0.0077	1.20831		1	0.462149

## Sheet: Image44
X0	Y0	Y1	Y2	Y3	Y4	Y5	Y6	Y7	Y8	Y9	Y10	Y11	Y12	Y13	Y14	Y15	Y16	Y17	Y18	Y19	Y20	Y21	Y22	Y23	Y24	Y25	Y26	Y27	Y28	Y29	Y30	Y31	Y32	Y33		Ap-basal	Avg int
0	18.944	19.167	23.889	17.333	30.444	20.889	14.111	13.944	17.0556	18.8889	17.056	14.167	14.0556	14.7222	9.6111	12.6667	7.2222	7.6667	8.3889	11.5	8.333	21.333	24.667	12.611	19.611	33.8889	35.833	57.6667	28.8889	23.6667	26.1667	21.3889	27.5556	37.7778		0	20.3268
0.1191	22.667	21.111	21.167	16.444	31.278	23.056	23.333	14.944	21.0556	17.3889	18.722	24.889	24.1111	23.4444	7.5	13.6667	5.3333	11.1111	10.6111	14.6111	13.444	20.167	27.111	17.056	17.778	46.2778	58.556	49.3333	37.4444	16.0556	35.9444	15.3889	22.8889	40.3889		0.00555364	23.067
0.2383	36	21	29.278	25.556	37.889	30.667	29	17	23.3889	20.8889	19.833	22.222	21.5	30.0556	8.7222	14.6111	12.5	12.6667	11.1111	12.5556	13.222	35.722	37.056	14.056	17.333	52.3889	51.111	58.1667	36	17.6111	39.4444	23.2222	31.5556	40.3333		0.0111119	26.5785
0.3574	32.833	26.667	40.222	31.889	52.278	35.556	29.833	24.167	22.0556	26.5556	23.611	31.611	22.3889	27.3889	13.3333	19.7222	13.3333	11.3889	15.6111	14.9444	16.889	36.667	47.778	20.667	25.278	54.4444	66.722	71.3889	42.5	24.1111	43.1111	17.8889	30.5556	35.6111		0.0166656	30.853
0.4766	41.333	30	49.278	44	37.444	42.389	43.167	22.833	31.6111	30.3333	34.056	37.556	30.2778	27.3333	9.9444	21.9444	13.1667	11.3889	10	24.4444	19.167	52.611	59.667	26.556	26.833	54.0556	86.167	72.3333	44.6667	19.3333	26.2222	23.5556	24.1111	35.6111		0.0222239	34.2174
0.5957	45.389	38.167	71.611	47.056	44.944	55.222	44.222	29.333	35.2778	32.3889	35.778	53	32.5556	38.2778	18.8333	35.4444	13.8889	13.8333	16.8333	16.1667	27	59.611	67.889	26.278	27.222	50.7778	78.333	76.3333	56.8333	24.2778	29.5556	20.2222	31.6111	42.0556		0.0277775	39.3006
0.7148	60.278	41.278	91.833	70.167	55.667	72.5	53.333	42.167	38.7222	39.5	49.944	74.611	40.2778	45.4444	21.1111	44.6111	17.7222	16.8889	16.8333	23.3889	37.944	76.889	67.611	42.056	30.556	65.6111	83.056	83	58.3333	24.8333	24.8333	21.7778	25.5	27.9444		0.0333312	46.6536
0.834	71.444	44.167	104.944	87.222	70.722	87	73.222	44.444	57	36.5556	60.667	105.5	38.9444	45.1667	22.7778	58.5556	23.2778	18.6667	18.7222	27.9444	45.556	93.389	102.778	42.833	41.222	65.0556	73.667	90.6111	76.2222	25.0556	30.6667	19.6667	35.6667	37.5556		0.0388895	55.2026
0.9531	91.222	65.667	126.222	122.944	84.889	100.111	91.889	51.556	60.8333	40.1667	81	111.556	50.8333	66.7778	34.6111	76.8889	27.6111	19.3333	25.6111	23	57.278	118.444	109.111	47.167	38.778	71.7778	79.5	91.0556	74.3333	23.9444	24.3333	28.7778	30.0556	35.9444		0.0444431	64.2124
1.0723	94.722	97.944	139.056	141.722	108.5	123.722	111.222	72.389	64.1667	58.7778	81	124.722	54.3333	67.8333	36.6111	87.5556	33.7222	21.7222	24.6111	35.1667	72.778	134	112.278	57.222	44.667	71.9444	89.444	92.1667	62.1111	22.3333	27.8333	29.1111	22.6111	34.7778		0.0500014	72.1405
1.1914	111.556	101.278	140.611	150.667	127.278	154.667	141.056	91.611	76.1111	65.4444	103.444	110.389	57.3333	65.2222	42.6111	86.3333	34.2778	23.6111	35.7778	47.9444	90.889	157.889	120.833	74.444	56.833	78.7222	92.389	89.5	78.7222	22.5556	33.5556	32.0556	28.3333	37.5556		0.055555	81.2206
1.3106	112.056	107.722	134.611	145.167	149.444	158.5	162.333	110.167	74.6111	67.2778	91.056	109.056	71.1667	67.6111	52.9444	69.4444	36.8889	30.8333	39.4444	52.6111	121.389	168.556	126.611	102	60.222	70.2778	99.5	78.3333	64.8333	22.0556	23.5	29.3889	20.2222	35.8333		0.0611133	84.2843
1.4297	121.722	101.722	117.389	138.611	128.389	155.444	166.889	101.333	90.2778	81.0556	111.278	113.889	69.7778	70.7778	52.2222	54.7222	35.3333	34	37.3333	50.7778	131.056	161.722	144.889	126.722	68.167	78.1111	86.833	76.9444	59.6111	20.2778	20.6667	29.4444	27.8889	39.5		0.066667	85.4346
1.5488	108.389	105.667	105.278	148.278	120.667	151.722	175.667	130.5	90.9444	65.1667	106.278	90.556	68.0556	65.5	50.9444	45.7778	39.9444	34.9444	24.8889	51.0556	146.889	189	145.5	130.333	67.167	78.1111	100.278	55.3333	44.5556	24.8889	25.1667	31.7222	26.8889	31.4444		0.0722206	84.6324
1.668	107.667	101.722	96	146.667	103.389	142.111	168.778	121.556	96.1667	72.3889	104.556	91.944	67.2222	55.4444	72.2778	40.5	44.4444	37.0556	37.9444	45.8333	152.111	188.667	136.167	138.889	73.944	69.4444	94.278	61.7222	35.3333	24.4444	21.6111	29.7222	26.7222	24.0556		0.0777789	83.2582
1.7871	124.167	98.278	103.611	127.444	91.778	128.833	162.056	117.333	94.4444	90.3333	91.667	83.333	57.8889	50.1667	76.1667	39.1667	53.1111	39.5	29.5556	39.9444	164.222	181.611	118.889	129.722	64.444	70.9444	107.5	61.2222	28.8889	23.6111	23.0556	23.5	29.8889	33.1667		0.0833326	81.1601
1.9063	116.167	85.667	96.222	107.222	86.111	118.111	152.722	104.278	84.2778	84.8333	85.667	85.444	62.7778	65.4444	58.1111	38.3333	51.3333	34.7222	32.4444	38.7778	140.667	172.944	135.222	113.333	84	71.7778	102.444	64.3889	34.1111	21.0556	17.8333	26	28.4444	36.3889		0.0888909	77.567
2.0254	115.778	75.167	100.889	93.889	75.111	109.556	146.667	96.833	79.4444	91.9444	72.5	75.056	50.5	51	58.3889	37.5556	46.8333	37.2222	19.1111	30	150.333	160.167	121.556	93.389	100.556	74.5	93.278	68.5556	35.5556	27	24.6667	17.9444	27.2222	26.1111		0.0944445	73.0671
2.1445	112.444	67.833	78.444	81.5	66.056	98.667	142.333	92.778	79.9444	79.1667	76.111	56.056	43.6111	64	55.5	31.0556	46.3333	24.7222	23.9444	37.4444	128.389	164.056	136.222	84.278	94.222	71.3889	82.944	67.1667	32.8889	22.4444	25.3889	24.8333	19.1667	33		0.0999981	68.951
2.2637	97.278	81.722	90.167	66	59.056	82.5	130.111	94.167	75.5556	83.1111	59.5	53.167	45.1667	48.4444	66.5	31.5	43.6667	30.1667	17.5	36.8889	102.833	147.278	135.389	64.556	88.167	70.3333	87.389	63.7778	30.0556	20.7222	20.0556	25.6667	33.6111	25.5556		0.105556	64.9282
2.3828	77.111	73	74.222	48.833	50.5	82.944	111.944	94.778	72.1667	70.3333	58.833	63.222	46.3333	53.3333	59.2222	25.6667	50.5	31.4444	20.2778	37.7778	104.389	149.5	132	62.889	92.389	68.8889	92.167	76.0556	37.4444	19.0556	11.2222	29.0556	22.4444	31.3333		0.11111	62.6846
2.502	81.944	78.278	75.778	60.111	42.111	74	109.556	98.389	71.7778	65.8889	61.444	49.778	38.9444	48.2222	47.2778	20.4444	47.1111	24.2778	15.2778	32.7778	112.278	142.5	135.389	67.556	72.611	62.2222	71.444	67.1111	36.2222	22.6111	13.2778	22.6111	19.4444	27.6667		0.116668	59.3039
2.6211	78.722	79.722	58.167	46.111	41.444	69.389	93.278	109.222	63.0556	72.1667	61.278	58.722	38	51.4444	46.6111	21.5	28	29.2778	14.7222	39.9444	96.444	151.222	137.611	72.056	71	52.1111	77.444	53.5	29.9444	22.3889	9.5	20.2778	14.3889	19.4444		0.122222	56.7091
2.7402	87.389	80.778	42.833	45.389	41.833	66.833	101.333	99.611	73.8333	60.6111	58.778	34.556	39.8889	50.9444	44.5	11.4444	26.0556	30.2778	15.5556	33.1111	92.833	144.056	124.333	77	48.111	50.5	58.667	47.4444	23.7778	21.2778	7.1111	25.3889	17.1111	20.5556		0.127776	53.0506
2.8594	88.056	68.111	49	42.722	36.111	58.5	119.111	103.889	67.1111	51.2222	61.778	35.611	31.2778	39.2222	50.6667	20.8333	26.8333	32.5556	21.2222	30.3333	96.778	134.5	121.389	68.5	52.5	49.2778	54.889	44.3889	20.8889	19.2778	12.5	18.8889	17.6667	9.8333		0.133334	51.6307
2.9785	80.222	57.333	43.056	36.889	44.056	57.778	102.056	117.222	51.3333	44.2222	72.278	38.444	27.7778	22.1111	43.7222	19.9444	33.6667	18.7222	19.4444	24.2778	78.5	135.5	111.222	81.667	44.222	34.8333	50.111	38.1667	17	14.8889	5.8333	17.6667	12.2778	16.8333		0.138888	47.4494
3.0977	86.667	50.722	38.833	39.389	32.111	39.5	81.944	108.833	54.1667	47.2222	81.5	40.722	33.8889	27.3889	32.7778	24.3333	27.1111	22.3333	18.7778	25.8889	78.222	119.056	97.278	65.556	45.667	40	37.222	33.6111	14.4444	14.5556	11.3333	14.5556	12.7778	16.2222		0.144446	44.5474
3.2168	78.5	39.222	37.722	30.167	29.444	50.444	91.667	88.889	47.8333	42.4444	83.167	31.111	34.7222	25.3333	39.6667	23	31.2222	24.5556	22.6111	23.6111	77.778	118.444	83.389	66.389	37	33.7222	43.333	35.7222	17.0556	14.3889	8.0556	11.5556	6.3333	12.4444		0.15	42.3807
3.336	83.167	43.222	35.278	34.722	34.111	34.722	67.778	88.333	51.6111	40.3333	81.667	30.444	28.2778	23	28.3333	24.8889	24.9444	21.3333	17.3333	22.3889	71.056	97.778	76.389	64	44.056	30	40.389	30.6667	12.5	10.4444	9.1111	13.0556	8.7778	7.7222		0.155558	39.1716
3.4551	79.778	32.222	28.278	38.889	24.611	29.444	65.222	80.5	58.5556	41.6667	83.889	35	27.7778	21.0556	24.5	21.8333	21.6667	14.1667	19.3333	19.7222	58	91.167	67.333	60.889	45.5	37.4444	38.556	41.8333	14.0556	11.2778	8.5	10.3889	8.8889	7.1111		0.161111	37.3252
3.5742	75.833	25.667	31.556	39.278	28	35.778	47	84	45.5	45	80.056	32.333	24.8889	24.2222	20.6667	18.2222	24.3889	16.7778	18.2222	18.0556	62.833	75.056	53.111	54.611	35.778	26.8889	27.778	36.5556	17.6667	11.2778	7.6667	10	6.1667	3.3333		0.166665	34.2402
3.6934	76.833	29.556	29.611	36.333	33.722	28.333	35.611	81.778	54.6111	47.3333	66.722	30.278	23.5	19.8333	18.6111	14.3889	19.5	14.7778	19.6667	15.7778	55.667	67.722	55.111	50.667	48.333	28.3333	29.5	45.6667	10	10	9.3333	7.1111	5.6111	7.5		0.172223	33.1568
3.8125	67.444	27.389	32.611	39.556	22.778	27.722	45.056	87.389	55.7222	51	68.333	31.5	18.3333	19.7778	24.8333	21.1111	22.9444	14.7778	18.1111	13.7778	55.222	60	53.5	51.389	45.5	34.0556	31.611	43.0556	6.7222	10	10.5556	5.8889	9.4444	5.8889		0.177777	33.3235
3.9317	56.667	29.667	37	43.222	24.722	28.667	39.333	68.944	56.4444	37.4444	65.333	21.389	15.3333	10.8889	23.3333	13.8333	16.2778	11.5556	18.0556	10.5556	46.556	48.833	46.556	53.222	36.722	35.7222	31.167	31.1111	10	6.4444	7.8333	6.4444	3.8889	7.8333		0.183335	29.4412
4.0508	57.222	28.667	30.889	43.333	33	27.444	45.5	66.778	63.7222	37.6111	61.778	20.944	17.1111	16.8889	16.6111	14.6667	20.8333	12	6.5	12.8333	48.278	57.611	46.944	54.056	39.5	38.7778	24.778	31.5	8.4444	11.7222	7.2778	9.7778	6.4444	3.5		0.188889	30.0866
4.1699	40.833	25.5	32.278	49.722	30.5	37.333	53.444	63.556	62.5	40.7778	47.944	19.389	16.8889	18.8333	20	9.9444	14.8889	14.5556	12.5556	10.5556	52.611	51.278	49.333	58.167	37.333	44.5	24.667	29.6111	9.6111	7.8333	10.1111	8.8333	6.4444	3.7778		0.194443	29.8856
4.2891	47.833	20.722	27.722	47.278	39.222	32.167	50.722	61.111	52.9444	42.6111	56.556	25.611	11.8889	15.3333	18.7778	13.3889	16.2778	9.6667	10.1111	10.5	43.833	46.889	44.389	55.278	41.444	44.4444	28.222	17.7778	11.5556	9.0556	7.5556	11.7778	6.3333	9.5		0.200001	29.0735
4.4082	35.611	21.333	28.556	50.889	31.389	27.944	44.611	48.444	59.4444	36.0556	47.944	28.056	12.3333	15.4444	17.7222	12.9444	12.6111	13.6111	11.7778	14.3333	37.5	45.778	45.333	63.056	33.444	37.3889	35.833	18.7222	15.8889	5.4444	4.6111	8.0556	9	6.1111		0.205555	27.5653
4.5274	43.833	19.222	23.333	50.5	32	25.056	44.722	49.278	52.5	31.7222	42.611	28.556	18.9444	15.2778	16.1111	13.3889	14.1667	11.1667	10.7778	6.9444	33.056	42.167	47.389	50.167	35.611	33.8333	32.056	14.7778	8.6111	4.6111	4.9444	8.1667	4.7778	4.5556		0.211113	25.7304
4.6465	46.556	19.5	25.667	57.722	31.5	28.5	40.444	46.722	47.4444	22.5556	38.444	40	20.3889	16.8333	16.0556	10.4444	13.8889	6.5	4.2222	6.6111	23.278	41.833	50.278	37.333	35.444	23.1111	38.556	16.0556	8.5	5.8333	4.4444	9.8889	6.8333	6.5556		0.216667	24.9395
4.7657	43.889	19.722	29.833	53.556	28.667	29.5	40.833	48.5	39.1111	28.9444	39	26.167	16.7222	16.8333	21.2778	11.5556	12.3889	11.4444	7.7778	12.3333	22.889	34.167	43.833	35	26.167	24.7222	35.556	26.2778	10.0556	4.5556	4.6111	12.7222	6.7778	3.7778		0.222225	24.3873
4.8848	37.222	18	24.056	44.444	29.5	23.944	40.944	45.111	45.5556	25.7778	37.778	24.111	13.1111	13	28.8889	11	8.5	10.6111	12.6111	9.0556	20	31.889	48.222	31.667	35	20.8889	28.889	17.4444	7.5	7.7778	7.7222	7.2222	5.6111	4.5		0.227778	22.8693
5.0039	34.889	22.5	25.111	58.278	33.889	27.778	34.278	38.222	38.0556	22.3889	35.944	22.722	18.2778	12.4444	16.5556	10.5556	9	8.1111	10.8889	5.7778	17.167	24.889	47.444	25.778	31.389	20.3889	28.611	19.7778	8.5	6.7222	3.3889	10.3333	3.5	3.7778		0.233332	21.6863
5.1231	44.611	20.778	18.167	52.278	31.833	23.333	30.833	32.444	38.9444	24.6111	44	22.722	20.6667	13.9444	22.8889	12.5556	9.9444	10.1667	10.5556	13.7222	18	23.889	50.556	21.722	25.333	20.3889	22.222	17.7222	6.7222	6.5556	3.3333	7.3889	5.5556	9.9444		0.23889	21.7157
5.2422	52.944	16.944	16.222	55	40.444	32.278	37.611	42.278	40.4444	26.7778	33.556	18.056	18.1667	12.6111	26.1667	13.5556	13.2778	6.9444	8.4444	13.3333	17.444	21.111	57	27.444	26.611	17.1111	18.889	17	3.9444	7.8333	9.6667	6.3333	7.2222	6		0.244444	22.6078
5.3614	33.889	23.833	22.167	47.278	38.944	30.556	28.389	40.278	35.1111	23.6111	28.778	27	18	7.4444	23.6111	12.4444	11.7778	10.5	6.6111	9.6111	9.056	21.889	52.222	20.222	24.667	15.5	18.056	15.1667	6.8333	5.6667	6.6111	6.1111	6.3889	6.7778		0.250002	20.4412
5.4805	44.833	19.111	26.444	39.222	27.333	27.5	34.167	32.056	29.3333	23.8333	24.5	18.722	20.1111	9.7778	14.7778	11.3333	13.4444	13.2222	7.1111	12.5556	12.333	20.333	48.889	25.444	19.778	20.4444	17.778	20.3889	5.2778	4.4444	9.6111	6.4444	6.1111	7.3333		0.255556	19.8235
5.5996	36	20.222	24.833	41.889	31	35.167	39.056	34.389	19.6111	22.9444	20.222	19.556	16.1667	9.9444	17.8333	6.7222	12.5556	15.8333	7.6111	11	7.889	18.389	30.278	27.778	19.222	24.9444	17.333	15.5556	7.8889	5.6667	7.6111	2.7778	8.2778	3.6667		0.26111	18.8186
5.7188	45.056	21.278	23.5	41.333	34.667	28.722	30.667	35.222	24.0556	26.0556	18.056	16.889	12.8889	16.3889	23.4444	7.1111	11.6667	8.1667	7.0556	15.3889	12.667	17.111	19.222	27.611	27.333	23.0556	19.167	20	10.1111	2.9444	9.0556	4.2778	7.0556	5.3333		0.266668	19.1928
5.8379	43.333	21.056	24.278	42.944	36.222	27.778	32.389	27.611	25.5556	20.9444	15.111	16.056	19.6667	16.6667	24.5	7.2778	11.3333	7.7778	8.4444	8.5	13.833	17.833	28.778	16.833	19.778	23.9444	19.833	20.8333	8.8889	6.4444	7.9444	7.6111	8.3889	4.7222		0.272222	18.915
5.9571	44.056	17.778	34.611	44.167	25.167	28.611	25.722	29.056	28.5	23.9444	23.222	14.944	14.7778	12.7778	20.6667	8.1111	7.6667	7.4444	6.1667	9.5556	11.222	23.444	32.722	20	17.944	21.5556	15.722	18.9444	8.4444	4.4444	7.8889	5.7778	8.3333	2.3333		0.27778	18.4036
6.0762	46.389	20.944	30	33.611	32.556	29.444	30.389	29	27.1111	15.8889	16.444	16.889	13.4444	11.5556	21	5.7222	12.3889	8.5	7.1667	8.7222	9.056	20.833	27.111	16.611	23.389	21.6667	16.167	18.3333	4.6111	2.8333	4.7222	3.7778	7.3333	5.5		0.283333	17.6209
6.1953	37.722	25.278	32.556	35.778	29.5	32.278	26.222	30.556	23.2222	20.5556	18.222	14.278	16.7222	17.1111	19.9444	9.2222	9.7778	6.3333	7.8889	8.5556	11.611	18.944	30.222	23.222	23.889	28.3333	10.5	14.1667	6.3889	6.6111	5.3889	4.4444	6.0556	3.2778		0.288887	18.0817
6.3145	31.944	28.5	31.611	30.944	27.111	35.5	28.167	28.889	18.8889	16.3333	10.944	14.556	14.7778	10.6111	17.7778	10.3333	15.3333	7.9444	7.9444	7.2778	8.833	22.222	18.833	22.889	31.667	19.1111	14.333	13.7222	6.3333	4.7778	5.2222	2.8889	6.8889	2.8889		0.294445	16.9411
6.4336	38.556	25.444	29.944	32.056	32.5	47.556	27.556	35.611	18.2222	22.5556	12.333	13.611	10.5556	18.0556	10.8889	6.5556	5.5	9.1667	5.9444	5.6111	6.389	17.833	32	20.444	23.278	17.7222	20.833	13.3889	7.5	4.7778	5.2222	4.3333	5.0556	5.6111		0.299999	17.4297
6.5528	31.5	22.722	31.722	30.556	32.278	37.889	32.833	24.333	24.1111	18.6111	11.333	14.444	7.4444	10	13.9444	12.6111	6.8889	7.3889	8	7.2778	10.611	20	29.111	19.889	27.778	21.0556	13.5	13.3889	6.1667	3.8333	4.5556	2.2222	5.4444	2.8889		0.305557	16.6568
6.6719	22.278	19.056	34.056	28.833	30.278	35.667	30.111	26.833	27.8333	17.1111	12	11.667	15.2778	9.3333	7.7778	7.3889	9.1111	7.5556	6.6111	8.8889	5.278	17.556	35.389	21.278	26	19.7778	17.611	11	6.7222	3.8333	2.7778	3.2778	6.6667	1		0.311111	16.054
6.7911	20.444	18.5	29.611	28.056	33.889	26.167	26.722	30	26.5556	16.7778	9.5	8.833	13.6667	7.7222	8.0556	16.1667	8.3889	8.6667	9.1111	5.8889	9.167	14.611	34.611	26	17.778	22.0556	15.667	13.3889	4.2222	5.8333	4.3889	3.8889	5.7778	4.1667		0.316669	15.7141
6.9102	23.389	19.444	28.778	25.167	36.167	30.556	27.5	25.444	22.7778	22.7778	10.333	10.222	14.3889	9.3333	11	15.5	8	7.0556	10.2778	9.1667	3.5	15	28.111	20.889	17.778	17.7222	17.278	11.5	5.9444	6.4444	3.8889	2.3889	6.2222	5.2778		0.322223	15.5654
7.0293	22.5	23.056	29.889	27.833	27.889	34.611	29.333	33	33.7778	16.6667	8.556	7.222	17.1111	3.7222	6.7778	7.1111	7.0556	9.2222	7.7778	7.3889	6.556	12.778	23.333	27.5	19	23.6111	16.389	17.0556	5.1667	4.6667	2.0556	1.1111	7.6111	4.9444		0.327777	15.6552
7.1485	17.667	19.667	34.667	22.778	18.556	27	30.222	22.778	30.8333	22.7778	11.556	6.111	12.4444	3.8889	9.7778	11.5556	8	15.3889	6.8333	4.9444	7	11.778	23.778	36.722	17	21.5	24	13.2778	6.7778	2.4444	3.2778	0.4444	5.3333	3.6111		0.333335	15.1291
7.2676	14.444	13.722	25.722	29.5	20.556	21.778	21.722	35.778	26.4444	16.6667	11.889	11.944	13.3889	3.8889	11.0556	13.7778	7.0556	10.6111	7.1667	6.3889	10.833	7.889	24.389	37.389	16.444	22.3889	23.389	17.0556	4.0556	2.3333	0.6667	2.1667	3.2778	3.5556		0.338889	14.6863
7.3868	16.611	19.667	22.111	35.667	20.556	18.167	18.5	32.889	21.1667	17.6667	14.5	4.944	13.1111	4.3333	10	7.9444	6.4444	11.3333	8.1111	4.0556	5.389	10.444	34.667	40.056	15.556	18.2778	22.556	17.8889	6.6667	2.8889	2.4444	2.3889	5.1111	4.3889		0.344447	14.603
7.5059	17.833	19.778	18.722	38.222	16.167	12.167	21.778	29.278	22.5556	18.2778	18	8	12.5	3.7778	6.5556	11.0556	6.3889	10.8889	9.2222	5.3889	4.111	13.111	28.556	37.889	16.444	22.8333	21.556	14.9444	7.3889	3.5556	0.5556	1.2222	3.3333	3.3889		0.35	14.2778
7.625	14.5	25	15.444	36.278	13.5	12.222	24.389	40.889	25.1111	19.0556	8.389	7.889	7.2222	6	3.8333	11.5556	10.5	12.5556	6.8333	4.3333	8.667	7.611	28.556	38.278	20.111	12.5556	17.333	13.4444	7.0556	3.0556	1.8333	1.1667	2.3889	3.5556		0.355554	13.8562
7.7442	18.444	19.333	21.944	26.889	9.389	10.5	28.278	29.444	20.2778	20.2778	9.333	8.778	9.5	3.7778	5	4.6667	9.1667	7.3333	8.7778	1.8889	3.722	11.444	30.389	28.167	20.833	10.6111	13.667	21.3889	4.7778	3.5556	2.5	2.0556	2.4444	1.5		0.361112	12.6487
7.8633	19.944	18.389	22.944	28.056	5.889	11.722	34.778	24.444	19.1667	16.4444	8.722	11.278	12.5	2.2222	1.8333	5.8889	12.1667	8.8333	5.7778	4.2222	2.667	13.5	25.889	27.889	16.667	9.2222	22.333	17.5	5.8333	3.7222	0.6667	0.8333	2.8333	4.8333		0.366666	12.6356
7.9825	22.556	21.222	22.389	18.167	6.778	13.833	21.667	32.722	25.7778	17.0556	9.556	9.056	13.6111	4.3889	3.6667	8.2222	10	7.6111	7.3333	4.8889	5.167	11.667	25.333	20.389	16	8.0556	19.667	21.1667	4.7778	3.2222	0.7222	3.3333	1.5556	3.7222		0.372224	12.5082
8.1016	30.167	26.944	23.278	18.278	8.778	8.944	27.667	29.556	25.9444	17.8889	12.333	10.556	12.7222	3.8333	6	10.0556	5.6111	12.4444	5.5556	5	4.833	11.5	21.056	19	17.556	6.6667	19.722	22.8333	5	3.0556	1.3333	0.7778	1.2778	4		0.377778	12.9461
8.2207	31.222	21.722	22.278	10.056	5.389	5.556	21.722	22.056	18.2778	15.0556	14.278	8.944	13.3333	3	2.5556	7.8889	7.2222	14.9444	9	3.8333	6.389	11.389	26.722	28.722	15	3.6667	14.889	18.3889	8.3889	4.1111	1.6667	1.2778	2.5556	3.5		0.383332	11.9118
8.3399	36.611	26	15.056	15.111	3	7.944	25.222	26.556	30.2222	16.2778	9.722	10.778	12.8333	2.9444	2.0556	10.7222	10.1111	8.6667	6.1667	4.3333	2.5	9.111	19.389	20.722	15.333	6.5556	14.444	17.7222	7.8889	3.1667	1.9444	0.0556	1.1667	5.7222		0.38889	11.9428
8.459	29.833	24.778	18.722	14.111	4	10.167	27.611	28.889	17.8333	13	10.111	8.611	9.3333	3.2778	1.4444	7.3333	7.5	7.8889	6.6667	11.2222	3.833	15.056	23.556	20.278	7.333	7.7778	14	17.2778	10.9444	6.0556	0.4444	0.5	0.3889	2.3333		0.394444	11.5327
8.5782	22.333	23.611	13.222	14.222	5.667	6.389	19.667	24.667	22.3333	18.3333	12.667	12.333	8.7222	3.2222	0.8889	8.7778	9.6667	10.9444	4.9444	3.5	3.556	16.611	20.944	29.611	12.5	4.6667	17.611	18.3333	6.6667	5.0556	0.3333	0.1667	2.8333	2.1111		0.400002	11.3856
8.6973	18.944	20.722	14.722	7.778	3.889	4	20	22.833	27.8333	13.5556	11	10.389	7.0556	2.5556	2.3333	6.9444	7.4444	7.7778	6.8333	7.9444	3.222	12.389	17.611	21.778	4.389	4.3889	21.056	18.8889	10.1667	3	2.5	0.8333	0	2.9444		0.405556	10.2271
8.8165	18.056	26.556	22.167	8.056	7.222	3.556	23.167	19.778	23.5556	14.2778	14.167	11.722	11.0556	3.1111	1.2222	7	6.4444	7.5556	4.6111	7.7222	3.389	12.778	21.778	23.222	6.556	4	17.556	22.9444	7.5556	2.8333	0.5556	1.3333	0.2778	2.5556		0.411114	10.8334
8.9356	13.778	31.278	17.722	7.278	5.167	4.278	20.722	16.722	20.5556	10.3889	7.389	10.111	9.7778	1.3333	0.6667	9.1111	7.9444	10	6.5	6.1111	1.944	7.722	14.667	28.167	4.889	4.6111	23.778	17.0556	5	3.8889	0.8889	0	1.1111	3.2222		0.416667	9.81702
9.0547	14.222	29.111	28.944	6.5	2.333	5.889	13.944	20.389	23.7222	10.8333	7.833	6.222	11.2222	2.6111	1.2222	5.1667	7.6667	9.2778	5.6111	8.8333	4.444	6.944	24.889	26.556	6.167	3.6111	13.722	14.2222	6.2222	6.7222	1.2778	0.3333	0.5	2.1667		0.422221	9.98033
9.1739	16.611	35.778	22.556	9.111	1.889	5.222	19.111	19	21.7778	12.9444	8.778	7.611	3.8889	3	2.2222	4.2778	9.0556	9.2222	6.2222	4.4444	4.389	8.778	19.611	18.556	6.889	4.3889	17.722	14.9444	7.0556	4.8333	0.7778	0.3333	1.1667	3.5556		0.427779	9.87421
9.293	14.5	28.944	19.5	6.889	3.222	4.278	21.611	18.944	20.1111	9.1111	11.667	6.778	5.1111	2.3889	0.2222	6.1111	6.8333	9.6111	5.3889	10.5	2.389	10.333	22.611	18.722	6.333	3.4444	15.667	13.7778	6.5	4.4444	2.8333	0.9444	1.3889	2		0.433333	9.50324
9.4122	10.667	24.833	17.056	5.889	1.667	4	10.222	21.556	23.9444	8.6111	8.278	8.556	6.2222	1.8889	1.4444	4.6111	8	7.4444	5.1667	3.8333	9.056	10.889	23.222	22.5	5	1.7778	10.444	20.7778	9.6667	3.2222	1.2222	0.2222	0.8889	2.7778		0.438891	8.98697
9.5313	17.111	19.833	16.944	5.167	5.722	2.5	18.167	26.333	23.5	10.5556	9.944	7.222	5.7222	2.3333	0.7222	2.8333	12.7222	7.8889	7.4444	5.5556	3.278	8.556	22.333	20	2.333	2	6.778	17.1667	10.0556	5.6667	1.7778	0.7222	0.7778	1.8333		0.444445	9.16173
9.6504	12.444	22.278	17.667	7.556	4.056	3.944	20.389	22.889	25	11.8333	9.056	6	5.5	1.7778	1.2222	2.1667	10.4444	5.3333	3.9444	6.1667	3.944	9.056	26.667	18.611	2.778	3.1111	10.556	18.7222	9.2222	5.6111	1.5556	0.8889	0.7222	2.8333		0.449999	9.23372
9.7696	15.389	12.056	19.111	4.5	3.278	1.278	14.111	18.333	25.4444	11.7778	11.5	7.111	4.3333	1.9444	1.1111	5.2778	10.6111	4.5556	6.2778	6.3889	6.167	9	21.389	15.278	1.889	1.2778	7.389	20.6667	6.3889	3	1.3333	0	0.2222	3.1111		0.455557	8.27945
9.8887	14.444	20.333	13.278	4.5	4.056	5.5	11.444	20.889	25.8333	7.9444	12.056	9.222	3.5556	0.1111	2.2222	2.0556	10	9.7778	7.1667	6.5556	3.611	8.444	21.056	17.944	6.056	2.2778	12.222	21.2778	10.3889	4.3333	0	0	1.9444	1.3889		0.461111	8.87907
10.0079	19.722	12.722	20.667	4.167	1.889	4.722	14.389	19.722	22.1111	9.8889	9.722	7.944	1.6111	2.3889	1.1111	5.0556	12.3889	9.8333	7.6111	5.5556	5.722	9.278	14.278	20.167	3.111	4.9444	10.889	19.1111	9.1667	3.6111	0	1.1667	1.3333	7.2778		0.466669	8.91993
10.127	11.833	14.889	24.111	2.833	3.444	2.944	18.556	18.056	25.5556	10.3333	11.056	11.944	3.1111	1.5	2.5556	2.5556	9.5	10.5556	9.6111	4.9444	2.889	7	22.778	16.278	4.778	3.5	9.889	17.6111	6.8889	3.3889	0.3889	0.9444	0.3889	6.6111		0.472222	8.91831
10.2462	18.556	23.167	22	6.389	1.889	0.889	15.722	21.111	21.1111	8.8889	9	11.111	2	0.6111	0.8333	2.0556	7.4444	6.8889	7.7222	3.7222	3.278	8.889	23.722	14.056	3.389	3.1667	7.556	24.5	6.9444	4.0556	2.3333	0.3889	0.6111	1.2778		0.477781	8.68469
10.3653	8	16.833	19.278	4.167	2.278	3.611	13.667	17.556	16.2222	6.4444	9.722	8.611	1.4444	1.7222	0.6111	2.1111	6.6111	8.7778	7.4444	7.1111	5.944	6.556	18.611	16.833	1.778	2.5556	9.444	20.6667	7.6667	4.2778	0	0	0.3889	3.3333		0.483334	7.65523
10.4844	9	16.167	17.389	8.278	2.778	2.778	20.056	17.833	21.3889	8.8333	9.5	7.111	1.6111	0.3333	0.3333	1.8889	6.5556	7.7222	5.3333	2.7222	7.5	9.167	14.889	18.778	3.889	2.5556	7.667	15.4444	11.5556	3.9444	0.6111	1.1667	0	2.5		0.488888	7.86117
10.6036	13.111	19.056	15.444	3.333	4.167	4.444	10.889	22.444	18.8333	6.9444	6.889	10.556	2.1111	1.0556	0.4444	1.9444	6.7778	7.6111	5.6667	7.3333	5.611	10.056	13.056	14.778	2.5	1.8333	8.444	16.5556	9.7778	1.9444	1.3333	1.1111	1	2.1111		0.494446	7.62255
10.7227	10.444	15.444	20.056	6.944	1.167	3.833	14.944	16.333	20.4444	8.0556	5.778	7.444	2.7778	0.8889	1.1667	3.6667	10.0556	5.7222	6.1667	5.3889	7.5	5.944	14.833	17.444	0.389	2.2222	4.722	20.0556	6.3889	3.1111	1	1.4444	1.1667	2.0556		0.5	7.49991
10.8419	11.889	13.444	16.667	3	1.056	2.333	11.444	19.833	16.7222	6.8333	10.611	4.278	1.7778	0.6111	0.5556	1.3889	14.0556	5.6111	14.1111	4.2222	4.944	7.278	14.611	12	2.722	0.9444	4.944	18.8333	9.9444	3.4444	1.0556	0.2778	0.5556	2.9444		0.505558	7.2042
10.961	13.667	18.222	18	2.611	1.889	2.944	13.611	16.722	20.6667	9.3889	5.056	7.889	2.4444	1.8889	0.1667	4.0556	9.2778	8.2778	6.1667	6.7778	3.556	10	13.278	11.222	1.444	1.5556	6.222	13.7222	8.5556	3.8333	1.6111	0.3889	0.1667	2.7778		0.511112	7.29575
11.0801	6.167	12.167	17	0.667	4.222	2.056	7.444	28.111	22.3889	12.7778	6.833	5.167	0.9444	0.7222	0.8889	0.2778	11.1667	4.8889	6.8333	6.0556	4.944	10.667	10.833	18.111	2.944	1.2222	6.667	14.2778	9.1111	4	0.1111	0	1.9444	2.5		0.516666	7.17974
11.1993	10.556	20.056	15	1.944	2.778	2.556	14.056	18.333	14.5556	10.5	6.833	9.556	3.0556	1.7778	0.5	2.8889	10.4444	7.2778	5.3889	6.8333	6.722	7.444	13.611	21.5	2.611	2.6667	3.889	19.5556	13.8333	4.1111	0.3889	0.0556	0.2222	1.0556		0.522224	7.72224
11.3184	17.056	15.611	16.778	2.722	2.278	2.944	15.833	19.167	15.2778	9.3333	9.722	8.667	1.5556	0.2222	0.7778	1.2778	6.8889	6.6111	6.9444	10.1111	5.333	8.167	9.444	18	2.167	1.3333	2.889	13.6111	12.5556	3.7222	0.0556	0.0556	0.3889	1.8889		0.527778	7.33498
11.4376	7.167	15.778	18.778	4	3.278	2.833	8.5	25.667	21.7222	7.0556	3.444	6.111	1.7778	1.6667	0.6111	1.3889	7.2778	3.4444	6	7	5.278	6.833	9.5	16.333	1.667	1.1111	3.722	26.5	11.6667	4.4444	0	0.7778	0.7778	4.8333		0.533336	7.26308
11.5567	8.444	19.444	7.667	3.111	2.056	2.778	16.556	25.056	17.2778	7.5556	9.389	9.5	1.4444	0.3889	0.9444	2.1111	4.8333	6.5556	5.8889	7.6667	7.611	8.833	13.667	12.833	5.444	1.3333	4.778	25.3333	12.4444	2.4444	0.3889	0.7778	0.5	4.1667		0.538889	7.62419
11.6758	12.222	15.167	10.444	3.611	2.611	2.111	11.167	21.722	16.7222	8.6667	5.444	9.667	0.7778	1.3333	0.3333	2.1111	6.8889	5.5556	6.2778	7.3889	6.278	9.778	17.333	17.556	1.833	1.8889	2.778	23.7222	8.9444	5.1111	0.7222	2.5556	1	2.6111		0.544443	7.42156
11.795	11.722	17.667	15.222	4.944	2.944	3.444	12.167	22.167	17.6667	13.9444	8.833	7	1.7778	0.6667	0.6667	1.8889	5.3333	8	9.8889	7.7778	4.778	7.556	15.056	9.833	3.389	1.7778	5	28.1111	13.4444	3	0.7222	1.3889	1.1111	2.1667		0.550001	7.97222
11.9141	13.778	20.5	24.611	3.111	1.833	3	20.444	28.111	17.5556	6.6667	8.167	8.444	2.3333	0.1667	1.5	1.1667	4.2222	4.5556	9.3333	7.8333	5.333	11	12.611	15.611	2.944	1.2222	3.333	24.6667	15.6111	2.2778	0.8889	1.2778	0.3333	2.5556		0.555555	8.44111
12.0333	10.167	20.389	15.167	1.944	1.667	1.833	14.944	22.278	14.3889	9.8333	6.611	9.167	1.5556	1.6667	1.5	1.3333	5.8889	4.3889	4.0556	7.3333	6.333	8.444	6.667	13.778	5.333	2.2222	2.611	25.8889	13.2222	2.3333	1.0556	0.3333	0.1667	1.5		0.561113	7.23529
12.1524	6.389	20.222	11.833	0.5	3.333	0.611	16.278	23.389	18.6111	10.6667	7.889	7.722	2	1.8333	1.1667	2.4444	6.2222	7.2778	6.1111	10.3889	6.444	9	14.444	13.778	2.333	1.5556	2.389	18.7222	7.5	3.2778	1.2222	2.0556	1.3889	4.8889		0.566667	7.46728
12.2716	9.5	18.222	13.611	2.944	2.944	2.611	16.111	21.833	14.3333	9.3889	9.611	6	2.7778	0.2222	0.3889	2.2778	7.3889	8	5.6667	7.0556	3	8.444	14.278	17.333	2.944	0.5	4.556	16.1667	11.7778	2.1667	0.6667	1.1111	1.3889	2.2222		0.572225	7.27771
12.3907	5.889	24.111	22.556	2.278	2.278	1.778	15.5	22	16.8333	8.1667	7.222	8.056	2.2778	0	0.4444	3.6667	5.6111	6.6111	7.8889	2.1111	7.167	4.833	12.444	15.444	2.556	2.2778	0.833	17.3889	10	1.5556	0.6667	0.1667	0	6.1667		0.577779	7.25819
12.5098	11	21.5	17.444	2.722	1.944	2.667	14.056	27.111	12.3333	6.1667	2.5	8.111	3.3333	0.6111	0.0556	2.3333	7.6111	8.9444	4.6667	8.7222	5	8	12.333	16.056	3.722	1.6111	1.278	11.4444	10.7222	1.2222	0.3889	0.3889	0.3889	3.9444		0.583333	7.06861
12.629	6.222	18.667	14.667	3.722	1.556	2.778	21.611	16.111	12.8889	8.2222	6.278	9.056	2.3333	0.5556	0.5556	1.9444	7.1667	7.7778	3.8333	6.9444	5.556	5.556	13.111	15.889	4.556	3.0556	3.278	18.6111	10.1111	2.3333	1.1111	0.2222	0	2.6667		0.588891	7.02786
12.7481	9.222	21.889	22.556	2.556	0.167	1.611	22.333	20.944	15	8.2778	7.111	8	3.6111	0.6111	1.0556	1.0556	8.1667	6.3889	5.9444	4.8333	4.111	9.556	14.056	9.556	4.667	3.7222	2.5	21	10.3889	3.2778	0.5	0.5556	0	7.6111		0.594444	7.73044
12.8673	9.389	21.722	20.778	1.889	1.278	4.056	22	26.111	15.3333	5.6667	6.833	7.222	3.3333	2	1.8333	5.3333	9.1111	8.8333	8.5556	6.2222	5.444	9.278	17.556	17.944	5.556	2.5556	4.556	16	10.3889	3.3889	0.6667	1.1111	0.2778	3.1111		0.600003	8.39218
12.9864	14.944	16.944	16.222	0.611	2.056	1.556	25	25.222	22.7778	4.6667	10.333	4.5	1.7778	1.3333	2.8889	2.1111	5.0556	2.2778	5.6111	6	9.722	7.278	16.889	12.722	3.778	1.7778	4.056	23.7222	7.0556	3.1111	0.2222	0.3333	0	2.1111		0.605556	7.78431
13.1055	8.333	19	18	2.944	2.167	4.778	24.444	27.778	14.8333	9.9444	5.556	5.222	2.2778	1.3333	0.3889	1.7778	6.2778	5.4444	8.3333	8.2222	5	7.778	15.278	15.111	3.167	1.4444	4.278	18.4444	13.2222	2.0556	0	0	1.3889	3.6667		0.61111	7.8791
13.2247	7.389	17.944	23.444	2.333	4.944	2.778	16.667	23.944	12.4444	3.3889	6.167	6.611	2.5556	2.1111	1.3889	2.5	8.7778	4.9444	6.8333	6.5	5.5	8.389	12.5	12.778	3.5	2	4.778	19.7778	10.8889	2.6667	1.6667	0	1.6111	3.7778		0.616668	7.45586
13.3438	5.556	19.667	20.944	3.722	1.111	2.722	17.167	19.5	14.0556	6.5	5.833	5.722	3.6667	0	0.7222	3.7778	7.4444	3.7222	7.9444	7.5556	5.778	9.889	8.5	11.889	4.333	1.2778	3.889	15.0556	11.0556	3.3333	0.6667	0.8889	0	2.6667		0.622222	6.95751
13.463	6.722	22.944	24.889	1.889	3.722	3.111	18.722	24.278	13.7778	2.2222	9.556	3.944	1.5556	2.0556	1	4	5.9444	3.2778	5.7778	6.2222	8.111	9.056	11.278	14.278	2.722	2.6667	0.611	19.8333	15.6111	3.5556	2	0.5	0.8333	3.3333		0.62778	7.64705
13.5821	9.056	21.389	25.389	5	0.889	5.278	23.833	16.889	13.8889	4.3333	5.889	5	2.8889	1.6111	2.3333	2.2222	3.7222	6.3333	6.9444	6.3889	5.444	5.5	14.444	15.444	4.167	2.8333	2.056	21.6111	11.5556	1.2222	2.6111	1.8889	1.3333	2.7778		0.633334	7.71079
13.7012	7.167	22.611	30.333	2.444	3.778	4.222	18.778	21.556	13.8889	8.3889	6.5	4.056	2.5556	2.1111	0.6111	4	9.0556	3.2222	6.8333	4.2778	7.556	10.556	13.722	20.944	4.278	2.1667	5.889	18.2778	6.1667	3.1111	1.5	1.5556	1.3333	0.7222		0.638888	8.06376
13.8204	10	24.556	20.111	2.611	2.444	4.167	21.778	19.167	12.8333	8.5556	7.833	4.944	5.3333	0.7778	0.6111	4.9444	6.4444	4.5556	4.4444	3.5	7.222	5.889	10.889	15.778	4.222	1.3333	1.611	15.7222	13.0556	1.5556	0.6111	0.4444	2	1.2778		0.644446	7.38888
13.9395	6.389	23.278	25.556	3	2.111	3.444	22.167	20.167	10.6111	4.9444	4.778	5.278	3.2222	3.0556	2	5.6667	7.4444	5.5556	7.5	6.8333	7.222	7.111	15.667	15.722	3.611	3.1111	3.611	17.5	18.0556	4.3333	1.9444	0.4444	2.9444	2.5556		0.65	8.14218
14.0587	9.556	24.333	21.278	2.778	2.278	3.944	17.167	16.778	14.1111	8.2222	7.556	4.111	5.2222	0.0556	0.0556	3.8333	7	9.8333	8.6667	5.1667	5	7.556	17.889	14.5	4.111	1.4444	2.778	15.6667	11.2778	1.9444	2.5	0	3.0556	2.6111		0.655558	7.71411
14.1778	7.611	20.556	22.167	3.111	1.556	2.111	15.056	20.944	13.1111	8.8889	5.722	6.278	4.0556	2	1.2222	4.2222	8	5.1667	5.4444	3.3889	6.5	9.444	17.444	16.389	4.778	1.1667	2.333	16.7778	13.3889	2.3333	2.6111	0.1667	0.3889	1		0.661111	7.50981
14.297	8.722	23.333	22.833	1.556	4.667	5.056	16.056	22.722	11.1667	10.3333	5.667	4.389	4.1111	1.6111	1.7778	8.1111	8.3333	8.0556	3.9444	4.8889	5.944	10.889	16.611	22.222	6.222	3.5	2.889	14.7222	15.6111	1.7222	0.7222	0.7778	1.7778	3.6111		0.66667	8.36929
14.4161	8.556	21.111	18.611	5.056	1.333	5.222	19.333	25.111	9.0556	8.8889	5.333	6.389	7.0556	2.7778	0	4.1111	8	7.9444	7.3889	5.6667	7.333	6.611	17.222	16.389	9.222	2.9444	3.611	19.7222	15	3.1111	1.2778	0.3889	2.2222	1.6111		0.672223	8.34146
14.5352	7	23.111	19.611	4.444	1.889	4.389	18.333	21.056	10.4444	4	5.111	6.278	5.3333	3.5556	1.5556	5	10.0556	11.7778	4.1667	5.7222	7.667	9.056	13.278	17.722	9.944	1.9444	3.889	16.0556	16.2222	1.8333	1.3333	2.4444	1.1111	1.9444		0.677777	8.15523
14.6544	9.944	21.278	15.611	3.944	2.167	4.889	21.5	23.667	8.2778	5	5.056	5.444	4.0556	1.3889	0.8333	3.9444	9.6667	11.6667	7.4444	4.6111	6.5	6.722	12.444	22.889	8.056	3.5556	5.611	13.5556	9.2778	2.9444	0.8889	2.4444	1.1667	3.5556		0.683335	7.94117
14.7735	9.278	22.167	17.778	6.056	2.167	6.889	21.167	23.167	13	4.5	6.833	4.944	6.8889	1.6111	0.5556	5.4444	5.3889	8.4444	6.8889	4.4444	8.111	4.167	12.722	25	11.111	3.5556	3.333	17.6667	16.7778	2.7222	1.9444	2.2778	2.7778	3.8889		0.688889	8.63729
14.8927	7.222	22.056	18	6.444	1.444	10.333	30.5	23.167	9.4444	9.4444	6.944	5.667	5.0556	4.5556	1.2222	8.2778	7.7222	8.6667	7.3889	5.6667	4	6.389	11.667	25.556	8.611	3.0556	5.778	11.9444	15.4444	2.0556	2	1.6667	1.4444	2.3889		0.694447	8.85949
15.0118	6.5	20.167	17.444	4.222	1.278	6.333	23.889	23.389	10.1667	7.6667	5.833	5.722	4.6667	4.7778	2.6667	8	8.8889	9.5556	12.9444	4.0556	7.278	6.722	12.944	18.056	7.556	3.2778	7.5	14.6111	18.6667	2.5	2.6111	1.2222	2.0556	1.6111		0.700001	8.66993
15.1309	10.056	19.444	22.111	4	2.056	9.778	26.222	17.833	6.6667	7.7222	7.333	5.222	7.3333	6.8333	3.6667	5.4444	8.1667	6.8889	6.1667	7.3889	9.167	5	9.333	25.556	6.444	6	5.111	19.7778	14.2222	3.2222	0.6111	3.1667	3.3333	2.6111		0.705555	8.93789
15.2501	9.111	21.833	14.889	3.611	6.833	9.833	23.167	20.889	7.0556	10.2778	7.667	5.5	8.5556	10.7222	2.7778	9.7222	5.6111	2.6111	9	6.2222	8.833	6.722	11	24.556	9.778	8.8889	5.611	17.3333	13.0556	2.7778	4.3889	1.6667	1.9444	2.8333		0.711113	9.27287
15.3692	6.556	23.667	20.111	3.389	2.778	14.389	19.833	20.056	10.6111	8.2222	2.944	5.889	3.6111	6.6111	3.5556	4.1667	5.5556	5.9444	9.5556	5.8889	9.611	5.389	10.833	22.722	14.556	5.2222	4.944	15.3889	16.2778	2.7222	2.0556	1.8889	2.3889	1.3333		0.716667	8.78433
15.4884	5.889	19.833	15.111	6.444	7.222	15.333	19.611	16.722	10.8333	6	3.444	5.944	5	4.5	4.8333	8.2778	4.8333	7.7778	7.1111	4.2778	7.111	10.111	9.667	23.111	13.611	3	4.833	15.2222	16.6111	2.7778	1.1667	1.4444	1.5556	1.2778		0.722225	8.54403
15.6075	5.167	21.889	18.833	4.667	4.5	13.944	19.167	14.111	9.1111	7.2222	4.889	4.833	4	8.5556	5	8.1667	3.7222	6.1111	5.8889	4.8333	9.889	4.056	13.389	18.667	11.5	4.8333	7.111	20	17.6111	4.9444	3.4444	3.7778	2.8333	2.1667		0.727778	8.78924
15.7266	5.833	16.611	22.833	7.778	2.556	17.056	17.278	19.889	7.1667	3.8333	5.556	5.722	6.2778	6.7778	6.7222	6.3889	6.3889	7.3333	4.3333	7.7778	8.778	8.889	12.389	16.167	14.722	3.3889	8.944	15.8333	11.1667	1.9444	2.5556	3.6111	0	1.6667		0.733332	8.65199
15.8458	6.389	18.167	13.222	8.833	3.722	20.389	17.944	14.778	6.4444	7.2222	5	4.611	6.6667	8.6111	8.2222	4.3889	6.4444	6.2778	4.8333	7.2778	8.111	5.944	12.833	15.833	24.278	8.0556	10.222	20.0556	14.8333	4.8889	3.4444	2	3.5556	2.9444		0.73889	9.30714
15.9649	8.056	18.556	17.056	7.889	4.778	20	19.056	18.333	3.6667	5.0556	4.722	5.889	5	8.8333	6.5	2.6111	7	6.6111	4	4.1667	5.556	9.556	9.278	16.389	18.889	8.5556	9.611	19.4444	12	2.6667	1.5556	1.0556	3.7778	1.8333		0.744444	8.76316
16.0841	10.444	17	15.667	11.278	5.833	27.167	16.167	19.222	4.8889	7.2778	5	7.778	5.7222	7.0556	9.6111	4	5.1667	7	6.1667	6.6111	3.944	5.944	15.722	15.944	29.444	12.8889	10.722	18.5556	17.5	3.5556	3.5	3	2.2222	1.4444		0.750002	10.1013
16.2032	6.722	19.5	18.778	13.444	7.944	18.889	23.056	15.333	7.7222	5	2.444	6.056	4.1111	4.5556	12.0556	2.8889	2.9444	8.6111	4	4.3889	6.5	4.333	10.111	15.278	32.889	8.8889	18.889	15.2778	16.0556	3.3889	2.4444	2.0556	6.0556	2.3889		0.755556	9.7941
16.3224	6.222	21.667	12.944	15.944	11.667	20.833	18.889	15	3.6111	8	4.778	2.444	3.3889	7.3333	13.1667	6.1667	6.5	5.0556	5.8889	6.0556	4.222	7.778	14.833	18.167	26.889	12.6111	7.389	14.4444	20.3333	3.9444	1.5	1.6111	3.2778	1.6111		0.761114	9.82841
16.4415	4.722	17.333	20.333	18.444	14	16.278	23.167	15	5.1667	4.2778	3.222	2.389	7.9444	11.8889	13.6111	4.1111	5.5	8.1667	5.6111	5.1111	8.056	7.111	11	24.444	26	13.7222	10.222	13.1111	23.6111	4.3333	2.2222	2.0556	2	1.8333		0.766668	10.4706
16.5606	6.5	16.889	20.056	11.889	17.111	15.889	12.611	12.222	3.1667	5.1111	2.389	4	4.5	3.3333	14.4444	8.8889	9.3333	5	6.6111	4.4444	4.944	5.056	16.722	22.222	22.167	13.3889	12.722	16.6111	13.4444	3.5556	1.6667	4	3.3333	1.5556		0.772222	9.5817
16.6798	7.278	17.556	23.556	17.556	22.389	18.389	20.833	11	4.7778	2.9444	2.889	2.611	3.3889	5	11.7222	6	7.7222	6.1667	8.3333	4.0556	4.611	6.5	14.833	22.056	24.111	16.4444	13.333	18.5556	18.7222	3.2222	4.2222	5.1667	2.5	2.6111		0.77778	10.6193
16.7989	3.5	23.389	21.333	18.944	20.333	14.111	20.167	13.444	2.5556	3.1667	0.833	2.667	2.2222	2.9444	9.8333	5.3333	8.2222	9.1667	4.8333	5.1111	4.556	5.833	17.944	23.111	21.222	18.8333	12.556	20.3889	17.5556	5.6111	2.1111	2.1667	2.0556	0.3889		0.783333	10.1895
16.9181	6.222	21.333	23.722	18	19.444	15.389	17	7.222	2.6667	4.7222	3	1.833	3.9444	3.2778	10.0556	8.8889	5.3333	7.4444	8.7778	4.3889	6.5	9.389	13.833	20.333	20.778	19.7222	21.778	21.1667	21	4.6111	0.5556	1.0556	2.5556	3.6667		0.788892	10.5768
17.0372	6.667	15.889	19.278	27.722	26.056	16.167	26.944	7.778	1.3333	0.6111	2.389	1.5	3.3333	0.6667	8.1667	5.6111	8.3333	7.6111	8.3889	7.8889	6	7.5	9	21.333	18.556	15.5	21.222	19.4444	16.8333	3.0556	1	0.2222	2.5	2.0556		0.794445	10.1928
17.1563	10.222	15.167	21.889	16.722	19.556	16.722	15.889	9.611	0.6111	1.4444	1.111	3.111	2.1111	1.3889	3.3333	4.2222	4.8333	7.1667	8.9444	5.5	6.556	8.222	12.222	26.444	20	14.8889	18.722	16.8333	18.2222	1	0.3889	2	1.7222	2.7222		0.799999	9.39703
17.2755	10.944	18.444	18.111	23.611	15.944	15	10.333	5.111	1.5556	1.1667	0.444	0.722	2.5556	1.5	2.7778	3.3333	7.3333	2.2778	6.6667	4.5	3.444	5.889	17.611	23.167	22.389	18.8333	12	13	19.2778	2.7778	0.1667	0.6111	0.6111	1.5556		0.805557	8.63718
17.3946	4.5	13.611	18.056	20.944	23.278	13.889	12.611	3.556	1.0556	0	0.833	0.056	1.3889	1.8333	2	1.6111	7.3889	3.8333	4.5556	4.2222	5.111	6.444	17.278	18.222	14.778	18.7778	18.667	17.2778	16.1667	1.5	0.7778	0.5556	1.7778	0.5		0.811111	8.14872
17.5138	5.222	17.778	18.611	20.333	16.278	18.167	12.889	5.889	1.1667	0.8889	0.278	1.278	0.6111	1.1667	1.8333	1.5	3.2222	3.7222	3.6111	5.4444	9.333	5.722	9.111	17.056	13.111	19.5556	18.833	16.7778	19.3333	3.6111	1.2222	0.7222	0.3889	1.0556		0.816669	8.10948
17.6329	5.667	19.056	21	21.778	22.222	16.444	10.889	3.778	0	2	0.833	0.444	0.3333	0.6111	1.7778	3	3.1111	3.7222	4.5	4.6111	7.722	6.389	11.556	14.5	11.333	12.8889	17.5	16.5	16.7222	4.1667	0.5	2.2222	0.9444	0.2778		0.822223	7.91176
17.7521	4.833	17.111	15.944	19.778	23.056	19.778	11	2.333	2	0.9444	1.278	0.722	1.1111	1.4444	1	1.2778	5.2222	1.3889	4.6667	4.5	5.167	6.556	13.611	15.333	11.5	12.2222	15.722	15.2222	20.5556	4.1111	0.5	1.6667	0.5	1		0.827781	7.73692
17.8712	6.278	19.889	17.778	23.5	21.056	18.944	7.389	4.444	0.1667	0	0.278	0.889	0.6111	0.6111	0	1.6111	2.2778	0.3889	5	1.8333	3.833	5.111	11.889	20.944	10.889	14.8333	23.444	10.8333	14.1667	1.1111	2.1667	1.2222	0.7222	0.5		0.833335	7.48854
17.9903	4.444	17.333	21.222	19.944	23.778	12.833	4.556	1	0.9444	1.3333	1.222	0.167	1	1.7778	0.4444	0.2778	2.2222	3.7778	3.7778	2.1667	3.944	8.778	14.778	13.611	15.333	16	13.111	14.7778	13.7222	2.4444	1.3889	0.4444	1.3889	2.3889		0.838889	7.24505
18.1095	5.889	20.333	18.722	16.611	21.056	12.389	3.167	2.167	0.1667	1.1111	0	0	2.3889	1.9444	0.7222	1.3333	1.2222	1.5556	2.3333	1.3333	4.389	5.444	16	16.111	16.833	18.6667	18.389	13.7222	9.0556	0.4444	2	0.6111	3.0556	1.0556		0.844447	7.06536
18.2286	2.944	19.222	20	15.778	20.833	14.111	1.5	0.167	0.5556	0.5556	0	0.222	0.7222	1.8889	0	1.6667	2	0.9444	0.4444	0.3889	3.722	6.222	11.833	17.611	16.333	10.3889	17.722	11.1667	11.1111	0.3333	1.2778	0.3333	2.9444	1.3333		0.85	6.36104
18.3478	5.5	22.944	16.278	22.667	30.889	12.556	2.111	1.778	0	0.6111	0.444	1.056	0.5	0.4444	0.2778	0.8333	1.9444	0.7222	1.1667	1.5	4.278	9.778	12.222	16	16.722	16.7778	20.778	14.3889	7.2778	1.1111	2.7222	0.4444	0.6667	1.4444		0.855559	7.31865
18.4669	7.056	24	18	22.778	15.444	10.778	1.722	0.444	2.1667	0	0	0.556	1.0556	0.8333	0.8889	0.4444	1.6111	1.6111	1.3889	0.5556	1.722	3.333	11.722	17.889	16.278	14.8333	20.833	13.8889	10.1111	3	0.6111	0.8889	0.8333	0.0556		0.861112	6.68626
18.586	4.5	20.833	20.167	17.833	23.111	10.444	2.667	1.611	0.0556	0.1111	0.944	0.111	0	0.3889	0	0.9444	0.9444	1.6111	1.4444	0.5556	2.111	2.444	10.056	15.444	15.944	11.3889	14.389	18.1111	7.1111	0.5556	0.7222	0.6667	0.8889	0.8333		0.866666	6.14536
18.7052	5.333	12.5	18.222	22.944	13.889	6.611	3.056	0	1.1667	0	0	0	0	1.2222	2.0556	0.2222	1.8333	0.7778	1	0.5556	0	4.111	12.111	16.111	13.444	12.3333	16.611	16.8333	4.0556	0.8333	0.0556	0.6667	1.8889	1.0556		0.872224	5.63231
18.8243	5.667	11.222	16	23.222	18.667	8.667	1.944	0	0	0	0.611	0.333	0.3889	0.6111	0.1667	1.1111	0.7778	0.5	1.1111	0	0.944	1.889	6.222	12.389	15.444	10.6667	14.833	14.5556	4.1667	2.5	0.5556	2.1667	0.2778	0		0.877778	5.22382
18.9435	4.389	21.444	11.056	18.778	20.5	1.944	3.222	0	0	1.4444	0	0.611	0	0	0.4444	0.5556	0.6111	0.7222	0.6111	0.1111	0	1.333	6.667	12	13.111	20.6667	20.056	12.6111	3.2778	0.6111	0.8333	0	0.3333	1.2778		0.883336	5.27124
19.0626	6.056	16.389	19.111	22.556	11.167	3.389	0.889	1.444	0	0.5	0.333	1.056	0.5556	0	0.3889	1.5	0.5	0.5556	0	0.1111	0	1.833	6.5	11.278	13.5	15.6111	20.944	13.8333	3.2778	0.8333	0.6667	0.9444	0.2222	0.3333		0.88889	5.18466
19.1817	3.556	17.667	17.611	16.278	13.333	4.111	2.389	0.167	1.2222	0.2222	0	1.056	0	0	0.1667	0.5	0.8333	0.7222	0.6111	0.0556	0.222	1.056	5.444	12.556	13.389	18.1111	13.167	6.6667	1.0556	1.3333	1.7778	1.1111	0.5	0.7778		0.894444	4.63731
19.3009	4.167	15.222	14.5	20.167	12.944	2.056	1.444	0.611	0	0.1111	0.278	0	0	0.0556	0	0.2222	0	0.3889	0.3333	0	0.444	0.944	3.778	10.611	14.944	19.1111	15.778	7.1111	1.9444	0.6111	0.8333	0.7222	0	0.1667		0.900002	4.39703
19.42	5.389	14.278	17.5	15.944	8	0.611	0	0.222	0	0	0	0	0	1	1.0556	0	1.1111	0.1111	0.1111	0	0.056	0.722	1.167	7.722	16.111	17.7778	8.889	5.8333	2.1667	1.4444	1.0556	1.5	0.3889	0		0.905556	3.82843
19.5392	1.722	16.333	14.944	19.167	4.111	2.111	0	0.333	0	0.8889	0	0	0	0.2222	1.2222	1.1111	0.7778	0	0	0.3333	0	0	1.667	6.944	15.722	15.1111	8.5	5.7222	0.3889	0.1111	0.2222	0.6111	0.8333	1.6667		0.911114	3.55224
19.6583	5.556	11.722	15.944	14.944	4.611	0	0.778	1	0	0.0556	0.222	0.278	0.1111	0.5	0.0556	0.0556	0.4444	0.3333	0.1111	0.2778	0.722	1.833	1.389	4.611	15.722	10.7222	10.778	3.3333	0.1111	0.3889	0.5556	2.4444	0.3333	0.5		0.916667	3.24833
19.7775	2.722	15.333	18.556	12.889	2.778	2.944	1.222	0.5	0	0.6111	0.056	0	0	0.3333	0.1111	0.8333	0.5	0.2222	0	0	1.167	0	1.889	4.611	8.333	10.5556	9.111	2.7222	1.6111	0.2778	0.5	0.7222	0.7778	0.0556		0.922226	2.99836
19.8966	0.333	12.333	14.778	8.444	1.944	1	1.056	0.444	0	0.6667	0	1.556	0.2222	0.7222	0	0	1	0	0.0556	0.0556	0.556	1.5	0.278	4.667	8.5	6	6.278	0.6667	0.6667	0.2222	0.1111	2.2778	0	0.1667		0.927779	2.25001
20.0157	3.222	10.222	15.278	11.444	2.722	0.444	0.444	1.333	0.6667	0.0556	0.111	0	0.1667	0	0	0	0.1667	0.0556	0.4444	0.1667	0	1	0.5	1.833	4.389	5.7222	5.333	1.1667	0.6111	1.9444	0.4444	0.6111	0.7778	2.2222		0.933333	2.16169
20.1349	2.056	10.778	6.333	3.056	2.278	0.833	1.222	0	0.5	0	0.611	0	0.5	0.5556	0.2778	0	0	0	0.5556	0.1111	0.778	0.667	0.611	3.056	7.222	2.1111	3.667	1.4444	0.3889	1.3333	0.2778	2.4444	0.3333	0.5556		0.938891	1.60461
20.254	1.722	7.444	8.944	4.333	0.5	0	0.278	0.333	0.0556	0	0	0	0.6111	0	0.3333	0.9444	0.3333	0.6667	0	0.4444	0	1.111	0	1.333	1.778	1.6667	1.389	2.1667	0.5556	0.8333	0.3333	0.1111	1.3333	0.7222		0.944445	1.18459
20.3732	1.778	7.333	7.056	3	1.944	0.056	0.333	0	0	0.5	0	1	0	0.8333	0	0.2222	0	0.3333	0.3333	0.7778	0	0.167	0.056	1.444	2.222	2.5	4.444	2.2222	1.0556	0.2778	1.0556	0.2778	1.1111	1.2778		0.950003	1.28267
20.4923	5	8.444	4.5	2.333	0.167	1.222	0	0.278	0	0	0	0.722	0.7778	0.3333	0.7222	1.1667	0	0.5556	0	0.3889	0	0	0.944	0.167	3.111	1.1111	0.5	1.1111	0.2222	1	1.7222	0.1667	0.9444	0.7778		0.955557	1.12906
20.6114	1.667	4.111	2.833	1.778	0.889	0.278	0.278	0.167	0.3333	0	0.111	0.278	0.4444	0.2778	0	0	0.6667	0.8333	0.2222	0	0	0	0.611	0.389	2.111	1.8889	2.278	1.3333	0	0	1.3889	0.1667	0.7778	0.8333		0.961111	0.792518
20.7306	1.667	3.278	2.889	2.5	0.333	0.278	0	0.611	0	0.3889	0	0	0.7778	0	0	0	0.7778	1.1667	0	0.5	0	0	0	1.722	0.333	1.1667	1.778	0.2222	0.1667	0.6111	1.9444	2.8889	1	1		0.966669	0.823535
20.8497	1.333	2.944	2.5	0.778	2.5	0	0	0	0	0	0	0.444	0	0	0	0	0	0	0	0	0	0.222	0	0.722	3.444	1.1111	1.389	2.1111	0.6111	0.5556	1.2222	1.0556	1.8333	3.7222		0.972222	0.838182
20.9689	0.944	3.111	0.556	2.333	0.278	1.222	0	0	0	0.1667	1.278	0	0	0.3333	0	0	0.5556	0.8889	0	0	0	0.556	0.111	0.333	0.556	1.1111	1.667	0	0.8333	0	1.2222	0.2778	0.6667	0.8889		0.977781	0.584985
21.088	0.056	1.278	1.222	1.5	0.944	0.611	0	0.889	0	0.1667	0.444	0	0.3889	0	0	0	0	0	0	0	0.333	0.667	0	0	0.389	1.0556	0.889	0.7778	0.4444	1	0.1111	1.7778	1.6111	1.1111		0.983334	0.519603
21.2071	0	1.167	0.056	0.778	0.278	0.722	0	0.611	0	0	0.278	0.222	0.2778	0	0	0	0.1111	0	0.4444	0.3333	0.944	0.111	0	0.333	3.889	1.6667	0	0.2778	0.4444	0.5	1.0556	1.6667	0.6111	1.8333		0.988888	0.547388
21.3263	1.111	0.611	0	1.667	0.5	0	0	0.722	0	0.0556	0	0	0	0.0556	0	0	0	0	0	0	0	1.111	0.278	0.444	0.111	1.4444	0.278	1.0556	0	0	0.3889	0.4444	1.5	0.4444		0.994446	0.359468
21.4454	1.944	0.722	0.556	0.611	1.389	0.167	0.222	0	0	0.2778	0	0	0.3889	0	0.2222	0	0	0.4444	0	0	0.056	0.722	0	0.444	0.889	0.5	0	0	0.3333	0.8333	1.6667	0.6667	1.2222	1.1111		1	0.452606

## Sheet: Image20
X0	Y0	Y1	Y2	Y3	Y4	Y5	Y6	Y7	Y8	Y9	Y10	Y11	Y12	Y13	Y14	Y15	Y16	Y17	Y18	Y19	Y20	Y21	Y22	Y23	Y24	Y25	Y26	Y27	Y28	Y29		Ap-basal	Avg int
0	11.3687	8.7632	8.9356	6.7993	10.8773	12.1579	11.8622	10.1574	9.4341	13.9656	13.0264	18.5734	15.0551	14.6738	18.9283	9.8039	12.6827	9.5024	13.4476	7.9319	11.0323	9.7907	11.396	7.6769	8.8488	8.493	8.8824	4.3299	10.94	7.6496		0	10.8995
0.1191	6.496	8.55	9.7107	5.6289	8.084	15.6942	9.5444	10.1036	11.3752	16.6532	18.3273	19.88	12.5592	14.555	20.2023	11.7418	14.1519	10.2946	14.6755	12.5341	10.6116	16.4171	13.751	9.2143	12.4817	6.6932	8.0391	3.8678	10.2001	5.3145		0.00502339	11.5784
0.2383	11.772	13.0065	10.4873	7.4407	17.9826	16.814	11.6056	9.7144	14.7378	18.0532	14.4376	23.7746	12.8185	20.1357	20.6978	15.4478	16.1002	12.9754	11.2683	10.2337	13.1552	18.4841	16.0021	10.2117	8.6942	11.4018	5.7948	4.3492	12.2573	5.9776		0.010051	13.1944
0.3574	14.3698	15.7823	15.3765	7.2344	14.8525	21.9449	9.9036	8.5083	12.6099	22.4604	15.9234	21.6428	13.9261	19.3195	20.6369	15.5162	18.6606	14.4625	13.5002	7.0431	13.0397	17.7252	15.5539	11.0022	15.7197	15.1221	11.7337	4.8604	11.1128	8.6897		0.0150744	14.2744
0.4766	12.8731	13.3962	15.9683	8.6107	19.1309	28.7873	16.066	9.5191	11.0751	26.0298	15.1034	26.5031	13.9571	18.1452	23.1039	12.5693	22.7003	13.3532	12.5368	14.4178	18.6786	18.3838	16.1864	13.7327	13.0925	13.2424	9.0289	4.4248	10.7749	9.2967		0.020102	15.3563
0.5957	17.0546	14.9743	15.9076	6.7288	20.8664	28.9725	12.3943	10.5621	11.0832	27.3366	18.9825	23.294	16.7403	12.9893	26.2871	17.4225	16.9968	17.5665	14.8569	14.2021	18.3819	22.9583	18.5323	13.9656	16.0511	15.7216	12.6691	5.8934	14.5127	11.3908		0.0251254	16.5098
0.7148	16.9175	18.5307	15.7311	7.6822	25.1513	26.347	16.2074	13.3425	16.5927	32.3555	17.6492	35.4617	11.4605	18.2735	23.336	17.5149	13.8956	16.2225	13.5466	10.6766	30.4457	29.5006	20.4556	14.9373	13.7556	14.6768	13.1925	7.1983	14.2062	9.748		0.0301488	17.8337
0.834	23.4195	26.8842	17.9574	9.5398	29.1365	36.0549	17.8757	13.9872	15.2479	38.1762	23.1488	35.4597	11.5851	18.1934	25.007	14.7951	17.6879	14.5069	12.0301	15.072	29.6637	34.5728	15.9496	12.849	19.8995	15.9658	13.2803	7.3733	14.0967	13.3131		0.0351764	19.7576
0.9531	29.4482	23.5163	20.2828	12.26	27.4642	30.1733	18.4007	13.7115	17.6788	41.5786	25.1011	39.2925	10.2594	14.6751	22.7924	18.4804	16.3556	15.6299	17.6523	15.7676	29.13	31.184	21.819	14.23	19.4595	15.6859	18.028	5.156	15.0165	14.3161		0.0401998	20.4849
1.0723	29.2232	26.7081	18.4755	10.6817	35.0083	34.6452	17.573	13.7339	18.1416	46.2085	21.2231	40.2444	17.4929	14.726	30.5691	20.6005	16.7296	17.2745	17.9687	14.0879	32.0241	30.0615	20.7397	21.2606	19.642	15.2208	11.386	6.3275	15.1593	12.5326		0.0452274	21.5223
1.1914	33.9708	22.2091	24.1346	14.6374	41.5443	28.7928	17.784	15.1669	24.7174	50.4713	24.8535	38.3634	19.4629	19.7033	24.2646	18.4093	21.0009	19.4632	13.9076	17.2358	33.6385	29.0405	28.8002	22.2096	20.8342	15.7713	15.9895	6.2914	15.1787	13.8615		0.0502507	23.0569
1.3106	33.0892	28.4966	24.8236	11.2719	38.9878	39.1157	17.6144	17.3412	29.7882	48.6876	32.2609	37.866	17.1088	19.7861	23.1116	21.3755	17.2922	19.1302	10.5895	20.8261	37.3181	27.597	29.1867	19.7119	17.2248	18.492	19.8786	7.3224	19.1967	18.2435		0.0552784	24.0912
1.4297	33.7541	32.4388	19.1394	18.6622	48.5265	40.7754	17.7829	14.6787	30.6035	48.0816	34.6034	34.3368	20.5471	23.4599	23.7807	24.0583	15.5954	14.8089	15.0421	13.395	35.335	29.5367	32.2342	21.4006	19.4837	20.3512	24.4025	8.3098	19.852	22.4779		0.0603017	25.2485
1.5488	32.9114	34.8186	33.7279	23.4732	48.3733	46.799	20.8911	19.7347	32.4347	46.8877	40.8677	34.9852	21.4671	25.5831	21.4611	17.0602	14.7495	14.2543	14.7969	20.2567	36.521	32.8056	34.8607	21.7507	21.2553	13.7104	23.117	6.3786	18.5228	21.6401		0.0653251	26.5365
1.668	42.9413	39.7579	33.0235	33.7278	56.0287	50.5812	28.4233	17.8246	39.0202	49.5178	40.9231	39.0951	18.7258	32.0732	23.3529	17.8567	14.1469	13.9141	18.068	19.4182	47.1446	27.0744	40.9517	21.0046	21.7706	13.1814	21.2933	13.3249	19.518	23.9389		0.0703527	29.2541
1.7871	42.9632	45.5163	36.7049	33.6442	66.0482	42.4271	26.3188	22.6848	45.1539	52.6644	39.3209	36.7747	19.7695	27.3465	27.511	14.8687	15.3553	12.8687	20.1248	24.9495	41.2612	26.4987	28.6092	25.728	19.4235	19.8086	22.6008	9.2978	24.2579	26.5962		0.0753761	29.9032
1.9063	48.0667	38.2686	38.2695	34.9965	66.9875	49.911	26.598	25.984	51.5802	41.753	42.9441	36.2181	21.4586	21.2032	22.2177	19.8945	17.668	10.8979	19.2531	25.9046	39.6726	35.6755	32.866	19.7655	20.355	24.4141	21.915	12.7492	27.3738	28.6553		0.0804037	30.7839
2.0254	47.5234	38.4148	36.9997	39.416	62.2648	49.173	28.3116	28.2547	58.0906	41.4944	41.701	36.7985	20.9749	23.2183	21.7284	18.0504	15.7584	10.4991	19.0531	31.5948	42.2407	31.0753	36.1392	22.2567	16.1071	21.1061	22.2407	13.4612	26.267	31.2429		0.0854271	31.0486
2.1445	45.7963	41.3891	33.1147	38.385	53.0226	42.2248	31.9519	37.5303	65.9788	38.1112	38.6849	36.8147	24.943	23.591	23.5371	23.2797	10.0355	12.7058	17.3561	25.0892	41.373	34.8126	37.3376	17.6715	22.4791	19.6877	19.9121	20.8841	28.1664	35.5709		0.0904505	31.3812
2.2637	47.8362	45.4043	30.8725	43.6911	58.5762	40.5678	33.5504	38.0255	60.7813	43.8328	41.7876	38.1177	24.5191	25.7806	23.2499	26.7123	17.1852	10.7882	18.6652	27.3514	40.4073	35.3538	33.0979	16.2495	17.9672	17.6558	23.5671	21.0237	30.3114	30.3964		0.0954781	32.1108
2.3828	49.1771	43.3164	28.6741	52.3392	59.4993	43.4651	37.5427	42.2822	59.5026	38.3118	38.2829	32.1459	29.5766	28.9432	27.7396	24.936	19.1891	9.2913	19.378	32.514	39.0241	36.2277	29.9224	15.0332	17.0805	17.9951	29.2971	17.715	26.1908	31.9393		0.100501	32.5511
2.502	54.9476	44.5295	25.0581	41.548	56.569	43.8962	38.2468	44.9021	63.6926	35.6527	36.5488	37.6665	31.4415	24.073	20.9264	21.7819	19.5792	9.124	19.408	26.8127	38.2662	33.6604	33.0751	17.7392	15.5096	25.4117	27.5073	23.9971	32.1895	35.4203		0.105529	32.6394
2.6211	60.6896	44.6697	27.2781	39.7817	50.2856	48.9945	36.86	48.6704	59.7151	34.3927	36.2929	35.7064	32.0436	24.1995	18.6805	22.2035	13.1241	10.832	22.3342	30.8627	35.477	28.0495	31.8497	19.5577	15.677	17.9586	17.7664	20.7094	26.0983	37.1164		0.110552	31.5959
2.7402	60.6503	40.684	34.228	42.544	57.0758	41.6564	48.7859	46.1253	57.4614	32.1306	35.3762	47.8577	39.502	27.2349	20.7768	19.8181	11.7436	11.606	22.2001	23.2975	31.2369	19.8866	31.9908	20.8144	13.8492	16.2128	19.7765	24.8421	20.5257	38.7578		0.115576	31.9549
2.8594	52.1942	39.933	33.7147	46.7586	52.8878	37.0913	38.2557	36.5366	45.9951	28.2912	30.1744	46.2624	24.7182	23.0586	22.0501	17.994	14.5517	14.7659	22.4715	23.3749	28.3446	20.8378	26.3401	16.7193	9.7603	16.3785	21.6382	20.4302	22.303	48.7521		0.120603	29.4195
2.9785	60.8552	41.0765	32.0827	47.225	45.8196	39.1021	42.5023	37.1138	50.0176	29.4528	28.8747	39.0103	26.6141	25.6616	20.7053	19.7346	13.9685	12.1288	16.5558	21.3831	25.2397	26.4451	28.8071	19.44	10.6783	15.193	21.5867	21.2871	31.8935	45.1956		0.125627	29.855
3.0977	59.8212	35.8336	28.9858	42.7864	55.0138	38.8522	38.6542	38.6174	50.9526	27.6284	32.7387	37.0061	31.6072	21.655	27.621	22.0749	13.8507	11.602	18.8404	23.2479	31.7202	20.587	28.448	17.3683	9.1413	12.8182	22.8856	25.4582	25.6945	46.8364		0.130654	29.9449
3.2168	56.8645	31.9615	27.5368	40.0118	54.9756	28.5768	37.647	40.351	40.623	31.8183	35.6815	27.9612	26.0044	20.3891	30.3638	24.9403	10.6566	15.4861	16.0148	20.3166	29.8752	23.5508	26.4812	13.1665	11.5761	14.7242	19.2166	25.1713	31.9079	36.6598		0.135678	28.3503
3.336	48.8581	32.7881	31.5861	46.7186	56.6357	37.1175	34.2147	39.3464	42.2836	27.8073	26.7196	36.2837	23.3064	26.5802	25.0307	19.9288	11.7161	12.2678	19.373	25.6385	29.9468	19.3979	26.3321	15.225	14.3004	18.8282	17.4343	20.5591	27.4017	40.0049		0.140705	28.4544
3.4551	55.8637	28.0293	27.1845	46.254	50.9955	31.7393	38.239	36.9928	45.9045	24.6374	20.0974	27.1695	28.6108	26.8098	22.3796	18.5849	9.6232	15.3072	19.8304	22.8331	27.1482	21.8703	25.4597	14.7201	10.7751	13.0422	18.14	22.4242	23.1452	35.939		0.145729	26.9917
3.5742	55.4365	24.8393	32.9181	44.5005	50.6314	26.8908	37.5405	31.0252	44.311	32.5075	25.4877	27.0356	23.1284	23.2002	27.4772	17.097	11.2922	15.4533	23.8189	18.4205	25.0529	20.5797	23.791	17.0461	13.6474	15.313	14.9828	27.4386	26.3293	36.0904		0.150752	27.1094
3.6934	39.949	31.0839	35.2626	52.0937	47.1779	30.0181	32.1909	31.158	40.1906	33.6037	26.7579	24.8206	27.24	27.8241	25.2872	22.8134	12.6229	14.2437	23.076	23.6352	23.778	23.3209	25.0106	17.6913	10.8853	12.5901	20.4117	23.1647	27.423	35.6846		0.15578	27.367
3.8125	38.4578	26.2326	32.145	49.1292	39.0532	34.6842	32.4927	31.7259	37.5993	28.9973	22.2581	24.5092	29.5841	22.5997	29.0035	17.1663	11.12	13.587	18.425	20.4523	18.8698	20.6488	24.9349	16.546	10.0888	11.6213	14.9877	28.154	22.2239	37.5868		0.160803	25.4961
3.9317	35.9255	28.7291	34.9964	38.7143	41.3076	25.0683	35.6351	35.5067	37.1387	29.106	21.3167	22.3665	24.2644	21.9288	29.4591	16.2951	11.0406	13.259	17.804	18.2074	19.5158	21.1659	25.0478	12.2717	9.9119	12.7327	16.1218	25.3688	19.5452	36.48		0.165831	24.541
4.0508	37.8198	25.9107	32.3254	37.2463	39.0853	22.757	33.4994	37.8861	37.3912	27.2083	22.216	24.3026	26.9556	29.4494	28.5173	19.8691	9.688	15.0669	14.5262	20.2444	16.7367	24.1798	23.9618	16.1361	8.6608	14.5087	14.5666	25.1427	20.5847	38.7723		0.170854	24.8405
4.1699	32.313	27.5194	32.385	35.215	33.0626	21.0766	32.0452	32.9331	37.7152	25.2148	25.2896	25.2078	27.1826	26.1891	25.5774	22.7168	9.8185	12.709	20.1506	19.7884	21.0618	17.7995	26.8597	17.095	7.9281	10.5344	17.3474	28.2433	28.0355	35.2066		0.175878	24.474
4.2891	31.4824	21.4594	28.5308	29.0325	32.9041	26.1364	37.9148	35.9682	31.9882	26.0597	23.07	20.7577	30.0286	24.2192	28.1032	18.4422	10.7979	12.272	16.0436	15.6412	16.7592	15.4219	25.8746	19.3618	11.6907	7.5469	16.2974	24.6503	24.0025	35.4957		0.180905	23.2651
4.4082	38.203	16.6466	29.4346	37.1107	26.0494	21.1315	31.5613	33.2396	32.6067	18.9223	17.6003	23.3156	27.2168	22.9652	29.8418	20.606	12.3448	18.8495	15.2578	18.068	22.8499	21.6284	20.5778	16.2714	5.9185	8.3728	13.1845	22.3093	28.3949	33.3329		0.185929	22.7937
4.5274	30.9142	17.3187	25.352	33.1456	21.9181	24.7048	31.8506	38.1235	31.7144	21.6872	21.2442	19.7184	27.1954	25.525	27.082	15.8249	11.27	13.8115	11.9343	16.5983	20.037	17.7493	20.9694	18.2653	7.6271	13.6216	14.991	20.9132	24.095	37.8867		0.190956	22.103
4.6465	26.6994	16.7903	31.3918	24.1398	19.109	21.2004	24.6718	39.7636	33.1128	18.9207	18.8551	17.2294	21.3748	26.6559	28.7403	16.7261	9.8468	10.746	15.9959	16.8549	20.8192	19.1098	23.5709	12.073	6.6868	9.2239	13.7527	21.3777	20.7509	32.5708		0.19598	20.6253
4.7657	25.7008	17.7871	21.1075	23.7267	22.0144	27.0301	37.0309	32.9973	30.7805	18.4259	15.6099	19.4677	23.7408	28.0515	27.302	18.2245	10.4377	12.008	11.9236	17.343	21.2102	17.3817	21.3341	14.5995	8.3031	7.7	13.7231	18.5229	19.1277	33.171		0.201007	20.5261
4.8848	25.1154	19.6981	25.188	27.4687	18.6284	24.4978	34.5673	41.8612	30.3091	20.0904	16.9382	20.3703	21.8876	26.0788	25.5395	20.1725	10.4203	13.5718	12.5761	15.7015	19.2586	18.8395	15.6166	8.4603	11.6789	9.4444	13.4557	21.3613	21.6309	36.5202		0.206031	20.8982
5.0039	31.7773	11.1604	26.2873	27.5934	16.6234	21.9851	38.6171	35.8584	28.2624	18.8554	17.3155	23.1239	23.1387	25.0654	27.24	15.4164	10.5035	12.1219	13.2569	20.2491	19.5829	16.3452	16.0099	14.5216	11.1101	7.3537	10.5526	20.8085	24.4529	38.2499		0.211054	20.7813
5.1231	27.1199	11.111	25.1553	23.9327	14.2424	24.2943	33.0428	31.3025	30.9488	21.7616	19.1558	24.7193	20.7982	21.6062	24.1398	14.3813	10.9547	5.9193	13.7528	17.1017	22.3318	14.6557	17.6407	12.2096	8.2785	8.8566	10.3268	20.9376	20.6582	36.5033		0.216082	19.5946
5.2422	33.178	14.2248	27.5155	28.9722	14.7464	21.6371	32.1977	27.2028	29.9129	19.5772	24.9224	20.2744	28.6928	24.6829	27.0831	14.8174	9.0795	8.6986	11.9002	22.8116	21.0834	18.3892	19.9475	12.9159	6.1252	9.0801	11.3194	19.516	20.3317	37.3797		0.221105	20.6072
5.3614	31.5748	15.5855	24.6387	30.8475	19.5404	27.7077	33.8089	27.7328	34.8493	21.2206	25.0814	18.5955	24.0529	21.4544	24.3414	11.7263	14.5066	12.3359	12.8261	17.0793	20.3805	15.1849	15.9419	13.4638	7.1636	10.0168	12.3929	13.0841	22.1774	34.0678		0.226133	20.446
5.4805	26.5279	11.8832	21.6546	25.2753	21.4647	26.0645	29.4684	25.7859	24.6877	22.9691	25.5783	18.8044	22.5303	22.623	23.7971	14.9447	15.0798	11.1898	13.47	17.7771	22.3674	14.9693	19.7502	12.0646	6.8745	9.5693	17.2608	13.5615	17.544	32.9793		0.231156	19.6172
5.5996	22.1457	11.7976	23.2164	25.8521	16.9615	25.0221	29.3932	28.4336	28.3358	15.2332	22.9059	21.1931	21.0113	23.5822	30.5851	13.0691	10.9286	10.4239	12.5735	14.7709	20.9396	17.1832	19.087	12.5647	8.7285	8.3008	17.5006	15.056	23.6116	36.7197		0.236179	19.5709
5.7188	20.1718	11.6169	21.293	25.0247	14.6605	25.8221	35.6835	25.6343	29.4678	16.6491	24.7778	23.8251	21.6807	22.4344	26.9511	17.6316	12.65	9.1617	9.0203	12.2365	16.0495	14.9258	18.3845	10.0291	7.8889	9.5276	18.4852	14.8243	23.6967	35.6079		0.241207	19.1937
5.8379	28.0359	16.2158	20.722	24.4739	13.9002	24.2707	32.4396	30.4697	26.1218	15.1571	21.3055	24.1359	14.9229	22.9532	24.9552	13.1482	12.6829	9.965	12.3653	14.3317	11.292	13.7821	19.1787	9.5367	8.6743	9.3456	16.2598	15.576	20.5741	33.4921		0.24623	18.6761
5.9571	22.8823	13.0647	24.0073	21.0904	17.0181	27.6945	35.3256	27.6266	25.4783	12.5928	19.7705	26.7775	24.3083	21.1368	28.3519	18.3881	12.5519	17.2495	10.0987	14.3801	17.4227	16.6544	18.7987	11.4575	9.3274	10.6214	16.9107	15.6844	19.6876	31.1243		0.251258	19.5828
6.0762	25.2408	13.4423	24.3038	20.8578	14.2592	20.2555	43.2608	27.5671	25.8919	17.2212	21.5233	27.2034	26.9369	23.1928	22.4716	11.2813	13.8551	9.8966	12.9097	11.4499	16.6739	18.8116	18.6189	11.5129	10.852	5.8063	15.3728	14.3421	22.9793	32.2537		0.256281	19.3415
6.1953	23.398	16.4737	24.5683	22.8416	13.8306	22.1485	45.779	24.63	20.5348	18.6389	18.4881	26.0098	25.9725	18.9773	24.2163	10.187	12.126	13.938	10.8668	9.4758	17.1787	12.4592	17.2675	11.1605	9.1947	6.5162	13.9627	12.8668	25.251	32.4791		0.261305	18.7146
6.3145	23.6618	15.3822	22.1843	18.1039	17.3008	25.244	35.1356	26.5479	24.4173	16.1085	20.0351	28.3718	20.9658	17.7118	25.3092	14.4832	12.0575	11.0624	11.5268	13.7283	18.8237	11.9325	15.8784	8.1143	9.1962	7.6237	12.5485	11.389	19.7196	23.6861		0.266332	17.9417
6.4336	21.9137	17.2116	15.4542	16.5642	19.9975	21.1994	34.6202	26.0905	16.3855	12.7936	19.6753	18.0853	27.9972	25.1395	28.5456	11.3434	11.2551	8.8742	11.5704	16.6101	18.5861	9.1329	12.075	7.639	12.2528	11.9994	16.1239	17.5299	22.0757	25.7651		0.271356	17.8169
6.5528	19.6223	16.0782	22.1998	16.427	18.6559	27.6771	43.3077	27.1073	24.7558	15.0022	18.8346	20.5352	26.9562	26.9966	21.9212	8.9132	11.7385	10.8807	8.5211	11.0318	15.5387	12.3569	16.2607	9.678	15.3899	11.1119	16.7398	15.812	26.2259	24.8502		0.276383	18.7042
6.6719	18.5637	17.6123	15.6467	23.7921	22.8856	25.2616	35.8983	21.2947	23.7965	17.1552	20.6263	24.1879	24.7186	19.1404	21.3139	16.2589	9.7785	8.4189	6.7761	13.0074	18.4169	12.437	15.949	9.2347	13.5473	10.9422	10.5765	11.7145	28.2381	26.7445		0.281407	18.1311
6.7911	17.5541	16.0036	14.1165	20.9068	22.8486	26.4454	31.5652	23.4984	23.6949	16.1913	23.0683	21.1559	21.6884	13.9247	17.6412	16.7147	7.8945	11.7137	15.71	14.1372	14.3425	12.0234	14.6332	8.9462	10.3378	11.5915	10.8816	11.3994	24.8216	25.0956		0.286434	17.3515
6.9102	16.4326	21.2554	14.1469	21.163	25.5871	26.55	30.3628	20.3009	21.3173	16.0368	25.8256	25.2132	24.9151	15.3281	19.7235	13.7991	12.6758	10.9541	7.8782	11.4342	17.4079	12.8361	14.1991	8.1255	12.8717	10.7233	8.5514	11.699	19.229	22.0647		0.291458	17.2869
7.0293	20.4489	16.7096	17.6053	17.0275	21.8738	22.3847	27.377	21.4833	23.202	15.3775	23.7186	19.1374	24.0645	16.7668	16.9946	12.9544	12.5631	8.6556	10.106	13.7132	12.3575	16.272	13.5699	9.1291	12.3906	9.066	10.4065	12.5354	21.3122	24.8497		0.296481	16.8018
7.1485	18.0331	20.4622	14.285	17.9985	20.7508	29.5135	32.0271	21.8451	19.6848	16.2777	21.5921	20.9897	28.5001	15.1963	16.3752	11.2892	12.9186	7.9599	13.372	11.054	13.5859	16.6767	11.8546	12.0964	11.9786	8.0665	6.8805	14.1825	19.3386	27.2992		0.301509	17.0695
7.2676	16.3908	17.9338	16.9372	17.9776	18.2144	25.2395	31.8335	15.4567	27.0234	17.7191	30.6027	22.1432	27.2856	16.3611	17.0127	12.7097	11.0085	8.6349	16.8587	9.7945	10.9399	17.3756	9.0765	12.1152	8.9044	9.0799	8.5982	10.7992	16.7115	27.669		0.306532	16.9469
7.3868	15.1433	14.3245	21.0235	18.0604	16.5965	23.0235	29.5283	14.9332	22.569	14.9911	22.7941	23.4514	27.4512	18.7208	12.9192	11.1651	10.364	11.5574	14.0408	10.1554	9.9019	14.7864	10.2411	6.4046	8.6707	7.6602	9.7708	11.8401	13.212	24.4623		0.31156	15.6588
7.5059	19.4965	13.7519	20.9714	18.1905	19.7569	26.6806	28.0476	18.799	23.9968	13.7697	21.3894	30.7487	19.8545	20.4779	15.2428	9.0779	7.848	10.3337	11.7442	7.7145	15.4701	13.2613	9.1466	7.0283	8.064	7.4838	10.2449	10.2495	17.8995	20.9679		0.316583	15.9236
7.625	20.3541	13.9705	17.2274	19.1143	19.3502	33.8565	31.0583	18.9499	29.2775	14.4786	26.6446	22.7721	25.5192	21.5825	12.6619	14.0879	8.1953	7.3066	16.403	6.7168	13.7458	20.2934	10.4496	6.6305	8.8245	8.2623	7.7986	9.6433	14.4364	22.765		0.321606	16.7459
7.7442	25.2721	16.666	14.6809	15.7439	21.2997	26.376	29.3589	17.5356	26.1543	13.0824	23.0047	21.064	25.9473	18.5173	12.6889	9.9776	7.8789	7.1423	11.9031	9.8352	7.5677	17.2619	7.2092	8.1487	7.3731	9.1011	5.6306	7.7201	16.5659	21.2195		0.326634	15.3976
7.8633	20.198	13.1617	16.3306	14.247	20.4426	27.9281	24.4777	17.2468	20.2731	15.5607	25.7582	20.027	27.6339	17.7734	11.2193	11.0079	8.4792	10.5549	11.8729	11.0129	15.9555	13.6925	9.0792	8.7336	4.4858	11.5763	10.5609	7.7851	14.5356	26.7923		0.331657	15.6134
7.9825	21.6589	14.5288	15.0932	16.6525	16.3341	26.3819	28.828	18.698	24.1325	14.1592	26.7491	18.9256	16.4946	14.1538	14.3343	6.0393	10.9671	6.013	10.8812	11.2286	11.5137	10.4973	6.4007	8.7926	6.2664	6.6011	6.6125	11.4591	15.5893	22.8761		0.336685	14.6287
8.1016	18.3975	11.3715	14.4892	18.2068	23.604	21.1699	21.594	19.5117	25.4646	13.096	27.297	20.8195	28.0183	18.9063	11.5914	11.7684	10.1253	6.532	12.3855	7.745	9.7431	13.6264	11.0571	9.6884	5.8011	8.0216	6.8066	8.5109	15.3129	17.94		0.341708	14.9534
8.2207	22.5492	13.0901	17.4916	17.2905	20.8925	25.3381	21.5271	13.5139	26.1185	8.1459	22.2286	22.3622	18.5834	19.4949	13.109	11.2732	8.8926	6.316	13.7857	9.6344	10.0039	14.5543	10.332	9.2083	5.4412	11.8389	7.5226	7.8489	16.9233	23.1315		0.346732	14.9481
8.3399	19.2676	13.4988	12.8018	12.5186	19.4779	27.6873	28.2622	15.5204	23.2715	10.041	24.0778	17.3344	22.5845	19.6751	10.8951	9.6441	8.3606	8.1895	9.8314	9.1191	11.1299	16.6913	7.5249	7.0821	4.1814	9.7305	5.5279	7.3778	15.736	21.5483		0.351759	14.2863
8.459	18.4361	12.1441	11.2742	10.257	22.9131	25.3352	17.9381	18.5974	27.3944	5.4532	20.7669	15.224	24.8745	16.9988	15.2582	9.9334	7.388	10.0319	9.0046	7.0327	13.06	12.5787	12.9734	6.1471	2.4336	10.6319	7.6094	8.9107	15.6137	18.7645		0.356783	13.8326
8.5782	12.732	16.4257	10.3067	11.0737	18.4735	25.1324	19.4863	14.6383	18.0366	7.7126	15.828	22.9684	19.32	14.7905	13.3796	9.7928	7.8874	7.9732	7.934	8.63	10.5717	11.3066	10.538	5.1429	1.3423	9.4282	5.8464	5.9136	12.9598	19.2477		0.36181	12.494
8.6973	13.5708	10.7134	19.4846	12.2067	24.4647	24.1313	16.9417	15.7349	21.8926	5.9914	12.8379	18.477	23.6865	18.9315	10.2704	7.0511	7.6344	9.7053	6.7059	8.6954	12.0737	12.6296	11.0142	7.9526	5.1055	6.8547	7.5407	7.5365	17.2994	19.2231		0.366834	13.2119
8.8165	10.5665	10.1307	16.0386	11.9015	18.8412	24.4977	17.2562	15.8993	24.8685	7.6928	11.0435	14.5755	22.0396	18.5533	12.5124	6.8708	6.4948	6.6035	8.3688	8.9782	12.7303	11.1199	7.287	5.2593	2.5226	7.5832	8.8115	9.7707	11.5006	15.5903		0.371861	12.197
8.9356	12.8237	8.5519	16.1515	10.8452	18.7532	22.1555	22.356	15.9765	21.8106	3.3818	8.2045	15.7502	22.819	20.4515	9.0858	8.2547	8.115	8.3959	9.3186	12.5214	11.2324	11.5562	5.6705	3.4008	3.617	8.855	9.2968	9.2143	15.9405	15.6282		0.376885	12.3378
9.0547	13.5501	13.4774	15.1734	13.9201	15.522	21.4235	16.149	19.9956	26.0723	5.5607	5.7459	16.6032	17.0948	17.5871	10.1178	6.0919	2.7984	7.4885	7.7886	9.7241	9.795	10.8446	5.2801	6.2119	2.6808	8.5643	8.5199	7.5713	14.477	17.8621		0.381908	11.7897
9.1739	12.7671	11.4825	15.8111	12.2436	14.1913	22.3816	16.4591	18.9486	22.1806	7.1602	5.1584	12.0607	17.5081	14.9136	13.1193	7.3615	5.105	8.5139	8.7768	8.6069	14.4803	9.6891	5.4109	2.9674	3.7155	5.5972	7.9903	12.7374	12.9626	16.0011		0.386936	11.5434
9.293	8.5759	10.2682	18.1741	12.2249	22.2285	20.6986	17.2469	18.0681	23.0176	8.5493	8.256	9.4125	15.5895	17.4415	14.9653	6.1889	7.3916	7.0522	6.6758	7.7726	8.8583	12.9137	6.3829	7.3688	1.7136	6.4325	5.9632	8.6646	17.5118	20.3124		0.391959	11.864
9.4122	13.6672	15.2378	13.3952	11.9397	16.3296	20.2723	13.9848	17.8108	25.9584	4.9762	6.2039	15.5441	16.0599	13.5897	11.2603	8.3192	6.7431	7.6238	8.0054	5.0719	8.5176	11.5906	6.7053	3.8342	2.735	4.8034	9.2939	5.637	13.5546	12.2343		0.396987	11.03
9.5313	15.6631	7.5804	11.8446	11.2888	15.0089	20.3241	14.3513	21.1391	20.4843	7.1635	6.6965	10.8225	20.4633	15.8299	11.4702	9.9747	7.0634	5.3531	6.6984	5.7944	9.8403	13.6198	7.2956	6.4257	2.9274	5.235	8.6694	9.6632	12.6836	19.1968		0.40201	11.3524
9.6504	11.4098	11.9644	12.093	11.0266	14.9002	17.5543	12.5968	21.274	16.428	9.7702	5.4769	11.8426	25.1234	13.6086	11.5711	7.3798	4.2412	6.4978	8.0938	7.0071	8.2216	10.5147	9.1248	4.1699	1.3386	3.5127	9.8064	10.9092	16.2247	18.7419		0.407034	11.0808
9.7696	12.2028	14.7617	12.4383	12.2745	12.46	15.0169	16.5277	20.5524	13.1725	6.2962	4.2225	14.7482	21.1616	13.7493	8.8433	4.6928	6.0035	6.2054	6.9106	7.0167	7.0765	10.269	8.5775	2.7569	2.8735	3.6024	8.4723	11.9127	13.1212	15.4247		0.412061	10.4448
9.8887	10.9965	12.3623	12.4066	9.7121	12.2305	15.4258	19.2327	21.461	22.2074	8.4852	5.1265	14.7409	19.9876	15.2532	8.7602	6.5376	5.8249	5.6546	5.2723	7.5882	8.5921	11.9729	4.751	2.0966	2.1481	2.155	7.5905	7.4011	10.3264	15.8051		0.417085	10.4035
10.0079	10.9	13.2795	11.3432	10.0416	13.9119	17.3318	17.35	17.9442	15.4268	6.9965	5.3706	12.2371	16.7487	16.017	8.8688	7.0913	5.598	8.8751	5.5452	6.9266	7.467	13.2985	5.4601	4.9793	0.3263	4.4368	8.799	10.4756	9.8341	18.4984		0.422112	10.3793
10.127	11.8215	13.1762	15.0639	9.3848	15.6933	16.075	15.1131	15.9149	14.4244	4.8624	7.0762	12.5412	19.0277	12.7005	7.0428	8.364	5.7317	6.2363	8.4241	9.0745	7.7527	9.9912	4.943	3.1119	1.4278	4.8283	8.2263	9.7847	12.0997	13.6788		0.427136	10.1198
10.2462	14.4706	12.3753	10.4231	8.0349	17.0831	19.3449	18.2072	22.9536	13.4795	6.9404	5.2022	12.3015	19.2619	10.3275	6.9035	4.2404	4.4695	8.661	6.0681	5.5014	7.4004	9.746	4.218	1.4745	1.6077	1.9238	7.1355	5.9583	14.8289	9.0943		0.432163	9.65457
10.3653	12.5203	9.8422	12.3544	8.9079	19.4049	19.0181	17.4891	18.1707	18.471	6.2782	4.4789	10.7624	20.1248	18.3753	12.2672	5.0663	4.6962	5.782	8.3746	10.3029	9.1929	5.8023	4.8154	2.3196	1.8428	3.6233	6.3565	6.1252	17.7641	11.5801		0.437187	10.4037
10.4844	11.5639	14.8992	9.6176	8.2016	14.1784	20.2937	15.2621	22.5956	14.365	6.1386	4.1698	11.0833	20.3715	16.1889	7.6073	6.4848	4.6469	6.522	6.9097	9.4351	9.2335	10.6459	4.4703	3.7111	2.1091	2.1727	6.281	7.5116	10.5325	9.1484		0.44221	9.87837
10.6036	9.7447	14.5169	11.3684	9.2566	13.6836	18.5336	15.864	19.3169	11.1698	5.0844	2.7129	9.9663	23.7027	17.3788	8.5181	8.2807	3.8244	7.4827	7.7867	8.6254	7.0781	12.4994	5.1169	1.8439	1.1304	3.0218	12.9076	8.7536	14.2281	9.1359		0.447238	10.0844
10.7227	8.0539	14.2099	11.6736	10.3953	18.5892	17.8821	18.4633	16.2978	19.3704	2.9525	5.4905	9.557	17.1156	15.1273	9.118	6.3995	4.0469	8.4856	6.1873	9.1846	9.1478	11.2451	4.1459	1.1338	0.8588	6.4104	6.5277	9.3762	8.7739	7.1076		0.452261	9.77758
10.8419	5.8038	18.9182	13.6401	11.5288	14.3983	19.8204	20.0468	14.4084	16.059	4.6431	4.0946	13.4897	18.5813	14.6193	8.8548	5.8875	6.0553	4.6908	6.4796	9.2625	6.048	10.5507	3.1488	2.0518	1.0832	5.3795	9.2061	8.3442	10.7519	8.4334		0.457289	9.876
10.961	7.8272	17.2996	11.8512	11.0095	10.5054	13.2695	21.3377	19.8417	16.6756	4.6171	6.1172	9.8394	17.8162	16.3029	7.55	8.3238	6.3118	3.9818	10.2444	9.7869	8.0062	6.5982	5.0996	1.2571	3.6011	4.6037	7.7722	7.2604	11.452	9.0796		0.462312	9.8413
11.0801	8.5481	16.1824	9.1902	14.3242	15.3611	12.5786	19.4786	19.5899	12.5016	5.2076	4.076	11.2506	17.3657	18.7793	12.7096	4.1528	5.7042	7.0089	4.3666	8.8937	8.8339	4.7288	8.7346	2.5597	1.1485	5.1334	9.2427	6.5097	10.2249	8.3339		0.467335	9.75733
11.1993	10.1164	18.8181	12.8995	9.8059	11.7512	15.2814	16.1087	13.9924	11.9654	4.2455	5.7721	11.1382	11.1828	15.081	13.5242	4.5097	5.8258	4.7388	6.7067	8.1229	12.1892	8.2654	3.216	1.9797	2.248	6.2761	8.7962	5.8925	10.5194	7.3908		0.472363	9.27867
11.3184	7.33	10.2721	12.5351	12.1814	11.4375	17.6757	12.1748	14.6297	13.2952	4.3487	5.8302	11.5701	16.5148	15.7969	7.8379	5.1034	5.5532	2.5208	8.8805	9.1816	10.3579	6.6446	4.4823	2.1181	0.9056	4.6653	6.2211	9.4371	10.3803	11.3922		0.477386	9.04247
11.4376	4.5846	14.5433	14.7147	12.9348	11.7182	18.148	18.6407	15.8251	16.0277	4.2713	4.3552	10.8726	17.8161	16.2427	9.5679	8.9649	5.2404	5.2075	5.3385	5.6163	10.486	5.3343	7.1482	2.0948	1.1749	3.5858	7.9254	4.9483	7.1662	6.7832		0.482414	9.24259
11.5567	4.0644	16.6814	15.6056	13.7729	10.1355	15.5783	13.835	15.8403	19.5683	3.7903	4.6962	9.2633	13.5795	17.7307	6.7207	8.6706	5.8981	3.9755	5.9748	3.8313	7.3253	8.2148	6.4799	0.8392	0.7616	5.1749	7.8448	6.4428	8.2496	8.9974		0.487437	8.98477
11.6758	6.0271	16.8636	12.1221	14.6549	10.589	14.5494	12.8598	16.9578	15.3669	2.4631	2.7168	7.0603	16.5365	14.5694	9.3458	7.0244	5.9141	7.4363	4.032	6.9868	10.2187	4.4336	6.3248	1.2437	0.1861	5.7307	6.8816	7.9846	9.0068	9.7621		0.492461	8.86163
11.795	7.4188	15.6717	15.1784	13.2378	14.5622	16.254	11.9894	16.8383	14.4542	2.9559	3.1661	10.8676	19.8009	19.6546	7.971	6.3543	5.0981	5.5094	8.2102	9.771	7.3554	6.5343	5.0392	1.4619	0.7347	4.7818	8.0649	7.7736	8.0037	9.4789		0.497488	9.47308
11.9141	8.3798	21.7446	13.1424	11.8717	13.3289	13.6077	16.1116	16.3635	18.6786	3.4184	5.4345	7.7019	15.1731	14.9589	12.8695	7.4072	5.5231	4.5834	6.1539	8.2186	7.8761	8.7977	5.9731	1.5137	0.9199	3.4741	7.6601	8.1467	8.3604	9.9906		0.502512	9.57946
12.0333	8.1327	13.8096	15.3875	6.6719	12.5297	12.4687	17.7438	12.1177	18.0247	3.8419	5.5469	12.8664	14.8227	13.5501	10.7852	6.2056	7.3599	2.7311	6.3521	9.4164	10.53	9.1334	7.3645	1.1018	2.0892	3.5493	7.067	9.412	8.1366	9.6717		0.507539	9.28067
12.1524	8.6834	14.4825	13.8838	11.3238	14.816	10.6122	17.9705	15.8124	15.6126	4.6308	4.4147	7.531	14.3531	21.4677	9.4358	9.2261	5.2829	6.0985	8.9257	8.0625	14.0684	8.3994	4.7953	2.1466	0.8566	3.0305	9.1019	8.2269	9.9556	10.7122		0.512563	9.79731
12.2716	9.966	13.034	15.9449	10.5407	15.8895	13.3152	14.9511	19.0405	13.8668	4.9376	3.7213	8.4945	12.8216	20.7454	13.0142	7.1517	4.6516	6.035	5.8735	8.864	10.423	9.2368	5.1428	2.3744	1.8319	3.625	7.4608	8.6074	6.7557	9.9492		0.51759	9.60887
12.3907	10.3717	16.2399	14.7481	10.1008	10.9226	12.7539	19.7728	17.7314	18.3227	3.8924	2.3433	7.5466	13.7283	19.6624	9.4813	5.5047	5.2534	4.7667	6.159	8.002	7.4023	8.9334	7.103	1.2786	0.9349	3.1086	5.6788	7.2583	8.1243	12.5681		0.522614	9.32314
12.5098	7.7908	13.0493	13.7356	8.5658	11.017	11.5945	20.5434	17.6468	13.0662	3.575	3.0662	12.0442	14.2716	15.896	8.619	5.6565	3.4094	5.3569	6.6618	7.6067	8.1719	11.8219	5.9839	0.6018	0.6749	3.3505	6.0823	5.5689	8.3653	14.5673		0.527637	8.94538
12.629	7.2226	12.2237	14.2503	8.3712	13.34	12.5273	21.6735	14.3263	14.8563	2.8177	3.4549	8.6402	18.0731	16.2174	12.6356	6.7999	4.509	5.262	4.2245	7.6137	5.3332	8.1541	3.7879	0.6437	2.1202	1.7421	5.0509	6.5764	8.1823	12.3893		0.532665	8.76731
12.7481	6.1371	12.146	12.8797	5.9814	12.6854	13.1648	18.2341	13.5478	12.4558	3.1059	2.795	9.3198	16.3017	16.8861	16.7352	5.4968	6.0583	5.5149	6.6931	5.5959	4.4211	6.4771	4.7941	1.4693	1.1968	3.8982	4.2023	4.8481	7.6102	14.3261		0.537688	8.49927
12.8673	10.0505	10.8589	13.3561	5.7359	10.5373	11.2746	21.4339	14.0136	12.8608	2.0531	3.1841	7.7626	15.0148	20.7638	9.6586	4.145	3.9577	4.0805	5.1418	9.4383	7.5687	8.3501	4.5805	1.3352	1.7437	5.4756	3.9633	4.607	7.9703	8.6533		0.542716	8.31899
12.9864	8.0606	14.4402	14.1729	8.2226	9.3847	14.8669	15.9384	15.2279	12.6248	3.2813	2.8988	8.2772	20.4882	20.5676	11.3589	5.7293	4.2454	2.6406	5.7983	8.4082	8.9097	11.5721	4.2374	2.2821	1.4477	3.7813	4.1192	5.4933	7.6605	11.3063		0.547739	8.91475
13.1055	9.926	15.129	13.3727	8.3431	10.1446	15.7184	15.3434	11.4573	9.0557	1.6895	5.1547	8.0105	14.5155	21.9859	13.7247	5.1893	3.7205	3.8541	7.5158	5.9148	10.8236	7.4387	4.6228	2.3878	1.0078	1.9675	3.8444	8.0752	5.676	11.9551		0.552762	8.58548
13.2247	8.9477	18.5775	12.1838	8.1845	12.635	16.7368	16.2246	13.869	11.138	3.5655	6.4741	7.0324	11.4141	18.6614	7.26	4.7446	4.442	3.8726	5.1715	5.5183	7.3232	7.1356	2.4735	1.896	1.5138	3.1235	5.7779	6.3183	5.9971	16.9996		0.55779	8.50706
13.3438	11.1073	13.9526	14.8093	8.0043	8.9651	16.7287	12.6195	10.5911	10.2654	4.1383	3.8727	9.1963	15.268	16.193	8.5875	4.0681	5.7185	2.4843	7.2243	5.5015	8.0128	7.0174	5.9342	0.8178	2.0762	2.7284	6.4109	7.2311	7.0534	11.5309		0.562813	8.2703
13.463	12.3813	13.2903	15.8169	8.6218	9.9927	19.1085	13.3324	11.2254	11.685	2.4352	3.3063	4.8145	21.6965	21.729	9.9986	5.0169	2.4607	5.1607	6.792	9.746	8.8635	7.3036	8.4857	1.67	1.7816	1.0135	5.095	10.4559	8.8474	9.0519		0.567841	9.03929
13.5821	11.7019	14.0104	13.9596	10.2144	7.9728	11.3366	17.1572	12.9195	11.8294	3.7218	2.0939	6.6963	16.2946	17.8597	9.8845	4.7704	4.1037	0.8997	8.1445	6.7876	9.6462	10.613	3.1861	0.8202	0.8466	2.8752	4.333	6.1801	7.754	12.1755		0.572864	8.35961
13.7012	9.0893	12.2239	11.5713	9.7782	7.9781	13.6109	15.437	12.1651	18.5318	3.5522	3.1746	6.9167	15.5739	15.2465	10.5589	4.305	5.5115	5.5097	4.9287	8.4568	6.9602	7.9391	4.9386	1.1228	1.3756	3.3908	3.8063	7.8017	8.3027	12.4663		0.577888	8.40747
13.8204	11.7538	10.7324	9.909	13.1233	6.7966	14.7265	12.1706	11.657	16.5617	2.36	1.1746	5.9473	17.5606	17.95	11.6489	5.8814	7.9475	3.2834	6.8112	5.853	7.4392	7.0916	5.7671	1.9597	0.8853	4.1464	3.8443	8.4799	10.2867	13.7154		0.582915	8.58215
13.9395	8.6559	11.8715	10.5639	6.4304	11.1703	17.8682	11.2306	13.0629	13.7701	3.5153	1.8024	5.0981	13.9503	16.3883	10.3738	6.6605	4.5398	5.0407	5.446	5.4191	5.366	4.8854	5.4938	1.9144	1.8717	2.8187	7.1889	7.6568	8.112	11.2668		0.587939	7.98109
14.0587	5.0591	13.243	13.8363	10.2338	10.8622	22.5735	16.8474	19.7199	11.8679	2.9984	3.333	6.9405	10.7121	15.8427	11.9254	5.161	2.9876	6.1197	7.1812	8.0834	5.563	5.8431	6.7581	1.6978	0.2656	3.325	8.9569	7.2983	9.8147	10.6996		0.592966	8.85834
14.1778	7.234	10.4206	11.5598	9.8257	9.4347	15.7666	14.5138	18.6686	12.6681	4.1814	3.9379	7.6129	13.331	13.6991	7.6138	4.6579	5.2413	6.0297	5.0403	8.8875	7.0748	7.4757	6.4527	0.2689	0.5197	3.0101	4.069	7.6088	7.6426	6.2074		0.59799	8.02181
14.297	6.4093	9.0026	11.0745	13.0107	9.6758	17.3086	13.1668	15.7494	8.8491	4.5706	5.1514	3.8154	12.9126	12.8159	13.9057	6.015	5.3603	4.6502	3.8983	7.4881	4.8395	10.0514	5.2928	1.1927	0.4588	3.3866	3.8486	3.3226	7.1787	6.879		0.603017	7.70937
14.4161	6.7911	11.894	9.9022	12.8177	12.2232	13.9243	12.0015	16.9249	10.5655	2.3677	4.8746	9.2507	12.345	13.5216	10.9886	10.4951	5.0867	5.0847	6.7203	7.4547	5.6393	6.377	7.3307	0.391	1.6997	2.8419	5.908	7.4859	9.6135	6.4983		0.608041	8.30065
14.5352	9.2315	9.8854	13.304	6.6589	11.513	17.1782	14.0919	15.4497	11.2429	4.1624	3.6302	7.4542	13.9418	12.4483	13.5632	9.3905	4.0294	6.0374	7.5757	10.0616	5.5553	6.0059	4.719	0.8243	1.433	4.8637	6.1477	7.3908	8.952	10.5275		0.613064	8.57565
14.6544	10.2214	8.5723	8.6124	7.5264	7.4866	19.9886	16.0936	11.8644	14.2407	4.8831	3.1164	7.7143	13.4991	12.1926	12.5276	7.6098	4.0735	3.5258	5.9685	12.3367	8.4284	5.7664	5.8712	2.0083	0.7819	3.0425	5.4547	7.4905	9.6635	11.4213		0.618092	8.39942
14.7735	6.1796	7.4401	13.7188	11.7739	8.0457	20.7449	15.043	15.2379	10.1602	6.3971	2.8836	6.165	18.6946	13.8414	9.2871	4.5723	4.2263	3.7263	6.7165	6.4191	4.9924	7.3758	5.028	2.3272	0.5688	3.4462	6.4159	7.2225	9.1931	7.0096		0.623115	8.16176
14.8927	7.0659	13.6062	11.6224	11.9522	6.8389	15.0589	15.7303	10.8902	11.8613	6.4671	1.6356	6.4661	16.4259	12.8221	11.3958	3.1576	3.8918	3.6779	6.2132	7.7433	7.4419	6.7006	3.5798	0.5325	0.161	2.9377	5.3431	9.2386	7.1381	7.3689		0.628143	7.83216
15.0118	6.0396	12.7974	13.5874	7.1271	7.1823	18.4458	17.7126	11.1426	8.2608	2.1563	2.1439	9.1196	16.3368	12.8483	9.972	6.4425	4.1614	4.8505	4.8139	7.7522	6.9972	5.7216	2.7018	0.1924	2.0441	2.8377	4.6828	7.0583	7.8453	7.1962		0.633166	7.67235
15.1309	6.9202	9.7498	11.2069	10.0742	8.0662	14.0229	13.9087	11.5478	16.06	2.5178	3.5221	8.9755	19.0569	13.9357	7.041	6.2292	3.5773	2.7496	6.1932	7.1863	6.5558	9.003	8.6826	2.2729	1.7924	2.3239	4.0914	7.7153	9.4603	5.8792		0.63819	8.0106
15.2501	8.949	11.5975	10.9283	9.3841	8.8312	13.4216	14.6996	13.6549	12.0805	2.6905	2.6611	6.4244	17.5144	13.1649	10.8462	6.0113	6.3994	3.9189	6.2899	9.2618	8.0072	5.6499	4.4608	2.0786	0.6679	0.8253	8.0973	4.7672	8.9279	7.4717		0.643217	7.98944
15.3692	9.2898	8.2002	11.5626	9.3734	10.9561	13.384	12.182	10.8013	12.6952	4.2618	3.5013	6.284	15.2358	13.1242	9.2892	5.6706	4.0979	3.4281	8.6019	6.1267	5.9958	5.4925	3.3147	1.1401	0.9389	3.873	5.5335	7.3613	7.8116	7.0386		0.648241	7.5522
15.4884	8.5834	10.8569	11.882	11.1149	8.4145	12.9198	12.0203	13.3999	10.7875	3.6825	4.56	8.8038	15.2739	14.9675	8.804	5.5416	4.8507	3.6889	4.4658	8.0294	6.2935	6.8094	2.8399	0.4243	0.836	4.2248	4.7821	7.5588	9.5353	8.7801		0.653268	7.82438
15.6075	12.2477	11.7832	12.2469	8.645	8.3254	13.9939	14.26	16.1493	11.8844	3.2975	3.5428	8.2614	18.4683	16.5359	8.7696	5.9226	5.8735	4.6874	5.6135	6.2722	7.1397	7.1232	4.4181	1.1565	0.7486	2.7098	3.8845	6.8991	7.2454	4.6175		0.658292	8.09076
15.7266	12.4663	11.416	15.2802	9.7141	7.8065	11.7211	15.0771	12.151	9.8787	5.3572	3.8223	7.621	15.5635	14.4216	7.5029	4.0766	4.7418	3.7483	4.284	11.0736	6.0478	9.5531	4.5758	1.9724	1.3883	2.6961	5.7135	8.1394	5.978	6.2305		0.663315	8.00062
15.8458	11.9571	11.6225	11.7036	8.8738	8.9104	12.3724	17.634	13.4467	12.2653	7.1253	1.6735	6.3646	14.9007	14.731	7.4143	7.6238	4.4036	3.5859	5.296	13.0691	6.2707	7.7111	3.1517	1.1021	1.8818	3.7441	3.8937	10.8266	6.0203	5.8738		0.668343	8.18165
15.9649	11.6548	13.2562	12.3771	6.7036	10.4905	12.0802	18.9998	12.121	10.3127	3.5368	2.7892	8.2349	12.3433	15.1012	12.9552	5.909	5.8481	3.7736	5.6625	11.1493	3.5605	8.8188	4.9907	0.2562	1.4453	2.0504	3.7581	10.3835	7.9948	4.7542		0.673366	8.11038
16.0841	11.261	17.7211	12.061	10.3048	5.4589	12.4838	16.6536	14.2697	12.0632	4.1735	2.4506	7.9289	14.6191	15.3791	16.1283	4.3518	5.816	4.493	6.8689	6.5657	8.1296	8.5601	4.847	1.1591	0.5876	3.8194	5.282	10.0214	10.7418	5.3479		0.678394	8.6516
16.2032	11.8608	16.8173	12.2893	9.9203	8.8425	9.8874	14.8236	16.6678	10.4659	5.2238	2.089	7.9804	11.126	14.1356	11.0433	5.3492	2.4571	3.7265	4.7223	7.8797	7.0242	6.6353	4.2019	0.0639	1.4858	2.8636	3.4064	7.2734	9.2133	6.1516		0.683417	7.85424
16.3224	11.6315	15.0527	8.0761	7.2088	9.219	13.9587	13.8792	15.2823	11.6565	4.252	3.2812	7.7446	13.424	10.8739	10.6641	5.7633	4.5145	5.5138	6.1194	7.8089	7.3497	6.0228	3.9701	1.2591	2.201	5.1425	4.3456	8.8127	4.8764	9.079		0.688445	7.96611
16.4415	11.0561	11.8742	8.965	8.2423	11.4521	10.7283	15.0916	13.2227	11.9135	5.1856	2.9225	6.3202	17.3217	15.8539	10.1157	3.2566	3.7881	3.8252	6.3543	7.1611	4.7684	5.9311	4.0928	2.7097	1.2545	3.368	5.1213	9.3512	6.4701	8.1245		0.693468	7.86141
16.5606	10.1731	12.1969	11.9503	8.632	11.1034	13.3168	14.7847	15.8307	10.2573	5.041	3.1118	8.6203	12.5704	14.1789	12.6281	4.2474	3.1318	4.2422	5.2207	8.0852	5.7507	4.929	4.0227	0.6093	1.9783	2.5362	5.9432	11.6081	5.9889	9.6602		0.698491	8.07832
16.6798	9.0896	9.2491	10.1921	6.8824	9.0931	11.3159	16.5872	16.6138	15.404	5.3045	5.1865	12.2238	11.9339	14.5738	12.7998	6.5658	4.8428	4.2106	6.7956	14.4629	9.1761	3.599	5.5932	0.4366	1.0472	4.8582	5.2767	7.8084	7.6352	12.6142		0.703519	8.7124
16.7989	7.7737	13.1444	10.277	6.8797	5.9733	12.5988	14.013	14.6264	11.4241	7.6681	3.5309	6.2317	11.5447	12.7854	6.1101	6.7185	5.7497	1.9528	6.16	5.6118	7.8529	4.14	9.2601	2.7032	1.4968	5.5671	4.1967	5.7651	9.9928	7.2828		0.708542	7.63439
16.9181	10.1156	9.4065	9.1278	6.6205	6.9662	13.2124	10.1016	14.1272	10.7655	5.0121	2.7053	10.2691	14.8306	14.6355	11.0607	6.0546	6.4331	3.2224	9.7799	6.5149	7.5119	6.2536	5.1548	1.1047	1.4334	6.9335	4.3369	9.3298	8.071	5.8257		0.71357	7.89723
17.0372	13.6637	10.6472	9.9581	7.8696	13.2776	12.4539	11.3943	12.5693	14.4164	5.7553	2.3151	7.2464	11.9876	14.1789	8.8187	7.3005	2.6059	4.4283	8.4103	8.9043	7.7306	4.725	4.7939	1.0739	0.9097	6.4024	5.4262	6.9898	7.6795	7.3757		0.718593	8.0436
17.1563	8.5847	12.1809	14.9304	11.6522	6.897	13.1471	10.4074	12.8703	12.2264	6.1359	2.5357	7.0417	13.6621	15.43	8.8549	6.0164	4.0907	2.7193	8.6572	7.3135	5.8371	3.2084	5.0569	0.6593	1.921	5.1403	4.7731	5.9709	8.9552	5.8879		0.723617	7.7588
17.2755	9.242	11.5833	11.8715	8.5672	10.9486	16.3152	13.3759	13.374	11.4213	6.1536	5.4811	6.3635	11.2116	15.1094	11.9602	6.9644	6.1643	1.669	9.5405	5.7052	4.7298	5.3452	2.5133	2.2194	2.2519	7.3723	4.7544	7.4786	9.4854	7.3216		0.728644	8.21646
17.3946	10.8185	11.3152	8.9775	10.557	10.4051	11.5381	12.3399	16.6877	12.8391	10.3132	3.4158	8.0473	7.3772	12.1524	11.1095	5.3941	3.4042	3.661	5.0928	8.0734	4.6168	4.6549	4.8855	1.7685	0.9963	4.0156	6.7001	6.003	5.5675	6.9895		0.733668	7.65722
17.5138	11.8805	12.4735	10.4943	10.7067	8.1083	11.9888	17.1339	9.6042	11.2565	8.5363	2.5652	4.0944	10.3794	12.3043	14.1846	8.1315	2.1598	4.9669	5.1626	7.0417	5.5597	3.0953	4.1049	0.7909	1.7958	6.3432	7.0484	5.8198	5.9545	6.307		0.738695	7.66643
17.6329	12.762	9.4919	9.9713	10.7025	8.5937	12.7562	16.5601	9.7631	12.4052	9.3412	2.2112	7.7999	17.3059	18.5465	12.2143	5.8821	6.5622	4.9742	6.5448	5.6643	6.0661	5.1161	4.2382	2.2466	2.1063	6.1546	6.1805	5.9806	6.2021	7.2661		0.743719	8.38699
17.7521	11.9065	11.8033	9.8433	8.3376	11.1668	14.0128	12.2649	13.0933	9.6661	8.6283	6.0249	11.463	14.3079	16.6167	11.3303	5.5151	5.2121	5.741	4.9011	4.6992	5.6902	2.6245	1.3776	2.5226	1.4596	6.5141	4.8487	5.8576	7.8646	4.5715		0.748746	7.99551
17.8712	7.4108	10.3235	10.8715	9.463	10.2454	10.7393	14.8114	14.7153	8.3627	7.1086	7.3857	8.2353	10.8607	13.8754	8.026	4.8244	6.6927	4.4584	7.7267	6.0964	6.763	1.8902	2.8708	2.4545	2.649	5.7645	4.7227	7.9997	8.5713	6.531		0.75377	7.74833
17.9903	10.8991	10.367	7.4531	8.8582	9.9761	13.5102	14.3811	13.3839	15.2476	6.2498	4.6253	9.3183	12.6138	12.3096	10.8752	4.5819	6.7861	4.5333	7.7532	9.5721	5.4039	2.7784	4.4101	0.4462	1.5594	6.0693	5.2248	4.6263	6.0768	5.8954		0.758793	7.85952
18.1095	13.0845	14.2993	7.8343	14.5225	11.4468	11.3394	13.88	14.3644	11.5837	9.951	7.3075	10.2505	12.1219	11.8863	10.5242	5.5823	7.2629	5.4883	9.001	8.3044	7.5545	3.419	3.543	0.5383	1.0141	8.0189	6.1713	4.0553	8.3729	5.5087		0.763821	8.60771
18.2286	9.7253	10.7168	9.5873	10.9836	14.1384	8.5929	12.6755	14.3795	13.5443	6.8936	7.7008	11.3756	11.3477	15.1546	16.1487	7.0102	5.7035	5.5	7.2331	5.3938	5.4817	5.1449	2.6554	1.816	0.9765	6.4078	7.9048	7.7456	6.4873	4.1573		0.768844	8.41942
18.3478	6.812	7.5714	10.2959	9.703	14.9548	13.7343	11.3029	12.3032	13.2877	7.3918	4.7623	9.8087	9.6674	13.8556	12.9753	6.2132	3.6227	9.5198	8.9843	7.1895	6.4565	4.5666	6.3543	2.1537	0.6903	4.3201	4.9382	9.6988	9.1885	5.7272		0.773872	8.26833
18.4669	11.7123	9.6003	8.3736	9.799	13.8385	12.816	13.642	11.3451	15.7439	6.5465	4.8553	10.7271	15.6075	12.5763	9.2774	7.2686	1.4812	2.3144	11.5042	5.9275	6.2576	3.5338	3.5796	1.3995	0.9954	4.9205	6.1648	5.4755	7.8803	5.7191		0.778895	8.02943
18.586	9.6407	6.5437	8.7436	8.0433	9.3601	9.5375	13.8514	11.4983	17.6283	6.9843	7.6099	10.701	11.5209	11.1475	8.9974	4.0166	3.8658	6.2361	5.4682	6.5399	3.7885	3.5719	2.2464	0.7597	0.8251	5.4642	4.3696	6.2559	2.8402	6.9946		0.783918	7.16835
18.7052	11.8486	8.3126	14.7738	9.3742	15.0112	8.7524	11.9066	10.7255	16.7957	9.0519	8.5001	10.2037	15.8865	11.4816	9.7662	4.6948	3.3991	6.799	8.1367	6.2589	4.5984	4.8812	2.8656	0.7767	1.306	5.3903	3.6314	6.149	5.2289	6.6357		0.788946	8.10474
18.8243	12.4679	10.3743	13.2394	10.7787	15.8469	9.1626	10.9698	14.089	10.7816	9.8922	9.4698	11.8998	11.9246	13.0253	14.1898	6.8896	2.6928	4.5034	11.233	8.3074	3.1917	3.5126	3.2679	1.1837	1.4898	4.1626	2.9053	6.8811	5.7054	8.4795		0.793969	8.41725
18.9435	9.6431	11.1439	14.2342	11.9427	19.6303	10.7073	12.3069	14.3146	17.0939	10.1596	7.0135	12.3801	11.9136	11.5217	11.2897	3.701	4.5395	4.2838	8.8101	5.5276	4.0957	4.9624	3.9245	1.251	1.7071	5.2048	7.2244	5.4032	8.1358	4.4608		0.798997	8.61756
19.0626	11.5154	12.838	15.908	8.869	14.1219	16.88	13.0761	10.8369	14.6355	9.7995	7.6638	9.1936	14.6408	11.8331	15.4653	4.8726	3.2201	4.6197	7.3282	4.64	4.7406	2.9942	3.0784	2.1191	2.7191	4.6936	5.2582	3.6674	8.4782	4.5478		0.80402	8.47514
19.1817	9.6477	13.1387	11.2322	7.6826	14.78	13.0263	11.4723	10.7875	10.0942	10.093	10.4833	11.727	15.501	13.4896	11.8524	3.4946	6.193	7.1742	8.1145	8.5758	3.3224	4.298	1.9608	1.2852	1.8829	4.6994	5.0842	4.154	5.7702	3.17		0.809044	8.13957
19.3009	11.0879	10.6466	11.2425	7.6944	14.3137	8.8208	12.8682	9.5726	15.3094	6.8144	9.9097	13.5556	10.5851	12.4216	8.0512	6.977	5.1603	4.8821	5.196	8.8431	3.7289	3.3907	3.6729	3.1546	2.6129	3.1766	3.5818	5.9261	5.9487	5.0946		0.814071	7.808
19.42	11.4632	11.3312	14.7545	11.7745	13.6261	11.141	10.3215	11.4963	15.1001	11.5584	6.6899	12.5344	7.9048	7.4613	12.8993	4.4217	4.3428	3.1248	7.1525	6.5567	5.4882	3.1247	4.5076	3.5015	3.078	4.6669	3.742	3.6514	4.3621	4.6131		0.819095	7.87968
19.5392	8.0683	9.0059	11.3392	10.5953	10.7881	9.4872	14.1217	11.5647	17.0491	9.4021	6.53	11.8624	10.6697	13.4664	16.5258	8.3597	3.9983	5.1121	7.4144	6.3448	4.1024	1.6881	3.7575	2.3304	2.1688	5.2744	2.9888	5.5144	4.1961	3.5271		0.824122	7.90844
19.6583	10.1947	9.6527	11.3883	5.8602	11.9065	13.6589	12.1844	8.6478	15.2497	10.9307	10.0834	11.7774	8.1929	8.1089	14.9385	6.0698	5.1281	3.2977	6.224	6.8953	5.4572	3.2958	4.7396	0.918	1.7017	7.0093	4.6959	7.7548	3.8679	4.0885		0.829146	7.79729
19.7775	8.7406	7.2818	14.4698	9.7231	10.6942	13.6379	17.2655	9.6005	10.8287	11.5233	6.5405	8.0454	12.2636	12.3752	9.4086	5.6634	3.0897	4.0113	5.9387	7.6127	2.49	4.0907	3.1056	1.5318	2.5041	6.457	4.8781	5.3176	3.2646	2.4894		0.834173	7.49478
19.8966	8.377	7.9252	12.0363	14.2704	9.3772	11.7887	11.3316	7.315	16.487	6.6305	9.4338	13.8867	13.0804	13.9588	14.0928	7.6595	2.4959	3.0175	4.9896	4.8576	2.7135	4.2755	4.1785	4.1078	2.3199	7.901	4.2108	4.059	2.505	1.7669		0.839197	7.70165
20.0157	6.6867	10.4875	9.5001	12.5805	10.1894	8.2652	12.9323	12.5765	14.854	11.308	13.6019	10.1583	11.9523	13.0587	14.7912	5.8148	3.0348	4.9926	7.0484	4.4477	3.8136	2.2181	2.9917	4.2739	4.0489	5.6679	5.6071	4.5659	4.4837	1.5037		0.84422	7.91518
20.1349	8.5837	10.4986	10.4401	14.1366	11.9962	12.8888	11.8136	13.4503	10.8249	7.6395	8.7499	10.5496	8.8559	13.0896	10.4306	3.6977	3.8533	2.2392	6.0703	6.1207	3.4732	3.2363	3.0692	2.422	4.9847	5.89	4.1628	3.6732	2.0497	3.1198		0.849248	7.40033
20.254	13.0705	8.0522	9.0587	10.1233	12.6164	17.6191	11.9036	10.2269	8.5485	12.4166	14.1976	6.0336	12.9842	13.9995	10.1283	6.3295	3.7309	5.0303	4.3004	4.2707	3.9318	3.2459	3.1127	2.4506	3.3317	4.3217	3.4061	1.8957	2.9725	2.4528		0.854271	7.52541
20.3732	10.9179	9.1854	6.4235	9.4916	13.6578	14.9835	15.1915	12.0426	10.3803	9.7508	11.8396	10.4676	13.352	12.4793	12.3224	4.5905	3.1733	4.2369	6.3272	6.8523	2.7265	3.2731	5.789	1.6322	2.627	3.5541	2.7447	4.7471	2.1871	1.662		0.859299	7.62029
20.4923	8.5736	8.4874	11.7834	11.3982	11.7393	10.5528	15.5988	14.8993	11.8748	8.3897	9.7377	12.1439	16.0703	9.3034	11.5276	5.2935	4.1059	5.3672	6.2153	4.102	5.035	1.0734	2.3705	2.3877	2.9236	3.2678	3.0273	1.9837	0.1956	0.453		0.864322	7.32939
20.6114	11.7767	11.0976	10.086	12.1036	12.6607	12.7607	9.5616	10.1745	8.2017	10.09	10.8509	8.5146	12.342	14.3511	8.4227	5.3886	3.1763	3.5826	6.5585	6.8046	1.7212	1.9599	1.5249	2.0555	2.9987	3.7933	4.2162	1.4792	1.2138	0.9638		0.869346	7.01438
20.7306	8.6937	9.2525	11.793	11.9055	10.6353	11.3105	10.2941	9.1649	9.0515	10.1668	10.0788	14.6793	11.6273	10.3369	11.2444	4.8033	3.6471	4.4276	7.2224	6.4822	2.0584	2.8098	1.5727	2.8237	3.66	5.044	3.2071	0.9302	0.5784	0.629		0.874373	7.00435
20.8497	8.0959	10.0208	6.8272	11.646	12.4337	11.7107	12.8354	12.309	9.4049	9.0028	10.0912	11.3161	8.7073	7.244	14.5338	3.24	3.9744	4.1879	6.4719	7.7161	0.7452	2.9439	1.5848	2.3926	4.2747	4.5436	2.6811	0.6544	0.3779	0.7458		0.879397	6.7571
20.9689	7.9024	8.696	6.9479	11.4092	11.6891	10.3318	14.8946	11.8416	8.2533	9.8666	9.358	11.1365	9.4264	12.7854	11.9359	6.1757	2.9324	4.6029	5.406	7.1934	3.4601	2.2246	2.7908	2.7615	2.4711	4.9419	1.4149	0.8923	1.4373	0.7413		0.884424	6.86403
21.088	9.2116	10.326	8.0612	12.1026	10.438	11.6687	11.095	11.7042	6.3041	8.5852	7.983	10.5265	7.3679	11.8349	11.0721	9.8162	3.8589	6.7331	8.8651	6.6536	1.774	4.0704	3.3071	4.5031	2.7993	4.7296	0.5806	0.8399	0.362	0.6005		0.889448	6.92581
21.2071	9.0329	9.7766	11.1328	13.3705	12.222	8.4947	10.9792	11.5389	7.7841	12.6415	7.4817	11.2752	10.4153	9.2153	9.2934	7.1977	3.0671	4.4824	9.5504	3.0347	0.5186	2.4565	3.4651	2.589	3.1754	6.5829	1.099	0.1901	0.3652	1.284		0.894471	6.79041
21.3263	8.2056	9.7226	7.1601	11.3196	7.8795	12.3969	8.8421	7.5962	8.3751	12.765	8.0005	8.8644	12.0848	8.188	8.1495	4.9864	1.8573	3.1613	9.2914	4.519	1.075	2.4461	2.2132	7.9801	4.5055	4.9139	1.4041	0.7199	1.5332	0.3792		0.899499	6.35118
21.4454	7.973	9.4339	7.7517	11.1306	12.4125	15.0758	9.1118	9.7524	9.3395	10.6909	9.5367	10.4956	13.0922	12.2618	11.2091	6.8855	3.0377	3.5455	5.5359	2.1265	0.3439	1.3866	2.5017	3.9974	5.4458	4.6178	1.1132	0.996	0.0509	1.4325		0.904522	6.74281
21.5646	9.9159	11.4816	7.8512	11.0357	12.9094	13.6552	10.8405	7.3268	11.0818	11.6829	12.7781	14.7751	14.5222	9.1605	11.8888	7.7089	3.3454	4.24	7.0253	1.2726	0.4128	0.9005	3.271	4.1036	5.9288	2.5679	1.2325	0.8401	0	0.873		0.909549	7.15427
21.6837	7.9902	6.3523	9.0307	16.4392	12.5278	14.0785	9.9695	5.5938	9.4447	12.5017	12.6643	14.5137	8.8342	12.0315	13.9719	4.5629	3.5417	4.2556	10.2504	4.002	1.739	2.7359	3.1275	3.1591	4.4468	4.7831	1.1008	0.3442	0.6205	0.7172		0.914573	7.17769
21.8029	6.6324	6.9929	7.7546	14.315	16.9516	11.9104	10.9082	5.9379	7.4571	11.7507	9.011	9.4593	8.7477	10.8017	11.2987	5.9652	2.7672	2.0081	5.6362	3.7993	1.0382	2.676	1.9088	3.6183	2.4739	3.8125	0.5899	0.0895	1.5234	0.3359		0.9196	6.27239
21.922	7.6334	8.3969	8.075	10.3011	12.1561	11.0468	11.1589	4.8785	11.838	9.5162	8.1477	6.0525	10.5301	12.3544	10.6755	4.7643	4.07	5.6743	9.0694	2.0185	0.9789	0.5096	1.5852	3.3545	3.9192	4.1191	0.7083	0.307	0.4998	0.8301		0.924624	6.17231
22.0411	7.6252	6.535	7.3694	9.4953	10.1925	10.0643	10.2675	2.7882	11.9369	12.6382	9.1342	8.616	10.6446	11.8645	12.7125	3.131	4.5663	4.7854	8.3122	0.8543	0.9633	2.4907	1.6311	4.7777	4.6381	2.4512	0.3098	0.3904	0.6422	0.0557		0.929647	6.06279
22.1603	9.9701	5.8367	5.8781	11.4094	9.898	11.4133	9.6235	2.5982	12.5112	10.928	13.2081	8.0933	9.1185	12.5155	11.4677	8.1029	4.4959	4.3753	9.7162	2.003	0.0171	0.9868	2.1881	5.1501	3.6214	2.3772	0.2483	1.3476	0.1561	0.2479		0.934675	6.31678
22.2794	9.5475	6.64	4.6371	10.0683	12.3548	11.6642	8.8303	2.1696	8.5424	8.9295	7.0631	7.8651	8.4931	8.2877	12.1224	7.6742	2.4115	3.624	5.6441	1.9602	0.6037	1.7963	0.9147	4.7777	4.9755	3.7293	0.3578	0.4526	0.5279	0.0971		0.939698	5.55872
22.3986	7.5546	9.4148	3.3341	9.1129	8.4862	11.638	9.666	0.7015	12.8489	11.3403	12.1782	11.0371	6.9862	9.2131	10.7501	1.9754	1.06	2.4705	5.6716	1.6218	0.7133	0.4514	0.868	5.1372	7.8809	2.9232	0.3615	0.3857	0.8138	0.0775		0.944726	5.55579
22.5177	10.0749	7.3726	3.0059	7.2312	10.613	7.8381	9.9514	1.6591	8.323	10.657	10.1464	8.5549	9.8646	9.6656	12.8895	7.1592	3.2066	3.6525	2.5563	0.8341	0.9279	0.1711	1.1705	4.2166	4.9978	1.0069	0.6589	0.2212	0.292	0.8545		0.949749	5.32578
22.6368	10.4743	7.981	1.7094	6.749	10.4677	6.8251	8.5894	1.5266	5.4925	10.4324	10.0154	7.4627	7.6036	11.6521	13.1169	7.8336	2.0633	4.4769	4.169	1.2238	1.2345	0.0414	0.1885	5.2583	2.6225	2.1965	0.3922	0.3449	0.2663	0.1263		0.954773	5.08454
22.756	8.1731	5.0555	2.1927	4.591	6.5662	7.5704	6.8668	0.6852	6.1477	9.8598	11.6644	7.6589	6.1306	8.8505	7.983	3.1981	3.7919	4.3509	3.4596	1.1261	0.5883	0.527	0.4411	1.8905	3.1121	1.9165	0	0.3967	0.1029	0.3886		0.9598	4.1762
22.8751	8.2476	7.6823	2.021	3.6809	11.4309	6.5089	4.6316	1.2742	5.7651	6.207	12.5209	9.7338	5.9249	9.3864	11.5246	7.0558	1.7822	4.2833	5.3803	0.7767	0.1025	0.204	1.4009	5.6081	3.4712	0.6796	0.4068	0	0.2958	0.1902		0.964824	4.60592
22.9943	8.6785	6.43	0.4635	5.2295	8.0731	8.2309	4.3787	1.0759	3.5045	9.5701	17.1315	7.9305	7.5384	5.9488	9.3333	8.9567	3.5143	3.2356	3.8294	0.7139	1.009	0.3936	1.3029	2.7912	2.9797	2.5709	0.3657	0	0.8462	0		0.969851	4.53421
23.1134	6.7714	6.6017	1.6806	2.946	5.7078	5.953	4.495	1.2351	1.4579	5.1528	12.9995	7.2588	5.4338	6.3538	6.3865	5.0159	4.3382	1.726	3.8153	0.8549	0.7052	0.3691	1.2739	2.6626	2.7935	0.6702	0.9076	0	0.6914	0		0.974875	3.54192
23.2325	5.3296	3.4889	2.5928	2.5911	3.6685	6.6014	1.6654	0.7807	1.4585	5.2585	15.0773	7.796	4.3992	10.7314	6.197	4.8466	2.8198	1.559	5.5156	0.2083	0.1774	0.522	1.5688	1.9025	1.797	0.1335	0.9079	0	0	0		0.979898	3.31982
23.3517	5.0429	2.0426	0.8484	3.3803	6.3578	8.6335	2.958	1.0116	1.3209	2.2861	13.5616	7.0998	4.553	10.8551	6.5198	4.9222	3.0301	2.1395	3.013	0.2004	0.2832	0.3776	0.9369	1.7111	1.7486	1.7304	0.3463	0	0	0.3629		0.984926	3.24245
23.4708	4.2812	1.7998	1.2583	2.4576	2.4462	5.0021	3.4203	0.1538	1.253	1.7054	12.336	6.9599	3.4571	9.1659	9.8548	5.2581	3.259	1.6071	4.2385	0.4394	0.0899	0.0677	1.6325	0.7228	1.5312	0.5655	0.009	0	0	0.2481		0.989949	2.84067
23.59	2.5576	3.1685	0.5795	1.2474	4.3832	3.2119	2.1185	0.0128	1.3575	0.8366	18.5791	7.4521	5.5738	8.3115	6.2256	3.5717	0.9251	3.4658	6.104	0.5406	0	0.4832	0.7597	1.0998	1.5152	0.9452	0	0.3501	0.0893	0		0.994977	2.84884
23.7091	2.3335	1.576	0.2105	0.9286	2.075	3.2354	2.7132	0.1579	1.1886	2.0697	13.5943	6.4405	3.2507	5.2347	8.288	3.2934	0.903	2.2122	3.5249	0.8538	0.6314	0.7492	0.393	1.1188	0.9439	0.8447	0.0702	0.4626	0.0725	0		1	2.31234

## Sheet: Image19
X0	Y0	Y1	Y2	Y3	Y4	Y5	Y6	Y7	Y8	Y9	Y10	Y11	Y12	Y13	Y14	Y15	Y16	Y17	Y18	Y19	Y20	Y21	Y22	Y23	Y24	Y25	Y26	Y27	Y28	Y29	Y30	Y31	Y32		Ap-basal	Avg int
0	45.499	35.846	14.847	14.8888	14.0755	18.8816	19.2367	29.1695	30.6931	25.5772	23.3815	25.434	23.919	33.806	48.137	55.828	46.7396	13.7441	13.0503	10.8747	8.9122	6.6895	7.1953	12.3217	10.0345	12.9443	23.701	16.7654	18.656	13.8332	26.2975	21.2059	11.2527		0	22.2254
0.1191	49.611	38.653	14.204	13.9857	14.2587	16.4174	21.1484	33.5742	25.2628	32.2938	20.535	34.299	28.154	39.772	41.34	63.77	48.6715	14.568	10.7514	10.8312	11.3833	8.2002	5.0336	8.1139	12.2362	8.6544	24.5568	21.1596	18.2993	16.68	36.0734	25.9677	11.2253		0.00436529	23.6268
0.2383	53.338	40.343	17.15	10.1599	15.3932	18.6595	19.1694	30.9468	28.8037	20.7643	24.242	32.301	37.128	33.885	41.641	69.195	48.0862	13.9485	17.411	13.979	12.6435	7.3942	5.8007	12.3211	12.5724	10.5754	24.0883	26.3846	21.6084	25.6202	35.7999	40.5354	12.8941		0.00873425	25.2964
0.3574	64.58	50.133	19.296	15.0973	18.4029	19.4736	21.6966	26.9363	30.8112	29.3679	21.8415	33.061	36.221	42.502	42.76	71.706	49.1759	14.527	16.7272	16.3416	9.8273	11.3681	8.0131	13.5988	16.4438	9.4976	25.8	32.714	25.4425	27.3637	36.0447	49.8499	17.5008		0.0130995	28.0037
0.4766	64.777	51.16	23.323	14.9943	21.2274	18.8105	24.1551	31.3998	25.9783	24.0093	19.4332	32.974	44.478	51.848	41.511	69.714	51.0659	18.0749	13.5821	18.4623	9.7418	12.9753	7.9975	13.1971	15.4004	15.5692	25.189	31.2628	30.8571	31.9476	45.55	58.0586	15.8711		0.0174685	29.5332
0.5957	61.787	66.509	28.768	15.5346	23.0759	19.9628	28.3929	32.2099	36.9578	28.9143	25.4411	53.062	56.977	53.43	48.013	72.908	62.6914	22.9666	20.9784	18.0956	14.4006	21.6686	11.4425	11.0801	13.1228	19.9254	32.1181	31.0913	35.8703	37.1094	42.914	62.2582	15.0506		0.0218338	34.0826
0.7148	70.983	71.775	33.311	17.1368	24.4958	23.0889	30.6447	34.8023	33.728	24.1886	19.647	54.579	49.514	56.57	48.926	70.397	61.6457	26.3129	21.5475	21.9915	12.2164	21.9994	8.133	13.89	15.2775	13.5045	33.6981	33.0158	36.124	39.6207	44.1376	78.4051	27.0928		0.0261991	35.5273
0.834	77.978	76.778	40.552	16.6803	20.5776	16.8459	27.0229	35.2932	29.5527	30.4816	23.3585	48.023	61.86	72.511	60.515	78.622	54.1996	29.8659	27.8004	27.4227	15.2425	21.3177	6.7602	15.7923	19.5245	16.3468	31.5759	29.1148	45.662	36.84	53.9273	83.4679	29.1664		0.030568	38.2024
0.9531	92.304	74.216	49.122	17.3601	21.0666	21.2386	26.907	30.1996	31.6883	24.5185	29.2381	64.514	69.664	77.434	60.45	95.891	57.722	27.613	26.4974	20.163	18.5325	22.1206	9.0052	18.1085	20.6739	19.2905	30.9741	34.1643	42.2856	43.3932	52.9515	77.5313	30.3479		0.0349333	40.5208
1.0723	100.682	80.833	52.158	17.1894	24.841	22.6828	28.0778	42.0225	34.0106	32.5777	33.6651	69.453	81.429	95.163	76.612	84.128	70.5236	29.2178	28.2955	23.1547	20.4976	23.2501	12.1763	17.0949	19.4511	17.4593	30.0532	42.1019	50.0225	41.3781	47.6067	88.5069	37.7999		0.0393023	44.6702
1.1914	97.479	81.277	59.569	18.6803	24.5596	19.9754	36.1716	40.6808	38.4601	28.7186	32.5035	70.809	88.542	92.475	99.235	84.604	74.4802	30.0135	28.1145	16.1639	23.1277	26.7373	10.2637	17.5356	23.9523	20.4233	37.6132	44.9152	46.466	52.244	55.7842	93.0894	46.2272		0.0436676	47.2997
1.3106	112.566	84.958	72.89	16.8406	26.9646	25.1004	31.8819	42.5715	36.8291	31.559	36.7487	80.096	104.42	103.803	105.915	84.151	74.0486	35.7713	33.8194	17.3254	19.8398	29.0184	13.5462	14.8911	34.3593	19.6078	34.7877	39.0636	53.5933	56.3486	58.3973	78.9429	48.1026		0.0480365	50.2654
1.4297	101.126	95.049	91.787	21.5109	22.9514	27.2811	28.3923	41.1761	34.5657	26.9172	43.9983	85.332	101.409	107.309	121.329	89.418	66.6809	44.7274	35.7164	16.2512	19.8989	26.046	14.8443	17.9077	31.0933	22.9649	33.8781	41.889	57.458	53.3964	56.8513	76.0063	54.5471		0.0524018	51.8094
1.5488	115.002	98.868	89.4	22.4256	24.716	31.5749	31.6964	44.6123	35.2886	28.4149	36.3602	83.413	102.887	102.804	121.086	91.232	69.394	39.8821	30.5679	20.2164	17.6506	21.822	13.9201	16.71	23.309	26.0349	46.2329	49.5028	49.7271	51.7629	63.1397	75.305	50.2394		0.0567671	52.2787
1.668	121.58	103.945	100.552	27.1968	31.245	28.264	35.7887	41.6544	34.9867	33.8479	44.6956	82.495	108.333	106.751	121.142	90.288	79.6926	39.0989	29.8718	20.7346	16.76	18.509	15.6056	20.1985	20.8007	29.7212	51.4865	51.0829	49.2818	62.8702	67.026	71.7202	47.0396		0.0611361	54.6747
1.7871	125.1	90.83	108.49	26.9212	25.4434	25.4831	40.8383	47.0171	35.8599	32.1712	44.1634	88.407	90.444	104.941	116.046	97.281	79.3675	39.9572	28.4966	17.6121	16.3367	19.6791	17.6661	19.4096	21.2983	31.8062	59.8847	62.2312	42.8218	65.6148	69.1495	78.7381	46.4642		0.0655014	55.0294
1.9063	116.304	106.676	119.007	28.8778	22.8787	25.0922	45.8894	50.4887	38.2675	34.4864	46.2535	92.88	109.096	101.869	122.971	111.961	72.8462	38.5104	25.3356	16.6556	13.7318	14.2759	21.7205	17.1454	22.5564	34.7253	59.6083	64.6441	50.5073	67.7622	66.7629	76.1758	42.5798		0.0698703	56.9255
2.0254	102.086	110.982	128.293	30.8594	20.7648	25.0417	45.5076	46.3173	46.6777	39.9947	46.1578	95.904	103.801	105.048	120.92	132.057	71.303	33.7356	23.6651	17.403	11.6604	14.5783	14.9443	17.6124	21.9621	43.2909	51.0535	61.8336	51.3941	65.5803	65.5919	77.2788	41.607		0.0742356	57.1184
2.1445	107.118	110.607	126.271	30.8857	21.8079	22.9374	36.6907	47.62	45.1218	40.4899	40.6896	96.082	108.6	111.841	122.128	126.632	74.8965	31.4796	23.7969	12.459	18.1232	13.606	15.3198	15.4427	22.7281	37.8807	51.6506	80.9827	60.7155	77.7729	66.9138	82.1759	42.8296		0.0786009	58.312
2.2637	102.997	110.265	132.141	27.2796	20.6073	24.2887	39.4422	43.4185	45.4767	41.5011	47.4075	100.952	114.243	122.089	121.222	120.653	72.2501	29.924	23.3341	11.2287	16.8765	16.3564	15.4097	12.7959	22.5047	34.5473	52.7558	79.7746	58.0225	82.9176	54.957	88.6211	35.6372		0.0829699	58.2393
2.3828	114.749	113.639	122.756	28.7064	22.2209	24.8384	43.3677	46.5648	49.1357	36.5246	48.4919	98.454	109.887	120.462	132.195	119.178	80.4648	30.225	16.3664	14.9003	10.9565	12.5639	14.8343	13.3837	16.5182	41.8094	51.3667	80.7634	67.6179	85.7398	64.6725	81.2033	36.5465		0.0873352	59.1243
2.502	122.77	130.156	118.507	25.6248	18.5555	26.3474	50.4965	48.2041	48.1148	41.0377	53.1921	93.143	107.426	113.257	123.834	120.13	72.8084	29.2519	15.7522	13.8793	10.8178	8.8043	11.1209	14.1065	17.3096	35.3846	45.8154	68.507	72.2236	80.3227	72.781	82.4173	32.6385		0.0917041	58.3254
2.6211	110.602	127.414	126.618	25.5774	23.2568	24.0451	52.1927	44.0814	43.6493	39.3262	58.1286	97.407	97.413	104.628	114.461	119.375	63.7137	24.8844	20.5621	12.4358	9.5814	9.8306	10.832	13.5698	16.269	40.8546	44.4846	68.999	73.9337	81.1746	64.8127	75.2414	32.7982		0.0960694	56.7319
2.7402	108.851	130.829	135.76	24.6335	20.881	18.7318	55.9324	48.1054	46.0188	38.9172	62.0971	99.525	101.128	113.246	121.691	117.149	72.8479	27.6827	15.0269	12.1606	10.7817	10.8631	11.1714	13.1173	13.8715	31.2866	44.2546	60.2004	75.4162	78.6921	70.8918	71.6047	29.9483		0.100435	57.3732
2.8594	105.743	128.249	144.912	24.5364	20.3575	18.0597	51.7827	49.8063	41.4048	37.6242	61.3033	107.711	110.243	115.873	122.936	118.242	80.0817	26.6278	13.8011	12.5945	10.4289	10.456	13.4699	12.0407	10.1044	30.4629	37.6049	57.8283	80.3917	73.4424	68.8753	60.6625	25.9944		0.104804	57.0803
2.9785	85.761	128.785	139.158	23.971	22.4076	19.0596	47.3623	48.3423	46.9425	34.8142	53.5294	98.296	94.594	113.941	123.633	115.138	80.3175	21.9754	13.3263	15.6868	9.7137	7.829	11.6557	16.8421	13.5983	26.1667	39.0846	43.5161	79.112	70.0798	68.9744	64.9692	23.5472		0.109169	54.61
3.0977	85.159	119.557	137.776	24.4297	18.6429	20.3563	49.5102	43.8154	41.217	33.9687	57.2067	96.491	99.815	111.49	114.961	111.394	75.0402	23.6544	10.2958	10.8297	12.838	9.5452	14.3607	12.8853	10.9436	27.9257	31.7288	56.7355	74.2274	59.9667	61.1631	62.2664	22.7506		0.113538	52.8166
3.2168	96.756	116.435	135.825	19.2284	19.494	20.0881	43.7704	47.0322	44.4146	37.6844	55.9077	96.439	107.372	106.984	101.328	96.583	75.1121	25.6213	8.7877	12.9562	13.776	12.2924	12.1277	12.8717	10.4609	24.0341	28.0253	59.7273	65.0841	55.9556	65.0005	53.8967	21.6356		0.117903	51.5972
3.336	88.846	122.448	122.238	22.5355	17.3074	18.945	45.9175	50.0461	41.2961	31.3392	52.0372	93.07	111.976	110.537	122.304	101.403	75.7581	19.4122	10.1999	9.6886	9.4917	11.0143	9.8798	9.3767	9.8159	18.5392	25.7417	58.2972	67.3392	52.8608	70.3132	52.1991	20.2157		0.122272	50.9815
3.4551	92.557	111.217	128.96	17.0231	16.5746	17.0017	39.7407	54.0807	44.2524	37.91	61.4894	85.974	112.565	98.426	123.706	88.663	79.9928	18.4478	9.6292	11.5552	9.1505	5.8918	11.4369	11.3349	9.2675	23.1614	26.7876	50.0416	71.3489	56.4675	65.5158	54.7615	17.3988		0.126637	50.3736
3.5742	82.002	115.11	127.996	20.0152	15.3955	14.8917	37.3206	47.9997	49.0756	36.1947	52.2588	100.204	124.892	105.16	110.447	92.12	76.1744	27.2863	9.8804	10.6105	11.8458	10.9725	9.7576	6.6916	9.0238	21.1398	27.0436	47.9228	63.6189	58.5579	72.4251	51.6284	17.5902		0.131003	50.4016
3.6934	95.372	129.393	127.947	19.3613	20.8982	18.0787	33.7704	41.0042	49.3978	39.0226	59.9918	99.877	121.015	99.743	114.991	95.565	81.6103	26.414	9.6947	7.5124	11.4935	8.9282	8.5538	7.464	9.6967	18.4505	31.0224	46.8116	57.2929	56.3107	57.984	49.0876	17.481		0.135372	50.6435
3.8125	87.572	115.155	108.548	14.2603	14.09	14.3056	36.3837	49.9885	50.6431	34.7235	71.5125	96.136	110.132	99.239	102.023	89.729	70.9958	30.5389	8.4889	11.7785	12.1257	6.978	8.0154	6.9743	11.7184	17.9685	27.7579	47.9907	61.0436	54.2465	69.9226	45.1586	15.7036		0.139737	48.5408
3.9317	75.3	112.741	109.715	11.9328	13.1792	14.6771	24.3789	47.5518	48.3286	42.5956	58.7264	95.57	109.668	99.278	96.346	82.475	75.3899	25.3137	10.8333	9.5161	8.366	9.4371	9.5076	8.6848	14.4966	20.0202	24.876	46.4745	66.152	56.3744	65.3567	45.8481	17.1632		0.144106	47.1598
4.0508	78.694	116.453	114.026	12.6951	11.014	19.4417	30.5632	45.7314	47.5242	37.4768	65.6409	92.086	110.764	91.746	100.009	78.486	74.9513	25.2362	9.1838	10.627	9.0516	7.9868	11.377	10.8966	8.764	17.1569	26.9771	42.3554	53.9435	54.4497	67.0554	44.9413	15.5082		0.148471	46.7519
4.1699	74.094	110.741	113.236	11.5881	12.7965	15.6329	31.5622	46.1262	50.2718	41.0429	71.8333	87.033	107.4	96.094	95.726	77.174	77.6339	21.0522	8.3684	12.3492	7.5388	9.8187	10.5683	10.1177	8.3944	17.2897	22.3912	43.081	54.3821	50.1272	67.1829	49.9437	15.5384		0.152837	46.307
4.2891	66.599	109.664	113.026	11.3304	13.8749	18.6288	23.0053	47.0079	44.2595	35.3739	66.4835	76.056	112.591	102.762	107.918	80.386	69.3187	19.1473	9.6897	11.9591	7.2598	7.7845	8.508	11.407	8.3617	14.4242	24.9297	36.8241	47.0195	44.3862	56.7224	47.9706	16.8087		0.157205	44.5905
4.4082	64.039	117.614	109.439	13.0977	11.1676	18.3223	20.4005	41.4175	37.1053	37.2251	70.5294	77.882	103.567	105.354	107.158	81.058	67.8944	24.5207	6.9912	12.8492	8.4232	8.0706	9.4456	8.5669	7.7372	17.6525	26.4362	40.7015	48.5396	48.4218	58.4823	58.8905	15.0414		0.161571	44.9709
4.5274	64.866	108.636	89.255	9.6177	9.9895	19.7667	24.7105	45.8072	36.8102	37.4112	65.9493	72.922	100.854	97.322	93.324	73.179	73.6198	19.2216	7.0821	11.9038	7.3002	12.5135	7.6952	7.2389	7.3657	17.081	27.3098	43.9542	47.8	39.8492	46.5231	45.2863	16.4976		0.16594	42.0807
4.6465	54.86	105.803	87.351	11.359	12.9836	16.6227	24.9332	45.9383	34.5647	38.2982	61.9681	78.666	97.231	95.107	94.013	65.011	60.4594	18.9558	7.2131	7.2813	4.3827	7.656	10.4921	6.2171	6.2059	14.0293	23.16	39.832	44.9068	41.1253	47.4058	37.0203	15.8679		0.170305	39.9067
4.7657	54.559	95.154	78.695	14.8842	15.8056	16.0933	24.6608	41.6101	34.8699	38.6542	59.3219	74.188	97.344	93.057	99.627	57.906	62.9905	19.7518	5.6647	7.4502	7.7992	9.2223	9.4871	5.0762	5.3201	13.4851	25.3877	43.8989	38.2979	42.0872	53.8036	37.5975	13.6958		0.174674	39.3165
4.8848	51.803	86.296	72.079	12.7815	14.7684	12.2267	33.9864	38.3114	34.3035	31.5976	57.3107	73.172	102.381	83.654	95.24	68.492	50.9944	15.9661	7.3546	12.4133	10.2395	7.2531	6.478	5.511	5.834	17.0527	30.7191	43.0663	41.9568	42.7932	55.7805	36.9834	13.4383		0.179039	38.5527
5.0039	48.054	86.453	65.767	13.4243	9.5077	11.7936	23.5188	30.599	40.5697	35.8047	57.1428	74.511	97.237	85.455	99.885	59.472	44.7719	17.9142	6.1032	12.1383	7.7793	7.2548	6.678	6.3647	6.9778	18.25	26.3682	36.0265	30.641	34.4735	58.1866	32.0301	14.425		0.183405	36.5327
5.1231	53.356	93.334	51.515	9.4918	4.6478	12.9228	21.7902	37.043	38.6586	35.7774	63.3253	64.021	86.147	90.819	88.755	60.216	49.3776	15.9124	7.0861	12.0377	8.7076	7.7523	5.4206	6.0349	7.1968	13.2282	29.1892	33.1054	31.9794	29.7438	61.9995	30.8336	15.003		0.187774	35.6493
5.2422	46.502	92.749	46.909	11.5719	7.5664	13.3656	22.7408	31.9553	36.389	25.0699	58.7577	67.089	79.883	86.173	82.234	62.711	43.1142	14.6126	5.8027	11.5864	12.0052	8.0568	7.5078	4.577	6.2935	16.3515	25.0938	31.1844	35.3255	29.5319	52.6241	34.7096	16.8863		0.192139	34.1494
5.3614	48.511	79.776	53.707	9.3797	8.2306	17.09	27.0296	29.5262	32.5085	27.9759	51.2943	63.785	67.808	76.625	75.023	56.999	43.8182	14.1585	9.3014	9.3613	12.0373	5.5192	9.5637	5.0498	6.8663	17.213	25.155	29.3553	37.0931	31.8498	52.2773	26.7566	11.2002		0.196508	32.4801
5.4805	35.554	77.987	49.142	8.1512	10.4805	17.6506	25.5353	27.3842	33.1866	29.5916	57.769	57.877	71.298	83.1	70.982	53.162	39.7092	19.5082	8.2695	9.9454	13.3464	6.7209	5.8891	4.9683	5.9594	15.9453	21.553	24.5153	36.7119	34.5218	51.3937	28.7253	13.0029		0.200873	31.8041
5.5996	41.012	78.094	40.076	7.9706	7.8833	14.0053	25.363	31.5853	29.4973	27.6969	47.7723	51.727	77.078	79.275	74.453	53.433	37.0699	16.249	7.3988	9.1589	10.8511	3.7952	6.3868	3.668	4.913	14.8362	24.1379	22.8159	29.123	30.2005	46.6169	18.0366	11.561		0.205238	29.8103
5.7188	48.578	76.364	40.172	8.0027	7.3364	10.7263	26.7633	25.6706	29.8308	27.5714	48.3751	51.242	77.033	73.961	69.505	50.118	34.3958	13.9643	7.6891	7.0663	9.2874	6.0915	7.5074	5.0249	8.5529	14.122	24.2212	24.133	28.5121	30.989	36.5251	23.2057	12.7171		0.209607	29.2501
5.8379	41.443	65.169	37.615	6.8343	8.5737	8.6727	31.729	28.6989	32.4517	20.7129	47.3576	47.927	70.516	67.697	63.873	49.658	34.1221	16.5871	8.435	8.0991	9.1728	3.8845	5.061	7.5763	7.2712	12.9155	21.4392	24.7471	29.7394	34.8696	35.1765	20.4384	12.5381		0.213973	27.9091
5.9571	35.663	69.658	29.715	8.7477	6.339	13.7154	33.8205	31.3678	26.8131	25.5804	40.8	42.229	67.853	64.656	71.13	44.936	34.2944	14.3761	7.611	7.4904	8.57	6.5224	5.6654	5.5938	7.4598	14.5915	21.3983	24.1262	35.9403	38.048	38.2493	21.7325	13.1448		0.218342	27.8133
6.0762	45.073	72.06	25.243	8.7779	5.7774	13.7405	31.8725	25.2414	26.3781	18.7246	34.3479	40.121	60.032	62.297	73.557	39.749	31.84	8.8906	5.8045	5.4315	6.3508	7.0631	4.1066	5.4325	5.3623	13.8698	16.6831	23.8403	37.6043	35.2627	35.8661	14.8578	8.4306		0.222707	25.7481
6.1953	45.774	67.131	23.558	7.9618	6.9722	12.6422	28.3801	34.9247	26.589	23.1115	34.1375	36.637	68.043	70.152	71.051	39.349	28.6843	8.4906	6.4867	6.6401	4.2734	5.9043	4.7055	5.0191	6.7522	12.7279	18.5897	20.8068	30.915	37.954	27.5959	14.847	11.3316		0.227072	25.7012
6.3145	39.016	61.004	19.703	8.4571	8.5683	12.036	27.7078	33.1636	25.7972	22.1783	33.8285	31.708	68.722	70.03	71.182	40.603	26.0657	10.2461	10.5694	5.1313	7.0806	4.9444	3.5147	2.4379	4.9882	12.8843	20.2196	20.6233	24.1296	37.8072	27.7752	13.7109	13.5011		0.231441	24.8283
6.4336	33.015	60.408	23.198	7.3861	6.5895	12.1324	25.5461	26.7568	29.6942	20.9377	31.4228	34.055	53.921	73.114	70.925	39.275	24.994	7.4704	10.0277	4.5654	6.1654	4.3111	4.2607	5.3619	5.5751	17.4045	19.1568	18.8527	22.4551	29.5262	30.337	14.3689	13.056		0.235806	23.8262
6.5528	32.413	63.628	22.659	10.0816	7.4546	12.9767	24.9127	27.6197	27.2073	19.785	29.6985	34.89	49.873	69.246	70.701	40.525	27.2323	8.4869	4.6838	4.2944	5.0275	5.7084	5.0948	4.833	7.1076	11.9208	16.0214	20.4119	29.8532	31.5574	37.7152	18.0556	11.5745		0.240175	24.0379
6.6719	23.531	66.755	16.909	7.2232	6.978	11.3129	22.8415	27.6289	24.161	17.4914	31.2799	35.189	49.854	66.656	71.175	35.136	24.9471	11.5794	6.2836	6.6764	5.328	5.0455	4.7884	4.9344	3.3516	9.2147	21.3741	24.2597	25.2482	30.6476	32.8425	16.6688	10.8999		0.244541	22.9761
6.7911	20.981	65.029	19.424	9.9283	7.3257	10.0413	20.9526	26.4423	25.7852	17.9178	30.3883	30.05	44.295	62.366	63.734	35.55	21.8367	12.7044	9.1104	8.7294	6.5005	5.4056	4.0578	3.1858	5.313	10.3619	17.3471	20.001	26.0155	30.8442	36.3407	17.4858	13.5537		0.24891	22.3941
6.9102	22.814	55.332	20.592	9.3906	8.8443	9.6145	22.1744	26.4257	22.9919	19.8295	34.3582	27.55	47.263	55.698	49.501	36.155	23.4865	11.3379	8.5329	8.8211	7.4909	4.1622	2.8464	4.3363	5.7209	13.5264	16.7549	26.2606	29.1907	29.8395	38.831	17.951	16.321		0.253275	22.2407
7.0293	19.545	49.751	16.868	7.2919	6.7223	8.9174	20.5416	22.7513	19.1486	20.1515	25.918	31.057	43.307	48.76	46.943	38.726	22.3721	10.8731	7.1298	5.8902	7.187	5.0996	5.1458	5.7879	5.9444	9.0032	16.8528	19.8296	27.7178	29.9849	33.2718	16.1711	16.1901		0.25764	20.3288
7.1485	21.129	51.144	15.908	7.192	5.9303	8.0196	15.0343	18.8325	17.3076	16.8743	25.6213	29.432	44.059	48.048	40.564	41.075	26.6469	10.3205	8.3699	7.0122	9.0707	4.2262	5.8146	6.0842	7.6786	8.889	18.6764	15.5778	26.5973	28.4127	29.8055	18.0261	15.922		0.262009	19.797
7.2676	20.338	46.103	11.574	6.2283	6.6421	7.2669	17.8716	21.2524	20.5925	20.6631	25.0176	35.843	44.171	46.5	38.322	32.405	24.4378	9.3247	8.9209	5.8173	7.0093	2.6192	3.4668	6.4817	5.6954	13.7145	17.4541	17.7464	31.7747	30.1334	28.2212	17.2861	14.586		0.266374	19.56
7.3868	24.083	43.766	13	5.4376	5.1022	8.6722	19.5173	22.9693	21.6286	14.3397	22.7664	31.344	40.86	48.17	34.342	37.057	20.9615	9.6497	8.1474	5.8938	5.9416	4.2208	4.6488	5.065	8.1807	8.6299	15.0846	21.242	26.2585	22.6274	26.895	22.7232	11.3377		0.270743	18.8049
7.5059	19.762	41.886	8.99	5.1538	8.0342	9.7455	16.6485	21.4886	21.6088	17.5052	23.6874	25.613	48.016	48.266	29.68	42.73	20.4608	9.8951	7.496	6.3888	6.5552	4.1052	3.333	5.6251	5.6884	9.1195	17.4415	22.0629	20.8069	23.3487	26.1064	17.3289	15.5298		0.275109	18.4881
7.625	23.735	39.793	9.636	5.1588	8.4721	9.0318	15.8045	17.4872	16.3743	14.4643	24.2282	30.418	37.474	39.707	38.027	32.67	15.791	8.6273	7.5304	5.8827	5.8201	4.0448	5.4591	3.6738	5.2019	8.4511	16.8719	22.1167	25.2346	24.5478	23.9961	17.043	12.3043		0.279474	17.4266
7.7442	18.925	40.28	12.022	5.9257	6.5595	10.2469	20.3954	22.1736	21.0572	17.0929	26.9508	29.84	36.022	38.678	36.625	36.752	14.664	9.4405	8.612	4.3244	6.8069	3.5833	6.2268	2.6887	4.0068	10.3679	21.1317	24.0116	24.5632	16.8322	26.2805	17.3645	14.2203		0.283843	18.0203
7.8633	24.014	42.311	9.197	6.2764	7.1787	9.6398	17.3872	15.2884	16.4921	21.241	24.7268	30.61	40.928	33.025	32.899	36.759	19.8458	10.3502	5.9285	6.315	6.5486	4.6467	6.459	2.0447	4.2866	10.1973	17.4844	22.6399	23.5546	25.9616	27.5327	19	11.9612		0.288208	17.9615
7.9825	20.382	52.22	7.822	4.2054	5.2486	9.7589	16.6182	21.3807	20.0235	19.6857	25.4352	29.999	40.747	40.308	36.445	40.252	18.4271	6.5628	7.783	5.662	4.242	3.7644	4.6215	3.1469	7.8741	8.751	17.3349	16.7657	19.5457	29.394	24.4747	17.9475	9.172		0.292577	18.0606
8.1016	18.961	40.959	9.614	7.8921	6.8019	8.0966	16.6111	19.2917	14.5515	17.3182	20.5309	27.785	36.821	40.557	33.875	39.81	17.7357	7.7927	6.3323	5.0918	6.4282	6.8165	3.6779	2.0892	9.4376	8.8033	23.0475	13.7629	20.3881	29.7639	19.87	14.0637	9.2604		0.296942	17.086
8.2207	16.215	36.234	9.555	7.6807	5.9843	9.3612	18.961	17.0208	16.4435	16.9521	23.7363	28.313	43.456	32.647	27.822	37.312	19.6244	7.7189	3.5744	4.5155	6.4857	4.8212	4.4844	1.4336	5.8112	9.24	20.8739	16.3184	15.7717	31.7011	18.6794	12.0537	12.5145		0.301308	16.4641
8.3399	18.888	37.827	8.835	6.0494	4.9514	7.005	19.43	15.6105	18.6954	15.0235	24.3599	31.138	34.434	36.541	22.937	37.227	21.1867	5.2755	4.8346	4.9061	6.6151	3.5731	3.0035	2.6465	7.453	7.9968	20.9398	15.8405	17.51	22.9796	18.9115	13.0269	14.9045		0.305677	16.0774
8.459	23.365	36.96	7.763	5.021	4.487	8.5031	17.6607	19.854	13.6936	16.219	25.1049	32.778	30.924	34.246	32.984	45.625	18.1664	6.2445	6.5465	4.6619	3.4667	3.4021	3.2634	4.5754	8.5064	10.2942	22.8027	17.8511	25.1609	24.4741	23.3183	17.4164	12.0029		0.310042	17.1922
8.5782	23.324	46.256	6.623	6.0056	6.4655	8.2607	13.3364	12.8885	12.4728	17.2901	21.7966	30.248	29.525	43.854	25.781	38.626	17.2568	8.647	7.8411	3.3154	4.9974	3.1497	3.7968	4.3466	4.6219	9.2763	21.2558	17.8078	21.7381	25.2077	24.9819	14.9332	13.4074		0.314411	16.6465
8.6973	20.416	38.207	7.839	6.3714	7.4214	8.0887	18.3224	11.0074	15.1403	20.605	18.3078	30.441	27.121	36.756	36.161	30.113	21.5119	9.0266	6.293	4.1451	5.2299	3.8523	3.9568	2.9211	8.3973	11.096	20.7149	14.188	22.5588	25.9729	21.9658	11.6028	8.9507		0.318776	16.2031
8.8165	19.968	31.652	6.322	5.1614	8.368	11.5627	17.6503	17.1558	11.239	15.0318	23.0716	34.562	28.375	33.323	31.069	37.482	20.4104	6.4545	5.947	4.232	6.1894	4.5546	3.7235	4.5612	6.224	7.5036	18.0487	16.7385	28.3944	22.8832	22.441	17.5186	13.5257		0.323145	16.4044
8.9356	22.236	34.696	7.186	6.5746	7.8408	8.6317	17.378	18.332	10.6538	17.9634	25.6159	33.916	28.86	37.646	29.112	35.91	15.7632	10.7757	7.8526	4.051	3.6403	6.484	3.1471	4.4678	3.7245	10.0106	23.2144	17.0577	23.3637	19.1621	23.3607	17.0122	13.4241		0.327511	16.6383
9.0547	18.295	29.973	8.571	8.5048	9.106	9.0747	18.637	21.7926	16.4438	14.9085	26.1644	28.002	23.072	42.012	29.521	37.827	16.3767	9.7833	6.5169	2.8677	4.2293	5.9391	2.6009	2.0829	5.053	12.1788	20.8491	21.1937	21.4635	19.0021	20.3886	18.118	14.9721		0.331876	16.5309
9.1739	24.679	24.377	9.583	4.7587	7.0844	9.6902	15.7669	20.3739	16.9345	17.8822	25.5671	31.078	19.828	43.618	30.22	35.372	15.6101	7.6694	6.6154	4.2361	3.3951	2.8333	3.3555	2.9204	6.383	7.5053	16.808	18.7485	22.9832	17.1743	23.8817	19.2888	14.9714		0.336245	16.0967
9.293	22.216	24.056	5.634	3.1365	6.8951	6.4243	11.8545	17.4499	19.1257	13.9767	28.6098	27.658	22.827	36.414	26.497	30.941	21.614	5.3572	5.0158	7.1527	3.5102	5.066	3.1349	5.2143	4.8539	8.3255	22.7912	17.174	23.8541	21.3362	21.7114	14.3446	19.0283		0.34061	15.5515
9.4122	24.077	28.201	4.384	3.9	7.6622	8.4778	13.4626	17.5652	15.4591	15.7901	22.8898	29.326	20.535	35.122	28.918	34.725	16.6792	7.0404	3.3412	5.0401	5.0025	3.6385	3.4418	5.3073	4.8402	6.9138	18.9627	17.6973	23.7054	19.3271	19.3035	15.2271	16.6122		0.344979	15.2295
9.5313	20.751	27.403	6.434	5.1857	6.9886	8.0412	12.1825	16.1654	15.5708	16.6652	16.4815	29.426	21.634	34.109	25.365	28.148	12.8564	6.6906	5.1496	5.5662	3.3182	6.3208	3.0951	2.8273	5.2493	7.0064	21.2725	18.1786	20.6496	16.9573	24.4989	17.08	16.0141		0.349344	14.6449
9.6504	22.542	26.882	5.654	3.8666	8.2895	7.0281	12.581	15.0248	15.977	19.4356	19.0675	31.792	23.625	39.048	30.6	28.639	15.3933	8.6423	6.0051	4.8528	5.6012	5.7403	5.6189	2.6818	5.2557	6.5305	24.7138	16.3391	17.8179	12.6798	21.4514	15.1074	13.8402		0.35371	15.1007
9.7696	23.959	30.929	5.615	4.8063	5.1035	8.6508	12.1524	17.0981	14.3265	14.7401	21.323	29.567	21.117	36.397	27.298	20.862	15.9555	6.395	5.9204	6.7591	3.1771	4.8757	4.062	5.1817	4.4394	7.8165	25.6627	22.4985	16.492	12.8159	14.5869	13.2045	11.4376		0.358079	14.4008
9.8887	19.901	27.918	8.8	4.2404	3.8806	8.5466	8.9986	15.948	10.1415	15.3367	22.0408	22.561	20.645	40.823	27.491	24.079	11.7392	8.6719	4.7419	4.3837	3.6212	5.8181	3.9291	5.4666	4.0885	8.4107	21.9316	19.7408	24.7729	16.8101	15.315	14.3291	17.3577		0.362444	14.3176
10.0079	22.664	26.902	7.714	5.3527	5.6734	6.0013	15.8865	16.9147	10.5884	17.4893	24.0734	22.943	19.171	32.899	34.564	22.549	14.7178	6.5061	6.8009	2.9626	3.7353	4.0955	3.5325	1.8113	4.1836	8.5689	14.5741	17.6642	24.3136	14.9806	15.6231	18.1208	14.7168		0.366813	14.1907
10.127	24.811	26.932	9.356	4.2931	5.6386	7.4877	15.658	17.2083	13.7639	17.2259	25.3972	24.185	23.627	39.911	26.662	24.551	15.1636	6.9859	5.0628	6.4283	5.685	7.3139	3.5083	2.3297	3.3218	8.7631	17.443	20.7081	22.6952	19.1715	18.9695	12.8778	13.18		0.371178	15.0399
10.2462	18.334	28.521	6.69	4.1697	4.6055	7.0648	11.9242	16.2036	14.1038	13.1791	26.39	21.493	23.507	42.421	24.508	28.237	14.3842	8.4926	3.9087	6.2845	1.8884	2.4771	2.4793	3.9368	3.7888	7.8586	20.1272	20.5344	25.3255	20.4521	18.5665	10.964	13.6413		0.375547	14.4382
10.3653	18.933	35.328	5.851	5.1919	7.2679	5.9709	12.3976	13.4179	14.5574	18.9021	24.2337	22.01	24.976	40.598	21.802	29.665	14.9057	6.9817	3.4832	3.4559	3.0929	4.2283	1.2765	3.2532	3.4509	9.3073	19.5411	16.8072	20.7608	13.0568	16.0586	9.0372	10.068		0.379912	13.9354
10.4844	17.651	41.691	4.797	5.2062	3.9567	5.7642	15.8204	14.5502	12.1316	18.6234	17.808	19.744	23.113	32.979	18.827	31.15	13.0894	9.5769	4.5561	3.4897	3.9152	3.3654	2.0229	2.9559	4.4994	9.4492	18.9479	17.6121	19.7888	15.4454	14.5795	11.5465	10.3255		0.384278	13.6054
10.6036	18.913	39.225	4.075	4.9521	5.0782	10.2561	12.6615	17.3882	11.6814	14.2038	21.7671	23.715	27.524	30.564	23.049	32.612	14.8706	8.1053	3.852	4.1814	4.6106	4.258	3.8246	3.6688	4.1151	9.0006	17.4363	18.1182	15.9471	15.2124	15.126	12.3076	10.6121		0.388647	14.0276
10.7227	22.562	36.792	5.212	5.5894	6.0859	6.2402	13.7378	15.8671	17.3889	13.7285	19.0632	20.289	26.434	32.853	19.707	31.839	12.498	6.8758	5.0103	5.8287	3.4364	5.1572	5.464	2.4991	5.7439	7.4227	15.7742	18.0526	17.6862	15.1409	14.8398	10.5644	13.378		0.393012	13.9019
10.8419	19.219	34.786	6.765	3.3489	7.808	7.855	12.5038	13.4372	16.2496	15.2796	18.5876	18.546	31.839	32.292	23.153	34.172	10.4683	5.2495	5.6054	3.2862	4.3283	6.2344	3.1756	2.9258	5.4868	9.428	15.1471	17.6809	15.052	13.1395	13.7298	9.8132	12.5471		0.397381	13.6103
10.961	17.877	29.862	6.279	3.6453	5.7954	9.5677	11.0231	12.278	16.1678	13.0638	17.4689	17.682	29.598	33.887	18.829	30.735	13.9941	5.8184	3.4311	4.6745	4.6223	2.9716	1.8945	4.699	7.1981	9.2389	16.6938	18.3788	16.4594	15.0383	14.6218	8.4433	13.5926		0.401746	13.1979
11.0801	22.227	28.646	5.478	4.6252	5.584	8.598	12.5403	16.6245	16.4002	11.2112	19.5643	12.877	25.834	29.163	20.834	30.715	13.6339	6.3563	4.9136	3.8287	5.9289	4.391	3.0341	3.135	6.1419	7.7748	17.6849	16.0635	16.2889	15.074	11.4473	11.8853	13.4207		0.406111	13.0886
11.1993	19.116	21.255	5.979	2.5642	4.0387	9.9661	11.6284	12.9595	14.8833	18.2495	12.8762	16.864	25.722	30.962	21.794	29.624	12.0674	7.7393	5.4156	5.2919	4.0383	5.6419	2.6666	2.7202	5.5189	7.3604	15.5182	20.2276	15.6173	17.2918	15.2428	11.0247	9.2714		0.41048	12.7617
11.3184	21.244	26.665	8.794	3.6937	3.373	8.7415	15.9431	14.9277	11.9796	17.4852	15.4775	16.117	24.082	30.286	26.781	30.348	14.1039	5.6819	6.5892	5.127	3.8156	6.966	2.7201	2.9416	6.225	10.5049	16.3395	21.2152	13.5571	20.2966	14.2687	13.3465	8.3356		0.414846	13.5749
11.4376	21.475	18.057	6.386	2.0258	2.5164	9.5452	15.2054	13.7712	12.8338	17.448	14.5072	17.377	15.937	24.241	22.846	35.284	15.349	7.0406	4.7895	5.2699	4.7315	4.4766	2.726	1.6241	5.4092	5.7493	19.4785	18.0292	12.3862	21.146	17.8848	10.6778	13.4853		0.419215	12.7185
11.5567	18.806	14.565	5.648	1.6469	3.1025	8.2751	13.6381	14.6194	16.3003	20.6189	18.417	14.09	14.645	25.548	26.213	32.179	13.69	6.0677	5.0881	3.832	2.5285	3.4185	3.1778	2.5296	5.1996	7.9418	16.2853	18.3807	15.9201	20.5134	14.5102	9.5899	12.702		0.42358	12.4148
11.6758	19.605	14.643	6.227	4.1005	3.7184	13.2957	13.6969	14.3092	15.2373	17.9628	16.0239	18.856	11.038	22.927	28.501	28.159	12.414	6.1764	5.9307	5.5801	1.6938	2.1962	2.8054	0.7333	3.4219	6.8874	16.1622	20.8192	15.4263	19.283	15.989	11.8776	15.8843		0.427945	12.4722
11.795	26.163	18.55	7.039	3.0772	5.2521	10.7447	13.0012	14.7285	13.1505	14.62	17.9086	19.511	12.9	22.142	26.766	29.297	11.7106	5.0142	5.6404	3.9834	2.6994	3.4606	2.356	0.8562	4.7086	6.9426	15.6136	17.4118	12.9343	14.7708	14.5008	12.5102	9.6546		0.432314	12.1097
11.9141	21.086	16.138	4.24	1.7376	6.4797	9.6449	11.7479	13.8233	14.3576	15.5516	17.0314	16.511	8.381	17.44	26.055	26.351	14.8609	6.0659	4.5602	6.1103	2.5384	3.4269	2.7261	1.5364	5.4159	7.0203	15.3807	17.1991	14.5225	13.4345	15.3051	14.9702	10.7419		0.436679	11.5876
12.0333	20.077	16.616	4.543	1.7585	5.2221	10.0246	11.4245	15.6404	14.0738	18.2284	25.9529	17.372	11.603	16.336	25.665	23.544	17.2098	4.8774	3.8696	2.997	2.9116	3.1752	1.7157	2.7121	6.7499	12.1709	16.5968	16.1178	12.2153	12.968	15.6635	9.6568	12.052		0.441048	11.8709
12.1524	21.455	15.94	6.01	3.2103	5.5837	10.5484	13.2805	16.1393	14.5575	14.1356	17.9722	15.52	9.064	11.322	26.804	21.711	15.1727	6.3272	5.0452	4.9946	5.253	4.2382	1.5823	2.5332	4.1765	10.5757	18.2031	17.739	15.1683	12.1158	14.3245	10.3716	9.0808		0.445414	11.5199
12.2716	20.206	19.05	3.718	1.2713	3.1188	13.7151	10.925	14.1128	13.5167	19.9273	13.0903	14.092	7.818	12.602	27.21	18.164	14.4404	4.1201	3.9784	4.4726	2.756	4.4351	1.8153	3.7698	5.9186	9.8732	22.3788	17.2531	15.5451	11.519	12.3184	11.4331	8.1149		0.449783	11.1115
12.3907	20.127	22.185	3.333	1.4263	3.7063	11.55	9.2373	13.4402	16.0188	18.99	18.4803	13.338	9.535	8.638	24.689	23.823	14.7847	3.8434	3.603	5.6773	5.3546	2.3852	1.2779	2.2163	5.5289	10.477	24.736	17.3167	12.8014	12.1484	11.6792	9.1757	10.5318		0.454148	11.2744
12.5098	17.592	16.396	5.466	1.9242	2.8988	12.6734	7.8543	16.269	15.6745	19.5273	19.9301	10.559	7.795	9.687	21.019	24.093	17.4909	4.4542	4.3001	3.3299	3.7445	2.0051	1.3284	2.5232	4.236	9.4439	25.9238	17.4271	11.5874	13.4811	11.6845	8.5538	9.9848		0.458513	10.9351
12.629	18.6	12.307	5.905	2.2472	3.0134	10.4141	10.469	14.9809	13.0366	19.9412	21.5356	10.234	6.015	7.59	23.215	24.228	14.4772	4.7896	5.6966	2.3052	1.7799	3.6215	2.8526	3.3568	4.2343	10.8881	27.725	16.4166	11.7135	12.5543	11.1364	8.2215	9.4721		0.462882	10.7568
12.7481	19.967	13.237	3.865	2.4503	3.5874	11.5057	10.3445	12.3803	16.0814	16.1389	19.7336	14.485	5.087	6.928	22.635	23.186	14.53	6.5493	3.6279	4.3184	3.209	3.2067	1.99	1.2894	5.818	8.8692	19.5924	13.2895	12.6549	13.0266	15.1938	9.0301	10.182		0.467247	10.5451
12.8673	17.339	16.075	6.21	2.5066	2.8333	10.7358	13.5099	16.6271	16.1287	19.081	22.479	10.635	7.096	4.977	24.916	27.813	11.3568	4.2262	6.2737	4.116	3.963	4.1676	1.8809	1.5922	4.8844	7.3108	16.5143	14.2888	12.9134	14.2617	14.8437	8.9746	10.2228		0.471616	10.9319
12.9864	16.407	13.091	4.424	1.6378	4.8529	9.9403	9.8959	15.0589	18.3102	16.5447	18.9129	10.629	6.314	5.832	26.7	24.747	12.6705	3.0759	4.86	2.8266	2.8911	2.5154	1.9925	2.13	1.9852	9.3183	14.7242	17.3739	8.6932	12.3607	10.2465	12.3954	8.603		0.475982	10.0594
13.1055	19.653	14.341	3.525	3.0782	4.7761	12.5211	12.0988	11.462	17.9458	22.5285	23.3095	12.681	3.904	5.976	32.945	25.802	15.5705	3.4179	3.6189	2.9181	2.0193	3.8739	2.9175	2.4225	5.0521	10.5331	14.5994	18.5198	7.2825	14.2876	9.5584	6.0515	8.7881		0.480347	10.8478
13.2247	12.75	15.934	5.173	3.5795	5.9498	11.845	12.5793	11.6814	16.4888	21.9762	23.3474	10.151	3.694	6.139	28.803	23.233	13.5025	3.6285	5.8709	2.5927	1.8663	6.637	2.7356	2.902	4.4608	10.0171	14.8152	16.2411	8.3423	14.2567	9.826	10.9423	7.5565		0.484716	10.5915
13.3438	16.555	10.975	3.658	3.8731	6.5412	8.8043	12.0295	14.4985	14.0505	20.2611	24.2396	6.58	2.557	5.917	25.318	23.399	11.1913	5.0812	5.9344	3.0928	1.4401	4.2582	1.8641	2.0862	3.5187	11.0957	15.4698	12.7819	12.0474	11.4541	13.4883	11.3561	7.5853		0.489081	10.091
13.463	14.49	10.997	4.595	2.2958	7.2893	8.6592	10.7459	18.2416	15.6656	24.7054	22.5855	6.308	5.348	4.13	30.941	25.726	12.035	5.9441	6.3481	4.7242	1.1675	2.0337	1.4931	1.4502	3.0432	7.9131	14.4857	16.874	9.8118	10.9489	10.2013	7.7323	9.4375		0.49345	10.2535
13.5821	17.121	13.424	5.067	1.3722	4.8868	8.5407	12.9334	16.9888	19.3046	28.5745	22.8672	5.791	4.666	4.231	21.906	25.385	15.586	5.3957	4.5253	4.516	2.3496	3.3441	2.5998	1.0057	4.4507	8.1666	16.4772	12.6746	10.2094	13.9318	13.3673	8.226	7.9081		0.497816	10.5392
13.7012	16.888	12.923	5.08	2.8677	4.0979	12.6717	17.3058	13.53	18.1971	18.2835	19.1491	5.869	3.993	5.973	18.955	18.93	14.2633	4.2236	3.3391	2.8936	0.9894	3.9303	2.8983	1.3119	6.8568	6.3688	17.1375	19.9448	12.7794	12.7499	12.6761	11.377	6.7307		0.502181	10.1571
13.8204	14.734	11.191	3.227	3.6958	3.2988	12.8286	16.3254	14.2695	12.9548	23.8236	21.8005	4.588	4.457	3.639	22.905	20.045	15.3833	2.5227	5.2511	4.0831	1.313	3.9916	3.8675	2.2746	7.1247	6.6945	13.4061	12.8172	15.0696	10.835	9.2115	9.9801	11.985		0.50655	9.98768
13.9395	14.895	12.34	3.271	2.0048	4.3285	11.5128	14.9491	12.9557	13.9519	21.9403	16.6853	7.91	4.053	3.738	21.381	22.151	16.8952	2.429	6.534	3.3622	2.2983	4.2303	1.9046	1.8499	4.1065	7.3352	17.3886	10.6601	15.9922	10.642	8.2676	9.3199	7.7158		0.510915	9.66663
14.0587	13.147	15.098	2.86	2.6931	5.8707	11.4013	15.875	18.3243	13.2862	24.1573	15.9327	5.928	3.871	3.438	32.375	19.713	14.5645	6.0527	5.5596	2.2115	1.5788	4.3567	2.7953	3.3612	4.7631	7.6079	17.0514	15.5151	14.6391	8.9667	10.1816	10.1056	6.7682		0.515284	10.3045
14.1778	21.945	14.956	3.428	4.8015	3.0882	12.8434	13.2624	19.6283	17.0771	23.048	17.7031	6.336	2.886	4.092	25.441	21.345	14.6511	4.983	6.5226	2.6121	2.0617	3.9696	1.6811	3.3693	3.7761	7.609	17.3763	15.9534	16.1688	8.9906	10.2663	11.177	6.853		0.519649	10.6031
14.297	16.779	13.99	3.607	3.5819	3.6566	9.7645	14.6726	18.7009	15.7502	20.7079	18.3853	5.972	5.762	2.925	19.966	19.801	16.785	4.4623	5.1036	4.9752	1.9576	2.3936	0.7775	1.2485	6.1496	10.978	23.1197	13.2484	12.5726	9.7269	11.4096	9.1723	6.4836		0.524018	10.139
14.4161	17.846	14.817	3.269	3.1357	2.2422	10.063	12.827	12.8144	15.6552	18.2608	17.1321	4.787	4.759	2.244	21.722	22.176	13.0789	3.313	3.3486	4.43	1.4758	3.1032	1.2854	0.65	4.3188	10.6472	21.4616	19.2582	12.3363	10.8467	12.9636	9.9356	8.2817		0.528384	9.83288
14.5352	19.899	10.307	2.009	1.673	2.8184	16.269	15.0466	17.2801	13.5157	18.0292	15.9644	5.341	4.416	3.878	19.48	28.13	15.6528	2.9914	4.0807	2.4086	2.6979	2.1121	1.3699	1.9213	4.4648	8.2384	15.5124	20.4399	10.5125	10.8335	9.2359	10.0363	8.4297		0.532749	9.84832
14.6544	18.704	10.12	1.783	1.9656	5.8089	12.4718	15.8947	15.5938	17.2795	16.4545	17.747	5.423	2.246	2.273	15.6	24.301	13.5656	4.562	3.7225	3.5374	1.8789	3.2245	1.7157	3.633	4.4586	9.2387	14.4797	19.1861	13.5186	7.1137	9.7717	9.9085	11.0302		0.537118	9.64276
14.7735	14.87	9.212	2.649	1.5767	4.454	12.7505	15.3343	17.401	22.9405	20.8214	18.3779	6.321	2.425	4.584	14.347	22.657	12.1569	5.1298	3.4953	3.0492	0.8399	1.4819	2.1672	3.6403	6.2458	11.1921	17.9331	17.0012	16.2672	11.5094	9.0039	9.4085	10.11		0.541483	10.041
14.8927	19.629	11.554	3.48	2.113	4.3493	12.8137	17.8583	20.2655	16.5705	24.3589	14.8545	6.771	2.356	3.289	17.897	17.236	16.237	4.281	4.53	3.2978	0.9211	4.4952	1.8065	2.9487	3.9312	7.7364	18.3788	19.4775	12.894	12.0126	6.5894	9.2747	7.93		0.545852	10.0648
15.0118	20.382	10.337	2.54	2.5686	5.0093	14.7533	20.6929	20.0132	18.7813	20.4231	19.0759	5.937	5.567	3.401	15.274	14.98	16.5322	3.995	5.4869	1.9548	1.6974	3.1132	1.6854	2.1692	3.0133	11.3136	21.8052	17.3849	13.5179	8.0384	10.2944	9.3177	9.4255		0.550217	10.3176
15.1309	17.271	10.243	3.727	2.4878	3.5535	12.4362	17.0741	20.2067	19.1154	23.1562	17.3836	6.884	2.685	4.624	17.606	19.865	18.2925	4.5929	5.232	1.6298	1.0363	5.5081	1.5792	1.767	4.8435	11.1751	16.5873	18.4918	13.0661	9.419	6.411	11.6887	11.2496		0.554583	10.33
15.2501	12.913	9.873	3.349	2.4224	2.0267	11.8055	14.5833	18.611	18.8317	19.6681	16.6014	5.35	5.206	3.753	14.219	19.093	15.5951	4.6916	3.2348	2.2343	1.2028	2.3093	2.886	1.7503	5.2426	7.8489	12.9277	16.8189	13.8842	10.0087	7.0268	10.7691	10.0078		0.558952	9.2953
15.3692	16.576	10.095	3.371	3.9886	4.3826	16.7	11.1863	20.489	16.583	19.187	18.9991	5.411	2.446	3.838	18.663	18	15.7211	4.4154	2.8685	2.0039	1.5744	2.6773	1.5053	1.4002	4.2275	10.1029	12.2617	11.121	13.0032	8.6088	10.873	9.7887	9.0581		0.563317	9.42808
15.4884	10.439	12.581	1.952	3.5324	4.9329	17.4244	11.6478	21.0441	19.677	20.2616	21.3967	5.445	2.86	3.575	21.61	21.299	17.947	5.4732	4.1901	2.8947	2.0709	4.0734	3.2939	2.4271	5.2466	14.081	13.5138	12.7967	13.6614	9.1057	10.3008	11.6384	9.5865		0.567686	10.363
15.6075	10.849	7.519	2.881	2.4143	3.9438	18.4125	11.8169	22.271	19.2506	21.698	18.9651	4.071	1.916	4.962	18.067	19.642	24.9717	3.9621	3.4197	2.622	1.2599	3.6129	1.7711	1.925	3.5857	14.6072	16.0798	13.4679	14.1863	9.7573	10.4911	11.188	8.9137		0.572051	10.1364
15.7266	14.846	7.246	2.181	3.4196	3.2424	14.9179	15.3214	19.2098	17.6283	21.0717	18.4046	2.763	3.766	2.138	14.386	20.383	18.7548	4.712	4.643	2.6725	1.119	3.8979	2.2795	1.7465	4.575	15.0473	15.2516	14.816	16.1209	9.2074	9.8072	10.2082	9.5824		0.576416	9.85957
15.8458	13.457	9.508	3.221	2.9009	7.062	18.5783	18.9317	16.0658	21.2752	23.6375	18.9575	4.927	3.46	1.697	15.448	18.816	15.83	3.1639	3.2937	1.7539	1.3171	3.2851	2.5902	1.992	4.9838	12.7289	19.9047	14.7613	14.4202	8.3218	10.2716	12.2975	9.771		0.580785	10.2615
15.9649	14.038	12.597	3.609	3.0517	5.1921	22.5277	17.8698	20.2397	18.5788	20.2863	15.6042	4.457	3.151	3.274	18.333	20.368	18.2654	3.0896	3.2761	2.988	1.4523	3.5449	2.503	1.3255	5.1522	9.3533	18.435	14.6874	16.8666	6.1988	10.042	8.2998	9.6443		0.585151	10.2516
16.0841	16.907	12.323	2.742	2.1943	6.9967	19.262	17.6322	22.9053	18.0455	22.28	19.9512	4.997	2.576	4.126	13.019	21.411	15.9721	4.5842	2.9953	3.8953	0.628	3.0653	3.0353	2.4066	3.9441	11.827	20.4836	19.7638	15.4035	8.4801	8.5259	13.6099	9.2776		0.58952	10.7656
16.2032	10.368	12.554	1.966	1.5677	6.1013	19.1191	15.125	16.2966	17.402	17.8132	17.5397	5.112	3.645	3.158	15.485	16.407	19.6022	4.2118	5.4464	2.6745	2.0747	3.4927	4.296	1.8103	3.0496	14.1242	19.2566	16.2369	15.2509	12.3879	8.1235	12.0395	9.076		0.593885	10.0853
16.3224	13.375	9.315	2.016	5.0704	3.8862	18.4432	12.7023	17.6112	19.6571	22.6178	18.9804	4.471	3.223	3.738	22.051	21.098	21.0036	4.829	6.5881	1.5859	1.5848	3.4966	3.1208	2.6651	6.1506	12.0923	17.1934	15.436	16.3078	12.0452	11.612	9.0562	8.1817		0.598254	10.6426
16.4415	15.743	8.631	3.801	3.3391	7.2741	16.2388	13.8066	21.7707	17.6199	24.7754	16.7994	4.232	3.532	3.522	14.722	22.154	19.0093	6.6648	4.4042	1.8918	2.0668	3.1056	2.5478	2.0607	5.2714	14.0098	16.4902	17.0535	15.4482	10.5054	13.7984	9.0193	8.9882		0.602619	10.615
16.5606	14.219	7.006	1.981	3.2742	9.505	15.6017	18.4786	18.4295	18.1699	19.7826	18.1552	5.42	1.414	1.961	12.523	23.525	18.9586	5.4249	3.6957	3.3582	2.6188	2.7013	2.5456	2.678	4.4818	13.0006	19.9926	14.0307	15.3547	7.2286	10.1442	11.9683	9.7999		0.606984	10.2251
16.6798	14.522	6.922	1.261	3.3766	6.0243	18.0729	20.8434	12.8751	20.2041	20.9591	16.5124	6.183	1.942	3.491	11.755	19.349	20.3415	4.4639	4.0818	2.6734	1.501	2.5163	2.664	3.3449	3.8501	10.2735	14.2851	15.29	17.2409	8.0768	9.1463	9.6493	10.1581		0.611353	9.81363
16.7989	13.627	10.272	1.343	4.3024	5.629	21.1673	20.6103	14.2686	20.8849	22.4633	15.7682	6.486	3.809	1.659	13.364	20.291	22.0269	3.3608	4.2589	1.4516	2.196	2.4336	1.8538	3.8847	5.7889	13.9746	22.5272	18.5806	17.0633	9.5575	9.6056	9.9611	8.8018		0.615719	10.7052
16.9181	16.442	7.962	1.382	3.4731	4.9178	19.0909	23.5359	19.4449	19.9707	22.7915	15.5535	4.604	1.948	2.302	14.763	22.804	16.944	4.474	4.0405	3.9467	2.8277	2.8786	1.7286	1.7783	5.2083	12.5461	20.7296	16.5428	16.2753	8.5425	11.8478	9.2686	10.6077		0.620088	10.6416
17.0372	15.702	12.706	3.222	2.9474	4.8259	17.9251	20.1691	19.5604	23.1561	23.8257	19.3073	3.324	1.302	4.206	18.367	19.079	20.551	2.9021	5.1332	3.8611	1.5925	2.4675	3.4464	2.0212	5.8531	13.3449	19.7443	18.7564	16.71	11.8515	10.2406	10.584	8.1745		0.624453	11.1169
17.1563	18.298	11.221	1.887	2.599	6.6143	17.1891	14.4211	23.6151	23.3857	24.6085	17.5335	4.36	1.116	3.184	15.678	19.808	18.4618	4.9082	5.8119	3.6743	0.8372	2.3343	2.7902	1.7395	4.3491	14.548	18.952	20.2053	15.4991	11.3187	12.0851	5.9161	10.5591		0.628818	10.8942
17.2755	14.831	9.022	1.264	2.5778	7.5405	21.1759	16.8039	19.3169	16.8325	22.9224	19.8398	6.315	2.798	3.226	15.351	21.176	19.6534	7.308	6.2071	3.639	1.3281	2.7738	2.5748	2.621	3.6835	14.8283	19.572	16.5171	19.7002	9.4044	7.8811	8.3307	9.7357		0.633187	10.8106
17.3946	16.319	8.458	3.48	3.0206	5.9833	16.3565	16.889	21.3879	19.5333	20.1255	20.4091	6.718	3.484	3.757	13.365	24.963	24.4115	6.2098	3.1238	2.6196	1.3205	2.2944	1.2501	2.8127	3.9741	14.6364	19.3093	15.0161	18.2334	8.0868	6.1386	12.3556	8.4774		0.637553	10.743
17.5138	17.481	10.463	2.393	2.5095	6.3168	14.5603	15.2772	20.8234	19.3773	18.7489	21.7397	5.81	2.113	2.179	15.149	23.723	22.3717	6.2587	2.7841	2.2135	3.2805	2.5375	2.4689	1.8848	5.0274	13.8077	24.6206	15.695	13.8651	10.9971	10.6014	11.9886	5.9195		0.641921	10.7572
17.6329	17.968	9.491	1.38	2.5472	8.1568	16.8271	17.9983	17.5318	19.0906	19.7892	23.825	5.726	2.54	4.191	16.951	22.397	15.9502	4.8639	4.0996	3.7959	1.9553	2.0954	2.9531	1.6379	5.2596	11.7217	21.569	19.333	13.1874	10.2399	11.1818	11.4759	7.8582		0.646287	10.7754
17.7521	13.758	9.351	2.519	2.868	10.548	18.471	19.8955	19.6183	19.1263	26.1426	19.7544	5.007	2.435	4.345	13.85	24.078	17.0747	5.0586	5.0382	3.5241	1.385	3.7366	2.3753	1.4313	5.4491	14.7261	20.6629	19.2466	18.5938	13.5342	12.706	13.7338	6.8043		0.650656	11.4196
17.8712	19.25	7.887	4.052	2.2509	10.3942	16.8222	17.2175	18.2584	17.4992	19.5395	23.7349	4.659	3.201	3.381	12.306	20.147	23.5736	4.3341	4.8434	3.5871	1.534	4.7427	3.0158	1.5286	4.0365	13.5189	19.2009	18.2914	17.4451	12.8643	11.4037	11.7767	7.3598		0.655021	11.0199
17.9903	18.693	7.833	2.967	2.5945	10.7066	19.8482	17.8909	16.0151	15.5874	24.2166	20.0895	4.987	1.989	3.486	18.687	15.331	23.4432	2.9313	4.582	2.0973	1.728	2.9309	3.2543	3.7747	5.2567	16.1262	16.6732	16.6852	13.3397	8.1571	15.2602	7.4474	7.0666		0.659386	10.6568
18.1095	14.188	7.225	1.665	3.8	9.1354	16.8027	20.6966	14.7654	19.0377	16.7221	21.3511	4.461	2.761	2.842	12.608	17.133	17.0683	2.6527	4.099	1.4897	1.6729	3.3414	3.3524	2.534	4.911	14.6745	16.9613	17.9773	15.8682	10.54	11.3802	8.7409	5.4881		0.663755	9.93775
18.2286	16.401	5.92	2.261	2.8622	7.6902	18.7342	17.7253	17.0897	20.6341	19.4436	24.1876	5.72	2.83	3.204	13.369	14.992	17.0626	2.8712	3.5387	3.2413	1.7039	4.3934	2.2942	2.7968	4.4765	14.0226	16.9429	18.493	15.4239	12.6733	14.673	6.0157	6.2827		0.668121	10.3021
18.3478	18.777	6.431	4.384	2.3976	8.4983	19.1045	17.7379	20.1665	19.3109	18.4423	21.6926	7.221	3.108	1.68	10.323	23.185	16.0162	4.4129	4.9067	3.031	1.8109	5.4333	2.3754	2.3415	3.8786	17.2559	19.9807	19.5984	17.1508	12.6351	17.1095	8.6649	8.1168		0.672489	11.1266
18.4669	20.29	6.676	3.845	3.0323	15.2635	17.9118	18.2974	21.9256	19.2171	20.0449	22.6309	6.217	2.998	1.585	10.53	24.607	21.1787	4.5598	2.3878	2.5063	2.2166	3.109	2.7428	4.4378	4.6697	14.5481	23.974	22.5428	18.8258	13.7052	14.0101	10.4232	7.4854		0.676855	11.7695
18.586	17.14	10.915	2.986	2.384	11.9219	24.5086	16.2598	20.2246	21.5376	22.4202	21.1517	5.258	2.403	1.43	12.354	14.143	16.606	4.4501	2.73	2.7643	2.9401	2.8683	3.315	2.0882	5.325	14.6504	21.1698	22.6598	16.1934	10.9978	18.6591	7.4136	7.1262		0.68122	11.1817
18.7052	16.63	9.1	2.39	3.5192	9.8974	20.1255	19.9355	18.1667	19.7451	19.7338	18.965	5.506	1.865	1.546	14.458	18.768	14.4063	5.2635	5.2883	5.0309	2.7623	3.8231	4.5347	1.1724	5.9233	13.0174	24.2277	22.6187	14.3731	12.7457	19.0457	9.0783	5.8241		0.685589	11.1966
18.8243	18.814	9.199	3.181	2.8519	9.6871	18.2032	21.9415	22.0768	19.8715	23.1934	20.1802	6.854	2.398	4.848	11.75	22.336	19.8762	3.149	4.8255	3.7825	4.2872	3.9509	1.9535	2.1132	6.5801	12.7994	21.4007	23.3581	13.1269	14.2827	17.2747	9.2363	7.824		0.689954	11.7335
18.9435	18.038	6.837	2.897	2.1164	6.4686	21.3419	21.2189	20.4062	23.5357	23.0958	18.8173	6.329	3.908	6.772	15.263	23.063	21.2101	3.5002	3.6376	4.2745	4.2859	3.6658	2.2512	1.9556	4.1575	14.1162	25.2463	22.8621	13.4367	10.0898	15.724	7.1656	8.147		0.694323	11.6919
19.0626	16.468	7.321	1.521	2.2103	10.7222	17.5068	20.7167	19.9153	21.4069	19.7078	19.8622	5.935	3.448	3.004	17.043	25.836	19.6818	3.3445	3.8737	5.5842	2.834	6.8901	3.9256	2.5834	2.6757	14.8972	25.7625	21.2831	16.5645	12.5905	10.8838	9.0176	8.2973		0.698689	11.6156
19.1817	16.551	7.07	3.6	1.4219	11.0784	19.0554	22.4565	25.8091	21.3778	18.0257	15.4972	9.324	2.645	4.457	12.877	20.98	22.1183	5.9594	2.3907	5.6157	4.4863	3.5573	3.6415	2.6016	2.3709	13.5103	19.716	21.6447	16.9231	11.8385	15.7458	13.1323	7.0254		0.703054	11.6516
19.3009	21.551	7.548	3.353	4.3015	10.2293	20.8319	20.9854	22.7548	24.2921	20.7227	19.2745	6.872	2.323	3.483	10.816	17.955	19.6647	4.4508	3.4522	3.7923	4.0097	2.0021	2.3858	4.5203	2.6079	14.5455	21.5401	24.535	16.3274	14.4046	15.5302	9.1631	5.4829		0.707423	11.6881
19.42	18.34	7.189	5.303	4.8933	11.034	17.752	19.8682	21.1353	19.5786	20.3904	21.2689	5.905	2.136	3.391	10.291	21.887	17.5818	3.941	2.7948	2.4474	2.0914	2.1672	2.9861	5.462	3.2268	15.3727	20.291	24.0062	19.9312	13.0765	14.9016	9.8549	5.6041		0.711788	11.397
19.5392	15.783	7.484	3.161	3.0496	9.3131	19.5887	18.5854	21.8215	22.9096	15.8826	17.4083	9.096	2.639	2.793	13.984	19.206	20.9453	4.1003	2.4837	3.6593	3.3667	2.9764	2.4624	5.4383	4.1241	15.5682	20.1406	24.5517	24.1903	14.8906	11.9477	7.8214	6.4743		0.716157	11.4499
19.6583	13.089	7.162	1.983	5.3002	12.1203	16.8074	18.0957	17.5926	19.0841	16.8142	24.6358	10.105	3.26	2.6	10.661	13.896	20.8103	5.9755	2.165	3.7322	2.6099	3.2728	2.0474	3.098	3.6592	16.1282	18.6697	23.4799	19.5591	12.0049	9.919	9.2883	6.0129		0.720522	10.7769
19.7775	16.994	8.44	2.116	5.4917	11.2641	16.2526	22.9326	20.2986	25.4605	16.1902	24.1964	8.451	2.947	3.277	14.652	19.438	16.4114	5.8981	3.1944	4.5487	2.3973	5.1475	2.4019	3.0235	3.1176	16.263	20.7157	23.3674	20.9004	14.8902	6.3967	4.9129	7.3346		0.724891	11.4946
19.8966	14.649	7.911	2.426	6.3834	12.7011	16.0747	22.718	19.5706	23.9353	14.5529	17.0963	9.666	1.834	5.744	15.894	24.846	15.9856	5.5487	3.3164	3.3639	4.1625	4.9019	1.1405	2.2882	5.1844	15.893	22.0049	19.7904	20.6248	17.8669	7.644	8.0482	5.9082		0.729257	11.5053
20.0157	15.652	7.791	4.885	3.4997	11.5331	12.8872	17.3112	25.4487	19.0239	19.4218	22.709	11.151	3.711	4.814	13.925	22.431	20.049	6.6794	4.0029	2.8002	2.9058	6.2968	1.4755	3.7447	6.017	16.8725	18.9822	19.4924	17.5517	11.4217	9.239	7.9141	4.8989		0.733622	11.4103
20.1349	14.377	8.688	2.967	2.4621	11.4003	16.2866	15.8011	25.5568	17.8778	16.8623	22.6462	9.298	3.499	1.983	15.713	17.165	19.0742	6.935	3.5203	3.7169	2.9773	5.9772	3.448	3.5651	3.1937	16.2164	18.1264	16.4484	16.7365	13.3792	10.6493	5.7095	5.6171		0.737991	10.8447
20.254	15.35	8.087	4.506	3.8523	13.7689	18.5997	17.0693	26.856	19.62	16.7526	19.9801	11.913	2.102	1.945	16.826	18.412	17.5535	4.4577	3.3976	4.1072	3.1094	5.4037	1.641	4.0263	3.438	15.9497	22.2346	22.5326	10.7308	14.0504	7.0039	4.7988	5.7333		0.742356	11.0851
20.3732	21.745	6.013	4.422	3.5578	15.3394	17.9031	17.0984	28.089	21.4641	18.8921	20.8488	9.238	2.682	5.822	14.739	18.477	17.292	3.9237	3.6061	3.2017	3.3401	5.0918	2.525	2.6011	6.4107	16.5405	21.2249	16.7589	14.0866	14.3047	6.7666	5.116	7.793		0.746725	11.4216
20.4923	19.261	5.073	2.872	4.5044	16.7431	18.1903	19.659	27.1424	24.1966	22.3818	26.5055	13.957	1.433	5.894	15.688	20.682	19.4311	2.0425	2.5693	4.4043	2.6151	3.6943	2.9322	1.6865	8.5418	16.1811	19.6482	16.1915	13.1968	11.2597	5.3247	5.7498	4.176		0.75109	11.6312
20.6114	24.416	7.033	2.718	5.8909	17.5176	18.8528	17.764	28.4464	22.962	18.659	18.1409	14.639	1.97	4.531	18.982	20.57	17.1684	4.1813	3.9738	4.3475	3.5749	4.8721	2.5438	0.7814	5.9889	18.2634	24.0504	17.0567	15.0116	12.44	6.8325	5.1546	1.5667		0.755456	11.8455
20.7306	17.914	7.524	2.962	6.8757	20.8008	19.8318	19.4087	26.1734	25.1438	19.2813	19.6358	14.36	3.088	2.813	19.955	19.63	18.9536	2.3859	3.0719	2.8525	3.9307	6.3012	2.6127	2.7963	6.7371	16.1499	24.3256	20.7906	16.8376	8.8169	7.6735	8.8508	0.9947		0.759825	12.1054
20.8497	17.184	8.796	4.031	6.4263	18.9846	15.9384	17.8036	32.7289	24.002	18.253	16.5697	11.844	7.082	3.376	24.335	24.595	21.5249	2.646	3.8909	3.2161	5.9599	3.9067	2.2544	3.5922	4.6487	18.7827	22.356	14.1835	18.7582	8.0948	7.2867	7.9988	2.1353		0.76419	12.2177
20.9689	19.285	6.755	2.286	6.9583	15.339	21.6576	22.3243	26.6367	23.1511	21.1086	19.7205	11.849	2.707	4.405	15.747	23.404	22.2846	3.9297	4.9348	4.3761	3.1682	4.7987	5.8721	4.3043	3.998	18.6781	16.7841	20.8189	18.9955	11.2274	9.8077	4.2322	3.1615		0.768559	12.2638
21.088	19.283	8.784	4.545	5.7145	18.8574	20.5717	18.4984	26.8691	18.6638	17.7964	18.8812	15.716	2.351	4.502	20.636	21.542	17.4042	4.4353	3.8916	4.335	4.252	5.442	4.0173	6.4655	5.2048	16.2478	19.5285	21.2033	17.0391	10.8703	7.3554	5.6701	4.3724		0.772924	12.1499
21.2071	16.778	7.711	1.556	6.7264	16.4621	21.8232	17.749	23.4318	21.5924	15.861	21.8018	15.019	3.142	6.518	22.072	24.132	18.719	4.7227	4.462	6.323	2.3301	3.6825	3.9699	6.9436	4.5558	16.1516	20.6693	20.8052	15.798	9.2884	6.2576	4.7581	3.1313		0.777289	11.968
21.3263	14.145	8.137	3.47	5.9371	18.2695	15.6762	18.889	25.2084	27.612	19.7911	18.592	20.709	3.972	4.177	24.596	19.847	18.0066	2.7187	6.5546	6.9149	2.946	3.4234	3.5	3.2303	3.1604	16.3635	25.6027	15.0247	16.2263	9.6402	6.725	3.7293	2.7892		0.781658	11.9874
21.4454	21.242	7.217	3.812	6.1866	17.1099	21.2664	15.9354	26.4179	20.666	22.1115	17.3193	19.017	4.389	3.789	22.615	18.374	18.1563	2.9003	5.1355	4.53	3.666	3.3345	3.9277	3.3618	5.0931	12.7931	21.7934	17.4533	16.6146	10.0125	5.3443	4.052	3.0862		0.786024	11.7795
21.5646	16.659	11.222	5.735	5.886	23.3695	21.5711	18.5045	25.3194	21.7268	18.3747	20.1527	17.296	3.942	3.141	22.947	18.297	21.5985	4.5698	4.7758	4.7224	3.2188	3.4749	4.4689	3.5587	3.7736	15.1134	20.2177	17.0321	12.9356	13.5364	6.733	1.2059	2.2971		0.790393	12.0417
21.6837	14.786	7.725	2.998	5.9197	21.5284	20.0191	16.8935	24.7579	24.2732	18.8283	21.836	22.37	4.405	2.235	21.214	18.955	24.7902	5.2163	4.2613	3.9886	3.43	3.8981	2.821	3.7163	5.3342	16.2732	21.6674	17.0546	17.7472	10.4052	4.7576	2.3699	2.6801		0.794758	12.0956
21.8029	14.907	7.915	2.244	4.9646	19.6747	17.814	19.0142	20.9265	21.4173	17.4848	22.0708	29.398	3.154	3.68	24.562	24.217	19.7996	2.0042	3.9052	3.5592	4.0565	3.7855	3.0149	3.2171	5.1607	21.2326	22.7052	20.6922	17.1491	10.8737	3.2206	3.5453	0.8677		0.799127	12.1889
21.922	19.333	7.222	5.227	7.3765	22.7699	20.7426	16.4974	22.2782	21.5887	21.1353	18.1048	23.689	3.999	2.385	25.548	22.001	17.6282	3.116	3.2838	7.1269	3.8206	2.2471	3.487	3.264	5.2993	14.8039	20.5676	18.7297	17.6685	14.0851	4.0186	3.2752	0.9928		0.803492	12.2216
22.0411	15.855	9.177	3.526	7.9506	20.2554	20.2187	20.3737	22.4814	18.1212	25.283	18.3113	22.507	1.756	4.563	26.197	23.658	17.7672	2.9754	3.0524	5.7893	4.9418	3.8534	2.4925	3.736	6.2037	17.8361	15.237	15.7364	19.3007	9.6356	3.6639	2.0428	1.0618		0.807858	11.9867
22.1603	16.172	11.926	6.41	8.3369	22.1032	22.328	22.0043	17.7796	19.8114	19.516	20.9589	23.616	3.08	4.764	21.738	23.152	17.7681	3.6295	5.3868	4.3653	3.7204	5.494	2.4339	2.1951	8.7909	19.754	18.9643	18.4532	14.7653	10.3897	3.4194	1.899	0.4457		0.812226	12.29
22.2794	20.994	8.362	3.977	8.1906	20.0469	16.5459	22.4804	22.3414	22.2314	17.4057	20.3669	21.15	4.31	5.976	19.26	18.511	21.0233	4.4627	2.8939	4.9769	3.5375	5.2489	1.8481	3.4527	5.6534	20.921	16.1214	12.8773	16.1714	7.4368	3.0274	1.8555	2.1788		0.816592	11.692
22.3986	17.438	7.569	4.902	6.9061	21.8618	17.187	16.2313	25.2983	25.3528	18.88	22.4441	24.806	6.24	7.366	22.246	17.575	17.0478	5.1835	2.8863	4.248	3.9272	2.8719	3.4423	2.619	3.674	24.1351	15.484	16.1404	12.809	9.3347	2.6864	1.7815	1.7265		0.820961	11.8879
22.5177	17.827	9.193	2.877	6.8623	20.0429	22.8648	21.6606	25.7611	17.6991	22.0073	25.2844	20.104	4.797	9.018	18.501	21.276	19.8149	4.2244	2.4936	4.1033	3.7033	4.1091	3.5738	3.7894	5.6249	20.0369	22.6016	13.8545	19.0405	8.2041	3.7305	0.7049	1.2595		0.825326	12.3226
22.6368	17.898	8.442	3.799	10.6616	18.6119	24.1408	24.6475	22.0773	21.888	20.0122	21.2734	18.198	6.386	8.156	17.142	19.187	20.9945	5.5789	4.6019	3.1926	3.0112	5.7996	2.5772	2.45	6.6586	19.6496	17.1144	17.301	15.9617	2.9696	2.7836	2.5076	0.8295		0.829691	12.0152
22.756	19.049	6.941	5.738	7.4845	20.8855	24.0509	19.3221	27.6473	19.3887	16.5335	16.688	23.514	7.159	11.772	16.82	23.245	17.9714	6.9611	3.9384	5.9271	3.8442	2.9098	1.7478	2.6775	5.6552	22.7432	17.3772	18.2147	17.7413	6.1522	3.4273	1.8041	0.1092		0.83406	12.2861
22.8751	16.086	10.932	5.025	10.0174	18.6128	23.1169	23.5903	22.2842	24.6751	23.3265	24.4297	26.38	7.389	14.082	18.551	20.182	14.3433	5.4445	3.3832	3.2705	3.8971	4.6446	3.0826	3.5389	8.3417	21.8157	16.8719	24.7665	16.4807	4.4614	3.7429	1.9145	0.4292		0.838426	13.0033
22.9943	16.858	9.791	3.699	8.8741	18.2527	20.248	18.4432	21.8005	22.0066	17.186	19.5439	23.656	9.249	16.326	19.327	14.662	13.3876	3.1459	1.4893	2.955	2.7389	2.7787	3.8216	3.3521	5.5349	21.3167	19.179	21.421	13.3833	3.9506	2.787	0.781	0.7941		0.842795	11.5982
23.1134	17.468	9.601	2.328	10.341	18.4066	19.3406	18.7194	28.8133	17.3659	16.5509	20.8048	23.184	8.234	18.587	20.437	17.006	10.4863	1.2994	1.7456	4.4189	2.2548	2.9155	5.0362	4.0019	4.7228	16.2994	17.91	19.3171	17.8057	4.9262	1.9405	0.4797	1.7935		0.84716	11.6528
23.2325	17.922	12.487	4.923	12.3293	18.1048	19.424	19.286	23.3559	16.2769	16.6925	22.7198	21.559	10.377	15.656	20.934	18.515	9.6396	3.3322	2.3213	6.2588	5.2007	2.4066	1.73	1.9945	7.6704	20.2623	18.5547	21.7764	16.4077	4.8699	0.3594	0.4796	1.477		0.851525	11.9789
23.3517	19.734	12.837	3.173	9.4256	18.9917	19.3862	21.0803	22.9461	20.4266	17.8133	20.2171	22.597	14.096	16.065	26.49	18.388	5.6166	3.0025	2.0005	4.6113	3.9679	4.0367	2.3948	3.0853	4.8088	21.6954	20.9074	21.6561	15.0636	3.076	0.7559	0.8188	0.133		0.855894	12.1605
23.4708	14.968	9.471	2.793	8.392	21.001	17.5963	20.1725	18.356	19.9732	14.6397	18.613	17.982	20.213	20.147	25.19	16.818	7.5927	2.6085	3.5488	3.2959	2.9033	3.3775	2.1618	1.9859	6.4694	20.5998	16.3703	20.8127	7.6602	2.8334	0.6578	0.1101	0.0376		0.860259	11.1925
23.59	17.224	7.611	4.385	8.8107	18.9394	17.1854	20.2951	20.5918	18.9129	14.7663	20.2709	26.714	23.179	18.905	19.341	15.944	5.6087	1.6706	5.6904	3.204	5.7242	2.8543	2.4194	3.8456	5.3841	13.8545	18.8836	18.9495	7.5144	2.0598	1.6627	0.8188	0.178		0.864628	11.3151
23.7091	13.597	10.874	5.079	8.7208	13.1483	19.2451	16.7963	22.5012	14.4009	16.0109	22.9005	29.606	30.247	25.536	19.827	12.481	4.252	1.1889	4.7539	7.1155	4.3541	3.0709	2.6272	2.0095	8.925	16.2508	17.6306	18.8874	9.3109	3.1381	1.6744	0.5786	0.6365		0.868994	11.7386
23.8283	10.127	12.587	3.046	9.4225	19.9318	17.9741	18.0971	21.1821	16.7451	15.1162	17.4178	25.357	28.956	19.784	20.535	12.051	3.4304	1.2014	4.8575	4.6639	1.8359	3.3416	3.0568	1.8697	5.7776	18.4584	22.4733	12.2185	7.0608	3.6843	0.9051	1.0088	0.413		0.873363	11.0481
23.9474	14.719	9.323	4.676	9.8325	18.7216	21.7164	18.4583	24.2098	11.9682	18.8775	18.1792	24.706	28.996	15.896	19.072	8.62	4.3811	0.9448	3.9537	3.7407	5.7753	1.8213	2.6055	1.8091	6.9782	18.7731	21.0143	15.133	7.5211	3.126	1.9556	0.5055	0.0964		0.877728	11.1547
24.0665	14.511	6.547	2.63	10.4718	21.7856	21.5313	17.4222	20.9871	15.1258	16.3492	18.8934	25.743	24.959	20.541	17.404	8.165	2.2836	0.4939	3.6622	3.5234	3.0105	3.2485	0.8684	1.7374	7.7572	14.698	24.1462	14.434	7.0605	1.99	0.3798	0.0284	0.109		0.882093	10.6817
24.1857	13.462	10.581	5.093	9.4558	25.9183	21.08	21.1665	18.6357	21.6656	19.8004	20.7889	22.262	25.708	17.679	16.849	6.201	2.6909	0.2108	2.4334	6.4532	4.5066	2.5755	1.3265	1.5416	6.0554	16.23	17.4743	16.7096	6.706	2.1979	0.7553	0.0334	1.797		0.886462	11.0922
24.3048	16.184	7.705	3.798	12.2291	27.7192	19.9796	22.2572	19.9237	20.7561	18.9498	17.3319	19.907	20.231	15	19.983	5.236	0.8435	2.0415	4.2918	5.6888	4.8232	1.8608	2.7846	1.7471	3.6003	19.5006	17.473	12.3341	5.7854	2.5727	0.9337	0.8305	0.7658		0.890827	10.7596
24.424	18.547	9.022	4.722	16.9395	24.0889	16.1646	19.4462	15.9942	17.3094	19.4966	15.0568	20.34	20.973	15.846	11.288	5.855	0.5395	1.4606	4.7326	3.3726	6.8352	3.481	2.2478	2.0368	3.0153	15.7793	20.2552	9.731	3.9379	2.0797	2.3721	1.2204	0.8178		0.895196	10.1516
24.5431	12.691	8.151	4.89	16.6289	27.8969	17.4253	17.4052	15.6836	14.7059	12.8436	13.0595	21.736	18.28	13.472	11.468	5.507	0.7058	0.7241	3.6159	5.5611	3.2335	2.5571	1.9317	1.2995	2.7564	20.1631	21.3432	6.6325	2.4457	1.4373	0.604	0.4027	0.7928		0.899562	9.33486
24.6622	11.241	11.684	4.303	13.1731	17.6761	17.1067	15.4722	13.463	13.3263	14.104	13.9919	19.829	21.29	14.285	9.938	5.804	0.9278	0.5614	3.1815	3.0347	4.8131	3.4415	0.6298	0.3406	3.8116	18.6584	19.1686	8.3931	4.7927	1.6988	1.1964	0.2008	0.4866		0.903927	8.84923
24.7814	10.092	11.436	4.633	15.7952	16.072	14.5685	14.2255	12.5504	10.9234	12.1807	11.4237	21.483	21.292	14.744	10.052	4.573	0.8607	0.7787	1.1814	1.7394	4.0613	2.3104	0.7091	1.5909	2.2929	21.8866	12.8969	7.4828	5.3355	0.9881	0.6905	0.1929	1.3374		0.908296	8.25394
24.9005	10.159	10.222	3.618	18.1951	15.6374	14.7891	11.2892	10.8094	14.9427	12.0065	11.3902	19.464	27.32	15.168	6.769	2.807	0.6234	0.8042	0.7149	2.0249	3.4076	0.8442	1.7353	1.1669	1.7833	22.3936	16.3527	5.8676	4.5691	1.417	0.7409	0.0863	1.511		0.912661	8.20089
25.0197	8.605	7.956	3.981	14.2549	21.2631	22.5881	12.5394	8.6981	15.6014	8.455	10.2704	17.337	25.034	14.089	6.298	3.191	1.1733	0.9013	0.5883	1.8513	1.4444	1.6489	0.7236	0.1359	2.0878	19.1574	17.2183	7.3785	3.8405	1.0023	0.5511	0.0086	0.9497		0.91703	7.90372
25.1388	7.456	7.777	5.638	13.265	22.2898	20.172	9.4645	4.6588	10.716	9.4477	10.3603	15.41	22.476	13.705	5.412	3.893	1.2438	0.4626	0.1815	1.5132	1.3249	1.0731	1.1459	0.0102	1.3494	20.4226	11.997	5.0934	1.389	0.0968	1.4441	0.9835	0.1976		0.921395	7.03242
25.258	6.795	5.758	4.82	16.6253	19.3492	16.8164	8.4943	6.4361	13.1369	8.9382	8.3078	17.794	28.758	12.41	4.909	1.398	0.0568	0.468	1.3091	0.8019	3.9017	1.0341	0.8472	0.3476	0.761	16.3694	10.9993	3.4474	0.1757	1.1632	0.6034	0.5451	0.5055		0.925764	6.79038
25.3771	6.986	8.135	5.127	15.9207	19.1707	17.1894	7.0485	3.8732	10.9334	9.7473	9.9215	13.569	27.745	7.313	4.047	1.353	0.0717	0.3402	0.4079	1.1335	1.6703	1.257	1.3377	0.9105	1.1921	20.3445	6.9316	2.6321	1.7162	1.1325	0.6208	0.326	0.6159		0.93013	6.38546
25.4962	6.092	8.55	5.095	18.1436	19.1252	18.106	7.0577	1.3823	9.4495	8.0108	5.5603	13.288	24.305	5.657	3.756	0.362	0.6023	0.3803	0.8069	0.7856	0.5176	0.814	0.7827	0.751	1.0683	24.1004	6.8379	1.8472	1.7767	1.0422	0.3343	0.6072	0.8305		0.934495	5.99471
25.6154	6.253	6.227	3.227	16.0619	23.5864	14.4133	5.2162	3.2493	6.997	5.6945	1.9227	10.458	21.35	5.619	2.01	0.602	0.739	0.0338	1.3377	1.348	0.8606	0.6116	0.9758	0.0213	0.9568	20.3387	3.6322	2.4573	0.3169	0.6969	0.0492	1.1318	0.0036		0.938864	5.10298
25.7345	5.389	5.086	4.367	12.9371	21.8908	15.4673	5.622	1.5715	7.6582	4.6974	2.8687	10.861	15.168	6.213	1.482	1.545	0.3664	0.7212	0.004	0.259	0.1703	0.761	0.0508	0.7647	1.4271	20.5012	0.9007	0.3427	2.1827	0.2985	0.338	0.3014	0		0.943229	4.61254
25.8537	5.286	4.803	4.217	15.9994	17.1862	15.5936	3.5593	2.29	8.3838	2.1918	3.9453	8.962	15.819	3.365	1.879	1.25	0.4341	0.5498	0.2379	0.8127	0.8028	0.7318	0.4967	1.2573	0.7303	18.9683	0.3128	0.0003	1.4455	0.4364	1.125	0.3073	0.2098		0.947598	4.35119
25.9728	3.331	5.357	3.607	15.8347	21.452	13.5021	3.5702	1.8791	6.3136	2.7754	4.038	6.229	10.511	2.427	1.435	2.056	1.1655	0.1708	0.3498	0.2484	0.0994	0.5456	0.1927	1.2507	0.5182	18.375	0.7557	0.4981	0.2705	1.1566	0.359	0.4129	0.1965		0.951963	3.96617
26.0919	2.771	2.581	3.68	13.0169	18.9289	12.6355	4.2777	1.0757	4.0879	1.0994	3.0843	5.213	10.205	2.162	1.185	0.759	0.092	0.0835	0.4083	0.5409	0.6639	0.2584	0.4805	0	1.2213	19.5657	0.5557	0.911	0.8796	0.1772	0.0005	0.5931	0.0403		0.956329	3.43134
26.2111	1.404	2.239	3.434	11.026	20.9741	12.9552	3.7539	1.2832	2.4677	0.2662	2.58	5.05	7.333	2.03	2.483	0.998	0.1499	0.1387	0.3183	0.1029	0.0336	0.0142	1.307	0	1.0051	17.1837	0.7575	1.4975	0.5256	0.1452	0.2437	0.8718	0.2537		0.960698	3.17654
26.3302	2.211	2.79	3.365	8.8286	24.0469	16.0877	2.6298	0.7912	2.7554	0.4645	1.0697	3.106	4.9	2.331	1.885	0.661	0.4057	0.2494	0.0151	0.7952	0.1826	0.0442	0.0446	0.0801	0.8746	16.2549	0.4172	1.361	0.4547	0.9327	0.5239	0.0576	0.2996		0.965063	3.05806
26.4494	1.749	1.107	5.729	8.9664	16.8735	12.293	1.802	0.9268	1.6892	1.7582	1.0479	3.147	5.538	0.98	1.113	0.826	0.3627	0.5497	0	0.8321	0.6785	0.8135	0.2112	0.0862	0.214	18.6964	0.0198	0.4436	0.682	0.294	0.8717	0.4182	1.1834		0.969432	2.78494
26.5685	1.606	2.015	5.869	10.0007	15.1615	8.5935	2.0015	0.7615	0.5336	0.9703	0.6901	2.111	4.331	0.897	1.178	1.231	0.3067	0.3891	0.3364	0.2992	0.2306	0.0351	0.9485	0.1029	0.5551	12.4998	0	0.9866	0.888	0.1221	0.2028	0.8043	1.0826		0.973797	2.35577
26.6876	1.867	1.913	5.858	9.5855	16.3534	6.3659	1.6147	0.7016	0.727	1.4113	0.7097	1.357	1.746	0.971	1.718	1.319	1.0549	0.2079	0.3005	0.5955	0	0.1213	0.2204	0.5995	0.2112	14.0467	0.061	0.3777	0.6489	0.74	0.5276	0.8457	0.2706		0.978163	2.27417
26.8068	1.613	1.663	3.359	7.3026	15.9816	6.7433	0.4173	0.3559	0.4407	1.499	1.1856	2.356	2.586	1.277	0.524	0.529	0.6536	0.0906	0.0969	0.1772	0.3836	0.8923	0.2305	0.6542	0.6795	11.8628	0.8509	0.0928	0.1071	1.0566	0.4719	0.5668	0.1156		0.982532	2.02472
26.9259	1.872	0.803	1.703	10.0553	9.6325	9.1208	0.2641	0.0739	0.1984	1.7536	0.4611	1.635	0.79	0.394	0.506	0.009	0.5046	0.5371	0	0.9753	0.2783	0.4551	1.3059	0.5487	0.4765	11.9175	0.0308	0.298	0.0358	0.1247	0.155	0.1019	0.2304		0.986897	1.73477
27.0451	1.315	0.811	3.499	6.5771	12.294	10.1493	0.5168	0.3682	0.2936	1.2446	1.3508	1.574	1.669	0.91	0.692	0.259	0.2699	0.5989	0.0087	0.5015	0.4441	0.0315	0.1245	0.0933	0.0098	9.9595	0	0.7979	0.1864	0.3496	0.2401	0.5393	0.3253		0.991266	1.75769
27.1642	0.747	0.62	4.138	3.4221	11.1864	6.7396	0.2788	0.5389	0.6736	0.4368	1.1949	0.787	0.531	0.105	0.498	0.434	1.1033	0.0369	0.0599	1.0536	0.039	0.3104	0.0024	0.4219	0	6.8616	0.0546	0.1143	0.5056	0.2499	0.2085	0.1078	0.0754		0.995631	1.31928
27.2834	1.169	1.729	4.646	4.0318	8.8734	3.3807	0.8049	0.5982	0.5145	0.4769	1.8723	0.788	1.377	0.803	1.001	0.716	1.433	0.046	0.0982	0.6031	0.0211	0.1896	0	0.1777	0.231	7.0566	0.1757	0.3351	0.1056	0.1295	0.2265	0.1279	0.3783		1	1.33687

## Sheet: Image18
X0	Y0	Y1	Y2	Y3	Y4	Y5	Y6	Y7	Y8	Y9	Y10	Y11	Y12	Y13	Y14	Y15	Y16	Y17	Y18	Y19	Y20	Y21	Y22	Y23	Y24	Y25	Y26	Y27	Y28	Y29	Y30	Y31	Y32		Ap-basal	Avg int
0	19.3531	26.5777	36.3902	23.6964	22.1334	11.8036	18.9922	16.8792	33.1535	17.1883	13.1745	29.8376	28.2053	24.7705	14.0843	15.6589	24.7771	24.394	20.001	15.8445	22.0844	12.1415	20.02	24.6553	25.219	22.636	41.5383	28.4684	20.9807	37.6288	39.728	44.2414	53.1106		0	25.1324
0.1191	20.2104	32.1276	38.136	32.8528	19.6701	12.2956	17.3862	21.264	36.1754	19.3603	17.7863	20.9129	28.2225	31.7029	17.0829	16.0617	26.4654	21.2411	21.203	12.842	18.2447	12.4273	19.378	28.2423	31.622	22.745	42.8396	31.4673	23.7789	32.1794	50.013	57.4081	56.7906		0.00512644	26.9738
0.2383	18.9945	27.7266	38.4631	28.1655	22.665	10.611	15.8783	27.7958	39.0301	19.766	16.3783	26.7417	32.3336	28.6332	16.875	17.1955	24.8498	29.1026	22.2743	15.9858	22.9399	17.1889	17.578	32.3074	36.373	29.954	47.7697	48.8482	25.2925	30.0599	43.617	57.8592	54.0493		0.0102572	28.5849
0.3574	18.9154	25.2641	50.9793	30.5858	17.8216	9.8524	18.9586	29.1522	37.132	30.7943	18.4092	33.5461	32.7024	30.5968	17.2131	18.0449	27.7498	35.9497	19.7426	20.1505	22.5666	16.1583	23.741	35.0013	39.876	28.778	50.9579	34.918	22.1674	46.7053	55.907	44.2505	64.4061		0.0153836	30.5756
0.4766	20.6038	28.9133	54.2092	28.4945	17.2662	12.7466	22.4136	30.6407	44.3702	27.6701	27.5788	36.2679	40.931	29.546	12.2651	19.2386	30.44	32.3427	21.4274	17.8924	18.7115	14.6472	19.819	40.1171	46.894	38.936	53.4986	43.9309	24.7616	44.421	46.859	53.5463	60.3545		0.0205144	32.1744
0.5957	33.9645	31.0422	54.4711	36.3888	25.7458	14.5123	20.1933	32.882	50.1167	32.8406	24.0132	43.5909	36.3176	34.239	22.4287	21.3361	27.378	28.8937	24.3816	20.2741	27.4196	16.2118	32.383	39.8102	61.53	45.907	57.3238	46.8961	30.084	46.3966	50.692	54.5733	66.9769		0.0256408	36.0974
0.7148	31.3488	28.1669	52.7658	37.7987	18.3133	10.8152	22.8061	32.882	58.9063	40.2083	32.4358	42.5206	32.4482	37.5894	16.6075	27.2856	28.7357	30.0809	27.297	22.5284	33.5276	15.3282	34.531	57.5434	64.626	58.19	72.1275	42.3842	31.6275	62.3151	51.288	50.8634	71.4267		0.0307672	38.7066
0.834	22.4317	34.9919	66.4258	42.1993	14.2659	14.0836	12.3971	33.567	57.1655	45.924	36.6513	57.0024	43.4716	40.9921	17.4793	25.9439	29.9058	36.1811	26.1115	21.6095	29.7226	20.4524	39.913	60.2604	79.475	75.685	68.9109	43.4747	34.3055	54.471	66.915	55.4249	64.4741		0.035898	41.5844
0.9531	29.9695	40.8387	57.2029	32.6948	26.0078	19.2134	22.5219	36.7522	57.796	54.8628	35.6719	66.8167	36.4601	33.2805	17.3067	32.5134	34.1628	41.7821	23.6452	26.9368	31.2492	17.0559	44.117	69.6154	80.863	77.693	71.7139	50.6917	37.2851	58.6228	63.194	60.7866	61.2411		0.0410244	43.9565
1.0723	36.3475	50.6261	63.5296	39.6767	25.6587	13.9677	26.3908	36.9807	62.8055	56.1018	48.9824	77.2314	44.5644	37.5863	19.9927	31.9562	39.4806	37.7058	37.8748	36.953	31.6171	21.2443	45.098	82.5726	85.862	85.794	79.2083	57.9413	37.6515	76.8474	79.523	56.4903	70.4599		0.0461552	49.537
1.1914	38.2542	51.7862	62.0115	43.3113	25.5266	17.265	23.0644	36.2144	63.1798	55.723	35.5555	82.9043	35.5672	45.4549	20.3532	47.0423	44.8261	34.6392	34.5842	28.7587	33.8795	24.571	67.672	74.3064	79.637	93.936	80.7949	52.9122	54.0833	80.8427	110.625	57.1562	68.2821		0.0512816	51.6582
1.3106	35.8482	50.4705	64.1561	35.7063	27.064	20.2035	24.3774	37.6408	71.6592	54.9822	49.6895	92.4493	42.3787	35.7019	22.9195	45.0259	54.6034	40.8514	37.2376	34.1433	31.1253	31.3425	70.282	77.4879	81.54	103.873	84.3699	57.208	52.4939	88.5118	94.825	61.7011	73.5344		0.0564124	54.1031
1.4297	40.8312	50.1683	64.9383	53.9881	28.4733	12.7541	28.0202	42.8908	68.6644	54.7008	44.4462	81.9116	40.2792	47.518	28.9361	50.9253	53.9194	43.7483	42.7793	45.7366	38.4939	29.5705	89.529	81.4881	85.616	121.499	76.6679	53.2601	45.9177	77.593	108.592	69.3367	72.9241		0.0615388	56.852
1.5488	45.9874	46.0436	67.2954	44.9717	24.5992	14.5495	30.553	50.4208	62.7925	40.7506	39.3028	79.1757	53.8758	37.5672	28.5491	53.2427	56.436	41.6424	35.6832	34.8253	28.7367	31.9441	101.668	76.4874	87.145	142.22	65.8063	46.3745	48.7272	85.8597	101.328	65.4977	70.9676		0.0666652	55.7887
1.668	41.4482	47.9753	62.8093	45.8831	30.692	16.2372	22.4478	41.1045	51.7371	41.7629	40.3603	80.2694	41.7061	47.5144	32.6715	59.1327	49.2153	38.9446	26.7136	44.0117	33.4697	25.4465	106.473	70.9195	75.892	138.68	56.6127	43.851	54.3854	91.5956	110.192	76.465	76.6502		0.071796	55.2506
1.7871	38.8073	40.5558	53.8143	39.4048	27.333	19.1292	34.7925	34.5307	56.3879	37.4934	35.1718	68.0011	42.5979	45.6314	33.2446	43.6232	40.9277	33.3859	34.4527	35.9111	30.7316	28.5654	116.539	69.2392	66.249	142.066	54.1682	37.3691	56.105	95.7407	107.674	53.8189	74.9768		0.0769224	52.3769
1.9063	31.9289	42.1124	63.3604	45.7342	25.3097	13.8272	26.5927	38.0803	46.4593	38.525	33.5043	55.3496	42.4016	46.6249	32.4975	38.2287	34.9122	26.3866	23.3328	37.7996	32.0936	32.5963	95.865	70.9029	81.007	143.234	45.2403	34.0874	50.1055	94.2015	92.404	57.5783	68.8778		0.0820532	49.7322
2.0254	29.8821	33.3351	43.713	34.4022	18.6392	11.3991	26.1536	33.9365	48.5353	27.4746	30.8956	62.6929	39.3513	44.4493	30.7158	34.9944	35.3352	23.9811	25.4051	30.966	28.6355	22.4517	98.753	68.4152	72.416	139.266	52.3308	35.9876	62.5537	87.8512	86.556	49.5555	54.294		0.0871796	46.2219
2.1445	26.2611	40.769	50.3483	36.1435	20.696	13.3915	27.1493	38.1207	39.9735	32.0069	29.1302	45.321	33.7458	42.6996	28.4322	33.7824	27.929	29.5471	24.4154	31.7952	30.5245	26.3718	94.1	68.383	63.041	140.757	46.699	46.8083	72.654	89.3432	88.374	39.592	52.2428		0.092306	45.7742
2.2637	20.1867	38.6068	39.8409	29.9609	21.3065	17.1876	27.714	29.5461	37.4478	27.8528	28.0246	43.4432	35.005	27.2903	19.9312	22.5603	25.0098	29.8007	21.4765	28.8523	22.2912	29.6697	101.151	54.7665	69.135	128.68	46.8195	33.9642	66.8326	89.3484	72.403	46.6477	58.8896		0.0974368	42.171
2.3828	23.6702	30.9603	42.0103	27.5719	13.8779	13.2962	22.5354	28.6252	42.2514	28.9178	20.2726	37.9254	27.3895	27.08	21.5838	19.4371	28.0651	24.9113	23.1872	23.3605	22.4673	39.7623	108.41	52.7074	91.391	121.367	50.5902	31.9868	63.0167	75.1791	68.473	30.6731	52.4294		0.102563	40.4661
2.502	21.675	36.6648	37.8298	31.0863	14.612	13.7731	23.4773	24.2837	49.3514	42.895	25.5996	36.53	27.3445	20.4088	17.8588	27.3204	27.3822	20.7241	27.1052	20.014	17.9109	24.8718	99.515	47.1544	87.525	116.903	54.6746	31.5125	59.8401	77.0811	57.95	25.5744	45.6078		0.107694	39.1532
2.6211	21.5159	35.6388	29.8063	38.2748	21.5544	13.5095	19.5719	20.6828	33.9196	32.8018	21.011	27.1033	20.6991	22.4615	14.6823	19.1987	22.8932	25.087	25.9302	22.0992	20.9211	32.5155	100.19	46.2818	87.847	110.659	57.6485	40.6313	56.0757	64.6434	59.143	26.1801	58.3642		0.11282	37.8649
2.7402	15.9006	32.543	30.4743	29.8919	18.7352	10.7365	15.5705	23.364	37.8438	38.6183	30.0352	29.1958	18.9314	14.7928	16.3393	20.4239	21.1078	21.7991	18.6827	19.3933	19.1342	24.9951	100.476	44.5742	95.332	106.856	59.8071	37.6697	62.5572	55.2754	50.921	32.1003	40.5844		0.117947	36.2019
2.8594	19.4657	39.0802	27.0471	32.3394	25.3112	12.7052	21.4649	19.4222	36.9514	33.2588	24.5276	22.2497	17.1828	17.1769	16.3632	18.3074	22.2876	20.1616	24.5135	18.637	20.367	24.8996	96.281	45.6709	102.081	100.238	65.8843	39.6904	52.5622	46.2139	41.907	27.9523	35.5996		0.123078	35.3879
2.9785	19.6764	33.3624	31.8946	22.6264	18.4636	11.8349	19.2121	15.9212	46.0348	41.7854	16.3715	19.0958	9.929	13.5595	11.6296	14.2431	25.8569	20.6896	17.8902	16.6269	12.0746	21.1111	104.588	51.9876	93.54	92.489	67.6934	36.2785	64.8416	48.4449	42.172	26.8974	40.234		0.128204	34.2138
3.0977	20.557	21.3834	33.7147	23.7425	19.6371	16.1757	14.2935	18.1341	36.8962	50.0063	20.3928	14.6191	8.545	8.0948	9.1601	12.6411	21.6411	18.1081	20.7596	17.0076	17.0053	22.1844	101.424	49.2961	90.769	87.994	52.1432	38.093	46.011	60.6989	30.11	25.6284	36.0479		0.133335	32.2095
3.2168	23.3236	26.2837	25.9505	19.1207	16.7511	14.4895	10.75	15.1056	40.8948	59.767	19.4209	14.0164	10.6173	10.5135	9.8718	17.2047	21.5104	19.7296	18.2076	20.6553	13.3865	18.6309	97.488	60.418	84.661	99.201	42.5609	40.2717	42.3534	52.2651	28.222	23.6643	34.3722		0.138461	31.8691
3.336	18.1718	24.2403	26.3596	19.4065	16.7849	18.2457	16.1771	13.6635	37.2342	53.1251	25.2987	11.6377	8.9277	10.3172	10.4016	9.4224	19.7897	17.2742	14.0596	16.5141	14.8416	22.2093	88.454	51.9736	71.884	66.727	48.4353	40.9511	44.9597	53.7066	23.791	17.5718	36.949		0.143592	29.379
3.4551	23.2822	32.1558	27.8829	17.854	13.3846	13.5492	11.7047	17.7824	29.4306	45.5064	18.5244	12.4917	9.1171	8.9087	9.4752	13.0881	16.6843	11.3234	15.9028	14.2649	17.4752	21.7173	91.712	39.33	70.458	74.055	42.1413	25.2887	30.7825	41.502	19.549	15.5507	29.5156		0.148718	26.7088
3.5742	25.5277	28.9362	21.9419	14.2405	13.4595	11.9862	13.0942	15.3976	26.6424	42.6537	21.0017	7.8535	6.4385	8.297	10.6902	11.0253	12.3617	12.8946	15.4939	22.6863	15.3783	21.3184	72.266	44.2225	59.535	77.167	31.9793	34.399	36.3661	31.2908	23.88	24.3509	34.0607		0.153845	25.7223
3.6934	17.1421	21.2309	22.2102	20.1106	16.521	8.0972	12.1355	14.9258	24.2911	35.6235	28.1688	8.8035	5.6795	6.9311	5.5607	11.2375	17.4949	16.6102	17.1107	16.1214	19.7667	18.5901	86.298	48.9241	60.367	54.58	34.9355	32.6008	34.0843	39.3305	14.774	18.0989	37.7732		0.158976	25.0342
3.8125	21.2475	20.0455	23.4328	21.1	14.571	11.8382	13.8793	17.3896	21.954	27.3102	20.3714	7.7476	6.2108	7.5562	8.0654	7.4745	22.9481	8.2211	18.8569	16.9541	23.6986	19.6773	83.536	43.4681	68.33	63.748	35.5352	36.3091	36.1833	39.607	23.261	20.0198	34.2052		0.164102	25.5986
3.9317	19.8335	15.3485	19.7409	17.5431	15.324	12.6338	10.4467	11.362	26.3184	29.068	22.1021	5.2733	6.3953	7.1393	7.8009	7.6498	24.9081	14.1176	16.9802	9.1289	13.0995	16.6201	73.871	39.0794	65.258	56.593	39.3456	29.5479	31.8868	41.6456	17.625	24.0184	25.8394		0.169233	23.4407
4.0508	24.5137	16.6837	20.1439	20.1202	15.2156	7.6842	12.0656	15.1545	34.8397	28.2625	29.2161	9.3605	6.9707	9.7019	6.8605	10.1436	19.4433	13.4947	18.4499	11.0981	13.9061	21.1961	75.267	41.8632	71.228	54.801	40.805	23.8915	33.771	39.54	13.142	25.3462	27.626		0.174359	24.6002
4.1699	16.5098	21.2984	20.4807	16.2655	13.4224	7.7987	11.513	19.2765	26.6692	24.1991	28.9844	7.5938	7.1834	6.7906	5.8006	8.1609	21.2857	20.0173	17.3168	11.893	13.7732	16.7828	59.54	35.4109	74.233	61.025	40.8696	28.2804	28.956	38.0145	25.48	19.4038	31.1055		0.179486	23.798
4.2891	20.5077	13.9643	18.9138	15.5581	13.1462	6.8753	8.2618	12.2896	27.0738	22.0855	25.6639	6.3644	6.2536	10.0939	9.5795	8.1322	20.4492	17.7539	23.8033	14.2253	11.4653	16.3654	58.363	34.9638	77.246	52.764	39.607	29.6012	29.6559	45.6375	16.141	31.2664	28.1127		0.184616	23.3995
4.4082	20.495	15.324	18.6589	13.704	13.2244	9.1237	7.1518	9.2739	17.8765	20.4843	28.1619	7.3188	1.5116	6.0615	6.8202	6.8017	17.2316	12.646	13.9301	12.6767	14.7894	19.606	53.926	33.8988	74.686	56.123	34.6611	34.0605	23.2937	32.9028	21.959	24.4601	25.7585		0.189743	21.4728
4.5274	13.9202	18.321	15.7147	18.8449	14.7437	7.628	6.2193	14.5083	12.8838	23.6634	22.0288	5.424	7.1519	6.308	4.4724	8.224	15.7459	17.9145	15.7251	16.3442	13.693	20.6198	58.29	43.3357	69.155	59.659	30.9428	28.9917	27.4868	37.411	14.813	25.4477	21.8704		0.194874	21.7425
4.6465	15.9361	12.5559	13.7051	14.9022	17.4173	4.3083	7.8525	11.3222	17.0779	24.1688	18.579	5.678	3.3223	6.3308	4.6722	11.3538	18.3793	15.8206	15.8021	11.3426	15.1201	17.6759	48.071	36.4048	65.973	56.514	32.6211	28.5595	22.9344	28.9224	20.05	26.1655	23.8944		0.2	20.4071
4.7657	11.6583	10.9889	15.1059	20.4763	12.149	9.2989	6.3572	14.2892	13.8276	22.7059	24.2613	5.7182	6.388	6.327	4.5251	6.016	15.7393	16.4942	22.4082	16.1162	13.2472	15.4605	43.497	38.1185	52.919	48.695	24.335	28.884	22.8643	32.1037	24.089	21.0408	20.9278		0.205131	19.607
4.8848	15.2723	9.8382	13.0069	15.4448	12.4699	6.1	7.7966	8.0886	16.0626	20.4914	19.6791	5.4992	4.8605	5.6904	2.8325	6.6591	18.8518	15.5431	15.2654	16.8449	13.768	15.208	54.468	35.489	52.231	43.724	31.4715	28.9593	26.1557	26.9304	22.858	18.9855	23.1895		0.210257	19.0829
5.0039	10.9099	12.514	18.7151	16.0514	8.8047	9.082	4.7895	11.2122	17.9579	23.7029	11.8656	5.1095	4.0223	6.8517	2.3113	5.4858	16.0401	12.772	20.8559	14.1324	13.1284	12.7872	59.805	44.0239	45.747	40.747	25.9552	22.9297	22.3547	22.9729	19.447	19.4166	26.0013		0.215384	18.4395
5.1231	15.3504	13.4807	10.8814	19.0187	12.4995	7.8312	8.0105	8.978	13.6542	18.5913	10.9026	6.8676	2.9728	6.123	3.6122	6.6365	14.8172	13.9463	21.7102	16.4259	11.9151	18.8766	55.161	31.403	48.365	36.356	26.0847	29.7489	25.2117	29.5268	13.829	20.339	22.3951		0.220514	18.2279
5.2422	11.7996	17.6798	13.6791	17.1643	14.9836	4.5223	11.0584	10.5122	21.9454	15.4078	15.2697	9.1539	7.3236	6.8711	4.5032	10.807	15.5486	11.8372	16.1808	13.0968	12.6246	17.6518	43.537	45.18	45.182	29.028	27.0666	23.0904	32.0363	26.1258	17.477	18.5955	25.7233		0.225641	18.5655
5.3614	10.1167	9.1978	12.8397	11.0774	8.4361	2.81	8.7449	14.9025	17.9618	17.4061	13.591	6.0402	4.2232	8.0904	4.3102	6.0164	14.6469	12.5674	11.9066	12.6712	11.6069	13.7602	54.676	44.1353	36.895	36.78	23.0425	30.3102	27.7056	17.0366	14.516	17.4063	19.8578		0.230772	16.8268
5.4805	12.9106	12.7705	13.9209	14.0447	8.1164	5.2569	6.226	9.3115	17.4694	11.2737	21.3358	8.9021	6.8111	10.1142	2.9172	7.3264	11.2051	14.4952	11.7119	11.0362	11.9866	20.8157	43.93	39.8806	36.839	29.068	28.1943	28.1978	25.5757	20.4398	18.469	16.6517	18.015		0.235898	16.8248
5.5996	10.0965	9.7114	8.3402	10.8536	11.6585	3.989	7.3348	7.1227	18.4861	17.7696	21.1386	11.1444	8.3125	5.7915	3.1782	7.5903	13.842	10.1084	13.1929	7.5075	13.3981	14.7792	39.605	37.2182	24.093	27.506	25.5026	21.9695	22.9499	20.4575	16.43	15.9175	20.2139		0.241024	15.37
5.7188	10.568	9.4623	14.6824	9.1949	5.2515	3.6678	5.0126	12.1855	14.9687	19.0206	20.2375	7.0849	4.7284	7.0731	2.4246	5.2638	15.9124	10.0198	7.8935	8.6692	8.1209	12.575	55.109	47.4585	40.538	31.469	25.1678	16.1557	23.5	14.0556	17.223	21.8803	25.3742		0.246155	16.1197
5.8379	16.6988	8.4952	11.5257	11.3162	11.2829	8.9713	5.2764	10.6611	9.6086	13.3818	13.5368	10.1649	6.8735	6.1802	3.4	4.9943	10.2561	8.8655	14.9164	9.1371	10.9393	11.5585	40.447	30.6199	31.079	32.1	19.8957	16.5283	31.5928	25.774	19.034	18.9859	23.7349		0.251282	15.3889
5.9571	17.3698	8.5143	17.4929	13.4453	9.6369	7.3628	5.2009	11.5796	13.7615	11.7654	10.7907	12.5386	9.5101	6.0922	1.2454	2.939	9.9746	10.1232	13.1805	14.4528	10.5807	16.853	49.637	38.8108	32.116	30.877	17.4149	15.8477	20.0894	22.2887	20.538	18.7248	19.4514		0.256412	15.7638
6.0762	14.5482	11.8454	17.6516	7.5651	9.4415	7.8069	6.0814	7.6758	10.6561	14.9049	12.6824	14.605	5.5131	4.5178	4.3638	3.4081	11.0463	11.5137	9.4048	11.3286	11.175	17.3392	35.26	36.8582	28.019	36.372	19.2197	13.4531	25.8825	13.1792	17.034	14.6252	20.3943		0.261539	14.7082
6.1953	13.2025	17.0642	13.5014	11.3962	5.525	7.3707	5.4648	8.1465	11.7555	13.5381	17.0529	12.2389	4.8859	3.9232	4.7082	3.9359	15.4366	11.2008	14.7856	8.9266	14.8397	16.4009	32.182	28.9913	29.282	21.35	18.6122	14.6253	19.5672	16.9504	18.951	12.6527	25.9169		0.266665	14.3752
6.3145	11.1322	18.9973	12.1637	11.8078	11.4592	8.4137	3.9467	10.7753	13.0506	12.7446	17.6787	9.61	3.8549	7.0345	3.6857	9.1029	17.5328	8.969	11.7499	11.4874	12.6363	13.7105	33.643	34.2017	29.999	23.934	12.9719	9.4217	26.389	16.6707	24.802	11.3844	15.074		0.271796	14.5465
6.4336	10.4385	12.7641	13.1092	11.635	10.3378	6.8339	6.3545	6.9869	15.7227	11.5193	16.3989	13.0609	4.2204	5.5305	3.0588	6.8472	12.7545	13.0435	14.4844	12.6769	7.9197	11.3107	29.455	35.2657	33.501	23.917	15.6393	13.1259	21.6177	22.2103	22.794	10.2129	18.6562		0.276922	14.3456
6.5528	13.1026	12.558	11.7655	10.7841	8.7024	5.2399	5.0527	9.9905	11.3906	7.6958	15.8445	13.0437	5.9721	5.2952	3.1827	4.6707	13.9156	13.9226	14.1441	12.8109	12.5119	17.862	30.335	36.2522	30.103	29.216	9.5923	12.9762	23.4913	21.9421	16.277	18.3036	16.9423		0.282053	14.3906
6.6719	11.3566	16.7642	13.3491	13.004	6.7696	4.2188	8.3703	10.1064	11.0826	12.5332	14.9813	11.3307	4.7039	6.0543	2.7753	7.6168	12.0456	15.8407	9.1447	10.6922	13.6944	14.7248	27.437	43.6558	30.914	24.483	17.1119	12.9228	21.6187	13.5464	18.003	12.1867	16.4279		0.28718	14.2263
6.7911	9.8194	14.9846	13.3631	9.3486	6.7963	4.299	3.4031	10.9595	14.6973	8.2325	15.3545	7.4878	5.533	7.0588	3.1708	6.0113	16.6684	16.1054	11.6582	8.3364	8.8173	16.7345	26.325	34.0652	31.951	23.634	16.4092	12.1619	18.1115	12.5505	18.46	20.8443	10.8298		0.29231	13.4601
6.9102	7.8421	11.7417	9.5218	10.1775	6.603	3.5632	5.6833	7.9915	17.1522	11.2022	14.4439	9.6778	4.6712	4.6186	7.4096	6.9523	13.4484	10.218	11.8413	7.7641	10.4963	13.1495	31.865	43.9663	34.199	24.977	9.7715	13.3373	18.7437	9.2455	14.199	13.5756	18.6412		0.297437	13.2937
7.0293	10.23	12.0719	8.426	9.213	6.0806	7.1025	4.7352	7.4188	11.6189	13.4292	14.0658	11.5657	6.385	6.621	5.3526	8.0611	15.4663	13.6411	11.0792	4.3701	15.7017	10.8307	25.807	34.2781	34.878	19.626	5.5863	8.9914	26.2048	11.1172	19.003	18.3266	16.5604		0.302563	13.1468
7.1485	10.4588	13.5513	12.2081	11.0513	6.7565	7.1299	7.1226	9.8309	13.2772	12.4444	10.5302	11.3011	7.9533	6.7367	2.3358	6.1556	12.4952	12.8431	8.6079	4.9952	13.5758	12.7058	30.295	30.5139	25.298	30.798	7.6728	6.3891	18.5888	15.1563	19.188	14.6557	13.8109		0.307694	12.9222
7.2676	9.3306	13.5123	12.3717	13.1231	11.2864	4.4843	3.4089	8.0108	19.4592	11.2777	13.1639	12.2237	5.8384	8.2413	5.3008	5.5501	14.9045	13.8284	6.5307	5.0053	11.8454	10.7675	22.714	29.884	25.804	26.584	7.5227	9.2282	15.1139	12.5238	6.934	14.8852	10.2882		0.31282	12.1499
7.3868	10.6555	10.8524	10.3284	12.3508	9.5895	4.1959	3.0103	11.3047	18.1637	13.0175	14.2755	12.1947	4.0297	7.3002	3.25	6.3958	13.6363	13.6562	9.3558	6.2377	7.2038	14.3061	25.817	29.9515	21.526	25.822	11.7709	5.7283	18.3042	16.1817	10.621	14.9814	15.1264		0.317951	12.4588
7.5059	9.1862	10.7828	11.4747	11.2381	8.3297	6.1961	2.9567	8.0899	14.9485	13.0796	14.0371	13.6815	6.5575	7.2215	2.6308	10.5837	9.4621	8.2375	6.8782	5.8315	9.7017	10.2778	21.892	29.4448	27.605	20.853	5.1607	11.9113	23.4432	14.1343	8.607	19.1073	20.374		0.323078	12.2399
7.625	11.7669	11.7908	9.5821	9.8657	7.1122	4.0388	6.0184	8.1761	10.9386	10.8248	12.4069	8.0749	5.7395	9.1563	4.5474	6.7226	8.6817	7.7666	6.0193	6.2248	9.2906	9.9902	27.472	25.7859	27.864	21.284	10.2113	7.3168	23.2479	14.9495	10.352	12.8204	14.5718		0.328204	11.5337
7.7442	10.1377	10.2746	12.077	11.3388	5.6747	4.0023	5.1762	9.1401	10.2876	11.3009	11.5933	8.0414	2.9206	8.2221	3.7029	7.145	10.3677	13.414	6.1113	4.2124	5.9139	9.6642	26.103	26.1362	32.516	16.55	4.1022	8.0265	16.4246	12.4283	6.472	18.2434	16.2299		0.333335	11.0288
7.8633	12.2419	10.5686	11.5952	12.2665	6.1074	4.7317	4.4526	8.2689	10.9834	13.487	14.8944	9.4561	4.5471	10.1831	6.7062	7.4054	12.8737	9.1313	5.8916	3.409	10.2507	7.3591	23.741	33.031	25.23	30.845	6.082	8.3123	20.2422	14.2524	7.002	13.4963	17.9758		0.338461	12.0309
7.9825	12.1545	12.0567	9.662	9.0088	6.4054	4.3347	10.3019	11.7401	10.6231	12.6513	19.0911	7.0079	4.8714	8.8125	3.3668	10.9314	9.3522	10.2202	9.0417	2.5589	6.02	8.1666	25.397	26.9165	28.67	24.135	6.6527	4.6791	20.9102	18.7398	8.493	10.9236	13.3747		0.343592	11.7355
8.1016	11.7998	9.9036	12.5319	15.2282	6.2374	4.8083	3.9584	10.307	11.3739	10.1052	10.1738	5.2296	3.8719	7.6517	6.7142	11.5755	10.8449	6.4902	3.6112	4.3193	2.6166	8.5628	23.643	27.7574	27.816	19.073	4.9924	4.529	22.4962	13.4179	5.467	12.1397	10.6379		0.348718	10.6026
8.2207	10.5035	9.5655	12.4735	9.4621	6.1898	3.7589	3.3385	8.7881	6.9428	9.6928	14.4626	8.4843	3.4661	7.0502	7.0344	6.9104	15.1075	9.1903	3.9929	1.1636	6.4663	9.727	22.445	27.6192	23.524	21.015	5.2278	8.7194	19.5172	14.8101	4.174	11.1464	12.3863		0.353845	10.435
8.3399	10.2781	8.5552	11.1481	15.5996	6.9587	4.2753	4.8492	9.7091	14.1544	14.486	18.2862	8.964	5.6689	7.5688	6.6717	9.7416	9.8903	6.8962	4.8414	3.5149	5.6172	14.145	28.053	21.0562	16.036	24.983	5.2862	4.6054	12.0031	15.5684	7.641	11.4086	11.5113		0.358976	10.9082
8.459	14.6491	15.1885	6.4112	7.6175	7.889	2.5859	5.0509	8.4668	7.0319	8.5423	13.0392	7.7992	3.8332	6.766	5.6933	12.1271	8.8118	9.6664	4.7646	3.9159	4.9411	7.4128	21.637	19.4002	26.47	27.64	5.73	4.0571	18.5985	10.7989	5.011	10.1374	14.462		0.364102	10.1862
8.5782	12.0711	10.0246	10.8623	12.3199	7.9964	4.5176	3.6255	11.9155	9.3831	10.9899	12.8844	8.8267	7.056	10.218	8.2542	11.1399	10.7352	8.532	3.7274	2.7618	5.2256	9.6721	28.3	21.7089	29.025	24.943	6.5499	5.911	13.8852	11.5966	4.844	8.6799	17.7002		0.369233	11.0874
8.6973	8.9367	14.0182	8.3168	9.504	6.1172	5.9644	3.7534	10.8251	5.7801	10.7115	7.7869	9.5815	5.9302	12.139	6.2755	8.7236	7.8876	10.8349	3.3806	3.2798	3.542	9.1047	30.323	20.0661	24.112	29.113	3.8028	5.2185	17.3095	16.0994	5.453	9.3536	14.6907		0.374359	10.5435
8.8165	7.9065	10.4864	10.7593	9.4868	6.4623	5.1726	3.9679	7.5595	8.6749	11.0421	10.0287	10.0463	5.7557	9.7892	6.3826	10.3734	11.8127	7.8711	3.2905	4.0379	4.3742	12.1476	22.167	25.9984	24.364	21.069	5.589	4.9639	14.3055	14.4237	3.434	9.0825	16.7504		0.37949	10.2902
8.9356	8.3849	8.8621	8.0739	8.3751	4.7329	4.4794	2.5622	7.0397	6.1189	10.4847	7.6507	13.0343	6.8196	8.2788	6.6683	10.1256	9.6003	8.8665	2.8954	1.5421	3.3966	12.6237	27.783	22.8336	22.642	24.228	5.731	5.0478	23.4884	12.8407	4.072	6.8561	15.9787		0.384616	10.0642
9.0547	9.057	9.812	19.5517	9.4621	9.8949	2.1284	3.4687	6.0444	9.4811	9.1006	11.8128	9.5753	5.9242	7.769	8.3969	12.2729	7.381	8.4028	3.3052	0.9551	4.1651	16.4931	21.579	21.5022	22.349	16.557	6.4953	2.9772	17.7613	15.4649	3.484	7.8706	13.4278		0.389743	10.1189
9.1739	14.1326	9.1165	6.9411	10.1365	7.1792	3.7584	6.3106	9.4135	8.4247	10.1666	11.9593	7.2935	4.7961	6.4898	9.7051	7.7955	7.8622	12.5352	1.2739	4.248	4.5518	10.6008	27.786	18.8687	25.66	18.541	3.3573	4.1574	16.5277	13.8143	5.056	5.3079	18.112		0.394874	10.0569
9.293	9.4354	11.4669	12.4041	10.2045	5.8316	2.7901	5.2851	5.8663	8.7494	12.0965	13.0372	7.6685	4.2414	5.8965	10.4172	11.104	6.1938	9.8848	2.0473	1.4302	2.5663	13.8	24.513	19.0371	19.322	13.686	4.2279	3.4114	18.8311	14.0801	2.136	5.4282	20.1507		0.4	9.61335
9.4122	9.7578	8.9542	11.8967	10.0043	8.0436	4.2545	3.5172	7.0323	8.2998	15.8338	10.6981	12.1539	6.9218	10.054	10.6077	9.5992	12.4663	9.5966	4.4571	2.9261	4.5802	8.7528	26.6	21.7665	22.895	18.478	2.6569	6.1378	21.9062	11.6062	6.133	7.3692	17.2854		0.405131	10.7043
9.5313	15.4826	8.6132	15.7358	9.6946	8.2151	2.5289	5.5153	6.0638	9.3359	14.2781	11.7667	7.9692	14.2311	9.0562	10.3553	10.7916	8.4191	9.0947	3.1468	1.8696	3.2317	10.2931	18.807	12.8718	30.49	14.683	4.2489	8.3348	20.3484	12.5601	2.216	4.3575	13.2239		0.410257	10.2373
9.6504	11.237	11.4862	9.1029	10.123	3.0444	3.2332	6.8355	8.7262	7.0369	7.9529	12.0406	12.8925	12.4469	9.5597	10.1508	12.3859	10.1165	6.5089	3.0064	1.3471	2.0112	11.2787	17.082	21.6716	21.193	15.712	5.256	3.2955	24.6525	8.3548	1.92	4.4357	17.6698		0.415384	9.8111
9.7696	7.7456	15.0422	11.9213	5.9315	7.0172	3.8073	3.4009	8.0975	10.4643	9.9702	13.8063	10.1521	7.2219	12.0281	12.4668	11.8428	8.9245	8.6879	2.2773	1.8599	3.8301	8.4295	24.202	17.5832	21.296	14.588	6.5203	2.636	17.704	10.6938	4.326	5.5572	15.6659		0.420514	9.86962
9.8887	11.9084	8.7625	9.9366	10.3265	10.756	3.1238	2.1677	5.1611	12.7328	10.9291	11.5826	6.5759	7.883	7.5356	14.1603	11.2667	12.9613	4.9769	4.7315	1.3717	6.1918	14.7372	25.964	21.2196	24.209	15.616	5.2021	3.4997	19.0796	12.9328	2.242	6.3835	10.4813		0.425641	10.2003
10.0079	8.6328	13.93	8.6508	9.5321	7.5908	4.429	1.2265	8.3666	7.6748	11.7554	10.3337	8.1092	10.0346	11.2521	11.2869	7.7214	14.1524	6.0638	2.5553	1.3401	3.307	9.6565	22.017	13.6322	16.88	20.027	4.2429	5.1532	14.2258	13.3846	3.697	3.2105	9.5114		0.430772	9.1995
10.127	7.4754	7.7614	9.5049	11.148	4.3905	4.078	3.3187	5.1901	12.256	9.0934	8.9301	6.8657	8.603	6.9019	11.6294	7.6855	6.741	5.6001	3.3586	1.8907	2.4737	7.3328	21.586	14.6298	21.285	18.052	3.3844	5.3301	25.385	11.1902	3.593	3.4714	16.3644		0.435898	8.98485
10.2462	12.2288	5.7032	12.9662	8.288	7.6793	4.2984	4.2712	5.6123	6.4597	7.9754	8.8041	15.3584	9.7694	12.2426	10.1292	10.0613	9.244	8.2002	1.2212	2.0882	2.4312	12.8993	17.697	16.1995	18.05	20.089	3.0939	3.745	21.3675	9.7671	2.122	4.2204	16.0686		0.441029	9.40459
10.3653	8.1391	11.1712	7.0909	7.9007	7.5591	2.0354	2.9397	6.8814	10.4708	11.773	12.5109	12.2576	8.9039	13.1563	7.8485	11.3531	9.2248	8.0715	2.7759	1.8346	0.902	8.3468	17.751	8.7017	17.365	15.933	2.7061	5.4405	16.1371	6.1538	4.597	4.485	18.6851		0.446155	8.82129
10.4844	8.9344	4.3462	8.1604	9.1569	8.1666	1.8134	5.0903	7.7625	10.2082	11.5287	9.8134	8.6257	8.629	7.3062	13.1228	7.9992	7.9272	6.3936	2.9902	2.4628	2.4358	8.8039	18.589	12.0746	19.613	19.463	5.1196	3.8129	14.0304	6.2715	2.835	4.5243	12.2106		0.451282	8.49155
10.6036	6.7591	9.9889	9.4734	9.991	11.3753	1.4052	3.8349	7.4518	15.829	11.1018	7.1723	8.9543	12.2988	13.2752	14.6153	8.4222	8.4724	9.0421	1.9668	0.6943	2.3704	9.0985	15.891	12.4659	19.157	13.904	4.0775	2.0939	19.2577	10.6084	1.976	8.4668	15.3911		0.456412	9.29946
10.7227	6.5519	9.4891	6.0367	10.7529	4.4482	2.3732	3.9062	7.6198	9.8022	15.7797	12.2751	10.2983	6.8245	12.3844	8.2978	9.577	7.7229	7.2514	3.5636	1.3298	3.2299	8.3717	17.552	12.9388	15.915	15.32	2.8116	3.448	16.9979	7.3981	2.779	4.0852	13.9081		0.461539	8.51636
10.8419	12.201	5.8514	9.2792	9.3829	6.7775	4.1104	3.9032	7.0036	10.0158	9.0186	12.9349	9.3669	14.4108	11.2312	9.1366	10.4945	11.1301	7.2471	2.674	1.5276	1.9798	8.8667	15.163	12.4604	20.021	9.931	6.3897	5.0586	17.1508	5.0556	1.864	3.463	12.2119		0.46667	8.70645
10.961	8.9654	5.6974	7.2707	9.741	7.8747	2.7279	2.9927	6.8221	10.5168	11.1597	11.517	10.8926	9.8781	12.4641	11.952	12.7194	11.1296	7.5521	2.442	2.4857	4.2656	8.7819	18.753	8.9339	18.839	12.251	3.2444	1.7582	21.3726	5.1111	2.94	3.8638	16.6227		0.471796	8.8951
11.0801	11.8518	6.5508	5.6803	10.4401	7.736	3.397	5.9076	9.1712	12.8087	12.3635	14.9165	15.0848	8.3042	8.9977	8.0983	7.7977	4.9419	8.6758	3.7953	4.3578	4.4781	9.7337	17.505	13.3163	15.326	9.775	5.0408	5.3876	21.2077	3.8548	3.555	5.6501	11.7542		0.476922	9.01398
11.1993	16.9254	7.0965	7.2585	11.0102	5.8336	2.3927	4.1946	8.1022	13.4973	10.6596	10.8049	11.4678	10.2501	12.8129	13.666	9.9812	7.207	9.854	1.7764	1.4117	3.8784	5.8531	13.538	13.0113	14.673	13.145	4.0408	1.9944	19.9416	3.9735	5.747	3.6561	9.6807		0.482053	8.76774
11.3184	8.4414	6.9366	8.4382	13.3233	7.2412	2.2645	4.8349	7.1733	10.5654	12.4646	11.4132	9.6595	10.0236	12.2543	13.6718	11.4979	9.6241	8.3551	2.1775	0.9249	0.6062	6.6055	13.564	14.1926	16.068	19.055	4.8443	5.745	21.2157	4.1509	1.876	3.1057	14.7333		0.48718	9.00144
11.4376	9.1058	7.0574	7.9834	12.953	8.9327	2.4855	4.8821	8.8061	11.8095	9.768	13.6844	13.6568	11.2825	8.2335	10.6677	12.3838	8.2224	6.9872	1.6095	1.9706	1.5433	8.7062	14.579	13.4969	21.571	12.252	0.9638	6.7807	24.4421	5.8434	1.494	2.1225	16.6814		0.49231	9.18055
11.5567	12.7612	3.3099	5.7226	8.0953	9.9523	3.2865	4.7948	8.4852	11.3128	10.6061	13.555	9.8939	12.1107	10.6308	13.5978	11.8019	9.1272	8.6929	3.3172	0.2982	2.3386	6.9364	13.426	12.9108	11.151	13.295	2.0863	5.1104	30.4852	3.2651	2.562	4.4393	17.1496		0.497437	8.98509
11.6758	9.306	7.7854	3.4458	8.1712	4.3797	5.8325	2.5921	6.5217	9.105	7.2979	15.8207	13.9067	6.5656	12.9624	10.5818	8.3143	9.3486	7.7259	2.7855	0.5169	2.1449	6.9496	17.924	9.683	21.888	10.298	5.4456	3.4006	21.3759	2.905	0.969	3.2239	12.8009		0.502563	8.24164
11.795	13.9447	8.6424	5.1996	8.5853	7.1903	2.9249	1.8754	14.1074	6.7617	8.1641	14.3738	15.8512	9.6614	8.4556	9.9863	9.2518	10.5544	6.711	4.6367	0.1843	2.5623	8.5972	13.893	7.1279	22.86	12.719	2.3027	4.8645	12.0483	2.1441	2.509	2.9726	16.3533		0.507694	8.42473
11.9141	13.8433	9.3238	5.8874	8.1932	5.1	3.2544	5.0313	12.2263	7.0311	7.8591	8.5354	19.2718	8.6449	10.9582	14.3336	12.2817	7.9654	4.859	1.3755	1.0155	3.1835	4.9937	15.117	11.4626	22.169	10.021	3.3054	6.7782	15.6604	4.5108	1.34	2.4102	21.1003		0.51282	8.75888
12.0333	10.5437	9.8649	5.5514	6.316	6.2647	2.5005	8.1646	7.6556	10.827	5.8604	6.5404	16.3191	9.8468	6.7206	13.0225	7.6311	8.6642	8.374	2.0082	2.6913	2.6629	4.9697	16.503	12.639	18.938	15.374	3.7132	3.1796	21.6906	3.9635	1.188	3.924	16.9054		0.517951	8.51569
12.1524	11.8284	8.0923	2.624	7.8481	6.4929	3.9284	3.1262	5.6493	10.6003	9.4778	13.4425	16.5304	10.1168	7.4312	9.7444	7.3588	8.0995	8.3667	4.4971	3.225	2.0516	6.0032	12.786	9.2222	17.614	12.459	2.9125	3.3304	16.1722	2.7978	2.311	2.0818	16.0953		0.523078	8.00961
12.2716	8.2025	6.4726	3.3617	10.0896	7.926	3.6982	3.9257	11.2176	10.9799	9.4427	8.9439	12.7105	12.033	7.4712	11.0468	12.3649	8.1269	11.1626	2.3231	2.8341	2.3453	4.608	14.791	9.949	16.216	22.357	5.127	4.7264	14.3575	4.6598	1.356	4.0179	16.0059		0.528208	8.63183
12.3907	6.8681	7.9886	2.9278	7.8981	6.9872	4.1091	1.9859	9.0524	7.5885	13.6634	11.5455	13.044	8.5095	12.0024	12.6056	8.8789	8.9626	6.7781	3.6369	2.9832	2.1264	4.6812	12.254	14.0353	25.465	15.993	5.4842	6.4973	19.4302	3.4847	2.913	3.944	14.1557		0.533335	8.74181
12.5098	8.942	4.9823	3.8488	10.2759	5.1099	2.9379	2.003	10.3867	9.2325	13.2033	14.6587	22.6802	8.0927	7.0856	9.6277	6.7711	8.5768	7.0061	2.5493	2.8007	1.9075	6.8744	19.612	9.0693	26.294	12.898	4.4242	4.157	20.3916	2.1005	3.041	4.3257	16.479		0.538461	8.85895
12.629	10.1049	6.9798	3.7824	5.5466	5.1236	3.9774	4.8428	6.26	11.5386	9.0822	17.9418	24.4316	14.7843	9.832	10.4134	5.7056	8.1308	6.4468	1.2185	0.5123	2.8298	6.9103	15.727	9.7119	23.528	14.276	4.1726	5.9475	24.0062	5.3773	1.233	5.821	12.5615		0.543592	9.05326
12.7481	10.0132	6.6564	4.2848	6.4742	6.9106	2.283	3.3771	8.7493	11.6779	12.8626	13.4931	25.2214	8.5878	9.1079	11.7955	7.1369	7.6848	3.1443	1.4036	3.1718	1.1482	5.6429	15.13	11.9686	21.366	20.649	5.2528	5.3555	15.6084	5.7467	2.937	4.9358	14.7126		0.548718	8.92393
12.8673	10.3587	7.2969	3.5668	7.5932	7.0429	6.5178	2.5388	7.397	11.6705	10.3038	11.7652	12.8975	11.1902	9.2991	12.6056	8.726	9.1045	7.4292	3.8756	4.0802	1.5016	7.7441	14.852	10.4478	18.127	18.497	5.5777	9.9693	16.5173	3.2474	1.357	5.9563	11.8832		0.553849	8.81628
12.9864	10.3748	9.5239	2.8187	5.6124	6.3534	4.0342	3.3138	7.9532	10.4708	9.1493	10.6067	17.4293	9.612	9.0642	15.0845	7.4174	5.3252	5.8406	1.7235	1.6655	0.5008	6.1914	20.504	7.8534	19.16	17.326	5.7849	8.7169	17.3487	3.4225	1.857	4.4288	17.1904		0.558976	8.5957
13.1055	8.2345	7.9916	2.6001	6.561	7.6244	4.0601	3.6013	6.1508	14.2555	8.792	10.4062	13.528	9.7852	9.3512	12.4255	6.8222	9.6247	5.3556	2.151	0.9568	1.3869	2.8801	16.944	12.2098	18.342	17.338	7.1009	11.3129	16.7472	3.5415	1.96	3.286	20.5207		0.564102	8.60145
13.2247	11.4201	5.3502	2.1344	6.7541	11.256	1.3521	2.0877	4.853	10.3973	9.9222	11.9618	10.2305	8.4693	10.4309	9.5934	9.752	7.7876	5.2271	4.1523	3.1408	2.1711	7.2749	11.906	9.6971	19.242	16.76	5.4169	9.7866	19.3303	4.2328	2.229	4.5849	14.7604		0.569233	8.29287
13.3438	6.7671	6.1371	2.8278	5.2889	7.0372	3.0609	1.9825	5.1953	14.1058	6.0217	11.3731	8.0367	10.0114	12.8618	9.447	5.9384	9.1367	4.9308	3.4246	1.4686	2.3673	4.4201	20.968	9.8385	17.735	22.746	6.5977	17.1186	18.8596	5.5184	3.494	1.8415	17.3034		0.574359	8.60186
13.463	6.5029	3.4847	4.9811	6.2882	6.6905	5.3081	6.123	5.4058	7.6921	11.4828	13.1659	12.0958	7.3443	10.5178	13.7874	8.3584	9.6581	7.9725	0.9344	1.3565	1.4148	4.9614	13.631	11.4565	17.429	12.866	5.6584	11.0811	11.882	2.0784	2.831	5.7349	18.1031		0.57949	8.12963
13.5821	8.8372	3.7626	3.7153	4.8821	7.0009	5.1629	5.9375	4.687	12.0986	13.6186	13.8474	15.5028	10.9994	11.4368	7.8926	8.2961	10.4946	6.5701	1.612	1.5048	3.0232	9.69	19.635	13.2163	18.22	18.036	6.872	11.6103	17.5682	5.4103	1.555	4.7646	14.0215		0.584616	9.13581
13.7012	10.0054	7.7555	3.5676	3.9902	5.7386	4.9408	2.2651	11.0326	14.4774	11.3844	15.5551	7.6203	11.5412	12.4299	11.7369	9.0088	9.0786	4.9177	3.4514	2.242	1.4882	4.3479	18.343	10.1612	13.118	18.321	7.2306	16.2604	17.0946	1.9307	1.613	8.0023	18.3602		0.589743	9.06093
13.8204	10.3353	7.7213	3.3256	3.0772	8.8308	3.9689	4.5827	10.3446	11.6221	8.9591	13.6935	14.2462	12.3032	8.466	8.1399	6.1776	13.0102	6.9694	4.3052	1.6824	2.9664	4.7687	17.913	12.8982	16.823	19.085	3.9513	19.942	17.7294	2.5266	3.43	7.1051	14.1051		0.594874	9.24258
13.9395	14.0854	5.1868	4.4378	5.7028	6.4904	3.3484	5.1651	5.9081	14.2205	11.3178	11.7927	16.403	15.2244	6.5361	12.3026	7.9584	7.9799	5.5019	2.0294	2.5466	2.6877	3.0229	19.129	13.676	18.78	19.424	7.5865	11.579	11.9045	1.4321	1.383	5.8187	17.2607		0.6	9.02492
14.0587	9.0228	4.8863	2.4097	4.8099	6.8866	3.5568	3.6229	5.8216	12.6834	10.2882	10.9263	12.1583	11.1239	11.134	15.9846	8.0047	11.4795	8.5446	3.9751	2.6859	3.1104	5.3109	14.214	13.1737	19.237	20.578	9.7198	19.5388	19.0411	3.4743	2.47	4.855	11.3312		0.605131	9.27452
14.1778	8.7198	6.0196	3.4327	3.5902	6.7257	3.214	2.2345	6.2517	16.548	6.5487	14.9459	11.0503	7.9321	10.3603	12.4119	10.0694	8.7359	6.6524	3.4345	1.0379	3.168	6.5557	19.344	16.6053	21.446	22.397	12.2627	15.2075	20.8395	2.1876	2.739	4.1147	15.3057		0.610257	9.45722
14.297	9.9967	3.3882	4.7375	4.2389	9.7044	5.5041	4.6718	7.2515	9.3625	10.2047	11.7351	10.9186	9.623	11.2912	14.0633	5.4214	11.0694	7.5459	2.9469	2.2312	1.2421	5.7067	12.441	14.7387	18.757	21.099	7.2802	14.3301	15.0908	4.1405	1.903	6.8553	12.9632		0.615388	8.86224
14.4161	8.2028	5.7744	3.9188	4.9196	6.9841	5.5084	7.2709	7.0229	10.1571	7.0448	11.1462	14.4713	9.0511	9.8026	11.9401	10.8519	5.6166	7.6162	2.897	0.5417	0.8849	9.0483	18.083	14.105	20.689	29.161	13.0306	16.6739	17.617	3.719	3.067	8.0378	16.7347		0.620514	9.74514
14.5352	12.3146	9.8024	3.5508	3.1225	6.2758	3.9897	3.1401	6.2483	9.194	7.8884	12.8924	9.6558	10.0506	6.6929	13.1803	9.0299	6.6306	5.03	2.1478	1.1073	2.2114	6.8241	21.257	14.9092	22.579	18.698	11.6806	24.0683	17.8726	3.8994	1.488	9.5527	8.9651		0.625641	9.2712
14.6544	8.6461	7.2034	3.7255	4.0525	8.5584	5.193	4.5715	5.5305	9.8374	7.8969	12.3383	14.1828	12.7371	7.3355	9.0401	7.9785	4.9852	7.0459	1.9277	1.2562	3.1592	6.9767	15.45	16.0237	16.17	27.529	14.5484	20.6023	24.5691	1.5577	4.336	7.2097	16.8586		0.630772	9.66766
14.7735	10.128	5.7349	4.6477	3.288	6.3401	3.1948	6.9691	4.9198	9.9902	10.4443	10.9755	12.6198	10.6377	7.1231	8.667	7.5418	7.047	10.8409	4.5178	1.9351	0.6526	7.1605	15.383	17.522	20.037	25.733	13.8066	21.4964	14.9205	2.8408	3.075	10.0859	16.9731		0.635898	9.61361
14.8927	9.7971	7.6063	4.683	3.3782	5.6218	4.094	4.579	6.7054	9.0154	11.4338	9.8621	16.7881	9.3956	8.6548	9.7235	4.2652	6.5009	9.3612	2.1927	2.7112	0.9681	8.496	13.175	19.2333	20.175	26.222	13.5887	20.5363	20.9933	1.8633	2.148	8.1536	12.8591		0.641029	9.53882
15.0118	9.9453	7.9149	5.4916	3.8647	4.2779	4.0618	5.8008	9.0418	12.1547	9.9762	12.3468	14.6612	14.9133	12.1308	13.9527	11.4985	6.5381	6.4007	2.5499	0.5262	1.8438	5.1006	17.781	25.4602	24.372	19.888	23.9419	22.2447	19.0287	4.2958	3.225	12.0674	14.5136		0.646155	10.964
15.1309	9.247	7.0795	2.2033	4.4594	5.3723	4.5139	5.1303	6.0779	9.4215	8.8396	10.1468	11.8447	9.2865	8.4515	9.2311	10.3637	7.8296	7.6141	1.8127	2.3085	2.9175	6.292	21.333	23.912	25.843	21.214	22.6603	15.7269	15.5098	6.1848	3.203	13.4123	15.2244		0.651282	10.1414
15.2501	5.4979	8.8862	2.2637	5.646	4.1225	3.9272	4.4212	4.8714	11.6586	9.8914	12.246	13.9816	11.3738	9.2847	8.6464	9.0767	9.2854	6.4809	2.3681	0.3863	1.2156	7.189	20.796	25.8441	22.314	17.491	22.1896	32.2982	20.3132	5.7461	4.202	12.5711	15.527		0.656412	10.6671
15.3692	11.3911	7.0956	5.5364	5.5978	3.7876	3.637	2.3266	9.8581	12.3324	12.5912	12.3361	14.1269	10.7972	11.509	16.1031	11.2589	6.6402	5.876	2.1649	1.8508	2.2082	4.9432	18.868	23.3837	30.921	20.926	20.1738	20.2341	19.2497	5.2758	2.756	14.0495	17.5995		0.661539	11.1335
15.4884	8.9248	8.0557	4.0106	4.4193	7.52	6.5228	2.4258	5.6608	10.1752	10.2213	18.0568	16.9809	8.8901	11.1959	13.9989	9.9418	4.381	4.8786	3.8926	1.3553	1.4276	5.5739	17.963	19.2944	29.821	17.912	24.5717	25.3019	14.1972	6.4154	3.903	13.1852	13.3234		0.66667	10.7393
15.6075	6.704	9.6134	2.6785	3.4027	6.0283	3.0888	5.1562	8.1986	13.1828	12.0671	12.8958	13.6981	7.1933	10.6153	10.5651	6.3802	6.1248	6.424	2.9368	1.7321	1.5377	7.7944	20.902	16.0764	24.88	24.677	22.1391	24.8811	15.8916	3.1152	2.99	15.8213	16.4615		0.671796	10.4804
15.7266	11.1589	8.2088	4.121	2.4663	6.6749	4.7679	3.8839	9.2256	8.8785	13.634	11.0846	11.8849	8.6648	14.2686	12.6128	8.6669	10.4181	7.0484	3.2398	2.5616	1.4555	8.8567	20.054	19.0772	29.34	20.829	21.9608	25.48	14.2721	5.9723	6.64	14.6191	15.1115		0.676922	11.1254
15.8458	9.9928	13.6278	5.2802	1.6832	4.9738	6.5443	2.4825	7.5605	13.4542	10.802	15.6168	13.8933	9.5811	16.7499	13.2305	9.8464	11.2133	7.1465	3.2284	3.7168	1.692	8.7914	23.009	16.301	24.879	25.748	20.054	21.8508	20.7943	3.0098	3.621	21.1055	14.3778		0.682053	11.6927
15.9649	10.5573	13.2785	2.1781	4.1033	5.1908	3.8375	5.9156	5.4499	9.7912	16.2279	12.8619	19.98	9.3666	12.2677	7.8496	10.8813	6.2046	7.7529	3.1749	2.0946	3.6882	7.3513	18.426	22.7384	25.345	19.93	18.6398	25.4457	11.1913	4.4899	3.544	17.0423	14.3924		0.68718	10.9451
16.0841	6.6121	11.2651	4.0971	5.4428	7.4998	3.9549	2.3826	8.0846	7.9831	8.0246	7.7566	19.6562	7.9982	14.1248	7.5543	9.2714	6.4263	7.1662	3.8531	2.9395	3.0015	9.3758	19.109	19.5605	25.574	27.335	27.0871	20.499	20.8681	3.9528	8.113	23.6477	16.2743		0.69231	11.4088
16.2032	8.6745	10.7021	3.6234	3.3585	8.3021	3.5915	2.8008	6.9363	13.1001	9.8504	14.4494	14.2923	9.6169	14.0761	6.8256	6.4476	8.4924	7.4322	2.1056	1.4623	0.835	9.0989	20.204	23.0245	22.258	22.727	19.4901	24.2995	19.9443	2.6512	5.759	19.8692	15.7556		0.697437	10.9714
16.3224	8.5922	13.8004	6.4196	2.8095	8.7722	3.0717	4.4138	7.7311	8.5335	10.3284	15.8676	17.8609	8.7735	12.7776	10.2557	8.5872	7.0277	6.5274	3.8419	1.404	1.5652	8.08	18.601	25.7819	23.395	21.739	27.7788	17.9564	12.5197	4.9293	5.158	19.9254	15.0118		0.702568	11.2072
16.4415	10.4886	12.9437	7.9624	2.6571	7.4363	7.0457	4.2743	6.8978	16.4836	9.9156	13.4262	14.4143	11.7208	9.7206	10.5419	10.1456	5.1127	5.4854	2.8677	1.7753	1.4635	8.1219	14.096	22.9061	28.193	21.563	24.9211	25.738	16.5961	7.169	7.243	18.8331	10.5643		0.707694	11.4765
16.5606	6.1079	8.4363	4.2713	5.8349	7.1942	5.9516	3.1355	10.902	10.7782	10.6913	12.9346	15.564	8.9496	11.6735	11.8267	12.6347	8.065	4.7791	4.403	1.8332	0.2906	5.5949	17.344	27.0372	23.925	25.252	22.1123	25.5311	16.4897	7.2848	6.781	17.1059	13.8554		0.71282	11.3506
16.6798	8.9627	14.3844	5.2552	4.2825	6.2053	4.7765	4.0353	7.9944	13.0542	8.906	14.9624	14.1301	13.2189	10.7208	12.3059	11.1959	9.3103	9.4974	3.1494	2.1958	2.3557	6.8136	19.089	25.393	29.683	23.067	25.674	22.1182	17.3227	9.7744	9.49	18.2259	14.4276		0.717951	12.1811
16.7989	11.5868	12.7313	7.9882	4.1154	7.949	3.4626	2.9749	5.9926	10.2658	13.5601	16.3929	11.8344	13.5737	10.26	14.3235	11.5066	9.8555	6.7429	5.5903	0.9276	1.9825	6.9154	14.548	24.9438	22.32	24.164	31.1742	16.8295	10.3408	10.2061	7.825	19.0884	12.1295		0.723078	11.6394
16.9181	7.1333	11.3901	4.8413	3.5044	9.5808	2.6703	4.1748	7.1703	12.1398	8.1956	15.5443	17.1761	10.5603	6.5095	13.0613	8.7703	9.408	9.4764	7.6234	1.069	2.0106	8.9892	16.365	19.6013	24.586	25.744	21.3072	20.8732	16.2264	7.5599	13.035	15.3909	16.3049		0.728208	11.4543
17.0372	11.1575	11.7339	6.0623	3.7446	7.0994	6.7363	3.9884	4.2963	14.0238	12.0708	13.0625	18.6685	7.2656	10.4183	8.7831	9.1873	7.618	4.5908	5.7291	2.9658	3.1155	9.3218	13.534	20.0108	23.929	28.54	25.8228	21.9804	18.148	8.3918	16.212	19.9714	12.4946		0.733335	11.8386
17.1563	10.5215	10.0981	9.9395	3.9769	5.368	2.2097	1.9291	9.0135	9.1696	6.3083	11.7908	15.7567	15.6526	17.3596	12.9108	8.3754	6.7146	7.3834	8.996	3.5313	2.1516	5.6705	17.34	23.071	20.846	29.365	19.1641	14.516	16.3421	12.0967	14.086	15.3356	13.9642		0.738461	11.5441
17.2755	12.1609	11.2551	7.4724	1.026	7.5063	4.813	6.0294	7.7771	11.94	14.7515	13.3298	15.9866	11.9214	8.4845	10.324	11.7117	8.5922	6.9541	7.5875	2.4664	6.7891	6.4064	16.075	22.2116	22.865	24.548	22.4891	15.853	18.0417	15.2265	15.101	16.5179	11.225		0.743592	11.983
17.3946	9.5898	8.4143	4.8105	5.8461	6.1024	4.7701	4.4123	7.5541	13.9854	14.6923	13.4815	14.8818	11.0631	12.0646	10.2635	10.3308	7.804	3.9297	6.1749	1.5172	3.5699	4.961	13.068	27.0558	25.315	19.99	21.4537	20.0571	18.2034	16.5008	20.341	13.7759	13.6029		0.748718	11.8055
17.5138	13.9532	11.1165	7.9066	4.0904	9.0219	2.5831	6.3646	5.5593	11.8333	12.8936	15.6712	17.5936	13.8764	12.6731	11.2625	10.9028	5.7523	3.73	8.281	2.8228	5.0984	5.4391	15.38	22.9819	24.06	18.963	22.249	18.4081	16.367	14.8863	17.856	14.3968	13.6367		0.753849	12.0488
17.6329	12.768	11.1669	6.3284	6.0893	6.5063	3.033	4.4651	10.4613	16.4576	8.7416	17.9203	16.3483	12.9118	14.5937	11.7345	9.2779	9.7846	5.4223	6.1578	4.3506	5.1571	7.5827	18.31	23.1155	24.622	25.464	23.0876	17.6814	19.842	12.7151	18.892	15.59	15.2573		0.758976	12.7829
17.7521	9.6736	11.1927	6.2041	5.975	9.664	4.1755	4.3467	7.6936	12.0709	14.1303	15.2788	18.0719	10.9686	12.9835	12.108	6.9158	4.4245	6.2815	4.6096	4.4676	3.7346	6.8351	11.631	20.7267	30.561	21.058	26.2786	16.3563	21.2515	13.5012	15.304	16.437	13.7948		0.764106	12.082
17.8712	10.8192	11.1335	7.6533	5.4987	9.859	2.8302	5.0331	7.3604	10.6348	14.099	10.1719	14.2407	13.1078	15.3565	11.9744	14.1835	6.5372	4.6446	7.7816	4.2794	4.6535	7.0475	16.189	22.4511	35.751	24.619	19.1046	16.833	15.8521	11.7672	15.568	13.2776	19.7721		0.769233	12.4268
17.9903	14.6711	14.0241	8.4962	3.5822	8.1961	7.577	3.4035	6.1118	10.8213	11.1115	11.5046	17.5295	12.1165	14.1697	13.4179	8.3119	5.7739	3.5278	7.2869	5.3649	5.583	12.1225	14.055	20.1598	27.492	22.976	22.2631	16.338	17.7154	14.8126	10.672	16.2953	17.1231		0.774359	12.2608
18.1095	14.7443	16.9369	8.7728	5.0755	6.5549	2.7457	8.9102	5.356	14.107	16.8189	12.7533	15.412	13.2787	10.7441	12.0408	11.6025	8.1137	7.5142	7.391	6.3873	4.4535	8.2022	13.247	30.438	25.121	28.521	23.1698	22.1051	17.7925	12.2652	14.189	19.8694	16.8354		0.77949	13.3778
18.2286	11.4458	18.2893	13.2623	5.9562	7.0563	4.7552	4.7913	7.8945	8.5934	16.3308	12.8953	19.7835	11.1034	7.8081	12.6076	8.3902	5.7476	3.378	5.1588	7.5946	5.7266	7.6017	13.179	20.9174	23.059	25.316	23.3211	13.9932	16.7725	8.7252	13.948	15.3178	15.2605		0.784616	11.9994
18.3478	11.5079	15.7472	10.675	5.9886	5.2186	8.2202	2.5651	8.1524	13.2917	10.5169	13.1341	15.5768	13.6807	13.6319	16.5958	9.0447	4.0705	6.6619	4.2391	7.7504	7.8438	6.025	12.603	24.5953	28.492	24.64	24.7304	18.3384	18.8155	13.1405	14.733	12.083	13.9335		0.789747	12.6134
18.4669	10.0186	15.8771	10.9358	5.2624	9.8774	7.4735	2.6401	8.722	8.6765	9.9584	14.3339	15.4659	13.636	9.6547	10.1176	13.3333	9.3023	7.765	6.1303	4.7845	4.8665	8.1666	16.585	21.9539	21.173	30.868	25.1495	17.5471	14.1884	9.1303	9.458	14.5764	14.3447		0.794874	12.181
18.586	13.496	8.8033	15.6328	5.1259	10.7151	6.5542	1.9627	8.5955	5.5655	16.9813	13.5558	14.6141	10.8938	11.3072	13.431	7.5971	3.4131	4.1214	5.1472	5.7587	3.583	7.478	16.297	24.92	21.191	25.61	23.9665	20.8199	18.0971	16.5952	14.648	17.1843	16.5064		0.8	12.4293
18.7052	6.9457	6.952	13.9357	9.5631	4.7227	3.3242	4.3087	7.3484	8.7461	15.4275	13.5327	16.8872	13.5404	11.4222	7.7769	8.1804	6.8631	5.4415	3.5819	4.1091	4.916	7.8359	11.258	18.9026	22.811	27.778	21.548	14.0589	14.3166	15.0424	9.623	10.9354	8.4237		0.805131	10.9109
18.8243	10.7005	6.0905	12.1175	8.357	10.8053	5.0799	3.7437	4.4033	7.7795	12.1955	11.6243	19.2749	13.0074	8.3103	10.6434	6.1372	5.7433	5.9726	4.789	6.6265	5.2126	6.5265	12.985	21.9659	23.404	19.228	23.3762	13.0635	11.0722	15.3416	10.227	16.4828	10.8562		0.810257	11.0043
18.9435	11.1935	9.1283	15.4609	11.0665	8.3147	6.6973	3.688	4.9626	10.5685	10.9503	12.3862	14.1641	13.7205	10.5061	10.2762	6.4237	4.8026	3.8478	5.3851	5.1358	7.1052	7.0249	11.899	18.6688	26.254	24.366	20.1587	10.1779	9.899	14.6463	13.767	13.1049	12.8678		0.815388	11.1702
19.0626	12.3185	11.6842	10.9355	6.6354	10.6852	6.0532	3.3435	8.0358	8.8341	13.091	8.7817	14.4259	8.4352	6.7134	7.1843	4.2578	4.5344	1.6939	8.4907	6.1936	5.0265	4.5236	14.541	19.696	29.026	20.347	11.9273	12.3912	11.6664	17.1646	11.959	14.8223	10.5119		0.820514	10.4827
19.1817	9.7661	12.3594	13.8913	8.908	10.6958	4.702	3.5631	4.8402	5.9578	17.6514	10.5368	18.5831	12.7768	6.4809	15.1316	5.2565	2.2164	5.9892	5.0824	5.965	4.2099	10.2892	13.953	17.2312	20.014	23.515	8.5814	10.534	21.8816	13.8687	10.113	10.0075	8.3554		0.825641	10.6942
19.3009	15.7793	12.6095	11.8466	11.0807	7.6467	6.5322	4.8585	7.1083	9.1677	10.484	9.491	10.6115	10.5229	11.632	10.7645	5.8809	3.6199	4.6745	3.6358	5.0822	6.5498	6.8673	9.353	23.2386	26.711	22.944	3.8173	9.8129	18.9637	12.2764	6.277	6.9858	5.4481		0.830772	10.0689
19.42	9.7563	12.4111	15.6305	14.4026	9.261	6.5133	2.2442	5.0521	8.8806	11.9814	11.3207	11.0554	8.0839	9.9515	5.3909	3.0925	4.6357	2.1798	0.9465	3.3375	5.2073	4.8264	8.339	19.9295	20.085	21.916	2.6827	4.5179	16.6284	13.3454	4.169	5.8969	1.8914		0.835898	8.65341
19.5392	13.0662	14.2118	17.5603	10.6361	11.372	5.4197	3.9426	4.7419	7.7389	14.4813	10.2223	7.4209	8.4417	8.0435	5.6377	0.7044	1.5879	2.7908	4.7815	6.8486	3.2829	4.1749	9.551	18.5854	23.791	23.452	4.5082	2.6	14.8626	16.0256	4.575	5.0194	1.4359		0.841029	8.83376
19.6583	13.1856	9.5829	12.8509	10.2311	9.2438	3.9561	3.6876	5.4427	8.815	9.9406	14.9333	3.3526	4.6274	6.2878	5.8594	2.0314	1.7336	2.247	4.9519	5.0696	5.6711	9.1467	11.609	20.7216	25.839	27.474	1.8502	1.2794	17.2278	7.677	2.232	1.7115	1.7107		0.846155	8.24789
19.7775	9.8669	8.6605	11.6417	10.7926	12.2756	8.9837	2.1374	5.9245	8.2947	7.14	12.4234	5.5808	5.7385	5.2804	6.5475	0.605	2.2195	1.0468	2.527	4.5669	7.0005	7.179	8.425	16.3655	24.676	20.948	1.288	0.7789	13.2494	8.8288	2.158	3.9505	2.3472		0.851286	7.55904
19.8966	10.3071	10.4849	9.6806	13.5629	10.1189	5.9441	6.9191	3.0705	14.5942	10.1437	12.9799	5.3132	2.7271	4.7806	4.0778	0.0012	1.6667	1.3612	1.2022	2.8544	7.6185	5.3013	7.28	16.8045	19.655	17.041	2.6738	0.5227	11.6227	4.9564	0.889	1.4356	0.8766		0.856412	6.92325
20.0157	7.2197	8.5938	11.4009	9.0622	11.5341	7.5305	4.2222	3.822	7.6662	10.8276	13.5767	6.5669	7.4651	2.1774	2.555	0.1724	0.6076	2.624	0.7408	4.8839	5.0178	5.9172	12.783	18.3092	18.979	7.288	1.383	0.9714	9.0444	8.6371	2.469	1.7848	2.6528		0.861539	6.62078
20.1349	6.7812	8.9216	11.563	12.0312	11.4896	9.9952	2.8329	4.7716	6.1428	8.5859	12.0755	3.4583	4.656	3.7024	4.8605	0.7212	1.0889	0.2523	1.1598	2.4645	3.2871	5.6454	7.472	15.5585	19.128	3.942	2.5091	0.08	8.6745	4.424	0.999	1.3443	0.109		0.86667	5.77962
20.254	9.974	6.9575	11.5928	8.7234	10.4962	4.742	3.695	5.4843	2.8717	7.7312	9.5664	5.9855	3.1988	3.9332	2.1317	0.0115	0.9868	0.7212	0.6788	1.428	4.0288	6.9049	6.854	20.4191	12.854	2.13	0.0462	1.6483	4.9089	1.7497	1.422	1.9179	0.863		0.871796	5.05021
20.3732	5.5524	8.3504	11.5587	9.9379	9.1596	2.5105	2.9226	4.3279	8.4238	7.4973	10.3221	3.0966	1.1909	3.2114	3.1995	0.4106	0.3837	0.6559	1.5938	1.2147	5.2919	5.3662	12.33	18.5631	10.504	4.26	0.6406	1.1454	3.2273	1.9138	1.189	1.2745	1.3807		0.876927	4.92748
20.4923	4.6816	7.793	10.5774	10.438	10.7475	3.8344	3.7223	5.4999	6.471	7.8158	3.9061	4.2271	1.5286	3.5712	0.0678	1.3065	1.1653	0.9184	0.4685	2.3184	6.9028	6.4003	6.037	15.436	7.153	2.215	0.0873	0.6991	3.4945	2.4983	1.582	0.3455	2.4234		0.882053	4.43433
20.6114	9.5129	4.8863	10.0962	9.311	12.0584	4.3957	2.682	4.9941	5.4541	8.3277	5.0473	3.1355	1.6404	1.353	2.9759	0.4338	1.1579	0.7125	0.765	2.0703	3.8177	2.1856	1.803	10.7181	2.86	1.342	0.7297	2.0556	1.4376	0.9616	1.46	0.1913	2.7599		0.88718	3.73734
20.7306	6.6315	10.5792	4.7654	13.5092	11.8155	3.151	2.3814	6.3303	5.786	6.4906	3.0149	2.7577	0.5831	1.602	1.978	1.8002	0.1558	0.7091	0.2462	0.3627	1.0727	4.8245	2.431	8.9615	2.075	0.451	0.004	0.2417	1.0915	2.3104	0.476	0.0125	1.4137		0.89231	3.3338
20.8497	6.8288	6.0985	9.1033	11.5445	13.8336	7.0548	4.603	2.7947	5.582	5.1961	2.8316	3.6492	0.0331	1.1038	0.9541	0.4449	1.1507	0.6136	0.5426	0.0184	1.1526	2.3939	1.886	4.8202	1.608	1.368	0.0012	0.5427	1.2816	0.3409	1.034	0.1661	0.7314		0.897437	3.06994
20.9689	7.6618	6.04	9.3498	11.613	7.1261	5.0538	2.5839	4.0078	3.7002	6.4682	5.6161	0.7555	1.1185	0.8385	0.7863	0.0027	0	0.5618	0.3778	0.5405	1.4046	2.7643	2.397	2.8162	0.846	0.35	0.176	0.4957	1.7067	0.5291	0.838	0.2723	0.1242		0.902568	2.69462
21.088	2.5783	5.0267	9.2086	7.2859	9.7646	3.3265	4.412	2.1273	7.5252	2.3764	1.7278	1.3732	1.0288	1.4764	1.3325	0.9258	0.3259	0.0601	0.0158	0.0077	0.0377	0.9481	0.787	1.4489	1.905	0.387	0.2672	0.176	0.4657	0.0154	0.557	0.0086	0.5103		0.907694	2.10362
21.2071	1.7348	5.2961	10.056	11.2894	6.7884	4.5975	1.8072	1.9186	4.1124	1.3192	3.225	3.1277	1.716	0.9889	0.0165	1.7029	0.0075	2.9491	0.9689	0.7165	0.3453	2.185	0.11	0.4352	2.142	0.517	0.014	2.0936	0.0062	0.9096	0	0.6124	0.7645		0.91282	2.25677
21.3263	1.4323	5.5329	11.6881	11.4626	8.5617	5.0041	2.9082	1.8026	5.0661	4.0956	0.8615	0.9841	0.669	0.0161	0.7133	0.4247	0.4037	0.0198	0.9075	1.2204	1.2552	1.1786	0.554	1.493	1.033	0.003	0.4899	0.329	1.1473	0.7198	0.797	0.2765	0.1688		0.917951	2.21877
21.4454	1.3403	4.9128	11.9255	7.3098	7.9122	4.8519	1.7364	1.8396	4.0831	1.7203	1.2822	1.5459	1.0627	0.6659	1.0741	1.2113	0.6542	0.0575	0.0726	0.5725	1.7188	0.4557	0.405	0.8449	0.723	1.251	0.2507	0.6491	1.1159	0.0123	0.63	0.0049	1.3545		0.923078	1.97717
21.5646	0.635	3.4916	10.6912	12.6699	9.5754	3.9687	1.305	1.3901	1.6067	0.4574	0.8317	0.6865	0.3103	0.7064	0.0384	0.8215	0.2226	0	0.4894	0.0048	0.549	0.1984	1.758	1.005	0.017	0.829	2.4081	0.5301	0.0775	0	1.437	0.2837	0.0927		0.928208	1.79055
21.6837	0.2965	1.5204	12.8877	9.0368	6.9113	3.992	1.0583	2.0329	1.3661	3.2535	2.2481	0.9471	0.7225	0.4941	0.2295	0.3217	0.6679	0.9738	0.0091	1.0078	1.0368	0.5651	0.389	0.5948	0.712	0.872	0.0595	1.5804	1.3919	0.1111	0.026	0.3822	0.4875		0.933335	1.76319
21.8029	1.0823	1.7702	8.6326	12.3205	8.0909	3.0617	1.2644	0.561	1.1513	1.1163	1.7338	1.6303	1.1898	0.4551	0.4371	1.4503	0.0001	0.0226	0.2749	0.562	1.7589	0.8136	0.515	1.1659	0.639	1.494	0.3321	0.647	0.0097	1.701	0.444	0.3297	0.5569		0.938466	1.73376
21.922	0.1811	1.5408	9.6073	7.9667	7.8257	4.1304	1.5459	0.0205	0.2985	1.0387	0.896	0.035	0.0336	0.2899	0	0.1994	0.0093	0.5341	1.7546	4.59e-05	0.0242	0.231	0.162	1.0095	0.75	0.296	0.2312	1.1649	0.3779	0.1923	0.186	0.9943	0.3755		0.943592	1.33037
22.0411	0.5937	0.4244	7.3868	6.7074	7.3472	1.395	0.8279	1.0861	0.7688	0.5279	2.3194	1.9123	0.5509	0.5589	0	0.5578	1.0968	0.3004	0.5169	0.341	0.6544	0.8167	0.006	1.3682	1.724	0.839	0.223	1.3665	0.0238	0.4924	0.502	0.0613	0.3024		0.948718	1.32119
22.1603	0	0.2795	3.9901	9.831	9.5265	3.1536	0.4379	0.0965	1.8108	0.785	2.5486	0.5158	0.2587	0.7947	0.0051	0.4503	0.0098	0.5115	0.3752	0.6577	0.3301	0.2473	0	0.2342	0.081	0.027	0.9424	0.2345	0.5432	0.0211	1.154	0.5837	1.9076		0.953849	1.28316
22.2794	0	1.5695	3.2972	10.129	8.6193	1.5039	0.0272	1.9117	0.7116	1.6486	1.5559	0.6577	1.0191	1.0484	0.2207	0.0021	0.8291	1.5405	0.1901	0.5131	0.7867	0.937	0.016	0.0284	1.337	1.274	0.3839	0.0126	0.0551	0.7025	0.598	0.0259	0.5725		0.958976	1.32498
22.3986	0	0.1941	3.0184	10.4879	6.9485	1.8577	1.0414	1.7675	0.6692	0.5656	0.4711	4.868e-06	0	0.0253	0.283	0	0.1717	0.2425	1.3004	1.5035	0.3711	0.2714	1.309	1.4088	0.844	0.893	1.2074	0.9311	0.0092	0.1945	0.194	0.1086	1.0416		0.964106	1.19186
22.5177	0	0.1613	2.3623	6.5436	6.0138	0.8069	0.0122	0.0071	0.7212	0.1678	1.3077	0.1726	0.3873	0.2188	0.4522	0	1.243	0.3208	0.0244	0.576	0.7608	0.0081	1.005	0.1401	0.191	0.443	0.9181	0.7784	1.1175	0.8152	0.936	0	1.6954		0.969233	0.918412
22.6368	0.0047	0.3257	1.6079	3.5881	6.431	2.0887	0.4972	0.0222	1.0893	1.2367	0.6242	1.1859	0.0247	0.443	0.7056	0	0.7479	0.2811	0	0.0114	1.291	0.1405	0.118	0.268	0.709	0.603	0.2334	0.339	0.6056	0.0036	0.796	0.8012	1.0976		0.974359	0.846097
22.756	0.162	1.6406	0.6292	4.1278	5.9015	2.4458	0.9747	0.6466	0.4593	0	0.3073	0.0861	1.5761	0.7806	0	0.4359	0.0678	0.0093	0.0074	0.4403	0.9943	1.026	0.326	0.7528	0.055	0.286	0.1745	0.0174	0.9831	0.7787	0.606	0.0321	1.0858		0.97949	0.842909
22.8751	0.015	0.4646	0.0152	4.0714	4.4282	0.4821	0.0276	0.1647	0.7219	0.4075	1.3661	0.7571	0.1806	0.3828	0.6497	0.6207	0.3809	0	0.6011	1.1677	0.0031	0.4816	0.291	0.431	0.011	1.773	0.0174	0.2771	0.0564	0.7815	0	0.108	1.1795		0.984616	0.676227
22.9943	0.4293	0.0168	0.006	2.0686	2.6938	1.5172	0.4361	0.4954	0.2594	2.314	0.5621	0.7218	0.0534	0.2304	0.4178	0.1102	0.4427	0.0077	0.5659	1.4771	6.504e-05	0.4426	0.49	1.5631	0.568	0.003	1.9416	1.2023	0.0621	2.4372	0.004	0.2776	0.4651		0.989747	0.735829
23.1134	0.0007	1.1857	0.5607	0.8289	1.3276	0.014	0.3331	1.8732	0.9183	0.1375	0.9533	0.0205	0.5979	0.5436	0.6593	1.073e-05	0.5883	0.4368	0.7912	1.5073	0.0391	0.2364	0.22	0.258	1.275	0.384	0.3708	0.8949	1.2097	1.2663	0.196	0.67	2.3537		0.994874	0.686419
23.2325	0	0.0254	0.913	1.2654	2.3312	0.9647	0.015	0.1896	0.1937	1.1378	0.4409	0.2771	0.0187	0.8872	0.1623	0.2171	0.8569	0.4873	0.8272	0.7318	2.0173	0.006	0.005	0.6064	1.43	0.17	0.2845	0.798	0.5691	0.0162	1.356	0.0094	0.9423		1	0.610682

## Sheet: Image17
X0	Y0	Y1	Y2	Y3	Y4	Y5	Y6	Y7	Y8	Y9	Y10	Y11	Y12	Y13	Y14	Y15	Y16	Y17	Y18	Y19	Y20	Y21	Y22	Y23	Y24	Y25	Y26	Y27	Y28	Y29	Y30	Y31	Y32		Ap-basal	Avg int
0	20.273	15.069	33.768	42.411	23.705	29.259	44.993	28.608	38.125	34.259	30.6256	32.3862	23.8151	33.8811	23.3811	26.2379	30.5821	22.9927	33.9509	26.258	24.0186	25.4423	22.408	25.8063	18.3017	29.5791	22.816	21.7579	11.4705	12.4397	17.732	13.7542	17.5983		0	25.9911
0.1191	26.688	23.12	35.449	43.1506	27.936	33.603	51.878	26.816	51.143	39.943	33.343	39.9586	29.5007	30.3771	23.7933	26.3933	41.0238	24.9308	29.9514	24.2104	25.0505	27.4263	26.7833	27.6086	27.6586	27.533	27.143	19.2762	16.3753	17.4771	19.845	15.7657	16.6037		0.00499826	29.0229
0.2383	31.287	17.551	37.792	46.8358	33.743	33.972	55.17	32.878	49.084	39.448	37.1298	33.2689	24.9565	37.4507	23.8401	26.0076	35.8358	31.5442	42.2278	32.3855	24.5047	28.307	32.3427	32.303	23.899	33.8516	29.763	22.9364	15.0517	10.827	18.276	18.0437	25.5587		0.0100007	30.8507
0.3574	45.05	27.778	38.68	45.5585	46.592	56.456	55.503	32.306	49.122	44.801	43.7109	38.257	29.0038	35.8209	28.8904	35.148	32.9044	27.9559	42.331	26.729	38.6713	34.9945	29.9352	42.6836	31.8029	45.1147	38.444	23.9205	18.8958	14.0374	18.002	14.4962	27.2042		0.014999	35.1758
0.4766	41.339	25.031	45.553	51.7775	43.307	61.928	57.386	39.898	60.56	54.22	41.4965	39.3351	34.213	47.1105	33.7265	29.742	47.9346	31.7115	46.2913	34.1989	41.093	35.353	36.597	51.492	36.4537	47.1806	32.021	26.0743	22.743	16.5	15.633	18.1961	22.13		0.0200014	38.4311
0.5957	41.254	29.697	56.965	64.7355	47.887	66.178	60.513	45.01	68.621	62.624	51.4482	47.8769	41.4892	49.5787	32.2222	39.6967	44.4766	36.0929	48.352	40.714	56.0711	41.7852	41.8786	48.7927	37.7164	45.8209	41.555	34.8514	24.358	21.1793	29.685	26.5095	32.4029		0.0249997	44.183
0.7148	49.502	42.91	62.549	72.1172	55.843	69.978	64.638	41.01	72.28	49.301	50.2496	46.5022	32.1912	47.3742	35.8404	38.777	66.4544	42.5532	42.9381	51.5676	62.761	41.9996	41.3526	51.5537	44.7495	57.4398	47.153	40.5162	25.8261	22.6606	42.706	30.3182	27.4735		0.0299979	47.6087
0.834	51.597	45.305	75.882	81.0305	79.788	73.475	82.336	47.173	82.439	75.42	60.5974	42.6012	38.0867	44.2912	42.9411	41.4014	59.3355	41.8591	41.8358	59.2459	61.9272	54.2544	60.1958	62.4659	39.031	61.2066	51.282	46.1094	32.0204	27.7502	38.55	36.2529	38.1411		0.0350004	53.813
0.9531	67.603	42.33	73.183	88.7725	75.736	66.582	88.407	49.945	93.318	92.896	53.3724	38.6586	46.1182	54.8965	40.8035	38.5325	78.0938	38.2758	42.9991	56.8749	55.8123	57.2267	65.4048	64.9232	38.3648	72.58	65.598	45.0903	41.5099	31.2348	53.759	38.8678	43.0886		0.0399987	57.6018
1.0723	63.392	49.346	94.664	87.8954	85.032	87.953	99.658	70.905	94.863	80.249	64.2602	60.9661	39.0896	53.3546	43.64	34.2802	84.4632	46.6212	35.3758	73.827	57.7959	64.2462	69.6713	81.0632	53.6159	70.2502	74.529	54.0991	48.2921	42.2149	65.184	39.3941	47.137		0.0450011	64.1615
1.1914	79.932	52.416	111.431	97.9313	109.613	96.654	103.971	65.476	85.938	88.409	71.9042	52.0872	37.2823	54.2303	41.211	42.2275	85.465	53.397	54.3233	68.7033	58.5579	76.7476	76.8352	97.7133	68.1091	81.1571	80.064	57.7308	66.7026	44.0643	64.998	43.2026	48.9214		0.0499994	70.2244
1.3106	82.087	67.253	101.569	96.8746	111.269	105.669	114.005	70.214	103.806	95.568	54.3425	52.7021	42.0849	53.6244	49.2072	44.773	90.5555	56.5682	57.2516	81.9746	62.482	82.363	78.5341	93.6092	68.1143	92.5025	86.496	75.7439	77.1625	58.9449	79.334	56.5141	52.0515		0.0550018	75.6137
1.4297	95.773	87.26	126.342	93.1263	118.948	120.51	117.767	85.325	85.728	104.676	61.9761	62.7636	49.3866	59.0859	55.6637	59.8955	96.4306	55.8766	69.784	79.0202	62.1132	88.5082	86.558	91.2781	87.5161	90.1806	99.975	85.0374	76.2	68.6632	78.566	74.7587	58.0352		0.0600001	82.8099
1.5488	98.458	91.436	109.33	90.1396	136.644	131.305	86.355	86.177	92.123	97.329	63.3794	55.2237	49.5819	61.5742	62.0201	71.8446	83.2099	60.1292	65.134	81.5914	64.7277	83.0099	90.0284	81.9995	85.7144	91.3942	92.96	76.9856	64.2874	83.2985	96.561	77.489	60.9611		0.0649983	82.497
1.668	93.732	114.903	109.807	94.6607	131.397	119.45	101.718	108.432	100.049	94.533	57.0699	58.8833	46.0111	68.5545	53.438	73.3024	76.3221	70.3235	75.1118	90.8852	83.6251	85.603	84.7413	89.9561	77.0045	87.6385	88.294	82.4301	56.6761	82.2883	98.717	88.7008	71.7343		0.0700008	85.3331
1.7871	97.241	122.655	112.73	82.3966	127.967	109.816	97.705	95.028	79.059	90.011	56.7654	48.0824	55.2838	53.351	55.8258	74.1995	75.7967	76.6685	79.7852	88.8328	79.6944	84.2106	93.1318	77.0658	68.6062	92.5544	91.129	79.0328	59.2883	64.1427	99.302	85.4762	70.2018		0.0749991	82.5162
1.9063	87.403	131.124	105.986	95.5846	98.45	113.205	76.139	85.057	93.824	91.319	60.2937	38.8766	48.1775	57.1666	54.1682	62.7437	81.3635	80.4182	55.3665	92.7294	82.9093	85.449	91.2487	75.6517	76.0219	79.0183	88.748	79.3866	45.8446	60.0219	102.341	75.4705	70.6335		0.0800015	79.4588
2.0254	97.568	123.396	115.133	81.6658	107.156	99.673	58.715	82.311	84.663	83.492	58.6694	40.6137	55.0208	49.1421	56.6461	80.7037	58.335	86.0468	71.2579	90.4998	63.9394	84.4918	86.215	72.987	62.9758	75.539	101.61	72.5769	46.5836	64.9884	80.258	93.9093	77.1734		0.0849998	77.6956
2.1445	109.948	107.837	98.737	73.7254	107.31	82.714	54.419	82.954	91.481	62	60.1836	47.3572	39.6493	48.4635	50.3978	62.903	55.3352	69.8558	67.4239	73.4283	74.1496	72.5203	83.6617	72.944	58.1899	68.6945	88.473	68.9238	45.5394	68.8839	83.799	80.0009	72.7376		0.089998	72.2618
2.2637	109.562	103.71	107.331	65.4392	102.313	98.776	55.578	76.83	90.708	75.311	49.8803	45.7974	28.326	48.7719	51.8099	67.2364	56.6454	71.8709	57.2425	85.5168	74.9149	69.7641	69.0305	75.8932	68.4128	64.5649	84.404	56.926	39.9943	64.1823	77.309	85.0587	69.3382		0.0950005	71.1651
2.3828	112.914	101.988	93.576	70.7145	97.981	92.279	60.542	66.792	95.414	75.306	53.886	42.8911	37.015	49.366	48.6681	55.7041	58.0205	74.4739	59.7634	68.2853	72.4841	72.5381	75.0183	82.621	57.1249	66.2002	77.029	62.5345	46.729	53.3128	72.986	82.8086	60.0836		0.0999987	69.6076
2.502	117.836	100.282	86.229	67.794	86.153	92.001	62.697	55.324	97.039	66.048	57.3684	34.5941	35.5412	35.787	45.4944	52.1208	69.2331	67.3914	53.0342	76.7225	60.0887	73.3896	82.721	71.1627	61.1953	66.6745	74.268	56.8089	47.2118	57.6689	79.951	76.8599	68.5273		0.105001	67.7339
2.6211	119.566	105.529	87.69	56.1557	88.169	95.073	54.148	71.254	96.361	69.202	42.1596	35.0099	26.0343	45.2084	49.6008	51.1779	59.6206	65.1431	57.7233	76.6555	71.4431	68.0739	80.7105	75.6359	51.0054	60.0273	56.215	57.6119	43.1644	61.9151	71.218	71.2525	60.8954		0.109999	66.0803
2.7402	105.523	97.827	82.913	55.3232	79.939	88.397	52.508	54.364	90.304	60.386	49.1712	30.2113	27.1864	29.1794	45.2993	47.2891	56.4484	55.1927	48.3632	70.0959	63.2482	62.6745	73.4601	59.2255	46.0151	60.1427	53.685	61.171	28.641	60.0853	84.72	69.7646	49.9693		0.114998	60.5674
2.8594	100.715	87.257	72.738	59.5326	87.121	89.834	46.982	49.228	72.773	63.29	46.1836	30.2645	24.4924	35.893	40.8737	47.7635	47.8807	48.615	50.2201	74.6933	57.8284	66.5512	72.5505	58.1223	44.1078	62.8615	54.832	45.9334	42.6922	65.1144	95.212	64.6389	53.1779		0.12	59.3931
2.9785	106.418	69.099	80.372	59.6069	83.196	74.174	50.147	55.546	71.172	56.723	50.0808	29.0318	26.3699	27.1954	41.5545	42.9577	47.7157	48.5554	50.8054	58.358	52.6749	53.1365	72.5552	54.849	42.7561	53.7688	63.155	55.7795	35.3449	53.0618	94.109	55.196	56.5076		0.124998	56.7264
3.0977	99.141	70.715	68.746	57.6386	75.908	72.253	41.45	51.431	70.163	54.312	47.0412	28.0466	26.5567	33.4309	35.8472	40.2741	50.9542	49.6841	46.4694	50.953	51.513	60.0654	59.7641	58.9484	38.7686	42.6914	54.971	51.1219	30.6367	62.6176	83.372	50.1786	40.5662		0.130001	53.2191
3.2168	82.803	84.433	76.062	56.4322	78.407	76.614	40.951	44.066	56.362	57.362	39.6532	33.3941	24.4555	21.1852	42.1666	47.4287	47.848	41.2004	49.9235	60.6492	61.2938	58.5742	72.0649	54.0935	49.4057	45.796	57.683	41.1622	36.6519	58.3666	79.804	43.2794	46.3391		0.134999	53.5125
3.336	102.008	75.09	68.059	63.9308	67.575	70.048	39.86	39.818	57.774	54.431	32.2491	24.9765	19.2348	30.291	31.5199	35.8547	40.9278	49.1316	44.4227	56.085	62.8314	56.0241	58.4978	52.0373	38.2734	37.0346	50.636	49.3971	36.6064	63.0191	70.691	59.354	40.5242		0.140002	50.8549
3.4551	92.631	76.653	53.666	59.254	68.116	69.641	51.349	39.494	68.732	65.517	31.3536	21.474	17.1297	24.0423	34.8797	34.8046	46.4452	54.4151	40.7404	46.3225	54.4695	56.8388	61.2973	55.8377	32.6644	34.3016	52.339	46.0306	33.7731	56.4703	68.876	56.4952	48.1558		0.145	50.1276
3.5742	75.21	86.505	58.233	55.7711	69.676	51.949	43.119	47.442	66.419	69.067	38.3264	23.1499	27.3448	30.6001	34.7704	40.3726	40.6868	51.9128	56.0077	44.2996	53.8415	58.3871	57.0373	48.6599	38.6177	34.6841	49.792	39.4807	23.979	49.3632	56.46	43.0905	49.9918		0.149998	48.9166
3.6934	80.114	94.153	50.398	47.4384	73.617	59.356	46.273	39.862	61.294	59.035	45.0359	26.1942	26.1403	27.6414	36.1723	40.2293	46.4271	50.4588	52.7967	47.8036	54.2971	51.3688	47.6871	41.8336	43.2937	34.7093	48.506	32.2386	30.1173	46.5836	59.02	53.3436	44.9502		0.155001	48.436
3.8125	75.838	94.497	57.616	49.9716	57.601	65.145	48.59	34.123	61.408	65.893	34.105	27.1304	19.695	24.4452	33.4453	37.5265	40.9205	42.6537	48.2653	46.6102	53.5667	38.6935	48.2151	33.5321	34.0412	34.5681	48.308	39.6081	29.36	46.0066	55.075	47.769	43.737		0.159999	45.9988
3.9317	64.578	67.323	57.128	51.3819	47.981	52.032	48.646	32.556	67.988	50.799	34.2092	25.5544	21.874	25.591	30.6281	29.1493	35.3308	50.6171	43.2528	39.6421	41.4644	39.858	47.8253	39.3184	36.4185	36.1463	39.888	36.3141	28.1034	44.4473	52.48	50.3841	41.6481		0.165001	42.7442
4.0508	67.528	79.899	42.798	38.4673	54.002	58.824	47.751	33.138	58.772	55.786	28.7334	26.8106	23.4746	17.7252	33.8514	33.6632	32.1915	37.7034	47.4391	33.7968	59.1793	39.2052	41.2432	34.2592	32.02	28.5651	44.201	48.3959	29.5547	39.7618	43.394	41.6928	37.394		0.17	41.5521
4.1699	63.13	73.354	43.388	46.7704	53.046	60.347	51.997	41.214	61.392	46.326	30.662	23.318	16.6954	20.423	30.0468	44.8426	42.0657	43.5789	39.9247	38.8735	43.3539	36.9991	35.3624	37.1541	40.0746	29.2754	31.179	35.9082	31.9767	51.0526	51.512	43.9932	35.7861		0.174998	41.6673
4.2891	49.648	81.569	48.173	41.6917	50.81	55.365	44.759	35.598	58.72	40.555	28.8829	22.9417	18.884	19.3619	23.4452	23.4491	33.4164	36.1759	44.2524	45.6322	45.1365	34.029	36.0072	35.3447	35.8099	32.829	38.745	32.1858	34.2268	35.8338	46.834	39.9802	43.936		0.18	39.219
4.4082	46.944	77.145	51.322	41.7726	47.764	47.493	36.7	44.669	60.901	39.723	30.4748	28.6092	23.3227	17.3691	27.8181	26.4311	32.7204	45.7807	40.8664	46.1109	44.3781	31.0021	33.0352	30.086	40.6218	39.4844	34.692	33.4343	23.3609	53.7873	44.789	45.9085	37.2485		0.184999	39.5686
4.5274	46.64	71.258	41.877	41.147	47.115	57.354	35.191	45.228	59.287	41.915	31.2536	29.8891	17.2811	19.0804	22.7329	30.7918	24.3335	44.9137	25.7415	35.9196	47.6974	32.9378	35.2576	32.2608	43.3479	39.8326	39.2	34.9188	26.7647	42.9082	51.032	35.3727	39.4209		0.190001	38.4818
4.6465	44.671	61.015	46.069	38.1854	44.322	55.551	46.901	38.352	59.064	44.639	30.3699	21.9156	22.1329	15.2555	26.481	29.1402	29.3371	38.0567	37.5411	36.8445	47.1993	33.8414	32.8473	26.005	38.9769	37.1568	33.315	34.1035	27.4242	41.6239	32.456	32.8567	33.2438		0.194999	36.8756
4.7657	51.379	64.54	48.259	51.7996	45.36	46.147	36.695	32.103	52.723	39.418	27.4922	23.3645	22.9003	20.8926	25.1486	29.4512	25.4314	34.4084	40.5147	26.9081	42.7706	30.417	32.2034	37.2949	34.3725	33.437	36.425	29.7649	25.3511	35.1981	36.28	36.9589	28.2439		0.200002	35.8683
4.8848	38.589	61.604	37.85	52.8613	44.324	39.999	34.779	27.696	46.12	33.974	19.8715	21.743	20.7705	20.8579	19.7508	31.9729	28.7481	37.5134	34.3908	33.3838	38.9735	32.6776	24.4805	32.696	34.5378	30.659	40.403	36.4146	25.2842	29.617	35.004	45.6378	32.6037		0.205	34.1148
5.0039	42.645	50.459	47.928	45.2214	41.792	46.34	35.736	34.642	44.312	41.991	29.6381	19.3001	23.0384	16.8892	20.7941	29.7715	27.8315	41.2588	35.4317	26.9864	34.1691	25.0479	22.8052	28.6404	34.2415	28.3388	41.94	30.8578	27.1581	27.5488	34.877	29.7947	41.5325		0.209998	33.6048
5.1231	44.341	62.262	38.238	49.9184	39.972	49.009	38.019	27.849	39.437	33.857	23.3882	21.5856	19.6371	21.3279	23.1103	29.3011	29.4634	34.6099	28.1025	31.401	33.6974	24.4038	24.7016	34.8244	31.9219	29.8505	36.819	31.1149	20.5309	32.0536	27.693	28.1291	38.2987		0.215001	32.693
5.2422	47.925	56.159	38.366	47.0419	38.747	42.439	36.483	33.434	45.184	34.36	27.8183	19.2803	21.333	13.9265	19.0734	33.1835	26.009	36.6563	31.3559	28.6437	39.1736	24.3078	28.5372	28.6638	45.1036	30.3033	35.839	28.5462	26.6457	20.4281	27.724	35.7751	36.5885		0.219999	32.8804
5.3614	41.577	52.472	32.591	49.1796	32.834	37.528	32.335	36.844	47.418	29.642	27.8509	22.0664	18.1875	15.2998	16.7157	29.2816	26.1992	26.3907	50.2646	33.4419	30.9291	23.6351	23.1589	36.9559	29.3364	30.894	37.181	30.6819	22.6194	22.3333	27.032	38.3181	35.52		0.225001	31.7186
5.4805	46.148	45.692	38.939	44.5379	43.493	44.724	30.786	27.59	46.035	35.084	32.0484	20.0237	23.2383	18.8571	19.1463	28.8018	24.3334	23.6799	36.4288	31.2311	30.7225	27.1467	30.902	33.8969	32.6842	31.873	36.021	21.6761	28.707	26.0751	29.839	31.0447	35.0111		0.23	32.0126
5.5996	53.988	41.05	34.948	57.4821	38.686	38.198	25.555	35.432	36.1	32.144	29.4963	22.0662	21.1579	14.4272	18.247	24.5324	26.4426	28.7319	41.9802	31.2089	24.3234	24.2328	22.2363	32.1166	34.175	29.5809	41.247	25.795	22.4183	30.2284	21.718	27.833	30.2803		0.234998	30.8503
5.7188	44.807	39.651	30.4	47.0547	36.199	41.664	21.719	27.735	38.549	37.949	27.6849	25.8801	26.3333	15.0944	21.4865	28.7295	23.308	30.2928	38.9093	29.5255	24.3231	21.6211	27.8849	24.0085	30.641	23.035	41.817	24.9794	18.0149	23.8682	30.139	33.79	37.855		0.24	30.15
5.8379	38.584	38.525	35.089	42.5315	28.962	36.721	28.284	38.683	41.138	27.616	16.8599	16.7754	19.5403	17.2802	20.2601	23.6526	24.2981	25.0183	26.8982	27.3442	23.3037	22.0505	25.1055	30.6295	29.8985	30.143	37.685	25.6052	17.1932	26.8276	31.353	37.0469	29.7754		0.244999	28.5054
5.9571	40.518	36.94	37.415	51.286	30.09	39.033	22.713	32.935	36.521	26.194	21.5213	21.2281	20.5309	20.0454	13.2342	25.3217	22.5269	27.8345	35.3736	38.3046	28.7167	19.8635	27.9818	26.961	31.6853	27.763	33.752	14.3487	19.9549	29.9345	29.565	26.2493	24.7807		0.250001	28.5189
6.0762	32.79	46.567	33.866	45.874	29.335	34.274	34.572	37.948	34.089	24.061	23.107	19.3139	18.9384	17.1427	22.4242	21.754	24.6962	31.233	32.9383	37.3818	23.3817	22.1202	30.1487	28.7001	32.5228	20.2009	25.565	27.0617	22.4758	28.752	26.79	26.493	28.5377		0.254999	28.638
6.1953	32.046	35.005	34.156	44.8534	31.195	32.142	26.685	34.449	40.472	33.078	22.9822	22.5328	14.6348	12.1026	13.5128	23.9228	23.4249	27.1013	30.6493	28.3917	16.159	21.4166	21.7903	33.8134	31.3307	27.939	27.159	18.8268	24.5103	28.76	26.626	28.6594	22.6978		0.259998	27.0614
6.3145	31.417	39.519	31.446	49.4349	30.278	32.705	24.264	27.091	36.241	31.681	14.8755	20.4766	19.4103	14.4578	15.7263	22.2074	29.4675	21.9582	27.8512	25.2741	25.5477	18.4928	22.2408	29.3456	35.2207	27.7555	30.527	17.1619	17.2478	24.2706	20.632	29.1061	23.0543		0.265	26.2541
6.4336	31.546	45.084	37.045	39.9518	26.967	35.895	22.107	34.276	41.658	38.585	24.2407	21.525	14.6097	14.2935	22.0449	22.3356	22.2765	22.9136	31.0622	21.4647	25.3499	20.908	21.4009	26.1116	27.9015	27.6945	31.572	19.0487	19.8492	20.1955	20.47	25.109	31.0665		0.269998	26.8654
6.5528	34.361	42.891	27.346	35.1266	30.196	36.612	24.962	28.552	28.39	36.123	19.1264	18.9123	13.0784	13.693	19.8797	16.1059	23.9625	19.3366	28.2902	30.6994	24.5831	20.5003	21.0525	29.5838	32.9271	24.4404	28.233	18.4344	19.1374	30.9054	21.349	38.2689	27.5229		0.275001	26.1995
6.6719	34.766	38.796	37.258	31.4638	35.165	30.67	19.636	26.302	24.21	33.517	17.7817	20.6014	16.031	16.0929	13.8958	19.5063	31.3335	26.8046	27.6343	23.9216	27.2276	20.442	22.2948	39.737	27.7024	20.8045	24.747	17.9899	15.9655	27.7241	25.04	36.5415	28.1034		0.279999	26.0517
6.7911	28.846	32.733	31.586	30.721	28.908	30.246	28.535	26.579	26.598	26.913	16.5687	13.808	11.2061	16.6549	16.9094	26.8856	30.5256	28.4876	27.5531	26.2075	24.947	19.0555	24.6263	31.3734	38.1439	24.2603	27.259	18.3076	19.4135	28.3455	20.137	25.6353	26.1824		0.285001	25.2775
6.9102	31.715	32.042	32.154	30.1105	24.618	29.349	33.307	32.794	26.812	23.639	17.174	15.1677	14.1871	14.2368	19.0756	19.9475	29.4625	17.5903	31.3513	27.7308	21.7147	15.4892	22.8407	24.5834	27.8574	25.4159	26.239	16.4185	17.4298	24.1774	21.23	29.536	26.4035		0.29	24.297
7.0293	32.779	34.634	31.3	27.2053	23.725	25.691	23.805	25.079	37.453	29.318	21.9323	20.186	16.6059	13.368	18.6104	23.0883	24.0927	20.2992	23.0709	23.8341	24.232	21.9401	23.6887	25.2005	29.9144	23.0755	31.747	17.5829	13.6898	31.6651	20.918	26.8092	22.4842		0.294998	24.5159
7.1485	42.249	27.2	25.32	27.3843	26.493	31.351	36.747	32.234	32.979	22.203	17.1162	15.3357	15.15	13.1447	18.0348	19.1244	20.9664	20.3361	23.662	23.1187	24.5851	16.892	18.946	22.9926	21.6782	27.2384	30.57	23.8306	18.0411	24.5478	20.261	26.5326	33.9823		0.3	24.2499
7.2676	32.12	36.746	22.818	28.6877	23.947	24.357	25.946	26.851	22.635	29.467	23.7142	14.7689	18.1624	17.1277	17.2463	20.9634	26.2577	20.0721	26.7155	23.4415	27.1489	18.968	20.64	19.4293	21.3024	23.752	31.257	21.6928	17.2865	22.7456	18.783	26.0361	21.8369		0.304999	23.4219
7.3868	28.122	31.98	28.439	26.0007	28.694	29.239	22.458	27.86	28.209	33.889	21.5352	21.2521	20.5579	16.6128	17.8098	23.9812	31.5229	23.2956	24.8666	27.7159	24.2173	20.9286	20.5031	22.0671	23.3327	27.3466	28.437	27.7358	17.9946	17.3112	17.742	18.3035	23.5986		0.310001	24.3503
7.5059	36.245	42.32	22.731	35.0021	32.846	25.109	25.596	30.437	22.647	26.222	25.4545	19.086	14.2472	12.6851	15.1588	19.8086	32.645	22.8794	22.4001	23.6713	23.9534	14.7451	22.4306	20.3461	18.4482	25.5492	26.471	16.2334	21.8399	20.1082	20.333	22.7507	19.6119		0.314999	23.6367
7.625	26.775	33.016	20.407	28.1505	23.707	25.844	22.983	26.718	26.688	21.388	15.829	22.2059	15.089	16.0784	16.0487	27.1177	29.7068	23.2278	17.8729	20.1985	29.1947	15.8978	25.9924	23.7456	21.6248	19.8209	24.486	14.6432	17.8432	11.3377	15.244	19.9915	22.1521		0.319998	21.8492
7.7442	21.244	26.479	24.53	27.9219	25.632	23.838	27.944	32.211	26.827	23.677	14.2466	17.9432	12.7633	15.2767	15.9814	27.1442	28.0958	22.053	13.8642	21.2411	19.7731	21.2008	26.9214	21.9743	21.9881	18.911	22.131	15.2904	11.8007	16.3737	14.142	20.4113	23.0796		0.325	21.3003
7.8633	27.835	24.91	25.312	32.0831	24.451	24.423	32.687	27.045	27.046	23.35	22.6841	13.1325	13.4642	13.6352	13.09	24.0633	24.7266	23.7397	16.8187	19.7674	21.5979	19.3774	16.8638	23.6857	19.8514	17.593	30.679	22.6339	16.9694	12.4752	18.877	18.4678	19.4446		0.329998	21.5994
7.9825	29.927	25.58	20.144	33.816	23.371	20.625	34.77	33.843	25.946	27.979	17.0812	15.0012	16.4638	10.4306	17.4767	24.6616	26.6717	20.367	11.0981	17.7623	21.9788	21.0523	16.8243	19.6116	27.3387	16.9387	29.027	17.77	21.0656	16.8978	18.291	14.9957	20.4602		0.335001	21.6748
8.1016	31.663	28.851	20.808	25.991	28.799	31.371	33.734	31.777	30.872	27.927	13.4792	9.9045	16.6343	15.6605	19.7319	21.4365	25.4028	24.9755	13.5623	15.3877	25.0061	20.785	21.517	23.0639	21.5903	23.4275	21.229	18.7653	16.7956	19.2074	17.723	17.0676	23.1979		0.339999	22.3438
8.2207	25.862	30.255	22.3	23.9294	28.55	30.691	37.513	26.952	25.534	25.363	17.2854	12.3499	17.4037	13.5983	17.1364	20.3565	24.8459	21.5758	13.717	18.3855	21.3361	20.7107	21.1404	22.1736	23.1848	20.6664	26.094	16.9463	15.1897	16.7615	18.281	23.8751	20.8619		0.344997	21.8432
8.3399	21.15	24.242	24.739	23.4633	21.561	18.353	32.701	34.456	26.704	25.11	17.8072	14.9041	11.6585	13.8223	18.4029	19.7028	23.5731	19.087	9.4598	16.4514	26.9805	19.8682	23.9801	29.7565	20.6578	26.2228	28.564	17.0209	17.8847	18.3896	16.416	20.0095	23.3058		0.35	21.4062
8.459	23.582	36.195	26.225	19.8781	27.04	26.791	32.602	27.528	29.485	24.363	12.3064	10.5962	13.3781	10.4154	26.5091	22.8503	26.1878	19.1359	7.8397	12.7475	24.8716	23.6036	17.1544	24.1761	16.1042	25.5611	25.466	15.0001	15.5762	18.1249	19.866	25.0939	25.2667		0.354998	21.5612
8.5782	31.639	30.734	19.983	21.1736	24.343	22.21	32.026	28.607	30.891	36.467	19.282	17.5623	19.5306	16.5592	20.9385	23.1121	21.7399	18.1941	11.1983	12.2764	26.143	19.4981	22.8401	22.5874	23.2544	27.9493	29.039	19.2826	22.7506	19.099	13.986	13.9325	23.2356		0.360001	22.4868
8.6973	23.725	26.188	22.805	19.2874	24.458	26.41	32.993	29.884	26.014	20.638	15.4842	17.87	12.686	12.7139	19.5224	21.3689	25.8116	18.6563	8.1652	11.7875	25.4081	15.6776	21.6768	22.0414	20.442	20.3193	21.946	19.0651	13.091	19.887	16.051	17.6468	18.9815		0.364999	20.2637
8.8165	26.901	29.587	16.578	16.4585	26.634	23.48	28.987	25.111	29.349	30.639	15.3792	16.8142	10.6259	11.6738	21.9599	18.2478	21.6168	17.2774	4.4053	9.9401	25.1091	21.879	18.7515	23.6844	23.9962	21.3104	30.435	22.5317	18.3599	15.836	13.902	20.0328	19.0164		0.370001	20.5003
8.9356	30.615	31.321	11.918	15.0318	23.556	20.45	25.742	21.203	32.911	20.143	17.397	15.8044	6.4377	12.4089	14.1108	19.2427	26.4849	15.8505	6.4227	10.5181	26.4386	20.2048	19.2562	19.9634	17.6695	17.7826	29.323	15.4322	14.9564	13.4341	15.825	20.6782	22.6604		0.374999	19.1271
9.0547	32.262	27.543	12.223	16.8723	22.091	19.716	26.299	27.459	26.175	26.499	14.8874	17.5773	5.6226	10.5617	12.0585	27.9174	18.031	14.521	8.3187	8.7119	23.3278	18.1344	23.8704	18.9698	21.1934	25.0697	26.483	15.9035	13.6301	13.8111	10.45	15.4405	18.1727		0.379998	18.7819
9.1739	32.138	29.468	11.305	11.0777	22.577	24.14	29.164	30.565	21.521	30.164	13.8009	13.5366	9.984	9.9285	12.7844	22.1502	15.2736	9.3395	4.5039	10.812	22.0805	17.7754	19.0128	22.0731	17.6479	18.2586	27.464	17.5001	12.6348	12.6874	15.152	21.4447	17.9915		0.385	18.3623
9.293	23.872	29.396	13.875	15.0889	28.298	24.26	26.602	31.359	27.228	35.544	19.9609	15.0864	5.9668	7.1896	11.0871	19.205	20.9388	17.2905	4.9274	6.1198	22.9301	17.2957	14.5365	15.6229	23.6034	21.5078	25.108	15.4253	10.5844	12.6104	17.87	27.2975	22.25		0.389998	19.089
9.4122	28.438	25.082	8.028	10.748	24.517	29.695	29.371	23.343	27.647	27.538	18.8028	14.318	8.5002	8.743	18.1267	26.2443	18.9028	17.7045	4.9924	7.0629	18.6331	19.5469	18.2238	21.0719	15.7028	21.8894	20.308	20.6556	17.4178	13.8805	12.719	25.0644	23.2572		0.395001	18.975
9.5313	23.996	21.845	10.963	13.881	25.07	28.613	36.039	21.72	31.268	21.21	15.7686	12.8252	5.2379	8.5951	11.5108	18.5077	25.41	13.8251	3.666	6.4927	17.2523	18.1679	20.1483	20.006	16.1149	21.0806	21.865	18.4004	12.8233	17.1241	10.786	21.3435	17.8899		0.399999	17.862
9.6504	26.702	22.429	5.135	10.2751	22.892	29.036	32.339	21.764	31.633	24.59	16.9941	12.2981	6.4172	6.3341	8.8215	26.7706	23.5267	17.9378	4.4967	5.2357	17.5622	23.2092	15.3494	21.286	14.3079	18.2025	18.726	18.8587	12.8631	8.9847	13.388	21.3951	22.4814		0.404997	17.6437
9.7696	30.992	24.98	12.837	13.6013	22.309	33.332	33.255	22.429	27.461	24.553	18.9702	9.1688	2.8764	6.0756	9.5762	18.2926	21.7733	15.5771	7.1975	3.7555	18.8426	17.7427	20.9851	19.5034	17.4127	16.2285	25.425	15.7926	16.8407	13.1737	17.216	17.8418	19.7522		0.41	18.0536
9.8887	26.221	27.688	8.048	11.6419	22.527	29.24	30.532	23.56	30.756	27.759	13.6225	8.8331	3.0407	4.7825	13.5278	18.7187	22.8853	12.1905	4.2794	4.2659	14.2708	20.933	10.6117	18.1712	17.2593	19.4293	22.67	19.7692	15.6305	11.5421	14.996	18.8936	19.5783		0.414998	17.2083
10.0079	25.975	19.26	6.501	9.591	26.007	30.456	37.117	19.987	20.22	24.829	16.2634	10.5344	6.7185	6.1646	18.047	23.6108	21.6366	13.3687	4.2385	5.9563	18.9943	20.691	22.5042	26.0593	17.2223	16.2886	21.88	17.1107	15.7476	15.3151	15.435	18.0013	19.9855		0.420001	17.9308
10.127	31.499	21.622	8.349	10.1438	22.294	23.923	28.264	23.15	23.421	28.518	14.2613	13.7222	1.8698	3.0943	12.25	16.1878	23.6533	11.9834	3.2963	5.2014	22.0072	17.4703	21.3305	20.5787	12.6575	16.038	25.409	18.1061	15.1956	12.1484	14.29	18.9088	19.5965		0.424999	16.983
10.2462	35.47	23.506	6.963	10.9511	31.633	20.586	30.9	32.428	31.118	30.525	11.0704	12.7928	1.7566	5.4809	13.0178	17.0441	22.9828	12.6225	6.2884	3.688	19.5535	26.4065	25.3006	18.6982	10.426	19.6345	29.536	23.5747	16.4152	10.8552	9.772	21.1949	22.8697		0.430001	18.6382
10.3653	25.193	21.515	6.501	6.3308	23.848	26.052	30.462	25.76	27.264	28.189	10.1169	13.3152	4.445	1.6098	14.2874	22.6971	28.917	5.9492	3.7717	6.8472	16.5274	21.5756	12.6077	16.4127	15.0558	16.984	25.031	19.9164	7.2993	9.8358	15.581	22.2825	18.3397		0.435	16.6824
10.4844	26.6	18.788	5.435	13.094	29.68	26.383	24.565	25.67	26.395	19.92	16.6669	11.7158	4.6887	4.0999	13.6986	19.1083	27.3697	10.3363	4.4065	6.1082	17.2592	21.0744	20.286	16.4616	12.76	19.347	27.246	16.792	16.4401	10.2844	10.772	20.4539	19.4578		0.439998	17.0716
10.6036	29.137	15.027	5.422	7.3877	26.018	32.421	28.979	18.483	27.154	25.692	14.3286	10.3931	3.4586	4.6849	13.0584	21.5632	21.937	12.053	3.4188	1.8479	18.1233	16.8582	24.5169	21.0957	18.2342	16.1266	25.074	16.8591	17.1493	9.908	14.583	26.0271	19.0519		0.445	17.1537
10.7227	26.1	18.744	6.026	10.3983	26.331	22.355	17.256	22.056	29.57	24.556	13.9995	7.8075	3.5493	4.0913	12.258	17.6935	22.4518	10.1624	2.4769	3.7338	17.2569	18.1388	15.786	18.113	18.6133	14.2375	29.309	18.8228	17.6199	12.9472	11.403	21.8263	20.7676		0.449999	16.2563
10.8419	25.424	24.885	3.756	11.0704	22.036	22.429	21.002	22.366	22.204	19.847	14.2752	9.827	5.855	4.4698	18.0234	17.4105	18.7941	10.0152	3.419	1.8091	15.0604	20.0822	20.8854	16.3026	14.4555	19.4504	26.385	15.5296	16.2646	10.8035	13.999	17.632	21.271		0.455001	15.9709
10.961	25.219	17.665	3.925	9.316	25.933	22.578	22.461	25.187	23.292	22.45	14.1619	7.8664	3.5108	5.1778	14.3122	14.2304	26.7087	12.25	8.4402	3.194	15.0769	22.7631	18.4849	16.109	14.7441	15.0335	27.862	18.2694	15.4511	12.6725	14.223	21.6872	24.9438		0.459999	16.5212
11.0801	23.381	17.255	2.924	4.6732	17.233	19.444	18.981	26.182	22.826	17.295	14.1596	6.878	2.3627	4.144	19.3329	19.0677	21.7836	7.9209	4.4796	1.2555	15.4289	20.425	21.0637	20.7917	15.724	15.2869	26.981	16.1261	14.703	17.6789	7.935	22.5877	25.6241		0.464998	15.5132
11.1993	23.805	17.316	5.944	7.4215	21.416	20.021	21.605	28.108	27.432	23.721	14.9464	10.015	3.0231	4.8597	11.2217	17.0789	19.2981	9.2536	4.8858	4.0022	18.9067	17.2694	25.5558	12.0729	11.4496	21.5532	23.107	17.4813	12.4323	9.3284	15.585	19.2838	24.7301		0.47	15.8827
11.3184	28.991	17.479	6.964	8.4765	19.209	28.771	18.15	24.328	17.476	23.41	14.7808	11.2847	2.0146	1.718	6.5797	21.0916	19.4991	7.8323	2.8977	5.6828	14.8394	23.2455	21.8513	18.2182	13.8554	17.9668	29.588	18.9205	17.141	10.8507	9.277	16.3769	21.0986		0.474998	15.7535
11.4376	33.129	11.478	6.349	9.4693	24.57	18.446	17.399	29.046	18.154	19.812	10.3068	6.09	3.3633	4.5297	12.2064	20.3691	26.2105	9.1732	2.8428	4.9746	15.8742	18.0524	20.6998	17.0332	16.4713	16.1928	22.592	19.2496	13.9854	11.3273	8.205	23.0536	25.105		0.480001	15.6291
11.5567	24.332	10.963	4.807	7.63	22.103	22.517	22.061	29.845	21.858	18.294	18.2689	7.8513	4.6458	4.4606	9.7878	19.4014	28.9672	7.1909	1.8931	5.1334	16.0351	28.4818	15.8538	17.9641	16.1697	18.4491	23.16	15.7664	13.9026	11.3266	14.254	21.6891	20.795		0.484999	15.9351
11.6758	24.631	9.008	6.346	7.2816	20.2	25.809	17.635	16.63	23.096	20.822	17.4658	9.297	3.7935	4.0917	10.8119	14.7056	26.8484	6.089	3.0919	3.7433	16.5943	20.0475	19.8699	14.5028	14.2662	12.8622	20.684	16.0109	17.0517	13.2676	13.892	21.0859	21.0339		0.489997	14.9262
11.795	28.144	7.658	5.924	7.0752	20.147	27.567	20.511	25.955	29.153	21.113	19.4592	5.9123	3.506	2.6752	10.5301	21.555	20.1235	8.5536	4.4788	2.0287	18.1096	18.5784	19.5216	21.1752	21.0423	17.1644	26.691	17.2262	17.1699	11.9217	10.402	13.3329	21.2532		0.495	15.929
11.9141	25.405	11.338	5.372	5.8085	26.373	28.326	15.163	18.785	27.793	16.638	12.8447	5.4312	4.236	5.3719	17.9041	21.6646	19.4635	10.4132	4.1995	1.9729	22.3357	19.7152	22.6734	15.8002	15.0286	19.3361	21.985	17.5613	16.6329	8.6729	13.884	17.4251	25.0788		0.499998	15.7767
12.0333	26.724	13.345	5.326	6.2097	32.25	27.161	21.139	23.113	18.314	26.7	15.3365	6.0789	3.2285	1.2972	13.4671	18.8491	21.2741	6.8781	4.0062	3.3957	18.074	23.6251	20.1745	24.962	17.1098	17.1722	22.031	19.1583	16.0099	12.603	14.2	15.0881	22.0617		0.505	16.2534
12.1524	33.451	9.664	4.674	9.1093	20.801	28.985	21.394	24.702	25.678	18.743	11.263	5.441	3.4466	3.5117	11.3766	25.469	22.9801	6.531	3.767	3.7969	12.1359	19.968	21.0814	21.7857	14.9493	20.0903	18.451	19.1771	15.8378	12.798	13.041	15.7379	20.5506		0.509999	15.7693
12.2716	23.545	10.5	3.761	7.1721	21.388	20.397	19.566	19.846	19.014	19.829	10.3653	5.1166	5.1908	3.4098	8.1077	17.8201	25.914	6.9572	2.2129	4.5771	10.5981	20.6399	23.8431	21.2144	12.2109	20.0977	27.131	15.8935	13.2224	7.7411	17.799	14.4367	22.8497		0.515001	14.6172
12.3907	24.896	13.529	4.004	7.6849	20.479	27.42	17.726	24.116	18.386	18.725	16.4577	6.9923	2.8442	4.447	8.5147	17.6539	17.7553	6.7796	2.0161	5.6153	13.7177	19.4955	27.6933	25.4002	8.973	15.682	29.91	19.9658	17.3448	10.2742	12.413	17.4643	23.4923		0.519999	15.3899
12.5098	28.63	10.114	7.661	4.7202	17.915	23.461	15.586	26.957	23.16	15.069	11.1772	3.5229	2.0829	4.0033	10.6004	24.5003	24.638	6.0193	5.7285	2.3974	15.8064	19.4061	20.3993	17.4658	18.3011	22.0522	28.09	12.9774	14.8563	15.092	16.714	21.2535	22.0056		0.524998	15.5262
12.629	27.329	6.415	1.068	7.2741	19.078	23.039	13.637	27.511	22.139	20.968	15.2829	6.3257	2.9907	3.5404	13.8062	17.6403	25.6503	7.3123	2.4192	1.8794	11.7119	16.6767	22.2952	23.2408	13.7585	15.1414	23.155	15.1716	14.2453	10.2321	12.753	15.7434	20.5958		0.53	14.5462
12.7481	27.604	8.014	4.964	7.1092	23.098	20.558	22.521	31.783	23.825	19.296	16.4939	2.7793	2.1018	2.3489	9.0207	14.828	23.8811	6.8342	3.5665	4.2981	17.9828	16.4579	20.4551	18.7526	16.5848	16.1007	25.415	16.8742	19.7937	9.3544	13.003	17.6295	24.989		0.534998	15.4036
12.8673	34.875	9.233	5.816	7.9683	18.827	24.772	18.422	27.169	30.585	17.644	15.0996	3.8794	4.2561	2.7413	9.3116	17.447	23.8002	8.9239	4.7877	2.7515	19.7987	25.8424	22.0701	19.3074	10.6422	20.6828	24.029	16.5951	19.3386	12.4134	10.101	17.0085	16.754		0.540001	15.8452
12.9864	24.926	8.55	4.061	5.5012	22.393	21.938	13.554	28.601	26.837	20.983	16.0337	3.4954	2.459	1.6853	12.2265	24.4118	17.4072	8.7546	2.5766	3.9871	13.8128	17.0492	22.8061	23.3771	12.3866	17.4964	17.777	20.487	20.6611	11.3616	13.41	20.3125	19.297		0.544999	15.1702
13.1055	25.238	7.354	4.45	5.6544	23.985	21.657	21.007	23.534	21.619	18.085	15.4808	3.2599	3.2839	3.0632	10.9264	20.5543	24.1615	7.8394	5.3455	3.4263	15.3246	23.0042	23.1864	19.8742	13.6015	21.0281	16.359	20.0932	16.9308	9.4535	15.342	21.4854	17.5035		0.549997	15.2458
13.2247	21.642	8.246	5.234	10.7155	19.426	25.673	15.404	25.597	18.477	21.485	14.1423	4.7892	1.0789	2.8446	8.5113	16.9404	28.6752	6.6414	2.9931	4.2371	12.0566	23.7687	28.5224	24.2368	9.8309	14.8223	24.135	13.755	12.9083	7.2636	11.104	13.2138	23.1431		0.555	14.5913
13.3438	24.183	9.445	5.102	6.1661	28.588	20.033	16.009	20.837	23.34	20.932	13.7539	2.8915	1.1269	3.3357	8.6137	22.4317	26.5654	5.1589	2.1547	3.5945	12.3531	19.243	21.9379	20.2441	11.9525	18.2254	18.218	18.604	18.7459	9.7551	17.387	17.7104	18.5322		0.559998	14.7627
13.463	23.476	9.794	7.868	9.7441	20.987	22.339	19.357	29.368	21.572	16.966	14.5218	2.1819	1.868	0.9339	9.6594	19.9163	24.6582	7.9579	3.978	1.7676	8.5042	19.0744	18.1712	22.3685	14.7061	21.5328	24.91	16.8211	17.0052	13.0386	19.173	16.5484	19.5215		0.565	15.1603
13.5821	21.026	10.151	3.323	11.1829	25.449	19.583	20.803	18.684	27.137	21.549	13.5215	4.4223	0.468	1.8917	10.2031	18.6241	18.8012	6.7952	4.1146	4.5061	11.8388	23.025	24.3641	16.4901	17.8794	18.2595	18.839	18.9098	14.724	10.7573	18.436	17.7077	20.137		0.569999	14.9577
13.7012	25.832	10.234	3.543	6.7369	21.347	21.679	16.815	22.695	28.038	23.492	15.5073	5.4802	1.0662	2.6927	7.6736	19.8558	23.1623	7.4971	2.2894	1.7666	12.8645	18.1815	20.3366	23.9909	14.7458	19.1173	28.649	19.074	17.0697	10.6925	16.535	22.1239	21.9625		0.574997	15.5378
13.8204	30.98	5.835	2.086	8.0958	21.484	27.275	15.091	24.776	27.901	21.633	13.3101	5.0045	0.4013	1.5455	11.4181	19.7123	25.0572	8.4607	4.1947	1.7718	13.3324	24.1539	20.3978	20.6268	12.3489	20.1785	28.097	12.6912	17.213	9.6636	16.232	17.7857	19.9521		0.579999	15.4153
13.9395	28.752	7.537	3.421	9.7348	27.681	20.577	14.546	19.734	24.635	20.917	15.7508	2.873	1.9131	2.2823	9.7804	19.0548	20.7948	10.0379	3.1669	3.9677	13.0488	23.5639	14.2611	21.8617	13.4504	17.5884	25.781	16.6755	14.8626	18.2303	18.121	17.9678	16.9792		0.584998	15.1378
14.0587	20.535	7.678	6.765	9.1542	31.056	22.806	16.82	17.535	28.033	15.501	11.8163	2.8881	0.5581	0.8374	9.2217	15.8308	23.4566	8.0078	3.7162	1.7118	8.1848	20.0231	17.8968	19.1714	10.607	16.1154	25.791	17.919	16.9354	14.6636	19.734	20.0275	23.8462		0.59	14.6922
14.1778	27.23	7.28	4.263	12.0311	28.011	17.191	15.779	18.006	22.276	17.427	10.7053	4.7592	3.3277	0.7269	12.1657	23.8682	20.6004	6.6892	2.5494	2.3059	7.2803	22.064	22.0846	18.7361	18.7224	14.6026	27.312	18.8934	16.9067	16.9374	15.616	19.9475	15.4571		0.594998	14.9016
14.297	20.087	6.025	3.124	9.5877	20.438	22.71	15.088	16.034	23.065	11.619	13.1646	4.6826	1.4077	6.5138	7.9228	20.9362	20.2408	6.7472	3.0173	3.5821	13.216	20.2094	15.7556	22.5239	20.6718	21.9066	23.113	17.0676	19.4867	13.8697	19.349	15.1872	19.4355		0.600001	14.4783
14.4161	17.084	8.24	1.957	10.4023	28.35	20.535	8.77	28.811	17.513	19.582	20.9488	4.2741	1.7613	3.3216	9.2302	18.768	16.0559	10.5726	5.9647	4.8373	10.1779	17.8635	15.9864	16.9771	17.4745	20.3457	21.947	17.5188	21.2429	14.4752	17.043	17.8188	21.301		0.604999	14.7621
14.5352	17.071	9.249	4.733	7.941	17.905	15.832	18.532	13.493	28.476	22.144	13.2046	2.0898	1.2279	2.4195	11.2561	20.3235	18.5838	12.7801	6.0296	3.4778	11.0198	25.3545	20.9341	23.1136	14.0279	23.1656	19.878	10.5723	16.5037	18.1428	17.596	15.1844	18.375		0.609997	14.5647
14.6544	23.824	5.037	7.555	10.5682	19.835	22.833	10.1	22.735	22.255	15.849	13.1507	5.1693	2.6236	1.8687	8.8582	17.0658	20.5184	7.6177	4.5381	2.3324	12.5632	20.3445	21.297	14.4099	12.043	20.9619	16.709	18.3014	15.7474	16.094	13.551	21.3149	18.7249		0.615	14.1332
14.7735	22.205	5.6	3.519	15.7409	26.459	16.763	24.046	18.491	20.621	17.862	12.0411	4.2869	2.1953	3.1759	12.4171	16.1511	18.4703	8.2881	4.451	3.3036	12.9059	28.7007	22.0323	16.8313	12.0392	22.7058	19.873	21.8093	17.3903	16.7319	20.898	13.8687	16.8439		0.619998	15.1127
14.8927	25.587	7.432	5.381	10.7023	26.171	24.551	18.292	23.366	24.753	20.624	15.2471	5.5334	2.1369	1.6555	11.2564	15.0434	24.2979	8.0357	4.0228	3.0872	11.9207	24.1654	19.4934	20.0394	16.5674	22.6157	28.095	19.2562	18.3936	17.1746	14.262	20.6135	24.2494		0.625001	16.1825
15.0118	23.861	6.122	2.828	10.2585	23.864	24.305	16.085	17.722	22.432	19.427	11.3895	5.2602	0.7989	1.6578	9.2183	18.5013	21.2934	9.1015	2.7208	2.1745	12.345	13.4079	26.2936	17.9877	15.4315	27.4356	21.265	21.2998	19.9346	16.4004	12.927	19.9932	24.9549		0.629999	15.112
15.1309	25.783	3.751	3.163	10.453	28.3	15.593	19.559	19.603	22.909	17.689	13.7492	2.8667	1.6932	3.6964	12.4594	18.901	23.7641	7.3284	6.9046	4.1342	12.648	19.5963	16.4254	26.4779	12.765	25.1051	21.402	13.2993	15.4953	18.8052	15.419	15.3356	20.2407		0.634997	15.0095
15.2501	21.558	6.31	4.252	7.2856	24.24	20.734	18.752	18.35	18.356	12.027	15.1779	3.0545	2.0798	3.2978	11.5771	15.6523	15.0918	6.4326	6.1112	5.1971	9.8335	22.8228	17.8254	24.3926	18.1276	22.1631	25.534	19.052	16.8611	19.4877	11.065	19.3432	24.1098		0.639999	14.732
15.3692	28.285	11.17	5.545	6.8427	32.071	21.706	19.811	18.92	22.967	18.764	13.739	7.0964	0.5073	1.0186	10.3873	20.379	19.8835	10.7804	6.2595	4.8895	12.9252	20.8783	26.0506	20.9344	17.7603	26.1457	23.695	18.2718	21.3799	21.5289	10.583	18.4886	21.1737		0.644998	16.389
15.4884	28.844	4.831	3.866	13.0408	23.659	22.007	14.613	20.619	21.596	18.97	18.8514	6.9621	2.4966	2.1869	8.9096	16.5609	21.5453	6.8488	6.3478	2.0576	10.8681	20.6585	18.8396	18.4988	16.1035	21.6881	25.843	20.5994	13.1141	14.9496	14.198	15.592	17.3616		0.65	14.9432
15.6075	21.905	3.485	5.879	12.214	30.31	21.098	17.961	24.242	18.236	14.279	16.1279	5.7409	2.022	3.7142	15.5812	19.4481	19.6412	11.2788	4.0321	2.918	9.8588	21.237	17.9061	21.6602	16.6941	21.9083	23.336	13.5354	17.4438	15.8797	10.998	24.4931	28.356		0.654998	15.5582
15.7266	27.979	3.933	5.219	10.769	23.694	25.546	19.004	24.108	28.39	17.327	12.9153	4.9594	1.9759	1.0407	11.0298	18.9701	21.9143	7.2345	3.5516	4.0609	11.0448	22.1766	21.934	20.871	17.911	27.5888	28.311	25.9877	19.565	17.9161	13.004	14.7204	18.4203		0.659997	16.1537
15.8458	25.356	9.372	4.275	12.2371	27.614	21.409	24.028	22.526	21.224	15.497	14.628	6.6343	3.5997	2.593	12.9773	17.8795	26.3466	12.2386	1.5611	3.1423	14.3366	24.7904	31.4506	24.8302	19.6816	18.6005	27.184	19.7075	16.2465	18.6335	16.392	18.8379	18.8681		0.664999	16.809
15.9649	24.766	4.74	4.439	13.7042	25.139	17.329	22.161	21.719	24.221	22.949	13.1142	5.3912	4.3735	0.5831	10.7468	16.7968	19.4583	10.2252	3.4765	3.4376	17.1365	17.5092	24.0732	23.3394	15.9687	25.5266	23.662	19.1099	27.0994	17.6057	20.517	19.0764	20.5961		0.669997	16.3633
16.0841	26.185	7.243	3.178	12.9981	26.331	19.932	28.05	19.47	23.422	19.45	19.7059	4.7955	1.8665	1.8853	10.1601	16.9727	23.9516	13.2308	7.9553	4.2007	18.5183	24.6738	27.7115	21.8195	19.4327	24.4707	26.227	19.5313	13.6846	18.4063	17.858	28.1438	21.7824		0.675	17.371
16.2032	25.099	5.048	9.287	10.6483	25.424	19.539	23.704	22.951	21.8	21.593	8.6134	3.7549	4.5384	3.7267	8.3049	22.154	22.0976	12.6576	5.4716	4.1886	13.758	21.8808	21.3885	19.7222	16.624	23.4179	22.564	14.5433	14.096	15.852	18.144	17.4396	22.8713		0.679998	15.8455
16.3224	22.549	5.435	5.054	19.2488	25.493	24.691	20.879	22.882	27.58	19.615	15.745	3.3109	0.8473	2.3667	13.5038	19.7555	14.3452	14.0187	5.7594	3.3486	14.3094	20.2482	23.2949	18.0959	15.2555	26.7384	24.017	23.1514	15.3823	19.1668	19.918	17.1352	23.4331		0.685001	16.5628
16.4415	22.923	9.332	6.326	16.915	22.769	23.757	19.929	19.701	24.504	16.087	12.3245	4.3841	3.7861	2.1284	18.0365	20.0226	23.4345	17.8073	4.4255	4.8167	20.8647	23.7392	17.3815	25.2182	19.6983	20.967	29.254	21.2281	16.9714	15.7766	22.829	20.1795	16.3974		0.689999	17.0883
16.5606	27.034	7.484	2.752	14.9946	23.31	18.661	27	22.815	20.594	21.563	13.3838	7.1886	0.7969	2.9296	11.4374	13.016	19.2333	14.8079	4.9276	3.6527	15.0136	14.2597	17.9234	24.6145	19.2197	26.9079	24.405	21.4597	14.9957	21.9486	22.607	19.4212	20.9053		0.694997	16.4019
16.6798	17.674	4.671	8.862	20.0331	27.688	18	23.158	23.28	16.409	17.974	14.5643	3.2933	2.1985	3.7382	14.3849	17.1433	26.0813	11.2773	4.1121	3.0282	17.4283	19.7317	17.7991	22.6862	23.0005	31.3065	29.517	18.4988	11.4824	21.7776	23.321	17.1797	22.647		0.7	16.7863
16.7989	24.587	6.786	8.326	23.0297	25.597	23.424	22.782	22.657	24.688	22.508	16.3195	5.598	1.7179	2.4122	13.2	17.9429	22.0633	13.4207	5.227	3.4725	15.9849	24.7368	21.8164	21.0374	22.5502	27.6783	18.436	18.386	17.3166	23.8935	19.925	14.6357	21.2877		0.704998	17.3771
16.9181	23.585	6.474	9.657	24.0817	28.353	21.946	21.774	18.881	17.517	23.602	14.476	7.7007	1.9159	4.3687	16.113	21.8181	24.478	14.7171	6.0857	3.5102	18.0976	28.562	25.3219	21.3124	19.3686	29.8516	23.847	18.148	22.574	19.0432	19.089	16.196	19.7638		0.71	17.9463
17.0372	24.164	5.379	5.756	21.4405	23.639	19.35	25.186	21.175	23.456	17.67	18.4498	4.0187	2.9736	4.1102	12.7077	12.6663	20.8823	16.6259	4.5153	2.248	13.2734	32.7074	21.6654	22.0505	19.3205	24.0149	26.691	16.0157	20.2249	17.4762	18.585	14.9032	23.5482		0.714999	16.8754
17.1563	21.062	7.447	8.011	21.3518	21.522	21.788	20.822	16.985	17.605	15.783	13.5831	8.1747	2.2952	4.5036	17.286	15.4675	22.2402	13.284	6.7968	6.9649	21.9074	23.6614	22.7413	23.3627	24.7253	23.9845	25.138	19.6773	17.12	12.3568	17.455	12.7933	21.0829		0.719997	16.6357
17.2755	24.513	7.724	9.258	17.3354	26.825	24.526	17.708	16.745	18.042	20.189	9.2324	7.5973	3.8117	5.503	12.0236	14.1279	22.3072	17.851	5.0904	3.7393	14.2059	24.7047	21.9925	18.8752	24.7559	27.642	17.623	18.8344	15.7326	15.8901	18.596	19.6222	23.3255		0.724999	16.5439
17.3946	26.424	11.501	8.284	26.6797	27.953	22.859	19.099	19.817	17.635	18.895	15.2618	4.6637	3.4282	2.6654	13.2007	16.6888	19.2146	17.3728	7.3731	5.4523	17.6533	20.2006	24.4916	20.2062	22.2404	27.3297	19.655	17.474	16.0699	17.2298	12.971	19.2991	18.9627		0.729998	16.9167
17.5138	26.596	10.913	14.545	20.9897	24.946	25.532	14.955	16.253	18.316	16.552	17.468	6.8664	1.5119	2.3571	13.8233	17.4415	23.1647	19.9985	3.4314	4.5845	16.0029	22.8682	26.3422	20.1205	19.6767	23.0446	20.168	14.7451	12.1724	19.3277	11.091	15.6946	19.7093		0.735	16.4002
17.6329	29.688	9.456	10.983	25.1333	27.785	22.826	19.549	25.441	21.682	9.7	15.4108	6.0542	4.1573	2.739	14.7442	17.5192	23.0361	19.3981	4.297	5.6118	21.9167	22.5927	20.402	27.5004	16.5863	17.1265	27.066	17.9735	16.2432	10.6678	12.974	18.9969	19.8484		0.739998	17.1244
17.7521	23.584	11.599	12.706	21.5597	25.071	27.598	20.265	27.812	23.565	20.169	12.3981	5.5952	3.9301	2.5727	14.0147	15.7901	22.5005	19.9624	7.3008	4.3783	18.3582	27.4431	21.3406	18.4383	22.885	17.0411	22.04	16.5137	17.4426	20.1977	15.606	21.5092	21.9264		0.745001	17.6701
17.8712	22.151	14.677	12.225	27.1868	27.134	25.687	20.709	20.094	30.911	22.01	11.285	6.3124	1.5403	4.9877	16.3854	17.6339	19.1645	18.4867	6.7414	7.2011	17.7451	30.6977	21.6924	20.7795	31.8995	17.8081	24.254	18.4548	22.5991	13.9437	15.742	18.1828	21.2071		0.749999	18.41
17.9903	24.021	11.131	15.576	21.5967	21.111	23.847	24.672	21.773	26.889	17.015	15.745	9.985	3.9133	4.5767	15.9772	15.6485	23.0979	24.8766	7.2194	6.7724	23.663	21.4284	24.0194	29.0003	26.2798	24.3042	23.794	15.7268	14.6179	18.9051	22.317	16.3911	19.9692		0.754997	18.6624
18.1095	22.84	16.445	16.274	22.5232	25.831	19.691	19.34	20.762	25.886	25.036	13.1347	11.009	4.4634	2.5685	14.3334	16.3114	24.4989	23.5429	9.3472	6.0411	20.8462	23.006	28.2598	21.4093	16.9366	27.1043	24.224	14.8963	13.5277	18.8907	22.55	16.3635	20.0956		0.76	18.4239
18.2286	24.549	15.229	14.259	23.4479	21.119	21.537	24.225	21.812	27.657	18.306	14.5532	9.0577	3.4883	4.2473	10.9313	15.0805	24.1519	22.8269	10.5985	8.1154	14.7492	23.3522	19.9773	18.5133	21.8898	26.5719	23.2	13.1768	16.0518	13.1232	18.56	24.1741	18.0853		0.764998	17.7763
18.3478	23.593	17.051	13.675	21.018	22.009	25.539	23.465	22.238	23.259	18.737	12.575	12.919	4.1787	5.8042	16.2369	12.6401	20.5655	25.5003	12.0944	5.7326	14.5998	24.8937	22.1033	22.5806	21.8885	19.7161	19.712	12.1797	14.8842	13.5588	19.345	18.9808	17.8061		0.77	17.6085
18.4669	31.86	17.778	11.235	25.2585	25.852	17.155	24.697	23.277	27.031	19.586	17.6971	18.1158	5.5851	8.6484	10.8733	18.3417	20.5874	19.8805	10.843	7.9464	23.4121	20.4704	25.7416	21.9836	19.9525	18.0294	22.345	10.3106	14.5208	14.6877	20.056	21.7954	22.3544		0.774999	18.7245
18.586	22.399	18.577	17.263	28.0258	25.751	26.946	23.722	23.688	27.029	15.872	14.2413	15.617	4.3762	9.3142	13.5208	20.2959	22.0188	25.2382	10.6915	6.1242	23.141	25.5108	20.0603	19.9046	15.0741	24.8598	22.908	10.2193	13.6094	15.6434	22.556	19.4847	26.1528		0.779997	19.0859
18.7052	25.596	17.67	22.11	33.2276	26.41	24.244	20.981	23.989	29.556	19.559	13.4322	15.2565	5.2848	7.9204	14.2535	15.3451	22.487	25.4678	11.767	8.0895	19.3761	26.3417	21.9823	21.4656	21.4227	27.965	19.234	16.2469	17.849	21.7958	16.613	23.0334	22.7065		0.784999	19.96
18.8243	25.03	23.278	23.453	28.87	29.489	26.526	28.706	17.179	28.688	26.7	12.3804	12.8946	2.9015	11.5129	15.3507	19.3321	24.2344	19.0361	14.4284	15.2745	22.7876	26.5805	18.1756	21.18	27.4818	29.4899	25.47	13.9165	18.3239	14.1281	12.812	21.3776	24.0601		0.789998	20.6378
18.9435	32.048	16.692	19.147	25.387	24.433	25.401	22.266	29.463	26.81	16.898	13.6282	15.316	4.8582	9.3408	17.6825	20.3815	17.33	20.6654	17.8323	13.273	19.3114	12.9533	26.5249	23.7838	24.0336	19.6456	22.91	19.9129	15.8422	13.76	16.179	21.3803	23.0476		0.795	19.6405
19.0626	29.117	19.139	19.693	26.6843	25.655	31.295	24.034	18.319	30.144	16.689	14.5996	23.7583	5.1757	11.1762	14.1271	19.968	20.8055	18.1974	18.561	12.4151	23.1366	21.1161	19.4538	18.2415	24.9019	24.1875	18.796	15.7045	12.9309	9.5637	18.576	19.7825	21.4639		0.799998	19.6184
19.1817	26.569	18.279	22.976	30.0707	28.31	27.33	20.599	23.092	21.063	17.666	15.6904	13.5816	7.2746	15.3698	11.2536	15.4403	19.5273	21.4247	22.9907	16.2418	24.1755	21.5438	19.8467	19.7063	28.3613	24.5867	20.345	9.5424	5.9574	12.9923	18.577	17.3256	22.5478		0.804997	19.4017
19.3009	36.299	19.713	31.382	26.4958	20.642	27.74	22.66	20.834	26.875	14.827	13.822	15.2548	5.6281	11.1455	15.5749	16.6768	24.1731	20.6808	21.6251	13.0198	18.8126	23.6029	16.5908	22.1845	22.0502	22.2745	22.412	9.9917	8.3746	9.9232	15.848	24.713	19.9859		0.809999	19.4495
19.42	30.623	22.08	21.511	26.6743	25.061	25.408	23.1	21.72	21.842	13.123	13.3011	14.1728	6.7043	7.876	13.119	13.5953	18.2438	17.3106	15.5803	16.1414	17.2546	26.3978	19.1985	25.3731	27.5319	18.6905	17.474	11.1468	7.1192	9.6882	15.989	21.7954	21.7405		0.814997	18.3814
19.5392	27.745	24.049	21.248	26.2952	24.506	24.64	25.754	25.19	18.13	20.492	13.9444	21.2275	10.944	14.3574	16.1786	16.2908	20.682	20.4655	23.6825	19.8975	20.6697	23.0761	13.9259	20.4673	18.5201	20.5678	21.174	11.2591	6.545	14.0199	17.068	18.7959	22.2886		0.82	19.5181
19.6583	29.974	21.928	24.813	27.7127	25.996	25.79	24.065	22.458	23.639	21.046	15.6168	13.7643	12.7839	11.9688	19.8092	14.2262	12.8973	19.7684	17.3759	17.3461	21.8505	19.5827	14.7477	21.887	23.8657	19.8439	10.471	8.0736	4.5994	9.1684	11.346	18.8395	23.2057		0.824998	18.4988
19.7775	25.445	26.032	22.943	28.3561	25.589	25.833	32.254	18.997	19.129	14.643	11.8817	12.5314	14.5571	9.9082	10.4278	12.9641	14.1541	19.8129	22.8816	16.2944	22.2261	20.3635	13.5857	12.8336	20.9945	17.2873	9.919	5.812	5.3866	5.6151	13.626	17.2011	25.5086		0.83	17.424
19.8966	22.761	24.376	21.115	26.4263	25.427	25.993	19.565	18.361	21.914	17.085	12.2097	12.8261	11.7105	14.2	9.6478	12.4249	15.2404	20.8773	24.9481	21.4751	21.2312	17.6185	15.6741	18.6849	21.1508	20.3562	10.397	3.1327	1.5495	5.2226	7.469	14.5461	20.86		0.834999	16.8629
20.0157	33.234	22.914	24.919	28.6267	27.392	24.652	29.204	23.184	25.018	11.238	12.6887	13.8048	19.0407	12.7777	16.8082	10.8672	20.7913	20.9827	25.3378	19.4491	28.3504	16.7175	11.0739	15.4046	24.9068	11.8595	6.595	5.5283	1.6873	2.5812	2.947	16.1732	25.1788		0.839997	17.9374
20.1349	25.608	32.027	19.324	32.1808	24.155	25.424	25.312	19.785	21.294	12.676	11.9569	10.6405	14.3035	13.9507	11.9024	5.3485	11.9995	14.9312	24.0659	23.9776	23.035	17.8184	8.2849	7.2224	17.3341	9.6883	10.519	3.5603	3.6607	4.9793	5.719	17.207	19.7369		0.844999	16.0493
20.254	26.807	25.248	22.416	29.5468	24.049	26.623	24.015	27.622	25.406	12.435	14.7481	20.9937	15.5736	11.139	10.5203	5.3208	8.2499	18.2876	22.1751	22.4341	16.0971	22.2609	7.2919	8.3874	20.8644	11.1298	5.897	5.9488	1.9705	4.8469	5.96	10.1078	17.5691		0.849998	16.1194
20.3732	30.521	32.241	28.341	27.2851	21.914	16.616	21.723	27.591	18.277	7.467	15.7034	14.0507	14.913	11.5164	9.9907	11.804	10.0128	21.6905	24.8869	16.5625	17.3862	16.262	10.6975	10.2693	15.1373	5.5357	5.144	3.3922	2.3883	5.121	4.059	15.9516	17.7813		0.855	15.5222
20.4923	28.173	31.393	21.428	29.4267	25.169	30.426	20.624	28.739	18.246	10.819	12.5467	19.2308	15.2942	10.3948	18.991	8.0016	8.431	17.6979	18.6504	18.1659	17.8063	23.1951	9.2086	6.544	16.034	3.7621	3.155	2.1459	0.2034	2.1358	4.349	16.4912	23.9881		0.859998	15.7838
20.6114	26.109	29.978	29.858	30.2514	29.425	23.122	26.157	30.256	17.447	4.21	12.4568	13.6892	19.0962	18.9123	11.1911	5.194	6.0246	21.7087	20.8964	26.1775	18.2339	17.2623	7.024	2.1253	14.8085	5.3532	2.238	1.9633	3.0166	2.7647	4.894	11.8523	27.3436		0.864997	15.7891
20.7306	22.658	30.012	24.637	34.6018	31.202	22.301	30.493	26.368	20.263	5.267	12.5686	14.6894	13.998	10.0135	10.1649	4.5804	3.8459	18.8145	22.9323	21.421	18.4647	13.5652	2.9252	3.4396	9.0155	2.2174	2.022	3.7891	2.0468	1.4807	2.498	12.8663	23.3615		0.869999	14.5007
20.8497	33.913	31.239	24.681	22.3502	22.626	21.876	27.502	27.036	12.098	6.316	9.7995	8.5987	15.581	11.3024	13.9589	3.1028	4.5235	15.8803	19.3245	18.1823	23.5793	10.3908	5.4542	2.6687	10.1559	2.9672	1.255	2.3611	0.7781	0.0582	4.68	12.2484	18.7508		0.874997	13.4921
20.9689	23.724	32.153	31.946	20.5469	25.774	17.485	22.647	22.863	14.501	4.989	9.8795	16.3131	13.0885	10.3288	12.1609	4.2363	8.6239	20.725	17.9919	19.4369	22.8333	12.8317	3.6007	3.6377	7.9605	2.1405	2.152	2.0649	0.8448	2.4216	2.258	9.8279	18.4042		0.88	13.3452
21.088	23.69	27.225	28.312	27.8582	25.108	26.553	21.454	25.638	12.589	1.994	11.4423	10.3768	10.6172	13.7532	10.8102	3.7281	1.8349	15.2483	19.4055	22.9999	22.9081	12.7727	4.1329	4.2356	5.8873	1.548	1.477	1.1226	0.0354	1.5631	1.75	9.6826	13.7579		0.884998	12.7731
21.2071	27.497	23.175	22.834	25.4895	25.573	20.337	22.983	18.928	12.937	2.127	7.9511	16.492	12.9503	13.4717	10.3747	3.2997	3.3427	15.1295	13.0638	23.7476	17.4333	11.7592	4.1267	2.2541	3.023	2.8179	2.149	1.3468	4.3646	2.1465	2.47	7.5759	17.3196		0.889996	12.1361
21.3263	23.478	28.676	25.147	23.5268	23.085	27.814	23.704	31.403	9.048	1	7.5432	12.3962	9.5708	13.0969	3.9755	2.2825	0.971	13.6628	14.8681	23.206	21.7653	11.1385	2.8598	3.2775	3.3702	2.9427	1.219	0.8839	0.7212	0.0674	1.658	5.6397	16.566		0.894999	11.8353
21.4454	29.446	28.316	24.381	24.2243	27.593	22.357	16.469	21.965	8.798	1.695	7.4572	15.6979	15.9244	10.0559	3.5357	1.2154	2.2821	9.1294	11.7259	20.7886	15.9174	4.2418	2.5709	1.6038	3.9151	1.4938	1.125	1.5573	0.0003	0.5551	1.985	4.1335	13.9524		0.899997	10.7912
21.5646	25.578	28.188	21.23	21.5459	24.979	27.462	19.953	20.951	7.129	1.067	5.7469	9.9122	14.3897	12.3325	4.5693	1.9811	0.5835	7.7831	8.1396	18.6842	14.3514	4.8785	2.9112	1.5421	1.9236	1.709	1.403	1.058	0.4889	1.0886	1.681	7.053	15.9528		0.905	10.2499
21.6837	23.997	22.703	23.164	27.9724	25.391	24.52	21.071	20.247	8.909	3.958	5.6526	8.8425	12.8863	12.1758	1.5257	1.2098	2.0624	5.4567	5.9516	12.0537	10.9765	4.2221	0.9714	1.3217	0.4657	2.3179	2.204	0.6763	0.2857	0.0647	1.115	4.177	11.6699		0.909998	9.40053
21.8029	22.596	19.955	26.135	24.6156	23.124	29.139	18.709	20.59	2.769	4.199	4.388	6.7325	12.5273	10.4647	3.923	0.8164	2.1872	2.7334	4.4649	13.5053	9.0438	0.9963	2.2698	1.8016	0.6038	0.254	1.032	0.3861	0.7307	0.968	0.596	3.8443	9.3166		0.915	8.64901
21.922	31.016	28.063	26.378	28.3314	26.686	23.145	20.581	22.126	2.848	0.987	4.4367	4.5439	11.7851	6.7047	3.0435	1.1757	1.4829	5.8739	4.5631	11.5292	7.9405	1.4582	0.7541	1.7852	1.0253	1.2002	0.812	0.486	0.4391	1.3116	1.946	2.5159	12.7468		0.919998	9.08245
22.0411	20.272	32.886	30.894	24.6171	27.14	27.297	22.631	19.66	4.784	2.366	2.0824	5.715	11.7593	4.8325	1.6202	1.862	0.0092	3.2696	3.0378	10.1748	6.0862	3.8996	0.514	1.1149	0.8024	0.8776	0.14	0.8846	0.5539	1.5429	0.762	4.3007	10.4601		0.924997	8.75299
22.1603	23.322	34.48	20.583	18.425	23.003	17.879	19.839	23.37	4.38	1.594	2.1624	2.014	7.1548	4.3405	1.8875	0.8838	0.5488	2.5292	2.566	5.3908	6.3032	3.0558	1.9248	0.5876	0.9592	0.4089	1.22	1.319	0.1683	1.1893	0.844	2.075	9.1007		0.929999	7.43965
22.2794	27.921	26.442	24.046	20.0145	26.715	25.462	25.338	20.41	3.316	2.512	3.9736	2.7892	5.7509	4.5076	0.963	0.4635	0.5372	2.2652	5.1015	6.4553	5.2096	2.2752	1.6354	0.0051	1.5754	1.061	0.067	0.0377	0.4974	0.5591	1.963	0.6709	4.5988		0.934997	7.73149
22.3986	24.204	29.377	24.358	16.2863	30.029	21.132	23.63	23.714	1.552	0.211	1.1193	2.7928	3.7529	2.9139	1.1004	0.2152	1.3835	1.7101	1.7992	3.264	4.3206	1.23	0.9474	0.6035	1.111	0.3991	1.384	0.9813	0.1318	0.054	0.519	2.8544	10.307		0.94	7.25417
22.5177	28.567	28.715	21.922	19.5915	20.708	28.301	22.183	20.996	2.02	0.869	2.3378	0.5926	0.8458	1.229	0.5644	0.5914	1.0323	2.9852	2.5599	3.0024	3.4481	1.4291	1.4578	0.3947	0.1843	0.9402	0.28	0.0143	0.2197	0	0.353	3.585	6.6625		0.944998	6.92673
22.6368	21.262	27.358	20.017	13.3776	20.783	26.343	21.547	24.037	0.083	0.445	1.1817	0.6545	0.1278	2.5911	0.3368	0.3025	0.6457	2.2742	3.2297	3.5775	0.9198	2.6174	0.7541	0.1422	0.4525	0.6521	0.0002754	0.0365	0.3297	0	0.112	1.3733	4.2834		0.949996	6.11659
22.756	22.959	23.34	17.47	12.5311	24.361	25.248	25.59	12.308	2.272	0.49	1.1975	0.0134	0.929	0.6691	0.5562	0.2171	0.0155	1.4325	3.5248	2.6035	1.5092	1.3495	0.2336	1.1175	1.6543	0.9297	0.759	0.7921	0.0075	0.3291	0.373	1.4331	2.4307		0.954999	5.77715
22.8751	24.412	27.994	12.725	10.8934	23.191	18.15	22.354	16.744	0.346	1.814	0.3115	1.3437	0.9894	0.8419	0.903	0.2795	0.3954	1.3281	0.9241	2.7	2.8385	1.5922	1.0248	0.7348	2.1379	0.2368	0.683	1.1652	0.3275	0.0042	0.023	0.7102	4.0033		0.959997	5.57944
22.9943	33.775	25.841	10.196	12.703	18.907	21.78	14.672	13.081	1.263	0.206	0.8172	1.1873	0.1786	1.2795	0.1918	0.7122	0.3902	1.7438	2.2727	0.8575	1.7023	1.9978	0.5394	0.9604	1.476	0.5838	0.002	0.276	0.0059	0	0.728	0.571	1.2087		0.965	5.21534
23.1134	29.952	15.37	6.444	6.6873	16.852	17.82	14.699	12.466	1.542	0.709	1.1951	0.3641	1.2909	2.4492	0.7703	0.2879	0.3903	1.1695	3.2737	1.961	3.2744	2.1979	1.8502	0.7825	0.5135	0.1808	0.508	0.0085	0	0.0189	0.716	0.6142	4.2585		0.969998	4.56414
23.2325	22.42	15.319	6.205	8.1194	13.727	22.903	13.446	11.319	1.025	0.116	0.6054	0.8182	0.5612	2.0675	0.2298	0	1.4916	0.4328	1.4308	1.6554	1.1357	2.0735	0.1269	0.562	0.7103	0.0465	1.108	0.0271	0	0.4398	0	2.2076	2.8418		0.974996	4.0961
23.3517	20.141	12.132	6.825	2.4578	13.072	18.424	9.41	7.072	0.021	0.009	0.9253	0.0088	2.1152	2.0156	0.0097	0.0004	0.2831	0.2325	0.4594	3.1277	1.3297	2.0696	0.0025	0.2754	1.0853	1.085	1.15	0.7498	0.0001	1.0413	0.648	1.5926	0.676		0.979999	3.34687
23.4708	20.782	10.089	4.639	4.665	8.393	9.433	6.144	5.044	0.851	1.302	0.829	0.0101	0.787	0.0114	0.7642	0.1662	0.86	1.2059	2.5481	0.4869	1.2876	0.0532	0.5593	0.336	0.898	0.7628	0.017	0.0165	0.0612	8.197e-06	0.455	0.0375	3.9943		0.984997	2.65119
23.59	10.776	4.815	2.773	1.0242	8.643	8.485	3.211	4.05	1.028	0.024	0.4566	1.1101	0.5053	0.8775	0.0053	0.3296	0.1261	0.3535	2.149	0.5044	1.5135	1.2964	0.4898	0.5869	0.2918	0.1651	0.669	0.8733	1.3251	0	0.6	0.2833	2.8366		0.989999	1.88416
23.7091	10.345	6.422	2.675	1.6522	7.859	5.359	4.376	2.034	0.245	1.157e-05	0.226	0.721	0.8521	0.6612	0.1097	0.6071	1.614	0.5485	0.0264	1.757	2.4494	0.0202	0.0151	0.0251	0.6139	0	0.709	0.0589	0.1703	0	0.023	0.3729	0.5817		0.994998	1.60999
23.8283	5.621	3.581	1.237	2.2606	2.863	2.193	3.898	2.861	1.141	0.942	0.7856	0.6556	0.9691	1.815	0	0.0078	1.74e-09	0.059	0.6508	0.2313	0.4111	0.4393	1.2442	0.5492	0.666	0	0.668	0.2744	0.0543	0	0.002	0.0024	1.214		1	1.1302

## Sheet: Image16
X0	Y0	Y1	Y2	Y3	Y4	Y5	Y6	Y7	Y8	Y9	Y10	Y11	Y12	Y13	Y14	Y15	Y16	Y17	Y18	Y19	Y20	Y21	Y22	Y23	Y24	Y25	Y26	Y27	Y28		Ap-basal	Avg int
0	28.6981	17.8906	29.552	25.4729	27.1317	37.2569	39.2282	26.2018	29.3407	30.3725	30.0467	19.2821	18.6816	17.6802	21.558	16.7293	11.3708	13.2324	18.7518	22.2164	12.7279	12.4837	8.9781	9.0548	10.0072	22.827	25.9327	19.3118	21.7832		0	21.5104
0.1191	28.985	27.9581	26.8962	27.974	30.2452	36.335	42.7442	29.1565	32.0497	35.5832	27.8488	22.357	20.5454	20.1038	25.7329	15.5492	12.8513	13.4296	22.7689	31.9865	19.0264	10.8116	8.6102	10.4977	15.4741	26.215	25.4467	25.913	20.4898		0.00609544	23.9167
0.2383	34.2456	37.2518	37.3085	37.4432	28.526	30.6561	45.4701	31.5875	41.2286	29.2384	24.6828	19.7097	21.28	20.5239	22.3609	21.7145	14.8676	15.0068	22.0848	28.3979	18.6007	15.3204	8.8246	12.0568	16.7239	40.053	28.979	28.9315	26.0323		0.012196	26.1761
0.3574	30.9259	38.8707	32.2163	36.7286	29.8163	37.8658	39.9241	35.2696	34.441	34.1952	28.0287	23.4685	23.9055	17.9499	24.9498	32.0256	15.3398	12.0007	25.1824	40.0614	27.2392	19.6462	11.2392	10.3189	19.2961	46.471	37.9299	37.9309	27.0949		0.0182914	28.6321
0.4766	35.4815	37.5607	40.5414	48.7104	42.6834	35.6309	48.2599	41.7748	35.4802	43.2161	30.0348	29.5848	21.7204	19.2835	26.7096	22.1439	17.5115	15.8821	33.1416	35.5879	33.795	18.8081	14.5705	15.4093	23.4133	63.468	39.1138	48.126	29.7113		0.024392	32.6674
0.5957	47.7426	39.705	44.7513	46.7668	38.968	40.1476	49.9792	45.9778	36.592	40.1965	38.7331	31.5614	26.9868	24.6022	30.6658	27.2888	18.6721	17.7479	41.1086	36.4052	34.5004	30.8682	14.8699	16.4314	22.6614	73.556	57.6796	69.6264	40.3523		0.0304874	37.4188
0.7148	43.3814	47.545	46.2304	50.2215	39.7174	45.3254	63.9304	50.1759	47.7247	43.239	37.4659	37.0997	29.9751	29.9453	30.0452	40.0445	14.9375	24.3335	47.7503	49.5627	36.5273	34.8992	19.0368	18.5644	35.6072	81.917	61.5611	76.3548	40.8883		0.0365829	42.2071
0.834	47.0104	51.3454	51.417	64.7528	47.6885	43.511	69.5676	52.7427	56.7672	60.8642	39.5984	35.2018	30.597	31.8163	28.9055	37.4054	19.504	23.9855	58.9415	43.832	48.4249	43.4235	24.137	19.9633	38.2699	103.544	73.1114	77.3586	36.6347		0.0426834	46.9076
0.9531	48.1678	59.1754	48.8876	53.4623	50.7634	46.4106	74.4845	62.1555	57.8312	59.3853	42.2086	43.4438	38.3131	39.1165	36.2322	40.7048	19.1131	30.1567	64.6114	55.4323	54.7992	53.0564	29.1386	21.8717	41.4945	102.201	89.7177	83.1272	48.7394		0.0487789	51.5242
1.0723	41.6687	61.3774	55.4916	52.3718	57.5943	51.018	81.1887	68.0432	63.551	61.4127	45.5282	45.5559	31.7533	39.5072	42.7165	47.0547	19.0692	41.5847	67.2775	44.0133	52.6474	59.8842	32.6344	20.3222	62.1151	106.07	96.4267	83.671	43.3482		0.0548794	54.3068
1.1914	47.6145	52.7688	57.1686	65.5745	61.8176	54.7817	85.9661	63.0994	67.0473	69.7061	53.5024	48.7069	40.5128	46.1937	37.2349	44.2455	28.1747	53.0436	68.254	55.881	60.325	59.9401	34.2546	26.1692	71.1223	89.2	86.7931	78.5559	50.3093		0.0609749	57.1712
1.3106	63.1175	77.4759	48.4065	51.5224	61.8646	72.036	86.6645	69.2599	81.7272	72.6756	77.3905	49.5075	39.8643	35.9117	35.9704	36.3477	27.656	53.6069	76.5013	64.9613	52.5468	70.8315	42.7189	33.434	83.4727	80.879	77.2883	80.2998	45.139		0.0670754	60.313
1.4297	65.0112	68.0117	45.5654	58.4377	69.5048	76.3231	72.544	72.544	76.5451	78.6828	73.1726	42.3228	43.3247	31.5451	40.9063	36.5568	25.5224	56.4385	85.6389	58.7149	50.9341	75.2729	46.8396	38.0103	83.0048	74.036	83.8483	67.5943	40.5891		0.0731709	59.9118
1.5488	70.4515	67.5445	46.0868	55.5991	74.7363	67.692	67.1902	78.2974	69.568	74.2205	65.193	49.31	52.2893	27.967	31.3504	44.0262	32.0617	64.6509	75.2878	61.5	55.9896	86.6326	62.5335	39.243	79.1562	62.14	76.311	64.3293	41.9281		0.0792663	60.1133
1.668	67.2819	74.4359	54.1691	56.9814	59.0669	60.7028	58.5214	79.6561	84.8429	67.2351	68.9773	57.4633	44.3704	37.5626	36.4335	45.2129	30.1693	69.6891	76.9904	69.2858	67.1785	94.7727	61.8216	44.4082	83.1926	57.427	66.8625	57.0815	46.004		0.0853669	61.3033
1.7871	69.805	81.7613	44.5268	47.9842	47.4602	65.7031	55.4511	78.625	74.2623	75.2694	61.4437	49.3094	49.2528	38.6609	31.6018	40.2559	41.7538	67.2521	72.4147	77.7328	67.173	77.5612	63.7367	50.8185	77.6375	56.839	58.4555	58.1452	47.3776		0.0914623	59.5955
1.9063	68.83	65.0329	44.9294	37.0207	59.9707	67.5727	55.5097	82.89	68.3789	62.2368	54.9842	54.6773	44.2554	34.6518	33.8659	35.4233	44.8375	78.1732	81.2324	82.5586	70.2173	79.6555	64.1152	50.2738	66.0784	73.288	56.0783	49.2429	51.3268		0.0975628	59.2175
2.0254	60.6078	63.5734	45.7462	40.5703	51.9244	70.4168	42.8642	80.4138	65.4319	55.3783	58.415	55.2687	39.7368	26.0618	30.6306	37.073	49.3806	70.6985	86.7489	85.8939	63.4463	80.0481	65.9154	47.2534	77.6648	55.657	54.7188	45.0467	46.6719		0.103658	57.0089
2.1445	53.2991	51.4682	37.0416	41.0999	48.2774	60.0119	48.7846	78.1774	60.7327	59.7663	61.1598	56.153	38.0623	27.2433	29.03	36.4645	51.6846	70.9946	73.2132	88.0217	74.852	82.6801	61.5916	56.5073	72.9142	55.279	53.6686	49.7491	49.5007		0.109754	56.1182
2.2637	53.3141	48.1648	40.7242	37.1943	48.4639	59.8477	40.151	78.74	64.0482	65.5251	66.2075	54.5964	36.3832	34.5956	28.6194	38.6992	46.5699	65.0375	76.5854	77.7606	73.2455	75.5731	50.6304	65.2111	73.8605	49.648	44.8597	43.487	45.6961		0.115854	54.6014
2.3828	50.2879	43.0264	38.0763	34.6325	47.8792	57.2263	39.7384	77.9034	68.1039	66.5275	77.2077	52.7606	34.3932	30.3295	29.4762	37.5611	54.4844	57.8564	77.5778	95.2681	69.3665	79.6159	56.6481	58.8302	67.9464	49.091	45.7987	50.6515	56.657		0.12195	55.3421
2.502	40.809	38.4514	42.4215	38.055	45.8921	57.7559	41.4297	73.6589	67.4843	68.8003	67.1139	44.8554	26.9315	29.5046	29.1292	32.4056	46.8038	64.559	70.7525	99.4633	67.2875	74.8839	59.2153	57.3638	81.1133	50.922	42.1023	31.4066	52.3619		0.12805	53.2046
2.6211	37.8019	37.7049	39.6259	37.2952	38.1353	47.6552	32.1094	65.7171	59.2473	73.4658	63.2859	43.7331	31.1807	27.1865	31.1255	26.3885	44.3685	68.4353	67.4777	95.7561	58.537	60.4857	52.7256	55.961	65.0111	48.437	37.9201	38.9201	47.4588		0.134146	49.419
2.7402	39.7217	34.1465	37.5677	34.6238	40.6907	43.8434	37.1687	74.4554	60.608	60.4418	62.501	42.3076	26.4291	22.8553	29.7483	27.4919	46.2767	67.3014	66.5172	92.5853	62.6366	59.8219	46.1344	58.4386	68.5414	44.801	37.7463	33.8794	56.2409		0.140241	48.8111
2.8594	30.3206	27.825	44.7002	34.5674	37.1352	37.3613	34.0476	61.1197	53.7187	54.692	66.2755	39.6297	28.3672	22.3117	31.6315	24.8419	42.616	62.8187	58.0163	85.8312	54.8184	65.1429	44.3362	53.3922	55.8819	44.14	46.0636	32.8445	53.629		0.146342	45.7957
2.9785	38.519	32.4065	42.1626	25.7084	32.5027	34.7789	31.9051	62.2037	50.3712	58.895	55.611	36.0282	31.2626	26.5209	25.947	25.4863	34.5347	56.3864	63.6222	76.2453	50.265	62.0798	51.851	56.5361	61.7423	40.425	40.8402	30.5331	38.8847		0.152437	43.9398
3.0977	32.0762	24.152	38.3467	22.1556	27.1684	30.6107	24.4266	40.104	50.549	50.0065	56.1472	37.3831	22.2931	23.8974	29.0745	20.7198	37.8719	53.7361	61.6079	68.2358	49.3793	55.4338	45.1313	51.4881	50.5903	43.788	47.9007	32.2133	50.6747		0.158538	40.5918
3.2168	42.1273	28.9603	33.9522	27.6681	24.8857	30.7011	27.8261	44.3944	37.5159	60.7733	54.6363	32.25	27.9801	21.5009	22.5	18.3193	33.4379	46.8088	61.5626	74.9377	43.8304	48.4092	39.3524	47.6007	50.0766	44.711	50.3857	35.7162	45.2583		0.164633	39.9337
3.336	36.4274	30.5716	32.5366	31.6074	25.9808	34.6683	25.0566	39.189	35.7534	58.9157	43.9572	35.6042	27.5405	22.1968	23.7182	19.6098	37.8154	45.2925	68.0953	66.6364	44.77	45.9873	37.7814	53.9811	38.6375	40.071	48.0272	32.8563	50.1219		0.170734	39.083
3.4551	40.5892	27.153	37.0709	25.4928	27.2233	31.9879	31.4378	44.7363	34.8001	61.3273	50.2106	36.3817	27.0339	21.9328	19.2249	23.2087	34.4988	40.1038	67.1994	68.1602	50.2843	48.2861	47.7571	35.8593	43.6977	44.91	36.9219	35.952	46.4113		0.176829	39.3053
3.5742	29.5505	19.5121	30.2428	20.1955	31.9029	27.9631	23.5084	40.5067	31.292	59.4142	47.1075	27.1575	22.5492	27.654	22.0222	21.7132	40.7174	39.4226	67.7439	69.48	49.1813	42.9939	29.9145	41.2899	40.1	38.024	39.8887	38.2737	46.06		0.182925	36.7373
3.6934	28.4966	24.3366	25.1954	23.716	35.8614	34.5763	32.8339	33.1837	35.9963	51.5086	46.527	31.541	25.6185	32.4872	18.9627	19.5387	42.0418	45.4832	60.2538	59.3457	47.3053	43.7027	30.9232	33.7095	37.7325	34.613	40.6255	38.0302	38.7632		0.189025	36.3072
3.8125	26.6639	18.5099	29.177	23.7546	27.5435	27.881	28.0417	34.1616	42.3132	59.4888	44.5938	28.7267	23.3599	26.013	20.2164	26.5837	42.8932	46.9821	59.8431	51.3455	50.4208	41.6564	31.5032	33.0914	35.4158	34.113	30.4224	39.2732	31.2222		0.195121	35.0073
3.9317	24.5039	20.6487	28.2069	28.6086	29.1679	24.9096	25.9226	35.3057	43.394	55.5088	41.7234	31.6177	24.6162	25.439	25.1633	19.2621	36.8224	48.06	63.6103	44.7477	50.0832	41.6565	39.1228	37.4935	28.0034	43.931	39.2156	31.8966	34.586		0.201221	35.2837
4.0508	33.4103	23.5767	31.2201	22.754	34.4534	28.841	30.024	32.9416	37.1265	40.1685	37.6602	32.5974	27.9819	21.7169	26.8786	19.0913	33.6308	49.8429	60.2446	50.2626	46.2135	40.5374	34.768	30.3517	19.9633	40.922	42.4283	31.3675	37.1705		0.207317	34.4188
4.1699	32.9649	20.7694	20.1233	25.2143	33.5191	35.2356	23.0651	28.642	36.5093	42.6247	40.0448	26.8801	24.2099	19.9996	24.7235	23.9565	29.9615	47.482	55.6862	47.8555	40.5122	42.9724	33.3185	31.6301	25.2167	33.32	34.0163	26.0926	37.2967		0.213412	32.5463
4.2891	30.6097	18.6221	23.8978	24.466	26.6269	28.2396	21.6664	26.8768	40.2248	47.6336	37.8661	23.2812	22.7022	17.1184	24.8909	25.9737	28.3238	52.1978	64.6416	49.1431	45.4456	38.774	37.494	34.3902	28.2611	36.005	37.863	26.9467	39.1036		0.219513	33.0788
4.4082	26.2477	20.3663	18.9383	16.9224	25.7828	23.24	17.7098	31.415	33.6103	46.6593	33.8382	18.7809	25.5837	21.868	22.1068	20.545	24.2429	53.1671	59.9354	50.0473	52.3902	49.9978	29.9064	28.1876	25.44	29.589	29.2046	36.3636	36.6166		0.225608	31.3346
4.5274	24.3578	15.3173	22.4513	24.7466	28.061	23.4228	29.9718	27.0587	29.3296	34.8591	28.9882	22.5363	23.7114	20.8805	21.955	23.7495	25.7806	52.6339	62.4993	48.143	34.8333	37.3296	26.7477	23.4337	22.6545	33.536	35.6845	31.5908	40.2758		0.231709	30.2255
4.6465	18.4013	17.1906	24.4276	21.623	26.0404	20.1279	29.5385	34.5368	36.6053	37.7851	26.0914	27.9316	24.0771	15.47	21.9774	30.622	20.1878	52.4184	50.6314	43.8214	29.8617	34.5454	26.8097	31.6514	25.7618	27.327	34.5376	32.0483	36.7039		0.237804	29.6121
4.7657	25.3037	26.5895	18.1756	18.4595	27.6287	23.7092	29.6311	27.1816	29.2635	37.8729	26.9376	23.528	22.5341	18.7462	22.5535	26.6461	25.361	53.5809	44.995	42.8254	41.4805	33.8533	33.2858	23.4326	22.8985	34.519	27.399	27.0556	27.5178		0.243905	29.0678
4.8848	31.0097	22.2928	18.8921	19.443	25.1322	18.6992	25.2319	25.5824	26.088	31.6212	27.0817	24.1334	18.8357	22.2246	23.6232	17.9584	23.2608	61.0106	48.3733	48.3588	42.0554	33.6019	26.3692	22.5002	22.9649	29.138	25.5892	27.873	27.736		0.25	28.1614
5.0039	29.2952	20.4567	23.3419	17.6176	25.328	22.0842	26.2357	26.8398	24.305	28.4921	29.0617	21.9065	26.8093	25.2622	21.2089	14.9581	23.706	53.2256	52.8045	46.5714	34.5099	30.9546	24.5942	22.1882	23.6037	32.033	28.9798	20.9066	21.9653		0.256095	27.5602
5.1231	24.3276	20.0187	20.373	20.2715	23.6007	18.0144	19.9712	32.5612	24.196	31.212	20.5067	20.5054	22.5199	23.7032	21.2956	18.6052	24.9382	52.3129	45.3463	42.3496	37.1533	31.9693	27.035	24.5642	16.2865	30.919	25.0075	28.2196	26.2466		0.262196	26.6907
5.2422	19.7861	20.9002	15.8837	18.0469	19.8909	21.7704	18.3195	26.8642	24.8486	26.8454	24.8204	26.565	23.043	20.07	23.3887	19.7493	26.4893	56.1954	37.8556	53.2145	39.7613	24.3529	25.9881	22.5089	19.6926	30.77	29.0803	20.2345	21.7517		0.268291	26.1616
5.3614	16.1934	26.2246	13.7124	18.936	23.4039	23.6888	16.2756	30.1379	26.0453	34.0551	25.72	25.8113	20.6791	22.9188	19.2606	20.9758	30.0602	49.9992	45.6723	43.727	34.1964	25.6037	27.1178	25.7581	17.3198	21.853	24.4171	20.8389	21.4255		0.274392	25.932
5.4805	17.6906	20.7708	19.882	16.9616	18.8555	21.7412	14.0839	29.8543	31.1304	24.819	26.3104	24.6268	17.2997	23.6759	21.9937	15.8462	26.0962	47.2408	47.6645	51.7084	38.9705	26.1894	23.8971	21.4428	14.2471	27.758	29.3403	23.4368	13.8158		0.280487	25.4259
5.5996	22.5797	22.2198	21.2836	26.0794	24.1087	20.5133	16.8354	31.9842	28.2981	22.9233	22.2073	24.1301	21.0407	20.0825	20.223	27.0554	24.1476	46.6941	51.2	48.5849	45.6034	29.5069	18.1911	21.1098	24.9987	19.757	27.1887	28.7033	19.6597		0.286583	26.79
5.7188	17.9132	24.8054	18.9192	19.6045	17.7569	25.5452	22.0766	26.9568	29.1279	24.3784	24.6256	19.3518	26.0349	16.9121	12.1286	27.7707	31.3102	42.4807	53.7325	45.9266	38.1853	20.6873	23.9727	25.1701	19.0619	26.379	27.9217	23.8538	15.8836		0.292683	25.8094
5.8379	23.3272	20.4608	20.5609	21.6122	18.1495	26.4524	22.7776	27.8	25.0319	29.0405	23.637	18.8344	20.2625	15.8492	17.1907	27.3974	22.9311	39.5455	40.5721	55.2776	35.9184	27.3453	26.9203	22.1249	17.4739	27.344	24.4742	22.4599	21.4634		0.298779	25.5943
5.9571	21.2128	21.498	15.9551	18.4053	23.6847	29.9878	17.2566	21.152	25.6301	25.5083	25.2925	23.1659	14.7857	15.2815	13.7706	22.8674	21.3023	36.89	39.2276	54.0163	37.8922	25.0871	26.3739	18.6364	20.4917	27.04	24.3885	17.1114	13.5317		0.304879	24.0498
6.0762	22.0089	21.9247	18.9638	21.0695	21.1364	25.4893	20.7742	28.8163	31.2257	27.4714	26.4692	14.7101	16.9539	16.766	13.173	17.3232	22.6746	36.0424	35.7503	43.4582	32.4111	24.9301	30.059	16.3483	18.2867	20.937	22.4505	19.1532	18.7919		0.310975	23.6403
6.1953	27.6357	18.642	16.4853	15.3052	15.6665	22.1646	18.1075	26.9799	28.511	25.6521	23.8922	15.6115	16.2758	9.6976	13.0086	23.6117	23.7262	33.3846	40.6988	40.7398	31.0699	23.1332	25.2382	20.2482	15.662	18.304	22.3544	18.557	25.8192		0.31707	22.627
6.3145	31.2349	17.5292	16.3385	17.9509	21.6061	21.4484	13.041	24.806	29.7265	22.601	26.7676	23.4002	17.2116	8.5501	10.9085	31.3351	23.1468	32.5368	29.6299	47.2719	33.4984	25.6836	22.0546	20.9131	10.5118	16.297	20.5026	14.914	23.0956		0.323171	22.5694
6.4336	30.3546	17.5859	17.3055	20.3804	16.8155	19.2325	20.1605	20.0737	26.2976	23.0855	22.8584	21.842	13.1077	7.5044	12.2265	15.1624	26.2021	34.6756	27.5674	33.1939	31.6933	20.7001	20.7295	18.2838	16.3123	18.972	20.8749	24.0838	25.8161		0.329266	21.4861
6.5528	21.2096	16.2502	13.6294	13.4781	18.3029	24.2204	22.8756	22.4437	22.3046	25.7103	19.1593	22.5515	16.5487	11.6735	11.756	19.2633	24.5921	32.4674	32.0157	42.6772	30.3935	17.513	21.7875	15.6409	12.0104	18.706	20.6613	14.6795	18.5004		0.335367	20.7939
6.6719	24.0163	19.3694	16.869	14.168	19.8968	15.8298	20.9458	23.3703	22.1678	23.869	26.0728	21.0733	18.2586	4.7834	12.6078	12.2399	24.6913	28.5573	28.239	35.3754	33.4938	19.2689	23.4532	16.5176	21.8366	18.55	18.698	20.4046	22.5028		0.341462	20.9354
6.7911	20.9142	17.51	21.1866	14.6588	18.9512	17.5154	25.5747	25.6902	21.0588	29.6397	27.527	24.6578	15.5773	8.846	11.9278	19.1658	24.9864	37.5523	45.3824	36.6107	26.3943	14.6847	23.9855	18.6753	17.4123	18.677	15.963	18.6281	23.3825		0.347563	22.1633
6.9102	19.0871	22.4956	17.3966	17.0474	18.3313	15.7861	23.7279	17.4015	22.6205	31.2957	26.2416	21.839	11.8201	7.0879	8.3243	14.2327	19.9352	40.2113	41.0009	26.2788	26.2517	18.8362	22.9061	18.2485	21.5196	17.106	16.0021	16.0009	21.2735		0.353658	20.7002
7.0293	17.2692	12.2709	16.0852	18.7952	16.3583	11.739	26.8581	21.3923	27.0842	20.4347	30.0427	18.8578	11.3426	10.1672	7.0216	15.773	25.9032	32.5392	46.9901	30.3253	30.2831	13.3569	17.7767	19.4488	19.7532	11.32	14.7817	13.484	17.7249		0.359754	19.8338
7.1485	21.2423	13.4338	10.1299	14.4751	19.5593	19.8389	16.4536	21.5201	26.1262	21.3403	29.1242	13.984	13.1014	6.0847	7.6298	17.2893	23.8903	30.7324	50.5456	28.932	28.2643	12.9177	14.6269	16.6676	20.0596	15.509	16.3274	15.869	18.3733		0.365854	19.4499
7.2676	16.5126	12.8532	14.498	21.1243	18.2184	19.7583	18.5553	21.7483	24.4698	25.9277	20.3045	16.6185	11.716	6.0834	10.6407	12.1806	24.7138	33.897	43.9299	22.5044	37.767	14.3076	11.8861	17.2207	22.9741	14.655	15.6009	15.9346	23.1308		0.37195	19.6459
7.3868	16.0743	16.7558	14.211	18.0848	24.4082	23.6931	18.2179	18.8841	21.6674	25.6955	19.6557	14.4592	12.4885	5.2157	5.5191	16.3922	22.1736	43.1577	41.1361	30.2122	22.558	11.7252	17.0613	12.6221	15.7225	14.746	14.8655	17.8407	19.5834		0.37805	19.132
7.5059	18.479	6.6745	9.9406	20.6007	21.1304	22.1963	20.5506	21.9053	23.099	24.4961	22.5023	13.6204	8.7484	5.5575	6.655	12.6796	28.3302	44.6995	41.5065	31.8339	23.6796	9.9544	15.2795	16.4745	16.8818	16.723	13.6337	17.1148	20.3387		0.384146	19.1478
7.625	15.2813	15.0766	13.5348	18.8923	23.3493	26.678	22.5473	24.5404	21.0322	24.281	19.205	15.4217	11.5573	8.2873	4.9373	16.919	24.0137	44.6846	35.8357	26.138	21.0054	8.3452	11.9228	17.3224	13.2324	14.827	10.8657	19.3136	20.2982		0.390241	18.9429
7.7442	15.4837	11.4173	8.2108	19.2298	21.0535	23.3216	20.1197	22.9568	25.0604	25.3278	19.2014	16.7821	8.7686	7.4184	8.5358	13.9975	19.7184	31.2325	35.0635	22.9051	25.8658	9.7158	14.6448	10.7591	14.3854	16.517	12.5769	14.0195	17.5178		0.396342	17.6485
7.8633	21.349	11.0483	5.2381	20.5817	21.1611	22.0757	18.4949	28.5575	22.272	28.2945	20.6557	16.5378	13.9036	4.0768	7.128	19.1043	19.1895	33.9369	33.3063	25.3948	23.482	10.0305	11.0066	16.1155	12.2792	17.448	10.1261	9.5195	19.0035		0.402437	17.9765
7.9825	16.4799	10.5325	7.6783	18.5033	17.8594	20.287	18.2722	22.3771	18.4805	27.4158	16.2551	17.3082	13.2324	4.7157	4.52	13.7261	23.1811	29.0062	42.066	25.4753	15.1812	10.7867	13.3699	16.9479	15.0814	13.799	12.4707	13.3168	22.2181		0.408538	17.2601
8.1016	15.3226	8.2612	5.0759	15.6832	19.2858	20.8226	21.653	22.3331	24.7193	22.416	16.3437	16.0843	13.2605	8.2089	5.3534	13.28	18.6107	28.412	33.9767	29.5362	16.695	6.2583	11.3318	13.3615	9.0001	19.543	10.8964	13.1395	19.5126		0.414633	16.4958
8.2207	13.3214	11.0198	7.1926	11.6482	19.8632	14.3556	15.8936	24.78	19.615	29.5373	22.5606	15.1211	11.3336	5.6332	4.7623	16.4656	25.4131	28.1229	41.5991	26.4439	14.0895	6.8558	14.3834	14.7082	13.6328	13.421	13.9144	16.1449	13.1115		0.420729	16.7222
8.3399	15.4509	8.1623	7.1017	8.3857	16.7355	20.0415	15.9311	23.9391	19.4341	21.7208	24.7109	12.4914	10.5388	5.5045	4.8661	14.0986	22.3878	29.6556	38.5727	27.2923	16.4967	5.4569	13.6658	13.0946	13.1945	12.091	10.5378	18.5859	17.9638		0.426829	16.1417
8.459	15.4714	7.7731	5.4851	11.001	14.8113	20.5812	15.8872	22.0046	23.2699	24.4778	21.8252	17.8896	13.8284	4.2121	4.1175	15.1761	19.466	29.7406	36.2393	22.88	15.8144	7.4117	11.1981	13.8793	12.8797	8.498	9.7547	15.6657	14.2731		0.432925	15.7073
8.5782	10.9171	5.9742	5.7497	8.1174	18.7304	17.2247	18.4225	22.2538	12.2776	25.0969	20.1295	14.1582	13.058	5.6623	8.815	13.0723	25.2429	22.2889	38.1858	32.1	12.5221	7.0146	6.4963	14.5156	11.8238	9.451	8.8656	15.4517	13.8029		0.439025	15.0835
8.6973	10.692	7.5073	5.489	7.8149	20.3547	21.8383	14.5599	27.6211	19.1215	19.9577	20.8695	17.7818	11.4294	5.1542	8.077	13.0732	23.2752	30.6392	37.0484	26.9397	15.0205	4.6534	9.2582	13.6276	13.905	8.946	6.3744	17.5812	10.7812		0.445121	15.4963
8.8165	7.9536	7.5388	5.5715	7.0634	24.3423	18.7669	17.1839	19.77	25.0217	22.7037	21.7556	15.4483	10.5094	3.1611	5.7701	12.8782	23.1509	26.668	39.0308	23.5658	12.4078	5.2586	8.86	11.0217	11.5365	10.585	5.7373	15.9933	11.3172		0.451221	14.8473
8.9356	16.7509	6.134	5.2536	6.2887	11.7608	18.0071	16.4249	19.9514	16.6761	19.1297	21.0644	22.1448	8.2979	3.7214	3.7676	8.4257	20.2998	27.996	37.3464	24.8109	12.393	5.7599	6.24	15.9222	11.4808	9.026	8.5526	15.2103	16.8435		0.457317	14.3338
9.0547	16.3453	6.6951	2.99	4.1574	14.7756	13.2134	18.955	16.1276	19.2396	24.5398	29.5576	22.0316	10.4848	5.1299	4.2764	8.3414	17.3073	22.1435	34.4744	23.4552	16.0995	9.1194	9.2198	10.8471	14.824	10.766	7.3817	15.8301	13.621		0.463412	14.55
9.1739	15.2341	6.4438	4.4585	5.1889	15.2444	20.3569	14.9316	19.0938	20.1045	18.0271	22.5321	15.8524	13.1118	3.7165	5.0557	10.9022	20.1229	27.6295	41.5659	24.2832	10.6083	9.5411	4.8073	11.8072	11.5573	8.448	9.0064	13.3939	7.6577		0.469513	14.1615
9.293	12.606	5.3791	5.617	2.8306	13.6514	13.1802	17.9177	19.1112	14.6526	26.2106	19.2764	21.3296	10.4361	5.7774	4.9621	10.9727	19.6016	26.8335	29.2711	18.8228	9.1082	6.7039	7.9589	14.6097	11.9196	13.753	5.9101	15.5628	9.984		0.475608	13.5845
9.4122	14.0956	4.2521	3.6765	5.5813	16.0088	19.0957	16.0072	22.054	21.4684	21.8725	22.0934	19.0631	10.178	4.065	4.5217	12.2966	18.2882	28.3364	25.5758	15.8486	9.891	2.1654	6.4625	15.7207	7.5527	10.889	4.382	8.3592	11.2807		0.481709	13.1408
9.5313	18.4318	6.7216	4.3114	6.407	14.8868	19.8264	15.7175	30.685	20.6235	26.5046	23.8307	21.4848	6.5462	5.1208	3.9389	9.3997	23.3881	33.2161	24.1539	18.5827	6.0501	5.0427	8.1128	8.9351	12.8602	11.646	10.3068	10.9736	7.534		0.487804	14.3186
9.6504	13.8149	5.0378	2.7766	3.5805	21.3137	20.4167	17.5629	24.0038	17.256	23.6507	19.7828	16.5819	7.2597	3.9209	8.0577	6.3851	21.6911	31.3261	27.798	22.2671	9.6726	4.5393	6.7024	12.3278	10.9934	10.792	6.6024	10.0866	7.6454		0.493899	13.5809
9.7696	12.1402	5.8352	4.2053	3.6674	15.6056	16.3379	18.5396	23.6228	19.2462	17.8457	19.2861	12.8978	8.0885	4.9515	3.7651	13.9994	20.2004	25.1219	21.5786	26.2032	10.4159	7.0354	3.6792	8.0252	7.7972	7.014	7.0452	12.616	9.8862		0.5	12.6432
9.8887	11.0517	5.7378	1.8501	3.7725	13.8693	13.9483	19.9301	19.4937	16.8118	15.4869	21.703	12.4306	11.3614	4.2727	3.0706	12.6903	19.0168	29.5356	23.5474	26.9519	6.8838	4.3979	6.037	7.272	12.0016	6.36	5.3082	13.5816	7.6786		0.506095	12.2777
10.0079	12.5291	5.1064	2.6377	2.2773	14.1739	12.1187	16.8165	16.7971	21.3933	19.5848	21.4706	12.1635	7.8197	4.1806	3.5258	11.9423	19.1223	32.8927	22.1008	32.2066	7.6528	7.0691	4.2058	11.9889	10.0525	7.538	10.4294	8.1291	9.8124		0.512196	12.6806
10.127	15.626	7.024	4.7057	3.6267	12.1653	18.1103	14.3053	20.7451	18.7295	20.637	20.3741	16.3062	10.4049	4.2659	3.0205	9.4527	19.4276	30.2022	32.6983	27.2175	4.2543	3.8326	4.5889	14.7774	10.2959	6.694	6.7872	9.7326	9.0669		0.518291	13.0715
10.2462	10.8189	4.5389	3.765	4.2574	13.1914	11.4616	14.4137	23.8634	21.8069	20.7424	17.5144	10.738	8.0293	4.3826	3.7378	7.594	21.3957	25.7298	21.3259	25.5375	6.1493	6.7101	3.2319	18.3956	9.0438	7.726	4.4892	11.5965	9.9277		0.524392	12.1419
10.3653	7.6459	4.374	3.1193	4.3029	13.455	14.2669	15.289	23.7673	17.0793	21.2935	21.7894	16.5494	8.8078	3.7038	2.9156	11.4351	15.4967	26.4625	30.9721	27.3843	9.2769	3.5474	3.387	8.5518	10.0045	8.507	5.126	9.7704	7.8602		0.530487	12.2807
10.4844	10.1466	3.8828	2.8886	4.0673	13.922	16.447	17.8504	24.6796	19.6265	22.3342	17.8731	13.1256	8.7698	3.7976	4.8705	13.9936	20.5531	27.2782	24.6814	21.6534	4.5558	5.041	5.0925	9.1033	9.9373	5.75	7.3613	9.4627	9.0054		0.536583	12.3362
10.6036	9.4164	6.0869	3.8969	4.2446	14.9472	16.7159	18.6693	23.2365	22.4535	23.4546	20.6877	15.9375	9.5417	4.703	3.7065	11.2133	19.1098	31.8187	37.5898	22.123	7.4343	5.5636	4.4181	7.3104	10.5704	7.621	3.5942	9.7352	6.0207		0.542683	13.1662
10.7227	10.9789	3.4855	2.9149	5.1032	13.5392	14.5651	25.2349	27.637	21.2858	27.4781	16.0319	16.5571	11.9687	3.1905	2.7481	11.2752	21.2797	29.2165	29.4209	17.9447	9.1845	2.6595	5.079	6.5295	10.5259	5.913	5.1952	7.6492	5.2049		0.548779	12.7516
10.8419	13.5219	5.6807	2.2967	5.9252	11.7624	14.4975	27.2836	22.124	18.7942	21.2927	21.7915	15.7172	10.9526	5.0314	3.6579	11.0074	23.9009	29.6569	24.888	26.8251	8.8219	3.7712	5.0604	7.7899	7.9069	7.26	5.253	6.4034	7.7897		0.554879	12.9884
10.961	10.3172	5.673	3.303	4.8133	15.1716	19.7038	26.0338	22.2017	21.7046	22.1838	15.2041	15.4809	9.4868	5.069	5.1402	9.313	22.801	23.4637	26.6146	21.528	7.7909	4.0263	5.0598	6.3044	8.1902	9.111	4.3178	12.4	6.7173		0.560975	12.7284
11.0801	9.338	5.4185	3.5854	3.9735	14.5414	11.6635	22.3567	20.6361	19.3014	26.3456	17.2626	17.2366	9.4238	4.9908	2.9412	10.5644	22.0911	30.1922	25.4074	28.6993	3.7215	2.9481	2.5891	10.1937	6.0109	8.755	5.1384	11.6223	7.2434		0.56707	12.5583
11.1993	9.5099	2.0158	2.579	2.4852	15.8799	12.4728	25.6425	22.8626	29.0114	27.1692	18.4022	19.8903	13.6744	2.1064	3.5705	9.2056	17.1615	21.8023	24.7446	19.8491	8.047	1.8613	3.6977	7.1889	7.3892	7.782	4.4442	10.1856	5.9834		0.573171	12.2971
11.3184	9.9006	4.1671	4.3964	2.7121	13.4549	15.4795	21.9743	23.2723	29.6638	24.644	14.4205	18.6124	10.5579	1.864	3.0536	9.2501	18.7214	31.1821	26.2786	20.4811	5.9534	3.178	2.803	9.8809	10.2707	4.909	4.0953	10.8402	5.6872		0.579266	12.4726
11.4376	12.2086	4.1434	6.9184	5.2804	12.5868	11.3088	22.571	19.2603	20.1657	22.2443	20.5248	15.5103	8.9636	3.6293	2.3831	7.8584	17.0694	29.5616	24.1815	23.4551	8.4331	2.1976	3.3122	11.7288	8.3894	7.955	5.8741	6.3323	10.3683		0.585367	12.2212
11.5567	8.2591	5.5306	3.41	5.1175	8.4504	15.0621	18.2162	20.8415	15.6405	19.6917	19.8932	16.0855	12.9295	5.7838	5.6182	12.8386	19.2984	30.2981	25.3912	19	5.4796	3.8246	2.4291	10.6754	7.1315	6.121	4.9711	8.5141	5.2073		0.591462	11.7831
11.6758	7.7457	5.7973	3.2614	3.3841	14.6111	15.2011	20.8022	26.0883	21.7779	23.5101	21.9074	16.7836	12.9025	3.2903	4.984	13.2601	21.6089	27.5766	25.5603	17.4475	5.9151	2.4034	2.5642	9.3862	6.24	5.21	4.524	7.2211	5.5952		0.597558	12.2952
11.795	8.1784	5.6697	5.4865	2.4617	9.5176	15.5608	21.2291	26.3274	19.8751	19.5338	14.0341	24.352	8.9593	6.0231	4.4931	18.8311	17.5984	26.0409	23.7207	24.963	5.5601	4.5244	3.7407	8.0832	7.687	5.238	2.9297	7.3413	4.5113		0.603658	12.1542
11.9141	9.2494	2.8252	3.965	4.9577	12.5158	15.6798	22.0553	26.8859	25.4537	22.0946	17.9711	17.9899	9.2885	4.2451	3.5084	9.4172	17.4364	25.3134	25.3594	21.848	5.012	3.7576	4.9898	9.349	7.713	7.148	7.8761	5.9066	5.1379		0.609754	12.2396
12.0333	8.1504	6.01	2.76	3.3682	8.341	13.2405	20.9573	25.3115	26.5036	21.0986	18.4682	21.0846	8.021	5.1333	2.4094	12.758	19.2875	33.2062	19.4376	22.5341	6.6188	6.1711	3.7051	7.3236	7.8922	4.841	5.0007	8.2664	7.1504		0.615854	12.2431
12.1524	5.5779	7.2428	1.96	2.9282	10.9564	17.8318	17.2191	23.4734	24.6157	20.3541	16.2753	19.1816	11.3442	3.4219	5.1206	7.7132	19.5266	21.4889	24.9332	23.8999	3.5871	3.7592	7.1117	11.0655	7.8902	5.717	4.4907	7.3457	4.4165		0.62195	11.7396
12.2716	8.2607	2.4856	0.7315	3.3895	10.3433	15.6092	22.4023	25.4065	33.1595	23.2622	19.455	21.1295	10.1133	6.235	2.5186	11.3737	17.1739	26.314	22.7057	25.2917	4.9868	3.2538	4.4963	6.8285	7.6754	5.67	3.6804	5.0236	5.605		0.62805	12.2269
12.3907	8.1895	6.0854	3.4465	4.1414	12.18	17.967	23.3835	24.2572	31.8556	26.1781	19.2326	15.8798	13.2077	5.3247	3.1414	11.5543	13.2152	22.4367	19.6686	24.1134	4.8645	5.8038	5.6364	6.4	6.5994	3.955	6.0182	8.2916	4.8104		0.634146	12.3392
12.5098	11.615	5.8451	1.6827	4.0416	12.2777	17.6146	20.8992	27.7969	27.3092	27.5325	18.2439	17.7037	8.599	3.4729	3.7011	11.6753	12.8653	20.8013	22.33	21.1231	6.2236	1.9099	5.3758	7.8223	9.1633	4.577	6.7699	7.5694	6.0173		0.640241	12.1572
12.629	8.1533	2.6659	2.2122	5.0693	10.2773	14.5587	19.3134	20.2865	29.8618	25.0436	21.9064	18.5558	6.4609	3.2303	4.269	13.2475	16.9848	27.1547	28.5896	24.6069	5.647	1.5001	4.5107	10.2378	5.7742	5.023	6.7039	4.8213	5.2563		0.646342	12.1352
12.7481	7.6767	1.9584	1.897	1.5745	13.5368	13.2376	18.8483	23.8483	27.815	28.8105	22.0866	17.7936	8.3171	4.1749	3.6523	9.8723	15.701	18.6067	33.2478	25.3549	7.5637	3.2397	3.5866	7.2825	7.5188	3.296	3.7553	9.3438	4.1619		0.652437	11.9917
12.8673	7.4588	2.765	0.9041	4.0525	10.0206	16.683	17.4354	21.3393	25.0148	29.9606	15.0336	26.5099	13.8035	4.2955	5.0882	6.9995	15.7191	22.0194	30.3773	22.7995	5.6839	3.306	2.732	8.6837	4.9508	4.556	5.1922	6.6256	6.0626		0.658538	11.9335
12.9864	7.4053	2.7927	1.6602	1.6737	6.1067	13.3667	18.5593	23.0076	23.4507	25.6653	24.4373	21.3461	14.3236	4.7652	6.8729	11.4668	18.8251	20.633	34.1895	25.5028	9.2	2.5595	7.7184	9.8571	5.2365	5.96	6.6763	6.8821	4.8146		0.664633	12.5847
13.1055	10.166	3.1527	1.4103	3.6861	11.7023	14.2858	18.7667	19.1089	28.9382	24.8352	22.1885	29.6361	11.3303	6.9251	5.5045	8.3693	19.1287	23.7566	33.6413	22.9194	5.1572	2.6256	2.9329	8.5999	7.3137	5.449	3.4795	6.7534	2.9148		0.670729	12.5751
13.2247	7.3316	1.9994	3.5879	3.1569	8.7777	14.0147	23.2068	17.7744	26.2394	24.8125	21.4962	24.333	10.9217	6.2062	2.5766	10.3687	18.0237	26.3557	32.2913	29.3359	5.153	2.265	3.5178	9.3349	6.7031	4.731	5.6645	2.8902	4.1843		0.676829	12.3191
13.3438	9.4163	6.138	2.6312	3.1067	8.0339	10.7337	20.9511	17.1483	24.5333	29.3041	20.1609	24.1061	13.0157	3.3061	3.9769	10.0698	17.9845	21.9936	27.4966	23.4674	2.0195	1.2173	4.1653	7.3164	7.5055	5.652	5.9183	4.4587	7.8592		0.682925	11.8513
13.463	10.0272	5.4595	1.4174	4.5369	7.2307	11.6613	20.1653	24.0616	19.5788	24.372	24.1785	15.1363	11.1145	4.5388	4.2597	10.5432	17.2665	21.2889	19.9531	21.5708	6.0773	1.3162	2.0326	8.8022	6.9678	4.666	6.0679	7.1799	2.0777		0.689025	11.1568
13.5821	8.4855	7.0539	2.3825	5.3369	7.9039	12.5397	18.0246	21.1693	21.3563	28.7429	21.1346	21.4658	9.2796	7.8242	5.6453	8.5067	16.3947	22.9599	23.5488	21.402	6.6405	1.6779	2.3293	7.5173	6.8819	6.453	3.2693	3.3355	4.3883		0.695121	11.5052
13.7012	7.1904	2.6875	3.7194	5.6967	8.0126	13.3673	19.8034	19.2853	25.3592	19.9934	20.8089	18.8971	14.0229	3.2003	4.6009	9.9146	15.7354	23.6808	24.531	22.0215	4.0741	4.1919	3.0963	10.0606	5.0159	8.997	4.2961	8.2682	4.9139		0.701216	11.567
13.8204	5.4319	2.7394	4.7871	3.5877	8.6309	9.1644	24.2205	23.7437	30.6599	15.7164	23.7518	20.0983	8.6714	3.5927	6.9628	9.0346	19.8967	20.5724	27.4541	26.3269	4.6961	2.2728	5.1303	9.7288	6.4806	4.205	4.7877	4.6545	3.7903		0.707317	11.7514
13.9395	13.9787	4.644	0.9455	2.6147	12.6411	15.1171	17.0769	24.4379	23.1667	13.6792	21.8492	25.8313	12.6349	4.748	4.4527	7.8544	15.2812	23.9467	23.9949	19.7742	3.6815	2.9743	3.6587	7.6758	8.7908	6.89	2.3701	3.8385	2.427		0.713412	11.413
14.0587	10.2555	4.4814	3.3382	1.4242	12.6856	14.2796	25.2171	23.7767	23.0765	22.8257	20.1667	24.5768	12.7889	6.6767	5.2033	10.0281	11.8814	22.6768	23.8932	23.138	7.352	2.4294	2.0508	7.9724	6.8673	9.593	4.5065	2.9305	3.3967		0.719513	12.0513
14.1778	14.4072	4.9593	3.3624	2.7002	12.5723	15.209	18.2611	22.2712	27.8067	21.6107	22.7787	25.5892	10.3058	6.9705	4.0726	9.5927	12.2309	28.0828	24.5208	23.515	5.9565	2.9561	4.7214	9.8595	7.7307	4.877	4.4898	4.77	3.2873		0.725608	12.3954
14.297	9.7199	3.6162	5.0829	3.2717	11.9655	16.1854	15.9383	21.7473	30.6949	19.3522	17.736	20.1878	8.2145	7.8138	4.3865	6.7571	16.0807	27.2238	21.9251	20.1994	7.977	1.5413	4.416	11.1899	6.8271	4.487	4.6485	5.2776	4.2007		0.731709	11.6781
14.4161	9.9675	3.3216	3.4178	3.5994	14.6691	16.2636	15.0787	29.7659	22.5965	21.8541	26.637	18.4914	12.0345	7.3899	2.7952	13.0669	17.2336	27.386	24.4396	19.8848	6.5422	2.1853	6.4995	8.8507	6.6459	5.772	4.0922	4.2211	3.9564		0.737804	12.3675
14.5352	15.4248	5.8063	2.5426	3.5291	10.9566	12.5056	16.4439	25.3299	22.579	16.0775	28.9279	16.5118	12.2975	8.0812	6.9922	9.7205	13.7294	28.0574	25.4915	20.4226	4.6012	1.0354	3.9885	10.3784	6.3217	3.49	3.543	3.7186	4.6963		0.743899	11.8345
14.6544	15.0383	2.9361	1.9401	4.3466	10.0438	13.8865	16.7999	29.1405	28.1077	21.6015	17.9486	25.2172	12.0819	7.0512	7.6985	10.5813	11.3204	24.9537	28.1838	21.436	7.3505	3.7994	4.5427	3.8501	3.3901	5.157	3.7061	4.779	2.7454		0.75	12.0563
14.7735	14.045	5.0584	1.6754	3.5987	10.0402	14.6244	23.4718	21.8561	25.2852	23.1386	28.5498	18.9525	12.6643	7.5523	6.8216	8.3718	11.9523	24.3906	29.2276	24.5629	8.1098	3.2858	4.6615	5.9355	6.4055	6.092	4.7707	3.8596	3.221		0.756095	12.489
14.8927	13.6361	5.6586	3.9105	1.5017	14.2548	14.1545	23.1107	32.1238	26.8127	26.1586	18.0585	14.2916	14.8431	10.58	5.4809	4.5519	13.7554	23.995	21.5314	20.9297	8.5964	2.2068	7.1705	6.4114	3.3184	5.194	4.9628	2.8123	3.6185		0.762196	12.1942
15.0118	14.0502	3.9919	4.0372	2.076	11.4378	14.3404	25.7209	21.4171	27.6345	22.5146	19.6553	17.7541	12.6516	11.4312	8.6654	7.2209	14.9522	19.501	20.6183	16.6244	5.489	3.3775	4.4966	8.9832	2.8663	4.216	2.0608	3.8951	1.7615		0.768291	11.498
15.1309	9.8592	6.4014	4.061	4.2505	12.2898	16.8578	19.5804	30.0955	25.2669	20.5455	22.7689	16.4723	12.2648	12.8246	10.2262	7.3822	12.4875	21.7691	30.6186	18.301	7.6916	1.5076	3.0557	8.1262	6.5554	4.437	4.4611	4.3925	2.1119		0.774387	12.2987
15.2501	17.2525	4.3089	3.5886	4.1325	9.4393	16.1344	24.6753	32.8529	29.3792	16.7908	23.8854	19.737	9.6101	6.4823	9.4198	8.4592	11.0276	22.5977	24.0982	21.7386	10.2028	2.1816	6.2174	3.9085	3.792	5.112	2.9719	2.8265	3.8668		0.780487	12.2996
15.3692	15.335	4.6868	5.5913	3.5669	7.7565	14.7618	24.5655	33.3459	31.2054	19.3526	23.5861	27.0318	15.8246	10.0377	7.6577	12.5903	16.939	29.0604	29.1812	18.0163	11.1554	2.6361	6.6107	3.8622	4.1887	4.925	4.9183	3.9369	1.6748		0.786583	13.5862
15.4884	12.5501	6.5908	3.3266	2.4635	12.4808	16.2821	19.6744	20.0524	33.9132	28.3704	21.3509	21.4537	11.1396	11.3086	10.0233	13.162	13.1392	32.8939	24.8602	17.1905	8.8095	1.685	4.4406	6.8887	7.0257	6.516	5.6339	2.3518	1.6058		0.792683	13.0063
15.6075	13.1608	5.8323	3.7126	5.7595	10.0542	14.4684	23.1257	31.5195	33.5585	30.6705	23.1068	22.61	11.6254	7.5745	8.7531	8.9245	14.3357	29.4871	27.1849	15.2122	11.6885	3.5323	7.9998	7.8945	7.3171	2.53	5.8965	0.8207	2.4637		0.798779	13.4765
15.7266	13.2089	4.7645	3.3751	4.655	11.6361	16.6894	20.8866	32.9494	31.6726	31.577	22.3782	25.5111	10.1604	11.103	9.8526	9.8462	14.7666	25.4452	29.5357	14.9215	11.0778	4.2347	4.8649	8.5622	5.7351	3.256	4.6384	0.9778	2.773		0.804874	13.4847
15.8458	15.6497	6.0846	4.8449	7.9393	9.7649	12.217	21.2388	30.1404	36.1137	31.5092	19.0376	21.2463	10.9047	13.112	8.8978	9.8272	17.3708	21.5256	31.8561	19.9222	10.095	3.4946	4.4692	6.1116	5.0318	3.427	6.7893	2.4684	2.4264		0.810975	13.5695
15.9649	10.4502	7.3174	4.3293	5.8937	15.8331	12.7767	27.7354	26.6269	26.7218	22.8338	20.6306	15.6492	10.463	10.5072	10.5754	8.7929	10.7117	22.7813	24.3617	19.8714	14.0125	3.9133	6.2382	5.2924	6.1479	2.824	6.0559	2.3295	1.3671		0.81707	12.5187
16.0841	11.2463	9.1004	4.5316	7.6744	13.6872	15.9929	20.1707	31.982	24.8822	21.8677	19.5944	22.0386	8.012	9.684	10.9887	6.1171	11.7488	22.9048	25.6519	19.8867	12.8759	3.2379	5.4111	2.634	4.6944	5.698	6.1786	3.0748	2.1659		0.823171	12.5425
16.2032	13.3597	6.7449	6.2175	11.3011	13.3187	14.18	23.2173	30.3612	24.4456	29.9431	26.0917	19.7539	10.3778	7.4666	10.1713	7.4653	12.1496	27.5767	22.1191	23.4864	10.8611	5.7908	5.6203	5.2783	5.3464	5.764	5.4238	4.3013	3.8074		0.829266	13.5152
16.3224	11.4535	7.9122	5.3341	7.0513	12.5413	13.037	20.4815	29.7067	26.4476	27.6729	31.1697	17.6563	8.0465	10.6241	10.2316	8.5538	15.4691	21.3174	24.2709	20.9651	16.0823	2.6616	8.045	1.2437	4.1203	3.914	3.9213	3.4889	2.7328		0.835367	12.9708
16.4415	12.0506	7.5792	4.2867	8.9827	15.36	13.8464	19.0333	23.4493	29.252	28.3557	28.3282	18.9806	10.9818	7.5939	8.2948	6.8523	17.1541	20.4217	20.1671	19.2138	12.9462	3.2845	4.7812	7.4145	1.8673	2.343	4.0605	3.3189	2.0818		0.841462	12.4925
16.5606	15.4875	7.8426	5.1858	7.207	11.7258	11.1609	18.0563	23.9625	22.941	28.0438	24.8528	19.4263	13.1414	8.9022	6.2646	6.4628	10.982	27.7164	19.6075	19.4049	18.1643	3.8207	8.5518	5.2584	5.3189	5.959	4.0709	4.225	3.5668		0.847558	12.6659
16.6798	13.1952	9.6436	4.3459	12.5247	18.5396	13.7871	21.7473	30.2888	21.9453	36.2776	36.274	17.168	12.9637	7.7652	5.114	9.0095	10.9844	23.2648	15.6836	18.7312	16.8598	5.8894	6.7725	4.2712	6.4267	3.176	5.4365	2.9913	0.4724		0.853658	13.5017
16.7989	11.6521	8.9865	10.2953	11.7026	12.9558	11.7282	17.4283	30.6737	23.8225	34.4665	28.9334	14.5113	14.1852	6.9306	4.0703	5.1671	8.9654	21.9058	19.9466	20.2843	19.5388	4.18	8.5099	5.3195	4.5041	6.901	2.7835	2.0286	1.8405		0.859754	12.904
16.9181	14.4972	11.1708	8.1571	11.1264	16.6952	13.5886	18.3787	25.8505	29.7049	31.4285	29.8279	18.638	10.9913	6.777	6.8834	4.6024	9.3162	29.5189	24.1263	16.5184	15.7087	5.4823	6.737	6.3433	4.8216	5.586	3.7841	2.4574	1.8158		0.865854	13.4667
17.0372	11.4844	8.2791	7.5463	8.9867	16.1649	11.2012	19.4553	25.9623	32.5034	31.7883	26.0477	18.1981	11.989	8.8994	6.6803	3.1904	7.3836	15.8239	27.249	14.7322	10.836	9.2329	8.4056	3.3128	3.9237	6.992	4.7646	3.6837	2.6125		0.87195	12.6665
17.1563	15.4464	4.2693	5.0567	12.0181	13.7246	12.2445	16.0851	25.4188	31.8231	31.7098	22.5275	15.641	11.9177	8.348	5.8287	2.9093	5.5952	24.9806	22.4656	19.4519	17.9256	8.1954	6.3347	3.1232	4.1844	3.277	4.1449	3.0503	1.8779		0.878045	12.3991
17.2755	9.5279	12.9827	12.0805	11.5189	17.2813	11.4385	17.9876	31.837	34.5956	34.927	18.7287	20.7596	11.9036	5.7085	5.8072	2.1453	6.9922	22.5396	24.1875	15.2153	14.4113	9.0198	7.8538	1.8883	2.0968	3.273	2.4233	3.1035	1.1854		0.884146	12.8765
17.3946	11.4408	9.5304	9.4896	10.4493	9.9799	10.7472	16.3466	25.4819	31.1444	26.9031	19.2848	24.7729	9.0775	5.9803	4.8185	1.4324	2.1848	22.1422	20.4929	15.6339	11.4475	9.3428	11.6069	5.4371	2.9483	3.647	3.7736	3.9645	1.5406		0.890241	11.7601
17.5138	12.2104	13.8982	8.4751	9.9009	11.8706	9.2171	20.3524	20.2695	28.6048	21.4574	23.9926	23.7403	11.9868	6.6929	3.1088	2.0801	4.3266	21.4705	26.229	16.4796	10.8846	9.9015	9.9231	3.3412	1.4023	3.076	4.9923	2.8107	0.8468		0.896342	11.8463
17.6329	13.4423	11.3347	11.0965	7.3342	12.1002	11.4185	15.6142	23.7784	24.7146	24.5534	23.4161	28.5999	13.2411	10.615	4.1484	1.8146	1.2341	15.2841	24.2764	12.1738	11.1102	13.1502	4.0264	2.9929	4.2953	6.559	4.0603	2.4394	0.648		0.902437	11.7059
17.7521	13.2366	9.0522	11.234	10.1435	17.2803	9.6062	15.7754	26.0851	25.9956	20.7888	21.2604	19.7043	12.226	4.4478	2.8979	0.5465	2.0231	11.4474	24.47	10.9478	12.3685	9.3295	4.7914	3.3055	1.4755	4.065	3.9238	1.7044	1.0951		0.908538	10.732
17.8712	13.0243	13.0493	8.6036	10.253	13.8174	11.4933	15.7008	22.9961	25.9284	21.3201	22.3951	20.0648	5.3202	3.2095	0.8974	2.2252	2.9945	13.2306	23.262	10.5074	11.5649	6.6825	7.3648	3.0929	2.6892	3.784	3.321	0.9494	0.9959		0.914633	10.3703
17.9903	13.3884	13.7617	12.8694	11.875	10.3877	10.8961	15.1413	23.286	29.5438	23.8492	17.7295	20.3443	3.96	2.8524	1.301	0.8074	2.753	11.5782	14.0745	12.9095	10.3259	9.0241	8.3854	3.3684	1.6789	4.012	6.1864	2.4149	2.4016		0.920729	10.383
18.1095	9.8291	10.5297	9.1832	11.8088	11.7224	12.8794	13.5982	21.9394	28.9406	22.3241	18.6137	18.7036	4.5872	1.3152	0.3038	1.601	0.4069	6.6582	19.2197	15.8512	12.3967	7.3223	8.2442	3.3213	4.2128	3.304	4.9867	3.2309	0.8933		0.926829	9.92854
18.2286	10.4197	13.0957	13.766	11.6917	16.7414	12.7829	11.3387	28.3421	26.5546	25.215	19.1376	17.4373	2.8394	2.0469	2.642	1.1148	0.4807	4.9861	17.4254	11.442	10.2165	7.1057	6.0362	3.1495	1.0473	2.846	2.5035	2.5157	1.2726		0.932925	9.86872
18.3478	12.17	8.0125	12.9544	14.4441	14.02	14.9394	9.5196	29.2253	32.479	24.3701	23.6747	13.9513	1.9669	1.8854	2.1707	1.2237	1.6042	6.1413	16.866	10.2196	10.0957	7.3566	6.9331	1.4661	1.2981	3.321	2.8801	2.4118	3.5927		0.939025	10.0412
18.4669	11.1454	12.1028	15.7719	13.1061	13.7424	11.5397	11.624	24.1368	26.9124	22.6821	29.9734	15.5507	2.7597	1.6913	0.613	0.8492	0.7919	2.4903	19.3573	9.7855	10.8968	8.0485	6.5583	2.0919	2.0383	3.957	5.2389	2.3034	3.4399		0.945121	10.0413
18.586	16.3764	13.8629	15.5963	9.414	11.4586	10.7102	10.7026	29.5693	22.6664	23.4439	25.5201	10.3937	1.0774	2.2619	1.525	0.5713	0.8195	2.2916	14.0684	7.5254	8.9368	6.1765	5.1215	2.6146	1.8479	3.539	4.438	2.2048	0.6016		0.951216	9.1495
18.7052	7.908	16.4102	13.3976	12.7286	10.8691	10.586	8.1124	24.6658	25.6531	22.4115	30.4146	9.61	1.2262	1.8772	0.3387	0.3638	0.0891	0.6131	11.6133	10.2147	8.0174	11.2504	6.938	0.2245	1.5451	2.883	3.099	2.1448	0.9645		0.957317	8.83344
18.8243	8.0788	15.5558	15.6178	14.2626	12.9874	14.7158	6.1121	23.6579	27.576	27.5419	30.4302	6.5889	1.3108	0.8236	1.2114	0.3015	0.2366	1.4567	13.2338	5.8862	12.3201	10.6859	5.5539	2.2843	1.2617	3.45	4.4288	3.1554	0.9304		0.963412	9.36746
18.9435	6.7409	9.5328	14.4554	11.1465	12.0166	12.682	4.1869	18.2854	25.8401	28.9248	27.2331	6.6071	0.5282	0.8092	0.7212	0.2771	0.8348	0.8523	6.057	4.5265	9.0255	7.0033	3.9616	1.0404	0.8917	4.086	2.2082	3.6539	0.8009		0.969513	7.75619
19.0626	7.2915	8.934	11.0904	12.5287	15.3123	10.0813	4.5282	20.5199	25.9587	20.6111	27.6734	5.7819	3.1255	0.2367	0.3273	0.2228	0.4394	0.4572	4.4772	5.1959	5.4632	7.1708	6.2191	1.6869	1.804	2.86	2.2677	1.0455	1.3885		0.975608	7.40342
19.1817	3.7898	10.377	8.0628	9.7172	13.7737	10.0358	1.1039	16.579	27.09	20.4764	25.3295	4.2526	1.1792	0.3135	0.35	0.5647	0.143	1.4605	5.4452	4.4926	3.7478	7.3327	4.9809	2.0648	2.7097	1.319	2.0414	1.3686	0.4841		0.981703	6.57191
19.3009	2.5322	6.5632	9.1754	8.7425	8.188	8.8374	2.631	16.7459	30.9946	24.0965	23.5313	2.3852	0.5521	0.3204	0.6366	0.061	0.6764	0.1968	2.4409	2.3506	6.5347	6.5222	4.0451	1.3352	0.9958	1.594	2.3772	1.6117	1.1904		0.987804	6.13325
19.42	3.2975	3.6839	7.7085	5.2596	8.0249	2.7873	0.2013	12.4194	29.495	17.5625	20.5034	1.038	1.1465	0.3851	1.0206	0.597	0.3701	0.7912	2.1225	1.8785	4.1969	5.4937	3.6285	1.708	0.7139	2.423	1.0554	1.4368	1.5441		0.993899	4.91356
19.5392	3.5089	3.687	4.5774	8.0854	6.374	2.732	1.5465	7.3607	22.6583	20.7408	23.673	1.1948	1.0152	0.5449	0.2831	0	0.2196	1.9315	2.5206	3.284	1.8645	4.952	6.6293	0.86	0.7097	0.731	2.1631	1.8008	0.1735		1	4.6835

## Sheet: Image15
X0	Y0	Y1	Y2	Y3	Y4	Y5	Y6	Y7	Y8	Y9	Y10	Y11	Y12	Y13	Y14	Y15	Y16	Y17	Y18	Y19	Y20	Y21	Y22	Y23	Y24	Y25	Y26	Y27	Y28	Y29	Y30	Y31	Y32	Y33	Y34		Ap-basal	Avg int
0	18.6021	13.767	18.8394	12.2861	6.7174	12.3113	12.0548	9.4852	15.6249	3.8626	3.8936	6.5917	5.1238	7.6165	3.0828	2.88	0.96576	2.72321	7.566	8.357	5.2718	4.4481	4.5522	5.8007	5.2834	6.5544	2.9344	5.1793	6.0399	5.2467	5.2718	4.2534	5.4385	5.82	4.9053		0	7.12432
0.1191	19.5379	13.2074	14.2877	12.0785	9.5736	11.4174	18.8083	8.0634	14.5676	5.4408	6.261	5.1212	4.161	9.0189	4.2925	1.8684	1.31798	2.66907	8.1054	8.4154	6.2594	4.1655	6.8372	14.1253	6.8176	6.871	3.6911	7.9532	5.6089	7.5528	10.3997	3.921	4.9195	5.7925	5.621		0.00574513	7.96426
0.2383	13.5196	13.2517	16.7623	12.2037	12.1709	5.9585	20.5029	11.2193	19.0207	4.8018	7.0166	6.5808	10.2249	11.1179	1.8649	2.8746	0.96899	2.2832	5.6833	9.3056	5.4794	3.802	8.1295	6.8939	6.6591	9.7984	5.5432	7.2182	9.6703	8.6353	6.9222	8.3924	3.9539	5.912	6.9329		0.0114951	8.32214
0.3574	18.016	11.5812	21.6631	15.5689	13.4947	13.2443	19.0476	13.1422	17.8305	4.0629	2.1994	10.2771	6.8898	7.9893	5.2663	3.4031	2.91869	1.40853	8.0445	11.8494	7.754	5.7658	13.47	13.1696	11.567	13.8347	6.8961	8.2276	12.9812	13.519	6.3897	8.8627	6.3925	4.7	5.0848		0.0172402	9.90035
0.4766	21.4125	15.6566	24.5683	18.7083	10.8151	15.9095	18.5345	10.99	27.5271	6.5116	5.8132	11.4235	10.4301	10.4537	4.1705	5.0739	4.69003	2.99672	11.4299	13.7958	9.3776	5.8323	10.381	23.2937	11.7943	16.1184	5.7813	14.6363	15.0737	12.504	6.7334	4.2853	4.4299	9.5554	5.6095		0.0229902	11.6091
0.5957	20.2325	14.9241	28.8566	24.7239	11.3194	20.9097	29.7953	14.8469	21.167	4.9821	6.1967	8.7985	8.247	10.4066	3.2537	3.389	3.35042	3.60982	11.3552	24.22	9.8419	8.8334	11.0221	21.4709	9.9213	19.53	14.3124	12.3455	16.7039	12.2938	6.8907	9.1262	10.8044	8.3502	6.3756		0.0287353	12.9259
0.7148	24.9609	23.8238	38.0381	32.3917	16.1396	19.7576	33.1168	17.5882	19.4207	11.4908	7.609	8.4361	10.5501	11.8711	5.2643	2.8179	1.53771	2.44721	19.2258	19.548	8.0522	10.7338	20.4134	27.0485	13.0147	30.5337	17.6901	18.4662	18.9339	9.5629	6.0113	11.4887	10.2524	8.9153	7.3711		0.0344804	15.5578
0.834	24.2099	31.3527	51.5963	28.0072	20.9665	25.5647	37.1139	18.2728	26.6729	10.6938	10.4017	6.7872	10.9435	15.9851	7.6995	5.7704	2.97823	4.62631	21.2512	15.8535	15.1261	13.2563	25.7055	37.6955	22.8374	40.1712	21.6913	24.3712	13.851	13.7384	7.1436	9.2988	11.724	8.6606	6.1823		0.0402304	18.52
0.9531	29.3082	24.3687	55.7764	35.0907	16.5429	31.6851	46.3654	20.7268	30.9175	8.2764	10.384	7.4342	16.4689	15.0868	9.6768	7.4812	1.75476	4.42375	15.3688	19.9849	18.4642	12.9861	30.1166	42.0004	30.6099	33.5412	25.6232	26.7539	15.7135	9.2658	11.1921	9.6456	9.5015	8.7392	9.1969		0.0459755	20.0135
1.0723	24.5321	33.1143	57.6091	57.4217	26.6588	32.5501	46.5444	24.2022	18.838	8.0715	17.6464	7.2725	16.6209	19.1114	5.3049	8.7387	4.81951	3.13611	16.9395	16.0815	23.1165	23.6117	36.7176	38.7506	32.8013	36.0859	24.2996	26.6561	13.5402	9.9211	11.3494	13.6982	7.6576	10.0826	6.1648		0.0517255	21.7048
1.1914	33.9374	42.3459	79.1028	66.9048	31.1196	33.7764	43.5858	28.3755	13.3822	12.5578	16.4584	9.874	20.229	9.077	10.4674	5.7314	6.06539	6.77088	14.3967	20.9463	23.9994	25.5562	37.4097	42.5589	39.3938	41.7066	22.5589	18.3952	19.0954	13.3894	12.779	14.0462	11.0823	7.3468	13.5545		0.0574706	24.2279
1.3106	31.5979	54.8757	74.9338	70.3029	43.5799	38.2315	39.5101	28.7684	20.9611	12.1841	19.4031	14.415	18.0761	9.4132	9.8267	10.5466	3.24538	8.24536	14.2712	19.9172	36.8851	22.429	37.5223	39.7089	37.872	37.6717	26.8558	21.2636	24.3998	14.7495	16.1071	17.4437	13.4187	8.7776	14.5578		0.0632206	26.0562
1.4297	45.633	67.8091	82.116	74.2282	50.6945	41.4925	50.25	33.8294	16.0553	9.7434	21.7352	20.0019	14.7866	17.6472	10.0432	13.595	7.32462	8.24777	15.1879	25.3425	27.5346	34.868	40.2272	29.4034	23.7608	35.5097	23.9793	28.4718	22.4291	11.5663	15.9554	16.2697	14.5301	9.2908	14.5412		0.0689657	27.8314
1.5488	51.7752	74.4648	88.8207	61.7859	56.5392	38.9368	37.407	39.6633	11.8554	14.9685	22.1695	14.7176	8.9467	17.8901	7.152	7.8349	5.18654	8.21756	14.8624	19.6821	23.9763	33.8954	36.128	17.6813	22.3172	31.04	25.4961	33.1388	24.0972	10.0945	14.2605	16.334	25.1547	9.4019	16.5763		0.0747108	26.9277
1.668	67.832	66.1819	74.4159	58.2192	57.3189	56.1919	46.8654	45.6434	16.8138	21.8192	23.4081	13.7437	13.1506	18.5565	8.9244	10.0427	6.45407	6.55288	11.9252	18.8778	31.1624	25.0468	30.4961	24.2026	19.2423	29.5763	26.2708	35.1741	23.2698	14.1993	15.8247	16.7488	20.0198	9.972	13.7117		0.0804608	27.9387
1.7871	73.7078	56.9497	57.2988	49.5853	64.0691	63.0308	54.3595	43.7661	17.8577	20.2158	20.0957	17.5729	11.2725	14.5503	11.2819	12.0443	6.46844	6.42715	11.4994	16.3639	28.0179	29.1447	27.6065	22.88	20.0357	26.0241	24.9674	32.7088	21.78	8.781	14.0985	17.829	19.0039	8.5716	16.8263		0.0862059	27.0484
1.9063	76.7782	69.4011	47.8895	35.3283	60.5644	56.4125	46.3304	41.1719	15.8503	14.308	19.9517	15.3282	11.5812	15.4208	10.4757	7.082	8.32485	5.44694	19.6544	15.5677	14.2293	25.2031	30.7847	12.791	15.5753	20.3782	29.4706	28.5019	15.9694	10.8473	15.0317	16.1087	12.7392	9.4939	16.3055		0.0919559	24.7514
2.0254	74.965	71.3373	45.8893	40.5527	65.7714	56.4923	40.6193	42.5731	11.4535	23.3351	16.7693	11.9004	12.9762	14.828	15.1234	7.4404	6.02147	8.03302	14.0375	15.4527	16.8793	19.756	26.1773	16.0006	16.4357	23.7545	30.6624	28.6759	15.8331	7.861	15.5036	18.7086	12.3089	11.736	12.3471		0.097701	24.806
2.1445	71.2067	62.2817	33.9692	38.4392	66.4252	57.4255	40.2616	33.5461	12.8675	27.0921	18.3123	11.3645	14.9839	14.7143	4.3093	10.2192	8.37772	7.98275	14.1549	14.7549	18.5308	18.9934	21.682	14.2103	19.9823	17.1823	29.5047	21.8084	15.1455	9.2886	17.4542	22.5165	11.0385	10.4684	11.5972		0.103446	23.4883
2.2637	65.8581	50.986	30.0526	32.169	51.1246	52.8555	48.7595	36.8517	10.2092	22.8519	15.8307	11.4698	16.726	16.0398	8.1556	9.2885	7.71344	8.40371	14.5359	16.6981	14.7033	17.1479	20.9524	15.4674	21.217	18.9564	22.0942	24.6714	13.1225	9.2792	10.6359	17.9517	7.4704	10.3267	14.3874		0.109196	21.8561
2.3828	67.8055	44.9949	36.6838	30.9369	49.1759	48.4791	46.0684	40.3662	13.4669	23.4374	18.6027	12.9773	10.307	14.7642	8.5189	7.0548	4.87148	6.56008	14.6005	18.1621	18.6139	20.3093	24.1817	16.7231	16.2425	18.4361	17.8274	19.8373	15.0716	7.4498	14.956	12.7092	7.2599	12.3292	9.0173		0.114941	21.3942
2.502	62.9769	38.8607	31.0229	29.0509	42.2495	50.5223	35.1892	29.7619	10.5225	22.5423	20.8607	14.0791	8.6497	14.3838	7.0333	7.6268	4.23221	8.31389	14.4624	17.1592	13.5413	17.8102	18.0487	12.6907	19.7997	25.8221	23.0746	20.6857	17.002	10.1102	8.371	15.3326	10.3139	10.5752	13.5753		0.120691	20.1787
2.6211	61.4591	36.7269	27.3453	29.0678	46.8736	50.5278	33.4618	27.2705	11.4761	14.1781	10.6765	12.3694	13.8461	19.0669	7.9107	8.5423	8.63101	4.21822	14.6333	14.1223	16.7631	16.7119	20.8954	9.7151	14.371	19.3686	21.0302	18.1258	13.5574	5.6623	11.9904	13.8957	9.0358	8.3648	9.6373		0.126436	18.9008
2.7402	54.226	44.5638	21.6836	29.526	44.3831	41.1062	34.0137	31.3209	14.402	10.3822	15.5218	12.1553	12.3458	9.4784	6.7964	6.6237	7.70323	7.41208	15.7617	13.0412	19.3414	16.6462	19.8557	12.529	18.588	19.492	21.8734	18.4565	14.7061	8.4302	10.471	16.0479	9.8925	7.0919	8.4619		0.132181	18.6952
2.8594	60.4649	46.0025	29.0874	28.4803	40.561	41.3616	29.5392	30.2623	11.2955	12.6332	11.9559	15.3606	9.8778	16.0895	8.3712	5.344	6.84499	8.26639	19.5625	14.5741	15.3297	14.2373	22.2735	8.8134	16.2666	22.9302	17.3238	14.0664	14.0644	8.3675	14.6913	9.0469	7.2215	8.5761	13.9237		0.137931	18.6591
2.9785	58.2473	33.2874	31.8415	32.7542	42.7154	31.513	29.8095	35.5449	11.2317	10.5137	11.2388	8.5068	10.0206	9.7171	7.8343	4.5458	8.8111	6.77989	15.4844	11.7108	16.6318	13.9982	17.5731	9.4587	10.0953	18.5067	20.1469	17.543	11.5346	10.7422	9.1783	10.1833	6.0026	6.9673	11.1089		0.143676	17.1937
3.0977	50.188	32.8911	22.2618	37.6753	43.1896	34.4232	25.5457	26.1404	10.2675	7.2362	10.7568	12.5187	10.6064	11.7902	6.3065	5.139	4.64498	7.42103	16.4545	13.9934	16.0666	14.2593	18.13	12.9015	15.1922	17.254	19.0108	18.2196	13.2392	10.6902	5.5605	10.3733	5.6579	5.4596	8.1053		0.149426	16.5592
3.2168	56.5731	29.8097	25.9321	37.4615	48.0191	28.2784	35.6861	24.7987	14.4892	10.5391	12.1974	8.4413	9.2464	10.5065	4.6877	5.4996	6.04951	6.59884	15.5832	12.7375	12.3438	12.939	18.8548	10.9177	15.2016	22.7113	15.9833	20.0442	17.288	6.418	9.9796	10.7083	6.2509	5.634	9.6284		0.155172	17.0868
3.336	49.6066	26.6051	24.2055	38.4367	40.731	35.1503	29.9484	23.6109	11.1221	8.997	8.8379	5.764	10.0533	11.7782	2.7591	5.1333	4.38807	4.0428	13.2965	14.9157	22.1034	12.6164	15.8532	13.5151	15.5454	24.0179	14.6343	19.626	10.6482	8.003	10.1079	9.4997	6.1406	6.4606	8.6992		0.160922	16.1958
3.4551	48.3781	33.1184	23.2336	39.0025	38.0615	33.8942	36.7435	22.9114	11.8473	9.3043	6.8305	8.2048	13.7073	8.168	3.788	6.956	5.18065	4.45409	10.333	15.4098	16.084	9.6187	19.7956	10.5149	17.548	16.4821	18.3423	23.0845	16.7761	7.3922	11.8401	12.3418	8.051	8.073	9.8846		0.166667	16.7245
3.5742	46.3977	36.6026	21.6928	42.7739	39.7899	32.8826	42.0239	19.0262	15.2245	11.3078	10.384	7.42	6.4114	8.5388	5.5673	8.1149	7.78563	9.04463	12.4838	13.5535	18.0778	15.8964	21.762	10.3809	15.8285	18.5954	12.0646	20.3212	14.0503	7.6342	9.9325	7.9903	6.1793	8.2776	10.7285		0.172412	16.9927
3.6934	47.6814	34.9879	24.8738	41.7571	33.2949	25.7971	35.3093	18.9365	12.3728	7.9495	7.3244	6.3877	8.0357	12.0289	7.2947	7.7909	7.80756	5.39488	10.4334	15.281	8.9641	10.1043	13.1821	12.4474	11.2719	10.0055	18.2966	21.179	17.165	8.6619	8.129	11.0718	7.6155	4.2782	8.0133		0.178162	15.4607
3.8125	48.3729	33.6116	23.2738	38.8663	31.9392	24.5518	34.6745	19.358	8.6711	4.6658	7.942	9.7991	10.8022	7.4011	5.9969	8.3699	7.7988	5.79271	17.0634	14.0213	9.3615	11.3861	12.1863	13.8411	10.4079	13.2517	11.8163	20.7351	13.1072	7.4117	11.1441	9.4715	6.3356	8.6202	7.1951		0.183907	15.1213
3.9317	40.9574	32.3789	26.4399	40.8357	29.4386	19.0708	30.4638	13.3244	12.596	10.6533	4.8811	11.4208	9.1282	5.8167	5.0175	10.116	3.65281	4.23235	16.5979	12.7972	13.3501	16.6119	11.6877	14.1053	15.2572	12.5565	23.2293	21.3526	12.6796	7.5361	11.4151	11.8868	6.9665	10.3953	4.6625		0.189657	15.2432
4.0508	42.1919	34.4779	28.9972	39.2436	33.4165	27.3684	36.9593	20.392	17.7603	7.4079	8.1861	5.6881	7.9461	8.2551	9.9231	7.9264	8.25152	4.11853	12.8223	18.2613	12.3342	21.5811	11.9249	11.9931	11.7837	12.5094	16.0298	20.413	11.3503	8.6819	11.2977	6.6664	4.3056	9.0873	7.6884		0.195402	15.9212
4.1699	37.7426	37.9609	29.0207	27.4285	28.2689	31.9185	36.7081	16.7303	11.6611	7.1198	8.7284	8.8556	9.6243	5.9179	12.4381	7.5865	6.70551	6.74787	6.8565	12.8336	8.6684	15.8777	13.0368	9.6613	11.0523	11.1544	22.9371	20.7831	17.025	7.0667	11.5154	8.6271	6.68	10.1116	5.5927		0.201147	15.1612
4.2891	34.6909	28.9292	28.4795	30.4747	27.5566	28.134	29.3673	18.8836	14.3033	7.5821	10.4165	8.3379	8.6665	6.7304	11.8359	10.3832	5.07696	5.02333	11.1009	11.8901	9.3845	17.1339	14.474	9.9145	10.1541	10.2649	20.7466	19.7948	24.0536	6.4982	10.7005	12.0497	5.6559	10.6224	5.5768		0.206897	14.9968
4.4082	32.3701	30.064	31.0911	38.7438	20.8922	30.1744	34.7083	16.7956	12.2637	12.0699	9.5974	9.2372	9.2909	9.2098	8.7472	9.6768	5.07144	5.41795	12.5809	11.4163	8.3532	18.807	15.8083	12.1588	8.407	10.775	18.5174	18.7971	15.2655	11.5655	11.5548	9.9981	5.1763	11.3664	9.3745		0.212642	15.2955
4.5274	35.6877	35.5745	33.2804	36.8062	31.1152	33.4841	29.2919	13.3441	10.2695	9.5125	10.1455	7.1614	12.0617	5.8503	8.9368	7.2056	4.63998	5.02437	10.1048	11.6117	9.8388	13.069	13.5362	12.2681	11.6229	11.6151	14.6283	19.2357	16.2575	11.6483	10.3113	5.8918	8.4456	4.9449	4.1131		0.218392	14.8153
4.6465	29.3876	27.1418	34.589	30.3712	25.8293	29.7257	28.5808	13.6782	11.8357	8.1947	11.288	9.6965	7.7837	10.1112	7.9889	4.815	4.98185	7.16483	9.1599	11.2399	12.3591	14.1904	10.4405	9.8859	9.6421	9.3638	17.0635	12.5144	16.6912	9.3514	9.6951	7.2891	8.8551	3.6041	10.1436		0.224137	13.8472
4.7657	28.5482	28.7484	33.6407	39.9086	23.7149	25.9508	27.3907	17.7009	12.6728	6.3071	8.0324	12.2557	7.2079	7.9276	6.0709	3.4054	6.34723	8.05486	11.5858	12.2037	13.4995	12.9671	11.7244	8.169	9.5667	12.1207	20.1847	14.7365	21.8755	8.6636	9.3421	9.2992	6.8856	4.3646	9.4648		0.229887	14.3011
4.8848	28.8393	25.5488	28.2383	38.7668	32.4043	20.2461	23.126	16.5941	11.8334	9.704	13.3647	9.1093	10.6096	10.2591	7.1669	5.2975	6.72125	6.84792	9.357	7.383	7.7915	12.9391	11.2498	11.6693	8.7313	10.7312	19.03	16.0625	15.9107	9.1516	6.3121	6.7815	5.9327	6.6508	8.218		0.235632	13.6737
5.0039	20.1681	33.5602	21.8332	37.5414	29.9224	15.5418	31.4973	15.0375	11.0989	10.9223	12.3617	15.4443	9.4635	7.1377	7.3292	5.3687	6.78026	7.15325	7.3454	9.4776	9.0289	13.6488	11.2271	12.1191	10.3442	9.6977	15.3294	13.2417	14.3294	12.4272	8.5594	7.3886	7.2657	5.4226	8.164		0.241377	13.5194
5.1231	22.187	28.0423	28.5244	23.9766	27.8849	21.0318	28.2005	15.0236	11.6905	11.0085	7.5578	11.0466	11.1384	6.2137	6.672	3.5598	6.99352	6.10202	9.9242	8.0083	11.1944	16.8503	12.9385	12.195	11.0611	10.2377	13.7378	11.2345	17.7975	10.4242	7.4597	7.9718	5.3826	5.1062	8.5578		0.247127	13.0553
5.2422	21.3354	29.5932	20.0504	27.7992	26.2845	19.7909	30.1602	12.7859	9.5065	10.07	12.7163	9.3539	10.0273	5.8813	4.6781	3.2343	6.84327	6.97205	11.7135	11.3186	9.479	19.3437	11.6822	14.7093	10.434	9.3884	10.1706	17.1039	12.0634	7.7199	5.9702	7.5325	9.1379	3.6268	8.4124		0.252873	12.7683
5.3614	29.8641	24.7502	27.3116	24.2447	27.1969	20.3439	20.1268	13.2612	11.2054	12.9426	10.1844	11.2793	10.1224	6.106	2.563	2.7823	6.42581	6.73179	13.9262	10.5893	13.1632	14.9802	10.6829	11.0992	11.3123	9.8182	13.4159	13.895	12.4636	7.9776	9.6624	9.7964	5.6151	1.8429	5.6917		0.258623	12.6678
5.4805	19.6671	23.0486	25.3165	20.9151	27.2768	23.2449	25.419	9.769	7.0252	11.1941	9.0428	12.2988	13.5346	6.9699	6.4851	2.7715	6.93796	3.04795	9.2893	8.7571	6.9964	14.7341	12.4424	11.0845	11.025	5.0016	15.0314	9.4609	12.2971	9.2978	8.5772	5.716	3.1917	2.0097	8.7188		0.264368	11.6456
5.5996	27.0732	18.0612	19.9068	18.8796	27.0872	22.2585	36.0869	12.8627	6.1029	11.845	13.2784	11.412	12.2054	8.6871	6.0595	3.6927	8.50879	5.01467	8.1832	8.0112	12.2257	16.0476	14.2493	9.2581	15.5947	12.9103	13.489	9.8789	9.4696	11.0246	5.2627	9.7068	5.1246	2.5191	5.9492		0.270113	12.5122
5.7188	27.276	15.5564	20.8913	19.5763	30.6447	26.28	28.109	11.5241	10.806	6.9043	14.668	12.3555	13.5381	5.2492	4.4264	2.9563	7.36591	5.11043	9.1979	9.1538	11.2192	15.7598	14.5899	9.8953	12.2187	9.0802	13.3731	15.5365	9.3598	7.7513	7.1576	6.3198	7.1899	1.8982	6.5879		0.275863	12.2722
5.8379	18.1147	18.4377	17.3388	18.8902	31.3237	14.7597	23.7871	10.8855	10.7865	13.3934	12.7206	12.8738	11.9439	7.9656	7.6093	2.7898	6.03226	3.31456	5.4216	11.9271	7.5944	11.9081	10.5826	8.4391	11.7275	9.0244	12.5589	12.1168	11.448	8.6721	7.6029	8.1551	5.625	2.9484	3.8465		0.281608	11.2162
5.9571	25.0949	14.9729	21.1578	19.2967	21.1292	24.9201	23.855	11.7767	8.264	11.8072	8.9114	13.3456	14.9187	9.2479	6.1109	2.6359	5.49994	2.95815	8.3543	7.8155	12.7177	9.5561	11.562	6.7766	10.6378	6.4824	10.78	13.2145	7.6043	8.611	6.0155	8.3295	6.1885	4.5609	6.751		0.287358	11.196
6.0762	33.1756	20.5085	17.1313	17.3783	19.3049	20.0655	25.2846	10.0934	13.3785	8.4844	9.5785	8.798	15.1785	7.8862	5.7274	3.5846	4.5028	6.60683	9.1921	6.5946	10.4654	7.2805	10.6542	8.2531	8.1233	10.5855	14.3433	17.3734	8.7623	8.2356	5.7756	8.0927	4.8001	2.986	6.8402		0.293103	11.2864
6.1953	29.6109	22.2652	21.2736	14.9734	18.4128	20.6739	23.9285	15.272	14.5922	16.0117	9.2964	6.6999	12.5776	6.7421	4.1077	2.8456	4.26687	7.58615	11.8704	10.0127	9.9111	10.6252	13.9928	5.2008	9.1432	6.8463	14.6747	18.0186	10.8487	9.9719	7.2786	7.5749	3.4937	1.558	6.5932		0.298848	11.6786
6.3145	25.0494	22.8267	20.2312	16.0834	19.8378	19.1069	26.7072	15.2681	6.7389	15.2208	6.4819	10.9133	14.9492	6.0963	2.6603	1.6281	5.56872	4.40306	6.1723	11.4453	12.8905	11.7125	8.6381	9.9054	18.7806	9.724	13.5975	17.3701	10.9899	6.0357	6.6822	6.4724	4.0027	1.4831	2.0533		0.304598	11.3636
6.4336	25.3008	22.1481	16.1988	11.981	20.7451	14.9892	24.3464	15.4096	7.7203	10.8241	10.0595	9.4535	11.799	4.3081	3.6969	2.5992	6.07359	4.36102	8.1301	11.5692	8.7778	11.4124	6.365	11.0698	14.3987	11.4135	13.2621	14.0224	9.9921	6.4643	9.3967	8.2479	4.3505	2.7398	3.7131		0.310343	10.7811
6.5528	20.965	21.684	22.3251	11.0373	20.4271	16.6802	28.6346	10.5492	11.8157	13.8955	9.9037	11.7237	14.4162	4.667	5.8368	1.3281	6.06151	4.07676	9.1211	8.2038	9.1429	6.954	9.5995	6.1425	8.5693	8.3686	7.3251	15.3225	9.2414	7.9862	8.2557	9.4919	2.1368	3.5719	2.7307		0.316093	10.5198
6.6719	31.5268	20.2094	14.4578	11.9472	13.3381	14.9789	22.7759	12.0676	10.3968	14.461	12.5814	8.1898	13.5008	5.3606	3.9838	1.6926	5.61213	6.47031	9.347	12.1513	8.4188	8.6696	7.1445	7.0729	7.5278	7.3031	8.7337	11.8479	9.6579	7.1567	9.6961	7.4506	3.8207	3.5315	2.5031		0.321838	10.1595
6.7911	29.7909	18.5206	11.501	6.9994	16.9151	15.6408	22.3778	12.9304	13.9599	14.2652	8.2155	9.5618	11.6314	4.9251	3.1008	2.1265	2.592	5.52548	9.8899	13.1184	7.801	8.2977	5.8088	6.9236	10.9386	6.4763	9.1013	10.3859	16.1233	6.3586	9.3889	7.1455	3.1919	2.0924	0.8199		0.327588	9.84119
6.9102	26.2528	19.0706	13.7777	9.6933	15.8837	14.9012	30.7211	16.1111	10.9522	11.4898	9.3735	10.5616	9.4379	4.4468	2.5259	1.1712	3.35478	3.75033	7.5545	10.8445	10.1009	9.7028	7.0504	3.9322	14.0312	8.5728	11.7207	6.5367	13.6402	6.9184	7.0219	6.7659	1.813	1.884	2.4113		0.333333	9.82791
7.0293	25.3786	26.1579	15.2067	10.7209	14.9141	16.0326	27.2026	13.2102	7.9574	9.5671	7.9466	6.4716	9.4623	7.0193	2.1695	0.6419	6.1101	5.27366	11.4459	13.2234	10.0772	8.6564	6.4914	4.9327	7.8292	8.7746	14.1464	10.4821	10.7916	11.0216	7.9152	7.496	2.2337	2.1585	1.6575		0.339078	10.0222
7.1485	23.9439	21.789	13.495	9.4953	14.6333	18.0729	28.3573	10.4832	9.7559	11.731	7.176	7.2713	10.2966	6.8812	1.88	0.0216	2.7831	4.91808	7.7865	13.2447	9.5034	10.1926	6.0855	5.2361	10.2828	12.1851	11.5421	11.3032	9.2302	11.6006	5.4114	7.2875	1.9465	2.945	4.2049		0.344828	9.79922
7.2676	19.8634	15.7523	12.7789	10.1248	13.7002	24.2487	25.517	11.2803	13.0747	12.7576	9.0524	5.8078	11.0451	2.8983	1.5457	0.0459	2.30154	6.08411	9.4397	16.3439	11.305	8.9028	7.1688	5.1362	5.5607	9.0269	12.6316	14.0968	12.7305	7.514	6.2755	6.5085	2.6716	0.3746	1.965		0.350574	9.5866
7.3868	17.3993	20.3609	12.2627	7.2808	14.5628	16.9868	18.707	11.7694	11.7023	10.0121	12.0797	6.5585	13.6477	5.6229	1.3767	0.4418	4.08435	7.21849	8.6525	15.1481	13.4824	9.6731	5.4582	3.6881	7.2095	7.7674	10.4375	10.294	9.43	5.8749	6.3067	6.585	1.2347	2.0071	2.8191		0.356324	9.08979
7.5059	24.4088	23.7719	10.6751	5.9164	10.1763	23.0868	26.6397	10.0964	9.5539	11.8855	12.3755	5.5791	15.3018	6.3614	0.9941	0.7513	3.14978	4.65803	9.003	13.929	11.7091	9.1314	9.0006	3.6305	5.243	10.999	9.7957	13.5471	10.6802	7.5672	5.0342	6.1467	2.2639	2.5323	0.8316		0.362069	9.61218
7.625	21.2214	24.3244	14.5629	8.9925	12.7105	14.64	21.6338	10.4974	11.8154	12.3987	11.545	5.3161	13.7864	4.6342	1.0716	2.0067	4.26525	6.59642	8.0119	15.4199	10.8248	7.3528	10.5716	6.5853	4.6404	6.0368	12.5793	6.8094	7.7076	8.0819	6.5902	7.1741	1.7346	1.491	1		0.367814	9.27515
7.7442	21.5685	24.6597	10.617	7.5293	11.0755	18.633	22.1024	10.7731	10.7449	11.1504	8.4615	8.8834	10.7549	6.2078	2.0653	0.6127	1.70449	5.89122	7.2003	13.3568	10.4191	9.3862	7.2704	3.7515	3.1304	8.2493	9.5048	9.3588	9.2594	5.8333	5.8554	5.4154	3.5246	2.7349	1.5953		0.373564	8.8366
7.8633	14.9251	23.8407	8.3009	9.7024	13.2699	17.6626	19.4241	10.6104	7.8328	8.6645	8.4848	5.108	10.1283	5.3049	0.8885	0.3237	2.66833	3.85654	10.8916	9.6069	14.7998	11.0527	6.1954	3.0498	4.019	5.928	9.746	12.0257	7.8805	7.5991	5.9034	9.173	3.1695	1.6178	0.8602		0.379309	8.41471
7.9825	16.8176	25.5806	8.4852	8.1801	12.1558	17.8218	26.1841	11.8368	10.3772	11.136	9.9609	5.0777	12.3347	3.5826	0.5427	0.577	4.57382	4.66666	6.4884	13.3247	9.0235	8.9302	8.093	3.4396	4.5003	11.6165	14.4372	10.2611	9.0308	5.4063	6.5309	7.5236	0.5005	1.6834	1.4232		0.385059	8.91727
8.1016	19.7345	19.9196	8.0391	6.6962	5.9003	15.3256	25.8687	9.6983	8.4559	7.7981	7.3069	5.1319	9.9511	3.9168	0.5284	0.8006	1.37457	4.77965	7.0394	13.2997	6.8464	8.448	5.3447	3.8362	6.6421	10.8288	12.27	8.8157	9.5739	4.8585	5.0392	6.1952	2.7263	2.6868	1.7787		0.390804	7.92731
8.2207	15.5409	20.3449	10.6499	6.5604	7.2178	14.1397	17.9026	11.136	11.564	4.181	3.9569	6.7118	10.7615	4.7313	1.4207	1.013	2.20513	7.51261	5.41	7.8027	10.7868	8.2091	8.0229	0.8979	2.8079	8.8162	9.7548	7.9988	7.3734	6.9845	4.6899	7.4475	2.2824	2.9422	1.4902		0.396549	7.46478
8.3399	18.5297	22.2564	10.464	4.7309	7.8473	18.0975	19.2836	15.2623	8.2288	4.8588	2.6417	5.0214	9.4853	4.7658	1.7057	1.4646	3.24319	7.1199	6.4196	11.664	6.631	10.0884	8.36	1.7016	2.0763	10.0823	7.5401	8.4766	7.2233	5.3841	6.5101	4.2566	0.689	2.5229	2.1237		0.402299	7.62161
8.459	19.6458	22.2397	7.7725	4.4833	8.6145	17.8709	24.3122	10.1579	7.9011	6.2379	3.9098	6.1636	9.4003	3.6674	1.2626	1.1566	2.22934	2.59254	5.3281	9.6414	7.5311	8.6801	7.0082	2.1607	3.155	8.0546	7.1727	10.5898	6.2112	5.0274	6.4472	5.3687	3.2875	2.8049	1.1664		0.408044	7.40723
8.5782	17.4158	17.8255	6.1316	5.7077	6.9249	20.9951	33.4441	12.1651	9.4795	2.8564	6.0307	5.7705	7.1233	4.2953	3.7487	1.1303	2.79751	5.55468	8.9323	9.8805	6.4588	10.1634	7.7869	5.0601	5.2549	9.1381	11.1445	9.1483	12.4084	6.8693	6.2582	6.8154	2.3051	1.5997	1.4305		0.413794	8.28717
8.6973	22.6782	21.1169	6.0014	6.1312	6.8675	19.7786	21.492	11.6537	9.5518	4.5845	3.9036	1.8605	4.0822	1.9492	1.9312	0.9199	1.43481	7.08142	8.6127	13.7226	10.4827	8.1743	7.6013	1.9437	3.5195	8.355	8.2016	7.1109	7.4816	3.8153	5.8761	5.9139	2.5446	1.2754	1.7552		0.419539	7.41157
8.8165	20.2846	15.6373	5.2733	3.3559	6.322	19.6328	23.0805	10.3718	8.2722	6.3537	4.1477	5.3116	5.8826	3.3527	2.0634	2.6542	2.36979	6.99436	7.3115	9.5676	8.7645	8.0137	7.1649	1.3966	2.5733	8.7553	5.4032	6.6017	8.2656	7.0354	6.5946	5.8601	2.7435	1.2417	1.4577		0.425289	7.14604
8.9356	18.3628	16.0341	5.4008	3.958	12.1545	18.2035	19.2392	8.5609	9.8732	3.5313	5.5696	4.6384	6.4701	4.1417	0.5629	0.4834	3.15527	4.11991	4.0292	9.2819	9.601	8.2104	9.2682	1.9038	3.1571	6.8591	8.6654	9.8577	7.2208	6.6229	7.1881	4.78	1.0524	1.3454	1.3564		0.431034	6.99598
9.0547	24.3321	13.8667	5.4178	4.1415	9.9765	16.6527	13.8674	9.3712	12.2366	6.1204	3.7777	4.6819	10.6589	4.2013	0.6424	0.785	3.65199	7.62072	7.898	9.9858	8.475	8.7229	7.3202	1.8271	2.8679	5.9149	10.2806	8.4024	6.686	4.6098	10.1049	4.5567	1.8491	1.8599	1.8896		0.436779	7.29296
9.1739	23.3772	19.4822	7.7783	5.1062	6.1304	14.0509	14.5391	10.7615	7.0854	5.163	3.5973	5.0063	8.1454	4.0985	1.1392	0.6831	1.26441	6.49152	7.4326	8.151	9.5758	5.3251	6.5354	2.7452	4.7279	6.772	8.3272	8.3107	8.0924	7.1848	5.0932	4.3109	2.0952	0.8031	2.83		0.442529	6.92036
9.293	23.0575	15.5872	5.2986	6.2579	6.6055	11.5237	15.6395	9.6332	15.4593	7.0539	4.8658	4.0884	9.8963	7.5536	0.9326	1.2375	0.92374	7.33595	8.8218	8.7952	6.5887	8.1225	7.3271	2.2226	2.9044	5.0774	10.3757	6.6093	7.4758	5.1974	6.5988	5.0808	0.7503	1.3063	1.4976		0.448275	7.0772
9.4122	20.4445	15.7164	5.8263	6.8742	5.1848	14.3184	15.7533	9.8708	11.4459	5.9002	4.0463	5.2078	8.377	4.15	1.2977	0.9588	2.18407	7.63908	8.4499	6.7796	6.6119	6.1895	6.5574	0.8098	2.9465	6.0682	4.3122	10.1632	8.9971	2.89	6.1108	3.684	1.1802	0.9038	0.9279		0.454024	6.5365
9.5313	13.8683	15.98	4.2398	6.4699	4.0335	9.308	13.9686	9.1283	11.0674	7.3858	2.547	4.0692	8.3841	3.3201	0.8765	0.4931	1.33168	7.42372	6.3847	4.825	11.5651	6.4332	6.0765	0.6767	2.7077	7.7608	9.5623	9.2827	11.1667	5.2417	5.7738	7.4852	2.9069	1.5055	1.8874		0.45977	6.43248
9.6504	17.9493	12.8063	4.0307	4.4843	3.5494	13.8624	11.2682	7.1242	8.7534	4.931	4.5326	3.0188	6.1547	4.5903	0.9487	0.494	1.43091	4.4653	9.2495	5.7177	8.9269	8.2941	6.2921	1.5882	3.8013	8.6719	7.4637	5.5477	9.7353	6.4097	3.8533	7.1306	0.8252	2.6353	1.3508		0.465515	6.05394
9.7696	22.0847	18.107	4.0427	5.7218	5.2518	11.1011	9.2878	5.2642	6.6735	5.4103	2.1797	5.8418	5.2747	1.4955	1.2471	0.578	1.57672	7.37184	7.4049	7.5386	10.2871	7.3418	3.3481	2.6262	2.742	6.4096	7.6989	10.791	7.9562	9.4216	5.0319	6.2514	1.2885	0.8061	3.4547		0.471265	6.25454
9.8887	20.8693	11.5394	5.6134	4.0903	4.7923	12.1864	7.472	6.3984	7.9992	3.1805	3.204	3.2577	7.8337	3.3859	1.1935	0.956	2.07782	8.75813	9.2479	5.1253	10.7875	6.2901	4.1105	2.1328	3.3489	6.5226	7.3853	6.6566	6.2042	5.0006	4.5759	4.4334	2.5429	0.5388	0.9303		0.47701	5.73262
10.0079	24.7903	11.9107	5.9528	4.252	4.551	15.3133	7.8469	10.3132	8.2352	2.8887	4.501	3.1513	4.2753	3.2318	1.0224	0.6377	2.32566	4.98558	9.2575	6.3906	9.0064	7.0721	4.4688	1.3095	1.9285	5.4061	10.7531	6.9698	9.1181	8.0204	5.19	4.3016	1.171	1.722	2.0104		0.48276	6.12231
10.127	21.2029	11.3965	7.166	5.4877	4.1402	10.1842	14.9537	6.2007	6.2765	3.2688	3.3204	6.046	8.0611	2.5212	0.5533	2.3326	1.56618	5.36036	8.3648	8.1731	9.4016	6.22	5.0218	1.9183	2.7279	7.4506	7.5624	7.3127	9.047	3.9901	4.6129	4.5374	1.2342	2.2214	3.3957		0.488505	6.09229
10.2462	19.4962	13.5252	5.0644	4.8537	4.4401	19.5027	14.4518	8.5651	5.5591	4.1861	3.5091	4.9065	6.4551	4.8125	1.6817	0.8922	0.75569	5.17197	7.8073	8.0309	9.4122	9.3983	3.9201	0.8534	2.7544	6.2745	8.1162	7.0436	8.0995	4.7395	5.4848	5.2291	0.6328	0.5703	0.7895		0.494255	6.19959
10.3653	19.6031	9.1923	2.7611	4.1371	5.1489	17.0759	10.0686	7.6529	7.1911	4.8809	3.1316	2.1282	5.1517	6.2306	1.1377	0.7825	2.47575	4.15083	6.2365	5.2005	6.5903	5.852	3.9246	0.8003	3.2338	9.9299	8.4095	7.4103	8.9111	5.1501	5.8948	8.5784	0.6042	1.2609	1.4752		0.5	5.78181
10.4844	14.7976	12.8035	7.1967	3.1546	3.9131	23.7024	11.7177	9.8319	6.9699	4.3099	2.0992	2.4071	6.5722	4.1046	0.2215	0.2171	1.5455	2.57776	6.6457	4.1736	7.4922	5.6651	3.0538	3.1333	2.3958	5.5696	9.1188	6.6823	6.2521	3.9634	3.5742	5.3748	1.5951	0.9199	0.818		0.505745	5.55914
10.6036	12.115	12.0011	2.1349	3.9569	4.5431	17.9104	12.6787	7.6248	8.3165	5.0941	2.3998	3.4598	6.9126	1.989	1.553	1.1947	1.43892	5.96317	7.1574	9.2306	7.643	5.7865	3.197	1.6447	0.9063	4.4945	5.9091	9.3575	6.4514	4.0902	3.7839	4.0333	1.4083	1.5994	0.6346		0.511495	5.38898
10.7227	15.6045	14.1315	6.6367	5.4401	2.9103	18.5681	14.7065	8.4215	7.1652	4.7202	2.2819	1.22	5.4307	2.8052	0.7833	0.2009	0.82241	5.09702	9.3834	7.4608	4.6215	7.419	2.8947	0.3434	2.6102	5.1496	5.1106	7.9826	4.3337	6.1676	4.8214	2.4287	1.4438	2.6175	1.7831		0.51724	5.52908
10.8419	11.2262	14.799	3.3335	3.8213	3.8257	13.6664	10.8447	7.26	7.2134	1.7206	3.7129	2.0924	4.0376	2.8606	0.0758	0.1909	2.27905	5.38035	8.2325	7.8027	8.3124	6.2636	2.2383	3.9443	2.7199	5.8793	7.9686	8.1921	6.9241	5.9199	3.6161	2.2984	0.8622	0.4407	1.6395		0.52299	5.18843
10.961	12.6125	7.2384	5.447	5.0854	1.9058	13.8762	12.8923	9.2451	9.8318	4.8447	2.4001	2.6791	6.3722	3.3843	0.6227	1.1884	2.64797	3.61304	7.1582	5.4103	5.5361	8.1113	1.7495	1.1494	3.6269	5.9162	3.9517	6.5987	7.0547	6.6497	4.998	2.2435	2.5892	1.0601	1.2523		0.528735	5.16979
11.0801	14.6617	13.758	2.9075	6.6654	3.9077	16.1143	14.7453	8.8406	5.328	2.9867	2.1277	3.3099	4.8734	1.7338	0.5851	0.8353	1.38219	1.49881	7.2659	4.2062	9.1305	6.0615	2.9575	1.2409	5.9729	3.8614	7.9313	5.8898	8.8219	2.9825	4.1813	6.9853	2.109	0.3238	0.7161		0.53448	5.33998
11.1993	9.3014	9.5532	5.498	4.2831	8.24	21.3043	13.5666	6.3448	6.1603	4.291	3.6719	2.4686	4.8135	1.1808	1.3759	0.8355	1.08946	5.3945	11.5658	8.1677	5.1507	7.4545	3.4055	1.6496	3.9525	5.1273	9.2295	4.1856	6.1917	4.7856	4.4711	3.0418	0.6632	2.8695	0.4973		0.54023	5.47948
11.3184	12.1913	11.9629	4.6391	6.0846	8.3234	18.2677	13.7994	6.8496	7.8532	4.7644	2.3943	2.2527	6.6388	2.2206	1.861	1.1414	3.34682	4.27398	8.135	5.2125	5.5569	7.3436	4.0125	0.6262	3.8774	6.7154	5.0155	6.7004	4.5225	4.456	2.8568	1.7609	0.9678	1.5256	0.4861		0.545976	5.38961
11.4376	18.7982	6.8691	2.8004	4.0004	4.8342	17.9279	9.2467	8.891	5.4743	0.7857	2.6033	2.8716	5.7113	1.1237	0.4985	1.4076	2.16293	4.63203	9.9096	4.7811	4.4422	3.2743	3.8794	1.8053	2.4815	3.7517	6.9986	5.3183	8.9692	2.4889	6.0365	2.8242	2.5316	1.0222	0.7396		0.551725	4.91123
11.5567	13.4448	10.7255	3.537	5.4683	3.5311	14.0641	11.4371	4.192	8.4081	5.1448	1.618	4.2865	4.8206	2.9142	1.305	0.3517	2.34631	2.77708	6.3717	5.3489	6.914	5.1809	3.3517	1.3475	1.5247	7.8493	5.2842	6.6731	9.8312	6.54	3.8932	5.9515	0.7787	0.7462	1.7569		0.557471	5.13474
11.6758	17.9191	10.2599	2.7675	3.3154	3.4467	12.1751	11.046	5.2899	3.3991	5.4214	2.166	4.6245	3.7354	1.3344	0.5222	0.0846	1.77452	5.5409	5.8466	6.5797	4.9984	6.4557	2.2259	1.1687	1.061	5.8856	7.1825	5.7905	7.4099	3.9722	5.8148	4.5242	2.8071	1.5117	0.7685		0.563216	4.82359
11.795	14.6679	10.724	3.3383	2.0761	5.0434	14.8878	11.4957	4.0899	4.8486	4.2192	3.6849	3.4742	3.3357	1.5552	1.3569	0.455	1.30929	6.13564	7.8157	2.3304	8.0263	6.9522	4.1036	1.2443	2.1658	4.0129	9.6109	7.7991	5.1713	6.3248	4.4067	4.5418	1.2432	1.0653	1.838		0.568966	5.01
11.9141	17.9264	9.8947	6.1002	1.8358	4.1087	12.5194	11.6326	6.2136	6.734	6.2065	3.5373	2.0234	4.8599	2.3416	1.2372	0.4867	2.95695	3.37846	5.9589	7.8254	7.3846	5.5327	3.299	2.2975	2.7698	5.2877	5.8026	7.09	4.5687	5.9702	3.3609	3.621	3.8004	0.7223	2.1449		0.574711	5.18371
12.0333	11.224	10.1634	3.762	3.7359	3.7477	13.9539	11.2638	7.1104	5.1102	4.5161	1.9765	3.6244	5.5957	2.6471	0.5918	2.496	2.69621	6.36699	6.269	5.1786	5.2009	6.9618	1.3431	1.1202	2.1645	4.0041	5.6336	4.8908	5.2782	1.5663	2.8924	4.5628	1.4204	0.9244	0.5338		0.580461	4.58649
12.1524	12.1755	10.6238	3.1332	1.3151	5.0565	13.1831	9.8421	3.9656	5.3653	3.9096	1.917	2.8407	3.7974	6.3806	0.7822	1.3783	1.93748	5.64211	5.9637	5.214	6.1553	6.5137	3.8767	0.5247	2.2265	2.4813	7.4479	6.868	5.4711	3.667	4.3557	3.3871	2.3198	3.4354	0.7401		0.586206	4.68267
12.2716	19.1004	7.5406	2.5549	2.6371	4.4225	9.9335	9.5169	1.9184	6.3854	4.1465	1.9207	2.7033	5.9558	2.972	0.4716	1.3646	0.19688	4.99648	6.3337	5.6833	10.2826	6.1351	3.4199	1.1216	3.1745	3.7989	6.7899	5.3542	7.1399	4.6166	3.1721	3.2224	2.1656	4.0418	1.9883		0.591956	4.77651
12.3907	16.6894	6.8071	2.9398	1.779	4.3761	11.2963	7.2608	3.5638	9.9039	4.0907	2.0545	3.9161	3.9572	2.5303	0.2249	0.9415	1.35809	4.80077	8.6818	7.0069	7.0812	10.5946	4.2201	1.9067	1.6529	6.2446	4.3053	6.92	8.6479	3.6227	4.4341	4.6279	2.0099	0.2878	3.0526		0.597701	4.96535
12.5098	14.3089	7.3653	4.5777	1.7004	4.4129	14.3409	11.2951	9.0985	4.7123	5.1045	1.4	2.0604	4.8767	3.6522	0.6235	0.7039	1.91686	6.45049	9.6915	6.2274	7.1759	7.8352	4.4669	3.0456	1.9719	6.2999	6.1061	8.5626	5.4689	4.1325	2.5241	4.4717	1.5796	3.0862	0.588		0.603446	5.19527
12.629	6.546	5.9021	3.8771	1.4427	6.8265	11.2564	11.117	6.6396	3.1541	4.0517	0.781	3.8186	5.8393	2.9302	1.6679	0.8818	3.07316	7.46547	5.0926	4.8724	7.0708	6.8296	3.3191	1.254	1.5097	7.5983	6.6617	7.0138	8.3884	5.4619	3.946	2.8597	0.5995	2.2814	1.1165		0.609196	4.66132
12.7481	14.1412	8.7522	2.5216	2.7646	4.808	14.2769	9.3158	6.068	7.1395	2.6388	0.3981	2.6846	4.2257	0.9469	1.9401	0.4162	2.49932	5.57732	7.1208	8.8461	5.9832	10.9086	2.4644	2.921	2.21	7.0482	8.8823	6.8531	8.3113	5.4324	3.5088	2.6533	1.5368	1.5318	1.2288		0.614941	5.10159
12.8673	15.9881	10.2253	2.1192	2.4988	3.4956	10.8325	12.2615	6.9225	7.6183	5.4262	0.655	5.082	6.1889	3.3877	0.9408	1.7803	2.92074	4.63501	5.9273	5.1353	7.6485	7.033	2.9854	4.4915	1.7408	7.1472	4.3257	7.0366	6.9779	5.1179	5.126	2.5855	3.6003	1.879	0.6152		0.620691	5.21004
12.9864	16.1967	9.3339	1.5072	1.8252	2.5515	11.8247	12.0156	7.6319	3.37	3.3313	1.0461	3.3939	7.3656	2.9942	3.1586	0.5362	3.0354	4.79952	7.2649	5.4956	8.5751	8.7704	2.7997	4.1414	3.02	8.1421	5.1038	5.593	6.4508	4.0347	4.5858	1.6038	4.4907	1.078	0.3352		0.626436	5.06864
13.1055	13.0919	10.5257	3.5053	2.6416	5.6982	12.8891	8.7127	7.4627	4.1924	4.4856	2.2277	1.8948	5.3476	4.3256	0.6178	1.8942	2.93564	4.72655	12.9029	6.397	9.9702	8.2338	2.4914	2.82	3.3057	6.8887	9.4172	8.9656	5.1569	3.1598	5.9818	1.9072	3.2594	0.5584	0.3301		0.632181	5.39775
13.2247	15.1217	11.9516	2.7826	3.1829	5.0694	12.8177	8.5257	7.2631	6.1242	2.4982	3.1092	4.447	6.0024	0.8594	0.2028	1.0781	2.71565	5.07577	7.3854	4.9988	8.9238	8.809	3.8068	3.6208	4.0623	3.4779	8.0365	5.7982	4.081	3.3611	5.6516	3.0689	1.4803	0.8002	0.4055		0.637931	5.04559
13.3438	11.9642	12.2801	1.9497	2.0609	3.6744	13.1615	9.5916	4.3831	6.799	5.7176	4.3875	3.2588	4.4732	0.9325	0.4093	2.3849	3.07994	6.07742	5.0445	4.5472	6.5669	6.7938	5.4537	3.3673	4.5562	4.0163	6.0427	7.2752	4.6574	5.2525	3.9221	2.8667	2.3732	1.1193	1.2009		0.643676	4.90404
13.463	9.6122	9.5078	1.9794	2.7835	4.1077	14.7879	9.0894	3.9384	7.1133	4.0105	4.235	4.1318	4.215	3.8263	1.0008	0.982	2.54315	7.99925	7.4925	5.3654	6.9027	7.8128	4.817	3.6945	3.868	6.3607	4.0029	6.712	7.9523	5.1889	4.4263	3.7258	3.5479	1.955	0.5067		0.649426	5.14842
13.5821	14.1418	9.5072	4.7568	3.1198	4.4038	8.1383	5.6057	4.9095	3.9323	5.1476	4.8367	3.6534	3.9133	2.3797	1.642	0.3093	3.27487	6.58211	7.1566	8.1764	8.5456	8.4181	5.9408	4.8526	5.2643	3.9343	2.6697	6.9101	6.1416	6.423	4.2034	3.3935	1.2751	0.9934	0.4975		0.655172	5.00143
13.7012	15.3848	10.8092	4.6425	2.8572	4.6617	13.8049	7.0421	5.5778	4.6471	3.5814	3.3564	2.3385	4.6674	3.1079	0.7977	0.9724	5.17242	6.77668	4.9482	7.6683	6.3616	4.976	5.8821	4.2264	4.6435	4.1585	6.5341	5.012	5.5739	3.6285	5.5717	4.6403	2.6066	1.2085	0.6315		0.660917	5.09914
13.8204	14.9865	11.5248	3.1951	3.9086	5.291	11.8653	6.2938	5.4301	4.1733	2.8645	1.5755	3.3466	5.4329	3.8103	0.2925	1.6537	2.67589	4.84087	6.937	7.5031	7.1051	3.5584	4.5649	2.4056	4.6627	3.9174	5.0176	5.8562	8.2676	2.6274	5.5389	2.7592	1.4992	1.9602	0.968		0.666667	4.80885
13.9395	18.1093	10.8283	4.2551	4.1232	5.1848	13.1237	8.6128	6.6755	5.7646	3.842	1.6409	3.9576	8.14	2.409	0.3574	1.4892	3.77033	6.86261	6.208	8.2959	3.982	6.1727	3.4971	3.0834	3.9452	6.5826	5.1007	6.3838	4.6607	3.1638	6.1686	2.6065	4.0374	1.7556	0.4746		0.672412	5.29328
14.0587	16.18	12.2741	2.9789	2.9661	4.8442	12.6172	10.0557	7.2792	5.974	4.3007	2.7866	3.5255	4.5144	0.6973	0.881	2.1491	4.16852	7.95837	7.5569	8.3446	8.526	5.8574	4.5308	1.2366	7.5318	5.8308	6.4106	10.153	6.4537	2.3671	4.7612	4.3342	0.9406	1.0385	0.5851		0.678162	5.50314
14.1778	14.1134	10.9181	4.438	1.8339	6.5578	12.4177	4.3667	7.5157	7.5366	3.3903	3.4112	5.6592	4.5325	4.8106	1.4159	2.1009	6.32548	7.59614	7.3931	8.9928	6.2896	7.4254	5.7844	3.8006	3.0971	6.3299	4.2924	5.0837	5.6782	2.416	3.4536	3.0074	4.0147	0.1173	1.2342		0.683907	5.35287
14.297	16.0889	10.4707	4.409	3.3156	8.4861	12.6147	5.9353	4.8159	5.0951	3.8583	3.5129	4.133	4.7312	3.3951	1.553	1.7315	3.57019	3.8447	8.5354	6.3838	7.8123	6.8424	5.5064	3.0907	3.092	4.7647	5.667	7.0959	2.5788	2.0966	2.5258	3.8019	4.1299	0.5699	1.3348		0.689657	5.06827
14.4161	17.2251	11.1824	5.521	4.551	6.0467	14.533	5.8689	6.0584	4.9846	3.8322	3.6157	6.2958	5.5747	2.9371	0.6751	1.926	2.00338	4.42962	8.7287	6.2562	7.0005	5.4407	4.0362	6.3966	3.4751	3.8717	4.6072	5.876	2.9196	4.1239	4.0535	2.5485	3.9724	1.7119	1.8092		0.695402	5.25967
14.5352	14.2225	9.9636	3.8712	1.7664	4.5727	11.0683	5.6568	9.436	5.8441	3.5048	3.4201	6.6581	3.5501	2.5263	0.9092	1.8367	4.68788	5.89412	9.7283	7.4872	6.186	4.8296	5.5613	4.3472	3.7472	5.9821	6.7394	7.3216	4.4912	3.5466	2.2905	6.1282	3.3488	0.5507	1.8431		0.701147	5.24337
14.6544	17.6652	11.1673	5.5886	3.1875	8.6449	11.5391	6.8548	7.4654	5.3022	5.4917	5.6046	5.8452	4.8337	1.9997	0.178	2.2029	3.82708	7.39572	7.7034	9.5779	8.6113	4.3318	4.0485	3.7803	4.2076	4.5856	4.7104	7.0772	3.3917	3.9189	3.3252	4.02	5.1836	0.1791	3.2456		0.706897	5.61976
14.7735	15.4193	14.1521	5.0861	1.2927	6.8874	10.0673	5.3635	6.4562	5.8635	3.5551	5.0161	5.467	5.2227	2.1335	2.2013	1.3785	3.95624	7.15321	8.269	6.6382	7.3623	5.009	5.6298	2.1039	2.5263	4.4195	7.8623	5.6489	4.4188	4.2606	4.9821	3.5591	4.1125	1.1024	1.7684		0.712642	5.32414
14.8927	17.2315	10.5817	3.1835	2.9565	8.3031	8.8527	4.4448	2.5276	4.8743	5.0373	4.3335	4.4244	6.1935	2.4149	1.8499	0.8674	3.09222	6.57118	6.2407	7.2886	7.115	5.1624	5.2747	4.8968	6.7846	5.7868	5.9359	8.2397	4.7242	3.2332	5.8079	2.4234	2.0228	2.0126	1.4355		0.718392	5.20357
15.0118	11.6132	10.2913	4.1693	3.1844	7.7574	6.5965	4.7364	2.8279	5.397	4.1299	2.6801	3.2499	4.1438	3.1249	1.6332	1.6412	2.77645	5.91704	9.3102	8.7219	8.3244	5.2795	4.9882	5.5095	6.3325	9.1463	7.0205	7.6463	2.7922	3.9437	4.0299	1.9506	3.3392	1.8923	1.9843		0.724137	5.08804
15.1309	11.9652	13.0751	8.0464	4.0927	8.2155	13.2564	4.5325	6.0053	4.9431	4.2798	2.4456	3.991	4.1646	1.6935	1.4068	3.8677	1.44559	3.19556	6.3004	7.4481	5.1923	4.836	3.4423	4.5797	3.801	8.0711	3.9801	4.1862	3.1745	2.2047	4.9725	3.776	2.8518	1.9556	0.751		0.729882	4.91845
15.2501	13.7425	11.8227	5.8706	3.5945	9.9235	13.0084	6.3697	3.5528	3.3961	2.2417	6.3249	6.9621	4.4352	3.2805	3.9063	3.7379	5.11745	3.96623	9.3934	4.7654	5.0134	6.6145	6.779	3.683	2.6316	3.707	7.9869	7.3379	7.4465	2.671	4.5211	2.4573	3.4626	3.5052	0.9921		0.735632	5.54917
15.3692	13.5968	13.8098	9.1159	2.5519	10.9964	16.648	4.849	6.4233	6.3499	6.8003	3.1738	5.7714	3.5602	5.0284	3.2968	1.2302	2.41865	3.39076	6.5783	7.533	6.4995	3.4188	6.679	2.6436	6.747	6.8348	3.7387	7.1229	6.4196	2.0254	4.7905	5.0486	1.8488	3.5845	0.6351		0.741377	5.74742
15.4884	11.9627	12.9793	9.2497	3.049	14.6238	15.014	7.1386	5.2699	6.2897	5.0294	5.1803	6.1018	3.6374	4.0972	0.2048	2.6093	1.3892	4.25327	3.7698	8.7833	5.8706	5.8573	5.3304	5.4208	8.5025	5.2852	6.9932	4.735	5.4478	1.662	2.4526	3.6955	4.4379	1.8733	1.4304		0.747127	5.70363
15.6075	11.8304	14.5604	10.007	5.4357	11.3063	8.5471	3.7122	7.5693	6.2907	4.6102	5.2472	5.4235	3.1352	3.9595	0.8562	3.1301	2.25109	5.414	4.8519	6.2721	5.2006	5.3885	4.4651	6.5003	6.7089	3.5751	4.1555	4.6071	2.8233	1.1956	1.5479	4.6635	3.2912	0.6013	2.8756		0.752873	5.20027
15.7266	15.2091	6.7571	10.2878	3.4033	11.5036	12.8773	5.4749	4.1264	6.9485	6.0057	6.3776	4.1772	5.7153	4.4162	2.3119	1.9125	2.06321	5.70752	7.3222	7.67	9.3369	7.1589	5.604	8.3046	10.6095	2.9334	6.7758	2.9654	2.9495	2.9967	2.0473	3.162	5.0711	2.1066	2.0098		0.758618	5.83711
15.8458	15.2141	8.6992	13.5186	2.5274	9.5892	9.3381	2.6312	5.9184	4.7954	4.581	7.3208	3.4981	3.7578	3.3356	1.643	2.7466	1.72409	3.75925	4.9076	3.6985	5.7642	8.1237	5.9534	8.1187	6.5745	3.0408	6.5517	5.5878	4.5686	1.9107	1.8098	4.5057	6.5081	3.7493	3.4303		0.764368	5.41146
[truncated: 41 more rows]

## Sheet: Image14
X0	Y0	Y1	Y2	Y3	Y4	Y5	Y6	Y7	Y8	Y9	Y10	Y11	Y12	Y13	Y14	Y15	Y16	Y17	Y18	Y19	Y20	Y21	Y22	Y23	Y24	Y25	Y26	Y27	Y28	Y29	Y30	Y31	Y32	Y33		Ap-basal	Avg int
[truncated: 164 more rows]

## Sheet: Image13
X0	Y0	Y1	Y2	Y3	Y4	Y5	Y6	Y7	Y8	Y9	Y10	Y11	Y12	Y13	Y14	Y15	Y16	Y17	Y18	Y19	Y20	Y21	Y22	Y23	Y24	Y25	Y26	Y27	Y28	Y29		Ap-basal	Avg int
[truncated: 166 more rows]

[truncated: 1 more sheets: Sheet1]
