# Supplementary material for: Crumbs organizes the transport machinery by regulating apical levels of PI(4,5)P2 in Drosophila
Source: eLife. 2019 Nov 7;8:e50900. doi: 10.7554/eLife.50900 (PMC6881148; doi:10.7554/eLife.50900)
Supplement: Figure 3—figure supplement 2—source data 1. [file elife-50900-fig3-figsupp2-data1.xlsx]

## Sheet: Image12
X0	Y0	Y1	Y2	Y3	Y4	Y5	Y6	Y7	Y8	Y9	Y10	Y11	Y12	Y13	Y14	Y15	Y16	Y17	Y18	Y19	Y20	Y21	Y22		Ap-Ba	Average int.
0	0.7222	0.72222	3.4444	2.5	1.2778	2	3.1667	3	0.66667	1.4444	2.1667	3.5556	1	2.77778	1.72222	2.5	3.88889	0.22222	2.11111	1.3889	4.8889	3.5	3.8333		0	2.28261
0.119	0.1667	0.94444	2.5556	2.8333	1.6111	3.0556	3.1111	1.1667	1.88889	5.3889	2.3333	4	6.2778	2.33333	0.72222	1.72222	2.05556	0.05556	1.66667	1.5556	2.1667	1.6667	3.2778		0.00558497	2.28503
0.2381	0.6667	1.05556	1.8889	0.6667	2.1667	4.5	3.3333	2.3333	3.38889	2	3.7778	2	6.2222	1.44444	1.16667	2.44444	1.5	1.61111	0.72222	2.5556	3.9444	1.9444	1.9444		0.0111746	2.31642
0.3571	0.0556	2.77778	5.2222	3.8333	2.4444	5.2222	0.8889	2.6111	1.66667	1.2778	3.5	3.8333	2.2778	4	0.38889	0.61111	2.05556	1.77778	4.83333	4.8333	2.8889	2	2.8333		0.0167596	2.6884
0.4761	2.7778	3.11111	3.8333	5.3333	1.6111	2.7222	3.0556	2.5	1.61111	2.3333	4.2222	5.1667	1.7222	2.66667	1.77778	0.38889	0.55556	1.77778	1.5	3.7222	2.5556	2.2222	2.5556		0.0223446	2.59662
0.5952	0.7222	0.55556	5.5556	6.6667	0.3333	1.9444	1.5556	4.5	2.5	4.1111	4.0556	3	1.5556	5.5	1.66667	1.44444	2.66667	2.61111	3.05556	3.6111	1.9444	2.1111	2.5556		0.0279342	2.79227
0.7142	0.3889	2.16667	3.1667	5.1111	3.2222	4.0556	2.0556	2.8889	2.5	1.1667	3.9444	8.1667	6.1111	2.61111	7.33333	2.38889	3.66667	1	1	3.7222	3	4.2222	2.2222		0.0335192	3.30918
0.8332	0.2778	1.33333	1.3889	1.4444	1.8889	3.1667	2.6111	3.5	7	2.5556	1.9444	4.3333	7.3889	2.05556	2.66667	1.22222	2.27778	1.16667	3.22222	2.5556	6.1667	2.0556	2.6111		0.0391042	2.81885
0.9523	1.5556	2.72222	3.7222	3.5556	2.5	0.0556	3.8889	3.2778	7.83333	1.5556	5.4444	8.8333	4.3889	3.5	0.88889	3	1.94444	1	5.77778	2.3333	3.2778	1.9444	4.3333		0.0446938	3.36232
1.0713	1.2222	1.77778	4.4444	6.0556	0.9444	0.2778	2.1667	0.5556	5.27778	0.4444	3.5556	7.5556	6.3333	7.61111	0.5	1.05556	5.61111	1.55556	3.11111	1.3889	1.7222	2.1667	2.7222		0.0502788	2.95894
1.1903	2.8889	2.05556	1.5	7.6111	4	1.5556	1.8889	1	1.55556	3.2778	4.2778	5.5556	6.6111	1.38889	2	4.16667	0.55556	4.83333	3.44444	3.6111	5.0556	5.5556	1.9444		0.0558637	3.31885
1.3094	3.2778	2.33333	3.1667	4.2778	0.7222	4.4444	5.5556	1.2222	3.44444	3.9444	4.4444	9.3333	4.1111	2	2.22222	2.05556	1.16667	5.27778	2.72222	2.2222	4.5	3.8333	3.7222		0.0614534	3.47825
1.4284	2.3889	3.5	4	4.7222	0.7778	4.8333	1.4444	2.8333	3.44444	5.1111	5.5	7.4444	7.3889	4.5	3	2.33333	2.27778	2	4.5	4.4444	2.9444	2.8333	2.3333		0.0670384	3.67632
1.5474	1	0.33333	2.2778	3.6111	4.2222	1.3333	1.6111	0.7222	2.55556	3.6667	5.6667	8	5.1111	4.66667	2.27778	3.11111	1.61111	3.05556	3.77778	3.9444	1.8333	6.9444	3.5		0.0726233	3.25362
1.6665	3.6667	1.44444	5	4.8889	2.9444	1.3889	1.9444	4.7778	8	3.6667	6.7778	8.6111	6.3889	6.83333	4.5	4.11111	4.77778	4.94444	1.88889	5.4444	4.7222	3.3889	3.6111		0.078213	4.50966
1.7855	1.7222	1.83333	10.3333	2.3889	3.0556	7.8889	1.8889	2	5.33333	4.1111	6.7778	2.5	6.9444	6.77778	3.83333	3.72222	2.5	3.27778	5	5.3889	6.5	1.5	3.0556		0.083798	4.27536
1.9046	2.2222	2.66667	2.0556	2.5	4.1111	0.0556	2.2778	2.9444	3.22222	4.8889	7.6667	5.8333	3.0556	5.72222	2.72222	1.77778	1.11111	3.44444	3	5.7222	5.0556	2.3889	0.7778		0.0893876	3.27054
2.0236	1.2778	2.94444	6.1111	6.2778	4.1111	0.3333	3.5556	3.8333	4.33333	4.3333	3.6111	4.3333	5.0556	3.83333	4.55556	2.94444	1.05556	6.38889	2.61111	6.5	4.1667	4.8889	2.2778		0.0949726	3.88406
2.1426	1.8889	2.77778	3.9444	2.5	2.6667	3.5	2.6111	4.2222	3.44444	4.1111	3.8889	2.7222	8.3889	9.05556	3.11111	2	0.83333	3.5	2.44444	7.2222	3.9444	4.5556	4		0.100558	3.7971
2.2617	1.1667	1.72222	1.8889	2.5	2.9444	2.0556	3	5.3333	5.5	1.5	5.7778	4.6667	3.1667	5.11111	2.33333	0.94444	1.22222	5	4.22222	6.1111	4.5556	3.9444	2.6111		0.106147	3.35991
2.3807	2.6667	2.16667	0.7222	4.9444	1.8333	3.3889	0.3889	2.5	5.77778	5.2778	7.6111	3.3333	4.5	4.55556	8.77778	1.88889	3.05556	8.83333	5.16667	4.4444	1.8333	5	0.8333		0.111732	3.8913
2.4997	6.2778	2.22222	3.1111	2.1667	2.7222	4.8333	3.5556	2.4444	6.27778	4.6111	6.1667	4.3333	12.1667	4.5	8.38889	1.83333	1.22222	5.44444	2.72222	3.2222	3.3333	6.8889	1.1667		0.117317	4.33092
2.6188	0.9444	1.44444	4	6.6667	3.6667	1.5	2.2222	2.5556	3.94444	3.8333	1.2778	3.9444	5.3889	3.61111	4.94444	3.38889	3.83333	2.5	5	5.6111	5.0556	6.2778	3.5		0.122907	3.70048
2.7378	4	3.33333	3.8333	4.2222	5.6667	3.3333	3.6111	5.6667	6.61111	2.6667	4.7778	1.6667	5.8889	4.38889	7.16667	0.11111	1.11111	5.66667	7.38889	4.6111	3.1667	5.9444	0.7778		0.128492	4.15701
2.8568	0	4.16667	6.2222	1.7778	2.6111	3.9444	1.5556	4.5	3.72222	6.7778	2.5556	2.1111	5.2222	4.5	4.33333	2.66667	4.27778	1.88889	6.27778	2.8333	3.0556	5.1111	1.7778		0.134077	3.56039
2.9759	3.2222	1.44444	3.5556	4.2222	2.6111	3.0556	4.2222	5.1111	2.66667	1.4444	4.8333	3.1111	5	7	9.5	6.22222	3.61111	2.88889	3.27778	5.7778	3.8333	4.3333	1.1667		0.139666	4.00483
3.0949	3.1667	3.44444	7.7778	3.8889	3.3889	3.5556	3.3333	8	3.66667	4.2778	6.8333	1.6111	4.7778	5	5.33333	5.61111	3.44444	6.11111	2.83333	2.4444	1.6111	5.3889	3.3889		0.145251	4.29952
3.2139	2.4444	1.33333	3.2222	4.8889	4.8333	4.3333	3.4444	4.9444	8.44444	5.5	2.7778	2.9444	3.0556	4.77778	2.94444	3.77778	3.11111	3.72222	6.38889	5.2222	5.3333	5.1667	2.7222		0.150836	4.14492
3.333	3.7778	3.22222	3.1667	2.9444	3.4444	2.8889	2.2778	2.1111	8.33333	7.1111	2.6667	2.8889	6.6111	5.94444	5.72222	1.5	3.27778	4.72222	4.83333	2.6111	4.2222	1	3		0.156426	3.83816
3.452	4.3333	2.5	4.2778	2.1667	1.7222	4	3.2222	3.3889	9.38889	4.8333	3.4444	4.7778	5.1111	5.05556	7.38889	8.88889	4.66667	2.33333	3.77778	3.1111	3.3333	3.1667	3.2222		0.162011	4.2657
3.571	5.1667	2.94444	3.6667	4	4.5556	2.3333	1.8333	3.1667	7.33333	5.5556	5.8889	3.0556	2.4444	5.77778	4.44444	3.05556	3.61111	9.55556	2	3.1667	3	7.0556	1.5		0.167596	4.13527
3.6901	4	2.94444	3.2222	3.1111	4.3889	3.2778	4.1111	6.2222	7.55556	5.2222	7.3889	2.2778	4.8333	3.55556	5.16667	3.55556	3.11111	8.5	4.88889	2.9444	0.2778	2.4444	3.5556		0.173186	4.19806
3.8091	3.5	5.16667	1.7778	4.1667	3.1111	4.3889	6.6667	2.4444	7.11111	3.8333	4.6111	4.3889	4.2778	7.33333	1.33333	1	3	5.72222	2.16667	9	4.7222	1.9444	2.6667		0.178771	4.10145
3.9281	4.9444	2.88889	4.8889	2.1667	2.7222	2.6667	2.5	5.3333	5	3.4444	1.1667	3.0556	2.6667	2.72222	3	1.16667	1.88889	4.72222	4.5	5.9444	2.8333	3.4444	5.6667		0.184356	3.44927
4.0472	4.0556	2.66667	2.1667	4.4444	4.1667	6.2778	4	5.5	4.5	4	6.1111	4.7778	4.3889	4.11111	6.55556	4.38889	6.16667	5.38889	1	4.4444	1.4444	4.2222	3		0.189945	4.25121
4.1662	4.0556	2.11111	5.1111	3.7778	1.6111	4.5556	8.1667	2.2222	6.22222	6.7222	2.4444	3.1111	4.2222	6.05556	1.94444	3.77778	1.94444	9.22222	3.22222	5.1667	3.0556	0.7222	1.5556		0.19553	3.95653
4.2852	2.5556	1.94444	3.6667	3.8889	3.1667	4.4444	4.6667	4.6667	3.94444	4.0556	4.6667	3.6667	2.8889	5.05556	6.55556	1.77778	3.88889	5.22222	2.61111	4.5	4.1111	4	5.5556		0.201115	3.97827
4.4043	4.4444	3.05556	1.3889	5.7222	2.3333	3	2.5	7.7222	5.44444	7.1667	3.2222	1.3333	3.4444	3.16667	7	2.83333	5.33333	2.22222	3.55556	3.3333	2.6667	4.6667	7		0.206705	4.02415
4.5233	1.7778	1	0.5556	7.5	1.9444	2.8889	3.0556	5	4.16667	4.5	4.7222	3.6111	5.8889	1.44444	5.11111	3.61111	2.44444	5.72222	1.94444	4.6667	4.1667	5.3333	3.6111		0.21229	3.68116
4.6423	5.2778	4.66667	2	5.8333	6.3889	3.6667	2.9444	4.9444	3.27778	6.5556	4.3333	1.8333	7.7222	5.5	9.61111	6.22222	0.5	5.61111	2.38889	6.2222	3.1111	3.2222	2.5		0.217875	4.53623
4.7614	3.5	2.33333	2	8.6111	4.7778	8.1667	5.2222	3.3889	1.61111	3.3333	4.6111	4	4.8889	6.61111	5.94444	6.38889	3.5	5.33333	2.94444	6.6667	5.5556	3.8889	2.2778		0.223464	4.58938
4.8804	4.2222	1.77778	4.5556	5.1111	1.3889	8.0556	5.5556	6	4.77778	4.8889	6.6667	4.7222	4.8889	5.22222	8.66667	5.88889	6.27778	6.55556	0.72222	4.2222	3.5556	4.2222	3		0.229049	4.82368
4.9995	2.6111	1	2.9444	10.1667	3.7778	4.5556	5.6667	2	3.77778	8.6667	8.6111	4.8889	1.4444	6.72222	4.38889	6	1.77778	5.11111	3.33333	4.8333	4.7778	6.3889	3.0556		0.234639	4.63044
5.1185	3.4444	5.72222	2.8889	4.5556	2.5	6.2222	1.1111	6	5.61111	7.3889	2.9444	4.1667	5.3889	3.61111	3.33333	9.11111	3.88889	6.55556	4.66667	3.7778	5.7778	2.6111	3.1111		0.240224	4.53865
5.2375	3.4444	7.22222	4.6667	4.1111	3.4444	5.8889	3.1667	7.7222	1.66667	7.2778	9.8889	5.2222	4.7778	4.38889	10.0556	4.77778	2.94444	4.55556	2.72222	2.2778	6.8333	1.8889	3.9444		0.245809	4.90821
5.3566	5.3889	6.22222	1.4444	4.5	1.3889	4.9444	3.6111	4.1667	5.55556	3.8333	10.5	3.1111	3.6111	4.11111	6.22222	5.61111	3	2.61111	1.72222	5.3889	6	1.8333	5.2778		0.251399	4.35024
5.4756	6.1667	2.83333	5.0556	3.6667	4.2222	2.6667	2.7222	4.9444	1.83333	5	10.0556	1.6111	2.0556	2.44444	2.38889	5.94444	3.55556	2	1.72222	3.7222	4.3333	1.4444	3.8889		0.256984	3.66425
5.5946	9.9444	5.38889	2.1667	2.7222	3.6667	2.4444	5.3333	4.4444	1.22222	4.0556	6.5	3.7222	6.5556	2.5	3.27778	7	2.38889	6.55556	1.27778	5.1667	6.5	1.8889	4.4444		0.262569	4.31159
5.7137	5.5	6.77778	3.2778	8.0556	2.6667	1.7778	2.3889	4.5	3.44444	2.8333	2.2778	2.0556	2.8889	2.27778	6	4.77778	2.77778	5.55556	2.55556	4.9444	8.4444	1.3889	1.0556		0.268158	3.83576
5.8327	1.5556	7	4.2222	4.5	2	2.2778	3.8333	2.7778	2.22222	4.7222	2.7778	2.4444	3.7222	5.94444	6.61111	3.05556	3.38889	2.22222	4	1.5556	7.1111	4.4444	2.1111		0.273743	3.67391
5.9517	1.9444	9.5	2	3.0556	1.4444	5.2778	3.6111	4.7222	3.33333	4.1667	3.2222	4.5556	4.5556	4.61111	3.44444	3.88889	5.05556	3.33333	4.94444	5.9444	4.3333	6	5		0.279328	4.25845
6.0708	4.0556	7.33333	0.5556	5.1667	0.5556	1.8333	6.7778	3.9444	2.44444	7.2778	4.5556	2.2222	3.2778	6.72222	1.88889	2.66667	5.77778	3.11111	4.22222	0.8889	3.7778	2.2222	1.9444		0.284918	3.61836
6.1898	1.8889	7.38889	2.5556	6.4444	1.0556	4.7778	4.3333	4.6111	3.55556	4.3333	3.3333	1.8333	5.5	4.11111	4.61111	3.61111	5.33333	2.44444	4.55556	3.5	3.7222	3.1111	3.9444		0.290503	3.93719
6.3088	2.0556	7.44444	1.3889	6.1667	1.7778	2.4444	7.5556	4.7778	4.72222	5.8333	2.9444	4.6667	3.4444	3.61111	6.77778	1.66667	3.16667	0.61111	1.94444	3.3333	3.3889	3.2778	2.2222		0.296088	3.70531
6.4279	3.2222	7.66667	1.5	4.9444	2.6111	3.5	4.1667	2.4444	3.61111	5.0556	6.4444	3.8889	4.6667	4.94444	4.22222	3	1.83333	1.61111	3.38889	3.3889	3.7222	1.3333	3.3333		0.301677	3.67391
6.5469	2.2222	8.16667	1.3889	5.4444	1.8889	2.6111	4.6667	5.4444	1.94444	4.5556	4.0556	3.5556	5.2222	3	2.61111	3.5	4.61111	2.83333	1.61111	2.3889	1.5	2	4.8333		0.307262	3.48068
6.6659	4	4.61111	3.3889	6.7778	1.4444	6.5	9.5556	4.5	5.5	4.1667	8.2778	3.4444	5	1.22222	3.83333	0.77778	3.88889	3.77778	5.33333	1.9444	1.1111	2.1111	5.2778		0.312847	4.19324
6.785	4.2222	3.44444	2.7778	5.1667	2.2222	2.2778	6.3333	5.3889	7.33333	5.2222	8.1111	3.2222	5.5	4.66667	2	2.44444	4.27778	1	0.5	2.3333	0.3889	3.2222	7.2222		0.318437	3.88164
6.904	5.3889	2.38889	3.9444	7.3333	4.1667	4.8333	4.8889	2.5	7.77778	6.1667	5.1667	3.7778	1.3333	4.05556	3.16667	4.77778	2.44444	2.16667	0.55556	4.2778	4.0556	1.4444	6.9444		0.324022	4.06763
7.023	5.1667	4.77778	4.1111	5.1667	7.6667	2.6111	5.7222	3.3333	8	3.8333	3.5556	2.2778	5.7778	4.44444	2.5	7.16667	2.94444	5.05556	2.88889	1.3333	3.9444	2.6111	12.7778		0.329607	4.68116
7.1421	3.8889	4.83333	6.0556	4.8889	6.1111	4.8889	4.6667	2.6667	3.77778	2.7778	7.2778	3.5556	4.8333	8	3.44444	3.44444	3.5	2.33333	1.5	3.9444	3.8333	2.1111	6.0556		0.335197	4.27778
7.2611	3.3333	3.88889	7.6111	7.3333	4.3889	4.6667	1.7778	4.3333	5.27778	4.0556	5.5556	3.5556	4.5	2.55556	2.33333	6	4.22222	1.05556	0.77778	3.7222	3.2778	4.0556	11.5		0.340782	4.33817
7.3801	2.6111	5.44444	7.0556	5	8.2778	3.9444	4.5556	7.8333	6.27778	7.3889	6.2778	2.1111	1.7222	3.33333	0.72222	8	2.11111	1.61111	1.22222	10.6111	2.8889	2.3889	8.1667		0.346366	4.76329
7.4992	3.3333	4.94444	8.0556	2	8.2222	5.6667	1.9444	7.2778	5.22222	3.8889	9.4444	2.9444	2.1111	3.33333	4.72222	8.38889	2.66667	2.77778	1.61111	5.3889	4	0.2222	7.5556		0.351956	4.59662
7.6182	2.3333	4.44444	7.1111	3.6667	5.2778	4.3889	1.8889	3.1111	1.44444	3.5	6.3889	2.5556	3.3333	2.55556	3.88889	5.72222	1.94444	1.44444	1.72222	3.1667	1.6667	3.6667	6.9444		0.357541	3.57247
7.7372	0.8333	6.55556	10.3889	9.8889	7.5556	4.5556	4.7778	3.8333	2.61111	6.3333	9.9444	1.3889	1	6.27778	5.94444	5.38889	4.22222	2.66667	4.66667	4.5556	1.3333	3.1111	7.5		0.363126	5.01449
7.8563	4.6111	3.5	15	8	4.3333	5.3889	5.0556	5.7778	7.27778	3.8333	5.3889	2.7222	1.4444	5.88889	2.05556	5.66667	4	1.27778	3.11111	5.5556	1.8889	2.5556	7.2222		0.368716	4.85024
7.9753	3.2778	3.94444	2.8333	5.8889	4.2222	2.5556	2.7222	7	2.38889	5.3889	3.1667	3	3.8333	7.77778	4.44444	4.55556	2.72222	1.05556	2.27778	6.5556	2.2778	3.0556	5.1667		0.374301	3.91788
8.0943	4.2222	6.94444	11.1667	5.8889	4.2778	4.0556	4.1111	6.2222	3.94444	4.6111	4.8333	0.6667	2.9444	7.05556	5.61111	2.55556	1.44444	0.33333	1.16667	5.8889	1.6111	1.7778	6.1667		0.379886	4.23913
8.2134	2.6667	3.55556	6.7222	6.1111	2.1667	4.2222	5.3333	8	3.11111	4.3889	6.2222	3.3889	1.9444	4.44444	3.44444	4.27778	2.5	1.5	1.44444	4.2778	1.0556	1.6111	6.5		0.385475	3.86473
8.3324	6.3333	6.33333	7.3889	4.2778	2.7778	10.7222	2.5556	6.6111	3.77778	5	4.2778	2.1667	3.4444	4.27778	2.38889	4.94444	4.66667	0.61111	1.88889	5.6111	0.7222	1.2222	3.9444		0.39106	4.1715
8.4515	6.6111	6.72222	6.6667	7.3333	6	10.1111	4.2222	9	1.88889	3.8889	5.3889	7	2.9444	4.61111	2.38889	9.33333	5.05556	5.55556	1.61111	2.0556	2.5	1.3333	7.0556		0.39665	5.18599
8.5705	4.7778	5.66667	5.4444	6.4444	3.5	11.4444	5.0556	5.1667	1.33333	7.5	2.0556	1.5556	2.7222	3.22222	1.33333	6.38889	1.55556	2.38889	1.16667	3.6111	1.7778	1.7222	4.3333		0.402235	3.92029
8.6895	2.4444	6.55556	7.4444	9.1111	2.6111	16.5	4.4444	17.6111	1.88889	6.1111	2.5556	1.2222	2.0556	4.44444	3.88889	7.5	1.22222	2.61111	1.77778	2.9444	1.8889	0.4444	1.6667		0.40782	4.73671
8.8086	4.7222	5.27778	7.3333	4.8889	3.2778	12.7778	2.8333	10.4444	5.38889	5.7778	2.6111	2.1667	3.7778	5.77778	3.22222	3.55556	2.33333	1.77778	2.83333	0.8889	0.5	1.7222	2.6667		0.41341	4.19807
8.9276	1.0556	5.33333	8.6111	7.4444	4.5	11.3333	4.3889	10.6667	4.05556	6.0556	2.6111	3.5556	5.7778	2.5	3.55556	6.66667	3.11111	2.94444	0.83333	4.0556	1.2222	1.2222	1.9444		0.418995	4.49759
9.0466	4.4444	4.27778	8.1667	7.7778	2.3333	7.2778	1	6.7778	3	5.7222	3.2222	1.1111	2	3.27778	6.22222	5.22222	1.27778	0.05556	2.27778	4.1111	4.8889	1.2778	4.1667		0.424579	3.90821
9.1657	0.6667	4.72222	9.6111	5.2222	4.9444	9.5556	1.3889	8.2778	6.22222	4.7778	2.4444	0.3889	2.2778	6.88889	2.33333	5.94444	1.77778	2	3.16667	2.9444	1	1.0556	2.4444		0.430169	3.91546
9.2847	1.6667	4.05556	9.3889	1.7778	4.7222	9.1667	4.4444	6.6667	3.72222	4.2222	2.2778	2.7778	3.7222	4.22222	3.38889	4.33333	1.44444	1.38889	2.11111	3.1667	1.0556	1.9444	3.3333		0.435754	3.69565
9.4037	1.5556	5.88889	6.5556	4.7222	9.2222	7.8333	5.8333	7.5	3.05556	6.1111	2	2.1111	2.6111	4.88889	2.33333	6.38889	1.11111	0.94444	2.61111	4.2778	4.2778	3.3889	0.6667		0.441339	4.16908
9.5228	2.8333	10.2222	6.5	2.9444	5	7.3333	2.7222	8.6667	1.77778	9	0.8333	1.0556	2.6111	5.16667	4.61111	4.5	3.94444	1.27778	1.55556	2.6111	3.1111	4.5	2.2778		0.446929	4.13285
9.6418	3.0556	5.27778	4.5556	3.4444	8.8889	8.6111	2	9.6111	2.88889	2.9444	2.3333	2.0556	4.8333	5.72222	6.83333	2.33333	2.61111	2.5	2.27778	3.2778	1.1111	0.3889	2.6111		0.452514	3.92029
9.7608	2.0556	2.38889	4.6111	4.3889	5.2222	4.5	3.6111	5.1667	1.61111	7.7778	0.7778	1.2222	1.5	8.61111	6	7.22222	1.33333	3.55556	1.66667	5.7778	3.7222	0.7222	1.3889		0.458099	3.68841
9.8799	1.1111	8.55556	4.9444	2.4444	8.7778	3.1667	3.6667	2.6667	1.22222	6.1111	2.7778	2.2222	4.7222	5.94444	2.66667	3.44444	2.5	2.05556	2.66667	4.8889	2.7778	1.8889	0.5556		0.463688	3.55556
9.9989	1.8333	4.94444	5.9444	6.0556	8.3333	5.8889	5.7222	2.1667	1.61111	9.3333	1.8333	2.5	3.6667	2.33333	4.38889	3.22222	2.11111	1.72222	2.66667	3.3889	0.6111	1.5	3.3333		0.469273	3.70048
10.1179	2.0556	5.5	7.0556	6	7.3333	2.6667	5.2778	1.9444	0.77778	7.1111	4.6667	0.7222	4.3333	3.27778	5.27778	4.38889	3.5	3.05556	0.66667	1.4444	1	3	2.3889		0.474858	3.62802
10.237	1.8333	4.16667	2.5	3.5556	4.3889	7.6667	5.8889	3.8889	2	4	2.2222	0.3889	5.7222	4.22222	6.77778	5.38889	3.05556	1.5	1.27778	3.5	0.6111	2.0556	1.1667		0.480448	3.38165
10.356	1.9444	2.27778	3.5	2.7778	4.3333	6.7778	2.8889	2.8889	2.33333	9.2222	0.2778	1.1667	6.1667	5.33333	3.44444	6.05556	0.83333	1.83333	1.44444	4.3333	1.0556	0.7778	2.5		0.486033	3.22464
10.475	0.3889	2.38889	1.5556	3.2222	4.7778	4.6111	4.2778	5.7222	1.77778	5.7778	1.5556	1.6667	5.6667	1.94444	3	4.66667	2.61111	3.16667	1.38889	2.1111	2.3333	1	1.3889		0.491618	2.91305
10.5941	1.3333	1.72222	5.9444	5.3333	2	5.0556	5.7778	2.3889	4.88889	3.9444	1	0.6111	4.6667	5.33333	3.88889	3.72222	3.33333	3.72222	0	4.1111	1.4444	1.1111	1.1111		0.497208	3.14975
10.7131	1.9444	0	3.8889	5.4444	6.4444	3.8889	5.9444	5.4444	2.94444	4.1667	2.4444	2.6111	3.0556	4.5	6.38889	1.38889	3.33333	1.72222	2.55556	1	0.5556	2	1.8333		0.502792	3.19564
10.8321	0.3333	1.72222	4.7778	3.6667	5.3333	6.1667	3.3889	3.7222	3.66667	3.3333	2.3333	2.0556	2.7778	4.5	1.66667	0.16667	3.83333	1.66667	1.27778	5.1667	1.7222	1.3333	1.2778		0.508377	2.86474
10.9512	2.4444	1.11111	9.0556	4.7222	4.0556	6.2778	5.1667	1.8889	4.38889	3.1111	4.3889	1.7778	4.3333	3.72222	5.22222	4.61111	5.05556	1.11111	1	1.9444	2.9444	2.1667	2.5556		0.513967	3.61111
11.0702	1.1667	2.05556	9.1111	5.6111	1.8333	4.2778	2.2778	5	2	6.4444	1.2778	2.2778	3.3889	2.44444	3.66667	2	3.77778	3.72222	3	3	1.6111	1.6667	0.5		0.519552	3.13527
11.1892	1.2778	0	5.8333	5.7778	1.6111	6	6.5	2.1111	1.5	8.6111	1.8889	0.7778	1.3333	4.38889	6.88889	1.27778	1.83333	2.38889	3.27778	1.7222	2.3333	0.1111	1.4444		0.525137	2.99516
11.3083	3.1667	1.5	9.0556	4.2778	4.7778	7.7778	4.2778	2.7222	3.38889	4.6667	2.8889	0.6111	2.9444	1.88889	5.16667	1.44444	2.72222	1.33333	1.94444	1.3889	3.7222	1.2778	1.7222		0.530727	3.24638
11.4273	0.2778	1	5.3889	5.7222	5.6111	4.5556	2	2.3333	3.38889	3.5	1.6111	2	2.3889	5	4.72222	2.55556	2.05556	0.11111	0.27778	4.5	2.2222	1.3889	3.7222		0.536312	2.88406
11.5463	0.6667	3.27778	7.8333	1.9444	2.3889	7	0.9444	1.6111	2.27778	5.5556	1.7778	0.1111	0.7778	6	3.38889	0.94444	2.22222	1.11111	0.33333	1.9444	7.1111	0.7222	4.3333		0.541897	2.79468
11.6654	0.6111	1.55556	3.9444	6.1111	3.0556	3.5	1.7778	0.6667	2.16667	2.5	1.2222	1.5	3.2222	2.72222	2.27778	3.33333	3.72222	0	1.44444	1.4444	3.5556	0.8889	3.8889		0.547486	2.39614
11.7844	2.8889	2.05556	6.0556	6.2778	5.6667	4.0556	4.2778	4.1667	4	6.3333	2.7222	0.8333	2.5556	3.05556	5.11111	0.61111	2.27778	0	0.44444	3.8889	3.6667	1.1667	2.0556		0.553071	3.22465
11.9035	2.9444	3.16667	1.6667	4.6667	3.0556	4.4444	2.3333	2.9444	2.83333	4.8333	2	1.9444	3.2778	4.33333	3.55556	2.77778	1.16667	1.94444	2.11111	1.1111	6.0556	3.8333	2.9444		0.558661	3.04106
12.0225	0.7222	1.5	5.9444	4.9444	5.2222	6.3333	6.3333	1.4444	2	4.5	2.3889	4.9444	2.6111	1.83333	3.33333	1.22222	2.33333	3.5	0.33333	1.1667	1	1	5.0556		0.564246	3.02898
12.1415	2.5556	1.72222	2.4444	7.5556	5.6111	5.2222	2.6667	2.1111	1.61111	4.6111	1.9444	0.7222	1.8889	0.61111	4.44444	1.5	0.66667	4.05556	1.33333	1.8889	1.1111	2.6667	4.3889		0.569831	2.75362
12.2606	0.9444	0.88889	2.7778	6.7222	4.6111	6.6667	1.7778	1.2778	0.27778	8.0556	2.3333	0.9444	4.5	5.72222	4.83333	3.61111	0.44444	0.66667	0	2.5	5.5	2.1111	2.8889		0.575421	3.04589
12.3796	2.9444	0.94444	3.7778	7.1111	5.1111	8.0556	3.7222	1.3333	0.77778	3.8889	1.9444	1.2778	2.3333	1.83333	2.72222	4.27778	1.66667	0.44444	2.5	5.5	6.2222	1.4444	1.2222		0.581005	3.08936
12.4986	0.8889	2.11111	0.7778	5.5	3.8889	9.3333	4.3889	2.8333	0.88889	4.3333	1.7222	0.8333	2.6667	2.44444	4.05556	1.61111	5.83333	2.33333	1.11111	3.0556	5.1111	1.0556	2.2222		0.58659	3
12.6177	0.5	3.61111	1.5	4.8889	8	3.3333	0.3889	0.7778	1.5	3.5556	3.1111	2.6667	3.5	4.16667	1.77778	1	1.33333	1.55556	1.94444	3.7778	3.5	1.7778	1.6111		0.59218	2.59904
12.7367	0.7778	4.55556	0.1111	6.6111	9.5	5.3889	2.7778	0.7778	3.38889	3.7778	2.5	3.4444	2.4444	6.5	0.38889	2.11111	2.5	1.05556	1.44444	1.3889	1.9444	1.2222	0.5		0.597765	2.83092
12.8557	1.5556	1.83333	2.5556	10.2778	5.4444	3.3333	4	0.6111	2.16667	3.2778	5.4444	3.4444	2.0556	3.44444	3.44444	2.83333	0.88889	0.94444	0.66667	4.1667	0.5	1.5556	0.6111		0.60335	2.8285
12.9748	0.5556	1.83333	2.5	3.3889	2.4444	4.2222	2.6111	2.6667	2.05556	3.5556	1.8889	1	0.8889	7.27778	2.27778	0.5	1.5	0.27778	3.05556	5.2222	3.2222	2.6111	1.2222		0.60894	2.4686
13.0938	1.4444	2.05556	4.0556	7.8889	6.7222	2.3333	5.1667	1.3333	3	5.5	1.2222	0.5	2.6111	4.55556	3.72222	1.77778	1.27778	2.16667	1.72222	0.6111	2.1111	1.5	1.9444		0.614525	2.83574
13.2128	0.5	2.88889	2.8889	6.1111	7.3333	6.0556	5.5	1.1111	3.44444	1.1111	1.5	2.5	2.3889	7.77778	1	2.77778	1.05556	1.16667	2.61111	2.8333	4.6667	0.6667	1.5		0.62011	3.01691
13.3319	1.4444	1.27778	3	4.1667	4.9444	3.1111	3.8333	1.3889	1.88889	5.9444	0.6111	2.2778	2.1111	6.11111	1.94444	2.33333	0	1.22222	0.77778	1.9444	4.8889	1.3333	1.8333		0.625699	2.53864
13.4509	3.4444	2.61111	4.7778	2.3333	7.1667	4.1667	2.3889	1.6111	1.77778	5	2.1667	3.8333	1.9444	6.77778	1.77778	3.11111	3.77778	0.72222	1.55556	3	3.8333	1.5	2.5556		0.631284	3.12319
13.5699	2	1.83333	3.6667	2.7222	6.7778	5.3889	2.7222	1	2.72222	3.5556	1.5556	1.6111	0.3889	7.72222	2.83333	1.55556	1.44444	2.11111	1.88889	2.7222	4.8889	2.7778	1.3333		0.636869	2.83575
13.689	3	2.33333	5.1667	4.4444	3.6111	4.7778	3.0556	2.6667	1.94444	4.2222	0.8333	0.9444	2.1111	4.66667	3.38889	2.38889	2.61111	1.44444	1.61111	3.7778	1.5	0.8889	1.4444		0.642459	2.73188
13.808	0.5556	2	3.1111	2.3333	3.3889	3.6667	3.2778	1.6111	0.22222	3.0556	0.4444	0.7222	2.5556	6	1.38889	1.5	5.38889	1.77778	3.27778	2.1111	1.2778	3.1111	2.2222		0.648044	2.39131
13.927	0.2778	2.94444	1.8333	3.7222	2.2778	3.5	1.8889	3.6111	3.22222	5	2.4444	2.6667	5.4444	4	6.44444	2.44444	4.94444	1.11111	0.88889	0.6667	3.8333	1.7778	1.8333		0.653629	2.90338
14.0461	1.5	4.77778	3.9444	2.3889	3.1111	7	1.7222	2.4444	1	2.3889	1.6111	0.5556	3.6667	3.05556	0.83333	4.05556	3.5	0.11111	1.44444	4.0556	2.0556	2.1111	0.8889		0.659218	2.5314
14.1651	2.5	1.05556	3.6111	7.2778	4	1.1111	3	0.1111	0.55556	1.5	1.6667	1.7778	4	3.22222	6.11111	1.5	5.88889	0.44444	2.38889	4.0556	4.3333	1.2778	1.2778		0.664803	2.72464
14.2841	1.6111	1.55556	4.5	3.1667	3.4444	4.6667	2.3333	2.7222	1.94444	3.7222	1.3889	1.6667	8.1667	3.16667	5.66667	0.55556	2.5	1.61111	1.72222	2	1.3889	1.4444	0.3333		0.670388	2.66425
14.4032	2.2222	0.72222	1	5.1111	4.3889	5	5.6667	1.7778	1.94444	6.8333	2.5	4.2222	4.4444	4.33333	4.11111	1.66667	4.72222	1.22222	1.44444	2	1.0556	0.8333	0.3889		0.675978	2.93961
14.5222	3.3889	1.77778	5.2222	2.4444	1.8889	3.1667	4.0556	2.6111	4	3.8333	1.4444	2.2778	6.2222	1.66667	4.22222	3.55556	5.33333	4.55556	3.22222	1.7222	2.0556	1.1667	1.7778		0.681563	3.11353
14.6412	0.8889	3.22222	3	4.0556	1.9444	2.8889	4.7222	0.6111	1.5	3.8333	4.3889	4.1667	4	2.11111	3.72222	3.5	2.44444	2.22222	1.38889	4.6667	3.9444	3.6667	2.1111		0.687148	3
14.7603	1.5	1.27778	3.3889	3.7222	3.3889	6.1667	2.4444	2.1111	2.16667	6.1111	5.3889	3.7778	3.3889	1.5	5.72222	4	5.11111	1.33333	0.33333	3.6667	5.6667	1.7222	1		0.692738	3.25604
14.8793	2.7778	1.05556	3.2222	3.0556	5	5.8889	2.6667	2.6111	1.94444	4.7222	2	1.2778	4.7778	0.77778	3.22222	4.5	3.61111	1.16667	3.33333	2.7222	4.8333	0.6667	2.2778		0.698323	2.96136
14.9984	2.1667	1	3.3889	2.1667	3.8333	1.5556	2.3889	0.7222	1.16667	4.5556	3.4444	3.1667	3.1667	1.11111	2.22222	1.66667	4.33333	2.55556	0.83333	8.0556	4.2222	4	0.1111		0.703912	2.68841
15.1174	0.1111	1.16667	4.7778	0.6667	2.7778	1.3333	4.2222	2.3889	1.88889	3.2222	2.0556	2.6111	3.3889	4.22222	4.88889	2.22222	7.66667	1.5	1.27778	1.4444	2.0556	0.5556	1.2778		0.709497	2.50967
15.2364	2.1111	1.16667	2.0556	2.5	5.5	4.1667	1.5	2.8889	3.66667	7.9444	2.5	2.2222	1.7778	1.16667	0.72222	3.55556	4.61111	3.94444	1	3.8333	1.8889	3.0556	3.9444		0.715082	2.94445
15.3555	2.8889	5.72222	4.3333	3.7778	4.8333	6.2778	2.1111	1.5	0.94444	4.7778	1.8889	3.8889	2.8889	1.77778	5.55556	2.72222	1.27778	0.5	2	1.3333	3.8889	0.8333	0.7778		0.720672	2.8913
15.4745	2.7778	0.44444	7.5556	3.7778	4.7222	2.3333	4.0556	0.8889	1.05556	3.9444	2.9444	1.4444	4.5	3.77778	5.38889	0.77778	1.77778	3.27778	1.77778	1.0556	2.1111	1.6667	3.3889		0.726257	2.84541
15.5935	0.7222	1.72222	3.6111	4	4.2222	2.5556	0.3889	1.0556	1.77778	4.6111	2.7778	1.2778	2.5556	1.94444	2.88889	3.33333	4.72222	3.05556	1.77778	1	1.1667	1.5556	1.2778		0.731842	2.34784
15.7126	1	1.44444	8.0556	1.7222	3.7222	1.7222	6	1.2222	3.55556	8.2778	2.7778	2.6667	3.6667	1.5	3.33333	4.66667	1.83333	0.66667	0.72222	2.3889	2.3889	3.2222	1.6111		0.737431	2.96377
15.8316	0.8889	0.94444	3.8333	2.1667	4.8333	0.6667	2.3889	1.5556	3.38889	3.7222	4.1111	8.5	3.1111	2.5	3.33333	4.05556	3.11111	2.11111	0.88889	5.0556	2.5	0.3889	2.2778		0.743016	2.88406
15.9506	1.0556	2	3.5556	2.5	4.6111	2.3333	5.1667	1.1111	2.94444	6.0556	3.3889	2.8889	6.3333	2.38889	2.61111	2.11111	0.5	1.61111	2.22222	2.8333	5.1667	4.7778	4.1667		0.748601	3.14493
16.0697	1.6111	1.11111	3.4444	3.4444	8.2222	2.3889	4.9444	2.3333	5.22222	5.1667	2.8889	2.3889	5.0556	4.16667	4.05556	3.27778	0.83333	2.55556	1.22222	2.3889	2.1111	3.4444	0.5		0.754191	3.16425
16.1887	1.2222	3.22222	3.6111	0.6667	7.3333	3	1.5556	0.5	2.38889	5.6111	3.8889	2.5556	3.8889	3.77778	5.44444	3.72222	2.44444	0.88889	3.72222	1.3889	0.2222	1.6111	2.3889		0.759776	2.8285
16.3077	2	4.5	3.2222	0.8333	7.1111	6.2222	6.3333	4.0556	4.22222	4.7222	2.5	3.9444	3.2222	4.44444	4.38889	1.66667	2.27778	3.66667	2.33333	4.8889	1.5	2.8889	4.0556		0.765361	3.69565
16.4268	2	2.88889	3.2778	1.1111	3.3333	1.2778	2	1.8889	1.83333	3.8333	2.9444	3.6667	4.0556	2.83333	2.05556	4.44444	4.38889	4.55556	2.05556	4.7778	5.1667	2.4444	1.7222		0.770951	2.98068
16.5458	1.7222	1.88889	5	0.5556	5.3889	2.5	4.3333	2.4444	3.72222	4.5	4.0556	4.8333	5.8889	3.61111	2.72222	1.88889	2.33333	2.94444	2.05556	2.8889	4	2.3889	2.6111		0.776536	3.22947
16.6648	0.9444	2.61111	5.3333	1.1667	3.1111	1.6111	5.3889	5.5	1.5	5.6667	4.5	4.2222	4	2.05556	4.22222	1.88889	1.5	2.38889	4.05556	1.7222	2.0556	1.1667	1.8333		0.782121	2.97584
16.7839	1.2222	1.83333	3.1667	2.5	4.2222	2.0556	3.0556	2.7222	1.5	5.8889	4.0556	1.8333	3.8889	3.44444	5.11111	4.33333	3.88889	2.05556	1.22222	1.4444	1.7778	3.3889	0.5556		0.78771	2.83334
16.9029	3.6111	0.66667	3.7222	3.0556	3.7222	0.5	4.3889	1.6667	1.94444	2.1111	1.3333	0.1667	6.6111	4.05556	5	2.94444	4.83333	1.72222	2.11111	2.5	5.5	2.6111	1.8889		0.793295	2.89855
17.0219	1.2778	0.77778	0.7222	5.1667	4.7778	0.9444	2.8889	1.6667	3.44444	1.1667	1.7778	4.5556	1.8889	1.16667	4.83333	2.66667	4.77778	4.11111	0.55556	6	4.5	2.5556	1.7778		0.79888	2.78262
17.141	2.1667	2.22222	4.1111	2	2.3889	1.6667	4.5	5.1111	1.05556	3.6111	2.1111	1.6111	2.5556	5.61111	7.44444	2.16667	7	4.16667	3.77778	3.2778	0.7222	2.4444	3.5556		0.80447	3.27295
17.26	2.3889	4.33333	4.2222	3.0556	3.1111	1.8333	3.7222	3.5	4.72222	2.7222	0.8889	0.7778	2.5	2.55556	2.22222	1.55556	3.94444	1.83333	6.66667	1.2778	3.3889	1.8889	1.5556		0.810055	2.8116
17.379	1.7222	1.61111	3.8889	1	0.9444	1.2778	7.8889	4.7778	2.88889	4.3889	1.8889	1.2222	2.7778	4.27778	5.55556	2.16667	5.05556	4.5	3.66667	3.5	6.1667	2.4444	1.8333		0.81564	3.28019
17.4981	6.9444	2.38889	3.9444	1.5	2.8333	0	6.0556	3.3889	4.44444	2.1111	2.7222	3.4444	1.8889	3.94444	5.33333	4.22222	1.77778	4.05556	3.33333	3.5556	3.2778	4.7778	3.6111		0.821229	3.45893
17.6171	5.8333	6.94444	2.7222	1.7222	0.9444	1.5556	4.0556	4.5556	2.55556	3.4444	1.1667	3.1111	4.1667	5.66667	2.77778	1.66667	5.11111	4.05556	7.61111	2.5	5.3889	6.1667	2		0.826814	3.72706
17.7361	6.1111	1.55556	3.6111	1.3889	2.3889	1.0556	5.1111	2.2778	0.61111	5.1667	1.8333	0.9444	2.5556	7.5	1.38889	3.27778	4.16667	0.72222	6.66667	2.7778	2	4.7222	2.1667		0.832399	3.04348
17.8552	0.3889	4.61111	1.7778	1.8333	1.6111	1.0556	6.2222	1.0556	1.94444	7.5	1.6667	2.6111	4.8333	8.55556	3.88889	1.22222	3.77778	4.38889	4.38889	4.8333	3.0556	6.3889	3.2778		0.837989	3.51691
17.9742	4.4444	2.61111	5.8889	1.7222	4.4444	2.6111	3.4444	4.2222	2.55556	5.5556	4.7778	2.1111	3.5	6.66667	5	1.94444	4.05556	2.83333	2.61111	3.3889	6.7778	3.7222	8		0.843574	4.03864
18.0932	5.2222	2.83333	0.8333	0.1111	0.8333	3.4444	1.6111	2.9444	1.22222	4.0556	3.3889	6.1111	5.3889	9.5	4	2.44444	3.61111	2.5	5.38889	0.9444	3.0556	4.6111	4.1111		0.849159	3.39854
18.2123	3.9444	2.05556	3.5	2.1111	1.9444	2.9444	1.7222	2.2222	1.5	11.7778	5.5	1.4444	3.6667	10.1111	2.83333	2.16667	5.16667	4.05556	2.33333	3.4444	3.3889	5.7222	4		0.854749	3.80675
18.3313	1.5556	4.38889	4.4444	1	0.8889	4.5	2.7778	2.9444	1.38889	10.4444	1.8333	1.6111	2.0556	8.38889	6.66667	1.5	2.38889	2.66667	3	3.3889	1.3889	3.1667	3.4444		0.860334	3.2971
18.4504	4.1667	5.88889	5.6111	0.6111	1.3333	5.4444	0.9444	2.6667	2.38889	10.2222	4.5	4.5556	4.6111	3.33333	2.5	3.66667	1.61111	1.27778	5.94444	4.8889	5.4444	1.7222	5.7222		0.865923	3.87197
18.5694	7.0556	4.27778	1.7222	3.2778	1.1111	8.1667	2.6111	3.1111	4.33333	7.2778	1.1667	3.8333	8.7222	4.94444	3.83333	1.88889	1.77778	2.11111	5.16667	1.1667	3.1667	4.2222	3.0556		0.871508	3.82609
18.6884	5.1111	4.77778	1.1111	1.7778	3.2778	10.7778	4.5	2.1111	5	8.5	1.6667	1.2778	4.5	8.16667	1.05556	1.27778	3.66667	4.22222	2.61111	0.9444	3.9444	1.3333	4.0556		0.877093	3.72464
18.8075	2.0556	3.61111	0	1.1111	2.2222	13.5	5.2222	4.1111	4.38889	3.8889	2.0556	2.5556	6.0556	5.11111	2.11111	0.38889	0.94444	4.33333	1.5	3.6667	3.1111	2.2222	3.3333		0.882683	3.36957
18.9265	3.8889	1.77778	3.3333	1.5556	3	13.9444	5.2222	4.2222	3.27778	6.0556	8.2222	5.5	3.9444	7.38889	1.22222	2.55556	3.27778	6.61111	4.88889	0.8889	1.2222	4.2778	2.3889		0.888268	4.28985
19.0455	2.8889	8	2.3889	3.6111	0.6111	13.6667	9.3333	1.5556	4.22222	5.3333	2.2778	4.2222	1.9444	4.55556	2.77778	1.27778	1.61111	2.94444	4.66667	1.2778	4.3333	3.1111	4.7222		0.893853	3.97101
19.1646	1.4444	2.27778	3.4444	5.7222	5.3333	18.9444	4.9444	3.0556	9.72222	6.6667	4.3333	3.1111	5.6111	5.66667	1.88889	0	1.11111	7.88889	9.61111	6.3889	3.6667	3.8889	1		0.899442	5.03139
19.2836	4.9444	2.11111	4.8889	5.8889	5.2778	15.6667	8.8333	2.2222	6.22222	2.5556	3.6111	3.5556	9.2222	3.94444	6.83333	0	3.72222	6.94444	5.27778	2.4444	1.6667	0.8333	3.6111		0.905027	4.79468
19.4026	0.7778	3.38889	4.1667	2.7778	6.1667	13	2.7222	2.6667	6.44444	7.1667	3.0556	3.9444	7.6111	5.61111	4.33333	1.5	1	1.16667	8.33333	4.7778	2	3.2778	4.6667		0.910612	4.37199
19.5217	2.5	3.27778	1.8333	10.5	5.5556	14.1667	5.6111	3.1111	5.72222	3.2222	3.8333	6.2778	3.8889	4.38889	1.94444	1.5	2.38889	6.16667	1.77778	4.5556	3.2222	2.2222	1.6667		0.916202	4.31884
19.6407	4	2.94444	4.2222	10.2222	9.2222	14.9444	4.1111	5	6.11111	5.0556	1.5556	3.8333	4.2778	2.33333	3.27778	1.83333	3	5.94444	4.94444	7.8333	2.6667	1.7222	0.8889		0.921787	4.78019
19.7597	1.8889	2.88889	2.7222	4.5	6.1667	5.1111	5.7778	3.2222	5.83333	7.0556	1.7778	4.0556	3.4444	5.11111	0.38889	1.33333	1.77778	6.77778	3.83333	5.9444	2.3889	3.2222	0.4444		0.927372	3.72464
19.8788	2.2778	3.33333	4.5556	6.5	8.2222	4.2222	4.9444	2.1111	4.77778	4.8333	4.6667	4.6667	5.7778	1.77778	2.94444	1.38889	4.22222	1.94444	1.44444	7.7222	2.7222	1.9444	3.6667		0.932962	3.94203
19.9978	1.4444	3.16667	4.9444	5.6111	10.4444	3.9444	4.3333	4.2778	3.94444	4.5	5.8889	5.5556	5.9444	3	5.16667	1.61111	5.61111	5.05556	5.27778	6.6667	2.7222	2.3333	1.5556		0.938547	4.47825
20.1168	3.2778	1.61111	2.6667	7.3889	10.1111	5	7.1111	3.0556	5	6.8889	2.6111	4	6.0556	4.38889	2.44444	1.77778	3.5	2.5	4.61111	12.3889	5.8333	5.8333	2.0556		0.944132	4.78744
20.2359	1.7222	1.27778	8.1111	1.8333	8.3889	6.2222	1.8889	1.4444	3.44444	5.0556	6.5	4.9444	2.6667	0.72222	5.94444	2.88889	5.72222	3.27778	4.11111	6.1111	4.9444	8.1111	1.7222		0.949721	4.2198
20.3549	2.3889	1.72222	5.8333	2.8889	9.1667	3.8333	3.7778	4.2222	5.66667	3.7222	4	4	1.3889	1.55556	5.27778	4.72222	1.55556	3.55556	2.11111	10.2778	5.4444	7.5556	0.8333		0.955306	4.15217
20.4739	1.8333	3.27778	4.1667	5.2778	7.1111	2.0556	2.9444	3.6111	7.83333	5.0556	1.5	9.6111	2.9444	2.83333	3.38889	3.88889	3.11111	2.11111	1.66667	8.5	4.1111	6.8333	2.5556		0.960891	4.18357
20.593	7.0556	4	5.6111	6.7222	7.5	2.7778	7.1667	6.7222	2.83333	3.5	1.1667	8.0556	3.8333	1.83333	4.38889	3.38889	8.33333	3	2.61111	15.5	5.7222	6.7778	1.5556		0.966481	5.21981
20.712	2.4444	3.22222	3.7778	6.7778	5.1667	3.6111	10.7778	5.8333	3.88889	10.8889	3.7778	10.5556	3.3333	3.33333	2.61111	4.11111	3.88889	2.22222	2.55556	8.3889	10.2778	10.9444	2.5		0.972066	5.42995
20.831	7.1111	3.77778	4.3333	7.0556	7.7778	3.2222	13.0556	5.5556	3	6.7222	4.2222	3.3333	5	2.33333	5.5	3.83333	8.11111	3.38889	4.27778	8	11.6111	9.9444	0.8889		0.977651	5.74154
20.9501	2.2222	4.38889	7.8333	9.1111	5.3333	6.5	18.7222	3.5	3.61111	4.5	7.3889	7.3333	6.1667	3.72222	2.72222	1.44444	4.11111	4.72222	3.44444	8.5556	12.9444	9.3889	1.2778		0.98324	6.04106
21.0691	4.4444	3.61111	2.3889	8.3333	7.2222	4.9444	18	8.1667	3.33333	6.3333	3.6111	7.6111	9.0556	3.22222	1.88889	4.33333	4	5.5	3.77778	7.9444	6.7778	11.2778	0.5		0.988825	5.92512
21.1881	10.6111	5.83333	1.7778	8.2778	4.2222	6.9444	12.8333	10.3889	4.72222	10.4444	7.5556	10.3889	5.6667	1.11111	3.88889	2.55556	4.94444	1.44444	2	9.3889	7.8889	10.6111	3.5556		0.99441	6.39372
21.3072	7.2222	8.22222	2.3333	5.4444	5.8889	3.7778	17	4.5	2.94444	7.8333	10.8333	7.7222	6.1667	1.72222	2.11111	4.27778	4.11111	2.61111	2.27778	10.1111	5.1667	7.2778	1.2222		1	5.68599

## Sheet: Image10
X0	Y0	Y1	Y2	Y3	Y4	Y5	Y6	Y7	Y8	Y9	Y10	Y11	Y12	Y13	Y14	Y15	Y16	Y17	Y18	Y19	Y20		Ap-Ba	Average int.
0	4.7719	5.9804	3.4085	4.5595	2.1451	6.36547	2.99761	4.27803	3.67379	3.18088	1.71723	3.7062	3.02914	3.36444	5.638	4.18383	2.41683	2.9215	2.93898	4.02042	4.0916		0	3.78045
0.119	5.5813	6.3801	4.5303	6.2016	2.0284	6.45287	5.20211	4.20071	4.37063	1.89112	5.8512	3.0563	6.4877	2.51125	3.0485	4.76504	1.71145	4.5604	2.66987	2.39568	4.9586		0.00709013	4.2312
0.2381	5.4272	5.1196	2.948	5.2242	2.7226	4.21265	5.47017	3.8849	3.99384	2.34995	3.88224	3.9866	9.11938	1.41132	4.7069	2.17007	5.36774	6.415	3.15604	3.65078	4.032		0.0141862	4.25006
0.3571	6.6202	4.8407	3.788	3.8934	5.4341	4.76631	5.51038	2.65192	3.66203	3.82395	6.14415	5.1244	3.15019	2.60243	5.2779	4.85162	3.89993	4.2245	4.83579	2.63312	5.4782		0.0212763	4.43872
0.4761	5.6318	6.8205	3.2333	6.9928	5.3831	5.51067	4.5097	5.1271	6.09416	5.31848	4.89512	5.0482	2.12969	2.1273	6.5198	4.57349	3.38467	5.4154	3.52427	3.89683	7.6806		0.0283665	4.94367
0.5952	6.0536	7.3468	4.2053	6.6691	3.6611	3.9707	5.85874	5.31555	6.90006	3.35554	3.61106	5.9819	2.00357	3.31182	6.3735	1.40046	4.06201	6.9618	6.61724	3.91077	4.1418		0.0354626	4.84345
0.7142	4.7121	5.8345	8.9552	8.0326	4.0473	6.98428	5.8333	3.93917	5.03758	3.05115	1.71695	7.4165	4.54408	2.84643	5.3489	2.23105	1.24209	5.7248	6.04908	4.53701	3.9339		0.0425527	4.858
0.8332	5.0027	5.3401	6.0973	5.8844	4.7336	6.74314	4.97931	1.81268	7.13246	3.03076	5.41729	4.6678	3.7468	2.96925	2.7679	1.95193	2.88501	2.3344	4.47397	2.55118	6.6663		0.0496428	4.3423
0.9523	2.8139	6.2677	7.2427	7.3495	3.8064	5.66972	4.15771	2.79139	4.17378	6.30489	3.12834	2.0447	3.92584	2.69936	3.1377	3.78032	2.9849	3.7438	3.63749	5.50074	6.0802		0.0567389	4.34481
1.0713	1.9711	5.5347	5.989	8.1866	4.9089	6.98816	4.1008	3.22583	2.45177	2.79932	5.48735	1.9183	5.47654	3.9393	3.8134	6.72619	3.22144	4.305	4.8126	3.90206	8.4298		0.063829	4.67563
1.1903	4.058	5.2854	6.7359	6.3142	6.0735	7.47362	6.15321	2.25478	3.06758	3.33798	7.75547	1.6813	3.42625	5.55408	2.417	3.18079	2.90532	6.5332	6.92781	2.43203	8.8676		0.0709192	4.87786
1.3094	4.0874	5.7458	6.7318	4.0901	6.4668	5.33549	4.05446	2.35414	5.21234	3.21267	6.77892	2.8544	2.65928	5.89572	7.9783	5.24919	2.88091	5.0886	8.56739	3.25979	6.1989		0.0780152	4.98583
1.4284	3.8155	5.6537	6.5686	6.7322	5.5174	6.95779	3.82309	4.47116	4.31371	3.37612	5.79435	4.8741	3.742	5.2046	5.8848	5.04791	3.38949	4.4993	8.7769	7.33962	4.2937		0.0851054	5.24172
1.5474	2.2532	9.9978	9.4036	7.3091	3.2925	7.32981	5.2242	4.11132	3.43615	3.66619	7.1232	2.7391	6.44298	6.16245	10.9076	2.94168	2.16265	5.0979	6.43789	3.19014	3.3008		0.0921955	5.35858
1.6665	1.8878	9.5181	8.8307	4.1599	4.5975	5.20808	3.69449	5.55023	1.46479	2.63687	6.39729	3.6439	4.33264	7.5935	7.9905	7.23879	4.17391	6.7738	4.84556	3.76212	5.1597		0.0992916	5.21239
1.7855	4.7814	10.2387	11.6649	5.4017	4.4291	5.20266	3.56749	4.658	4.37065	4.05252	6.28172	2.9958	2.80755	5.25665	5.8493	6.09986	7.56779	7.3326	2.96106	6.28737	4.2063		0.106382	5.52443
1.9046	5.7509	10.7586	11.847	5.4084	6.0468	7.17039	2.98603	2.72727	2.54305	3.02874	6.51818	3.1874	2.8025	3.90493	5.1366	5.8184	4.63603	4.713	4.1742	6.43828	5.7202		0.113478	5.3008
2.0236	6.5009	8.2751	15.5045	4.7724	2.1279	4.78096	3.13009	5.65587	4.40862	1.90421	7.11733	4.1263	3.35585	5.77875	7.0809	8.21698	3.27681	2.7218	4.94629	4.24408	7.7631		0.120568	5.50899
2.1426	3.664	9.4079	12.0296	6.5741	2.2749	4.39183	1.9404	5.05555	5.89262	3.7471	4.30029	5.986	2.72434	6.33431	7.5499	7.60783	3.42726	3.448	2.92072	4.61677	9.645		0.127658	5.40659
2.2617	7.3168	11.6517	10.0289	6.9802	2.375	2.83361	3.20056	3.32595	4.02905	3.90543	2.10463	4.6544	2.27442	5.20956	7.0235	6.76565	4.17886	5.4725	3.53447	5.80598	7.3593		0.134754	5.23955
2.3807	6.9615	15.288	7.7125	6.2659	4.4769	4.63096	3.32787	3.50272	4.93502	4.82397	4.62646	6.2199	2.55989	8.63189	4.3799	5.28569	5.26689	4.2247	3.75186	6.32838	4.6619		0.141844	5.61251
2.4997	6.0888	15.0266	11.6679	6.4453	3.8491	6.56152	3.84222	5.77957	3.70812	2.72585	5.12863	4.7718	4.23557	7.07076	3.7482	7.20103	5.26174	3.6863	6.67421	5.93708	6.0722		0.148934	5.97536
2.6188	5.9961	10.8886	9.8713	6.9662	7.9357	3.62563	3.2687	4.76673	3.31882	2.9682	1.53668	4.8182	6.0817	7.48837	3.954	3.51422	5.18898	2.8225	7.45039	5.39527	5.4611		0.15603	5.39607
2.7378	4.4366	10.0917	7.1378	5.9359	8.316	3.65366	5.16328	3.55272	4.28657	4.42157	2.69324	5.0214	4.96002	7.73539	3.2345	7.41395	4.35306	3.5955	3.95017	5.80095	7.7835		0.163121	5.40655
2.8568	2.0558	7.9365	8.3678	4.6873	6.9818	4.60595	3.00488	5.127	5.56948	2.54349	5.88806	4.8631	6.45519	3.86094	2.5711	3.95185	3.14627	2.5988	2.19356	4.88693	5.7584		0.170211	4.62163
2.9759	4.6735	6	10.1248	5.9745	5.1562	4.65155	3.01331	3.72745	4.72556	2.51539	7.30101	5.6735	5.55992	4.03229	8.5633	2.94547	4.63892	3.2825	3.34861	4.37949	7.4798		0.177307	5.13177
3.0949	1.8574	4.4136	9.2873	6.4125	6.0195	6.11798	4.07692	3.64194	5.05246	3.70461	7.06643	9.2806	3.91424	7.52163	6.6518	5.0625	5.82201	2.4648	3.88875	7.14831	5.9736		0.184397	5.49423
3.2139	3.4572	7.9042	6.172	10.7981	5.6171	4.36815	4.48433	3.23274	5.95282	3.06359	5.62686	5.6517	3.72806	6.28218	7.7583	3.77186	3.59828	3.1976	5.13792	7.63661	7.2874		0.191487	5.46319
3.333	5.5918	6.7203	8.091	11.1567	5.3095	4.22419	6.86932	2.44938	2.92028	2.56948	6.10039	4.5719	4.67642	6.42489	7.5265	2.82962	2.75457	3.5177	5.11922	7.2227	5.7255		0.198583	5.35102
3.452	6.5051	5.3078	10.0366	13.6352	3.1012	7.17867	5.01195	2.82085	3.59302	2.50788	5.19915	4.6399	3.98569	5.89436	5.5106	3.33241	4.31129	4.7299	5.23185	9.75766	3.2029		0.205673	5.49971
3.571	4.4296	3.4003	12.1314	12.667	7.7502	3.40636	5.06202	3.76967	3.04435	3.5372	5.79501	1.91	5.06662	4.46286	3.8813	4.17206	2.45276	4.1666	5.00845	7.28895	3.7393		0.212763	5.102
3.6901	5.07	1.0632	8.686	12.2393	8.0461	4.98063	4.29854	3.72883	5.26815	6.29763	4.43894	3.8478	4.58154	6.32349	3.3526	4.71645	2.70657	2.5336	4.95597	8.37996	2.2251		0.21986	5.1305
3.8091	3.8259	3.8977	7.3723	9.3752	7.7707	4.07554	5.12988	3.2866	6.29048	7.30684	4.42131	4.0941	4.32642	5.6747	4.9925	3.97534	3.06297	4.2819	5.46055	6.9178	3.6119		0.22695	5.19765
3.9281	3.4111	8.0975	5.865	11.4309	5.0944	2.39306	3.97971	7.05219	5.31578	6.07904	3.30632	3.062	3.23486	3.99053	5.0841	4.92635	3.2179	5.0142	5.29824	5.93955	5.8215		0.23404	5.12449
4.0472	4.4794	7.6399	4.8804	10.9497	5.6023	3.85195	3.90567	5.23286	4.26147	4.65924	3.58548	2.8855	3.6259	5.49917	6.1642	4.7539	4.25832	5.1413	3.59507	4.91247	5.3656		0.241136	5.0119
4.1662	4.0634	5.6475	6.2117	13.8955	6.8175	4.07769	5.01431	5.91035	6.02213	7.62476	3.30609	4.1764	2.88842	5.19703	2.9721	4.49103	4.03831	6.3453	3.31039	4.49396	4.0284		0.248226	5.26344
4.2852	4.3714	5.4767	7.7731	13.4092	10.3954	2.59703	5.88204	3.69695	5.62814	6.22094	7.02136	4.2908	2.6713	4.96021	3.5884	4.00267	3.47601	6.2076	3.63481	6.03924	5.1888		0.255316	5.54915
4.4043	4.7083	5.2662	6.6591	13.0513	6.6819	3.1993	5.21111	4.74826	5.256	5.82884	5.4374	5.135	2.37524	6.84252	3.1655	3.91536	5.58951	6.6549	4.92699	6.50003	3.5523		0.262412	5.46215
4.5233	3.6875	5.9688	5.9792	6.5206	4.8301	2.11241	5.97744	4.44728	6.60238	6.12553	5.33539	7.4226	1.97521	4.10817	6.161	4.80998	8.84993	6.6444	4.2816	5.65835	3.1185		0.269502	5.26745
4.6423	5.6971	9.2557	6.1572	9.7485	4.516	2.23354	2.8771	3.78329	5.41793	6.10497	5.38886	4.3279	2.28978	3.42497	6.6045	3.59838	3.2361	5.067	4.72508	4.13572	5.6223		0.276592	4.96247
4.7614	7.3629	7.535	7.8145	9.9766	5.3982	3.76135	5.35497	5.70552	5.38301	7.65756	5.14625	2.8418	1.67248	3.91109	5.2866	2.24811	5.58417	6.6966	4.24161	5.18344	5.7049		0.283689	5.45079
4.8804	7.9104	8.9049	8.8319	10.7124	6.3616	3.30941	4.24272	5.71467	5.62293	4.57367	4.25228	4.21	2.27924	5.32923	4.8199	4.5032	5.78073	7.9268	4.69386	7.05922	3.1484		0.290779	5.72321
4.9995	12.1265	5.767	12.1579	15.4938	8.8133	5.79893	3.1511	5.73071	5.04919	5.94122	2.89961	7.4002	3.28349	3.78437	4.3158	4.5152	4.26455	6.5715	3.33008	7.08624	5.5194		0.297875	6.33334
5.1185	11.8144	9.2944	16.3463	12.201	4.6095	4.95081	5.58919	3.9153	6.33022	4.39421	3.61139	5.1179	6.50981	3.68336	4.2405	5.42255	5.22375	4.1235	2.61489	6.08162	5.221		0.304965	6.25217
5.2375	11.6735	5.7338	12.0858	12.8759	3.3922	3.7376	3.43136	7.2462	3.4543	4.79195	6.61459	5.0041	6.54688	6.51135	3.4216	6.47488	5.39935	2.7372	2.3756	5.81734	3.5811		0.312055	5.8527
5.3566	13.0722	6.8475	17.5509	9.8438	5.4101	5.15447	2.23914	4.95258	4.26311	4.18527	6.10603	3.5131	4.42269	5.53656	3.8533	6.46918	7.94589	4.0784	3.86545	6.33999	3.445		0.319151	6.14736
5.4756	9.6738	6.2038	13.0879	7.46	4.8566	3.76941	2.93827	6.03397	2.93054	5.40739	4.52159	3.6884	4.6525	4.4039	4.4581	6.58667	2.90539	2.624	3.96359	6.01676	3.6166		0.326241	5.22853
5.5946	13.5726	9.0611	11.6648	8.9669	4.34	5.66872	2.51368	5.97967	2.30151	3.30676	1.98182	6.1577	4.60425	4.84209	5.0651	6.25875	5.10315	3.3849	3.73604	4.22434	3.4063		0.333331	5.53048
5.7137	11.5585	5.519	9.9222	9.2055	4.5164	3.98937	4.38433	5.91254	3.53303	4.43335	3.39803	3.2157	3.70138	2.56618	3.1975	5.26225	4.52585	3.4708	4.14317	5.05005	3.0662		0.340427	4.97959
5.8327	6.5191	9.1629	12.9048	7.0776	3.6635	0.95017	5.76104	6.0064	3.18166	5.28848	4.00893	3.7427	2.05072	2.67892	4.1132	5.61862	2.96145	3.4636	4.7957	5.42366	5.5646		0.347518	4.99704
5.9517	5.0355	7.8882	17.8861	5.8847	5.1802	4.76563	5.2631	5.30668	2.16457	4.40984	1.81097	8.2708	3.43681	2.0487	2.1207	5.72466	3.28043	7.1092	3.67766	2.68342	9.7711		0.354608	5.41519
6.0708	8.2094	7.7419	13.6644	7.9234	5.5302	4.48142	3.84616	3.66736	2.71205	4.90972	3.74473	3.6532	5.56957	3.57156	3.6059	7.43948	4.57456	8.2475	2.47411	4.63995	8.5214		0.361704	5.65371
6.1898	7.3158	12.9212	13.374	3.7287	6.1452	4.91405	3.75993	3.08201	2.43786	4.81483	3.55962	2.2969	4.21006	4.34777	2.6048	6.16229	3.84968	9.0498	3.16948	6.54879	12.416		0.368794	5.74804
6.3088	6.4833	15.9615	12.9745	5.9675	5.2618	5.14981	3.15824	2.39269	2.65244	6.76021	2.6204	2.6671	6.99017	2.93543	1.8955	7.32458	6.28231	8.5518	7.5069	5.45468	12.1487		0.375884	6.24474
6.4279	6.3675	13.1037	11.0196	4.9122	7.1342	6.98273	4.5111	3.75915	2.53383	4.15077	2.77093	4.4124	9.82585	3.08999	2.1104	5.28624	3.14336	6.0425	7.34422	4.53756	9.5811		0.38298	5.83902
6.5469	8.4767	13.9593	9.8284	5.4654	8.372	3.73549	2.61003	4.11769	4.12674	6.51045	1.35123	5.5505	5.88021	4.87534	2.5238	6.55158	3.19709	3.4142	8.20997	4.76504	12.5939		0.39007	6.00548
6.6659	10.9382	17.594	10.4314	5.6866	7.1445	7.52259	3.65299	7.43992	3.24976	5.79705	5.72653	6.1924	2.35899	4.38332	4.4812	5.04521	3.94095	0.6351	3.92063	6.61588	12.7443		0.39716	6.45245
6.785	11.3064	16.7793	9.4005	6.3863	6.9841	5.39548	2.05235	6.26445	4.1898	5.98536	7.19395	4.6139	1.93232	4.90682	2.6473	4.98001	4.83964	2.809	6.06303	5.01887	13.1098		0.404256	6.3266
6.904	11.8492	12.5597	13.712	6.1494	13.2728	5.09699	2.10021	5.70925	5.16216	3.81668	8.36574	4.6557	1.75329	5.30233	4.7749	5.13391	5.89375	5.3418	3.11577	4.29961	9.7009		0.411347	6.56029
7.023	12.5688	14.2386	9.5283	8.1668	13.9184	3.73788	1.86952	8.93647	7.06783	3.1033	5.36973	9.6983	3.78681	6.224	2.113	7.04856	6.52053	3.1423	4.63965	6.9246	11.3634		0.418437	7.14128
7.1421	12.4186	10.8978	7.4836	8.6728	8.4102	5.97493	2.66614	7.28834	6.54959	5.03863	4.88173	9.2058	5.63802	4.85824	2.0683	5.90343	5.99901	5.7848	1.07392	5.12237	9.0814		0.425533	6.42941
7.2611	19.509	15.1167	6.0564	10.9135	8.6346	3.59589	2.65228	6.01071	8.27231	6.43466	3.13277	8.469	4.38304	6.54982	2.577	2.32651	8.00663	4.2278	3.11064	8.82805	7.6104		0.432623	6.97227
7.3801	12.1199	10.4111	9.8494	8.183	5.3116	3.9301	2.91569	6.59686	6.7031	2.20311	4.21407	16.6151	4.23737	4.66146	2.4207	3.43143	7.00447	2.8287	5.07298	7.91253	10.4764		0.439713	6.52853
7.4992	7.2311	9.8684	10.0807	7.6116	7.037	5.66847	2.57104	6.35639	7.90617	2.05505	5.22982	10.411	3.18041	6.87672	2.9689	3.23071	8.61351	3.2055	5.11061	6.87318	9.0788		0.446809	6.24596
7.6182	5.7608	9.0666	6.7765	8.8114	8.0738	4.24154	3.15509	4.98566	5.91969	4.55926	2.24321	6.9914	7.77794	6.84233	3.0621	3.53358	8.8827	3.2762	3.96937	7.01421	8.1725		0.453899	5.86266
7.7372	4.7592	12.5113	9.6066	6.0243	7.3712	4.09002	1.37394	4.18613	6.25912	3.55772	1.50966	7.0795	4.70855	6.32054	2.0867	3.6587	5.62948	3.575	3.12106	5.70535	8.9279		0.460989	5.33628
7.8563	4.9906	10.5597	8.6857	9.8328	14.5665	5.63153	2.42568	5.16468	4.86828	4.09747	3.91873	7.5881	5.86997	5.51575	1.5745	3.9847	3.77772	5.0306	6.39294	6.28614	4.6024		0.468085	5.96974
7.9753	3.6039	6.154	5.9187	4.4939	8.9671	4.67763	1.37228	3.13147	6.79328	2.73842	2.75896	6.09	9.58341	4.88794	1.9402	2.72016	2.91326	3.6262	3.4619	4.02361	7.4534		0.475176	4.6338
8.0943	4.7867	7.1336	4.8247	5.1988	8.7375	5.34081	4.27721	7.09273	3.90979	3.28275	3.34188	4.6953	5.34041	4.52807	1.7892	8.37062	3.36302	4.116	4.27816	5.88328	3.7301		0.482266	4.95336
8.2134	4.9061	10.964	7.7882	5.7424	3.6942	7.36741	6.73905	6.02521	3.33925	2.8548	3.38701	4.7921	8.41763	6.94131	2.1374	4.68734	5.12135	5.9545	6.23046	3.68164	3.9422		0.489362	5.46255
8.3324	4.3144	10.6369	9.7146	5.061	6.4907	4.46624	4.06916	5.03315	2.85506	3.13955	2.47222	3.9039	8.44035	5.92127	2.4089	3.97269	4.61755	8.8418	5.20756	3.2765	3.9682		0.496452	5.18151
8.4515	5.7108	11.6817	8.7589	5.0705	8.258	5.03343	2.76281	3.95469	3.42602	2.39237	2.82789	3.5453	6.26743	6.27371	1.6818	4.13261	4.15583	9.9144	3.37442	6.70511	2.9213		0.503548	5.18329
8.5705	6.9907	11.5665	7.4658	5.3717	6.5379	4.35202	3.15995	1.8316	4.65434	3.91028	3.75308	3.6156	5.43043	5.22256	2.2831	3.53911	4.43354	10.0019	3.01623	8.55197	2.7193		0.510638	5.16227
8.6895	8.2225	9.0942	8.0473	5.6588	4.8433	4.88912	2.35057	2.33367	3.89198	4.40365	3.22926	1.2954	7.12203	3.57427	4.3559	6.85636	4.03655	12.2791	2.51337	5.46508	2.1425		0.517728	5.07642
8.8086	8.03	8.0393	7.825	4.1767	7.2087	3.55	1.00824	3.58946	3.73321	7.95283	2.66351	3.6593	6.10641	1.37859	4.2867	6.2354	2.51749	15.4362	3.73631	6.15798	2.883		0.524824	5.2464
8.9276	4.6758	7.3546	4.6041	6.2495	6.7044	3.68857	1.70337	2.22633	3.61379	4.13815	2.8449	4.1955	4.08352	4.16115	4.3282	4.5009	3.2947	13.7272	2.82094	8.4705	2.4836		0.531915	4.7557
9.0466	5.5876	7.8585	6.7509	7.4012	5.4575	3.18744	4.37369	4.35509	4.37731	3.50425	3.07306	3.8604	4.33634	6.75768	1.1484	4.66462	2.41821	12.5811	6.30044	8.48329	2.3763		0.539005	5.18349
9.1657	7.0059	8.7926	6.5207	6.9534	9.446	4.64699	6.66405	4.77126	4.66522	1.84205	4.13832	4.6869	4.2322	6.28264	1.4096	5.46955	5.60544	14.1648	6.17945	7.64112	4.3088		0.546101	5.97271
9.2847	4.9068	6.8384	4.2707	6.6676	5.9073	3.73763	5.83454	5.1108	3.06027	4.73901	6.36995	4.5037	3.70435	5.05889	5.1148	2.88011	5.30918	13.8095	6.21863	8.28362	4.3611		0.553191	5.55652
9.4037	3.0435	8.8535	5.6328	7.681	8.1679	3.61294	3.04921	3.64036	2.88952	3.70279	6.40574	3.7179	4.25269	5.68442	3.0389	3.83133	5.77133	9.641	4.96231	7.0898	3.5309		0.560281	5.15237
9.5228	4.1566	9.3108	4.5874	5.0833	6.4485	9.38038	3.33179	8.40695	3.87251	2.43498	5.83392	2.3588	2.60327	2.03616	5.0624	3.79377	5.36968	8.1818	6.17695	7.65953	5.954		0.567377	5.3354
9.6418	4.8525	10.1222	6.4447	5.6601	6.3762	9.12743	3.21769	5.74679	4.82495	0.39191	4.00754	1.4093	2.04876	2.84771	3.4893	3.92543	3.3374	5.7515	4.09302	11.062	6.6606		0.574467	5.01891
9.7608	4.1175	6.6845	4.5215	7.1393	6.2275	10.8862	4.85217	4.95821	3.07198	2.6892	5.0517	2.4943	1.74076	3.05942	1.415	1.07489	4.62047	6.6974	4.58226	8.25405	4.8106		0.581557	4.71185
9.8799	2.9233	6.1766	4.4168	8.6116	8.7665	9.97832	3.65611	5.28094	2.82453	3.21338	5.95986	1.4944	6.15854	2.80031	1.4022	3.78174	4.50824	3.5198	5.11111	9.66557	5.4791		0.588653	5.03471
9.9989	4.4332	7.3387	3.5871	6.4713	4.951	7.28333	4.73195	2.63631	2.44353	5.51521	5.43581	3.407	3.60571	1.99585	2.7472	6.4546	4.51599	4.9643	6.48443	6.22694	3.4627		0.595744	4.69963
10.1179	2.4975	7.6454	4.5064	4.6301	8.1695	6.31264	3.21467	3.62609	4.59958	3.1003	3.84654	1.5926	4.13102	1.86154	3.7454	5.83304	4.44282	4.4451	4.24534	5.26802	4.7358		0.602834	4.40235
10.237	4.4367	6.9308	4.9073	4.8811	8.7342	9.3268	4.8922	3.34542	3.32851	3.98875	3.74115	3.0981	2.48638	4.66644	1.6766	4.75588	5.91349	2.3584	4.19112	6.86398	3.1184		0.60993	4.64961
10.356	4.9037	5.0212	3.5469	6.3389	8.87	7.48721	2.66915	1.78827	4.92844	5.8327	4.4201	3.5381	1.96729	6.81872	2.4456	8.2418	4.46097	3.0471	4.75589	6.22394	5.1055		0.61702	4.87674
10.475	4.4519	2.8247	5.0816	5.638	6.2602	6.77425	5.26165	3.09006	4.85617	4.03276	2.25843	2.2735	1.39309	8.23254	0.9551	2.81106	5.49222	3.2124	4.27582	6.58746	4.6553		0.62411	4.30563
10.5941	2.0432	3.7459	3.421	3.8988	7.8854	6.91625	4.56456	2.91909	5.14541	5.20492	1.68008	1.4609	1.84808	5.381	2.5231	4.33166	5.19957	2.8362	5.7548	4.0246	4.9324		0.631206	4.08176
10.7131	3.2073	4.1234	4.675	4.5111	6.1247	4.75276	3.2703	4.55349	7.50177	4.19026	3.97984	3.095	2.03331	5.0458	2.7099	4.73274	5.73885	3.7856	8.61	4.19157	3.7927		0.638296	4.50597
10.8321	5.608	4.0415	8.0723	3.7314	7.924	6.93961	2.60624	5.11	7.37938	4.57663	3.78852	2.024	2.25997	5.35156	2.2448	4.46942	4.87482	2.841	2.97869	4.81066	5.0893		0.645386	4.6058
10.9512	3.9309	4.0541	7.3055	4.602	5.6723	7.01567	1.43429	3.72384	9.46488	6.05606	4.55767	3.0611	2.66561	5.9937	1.452	5.7796	5.4088	5.5311	2.46568	6.14211	4.8846		0.652482	4.81912
11.0702	4.2241	5.5156	4.8939	7.6046	4.1703	5.91228	3.76891	5.26109	10.0928	6.66927	3.1655	2.6207	1.98832	4.8392	1.6352	8.98433	6.20699	4.1526	4.20213	4.97927	4.6858		0.659573	5.02728
11.1892	1.54	3.4833	3.434	4.46	3.7931	4.46267	4.648	6.3664	6.3411	6.97424	4.47177	3.3464	1.86628	3.19344	0.7934	6.73773	5.2958	5.3975	3.74174	4.54826	2.7819		0.666663	4.1751
11.3083	3.486	5.2698	2.3448	2.2956	3.7433	7.13528	2.54841	5.85802	4.96641	6.60003	5.06864	5.2604	0.60621	4.88899	2.9845	5.42424	6.24493	3.537	5.72644	5.30147	3.6827		0.673759	4.42729
11.4273	4.0523	2.5306	2.3717	3.6694	1.0541	5.25851	1.52088	7.54926	4.04438	7.36733	4.52568	6.7555	3.08603	5.83949	1.6388	6.23516	5.95414	3.8739	5.61101	4.29291	4.555		0.680849	4.37077
11.5463	6.2264	6.0865	4.0395	4.9424	1.2389	5.22527	4.16724	9.55079	4.89357	5.9121	5.77263	6.7062	1.62441	3.08613	1.0661	6.14123	5.1976	5.0236	3.39252	2.70988	0.8317		0.687939	4.46832
11.6654	7.5228	5.3962	5.0444	5.6161	1.4935	4.49811	3.76391	8.7197	2.87697	8.74195	0.71114	5.098	3.29063	4.02933	1.2033	5.16818	5.72723	2.6955	5.73497	3.3044	0.6924		0.695035	4.34899
11.7844	7.1012	4.7278	6.0646	5.5227	2.1643	4.46796	4.2478	5.70429	6.50411	6.61629	4.99616	4.8784	2.09962	6.43813	3.943	3.35347	5.21517	6.6219	5.90605	7.32085	2.5273		0.702125	5.06767
11.9035	5.2505	7.2311	2.2583	4.7242	3.5929	5.45958	3.53591	8.48146	5.17598	4.76568	6.53683	5.1641	5.01804	8.35533	3.8349	3.07789	4.28868	10.088	4.75719	7.45774	3.1888		0.709221	5.34491
12.0225	8.6747	4.0332	6.2938	5.2	5.4882	5.74511	2.10133	8.62274	6.18051	4.04097	4.99198	2.379	3.46477	7.43745	4.1845	7.63445	4.31825	10.2218	4.90023	5.90949	2.5869		0.716311	5.44807
12.1415	6.3184	3.3157	3.5653	8.4868	5.6083	5.35252	1.91147	8.53421	5.39731	6.17187	3.05699	2.8725	1.38158	10.7368	0.7195	6.29888	3.2129	6.4368	5.41316	6.67269	1.8261		0.723402	4.91856
12.2606	6.0856	4.4449	4.9648	9.4086	5.5361	4.36287	3.3894	7.43222	3.64097	3.58415	4.28187	3.1164	4.51442	7.51506	0.3555	2.64423	4.69034	6.4277	4.72176	3.90254	1.4818		0.730498	4.5953
12.3796	9.382	6.2453	5.0467	3.7694	5.1946	6.10899	2.0973	6.57053	2.57789	3.40325	4.37514	2.5069	3.99399	8.83091	2.4633	6.03139	2.2889	6.7788	3.39651	5.98856	2.5833		0.737588	4.74446
12.4986	6.9572	3.0095	5.0325	4.0338	7.1119	7.92174	5.99364	7.52563	5.6818	2.45507	6.72069	2.113	4.85226	8.06299	1.065	6.45169	2.01753	5.0322	4.4896	5.58083	1.7606		0.744678	4.94615
12.6177	8.3869	2.74	5.9925	5.0732	6.1377	6.64795	5.47175	6.39991	3.86096	5.33165	4.80614	2.7643	3.93516	7.76924	1.5979	4.05696	1.49743	5.4652	4.75055	7.80232	1.3024		0.751774	4.84715
12.7367	10.9228	5.8752	6.2347	3.5988	9.6517	8.47743	5.64658	7.00777	2.84155	9.8642	4.20711	3.6475	5.25593	5.32824	2.5145	4.82048	1.842	6.2493	4.03295	10.1786	1.7517		0.758864	5.71186
12.8557	9.9994	4.9937	3.6837	5.2016	8.5419	8.59414	5.85542	4.37747	4.13859	5.78108	5.53361	3.9159	6.56733	5.84373	2.2134	3.06979	2.64235	6.4885	3.11041	4.39295	3.9787		0.765954	5.18684
12.9748	8.5214	5.681	5.803	6.0856	6.5795	9.89697	3.06048	3.41273	3.06704	7.73785	5.87906	4.2253	4.50512	6.80317	2.8994	4.96851	4.1955	4.062	5.45518	4.22983	2.2873		0.77305	5.20743
13.0938	5.9071	4.1139	6.3824	2.1684	10.373	3.32033	5.36042	3.38984	3.57977	6.02563	4.25581	1.8548	3.36979	8.02692	3.2363	6.09094	4.96501	3.3907	8.40943	3.34764	2.2522		0.78014	4.75335
13.2128	7.5432	7.6779	5.7793	2.2173	5.1019	7.66236	4.9855	3.50642	4.61516	4.42916	2.94931	3.1096	1.84658	8.7603	1.844	4.20946	3.28079	3.5442	6.61607	5.6459	1.5327		0.787231	4.61224
13.3319	9.1798	7.2523	6.6107	2.3354	5.5438	6.85968	3.4062	3.99308	4.48011	4.91978	3.20785	1.763	4.9376	8.8277	2.8796	7.36991	4.11412	6.4734	5.15776	6.32318	2.2232		0.794327	5.1361
13.4509	5.923	8.2327	7.2917	2.276	8.4909	4.80997	2.62699	3.34815	3.74011	6.7469	3.59487	1.0105	7.22966	8.11002	3.7356	2.83012	3.34005	3.7367	3.62256	5.93682	4.8987		0.801417	4.83486
13.5699	4.22	7.4537	5.8005	4.999	3.7618	4.54633	2.70315	4.53002	3.61053	7.45245	3.32722	1.8406	4.51902	9.86327	2.8516	1.58244	4.71341	5.1757	2.45317	4.90914	1.497		0.808507	4.37191
13.689	4.6052	5.8127	7.0385	4.8977	4.3282	4.5176	1.83395	1.68096	4.96465	4.10391	2.78813	5.2146	7.10347	5.39453	0.853	1.68775	4.24633	5.5134	3.64903	4.15875	2.098		0.815603	4.11859
13.808	5.9861	9.5229	5.5105	4.7948	4.8164	4.35136	1.7336	2.66637	3.838	3.2341	3.18333	2.1618	6.45361	5.08274	5.0662	2.32867	6.19783	4.56	5.76783	4.20064	4.7781		0.822693	4.58261
13.927	11.2362	4.8151	5.117	5.3063	3.383	4.57603	4.0211	6.47458	6.57918	1.88264	4.39392	1.7034	7.94813	8.35302	3.431	5.32676	4.53849	1.5755	2.22102	3.04592	3.7143		0.829783	4.74489
14.0461	8.2843	5.3323	3.8881	3.9001	3.5373	3.99672	3.92248	5.17914	3.54664	1.29398	5.48814	1.4017	4.48335	7.17054	3.4076	3.91133	5.19353	2.7835	2.08745	4.52809	2.9782		0.836879	4.11021
14.1651	6.4541	5.2507	4.4541	5.6999	3.7543	3.2906	1.54136	5.97934	3.55673	1.50274	6.30947	2.7683	2.49351	3.2044	2.95	3.16906	3.66984	4.4606	3.36182	3.15867	4.5085		0.84397	3.88276
14.2841	8.4173	3.0772	4.5539	4.2316	4.9556	2.41495	1.40197	3.8865	4.27971	2.47849	6.36979	1.5204	3.83423	3.72932	2.2392	2.20049	6.03257	3.8201	3.57797	3.05417	2.6513		0.85106	3.74889
14.4032	8.2554	9.8103	4.7182	4.7298	5.6573	4.41237	2.66839	2.35967	4.20337	3.75683	6.53587	2.437	4.75611	3.42682	3.0602	3.27651	5.41455	3.273	3.43196	3.75339	0.8412		0.858156	4.32277
14.5222	7.7084	6.1349	3.1178	4.2714	4.9033	3.99945	4.35848	2.02747	2.60633	6.81689	3.20204	3.3314	8.88542	3.47411	2.9852	6.10256	2.67917	2.8222	3.76857	4.16186	1.0834		0.865246	4.21145
14.6412	8.2572	3.907	1.9517	4.5647	4.3867	4.21253	2.99189	1.60049	2.92939	6.50144	3.79202	1.6298	5.16236	3.54839	3.8034	4.84491	3.76744	2.3294	6.59848	4.2732	1.9737		0.872336	3.95363
14.7603	8.9996	5.3019	2.425	5.6417	6.0653	4.12341	2.13445	2.83176	3.08041	6.06652	3.58153	2.4375	3.66129	5.95608	4.4876	4.87054	1.87156	2.7649	4.95296	2.52831	2.8175		0.879432	4.1238
14.8793	10.5955	6.6923	3.7398	2.749	6.531	5.73814	1.67156	1.4344	1.77164	8.65304	5.62246	2.1988	4.48203	4.80175	5.8775	3.33632	3.95673	1.8705	5.15094	3.72291	2.1473		0.886522	4.41636
14.9984	9.606	8.2132	3.5237	3.9851	4.484	6.03729	2.37577	3.61737	3.84876	8.26791	6.50653	1.836	4.78152	6.20254	3.9701	5.24156	5.44042	6.034	3.25374	4.68559	2.153		0.893618	4.95543
15.1174	7.6029	10.0936	2.2643	6.3687	3.8711	4.93576	3.24023	3.0537	5.56848	5.72933	5.37871	4.2609	1.64	5.87472	5.5167	7.95595	3.17929	6.1541	6.51022	5.48833	2.02		0.900708	5.08129
15.2364	8.6956	6.9705	4.4994	6.8384	3.7843	3.48694	5.15388	2.56072	3.0417	3.18862	3.88931	6.0879	1.00773	4.86159	4.6713	6.22997	2.04259	4.9515	5.81715	4.12683	1.4418		0.907799	4.44513
15.3555	11.0972	4.3005	4.217	7.7874	4.2942	3.43483	2.5069	4.2949	5.09604	3.00478	4.98608	3.6787	4.19057	4.46984	5.426	8.94083	2.90772	4.9507	6.46463	1.90581	4.1264		0.914895	4.861
15.4745	6.4298	5.4294	1.9689	6.5157	5.1246	3.89893	1.05385	5.38452	3.7309	2.88731	5.84821	2.9657	3.07436	5.67786	6.7563	6.64105	3.37971	3.5508	4.61421	3.85875	4.9902		0.921985	4.46576
15.5935	5.4748	5.9308	5.3691	8.5918	6.2617	4.49818	0.31948	2.65736	2.58915	3.47858	2.35239	3.8041	3.10085	4.89986	7.7139	5.43722	2.36469	3.7999	5.25576	4.27533	3.2099		0.929075	4.35166
15.7126	4.2885	11.6348	3.27	6.5805	7.5523	4.00115	1.26341	2.55783	3.35594	4.91234	2.22635	7.0635	3.74041	4.59332	10.2074	8.71563	4.41658	4.2981	8.7657	4.36138	3.1669		0.936171	5.28438
15.8316	8.9036	7.0983	2.4323	8.2562	8.6632	5.21997	1.49099	4.05466	4.75455	3.04748	2.92519	7.4883	4.09652	4.43442	5.058	4.53328	1.43138	4.3242	8.09118	2.87433	2.3866		0.943261	4.83641
15.9506	6.0953	3.5971	1.9457	5.649	6.9692	3.23361	2.021	3.47451	5.18226	3.0145	2.53893	4.4352	3.0477	3.23617	5.4865	2.09031	2.48385	2.722	4.83891	2.43686	4.6496		0.950351	3.76896
16.0697	4.5143	6.3045	3.8294	4.9395	3.7121	2.47436	2.38563	1.7723	6.21945	2.97313	3.58651	4.1207	2.75095	3.19324	4.8989	3.81184	2.22777	4.1083	6.13122	4.93493	6.0555		0.957447	4.04498
16.1887	3.5758	6.3973	3.1941	7.9539	6.1907	3.21217	2.89701	1.92107	4.87316	4.367	4.63125	5.0687	5.83317	3.25093	5.0283	2.30569	1.11835	2.414	4.30564	3.92212	2.4753		0.964537	4.04456
16.3077	2.1622	7.0215	6.1602	7.9017	5.7225	4.42735	1.94187	1.79131	3.1438	3.85436	4.59787	7.6478	4.45928	2.7956	4.8109	4.2486	2.23647	4.864	2.86543	2.37607	3.101		0.971628	4.19666
16.4268	3.0098	6.0958	5.8569	10.2495	2.4276	3.84743	3.17007	2.36611	4.27439	1.88967	3.95372	5.1214	3.97621	3.58586	1.7853	4.69154	1.27892	4.5481	2.852	2.75652	5.2431		0.978724	3.95143
16.5458	2.6173	2.3645	2.4946	7.3375	4.7239	3.33638	3.05651	1.44075	4.60596	3.0697	4.49675	3.3312	3.43108	2.82728	2.8497	3.5999	3.0662	4.5655	4.62666	5.11095	2.9028		0.985814	3.61215
16.6648	2.5083	5.1511	2.2964	6.7883	4.1929	1.9703	1.43665	2.21266	2.69967	3.97093	1.8473	2.0208	3.68946	5.24212	3.0978	5.25761	1.42983	2.7314	4.04091	3.66937	4.3424		0.992904	3.36172
16.7839	2.7789	3.7723	3.486	7.5505	3.4812	2.63121	2.86566	2.28597	2.80275	5.78467	1.78562	1.8545	3.02787	4.70214	3.8582	3.95469	2.74747	3.7816	5.17558	4.08049	2.467		1	3.56544

## Sheet: Image9
X0	Y0	Y1	Y2	Y3	Y4	Y5	Y6	Y7	Y8	Y9	Y10	Y11	Y12	Y13	Y14	Y15	Y16	Y17	Y18	Y19	Y20	Y21	Y22	Y23	Y24	Y25	Y26		Ap-Ba	Average int.
0	1.53358	2.6608	2.25867	2.38043	2.0158	1.268	1.339	0.55529	5.57731	6.65899	4.2085	2.24043	5.743	5.66779	3.46999	1.9358	3.09295	4.0582	6.81125	5.9269	5.0987	6.2519	1.66239	2.0445	5.5348	4.6326	2.73359		0	3.60597
0.119	1.10772	1.20679	4.15496	1.21729	2.3412	0.7735	2.5425	0.9235	6.38407	4.93808	2.2491	2.94388	4.9355	6.71681	1.58965	3.259	3.82622	4.674	8.65481	3.12513	4.2959	6.1335	2.25925	2.7761	3.9746	5.7842	5.03205		0.00636759	3.62294
0.2381	1.42329	2.95592	1.28335	2.0309	2.0407	2.5213	1.5115	0.4884	2.68052	5.79182	2.6568	2.58515	8.4269	4.18316	1.91055	2.9462	3.05599	7.5429	8.20223	6.53159	6.087	7.2176	2.4386	3.7144	3.4431	9.2712	5.03124		0.0127405	3.99897
0.3571	1.04074	2.70404	1.20366	1.96093	1.4752	4.2024	4.3413	1.13912	4.75898	4.42767	3.9692	3.01421	7.1266	4.74576	2.94457	2.1746	5.17947	6.3341	4.99323	2.22098	7.6212	5.3725	1.03677	2.4287	4.7804	5.41	4.76408		0.0191081	3.75446
0.4761	0.8554	1.81455	1.8664	0.95715	1.7768	2.8831	2.16	1.71456	4.44485	7.19529	1.9441	4.45506	6.7536	3.44838	1.7016	2.7286	4.69051	4.8487	6.72054	3.10509	5.4082	6.5608	3.20367	2.5419	4.6351	9.0924	4.85414		0.0254757	3.79113
0.5952	0.74386	2.46921	2.53941	2.92895	1.9023	2.4577	3.5882	3.81262	4.0651	3.97723	4.4897	3.6618	4.8575	4.36539	4.22202	3.3469	3.63839	2.457	4.99669	2.9522	4.4788	8.5604	5.02115	4.2823	6.871	6.6131	8.73179		0.0318486	4.14929
0.7142	1.45051	2.32943	1.6404	1.17977	0.8207	2.372	1.7317	1.11168	5.87725	6.28137	3.5037	3.6845	5.8682	3.94695	2.9614	2.5714	2.45992	5.3932	8.93891	3.86567	5.5825	5.6959	4.61935	6.5772	4.2438	10.0109	5.83611		0.0382162	4.09461
0.8332	2.44823	5.0028	3.56365	2.63433	1.7819	2.1264	3.4253	2.28189	5.34819	4.62542	4.989	2.75341	8.7202	2.95453	4.38471	0.824	1.88119	6.5549	8.77159	3.4506	5.0477	8.0129	4.35425	4.4565	2.1525	14.2742	5.09075		0.0445838	4.51522
0.9523	2.53527	2.92958	2.44393	1.83556	2.1913	2.1736	3.0572	2.23224	6.75837	6.47969	5.4338	4.44282	8.5853	5.49069	3.07532	0.843	3.53833	2.5073	4.67198	4.50531	5.8676	9.3507	4.88729	5.725	2.1645	10.2187	6.064		0.0509567	4.44475
1.0713	2.79148	1.95773	3.3365	1.45364	3.6818	4.183	2.3649	2.81693	4.57832	4.2015	3.2931	6.68357	10.6773	5.85517	2.72625	1.8696	4.69639	7.6802	3.18035	5.12485	4.3503	7.7315	6.52356	4.6249	5.1466	7.4355	4.48775		0.0573243	4.57232
1.1903	2.01555	4.97941	2.7635	3.98121	0.8737	2.9648	2.1787	4.64661	4.77515	3.12586	3.687	3.00041	6.9182	5.04528	2.58438	3.1187	4.93266	7.5977	4.79226	4.44931	4.7175	9.4238	4.60718	4.5023	8.1335	5.9271	5.0563		0.0636919	4.474
1.3094	3.00232	3.47761	2.16704	2.48697	1.7534	2.6166	2.705	1.81734	5.55067	6.00427	3.5773	2.75818	7.2483	6.21833	2.36237	1.3055	6.15178	8.1632	5.63267	3.87733	4.7822	9.0432	5.48665	5.0516	5.223	7.2005	5.23193		0.0700649	4.4776
1.4284	2.59582	3.39541	0.68698	0.83332	1.4293	1.5301	2.6283	2.50005	3.81939	5.15299	2.5755	4.40681	9.7292	7.28994	2.23717	2.0855	4.022	5.4967	5.59553	6.42999	5.3874	6.6196	6.00281	4.9986	5.5683	7.3462	7.23677		0.0764324	4.35554
1.5474	3.10012	2.65359	2.83472	2.7365	3.2534	1.7073	3.9715	2.71007	4.28627	4.79914	4.9589	3.38974	5.8306	4.4807	1.86586	3.9844	6.76016	7.1295	5.98707	7.89446	3.5482	5.4949	4.4172	4.7425	4.4987	7.6984	6.38804		0.0828	4.486
1.6665	2.62127	1.46346	1.70606	4.03515	2.7504	0.9555	2.6987	3.02409	7.96454	3.30188	6.3849	3.15282	4.7375	7.0894	3.69265	3.4501	6.27083	10.3163	4.93216	8.52327	5.2761	5.2452	3.7348	5.9137	4.3005	7.6732	9.47645		0.089173	4.8404
1.7855	1.04282	2.99394	0.94268	1.11447	1.8359	0.9426	2.1269	4.75305	5.35243	6.11334	7.278	3.11085	3.4744	6.08151	4.67761	4.6075	5.56244	7.4014	3.73309	5.38923	5.3148	5.6223	4.97098	3.8037	3.0287	8.7549	6.45781		0.0955405	4.31435
1.9046	1.34071	5.57385	1.81179	1.14302	1.1093	3.505	1.8605	3.81544	2.16174	3.91221	5.7642	3.91953	5.171	5.27514	4.12893	6.106	3.9896	10.0417	5.34772	3.72409	5.4131	5.9328	6.48999	4.0203	4.5719	7.1924	6.71383		0.101913	4.44577
2.0236	1.42074	4.30127	0.60982	1.01535	2.8532	4.3116	2.5902	1.89909	4.20452	7.36297	4.5255	3.94653	6.9451	7.08483	5.53507	3.87	7.12797	7.6073	3.82167	5.23082	2.608	4.466	9.03283	5.0531	7.5057	3.6555	5.97576		0.108281	4.61335
2.1426	4.36611	4.39256	1.72984	1.56941	1.4462	1.2342	2.6705	3.2711	3.68035	4.95277	3.8281	3.37188	7.0734	6.04041	3.35261	5.5496	5.9997	12.8118	5.57983	4.86645	3.13	5.4829	5.99194	4.5675	4.2174	5.2991	8.01075		0.114649	4.61061
2.2617	3.69552	3.86568	1.59413	1.80894	2.4054	1.7635	2.6693	3.48054	5.84134	4.34034	5.0107	4.51817	6.1848	8.32473	5.42599	8.2631	9.0774	14.221	6.71892	5.07873	3.7069	4.9524	5.51307	7.0793	3.8958	2.5562	5.92908		0.121022	5.10818
2.3807	3.33388	2.06329	3.05955	2.05551	2.5504	3.8207	4.2942	4.58611	4.91991	6.20532	4.3487	5.19812	2.0427	4.11885	2.99796	9.0857	6.53147	7.1913	4.63914	4.42591	5.9074	3.5017	4.50471	7.26	3.6549	6.1489	3.96845		0.127389	4.53388
2.4997	4.4578	0.60318	2.49902	1.445	5.1497	3.9306	1.9883	3.57989	2.91985	8.18423	3.255	2.94666	4.9154	3.84717	3.74201	7.4109	6.50844	7.3655	6.65684	5.21432	7.3703	3.2464	3.31591	6.3836	4.014	8.1746	8.74942		0.133757	4.73608
2.6188	3.30456	3.33841	3.58167	1.4422	4.2077	0.6905	3.4598	4.17569	2.51289	6.09922	4.379	3.51131	3.3686	6.33736	6.13544	8.3153	5.47709	5.1403	6.12038	5.00877	5.4063	4.0041	4.47422	10.4268	4.8552	5.764	5.31757		0.14013	4.69831
2.7378	1.39372	2.43282	3.28698	1.22979	2.5676	0.9902	3.7514	3.82754	5.15662	3.65588	2.6533	1.23631	4.5764	3.24852	5.17975	6.5696	6.97443	7.8549	5.94642	2.97954	6.0875	1.9456	6.72718	8.1277	4.7763	7.876	7.13762		0.146497	4.37739
2.8568	2.89601	4.17783	2.22796	1.8246	3.7063	4.6826	3.9097	2.33469	5.48875	8.06585	4.8788	2.54845	4.4742	5.69915	5.12512	6.6542	2.94548	6.5953	4.22279	2.47901	5.1062	3.2346	3.84595	11.2057	2.5955	6.5679	6.66118		0.152865	4.59829
2.9759	1.94447	2.96339	2.98131	1.6155	4.2861	2.494	2.005	2.24209	5.54996	8.60749	4.1025	2.97917	3.1514	7.09595	6.19468	6.1584	2.10543	6.712	6.29509	3.39589	7.0558	3.1473	6.04423	7.004	2.6678	7.2054	3.56109		0.159238	4.42835
3.0949	3.48411	2.0437	1.13969	3.19205	4.5782	4.1579	4.2877	4.63238	4.13763	8.6763	1.6135	4.43253	1.9233	10.042	7.70716	6.2352	4.28127	5.4983	5.12524	1.84515	4.9123	3.1706	5.09386	8.5023	4.9082	7.9113	5.26315		0.165605	4.77018
3.2139	3.42064	2.20977	1.95919	2.87528	2.4536	4.0734	4.515	0.74378	3.31458	4.74602	3.3861	4.69902	1.8907	5.10149	3.67172	5.7555	4.13177	5.417	5.21592	3.74616	8.5271	4.1255	3.2978	8.5213	6.9267	8.3213	7.03918		0.171973	4.44761
3.333	3.32973	3.58621	1.06189	3.44553	1.4227	3.623	2.7365	1.35815	3.25134	7.82856	4.9591	5.7936	4.1354	4.97678	4.60833	7.6473	5.98722	6.4538	5.10572	4.01113	8.7758	4.7824	5.51368	8.6591	8.0862	5.2292	8.85268		0.178346	5.00819
3.452	3.16975	5.83714	1.28149	2.86076	1.729	5.4454	3.0836	3.35711	2.27257	7.34852	5.5164	3.62875	4.9779	6.1673	5.62064	4.8083	3.59428	7.5694	4.56991	1.92062	5.8013	2.4348	5.92695	4.7727	6.5615	8.1555	6.9035		0.184714	4.6413
3.571	2.34296	4.25686	3.30929	2.97156	2.4941	3.3394	2.8938	3.61314	4.0523	7.9671	5.2209	4.87008	4.5634	8.04254	4.01631	7.6675	8.06456	7.1011	4.00521	2.15619	4.4795	2.8724	5.41625	5.8142	8.8378	5.4197	5.886		0.191081	4.87682
3.6901	2.21212	3.0566	1.47021	2.56175	5.6652	2.5668	4.4949	2.88682	4.77081	7.1029	3.7636	4.49898	5.0023	6.75317	3.71296	6.8825	6.01778	9.4344	3.57093	4.67501	7.4748	4.0269	4.38866	4.013	4.0599	4.3817	4.30464		0.197454	4.58331
3.8091	1.78462	5.20776	1.39037	1.13737	2.113	4.2411	3.6698	3.86268	4.58952	7.45309	4.1908	5.97208	3.6062	7.83716	3.33729	4.8829	6.24888	5.6764	4.38424	5.60951	4.9142	2.9919	5.23458	5.8787	3.618	3.9454	4.09307		0.203822	4.36558
3.9281	3.2808	6.5669	2.11797	2.66058	3.1049	4.4904	5.8989	1.73318	3.31877	6.59183	2.5486	5.85785	6.5519	6.89204	5.73193	5.5769	5.36205	7.8541	4.63786	6.27609	5.4093	2.507	6.78828	5.553	5.2554	8.0212	6.8553		0.210189	5.09048
4.0472	4.19285	3.99776	5.10603	3.8117	4.3456	3.3909	3.5609	1.85451	3.00558	4.72321	1.901	3.84729	4.4817	4.80587	5.26631	5.4723	8.54205	6.3442	5.12359	4.82658	3.4788	1.7957	4.07713	5.6809	2.9656	5.9988	9.74566		0.216562	4.5312
4.1662	3.36037	6.54649	4.28045	4.57579	4.9965	2.853	5.7329	1.46829	3.97881	4.24597	5.9558	3.89129	2.6238	5.99691	7.9786	6.0494	6.57397	8.496	5.74022	3.24242	5.4945	1.8642	5.49821	6.0543	6.4649	6.0628	5.07065		0.22293	5.00358
4.2852	1.65044	4.25687	1.37977	1.15815	4.0578	5.003	4.5141	1.87132	2.60394	6.11315	5.3433	5.11308	2.0198	3.70538	7.41119	3.1643	3.65612	6.5726	4.58981	7.92009	5.7463	4.7688	2.97823	8.186	4.6156	5.1733	4.90739		0.229297	4.38814
4.4043	3.62758	3.62133	2.64895	2.23837	3.892	3.7835	2.5012	1.15498	2.76426	4.02004	5.1828	3.91633	3.0185	5.8884	5.69879	4.1772	3.61403	6.0313	5.58662	6.60197	5.2461	3.8612	3.35403	5.8813	4.9049	6.7663	4.49957		0.23567	4.24006
4.5233	2.23674	4.25968	1.97182	1.80884	2.5579	4.0299	3.8011	1.1077	3.37253	3.83087	4.391	4.23727	3.0626	5.94606	3.58993	4.4935	6.3566	4.9058	4.03781	5.05252	3.4129	2.2494	3.95755	5.0433	3.6476	4.1878	2.9794		0.242038	3.72326
4.6423	2.39046	5.75615	2.93131	1.40011	1.8717	2.9781	4.3004	1.96604	2.6904	4.8772	5.4861	3.62061	4.3629	8.25364	4.57491	4.0793	5.32469	5.1768	2.61544	3.75583	3.8385	3.6201	2.74911	6.4951	4.049	3.3268	3.73682		0.248405	3.93435
4.7614	3.34394	5.53491	1.57878	2.56074	2.6554	4.8172	4.2224	3.80121	3.12131	4.97865	3.3251	6.57367	2.6567	6.29226	4.83543	2.8743	7.21611	8.4323	2.23873	4.82028	3.0549	4.0154	3.50954	6.5757	5.4379	4.1586	6.71875		0.254778	4.42038
4.8804	3.20213	4.69173	1.14717	3.37678	8.3447	5.8693	5.8695	2.50221	2.44652	3.16612	3.0646	4.21432	4.4896	4.6785	4.10029	3.6749	7.03173	7.4513	2.85294	3.89887	2.7653	3.1212	4.5146	5.4046	4.923	4.0306	4.8901		0.261146	4.28602
4.9995	4.39844	4.42397	2.69161	2.70213	5.6355	5.0272	6.4424	4.13126	3.14853	9.06601	3.7972	2.38238	3.2121	5.94082	6.64386	5.2824	4.78356	5.1616	5.51344	4.61753	2.5067	2.786	6.25262	3.6161	2.7886	7.6294	4.68301		0.267519	4.63942
5.1185	4.98553	4.65245	1.65986	3.77039	2.4718	4.8901	4.9285	5.09309	4.13887	5.05279	3.8261	3.8038	3.4124	4.36183	5.21926	4.7031	6.98385	6.1146	3.0959	4.77887	3.5478	5.5242	4.33328	2.004	3.6219	5.5659	6.50219		0.273886	4.40898
5.2375	3.49889	2.43979	1.08898	2.06691	3.2294	3.6337	3.1055	4.36545	2.39532	3.83036	3.701	3.15853	1.7495	3.89944	5.15942	4.3517	5.4652	5.0345	1.97896	5.09298	4.3892	5.1533	5.33118	6.1971	7.5313	5.7859	5.98691		0.280254	4.06002
5.3566	4.94577	3.89562	0.70982	4.25465	6.002	2.7312	10.765	3.67313	2.90602	7.80339	4.4771	3.91445	2.1214	5.33518	5.69238	2.3282	6.87082	3.9889	2.76755	5.78509	5.0857	3.6449	4.32083	6.6361	6.0356	3.553	7.81096		0.286627	4.74277
5.4756	4.39169	4.05731	0.85179	2.96395	5.4253	6.0781	7.712	2.79345	3.14002	5.56074	3.7965	3.01918	2.7892	6.16992	7.10226	3.9447	7.11429	3.7485	2.74686	4.57314	4.7945	4.7583	4.13184	6.1718	6.9269	4.3043	8.14631		0.292995	4.71159
5.5946	5.37477	6.63647	0.3331	1.89838	3.12	5.8903	6.3483	2.37929	2.81718	3.96612	4.6021	3.64055	1.2974	5.88552	9.3106	3.8639	6.14878	3.412	1.88814	4.82741	6.6364	3.8774	4.68996	5.2874	6.9599	6.0312	5.9854		0.299362	4.55955
5.7137	3.12699	4.35553	0.6663	1.834	6.5058	5.6553	6.1216	2.57715	3.15727	4.13683	2.2926	5.89518	1.3694	2.80059	6.92402	4.4102	9.35171	3.196	3.6885	7.66987	8.2311	5.1525	2.134	5.9244	7.6519	7.1659	5.90429		0.305735	4.737
5.8327	1.89292	4.08593	3.25813	3.15129	2.5399	8.7354	7.1989	3.31546	3.37292	2.97781	2.0536	5.82518	2.6311	2.43127	7.74274	2.8046	7.41233	3.0029	4.48434	7.60359	6.0385	4.2353	6.1186	5.6317	9.8363	6.4564	3.32909		0.312103	4.7469
5.9517	2.09809	3.43255	3.47525	1.53172	0.7146	4.3377	4.3514	0.90391	3.26513	2.47715	4.3738	3.70583	0.7263	4.22789	7.01374	2.6396	7.47705	3.7508	3.63045	5.57856	5.513	5.5602	6.19143	5.5652	6.1692	3.5243	5.59398		0.31847	3.99366
6.0708	2.39788	5.60388	3.19454	3.31136	2.3798	3.0617	7.8053	2.30253	4.15083	2.35655	3.6878	2.89452	0.7137	2.48227	4.13928	3.7081	5.43029	3.829	4.246	4.31457	8.1245	4.0291	6.52476	5.4385	6.3622	3.6004	6.64432		0.324843	4.17532
6.1898	4.7261	1.93051	3.57866	3.34451	3.4683	6.9756	9.4449	4.88103	5.73408	2.63189	1.6239	2.59222	2.016	2.62842	3.73712	4.7634	5.3993	2.7482	2.53728	8.55873	7.6739	4.7911	6.7804	6.0505	6.0112	6.1803	7.99483		0.331211	4.77046
6.3088	2.63628	1.68724	2.91594	3.65801	2.6394	11.6312	8.0233	4.82205	5.81962	4.50647	1.9681	5.21805	1.6342	3.79422	2.96502	6.2525	10.107	3.6835	2.32704	8.51118	9.9766	5.35	6.04362	4.9858	8.097	4.8894	10.7981		0.337578	5.36818
6.4279	3.2774	2.72976	2.50233	2.87578	2.5075	3.7236	6.6744	4.9443	3.85482	5.65927	4.0832	3.11164	2.6174	3.09085	3.5687	5.7111	5.21626	3.8571	1.44981	9.42093	8.8116	3.2274	6.28478	4.8823	6.7933	5.7203	7.58078		0.343951	4.59913
6.5469	3.02947	2.82192	3.4503	2.68892	3.2849	6.512	6.2233	3.86723	6.0551	4.88105	2.072	2.24495	0.7145	2.12521	3.06669	3.2564	5.12615	2.9439	3.16376	8.15595	6.8837	3.6782	4.17723	6.5239	7.5036	4.9172	4.18755		0.350319	4.20574
6.6659	6.49134	5.12794	2.89529	2.24148	3.7569	4.538	5.2722	2.01415	2.53735	5.18668	2.3689	1.27323	1.2046	3.26945	3.76775	3.6214	6.23056	2.027	3.5525	6.74619	7.2423	3.298	3.57362	4.2969	9.2204	4.7658	3.52933		0.356687	4.0759
6.785	5.43043	3.76234	5.69149	4.06453	5.5873	4.8516	7.0714	4.52029	3.19212	3.22051	3.0183	3.15503	2.098	3.24866	3.22148	3.3934	4.99281	2.0736	2.21808	4.18192	3.911	1.593	3.76422	3.8959	8.3503	4.9531	2.10854		0.363059	3.98405
6.904	2.51766	0.87834	3.14966	4.35818	5.6043	7.2274	2.9731	4.4442	3.66986	3.4682	2.3241	2.96946	1.9619	2.88332	2.06232	2.5543	3.591	3.4029	0.71544	4.38023	2.7106	1.564	4.67772	4.6311	6.6868	5.6997	1.20431		0.369427	3.41889
7.023	2.02448	2.06196	2.50576	5.55638	7.5362	4.8604	2.7054	5.93594	3.27419	3.00305	3.302	3.20851	2.0549	1.78719	1.1348	3.615	4.70684	1.839	1.00619	5.19088	5.341	4.0596	4.62215	5.7291	9.4117	6.6752	2.15734		0.375795	3.90019
7.1421	2.7363	2.98515	3.35912	4.9106	6.899	3.7991	5.4372	2.85842	5.96021	2.58639	2.8592	2.93595	3.472	1.77196	1.1489	2.8212	8.3477	3.412	0.85431	3.7439	6.2994	4.8186	5.22308	8.7972	8.6056	6.5263	4.73518		0.382168	4.36681
7.2611	6.54035	2.84668	6.43721	4.15299	6.8133	2.8663	4.1967	3.39786	6.12496	2.15421	2.1762	2.3055	1.8622	2.27319	2.70177	2.953	4.33077	3.1597	2.8283	2.27218	3.8909	3.5528	2.42737	6.633	6.1834	5.9707	3.16257		0.388535	3.85978
7.3801	3.21232	1.39195	4.10273	3.01049	4.9292	4.7518	3.6171	2.11947	4.4971	2.01683	2.3607	2.18703	2.1243	2.4088	2.35168	3.4084	4.81153	1.7123	3.17286	2.79857	5.9969	2.4313	2.05769	6.0864	5.5059	8.3233	3.48239		0.394903	3.51367
7.4992	4.73815	0.72986	6.33579	3.50725	6.0144	2.3215	6.3651	4.71853	3.25163	2.55543	1.6137	3.28392	1.5966	1.54094	3.4067	3.3375	4.23172	2.9555	1.73247	2.56768	3.435	4.3861	2.69432	7.0235	5.0367	7.8392	2.4471		0.401276	3.69134
7.6182	3.95435	3.20182	4.08479	3.25907	4.6189	2.6133	5.4331	3.05634	3.43282	3.019	2.3584	4.60488	1.3331	0.75597	2.5878	1.983	6.09495	3.2006	2.3893	1.87061	4.0644	3.2031	1.44799	7.0806	4.4894	6.0661	1.49406		0.407643	3.39621
7.7372	3.50965	2.46962	4.47261	4.0982	3.7806	2.9781	3.4036	4.23749	3.25369	3.5453	3.1519	3.86247	2.396	0.92043	2.67992	3.5222	4.03705	2.181	1.91479	3.07257	4.5773	3.1158	1.38595	3.0936	10.2052	8.2057	2.531		0.414011	3.57784
7.8563	3.95096	3.92814	3.58727	4.55316	7.6149	6.0715	4.0518	4.48582	1.63679	3.84354	2.9274	3.81948	0.4443	0.51475	2.6493	4.1796	2.30132	3.4257	0.61334	3.03361	4.5311	2.7279	2.48372	3.001	8.9114	8.6269	5.15507		0.420384	3.8174
7.9753	3.32882	3.68412	1.71704	4.46601	5.0612	5.9673	2.9721	3.13478	3.94151	1.76981	4.4003	4.70118	1.4489	3.93749	4.61998	5.1473	3.70915	2.7473	1.13827	3.45011	3.4756	2.6032	3.40485	6.4071	7.15	4.8525	3.92272		0.426751	3.82069
8.0943	3.6392	3.3733	4.30515	4.55314	4.0341	3.1624	2.6393	2.29509	2.75345	1.80094	2.3491	5.18239	2.8974	4.19088	5.5423	4.8126	2.62381	2.3899	1.55838	3.3103	4.0408	2.0118	1.47103	4.0233	6.671	2.7237	3.79937		0.433119	3.41312
8.2134	2.05461	4.03684	3.12807	3.76461	6.3302	2.2618	3.9591	1.05459	2.71381	1.83607	5.1554	3.7407	1.4703	1.81503	3.5104	3.8402	1.35841	2.7877	2.4115	3.17831	5.4841	1.0455	4.09305	4.6088	5.4806	5.5731	3.17234		0.439492	3.32834
8.3324	2.8048	3.69267	3.31369	2.50909	5.5566	4.5469	3.9202	2.90516	2.78717	1.90416	3.4053	3.21152	0.6355	0.29516	3.82142	3.601	1.39239	1.173	1.41966	4.01403	4.1303	1.208	3.9775	5.0795	7.2006	5.4995	4.49494		0.445859	3.27777
8.4515	2.26625	4.69285	4.84166	3.42014	5.2785	2.6373	3.2128	4.08435	2.17337	3.4676	0.8942	5.0478	1.7993	1.66331	3.03877	3.6082	2.58311	0.624	4.37866	5.79765	5.7761	3.6166	2.79691	5.9621	6.2055	8.5597	3.78556		0.452232	3.78564
8.5705	2.09897	2.49281	2.3538	2.62017	3.5371	3.2406	2.0385	4.50295	4.06559	2.59669	3.0464	4.72385	2.2209	3.35901	1.24826	2.4257	2.75965	2.4963	2.88989	1.84635	6.0783	2.1283	1.92302	5.408	8.8989	8.957	1.4784		0.4586	3.3865
8.6895	1.36372	3.27656	3.52915	2.61395	3.3602	2.1881	2.8613	5.19562	4.04095	2.79295	4.9412	2.87003	2.3523	2.51286	3.27202	2.9741	1.78051	2.7519	2.78045	3.37275	8.1467	0.9293	1.14409	5.5876	8.3066	8.1415	1.98013		0.464968	3.52098
8.8086	4.68831	3.57716	2.95529	2.40792	3.3896	3.9289	1.5897	4.71533	3.43012	3.47109	3.7018	4.39146	1.5431	1.72664	2.58751	3.9624	2.32079	1.7013	2.60439	3.14633	10.3509	1.1243	2.21563	6.038	6.056	5.1119	1.68418		0.471341	3.49704
8.9276	4.27379	2.39694	2.44886	2.95	2.4069	2.513	2.9382	5.29656	7.18529	3.65835	2.5826	3.10173	1.9302	2.05639	1.97132	3.6988	2.13178	1.486	2.60953	5.03122	6.727	2.6212	2.54085	5.1599	4.7461	8.4739	2.65108		0.477708	3.54028
9.0466	4.53065	1.39144	1.7243	3.97924	2.87	2.3867	3.1233	4.80377	4.60211	5.07429	4.9899	4.05086	2.8245	0.73955	2.90614	2.6593	2.26925	1.4112	2.45131	4.20352	7.0024	2.2449	3.77664	9.4727	6.7851	8.7183	3.09024		0.484076	3.85487
9.1657	5.82159	2.05316	1.56069	5.61127	5.7633	2.3229	2.1777	3.11666	3.32756	1.6873	3.4877	3.59773	2.0514	1.29351	3.11539	3.1608	2.17066	3.1886	2.10028	2.60738	5.5061	3.3891	3.54879	5.8936	4.5146	5.0343	2.65031		0.490449	3.3612
9.2847	3.70205	4.55394	1.58583	6.09269	3.2267	1.5786	1.969	3.1133	4.35522	2.45751	6.2457	1.77357	0.8885	1.61855	4.57998	3.4029	3.94737	2.6672	3.72366	3.01475	8.6687	3.0696	3.36198	5.0432	5.5832	3.8406	4.99469		0.496816	3.66885
9.4037	2.97883	3.14735	1.84858	4.49335	2.1848	1.1076	1.7576	3.2891	3.8852	4.36439	3.1423	2.12617	0.5264	1.81641	7.05797	3.7966	2.54649	0.6804	2.15284	4.0335	6.6738	2.7913	3.7826	7.0098	5.7092	4.9432	2.91197		0.503184	3.3614
9.5228	1.29385	2.07062	3.22015	7.48361	3.1898	1.1697	1.4133	4.7482	4.97164	2.18605	2.7859	1.56089	0.1731	1.83623	6.32157	4.5121	3.49767	1.3583	1.20688	2.18878	11.0593	3.382	2.06196	6.7582	9.9597	2.8697	1.2845		0.509557	3.50236
9.6418	3.61539	4.19123	3.55784	5.0195	3.3412	3.0566	2.0375	5.68248	3.53433	4.41573	4.0424	1.57791	1.0478	1.00604	10.0299	5.3797	3.52754	1.1887	1.5986	2.61651	10.4651	0.9324	5.16544	10.3091	8.5766	5.6778	1.53457		0.515924	4.18992
9.7608	4.36013	1.71576	2.50442	3.70857	3.0859	3.815	2.4686	3.15873	5.88781	2.38283	4.3938	2.21634	0.9695	0.94596	6.91962	4.9865	3.24	1.0077	2.0513	2.13939	7.8382	2.1703	1.51956	5.7349	7.2046	6.6834	2.75975		0.522292	3.55069
9.8799	6.10235	3.28193	2.54217	6.32159	3.4204	2.9768	2.5364	2.67879	3.68509	1.98322	3.7032	1.40963	1.3928	0.99256	3.3382	4.0553	3.28159	2.6548	1.51791	3.80065	6.2184	2.5669	1.97903	7.8325	8.0324	3.8934	3.69483		0.528665	3.55159
9.9989	2.28657	3.19915	4.32045	3.23181	3.6806	1.2957	2.2411	2.73072	2.39364	4.29542	2.1818	3.6068	1.5605	2.0608	5.80951	4.7395	2.72263	0.7467	1.90861	5.18487	7.5228	2.6792	3.18045	7.7217	6.1834	4.8388	4.24244		0.535032	3.57651
10.1179	2.57861	3.87637	1.89161	2.30441	3.4355	2.6596	2.3619	2.06069	3.37648	7.11764	4.6897	4.24413	3.443	1.04999	4.84062	4.6601	2.86226	1.6396	3.15282	2.51391	5.777	2.8511	1.0552	11.5807	4.0938	7.3993	2.47079		0.5414	3.70322
10.237	2.47143	4.26743	3.41149	5.08817	3.5148	2.4579	0.9347	4.1934	4.04029	7.75092	4.3579	4.21813	0.9694	1.46045	2.73635	3.9945	4.36518	1.3712	2.27519	3.27321	6.0597	1.0285	4.05774	14.6255	4.9004	7.4905	2.95139		0.547773	4.00984
10.356	1.34773	3.1324	2.73784	3.76796	2.9476	1.6147	1.5443	3.13283	5.03055	5.82039	7.2117	2.85426	1.3589	1.12074	1.84237	3.3777	2.37294	0.7128	2.40493	3.68208	6.5173	2.7006	4.4188	11.9918	5.5443	5.8913	2.77988		0.554141	3.6244
10.475	1.26907	3.42556	2.25291	3.03096	6.314	1.0043	1.3442	2.20522	5.55452	3.58374	8.2404	3.19407	0.6436	0.71244	2.6989	3.3067	3.26492	1.4975	1.46875	1.61408	4.2578	3.4924	3.11489	9.8047	6.5555	4.719	3.83925		0.560508	3.42257
10.5941	2.0774	5.12221	5.59971	3.67191	8.1699	1.8539	1.3423	2.56762	5.03579	2.68817	9.0914	2.21709	0.7363	1.10526	4.54453	2.4028	3.61493	1.2054	1.38505	3.89023	5.5898	0.9658	1.23149	11.7693	8.5063	3.9266	5.65173		0.566881	3.92455
10.7131	1.38462	4.51205	2.86526	5.42427	7.0886	2.083	3.2669	2.57434	7.62401	2.94074	11.035	1.52107	0.5452	1.73619	3.98517	4.6363	5.6388	0.5342	3.02034	4.44156	4.1042	2.8712	2.68528	10.5481	7.821	5.6357	4.35482		0.573249	4.25474
10.8321	2.54577	2.73794	2.66354	7.35939	7.1041	0.3633	2.3076	2.56408	6.47647	3.37588	10.5988	3.33408	1.2956	0.36549	2.22558	6.2399	4.2503	1.5204	2.06701	4.20784	5.8875	2.1379	0.33599	8.8967	6.1589	4.7277	2.36743		0.579616	3.85612
10.9512	1.86315	1.29781	3.21154	8.26026	8.1488	0.8424	0.5214	5.10753	8.17659	1.45163	10.9581	1.56228	3.4932	1.64312	4.32299	4.7643	2.11723	1.9373	3.13101	1.2383	4.9279	3.1311	1.40595	7.051	9.2589	3.5502	1.59307		0.585989	3.88767
11.0702	1.70251	1.48157	5.20567	6.48597	9.4371	0.8981	0.0276	3.32591	3.47278	0.42907	7.1224	1.69241	3.5676	1.46389	4.88284	5.4504	6.05751	1.5855	4.70568	3.71364	6.8575	3.0559	1.53654	7.4813	14.1392	4.4016	3.32747		0.592357	4.20399
11.1892	1.38732	3.48032	4.41298	5.28207	9.5472	2.1495	0.8798	3.09295	5.03179	1.22157	7.7308	1.89447	1.0462	1.60697	3.42825	4.5254	4.54942	0.9776	3.58098	3.76083	9.6358	4.6074	1.9194	5.1041	7.7513	5.5951	2.73392		0.598724	3.9605
11.3083	0.87945	2.42122	5.84475	5.55091	6.0045	1.5551	1.0069	3.95215	4.30212	1.97991	4.6554	2.87946	0.6986	2.43541	2.74294	5.4196	2.14269	1.306	0.87034	3.83623	10.1984	2.6411	2.17511	7.9175	4.6753	5.6269	3.03173		0.605097	3.58332
11.4273	0.33755	2.11212	5.76527	6.11384	12.2052	0.7102	1.4409	2.04085	1.69473	2.16902	5.7377	1.92534	2.1868	0.50533	1.3202	4.5865	1.43128	1.9759	1.43519	3.80374	9.3923	2.853	1.06873	5.1235	4.8623	7.5367	1.95429		0.611465	3.41809
11.5463	0.68787	2.69224	4.06466	6.29034	8.8198	0.29	0.8075	3.00308	0.73454	1.69184	6.3055	2.28611	0.9104	0.59388	1.06374	6.6388	5.71534	1.5461	1.53281	4.42587	8.2089	3.1353	1.85604	4.3336	6.4107	7.651	4.91206		0.617832	3.57807
11.6654	0.35078	3.45838	6.26599	4.50169	8.5675	1.2555	0.5012	1.91282	0.91448	0.41838	4.9702	1.31232	1.2761	0.42984	1.85869	6.23	4.9345	2.6378	2.35949	3.81955	9.4316	2.0257	1.43498	7.4157	8.4821	8.8196	3.77587		0.624205	3.68003
11.7844	1.26417	3.85465	4.59821	6.80939	7.0696	2.1119	1.11	2.85456	1.57339	2.52958	3.0977	1.58185	0.6114	1.03636	2.11212	7.0876	3.66737	1.6608	0.76781	2.78769	6.9718	1.9583	3.44278	6.0076	8.639	6.3229	2.38927		0.630573	3.47844
11.9035	1.25205	4.23007	5.44926	3.67584	3.6223	1.2355	3.512	3.17343	1.36297	1.44562	3.6104	1.67293	0.9709	0.94384	1.42818	8.6874	1.3143	2.4315	1.69178	2.63908	4.5832	3.4926	3.45286	3.1066	7.87	6.0008	2.96406		0.636946	3.1785
12.0225	1.81268	7.78998	3.99918	1.82483	5.9448	0.329	1.6092	4.45876	2.67235	2.03494	1.5459	1.45021	1.6405	2.73127	2.64935	10.8077	2.9679	0.7983	0.9055	2.81686	4.6917	4.9878	1.07492	7.6273	13.2117	6.4221	2.24472		0.643313	3.74257
12.1415	2.97268	5.87312	3.71431	3.85272	3.4554	0.5742	1.0363	4.18248	2.79437	2.96119	1.6408	1.51657	1.3965	0.75776	2.13048	8.3465	3.90562	1.3138	1.35508	1.58345	6.1846	5.0316	1.90998	4.9287	7.3185	7.6639	2.17871		0.649681	3.35479
12.2606	3.95968	4.02342	4.39559	3.03941	1.2125	1.4298	2.4318	4.60688	1.039	2.51473	3.6523	2.09953	2.1337	1.60413	1.80745	6.2704	3.96058	2.4597	1.38086	3.54319	7.8467	4.9044	3.98996	3.8806	6.7751	6.6201	3.51569		0.656054	3.52212
12.3796	4.04831	2.95581	4.91714	4.5548	3.281	1.9616	0.7577	1.63873	1.73039	3.72553	3.0029	3.21595	1.0106	0.57714	1.571	7.123	5.09218	1.2869	2.68632	2.24654	6.3957	4.0359	4.12266	4.231	6.6242	4.9012	3.34759		0.662422	3.37192
12.4986	4.46439	1.4486	3.63331	2.60028	1.7673	1.0491	1.4592	3.65801	3.81449	3.63014	1.5953	2.23559	0.2569	1.13344	1.10968	4.6287	7.21968	1.3092	2.162	2.09577	8.589	3.1431	2.26004	7.9932	8.3122	6.0008	1.09615		0.668789	3.28391
12.6177	4.85083	1.26428	2.57081	0.86254	2.867	1.9009	0.7576	2.81577	3.00384	2.86937	2.0449	2.31298	1.3523	0.96708	1.49325	7.1543	4.10479	2.0928	2.6323	4.30833	2.0104	5.5748	2.30486	6.1325	10.9223	5.5926	3.06712		0.675162	3.25298
12.7367	9.82846	0.95328	2.20513	2.16024	3.8294	1.0941	0.9867	1.98826	3.61481	1.08242	4.3702	1.74277	0.6936	0.64496	1.77655	6.3863	3.46289	1.0697	2.58013	2.45461	4.4002	5.7017	0.7336	7.0183	12.1608	6.3613	5.1851		0.68153	3.49946
12.8557	2.96012	2.04353	2.0343	1.65255	5.0918	0.9158	1.1384	2.5788	4.60774	2.1218	2.7898	1.55673	0.9111	0.66739	1.8259	5.8044	2.37232	3.4389	3.6748	3.4245	4.3906	5.5502	2.24935	5.9217	5.8041	6.5473	2.38248		0.687897	3.12802
12.9748	3.27746	2.55041	0.3719	4.49653	2.4786	1.0836	2.9175	5.50275	2.45638	3.55721	2.8269	3.60994	1.732	2.29665	3.4761	3.2042	1.51995	1.9989	4.55556	2.68761	3.783	4.2309	2.04581	8.8715	9.0147	4.8661	2.74458		0.69427	3.41321
13.0938	5.21345	2.45103	1.31468	3.60379	2.5245	1.147	2.4923	3.04524	3.29069	5.38506	4.0746	2.13939	1.2881	2.29496	4.16653	3.2201	2.37259	1.758	2.33563	2.73369	2.7611	2.6581	1.28396	6.584	7.7444	3.8795	2.72578		0.700638	3.12919
13.2128	5.70645	3.09527	1.00487	3.11549	4.4399	0.9274	0.7954	1.74096	3.9921	4.62542	3.5884	2.2964	1.4401	1.0984	4.12283	3.5351	4.06942	2.3251	5.66824	2.46536	2.6748	1.8475	1.42949	6.6881	7.8486	4.0708	2.51693		0.707005	3.22699
13.3319	3.96908	1.98652	2.59902	2.37295	2.9301	1.7134	1.0662	2.94282	1.37034	3.40369	2.7481	1.77316	1.476	1.48207	2.96554	4.1108	2.79948	1.8589	6.07177	5.55216	3.7183	2.9424	1.9297	5.0596	4.7785	2.8363	2.44236		0.713378	2.92219
13.4509	2.51931	4.19395	4.09619	3.60221	2.8465	1.4935	0.8101	3.0175	3.42277	5.31539	2.9232	1.16131	1.6802	1.33523	4.30632	3.3629	1.50621	0.7716	1.45704	3.86667	3.4595	2.9155	2.38087	6.5499	6.7541	5.6246	2.94887		0.719746	3.12302
13.5699	2.73991	5.30572	3.6651	2.80253	4.8258	1.3348	0.4	2.49925	3.12444	4.191	3.1098	1.91462	1.4934	1.49695	2.50655	4.2232	2.1064	1.1527	1.24915	4.19746	2.2773	3.5734	3.17206	5.0215	6.0539	6.0161	3.08499		0.726114	3.094
13.689	3.85384	2.2071	3.93962	3.49608	4.2361	1.2193	0.857	2.25204	2.95886	2.39951	1.8849	1.31501	2.2589	2.3353	1.92612	3.8139	2.44477	2.4111	2.36967	3.66125	2.8738	2.4579	3.40193	4.8445	7.9782	5.4643	3.93857		0.732486	3.06665
13.808	4.00717	3.13517	3.95824	2.29413	1.9094	1.3154	0.9983	2.35808	3.13825	1.66557	3.6311	2.11812	1.9067	2.1159	1.55238	3.5209	2.37335	4.7625	2.48077	5.9233	4.3649	2.3806	5.5563	4.1562	6.8157	5.2017	5.27125		0.738854	3.29301
13.927	3.78817	2.8975	2.86241	3.12603	4.6972	2.3173	0.7244	0.65687	1.20549	1.87798	3.1701	1.24015	0.7915	1.48156	2.28895	5.9284	1.40059	5.4373	1.5667	5.15321	2.678	3.4845	1.57212	5.327	9.9151	9.6494	4.13881		0.745222	3.31025
14.0461	3.61354	2.29216	3.84596	3.09699	4.7706	0.8828	2.3582	1.26525	3.03464	4.33123	2.3702	3.00536	1.9642	1.6347	2.00254	3.4516	1.02115	3.718	2.51188	5.95601	1.5194	3.7964	0.70883	5.2101	6.0277	3.9337	2.4038		0.751595	2.98989
14.1651	1.90364	5.02402	3.81106	3.5805	6.8956	0.9801	1.4622	2.52789	4.36112	1.82797	1.9369	3.36137	2.3516	1.52099	2.17066	4.137	1.22189	1.0481	2.81246	2.34297	2.0589	2.1647	1.38537	5.6015	6.4094	3.4752	2.46915		0.757962	2.92008
14.2841	3.08943	6.1602	3.95803	2.1475	5.3511	1.1704	0.4379	2.45867	6.18998	3.45837	0.8882	2.89357	0.7342	0.30872	2.35906	2.9748	2.52379	2.9502	4.87516	2.37798	3.0879	2.2033	2.71768	5.6602	4.4542	4.1422	2.2906		0.76433	3.03198
14.4032	4.14519	4.18907	3.28011	2.87522	3.0711	0.3098	0.765	3.56057	1.80171	4.64262	0.6492	3.30737	1.081	0.39862	2.9231	3.081	3.25741	3.1305	3.77767	2.76514	5.9349	4.2532	2.90607	2.2539	8.0248	3.049	3.50841		0.770703	3.07191
14.5222	2.58866	2.79865	4.5372	2.61972	3.7657	0.4973	1.5298	3.72037	2.87696	3.08424	0.9814	1.33163	1.7501	1.26004	3.14905	3.4399	4.14697	1.3328	5.16102	3.68478	3.2173	1.8953	3.4689	3.4528	4.5568	4.4239	5.02536		0.77707	2.97395
14.6412	4.7403	2.94306	6.53229	4.13623	3.6152	2.1582	0.7673	2.19861	3.35263	2.88716	1.8289	2.8534	0.7886	2.07857	2.99666	5.1861	1.91593	2.2232	3.95233	5.60496	5.5437	1.4589	3.56814	7.3143	8.2715	4.5842	4.71206		0.783438	3.6375
14.7603	2.31848	1.17688	6.09869	5.80615	1.9652	1.0271	1.0505	4.02174	3.69052	3.86407	1.5466	2.4097	2.24	2.21125	3.29496	6.6335	3.44981	1.6695	2.81956	2.94442	3.8543	3.8241	4.59763	6.4205	7.7827	0.7311	4.18879		0.789811	3.39399
14.8793	1.44951	3.23561	3.56899	3.39966	2.7082	1.6278	0.7754	1.95146	3.11347	6.15449	3.108	4.1089	1.9547	3.58773	4.9512	6.8989	4.08891	5.2752	4.56483	4.19967	4.6543	1.6279	1.845	6.1358	5.9293	2.4773	6.46872		0.796178	3.69855
14.9984	1.1115	4.45314	4.53774	2.53553	1.3971	1.3669	0.8556	3.0107	1.4331	6.4794	3.0338	2.369	2.2798	2.52205	1.81082	3.7067	4.11549	2.6585	1.99576	3.86047	6.3792	4.1335	3.42447	4.0117	5.9462	3.2826	4.56798		0.802551	3.23255
15.1174	1.46088	1.86516	5.71628	1.4172	1.3623	2.2951	0.422	3.35431	3.22316	6.40486	0.8028	2.44744	3.0375	1.63822	2.05016	5.8329	2.11755	2.7885	3.07648	3.74474	7.5454	2.6126	3.0375	3.5252	6.111	2.8607	4.59446		0.808919	3.1609
15.2364	1.61755	1.7798	2.95845	3.5712	2.6948	1.8488	1.3714	2.87718	7.9053	5.50745	0.8049	2.15856	3.2159	3.18186	1.3526	4.7297	2.8523	4.6141	0.91483	5.99672	3.3141	1.5102	4.22033	5.8813	5.6139	5.4178	4.0741		0.815286	3.40686
15.3555	1.4587	3.22641	3.36826	2.5756	4.8336	0.4132	1.7825	6.17644	3.72155	3.90144	4.7896	3.48617	3.7515	1.9756	4.9943	4.8707	3.76798	2.9502	3.5697	3.69034	2.5032	3.4233	2.02062	5.9542	4.3464	5.7173	4.54745		0.821659	3.62282
15.4745	3.45822	3.89707	4.88377	3.57771	2.1282	0.7154	2.1361	3.6624	2.59915	4.6777	4.6374	4.91825	1.8101	3.87681	3.07675	5.4693	4.67968	2.9435	1.74377	4.57259	2.7972	3.4405	4.72889	8.3208	5.761	5.0803	4.77702		0.828027	3.86554
15.5935	3.02409	1.9583	3.69572	2.90721	0.6606	0.9431	2.6861	3.49975	4.85505	5.54995	2.8858	3.48517	1.1516	3.36242	2.79087	6.0021	3.82398	2.8101	2.10579	5.0083	4.0004	4.4863	5.1315	4.8113	7.0422	3.599	6.43851		0.834395	3.65612
15.7126	4.33758	2.17911	4.57304	2.49581	0.8331	0.4502	3.4423	3.94806	5.36838	4.40251	3.2924	2.81596	2.0975	0.92548	1.52488	4.2542	6.45968	3.263	3.14593	4.01316	3.0205	1.4062	3.82608	6.0341	4.8159	4.6208	4.51176		0.840768	3.40954
15.8316	4.76951	2.59151	2.87976	2.50071	2.12	0.2863	2.8529	3.13037	5.30887	3.81109	0.8065	2.33163	3.0949	1.45926	2.3149	5.5018	2.3155	3.2222	3.79163	6.72245	2.9469	4.0797	4.11786	5.4163	4.7751	7.0415	4.56365		0.847135	3.50936
15.9506	2.67915	2.21366	5.38583	3.41685	3.2425	1.0065	2.9876	5.04065	5.77372	3.90609	2.3634	2.14976	3.1236	2.48232	2.89348	4.6577	2.00923	6.929	2.17368	5.48023	5.3325	2.1203	5.98198	9.7245	4.6352	6.3747	3.86593		0.853503	3.99815
16.0697	1.06013	1.12307	5.71077	2.8458	1.1381	2.0063	1.5897	5.09989	6.32138	1.82566	1.836	4.76029	1.1302	2.60236	2.55968	2.5541	4.91069	5.8317	1.78191	3.58976	6.6933	3.2443	6.27945	9.0961	8.6345	5.5204	2.20027		0.859876	3.77577
16.1887	2.51579	3.58055	4.4916	2.6204	1.7394	2.9034	1.4207	3.39002	3.74338	2.3837	4.3819	2.75311	1.9954	2.59557	2.31766	3.8029	2.18505	4.1114	4.21898	3.76764	6.1485	3.2437	7.44034	4.5749	6.5817	3.1958	2.95119		0.866243	3.52054
16.3077	1.96379	4.25463	2.82803	2.78433	2.237	1.4358	1.541	4.0041	4.31165	2.59529	5.967	1.90796	3.0921	3.27722	5.15871	3.6668	1.93413	6.8297	3.22297	5.09074	3.7091	4.2729	7.48575	9.4307	7.3052	4.3465	1.98228		0.872611	3.94946
16.4268	2.96892	3.75231	2.40322	1.94965	2.4947	2.3641	1.9233	4.30173	3.81176	2.20481	2.3658	0.77036	1.026	1.5923	2.40237	3.8248	3.6326	7.7435	2.75044	8.01856	2.4581	3.9202	5.32386	11.6037	7.6788	6.9696	2.01923		0.878984	3.78795
16.5458	6.16041	2.94794	3.3702	3.73993	2.2142	2.5366	1.8843	2.91519	3.74972	2.47824	3.3715	3.19898	1.1132	1.42132	3.40552	2.4742	3.51995	9.4037	5.14058	5.48415	3.0145	4.9079	5.71956	5.3586	5.8335	6.8597	3.76685		0.885351	3.92557
16.6648	6.51165	0.90815	1.93069	3.62073	2.5995	1.3584	0.9984	4.82157	2.15351	3.76375	5.5075	4.65727	1.6	0.82745	0.88827	3.7733	5.08855	8.4507	5.82858	5.11386	6.9498	8.822	2.53693	4.7392	2.0362	3.5476	3.84209		0.891719	3.81021
16.7839	3.78164	3.14658	2.05894	2.96058	2.4017	2.0809	1.4973	2.66953	2.74987	3.95985	3.163	2.069	4.5752	0.82949	2.015	4.0055	4.29961	11.6327	4.24007	5.2474	9.4425	11.7627	7.68793	5.0656	3.5749	4.6581	1.67629		0.898092	4.19451
16.9029	4.81052	4.82047	2.34205	4.15248	4.5659	2.6855	0.9196	2.54364	4.51993	1.65948	1.7879	4.59005	4.5256	0.9567	2.4785	2.9507	3.11146	8.3283	6.58898	4.01888	5.0202	9.3536	10.0805	8.0522	4.5735	5.7707	1.5707		0.904459	4.32511
17.0219	5.16922	1.86391	4.82364	2.57832	1.5537	1.8545	1.3077	3.80931	5.74862	2.20116	3.325	5.10763	3.8987	1.73195	2.65446	2.8371	4.32187	6.1168	2.98844	7.87291	3.3815	9.0864	7.46765	7.0625	5.1863	6.7779	3.24148		0.910827	4.22106
17.141	4.18431	2.29142	2.76126	2.62197	2.1174	2.7981	2.3382	2.84225	3.8079	1.40956	4.1226	3.23384	5.4039	2.18763	4.01573	1.1665	4.17818	5.0043	5.0242	5.55958	2.5802	9.295	5.6407	7.7411	2.7299	5.1608	5.98308		0.9172	3.93332
17.26	6.68729	2.87856	2.95093	2.86474	2.2261	3.5311	3.9945	3.8401	2.82224	1.55328	2.8965	4.0512	5.1947	1.743	3.57895	1.9295	5.92315	6.0526	3.50462	3.46709	4.1837	9.2434	9.68271	8.4382	5.6927	5.9824	7.44449		0.923568	4.53177
17.379	7.79218	1.05834	3.68473	4.45663	2.9481	2.402	2.7696	2.6112	6.07943	1.32962	3.3702	3.9692	4.6293	2.25647	7.68257	1.6606	5.3037	6.0122	5.18281	4.10733	3.7743	12.4677	8.70646	5.8904	5.8922	4.1799	3.15361		0.929935	4.56929
17.4981	3.89621	3.23051	5.38935	4.98057	1.5852	0.5964	1.7099	3.16353	6.74026	1.54468	3.3024	6.31992	4.73	2.59743	5.24629	2.0569	0.95645	8.1907	5.04666	2.75148	5.2579	18.6604	7.96095	5.8689	5.0137	4.4481	5.15409		0.936308	4.68144
17.6171	2.39096	1.49809	7.07055	4.01161	1.6123	2.2692	2.2918	3.38406	4.16587	1.57215	2.8098	4.42072	4.7404	2.42247	2.35413	3.521	2.04624	7.6449	3.90772	2.57567	6.7113	17.0658	6.64247	3.4233	6.0904	2.2697	5.69721		0.942676	4.24481
17.7361	1.73857	2.91522	3.50393	3.86207	3.2062	2.9064	3.3284	2.77543	8.95495	0.62226	2.8665	3.17999	6.2956	3.94642	6.44775	3.0568	3.27779	6.6352	6.37038	1.20854	4.6588	22.9841	8.5368	5.9673	5.2732	4.1752	4.07052		0.949043	4.9172
17.8552	3.51687	3.63027	2.73365	3.99852	4.6681	2.4221	5.8604	1.39261	5.41672	1.76279	3.8673	4.86028	2.3074	1.97024	5.83968	1.6561	3.27535	3.5337	6.59947	0.27125	2.8489	25.3221	3.5426	4.2543	2.0707	2.7793	3.809		0.955416	4.22999
17.9742	3.62244	3.2601	3.98465	5.03958	4.1955	1.9327	3.1661	1.16824	8.15002	0.41396	1.7777	3.57262	2.0472	1.68854	3.61637	0.2731	2.40605	4.0224	3.79459	0.79683	4.1853	18.0199	4.33003	3.4166	4.2157	2.9082	3.21889		0.961784	3.67494
18.0932	4.30151	1.97427	2.60298	5.04363	3.0501	4.8051	3.9062	3.00688	7.68116	0.84367	1.1895	3.89777	1.3616	1.77085	4.98876	0.4815	1.93761	3.2917	7.20271	0.75537	2.286	16.7007	7.38259	3.3851	3.5018	2.8808	3.29091		0.968151	3.8341
18.2123	5.17135	3.88542	6.8902	3.48969	3.2626	2.9075	2.1895	4.55845	4.03341	0.31238	0.8818	1.52854	0.067	2.9192	6.0034	0.9914	1.20551	5.0462	5.42144	1.71318	1.1335	19.6367	3.4321	4.6768	1.5406	2.512	3.77849		0.974524	3.67364
18.3313	3.62139	3.23631	3.56513	1.68418	3.4969	3.4191	1.6084	1.99386	2.60774	0.01598	1.0818	0.83242	0.8264	4.56254	7.68139	1.1979	0.19927	3.9335	4.34674	0.86622	2.5766	17.078	2.4321	3.9388	1.685	4.4982	3.10465		0.980892	3.18854
18.4504	4.03523	2.4821	1.68825	1.50667	2.8147	3.0331	3.7617	1.16878	3.05237	0	1.2355	0.41641	0.634	1.47489	5.1058	0.6886	1.11489	3.3558	3.4723	1.04326	1.2314	13.5495	5.30947	2.5989	2.4335	1.6862	5.47269		0.987265	2.7543
18.5694	2.93666	2.65676	1.35274	1.76749	3.9601	4.2323	3.9588	1.34446	4.05405	0	0.348	0.80673	0.4556	0.97365	2.82967	1.3807	0.65858	3.2652	3.24431	0.39926	0.7603	10.839	6.20619	4.3911	1.7502	1.1616	3.65764		0.993632	2.57004
18.6884	3.45092	2.68328	1.28765	2.13553	6.411	3.0633	2.9682	2.93024	0.99847	0	0.3216	0.67113	1.8602	0.80207	0.69045	0.2536	0.69343	2.731	0.72931	0.91776	0.7358	9.4291	4.56859	4.6288	1.2158	1.5846	2.8018		1	2.2431

## Sheet: Image18
X0	Y0	Y1	Y2	Y3	Y4	Y5	Y6	Y7	Y8	Y9	Y10	Y11	Y12	Y13	Y14	Y15	Y16	Y17	Y18		Ap-Ba	Average int.
0	11.3799	12.2879	13.0843	14.2543	11.6437	15.3853	18.3542	16.0485	12.0411	17.6204	12.8488	18.8602	9.7437	14.0149	14.0666	13.1101	9.4536	10.3487	12.8865		0	13.5491
0.119	18.3007	9.4674	13.605	14.4533	10.0624	19.9159	25.8092	14.8132	13.0646	14.219	13.742	15.7535	15.7521	18.3592	18.9889	13.4287	9.4008	12.7486	9.6919		0.00724426	14.8198
0.2381	13.4328	10.6921	17.608	13.2885	17.3186	14.0393	19.1638	14.6312	11.0064	11.8266	15.0493	21.9445	11.2301	18.6198	12.95	10.7709	10.8247	12.7906	11.2231		0.0144946	14.1269
0.3571	9.0917	12.7663	19.0851	17.4884	18.4824	17.7664	11.9952	12.7052	15.1492	15.2053	16.0393	17.9498	13.7647	14.9223	16.8129	13.9592	14.621	13.5748	12.3983		0.0217389	14.9357
0.4761	11.5021	13.1305	14.6643	12.4542	13.3325	19.0579	15.5681	11.656	16.1192	15.9069	17.5235	13.3292	10.5409	12.1598	18.3229	14.751	13.6316	7.0487	8.5237		0.0289831	13.6433
0.5952	8.3804	9.5591	13.3489	13.9534	13.9437	14.3908	10.9279	9.8558	7.5617	14.2826	12.1273	12.4526	14.0172	13.2357	19.5586	13.6054	9.065	9.0394	14.9683		0.0362335	12.3302
0.7142	9.7239	7.8732	12.1909	12.7918	19.0499	14.2323	14.5253	16.5939	13.8695	16.2477	12.459	19.6501	10.7214	12.9543	16.0297	14.5047	12.8898	7.734	17.0938		0.0434777	13.744
0.8332	8.762	10.7669	12.4139	14.4212	21.0811	12.07	16.2422	16.2109	14.4934	17.7766	11.5255	14.1603	9.0968	17.3593	9.181	12.3218	10.7691	8.2016	12.4797		0.050722	13.1228
0.9523	8.1297	6.3957	13.8111	19.877	20.0983	16.4104	12.848	17.7398	17.0842	15.7822	12.1213	13.3498	10.9722	17.6176	7.3764	12.9929	11.9916	9.2371	12.9755		0.0579723	13.5164
1.0713	11.3542	9.2132	20.1095	12.5351	21.9436	10.9305	9.4808	13.5425	18.1809	15.7681	13.4209	8.8519	9.6892	11.783	15.1964	9.1883	12.757	8.4049	9.0098		0.0652166	12.7031
1.1903	6.5109	8.123	10.1606	10.6052	14.4923	9.4651	9.6337	12.2322	16.5771	13.0349	11.431	14.9421	7.5336	16.0086	13.4085	11.4821	6.5295	8.6434	14.3014		0.0724609	11.3219
1.3094	6.4902	7.1211	12.304	15.471	16.0881	5.5536	12.6065	14.2229	18.232	12.5177	8.5082	7.572	9.8845	10.4029	9.8147	14.3931	6.8669	8.9417	9.6538		0.0797112	10.876
1.4284	8.2437	10.3663	13.0812	10.4421	11.6323	5.5867	12.0829	18.6221	16.8665	12.3832	8.3318	13.9906	9.5829	6.9798	11.7574	11.2536	7.8306	6.6966	8.2263		0.0869555	10.7346
1.5474	10.84	3.8744	9.6013	12.4467	10.4217	10.4459	8.0688	18.2359	14.8481	16.3873	8.2024	13.6481	7.5206	10.0071	10.2197	9.7438	6.7836	7.257	13.056		0.0941997	10.611
1.6665	8.9171	5.4165	12.8257	16.5782	11.0707	9.6791	11.3558	14.0159	11.6285	9.8274	8.7114	10.0412	7.1397	11.0684	10.227	8.3989	6.1489	10.7564	13.0804		0.10145	10.3625
1.7855	8.5455	6.3112	23.7244	9.8613	8.639	4.0503	8.3422	10.9196	19.3985	12.6671	10.8484	12.6495	10.5311	14.6677	12.2201	11.0196	3.1812	10.7332	10.3948		0.108694	10.9845
1.9046	5.5001	4.5796	18.5681	14.0925	5.9003	7.5173	9.8191	19.0214	15.6381	11.1986	7.0976	14.5213	7.1178	13.2369	12.3977	10.7308	4.4383	10.3927	11.0461		0.115945	10.6744
2.0236	8.4147	5.6866	16.19	15.7985	9.6063	9.2159	9.2557	18.1482	21.641	9.9541	6.2975	7.9256	8.8855	14.5643	9.0862	5.2024	5.6063	9.7084	6.2585		0.123189	10.3919
2.1426	3.8013	8.5779	11.6456	15.9232	11.6667	9.922	12.5686	20.3059	17.3345	9.8028	9.03	5.9724	4.7421	11.5915	9.8638	5.8201	9.3037	7.0993	5.0638		0.130433	10.0019
2.2617	6.2404	4.2556	14.6618	17.5434	7.4858	9.6442	8.5839	20.2888	10.5857	12.6665	6.9283	10.7017	7.1007	12.6095	7.6195	6.0599	5.7726	5.0083	9.9346		0.137684	9.66796
2.3807	5.5434	7.1373	14.9185	15.7837	9.4531	7.5088	7.8383	11.5118	10.1559	8.2587	8.5266	6.6556	8.5026	9.6632	8.5031	5.0403	4.3981	8.7624	8.4911		0.144928	8.77118
2.4997	4.3318	7.7337	11.7188	19.0907	7.0306	8.3878	7.3421	16.7485	13.3518	5.8818	5.511	6.9139	5.6231	11.6958	7.8324	8.8842	6.0308	8.3432	6.0411		0.152172	8.86806
2.6188	1.9199	9.2895	13.6979	22.3747	6.8253	5.9087	6.2973	22.9751	13.1982	5.631	5.603	8.3022	6.6727	14.7781	8.5382	7.8485	6.723	7.0124	9.8249		0.159422	9.65372
2.7378	6.1672	5.5984	12.5729	21.8102	8.8578	6.4781	7.6285	28.1558	14.9268	5.595	6.5089	7.3931	9.1768	12.9158	7.4437	6.8078	6.602	8.2152	9.6973		0.166667	10.1343
2.8568	6.8484	8.2319	10.811	13.2637	8.3823	6.5612	8.4037	25.14	6.3724	5.5144	8.5791	11.5107	6.4867	13.999	8.6588	7.1494	11.0197	8.2551	8.4199		0.173911	9.66355
2.9759	5.0007	7.2402	14.6154	9.9402	6.9272	5.3116	9.6074	19.9897	7.1051	5.9747	5.3087	5.7267	7.6319	12.5165	5.0405	9.2531	8.9729	7.8328	8.486		0.181161	8.55165
3.0949	5.395	6.0589	11.9987	16.2056	7.3012	6.1136	8.2269	16.1093	9.9667	4.8977	7.6319	6.997	6.3381	14.4318	6.4634	9.7653	8.161	11.0058	9.7824		0.188406	9.09738
3.2139	4.2203	4.0634	12.3629	17.2791	7.7339	6.3502	8.2362	10.2778	12.5818	1.8701	2.6491	7.0867	6.3582	8.059	7.3356	6.9627	10.3851	9.7523	8.7584		0.19565	8.01699
3.333	5.8247	10.7137	8.2472	16.1596	8.8247	1.6826	3.8952	9.7159	8.4149	5.2495	3.8084	9.4917	7.1067	16.7719	9.1759	8.1589	10.8202	8.8245	12.0758		0.2029	8.68221
3.452	3.88	9.842	10.2651	13.672	11.1698	3.1441	8.1358	18.0306	8.4886	2.1278	4.4981	7.8876	4.4015	9.8852	7.3405	6.4644	8.8342	9.9041	7.3635		0.210144	8.17552
3.571	5.9398	6.0672	13.5974	8.9813	5.9315	4.8049	8.7735	10.5031	10.2203	2.2448	3.0059	7.5611	5.223	8.7747	5.8412	9.5498	4.7411	8.7456	9.8645		0.217389	7.38793
3.6901	6.2584	11.6367	7.7696	10.3422	9.2487	3.1593	6.9046	8.4236	7.9132	5.2141	2.4719	6.2369	11.2531	10.0311	11.6303	10.3063	8.105	9.4427	11.2892		0.224639	8.29668
3.8091	7.184	6.1083	6.5611	6.7693	5.1816	6.7008	5.3723	11.602	13.1213	6.2155	3.2314	5.0984	6.2111	11.1552	6.6836	10.6286	5.9313	7.541	14.9552		0.231883	7.69747
3.9281	4.2294	6.4402	7.2511	6.7572	7.8632	5.4387	6.165	11.1695	9.9953	2.3846	3.2609	6.3516	4.2503	11.159	3.3933	8.9211	5.8173	8.3109	13.2632		0.239128	6.96957
4.0472	6.6721	8.8132	6.1026	6.3645	9.7255	8.9749	10.4102	7.9826	13.861	4.428	2.449	4.5447	5.7609	13.9005	5.87	10.7122	9.4829	9.0852	12.1776		0.246378	8.27987
4.1662	8.9558	8.5528	3.5763	8.4243	5.1418	5.7979	15.0071	6.3756	9.5563	4.6667	3.4232	5.268	7.3009	13.7457	10.0186	7.4974	6.4208	10.9339	15.6374		0.253622	8.22634
4.2852	6.6752	8.7418	5.9859	12.1013	7.2569	4.2338	11.806	8.2409	6.6188	4.4664	2.7648	4.5587	4.9158	11.3166	7.5938	7.33	3.781	11.0667	15.6266		0.260866	7.63584
4.4043	6.4436	9.8503	8.0158	9.4122	6.7379	5.5189	8.2261	3.5622	7.8625	3.3477	3.9894	4.9579	10.2732	13.8365	5.9997	5.776	3.9191	11.7445	15.744		0.268117	7.64303
4.5233	4.368	10.121	5.4964	7.4057	7.3891	6.7087	10.9515	9.4756	11.0512	3.9488	5.0885	4.8257	8.9345	15.544	10.5591	7.5734	5.1827	7.6667	13.8483		0.275361	8.21784
4.6423	5.2847	12.0534	4.1724	8.8195	6.1955	7.067	8.7585	13.297	5.9965	3.9974	2.858	4.2091	8.848	12.9884	9.1097	7.6888	5.4602	9.5768	11.169		0.282605	7.76578
4.7614	5.2899	14.2092	3.3792	4.9214	7.8491	6.3759	5.1017	6.3858	6.8198	5.2584	2.9008	5.3311	6.2812	14.6186	7.8267	2.0038	4.0527	6.1786	11.3587		0.289856	6.63908
4.8804	5.5852	8.6028	3.2762	7.8721	5.152	4.267	6.5147	6.1279	7.33	4.0189	2.4545	3.2445	7.927	13.5067	6.9149	6.2392	4.411	7.1224	8.2253		0.2971	6.25223
4.9995	11.189	7.4864	4.7028	7.6147	6.4495	7.9876	5.4316	4.9367	7.2806	4.7749	4.7403	6.5655	12.5299	11.9493	7.2007	6.5162	4.4325	7.8062	8.3992		0.30435	7.26282
5.1185	11.5153	6.2481	7.3124	6.4971	9.1449	5.8487	8.6996	10.4447	5.3618	3.5021	3.1942	4.8127	10.3664	11.4514	8.7459	8.8726	5.9392	10.8512	7.7798		0.311594	7.71516
5.2375	9.4108	9.5094	5.8876	8.9936	10.8743	6.5298	7.767	11.5264	5.7122	4.1102	3.017	5.4332	9.9049	12.3232	7.9523	7.0747	7.9535	9.8781	8.784		0.318839	8.0338
5.3566	11.8599	7.3673	4.6734	5.4926	7.4969	6.003	6.8912	15.4607	5.2198	3.6482	3.0702	4.9217	8.1207	13.3301	13.9772	5.0733	5.9527	8.9669	11.2725		0.326089	7.83149
5.4756	7.776	3.8902	7.151	6.3269	8.1491	6.4925	7.0112	11.1958	5.312	4.0748	2.6263	2.3341	7.1063	10.3864	7.8	6.4088	5.1026	11.8868	10.1446		0.333333	6.90397
5.5946	19.1053	6.7199	5.2793	6.5857	8.6483	5.1467	5.7578	19.4975	5.0948	3.2301	5.8598	3.0078	5.7994	12.5765	8.797	4.1172	8.8783	19.3588	8.6261		0.340578	8.53086
5.7137	14.115	6.7177	3.0414	8.4914	15.7705	7.5428	8.3175	12.7555	6.4509	3.6913	6.3148	6.2518	5.3177	14.866	8.7014	5.9214	6.5786	11.2862	6.7911		0.347828	8.36437
5.8327	9.2834	9.3508	7.1774	7.5319	8.3855	7.9275	10.6129	14.5995	6.2041	4.0913	4.0792	4.7582	10.8396	15.7047	9.0511	5.6628	7.6691	13.3392	6.2429		0.355072	8.55322
5.9517	14.8817	7.0684	8.1229	5.8543	7.8128	3.1406	7.5638	10.5331	2.8215	3.9865	5.4098	5.3161	8.7018	14.1568	9.8028	5.8937	5.383	12.3625	11.0056		0.362316	7.88514
6.0708	12.6248	6.6522	6.5193	3.7916	8.4949	5.2058	7.2141	10.1414	5.5148	4.3201	5.3758	4.9801	11.2924	10.8993	7.2345	5.8956	8.587	17.7674	5.0506		0.369567	7.76641
6.1898	9.8533	9.4118	6.0213	8.6062	3.6042	6.1575	8.985	14.25	2.7826	10.7893	6.2919	5.1191	11.7073	10.4592	8.2459	6.3242	10.7171	17.0153	9.6217		0.376811	8.73489
6.3088	5.9337	4.4329	11.3406	5.399	4.4161	6.5499	13.4441	10.5178	5.3912	8.7033	4.4663	6.7463	12.733	14.089	9.1077	7.4985	6.7596	19.5616	6.8456		0.384055	8.62822
6.4279	6.4903	6.1631	7.6472	6.7454	4.1698	5.7736	11.2241	8.0709	5.8164	4.4856	5.4214	8.6749	14.4537	12.2485	8.0364	8.3711	5.5262	8.5699	8.9288		0.391306	7.72723
6.5469	7.1447	5.8677	9.8204	5.6749	4.8484	6.269	9.8324	12.4574	3.8868	9.8402	4.8309	6.3732	9.9793	11.3519	8.7769	10.573	11.1615	11.7538	6.511		0.39855	8.26071
6.6659	9.5723	5.4379	17.1839	8.9877	5.4335	6.8237	11.4809	9.3152	3.0781	3.1152	4.8597	4.5759	13.0122	10.7916	11.6129	8.6036	11.1265	15.7692	6.4983		0.405794	8.80412
6.785	7.5392	5.0953	13.6691	6.2958	7.986	7.1075	15.7752	10.7792	4.4105	7.8817	2.5173	4.4018	12.2825	9.8117	7.3887	7.9658	12.0316	9.6413	7.8293		0.413045	8.44261
6.904	9.2131	6.8378	13.2039	6.9388	6.1725	6.2673	13.2135	10.423	3.1403	5.7036	5.9003	6.9037	8.3652	4.7176	11.3286	9.9451	8.9773	15.4273	8.7479		0.420289	8.49615
7.023	12.7269	6.48	10.6639	6.859	3.5779	3.4907	8.3196	9.7212	4.1321	4.2737	6.0392	3.636	7.261	8.2525	9.0925	4.2175	11.0293	14.8382	6.7952		0.427533	7.44244
7.1421	9.1849	7.6175	11.5547	2.6413	2.7426	5.4514	12.7084	8.0293	4.792	3.5128	6.8691	4.8909	6.0892	5.9174	7.4258	4.8402	8.8193	15.5977	7.7141		0.434783	7.17887
7.2611	8.4615	8.8719	8.9992	6.1769	3.6972	4.4911	10.082	9.1641	2.2646	4.6306	5.3614	6.5306	8.9941	7.5122	9.0627	8.0246	8.8144	11.8079	5.8911		0.442028	7.30727
7.3801	7.9372	8.2763	11.4846	7.7023	2.3373	2.6796	12.1061	8.2377	2.266	3.8051	5.6828	6.701	5.3586	4.0631	7.3068	6.0941	10.0505	9.252	8.8054		0.449272	6.84982
7.4992	5.9652	7.8959	8.438	9.1405	0.6571	4.206	10.0563	12.5668	4.2655	5.4963	6.7855	5.9397	4.2588	6.1506	8.8823	8.1352	12.1685	7.9313	7.9321		0.456522	7.20377
7.6182	6.0164	9.1307	7.0569	9.714	4.5751	3.8834	8.8791	9.9425	3.1976	2.5657	6.3188	2.6648	7.1672	8.607	6.6137	5.3501	11.0704	7.1405	8.0116		0.463767	6.73187
7.7372	4.5872	7.8262	4.2269	8.3284	3.3594	3.2871	8.0595	8.5485	2.0987	3.0574	5.1997	7.2917	4.6015	8.7808	9.3314	9.1319	5.5614	9.3592	6.8347		0.471011	6.28798
7.8563	3.8243	10.242	9.3706	5.2719	3.766	3.0621	5.4072	7.9952	3.1325	1.7914	5.3895	4.1999	9.7938	9.1324	9.6195	7.9707	12.2365	4.9923	8.8062		0.478261	6.63179
7.9753	7.2364	6.6164	4.5948	6.3678	3.6134	1.6627	3.8555	3.4114	4.5099	4.6322	5.7061	5.7185	5.9507	6.7506	11.7215	6.6033	3.6795	9.1126	7.4985		0.485505	5.74957
8.0943	5.6717	8.0701	4.1088	8.8572	4.3788	2.4858	5.1338	6.1803	2.2393	2.5543	7.6031	8.2003	5.1569	6.4813	6.6976	8.0983	4.0533	9.1453	6.6576		0.49275	5.88283
8.2134	7.5156	5.5564	5.7682	6.313	0.9127	5.4252	4.1846	8.6698	4.8017	2.6822	6.6824	5.6209	10.3047	8.0926	7.5833	6.1809	6.0587	8.9299	4.791		0.5	6.10915
8.3324	5.9779	6.9684	9.8431	6.2766	2.1251	3.1674	4.9673	8.3856	1.7176	1.686	6.1991	9.4214	9.5527	5.7512	7.1561	4.3846	3.1616	9.6813	7.2762		0.507244	5.98417
8.4515	9.4351	9.5927	7.5177	8.1065	0.5346	3.5959	5.6876	6.8466	2.1004	5.114	5.1826	8.1444	8.0768	5.5042	4.6696	4.4498	6.471	5.2431	6.2537		0.514495	5.92244
8.5705	11.1394	7.8123	11.5307	8.8645	0.9973	3.404	7.4035	7.0466	2.6411	4.573	2.6346	4.8955	11.3453	6.102	7.0565	6.8421	7.3954	6.4567	4.3958		0.521739	6.44928
8.6895	5.6876	7.6974	10.0201	7.1102	0.4215	3.7458	8.6074	4.4752	6.0262	3.5978	3.0798	4.9698	5.0781	8.8768	4.9265	7.8455	3.5567	9.9743	3.5878		0.528983	5.75182
8.8086	4.4591	8.6505	7.9904	9.7397	1.6877	1.6774	4.6054	5.5363	7.4891	6.2265	4.8114	5.2316	6.6228	5.0146	12.7269	5.3502	5.4518	5.9187	3.3298		0.536233	5.9221
8.9276	3.9633	13.6901	7.45	6.8429	1.9584	0.9695	6.574	10.1808	6.3624	3.6916	8.6444	4.4808	7.3855	6.7421	7.9042	5.0546	5.9365	3.3311	9.56		0.543478	6.3538
9.0466	4.5375	9.9209	13.4275	9.0777	2.6764	2.487	4.6981	3.1847	3.627	2.5399	6.3073	7.8379	4.9225	7.3869	7.6879	11.2272	7.2095	4.8192	6.2342		0.550722	6.30575
9.1657	5.9688	8.3014	14.6937	10.7268	3.5379	1.6813	5.3138	4.8867	3.2169	4.1634	4.845	10.7006	11.4779	8.5035	8.5237	8.2329	7.2221	4.2444	3.7792		0.557972	6.84316
9.2847	4.0817	6.4383	10.112	7.4653	2.2679	1.491	5.7431	4.6779	6.0333	1.9321	7.0647	6.7108	6.1187	4.8589	5.2582	5.2225	5.8494	7.3748	3.8459		0.565217	5.39718
9.4037	6.0173	8.4203	11.5352	7.4862	1.4068	1.8985	5.2457	8.5173	2.6472	4.6484	5.0531	8.7403	6.3137	3.5188	5.4043	5.1697	3.8936	6.192	5.9352		0.572461	5.68651
9.5228	3.4699	7.1947	8.7961	6.9644	1.5311	2.7354	6.2181	6.7848	2.416	4.3205	8.2849	5.2965	10.0299	8.4227	8.7855	5.1192	8.3225	5.2011	4.3457		0.579711	6.01258
9.6418	2.9371	6.0939	5.5575	4.4399	3.3002	2.8298	3.8257	9.9499	5.1393	5.896	5.2892	6.3605	9.4962	6.3468	7.0626	5.7945	5.5725	5.0907	5.9246		0.586955	5.62668
9.7608	1.9529	7.0835	6.8528	8.1047	3.1636	1.9157	3.74	11.3814	2.3279	3.0031	6.5831	7.1071	9.7531	5.3822	5.0614	6.6568	4.6077	7.4464	4.3357		0.5942	5.60311
9.8799	1.84	2.8856	13.8734	5.2042	3.724	2.5445	5.0401	4.8379	6.4684	5.9316	5.4905	8.6302	6.8504	4.1973	11.3518	8.4881	5.3146	6.716	4.0463		0.60145	5.97026
9.9989	4.4689	5.9039	10.4031	6.7879	0.741	1.6972	7.0904	8.3028	3.2984	5.2482	4.5356	15.2992	6.9626	6.2844	12.2758	10.599	4.2795	5.6318	6.5448		0.608694	6.65024
10.1179	4.524	4.9428	9.4574	8.2703	1.7653	2.3134	7.7792	8.8367	4.164	8.905	6.3342	6.6091	3.3441	3.3933	8.3779	11.2341	4.8809	5.4373	6.4536		0.615939	6.15908
10.237	4.0485	4.7029	11.8815	6.4892	0.923	1.0488	3.7396	10.9719	7.2688	6.5842	6.982	7.0514	3.6872	2.3505	9.6401	19.1666	6.0341	11.4492	4.5009		0.623189	6.76423
10.356	5.9737	2.6604	9.4704	7.5631	0.6696	2.5746	2.4064	6.4673	5.883	7.1959	8.0778	8.1225	4.7307	5.185	9.3523	10.1825	8.5187	8.4077	3.5997		0.630433	6.16007
10.475	4.5198	8.7885	8.5682	6.8042	1.9555	0.9425	1.9235	4.5237	5.6262	5.0754	7.2179	10.7926	1.6932	3.4964	6.7938	11.3119	10.6419	7.1292	6.4582		0.637677	6.01382
10.5941	8.5539	4.695	9.3227	5.3849	0.9577	0.1758	4.3124	7.5172	5.2112	3.3991	6.8197	11.0934	6.428	6.5295	7.5501	15.4185	7.4202	9.436	5.825		0.644928	6.63423
10.7131	5.6423	2.8343	8.6956	4.2999	2.456	1.2778	2.455	8.8276	4.9141	2.9033	6.0605	5.2702	7.7437	6.4188	8.1972	15.9022	9.836	8.0206	4.4044		0.652172	6.11366
10.8321	9.6224	1.7096	12.726	2.3792	0.1574	1.935	5.1996	3.2432	2.9934	4.9063	4.2961	5.6931	6.092	7.5337	8.8117	9.6002	8.2788	7.3212	3.3253		0.659416	5.56969
10.9512	5.0786	3.6478	9.5503	3.4983	1.0542	3.519	4.2536	6.7558	4.0042	4.0333	3.1216	6.1408	6.4618	7.9032	7.9294	13.1148	6.5869	6.9093	7.4723		0.666667	5.84396
11.0702	7.1772	1.3041	8.1168	5.064	1.8297	1.6469	4.8108	5.244	3.6933	3.8048	5.3096	6.7438	4.5603	7.1687	7.9764	10.356	5.8527	8.306	6.1416		0.673911	5.53193
11.1892	4.5367	3.9911	10.2796	5.1934	1.2153	1.5794	6.0569	3.7998	7.7977	4.7263	4.8968	6.5761	10.0211	6.6651	4.6721	10.3091	9.1247	11.0051	4.8537		0.681155	6.17368
11.3083	2.9458	4.7454	5.8504	4.5677	2.025	1.9898	2.995	8.9951	4.6045	3.0887	5.1463	3.6795	7.9445	4.829	8.0493	12.8719	5.2627	9.7415	4.3968		0.688406	5.45942
11.4273	5.4071	2.7651	5.2302	5.2436	1.2328	3.4237	3.894	4.606	9.6478	4.7827	6.796	2.215	10.8743	7.0571	5.1527	11.3601	6.7075	7.9229	3.498		0.69565	5.67456
11.5463	2.5678	1.6389	6.4245	3.4313	3.0158	1.7158	3.4105	7.6773	3.8058	3.3313	8.3211	3.2443	7.1523	6.765	6.556	7.3658	8.638	6.5073	4.8535		0.702894	5.07486
11.6654	1.8941	2.6897	7.2863	3.7603	3.0474	2.4525	4.1088	6.5306	4.0463	4.6674	5.1595	5.9315	8.6123	9.3247	11.8049	6.5061	5.6201	7.8496	3.8384		0.710144	5.53318
11.7844	3.0507	4.567	5.4043	3.347	0.3788	2.7791	2.9814	3.9265	4.8682	5.8841	3.6391	6.5517	9.5625	7.2599	11.9524	5.0767	5.0587	11.1562	2.8041		0.717389	5.27623
11.9035	3.4277	5.5661	4.6707	5.7537	1.385	1.4998	2.9685	5.3841	8.9239	2.706	5.7165	8.0608	9.4845	10.1573	13.2519	5.4855	8.6553	8.5945	3.8711		0.724639	6.08226
12.0225	3.8826	3.551	2.5311	6.0912	2.2527	1.3254	4.7728	8.7001	4.0281	3.8116	8.4342	8.9751	7.7265	7.2009	9.1886	5.5947	3.5121	9.1656	6.337		0.731883	5.63586
12.1415	2.6101	1.9453	2.3157	4.3675	2.0211	1.1027	2.7732	7.1274	3.6806	1.8887	8.2857	4.946	10.5592	11.6001	6.3109	8.5851	2.7828	6.9897	2.945		0.739128	4.88615
12.2606	2.8305	3.7303	2.934	4.8755	1.3663	0.9664	2.2716	5.1622	3.4227	5.6664	8.3901	6.3486	5.6871	8.5268	5.7629	3.8185	7.5654	7.4238	4.773		0.746378	4.81695
12.3796	6.3414	1.6934	3.2621	3.235	1.9886	1.416	4.6297	7.065	3.5916	3.8282	8.0798	8.2572	6.4128	12.0429	8.8164	10.2294	2.4784	4.4471	6.4882		0.753622	5.48964
12.4986	4.931	2.8186	1.2182	1.562	0.6442	2.3176	2.6035	4.8813	3.8654	2.6001	11.4852	4.9785	4.3891	10.5476	6.1061	6.7866	3.2663	4.3499	3.4654		0.760866	4.35877
12.6177	4.1847	2.7567	1.7471	4.2594	0.7895	3.426	4.475	5.0497	6.1358	2.1702	9.081	3.0491	8.3321	6.847	6.3119	8.0392	2.6657	5.8131	3.2178		0.768117	4.65005
12.7367	6.1355	2.6592	3.544	5.9627	1.5883	3.8165	5.4489	12.0634	5.0175	2.5776	8.8019	6.0621	3.6209	9.4855	4.0001	5.7331	4.3393	7.0956	5.7021		0.775361	5.45548
12.8557	2.5101	4.5049	2.0434	2.8415	1.5775	1.9981	6.0084	8.7972	2.8191	3.308	5.758	5.211	2.2772	5.7588	4.608	8.6162	2.4162	4.9364	6.8158		0.782605	4.3582
12.9748	4.6506	4.6398	1.3065	3.5845	3.1774	1.1017	2.9585	6.0959	3.4235	2.3601	7.0249	8.0984	3.4395	8.0257	4.9047	6.432	3.2865	3.1401	5.6561		0.789856	4.38455
13.0938	3.5922	3.1115	2.2517	2.4055	3.1706	1.4869	2.9584	12.3791	5.4533	4.1101	3.4604	7.4962	3.9907	6.0256	3.7913	2.3373	3.9221	8.5388	4.5106		0.7971	4.47328
13.2128	5.6399	1.5452	4.4914	3.4697	1.8063	1.551	1.6971	7.461	5.3341	3.0042	6.4493	7.7412	4.3754	4.892	4.9093	3.856	4.4896	5.7214	3.2249		0.804344	4.29784
13.3319	3.0302	1.9927	2.5845	6.4217	4.0669	1.0509	2.993	5.0298	3.7912	6.57	4.7646	6.8649	4.0577	6.3629	7.6715	6.2595	6.8466	4.0592	2.3902		0.811594	4.56884
13.4509	2.852	2.7984	3.6353	3.9427	3.3021	2.2056	2.9088	7.2712	3.7601	6.1268	5.5205	7.3233	3.7199	3.8614	8.4386	3.9618	5.0223	4.758	3.547		0.818839	4.47136
13.5699	4.4741	3.3481	3.8865	2.9403	3.6136	2.8956	1.5164	5.7314	5.5668	8.2719	2.7224	6.0154	4.9489	1.4333	4.6735	6.7116	3.7466	6.2534	4.2805		0.826083	4.37002
13.689	3.7433	5.4714	4.8934	8.5257	1.4859	1.4388	4.3687	3.9691	6.4379	5.4508	4.0686	4.0709	4.2358	1.6589	5.4721	1.9965	3.2162	7.1623	1.6721		0.833333	4.17571
13.808	3.3554	1.7595	4.4915	6.0588	1.8654	4.9316	1.9247	9.1423	2.731	7.7486	3.3456	6.6746	6.0358	3.3595	3.0053	6.6168	4.4441	5.4514	4.4745		0.840578	4.60086
13.927	5.1113	3.7686	4.9959	2.4266	3.4424	3.2811	5.9445	6.9588	3.6832	7.7676	2.0656	2.9234	6.7483	1.5481	6.0711	6.2563	4.6339	9.0259	4.5224		0.847822	4.79868
14.0461	5.955	3.2006	8.8805	4.0293	0.8795	2.0111	3.9983	3.3128	2.6793	8.7391	4.1991	2.566	5.6058	3.7458	4.842	6.7229	3.0678	6.5499	4.5922		0.855072	4.50405
14.1651	7.6994	7.182	3.6238	2.5525	3.7329	1.2595	1.3839	5.6359	4.616	7.1947	1.817	6.2809	5.3473	3.6959	5.6955	10.3236	4.7188	3.8948	3.7912		0.862316	4.76029
14.2841	3.0883	2.4759	3.7967	2.3008	3.8894	1.3077	1.3126	5.6584	5.7372	8.6939	1.43	5.1031	3.3821	3.3262	4.1733	6.444	5.2699	9.3634	5.4458		0.869561	4.32625
14.4032	1.59	4.675	4.0976	2.8353	2.98	2.3511	4.045	5.1408	4.8799	8.6009	1.9905	4.6721	4.6405	1.1592	5.7576	2.8702	3.3634	13.1722	3.8975		0.876811	4.35362
14.5222	4.2771	5.3504	4.8495	6.8664	3.1756	1.473	3.3326	2.8499	5.4344	10.8334	3.0371	2.3984	4.0178	4.2083	3.3252	7.9914	6.4733	8.1994	3.1237		0.884055	4.80089
14.6412	7.5385	8.0615	3.4634	7.1782	3.1059	2.0246	4.1253	2.6422	3.577	5.7004	2.8528	4.6153	7.4781	9.5193	5.0628	6.2374	5.6753	7.5032	2.594		0.8913	5.20817
14.7603	1.7359	2.9445	6.3018	7.1846	3.9588	1.5295	2.5687	3.2894	3.4302	5.7892	3.7835	2.3487	9.86	7.0981	3.1523	3.9658	3.8307	5.3989	4.275		0.89855	4.33924
14.8793	6.869	5.767	5.3037	5.0669	2.9953	1.219	1.3009	2.8072	3.4588	6.308	3.8501	4.1333	5.074	3.3162	1.6429	4.2384	3.4462	6.3873	3.6692		0.905794	4.04492
14.9984	4.8954	5.509	5.993	5.9493	4.2636	3.5304	3.9852	2.341	3.0949	3.0317	2.4996	3.1152	6.2698	4.4508	7.071	6.4409	4.0839	7.8074	1.6885		0.913045	4.5274
15.1174	7.3545	6.7218	7.4751	3.402	4.1849	3.2136	5.5981	2.2038	3.2564	3.3433	4.1535	3.6925	4.828	5.0156	7.1669	4.679	5.5506	6.1463	1.406		0.920289	4.70484
15.2364	6.182	10.3152	3.3014	5.9328	5.3581	2.0129	4.4529	2.9102	3.5481	2.9858	6.821	3.3367	4.1081	3.4662	3.6027	4.2381	5.8697	6.3735	1.2379		0.927533	4.52912
15.3555	8.5629	12.4153	7.5502	5.1902	7.6238	2.8107	3.0035	3.0209	3.3482	3.0873	6.0067	5.3589	4.4913	4.9359	6.1644	3.4855	7.2096	6.9731	3.8283		0.934783	5.52983
15.4745	6.8069	4.6397	5.4304	2.9989	6.4284	4.2822	3.9445	4.1441	1.4556	4.1782	3.3424	5.9397	4.2917	3.2966	3.7868	7.8913	9.6998	6.3702	1.9758		0.942028	4.78438
15.5935	7.6463	5.863	3.8866	6.7393	4.5746	4.5133	6.5627	2.1328	1.337	3.0417	4.8975	2.4543	5.3038	2.4824	4.0179	3.892	8.7247	7.6125	4.4883		0.949272	4.74583
15.7126	4.5982	4.9671	6.573	2.1667	5.0644	3.3334	6.7744	7.101	2.5762	4.2779	4.9701	5.014	5.9365	3.8812	4.3964	2.4108	10.4927	7.2423	3.5488		0.956522	5.01711
15.8316	4.9152	3.8264	5.7444	1.6253	5.1037	3.7934	2.4735	4.1956	3.2461	3.3264	7.5199	2.7821	3.4588	5.6228	3.9441	7.1668	4.7916	8.13	4.4021		0.963767	4.52991
15.9506	2.2561	2.6668	5.6071	3.0241	3.6872	4.3916	3.5452	3.1858	2.725	2.8838	2.8441	4.557	2.5214	5.0639	5.0518	6.4859	4.2782	7.2135	4.1659		0.971011	4.00813
16.0697	1.7322	3.8338	3.3444	3.2809	4.5969	5.9848	4.1476	3.3757	1.6842	4.4109	4.1166	6.1519	6.432	3.9717	2.6975	3.5171	5.0082	10.6692	2.795		0.978261	4.30266
16.1887	1.8346	1.5798	2.5617	2.7929	3.0203	7.4893	1.7245	2.9764	2.9317	3.4605	2.9824	8.2595	4.8933	4.5191	4.6024	5.0975	5.9216	7.4838	3.8254		0.985505	4.10298
16.3077	2.8318	1.0033	1.4104	1.5985	4.3606	9.9397	5.6902	3.2869	3.4541	5.847	4.4797	6.6935	7.2115	3.8595	4.4071	4.7753	8.5848	11.8466	6.7165		0.99275	5.15774
16.4268	4.0072	0.4414	3.3665	3.0199	2.8966	7.2178	3.488	2.227	4.6456	2.496	4.0818	5.8619	7.6808	0.9464	3.6831	4.7273	5.1042	7.553	3.6003		1	4.05499

## Sheet: Image17
X0	Y0	Y1	Y2	Y3	Y4	Y5	Y6	Y7	Y8	Y9	Y10	Y11	Y12	Y13	Y14	Y15	Y16	Y17	Y18	Y19		Ap-Ba	Average int.
0	21.6792	15.2496	30.9145	19.2503	18.6138	23.7496	17.4845	17.318	17.3985	10.4752	20.0255	19.901	12.9246	27.5656	21.8647	19.7818	21.0286	15.6767	18.8759	15.2441		0	19.2511
0.119	21.109	20.3089	22.5574	16.6836	16.8534	19.0411	15.814	20.305	18.9188	12.0213	25.1291	17.4274	13.9659	27.7594	22.8424	14.5049	22.3849	13.339	16.4041	15.9854		0.00757354	18.6678
0.2381	23.294	13.9894	24.919	23.2438	13.1749	16.2339	14.8039	18.741	19.2344	9.7243	18.6105	18.2498	13.9558	30.1391	24.8097	17.0645	17.5109	11.4965	16.5219	14.0696		0.0151534	17.9893
0.3571	25.8696	18.1148	21.8568	16.6409	17.7675	19.4424	19.1474	14.939	16.3669	8.7453	24.1537	12.8255	15.2116	27.3245	20.5264	14.124	18.741	14.5018	17.1442	12.8021		0.022727	17.8123
0.4761	27.1002	17.284	21.1611	25.4238	16.3191	22.4816	15.6996	25.756	24.8315	7.6571	20.0471	17.0207	12.2957	22.3329	16.7385	9.8228	16.2814	11.366	22.1169	10.6619		0.0303005	18.1199
0.5952	30.3822	15.4849	21.926	23.1144	10.801	26.7897	15.9173	22.577	26.4078	11.0126	19.6081	17.1543	10.1135	19.9209	20.9158	11.4938	20.0191	14.937	15.9917	16.3015		0.0378804	18.5434
0.7142	27.5291	21.9889	22.3722	18.4678	16.2448	20.4915	17.6329	26.428	20.7463	9.0355	20.4638	15.8547	12.4363	14.6449	24.3853	10.6089	16.3912	14.1784	13.9239	16.2635		0.045454	18.0044
0.8332	21.9693	20.6191	21.1747	23.4334	19.9523	23.0451	23.3154	35.344	19.481	7.5144	18.6831	13.9633	9.7233	12.5364	24.121	15.2591	14.2314	16.0253	14.9218	12.7121		0.0530275	18.4013
0.9523	19.9505	23.9683	21.1182	8.1944	20.9163	22.9836	29.9974	51.093	14.7076	8.1674	12.4514	14.0367	9.2618	11.9556	29.1719	13.1414	13.5013	11.4779	12.5459	13.7815		0.0606074	18.1211
1.0713	19.6775	22.4888	27.2113	13.4557	22.5562	23.044	40.8641	67.223	9.3193	6.29	17.7851	15.4504	20.4987	11.4005	28.2854	10.1778	13.2177	6.1669	10.3743	13.1519		0.068181	19.9319
1.1903	31.5924	21.1988	25.1457	11.975	18.2988	22.9908	44.7079	89.542	7.6252	7.8509	14.5362	17.2909	18.4157	11.4843	26.8957	10.031	17.8618	9.539	12.3769	14.2256		0.0757545	21.6792
1.3094	27.5323	17.1281	25.6956	16.7893	26.8167	21.403	42.795	100.155	11.022	7.2945	13.7428	18.0414	16.0156	8.3585	24.9958	11.0724	12.395	9.4126	12.6462	10.7755		0.0833344	21.7044
1.4284	32.0586	21.8275	26.1724	17.9804	26.2996	27.5842	45.3459	106.172	17.2462	18.1139	12.633	22.4287	12.9172	10.6907	28.563	8.7472	12.0589	8.2226	10.416	10.3288		0.0909079	23.7903
1.5474	31.7108	18.5414	30.8257	20.8858	23.5477	24.1373	32.7244	93.851	22.1009	11.6114	12.5152	29.1074	16.5953	7.8089	32.0863	8.87	13.2257	7.1632	11.9456	8.9374		0.0984815	22.9096
1.6665	28.969	20.2733	29.5097	15.6085	20.2846	29.4639	27.7743	75.89	22.6659	9.45	14.5561	32.2739	12.7129	9.8825	29.5917	9.9336	17.5905	5.3749	14.7777	8.4471		0.106061	21.7515
1.7855	29.5591	24.9733	24.05	12.8152	20.2065	30.0741	26.9166	49.382	26.1443	10.903	17.0043	17.5711	13.0075	6.7901	27.673	12.8931	10.7453	6.8797	12.7057	10.2558		0.113635	19.5275
1.9046	24.097	24.1517	29.54	12.3586	23.4907	38.3512	21.509	24.706	18.1073	9.4589	19.1652	15.5592	11.4597	9.5712	26.9064	8.5772	11.5728	6.8105	13.7099	8.7213		0.121215	17.8912
2.0236	25.7578	21.1134	33.8395	14.6587	18.6322	45.0282	24.0529	15.997	11.5767	15.3782	16.1129	19.8548	13.9045	8.0893	24.1185	7.6673	17.6329	6.6069	15.495	12.8112		0.128788	18.4164
2.1426	34.0307	17.6171	25.1069	15.0692	21.8423	41.1585	13.9649	13.147	13.4586	15.6659	14.6005	16.667	15.8182	10.4427	22.4778	9.5404	15.7712	7.5607	12.8486	10.2085		0.136362	17.3498
2.2617	27.6485	17.9079	23.0526	16.2779	22.9515	49.2424	15.9966	20.677	16.5725	10.9521	9.7018	17.0859	9.4356	9.4474	25.282	15.4154	14.7338	9.0832	12.5534	17.0588		0.143942	18.0538
2.3807	27.5232	12.8241	15.0413	10.6194	15.9989	49.3687	22.2433	18.187	22.3522	10.9971	11.4045	16.9649	24.5236	7.8606	26.5741	15.4975	18.0715	8.0066	9.9178	14.3463		0.151515	17.9161
2.4997	30.1598	20.7737	15.3068	11.1608	8.7552	57.1876	23.216	19.354	21.5962	12.43	9.788	16.2523	21.5056	9.0267	26.5198	16.2785	14.2792	10.1902	6.9508	19.7988		0.159089	18.5265
2.6188	24.7905	21.0905	13.1362	10.8997	8.549	65.3555	27.5806	20.073	23.5993	16.7241	9.7979	15.4677	14.0313	9.5526	24.6068	13.1232	16.757	8.2425	7.3099	15.3256		0.166669	18.3006
2.7378	23.5092	21.8677	11.3296	10.9994	14.6318	51.0876	22.4225	18.446	28.3131	15.5498	8.2155	16.1221	17.6884	13.0735	22.8585	9.4467	15.507	8.5175	6.8561	13.364		0.174242	17.4903
2.8568	19.9601	20.1696	16.3887	13.6588	10.0914	53.1685	23.3428	23.704	25.3972	19.048	8.3786	17.309	22.0898	15.8681	21.1702	10.0488	8.8717	8.6526	7.6462	19.0526		0.181816	18.2008
2.9759	17.0413	21.2888	18.4938	15.6199	11.3723	55.5887	21.7899	18.152	30.8096	11.5695	8.6414	17.5049	24.5692	15.6486	17.111	12.3149	12.4847	7.3974	9.0086	11.3276		0.189396	17.8867
3.0949	14.5881	24.4383	16.874	14.801	12.001	57.6172	20.5196	11.018	30.1616	11.9634	7.3833	21.431	21.03	13.938	16.9661	12.6172	8.6173	8.0039	7.5835	14.2693		0.196969	17.2911
3.2139	15.2598	23.2092	14.1959	14.2455	11.7444	63.1196	17.9377	13.158	26.4373	11.0197	9.1904	27.9461	21.1414	11.5206	17.8217	14.6532	8.2798	8.2986	8.883	15.9272		0.204543	17.6995
3.333	21.6117	19.7868	23.1373	14.2302	6.4188	68.1657	20.6159	22.12	25.6533	7.5168	10.0127	22.2426	23.7625	14.3655	12.929	14.0459	12.0742	9.7463	7.2596	15.197		0.212123	18.5446
3.452	15.3308	19.2864	15.0388	10.2533	11.3538	74.2545	21.4741	18.836	28.1574	11.1314	12.2729	25.8984	17.9397	15.6062	13.2468	14.7678	8.261	8.8265	9.4268	16.2419		0.219696	18.3802
3.571	12.8148	21.6885	13.6107	14.4519	8.6056	80.8516	31.1619	15.92	26.786	7.724	12.9403	27.9196	17.495	12.1274	18.1589	13.7532	10.5693	13.135	10.7938	23.9652		0.22727	19.7236
3.6901	11.623	18.5601	14.7859	14.7391	5.3758	69.935	33.8496	20.901	34.1857	8.5094	10.4218	30.2411	18.5024	15.2344	21.9887	12.5793	10.9204	7.3331	13.3798	24.3268		0.23485	19.8696
3.8091	11.7341	12.5773	16.7429	9.8094	5.4421	62.7126	39.2074	21.736	33.4818	9.1098	9.587	34.2445	24.3369	15.3107	20.9055	15.9136	10.4147	9.8688	10.3365	23.4381		0.242423	19.8455
3.9281	14.6133	13.1233	11.8696	9.4119	7.6452	58.8342	43.8329	24.866	32.926	8.6615	12.6565	26.6095	19.2577	19.5399	20.1965	13.0285	9.8201	13.3911	11.2287	18.3987		0.249997	19.4956
4.0472	15.2272	10.0536	12.0432	8.9965	9.6977	56.8592	49.3146	30.695	27.9495	9.7035	13.5291	22.0981	17.4835	16.2449	19.7249	9.3572	11.2075	11.8136	9.8069	19.9469		0.257577	19.0876
4.1662	12.7079	10.0085	15.9068	10.4776	7.7464	60.2939	43.3065	30.219	35.4794	9.5514	8.2903	23.1221	17.7268	18.7087	17.3383	12.788	9.9929	9.0714	8.0212	20.7964		0.26515	19.0777
4.2852	14.4163	9.5054	15.3901	10.149	8.0148	48.3881	52.6888	30.719	25.9709	12.1582	7.6177	20.049	17.8812	25.8255	22.5467	12.6773	8.6399	6.743	12.3941	22.4223		0.272724	19.2099
4.4043	8.328	12.6034	15.424	9.4974	11.4622	41.8128	65.4825	38.78	26.8729	13.4561	7.6137	20.818	14.5294	19.9611	24.1515	14.9108	11.3553	12.4911	13.0238	24.1047		0.280304	20.3339
4.5233	11.9945	11.3677	8.6547	8.4423	7.8758	44.0134	59.5359	39.388	24.1916	12.0204	8.3548	14.2903	19.8119	17.5185	22.0077	14.3333	11.9487	12.4046	9.5254	23.7217		0.287877	19.0701
4.6423	8.2374	10.474	9.8186	7.6874	9.4301	31.5254	61.877	44.319	27.5314	10.9988	8.5037	20.8966	16.6896	17.5188	17.8984	14.204	13.5376	13.6574	8.6617	19.4212		0.295451	18.6444
4.7614	9.0122	11.1132	14.8852	6.4789	16.3789	27.1037	51.5339	40.911	24.1301	10.6222	8.1524	18.19	12.0888	13.4904	19.2659	11.7164	10.6776	8.6503	9.2982	18.795		0.303031	17.1247
4.8804	10.2076	12.7487	14.8626	10.5531	11.0426	26.8185	47.4449	34.876	35.3706	8.1616	8.8292	15.711	18.6813	15.1773	22.86	12.8942	9.6278	10.9733	9.008	20.5977		0.310604	17.8223
4.9995	11.9057	9.9347	11.5965	6.8202	11.1997	26.1425	50.5519	35.439	31.3685	13.7177	11.9741	14.1789	19.0072	16.4156	17.4546	12.3208	10.8421	13.8252	12.7865	25.3867		0.318184	18.1434
5.1185	10.1431	7.6618	13.4151	5.2316	10.1723	23.8599	58.919	33.789	22.0681	11.9937	11.9205	17.0348	18.1197	21.2288	19.1711	11.529	8.7431	13.2607	10.1368	18.6246		0.325758	17.3511
5.2375	12.1886	7.377	12.1483	6.5046	8.6637	21.3222	49.3007	28.114	21.9354	10.6256	9.6702	17.5761	13.4621	20.8199	18.2159	8.3574	7.3123	8.945	9.691	17.4957		0.333331	15.4863
5.3566	11.1118	13.3929	12.915	8.591	11.0037	15.3208	45.6293	29.146	23.3041	9.0305	8.1386	16.5828	15.3384	18.9637	15.2511	13.0945	14.1578	10.3925	9.9336	19.3485		0.340911	16.0323
5.4756	10.4057	14.9204	10.3463	6.6989	9.0495	14.5582	40.8782	34.856	26.524	11.1754	7.753	16.0222	10.6267	14.49	16.478	15.9567	12.7053	14.1145	11.3841	14.2546		0.348485	15.6599
5.5946	10.9856	13.984	12.5369	8.6129	8.8783	10.4212	34.7192	33.198	20.4838	17.1356	7.206	19.4498	12.3623	16.1663	15.6881	19.0977	9.3308	10.2829	15.8326	13.9765		0.356058	15.5174
5.7137	12.4518	13.6526	8.3314	7.3661	6.9009	11.2318	34.4702	30.934	26.1751	21.0764	8.8469	19.4626	12.6927	12.3528	22.3163	16.4384	11.4866	12.6173	14.2747	16.5488		0.363638	15.9814
5.8327	10.0324	14.678	7.4713	9.9813	8.6089	12.1975	31.5372	28.22	22.7964	17.1919	11.6572	13.8284	12.2984	19.3832	22.2754	17.809	10.9944	9.9643	17.6238	14.9433		0.371212	15.6746
5.9517	8.8919	9.0836	11.0285	9.6753	12.7542	9.9193	30.7542	26.071	24.2377	12.9565	10.0867	14.8653	9.4794	17.5896	17.0926	17.9376	13.1507	11.428	11.0169	13.7108		0.378785	14.5865
6.0708	12.2401	9.5073	8.9099	6.71	10.6747	7.6657	29.4561	23.13	14.7179	8.5163	8.6688	15.8952	10.9429	11.9632	17.0776	17.8424	10.2617	14.9516	15.1033	19.9232		0.386365	13.7079
6.1898	16.5641	14.0614	8.3576	9.7459	10.0514	8.1493	32.996	28.525	12.9813	6.8693	12.5006	17.8235	9.4365	17.8776	13.8788	14.1176	13.2384	13.0774	11.0045	16.9032		0.393939	14.408
6.3088	12.407	10.9986	9.3102	11.6635	9.6345	7.4265	35.0799	32.551	15.2864	7.5115	16.2678	14.8929	8.5332	18.1367	13.771	8.2768	12.2499	10.9583	9.6805	20.1613		0.401512	14.2399
6.4279	10.6321	14.7969	13.0144	14.9997	7.7176	7.1186	36.4809	29.244	12.9444	10.6303	11.0988	15.2954	10.0979	12.8061	17.5932	11.2087	9.9748	11.6112	11.8308	15.9413		0.409092	14.2519
6.5469	8.6373	9.6743	14.1281	13.4954	9.0383	8.6997	43.2712	27.306	11.0947	6.784	6.0937	11.2722	7.8615	17.5846	13.5003	11.3636	11.3898	15.7742	10.188	17.8983		0.416666	13.7528
6.6659	9.3749	9.5059	11.5025	15.0428	8.4456	11.2315	39.3654	25.133	11.4668	10.1443	6.8288	11.0161	5.3916	16.1117	12.0373	12.2498	10.8623	14.6728	10.2777	20.7222		0.424239	13.5691
6.785	5.4449	14.4643	9.3881	15.1703	7.3155	10.6691	33.0618	34.625	14.9023	11.7872	6.0816	13.7809	6.0533	18.4735	11.4718	13.8408	13.4919	13.9325	12.5015	18.0248		0.431819	14.2241
6.904	8.0716	14.759	10.7917	11.485	7.7518	9.2785	32.7078	34.284	9.7555	12.0949	7.5309	10.2939	4.2367	19.9607	10.7236	18.1839	10.1965	12.2276	12.6588	18.2311		0.439393	13.7612
7.023	10.3356	10.2111	14.2256	17.1561	5.1916	12.1702	41.6969	27.501	14.0187	11.2993	4.4057	14.991	5.692	18.8456	12.0588	16.4639	11.1895	11.2065	11.9232	17.4092		0.446966	14.3996
7.1421	11.047	18.2703	10.1242	16.2522	12.5643	11.6212	35.6069	22.803	12.0723	11.93	6.2182	13.1517	2.986	13.4903	11.2173	11.1876	11.2516	12.1594	7.9447	17.4932		0.454546	13.4696
7.2611	11.7962	12.7182	8.5271	16.5413	12.963	13.378	31	29.261	12.3162	13.9619	9.1956	8.4298	2.8715	11.169	10.0539	14.6494	4.6157	7.8858	7.935	18.3242		0.46212	12.8796
7.3801	9.6415	13.8518	4.735	15.076	7.1261	12.9935	34.9	24.03	17.4569	9.651	6.1479	10.1791	4.9778	11.5538	9.1896	13.0503	5.2527	7.9705	7.8213	17.4461		0.469693	12.1525
7.4992	9.3598	12.5448	8.0368	8.8895	7.6532	11.6928	29.8338	34.125	25.87	10.7571	8.8628	10.1878	3.3518	9.1048	10.319	8.124	6.8975	9.5956	9.3929	17.612		0.477273	12.6105
7.6182	8.712	6.8933	6.7287	15.1481	7.5471	9.4695	25.1991	30.455	26.471	6.9068	5.5784	8.8198	1.8704	13.4544	10.4851	9.9162	5.1567	8.7659	8.5995	11.7765		0.484847	11.3977
7.7372	10.2047	4.1622	6.4288	13.0316	11.6684	11.305	22.9413	30.969	18.027	7.428	7.5689	9.3547	2.1806	9.0176	14.1052	11.6573	3.5048	10.7777	6.4856	10.6463		0.49242	11.0732
7.8563	9.5334	9.1128	8.3876	17.5283	11.1979	14.6493	18.477	33.87	14.2962	9.9078	8.1019	7.3581	5.6337	5.8217	16.1742	11.3472	4.6527	7.5672	5.4579	11.4471		0.5	11.5261
7.9753	10.6972	10.6716	6.8592	17.4933	9.2192	13.2399	17.5866	23.775	21.445	10.7892	8.4669	7.5048	6.8144	3.9171	18.5664	13.9985	5.4388	6.641	11.9532	9.699		0.507574	11.7388
8.0943	13.5439	8.273	5.2138	15.6819	13.5075	10.5423	17.4932	21.686	21.4153	6.8246	10.5619	9.4811	1.7958	8.6674	17.2214	13.3936	5.8238	7.5167	19.112	13.5994		0.515147	12.0677
8.2134	9.4911	15.1409	13.8667	14.9392	12.1231	10.9788	19.1559	31.728	18.6667	6.1532	9.1363	10.6719	2.7302	7.5212	18.7267	9.6264	4.352	8.8472	16.2782	13.6366		0.522727	12.6885
8.3324	12.5642	11.41	9.7559	9.1583	8.9276	13.194	21.1117	31.259	15.086	6.781	8.252	8.1892	3.5956	7.3912	14.1852	13.6881	4.9247	9.2769	16.7341	12.66		0.530301	11.9072
8.4515	14.455	10.9867	8.9596	11.4374	8.2919	13.8875	26.5111	20.353	16.0096	9.4867	12.4285	9.0029	3.0881	6.9078	15.2019	12.5853	5.0456	4.249	23.6879	6.2853		0.53788	11.943
8.5705	14.5936	13.5403	7.0281	13.4833	10.0837	11.7514	29.2514	24.49	21.2987	10.2985	8.9142	10.9584	3.0481	4.677	11.089	11.1366	5.148	8.0875	17.7692	9.904		0.545454	12.3275
8.6895	15.5187	12.4893	11.3656	12.277	12.3846	12.4335	25.3446	23.983	11.3095	11.1377	9.8127	7.0015	2.7824	5.0951	17.1578	13.6324	4.0021	6.2534	11.9974	10.8773		0.553028	11.8428
8.8086	13.8863	14.1537	10.6272	14.2035	9.381	13.6955	24.6604	24.847	16.2015	7.9871	7.1805	10.7977	2.0386	3.4335	16.621	14.107	3.6294	6.5811	8.7684	12.6051		0.560607	11.7703
8.9276	9.7319	12.3212	9.8566	12.8463	6.9064	17.5407	20.5769	22.059	11.4223	5.0059	8.357	15.6169	1.3456	5.004	15.2739	15.7587	2.545	7.3877	9.8682	14.1604		0.568181	11.1792
9.0466	10.2262	14.5125	11.7843	11.1561	7.3949	14.0011	21.8808	21.314	7.8664	7.0494	5.5104	12.4498	3.4478	4.5575	18.4129	12.3718	5.4236	4.3052	6.8535	10.1227		0.575754	10.532
9.1657	9.5153	10.28	12.53	9.1489	10.0364	8.9752	18.625	24.32	10.5788	4.6212	5.2866	13.1644	5.1317	3.3269	18.4299	11.7124	2.1941	6.9935	15.6546	8.54		0.583334	10.4532
9.2847	7.9791	9.1781	7.2183	9.6453	7.7734	10.8526	17.5209	18.257	10.1355	5.8127	4.7946	14.5231	3.7572	5.0475	18.1665	11.3189	5.2772	4.002	12.4137	7.7781		0.590908	9.57259
9.4037	5.619	13.1549	11.2204	5.0379	12.6766	12.0655	17.2294	18.384	8.2741	6.5171	6.7313	20.1976	4.9176	4.8407	13.5885	9.759	3.2627	2.6563	7.5529	7.4064		0.598481	9.55459
9.5228	5.5587	10.3589	9.7895	3.0196	13.6259	9.5987	17.0998	13.197	9.1449	5.6202	8.2892	15.0315	1.1011	4.0989	13.236	10.7798	4.4299	5.6179	8.8283	11.6603		0.606061	9.0043
9.6418	4.7709	12.1922	9.7532	7.7442	16.4035	8.1014	17.3385	15.083	14.7313	5.5112	8.7035	17.9946	3.4967	4.5004	14.4418	11.0079	3.0352	5.3496	12.0775	8.8415		0.613635	10.0539
9.7608	7.2812	14.4331	11.658	8.2676	11.3351	9.5589	15.0387	16.975	18.2631	4.4458	8.3314	8.6097	3.0377	5.0521	16.1114	8.5003	1.8466	3.1846	7.0047	6.2403		0.621208	9.25877
9.8799	9.0214	10.8635	12.712	8.8102	9.0838	8.3482	16.5219	17.126	19.6694	6.0306	6.1387	10.882	1.2708	2.5322	14.8897	6.9865	2.8754	6.4374	7.5116	9.4839		0.628788	9.35976
9.9989	6.5093	11.4998	12.7376	3.6261	9.5609	6.7767	18.6128	15.339	19.7868	7.3257	10.969	8.3074	2.9397	2.5546	16.385	7.8224	1.3858	3.137	6.2457	9.9874		0.636362	9.07543
10.1179	4.947	11.3582	15.2143	3.5957	12.176	7.7469	21.5585	14.354	19.4872	6.6096	6.5149	7.2514	4.4303	2.4658	14.6262	10.2761	3.2278	3.2534	8.7389	9.043		0.643935	9.34376
10.237	5.6218	11.377	13.7656	6.4117	11.7339	11.1837	19.1441	16.634	14.4324	7.4167	9.311	10.2453	1.1995	3.2791	13.8719	12.2017	3.2361	3.5274	7.5173	10.9469		0.651515	9.65285
10.356	6.9763	6.5155	14.2202	4.7462	9.1749	9.1123	17.7679	9.963	12.68	2.839	10.5839	4.8757	1.329	3.5007	12.7735	6.3332	3.0179	1.5652	6.8395	8.3561		0.659089	7.6585
10.475	7.0756	8.0364	13.5793	5.8575	13.1278	6.4163	16.5142	10.164	17.5739	5.1787	6.5033	5.5975	2.8147	2.035	13.7968	6.1151	2.4217	1.8272	7.4509	10.8974		0.666662	8.14916
10.5941	5.1463	7.5309	9.6696	5.1636	7.9792	5.1651	12.109	14.356	10.5691	8.4811	5.5761	8.1255	3.1127	2.2332	13.3134	7.5938	2.0428	3.1825	8.4695	11.6064		0.674242	7.57129
10.7131	4.0571	4.74	10.3473	7.4817	9.7094	7.8408	15.3283	14.906	11.3227	5.9045	5.4173	6.0674	3.1476	2.0926	12.081	12.4276	1.9413	2.9581	7.646	10.681		0.681816	7.80489
10.8321	5.376	5.6582	8.0537	7.442	9.4285	7.1266	11.8949	11.537	16.1106	11.2636	5.3546	4.5483	1.4583	3.0256	10.8986	8.0618	3.0865	3.9663	7.959	12.2284		0.689389	7.72392
10.9512	4.7385	7.9781	5.7195	2.9174	10.6891	9.0343	13.3979	10.513	12.4551	8.4443	6.732	8.4429	2.9743	3.4764	12.7092	11.1821	3.6158	2.6817	8.2399	15.2583		0.696969	8.05999
11.0702	8.9413	6.7337	6.1094	2.6691	8.4758	7.1656	22.6246	12.945	11.9195	5.6514	5.453	14.1286	1.5972	2.3303	9.5789	14.0893	3.0896	4.1992	6.141	12.1415		0.704543	8.2992
11.1892	11.9336	4.5092	7.0575	2.6868	8.2608	8.7111	12.521	7.932	10.9127	6.7559	6.0856	8.6694	2.5158	1.4853	8.6472	9.6576	1.7998	4.432	7.6003	12.7316		0.712116	7.24526
11.3083	9.4523	5.4442	6.2074	4.3526	6.0076	9.1772	17.4557	8.878	10.9447	7.673	6.2191	7.1374	1.7103	1.4685	13.2839	10.6769	5.0307	6.7575	10.5801	14.2045		0.719696	8.13308
11.4273	10.923	6.7633	7.0538	5.1389	6.1289	10.4919	18.0026	11.097	10.9554	7.2648	6.0895	7.3231	1.996	2.8248	10.2225	6.517	3.8034	5.2055	8.473	12.9063		0.72727	7.95903
11.5463	8.6817	9.4069	7.8902	4.4649	4.8287	8.0392	14.8209	6.878	11.6838	6.1759	4.3355	5.4917	3.0683	3.5452	11.3127	8.4679	3.865	5.012	9.8547	15.4267		0.734843	7.66249
11.6654	4.8598	11.1141	9.4687	5.6726	5.7461	5.012	19.0149	7.264	9.1326	9.5975	3.882	9.1629	1.8506	2.8278	12.0173	8.5894	3.053	2.7679	5.121	10.4928		0.742423	7.33235
11.7844	9.3368	9.2419	8.5921	4.0059	7.7966	4.2908	18.3775	12.131	7.2248	6.5637	4.0549	11.7363	2.4696	4.4884	9.8278	11.2286	2.7543	4.2337	6.1854	16.26		0.749997	8.04
11.9035	6.7773	8.6562	8.9842	4.7784	6.9145	6.6012	16.7757	15.727	9.2888	6.1383	6.6358	8.4875	2.5274	3.1191	11.8922	8.1275	1.5857	4.3698	8.6212	12.9673		0.757577	7.94876
12.0225	6.3395	12.1292	6.5712	5.5004	7.2093	3.5023	14.4545	15.917	10.6677	6.6836	5.9475	10.8556	0.9017	2.1759	10.2559	10.172	2.9138	4.7275	11.7183	12.0562		0.76515	8.03496
12.1415	5.6	10.6747	9.8572	10.0513	7.0793	6.9365	17.0384	16.086	9.1303	7.8072	5.7269	5.8809	2.2039	1.437	9.237	15.1	2.4209	4.3763	13.9404	15.9296		0.772724	8.82569
12.2606	6.5914	8.4111	13.0361	9.5527	5.0794	5.3722	18.4236	12.515	8.687	4.7543	5.975	9.9682	1.7285	2.416	9.8459	12.8677	2.3169	4.3713	6.8851	17.5032		0.780304	8.31503
12.3796	7.493	4.7243	9.9999	12.3767	6.8331	6.4646	13.2085	12.197	5.3396	5.0053	2.7471	6.4314	1.7653	2.895	11.2937	16.106	3.8964	3.2307	5.3796	12.8062		0.787877	7.50967
12.4986	12.3536	5.2292	9.7032	12.915	4.289	7.2915	12.6488	15.909	3.6316	8.861	8.8842	8.1003	2.4557	1.6624	14.12	14.9462	1.6644	5.8938	4.9833	11.4113		0.795451	8.34768
12.6177	6.3765	6.6993	6.891	11.4388	3.9283	7.8321	12.7385	19.12	6.8027	7.6726	9.5826	10.9256	2.5481	2.9852	14.9481	10.8053	4.4103	3.4152	7.9608	9.4372		0.803031	8.32591
12.7367	7.3583	8.7031	6.9782	11.4039	3.8348	8.2872	9.5185	15.836	5.5795	11.917	7.6746	11.5564	1.4777	4.3919	18.5314	9.3298	4.0168	3.0936	8.7582	10.6081		0.810604	8.44275
12.8557	8.3753	10.4739	5.7301	9.7432	4.1903	7.6061	11.0494	17.909	8.3285	8.1613	3.5935	10.7323	1.8138	2.6554	18.6059	11.9251	4.2064	4.7786	6.4081	9.0127		0.818178	8.26495
12.9748	6.9192	4.9092	5.0055	7.5634	5.8586	9.9246	12.9786	9.601	8.4761	9.4529	4.6275	12.5924	5.2161	3.3543	19.9337	10.2721	4.3379	3.4323	8.467	10.3685		0.825758	8.16455
13.0938	10.59	4.2387	5.8749	8.5013	4.1371	10.1916	13.7024	8.392	8.4941	12.2465	5.3748	10.6622	2.7009	3.705	12.4726	7.78	3.062	5.4284	8.7889	8.5978		0.833331	7.74706
13.2128	6.7493	6.8313	7.4394	7.4896	3.121	10.3668	9.5152	7.315	6.6517	10.2826	4.5236	10.7708	1.5021	2.1412	12.2484	9.5571	3.3695	6.2764	9.2174	11.3183		0.840905	7.33434
13.3319	6.5356	9.4899	6.0151	6.6818	5.5216	11.5432	12.1719	7.947	7.8634	11.3444	6.9388	11.7176	0.8354	3.2489	11.9572	12.2888	2.5889	7.744	8.0403	10.6478		0.848485	8.05608
13.4509	8.3452	4.6701	6.7013	3.8238	5.2935	9.1102	11.1263	9.8	6.8769	11.4787	5.7621	12.0424	2.3113	2.403	8.0125	7.5629	3.8984	7.4195	8.7885	7.3303		0.856058	7.13785
13.5699	7.521	9.3228	5.3959	5.1262	5.1732	9.9242	6.2423	11.642	14.3262	10.0459	7.2023	11.6564	1.7609	3.7145	7.4873	7.2231	3.8324	6.0258	9.6898	6.8678		0.863632	7.509
13.689	6.6301	4.7673	4.6473	4.6442	6.176	8.8945	7.8535	14.538	12.6323	10.52	8.1212	8.0851	3.0449	2.2391	10.4847	10.9299	2.8403	4.5693	10.3904	8.4153		0.871212	7.52117
13.808	6.749	6.9118	5.5467	6.833	3.6931	7.5257	7.3842	10.036	9.5454	13.4148	9.5733	9.6771	3.0906	4.9245	6.5674	10.9315	2.3705	5.01	13.0855	7.7038		0.878785	7.52869
13.927	7.9195	5.5496	5.4644	6.5899	4.6083	9.5898	11.5183	11.39	11.4106	8.7898	5.8227	9.1666	0.9311	2.8829	8.7953	9.5477	2.2137	6.756	14.6768	7.5608		0.886359	7.55919
14.0461	8.147	5.8969	7.9164	6.0038	3.1311	8.8181	9.3719	9.7	11.9674	9.7736	8.3931	13.3704	1.3282	2.5424	6.6378	6.0344	3.5143	7.2713	14.2459	6.4267		0.893939	7.52454
14.1651	7.7201	4.9931	7.6114	7.1542	4.093	10.3058	8.1919	8.183	12.2766	8.7419	6.8219	13.5774	1.0063	2.2321	7.7978	5.4328	3.0458	7.9274	14.7448	6.7774		0.901512	7.43174
14.2841	10.123	3.5402	6.2194	6.9054	2.3867	13.3186	9.156	12.551	11.7085	7.3217	6.584	10.9221	2.0101	3.1199	8.7171	8.1575	1.6156	10.4909	10.7091	9.6516		0.909086	7.76042
14.4032	10.2707	4.3014	8.9854	5.5149	6.093	8.0444	7.9063	13.779	16.1956	7.8888	7.993	10.4453	2.5084	2.0547	8.7471	9.4346	2.1172	10.8878	8.7896	9.8581		0.916666	8.09077
14.5222	5.5867	4.0509	5.7749	2.8309	5.6058	5.5454	10.1265	13.342	16.7698	6.0749	7.0384	8.3431	2.7792	2.0033	8.666	7.0335	2.2172	8.8723	9.2914	9.3799		0.924239	7.06661
14.6412	5.9336	5.4459	6.6799	4.9812	6.9696	6.7876	9.9268	12.415	13.5417	4.986	5.8225	8.3836	3.0105	2.6379	6.1844	11.0126	2.8073	9.1548	7.9792	10.658		0.931813	7.2659
14.7603	5.7811	6.5473	7.5966	5.8131	3.9128	4.8095	10.2818	16.691	8.0802	5.3704	4.7765	11.7017	1.7346	3.6695	4.0358	10.8804	2.4659	7.4656	15.7455	8.0773		0.939393	7.27183
14.8793	6.254	4.9782	4.2777	4.4541	3.7544	3.181	9.6921	12.78	6.219	5.926	5.9095	13.1152	3.0132	2.1725	5.1697	9.1617	3.4112	8.4373	9.8968	6.3168		0.946966	6.40602
14.9984	5.259	4.0073	5.427	3.1433	1.3941	2.9275	14.4442	9.227	7.5976	4.7531	6.7669	10.3466	4.6083	3.8837	6.7192	6.6461	4.0533	9.1775	10.1811	6.7947		0.954546	6.36788
15.1174	4.1933	4.981	3.6755	1.9794	2.7856	5.67	8.1803	8.006	8.8441	6.3171	6.0981	8.6268	3.1103	4.4327	6.3315	5.9282	3.4483	9.7771	16.972	7.1431		0.96212	6.32502
15.2364	4.9176	5.7282	1.9285	1.3998	1.5946	4.8675	6.6334	10.094	9.0112	4.2229	6.2848	7.3302	3.7649	1.4584	2.4206	8.0133	2.8251	9.0314	14.6642	10.0832		0.969693	5.81369
15.3555	2.4359	6.5896	1.3666	2.6794	2.0159	1.8936	10.5347	9.904	12.5249	3.4294	5.2283	5.7115	3.8479	1.349	3.3751	9.2296	4.5106	6.5834	10.7682	12.6259		0.977273	5.83017
15.4745	3.8283	4.014	1.9454	2.304	1.6065	4.1504	7.008	6.018	10.0922	3.4416	5.8861	6.8707	4.7525	0.9724	5.145	11.0137	7.2996	5.4997	8.2007	7.9606		0.984847	5.40047
15.5935	3.2308	3.5011	2.2646	1.7225	1.0178	1.7999	8.1365	5.833	9.3555	5.4417	7.0954	8.1063	8.6605	2.2619	4.3266	13.2177	4.6476	3.4719	10.3232	7.3088		0.99242	5.58617
15.7126	1.2373	2.5493	2.5475	2.2177	3.8539	2.3593	8.1805	5.404	7.8303	3.3495	4.386	10.0706	6.0818	2.5547	7.2836	16.2227	3.627	4.8269	10.2884	7.3655		1	5.61182

## Sheet: Sheet1
Image17				Image18				Image9				Image10				Image12					Distance	Image17	Image18	Image9	Image10	Image12
Ap-Ba	Average int.			Ap-Ba	Average int.			Ap-Ba	Average int.			Ap-Ba	Average int.			Ap-Ba	Average int.				0	19.2511	13.5491	3.60597	3.78045	2.28261
0	19.2511			0	13.5491			0	3.60597			0	3.78045			0	2.28261				0.05	18.3487	13.784	3.99748	4.44807	2.74106
0.00757354	18.6678			0.00724426	14.8198			0.00636759	3.62294			0.00709013	4.2312			0.00558497	2.28503				0.1	21.4126	11.4465	4.49575	5.12521	3.71819
0.0151534	17.9893			0.0144946	14.1269			0.0127405	3.99897			0.0141862	4.25006			0.0111746	2.31642				0.15	18.1925	9.90855	4.65951	5.49141	3.93881
0.022727	17.8123			0.0217389	14.9357			0.0191081	3.75446			0.0212763	4.43872			0.0167596	2.6884				0.2	17.9136	9.11425	4.64017	5.28116	4.01933
0.0303005	18.1199			0.0289831	13.6433			0.0254757	3.79113			0.0283665	4.94367			0.0223446	2.59662				0.25	19.3099	7.86191	4.41643	5.19702	4.45357
0.0378804	18.5434			0.0362335	12.3302			0.0318486	4.14929			0.0354626	4.84345			0.0279342	2.79227				0.3	18.9355	7.34523	4.51817	5.63594	3.85319
0.045454	18.0044			0.0434777	13.744			0.0382162	4.09461			0.0425527	4.858			0.0335192	3.30918				0.35	16.5733	7.99041	4.55134	5.45013	4.25336
0.0530275	18.4013	18.3487		0.050722	13.1228	13.784		0.0445838	4.51522			0.0496428	4.3423			0.0391042	2.81885				0.4	14.7664	8.2581	3.85133	6.03858	4.30408
0.0606074	18.1211			0.0579723	13.5164			0.0509567	4.44475	3.99748		0.0567389	4.34481	4.44807		0.0446938	3.36232				0.45	13.9183	7.56013	3.55213	6.53434	4.13043
0.068181	19.9319			0.0652166	12.7031			0.0573243	4.57232			0.063829	4.67563			0.0502788	2.95894	2.74106			0.5	11.94	6.2322	3.52389	5.24579	3.38191
0.0757545	21.6792			0.0724609	11.3219			0.0636919	4.474			0.0709192	4.87786			0.0558637	3.31885				0.55	12.0737	6.09848	3.71356	5.27907	3.01691
0.0833344	21.7044			0.0797112	10.876			0.0700649	4.4776			0.0780152	4.98583			0.0614534	3.47825				0.6	10.2952	5.87707	3.88668	4.90789	2.91304
0.0909079	23.7903			0.0869555	10.7346			0.0764324	4.35554			0.0851054	5.24172			0.0670384	3.67632				0.65	9.45741	6.35648	3.49408	4.54923	2.7606
0.0984815	22.9096			0.0941997	10.611			0.0828	4.486			0.0921955	5.35858			0.0726233	3.25362				0.7	7.89528	5.6183	3.28821	4.55506	2.87547
0.106061	21.7515	21.4126		0.10145	10.3625	11.4465		0.089173	4.8404			0.0992916	5.21239			0.078213	4.50966				0.75	7.7287	5.38861	3.11414	4.9778	2.85508
0.113635	19.5275			0.108694	10.9845			0.0955405	4.31435			0.106382	5.52443	5.12521		0.083798	4.27536				0.8	8.18681	4.56831	3.24506	5.06324	3.05529
0.121215	17.8912			0.115945	10.6744			0.101913	4.44577	4.49575		0.113478	5.3008			0.0893876	3.27054				0.85	7.87822	4.4985	3.57866	4.22284	3.45357
0.128788	18.4164			0.123189	10.3919			0.108281	4.61335			0.120568	5.50899			0.0949726	3.88406				0.9	7.51239	4.54763	3.91114	4.43782	4.01959
0.136362	17.3498			0.130433	10.0019			0.114649	4.61061			0.127658	5.40659			0.100558	3.7971	3.71819			0.95	7.17563	4.83407	4.41611	4.57333	4.30837
0.143942	18.0538			0.137684	9.66796			0.121022	5.10818			0.134754	5.23955			0.106147	3.35991				1	5.76122	4.3594	3.13409	3.82528	5.5776
0.151515	17.9161	18.1925		0.144928	8.77118			0.127389	4.53388			0.141844	5.61251			0.111732	3.8913
0.159089	18.5265			0.152172	8.86806	9.90855		0.133757	4.73608			0.148934	5.97536			0.117317	4.33092
0.166669	18.3006			0.159422	9.65372			0.14013	4.69831			0.15603	5.39607	5.49141		0.122907	3.70048
0.174242	17.4903			0.166667	10.1343			0.146497	4.37739			0.163121	5.40655			0.128492	4.15701
0.181816	18.2008			0.173911	9.66355			0.152865	4.59829	4.65951		0.170211	4.62163			0.134077	3.56039
0.189396	17.8867			0.181161	8.55165			0.159238	4.42835			0.177307	5.13177			0.139666	4.00483
0.196969	17.2911			0.188406	9.09738			0.165605	4.77018			0.184397	5.49423			0.145251	4.29952
0.204543	17.6995	17.9136		0.19565	8.01699			0.171973	4.44761			0.191487	5.46319			0.150836	4.14492	3.93881
0.212123	18.5446			0.2029	8.68221	9.11425		0.178346	5.00819			0.198583	5.35102			0.156426	3.83816
0.219696	18.3802			0.210144	8.17552			0.184714	4.6413			0.205673	5.49971	5.28116		0.162011	4.2657
0.22727	19.7236			0.217389	7.38793			0.191081	4.87682			0.212763	5.102			0.167596	4.13527
0.23485	19.8696			0.224639	8.29668			0.197454	4.58331			0.21986	5.1305			0.173186	4.19806
0.242423	19.8455			0.231883	7.69747			0.203822	4.36558	4.64017		0.22695	5.19765			0.178771	4.10145
0.249997	19.4956	19.3099		0.239128	6.96957			0.210189	5.09048			0.23404	5.12449			0.184356	3.44927
0.257577	19.0876			0.246378	8.27987			0.216562	4.5312			0.241136	5.0119			0.189945	4.25121
0.26515	19.0777			0.253622	8.22634	7.86191		0.22293	5.00358			0.248226	5.26344			0.19553	3.95653
0.272724	19.2099			0.260866	7.63584			0.229297	4.38814			0.255316	5.54915	5.19702		0.201115	3.97827	4.01933
0.280304	20.3339			0.268117	7.64303			0.23567	4.24006			0.262412	5.46215			0.206705	4.02415
0.287877	19.0701			0.275361	8.21784			0.242038	3.72326			0.269502	5.26745			0.21229	3.68116
0.295451	18.6444			0.282605	7.76578			0.248405	3.93435			0.276592	4.96247			0.217875	4.53623
0.303031	17.1247	18.9355		0.289856	6.63908			0.254778	4.42038	4.41643		0.283689	5.45079			0.223464	4.58938
0.310604	17.8223			0.2971	6.25223			0.261146	4.28602			0.290779	5.72321			0.229049	4.82368
0.318184	18.1434			0.30435	7.26282	7.34523		0.267519	4.63942			0.297875	6.33334			0.234639	4.63044
0.325758	17.3511			0.311594	7.71516			0.273886	4.40898			0.304965	6.25217	5.63594		0.240224	4.53865
0.333331	15.4863			0.318839	8.0338			0.280254	4.06002			0.312055	5.8527			0.245809	4.90821
0.340911	16.0323			0.326089	7.83149			0.286627	4.74277			0.319151	6.14736			0.251399	4.35024	4.45357
0.348485	15.6599			0.333333	6.90397			0.292995	4.71159			0.326241	5.22853			0.256984	3.66425
0.356058	15.5174	16.5733		0.340578	8.53086			0.299362	4.55955			0.333331	5.53048			0.262569	4.31159
0.363638	15.9814			0.347828	8.36437			0.305735	4.737	4.51817		0.340427	4.97959			0.268158	3.83576
0.371212	15.6746			0.355072	8.55322	7.99041		0.312103	4.7469			0.347518	4.99704			0.273743	3.67391
0.378785	14.5865			0.362316	7.88514			0.31847	3.99366			0.354608	5.41519	5.45013		0.279328	4.25845
0.386365	13.7079			0.369567	7.76641			0.324843	4.17532			0.361704	5.65371			0.284918	3.61836
0.393939	14.408			0.376811	8.73489			0.331211	4.77046			0.368794	5.74804			0.290503	3.93719
0.401512	14.2399	14.7664		0.384055	8.62822			0.337578	5.36818			0.375884	6.24474			0.296088	3.70531
0.409092	14.2519			0.391306	7.72723			0.343951	4.59913			0.38298	5.83902			0.301677	3.67391	3.85319
0.416666	13.7528			0.39855	8.26071			0.350319	4.20574	4.55134		0.39007	6.00548			0.307262	3.48068
0.424239	13.5691			0.405794	8.80412	8.2581		0.356687	4.0759			0.39716	6.45245			0.312847	4.19324
0.431819	14.2241			0.413045	8.44261			0.363059	3.98405			0.404256	6.3266	6.03858		0.318437	3.88164
0.439393	13.7612			0.420289	8.49615			0.369427	3.41889			0.411347	6.56029			0.324022	4.06763
0.446966	14.3996			0.427533	7.44244			0.375795	3.90019			0.418437	7.14128			0.329607	4.68116
0.454546	13.4696	13.9183		0.434783	7.17887			0.382168	4.36681			0.425533	6.42941			0.335197	4.27778
0.46212	12.8796			0.442028	7.30727			0.388535	3.85978			0.432623	6.97227			0.340782	4.33817
0.469693	12.1525			0.449272	6.84982			0.394903	3.51367			0.439713	6.52853			0.346366	4.76329
0.477273	12.6105			0.456522	7.20377	7.56013		0.401276	3.69134	3.85133		0.446809	6.24596			0.351956	4.59662	4.25336
0.484847	11.3977			0.463767	6.73187			0.407643	3.39621			0.453899	5.86266	6.53434		0.357541	3.57247
0.49242	11.0732			0.471011	6.28798			0.414011	3.57784			0.460989	5.33628			0.363126	5.01449
0.5	11.5261	11.94		0.478261	6.63179			0.420384	3.8174			0.468085	5.96974			0.368716	4.85024
0.507574	11.7388			0.485505	5.74957			0.426751	3.82069			0.475176	4.6338			0.374301	3.91788
0.515147	12.0677			0.49275	5.88283			0.433119	3.41312			0.482266	4.95336			0.379886	4.23913
0.522727	12.6885			0.5	6.10915	6.2322		0.439492	3.32834			0.489362	5.46255			0.385475	3.86473
0.530301	11.9072			0.507244	5.98417			0.445859	3.27777			0.496452	5.18151			0.39106	4.1715
0.53788	11.943			0.514495	5.92244			0.452232	3.78564	3.55213		0.503548	5.18329	5.24579		0.39665	5.18599
0.545454	12.3275			0.521739	6.44928			0.4586	3.3865			0.510638	5.16227			0.402235	3.92029	4.30408
0.553028	11.8428	12.0737		0.528983	5.75182			0.464968	3.52098			0.517728	5.07642			0.40782	4.73671
0.560607	11.7703			0.536233	5.9221			0.471341	3.49704			0.524824	5.2464			0.41341	4.19807
0.568181	11.1792			0.543478	6.3538			0.477708	3.54028			0.531915	4.7557			0.418995	4.49759
0.575754	10.532			0.550722	6.30575	6.09848		0.484076	3.85487			0.539005	5.18349			0.424579	3.90821
0.583334	10.4532			0.557972	6.84316			0.490449	3.3612			0.546101	5.97271			0.430169	3.91546
0.590908	9.57259			0.565217	5.39718			0.496816	3.66885			0.553191	5.55652	5.27907		0.435754	3.69565
0.598481	9.55459			0.572461	5.68651			0.503184	3.3614	3.52389		0.560281	5.15237			0.441339	4.16908
0.606061	9.0043	10.2952		0.579711	6.01258			0.509557	3.50236			0.567377	5.3354			0.446929	4.13285
0.613635	10.0539			0.586955	5.62668			0.515924	4.18992			0.574467	5.01891			0.452514	3.92029	4.13043
0.621208	9.25877			0.5942	5.60311			0.522292	3.55069			0.581557	4.71185			0.458099	3.68841
0.628788	9.35976			0.60145	5.97026	5.87707		0.528665	3.55159			0.588653	5.03471			0.463688	3.55556
0.636362	9.07543			0.608694	6.65024			0.535032	3.57651			0.595744	4.69963			0.469273	3.70048
0.643935	9.34376			0.615939	6.15908			0.5414	3.70322			0.602834	4.40235	4.90789		0.474858	3.62802
0.651515	9.65285	9.45741		0.623189	6.76423			0.547773	4.00984			0.60993	4.64961			0.480448	3.38165
0.659089	7.6585			0.630433	6.16007			0.554141	3.6244	3.71356		0.61702	4.87674			0.486033	3.22464
0.666662	8.14916			0.637677	6.01382			0.560508	3.42257			0.62411	4.30563			0.491618	2.91305
0.674242	7.57129			0.644928	6.63423			0.566881	3.92455			0.631206	4.08176			0.497208	3.14975
0.681816	7.80489			0.652172	6.11366	6.35648		0.573249	4.25474			0.638296	4.50597			0.502792	3.19564	3.38191
0.689389	7.72392			0.659416	5.56969			0.579616	3.85612			0.645386	4.6058			0.508377	2.86474
0.696969	8.05999			0.666667	5.84396			0.585989	3.88767			0.652482	4.81912	4.54923		0.513967	3.61111
0.704543	8.2992	7.89528		0.673911	5.53193			0.592357	4.20399			0.659573	5.02728			0.519552	3.13527
0.712116	7.24526			0.681155	6.17368			0.598724	3.9605			0.666663	4.1751			0.525137	2.99516
0.719696	8.13308			0.688406	5.45942			0.605097	3.58332	3.88668		0.673759	4.42729			0.530727	3.24638
0.72727	7.95903			0.69565	5.67456			0.611465	3.41809			0.680849	4.37077			0.536312	2.88406
0.734843	7.66249			0.702894	5.07486	5.6183		0.617832	3.57807			0.687939	4.46832			0.541897	2.79468
0.742423	7.33235			0.710144	5.53318			0.624205	3.68003			0.695035	4.34899			0.547486	2.39614
0.749997	8.04	7.7287		0.717389	5.27623			0.630573	3.47844			0.702125	5.06767	4.55506		0.553071	3.22465	3.01691
0.757577	7.94876			0.724639	6.08226			0.636946	3.1785			0.709221	5.34491			0.558661	3.04106
0.76515	8.03496			0.731883	5.63586			0.643313	3.74257			0.716311	5.44807			0.564246	3.02898
0.772724	8.82569			0.739128	4.88615			0.649681	3.35479			0.723402	4.91856			0.569831	2.75362
0.780304	8.31503			0.746378	4.81695			0.656054	3.52212	3.49408		0.730498	4.5953			0.575421	3.04589
0.787877	7.50967			0.753622	5.48964	5.38861		0.662422	3.37192			0.737588	4.74446			0.581005	3.08936
0.795451	8.34768			0.760866	4.35877			0.668789	3.28391			0.744678	4.94615			0.58659	3
0.803031	8.32591	8.18681		0.768117	4.65005			0.675162	3.25298			0.751774	4.84715	4.9778		0.59218	2.59904
0.810604	8.44275			0.775361	5.45548			0.68153	3.49946			0.758864	5.71186			0.597765	2.83092
0.818178	8.26495			0.782605	4.3582			0.687897	3.12802			0.765954	5.18684			0.60335	2.8285	2.91304
0.825758	8.16455			0.789856	4.38455			0.69427	3.41321			0.77305	5.20743			0.60894	2.4686
0.833331	7.74706			0.7971	4.47328			0.700638	3.12919			0.78014	4.75335			0.614525	2.83574
0.840905	7.33434			0.804344	4.29784	4.56831		0.707005	3.22699	3.28821		0.787231	4.61224			0.62011	3.01691
0.848485	8.05608			0.811594	4.56884			0.713378	2.92219			0.794327	5.1361			0.625699	2.53864
0.856058	7.13785	7.87822		0.818839	4.47136			0.719746	3.12302			0.801417	4.83486	5.06324		0.631284	3.12319
0.863632	7.509			0.826083	4.37002			0.726114	3.094			0.808507	4.37191			0.636869	2.83575
0.871212	7.52117			0.833333	4.17571			0.732486	3.06665			0.815603	4.11859			0.642459	2.73188
0.878785	7.52869			0.840578	4.60086			0.738854	3.29301			0.822693	4.58261			0.648044	2.39131
0.886359	7.55919			0.847822	4.79868			0.745222	3.31025			0.829783	4.74489			0.653629	2.90338	2.7606
0.893939	7.52454			0.855072	4.50405	4.4985		0.751595	2.98989	3.11414		0.836879	4.11021			0.659218	2.5314
0.901512	7.43174	7.51239		0.862316	4.76029			0.757962	2.92008			0.84397	3.88276			0.664803	2.72464
0.909086	7.76042			0.869561	4.32625			0.76433	3.03198			0.85106	3.74889	4.22284		0.670388	2.66425
0.916666	8.09077			0.876811	4.35362			0.770703	3.07191			0.858156	4.32277			0.675978	2.93961
0.924239	7.06661			0.884055	4.80089			0.77707	2.97395			0.865246	4.21145			0.681563	3.11353
0.931813	7.2659			0.8913	5.20817			0.783438	3.6375			0.872336	3.95363			0.687148	3
0.939393	7.27183			0.89855	4.33924			0.789811	3.39399			0.879432	4.1238			0.692738	3.25604
0.946966	6.40602			0.905794	4.04492	4.54763		0.796178	3.69855			0.886522	4.41636			0.698323	2.96136
0.954546	6.36788	7.17563		0.913045	4.5274			0.802551	3.23255	3.24506		0.893618	4.95543			0.703912	2.68841	2.87547
0.96212	6.32502			0.920289	4.70484			0.808919	3.1609			0.900708	5.08129	4.43782		0.709497	2.50967
0.969693	5.81369			0.927533	4.52912			0.815286	3.40686			0.907799	4.44513			0.715082	2.94445
0.977273	5.83017			0.934783	5.52983			0.821659	3.62282			0.914895	4.861			0.720672	2.8913
0.984847	5.40047			0.942028	4.78438			0.828027	3.86554			0.921985	4.46576			0.726257	2.84541
0.99242	5.58617			0.949272	4.74583			0.834395	3.65612			0.929075	4.35166			0.731842	2.34784
1	5.61182	5.76122		0.956522	5.01711	4.83407		0.840768	3.40954			0.936171	5.28438			0.737431	2.96377
				0.963767	4.52991			0.847135	3.50936			0.943261	4.83641			0.743016	2.88406
				0.971011	4.00813			0.853503	3.99815	3.57866		0.950351	3.76896	4.57333		0.748601	3.14493
				0.978261	4.30266			0.859876	3.77577			0.957447	4.04498			0.754191	3.16425	2.85508
				0.985505	4.10298			0.866243	3.52054			0.964537	4.04456			0.759776	2.8285
				0.99275	5.15774			0.872611	3.94946			0.971628	4.19666			0.765361	3.69565
				1	4.05499	4.3594		0.878984	3.78795			0.978724	3.95143			0.770951	2.98068
								0.885351	3.92557			0.985814	3.61215			0.776536	3.22947
								0.891719	3.81021			0.992904	3.36172			0.782121	2.97584
								0.898092	4.19451			1	3.56544	3.82528		0.78771	2.83334
								0.904459	4.32511	3.91114						0.793295	2.89855
								0.910827	4.22106							0.79888	2.78262
								0.9172	3.93332							0.80447	3.27295	3.05529
								0.923568	4.53177							0.810055	2.8116
								0.929935	4.56929							0.81564	3.28019
								0.936308	4.68144							0.821229	3.45893
								0.942676	4.24481							0.826814	3.72706
								0.949043	4.9172							0.832399	3.04348
								0.955416	4.22999	4.41611						0.837989	3.51691
								0.961784	3.67494							0.843574	4.03864
								0.968151	3.8341							0.849159	3.39854
								0.974524	3.67364							0.854749	3.80675	3.45357
								0.980892	3.18854							0.860334	3.2971
								0.987265	2.7543							0.865923	3.87197
								0.993632	2.57004							0.871508	3.82609
								1	2.2431	3.13409						0.877093	3.72464
																0.882683	3.36957
																0.888268	4.28985
																0.893853	3.97101
																0.899442	5.03139
																0.905027	4.79468	4.01959
																0.910612	4.37199
																0.916202	4.31884
																0.921787	4.78019
																0.927372	3.72464
																0.932962	3.94203
																0.938547	4.47825
																0.944132	4.78744
																0.949721	4.2198
																0.955306	4.15217	4.30837
																0.960891	4.18357
																0.966481	5.21981
																0.972066	5.42995
																0.977651	5.74154
																0.98324	6.04106
																0.988825	5.92512
																0.99441	6.39372
																1	5.68599	5.5776
