# Supplementary material for: Crumbs organizes the transport machinery by regulating apical levels of PI(4,5)P2 in Drosophila
Source: eLife. 2019 Nov 7;8:e50900. doi: 10.7554/eLife.50900 (PMC6881148; doi:10.7554/eLife.50900)
Supplement: Figure 3—figure supplement 2—source data 2. [file elife-50900-fig3-figsupp2-data2.xlsx]

## Sheet: Image5
X0	Y0	Y1	Y2	Y3	Y4	Y5	Y6	Y7	Y8	Y9	Y10	Y11	Y12	Y13	Y14	Y15	Y16	Y17	Y18	Y19	Y20	Y21		Ap-Ba	Average int.
0	53.4414	46.4006	52.7836	51.394	74.035	71.258	42.7098	64.6467	71.7509	66.391	72.842	118.744	103.209	89.027	61.4975	73.969	83.891	56.4808	52.024	63.1694	52.2723	52.9155		0	67.0388
0.119	50.8757	48.0122	54.9119	61.152	81.986	76.219	41.1474	72.7224	74.1889	59.931	73.645	131.78	121.74	102.853	53.9841	86.89	86.839	61.1313	59.8456	57.126	44.7561	47.6724		0.00769007	70.4277
0.2381	58.7105	43.1713	52.9693	62.439	85.914	77.844	51.3979	63.7298	72.4451	68.657	76.498	138.982	133.826	106.779	62.2521	92.681	86.912	61.6655	62.6935	58.4858	42.076	41.7918		0.0153866	72.8146
0.3571	57.39	57.263	48.6313	74.933	73.424	83.509	48.057	68.251	80.6363	77.082	65.439	153.475	151.68	118.736	72.8843	105.101	88.281	72.8594	62.59	61.257	45.5478	57.672		0.0230767	78.3954
0.4761	51.6918	51.6428	56.9993	75.771	80.597	85.374	37.8742	65.5333	76.1375	80.905	82.824	159.315	154.551	116.413	70.017	103.696	101.934	74.5351	64.6344	71.8905	50.6068	55.7739		0.0307667	80.3962
0.5952	62.2174	54.1238	62.1332	72.965	85.836	88.667	42.5799	67.9972	92.9349	92.563	91.315	160.904	168.415	126.542	72.6912	106.116	94.726	81.3585	88.6825	64.2234	57.0503	52.667		0.0384633	85.7595
0.7142	54.5783	39.6547	59.6548	77.526	83.682	86.052	49.6837	73.6835	83.1619	80.996	90.14	156.169	168.557	131.178	86.5438	101.102	95.941	78.4713	82.7481	58.8452	58.2289	60.714		0.0461533	84.4232
0.8332	60.2415	53.8714	69.6261	90.717	90.699	78.609	46.6592	61.0811	82.0911	92.507	103.222	170.248	169.279	147.821	80.1934	106.156	110.317	84.2518	81.174	69.6373	69.5326	65.3741		0.0538434	90.1504
0.9523	56.0139	55.7197	66.0895	90.82	76.932	75.688	50.943	72.16	76.7264	95.343	101.584	179.945	167.997	137.598	85.1825	100.986	110.007	77.6111	88.7694	76.7625	70.2379	69.7007		0.06154	90.128
1.0713	51.6816	51.4088	62.7614	97.45	72.644	79.51	56.7765	79.4845	86.7409	96.361	100.491	187.279	170.154	142.891	88.706	100.127	99.035	72.6573	81.0563	70.1698	63.6084	65.6878		0.06923	89.8491
1.1903	55.1823	51.3195	51.6002	109.412	77.592	86.934	61.3207	79.9725	79.0755	82.693	110.195	194.826	174.118	143.436	82.8554	94.965	109.569	73.6015	74.5764	69.6837	76.2185	73.313		0.0769201	91.4754
1.3094	63.2216	57.5376	56.5178	104.645	87.421	78.712	56.3606	79.2082	86.3453	89.39	104.292	192.976	180.778	135.885	86.887	103.314	116.206	73.8098	78.7623	82.6746	79.6079	79.8121		0.0846166	94.2893
1.4284	60.7419	51.814	54.3827	91.314	90.823	92.864	63.8762	74.2657	87.4514	107.058	109.949	193.19	174.434	143.174	78.5259	106.579	105.742	72.217	84.1786	80.7499	86.1672	79.1947		0.0923067	94.9406
1.5474	58.0392	55.7983	58.4974	110.115	91.584	87.966	60.9351	75.1516	84.4736	105.908	113.541	184.498	180.913	149.538	77.702	109.298	98.708	72.8007	76.9997	72.7127	74.8883	77.809		0.0999968	94.4489
1.6665	53.6876	48.8596	47.6901	110.788	90.564	84.48	60.1499	76.5482	79.6592	107.355	123.581	186.411	175.888	154.18	83.9721	97.016	104.869	72.2098	77.3236	77.3155	70.1087	78.7471		0.107693	93.7002
1.7855	62.7976	57.2599	60.6398	107.238	85.847	93.9	56.919	78.9644	92.6907	98.702	117.871	186.069	186.691	139.927	81.1198	101.92	98.21	73.2796	66.6087	67.7442	75.1611	60.3774		0.115383	93.179
1.9046	53.508	50.7409	58.9471	92.67	89.121	96.858	55.803	80.9449	91.6521	109.197	121.73	183.894	183.686	135.837	76.6112	97.969	103.214	64.4322	67.0791	67.1614	65.4533	63.8974		0.12308	91.3821
2.0236	48.7197	55.1551	51.1065	95.777	83.359	99.776	59.2012	78.7913	90.1669	102.054	108.388	191.874	172.087	126.395	76.3294	84.793	106.019	66.6584	72.7637	69.2559	67.9921	62.8105		0.13077	89.5215
2.1426	48.3199	54.0743	47.7119	111.213	101.955	89.449	52.0528	78.9152	90.5534	106.205	127.487	180.091	169.678	132.993	67.7085	91.324	112.099	65.4717	71.0667	73.7842	75.92	70.7167		0.13846	91.7632
2.2617	49.9718	62.988	45.0681	100.234	111.206	87.448	60.6976	69.205	92.4905	102.853	128.296	194.814	166.977	135.112	67.5375	88.454	98.971	54.95	74.6321	72.912	71.898	57.6554		0.146157	90.6532
2.3807	51.2833	49.3698	50.015	93.127	102.127	103.998	64.3201	84.7272	92.5827	94.897	119.426	184.102	167.226	109.486	56.7338	84.062	103.695	53.1929	79.4766	77.8433	67.5256	45.5779		0.153847	87.9452
2.4997	50.7773	50.9374	44.2557	108.511	96.132	99.342	54.8863	81.3224	84.6387	96.033	121.132	178.255	160.545	114.284	62.1889	84.618	93.295	56.4007	66.737	70.0277	59.5114	51.9577		0.161537	85.7176
2.6188	53.486	45.7101	51.0699	108.528	93.412	99.486	44.4042	78.1929	70.3708	106.601	122.189	169.285	153.535	104.922	53.437	80.271	90.188	63.1923	62.1385	56.2453	67.4949	56.5102		0.169233	83.2122
2.7378	50.2556	42.1573	43.7768	95.762	86.407	84.174	45.6026	89.9568	72.1049	89.911	125.432	162.691	142.748	96.888	52.7872	80.291	84.798	47.6956	63.4964	52.6047	62.0729	36.6963		0.176923	77.6504
2.8568	46.8032	44.1152	38.3912	85.563	86.771	88.622	45.2486	75.213	80.5734	89.129	130.235	146.181	132.841	85.666	43.8638	83.579	79.2	43.6341	56.4097	64.5253	56.5191	31.8816		0.184613	74.3166
2.9759	37.7218	43.5178	42.6503	99.344	95.887	103.019	47.5368	73.4149	85.5779	64.344	116.872	123.463	133.29	58.635	36.205	74.643	78.78	47.131	61.0983	53.1743	54.4932	27.0058		0.19231	70.8093
3.0949	33.3024	37.5356	43.167	95.788	99.031	100.369	50.0777	71.5141	71.8822	47.184	115.497	116.934	105.531	46.366	38.4055	64.663	67.827	37.7956	55.8898	54.0241	56.8034	24.7146		0.2	65.1955
3.2139	28.3332	38.5484	35.5218	93.032	89.613	100.319	45.8401	76.7369	73.1049	37.132	91.443	100.965	90.166	45.967	40.0214	72.91	75.23	39.2272	56.5492	54.7467	42.7748	26.7831		0.20769	61.5893
3.333	24.0212	37.2565	36.1636	103.213	101.126	107.751	41.5264	66.0257	79.2	22.071	71.884	85.637	78.611	35.591	34.6687	64.552	70.548	43.0814	43.36	57.6269	41.3226	25.222		0.215387	57.7481
3.452	23.5448	34.0499	33.5141	96.352	96.228	100.586	41.0922	57.8568	80.7762	18.674	54.391	83.509	63.189	26.928	31.4044	58.541	55.899	39.0144	46.9963	53.4882	33.6445	21.648		0.223077	52.333
3.571	26.712	39.501	32.9702	97.583	92.091	89.647	37.4476	56.0328	73.3072	16.449	44.799	66.315	60.466	27.894	27.1106	57.294	65.606	39.2907	39.4506	41.3627	22.9655	20.9463		0.230767	48.8746
3.6901	21.2385	27.4432	29.2614	92.62	85.312	91.216	33.8182	57.1654	57.2729	14.318	38.199	50.985	55.027	30.491	25.2883	49.969	55.172	44.656	42.0583	41.4425	18.6408	22.7265		0.238463	44.7419
3.8091	17.9101	23.8205	27.6143	100.668	97.028	100.785	27.9478	47.619	61.0086	21.685	37.183	56.252	47.427	27.636	25.5493	42.109	59.464	36.5973	37.8179	45.3212	13.26	17.5624		0.246153	44.1939
3.9281	16.6503	19.0442	33.1067	87.525	107.051	101.764	27.1435	42.7458	53.7458	24.752	28.567	58.077	36.92	24.773	25.4285	34.031	56.768	36.3552	37.0087	41.3582	14.7894	17.8163		0.253843	42.0646
4.0472	15.3699	20.8017	26.3611	90.237	112.137	89.796	17.9959	36.0569	50.8678	18.875	33.951	38.516	34.308	17.389	22.3457	26.471	59.811	27.1385	29.3582	39.7974	13.8099	18.5331		0.26154	38.1785
4.1662	19.4517	22.9903	32.194	86.94	111.349	92.121	34.6361	28.4487	36.8631	26.659	38.682	35.607	26.236	22.93	17.3825	32.473	47.985	22.7804	28.3282	25.8036	13.1991	20.9652		0.26923	37.4557
4.2852	14.4633	14.5873	29.0131	83.755	106.326	84.294	29.3566	29.844	30.1308	28.822	41.8	35.465	24.76	19.424	19.5436	39.14	43.111	20.0808	26.5614	17.7026	11.4946	18.0841		0.27692	34.8981
4.4043	12.569	16.1861	32.4452	79.57	90.985	75.747	29.7991	25.9848	33.7883	23.103	41.822	31.422	22.992	21.497	13.6954	32.115	49.346	17.4323	25.1298	17.6335	12.742	13.9462		0.284617	32.725
4.5233	15.5211	18.4898	29.8222	74.654	79.047	82.181	27.521	27.2457	31.7207	25.249	34.86	26.073	19.422	25.748	19.643	29.081	51.341	14.2544	19.9923	11.4984	14.9755	14.4919		0.292307	31.4924
4.6423	10.9769	15.2381	32.14	75.74	84.986	66.162	28.4939	26.5761	29.0282	22.478	35.968	26.505	18.951	30.717	22.7415	30.415	52.242	15.4616	20.3891	6.5712	15.0064	12.7916		0.299997	30.8899
4.7614	11.5372	14.7624	29.6919	71.613	92.642	64.392	27.4988	26.1453	29.5473	12.729	35.602	19.237	18.159	26.624	16.2479	25.41	39.111	15.0867	19.0217	11.5146	11.0481	13.8829		0.307693	28.7047
4.8804	9.9471	15.402	23.4451	56.338	85.02	59.751	27.2025	22.5994	22.7532	11.085	45.538	18.744	15.652	31.063	20.1301	23.486	40.578	11.8909	14.0148	10.9173	6.3834	12.7588		0.315383	26.5773
4.9995	12.0333	13.1669	22.3121	40.531	88.787	56.35	17.8911	20.3124	16.698	14.263	45.022	19.803	10.545	35.884	16.9612	22.701	35.692	15.9593	17.6278	10.1465	8.0879	11.6936		0.32308	25.1122
5.1185	11.7325	11.3317	28.8179	41.767	78.391	53.648	15.8311	24.0504	18.756	13.773	31.979	18.641	9.678	31.09	12.6895	23.916	33.402	16.1487	19.995	7.5431	12.4125	18.813		0.33077	24.2912
5.2375	11.6264	14.2445	23.2185	36.04	82.901	43.408	21.5373	27.4698	17.2638	16.456	27.429	17.878	11.193	36.268	12.0072	27.856	27.238	12.1875	17.1975	8.7779	9.5485	17.0112		0.33846	23.5799
5.3566	13.6846	14.0705	16.6057	27.453	63.528	35.562	19.9259	23.9547	18.2168	15.418	22.656	10.159	9.726	28.537	13.9903	26.472	23.785	7.8173	16.9423	6.65	9.429	12.6938		0.346157	19.8762
5.4756	17.5109	15.1783	13.0077	22.115	58.667	34.375	20.5296	26.3262	17.4742	14.904	22.06	10.438	10.409	30.894	21.019	23.223	22.003	11.1552	14.3167	8.7879	8.9951	18.4952		0.353847	20.0856
5.5946	17.2215	12.646	11.6342	14.116	40.753	31.881	17.2821	31.7764	19.0848	15.942	20.041	7.912	9.499	34.723	20.0674	27.757	17.888	7.5676	13.7294	8.8398	9.9676	18.299		0.361537	18.574
5.7137	15.9931	14.6883	13.6209	15.755	41.213	25.821	15.0765	18.3756	22.0587	18.032	21.621	9.228	11.451	28.126	16.1088	23.538	17.609	8.7308	16.7698	10.865	7.8257	14.8928		0.369233	17.6091
5.8327	20.2181	13.0743	12.0142	21.036	34.183	30.737	21.8783	19.4299	20.5216	23.631	19.609	10.881	11.381	32.621	19.117	26.858	19.891	11.28	17.0249	10.1959	6.9315	13.5186		0.376923	18.9106
5.9517	15.5323	14.5867	13.1581	16.675	25.636	26.986	25.6358	15.15	22.213	21.756	18.919	9.214	16.858	36.707	15.7373	25.392	21.42	16.1278	14.3378	6.8681	5.6581	15.7724		0.384613	18.1973
6.0708	12.7198	12.4487	13.4779	11.599	18.781	25.86	20.7015	14.5349	16.9392	24.514	23.51	12.305	12.247	45.001	9.6614	17.645	19.517	12.3706	13.7489	6.9975	10.254	13.2816		0.39231	16.7325
6.1898	13.2308	15.272	12.8954	15.018	17.721	20.101	15.4557	14.1344	17.8115	30.472	20.026	8.132	10.679	38.987	10.7058	15.756	11.695	14.9874	11.9949	6.6063	10.2898	15.2925		0.4	15.7847
6.3088	11.4242	13.943	12.0146	14.234	15.132	18.391	19.0854	15.6391	14.8379	32.398	17.284	5.484	8.159	34.705	12.0651	14.184	13.722	20.7914	19.3902	5.0534	9.7936	17.0478		0.40769	15.6718
6.4279	12.9772	14.719	17.9976	9.949	9.953	14.297	19.3058	15.7687	14.2893	28.92	18.357	4.792	4.152	35.42	14.6534	18.116	14.049	16.8029	13.9748	5.1091	9.3986	15.0589		0.415387	14.9118
6.5469	14.0866	11.0187	13.0264	9.954	8.082	16.438	13.5046	10.8827	12.8559	29.377	15.366	2.923	5.282	40.022	10.7566	15.833	17.865	10.0148	9.1547	3.6766	6.7579	13.3395		0.423077	13.1917
6.6659	12.5115	9.3006	15.3371	17.124	7.827	15.271	20.6295	15.5041	18.9887	14.106	12.652	6.647	6.395	35.874	10.2841	15.289	13.403	20.3759	11.4747	4.5207	5.8711	15.3943		0.430767	13.8536
6.785	14.0329	8.0079	14.266	10.833	7.197	10.775	17.9176	17.876	12.6158	10.825	11.175	6.804	5.646	32.448	12.2403	16.847	15.334	23.2153	15.1972	6.2868	10.3363	10.7778		0.438463	13.2115
6.904	10.1985	5.1988	13.4605	13.801	6.945	12.537	19.8752	10.1289	7.7352	8.96	13.306	3.729	7.646	26.555	7.2623	19.334	21.071	14.4708	12.4003	7.8821	7.7717	10.6479		0.446153	11.8598
7.023	7.3337	6.5377	9.697	14.702	7.243	13.101	19.8989	11.929	12.4124	9.431	9.056	6.193	4.854	22.694	10.3398	21.938	19.049	19.7754	10.6114	5.5335	7.1381	14.4758		0.453843	11.9974
7.1421	9.9503	9.6732	11.1018	12.185	9.743	11.455	15.7876	12.5326	17.004	14.301	8.376	7.794	5.654	30.994	7.2524	21.867	19.353	17.89	13.8396	8.5741	8	14.4484		0.46154	13.0807
7.2611	13.4179	13.0172	6.003	10.3	4.464	14.773	12.2002	13.5445	13.0953	16.141	8.349	4.45	5.971	20	10.4219	16.938	14.469	15.3358	12.8304	4.6807	4.9295	11.1284		0.46923	11.2027
7.3801	12.073	6.3683	5.9598	6.87	4.324	13.361	11.8309	9.0647	11.4412	13.445	8.091	6.093	4.951	15.693	9.2189	17.313	21.573	7.982	8.9169	5.2781	4.951	9.8263		0.47692	9.75569
7.4992	7.3751	6.7596	9.447	9.438	5.447	11.731	10.8103	9.9801	12.2236	12.779	10.012	5.505	6.149	19.314	11.1181	14.032	23.037	9.0712	8.9265	2.6829	6.9675	7.837		0.484617	10.0292
7.6182	8.0333	6.0846	7.2944	5.767	5.042	11.716	14.29	11.2638	12.1548	10.607	13.6	2.029	5.98	17.995	11.1834	15.004	21.669	7.7759	4.675	4.217	5.0586	6.1363		0.492307	9.43528
7.7372	11.4699	8.2853	8.3851	6.262	4.146	9.965	15.0893	5.4286	14.9749	7.462	17.289	5.482	1.902	13.227	9.123	10.902	15.185	8.4133	6.5496	3.1485	7.1139	6.9165		0.499997	8.94181
7.8563	9.9447	10.4182	5.2763	4.005	7.719	7.694	17.8422	2.7445	9.9379	8.63	18.471	2.807	4.393	14.06	9.0165	10.765	12.871	8.413	5.0019	2.7668	5.5232	5.5253		0.507693	8.3557
7.9753	11.4737	7.5817	9.1031	4.068	6.206	10.403	17.5739	7.7283	15.3307	7.609	11.378	3.039	5.797	10.893	9.9118	13.538	9.913	9.4554	7.3114	3.0222	4.658	5.4844		0.515383	8.70357
8.0943	8.4188	8.1586	9.3924	7.643	3.722	7.792	11.2982	6.8737	11.3635	8.926	11.559	1.952	6.057	9.905	10.0141	12.065	9.702	6.3565	5.9358	4.6957	3.7759	6.4111		0.523073	7.81897
8.2134	12.533	6.5152	12.0199	5.967	3.28	7.46	11.3441	6.1328	11.0095	8.914	8.559	3.71	6.497	11.426	12.7283	12.277	10.934	4.6627	7.6168	4.4172	2.0161	4.1119		0.53077	7.91507
8.3324	10.3921	4.3136	10.8369	4.285	5.065	7.809	9.3624	7.5394	11.1286	4.906	8.134	2.915	4.73	9.761	8.1051	16.54	11.516	11.6018	8.4195	3.8465	4.3208	3.7041		0.53846	7.69235
8.4515	8.607	9.4132	6.1366	5.946	5.939	4.286	10.1765	6.5139	13.0033	9.966	10.39	5.55	3.11	10.903	7.7929	15.105	15.441	12.1257	5.9617	3.5592	4.1338	3.6854		0.546157	8.07933
8.5705	11.9672	11.2797	9.9401	5.704	4.381	4.665	7.4949	8.5207	14.5413	7.481	9.439	3.137	3.053	8.928	12.3792	16.768	11.324	8.6069	5.8415	2.2757	2.9946	7.2413		0.553847	8.08923
8.6895	7.8445	7.51	8.0627	4.477	6.468	3.257	8.1273	7.4605	14.8575	9.937	12.813	3.166	4.554	6.972	12.7715	11.026	10.912	8.9719	7.8038	2.8079	2.7613	4.777		0.561537	7.60627
8.8086	6.5609	10.9476	8.5395	6.891	3.123	4.023	11.2102	5.8807	14.0074	12.289	13.513	3.626	6.004	4.828	11.065	11.161	10.266	11.4611	8.494	3.4926	1.8654	7.8155		0.569233	8.04836
8.9276	7.8939	10.3651	8.1351	5.254	3.574	3.874	11.851	5.9817	11.003	8.501	10.802	3.535	4.845	4.841	16.2725	12.728	7.789	11.3722	7.0994	3.4376	2.6375	8.9699		0.576923	7.7619
9.0466	6.4659	9.5223	7.6084	5.745	3.606	6.569	15.8193	3.8889	9.8826	9.905	19.84	4.014	3.717	8.56	10.6503	13.038	8.816	9.567	8.3416	2.1332	3.2661	5.5114		0.584613	8.02123
9.1657	3.4451	9.2666	5.9076	5.66	4.033	5.46	11.9551	6.015	7.5439	10.819	13.348	3.522	5.904	9.498	8.4092	7.446	9.609	8.401	10.6977	2.3122	2.8979	5.7664		0.59231	7.17803
9.2847	5.0129	11.5991	8.0194	5.509	2.578	3.975	13.4246	5.6271	13.5392	14.329	14.07	3.713	4.118	5.193	10.3847	13.289	10.447	9.2488	7.7627	4.8026	4.8726	7.2753		0.6	8.12682
9.4037	3.9742	12.0963	8.8738	4.671	2.35	4.812	10.0611	3.4087	13.8873	9.891	15.927	1.601	3.708	6.026	7.9643	12.439	9.678	8.1543	7.533	5.6703	5.1653	8.8218		0.60769	7.57788
9.5228	4.6216	8.981	7.0547	4.152	4.018	4.236	12.8967	5.7244	7.4502	7.574	16.372	2.919	3.781	7.665	9.0417	13.508	8.174	7.2507	9.6377	2.6594	3.3623	5.6332		0.615387	7.1233
9.6418	6.9575	7.9507	7.3799	3.169	3.587	4.105	8.4208	3.5601	10.5916	9.535	14.342	8.248	6.178	5.973	6.7319	13.252	12.061	12.1246	7.7787	4.408	3.169	7.3948		0.623077	7.58716
9.7608	5.2469	5.8756	8.9757	1.807	3.328	5.941	9.2708	4.9252	9.6023	13.851	11.047	4.073	2.918	4.736	11.9271	11.562	9.066	6.7393	10.2249	4.071	3.3045	9.622		0.630767	7.18701
9.8799	5.5639	5.2941	6.824	3.547	3.383	2.39	8.4344	5.0612	12.4873	10.79	9.575	2.068	2.974	3.244	7.2152	16.166	5.765	6.4763	9.4463	3.4101	2.9323	8.3338		0.638463	6.4264
9.9989	6.9492	5.2544	10.6243	2.932	3.586	4.948	8.7453	6.6386	9.4183	11.912	8.515	2.433	2.274	5.837	9.3249	12.729	6.153	7.4661	9.6817	2.8275	5.8555	7.436		0.646153	6.88822
10.1179	5.7297	5.9418	10.858	6.118	7.551	4.793	6.4853	5.5813	12.8771	11.065	6.321	3.545	3.09	4.691	9.1091	10.855	4.34	7.393	7.4286	2.882	4.1429	8.9296		0.653843	6.80579
10.237	6.6032	5.3457	9.3286	3.314	5.236	2.53	5.9919	9.0793	7.0317	8.502	11.269	4.753	3.759	3.854	8.666	9.116	5.424	7.9433	6.3741	2.4591	2.6393	8.4033		0.66154	6.25557
10.356	3.8341	3.4289	11.6007	2.621	4.2	2.088	4.1799	8.015	10.2245	4.554	12.184	5.589	4.002	5.3	9.9851	11.293	7.444	8.4124	7.5158	3.6927	3.2249	5.2411		0.66923	6.30137
10.475	4.1637	4.5867	8.1232	3.592	2.144	5.129	4.842	6.4192	9.9527	7.06	8.396	4.08	5.238	4.669	10.9358	13.589	10.619	9.9169	7.0368	2.9279	3.5694	4.9965		0.67692	6.45395
10.5941	4.6643	6.7708	8.3836	3.876	2.873	3.469	4.9881	7.2414	14.4725	6.814	7.96	3.417	3.467	5.858	9.1651	9.388	6.793	9.1047	6.1795	2.2802	2.573	8.8458		0.684617	6.29927
10.7131	3.7949	6.1547	8.231	2.488	3.078	5.015	4.6607	4.0393	16.207	3.687	9.072	5.011	2.634	4.101	10.2344	7.949	9.748	8.2445	6.1079	1.2832	2.8369	8.4312		0.692307	6.04585
10.8321	5.2645	4.3338	12.8052	4.465	2.715	3.367	4.3652	6.3569	14.712	5.651	11.147	3.849	2.331	4.089	9.9507	8.721	8.456	10.0797	3.8958	2.2548	2.3928	11.6824		0.699997	6.49476
10.9512	5.5104	5.1153	5.6313	5.28	3.164	2.847	5.8537	7.2838	19.2661	6.394	13.489	2.944	3.167	5.711	10.9254	8.987	6.508	11.4198	4.2409	0.7188	3.4012	12.1555		0.707693	6.81878
11.0702	4.037	5.9889	6.9203	4.345	2.04	4.904	4.0983	6.8614	11.8911	8.768	17.156	5.677	2.734	6.934	13.1583	8.252	4.662	8.6928	5.5816	3.1032	2.8918	15.4138		0.715383	7.00502
11.1892	5.1792	6.0664	7.4254	3.574	3.597	5.504	5.7692	8.3943	14.1658	5.511	15.781	8.363	3.091	6.466	11.5743	6.109	6.885	9.2222	1.823	0.7801	5.1113	13.9558		0.723073	7.01582
11.3083	7.4091	6.7927	13.2896	4.047	5.236	5.472	6.4892	4.1258	11.6006	7.646	12.237	7.32	4.292	13.566	13.6028	8.351	6.505	12.6799	1.8057	1.5267	2.7082	12.0345		0.73077	7.66985
11.4273	6.8428	5.9961	12.5697	2.921	4.225	2.14	5.0236	5.84	8.3656	6.718	12.289	4.687	5.551	8.419	15.1624	9.032	7.188	10.7958	4.9541	2.0766	4.4601	8.9748		0.73846	7.01053
11.5463	6.8601	6.6931	7.6039	3.488	1.463	2.834	1.7612	5.5517	8.8439	11.575	13.553	6.348	3.582	11.583	17.7696	8.266	9.989	14.853	2.5551	1.5718	4.2353	9.7028		0.74615	7.30375
11.6654	6.1038	7.4785	13.6777	3.222	2.182	3.825	6.2701	2.5774	8.1819	7.638	14.33	7.979	4.893	11.969	14.2763	14.929	9.98	7.5189	0.8896	3.3726	1.3864	6.7357		0.753847	7.24618
11.7844	8.8414	9.7688	15.0995	4.017	3.027	3.193	7.7552	4.045	8.3174	8.922	11.161	10.178	5.069	7.119	13.738	19.768	15.848	6.3578	1.4733	1.0434	3.1768	7.7746		0.761537	7.98605
11.9035	7.3573	5.2834	10.9777	4.058	3.608	4.706	7.0186	3.7736	8.0467	11.18	10.905	14.425	3.556	10.931	9.7288	16.01	10.454	3.8517	3.6459	0.831	3.6616	8.2178		0.769233	7.37396
12.0225	6.9955	7.0338	13.5012	1.648	3.05	2.039	6.834	6.7275	8.3419	16.321	9.856	20.156	7.629	10.522	12.2874	14.509	10.796	5.049	3.0334	0.856	3.7192	5.9578		0.776923	8.03921
12.1415	4.1086	9.3575	11.6106	3.554	2.71	1.34	7.1501	4.6193	7.4007	10.757	11	17.621	3.608	13.008	12.6429	12.817	8.082	4.1016	3.3708	1.5817	5.6692	5.5244		0.784613	7.34702
12.2606	3.6261	7.9677	12.4522	3.299	3.788	5.082	4.9544	8.3804	9.8728	9.362	4.422	16.363	5.033	16.511	10.7495	13.11	7.701	4.1103	6.4817	1.8895	3.9365	7.5278		0.79231	7.57363
12.3796	5.3073	7.7273	12.2325	2.171	2.711	4.783	5.0938	3.5405	7.4288	9.097	4.689	16.836	4.409	8.3	10.1273	7.561	9.01	5.3437	6.8299	4.8383	2.7325	9.5392		0.8	6.83219
12.4986	3.0667	8.74	11.605	4.886	3.605	4.188	7.3261	4.6067	9.343	11.666	5.698	28.89	6.567	8.065	11.5117	10.583	13.407	6.3418	3.985	4.1644	2.981	7.855		0.80769	8.14006
12.6177	2.9438	8.9999	10.1316	4.159	4.768	3.387	6.6731	6.2187	7.3815	8.917	5.779	24.477	6.871	10.422	11.8274	7.461	9.776	5.2673	4.2311	2.846	3.3297	4.9317		0.815387	7.30904
12.7367	2.7791	10.8759	9.2243	2.618	4.699	0.978	9.6561	5.3901	7.8709	11.415	6.511	21.681	7.102	12.035	10.3398	9.838	8.787	6.094	3.9409	2.0285	4.9513	5.5911		0.823077	7.473
12.8557	3.4818	11.3682	11.0648	4.03	2.682	2.559	8.4549	5.5513	7.1974	10.44	3.873	21.613	9.517	13.896	11.466	10.991	9.573	8.3814	2.4426	2.8037	4.4656	4.4937		0.830767	7.74297
12.9748	4.5059	7.9993	10.0681	5.282	3.39	2.516	6.454	5.6852	5.8917	7.239	4.923	17.005	10.533	12.071	8.3408	12.006	11.54	7.2735	4.9331	4.8763	2.8927	5.0854		0.838463	7.29595
13.0938	4.0665	11.6576	7.9488	5.266	3.502	1.69	11.5804	3.9233	7.8515	9.074	3.355	13.273	11.197	11.465	6.6195	11.252	9.087	12.3692	6.0694	3.0912	3.812	5.0592		0.846153	7.41862
13.2128	4.9575	13.158	10.1926	9.35	4.308	2.205	6.5424	5.018	6.14	9.022	4.16	7.711	16.666	14.638	9.8487	11.975	4.214	10.76	4.1932	1.9297	3.2217	2.9753		0.853843	7.41755
13.3319	4.0663	10.1219	8.4543	7.186	1.155	2.162	5.9506	6.9116	7.8556	4.571	2.057	8.306	14.242	15.388	8.4125	8.95	8.107	5.1496	3.1692	1.0769	3.0845	3.7515		0.86154	6.36948
13.4509	2.5889	13.851	7.0776	4.814	0.406	4.264	9.1299	6.0311	7.936	2.802	3.895	9.412	17.611	16.859	11.3143	9.926	10.353	6.863	5.439	3.2368	3.514	2.5388		0.86923	7.26647
13.5699	3.3068	16.3102	7.6408	6.465	1.287	2.879	4.8405	2.908	5.1833	1.913	3.033	7.191	14.324	12.92	9.5636	10.148	9.12	6.0121	6.0041	3.0797	3.1567	2.9404		0.87692	6.37392
13.689	3.9693	10.8722	7.8043	9.79	2.198	5.328	8.6799	3.4621	4.8321	2.308	3.851	5.465	10.038	10.163	9.762	9.43	9.82	7.0147	3.2735	2.3175	4.5849	5.7416		0.884617	6.39569
13.808	3.4423	8.5938	7.1829	8.253	3.279	6.647	4.632	5.5784	5.1456	3.518	2.291	4.995	7.158	11.075	10.0034	11.764	10.45	5.9533	5.9209	3.6089	4.6259	3.6892		0.892307	6.26394
13.927	2.2442	8.0824	8.1616	5.059	4.23	5.441	6.4174	4.0479	5.5955	3.398	3.073	3.114	4.903	6.696	8.5821	9.769	5.308	7.1684	4.8336	1.0518	2.1879	4.4335		0.899997	5.1726
14.0461	3.1877	5.0644	11.0972	5.281	4.152	8.22	11.5035	2.3648	4.2904	2.492	2.69	2.507	4.481	4.162	7.9252	7.648	6.961	5.3019	7.4774	3.4989	2.4371	6.4301		0.907693	5.41694
14.1651	3.1112	2.7445	10.7805	10.378	2.068	5.842	11.8981	1.4159	2.1892	1.396	4.004	2.146	4.26	4.69	6.4547	7.297	6.588	7.1462	5.6496	2.9738	4.1803	5.1896		0.915383	5.10921
14.2841	3.5485	7.3206	9.9884	11.421	3.834	4.553	7.9335	3.3094	2.8082	4.108	4.674	2.854	4.82	3.901	10.3085	8.627	6.978	6.9297	7.0327	2.0035	4.3076	4.8084		0.923073	5.73041
14.4032	4.9138	9.6679	8.718	11.119	5.916	3.951	7.2103	2.5668	1.7053	6.185	3.003	6.974	5.791	4.063	11.0567	8.86	8.643	5.2399	6.4193	3.9375	5.4844	4.4249		0.93077	6.17499
14.5222	5.3762	5.0712	7.7617	14.296	6.512	5.607	6.2247	1.6172	1.5557	4.006	3.559	4.142	6.581	5.321	6.7965	4.923	7.666	2.6207	6.4796	3.8538	4.3473	4.4256		0.93846	5.39742
14.6412	5.6525	4.4269	10.7094	17.736	6.486	7.564	3.1457	3.6345	2.2162	4.107	3.518	5.059	5.902	7.597	5.2627	5.924	5.859	5.3688	2.5673	5.7581	3.3398	1.8561		0.94615	5.62227
14.7603	4.6057	4.625	11.166	15.61	6.2	3.356	4.8097	2.2096	2.4511	2.688	2.167	4.955	6.687	6.229	4.0032	7.092	5.326	6.5364	4.8019	6.2657	3.9671	2.3315		0.953847	5.3674
14.8793	1.9666	5.9408	11.269	13.849	10.974	3.569	3.7218	2.0224	3.9629	2.432	2.412	5.383	10.837	6.108	7.0849	10.955	3.246	3.5178	4.0898	6.6641	2.5477	1.9111		0.961537	5.65745
14.9984	2.9585	4.8839	6.7591	13.96	8.221	5.747	1.7803	1.0033	4.8635	2.972	5.222	6.597	10.542	5.744	8.8439	6.772	5.646	2.2375	7.44	7.9496	2.6666	1.9516		0.969233	5.67095
15.1174	4.6286	4.0656	4.1865	16.152	8.817	9.81	2.4435	2.3332	4.5571	3.67	5.065	5.83	8.618	7.214	6.9805	6.564	6.279	2.6692	8.2223	5.0145	3.2317	3.3778		0.976923	5.8968
15.2364	5.0336	5.6888	7.2611	16.531	11.192	8.972	2.4008	2.5277	2.1244	4.003	4.213	4.644	6.542	3.094	4.7922	6.097	4.773	4.5168	7.1205	3.7436	1.3884	3.7577		0.984613	5.47348
15.3555	5.6138	2.4229	5.5626	17.793	14.612	9.053	3.8038	1.8159	2.136	1.638	4.21	5.587	11.724	3.908	5.7383	2.823	6.358	3.5254	5.5111	3.1819	3.5666	2.7871		0.99231	5.60779
15.4745	7.1858	2.8054	5.1184	14.328	16.166	9.547	2.882	1.5546	2.0779	2.315	6.637	9.427	12.166	3.801	4.426	4.336	4.42	5.5559	5.8967	2.4387	3.26	4.246		1	5.93593

## Sheet: Image4
X0	Y0	Y1	Y2	Y3	Y4	Y5	Y6	Y7	Y8	Y9	Y10	Y11	Y12	Y13	Y14	Y15	Y16	Y17	Y18	Y19	Y20	Y21	Y22	Y23		Ap-Ba	Average int.
0	123.833	121.5	99.056	89.667	94.833	125.833	96.667	129.111	116.667	94.667	87.056	81	87	67.944	89.111	69.278	57.389	94.667	78.056	87.111	74.111	64.556	95.5	93.556		0	92.4237
0.119	114.222	121.222	113.778	87.222	82.944	129.444	110.556	134.611	124.889	83.056	86.222	95.278	80.167	87.056	85.889	75.833	68.722	92	101.444	83.611	71.944	79.278	129.722	104		0.00684734	97.6296
0.2381	139.944	129.444	118.667	98.667	104.889	129.556	124.389	150.778	135.667	95.778	124.722	125.389	87	114	103	65.278	73.278	122.556	109.5	84.278	78.167	79.222	127.778	107.944		0.0137004	109.579
0.3571	175.944	149.222	141.611	98.167	101.778	150.111	159.111	168.167	154.667	116.889	132	135.5	98	119.667	91.667	70.833	79.389	131.611	137	84.944	83.389	80.389	166.389	120.722		0.0205478	122.799
0.4761	192.167	192.611	161.278	92.167	97.833	156.444	182.278	196.222	195.611	132.389	141.889	143.389	111.667	125.444	108.833	88.722	73.889	155	156.167	92	86.944	112.611	172.556	117.944		0.0273951	136.919
0.5952	204.889	197.111	181.222	123.389	108.222	168.889	195.056	225.667	214.611	157.944	146.444	138.778	96.778	149.222	116.667	101.889	77.944	167.889	158.667	110.056	115.778	110.333	205.111	121.444		0.0342482	149.75
0.7142	218.944	206.167	197.056	110.278	116.056	142.222	176.111	240.722	218.722	182.889	131.5	140.889	122.111	143.333	137.056	102.167	72.778	171.833	166.833	120.722	148.611	151.611	211.333	125.611		0.0410956	156.481
0.8332	222.944	226.444	206.278	118.556	119.556	148.667	196.611	236.5	232.722	189.444	147.5	147.889	111.333	130.444	149	133.5	90.667	170	143	142.667	151.333	196.389	212.444	135.556		0.0479429	164.977
0.9523	225.333	210.833	209.556	111.167	136.667	127.611	185.111	244.389	238.444	167.333	144.111	148.722	138.389	131.389	146.556	154.889	105.333	146.444	144.556	132.389	178	185.389	220.5	146.389		0.054796	165.813
1.0713	223.611	217.778	217	131.556	156.611	137.944	183.889	236.111	224.778	184.389	143.722	156	133.444	130	144.889	161.167	101.444	141.222	161.667	130.111	171.5	187.778	218.222	144		0.0616434	168.285
1.1903	217.167	224.333	222.611	116.444	157.333	126.833	198.833	228.722	223.722	171.389	150.444	145.056	131.5	133.833	136.167	158.5	92.056	154.611	146.111	135.944	182.056	199.889	213.722	153.333		0.0684907	167.525
1.3094	218	217.167	219.833	123.444	162.556	126	176.389	228.833	213.333	172.167	154.667	140.278	138.667	141.167	146.278	119.5	85.056	144.111	141.111	139.722	182	196.944	210.611	151.833		0.0753438	164.569
1.4284	209.111	206.056	228.111	122.722	165.389	130.944	195.833	240.056	222	182.611	157.278	126.389	144.556	146.722	129.722	109.611	94	157.889	145.111	151.444	183.389	187.444	213.778	138.778		0.0821912	166.206
1.5474	203.889	223.333	236.056	127.5	178.111	148.389	183.889	241.278	224.611	174.056	148.667	128.444	132.778	161.611	151.778	96.333	102.444	138.833	127	125.167	165.278	200.889	207.944	121.389		0.0890385	164.569
1.6665	217.389	224.889	231.111	120.889	173.333	146.389	185.056	232.556	217	179.278	151.667	118.444	126.5	157.611	137.333	98.833	100.056	127.889	119.5	113.222	179.667	193.389	216.944	132.444		0.0958916	162.558
1.7855	215.611	217.667	231.222	127.944	168.111	149	176.5	230.5	220.778	151.722	141.5	119.333	125.556	155.222	123.056	97.556	101.5	111.889	95.889	114.278	163.944	191.167	214.167	128.778		0.102739	157.204
1.9046	216.944	213.278	234.389	123.056	144.222	137.167	162	233.5	215.556	164.833	127.722	132	117.111	160.556	139.333	117.222	83	94.278	89.389	113.611	170.389	182.5	203.889	146.722		0.109592	155.111
2.0236	213.722	194.556	226.056	120.944	152.389	133.556	148.611	223.889	207.167	161.611	136.278	129.5	110.611	141.778	125.833	92.667	97.889	91.667	97.889	91.778	172.611	186.056	202.556	142.556		0.116439	150.09
2.1426	217.833	209.722	233.056	122.778	157.722	135.167	145.944	216.333	210.278	165.278	146.444	125.722	104.778	129.5	105.722	88.333	84.778	90.889	88.667	86.056	179.889	168.667	212.167	113.222		0.123287	147.456
2.2617	216.389	173.444	232.667	128.222	173.833	134.944	173.167	229.611	190.389	153.111	129.556	123.278	103.333	129.5	105.444	86.167	79.111	70.889	91.667	85.611	181.111	184.944	214.056	106.833		0.13014	145.72
2.3807	201.222	181.278	226.056	113.167	154.056	133	172.222	214.556	190.111	157.278	140.722	156.556	96.889	129.389	100.222	90.389	68.167	65.833	75.833	67.167	165.333	175.056	193.5	101.167		0.136987	140.382
2.4997	203.667	183	231.278	107.056	163.889	127.778	168	214.667	192.556	137.833	118.167	131.111	80.167	127.444	121.444	69.833	74.111	66.389	71.056	84.5	146.722	166.778	192.611	115.722		0.143835	137.324
2.6188	207.667	185	223.722	96.667	128.167	125.722	159.167	216.278	174	125.056	112.222	126.389	91.556	119.944	119.056	48.111	63.333	50.5	50.5	74.278	141	178.667	174.833	104		0.150688	128.993
2.7378	196.556	165.667	224.778	91.722	141.333	124	131.889	210.889	185.889	123.722	119.722	123	88.778	115	101.778	42.222	63.667	51.333	53.556	74.5	118.278	175.389	192.944	85.333		0.157535	125.081
2.8568	199	165.444	216.778	79.889	122.722	126.333	120.722	208.611	180	124.278	112.333	113	95.611	100.278	93.667	43.556	56.278	33	45.556	74	124.333	178.111	201.333	78.833		0.164382	120.569
2.9759	198.667	157	218.722	63.444	115.556	122.056	117.833	217.111	166.389	117.111	110.111	107.778	87.944	71.167	75.5	36.611	45.167	52.056	44.389	70.389	108.333	169.778	182.778	60.833		0.171235	113.197
3.0949	183.833	134.722	188.889	52.333	95.667	116.333	90.111	204.444	164.278	127.389	91.222	89.111	72.556	84.667	84.944	43.333	48.944	44.222	39.167	77.722	96.278	184.5	184.889	65.056		0.178083	106.859
3.2139	192	118.222	179.722	59.833	96.667	86.778	92.611	205.278	172	108.222	93.778	89.556	88.5	55.889	94	20.056	49.278	37	50.611	70.833	94.722	193	183	48.722		0.18493	103.345
3.333	180.389	130.056	166.722	51.944	94.889	98.333	85.278	189.556	175.056	102.278	71.833	77.611	74.222	64.611	84.444	19.056	45.111	51.5	42.611	61.722	89.667	188.222	181.556	64.889		0.191783	99.6482
3.452	159.056	124.833	144.389	51.833	87.333	92.167	81.944	197.833	169.111	86.389	77.722	58	68.222	54.667	85.722	19.889	38.167	36.556	31.278	58.556	71.833	185.944	187.722	57.167		0.198631	92.7639
3.571	169.556	123.5	112.944	49.111	77.5	81.556	67.278	179.778	163.5	90.611	81.222	50.556	60.611	39.056	66.222	23.5	26.833	34.556	32.833	44	54.722	167.833	169.833	60.389		0.205478	84.4792
3.6901	163.389	114.056	119.611	47.056	80.667	88.889	56.444	180.278	180.222	75.722	79	28.667	71.167	58.5	80.611	26.667	31.5	37	33.333	52	77.167	154.833	171.722	57.611		0.212331	86.088
3.8091	160.556	112.333	87.944	57.444	67.667	75	67.056	180.111	153.944	89.389	62.167	40.5	68	40.5	64.722	21.111	30.611	29.167	31.167	36.444	61.5	129.222	164.111	43.444		0.219178	78.0879
3.9281	169.056	105.056	56.5	50.389	75.222	52.667	77.833	159.389	160.444	87.5	66.556	29.222	58.333	36.389	80.278	23	18.167	34.278	23.556	38.778	57.611	127.444	136.944	34.833		0.226026	73.3102
4.0472	137.389	104.444	65.889	44.667	66.667	34.056	91.722	149.222	144.889	67.944	63.556	32.611	58.5	31.833	72.389	24.722	22.944	18.778	20.167	34.167	57.722	119.278	140.222	39.389		0.232879	68.4653
4.1662	130.833	97.556	68.056	46.667	63.833	26.889	100.278	159	140.333	60.278	59.611	30	66.278	40.222	69.333	28.111	21.778	22.778	22.833	30.444	51.889	109.611	152.889	28.111		0.239726	67.8171
4.2852	124.778	99.833	63.5	45.556	50.611	32.056	114.444	138.5	126.444	57.444	43.389	28.889	71	41.333	54.444	30.444	20.389	17.556	27.333	24.167	58.333	100	155.333	25.444		0.246573	64.6342
4.4043	121.833	100.889	56	65.111	48.667	21.167	96.556	132.778	117.167	52.444	47.389	28.222	69.111	43	71.667	27.5	27.667	21.444	24.611	20.333	51.944	96.222	148.056	22.111		0.253427	62.9954
4.5233	124.889	80.889	61.5	75.278	55.556	25	86	129.889	122.833	54.722	50	31.667	52.056	44.278	68.333	26.778	22.056	16.667	16.556	13.222	45.389	95.056	107.889	25.333		0.260274	59.6598
4.6423	121.5	97.5	59.5	86.111	50.778	20.556	73.056	107.5	88.056	48.389	50.056	43.778	54.778	38.5	55.111	31	24.111	18.333	21.056	14.667	55.167	75.944	110.444	16.056		0.267121	56.7478
4.7614	106.889	95.778	57.167	94.833	53.222	34.111	66.889	110.667	95.944	53.722	34.5	36.778	63.333	36.389	54.111	26.944	16.611	11.111	17.278	16.667	37.611	70.833	105.056	14.389		0.273974	54.618
4.8804	121.389	105.778	48	99.778	46.667	27.833	48.667	84.611	103.556	36.611	45.333	46.5	47.778	31.611	54.667	28.778	29	20.944	11.111	13.833	39.778	70.222	62	20.611		0.280822	51.8773
4.9995	105.444	110.167	49.056	105.667	47.278	29.278	40.444	87.111	100.778	32.222	37.556	43.222	46.333	30.944	47.944	32.5	25.222	20.222	11.333	18.056	36.444	48.611	79.833	20.611		0.287675	50.2615
5.1185	117.056	116.056	65.722	116.611	52	29.333	32.444	93.667	95.278	32.5	39.056	47.167	49.889	31.611	37.611	32.611	31.722	15.667	14.167	17.833	37.167	51.222	81.889	11.778		0.294522	52.0857
5.2375	109.444	100.944	52.778	112.667	54.222	23.556	37.389	86.833	95.444	30.222	38.556	47.944	46.444	29.833	43.5	28.722	21.778	19.611	12.667	12.833	24.5	48.333	80.389	19.778		0.301369	49.0995
5.3566	103.833	104	76.667	114.667	43.611	28.222	36.778	84.333	99.556	34.444	37.389	57.222	33.611	30.667	38	34.222	28.833	21.556	17.111	12.556	22.556	48.333	77	15.444		0.308223	50.0255
5.4756	79.556	97.278	65.278	124.167	62.5	22.222	34.333	97.278	91	25.056	34.889	66.722	31.667	24.056	27.833	33.556	21.778	22.167	21.111	10.722	29.056	40.889	78.556	13.278		0.31507	48.1228
5.5946	67.556	105	54.389	117.833	51.167	25.722	28.889	79.611	95.111	23.167	37.056	57.611	38.944	30.944	20.333	32.111	22.278	18.722	16.056	7.5	14.222	23.111	72.5	19.889		0.321917	44.1551
5.7137	66.833	93.222	52.667	123	34.944	21.778	29.167	87.056	95.111	16.722	41.5	64.611	34.444	24.111	26.5	21.778	17.833	21.333	10.722	6.5	9.278	31.944	71.222	20.5		0.32877	42.6157
5.8327	54.056	88.667	49.389	125.278	37	13.778	32.778	97.278	76	15.389	33.444	70.944	33.167	30.333	18.667	25.167	26.222	25.333	6.833	9.5	18.778	31.722	78.167	13.778		0.335618	42.1528
5.9517	47.778	76.333	39.889	78.111	46.5	15.333	29.389	87.611	89.111	12.167	35.778	50.778	28.111	28.944	23.222	19.389	21.778	15.333	7.722	8.833	20.444	36.667	64.667	13.278		0.342465	37.3819
6.0708	59.722	87.222	46.056	85.5	42.889	19.722	23	82.222	112.167	20.667	39.444	52.5	29.056	24.944	28.556	12.167	21.5	21	5.222	6.889	13.333	44.556	67.222	14.833		0.349318	40.0162
6.1898	57	69.5	51.056	83.222	35.444	22.611	13.889	87.444	114.556	21.278	43.611	42.667	41.444	32.944	20.389	24.389	19.556	22.722	8.389	3.5	12.5	33.667	77.833	10.056		0.356165	39.5695
6.3088	61.778	58.611	39.111	84.389	35.944	17.944	17.722	99.778	119.889	21.944	39.278	44.278	25.389	35.778	19.389	18.167	18.944	27.833	5.667	5.333	13.944	49	77.333	12.889		0.363013	39.5972
6.4279	69	63.889	38.722	70.722	27.889	27.833	22.556	90.611	93.833	15.5	34.778	48.667	26.889	31.444	16.778	15.389	19.5	22.833	3.944	7.611	11.778	49.611	68.5	14.389		0.369866	37.1944
6.5469	63.056	48.722	33.889	58.111	21.833	23.056	21.333	86.722	75.556	13.667	28	37.833	19.222	33.056	19.889	17.556	15.722	18.056	2.833	5.722	10.278	42.056	55.611	12.556		0.376713	31.8473
6.6659	55.556	69.056	39.778	34.833	22	29.556	24.333	84.556	53.111	17.056	29.056	30.5	19.389	24.778	9.778	7.833	24.222	11.944	3.833	3.611	11.444	44.5	52.056	9.889		0.383561	29.6945
6.785	70.889	49.889	32.778	25.333	23	27.222	21.389	80.389	48.056	20.056	26.111	37.667	12.278	20.222	8.778	13.667	20.667	7.278	3.889	4.611	9.833	29.722	37.333	9.778		0.390414	26.7015
6.904	54.167	43.056	43	24.5	18.778	20.944	22	70.111	39.222	21.833	22.833	32.056	12	13.056	18.111	11.333	28.5	10.667	3.778	1.611	4.833	29.556	38	9.167		0.397261	24.713
7.023	47.278	38.278	33.889	30.389	18.111	21.111	19.611	54.722	29.222	29.333	18	29.667	7.556	5.167	4.444	18.889	23.389	8.278	3.889	5.778	9.722	29.222	27.444	7.278		0.404108	21.6945
7.1421	37.333	35.889	28.667	19.278	17.167	28.222	15.722	58.167	47.278	25.056	27.722	25.833	6.889	6	6.889	11.889	20.889	5.222	3.778	3.778	7.278	29.944	27.778	6.5		0.410962	20.9653
7.2611	34.944	30.222	20.944	22.389	16.556	20.722	14.889	40.611	34.778	25.722	27.444	17.5	3.444	6.111	9.722	19.278	21.444	4.278	2.778	3.667	5.278	28.222	16.667	10.722		0.417809	18.2638
7.3801	22.667	18.889	14.722	23	21.611	19.5	13.778	38.667	20.444	28.444	21.611	33.056	5.444	7.778	6.111	14.611	19.111	5.944	4.056	4.333	6.889	29.056	16.611	9.167		0.424656	16.8958
7.4992	19.556	18.833	11.333	19.833	12.333	24.722	13.278	24.611	32.833	35	29.556	23.944	8.278	7.333	6.833	19.611	16.556	5.056	2.833	3.111	4.778	34.222	15.056	4.5		0.431509	16.4166
7.6182	19.056	16.778	11.611	15.278	13.167	20.944	21.222	17.611	39.611	37.333	21.111	32.278	6.611	3.389	5.722	12.167	15.056	7	4.833	4.944	8.333	30.722	14.944	5.944		0.438357	16.0694
7.7372	16.667	9.389	17.111	20.722	11.389	15.056	18.722	16.111	32.722	47.611	14.778	26.056	8.333	4.111	16.722	17.833	15.667	2.722	2.111	3.722	5.5	25.667	16	6.5		0.445204	15.4676
7.8563	26.444	13.556	9.944	14	9.056	24	13.056	20.889	33.222	37.556	16.167	24.889	8.389	5.111	6.389	14.278	17.389	7.111	3.444	5.333	7.667	25.056	15.389	11.722		0.452057	15.419
7.9753	30.5	11.667	12.611	17.889	8.278	19.111	12.833	20.389	25.833	40	10.667	17.444	8.111	3.444	9.556	12.944	9	5.833	2.5	4	7.333	27.167	19.333	10.722		0.458904	14.4652
8.0943	29.278	7.167	8.778	18.556	8.722	17.667	17	26.389	22	27.111	11.556	11.222	7.833	5.278	7	18.444	15.556	3.722	0.333	3.5	5.333	28.611	15.889	9.389		0.465752	13.5973
8.2134	31.056	6.5	9.5	15.944	14.5	12.389	19.556	20.389	22.833	15.111	11.278	17.778	4.778	5.444	10.444	17.833	18.278	1.944	4.833	3.111	9.889	29.667	12.222	9.5		0.472605	13.5324
8.3324	30.889	8.556	13.611	19.667	10.167	16.222	16.833	27.833	35.667	13.222	17.889	16	6.944	4.111	6.333	11.222	12.611	10.389	2.5	3.667	6.278	15.889	15.333	8.333		0.479452	13.7569
8.4515	21.5	8.667	6.111	18.111	10.778	10.333	16.111	30.889	27.944	10.111	15.556	13.5	3.111	5.667	10.111	11.611	25.444	2.944	3.056	4	9.167	22.222	12.667	10.833		0.486305	12.9352
8.5705	18.389	9.778	10.333	19.944	6.333	15.222	9.444	35.111	26.278	15.944	15.111	18.389	2.556	4.056	5.167	15.333	23.722	5.278	1	2.056	5.778	21.111	12.278	12.833		0.493153	12.9768
8.6895	17.778	4.889	9.944	15.333	11.222	11.111	13.278	43.944	22.167	9.833	20.611	14.5	3.167	3.222	3.667	8.889	22.944	6.333	2.556	5.444	8.167	17.222	19.278	14.833		0.5	12.9305
8.8086	10.722	6.389	4.444	14.222	8.778	16.278	15.222	37.389	16.556	12.944	14.056	15.056	5.833	3.944	5.611	11.722	23.056	9.111	1.278	4.278	6.556	16	21.167	14.667		0.506853	12.3033
8.9276	11.111	5.056	10.389	21.111	11.611	11.5	18.278	31.833	21.167	11.167	15.389	16.444	4.333	3.944	6.111	11.167	18.667	6.389	2.556	1.389	6.722	19.056	26.833	20.833		0.5137	13.044
9.0466	6.667	7.667	2.833	13.667	6.056	18.389	17.556	27	21.333	14.278	12.944	15.833	5.722	5.389	9.333	11.333	10.333	7	1.056	3.222	5.167	15.111	20.944	15.333		0.520548	11.4236
9.1657	5.278	4.167	11	13.611	5.722	15.778	14.833	26.722	21.389	15.833	18.444	20.722	6.889	3.389	11.167	8.722	13.389	7.667	3.889	3.389	9.222	16.722	20.111	20.278		0.527401	12.4305
9.2847	10.111	3	3.222	11.778	5.889	15.944	19.056	26.222	21.944	17.222	14.333	23.389	5.167	2.5	10.722	10.944	9.278	7.667	3.5	3.722	7.556	19.611	23.333	13.111		0.534248	12.0509
9.4037	7.111	2.056	7.667	4.722	9.667	16.944	20.722	12.111	22.389	19.222	18.389	27.667	8.278	2.833	12.5	7.889	11.056	5.333	3.444	0.778	11.556	22.944	20	11.944		0.541096	11.9676
9.5228	3.5	3.389	3	6.778	4.111	14.167	16.611	9.333	23.167	26.278	13.5	22	7.222	2.667	14.778	15	8.333	7.056	5.056	1.111	10.222	16.944	19.833	17.056		0.547949	11.2963
9.6418	9.944	2.889	4.278	6.778	7.944	13.944	19.667	13.444	22.333	21.333	10.778	19.444	5.5	3.333	13.556	9.944	4.111	8.389	4.278	0.278	13.5	15.778	10.833	9.167		0.554796	10.4768
9.7608	7.222	6.056	3.778	9.056	5.5	9.944	17.056	15.778	16	24.222	14.444	22	5.278	2.778	7.722	16.222	8.333	6.5	2.722	1.444	16.611	11.611	12.722	11.556		0.561643	10.6065
9.8799	8.167	4	7.889	8.222	9.389	16.333	23.944	21.833	11.5	30.389	15.778	16.167	8.444	1.944	12.556	11.667	7.444	2.722	4.778	3.667	17.167	10.278	11.889	6.5		0.568496	11.3611
9.9989	9.944	2.444	4	11.611	10.389	16.389	20.722	12.5	18.222	31.556	13.5	17.278	7.111	7.889	6.5	4.278	5.444	4.389	3.611	1.556	8.944	6.5	6.222	8.556		0.575344	9.98146
10.1179	6.167	3.889	5.667	19.611	4.333	8.944	16.944	18.944	6.833	37.722	16.056	14.222	5.056	2.444	7.778	2.667	3.167	1.889	2.667	3.222	9.333	7.778	14.778	6.5		0.582191	9.44213
10.237	5.556	3.611	2.278	20.278	5.222	12.611	19.833	19.5	10	33.111	19.944	14.944	5.444	1.111	6.667	9.611	3.5	3.444	2.722	3.833	4.611	6.722	10	9.111		0.589044	9.736
10.356	4.444	4.056	4.5	17.556	8.667	11	12.167	15.944	4.389	34.444	15.222	17	6.833	1.556	11.611	5.389	8.167	5.111	7.167	2.389	9.278	8.667	11.278	10.444		0.595892	9.88663
10.475	6.944	0.944	4.722	19.333	4.5	8.278	11.722	12.833	4.556	27.167	10.167	14.222	2.833	1.833	6.222	10.056	5.667	2.833	1.5	2.889	5.667	15.556	12.778	6.333		0.602739	8.31479
10.5941	6.444	4.944	4	15.778	7.056	3.944	8.167	12.611	4.278	23	9.5	17.778	6.667	1.611	4.556	8.667	5.278	0.944	1	1.056	4.389	12.056	12.5	11.056		0.609592	7.80333
10.7131	2.611	6.222	6.722	10.278	4.778	7.333	14.5	17.333	7.5	23.389	10.611	15.944	3.111	4.056	7.667	12	6.222	7.056	1.556	2.333	5.167	13.389	12.5	7.444		0.616439	8.73842
10.8321	5.056	2.056	3.167	12.222	9.111	10.611	10.833	14.111	5.556	22.389	12.056	10.833	8.111	3.722	9.667	12.056	4.167	4.944	0.111	2.722	4	14.389	11.056	7		0.623287	8.33108
10.9512	5.111	4.278	4.667	13.944	8.333	5.556	11.056	20.056	6.333	28	8.333	13.444	1.778	0.833	10.5	14.389	2.944	2.889	0.333	3.556	5.667	12.444	8.333	7.778		0.63014	8.35646
11.0702	2.667	3.333	2.611	9.611	7.167	4.222	14.778	15.722	13.611	26.833	15.444	15.611	3.611	6.778	6.556	13.278	9	6.5	1.5	1.944	2.944	9.222	8.944	9.5		0.636987	8.80779
11.1892	6.722	3.389	3.833	11.556	5.889	7.278	15.722	19	23.889	28.611	13.056	20.944	2.778	4.556	6.056	14.222	4.944	4	3.833	3.222	4	6.667	12	6.833		0.643835	9.70833
11.3083	2.889	4	4.944	10.611	9.222	6.278	7.667	15.389	25.222	28.444	6.667	17.611	5	2.944	9.611	13.556	5.833	2.278	2.5	1.444	5.056	9.5	13.944	7.889		0.650688	9.10412
11.4273	2.333	5.444	3.667	16.556	12.778	5.167	11.444	19.056	15.333	16.722	12.889	19.111	2.667	4.167	12.556	9.667	4.167	2.722	2.611	2.056	6.889	7.778	8	6.722		0.657535	8.77092
11.5463	2.611	3.111	2.111	21.944	6.778	9.444	12.167	18.667	12.278	13.5	20.111	14.389	4.889	7.778	6.444	7.778	7.167	6.222	5.056	4	3.222	12.111	9.722	8.111		0.664382	9.15046
11.6654	2.222	3.056	2.833	15.778	15	15	12.222	16.833	11.611	12.889	7.111	13.833	5.056	2.556	8.556	8.167	7.778	6.778	2.389	2.278	5.056	5.611	10.556	7.611		0.671235	8.36583
11.7844	2.889	3.389	4.389	17.778	5.389	11.167	15.722	13.667	6.611	10.111	12.111	12.778	6.833	1.278	6.944	7.444	6.444	4.778	1.667	4.556	5.667	11.389	4.056	6.056		0.678083	7.62971
11.9035	1.278	2.667	6.722	15.056	9.556	10.278	16	13.389	10.5	11.056	13	12.667	4.222	6.278	4.611	8.889	10.778	7.222	4.333	6.333	5	9.333	8.833	7.333		0.684936	8.55558
12.0225	6.111	0.889	3.889	9.944	7.056	6.889	20.722	15.333	6.444	10.556	12.167	10.833	4.333	3.278	10.389	5.444	7.722	6.722	2.889	3.444	4.167	9.833	10.5	3.722		0.691783	7.6365
12.1415	1.611	2.833	1.722	11.111	5.056	10.278	12	13.556	7.722	6.722	11.833	9.278	4.444	5	11.278	7.889	9.5	4.222	2.056	5.611	6.833	14.222	13.333	4.389		0.698631	7.60413
12.2606	2.5	1.889	2.444	15.889	5.333	6.389	11.833	19.833	13.333	9.5	10.5	6.611	3.111	5.5	11.611	8.444	7.889	0.889	3.5	4.111	5.222	6.556	10.944	9.167		0.705484	7.62492
12.3796	4.5	2.611	1.389	11.611	5.667	7.778	12.611	10.389	13.944	8	10	9.333	3.667	1.167	8.556	5.5	6.944	4.222	3.389	6.222	7.056	7.778	13.722	4.722		0.712331	7.11575
12.4986	3.222	2.944	7.333	19.5	3.444	9.222	4.5	15.333	11.5	4.889	9.444	3.111	4.889	4.5	9	5.889	6.722	5.722	3.833	3.222	6.333	6.5	17.778	3.444		0.719178	7.17808
12.6177	4	2.333	5.5	22.722	8.5	5.667	7.333	15.278	13.278	8.167	7.889	10.833	2.444	7.889	9.611	7.278	9.278	7.056	5.167	6.278	13.278	5.667	12.167	6.056		0.726031	8.48621
12.7367	1.889	2.056	4.611	14.722	10.556	3.333	4.889	12.389	14.889	7.278	10.111	7.167	3.944	11.611	10.833	5	10.056	4.667	7.111	13.5	12.722	5.944	16.444	5.778		0.732879	8.39583
12.8557	7.056	2	3.778	17.222	8.778	10.444	7.611	13	15.667	11.5	11.111	8.444	3.278	3.278	12.111	6.667	6.167	5.222	7.389	12.444	12.444	9.111	20.222	7.056		0.739726	9.25
12.9748	1.333	0.889	1.722	26.722	11.333	7.167	6.167	12.056	18.889	12.278	10.556	11.278	4.944	3.333	14.167	7.833	9.278	6.444	4.222	14.222	12.667	8.278	16.5	9		0.746579	9.63658
13.0938	2.278	2.278	5.611	13.056	13	8.167	8.833	12.944	19	13.778	11.778	12.167	3.556	7.389	9.778	4.056	6.444	7.722	7	22	8.167	5.722	14.944	7		0.753427	9.4445
13.2128	2.167	3	4.778	22.167	12.222	9.889	8.278	11.944	26.889	15.944	9.833	11.556	6.389	6.5	10.222	9.333	7.667	6.667	7.111	18.611	17.722	9.111	14.111	7.278		0.760274	10.8079
13.3319	3.5	3.722	3.5	12.833	13.222	12.5	11.056	16.222	25.389	20.278	8.778	14.889	6.667	7.333	18.778	9.222	10.833	8.444	8.667	16.389	8.167	4.389	11.389	5.278		0.767127	10.8935
13.4509	1.333	1.111	4.833	14.333	8.444	22.611	6.5	7.389	22.444	9.222	16.778	20.111	4.167	3.5	7.278	4.722	8.389	8.111	11.278	9.667	12.056	4.556	12.333	3.944		0.773974	9.37958
13.5699	5.167	3.833	5.056	20	7.833	13.444	4	8.944	21.222	11.278	12.889	22.889	16.444	4.889	15.167	12.5	9.833	15.556	11.5	7.167	6.667	5.056	13.389	4.222		0.780822	10.7894
13.689	3.611	2.111	9.333	26.111	7.444	12.667	6.278	10.944	11.778	9.944	13.278	14.389	15.5	8.611	14.111	9.278	8.111	12.944	7.222	6.833	10.167	5.389	9.722	4.389		0.787675	10.0069
13.808	5.556	3.278	8.5	24.167	9.167	11.833	2.889	7.833	11.889	12.333	14.111	15.222	14.722	4.111	15.5	16	13	15.833	6.556	5.778	8.222	8.056	11.5	8.111		0.794522	10.5903
13.927	3	1.444	8	23.611	9.333	5.333	3.778	12.5	11.111	6.778	15.722	20.611	6.778	5.944	18.944	16.611	8.222	13.944	6.944	6.278	10.667	5.667	3.333	7.889		0.801369	9.68508
14.0461	3.222	1.778	3.444	27.944	15.056	7.667	5.556	14.944	8.556	8.889	12.222	18.722	10.222	9.278	21.444	7.833	8	7.778	8	9.833	6.667	6.222	9.222	8.5		0.808223	10.0416
14.1651	7.778	6.444	13.833	29.389	18.222	9.611	3.556	10.444	8.944	6.611	7.111	10.556	10.944	6.778	12.778	9.5	10.556	5.778	6.611	13.222	10.556	7.444	7.889	7.444		0.81507	10.0833
14.2841	3.5	4.5	9.389	26.833	13.056	5.833	6.556	9.278	12.667	6.667	6.5	16.278	8.722	5.944	14.222	11.444	5.333	3.222	6.556	8.611	7.5	12.222	10.333	10.611		0.821917	9.40738
14.4032	6	6.889	4.278	28.111	14	9.167	9.5	15.444	9.833	8.222	6.722	12	6.389	11.444	19.889	3.778	7.167	2.889	5.722	7.556	7.667	8.722	5	9.5		0.82877	9.41204
14.5222	5	2.833	5.611	39.056	20.056	13.389	3	8.889	9.056	9.222	8	14.556	13.889	6.611	24.5	4.611	5.389	3.056	2.833	8.556	6.389	15	9.333	7.5		0.835618	10.264
14.6412	4.389	6	11.944	33.944	15.5	11.333	7.778	10.056	7	7	9.056	14.778	11.722	7.056	16	8.944	2.5	3.389	5.167	9.167	8	10.611	4.389	7.222		0.842465	9.70604
14.7603	5.444	3.5	7.722	23.889	10.556	9.111	9	9.944	10.833	4.111	6.278	10.889	18.667	9.556	16.5	9.778	5.5	2.556	2	7	11.222	16.056	5.444	9.111		0.849318	9.36113
14.8793	8.722	2.222	11	22.944	12.778	4.889	6.222	6.056	3.944	5.111	5.444	6.778	10.444	12	10	7	2.722	1.778	1.389	4.444	6.944	9.222	7.611	14.611		0.856165	7.67813
14.9984	7.889	9.667	7.667	18.389	10.111	6.611	7.778	10.722	6.333	1.889	5.722	10.333	11.778	10.944	10.778	9.167	5.667	2.333	3.167	3.389	6.111	5.056	6.722	14.389		0.863019	8.0255
15.1174	9.889	7.222	8.667	13.389	8.444	5.278	5.889	5.556	6.278	4	4.389	6.944	13.111	11.778	10.556	7.056	2.111	2.444	3.167	1.5	0.944	6.833	8.556	12.722		0.869866	6.94679
15.2364	10.5	7.667	14.889	7.889	6.944	3.778	8.889	9.389	9.111	6.722	6	9.778	12.611	14.722	9.5	2.667	5.222	2.722	2	1.611	5.111	3.333	8.167	5.444		0.876713	7.27775
15.3555	16.889	16.333	16.167	8.778	9.667	3.889	19.444	10.278	7.167	4.778	5.778	6.889	10.111	15.444	5.056	1.611	5.556	3.833	3.556	3.333	7.222	4.389	7.333	6.222		0.883566	8.32179
15.4745	16.111	11.167	25	8	9.167	3	13.778	9.667	7.444	2.778	3.444	11.611	11.722	16.667	8	2.667	0.611	0.889	6.5	0	2.5	2.889	9.333	4.389		0.890414	7.80558
15.5935	14.778	11.111	24	9.722	4.778	3.722	5.667	5	7	4	3.667	0.5	8.444	22.889	8.5	5.389	0.222	5.278	3.5	1.056	1.833	3.722	4.278	7		0.897261	6.919
15.7126	17.778	13.222	25.611	4.722	2.167	1.889	4.167	3.667	4.833	2.333	3.778	4.944	11.111	18.333	7.833	1	0.556	2.944	6.444	2.278	1.222	6.222	5.167	9.444		0.904114	6.73604
15.8316	17.111	6.556	20.944	4.222	4.389	2.056	4.5	1.944	6.111	2.333	3.167	4.667	6.278	16.722	6.167	1.222	2.222	3.444	5.111	1.444	3.278	2.778	8.611	7.722		0.910962	5.95829
15.9506	15.611	9.667	13.889	5.222	3.611	0.944	2	1.778	3.667	2.333	0.778	5.5	5.667	17.5	3.111	1.167	0.556	5.889	5.556	3.278	6.278	2.889	2.389	8.889		0.917809	5.34038
16.0697	7.111	18.889	9.389	2.5	2.5	1.167	1.611	1.722	3.889	0.611	0.389	2.667	3.944	15.222	4.5	1.333	0.889	8.056	3	2.389	7.444	4.111	6.222	6.333		0.924662	4.82867
16.1887	15.556	17.889	10.833	2.667	0.111	1.389	1.944	0.778	2.5	2.167	2.722	0.222	3.889	9.944	2.278	2.167	1.278	6.833	5.5	3.333	5.667	4.833	2.5	3.111		0.931509	4.58796
16.3077	16.944	14.667	8.833	2.333	1.667	0	1.333	1.389	2.444	1.444	4.556	1.944	3.111	8.667	1.111	2.111	0.889	5.722	6	4.444	9.667	5.5	2.056	3.611		0.938357	4.60179
16.4268	24.778	15.389	5.222	0	2.556	1.389	0.833	0.5	0	1.056	2.556	2.556	1.611	7.778	0.5	1.333	0.833	2.167	4.611	1.889	7.833	4.667	2.833	4.722		0.94521	4.06717
16.5458	15.056	13.667	4.5	1.667	0.944	0.111	1.111	2.278	1.222	0.333	2.556	0.167	1.944	4.333	2.389	0.222	0.611	1.111	4.222	5.889	4.889	11.722	3.5	2.778		0.952057	3.63425
16.6648	23.056	7.833	2.5	2.778	2.667	0	0	0	1.889	1.556	1.278	1.889	0	3.667	2.333	0.056	1.167	3.944	4.556	7	9.889	5.944	6.056	1		0.958904	3.79408
16.7839	18.222	6.333	1.889	2.111	1.889	1.167	2.5	2.333	0.833	1.167	2	0.333	0.833	3.944	0.333	1.278	1.778	1.722	6.556	9.556	8	14.5	3.889	1.444		0.965758	3.94208
16.9029	16.389	3.222	3.333	3.778	1	0.222	1.111	2.611	1.722	1.222	1.278	1.5	1.278	2.833	0.667	3.556	1.278	4.444	1.333	8.889	6.278	5.778	4.833	1.667		0.972605	3.34258
17.0219	9.944	4.833	2.389	2.056	0.833	0	1.556	1.5	1.556	1.833	1.333	3.833	2.778	3.778	1.722	0.167	5.556	4.389	3.056	10.444	8.389	9.667	6.667	3.444		0.979452	3.82179
17.141	5.444	3.222	2.111	1.333	3.611	0.722	0	2	1.778	1.333	2.444	1.389	0.722	1.722	0.889	0	2.889	3.722	5	6.778	6.333	8.111	7.889	6.944		0.986305	3.18275
17.26	8.333	1.444	1.944	0.611	0	0.611	0	0.444	0.5	1.889	1.278	1	2.111	1.944	0.389	0.944	1.111	2.167	4.5	1.556	3.667	5.222	8.667	5.167		0.993153	2.31246
17.379	4.444	0.833	2.5	2.833	2.056	2.944	1.389	1.944	1.222	0.611	1.444	1.722	1.278	1.222	2.5	1.444	3.722	2.444	3.056	2.278	1	7.333	7.778	2.444		1	2.51837

## Sheet: Image26
X0	Y0	Y1	Y2	Y3	Y4	Y5	Y6	Y7	Y8	Y9	Y10	Y11	Y12	Y13	Y14	Y15	Y16	Y17	Y18	Y19	Y20	Y21	Y22	Y23	Y24	Y25	Y26		Ap-Ba	Average int.
0	51.7821	35.1595	44.1251	39.0227	67.8596	33.9854	28.1218	33.8973	26.1729	29.352	28.7145	38.2784	48.5527	26.2041	16.8905	28.7274	32.1342	37.0386	34.7969	28.846	33.0107	32.0824	43.0558	46.939	49.7864	28.9175	39.7881		0	36.4164
0.119	39.084	39.512	46.469	37.3763	63.8712	42.4131	33.6144	38.6828	28.8413	34.0674	26.1017	53.1795	69.9682	35.989	14.1631	24.294	34.4581	41.4283	40.5994	40.5444	35.4287	33.7738	33.6233	47.5019	50.6347	21.5948	46.8154		0.00632726	39.0381
0.2381	57.6346	39.9584	37.1935	43.2438	63.0353	40.5942	26.5337	44.6662	21.8361	38.6521	33.7502	43.4355	65.0132	35.6561	16.7685	27.5713	44.5439	35.4353	42.2971	30.0371	33.4555	47.7314	36.8761	50.2695	63.3653	29.6195	56.0217		0.0126598	40.9332
0.3571	49.976	52.2298	40.9382	34.9137	61.2425	38.453	33.0444	34.0422	27.3408	40.0778	37.8495	50.2086	58.782	28.1536	18.1924	20.5577	43.1013	41.5415	40.309	36.9518	38.3784	32.4868	29.5546	56.2554	57.1514	30.1065	48.5646		0.0189871	40.0149
0.4761	61.9052	52.6084	47.0497	40.6294	59.5425	42.8264	37.9471	34.5805	35.2727	45.3415	34.3198	39.3358	65.2771	24.1194	19.5588	25.5211	37.9125	40.8806	40.7074	41.2013	39.6026	23.3826	32.3527	81.658	52.2055	33.4998	59.2368		0.0253144	42.5361
0.5952	49.7731	51.4641	50.0288	44.5708	68.1711	50.2069	30.8808	33.1232	36.0766	52.1996	32.3107	42.0741	70.5108	23.2533	13.3422	24.1767	39.2388	44.983	51.6116	47.5719	49.9625	36.3777	37.731	57.9157	63.5635	38.9277	54.2562		0.0316469	44.2334
0.7142	46.8842	60.4764	44.0611	44.832	64.2222	50.7187	32.6637	35.7827	44.069	53.1841	34.943	57.145	73.8849	26.452	22.1826	23.6845	38.734	40.5572	56.7296	38.9602	56.7363	37.2623	41.0609	59.3925	64.9818	45.4457	54.1964		0.0379742	46.2683
0.8332	56.4846	68.6353	58.49	53.2662	70.5801	46.005	30.153	43.2351	40.2554	60.0357	28.9199	57.4456	72.4846	28.2761	14.3575	32.747	41.9108	42.1828	39.7522	47.1592	50.1889	34.2894	54.6074	48.9403	71.3608	56.4006	64.2394		0.0443015	48.6075
0.9523	56.3762	56.0585	66.6724	56.1195	57.2115	46.9794	39.1886	49.5877	36.5537	48.8647	36.4962	52.8246	61.9242	26.3277	17.481	28.9485	39.075	38.0431	43.0164	37.4965	47.1589	36.2993	45.2163	45.5927	53.4449	63.3436	61.9056		0.0506341	46.2299
1.0713	43.9919	54.4009	55.2818	78.7782	75.5422	50.4184	45.3464	54.0505	41.7591	49.1466	36.5127	45.8333	79.8412	19.7716	15.6577	27.2628	37.4596	40.8066	56.816	35.4237	48.6438	30.1135	57.7258	46.0942	68.2004	52.8589	72.8657		0.0569613	48.9112
1.1903	59.7461	65.8361	56.7305	68.1158	78.9037	57.9205	58.1782	55.468	50.6918	56.8948	37.5697	45.5508	72.5578	28.8729	10.0023	27.5231	42.4227	33.6761	56.8084	44.2855	47.9574	27.3622	66.0098	40.5763	56.9106	60.5429	72.1601		0.0632886	51.0842
1.3094	57.8686	47.1892	64.7444	91.9271	59.3814	59.4184	53.4962	54.2176	62.1419	49.8721	39.7507	43.0802	78.2546	26.1031	11.8506	22.4704	37.8743	45.5682	57.7074	26.0447	47.8211	41.4032	59.6641	29.9071	59.7909	59.3782	79.3707		0.0696212	50.6036
1.4284	66.5784	40.8455	66.1607	82.2357	58.3598	69.8557	59.9712	65.1264	55.5074	60.8802	44.9324	34.2741	74.9752	35.9269	14.281	17.958	35.5727	42.5467	49.8775	29.935	58.9259	31.5757	54.6032	38.2743	56.2136	59.2116	99.2392		0.0759484	51.9942
1.5474	65.0856	51.0964	58.4237	88.0512	71.1987	67.8621	61.5134	72.5646	52.4338	47.2417	41.8316	43.1213	82.6241	26.2291	10.4585	20.7699	29.4336	40.4156	46.4373	28.2584	46.072	29.8182	60.7904	35.8291	54.4706	46.306	96.4435		0.0822757	50.9178
1.6665	59.3645	47.2068	70.1833	98.6122	63.7866	84.2786	69.908	48.7425	60.9358	50.6165	51.2271	39.5462	85.3872	25.2884	13.9161	22.3896	39.4443	36.0661	54.5079	24.8671	44.3592	36.1079	65.7961	33.16	46.5896	54.9913	79.1956		0.0886083	52.0916
1.7855	62.0078	40.9582	67.9108	98.3013	68.595	77.7465	72.4549	55.0895	53.2671	46.5049	57.4523	44.4556	98.4134	26.0564	12.6181	17.2226	21.8313	40.6548	45.0862	26.7725	35.2677	38.5863	56.2422	38.8543	46.019	48.8477	83.1781		0.0949355	51.1257
1.9046	61.8578	39.195	48.231	91.9793	71.911	79.7881	72.8924	55.9861	47.0972	40.5794	50.7973	41.8581	89.3153	25.1433	11.8272	18.8187	31.0219	31.2303	42.7787	23.4938	34.8364	27.6848	48.3357	40.1663	65.0108	51.3049	85.3018		0.101268	49.2016
2.0236	70.7141	40.3542	60.4575	79.5708	67.7575	76.0806	74.4456	64.4127	59.7896	54.0374	59.6655	29.4682	92.7287	27.6436	11.3426	26.598	33.8591	30.2258	50.9948	20.5935	33.0001	31.9917	52.9806	39.6283	57.9463	46.7899	80.8961		0.107595	50.8879
2.1426	75.3053	31.5588	73.2713	83.829	69.9324	71.3415	66.8447	44.0401	52.1024	49.5229	64.2708	32.2812	85.1258	27.0672	16.9792	18.6035	24.6869	31.7311	50.6024	22.8317	26.7148	35.3699	46.5303	38.0767	67.973	40.5231	67.0812		0.113923	48.674
2.2617	62.0822	28.4981	56.3108	77.0939	79.8405	77.77	70.9656	44.9278	70.031	48.834	57.2797	36.2594	85.538	28.333	8.8986	19.4486	17.6497	25.8288	44.0887	29.7379	25.9898	37.9777	57.7882	31.4049	77.5338	25.1244	64.6776		0.120255	47.7745
2.3807	59.3982	28.9142	55.4103	67.8089	81.6067	64.6642	62.0739	44.5181	56.2357	53.7169	75.7225	39.4072	87.5313	24.3858	14.4045	21.6831	19.5977	24.9334	48.0554	21.7108	28.0409	37.5872	53.8169	45.2421	62.6014	34.1439	59.3285		0.126582	47.1311
2.4997	63.3507	17.7197	60.3086	70.7669	70.9893	59.0847	49.5475	49.0166	55.6139	56.0893	74.7717	38.241	82.9794	21.4561	13.7438	12.4863	18.2148	22.9909	46.7091	24.6659	26.1625	41.617	46.8458	33.5299	69.8646	34.803	50.6817		0.13291	44.8982
2.6188	58.829	22.8132	55.78	62.2694	75.2385	63.7077	58.9377	40.8494	54.0307	55.1458	72.4856	35.2441	88.5292	30.5372	13.6668	17.1514	15.665	22.7108	53.3556	17.8031	27.579	55.1419	50.7106	34.7438	61.1904	28.2877	54.2207		0.139242	45.4305
2.7378	53.2546	28.7582	35.7043	70.6558	57.7655	66.5964	67.5148	50.5889	44.7437	62.2124	79.4595	27.8562	76.1408	31.998	15.3491	18.0769	15.2432	17.7446	43.1953	20.2501	25.0855	55.8371	43.8119	42.0528	70.8071	29.2985	45.7619		0.14557	44.2875
2.8568	49.6962	15.7635	37.1369	62.669	92.4401	70.5757	49.9007	48.3193	46.7434	54.2412	74.2595	27.9263	74.9292	30.2593	6.6467	13.8905	25.0702	19.5841	50.7801	20.872	27.3193	46.8745	50.124	42.0838	62.1979	18.8156	47.6048		0.151897	43.212
2.9759	42.1598	23.9998	24.3625	47.151	69.9646	64.9485	55.4695	39.4839	45.6951	54.9686	69.9924	19.2725	74.8417	29.8158	11.2905	12.749	24.0289	25.0167	49.9912	13.4832	20.1894	54.4458	43.2313	43.8688	74.7656	28.832	36.3255		0.158229	40.7535
3.0949	33.631	21.0868	28.4281	55.2069	80.3158	74.2302	52.8473	39.4468	35.2443	52.1539	64.6512	24.0892	66.3612	32.0247	12.8104	15.7783	23.0829	11.2859	47.8554	11.7515	15.6874	56.1058	36.0796	46.1474	70.0033	24.3283	49.3494		0.164557	39.9994
3.2139	36.1117	23.8959	41.966	53.4167	60.3905	75.7173	42.486	29.6214	32.3145	43.1336	95.7018	33.8375	70.1375	35.0913	9.8349	13.6421	13.9555	16.6677	48.2258	12.8479	17.2263	70.9512	42.2569	48.9268	74.9487	13.2088	43.518		0.170884	40.7419
3.333	35.5091	20.2199	45.5615	63.1052	46.603	66.2533	43.9388	40.1081	34.3108	34.2952	79.9249	24.7475	67.5761	27.8891	10.8206	9.1717	22.6905	19.3488	47.0815	19.1639	22.9306	59.8293	27.2597	41.9179	62.2447	19.9076	34.7519		0.177217	38.043
3.452	42.9723	22.8417	47.8421	46.2647	63.8749	57.9389	36.051	30.3136	22.1177	50.1532	79.5747	37.7728	57.5818	31.8953	17.4258	9.5647	22.1217	15.9589	44.6988	11.1497	14.2565	56.7559	30.2604	40.3524	74.667	19.6742	27.3075		0.183544	37.4588
3.571	35.7647	15.014	39.8966	59.0699	59.2506	58.0244	32.5117	34.1029	25.0221	37.2688	60.5726	33.4979	54.5005	28.6034	11.1037	11.0536	22.8274	20.7461	50.473	15.0225	14.1872	48.1702	25.0165	53.543	73.4128	12.5655	33.3977		0.189871	35.7266
3.6901	44.0942	21.6208	45.4477	32.6656	59.7712	41.9825	30.5287	26.5624	24.7749	27.1233	74.0818	38.7983	50.835	33.8718	12.6217	10.2588	24.2576	17.2925	29.1049	15.8522	18.4386	49.51	31.6571	44.662	60.2099	15.2724	31.4314		0.196204	33.8047
3.8091	41.6267	13.5432	60.761	37.689	47.7935	35.7024	28.1616	20.4748	17.5713	23.954	70.2642	38.7328	49.4191	36.9437	10.0287	8.7767	22.3325	11.8058	30.7641	13.3175	13.3058	54.0093	27.5926	59.0064	55.1372	17.1152	24.0897		0.202531	32.2192
3.9281	42.2659	17.325	55.456	35.0239	43.6668	46.0407	28.2026	22.5019	19.38	29.3771	72.1435	38.6178	36.0522	28.0464	10.8949	11.0618	29.5692	17.1015	29.7153	15.0043	17.9533	38.9202	25.4132	62.8231	55.4065	15.4077	19.9849		0.208858	31.9761
4.0472	37.8943	16.7264	48.5184	26.4331	42.9132	36.1651	24.6812	17.9775	25.6379	22.5109	62.3641	33.8227	41.3418	35.7776	12.0318	11.2109	28.8692	12.7965	24.303	11.7824	15.8298	43.0286	31.8532	58.0408	44.3379	11.9703	22.1125		0.215191	29.6641
4.1662	45.0117	11.5382	52.9723	40.1739	29.8484	31.7711	26.3605	15.6168	13.4201	16.6042	66.1822	41.3744	36.6371	39.2014	12.1548	13.1773	22.1517	9.3932	20.128	11.3196	15.4636	47.8816	24.3478	62.3296	42.0953	11.7203	30.5645		0.221518	29.2385
4.2852	42.3117	9.0654	55.5701	23.8247	31.2787	26.0677	24.7623	14.6678	13.792	17.4118	58.4812	35.009	36.0935	39.2083	13.238	15.7895	24.8585	10.5868	28.9982	8.6199	12.5279	48.7751	32.2646	58.1859	39.3059	11.0006	20.1222		0.227845	27.8451
4.4043	42.6885	8.8921	57.4149	23.7414	30.285	29.0673	26.0119	12.9423	14.9636	19.7659	61.2558	40.9009	37.056	30.6685	12.7946	16.1055	14.4718	11.4997	22.0704	9.7695	10.8949	44.9934	28.2351	56.6243	44.6678	8.9865	26.3025		0.234178	27.5211
4.5233	39.6625	9.7833	57.9116	24.6629	32.2312	24.6417	29.1635	21.3921	14.1635	13.2094	63.0889	32.1263	38.1112	41.2179	10.1498	11.65	16.5425	11.1082	20.0643	10.7856	9.9521	48.2679	24.493	52.9739	30.5633	15.1267	29.0489		0.240505	27.1145
4.6423	43.3191	7.0201	53.2007	14.2603	28.0655	23.8212	22.3546	17.1484	23.5184	13.3354	61.5379	34.4539	32.74	28.8821	13.5827	11.064	12.2765	14.0693	19.7835	11.7972	10.5864	45.3155	14.9603	57.1391	19.4697	13.5858	18.2839		0.246832	24.6508
4.7614	41.8371	4.6587	49.993	19.8723	37.0244	21.4371	22.9573	13.5597	21.8069	20.3321	54.6315	29.1738	41.4837	31.885	14.5357	15.2672	15.3026	22.1372	13.9626	6.5938	8.2411	37.2799	17.9004	53.1951	18.977	6.9516	20.5749		0.253165	24.5027
4.8804	33.5704	8.8746	47.0693	20.9162	34.1705	25.0057	26.0246	17.4184	19.9646	18.5491	53.4711	40.0707	40.2136	27.1626	8.0897	7.7045	14.3955	11.8375	19.253	7.7597	12.5004	33.6586	24.6478	51.1083	13.898	11.8796	18.4495		0.259492	23.9875
4.9995	36.3494	6.0663	42.9072	19.7796	32.8595	24.537	20.1804	12.8171	16.1099	14.2528	43.1887	38.1692	44.9929	28.9688	10.8712	9.3977	13.8017	12.949	10.6709	11.8371	10.6841	33.1823	14.4502	39.162	21.978	7.9627	12.6504		0.265825	21.8806
5.1185	29.8445	6.9548	28.7384	13.9677	31.3256	23.8209	18.9433	8.2322	26.3544	20.1734	57.2055	36.3747	39.9882	26.132	8.6454	13.5064	13.9612	15.7908	9.1325	9.5051	11.7985	35.8334	15.1124	32.8208	14.8604	9.6128	15.0831		0.272152	21.2488
5.2375	23.4494	3.6569	23.0431	16.7569	33.6595	21.0505	18.9	10.3683	15.3102	16.0543	47.6992	28.3686	28.846	26.9328	15.5798	6.8879	8.6154	11.7596	14.4103	9.0544	13.66	30.8866	12.1666	30.0317	12.1303	8.4905	9.2575		0.278479	18.4084
5.3566	25.0985	7.3037	17.9325	8.5888	34.4864	20.1593	24.9489	9.92	19.0013	23.0929	32.5402	38.5529	38.4258	33.5878	11.6274	7.1514	12.3395	11.9743	12.4505	9.1688	10.7016	25.3832	9.6736	26.3739	11.1891	13.3512	7.9359		0.284812	18.6281
5.4756	25.4802	4.5863	18.5387	19.7259	28.6511	9.4026	17.0998	10.164	16.2699	17.1896	35.6117	38.4563	39.2094	28.5529	9.9214	4.4192	7.371	7.3379	11.6874	7.882	11.9918	21.9169	8.0816	26.7415	9.3102	11.4828	11.1827		0.291139	16.9728
5.5946	15.7524	3.3854	11.8672	19.5042	36.4035	6.7625	12.4437	8.8438	26.9728	19.2218	38.1802	43.8563	47.4622	24.8013	12.5639	7.2448	13.0072	12.5331	12.286	13.7446	13.0544	21.1536	8.1458	22.1242	4.8673	6.0978	7.6323		0.297466	17.4042
5.7137	18.3083	3.6157	11.709	24.459	40.0734	7.963	17.019	10.2302	24.5048	19.6873	24.8751	35.9576	45.5706	34.3388	9.2799	4.7949	14.1602	8.6643	14.1523	7.7865	13.9021	17.0131	6.1642	16.9831	7.041	6.6862	8.5202		0.303799	16.7948
5.8327	17.2795	2.9737	12.2174	19.5203	25.6389	14.4706	17.3214	13.9771	34.635	13.5829	22.2432	38.6226	41.572	31.825	11.9009	5.907	9.1094	6.5286	12.5438	4.9201	9.3015	13.7939	9.5189	14.8555	7.9911	5.2686	7.2937		0.310126	15.7338
5.9517	18.196	4.6063	6.6824	25.1448	20.1843	12.8279	19.7373	10.6565	23.2628	21.5391	24.4005	45.3268	55.5465	33.2298	7.5654	4.4099	11.3812	6.1557	14.8281	9.4821	15.8363	12.128	7.2374	18.01	7.0279	11.6118	5.3591		0.316454	16.7546
6.0708	12.6571	5.979	6.1828	21.5737	12.3408	14.1659	22.1502	8.0875	22.4244	14.3824	19.782	51.3839	58.4923	32.0384	11.09	8.4473	10.2601	8.9841	14.7496	7.9908	11.8995	8.2356	10.7038	13.845	9.8648	9.2243	6.6804		0.322786	16.0598
6.1898	15.6985	5.4905	7.4205	27.4271	18.6088	14.1213	15.2237	6.6076	24.2367	18.5539	20.9926	33.7668	55.7608	35.162	7.2591	9.3688	8.5064	5.591	9.6027	8.7782	11.1458	12.1316	7.7997	6.599	9.168	7.9266	7.6451		0.329113	15.2071
6.3088	9.5354	5.4305	6.0147	19.8013	28.4082	11.3105	13.3539	4.5043	22.2948	17.1178	14.5675	43.9411	54.1253	23.1689	16.148	4.9032	4.9831	4.4266	14.3111	8.9401	8.9724	9.2999	11.1825	8.5883	5.0229	6.8281	10.3815		0.335441	14.3541
6.4279	10.8477	5.0436	5.7645	17.3743	14.9246	6.0792	17.5958	4.6802	20.0324	20.0911	21.6925	36.0398	48.4711	30.5283	5.7654	8.8088	6.7391	4.9381	9.264	7.2479	8.6426	10.077	9.4507	8.6373	6.0096	9.2289	6.6785		0.341773	13.3575
6.5469	9.3044	5.2492	5.2048	21.0234	13.9834	5.9562	12.245	7.1247	14.3837	9.969	13.3146	29.9395	51.4261	23.4553	10.7592	8.4989	9.8731	3.9759	10.2468	3.8016	8.7612	7.7918	9.7086	9.6194	5.2443	7.2599	6.5824		0.3481	12.026
6.6659	7.4281	3.2017	5.0793	22.5956	7.5149	5.963	14.0222	5.4633	17.3015	10.4541	16.0477	23.5665	44.3637	18.596	11.1826	7.2304	6.2034	2.8937	9.2455	5.6373	10.154	11.0484	9.3599	7.6761	5.3159	4.4473	5.6274		0.354428	11.0229
6.785	7.9644	5.0366	1.9887	20.9345	11.347	4.2147	10.0787	7.8413	18.7264	13.1333	10.1407	21.4823	50.6223	22.4409	9.9291	5.0713	5.7917	4.1636	9.2642	6.4705	10.5624	7.085	5.8999	8.8799	5.6226	6.6339	2.8208		0.36076	10.8943
6.904	16.6464	3.1054	6.3171	22.7086	8.7313	5.5526	12.7903	9.3488	14.6393	9.9242	15.8486	21.7708	47.4243	18.4671	7.6599	4.5874	3.5705	5.1723	11.904	7.9562	4.7867	7.0378	12.7241	6.2869	4.8957	5.5043	3.1728		0.367088	11.0568
7.023	10.6386	1.9986	5.1694	25.8727	4.4129	4.2863	15.1576	4.373	20.3335	9.1418	11.0325	22.9841	32.6227	13.261	12.6181	5.4879	10.5256	8.0633	8.0871	11.6909	8.1084	10.8615	8.057	6.3734	4.9748	1.4716	3.3261		0.373415	10.4048
7.1421	12.4948	2.9805	6.0742	14.0599	6.0914	5.8344	15.8121	7.13	14.9198	9.0841	12.1503	23.7152	38.0261	12.3845	9.1163	5.0559	6.3783	6.445	4.6455	7.6985	6.3573	10.6803	7.0862	6.3048	3.2455	7.5462	3.09		0.379747	9.79286
7.2611	12.7468	2.7909	3.5852	9.6386	6.0768	6.6334	19.2215	8.296	14.9374	8.5307	9.8716	20.0383	33.002	18.8348	8.7047	3.8316	4.2856	7.9282	6.85	11.5859	7.7087	4.2456	6.0001	9.1652	3.3613	2.1884	5.903		0.386075	9.48009
7.3801	4.8436	6.159	2.0946	9.0979	6.5343	3.8019	21.5245	2.7594	10.7432	6.443	10.8753	25.1039	40.431	16.4241	6.2927	3.5408	1.193	3.9059	6.0268	2.6998	8.5235	3.8571	4.4354	9.6883	5.6801	3.3185	3.646		0.392402	8.50532
7.4992	6.9596	4.6895	2.4328	3.7601	5.8047	3.9798	28.1569	3.9056	10.1329	14.3806	12.5682	17.6614	26.202	9.995	8.4361	3.1669	4.3262	5.881	8.1125	6.5218	5.3399	5.487	8.7582	3.4594	6.5659	3.6364	1.0941		0.398735	8.20054
7.6182	6.6763	2.6124	2.1896	8.9167	5.5871	3.629	29.7911	1.7365	10.7287	10.191	12.2805	16.3189	26.3879	10.6021	7.5192	3.5464	5.7175	5.5608	4.8754	7.9074	7.2894	9.0613	8.7824	2.552	3.7385	1.9936	6.7728		0.405062	8.25794
7.7372	7.3565	2.6971	3.4256	8.6089	5.3385	1.8557	24.8901	4.9783	7.0328	7.3351	7.5492	22.5225	32.5217	13.2488	10.1541	5.6191	5.5897	3.3329	4.8994	3.8247	7.4654	9.0027	7.7579	6.0243	5.1719	3.7232	4.2694		0.411389	8.37761
7.8563	4.5412	1.1656	1.8998	9.5917	5.6691	5.2157	10.3712	4.7844	7.8303	11.0487	12.0275	12.0338	29.7728	15.9982	9.6444	2.9098	7.23	2.6754	9.0707	2.3551	12.1734	5.2453	4.83	4.659	1.9354	5.3568	4.3915		0.417722	7.57136
7.9753	4.302	0.65	5.0894	7.9872	4.7349	3.8973	13.5235	6.0254	7.0714	8.5479	5.251	13.494	24.526	18.5957	11.3357	5.2489	5.6411	5.4194	3.9092	3.5938	5.0813	8.7115	5.7369	4.3835	3.4626	3.4073	2.6274		0.424049	7.12053
8.0943	2.707	3.5985	6.1803	12.7915	4.9874	3.2072	10.234	5.7385	15.7088	10.9004	3.1014	15.2958	30.2066	21.4998	9.2894	3.3689	6.3941	6.4524	5.7776	3.9707	4.9279	7.4024	4.113	6.8497	4.3899	5.0369	5.8187		0.430376	8.14625
8.2134	5.3753	1.2053	2.4302	15.4546	3.89	4.5251	10.9279	6.744	10.3954	11.3475	9.8873	14.2381	19.707	13.6655	5.6458	2.3829	3.6672	4.3979	10.2791	3.9252	5.4172	4.1323	6.6527	6.4893	5.2507	4.8131	3.4161		0.436709	7.26899
8.3324	5.4556	2.6719	3.9993	8.577	5.2031	5.2518	11.2776	5.4817	10.2331	8.6666	7.1318	13.9363	22.8702	18.4962	9.4102	3.2674	4.0541	3.7312	5.7808	3.7833	5.7971	5.3197	6.8542	11.8713	3.8542	2.1463	3.6745		0.443036	7.36283
8.4515	4.1575	4.6295	2.1185	11.8329	2.2467	5.496	12.4234	8.325	7.1428	8.4037	3.6768	16.2984	25.1987	13.9867	7.4978	3.3764	6.8778	3.3531	5.074	2.1603	4.3734	3.614	7.4526	7.9436	1.375	1.0314	2.7983		0.449369	6.77275
8.5705	2.6284	3.1981	6.5563	15.2416	1.9088	4.274	11.3738	10.0921	6.5895	4.9274	5.7336	14.1441	15.4589	13.2379	2.6343	2.4615	5.9628	4.47	5.4919	0.0765	5.8651	11.6957	6.6774	3.8726	1.765	2.9286	4.515		0.455696	6.43633
8.6895	4.5942	1.2125	4.3466	16.3145	3.2363	1.7924	18.0008	11.5487	4.7947	9.1558	7.9561	7.5366	13.3416	18.319	6.0553	0.9618	3.5337	4.2614	5.3799	3.2158	11.6151	4.447	7.8222	6.0871	3.2711	3.1855	4.0046		0.462023	6.88853
8.8086	4.9128	4.1421	2.8896	10.6752	0.4263	4.0895	7.994	11.4353	10.5134	7.5335	6.5671	10.8854	10.4167	14.7939	7.8237	5.6847	3.5455	0.5079	3.3715	2.2629	5.4284	6.4836	4.0964	6.1492	2.8479	3.1569	2.8279		0.468356	5.98005
8.9276	4.6622	3.7833	5.3243	15.9445	1.99	1.5054	11.8827	7.7563	8.8886	5.4226	4.7863	7.3225	10.7864	21.2567	10.6928	4.4216	4.4758	1.4209	6.6331	0.7853	2.497	6.0085	4.2029	4.7552	4.2902	1.1513	3.7209		0.474683	6.16175
9.0466	4.9636	3.2421	3.5492	9.1085	4.5393	3.5334	7.372	10.6537	8.7194	7.9026	7.2357	7.9905	7.8101	14.7613	7.2122	1.4545	3.9609	1.9912	4.1815	0.5006	2.0593	7.1252	7.3386	7.0755	3.0436	1.9808	0.7959		0.48101	5.5593
9.1657	5.0488	2.612	3.9772	8.8506	1.6583	4.3187	6.4466	7.5238	10.979	10.7959	7.3661	11.1867	5.0237	12.0493	8.6723	3.0693	4.2409	1.9727	5.8703	0.5861	8.4625	7.0469	9.1627	7.4649	4.6853	0.557	2.3194		0.487343	5.99804
9.2847	4.5731	1.9661	2.0786	7.8892	3.9978	3.1086	4.6613	9.9104	6.3258	10.0792	7.1861	4.9679	8.6838	11.3608	7.7583	2.5547	3.4737	1.2971	2.9269	3.1654	6.7127	4.9658	5.9726	4.7097	0.9803	2.958	4.9126		0.49367	5.15469
9.4037	3.489	0.8304	2.1948	5.3396	4.937	1.5375	8.1054	10.6657	5.851	11.1822	8.8282	9.7977	6.3204	9.2516	7.1093	2.6797	5.4786	4.1376	5.2982	1.2995	6.1365	2.9354	5.983	4.0792	2.8825	1.1494	3.3203		0.499997	5.21554
9.5228	5.6168	4.7468	3.1644	4.313	2.7819	6.0207	7.1065	4.6178	6.9573	7.9939	6.4633	8.0508	7.5272	8.1579	7.3705	1.1829	4.0717	5.2218	4.4566	3.7196	9.5975	3.6835	5.2985	4.6682	2.346	0.9953	5.8589		0.50633	5.25886
9.6418	6.991	3.9997	2.9521	1.34	2.1283	2.7059	9.2322	7.982	3.7459	6.6702	4.7507	5.7758	5.6739	10.6916	8.8144	2.4425	3.6032	4.9719	4.3649	1.6453	4.7814	6.9171	6.0515	3.5188	1.7388	3.1224	5.567		0.512657	4.8955
9.7608	4.52	1.6029	4.2103	6.6799	1.4595	2.1177	8.8465	6.8411	5.669	7.5442	3.9755	4.2141	4.8899	10.1079	4.7253	5.3934	5.3206	5.931	4.326	2.6805	3.5977	3.6267	1.7799	2.4004	1.115	1.9929	7.0524		0.518984	4.54149
9.8799	8.8713	2.9832	3.4992	6.9451	3.1119	4.463	10.4158	7.4286	5.2681	8.1273	3.5903	5.0786	8.2777	11.1629	6.4092	1.084	5.8572	3.8322	4.4971	2.2607	4.901	4.4725	2.4024	4.7561	1.049	4.4833	3.5189		0.525317	5.13876
9.9989	9.0956	0.8047	2.5981	3.4663	4.2968	3.6773	11.4606	3.0764	5.2203	6.4181	6.6064	5.0232	2.0488	11.261	6.819	4.9508	3.9641	2.6893	4.9255	1.4291	3.4644	8.2525	3.2581	3.3962	0.6675	2.724	4.1541		0.531644	4.65734
10.1179	8.7239	1.8404	3.9943	6.7967	0.787	2.7822	5.0206	5.6261	6.0153	5.621	3.8784	4.8587	5.9633	15.2263	7.5947	2.0296	4.9953	1.37	4.8393	1.8098	4.054	5.0451	4.5965	1.3192	2.2837	2.8648	4.7123		0.537972	4.61661
10.237	6.9816	1.9758	3.5376	3.8092	2.3543	4.4552	5.4713	6.8106	6.7827	10.8862	4.5035	2.0689	6.7211	13.4025	5.5915	5.8459	7.4497	2.1068	5.2216	0.9454	3.0018	2.8802	5.9595	1.8569	1.159	4.5493	4.2041		0.544304	4.83453
10.356	13.6016	1.3152	4.0491	6.6195	0.6147	2.2074	6.9412	3.1974	4.7821	5.9602	2.8804	6.7323	6.6588	7.5902	5.1655	5.1703	3.1798	3.1556	5.0617	0.6639	2.9259	5.0527	3.325	2.8448	0.8567	4.4785	2.7907		0.550631	4.36375
10.475	13.2365	2.6313	3.8874	10.6225	2.0183	2.333	8.9043	7.3784	3.9828	8.2278	2.3195	6.7457	6.6069	6.5356	6.5771	1.365	3.7719	3.8031	6.622	4.333	7.3906	4.0002	3.4998	0.151	0.6234	2.6621	4.3138		0.556959	4.98307
10.5941	16.4499	2.9939	5.0783	8.0576	4.7989	4.4025	4.4801	4.6538	4.2921	4.7994	5.5199	4.7649	6.0208	5.9599	6.3975	3.9277	5.9167	0.7727	4.1469	2.3591	4.4063	0.4235	7.2374	0.9626	0.6906	3.3705	4.103		0.563291	4.7032
10.7131	17.0644	1.2477	5.1831	5.4956	5.6856	2.2548	3.3691	7.2064	4.6792	6.8585	6.2359	2.5095	7.6248	8.1533	2.8256	3.9711	4.6039	1.0587	5.0527	3.2768	2.2046	3.9169	1.0772	3.2433	1.9611	1.0491	0.9932		0.569619	4.40008
10.8321	16.8622	1.242	3.3925	4.4006	1.8422	4.3957	7.1991	7.1575	5.4383	5.5574	8.3762	3.7536	3.6544	6.6174	4.5948	1.1369	3.8288	1.4812	4.214	2.0977	5.3945	2.5982	3.086	5.4906	1.4241	1.4258	2.4346		0.575946	4.41097
10.9512	22.7061	3.5229	3.1363	3.9867	3.5274	3.0255	9.5174	4.0798	6.1113	6.7332	10.6255	4.6706	4.0145	10.7248	7.683	2.1351	2.92	1.9984	4.3406	2.3071	5.3594	1.8609	3.6551	7.3339	2.4711	6.5597	2.6616		0.582278	5.46918
11.0702	13.4561	1.4227	5.5528	5.1972	3.1998	1.7022	7.6929	7.4704	4.8357	7.4359	5.6437	4.487	6.0502	6.6688	2.2482	2.7104	2.8155	2.6053	4.7422	2.7915	1.9848	1.7478	5.8572	2.9688	2.1175	2.807	2.8566		0.588606	4.40993
11.1892	16.0029	1.4939	1.6742	7.9123	4.0028	4.4254	7.2211	6.6832	3.6831	4.7239	9.0107	2.3707	5.957	5.4731	4.5974	2.7074	4.9256	2.2317	1.9684	1.3919	2.002	7.1458	6.0994	2.7004	1.2987	2.9824	3.1145		0.594933	4.58518
11.3083	14.5616	2.8747	2.1797	4.8978	2.7409	4.5338	12.1369	6.8465	4.2422	5.5292	5.4089	5.2152	6.4222	12.7239	5.0341	5.0929	2.6598	4.7594	2.2853	3.1306	1.2272	4.8327	5.8514	3.7558	1.7533	1.3387	0.9805		0.601265	4.92649
11.4273	15.2221	0.8703	6.1854	4.9487	4.9481	3.0735	6.3862	2.3213	2.3339	3.6297	5.4714	8.05	4.796	9.4966	2.8075	1.9966	2.4864	1.0764	4.6633	2.804	1.8167	5.4828	5.8478	0.9299	1.5508	0.3963	0.1978		0.607593	4.06628
11.5463	10.8179	2.8969	2.4198	6.2943	5.5478	4.1901	5.3378	10.1707	3.6906	4.2761	8.4277	2.4981	5.3327	6.4078	4.306	4.2086	1.4967	2.6538	3.3725	4.5525	2.9311	4.6408	3.1499	2.4508	2.682	4.0078	0.9458		0.61392	4.43358
11.6654	10.7167	1.3876	4.7269	4.6235	3.068	2.1505	6.8438	4.4641	2.1412	3.4652	4.7629	7.1621	4.9071	4.1904	2.1773	3.1753	5.163	2.6854	2.057	4.1349	1.2484	3.911	2.7206	1.6547	2.3696	1.9378	0.2197		0.620253	3.63203
11.7844	8.6578	1.8812	7.1977	8.1987	1.6215	2.9662	7.386	6.9797	3.1217	2.9976	7.9705	7.3979	4.7878	3.6644	4.503	4.5627	5.678	1.8265	1.5454	3.5255	4.1394	4.0509	5.3196	1.0683	0.6209	2.5955	1.2424		0.62658	4.27803
11.9035	11.9684	3.2615	4.9305	10.9923	3.7254	1.8527	7.4515	5.4262	4.3805	4.8164	5.7187	3.9467	4.4813	9.003	5.6172	3.9233	2.512	3.534	4.3779	6.8937	4.2165	4.5186	2.5144	2.9016	0.4488	0.4358	1.6766		0.632912	4.64909
12.0225	10.171	2.5716	4.0772	12.6454	3.0455	6.4998	4.4203	7.067	1.4598	3.425	9.3736	4.3514	5.5577	5.5959	5.0548	6.3351	3.6702	3.2595	3.574	5.1768	3.4328	4.3407	2.2879	2.38	0.4691	0.9335	2.4018		0.63924	4.57694
12.1415	9.8706	2.3294	5.5151	12.9821	6.6177	3.4819	5.6573	5.9628	1.7323	4.8212	5.9601	7.5743	7.5123	6.9582	2.9847	6.4471	8.5686	1.2548	4.4311	3.2623	2.4079	4.3081	3.7298	0.9375	2.0564	0.1477	1.0956		0.645567	4.76322
12.2606	7.9344	3.6074	8.0446	5.3125	2.1034	2.9805	9.8269	6.2588	3.9644	1.4966	8.2208	5.1118	3.1407	5.4559	3.5051	8.1086	3.5019	1.5442	3.6592	4.8432	3.612	5.5275	3.0098	0.7961	1.7013	1.2891	1.3936		0.6519	4.29446
12.3796	4.7118	1.3145	8.7349	6.7201	3.8384	3.4669	7.648	1.8702	3.2313	4.8485	9.179	4.7149	5.2637	6.3123	4.3497	7.3272	3.2252	1.9483	5.9198	3.382	2.4205	2.096	3.2805	1.2069	0.6128	3.5734	1.1288		0.658227	4.16021
12.4986	5.3871	3.8274	7.0547	5.5348	4.9372	3.2023	5.1824	5.3408	4.052	1.7446	7.9113	5.4063	3.8054	5.9913	2.5222	7.584	3.3279	1.4491	2.8701	3.8018	1.7585	5.7551	1.1775	2.4546	1.4462	2.9023	2.2922		0.664554	4.02663
12.6177	8.1323	2.4261	6.5052	6.1366	2.197	2.9829	7.4496	1.2523	5.0932	4.0089	8.42	2.8421	2.1822	9.8115	3.3481	5.7643	4.965	3.5103	3.5053	6.1759	4.5542	2.2693	2.9045	2.5167	1.1604	0.8997	2.729		0.670887	4.21269
12.7367	4.7926	1.6935	7.9466	3.8114	2.8409	4.1566	8.5715	4.0697	3.7093	2.2508	4.5379	4.1838	9.0126	7.7859	1.0707	3.5091	6.9408	2.1346	3.8409	2.9064	6.6398	2.8171	1.6088	2.2449	0.7319	0.8677	1.6372		0.677214	3.93752
12.8557	8.9241	3.4974	5.3281	5.226	5.4445	3.134	9.5761	4.4083	3.9402	4.4894	6.9844	8.7436	7.4291	5.0064	3.0286	2.077	2.4585	0.7574	3.3313	3.266	2.7817	1.4468	3.0451	0.9303	0.6627	2.2246	0.8102		0.683541	4.03525
12.9748	3.5408	1.8619	6.5748	7.6284	4.7541	4.515	4.7363	6.3321	6.0404	5.7112	6.5029	4.8746	5.709	8.1862	3.1387	4.3988	4.313	2.3795	1.9881	2.3384	2.6618	0.9115	2.5694	3.1143	0.8759	2.5418	1.5151		0.689874	4.06348
13.0938	4.872	4.5643	9.8875	4.5357	4.686	5.5023	3.5119	5.8887	5.4243	9.0488	6.5721	4.5729	5.7213	4.0761	7.7127	5.4121	3.6443	3.2672	2.9803	2.8875	5.279	1.6069	0.7735	1.3433	0.7795	1.2599	1.9788		0.696201	4.36255
13.2128	7.0062	1.8173	7.5718	4.1271	3.3917	4.1964	4.5923	4.1046	4.6388	7.717	4.0952	5.9468	2.6572	4.6489	2.8089	4.3505	4.9642	1.8836	3.0762	1.9197	1.1274	2.073	2.609	1.2247	0.1321	2.792	1.8121		0.702528	3.60314
13.3319	5.2515	3.5418	6.7875	5.3467	3.3757	3.9895	5.4546	8.235	6.6933	5.3341	3.7204	6.245	8.0435	5.1543	5.4597	4.5908	2.6051	0.7232	1.7563	2.4732	4.553	2.5996	3.8044	1.4942	0.9803	0.0413	2.6832		0.708861	4.10879
13.4509	5.7028	3.9099	8.983	4.653	4.134	5.3127	6.2891	4.9776	9.6283	4.832	5.881	5.259	5.2517	6.607	6.667	2.6842	3.0195	1.5779	3.0348	4.2006	5.443	3.7262	0.7658	1.8953	0.7243	1.8864	1.7116		0.715188	4.39843
13.5699	6.8203	2.6993	6.0293	4.6872	2.6686	2.5584	1.7453	2.7127	14.6556	3.6583	8.7152	7.3589	8.9559	4.7261	4.8501	5.4199	2.9027	4.4713	3.5198	2.8158	2.6981	1.1377	1.7923	0.5481	1.088	0.2638	2.8881		0.721515	4.16247
13.689	4.4057	2.5987	4.5354	7.2575	3.2823	7.2727	5.2325	3.8904	11.1282	6.4576	2.4146	6.8418	7.6535	6.7328	6.7848	4.0463	4.8428	1.2263	3.2724	2.9755	5.1433	2.8039	3.6738	1.1804	0.46	0.9293	1.6872		0.727848	4.3974
13.808	3.0432	4.0671	4.5058	6.7114	4.7097	4.253	4.5523	4.6395	16.5429	4.6819	5.5324	5.6356	4.9899	1.8562	6.4547	7.4564	2.5509	3.8198	1.6786	2.6089	4.1607	4.9479	2.5805	1.5127	1.0508	1.4536	1.222		0.734175	4.34142
13.927	5.0824	3.7696	2.7756	7.6573	2.992	5.9659	3.6905	3.1051	14.5618	2.6227	5.8268	4.252	5.9489	6.6047	4.7745	8.2765	1.5441	5.4968	2.4	2.7217	1.9687	3.9081	2.1676	0.0187	2.2507	0.7041	1.8695		0.740502	4.18357
14.0461	6.6526	1.8543	2.069	10.0678	4.2714	3.9804	7.6411	4.3513	23.5393	4.2812	4.5501	5.9155	5.0954	11.6309	2.8756	3.0339	3.7491	4.1461	4.9528	2.5311	3.5181	0.8254	1.4101	0.0882	0.8738	0.4085	0.8283		0.746835	4.63486
14.1651	5.5519	10.2818	4.1737	6.7641	1.3619	6.4727	3.6285	3.1704	12.9469	5.6095	2.7256	8.9421	5.3301	6.9229	7.711	2.641	4.1683	1.5886	7.1639	0.657	2.9451	3.9977	1.1536	1.7862	1.0478	0.6671	0.9436		0.753162	4.45752
14.2841	7.0064	8.005	9.1142	7.6297	2.6942	7.324	2.6022	7.9002	13.0918	4.8672	5.3683	11.5114	2.4829	8.6526	10.5684	3.9711	4.2079	1.7084	3.1267	1.1039	2.1327	2.9505	0.0902	2.116	2.5959	0.814	1.1172		0.75949	4.99085
14.4032	4.3424	10.4448	8.8547	9.8404	2.742	4.824	3.1023	8.9878	13.8334	4.8877	7.0352	9.1878	5.0237	7.7897	9.1878	3.1655	3.6809	2.9411	3.8074	4.4675	3.7006	3.7006	3.0581	1.0771	1.3389	1.4359	1.6253		0.765822	5.33639
14.5222	4.2914	7.8533	8.0113	12.5942	2.4111	4.7433	3.3746	6.8564	14.3265	8.5793	8.9031	7.4341	4.6247	7.3844	4.298	2.7656	3.5518	1.8103	5.0171	6.058	3.0604	4.6853	2.0303	1.0876	0.1951	2.267	2.5427		0.772149	5.21322
14.6412	2.721	6.8452	8.7944	12.7961	1.4904	4.3407	5.0372	5.085	15.8848	5.0158	4.8155	5.6445	4.76	13.505	4.9183	2.32	5.4862	3.4209	4.3432	3.9931	5.9678	2.4988	3.1601	1.8996	0.0616	0.298	0.0511		0.778477	5.00571
14.7603	4.1076	6.997	7.5179	11.7087	3.6608	6.3508	4.799	6.2277	17.5703	4.8992	8.8535	7.8559	7.2874	7.8382	8.3254	4.1428	3.9475	0.5982	3.348	1.1558	5.48	1.9124	2.5461	1.3239	2.316	1.9665	1.6188		0.784809	5.3465
14.8793	5.4589	4.3226	7.6862	14.7312	2.6509	6.8584	3.1074	3.7622	12.6985	6.5977	9.4769	10.6703	5.6975	14.4196	3.6789	3.1279	2.6882	4.2034	1.9613	5.2973	1.7249	2.4442	1.3145	1.1807	0.0113	0.1624	2.9094		0.791137	5.14232
14.9984	3.9727	3.8686	6.3423	11.3656	2.6293	4.5389	1.1516	2.0773	11.0898	7.1609	14.0779	7.086	5.4402	13.9611	7.3526	3.5374	2.4895	3.1419	2.8315	1.4103	4.2561	3.7086	3.2517	0.4566	0.0133	1.5277	2.4183		0.797469	4.85769
15.1174	3.8297	6.372	6.4238	12.4529	4.5641	8.3313	5.6765	4.7244	9.0292	5.9927	18.7981	5.4582	7.7412	14.0438	4.0698	1.6723	6.7242	5.4002	3.7387	2.4557	3.236	1.6362	1.5955	0.0008	0.2831	1.7506	2.0678		0.803796	5.48403
15.2364	5.5154	2.4706	6.9079	10.1456	3.4702	7.6739	1.6845	6.4468	4.6119	4.4326	9.6885	5.8588	3.8326	14.7836	9.3554	3.0393	1.7122	3.1328	1.6908	1.6321	3.4904	1.3279	2.5368	0.6707	0.5236	0.646	1.0954		0.810124	4.38431
15.3555	4.9925	4.2363	6.4376	8.1604	0.6095	21.4572	1.9268	5.4476	8.4217	10.0047	9.0326	3.0066	6.1534	16.0799	6.7982	3.3909	7.6413	4.5369	3.6046	3.5851	6.2513	1.9422	2.0128	0.5172	1.6836	1.0807	1.1705		0.816456	5.5623
15.4745	4.1966	3.11	2.4925	9.86	1.3553	10.2107	3.4222	8.7309	6.5383	7.427	9.4047	5.6722	3.2763	12.8831	6.3523	4.0011	7.1602	4.2513	6.4374	3.4999	3.7591	2.4088	2.7886	0.6391	0.0225	0.94	0.0273		0.822783	4.84694
15.5935	7.1224	4.5275	3.5325	7.0446	5.9626	18.0042	3.0762	5.0115	1.7212	8.3078	13.1221	4.155	3.9909	17.1313	5.1119	1.4192	7.7994	3.8943	1.917	1.7505	1.3056	1.1372	3.9735	0.0577	1.5993	2.0062	0.0047		0.829111	4.98838
15.7126	6.3486	7.3903	7.3509	10.5261	5.1134	14.2066	3.1354	4.3626	3.7165	5.4565	5.8413	6.3328	5.2853	12.9926	3.5461	2.9145	9.7355	3.9368	2.8405	2.6787	3.8774	1.5104	2.0334	0.9647	1.0603	1.6633	2.46		0.835443	5.08446
15.8316	4.2055	4.649	6.5828	8.7014	1.3647	10.5257	4.0872	9.7501	7.0791	7.0867	2.4179	4.1852	1.9123	10.7742	5.1429	0.6316	3.5394	1.7739	4.6461	2.3198	3.0258	0.8348	0.9508	0.8907	0.6019	0.1806	1.1222		0.841771	4.03638
15.9506	8.0426	5.4544	8.8485	14.9434	3.5327	10.4069	5.1986	7.9389	6.0003	8.9244	4.0531	5.7373	7.1897	10.4511	5.1627	1.4007	5.484	0.9651	3.0383	2.8023	5.1623	1.7087	0.473	1.103	0	1.4193	0.4405		0.848098	5.03266
16.0697	9.3986	7.9017	3.8915	12.7363	1.3945	8.2389	4.7241	6.5365	9.7119	4.2569	1.765	10.1798	4.3081	8.7554	4.2496	2.2068	5.0387	3.0671	4.2402	2.0082	2.8303	2.667	1.0668	0.3833	0.0119	0.0494	1.5948		0.85443	4.56346
16.1887	8.8155	7.6042	3.6943	11.8542	4.3656	7.7939	4.7692	5.2797	6.0033	6.8491	5.9677	6.903	5.5163	11.1657	1.2156	1.6588	6.9859	1.7654	4.3009	0.8065	4.5149	0.7006	0.0647	0.3498	0.2388	1.119	0.6272		0.860758	4.47888
16.3077	6.7632	6.6708	6.157	12.2606	6.8216	15.6345	3.8953	4.2144	14.1862	5.731	5.4312	5.4425	8.7601	9.1058	1.8779	4.2748	1.6882	5.135	3.5879	3.8634	2.8016	3.3035	0.8485	2.4072	1.0947	0.7349	0.6359		0.867085	5.30843
16.4268	9.4189	7.1584	5.2433	11.0044	3.8538	8.442	5.5159	4.9527	10.8461	5.1726	4.4408	3.9795	5.0535	16.4178	5.292	0.6151	3.2315	8.2396	7.2567	3.2704	3.4357	0.9625	1.8641	1.1191	0.5478	0.5966	1.0709		0.873418	5.14821
16.5458	7.4322	8.4811	9.5236	10.653	7.5708	7.1418	5.1206	5.5852	9.6203	3.9621	6.5158	5.6652	2.3058	5.5923	2.4946	1.962	1.9951	5.1423	4.0003	2.5396	7.0341	1.2781	1.7965	0.1524	0.4859	1.506	1.4889		0.879745	4.70539
16.6648	7.9928	8.2135	9.1887	15.3162	5.4093	5.061	1.6346	5.7831	8.6477	4.8441	4.7107	3.3457	8.7538	10.8094	8.5827	2.9301	6.9067	6.4192	4.7301	1.7174	3.3744	1.6518	2.8694	0.3769	0.0821	0.026	1.135		0.886072	5.20416
16.7839	8.9989	9.38	6.9712	16.7652	5.9632	7.3046	3.1257	5.1834	4.3422	7.3621	3.4315	5.6434	5.322	9.5938	4.4815	2.4501	3.218	6.1706	5.874	3.9563	4.404	2.4911	0.9104	0.0135	0.7646	0.9386	2.4518		0.892405	5.09303
16.9029	5.6414	5.3538	7.7027	21.2756	6.4534	4.717	3.9602	4.4726	6.2379	5.4973	3.3542	5.8923	7.7212	6.7208	5.903	2.7369	3.6543	1.8933	2.1055	2.1428	4.0662	2.2109	0.4741	0.1588	0.0037	0.3401	1.8735		0.898732	4.53939
17.0219	12.2261	5.9452	10.7917	20.0177	6.8955	5.401	2.8979	5.3273	5.2505	6.3345	1.6831	1.8961	4.6139	7.4344	5.4387	2.7314	4.5334	4.4591	2.7845	1.7113	5.4232	0.348	2.8389	0.0268	0.0251	1.3658	0.9246		0.905059	4.78984
17.141	15.8801	4.9149	11.5643	14.1917	6.9159	8.686	3.8593	5.7471	3.6051	4.5448	2.9081	2.6106	4.8763	11.0858	2.3391	4.3051	4.2168	4.9203	3.474	3.4033	4.702	0.9378	3.5754	0.7509	1.6638	0.3884	0.1908		0.911392	5.04658
17.26	15.4061	7.1073	6.8107	15.5905	5.4057	4.328	3.8602	4.3438	7.5112	2.1872	1.1233	3.2526	2.4575	8.5642	3.843	2.189	5.1393	4.5616	3.4716	1.0977	2.2599	1.2023	2.9106	0.3301	1.0937	0.0175	0.4477		0.917719	4.31527
17.379	8.4646	4.7856	9.2603	9.8494	2.9666	5.0315	7.0952	5.6264	4.1572	5.3678	3.1119	2.6779	4.6907	8.546	5.344	1.5223	4.0924	5.0659	1.7656	1.4081	3.3876	1.0948	1.4598	0.5429	1.4273	0.2732	0.3549		0.924046	4.05074
17.4981	8.0209	6.2817	5.7256	9.7342	9.7576	8.4608	3.6277	5.4643	4.998	6.5007	2.4476	5.6413	5.1086	7.9746	3.7046	1.3782	4.2811	5.7483	0.8052	3.4086	4.497	0.85	1.4737	0.0355	1.0747	1.2603	1.0957		0.930379	4.42061
17.6171	8.2186	2.9684	3.1202	8.062	12.0902	10.9789	2.7491	7.3041	7.0231	5.096	2.5189	3.9812	4.9459	15.9403	3.3292	3.8061	3.0703	2.665	2.3889	1.3135	0.6791	0.5647	1.3733	1.2324	1.508	0.5012	2.5312		0.936706	4.44296
17.7361	4.828	2.1969	3.8877	6.9061	3.8713	12.1411	0.9886	6.0182	5.37	5.4213	4.1472	3.0767	9.164	11.46	2.5036	2.4553	4.2551	7.906	0.6618	2.1606	1.802	1.0844	1.6808	1.3931	2.1316	1.0501	1.6996		0.943033	4.08374
17.8552	4.3074	2.8133	3.1174	7.4509	8.0358	8.8491	1.9906	6.1933	2.6712	7.6099	4.3735	7.134	5.9467	9.2684	4.9882	3.6031	0.6558	2.1129	1.9419	4.514	2.8571	1.6471	0.408	0.5312	0.1167	0.9267	0.8708		0.949366	3.88648
17.9742	3.2924	4.4546	4.0673	6.5632	7.1091	5.634	6.3441	6.779	4.3949	7.4098	11.4949	4.9261	7.6303	14.3116	3.4207	3.1683	2.0728	5.812	3.9988	1.7141	3.4121	2.3298	1.4162	0.9429	0.5699	1.8271	0		0.955693	4.63319
18.0932	4.2722	2.002	3.0304	6.498	4.9263	6.3799	6.3473	5.1739	3.8965	3.4652	13.8231	5.4593	8.2054	6.0148	1.6784	2.9916	4.6411	2.2263	2.9758	1.6479	0.5998	1.316	2.4401	0.8203	0.7644	0.5839	0.4857		0.96202	3.80243
18.2123	2.4819	1.396	2.2897	3.8307	9.0092	2.9256	5.5089	2.3339	1.7131	3.9793	12.6215	8.2845	7.6327	8.6879	4.0554	1.9009	5.0391	3.6301	2.7368	2.2037	4.0495	2.4684	2.7232	1.4174	1.0101	0	0.7406		0.968353	3.87667
18.3313	2.5249	2.1821	0.6893	3.5529	5.8991	3.9039	5.0983	7.0494	6.0051	4.6463	7.5684	4.3486	8.0183	9.5403	4.0815	1.2066	6.0891	3.5874	2.0118	3.4537	0.6893	1.1176	4.033	0.5416	0.7542	0.0316	0.3604		0.97468	3.6661
18.4504	3.0436	0.7662	1.5384	3.2171	4.4099	2.5736	4.5665	5.368	4.7488	6.231	5.8487	6.3092	4.9301	5.6752	4.2455	6.0698	8.1807	1.0565	5.4744	2.1798	2.9672	1.6872	1.7659	0.8526	0.748	1.0955	0.1574		0.981013	3.5447
18.5694	2.5891	2.8375	2.6044	0.1811	4.9864	5.9933	3.7498	3.6623	5.3082	5.3912	4.9388	6.71	5.0632	10.7078	2.2449	3.9201	5.2974	2.594	3.1553	2.4219	2.1102	2.846	1.0613	0.0393	1.9177	0.3764	0.2798		0.98734	3.44398
18.6884	0.9023	0.0535	0.4306	0.6019	3.9414	0.7512	1.9	5.3638	5.2028	3.2579	2.0929	6.404	6.9462	5.4806	2.762	3.7458	3.8242	6.2943	2.4852	4.8613	0.0814	0.8653	2.0666	0.8571	1.0627	0.2507	0.0084		0.993667	2.68497
18.8075	1.0441	0.0042	3.0779	0.7887	3.6403	5.8085	4.6413	4.3515	5.4197	6.501	5.7476	9.217	6.6832	9.2256	4.3467	4.2459	3.374	3.8592	6.2381	3.0653	3.1473	4.3663	1.8498	0.6505	0.6575	1.2221	0.0536		1	3.82322

## Sheet: Image25
X0	Y0	Y1	Y2	Y3	Y4	Y5	Y6	Y7	Y8	Y9	Y10	Y11	Y12	Y13	Y14	Y15	Y16	Y17	Y18	Y19	Y20		Ap-Ba	Average int.
0	26.2357	47.75	48.7277	29.0675	29.2907	34.1743	66.238	55.354	54.043	74.903	41.821	33.8876	22.2886	28.6119	28.5147	31.0228	64.301	47.8171	30.0038	60.2955	47.1271		0	42.9274
0.119	30.3297	63.216	56.1308	29.1549	30.2879	40.0697	56.7614	61.257	60.872	76.359	57.543	37.3086	25.7878	28.1864	30.0229	34.5718	68.652	54.0634	34.438	62.5727	47.4147		0.00602236	46.9047
0.2381	29.4616	77.086	52.2921	36.8637	28.7265	38.7447	51.0586	61.098	62.823	60.799	55.617	32.8365	25.7721	24.3876	31.4645	34.7215	82.144	68.2589	31.6687	73.5741	45.2261		0.0120498	47.8392
0.3571	28.1648	91.13	60.3164	35.1787	31.0185	47.5145	55.9198	73.638	59.922	60.749	63.102	35.909	22.2794	23.8966	22.7483	35.6439	73.58	70.727	35.0944	74.0611	34.1076		0.0180721	49.2715
0.4761	14.7843	95.103	70.3838	37.7303	40.9474	56.1627	63.9572	70.798	60.35	66.369	73.499	46.6978	19.4978	22.7843	23.7977	35.0712	81.84	80.2239	40.7032	62.7537	30.8994		0.0240945	52.1121
0.5952	15.9677	97.706	69.5698	47.653	50.4538	61.4307	61.6039	73.446	65.692	72.224	87.707	56.0734	20.5944	24.1693	19.1266	37.2998	82.026	87.2587	42.4205	63.433	41.7046		0.0301219	56.0743
0.7142	22.0728	87.349	65.2149	35.9015	56.2094	52.9659	57.8862	82.443	63.877	69.723	111.019	68.534	22.1423	21.9656	18.6853	33.9932	89.469	80.6022	58.2447	75.1972	40.2008		0.0361443	57.795
0.8332	31.4897	88.445	70.8608	33.0265	63.578	56.1772	57.6688	68.857	75.424	73.504	127.313	77.0355	20.5438	27.7971	17.583	31.5204	93.967	87.1227	64.0898	66.3306	37.9873		0.0421666	60.4915
0.9523	35.8974	95.095	82.3794	35.2507	60.3703	72.1081	59.1121	73.621	77.637	84.339	141.46	73.1016	23.3372	21.0787	21.2774	30.2019	97.02	91.1413	60.1863	63.3717	41.927		0.0481941	63.8054
1.0713	32.4082	93.558	81.5553	42.903	60.3125	65.5343	73.8794	75.486	87.142	93.566	151.001	70.9077	25.1414	20.2607	23.6328	32.7696	103.008	94.2889	61.2555	65.7947	45.9663		0.0542164	66.6843
1.1903	36.1042	104.475	77.2047	41.9306	54.1774	70.4713	72.1413	82.743	90.462	101.544	151.114	68.2988	24.9041	24.5738	25.0738	28.8431	102.824	95.9732	71.1772	73.421	48.2142		0.0602388	68.8415
1.3094	39.3326	103.273	80.7827	45.4105	55.8428	74.2652	56.5067	87.895	75.699	108.454	154.166	60.234	24.5712	26.2101	25.8723	35.0199	110.935	92.8829	70.2165	74.4329	46.4946		0.0662662	68.976
1.4284	35.9735	95.815	82.9168	41.8679	56.8262	69.8116	61.5985	106.014	75.558	106.374	141.152	50.6962	25.8205	24.634	26.9838	35.5456	106.803	91.0008	76.1923	63.4013	47.5855		0.0722885	67.7415
1.5474	38.2314	92.349	75.3764	53.2502	64.4301	62.911	68.2515	89.14	82.906	109.466	122.033	52.629	29.275	22.7037	24.7675	28.5581	103.231	94.4644	80.6719	63.2137	56.7514		0.0783109	67.3624
1.6665	37.8364	92.866	72.7845	60.1036	69.8393	72.1753	66.8945	95.859	89.753	99.9	111.143	44.5903	22.134	21.0839	27.0008	30.3096	111.871	92.5777	94.4657	66.8204	54.0206		0.0843383	68.2871
1.7855	43.9697	87.931	75.9167	58.7979	67.4051	84.2544	64.575	96.949	90.293	104.286	94.397	37.3312	27.0779	26.5998	29.0201	31.6737	111.887	86.5678	89.4526	61.4568	51.7084		0.0903607	67.6929
1.9046	51.4577	87.948	80.9783	65.0405	69.0091	87.569	66.6224	103.651	94.825	106.608	94.627	42.014	26.8491	25.6668	24.2391	33.8068	99.998	93.5378	78.4695	74.3038	51.4929		0.0963881	69.4626
2.0236	45.3222	83.151	82.6649	53.1295	76.5002	78.2259	70.5882	99.753	96.539	110.252	84.932	29.1635	22.3387	23.8354	23.2455	29.3883	103.663	99.2162	61.1178	55.7291	57.8874		0.10241	66.0306
2.1426	36.2014	84.874	83.4601	50.8683	76.9034	77.8023	68.7504	88.499	106.657	98.184	66.914	27.1392	22.3922	20.3991	27.3743	28.4396	95.868	95.2441	61.8462	68.1534	54.6848		0.108433	63.8407
2.2617	37.7211	90.099	84.0624	59.0803	73.184	83.3589	73.0145	80.833	99.757	112.385	65.879	29.8296	24.3181	19.8719	23.7592	23.6161	93.593	91.9377	64.2338	69.6181	65.0915		0.11446	65.0116
2.3807	41.702	99.132	81.1288	60.2106	78.4809	72.6135	66.3443	83.792	107.579	110.14	67.564	21.7761	19.7139	18.0537	20.0216	20.1128	86.801	99.3475	59.2258	67.5034	62.277		0.120483	63.9771
2.4997	44.2303	117.718	77.1199	62.1485	75.0373	71.3881	62.6401	77.731	106.902	98.031	75.687	19.9042	19.7167	13.2592	22.8926	20.1749	96.151	101.079	70.3061	52.265	56.3006		0.126505	63.842
2.6188	45.2197	108.214	70.8073	61.5571	66.9374	76.9253	68.3727	79.001	106	91.793	65.869	17.3182	16.9584	13.007	26.763	20.1068	94.217	97.8108	72.4422	59.9098	58.608		0.132532	62.7542
2.7378	40.2268	108.934	60.6197	68.1377	61.4329	80.3221	63.8194	78.249	92.299	84.925	72.04	19.3042	16.4808	16.1854	17.6328	15.898	92.267	85.7875	69.5144	54.8017	60.2197		0.138555	59.957
2.8568	43.9385	107.346	58.9992	56.3475	73.1722	84.9031	55.4663	72.187	91.266	97.326	72.684	21.1837	11.5864	14.549	17.2201	15.5904	92.182	98.5309	74.4584	60.4388	45.7414		0.144577	60.2437
2.9759	43.5752	95.915	61.5262	56.06	89.5094	79.3052	56.6991	70.886	83.596	91.09	71.813	15.9827	13.122	10.1168	14.9712	18.1711	100.507	83.2655	89.736	64.5335	48.1756		0.150605	59.9313
3.0949	43.6697	99.491	56.1933	56.4043	86.3814	74.4106	46.5547	66.162	92.32	79.393	77.47	17.0473	15.4496	10.8076	19.2275	17.0084	100.57	68.3707	86.8951	54.2092	48.3399		0.156627	57.9226
3.2139	38.7502	96.738	59.073	54.3584	84.5629	70.5978	47.564	65.892	85.389	70.166	78.243	16.5776	10.2342	14.6002	18.0945	13.6947	89.049	77.6199	87.6674	52.3824	58.5421		0.162649	56.657
3.333	36.7421	85.638	57.7393	54.4321	84.243	75.7623	29.7433	64.082	80.969	66.394	76.168	13.122	8.1717	13.7261	13.341	14.0372	90.931	71.8502	78.5749	50.2842	63.3718		0.168677	53.7773
3.452	43.2042	86.792	51.7729	60.603	80.385	77.3242	37.4285	54.028	67.561	59.312	66.186	11.508	11.8354	9.7665	14.788	22.7425	100.62	73.4485	73.4361	48.7901	55.5933		0.174699	52.7202
3.571	44.1664	83.823	63.2761	57.7575	79.7337	63.8118	32.9305	47.197	76.263	52.512	61.799	13.2495	13.8534	10.8113	13.139	19.3698	84.806	66.659	67.9792	54.0212	53.7621		0.180721	50.52
3.6901	42.7647	71.262	71.6515	53.1717	65.2477	57.2189	20.2324	47.82	73.904	40.84	62.768	12.0984	13.5695	14.0896	15.4973	12.6179	83.47	75.3707	60.6847	49.3331	51.9438		0.186749	47.4074
3.8091	40.4797	71.869	64.0855	51.8448	67.0833	62.0657	21.2393	49.734	63.119	39.74	56.552	11.9686	12.2172	15.5859	15.6999	15.6249	93.002	77.1879	71.9629	41.8288	54.0666		0.192771	47.4741
3.9281	46.5611	71.001	61.6592	49.0503	59.2567	56.7508	19.4626	52.068	65.609	34.574	58.329	8.517	13.2559	10.0775	22.2421	16.3337	85.488	80.0563	75.4134	47.1052	49.8455		0.198794	46.7932
4.0472	50.102	72.388	58.859	41.4705	52.2556	54.6185	29.1922	45.674	56.889	37.407	62.648	8.7941	11.7271	12.8643	19.1624	15.2698	80.696	80.6408	74.5705	58.9623	48.1169		0.204821	46.3004
4.1662	50.731	63.85	53.4822	39.7691	45.0815	42.9919	28.3339	43.175	51.686	36.408	60.373	9.9072	10.584	13.9101	14.2094	14.0291	73.757	82.0613	58.8958	50.387	53.7032		0.210843	42.7298
4.2852	57.1515	60.585	59.1164	35.6843	38.5556	38.3028	34.2799	47.372	49.582	44.186	56.894	8.2124	10.0338	13.6286	13.4856	12.1089	71.413	63.2573	59.6138	40.8886	50.5915		0.216866	41.1878
4.4043	55.1614	57.625	65.3491	23.6874	33.7044	40.7931	40.3536	51.417	34.594	37.706	51.908	10.9705	9.934	12.063	15.9449	12.0078	72.535	75.1306	52.1209	42.988	36.4913		0.222893	39.6421
4.5233	49.4839	51.116	59.4432	28.0159	27.883	41.0055	29.1928	49.102	31.618	38.724	58.556	9.5285	9.1065	13.9241	11.3947	10.4196	63.632	61.8277	53.2103	53.5153	30.3334		0.228915	37.192
4.6423	45.2424	48.801	57.9316	25.0088	25.068	48.0672	25.0832	50.211	31.504	34.871	56.498	5.7932	8.0692	8.7595	11.1088	9.4712	62.939	67.392	43.3607	43.2712	40.931		0.234938	35.6849
4.7614	37.5958	51.662	59.3403	25.1952	23.8421	37.7527	20.9977	48.457	24.057	36.45	56.178	9.9238	9.0877	8.6249	10.1014	10.1131	69.589	66.2983	32.3635	42.4746	42.6925		0.240965	34.4189
4.8804	38.5499	46.397	58.4413	21.3623	21.4817	42.2327	18.7188	51.441	19.445	32.85	46.008	12.5354	8.7815	7.5122	10.8721	8.6406	68.126	59.3837	30.5687	46.2351	29.7637		0.246988	32.3498
4.9995	29.5611	42.036	64.7738	18.4144	25.1863	39.2555	14.9061	50.835	19.026	32.646	45.875	11.9714	8.2275	9.3858	6.7344	8.0333	64.984	63.0755	23.6202	34.9098	25.4795		0.253015	30.4256
5.1185	26.8936	37.368	61.4398	19.6908	23.4592	43.2481	19.0617	43.915	24.147	26.431	42.704	13.9853	10.0671	8.5103	9.7161	9.1179	61.395	68.2843	23.0822	30.143	28.3943		0.259037	30.0502
5.2375	26.2962	40.115	50.0209	13.4611	19.3108	50.9363	20.7492	41.588	18.795	27.536	36.046	16.6741	6.333	11.5415	10.6469	6.405	54.511	59.3579	23.799	31.0897	27.2908		0.26506	28.2144
5.3566	23.037	37.904	55.0858	11.443	15.754	45.75	14.6092	33.724	16.246	27.794	25.614	9.0052	6.6145	9.8593	9.0226	5.9452	35.382	65.5198	22.4345	27.2313	18.6648		0.271087	24.6019
5.4756	21.9708	32.191	58.8149	14.0521	18.8522	36.1711	9.5369	31.945	17.7	23.239	25.987	7.5016	8.2329	9.946	11.2906	7.8891	37.26	60.5658	17.6257	34.0185	14.8001		0.277109	23.79
5.5946	22.9779	30.799	53.7113	12.8957	16.2518	36.4685	14.648	37.617	22.837	23.762	22.647	10.6532	6.9383	6.701	9.4195	5.786	38.002	64.7485	19.7168	27.4491	11.32		0.283132	23.5881
5.7137	27.2863	21.089	57.2014	15.9835	18.7249	41.5633	16.2287	34.447	24.632	22.196	29.989	10.3553	8.6459	8.362	9.2731	7.0422	44.855	51.3365	21.35	21.129	9.564		0.289159	23.8692
5.8327	21.5638	17.796	45.4203	16.0462	17.566	40.999	12.7781	27.639	30.653	18.9	31.401	8.9685	10.9006	8.4559	10.1933	7.7892	37.232	44.7587	18.8091	17.1176	12.0066		0.295182	21.7616
5.9517	15.9092	14.541	28.7545	11.2963	19.2095	41.1806	16.0368	23.427	28.529	19.65	27.234	5.4611	6.6833	7.3142	7.5389	6.5544	35.519	45.3795	15.4658	14.1701	9.4924		0.301204	19.0165
6.0708	13.9301	13.627	29.2432	10.5967	22.1793	39.6674	15.8755	15.744	23.899	18.704	24.625	6.7395	7.3579	8.4279	9.0828	9.7671	27.95	47.1283	19.7291	16.0708	8.646		0.307231	18.5234
6.1898	12.7057	13.697	27.058	10.0218	16.0461	37.6367	11.6651	14.151	20.062	22.973	18.174	8.4708	7.4754	10.5383	9.0429	8.1491	30.292	36.7834	20.8989	12.0436	6.3271		0.313254	16.8672
6.3088	16.1396	10.119	20.274	7.1162	20.8276	39.1452	12.5204	12.408	17.483	21.639	10.301	8.1048	8.0894	13.3874	5.4332	6.5264	26.608	33.5128	22.4318	13.4629	6.2558		0.319276	15.7993
6.4279	12.8723	10.265	18.5185	9.3921	21.8105	41.7208	13.1507	13.839	16.631	22.886	11.653	9.1346	7.2378	9.3102	5.9969	10.9356	21.903	26.7207	19.8646	8.4011	7.7415		0.325304	15.2374
6.5469	6.7013	6.231	22.9835	9.1312	19.2889	40.5992	10.8046	14.974	16.598	15.703	10.052	5.8357	4.8728	7.8481	6.8432	10.2511	22.896	29.2421	16.6255	5.2289	7.9635		0.331326	13.8416
6.6659	10.5429	7.8	18.2027	9.9208	20.3034	46.1084	11.7853	14.844	10.907	20.178	10.282	8.2602	6.4104	6.0001	5.2046	8.2391	27.502	23.0674	13.3443	8.5718	9.8641		0.337348	14.159
6.785	9.583	7.024	21.319	9.8706	19.1877	43.2141	12.2876	11.456	13.766	19.661	7.232	7.3157	8.2163	9.2901	8.0653	6.7773	23.999	23.2335	13.116	7.516	9.3692		0.343376	13.8809
6.904	7.359	4.874	21.8125	9.5554	20.3724	33.8032	10.9007	8.326	15.582	20.473	7.233	8.5748	6.9228	7.5561	7.6471	7.6283	21.773	18.4519	13.0756	6.2779	6.6858		0.349398	12.6135
7.023	5.2525	8.319	20.9091	9.5889	18.3404	29.6675	7.7403	7.838	15.274	14.877	8.988	6.5719	10.8015	6.5394	8.6369	5.0599	26.945	17.4575	13.936	10.5599	4.1464		0.35542	12.2595
7.1421	6.7972	6.507	19.4139	11.2791	17.9533	36.2389	5.7559	7.568	12.795	17.407	12.016	9.3659	8.0522	8.131	4.9455	5.4713	34.015	20.921	15.5268	8.0369	8.3519		0.361448	13.169
7.2611	8.3776	5.427	15.3323	10.9031	12.5597	36.4076	6.6334	10.193	16.039	17.29	14.119	8.245	6.9341	8.701	1.903	6.382	28.95	19.113	17.88	8.2693	7.9775		0.36747	12.7446
7.3801	6.0291	5.766	15.0695	9.2129	12.5942	42.0355	7.465	9.682	12.951	13.194	8.977	7.826	7.0294	6.4761	3.8712	2.4662	22.933	19.8732	8.8369	6.4958	10.9117		0.373493	11.4141
7.4992	5.9243	4.892	16.5236	7.2373	7.5706	41.0218	8.0186	15.108	12.143	17.416	10.958	7.9201	4.5079	4.7599	2.2631	5.1627	15.732	15.1029	11.5568	8.6483	9.075		0.37952	11.0258
7.6182	6.0924	6.17	13.4991	13.0468	6.3288	36.9757	6.2388	12.857	12.328	20.451	9.367	7.1428	5.6327	5.7523	3.1983	4.1687	17.418	15.6769	14.1353	10.3688	5.9778		0.385542	11.087
7.7372	7.6875	5.851	12.514	11.0632	8.3517	36.6688	11.7101	10.998	14.903	18.549	7.179	10.2057	3.0092	8.6596	2.4082	5.647	16.563	17.6817	10.3599	7.3369	5.156		0.391565	11.0715
7.8563	6.3494	4.622	12.4953	11.2954	7.9749	27.1215	12.7933	8.668	12.733	19.085	10.983	5.6377	4.7199	4.6623	2.2475	5.7883	12.195	13.5787	4.336	7.5302	5.9353		0.397592	9.5596
7.9753	7.892	5.669	8.1604	7.3599	6.5982	21.1221	13.7456	9.545	12.365	16.301	7.111	8.9057	2.511	6.7774	1.8792	5.444	12.488	17.3246	7.8222	9.5084	5.5996		0.403614	9.24425
8.0943	8.6696	4.172	8.3078	7.4665	9.1585	20.4171	14.3129	9.307	13.2	12.188	9.85	7.369	3.8535	4.6921	1.4501	5.1657	13.708	11.8824	7.9126	6.637	6.4246		0.409637	8.86402
8.2134	5.9702	2.909	7.4374	12.4039	5.1852	18.0312	9.192	6.775	12.268	11.815	12.582	9.0699	3.8417	6.4268	0.8249	6.7267	10.635	12.9415	5.3722	8.4217	5.9885		0.415664	8.32466
8.3324	7.5684	0.776	6.2956	6.2785	6.2548	9.2363	7.1932	7.334	14.973	12.095	11.775	9.5032	4.9626	5.1445	4.2682	2.4444	12.121	13.9808	3.4035	9.6716	6.8952		0.421687	7.72261
8.4515	5.5828	0.697	6.0053	6.3546	7.5051	8.6937	7.1278	6.519	16.749	8.861	10.962	9.6994	4.9027	4.728	4.8319	3.3788	8.539	13.9154	5.5471	6.1247	3.8531		0.427714	7.17035
8.5705	3.4817	2.009	3.6138	6.5045	9.1527	8.766	8.6144	8.995	14.977	4.859	8.149	10.5378	3.8047	5.8046	2.7297	5.4449	6.229	14.8835	8.2858	8.4114	9.1846		0.433736	7.3542
8.6895	5.7751	2.338	3.2336	7.676	9.5803	7.6722	8.023	6.866	10.933	8.548	5.573	12.2619	2.5557	7.6198	2.8174	7.584	5.103	19.4823	9.0826	4.2321	10.0669		0.439759	7.47733
8.8086	3.1089	3.215	5.7898	7.1895	6.2366	8.2476	9.5737	8.603	8.656	11.581	4.107	5.9343	1.9226	8.0088	1.6616	7.9364	6.161	20.0165	4.9761	7.7321	7.7162		0.445786	7.06541
8.9276	5.0551	2.676	4.6789	3.5558	9.0959	6.704	7.466	7.975	10.454	11.399	3.786	6.5138	3.2382	4.7564	1.5748	6.4279	5.601	21.9342	4.4269	10.0213	5.4462		0.451808	6.79935
9.0466	5.0832	3.218	1.8935	5.9856	13.1966	6.4089	6.2003	9.233	7.848	8.133	4.383	6.7491	2.3226	6.6945	2.1886	3.141	4.822	21.0412	6.1965	6.6966	6.0472		0.457831	6.54678
9.1657	1.9222	3.721	3.0481	5.2459	11.7966	6.5706	8.0133	10.423	6.014	13.252	3.339	5.2956	5.4217	7.6615	1.776	3.6843	6.706	16.4713	7.0235	6.0916	6.5931		0.463858	6.67001
9.2847	2.0233	2.14	3.357	6.4178	11.8108	7.0717	7.8443	8.333	10.446	10.323	7.85	7.9264	8.3375	12.4971	1.7425	2.9758	7.409	19.2784	6.4918	8.7881	4.244		0.469881	7.49083
9.4037	4.227	1.886	2.3976	4.8534	8.1153	6.8217	4.4026	9.331	11.483	8.166	4.842	4.9591	3.9827	8.0858	1.9163	4.6514	7.502	11.523	5.7342	6.0683	5.4143		0.475903	6.01727
9.5228	4.9006	3.131	2.9592	6.7274	7.2606	4.7395	8.6134	7.365	11.896	11.779	3.844	5.124	4.7239	7.6277	0.4219	3.4857	9.262	12.8682	5.2513	5.02	5.3359		0.48193	6.30173
9.6418	2.7606	2.191	2.0934	6.1228	5.4401	5.4514	11.4776	7.196	7.526	11.086	5.237	5.12	3.7824	5.8353	0.9144	2.353	8.891	10.9893	4.6454	7.258	3.869		0.487953	5.7257
9.7608	2.21	3.626	3.5589	5.4992	5.5263	6.2675	8.9351	5.786	8.291	10.42	5.187	6.5901	2.588	6.7665	0.9021	3.0742	7.984	9.7777	7.7632	4.6805	5.3164		0.493975	5.74999
9.8799	3.3874	5.253	2.9902	8.2607	3.4928	4.3128	7.6005	8.405	4.119	11.765	2.143	5.7755	2.7725	6.6215	2.251	1.5321	8.055	12.3788	7.0548	5.3557	3.4483		0.500003	5.57022
9.9989	5.2708	2.992	0.9562	5.5761	6.5804	2.2023	13.0599	6.2	7.504	7.589	2.274	7.4764	3.2796	5.0339	2.813	3.212	9.081	14.7884	4.7539	4.8766	3.7419		0.506025	5.67911
10.1179	2.4966	4.07	4.06	4.5398	7.5719	0.7009	9.3546	5.218	4.758	10.543	3.41	6.7645	4.9322	4.8266	1.2182	3.5898	8.76	13.4405	5.1832	3.4259	5.7204		0.512047	5.45639
10.237	3.5791	3.766	3.4853	7.3018	6.4782	3.1053	6.3537	3.489	3.925	12.055	2.581	7.2873	7.1136	2.3459	1.1411	1.8589	3.908	14.1917	8.2399	5.079	2.8465		0.518075	5.24435
10.356	0.673	2.65	4.8245	9.4459	7.7235	2.6243	7.843	3.942	4.835	10.794	1.683	5.3313	6.4689	1.427	0.7228	2.9235	9.795	8.0879	8.4364	4.4906	3.0235		0.524097	5.13072
10.475	0.6729	1.743	3.0474	6.8816	8.6351	4.215	8.6345	6.848	6.276	10.471	1.245	8.2366	5.5399	2.9486	0.7594	2.9222	8.695	4.7421	5.6868	4.3455	5.6531		0.530119	5.15232
10.5941	0.4492	2.367	2.3009	5.2796	5.9057	2.2619	7.5589	6.722	11.036	9.41	0.891	12.3596	5.2024	1.868	1.2921	1.6373	6.195	8.6843	3.4268	4.6073	6.335		0.536147	5.03762
10.7131	1.401	0.897	4.2169	5.3123	6.3891	1.1765	7.0657	7.153	7.584	8.453	2.245	9.793	3.7029	1.9676	1.291	2.6833	6.92	6.4235	5.107	3.1742	7.992		0.542169	4.80705
10.8321	1.3603	2.023	2.1647	6.236	3.5304	1.2456	8.0532	7.163	7.242	4.858	3.422	10.894	3.7789	3.7036	2.2949	2.7805	5.587	8.4374	8.1927	3.7362	4.8707		0.548192	4.83686
10.9512	1.8702	1.101	3.061	4.8414	5.5769	2.5864	5.4985	4.985	10.612	6.81	2.762	10.9869	4.3435	1.5553	1.2589	1.1508	3.857	9.4508	6.5809	5.4541	3.7815		0.554219	4.67258
11.0702	3.8703	1.52	2.236	4.0636	2.1119	0.2967	5.3639	6.352	6.581	6.807	2.195	7.8677	2.7165	2.718	1.6724	2.2121	5.289	13.2894	11.5581	4.4567	2.1522		0.560241	4.5395
11.1892	2.9396	0.929	2.6148	2.9721	2.5586	0.4852	3.6206	5.227	6.564	5.187	0.894	7.7006	4.9024	3.1575	2.2116	2.3967	6.582	11.8827	12.9845	3.9398	3.1405		0.566264	4.42334
11.3083	1.7569	0.545	3.2477	2.6643	3.4692	1.0603	3.896	3.016	7.702	10.178	1.861	10.6094	4.6568	2.1974	0.4992	2.8817	3.328	8.4807	10.359	3.4885	5.3594		0.572291	4.34555
11.4273	1.2531	1.572	1.3384	3.84	5.6123	1.8791	3.6635	5.002	7.357	8.877	1.155	7.9529	3.383	2.0454	0.5315	2.5715	2.801	12.872	7.3566	6.8399	3.5076		0.578313	4.3529
11.5463	2.9471	1.139	0.488	2.2249	7.0619	2.7575	2.5077	5.573	7.418	4.517	1.384	7.8114	4.1954	3.6155	2.554	1.7849	2.436	12.4418	4.6529	3.5046	4.6557		0.584336	4.07954
11.6654	1.4843	1.229	1.497	3.6304	6.7029	2.2903	2.4765	5.341	7.855	5.931	2.452	5.1963	7.8477	2.524	2.4189	2.0503	1.562	9.3883	3.3923	3.8282	3.2463		0.590363	3.92113
11.7844	1.8532	1.848	2.0781	2.7207	4.5415	1.3106	3.3462	4.992	4.369	5.66	2.017	5.4378	6.1522	2.1201	1.22	1.4919	2.656	10.5393	4.6258	6.5467	6.6591		0.596386	3.91358
11.9035	1.2973	1.071	2.8514	2.1206	4.9338	0.3975	1.4918	6.698	3.55	3.708	2.457	3.4951	7.8569	2.3334	3.4792	1.4656	2.759	9.6143	3.1853	4.2552	7.448		0.602413	3.64135
12.0225	3.0297	1.027	1.8797	4.9244	2.322	0.6269	2.616	5.05	2.446	4.48	1.305	8.0863	6.2914	2.1907	2.0667	1.3396	2.983	7.5372	3.1626	5.7295	3.3816		0.608435	3.4512
12.1415	1.4761	1.676	5.0531	5.0871	2.5969	0.1735	5.0925	4.56	2.861	1.629	1.843	6.6162	4.9368	1.2601	1.5126	1.1025	3.065	4.944	4.663	7.7405	4.0471		0.614458	3.42552
12.2606	2.2877	3.489	2.1739	6.691	2.2939	1.6767	3.9102	5.207	2.149	4.201	0.6	7.8829	5.3546	2.3036	0.6554	1.5398	3.836	4.2278	3.7396	5.9841	3.237		0.620485	3.49715
12.3796	1.9533	2.476	0.3758	6.7638	1.0929	1.7307	4.5719	7.202	2.686	3.03	1.371	10.0787	5.6644	2.0608	1.5577	1.6431	4.391	3.6053	5.3232	6.0556	4.5907		0.626507	3.72495
12.4986	2.3206	3.608	1.0913	6.7914	1.2046	0.4	2.8291	10.042	3.698	1.304	1.96	4.6216	4.9036	1.8088	1.0859	2.384	5.718	7.0946	5.344	9.0095	2.3894		0.63253	3.79088
12.6177	4.6625	2.556	3.0764	4.9041	4.2396	1.0486	0.9637	7.043	1.073	3.143	2.408	4.4644	7.3069	1.1078	0.5789	1.7676	3.674	4.8862	4.3307	5.9234	3.6244		0.638557	3.46582
12.7367	3.8446	2.014	2.3701	5.7565	2.5931	0.6667	2.5301	4.813	2.555	3.669	1.353	5.1755	3.122	1.0922	0.9186	2.4804	3.851	4.0565	5.0407	4.9604	5.4102		0.64458	3.25108
12.8557	2.2733	2.033	2.015	5.7493	2.5312	0.2658	2.3506	2.613	2.58	5.226	1.59	2.9512	4.486	2.1518	0.845	1.1892	5.87	2.3659	4.0901	5.6463	4.1657		0.650602	2.99945
12.9748	1.4235	0.963	1.3182	4.9084	2.7106	2.3851	0.6753	4.867	1.756	5.497	1.096	2.4408	3.606	2.3808	1.4951	1.5283	4.588	3.8005	5.1918	5.0978	3.2469		0.656629	2.90362
13.0938	1.9656	1.468	1.6624	4.3158	2.3591	2.4445	1.6931	3.889	3.673	7.566	1.969	3.0058	4.4391	4.5146	1.334	0.9368	4.869	5.1621	5.4486	4.0937	2.4678		0.662652	3.2989
13.2128	3.1231	0.834	1.0558	4.0788	0.3503	1.056	0.9625	4.756	4.748	7.817	1.268	4.9988	4.319	2.0277	2.0071	0.4217	1.802	4.1834	7.9542	6.1088	1.4587		0.668674	3.111
13.3319	0.8735	0.414	1.174	4.5197	0.1899	0.5142	1.6335	6.322	2.073	5.642	0.525	6.585	4.8578	1.6903	0.4419	0.5233	3.646	3.5694	6.1126	5.505	2.7686		0.674702	2.83718
13.4509	1.5593	1.347	1.8125	3.2145	1.419	2.2599	1.8631	6.65	3.561	2.865	1.958	5.6476	5.2009	3.4183	0.6893	1.2671	3.293	4.2249	7.7638	4.0499	4.6179		0.680724	3.27057
13.5699	1.6529	1.311	0.6959	5.8066	1.6924	2.6023	2.9191	6.304	2.502	6.448	2.739	3.4213	5.8196	1.4622	2.5816	3.7349	3.517	4.9481	4.2008	4.5776	3.5264		0.686746	3.4506
13.689	1.4933	1.256	1.2557	6.7979	1.1101	2.3827	2.3707	4.167	4.737	4.002	3.082	3.2215	6.6885	4.2294	2.6691	2.6407	7.154	2.1611	4.9851	4.3077	4.9593		0.692774	3.60337
13.808	1.9211	1.677	2.043	11.1372	1.9635	2.6574	2.9836	6.113	3.515	4.45	4.102	4.9977	4.6575	2.8671	1.3596	1.2407	4.938	3.4064	3.2011	2.0266	5.1191		0.698796	3.63698
13.927	0.2992	0.851	1.423	12.9603	1.7845	1.6179	1.2873	5.383	3.886	3.57	2.987	2.6761	3.7908	1.5819	1.4757	1.0635	5.525	3.022	2.7573	5.5487	2.968		0.704818	3.16468
14.0461	1.5159	0.05	3.8406	10.5607	1.4	1.2847	1.635	4.676	3.316	3.335	0.728	3.406	2.1868	2.9281	2.9711	0.6588	3.505	2.8724	4.5477	3.2354	3.6781		0.710846	2.96816
14.1651	3.3796	1.913	2.5334	8.1364	3.2276	1.2228	3.1474	3.513	2.956	4.633	1.882	5.0128	2.8481	2.5503	2.3248	0.8581	2.402	2.4968	2.2115	3.4457	4.3552		0.716868	3.0976
14.2841	3.7642	2.442	1.3894	6.5419	0.4611	3.3755	2.3586	3.843	4.389	8.613	1.772	9.3561	4.005	1.7004	0.6842	0.7033	3.721	1.9491	0.9194	3.9711	6.081		0.722891	3.43049
14.4032	2.3551	3.416	3.4541	4.9269	1.0695	1.4797	1.1375	5.361	4.762	6.786	2.83	3.7284	3.0008	0.3171	1.5578	1.1926	2.583	1.8278	2.343	3.7835	3.9475		0.728918	2.94568
14.5222	0.822	0.196	2.1482	7.5587	2.0278	1.6178	2.0809	3.236	5.166	3.232	2.31	2.8388	3.7083	1.0141	1.2828	2.69	3.399	2.6153	4.0985	3.2645	5.3931		0.73494	2.89047
14.6412	0.7225	1.308	2.3022	6.5501	1.8407	0.5428	2.8034	2.421	4.055	4.433	3.42	6.6391	2.0261	4.0587	0.6788	2.3504	2.602	5.2524	4.9035	2.498	5.4332		0.740963	3.1829
14.7603	2.2709	2.33	1.5415	7.287	1.0348	1.9096	2.8925	2.056	5.268	3.269	3.746	3.4116	2.8431	1.4409	0.8674	1.5519	1.948	3.1342	3.8508	2.9321	5.488		0.74699	2.90825
14.8793	1.4912	1.415	2.1168	7.0569	2.5927	1.4566	1.4587	2	2.076	5.335	5.344	3.549	2.8847	0.9426	0.367	2.8878	2.508	1.8903	5.0157	3.4366	5.8758		0.753012	2.93811
14.9984	1.9649	1.275	2.8159	5.1482	1.8912	1.2456	0.619	2.087	1.866	4.348	2.919	5.0064	3.3269	1.2939	0.9034	0.7795	3.007	2.8283	2.6427	2.7007	5.4188		0.75904	2.57559
15.1174	2.0201	1.906	2.8762	3.7557	1.7842	0.4569	2.7491	3.334	3.649	3.602	1.722	2.699	2.6589	2.7004	0.5917	1.2663	2.3	4.9512	3.4902	1.8519	3.7426		0.765062	2.57654
15.2364	3.5354	2.071	1.5254	2.7525	1.6187	2.5058	1.0889	5.147	1.685	3.037	3.931	2.6774	2.7493	4.9436	0.8783	0.8033	1.024	5.8674	4.9055	5.337	4.4842		0.771085	2.97941
15.3555	4.4536	0.588	2.6756	3.7885	0.8627	3.6371	0.5933	5.767	3.271	2.931	3.932	3.8538	2.8633	4.5537	1.5369	2.9861	1.887	4.389	3.4175	4.2733	3.1613		0.777112	3.11532
15.4745	4.7181	1.409	1.3046	4.7636	1.6058	2.3564	1.6576	3.751	3.143	6.214	2.827	4.6256	3.458	3.4648	3.1176	0.8428	3.684	3.0572	4.5409	2.9716	4.1312		0.783134	3.22113
15.5935	2.9154	1.198	1.4326	3.3659	4.579	0.3759	0.9366	3.41	4.151	9.393	2.393	5.0811	4.6131	5.4793	1.7502	0.8175	2.379	3.9271	5.7205	3.3867	5.1586		0.789157	3.45064
15.7126	5.4384	1.467	4.3293	2.6857	3.003	1.1343	1.0432	1.297	2.457	7.431	2.241	6.0285	4.7346	2.6376	0.9784	2.1558	3.686	5.6812	4.4497	3.0676	4.0333		0.795184	3.33236
15.8316	3.7637	0.613	3.0869	4.7618	3.309	1.8215	3.3756	1.972	1.954	8.962	3.072	4.1552	5.467	2.6841	1.517	1.1439	3.594	6.3924	3.2776	4.6949	2.9948		0.801206	3.45773
15.9506	5.0516	2.581	4.1914	6.404	2.1042	1.678	1.1831	1.972	1.953	5.169	2.274	6.3656	3.2677	3.3841	2.2741	0.5303	2.897	7.6187	4.3323	2.6978	2.4203		0.807229	3.34996
16.0697	4.3512	2.589	4.4722	4.1018	3.937	1.7208	2.3217	4.187	3.752	3.276	1.58	3.5569	3.6233	2.4009	3.2723	1.5399	3.429	4.2045	3.6534	5.5068	2.6245		0.813256	3.3381
16.1887	4.3979	2.783	2.7951	3.6605	3.1848	2.5115	2.9129	4.073	4.727	4.832	3.819	5.4062	6.2017	3.136	1.0161	1.9486	3.517	8.1191	1.931	2.2256	1.1939		0.819279	3.54247
16.3077	5.449	1.474	5.0149	2.9909	2.6299	1.3504	2.871	4.68	5.576	2.279	4.429	8.5627	2.2252	3.7332	1.0171	1.6834	6.571	5.434	4.329	1.0922	2.5618		0.825301	3.61684
16.4268	5.208	1.087	5.065	3.9525	2.4687	2.1208	2.6839	3.587	6.099	3.398	6.349	8.7026	2.6537	5.9047	1.5455	2.165	3.542	4.326	3.4476	1.6648	2.2749		0.831328	3.72599
16.5458	7.611	2.154	2.2146	3.5084	3.0205	2.5907	2.1244	4.8	6.953	5.282	5.049	6.9711	3.8337	3.4501	3.0252	2.1578	6.6	6.4559	3.6134	3.3882	3.3173		0.837351	4.1962
16.6648	5.8625	1.695	2.5532	3.0331	3.6046	1.6048	3.9585	4.596	9.091	3.866	4.221	6.2521	3.072	3.8092	2.0201	3.125	7.138	6.0225	4.7148	1.6469	4.0378		0.843373	4.09162
16.7839	8.0246	3.616	3.2171	3.2849	3.8697	1.3976	1.7593	2.532	8.221	6.203	3.702	4.9903	4.3717	3.547	1.0819	2.1039	7.039	2.9218	5.9755	3.1045	2.45		0.849401	3.97204
16.9029	8.6547	4.398	2.0638	2.2048	2.5763	0.2861	2.3942	1.896	2.933	6.499	5.218	6.0197	5.4719	3.444	0.7664	0.8203	5.314	2.6828	6.1858	1.6396	3.1388		0.855423	3.55272
17.0219	9.6403	5.25	5.0293	6.3199	2.107	0.7739	2.1296	3.16	2.786	2.63	5.294	8.9979	6.2595	2.9411	2.2351	0.4681	3.059	2.7463	6.8246	3.4437	1.8302		0.861445	3.99645
17.141	8.7886	5.047	3.5636	5.3728	3.6929	1.362	4.2993	3.478	3.853	3.631	7.315	4.2071	3.9257	3.6993	1.5628	0.2007	3.296	2.9322	7.6217	3.7971	0.7857		0.867473	3.92531
17.26	6.6039	3.693	4.4751	2.7842	5.7046	3.2622	3.1141	3.199	3.236	6.194	6.763	6.4341	5.8183	4.1681	0.9599	1.8162	6.317	3.4806	6.7136	2.5764	2.4135		0.873495	4.2727
17.379	6.6656	3.139	6.9588	2.0975	4.5384	4.0934	6.1101	8.286	4.557	6.486	7.817	8.0055	7.1844	2.9163	2.5372	3.5202	2.591	2.8243	8.3328	2.4112	2.7837		0.879517	4.9455
17.4981	4.8201	4.524	4.7283	3.9671	3.7909	1.9606	4.2983	8.684	3.313	4.455	5.349	4.7648	5.4092	4.1003	4.0114	3.6578	5.309	1.4049	5.4785	2.4615	2.6616		0.885545	4.2452
17.6171	5.0689	4.316	4.7176	2.8602	6.0457	1.4046	3.8439	6.951	4.679	5.086	4.886	4.4396	5.1561	3.7114	2.6122	1.7588	5.244	3.4539	4.3712	1.7593	2.1951		0.891567	4.02669
17.7361	4.7227	3.425	3.8946	2.9178	5.8208	3.2788	3.8251	7.537	2.832	4.982	6.465	5.5144	5.0715	5.0019	2.803	1.1846	4.075	1.8643	3.3895	3.2154	3.3531		0.89759	4.05588
17.8552	6.2135	4.019	4.3433	4.3563	8.4073	2.7734	2.0788	5.53	5.961	4.799	7.342	4.939	3.8879	5.3784	2.4583	2.0068	3.706	1.7673	4.3122	3.0753	4.8622		0.903617	4.39129
17.9742	4.3234	2.532	4.3848	5.5557	6.7721	4.869	2.8014	3.418	4.506	4.23	7.748	6.7544	3.8388	4.9464	1.3343	1.5246	3.784	2.481	5.372	3.388	4.3626		0.909639	4.2346
18.0932	3.2053	4.869	2.5624	2.8905	4.0911	3.8219	2.7817	5.496	6.091	4.616	10.485	7.5208	7.0516	3.3325	2.7889	3.0668	2.653	3.159	4.4755	3.666	4.282		0.915662	4.4241
18.2123	4.2029	4.39	4.7649	3.4889	4.5076	5.2142	4.3036	4.43	6.317	2.246	7.351	6.3574	5.1073	2.532	2.7422	3.6339	1.822	2.6741	6.5872	2.9604	4.6725		0.921689	4.30024
18.3313	3.3542	4.529	5.4058	5.4814	4.6226	4.5112	1.0254	3.297	4.379	1.628	4.498	3.6056	3.9372	1.9139	2.4716	2.4992	2.714	4.0459	4.7953	2.938	6.2631		0.927711	3.71026
18.4504	3.0176	6.334	2.6183	2.7702	4.4471	6.3947	1.5537	3.274	3.835	2.139	4.828	7.3431	2.1689	2.8817	3.611	2.1804	3.499	4.3299	3.7825	2.6317	7.0577		0.933739	3.84274
18.5694	3.3944	4.453	1.9082	2.5911	5.4098	5.4783	3.414	3.92	2.701	2.88	7.132	7.2905	2.3914	3.466	3.9117	2.3878	2.251	6.2804	3.9809	3.1726	5.3038		0.939761	3.98657
18.6884	2.8105	2.344	3.6362	1.6437	4.8329	5.2554	2.1039	3.239	5.057	2.364	4.611	7.4853	3.2088	3.8106	2.5822	1.1722	1.659	4.9485	2.5488	3.2512	2.6995		0.945784	3.39351
18.8075	1.6059	2.778	1.8234	1.6193	4.3378	2.9691	0.9123	3.017	1.859	4.524	4.262	5.2755	2.0537	1.686	3.5293	1.4655	1.336	8.1314	3.351	2.5722	2.4496		0.951811	2.93133
18.9265	1.8415	3.496	2.0224	2.3724	2.8755	5.9554	1.8732	2.581	2.277	2.801	4.079	2.9946	0.7228	1.5356	2.6824	1.9291	1.901	4.0905	8.4927	4.0702	2.3826		0.957833	2.99885
19.0455	1.8482	2.928	0.421	2.104	3.4104	8.2632	1.7011	3.311	4.341	3.669	8.768	1.329	1.3538	2.3993	6.7339	3.8756	1.486	3.3183	5.954	3.3228	3.1245		0.963856	3.50772
19.1646	1.3552	2.224	1.8536	1.3529	3.6041	6.3847	2.0394	2.565	4.02	3.572	8.236	1.1447	1.1256	1.7407	3.7516	2.7172	3.954	6.382	6.9997	3.4719	2.4136		0.969883	3.37657
19.2836	2.8776	1.398	0.9667	1.0725	2.3777	3.4687	3.9134	1.839	1.457	1.469	7.621	2.3176	2.9834	1.9153	1.7555	2.8606	6.309	7.5288	5.9618	6.1002	2.6201		0.975906	3.2768
19.4026	1.4481	0.911	2.0753	1.3104	3.3562	3.0668	3.419	2.332	2.109	1.029	10.052	1.1243	2.3343	1.7166	0.9182	3.6253	5.667	6.7575	6.0065	6.0992	3.0463		0.981928	3.25733
19.5217	1.17	0.577	2.1661	1.0075	2.9342	5.1052	3.4878	2.349	1.35	1.16	8.135	0.5012	2.6953	1.2522	1.2329	2.1669	8.064	4.1753	2.8759	3.5567	3.0531		0.987955	2.81025
19.6407	2.4861	0.658	0.9908	1.6326	2.7606	3.2327	3.611	1.734	1.381	1.557	4.856	0.826	1.1183	0.6611	0.7403	4.3389	3.636	4.2264	2.2807	3.9268	3.5442		0.993978	2.3904
19.7597	1.6663	1.901	1.2663	0.7185	1.3589	1.7527	2.5883	1.541	1.039	1.765	3.642	0.4935	0.287	0.7027	2.5479	2.0416	4.627	3.1053	1.2749	3.8385	4.9105		1	2.05085

## Sheet: Image24
X0	Y0	Y1	Y2	Y3	Y4	Y5	Y6	Y7	Y8	Y9	Y10	Y11	Y12	Y13	Y14	Y15	Y16	Y17	Y18	Y19		Ap-Ba	Average int.
0	28.1531	28.3358	30.2861	25.9375	30.4331	30.9857	30.0836	34.2581	28.6856	49.1242	58.1085	47.6916	52.422	33.699	25.8232	24.0987	28.5243	41.0713	32.7917	36.2049		0	34.8359
0.119	28.4256	31.3469	31.4068	31.3317	28.3452	29.2042	38.7676	41.7926	30.1716	49.2273	67.8699	47.4128	53.57	30.6382	21.9918	26.3801	22.4436	38.0869	31.5192	32.651		0.00884699	35.6291
0.2381	37.9035	27.9673	39.7031	32.3459	22.6624	33.2196	43.8569	40.8889	29.4963	55.2731	67.691	55.1964	71.002	31.0105	28.8618	23.968	21.4793	38.562	35.9425	41.1804		0.0177014	38.9105
0.3571	33.9994	29.6884	41.0165	36.509	24.0315	36.0738	42.7481	34.1864	34.8299	63.4631	70.7532	47.573	75.327	25.8615	34.0647	30.3437	15.9738	38.7893	34.8824	39.1649		0.0265484	39.464
0.4761	34.1875	31.2962	30.3069	37.5211	23.0271	43.0199	47.7682	32.3763	29.135	58.8788	70.5268	47.5391	73.134	24.685	31.6444	28.6342	18.2184	41.2287	39.7386	32.601		0.0353954	38.7734
0.5952	26.2078	35.8281	32.4467	38.6032	27.0638	42.4086	46.6787	39.0548	30.2365	64.2998	62.7967	56.8564	72.061	25.7983	36.9298	31.391	20.398	51.7471	35.4983	33.8117		0.0442498	40.5058
0.7142	24.6194	41.81	37.8523	34.5226	32.0191	40.883	41.4291	44.2101	22.7255	63.952	69.8259	58.5077	79.372	31.9944	41.1724	26.7924	28.4816	45.4298	35.7911	34.543		0.0530968	41.7967
0.8332	24.3496	37.5104	35.0462	35.4679	37.3106	38.4363	46.8998	41.796	28.8415	64.7715	67.8362	48.7615	82.969	29.0539	45.9875	29.2312	31.9029	38.257	32.6149	32.4952		0.0619438	41.477
0.9523	24.0257	31.8468	28.6731	37.4626	37.2201	33.9237	55.2681	44.959	36.1606	72.4025	81.13	56.4804	83.335	36.8518	43.3709	27.2156	37.646	41.4347	32.8077	28.407		0.0707982	43.5311
1.0713	24.052	27.4511	28.2263	37.6991	36.4816	47.9344	50.0883	37.7528	38.9096	69.8653	81.4627	65.2267	94.547	35.3572	38.305	30.9567	36.5112	46.0676	38.9379	30.7413		0.0796452	44.8287
1.1903	19.6784	31.477	27.1286	43.0802	41.8492	43.1953	50.3361	48.5477	29.3223	66.844	84.843	61.6046	99.767	33.0828	32.345	31.6985	44.2613	47.1343	34.1518	35.6213		0.0884922	45.2984
1.3094	23.1618	27.8333	26.0555	33.2771	31.7707	37.3551	49.0007	43.9462	34.7084	76.9606	77.6506	75.0627	93.632	51.0808	34.2697	28.6443	39.5612	50.5425	25.3021	41.325		0.0973466	45.057
1.4284	24.1568	28.6406	19.8856	29.4267	30.3222	49.7577	49.8251	36.1693	31.9999	75.5481	89.884	71.1036	95.817	39.5287	32.3231	27.8844	44.4617	57.8986	24.1013	37.8293		0.106194	44.8282
1.5474	25.38	27.2408	17.401	29.0966	36.1224	39.8801	44.0449	33.4157	30.6625	82.89	89.7172	74.3021	95.569	45.72	34.6661	24.0301	40.618	56.3461	29.5998	38.4885		0.115041	44.7595
1.6665	21.667	26.3434	16.5452	30.5405	37.3378	35.2519	37.8171	33.48	31.5803	79.8865	100.42	76.1703	92.504	43.5913	40.6122	32.4375	35.0056	53.0112	32.9027	42.8802		0.123895	44.9992
1.7855	23.9319	22.8823	12.3616	30.5956	33.175	35.2605	35.9769	31.5907	35.2379	87.3048	85.7058	74.7113	91.959	40.3973	34.285	31.7328	37.4722	43.4319	41.577	40.5967		0.132742	43.5093
1.9046	23.9102	22.873	15.57	30.7238	30.4042	35.1514	31.5241	36.4998	30.68	82.0695	91.9814	79.3999	95.63	42.9892	35.9153	26.1716	41.4977	42.7979	35.0402	47.51		0.141596	43.917
2.0236	23.717	18.6564	14.3316	28.481	24.1814	30.3747	28.8921	35.4182	28.6807	72.9389	83.8543	83.7514	96.441	40.517	35.4347	28.2915	37.0272	52.7736	35.716	41.5718		0.150443	42.0525
2.1426	21.5883	17.1704	15.0961	24.7356	22.8795	34.9669	25.6028	36.2445	28.0697	56.1214	87.0048	80.8343	99.09	44.5819	28.2591	33.8122	32.1958	41.7349	40.6018	47.4292		0.15929	40.901
2.2617	22.2843	13.8907	8.0207	22.9357	17.847	29.5891	29.5257	31.3191	24.2607	73.5242	90.6177	79.8385	94.641	33.4638	30.3852	36.4384	30.9266	44.4434	40.92	40.3616		0.168145	39.7617
2.3807	17.542	15.8892	7.0406	20.1709	17.2575	29.3806	26.2472	30.4806	19.8721	62.812	81.5164	87.6154	98.025	44.0236	28.567	32.8371	25.7079	44.2617	43.2636	47.0403		0.176992	38.9775
2.4997	18.0135	11.8955	13.6228	18.8942	20.8786	29.1557	21.0162	29.3802	20.252	66.9034	79.6738	88.3473	95.492	38.4442	22.0098	24.3632	26.9629	46.6285	40.062	41.9724		0.185839	37.6984
2.6188	14.8018	12.4845	12.1175	19.8678	19.4317	23.354	21.8548	29.1981	20.7164	59.2874	73.5952	86.5666	103.853	28.171	18.4296	20.8199	22.9626	47.8125	33.2995	37.1262		0.194693	35.2875
2.7378	10.8038	11.4613	19.1609	20.0496	18.1002	23.5927	15.2491	23.245	22.305	54.5433	83.6618	80.5204	92.623	34.8841	25.2744	24.0864	20.0132	40.338	31.8629	34.7701		0.20354	34.3273
2.8568	9.4353	12.6069	10.0677	9.2392	21.5698	23.2316	13.1932	19.6917	19.6496	57.5122	75.5129	88.5681	85.122	39.6816	22.5363	22.6247	15.8296	43.2249	37.4952	41.9288		0.212387	33.4361
2.9759	10.5565	12.0283	8.4035	10.1231	19.9421	17.9123	9.4222	27.4643	15.5253	71.2999	74.3722	78.0182	93.981	35.4437	20.2087	23.5746	18.1986	47.901	30.6149	42.2127		0.221242	33.3602
3.0949	13.1262	11.5629	6.5401	15.3927	13.8281	17.6026	14.3341	22.65	17.0839	59.3663	68.7876	77.4328	98.72	28.536	21.3895	20.3441	18.1069	41.2632	33.7239	39.5945		0.230089	31.9693
3.2139	14.0703	9.9147	11.234	15.217	12.716	15.8322	16.3101	25.7061	14.8853	56.7268	71.324	65.3922	92.723	27.2426	16.764	15.7431	18.1922	39.4387	37.7689	33.0025		0.238936	30.5102
3.333	9.5017	12.3143	10.3393	8.9862	13.9065	16.4922	17.9551	23.7918	14.6466	50.094	73.4707	53.4466	85.384	25.7842	16.762	22.0863	19.5497	46.1887	38.9142	38.0692		0.24779	29.8842
3.452	11.114	8.4151	10.2484	9.9658	12.7654	15.5508	19.5524	23.2623	11.0998	46.819	71.9817	45.8926	96.141	20.119	16.9138	21.9544	13.8048	38.835	34.5931	39.8536		0.256637	28.4441
3.571	7.4249	15.7847	11.3268	12.8997	14.8553	10.6743	16.6844	26.0168	16.4741	35.5378	62.9195	47.7871	93.969	21.6907	15.7493	17.6584	17.1631	32.6143	33.411	33.1923		0.265484	27.1917
3.6901	5.2419	11.913	12.404	14.9932	15.9937	13.3104	18.0765	25.9947	14.144	36.2414	56.9127	41.2972	87.209	19.3075	15.3555	25.2662	21.735	22.4333	32.3369	26.3249		0.274339	25.8245
3.8091	7.0643	10.2726	8.0062	17.3018	13.2493	15.2661	14.8224	23.4616	11.9794	33.4905	42.0293	35.569	91.225	15.8557	20.2511	21.114	19.2679	22.9617	24.3908	28.0625		0.283186	23.7821
3.9281	6.7678	9.7587	9.0146	12.7146	12.5002	12.0339	14.3767	26.3907	11.5129	30.5722	52.0293	31.1461	86.236	21.4863	18.6585	22.4967	20.1809	25.2931	27.7332	32.8968		0.292033	24.19
4.0472	7.6653	7.5364	10.509	9.1856	12.2384	10.3043	11.9672	25.4487	8.3533	29.3812	49.8622	39.3942	88.341	21.881	19.2833	17.2431	15.4037	21.1908	24.2408	38.2039		0.300887	23.3817
4.1662	11.5344	17.0294	9.9344	8.0693	12.971	8.1062	9.4481	21.2282	10.0736	32.7314	46.4802	39.319	84.42	21.7858	19.4758	14.1651	19.0903	23.591	17.8865	29.1162		0.309734	22.8228
4.2852	5.7962	12.509	10.7067	5.7383	10.5924	6.0976	6.7448	20.3754	10.7429	33.7864	47.3425	47.9218	94.966	22.2436	18.3434	16.6552	26.0063	16.0801	13.1294	32.5019		0.318581	22.914
4.4043	5.396	9.1279	7.1427	9.715	9.2335	6.717	8.6227	18.7608	10.3873	28.1093	37.6774	54.8825	73.421	20.6159	17.5368	17.5038	30.4619	19.3507	14.5859	29.8205		0.327435	21.4534
4.5233	7.7316	9.1933	5.411	7.4243	11.0153	10.6939	5.9688	14.1476	9.1326	22.8208	32.9079	61.0472	68.845	16.4613	13.4258	18.9795	25.8594	15.316	18.0165	24.5764		0.336282	19.9487
4.6423	12.879	12.2334	3.3507	8.1903	9.7424	11.8902	8.6959	15.5216	15.7082	19.8413	35.55	57.8398	67.568	17.6068	14.4143	21.7321	28.3842	14.9482	21.6919	21.9538		0.345129	20.9871
4.7614	5.8047	8.8562	4.3301	6.3771	8.4934	11.4023	6.7742	12.0858	14.0328	17.5812	28.1272	65.1493	53.537	13.439	12.9338	25.3784	33.2447	13.7896	23.6678	24.2644		0.353984	19.4635
4.8804	5.6638	10.3656	7.0163	5.7231	6.7938	7.9539	6.8598	12.4165	10.12	12.6401	26.4282	76.7779	46.698	14.1533	16.5713	25.2904	28.0351	12.5555	24.3896	19.5511		0.362831	18.8002
4.9995	6.2902	12.3377	5.4707	8.5627	8.9991	10.0354	4.7037	11.206	10.7481	14.1478	27.9998	80.5344	43.563	17.7295	12.8615	25.2741	33.4216	11.582	22.2849	13.9486		0.371685	19.085
5.1185	5.4778	9.2553	4.322	8.3754	7.689	9.83	4.2953	11.0275	14.3425	16.9659	22.1789	69.008	33.933	18.4316	9.3269	18.4567	29.5443	14.3442	18.7415	11.3562		0.380532	16.8451
5.2375	3.5996	8.4007	6.0968	6.8671	7.6839	10.0817	5.017	9.3728	14.3109	22.5994	25.9387	67.876	31.984	19.1743	7.6031	20.1925	24.0798	20.6124	16.4248	9.9121		0.389379	16.8914
5.3566	5.3372	13.3271	6.4864	11.4348	6.5771	6.2584	5.8317	7.8348	8.2338	20.0438	24.1511	60.173	24.858	22.5261	11.6043	24.7218	28.8806	17.7932	15.3618	9.9966		0.398234	16.5716
5.4756	4.7563	9.2428	4.8071	5.6917	4.7604	5.6472	3.0587	9.5733	9.3106	14.9878	21.6316	47.229	22.912	26.2077	12.1358	15.1762	32.7437	22.7404	15.6278	13.2628		0.407081	15.0751
5.5946	5.9823	6.8584	6.5719	5.5542	6.0371	4.86	4.5797	8.9574	10.8992	15.1576	15.0543	45.5982	23.456	25.021	18.6874	17.5942	27.2086	24.3384	17.9759	15.6692		0.415928	15.303
5.7137	5.859	6.5131	6.5783	5.4683	5.543	3.0205	2.361	5.7136	6.3739	22.2324	14.3899	44.7245	20.11	19.8111	13.1185	13.8501	24.5159	28.3484	19.1773	9.6702		0.424782	13.869
5.8327	6.2395	6.6438	6.1799	5.7522	6.3632	5.9524	2.4834	5.6013	5.7392	13.6336	15.9629	38.3056	15.375	19.2065	8.7071	12.923	27.1064	24.68	15.7302	12.7124		0.433629	12.7649
5.9517	7.8106	8.2831	4.2995	5.5312	5.3653	3.9663	1.7879	3.6974	5.9739	17.1822	10.6634	31.8619	14.92	13.9457	13.9529	12.7871	26.9966	27.5278	17.5371	19.4895		0.442476	12.679
6.0708	8.5166	6.6466	9.3215	6.2417	4.3343	3.0949	1.5968	4.3695	9.0443	15.0606	13.0249	29.746	14.83	14.743	12.2179	11.7818	25.1278	30.7379	17.2474	22.9237		0.45133	13.0304
6.1898	6.3716	4.8598	4.7364	4.0547	3.9195	5.2479	2.1667	3.8002	12.7558	11.7492	15.2755	22.6747	16.008	16.0771	9.3899	13.6535	19.7625	28.5461	13.6146	22.1818		0.460177	11.8423
6.3088	2.777	4.8144	7.6514	6.9179	5.7403	4.7472	1.9855	4.7155	10.5233	17.2374	8.5442	23.596	16.079	11.8363	14.2223	11.8039	18.5416	29.2247	11.774	17.2027		0.469024	11.4967
6.4279	3.58	4.7468	8.8048	11.4079	5.6057	4.6082	1.7711	1.8079	7.228	14.5431	9.6381	28.7876	14.084	14.3423	10.0104	12.9693	21.6763	26.7057	12.7309	16.0237		0.477879	11.5536
6.5469	2.4219	4.4988	5.1269	8.746	4.9846	4.3558	3.0986	1.4623	7.3511	19.293	9.8091	18.7014	14.109	8.9329	10.1968	12.1351	19.159	22.2614	11.3969	14.6137		0.486726	10.1327
6.6659	2.7754	2.4206	2.5636	4.7539	7.7866	3.4722	0.517	3.741	7.8679	13.2237	13.4608	17.9852	15.434	10.5406	8.3803	11.7904	23.5247	18.1628	13.7103	12.6234		0.495573	9.73672
6.785	2.1236	2.8125	3.0304	4.5318	6.4261	2.3747	1.0261	3.7582	6.3634	11.5472	12.1371	18.3311	15.793	8.8275	9.3352	12.9913	18.5595	25.0196	14.0069	9.5827		0.504427	9.4289
6.904	2.9181	3.4374	3.1507	6.6301	7.9539	1.5197	1.8784	3.0937	7.7025	14.3755	7.583	19.4117	17.468	7.5779	9.7757	11.3662	20.7473	18.6074	15.5565	13.8938		0.513274	9.73238
7.023	2.1844	2.7725	2.0198	7.2726	4.476	2.2428	2.699	5.1873	6.1861	12.4167	13.8131	15.6565	14.68	10.2722	7.1788	12.6735	13.8896	17.9064	14.1673	10.2189		0.522121	8.89567
7.1421	1.8245	2.5957	2.4025	4.7322	4.9395	1.9451	2.0122	3.1841	4.5615	7.9547	9.3278	17.5943	12.686	9.1943	6.6277	13.1897	12.5802	13.7602	11.6051	9.9107		0.530976	7.6314
7.2611	2.5435	5.9886	3.3429	3.7418	5.0451	1.9744	1.7234	1.7143	6.0861	10.9574	7.7824	18.1194	12.395	9.1539	7.8349	10.0037	13.2848	7.6971	12.1914	10.3291		0.539823	7.59546
7.3801	5.1736	4.4313	1.555	3.249	4.6043	1.9056	1.0122	1.1753	4.7987	10.8342	8.3076	16.5688	10.696	8.0606	10.0712	6.2351	12.8747	11.582	11.2149	6.4008		0.54867	7.03754
7.4992	3.2894	5.0711	1.4844	6.4612	7.1475	3.8582	0.2946	3.2072	6.0932	7.4786	9.9452	19.6823	11.401	8.9903	10.0517	8.5894	13.3647	6.728	12.2533	10.6769		0.557524	7.80341
7.6182	2.8471	4.5901	2.3492	8.4583	5.0748	0.497	0.7689	3.5359	4.8172	8.3625	8.2225	25.8795	13.462	7.6419	5.4525	9.2372	9.6005	6.8943	9.0116	9.9367		0.566371	7.33199
7.7372	2.7219	2.145	1.775	10.5527	8.5407	0.2991	1.6826	1.658	4.4992	5.8784	10.7836	27.1278	13.867	5.7421	4.527	7.2006	6.1488	7.3138	9.1968	9.7247		0.575218	7.06924
7.8563	3.1817	4.1605	4.5954	4.8754	5.9301	1.6514	1.7969	1.2357	2.7872	9.1772	8.5593	25.0742	13.492	7.9444	7.6417	5.6617	4.9673	6.224	5.1288	8.4441		0.584072	6.62645
7.9753	2.3454	3.4684	2.7654	3.5832	4.3181	1.0627	1.6096	0.5762	2.8878	5.2065	7.2279	19.695	15.907	12.7708	8.497	6.5877	7.3825	13.448	8.4439	12.6441		0.592919	7.02136
8.0943	4.426	1.8549	1.6908	3.9705	3.706	1.2339	1.5921	0.6066	5.5525	7.5153	9.2609	16.5412	18.553	9.8186	5.8708	5.9854	5.1473	10.4882	11.1334	11.7578		0.601766	6.83526
8.2134	2.5592	2.1809	1.897	4.033	3.0324	0.6457	1.3141	1.3762	5.9095	7.5806	16.1261	15.2869	19.366	10.2306	3.0068	7.5193	4.5631	11.4935	7.1168	13.9963		0.610621	6.9617
8.3324	1.4155	3.4492	3.8289	3.0603	2.0607	1.1905	1.8373	0.9197	7	7.1975	13.4298	12.3596	13.857	10.3297	3.517	7.6653	5.6199	14.7509	15.4643	14.089		0.619468	7.15211
8.4515	4.3772	3.2866	3.429	3.359	1.1844	0.4768	1.2494	0.8163	4.8701	5.3445	11.0992	9.0014	16.316	3.4582	7.2587	7.8383	7.8082	9.0136	10.7263	11.5443		0.628322	6.12288
8.5705	3.1127	3.2273	3.4212	1.4565	1.7628	1.5656	0.2912	0.4551	5.0149	3.8904	14.5335	10.9832	15.195	4.5336	5.7829	7.8314	4.5621	11.0708	11.5958	10.5786		0.637169	6.04323
8.6895	2.0023	3.2176	2.9404	1.4417	1.1653	0.6307	0.3814	1.28	4.7295	1.6884	14.8401	12.1548	16.48	5.2825	4.1083	7.3382	5.1921	7.5992	11.9845	8.8786		0.646016	5.66678
8.8086	1.0612	1.9815	4.25	1.8014	1.4065	0.7342	1.2247	1.334	5.877	3.0254	10.6128	10.2937	15.375	6.2942	4.1408	7.4477	3.2156	7.1071	7.0491	10.9567		0.654871	5.25943
8.9276	3.7734	1.8249	2.6323	1.4206	2.5428	0.3702	0.8654	1.3298	3.414	1.7	11.114	9.2419	14.399	4.7778	2.7762	6.8313	4.1746	2.6633	13.4934	8.7756		0.663718	4.90603
9.0466	4.1897	3.4953	2.6514	0.9407	3.7724	1.4739	0.0398	1.5741	2.7473	1.3809	9.0772	12.8861	17.483	5.4449	3.0591	10.6511	4.6506	3.3423	9.2931	10.8744		0.672565	5.45136
9.1657	3.6686	3.2646	2.1607	2.7299	2.2081	0.8476	0.1834	3.0849	3.8633	1.7761	8.1336	11.6334	13.663	5.0567	2.8383	4.1664	4.9664	5.7431	6.8474	9.5742		0.681419	4.82048
9.2847	2.6621	3.0134	2.0537	1.8016	1.8011	0.2497	0.4263	1.2335	4.3039	2.7978	7.5884	11.5341	12.528	3.2004	3.4618	3.6877	6.3318	5.0632	7.2373	7.3374		0.690266	4.41566
9.4037	2.4301	4.8567	1.8004	2.0401	1.5384	0.2114	0.5123	1.4433	3.7546	2.3325	8.0738	8.8251	13.373	2.3664	3.5356	3.9785	7.1016	2.9803	9.3675	5.8338		0.699113	4.31777
9.5228	2.6525	2.5325	2.5508	1.4404	1.1231	0.2644	1.5025	0.9036	0.716	1.8509	8.5365	5.0499	7.458	3.0125	5.7611	3.457	5.8903	5.1933	8.1739	6.9387		0.707967	3.75039
9.6418	2.3645	2.6123	2.1146	1.2638	0.8885	0.1245	1.5736	1.3906	3.5487	2.6486	7.6012	7.7121	9.353	3.2214	6.9244	3.8683	4.3398	4.9731	5.9055	5.0984		0.716814	3.87634
9.7608	1.8358	1.0761	2.1607	0.8634	1.8836	0.4288	0.7638	0.9254	2.0794	2.917	8.6979	11.8237	8.564	2.4105	5.6709	5.4322	3.5029	8.4618	8.7537	7.9646		0.725661	4.31081
9.8799	4.8007	2.3751	1.8838	0.5713	1.027	1.3806	0.2362	2.2097	2.4488	2.9394	6.5241	10.6556	9.84	3.314	4.9993	4.7711	1.9148	5.0832	9.2526	6.2759		0.734516	4.12516
9.9989	2.7554	0.7518	1.7831	0.1783	1.8597	1.1908	0.4773	2.8776	1.6027	1.6179	13.4824	13.604	12.932	2.2121	7.4424	4.3107	5.4285	5.2871	9.0062	6.7321		0.743363	4.7766
10.1179	2.783	2.7254	0.5716	2.2816	0.7667	1.168	0.0357	1.5374	0.8335	1.563	9.0161	10.4252	8.291	3.9526	4.6316	5.2127	6.4252	3.418	13.0297	3.3074		0.75221	4.09877
10.237	2.191	1.6403	1.1964	1.7096	1.03	0.7452	0.0075	1.1085	3.1074	3.282	7.0882	7.9041	7.303	3.339	3.3241	4.028	7.0853	3.2904	11.0912	4.3013		0.761064	3.73862
10.356	3.1055	2.2164	1.5093	0.4004	2.851	0.689	1.025	0.4006	5.376	1.1871	5.5806	5.7256	7.067	4.1315	6.7303	4.8944	5.3085	4.839	7.0947	4.3983		0.769911	3.72651
10.475	2.0062	2.5495	1.9574	0.3483	3.9753	1.787	1.4239	2.5125	2.0125	1.6975	4.0053	6.8967	5.966	5.1582	5.5934	3.9217	4.5125	3.3769	9.0286	4.3282		0.778758	3.65288
10.5941	1.8228	1.3625	1.8343	1.0429	3.0054	0.3694	1.0298	1.6915	4.3076	3.4971	7.296	7.1782	6.622	5.9171	3.4194	2.7431	5.1355	2.7895	8.4608	6.4584		0.787613	3.79916
10.7131	2.2204	1.9506	2.1347	1.9893	1.576	0.3019	0.7705	2.0362	3.1778	3.8037	6.2867	5.281	7.165	4.9646	2.7278	1.8474	5.255	3.4322	4.5189	7.0316		0.79646	3.42357
10.8321	1.049	2.1831	4.039	2.3214	2.2194	0.0416	0.4427	0.6139	3.2213	3.4826	5.9881	7.4241	6.699	2.9071	4.8902	4.7663	3.9899	4.8443	4.6792	9.7344		0.805307	3.77683
10.9512	1.9538	1.9631	1.7861	1.8813	2.2157	0.3007	0.7643	1.3158	1.5944	3.0629	5.0015	5.8163	7.595	0.929	5.0153	5.4243	1.2973	2.7665	5.843	10.5814		0.814161	3.35539
11.0702	2.3502	2.1361	2.482	2.3232	2.2785	1.8149	1.417	2.586	2.0196	2.6599	4.6918	3.5972	12.135	2.6947	1.9157	3.1091	1.4345	2.032	4.6325	11.885		0.823008	3.50974
11.1892	0.3054	3.2498	0.3674	3.5285	2.7346	1.873	1.5244	2.1447	2.6013	2.5619	4.1551	4.6107	7.866	2.1367	1.0043	2.3386	2.211	2.2036	4.0848	8.531		0.831855	3.00164
11.3083	0.3877	1.9049	0.8763	1.8579	2.8748	1.6272	1.0772	1.5722	0.9732	4.1247	4.2223	6.2094	7.324	3.6166	1.5623	2.7009	2.8451	4.7514	4.7829	8.5807		0.84071	3.19358
11.4273	0.9068	2.3816	1.0596	1.3429	3.9138	1.449	1.3862	1.6334	3.0338	3.4661	5.6919	8.5273	5.336	3.2629	1.3504	2.7726	2.917	3.3669	3.6029	8.7441		0.849557	3.30726
11.5463	0.6985	1.5331	1.599	0.6954	2.9025	1.2971	2.3161	1.1681	3.6669	2.5077	5.2669	6.904	8.249	3.7475	3.286	4.535	2.9033	4.3281	5.7951	5.8555		0.858404	3.46274
11.6654	1.3283	1.1217	1.7921	1.8621	1.4959	0.8778	2.1889	0.6666	0.9486	1.0098	6.052	10.0412	7.74	2.5039	2.2678	2.9225	1.8598	3.4312	6.2176	5.2906		0.867258	3.08092
11.7844	0.956	1.447	3.5971	1.3695	3.3188	0.5099	1.1058	0.7741	1.5387	2.2743	5.7171	6.7975	7.049	1.2787	0.8547	1.6478	3.1818	4.7744	4.4954	4.4852		0.876105	2.85864
11.9035	1.6549	2.2636	1.8411	1.2095	2.7434	1.5575	1.6021	0.5468	1.2199	1.332	4.5129	7.74	2.678	2.8134	1.1852	1.7084	2.5602	4.1025	4.7979	5.0694		0.884959	2.65693
12.0225	1.1945	1.6751	2.0466	1.2883	1.7029	1.0283	0.4158	1.3855	2.1102	1.5675	3.2014	7.3349	7.431	2.0718	1.1223	1.3977	1.326	3.3424	6.2349	8.0397		0.893806	2.79584
12.1415	2.1445	0.7632	3.2725	0.5711	3.1556	1.0681	1.2092	1.4495	1.3744	2.7197	0.7054	7.5867	4.868	1.2669	1.9205	0.687	3.1854	1.9836	2.2122	9.5588		0.902653	2.58512
12.2606	3.446	2.8338	1.5851	0.5853	3.1778	1.6071	1.4764	1.1579	1.1854	2.0374	2.527	4.2927	3.425	3.1024	1.5448	1.4731	3.6348	6.5425	3.765	5.1394		0.911508	2.72695
12.3796	3.6021	1.8022	1.7749	1.8961	2.2418	2.6576	1.0315	0.3448	1.6993	1.2298	3.9609	3.4939	2.169	1.9123	2.0201	0.7431	3.4952	7.1757	6.1981	6.7227		0.920355	2.80855
12.4986	2.0454	0.4711	1.8465	1.665	1.0185	2.6374	1.5221	0.465	2.619	2.2039	2.2373	7.0804	3.36	1.2806	1.4074	0.7381	3.2889	7.5001	4.659	7.1671		0.929202	2.76064
12.6177	2.0629	0.4463	3.6469	2.3479	1.7448	1.1234	0.1735	1.5089	0.4964	2.5702	4.6245	3.7805	4.125	2.0119	1.4628	0.3655	2.5819	5.8819	3.8109	5.7717		0.938056	2.52689
12.7367	3.798	0.8779	2.4459	1.8077	2.2294	0.4044	1.5608	0.7918	0.8389	1.4177	3.082	6.0652	4.125	1.8454	2.9591	0.103	2.4917	8.6409	4.3425	5.6093		0.946903	2.77183
12.8557	1.9327	1.4489	4.6081	1.0605	2.0992	1.088	2.2016	1.6058	1.6226	1.0506	3.2176	9.0951	4.2	2.1987	1.9578	1.2638	1.9679	8.0931	4.2975	8.9929		0.95575	3.20012
12.9748	0.563	0.6571	2.1871	1.5553	2.4783	3.6867	2.2297	1.1196	1.3292	1.8371	3.6289	6.9483	2.21	1.6257	3.4686	2.999	0.4701	3.307	6.0027	10.0299		0.964605	2.91667
13.0938	2.5465	1.6939	1.8226	1.6121	3.2171	2.3367	1.842	1.1742	0.2466	3.5087	1.9187	5.078	4.605	0.1819	1.3767	1.0325	3.0956	1.5622	5.0641	9.377		0.973452	2.6646
13.2128	4.3747	3.1962	0.2642	0.7676	3.2209	0.9559	2.3839	0.5712	1.3865	1.7912	2.8428	5.8412	3.13	2.0717	0.3155	1.3662	2.0205	1.1552	5.7595	12.144		0.982299	2.77794
13.3319	1.1378	2.8608	0.6564	1.5642	2.456	2.0311	1.6377	0.7936	0.9391	0.5071	2.7959	4.8996	2.34	3.1755	1.8182	1.5725	1.3332	1.9376	7.5952	8.4135		0.991153	2.52325
13.4509	1.8205	2.9734	0.2507	1.729	3.2353	1.7769	2.0069	1.5438	0.7774	1.6461	2.3439	6.829	2.116	0.5477	0.8814	2.214	0.1606	3.646	5.3662	7.3306		1	2.45977

## Sheet: Image22
X0	Y0	Y1	Y2	Y3	Y4	Y5	Y6	Y7	Y8	Y9	Y10	Y11	Y12	Y13	Y14	Y15	Y16	Y17	Y18	Y19	Y20	Y21	Y22		Ap-Ba	Average int.
0	25.0405	23.7343	36.8453	35.6799	44.6263	37.6189	22.5734	24.1285	25.2208	17.6474	22.562	24.7128	24.3203	33.5409	26.8901	26.72	25.0023	28.1897	29.3947	24.4405	17.7325	20.5332	25.2096		0	27.0593
0.119	21.7274	33.5352	37.173	37.9417	45.9544	35.3754	17.4892	31.9451	20.5419	19.7684	23.6845	32.6909	27.3505	35.9461	32.3911	27.758	25.7947	28.8921	31.0788	27.5735	20.046	24.9824	23.8386		0.00719216	28.8469
0.2381	28.2427	29.0614	38.603	45.5884	53.575	36.2789	20.2766	36.6135	22.4875	19.4012	29.5289	47.7324	25.9757	46.3915	36.3052	24.402	25.9736	25.9053	26.7969	25.2809	20.9379	21.5975	30.3652		0.0143904	31.1879
0.3571	38.2121	28.4462	39.2493	41.4175	57.2978	32.315	19.6425	34.4675	17.8982	27.4519	37.5148	45.1552	20.962	59.1415	39.5312	37.328	24.6967	25.7193	29.9746	21.1669	16.0504	22.564	33.3077		0.0215825	32.5874
0.4761	36.2873	26.1747	37.7046	51.7186	63.9178	44.6629	17.4797	31.8284	22.8007	26.5784	47.7699	48.5673	19.04	43.7173	39.4615	37.789	35.9554	24.7166	24.4865	18.8334	17.8408	21.6328	27.0562		0.0287747	33.3052
0.5952	41.7869	24.9362	41.3873	45.7612	52.8302	32.3071	15.3629	26.4536	27.1149	20.1994	49.5852	50.4414	20.6225	52.7883	36.7121	52.88	36.0267	28.3159	28.2414	25.091	19.5046	35.6431	30.0392		0.0359729	34.5231
0.7142	42.294	27.4504	38.025	40.2432	54.942	43.6572	17.0941	33.0803	24.6254	20.3697	52.3672	61.9542	25.0039	65.324	40.9877	66.349	33.5282	30.8112	31.913	28.0005	19.0344	29.4825	32.842		0.043165	37.3643
0.8332	41.9858	31.6425	37.744	55.2289	65.1727	39.0884	19.9999	38.1704	28.1571	23.1263	44.7627	71.3832	27.9	62.1395	55.0731	73.918	44.7838	32.9488	37.0549	23.6696	23.4819	29.6047	31.6531		0.0503572	40.8126
0.9523	47.8317	26.3329	50.2911	53.2642	67.9257	28.997	19.8811	32.5453	28.639	22.9226	42.1959	77.7533	20.9085	63.1501	49.9807	91.123	59.3752	29.3167	32.9595	32.6665	29.2014	36.757	38.5074		0.0575554	42.7185
1.0713	47.9456	33.1663	52.2398	56.3379	64.7697	36.0803	23.9177	29.9743	28.9286	32.2358	45.1032	87.377	24.2525	57.3573	40.3133	99.077	59.1284	29.276	32.8246	28.2946	30.4942	42.4035	38.5563		0.0647475	44.3502
1.1903	44.5563	31.208	49.6354	53.4205	68.9314	36.893	20.0282	36.6309	33.3096	28.1217	45.0434	79.968	24.7157	58.5319	48.5655	103.77	53.2535	27.951	35.7933	25.7614	24.2171	38.2478	38.5423		0.0719397	43.7868
1.3094	40.937	26.3777	54.0152	59.8752	71.311	40.7223	25.438	33.1424	26.8051	28.7174	32.4028	90.0746	27.1943	46.6714	46.9302	108.133	55.3123	31.9364	29.7716	23.0369	19.8664	35.3593	40.9494		0.0791379	43.26
1.4284	46.7864	37.4632	39.4611	57.9619	63.3943	42.9536	19.9724	38.859	20.1869	30.8575	36.4011	86.9704	28.2162	43.2608	44.1163	90.192	65.8907	30.7055	31.9548	21.0942	22.9774	34.7441	41.8036		0.0863301	42.4445
1.5474	47.9252	30.568	46.4076	56.5779	70.753	35.8754	29.9952	33.0286	22.2466	23.0796	43.9289	85.0248	26.1098	42.9659	49.4378	95.366	80.3779	34.6447	40.9445	22.8262	25.6396	36.9873	44.7416		0.0935222	44.5849
1.6665	42.6581	32.1006	46.7429	63.0244	74.212	46.0199	24.5385	29.754	27.4773	17.6839	37.4152	88.5895	21.5057	36.8676	45.0169	122.122	93.5583	30.3032	33.6253	24.5435	23.7444	44.2431	32.7135		0.10072	45.1504
1.7855	46.5502	41.9986	43.4646	55.781	77.3526	43.1208	21.9294	38.3664	26.4809	27.5515	41.5699	85.6911	25.0046	32.7058	39.2208	114.907	70.6254	37.8342	23.3028	27.0348	27.0623	33.5236	33.2839		0.107913	44.1027
1.9046	49.6258	45.9494	39.1897	47.5115	69.4349	43.4278	22.4113	42.0111	19.8232	23.2841	42.832	93.12	46.8719	30.5349	41.8891	104.007	81.5601	37.2993	20.3331	27.1457	26.3265	37.0614	36.3976		0.115111	44.6977
2.0236	43.1195	47.7366	47.1806	41.1438	59.0394	43.9095	22.6728	42.4002	25.7408	24.986	30.2152	84.1946	39.8348	30.461	34.9792	92.672	83.6275	37.5433	21.2924	26.8486	23.4214	42.6079	34.916		0.122303	42.6323
2.1426	42.6497	42.4869	43.5499	40.0104	64.216	42.8635	24.6079	41.9441	26.9965	26.5291	30.6748	94.7824	36.4999	22.9227	31.9403	95.8	87.5318	32.8784	32.8944	29.4698	22.0405	39.6	34.4814		0.129495	42.9291
2.2617	42.5139	43.2671	39.119	45.3879	52.4714	47.3212	23.722	45.8631	25.6321	24.179	34.6895	93.7139	32.8428	21.9363	33.027	87.34	79.9234	31.6015	25.7767	25.3099	22.5773	44.0976	35.9523		0.136693	41.6637
2.3807	32.7624	43.1617	33.1451	50.5181	45.5636	50.9537	20.5654	44.694	29.4488	26.7613	33.2648	88.901	36.9247	20.4226	40.0766	87.788	84.1022	36.0206	23.2835	23.756	17.4436	39.0843	35.334		0.143885	41.0424
2.4997	29.3526	44.8617	34.8393	51.2183	42.1401	51.4553	31.7605	50.3282	30.7847	23.935	22.8933	73.1045	34.5712	19.9731	35.8364	82.042	67.6169	33.9117	24.1295	20.5513	18.666	47.5535	32.9792		0.151078	39.3263
2.6188	26.1081	44.283	32.5472	40.5578	37.3573	45.5865	28.9945	45.7733	24.9607	27.2066	21.0786	64.9027	37.7507	23.1049	31.2033	76.257	66.1702	26.5696	21.8966	17.6181	18.3384	36.4053	28.8951		0.158276	35.8072
2.7378	23.2135	35.8039	50.0097	34.1448	39.7106	57.214	20.3095	44.9004	24.4647	22.3125	20.2738	64.2876	37.4972	21.4934	25.6491	76.126	68.9397	23.6406	22.3021	23.2854	17.4039	35.2573	33.4473		0.165468	35.7255
2.8568	30.2866	42.483	42.9778	41.3715	41.1182	47.7045	17.4064	43.1016	23.7416	24.7904	25.1771	58.7242	40.6384	21.9518	22.0423	62.922	54.9269	35.3583	16.4221	23.7659	13.3289	33.2478	44.1902		0.17266	35.1164
2.9759	28.2592	35.6201	40.7055	44.9457	35.537	47.2008	16.4445	35.3714	29.1939	21.802	23.8856	70.8643	48.1269	21.886	23.8423	52.575	61.1624	39.2805	15.22	22.8978	9.9259	34.9704	39.6902		0.179858	34.7568
3.0949	25.3301	35.0133	38.2859	36.3002	34.2454	49.6762	17.7174	35.2433	30.2914	20.2022	28.4451	74.7361	41.2849	19.2201	27.738	37.061	51.5749	35.4257	21.5921	26.3981	14.4448	31.7077	38.8939		0.18705	33.5143
3.2139	25.1322	35.7413	45.1393	34.3939	31.6438	51.1536	21.4765	39.825	24.9251	21.7838	17.965	62.8094	44.0947	14.4606	27.5507	26.088	52.5648	38.3684	24.4632	17.647	13.5427	24.3477	39.583		0.194243	31.9435
3.333	31.0977	40.5601	52.1406	34.7501	34.8559	47.2815	21.0686	35.2445	24.1295	17.3565	14.597	53.1986	39.1306	17.6963	32.2851	20.785	52.9792	43.1633	26.9479	16.1143	11.1108	28.4087	33.8575		0.201441	31.6852
3.452	26.9474	40.2456	43.3434	37.4067	38.605	51.1166	23.0879	36.658	23.309	21.8694	16.2848	53.2367	39.261	17.6304	23.7371	19.886	42.5213	38.4443	14.6323	17.7353	11.0974	20.8958	30.4959		0.208633	29.9325
3.571	32.5056	38.4181	38.995	38.4769	40.7188	52.3699	25.2405	41.4036	21.3721	22.6027	16.3119	56.4166	31.0025	19.6381	23.9416	23.494	43.1123	33.9312	9.0266	19.9078	10.8398	19.5417	22.047		0.215825	29.6224
3.6901	35.1463	36.3135	38.3999	37.1925	40.0534	43.2878	23.9401	41.9364	22.6359	18.9755	19.1042	50.6521	26.7241	18.1741	19.3049	24.778	38.4297	28.6603	10.6535	18.143	9.0227	19.5817	15.465		0.223023	27.6772
3.8091	30.3388	36.0204	42.1872	37.0486	42.3807	48.427	22.7682	38.5038	25.1606	19.7916	18.8602	43.7215	21.8205	18.8042	20.5081	24.35	31.0923	28.8481	15.6166	22.9006	15.7651	18.4333	14.9516		0.230216	27.7521
3.9281	36.2013	28.9028	39.5891	35.2053	42.1408	43.1716	20.8759	39.7175	26.5052	22.1789	16.0239	43.1724	18.8262	21.2359	21.3405	25.226	28.3239	31.9346	17.7129	20.5856	14.4619	21.443	17.2425		0.237408	27.479
4.0472	27.41	27.4163	39.3463	40.299	40.8026	41.7332	13.9442	39.2911	25.8907	20.1172	21.2901	39.2129	22.979	24.4819	17.9554	23.843	27.5465	27.896	20.976	17.6934	9.4425	20.3397	18.3021		0.244606	26.4439
4.1662	27.997	31.8121	38.617	41.2483	40.7517	45.365	20.6718	46.8305	26.5965	18.9903	18.5913	40.7428	23.2953	22.3561	16.2447	28.443	25.0853	24.997	19.1365	16.8631	10.6593	13.1724	19.2636		0.251798	26.8579
4.2852	27.5305	32.7634	32.9491	35.3822	38.8065	49.5003	20.9169	41.1595	19.9078	15.0316	17.9408	36.8583	22.8749	22.0143	16.8607	33.667	26.0073	31.4696	18.031	18.3357	11.3435	10.0807	17.9259		0.25899	25.9721
4.4043	27.5317	28.8001	42.966	43.9094	40.8633	47.2607	21.9065	41.7402	20.916	19.0941	20.5322	39.2574	19.4711	20.2381	19.5757	22.956	22.7184	24.9042	16.9161	17.1588	10.96	11.3728	15.9823		0.266188	25.9579
4.5233	25.1465	33.6793	40.7144	37.1724	35.1504	53.7666	21.9156	38.0638	21.6453	21.985	18.9043	33.5675	16.5706	23.134	19.1146	31.418	24.8752	25.6579	16.2758	18.9178	11.6291	15.6171	13.8438		0.273381	26.0333
4.6423	24.9761	37.3843	40.3013	31.3962	33.5491	50.2653	24.7096	30.6713	25.529	15.6199	16.4778	33.4556	12.9763	26.556	16.4902	33.382	23.1424	18.6884	12.2805	18.3609	13.2868	15.9942	15.971		0.280573	24.8463
4.7614	24.9879	36.7056	39.345	33.802	37.2424	49.3873	23.1874	23.0236	21.176	14.7653	10.8987	35.4511	15.2614	15.131	19.3026	33.611	22.4924	16.5414	17.3668	16.4298	15.9223	12.6486	19.6648		0.287771	24.1019
4.8804	25.7682	29.0422	32.9987	39.5565	44.0594	46.0601	19.9745	25.2961	20.2603	13.176	16.1992	32.8176	17.1505	18.5515	15.9222	32.776	19.0984	17.8117	20.2179	15.8135	12.9353	14.1119	15.6798		0.294963	23.7077
4.9995	33.106	32.6468	36.5842	34.9816	37.2364	47.4329	19.0273	30.0652	21.5014	19.1245	14.5664	34.4116	14.4075	19.9438	18.5604	31.834	18.9593	20.0584	13.0056	14.3734	12.0022	14.9184	17.677		0.302161	24.1924
5.1185	25.2561	31.1315	31.1518	48.5241	46.9514	51.3413	22.785	23.7449	18.8289	18.7388	12.5646	39.6665	14.5864	17.5175	19.0602	32.946	20.8361	20.0868	12.4418	17.4826	13.4641	14.7852	18.3732		0.309353	24.8811
5.2375	27.1951	27.1265	37.6507	41.8039	42.517	38.5356	20.0558	33.3102	17.5905	13.6885	11.8933	36.8516	11.4591	19.6385	13.5378	31.574	14.4917	31.3929	9.9635	17.3698	11.6662	14.0109	18.1134		0.316546	23.5407
5.3566	29.861	22.3869	33.8211	40.4439	42.1239	43.0868	15.2192	33.8196	19.4737	10.5211	9.3088	29.8496	10.3501	17.9363	12.055	38.798	16.9715	27.4836	15.6935	17.7034	9.525	14.5796	19.2992		0.323744	23.057
5.4756	31.2143	20.7816	34.5232	33.4311	35.5521	41.0354	20.0667	25.5811	17.2623	17.1752	12.0292	32.5604	9.821	20.1483	10.0421	33.183	19.5032	28.051	9.5211	16.0433	7.6578	13.8809	22.3597		0.330936	22.2358
5.5946	24.6847	16.7524	28.7374	32.2644	34.4942	33.1768	17.5488	24.0484	15.3648	15.1347	17.8516	40.6619	12.6859	16.0413	12.0111	28.237	23.8991	26.9011	6.9996	15.6179	8.8093	12.7836	25.1949		0.338128	21.3
5.7137	25.9673	16.9221	22.915	38.3107	41.8064	39.031	17.5689	25.1168	15.9832	13.0087	13.2018	37.8959	13.59	12.0595	11.2851	24.186	18.8538	38.1521	8.5004	10.7159	9.7966	16.2866	14.2098		0.345326	21.1028
5.8327	20.5814	14.3534	32.9537	28.8572	43.4003	43.4025	15.8945	29.3091	16.2037	13.9017	14.2351	40.2917	14.5588	8.0109	8.5684	18.226	15.166	31.5305	12.3253	11.7914	10.0187	15.0738	21.9963		0.352518	20.8978
5.9517	21.8599	19.5022	34.4866	29.5838	36.6905	33.8347	14.7595	19.9222	20.7236	14.6625	13.8477	34.8227	15.2911	8.3553	7.1365	22.391	14.955	27.5761	11.0495	9.255	13.49	12.8253	19.8163		0.359711	19.8625
6.0708	18.9094	16.4135	29.7822	26.5426	47.8165	34.901	25.3811	16.4674	19.8955	8.7481	16.0739	39.116	12.8444	5.1989	12.3789	23.667	13.2263	35.8365	9.5802	7.4293	15.9632	11.9831	13.559		0.366909	20.0745
6.1898	19.0773	15.4629	28.2142	36.7454	48.4398	38.8246	18.428	23.655	20.5758	13.7956	13.3385	33.2001	12.8013	6.5034	11.3523	23.397	12.6621	32.1225	12.3254	8.1965	14.115	12.9005	10.3658		0.374101	20.2826
6.3088	12.329	17.0395	20.9772	30.861	49.2293	41.205	17.0437	21.6058	19.9836	14.8455	11.4155	37.1839	11.4592	8.9395	6.1226	17.935	8.7656	30.2364	12.8805	7.8625	9.9985	13.0238	8.349		0.381293	18.6649
6.4279	12.7091	20.7827	18.1378	32.8661	49.4026	34.1695	20.9406	18.0774	17.9589	9.4013	14.8255	41.9	11.6347	5.4964	8.384	15.431	9.6325	23.7269	10.2852	9.6676	9.5591	13.6935	7.7631		0.388491	18.1063
6.5469	13.8118	20.7521	16.2746	29.9052	43.577	33.1052	15.3627	22.4769	16.8811	8.3856	13.6957	36.1272	13.1346	5.9454	7.4046	15.644	12.6214	30.3658	9.1022	8.479	13.1876	16.3998	7.1026		0.395683	17.8149
6.6659	14.6422	17.8054	16.8534	28.6261	42.1946	30.3192	18.5705	24.7606	18.4329	12.844	11.6281	34.917	15.1098	5.7237	4.6366	20.863	8.0435	25.8351	13.2189	9.712	5.6801	15.3967	6.6827		0.402876	17.4998
6.785	13.4151	16.0512	25.1141	31.8216	42.1876	28.7644	25.9473	25.8144	18.9003	13.8088	11.5118	32.5613	16.0361	2.1947	7.2919	15.947	6.3655	22.4612	15.4558	9.3128	10.7678	17.7645	6.8531		0.410074	18.1021
6.904	14.2338	14.2655	21.9139	32.8889	41.5187	33.8602	20.9993	22.3437	14.0797	10.3545	12.3334	31.0165	16.8445	3.5926	6.0858	10.422	5.2156	25.9421	11.0861	9.0898	10.1489	16.1691	6.686		0.417266	17.0039
7.023	17.3285	15.1883	16.1819	30.1758	36.8171	32.4814	13.1268	24.3548	17.0524	8.3162	12.0372	33.3776	16.5585	3.8808	4.587	10.67	7.0391	24.2984	11.4858	6.2899	12.9677	13.8577	3.4142		0.424458	16.1516
7.1421	14.9542	12.9978	16.8512	35.0532	39.1626	39.8436	13.6623	19.8308	11.4983	8.1259	10.1794	29.1433	11.5381	5.0059	4.9416	15.075	8.539	19.142	10.9113	5.4779	11.9402	11.5128	2.6671		0.431656	15.5675
7.2611	10.2769	14.3908	16.3812	34.8877	33.4201	35.2098	15.9027	24.5691	13.147	11.5742	6.0584	38.4437	8.7674	3.7824	7.3268	8.48	6.7882	23.6866	6.5064	8.6902	16.3456	12.5759	3.6132		0.438849	15.688
7.3801	8.5872	10.9859	11.1321	38.1948	26.6269	44.9861	16.1192	24.052	12.4178	8.8346	10.9387	36.4111	10.7923	4.2094	5.8504	11.44	7.2018	17.8166	9.7522	4.8718	14.0376	11.3633	4.0478		0.446041	15.2465
7.4992	8.2246	13.2082	14.4903	41.6558	22.8716	41.8901	14.5203	21.6083	11.2728	11.4049	5.7963	32.5911	13.3392	3.274	2.5666	12.821	5.0931	14.0373	10.8216	6.2509	12.5047	13.1069	5.7061		0.453239	14.7416
7.6182	10.9193	14.0315	12.1532	38.551	16.3391	33.8221	11.4549	25.3409	8.2591	12.579	8.4705	35.5237	11.6535	0.7882	3.7391	13.216	7.848	9.7963	11.3943	5.5197	14.9056	10.2379	2.9661		0.460431	13.8917
7.7372	12.083	13.5581	10.3262	30.0022	12.9587	34.9075	12.959	26.2864	8.3441	8.5506	6.7912	35.0916	11.1543	1.7303	3.6415	9.494	5.4599	14.6058	15.3733	6.1898	10.7416	11.7115	2.5571		0.467623	13.2399
7.8563	13.6424	12.5229	10.7379	27.8121	19.2021	31.3088	11.1393	23.6194	10.6111	5.2517	4.9889	38.6597	10.5757	2.2213	2.0469	6.719	5.9198	16.4538	17.642	6.0729	12.7381	11.4543	2.3121		0.474821	13.2023
7.9753	14.1132	12.0451	10.2314	24.6552	12.2673	36.5986	10.2769	19.7208	8.9876	6.2903	7.6645	34.1882	14.1255	1.9487	2.2921	7.703	5.0016	7.6025	16.5407	9.8112	9.3441	8.9181	1.4237		0.482014	12.25
8.0943	15.3811	10.7419	13.6344	25.182	11.43	31.5962	9.4156	15.0682	8.2839	9.2536	7.1111	25.0606	10.9927	2.1751	1.6021	8.532	2.2229	7.1306	19.1076	6.1811	12.9665	7.3663	3.5125		0.489206	11.476
8.2134	15.4274	7.1181	11.5087	25.1546	11.408	29.8266	11.0026	15.3638	10.0948	10.1105	6.7974	28.1653	9.1447	2.2839	5.054	9.879	2.7891	9.6989	15.7665	6.1357	9.0979	10.2495	2.896		0.496404	11.5206
8.3324	11.8614	5.1736	11.2612	23.5436	11.9042	29.2047	14.8472	12.7308	9.9017	8.27	7.0324	29.029	7.1318	2.4285	3.5847	8.18	5.0764	9.3501	15.4817	5.13	8.9988	5.3349	4.5347		0.503596	10.8692
8.4515	14.8274	7.685	15.5012	27.2183	15.9232	28.0238	9.5754	13.7316	6.9681	7.5956	5.13	30.5023	5.7075	3.538	3.2927	8.554	5.0326	4.8136	19.3214	7.4738	6.8214	6.5668	5.8368		0.510794	11.2887
8.5705	17.5824	9.3742	12.5861	25.1408	13.9568	25.7353	11.9128	9.962	6.1523	9.4532	6.9741	20.3487	10.313	3.0206	2.1425	8.055	5.9336	4.7216	14.4897	7.5048	6.5343	5.2324	3.7208		0.517986	10.4716
8.6895	8.9228	4.7557	18.2799	24.4	13.7513	29.3288	7.6681	13.7047	7.582	7.2112	8.3908	16.8007	13.2515	3.0097	3.9304	6.763	5.7437	5.8394	12.4244	6.5775	8.0415	5.4405	1.9943		0.525179	10.1657
8.8086	9.9026	8.2465	17.4372	24.0846	14.4354	25.5898	7.8223	15.8363	8.6172	8.3669	6.8895	17.2435	8.0607	1.0879	1.4313	7.734	5.0699	5.3123	12.4379	3.881	7.8859	7.9326	0.7522		0.532377	9.82859
8.9276	8.8563	9.6504	14.3849	26.7536	11.7993	30.4351	6.7681	16.2872	11.9956	7.02	3.5036	21.7537	5.2319	1.3386	3.7359	4.559	3.4066	0.6975	11.9736	4.2301	4.9824	7.3259	1.6288		0.539569	9.49209
9.0466	8.9693	5.7832	15.7369	25.826	13.4846	28.1917	6.6663	19.853	8.3955	8.7516	2.7122	20.3461	6.6602	1.7645	2.0652	4.812	2.6768	2.8172	17.8107	5.7837	6.9137	8.9221	2		0.546761	9.86707
9.1657	6.5295	8.1449	12.5789	30.0946	14.8476	32.6533	6.609	24.364	7.3391	12.3357	3.8324	15.848	6.7338	2.1288	4.2598	8.073	1.6011	2.9823	20.6624	6.2395	9.5319	8.0946	2.1892		0.553959	10.7684
9.2847	5.7197	7.4266	12.4067	32.9806	17.4406	29.6223	6.8897	20.9029	7.6209	8.7205	3.1323	14.1142	6.7473	0.8795	2.4616	6.602	2.5872	4.8252	17.2809	4.3296	5.788	4.7317	3.8201		0.561151	9.87087
9.4037	6.6867	5.7503	13.5992	25.731	10.2439	22.7037	7.2492	25.1807	6.7735	7.2665	3.6247	15.2309	9.6565	2.6251	2.7136	4.842	1.8362	2.961	20.5052	6.149	7.7285	5.1428	2.1938		0.568344	9.40843
9.5228	5.6283	2.7159	8.8396	22.942	17.0771	20.7195	6.5827	17.7703	7.9896	9.4599	3.6897	12.7961	7.0983	1.8486	1.9466	5.855	1.8936	3.3487	19.0514	7.3276	10.2953	7.7106	0.5259		0.575542	8.83097
9.6418	4.8542	4.5448	11.8039	23.3132	15.3387	25.3634	6.6618	13.6114	6.9715	12.473	3.3785	15.9622	6.3037	2.1225	2.28	4.456	2.3121	3.281	11.0407	6.3132	6.0372	4.0866	1.7967		0.582734	8.4481
9.7608	7.4815	5.9726	9.505	26.2466	13.4677	25.1946	6.9789	9.1604	10.4966	7.6837	2.8577	16.001	9.4758	2.7685	3.0488	6.954	2.3634	2.7659	9.0332	6.4076	5.8144	6.8715	1.1946		0.589926	8.59757
9.8799	4.9522	5.0458	7.1876	24.1676	14.4337	19.1106	12.4323	11.4169	9.4131	5.7906	3.4206	16.1708	6.1626	1.6388	2.404	6.988	2.1699	3.4737	11.0394	7.2724	5.8142	13.7633	3.1642		0.597124	8.58401
9.9989	4.4693	5.7809	10.0824	24.5239	12.626	19.1416	11.2611	9.1048	8.8591	6.7483	2.0653	13.9528	5.1538	2.3579	2.9784	3.424	2.3227	5.024	13.3411	5.0272	7.8362	17.0726	2.2254		0.604317	8.49473
10.1179	5.0667	2.7785	9.6408	28.3075	9.8822	15.3886	9.7058	15.7319	8.2103	6.5523	3.2339	10.8269	5.243	2.2959	2.0254	7.609	0.9964	4.7649	14.7223	4.1275	5.7567	6.2094	2.414		0.611509	7.89087
10.237	4.4127	6.6855	9.2285	28.8771	8.8498	25.0897	9.9813	21.6604	12.5219	4.3089	2.0742	9.5945	6.574	2.9589	2.0458	5.552	0.613	3.3963	16.706	3.8085	8.3643	7.3147	3.4148		0.618707	8.87099
10.356	4.7099	2.6339	11.7461	23.9752	6.5459	30.5285	7.6947	12.5527	11.0821	6.1327	3.6306	9.3106	5.0251	3.4785	2.1398	4.044	0.7077	5.3567	13.2097	4.0857	6.4524	8.5973	3.3049		0.625899	8.12803
10.475	4.0858	4.4463	16.7437	21.7148	9.7422	22.4439	9.2286	14.0098	11.998	7.1463	2.7287	12.097	2.7882	2.5831	2.0724	3.105	2.7752	4.5309	12.0179	5.4229	4.7908	7.4467	2.9455		0.633091	8.12451
10.5941	4.3313	3.2772	8.568	24.6863	12.8371	24.289	4.6119	14.5479	9.7674	7.588	2.3156	14.3422	2.8374	4.2849	1.4642	4.375	3.5899	3.7081	14.357	8.1345	5.521	7.8601	2.473		0.640289	8.25074
10.7131	1.681	2.4736	8.1293	20.6323	8.4723	22.1883	7.522	17.3294	11.6288	8.7178	3.4748	12.5288	4.8427	2.2814	0.7918	8.724	3.5425	2.5118	13.7653	6.6117	10.8989	12.2473	2.9968		0.647482	8.43446
10.8321	3.6986	2.7512	10.0132	20.1519	10.3464	21.5844	7.3116	19.0321	13.4315	9.7185	1.6996	11.0557	3.9193	3.1934	0.8904	3.545	3.1187	3.2843	12.8681	7.2099	6.7924	11.3181	2.4732		0.654674	8.23511
10.9512	2.413	1.2488	12.0747	23.8732	10.8163	22.4921	6.7223	17.7098	14.6585	9.0414	1.7178	13.5517	7.6463	1.0691	0.9042	2.254	1.8717	3.2501	13.905	7.3833	5.1035	8.9811	3.0281		0.661872	8.33548
11.0702	2.455	3.0273	10.6166	12.3892	9.2043	15.553	6.7803	19.4264	10.7304	3.2462	4.3282	11.9827	8.5778	3.1713	2.2785	4.467	2.079	2.5201	7.3409	6.3732	8.8905	9.9749	2.8852		0.669064	7.3173
11.1892	2.9414	2.667	13.036	12.8761	5.737	14.1641	5.0437	20.5736	8.7015	4.1277	1.965	13.1498	7.5379	2.3367	1.6535	3.631	2.0919	3.4084	11.8189	4.9984	6.0044	13.1068	3.2369		0.676256	7.16555
11.3083	4.0623	1.874	15.2113	15.9062	9.2715	11.0608	3.8293	14.4989	12.1206	6.5596	0.8379	5.9649	4.8518	4.022	0.2836	2.264	1.5803	3.0771	8.7604	8.821	8.9422	10.9231	1.854		0.683454	6.80769
11.4273	5.2964	2.9571	8.1752	13.316	12.4973	10.8585	5.3733	14.2852	11.654	3.4449	1.6893	10.305	4.8615	1.1643	1.3212	2.378	2.102	2.3769	8.8892	7.3798	6.1446	12.3222	2.8336		0.690647	6.59241
11.5463	3.9536	2.8624	6.9563	16.6481	10.6048	14.191	5.2554	16.9008	10.5298	4.232	3.2867	11.2013	2.8874	0.7908	3.639	2.918	1.553	1.2168	6.4349	8.0388	6.1061	14.1721	1.0399		0.697839	6.75735
11.6654	2.7117	1.1952	7.0945	18.0278	8.7966	9.0284	5.8002	19.5222	10.5757	7.434	3.1854	8.9561	4.5748	1.4491	2.8303	6.42	3.9268	2.0058	7.9929	6.4565	4.2362	9.364	2.6738		0.705037	6.70687
11.7844	2.3648	2.1584	4.9661	14.4203	17.6955	10.4586	6.4951	16.3096	13.2269	6.6194	4.8196	6.4505	2.4031	1.5009	1.5578	8.443	2.9998	2.381	7.3513	8.3849	4.7415	6.5726	2.9484		0.712229	6.75083
11.9035	0.9539	1.801	5.2726	14.8784	11.4554	12.957	8.609	16.9433	9.7811	7.6694	3.1564	10.0227	2.5717	1.6887	1.1161	1.761	1.7154	1.8647	6.6412	6.4669	7.3169	4.7707	3.3561		0.719427	6.20737
12.0225	2.2109	1.0341	3.6791	12.8733	8.1919	10.305	4.8602	11.0848	12.3579	3.6263	3.6996	8.4839	5.0173	3.797	1.3325	2.335	2.2014	1.5426	9.373	4.6996	6.4423	4.1011	3.6469		0.726619	5.5172
12.1415	3.4293	2.4237	4.2191	11.7273	12.0608	8.7173	4.7565	9.3614	13.781	4.4292	3.1201	6.448	2.6901	1.2823	1.6463	5.647	1.3251	2.4553	9.1492	5.5641	4.278	5.1742	3.4597		0.733812	5.52804
12.2606	3.502	1.1112	4.3911	13.2854	12.7883	9.0102	4.262	11.9485	14.1933	3.4783	2.812	9.8031	3.2347	2.231	1.8622	2.181	2.2335	2.2399	8.4474	5.6619	4.0675	5.9013	2.8466		0.74101	5.71706
12.3796	5.2572	1.7295	5.8545	10.8375	12.3955	9.5866	6.1855	14.054	6.3154	3.6738	1.7705	8.5898	2.6692	3.4462	1.6289	3.603	3.1441	2.1808	10.1724	7.4941	4.4306	7.9323	1.7763		0.748202	5.85773
12.4986	5.2038	2.3742	3.7628	12.3726	11.5311	6.5458	5.9376	13.9221	6.942	7.7282	2.0746	6.9573	2.295	1.9949	1.7173	3.69	1.9422	2.2609	7.8693	10.4792	3.1613	10.4271	0.9607		0.755394	5.74565
12.6177	3.4636	1.5572	1.1235	9.1223	11.9435	7.5256	6.5583	12.2664	14.2813	6.4383	3.9103	7.1779	6.5919	1.4835	2.3156	2.302	1.7762	2.8913	7.0045	11.5251	3.2109	12.6768	2.0478		0.762592	6.0519
12.7367	2.119	2.7302	4.809	9.7656	10.9759	7.4171	5.6947	9.6706	15.2001	3.4256	2.4673	6.2734	4.599	0.6385	1.3655	4.39	3.5831	5.0932	12.1577	11.6527	6.2614	9.8729	4.3821		0.769784	6.28455
12.8557	2.1618	1.0322	4.1931	5.1225	10.6887	12.9291	6.1577	7.1944	11.3451	2.6618	2.0623	9.2057	6.882	1.162	1.9643	5.263	3.1052	1.6782	8.3413	11.1637	3.0176	6.927	2.5873		0.776977	5.51504
12.9748	2.7397	1.5982	2.2496	5.501	7.3906	10.0714	3.4098	10.2461	15.8932	2.5351	3.6504	4.8383	6.7756	2.3999	1.591	5.765	1.1859	1.763	6.313	10.8019	5.0662	6.3817	2.4921		0.784175	5.24603
13.0938	2.8759	1.1002	4.4483	3.3557	7.3847	8.2751	4.3971	13.4595	14.1736	4.6537	4.5284	5.8855	7.3221	1.0283	1.5426	5.858	2.4763	3.2408	8.5923	11.7071	5.7005	9.5284	2.3775		0.791367	5.82224
13.2128	2.1294	1.6216	4.7665	7.097	8.5347	7.6784	5.6402	13.6607	14.5536	4.4537	1.5474	3.6853	6.0036	1.3249	2.0188	9.085	2.1239	1.8252	10.1122	8.1367	3.1092	6.7059	3.0594		0.798559	5.60319
13.3319	1.4475	1.704	2.1629	5.6968	9.6121	9.7767	5.9128	16.7583	13.6244	2.4713	2.3135	7.5962	6.7763	1.1249	1.5323	9.759	1.6608	2.0178	10.0089	5.7334	3.0258	6.9939	3.3644		0.805757	5.69887
13.4509	2.7188	2.5071	2.8953	4.8201	7.0824	10.3968	3.4786	13.5537	12.7153	1.0758	3.1255	6.8577	5.9776	2.2583	1.7071	10.589	2.3399	4.0455	7.8673	5.2504	4.6214	11.6638	2.9313		0.81295	5.67299
13.5699	1.7814	1.9748	3.6884	5.1448	10.231	12.0419	4.8344	10.261	10.8965	2.382	4.9506	5.7613	6.457	1.166	1.4512	10.905	2.5578	3.5413	9.1607	4.9395	4.0112	11.9728	2.5487		0.820142	5.7678
13.689	2.7296	2.4199	2.1992	7.1523	5.443	8.7359	3.8331	10.443	7.1224	4.2573	2.1001	8.4329	6.7274	1.7042	2.3683	8.413	2.3615	3.6386	11.3513	5.9245	3.322	7.3339	2.7978		0.82734	5.25266
13.808	2.6526	1.9065	0.7457	8.4778	6.3766	5.2069	5.507	11.9189	6.1554	4.0943	2.2094	4.7497	7.3342	3.7239	1.8246	6.652	3.154	2.4673	8.6546	10.0007	5.5855	7.7283	4.4936		0.834532	5.2878
13.927	0.9468	0.5007	2.1916	7.4229	4.0324	7.7921	3.7648	10.1866	6.5067	3.3479	4.0875	5.6814	8.1585	2.5215	0.9922	7.106	1.8215	1.8562	6.4662	5.7772	3.9007	8.7296	4.3596		0.841724	4.7022
14.0461	2.0607	0.2858	1.2513	6.0818	4.7745	8.037	4.7754	14.6679	7.0818	2.4178	3.7343	5.8841	4.196	2.1697	2.0529	9.206	4.5772	2.9291	6.4039	2.5031	2.2214	10.1532	7.0581		0.848922	4.97926
14.1651	2.5742	3.3054	2.5152	9.4343	5.7681	8.4599	3.7356	15.2154	2.644	1.6982	3.2817	3.7231	5.5583	2.2901	3.2858	8.761	3.7647	3.5592	7.3367	6.1926	3.5225	9.6937	8.7855		0.856115	5.43936
14.2841	2.5599	2.9211	2.1406	5.8873	3.5368	5.3121	2.9507	11.8988	3.2579	2.9777	2.1464	5.4767	3.7156	2.8658	1.5933	3.291	1.6469	3.4901	5.9947	3.2645	4.271	11.2664	7.9844		0.863307	4.36738
14.4032	4.4136	1.7868	3.758	6.2621	2.8559	5.537	3.7159	11.4978	5.3433	3.0006	3.7778	4.3398	4.981	1.749	1.2553	5.379	2.176	2.9414	4.9827	4.2349	6.2346	8.1288	5.3145		0.870505	4.50721
14.5222	1.7578	2.8286	4.2182	5.2506	4.1127	6.1311	4.1132	12.8703	5.8689	3.6156	4.4493	2.8413	3.9242	1.1747	1.2447	5.488	2.8386	6.031	6.1791	3.2859	3.9948	10.6554	7.7895		0.877697	4.81146
14.6412	1.7778	2.9449	0.9749	5.932	4.145	5.7895	3.2377	10.1411	3.9759	4.3715	0.8133	4.1526	3.1838	1.6648	1.8819	4.595	1.9926	2.963	5.4669	2.518	3.6726	8.723	7.1177		0.884889	4.00154
14.7603	2.3544	2.3364	1.6909	5.1295	3.4987	9.0193	4.01	9.5536	1.7818	3.9064	3.2048	2.7204	4.3351	2.7918	4.394	8.02	4.671	3.6936	6.9674	5.5354	2.2051	8.7732	4.814		0.892087	4.5829
14.8793	1.1267	3.7092	1.1961	5.194	2.8996	6.928	3.4539	9.0455	3.9985	3.484	2.5197	2.0378	2.6415	5.0469	3.0995	6.059	3.5199	3.3564	5.6174	5.9422	1.6659	9.6526	4.8201		0.89928	4.21802
14.9984	1.0638	3.4755	4.5074	4.0581	5.97	10.3429	5.8559	12.3524	6.4344	2.0377	0.7067	2.0624	1.7953	5.2026	1.6509	5.302	2.9884	4.8301	5.4348	4.4989	3.094	7.8081	5.3815		0.906478	4.64582
15.1174	0.9804	1.921	2.1816	3.0625	5.8915	11.7905	4.3719	10.6902	4.272	3.0122	5.5687	2.7739	4.7939	3.1679	3.1913	2.223	5.5927	6.0138	4.2529	6.545	3.4089	5.8722	5.0558		0.91367	4.63625
15.2364	2.2252	1.7605	1.2148	3.9617	7.9518	6.3728	2.8489	8.2105	3.7872	3.0629	3.7518	2.273	4.2425	1.808	1.3331	3.895	5.1146	2.7898	5.5788	6.0228	4.6212	6.2072	4.0182		0.920862	4.04575
15.3555	1.2274	2.7152	3.8175	4.6024	5.1312	7.8499	4.9729	5.8478	3.761	1.957	0.9242	1.6648	1.6354	2.2222	2.1266	3.402	4.9108	1.2829	7.4666	5.1667	5.5128	1.7789	4.0543		0.92806	3.6535
15.4745	1.4824	2.4243	1.3837	4.202	7.4629	5.8388	3.9244	6.3796	5.388	1.0534	2.0978	2.2437	1.8062	2.2141	0.9202	3.468	5.4116	3.194	3.8676	7.7607	6.2234	2.8066	3.36		0.935252	3.69189
15.5935	1.9835	2.118	0.8429	3.1425	6.3016	7.2148	3.3177	7.5913	5.4105	1.2507	1.7914	6.1543	3.3576	1.0078	0.4549	2.31	6.946	3.7848	3.759	6.4253	8.536	2.6744	2.9137		0.942445	3.88212
15.7126	2.4619	1.7316	3.5257	3.6846	3.6645	4.3498	2.523	7.3445	5.2293	1.4171	0.6739	3.8245	2.7313	1.1082	1.2599	2.031	6.4441	3.5334	3.8757	6.2335	6.3695	4.2754	2.1963		0.949643	3.49951
15.8316	3.4757	1.9301	3.2786	6.7477	4.4359	5.0603	1.9991	6.4687	6.9433	2.2006	1.311	4.149	1.7805	1.384	2.365	4.089	5.2934	2.9378	2.2333	5.6803	8.4251	3.1624	1.1093		0.956835	3.75913
15.9506	1.31	0.8855	1.585	4.8363	5.2403	4.5568	0.8777	7.2858	6.5166	2.2305	3.3924	3.3346	0.9903	2.0494	0.7804	3.689	3.5514	3.5653	6.4914	7.4664	5.8135	4.4761	3.3226		0.964027	3.66293
16.0697	1.4258	1.1016	1.7724	5.6092	8.6612	4.206	0.3271	5.3929	4.5877	2.5792	2.682	0.9278	1.6526	2.7219	0.8938	3.972	3.5263	2.4232	4.1427	7.7519	4.7232	6.1677	2.9525		0.971225	3.48699
16.1887	1.6666	1.7375	2.8796	4.102	9.4696	4.1028	0.8945	7.1596	3.5986	0.9263	2.8081	3.1377	1.9724	1.8026	3.7659	2.708	1.8432	1.8261	4.2106	7.4572	3.5914	4.9825	4.3441		0.978417	3.52117
16.3077	1.5113	2.6574	1.5395	4.4263	8.0341	2.7674	1.5818	3.8828	2.9877	2.5093	1.6067	3.9307	2.1226	2.211	3.2914	2.454	2.9488	3.6498	3.7562	5.925	4.047	6.4692	4.1847		0.98561	3.41281
16.4268	2.1391	1.9371	2.5352	3.5345	8.3826	2.8244	2.5024	3.8385	3.6732	1.4283	2.7187	4.7547	1.3408	1.0011	1.3548	2.55	2.2476	4.3569	2.8918	5.3404	2.0355	7.658	4.8983		0.992808	3.30191
16.5458	0.7221	1.1782	2.4584	2.8704	8.529	3.232	2.5522	5.5582	4.5636	0.6862	1.6297	5.0221	1.1926	2.9816	2.8588	1.805	2.5443	3.5041	2.9941	5.4044	1.7202	9.1606	5.7128		1	3.42959

## Sheet: Sheet1
Image22				Image24				Image25				Image26				Image4				Image5				Distance	Image22	Image24	Image25	Image26	Image4	Image5
Ap-Ba	Average int.			Ap-Ba	Average int.			Ap-Ba	Average int.			Ap-Ba	Average int.			Ap-Ba	Average int.			Ap-Ba	Average int.			0	27.0593	34.8359	42.9274	36.4164	92.4237	67.0388
0	27.0593			0	34.8359			0	42.9274			0	36.4164			0	92.4237			0	67.0388			0.05	33.2108	38.5593	54.3905	42.6975	132.93	78.6757
0.00719216	28.8469			0.00884699	35.6291			0.00602236	46.9047			0.00632726	39.0381			0.00684734	97.6296			0.00769007	70.4277			0.1	43.7565	44.1701	68.0493	50.7413	164.417	92.6902
0.0143904	31.1879			0.0177014	38.9105			0.0120498	47.8392			0.0126598	40.9332			0.0137004	109.579			0.0153866	72.8146			0.15	42.342	43.8475	62.4447	46.537	143.582	90.7407
0.0215825	32.5874			0.0265484	39.464			0.0180721	49.2715			0.0189871	40.0149			0.0205478	122.799			0.0230767	78.3954			0.2	34.0784	37.8256	51.0636	37.3434	105.743	76.1503
0.0287747	33.3052			0.0353954	38.7734			0.0240945	52.1121			0.0253144	42.5361			0.0273951	136.919			0.0307667	80.3962			0.25	27.9664	31.2673	36.7039	27.8141	71.6283	50.2208
0.0359729	34.5231			0.0442498	40.5058			0.0301219	56.0743			0.0316469	44.2334			0.0342482	149.75			0.0384633	85.7595			0.3	24.9731	24.874	24.3615	19.4157	53.4785	33.4778
0.043165	37.3643			0.0530968	41.7967	38.5593		0.0361443	57.795			0.0379742	46.2683			0.0410956	156.481			0.0461533	84.4232			0.35	22.4308	21.2649	14.798	14.3145	43.0049	23.2537
0.0503572	40.8126	33.2108		0.0619438	41.477			0.0421666	60.4915			0.0443015	48.6075			0.0479429	164.977			0.0538434	90.1504	78.6757		0.4	18.9008	17.2114	11.1645	9.57409	30.206	17.3543
0.0575554	42.7185			0.0707982	43.5311			0.0481941	63.8054			0.0506341	46.2299	42.6975		0.054796	165.813	132.93		0.06154	90.128			0.45	16.0716	13.5292	7.59724	7.38208	17.0711	13.171
0.0647475	44.3502			0.0796452	44.8287			0.0542164	66.6843	54.3905		0.0569613	48.9112			0.0616434	168.285			0.06923	89.8491			0.5	12.3499	10.6985	6.25907	5.85113	13.4563	10.4076
0.0719397	43.7868			0.0884922	45.2984			0.0602388	68.8415			0.0632886	51.0842			0.0684907	167.525			0.0769201	91.4754			0.55	10.2689	8.11598	5.113	4.78836	11.8741	8.09346
0.0791379	43.26			0.0973466	45.057			0.0662662	68.976			0.0696212	50.6036			0.0753438	164.569			0.0846166	94.2893			0.6	8.89067	6.97686	4.15211	4.73601	9.90408	7.76007
0.0863301	42.4445			0.106194	44.8282	44.1701		0.0722885	67.7415			0.0759484	51.9942			0.0821912	166.206			0.0923067	94.9406			0.65	8.27639	6.20102	3.45076	4.3367	8.69279	7.08511
0.0935222	44.5849			0.115041	44.7595			0.0783109	67.3624			0.0822757	50.9178			0.0890385	164.569			0.0999968	94.4489			0.7	7.09752	4.61028	3.25299	4.05018	8.16726	6.30846
0.10072	45.1504	43.7565		0.123895	44.9992			0.0843383	68.2871			0.0886083	52.0916			0.0958916	162.558			0.107693	93.7002	92.6902		0.75	5.90341	4.23754	3.04521	4.33556	8.50099	7.15285
0.107913	44.1027			0.132742	43.5093			0.0903607	67.6929			0.0949355	51.1257			0.102739	157.204	164.417		0.115383	93.179			0.8	5.74598	3.68626	3.08859	5.17209	10.3075	7.61316
0.115111	44.6977			0.141596	43.917			0.0963881	69.4626			0.101268	49.2016	50.7413		0.109592	155.111			0.12308	91.3821			0.85	5.3003	3.30506	3.70955	4.81236	9.4942	7.44286
0.122303	42.6323			0.150443	42.0525	43.8475		0.10241	66.0306	68.0493		0.107595	50.8879			0.116439	150.09			0.13077	89.5215			0.9	4.44776	2.79549	4.23238	4.90842	7.43321	6.17986
0.129495	42.9291			0.15929	40.901			0.108433	63.8407			0.113923	48.674			0.123287	147.456			0.13846	91.7632			0.95	3.88116	2.79916	3.85292	4.35995	4.71693	5.56695
0.136693	41.6637			0.168145	39.7617			0.11446	65.0116			0.120255	47.7745			0.13014	145.72			0.146157	90.6532			1	3.46923	2.66845	2.9586	3.54887	3.27345	5.70707
0.143885	41.0424			0.176992	38.9775			0.120483	63.9771			0.126582	47.1311			0.136987	140.382			0.153847	87.9452	90.7407
0.151078	39.3263	42.342		0.185839	37.6984			0.126505	63.842			0.13291	44.8982			0.143835	137.324			0.161537	85.7176
0.158276	35.8072			0.194693	35.2875			0.132532	62.7542			0.139242	45.4305			0.150688	128.993	143.582		0.169233	83.2122
0.165468	35.7255			0.20354	34.3273	37.8256		0.138555	59.957			0.14557	44.2875			0.157535	125.081			0.176923	77.6504
0.17266	35.1164			0.212387	33.4361			0.144577	60.2437			0.151897	43.212	46.537		0.164382	120.569			0.184613	74.3166
0.179858	34.7568			0.221242	33.3602			0.150605	59.9313	62.4447		0.158229	40.7535			0.171235	113.197			0.19231	70.8093
0.18705	33.5143			0.230089	31.9693			0.156627	57.9226			0.164557	39.9994			0.178083	106.859			0.2	65.1955	76.1503
0.194243	31.9435			0.238936	30.5102			0.162649	56.657			0.170884	40.7419			0.18493	103.345			0.20769	61.5893
0.201441	31.6852	34.0784		0.24779	29.8842			0.168677	53.7773			0.177217	38.043			0.191783	99.6482			0.215387	57.7481
0.208633	29.9325			0.256637	28.4441	31.2673		0.174699	52.7202			0.183544	37.4588			0.198631	92.7639			0.223077	52.333
0.215825	29.6224			0.265484	27.1917			0.180721	50.52			0.189871	35.7266			0.205478	84.4792	105.743		0.230767	48.8746
0.223023	27.6772			0.274339	25.8245			0.186749	47.4074			0.196204	33.8047			0.212331	86.088			0.238463	44.7419
0.230216	27.7521			0.283186	23.7821			0.192771	47.4741			0.202531	32.2192	37.3434		0.219178	78.0879			0.246153	44.1939
0.237408	27.479			0.292033	24.19			0.198794	46.7932			0.208858	31.9761			0.226026	73.3102			0.253843	42.0646	50.2208
0.244606	26.4439			0.300887	23.3817	24.874		0.204821	46.3004	51.0636		0.215191	29.6641			0.232879	68.4653			0.26154	38.1785
0.251798	26.8579	27.9664		0.309734	22.8228			0.210843	42.7298			0.221518	29.2385			0.239726	67.8171			0.26923	37.4557
0.25899	25.9721			0.318581	22.914			0.216866	41.1878			0.227845	27.8451			0.246573	64.6342			0.27692	34.8981
0.266188	25.9579			0.327435	21.4534			0.222893	39.6421			0.234178	27.5211			0.253427	62.9954	71.6283		0.284617	32.725
0.273381	26.0333			0.336282	19.9487			0.228915	37.192			0.240505	27.1145			0.260274	59.6598			0.292307	31.4924
0.280573	24.8463			0.345129	20.9871			0.234938	35.6849			0.246832	24.6508			0.267121	56.7478			0.299997	30.8899
0.287771	24.1019			0.353984	19.4635	21.2649		0.240965	34.4189			0.253165	24.5027	27.8141		0.273974	54.618			0.307693	28.7047	33.4778
0.294963	23.7077			0.362831	18.8002			0.246988	32.3498			0.259492	23.9875			0.280822	51.8773			0.315383	26.5773
0.302161	24.1924	24.9731		0.371685	19.085			0.253015	30.4256	36.7039		0.265825	21.8806			0.287675	50.2615			0.32308	25.1122
0.309353	24.8811			0.380532	16.8451			0.259037	30.0502			0.272152	21.2488			0.294522	52.0857			0.33077	24.2912
0.316546	23.5407			0.389379	16.8914			0.26506	28.2144			0.278479	18.4084			0.301369	49.0995	53.4785		0.33846	23.5799
0.323744	23.057			0.398234	16.5716			0.271087	24.6019			0.284812	18.6281			0.308223	50.0255			0.346157	19.8762
0.330936	22.2358			0.407081	15.0751	17.2114		0.277109	23.79			0.291139	16.9728			0.31507	48.1228			0.353847	20.0856	23.2537
0.338128	21.3			0.415928	15.303			0.283132	23.5881			0.297466	17.4042			0.321917	44.1551			0.361537	18.574
0.345326	21.1028			0.424782	13.869			0.289159	23.8692			0.303799	16.7948	19.4157		0.32877	42.6157			0.369233	17.6091
0.352518	20.8978	22.4308		0.433629	12.7649			0.295182	21.7616			0.310126	15.7338			0.335618	42.1528			0.376923	18.9106
0.359711	19.8625			0.442476	12.679			0.301204	19.0165	24.3615		0.316454	16.7546			0.342465	37.3819			0.384613	18.1973
0.366909	20.0745			0.45133	13.0304	13.5292		0.307231	18.5234			0.322786	16.0598			0.349318	40.0162			0.39231	16.7325
0.374101	20.2826			0.460177	11.8423			0.313254	16.8672			0.329113	15.2071			0.356165	39.5695	43.0049		0.4	15.7847
0.381293	18.6649			0.469024	11.4967			0.319276	15.7993			0.335441	14.3541			0.363013	39.5972			0.40769	15.6718	17.3543
0.388491	18.1063			0.477879	11.5536			0.325304	15.2374			0.341773	13.3575			0.369866	37.1944			0.415387	14.9118
0.395683	17.8149			0.486726	10.1327			0.331326	13.8416			0.3481	12.026			0.376713	31.8473			0.423077	13.1917
0.402876	17.4998	18.9008		0.495573	9.73672			0.337348	14.159			0.354428	11.0229	14.3145		0.383561	29.6945			0.430767	13.8536
0.410074	18.1021			0.504427	9.4289	10.6985		0.343376	13.8809			0.36076	10.8943			0.390414	26.7015			0.438463	13.2115
0.417266	17.0039			0.513274	9.73238			0.349398	12.6135			0.367088	11.0568			0.397261	24.713			0.446153	11.8598
0.424458	16.1516			0.522121	8.89567			0.35542	12.2595	14.798		0.373415	10.4048			0.404108	21.6945	30.206		0.453843	11.9974	13.171
0.431656	15.5675			0.530976	7.6314			0.361448	13.169			0.379747	9.79286			0.410962	20.9653			0.46154	13.0807
0.438849	15.688			0.539823	7.59546			0.36747	12.7446			0.386075	9.48009			0.417809	18.2638			0.46923	11.2027
0.446041	15.2465			0.54867	7.03754			0.373493	11.4141			0.392402	8.50532			0.424656	16.8958			0.47692	9.75569
0.453239	14.7416	16.0716		0.557524	7.80341	8.11598		0.37952	11.0258			0.398735	8.20054			0.431509	16.4166			0.484617	10.0292
0.460431	13.8917			0.566371	7.33199			0.385542	11.087			0.405062	8.25794	9.57409		0.438357	16.0694			0.492307	9.43528
0.467623	13.2399			0.575218	7.06924			0.391565	11.0715			0.411389	8.37761			0.445204	15.4676			0.499997	8.94181	10.4076
0.474821	13.2023			0.584072	6.62645			0.397592	9.5596			0.417722	7.57136			0.452057	15.419	17.0711		0.507693	8.3557
0.482014	12.25			0.592919	7.02136			0.403614	9.24425	11.1645		0.424049	7.12053			0.458904	14.4652			0.515383	8.70357
0.489206	11.476			0.601766	6.83526	6.97686		0.409637	8.86402			0.430376	8.14625			0.465752	13.5973			0.523073	7.81897
0.496404	11.5206			0.610621	6.9617			0.415664	8.32466			0.436709	7.26899			0.472605	13.5324			0.53077	7.91507
0.503596	10.8692	12.3499		0.619468	7.15211			0.421687	7.72261			0.443036	7.36283			0.479452	13.7569			0.53846	7.69235
0.510794	11.2887			0.628322	6.12288			0.427714	7.17035			0.449369	6.77275			0.486305	12.9352			0.546157	8.07933
0.517986	10.4716			0.637169	6.04323			0.433736	7.3542			0.455696	6.43633	7.38208		0.493153	12.9768			0.553847	8.08923	8.09346
0.525179	10.1657			0.646016	5.66678			0.439759	7.47733			0.462023	6.88853			0.5	12.9305	13.4563		0.561537	7.60627
0.532377	9.82859			0.654871	5.25943	6.20102		0.445786	7.06541			0.468356	5.98005			0.506853	12.3033			0.569233	8.04836
0.539569	9.49209			0.663718	4.90603			0.451808	6.79935	7.59724		0.474683	6.16175			0.5137	13.044			0.576923	7.7619
0.546761	9.86707			0.672565	5.45136			0.457831	6.54678			0.48101	5.5593			0.520548	11.4236			0.584613	8.02123
0.553959	10.7684	10.2689		0.681419	4.82048			0.463858	6.67001			0.487343	5.99804			0.527401	12.4305			0.59231	7.17803
0.561151	9.87087			0.690266	4.41566			0.469881	7.49083			0.49367	5.15469			0.534248	12.0509			0.6	8.12682
0.568344	9.40843			0.699113	4.31777			0.475903	6.01727			0.499997	5.21554	5.85113		0.541096	11.9676			0.60769	7.57788	7.76007
0.575542	8.83097			0.707967	3.75039	4.61028		0.48193	6.30173			0.50633	5.25886			0.547949	11.2963			0.615387	7.1233
0.582734	8.4481			0.716814	3.87634			0.487953	5.7257			0.512657	4.8955			0.554796	10.4768	11.8741		0.623077	7.58716
0.589926	8.59757			0.725661	4.31081			0.493975	5.74999			0.518984	4.54149			0.561643	10.6065			0.630767	7.18701
0.597124	8.58401			0.734516	4.12516			0.500003	5.57022	6.25907		0.525317	5.13876			0.568496	11.3611			0.638463	6.4264
0.604317	8.49473	8.89067		0.743363	4.7766			0.506025	5.67911			0.531644	4.65734			0.575344	9.98146			0.646153	6.88822
0.611509	7.89087			0.75221	4.09877	4.23754		0.512047	5.45639			0.537972	4.61661			0.582191	9.44213			0.653843	6.80579	7.08511
0.618707	8.87099			0.761064	3.73862			0.518075	5.24435			0.544304	4.83453			0.589044	9.736			0.66154	6.25557
0.625899	8.12803			0.769911	3.72651			0.524097	5.13072			0.550631	4.36375	4.78836		0.595892	9.88663			0.66923	6.30137
0.633091	8.12451			0.778758	3.65288			0.530119	5.15232			0.556959	4.98307			0.602739	8.31479	9.90408		0.67692	6.45395
0.640289	8.25074			0.787613	3.79916			0.536147	5.03762			0.563291	4.7032			0.609592	7.80333			0.684617	6.29927
0.647482	8.43446			0.79646	3.42357			0.542169	4.80705			0.569619	4.40008			0.616439	8.73842			0.692307	6.04585
0.654674	8.23511	8.27639		0.805307	3.77683	3.68626		0.548192	4.83686			0.575946	4.41097			0.623287	8.33108			0.699997	6.49476	6.30846
0.661872	8.33548			0.814161	3.35539			0.554219	4.67258	5.113		0.582278	5.46918			0.63014	8.35646			0.707693	6.81878
0.669064	7.3173			0.823008	3.50974			0.560241	4.5395			0.588606	4.40993			0.636987	8.80779			0.715383	7.00502
0.676256	7.16555			0.831855	3.00164			0.566264	4.42334			0.594933	4.58518			0.643835	9.70833			0.723073	7.01582
0.683454	6.80769			0.84071	3.19358			0.572291	4.34555			0.601265	4.92649	4.73601		0.650688	9.10412	8.69279		0.73077	7.66985
0.690647	6.59241			0.849557	3.30726			0.578313	4.3529			0.607593	4.06628			0.657535	8.77092			0.73846	7.01053
0.697839	6.75735			0.858404	3.46274	3.30506		0.584336	4.07954			0.61392	4.43358			0.664382	9.15046			0.74615	7.30375
0.705037	6.70687	7.09752		0.867258	3.08092			0.590363	3.92113			0.620253	3.63203			0.671235	8.36583			0.753847	7.24618	7.15285
0.712229	6.75083			0.876105	2.85864			0.596386	3.91358			0.62658	4.27803			0.678083	7.62971			0.761537	7.98605
0.719427	6.20737			0.884959	2.65693			0.602413	3.64135	4.15211		0.632912	4.64909			0.684936	8.55558			0.769233	7.37396
0.726619	5.5172			0.893806	2.79584			0.608435	3.4512			0.63924	4.57694			0.691783	7.6365			0.776923	8.03921
0.733812	5.52804			0.902653	2.58512	2.79549		0.614458	3.42552			0.645567	4.76322			0.698631	7.60413			0.784613	7.34702
0.74101	5.71706			0.911508	2.72695			0.620485	3.49715			0.6519	4.29446	4.3367		0.705484	7.62492	8.16726		0.79231	7.57363
0.748202	5.85773			0.920355	2.80855			0.626507	3.72495			0.658227	4.16021			0.712331	7.11575			0.8	6.83219
0.755394	5.74565	5.90341		0.929202	2.76064			0.63253	3.79088			0.664554	4.02663			0.719178	7.17808			0.80769	8.14006	7.61316
0.762592	6.0519			0.938056	2.52689			0.638557	3.46582			0.670887	4.21269			0.726031	8.48621			0.815387	7.30904
0.769784	6.28455			0.946903	2.77183			0.64458	3.25108			0.677214	3.93752			0.732879	8.39583			0.823077	7.473
0.776977	5.51504			0.95575	3.20012	2.79916		0.650602	2.99945	3.45076		0.683541	4.03525			0.739726	9.25			0.830767	7.74297
0.784175	5.24603			0.964605	2.91667			0.656629	2.90362			0.689874	4.06348			0.746579	9.63658			0.838463	7.29595
0.791367	5.82224			0.973452	2.6646			0.662652	3.2989			0.696201	4.36255			0.753427	9.4445	8.50099		0.846153	7.41862
0.798559	5.60319			0.982299	2.77794			0.668674	3.111			0.702528	3.60314	4.05018		0.760274	10.8079			0.853843	7.41755	7.44286
0.805757	5.69887	5.74598		0.991153	2.52325			0.674702	2.83718			0.708861	4.10879			0.767127	10.8935			0.86154	6.36948
0.81295	5.67299			1	2.45977	2.66845		0.680724	3.27057			0.715188	4.39843			0.773974	9.37958			0.86923	7.26647
0.820142	5.7678							0.686746	3.4506			0.721515	4.16247			0.780822	10.7894			0.87692	6.37392
0.82734	5.25266							0.692774	3.60337			0.727848	4.3974			0.787675	10.0069			0.884617	6.39569
0.834532	5.2878							0.698796	3.63698			0.734175	4.34142			0.794522	10.5903			0.892307	6.26394
0.841724	4.7022							0.704818	3.16468	3.25299		0.740502	4.18357			0.801369	9.68508	10.3075		0.899997	5.1726
0.848922	4.97926							0.710846	2.96816			0.746835	4.63486			0.808223	10.0416			0.907693	5.41694	6.17986
0.856115	5.43936	5.3003						0.716868	3.0976			0.753162	4.45752	4.33556		0.81507	10.0833			0.915383	5.10921
0.863307	4.36738							0.722891	3.43049			0.75949	4.99085			0.821917	9.40738			0.923073	5.73041
0.870505	4.50721							0.728918	2.94568			0.765822	5.33639			0.82877	9.41204			0.93077	6.17499
0.877697	4.81146							0.73494	2.89047			0.772149	5.21322			0.835618	10.264			0.93846	5.39742
0.884889	4.00154							0.740963	3.1829			0.778477	5.00571			0.842465	9.70604			0.94615	5.62227
0.892087	4.5829							0.74699	2.90825			0.784809	5.3465			0.849318	9.36113			0.953847	5.3674	5.56695
0.89928	4.21802							0.753012	2.93811	3.04521		0.791137	5.14232			0.856165	7.67813	9.4942		0.961537	5.65745
0.906478	4.64582	4.44776						0.75904	2.57559			0.797469	4.85769			0.863019	8.0255			0.969233	5.67095
0.91367	4.63625							0.765062	2.57654			0.803796	5.48403	5.17209		0.869866	6.94679			0.976923	5.8968
0.920862	4.04575							0.771085	2.97941			0.810124	4.38431			0.876713	7.27775			0.984613	5.47348
0.92806	3.6535							0.777112	3.11532			0.816456	5.5623			0.883566	8.32179			0.99231	5.60779
0.935252	3.69189							0.783134	3.22113			0.822783	4.84694			0.890414	7.80558			1	5.93593	5.70707
0.942445	3.88212							0.789157	3.45064			0.829111	4.98838			0.897261	6.919
0.949643	3.49951							0.795184	3.33236			0.835443	5.08446			0.904114	6.73604	7.43321
0.956835	3.75913	3.88116						0.801206	3.45773	3.08859		0.841771	4.03638			0.910962	5.95829
0.964027	3.66293							0.807229	3.34996			0.848098	5.03266			0.917809	5.34038
0.971225	3.48699							0.813256	3.3381			0.85443	4.56346	4.81236		0.924662	4.82867
0.978417	3.52117							0.819279	3.54247			0.860758	4.47888			0.931509	4.58796
0.98561	3.41281							0.825301	3.61684			0.867085	5.30843			0.938357	4.60179
0.992808	3.30191							0.831328	3.72599			0.873418	5.14821			0.94521	4.06717
1	3.42959	3.46923						0.837351	4.1962			0.879745	4.70539			0.952057	3.63425	4.71693
								0.843373	4.09162			0.886072	5.20416			0.958904	3.79408
								0.849401	3.97204			0.892405	5.09303			0.965758	3.94208
								0.855423	3.55272	3.70955		0.898732	4.53939			0.972605	3.34258
								0.861445	3.99645			0.905059	4.78984	4.90842		0.979452	3.82179
								0.867473	3.92531			0.911392	5.04658			0.986305	3.18275
								0.873495	4.2727			0.917719	4.31527			0.993153	2.31246
								0.879517	4.9455			0.924046	4.05074			1	2.51837	3.27345
								0.885545	4.2452			0.930379	4.42061
								0.891567	4.02669			0.936706	4.44296
								0.89759	4.05588			0.943033	4.08374
								0.903617	4.39129	4.23238		0.949366	3.88648
								0.909639	4.2346			0.955693	4.63319	4.35995
								0.915662	4.4241			0.96202	3.80243
								0.921689	4.30024			0.968353	3.87667
								0.927711	3.71026			0.97468	3.6661
								0.933739	3.84274			0.981013	3.5447
								0.939761	3.98657			0.98734	3.44398
								0.945784	3.39351			0.993667	2.68497
								0.951811	2.93133	3.85292		1	3.82322	3.54887
								0.957833	2.99885
								0.963856	3.50772
								0.969883	3.37657
								0.975906	3.2768
								0.981928	3.25733
								0.987955	2.81025
								0.993978	2.3904
								1	2.05085	2.9586
