# Supplementary material for: Crumbs organizes the transport machinery by regulating apical levels of PI(4,5)P2 in Drosophila
Source: eLife. 2019 Nov 7;8:e50900. doi: 10.7554/eLife.50900 (PMC6881148; doi:10.7554/eLife.50900)
Supplement: Figure 3—source data 1. [file elife-50900-fig3-data1.xlsx]

## Sheet: Image13
X0	Y0	Y1	Y2	Y3	Y4	Y5	Y6	Y7	Y8	Y9	Y10	Y11	Y12	Y13	Y14	Y15	Y16			Ap-Basal to 1	Average intensities
0	30.2145	35.4729	30.2107	17.9114	15.3376	14.8778	12.8008	8.6767	16.9372	22.9402	23.1991	17.6255	12.6429	16.6314	22.2836	22.0175	23.6317			0	20.2007
0.0992	30.4842	37.3859	33.7028	20.6322	12.8347	13.0535	15.5355	12.8921	12.9825	25.8992	21.9094	13.3735	14.6368	16.078	16.449	19.8559	35.077			0.00398291	20.7519
0.1985	25.5622	43.7169	42.3704	21.9265	16.8988	14.4218	14.9117	14.9437	14.8266	22.0167	26.6468	14.6927	17.7425	20.4483	16.4398	15.9386	38.534			0.00796984	22.4728
0.2977	28.6078	41.8442	35.9865	21.4147	14.7591	16.4257	15.9739	10.0608	18.165	19.5546	31.7133	19.4042	15.4343	25.8591	20.6094	17.3153	46.4933			0.0119528	23.5071
0.3969	28.6775	31.5094	41.8554	19.9251	15.2279	17.5919	15.3453	10.2038	15.6168	22.4261	32.5306	19.8802	14.6388	24.5914	27.1617	20.6783	50.7685			0.0159357	24.037
0.4961	32.9599	33.621	43.4391	22.4305	12.2861	14.5853	17.0877	11.6385	15.2005	23.5618	31.4034	13.276	14.3498	22.8543	28.8323	21.8283	47.2148			0.0199186	23.9158
0.5954	35.8087	31.2217	41.9782	28.2209	16.9892	18.8952	17.5015	14.3436	13.5277	21.1662	33.9137	15.5718	13.0785	23.0164	25.9037	24.9551	48.5169			0.0239055	24.977
0.6946	35.9284	29.4919	44.557	27.2024	14.4968	19.4685	18.633	12.1106	14.8586	21.3585	37.8682	16.381	11.8624	23.1451	24.5712	22.9348	53.9198			0.0278884	25.2228
0.7938	37.4794	34.6761	51.3472	32.5973	13.9192	25.1353	21.5259	12.8559	14.6303	20.8376	34.8296	11.1165	16.0769	35.0105	25.3273	19.8967	48.0683			0.0318713	26.7841
0.8931	49.3338	38.9906	45.391	37.6139	20.595	24.666	21.2422	12.2815	10.5144	22.0995	32.2633	14.1541	12.343	40.9817	36.5725	23.925	48.5599			0.0358583	28.9134
0.9923	46.8164	39.9641	38.3029	35.2336	20.447	22.9405	21.6514	16.1841	16.0178	19.8807	34.068	11.8367	12.3594	49.2856	38.7076	25.1998	52.7625			0.0398412	29.5093
1.0915	54.2453	41.2593	21.2172	30.0282	19.0211	26.4845	28.5933	19.1625	19.4607	27.6893	34.7285	15.697	15.0761	48.7757	32.98	24.2986	54.2902			0.0438241	30.1769
1.1907	44.3297	36.3192	26.6927	32.4374	17.3535	24.2063	24.8755	22.4854	17.5644	30.7367	38.4164	18.2098	13.8776	41.1624	35.5821	33.6017	47.1748			0.047807	29.7074
1.29	56.9027	30.6368	23.6626	29.2106	20.4431	23.5819	25.7242	20.9743	20.6453	33.6988	42.8301	18.7323	14.3074	35.3325	45.4722	39.064	37.8813			0.0517939	30.5353
1.3892	60.8701	28.3964	24.3882	34.6779	16.9621	21.9837	28.422	21.8808	17.7272	25.6392	45.8303	18.0608	17.9386	36.8256	42.5712	36.0956	45.1498			0.0557768	30.7894
1.4884	53.1255	29.975	24.1518	35.7466	22.3334	26.6163	25.8408	17.4102	18.0171	28.083	48.786	17.5458	20.0628	37.013	49.921	38.6802	45.3433			0.0597597	31.6854
1.5877	55.8293	36.75	31.728	30.238	26.2978	28.9953	25.6517	20.0447	16.2897	33.2205	44.5421	19.9045	19.4957	37.5508	43.1716	38.452	49.7267			0.0637467	32.817
1.6869	58.9595	34.5264	46.2708	28.4359	29.0747	29.4102	29.1995	27.2617	14.7276	28.6244	48.7588	25.4671	19.2859	37.1672	42.238	42.9321	43.7672			0.0677296	34.4769
1.7861	57.7135	46.1138	49.3712	32.1997	38.6752	34.0899	32.3595	24.0457	18.5099	32.4461	53.0971	23.9865	25.2628	38.6519	49.0474	44.849	47.065			0.0717125	38.0873
1.8853	59.0674	45.4808	54.2723	32.3237	43.7289	33.908	31.484	26.5483	16.9608	41.2291	59.9851	20.9449	25.3966	43.3167	55.5676	50.6551	46.0385			0.0756954	40.4063
1.9846	56.8696	35.2383	55.1265	29.4367	43.194	33.1918	32.1338	23.6434	21.2678	32.3158	55.3153	16.4269	35.119	44.2771	52.9051	54.343	45.9488			0.0796823	39.2208
2.0838	53.1848	30.3428	56.8201	23.3497	36.3828	35.5073	34.145	29.2463	22.2195	35.5796	56.7438	24.6451	35.4508	48.675	58.7564	48.3639	45.9109			0.0836652	39.7249
2.183	54.5236	29.849	50.383	28.9631	36.2436	31.161	37.1593	31.488	25.0899	44.0955	55.5165	23.4114	37.8169	46.7748	62.393	53.8153	47.8069			0.0876482	40.97
2.2823	51.366	35.9255	56.9303	31.0411	36.2098	38.4486	35.7533	31.7071	20.8707	44.4315	50.3048	25.5395	29.252	44.1992	62.3659	48.6657	48.2457			0.0916351	40.6622
2.3815	60.0396	39.414	49.3994	32.6659	38.8437	39.6908	35.8933	38.409	21.636	41.1346	51.8146	22.7736	32.4532	43.9291	57.5172	49.4498	42.8682			0.095618	41.0548
2.4807	64.0551	32.2042	45.7213	30.0095	37.6485	48.7411	47.138	33.2856	21.6186	41.5163	55.8228	26.4764	35.5177	50.9769	55.5302	55.3956	47.4692			0.0996009	42.8898
2.5799	63.5039	31.1332	41.2955	35.1971	46.5793	51.4278	42.5982	32.7216	34.1031	43.0606	55.4837	24.7862	36.9087	40.8983	59.901	45.9701	51.7141			0.103584	43.3696
2.6792	47.0686	33.9585	35.6814	39.645	47.6928	49.2836	44.8023	37.2092	39.1183	54.4792	57.1471	30.3439	43.8029	45.1177	58.9214	55.2589	48.47			0.107571	45.1765
2.7784	33.1102	31.4447	29.7623	32.0239	36.2329	47.4123	40.7854	39.0188	32.2498	54.5727	55.8956	24.9335	40.6134	42.4013	71.7066	48.7258	46.4258			0.111554	41.6068
2.8776	38.4394	30.7481	27.7508	38.0647	38.0221	52.8714	43.8079	36.6107	40.1433	54.1597	63.2743	23.6775	33.0537	41.0829	73.9431	45.3233	43.4385			0.115537	42.6124
2.9769	30.5476	34.0137	27.3456	32.2562	38.2576	59.0922	52.9836	34.414	33.8952	51.5913	70.8266	23.5761	30.17	46.2172	67.3007	51.6224	52.8006			0.119523	43.3477
3.0761	41.7271	35.2902	23.5161	31.8027	38.2367	62.857	58.4448	33.4183	29.1353	59.071	76.226	27.325	34.389	49.1489	63.0371	52.3265	45.6152			0.123506	44.7981
3.1753	39.4489	38.8886	20.6129	26.2697	32.9654	52.8241	53.524	39.5837	30.8968	56.8371	61.5328	25.6142	33.9837	41.9474	57.8868	44.3824	55.7355			0.127489	41.9373
3.2745	36.1403	42.7285	19.9393	24.5595	37.1726	49.6263	58.2486	47.4585	37.2067	64.4305	55.7831	23.9373	29.2397	48.0667	55.0724	52.5142	53.317			0.131472	43.2612
3.3738	34.2255	48.251	19.7448	27.8836	41.2454	43.2437	55.633	51.5184	40.998	65.399	57.9609	29.7353	30.426	52.7601	51.7366	60.8055	52.2372			0.135459	44.9296
3.473	43.5327	40.2732	20.3993	35.2856	49.8176	42.5413	52.6414	50.6867	44.4791	57.7561	61.2925	26.2197	30.2364	46.5429	44.837	69.9543	48.5054			0.139442	45.0001
3.5722	44.8951	37.1038	14.633	34.665	48.775	37.8697	52.0253	56.1097	49.7367	57.0465	62.2311	24.3524	32.7598	42.3609	49.2935	64.5206	47.6475			0.143425	44.4721
3.6715	38.0707	33.6514	24.6955	33.6624	40.5955	45.1406	46.358	57.6515	54.0134	55.6903	57.7234	27.7276	34.1785	42.6639	43.7214	59.5499	45.6391			0.147412	43.5725
3.7707	27.5894	33.4097	25.1945	31.0845	35.3517	50.3127	49.84	51.5316	56.233	48.4558	57.1697	28.5631	31.2388	50.0748	40.2702	57.164	47.6038			0.151395	42.4169
3.8699	26.5234	35.7535	26.1965	29.9973	39.2255	42.6857	47.3131	44.5248	55.3108	53.7464	56.929	33.6798	33.7882	51.7968	40.2952	51.3776	48.6991			0.155378	42.226
3.9692	22.9887	37.4793	28.9983	29.4196	41.6454	36.1112	38.8854	42.6965	59.4886	51.863	51.8038	39.7027	38.2371	51.7907	46.1241	59.1447	59.0557			0.159365	43.2609
4.0684	25.9411	56.4867	32.0521	31.5813	42.4816	41.5455	37.7405	42.666	62.4938	40.9872	40.3949	37.6043	32.6658	52.8229	55.0403	51.4549	69.0165			0.163348	44.2927
4.1676	28.3657	41.6609	33.6813	21.4277	39.0319	38.2709	33.4894	38.4542	52.6092	43.7139	36.383	36.3275	27.6082	47.844	44.9172	58.9873	72.8049			0.16733	40.9163
4.2668	26.963	40.6127	29.4147	22.4037	45.3978	34.1521	39.7483	37.8236	55.6667	43.8471	35.1129	33.9256	30.456	49.0763	42.1951	57.7419	62.7457			0.171313	40.4284
4.3661	33.0049	38.8211	33.3696	25.8087	42.6155	32.8721	44.7299	37.9184	57.151	44.5101	32.0216	33.2407	36.6512	47.1062	36.6929	43.8982	63.8617			0.1753	40.2514
4.4653	24.8772	35.122	30.0389	28.2	52.5983	36.995	47.7776	35.5	44.6229	36.855	31.5453	40.9462	37.2634	44.4003	42.1089	51.3926	56.1848			0.179283	39.7899
4.5645	25.075	34.9081	21.9051	30.6828	42.5844	37.3435	46.6732	35.2059	38.6157	36.664	35.0333	39.0073	35.9805	36.6151	39.3351	53.3609	61.9877			0.183266	38.2928
4.6638	29.859	40.9019	24.2479	25.0769	41.8373	41.2395	46.6835	40.3796	34.1509	35.0678	44.31	31.9695	30.7247	36.4098	28.7555	51.651	70.518			0.187253	38.4578
4.763	30.9233	37.9549	31.4522	21.8995	48.5301	49.8315	54.5228	38.0565	36.3281	36.0109	41.2335	23.6178	38.6	34.424	31.7132	51.4339	78.4004			0.191236	40.2902
4.8622	29.5866	40.1689	30.0145	24.8895	45.3834	37.0988	56.7304	36.1117	38.0264	37.2315	39.3393	26.8467	36.5942	31.6715	26.9664	46.9642	66.1216			0.195219	38.2203
4.9614	27.5534	40.19	24.2842	24.7213	44.6915	45.0438	61.9198	32.5053	29.4727	46.3208	41.7001	28.1312	33.1182	28.6311	28.4148	52.1996	61.0591			0.199202	38.2328
5.0607	27.1164	38.6044	29.476	29.271	39.7687	41.925	64.2144	39.8587	33.4239	47.4937	39.0243	33.9232	34.2605	23.0132	27.2089	50.3301	60.5082			0.203189	38.7894
5.1599	27.0468	33.1242	29.526	32.5945	33.594	54.399	55.5436	25.7323	32.898	40.0315	40.2984	33.5786	31.4298	24.4232	28.9859	47.0619	66.3177			0.207172	37.4462
5.2591	24.6055	34.8538	29.3969	30.0954	36.577	52.3919	56.0842	22.2084	29.395	43.4236	38.2867	30.6356	25.6461	17.0822	27.2457	45.5855	64.7936			0.211155	35.7828
5.3584	22.9929	29.0186	24.962	33.1509	36.7778	48.3233	55.4169	29.2211	26.9492	57.1136	33.6201	28.1907	28.5133	16.9231	23.2608	35.6199	73.2244			0.215141	35.487
5.4576	28.3209	23.7854	28.7293	27.1372	37.989	35.5635	52.1806	27.4584	30.0104	45.3074	33.9214	20.8814	23.7562	17.8101	25.9361	35.4897	72.7949			0.219124	33.3572
5.5568	25.8061	35.1001	31.363	27.5349	39.7463	34.2707	45.348	29.9889	31.6855	45.8128	41.5357	23.0925	22.945	23.9767	21.8124	37.9223	77.1071			0.223107	35.0028
5.656	23.5703	28.2312	30.3246	28.7556	34.6172	30.2265	46.384	29.5448	34.1063	51.1273	42.5919	32.8152	23.8003	20.7255	21.7622	34.0999	77.0244			0.22709	34.6887
5.7553	24.5046	34.1456	31.6659	36.4572	37.5833	33.9309	50.3034	28.1231	33.0122	40.2606	34.9445	30.5999	28.9536	25.6317	15.1138	37.1191	66.9994			0.231077	34.6676
5.8545	27.423	33.0118	28.2315	27.8893	41.0103	35.5186	55.227	33.0166	31.342	38.6391	33.0883	28.2301	22.9302	26.6086	17.3287	32.5137	83.0878			0.23506	35.0057
5.9537	23.4369	34.7256	22.6287	28.7173	38.9838	29.4452	50.454	32.5611	30.0627	37.919	30.5593	27.319	21.8214	24.1739	17.474	28.5028	78.4949			0.239043	32.7812
6.053	25.5609	26.2995	23.5449	28.632	38.002	30.2479	43.6019	27.1457	38.8746	34.1708	30.541	27.2224	23.3187	28.004	15.6359	27.2274	80.2229			0.24303	32.2501
6.1522	25.1034	26.5517	20.5695	31.6707	34.609	28.9275	40.0284	24.6106	34.6947	28.0946	27.5069	32.4096	25.032	24.6249	17.8259	26.9079	71.5601			0.247013	30.631
6.2514	30.5334	29.3065	19.3879	24.949	33.7735	32.4726	40.1054	28.307	26.3277	28.2788	29.179	28.8012	26.5403	28.4417	15.3689	29.2507	69.7367			0.250996	30.633
6.3506	27.496	25.7207	21.0979	23.7534	27.9773	33.031	41.3894	26.324	29.6474	21.748	21.7704	26.7756	26.8265	30.0067	16.7328	21.9997	67.3043			0.254979	28.8001
6.4499	25.4868	29.8355	17.6252	25.8569	26.6506	28.8839	29.3548	36.7655	23.74	31.593	29.6259	23.5166	23.4462	31.5539	15.8929	19.3407	58.0164			0.258966	28.0697
6.5491	17.0913	28.1389	20.9572	20.936	28.1531	20.1718	25.4568	29.9725	30.2644	30.1864	27.0012	19.5237	25.5461	32.2126	17.6594	22.5765	64.4944			0.262948	27.079
6.6483	18.7161	32.6586	16.3806	19.8468	23.5854	22.0791	20.3424	26.1176	31.4527	31.3019	24.3192	18.2115	18.5154	29.3295	21.0602	22.1503	64.5264			0.266931	25.9173
6.7476	15.7008	23.1719	14.5294	24.1486	16.3804	19.853	19.6659	24.7551	27.9633	28.1529	26.5753	19.3207	22.5596	20.2698	19.8359	27.4168	72.3375			0.270918	24.861
6.8468	15.847	22.1774	15.4753	23.8789	20.9579	22.1445	22.3067	23.0508	26.9023	18.8854	24.1529	19.6187	21.8603	15.7464	19.2192	21.1788	66.2319			0.274901	23.5079
6.946	16.013	22.2373	16.055	21.3801	14.0671	27.143	19.6144	20.38	24.6178	16.4188	25.5159	20.1652	19.3809	19.9644	20.3044	16.3516	62.2356			0.278884	22.4614
7.0452	21.504	21.389	18.3299	20.0592	20.9034	24.8602	15.926	16.9261	23.0165	17.7581	17.2062	17.7768	19.5312	23.5485	15.0315	19.6656	56.2232			0.282867	21.7444
7.1445	18.0747	19.2375	17.2776	17.9436	17.0693	16.9447	17.1688	17.7452	24.2179	21.2966	18.3068	15.3652	16.3663	18.3824	18.9738	21.4015	55.0747			0.286854	20.638
7.2437	14.2651	20.0026	21.4368	17.7862	18.4952	19.1065	15.3916	19.2577	21.9187	20.1318	15.5587	17.1498	17.1563	16.5898	17.185	21.726	50.7497			0.290837	20.2299
7.3429	12.0967	14.5991	21.0606	18.1126	18.303	15.5185	18.6948	21.3968	26.3345	17.3065	17.1281	18.4214	19.6824	14.9854	19.88	23.3538	42.131			0.29482	19.9415
7.4422	16.8952	15.382	18.0006	15.4796	19.2844	16.5906	19.6672	17.8664	27.0323	18.0916	21.2448	14.8845	15.299	20.0739	18.1286	25.3238	38.507			0.298807	19.8677
7.5414	12.3214	14.9911	13.9254	18.1907	14.359	15.4517	22.6026	21.6497	19.2538	22.9848	20.3163	14.5328	18.161	21.8554	15.7061	24.0494	34.9809			0.30279	19.1372
7.6406	12.0857	19.3033	16.1132	18.8377	17.6377	15.7118	22.3981	18.41	19.4732	21.4966	20.733	17.4498	21.1464	23.6984	16.1154	24.1325	30.533			0.306773	19.7221
7.7398	15.6159	17.5132	13.6667	18.2384	16.3131	15.5256	17.1322	17.7915	16.7568	23.1435	15.016	11.6108	22.4513	22.4651	24.2607	20.218	31.7274			0.310755	18.791
7.8391	11.6787	17.1825	11.6284	20.8909	15.5971	19.1466	13.491	18.8423	23.1407	22.682	15.2892	15.173	23.7349	19.4375	22.1323	19.143	32.9923			0.314742	18.9519
7.9383	12.3131	18.4425	16.0772	21.0644	14.0072	16.5794	13.7872	19.9376	23.2939	26.1389	16.0489	13.4346	23.7148	26.2074	19.6526	13.1696	27.9762			0.318725	18.9321
8.0375	10.1949	12.4737	13.8009	18.4705	13.868	15.5317	12.067	22.9027	24.9958	24.8494	14.3604	16.3743	24.5132	18.2444	21.0321	25.458	32.2327			0.322708	18.9041
8.1368	15.3126	13.2693	14.2645	18.0456	15.1253	12.1696	15.0226	18.334	22.9014	23.1566	14.7636	14.1603	19.0344	22.2904	15.0245	22.6468	33.1762			0.326695	18.1587
8.236	17.1587	16.8216	13.001	18.0991	17.3996	12.7661	15.5087	19.9372	18.4789	19.9154	13.7819	14.7109	19.839	19.2656	16.3632	21.956	31.0374			0.330678	18.0024
8.3352	14.654	17.7445	16.544	21.2011	20.2589	11.9051	18.7375	17.4783	18.6875	15.0932	10.8895	18.0942	18.8484	21.2573	15.3448	18.9613	28.2525			0.334661	17.8795
8.4344	15.7682	17.4397	12.706	17.5965	13.882	11.457	19.4029	12.8876	20.3977	20.6215	12.4264	24.6004	18.4762	20.9605	15.8395	20.2349	24.416			0.338644	17.5949
8.5337	12.0882	13.4368	14.162	14.5006	17.0354	11.2386	13.9657	13.626	15.8264	16.7291	13.8306	20.2233	16.5091	26.9947	14.8248	25.2211	29.752			0.342631	17.0567
8.6329	11.5104	15.3086	12.1502	16.0734	15.9808	16.0612	15.8232	13.3966	17.2868	20.0316	14.4929	19.5201	17.3595	20.048	15.6278	27.2613	31.0763			0.346614	17.5887
8.7321	11.9396	16.5507	10.754	13.4477	15.4237	13.3512	14.1336	11.3239	13.1309	15.7755	13.6291	13.1957	18.0067	24.5537	15.9665	25.1825	28.7317			0.350597	16.1822
8.8314	13.2729	17.8706	16.8718	13.3535	13.7755	14.2943	18.7203	10.9159	17.5271	11.2091	16.4851	14.4779	19.0075	21.5654	17.8364	25.1856	26.4027			0.354584	16.9866
8.9306	12.7185	14.1816	15.2494	14.7546	11.8485	15.4926	17.036	16.3186	19.9475	14.1081	22.3252	16.5995	17.1112	23.2104	17.3968	26.009	21.0498			0.358566	17.374
9.0298	11.951	10.4453	15.778	13.2201	15.7652	12.9577	13.8518	12.7325	16.7573	17.2759	20.5011	15.7211	22.1599	21.3	21.5084	26.7314	24.5944			0.362549	17.2501
9.129	8.2646	12.9979	16.7052	16.6893	12.8865	10.3628	19.1045	13.4579	15.6465	16.8822	17.7037	18.1479	16.3441	20.8257	22.3021	37.4424	21.0455			0.366532	17.4593
9.2283	7.8678	16.4173	12.5533	18.8778	18.6365	12.4922	18.0882	13.716	20.0612	14.4035	20.6566	15.8693	16.9437	21.4171	15.0434	30	28.2372			0.370519	17.7224
9.3275	10.2995	17.0201	11.7965	16.9944	11.2069	14.3653	16.5395	14.658	24.4166	16.1612	20.0474	15.1712	25.3844	15.3414	18.3306	26.0429	23.9767			0.374502	17.5149
9.4267	9.1307	17.0362	14.7317	17.797	12.928	14.6913	14.7459	13.0849	20.3126	19.1168	17.6427	17.0856	18.3222	13.173	21.2216	19.5945	26.7767			0.378485	16.9054
9.526	9.0128	14.4897	11.7378	17.6832	14.6599	17.5497	15.8993	13.6378	17.2122	18.8233	15.8496	14.16	18.2586	14.545	21.3919	20.0477	25.9814			0.382472	16.5259
9.6252	11.5654	12.6471	15.8518	13.0632	14.5938	22.1626	15.9994	15.9153	18.6038	17.0674	15.8779	14.6425	22.9374	16.4099	27.1485	22.9306	21.228			0.386455	17.5673
9.7244	11.7221	15.0925	12.9529	11.7377	13.2703	19.3807	23.1491	12.5582	19.8269	21.1282	17.8105	16.9476	20.8168	17.6036	22.5678	17.4429	27.2677			0.390438	17.7221
9.8236	14.3708	11.858	15.8372	13.8705	15.7663	19.6077	16.3742	9.9304	15.5769	19.9984	13.8127	15.7705	18.6466	11.5833	20.2129	21.6516	20.675			0.394421	16.2084
9.9229	16.1975	12.9778	16.5568	13.4679	13.88	19.3638	17.9704	11.5988	17.4914	14.6362	15.2164	18.5673	14.8548	12.9617	16.5551	18.9294	19.933			0.398408	15.9505
10.0221	16.6774	9.7761	13.849	16.2615	15.2793	16.3033	14.4123	12.6608	10.7614	15.0525	18.7219	13.5317	13.899	15.5181	14.7761	19.3856	18.4146			0.402391	15.0165
10.1213	13.5765	9.9883	16.2551	14.7518	11.93	12.628	16.8852	14.3779	12.158	13.4074	11.4811	11.4163	18.0896	17.1249	20.0545	20.562	15.195			0.406373	14.6989
10.2206	11.7762	11.3461	11.6983	13.3172	14.7962	13.3362	19.8508	15.3177	11.2273	16.573	14.6763	12.6819	18.6255	19.4282	23.0254	16.6811	16.0609			0.41036	15.3187
10.3198	12.9093	12.5906	14.0346	12.6265	14.1264	20.3761	16.5103	15.8504	17.4949	12.3765	10.3042	12.9382	14.262	20.2567	17.0057	14.2375	16.9721			0.414343	14.9925
10.419	13.1145	11.7237	12.9148	15.255	13.7561	17.8279	16.7057	13.4767	15.009	13.9591	14.5085	14.5672	15.9095	24.6308	23.7127	14.6844	12.5245			0.418326	15.5459
10.5183	9.6056	11.39	14.1675	15.2387	15.3545	20.1018	16.4813	15.4473	15.3547	12.1851	11.7544	17.4178	22.0735	24.0704	22.5112	14.3506	18.3297			0.422313	16.2255
10.6175	12.6168	13.8782	16.3311	18.6432	14.8608	16.425	11.4141	21.457	16.716	13.1279	14.3709	17.8322	16.2995	18.7625	26.1398	20.5403	21.5589			0.426296	17.1161
10.7167	10.4955	15.3977	13.5098	15.3425	11.9633	15.2699	13.2544	17.517	14.1341	11.0065	15.5844	15.305	13.3323	18.3923	32.6327	21.1048	25.2004			0.430279	16.4378
10.8159	7.7067	14.2098	17.7713	16.925	13.8705	17.1011	17.8023	17.484	12.7314	10.6362	15.7373	14.0444	19.1304	15.9899	27.7515	19.6635	21.6214			0.434262	16.481
10.9152	9.633	12.7619	16.7433	16.6511	13.5781	13.2803	15.754	18.2709	11.0795	13.0625	16.2351	15.4848	16.9362	8.789	19.5028	17.9791	17.0287			0.438249	14.8688
11.0144	8.0043	10.8273	19.1034	15.2711	17.7354	12.3315	11.2074	21.8444	15.4832	8.6478	14.7381	15.5684	17.9866	9.716	15.666	19.9843	23.6358			0.442232	15.1618
11.1136	12.4196	11.2569	19.1496	16.0581	12.6646	13.2161	9.8834	21.3776	16.5761	16.5597	15.2763	14.8697	16.7149	7.804	13.1626	18.1367	19.6442			0.446215	14.9865
11.2129	8.3463	12.0774	19.4728	15.3475	14.7695	10.2388	13.0868	24.9643	14.7212	17.4678	17.7063	15.1794	16.669	10.0332	9.3809	18.9826	19.2279			0.450202	15.1572
11.3121	10.131	13.5409	14.3781	18.0381	19.8512	10.2186	15.2824	21.7312	18.1449	16.6648	12.8851	15.9151	16.112	8.05	10.1585	14.4564	15.6631			0.454184	14.7777
11.4113	11.9648	15.9888	16.1059	19.5061	18.6906	10.2418	13.8041	14.846	15.1226	15.8386	16.9727	15.6359	18.0715	8.4507	10.8438	18.1693	20.782			0.458167	15.355
11.5105	10.5653	13.9195	20.9025	13.9071	16.8221	11.157	15.4107	20.8883	16.087	13.753	16.3829	15.8927	20.0977	8.8102	7.7549	20.5412	15.3548			0.46215	15.191
11.6098	10.7661	11.0985	14.462	17.6817	11.2678	16.4982	16.3478	15.4222	15.4082	13.8045	12.9495	13.2058	21.3127	6.371	11.3615	16.6967	17.7742			0.466137	14.2605
11.709	12.0451	14.8173	15.7699	13.5389	10.5896	14.5186	17.1782	13.0632	12.5621	17.0197	17.2545	15.1171	20.7514	6.2044	10.9838	18.5557	20.6876			0.47012	14.7445
11.8082	12.7452	10.0997	18.3457	14.0993	8.7587	8.0572	13.393	9.3002	14.2517	15.4462	17.1389	14.248	19.0182	6.9655	14.335	21.3535	15.4225			0.474103	13.7046
11.9075	16.8991	15.1148	19.5756	15.4172	13.4433	12.8584	16.4981	8.6902	13.1717	18.6982	17.9047	19.9812	18.4406	7.1198	11.2496	16.3471	19.3344			0.47809	15.3379
12.0067	16.8099	12.7001	13.2903	11.4643	11.9345	11.6376	15.2596	10.5613	11.7601	13.6063	16.3098	14.6776	18.4781	6.2419	10.6301	18.5291	17.5524			0.482073	13.6143
12.1059	19.154	13.7924	16.0538	11.192	14.5813	12.3222	13.2412	9.9991	12.423	18.0817	14.3033	15.9356	24.735	8.2717	8.1541	18.6144	19.1316			0.486056	14.7051
12.2051	23.2436	14.8961	12.8655	11.9851	12.4803	17.1328	12.8424	8.6564	11.1404	13.2643	11.393	17.2165	22.4367	7.1907	5.1029	18.3712	12.0304			0.490039	13.6617
12.3044	20.0191	16.9665	14.5346	13.9472	9.7443	19.115	13.6484	9.239	10.6607	13.6758	14.5822	14.6426	19.7553	6.4475	3.5061	17.2848	17.0728			0.494026	13.8142
12.4036	20.453	14.4903	10.6767	14.1834	10.7206	15.4674	11.3537	11.6948	14.862	15.9636	18.3734	12.5637	21.496	5.7992	5.9733	17.3305	23.7058			0.498009	14.4181
12.5028	16.7757	15.4972	12.7574	14.2004	14.3225	19.8453	16.5103	9.999	13.9568	14.3188	18.5686	11.8779	15.3928	6.8681	5.3958	18.2087	27.6436			0.501991	14.8317
12.6021	17.9019	12.313	13.8345	17.2568	12.4991	14.0904	10.4589	12.7768	14.2052	10.5157	19.7101	13.4431	17.0176	6.7388	6.4443	17.8005	19.0535			0.505978	13.8859
12.7013	13.9165	14.475	13.8124	11.6911	10.0569	14.5376	16.8464	14.7263	12.5281	12.2926	18.2783	16.184	16.2961	7.4452	8.2607	19.9256	15.8907			0.509961	13.9508
12.8005	12.8249	11.8914	11.6107	12.9994	12.7537	16.2326	17.9331	15.6468	14.3429	13.8592	17.1221	17.5934	12.3152	8.6879	7.2624	19.7922	19.6876			0.513944	14.268
12.8997	13.5967	13.3352	14.3395	15.0884	14.6602	15.1235	20.1113	12.9804	14.6933	15.6204	16.0597	17.7258	10.1255	9.0742	5.5597	19.2961	18.5889			0.517927	14.4693
12.999	11.7814	18.0022	10.2911	16.918	18.3111	13.8867	19.5078	13.2342	12.2184	16.0517	17.578	18.9471	8.7643	8.8029	6.5056	17.1461	14.0346			0.521914	14.2342
13.0982	11.3937	13.5235	13.9248	16.5347	14.4373	17.2645	12.2797	12.4911	17.5169	15.8564	15.3285	14.8617	15.219	6.1741	8.2985	14.8732	17.5926			0.525897	13.9747
13.1974	10.1927	14.2942	17.8198	16.8814	12.9843	13.1215	17.1025	9.8851	14.4029	12.7026	13.1799	15.3892	14.5446	6.61	8.3293	14.6439	18.1495			0.52988	13.5431
13.2967	12.5705	13.97	16.9118	16.7309	14.8222	15.2721	14.9668	9.0959	18.0508	15.8308	15.2443	15.99	14.7811	5.1123	7.1996	16.698	16.8006			0.533867	14.1205
13.3959	9.6512	14.5907	18.5772	16.0361	16.8149	12.1784	13.2184	11.9638	15.5737	15.6659	12.9681	14.7591	12.7222	4.2586	8.0286	16.5438	15.3373			0.53785	13.464
13.4951	11.9655	13.5158	19.0492	17.0558	16.1838	15.6135	13.3323	11.8003	14.1299	12.1895	19.9475	16.9008	21.3118	4.7686	9.06	10.9914	15.5391			0.541833	14.315
13.5943	9.235	17.9979	14.7923	19.4329	13.8191	14.1128	15.9459	15.6253	14.846	11.8523	11.9107	16.056	24.2207	5.2493	10.646	13.1934	18.2615			0.545816	14.541
13.6936	16.1326	12.7838	15.5924	16.6567	15.5893	13.5734	18.4069	10.5848	12.4861	15.0939	15.2841	18.322	21.2741	6.6147	11.0182	12.9905	15.2206			0.549802	14.5661
13.7928	13.4694	14.7941	16.0898	14.8131	16.0299	10.0082	12.0247	13.1347	18.4965	14.2876	15.0901	17.8069	18.0734	8.5146	7.822	13.8857	17.7041			0.553785	14.2379
13.892	11.7155	14.4984	17.9714	13.9387	16.6773	13.864	13.3799	20.9348	15.4697	21.0101	19.6031	18.8583	17.3503	9.366	7.6602	14.9486	17.4258			0.557768	15.5689
13.9913	14.6126	14.5643	15.305	18.4757	18.7687	14.9488	12.2232	23.6999	14.769	18.0026	19.6214	13.3436	13.5241	11.3126	3.6632	18.2183	23.3981			0.561755	15.7912
14.0905	14.0198	12.9705	12.6628	15.6148	13.6152	14.465	14.9726	25.1639	16.4084	14.6316	14.8893	16.0609	9.6478	8.1365	4.1535	13.3251	16.7332			0.565738	13.9689
14.1897	12.3722	14.2371	16.5815	15.1344	11.8728	13.3668	15.6481	21.0982	11.9194	16.083	12.8269	16.6827	11.7033	5.6888	5.4963	19.6152	17.6914			0.569721	14.0011
14.2889	14.2992	13.045	13.0112	14.2142	15.4547	13.3123	16.4148	18.8506	12.522	12.6235	14.8573	14.2164	13.6621	7.3383	6.9926	16.1415	16.4677			0.573704	13.7308
14.3882	13.2847	9.5809	18.8356	17.1817	15.9801	12.0542	18.8918	28.2046	8.0451	15.9319	13.6931	16.1734	14.7851	5.0212	9.778	19.7513	11.8454			0.577691	14.6493
14.4874	13.4168	11.5024	17.6595	16.0951	13.0855	15.9513	13.9729	20.7181	17.065	9.185	20.998	15.1793	13.9064	7.6061	6.7655	15.4521	11.8108			0.581674	14.1394
14.5866	18.0956	11.6466	14.1787	11.1	17.4005	12.869	15.6393	19.2954	13.0837	10.5923	22.1103	16.6494	14.3386	6.9876	7.2746	17.0796	11.0882			0.585657	14.0841
14.6859	17.6545	8.8147	14.83	13.0053	17.2023	13.6154	16.8702	20.7088	16.4652	14.5064	23.9476	17.4632	16.0107	6.0856	5.2258	14.8993	14.8222			0.589644	14.831
14.7851	19.0186	11.3374	14.3601	11.9962	10.9602	13.6675	17.0386	15.3887	15.0267	14.6802	24.8006	22.3616	13.0766	8.7604	6.0748	16.7846	12.9586			0.593627	14.6054
14.8843	16.7602	8.5317	15.7024	13.3382	15.3363	16.9871	14.1539	15.7884	18.0649	17.2026	20.8366	17.9315	10.3918	7.6088	6.37	17.3807	11.211			0.597609	14.3292
14.9835	17.5705	10.3576	10.8171	16.2316	14.9438	15.2178	13.8716	14.3415	14.3089	19.9184	17.499	18.6162	13.0983	4.9689	3.0355	16.303	13.5471			0.601592	13.8028
15.0828	17.2909	20.3428	15.3046	19.6514	14.4114	12.8831	16.4919	14.2507	13.8432	22.1393	15.6732	14.4618	9.3449	4.2705	5.6325	18.8994	14.8626			0.605579	14.6914
15.182	20.0999	14.1594	12.8017	20.9517	15.3008	11.5278	15.4546	13.3537	10.5079	15.7633	16.4698	17.4429	13.2374	3.9716	5.5036	27.5161	13.0534			0.609562	14.5362
15.2812	17.7911	14.6781	15.5764	22.7711	11.7138	12.1552	21.5371	11.9173	20.1358	16.7324	15.758	19.5691	14.7099	5.2759	8.0358	20.2522	13.197			0.613545	15.4004
15.3805	16.3108	14.1989	13.5732	21.0915	11.4831	15.4906	19.5415	10.7804	20.5237	17.6931	15.0804	17.4444	14.8676	6.4651	6.6992	24.77	10.7253			0.617532	15.1023
15.4797	18.0507	14.9475	17.4924	13.1114	16.2079	18.7752	17.3725	11.1787	17.5372	14.3196	15.228	16.2382	18.1545	5.2703	12.7115	22.1898	11.6005			0.621515	15.3168
15.5789	16.4207	13.7773	15.2739	11.7978	13.6172	18.5802	16.1226	11.8321	14.3646	13.3796	15.2879	17.4309	25.0649	8.4802	12.3413	20.0563	11.0684			0.625498	14.9939
15.6781	17.391	15.3858	14.3994	15.7692	18.0337	22.9446	15.7389	13.0371	12.6244	11.502	15.5163	21.2328	25.416	9.8714	9.6282	19.4634	12.9933			0.629481	15.9381
15.7774	13.3372	13.3493	15.6971	17.7968	19.5965	17.384	16.8802	14.9849	12.033	15.8556	22.6678	20.3418	19.1109	6.8193	7.1716	20.7447	18.6943			0.633468	16.0274
15.8766	17.6511	14.9502	18.0961	21.6862	24.0923	15.5843	16.8809	20.7288	12.4028	16.5078	30.524	20.6053	15.6933	8.4847	5.4666	21.9989	25.4999			0.637451	18.0502
15.9758	16.9851	13.9507	17.7581	18.7198	23.1619	15.764	15.0199	17.5973	16.8478	14.4017	22.8371	19.8978	21.2136	7.6545	7.3511	25.3818	23.2555			0.641434	17.5175
16.0751	14.0053	12.9619	19.6972	18.4084	18.4672	18.8183	18.4389	16.593	16.5943	15.1307	23.0098	17.3249	24.5778	11.4189	5.5283	20.761	14.8175			0.64542	16.8561
16.1743	15.1821	12.6355	18.3509	19.9891	20.0211	18.731	21.8158	19.2911	14.8096	14.4171	21.7746	17.0103	20.2015	9.4011	6.4506	19.2316	17.0925			0.649403	16.8474
16.2735	12.7362	14.3963	20.7902	19.3563	18.3643	15.1065	20.4805	16.3405	18.9145	16.6478	18.5124	21.9521	18.0558	7.9096	8.667	15.8641	15.3519			0.653386	16.438
16.3727	18.9354	12.9556	21.6974	20.0169	16.875	20.2697	18.78	19.2539	17.0183	18.4682	19.0581	16.3241	18.8728	10.725	10.5817	15.6714	17.1626			0.657369	17.2157
16.472	14.6003	12.6276	20.9715	15.5667	18.3491	20.7984	15.0411	14.3599	22.5207	15.6085	15.3572	20.8556	16.1299	11.4307	8.0726	12.8347	16.6448			0.661356	15.9864
16.5712	16.144	13.3588	21.0632	16.891	24.0305	18.8241	16.1458	14.7373	23.6412	16.374	14.0394	17.8261	22.9534	15.6634	8.5512	18.3857	15.986			0.665339	17.3303
16.6704	21.1235	17.388	19.391	11.0173	23.5334	17.2172	17.6176	13.5344	23.6961	15.5694	16.4989	20.8349	25.2436	13.4559	7.1138	16.2575	15.0397			0.669322	17.3254
16.7697	24.4673	16.6378	21.7952	13.6315	20.2012	19.8113	19.3852	13.6272	19.4389	17.8031	20.1684	21.8715	28.005	10.7918	7.7013	14.704	15.8502			0.673309	17.9936
16.8689	15.1303	17.2456	12.9041	15.6706	22.4715	20.6896	23.4026	14.6689	16.8815	18.8046	19.1925	21.1375	25.3596	15.5327	6.9418	16.43	20.4617			0.677292	17.8191
16.9681	14.0457	10.1702	12.9953	18.0573	17.7725	22.9259	20.5831	19.1296	18.5823	19.6317	21.9951	27.554	20.3547	13.5991	8.9152	18.5965	19.0614			0.681275	17.8806
17.0674	9.9758	14.6189	11.8056	14.8417	16.197	20.3362	18.9855	19.3709	16.7486	21.6512	18.3723	22.0622	20.058	14.0079	10.6845	20.8135	16.7531			0.685262	16.899
17.1666	16.2058	11.7298	16.5898	18.6342	19.2216	23.0334	17.9829	16.2466	19.3987	16.1029	16.0794	21.9523	17.698	12.0893	8.7555	19.7714	15.7694			0.689245	16.8977
17.2658	12.9728	19.6023	11.6436	18.9972	15.4484	18.6725	20.703	16.7303	16.5488	17.7902	18.1697	20.3967	22.552	15.8116	11.4976	19.2837	14.6396			0.693227	17.1447
17.365	13.3518	14.7513	13.9719	16.757	15.6989	21.8492	15.1565	16.7644	18.5877	13.3999	13.2047	22.6445	18.9569	14.8539	12.0057	16.3564	17.1546			0.69721	16.2038
17.4643	13.3994	18.083	10.4451	18.9248	15.0082	18.923	16.5405	19.9922	17.6898	20.743	16.4516	14.1648	20.5403	18.5833	13.6452	15.4603	14.9065			0.701197	16.6765
17.5635	9.6094	22.5465	12.4038	18.7695	19.7893	18.9111	15.0081	14.6862	15.4918	20.3653	17.6046	17.4416	28.7607	15.2815	13.6185	18.433	14.8994			0.70518	17.2718
17.6627	14.207	24.5418	11.8167	16.168	19.2744	14.7271	14.9288	18.2941	17.8703	15.8794	19.7097	18.2298	34.3752	12.6218	14.1632	16.146	21.5956			0.709163	17.9146
17.762	12.4234	20.1489	18.0129	18.5296	16.3756	13.464	15.5584	17.6942	20.7037	19.2227	17.9126	16.7744	23.2181	14.4276	16.5796	13.0192	26.3291			0.71315	17.6702
17.8612	9.6272	23.9794	18.007	20.6926	16.6744	16.2816	15.6881	13.4102	20.323	16.9317	15.4863	17.1768	21.0917	13.6671	21.7404	14.4495	20.8482			0.717133	17.4162
17.9604	11.2325	13.2062	18.3196	20.036	18.3763	15.6781	15.8034	16.8862	24.4506	15.3458	18.0632	23.4647	16.3885	10.0659	17.8656	19.2648	20.3612			0.721116	17.3417
18.0596	13.5619	18.486	18.0972	20.1092	18.3447	14.0017	12.1451	17.7563	20.8369	18.6233	21.1336	20.289	13.6045	13.5499	20.8541	18.2159	19.5357			0.725099	17.5968
18.1589	12.6511	15.3515	18.6143	16.6779	20.4133	15.1294	10.668	21.1116	23.6121	14.6427	16.6683	18.2456	17.324	13.4708	17.7618	24.7642	21.8655			0.729086	17.5866
18.2581	11.5389	14.5117	18.4584	18.5201	18.5318	17.4392	13.3833	23.1909	19.5303	12.5314	14.0432	19.2132	19.9542	11.8442	19.3143	19.9395	18.3545			0.733069	17.0764
18.3573	14.8921	18.4553	15.2304	15.6746	15.8652	15.8825	15.2929	23.5634	16.7138	15.2744	15.8948	16.0249	18.4447	13.4945	19.825	21.006	13.4794			0.737052	16.7655
18.4566	12.6803	16.966	18.6433	13.9584	15.771	16.7897	17.2843	20.9459	15.1063	12.9924	15.4459	18.2234	22.6253	11.5317	20.4896	21.2278	17.2664			0.741038	16.9381
18.5558	15.4009	17.869	22.3225	15.171	19.3124	16.1657	16.7567	19.3382	15.1378	16.4925	15.6686	17.4906	25.0931	15.0281	22.873	20.216	14.4668			0.745021	17.9296
18.655	17.1081	11.4148	20.22	14.9909	21.6541	19.2341	19.3476	17.6969	12.5022	16.4214	13.7432	15.7624	20.4465	20.4078	23.4053	24.4874	15.9006			0.749004	17.9261
18.7542	19.4583	22.0502	18.6897	19.6764	18.9979	15.3401	20.5136	16.6633	14.931	14.7483	11.413	19.3112	18.5727	20.6601	23.748	24.6963	14.4826			0.752987	18.4678
18.8535	19.065	18.462	20.5836	18.1484	20.3949	17.5948	21.0286	17.7637	16.4666	10.3678	10.8131	15.753	22.8367	22.9357	23.2592	26.0829	15.1372			0.756974	18.629
18.9527	20.0246	18.0147	20.2636	17.1607	16.7573	17.0932	24.2195	17.3377	12.8646	10.1063	13.0055	17.0608	20.1425	30.7338	22.8433	19.3518	18.7506			0.760957	18.5724
19.0519	19.7564	16.2203	19.9786	13.9472	17.0323	17.4609	18.8066	17.0933	18.66	10.4342	15.3496	12.2778	14.3318	30.4366	22.4205	23.9929	24.7324			0.76494	18.4077
19.1512	16.0213	20.1661	18.2678	16.5706	14.7915	16.9005	18.9427	17.4516	25.3926	14.0007	13.8646	16.1316	13.8892	25.4383	25.7179	26.501	19.4637			0.768927	18.7948
19.2504	17.6772	16.0751	17.9367	15.9897	18.4515	16.6286	18.7386	17.703	19.4352	15.2312	15.6383	14.7175	15.9926	18.7934	32.3402	26.9639	15.2773			0.77291	18.4465
19.3496	17.7253	16.673	18.5131	20.1685	20.765	17.0081	17.358	22.5779	19.8552	17.9873	20.4348	12.4315	13.0863	16.9955	27.0618	20.729	15.484			0.776893	18.5208
19.4488	15.7813	20.5441	20.1901	13.9356	14.7496	17.5287	17.9922	21.0919	14.0441	20.792	15.5291	15.1746	11.2418	15.2807	20.7893	12.4715	19.0997			0.780876	16.8374
19.5481	15.9624	18.1504	14.9242	14.3745	17.7027	17.9229	17.866	23.3212	16.4415	17.938	11.8535	16.7999	20.1726	9.9693	15.4084	13.829	19.0452			0.784863	16.5695
19.6473	22.2096	20.861	16.9032	16.1793	19.9808	19.0904	15.6501	18.3441	13.6875	18.2538	7.8946	11.9744	19.4372	12.7668	22.191	10.3861	17.7765			0.788845	16.6816
19.7465	15.4038	21.9675	17.2927	19.0313	18.8752	18.5072	14.3642	21.0221	18.147	16.6015	5.1875	6.2326	18.0867	17.337	17.8829	14.437	17.5543			0.792828	16.3489
19.8458	8.4808	17.5713	19.735	16.5143	20.2071	18.0887	16.437	24.3412	18.4077	19.1138	3.3902	3.8299	17.2436	14.2692	18.4461	20.7934	15.0276			0.796815	15.9939
19.945	13.3884	14.9905	17.5357	23.521	17.5056	20.0683	16.3631	17.8672	18.1392	13.4127	2.3775	1.8069	16.4323	16.2536	18.5631	23.8261	15.1665			0.800798	15.7187
20.0442	15.2046	17.5381	14.084	22.7205	20.1962	14.0872	15.9713	21.421	15.1848	14.1498	2.6739	3.903	15.4185	16.7419	15.3344	19.2042	16.2621			0.804781	15.2997
20.1434	13.888	21.3958	13.9762	22.62	17.3252	21.0417	19.4302	16.2225	15.7856	14.1393	1.4413	2.742	15.3826	12.9578	16.4109	25.7512	21.4652			0.808764	15.9986
20.2427	17.4466	24.0798	14.7348	24.2738	14.8076	15.7496	21.6846	13.594	16.3046	13.011	0.3631	1.7945	16.5106	13.8862	20.0319	28.5774	18.3266			0.812751	16.1869
20.3419	18.5166	17.4393	13.8537	20.088	16.1524	13.9619	21.5098	14.0395	12.432	9.8395	0.678	0.4945	15.5478	10.7098	18.8558	25.5592	14.6344			0.816734	14.3713
20.4411	17.9311	18.4933	16.0875	16.3589	16.8596	11.3159	15.3354	16.7194	14.9693	6.4309	0.3761	0.3597	14.4347	12.9973	21.9505	24.2913	13.1347			0.820717	14.0027
20.5404	18.6245	16.3582	17.1375	13.5359	18.5908	12.4227	14.3023	15.4131	17.492	5.9966	0.3672	1.0525	11.789	13.8977	26.4021	18.7202	15.1424			0.824704	13.9556
20.6396	15.5571	19.212	15.9436	19.6155	23.3694	17.5463	13.3537	16.7035	18.5351	2.1354	0.8274	0.5245	15.7879	13.3977	21.5173	16.6766	15.8102			0.828687	14.5008
20.7388	17.607	17.1839	17.718	19.5231	19.9679	16.1485	15.6934	14.3018	12.9799	2.1925	0.2471	1.4643	18.5889	17.884	18.3885	19.0709	13.6766			0.83267	14.2727
20.838	17.7175	18.1919	13.374	17.3096	26.3816	15.2053	14.041	18.9267	14.6064	2.7439	0.3367	0.2608	16.2732	16.5438	18.4856	16.6394	12.6547			0.836652	14.0995
20.9373	20.2574	17.0179	16.115	21.8374	31.8589	12.4253	16.4139	16.589	13.0206	2.8657	0.5128	0.2497	11.4378	11.9512	18.7631	14.333	12.2297			0.840639	13.9928
21.0365	18.3552	19.1607	13.3655	19.0997	25.8141	17.3839	17.7996	17.6229	9.8913	1.1634	0.8086	0.1225	7.3486	13.9849	15.4499	7.5698	11.7716			0.844622	12.7478
21.1357	16.737	22.0632	12.0323	16.1881	17.4021	14.7417	16.5339	11.7244	12.2292	1.7101	0.6638	0.5348	3.7999	15.9802	11.7915	4.3036	12.3326			0.848605	11.2217
21.235	17.8973	19.5434	17.4519	14.0001	15.5973	15.0382	16.1833	9.3044	8.1184	0.6529	0.7272	0.1718	1.8796	19.5937	8.023	2.1742	14.7932			0.852592	10.6559
21.3342	17.6063	14.8873	18.5222	15.9371	12.1929	15.4674	14.8488	10.2256	5.1152	0.5718	0.2503	0.8517	1.0888	12.7143	8.0166	2.8872	11.0815			0.856575	9.545
21.4334	18.3205	12.6982	21.1623	16.4953	15.7436	15.2541	8.442	8.9407	4.8405	0.18	0.8719	0.1607	1.456	11.3918	5.6969	1.0142	10.2518			0.860558	8.99532
21.5326	18.5943	13.8575	16.0114	18.3808	15.497	17.3649	15.1288	8.1808	2.5894	0.8508	1.2962	0.1819	1.5858	5.0004	2.8569	0.3251	10.476			0.864541	8.71635
21.6319	18.0514	18.8168	15.4063	14.482	11.9238	18.2576	9.7614	5.9589	2.0364	0.3544	0.8242	0.5079	2.1021	2.455	2.957	0.3883	7.0167			0.868528	7.72354
21.7311	16.3652	18.0778	12.1596	11.6394	15.1837	20.8526	8.4607	3.7582	3.4356	0.7177	0.149	0.5163	2.2341	1.4812	1.7295	0.5165	3.221			0.872511	7.08812
21.8303	18.4443	19.3504	14.6785	10.0497	14.4846	19.0691	7.5064	2.735	1.3666	0.4186	0.4018	0.174	0.9902	2.183	0.7743	0.3163	2.1868			0.876494	6.77233
21.9296	18.1256	14.7858	12.2277	11.4276	9.2728	17.8225	3.4688	2.1472	2.1228	1.0826	0.194	0.7998	0.1278	1.3464	1.8046	0.1093	1.5782			0.880481	5.79079
22.0288	16.4321	17.059	11.9965	13.4298	13.5508	13.6735	2.6244	1.759	1.1322	0.0738	0.3454	0.6931	0.2986	0.9687	0.9703	0.3305	0.8078			0.884463	5.65562
22.128	13.6169	12.709	11.3294	11.7556	14.04	16.0715	2.1315	1.4549	1.0904	0.146	0.0163	0.5362	1.032	0.2683	0.7622	0.3566	0.2735			0.888446	5.15237
22.2272	12.9601	14.8603	11.3439	12.125	8.9714	11.1051	3.1079	1.1356	1.0799	0.3867	0.4033	0.4723	0.1208	0.5288	0.5877	1.0796	1.0399			0.892429	4.78284
22.3265	11.3513	17.2659	11.8781	11.0715	6.7692	16.2954	1.5291	1.6969	1.2774	0.017	0.3536	0.2095	0.9429	1.2204	0.0178	0.3114	0.2314			0.896416	4.84934
22.4257	13.258	20.7587	13.4633	6.425	6.0846	13.8032	1.2248	0.9396	0.3441	0	0.432	0.5133	0.1208	1.2376	0.3539	0.3614	0.4444			0.900399	4.69204
22.5249	14.1693	17.1181	11.8348	5.6681	4.5379	12.4308	0.9615	0.5483	0.7621	0.3452	0.2125	0.8054	0.1433	0.6536	0.3787	0.6781	0.4294			0.904382	4.2163
22.6242	13.5831	21.8543	12.292	5.2529	3.2163	10.6375	1.2632	1.2636	0.6942	0.2285	0.2348	0.0537	0.007	0.3184	0.7011	0.4713	1.0522			0.908369	4.30142
22.7234	17.1524	20.5441	11.0705	2.7443	1.8642	5.7854	4.1277	0.6268	0.7731	0.9259	0.7681	0.1273	0.6166	0.1148	1.1558	0.6025	1.33			0.912352	4.13703
22.8226	13.7398	25.0851	8.757	0.6135	1.5852	1.7175	4.3603	1.5093	1.1247	0.0553	0.5041	0.0051	0.4277	0.1261	1.7266	1.2956	0.8572			0.916335	3.73471
22.9218	15.5344	23.8991	6.1309	0.8864	1.8606	1.7241	4.5648	1.0144	1.3586	0.3451	0.6658	0.0995	0.3227	0.688	0.3621	0.7608	0.4709			0.920318	3.56989
23.0211	15.5113	22.0615	5.8703	0.4037	1.4765	1.1075	1.2929	1.0294	2.013	0.3907	0.6965	0.1953	0.3879	0.2797	0.9058	0.1848	0.2462			0.924305	3.17959
23.1203	12.052	18.2267	4.5549	1.2549	1.6367	0.9834	1.0547	0.5735	1.365	0.6564	0.2217	0.3303	0.3043	0.4536	0.0806	0.4978	0.4194			0.928288	2.62741
23.2195	11.2659	18.6722	2.178	0.8112	1.8974	0.9744	1.2892	0.9044	0.8545	0.288	0.2615	0.2034	0.4336	0.4124	0.3901	0.5344	0.8733			0.93227	2.48494
23.3188	15.8046	17.6352	2.2171	0.6009	1.2608	0.2214	0.5593	0.8096	0.9493	0.0638	0.1995	0.1614	0.898	0.4354	0.1456	0.3143	0.4006			0.936257	2.5104
23.418	17.723	19.7872	1.1208	0.2581	1.8987	0.6274	0.2238	0.4879	0.847	0.1217	0.7903	0.3538	0.7396	0.9847	0.3832	0.4053	0.1684			0.94024	2.76005
23.5172	15.6816	17.7599	1.1657	0.3948	1.8575	0.2626	0.8262	0.401	0.3622	0.3019	0.0336	0.3659	0.1271	0.4299	0.461	0.1646	1.0449			0.944223	2.44944
23.6164	15.0985	19.5981	0.7431	0.1048	0.4153	0.6427	1.0165	0.596	0.1156	0.3537	0.5045	0.3386	0.2392	0.3436	0.3135	0.5793	0.7001			0.948206	2.45312
23.7157	16.2198	21.2693	0.6936	0.4348	0.3891	0.0489	0.4427	0.564	0.0131	0.0112	0.0372	0.1084	0.3761	0.1445	0.782	0.6811	0.3567			0.952193	2.50426
23.8149	18.524	23.0108	0.6519	0.1064	0.4695	0.3982	0.1576	0.2755	0.436	0.3395	0.1967	0.2463	0.1671	0.0588	0.0876	0.1786	0.255			0.956176	2.67997
23.9141	14.2591	16.6751	0.3679	0.1016	0.5904	0.6996	0.7775	0.3897	0.454	0.162	0.0521	0.112	0.1492	0.1627	0.2536	0.4814	0.5324			0.960159	2.13061
24.0134	16.9527	10.6163	0.1097	0.0556	0.5396	0.0893	0.6855	0.7777	0.1703	0.2972	0.0932	0.1417	0.5435	0.2879	0.1001	0.0247	0.1572			0.964146	1.86131
24.1126	17.7921	8.982	0.2187	0.15	0.4758	0.4477	0.4234	1.0366	0.0587	0.144	0.1032	0.1354	0.9858	0.0944	0	0.2451	0.2548			0.968129	1.85575
24.2118	12.608	10.6002	0.639	0.1088	0.7176	0.4952	0.2507	0.7427	0.2195	0.35	0.1008	0.0083	0.0736	0.0118	0	0.3529	0.396			0.972112	1.62795
24.3111	13.8496	5.3724	0.3035	0.4289	0.4935	0.21	0.3527	0.1324	0.329	0.1463	0.004	0	0.1466	0.5673	0.002	0.19	0.6312			0.976099	1.36232
24.4103	13.3553	7.0617	0.2524	0.1504	0.2281	0.2879	0.2295	0.0208	0.008	0.4511	0.1896	0.2936	0.3598	1.0297	0.1963	0.332	0.2891			0.980081	1.45502
24.5095	13.0256	6.6618	0.1913	0.0072	0.3427	0.2344	0.9167	0.3817	0.434	0.0512	0.4603	0.4236	0.052	1.3984	0.2069	0.0222	0.4996			0.984064	1.4888
24.6087	11.0345	4.3735	0.3103	0.0028	0.3971	1.1588	0.154	0.2532	0.7337	0.0103	6.602e-05	0.0793	0.0039	0.9668	0.1957	0.0948	0.6899			0.988047	1.20345
24.708	9.4926	3.6892	0.6894	0.1925	0.1906	0.4043	0.4875	0.3024	0.0982	0.1428	0.0199	0.2365	0.6965	0.6651	0.008	0.2811	0.4268			0.992034	1.0602
24.8072	9.5846	4.7842	0.5015	0.0051	0.1535	1.1162	0.8114	0.3108	1.4019	0.192	0.6741	0.1151	0.1059	0.408	0.102	0.1685	0.2433			0.996017	1.21636
24.9064	7.6247	2.5464	0.2464	0.2349	0.1584	1.1707	0.6417	0.3356	1.5347	0.4044	0.6681	0.3532	0.5313	0.24	0.3448	0.2396	0.2108			1	1.02857

## Sheet: Image12
X0	Y0	Y1	Y2	Y3	Y4	Y5	Y6	Y7	Y8	Y9	Y10	Y11	Y12	Y13	Y14	Y15	Y16	Y17		Ap-Basal to 1	Average intensities
0	23.2079	27.4674	20.1663	27.7226	26.0167	22.7296	28.3139	27.9112	31.4836	28.6273	27.6069	29.2371	32.2923	31.3536	37.6419	35.6547	37.0056	38.9314		0	29.6317
0.0992	21.9751	22.1087	22.493	27.3051	26.3851	25.3133	29.544	24.7586	26.5152	24.2715	24.6147	24.7186	35.0306	35.1962	37.6027	35.1431	38.5954	40.3178		0.00602234	28.9938
0.1985	22.6459	21.4273	27.0824	25.9826	31.7553	27.1968	31.7123	22.3584	24.4415	28.1434	27.6385	27.8244	34.3288	36.7119	42.4003	38.8704	40.6282	35.1137		0.0120508	30.3479
0.2977	21.8524	25.0515	32.6384	24.9364	28.1762	26.6112	26.0603	25.281	31.6247	27.2014	30.7368	29.0532	26.4374	42.9287	48.9518	40.2118	41.7542	36.762		0.0180731	31.4594
0.3969	22.0644	24.1801	23.8249	26.365	26.0133	27.6342	28.5136	26.4277	27.4686	26.142	31.9181	26.3724	26.995	52.7674	48.6114	37.9077	40.4304	40.901		0.0240954	31.3632
0.4961	25.7627	32.0528	25.1385	26.636	26.7566	32.6236	26.4088	29.8769	30.2004	29.926	36.3386	28.1465	29.4565	53.1951	47.0039	46.2422	39.9129	43.7501		0.0301178	33.8571
0.5954	25.6574	30.19	26.1532	26.8054	25.6586	27.9302	31.8636	28.842	30.0208	30.6538	36.0181	27.3356	32.4901	61.487	45.3911	54.0711	36.712	39.8586		0.0361462	34.2855
0.6946	31.0627	27.0633	26.6915	30.1054	25.8419	28.0771	27.3452	20.9848	30.7658	30.1068	44.5721	32.9165	37.7821	58.8868	42.4778	52.8161	43.9287	37.7774		0.0421685	34.9557
0.7938	23.5683	26.1066	25.4303	36.3187	25.9047	26.4401	28.4794	22.9618	34.7134	35.0591	44.8479	39.7975	42.4109	66.3169	45.5554	62.797	49.8278	37.3107		0.0481909	37.4359
0.8931	20.4271	25.0576	29.3226	35.3736	28.7932	33.5833	33.5385	25.1744	34.4986	25.8495	42.2578	39.7109	44.5289	74.0218	57.4653	63.7999	49.019	42.1459		0.0542193	39.1427
0.9923	20.5841	25.828	26.9548	35.1156	27.1129	31.5714	35.2428	28.1745	32.723	28.5193	51.2848	40.4272	49.7531	62.3163	59.1696	69.9198	58.2315	38.4468		0.0602416	40.0764
1.0915	20.627	30.6686	30.1711	41.9505	31.0441	28.0291	36.4555	29.0093	38.3335	29.3809	48.514	42.0708	58.0112	46.8191	46.6018	73.3281	62.7883	34.8532		0.066264	40.4809
1.1907	24.7365	28.6007	33.099	45.7161	33.4138	30.3168	37.0941	23.0822	44.3818	24.9268	44.6362	39.6934	63.0201	50.1205	50.8541	75.3437	62.4318	36.4996		0.0722863	41.5537
1.29	31.1173	27.5266	42.0643	52.1837	33.6748	34.8177	46.8188	30.636	43.9396	28.7432	48.4344	37.6513	60.6445	51.6217	43.6065	66.6148	61.062	40.4995		0.0783147	43.4254
1.3892	40.464	24.6767	40.637	48.0437	39.8558	34.2839	48.7591	29.1605	48.1899	34.6012	50.2785	42.349	66.2948	63.1843	44.7233	71.5481	72.9348	48.8269		0.0843371	47.1562
1.4884	35.0679	30.7526	42.9106	46.5505	42.6789	32.4056	49.2255	31.5468	49.1401	35.0995	51.303	33.6361	68.0796	65.4014	47.4688	67.5631	71.3089	46.9983		0.0903594	47.0632
1.5877	33.0255	39.9991	43.6167	46.0818	62.6646	39.3038	40.5226	35.0675	51.8938	43.9157	56.6001	25.267	63.6984	62.1483	46.0337	62.5954	64.6458	51.7999		0.0963878	48.2711
1.6869	36.7515	42.5075	40.4279	47.9572	60.7803	42.9721	47.5557	41.4231	55.9867	50.1427	50.0094	28.1299	66.5423	68.2104	41.835	61.3803	59.7058	56.4575		0.10241	49.932
1.7861	41.2971	40.8696	46.3617	42.535	67.0515	50.2885	56.0131	45.8642	52.8261	61.2688	45.958	34.014	73.7246	65.9925	52.0489	55.6134	46.913	68.3007		0.108432	52.6078
1.8853	44.1441	43.5607	43.2718	41.6725	61.4621	61.6423	64.0659	47.2014	53.6021	67.5315	43.9659	38.2265	64.9317	64.4265	54.266	41.0359	40.1133	73.7465		0.114455	52.7148
1.9846	41.6366	37.9145	41.1515	47.0644	62.6106	69.9546	65.9609	42.3749	51.0897	80.4586	35.375	37.0863	60.6402	76.7093	58.636	41.5983	37.7554	70.3363		0.120483	53.2418
2.0838	38.1321	36.2689	42.9841	45.7443	55.7903	79.5421	64.7926	44.196	54.5108	78.3341	40.0934	34.6784	52.0644	67.4426	54.378	46.7757	37.5792	65.4345		0.126506	52.1523
2.183	44.9211	29.4468	40.8554	44.5263	58.4244	77.0466	60.0313	46.6488	57.3781	81.3425	48.4579	31.7239	60.6858	56.0912	57.3633	41.969	41.0006	66.1154		0.132528	52.446
2.2823	47.2341	28.5555	36.4192	43.9295	55.7124	66.1516	58.587	46.1578	59.784	66.2108	43.744	36.282	60.7327	53.6149	53.0792	44.2712	33.0861	63.3279		0.138556	49.8267
2.3815	45.6051	24.2109	33.0452	46.3916	57.6058	66.558	54.4951	55.2356	49.5827	60.4992	42.9756	37.0845	58.5859	44.6433	52.0613	42.0508	35.3895	56.7294		0.144579	47.9305
2.4807	44.725	24.7312	31.2986	48.27	56.7028	62.4043	59.8097	55.8477	53.5837	59.6741	41.049	34.6092	47.4819	43.5799	52.5078	38.9142	35.8876	57.1115		0.150601	47.1216
2.5799	53.7809	28.2988	29.872	47.0232	65.608	57.5221	60.3063	65.0645	44.2134	48.7507	37.4434	35.5652	48.3646	45.1749	57.8152	42.8221	29.8884	48.0677		0.156623	46.9767
2.6792	68.904	32.0101	23.4729	41.4403	61.3148	61.7697	59.4955	70.9838	34.8395	46.7214	36.4477	39.0782	41.6437	52.0655	66.0362	46.7104	36.4271	38.8597		0.162652	47.6789
2.7784	77.1891	33.4131	25.9717	48.9421	60.7796	59.4613	50.0046	78.0468	35.5833	46.0537	37.8578	34.1034	45.675	48.9417	65.2694	51.0503	29.5986	35.4745		0.168674	47.9676
2.8776	85.7189	26.5676	25.6647	42.605	60.6371	54.2246	48.9133	82.1741	36.515	45.1283	38.1828	35.1138	39.9265	43.3936	70.8545	41.7412	29.456	35.4541		0.174696	46.7928
2.9769	85.6349	21.307	22.8143	36.0553	76.2129	52.4463	47.9339	83.6127	33.1322	41.9729	35.8749	38.648	37.254	38.5231	65.8012	35.4832	30.0001	39.4809		0.180725	45.6771
3.0761	99.9224	21.5624	20.2228	28.7541	75.9665	47.9746	47.7103	81.1022	31.6174	40.7327	38.6461	36.8365	36.5179	41.0209	59.7126	29.2454	32.4729	43.7626		0.186747	45.21
3.1753	87.2025	25.2581	22.039	28.8698	77.6806	53.144	59.0002	78.4679	28.9075	35.271	36.7975	36.8335	38.2151	41.5188	53.7581	25.8436	27.6817	51.4354		0.19277	44.8847
3.2745	74.3768	21.7157	22.9208	29.8719	72.9542	47.8864	63.0152	70.2867	27.9476	41.3975	44.2952	31.3965	32.0642	41.5609	48.6076	27.9455	25.8743	37.2014		0.198792	42.2955
3.3738	60.6491	23.448	21.0146	24.7084	61.4765	46.5888	55.58	58.2061	24.0758	40.1776	46.1237	29.1614	35.5599	37.7851	37.3392	24.3575	26.2745	32.1421		0.20482	38.0371
3.473	55.267	20.4389	24.3269	27.3255	60.0068	47.8819	53.5808	54.3341	21.554	36.7925	47.4282	39.8957	34.136	33.3651	34.9508	19.3074	23.6185	36.2381		0.210843	37.2471
3.5722	48.7271	22.0778	21.3664	26.2311	47.6761	40.5989	50.1832	44.0012	18.756	29.4997	42.0653	37.9605	29.3842	29.6354	33.7725	18.6759	23.795	42.7632		0.216865	33.7316
3.6715	36.2304	21.5659	23.8685	21.0499	43.967	38.4919	49.6985	37.7594	18.0228	21.4369	34.5582	39.5031	31.3671	25.3693	32.9034	20.0308	23.1934	39.6593		0.222893	31.0375
3.7707	33.3886	19.802	23.5442	24.1244	43.9903	39.7513	42.572	30.9513	15.4448	23.7047	32.7194	35.8434	27.661	20.7737	32.3576	21.713	18.5735	34.7823		0.228916	28.9832
3.8699	40.9529	17.7099	20.2473	27.6567	35.9128	35.3382	38.3181	29.7193	16.801	21.7916	38.6938	33.6376	23.058	25.6302	36.9525	19.8679	20.5632	33.5783		0.234938	28.6905
3.9692	40.3802	19.8089	24.3462	25.4414	32.1529	28.4945	32.9663	32.0815	17.2412	20.8717	41.9376	31.5766	30.0478	30.1647	29.2766	20.5839	25.5307	30.8315		0.240966	28.5408
4.0684	33.5359	21.8603	21.5275	25.6406	36.9332	21.2024	24.0184	24.2277	17.6815	16.4535	42.0757	23.9113	32.2604	28.4689	31.7481	22.9473	29.3388	35.422		0.246989	27.1808
4.1676	30.4652	18.0646	18.3751	24.3885	32.1929	22.805	26.2738	24.1348	23.8904	19.6798	28.9441	25.3313	28.9249	29.7598	30.4867	26.4697	28.9583	34.738		0.253011	26.3268
4.2668	33.1807	17.7544	19.3328	26.7548	28.1603	19.8041	27.6768	24.5697	23.4965	22.6137	25.8039	22.886	37.6218	40.4565	29.7951	27.1117	27.1449	28.168		0.259034	26.7962
4.3661	41.3494	16.4553	24.7784	23.9059	26.5471	17.2171	25.6735	23.0948	25.1045	19.1366	28.3472	26.3746	29.3981	32.8966	31.5338	26.5918	28.0852	31.8359		0.265062	26.5737
4.4653	49.5552	13.8653	24.4994	22.6839	24.1167	22.195	25.9759	26.826	19.3172	23.2409	22.6779	32.6401	26.4312	34.4571	32.7734	23.8491	26.8182	30.3366		0.271084	26.7922
4.5645	47.8053	13.9198	24.0182	19.6861	26.6961	20.4195	25.2453	25.3519	18.0127	21.0423	22.0208	35.8748	19.877	29.5354	24.819	31.2271	25.2085	28.2828		0.277107	25.5024
4.6638	44.9596	15.8832	22.5589	19.4137	28.7952	20.4335	22.4014	22.0411	18.0459	24.8079	23.288	32.4775	26.7692	26.7232	21.9961	32.8286	22.6975	23.2482		0.283135	24.9649
4.763	47.2894	16.0026	22.7319	24.3486	32.3427	25.6056	22.7511	21.0453	20.7257	20.769	20.2326	31.5872	24.0083	30.1329	25.7101	27.9411	16.5113	25.1019		0.289157	25.2687
4.8622	36.8482	18.342	25.8333	21.8817	31.0884	29.9996	21.2613	20.1066	20.8005	16.45	21.4978	31.4146	22.7406	31.65	24.8955	25.419	17.0052	22.2238		0.29518	24.4143
4.9614	33.5934	18.3233	24.568	22.8308	23.5445	24.6747	20.1578	21.6941	21.543	20.7907	18.7767	26.2848	21.0162	31.4773	23.0603	22.3736	17.7272	19.0464		0.301202	22.8602
5.0607	29.485	15.0905	23.1264	21.169	20.4703	21.0587	18.7127	20.8054	25.3819	23.0865	22.7445	22.4008	16.1497	27.4141	25.2403	21.5846	18.9962	21.2969		0.30723	21.9008
5.1599	30.9673	16.5474	20.9866	22.9112	19.5477	16.8104	21.3102	22.3628	25.4692	21.3364	19.4456	17.5949	16.258	24.741	21.2818	20.9356	22.7037	25.968		0.313253	21.5099
5.2591	33.8092	17.8179	14.1095	21.9996	17.016	18.6604	18.2177	19.8465	20.6697	22.7582	21.1615	19.5654	15.7256	29.3161	17.4148	24.9826	23.7838	24.3911		0.319275	21.1803
5.3584	33.1207	20.9402	15.2759	18.9501	20.7753	17.5399	20.7213	23.0367	22.518	22.2207	23.5947	23.0803	15.4366	26.5771	18.1661	23.753	22.0567	19.51		0.325304	21.5152
5.4576	31.9574	14.9329	16.0975	21.0882	23.1362	15.7202	21.1172	20.7783	18.6127	21.6395	24.3772	25.4009	20.8288	23.6464	20.8532	27.9607	17.9791	18.3474		0.331326	21.3597
5.5568	27.8995	13.9915	16.4255	18.5909	22.1896	16.5979	22.2176	22.272	18.7214	19.0141	30.2861	21.5721	19.087	24.751	17.3527	21.7483	21.0315	19.5611		0.337348	20.7394
5.656	30.5913	15.5641	16.0738	18.0624	18.4182	14.0177	17.7072	21.8458	21.0077	19.4781	27.9739	21.1488	19.6952	26.8888	17.5757	19.8638	19.9873	21.2435		0.343371	20.3969
5.7553	21.6299	13.7536	15.2415	19.5293	18.2205	18.052	16.1716	16.6929	24.2438	18.9357	25.2846	20.5844	20.7248	26.5261	22.6717	22.013	21.1046	22.234		0.349399	20.2008
5.8545	20.4464	15.5919	15.8597	23.2048	15.4971	16.1166	17.1353	17.3495	28.9302	19.0202	23.8093	19.2864	21.5248	25.3549	25.6333	18.2813	24.7018	18.5797		0.355421	20.3513
5.9537	17.1304	18.2215	16.9046	24.268	15.5356	13.5102	13.1243	19.5396	27.4024	21.3935	23.0121	21.2631	22.4834	30.8688	29.9194	17.1726	19.163	23.5516		0.361444	20.8036
6.053	21.9573	15.3224	20.5325	20.8958	17.0715	14.5783	16.5659	21.8816	24.2706	20.0003	28.2267	20.9754	24.1579	24.9263	25.8849	20.1905	21.7091	26.7897		0.367472	21.4409
6.1522	18.7397	17.5992	20.7187	20.0873	17.3649	12.8665	13.5425	16.4984	25.4048	20.5546	30.0236	18.4835	20.5035	25.5695	19.5752	23.937	16.2491	24.9582		0.373494	20.1487
6.2514	13.9599	18.6479	17.6391	18.2667	18.1785	15.0101	17.0263	15.6269	29.0116	20.7926	33.8146	17.5092	16.8102	29.079	19.3973	22.2329	19.2235	19.1931		0.379517	20.0789
6.3506	13.067	18.0959	15.9422	16.5992	20.2775	11.6736	21.5298	14.9008	25.7379	23.3118	29.1962	22.6985	13.9828	27.2527	23.9417	20.9205	16.6076	19.2546		0.385539	19.7217
6.4499	12.8719	12.7225	14.9554	17.6301	15.0462	13.3572	29.7241	23.0347	16.8654	20.6588	26.3174	23.6472	14.7728	25.0719	21.1703	17.1974	13.4838	19.5517		0.391568	18.7822
6.5491	14.3259	12.1812	18.5098	13.6852	14.066	13.0084	23.8945	18.8033	16.406	20.9807	22.5515	21.2131	13.3157	22.0189	20.3407	20.8946	22.5178	23.3082		0.39759	18.4456
6.6483	14.7392	13.1408	17.6412	16.2664	11.7816	14.3616	22.5292	20.7189	17.1733	15.6115	24.813	16.9332	10.5575	22.4512	23.2656	20.8869	20.7389	18.1782		0.403612	17.8771
6.7476	17.9773	17.3208	19.6939	21.2671	17.4776	15.3924	22.355	19.7755	20.3017	15.1	18.9242	16.3231	9.8281	25.7936	20.6476	21.6877	20.7885	18.6374		0.409641	18.8495
6.8468	16.4473	22.8314	20.9667	23.0177	17.8409	13.6166	27.4772	17.0796	21.2509	16.9033	25.3533	16.3648	7.7302	27.0838	23.4683	22.8127	22.4121	19.1634		0.415663	20.1011
6.946	17.6031	21.4138	13.1264	24.0283	21.293	19.2337	25.4337	15.604	19.5431	15.1054	20.4582	18.5021	9.3249	26.2344	19.8515	22.7167	23.3644	20.2208		0.421685	19.6143
7.0452	13.3885	18.23	12.4546	22.3464	16.8121	18.8165	22.2483	16.8681	14.6546	13.6771	15.2765	16.1586	6.2986	23.6079	22.437	23.5665	21.6773	20.1914		0.427708	17.7061
7.1445	12.9696	16.7348	9.6139	17.9889	15.1117	17.997	18.6065	15.661	14.6548	12.1326	16.9977	13.0833	6.7146	25.7384	20.6002	29.3004	21.3224	22.8307		0.433736	17.1144
7.2437	11.6918	14.1673	9.845	20.8449	13.0968	13.3241	15.2216	15.8417	16.8559	14.7598	23.7057	12.6786	6.1061	20.8925	23.291	26.7055	16.0623	22.3535		0.439758	16.5247
7.3429	11.742	12.8297	11.7766	22.284	12.53	10.2931	15.4944	17.8877	16.7415	17.1662	21.6912	14.2016	6.5473	19.5685	24.7847	22.4813	15.9829	21.6026		0.445781	16.4225
7.4422	11.4949	14.3103	12.3512	20.5161	13.4119	7.5608	17.1224	18.3774	19.4585	19.9889	25.9014	17.5698	5.814	21.2971	21.8787	20.6869	17.568	21.9023		0.451809	17.0673
7.5414	14.497	14.0524	14.0723	17.8681	11.495	9.3318	20.0089	17.5704	18.1281	21.9486	27.419	11.9649	6.4334	20.0289	20.1508	22.8033	17.5612	21.428		0.457831	17.0423
7.6406	14.8127	14.3172	13.5747	15.882	11.6503	10.3476	26.2546	17.3593	17.5114	17.635	23.2466	10.3871	6.4469	20.6245	22.6409	18.4829	13.259	21.745		0.463854	16.4543
7.7398	13.9998	11.6371	11.7688	21.7283	11.7324	10.0512	21.6856	19.6303	10.8846	17.5731	19.549	9.0722	6.3964	18.5224	27.0243	21.5722	11.6919	17.4603		0.469876	15.6656
7.8391	12.2874	11.6262	14.6693	24.8464	14.1735	8.978	19.5428	24.356	13.7198	21.7035	17.4761	8.6096	7.3865	24.0887	24.6017	24.9533	10.6734	14.2269		0.475905	16.5511
7.9383	12.3338	14.1916	9.5023	25.532	15.3225	5.7821	19.136	23.2533	11.2134	18.0996	17.3546	6.6403	4.0937	24.9591	20.7027	21.958	10.3549	12.1475		0.481927	15.1432
8.0375	10.7966	12.6407	15.0915	21.763	15.294	11.3853	21.4171	19.4574	11.62	15.3917	16.2743	7.1423	5.5208	20.7906	22.7458	17.8844	8.4342	10.2412		0.487949	14.6606
8.1368	16.7762	13.4802	12.0988	17.302	15.9705	13.317	19.8915	21.5286	14.1211	11.3651	16.8742	5.4041	7.0731	19.2752	25.2095	20.8089	11.1114	11.5939		0.493978	15.1779
8.236	14.7882	14.0636	13.3579	18.5015	17.6129	12.7745	19.291	19.8319	13.7939	11.7531	20.1515	8.7309	7.2856	19.881	29.6817	21.0239	10.747	13.4824		0.5	15.9307
8.3352	14.975	15.8326	13.543	16.2546	18.5231	10.3739	18.8656	14.93	19.4237	11.803	21.8984	6.3969	4.8302	20.103	22.4553	22.6669	10.2694	19.0202		0.506022	15.6758
8.4344	11.8225	17.5757	13.9137	18.1814	15.6846	7.2258	16.1082	15.2962	19.7836	8.6607	23.2245	5.5239	6.1743	20.0492	23.0543	22.5861	11.4076	13.5539		0.512045	14.9903
8.5337	14.1031	24.376	13.3754	19.5372	16.1347	7.3428	15.4877	19.3227	13.5018	8.9337	25.2486	8.3526	5.9031	21.2603	22.7719	17.8223	7.3191	17.6357		0.518073	15.4683
8.6329	12.6302	23.7801	12.6026	21.7805	15.2331	8.9832	16.0275	19.6815	12.7174	12.339	20.8273	6.4831	4.3176	22.7007	21.4809	16.8614	11.7492	14.3439		0.524095	15.2522
8.7321	11.2874	25.6081	10.098	26.7178	14.7199	10.0973	13.6414	17.5352	12.8252	11.3965	16.778	5.0584	5.6071	21.882	22.2063	18.0196	8.3253	12.2333		0.530118	14.6687
8.8314	14.931	25.0378	10.2678	27.9694	15.6878	8.7185	11.247	13.8629	14.0775	12.6957	18.4455	8.1484	6.7722	26.9916	20.7659	17.5533	7.5685	13.4177		0.536146	15.231
8.9306	15.6912	22.9414	8.2955	26.7591	16.3319	9.2466	14.2724	18.324	12.1492	16.1622	18.2147	9.2563	8.5141	32.8584	22.963	17.8486	5.6535	12.5228		0.542169	16.0003
9.0298	12.8459	21.9867	10.6064	28.8632	13.9462	6.8938	12.9545	17.3114	11.0898	15.8622	20.802	9.4991	10.6578	29.4549	18.9812	20.6812	5.2318	12.913		0.548191	15.5878
9.129	11.2939	16.7859	9.9704	34.0115	14.13	5.9894	15.2833	15.857	11.7283	14.7383	15.8933	9.0034	9.7984	19.8605	15.1174	15.2329	7.834	8.9756		0.554213	13.9724
9.2283	15.6385	14.694	11.7339	33.7947	14.1753	8.618	16.4211	16.2582	13.4707	15.507	19.607	10.1268	6.8678	21.4997	20.9343	14.8055	6.8255	11.0902		0.560242	15.1149
9.3275	14.8121	14.3016	14.1706	31.7588	13.2183	8.7429	14.7507	16.0396	12.1065	14.6935	16.735	9.3679	5.1077	20.4762	23.7831	15.1231	10.2149	10.6635		0.566264	14.7814
9.4267	11.497	12.0304	11.4235	27.5745	17.7359	8.416	15.8809	15.1317	14.6145	13.3969	16.1442	8.5783	6.59	16.418	21.7445	17.7121	7.1847	9.6076		0.572286	13.9823
9.526	11.8067	12.9929	14.6759	22.6437	20.2474	8.3055	15.2391	12.8663	17.2066	13.773	16.0873	8.4108	7.4496	16.2299	19.9387	17.8862	6.9778	9.4059		0.578315	14.008
9.6252	11.1363	13.7089	13.8582	20.0582	20.3912	8.1682	14.5476	14.2139	15.2501	10.3346	23.4169	10.8913	6.402	17.8673	26.2963	19.394	6.2238	10.4084		0.584337	14.5871
9.7244	13.5564	16.4707	10.9163	22.0181	18.9958	9.55	12.1905	14.6892	13.3027	11.6545	19.4506	9.6409	8.1188	14.9795	27.8526	18.9101	7.4102	6.1736		0.590359	14.2156
9.8236	11.5729	14.3432	11.235	18.4729	18.268	11.5115	11.1892	18.0589	12.0921	8.1244	17.9806	7.8787	5.6172	14.5139	24.9583	19.8413	4.7954	6.0533		0.596382	13.1393
9.9229	11.6183	16.4656	12.618	20.8736	16.6631	8.6964	10.9695	18.4802	10.7338	11.3204	19.1029	8.0238	9.4172	15.3851	22.226	21.6153	4.8268	6.5657		0.60241	13.6445
10.0221	15.2002	15.5294	13.0122	18.6982	17.3916	7.0099	14.1702	20.1734	9.5231	10.6096	21.1032	6.6304	14.1246	19.4584	23.0726	24.7953	5.0584	7.1093		0.608432	14.5928
10.1213	12.0533	11.1881	9.9038	16.6881	16.4488	6.4536	13.6502	18.0143	10.6444	9.2241	19.593	5.6112	13.2259	20.6382	23.1281	29.7981	4.6868	8.8859		0.614455	13.8798
10.2206	10.6884	11.5242	13.5641	19.9273	19.3255	5.038	14.7799	20.4218	13.8443	10.7859	19.6667	7.7319	11.6472	22.2947	22.1089	27.0839	5.2578	7.627		0.620483	14.6288
10.3198	15.1124	13.3312	10.9326	22.6791	14.8882	6.4586	15.1866	18.458	12.3228	11.4895	20.8923	6.5595	8.9314	18.2823	27.8105	30.1494	6.747	8.7153		0.626506	14.9415
10.419	14.9616	16.3405	11.9925	18.8274	12.1231	5.8802	14.3453	20.5731	17.1672	16.0221	22.3334	5.1868	5.9952	17.6612	31.1364	21.8296	7.1746	6.8738		0.632528	14.8013
10.5183	14.0937	15.411	14.2744	20.1281	11.6239	4.676	12.2272	24.3247	13.1694	11.794	19.5931	5.6363	7.793	19.1081	34.0788	23.7074	6.2702	10.0599		0.638556	14.8872
10.6175	12.4912	14.2965	11.9419	22.9142	13.2992	5.8698	12.934	20.2462	12.8255	10.1564	21.6585	4.9445	7.9947	18.3389	33.4002	21.9129	9.0246	9.6625		0.644579	14.6618
10.7167	13.3424	13.1657	11.5456	17.503	15.9718	6.8284	13.3642	15.958	11.8185	11.0549	20.8373	6.2222	6.7613	15.0497	27.816	23.0294	8.367	9.2028		0.650601	13.7688
10.8159	14.9097	15.4044	14.2813	18.7275	18.8759	7.8236	13.6634	14.0154	13.9555	10.9217	21.0065	6.9554	5.486	19.7577	24.0967	18.8653	7.5069	7.3611		0.656623	14.0897
10.9152	15.5296	15.99	13.9919	22.6322	13.6983	10.2841	13.366	12.8085	13.0561	11.5207	17.6333	8.9669	5.946	17.2913	24.3737	23.7167	8.0726	8.2811		0.662652	14.2866
11.0144	14.9987	15.8793	17.5276	18.3961	16.0372	9.8176	15.3663	17.1773	14.1945	10.9222	22.6646	8.467	8.047	15.4165	22.7402	20.78	7.8164	8.7494		0.668674	14.7221
11.1136	16.7958	11.9125	15.7186	24.9745	12.9083	8.1746	13.4969	15.193	12.0016	12.882	22.1224	7.9585	8.4022	17.6955	24.5584	22.9416	8.5765	9.7277		0.674696	14.78
11.2129	14.1583	18.3119	16.4172	26.6817	14.838	6.5313	16.9376	17.7947	15.6456	13.3672	22.6428	8.8855	7.1251	17.6633	24.5283	20.8187	7.1952	9.3259		0.680725	15.4927
11.3121	13.7044	22.0959	18.089	26.5089	14.5895	5.9117	19.4783	18.2085	16.6019	11.6495	20.7329	10.1007	9.058	15.7023	23.9557	20.537	9.865	7.2182		0.686747	15.7782
11.4113	15.2821	20.6642	14.0639	25.8089	14.7963	6.954	18.8998	18.9868	17.0585	11.8687	23.4367	10.5759	10.5698	14.0192	23.4414	24.6178	10.413	8.2768		0.69277	16.0963
11.5105	12.806	18.0406	18.0813	20.999	19.688	6.6295	19.6187	18.9986	18.0707	10.6865	21.5809	10.3323	12.1244	15.6183	22.7134	27.2091	12.578	10.6044		0.698792	16.4655
11.6098	14.4379	14.1924	19.3617	25.4047	19.8229	6.4997	16.0616	18.948	17.9943	13.181	23.4984	11.8928	10.0028	16.3153	23.8672	25.0389	11.8341	14.5864		0.70482	16.83
11.709	14.3068	11.7631	17.1324	25.9147	19.8703	6.6149	18.8587	20.9153	18.5622	12.9418	22.3064	9.8185	14.7678	18.2032	25.907	27.3373	13.3048	14.2074		0.710843	17.374
11.8082	16.6231	13.9622	17.0343	24.148	21.0014	6.4314	17.2745	19.8786	20.5413	16.3236	18.7291	8.2638	20.9863	20.6849	21.1697	23.802	15.8385	10.8488		0.716865	17.419
11.9075	16.8531	15.4554	15.7249	21.3647	16.8831	5.69	17.4645	17.8212	20.0373	15.7609	23.5684	9.0298	21.9127	21.8184	22.099	24.2682	16.8962	11.4578		0.722893	17.4503
12.0067	16.4555	18.333	14.7387	22.1872	20.1111	4.2882	18.0172	15.439	21.6641	12.8273	22.6529	9.9247	24.4767	18.9179	24.7873	27.4254	13.5629	11.8431		0.728916	17.6473
12.1059	19.1983	16.3195	13.4789	20.0641	20.9695	6.4833	18.0066	18.0039	18.5291	14.613	22.8335	11.864	21.1092	18.625	25.8259	25.0288	14.6963	12.4088		0.734938	17.6699
12.2051	18.5439	16.7374	15.1048	23.0816	22.3751	5.8957	18.2364	20.4785	16.7111	11.8498	20.4367	12.7047	24.7088	17.7623	25.8993	25.1099	13.6263	14.3134		0.74096	17.9764
12.3044	15.5436	20.0471	18.294	21.2902	20.5957	8.2039	15.6151	22.5521	14.5847	12.6639	19.9211	9.9732	22.4908	18.3055	31.1261	24.5454	18.1456	19.3997		0.746989	18.5165
12.4036	15.9017	15.1083	16.1104	21.93	22.0464	7.5945	17.5099	23.3804	17.375	17.6625	21.0482	12.8936	20.355	16.2048	29.6247	22.9548	19.54	15.9894		0.753011	18.5128
12.5028	17.4647	15.1389	16.1917	21.5129	19.3993	7.1097	20.315	26.2095	16.2305	19.6129	21.038	12.7854	20.317	17.2506	25.1717	22.8165	17.1633	20.6245		0.759034	18.6862
12.6021	16.5349	16.3691	16.0524	17.2663	18.0671	6.8731	14.9487	22.8273	19.3263	18.548	22.5359	14.0526	21.5371	18.8504	23.2773	28.1933	18.0761	17.4052		0.765062	18.3745
12.7013	15.4037	16.4539	17.8532	18.319	18.5146	10.2673	12.7442	17.5976	18.7181	16.4251	20.0089	11.9701	22.7927	21.7912	20.9684	25.836	13.467	18.7072		0.771084	17.6577
12.8005	15.2393	17.6903	22.8934	23.0818	19.9861	11.0697	14.1021	16.1774	22.5683	19.2484	22.2426	14.6867	22.1702	19.8253	23.4246	24.7993	17.5341	16.7467		0.777107	19.0826
12.8997	16.3348	16.0228	19.8869	24.2298	15.0169	11.4484	16.5303	20.1804	18.0364	18.742	20.2196	18.4753	19.6194	21.8492	24.259	22.8553	17.0912	14.0385		0.783129	18.602
12.999	15.3164	20.041	16.9976	27.5842	21.0705	14.1791	15.1607	19.6054	16.8754	19.1096	18.2009	15.8916	18.579	24.8845	21.457	27.3072	15.5529	12.7331		0.789157	18.9192
13.0982	13.4126	22.5308	21.8388	25.9473	18.7347	18.8264	12.2752	24.2131	17.5397	19.9375	19.6452	12.7298	17.357	21.5164	19.366	28.7351	16.9512	15.5677		0.79518	19.2847
13.1974	12.0355	21.9649	21.5554	22.4055	18.3492	17.3545	15.207	24.0555	17.5229	18.4194	16.6538	14.6127	19.5737	18.047	16.9643	27.8631	14.0229	15.6072		0.801202	18.4564
13.2967	12.974	18.2128	18.1047	25.3748	23.0955	15.4195	15.4735	23.4502	17.4293	18.4256	21.6488	14.4424	22.49	23.0191	17.4511	33.127	14.0672	17.4657		0.80723	19.5373
13.3959	13.1457	17.7563	15.1167	20.5116	21.3748	11.7231	15.3999	19.6725	15.7892	17.2136	18.2707	14.2975	20.9293	20.9286	12.1579	31.6467	15.0737	16.6558		0.813253	17.648
13.4951	15.4634	15.8883	15.3318	17.4447	16.7524	10.9476	16.8421	25.7317	16.9689	15.8813	22.7549	14.419	22.3623	19.0028	12.6045	27.9983	15.344	13.0338		0.819275	17.4873
13.5943	12.7308	14.4356	16.5557	16.5135	16.4866	12.3494	15.2053	19.446	21.0727	15.2736	19.757	14.5387	20.0319	18.3124	8.39	25.6029	14.9647	15.8327		0.825297	16.5277
13.6936	13.0405	17.828	14.7744	13.5215	16.5624	13.3492	17.4597	20.114	22.8397	14.5666	19.6748	14.135	17.9346	12.6177	7.7886	25.5811	16.4983	22.2765		0.831326	16.6979
13.7928	16.3728	17.381	16.0577	13.8381	15.6756	10.2484	17.4384	20.4111	23.0437	13.7918	19.0945	14.2038	14.5056	12.3342	8.3245	22.0373	20.0944	21.1379		0.837348	16.4439
13.892	13.9833	18.1989	14.0755	12.8846	17.3698	10.0111	18.9077	19.6216	23.7894	15.3939	20.6191	18.4887	9.142	9.3491	7.0365	20.0011	25.2848	22.1927		0.843371	16.4639
13.9913	10.5211	20.3008	13.573	9.9432	16.0331	12.0462	18.3092	17.8868	28.4654	15.4	20.8181	17.8141	8.1011	9.1444	5.7326	18.6874	26.3084	26.2518		0.849399	16.4076
14.0905	12.7021	21.2562	12.9784	8.9819	17.4665	13.1911	17.5013	18.949	25.3649	16.6348	24.3269	19.5729	6.6302	10.0994	5.6439	14.8785	23.0555	17.6599		0.855421	15.9385
14.1897	13.9847	18.3809	10.2802	5.4506	15.3454	14.811	15.0113	23.1522	26.1859	14.3209	21.1473	19.1474	7.2117	10.2459	5.0097	13.1227	23.7464	19.7111		0.861444	15.3481
14.2889	14.6819	17.2569	6.3994	4.0408	16.0171	15.7472	14.4932	20.5833	28.3374	13.7036	18.7656	18.072	8.0116	12.0669	6.0219	11.2412	23.0035	16.6069		0.867466	14.725
14.3882	12.8603	12.9673	4.6945	4.0329	15.5694	12.4164	10.7305	23.8432	25.3494	12.0143	18.0721	15.2185	6.6764	11.1236	3.9099	11.9104	27.6909	18.5473		0.873494	13.7571
14.4874	10.5986	12.7805	4.1289	4.9329	16.8052	13.4308	13.1425	26.4676	17.7048	12.7856	17.9125	13.4709	7.9336	13.1395	4.5992	9.7151	22.8398	16.8793		0.879517	13.2926
14.5866	12.2946	12.7832	3.771	2.3116	19.6238	13.4639	14.1501	22.7887	14.6644	12.1865	14.0166	9.5446	6.8401	11.6535	4.3874	6.676	19.986	16.8653		0.885539	12.1115
14.6859	10.3497	11.6094	2.8804	2.0465	17.912	14.2728	11.7219	19.3768	14.8901	13.1422	13.6361	4.2183	5.6098	8.1382	3.666	7.1082	20.73	20.7973		0.891568	11.2281
14.7851	10.3362	9.1296	2.1363	1.358	17.5476	12.6856	11.3453	14.6604	16.1643	12.1419	10.3225	2.4868	5.6645	6.808	4.4079	5.7927	23.0976	17.9864		0.89759	10.2262
14.8843	8.3483	7.4792	1.8768	1.5605	16.4623	12.9333	6.6428	13.4253	14.3081	10.3033	8.733	4.5304	4.5232	5.112	5.7559	5.3328	22.8441	17.9292		0.903612	9.33892
14.9835	8.8111	6.4728	1.1733	1.4899	17.855	10.3905	5.5632	11.8214	11.288	11.5517	8.9734	4.7099	5.6739	4.9593	2.7301	5.8087	17.1314	16.477		0.909635	8.49337
15.0828	8.4706	3.5928	2.5156	1.2698	16.3602	7.9719	4.4548	9.2584	10.8112	10.7868	6.6534	3.7409	4.5175	3.2231	5.6341	3.9032	15.8749	20.3075		0.915663	7.74148
15.182	6.6929	4.7692	0.6415	0.9776	14.0542	8.5848	4.2345	6.5714	10.1363	9.4352	4.4775	4.3955	3.3437	3.8823	6.488	4.8395	12.3597	24.8986		0.921685	7.26569
15.2812	6.2209	4.33	1.4601	1.2242	11.6407	6.4891	3.6266	4.6873	5.4784	8.8284	5.1575	4.0182	1.6929	2.9864	5.9278	3.6713	8.1432	16.4336		0.927708	5.66759
15.3805	3.2282	3.4517	2.2612	0.9813	11.4362	5.3633	3.8244	3.644	5.6573	9.1969	5.7491	5.4647	1.7854	3.4019	5.3036	2.7508	6.0019	15.6285		0.933736	5.28502
15.4797	4.631	3.5267	2.0218	1.2345	9.3164	3.871	2.4271	3.0649	4.68	5.426	5.2561	5.5629	2.2086	3.2366	3.267	4.5153	3.4268	13.1099		0.939758	4.48792
15.5789	3.6868	2.6532	1.6836	1.0868	6.7076	3.0613	2.0925	2.8108	4.0864	5.2863	5.0247	4.4018	1.8802	2.735	3.0449	3.9907	2.0709	14.109		0.945781	3.91181
15.6781	2.8076	3.4413	1.5462	0.8591	3.8246	1.9692	1.3987	3.1701	5.1792	4.7416	5.3204	4.6514	1.2104	2.3606	3.2672	3.1325	3.4838	10.6129		0.951803	3.49871
15.7774	2.671	3.1381	1.414	0.6378	3.0477	2.9262	1.5361	3.9056	6.6391	3.1033	7.848	4.6744	1.3054	3.5989	2.5427	2.4003	3.6213	10.6248		0.957831	3.64637
15.8766	2.5549	2.5355	1.8362	1.2917	1.5112	1.6757	1.0676	3.3484	5.3496	3.5304	6.8566	5.67	2.0405	2.521	1.9056	2.159	2.1645	8.7607		0.963854	3.15439
15.9758	2.2781	3.1245	1.534	1.4793	1.5131	1.3363	1.1489	4.7928	4.7339	2.5777	8.3102	10.5186	1.2822	3.699	2.8749	2.6202	2.0588	8.1481		0.969876	3.55726
16.0751	2.4983	1.4457	1.7947	1.5582	1.2095	1.4924	0.9178	3.1834	3.9771	3.7053	5.037	8.8622	1.3002	3.1204	2.7091	4.0873	3.3473	5.8915		0.975905	3.11874
16.1743	3.2262	2.519	1.58	1.6946	0.8658	1.5256	2.0047	3.949	4.5343	3.5138	5.9438	6.4651	1.4568	2.0496	1.9221	2.2488	3.1269	8.6072		0.981927	3.17963
16.2735	2.2047	4.0001	1.5302	1.5526	0.3679	1.9577	1.2157	4.8395	3.3977	2.84	8.0842	6.4512	0.9244	2.4838	2.5727	2.0165	2.4439	9.6626		0.987949	3.25252
16.3727	3.4269	3.5544	2.5352	3.0788	0.9899	1.035	1.1106	3.7917	3.8303	2.9727	7.0741	5.6255	1.4228	2.1973	2.2953	2.7463	2.8084	7.1759		0.993972	3.20395
16.472	2.8457	3.4207	3.2053	2.0252	0.4434	1.359	1.9461	4.6409	3.5302	3.1177	7.5042	4.7612	1.243	2.3732	1.8375	4.7926	2.553	8.6795		1	3.3488

## Sheet: Image11
X0	Y0	Y1	Y2	Y3	Y4	Y5	Y6	Y7	Y8	Y9	Y10	Y11	Y12	Y13	Y14	Y15		Ap-Basal to 1	Average intensities
0	50.0765	30.8719	32.962	30.382	24.7987	29.1027	29.06	30.0938	32.197	30.0776	37.472	45.0901	38.6068	50.241	52.558	51.377		0	37.1854
0.0992	47.4718	28.9171	35.5135	29.6733	27.5478	27.418	31.879	32.4873	28.822	31.6469	40.844	45.7188	37.1492	46.922	44.548	58.4		0.00480629	37.1849
0.1985	39.7311	27.3415	35.3606	28.0788	30.741	27.5872	34.458	32.5512	29.296	35.9651	47.118	43.8106	37.2743	41.943	49.369	61.036		0.00961743	37.6038
0.2977	42.3697	30.2007	34.2517	27.1954	34.3075	30.7449	32.188	31.1254	33.403	29.5968	44.925	43.1349	40.1797	43.242	51.638	70.482		0.0144237	38.6865
0.3969	34.85	33.6597	32.8835	23.1167	40.529	31.9924	30.16	32.512	32.532	29.6542	42.744	37.5868	38.9208	48.654	58.334	65.794		0.01923	38.3702
0.4961	32.1172	35.9865	34.0701	23.5039	38.212	29.7651	32.055	35.1581	32.364	28.338	39.084	37.2549	38.3108	51.181	62.611	65.392		0.0240363	38.4627
0.5954	33.7502	32.3785	35.7959	24.8046	41.4678	31.8937	30.326	34.5466	36.039	26.8948	34.15	37.7368	36.0835	47.68	58.124	66.837		0.0288475	38.0318
0.6946	38.0606	26.0737	37.2108	26.3805	40.4376	34.0139	41.435	35.4949	40.574	31.6899	34.727	39.3977	35.4298	49.335	57.677	61.628		0.0336538	39.3478
0.7938	33.7286	27.4452	34.9069	28.2654	40.5062	33.1579	33.681	39.8025	39.561	31.0615	44.528	36.2441	43.9007	51.835	60.242	67.099		0.03846	40.3728
0.8931	28.6461	24.9154	39.4855	31.6766	36.3895	36.3102	32.561	39.5263	39.539	33.4397	43.72	37.8428	49.5928	49.507	59.359	75.731		0.0432712	41.1401
0.9923	33.1137	22.1692	33.1554	33.2729	37.584	42.3727	31.602	38.0117	40.482	38.8246	44.534	41.815	46.4231	43.114	56.18	79.9		0.0480775	41.4096
1.0915	38.5523	23.4217	31.6093	35.3289	39.1294	46.6568	30.647	39.5891	43.276	42.9863	45.114	45.2501	50.1827	53.281	49.522	73.805		0.0528838	43.022
1.1907	48.4714	25.591	34.8544	31.9523	28.1587	44.6013	34.709	39.5104	37.575	43.7678	45.61	49.3106	50.0203	55.89	49.245	73.834		0.0576901	43.3188
1.29	50.3459	28.3687	36.8141	41.0379	27.5753	41.3671	29.051	47.5526	34.712	46.9483	48.357	50.7124	56.1956	56.448	55.889	75.383		0.0625012	45.4224
1.3892	43.9989	34.1001	39.3858	48.2477	27.4445	38.6043	27.495	51.9248	39.451	50.5496	51.422	50.5542	52.0135	60.044	60.538	82.285		0.0673075	47.3786
1.4884	37.9887	37.2204	42.5867	50.7395	26.2637	39.796	29.88	62.8301	38.227	44.6028	56.973	48.6487	45.8761	63.606	65.479	83.264		0.0721138	48.3739
1.5877	39.513	43.2982	52.5957	49.7968	25.3014	35.3663	30.026	70.449	34.281	48.4435	67.72	46.9336	46.3416	61.298	64.128	88.85		0.0769249	50.2714
1.6869	39.7383	49.0342	65.0681	55.2762	26.4198	41.1488	30.666	62.8694	37.226	50.254	73.805	42.1557	34.8456	61.605	67.309	90.914		0.0817312	51.7709
1.7861	48.7478	50.6875	73.995	51.448	28.8033	44.6603	28.114	62.0603	39.132	49.9285	85.438	42.3442	35.5097	60.117	78.737	95.818		0.0865375	54.7213
1.8853	64.0707	54.5793	65.8691	50.4054	30.2209	42.3568	34.555	55.7747	40.522	49.7712	98.117	42.8762	45.3355	53.193	89.152	103.008		0.0913438	57.4879
1.9846	63.7344	56.7507	55.7242	49.9099	29.3274	43.5132	33.744	46.878	41.689	55.7234	118.119	43.062	40.5288	58.394	97.95	94.095		0.096155	58.0714
2.0838	58.0096	56.2271	56.8555	50.6766	32.146	46.1659	39.913	50.9853	50.466	60.2116	128.83	47.4119	41.1451	57.924	114.392	96.127		0.100961	61.7179
2.183	58.1702	56.3052	57.4773	42.3196	44.3693	46.7458	37.836	58.9019	57.579	66.8572	134.212	42.8508	47.8016	64.023	111.183	98.857		0.105768	64.0931
2.2823	57.6191	61.797	52.3688	35.5636	37.5864	42.6783	39.382	65.2888	62.07	68.4698	143.525	42.5697	38.1872	60.593	122.03	109.614		0.110579	64.9589
2.3815	56.0221	62.2904	46.2969	35.6811	35.1977	48.1236	58.006	73.6373	68.151	62.0949	147.18	42.5101	38.333	58.321	117.781	106.352		0.115385	65.9986
2.4807	51.505	64.3595	44.079	32.7895	37.3178	52.4657	80.121	64.5714	77.181	59.974	141.179	39.7932	33.9419	58.142	111.78	95.97		0.120191	65.3231
2.5799	43.7393	64.3909	42.842	27.3638	42.8156	57.6431	90.414	57.7829	78.006	57.6237	139.026	46.7834	30.4129	65.951	90.174	96.213		0.124998	64.4488
2.6792	42.9445	71.3304	45.3557	30.2138	43.926	58.6158	102.075	58.018	78.253	58.6017	140.533	48.1616	29.5853	68.046	79.152	96.531		0.129809	65.7089
2.7784	35.8573	78.5896	42.7412	36.9223	49.5158	52.5426	114.109	63.4132	83.509	58.5903	126.162	52.6853	32.5658	59.553	76.092	91.218		0.134615	65.8791
2.8776	32.4792	68.2624	40.8983	38.0686	56.3119	43.9787	130.544	59.1235	79.467	56.9985	114.571	59.1555	34.4863	52.277	79.843	95.819		0.139421	65.1427
2.9769	29.2583	70.0592	40.6132	33.1034	59.9503	35.0814	126.403	53.3988	89.492	51.4123	105.897	66.9139	49.3053	65.638	89.793	90.505		0.144232	66.0515
3.0761	24.5587	66.4419	35.2945	35.3179	54.7074	31.5845	126.773	52.3287	99.808	47.6474	116.427	68.022	48.9856	62.123	87.351	90.621		0.149039	65.4995
3.1753	20.0508	51.0067	30.443	34.4558	62.4461	29.8544	128.628	58.6242	105.102	53.5521	98.21	62.0282	45.8512	61.185	92.444	98.202		0.153845	64.5052
3.2745	20.5812	47.1712	28.7859	30.136	62.8725	32.8788	117.926	65.135	108.384	51.8722	96.41	69.4991	38.1699	63.039	100.169	101.298		0.158651	64.6455
3.3738	24.0749	40.4929	26.7527	31.623	61.9116	32.6697	106.141	61.1826	104.245	47.9939	98.251	69.0443	32.829	63.466	93.865	120.048		0.163462	63.4119
3.473	21.4219	32.216	27.2842	28.3778	53.997	33.8298	102.961	57.9843	92.713	47.3081	102.271	76.2896	34.2385	53.141	87.437	129.923		0.168269	61.3371
3.5722	21.4607	26.4664	30.7013	30.6854	49.9573	34.9769	106.951	55.0207	97.319	43.0641	91.85	80.4372	32.2958	55.846	86.651	138.527		0.173075	61.3881
3.6715	16.4639	25.9844	27.3347	33.7962	56.1848	30.8119	103.679	55.3047	97.621	39.3098	83.066	80.346	28.5445	55.568	84.006	141.985		0.177886	60.0004
3.7707	19.2343	21.2544	23.3736	30.2129	61.922	33.0499	92.929	63.4927	85.793	37.851	75.989	80.3095	31.7049	53.327	83.276	137.837		0.182692	58.2223
3.8699	19.4305	20.865	24.9678	28.997	68.639	35.7091	94.073	69.7691	79.169	37.4674	73.696	88.5833	39.6924	54.476	83.478	137.308		0.187499	59.77
3.9692	19.1578	23.303	22.0174	32.5758	67.3359	36.5616	84.664	69.73	87.427	32.3401	69.232	99.6748	40.9999	54.346	91.892	123.613		0.19231	59.6794
4.0684	17.6453	21.1324	23.9778	30.9779	70.1632	36.1825	80.983	67.9397	92.002	30.453	66.309	101.441	41.9397	55.445	83.737	116.98		0.197116	58.5818
4.1676	18.4424	19.9433	21.5139	32.4257	58.5689	30.0269	81.452	57.3992	91.96	28.9333	63.297	92.0695	39.4001	53.075	84.356	116.439		0.201923	55.5814
4.2668	18.2082	22.9304	19.4246	27.02	54.6934	32.9323	83.447	49.6248	88.699	27.8439	64.842	93.3222	41.6127	56.37	80.108	112.696		0.206729	54.6109
4.3661	18.6515	22.7515	27.0311	28.248	51.2726	35.4999	88.86	53.2097	95.014	27.6803	64.173	95.7808	44.7693	51.221	76.483	113.542		0.21154	55.8867
4.4653	17.2154	24.529	28.7319	28.9804	43.6421	29.2463	82.629	48.5226	82.8	27.5704	55.948	94.3054	43.3546	51.977	73.489	114.378		0.216346	52.9574
4.5645	17.0781	23.7806	25.0798	25.7781	32.215	31.7149	90.972	42.3859	75.361	26.2128	53.237	78.3225	36.817	55.197	71.362	119.348		0.221153	50.3039
4.6638	15.8053	20.5073	20.9038	24.3869	31.1259	31.6223	89.262	42.9804	65.345	26.809	59.709	67.441	40.4103	63.317	77.262	109.282		0.225964	49.1356
4.763	17.8433	17.7267	17.8706	22.4822	32.8461	31.0896	77.574	38.5997	63.123	19.8524	68.655	64.6005	41.4548	63.937	86.706	100.718		0.23077	47.8174
4.8622	16.7894	18.6323	16.3991	24.7794	29.1441	27.6205	66.685	36.3868	54.661	22.1778	66.324	61.1095	35.9656	64.409	92.212	94.859		0.235576	45.5097
4.9614	14.6562	17.0647	19.4063	29.5122	24.7221	26.526	63.479	37.3441	54.314	22.7289	63.955	66.49	36.3493	63.201	91.928	94.196		0.240383	45.367
5.0607	14.4711	17.0446	17.8407	31.7628	22.1665	20.1779	66.083	32.4535	48.411	21.9735	61.782	67.9415	30.9542	64.246	77.034	97.002		0.245194	43.209
5.1599	14.7455	13.2666	17.5224	30.5111	22.7819	25.4238	58.687	25.3799	42.921	22.426	58.325	68.099	24.3611	80.858	82.753	92.208		0.25	42.5168
5.2591	12.4261	16.2351	19.6202	27.8132	22.5388	24.471	52.626	22.2425	37.956	20.495	46.705	75.0931	18.8187	88.664	81.256	91.325		0.254806	41.1429
5.3584	14.6285	21.955	16.9724	24.0668	19.7001	20.1005	50.496	28.2237	33.12	19.1077	49.125	72.8264	16.1972	100.411	79.203	92.578		0.259617	41.1695
5.4576	16.6434	17.3627	19.6365	27.3121	15.4854	19.6076	50.524	25.1343	32.013	16.881	53.343	72.7943	17.1656	104.27	71.896	78.533		0.264424	39.9126
5.5568	16.8352	17.2137	16.3066	28.8749	15.5928	22.4009	55.594	20.4432	23.787	18.5428	55.283	71.0904	15.0343	111.382	68.928	82.656		0.26923	39.9978
5.656	16.3701	17.7095	16.766	25.5638	19.2762	18.8512	55.412	20.7406	21.445	18.0102	48.147	61.1287	15.7176	115.54	74.856	83.832		0.274036	39.3354
5.7553	16.3599	17.3328	15.0362	20.4353	14.5251	18.6955	47.618	19.9343	22.523	17.1594	45.584	63.9219	16.6774	120.434	67.246	81.118		0.278847	37.7875
5.8545	14.4395	15.4346	18.9405	17.1369	17.9468	16.8854	37.371	14.814	20.894	21.6322	46.042	60.1695	22.5507	120.17	67.219	84.358		0.283654	37.2503
5.9537	13.1332	18.4626	20.3195	18.6648	18.9939	12.9763	33.483	15.6815	22.031	21.9562	46.646	58.3066	23.8767	119.624	67.889	72.846		0.28846	36.5556
6.053	13.8804	20.0984	20.2934	16.5877	18.7629	11.8783	32.334	16.6196	24.385	20.4007	40.377	60.1429	23.4934	111.537	54.902	68.123		0.293271	34.6135
6.1522	11.7791	17.2185	17.9011	13.1947	17.6912	11.0267	26.489	18.367	18.398	19.6547	33.448	56.9614	23.7673	100.656	52.813	71.647		0.298077	31.9383
6.2514	11.9638	17.4366	14.9003	14.4379	18.3906	14.7477	27.024	22.442	14.718	20.5199	25.782	51.5345	18.7684	94.313	50.863	74.466		0.302884	30.7692
6.3506	10.7051	15.2879	14.6118	19.2613	18.6576	12.9799	21.526	20.195	16.74	15.6734	30.134	55.0954	21.9951	91.218	45.518	74.661		0.30769	30.2662
6.4499	16.6879	13.8395	13.8236	20.6003	18.6274	11.3288	19.143	19.0709	14.361	16.5165	27.467	51.4175	23.1845	84.416	43.018	76.28		0.312501	29.3614
6.5491	16.8894	15.1263	14.2652	23.798	20.1601	11.5127	14.011	16.6188	15.709	21.0793	27.984	49.0229	16.805	74.555	38.771	76.464		0.317308	28.2982
6.6483	18.5465	17.5513	12.3228	21.0644	16.0379	11.3289	14.354	19.0165	17.867	19.8355	31.225	46.0457	17.2979	75.406	37.314	71.322		0.322114	27.9085
6.7476	12.5812	19.0443	12.7548	17.8946	11.2088	10.5281	19.469	21.8814	22.235	16.1871	34.544	39.3691	20.7803	57.863	37.004	80.803		0.326925	27.1342
6.8468	11.9244	13.8076	11.7618	19.4524	10.3093	11.8102	15.296	22.6546	16.968	16.3131	30.781	34.5378	20.5954	53.926	38.311	76.2		0.331731	25.2905
6.946	13.9982	13.2041	13.9321	18.8367	12.9926	15.7111	15.792	17.926	19.918	17.0404	25.306	28.3911	19.1842	53.535	37.387	67.716		0.336538	24.4294
7.0452	14.1192	16.2649	12.3387	19.5973	12.3989	17.7262	19.408	16.9282	17.341	16.1631	23.41	28.5931	20.7689	44.671	37.3	64.644		0.341344	23.8545
7.1445	15.823	17.2221	12.9439	20.6868	12.6227	18.8391	22.546	18.1946	19.757	15.9631	22.922	22.5585	21.668	38.794	31.937	57.461		0.346155	23.1212
7.2437	14.0945	16.6576	13.0444	27.4978	14.4319	18.0067	21.649	18.071	17.731	18.6173	24.278	22.879	17.6905	34.485	31.657	60.673		0.350961	23.2165
7.3429	13.621	15.1353	14.5801	25.0322	15.9398	15.7099	16.985	16.326	14.856	20.8643	23.04	21.3607	16.5094	37.848	31.316	62.037		0.355768	22.5725
7.4422	15.0553	14.8559	10.0336	20.2536	12.8152	15.9033	19.291	15.6096	16.274	20.502	20.838	20.7157	17.5813	42.233	34.445	62.157		0.360579	22.4102
7.5414	15.1936	13.3091	13.4365	15.6031	16.1985	16.0008	15.696	17.2684	13.497	19.5766	16.07	21.7453	19.8993	43.223	34.73	59.203		0.365385	21.9156
7.6406	12.8797	14.8549	15.4496	14.1927	14.9012	12.9605	19.36	19.5001	15.02	20.189	16.459	23.1005	21.2478	41.276	39.703	59.314		0.370191	22.5255
7.7398	17.4084	13.3866	15.3804	18.5767	14.3052	10.9977	23.077	14.6411	13.699	18.5341	15.681	22.7586	20.7107	38.55	40.844	46.254		0.374998	21.5503
7.8391	18.3118	14.2284	11.953	18.6915	14.4045	8.5275	23.358	13.6161	14.037	16.1444	18.549	18.2094	17.7437	41.158	35.297	39.763		0.379809	20.2495
7.9383	22.2934	16.1297	12.2936	14.8303	11.8855	8.8107	23.592	15.4728	12.862	16.2298	19.603	18.4886	15.1587	32.879	33.486	35.371		0.384615	19.3366
8.0375	21.4622	13.4414	7.3926	16.7613	13.5329	8.7202	23.648	18.1738	15.714	15.7461	20.663	23.2275	15.615	30.392	31.405	34.596		0.389421	19.4057
8.1368	13.3743	14.2321	6.2744	15.4882	11.9359	10.0698	19.441	18.7753	18.742	17.4462	22.205	22.6505	18.5795	28.422	32.152	34.422		0.394232	19.0131
8.236	12.6828	13.4181	4.8683	19.6797	12.4528	13.0991	18.192	17.4665	16.393	18.568	17.396	22.7459	21.1715	32.196	30.494	32.044		0.399039	18.9292
8.3352	13.6284	12.3565	4.0573	21.2507	13.9524	9.4491	18.806	17.571	20.706	14.466	16.024	20.0162	22.0388	30.247	32.705	37.736		0.403845	19.0632
8.4344	14.5172	16.3309	5.3309	19.0124	11.7282	7.5628	21.383	21.1552	18.985	16.3816	14.628	22.5136	15.7528	26.774	39.353	36.424		0.408651	19.2395
8.5337	14.1555	16.5545	5.21	19.7507	10.8493	10.4591	19.547	19.9032	14.682	14.2395	11.807	20.5778	20.0682	26.61	43.429	32.444		0.413462	18.7679
8.6329	16.9431	18.6039	4.5919	15.9929	10.1491	10.5419	18.898	14.7587	12.963	12.6074	13.774	20.4252	19.9579	25.235	43.222	32.275		0.418269	18.1837
8.7321	16.3711	15.8226	6.7087	12.5604	6.7372	9.9276	20.47	14.39	11.854	11.0627	15.595	17.3719	17.253	21.026	39.918	30.562		0.423075	16.7269
8.8314	13.504	17.1198	5.7883	16.2566	6.4316	8.9519	15.829	14.0915	12.731	13.9426	17.628	16.0351	15.0907	18.51	31.121	36.166		0.427886	16.1998
8.9306	14.498	10.4308	5.2187	16.5353	9.5801	6.0766	13.115	16.9047	16.244	12.2938	15.386	17.7463	14.9027	16.814	29.984	35.608		0.432692	15.7086
9.0298	15.9585	12.2874	4.678	15.1534	11.5968	4.5548	11.426	15.3627	16.755	10.8506	11.014	13.8744	15.5112	14.983	27.521	38.117		0.437499	14.9777
9.129	15.5717	13.5062	6.3286	13.6571	14.5549	6.1076	12.718	11.3118	16.573	9.6338	11.113	15.8543	13.2684	16.573	26.093	34.768		0.442305	14.852
9.2283	18.8247	14.9004	4.2775	13.3881	14.0172	5.7798	12.286	12.9341	16.749	11.4738	13.011	14.4552	12.4513	15.468	24.408	36.378		0.447116	15.0501
9.3275	17.604	17.7505	5.5178	12.3523	12.1791	5.8841	13.644	13.0173	15.418	9.8875	16.499	15.1313	11.3109	13.567	20.536	31.568		0.451923	14.4917
9.4267	19.4483	16.6349	3.5914	13.2392	8.2262	4.9114	12.463	12.128	16.054	7.3346	19.692	18.2964	13.5442	14.602	17.442	30.514		0.456729	14.2576
9.526	15.0721	15.0529	3.3986	12.07	7.5154	5.0757	11.977	9.9668	15.67	8.3202	17.461	21.4346	14.0132	16.05	16.443	32.153		0.46154	13.8546
9.6252	10.5639	14.9222	5.2369	12.555	8.5003	4.7951	13.492	12.2473	14.115	9.1015	17.005	23.4624	14.1257	16.984	17.21	29.279		0.466346	13.9747
9.7244	14.582	14.582	3.6725	14.2177	6.424	4.8996	14.918	12.8988	12.239	10.3113	14.633	19.051	16.6758	15.708	17.528	28.997		0.471153	13.8336
9.8236	16.1506	15.7608	4.7814	13.9993	6.2357	4.1025	16.005	12.6323	12.865	7.9311	11.794	20.7937	17.0939	18.028	16.641	23.727		0.475959	13.6588
9.9229	16.1691	13.2515	6.0198	15.4269	6.6987	4.3443	17.064	12.0625	12.029	6.7104	15.557	18.1125	18.7448	21.35	14.016	19.973		0.48077	13.5956
10.0221	16.1223	12.3074	6.5115	17.608	6.436	4.5845	20.485	10.0916	14.432	6.5178	10.117	16.0779	16.3796	17.052	14.789	18.243		0.485576	12.9847
10.1213	15.4991	15.8183	5.6574	17.6124	5.9876	4.0454	21.81	10.8236	15.789	7.4145	8.834	18.8917	14.7119	16.791	17.516	19.576		0.490383	13.5486
10.2206	16.0157	12.5818	3.936	14.6907	6.8734	4.5027	24.667	9.5675	16.254	8.5111	9.14	15.2454	14.4683	19.163	18.998	21.288		0.495194	13.4939
10.3198	16.9794	11.5016	4.5739	17.9515	6.3556	5.4376	27.183	10.1903	13.273	7.8008	8.486	14.1693	14.8886	18.352	17.879	21.032		0.5	13.5033
10.419	14.7829	12.5904	4.2658	19.6654	7.1278	3.8897	23.861	15.9601	12.567	7.4686	10.791	14.1786	13.4543	16.587	16.2	20.557		0.504806	13.3717
10.5183	15.196	13.7483	4.7578	17.5936	6.1875	4.4387	26.328	17.2912	14.926	7.4706	13.437	20.4158	16.2003	14.788	13.88	23.422		0.509617	14.3801
10.6175	17.3029	11.5969	4.5577	17.4624	5.2244	4.4315	23.284	15.6283	13.426	7.0438	12.825	17.2272	15.8935	14.111	19.111	25.02		0.514424	14.0091
10.7167	20.0192	10.7957	5.0111	13.6194	6.3045	4.289	24.081	15.1417	12.944	7.3473	10.494	15.3538	17.1429	14.269	22.713	25.632		0.51923	14.0724
10.8159	21.4271	10.1506	5.7148	12.1672	6.4238	3.8742	24.053	14.6919	16.325	7.1304	8.872	13.0989	15.9932	15.226	18.954	29.698		0.524036	13.9875
10.9152	19.8927	11.2922	5.292	12.3682	5.3875	5.4688	19.129	17.4332	17.162	6.7644	7.669	11.8344	15.6611	15.145	15.379	26.434		0.528847	13.2695
11.0144	13.8837	12.9529	5.5058	15.3866	6.4159	5.4086	19.431	15.4019	17.365	5.7923	7.925	9.6554	19.0046	18.743	14.353	21.82		0.533654	13.0653
11.1136	11.0472	15.3406	4.7273	13.4479	5.3428	5.0572	18.079	15.3018	17.134	6.3202	8.424	12.7635	15.0898	15.467	15.904	27.388		0.53846	12.9271
11.2129	9.2917	14.2084	6.5815	13.7857	4.8542	4.6431	18.33	12.0002	14.605	5.0438	6.693	13.7187	10.4552	10.909	16.254	26.766		0.543271	11.7587
11.3121	7.2807	11.5808	5.8189	13.0433	6.7183	3.0132	17.769	12.0192	14.216	2.6166	3.733	13.4258	11.6062	12.662	20.209	25.311		0.548077	11.3139
11.4113	8.5364	8.3458	5.7941	13.2586	4.2547	2.7931	16.32	16.0426	15.075	5.1107	5.322	15.5603	8.8187	16.608	18.118	22.465		0.552884	11.4014
11.5105	8.4675	6.888	5.4643	16.5769	4.4419	3.1786	17.46	17.4757	11.355	4.3961	5.609	13.3462	11.4356	19.628	19.045	22.209		0.55769	11.6861
11.6098	8.7594	8.4346	4.4246	19.6764	3.6444	4.2452	20.691	19.2079	12.57	5.8531	6.362	13.4191	9.1786	21.274	19.014	27.214		0.562501	12.748
11.709	8.8959	9.8834	4.8494	19.8479	4.342	3.4049	15.724	23.9259	12.866	4.1158	8.161	15.1987	9.4942	21.999	20.636	25.566		0.567308	13.0569
11.8082	9.18	9.2109	4.6208	19.9864	3.2775	4.4223	15.156	22.0643	11.494	4.4021	6.862	13.7224	9.0296	17.823	20.246	27.812		0.572114	12.4568
11.9075	11.0907	11.0191	5.6303	15.9559	3.6719	6.2371	13.591	19.5658	14.101	5.7862	4.739	13.7327	12.6091	17.183	17.672	19.987		0.576925	12.0357
12.0067	10.1367	9.9741	4.17	14.1973	4.6043	5.9934	9.045	23.9069	16.788	7.2683	5.407	14.5664	15.4349	13.718	14.824	16.548		0.581731	11.6614
12.1059	13.6823	9.7246	4.476	12.0663	4.4658	6.6356	12.365	25.3694	16.058	7.4328	3.881	11.72	14.0709	14.696	12.197	14.091		0.586538	11.4332
12.2051	15.372	13.1575	5.3272	9.5806	5.3109	3.4171	14.172	24.7972	18.116	8.06	4.162	12.877	12.4681	17.146	11.922	12.067		0.591344	11.747
12.3044	12.4254	11.2806	5.1319	12.1989	6.8784	4.8688	14.787	22.1637	14.468	4.7873	5.332	12.4702	11.9143	15.487	14.966	16.565		0.596155	11.6078
12.4036	17.385	9.3207	3.789	13.5141	5.5465	4.3159	15.323	17.4257	14.396	5.8243	5.509	12.0666	13.7767	14.277	14.731	19.462		0.600961	11.6664
12.5028	15.1158	10.8365	5.9357	14.8167	7.7072	4.8132	13.254	14.7476	17.604	6.039	4.614	15.105	13.4451	13.739	17.11	18.07		0.605768	12.0596
12.6021	16.9857	10.5827	5.3858	14.306	10.803	6.5251	14.469	18.0462	13.182	7.5846	5.46	17.4348	12.1165	13.315	14.645	17.308		0.610579	12.3843
12.7013	14.0107	8.2654	7.5191	12.0076	8.2927	6.2312	18.972	15.764	12.517	7.0443	5.322	19.089	13.649	11.583	14.267	21.134		0.615385	12.2293
12.8005	14.1089	10.9025	5.7036	12.1588	5.9474	8.3182	17.242	15.8569	9.747	5.5752	4.031	19.8179	15.346	11.49	13.225	17.52		0.620191	11.6869
12.8997	18.0966	11.4086	4.7723	15.6071	5.2611	7.5354	18.349	17.6816	11.664	4.9805	4.675	16.5095	16.3827	16.052	13.114	14.381		0.624998	12.2794
12.999	18.5334	11.3143	5.093	21.1059	4.4087	6.4098	20.157	20.739	11.574	4.5097	5.001	16.9035	15.8983	13.908	12.557	11.985		0.629809	12.5061
13.0982	16.6979	13.4913	5.0371	19.0539	4.9954	8.1716	19.288	21.243	12.037	3.8841	4.928	18.0418	12.1308	16.82	13.184	13.747		0.634615	12.6719
13.1974	15.7339	12.8008	5.1392	18.6348	5.1697	6.7963	20.559	29.8631	14.403	4.6336	8.426	18.6185	10.7149	17.104	12.265	14.18		0.639421	13.4401
13.2967	14.7996	14.9226	5.6453	17.9957	4.4935	4.9438	23.858	28.736	13.504	5.8391	5.2	19.3702	12.1112	15.618	12.566	12.705		0.644232	13.2693
13.3959	12.9948	13.4605	8.7336	20.0695	5.5535	4.941	24.588	21.4852	12.844	4.9642	5.664	18.6382	13.3771	14.585	15.785	12.129		0.649039	13.1133
13.4951	17.8304	12.8508	6.5221	22.4678	6.7576	4.2385	27.717	23.0663	15.81	7.1999	4.713	17.1949	10.0873	15.184	12.292	11.355		0.653845	13.4554
13.5943	17.6704	15.4183	6.8338	18.5037	8.6121	6.1217	27.948	26.8097	14.396	6.1805	5.883	14.1397	11.1956	13.733	11.554	13.395		0.658651	13.6497
13.6936	18.6935	17.7016	6.6044	16.2993	7.891	6.5376	31.398	25.7718	15.221	6.2999	6.514	15.3607	11.5386	17.049	11.275	14.476		0.663462	14.2895
13.7928	18.9612	19.143	8.0847	19.7984	9.4175	5.1494	31.073	26.5937	15.452	5.196	7.211	17.8202	9.341	15.611	10.265	15.878		0.668269	14.6872
13.892	18.887	19.5689	9.9147	18.8378	7.4496	5.7495	27.512	31.1143	18.223	4.6732	6.435	13.8169	12.0395	16.942	12.663	16.858		0.673075	15.0428
13.9913	16.2669	15.3524	7.6688	19.8314	10.0907	6.6168	23.097	33.262	12.482	7.9753	7.602	11.7272	14.9658	15.595	15.812	18.697		0.677886	14.8151
14.0905	12.5811	16.0012	7.0718	20.9515	11.9665	8.1328	23.455	31.5562	16.748	6.3182	6.719	17.1429	14.6466	15.697	11.636	20.657		0.682692	15.08
14.1897	12.7887	21.815	5.5951	25.3357	17.9597	9.2845	26.841	28.3339	17.279	5.1801	8.029	14.7455	13.7153	14.519	12.448	20.537		0.687499	15.9004
14.2889	13.8697	24.6952	6.0668	22.1173	15.6929	13.9448	29.629	21.9558	17.183	8.153	5.822	18.1546	12.7959	15.839	12.103	17.568		0.692305	15.9744
14.3882	18.5503	23.9753	5.7121	17.1455	12.8433	13.6003	23.139	21.9304	15.899	5.3044	6.954	19.4452	11.8609	18.948	12.051	21.122		0.697116	15.53
14.4874	17.629	21.4054	7.7257	15.6831	11.7488	14.1084	17.877	26.6933	16.696	9.5245	6.831	19.8807	13.2418	14.655	12.828	19.995		0.701923	15.4077
14.5866	17.4509	13.4808	8.474	19.098	13.009	13.9362	20.527	25.8347	20.894	9.4022	5.48	17.0178	10.5292	15.037	13.579	18.854		0.706729	15.1627
14.6859	19.8339	12.6549	9.3925	21.3315	16.0696	13.6319	24.683	22.2217	26.549	8.8219	6.113	16.8416	12.2912	15.05	12.66	22.412		0.71154	16.2849
14.7851	21.5099	10.9213	6.8909	17.8098	17.9065	14.731	30.119	22.5814	17.398	8.2158	8.237	15.9976	16.5634	15.258	11.213	20.417		0.716346	15.9856
14.8843	23.009	11.8972	5.9655	15.6255	17.3929	16.1644	27.043	17.2204	14.971	8.1185	8.941	14.9709	16.5766	14.427	10.857	17.258		0.721153	15.0274
14.9835	20.1545	18.2345	7.0932	16.7961	17.9661	15.2134	25.213	16.0635	21.29	8.7401	8.567	17.4704	15.7225	14.74	12.685	18.007		0.725959	15.8723
15.0828	19.6867	18.9251	8.3241	15.4972	21.5361	15.8642	24.654	15.1459	20.192	10.9161	10.533	14.1933	19.9681	18.245	14.635	17.428		0.73077	16.609
15.182	24.9598	17.3815	8.4895	15.4331	19.8102	17.1361	23.77	17.2841	20.536	13.6992	12.745	11.2112	19.0839	16.776	11.333	19.517		0.735576	16.8228
15.2812	27.2452	18.0282	8.047	18.4639	18.5455	15.8299	19.434	20.5888	22.52	11.6501	11.431	12.8829	18.6001	17.955	12.434	19.2		0.740383	17.0535
15.3805	25.193	15.4194	7.3552	19.4391	23.1924	14.2904	18.107	17.2775	22.631	10.3468	14.596	13.2721	25.1914	13.836	11.839	18.047		0.745194	16.8771
15.4797	20.6332	16.0073	11.4116	17.385	20.8518	12.5635	22.5	18.3035	24.209	7.7611	13.237	15.841	23.8026	14.903	14.081	16.823		0.75	16.8946
15.5789	17.0012	14.9736	10.2158	14.6179	20.4497	12.7439	19.685	20.3179	19.431	6.5536	11.63	18.5427	21.6606	15.768	13.788	17.324		0.754806	15.9189
15.6781	22.4007	13.4224	8.8966	15.5141	18.142	12.2769	17.269	22.0214	17.045	5.1257	13.854	16.5296	22.1841	15.454	12.861	17.529		0.759613	15.6578
15.7774	29.403	14.9867	11.3025	16.1471	20.8997	11.8814	21.946	28.0697	18.176	6.3388	12.309	13.9377	22.0345	13.966	17.602	22.186		0.764424	17.5741
15.8766	28.8897	14.0625	11.0859	18.4644	20.1323	9.6533	19.156	30.6174	20.394	7.6012	11.96	14.8368	25.1349	15.133	16.506	22.925		0.76923	17.9095
15.9758	29.4601	12.6064	13.59	20.1345	20.158	15.1899	17.605	33.4718	18.764	8.1966	9.781	17.1305	25.8491	16.121	16.23	20.075		0.774036	18.3977
16.0751	22.8342	12.9325	16.3588	18.8893	20.5574	14.1423	14.116	25.9751	23.109	9.3312	10.795	17.8219	23.4406	15.736	19.892	14.197		0.778847	17.508
16.1743	18.8246	17.2714	21.0032	20.2575	19.6603	16.2747	13.068	27.7222	26.887	9.837	7.657	17.844	25.7488	13.717	19.399	15.86		0.783654	18.1895
16.2735	21.2112	18.7157	22.5482	20.7234	21.5972	14.6915	10.571	29.3098	22.783	8.7709	9.274	20.7199	28.2952	16.293	19.262	13.613		0.78846	18.6487
16.3727	24.6656	18.7711	18.8048	20.89	22.192	16.8382	10.008	22.0617	26.714	14.5085	9.694	19.3555	28.2367	17.766	13.342	10.613		0.793266	18.4038
16.472	23.7086	23.8534	19.432	16.9792	20.0553	17.1835	7.761	22.2032	25.278	14.2264	10.992	19.6301	24.2125	15.606	12.842	13.735		0.798077	17.9811
16.5712	25.9045	24.9046	19.6719	16.7761	20.509	17.2992	7.076	21.6805	23.507	18.0538	11.636	20.6051	20.8324	19.938	17.945	13.426		0.802884	18.7353
16.6704	27.9808	23.608	15.7112	19.003	20.7911	13.9447	7.378	21.9606	30.685	20.4549	14.38	21.1381	19.759	20.662	17.314	17.873		0.80769	19.5402
16.7697	26.6425	22.3339	16.8965	16.0413	17.4968	11.7224	5.729	21.7398	31.813	21.3106	14.984	21.2596	17.753	19.114	18.411	19.954		0.812501	18.9501
16.8689	24.4918	21.6627	18.6201	19.687	18.8732	11.3435	7.03	18.2924	23.322	18.4926	15.081	20.398	15.5329	19.46	16.599	14.743		0.817308	17.7268
16.9681	21.8973	24.4439	23.0676	17.7503	18.5038	10.7137	6.298	12.5524	26.65	18.3192	14.824	19.4806	18.3957	14.439	15.879	11.392		0.822114	17.1629
17.0674	20.5975	24.2555	20.5423	19.7843	18.2757	10.1784	4.509	10.3126	26.538	19.1184	16.307	20.8609	19.1484	13.64	16.653	14.923		0.826925	17.2278
17.1666	23.5483	22.8057	17.0507	21.6551	15.8098	10.1896	4.069	11.4685	23.724	22.2822	16.81	19.0711	17.7574	13.669	15.147	18.788		0.831731	17.1153
17.2658	23.0802	22.4143	15.0905	23.925	16.7842	10.6873	2.109	6.8068	20.479	19.1088	22.902	21.291	17.3449	13.455	15.376	13.443		0.836538	16.5186
17.365	20.1482	22.5641	14.4451	20.3459	15.7461	10.8342	2.595	7.6097	20.041	17.8323	19.272	21.8072	22.5682	14.487	22.913	14.002		0.841344	16.7007
17.4643	17.9304	24.2426	16.9533	22.4637	16.1241	8.3355	2.802	8.0397	23.891	17.6982	16.45	21.1691	20.5748	16.058	20.343	14.69		0.846155	16.7353
17.5635	21.3828	21.9196	18.134	22.2498	14.0324	6.9322	1.958	7.4571	27.302	17.5928	17.956	22.0121	16.5912	14.817	20.912	15.924		0.850961	16.6983
17.6627	22.6557	20.8288	18.3744	17.9293	11.6742	6.3945	1.537	7.6222	25.231	18.124	19.605	20.1373	18.2217	17.971	18.988	20.186		0.855768	16.5925
17.762	27.9078	22.4684	19.8587	16.4423	10.9602	5.9583	2.123	7.1159	24.301	16.385	20.148	18.4967	16.9351	21.447	18.91	20.275		0.860579	16.8583
17.8612	31.9423	25.6297	19.5544	18.4744	7.375	7.5849	1.102	5.637	18.774	16.2604	20.608	18.8391	22.8947	21.742	19.706	17.919		0.865385	17.1277
17.9604	36.986	21.4391	18.3022	20.3614	8.6176	7.8929	1.701	8.886	14.73	23.2958	19.846	19.8829	23.0369	21.776	19.638	19.586		0.870191	17.8736
18.0596	25.7734	19.4556	15.131	19.5952	7.7314	7.1756	1.861	10.5294	14.433	20.8436	20.318	22.1202	19.8628	19.235	17.88	18.874		0.874998	16.3012
18.1589	24.1037	22.3809	15.0486	15.8209	8.8466	4.826	1.895	7.5823	12.243	20.4677	23.061	18.6754	17.9561	15.491	18.434	17.217		0.879809	15.2531
18.2581	23.5709	26.2533	14.0044	13.4884	9.002	5.1912	2.241	6.0148	9.591	20.7634	18.655	19.2732	20.1526	14.25	16.99	20.477		0.884615	14.9949
18.3573	22.8793	25.9306	15.2245	9.511	9.4467	6.3705	1.771	6.2578	5.325	20.1117	18.598	21.5828	17.8974	13.776	19.591	20.387		0.889421	14.6663
18.4566	23.3806	22.9619	16.2655	7.53	10.0029	6.5643	2.126	4.8077	4.161	22.5651	18.63	20.1871	16.5092	13.671	17.209	23.056		0.894232	14.3517
18.5558	20.1334	21.4439	14.2297	9.5841	6.374	4.8155	1.248	6.577	5.231	20.1642	20.733	21.2512	13.0115	15.034	21.777	24.781		0.899039	14.1493
18.655	19.2178	21.3705	13.6143	5.9612	5.6078	3.9987	1.399	4.0779	7.802	15.2166	14.252	17.6746	13.5555	12.036	21.381	24.036		0.903845	12.5751
18.7542	15.8663	21.0809	9.2817	5.2691	5.2854	5.0326	0.893	4.9127	4.765	13.0858	15.217	12.5986	8.6681	11.334	15.069	24.18		0.908651	10.7837
18.8535	13.1289	15.7115	8.1969	5.1219	7.1709	7.3637	1.226	5.0424	6.485	10.3581	14.352	11.1552	10.1385	12.869	17.919	22.016		0.913462	10.5159
18.9527	14.3521	16.1006	5.7842	5.4959	7.7553	5.0438	1.433	3.9502	6.06	7.4149	15.685	9.0111	10.9582	11.176	16.62	20.295		0.918269	9.82096
19.0519	15.436	19.7121	4.9628	7.3758	9.0721	5.5556	0.661	2.9941	6.194	6.6357	18.287	8.4354	9.6552	9.829	14.834	22.528		0.923075	10.1355
19.1512	13.8933	19.934	4.0851	7.3179	8.9488	6.0383	0.981	3.5262	5.729	5.2131	16.553	6.1713	9.1503	9.131	16.178	26.982		0.927886	9.98952
19.2504	16.6802	20.4578	5.984	8.4045	5.7167	4.0045	1.643	3.5631	5.301	4.4984	16.211	7.0721	12.3101	8.009	15.162	26.317		0.932692	10.0834
19.3496	15.8172	20.2605	3.4892	8.0198	6.816	3.2467	1.962	4.5225	4.818	5.5151	18.888	4.6903	10.0613	6.929	12.078	29.397		0.937499	9.78191
19.4488	11.5016	18.751	2.1755	7.3716	7.5521	3.4743	1.92	3.2042	4.174	4.3296	13.632	5.4388	6.9197	8.861	13.94	25.373		0.942305	8.66365
19.5481	6.5114	17.4558	2.1911	7.0896	9.5515	4.5612	1.221	2.4991	4.851	5.4051	12.299	4.5623	7.8187	4.213	8.531	25.802		0.947116	7.78517
19.6473	3.8845	13.6115	3.1805	6.9584	9.1431	6.2521	1.513	2.8662	5.02	5.6771	10.183	4.8418	6.8407	5.62	5.609	27.523		0.951923	7.42024
19.7465	2.7525	9.602	3.3554	6.4261	7.838	3.8697	1.494	2.1467	6.693	5.3559	8.209	4.0479	6.4664	6.663	5.818	22.714		0.956729	6.46572
19.8458	0.945	7.9077	2.3763	7.6294	7.7809	4.1239	2.348	3.0853	5.545	4.374	8.616	3.8555	5.8949	7.027	6.153	18.352		0.96154	6.00087
19.945	0.904	6.6183	1.647	5.9421	9.1791	4.2434	2.169	3.0584	5.489	3.6601	9.581	3.5332	5.954	7.486	5.414	16.667		0.966346	5.7216
20.0442	0.7388	4.5465	2.2635	5.254	12.5316	3.5088	2.465	2.4606	5.775	5.363	8.455	3.0301	7.0367	7.987	4.012	14.058		0.971153	5.59285
20.1434	0.5427	3.5978	3.3755	4.0452	12.5491	2.6745	1.337	2.5267	5.417	4.2205	7.439	3.0193	4.6446	6.635	3.589	16.02		0.975959	5.10206
20.2427	1.0801	2.7473	5.3636	5.9221	9.4703	3.6722	1.494	3.6744	4.994	2.8961	6.44	3.498	6.2134	7.33	4.642	12.414		0.98077	5.11572
20.3419	0.7795	2.0597	4.1935	7.3976	8.2253	4.2534	1.761	4.1303	3.964	3.3876	5.896	4.1182	6.6935	6.136	4.505	9.067		0.985576	4.78547
20.4411	0.3175	0.9249	2.6587	5.382	7.5849	2.9625	1.862	2.7475	3.913	3.8275	5.096	3.1977	6.6547	6.124	5.476	5.913		0.990383	4.04012
20.5404	0.1685	0.9415	2.6868	7.1005	8.7213	5.0168	2.301	3.0687	2.847	3.9883	2.828	3.6013	6.3921	5.636	6.433	3.857		0.995194	4.09924
20.6396	0.8081	1.3354	1.5399	9.807	6.7093	4.901	2.773	3.235	3.514	2.4575	4.473	3.5646	5.303	6.031	4.66	5.08		1	4.13699

## Sheet: Image10
X0	Y0	Y1	Y2	Y3	Y4	Y5	Y6	Y7	Y8	Y9	Y10	Y11	Y12	Y13	Y14		Ap-Basal to 1	Average intensities
0	46.8158	54.9381	48.5515	52.6225	44.7716	52.7941	63.8074	55.8612	55.1752	75.9045	48.2451	40.198	51.956	44.3883	45.5202		0	52.1033
0.0992	46.7989	56.1808	41.5911	53.5658	43.6344	47.4845	60.8998	48.6674	58.8407	68.2765	55.5031	47.984	55.839	40.2457	45.5787		0.00469348	51.406
0.1985	41.5538	48.4676	43.0527	58.6766	42.271	44.9389	61.1816	45.9964	56.568	63.5846	52.8811	50.354	63.435	42.8291	50.6557		0.00939169	51.0964
0.2977	49.3924	48.6348	41.9713	69.1219	44.1829	43.0798	52.0847	54.4952	53.4113	54.357	48.6859	49.239	66.121	43.8651	55.6954		0.0140852	51.6225
0.3969	49.7037	44.8609	44.9729	66.3935	45.1754	48.2254	63.1671	52.5803	44.7489	48.9849	45.6539	48.299	67.758	39.8849	54.8767		0.0187787	51.019
0.4961	51.1766	45.6074	47.7126	68.7012	46.259	45.4104	55.0546	54.3651	41.1936	46.3035	47.0556	49.478	66.96	46.1695	50.2166		0.0234721	50.7776
0.5954	52.6387	51.1488	52.1968	67.9308	50.5345	59.6677	54.7313	50.4724	49.9305	48.8252	55.0064	52.497	65.801	55.1607	44.6671		0.0281703	54.0806
0.6946	49.4026	54.0943	48.7312	63.0598	53.4701	61.7292	50.2912	49.2164	45.8761	46.9412	57.9281	52.021	65.418	52.9882	44.9858		0.0328638	53.0769
0.7938	51.0894	60.2113	47.9453	61.0567	53.9207	59.2594	43.7755	49.4793	51.8304	48.5515	54.6765	50.232	72.014	51.9712	43.8209		0.0375573	53.3223
0.8931	55.2772	55.5536	44.8096	58.9688	57.101	50.3498	46.5402	60.0141	67.8857	54.0975	52.2855	53.161	75.987	60.7497	46.984		0.0422555	55.9843
0.9923	62.5841	48.4813	57.1626	61.5945	57.7441	56.5906	47.2739	64.3579	75.1179	60.4052	50.1506	45.749	78.473	66.745	44.5887		0.046949	58.4679
1.0915	74.6192	52.9148	59.1091	63.2211	60.5913	62.6108	51.8828	66.8705	73.3324	73.535	56.6027	51.576	82.916	60.6458	47.3699		0.0516425	62.5198
1.1907	63.2518	50.6996	55.7925	68.8202	59.5399	76.264	53.234	73.004	71.8979	75.4757	49.9564	49.288	80.075	71.8109	43.5337		0.056336	62.8429
1.29	67.6737	48.1748	48.9613	64.4371	55.663	81.4028	57.6321	67.5405	73.2625	70.9325	53.7761	55.948	85.024	79.8981	47.0311		0.0610342	63.8238
1.3892	62.5829	47.8961	44.5093	63.03	60.5111	79.3901	60.4321	61.8007	70.8127	62.6151	54.6711	64.914	93.931	80.6158	55.8207		0.0657277	64.2355
1.4884	71.6775	50.8728	46.9795	66.9838	60.1545	73.6336	59.4193	65.7548	65.122	67.243	50.3245	79.388	96.465	67.8745	54.9177		0.0704211	65.1207
1.5877	69.6442	51.9681	44.7115	68.2807	57.7296	64.3547	61.985	62.0513	64.8116	67.0249	50.7581	86.177	100.286	64.8411	55.1718		0.0751193	64.653
1.6869	68.7246	50.9719	48.6798	65.8229	54.7339	64.031	62.5271	70.6878	79.457	72.3038	54.9965	97.312	102.677	70.4356	54.0203		0.0798128	67.8254
1.7861	58.2621	58.197	49.956	62.8463	56.3586	77.7975	53.4254	76.5547	84.1825	67.3783	63.9087	102.977	113.836	70.1243	50.4364		0.0845063	69.7494
1.8853	67.4545	55.8245	54.7143	63.643	58.6991	76.5115	51.7815	86.8759	74.4229	66.0612	68.4996	105.321	108.462	70.3825	51.1542		0.0891998	70.6538
1.9846	67.7861	51.3265	56.0866	62.1631	66.1401	76.3867	54.8992	86.4008	68.1031	62.8669	69.5942	123.028	111.943	74.8912	56.2891		0.093898	72.527
2.0838	67.0443	52.0994	55.0238	69.5518	77.3367	62.9403	57.3682	83.1653	72.4365	59.4047	64.2585	112.13	113.291	75.6274	61.8682		0.0985915	72.2364
2.183	66.5473	49.0972	61.7035	72.7661	85.4021	52.979	60.0753	72.5192	76.2099	67.799	80.7024	108.519	101.06	84.9312	79.5881		0.103285	74.66
2.2823	61.1749	50.3137	67.6143	72.29	77.2904	50.5592	69.9313	66.3701	73.7086	65.5986	91.4665	102.091	106.132	84.8319	95.7764		0.107983	75.6766
2.3815	72.4608	54.907	68.4629	78.0085	71.1574	52.4208	72.3929	62.2379	70.5605	61.7288	91.4346	104.653	105.901	86.7583	89.7401		0.112677	76.1883
2.4807	67.0347	60.1847	70.5565	80.4657	71.8652	48.2503	70.7146	56.2868	60.1678	53.8196	84.2307	102.071	101.687	84.394	83.3991		0.11737	73.0085
2.5799	60.405	68.5727	66.1149	82.5354	69.2028	47.1094	73.8797	60.1331	57.1894	55.0476	88.0664	104.658	107.563	79.7152	82.065		0.122064	73.4838
2.6792	62.5722	79.2263	71.849	84.6149	72.2868	46.2973	70.8891	65.2363	50.3613	55.6028	93.5037	85.455	98.766	78.8985	71.9591		0.126762	72.5012
2.7784	62.1769	79.8959	75.8457	76.9016	63.2505	53.9414	79.3389	62.7337	47.0531	56.1492	96.8734	69.873	103.94	80.5454	66.0311		0.131455	71.6367
2.8776	54.8051	75.4536	74.4895	80.7178	66.3882	57.2154	80.7491	59.9792	39.7016	57.877	94.9498	66.243	87.975	86.0832	70.1523		0.136149	70.1853
2.9769	58.8387	75.9209	64.9235	87.155	63.2286	66.8112	84.3037	57.2381	39.4065	58.4564	91.1644	59.681	71.306	84.4064	65.2865		0.140847	68.5418
3.0761	58.0363	70.327	57.8675	81.4358	69.2724	68.595	79.2499	55.866	38.9316	46.6598	82.324	55.621	68.367	78.8501	55.7325		0.14554	64.4757
3.1753	58.5536	57.8574	61.6616	89.9302	66.7752	74.0927	84.3258	59.4211	44.6445	42.4121	76.357	50.922	72.194	79.5248	56.8035		0.150234	65.0317
3.2745	57.1936	46.6103	63.1119	80.5125	69.107	82.0795	87.2488	60.9509	47.7291	41.4875	76.3294	40.671	74.809	86.6983	51.334		0.154927	64.3915
3.3738	57.6765	43.972	61.637	84.7978	59.6425	80.5765	91.2018	63.1973	48.3087	46.2355	91.5682	38.931	70.47	88.4397	51.1395		0.159626	65.1863
3.473	49.3742	42.8727	57.7	87.3728	47.2978	80.3076	86.5451	68.7123	44.5129	45.599	94.8722	38.751	66.397	86.6164	50.1226		0.164319	63.1369
3.5722	44.4105	42.0852	55.1131	83.0444	41.2711	84.6155	90.693	86.2831	48.7513	47.2307	83.1542	39.609	68.917	77.1652	49.5051		0.169013	62.7899
3.6715	45.662	45.172	59.6702	89.1496	37.0995	90.6467	80.4372	88.8451	45.4374	46.144	75.9778	34.998	67.373	66.6258	39.7023		0.173711	60.8627
3.7707	40.9944	49.0144	63.9177	80.7094	37.6603	88.7916	75.3766	88.2206	47.0771	42.0121	82.7421	41.221	51.08	57.6144	34.5199		0.178404	58.7301
3.8699	33.2887	48.369	69.5568	84.852	37.5592	81.571	71.4243	83.9849	42.6894	42.5379	74.373	38.784	56.828	54.8573	31.7898		0.183098	56.831
3.9692	38.7329	51.8658	63.6872	70.5188	29.0315	74.7369	70.4876	84.0909	39.1288	46.4482	70.3301	30.363	48.957	48.4265	26.8575		0.187796	52.9108
4.0684	40.5861	53.1557	62.2737	72.3497	28.6354	87.766	63.1575	79.9713	44.5351	44.5404	57.8854	36.834	48.413	44.6553	30.1304		0.192489	52.9926
4.1676	38.9741	46.0544	59.2635	76.0457	30.1321	82.8717	58.9851	70.8095	48.0986	46.9306	54.4496	36.59	47.966	39.7323	32.136		0.197183	51.2693
4.2668	30.5883	42.9716	55.5129	83.047	35.8728	79.1938	54.7302	68.6388	50.9545	44.4521	58.2242	35.395	48.53	37.0275	26.2034		0.201876	50.0895
4.3661	33.8717	42.0535	49.1603	82.8103	27.285	78.3366	47.541	67.0303	50.4812	44.2025	53.413	41.427	46.869	37.44	23.0101		0.206575	48.3288
4.4653	29.269	42.1655	43.39	71.9128	28.0053	66.2461	48.0985	67.1456	48.986	42.8399	51.0975	40.842	43.084	36.703	23.3434		0.211268	45.5419
4.5645	29.8892	41.213	48.684	61.3922	26.9847	66.7259	46.2681	75.315	48.2975	43.0004	44.1991	35.344	38.69	38.6453	23.5724		0.215962	44.5481
4.6638	33.4789	36.5663	51.6507	58.4029	29.5711	62.1805	38.3292	90.1621	50.0525	48.2941	35.2119	38.614	34.565	42.7996	21.7786		0.22066	44.7772
4.763	30.5045	32.8162	53.2919	49.1199	27.6085	59.9535	34.5816	70.7187	52.818	49.1662	41.1847	35.37	30.878	53.6824	22.2923		0.225353	42.9324
4.8622	30.1125	26.8156	53.1994	53.2753	27.7938	59.2702	35.6012	63.4299	53.2481	44.2849	44.0147	40.62	28.441	52.9064	22.0064		0.230047	42.3346
4.9614	23.6508	28.8889	54.418	58.4963	34.9117	61.2873	34.1557	49.9793	52.2736	49.7543	42.2547	34.627	29.051	46.7382	26.1645		0.23474	41.7768
5.0607	24.2143	27.4596	53.9599	59.0581	36.3075	60.6395	32.6966	48.5947	45.7996	42.2747	37.1533	36.535	36.548	43.4328	24.8437		0.239438	40.6345
5.1599	23.0581	24.7637	52.5993	55.4786	42.2928	54.8229	30.5513	52.632	40.7004	37.8035	33.8293	35.722	33.196	39.0748	24.4102		0.244132	38.729
5.2591	22.8519	23.2854	41.9477	50.4978	34.7954	50.5905	28.0968	48.9158	45.3833	34.3999	33.3865	31.206	30.523	41.1431	24.2304		0.248825	36.0836
5.3584	23.0157	23.7675	40.0214	45.632	26.1356	43.9525	31.9852	44.538	44.1141	30.8234	30.1136	29.01	29.423	34.5224	19.3753		0.253524	33.0953
5.4576	23.4015	24.2133	41.3889	40.4033	28.7367	44.7918	26.7913	48.0861	42.9315	32.868	24.9004	30.873	28.621	36.5455	19.4178		0.258217	32.9313
5.5568	20.9936	23.4263	36.4767	49.4949	29.1525	45.2244	28.5475	42.4924	38.9169	32.4148	25.6657	26.978	30.696	27.8063	20.5382		0.262911	31.9216
5.656	17.4506	25.4757	31.574	48.037	24.5399	47.1218	27.6826	45.1705	42.4541	33.2571	30.3471	28.149	29.205	20.3726	23.589		0.267604	31.6284
5.7553	18.6006	27.1584	25.2152	44.105	27.7825	50.3485	29.6938	42.2517	48.8517	33.7753	33.5297	26.893	26.989	15.9522	21.7837		0.272302	31.5287
5.8545	16.9535	24.1412	19.2391	39.1161	28.0504	44.2156	28.4194	40.6321	53.1245	33.4472	34.1199	28.809	30.151	14.3263	15.9956		0.276996	30.0494
5.9537	16.4488	26.6133	22.098	33.0725	32.3437	42.9531	32.4546	35.7198	56.998	31.6987	30.7628	26.383	31.393	11.7527	13.2929		0.281689	29.599
6.053	14.2945	23.1807	29.5488	30.7067	31.074	42.0565	31.1672	31.5408	60.6007	28.0135	25.3415	20.983	31.888	11.5196	15.3197		0.286387	28.4823
6.1522	17.2786	26.1345	32.9271	28.5193	30.5101	30.8649	24.2969	30.1641	71.2789	27.1601	31.2039	25.563	26.655	10.6256	14.1771		0.291081	28.4906
6.2514	18.9684	21.4118	27.4345	30.2657	29.0767	33.699	23.0789	35.1007	72.0943	23.7643	31.9056	23.606	25.493	8.6706	11.9647		0.295774	27.7689
6.3506	22.0312	23.5581	28.8749	31.5891	30.2791	28.6329	22.1806	39.524	68.4908	21.3933	28.9505	26.717	28.279	9.2104	12.3038		0.300468	28.1343
6.4499	19.342	23.5514	21.7908	29.9068	25.4615	30.3426	20.9467	32.8138	60.7176	20.3407	28.0654	28.506	27.819	7.195	9.4768		0.305166	25.7517
6.5491	16.4241	19.5502	22.6467	28.9332	23.4856	33.3315	25.221	30.4185	62.4045	20.3641	25.9963	25.717	30.282	6.7757	10.3064		0.30986	25.4571
6.6483	12.9344	18.9286	21.0616	25.7276	25.4885	29.7179	21.979	27.7559	55.3656	16.0473	27.443	26.94	27.918	5.9805	9.9777		0.314553	23.551
6.7476	15.0627	24.7746	23.4005	27.081	23.1625	30.0262	18.7788	25.3701	52.2202	18.0437	25.8752	28.727	30.528	5.7856	8.6708		0.319251	23.8338
6.8468	13.5876	18.735	29.5407	21.3722	23.2244	26.0044	17.1034	28.3964	50.7896	19.2218	26.2509	24.021	29.225	5.5622	8.061		0.323945	22.7397
6.946	11.152	17.7748	29.31	23.5602	22.22	25.6695	16.841	24.9884	46.164	19.8203	25.012	25.476	29.994	5.5871	7.1018		0.328638	22.0447
7.0452	9.7977	19.9074	30.5833	25.9408	27.5205	27.8053	15.7873	26.904	42.1292	19.2869	20.8414	27.968	27.043	4.8152	7.8708		0.333332	22.2801
7.1445	10.3852	22.6704	24.6264	22.4795	31.7907	31.5671	15.8146	21.2199	41.4912	20.9385	21.0748	25.355	29.616	5.7229	6.3915		0.33803	22.0762
7.2437	10.4854	17.3544	25.7412	20.5223	30.2765	28.092	15.2182	24.0249	40.3517	22.2666	25.4749	24.28	29.905	4.7792	6.1886		0.342723	21.6641
7.3429	10.316	16.8261	31.3237	18.5308	28.5119	26.7628	13.6316	24.0725	34.1294	23.9672	22.4062	20.673	25.668	3.8536	9.0411		0.347417	20.6476
7.4422	11.0455	16.54	27.9225	19.901	22.276	26.5387	15.4675	20.4031	26.9019	27.9231	20.8188	21.423	21.695	5.2445	11.5334		0.352115	19.7089
7.5414	9.1889	19.4021	22.6923	21.1747	18.3757	28.5888	11.7997	20.928	22.1888	31.6567	20.1646	22.528	23.815	6.7048	9.3992		0.356809	19.2405
7.6406	8.5349	21.4178	21.6912	27.3271	22.8587	24.2982	10.234	20.9181	21.1365	25.3704	20.1453	20.535	24.192	5.4507	7.4482		0.361502	18.7705
7.7398	5.8336	19.7235	22	30.0749	18.1662	24.0834	12.1146	24.6745	21.7588	23.09	20.2081	21.627	29.574	7.4563	6.8787		0.366196	19.1509
7.8391	5.2472	16.1413	19.7096	30.8676	17.2189	23.5345	8.5112	22.0374	24.456	24.9945	21.9699	21.598	23.756	5.2957	6.5651		0.370894	18.1269
7.9383	4.8692	10.7898	19.8251	20.8665	18.4967	21.2215	9.3745	19.0378	20.0018	25.9995	24.7693	22.684	26.4	5.1453	10.3		0.375587	17.3187
8.0375	5.8213	10.6629	21.1453	22.5377	22.1225	18.3343	11.3946	16.4728	19.0165	23.498	18.8374	19.892	29.611	7.444	9.006		0.380281	17.0531
8.1368	5.5883	16.5083	18.6537	23.2316	22.1306	19.1399	8.6039	15.5402	20.337	23.7319	16.3441	20.831	33.909	6.8677	11.0057		0.384979	17.4949
8.236	8.2533	14.136	18.4729	16.592	20.4764	19.2752	9.2815	15.3592	22.4329	22.7127	16.1386	18.64	32.985	5.232	11.3044		0.389672	16.7528
8.3352	9.5769	14.326	19.8943	23.1097	17.7266	21.1206	9.206	16.1057	16.0473	21.37	18.5207	19.682	31.017	5.7745	11.9195		0.394366	17.0265
8.4344	8.1656	15.7985	25.1863	19.1053	16.8641	20.4746	9.1192	16.2938	19.6058	19.0761	18.5544	22.152	30.82	5.6307	13.3853		0.399059	17.3488
8.5337	5.6853	12.6262	22.7924	21.8657	20.7637	19.0113	7.7739	15.9367	22.6352	19.2445	17.0095	25.49	31.519	4.7645	15.1518		0.403758	17.4846
8.6329	7.5957	15.4849	22.8253	22.5443	21.1187	22.5132	6.9783	13.3383	20.5544	19.8403	15.8462	29.387	32.071	6.3392	12.5296		0.408451	17.9311
8.7321	6.8436	17.6493	22.4613	25.041	18.1699	19.3692	7.4484	13.81	23.3073	17.5084	13.9706	28.152	30.084	8.6208	12.21		0.413145	17.6431
8.8314	6.7745	18.8949	16.8747	23.6387	22.099	22.9415	6.8286	13.285	27.5814	22.5522	14.4496	24.964	22.3	7.4676	12.5237		0.417843	17.545
8.9306	8.818	23.3833	16.0964	21.1755	26.7086	20.9447	6.1808	14.4475	27.2054	22.9882	14.8318	25.829	20.873	4.8813	8.7959		0.422536	17.544
9.0298	4.8435	23.4116	18.9734	19.7363	25.4682	18.7969	6.7683	13.1277	23.8345	22.9566	14.8619	26.017	24.102	3.6709	7.1383		0.42723	16.9138
9.129	4.6805	21.7244	20.0562	20.5113	21.8733	21.9285	6.6701	11.1208	21.7666	19.1548	22.332	23.544	25.686	4.8076	9.1541		0.431923	17.0007
9.2283	4.583	20.8098	24.025	21.6943	23.3188	20.0666	7.9168	12.4006	20.7695	15.7407	29.1282	20.719	20.414	4.2416	8.7619		0.436621	16.9727
9.3275	5.3802	18.4662	25.1159	16.6224	21.4506	22.2592	10.5529	14.6411	24.1606	17.5366	26.412	20.984	20.745	3.3894	8.8774		0.441315	17.1062
9.4267	4.404	13.3777	29.7906	16.0036	23.5856	20.1558	9.4098	12.7075	19.4687	19.7998	26.5109	19.229	24.423	3.5046	9.2314		0.446008	16.7735
9.526	3.5423	11.1348	26.8689	17.5749	26.5024	16.7132	11.3072	12.7409	18.578	16.3326	27.7793	19.164	25.618	3.4778	9.0829		0.450707	16.4278
9.6252	3.9033	15.231	22.9582	17.8904	29.012	16.0506	11.5879	10.3548	21.4625	23.2741	21.9477	19.369	22.333	5.4057	7.5684		0.4554	16.5566
9.7244	5.4106	18.2216	20.8393	18.457	27.5784	20.6836	11.1818	10.2517	24.1852	24.3867	17.1902	23.507	19.475	6.7878	7.3571		0.460094	17.0342
9.8236	4.9647	14.7569	22.6315	16.9718	24.9698	20.0877	10.7584	8.365	22.3626	23.3587	18.2724	24.928	21.946	9.5917	11.1214		0.464787	17.0058
9.9229	6.5401	13.1082	22.0164	15.9096	20.2302	20.6715	9.5907	7.1832	18.5454	20.1102	18.1105	22.249	25.638	9.2529	11.5378		0.469485	16.0462
10.0221	6.7164	12.6476	25.6102	17.9684	23.7473	22.6623	10.1972	10.2248	19.334	18.7984	15.9962	29.926	22.506	12.0094	13.7763		0.474179	17.4747
10.1213	6.525	14.2518	30.0109	20.1071	30.3304	21.4792	8.7652	9.6886	18.1524	21.7346	14.5581	28.372	23.603	7.4253	12.5678		0.478872	17.8381
10.2206	7.5417	15.8406	31.6852	23.8206	33.4714	20.9758	8.2743	8.9216	17.8991	19.288	17.2048	24.933	17.658	7.8499	11.6789		0.48357	17.8029
10.3198	7.9832	13.4577	28.4192	18.8348	32.9032	18.4566	5.8918	10.9095	13.7886	19.9546	19.9739	22.4	18.917	6.061	9.4551		0.488264	16.4937
10.419	7.7735	11.4427	26.9926	16.3535	28.0424	15.8107	6.6171	13.9735	15.0238	16.3517	19.7328	25.478	21.755	5.4385	8.559		0.492957	15.9563
10.5183	10.9694	11.0857	23.2699	19.91	31.1442	15.2817	6.6183	13.812	18.8021	15.4932	17.4251	30.284	20.216	5.4497	5.0486		0.497656	16.3207
10.6175	12.4458	15.5908	23.6374	21.6121	30.4757	17.8776	5.2603	14.7204	20.2155	17.716	17.7534	30.451	21.342	4.4168	5.7884		0.502349	17.2869
10.7167	11.7609	15.1968	25.8928	22.5503	25.3687	14.6146	4.8826	11.6114	23.6749	18.0657	15.7729	28.199	19.901	4.5242	6.1926		0.507043	16.5472
10.8159	7.5659	15.2574	22.0942	26.9238	23.5217	15.617	4.8209	10.8075	25.9701	16.3212	18.7389	30.962	26.172	4.4967	6.6794		0.511736	17.0632
10.9152	6.7288	14.089	20.7073	25.84	22.6594	14.6886	5.2022	10.4691	22.9792	18.096	18.4956	33.824	25.494	4.6694	7.7193		0.516434	16.7775
11.0144	4.8502	10.1671	19.3769	22.0758	18.722	9.2703	8.1495	11.6614	23.3374	20.8117	21.3823	34.655	26.722	4.1706	7.208		0.521128	16.1707
11.1136	6.7809	7.4027	18.99	18.6486	22.4549	9.4573	8.3444	15.2811	19.1457	19.0915	17.0361	34.237	24.173	4.0233	8.2999		0.525821	15.5578
11.2129	5.8651	6.2277	21.1882	19.6092	24.4076	9.7519	10.988	14.5067	20.2708	16.7032	20.0479	30.189	20.414	4.9075	9.183		0.530519	15.6173
11.3121	4.5883	9.3609	25.2585	23.4196	26.3077	11.2685	12.2959	14.1386	24.9058	15.9326	28.1343	31.357	20.943	5.1767	12.4879		0.535213	17.705
11.4113	4.4473	9.7161	22.6444	25.0574	28.2932	12.808	10.9303	16.3865	25.2723	14.7483	26.5033	27.282	25.257	3.7283	10.604		0.539906	17.5786
11.5105	3.5812	10.8731	25.4478	23.5583	24.875	11.6718	5.8302	16.3167	24.587	15.7719	24.1266	28.793	24.799	5.2944	8.4699		0.5446	16.9331
11.6098	5.642	9.6601	26.0527	26.1332	25.1014	13.3766	4.752	12.1479	21.8354	15.2022	25.4324	27.103	28.456	6.4255	5.3789		0.549298	16.8466
11.709	4.0968	9.4493	24.259	21.7802	23.9876	12.9913	4.2702	14.3319	20.9486	13.3955	26.382	20.181	31.716	4.8327	7.3392		0.553992	15.9974
11.8082	4.4427	9.8258	20.5349	22.3821	25.7613	12.2225	3.8102	11.2502	21.1387	13.287	28.6005	18.943	34.654	5.1666	7.3003		0.558685	15.9547
11.9075	3.7502	8.1077	18.3791	19.7109	22.3933	14.8035	5.9603	8.581	23.7617	13.2507	32.7933	20.228	32.239	5.7979	6.8898		0.563383	15.7764
12.0067	3.8209	7.1844	19.3008	25.1447	22.2832	15.2302	5.4583	10.3277	23.6216	16.0272	32.4409	22.336	29.449	4.7134	8.0643		0.568077	16.3602
12.1059	5.0524	7.2972	22.999	28.8878	21.3791	13.2967	4.8297	10.1562	27.865	18.8504	28.4648	22.564	25.377	4.5662	10.6126		0.57277	16.8132
12.2051	4.0675	8.6368	23.6023	25.7475	24.3465	12.681	5.7903	9.3679	29.4907	18.9105	27.5642	23.198	21.058	7.5359	9.2478		0.577464	16.7497
12.3044	5.4199	6.4382	19.6966	23.0763	26.595	13.2689	6.8258	7.0499	27.9338	17.0066	29.0238	24.293	20.247	7.4977	11.1829		0.582162	16.3704
12.4036	5.9352	6.2917	22.3156	20.7258	22.8333	16.8909	5.9773	8.1541	20.9849	18.7539	25.0266	23.368	20.066	6.6187	12.3666		0.586855	15.7539
12.5028	4.7338	7.1148	28.789	21.2813	23.4736	20.7242	6.8469	8.3377	21.55	20.2061	23.6918	23.298	18.78	7.4017	9.411		0.591549	16.376
12.6021	5.5433	8.6242	30.9357	21.8183	22.5173	18.2691	5.8556	14.1702	18.4376	20.0658	26.9534	25.438	20.448	11.6457	8.9665		0.596247	17.3126
12.7013	4.0539	8.9749	28.5726	20.4016	21.9238	12.6673	7.1065	11.1726	18.7915	14.4875	30.831	27.751	23.394	8.5258	5.5319		0.600941	16.2791
12.8005	5.9647	9.1413	32.6116	17.8055	24.1261	12.1685	8.1018	12.5529	20.8831	18.9731	27.5513	23.645	21.771	7.6039	5.9679		0.605634	16.5912
12.8997	6.2393	9.3184	32.5047	23.0462	24.6875	15.5252	6.6212	12.7241	19.9977	17.7963	24.7793	27.356	25.127	10.0215	6.2147		0.610328	17.4639
12.999	8.2141	10.6178	26.4375	23.7202	23.3187	16.7144	8.7423	13.074	19.9889	22.1023	23.3806	23.461	28.942	10.5575	4.3757		0.615026	17.5765
13.0982	9.7089	10.1169	22.6136	30.0875	20.8156	17.142	8.3831	11.7315	17.2731	19.9846	22.0424	28.421	29.955	13.1976	5.4948		0.619719	17.7978
13.1974	11.9637	6.8842	24.6444	29.3793	23.131	15.4772	11.2615	11.3319	15.2814	24.0368	21.8024	30.009	36.101	15.3061	7.2106		0.624413	18.9214
13.2967	13.3524	7.5355	25.1411	33.9671	22.3377	14.1695	10.8643	12.6383	16.6951	18.7456	21.1582	26.731	33.055	13.4493	9.5975		0.629111	18.6292
13.3959	10.6468	7.928	26.6665	35.554	23.8521	15.4406	10.0304	12.1048	18.3636	17.8963	24.028	25.379	33.297	16.249	8.9253		0.633804	19.0908
13.4951	11.2803	7.863	27.2474	33.9268	19.6776	15.8454	7.4798	10.8088	20.3182	17.4286	29.0288	21.059	29.252	13.0215	9.8425		0.638498	18.272
13.5943	8.586	6.7285	27.12	31.4743	20.0675	16.7938	7.9765	12.672	23.3341	20.2692	31.0807	24.777	28.493	9.5637	10.3602		0.643191	18.6198
13.6936	8.3681	8.6795	24.0652	32.4252	25.9882	18.5344	10.3278	14.5299	20.968	20.852	29.4355	25.983	30.095	5.5472	9.5104		0.64789	19.0206
13.7928	9.5916	9.4091	28.8338	29.8258	22.889	20.9733	9.0527	12.3315	16.9747	21.215	29.3921	31.156	25.786	4.7916	8.6909		0.652583	18.7275
13.892	8.6925	8.5153	33.7447	29.2366	21.3916	16.6928	7.7051	14.7701	17.1472	21.3772	39.5735	30.603	26.172	5.326	10.8407		0.657277	19.4526
13.9913	7.2503	8.1865	32.0958	28.6537	18.954	16.2688	9.0844	13.0626	20.8353	24.0572	27.6278	33.472	32.053	5.128	11.7073		0.661975	19.2291
14.0905	6.7956	9.8828	26.0093	24.5722	22.4245	17.1902	9.234	14.6615	25.3261	27.4968	27.2153	27.733	29.402	3.385	8.6467		0.666668	18.665
14.1897	7.1543	12.0283	21.7179	22.0933	23.6194	21.2145	6.9236	16.5625	25.4055	24.0591	30.269	26.82	28.456	4.6729	6.239		0.671362	18.4824
14.2889	5.484	13.6894	24.3283	27.9365	24.7863	20.1784	6.3601	16.1816	19.3051	21.6804	31.9376	24.761	29.347	3.5394	6.2836		0.676055	18.3866
14.3882	4.9783	14.3005	23.2171	29.2411	24.0568	16.8208	5.1917	14.5225	16.8615	18.954	30.6433	23.352	25.805	4.4975	6.2361		0.680753	17.2452
14.4874	4.9426	12.2716	22.1734	23.7808	25.2153	19.3474	5.0433	16.0592	19.4488	17.9188	25.9615	20.074	22.903	6.0471	5.5019		0.685447	16.4459
14.5866	4.064	15.9759	24.883	25.0651	23.6406	22.2858	4.1782	13.9102	18.8204	24.367	27.2514	21.351	19.02	5.8773	5.4676		0.69014	17.0772
14.6859	5.4516	12.226	24.7596	24.4548	23.8634	22.0068	4.5232	14.8161	18.2226	27.5176	31.7204	23.999	19.351	4.0808	5.7494		0.694839	17.5162
14.7851	4.0239	13.2331	28.8957	19.4032	26.9688	20.5193	3.9028	19.6272	21.6888	25.5273	29.0399	25.496	23.438	4.6524	6.2628		0.699532	18.1786
14.8843	3.0008	14.3553	24.9653	15.818	27.9299	19.9248	5.0279	21.9331	26.1842	28.9863	29.9009	30.224	22.66	5.1527	5.3018		0.704226	18.7577
14.9835	4.2159	15.3246	21.0172	19.4599	23.7116	15.9934	5.5564	21.4895	22.9636	30.0135	23.6807	29.697	28.185	3.9066	4.1356		0.708919	17.9567
15.0828	3.9599	13.0673	25.5725	19.5824	27.7258	13.6361	5.9337	17.7808	21.4011	32.3588	22.0097	28.55	29.869	4.2168	5.5018		0.713617	18.0777
15.182	5.0656	14.7299	24.1702	22.5991	29.3891	14.0268	3.8714	18.5727	25.148	36.8161	23.1531	30.648	27.129	6.7061	4.6332		0.718311	19.1106
15.2812	6.761	14.5392	26.8681	24.653	29.9463	15.7211	5.2474	17.018	26.8448	36.0412	21.9369	35.452	28.248	6.125	5.837		0.723004	20.0826
15.3805	7.0133	14.4335	28.8598	24.1991	28.0444	21.5392	6.9408	17.5753	23.168	34.9653	22.6485	42.408	32.971	6.85	7.0276		0.727702	21.2429
15.4797	5.6753	16.6399	28.6481	24.4403	25.0647	19.7359	8.1917	17.8229	25.1298	33.5885	24.4444	37.63	31.234	9.1732	8.8183		0.732396	21.0825
15.5789	4.7499	19.8072	28.0413	26.8419	25.7054	20.7202	7.688	23.643	26.2292	33.8006	20.9595	34.037	22.087	9.4128	6.8909		0.737089	20.7076
15.6781	4.5699	21.7425	25.7272	31.1172	35.1524	18.2131	6.4218	22.4515	25.439	30.8206	23.3068	34.842	20.183	9.527	11.7589		0.741783	21.4182
15.7774	5.5907	16.5253	24.8375	35.1467	37.2574	15.0439	4.6359	22.3754	26.8398	29.2823	28.0953	28.627	18.235	14.7791	8.2399		0.746481	21.0341
15.8766	6.217	19.0041	27.736	31.9948	30.6302	17.6317	6.441	18.7627	22.782	26.7728	23.246	27.441	15.658	13.9362	10.5869		0.751175	19.9227
15.9758	6.2178	18.5469	31.2908	32.1494	27.5849	18.4074	10.2849	14.5436	28.5646	24.3173	22.6235	22.54	22.738	12.3534	8.9746		0.755868	20.0758
16.0751	6.0927	20.0431	32.7672	30.4551	24.622	17.7982	13.2174	15.6423	31.7854	24.4886	23.6242	22.499	22.031	15.2518	10.7121		0.760566	20.7353
16.1743	6.1414	19.8117	36.1768	29.7097	28.6402	23.0037	10.9198	18.643	31.9386	28.3949	22.4087	22.189	24.351	16.0945	10.2668		0.76526	21.9127
16.2735	4.9681	19.0701	37.6015	28.0412	31.4821	24.2249	10.9904	21.9352	30.3746	26.058	24.6142	19.178	15.7	19.8104	10.3527		0.769953	21.6268
16.3727	5.384	16.0853	33.8111	29.2685	30.6492	20.0452	12.5701	20.398	27.1933	24.6063	25.9377	12.568	8.096	17.802	14.6838		0.774647	19.9399
16.472	7.6025	14.273	33.6734	27.736	31.1909	20.0868	14.4441	16.0762	24.8926	26.3195	25.3909	9.497	6.89	19.118	14.5862		0.779345	19.4518
16.5712	8.3793	16.5334	36.719	29.5298	36.0349	21.1023	15.714	14.9887	25.2671	26.1938	27.6945	6.778	5.776	18.5822	17.3603		0.784038	20.4436
16.6704	8.9355	21.1151	32.1477	30.0986	36.4852	19.1305	21.9821	14.2238	26.6571	24.3768	21.2832	4.193	2.862	16.8583	18.1938		0.788732	19.9028
16.7697	10.9332	22.5972	28.2331	28.6509	35.5462	20.8895	20.1507	14.5408	28.3115	26.1534	21.4764	3.843	2.235	16.8311	16.8113		0.79343	19.8136
16.8689	14.5895	23.9464	26.4401	32.1882	30.131	24.5984	19.4339	16.7216	29.1128	28.7057	17.9814	2.349	1.71	15.8864	19.4547		0.798124	20.2166
16.9681	16.1389	21.238	30.2291	29.8718	25.6623	23.7474	19.6959	17.4911	27.7051	23.3551	18.3559	1.905	2.06	16.7891	17.2516		0.802817	19.4331
17.0674	15.8361	20.0944	24.9918	29.2439	20.9555	19.4887	18.867	18.2266	30.5022	26.9379	23.9264	1.346	1.107	17.2613	14.8944		0.807515	18.9119
17.1666	16.7637	20.5861	22.5675	30.5879	20.3421	16.6728	17.8088	19.2331	29.1291	23.1903	22.099	1.191	1.383	16.5749	13.5544		0.812209	18.1122
17.2658	18.6363	21.9555	23.6651	26.6604	23.1113	19.3285	15.1253	22.6399	27.0661	27.7219	16.8064	1.383	1.5	16.7098	16.6127		0.816902	18.5948
17.365	16.615	17.1777	26.6258	27.9659	22.2059	19.0878	18.8258	18.3621	25.6703	27.4151	15.1056	0.959	1.452	16.1237	15.6673		0.821596	17.9506
17.4643	16.8747	15.1937	28.5483	27.5966	23.8233	21.3768	20.0291	17.9704	23.5087	26.8402	11.1983	0.316	1.651	16.7947	15.2469		0.826294	17.7979
17.5635	14.3966	17.542	23.066	22.0833	21.8008	23.6361	16.8539	20.3098	22.316	26.9158	9.194	0.888	1.383	13.0914	14.0084		0.830987	16.499
17.6627	16.2234	17.298	24.6647	20.6994	19.5888	19.6275	18.5918	23.0112	20.2006	31.7465	7.5635	0.769	0.765	13.6632	14.3953		0.835681	16.5872
17.762	15.5226	18.0852	19.3555	18.8768	16.3933	18.1116	22.6986	20.1504	20.8018	34.6443	6.2293	0.815	0.381	19.9673	11.9725		0.840379	16.267
17.8612	19.8622	19.7075	10.6324	17.8721	10.4648	23.0695	26.8828	22.1159	18.2561	30.8247	3.3408	0.672	0.91	25.9875	13.2887		0.845073	16.2591
17.9604	20.7456	17.1642	7.7341	15.6506	6.8738	27.4741	24.9155	23.1367	24.3061	24.0294	0.5229	0.672	0.264	24.4739	12.0513		0.849766	15.3343
18.0596	19.2785	20.8967	5.9754	15.4028	7.895	21.2678	24.0733	23.15	17.1525	23.9078	0.9942	0.621	0.517	18.9341	11.5866		0.85446	14.1102
18.1589	15.4466	23.1968	5.4875	13.9858	6.7413	15.5898	22.8773	22.7967	18.173	23.8217	1.5164	0.375	0.224	21.4531	12.0971		0.859158	13.5855
18.2581	14.0549	24.5113	4.3081	12.4029	4.2237	18.4101	20.0467	18.8154	17.9735	18.3835	0.9507	0.181	0.43	18.6556	16.5244		0.863851	12.6581
18.3573	14.5879	19.8294	3.2062	11.2288	3.376	16.7709	23.7174	18.9129	12.5882	16.7589	1.1643	0.263	0.701	11.5378	17.1791		0.868545	11.4548
18.4566	14.3307	19.5474	2.505	6.9077	1.9825	27.5291	18.8418	18.9089	9.9324	17.5655	0.8776	0.425	0.724	6.2889	16.56		0.873243	10.8618
18.5558	16.4267	14.1245	1.0551	4.3033	1.3476	31.5587	17.5876	16.0947	6.9251	14.8511	0.5388	0.564	0.387	3.8346	15.6404		0.877936	9.68261
18.655	19.54	10.3845	0.9746	2.4171	0.8705	23.2443	16.3131	16.7094	3.6401	10.6624	0.6261	0.554	0.393	2.3976	10.5793		0.88263	7.95373
18.7542	15.3195	5.6178	1.5975	1.9508	0.7706	11.4762	17.4164	10.7655	3.5348	7.6776	0.4295	0.217	0.672	2.597	6.0803		0.887323	5.7415
18.8535	12.2346	3.5912	1.0747	1.2964	0.4302	6.8722	17.2536	6.726	2.1344	3.5139	0.7146	0.197	0.445	1.5213	2.4994		0.892022	4.03363
18.9527	9.1963	2.2869	0.6656	0.5271	0.5725	3.6708	16.8295	7.4451	1.2199	2.1929	0.5923	0.563	0.162	1.409	2.0903		0.896715	3.29488
19.0519	4.5068	1.8341	1.7223	0.9308	0.7758	1.9112	18.4	5.3279	1.5766	2.4891	0.5363	0.127	0.175	0.3367	0.7906		0.901409	2.76268
19.1512	4.0116	1.8118	1.4465	0.8774	0.6843	1.4423	17.6767	2.0183	1.1324	0.9525	0.7262	0.074	0.259	0.2893	0.2513		0.906107	2.24357
19.2504	2.2151	0.5858	1.0122	0.9239	0.623	1.5667	13.5621	0.6978	0.6216	0.634	0.4899	0.065	0.203	0.349	0.4582		0.9108	1.60049
19.3496	1.9883	1.0914	0.7446	1.1392	0.7361	1.1473	7.3426	0.8414	0.5022	0.9584	0.7405	0.393	0.261	0.495	0.1964		0.915494	1.23849
19.4488	1.4586	0.4215	2.1272	0.696	0.2465	1.4112	3.5713	0.8835	1.1512	0.9684	0.1763	0.452	0.546	0.0886	0.3053		0.920187	0.966907
19.5481	1.0523	0.3839	3.1827	0.5369	0.2358	0.6815	3.3264	0.4494	0.8247	0.9177	0.6819	0.367	0.318	0.0937	0.8385		0.924885	0.926027
19.6473	1.3354	0.4302	6.4787	0.4337	0.8124	0.4727	3.4633	0.5721	0.5862	0.245	0.2922	0.175	0.008	0.4141	0.9282		0.929579	1.10981
19.7465	0.3569	0.6206	14.4586	0.7696	0.3707	0.5601	2.6909	1.3628	0.8063	0.3995	0.3576	0.491	0.042	0.3585	0.5376		0.934272	1.61218
19.8458	0.681	0.3661	7.545	0.3753	0.047	0.8803	1.702	0.6751	0.5482	0.4975	0.4584	0.578	0.174	0.1713	0.4833		0.938971	1.01217
19.945	0.5134	0.2067	5.5589	0.5006	0.2493	0.9492	0.5997	0.7451	0.465	0.3241	0.0839	0.062	0.17	0.0719	0.3151		0.943664	0.720993
20.0442	0.7609	0.5414	2.9987	0.7386	0.4478	0.6261	1.0706	0.6437	0.2486	0.9748	0.3152	0.441	0.252	0.1348	0.1036		0.948358	0.68652
20.1434	0.0739	0.2437	0.9264	0.1707	0.6018	0.2312	0.7013	1.7514	0.3106	0.9065	0.2513	0.567	0.305	0.1359	0.0361		0.953051	0.480853
20.2427	0.1625	0.2069	0.3984	0.3737	0.4476	0.471	0.6347	0.5114	0.4679	0.8095	0.3805	0.108	0.434	0.4167	0.5254		0.957749	0.423213
20.3419	0.2656	0.2324	0.4011	0.5523	0.1522	0.3384	0.5472	0.2091	0.7309	0.201	0.4986	0.169	0.057	0.526	0.1544		0.962443	0.33568
20.4411	0.2906	0.3727	0.0864	0.323	0.0743	0.2352	0.2566	0.2331	0.2498	0.7254	0.8003	0.551	0.11	0.4562	0.1387		0.967136	0.326887
20.5404	0.2385	0.3046	0.0112	0.1521	0.0982	0.5966	0.254	0.336	0.1402	0.1409	0.0489	0.332	0.358	0.5325	0.3778		0.971834	0.261433
20.6396	0.349	0.3525	0.3553	0.1771	0.0012	0.3584	0.8889	0.1609	0.2262	0.1427	0	0.683	0.618	0.2798	0.1655		0.976528	0.317233
20.7388	0.5216	0.1757	0.2635	0.2286	0.2102	0.3013	0.6414	0.3086	0.498	0.2748	0	1.019	0.219	0.3214	0.0298		0.981221	0.334193
20.838	0.1569	0.3414	0.2144	0.1667	0.7555	0.1823	0.3756	0.3329	0.0485	0.2668	0	0.692	0.038	0.4086	0.1927		0.985915	0.278153
20.9373	0.1235	0.272	0.5055	0.4143	0.5192	0.1086	0.2479	0.3111	0.1473	0.2992	0.0455	0.301	0.012	0.0419	0.0505		0.990613	0.226633
21.0365	0	0.2819	0.043	0.0234	0.2489	0.2067	0.7818	0.2326	0.6136	0.7916	0.1773	0.197	0.292	0	0.1321		0.995307	0.268127
21.1357	0.0345	0.3006	0.1951	0.385	0.3876	0.1709	0.6904	0.1117	0.3642	0.2506	0.2754	0	0.092	9.337e-05	0.1889		1	0.2298

## Sheet: Image4
X0	Y0	Y1	Y2	Y3	Y4	Y5	Y6	Y7	Y8	Y9	Y10	Y11	Y12	Y13	Y14	Y15	Y16	Y17	Y18	Y19	Y20	Y21			Ap-Basal to 1	Average intensities
0	31.556	25.111	44.722	50.333	36.0556	26.3333	38.3889	27.111	26.833	38.722	31.389	27.278	26.8889	30.333	28.889	30.278	32.167	52.5556	50.0556	37	51.5	22.1111			0	34.8005
0.0917	27.944	26.389	48.278	44.722	44.3333	25.7222	27.6111	25.389	28.056	36.556	33.278	28.556	26.8889	22.611	28	31.778	24.778	66.7222	55	45.667	52.1111	33.6667			0.00384704	35.639
0.1834	39.111	38.333	37.778	50.556	50.8889	30	27.0556	27.444	28.5	34.278	49.111	37.222	27.4444	25.5	36	38.889	30.556	56.4444	56.6667	55.333	47.5556	29.7222			0.00769408	38.8359
0.275	37.167	46.056	38.944	59.167	60	32.7778	27.0556	25.056	26.111	31.611	48	40.389	30.8333	21.833	39.056	29.833	33	55.4444	45.5	68.556	53.6667	32.8333			0.0115369	40.1314
0.3667	35.056	45.333	34	43.889	55.2222	26.0556	17.3889	25.722	31.944	36.222	31.333	46.278	27.8333	35.333	36.278	42.389	34.722	63.8889	41.5556	64.5	55.3333	40.5			0.015384	39.5808
0.4584	32.556	45.222	42.556	46.833	57.7778	39.9444	20.3333	29.111	33.444	32.167	26.778	48.444	31.7778	37.5	39.111	36.389	37.833	70.7778	41.1111	70.278	53.0556	41.7778			0.019231	41.5808
0.5501	37.111	54.278	44.778	44.667	47.8333	53.2222	21.2778	28.722	33.333	40.944	29.389	44.833	32.3333	31.056	40.333	33.056	30.111	74.7222	37.0556	88.722	56.5	43.5			0.0230781	43.0808
0.6418	40.944	57.333	42.944	59.389	53.2222	48.6667	22.2222	33.611	37.833	47.611	33.611	59	39.6667	50	46.056	33.278	33.5	71.6111	46	97.667	65.1111	41			0.0269251	48.1944
0.7334	41.833	48.333	43.778	57.5	54.5	41.1111	27.5	37.167	51.167	44.556	38.5	48.222	33.5556	61.444	59	26.111	31.056	75.3333	38.0556	102.389	81.8333	70.1111			0.0307679	50.5935
0.8251	42.389	41.333	38.056	50.333	53.6667	35.4444	23.3889	42.444	62.556	49.222	36.278	59.5	33.0556	49.111	70.056	26	46.278	73	43.8889	112.444	74.7778	66.7222			0.034615	51.3611
0.9168	47.556	47.944	37.111	53.556	56.7778	47.8889	20.3333	42.444	82.5	53.944	41.444	47.889	38.1667	50.889	95.944	28.389	44.222	63.1111	43.5556	112.056	68.6111	60.6111			0.038462	53.8611
1.0085	36.556	46.444	32.722	51.167	65.3889	42.8333	23	64.389	109.056	58.944	44.833	51.889	36.7222	53.333	113.167	46.278	48.833	58.3889	45.5556	112.333	58.5556	50.6111			0.0423091	56.8636
1.1001	42.944	58.722	36.5	50.944	62.9444	52.3889	26.3333	64.778	136.056	70.111	49.889	57.722	44.3889	52.611	103.778	58.556	38.722	60.2222	45.8889	111.056	59	40			0.0461519	60.1616
1.1918	41.111	81.833	42.556	48.611	80.5	59.9444	24.4444	83.389	162.111	83.667	54.389	70.722	48	61.167	98.722	71.667	48.722	53.2222	37.8889	114.333	65.6667	55.0556			0.049999	67.6237
1.2835	60.944	116.222	42.778	56.056	87.7222	73.6667	26.5556	106.611	155.722	93.389	61.111	61.056	58.8889	71.5	96.222	93.5	53.722	56.6111	41.9444	121.556	75.3889	48.4444			0.053846	75.4369
1.3752	89.667	117.889	45.167	57.833	79.2778	81.6667	27.7222	130.944	163.944	100.833	65.5	72.944	65.2222	98.111	100.667	114.833	60.5	57.2778	46.1667	97.389	62.1111	52.6667			0.057693	81.2878
1.4669	116.889	123.889	61.611	60.444	73.2222	78.6111	34.6111	143.778	165.167	105	71.944	78.444	85.2222	108	106.778	122.389	84.222	63.3889	51.6111	97.611	53.6667	51.6111			0.0615401	88.0959
1.5585	144.056	128.944	70.222	66.944	73.7778	63.6667	46.1667	144.556	175.944	101.111	68.667	81.278	80.8889	118.111	111.444	146.611	83.5	80.4444	41.9444	105.222	45.4444	63			0.0653829	92.8156
1.6502	153.667	150.5	80.278	67.611	81	58.3889	65.8333	126.667	184.667	110.056	74.667	94.111	99.0556	99.389	123.278	145.444	93.278	91.8333	45.6667	116.611	47.8889	71.1111			0.06923	99.1364
1.7419	142.389	167.278	98.611	59.833	82.3889	47.3333	76.3889	104.444	170.556	124.722	74.278	86.778	90.5	97.333	103.389	161.5	114.611	79.9444	49.3333	116.778	49.2222	72.6667			0.073077	98.649
1.8336	146.556	155.222	121.111	50.278	77.2778	52.3333	78.5556	100.667	146	141.167	89.222	98.389	93.7222	93.333	106.389	159.389	113.111	84.6667	46.7222	132.778	46.3889	84.5			0.076924	100.808
1.9253	127.722	150.5	133.667	45.889	72.8333	48.2778	86.4444	88	113.778	128.778	80.611	90.389	93.4444	85.667	109.111	137.833	91.222	70.8333	58	160.833	33.1111	92.3889			0.0807711	95.4242
2.0169	122.611	152.222	142.889	56.722	70.5556	34.5556	71.6667	80.056	90.167	121.667	99.944	83.444	83.7778	102.111	111.389	113.667	103.889	53.2778	52.0556	159.5	31.1667	85.2222			0.0846139	91.9344
2.1086	119.167	153.667	129.667	59.389	71.6111	41.0556	64.3333	84.056	96.833	116.5	117.833	95.833	93.6667	102.333	111.556	107.611	87.167	60.5556	50.5556	135.333	32.2778	93.8889			0.088461	92.0404
2.2003	102.889	143.111	136.111	57.667	69.1111	42.2222	47.1111	78.556	92.944	144.944	132.833	125.167	88	93.056	85.167	96.222	84.389	56.4444	52.2222	110.444	39.5	70.3333			0.092308	88.5656
2.292	87.111	116.722	124.611	61.444	67	50.2222	41.5	83.556	94.722	141.556	138.222	130.222	64.0556	91.556	74.667	79.444	84.889	52.7222	47.2778	95.778	42.2778	72			0.0961551	83.7071
2.3836	67.778	88.167	113.611	82.667	67.2222	52.9444	41.5556	90.278	96.611	147.556	128.222	128.778	75.3333	99.111	68.833	74.167	66	55.7222	43.3889	80.833	45.4444	67.2222			0.0999979	80.9748
2.4753	61.222	97.944	95.444	105.444	58.6111	59.4444	43	88.944	100.167	130	130.778	131.667	77.7778	90.778	65.333	63.556	69.167	42.4444	49.8333	95.778	37.5	70.1667			0.103845	80.2273
2.567	63.556	64.722	104.556	120.889	48.1667	46.0556	41.1111	94.278	89.389	113.167	132.167	101.556	72.6667	74.222	58.5	47.056	67.667	54.1667	48.7222	80.611	29.4444	63.4444			0.107692	73.4597
2.6587	52.333	60.611	88.167	112.278	52.5556	42.3889	44	92.222	80.611	92	128.833	90.778	75.8889	76.167	43.167	48.944	73.833	61.5	46.1111	98.556	30.2222	67			0.111539	70.8258
2.7504	62.167	54.556	85.389	87.111	47.5	30.5	48.2222	67.278	81.444	74.111	131.167	64.944	89.0556	58.444	36.5	38.889	71.667	61.6111	58.6111	107.056	32	51.7222			0.115386	65.4521
2.842	83.611	54.278	91.167	66.667	41.0556	25.3333	43.3889	48.111	65.389	63.611	109.778	73.556	90.4444	61.056	34.056	30.667	59.278	55.1667	51.3333	100.889	30	50.8889			0.119229	60.442
2.9337	88.333	48.389	83.389	55.389	38.3333	28.3889	41.1667	37.722	65.889	53.722	91.333	83.556	62.5556	49.944	35.167	25.556	50.5	46.1111	47.5556	96.056	37	55.3889			0.123076	55.5202
3.0254	93.722	45.778	67.722	62.444	39.6111	31.2222	48	41	66.5	42.722	87.222	89.556	55.8333	37.944	38.444	23.167	39.944	44.6667	42.8889	109.167	38.1667	52.8889			0.126923	54.4823
3.1171	93.5	38.778	79.333	74.556	34.5	27.9444	46.5556	45.278	51.444	36.333	71.111	103.222	46.7778	41.278	46.056	28.778	39.333	49	44.6667	102.222	33.1667	38.3889			0.13077	53.2828
3.2088	78.889	44.389	66.556	63	31	33.6667	47.3889	40.889	41.222	26.722	66.944	92.167	40.5	41.333	48.389	29	33.889	41.6667	50.5	85.167	32.0556	27.6667			0.134617	48.3182
3.3004	75.222	49.333	59.278	79.5	29.7222	32.3889	31.5556	45.111	39.722	25.222	70.5	74.833	39.3333	49.778	33.778	24.611	30.167	35.1111	56.6111	104.611	32.2778	25.7222			0.13846	47.4722
3.3921	53.056	61.889	48.833	62.611	43.0556	28.8889	34.5	55.778	42.167	38.056	76.889	75.444	40.0556	46.389	40.5	27.389	32.056	31.2778	51.6111	117.667	32.1111	29.6111			0.142307	48.6289
3.4838	48.778	61.722	34.556	74.333	48.3333	33.8333	29.0556	46.667	48.778	34.056	89.667	72.056	36.3889	48.222	35.722	25.889	30.389	29.6667	44.4444	98.111	34.3333	24.3333			0.146154	46.7879
3.5755	46.944	53.944	33.833	63.389	72.1667	34.8889	37.6111	53.444	49.444	28.111	95.056	79.833	34	37.556	31.222	22.833	29.222	37.0556	38.4444	85.778	41.3889	21.3333			0.150001	46.7045
3.6672	55.889	46.778	34.056	49.056	67	36.7222	43.6667	54.833	42.667	28.167	87.5	87.667	41.8889	40.222	29.722	36.111	30.278	32.7778	32.6667	86.167	43.2222	21.8333			0.153848	46.7678
3.7588	53.278	43.667	37.556	41.722	43.3889	43.6111	49.2778	57.333	47.556	30.5	79.5	94.889	45.4444	37.833	27	29.389	37.5	50.4444	27	69.944	49.7778	23.2222			0.157691	46.3561
3.8505	51.222	45.778	39.778	37.833	43	52.8333	39.7778	59.5	40.722	27.056	65.389	61.167	46.2778	37.889	33.056	29	35.5	59	29.7222	54.222	78.6111	24.3333			0.161538	45.0758
3.9422	51.833	36.111	43.889	43.611	31.0556	44.8333	44.1667	66.389	38.833	30.333	62.611	42.111	43.3889	41.556	42.389	27.222	37.722	48.7222	28.3333	52.556	80.7778	30.2222			0.165385	44.0303
4.0339	56.389	49.222	33.944	39.389	26.9444	43.9444	48.1111	58.556	38.278	25.111	56.667	34.389	33.7222	37	38.667	24	34.278	36.7778	29.9444	36	83	28.5556			0.169232	40.5859
4.1255	49.556	49.222	37.722	44.667	32.5	37.8333	43.6667	57.944	29.722	24.278	57.667	39.167	33.3889	33.278	45	20.5	32.833	31.7222	37	28.278	63.5556	33.6667			0.173075	39.2349
4.2172	61.833	52.611	41.944	36.444	38.0556	44.1111	39.7778	54.167	36.833	20.444	43.167	39.167	28.8889	34.167	48.444	17.5	31.111	28.7222	33.7778	24.722	51.1111	34.0556			0.176922	38.2297
4.3089	59.556	45.833	41.5	32.278	36.6111	42.9444	31.7778	43.167	37.111	18.722	34.833	53.222	32.8889	36.667	39.222	20.778	29.389	27.9444	25.1667	30.611	43.5556	33.5556			0.180769	36.2424
4.4006	51.278	39.167	45.722	32.278	32.2778	39.1111	38.8889	53.778	41.722	21	37.222	69.111	30.2778	39.5	34.667	21.833	28.111	31	30.3333	34	45.4444	29.7778			0.184616	37.5682
4.4923	45.667	44.889	41.889	35.556	37.7222	40.2222	34.2222	52.222	37.778	15.556	38.389	49.111	37.8333	44.778	22.5	24.556	27.889	31.2778	35.3889	50.222	38.4444	27.6667			0.188463	36.99
4.5839	55.944	36.389	41.167	34.389	32.3333	37.3333	28.4444	48.111	32.5	17	33.056	32.278	33.9444	31.944	25.556	18.056	32.167	28.7778	24.8889	46.667	34	26.3889			0.192306	33.2425
4.6756	45.167	40.278	56	36.278	33.8889	31.8889	29.9444	50.611	30	16.944	28.444	33	32.2778	34.444	22.333	24.5	25.667	34.2778	29.1667	43.5	40.5556	19.4444			0.196153	33.5732
4.7673	45.333	34.056	49.5	35.833	36.1111	32.5	36.2778	49.556	29.056	24.444	29.222	31.222	28.0556	36.167	24.778	24.444	26.444	25.1111	17.8333	29.889	39.1111	18.5			0.2	31.9747
4.859	45.722	38.278	48.722	36.778	36.5556	37.5	29.5556	43.778	20.833	23	28	36.722	26	39.722	20.833	31.333	26.111	21.6111	20.9444	38.667	41.7222	20.8333			0.203847	32.4191
4.9507	53.111	45.611	37.833	34.667	33.3889	29.9444	31.9444	39.5	23.278	20.333	27.389	35.389	29.2778	41.222	17.056	26.778	34	20.4444	18.2778	35.556	40.2222	17.0556			0.207694	31.4672
5.0423	50.944	44.778	38.944	36.722	33.0556	42.7778	28	45.389	25.667	19.5	27.111	41.833	29.3889	44.5	17.889	24.667	38.278	24	18.9444	36.611	44.8889	23.5556			0.211537	33.5202
5.134	47.056	41.222	47.167	30.944	32.8333	40.6111	28.4444	43.889	20.778	20.611	28.778	42.167	32	47.556	21.833	24.833	37.778	27.6667	17.4444	36.167	42.9444	26.5556			0.215384	33.6036
5.2257	34.5	43.167	40.667	32.556	40.3333	43.5556	27.9444	35.722	17.056	20.111	29.111	36.389	37.3333	52.667	18.222	22.278	31.056	28.0556	16.2222	35.833	38.5556	24.6667			0.219231	32.091
5.3174	58.167	40.944	31.5	30.111	38.1111	42.3889	25.7222	42.556	16.111	20.056	25.667	34.278	34.5	47.833	25.778	20.333	29.111	28.2778	24.3333	33.056	33.2222	20.2222			0.223078	31.9218
5.409	66.5	35.667	29.278	35.778	34.3333	39.9444	36.8889	38.944	16.333	13.167	13.722	31.889	34.3889	44.444	24.278	16.056	30.556	34.4444	19.8889	27.556	31.8333	25			0.226921	30.9496
5.5007	64.833	25.278	31.611	35	24.0556	41.0556	32.5556	55.556	15.333	12.167	19.278	20.944	29.1111	37.556	19.222	15.111	34.5	32.3333	19.1111	26.222	28.9444	29.1111			0.230768	29.4949
5.5924	58.944	18.5	22	24.167	26.4444	35.9444	33.1111	45.611	17.944	18.778	19.222	24.278	30.7222	34.722	19.222	18.389	29.667	34.2778	19.3889	25.611	23.7778	37.7778			0.234615	28.1136
5.6841	60.778	22.833	24.222	24.778	27.6667	39.4444	25.4444	51.611	19.944	20.722	20.611	22.667	44.3889	32.611	15.889	14.389	35.889	29.5	19.5556	24.333	23.1667	50.5			0.238462	29.5884
5.7758	48.556	14.556	29.278	25.389	29.1111	45.1111	27.1111	43.222	26.944	19.389	24.333	33.222	58.2222	38.667	18.333	19.833	32.278	31.5556	25.5	19.389	18.2778	33.1667			0.242309	30.0657
5.8674	55	16.278	28.667	31.389	29.5	42.4444	24.8333	31.222	22.222	27.667	23.278	25.611	59.9444	28.889	21.333	18.111	25.278	35.8333	18.0556	16.222	28.7222	28.1667			0.246152	29.0303
5.9591	71.5	16.722	29.556	27.556	41.1667	38.8889	26.1667	30.667	23.833	26.556	15.056	24.722	42.8889	28.056	21.889	18.222	25.722	36.6667	22.7222	15.222	30.2222	26.1111			0.249999	29.096
6.0508	59.056	21.222	33.667	29.222	41.9444	46.8889	26.1667	22.556	18.111	32.5	23.667	28.889	32.3889	29.833	23.056	19	23.889	31.5	19.6111	17.056	30.2778	16.8889			0.253846	28.5178
6.1425	56.833	21.833	30.167	25.611	34.4444	40	25.1667	21.889	16.444	29.833	20.333	25.278	32.5556	21.778	24.944	16.944	31.056	38.5	28	21.611	39.3333	21.9444			0.257693	28.3863
6.2342	57.667	20.944	28.5	29.111	33.6111	37.3333	25.3333	19.833	17.278	28.222	23.5	24.111	37.2222	26.833	18.389	15.111	28.222	38.7222	19.7222	17.667	35.5	21.0556			0.26154	27.4494
6.3258	52.889	15.889	36.222	23.833	28	37.9444	32.5	22.222	19	21.722	29.889	24.111	26.4444	30.167	19.167	18.833	24.944	33.2778	29.7778	16.389	35.8333	26.0556			0.265383	27.505
6.4175	65.889	17.444	45.278	31.889	21.8889	43.8889	36.8889	22.444	20.5	23.389	38.778	24.111	33.8333	23.556	24.444	17.778	18.222	31.9444	30.0556	24.389	41.2778	32.2778			0.26923	30.4621
6.5092	42.833	23.167	31.611	32.222	23.1111	32.8889	38.4444	26.333	23.944	24.722	29.444	23.111	34.3889	19.556	22.278	14.5	14.389	23.3889	23.5556	17.556	32.8889	43.1111			0.273077	27.1565
6.6009	41.278	17.722	28.167	26.667	22.5556	27.1667	37.5556	27.833	17.278	35.944	30.444	17.944	36.8333	17.111	17.944	17.333	19.389	20.3889	31.6667	15	34.1667	25.3889			0.276924	25.7171
6.6925	38.889	22.389	35.444	36.111	20.1667	27.1111	28.4444	29.722	20.333	37	22.5	25.056	39.0556	17.889	16.833	27.667	29.056	26.7778	35.4444	20.278	31.1667	31.1667			0.280767	28.1137
6.7842	47.611	31.5	29.889	41.056	26.9444	27.1111	24.6111	31.5	21.667	45.278	17.333	27.722	28.9444	27.889	15.444	26.111	23.778	24	29.7222	17.833	39.3333	28.4444			0.284614	28.8055
6.8759	41.111	31.667	30.556	34.778	30.1111	36.9444	21.2222	33.111	24.333	43.944	13.889	21.056	33.2778	19.056	17.667	22	29.222	24.4444	30.6111	26.167	35.4444	20.3889			0.288461	28.2273
6.9676	33.778	25.944	36.556	31.722	33.5556	35	18.3889	30.222	29.111	32.722	19.556	21.667	24.8333	20.556	15.833	28.778	22.167	24.8889	33.1667	25.833	35.6111	20.8889			0.292308	27.3081
7.0593	24.611	15.833	39.444	25.167	22.7222	33	20.3333	26.278	25.944	25.167	16.667	20.333	28.7222	24.722	13.944	20.667	20.167	23.5556	30.5	18.778	29.7222	20			0.296155	23.9217
7.1509	28.222	17.5	43.667	22.556	25.8333	30.7778	23.2778	27.389	21.611	22.444	21.667	26.222	32	28.222	16.722	25.167	25.889	22.8889	23.8333	19.667	32.5	19.6667			0.299998	25.351
7.2426	27.5	16.889	56	22.889	23.7778	32.5	23.4444	25.833	14.167	23.833	26.5	32.5	28.1667	29.444	19.444	38.611	19.111	19.3889	18.4444	14.611	24.7222	16.9444			0.303845	25.2146
7.3343	21.5	17.722	50.5	22.778	25.8333	36.5	21.0556	34.056	18.722	19.667	21.667	25.611	30.6667	29.222	19.611	32.889	23.222	20.1111	12	15.722	24.6111	19.1111			0.307692	24.6717
7.426	28.667	24.222	38.444	24.889	24.1111	41.1111	22.8889	28.778	28.333	27.444	20.889	29.389	29.5	27.222	19.222	44.722	23.389	22	23.2222	17.389	28.2222	21.5			0.311539	27.0707
7.5177	36.056	14.778	37.667	22.944	20.0556	36.9444	28.1667	25.389	39.667	28.389	17.389	24.167	32.8333	18.778	19.222	51.167	25.167	23.8889	25.2222	13.278	17.9444	23.3333			0.315386	26.4749
7.6093	40.222	16.5	35.833	18.278	21.2222	45.5556	32.6667	20.778	46.667	29.278	15.167	22.333	25.7778	24.111	16.944	46.444	24.111	24.3333	20.3889	13.278	24.6111	23.8333			0.319229	26.7424
7.701	41.667	10.222	36.944	18.333	25.7778	43.5	36.5	16.167	36.944	24.278	17	21.944	32.2222	24.889	17.278	32.444	20.278	31.4444	21.0556	11	29.6111	18.7222			0.323076	25.8282
7.7927	41.333	10.5	31.944	28.556	33.1667	36.4444	43.9444	15.833	21.889	37.667	21.833	19.333	29.4444	27.056	20.222	31.111	22.556	21.0556	14.7222	13.889	22.6111	18.2778			0.326923	25.6086
7.8844	44.833	10.778	29	26.944	31.7778	34.6667	34.8889	17.111	23.556	35.222	18.222	24.833	29	24.167	24.111	26.222	25.444	23.1111	18.2778	14.611	24.8889	19.6111			0.33077	25.5126
7.9761	54.278	11.611	26.333	30.056	31.3333	37.7222	31.6667	17.944	16.278	26.333	16.611	22.833	27.4444	24.5	34.278	26.556	17.5	26.2222	21.0556	16	28.5	19.3333			0.334617	25.654
8.0677	41.278	22.611	28.389	39.167	33.5	28.2222	36.1667	22.5	18.5	23.444	26.111	19.167	21.2778	24.778	33.722	22.556	22.111	21.7222	22.6111	13.833	26.8889	23			0.33846	25.9798
8.1594	32.333	16.944	27.667	36.889	31	24.8889	33	21.611	15.278	15.222	26.389	19.889	21.1667	24.611	34.389	19.167	30.667	26.5556	16.5556	9.944	27.6111	23.5556			0.342307	24.3333
8.2511	32.889	9.889	35.389	35	39.3889	29.1667	20.4444	25.167	24	17.056	24.333	16.667	22.8333	24.889	23.222	15.5	30.722	28.3333	18.2778	16.167	23.3889	21.8889			0.346154	24.3006
8.3428	31.333	11.5	45.667	22.889	36.3333	23.1667	24	33.444	21.667	16.389	21.444	15	22.2222	26.5	19.056	14.056	33.056	27.7778	24.9444	16.833	27.2222	15.8333			0.350001	24.1061
8.4344	27.111	10.111	35.222	28.222	29.9444	30	33.7222	31.056	25.056	15.333	15.333	13.611	24.8333	31.278	27.667	10.944	33.056	22.8333	21.5	14.611	22.7778	14.2778			0.353844	23.5682
8.5261	33.167	9.5	32.722	35.889	28.6667	27.4444	41.1667	28.111	19.944	16	19.389	20.556	27.1111	30.556	34.278	13.389	38.944	24.7222	20.8889	14.222	19.8889	11.9444			0.357691	24.9318
8.6178	28.5	10.389	37.167	30.5	34.7778	28.0556	30.3889	31	18.556	18.278	14.5	20.722	25.1111	21.222	31.889	9.167	44.222	18.2778	13.4444	17.333	24.3889	10.8333			0.361538	23.5783
8.7095	27.111	11.056	40.111	21.722	31.7222	26.1111	27.6111	26.889	22.278	25.056	14.944	24.944	22.8333	17.778	37.944	12.5	34.778	17.1111	15.0556	25.167	32.5556	10.6111			0.365385	23.9041
8.8012	28.722	12.111	35.389	20.222	32.4444	26.0556	24.6667	23.722	17.778	20.611	13.333	15.167	23.7222	16.556	41.333	10.889	26.556	15.6111	16.7222	20.222	31.2222	13.4444			0.369232	22.1136
8.8928	20.778	11.056	37.444	15.389	26.2222	24.2222	20.6111	23.611	20.278	18.778	21.556	12.056	24.8333	14.778	37.278	11.389	26.611	15.7778	12.7222	15.5	35.2222	14.8889			0.373075	20.9546
8.9845	22.222	5.722	32.056	19.556	30.9444	26.6111	24.3889	31.167	23.778	17.889	24	17.556	27.6111	14	31.556	10.111	29.556	15.2778	16.5556	18.444	41.4444	17.7222			0.376922	22.644
9.0762	17.056	7.5	25.056	19.444	17	28.5	19.3889	35	22.167	19.389	26.111	19.944	23.5	19.167	30	11.222	28.889	18.5	19.5	13.389	32.5556	23.3889			0.380769	21.6667
9.1679	18.778	6.222	18.111	23.056	24.1667	24	20.9444	32.333	23.722	17.833	19.5	19.778	28.5556	24.667	23.722	8.333	33.111	22.6111	18.5556	15.278	27.7222	30.3333			0.384616	21.8788
9.2596	17.667	7.778	15.778	21.333	33.7778	29.6111	18.6111	30.111	30.944	22.611	27.833	22.056	29.0556	25.167	19.722	10.167	27.611	20.2778	18.6667	15.889	25.1667	26.6667			0.388463	22.5682
9.3512	13.944	6.111	15.722	18.5	37.3333	23.1111	31.3333	27.611	26.056	25.611	23.389	25.333	29.1667	18.111	11.167	5.278	22.611	17.2222	17.8333	17.444	24.0556	19.9444			0.392306	20.7676
9.4429	8.056	11.389	17.333	18.889	33.5	29.9444	28	26.333	21.556	24.278	19.056	22.222	32.0556	15.722	10.778	4.389	15.778	18.1667	17.6111	18.389	27.9444	16.9444			0.396153	19.9243
9.5346	15.333	10.056	13.444	24.556	32.9444	29.8889	27.8333	27.167	25.278	18.333	20.056	23.722	31.0556	11.944	15	7.5	10.5	17.0556	16.3889	9.056	22.2222	13.2222			0.4	19.2071
9.6263	11.556	12.389	16.333	21.778	37.0556	16.5556	19.7222	27.889	26.167	16.889	25.444	24	28.1667	10.778	11.5	6.278	10.556	17.8333	20.2778	17.556	39.5	12.4444			0.403847	19.5758
9.7179	10.722	11.944	17.167	35.722	36.0556	16	23.7778	22.778	26.111	10.556	26.611	22.778	28.8333	19.389	11.111	6.444	4.444	20	16.4444	17.278	47.6667	12.3889			0.40769	20.1919
9.8096	14	14.333	18.056	27.833	34.5556	14.7222	22.7222	34.722	25.611	10.889	28.833	28.444	26.7778	23.444	11.056	5.889	6.833	15.2778	22.9444	27.278	37.6111	13.7778			0.411537	21.1641
9.9013	9.833	12.944	11.778	31.667	32.6111	13.8889	24.6111	25.333	21.833	9	19.278	26.444	23.1111	27.056	12.389	6.278	8.5	13.2222	23.7222	32.5	28	12.5556			0.415384	19.3889
9.993	10.778	22	13.444	28.111	30.1667	18.1667	25.2778	27.056	25.222	15.444	20.278	34.833	21.7778	25.056	10.611	6.611	6.667	13.2778	19.9444	35.278	25.2778	15.2778			0.419231	20.4798
10.0847	11.556	28.889	10.444	20.111	28.1667	27.6667	35.5	29.389	16.111	8.111	25.056	34	26.8889	25.667	11.667	8.889	5.667	12.4444	25.4444	23.611	22.8333	14.0556			0.423078	20.5531
10.1763	13.333	22.611	13.278	24.389	33	17.7778	31.3333	25.222	20.556	8.111	22.222	25.944	26.6667	25.722	8.167	8.556	4.056	20.5556	22.1667	23.889	27.6111	14.5556			0.426921	19.9874
10.268	10.667	17.444	16.5	18.833	34.5556	18.9444	25.1667	23.667	27.833	15.333	21.722	22.222	25.0556	19.722	6.722	11.611	3.611	24.5	18.9444	19.944	16	15.1667			0.430768	18.8257
10.3597	12.722	9.5	18.889	22.278	37.5	16.8333	25.7222	22.278	31.167	17.389	20.611	24.056	22.5556	23.222	9.278	10.389	3.611	19.7778	16.1667	15.944	19.7778	21.0556			0.434615	19.1238
10.4514	9	11.444	15.833	23.667	41.5556	14.2222	26.1111	21.056	31.944	18.667	21.278	26.278	22	21.889	11.5	16.111	3.5	16	22.5556	15.111	16.6111	15.1667			0.438462	19.1591
10.5431	15.556	10.222	15	24.667	32.2778	14.8889	24.2778	19.278	32.111	8.833	17.778	25.389	25.7222	23.444	11.722	16.778	6.5	24.4444	21.9444	11.167	17	12.6667			0.442309	18.7121
10.6347	18.444	10	13.833	29.056	31.1111	21.6667	26.2222	19.278	36.833	9.889	12.722	26.333	23.5	25.5	12.667	21.833	3.778	16.1111	19.1667	9.889	16.7222	12.5			0.446152	18.957
10.7264	19.278	9.944	19.556	24.667	26.4444	19.4444	32.2222	17.556	33.667	7.056	12.667	31.611	29.2778	28.111	14.056	25.5	4.667	17.5556	14.2778	16.111	16.1111	12.4444			0.449999	19.6466
10.8181	19.667	12.833	16.333	25.722	18.5	17.2222	25.6111	23.889	36.833	6.778	12.167	28.833	28.5	34.778	16.056	26.556	6.722	16.7778	17	11.556	19.6667	14.0556			0.453846	19.8207
10.9098	14.667	12.722	20.444	26.056	16.6667	18.1667	21.9444	24.389	44.167	7.278	14.5	26.944	25.1667	34.944	14.167	30.222	6.667	21.6111	14.8889	13.889	20.2778	13.2778			0.457693	20.1389
11.0015	24.611	13.944	27	30.722	18.3333	15	18.2778	19.889	34.222	10.222	17.833	17.722	29.1667	31.556	19.167	28.333	4.833	20.2778	15.2222	14.444	18.6667	19.8889			0.46154	20.4242
11.0931	24.278	11.944	31.167	30.667	23.1111	14.0556	19.7222	24.333	48.444	12.667	21.556	14.944	25.6111	29.167	16.556	22.222	6.389	23.7222	15.9444	10.944	16.2222	14.1111			0.465383	20.8081
11.1848	18.722	8.722	27.444	27.722	22.2222	13.8333	14.3333	19.611	46	13.167	19.722	17	27.2222	23.444	17.889	16.5	4.5	23.8889	17.9444	11.333	14	19.1667			0.46923	19.2903
11.2765	15.722	11.833	32.778	21.389	19.6111	19.1667	15.8333	20.889	36.611	24.222	13.111	18.278	27.1667	27.333	15.611	20.611	7.889	26.1111	12.9444	12.611	12.2222	22.5556			0.473077	19.75
11.3682	9.222	10.667	28.222	29.111	23.8889	26.2222	17.8333	18.944	27.556	23.611	14.333	23.278	23.8889	34.167	10.611	28.389	4.889	25.4444	15.2222	9.833	13.2222	20			0.476924	19.9343
11.4598	5.5	7.5	19.111	20.222	25.7778	28.9444	22.5556	21.889	25.056	17.778	11.611	19.333	20.2778	33.833	15.944	36.778	7.944	25.3333	13.0556	12.222	14.9444	24.8889			0.480767	19.5681
11.5515	5.556	8.278	17.778	26.611	24	25.5	25.1111	17.389	20.722	18.056	14.833	24.5	24.5	26.389	15.278	33.333	10.556	28.9444	16.8889	18.5	16.6667	27.3889			0.484614	20.3081
11.6432	6.722	7.111	19.556	29.556	21.8333	22.3889	28.1667	13.167	26.444	14.333	20.5	26.667	25.3333	20.889	13.222	23.778	10.667	28.5	19.6667	14.833	19.2222	25.4444			0.488461	19.9091
11.7349	9.722	10.389	22.444	33.833	15.0556	19.3333	20.1667	11.444	24.889	14.167	34.778	30.556	24.2222	24.167	12.556	18.889	9.278	23.5556	25	20.556	15.8333	23.7222			0.492308	20.2071
11.8266	7.389	8.389	17.278	36.778	17.1667	21.0556	25	11.833	36.778	19.389	31.333	35.722	21.6667	23.111	12.778	14.833	6.889	19.3889	22.7222	16.444	16.8889	29.0556			0.496155	20.5404
11.9182	7.611	9.5	17.056	38.944	18.2778	23.6667	22.3333	12.5	38.222	19.278	36.944	33.222	28	24	12.167	18	7.778	22.0556	19.5	18.611	20.1667	27.3333			0.499998	21.5985
12.0099	8.444	8.167	13.556	36.167	16.5	14.6111	23.7778	16.056	34	13.833	31.444	29.667	31.2778	25.611	11.667	20.944	7.778	19.7222	16.0556	21.833	16	42.8333			0.503845	20.9066
12.1016	5.278	7.833	15.944	48.389	18.2222	15.8333	19.4444	16.944	34.944	18.111	30.111	29.722	33.4444	25.222	10.722	13.722	11.444	29.5556	19.7222	31.111	17.7778	36.3333			0.507692	22.265
12.1933	4.167	6.167	16.056	43.333	16.5556	14.6667	18.6667	16.167	32.167	11.667	47.444	24.556	21.5	27.167	8.778	9.889	13.333	38	18.9444	30.944	14.9444	36.4444			0.511539	21.4344
12.285	3.5	6.778	22.5	51.333	14.5	19.9444	16.9444	20.556	33.444	16.444	38.278	17.333	24.2778	23.833	15	9.556	12.5	32.2778	19.7222	30.5	11.8333	22.2778			0.515386	21.0606
12.3766	6.833	12.5	23.722	35.778	18.3889	23.7222	27.1111	22.333	34.5	33.222	32.778	18.444	18.7222	23.222	11.778	15.722	10.444	33.5556	18.4444	26	14.3333	16.7222			0.519229	21.7398
12.4683	4.889	7.278	28.333	36.056	19.5556	23.5556	29.0556	18.222	47.111	53.389	22.944	19.833	18.2778	24.5	14.611	17.222	12.278	20.9444	20.9444	28.111	15.8333	18.2778			0.523076	22.7828
12.56	9.889	6.333	20.5	33.611	20.0556	24.2222	23.4444	21.5	36.111	54.833	28.389	21.278	17.9444	24.056	10.167	16.833	14	19.3333	24.1111	24.444	20.5	18.5556			0.526923	22.2778
12.6517	10.778	8.111	23.667	33.833	21.9444	19.4444	34.6111	21.278	39.444	61.167	25.778	19.722	17.6667	28.222	10.389	16.389	9.167	26.7222	18.6667	27	21.6111	20.5			0.53077	23.4596
12.7433	18.333	12.222	20.778	29.278	13.7222	16.1111	38.2222	24.389	38.611	49.056	29.722	25.611	22.0556	27	11.722	16.556	8.889	25.3889	23.3889	22.889	24.9444	20.7222			0.534613	23.6187
12.835	24.111	6.5	22.222	24.611	15.5	16.7222	34.7222	30.444	27.778	43.556	36.5	29.556	25.2778	33.389	17.222	12.056	9.111	24.5	23.9444	18.167	18.4444	15.5			0.53846	23.1743
12.9267	21.667	7	20.667	38.556	17.6111	21.5556	34.3333	36.389	32.556	38.944	31.944	27.778	26	28.5	14.611	15.167	7.611	25	18.7778	10.556	15	17.4444			0.542307	23.0758
13.0184	14.944	7.778	17.389	33.778	23.3333	23.8889	31.5	21.667	25.889	41.222	31.333	27.889	34.1667	33.556	18.111	9.5	7.667	21.2222	19.3333	11.444	18.0556	25.7222			0.546154	22.6995
13.1101	12.556	8.5	18.444	42.833	20.3889	30.3889	28.9444	22.5	30	39.278	32.111	27	37.3889	35.111	11.333	11.889	7.778	18.0556	21.8333	12.278	17.1111	22.4444			0.550001	23.0985
13.2017	8.778	9.389	24.722	55.389	14.8889	36.5556	25.0556	24.833	26.611	44.778	33.778	19.778	38.3889	35.167	12.389	13.833	6.111	16.1111	24.9444	14.5	18.1667	24.3333			0.553844	24.0227
13.2934	9.944	11.611	20.889	52.722	16.3333	31.6111	30.1667	28.556	34.278	55.333	32.944	22.5	33.5556	44.111	10.056	9.056	11.667	19.8333	29.0556	15.389	12.2222	27.3889			0.557691	25.4192
13.3851	14.111	11.333	27.889	46.444	13	23.7222	22.8889	30.944	33.722	64.333	35.778	22.5	29.6111	32.667	10.944	7.556	8.667	26	28.2222	15.389	11.3333	24.7222			0.561538	24.6262
13.4768	15.944	9.5	31.778	30.611	12.1667	20.1111	20.1667	26.167	34.333	66.222	48.167	24.444	29.2778	24.111	15.444	10.722	6.722	19.7778	24.8333	17	14.7778	23.4444			0.565385	23.8964
13.5685	14.778	10.833	24.889	27	16.6667	14.5	15.7778	28.778	32.778	57.722	51	21.611	31.7222	27.444	20.722	13.333	9.056	19.1111	22.3333	23.667	24.3333	17.1111			0.569232	23.8712
13.6601	14.778	7.5	27.667	27.944	15.0556	20.6111	26.7222	24.444	30.667	43.333	44.667	25.944	33.9444	24.944	16.222	10.833	4.389	23.5556	21.1111	25.5	10.8889	21.4444			0.573075	22.8257
13.7518	14.389	6.222	23.167	28.278	21.5	23.5556	27.4444	26.056	35	36	41.167	27.944	44	22.333	21.333	11.444	3.556	18.7778	31.1111	23.611	17.7222	29.8333			0.576922	24.2929
13.8435	7.556	8.833	26.167	36.444	20.2778	14.7222	30.3889	24.444	28.778	34	42.167	30.389	39.8889	25.444	17.778	14.333	4.833	26.1111	32.8333	19.667	14.0556	27.4444			0.580769	23.9343
13.9352	7.167	6.5	20.667	34.778	23.6111	14.1667	29.3889	23.333	28.222	44.889	30.833	27.556	35.8333	25.444	13.333	14.667	6	24.6111	22.1667	24.389	16	30.9444			0.584616	22.9318
14.0269	7.5	7.778	14.333	43.611	25.7222	18.1667	23.8889	21.167	18.944	44.222	25.889	34.556	32.6667	25.722	19.889	13.111	7.556	27.6667	23.1111	22.389	24.0556	31.7222			0.588463	23.3485
14.1185	4.889	8.778	23.889	37.222	22.1667	14.4444	33.3333	23.778	28.833	43.944	25.389	33.167	28.3333	29.556	26.444	11.944	13.222	30.7778	27	18.222	20.5	33.8333			0.592306	24.5303
14.2102	7.222	6.667	26.333	36.333	23.8333	19.1111	31.6667	31.778	27.111	39.389	21.389	32.222	26.5556	27.5	19.667	9.722	12.611	24.2778	29.5556	15.222	19	30.2778			0.596153	23.5202
14.3019	8.5	13.056	28.444	40.111	30.3333	12.6667	31.6667	32.778	22.667	28.389	18.778	32.222	26.3889	29.389	17.5	5.278	14.5	24.2222	21.6111	21.722	20.1667	22.6111			0.6	22.8637
14.3936	7.111	16.444	32.389	35.278	26.3333	15.4444	26.6667	27.667	26.167	27.167	24.667	33.667	29.0556	35.056	15.333	9.778	13	20.3333	24.9444	19.944	17.5	25.5			0.603847	23.1566
14.4852	10.111	17.667	30.444	41	24	22.6111	23.3333	26.833	27.167	24.444	35	35.056	26.4444	42.944	17	6	13.556	20.5556	29.3333	23.056	17.4444	22.4444			0.60769	24.3838
14.5769	4.389	17.944	34.222	37.222	28.1667	27.3333	18.8889	33.556	31.278	25.444	29.722	37.611	36.9444	42.611	15.833	8.889	12.5	29.7222	25.4444	24.5	21	20.5556			0.611537	25.6262
14.6686	6.111	18.167	35.167	35.333	23.1667	29.3333	12.5556	35.667	25.889	29.611	27.222	25	39.6111	32.333	15.722	9	13.111	24.6111	28.3333	21.111	14.2222	17.3333			0.615384	23.5732
14.7603	8.167	13.722	32.444	29.778	17.4444	26.9444	18.8333	35.056	24.111	34.667	37.556	23.222	40.8333	30.833	13.056	7.389	17.444	27.3889	26.8889	22.778	21	28.4444			0.619231	24.4546
14.852	8.611	9.222	21.278	32.667	18.7778	28.9444	20.3889	35.444	22.222	25.333	26.778	35.5	46.9444	31.444	14.944	6.167	14.833	30.5	30.8333	20.833	28.8333	25.1667			0.623078	24.3484
14.9436	9.722	9.778	24.389	37.222	24.5556	30.6667	33.1111	36.111	26.444	32.889	30.833	27.167	48.4444	28.556	10.556	6.056	16.111	24.7222	25.7778	18.611	28.3333	26			0.626921	25.2753
15.0353	8.944	11.5	25.111	28.278	21.6111	29.3333	28.4444	35.722	27.222	34.5	28.167	32.389	36.3333	33.722	16.944	10.556	17.889	26.1667	24.5	18.278	38.3889	22.9444			0.630768	25.3156
15.127	5.167	13.333	28.833	32.889	18.0556	24.4444	26.3333	38.278	29.556	31.889	25.167	37.778	33.1111	22.5	17.667	11.778	20.944	26.2222	24.8889	16.5	37.1111	23.7778			0.634615	24.8283
15.2187	6.111	11.5	25.389	30.444	18.5	24.1667	21.8333	37.389	31	32.667	36.389	38.278	41	22.5	13.222	9.444	14.611	33.1667	30.5556	17.5	38.3333	16.3333			0.638462	25.0151
15.3104	2.333	10.944	36.444	35.278	26.9444	22.5556	18.0556	35.111	28.056	27.778	41.056	33.333	32.1667	17.444	15.111	7.111	15.5	33.3333	21.7778	20.667	32.3889	13.2778			0.642309	23.9394
15.402	3.722	13.278	35.056	33.611	22.3333	29.8333	17.1111	28.389	35.833	29.667	49.056	38.611	38.5556	15.389	10.444	3.944	19.778	39.2778	28.7778	25.056	25.2222	16.5			0.646152	25.4293
15.4937	2.889	10.5	36.056	28.444	20.2222	31.3889	16.4444	37.333	38.389	29.833	53.167	34.611	38.3333	18.056	7.056	3.889	11.667	32.6667	25.8889	25.722	22.1111	18.9444			0.649999	24.7096
15.5854	2.111	10.056	33.944	27.278	19.9444	32.2222	19.5556	34.556	33.889	31.5	48.222	44.611	37.9444	14.667	6.5	4.722	10.667	30.1667	27.1667	24.5	19.6667	22.1667			0.653846	24.3662
15.6771	2.111	9.611	30.889	31.278	16.3889	27.5556	20	36.333	36.444	28.278	43.444	34.833	44.1667	19	8	6.056	8.722	24.5556	33	28.056	16.4444	17.7222			0.657693	23.7677
15.7687	2.222	9.889	32.556	31.056	11.2778	20.3889	20.1111	31.944	41.167	28.833	32.222	38.778	35.1667	18.056	11.5	5.667	5.722	27.7778	33.2222	27.889	22.3889	25.5556			0.661536	23.3359
15.8604	2.833	13	31.722	33.333	17	16.6667	23.4444	37.222	43.222	26.944	27.944	34.611	32.5	19.944	7.167	5.5	11.056	32.1667	32.7778	23.167	22.7222	17.9444			0.665383	23.3131
15.9521	6.611	11.667	30.167	47.722	22.1667	15.2222	22.5	26.889	44.611	28.111	30.667	46.833	29.2222	12.722	5.444	5.333	8.056	28.7222	35.1111	21.167	18.7778	26.9444			0.66923	23.8485
16.0438	9.111	11.444	32.611	61.833	19.6111	14.6667	23.5556	28.611	37	31.444	37.667	34.944	23.3333	13.722	6.889	5.889	9.111	27.5	27.7778	30.167	15.8333	19.7778			0.673077	23.7499
16.1355	6.778	9.5	37.667	67.333	17.4444	16.7222	18.8889	38.278	33.111	32.722	38.889	32	22.6111	19.167	6	9.444	13.667	25.7778	35.7778	33.5	13.2778	24			0.676924	25.1162
16.2271	9.5	10.056	38.333	50.056	17.8333	21.5556	20.3889	36	26.167	38.278	41.167	33.667	23.3889	16.389	5.389	4.778	16.056	24.1667	40.4444	37.556	12.9444	19.2778			0.680767	24.6996
16.3188	9.778	8.833	34.833	43.167	20.5	24.5	18.9444	35.222	26.278	33.167	36.111	32.5	19.5556	15.222	4.944	6.889	23.056	31.0556	38.7778	37.667	22.5556	22.5			0.684614	24.8207
16.4105	8.833	12.944	28.111	52.444	22	19.9444	22.6667	31	32.056	24.833	28.167	25.333	23.1667	16.278	9.167	7.111	24.833	29.7778	41.7222	32.556	20.2778	19.8333			0.688461	24.2298
16.5022	7.444	9.667	33.778	38.5	19.4444	13.8889	26.7222	29.056	29.444	29.667	28.722	29.944	39.8889	13.833	8.056	6.778	22.5	26.0556	32.8333	37.833	17.7222	19.6111			0.692308	23.6995
16.5939	13.889	9.278	30.556	39.833	22.2222	16.1111	23.1111	34.278	31.778	26.667	34.444	31.611	39.3889	14.056	6.556	6.056	22.611	27.8333	25.2778	33.056	18.5556	14.7222			0.696155	23.7223
16.6855	17.222	8.611	29.556	40.389	22.7222	19.3889	22	29.833	24.833	24.833	42.278	30.167	48.1667	20.056	6.5	6.167	18.278	27.5556	30.5	31.611	22.7778	19.7778			0.699998	24.692
16.7772	13.5	5.722	30.389	38.556	34.2778	21.7222	23.5	35.556	24.111	34.833	38.722	32.833	49.7222	24.333	8.278	5.222	20.444	25.6667	26.7778	39	16.6111	20.3889			0.703845	25.9166
16.8689	7.722	7.444	23.111	31.389	25.9444	13.1667	21.8333	35.667	28.278	55.278	38.833	28.444	36.8889	26.111	7.778	8.278	21.722	27.0556	32.9444	37.389	24.7222	22.8889			0.707692	25.5858
16.9606	9.389	8.833	24.278	31.5	37.0556	11	23.8889	23.722	31	54.333	30.278	29.056	31.0556	22.056	9.611	7.167	19	27.5	34.7778	32.833	13.8333	23.5556			0.711539	24.351
17.0522	11.389	6.833	23.111	27.222	26.7222	13.1667	27.3889	23.556	29.889	41.111	21	19.778	25.3333	23.667	8.167	7.111	16.611	27.5	38.7778	26.5	20.3889	21.1667			0.715382	22.1086
17.1439	8.111	6.056	28.167	31.444	34.4444	10.4444	34.1667	25.278	36.222	26.611	26.556	11.556	24.3333	20.111	11.056	8.889	17.889	24	29.4444	21.556	22.5	24.8333			0.719229	21.9849
17.2356	16.056	9.056	26.5	38.722	33.7222	15.2778	31.8333	31.778	34.889	24.667	36.5	4.778	16.2222	16.889	11.778	9.222	18.056	22.5	25.5	25.333	28.8889	27.9444			0.723076	23.0051
17.3273	23.611	8.167	30.167	38.056	36.7222	29.8889	24.5556	29.778	35.667	28.111	37.944	1.889	11.3889	22.389	16.944	15	22.389	23.4444	33.4444	26.556	24.3333	36.1667			0.726923	25.3006
17.419	30.667	9.667	29.722	38.222	37.2778	24.6667	17.6667	35.278	31.5	26.389	36.944	4.056	6.3333	22.5	18.667	12.833	27.222	26.2222	35.1111	23.056	26.1667	40.7222			0.73077	25.495
17.5106	35.5	12.833	28.333	37.833	40.2778	19.5556	20.7222	47.167	30.167	26.944	23.889	2.222	5.1667	31.611	23.722	11.278	30.556	24.2222	34.9444	27.444	19.8889	34.2222			0.734613	25.8409
17.6023	32.611	16.389	24	44.444	35.0556	21.9444	32.1667	36.611	31.667	26.611	21.611	1.833	4.5556	30.444	31	11.667	29.833	23.7222	30.9444	27.722	18.4444	26.5556			0.73846	25.4469
17.694	31	11.056	21.333	48.444	39.7778	27.4444	27.8333	22.611	16.889	29	21.722	1.389	1.9444	33.5	28.5	11	28.111	26.8333	25.1111	17.056	15.5556	23.3889			0.742307	23.1591
17.7857	33.444	11.944	18	42.111	24	23.3889	28.2778	26.111	22.5	30.222	22.111	1.167	2.1111	38.833	29.833	13.5	23.278	23.8333	25.6111	17.056	25.5	23			0.746154	22.9924
17.8774	39.611	14.778	21.056	31.222	29.6667	20.3333	34.4444	27.389	23.167	35.556	26.444	0.944	1.6111	39.667	27.278	11.111	27.333	23.7222	35.3889	19.222	20.0556	23.4444			0.750001	24.2475
17.969	42.833	15.389	22.722	32.278	31.3333	17.8889	32.1667	28.056	22	36.722	35.167	0.667	3.1111	37.778	24.5	18.222	31.278	23.2222	33.8333	20	30.3889	22.3333			0.753844	25.5404
18.0607	36.833	18.722	22.722	26.778	41.3889	23	36.7778	23.556	22.389	30.778	43.167	0.944	1.3333	31.111	30	30.5	32.389	21.2778	21.9444	22.611	27.7778	24.8889			0.757691	25.9495
18.1524	35.056	27.611	16.333	24.889	35	19.7222	29.5	22.167	30.778	29.722	46.111	1.056	1.5556	29.611	21.167	36.556	31.722	21.5	26.0556	24.333	20.5556	16.9444			0.761538	24.9066
18.2441	31.722	34.056	17.333	27.167	33	19.7222	29.2222	23.389	32.556	33.278	35.333	0.944	0.4444	29.944	16.944	39.667	28.5	22.3889	30.3889	27.167	25.9444	20.2778			0.765385	25.4268
18.3358	26.444	40.389	17.111	30.667	40.8333	15.1111	23.8333	17.278	34.056	29.444	21.611	0.722	1.0556	26	16.222	40.889	36.5	23.3889	25.1111	27.167	26.1667	22.8333			0.769232	24.6742
18.4274	15.944	38.389	22.722	32.167	40.3889	20	32.0556	12.833	18.556	13.278	12.333	0.556	0.8333	24.111	15	24.556	29.833	23.9444	24.8333	23.111	21.2778	18.2778			0.773075	21.1364
18.5191	13.111	34.278	19.056	27.556	34.3889	25.0556	36.2222	10.667	10.111	5.333	4.111	0.667	0.6667	17.889	18.222	24.444	29.944	22.2222	26.2778	25.333	26.7778	18.3333			0.776922	19.5757
18.6108	17.222	21.5	21.778	15.222	25.3889	27.6667	38.1111	16.056	6.667	2.5	1.444	0.333	0.6667	14.056	23.889	22.611	28.833	23.5	33.6111	25.333	33.0556	20.2778			0.780769	19.0783
18.7025	16.167	20.333	19.833	11.889	29.7222	25.2778	26.2778	8.667	3.389	2.111	1.778	0.889	0.4444	9.056	18.611	20	28.667	20.0556	28.3889	23.111	28.5	16			0.784616	16.3258
18.7941	12.889	12.167	34.278	11.5	36.8333	28.8889	22.3889	7.556	4.944	2.778	0.444	0.389	0.2778	5.611	25.556	16	29.778	27.1667	27.3889	23.278	18	16.8889			0.788459	16.591
18.8858	16.667	15.778	39.611	9	26.3333	34.5556	22.6667	4.556	2.444	1.389	1.5	0.556	0.3889	3.222	24.5	14.278	21.722	26.0556	26	21.556	26.8333	18.2222			0.792306	16.2652
18.9775	17.667	15.222	35.611	6.056	27.4444	32.7778	24.7778	5.167	1.889	0.5	1.333	0.556	0.5556	0.889	25.056	20.333	26.111	29.2222	18.3333	16.944	23.9444	20.4444			0.796153	15.947
19.0692	26.5	11.167	28.333	3.778	20.7778	29.1667	19	4.889	3.722	0.833	0.944	1.222	0.2778	0.722	22.889	23.667	29.278	25.1111	23.2222	20.333	24.2222	23.6111			0.8	15.6212
19.1609	25.389	10.444	26.889	4	19.8333	24.7778	22.6111	6.556	1.778	0.722	0.889	0.722	0.4444	2.5	24.333	19.278	28.222	26.5	28.5	18.389	19.5556	24.9444			0.803847	15.3308
19.2525	36.944	14.833	31.5	4.667	22.8333	23	22.9444	5.056	1.889	1.611	0.611	0.167	0	2.722	24.222	24.833	30.667	25.6111	21.6111	19.056	21.3333	21.3889			0.80769	16.25
19.3442	33.278	15.778	22.389	3.944	22.3889	18.7222	28.1111	2.278	1	0.833	0.111	0.333	0.5556	0.5	32.944	26.278	29.833	24.0556	30.5	25.389	26.1667	21.8333			0.811537	16.6919
19.4359	34.167	15.111	28.889	3.889	19.0556	20.8889	26.7222	2.611	1.611	0.722	0.111	0.889	1.0556	0.167	34	26.778	36.222	18.8889	37.0556	28.611	23.5	23.2222			0.815384	17.4621
19.5276	30.556	14.556	26.556	3.889	16.4444	15.8333	27.5	3.611	0.944	1	0.722	0.222	0.3333	0.056	33.056	33.722	45.278	16.1111	28.2778	21.444	28.8333	22.7222			0.819231	16.894
19.6193	29.778	17.111	29.389	2.444	17.6667	15.1111	24.7778	2.833	1.222	0.167	0.389	0.5	0.5556	0.444	26.389	30.667	45.944	25.3889	24.8333	22.944	30.6111	27.6111			0.823078	17.1262
19.7109	33.833	18.667	37.833	1.778	11.6111	17.3889	26	1.667	0.444	0.333	0.278	0.222	0.2778	0.333	15.778	47.333	42.278	32.8333	24.7778	28.167	27.8333	30.6667			0.826921	18.197
19.8026	34.778	19.556	31.833	1.444	11.7222	14.9444	10.8333	2.278	0.278	0.167	0.278	0.611	1.2222	0.889	9.444	43.333	38.611	30.6667	16.6111	25.278	32	23.4444			0.830768	15.9192
19.8943	38.889	14.111	26.722	1.444	9.5556	24.3333	7.3889	1.278	0.333	0.278	0.444	0.167	0.9444	0.833	8.278	35.778	29.556	22.1111	18.2222	26	35.6667	21.1667			0.834615	14.7045
19.986	25.5	22.611	24.5	1.167	4.8333	18.3333	5.9444	0.944	1	0.556	1.611	0.222	0.1667	0.5	5.444	31.333	29.611	24.8889	19.1667	26.5	27.6111	16.9444			0.838462	13.154
20.0777	17.111	22.611	22	0.667	3.6111	13.1667	9.6111	2.833	0.333	1	0.389	0.5	0.1111	0.444	1.389	21.5	34.278	18.2222	25.7222	22.222	24.8889	14.2222			0.842309	11.6742
20.1693	17.722	25.167	21.333	1.111	1.6111	11.9444	12.2778	1.056	0.944	0.389	0.056	0.167	0.7778	1.111	1.722	31.167	31.667	25.4444	27.8889	13.944	19.9444	18.5			0.846152	12.0884
20.261	21.056	23.556	9.111	0.444	3	10.2222	11.0556	1.611	0.556	0.333	0.389	0.389	0.6111	1.222	3.111	19.778	33.111	27.6667	26	6.056	16.0556	18.5556			0.849999	10.6314
20.3527	27.333	31.944	8	0.667	4.0556	10	4.1111	0.722	1.556	0.556	0.222	0	0.5556	1.5	0.778	19.333	28.333	27.8889	24	6.944	17.5556	18			0.853846	10.6389
20.4444	29.889	31.278	5.722	0.611	1.9444	13.4444	4.4444	1.056	1.056	0.667	0.722	0.222	0.1667	0.944	1.389	16.889	24.333	18	17.4444	1.944	19.2222	15.5556			0.857693	9.40655
20.536	40.389	30.389	2.278	0.611	2.2778	9.1667	6.0556	2	0.278	0.389	0.389	0.444	0.2778	0.389	2.389	10.556	28.167	15.0556	16.1111	3	21.7222	12.6111			0.861536	9.31572
20.6277	39.5	27	1.944	0.944	1.1111	6.3889	5.6111	0.667	0.556	0.389	0.556	0.111	0.5	0.333	0.833	8.667	34.444	9.7778	14.2778	0.944	14.8889	6.6667			0.865383	8.00501
20.7194	38	24.389	1.111	0.611	1.4444	5.0556	3.8333	0.611	0.222	0.111	0.111	0.111	0.1111	0.611	0.889	3.389	42.389	5.3333	9.2778	2.5	8.8889	6.9444			0.86923	7.08835
20.8111	33.278	27	3.278	0.278	1.5556	4.2222	4.1111	1.111	1.167	0.722	0.111	0.5	0.5	0.5	0.889	2.444	40.167	4.2778	6	2.833	7.5556	4.0556			0.873077	6.66163
20.9028	24.167	28.556	1.722	0.833	0.7222	3.2222	3	0.778	0.111	0.222	0	0.444	0.4444	0.056	0.5	1.778	26.444	4.0556	3.1111	1.222	6	4.5			0.876924	5.08584
20.9944	18.556	36.444	0.556	0.556	1.7778	3.2778	3	0.5	0.278	0	0.222	0.722	0.2222	0.056	0.5	0.833	12.667	2.4444	5	1.833	9.2222	6.7222			0.880767	4.79044
21.0861	10.444	24	1.444	0.889	1.2778	1.5556	3.1667	0.444	0.667	0.5	0	0.111	0.8333	0	0.611	2.056	6	1.9444	3.1111	0.667	8.3889	5.7222			0.884614	3.35605
21.1778	13.056	25.722	0.389	0.722	1.3889	0.4444	2.8333	0.389	0.556	0.333	0.056	0.778	0	0.444	0.222	1.778	2.778	1.5	2.3889	1.611	6.1111	3.2778			0.888461	3.03538
21.2695	19.889	33.056	0.778	0.556	1.0556	1.8889	2.2778	1.278	0.333	0.556	0.333	0.056	0.1667	0.167	0.778	1.056	1.556	0.1667	2.0556	1.333	6.8333	3.3333			0.892308	3.61377
21.3612	13.944	36.667	0.833	0.167	1.2222	1.6667	2.7778	0.5	0.389	0.222	0.389	0.056	0.1111	0.5	0.889	0.667	1.778	1.0556	2.2778	1.5	4.5	3.3889			0.896155	3.43187
21.4528	7.611	41.778	2	0.444	1.7222	0.3333	2	0.278	0.333	0.167	0.333	0	0.1667	0.667	0.611	1.222	1.167	1.4444	1.3333	0.944	4.7222	3.0556			0.899998	3.28785
21.5445	5.056	44.944	1.444	0.556	0.6667	1.2222	2.1667	0.278	0.167	0.5	0	1.056	0.3889	0.5	0.889	0.611	0.722	0.1667	0.8889	0.444	1.3889	1.6111			0.903845	2.98487
21.6362	3.722	50.5	0.389	0.167	0.5	1.1667	1.7222	0.222	0.111	1.056	0.333	0.056	0.2778	0.444	0.389	0.5	1.444	0.7222	1.6111	1.889	1.8333	2.2778			0.907692	3.24241
21.7279	1.556	35.722	1	0.556	1.0556	0.3333	0.4444	1.222	0.722	0.889	1.444	0.222	0.2778	0.667	1.278	1.111	0.889	0.9444	1.6667	1.056	3.1667	2.6111			0.911539	2.67427
21.8195	0.722	28.944	0.444	0.5	0	0.9444	1.0556	1	0.444	0.667	0.056	0	0.1667	0.167	0.389	0.333	0.778	0.3333	0.4444	0.389	1.9444	1.4444			0.915382	1.87119
21.9112	2.444	22.222	0.222	0	0.4444	1.7778	1.4444	1.278	0.056	0.444	0.278	0.333	0.3889	0	0.278	0.778	0.167	0.1111	0.2222	0.944	0.8889	1.5			0.919229	1.64644
22.0029	1.889	24.556	0.722	0.667	0.3333	2.7778	2.3333	0.778	0.778	0.5	0.444	0.056	0.3889	1.167	0.556	0.444	0.111	0	0.6111	0.5	0.7778	1.3333			0.923076	1.89652
22.0946	1.111	17.389	0.611	0.056	1	2.5	0.2778	0.833	0.222	0.5	0.111	0.778	0.1667	0.111	0.556	0.389	0.167	0.2778	0.0556	0.722	0.5556	0.5556			0.926923	1.31569
22.1863	3.556	13.667	0.111	0.111	0.6667	1.7778	1.4444	0.5	0.611	0.278	0.111	0.5	0.6111	0.333	0.278	0.444	1.389	0.5556	0.5556	0.444	1.5556	0.9444			0.93077	1.38383
22.2779	1.389	7.556	0.944	0.167	0.4444	1.8889	0.6667	0.722	0.222	0.333	0.889	0.056	0.1111	0.611	0.222	0.278	0.611	0.2222	0.1667	0.611	1	0.3333			0.934613	0.883832
22.3696	1.278	4.389	0.333	0.444	0.3333	0.8889	1.0556	0.667	0.5	0.111	0.167	0.278	0.7778	0.167	0.056	0.444	0.722	0	0.2222	1.167	0.6111	1.3333			0.93846	0.724782
22.4613	0.556	4.167	0.333	0.333	0.1111	0.1111	0.1667	0.389	0.944	0	0.5	0	0.0556	0.333	0.5	0.5	0	0.2222	1.1667	0.5	2	0.3889			0.942307	0.603514
22.553	0.389	2.778	0.889	0.111	0.3333	1.8333	0.5	0.5	0.833	0	0.444	0.389	0	0.167	0.389	1	0.333	0.1111	0.7222	0.944	0.5	0.6111			0.946154	0.626227
22.6447	0.778	3.389	1.444	0.667	0.6667	0.6667	0.7222	0.778	1.722	0.111	0.222	0.389	0.8889	0.111	0	0.778	0.167	0.1111	0.4444	0.389	0.3889	1.1111			0.950001	0.724773
22.7363	1.556	2.333	0.167	1.167	0.2778	0.6667	0.7222	0.333	0.5	0	0.111	0.5	0.3333	0.167	0	0.056	0.778	0.3333	0.2222	0.222	0.3333	0.3333			0.953844	0.505095
22.828	1.056	1.667	0.333	1.056	0.7222	0.2778	0.5	0.056	0.556	0	0.667	1.222	0.7778	0.111	0.278	0.222	0.222	0.1111	0	0.444	1	0.2222			0.957691	0.522777
22.9197	0.722	1.611	0.722	0.278	0.8333	0.2778	0.2778	0.778	0.056	0.111	0	0.667	0.2222	0.056	0.611	0	0.278	0.3333	0.5	0.5	0.5	0.8889			0.961538	0.464695
23.0114	1.611	0.333	0.667	0.333	1.3889	0.4444	0.3889	2.389	0.111	0.222	0.167	1.056	1.1111	0.278	0.111	0.5	0.111	0.8333	0.1111	0.611	0.4444	0.5			0.965385	0.623732
23.103	2.056	1	0.833	0.222	1.2778	0.2778	0.1667	0.278	0.389	0	0.778	0.556	0.7778	0.111	0.111	0.278	0.5	0.2222	0.7222	0.611	0.8889	0.9444			0.969228	0.590945
23.1947	2.222	1.056	0.222	0	0.6111	0.4444	0.5556	0.111	0.333	1.5	0.222	0.111	0.1111	0	0.833	0.056	0.778	0.3333	0.7778	0.167	0.6111	0.1667			0.973075	0.510095
23.2864	2.111	0.111	0.056	0.944	0.3889	0.8889	0.8889	0.889	0.444	0.444	0.556	0.5	0.5556	0.444	0.611	0.056	1.167	0.4444	0.2778	0.278	0.6667	0.0556			0.976922	0.580809
23.3781	2.722	1	0.389	0.5	1.3889	0.1111	0.1111	0.333	0	0.833	0	0.056	0.5556	0.222	0.111	0	0.167	0.9444	0.1667	0.278	0.6111	0.8889			0.980769	0.517673
23.4698	7.167	0.389	0.167	0.444	2	1.1111	0.4444	0.944	0.222	0.111	0.222	0.5	0	0.222	0.5	0.222	0.222	0.6667	0.1111	0.278	0.6111	0.3889			0.984616	0.77015
23.5614	8.333	1.5	0.778	0	5.4444	0.5	0	0.167	0	0.167	0.333	0.556	0.3889	0.167	0.333	0.056	0.167	0.1667	0.7222	0.056	1.2222	0.6667			0.988459	0.987459
23.6531	19.5	1.611	0.833	0.333	1.8889	0.3889	0.6111	0.667	0.111	0.056	0.056	0.5	0.3333	0.222	0.667	0.667	0.5	0.1111	0.4444	0.111	0.5556	0.8889			0.992306	1.41165
23.7448	28.278	3.556	0.556	0.167	0.5	0.6667	0.1667	0.5	0	0.167	0.333	0.222	0	0.222	0.556	0.444	0	0	0.5	0.278	0.6111	1.2778			0.996153	1.77279
23.8365	26.5	0.667	1.5	0	0.2778	0.1667	0.5	0	0.222	0.056	0	0.444	0	0.5	0.5	0	0.222	0.2222	0.0556	0.778	0.2222	0.7222			1	1.52526

## Sheet: Image2
X0	Y0	Y1	Y2	Y3	Y4	Y5	Y6	Y7	Y8	Y9	Y10	Y11	Y12	Y13	Y14	Y15	Y16	Y17	Y18			Ap-Basal to 1	Average intensities
0	36.984	37.5416	22.363	25.0666	41.344	29.4822	30.951	34.357	47.598	39.234	40.054	34.0474	39.009	35.3	32.528	40.6633	36.2847	40.886	41.1463			0	36.0442
0.0917	31.321	43.0483	25.897	25.5631	37.579	31.2369	38.469	40.292	39.064	28.219	40.054	30.5957	39.1643	38.224	33.534	45.6569	33.2583	41.29	44.8897			0.00404951	36.1766
0.1834	31.903	32.0717	26.974	32.2366	39.978	28.9382	46.206	38.25	33.61	29.772	34.183	34.238	50.8524	55.167	46.415	47.5361	30.7382	34.79	49.1735			0.00809903	38.0544
0.275	29.304	31.8034	26.249	41.0153	45.781	35	51.295	41.178	41.916	31.063	36.054	36.3083	60.1166	43.672	35.558	45.7897	25.2342	30.856	52.2162			0.0121441	38.9689
0.3667	30.871	34.3666	24.663	43.009	31.939	33.9629	35.235	43.793	41.067	31.598	47.028	44.4244	57.0989	58.286	37.569	46.5053	32.9793	34.747	58.2561			0.0161936	40.3894
0.4584	30.925	30.0264	31.867	35.0802	23.943	26.782	31.751	41.649	54.964	32.573	51.956	40.7659	49.7412	74.497	40.623	48.8595	46.2602	41.557	57.0655			0.0202431	41.6256
0.5501	29.176	36.175	33.252	33.664	18.66	33.7713	30.407	50.097	57.291	45.2	52.758	31.0956	46.0874	73.349	46.997	65.9711	53.3969	45.204	56.7247			0.0242927	44.1725
0.6418	36.701	39.894	33.011	42.4212	21.71	35.8094	32.336	63.598	75.415	39.343	61.607	35.3312	42.6637	78.413	45.517	61.2217	61.9367	51.439	55.4578			0.0283422	48.0961
0.7334	45.675	41.0066	38.831	39.6356	29.211	40.9015	29.119	56.272	75.335	45.642	75.391	40.1835	48.9138	82.273	51.891	50.9511	80.6933	64.071	51.5902			0.0323873	51.9782
0.8251	62.151	38.4381	31.195	39.1281	24.562	51.7803	28.219	52.826	77.163	37.025	88.529	34.704	50.8967	75.771	59.189	51.8162	97.1249	67.849	55.0875			0.0364368	53.866
0.9168	63.674	42.2006	35.316	50.5368	27.284	50.6498	35.671	56.161	85.648	38.905	99.653	27.891	62.266	74.56	54.286	47.7174	93.2833	71.902	57.7495			0.0404863	56.5976
1.0085	76.028	34.4151	40.782	66.8501	32.478	44.1023	40.544	60.039	102.868	44.329	89.059	29.6458	70.4889	71.67	68.835	44.0153	82.7124	80.338	68.7152			0.0445358	60.4166
1.1001	75.337	42.6663	37.198	84.0001	44.805	42.7835	32.213	57.103	93.051	58.649	73.782	43.7745	72.2612	75.403	65.004	50.3174	74.4657	71.846	62.2961			0.0485809	60.8924
1.1918	81.003	30.181	44.113	76.0474	60.162	47.137	43.836	71.366	84.546	62.32	65.107	38.7094	54.9192	65.27	67.103	43.5154	69.2973	85.888	66.2494			0.0526304	60.8826
1.2835	93.703	39.8892	56.411	70.1704	66.565	56.0817	36.626	52.665	84.921	53.973	72.611	35.3151	65.0197	62.734	75.865	38.5818	63.4503	102.903	75.2695			0.0566799	63.3029
1.3752	107.594	51.3555	56.755	76.159	78.662	70.7932	37.966	49.705	89.693	52.113	73.393	32.6991	66.1877	70.807	74.722	41.3824	48.4558	107.862	80.5866			0.0607294	66.6785
1.4669	123.178	42.5208	56.42	82.5394	96.458	80.4961	41.711	50.466	89.39	59.834	84.496	37.5077	57.0775	82.146	80.17	40.5052	47.6827	95.605	94.3119			0.064779	70.6587
1.5585	125.035	53.8906	79.37	89.2365	104.579	87.4054	65.591	59.626	104.567	71.607	92.401	35.1807	51.7022	81.552	74.536	31.1866	42.8533	102.826	94.8174			0.0688241	76.2086
1.6502	110.229	58.7444	85.237	77.531	90.718	81.6023	73.443	69.368	106.434	76.999	91.479	39.1836	49.3175	94.926	66.54	35.9375	35.7139	103.609	98.3811			0.0728736	76.0733
1.7419	103.908	56.1859	83.474	79.4645	86.306	75.9627	75.951	78.789	103.16	75.324	95.227	44.0615	50.8057	94.774	62.432	34.6335	33.6433	99.212	81.7345			0.0769231	74.4762
1.8336	99.754	79.1275	83.314	80.4821	84.715	72.4169	75.489	81.246	107.656	63.957	88.663	48.6811	63.6962	84.651	54.458	31.5537	40.1332	111.665	90.8193			0.0809726	75.9199
1.9253	94.737	92.9319	84.649	72.7721	89.374	89.773	91.359	74.808	118.949	64.797	80.434	59.9127	60.0901	84.922	44.656	30.3962	34.952	113.023	75.6555			0.0850221	76.7469
2.0169	92.292	95.3277	98.752	65.8666	91.765	86.2988	78.519	74.614	93.748	57.18	70.041	61.3944	67.6213	98.184	49.429	29.1168	29.2176	115.653	66.1499			0.0890672	74.7984
2.1086	107.972	86.5053	95.299	51.2295	88.588	80.3486	78.329	78.932	87.86	69.09	70.6	62.8607	73.0056	99.052	64.943	36.4379	32.4895	113.572	67.4547			0.0931167	76.0299
2.2003	114.945	82.7296	97.44	59.3409	87.2	78.9652	73.27	75.318	88.232	75.664	80.987	86.2453	74.4985	93.712	71.602	39.7218	29.5665	106.695	72.7378			0.0971662	78.3616
2.292	122.334	68.1619	126.943	55.8395	80.09	85.7677	69.593	86.79	87.153	87.611	84.664	89.4082	81.2616	100.329	83.576	37.5714	28.7748	89.324	66.3835			0.101216	80.6092
2.3836	119.46	63.5763	141.067	51.0993	81.581	91.1478	57.386	107.875	93.714	98.313	84.031	92.7822	87.7934	95.115	81.129	40.4311	27.228	67.33	54.9151			0.105261	80.8407
2.4753	102.171	57.6277	130.332	56.8376	78.363	95.4947	54.122	106.29	88.852	115.874	100.115	67.3641	88.4458	85.734	83.055	39.1407	25.7407	71.4	48.7815			0.10931	78.7232
2.567	86.722	46.6452	123.12	54.9041	68.724	96.5751	60.324	115.418	105.516	133.327	115.962	58.0444	74.9644	64.275	87.238	38.7656	26.4685	74.138	50.8304			0.11336	77.998
2.6587	78.912	41.4378	101.459	77.3911	80.852	87.4682	74.68	109.824	101.253	135.692	111.342	58.6969	69.0888	48.044	76.605	41.077	30.2641	76.758	53.7422			0.117409	76.5572
2.7504	71.53	50.375	87.489	94.009	92.208	76.0202	80.362	87.746	99.828	138.309	101.131	58.7481	76.1539	52.665	90.453	41.1448	28.9142	69.636	62.0559			0.121459	76.7778
2.842	67.769	40.893	97.073	95.6116	101.535	70.8302	86.742	83.013	103.516	130.216	90.221	54.5146	70.8208	65.86	90.411	37.1317	31.7438	66.721	70.9509			0.125504	76.6091
2.9337	66.809	43.3803	91.622	89.5519	102.614	70.0845	116.076	90.196	107.618	133.363	102.727	47.5494	81.8625	65.03	93.413	37.3052	32.9965	81.903	64.656			0.129553	79.9346
3.0254	74.764	48.6292	85.009	73.5711	98.117	65.1353	112.712	101.601	105.245	123.534	110.323	43.4538	85.1825	57.164	79.833	42.7962	40.1589	86.094	69.2374			0.133603	79.0821
3.1171	69.519	69.6443	85.063	69.804	87.925	71.1768	112.328	93.074	93.198	132.456	121.101	43.3751	93.7406	60.151	79.983	37.7731	44.4855	77.622	65.5726			0.137653	79.368
3.2088	67.479	84.7526	89.341	52.7157	81.575	75.4875	89.949	94.405	81.735	124.979	99.519	40.8656	73.5358	59.285	74.899	35.5391	55.1363	60.413	66.0355			0.141702	74.0867
3.3004	58.038	84.2788	85.098	33.4905	69.014	75.6459	82.026	93.635	74.442	114.22	87.766	43.72	59.0298	66.909	58.271	32.5513	64.7293	59.176	59.9895			0.145747	68.5279
3.3921	51.448	83.4343	72.16	30.7474	61.62	72.8705	84.094	95.424	81.75	123.805	82.633	42.0116	54.0992	65.74	53.629	34.9312	58.2794	60.433	59.4387			0.149797	66.7657
3.4838	49.213	59.641	66.172	31.6081	45.528	59.3925	78.736	98.76	82.475	135.226	74.792	38.5504	34.3094	66.654	55.857	35.8066	66.1912	53.208	50.3235			0.153846	62.2339
3.5755	60.964	50.0519	57.743	33.0966	36.636	54.7665	88.412	79.271	80.637	112.056	73.597	42.741	40.0107	59.462	77.606	44.2736	81.8547	47.025	43.7041			0.157896	61.2583
3.6672	50.867	48.6615	52.381	40.3922	31.482	50.6033	90.4	69.867	98.844	100.446	96.633	36.3566	45.6069	58.132	102.859	56.1707	94.0528	43.877	47.1043			0.161945	63.9335
3.7588	53.66	50.2588	45.831	42.3495	26.425	50.4853	95.109	58.516	111.262	83.402	112.935	37.5714	36.0083	61.887	116.869	65.0208	99.1846	36.243	49.2502			0.16599	64.8562
3.8505	47.161	62.0585	42.424	47.5515	27.55	47.6072	95.01	54.728	105.849	71.367	122.606	39.7138	27.215	61.243	118.001	60.6805	94.8161	33.882	52.7953			0.17004	63.8031
3.9422	45.321	61.0549	43.067	48.7206	21.862	41.4533	89.035	62.966	85.529	75.82	116.586	45.749	31.3462	54.908	112.443	60.2596	96.4491	38.008	54.7459			0.174089	62.3855
4.0339	41.484	70.8935	37.773	49.6284	22.671	43.4561	95.246	71.469	95.096	82.265	112.523	44.7195	29.0361	40.105	103.659	54.1902	93.3528	30.76	53.4883			0.178139	61.6745
4.1255	37.574	63.1082	28.417	45.0024	28.817	35.268	72.889	61.828	96.372	93.727	91.308	47.8834	32.8411	32.708	90.064	44.0365	85.2058	25.19	49.9996			0.182184	55.9073
4.2172	29.853	71.6176	27.232	44.2728	31.824	27.803	76.3	57.679	101.343	93.959	88.34	50.0733	33.3514	27.693	80.644	45.5058	61.9428	20.043	43.1688			0.186233	53.2971
4.3089	36.775	72.1499	37.939	30.1888	35.682	27.7013	70.85	50.939	104.443	89.517	81.322	49.3474	30.7063	38.987	79.386	45.9809	45.144	22.069	39.7261			0.190283	52.0449
4.4006	44.027	74.2279	41.965	32.8047	50.615	29.439	61.499	39.857	83.784	72.149	82.774	51.9792	29.3786	44.138	65.14	37.9292	42.3591	23.647	37.399			0.194332	49.7427
4.4923	50.402	68.5192	50.748	28.1144	51.373	25.8415	43.489	33.332	74.029	66.155	70.77	48.1163	22.6882	52.241	58.715	46.6088	40.0226	23.254	32.2488			0.198382	46.6667
4.5839	46.605	78.8854	52.219	35.3402	75.755	21.4536	44.824	39.813	66.778	58.701	63.112	41.5794	31.4308	53.014	48.623	52.753	32.0832	29.677	25.9325			0.202427	47.2936
4.6756	40.1	79.3251	53.043	27.9799	77.376	27.6913	42.182	56.361	71.089	63.581	56.505	34.0002	36.981	45.527	41.408	51.2526	33.6178	30.306	25.8923			0.206477	47.0641
4.7673	37.713	69.3912	47.755	22.8566	63.836	32.0342	31.38	55.079	65.517	57.916	55.253	34.384	44.7252	44.744	41.522	52.7902	35.3775	26.941	23.7755			0.210526	44.3679
4.859	33.458	68.7415	43.506	31.4718	44.648	27.7321	28.272	59.668	71.024	52.498	54.449	30.4071	47.4537	47.451	38.245	46.9135	50.7211	33.707	21.1499			0.214576	43.764
4.9507	37.296	62.0408	32.251	29.3601	31.336	30.9038	31.58	51.742	86.244	49.536	59.259	30.2645	42.4539	53.072	32.459	58.798	57.8999	32.201	19.9215			0.218625	43.6115
5.0423	35.1	51.5575	27.939	28.2338	31.698	29.6971	31.131	47.683	110.752	37.225	61.585	31.0081	38.4217	59.478	36.97	59.8732	60.9127	31.422	19.0412			0.22267	43.6699
5.134	38.212	48.2522	27.296	36.9395	34.606	36.2731	27.352	46.449	94.271	33.179	48.845	29.2767	32.7895	51.545	27.439	56.637	65.8951	23.429	20.1115			0.22672	40.9893
5.2257	35.506	47.2291	30.453	32.4678	35.189	25.5476	26.448	45.794	95.786	43.801	34.861	27.2992	30.186	54.826	31.912	49.8727	52.8386	21.068	23.8618			0.230769	39.2077
5.3174	36.466	51.9626	38.45	35.0962	30.038	17.1861	21.679	36.964	85.752	55.021	29.705	20.3501	35.1668	48.772	34.885	38.4069	48.6475	20.44	24.5705			0.234819	37.3452
5.409	34.611	43.7514	32.107	23.3842	24.788	18.8349	24.933	38.782	77.421	60.193	28.727	20.4971	29.0702	41.528	29.582	34.8239	39.1414	18.636	23.1912			0.238864	33.8949
5.5007	34.119	41.6676	41.082	19.684	24.963	22.3782	23.455	38.021	65.143	66.209	33.427	22.9499	24.6801	47.154	31.393	39.7537	44.1932	27.089	24.985			0.242913	35.3867
5.5924	34.115	39.7671	41.714	14.1199	30.414	26.2795	28.844	33.617	62.713	52.377	42.24	22.5706	30.965	44.426	24.539	44.3528	30.8357	26.569	25.4152			0.246963	34.5197
5.6841	35.767	42.9246	43.951	17.9683	27.98	21.845	33.689	35.302	38.289	58.036	49.989	20.986	28.3236	45.76	21.159	41.1714	29.1235	27.318	37.93			0.251012	34.6059
5.7758	34.103	44.3254	41.483	20.4413	33.894	29.2166	30.321	31.126	31.456	57.108	49.315	20.9112	27.8038	58.565	25.235	29.4753	25.9465	24.745	43.5313			0.255062	34.6843
5.8674	43.308	39.5813	36.601	26.0913	34.352	38.1488	24.545	30.618	27.179	51.612	56.935	22.566	29.2829	60.878	28.781	26.7159	23.8502	26.01	36.7815			0.259107	34.9388
5.9591	46.08	33.8663	38.563	19.3336	26.097	37.4204	32.364	28.324	26.854	57.565	63.824	21.857	34.9898	65.027	29.764	28.2918	20.4807	22.243	26.7479			0.263157	34.7207
6.0508	63.834	22.0241	34.514	14.934	31.797	35.5632	38.278	23.043	25.484	60.55	58.397	33.6381	32.7109	63.189	30.43	32.0556	20.8267	21.027	30.6873			0.267206	35.4202
6.1425	90.917	26.6207	38.355	16.3751	36.604	26.3626	36.756	27.317	27.879	57.607	46.612	24.3946	27.5538	46.585	26.884	32.8469	23.8035	22.308	31.3122			0.271256	35.1102
6.2342	93.246	36.5387	26.285	17.6157	31.67	24.4452	41.127	27.657	36.06	62.658	44.467	23.1842	26.0889	38.353	26.482	31.7842	28.4964	21.007	26.0259			0.275305	34.9048
6.3258	103.799	32.2269	27.389	14.6658	28.392	20.8283	36.355	27.36	39.077	60.181	41.851	26.9249	22.8405	42.25	23.304	35.9716	27.4761	23.185	25.095			0.27935	34.6933
6.4175	85.098	29.7248	22.965	16.87	29.864	21.2071	41.254	23.127	44.926	50.851	35.405	22.8014	21.969	37.87	25.564	29.5735	31.3201	25.963	23.2309			0.2834	32.6097
6.5092	71.271	25.9981	22.389	14.8848	16	19.5981	45.672	26.81	28.35	42.384	36.099	21.7959	18.6277	46.415	19.292	27.0705	32.8169	27.156	26.4852			0.287449	29.9534
6.6009	55.139	21.9503	20.622	14.3494	11.604	17.6456	34.338	27.259	29.647	33.26	33.142	26.5576	19.4407	35.67	22.954	28.9536	28.8205	25.433	28.5337			0.291499	27.1221
6.6925	39.67	23.3986	18.107	13.8922	10.276	25.9709	29.916	22.933	30.857	32.421	30.101	24.4999	29.8314	32.47	22.909	28.6117	30.3864	23.207	33.3461			0.295544	26.4634
6.7842	36.606	21.1922	19.821	15.1273	11.49	24.9207	28.575	23.621	30.401	28.777	35.623	28.0358	33.5127	26.881	23.845	23.0445	25.8967	20.906	29.3312			0.299593	25.6635
6.8759	32.348	26.3591	22.583	18.3542	13.424	18.75	22.497	22.68	37.114	30.189	27.709	37.039	35.7726	31.458	22.961	26.4967	24.675	22.287	26.1593			0.303643	26.2556
6.9676	32.441	30.401	19.669	21.4358	11.254	18.5519	27.555	26.63	51.728	28.145	29.64	33.2263	42.3805	35.143	19.154	25.4966	30.2723	21.42	29.4209			0.307692	28.1034
7.0593	33.042	42.3792	18.969	19.3494	11.957	20.5735	28.122	28.535	49.673	26.565	31.057	33.0231	54.1535	29.469	22.087	16.9476	22.468	26.005	26.9595			0.311742	28.4913
7.1509	36.005	52.5326	17.583	17.5322	8.058	21.6032	22.744	25.302	46.769	30.077	31.729	35.7273	44.2343	25.702	20.964	21.4155	17.1209	22.547	24.2888			0.315787	27.4703
7.2426	36.434	39.8644	20.714	19.4868	10.645	22.502	24.4	27.062	45.419	22.817	27.105	40.7061	43.8956	25.658	26.239	23.2462	13.395	18.193	25.0964			0.319836	26.9936
7.3343	36.879	36.1231	26.801	19.5364	9.345	19.8979	28.803	21.891	39.93	25.876	23.277	32.6489	32.8396	28.184	24.609	16.3437	18.1687	23.897	32.1708			0.323886	26.1695
7.426	37.23	23.3307	27.353	19.3954	10.943	23.8796	31.39	28.599	44.224	21.818	21.294	31.985	26.2414	24.395	23.359	20.1208	21.4757	20.537	30.6381			0.327935	25.6952
7.5177	37.174	23.8046	21.66	22.9206	16.064	27.7788	46.486	28.383	36.845	25.136	19.903	30.4974	27.6513	23.069	30.685	22.1999	13.5625	17.915	29.0825			0.331985	26.3588
7.6093	32.2	19.0702	26.496	21.334	12.106	28.0859	44.375	35.252	33.072	19.574	23.246	27.9673	28.8877	21.136	28.233	29.6752	17.1868	14.799	24.7648			0.33603	25.6558
7.701	33.541	15.5559	27.155	11.8288	9.784	31.1132	40.003	33.322	29.139	21.223	20.511	27.2073	21.9284	27.634	24.984	28.1905	18.0105	17.105	24.7234			0.34008	24.3663
7.7927	36.386	11.8424	32.519	7.018	8.673	29.9878	32.007	30.02	28.255	21.945	22.207	28.1787	22.909	29.594	22.852	27.2011	24.2692	19.876	22.0473			0.344129	24.0941
7.8844	38.51	16.7377	29.447	10.3098	8.479	24.6992	28.115	27.286	26.075	17.993	31.828	26.4678	23.1764	28.429	20.696	24.1534	23.316	20.522	19.495			0.348179	23.4598
7.9761	47.975	22.2466	28.142	9.3911	11.69	20.9116	31.319	23.868	28.439	25.63	36.535	28.7815	19.6304	34.697	15.641	29.8247	21.2952	18.532	21.5222			0.352228	25.0564
8.0677	34.452	22.3692	21.767	13.0253	13.724	25.0883	29.598	18.843	28.343	33.484	24.966	32.8886	19.3026	26.761	16.429	23.8567	22.8118	22.698	22.7144			0.356273	23.8485
8.1594	28.493	24.8281	18.227	12.6713	13.343	24.7082	26.044	28.16	18.073	37.784	21.435	24.5236	25.9694	24.608	16.095	21.329	15.2143	24.486	20.8035			0.360323	22.4629
8.2511	21.457	24.0462	12.57	9.0854	15.203	24.3845	29.568	33.353	19.667	38.499	22.822	17.9123	30.1781	23.334	19.876	18.8253	18.6708	18.293	18.2488			0.364372	21.8944
8.3428	18.871	20.5807	13.409	11.3204	13.462	27.8649	25.122	27.471	26.382	30.052	23.972	16.6141	36.7088	22.733	21.189	20.1098	17.2549	18.02	21.6267			0.368422	21.7244
8.4344	21.034	22.0789	18.672	11.3918	9.056	33.0389	23.628	27.088	25.355	32.476	29.379	18.7901	33.4289	28.676	24.432	21.2716	17.5142	16.091	26.7497			0.372467	23.1658
8.5261	23.135	16.3043	18.867	11.3724	7.127	25.5671	23.884	28.451	24.239	41.999	30.859	22.2873	25.7449	23.723	25.97	21.2609	17.2798	18.544	16.6825			0.376516	22.2788
8.6178	28.026	16.8929	20.496	11.0798	9.174	24.7359	26.8	32.845	27.49	50.581	39.586	26.3842	35.5846	27.822	30.802	27.1912	17.7765	20.242	19.6875			0.380566	25.9577
8.7095	30.486	20.4237	20.079	13.5643	9.638	28.7431	24.429	29.217	24.799	44.062	49.204	27.0364	46.2412	40.074	31.049	25.9512	23.4467	25.62	20.6024			0.384615	28.1403
8.8012	26.749	23.3757	23.416	14.1184	11.871	20.6026	24.86	30.396	27.765	38.307	36.669	28.7036	54.418	48.486	24.459	27.7527	26.0356	27.874	19.8716			0.388665	28.1963
8.8928	22.676	30.4398	17.479	12.1788	10.736	20.3563	19.673	29.293	25.028	31.578	28.956	23.4059	53.9789	43.804	20.832	27.0666	18.3612	26.155	20.1324			0.39271	25.3753
8.9845	21.7	24.5187	18.73	9.2001	12.396	14.9622	14.47	25.806	28.244	27.458	23.327	20.9614	43.3849	32.516	17.322	24.2284	17.4051	23.917	17.9888			0.39676	22.0282
9.0762	23.18	16.5377	15.46	8.9634	12.952	14.9315	17.481	32.998	24.512	19.11	31.089	18.1469	43.8011	34.428	14.841	15.6828	24.8236	21.83	22.0749			0.400809	21.7286
9.1679	23.805	11.5189	18.274	6.0969	7.759	12.6337	15.521	33.771	29.095	18.376	33.377	20.8814	34.2145	31.572	14.013	13.8608	21.4061	20.175	21.7099			0.404859	20.4242
9.2596	24.793	12.7711	25.082	4.0702	6.48	13.568	15.216	30.853	29.55	20.909	36.903	29.6376	27.0721	19.591	19.635	14.2124	17.823	20.076	19.0086			0.408908	20.3816
9.3512	29.113	14.09	24.608	5.9381	8.705	9.0085	20.133	26.264	27.02	25.599	33.732	24.4436	23.2185	19.142	22.827	16.09	14.8338	16.757	19.1805			0.412953	20.037
9.4429	33.067	20.1046	19.651	7.9584	14.858	10.6515	19.997	18.429	24.617	18.942	30.316	24.1682	17.2995	23.391	24.093	15.5548	18.0426	22.261	22.5558			0.417003	20.3135
9.5346	28.76	20.5492	24.655	9.3532	13.635	9.1941	17.041	23.135	26.391	17.106	30.878	28.5978	21.063	25.19	23.781	18.2165	17.4365	25.19	26.0427			0.421052	21.3797
9.6263	24.928	22.3678	25.477	7.4406	10.667	10.7395	13.7	26.323	26.321	17.719	30.434	26.0238	23.4564	28.553	20.591	19.0937	19.1079	24.608	22.6525			0.425102	21.0633
9.7179	22.301	18.4033	29.412	11.5729	4.656	11.9612	18.045	21.257	23.329	22.491	32.617	23.3211	25.0397	24.275	23.162	24.938	22.5504	28.839	19.3347			0.429147	21.4476
9.8096	23.638	16.373	27.714	7.8761	5.063	11.8873	12.655	19.371	32.519	25.601	34.203	26.036	21.2068	27.222	24.725	28.9051	23.8674	27.57	21.5491			0.433196	21.999
9.9013	24.754	13.2305	27.056	10.2823	6.224	11.1944	16.579	21.86	29.554	24.992	26.654	20.3447	18.9187	30.906	20.048	23.34	23.9175	25.31	20.5808			0.437246	20.8287
9.993	26.591	13.8819	32.624	10.2872	9.377	13.6075	15.272	32.857	26.268	15.461	21.782	19.6129	16.8074	31.875	25.582	22.509	25.1827	20.998	16.9874			0.441295	20.9244
10.0847	24.578	15.9762	27.934	11.3596	7.623	13.3791	12.637	34.547	21.528	20.138	22.229	22.3521	20.4547	33.16	22.21	25.2738	27.639	15.735	20.8594			0.445345	21.0323
10.1763	19.922	16.9448	27.126	13.6177	10.279	9.0924	17.484	22.769	25.645	22.129	23.769	17.5333	18.6974	19.672	26.282	26.3879	29.0445	18.05	19.2226			0.44939	20.193
10.268	21.468	20.1843	21.959	16.3073	11.735	7.9343	17.808	20.948	21.584	23.139	20.639	16.3206	16.2671	23.987	23.937	19.7907	26.669	19.29	23.7894			0.453439	19.6714
10.3597	19.768	26.5959	24.207	24.2781	10.001	10.6523	22.138	22.273	21.089	22.625	21.134	17.8736	14.1345	21.079	24.178	19.6451	32.1234	18.715	27.8072			0.457489	21.0693
10.4514	23.438	26.4595	29.193	13.6836	5.294	13.5828	26.266	21.953	18.976	26.252	18.179	27.0957	17.5492	16.259	29.186	20.1607	35.4738	19.188	25.6231			0.461538	21.7796
10.5431	17.555	35.1334	30.815	13.5205	7.004	14.5169	26.139	29.568	19.901	26.065	17.528	18.6006	16.6772	16.804	25.853	21.1946	30.7425	17.85	29.5358			0.465588	21.8423
10.6347	20.478	24.7255	29.865	16.109	10.029	20.2199	22.665	28.722	23.32	28.824	20.709	24.4165	15.7814	18.302	26.469	19.8212	23.8979	14.978	34.6709			0.469633	22.316
10.7264	14.698	24.1438	37.004	14.9271	7.689	19.0279	17.67	29.708	29.588	18.796	31.173	22.4553	19.4409	17.927	26.645	22.7604	25.3868	22.732	35.1916			0.473683	22.9981
10.8181	18.632	20.4616	40.353	11.1616	8.685	16.3953	18.914	43.719	30.311	23.265	26.697	23.8771	24.3755	20.919	38.622	23.1831	20.254	27.042	42.6918			0.477732	25.2399
10.9098	15.695	23.6977	38.779	12.0107	14.433	17.1631	20.546	38.644	29.217	32.293	37.277	25.9373	21.5672	23.902	38.124	20.7987	19.8754	25.143	40.6798			0.481782	26.0938
11.0015	17.555	25.0803	38.993	11.7559	15.667	20.7622	22.631	40.264	30.984	41.901	35.906	35.8701	21.4293	25.532	39.628	19.5543	22.6927	23.53	46.7303			0.485831	28.2351
11.0931	17.604	23.6527	36.975	15.3347	11.947	20.2073	30.391	33.241	36.614	41.967	41.165	30.6891	23.9301	30.821	34.2	23.5869	19.6539	24.201	39.0801			0.489876	28.1716
11.1848	16.861	21.9428	36.502	14.6744	12.857	15.1385	33.082	24.688	38.403	34.041	29.328	33.1859	26.3124	33.871	38.398	29.846	24.4241	24.072	28.7248			0.493926	27.1764
11.2765	18.762	18.7862	31.986	9.4597	12.788	14.9199	29.177	28.57	35.185	31.222	24.912	36.746	25.4248	33.508	41.131	34.7576	25.8977	15.819	22.1838			0.497975	25.8545
11.3682	14.607	25.1439	37.599	9.608	13.272	12.8162	25.374	24.402	30.272	25.172	29.884	45.0061	27.5692	33.042	31.791	34.0886	29.3267	15.711	23.3694			0.502025	25.6871
11.4598	18.587	24.6089	33.13	7.1802	13.375	13.2339	18.808	22.048	31.648	28.012	34.346	47.1165	33.3806	28.788	25.772	28.7672	24.1638	13.947	24.9127			0.50607	24.8329
11.5515	28.253	25.816	29.291	11.6097	9.126	12.3808	24.564	30.069	27.647	22.584	25.818	44.2049	32.1712	25.869	20.314	25.9293	21.6558	17.72	25.4665			0.510119	24.2363
11.6432	32.36	31.3712	26.042	9.5189	7.48	11.7462	28.039	28.916	26.166	20.605	28.875	41.505	30.1429	28.619	14.538	18.982	23.5818	17.267	24.3273			0.514169	23.6885
11.7349	26.809	36.7785	28.164	9.7851	4.827	13.3761	37.476	24.203	18.607	20.145	35.021	39.2615	36.7866	32.248	14.855	22.5196	26.7424	16.035	28.0036			0.518218	24.8233
11.8266	26.126	36.4632	23.112	9.6752	8.336	11.98	35.486	23.936	20.872	25.8	45.919	38.0821	41.9927	30.831	18.801	27.0577	32.5909	15.762	30.8407			0.522268	26.5086
11.9182	18.525	35.9578	27.25	8.5588	6.829	14.1045	25.696	29.39	23.246	30.292	36.421	32.8661	40.8465	19.481	16.746	29.6358	32.4729	19.847	34.4104			0.526313	25.3987
12.0099	20.524	34.4766	26.647	6.8396	9.44	14.7999	26.719	37.515	17.286	23.4	33.207	25.9895	29.9317	22.833	21.714	17.3094	33.2994	14.956	33.8052			0.530363	23.7206
12.1016	17.07	38.5565	30.712	10.4329	10.542	15.8013	22.793	28.715	19.777	28.136	32.384	21.9294	30.7951	23.186	24.593	19.5291	44.378	16.34	33.1006			0.534412	24.6722
12.1933	13.82	32.1114	34.108	10.5063	13.414	13.0553	24.032	21.682	25.768	29.979	34.134	29.0137	33.6962	23.265	24.313	17.2408	42.8391	17.152	29.6763			0.538462	24.7266
12.285	17.626	20.6815	35.72	9.8875	12.173	16.5656	24.177	18.786	31.443	25.093	30.984	25.4817	41.7487	17.002	18.861	17.3501	35.6615	17.147	34.9588			0.542511	23.7551
12.3766	15.025	21.267	31.921	11.2335	12.904	13.9138	25.682	24.618	35.824	25.7	24.428	29.3795	45.8166	15.259	19.624	15.3683	33.1124	14.748	26.2678			0.546556	23.268
12.4683	14.959	21.0562	32.663	9.8971	14.272	20.0744	27.288	30.551	28.347	27.674	28.093	36.6688	37.1822	13.448	23.32	15.9892	32.2082	18.037	23.4892			0.550606	23.9588
12.56	17.714	26.6542	37.858	16.1599	11.822	15.791	27.355	27.696	25.253	31.722	31.149	36.0489	26.048	15.146	22.475	16.4363	28.7739	23.573	26.5256			0.554655	24.4316
12.6517	15.658	28.0853	33.454	9.4638	10.307	19.5969	34.781	32.019	21.904	30.22	31.373	37.5096	30.9174	19.018	19.597	14.5572	30.2656	19.768	28.4899			0.558705	24.5781
12.7433	28.282	24.4557	22.463	7.1931	7.292	19.924	38.847	35.586	24.756	35.556	26.044	28.4415	27.6606	24.422	18.852	17.4671	23.3201	20.35	27.0376			0.56275	24.1026
12.835	22.839	24.6389	22.864	10.6006	8.923	14.9409	38.395	35.153	21.972	35.987	27.108	27.0008	35.7348	21.565	19.239	19.4541	28.1025	22.477	29.8731			0.566799	24.572
12.9267	24.375	25.2686	20.502	9.9818	7.846	12.1063	32.131	34.316	27.018	28.38	26.705	25.8002	43.1375	23.451	13.992	20.5903	24.6783	19.855	29.178			0.570849	23.648
13.0184	23.793	20.2119	17.179	8.7868	7.871	13.5473	32.83	29.154	24.123	27.181	28.492	33.4915	35.5673	19.786	16.089	20.101	24.1193	15.784	25.3389			0.574898	22.2866
13.1101	21.576	19.3859	20.85	10.5414	9.287	11.1643	27.473	24.792	25.266	24.665	24.014	32.4784	20.6912	15.271	14.66	22.1798	23.1637	13.691	27.9773			0.578948	20.4804
13.2017	36.786	23.665	24.801	8.4412	8.352	11.9739	30.322	28.418	27.123	24.012	26.691	30.205	21.4996	16.842	13.706	13.5745	22.4516	16.287	30.6828			0.582993	21.886
13.2934	40.795	31.1197	24.267	13.7891	7.17	15.2234	23.015	30.343	32.518	30.4	29.869	30.3424	18.0513	20.981	12.828	18.024	22.8439	15.734	33.1436			0.587042	23.7083
13.3851	27.217	30.0382	26.919	11.9945	5.729	15.0651	26.551	31.538	26.316	27.886	30.357	26.8684	14.8704	29.631	15.472	16.8252	17.1752	15.579	31.6298			0.591092	22.5085
13.4768	22.242	28.7444	23.656	11.0715	8.541	16.7488	29.006	37.204	20.942	24.366	29.667	22.47	15.7	30.694	17.486	22.9893	23.4697	20.652	35.6922			0.595141	23.2285
13.5685	19.368	29.9727	28.201	8.2738	9.152	20.7086	33.284	40.134	18.561	25.22	25.277	21.8136	15.3935	27.331	22.427	26.2807	22.8623	14.267	32.1778			0.599191	23.195
13.6601	19.573	30.326	20.046	8.5358	10.033	20.4962	28.245	32.471	16.057	25.85	23.892	23.995	21.6119	27.214	28.309	21.3699	18.5014	19.318	35.2202			0.603236	22.6876
13.7518	19.648	27.4364	20.289	8.9721	10.749	25.6553	28.976	31.151	23.003	21.136	22.856	22.7304	23.7619	27.441	28.676	28.0548	19.6071	21.268	30.4289			0.607286	23.2547
13.8435	29.393	25.2637	16.974	10.6084	10.146	27.6825	27.388	29.107	17.194	14.393	30.025	21.1225	22.3757	20.865	30.258	33.6459	14.3819	18.384	26.1667			0.611335	22.3881
13.9352	31.703	22.969	20.24	12.9942	10.038	27.1937	25.725	28.437	18.458	17.561	30.824	25.7702	24.8809	20.326	40.818	42.2619	17.8868	19.305	21.7529			0.615385	24.1655
14.0269	39.326	24.0631	22.331	13.6341	8.49	30.2756	31.319	29.163	22.75	17.076	26.285	26.4736	26.5088	23.308	41.978	39.1916	17.9231	15.881	35.4865			0.619434	25.8665
14.1185	37.004	30.2275	21	15.3539	9.309	24.5784	32.29	24.775	22.213	15.737	31.218	23.6109	28.1292	20.252	42.62	34.6761	21.6369	17.158	37.3437			0.623479	25.7438
14.2102	23.711	30.6606	18.982	11.8771	9.483	32.4077	31.143	30.258	23.928	18.272	26.801	22.2568	22.2492	21.04	35.563	27.7856	24.0252	19.999	29.8073			0.627529	24.2237
14.3019	13.133	35.0316	22.708	11.5188	7.816	36.1017	35.387	32.189	27.192	21.928	29.05	25.3268	16.743	13.935	45.67	35.1502	29.8972	13.993	27.6548			0.631578	25.2855
14.3936	9.336	33.9192	27.111	9.6264	8.071	33.8653	41.134	27.489	26.278	19.642	26.838	27.5204	16.1608	14.364	31.914	34.6745	32.1039	13.136	23.9753			0.635628	24.061
14.4852	7.378	31.1075	26.656	8.5943	7.807	24.159	37.34	25.122	27.221	16.945	30.743	33.8755	14.2441	23.082	17.91	32.6576	25.1994	14.546	17.6027			0.639673	22.2205
14.5769	4.676	37.3491	24.071	8.1715	5.341	16.3982	38.754	23.875	27.713	16.359	28.972	30.3111	22.1478	31.619	15.358	36.052	20.5247	15.029	21.9294			0.643722	22.35
14.6686	6.105	43.1345	28.444	8.1846	6.037	16.2792	40.775	29.335	30.48	18.479	26.837	25.3263	14.4524	30.755	15.877	49.1291	18.974	11.07	22.8962			0.647772	23.2932
14.7603	3.269	39.6295	27.061	11.2985	5.26	17.8115	31.037	27.538	21.491	22.762	20.632	29.9502	15.6511	31.047	17.14	62.1916	28.5797	15.424	23.8827			0.651821	23.7714
14.852	4.251	37.4992	32.608	13.0936	5.185	13.0893	27.205	43.03	21.692	20.885	30.548	24.5853	14.8094	43.681	19.683	62.3987	23.1973	16.995	26.2441			0.655871	25.2989
14.9436	4.181	32.5642	31.77	21.82	5.768	15.5057	30.35	44.405	22.836	21.235	30.065	28.7612	16.6171	40.655	21.32	51.5089	22.3971	15.634	22.9189			0.659916	25.2796
15.0353	2.996	34.4335	31.1	17.4417	8.07	18.0693	28.239	43.676	17.574	19.013	28.472	24.6416	18.6927	36.854	23.878	49.985	25.6929	17.196	24.7264			0.663966	24.7764
15.127	2.869	34.7443	26.747	17.8558	6.641	18.1699	26.416	39.3	19.841	20.405	36.621	24.546	23.4862	28.764	23.111	40.0181	20.72	22.931	25.469			0.668015	24.1398
15.2187	1.829	36.2884	31.322	18.6033	7.899	12.169	25.154	37.143	22.079	22.31	49.854	28.7467	21.09	29	27.459	30.4482	18.5734	21.703	26.3244			0.672065	24.6313
15.3104	1.462	37.0663	27.563	20.558	8.876	15.1358	27.186	25.425	26.129	24.594	47.236	32.3499	19.7971	21.915	28.362	31.3577	17.3468	20.381	30.531			0.676114	24.3827
15.402	2.558	38.4636	28.214	19.1219	13.843	16.6725	26.978	26.564	30.072	24.095	43.373	35.5884	25.4855	23.523	20.556	25.2237	19.4341	22.194	23.2596			0.680159	24.4852
15.4937	0.988	33.7659	25.729	22.3109	18.169	19.7272	24.213	22.748	24.995	31.101	29.251	38.7908	24.5315	24.079	15.976	25.2058	19.6104	13.513	26.7625			0.684209	23.2351
15.5854	0.829	24.5976	28.995	28.1092	19.036	24.0967	19.985	24.262	23.383	23.934	27.556	44.9522	22.8435	27.918	16.311	26.0423	27.398	16.28	26.758			0.688258	23.8572
15.6771	0.861	22.2847	24.37	36.8428	19.425	20.9059	23.69	22.884	35.652	29.118	32.392	42.1913	23.8088	22.949	15.229	22.282	24.5434	21.192	22.2676			0.692308	24.3626
15.7687	1.119	20.9559	24.044	42.9614	23.183	21.4974	21.426	31.917	33.732	28.988	32.671	38.8366	35.1827	25.685	16.488	28.167	31.2452	16.774	16.0994			0.696353	25.8407
15.8604	1.397	23.667	21.863	35.0316	25.699	21.8487	23.885	40.453	27.239	39.61	35.406	33.5123	29.7944	32.392	16.938	29.9205	37.4199	21.018	17.9584			0.700402	27.108
15.9521	1.136	25.7635	16.502	31.568	25.936	27.4953	21.594	35.91	27.557	32.194	35.308	34.2037	32.5512	28.69	24.395	26.7855	38.4681	21.57	27.1042			0.704452	27.0911
16.0438	2.442	23.21	19.825	27.2636	23.314	20.5936	22.218	40.677	30.738	31.988	33.563	32.7388	29.3037	31.154	20.983	20.3024	31.6634	20.529	23.3623			0.708501	25.572
16.1355	1.303	18.3464	26.223	25.4826	16.286	22.0331	25.778	32.47	30.285	34.601	29.411	30.5625	30.0439	34.921	19.094	16.6243	33.1848	20.324	19.1771			0.712551	24.5342
16.2271	1.03	12.3612	21.99	20.8485	14.415	27.9378	32.777	23.158	23.001	32.618	33.075	29.308	25.5545	37.894	14.498	13.2028	25.7386	17.272	19.5527			0.716596	22.4333
16.3188	1.407	7.796	26.687	17.4413	10.453	26.3004	39.906	23.755	23.462	32.972	35.413	25.8904	21.7601	37.692	19.19	18.8676	29.8512	24.079	20.062			0.720645	23.315
16.4105	0.552	2.9653	21.432	23.5729	15.374	25.9435	44.344	19.425	23.879	37.152	41.37	26.8855	17.3771	33.005	20.357	17.226	23.1559	25.565	23.4719			0.724695	23.3186
16.5022	1.038	3.4501	21.136	21.9037	19.195	22.9833	34.38	23.816	23.802	34.855	37.12	32.5503	24.6618	32.277	24.506	18.8094	23.1052	23.892	24.9521			0.728744	23.6017
16.5939	0.827	2.7725	13.947	24.4749	17.939	21.7628	26.322	30.07	32.703	36.135	38.068	28.3509	24.8275	35.017	25.67	19.4329	25.5613	19.325	26.4415			0.732794	23.6656
16.6855	0.359	2.8296	16.76	21.0528	13.043	17.6399	35.567	29.489	27.481	40.25	38.003	17.6895	27.7752	32.162	24.904	14.9118	31.9542	23.202	19.4402			0.736839	22.8691
16.7772	0.512	1.7222	11.714	30.6587	17.307	22.193	30.883	31.936	32.495	39.837	33.241	16.9632	34.1983	27.457	21.997	18.3052	34.7173	28.414	19.6256			0.740889	23.904
16.8689	0.645	2.1616	12.122	24.0223	18.446	22.2826	31.341	28.142	37.818	32.219	36.985	15.191	31.387	28.386	22.096	24.832	32.057	30.864	20.2591			0.744938	23.7503
16.9606	0.374	1.0546	11.527	27.7632	18.644	21.8847	29.911	26.25	41.158	29.1	32.758	19.6671	34.2154	28.637	22.119	24.0062	28.4171	28.454	15.0947			0.748988	23.2124
17.0522	1.345	0.9827	9.667	24.1911	17.137	18.4999	26.32	28.786	43.781	27.619	27.401	23.4907	25.2104	25.054	16.539	28.0562	32.8044	21.318	16.7166			0.753033	21.8378
17.1439	0.534	1.6799	7.219	23.453	23.774	17.5925	23.029	31.197	38.849	21.32	20.443	30.8855	30.5761	24.439	21.453	26.6348	31.9077	25.009	17.6169			0.757082	21.9796
17.2356	0.488	0.9917	5.075	22.9701	26.754	17.3195	22.078	25.977	38.966	24.979	22.261	31.8367	16.7338	21.583	28.128	34.063	27.1113	34.569	18.85			0.761132	22.1439
17.3273	0.091	1.7137	3.212	24.5401	29.434	21.726	30.157	23.806	34.962	18.984	28.319	25.9976	18.7787	19.093	20.34	43.6664	31.2819	36.034	24.6721			0.765181	22.9899
17.419	0.573	0.3251	2.192	22.7896	32.597	22.7186	32.812	19.505	33.975	21.15	26.854	25.5471	13.681	16.214	20.054	36.6576	36.1008	33.594	28.1255			0.769231	22.3929
17.5106	0.644	0.4517	2.115	23.9878	32.21	25.3772	32.118	18.779	28.322	21.322	37.919	24.406	14.4898	21.503	18.663	33.1233	29.8354	25.979	29.6414			0.773276	22.1519
17.6023	0.218	0.3712	2.064	19.0736	26.906	18.1774	35.445	16.544	29.548	16.871	33.211	15.0231	15.9128	15.897	17.498	32.9927	32.0528	31.052	30.5525			0.777325	20.4953
17.694	0.606	0.2335	0.838	17.005	23.239	14.0126	36.395	18.383	28.398	17.726	32.662	17.8412	19.5406	21.934	16.236	36.0441	34.1012	32.432	38.2957			0.781375	21.3644
17.7857	0.145	0.2022	0.684	15.6873	23.198	4.1584	23.899	17.929	34.146	14.679	31.053	24.5622	22.8304	26.136	16.695	38.9773	29.1883	35.827	40.9942			0.785424	21.1048
17.8774	0.195	0.1894	0.67	14.7299	19.667	2.3261	13.717	23.524	25.956	19.365	26.07	24.0589	17.814	26.226	21.335	33.8688	24.0119	34.56	38.4776			0.789474	19.3032
17.969	0.191	0.9042	1.068	16.1849	17.177	1.9065	11.895	16.29	22.702	18.6	30.45	25.9071	18.2557	26.765	24.931	27.2197	23.1774	33.773	40.9393			0.793519	18.8598
18.0607	0.339	0.2977	0.297	15.1743	25.397	2.0979	8.151	11.059	20.002	15.446	40.27	13.8644	23.3067	30.778	24.313	25.8326	19.2665	35.052	30.2393			0.797569	17.957
18.1524	0.506	0.4968	0.051	14.9848	24.546	1.3416	3.157	8.56	21.295	22.586	54.764	6.3713	26.4605	36.507	22.575	22.4315	16.307	45.306	23.6881			0.801618	18.5229
18.2441	0.773	0.2268	0.546	19.1179	14.766	0.6053	2.892	5.587	18.289	17.026	45.65	1.8157	23.75	38.695	24.952	19.0834	20.3418	34.12	27.8968			0.805668	16.6386
18.3358	0.162	1.3175	0.649	15.4682	6.188	0.91	1.827	4.238	16.446	18.849	31.061	2.3134	33.9784	23.839	30.605	26.9898	20.6236	23.468	24.078			0.809717	14.8953
18.4274	0.245	0.4078	0.084	12.1486	3.052	0.8305	1.803	3.514	19.718	16.737	15.677	3.0551	36.2453	24.893	29.334	30.303	24.9219	23.899	26.4417			0.813762	14.3847
18.5191	0.642	0.1004	0.36	8.0203	2.112	0.545	1.378	1.586	22.925	15.203	9.64	1.5548	33.9853	28.974	22.184	28.0791	20.3745	19.606	33.2346			0.817812	13.1844
18.6108	0.664	0.1011	0.278	4.6845	1.556	1.2235	1.078	2.128	25.601	17.595	4.835	0.8405	25.6362	27.862	18.709	30.8871	20.5343	20.918	35.6429			0.821861	12.6723
18.7025	0.317	0.1604	0.143	4.5314	1.632	1.1697	0.429	1.683	20.586	16.479	2.117	2.1228	19.6358	29.558	18.845	26.2443	22.6347	23.694	32.2361			0.825911	11.801
18.7941	0.457	0.3418	0.184	1.613	0.454	0.8684	0.85	0.78	11.462	10.335	2.906	0.3776	13.4242	29.542	18.472	23.6826	22.3667	21.875	23.5311			0.829956	9.65907
18.8858	0.058	0.0181	0.262	1.6634	0.411	0.7752	0.097	1.378	10.191	9.383	1.304	0.6037	10.4008	29.818	15.165	25.0191	24.0159	21.751	20.1412			0.834005	9.0766
18.9775	0.622	0.1111	0.081	0.9152	1.487	0.5352	0.122	0.605	8.283	3.134	0.569	0.7599	8.5907	20.886	16.438	28.9083	23.2946	29.917	21.2219			0.838055	8.76215
19.0692	0.307	0.1023	0.292	0.7474	1.136	0.4005	0.073	0.412	6.773	2.733	1.117	0.9208	5.9492	16.39	25.453	38.4218	21.8245	35.335	26.7113			0.842104	9.74204
19.1609	0.16	0.1639	0.288	0.2715	0.728	0.4914	0.21	1.094	5.658	1.839	0.893	0.2161	3.2536	19.646	27.809	38.2751	24.3411	30.3	23.7838			0.846154	9.44324
19.2525	0.013	0.2117	0.031	0.2627	0.789	0.9524	0.097	0.389	2.665	1.817	1.274	0.0478	1.6605	19.542	26.8	26.2497	29.8313	26.612	29.0928			0.850199	8.85989
19.3442	0.199	0.0675	0.301	1.4626	0.161	0.2959	0.83	0.281	1.502	1.141	1.273	0.3109	1.1533	29.602	23.926	29.9733	25.7494	18.733	24.4618			0.854248	8.49598
19.4359	0.068	0.0593	0.085	0.3501	0.015	0.5654	0.246	0.377	0.89	1.382	0.71	0.385	1.0343	33.27	20.068	28.1806	17.2983	16.933	22.1842			0.858298	7.58427
19.5276	0.149	0.4799	0.003	0.3625	0.034	0.2227	0.604	0.645	1.092	1.496	1.095	0.5555	0.8008	40.109	21.942	29.1759	14.9466	10.227	13.3279			0.862347	7.22462
19.6193	0.053	0.2725	0.42	0.1936	1.46	0.3603	0.321	0.902	1.585	1.748	0.977	0.4991	0.7042	35.927	19.504	33.1101	15.7473	5.804	10.7525			0.866397	6.86003
19.7109	0.166	0.3211	0.46	0.6181	0.497	0.0971	0.2	0.557	0.363	1.547	0.289	0.5857	0.556	28.437	19.288	27.6249	13.4409	5.236	7.5252			0.870442	5.67416
19.8026	0.103	0.0438	0.317	0.0772	0.009	0.6188	0.063	0.481	0.454	1.437	0.295	0.4854	0.7618	19.137	26.358	29.4147	8.5102	3.509	5.4748			0.874492	5.13419
19.8943	0.107	0.1035	0.08	0.3671	0.065	0.9273	0.178	0.608	0.329	1.468	0.449	0.2754	0.1619	13.763	22.225	27.8004	5.3841	3.185	3.8561			0.878541	4.28067
19.986	0.453	0.1645	0.275	0.6575	0.157	0.4228	0.236	0.097	0.709	1.201	0.511	0.0206	0.3198	9.7	23.4	26.5149	7.3971	2.387	2.7767			0.882591	4.07368
20.0777	0.239	0.2453	0.004	0.6025	0.032	0.0178	0.223	0.904	0.653	0.689	0.055	0.5182	1.2635	5.418	24.784	32.5689	4.6199	1.494	1.4783			0.88664	3.98997
20.1693	0.262	0.1927	0	0.9844	0.008	0.3058	0.236	0.027	0.694	0.203	0.346	0.1806	1.2173	4.143	19.288	34.0912	4.2922	2.891	1.0725			0.890685	3.70709
20.261	0.894	0.584	0	0.8754	0.186	0.026	0.317	0.151	0.47	0.384	0.144	0.5601	0.7583	3.336	9.229	37.3241	2.1406	1.087	1.2965			0.894735	3.14542
20.3527	0.415	0.0446	0.005	0.0298	0.377	0.0728	0.05	0.466	0.361	1.526	0.265	0.0722	0.2907	1.8	6.057	27.7424	1.6231	1.538	2.2561			0.898784	2.36798
20.4444	0.011	0.018	0.444	0.0469	0.028	0.3592	0.471	0.391	0.21	0.247	0.146	0.0528	0.1206	2.08	3.772	23.3172	1.7966	1.256	0.8168			0.902834	1.87285
20.536	0.223	0.2707	0.056	0.0096	0.461	0.2382	0.209	0.547	0.143	0.409	0.296	0.4405	0.4172	2.226	1.632	21.6523	1.3811	0.932	0.6211			0.906879	1.69288
20.6277	0.495	0.0225	0.546	0.1244	0.216	0.4368	0.51	0.186	0.326	0.206	0.542	0.2118	0.942	1.583	1.115	18.5206	0.9115	0.334	1.3632			0.910928	1.50483
20.7194	0.449	0.239	0.208	0.2039	0.037	0.0386	0.429	0.186	0.055	0.026	0.004	0.3808	0.1325	1.063	0.552	24.8859	0.9261	0.441	1.0076			0.914978	1.64549
20.8111	0.099	0.0548	0.02	0.0477	0.006	0.2097	0.208	0.017	0.347	0.064	0.348	0.3556	0.248	1.558	1.136	24.3737	1.2811	0.697	0.2641			0.919027	1.64919
20.9028	0.069	0.0008	0.442	0.0158	0.115	0.1212	0.105	0.089	0.559	0.064	0.118	0.3247	0.0126	0.506	1.662	34.0913	0.7947	0.754	0.7862			0.923077	2.13844
20.9944	0.166	0	0.075	0.2533	0.53	0.2237	0.003	0.022	0.146	0.366	0.232	1.2216	0.2096	0.246	1.275	29.8677	1.2437	0.613	0.539			0.927122	1.95961
21.0861	0.055	0.0075	0.149	0.1051	0.459	0.3384	0.053	0.037	0.329	0.486	0.105	0.6689	0.015	0.831	0.569	16.0465	1.0758	0.663	0.4513			0.931172	1.18129
21.1778	0.002	0.6653	0	0.1036	0.162	0.0619	0.147	0.463	0.406	0.216	0	0.3454	0.3141	0.599	0.726	7.6313	0.3199	0.244	0.4326			0.935221	0.675742
21.2695	0.22	0.1605	0	0.1879	0.196	0.559	0.093	0.299	0.284	0.069	0.094	0.2283	0.1717	0.425	0.392	5.4833	0.1573	0.373	0.2158			0.939271	0.505726
21.3612	0.047	0.3664	0.182	0.0349	0.185	0.4361	0.149	0.399	0.108	0.004	0.074	0.1449	0.5535	0.147	0.733	2.557	0.5161	0.106	0.7592			0.94332	0.394847
21.4528	0.15	0.0945	0.429	0.0565	0.164	0	0	0.025	0.298	0.416	0.208	0.0723	0.1439	0.293	0.391	1.5866	0.3982	0.114	0.3118			0.947365	0.271147
21.5445	0.249	0.0119	0.013	0.1649	0.179	0.218	0.501	0	0.453	0.401	0.687	0.3632	0.0126	0.852	0.584	1.7875	0.62	0.892	0.1855			0.951415	0.430242
21.6362	0.054	0.4504	0.457	0.0965	0.139	0.0291	0.3	0	0.076	0.518	0.007	0.1108	0.1343	0.619	0.991	1.193	0.1964	0.112	0.2299			0.955464	0.300705
21.7279	0	0.4333	0.196	0.0149	0.033	0.1213	0.249	0.365	0.3	0.492	0.517	0.2228	0.1931	0.254	0.556	1.5546	0.1152	0.724	0.2429			0.959514	0.346532
21.8195	0	0.0515	0.174	0.0149	0.339	0.1566	0.06	0.859	0.093	0.892	0.094	0.3404	0.1557	0.236	0.368	1.8068	0.4785	0.292	0.2178			0.963559	0.348905
21.9112	0	0.0647	0.185	0.1518	0.085	0	0.103	0.989	0.744	0.311	0	0.0238	0.0171	0.09	0.247	1.1885	0.1743	0	0.0403			0.967608	0.232342
22.0029	0.096	0.0896	0.6	0	0	0.0137	0.032	1.012	0.578	0.098	0.22	0	0.2996	0.255	0.418	0.7862	0.4574	0.208	0.1981			0.971658	0.282189
22.0946	0.096	0.0708	0.738	0	0	0.8425	0.198	0.581	0.087	0.092	0.053	0.0896	0.4781	0.082	0.168	1.2228	0.1733	0.064	0.5273			0.975707	0.292811
22.1863	0.633	0.0936	0	0	0.278	0.1638	0.001	0.445	0.387	0.019	0.266	0.0265	0.0876	0.145	0.17	0.5854	0.4324	0.005	0.2691			0.979757	0.210916
22.2779	0.533	0.2435	0.269	0.3072	0.086	0.0366	0.11	0.074	0.162	0.003	0.295	0.2087	0.3476	0.28	0.155	0.6427	0.4235	0.003	0.5687			0.983802	0.249921
22.3696	0.276	0.1527	0.009	0.1338	0.154	0.0065	6.489e-05	0.247	0.133	0.33	0.141	0.0085	0.0654	1.064	0.38	0.2915	0.3282	0.324	0.1596			0.987851	0.221277
22.4613	0.221	0.0164	0	0.0539	0.319	0.1077	0.303	0.039	0.257	0.263	0.025	0.2412	0.1924	0.382	0.298	0.8244	0.3594	0.069	0.262			0.991901	0.222811
22.553	0.034	0.046	0.162	0.0051	0.586	0.0028	0.129	0	0.631	0.396	0.003	0.0883	0.0798	0.183	0.362	0.3388	0.375	0.227	0.0813			0.99595	0.196321
22.6447	0	0.0231	0.005	0.0045	0.323	0	0.015	0.161	0.067	0.064	0.237	0.3755	0.1206	0.296	0.017	0.4003	0.0657	0.598	0.3623			1	0.165

## Sheet: Image1
X0	Y0	Y1	Y2	Y3	Y4	Y5	Y6	Y7	Y8	Y9	Y10	Y11	Y12	Y13	Y14	Y15	Y16	Y17	Y18			Ap-Basal to 1	Average intensities
0	28.447	39.247	59.549	35.566	30.219	20.978	37.48	45.236	23.2894	33.583	21.5	28.545	23.395	33.396	48.2155	38.124	31.194	32.088	58.7581			0	35.2005
0.0917	28.072	46.851	48.514	40.079	33.408	23.458	32.184	45.672	24.3194	43.6487	25.38	26.08	29.515	28.729	50.9788	56.433	37.977	27.759	69.7835			0.0048555	37.8338
0.1834	35.634	31.399	44.045	43.69	40.901	30.274	37.068	61.344	24.3848	62.0289	30.417	25.34	29.624	33.448	51.5024	59.142	43.245	22.513	67.9401			0.009711	40.7337
0.275	44.075	33.77	50.401	45.947	40.254	34.448	37.764	53.521	27.6983	59.9263	27.156	31.093	29.082	34.562	53.9833	68.95	44.905	29.656	67.2171			0.0145612	42.8636
0.3667	48.252	34.772	40.119	45.11	49.352	36.296	35.243	52.476	26.9641	51.4006	30.316	42.313	36.586	39.193	44.9709	80.793	46.747	35.942	70.9303			0.0194167	44.6198
0.4584	40.243	41.076	49.059	58.23	53.973	42.921	40.742	54.206	29.6185	39.5392	35.555	48.953	37.114	43.024	47.2378	81.937	36.813	34.643	88.2954			0.0242722	47.5358
0.5501	53.278	33.787	76.108	59.665	61.302	47.988	47.942	75.485	32.7677	40.3979	43.162	61.798	39.674	41.285	40.1124	85.502	37.751	47.515	88.6627			0.0291277	53.378
0.6418	75.333	29.4	90.288	64.732	63.498	51.647	58.69	76.602	31.405	29.9225	48.415	78.17	50.391	55.464	38.4868	84.228	44.883	42.592	87.9834			0.0339832	58.0069
0.7334	91.537	36.834	96.047	97.788	89.902	53.23	65.176	85.427	32.7597	32.6219	51.293	91.195	53.182	49.301	39.6351	80.273	41.975	50.027	82.6013			0.0388334	64.2529
0.8251	88.004	43.268	94.79	105.362	102.521	46.284	66.061	101.322	33.8982	34.8725	64.837	79.854	73.866	62.416	39.9185	87.883	49.452	54.266	81.2012			0.0436889	68.9514
0.9168	93.933	54.613	119.287	125.268	138.583	61.312	76.856	102.542	33.0885	39.5067	63.516	86.574	79.076	62.024	39.1305	90.265	53.541	57.131	75.4384			0.0485444	76.4045
1.0085	123.526	71.984	134.873	127.288	132.999	68.577	93.94	119.021	40.7532	43.9269	63.137	91.387	101.725	73.334	45.9983	108.881	48.003	50.153	74.0907			0.0533999	84.9262
1.1001	160.144	92.223	128.505	135.26	118.086	73.045	108.289	126.873	51.5718	46.6469	73.711	95.968	112.388	77.409	46.4837	132.065	62.355	61.924	73.9413			0.0582501	93.5205
1.1918	172.286	108.338	115.746	132.621	139.861	77.914	103.518	116.767	46.945	41.6606	83.3	93.063	134.854	80.519	42.4012	159.536	67.354	82.301	69.4709			0.0631056	98.3398
1.2835	192.321	119.468	100.346	134.656	156.231	84.312	108.403	113.736	57.086	40.9255	105.698	93.693	158.731	73.085	38.2076	137.401	66.519	91.318	65.6598			0.0679611	101.989
1.3752	208.392	141.077	104.906	152.361	159.751	84.04	102.548	112.058	51.7516	52.6275	105.158	95.089	165.924	72.152	46.142	101.408	74.33	94.751	59.9604			0.0728166	104.443
1.4669	203.536	181.043	93.081	164.011	147.716	102.03	85.694	110.075	46.4002	46.6845	104.85	95.238	159.695	60.531	42.4775	76.72	64.544	108.033	52.7544			0.0776721	102.374
1.5585	181.672	182.619	85.923	159.709	139.051	107.116	107.701	122.843	58.6643	43.8523	99.227	103.869	160.243	61.618	42.7753	67.855	72.214	118.282	52.8368			0.0825223	103.583
1.6502	158.468	166.169	100.276	156.738	118.992	103.763	118.01	100.969	50.6793	50.2036	92.705	82.194	138.863	61.122	42.4687	58.169	79.945	104.925	46.9148			0.0873778	96.3987
1.7419	164.628	137.908	117.848	135.131	111.102	106.014	117.43	85.368	47.9517	53.4328	93.705	87.088	121.69	80.483	41.5772	55.035	81.615	101.567	51.9912			0.0922333	94.2929
1.8336	176.693	123.772	130.423	114.894	104.45	122.317	102.496	79.769	46.9078	40.479	95.861	80.77	123.198	81.965	46.4197	68.587	70.879	90.677	53.3596			0.0970888	92.3114
1.9253	155.638	111.387	142.244	108.754	103.522	105.134	85.29	80.776	38.0996	36.5144	86.704	70.2	116.236	85.466	50.0954	73.419	67.66	70.09	55.9209			0.101944	86.4816
2.0169	116.805	158.175	115.361	111.632	79.634	100.172	64.102	85.213	41.2417	43.3798	86.812	75.003	111.315	102.494	52.2703	72.493	70.208	73.633	57.796			0.106795	85.1442
2.1086	86.767	159.236	99.989	118.738	61.977	86.481	73.209	94.941	42.9755	42.6389	81.572	63.697	116.405	93.099	50.3889	66.688	82.029	71.164	64.4215			0.11165	81.9167
2.2003	70.6	158.04	83.944	130.154	62.191	84.652	71.837	95.144	43.0911	50.6064	76.272	70.739	122.822	88.252	50.0153	59.062	84.403	84.415	68.7946			0.116506	81.8439
2.292	70.519	148.475	84.757	107.361	76.422	66.673	82.423	103.95	31.2374	54.5779	68.219	59.638	113.613	81.01	45.5191	74.585	110.977	79.635	67.4004			0.121361	80.368
2.3836	73.402	138.42	78.481	75.218	86.369	50.438	90.36	99.984	27.6106	53.2112	60.919	63.524	119.889	81.63	46.1252	78.389	123.03	75.215	68.9655			0.126211	78.4832
2.4753	64.843	150.209	80.678	63.218	72.61	41.826	81.91	93.681	24.0685	39.6175	49.16	46.527	127.957	79.98	35.5963	78.973	116.534	67.113	67.5795			0.131067	72.7411
2.567	68.109	135.964	79.312	59.109	69.745	57.214	77.72	120.193	32.7995	40.6557	43.238	38.826	120.153	72.027	39.058	81.819	112.939	57.788	55.59			0.135922	71.6979
2.6587	61.909	142.053	95.982	66.36	60.088	78.358	68.311	105.837	31.7048	41.4995	39.517	35.995	98.434	51.199	43.9622	84.14	99.087	56.55	55.0459			0.140778	69.2649
2.7504	51.53	128.64	119.226	63.052	73.195	67.856	63.599	74.018	34.7274	42.1168	32.689	31.596	77.092	50.062	52.8774	72.187	102.685	52.063	49.5328			0.145633	65.1971
2.842	58.401	101.245	101.569	69.611	77.766	55.471	60.876	60.858	30.724	42.7602	30.185	28.906	71.52	48.779	52.9016	69.656	129.866	52	50.1105			0.150483	62.8003
2.9337	44.63	92.267	74.009	75.352	72.838	44.96	49.336	48.124	30.2157	34.9712	28.2	30.052	54.274	66.035	47.0308	67.403	119.17	49.431	45.8203			0.155339	56.5326
3.0254	32.776	80.317	68.058	78.968	60.263	37.143	44.341	45.478	26.6251	29.4588	25.395	32.247	48.319	49.845	40.1959	54.895	100.456	45.373	40.8925			0.160194	49.5288
3.1171	26.466	64.604	47.127	82.427	52.707	35.547	40.88	34.339	26.2661	23.1158	34.221	25.999	43.304	55.388	32.8878	50.126	87.239	52.075	45.3469			0.16505	45.2666
3.2088	29.091	65.188	28.874	75.981	55.102	35.158	39.259	45.453	28.5712	24.5421	30.393	25.508	36.709	50.507	32.692	47.757	80.345	46.767	45.8682			0.169905	43.3561
3.3004	28.979	60.593	26.196	56.551	53.305	27.808	31.809	39.144	25.424	35.5206	27.11	26.767	38.205	49.989	35.7654	44.615	81.695	52.709	35.0678			0.174756	40.908
3.3921	25.297	61.876	22.024	45.558	54.433	24.689	40.982	32.743	32.7132	43.3223	24.074	32.511	30.817	54.133	33.6169	46.994	78.032	42.28	29.6252			0.179611	39.7748
3.4838	30.935	58.52	29.435	43.694	53.77	31.064	33.081	32.649	50.1279	49.916	23.964	32.386	32.575	44.215	27.9837	52.269	73.966	31.874	23.9388			0.184467	39.8086
3.5755	22.439	46.287	25.987	41.234	49.934	26.85	43.096	28.532	44.8459	51.7822	20.82	40.981	32.144	53.412	17.1962	58.291	70.458	30.215	27.6669			0.189322	38.5353
3.6672	27.375	46.443	21.456	42.023	45.715	22.898	37.191	30.847	42.1158	49.2669	29.353	63.469	28.119	42.491	24.4342	52.34	48.343	29.61	27.9595			0.194178	37.4447
3.7588	30.762	41.253	22.781	40.919	58.025	26.82	44.645	42.433	41.7144	42.7402	33.288	58.477	24.153	38.875	24.5935	53.628	46.735	26.427	26.6678			0.199028	38.1546
3.8505	31.622	36.81	22.49	37.417	55.999	22.302	43.74	28.498	30.0404	39.843	34.318	57.476	34.21	43.048	31.6052	48.37	44.95	25.994	20.4777			0.203883	36.2742
3.9422	35.166	33.659	21.79	38.684	54.49	26.388	45.402	37.567	28.4017	37.503	28.181	44.083	28.282	43.604	32.8084	47.966	49.555	25.48	15.1672			0.208739	35.483
4.0339	33.331	29.684	19.5	34.454	51.023	25.14	43.777	32.578	27.024	29.1276	32.926	43.338	29.85	47.754	42.5146	39.952	58.866	25.281	17.2463			0.213594	34.914
4.1255	32.96	34.95	27.833	32.689	46.986	28.461	45.981	26.611	32.795	23.8878	26.627	24.789	35.098	61.007	54.6988	35.548	56.631	24.821	16.1937			0.218445	35.1878
4.2172	33.819	27.04	31.559	36.229	47.669	30.85	34.259	27.664	23.0975	16.5027	26.695	31.018	34.153	78.879	48.5195	41.514	55.57	21.072	18.0668			0.2233	34.9567
4.3089	40.203	38.877	32.278	37.757	37.852	29.545	29.294	23.644	22.2234	21.6092	26.172	29.523	44.436	88.531	43.4108	46.3	61.895	24.011	21.0686			0.228156	36.77
4.4006	49.237	47.497	26.035	32.138	36.025	27.045	30.473	20.759	23.5878	23.9903	26.418	24.815	47.729	80.764	28.8503	45.957	62.889	23.43	17.2353			0.233011	35.5197
4.4923	53.303	49.12	29.706	27.966	36.959	32.641	31.322	22.39	22.4552	26.8748	31.839	20.823	53.747	74.034	21.5116	52.73	67.962	22.216	24.954			0.237867	36.9765
4.5839	55.256	38.264	31.416	28.074	33.045	27.116	28.91	32.551	26.3513	26.1738	21.467	20.812	47.363	69.726	23.1661	59.118	67.287	17.808	25.1613			0.242717	35.7403
4.6756	70.416	47.782	29.956	27.446	46.109	23.973	20.393	30.492	25.631	26.8708	20.501	21.978	44.781	67.449	24.2793	59.778	56.933	19.569	26.3338			0.247572	36.3511
4.7673	67.224	41.31	37.59	31.569	35.549	25.289	24.073	29.978	28.4008	28.77	25.889	23.519	45.256	61.448	20.7194	73.626	49.44	18.127	27.8211			0.252428	36.6104
4.859	64.629	52.589	42.653	21.642	43.051	25.644	25.828	22.063	15.2578	29.4262	20.874	19.592	28.896	56.432	24.3768	63.517	44.095	23.225	37.6914			0.257283	34.8149
4.9507	44.291	37.524	44.21	22.695	29.219	22.336	24.66	21.606	15.041	27.5719	22.685	20.883	29.075	44.179	25.9157	53.44	35.344	16.678	33.9697			0.262139	30.0696
5.0423	39.214	29.954	32.159	23.356	34.802	26.325	27.576	20.545	16.5625	33.2663	18.533	23.748	32.588	35.085	30.9045	49.403	33.09	12.052	32.4827			0.266989	29.034
5.134	32.726	31.586	33.725	25.598	29.981	27.33	24.477	23.108	24.0748	23.3799	19.67	27.38	32.064	31.219	30.6999	50.426	33.543	15.434	37.7355			0.271844	29.1662
5.2257	33.436	25.448	19.826	22.436	26.651	31.639	18.932	21.081	18.3422	22.9143	14.949	37.425	33.093	31.98	23.3935	42.499	35.765	12.625	35.2604			0.2767	26.7208
5.3174	28.535	22.515	21.913	36.649	26.023	23.67	27.075	26.123	23.6102	17.7959	17.093	40.191	24.452	27.512	23.3313	40.446	28.213	17.802	36.0186			0.281555	26.7878
5.409	26.965	27.393	19.141	44.466	28.643	22.554	38.52	25.639	25.9917	23.7722	15.225	43.125	23.209	40.485	21.8601	42.869	24.304	30.854	36.0105			0.286406	29.5277
5.5007	23.846	21.765	27.32	41.805	45.73	33.475	28.588	25.955	26.3457	24.1879	19.633	45.822	14.956	40.717	29.0287	34.795	20.676	33.862	46.7399			0.291261	30.8025
5.5924	30.076	23.534	27.179	40.613	53.203	30.332	25.954	22.486	30.7956	20.68	17.541	42.486	17.9	44.307	26.4051	37.048	26.303	32.846	47.3815			0.296117	31.4247
5.6841	29.793	24.239	26.962	38.279	46.604	24.125	19.201	24.072	30.8682	20.9944	17.79	31.856	19.766	49.778	35.8721	25.22	33.082	25.402	55.7471			0.300972	30.5079
5.7758	24.882	23.071	26.29	42.763	34.224	27.49	22.301	18.173	17.0848	24.239	23.416	29.18	14.711	64.738	31.3409	34.209	30.682	25.146	72.7356			0.305828	30.8777
5.8674	20.549	20.525	25.424	36.066	35.779	30.93	26.133	25.045	25.3715	31.5535	29.039	25.027	15.929	59.358	30.3765	26.813	37.871	18.291	63.03			0.310678	30.69
5.9591	17.796	22.576	18.513	27.872	31.879	23.808	24.111	24.841	22.6091	24.5846	24.441	19.019	20.548	57.217	23.9334	38.125	31.079	16.392	60.4406			0.315533	27.8834
6.0508	16.759	27.231	20.891	21.832	25.286	27.379	25.661	26.647	24.9309	20.7065	26.576	20.775	28.419	63.327	29.3247	31.488	26.279	16.579	48.4267			0.320389	27.8167
6.1425	23.564	20.535	20.89	20.594	21.457	31.423	26.841	30.071	21.9867	22.6317	27.176	20.026	21.655	73.22	36.5725	35.058	19.266	19.342	39.0465			0.325244	27.9661
6.2342	18.176	17.973	23.055	30.902	21.712	26.858	28.588	26.076	25.5578	16.403	22.062	17.404	23.406	81.681	30.1932	36.951	26.283	21.65	44.9758			0.3301	28.4161
6.3258	15.101	19.747	23.911	35.209	17.542	25.184	24.211	24.428	22.2444	19.969	21.578	16.4	27.782	76.885	26.3402	31.249	26.997	18.777	38.8104			0.33495	26.9666
6.4175	15.027	20.357	27.982	31	19.041	29.119	32.84	23.988	26.3065	23.6225	20.347	16.961	20.883	72.985	28.8416	27.25	37.525	15.174	48.0735			0.339806	28.2802
6.5092	14.958	23.392	21.276	25.777	22.64	30.208	29.393	24.345	24.3042	19.1542	22.433	10.026	18.447	71.287	28.2044	33.524	35.125	12.434	45.8528			0.344661	26.9885
6.6009	14.151	23.907	18.806	23.835	19.377	27.263	25.837	19.973	22.1539	22.2753	19.87	14.227	22.045	64.401	26.2348	30.623	36.802	18.635	40.6069			0.349517	25.8433
6.6925	10.006	16.854	23.159	23.55	22.449	24.335	30.002	16.412	18.6829	17.5085	21.924	11.574	28.845	57.492	17.2708	27.37	25.742	18.547	37.3499			0.354367	23.6354
6.7842	15.005	26.691	26.752	29.44	20.198	25.051	28.621	15.152	16.1845	18.4001	24.708	8.907	31.574	48.041	22.4218	33.4	28.788	16.857	35.4851			0.359222	24.8251
6.8759	14.971	22.887	33.567	31.66	20.979	28.178	24.689	16.359	18.4077	14.6844	18.888	14.238	25.007	49.257	21.5719	27.988	31.951	15.8	30.9218			0.364078	24.316
6.9676	16.98	24.902	28.391	23.081	17.839	30.466	28.709	25.245	14.8634	14.3927	18.556	12.121	21.871	38.99	20.6371	34.989	31.551	8.92	27.5333			0.368933	23.1599
7.0593	16.275	25.871	28.405	21.914	23.234	44.839	28.368	17.298	20.1663	11.4884	13.47	6.245	17.817	30.501	20.5264	30.538	31.864	8.383	29.7977			0.373789	22.4737
7.1509	18.53	22.174	34.073	16.122	18.848	39.624	22.439	16.553	16.1224	15.6946	13.87	9.035	14.271	28.331	20.7387	27.965	32.361	9.309	33.5185			0.378639	21.5568
7.2426	14.571	18.296	39.075	10.807	17.12	34.808	19.219	20.977	23.4704	14.3204	14.083	7.214	13.529	24.913	21.9051	24.793	31.673	9.982	24.6055			0.383494	20.2822
7.3343	11.889	16.828	31.773	9.881	27.051	31.744	14.741	25.013	42.1143	18.2601	13.182	12.427	14.588	21.64	21.9433	26.125	26.609	11.992	18.1872			0.38835	20.8415
7.426	14.67	23.953	26.985	10.242	24.824	35.189	29.04	28.851	40.9546	18.5494	8.428	9.828	12.187	23.763	20.4996	31.043	22.683	8.828	10.2928			0.393205	21.0953
7.5177	14.526	14.642	25.992	15.345	32.719	21.217	31.252	30.555	24.7108	25.7245	11.285	10.061	18.038	26.576	23.9425	25.251	21.989	9.028	14.1495			0.398061	20.8949
7.6093	10.827	21.738	25.118	13.747	22.194	29.406	28.955	27.511	18.8421	21.0748	10.464	7.149	19.078	26.409	24.2828	23.543	22.733	8.782	10.6945			0.402911	19.6078
7.701	13.322	21.209	29.814	16.425	23.163	29.568	23.774	26.701	13.8887	19.5091	10.542	9.09	24.378	29.791	23.2551	24.056	26.615	7.786	12.3287			0.407767	20.2745
7.7927	13.41	22.753	20.987	15.693	29.178	29.062	22.375	32.446	11.501	22.4271	9.656	8.91	16.697	22.923	21.8095	21.693	21.156	6.307	16.6601			0.412622	19.2444
7.8844	13.288	26.314	25.774	11.467	28.201	22.832	20.234	25.937	14.2729	22.9659	10.431	8.923	22.26	18.471	14.222	20.018	20.808	7.043	14.0011			0.417478	18.2875
7.9761	12.207	28.472	31.077	12.321	31.779	28.349	23.936	26.569	12.1923	20.4935	14.122	14.422	21.166	13.557	17.9489	22.322	15.938	9.225	12.4978			0.422333	19.3997
8.0677	11.48	29.368	29.737	15.432	40.668	29.781	21.007	29.044	15.3396	19.7681	16.024	9.085	17.915	12.316	25.3581	29.478	16.871	10.04	12.586			0.427183	20.5946
8.1594	12.72	28.998	26.44	18.823	26.226	30.686	27.752	24.663	15.1086	17.4781	13.948	13.258	18.25	14.918	23.1084	23.893	20.579	6.424	9.0476			0.432039	19.5958
8.2511	8.452	22.203	27.971	22.764	25.807	33.022	26.695	25.178	17.7103	22.6134	19.957	15.005	22.416	14.563	30.7839	24.954	21.781	7.708	9.507			0.436894	21.0048
8.3428	4.518	25.444	25.952	26.266	27.021	42.01	28.514	28.297	21.6168	22.9851	28.227	17.916	17.719	17.335	34.2602	19.618	22.1	5.882	8.0431			0.44175	22.3013
8.4344	5.62	23.741	27.26	27.861	23.072	29.124	29.415	26.7	23.8959	21.8933	43.208	24.274	14.211	26.696	23.638	19.125	35.348	9.064	13.4633			0.4466	23.5584
8.5261	4.319	27.4	24.186	24.435	31.299	30.261	38.827	26.293	22.2089	27.4255	40.217	26.15	17.708	28.911	25.7445	23.411	23.712	5.458	10.6852			0.451456	24.1395
8.6178	5.563	23.751	29.926	19.426	34.892	28.584	31.577	31.034	28.8211	25.8485	36.026	27.871	15.48	20.874	29.9265	21.785	28.561	6.11	6.8421			0.456311	23.8367
8.7095	6.219	20.169	30.895	15.729	35.266	26.46	23.687	29.222	23.0987	22.2854	23.767	19.062	19.446	18.681	24.2474	22.767	24.81	10.251	7.5584			0.461167	21.2432
8.8012	7.173	20.376	23.211	15.123	52.65	26.178	27.598	28.384	17.2937	24.4575	27.519	15.715	20.44	20.003	26.2907	24.92	20.432	8.937	8.1494			0.466022	21.8342
8.8928	8.158	19.748	20.517	11.535	50.084	25.439	24.599	20.433	15.2526	26.7233	29.198	9.87	24.637	21.794	23.5425	18.904	16.265	9.996	11.1909			0.470872	20.4151
8.9845	8.477	32.991	20.778	8.917	48.884	23.202	23.117	23.631	15.1887	35.4703	25.148	8.968	17.371	26.06	30.9599	21.917	19.885	14.17	10.8725			0.475728	21.8951
9.0762	17.446	39.838	23.352	6.506	39.172	26.58	22.412	23.468	13.2863	29.8597	20.865	11.45	21.777	22.16	32.3074	26.152	19.932	11.109	8.3405			0.480583	21.8954
9.1679	25.603	36.386	22.061	11.22	39.058	28.686	15.413	30.195	13.0295	27.7172	17.576	10.642	21.568	24.86	32.3546	26.275	20.479	9.535	7.3157			0.485439	22.1039
9.2596	14.065	47.723	22.901	10.34	41.849	33.672	17.584	22.963	13.7657	20.2313	20.191	13.797	11.444	22.167	26.0803	33.299	21.86	9.512	9.0592			0.490294	21.7107
9.3512	9.06	39.121	20.545	9.539	31.252	31.919	21.371	22.816	15.4502	18.9468	14.997	12.894	15.262	24.193	23.5298	26.091	23.196	9.072	9.2179			0.495145	19.9196
9.4429	6.338	35.643	22.863	8.921	22.532	28.565	16.581	21.77	18.6732	22.1798	13.583	11.43	11.516	27.698	15.5019	27.941	20.223	11.108	8.6826			0.5	18.5131
9.5346	7.996	37.49	22.544	12.203	19.31	18.254	14.889	25.203	19.1451	28.746	13.676	16.012	7.153	31.016	20.1762	21.81	21.472	15.114	10.8509			0.504855	19.1084
9.6263	6.097	39.036	23.649	15.245	19.961	20.629	15.176	25.146	16.5657	31.1031	14.834	9.392	8.371	27.533	20.5371	19.529	24.246	16.359	6.2815			0.509711	18.9311
9.7179	3.109	27.547	26.564	17.965	20.228	27.435	23.09	27.866	23.1882	29.8694	16.704	11.225	7.297	24.278	17.6892	18.489	29.84	16.644	14.6852			0.514561	20.1954
9.8096	5.742	38.054	21.728	20.563	31.82	28.335	23.267	25.783	23.7352	27.6083	13.701	7.46	8.288	24.639	14.0027	21.499	30.313	12.85	8.2507			0.519417	20.402
9.9013	8.08	30.485	18.708	18.532	30.076	30.304	25.597	25.841	17.8353	25.0349	13.675	6.517	7.047	33.99	14.5657	21.497	31.304	12.644	8.4354			0.524272	20.0089
9.993	7.746	27.7	19.641	18.379	32.757	29.38	20.735	22.754	20.1168	23.8085	17.006	6.862	5.746	26.392	17.5584	17.736	26.843	10.492	11.8722			0.529128	19.1329
10.0847	5.102	28.961	18.06	17.546	31.383	24.24	13.056	24.849	22.9884	21.6827	20.399	6.733	8.606	20.43	14.423	14.224	20.868	14.05	9.4355			0.533983	17.7388
10.1763	5.647	25.677	23.457	19.931	26.776	24.324	14.924	33.261	24.8078	17.6542	11.842	6.759	9.005	27.27	18.4569	18.211	23.928	17.255	14.6089			0.538833	19.1471
10.268	5.916	30.074	26.245	11.824	27.599	22.846	20.311	22.291	21.1337	18.7059	11.319	6.086	6.869	21.441	13.5615	22.793	24.785	15.13	10.1674			0.543689	17.8472
10.3597	3.281	27.903	26.696	13.359	25.692	30.314	26.303	21.042	22.1961	29.2283	8.467	5.747	7.945	17.81	13.6888	22.843	24.806	16.105	7.6029			0.548544	18.4752
10.4514	6.066	23.824	20.753	17.155	19.182	23.025	21.831	19.83	26.919	28.9187	4.788	7.524	6.129	19.243	15.9329	24.96	27.164	16.883	8.3945			0.5534	17.817
10.5431	6.404	23.859	20.497	23.828	14.731	24.767	25.693	19.324	28.2382	33.6328	5.531	7.536	6.751	18.636	18.6639	24.217	23.495	14.149	8.7852			0.558255	18.3546
10.6347	4.785	22.204	16.703	24.12	17.452	32.236	24.243	17.998	33.0901	27.7391	5.697	9.658	7.24	14.227	20.0499	18.579	21.05	20.304	7.3451			0.563106	18.1432
10.7264	4.638	23.366	21.025	17.143	16.796	34.409	26.613	20.737	27.2892	28.1452	4.215	4.919	9.348	19.477	20.8852	25.493	26.107	14.829	8.2942			0.567961	18.6173
10.8181	3.759	19.339	23.382	27.99	18.878	35.552	23.607	23.514	28.1647	28.0761	6.345	6.474	9.602	21.929	20.1491	22.723	24.807	17.627	10.8031			0.572817	19.6169
10.9098	6.23	23.044	22.597	32.671	15.351	31.152	21.895	26.236	28.9755	16.0934	8.202	7.494	8.209	15.282	26.875	21.195	25.073	17.64	8.7992			0.577672	19.106
11.0015	6.221	26.095	24.926	35.072	26.141	34.824	29.557	28.224	18.2724	23.2661	6.723	6.248	4.559	15.614	23.6933	17.07	21.231	14.405	11.6481			0.582528	19.6732
11.0931	8.067	27.327	26.319	29.708	26.228	30.911	31.522	21.326	18.3003	22.4731	9.748	6.228	5.586	14.372	21.6144	15.755	19.082	12.592	11.374			0.587378	18.8701
11.1848	6.319	24.736	26.756	28.409	24.904	28.977	28.697	23.276	18.5824	26.281	12.278	7.771	7.022	19.993	20.6708	14.741	22.437	9.701	10.4788			0.592233	19.0542
11.2765	9.017	21.263	20.919	30.388	24.334	23.928	27.211	25.302	19.8544	21.8119	12.457	9.175	7.911	23.606	18.4958	22.937	20.093	7.228	15.9377			0.597089	19.0457
11.3682	11.464	20.366	28.066	30.123	21.47	26.727	25.937	26.612	24.1141	23.0491	12.31	6.21	8.988	28.645	21.932	18.926	30.888	7.885	9.903			0.601944	20.1903
11.4598	7.095	26.611	23.102	25.815	18.057	35.425	26.738	20.413	20.661	22.7433	9.248	6.35	12.225	27.233	28.1384	20.1	31.183	5.143	11.4333			0.606795	19.8797
11.5515	6.566	24.131	35.427	20.456	15.606	40.708	28.729	28.908	19.0259	30.0989	10.339	6.534	9.619	25.663	36.266	18.089	24.753	6.015	13.2652			0.61165	21.0631
11.6432	8.165	23.341	33.892	19.692	15.469	32.94	27.377	31.637	24.859	27.4863	7.986	6.578	9.875	19.941	36.8361	17.001	25.956	9.124	11.06			0.616506	20.485
11.7349	8.366	29.044	25.81	21.864	16.392	32.544	31.204	27.798	23.5368	24.0706	11.518	6.903	13.609	23.178	36.4125	19.388	22.776	7.869	12.973			0.621361	20.8029
11.8266	6.158	26.388	31.381	21.123	19.331	42.345	25.84	25.285	23.2683	24.0225	12.365	12.26	24.46	17.188	26.912	23.264	24.96	7.03	13.8883			0.626217	21.4457
11.9182	8.977	23.44	34.165	23.736	19.241	33.12	29.861	23.932	23.7844	27.8379	11.615	8.484	27.566	17.9	27.2812	25.679	20.153	4.865	9.9019			0.631067	21.1337
12.0099	10.347	29.857	38.177	30.371	23.309	35.385	36.089	26.939	18.0842	32.1441	9.992	10.104	35.727	26.906	21.8272	23.554	17.76	6.967	12.4731			0.635922	23.4743
12.1016	11.081	25.78	29.885	25.069	26.099	29.767	40.213	19.122	19.921	37.2383	8.783	11.023	27.174	27.03	18.3337	18.952	22.592	11.179	11.371			0.640778	22.1375
12.1933	13.024	21.549	27.673	29.664	30.709	26.449	38.492	28.528	20.066	32.7325	6.733	14.294	18.957	30.31	14.5037	19.336	26.756	7.146	12.9916			0.645633	22.1007
12.285	16.925	21.388	22.038	33.824	32.552	25.726	35.715	23.374	28.1279	33.461	8.541	10.299	13.937	25.8	10.796	21.453	25.496	5.625	14.665			0.650489	21.5654
12.3766	13.238	20.585	28.149	19.171	18.719	25.322	42.044	26.994	35.6016	33.6307	4.133	9.41	16.839	21.706	16.9653	18.739	29.935	7.734	12.5578			0.655339	21.1302
12.4683	13.098	19.53	32.353	24.345	21.224	27.914	38.245	33.243	29.0944	28.6263	4.288	12.363	18.884	43.684	20.468	20.266	21.883	8.874	9.7472			0.660194	22.5332
12.56	18.485	25.802	36.35	21.902	28.278	25.692	31.781	36.236	32.4005	27.7041	7.059	13.452	24.394	43.806	15.4368	28.104	25.131	13.081	7.2212			0.66505	24.3324
12.6517	21.424	27.786	32.379	21.075	23.873	26.531	38.22	26.941	40.0184	31.3114	4.685	13	22.137	36.981	15.923	15.051	28.458	13.933	4.2013			0.669905	23.3646
12.7433	23.529	31.115	34.772	23.312	26.818	24.222	45.689	26.127	39.4936	25.5843	5.669	18.779	19.059	31.524	19.6	25.559	25.827	14.715	4.6791			0.674756	24.5302
12.835	17.633	23.788	28.412	23.028	25.585	22.671	39.728	26.401	48.7665	28.4364	7.413	18.559	19.214	31.721	23.4946	24.881	33.175	17.745	4.4072			0.679611	24.4768
12.9267	17.758	28.572	21.872	25.701	33.259	29.025	31.833	28.347	60.9232	25.5678	6.943	20.785	20.526	27.795	20.3419	25.792	31.558	8.922	2.9376			0.684467	24.6557
13.0184	25.048	25.601	27.4	21.891	37.113	35.518	36.601	26.852	62.3611	19.1251	7.25	18.948	21.547	26.472	28.8883	36.164	35.535	4.367	5.7013			0.689322	26.4412
13.1101	29.402	35.626	19.233	16.746	40.725	40.197	36.372	24.399	62.4267	16.6606	7.964	20.961	23.264	33.62	20.7749	40.991	34.32	7.745	3.8869			0.694178	27.1218
13.2017	27.769	28.557	23.116	17.371	35.476	34.44	38.155	17.293	44.7677	17.3798	8.167	24.822	17.743	27.163	19.7884	42	33.709	7.272	5.0772			0.699028	24.7403
13.2934	32.085	35.031	26.099	13.569	38.875	29.223	35.796	18.156	43.196	18.6483	8.979	15.58	12.993	26.992	18.3844	30.994	36.105	10.013	7.5573			0.703883	24.1198
13.3851	25.356	24.215	24.457	19.835	31.84	35.451	24.332	27.58	40.6255	17.2095	10.783	8.849	13.684	26.633	24.1157	27.447	32.841	9.89	5.3156			0.708739	22.6558
13.4768	19.3	17.98	13.589	21.773	24.908	21.356	25.977	30.217	37.7992	17.4275	11.647	9.423	12.467	20.683	28.5893	30.008	30.627	6.524	5.572			0.713594	20.3088
13.5685	15.728	15.851	19.651	21.443	23.18	25.314	25.684	37.167	34.1408	20.9493	10.851	6.017	11.033	26.564	27.7987	35.189	32.368	3.525	7.6695			0.71845	21.0591
13.6601	15.086	18.197	18.666	22.676	25.723	30.124	24.57	37.21	36.4554	23.0995	10.536	6.11	9.155	23.481	29.9774	37.808	37.768	3.689	8.9219			0.7233	22.066
13.7518	11.47	17.21	21.535	28.915	23.592	37.006	24.261	32.773	31.5824	22.1435	9.736	3.736	7.704	22.767	26.8975	30.16	31.507	3.956	11.06			0.728156	20.948
13.8435	12.399	22.289	25.962	27.853	24.631	36.456	24.783	34.611	35.0777	23.6937	12.64	4.796	7.248	22.031	27.7698	26.442	32.493	6.069	15.3055			0.733011	22.2395
13.9352	12.007	17.307	26.918	33.17	16.83	35.577	33.658	31.585	31.1119	15.771	9.364	7.345	9.752	19.225	31.8796	22.423	26.837	5.283	12.7538			0.737867	20.9893
14.0269	13.605	26.401	27.829	30.029	19.331	22.154	34.024	33.407	23.8731	21.8768	14.33	6.94	9.662	15.934	28.4861	21.609	18.133	6.421	8.7086			0.742722	20.1449
14.1185	14.134	26.77	29.246	27.156	15.849	24.331	38.585	29.709	24.1373	27.3807	6.584	9.12	11.608	15.775	26.0816	26.594	24.258	10.049	4.302			0.747572	20.6142
14.2102	15.503	28.384	20.401	23.731	19.686	22.03	40.685	24.474	33.8961	27.9965	8.709	10.695	17.084	23.711	18.9824	32.313	26.106	8.379	4.8616			0.752428	21.4541
14.3019	23.084	30.124	27.45	20.521	19.016	18.261	41.299	26.938	36.5139	30.0176	11.739	5.455	16.566	28.492	21.0206	31.975	19.616	9.148	6.8492			0.757283	22.3203
14.3936	25.966	25.079	26.814	17.87	23.2	23.277	25.409	28.285	35.2746	27.6879	13.619	6.6	23.094	28.415	23.5258	35.329	24.695	11.657	6.0254			0.762139	22.7275
14.4852	26.939	19.759	26.636	18.211	17.038	30.414	31.735	25.487	35.7519	24.0915	23.42	8.458	18.861	37.09	21.8906	29.06	21.836	10.163	5.4839			0.766989	22.7539
14.5769	27.976	19.315	26.942	19.911	21.506	33.972	31.541	28.205	44.1279	26.5003	31.334	10.598	19.626	38.857	24.1094	22.501	25.641	7.884	9.5051			0.771844	24.7396
14.6686	36.586	26.095	27.135	19.837	28.337	34.77	41.089	27.45	42.9986	29.1784	31.384	13.666	20.038	40.461	23.0925	28.294	28.388	14.489	5.7529			0.7767	27.318
14.7603	28.095	30.842	31.761	20.243	36.626	37.482	51.703	21.574	35.1656	40.0925	32.564	10.282	31.529	34.786	29.3438	29.508	29.316	6.939	9.7341			0.781555	28.8203
14.852	19.84	35.651	32.306	17.521	28.841	30.401	50.082	22.777	30.8065	36.0158	21.969	7.133	31.466	32.311	26.7133	31.536	31.08	11.343	5.4201			0.786411	26.4849
14.9436	21.474	28.598	24.199	22.8	23.592	34.87	43.089	21.736	34.0597	28.9738	18.874	6.761	37.713	34.754	26.3429	27.483	30.378	12.568	9.0443			0.791261	25.6479
15.0353	21.493	27.785	20.76	23.77	21.703	37.79	35.744	30.809	34.7856	29.1774	14.705	5.481	40.472	37.741	25.0629	26.863	33.856	12.817	9.0153			0.796117	25.7805
15.127	20.814	20.385	27.632	31.913	14.564	36.013	24.952	40.098	35.0187	38.0734	11.862	5.904	32.788	44.444	33.8691	26.855	33.768	16.13	8.1317			0.800972	26.485
15.2187	17.975	22.759	26.578	33.301	13.596	28.2	27.93	39.281	29.4035	38.8328	14.866	7.799	29.088	41.049	31.9674	27.222	30.109	13.231	7.6301			0.805828	25.3062
15.3104	21.135	22.544	32.77	33.162	21.301	24.348	25.02	25.736	31.489	36.971	19.519	13.456	28.589	33.906	28.725	28.038	26.486	16.375	5.1186			0.810683	24.9836
15.402	14.041	20.605	30.858	30.982	20.924	20.004	22.464	23.093	26.7537	39.6294	12.584	11.562	38.301	39.293	39.9721	29.635	27.738	21.657	6.8622			0.815533	25.1031
15.4937	19.527	14.903	29.892	28.903	28.649	28.607	22.76	18.573	32.4317	40.7809	14.515	11.114	44.699	31.053	36.8274	27.479	21.825	27.585	6.7687			0.820389	25.6259
15.5854	12.549	9.353	33.588	28.548	36.375	22.276	17.875	11.458	45.9059	32.9729	14.532	6.864	51.922	38.437	43.6845	29.617	37.455	29.635	9.1146			0.825244	26.9559
15.6771	15.257	6.061	31.25	25.899	31.47	26.981	16.315	11.79	36.9886	29.8601	22.688	4.99	49.818	36.125	31.3527	31.602	40.793	28.379	5.0962			0.8301	25.4061
15.7687	13.619	3.098	19.253	18.753	28.283	28.534	16.412	9.022	30.029	33.6441	22.648	7.178	43.686	35.9	46.1324	23.997	41.968	25.33	7.4455			0.83495	23.9438
15.8604	10.016	4.372	19.615	24.706	31.763	31.745	19.26	4.479	28.3301	29.7733	27.167	8.656	44.159	37.813	48.6591	24.231	34.707	20.842	14.3696			0.839806	24.456
15.9521	13.868	3.798	16.038	19.576	21.261	38.203	37.819	2.213	36.9155	31.7301	22.569	11.887	26.745	41.595	49.5627	18.809	31.717	21.765	18.3167			0.844661	24.4415
16.0438	18.38	1.092	10.837	18.302	23.993	42.182	34.849	2.287	27.328	27.3579	27.162	28.556	20.085	39.572	41.0848	20.996	38.686	20.699	29.8877			0.849517	24.9124
16.1355	19.63	1.543	2.942	26.348	33.108	35.734	38.079	1.428	23.7561	24.9231	27.134	28.038	19.646	43.001	36.9524	22.553	35.629	20.462	44.0791			0.854372	25.5256
16.2271	20.031	1.446	4.84	38.842	38.188	41.15	28.725	1.107	23.6816	31.9933	26.588	36.05	27.098	41.245	24.2157	27.838	36.9	13.011	35.8904			0.859222	26.2547
16.3188	25.021	0.472	2.566	33.473	37.571	36.443	22.167	1.599	23.3823	24.3997	29.157	36.461	29.665	42.692	32.199	26.518	22.99	13.223	35.5239			0.864078	25.0275
16.4105	17.133	1.695	1.965	31.541	32.082	43.781	13.151	0.884	25.606	37.1809	31.295	32.082	19.21	34.012	35.3401	22.613	20.264	10.818	30.2375			0.868933	23.2048
16.5022	16.1	1.719	1.429	25.553	38.148	31.509	6.75	0.617	27.3461	39.223	35.879	26.514	24.864	35.472	29.883	18.545	26.644	16.056	35.299			0.873789	23.029
16.5939	10.264	1.185	1.289	20.902	38.964	22.685	7.004	0.896	40.5633	38.2578	45.953	28.769	17.217	25.728	27.109	12.78	31.246	23.449	30.3115			0.878644	22.3459
16.6855	9.953	0.446	1.282	14.55	33.475	15.602	8.86	0.465	36.1023	41.1839	38.317	20.162	20.411	30.606	34.7114	13.615	37.529	20.524	20.8462			0.883494	20.9811
16.7772	2.446	1.102	1.646	8.064	33.517	16.034	9.002	0.817	36.9718	38.4712	29.88	19.576	22.232	26.333	25.2278	10.06	40.968	19.007	20.4104			0.88835	19.0403
16.8689	3.046	1.056	1.202	6.043	23.099	19.264	7.385	0.099	31.0144	38.6637	23.672	22.245	18.665	26.785	27.3987	9.281	34.107	19.819	22.2854			0.893205	17.6384
16.9606	3.282	0.288	1.611	7.631	26.514	22.857	4.432	0.435	21.3956	33.2624	24.636	25.694	16.127	27.639	21.3769	3.129	29.77	18.725	23.5258			0.898061	16.4385
17.0522	0.755	0.344	0.622	7.473	20.182	26.176	2.601	0.057	11.8853	27.5377	22.881	18.356	20.876	32.573	18.8311	3.891	22.317	13.709	21.1399			0.902911	14.3267
17.1439	2.061	0.875	1.283	2.553	21.658	21.134	1.344	0.291	9.9801	36.3773	28.081	23.169	24.249	29.937	24.2243	6.769	20.686	25.705	18.4932			0.907767	15.73
17.2356	0.763	0.558	0.578	1.547	27.261	17.576	1.239	0.816	6.1022	33.6768	32.26	21.645	27.632	32.305	17.9262	2.623	20.626	30.454	15.5285			0.912622	15.3219
17.3273	1.44	0.509	0.338	2.922	29.7	15.051	1.348	0.012	5.4756	32.9435	27.046	17.529	23.09	32.198	17.9458	2.074	23.781	38.179	13.9338			0.917478	15.0271
17.419	1.271	0.48	0.837	2.934	29.248	9.293	1.146	0.552	3.8977	29.8383	26.758	20.849	24.322	24.259	18.3017	2.549	22.027	37.455	18.671			0.922333	14.4573
17.5106	0.604	0.17	0.547	1.355	31.744	4.779	0.114	0.183	3.5694	29.0778	18.779	29.071	25.859	26.072	26.7508	1.524	26.092	37.05	13.6002			0.927183	14.5759
17.6023	0.974	0.543	0.446	0.341	27.349	1.672	0.7	0.221	4.4791	24.4843	18.75	23.341	18.759	29.259	23.1822	1.944	38.669	33.297	19.3496			0.932039	14.0926
17.694	0.994	0.178	0.498	1.419	32.653	0.991	0.353	0.054	2.0287	26.7234	19.274	23.415	23.267	25.542	32.9706	2.308	41.084	33.268	31.0756			0.936894	15.6893
17.7857	0.193	0.71	0.628	1.314	22.442	0.986	0.328	0.226	1.3646	25.9269	22.563	23.601	27.84	23.282	28.0777	1.412	26.828	42.293	19.6996			0.94175	14.1955
17.8774	0.649	0.395	0.726	0.833	16.103	0.46	0.498	0.545	1.6632	21.4959	21.899	20.041	24.117	25.097	21.4091	1.492	16.678	36.77	21.7079			0.946605	12.241
17.969	0.297	0.501	0.407	0.443	9.366	0.388	0.607	0.392	0.6934	34.1734	25.154	15.754	29.275	26.679	10.9957	1.108	5.551	38.037	23.2341			0.951456	11.7398
18.0607	0.763	0.432	0.714	0.165	4.02	0.245	0.123	0.327	0.119	35.4518	17.531	22.4	29.513	19.979	4.7719	0.609	5.325	33.99	25.4715			0.956311	10.629
18.1524	0.279	0.185	1.183	0.56	3.364	1.144	0.497	0.282	0.576	23.2684	19.537	21.937	28.306	11.981	4.4097	0.124	1.729	25.461	26.4261			0.961167	9.01312
18.2441	0.121	0.887	0.041	0.553	1.139	0.398	0.003	0.008	0.2958	12.6655	14.067	23.569	35.24	7.89	1.9959	0.336	1.175	29.64	25.3551			0.966022	8.17786
18.3358	0.604	0.168	0.872	0.776	0.846	0.764	0.062	0.709	0.3407	4.8786	10.852	32.286	36.811	5.127	1.986	0.657	1.936	28.679	25.2249			0.970878	8.08312
18.4274	0.23	0.063	0.336	0.292	0.891	0.487	0.654	0.17	0.6064	2.9631	7.934	25.869	22.786	3.742	1.8673	0.67	1.612	27.892	23.8978			0.975728	6.47172
18.5191	0.822	0.221	0.167	0.928	0.67	0.559	0.338	0.171	0.221	1.6229	5.477	12.96	11.344	1.322	0.9084	0.841	0.574	21.208	24.4155			0.980583	4.46157
18.6108	0.125	0.603	0.182	1.219	0.61	0.178	0	0.116	0.3328	1.9301	3.623	6.392	6.472	1.802	0.402	0.762	0.983	22.231	21.5277			0.985439	3.6574
18.7025	0.323	0.51	0.593	0.505	0.606	0.446	0.217	0.177	0.0646	1.512	1.264	4.104	2.683	1.816	0.5506	0.4	0.083	22.97	18.0593			0.990294	2.99387
18.7941	0.003	0.056	0.167	0.007	0.169	0.119	0.168	0.646	0.3796	0.672	0.895	2.063	1.934	0.27	0.9202	0.814	0.718	23.389	13.9714			0.995145	2.49269
18.8858	0	0.276	0.552	0.329	0.441	0.988	0.441	0.345	0.1172	0.1698	0.384	1.292	3.46	1.292	0.0277	0.628	0.73	29.18	13.7834			1	2.86506

## Sheet: Sheet1
Image1				Image2				Image4				Image10				Image11				Image12				Image13					Distance	Image1	Image2	Image4	Image10	Image11	Image12	Image13
Ap-Basal to 1	Average intensities			Ap-Basal to 1	Average intensities			Ap-Basal to 1	Average intensities			Distance	Intensity			Distance	Intensity			Distance	Intensity			Distance	Intensity				0	35.2005	36.0442	34.8005	52.1033	37.1854	29.6317	20.2007
0	35.2005			0	36.0442			0	34.8005			0	52.1033			0	37.1854			0	29.6317			0	20.2007				0.05	54.5589	47.7258	49.183	53.7897	39.2348	33.1473	25.7651
0.0048555	37.8338			0.00404951	36.1766			0.00384704	35.639			0.00469348	51.406			0.00480629	37.1849			0.00602234	28.9938			0.00398291	20.7519				0.1	97.3735	74.1554	90.2821	68.0298	51.8535	44.7449	37.7321
0.009711	40.7337			0.00809903	38.0544			0.00769408	38.8359			0.00939169	51.0964			0.00961743	37.6038			0.0120508	30.3479			0.00796984	22.4728				0.15	74.9457	75.1927	55.948	71.073	65.2372	51.0052	43.577
0.0145612	42.8636			0.0121441	38.9689			0.0115369	40.1314			0.0140852	51.6225			0.0144237	38.6865			0.0180731	31.4594			0.0119528	23.5071				0.2	42.3258	56.9053	39.2209	58.1082	60.2618	45.0578	40.3883
0.0194167	44.6198			0.0161936	40.3894			0.015384	39.5808			0.0187787	51.019			0.01923	38.3702			0.0240954	31.3632			0.0159357	24.037				0.25	35.851	39.8689	30.7056	41.7075	48.7315	30.2173	34.3479
0.0242722	47.5358			0.0202431	41.6256			0.019231	41.5808			0.0234721	50.7776			0.0240363	38.4627			0.0301178	33.8571			0.0199186	23.9158				0.3	29.8856	31.7338	27.2014	30.0535	37.3157	25.3966	23.5932
0.0291277	53.378			0.0242927	44.1725			0.0230781	43.0808			0.0281703	54.0806			0.0288475	38.0318			0.0361462	34.2855			0.0239055	24.977				0.35	27.7604	25.9929	25.5236	22.705	26.2881	21.0171	19.1372
0.0339832	58.0069			0.0283422	48.0961			0.0269251	48.1944			0.0328638	53.0769			0.0336538	39.3478			0.0421685	34.9557			0.0278884	25.2228				0.4	21.9053	23.9001	22.1313	17.7971	20.6338	19.6623	17.0989
0.0388334	64.2529			0.0323873	51.9782			0.0307679	50.5935			0.0375573	53.3223			0.03846	40.3728			0.0481909	37.4359			0.0318713	26.7841				0.45	20.8401	20.7458	19.6847	17.1858	16.4198	17.925	15.539
0.0436889	68.9514			0.0364368	53.866			0.034615	51.3611			0.0422555	55.9843			0.0432712	41.1401			0.0542193	39.1427	33.1473		0.0358583	28.9134				0.5	21.3367	24.7053	20.2603	16.8924	13.6705	15.8282	14.4936
0.0485444	76.4045			0.0404863	56.5976			0.038462	53.8611			0.046949	58.4679			0.0480775	41.4096			0.0602416	40.0764			0.0398412	29.5093				0.55	18.9822	24.4658	22.5572	16.6177	13.0506	15.2052	14.1208
0.0533999	84.9262	54.5589		0.0445358	60.4166			0.0423091	56.8636			0.0516425	62.5198	53.7897		0.0528838	43.022	39.2348		0.066264	40.4809			0.0438241	30.1769				0.6	19.0672	23.1779	23.8526	16.3746	12.0099	14.1841	14.4585
0.0582501	93.5205			0.0485809	60.8924			0.0461519	60.1616			0.056336	62.8429			0.0576901	43.3188			0.0722863	41.5537			0.047807	29.7074				0.65	21.4088	23.8853	24.6016	18.2464	12.645	14.5202	15.9781
0.0631056	98.3398			0.0526304	60.8826	47.7258		0.049999	67.6237			0.0610342	63.8238			0.0625012	45.4224			0.0783147	43.4254			0.0517939	30.5353	25.7651			0.7	24.3133	24.7831	24.224	18.1306	15.0377	15.3935	17.1144
0.0679611	101.989			0.0566799	63.3029			0.053846	75.4369	49.183		0.0657277	64.2355			0.0673075	47.3786			0.0843371	47.1562			0.0557768	30.7894				0.75	21.248	23.7773	24.1265	20.0636	16.259	17.8208	17.5309
0.0728166	104.443			0.0607294	66.6785			0.057693	81.2878			0.0704211	65.1207			0.0721138	48.3739			0.0903594	47.0632			0.0597597	31.6854				0.8	25.3078	20.7721	20.5414	20.3229	17.7204	18.6329	17.4601
0.0776721	102.374			0.064779	70.6587			0.0615401	88.0959			0.0751193	64.653			0.0769249	50.2714			0.0963878	48.2711			0.0637467	32.817				0.85	25.1509	11.5933	14.7687	16.9477	17.4376	17.0169	13.9466
0.0825223	103.583			0.0688241	76.2086			0.0653829	92.8156			0.0798128	67.8254			0.0817312	51.7709			0.10241	49.932	44.7449		0.0677296	34.4769				0.9	20.8287	4.95469	5.38949	8.20292	15.5221	12.5034	6.64697
0.0873778	96.3987			0.0728736	76.0733			0.06923	99.1364			0.0845063	69.7494			0.0865375	54.7213			0.108432	52.6078			0.0717125	38.0873				0.95	14.307	1.17079	1.46612	1.14527	9.498	5.79395	3.14835
0.0922333	94.2929			0.0769231	74.4762			0.073077	98.649			0.0891998	70.6538			0.0913438	57.4879			0.114455	52.7148			0.0756954	40.4063				1	5.88454	0.255811	0.829471	0.300135	5.10606	3.30771	1.58086
0.0970888	92.3114			0.0809726	75.9199			0.076924	100.808			0.093898	72.527			0.096155	58.0714			0.120483	53.2418			0.0796823	39.2208
0.101944	86.4816	97.3735		0.0850221	76.7469			0.0807711	95.4242			0.0985915	72.2364			0.100961	61.7179	51.8535		0.126506	52.1523			0.0836652	39.7249
0.106795	85.1442			0.0890672	74.7984			0.0846139	91.9344			0.103285	74.66	68.0298		0.105768	64.0931			0.132528	52.446			0.0876482	40.97
0.11165	81.9167			0.0931167	76.0299			0.088461	92.0404			0.107983	75.6766			0.110579	64.9589			0.138556	49.8267			0.0916351	40.6622
0.116506	81.8439			0.0971662	78.3616			0.092308	88.5656			0.112677	76.1883			0.115385	65.9986			0.144579	47.9305			0.095618	41.0548
0.121361	80.368			0.101216	80.6092	74.1554		0.0961551	83.7071			0.11737	73.0085			0.120191	65.3231			0.150601	47.1216	51.0052		0.0996009	42.8898
0.126211	78.4832			0.105261	80.8407			0.0999979	80.9748			0.122064	73.4838			0.124998	64.4488			0.156623	46.9767			0.103584	43.3696
0.131067	72.7411			0.10931	78.7232			0.103845	80.2273	90.2821		0.126762	72.5012			0.129809	65.7089			0.162652	47.6789			0.107571	45.1765	37.7321
0.135922	71.6979			0.11336	77.998			0.107692	73.4597			0.131455	71.6367			0.134615	65.8791			0.168674	47.9676			0.111554	41.6068
0.140778	69.2649			0.117409	76.5572			0.111539	70.8258			0.136149	70.1853			0.139421	65.1427			0.174696	46.7928			0.115537	42.6124
0.145633	65.1971			0.121459	76.7778			0.115386	65.4521			0.140847	68.5418			0.144232	66.0515			0.180725	45.6771			0.119523	43.3477
0.150483	62.8003	74.9457		0.125504	76.6091			0.119229	60.442			0.14554	64.4757			0.149039	65.4995			0.186747	45.21			0.123506	44.7981
0.155339	56.5326			0.129553	79.9346			0.123076	55.5202			0.150234	65.0317	71.073		0.153845	64.5052	65.2372		0.19277	44.8847			0.127489	41.9373
0.160194	49.5288			0.133603	79.0821			0.126923	54.4823			0.154927	64.3915			0.158651	64.6455			0.198792	42.2955			0.131472	43.2612
0.16505	45.2666			0.137653	79.368			0.13077	53.2828			0.159626	65.1863			0.163462	63.4119			0.20482	38.0371	45.0578		0.135459	44.9296
0.169905	43.3561			0.141702	74.0867			0.134617	48.3182			0.164319	63.1369			0.168269	61.3371			0.210843	37.2471			0.139442	45.0001
0.174756	40.908			0.145747	68.5279			0.13846	47.4722			0.169013	62.7899			0.173075	61.3881			0.216865	33.7316			0.143425	44.4721
0.179611	39.7748			0.149797	66.7657			0.142307	48.6289			0.173711	60.8627			0.177886	60.0004			0.222893	31.0375			0.147412	43.5725
0.184467	39.8086			0.153846	62.2339	75.1927		0.146154	46.7879			0.178404	58.7301			0.182692	58.2223			0.228916	28.9832			0.151395	42.4169
0.189322	38.5353			0.157896	61.2583			0.150001	46.7045	55.948		0.183098	56.831			0.187499	59.77			0.234938	28.6905			0.155378	42.226	43.577
0.194178	37.4447			0.161945	63.9335			0.153848	46.7678			0.187796	52.9108			0.19231	59.6794			0.240966	28.5408			0.159365	43.2609
0.199028	38.1546			0.16599	64.8562			0.157691	46.3561			0.192489	52.9926			0.197116	58.5818			0.246989	27.1808			0.163348	44.2927
0.203883	36.2742	42.3258		0.17004	63.8031			0.161538	45.0758			0.197183	51.2693			0.201923	55.5814	60.2618		0.253011	26.3268	30.2173		0.16733	40.9163
0.208739	35.483			0.174089	62.3855			0.165385	44.0303			0.201876	50.0895	58.1082		0.206729	54.6109			0.259034	26.7962			0.171313	40.4284
0.213594	34.914			0.178139	61.6745			0.169232	40.5859			0.206575	48.3288			0.21154	55.8867			0.265062	26.5737			0.1753	40.2514
0.218445	35.1878			0.182184	55.9073			0.173075	39.2349			0.211268	45.5419			0.216346	52.9574			0.271084	26.7922			0.179283	39.7899
0.2233	34.9567			0.186233	53.2971			0.176922	38.2297			0.215962	44.5481			0.221153	50.3039			0.277107	25.5024			0.183266	38.2928
0.228156	36.77			0.190283	52.0449			0.180769	36.2424			0.22066	44.7772			0.225964	49.1356			0.283135	24.9649			0.187253	38.4578
0.233011	35.5197			0.194332	49.7427			0.184616	37.5682			0.225353	42.9324			0.23077	47.8174			0.289157	25.2687			0.191236	40.2902
0.237867	36.9765			0.198382	46.6667			0.188463	36.99			0.230047	42.3346			0.235576	45.5097			0.29518	24.4143			0.195219	38.2203
0.242717	35.7403			0.202427	47.2936	56.9053		0.192306	33.2425			0.23474	41.7768			0.240383	45.367			0.301202	22.8602	25.3966		0.199202	38.2328
0.247572	36.3511			0.206477	47.0641			0.196153	33.5732			0.239438	40.6345			0.245194	43.209			0.30723	21.9008			0.203189	38.7894
0.252428	36.6104	35.851		0.210526	44.3679			0.2	31.9747	39.2209		0.244132	38.729			0.25	42.5168	48.7315		0.313253	21.5099			0.207172	37.4462	40.3883
0.257283	34.8149			0.214576	43.764			0.203847	32.4191			0.248825	36.0836			0.254806	41.1429			0.319275	21.1803			0.211155	35.7828
0.262139	30.0696			0.218625	43.6115			0.207694	31.4672			0.253524	33.0953	41.7075		0.259617	41.1695			0.325304	21.5152			0.215141	35.487
0.266989	29.034			0.22267	43.6699			0.211537	33.5202			0.258217	32.9313			0.264424	39.9126			0.331326	21.3597			0.219124	33.3572
0.271844	29.1662			0.22672	40.9893			0.215384	33.6036			0.262911	31.9216			0.26923	39.9978			0.337348	20.7394			0.223107	35.0028
0.2767	26.7208			0.230769	39.2077			0.219231	32.091			0.267604	31.6284			0.274036	39.3354			0.343371	20.3969			0.22709	34.6887
0.281555	26.7878			0.234819	37.3452			0.223078	31.9218			0.272302	31.5287			0.278847	37.7875			0.349399	20.2008			0.231077	34.6676
0.286406	29.5277			0.238864	33.8949			0.226921	30.9496			0.276996	30.0494			0.283654	37.2503			0.355421	20.3513	21.0171		0.23506	35.0057
0.291261	30.8025			0.242913	35.3867			0.230768	29.4949			0.281689	29.599			0.28846	36.5556			0.361444	20.8036			0.239043	32.7812
0.296117	31.4247			0.246963	34.5197			0.234615	28.1136			0.286387	28.4823			0.293271	34.6135			0.367472	21.4409			0.24303	32.2501
0.300972	30.5079	29.8856		0.251012	34.6059	39.8689		0.238462	29.5884			0.291081	28.4906			0.298077	31.9383			0.373494	20.1487			0.247013	30.631
0.305828	30.8777			0.255062	34.6843			0.242309	30.0657			0.295774	27.7689			0.302884	30.7692	37.3157		0.379517	20.0789			0.250996	30.633
0.310678	30.69			0.259107	34.9388			0.246152	29.0303			0.300468	28.1343	30.0535		0.30769	30.2662			0.385539	19.7217			0.254979	28.8001	34.3479
0.315533	27.8834			0.263157	34.7207			0.249999	29.096			0.305166	25.7517			0.312501	29.3614			0.391568	18.7822			0.258966	28.0697
0.320389	27.8167			0.267206	35.4202			0.253846	28.5178	30.7056		0.30986	25.4571			0.317308	28.2982			0.39759	18.4456			0.262948	27.079
0.325244	27.9661			0.271256	35.1102			0.257693	28.3863			0.314553	23.551			0.322114	27.9085			0.403612	17.8771	19.6623		0.266931	25.9173
0.3301	28.4161			0.275305	34.9048			0.26154	27.4494			0.319251	23.8338			0.326925	27.1342			0.409641	18.8495			0.270918	24.861
0.33495	26.9666			0.27935	34.6933			0.265383	27.505			0.323945	22.7397			0.331731	25.2905			0.415663	20.1011			0.274901	23.5079
0.339806	28.2802			0.2834	32.6097			0.26923	30.4621			0.328638	22.0447			0.336538	24.4294			0.421685	19.6143			0.278884	22.4614
0.344661	26.9885			0.287449	29.9534			0.273077	27.1565			0.333332	22.2801			0.341344	23.8545			0.427708	17.7061			0.282867	21.7444
0.349517	25.8433			0.291499	27.1221			0.276924	25.7171			0.33803	22.0762			0.346155	23.1212			0.433736	17.1144			0.286854	20.638
0.354367	23.6354	27.7604		0.295544	26.4634			0.280767	28.1137			0.342723	21.6641			0.350961	23.2165	26.2881		0.439758	16.5247			0.290837	20.2299
0.359222	24.8251			0.299593	25.6635			0.284614	28.8055			0.347417	20.6476			0.355768	22.5725			0.445781	16.4225			0.29482	19.9415
0.364078	24.316			0.303643	26.2556	31.7338		0.288461	28.2273			0.352115	19.7089	22.705		0.360579	22.4102			0.451809	17.0673	17.925		0.298807	19.8677
0.368933	23.1599			0.307692	28.1034			0.292308	27.3081			0.356809	19.2405			0.365385	21.9156			0.457831	17.0423			0.30279	19.1372
0.373789	22.4737			0.311742	28.4913			0.296155	23.9217			0.361502	18.7705			0.370191	22.5255			0.463854	16.4543			0.306773	19.7221	23.5932
0.378639	21.5568			0.315787	27.4703			0.299998	25.351			0.366196	19.1509			0.374998	21.5503			0.469876	15.6656			0.310755	18.791
0.383494	20.2822			0.319836	26.9936			0.303845	25.2146	27.2014		0.370894	18.1269			0.379809	20.2495			0.475905	16.5511			0.314742	18.9519
0.38835	20.8415			0.323886	26.1695			0.307692	24.6717			0.375587	17.3187			0.384615	19.3366			0.481927	15.1432			0.318725	18.9321
0.393205	21.0953			0.327935	25.6952			0.311539	27.0707			0.380281	17.0531			0.389421	19.4057			0.487949	14.6606			0.322708	18.9041
0.398061	20.8949			0.331985	26.3588			0.315386	26.4749			0.384979	17.4949			0.394232	19.0131			0.493978	15.1779			0.326695	18.1587
0.402911	19.6078	21.9053		0.33603	25.6558			0.319229	26.7424			0.389672	16.7528			0.399039	18.9292			0.5	15.9307	15.8282		0.330678	18.0024
0.407767	20.2745			0.34008	24.3663			0.323076	25.8282			0.394366	17.0265			0.403845	19.0632	20.6338		0.506022	15.6758			0.334661	17.8795
0.412622	19.2444			0.344129	24.0941			0.326923	25.6086			0.399059	17.3488			0.408651	19.2395			0.512045	14.9903			0.338644	17.5949
0.417478	18.2875			0.348179	23.4598			0.33077	25.5126			0.403758	17.4846	17.7971		0.413462	18.7679			0.518073	15.4683			0.342631	17.0567
0.422333	19.3997			0.352228	25.0564	25.9929		0.334617	25.654			0.408451	17.9311			0.418269	18.1837			0.524095	15.2522			0.346614	17.5887
0.427183	20.5946			0.356273	23.8485			0.33846	25.9798			0.413145	17.6431			0.423075	16.7269			0.530118	14.6687			0.350597	16.1822
0.432039	19.5958			0.360323	22.4629			0.342307	24.3333			0.417843	17.545			0.427886	16.1998			0.536146	15.231			0.354584	16.9866	#VALUE!
0.436894	21.0048			0.364372	21.8944			0.346154	24.3006			0.422536	17.544			0.432692	15.7086			0.542169	16.0003			0.358566	17.374
0.44175	22.3013			0.368422	21.7244			0.350001	24.1061	25.5236		0.42723	16.9138			0.437499	14.9777			0.548191	15.5878			0.362549	17.2501
0.4466	23.5584			0.372467	23.1658			0.353844	23.5682			0.431923	17.0007			0.442305	14.852			0.554213	13.9724	15.2052		0.366532	17.4593
0.451456	24.1395	20.8401		0.376516	22.2788			0.357691	24.9318			0.436621	16.9727			0.447116	15.0501			0.560242	15.1149			0.370519	17.7224
0.456311	23.8367			0.380566	25.9577			0.361538	23.5783			0.441315	17.1062			0.451923	14.4917	16.4198		0.566264	14.7814			0.374502	17.5149
0.461167	21.2432			0.384615	28.1403			0.365385	23.9041			0.446008	16.7735			0.456729	14.2576			0.572286	13.9823			0.378485	16.9054
0.466022	21.8342			0.388665	28.1963			0.369232	22.1136			0.450707	16.4278	17.1858		0.46154	13.8546			0.578315	14.008			0.382472	16.5259
0.470872	20.4151			0.39271	25.3753			0.373075	20.9546			0.4554	16.5566			0.466346	13.9747			0.584337	14.5871			0.386455	17.5673
0.475728	21.8951			0.39676	22.0282			0.376922	22.644			0.460094	17.0342			0.471153	13.8336			0.590359	14.2156			0.390438	17.7221
0.480583	21.8954			0.400809	21.7286	23.9001		0.380769	21.6667			0.464787	17.0058			0.475959	13.6588			0.596382	13.1393			0.394421	16.2084
0.485439	22.1039			0.404859	20.4242			0.384616	21.8788			0.469485	16.0462			0.48077	13.5956			0.60241	13.6445	14.1841		0.398408	15.9505
0.490294	21.7107			0.408908	20.3816			0.388463	22.5682			0.474179	17.4747			0.485576	12.9847			0.608432	14.5928			0.402391	15.0165
0.495145	19.9196			0.412953	20.037			0.392306	20.7676			0.478872	17.8381			0.490383	13.5486			0.614455	13.8798			0.406373	14.6989	17.0989
0.5	18.5131	21.3367		0.417003	20.3135			0.396153	19.9243			0.48357	17.8029			0.495194	13.4939			0.620483	14.6288			0.41036	15.3187
0.504855	19.1084			0.421052	21.3797			0.4	19.2071	22.1313		0.488264	16.4937			0.5	13.5033	13.6705		0.626506	14.9415			0.414343	14.9925
0.509711	18.9311			0.425102	21.0633			0.403847	19.5758			0.492957	15.9563			0.504806	13.3717			0.632528	14.8013			0.418326	15.5459
0.514561	20.1954			0.429147	21.4476			0.40769	20.1919			0.497656	16.3207			0.509617	14.3801			0.638556	14.8872			0.422313	16.2255
0.519417	20.402			0.433196	21.999			0.411537	21.1641			0.502349	17.2869	16.8924		0.514424	14.0091			0.644579	14.6618			0.426296	17.1161
0.524272	20.0089			0.437246	20.8287			0.415384	19.3889			0.507043	16.5472			0.51923	14.0724			0.650601	13.7688	14.5202		0.430279	16.4378
0.529128	19.1329			0.441295	20.9244			0.419231	20.4798			0.511736	17.0632			0.524036	13.9875			0.656623	14.0897			0.434262	16.481
0.533983	17.7388			0.445345	21.0323			0.423078	20.5531			0.516434	16.7775			0.528847	13.2695			0.662652	14.2866			0.438249	14.8688
0.538833	19.1471			0.44939	20.193			0.426921	19.9874			0.521128	16.1707			0.533654	13.0653			0.668674	14.7221			0.442232	15.1618
0.543689	17.8472			0.453439	19.6714	20.7458		0.430768	18.8257			0.525821	15.5578			0.53846	12.9271			0.674696	14.78			0.446215	14.9865
0.548544	18.4752			0.457489	21.0693			0.434615	19.1238			0.530519	15.6173			0.543271	11.7587			0.680725	15.4927			0.450202	15.1572
0.5534	17.817	18.9822		0.461538	21.7796			0.438462	19.1591			0.535213	17.705			0.548077	11.3139			0.686747	15.7782			0.454184	14.7777	15.539
0.558255	18.3546			0.465588	21.8423			0.442309	18.7121			0.539906	17.5786			0.552884	11.4014	13.0506		0.69277	16.0963			0.458167	15.355
0.563106	18.1432			0.469633	22.316			0.446152	18.957			0.5446	16.9331			0.55769	11.6861			0.698792	16.4655			0.46215	15.191
0.567961	18.6173			0.473683	22.9981			0.449999	19.6466			0.549298	16.8466			0.562501	12.748			0.70482	16.83	15.3935		0.466137	14.2605
0.572817	19.6169			0.477732	25.2399			0.453846	19.8207	19.6847		0.553992	15.9974	16.6177		0.567308	13.0569			0.710843	17.374			0.47012	14.7445
0.577672	19.106			0.481782	26.0938			0.457693	20.1389			0.558685	15.9547			0.572114	12.4568			0.716865	17.419			0.474103	13.7046
0.582528	19.6732			0.485831	28.2351			0.46154	20.4242			0.563383	15.7764			0.576925	12.0357			0.722893	17.4503			0.47809	15.3379
0.587378	18.8701			0.489876	28.1716			0.465383	20.8081			0.568077	16.3602			0.581731	11.6614			0.728916	17.6473			0.482073	13.6143
0.592233	19.0542			0.493926	27.1764			0.46923	19.2903			0.57277	16.8132			0.586538	11.4332			0.734938	17.6699			0.486056	14.7051
0.597089	19.0457			0.497975	25.8545			0.473077	19.75			0.577464	16.7497			0.591344	11.747			0.74096	17.9764			0.490039	13.6617
0.601944	20.1903	19.0672		0.502025	25.6871	24.7053		0.476924	19.9343			0.582162	16.3704			0.596155	11.6078			0.746989	18.5165			0.494026	13.8142
0.606795	19.8797			0.50607	24.8329			0.480767	19.5681			0.586855	15.7539			0.600961	11.6664	12.0099		0.753011	18.5128	17.8208		0.498009	14.4181
0.61165	21.0631			0.510119	24.2363			0.484614	20.3081			0.591549	16.376			0.605768	12.0596			0.759034	18.6862			0.501991	14.8317
0.616506	20.485			0.514169	23.6885			0.488461	19.9091			0.596247	17.3126			0.610579	12.3843			0.765062	18.3745			0.505978	13.8859	14.4936
0.621361	20.8029			0.518218	24.8233			0.492308	20.2071			0.600941	16.2791	16.3746		0.615385	12.2293			0.771084	17.6577			0.509961	13.9508
0.626217	21.4457			0.522268	26.5086			0.496155	20.5404			0.605634	16.5912			0.620191	11.6869			0.777107	19.0826			0.513944	14.268
0.631067	21.1337			0.526313	25.3987			0.499998	21.5985			0.610328	17.4639			0.624998	12.2794			0.783129	18.602			0.517927	14.4693
0.635922	23.4743			0.530363	23.7206			0.503845	20.9066	20.2603		0.615026	17.5765			0.629809	12.5061			0.789157	18.9192			0.521914	14.2342
0.640778	22.1375			0.534412	24.6722			0.507692	22.265			0.619719	17.7978			0.634615	12.6719			0.79518	19.2847			0.525897	13.9747
0.645633	22.1007			0.538462	24.7266			0.511539	21.4344			0.624413	18.9214			0.639421	13.4401			0.801202	18.4564	18.6329		0.52988	13.5431
0.650489	21.5654	21.4088		0.542511	23.7551			0.515386	21.0606			0.629111	18.6292			0.644232	13.2693			0.80723	19.5373			0.533867	14.1205
0.655339	21.1302			0.546556	23.268			0.519229	21.7398			0.633804	19.0908			0.649039	13.1133			0.813253	17.648			0.53785	13.464
0.660194	22.5332			0.550606	23.9588	24.4658		0.523076	22.7828			0.638498	18.272			0.653845	13.4554	12.645		0.819275	17.4873			0.541833	14.315
0.66505	24.3324			0.554655	24.4316			0.526923	22.2778			0.643191	18.6198			0.658651	13.6497			0.825297	16.5277			0.545816	14.541
0.669905	23.3646			0.558705	24.5781			0.53077	23.4596			0.64789	19.0206			0.663462	14.2895			0.831326	16.6979			0.549802	14.5661
0.674756	24.5302			0.56275	24.1026			0.534613	23.6187			0.652583	18.7275	18.2464		0.668269	14.6872			0.837348	16.4439			0.553785	14.2379
0.679611	24.4768			0.566799	24.572			0.53846	23.1743			0.657277	19.4526			0.673075	15.0428			0.843371	16.4639			0.557768	15.5689	14.1208
0.684467	24.6557			0.570849	23.648			0.542307	23.0758			0.661975	19.2291			0.677886	14.8151			0.849399	16.4076			0.561755	15.7912
0.689322	26.4412			0.574898	22.2866			0.546154	22.6995			0.666668	18.665			0.682692	15.08			0.855421	15.9385	17.0169		0.565738	13.9689
0.694178	27.1218			0.578948	20.4804			0.550001	23.0985	22.5572		0.671362	18.4824			0.687499	15.9004			0.861444	15.3481			0.569721	14.0011
0.699028	24.7403			0.582993	21.886			0.553844	24.0227			0.676055	18.3866			0.692305	15.9744			0.867466	14.725			0.573704	13.7308
0.703883	24.1198	24.3133		0.587042	23.7083			0.557691	25.4192			0.680753	17.2452			0.697116	15.53			0.873494	13.7571			0.577691	14.6493
0.708739	22.6558			0.591092	22.5085			0.561538	24.6262			0.685447	16.4459			0.701923	15.4077	15.0377		0.879517	13.2926			0.581674	14.1394
0.713594	20.3088			0.595141	23.2285			0.565385	23.8964			0.69014	17.0772			0.706729	15.1627			0.885539	12.1115			0.585657	14.0841
0.71845	21.0591			0.599191	23.195			0.569232	23.8712			0.694839	17.5162			0.71154	16.2849			0.891568	11.2281			0.589644	14.831
0.7233	22.066			0.603236	22.6876	23.1779		0.573075	22.8257			0.699532	18.1786			0.716346	15.9856			0.89759	10.2262			0.593627	14.6054
0.728156	20.948			0.607286	23.2547			0.576922	24.2929			0.704226	18.7577	18.1306		0.721153	15.0274			0.903612	9.33892	12.5034		0.597609	14.3292
0.733011	22.2395			0.611335	22.3881			0.580769	23.9343			0.708919	17.9567			0.725959	15.8723			0.909635	8.49337			0.601592	13.8028
0.737867	20.9893			0.615385	24.1655			0.584616	22.9318			0.713617	18.0777			0.73077	16.609			0.915663	7.74148			0.605579	14.6914
0.742722	20.1449			0.619434	25.8665			0.588463	23.3485			0.718311	19.1106			0.735576	16.8228			0.921685	7.26569			0.609562	14.5362	14.4585
0.747572	20.6142			0.623479	25.7438			0.592306	24.5303			0.723004	20.0826			0.740383	17.0535			0.927708	5.66759			0.613545	15.4004
0.752428	21.4541	21.248		0.627529	24.2237			0.596153	23.5202			0.727702	21.2429			0.745194	16.8771			0.933736	5.28502			0.617532	15.1023
0.757283	22.3203			0.631578	25.2855			0.6	22.8637	23.8526		0.732396	21.0825			0.75	16.8946	16.259		0.939758	4.48792			0.621515	15.3168
0.762139	22.7275			0.635628	24.061			0.603847	23.1566			0.737089	20.7076			0.754806	15.9189			0.945781	3.91181			0.625498	14.9939
0.766989	22.7539			0.639673	22.2205			0.60769	24.3838			0.741783	21.4182			0.759613	15.6578			0.951803	3.49871	5.79395		0.629481	15.9381
0.771844	24.7396			0.643722	22.35			0.611537	25.6262			0.746481	21.0341			0.764424	17.5741			0.957831	3.64637			0.633468	16.0274
0.7767	27.318			0.647772	23.2932			0.615384	23.5732			0.751175	19.9227	20.0636		0.76923	17.9095			0.963854	3.15439			0.637451	18.0502
0.781555	28.8203			0.651821	23.7714	23.8853		0.619231	24.4546			0.755868	20.0758			0.774036	18.3977			0.969876	3.55726			0.641434	17.5175
0.786411	26.4849			0.655871	25.2989			0.623078	24.3484			0.760566	20.7353			0.778847	17.508			0.975905	3.11874			0.64542	16.8561
0.791261	25.6479			0.659916	25.2796			0.626921	25.2753			0.76526	21.9127			0.783654	18.1895			0.981927	3.17963			0.649403	16.8474
0.796117	25.7805			0.663966	24.7764			0.630768	25.3156			0.769953	21.6268			0.78846	18.6487			0.987949	3.25252			0.653386	16.438
0.800972	26.485	25.3078		0.668015	24.1398			0.634615	24.8283			0.774647	19.9399			0.793266	18.4038			0.993972	3.20395			0.657369	17.2157	15.9781
0.805828	25.3062			0.672065	24.6313			0.638462	25.0151			0.779345	19.4518			0.798077	17.9811			1	3.3488	3.30771		0.661356	15.9864
0.810683	24.9836			0.676114	24.3827			0.642309	23.9394			0.784038	20.4436			0.802884	18.7353	17.7204						0.665339	17.3303
0.815533	25.1031			0.680159	24.4852			0.646152	25.4293			0.788732	19.9028			0.80769	19.5402							0.669322	17.3254
0.820389	25.6259			0.684209	23.2351			0.649999	24.7096			0.79343	19.8136			0.812501	18.9501							0.673309	17.9936
0.825244	26.9559			0.688258	23.8572			0.653846	24.3662	24.6016		0.798124	20.2166			0.817308	17.7268							0.677292	17.8191
0.8301	25.4061			0.692308	24.3626			0.657693	23.7677			0.802817	19.4331	20.3229		0.822114	17.1629							0.681275	17.8806
0.83495	23.9438			0.696353	25.8407			0.661536	23.3359			0.807515	18.9119			0.826925	17.2278							0.685262	16.899
0.839806	24.456			0.700402	27.108	24.7831		0.665383	23.3131			0.812209	18.1122			0.831731	17.1153							0.689245	16.8977
0.844661	24.4415			0.704452	27.0911			0.66923	23.8485			0.816902	18.5948			0.836538	16.5186							0.693227	17.1447
0.849517	24.9124			0.708501	25.572			0.673077	23.7499			0.821596	17.9506			0.841344	16.7007							0.69721	16.2038
0.854372	25.5256	25.1509		0.712551	24.5342			0.676924	25.1162			0.826294	17.7979			0.846155	16.7353							0.701197	16.6765
0.859222	26.2547			0.716596	22.4333			0.680767	24.6996			0.830987	16.499			0.850961	16.6983	17.4376						0.70518	17.2718
0.864078	25.0275			0.720645	23.315			0.684614	24.8207			0.835681	16.5872			0.855768	16.5925							0.709163	17.9146	17.1144
0.868933	23.2048			0.724695	23.3186			0.688461	24.2298			0.840379	16.267			0.860579	16.8583							0.71315	17.6702
0.873789	23.029			0.728744	23.6017			0.692308	23.6995			0.845073	16.2591			0.865385	17.1277							0.717133	17.4162
0.878644	22.3459			0.732794	23.6656			0.696155	23.7223			0.849766	15.3343			0.870191	17.8736							0.721116	17.3417
0.883494	20.9811			0.736839	22.8691			0.699998	24.692			0.85446	14.1102	16.9477		0.874998	16.3012							0.725099	17.5968
0.88835	19.0403			0.740889	23.904			0.703845	25.9166	24.224		0.859158	13.5855			0.879809	15.2531							0.729086	17.5866
0.893205	17.6384			0.744938	23.7503			0.707692	25.5858			0.863851	12.6581			0.884615	14.9949							0.733069	17.0764
0.898061	16.4385			0.748988	23.2124			0.711539	24.351			0.868545	11.4548			0.889421	14.6663							0.737052	16.7655
0.902911	14.3267	20.8287		0.753033	21.8378	23.7773		0.715382	22.1086			0.873243	10.8618			0.894232	14.3517							0.741038	16.9381
0.907767	15.73			0.757082	21.9796			0.719229	21.9849			0.877936	9.68261			0.899039	14.1493							0.745021	17.9296
0.912622	15.3219			0.761132	22.1439			0.723076	23.0051			0.88263	7.95373			0.903845	12.5751	15.5221						0.749004	17.9261
0.917478	15.0271			0.765181	22.9899			0.726923	25.3006			0.887323	5.7415			0.908651	10.7837							0.752987	18.4678
0.922333	14.4573			0.769231	22.3929			0.73077	25.495			0.892022	4.03363			0.913462	10.5159							0.756974	18.629	17.5309
0.927183	14.5759			0.773276	22.1519			0.734613	25.8409			0.896715	3.29488			0.918269	9.82096							0.760957	18.5724
0.932039	14.0926			0.777325	20.4953			0.73846	25.4469			0.901409	2.76268	8.20292		0.923075	10.1355							0.76494	18.4077
0.936894	15.6893			0.781375	21.3644			0.742307	23.1591			0.906107	2.24357			0.927886	9.98952							0.768927	18.7948
0.94175	14.1955			0.785424	21.1048			0.746154	22.9924			0.9108	1.60049			0.932692	10.0834							0.77291	18.4465
0.946605	12.241			0.789474	19.3032			0.750001	24.2475	24.1265		0.915494	1.23849			0.937499	9.78191							0.776893	18.5208
0.951456	11.7398	14.307		0.793519	18.8598			0.753844	25.5404			0.920187	0.966907			0.942305	8.66365							0.780876	16.8374
0.956311	10.629			0.797569	17.957			0.757691	25.9495			0.924885	0.926027			0.947116	7.78517							0.784863	16.5695
0.961167	9.01312			0.801618	18.5229	20.7721		0.761538	24.9066			0.929579	1.10981			0.951923	7.42024	9.498						0.788845	16.6816
0.966022	8.17786			0.805668	16.6386			0.765385	25.4268			0.934272	1.61218			0.956729	6.46572							0.792828	16.3489
0.970878	8.08312			0.809717	14.8953			0.769232	24.6742			0.938971	1.01217			0.96154	6.00087							0.796815	15.9939
0.975728	6.47172			0.813762	14.3847			0.773075	21.1364			0.943664	0.720993			0.966346	5.7216							0.800798	15.7187
0.980583	4.46157			0.817812	13.1844			0.776922	19.5757			0.948358	0.68652			0.971153	5.59285							0.804781	15.2997
0.985439	3.6574			0.821861	12.6723			0.780769	19.0783			0.953051	0.480853	1.14527		0.975959	5.10206							0.808764	15.9986	17.4601
0.990294	2.99387			0.825911	11.801			0.784616	16.3258			0.957749	0.423213			0.98077	5.11572							0.812751	16.1869
0.995145	2.49269			0.829956	9.65907			0.788459	16.591			0.962443	0.33568			0.985576	4.78547							0.816734	14.3713
1	2.86506	5.88454		0.834005	9.0766			0.792306	16.2652			0.967136	0.326887			0.990383	4.04012							0.820717	14.0027
				0.838055	8.76215			0.796153	15.947			0.971834	0.261433			0.995194	4.09924							0.824704	13.9556
				0.842104	9.74204			0.8	15.6212	20.5414		0.976528	0.317233			1	4.13699	5.10606						0.828687	14.5008
				0.846154	9.44324			0.803847	15.3308			0.981221	0.334193											0.83267	14.2727
				0.850199	8.85989	11.5933		0.80769	16.25			0.985915	0.278153											0.836652	14.0995
				0.854248	8.49598			0.811537	16.6919			0.990613	0.226633											0.840639	13.9928
				0.858298	7.58427			0.815384	17.4621			0.995307	0.268127											0.844622	12.7478
				0.862347	7.22462			0.819231	16.894			1	0.2298	0.300135										0.848605	11.2217
				0.866397	6.86003			0.823078	17.1262															0.852592	10.6559
				0.870442	5.67416			0.826921	18.197															0.856575	9.545	13.9466
				0.874492	5.13419			0.830768	15.9192															0.860558	8.99532
				0.878541	4.28067			0.834615	14.7045															0.864541	8.71635
				0.882591	4.07368			0.838462	13.154															0.868528	7.72354
				0.88664	3.98997			0.842309	11.6742															0.872511	7.08812
				0.890685	3.70709			0.846152	12.0884															0.876494	6.77233
				0.894735	3.14542			0.849999	10.6314															0.880481	5.79079
				0.898784	2.36798			0.853846	10.6389	14.7687														0.884463	5.65562
				0.902834	1.87285	4.95469		0.857693	9.40655															0.888446	5.15237
				0.906879	1.69288			0.861536	9.31572															0.892429	4.78284
				0.910928	1.50483			0.865383	8.00501															0.896416	4.84934
				0.914978	1.64549			0.86923	7.08835															0.900399	4.69204
				0.919027	1.64919			0.873077	6.66163															0.904382	4.2163
				0.923077	2.13844			0.876924	5.08584															0.908369	4.30142	6.64697
				0.927122	1.95961			0.880767	4.79044															0.912352	4.13703
				0.931172	1.18129			0.884614	3.35605															0.916335	3.73471
				0.935221	0.675742			0.888461	3.03538															0.920318	3.56989
				0.939271	0.505726			0.892308	3.61377															0.924305	3.17959
				0.94332	0.394847			0.896155	3.43187															0.928288	2.62741
				0.947365	0.271147			0.899998	3.28785															0.93227	2.48494
				0.951415	0.430242	1.17079		0.903845	2.98487	5.38949														0.936257	2.5104
				0.955464	0.300705			0.907692	3.24241															0.94024	2.76005
				0.959514	0.346532			0.911539	2.67427															0.944223	2.44944
				0.963559	0.348905			0.915382	1.87119															0.948206	2.45312
				0.967608	0.232342			0.919229	1.64644															0.952193	2.50426	2.99066
				0.971658	0.282189			0.923076	1.89652															0.956176	2.67997
				0.975707	0.292811			0.926923	1.31569															0.960159	2.13061
				0.979757	0.210916			0.93077	1.38383															0.964146	1.86131
				0.983802	0.249921			0.934613	0.883832															0.968129	1.85575
				0.987851	0.221277			0.93846	0.724782															0.972112	1.62795
				0.991901	0.222811			0.942307	0.603514															0.976099	1.36232
				0.99595	0.196321			0.946154	0.626227															0.980081	1.45502
				1	0.165	0.255811		0.950001	0.724773	1.46612														0.984064	1.4888
								0.953844	0.505095															0.988047	1.20345
								0.957691	0.522777															0.992034	1.0602
								0.961538	0.464695															0.996017	1.21636
								0.965385	0.623732															1	1.02857	1.63107
								0.969228	0.590945
								0.973075	0.510095
								0.976922	0.580809
								0.980769	0.517673
								0.984616	0.77015
								0.988459	0.987459
								0.992306	1.41165
								0.996153	1.77279
								1	1.52526	0.829471
