# Supplementary material for: Crumbs organizes the transport machinery by regulating apical levels of PI(4,5)P2 in Drosophila
Source: eLife. 2019 Nov 7;8:e50900. doi: 10.7554/eLife.50900 (PMC6881148; doi:10.7554/eLife.50900)
Supplement: Figure 3—source data 2. [file elife-50900-fig3-data2.xlsx]

## Sheet: Image6
X0	Y0	Y1	Y2	Y3	Y4	Y5	Y6	Y7	Y8	Y9	Y10	Y11	Y12	Y13	Y14	Y15	Y16	Y17	Y18	Y19	Y20	Y21	Y22	Y23			Ap-Basal to 1	Average intensities
0	37.3168	29.852	39.45	39.733	47.5308	38.447	27.398	29.3256	31.886	47.676	40.6371	47.202	24.655	41.0734	32.3233	24.0992	69.0694	37.936	26.4932	21.7393	20.8717	44.4124	31.7254	33.9059			0	36.0316
0.0917	35.7602	31.475	43.822	49.825	48.1261	36.091	31.497	31.1748	33.018	40.617	40.8196	53.567	20.167	42.6992	41.9521	29.0123	58.596	39.75	28.402	21.9064	16.2033	41.5376	38.9059	37.6862			0.00520955	37.1921
0.1834	38.767	27.78	45.346	34.806	48.056	38.026	36.962	32.4091	35.902	44.627	38.5483	45.575	25.678	35.7459	51.2854	29.6744	56.4902	42.102	35.9747	21.3166	19.9698	42.9713	40.5223	42.5196			0.0104191	37.9606
0.275	32.1048	37.427	49.487	33.271	42.9283	41.936	39.65	35.8503	35.753	44.399	42.5646	48.697	30.71	33.2728	54.5677	27.6537	66.2538	35.165	34.6488	24.607	16.8511	44.468	39.7673	30.2481			0.015623	38.4284
0.3667	41.1632	44.811	58.999	28.668	51.5084	40.241	38.995	38.3195	31.156	41.535	38.2342	44.421	25.502	33.0604	51.436	32.5097	74.84	27.485	35.1523	23.8347	23.4191	40.3644	40.4164	37.2691			0.0208325	39.3058
0.4584	40.3743	43.568	76.161	32.218	52.0409	43.067	39.779	40.8799	40.617	41.719	44.9799	39.891	26.858	36.2712	48.5137	41.9775	77.0187	24.781	30.0722	29.8383	31.7831	34.7856	47.6111	43.1218			0.0260421	41.997
0.5501	33.4221	57.429	95.991	34.961	50.7446	45.506	41.126	48.3489	40.301	32.71	35.2497	43.278	27.733	42.1188	54.2204	45.2189	66.8181	27.846	24.2706	27.8443	29.194	33.1317	38.8152	37.0174			0.0312516	42.2207
0.6418	38.7306	54.119	115.355	37.376	42.0905	43.281	38.776	54.5181	37.2	47.324	46.8133	40.944	28.42	41.5724	54.4642	52.8201	61.3314	29.228	30.0604	25.2827	29.4391	34.5086	37.1576	36.7862			0.0364611	44.0666
0.7334	43.6445	57.458	103.879	52.902	51.1155	51.953	52.296	61.3785	42.473	57.269	41.8408	42.704	31.72	51.2598	62.6383	47.2576	53.4997	24.005	31.0791	30.4269	25.2457	28.3711	39.6188	37.5599			0.041665	46.7331
0.8251	66.3817	71.16	98.456	52.738	72.4903	57.85	57.685	71.715	56.626	61.451	45.7702	43.991	34.972	51.1321	60.5235	51.2912	49.2993	28.653	24.9754	29.8851	28.6716	31.8698	44.0917	30.0927			0.0468746	50.9071
0.9168	79.0319	73.098	107.339	52.158	74.6136	58.276	82.836	69.7157	69.467	64.183	51.1877	37.229	40.385	64.5595	48.0352	58.3891	49.4326	25.344	29.5135	31.9964	27.7803	29.2832	45.4952	29.1775			0.0520841	54.1053
1.0085	65.6118	87.048	114.033	59.659	84.2209	59.357	96.835	80.766	58.188	56.325	51.5117	31.416	39.655	71.9661	54.1471	56.6206	47.0572	47.745	33.9211	31.3399	26.7083	29.086	55.4473	38.2402			0.0572936	57.371
1.1001	62.9124	92.294	110.479	57.998	81.5928	82.39	115.704	87.7811	62.629	62.504	41.1315	36.803	42.128	68.0494	47.2754	50.723	51.877	44.806	37.4455	41.53	31.3858	31.3994	69.4923	31.4503			0.0624975	60.0742
1.1918	57.2333	111.77	106.893	60.071	76.1816	101.607	110.38	89.3902	69.718	52.673	49.3654	33.581	45.767	64.0623	50.8384	48.85	60.5419	41.039	54.8488	33.7634	27.708	43.5991	80.1884	49.5743			0.0677071	63.3185
1.2835	58.781	138.507	103.069	67.066	79.2795	97.609	97.711	87.6968	72.454	59.824	53.2424	40.263	54.186	61.2196	56.236	47.1817	45.2634	40.622	51.1209	45.0807	35.5169	44.4329	68.0098	57.1854			0.0729166	65.0649
1.3752	66.1577	142.885	104.59	74.479	68.8839	89.167	78.899	77.0568	82.817	39.133	54.3938	45.402	51.517	69.9607	48.6439	38.6445	38.5264	34.48	54.8763	50.1967	43.7291	43.4579	61.3824	72.1038			0.0781262	63.8076
1.4669	76.4066	121.627	94.902	74.078	52.1518	83.246	48.641	72.6948	99.896	46.309	74.2527	48.987	38.071	75.7672	46.6577	37.2497	26.3462	40.647	51.4683	41.6901	45.3935	49.1352	53.2999	78.7737			0.0833357	61.5705
1.5585	72.7586	100.87	79.441	65.391	63.7533	77.152	26.752	56.8792	96.374	46.053	75.2499	59.5	38.257	70.1654	36.593	36.0643	35.3768	54.954	53.2797	56.5276	54.7676	47.8818	50.8829	72.1659			0.0885396	59.4621
1.6502	71.59	85.146	63.716	60.602	52.3559	59.779	23.456	43.1749	100.039	35.261	93.8146	52.138	42.485	57.1965	48.4089	32.6062	34.2289	67.276	44.4437	47.4593	52.623	52.4705	38.1036	70.1842			0.0937491	55.3566
1.7419	77.342	88.53	62.375	80.268	48.3904	54.154	16.744	38.9083	93.307	38.441	87.3808	49.636	33.664	51.6339	42.0926	32.0388	25.8535	76.577	37.8851	47.582	51.618	67.282	38.9811	64.6153			0.0989587	54.3875
1.8336	85.9199	79.53	53.686	86.046	45.4797	39.025	19.717	31.8577	90.291	38.942	84.6509	53.845	35.675	52.5886	45.1777	25.8012	19.9171	65.778	43.8442	44.8773	50.9453	67.5772	43.7504	56.5668			0.104168	52.562
1.9253	82.8455	90.533	52.206	72.598	43.941	37.993	19.042	26.8585	79.918	44.714	81.8315	59.402	36.72	57.7825	43.0165	22.7812	20.2331	70.962	42.4887	34.4915	50.478	71.4357	45.3612	43.9299			0.109378	51.3151
2.0169	82.0996	97.047	42.742	64.315	43.5619	32.527	20.67	25.7313	77.033	47.48	67.0517	63.959	43.153	47.7513	42.7187	32.9523	21.3183	65.612	47.0462	38.5404	56.2321	68.4107	47.1175	44.9257			0.114582	50.8332
2.1086	75.2719	94.909	39.931	57.034	38.1941	32.873	16.622	26.1175	70.271	66.77	65.1814	70.484	40.179	47.008	38.7199	33.0683	19.5154	67.864	58.8517	32.3624	43.7416	67.4762	37.5037	36.8029			0.119791	49.0313
2.2003	68.0075	76.927	50.464	49.214	33.2812	28.27	12.743	20.393	66.221	83.483	41.4844	54.46	31.607	49.0256	37.0019	31.2965	25.5736	63.854	52.5687	38.821	36.0549	57.5828	33.7616	37.1667			0.125001	44.9693
2.292	71.0219	53.34	49.643	57.603	27.5486	41.059	22.061	20.802	74.646	86.042	38.7405	50.848	38.923	47.9897	27.4967	35.6097	32.6914	69.428	46.5004	53.1099	28.273	59.5987	34.7948	30.6342			0.13021	45.7669
2.3836	64.6521	39.009	59.714	68.173	37.8776	39.121	17.361	23.2015	70.413	113.757	48.5542	47.095	38.934	59.9814	40.0062	40.1175	34.2433	86.105	42.8874	51.5442	18.3888	64.4547	37.5698	29.2543			0.135414	48.8506
2.4753	53.5028	30.933	61.236	63.235	31.4963	37.749	16.826	20.3931	60.039	107.288	36.203	47.132	39.947	55.3879	38.2462	43.9161	30.089	100.117	34.0545	47.6204	24.8793	65.0697	40.1637	30.3301			0.140624	46.4939
2.567	46.0232	33.756	56.029	62.139	31.3793	26.546	23.944	23.2963	52.035	98.058	38.6595	53.238	35.464	52.4567	35.6082	43.2962	37.5845	93.509	35.6718	46.8638	23.5081	66.6096	33.1305	31.0355			0.145833	44.9934
2.6587	42.4858	25.339	39.92	58.367	34.0182	26.811	24.909	33.3097	38.774	85.146	39.2041	44.405	33.174	52.3313	27.2063	38.4663	45.8652	76.436	54.4978	40.6424	26.5472	78.3129	35.4702	34.4044			0.151043	43.1684
2.7504	41.9138	31.34	30.257	54.888	31.372	30.012	18.725	31.8444	39.809	71.408	47.7784	35.763	36.705	59.1292	29.1015	36.6316	44.8897	60.231	66.4535	46.9053	22.97	71.5348	41.7353	38.76			0.156252	42.5066
2.842	37.1046	22.726	28.631	49.166	31.0587	31.046	18.338	21.0357	32.523	49.168	47.0859	33.244	39.877	46.6075	29.0371	37.0385	55.2578	48.313	69.1826	46.5021	22.5549	73.2841	35.8793	35.4104			0.161456	39.1696
2.9337	32.4714	21.732	26.743	37.794	32.8159	26.412	22.98	14.1687	32.129	43.39	48.6421	42.47	46.228	44.9684	25.3025	29.9857	43.7282	52.991	51.7961	32.2743	24.378	74.5541	35.6217	37.8481			0.166666	36.726
3.0254	33.0154	22.667	21.848	36.901	31.6425	21.204	18.446	23.4485	36.957	50.199	39.6989	32.529	50.749	38.7708	20.9042	39.1143	41.848	49.889	44.9475	32.2112	23.0685	52.6279	34.7309	35.6468			0.171875	34.711
3.1171	35.2476	20.386	21.984	42.676	26.635	19.556	11.225	25.9127	31.092	52.509	39.6546	35.233	50.371	43.2755	17.5708	28.8947	36.6011	62.794	45.4448	32.3414	30.4466	43.0678	18.2726	41.3391			0.177085	33.8554
3.2088	36.7326	19.532	25.033	45.002	32.4783	24.18	8.045	33.6595	29.011	60.183	32.6667	36.501	50.239	42.7505	24.3302	28.6003	36.5663	65.642	48.219	24.5635	40.9437	44.816	19.6156	32.816			0.182294	35.0886
3.3004	30.8935	11.989	32.984	46.359	37.7913	22.94	7.321	25.1513	31.614	57.54	35.8316	30.421	49.379	36.5717	30.8129	33.1124	35.8828	52.865	46.6189	29.3111	46.611	40.7932	21.0605	30.868			0.187498	34.3634
3.3921	28.0746	16.772	35.939	47.372	37.8799	22.634	7.671	22.8667	30.832	64.363	43.1157	42.741	34.901	38.7989	34.3816	39.4045	28.5902	48.701	51.1159	29.799	52.7052	48.3466	33.5428	23.4797			0.192708	36.0011
3.4838	24.0314	18.937	28.828	40.183	31.3273	28.422	5.607	32.4426	30.918	71.617	40.4358	34.138	34.732	46.7547	29.1819	45.1624	31.543	44.159	60.8759	35.7607	56.3464	54.4406	35.3567	26.6128			0.197917	36.9922
3.5755	24.4201	23.199	34.396	35.337	39.7627	25.557	11.197	28.1622	25.85	60.784	43.2959	23.842	30.303	48.3317	23.1752	71.2597	35.4324	41.076	59.5692	34.6936	70.4733	55.3496	29.5822	29.8536			0.203127	37.7043
3.6672	22.3067	20.062	39.762	31.219	40.774	21.095	11.669	36.7164	28.485	42.286	49.3651	25.944	28.742	49.6518	22.9457	69.6785	32.8877	46.354	63.0117	35.7219	51.2576	55.1884	25.6006	35.9558			0.208336	36.945
3.7588	28.9117	24.876	29.795	33.191	29.169	20.638	5.899	30.5532	32.477	36.024	47.3332	30.796	22.208	48.0157	35.5459	64.6411	30.3925	46.623	58.0234	26.9175	45.9168	50.9239	20.8936	36.3293			0.21354	34.8372
3.8505	28.9556	24.704	33.945	30.633	23.0606	22.127	8.178	26.9704	35.312	33.403	42.1199	36.576	28.013	48.9679	43.9292	61.2887	26.7598	55.367	38.8738	31.0818	37.7173	48.1537	21.6268	46.4734			0.21875	34.7599
3.9422	30.3419	25.761	31.891	32.934	29.0623	16.812	7.923	20.0798	29.394	27.992	38.2674	33.54	28.259	57.7993	30.4878	51.1295	30.0669	53.743	40.3245	40.4629	42.5919	51.0347	29.5846	34.4055			0.223959	33.912
4.0339	38.5564	19.868	27.125	29.391	26.1072	25.86	5.623	15.2074	29.817	26.582	36.1769	28.787	22.408	58.8377	29.4309	55.4945	30.0415	60.951	46.0125	41.8455	33.4715	48.2762	32.1996	24.5072			0.229169	33.024
4.1255	24.6957	14.922	24.692	31.665	24.3028	29.609	3.566	20.5215	19.546	27.309	36.5639	20.177	27.206	54.1021	35.5226	54.3036	39.5681	62.337	37.8484	41.2808	32.1838	46.1767	40.8797	23.2544			0.234373	32.1764
4.2172	26.7298	18.269	34.406	30.528	29.1499	25.588	4.543	21.9627	18.653	17.101	35.615	20.827	33.481	47.0608	27.6708	46.4645	44.5787	57.607	32.8827	30.5957	26.4759	48.5939	26.5284	24.7192			0.239582	30.418
4.3089	31.719	18.531	26.726	30.149	24.6025	21.832	4.842	23.4557	26.344	31.108	31.5615	30.737	43.591	50.0202	29.8979	34.2807	35.0137	57.757	33.9908	32.021	28.0142	48.7058	32.1103	30.9533			0.244792	31.5818
4.4006	24.2181	16.864	23.725	37.326	29.5562	9.326	4.974	22.2223	19.789	35.022	32.3018	37.067	48.154	60.5296	30.5297	33.0499	32.2726	49.123	39.4511	26.3849	24.9614	43.2621	33.3308	25.1733			0.250001	30.7756
4.4923	15.9816	15.019	23.111	41.065	21.0495	6.297	7.019	15.4113	16.916	35.408	34.026	47.52	34.156	50.9096	21.5001	31.9766	36.0097	37.279	44.449	29.5383	28.8403	37.558	29.0824	27.3732			0.255211	28.6456
4.5839	14.6259	11.988	21.801	42.916	17.3232	5.312	8.773	13.449	16.363	39.089	36.7786	55.815	42.386	53.8446	26.2179	33.8051	37.6217	29.806	47.5664	23.7772	30.1864	29.1494	37.9421	30.854			0.260415	29.4746
4.6756	16.4681	11.869	24.184	34.637	19.2478	5.279	11.95	13.9743	17.626	38.717	44.9261	42.127	40.26	53.8185	28.9146	44.2344	35.3078	27.411	44.5347	22.1388	26.3125	35.6871	30.9256	25.3345			0.265624	28.9952
4.7673	12.5581	13.858	23.624	30.275	23.9076	7.059	13.823	12.4446	21.48	29.232	36.5369	38.696	58.001	50.2748	29.3888	45.7058	33.5191	39.476	50.6783	34.7628	25.6524	45.9094	29.8595	20.133			0.270834	30.2856
4.859	10.0854	11.171	23.567	32.403	26.5359	7.428	11.381	11.646	24.196	28.983	29.8744	32.079	58.203	42.4526	37.7566	30.7787	28.3261	55.032	43.3999	23.19	35.8829	37.7772	33.2	22.3653			0.276043	29.0714
4.9507	7.0104	13.254	20.576	30.855	36.2708	6.421	8.309	9.4855	29.46	25.791	29.345	34.225	57.086	40.5084	40.9099	23.8016	37.0876	50.469	33.2139	27.2431	35.6173	42.9142	27.3701	20.8246			0.281253	28.6687
5.0423	7.97	15.408	28.295	27.555	30.7405	7.896	10.145	8.9549	29.737	24.434	26.4778	27.62	52.143	45.124	34.7923	20.514	31.4363	41.957	28.877	23.4395	31.5993	43.899	26.8938	28.6961			0.286457	27.2752
5.134	8.4752	18.384	25.779	27.277	27.7496	9.861	11.44	8.4987	23.065	29.977	23.0877	23.796	55.904	37.3644	26.8699	18.6055	43.9404	31.826	36.2356	20.8211	27.6439	42.6745	25.1399	27.5929			0.291666	26.3337
5.2257	11.5079	12.56	25.207	30.361	26.846	5.507	8.673	7.6596	22.375	22.597	25.4277	24.823	39.354	29.259	23.7727	26.4673	34.51	31.629	39.5398	37.1389	28.0476	36.2392	25.4023	31.678			0.296876	25.2742
5.3174	12.1259	16.846	22.158	30.739	18.8367	9.038	16.211	9.5077	22.241	23.26	28.3158	21.778	38.335	29.5268	25.7431	23.2921	32.6956	31.753	36.0441	36.4094	24.1006	39.6666	18.5758	30.9122			0.302086	24.9213
5.409	12.815	17.863	31.608	26.606	20.9561	17.231	13.086	14.5082	21.266	24.505	28.6652	23.847	25.647	33.0804	20.4051	23.3948	26.0643	28.811	37.7092	30.4232	22.3037	30.2447	31.5403	33.5374			0.307289	24.8382
5.5007	14.3418	14.548	45.912	36.871	19.2591	17.411	15.812	11.1213	20.433	27.365	30.2702	20.429	25.968	34.4563	26.372	26.7145	20.1728	32.395	32.7362	37.7435	29.2131	35.6794	38.6994	28.1939			0.312499	26.7549
5.5924	12.3322	14.564	30.393	33.944	19.4494	7.095	14.52	7.9015	22.732	26.607	27.4218	30.558	27.354	36.6261	23.7914	28.8724	23.7618	29.48	28.9337	37.7802	29.4064	34.5791	36.7621	31.0799			0.317708	25.6644
5.6841	12.8271	15.248	35.347	40.192	13.4703	9.323	12.909	11.974	22.173	30.149	30.3516	31.435	23.747	38.0282	28.0893	27.902	23.3115	30.061	27.2522	31.4914	30.7848	26.7785	47.4045	30.49			0.322918	26.2808
5.7758	13.3859	15.754	37.761	36.526	14.4074	15.111	12.366	12.7903	23.019	40.403	33.7143	24.698	25.374	32.7654	32.5807	32.5911	26.9285	29.489	19.828	30.4814	30.7755	25.5729	45.0537	26.2877			0.328128	26.5693
5.8674	13.3216	13.724	29.457	32.666	13.3171	14.82	9.081	9.7168	33.205	37.487	39.0822	20.329	32.677	32.8034	33.1296	35.7151	22.4585	25.701	25.7602	27.0596	36.6746	37.7464	41.0905	26.2757			0.333331	26.8041
5.9591	12.4986	9.817	36.491	35.078	20.4044	14.587	6.506	9.729	34.842	38.2	53.4566	18.601	27.043	33.1643	29.6709	42.657	21.8636	22.141	33.3532	26.3891	34.2608	39.8376	31.1735	29.9922			0.338541	27.5732
6.0508	10.7164	9.83	24.247	37.125	22.9274	11.408	9.244	10.2454	33.878	38.521	52.9521	20.03	33.9	33.1453	20.874	43.0149	19.985	29.545	26.9679	29.9257	34.8804	56.321	33.3934	28.13			0.343751	27.967
6.1425	7.3611	11.506	26.683	37.466	23.2998	7.342	5.351	9.0182	33.302	27.264	50.9816	19.49	24.047	36.5737	29.3103	43.2488	29.9968	33.799	31.9663	34.5139	30.8387	46.2161	37.9455	28.9507			0.34896	27.7696
6.2342	6.5016	7.87	22.269	32.82	20.0302	4.596	6.682	7.773	26.516	35.525	38.2168	22.801	35.642	29.4792	20.0798	33.5735	33.6486	27.151	27.9013	34.4932	30.0837	42.7357	33.4532	22.2074			0.35417	25.0854
6.3258	8.9644	10.817	18.502	30.27	27.6536	3.782	6.348	7.0435	34.744	25.918	33.1445	22.929	39.327	35.2726	23.462	28.6321	29.3404	28.67	24.5497	38.1932	27.3042	41.8872	27.6516	22.5669			0.359373	24.8739
6.4175	6.8296	10.655	16.374	22.401	23.5165	3.643	3.812	5.4615	26.672	28.632	35.6815	19.443	34.925	33.6519	23.752	27.0551	28.5007	25.198	22.2328	34.7386	23.7763	47.2124	25.3864	16.7551			0.364583	22.7627
6.5092	13.9203	9.437	21.022	26.395	29.2212	5.28	2.685	4.3173	31.912	22.461	27.3375	26.556	32.84	31.0465	21.336	33.3907	26.3699	30.539	21.8889	33.6721	25.8049	49.9724	29.5318	25.4188			0.369793	24.2648
6.6009	17.9188	13.183	23.053	29.963	28.3091	4.324	5	6.3116	21.043	24.508	31.8321	31.4	33.07	31.9342	23.5221	34.5362	19.1819	34.642	19.6509	27.7632	28.4778	48.7059	30.4191	22.5907			0.375002	24.6391
6.6925	17.6076	23.424	23.863	24.898	29.2445	6.769	3.58	6.6634	20.945	24.762	28.2753	31.423	26.693	26.8365	33.2401	31.2988	18.2075	34.186	27.3296	29.8381	24.4535	42.1713	35.8239	28.1571			0.380206	24.9871
6.7842	16.0567	29.949	24.456	24.901	29.2886	4.488	5.881	9.333	18.849	31.372	32.8864	30.545	25.105	30.8622	37.8892	38.9455	19.9772	24.94	22.944	26.241	25.086	37.4698	33.9106	23.9861			0.385416	25.2234
6.8759	19.1131	34.197	24.974	36.369	27.3449	3.293	5.75	5.8848	23.021	34.397	43.0942	24.032	28.007	34.666	37.6449	54.0797	25.0012	25.945	23.6734	25.6854	17.7551	42.0157	25.7505	36.2047			0.390625	27.4124
6.9676	17.5949	29.077	34.518	29.445	24.9694	2.982	8.069	3.8502	22.207	26.635	50.3596	26.222	21.862	31.2697	28.5887	55.9859	24.5017	26.855	19.239	22.8007	20.0505	52.2804	27.1157	35.8116			0.395835	26.7621
7.0593	13.1297	31.045	25.472	32.612	28.3039	4.451	6.672	6.6344	20.457	25.562	42.8147	32.079	28.959	33.3113	27.1756	39.9539	24.902	30.68	17.3481	29.4511	15.083	47.1296	31.7596	31.5628			0.401044	26.1062
7.1509	20.1251	28.728	28.485	29.567	29.8556	4.182	7.269	5.2536	18.835	24.224	44.3365	30.377	24.974	36.5352	23.8071	26.7514	23.2128	27.97	23.3209	30.4731	13.8087	33.8773	37.0576	40.6463			0.406248	25.5697
7.2426	11.7907	35.72	17.737	31.991	24.947	5.212	7.898	6.4941	20.597	23.646	36.0996	22.767	23.597	29.7968	29.1938	24.3625	21.1515	33.824	20.0741	26.4708	14.0817	25.2618	39.7913	28.8531			0.411458	23.3899
7.3343	11.267	44.837	17.428	23.44	23.9102	4.572	6.35	6.2856	14.589	25.443	38.0105	20.514	24.125	27.9723	35.6867	25.419	20.9632	32.334	33	25.2508	15.8387	25.0233	28.9623	28.3484			0.416667	23.3154
7.426	12.9795	40.766	13.822	27.449	19.6794	4.749	5.857	4.9472	21.744	28.924	23.9816	24.803	22.297	21.8523	31.5642	18.6093	20.4525	25.559	32.124	26.5224	13.6734	19.1272	26.2927	22.0656			0.421877	21.2434
7.5177	13.0352	27.337	13.751	22.627	22.4959	5.684	6.393	5.2604	19.505	19.305	22.2401	24.672	23.215	20.9253	34.6039	15.3546	27.2589	19.804	37.3037	22.4582	15.3166	20.6435	27.9435	31.0504			0.427086	20.7576
7.6093	10.9304	22.31	7.933	21.239	17.0066	4.568	7.039	3.609	25.936	22.406	21.6465	33.699	29.676	18.8955	31.8913	20.5628	26.5218	21.418	34.6261	26.519	14.5562	24.6591	26.5639	28.2457			0.43229	20.9357
7.701	13.9909	18.46	10.933	30.939	16.8951	4.558	6.748	3.5794	20.671	23.295	17.5798	32.419	33.127	22.2752	20.9845	18.0157	24.2832	18.942	32.8873	27.5013	15.5358	27.1821	25.4917	29.2609			0.4375	20.6481
7.7927	15.5142	17.829	10.352	33.907	16.9127	3.273	6.305	4.4517	27.041	21.259	18.6764	30.007	27.615	30.5041	21.3552	22.1902	20.0725	30.466	28.9939	24.7128	21.382	19.9376	27.8513	27.7567			0.442709	21.1819
7.8844	15.9852	18.641	11.078	32.626	16.2025	4.863	6.304	3.7554	21.056	22.162	30.6459	27.04	32.991	22.1279	23.7168	21.6827	21.3403	30.336	34.4368	19.6698	15.1599	26.1639	34.9079	31.1028			0.447919	21.8331
7.9761	12.8958	15.605	11.859	35.227	17.0008	3.866	6.56	3.9901	20.614	19.465	27.4221	29.499	24.541	27.5681	19.8706	24.1098	27.1028	32.944	28.8228	21.6772	15.7855	31.1458	32.9464	31.3359			0.453128	21.7439
8.0677	11.5989	13.715	9.138	40.962	16.4482	6.029	8.399	5.3217	26.522	24.436	24.0855	28.385	25.393	24.7299	24.6579	22.3892	29.547	31.041	20.5329	20.9167	16.4898	30.6209	42.3495	34.1927			0.458332	22.4125
8.1594	12.3684	15.532	11.67	36.555	15.3113	7.399	7.55	8.4739	24.901	25.8	27.5425	22.719	24.176	20.1242	16.2339	24.5704	24.8122	27.038	22.1106	27.546	19.0451	23.5424	43.6042	41.5838			0.463542	22.092
8.2511	10.8296	16.241	15.53	30.504	10.8258	5.088	6.255	8.4652	17.758	38.025	26.045	24.801	28.106	20.7033	17.7841	24.8182	27.0482	22.83	20.6639	24.816	17.1156	28.5937	44.7533	47.5683			0.468751	22.2987
8.3428	13.1088	12.472	12.072	29.395	10.3989	6.802	5.074	11.0475	15.452	33.527	23.8644	28.583	20.675	24.8835	21.529	16.7691	26.8651	29.801	20.8137	21.9075	20.0308	33.0187	48.3388	47.2444			0.473961	22.2364
8.4344	18.1716	11.816	10.632	22.77	9.123	6.156	5.088	8.6188	24.637	31.532	21.801	24.701	26.715	22.9207	21.4629	20.1059	20.4309	24.641	22.0859	25.1083	17.5442	28.1818	51.2527	33.4231			0.479165	21.205
8.5261	14.7832	14.498	13.763	25.505	13.8151	6.874	9.183	11.8918	22.994	27.966	21.7878	21.908	29.672	25.2619	19.1796	11.8051	23.3544	25.208	18.3454	18.7157	19.9703	28.0669	56.5985	39.1163			0.484374	21.6776
8.6178	13.6451	13.369	11.137	35.111	20.3111	4.454	18.112	10.2703	19.903	27.926	26.4615	30.185	32.629	28.5604	21.3173	19.382	30.4458	21.526	15.9196	22.2744	14.5332	25.7932	51.4063	36.9358			0.489584	22.9837
8.7095	18.027	12.767	13.193	32.096	21.8897	2.886	34.848	13.8218	21.445	19.319	26.8852	24.618	35.757	26.4572	20.8297	19.8992	28.7419	19.429	17.2622	24.1674	15.0097	28.0586	45.0415	37.5742			0.494793	23.3343
8.8012	22.0833	11.998	13.355	29.606	20.5695	4.316	22.654	15.4347	21.82	21.655	32.2785	25.455	35.868	25.7093	23.4839	18.4178	21.0532	17.262	17.7849	22.1019	12.8421	23.3813	44.7066	40.6225			0.500003	22.6858
8.8928	22.1201	11.359	11.199	30.045	20.5149	3.906	22.021	8.5034	22.103	19.279	32.1429	23.343	29.55	24.3049	20.7687	19.6335	27.1851	17.499	23.1322	29.833	18.9476	15.6831	39.1573	43.7341			0.505207	22.3319
8.9845	13.719	11.166	10.462	26.722	18.6431	5.512	13.501	7.647	24.35	24.623	30.4438	24.698	27.234	33.7748	24.6566	20.1071	35.6395	19.569	23.8438	35.1375	21.4945	15.8157	32.3995	34.92			0.510416	22.3366
9.0762	11.0405	13.131	13.582	24.11	15.9872	4.687	13.442	3.8483	27.826	21.58	29.4922	22.253	22.695	27.9009	25.2456	22.6665	35.3284	22.446	26.4375	29.1208	17.1583	16.5952	30.6714	47.5268			0.515626	21.8655
9.1679	9.7194	9.807	11.793	31.645	14.3029	6.556	7.187	5.6723	18.862	26.082	32.2799	23.222	25.599	37.8467	21.9143	26.4907	29.8956	28.185	23.2638	30.2651	16.0487	16.5809	23.9305	60.7802			0.520835	22.4137
9.2596	14.4648	12.893	9.75	31.199	17.1848	8.011	6.056	2.4139	21.84	27.867	25.0433	19.717	25.057	30.8737	26.0502	26.1559	25.8721	26.941	27.9666	23.5517	18.4856	15.8939	24.5772	62.4721			0.526045	22.0974
9.3512	12.0636	13.797	9.428	26.021	19.7369	5.913	10.774	2.9149	20.424	25.404	30.5656	22.742	21.159	32.5472	29.6472	23.3572	25.7628	27.083	35.5567	23.7939	20.0193	16.7841	27.0492	69.0407			0.531249	22.9827
9.4429	13.8003	10.522	14.97	33.449	17.0573	6.45	4.831	2.6186	25.872	31.055	35.1022	20.823	18.27	37.8897	22.0103	19.5143	24.9895	26.025	33.5539	20.4781	18.9514	11.9826	19.9568	68.5678			0.536458	22.4475
9.5346	14.1128	10.372	13.138	34.34	21.5244	7.073	6.212	2.8466	25.183	35.252	43.6789	28.205	21.292	32.0114	26.8271	19.8307	35.9532	22.129	35.4368	18.4569	12.8256	13.1794	17.9461	51.5815			0.541668	22.892
9.6263	9.6427	16.509	17.914	32.362	17.4075	6.865	6.62	2.6185	23.098	29.39	36.3257	24.322	20.628	33.1301	26.6607	17.9669	40.3363	24.869	31.5555	23.0304	12.3653	12.9146	21.9829	33.2004			0.546877	21.7381
9.7179	9.403	16.083	15.502	40.853	14.9151	6.437	6.308	2.8686	20.029	29.032	29.7691	29.294	26.894	34.5791	37.3922	17.2416	49.5206	24.35	23.9231	19.9475	13.3309	8.8012	26.3458	36.2893			0.552081	22.4629
9.8096	12.1928	8.243	20.965	40.976	15.2979	3.988	5.677	4.15	21.478	34.879	24.6858	27.107	20.879	23.9898	30.0964	15.8398	42.9277	28.733	22.5618	17.8813	9.835	10.41	26.4775	34.243			0.557291	20.9797
9.9013	17.4992	8.854	19.652	29.206	12.635	3.594	6.699	3.0666	18.882	33.843	25.8847	38.67	26.221	18.9536	24.7254	16.9547	31.6682	36.641	19.4219	14.1111	12.0147	11.4351	22.0484	35.8071			0.5625	20.3537
9.993	16.4262	12.709	24.725	32.935	11.5422	4.002	3.402	9.5843	21.594	30.714	32.2862	35.317	25.926	20.7139	24.3148	17.8919	30.7624	32.734	23.9221	17.7609	13.4153	14.313	19.4086	39.7126			0.56771	21.5047
10.0847	13.4635	9.414	20.842	24.714	10.3143	1.755	4.164	16.2069	21.3	29.649	32.746	23.355	25.984	25.9859	25.8311	19.728	23.7355	35.026	22.1592	17.7845	11.6232	10.725	23.4555	42.3111			0.572919	20.5114
10.1763	11.3048	10.112	21.173	25.533	8.1147	1.797	1.022	21.1965	24.385	28.437	31.7878	25.514	24.715	23.7142	22.9062	25.6494	28.4383	34.359	17.0688	20.2182	16.6484	15.5571	18.3632	37.425			0.578123	20.6433
10.268	14.1193	9.674	19.27	30.498	11.1623	1.821	2.423	13.2731	27.371	23.098	26.2008	23.081	26.346	31.4928	19.7131	32.8644	25.1276	35.348	21.7327	19.9266	16.2943	11.1704	18.8508	39.3722			0.583333	20.8429
10.3597	20.589	7.07	14.298	25.612	9.9408	2.941	1.183	8.2796	24.473	26.055	27.7993	28.353	23.814	29.4708	24.6513	23.5989	21.3435	25.32	24.9853	19.982	15.2449	17.5683	19.6975	37.5407			0.588542	19.9921
10.4514	29.6926	9.877	12.756	31.127	8.6868	5.406	2.202	8.1093	28.295	25.977	26.5555	29.217	28.61	35.779	23.5045	28.1592	21.2579	20.338	24.7704	24.4514	19.7973	22.0808	15.3612	32.2004			0.593752	21.4255
10.5431	32.7221	10.651	18.832	32.05	13.2858	4.449	1.698	9.9739	21.956	26.271	34.1488	31.04	28.14	34.2998	21.5022	24.5169	26.1006	23.412	23.6586	23.869	11.8668	19.956	18.2647	31.0172			0.598961	21.8201
10.6347	24.488	6.857	22.72	29.901	15.1622	7.687	2.375	10.8797	20.637	28.358	34.4944	37.027	28.336	30.2487	18.3511	21.5562	27.7529	19.661	24.7343	25.3455	11.1656	18.29	16.9341	25.2737			0.604165	21.1765
10.7264	14.9364	10.476	19.328	29.392	13.5437	6.555	2.764	7.3183	21.706	24.928	29.1657	30.36	27.31	30.3189	18.7857	25.5053	19.6501	28.413	27.8744	25.4624	15.483	17.3849	25.0403	16.4784			0.609375	20.3408
10.8181	17.5272	5.369	16.44	31.459	19.0824	3.965	3.21	11.922	24.545	20.49	48.5309	33.408	26.908	29.6413	19.3324	27.1182	21.4097	22.096	26.206	26.4527	18.3083	16.1171	31.7878	15.8157			0.614584	21.5476
10.9098	13.2511	5.525	20.309	33.883	25.1818	3.088	2.688	9.8338	24.402	21.979	36.4243	28.428	22.121	45.4986	21.6887	30.9207	17.6938	24.004	22.9665	17.6535	10.7189	13.2411	34.1547	13.8164			0.619794	20.8113
11.0015	11.6604	5.872	22.121	35.983	22.4734	3.328	3.995	15.8381	26.891	16.632	29.2811	23.991	21.657	41.18	26.2895	29.0227	20.4515	23.044	26.0321	23.4035	14.5953	14.5675	30.4093	14.727			0.625004	20.9769
11.0931	11.2759	7.001	29.556	30.26	31.1011	2.968	1.907	9.9754	25.369	22.725	25.5183	26.572	22.809	36.0165	25.4093	25.0352	17.1424	23.828	31.2412	30.0823	16.4354	14.6487	22.8823	19.8445			0.630207	21.2335
11.1848	13.8169	10.138	28.109	32.533	27.037	4.948	2.607	8.149	28.805	24.085	24.5524	29.144	25.728	31.3257	24.0979	25.0655	17.5985	23.289	27.2969	22.9717	15.8295	9.6727	14.0619	16.0164			0.635417	20.2866
11.2765	14.5653	10.758	29.142	37.47	21.3937	7.07	3.199	8.8929	34.292	24.303	25.68	26.258	32.509	32.5065	21.633	23.105	22.324	26.641	29.2627	30.3278	21.06	9.2923	17.0174	16.9372			0.640627	21.9017
11.3682	19.637	13.913	31.603	27.333	23.2046	5.131	4.632	8.0165	40.353	20.397	23.6989	37.12	30.193	33.0285	28.8726	23.0726	19.4315	25.417	29.0856	33.6051	12.8212	10.7156	11.9678	20.6294			0.645836	22.245
11.4598	20.0235	14.488	27.932	38.756	28.8595	7.555	3.481	10.0728	38.986	26.565	21.7632	41.628	25.563	30.6506	23.0933	20.2592	26.8752	24.439	25.9049	26.525	20.3387	12.1972	13.8393	16.3436			0.65104	22.7558
11.5515	13.9895	19.875	24.718	41.299	27.0481	5.581	6.9	9.9986	41.125	20.965	17.7626	43.449	26.431	32.9212	19.6012	26.9737	23.7034	22.643	29.3	27.8082	12.1166	12.0563	16.6173	13.6602			0.656249	22.356
11.6432	16.1116	12.622	20.976	42.673	21.0954	5.682	5.419	6.2097	37.31	21.326	19.9433	42.117	24.431	35.2204	18.3644	28.0399	26.8177	26.224	36.9645	31.5431	15.8073	12.3332	17.9233	13.1526			0.661459	22.4294
11.7349	23.0524	17.552	21.365	41.314	18.3159	5.042	4.832	6.1946	31.505	23.548	17.2658	36.111	26.788	37.9783	24.9138	40.0452	25.454	23.925	37.1711	32.3523	18.4618	10.9459	15.9291	14.4626			0.666669	23.1052
11.8266	29.9948	17.86	23.19	26.497	17.768	5.136	5.296	9.7152	37.647	31.084	28.0089	27.656	28.535	36.3512	37.4748	34.1231	19.7368	28.979	30.1436	27.4554	21.8577	17.9781	15.5753	13.9601			0.671878	23.8343
11.9182	24.9209	15.272	29.63	23.294	11.8862	6.838	5.962	13.5291	31.732	30.805	25.0682	26.918	22.758	35.0025	38.7686	38.8759	21.2256	26.715	31.7702	26.8578	20.6324	20.4144	15.2978	22.0939			0.677082	23.5945
12.0099	23.0189	16.864	35.673	21.572	16.3969	8.091	7.762	21.2629	28.016	23.097	30.9721	29.018	25.903	28.0012	37.9501	38.6679	23.893	29.582	29.3749	27.6984	27.676	18.0648	13.2645	16.3864			0.682292	24.0919
12.1016	20.5592	13.994	36.574	25.804	20.3488	8.355	6.315	20.0776	17.087	27.197	40.9694	24.472	21.748	26.3834	34.6392	36.5687	24.9561	33.354	30.7479	26.315	26.9293	9.6039	22.4092	21.8963			0.687501	24.0543
12.1933	28.3438	13.83	34.689	28.669	20.1395	4.341	8.002	19.4891	22.758	31.635	38.9581	21.715	25.251	24.9294	33.0058	35.6085	28.775	35.626	36.9715	26.5103	22.3463	14.1397	16.6652	19.8873			0.692711	24.6786
12.285	32.5229	15.681	26.687	30.275	13.3841	4.455	8.222	12.507	22.788	23.263	33.3635	22.592	25.744	24.8792	40.3672	26.9581	29.9504	34.088	39.2832	31.733	27.314	13.0676	17.2204	17.2515			0.69792	23.8999
12.3766	39.6042	19.537	25.747	25.417	15.6868	9.42	3.798	20.8067	27.489	30.952	23.5669	28.833	29.441	22.4397	31.0688	29.087	28.1497	34.395	27.8783	28.7147	36.3625	17.8977	19.1499	19.0662			0.703124	24.7712
12.4683	36.2934	22.599	23.959	33.394	16.2684	10.211	5.084	26.5839	35.489	23.808	19.4432	25.885	26.079	22.8911	38.633	28.6281	28.1027	40.907	26.7014	29.5725	25.4717	15.0441	17.7504	20.4246			0.708334	24.9676
12.56	37.0149	33.328	28.28	36.381	16.2444	6.664	2.98	21.0335	29.022	28.59	26.4412	44.289	24.157	27.8245	26.341	27.2628	20.7724	38.199	27.6526	19.8414	23.3932	18.1997	19.3136	14.7475			0.713543	24.9155
12.6517	32.6824	30.608	22.91	31.033	17.4764	7.748	3.489	13.2667	31.386	24.473	25.242	40.817	29.82	26.526	28.8809	29.9559	23.9072	43.189	25.3458	29.1074	25.0516	17.9918	19.899	21.275			0.718753	25.0867
12.7433	26.6554	27.432	35.413	34.491	24.5113	9.351	4.471	14.154	29.289	28.158	34.8251	41.728	27.311	32.3375	22.7574	24.5579	20.868	38.146	25.9301	27.3446	31.7349	24.8314	23.8245	23.2308			0.723957	26.3897
12.835	22.3164	33.295	32.108	32.676	24.3431	10.762	7.039	22.4891	29.43	27.125	26.7131	29.762	27.667	32.3592	31.3002	23.7311	28.6488	42.521	25.9832	27.0074	28.9152	15.1396	20.7204	17.9723			0.729166	25.8343
12.9267	25.4433	25.271	28.656	32.77	21.439	8.342	4.551	26.9344	30.84	28.741	27.0344	31.425	27.122	35.4281	29.9674	23.0563	25.6434	34.873	22.2129	27.8826	27.7026	15.5534	24.797	24.3414			0.734376	25.4178
13.0184	21.5098	19.028	34.113	21.375	18.6391	9.34	7.548	24.1419	33.721	25.562	24.383	28.348	28.605	35.2831	28.1768	19.6135	35.7018	25.051	30.0578	21.958	23.9824	15.6603	22.4644	29.9343			0.739585	24.3415
13.1101	25.0289	23.958	35.828	26.851	16.2634	18.356	8.299	21.3003	28.332	21.993	27.5662	31.266	31.837	32.9181	32.7139	19.9854	31.2727	31.289	33.3837	29.6428	21.75	14.7601	24.7172	32.4479			0.744795	25.9066
13.2017	24.8996	22.97	35.221	22.998	15.3602	20.719	13.689	23.4631	26.425	26.658	32.1499	29.581	36.607	31.2539	29.7496	19.6526	28.853	31.241	36.9211	28.6377	24.4841	13.023	21.4637	26.8813			0.749999	25.9542
13.2934	16.1393	20.327	36.264	23.482	14.8708	21.087	15.454	24.3612	29.574	28.347	31.5441	39.483	32.665	30.3878	32.4061	28.6955	21.311	37.239	32.6966	30.5097	19.7399	14.8115	24.8236	35.3497			0.755208	26.732
13.3851	19.9589	25.614	26.538	31.715	15.5183	23.868	26.224	32.7156	28.518	26.911	44.6671	38.604	30.978	31.8193	35.0117	27.9423	26.4791	37.237	31.1117	28.5763	19.6892	17.7231	26.8853	29.3243			0.760418	28.4846
13.4768	20.7694	26.243	24.757	37.522	19.1136	26.927	22.723	35.7283	30.451	27.284	45.0075	49.591	29.264	38.9636	32.8773	32.3321	33.7535	28.453	25.5366	29.128	24.4331	19.0584	29.6474	20.2728			0.765627	29.5765
13.5685	23.8421	23.631	27	39.654	13.5127	30.523	23.918	34.8231	31.149	26.188	40.8871	42.772	28.779	37.5924	31.8135	40.3839	39.6055	26.718	22.5028	29.0083	21.0561	27.9349	26.2328	18.8618			0.770837	29.5162
13.6601	22.3278	29.447	26.353	39.13	20.5335	31.985	15.946	29.9082	28.568	31.368	44.8502	46.878	35.087	33.8554	29.2737	40.413	31.0721	29.852	26.6138	34.4554	28.9897	33.3518	15.3582	19.1074			0.776041	30.1968
13.7518	23.7145	29.122	33.089	36.909	22.1089	26.236	17.188	19.18	34.631	34.376	45.2809	36.921	32.091	35.9929	27.4754	33.2985	29.8164	27.788	20.3059	37.4567	27.164	29.2499	12.3311	17.944			0.78125	28.7363
13.8435	19.5392	29.589	40.742	37.496	30.2902	19.327	9.735	22.3476	31.56	39.704	46.4152	43.366	38.467	33.3756	24.7957	28.8689	28.1114	26.546	20.9652	31.0936	32.2713	18.311	15.3952	18.8459			0.78646	28.6316
13.9352	20.323	23.946	39.579	33.724	39.2721	17.372	13.221	15.3335	34.282	46.409	42.5838	47.729	35.564	28.1165	27.8774	22.6883	37.6957	32.774	26.138	39.1127	39.2122	17.4982	14.4099	25.7702			0.791669	30.0263
14.0269	21.1671	27.979	45.944	28.875	33.7095	19.541	17.141	17.1049	25.573	57.513	53.8919	50.062	42.601	39.661	29.4369	19.9729	58.1589	42.584	24.0513	31.2134	36.9503	28.9243	16.277	22.1543			0.796879	32.9369
14.1185	21.5534	37.957	40.911	26.713	32.7032	19.067	20.571	20.7569	24.023	53.574	59.9102	42.039	35.713	41.0588	26.62	24.0247	67.8576	39.342	20.7713	26.466	36.8166	23.8263	21.5833	18.0262			0.802083	32.5785
14.2102	25.6307	40.267	41.896	30.607	30.4235	23.18	30.647	22.7606	27.388	44.849	59.8941	42.865	43.933	40.3954	36.1084	25.2442	61.0287	30.439	18.218	24.2218	43.4599	23.0746	31.7678	19.3207			0.807292	34.0675
14.3019	32.2471	36.349	39.068	43.604	41.5545	29.227	41.758	25.8602	32.446	56.738	48.9725	33.719	38.547	37.8526	33.0696	31.0913	46.022	22.895	21.051	25.0815	47.7554	20.2836	36.4977	30.0575			0.812502	35.4895
14.3936	37.2289	30.063	42.652	41.489	51.3955	40.465	45.73	21.9618	43.178	56.256	46.1185	31.722	42.01	33.5676	41.0791	32.3434	35.127	22.36	27.6932	27.8497	40.582	18.461	29.6655	27.4471			0.817711	36.1019
14.4852	43.4461	34.844	42.248	38.633	66.5094	29.923	62.231	26.8682	54.432	73.752	48.7112	38.361	41.993	31.4615	47.0641	35.8603	29.0957	27.81	28.0895	27.417	43.5893	25.8648	24.9837	27.4157			0.822915	39.6085
14.5769	47.7066	33.34	34.393	30.537	80.3319	39.729	96.542	28.7038	61.273	54.264	53.9367	55.407	36.982	27.0601	57.5632	28.4484	23.4583	33.644	30.4638	24.1199	37.1791	22.2423	24.7854	28.8195			0.828125	41.2888
14.6686	49.7811	38.48	35.094	31.873	90.653	52.605	132.296	30.656	67.917	33.96	33.0736	74.317	38.678	28.9249	50.8148	32.5412	25.2173	45.551	31.6486	32.0857	33.3694	26.1604	20.2118	24.9548			0.833334	44.2026
14.7603	62.4173	32.875	28.435	24.343	70.7077	60.999	113.723	38.0655	90.827	19.88	20.8416	97.991	54.232	25.8355	51.639	37.521	23.9038	47.949	26.0838	27.5218	30.5071	23.286	33.561	24.7368			0.838544	44.4951
14.852	54.0485	35.313	34.107	35.315	67.7474	75.685	76.54	45.886	95.169	19.721	21.9755	108.483	70.784	25.9969	48.4167	27.5742	30.3762	57.157	34.8907	32.9501	27.0884	21.8725	31.6363	24.8334			0.843753	45.982
14.9436	41.186	48.002	38.836	40.326	46.8581	76.717	50.513	57.7531	102.942	19.314	16.9323	109.829	102.808	34.5343	45.8755	29.9796	29.2732	63.324	38.6536	31.6508	29.8979	20.9136	38.7076	25.7098			0.848957	47.5223
15.0353	35.4325	53.515	29.254	65.34	53.2276	67.593	42.206	67.4334	130.753	22.44	21.5026	97.325	90.438	42.4053	43.8473	27.5976	29.4781	68.479	65.749	39.2185	32.9586	15.7409	32.2314	25.3732			0.854167	49.9808
15.127	25.9535	37.176	38.821	105.213	61.4249	44.131	30.051	73.4882	106.466	31.482	12.8517	63.001	72.745	59.0621	31.1182	27.8095	37.5669	57.504	75.0603	44.3867	29.2726	15.6407	44.2918	23.6993			0.859376	47.8423
15.2187	14.7613	51.423	40.093	127.524	79.3333	39.335	33.037	58.1288	89.357	52.85	14.9407	45.332	40.398	66.5155	34.6194	25.6261	38.9804	48.426	69.0477	47.4657	25.8258	30.2211	48.6484	35.0951			0.864586	48.2077
15.3104	11.2736	68.623	41.166	135.34	88.9315	36.239	22.302	49.7411	51.412	50.501	10.4165	47.559	25.666	89.2722	36.7844	25.3814	39.1489	40.605	54.5977	68.6839	25.118	34.1289	36.3328	33.3602			0.869795	46.7743
15.402	8.3483	67.598	49.678	107.816	68.6519	26.42	25.916	40.0138	29.389	34.565	7.2829	51.779	21.332	75.8425	49.4383	27.1195	42.7899	31.068	27.9985	87.5286	27.2517	44.0836	36.7493	33.8893			0.874999	42.6062
15.4937	3.4829	65.111	77.342	79.5	48.321	22.978	27.859	49.2932	24.931	18.867	4.9405	47.708	21.789	56.875	61.9736	39.8861	44.3759	27.396	11.5808	78.3515	26.4703	47.9871	39.9139	36.8			0.880209	40.1555
15.5854	8.3625	58.68	96.049	72.076	24.5094	14.461	26.22	59.9528	31.534	14.658	4.2051	39.751	19.059	35.1077	82.9164	58.1015	42.4701	15.574	8.7676	58.3139	24.3745	44.4651	38.9815	34.8186			0.885418	38.0587
15.6771	6.218	72.901	111.958	71.273	17.1018	10.877	22.207	64.8276	42.264	10.096	4.4786	35.749	19.568	21.3883	73.3411	81.3941	31.4913	10.216	6.6384	38.9615	27.3489	44.4258	41.8566	45.2766			0.890628	37.9941
15.7687	4.1043	65.941	116.396	81.833	7.3424	7.724	28.199	67.8772	44.784	12.715	3.838	12.66	15.753	19.7744	69.9662	99.2259	36.6218	6.633	6.094	17.4816	28.5932	34.3732	39.8767	47.2744			0.895832	36.4617
15.8604	3.6683	76.249	123.098	98.684	8.8328	6.095	29.499	78.2056	32.516	9.253	1.8433	9.921	21.28	23.4263	42.6892	81.6499	39.3145	4.306	5.4657	15.7087	25.6211	25.6617	36.8246	42.7769			0.901041	35.1079
15.9521	3.7136	92.272	129.05	90.039	3.6812	7.706	26.225	74.3999	20.619	5.549	3.1164	13.06	26.448	25.0228	25.7534	54.1059	38.9948	3.496	4.3075	19.0475	23.7782	11.4815	41.1045	47.8059			0.906251	32.949
16.0438	4.8082	91.434	125.104	86.088	2.8373	5.196	28.121	70.8083	12.281	2.144	1.7248	18.442	29.108	20.4904	18.391	60.887	36.206	2.726	2.323	11.4517	14.1768	7.9535	31.7022	29.7283			0.91146	29.7555
16.1355	4.8443	72.299	103.176	76.641	2.4382	5.657	33.717	49.703	5.855	1.796	2.2413	18.047	24.464	13.7802	21.8572	46.9717	49.0772	0.887	3.2695	6.296	14.7707	5.0227	36.5921	30.7783			0.91667	26.2576
16.2271	6.6237	54.909	77.581	46.889	3.792	1.6	33.673	21.3698	7.864	1.692	1.1995	13.643	20.226	8.1036	16.3607	44.2578	65.6799	2.516	2.5103	2.9888	13.6897	4.4036	49.3005	25.6777			0.921874	21.9396
16.3188	4.4167	44.662	70.375	21.136	0.7103	1.943	40.022	7.8053	4.036	0.8	1.0501	11.86	12.227	6.3762	15.955	63.154	58.3129	2.059	1.3585	2.1667	10.6893	3.8887	39.8258	26.4067			0.927083	18.8015
16.4105	7.7082	35.106	60.258	13.749	0.8321	2.17	25.864	3.9948	1.106	1.01	1.3805	7.173	8.158	2.7453	12.6373	80.0715	31.3477	2.072	2.2423	0.9411	12.9257	2.7152	28.6536	30.8476			0.932293	15.6545
16.5022	7.2421	26.64	81.144	7.931	0.9136	1.136	17.266	5.643	1.169	1.083	1.0534	3.343	4.635	1.0793	8.3027	79.7775	15.138	0.797	1.6812	0.839	11.9654	2.0228	11.3158	26.4178			0.937502	13.2723
16.5939	12.3366	32.328	93.794	6.661	1.5556	1.168	11.89	2.5001	0.88	0.743	0.9417	3.714	4.54	1.6262	6.1332	74.4541	7.1277	0.795	1.5981	0.8361	10.1865	2.8089	6.9302	20.505			0.942712	12.7522
16.6855	12.6427	25.636	104.745	4.378	1.0662	0.986	6.883	2.812	1.462	1.189	0.326	1.366	1.73	0.7628	5.6403	73.6661	2.8766	1.429	1.6086	0.8718	7.4304	2.1831	5.5523	12.1318			0.947916	11.6406
16.7772	14.0056	14.866	104.852	3.568	0.3354	1.102	5.341	2.1135	0.42	0.399	0.3988	0.574	1.467	1.4041	2.3512	52.9112	2.3783	0.505	0.6835	0.2903	4.6379	1.1802	3.342	7.2934			0.953125	9.43414
16.8689	12.4573	17.862	81.901	1.71	0.1261	0.561	2.027	1.3782	1.258	0.349	0.3334	1.271	2.186	2.4094	0.9062	37.2165	1.3799	0.619	1.5332	0.2093	4.5476	3.4902	2.4677	3.5566			0.958335	7.57315
16.9606	6.3977	16.22	69.398	1.786	0.7644	0.227	1.504	1.2789	1.282	0.5	0.8913	0.74	0.629	0.6744	1.9502	36.8787	1.9624	0.893	1.215	0.7742	3.0635	1.8572	1.6128	2.2239			0.963545	6.44682
17.0522	3.8126	10.899	39.082	1.007	0.6147	0.269	0.907	1.3073	1.488	0.594	0.2838	0.978	1.375	0.4553	0.5889	30.4261	2.4798	0.676	1.4841	0.2945	1.416	1.8486	1.2799	2.9001			0.968748	4.43611
17.1439	0.9293	11.074	19.206	1.381	0.1226	0.444	0.89	0.2987	0.945	0.509	0.2177	0.835	0.701	0.3293	0.6825	36.7328	0.689	0.814	2.2144	1.3712	1.8725	1.6916	0.8295	1.734			0.973958	3.60475
17.2356	0.8786	14.39	7.505	0.782	0.7171	0.615	0.541	0.459	0.172	0.218	0.2179	0.404	1.072	0.3348	0.7702	37.7271	1.5814	0.46	0.7726	0.6831	2.0937	2.4815	1.1744	2.0491			0.979167	3.25415
17.3273	1.1577	12.744	3.863	0.438	1.103	0.334	0.12	1.4654	0.231	0.32	0.4455	0.708	0.714	0.7663	0.114	28.1805	0.5063	0.376	0.5187	1.3186	1.6089	1.6789	1.002	1.4038			0.984377	2.54657
17.419	0.5627	5.201	1.897	0.725	0.7833	0.184	0.332	0.1329	1.088	0.505	0.5022	0.2	0.237	0.6684	0.3844	12.1293	1.0852	0.341	1.0505	0.7385	1.4893	2.4513	3.1274	0.9614			0.989587	1.53237
17.5106	1.0535	2.512	3.284	0.731	0.223	0.711	0.493	0.7759	0.338	0.561	0.2212	0.815	0.269	1.3754	0.4389	7.0499	0.5199	0.382	0.5553	1.3659	2.4224	2.22	0.8678	1.5642			0.99479	1.28122
17.6023	0.4038	1.179	2.224	0.717	0.0014	0.015	0.114	0.5176	0.065	0.337	0.0099	0.275	0.01	0.2985	0.1719	2.9147	0.718	0.018	0.8502	0.3463	1.4552	1.4637	1.0141	2.5767			1	0.737333

## Sheet: Image7
X0	Y0	Y1	Y2	Y3	Y4	Y5	Y6	Y7	Y8	Y9	Y10	Y11	Y12	Y13	Y14	Y15	Y16	Y17	Y18	Y19	Y20	Y21	Y22			Ap-Basal to 1	Average intensities
0	32.0788	33.3293	61.393	35.2339	15.675	37.6003	35.2101	32.5	48.1925	58.195	21.141	25.6846	20.9485	28.6344	25.9268	23.872	25.158	25.762	17.6982	27.7322	28.4821	39.6193	36.8749			0	32.041
0.0917	38.3063	34.5515	61.006	33.9311	18.487	31.1967	34.663	27.0549	40.746	45.6265	22.848	28.4192	25.2931	26.061	20.8743	20.108	26.164	26.324	21.2636	24.2339	35.9414	33.703	31.7967			0.0044063	30.8087
0.1834	31.4387	38.899	72.346	38.3293	32.5	34.9606	28.0463	27.2177	41.2902	42.3272	23.424	33.9362	27.4399	27.5661	26.931	23.91	32.249	35.431	21.1847	23.055	37.4886	32.7288	28.1053			0.0088126	33.0785
0.275	35.0005	50.8595	76.061	33.7635	37.885	31.3091	29.6172	28.8071	49.5202	39.0756	21.166	28.5015	24.1441	30.2019	21.9351	29.009	29.869	33.11	24.4364	34.8127	30.7299	35.4002	24.2726			0.0132141	33.8907
0.3667	41.3616	47.6077	76.918	32.569	24.923	40.5898	25.2689	31.3407	51.1458	47.3711	20.442	34.0005	27.7333	35.3365	21.4299	26.073	21.66	38.752	33.5009	33.1274	29.2707	36.6223	22.6914			0.0176204	34.7711
0.4584	32.6378	38.7842	73.196	35.7507	21.979	42.8301	38.5672	51.7338	40.2935	46.9376	22.713	33.7551	22.7662	39.6726	16.4251	22.754	24.828	35.983	27.0939	29.5599	29.1411	35.4927	30.9986			0.0220267	34.5171
0.5501	30.1649	38.2378	64.571	24.7235	22.501	32.6538	35.8842	46.9457	53.5717	48.4777	28.42	25.4706	33.5263	26.5611	24.9127	22.721	38.285	40.595	22.0333	33.5277	32.5972	39.3628	36.6723			0.026433	34.8877
0.6418	37.7997	36.7357	65.632	33.7739	23.906	26.346	32.4588	46.1501	45.5597	53.9416	24.618	25.0393	33.9241	31.9929	24.2562	27.875	30.746	34.966	22.8326	25.8568	31.3005	29.1386	29.447			0.0308393	33.6651
0.7334	35.929	34.1235	73.882	35.2785	26.035	28.7683	25.1056	43.3704	38.4199	52.1354	30.831	27.4655	36.9262	34.8698	27.9215	36.373	31.323	26.91	23.2157	35.8084	32.2077	23.2147	31.0016			0.0352408	34.3963
0.8251	32.5162	29.9661	66.074	32.218	25.459	27.3858	30.8845	36.6943	35.4114	52.8862	28.474	39.046	29.9345	46.7443	29.9199	30.407	36.984	33.004	26.6724	37.4085	36.013	25.7886	28.2138			0.0396471	34.7002
0.9168	32.6827	28.9331	96.749	35.8367	20.088	25.9521	35.3228	40.0692	31.1947	60.1529	26.072	38.1117	31.3621	46.5228	25.5785	26.493	46.021	28.703	29.1787	31.4701	29.1439	29.0942	27.3084			0.0440534	35.7409
1.0085	32.2727	36.5804	116.238	41.1343	21.211	38.1862	28.7313	39.1488	37.2638	67.3019	24.077	31.5263	27.2714	47.3433	22.282	24.648	50.797	27.448	30.4327	31.3952	26.6295	26.3693	21.8796			0.0484597	36.9638
1.1001	27.7184	38.3504	110.695	42.2937	24.426	48.2574	32.9299	39.6681	34.7661	44.0078	23.879	28.9446	29.3861	41.9464	16.155	27.361	49.537	24.202	23.599	24.9459	35.4223	30.0538	18.8647			0.0528612	35.5395
1.1918	29.016	45.5564	113.485	40.5115	23.773	43.2594	30.7638	32.1404	38.183	41.5901	21.262	25.8669	35.0775	40.7464	22.6847	28.399	55.942	29.318	24.538	23.5943	42.3156	43.9166	19.9907			0.0572675	37.0404
1.2835	30.8137	45.862	109.447	36.812	23.939	38.2729	31.1505	27.1917	33.479	32.9481	26	27.9412	33.6171	46.0352	28.946	28.878	50.022	37.902	24.9366	27.9324	44.1133	55.473	27.3485			0.0616738	37.7853
1.3752	39.7512	52.6459	106.265	32.7248	22.788	37.351	40.2177	21.4684	34.3101	34.0403	28.896	29.1129	33.0602	45.8629	33.3687	27.951	53.472	44.029	25.0838	33.7461	44.2362	62.7051	23.7318			0.0660801	39.4269
1.4669	46.0214	65.6037	112.125	37.7855	24.474	38.9945	42.7211	30.573	47.8911	27.1098	32.737	35.8637	34.1214	44.7898	23.7021	32.691	59.74	41.961	22.3981	36.2796	42.5162	66.3234	26.1805			0.0704864	42.2871
1.5585	37.0408	69.5674	100.883	39.1476	30.019	45.6885	39.2845	26.5299	33.8989	31.0399	28.365	32.4809	37.1211	39.7946	26.9943	33.667	73.776	46.034	30.9028	41.9573	42.7413	63.0738	30.9384			0.0748879	42.6498
1.6502	25.8091	55.4607	86.338	38.2833	30.568	44.4598	39.6409	37.3475	32.9476	36.9753	27.322	22.7516	37.1049	44.9326	27.0493	26.6	71.648	48.492	30.1205	51.581	38.1751	64.8662	44.5169			0.0792942	41.8691
1.7419	21.8341	60.828	57.319	38.4895	39.399	43.8064	47.0154	37.1684	31.9909	44.1727	29.563	27.4482	34.2872	36.69	24.338	28.752	63.766	52.459	27.3797	55.0893	41.1147	71.0901	51.6669			0.0837005	41.9855
1.8336	23.7674	62.2232	65.567	36.2925	45.24	39.6822	48.9026	32.5745	28.5464	37.5714	28.728	25.683	37.2429	47.1584	24.6348	24.422	73.438	53.973	29.9077	70.968	37.6282	60.7956	61.2449			0.0881068	43.3127
1.9253	22.0397	61.0104	57.476	45.7125	36.055	46.2063	46.2792	32.3091	26.7521	37.961	32.126	29.4561	43.1728	47.4068	26.7665	29.349	87.375	57.571	28.4851	58.5664	46.8114	66.9956	61.8129			0.0925131	44.6824
2.0169	20.7996	57.9402	45.036	38.5784	34.999	57.493	52.8293	27.2507	30.384	38.4972	38.029	24.8427	33.6781	48.6411	25.2488	33.421	81.711	62.06	26.9468	48.7009	36.388	84.8296	64.9116			0.0969146	44.0529
2.1086	25.8157	53.243	51.08	39.2797	40.625	60.2107	50.1986	33.0757	34.8037	42.2784	38.602	24.163	28.2167	47.8439	30.0186	27.983	91.421	47.534	32.1369	44.8093	36.2321	72.9962	61.5025			0.101321	44.09
2.2003	22.0186	46.3173	54.324	53.5555	30.823	50.9246	75.9879	34.1186	31.5957	38.5591	38.085	19.5253	21.7836	47.5842	40.9071	24.572	64.982	50.191	30.9113	37.6665	39.8774	66.345	67.9418			0.105727	42.9825
2.292	20.9125	34.6796	52.931	53.4629	25.962	51.0386	73.2882	35.0469	33.8466	34.6488	43.586	28.4551	17.1581	44.4129	43.2561	29.677	60.482	52.642	35.2214	49.8216	35.5588	61.2846	73.6874			0.110134	43.0896
2.3836	29.3471	40.7636	45.047	55.6732	27.721	58.8435	77.5118	32.8192	32.9966	44.8461	45.344	29.5354	21.712	33.6523	40.0723	29.038	71.946	49.814	36.804	41.0323	39.2828	67.4268	72.4407			0.114535	44.5074
2.4753	32.9745	55.4195	40.517	46.3517	23.845	50.0611	67.3057	28.1524	33.6937	39.2355	47.802	32.3416	28.7916	37.2133	36.1894	28.601	87.535	51.894	59.7416	41.6678	37.8673	85.4816	49.7819			0.118941	45.3245
2.567	30.3591	66.9257	44.14	55.1356	24.559	48.6362	61.4142	19.7813	29.7462	47.6632	35.897	33.737	22.2821	40.7857	42.7588	31.787	112.694	69.632	58.2127	34.2299	45.7002	90.0454	44.9773			0.123348	47.4391
2.6587	29.8333	64.4582	44.543	64.3524	24.945	66.8258	47.03	30.3727	43.8738	42.5691	43.031	40.0039	22.6179	39.0456	43.9079	32.319	124.926	92.578	48.8723	39.4012	40.7536	85.9966	54.7444			0.127754	50.7392
2.7504	27.4504	67.6081	38.421	60.0835	32.509	75.8792	41.6203	33.9183	33.113	44.377	45.25	27.1227	28.9413	31.6938	36.4303	33.202	142.609	111.652	47.3606	33.0448	45.3689	71.4666	53.0626			0.13216	50.5298
2.842	34.2305	69.0275	38.812	64.8371	28.265	72.476	52.3464	34.4319	37.4526	42.4384	51.276	22.2093	34.6358	35.092	30.0603	34.896	169.383	104.507	55.7937	36.1181	41.8798	75.2308	49.1573			0.136562	52.8068
2.9337	40.3201	59.6801	46.968	52.9796	29.959	70.2187	66.0121	29.6829	41.1203	45.6732	50.596	27.7408	30.5431	29.0076	35.5674	32.247	159.63	102.295	79.5761	37.2394	46.5806	52.2394	50.3452			0.140968	52.8792
3.0254	32.7157	44.6329	56.655	52.5737	38.599	84.7848	67.5434	32.9221	44.5176	43.7033	46.627	24.1553	23.6262	24.1297	29.9923	35.259	151.874	100.915	88.8545	36.4822	45.1825	48.2384	42.6467			0.145374	52.0274
3.1171	35.9907	42.0433	56.938	44.608	31.444	95.1692	70.5625	31.4804	55.5663	50.9319	50.617	28.8099	26.883	20.2754	26.7143	41.83	136.942	116.599	72.0828	33.8092	44.7053	50.5283	42.0819			0.149781	52.4614
3.2088	41.6835	43.7764	49.315	48.3596	38.687	86.9196	68.2718	40.0281	66.6836	47.8212	50.324	27.162	23.8178	19.1328	32.9246	45.417	122.586	131.494	63.3429	27.8318	43.8045	52.6484	39.879			0.154187	52.6918
3.3004	36.2784	43.3484	50.164	52.1803	36.775	66.6438	64.6076	42.6735	68.5899	39.9106	56.998	20.5131	27.3429	18.3908	26.5405	43.221	127.434	125.743	65.7794	30.8897	38.2349	52.1321	42.8614			0.158588	51.1849
3.3921	31.6572	46.151	36.283	49.3178	37.545	64.88	65.4028	38.4399	72.671	32.6264	45.278	20.3845	31.5925	18.4148	26.0396	41.101	133.948	117.092	62.3923	31.2732	45.4395	45.8381	41.9619			0.162995	49.3795
3.4838	29.7827	47.7163	40.926	53.1076	27.747	70.6394	61.2404	38.1638	71.422	32.1734	55.011	23.8892	30.0591	18.7716	24.5027	34.818	106.006	98.79	65.0981	31.0447	39.0354	49.6478	49.2817			0.167401	47.7771
3.5755	39.8678	58.3964	55.069	50.2666	29.388	70.0947	61.7506	51.7229	61.3147	27.7801	64.714	31.1358	31.9967	22.8404	20.7597	52.936	116.497	93.206	76.3156	33.5084	35.7113	46.9257	49.0618			0.171807	51.3591
3.6672	41.3888	70.0563	54.155	47.5244	34.372	63.4203	67.7953	46.7296	58.5095	26.6873	78.176	38.4112	26.2926	24.6146	27.9269	57.167	123.554	88.902	79.5822	49.0592	35.3781	48.914	40.492			0.176214	53.4395
3.7588	43.9443	84.3544	44.573	44.1334	30.208	58.532	58.1614	39.269	48.0658	32.5429	80.721	42.7443	23.5228	30.3508	35.9895	60.557	105.233	103.773	75.4642	42.0877	51.5731	53.8838	29.3588			0.180615	53.0019
3.8505	49.5881	78.4107	37.867	41.1782	35.413	63.7113	65.9969	48.5902	48.1541	44.7913	92.693	37.236	26.91	33.5017	35.7433	55.673	89.404	106.443	77.3033	40.8189	47.3003	43.594	31.3717			0.185021	53.5519
3.9422	54.7491	74.8966	42.289	28.561	41.488	62.3261	67.1915	52.7308	37.7378	43.4183	84.48	32.4616	29.9671	33.6328	31.9763	59.581	66.616	97.655	64.1105	37.7583	65.6289	42.6791	30.8401			0.189428	51.425
4.0339	57.2501	85.8661	37.208	33.7877	37.112	51.7402	70.9682	39.7262	39.1374	36.4249	88.93	30.4461	30.9566	28.8529	34.8486	51.694	65.56	105.843	70.2339	42.9682	62.7513	44.1533	32.1528			0.193834	51.244
4.1255	65.8149	75.1044	35.446	34.1195	50.671	59.7133	82.9755	44.6017	36.8943	33.7118	93.079	29.2358	40.6671	22.1345	45.3766	54.43	64.192	95.15	66.2241	37.6752	70.2489	52.1309	28.2714			0.198236	52.9508
4.2172	85.132	64.8257	41.37	31.5206	52.458	52.9889	75.5937	44.1474	33.4282	28.1381	101.998	31.7052	42.5672	20.2066	42.0252	61.119	70.554	78.953	61.6283	35.7399	78.5306	49.2571	29.9443			0.202642	52.7753
4.3089	65.4549	68.4923	42.631	23.8228	53.265	58.6249	70.5721	49.3308	38.4473	31.5314	87.056	47.009	34.6135	20.9963	36.4099	59.431	79.185	79.764	69.2575	36.2402	88.955	51.7144	41.2611			0.207048	53.655
4.4006	58.833	67.3743	42.677	31.6416	43.146	72.1977	76.3185	52.3675	41.6938	27.3462	93.099	49.2762	25.518	23.6736	35.3303	73.825	76.714	72.16	54.8416	31.5685	89.3151	48.2141	41.7897			0.211454	53.4313
4.4923	49.0669	70.4653	37.461	32.1699	51.68	71.2163	80.4787	61.5777	39.4397	36.9965	99.479	53.3562	22.0782	25.4461	36.0916	66.029	98.109	70.362	49.7571	34.2888	77.7624	48.26	47.486			0.215861	54.7416
4.5839	60.3065	53.3264	29.759	24.7987	55.573	64.0462	93.1563	70.7418	43.5881	38.2639	112.904	57.1072	27.2699	24.7371	38.35	66.516	100.923	76.867	56.6571	38.7513	73.0959	54.4823	51.7035			0.220262	57.0837
4.6756	60.9525	49.0088	21.213	20.1215	63.605	61.5788	76.8807	88.5076	44.2859	37.2078	91.892	47.6627	22.6193	26.586	33.1761	64.424	97.695	72.345	56.5249	41.6445	84.3875	83.9294	49.2408			0.224669	56.3256
4.7673	74.0372	40.7903	23.715	20.7923	67.903	58.0162	61.6078	82.2221	49.5303	37.6573	75.782	41.8344	21.33	23.3527	42.7346	58.367	105.921	69.832	63.9674	37.2684	72.3936	72.2823	47.8125			0.229075	54.3108
4.859	63.1103	47.1853	21.629	25.4322	59.661	47.8319	51.1973	65.5474	42.5982	47.2408	73.346	32.8019	26.3534	35.1187	36.6525	64.774	119.454	68.122	57.5507	36.4312	71.4316	58.2266	48.73			0.233481	52.1924
4.9507	51.9105	51.5344	27.251	32.8494	60.733	51.0942	51.1895	56.5996	42.1889	44.2226	56.556	36.9505	22.7776	39.1256	44.798	68.813	129.353	57.988	62.4201	36.3753	79.6164	60.6194	47.8105			0.237887	52.7294
5.0423	47.5853	63.9496	35.169	30.8805	55.335	45.2441	60.7841	46.1472	30.4105	40.1689	42.942	39.6688	23.8275	42.9936	35.4698	65.699	122.63	57.195	50.5062	37.836	68.6496	72.8978	54.2825			0.242289	50.8814
5.134	40.6644	56.817	32.234	42.4643	51.287	39.6413	56.3985	45.8134	21.8522	34.6864	47.406	33.258	31.331	34.5411	32.9864	63.638	114.682	53.021	56.3279	33.5829	60.3092	64.641	50.079			0.246695	47.7244
5.2257	39.8278	44.1273	37.666	45.6112	58.583	36.3476	51.9451	44.8091	23.4288	31.0024	48.9	30.9061	30.506	38.4419	35.9494	64.407	108.281	43.424	59.3144	31.7833	47.6927	62.6089	44.0072			0.251102	46.0683
5.3174	42.7416	37.7535	33.808	42.7707	61.848	38.4565	56.7531	44.5281	25.6606	36.2512	55.804	23.1976	22.3404	32.9611	36.6412	76.12	96.717	41.709	58.952	31.1748	40.7796	82.9996	38.9905			0.255508	46.0417
5.409	50.1785	27.4401	25.601	43.9499	69.739	39.4484	49.1982	40.7767	30.8794	32.7805	44.441	22.5839	18.8372	30.8983	28.2238	86.748	93.992	38.825	62.4333	30.0775	35.6577	82.3774	30.9209			0.259909	44.1742
5.5007	45.0397	32.0514	23.759	46.3843	75.451	46.9584	42.088	38.5172	31.2791	46.3528	34.114	20.6405	21.2889	24.5576	23.5744	93.043	97.826	38.469	56.162	35.8096	50.0689	80.1022	27.752			0.264316	44.8387
5.5924	54.1542	32.4344	33.971	35.2865	89.333	52.9701	37.2625	31.5957	32.3093	48.705	35.207	19.6772	18.4738	17.662	24.7442	100.31	86.203	44.362	42.9756	28.692	38.1011	71.7568	28.6154			0.268722	43.687
5.6841	48.3805	27.2176	38.84	42.2956	83.041	44.455	33.7329	32.3877	27.9084	44.7376	39.918	26.8684	20.9348	27.3687	28.3982	107.69	87.496	35.757	38.9033	29.5967	37.8979	63.7166	33.8632			0.273128	43.5394
5.7758	54.353	27.8571	29.198	39.3474	81.322	46.6263	35.2226	43.5648	25.9591	39.0751	37.531	28.0262	19.534	27.9018	29.6092	102.762	79.546	29.692	29.5483	30.3347	30.492	55.0955	37.5297			0.277535	41.7447
5.8674	56.5319	32.8369	25.738	39.2159	94.65	59.7825	45.2912	44.0777	24.8964	27.6348	32.22	26.9302	14.4114	29.8377	36.4917	82.144	77.226	33.24	36.5507	28.0456	40.2976	55.5199	35.1044			0.281936	42.5511
5.9591	50.9493	36.9857	27.106	41.0242	110.719	53.007	49.7012	40.183	35.9601	26.3602	26.392	20.4013	21.4324	37.1559	38.7282	70.014	64.193	23.791	33.4864	26.6423	39.6092	41.2164	31.9705			0.286342	41.1751
6.0508	40.6891	33.7283	27.488	36.7853	104.94	48.4689	47.3369	36.2893	51.7632	24.5374	28.594	18.4909	28.9383	29.9451	35.5888	59.196	46.624	36.308	33.6022	19.5929	35.1826	37.5073	43.3525			0.290749	39.3456
6.1425	36.9682	42.1317	26.985	34.086	97.569	39.8116	45.7254	31.4503	40.6865	24.6289	25.813	22.6604	38.9867	29.8569	35.7031	63.596	49.695	37.732	30.8493	22.8666	39.1519	26.065	40.9956			0.295155	38.4354
6.2342	43.1964	33.8279	23.986	27.2319	95.285	32.2818	54.2514	30.3854	35.8457	27.0095	26.648	27.6444	35.7208	26.432	36.8502	71.755	36.965	42.104	28.5428	23.6212	36.4097	22.1808	28.0583			0.299561	36.7927
6.3258	39.4826	42.2271	31.857	27.4108	97.77	38.0111	56.6723	28.1552	38.7493	32.1061	23.948	27.2478	23.856	22.6112	42.4886	75.446	42.97	36.455	28.7084	19.4017	26.3805	24.5739	28.0342			0.303963	37.1549
6.4175	27.577	36.5327	31.984	27.0636	85.233	36.9917	31.3051	31.0444	43.0961	24.7862	30.504	23.9796	23.6267	19.8035	37.4116	69.43	34.1	39.39	23.1662	21.6587	21.6936	20.1945	32.6433			0.308369	33.6181
6.5092	33.9969	34.7935	29.46	33.4732	68.942	35.0297	28.6553	27.0023	29.2098	23.7001	29.324	23.0583	20.893	25.606	36.2057	60.5	33.58	27.893	18.1697	22.9396	14.7742	17.958	26.7691			0.312775	30.5188
6.6009	33.8825	36.422	40.324	42.558	64.946	30.7669	26.3261	30.3208	23.9369	25.9988	30.271	29.2727	23.4256	22.397	31.9679	58.531	27.648	28.634	18.3981	27.6211	18.9083	15.834	27.0811			0.317182	31.1075
6.6925	31.4912	37.0309	38.005	40.372	59.475	39.4558	25.8448	32.4169	25.1895	26.5664	21.222	26.4501	17.4649	18.4436	27.9945	54.866	30.964	28.501	20.6689	25.9785	21.618	20.0789	29.4807			0.321583	30.4165
6.7842	34.8542	31.308	50.22	46.5713	57.934	49.6614	25.6135	26.4279	24.1789	25.284	23.436	31.0143	16.3374	21.4784	26.1264	66.032	25.105	22.949	31.3784	22.011	33.1206	20.8712	35.2751			0.325989	32.4864
6.8759	34.7894	22.9106	49.594	51.4754	58.294	42.0796	32.8711	24.9916	28.357	25.3168	13.209	28.5536	19.1468	25.2092	28.0244	64.931	25.652	22.905	28.6185	25.8112	36.6247	21.1034	39.4584			0.330396	32.6055
6.9676	25.9631	22.6325	34.453	45.9666	70.903	38.064	36.416	32.7214	28.5286	19.2626	19.009	25.0319	15.3057	32.0891	19.7421	50.831	26.916	24.024	30.5401	27.7954	28.6216	22.599	32.0311			0.334802	30.8455
7.0593	21.1039	31.6256	31.845	40.6234	86.819	40.0197	40.0533	30.0505	30.2558	18.9816	22.858	31.3614	13.4568	28.2944	26.0833	46.11	28.29	19.579	23.3286	30.6524	20.9203	19.5128	41.1701			0.339208	31.4346
7.1509	25.6478	35.8426	20.996	41.106	85.11	34.2812	41.9549	24.6064	22.5703	19.344	21.105	30.9515	14.6888	23.7987	30.9107	36.717	29.582	20.968	31.0978	28.7755	15.3851	20.2051	28.414			0.34361	29.7417
7.2426	21.5224	30.2579	29.324	35.0206	78.203	32.1429	25.5406	22.8044	24.0786	29.8908	28.789	28.6051	19.5836	23.0946	30.793	35.295	34.606	26.42	28.1807	31.7598	21.335	26.6476	22.6999			0.348016	29.8519
7.3343	13.4932	23.7922	37.277	39.2783	72.575	30.3078	28.7629	28.5053	16.7791	34.6349	32.147	32.7546	23.7264	26.161	28.8792	30.726	46.69	28.621	20.6149	32.6675	27.8709	27.7785	20.2051			0.352423	30.6195
7.426	14.1604	24.792	41.549	34.8551	61.421	37.3839	25.2228	27.5054	22.3652	37.5181	32.122	31.4723	18.852	35.4051	30.8906	30.904	41.764	23.864	23.417	39.1069	25.5651	29.7289	20.7539			0.356829	30.8965
7.5177	22.5801	22.2432	32.565	42.4883	54.884	38.0307	25.6814	27.5893	24.6656	36.4832	36.873	21.5006	24.6884	33.0631	30.1602	34.628	30.77	22.41	19.9082	38.3306	28.3465	23.2391	15.0716			0.361235	29.8348
7.6093	23.6246	21.6513	27.201	42.6914	48.658	35.9718	22.696	24.2573	19.0533	29.5701	30.358	23.0092	27.0768	31.2769	24.0968	35.25	28.149	20.468	14.7471	26.0519	27.7163	20.9934	16.2017			0.365637	26.99
7.701	26.2375	19.5856	22.925	43.7196	55.938	30.4121	22.9832	26.162	18.1626	40.8998	34.267	28.1821	19.9754	32.1675	26.7641	30.97	24.276	25.007	13.591	27.6692	23.6992	21.5272	21.6976			0.370043	27.6878
7.7927	24.6477	26.0744	21.692	25.5567	61.678	34.3422	20.3889	30.4837	13.252	47.3454	32.074	24.6236	21.9015	36.8381	33.0256	28.988	31.978	23.485	15.9828	28.9352	18.2722	22.1031	25.2877			0.374449	28.2155
7.8844	29.1551	35.6171	25.281	29.2457	50.564	35.2541	30.4988	27.9364	13.1857	36.735	32.53	24.1883	18.2981	36.1841	34.8173	20.027	24.845	21.242	17.959	26.4966	16.7608	21.0299	33.953			0.378856	27.9045
7.9761	36.7831	32.2189	30.941	29.9036	51.647	40.6627	30.2827	23.9531	14.8206	30.9711	28.618	21.2908	12.9945	33.6483	38.2091	23.266	26.981	21.318	20.1705	28.7908	15.652	20.3919	34.0662			0.383262	28.1557
8.0677	31.0354	31.4847	31.051	36.9916	38.174	45.0609	29.3792	28.963	10.9669	35.3091	32.525	18.8661	17.7841	24.4203	28.2409	24.251	26.597	19.665	28.3361	23.9494	13.587	20.3893	25.2555			0.387663	27.0558
8.1594	28.0677	25.2581	31.577	32.3685	36.467	35.1926	17.6114	30.3697	11.2448	34.4056	23.346	26.9685	15.5134	15.7852	23.2186	22.636	27.689	11.698	27.5863	29.7199	16.1806	18.6773	22.1554			0.39207	24.5103
8.2511	30.4605	22.4188	31.922	29.6352	34.796	35.6658	19.3846	34.667	8.3765	20.6023	24.412	24.0953	19.3267	15.8897	27.6849	22.15	32.145	13.935	29.9454	42.7412	18.4781	19.7434	26.7107			0.396476	25.4429
8.3428	21.2667	17.6862	34.418	34.1835	36.2	37.1482	19.6631	28.7814	7.488	15.0511	19.784	22.8821	21.5877	12.2669	28.2787	20.279	38.306	14.037	23.3705	39.4657	14.9448	23.6558	22.7878			0.400882	24.0666
8.4344	19.5306	18.4639	35.354	34.5613	29.392	45.2014	20.0986	28.5981	8.4218	9.901	15.341	24.1259	14.6967	9.6497	27.0823	18.567	39.889	18.899	26.4048	35.6043	20.9786	28.1254	23.1773			0.405284	24.0028
8.5261	20.4141	23.8865	34.367	30.318	25.765	37.1745	19.4814	21.3726	6.3002	8.9381	26.854	20.3148	12.0555	8.9466	21.2208	19.18	39.726	27.738	22.8499	45.178	17.7735	24.6906	18.7764			0.40969	23.1879
8.6178	20.393	21.6854	31.925	35.1457	30.785	31.8551	23.6053	26.9665	7.7434	13.3386	21.995	21.5462	10.6097	8.0623	26.4259	23.68	31.033	30.27	25.1368	42.1539	17.7015	24.3624	18.6432			0.414096	23.6984
8.7095	21.8826	22.7134	28.417	36.0667	32.55	28.5961	30.8516	27.853	9.2839	12.7974	21.61	20.9799	12.3241	5.7015	25.3031	29.318	32.399	31.179	24.6568	37.452	14.3719	21.7171	23.0386			0.418503	23.9592
8.8012	32.5185	22.982	20.976	30.5966	39.671	22.8779	27.4368	28.3399	11.1462	10.9953	22.943	21.5859	12.2027	8.0191	25.9986	38.094	28.296	27.587	26.5016	41.1978	16.6139	18.3128	20.8164			0.422909	24.1613
8.8928	32.1697	21.5871	22.394	22.3443	39.018	22.7228	27.213	24.8649	10.6515	12.8839	19.251	21.6183	12.7067	7.0792	21.6232	33.84	28.511	27.611	22.1807	28.6851	19.5602	26.4933	21.6229			0.42731	22.897
8.9845	41.8389	22.8653	17.295	24.4512	33.01	21.7589	24.8088	26.8407	7.037	11.1934	17.833	25.9965	11.9516	8.1237	23.1935	30.937	28.864	30.489	25.4915	33.3083	19.552	20.932	18.709			0.431717	22.8904
9.0762	44.3227	22.3456	18.375	25.6442	28.118	23.0824	26.1218	29.5175	8.5086	10.9113	22.735	16.8199	14.242	7.7814	26.504	28.698	27.042	21.649	26.5716	34.8272	23.5936	21.8146	22.4678			0.436123	23.1171
9.1679	47.2222	24.6283	21.305	21.6213	31.494	27.5565	26.4675	25.7058	10.9754	11.2676	20.203	28.1502	14.3501	8.262	26.7821	23.088	22.359	26.872	22.2343	28.8765	24.8509	21.9982	16.8147			0.440529	23.1776
9.2596	33.3242	16.897	26.246	21.8305	26.413	31.507	29.3417	27.2556	11.9453	8.9656	21.815	22.5306	12.3667	6.7449	27.6775	22.538	22.628	31.232	24.1871	25.2688	25.8608	22.4848	17.6379			0.444936	22.4651
9.3512	35.0403	12.7724	25.881	21.8164	26.057	28.9668	37.9389	35.3726	14.1168	3.9282	17.688	23.8802	10.1448	8.2927	20.8336	21.825	17.234	26.32	22.1734	27.0746	21.4085	27.3546	14.5388			0.449337	21.7678
9.4429	33.6632	12.9475	18.813	24.3707	27.328	23.7285	29.6737	34.5888	13.4315	3.3426	16.776	24.6416	12.6312	7.6343	20.895	19.737	20.381	24.557	20.9207	37.1387	23.2123	23.0326	17.0571			0.453743	21.3262
9.5346	26.8635	13.1301	17.008	23.3696	28.382	17.4003	24.8381	33.5232	14.8433	5.0213	15.282	23.4992	10.5529	7.4616	23.5171	26.618	16.112	24.165	23.4414	38.5914	21.5362	22.6361	20.8333			0.45815	20.8098
9.6263	23.2213	13.2265	22.044	25.6519	19.142	21.6915	20.3104	25.1523	20.7449	6.3048	21.787	21.1541	7.0052	9.6704	25.4516	32.555	12.946	20.492	22.6814	37.0602	15.8727	21.5339	19.0885			0.462556	20.2082
9.7179	23.2565	17.0273	21.365	27.5842	21.793	20.2026	27.9916	19.1619	19.6733	12.9324	25.369	21.7546	9.0085	8.43	29.3376	28.99	15.585	17.091	18.0345	36.8361	16.8721	18.7806	20.8243			0.466958	20.7783
9.8096	33.3373	14.8642	14.735	33.3809	23.177	20.8033	25.6457	16.5494	20.6406	14.8598	28.3	17.4746	11.1262	12.5257	25.7449	28.211	21.541	20.088	19.9205	31.3862	16.29	19.0397	19.192			0.471364	21.2536
9.9013	28.9773	10.6606	18.435	30.121	23.004	15.1323	29.8377	23.3085	17.5672	11.5707	33.636	17.8266	11.1441	13.9072	24.1396	31.938	24.802	23.148	17.7635	21.1166	14.6175	15.5011	17.7413			0.47577	20.6911
9.993	31.9933	8.5929	16.369	25.0255	22.164	23.5627	28.9239	24.9998	17.2977	10.8538	31.564	13.7218	10.6711	10.9222	19.1086	28.448	22.1	18.639	22.2353	25.7501	12.9971	29.6077	16.751			0.480176	20.5347
10.0847	28.1512	7.6309	17.516	27.6695	23.719	21.7222	29.8722	27.2924	22.7008	14.1048	39.089	16.0975	11.8819	14.7679	26.7618	22.92	21.276	24.234	21.8612	21.5528	18.7315	35.2636	18.3626			0.484583	22.3121
10.1763	33.2099	11.6928	21.31	25.7133	20.543	23.3609	24.4394	31.6303	18.3953	13.9797	38.49	14.3965	18.5851	12.8439	33.7118	15.567	30.049	28.388	26.0828	26.8517	26.0948	46.3356	19.0924			0.488984	24.381
10.268	28.2274	13.7668	18.839	21.0043	20.592	21.8829	25.4228	24.9016	11.5158	8.4006	34.8	19.0655	24.0542	17.1612	37.3117	20.92	28.954	20.784	22.2301	34.132	16.3246	40.3939	13.9958			0.493391	22.8122
10.3597	27.3434	17.5083	17.472	26.2453	22.643	24.7631	25.3661	22.9662	12.7538	11.5765	35.364	18.8217	23.4444	17.8729	30.689	21.369	31.528	19.111	28.7867	37.6035	17.6676	20.5537	8.285			0.497797	22.5971
10.4514	30.0523	12.6801	17.773	37.1992	28.121	29.4123	34.6154	24.0184	13.4972	6.7709	37.374	22.899	23.2743	13.9642	38.3021	20.212	35.447	22.362	19.3676	29.2399	20.6116	11.1021	11.2204			0.502203	23.4572
10.5431	31.7372	13.5642	27.807	38.7396	27.2	28.9059	27.8976	19.6875	12.6237	7.6733	32.23	20.8034	20.2642	12.5725	33.4925	24.216	32.692	17.499	20.67	26.5075	18.9013	12.7006	10.2159			0.506609	22.5479
10.6347	33.9126	17.8567	20.378	40.4377	35.068	28.4027	29.099	21.2634	14.1548	8.7008	30.121	23.176	17.0081	21.2499	32.8777	19.805	34.744	16.573	23.1049	27.1771	17.3059	12.5122	8.2244			0.511011	23.1806
10.7264	26.2711	20.7587	16.904	43.9024	31.154	27.9685	35.9663	24.6729	11.509	10.8903	27.267	22.6864	14.088	29.2405	26.5773	23.665	26.065	18.094	21.6392	21.3946	27.538	10.9912	14.1685			0.515417	23.1918
10.8181	30.4778	16.5398	23.973	40.7719	23.919	25.5512	29.1595	20.5976	13.2644	21.1995	17.68	22.9814	9.2632	20.7674	21.6266	20.464	20.788	15.884	22.2105	19.2913	34.6413	12.622	10.7246			0.519824	21.4956
10.9098	41.4489	15.6937	21.629	30.2643	23.773	22.4448	19.3826	19.1196	9.4037	25.9711	24.311	25.0137	9.8589	11.9385	20.6129	35.018	22.099	12.022	26.6471	21.1072	23.2266	13.2187	13.1314			0.52423	21.1885
11.0015	40.7899	20.1773	17.92	37.4464	24.436	19.4525	19.4101	18.8383	7.2425	22.8821	24.128	25.7262	9.7795	9.5244	23.3466	27.195	18.862	14.573	28.2012	23.4498	20.8063	16.6336	11.9836			0.528636	20.9915
11.0931	46.1511	16.9482	12.322	41.2719	26.513	14.978	16.4481	21.0098	8.5898	18.2127	20.913	21.321	10.185	8.616	18.1421	26.819	20.058	15.697	27.5945	23.9578	20.0228	15.9795	13.8594			0.533038	20.2439
11.1848	38.8782	8.7664	10.313	44.0676	24.668	15.723	18.3873	21.0003	10.5388	19.3449	20.153	20.7026	16.1446	9.0607	22.2261	24.256	18.706	18.657	23.7276	20.3911	16.172	15.0605	15.0443			0.537444	19.6517
11.2765	39.8922	10.3455	8.868	28.0187	23.757	14.1705	18.8886	20.7899	13.1665	16.831	20.472	27.3287	19.6113	6.6901	30.1225	26.268	18.124	20.039	23.7778	36.7067	17.8246	14.0162	21.3197			0.54185	20.7404
11.3682	31.4754	13.6876	9.045	31.0296	25.035	21.0282	17.6166	19.6673	14.5783	14.7751	23.161	18.989	13.8406	8.2678	29.2069	23.815	18.533	22.136	25.1461	36.3829	22.9169	18.7145	20.9006			0.546257	20.8673
11.4598	19.4883	11.6066	9.752	24.1906	21.122	20.2386	18.7993	21.7401	9.9455	13.9122	28.109	24.9771	12.0295	11.3901	29.4281	28.918	29.946	15.566	17.339	39.122	23.4496	9.9463	19.8224			0.550658	20.0364
11.5515	20.2155	13.3321	10.891	34.4316	16.96	23.3279	21.903	23.0348	12.2135	9.1751	25.853	28.1412	10.6605	10.5467	24.7874	33.351	35.015	19.474	15.8502	35.6947	19.2344	9.4438	23.9055			0.555064	20.7583
11.6432	23.6659	11.6419	9.234	37.1265	19.134	19.2771	18.8318	24.5254	8.9308	11.0574	23.115	29.5602	12.0426	10.423	19.2106	35.179	35.758	21.685	21.6476	30.2887	18.783	8.3795	32.4739			0.559471	20.9553
11.7349	28.7253	12.3765	8.391	30.3369	20.347	23.7285	16.8349	22.7199	10.9105	12.1391	24.122	30.2241	13.7586	10.1657	20.7018	32.818	26.002	25.519	24.2027	28.893	18.4049	9.1446	35.3343			0.563877	21.1218
11.8266	31.9012	17.3311	10.228	30.6884	19.889	26.6316	23.997	28.0736	13.7841	14.0454	26.316	30.4734	11.1343	11.5567	18.6582	30	22.696	27.328	21.9088	24.9615	24.8413	4.7671	35.5122			0.568283	22.0314
11.9182	27.454	15.8793	16.149	31.5134	15.519	22.0834	26.039	24.6105	20.5367	13.6242	23.635	36.317	14.4471	9.6444	20.1695	28.923	27.56	23.116	17.5721	34.5383	25.4005	8.375	32.6361			0.572685	22.4236
12.0099	25.4535	14.729	16.162	23.55	13.652	20.9009	22.8407	29.1464	20.8766	12.7287	29.28	27.8005	17.2805	11.5123	18.9857	32.822	22.992	21.394	16.6008	27.1428	24.9322	10.7499	29.0846			0.577091	21.3312
12.1016	22.279	17.6548	12.747	26.3977	13.139	25.1467	22.4595	33.7255	21.8586	9.3357	39.441	21.0814	17.2394	10.1854	26.1946	26.156	19.341	22.821	18.741	28.4002	24.8577	7.16	24.0575			0.581497	21.3226
12.1933	17.8298	22.0982	14.931	25.9485	17.874	35.8515	23.5942	37.5864	22.9591	10.5317	38.616	19.8998	13.1037	8.0083	30.7267	29.325	21.196	16.389	18.7986	30.3619	21.2875	11.4962	23.043			0.585904	22.2372
12.285	22.2391	20.4053	15.555	26.8293	15.977	32.8587	22.309	41.5665	21.8722	9.8256	29.241	18.7102	13.2677	12.8278	23.5062	28.514	23.805	17.351	20.1552	28.1319	24.5719	21.2738	16.852			0.59031	22.0715
12.3766	21.5653	17.747	14.035	24.5261	16.778	25.3819	23.2801	33.7203	24.9707	11.3071	27.946	23.1589	12.5263	12.3796	20.9336	24.733	17.898	17.402	22.2948	22.955	19.783	19.9634	20.4875			0.594711	20.6858
12.4683	19.1646	20.5224	12.083	22.8697	18.067	22.4612	25.83	33.8909	17.4787	11.7127	36.187	32.4873	9.7689	13.7713	31.9641	23.232	21.007	22.054	20.0367	22.8275	22.3601	16.6011	20.4091			0.599118	21.5994
12.56	25.4603	17.0296	10.371	21.7403	23.394	23.4624	21.679	35.56	14.1393	10.0063	33.093	30.858	10.0836	11.132	34.4166	31.238	23.043	31.327	31.0827	29.0939	26.6909	13.6712	17.6114			0.603524	22.8775
12.6517	17.6651	17.5111	8.502	24.8194	18.188	19.5786	19.7166	34.5216	13.284	11.9867	35.406	23.0423	7.6287	13.6953	26.4368	24.127	18.247	37.326	28.7655	30.9489	19.9188	10.7856	18.6543			0.60793	20.9024
12.7433	15.8869	17.5434	7.811	25.6785	17.498	26.9482	17.2297	23.476	16.6726	9.3847	45.277	16.5299	5.3929	12.7868	19.3447	23.537	18.536	42.174	24.0848	30.1006	13.2073	13.3259	23.1122			0.612332	20.2408
12.835	20.871	18.2724	8.555	28.7802	21.718	24.9044	13.5854	16.4095	14.6855	11.897	42.01	18.9175	8.9697	12.6328	21.8332	19.005	19.46	28.321	23.7177	21.2948	12.058	15.5617	16.3074			0.616738	19.1203
12.9267	25.9434	16.3813	9.345	22.1658	19.425	25.2541	12.7733	19.8836	13.4953	18.7445	32.549	20.6881	11.8903	10.566	25.436	18.856	15.207	21.636	24.6249	22.2761	11.4653	13.7499	14.9519			0.621144	18.5786
13.0184	29.4662	15.5409	12.887	25.206	20.902	23.6244	18.2662	21.2214	13.553	10.3369	28.758	20.9408	11.524	14.154	31.3629	27.597	18.039	19.848	23.7523	21.8151	14.2904	15.5298	15.5255			0.625551	19.7453
13.1101	33.5872	13.6965	13.93	28.9803	21.568	25.4712	17.9035	22.3565	15.2189	7.6438	28.553	20.1817	18.9414	12.8642	25.4575	28.346	25.824	24.541	25.6194	26.8131	14.6695	17.8534	13.1713			0.629957	21.0083
13.2017	30.3899	10.6765	18.489	27.1113	27.665	26.2366	23.775	24.1741	14.1363	12.7079	27.329	16.9699	23.0634	10.3179	29.8185	29.822	22.41	25.249	26.641	28.3935	17.3755	21.3952	16.2147			0.634359	22.1896
13.2934	29.0891	14.0484	18.988	31.9062	31.152	23.5223	23.2063	26.1525	16.4182	13.7051	22.451	19.7217	22.6633	8.9755	38.6927	34.345	23.25	21.467	34.161	24.2252	19.464	17.8078	18.7132			0.638765	23.2228
13.3851	25.2973	13.8228	20.93	26.9257	39.113	23.2724	21.3088	27.4835	19.2479	15.6993	16.897	21.7456	16.8961	9.7611	33.3215	34.488	22.174	20.686	33.8909	27.7432	19.0415	22.3563	25.7603			0.643171	23.3853
13.4768	14.4909	18.6655	13.133	27.3115	45.839	20.7722	20.6117	22.3047	11.8916	15.5264	21.692	16.3617	14.9409	6.1786	26.5704	31.989	17.159	23.983	25.3878	23.6477	18.4071	16.9206	28.3485			0.647577	20.9623
13.5685	13.8527	20.3172	9.662	23.6193	39.691	18.5405	25.6245	25.8805	9.907	19.4885	24.639	18.8079	14.7684	7.6035	25.0793	30.879	19.979	16.543	24.1696	20.8117	16.5542	15.453	24.1386			0.651984	20.2613
13.6601	19.258	18.9942	12.769	19.108	30.201	19.906	24.9479	21.426	10.8077	13.0584	21.764	18.8012	12.9587	9.9116	24.696	26.113	22.282	18.053	23.8028	19.7264	16.4725	17.4863	18.745			0.656385	19.1865
13.7518	16.6313	21.0616	15.549	25.793	28.758	24.8969	18.178	23.7452	12.3836	13.53	21.892	21.1626	13.0673	6.5018	21.5322	28.358	21.733	19.794	25.3593	16.9651	14.3541	14.8654	18.7297			0.660792	19.3409
13.8435	9.6291	15.5047	16.953	27.3628	17.891	29.4763	23.3643	25.0203	10.4919	15.0661	21.371	20.3213	11.7464	9.0301	15.521	19.307	27.094	21.533	25.7029	18.9398	16.5935	15.1554	17.8885			0.665198	18.7375
13.9352	13.0484	12.7009	17.789	20.8076	21.961	31.2108	21.147	24.6803	12.5703	13.5902	19.677	23.3933	11.5394	14.1684	20.3074	20.376	25.065	21.271	28.3473	19.8859	15.3637	20.6773	13.6888			0.669604	19.2724
14.0269	9.761	10.7479	17.466	20.6745	22.344	31.6763	20.0092	26.3555	12.903	15.3833	15.61	18.8672	8.3418	14.9816	30.0724	23.412	25.535	22.827	26.902	26.5232	16.1194	21.6395	14.2987			0.674011	19.6718
14.1185	15.2895	10.9737	17.821	20.4167	23.225	28.1579	26.9173	30.1396	9.1724	13.0572	15.991	18.6395	9.9493	16.7265	41.2069	31.261	15.676	23.677	28.3134	24.4346	14.7964	18.047	16.7216			0.678412	20.4613
14.2102	13.2476	16.6261	25.373	24.3954	33.693	27.8655	30.1949	29.5808	8.1259	15.7631	19.384	18.4325	8.3401	17.7005	25.7432	29.511	16.262	25.078	24.1205	24.0807	21.0898	21.4301	17.6466			0.682818	21.4645
14.3019	21.2664	16.8879	18.809	31.9759	35.693	22.6744	27.4354	30.7557	12.5155	10.6674	24.925	28.8033	9.9053	19.2006	27.5465	25.18	17.137	20.977	25.6157	24.1141	18.9572	16.9586	15.3003			0.687225	21.8827
14.3936	15.2286	25.1296	14.121	40.4968	23.69	19.8172	25.3319	34.7624	14.5798	12.5529	24.011	27.5133	9.4554	25.4237	28.6437	19.233	19.753	29.39	27.4013	23.3502	27.037	18.7642	16.4187			0.691631	22.7002
14.4852	17.6899	19.414	15.455	46.7792	19.578	21.3405	25.7713	31.1457	14.9495	11.3543	27.066	21.7521	9.683	23.5332	27.5492	24.552	23.45	29.815	21.4879	29.8114	30.6613	15.3746	22.2384			0.696032	23.0631
14.5769	20.6472	17.2627	17.636	42.0134	23.922	17.9874	23.4116	26.0434	9.0302	26.4328	24.471	20.9351	13.971	23.8386	21.7353	20.929	26.287	32.508	23.6017	24.2989	29.9676	12.8479	26.6715			0.700439	22.8891
14.6686	18.4033	18.3635	24.25	33.7465	22.311	24.4306	24.6891	32.3134	6.5436	22.1763	22.815	19.4778	12.0513	27.3622	26.6804	22.273	24.279	23.646	23.9193	17.5487	29.7806	15.179	20.7308			0.704845	22.3031
14.7603	25.8867	26.8199	29.755	40.7404	22.947	24.735	26.579	26.2442	11.9632	18.9633	25.43	20.1018	12.5436	25.9227	21.2759	28.96	24.033	30.236	17.1984	20.1628	31.161	14.7803	21.8384			0.709251	23.8382
14.852	23.4577	21.3989	42.177	29.3469	26.135	28.8052	37.3998	21.2113	8.6477	19.3707	27.674	19.3027	14.3445	21.3132	30.2163	34.003	24.665	31.344	16.2609	24.9703	22.2786	13.0457	26.2296			0.713658	24.5043
14.9436	20.2624	21.4091	33.581	23.5301	26.916	32.7661	34.9082	28.7623	6.8899	23.9767	23.386	22.891	12.6884	25.7821	24.5835	30.955	28.663	24.983	21.2904	20.4618	19.394	12.569	24.6096			0.718059	23.7069
15.0353	18.3738	31.6108	27.263	35.3637	25.238	30.9755	23.3342	31.7409	8.1005	23.8454	27.175	25.0643	14.001	26.1127	28.4287	30.771	25.053	21.431	28.5385	19.5901	22.2421	14.6181	19.6753			0.722465	24.2846
15.127	18.9732	29.2953	28.97	35.8464	25.405	29.7036	20.857	35.8174	10.3919	28.6159	22.351	26.013	12.523	17.9155	22.9839	24.79	29.619	20.821	30.679	17.3768	23.2887	17.5349	19.0443			0.726872	23.8616
15.2187	16.9024	30.8202	18.405	30.3043	35.715	30.9539	21.82	35.3318	13.8631	24.6635	25.624	22.5164	17.1588	24.5567	22.1323	21.743	24.676	21.379	32.9447	24.8027	20.0166	21.8923	18.3524			0.731278	24.1989
15.3104	17.2843	23.391	22.669	28.5295	40.375	32.0966	20.5051	35.8764	11.7498	24.4897	28.987	16.6294	27.5765	22.9016	23.7245	17.504	25.95	23.934	30.4205	26.7439	20.3071	20.7558	24.8681			0.735684	24.6639
15.402	24.9904	15.6993	26.203	27.5853	27.851	36.1283	21.2425	31.9427	9.0757	19.0987	31.949	12.9529	36.7078	18.9003	29.6372	25.915	29.725	19.996	29.2859	21.9844	20.0915	22.715	20.4628			0.740086	24.3539
15.4937	23.3421	14.7524	32.041	25.1018	21.605	34.0842	23.1947	28.8103	9.9179	16.4296	32.614	14.094	50.7324	18.028	29.5308	36.112	25.69	21.552	31.878	26.8332	23.6275	21.998	24.9163			0.744492	25.5167
15.5854	27.739	12.1951	26.931	25.897	20.792	26.5754	17.8276	26.1162	8.8285	18.4557	31.228	15.9622	46.5174	23.8467	28.7503	37.407	32.96	18.471	23.8597	23.8366	27.9228	21.6649	25.0063			0.748898	24.73
15.6771	30.6614	14.0021	23.69	27.2921	18.748	23.1872	21.9437	29.3764	11.9683	18.8052	31.976	16.7804	30.0113	26.8135	24.0668	31.199	36.212	18.563	24.9732	28.6946	39.9233	24.6348	25.0455			0.753305	25.1551
15.7687	34.0406	15.5783	26.911	25.1414	21.032	22.9171	22.0423	30.1468	12.922	17.8113	28.69	16.4134	23.4434	18.6381	26.0093	32.612	35.622	27.663	35.6974	30.4857	30.8699	22.4733	23.6408			0.757706	25.2522
15.8604	32.6579	18.2295	29.732	24.8644	21.845	22.0623	22.4826	27.9762	15.3862	25.0998	25.455	17.9582	16.0709	19.557	22.2323	28.534	32.56	26.03	31.6034	31.4485	23.4081	25.9677	20.4011			0.762113	24.4157
15.9521	27.5501	18.4886	27.597	26.4171	22.224	29.8827	31.6949	27.4626	21.0751	31.0462	18.014	17.5743	21.5073	17.9966	19.0362	33.701	29.892	26.835	32.4775	23.0893	19.931	27.0095	21.7399			0.766519	24.8801
16.0438	20.2977	24.41	30.684	38.0392	30.894	36.6491	30.758	27.478	17.0169	40.5632	24.412	16.9907	21.6826	15.9988	19.1814	33.999	25.585	27.782	30.0112	27.4502	19.0299	28.71	21.8417			0.770925	26.4985
16.1355	23.9767	16.7004	25.144	44.7049	23.094	32.4589	22.6668	33.3436	21.6943	46.1982	29.371	25.4633	18.88	15.4674	14.9271	25.938	29.425	28.133	22.8294	29.6936	18.7732	25.2734	28.0969			0.775331	26.1849
16.2271	28.3785	14.4962	21.045	64.7298	23.96	36.2289	20.7683	30.8105	19.5305	40.5004	34.641	24.855	20.2854	13.7095	20.9023	28.853	28.821	21.735	22.1031	22.6846	16.327	22.7402	26.923			0.779733	26.3056
16.3188	27.0439	12.0963	19.914	45.3432	30.206	30.5849	18.5778	30.6056	18.5139	35.3489	32.487	17.5043	20.7198	11.2377	32.0182	26.097	26.299	21.057	23.2967	17.9782	17.0584	31.8621	16.9571			0.784139	24.4699
16.4105	27.2718	11.0843	15.676	31.3348	29.132	27.2641	23.7981	21.5761	21.692	34.135	30.252	18.2341	22.1976	9.9951	38.2406	26.147	21.558	14.888	26.5317	18.4696	20.7601	34.904	17.0894			0.788546	23.5753
16.5022	17.0283	11.6878	19.981	28.0161	26.008	30.0955	19.9623	18.8055	20.0638	27.8699	29.437	19.6462	15.1677	13.9206	34.8416	34.439	17.314	24.378	25.7646	19.1176	19.86	41.1815	21.6476			0.792952	23.3145
16.5939	18.0598	12.6016	20.249	34.2088	27.609	26.4446	17.1449	23.5139	24.0188	23.14	33.466	19.1189	15.307	17.0267	22.2543	27.846	22.621	29.871	22.9514	18.1294	19.8486	33.3612	25.1734			0.797358	23.2159
16.6855	19.4435	15.9159	22.664	31.2491	27.049	20.5198	18.2927	24.5896	20.6488	27.547	33.388	13.5314	9.9728	17.3911	26.721	21.963	26.87	28.783	20.867	22.8869	16.1906	24.107	28.2088			0.80176	22.5565
16.7772	21.8222	13.2748	25.404	33.1593	25.711	26.1506	17.8805	24.7626	29.621	20.5954	37.905	11.4844	11.2608	17.5798	22.0279	30.436	30.955	26.977	12.4216	17.9097	21.3008	24.8733	28.0772			0.806166	23.1126
16.8689	23.7655	13.9125	18.98	31.6161	22.446	24.1396	20.6384	20.0766	27.1925	15.4725	33.477	12.2554	11.2383	25.1104	21.4767	43.05	36.78	16.602	8.6767	20.5282	17.8385	24.4461	31.2369			0.810572	22.6503
16.9606	22.1968	10.7863	19.241	34.3609	29.809	24.9289	16.5787	22.3973	26.4184	19.4222	39.392	17.2569	14.4077	18.0845	23.3229	67.969	43.105	15.247	4.2085	23.9116	21.4394	20.1934	31.9798			0.814979	24.6373
17.0522	19.7822	10.3644	15.608	31.4608	22.942	17.1711	27.6874	20.9319	18.3656	19.4431	38.296	26.9351	13.6046	23.5492	24.8487	51.701	28.678	9.801	3.2701	30.9689	25.056	18.9773	34.3488			0.81938	23.2083
17.1439	19.364	10.5632	20.684	33.0224	23.928	18.1631	25.1262	18.8218	17.7405	22.7779	33.305	18.2024	19.3896	22.0953	20.8691	43.506	15.832	5.406	2.6557	27.0491	24.2358	16.9703	35.439			0.823786	21.5281
17.2356	31.8975	14.1509	22.022	27.9965	22.644	16.4201	23.8789	17.9641	13.9833	30.9289	36.426	19.078	12.9474	22.2284	32.3166	31.174	12.018	4.396	3.4058	34.0625	24.2199	16.208	30.4376			0.828193	21.7741
17.3273	28.1395	14.5805	19.415	27.6747	21.209	21.3983	18.2483	20.9227	13.1812	29.169	30.945	17.7954	11.0763	24.3465	48.8011	21.644	5.593	2.139	3.1271	30.8488	28.3137	19.7704	25.4036			0.832599	21.0323
17.419	26.3686	17.8199	20.71	28.059	23.251	28.6076	19.2028	25.6147	14.8019	31.755	31.411	18.1512	18.8312	25.1582	70.947	11.048	3.856	1.903	1.1633	23.7146	24.4887	16.0494	25.5929			0.837005	22.1089
17.5106	22.4674	21.7205	20.829	33.1506	31.569	36.5223	20.9656	40.4351	13.7861	31.7189	32.06	17.7382	17.6399	20.6696	50.6036	7.919	2.332	1.962	2.0585	23.0657	18.6745	13.7274	28.082			0.841407	22.1607
17.6023	19.371	24.6217	23.406	29.5393	26.695	44.1078	20.7798	38.2174	16.6896	31.4059	35.325	22.0338	17.5581	35.6795	35.5485	7.066	1.611	1.497	0.661	15.9013	13.7338	15.1107	25.2987			0.845813	21.8199
17.694	16.281	24.7035	22.845	27.24	24.159	43.2873	25.7933	31.2386	18.856	30.0457	39.064	26.201	17.5318	41.4234	17.3715	3.497	1.093	1.949	0.4967	13.1846	17.1861	20.7	27.4232			0.850219	21.3726
17.7857	14.3764	22.3719	22.624	30.2896	25.55	43.4277	27.3889	26.8273	19.9366	23.4817	22.32	30.2469	16.8159	43.9919	7.7227	3.001	1.341	1.932	0.6628	9.0406	21.5783	22.315	32.4276			0.854626	20.4204
17.8774	15.7018	21.7512	20.261	27.1981	34.28	40.073	29.101	25.5419	18.936	28.3093	17.04	48.3011	17.6125	18.4082	3.8067	2.516	1.544	1.422	0.9063	10.9661	17.335	18.7125	32.2576			0.859032	19.6514
17.969	11.6655	27.4172	19.714	20.1527	28.752	34.0796	19.7349	24.8897	15.7477	27.1827	11.715	41.6744	14.4736	6.3435	2.3601	2.763	0.587	0.673	0.2998	7.4004	23.2093	21.9416	24.8227			0.863433	16.8521
18.0607	16.2197	20.5106	14.895	18.9125	32.695	19.0858	16.568	25.0044	22.6139	37.4118	7.459	42.1779	15.6583	4.8181	1.2631	1.297	1.28	0.99	0.6942	3.9578	18.4569	19.4357	26.0725			0.86784	15.9773
18.1524	21.8425	21.9772	17.663	34.2923	37.516	11.5483	10.887	23.0308	29.8421	32.9228	12.751	23.9481	8.7395	2.2313	2.1048	1.503	0.759	0.644	0.4874	2.9063	24.8019	24.4816	16.7346			0.872246	15.8093
18.2441	23.2984	20.5402	21.579	41.5669	31.79	3.4412	10.9174	25.767	34.2121	24.5111	14.37	19.0903	3.1554	1.6121	2.279	1.469	0.904	0.759	1.169	2.5966	23.0442	19.3148	22.8193			0.876652	15.2263
18.3358	27.7538	20.2748	24.142	47.7074	19.162	3.4351	8.2205	34.5505	33.4297	17.6902	14.665	16.9832	3.1858	1.5613	1.5986	0.504	0.549	0.5	1.5627	2.7564	23.2288	21.8099	20.8633			0.881059	15.0493
18.4274	26.6249	19.5832	33.361	40.6628	29.254	2.0624	3.9019	27.7257	19.6405	15.3017	11.949	10.3571	3.003	0.7876	0.7798	0.584	0.761	1.003	1.1783	1.0627	27.3336	26.1519	25.3567			0.88546	14.2794
18.5191	20.4661	24.7618	34.301	40.2794	24.324	3.2417	2.166	19.3101	16.6304	10.9463	20.538	10.1601	2.984	0.9341	0.6848	0.402	0.842	0.462	0.4345	1.9258	28.4559	21.9624	28.4542			0.889866	13.6812
18.6108	25.1587	32.6436	34.924	34.541	24.191	3.1813	1.7393	13.519	15.8344	10.5588	25.994	13.5993	2.2336	0.4814	1.3858	0.576	0.426	0.099	0.7871	1.2301	27.0698	17.1312	21.0072			0.894273	13.4049
18.7025	20.9126	33.6181	32.371	36.5706	29.349	2.2479	1.0008	7.9069	11.7471	7.5555	31.36	28.1161	2.2086	0.2605	1.049	0.246	0.231	0.963	1.025	1.0561	20.7623	26.4973	30.0145			0.898679	14.2204
18.7941	18.5809	32.5728	33.812	29.7659	20.273	3.7319	1.6592	2.7677	6.8049	6.9754	18.893	31.422	2.6437	0.3846	0.4334	0.381	0.339	0.206	0.0881	1.8944	13.8803	19.1424	19.4226			0.903081	11.5684
18.8858	25.7052	31.6649	35.439	33.3429	21.354	3.9564	3.7543	2.752	4.1556	8.016	14.208	20.1706	1.5394	0.8225	0.7498	0.702	0.083	0.896	0.2528	1.9051	15.5853	16.9404	18.9151			0.907487	11.4309
18.9775	21.9816	24.8521	34.623	32.7371	22.484	2.5981	1.9996	3.0725	4.9884	5.3258	27.082	14.1967	1.3584	0.3942	0.0179	0.709	0.964	0.49	0.7118	1.7417	14.364	21.663	18.2797			0.911893	11.158
19.0692	11.7047	22.1902	25.735	36.513	21.515	3.0269	0.9689	1.9496	6.4867	5.9263	32.302	12.1588	2.7873	1.2064	0.4216	0.347	0.155	0.762	0.448	0.8931	10.5653	22.4692	19.3496			0.916299	10.4296
19.1609	8.9496	20.2629	30.896	31.9749	25.191	5.6769	1.8009	2.3015	3.2262	6.4726	33.565	9.1089	3.5464	0.6124	0.5013	1.304	0.879	0.575	1.072	1.6377	10.3643	21.5516	15.2825			0.920706	10.2936
19.2525	7.2339	21.4502	24.961	25.2156	24.76	6.4748	1.4989	1.4138	2.4471	5.1758	31.102	13.0393	2.6038	1.5721	0.7529	0.678	0.577	0.556	0.6315	0.9853	6.4424	27.2013	18.7617			0.925107	9.80584
19.3442	6.2219	20.1134	21.69	25.6776	29.437	6.8444	0.9584	2.6187	3.3927	2.7383	25.028	14.1585	2.6438	1.1465	0.7549	0.238	0.514	0.549	1.3037	1.1374	5.9725	27.2793	18.2611			0.929514	9.50779
19.4359	3.9192	24.965	11.225	31.3663	26.824	6.1719	1.2792	1.9579	4.0903	4.1788	16.998	21.4366	2.0528	0.0278	0.5031	0.957	0.486	0.314	0.8025	0.6526	6.4527	34.6608	22.0602			0.93392	9.71225
19.5276	3.7444	27.9724	9.763	43.6742	35.054	10.6698	2.7901	1.3416	2.1142	4.0176	12.764	19.5059	2.7637	0.6466	0.5977	1.412	0.453	0.483	0.5791	0.9611	4.1701	25.4512	25.5904			0.938326	10.2834
19.6193	3.3144	22.9143	9.518	41.5228	24.516	21.1851	0.9093	1.9774	3.1437	5.0236	10.298	20.7394	4.4791	0.572	0.0682	0.321	0.261	1.053	0.9052	0.2748	4.0056	15.9878	24.3454			0.942732	9.44935
19.7109	5.6678	16.0302	12.621	27.5489	19.472	15.8825	2.0065	1.5991	4.9053	4.3723	12.235	22.5494	3.0752	0.7453	0.3265	0.082	0.174	1.255	0.0384	0.5782	2.4065	9.874	19.1412			0.947134	7.93853
19.8026	6.4401	18.7804	16.522	26.0389	14.711	14.6529	0.6024	2.5936	4.7329	3.9237	13.753	25.6115	3.7507	0.146	0.6679	0.269	0.133	0.326	0.1511	1.1	3.0112	7.9861	15.0615			0.95154	7.86804
19.8943	7.8852	18.9976	15.246	21.653	11.638	16.6109	2.2915	2.6774	2.2673	2.73	11.411	20.8802	5.6635	0.0711	0.6302	0.57	0.56	0.508	0.6371	0.696	3.0399	6.3579	13.1732			0.955947	7.22587
19.986	5.2636	16.4754	16.139	15.6243	9.004	16.6009	1.2795	2.4868	3.0145	2.7464	14.481	20.2986	3.5263	0.5521	0.7755	0.442	0.131	0.386	0.1549	0.4736	1.5886	5.9038	7.919			0.960353	6.31595
20.0777	4.0569	16.2376	20.003	15.8161	9.019	18.475	3.0255	1.9923	2.982	5.9597	12.383	19.1806	4.794	0.846	0.184	0.181	1.299	0.492	0.1164	0.4474	3.1593	4.2223	4.4425			0.964759	6.49194
20.1693	3.4943	19.2933	17.605	13.5202	27.379	18.6312	3.099	2.6786	2.0625	4.9912	12.842	22.1017	7.5511	0.1665	0.4116	0.528	1.043	0.606	0.2871	0.2948	2.4075	3.1656	6.3279			0.969161	7.41248
20.261	2.9852	16.9142	18.603	13.0345	37.815	20.1769	3.7344	2.8611	2.0333	6.3126	10.794	21.2886	10.1793	0.0476	0.8433	0.257	0.723	0.371	0.7893	0.2329	2.3004	3.1301	4.0362			0.973567	7.80273
20.3527	3.2399	13.9336	17.517	7.9267	30.649	16.5037	7.5245	3.8353	2.9887	5.1642	7.926	19.1047	9.3102	0.4939	0.2498	0.135	1.361	0.624	0.9902	0.5054	1.1903	2.013	3.2729			0.977973	6.80257
20.4444	4.6772	13.9621	15.339	8.8868	22.719	15.6462	9.2413	2.3027	2.2147	7.3989	8.435	18.7919	11.8411	0.9291	0.1241	0.148	0.444	0.482	0.2494	0.9255	2.072	1.5999	3.4187			0.98238	6.60211
20.536	6.137	10.3474	13.141	5.4431	20.284	14.8761	13.0906	3.3605	2.3955	5.5567	7.385	13.5694	12.6555	0.676	0.5935	0.354	0.105	0.037	0.5919	0.7031	2.4075	1.1625	1.455			0.986781	5.92727
20.6277	4.0447	8.589	13.502	5.1083	22.54	16.1784	14.0297	7.852	1.7001	7.3455	8.958	18.7007	7.5525	0.5954	1.1524	0.851	0.354	0.647	0.6307	0.1666	1.4687	1.2713	2.8101			0.991187	6.34992
20.7194	3.7145	5.99	10.422	3.1437	22.158	18.2226	26.5959	9.3295	2.2624	7.8712	6.402	18.7017	6.1202	0.6481	0.3256	1.297	0.437	1.463	0.3949	0.3084	1.086	1.6078	1.8805			0.995594	6.53835
20.8111	3.4336	6.2413	13.713	3.8466	15.329	10.4823	29.8029	9.4292	1.7381	11.3492	8.676	14.7508	10.6172	0.0888	0.898	0.911	1.049	0.701	0.0284	0.2566	0.18	2.9886	1.2371			1	6.42381

## Sheet: Image8
X0	Y0	Y1	Y2	Y3	Y4	Y5	Y6	Y7	Y8	Y9	Y10	Y11	Y12	Y13	Y14	Y15	Y16	Y17	Y18	Y19	Y20	Y21	Y22	Y23			Ap-Basal to 1	Average intensities
0	76.611	123.056	95.9444	63.5	60.5	60.778	90.833	70.056	42.444	46.889	83	57.833	35.4444	59	30.3889	35.2222	32.5556	29.4444	40.389	43.111	37.8889	30.111	36.778	40.7778			0	55.1065
0.0917	83.889	127.5	92.6111	72.833	52.278	63.444	84	73.556	38.833	48.056	66.389	46.889	34.4444	45.944	32.6667	40.8889	34.7778	43.8333	37.722	34.167	33.3889	30.278	38.111	35.3333			0.00537761	53.8264
0.1834	93.111	106.389	94.3889	71.778	54.056	70.5	82.722	67.944	49.278	51.889	53.722	50.667	33.7222	39	29.9444	38.2778	35	39.2222	41.5	36.611	28.3333	39.778	25.944	45			0.0107552	53.2824
0.275	116	105.278	101.222	64.444	52	74.444	79.778	54.889	47.111	52.222	62.056	46.222	37.1667	36.222	40.7222	44.4444	30.2222	49.3889	43.833	39.944	36.1111	47.278	33.278	35.6667			0.016127	55.4143
0.3667	124	109.167	84.4444	81.889	63.889	91.167	83.056	55.611	58.056	52.667	63.056	47.778	39.8333	35.611	37.3889	50.7778	35.1667	47.1667	58.222	47.333	46.0556	42.278	39.667	38.1667			0.0215046	59.6853
0.4584	130.722	107.167	80.8889	79.778	68.222	137.722	68.556	47.944	53.056	60.833	54.111	53.167	44.6111	39.5	34.2222	54.2778	48.8333	43	44.778	35.889	46	54.444	44.889	39.1667			0.0268822	61.3241
0.5501	137.722	87.889	79.7222	107.5	79.167	141.333	82.667	46.778	71.444	58.778	68	53.889	50.5	44.5	32.9444	50	52.1111	48.4444	36.944	33.889	42.0556	43.167	38.056	41.8333			0.0322598	63.7223
0.6418	122.056	79.944	75.5556	124.611	89.5	153.5	82.222	56.056	79.167	52.722	53.722	42.167	48.8889	39.389	32.8333	56.9444	59.2778	53.9444	47.611	45.333	46.5	47.611	35.278	36.1667			0.0376374	65.0417
0.7334	117.056	75.389	72.9444	106.111	97.833	155.167	90.389	60.722	75.778	55.056	56.722	49	45.3889	44.056	35.6111	62.6111	68.7778	44.8889	46.667	44.778	41.8889	35	30.611	34.6667			0.0430091	64.463
0.8251	105.667	71.111	58.6111	97.833	96.5	149.5	90	51.222	70.611	53.5	63.667	51.389	43.2222	45.5	41.3333	72.3889	69.9444	37.9444	46	53.889	46.3333	58.278	30.611	33.3333			0.0483867	64.0995
0.9168	120.111	63.056	61.5556	83.667	108.111	133.611	90.111	56.278	76.222	56.278	70.722	60.444	51.7222	48.667	56.1667	66.7778	55.2222	37.2778	46.5	44.444	44.5556	59.222	31	33.0556			0.0537643	64.7824
1.0085	152	64.111	56.9444	64.722	107.611	134.944	87.5	51.444	91.611	52.278	75	63.833	37.0556	50.556	56.8889	41.8889	47.6111	37.7222	48	36.833	44.8889	68.722	37.722	37.1111			0.0591419	64.4583
1.1001	140.556	59.611	56.8889	67.944	116.389	119.111	84.778	41.389	100.778	78.167	64.833	63.389	38.8333	45.833	63.5	35.2778	41.0556	48.0556	53.389	38.833	42.8333	83.278	45.722	48.0556			0.0645137	65.7708
1.1918	111.167	52.5	49.6667	58.333	122.889	109.333	80.5	54.389	99.778	93.556	66.667	69.389	37.5	59.556	55.5	32.2222	37.6667	51.4444	48.5	43.056	40.1667	72.833	52.333	51.8333			0.0698913	64.6158
1.2835	106.667	51.944	54.1111	56.5	117.167	105.167	71.611	70.5	107.833	100.722	63.389	63.667	35.8333	81.389	58.3889	39.3333	46.5556	48	62.222	37.778	46.6111	84	60.611	46.5556			0.0752689	67.3565
1.3752	79.056	46.722	53.7778	54	104.167	104.167	74.222	81.222	130.611	109	71	65.111	33.4444	109.111	56.7222	49.3889	56.1111	56.2778	67.444	45.056	50.2778	69.722	64.222	57.5556			0.0806465	70.3495
1.4669	78.444	44.722	44.8333	57.444	96.556	71.722	79.278	97.722	121.389	125.944	76.722	61.5	30.8333	114	69.3889	58	56.5556	55.8889	47.389	49.278	47.7778	79.611	89.833	66.5			0.0860241	71.7222
1.5585	65.944	45.333	54.8333	63.333	82.778	66.5	101.833	109.778	127.778	142.222	83.556	62.5	27.7222	89.944	70.2222	76.6111	52	61.4444	55.944	49.833	51.5	79.889	107.278	71.2222			0.0913958	74.9999
1.6502	64.667	44.056	48.6111	64.056	74.278	57.389	113.611	121.111	123.722	127.5	97.5	67.722	31.0556	62	73.6667	72.9444	52.2778	58.5	63.778	51.722	48.5556	106.389	122.5	63.1111			0.0967734	75.4468
1.7419	44.833	53.778	51.7222	63	70.222	50.333	104.778	117.889	132.556	122.333	115	57.5	30.0556	36.5	74.5	64	52.7778	53.1667	61.5	57.5	54.4444	90.444	134.222	66.7778			0.102151	73.3264
1.8336	52.278	52.667	50.5	46.611	73.889	43.389	102.889	113.889	124.167	116.667	149.278	52.389	38.8333	35.333	81.5556	58.1111	42.2778	58.6111	62.944	64.833	59.5556	82.944	153.722	54.8889			0.107529	73.8426
1.9253	46.944	64.944	45.1111	52.722	78.056	44.5	111	103.389	131.222	103.722	157.056	44.556	41	34.222	79.3889	72.0556	44.2778	62.2778	79.167	76.278	50.4444	63.056	173.5	55.8889			0.112906	75.6158
2.0169	52.889	81.167	48.9444	60.667	85.389	47.5	102.111	93.667	99.611	90.333	154	35.444	39.7222	28.333	62.6667	56.1111	48.8889	80	95.111	92.444	62.7222	51.278	185.278	65.5556			0.118278	75.8264
2.1086	38.944	81.389	50.3889	62.667	94.389	34.611	94.556	90.333	102.111	83.111	162.389	36.278	39.5	29.667	53.6111	57.4444	58.2778	74.3333	101	93.889	67.5	43.778	185.389	79.7778			0.123656	75.6389
2.2003	35.444	74.444	55.4444	55	102.889	37.833	95.389	79.444	86.056	73.556	161.833	38.778	28.3333	30.5	59.6667	54.3889	70.6667	78.6667	104.278	93.611	89.1111	37.944	168.278	75.5556			0.129033	74.4629
2.292	40.667	57.833	52.2222	49.389	96.667	38.667	94.222	85.167	65.278	54.222	146.333	37.056	37.7222	25.444	56.1111	64.2222	73.8333	68.1667	99.5	108.056	91.0556	42.056	135.5	62.7778			0.134411	70.0903
2.3836	42.778	55.444	48.2222	53.167	102.278	38.222	105.056	80.667	68.889	43.056	145.611	43.389	29.5	27.5	50.9444	59.2222	68.6667	81.8889	101.722	100.889	78.8333	36.056	107.611	64.7222			0.139783	68.0973
2.4753	45.667	60.444	41.8889	52.111	108.667	29.444	130	83.5	46.333	43.944	135.111	50.778	33	32.5	56.5556	55.1111	57.6667	81.7222	96.5	111.556	80.7778	31.389	81.5	61.0556			0.14516	66.9676
2.567	44.667	53	46.8333	59.833	130.889	28.333	115.389	87.778	40.389	40.833	124.222	73.111	33.0556	40.5	57.5556	44.5556	56.3333	70.6111	106.778	124	80.6111	20.389	55.111	63.9444			0.150538	66.6134
2.6587	46.5	59.167	50.1111	45.333	144.222	29	111.056	98.333	37.056	39.167	127.444	92	26.1667	39.111	46.9444	42	57.9444	61.4444	111.667	110.389	75.4444	14	38.833	58.3889			0.155915	65.0718
2.7504	54.611	55.278	59.3333	54.889	131.667	29.722	119.722	83.222	35.722	41.222	108.833	97.167	29.6667	38.167	41.9444	48.2778	64.4444	68.3889	119.222	89.667	68.3333	15.556	25.611	54.2222			0.161293	63.9537
2.842	54.056	57.833	41.1111	56.889	126.944	28.667	128.889	69.389	48.944	33.722	101.556	90.333	23.4444	29.556	37.6667	51.1111	67	53	101.556	66.556	61.1667	20.833	36.5	47.9444			0.166665	59.7778
2.9337	39.389	54.056	42.2222	52.444	119.167	31.278	131.5	72.444	40.833	29.222	106.278	92.222	27.8889	27.667	33.4444	60.2222	60.9444	59	89.722	52.556	57.0556	29.167	31	36.8333			0.172042	57.3565
3.0254	39.778	44.111	40.5556	43.222	100.111	30.333	120.889	70.222	43.278	32.278	95.611	106.778	28.3333	26.167	32.7222	42.4444	57.3889	66.8333	70.778	48.222	57.1111	20.556	33.056	34.6667			0.17742	53.5602
3.1171	26.667	35.389	47.7778	48.778	83.389	31.833	131.167	76.611	40.222	48.833	92.389	96.556	25.2778	18.333	32.9444	34.5556	63.8889	68.0556	74.778	35.056	53	21.5	31	25.3889			0.182798	51.8079
3.2088	25.222	31.222	38.7778	50.333	71.389	48.556	122	71.222	42.222	53.333	76.444	88.889	30.8333	19.722	30.8333	44.6111	57.6667	63.8333	82.333	44.889	38.3333	24.611	35.722	33.7778			0.188175	51.1156
3.3004	24.333	38.889	41.6667	44.278	72.111	44.556	119.889	72.111	53.611	55.111	76.5	67.667	29.7778	21.944	35.6667	33.1111	53.8889	63.5	69.889	42.278	32.4444	17.778	29.778	33.7222			0.193547	48.9375
3.3921	32.333	29.333	39.1667	50.556	63.056	33.944	103.556	69.167	55.722	60.556	72.167	51.611	29.3333	28	39.7222	30.5	51.3333	55.8889	66.167	38.111	22.7778	20.389	31.222	31			0.198924	46.0672
3.4838	30.5	33.722	42.7778	50.5	65.611	42.611	101.389	56.222	46.611	49.167	56.944	43.889	31.6111	25.333	38.4444	24.4444	53.6111	46.2778	68.722	35.722	24.6111	18.611	32.278	42.5556			0.204302	44.2569
3.5755	42.722	38	44.1111	48.944	84.889	34.667	87.389	49.667	39.944	31.722	41.722	39.444	27.3889	23.778	32.0556	21.6667	52.6111	52.2778	63.278	26	22.7222	17.111	34.556	39.8333			0.20968	41.5208
3.6672	52	36.444	35.3333	56.056	73.5	24.111	72.278	52.667	32.778	32	34.944	46.667	39.6667	22.556	32.2222	33	69.3889	55.2778	60.944	28.444	23.0556	22.222	32.667	34.2778			0.215057	41.7708
3.7588	50.722	35.056	47.2222	50.611	59.167	32.167	79	42.278	34.722	25.778	28.5	43.889	48.8889	22.5	30.6667	40.4444	78.7778	74.3889	64.444	27.667	30.3333	18.111	25.222	35.5			0.220429	42.7523
3.8505	39.722	33.5	52.9444	52.556	60.722	30.889	88.389	52.889	34.778	25.056	34.333	42.278	62.7222	21.778	30.3333	30.3889	77.2222	70.3333	61.056	33.611	29	30.722	23.833	30.1111			0.225807	43.7153
3.9422	35.611	27.056	55.2778	64.333	53.889	23.778	74.556	51.889	46.222	32.667	37.389	39.111	63.7222	30.222	28.2778	39.1667	79.7778	70.5	62.389	21.056	26.4444	27.556	21.278	27.1667			0.231184	43.3056
4.0339	33.5	38.278	42.7778	58.167	57.333	25.278	65.889	43.444	38.333	34.889	50.556	38.5	62.5	30.333	27	35.2778	56.6667	64.6667	55.222	30.056	29.2778	30.111	23.722	29			0.236562	41.6991
4.1255	35.556	32	46.1111	63.778	55	20.944	66.556	31.5	33.056	28.611	45.5	49.556	45.2778	32.389	26.2222	27.8889	45.3333	76.1667	48.722	23.389	21.4444	32.5	29.056	31.7778			0.241934	39.514
4.2172	40.444	25.278	39.4444	54.222	60.556	29.278	56.5	29.056	41.222	29.5	49	53.611	32.1111	28.5	18.8333	29.8889	33.2222	71.6667	43.667	28.444	20.6667	25.556	24.444	33.6667			0.247311	37.4491
4.3089	34.778	31.778	31.1111	66.111	60.778	25.056	54.722	30.889	34.833	21.889	46.833	55.444	34.3889	27.389	27.0556	29.4444	37.5556	53.8889	29.444	33.556	25.8889	29.333	21.444	32.4444			0.252689	36.5023
4.4006	32.333	31.778	36.1667	60.5	53.444	24.722	43.833	23.389	23.444	27.944	41.611	57.944	25.7222	28.611	23.8333	31.6111	48.3889	57.1111	33.778	25.889	21.7222	25.333	22.333	37.2778			0.258066	34.9466
4.4923	33.5	27.778	38.0556	61.889	44.833	27.167	30.889	24.556	27.889	29	37.333	41.667	37.2222	27.667	30.2778	34.8333	48.5556	44.9444	28.056	23.389	22.2778	23.778	24.833	39			0.263444	33.7246
4.5839	22.444	30.944	39.7778	57.611	37.167	30.278	23.444	26.167	19.611	26.222	48.722	34.611	32.9444	24.889	25.6667	30.0556	46.6667	46.3333	33.611	22.5	24.7222	26.167	20.444	33.1667			0.268816	31.8402
4.6756	18.778	26.278	38.7222	57.333	28.5	37.889	37	33.5	21.944	23.944	51.611	28.056	34.7778	28.278	23.5	30.3889	44.7222	37.1111	34.167	19.111	19.2222	21.611	21.889	33.6667			0.274193	31.3333
4.7673	14.222	26.833	31.2222	52.389	31.389	45.222	27.389	23.889	22.278	29.5	38.611	26.722	30.4444	28.944	25.6667	31.8889	42.6667	38.3889	30.333	20.556	21.3889	18.389	18.167	31.2778			0.279571	29.4907
4.859	22.556	20.667	38.6111	37.556	31.278	34.611	38.889	22.778	21.167	27.278	47	25.111	31.5	22.667	31.8333	30.9444	50.3889	35.9444	27.111	20.778	21.5	19.889	25.389	29.7222			0.284949	29.7987
4.9507	20.111	21.111	33	43.444	29.056	33.556	38.389	22.444	16.833	26.889	55.833	23.833	20.5556	28.056	39.2778	22.1111	48.6111	37.8333	32.722	19.389	30.1667	19.167	20.389	23.8889			0.290326	29.4444
5.0423	15.667	18.722	41	38.5	25.556	30.556	42.333	22.944	15.222	16.389	50.556	21.5	21.7222	29.944	35.6111	22.3333	61.6667	31.1667	29.778	17.833	22.8889	15.389	22.889	28.0556			0.295698	28.2593
5.134	19.111	23.667	38.9444	37.833	27.944	36.667	34.444	22.667	20.5	19.167	37.333	12.778	24.1667	29	29.1111	24.6111	63.6667	25.2222	33.056	22.278	25.8889	21.111	34.389	29.4444			0.301076	28.875
5.2257	19.778	25.611	34.1667	39.778	22.5	36.222	32.722	21.556	18.056	19.556	31.944	23.722	31.0556	33.778	26.5556	36.5	73.1667	28.6111	24.444	31.444	22.7778	10.833	27.222	28.2222			0.306453	29.1759
5.3174	18.389	18.667	29.8889	39.778	28.333	40.833	29.556	18.444	22.444	17.722	37.444	23.278	35.6111	31.167	24.1667	35.2222	40	30.9444	23.778	26.833	28.3889	13.389	18.556	27.1111			0.311831	27.4977
5.409	17.167	20.111	37.1667	50.278	32.5	36.111	29.611	20.5	18.833	25.889	33.222	23.778	58.3333	36.444	28.5556	34.7778	41.4444	24.9444	21.444	19.556	25.4444	8.778	20.167	31.6667			0.317202	29.0301
5.5007	14.389	25.111	41.2222	45.167	27.5	31.056	24.889	17.667	13.333	29.111	29.5	31.056	55.0556	38.889	25.8333	36.3333	38.6667	28.1111	25.722	21.611	28.3889	10.056	18.111	32.3889			0.32258	28.7153
5.5924	18.389	19.611	35.9444	49.444	26.722	47.167	29.5	19.722	11.222	24.278	31.833	30.167	48.9444	33.556	24.5556	41.9444	34.4444	26.0556	26.833	18.944	28.3889	9.111	21.667	29.3889			0.327958	28.6597
5.6841	17.333	15.833	30.7222	47.389	26.056	45	24.222	22.556	13.889	22.444	24.778	34.389	59.3333	29.222	22.4444	38.2778	33.1667	29.6667	21.667	28.444	25.3889	9.944	23.444	38.4444			0.333335	28.5023
5.7758	20.333	13.778	32.2222	42.056	23.5	35.722	20.889	20.389	10.833	18.333	26.611	36.667	43.9444	26.111	27.8889	50	26.7778	38.7778	28.111	22.667	37.5556	12	24.444	32.8333			0.338713	28.0185
5.8674	22.444	15.167	32.3889	55	14.833	34	30.889	23.778	13.611	23.333	23.056	32.5	31.1111	19.611	29.6111	37.5	23.8889	32.6667	28.556	24	45.1667	11.278	19.722	34.3889			0.344085	27.4375
5.9591	19.722	15.889	30.1111	64.944	21.833	32.389	27.111	23	12.833	25.389	26.167	33.556	35.2778	16.5	26.6111	31.2778	25.4444	36.3333	34.5	25.5	43.3333	10.444	18.444	29.9444			0.349462	27.7731
6.0508	21.056	14.556	24.1111	66.389	20.778	36.944	23.778	19	13.278	30.778	24.167	40.556	40.3889	13.056	30.5556	41.3333	27.8889	36.1667	36.944	23.833	44.3333	8.722	15.889	33			0.35484	28.6459
6.1425	22.278	16.111	19.9444	58.167	18.111	37.833	24.444	20.611	13.778	32.722	26.556	31.833	32.0556	19.167	22.2778	40	34.0556	28.6667	35.722	23.056	39.7778	10.167	19.5	28.6111			0.360217	27.3102
6.2342	24.333	17.333	25.3333	52.5	18.056	33.722	22.5	13.556	11.722	26.889	28.722	27.278	25.2222	14.111	31.4444	34.6667	29.0556	21.6111	27	27.944	36.5	10.222	16.944	26.6667			0.365595	25.1388
6.3258	14.5	11.944	24.1667	55.889	18.111	29.444	20.278	13.111	11.444	21.667	30	25.556	26.3333	8.5	29.2222	27	26.7778	26.7778	29.889	29.222	27.5556	9.111	20.444	25.8333			0.370967	23.449
6.4175	15.889	14.833	31.7222	52.889	22.167	26.278	28.278	18.056	10.111	24.278	24.778	25.833	29.3889	11.667	23.6111	30.1667	39.1111	32.0556	24.111	27.167	29.1667	10.778	22.167	31.9444			0.376344	25.2686
6.5092	14.056	16.222	36.0556	50.167	19.722	22.778	32.611	15.111	11.222	22.667	26.444	27.833	28.3889	7.444	25.2222	39.6667	41.8333	27.7222	28.167	31.056	23.0556	8.667	24.111	30.1111			0.381722	25.4306
6.6009	13.167	14.278	39.8333	49.556	27.944	22.944	30	16.333	10.889	28	29.389	28.611	22.3333	14.667	18.7222	30.8889	30.4444	23.6111	26.667	39.778	31.0556	9.389	28.056	25.5556			0.3871	25.5047
6.6925	12.667	21.333	28.1667	43.5	25.556	28.278	34.667	18.111	13.167	27.5	29.333	28.667	18.6111	7.611	19	23	33.7222	26	23.778	32.833	35.5	10.556	29.444	27.4444			0.392471	24.9352
6.7842	9.722	17.5	36.5	38.5	31.167	24.944	33	14.389	12.222	28.944	34.389	27.833	21.9444	7.111	21.8889	24.3889	38.1111	25.7778	25	26.444	23.5	7.056	31.222	36.2778			0.397849	24.9097
6.8759	11.056	15.722	32.2778	39.056	25.833	23.833	33.667	15.722	11.278	29.667	32.556	29.667	19.5	8.944	26	28.6667	34.2222	35.5	29.278	24.444	29.2222	11.278	25	30.4444			0.403227	25.1181
6.9676	9.556	12.5	32.5	34.722	21.278	22.444	33.889	10.222	15.944	22.389	25.778	33.611	17.5556	10.611	27.7778	29.7778	34.1111	32.4444	27.556	26.5	34.0556	8.556	30	36.3889			0.408604	24.5903
7.0593	7.889	10.722	35.1667	42.111	24.278	20.333	41.556	12.444	14.111	21.833	25.833	32.778	9.9444	12.5	20.4444	27.1111	36.3333	36.1667	33.389	27.556	31.3333	12.667	24.278	29			0.413982	24.5741
7.1509	9.5	8.444	34.9444	40.556	21.389	21.944	34.611	16.222	17.111	21.778	24.222	38.667	12.5	12.222	20.1111	24.2778	32.2222	31.3333	38.444	26.111	28.5	13.389	21.778	26.7222			0.419354	24.0416
7.2426	7.222	11.111	35.6111	39.389	19.444	21.667	32.611	17.222	11.444	21.222	22.333	40	11.8333	8.778	24.4444	18.7222	32.3333	32.5	32.056	23.222	21.1111	15.889	25	25.3889			0.424731	22.9398
7.3343	10.278	10.167	30.9444	34.389	19.444	21.5	32.167	18.778	11.667	15	22	39.778	9.2222	7.056	23.6111	24.9444	33.9444	36.3333	28.167	27.333	21	19.611	20.889	29.2222			0.430109	22.8102
7.426	8.944	7.833	28.2778	35.111	24.389	28.056	30.667	16.222	8.833	21.611	20.611	43.944	7.7778	9.278	25.3889	29.3333	39.5556	30.6111	38.722	21.667	25.7222	13.556	14.556	27			0.435486	23.2361
7.5177	7.222	12.889	25.7222	36.556	24.389	35.556	37.056	15.222	5.222	14.833	28.889	45	8.8333	10.222	24.5	34.2778	37.0556	30.8333	26.278	16.167	23.8333	12.5	12.389	27.3889			0.440864	23.0348
7.6093	9.111	20.444	29.8889	26.611	21.722	34.778	36.889	12.722	9.222	14.833	32.778	42.611	10.3889	11.778	24.1667	31.8889	41.5556	27.5556	27.833	25.722	20.3889	11.278	14.167	31.6667			0.446236	23.75
7.701	8.667	25.278	31.5556	35.722	19.167	33.111	31.278	15.778	10.167	15.056	20.5	28.333	12.8889	13.722	38.5	35.5556	34.8333	31.0556	29.444	23.889	16.5556	10.333	13.389	31.7222			0.451613	23.6042
7.7927	7	14.667	24.3889	27.611	16.556	25	19.056	13.056	9.556	15.167	29.889	29.222	12.2222	11.167	36.1667	33.3889	31.6667	32.8333	19.056	28.778	21.1111	13.722	11.667	28.9444			0.456991	21.3288
7.8844	8.444	11.167	23.7778	30.167	18.278	28.5	22.889	16.611	9.222	14	32.5	26.611	20.0556	11.833	32.2778	41.2778	28	38.7222	20.389	26.056	18.9444	9.611	10.889	34.8889			0.462368	22.2963
7.9761	8.889	11.389	20.6667	25.611	13.167	26.167	27.111	13.667	9.611	13.056	30.889	28.722	13.0556	12.444	25.9444	36.8889	29	32.7778	17.167	25.5	18.9444	8.222	12.722	36.4444			0.467746	20.7523
8.0677	6.778	6.333	28.6111	25.222	16	25.611	32.278	11	10.389	12.333	24.5	28.611	16.6667	17.167	26.8333	42.6667	32.3889	29.6667	21.111	25.056	16.2222	8.111	11.444	38.4444			0.473118	21.3935
8.1594	5.833	8.222	32.3333	24.778	10.556	20.222	36	10.944	15.5	17.833	33.556	29.5	12.9444	19.167	25.0556	33.8889	26.8333	25.6667	27.222	22.833	14.8333	8.556	13.389	34.5			0.478495	21.2569
8.2511	7.889	6.556	26	25.167	17.222	18.944	34.333	9.667	13	17.389	39.222	29.889	13.2222	17.556	25.2222	34.4444	30	22.3333	31.556	22.056	10.7222	8.944	13.444	26.2222			0.483873	20.875
8.3428	5.056	5.111	25.3889	31.722	16.222	13.056	31.278	9	17.111	15.778	40.556	40.889	12.8889	24	32.7778	29.4444	25.5556	24.1111	25.167	27.444	11.5556	8.278	21.222	36			0.489251	22.0672
8.4344	6.111	7.611	33.1111	32.111	19.389	23.111	34.722	7.556	8.444	18.889	38.833	45.111	14.7778	15.167	27.2778	27.8889	23.2222	22.6667	25.167	22.722	11.9444	9.556	18.5	37.1111			0.494622	22.125
8.5261	7.722	9.333	42.2222	34.722	14.222	21.5	30.778	9.056	9.222	14.667	53.833	42.333	11.5	13.944	29.8333	32.1111	33.2778	31	24.278	27.667	18.7222	12.889	17.333	36.1111			0.5	24.0949
8.6178	9.111	9.333	44.0556	34.833	14.111	18.833	32.444	9.333	12.944	21.444	45.389	37.111	12.6667	13.5	20.7778	31.1667	36.9444	31.9444	29.444	28.889	17.1667	14.778	13.778	44			0.505378	24.3332
8.7095	8.111	6.611	23.5556	37.278	15.944	21.111	39.556	13.278	12.222	19.833	49.778	29.222	11.6667	21.944	29.0556	35.1667	39.1111	23.1667	36.056	31.944	14.8333	22.778	17.778	44.3889			0.510755	25.1829
8.8012	9.111	6.389	25.7778	32.444	18.833	26.167	36.167	17.167	10.889	15.167	50.556	35.111	16.3889	18.222	33.7778	37.8333	29.3333	26.7778	28.278	30.444	20.5	26.833	14.556	35.8889			0.516133	25.1088
8.8928	10.222	7.222	37.4444	31.056	12.278	25.167	36.5	13.722	6.556	11.111	39.389	28.833	14.7222	18.333	37.2778	41.9444	29.7778	32.3333	33.111	28.722	20.0556	25.5	18.222	43.6111			0.521505	25.1296
8.9845	8.056	6.556	34.8889	32.611	14.389	26.167	32.444	17.389	8.222	9.389	40.278	40.056	14.8889	10.722	36.5	43.1667	25.1667	30.0556	25.833	29.722	23.7222	20.111	23	44.2222			0.526882	24.8982
9.0762	10	14.722	28.7222	30.389	11.167	25.556	26.611	9.889	8.222	18.889	32.667	46.111	14.2778	8.056	43.8889	32	32.2778	27.2222	25.556	26.111	26.3333	13.167	26.5	35.4444			0.53226	23.9075
9.1679	8.944	17.778	39.0556	23.833	13.833	25.556	28.778	11.556	11.833	19.056	39.944	45.556	11	6.556	42.7778	23.8889	32.3333	20.8889	23.056	26.444	20.1111	17.278	29.722	38.9444			0.537637	24.1135
9.2596	8.611	24.167	30.9444	18.389	6.667	21.944	36.056	14.833	12.667	13.5	39.389	43.056	13.7222	8.556	34.0556	32.8889	30.9444	29.4444	22.889	25.667	20.3333	11.5	24.778	37.1667			0.543015	23.4237
9.3512	6	19.722	25.0556	18.889	11.5	29.556	39.111	16.889	15.444	13.333	30	33.667	15.9444	9.611	35.5556	34.7778	29	35.2222	24.611	30.056	22.4444	13.889	29.5	35.6667			0.548387	23.9769
9.4429	9.5	18.667	22.3333	24.056	13.556	39.333	27.556	21.611	10.222	18.444	38.278	30.167	13.8889	10.278	26.2222	36.1667	36.4444	39.4444	26.167	32.389	23.9444	10.222	22.944	29.8333			0.553764	24.2361
9.5346	9.556	22.167	34.1111	25.611	9.889	32.778	31.611	21.611	11.167	19.667	34.944	32.333	12.2778	11.5	21.9444	41.3333	26.3333	34.6111	27.5	39.667	33.2778	6.944	21	30.0556			0.559142	24.6621
9.6263	9.167	19.944	30.9444	19.556	8.889	33.889	39.667	15.5	12.833	15.056	33	47	10	9.333	26.1111	38.4444	27.0556	33.9444	31.333	38.611	23.7222	9.222	22.278	32			0.56452	24.4792
9.7179	6.778	24.056	30.8333	19.889	8.889	36.333	35.389	20.111	17.778	11.444	39.333	42.611	12.1667	6.944	27	31.7778	31.1111	33.8333	36.722	40.389	20.8889	6.778	16.833	37.1667			0.569891	24.7939
9.8096	11.389	14.278	32.8889	18.889	9.778	38.944	33.056	15.667	14.5	9.778	40.389	44.722	13.3889	8.556	26.6111	37.2222	29.5	34.2222	29.944	33.167	23.2222	7.778	19.722	34.6667			0.575269	24.2616
9.9013	9.5	18.167	27.0556	16.944	11.778	37.5	31.944	13.111	10.333	13.444	45.722	43.389	13.7778	10	31.5556	27.0556	28.5556	26.5556	27.167	27.889	16.2778	10.611	18	34			0.580646	22.9305
9.993	11.167	14.611	24.9444	19.222	18.278	36.444	27.556	11.389	12.278	12.389	39.111	50.222	11.3889	13.333	35.6111	30.5	27.1111	32.1667	22.333	32.167	20.3889	7	21.222	34.7778			0.586024	23.5671
10.0847	5.722	11.889	31.5	11.833	10.944	37.667	34.056	13.556	17.778	13.111	44.222	66.167	10.6111	11.833	19.4444	31.5556	32.1111	35.5556	23.278	41.333	14.3889	8.167	15	32.7222			0.591402	23.9352
10.1763	7.556	14.222	39.8889	21	10.389	35.944	30.278	12.5	19.722	12.444	37.944	56.889	7.1111	12.944	25.8889	29.8333	40.2778	36.1667	17.5	41.278	17.5	7.667	18.278	31.6111			0.596773	24.368
10.268	5.278	13.444	39.9444	25.389	14.889	43.167	37.444	10.722	18.167	19.833	34.556	60.889	10.0556	14.556	23	30.5556	33.5556	38.1667	17.278	34.611	17.3889	10.611	18.111	33			0.602151	25.1922
10.3597	7.889	18.556	38	26.278	16.389	36.833	44.556	11.333	15.556	22.444	33.5	51	10.9444	11.111	24.7222	31.4444	37.7778	41.8889	21.167	32.167	12.6667	10.167	18.056	39.3333			0.607529	25.5742
10.4514	9.111	17.111	41.2222	26	14.611	32	47.111	11.167	9.722	29.444	41.611	55.833	12.4444	13	26.2778	26.8333	30.5556	48.9444	20.278	37	20.2778	10.222	19.556	37.7778			0.612906	26.5879
10.5431	6.111	19.722	36.1111	25.722	9.278	36.611	43	8.278	6.167	35.722	36.5	48.167	12.4444	14.778	23.4444	29	35.5556	41.7778	24.833	44.222	17.5556	10.667	19	38.2778			0.618284	25.956
10.6347	5.611	20.889	40.4444	28.389	11.556	44.889	38.611	11.5	10.556	39.389	34.833	43.056	13.5	19.833	25.6111	36.5	31.4444	44.8333	26.667	34.944	23.3333	12.944	24.389	31.5556			0.623656	27.3033
10.7264	6.278	14.722	31.1111	35.778	12.778	34.833	50.944	11.667	14.278	23.389	35.111	40.611	13.5556	18.889	27.1667	35.8889	34.3889	33.8333	25.222	30.278	30.2778	13.889	19.333	33.5556			0.629033	26.1574
10.8181	13.222	15.944	35.4444	47.944	11.778	51.667	54.611	9.5	10.222	32.056	44.722	44.944	10.9444	15.444	28	30.2778	28.0556	38.6111	28.111	32.5	36.6667	12.722	24.278	30.4444			0.634411	28.6712
10.9098	11.5	13.111	33.6111	47.222	15.222	43.778	56.389	9.111	10.778	39.722	42.611	45.278	13.2778	12.111	28.5556	29.6667	22.1111	31.3333	29.556	25.833	39	10	22.889	28.7778			0.639788	27.5602
11.0015	11.167	11.056	32.3333	36.111	17.722	43.278	40.889	8.944	13.222	27.167	38.333	40.389	16.5	11.944	33.5	33.3889	26.7222	33.5556	33.333	26.111	44.2778	14.222	27.444	32.1111			0.645166	27.2384
11.0931	11.722	16.111	31	29.889	20.222	45.944	46.056	9.778	8.611	21.5	37.778	34.389	16.3333	8.5	26.1111	33.8889	30.1111	29.3889	33.444	25.667	42.8333	11.778	26.222	51.4444			0.650538	27.0301
11.1848	12.278	7.333	36.0556	31.556	20.889	40.833	45.167	12.389	10.667	19.444	34.833	26.056	13.6667	9.611	34.9444	35.7778	34.3333	34.3333	35.722	26.556	30.3333	12.944	22.222	48.2222			0.655915	26.5069
11.2765	12.389	12.833	43.7778	27.833	32	42.556	44.278	13	11.111	19.778	43.556	29.667	14.4444	10.056	38.5556	34.2222	27	31	37.111	21.444	21.7222	11.889	31.167	41.2778			0.661293	27.1945
11.3682	12.389	8.389	45.7778	31.167	39.611	39.056	39.556	13.389	13.722	23.944	39.222	33.833	13.4444	9.389	40.3333	39.5556	34.8889	25.2778	52.222	35.667	21.1111	13.611	26.667	38.5556			0.666671	28.7824
11.4598	13.556	8.278	51.1667	26.278	29.611	32.222	35.167	10	13.944	37.556	45.778	35.056	12	11.611	36.2222	35.7222	31.2778	22.3889	40.278	32.278	24.0556	14.111	29.056	43.2778			0.672042	27.9538
11.5515	10.278	9.667	39.2778	23.167	28.056	36.778	32.556	11.611	18.556	48.389	35.111	35	13.8889	13.222	29.1667	21.3333	26.8333	17.9444	37.111	30.056	26.2778	15.833	26.444	38.1667			0.67742	26.0302
11.6432	11.333	12.222	42.4444	35.389	25.111	44.5	40.278	19.833	22.944	54.444	35.111	35.167	15.1667	16.222	28.0556	20.1667	31.7778	24	44.389	31.444	27.3333	13.889	22.111	40.3333			0.682798	28.9027
11.7349	13.222	13.833	36.1111	38.778	29.111	38.667	31.444	19	21	50.833	40.667	30.111	17.9444	19.833	40.2222	22.6111	40.4444	24.3889	38.056	39.278	30.2222	18.722	22.444	36.0556			0.688175	29.7083
11.8266	10.222	9.722	33.2778	26.5	25.833	36.389	39.278	15.222	12.833	41.556	47.944	30.167	16.6111	21.5	32.6111	25.3889	36.8889	24.4444	30.667	32.222	34.7222	15.833	28.333	38.8889			0.693553	27.7939
11.9182	7.667	10	40.0556	23.056	23.444	36.556	43.833	25.611	15.444	43.611	47.333	26.333	19.7778	27.167	34.4444	28.4444	31.8333	28.2222	31.5	35.722	31	14.333	27.667	38.2778			0.698924	28.8055
12.0099	6.889	17.944	39.9444	35.5	32.278	35.722	44.611	21.944	12.556	39.278	43	28.833	22.3889	19.333	33.9444	31.2778	36.9444	25.8333	21.611	25.778	33.9444	26.278	27.5	40.4444			0.704302	29.324
12.1016	4	21.611	36.6667	36.444	37.556	36.833	44.389	21.056	12.833	39.611	43.5	29.944	31.1667	18.889	34.6667	36.7778	38.1111	30.1111	24.056	26.5	33.3333	23.778	32.222	36.1111			0.70968	30.4236
12.1933	7.611	24.5	35.8333	29.222	35.444	34.944	39.944	18.722	11.222	32.833	41.056	31.944	30.5556	12.667	27.9444	39.6667	32.5556	32.7778	24.444	36.778	28.3333	26.444	35.111	34.7778			0.715057	29.3888
12.285	7.667	26.778	32.6667	32.278	29.389	36.444	36.833	20.389	10.556	31.889	38.611	31.222	31.8889	14.889	33.1667	46.8889	30.6111	32.1111	25.889	42.111	29.8333	38.5	38.667	39.7222			0.720435	30.7917
12.3766	6.722	20.556	27.7778	35.333	21.222	25.722	33.056	19.667	12.667	21.833	37.944	38.5	31.5556	17.722	36.8333	55.6111	29.7222	40.3889	25.167	41.167	21.6667	39.056	31.5	34.8333			0.725807	29.426
12.4683	7.833	25.833	23.7222	29	26.222	31.444	41.944	22.111	14.056	26.833	47.444	28.5	24.4444	17.389	41.3889	58.2222	32.8333	35.4444	26.333	46.056	28.3333	32.222	36.833	35.5556			0.731184	30.8332
12.56	9.222	17.889	22.9444	34.056	26.556	39	37.722	26.722	22.333	25.333	33.778	29.889	23.5556	23.611	28.6111	54	35.8889	31.3333	20.889	36.222	22.3889	30.722	44.5	40.2222			0.736562	29.8912
12.6517	6.778	18.056	24.1111	34.222	39.389	27.167	41.444	30.667	29.778	22.667	40.944	30.5	20.7778	29.5	26.1667	41	31.6111	33.2222	18.667	43.778	31.6667	33.167	46.667	35.5556			0.741939	30.7293
12.7433	13.5	19.222	27.2778	25.611	36.111	38.056	39.333	30.167	37.833	26.5	50.667	34.722	19.5	27.056	33.0556	36.6111	31.7222	29.3889	29.444	35.722	32.5	30.111	49.333	39.8889			0.747311	32.2222
12.835	17.5	20.944	30.0556	27.667	30.778	32.222	31	33.222	36.444	32.167	51.222	29.667	20.2778	31.111	38	35.5556	35.7222	36.2222	34.222	27.667	29.3889	19.333	51.889	38.2222			0.752689	32.1041
12.9267	16.5	23	32.0556	20.444	30.944	30.278	35.389	22.778	29.222	32.333	49.889	35.722	20.6111	28.278	35	26.3889	37.7778	30.0556	27	25.722	26.4444	21.444	42.222	29.7222			0.758066	29.5509
13.0184	22.889	20.944	34.3333	25.667	26.5	32.944	34.778	28.667	21.778	29.722	51.056	39.111	15.8333	24.056	37.1111	29.8333	34.5556	27.6111	31.556	30.222	30.9444	20.889	43.722	37.0556			0.763444	30.4908
13.1101	28.333	21.167	32.3889	23.722	32.778	29.889	27.278	39.5	24.444	30.611	56.778	48.278	21.7222	27.389	35.7778	27.1667	36.7778	21.3889	32.056	33.667	27.7222	22.333	27.611	33.7778			0.768822	30.9398
13.2017	28.444	19.5	33.2222	27.222	33.167	34.5	25.5	36.111	30.111	30.667	40.722	38.111	15.8889	29.944	32.4444	30.5	36.8333	26.1111	27.222	36.444	27.5	18.778	28.222	35.3889			0.774193	30.1064
13.2934	28.167	17	37.6667	27.556	31.5	32.778	29.167	23.833	30.667	38	36.167	36.5	17	24.944	26.5556	39.8333	37.6667	27.1667	28.722	30.778	35.8889	16.389	29.167	40.9444			0.779571	30.1691
13.3851	22.722	17.778	31.5556	29.833	34.111	42.944	31.167	28.111	31.833	35.222	41.278	33.778	19.5556	20.333	24.7778	30.7778	36.0556	25.9444	27.667	28.944	32	17.389	31.111	47.6111			0.784949	30.1041
13.4768	19.278	17.833	31.1111	27.722	38.389	41.056	29.167	24.556	37.111	40.111	47.833	32.722	23.0556	18.611	24.8889	37.6667	38.4444	23.2222	25.778	36.333	37.7222	16.556	25.722	42.8333			0.790326	30.7384
13.5685	16.444	19.944	30.7222	32.722	45.889	41.5	25.444	20.667	32.111	38.556	38.667	30.5	26.0556	16.556	30.8333	24.3889	25.6111	20.2222	23.278	30.889	37.5556	15.611	28.556	32.1667			0.795704	28.5371
13.6601	13.167	20.222	30.6111	24.222	37.222	34	24.444	27.611	40.333	38.167	39.611	24.611	31.8889	15.333	35.4444	24.1111	26.8889	15.6667	33.111	41.778	41.3333	18.889	30.444	35.0556			0.801076	29.3402
13.7518	25.444	26.389	31.0556	30.278	31.667	38.389	23.5	24.611	32.278	37.444	35.5	24.278	29.1667	16.944	42.7222	21.9444	25.4444	18.2778	29.778	51.167	31.2222	24.667	27.222	35.1111			0.806453	29.7708
13.8435	22.833	33.222	38.9444	24.722	26.833	35.889	30.167	21.722	29.944	35.056	30.278	30.944	32.5	19.778	42.2778	20.4444	25.5	20.1667	26.833	47.944	30.3889	31.944	26.889	48.8889			0.811831	30.5879
13.9352	24.833	34.611	32.7778	27.444	29.111	28.167	26.556	29.5	33.889	34.889	29.611	39	24.5556	26.556	43.2778	26.5556	24.2222	18.1667	30.111	36.222	29.9444	27.556	38	39.9444			0.817208	30.6459
14.0269	20.611	41.278	31.8333	26.833	22.556	28	34	22.278	33.278	31.611	28	37.667	30.8889	40.333	50.5	35.9444	23.9444	21.0556	36	35	34.3889	31.611	45.889	36.2222			0.822586	32.4884
14.1185	25.667	37.722	32.8889	26.889	27.5	19.389	34.667	27.889	37	32.056	24.778	26.111	25.6667	36.722	46.0556	36.1667	24.2778	20.9444	43.222	42.222	34.4444	29.722	53.444	38.6111			0.827958	32.669
14.2102	28.444	39.5	36.0556	36.444	28.278	26.611	33.167	34.111	30.944	30.833	13.056	12.889	28.5556	44.556	46.6667	38.5	26.7222	27.1111	43.833	45.389	38.6667	27.556	43.667	30.3333			0.833335	32.9954
14.3019	34.722	42.111	36.5	43.611	32.222	27.944	31	41.167	34.722	30.5	9.944	6.222	30.4444	57.278	54.1111	42.5	31.5556	21.7222	26.5	54.056	49.5556	38.722	38.222	28.2222			0.838713	35.1481
14.3936	33.667	41	30.4444	35.611	38.778	35.222	17.722	41.278	28.222	36.722	5.056	4.278	33.8889	57.833	40.2222	44.8333	40.7778	22.2222	15.222	56.556	56.6667	41.333	46.556	25.9444			0.84409	34.5857
14.4852	35.667	35.389	34.5	32.556	30.944	23.722	11.444	33.111	17.889	30.722	3.167	3	39.6667	57.833	24.3889	40.5	25.0556	13.8889	10.722	50.944	63.4444	39.5	37.222	18.6667			0.849462	29.7476
14.5769	36.556	33.556	36.2222	28.611	29.667	24.222	5.111	25.944	21.222	32.333	2.556	0.556	58.2222	57.056	18.3333	27.4444	12.8333	8.1667	4.278	25.556	44.8333	45.611	40.556	11			0.85484	26.2686
14.6686	34.944	40.444	31.5556	33.056	32.667	33.167	2.611	20.556	24.889	26.722	2.167	1.333	52.7778	61.167	4.7222	17.7222	4.6111	1.3333	2.5	13	26.3889	41.111	28.5	9.3333			0.860217	22.8033
14.7603	35.944	35.778	33.5	32.111	31.278	30.278	1.667	11	29.111	20.944	1	1.722	36.8889	39.833	3	9.5556	4.9444	2.3889	2.833	4.5	9.8889	37.944	22.556	10.3889			0.865595	18.7106
14.852	39.444	41.222	37.5	30.611	33.611	31.5	1.222	4.056	23.111	14.056	1.333	0.889	14.4444	16.056	1.3889	5.3333	1.3333	0.6111	2.056	3.167	6.7778	35.5	31.222	6			0.870973	15.9352
14.9436	41.611	45.556	37	26.556	30.333	25.611	0.556	3	12.111	6.278	0.444	0.389	6.4444	8.444	1.3889	2.2222	1.3333	2	1.444	3.222	3.0556	31.944	28.778	4.2778			0.876344	13.5
15.0353	28	42.944	42.6667	33.222	37.722	14.833	1.278	2.167	3.056	4.778	0.611	1.556	3.3889	4.111	1.2778	2.2778	2.8333	0.6667	1.611	2.667	2.5	24.278	21.222	2.6111			0.881722	11.7616
15.127	24.111	37.944	49.2778	29.889	40	7.611	1.333	2.111	4.167	3.778	0.278	0.444	3.0556	3.556	1.2778	1.3889	0.2778	0.7222	1.333	0.889	1.0556	24	12.833	1.2778			0.8871	10.5254
15.2187	16.278	36.667	39.3889	37.833	47	3.833	0.278	0.944	2.222	1.778	1.222	0	1.3889	3.278	1.2778	1.6111	1.4444	1	0.056	1.944	1.2222	8.889	5.833	1.2222			0.892477	9.02544
15.3104	10.778	30.667	44.5556	36.389	56.167	2.167	0.667	0.5	1.389	2.889	0.833	0.722	2.7222	1.944	0.6667	1.1667	0.7778	0.1111	0.278	0.778	2.7222	2.944	2.889	2.3333			0.897855	8.62736
15.402	5.833	28.611	38.6667	36.278	45.667	1.111	0	0.889	1.389	1.778	0.667	0.722	1.1111	2.611	0.1111	1.1667	0.2222	1.5556	1.222	1.111	0.1667	2.222	2.778	2.6667			0.903227	7.43982
15.4937	3.944	32.889	42.3889	41.167	36.5	2.056	0.667	0.722	0.889	1.889	0.5	0.444	0.8889	0.611	0.2222	0.9444	0.2222	0.1667	0.833	0.833	1.2778	2.667	2.056	1.3333			0.908604	7.33798
15.5854	1.389	28.167	42.9444	46	29.667	0.889	0.222	0.5	0.5	0.833	1	0	0.7778	1	0.8333	0.8333	0.8333	0.5556	0.222	0.389	0.7778	2.667	1.167	1.5556			0.913982	6.8218
15.6771	1.056	33.722	43.7778	46.667	15.056	0.5	0.167	0.111	0.278	2	0.278	0.389	0.7222	0.667	0.2778	0.2222	0.4444	0	0.222	0.889	1.7778	0.722	1.278	1.5			0.919359	6.36351
15.7687	1.167	32.556	53.5556	40.5	18.167	0.778	0.5	0.611	0.667	1.389	0.278	0.833	0.7222	1	0.1111	0.2778	0.3333	0.0556	0.278	0.611	0.3333	1.5	0.833	1.5			0.924731	6.60654
15.8604	0.444	26.278	52.9444	50.111	13.444	0.778	0.556	1.389	0.556	0.889	0.944	0.611	0.3333	0.167	0.3889	0.2778	0.8889	0.7778	1.111	0.611	0.7778	0.444	1.167	1.0556			0.930109	6.53935
15.9521	1.056	20.389	57	40.778	9.167	1.333	0.5	0.5	0.444	0.167	0.333	0.278	0.1111	1.556	0.4444	0.0556	0.5556	0.1667	0.333	0.556	0.5556	0.222	0.667	0.2778			0.935486	5.72691
16.0438	1.056	12.111	48.7222	45.222	6.444	2	0	0.222	0.278	0.278	0.444	0.167	0.3333	0.611	0.1111	0.7778	0.0556	0.6667	0.444	0.167	0.1111	0.389	0.389	0.5			0.940864	5.06249
16.1355	0.556	9	46.7222	48.444	1.833	0	0.056	0.389	0.333	0	0.056	0.111	0.2778	1.556	1.1111	0.3333	0.1111	0.2222	0.167	0.222	0.9444	0.167	1.611	0.7222			0.946242	4.78939
16.2271	1.444	5.444	44.7778	44	2.5	1	0.611	0.556	0.333	1.278	0.056	0.222	0.7778	0.5	0.5	1.1111	0.1667	0	0.333	0.444	0.3333	0.778	0.611	0.4444			0.951613	4.50921
16.3188	0.889	2.778	37.8333	34.444	1.889	0	0.389	0.778	0	0.389	0	0.556	0.1667	0.667	0.5	0.5	0.1111	0.3333	0	0.222	0.2222	0.333	0.222	0.2222			0.956991	3.47687
16.4105	0.056	2	36.7778	30.778	1.167	0.167	0.167	0.278	0.444	1	0.5	0.611	0.2778	0.5	0.4444	0.7778	0	0.2778	0.278	0	0.1111	0.056	0.222	0.7778			0.962368	3.23619
16.5022	1.056	1.389	42.3889	36.889	2.167	0.167	0.222	0.722	0.278	1.167	0.389	0.056	0.3889	0.333	0.0556	0.2222	0.0556	0.3333	0.778	0.167	0.2778	0.444	0.722	0.2778			0.967746	3.78942
16.5939	0.222	0.833	42.1667	43.667	1.667	0.278	0.111	0.222	0.167	1.278	0.833	0.333	0.3889	0.611	0.1667	0.0556	0.3333	0	0.222	0.278	0	0.056	0.389	0			0.973124	3.92826
16.6855	0.111	2.278	47.1111	55.111	1.222	0.389	1.111	0.611	0.556	0	0.722	0.167	0.3889	0.5	0	0	0.3333	0.2222	0.389	0.167	0.1667	0.167	0.389	0			0.978495	4.67134
16.7772	0.333	1.444	47.0556	56	0.722	0.056	0	0.167	0	0.278	0.056	0.333	0.3333	0.444	0.3333	0.2222	0.0556	0.0556	0.389	0.444	0.3889	0.389	1.111	0.5			0.983873	4.6296
16.8689	0.5	0.722	37.3889	42.056	1.222	0.222	1	0.5	0.778	0.444	0.111	0	0.3889	0.389	0	0.2222	0.1111	0.0556	0	0	0.1667	0.222	0.167	0.2222			0.989251	3.62036
16.9606	0.944	0	32.7222	22.944	1.056	0.278	0.611	0.222	0	0.222	0.333	0.444	0.2222	0.333	0.1111	0.2778	0.2222	0.0556	0.056	0.278	0.1667	0.667	0.111	0.3889			0.994628	2.61107
17.0522	0.222	0.889	21.3889	9.667	0.611	0.222	0.556	0	0.167	0.333	0.389	0.333	0.3889	0.056	0.2222	0.2222	0.0556	0.1111	0.556	0.222	0.2778	0.111	0	0.4444			1	1.56021

## Sheet: Image9
X0	Y0	Y1	Y2	Y3	Y4	Y5	Y6	Y7	Y8	Y9	Y10	Y11	Y12	Y13	Y14	Y15	Y16	Y17	Y18	Y19	Y20	Y21	Y22			Ap-Basal to 1	Average intensities
0	27.9716	26.274	18.0863	36.6876	30.4404	25.9824	24.767	29.217	29.5215	34.1455	30.8015	60.9341	30.505	32.5246	53.83	32.444	66.875	33.321	52.0699	53.5522	58.9926	55.538	67.314			0	39.6433
0.0917	22.0326	19.539	28.4154	31.8544	26.3408	27.1028	21.9074	40.1395	37.0435	22.31	31.1393	63.5572	36.687	33.5489	66.016	29.317	68.064	35.523	48.102	68.9986	59.695	50.507	68.216			0.00448534	40.6981
0.1834	24.6826	26.56	26.9843	40.5162	29.7522	22.9255	24.0954	38.8977	40.5961	23.5569	27.0743	50.5007	33.178	37.7029	81.179	29.467	66.264	36.473	60.3795	69.851	59.9417	54.598	93.839			0.00897067	43.4354
0.275	17.3874	31.562	33.4852	40.5347	28.5355	20.5595	23.8651	37.1558	42.2192	21.2387	28.5937	54.8445	33.171	46.8409	86.818	39.406	55.329	37.037	70.4537	64.8086	59.1303	56.538	100.8			0.0134511	44.7963
0.3667	21.9162	28.522	37.9765	41.6171	28.2314	16.2479	29.144	34.8759	43.0619	30.4632	32.703	46.7344	29.579	37.1127	74.556	67.409	48.979	48.11	85.7249	80.6166	61.9673	55.546	119.656			0.0179365	47.8587
0.4584	26.0711	24.429	33.1587	45.7447	32.2416	17.254	26.9623	30.3379	46.1731	34.2643	40.4839	39.2912	30.156	40.9133	79.716	89.928	47.447	51.751	91.7495	81.2583	54.6606	53.059	131.973			0.0224218	49.9575
0.5501	24.3436	27.818	37.9639	44.3239	36.9094	17.9959	22.7426	28.9421	41.5118	33.7149	41.4188	36.2932	34.676	33.4392	92.49	116.223	53.451	52.596	71.5196	67.8924	49.7111	61.979	148.895			0.0269071	51.1674
0.6418	22.3059	23.513	41.054	54.8747	33.3329	25.5995	18.3477	23.0945	46.2774	30.3857	32.6725	43.4337	36.358	35.841	93.425	126.063	46.598	47.028	75.0442	52.5263	43.1847	64.541	158.108			0.0313925	51.0265
0.7334	23.7448	24.121	39.2861	38.4459	36.4686	26.6018	18.0383	24.5297	45.2962	22.0647	32.8541	47.9771	30.656	39.7484	91.674	123.992	48.079	52.376	75.8571	49.4337	41.8766	67.356	151.57			0.0358729	50.089
0.8251	22.3963	27.369	39.7315	37.5904	31.769	22.0643	21.7742	26.3293	41.0977	25.2905	33.5413	50.1565	32.756	43.0593	76.739	102.849	53.836	56.33	64.685	40.6839	49.2615	65.56	129.853			0.0403582	47.5966
0.9168	21.2128	25.527	53.4678	39.2576	33.5912	24.0436	25.1432	22.3537	44.3365	22.5395	25.7306	45.5542	31.123	44.6295	70.972	70.282	46.272	49.312	56.2375	38.13	50.399	72.363	139.391			0.0448436	45.7334
1.0085	18.8839	25.459	49.9895	44.0474	30.6276	19.8415	26.0707	28.3209	46.1351	27.0778	22.5826	36.9582	42.775	48.5103	79.875	50.952	58.741	44.752	53.2348	44.2625	56.6361	76.526	128.866			0.0493289	46.1359
1.1001	17.6334	24.539	45.683	42.5393	35.9807	25.2373	28.1772	35.2902	39.7153	39.0707	30.4788	40.773	50.274	42.0218	85.722	43.067	62.268	45.651	45.4061	39.5643	65.7204	81.009	149.844			0.0538094	48.5072
1.1918	25.2372	34.497	36.2123	41.9834	32.1945	25.1124	26.5827	32.2234	41.5122	34.682	26.74	40.9967	55.999	44.0096	104.217	31.25	71.242	47.015	39.7516	37.7899	69.323	74.384	144.279			0.0582947	48.5754
1.2835	37.797	37.472	44.0715	48.4445	26.3683	45.9141	29.8665	27.0327	35.6456	36.9554	25.9261	38.7176	62.681	54.3665	106.674	38.554	81.699	52.592	35.805	37.1357	69.8185	84.073	156.198			0.06278	52.7743
1.3752	40.4413	37.591	49.3338	52.6711	31.8448	45.5414	32.1246	37.72	52.1536	34.8198	29.2584	54.016	66.789	61.0575	94.461	45.648	74.47	51.856	42.9878	27.1688	67.9647	96.797	157.926			0.0672654	55.854
1.4669	45.8371	30.539	42.0026	63.791	33.793	39.3937	37.9651	40.3769	43.7348	31.7653	31.8933	46.439	78.079	66.7805	88.145	52.969	83.432	62.522	41.036	27.8205	58.7641	133.352	159.279			0.0717507	58.2483
1.5585	35.1877	38.37	52.5726	57.1399	39.0541	39.4254	37.052	43.8613	44.0158	26.9552	35.7487	44.0733	107.369	52.5946	84.714	62.542	86.145	57.247	38.5491	25.7244	55.2897	145.257	135.171			0.0762311	58.4373
1.6502	54.0761	42.075	53.6457	49.135	41.8474	45.653	44.3774	43.9766	34.1491	27.4355	30.9895	43.2635	108.862	43.0055	88.197	77.878	90.828	55.938	39.8881	30.131	71.3406	139.752	112.768			0.0807165	59.531
1.7419	49.2822	32.117	53.2623	43.3676	39.7572	41.425	57.4493	56.2017	32.771	33.8942	26.1108	43.2854	118.535	38.3065	82.937	77.003	81.34	51.996	25.3685	30.1683	87.8276	125.446	96.727			0.0852018	57.5904
1.8336	40.7867	31.801	49.771	46.5006	37.8901	34.0017	62.7462	72.4582	32.7663	31.5509	21.5217	46.2481	101.858	39.1616	86.985	69.169	74.874	44.879	24.6775	21.3515	87.4617	122.427	83.209			0.0896872	54.9607
1.9253	40.1173	36.912	46.9707	41.9447	29.8208	25.1991	63.2343	82.6453	37.4634	33.2335	26.6538	39.2647	90.299	42.7119	85.81	59.246	71.351	45.185	24.5164	27.2943	85.7454	136.224	63.406			0.0941725	53.7065
2.0169	40.576	35.365	45.1371	53.1197	35.6639	22.6245	57.7618	87.8939	44.7658	37.938	25.7453	39.5562	80.732	38.632	81.504	57.635	63.739	33.334	22.7037	37.5532	99.0112	124.594	49.107			0.0986529	52.8127
2.1086	42.1906	40.782	49.9513	63.4641	33.2777	22.0216	49.5773	88.1049	47.0878	37.7598	29.8063	38.0582	74.885	41.727	69.811	62.672	56	25.66	26.3856	44.9074	85.68	116.627	46.77			0.103138	51.8785
2.2003	39.5084	39.044	53.9783	76.5308	36.9708	19.3661	40.2538	86.1392	44.6525	38.6459	20.1274	33.0623	78.438	44.9623	73.426	52.855	41.371	32.318	21.105	62.8954	73.7252	100.167	45.884			0.107624	50.2359
2.292	33.6499	48.731	64.0788	56.2082	46.5924	20.1275	43.5668	89.9825	55.326	32.1447	23.8869	28.9403	69.23	39.7177	62.997	60.233	37.564	36.94	21.5121	61.374	66.7091	90.379	40.726			0.112109	49.1573
2.3836	32.0373	53.201	84.225	48.6508	52.2073	20.9161	43.5045	82.0557	58.186	32.2394	26.4005	26.3558	57.285	39.2239	78.583	75.106	42.851	38.041	36.1368	54.4088	58.4023	81.633	44.591			0.116589	50.7061
2.4753	36.128	68.905	87.0577	47.9894	65.4802	23.3574	35.477	77.1457	62.3663	25.7534	23.6519	27.358	44.133	35.0445	72.375	84.099	38.574	31.512	37.4968	38.0533	53.0201	93.111	42.95			0.121075	50.0452
2.567	33.7334	64.958	81.6886	51.8191	66.511	32.3992	34.5085	78.1388	69.1457	21.4376	33.8343	25.7218	45.856	35.7501	77.573	71.064	50.232	28.499	33.1258	16.7306	61.0838	113.202	40.919			0.12556	50.7796
2.6587	34.9802	62.771	61.4007	42.8996	58.7526	31.8696	28.7423	68.0507	50.9455	19.581	33.1416	28.8875	43.977	36.1082	79.065	66.523	51.288	32.795	38.6396	22.876	58.0575	92.126	43.989			0.130045	47.2812
2.7504	39.1621	58.883	57.8459	52.0108	58.2261	34.29	29.7189	63.4473	46.8039	23.8733	35.3545	35.7738	49.486	39.5005	72.859	58.621	55.909	31.585	39.0751	24.5411	61.4358	83.519	61.64			0.134531	48.4157
2.842	40.8689	62.844	47.3303	53.182	59.2471	31.2147	33.0317	57.9713	40.1604	26.0008	35.7982	37.466	48.186	40.4668	57.674	64.511	50.984	38.786	41.2362	32.8379	50.6762	92.259	50.729			0.139011	47.5418
2.9337	54.1327	60.423	50.0707	49.2956	55.1263	29.6376	32.2868	58.8462	36.4226	19.2374	31.1431	35.5587	60.496	33.9998	51.618	58.181	46.12	36.817	40.5148	27.3081	42.1719	96.711	55.117			0.143497	46.1407
3.0254	58.733	60.704	46.5546	51.0929	57.6345	29.0616	38.6759	53.6676	37.7776	19.1713	37.315	40.308	53.04	28.7239	49.868	51.736	49.495	35.061	41.4228	28.5143	36.6308	80.786	48.675			0.147982	44.9847
3.1171	60.6991	64.203	44.6471	49.5924	46.98	35.6777	37.3856	55.7016	40.7341	20.2245	42.3516	35.2812	38.386	35.084	47.005	46.079	46.571	39.063	37.2213	27.968	37.6037	77.359	46.584			0.152467	44.0175
3.2088	49.9352	78.78	46.6899	51.6186	48.7129	24.8102	49.8693	54.6916	39.1808	19.6654	44.6361	24.7783	35.605	41.5031	37.435	43.318	39.253	41.382	30.0832	34.2523	54.2878	96.374	49.694			0.156953	45.0676
3.3004	44.9193	86.437	52.7527	51.3116	39.8703	21.3497	43.7537	69.6727	33.0721	20.4901	51.2343	24.7747	32.315	37.7988	38.873	34.774	34.318	35.466	28.8793	25.1737	45.9271	94.772	43.562			0.161433	43.1086
3.3921	47.5686	93.248	42.9972	48.9735	34.3942	24.7974	46.6165	72.2216	25.5249	19.9354	49.7612	20.5074	38.647	32.313	34.5	28.106	34.954	32.073	27.5631	23.7598	50.1297	93.433	42.751			0.165918	41.9468
3.4838	41.1947	106.33	38.6151	45.0145	29.1287	20.8386	44.0953	55.9586	26.3858	22.9979	48.3866	23.2769	43.88	31.6931	23.769	26.974	31.904	24.888	31.1453	20.2746	39.1713	72.484	54.204			0.170404	39.2439
3.5755	31.3395	109.587	39.0305	30.4965	23.6466	25.2251	38.824	44.7167	29.8183	23.9048	60.3045	25.5078	40.017	32.2553	28.574	33.752	38.31	28.982	23.9824	19.0158	42.1476	71.338	56.863			0.174889	39.0278
3.6672	36.0398	132.48	37.398	29.0879	22.1531	28.2316	36.8122	32.145	26.1701	28.0845	40.2592	22.1452	38.659	35.6571	27.934	34.844	35.918	29.06	23.1789	21.2891	47.3353	67.722	49.707			0.179374	38.3613
3.7588	33.7668	148.48	27.9698	30.859	27.5594	23.2531	36.3981	29.9278	24.143	19.8981	39.289	19.4417	43.742	36.3374	32.271	32.296	35.055	33.063	20.3968	23.772	43.0947	75.725	38.996			0.183855	38.0754
3.8505	39.9631	130.109	37.5565	26.953	26.6163	18.7158	32.3406	32.6113	28.0229	22.0381	33.8806	25.2654	46.61	30.4396	29.779	27.18	36.999	32.585	18.144	18.7061	32.5886	76.592	40.627			0.18834	36.7097
3.9422	39.6737	106.228	35.1746	24.6298	28.3794	27.5754	24.9367	34.1254	29.8313	15.9279	30.2003	20.0875	40.716	31.4494	30.842	31.484	33.025	29.722	17.6195	16.6255	27.4931	86.688	37.576			0.192825	34.7831
4.0339	32.6792	99.89	27.6389	27.2816	29.1439	25.0259	24.3475	50.2638	24.0883	19.3464	28.602	23.0707	36.59	31.3513	37.249	37.002	35.373	32.339	19.1401	12.8155	17.4502	90.575	32.922			0.197311	34.5298
4.1255	38.1565	113.445	31.0924	30.8109	31.2928	24.7625	22.7197	56.1624	23.4134	24.5997	24.6916	19.6695	37.878	37.4229	26.431	51.673	35.05	26.845	19.1891	15.0547	22.0838	100.612	31.444			0.201791	36.7174
4.2172	43.0222	105.684	30.6915	26.7875	32.6546	21.1687	23.1474	56.4976	21.0593	27.0859	22.7997	29.6183	44.326	30.7194	28.883	51.294	31.468	23.553	16.5382	12.3898	16.6572	116.274	25.094			0.206277	36.4093
4.3089	33.4171	90.468	30.7907	27.4327	32.0466	24.8897	23.7336	50.6079	24.2274	31.3451	22.4179	28.6802	48.861	26.9145	29.106	46.761	34.138	32.256	21.3887	14.9097	19.8944	115.598	28.904			0.210762	36.4691
4.4006	31.0152	79.284	40.4082	28.3436	45.8154	30.2503	24.9243	39.6418	19.4225	32.8128	27.6464	29.9966	35.803	33.1701	32.01	43.219	38.702	33.456	27.3643	17.0115	15.7785	89.395	39.369			0.215247	36.2974
4.4923	32.6177	70.314	34.9534	30.5984	37.2239	29.1144	21.8664	32.2488	26.1135	34.823	29.9255	27.8628	37.788	29.5922	31.5	38.721	37.723	34.471	38.3812	11.6076	22.0813	88.673	32.661			0.219733	35.2548
4.5839	33.1909	53.312	36.8138	27.1343	35.1524	34.9619	23.6112	33.9332	25.6192	29.5649	27.353	26.8477	42.153	29.4096	29.823	48.819	31.051	29.172	41.9344	13.8994	24.5783	90.829	32.399			0.224213	34.8505
4.6756	45.3859	48.042	37.5264	33.7966	34.073	34.7971	27.64	31.5096	23.723	30.9463	27.789	20.3892	49.33	29.4885	31.77	47.658	43.657	31.625	43.1079	16.0962	29.3978	104.394	41.878			0.228698	37.5661
4.7673	33.8174	34.818	28.2971	36.971	25.6046	42.8836	27.6032	31.7662	17.439	32.2539	24.9855	15.7521	62.72	28.6069	35.432	44.282	38.573	30.462	46.7743	19.7636	37.6423	115.1	37.404			0.233184	36.9109
4.859	35.3364	28.038	38.1751	30.7915	19.9567	39.9759	31.1267	27.3255	28.7287	32.1626	22.1959	17.6134	54.813	27.0572	39.173	46.013	34.651	29.797	42.3536	15.6882	37.2232	111.084	38.433			0.237669	35.9875
4.9507	28.0398	20.846	41.608	28.8547	25.2322	30.273	26.7918	36.9887	27.9482	31.2426	25.263	25.7416	50.317	28.4831	39.034	45.463	21.987	31.449	43.4381	22.0473	25.9409	103.012	40.553			0.242154	34.8067
5.0423	26.9436	25.102	44.4005	31.8654	22.4084	27.058	24.4313	36.3095	33.2654	31.1512	31.4887	29.0506	45.213	24.0694	38.566	54.49	25.185	33.731	41.1942	19.0361	27.9263	78.946	50.288			0.246635	34.8748
5.134	24.8639	21.786	47.9976	28.9118	21.8392	31.0911	25.8787	29.0931	32.5925	32.0547	26.3178	29.2966	45.269	29.3163	32.553	54.393	31.439	34.731	44.8994	19.9486	24.1045	81.266	61.239			0.25112	35.2557
5.2257	25.0573	22.79	45.8849	34.3163	23.3339	28.931	27.6823	20.1015	35.6817	22.7656	28.0434	32.378	40.985	25.2316	32.941	52.905	26.885	38.432	38.5742	20.6664	20.1925	77.043	61.704			0.255605	34.0229
5.3174	21.8585	19.571	39.0934	33.3404	19.0237	28.7099	27.0872	23.084	33.5577	24.071	24.1803	35.11	42.757	26.3028	32.604	46.538	24.755	38.815	45.0551	24.8156	19.1905	74.545	72.487			0.260091	33.7631
5.409	26.4171	20.446	40.2628	29.3213	23.8973	26.0244	32.6654	24.5884	36.0841	23.7447	19.6271	34.7947	52.658	27.341	38.87	55.872	30.698	48.733	39.6375	28.2332	13.4391	85.238	84.822			0.264571	36.6702
5.5007	22.8684	24.278	36.2545	34.7238	20.1657	19.2004	27.1072	26.7497	30.206	23.8804	21.6579	24.4976	51.051	24.2085	42.562	61.59	26.073	44.785	36.2581	30.3834	8.49	69.861	104.815			0.269057	35.2899
5.5924	28.159	25.64	24.4022	32.5115	28.2448	20.0973	24.9252	24.4299	29.4067	24.1097	21.708	28.5551	47.31	22.1972	36.329	63.512	23.193	39.189	34.9564	24.3874	11.2422	60.075	119.79			0.273542	34.5379
5.6841	29.1774	25.939	24.3531	35.9278	31.4457	22.3377	30.5276	21.8479	27.9874	29.3211	23.9841	28.8368	42.564	20.2985	37.251	67.042	22.689	41.326	37.2099	12.2251	11.9398	52.026	122.37			0.278027	34.7229
5.7758	30.0893	30.399	26.8074	28.0402	32.7322	26.0809	32.2302	27.9351	31.7262	17.8168	23.5107	26.8136	42.291	33.0842	49.35	56.975	20.421	37.256	35.9677	11.7836	17.0302	49.767	103.962			0.282513	34.4378
5.8674	36.2882	28.679	29.9128	31.082	37.0018	20.8741	32.4835	41.8738	34.5569	26.7572	25.6324	22.6797	36.909	38.0054	45.269	42.103	19.09	37.039	41.6749	9.3234	10.6071	48.491	97.2			0.286993	34.5014
5.9591	28.3953	27.052	28.6957	24.2548	29.3816	22.1925	26.9143	44.1807	28.5149	24.718	28.9368	26.0823	42.954	28.2645	45.038	45.678	12.075	34.506	31.5448	7.5265	13.3324	40.76	95.861			0.291478	32.0374
6.0508	22.1742	27.574	34.1301	29.4309	30.2465	22.5899	28.7943	33.4949	23.679	22.9664	22.0835	22.1343	51.352	26.6499	48.373	42.866	15.931	35.335	39.6688	6.7682	16.0342	26.979	87.71			0.295964	31.1724
6.1425	27.8144	32.377	29.7902	26.9616	33.4764	25.3441	31.2049	38.7977	31.4309	23.8421	20.4539	21.9892	42.679	22.7164	43.57	46.015	16.103	30.26	36.5531	13.3243	19.6521	32.576	99.448			0.300449	32.4513
6.2342	24.8453	27.569	23.7509	28.7008	34.2766	25.8526	31.4145	35.1689	26.0363	21.9901	28.2131	28.7694	44.817	19.3759	36.661	57.152	15.197	24.255	38.5099	15.878	21.5663	25.503	107.638			0.304934	32.3105
6.3258	29.1015	27.122	18.7936	23.8963	38.2706	30.5601	26.6997	36.5601	25.7424	25.4838	25.3681	29.94	46.32	17.7572	34.941	60.526	18.618	28.015	42.6601	16.4908	19.8509	24.554	97.576			0.309415	32.3847
6.4175	30.1942	23.21	17.6104	21.1263	31.3965	23.6646	22.5383	26.1202	24.4882	27.6076	21.4566	32.4364	55.153	18.3428	39.995	58.529	22.716	21.493	43.6558	20.5115	16.1076	27.044	79.229			0.3139	30.6359
6.5092	25.3389	23.179	19.6012	24.4845	25.5975	22.2859	21.7761	26.6046	27.2706	25.7691	23.738	38.4011	62.801	17.6571	45.841	56.629	21.374	21.758	37.7462	17.9567	23.6573	21.596	51.935			0.318385	29.6956
6.6009	28.3255	21.648	23.3633	30.1093	32.4717	29.9567	31.8942	29.7103	27.3367	21.6683	21.0317	38.1447	56.949	15.0011	41.766	49.658	21.77	22.184	32.933	17.2989	21.9421	24.825	42.538			0.322871	29.675
6.6925	36.0541	22.878	23.86	30.084	28.4271	25.706	39.6872	29.6906	20.734	26.1003	18.8806	31.5397	52.001	19.3637	42.404	51.061	28.339	25.419	24.6394	16.8978	24.5316	25.251	35.92			0.327351	29.5421
6.7842	25.3377	21.425	26.1654	31.6028	30.8332	29.6652	38.7453	33.3968	29.8551	20.1026	24.1301	29.9262	47.606	20.845	44.984	61.971	22.184	23.92	21.9993	11.8692	20.8398	32.14	39.917			0.331837	29.9766
6.8759	26.7227	20.489	27.3647	25.496	35.951	29.9306	41.9612	28.8654	30.1911	26.1906	27.5159	37.0473	42.645	14.9723	36.696	70.613	22.965	24.242	28.0146	12.5408	17.8938	30.558	41.321			0.336322	30.4429
6.9676	31.7428	23.344	26.9089	34.4877	34.0481	33.8957	43.3143	28.5509	30.4569	28.2401	27.2212	40.8963	39.951	15.1844	40.733	77.544	20.965	28.34	32.7735	7.984	15.7697	28.611	45.273			0.340807	32.0102
7.0593	29.8316	23.002	30.1558	29.8024	37.5692	28.7752	39.8857	28.2694	24.9228	25.3677	34.4764	38.0619	30.203	19.6657	39.229	72.343	15.308	22.582	41.0201	8.3018	16.6152	25.92	35.581			0.345293	30.2995
7.1509	24.2359	20.571	31.0067	23.1519	36.2498	27.621	35.8427	30.721	23.7478	25.5278	25.4146	32.1439	30.447	21.1437	47.252	75.057	16.519	26.202	42.5143	7.9266	10.8909	25.218	32.07			0.349773	29.1945
7.2426	29.459	19.008	26.445	21.8454	40.8554	23.1493	31.6091	33.4967	23.7542	21.9285	26.0333	32.8099	35.3	19.6823	47.361	61.181	18.979	20.959	36.057	10.8451	15.478	28.729	30.121			0.354258	28.482
7.3343	25.6447	27.722	30.1387	21.8986	28.1242	25.4288	20.3472	33.1695	24.4922	26.6565	24.7832	32.2244	34.793	12.6523	39.667	55.591	20.778	26.336	37.7825	9.0252	13.9558	30.239	22.703			0.358744	27.1371
7.426	21.5666	26.885	28.8936	22.0515	34.3418	21.2468	23.0895	34.2339	26.2424	17.34	24.7379	27.9941	38.033	10.5115	37.061	51.365	22.34	29.043	45.2089	12.8232	11.2555	31.479	23.159			0.363229	26.9957
7.5177	24.9731	32.607	25.1136	24.5763	25.2274	22.8295	22.1547	28.594	23.3998	17.1282	21.0701	30.9381	32.018	11.628	31.091	40.732	17.557	30.735	43.1081	22.2515	12.9425	25.609	23.168			0.367714	25.6283
7.6093	30.6484	23.8	25.2437	21.6772	20.1779	31.036	27.2194	31.8279	23.6544	14.5051	25.9404	29.5578	26.649	9.9016	30.023	40.998	19.829	25.4	42.5201	29.3647	14.5938	24.872	18.272			0.372195	25.5527
7.701	38.6845	22.368	27.1313	25.124	22.3275	26.3118	25.1611	27.5759	28.8964	19.3205	26.9244	25.8673	24.952	7.6684	30.449	35.358	15.375	23.901	37.7486	23.3182	18.2779	30.481	23.637			0.37668	25.5156
7.7927	36.7496	24.343	25.6808	25.1882	19.2621	28.2267	17.296	29.7407	25.318	24.2762	22.9904	25.2408	22.394	8.0495	33.208	27.644	21.487	26.979	35.875	11.1089	15.8045	30.187	21.241			0.381166	24.2735
7.8844	29.8309	18.305	29.356	23.8395	27.3274	27.98	19.9087	27.4143	27.9674	30.6532	20.7903	31.5513	22.382	9.1673	38.302	30.046	15.705	28.232	34.0984	6.9287	13.6658	23.231	24.409			0.385651	24.3953
7.9761	26.7083	25.249	33.6383	28.4338	33.8712	25.6141	27.2823	27.8808	25.2481	24.0951	21.0254	26.6704	29.304	9.4388	31.042	36.653	19.394	25.511	33.8762	5.2925	15.601	18.381	23.323			0.390136	24.9362
8.0677	24.5185	24.425	31.8816	25.5157	34.535	29.4921	31.7945	21.6555	20.3151	26.255	25.5511	32.4301	24.039	8.7669	34.283	35.19	17.012	23.202	42.2564	5.6872	13.9692	11.732	22.534			0.394617	24.654
8.1594	26.3614	19.038	42.5955	25.4674	30.0162	29.4806	28.1915	26.5358	21.4709	25.9675	30.7324	33.398	25.505	9.1693	31.718	39.519	17.258	24.22	42.2062	7.6547	13.8844	14.271	23.323			0.399102	25.5645
8.2511	22.1174	21.312	29.4153	28.0366	28.3318	39.0173	34.9933	21.1681	16.5842	23.5171	34.9408	33.3012	31.269	9.2161	30.876	34.056	23.708	11.509	31.0405	7.9996	10.1984	17.684	21.836			0.403587	24.4403
8.3428	31.2775	20.45	28.2378	33.4255	22.3858	28.7084	26.5716	22.3666	22.025	24.7698	44.2394	29.5732	31.37	7.645	22.043	33.15	20.825	13.826	22.4882	7.6753	9.5291	15.493	21.385			0.408073	23.4548
8.4344	32.717	27.171	30.619	37.8248	19.223	31.5958	28.9779	31.4669	19.4183	34.3941	51.3267	26.558	20.301	11.7786	21.191	33.521	21.776	11.319	16.5308	8.6984	6.926	17.689	18.506			0.412553	24.3274
8.5261	30.0479	24.441	24.0886	35.2305	20.0875	26.3429	25.9112	32.3892	23.9171	30.3318	57.5488	25.5421	17.598	8.8497	27.478	30.568	30.705	11.302	22.7036	8.6159	8.7722	17.698	15.884			0.417038	24.1762
8.6178	31.0899	30.007	28.9194	30.2712	16.8223	30.638	26.6284	31.5367	19.9608	31.0906	44.7267	25.4146	13.548	13.7771	32.594	41.452	31.092	14.67	21.6216	12.9781	13.1973	20.763	17.29			0.421524	25.2212
8.7095	24.816	23.799	24.8217	38.0056	17.4962	38.8681	23.2659	34.8205	24.418	34.5165	30.9963	25.1378	14.213	13.9969	25.646	48.021	36.403	14.497	19.3213	18.6894	14.4899	16.415	21.273			0.426009	25.3881
8.8012	19.1852	25.546	20.9778	38.8118	19.0422	38.9377	22.2937	31.4099	21.3951	30.1015	18.1694	21.741	17.861	10.8585	23.3	64.884	40.38	21.225	19.4516	21.0099	18.019	11.706	19.552			0.430494	25.0373
8.8928	19.1007	18.147	22.5408	26.9629	21.8078	34.9035	29.9955	33.8187	19.5969	38.3841	20.0689	25.0478	15.861	10.07	19.789	87.215	64.157	19.02	19.4412	12.5769	18.1343	12.179	14.667			0.434975	26.2385
8.9845	14.4327	25.336	23.6248	25.3877	26.5153	34.0143	31.7244	34.3725	21.6633	33.4632	18.8896	21.0644	13.445	11.4252	18.882	104.299	95.578	26.878	21.7714	11.5169	15.3574	20.605	14.62			0.43946	28.9072
9.0762	14.9624	28.648	26.6609	27.5789	20.4573	43.8008	32.3477	31.6017	24.4888	34.9237	15.7083	20.8101	14.374	11.5787	23.335	102.84	119.687	22.153	25.0527	12.418	16.5621	21.757	11.813			0.443946	30.5895
9.1679	15.6819	22.858	24.731	32.6764	22.347	42.7841	37.062	28.115	22.8977	26.3867	14.1384	26.861	14.282	14.0025	24.643	98.535	111.059	27.262	32.4481	11.495	21.3173	16.918	13.865			0.448431	30.5377
9.2596	14.3786	23.03	22.8192	31.8278	24.6658	35.8273	40.7805	27.1388	21.7514	29.0143	23.1883	23.3083	12.42	11.6549	29.892	96.606	86.33	31.179	40.4978	10.6433	24.6548	13.93	15.989			0.452916	30.0664
9.3512	14.2969	21.958	18.5996	41.433	24.8134	35.3227	34.3158	29.7975	21.1143	33.2691	25.1322	21.6418	10.046	15.9154	24.832	79.121	49.216	26.428	38.4335	11.5002	34.2855	13.403	20.063			0.457397	28.0408
9.4429	16.3665	16.534	23.3458	37.2052	24.9316	28.1951	36.5348	26.1382	21.5902	30.2392	28.2714	21.9465	15.345	12.1102	23.287	54.895	31.152	24.742	38.5468	11.795	29.3328	11.069	20.831			0.461882	25.4089
9.5346	20.2694	19.216	22.3028	27.3441	27.9176	28.9849	28.8326	29.6317	24.9209	29.0981	21.8861	23.0338	15.255	14.4101	29.978	36.067	27.492	19.048	37.3996	10.6928	22.58	12.934	24.802			0.466367	24.0912
9.6263	19.9915	16.502	22.4428	24.4486	27.307	31.6118	25.6666	25.7994	25.6773	26.7352	17.1285	22.6665	16.974	11.3102	28.952	29.584	23.122	20.613	32.686	16.5344	22.4225	15.751	21.38			0.470853	22.8394
9.7179	23.8045	21.418	22.903	23.6585	25.884	29.6677	23.3664	21.2384	27.83	28.9801	22.314	24.481	19.488	17.2098	22.911	31.47	24.68	17.866	33.6602	19.0735	15.6771	10.017	22.466			0.475333	23.0463
9.8096	22.7076	11.876	25.8291	21.863	31.9223	30.6803	31.7467	29.9377	30.3999	37.511	14.9627	18.7212	18.074	16.7492	26.684	27.059	29.403	9.635	39.3997	17.9598	13.3994	11.14	19.217			0.479818	23.3425
9.9013	22.0149	18.632	27.4086	23.8762	31.8919	31.8796	34.2466	29.3323	28.9505	40.3406	14.5968	19.7275	17.472	20.2711	25.442	35.419	27.163	11.354	37.7594	24.6126	10.7581	16.223	21.901			0.484304	24.8379
9.993	21.3199	27.573	28.5095	28.8191	29.8093	39.2067	41.9013	29.9179	26.4338	37.5402	13.5746	16.1627	13.866	15.728	25.309	34.349	28.408	13.538	27.0108	24.3648	10.6003	16.957	14.164			0.488789	24.568
10.0847	15.2655	25.175	25.0645	28.3776	31.2511	36.8332	47.8546	32.1751	23.0946	32.1454	16.1462	18.4386	14.095	14.0024	27.826	36.208	23.321	12.055	30.3722	28.8957	18.4145	13.631	15.412			0.493274	24.6111
10.1763	12.4762	28.671	31.0216	26.9624	28.025	41.0003	36.5703	28.315	24.5341	34.7663	14.9257	24.4282	14.949	10.2522	25.872	33.45	16.994	15.475	33.5735	27.255	20.1747	7.881	13.798			0.497755	23.9726
10.268	14.262	27.9	37.8306	25.9472	32.1955	38.1488	28.5681	26.6473	29.3939	27.1943	13.3467	26.8496	14.829	9.0032	26.909	47.443	20.307	19.914	32.0663	26.4647	17.0625	8.222	22.896			0.50224	24.9305
10.3597	13.3425	27.831	24.4003	26.3043	27.1045	44.5699	25.4651	25.188	24.6088	24.7962	13.8353	30.3084	12.591	4.9824	23.987	47.695	18.099	16.616	38.8914	30.0308	15.5586	9.756	23.813			0.506726	23.9032
10.4514	17.7372	24.755	26.4855	23.9915	31.4131	39.1844	23.8433	37.7539	27.5916	24.3387	12.0979	30.2506	16.672	7.2605	20.458	42.564	23.586	17.748	36.3861	31.3728	12.6371	12.543	27.861			0.511211	24.7187
10.5431	15.68	29.57	29.2038	24.3973	31.4023	37.1101	40.2363	25.7011	24.2358	14.9712	10.1064	28.2965	12.426	4.2629	23.408	27.81	20.094	16.334	34.7009	28.8373	17.0634	16.778	26.616			0.515696	23.4453
10.6347	22.7724	24.726	33.9511	28.6199	26.8088	36.6771	36.232	27.487	25.4726	12.3728	10.1957	29.1701	14.253	4.8343	27.1	29.785	22.454	14.53	34.1116	32.0354	10.1182	18.212	26.9			0.520177	23.8617
10.7264	18.2897	24.16	26.2075	25.7689	29.5454	31.1834	26.8489	24.4735	24.8913	10.0786	9.7249	32.2624	14.544	4.3301	28.942	29.462	20.575	11.365	35.403	28.2304	12.2424	11.719	28.078			0.524662	22.1011
10.8181	19.7233	26.295	30.0929	22.5929	28.1431	29.5265	26.6724	26.8743	32.7188	10.2109	13.7196	24.1041	15.984	4.9624	29.792	28.891	24.694	11.645	34.2478	24.0085	11.4672	12.987	25.858			0.529147	22.4005
10.9098	19.5563	28.767	25.8444	21.5342	29.0507	31.7893	30.8593	25.9436	36.8193	13.7004	13.8491	24.1101	15.13	4.8323	32.395	29.726	25.553	11.924	40.9817	26.4559	9.0944	9.97	30.006			0.533633	23.3866
11.0015	17.5925	27.481	23.9354	24.2803	23.114	25.6178	27.735	21.2622	27.5273	11.9889	13.3227	21.226	20.503	5.9489	33.851	29.557	23.157	10.457	37.2813	31.9965	8.885	11.06	35.935			0.538118	22.3354
11.0931	19.9351	31.452	22.8443	22.9051	26.3176	29.4042	34.0401	31.0859	20.3358	11.8969	13.7244	18.1417	24.711	5.1458	24.781	26.307	20.927	13.247	24.8403	37.5019	6.8866	11.544	33.091			0.542598	22.2202
11.1848	22.4966	28.97	18.5566	20.4767	30.5501	33.0252	29.2662	30.5224	18.677	17.3128	14.295	21.3508	29.288	5.5826	19.612	30.091	19.121	11.444	30.6785	27.2447	8.7004	11.848	23.227			0.547084	21.8407
11.2765	17.0437	26.708	21.8132	29.6592	31.9635	33.1918	28.907	29.6825	16.2514	12.1867	13.9915	19.9425	27.27	3.0421	16.644	34.333	22.083	11.927	23.9855	35.7229	10.0714	12.115	33.082			0.551569	22.2442
11.3682	15.9815	26.899	26.9441	25.373	32.0353	39.241	26.1359	30.4104	13.083	10.616	11.5587	22.766	22.792	4.5271	16.41	35.272	20.355	15.581	28.2862	47.7152	10.2084	14.191	39.969			0.556054	23.3196
11.4598	20.3009	32.007	21.2411	32.4634	34.8718	35.7038	34.89	27.415	12.0122	11.9609	11.5814	23.7787	21.687	6.3523	27.356	32.578	21.9	22.115	24.492	45.1607	9.2497	17.788	52.819			0.560535	25.2054
11.5515	19.4491	31.714	17.0924	26.0191	29.602	42.1986	35.6925	23.8325	15.685	14.6689	13.3823	24.2302	18.871	6.8958	27.299	35.491	20.018	21.462	26.1138	38.0427	10.3364	19.425	49.345			0.56502	24.6464
11.6432	25.3078	31.518	16.0454	21.3763	28.6909	30.0117	32.5651	21.5039	20.2791	12.849	14.6573	20.3747	12.926	6.4165	31.687	39.226	23.545	15.675	31.2544	31.207	9.2176	17.014	41.214			0.569506	23.2418
11.7349	32.3216	25.464	16.7621	25.8173	32.6314	29.4727	33.3393	21.1188	17.9874	16.7621	20.2967	21.7436	12.585	8.0179	27.538	47.839	28.393	13.736	34.5491	28.7022	11.2708	13.214	35.254			0.573991	24.1224
11.8266	22.6354	16.604	15.8525	29.0838	29.2286	30.0023	37.8965	22.7601	14.8859	16.5786	26.1452	22.028	11.428	6.9137	29.583	55.719	28.615	13.029	23.7424	31.0684	13.2408	11.025	21.591			0.578476	23.0285
11.9182	16.841	22.68	17.376	32.0965	22.1395	31.5629	43.473	18.834	12.1751	19.0655	25.0608	22.3202	9.491	9.8785	31.262	42.112	29.339	15.641	26.4048	32.5522	16.621	10.844	22.1			0.582957	23.0378
12.0099	17.5814	29.424	20.8485	41.4049	30.4215	26.5333	51.2658	21.8373	12.4428	17.7866	17.0002	21.0017	8.304	10.5818	26.636	35.302	27.054	11.108	22.8402	25.1911	18.3857	9.174	24.198			0.587442	22.8836
12.1016	19.0838	30.784	23.8139	34.9656	31.5888	18.6957	45.9898	22.4566	11.8576	19.2054	19.5602	20.5521	8.164	11.0538	26.097	32.606	29.727	9.746	16.411	26.9556	21.1084	12.842	17.286			0.591927	22.1978
12.1933	20.5646	30.05	22.4012	32.1978	35.27	21.9107	32.1267	26.9822	17.263	23.3045	17.0007	28.1489	9.982	15.2717	24.039	34.533	25.133	15.272	15.2328	32.8608	16.8036	8.366	14.378			0.596413	22.5692
12.285	26.9397	36.447	23.6414	29.5963	35.5103	18.3897	28.2831	19.2167	13.9263	19.4258	14.9164	28.0404	9.224	13.4525	22.816	32.112	24.93	12.223	20.3992	30.1969	13.9463	10.286	13.628			0.600898	21.6325
12.3766	23.2206	41.06	23.9107	30.5781	36.0387	23.608	28.6023	20.6199	10.3163	20.3576	15.484	25.0663	9.714	12.1744	18.234	40.534	23.802	12.821	18.6208	32.3042	6.7437	8.949	17.341			0.605378	21.7435
12.4683	28.334	47.142	25.4914	22.2555	48.8138	18.2569	30.5116	27.1643	10.5641	14.8871	18.4475	23.6145	15.04	10.4514	16.184	57.161	27.966	11.109	12.7885	33.6512	7.7553	9.686	13.163			0.609864	23.0625
12.56	29.8928	44.741	20.8911	24.4695	50.6545	17.244	34.0363	25.7191	12.639	13.2638	19.7867	21.7091	12.556	12.8326	11.031	54.415	33.139	12.498	18.7305	36.3393	6.6214	13.941	14.847			0.614349	23.5651
12.6517	25.1329	38.636	24.5372	23.8656	57.3097	20.7001	32.0777	18.5975	12.8349	11.1257	22.4999	22.1447	10.321	11.9102	11.19	71.225	32.747	12.765	20.986	42.7116	6.6126	24.798	20.443			0.618834	25.0074
12.7433	26.5613	43.341	27.3637	25.8466	63.2122	17.54	30.4339	20.096	9.2561	11.2237	18.1489	17.4987	12.944	12.6509	14.207	78.821	32.863	19.666	23.801	51.2531	9.4473	25.78	28.098			0.623315	26.9588
12.835	20.4859	44.761	25.9797	26.9467	59.052	22.9557	34.9443	18.9091	12.5908	11.8469	16.7688	17.0312	13.358	9.4747	15	56.464	27.176	33.482	25.1902	58.0564	10.9457	24.192	37.71			0.6278	27.1009
12.9267	24.3686	48.941	17.7486	28.3733	63.8914	20.319	29.5723	28.6306	11.6286	11.204	11.8976	16.6046	11.258	10.471	10.8	49.342	28.269	40.936	24.529	60.8686	11.1435	16.265	40.366			0.632286	26.8447
13.0184	23.0778	35.626	25.988	21.2612	60.3945	18.7902	23.6585	29.9622	17.6867	9.4934	14.2962	18.9226	13.396	11.403	9.445	53.908	29.725	63.975	24.2269	72.8228	9.2072	12.828	36.25			0.636771	27.6671
13.1101	26.9712	30.936	31.6863	27.9903	44.846	29.5681	16.3291	32.2166	12.7751	10.4714	11.0531	22.6281	13.465	10.1079	13.547	54.39	23.94	53.148	21.2099	67.9552	10.7174	12.347	28.655			0.641256	26.3893
13.2017	20.7912	22.533	27.6037	24.0905	37.194	36.1221	21.348	28.0513	14.8365	9.3674	7.7122	18.6346	11.816	9.331	17.299	36.291	16.288	33.924	20.1241	66.9841	11.1188	12.316	27.878			0.645737	23.1154
13.2934	16.9848	25.349	28.4026	27.9905	24.3892	34.9896	20.9631	31.04	15.648	6.8382	9.3	15.8176	11.756	6.4258	18.37	36.61	17.838	24.061	18.0223	66.8131	13.793	11.652	22.764			0.650222	21.9921
13.3851	23.1906	25.477	26.6739	27.8322	24.128	38.5451	19.1908	28.2909	16.976	8.0137	12.2815	12.1267	16.779	5.1131	18.824	36.501	18.131	33.496	16.9593	67.942	13.7912	13.01	35.412			0.654707	23.4211
13.4768	19.6003	26.625	25.7058	31.0211	21.8871	36.914	25.3358	18.0661	20.766	8.5936	10.1661	13.2219	12.653	5.3329	16.476	46.5	13.009	46.971	21.7581	77.9311	13.5077	15.701	40.994			0.659193	24.7277
13.5685	18.4856	18.014	28.5749	29.9064	23.3299	29.9002	20.476	22.483	20.2312	7.3091	11.9869	14.4156	10.701	5.0543	20.31	40.65	22.167	38.834	25.431	79.384	16.4876	17.086	61.799			0.663678	25.3486
13.6601	22.8176	22.053	24.2251	29.3729	28.0924	29.2645	20.3598	17.2878	17.7527	10.5374	7.7453	15.6772	11.225	5.4229	25.198	51.039	18.503	31.618	22.4991	55.6318	30.2769	23.25	53.573			0.668159	24.9314
13.7518	17.7117	28.758	23.5461	30.4445	27.3499	30.6516	26.5167	15.9194	18.0727	11.86	12.954	15.0701	11.283	9.4819	17.509	51.139	21.919	25.355	23.1935	55.7546	29.2006	33.091	52.989			0.672644	25.6422
13.8435	25.7022	29.549	28.8018	30.859	26.1966	31.2245	30.5938	19.8961	16.9411	12.9822	11.3206	20.7851	7.015	7.5631	11.841	44.429	18.787	22.943	21.1787	54.1515	29.8358	44.428	42.874			0.677129	25.6477
13.9352	24.75	33.802	24.9638	33.5164	24.4964	30.3293	31.9584	16.2093	17.7641	9.0441	14.6149	19.5365	6.106	7.7358	8.938	44.219	19.077	43.879	16.7957	47.7455	26.1209	28.735	37.267			0.681615	24.6784
14.0269	35.796	35.197	31.253	40.0193	25.0225	30.4502	30.5238	19.7867	14.2325	7.4976	15.959	19.3982	8.245	5.0851	11.116	50.509	21.014	88.467	20.3576	45.7264	24.9572	18.862	31.239			0.6861	27.4224
14.1185	31.4455	29.892	24.9431	36.7013	23.9979	23.5321	32.3279	24.2277	14.2504	7.925	14.5773	14.8573	7.183	6.0596	10.799	45.199	17.937	115.534	22.5917	53.3524	32.8682	12.163	29.158			0.69058	27.4575
14.2102	27.9052	28.809	22.4146	33.3141	27.4285	25.6146	24.4456	21.7236	10.9986	6.5654	15.1172	18.0708	5.744	6.7118	11.712	41.562	22.342	123.429	22.5818	48.7425	42.439	11.944	31.228			0.695066	27.428
14.3019	24.0712	32.63	19.0253	29.0029	22.3577	31.4165	20.9109	22.1703	9.6689	7.068	13.2299	18.0964	6.599	5.0455	13.741	42.839	27.83	128.378	26.2096	44.8819	37.5592	13.125	32.877			0.699551	27.3362
14.3936	21.964	32.389	17.4957	27.2628	22.4382	29.8486	21.5556	16.5038	11.7903	10.8605	12.6544	17.2483	5.148	7.7723	12.634	36.824	27.321	137.051	23.5009	48.582	39.4688	17.799	39.859			0.704036	27.7379
14.4852	29.8984	26.52	22.3092	20.8247	19.1921	22.5863	20.7414	13.4251	17.5968	6.5195	10.2115	24.4546	4.704	7.9162	14.216	42.239	37.143	120.105	19.1883	45.254	33.9586	15.073	30.013			0.708517	26.2648
14.5769	20.8958	22.2	19.1179	22.226	25.3624	22.5655	22.7153	21.6352	19.6534	10.2074	9.373	22.8	4.14	11.2826	9.918	34.63	32.963	133.726	21.4284	43.0741	35.3675	20.766	30.557			0.713002	26.8089
14.6686	24.0221	24.583	18.5884	27.3631	23.6078	25.0708	27.7104	20.5558	21.9731	10.9809	11.3902	24.5011	4.243	15.8029	11.771	31.499	37.603	167.045	16.0016	46.8304	21.9829	19.835	39.717			0.717487	29.2468
14.7603	22.8625	29.32	22.392	31.113	22.7297	35.9885	27.5397	23.805	21.1568	10.3974	12.8489	19.8162	4.2	10.8451	11.591	34.527	31.894	159.877	18.662	45.2915	19.4598	17.222	47.775			0.721973	29.6224
14.852	25.3702	36.046	25.7805	30.6343	27.1262	32.8753	25.9653	26.9793	18.0495	6.8849	10.3595	20.0985	4.986	8.4709	8.455	32.649	39.867	161.937	25.2393	47.6937	22.8759	16.609	37.342			0.726458	30.0998
14.9436	27.8013	35.209	35.3013	29.4053	27.9154	41.4808	31.3219	29.6203	16.9505	6.3273	16.5986	19.5857	5.09	8.2905	13.398	31.012	46.642	133.451	33.5474	53.0103	22.6628	13.757	22.617			0.730939	30.4781
15.0353	17.0085	34.592	26.9472	29.0032	28.0673	41.1805	25.3728	24.9711	15.0793	6.3741	20.4335	22.8902	5.809	10.396	13.871	34.152	46.939	87.41	26.5266	50.9975	23.19	12.165	24.725			0.735424	27.3087
15.127	18.9778	29.412	24.1084	28.5518	23.4062	34.5454	25.3355	25.3449	14.2015	6.706	20.5093	18.2954	7.001	9.0069	11.506	34.218	42.36	53.013	20.8061	40.8445	27.1676	8.986	17.024			0.739909	23.536
15.2187	19.5682	34.423	23.1713	36.4712	19.9653	37.7662	26.0417	21.206	8.8435	4.0037	21.4177	26.6433	5.201	8.7768	9.766	28.178	41.813	32.117	22.485	38.2012	29.665	15.892	18.386			0.744395	23.0436
15.3104	20.7545	32.309	17.791	24.6937	17.2202	32.7726	27.2713	26.3251	13.6115	9.1523	23.6223	23.9577	4.501	4.6139	14.245	23.93	38.606	18.779	16.9728	43.7825	27.422	12.254	19.139			0.74888	21.4664
15.402	23.4267	38.679	17.0158	26.8129	24.3722	30.3293	21.6225	21.2367	13.3905	8.98	23.9831	20.828	6.359	5.2273	14.687	33.689	50.921	17.156	17.4822	46.3295	22.8983	18.206	23.727			0.75336	22.9287
15.4937	22.9316	40.334	15.8403	33.6483	28.2989	28.9205	21.6297	21.3753	16.3842	11.3974	25.2068	22.0722	9.423	5.1818	11.81	34.367	49.399	17.604	15.7416	55.7931	25.9397	18.442	27.457			0.757846	24.3129
15.5854	28.2289	31.105	19.8721	31.6071	25.947	33.513	23.4695	18.3415	15.6712	13.5107	23.7553	22.0315	7.112	5.4289	19.777	40.938	62.121	20.256	13.0277	44.4327	24.4628	16.489	30.826			0.762331	24.8663
15.6771	23.9341	36.38	24.7163	26.4891	24.4301	35.6549	24.8714	16.8471	15.1547	10.2798	19.1768	22.1909	9.908	8.6287	17.56	26.186	45.061	21.851	17.3011	39.903	26.7909	20.916	39.529			0.766816	24.0765
15.7687	19.6383	36.207	33.3124	32.4725	20.1128	28.9967	27.7182	15.3606	17.1295	11.3795	26.6404	24.1805	8.627	8.4132	16.878	31.661	39.836	23.046	16.5956	38.9483	27.3968	24.991	31.652			0.771297	24.3997
15.8604	14.8251	36.564	38.415	31.7811	27.2659	27.7771	27.2901	19.8125	14.5475	10.513	22.4072	21.7317	12.111	8.653	13.735	34.549	43.804	21.418	18.8397	42.567	19.3315	23.567	31.663			0.775782	24.4856
15.9521	18.2907	38.502	45.5505	36.2589	25.5326	22.6219	24.5411	20.9432	18.7051	10.2204	20.1977	19.8079	9.132	12.3887	13.841	29.265	37.683	31.464	20.1796	52.6785	23.2075	30.247	32.682			0.780267	25.8235
16.0438	20.9627	36.128	42.8462	30.3012	30.4349	21.6864	27.3094	22.4039	18.6378	9.3409	26.6614	22.1662	7.844	15.3634	13.771	28.067	38.569	31.619	24.6095	47.7295	25.55	32.853	28.667			0.784753	26.2401
16.1355	31.5267	32.684	32.8761	27.3116	32.2211	22.6189	33.2677	23.1424	18.3812	8.4057	38.0632	26.5885	12.556	12.8927	17.835	27.821	41.026	35.392	20.4401	44.774	25.6384	35.684	25.705			0.789238	27.2544
16.2271	26.1923	36.426	32.4076	29.691	36.3976	24.2783	43.6577	23.63	20.5377	11.8163	36.6413	17.3166	13.07	15.3103	21.78	32.602	53.633	34.742	20.3739	44.6836	26.6233	34.345	26.295			0.793719	28.8022
16.3188	20.1745	30.216	30.825	38.7455	41.5561	21.0307	37.4762	18.6166	21.4147	13.4775	39.4646	20.1201	15.196	13.7013	28.776	35.502	48.803	28.961	26.8003	51.9225	35.46	28.267	25.108			0.798204	29.2006
16.4105	19.7102	27.97	28.7446	42.1295	44.7368	22.5581	31.5751	20.382	24.7558	12.787	36.0798	19.5206	18.714	14.8515	22.464	34.992	41.102	41.735	32.143	37.8782	34.1146	28.798	37.626			0.802689	29.3638
16.5022	14.5286	30.057	26.7286	42.4748	44.1481	21.8833	27.8091	19.1283	30.5727	13.434	43.4497	20.6681	18.312	12.2965	21.202	37.281	42.53	34.736	25.0715	38.7954	36.5986	35.25	39.285			0.807175	29.4018
16.5939	18.0238	32.478	25.1704	34.065	37.4762	22.107	25.0027	18.5507	28.3284	7.9563	36.1816	33.1188	18.447	9.0379	16.708	36.744	35.336	33.559	29.8091	40.5333	45.1468	62.396	44.968			0.81166	30.0497
16.6855	26.5501	30.807	26.8641	40.2314	34.7484	33.347	24.9411	17.3101	20.6774	10.3208	28.0846	27.4798	21.404	16.4726	16.736	42.796	38.874	33.588	28.6612	40.7995	44.2806	88.271	57.359			0.81614	32.6349
16.7772	26.1068	49.602	28.0422	40.5791	30.8026	34.213	29.004	20.5299	18.4553	8.1056	22.1112	36.3435	27.448	21.6967	23.851	42.202	43.538	28.895	24.7264	35.873	45.6632	114.246	69.445			0.820626	35.7165
16.8689	18.7996	59.137	31.8709	39.9561	36.702	38.0634	31.1708	20.2901	19.2986	12.4651	17.1212	37.433	20.891	17.9719	23.665	37.763	44.83	20.167	29.2115	26.5623	43.369	105.515	76.001			0.825111	35.1415
16.9606	15.559	46.357	26.6409	45.4828	43.4068	36.3742	33.3583	18.1159	26.9529	12.5357	16.2267	33.1221	26.975	18.3472	27.787	35.3	59.913	23.829	36.4592	26.29	53.2297	79.014	81.219			0.829596	35.7607
17.0522	14.0971	28.765	22.7567	40.9893	55.3563	47.2198	35.2392	19.9745	21.8255	11.7423	17.3667	31.947	18.571	19.4119	25.557	35.977	53.041	22.475	36.3089	41.0131	59.8813	56.061	84.923			0.834077	34.8043
17.1439	17.9383	26.178	27.0362	40.2022	62.7757	48.6638	30.4166	22.1974	14.5873	11.9101	18.4667	33.433	24.117	17.1583	23.554	35.661	48.623	30.584	34.1572	45.0902	47.1963	48.379	94.528			0.838562	34.9067
17.2356	22.7168	16.598	25.2468	31.5152	48.6898	46.4876	25.9543	22.1342	16.2452	16.6924	22.9204	32.0957	22.682	18.5684	17.589	30.35	45.557	24.771	32.7062	44.6672	36.8059	46.247	82.122			0.843047	31.7114
17.3273	18.941	13.48	31.6512	40.1827	38.4119	47.1076	28.2837	24.8793	15.7602	17.9384	15.6332	27.6757	26.983	15.6724	19.242	36.734	39.709	25.937	31.1526	41.1225	31.5563	47.557	81.794			0.847533	31.1915
17.419	22.0807	11.143	30.116	40.0457	32.9183	44.8897	40.7212	25.1683	16.7616	14.1279	18.8812	24.5919	24.439	23.7262	21.102	47.357	30.339	33.107	25.9363	37.0455	37.2054	44.411	71.491			0.852018	31.2002
17.5106	21.9046	7.636	29.6042	49.5234	29.8764	46.2356	34.9795	33.5593	16.7058	14.4117	18.0754	20.5198	22.061	21.1799	26.805	37.768	26.719	33.608	24.1891	40.4042	51.3468	40.317	56.095			0.856499	30.588
17.6023	24.6488	6.387	26.8025	39.4814	21.5955	47.8341	41.934	34.1373	15.5145	18.4348	17.8946	22.8571	16.096	28.7714	24.577	44.672	29.475	42.161	23.338	30.0946	66.3046	35.271	46.189			0.860984	30.6292
17.694	26.9202	6.805	27.4872	44.4555	14.7866	42.1668	43.6856	38.0967	16.4722	21.8507	21.2965	26.4047	17.53	32.4522	26.603	30.533	31.245	38.615	29.1047	22.6086	73.079	28.117	44.666			0.865469	30.6514
17.7857	23.4531	5.095	29.8003	38.8065	8.7774	38.5693	44.6597	32.0301	15.6132	28.1884	22.8287	31.8124	25.883	36.3352	25.633	34.489	34.637	37.653	39.6294	26.3634	55.561	30.031	41.368			0.869955	30.7486
17.8774	33.1763	3.917	25.0412	45.704	7.5075	39.045	42.3356	29.1539	19.0668	28.2629	24.9075	26.9021	25.905	35.138	24.686	30.914	42.928	32.605	44.8351	28.7192	35.3038	32.871	63.486			0.87444	31.4092
17.969	35.8134	3.398	19.113	40.4856	4.3621	29.7284	40.6305	18.7745	16.7564	35.9006	29.2577	26.7884	23.773	37.9546	20.087	35.163	53.65	34.007	51.2959	33.5084	19.7566	38.064	77.289			0.87892	31.546
18.0607	40.1664	3.244	18.3885	44.9016	4.3965	23.4815	39.4145	20.8654	15.6841	31.9047	29.5838	33.9659	29.277	35.2398	26.371	43.773	57.715	36.527	35.362	27.8516	12.4982	29.719	95.764			0.883406	32.0041
18.1524	28.5034	1.552	12.7972	47.1811	3.7276	20.2118	35.433	21.898	18.7718	34.0247	24.5647	37.7538	32.238	30.0435	31.985	35.679	56.173	33.31	27.275	22.4693	8.3485	27.936	108.106			0.887891	30.434
18.2441	30.7825	1.522	13.6714	45.6764	2.1903	15.7756	35.1392	24.9149	20.5767	24.6951	30.5346	34.8368	37.749	34.308	29.726	29.79	55.389	33.528	32.5764	20.8904	8.0024	41.241	91.624			0.892376	30.2235
18.3358	31.5678	2.152	12.5868	44.7087	1.1575	12.2536	40.5503	35.7442	21.2855	16.4292	34.6524	30.4535	39.032	25.109	28.866	20.443	38.247	30.544	33.0615	21.8731	6.5645	40.319	75.276			0.896862	27.9512
18.4274	30.2648	1.208	9.2217	39.4418	1.6358	13.4083	37.2943	54.8802	18.9218	19.2979	46.8346	27.9677	43.366	27.1163	38.318	24.694	22.305	26.051	34.0068	21.577	5.5566	28.503	84.441			0.901342	28.5353
18.5191	34.9346	1.806	7.7572	33.0179	1.2786	11.5896	34.4613	64.5503	26.6283	19.2472	51.3424	35.879	43.3	29.2139	36.463	30.266	17.762	29.889	29.9514	24.5393	5.5401	26.46	74.688			0.905828	29.155
18.6108	26.8133	1.931	4.2932	26.5729	1.0517	9.1808	34.2928	60.5435	21.3325	19.9098	44.1283	37.4696	46.459	36.3266	38.091	35.241	12.305	35.053	33.7661	15.6384	4.3035	19.324	75.837			0.910313	27.8202
18.7025	18.6884	0.854	3.4063	32.3915	1.9844	4.2857	31.4091	52.7512	21.9013	21.9117	35.117	43.4877	52.119	40.2583	37.57	45.254	7.639	37.661	38.0127	20.6773	4.3606	16.724	63.787			0.914798	27.4892
18.7941	17.451	0.826	2.8082	28.8538	1.2397	3.7056	33.9015	39.041	34.0709	25.9502	24.847	39.3148	63.529	38.8701	32.16	52.894	6.859	30.985	42.4778	26.6931	1.8586	10.634	49.511			0.919279	26.4557
18.8858	17.6901	1.186	5.1229	23.7566	0.5294	3.2919	25.7695	27.6822	32.0163	33.7204	12.8203	26.7719	56.908	29.1159	40.828	56.957	5.684	24.04	49.5135	32.7664	2.4598	7.734	32.534			0.923764	23.8651
18.9775	15.9534	0.538	1.7052	25.0258	0.8643	4.6152	16.571	14.855	33.7043	34.9647	7.5345	19.4717	38.092	12.3707	38.238	43.803	6.178	13.584	51.6122	26.4318	3.1342	7.623	25.38			0.928249	19.2283
19.0692	14.999	0.346	1.291	18.0256	1.4985	2.9189	11.9827	7.3887	26.8464	38.6377	4.6235	11.2805	20.12	5.1092	36.162	37.599	3.606	10.796	42.6639	20.8287	2.2985	6.132	16.772			0.932735	14.8663
19.1609	14.1195	0.409	1.8474	15.0361	1.1982	2.995	7.2619	4.1481	28.2716	29.438	2.8453	2.9996	8.665	3.0378	37.736	28.65	4.184	9.198	41.2008	20.751	2.1418	6.986	11.487			0.93722	12.3742
19.2525	11.572	0.25	2.7809	12.3387	1.6246	1.7382	3.6548	3.6144	19.7372	21.6621	4.3424	3.3902	6.37	2.1386	33.501	20.007	5.74	7.652	42.9543	22.756	2.0987	3.286	10.277			0.9417	10.5864
19.3442	6.6021	0.619	1.3326	8.2951	0.6229	1.3542	1.7887	2.1399	17.3645	12.6658	2.4756	2.6883	3.444	1.2654	37.939	16.107	3.204	7.407	35.5071	36.5498	3.2189	2.847	8.286			0.946186	9.29234
19.4359	4.6418	0.881	1.2111	4.1339	1.5559	0.8406	1.7395	2.5287	11.14	4.7387	0.6048	2.2747	4.077	0.8409	18.977	8.652	3.514	4.935	27.8234	32.6656	1.8641	4.438	8.311			0.950671	6.6256
19.5276	2.6819	0.278	1.0081	5.4553	0.9418	1.8389	1.6517	2.3854	7.7357	2.8263	1.2098	1.8459	5.846	0.8719	11.195	5.445	2.42	3.595	19.2974	24.17	0.8625	3.352	4.874			0.955156	4.86033
19.6193	3.6465	0.418	1.7476	4.0259	0.9733	1.3008	0.8955	0.9514	4.8987	3.3296	1.2949	2.2674	5.246	1.4945	4.314	4.858	2.996	3.35	15.8427	18.8969	2.1849	3.414	4.085			0.959642	4.01877
19.7109	2.6809	0.561	0.4792	3.1731	0.6733	0.7989	0.9803	0.7654	3.6711	1.9687	0.3073	1.0071	6.102	1.0923	4.756	4.041	2.216	3.307	12.4821	14.8708	2.0143	4.872	3.927			0.964122	3.33682
19.8026	1.8495	0.353	0.3874	2.0661	0.9184	1.8849	1.5131	1.9497	3.0192	1.4632	0.9364	1.0358	5.943	0.5428	4.118	3.873	1.341	4.076	7.3731	7.0681	1.896	4.091	4.022			0.968608	2.68351
19.8943	1.1331	0.566	1.5492	1.4522	1.5543	1.2039	0.8474	0.6775	2.1352	0.5479	0.3781	1.5519	6.267	0.9389	3.102	2.476	0.76	2.076	6.2989	4.5821	1.8693	3.156	3.532			0.973093	2.11543
19.986	1.1859	0.284	0.74	2.1651	1.5047	1.2743	0.9652	1.0456	1.7744	1.1257	0.4257	0.5022	6.496	0.889	1.144	1.77	2.247	2.339	2.8215	3.1447	0.5385	1.361	3.064			0.977578	1.68728
20.0777	2.1961	0.055	1.4176	1.6004	2.4091	0.5684	0.2992	0.8306	0.8491	1.4248	0.0666	1.7292	5.92	0.4819	2.045	0.826	3.895	1.821	3.8585	4.2192	2.906	2.215	4.301			0.982064	1.99716
20.1693	1.3791	0.47	0.8302	1.5503	1.4883	0.7453	1.0251	0.9474	0.6234	0.9846	0.4576	0.8975	4.784	0.2147	1.902	2.064	2.335	1.53	2.9744	1.8359	2.2138	1.438	4.047			0.986544	1.59729
20.261	1.0499	1.115	0.7702	0.1787	0.9286	0.7854	0.0359	1.1461	1.0252	0.5136	0.8659	2.0017	6.387	0.1338	2.452	1.117	1.611	0.817	3.1586	1.2896	2.1099	2.511	2.802			0.991029	1.51327
20.3527	0.6776	0.26	0.4046	0.644	0.6184	1.376	0.4113	0.7783	1.1239	0.3586	0.7148	1.5483	11.197	0.6832	3.275	1.522	1.729	1.915	1.9289	1.6666	1.5873	1.792	2.397			0.995515	1.67864
20.4444	1.3177	0.34	0.4548	1.8088	0.2778	0.9863	0.8936	0.7583	0.2794	1.2122	0.6189	0.8672	8.119	0.3538	1.394	0.925	2.546	2.207	2.0497	1.6758	1.5396	1.483	1.539			1	1.46291

## Sheet: Image15
X0	Y0	Y1	Y2	Y3	Y4	Y5	Y6	Y7	Y8	Y9	Y10	Y11		Ap-Basal to 1	Average intensities
0	16.3385	23.4612	19.0031	15.7588	20.2165	21.038	17.6006	17.206	19.4516	20.1875	28.3415	11.2502		0	19.1545
0.0992	14.8069	22.1671	20.2403	15.3202	23.4999	22.1934	19.7389	19.5193	21.5265	20.6709	26.0567	12.258		0.00531761	19.8332
0.1985	14.5786	26.3937	18.2871	15.982	19.3758	17.9995	20.1517	22.2271	22.6081	22.7695	26.7106	12.5468		0.0106406	19.9692
0.2977	12.8837	25.3518	16.2238	16.5254	17.5494	22.6408	18.8009	20.5636	21.1924	23.1123	28.8994	11.1669		0.0159582	19.5759
0.3969	15.0562	31.0848	17.6984	16.6109	15.8968	22.7127	16.7008	22.4939	24.4521	26.9636	30.7522	13.2478		0.0212758	21.1392
0.4961	12.7899	33.6923	21.4138	14.7822	12.8245	21.2556	16.4458	16.3036	23.5734	22.5454	32.6141	11.315		0.0265934	19.963
0.5954	14.8309	28.5524	18.2689	15.1822	17.344	19.2436	17.8107	15.8696	19.3618	23.0526	40.3437	10.6339		0.0319164	20.0412
0.6946	16.6748	25.8805	17.1861	14.9728	13.8132	21.2587	18.2839	17.6622	24.4682	25.3516	39.2386	10.8609		0.037234	20.471
0.7938	15.042	28.2124	15.5501	13.1868	15.7722	22.3988	19.3588	15.8323	23.2255	25.7947	45.4287	9.7561		0.0425516	20.7965
0.8931	15.6343	22.8177	15.8243	15.5951	18.0918	19.8498	16.5362	14.6572	20.934	24.2045	41.7083	8.623		0.0478746	19.5397
0.9923	16.6968	21.3591	21.3715	16.4863	18.1718	20.4371	16.6272	17.8152	26.128	27.7621	39.4563	9.4823		0.0531922	20.9828
1.0915	17.7141	18.2491	18.1991	16.6099	18.4245	19.8675	20.6032	16.7947	29.7173	26.5251	37.9472	11.9726		0.0585098	21.052
1.1907	14.6163	23.0933	14.5232	17.7504	13.5074	18.397	22.0572	17.6192	34.3286	27.7873	38.4304	10.7132		0.0638274	21.0686
1.29	14.1835	21.3885	18.8904	17.093	18.7242	21.0079	23.3781	19.9636	31.0511	29.6336	35.2854	9.4861		0.0691504	21.6738
1.3892	15.7174	23.4297	19.6691	18.0339	19.0557	21.6736	26.6434	17.0202	27.6282	26.2707	44.7743	10.1674		0.074468	22.507
1.4884	16.7144	25.218	18.6154	14.7568	19.541	18.2313	27.0148	16.872	29.8264	26.0308	41.9905	10.9544		0.0797856	22.1471
1.5877	17.1991	24.8355	14.9885	13.7242	16.0004	24.4311	23.1561	16.5661	31.8569	23.6305	44.0844	8.3958		0.0851085	21.5724
1.6869	14.6162	27.1791	13.9167	15.4862	18.0186	22.9477	17.7487	16.567	34.4897	22.5999	44.9143	10.1208		0.0904262	21.5504
1.7861	15.3522	24.1668	19.202	16.7382	16.2502	19.8519	19.5029	15.2182	31.4872	20.1696	49.7108	11.1599		0.0957438	21.5675
1.8853	14.35	20.889	16.3814	17.345	15.6099	19.0265	19.3279	17.1386	32.7228	20.298	53.6693	11.8479		0.101061	21.5505
1.9846	14.0384	20.9976	17.6104	18.3569	15.6199	18.7965	18.8049	17.714	29.7972	18.8904	58.5242	9.4098		0.106384	21.5467
2.0838	12.6093	20.5206	19.5755	18.0166	17.751	18.2004	20.2471	18.5975	29.3303	22.6302	59.1329	10.6753		0.111702	22.2739
2.183	11.0501	20.482	21.508	16.6771	17.3316	18.367	17.2864	19.8026	27.7719	21.9709	60.9084	12.4637		0.11702	22.135
2.2823	13.7049	18.359	22.4423	17.078	17.5187	20.7329	16.6885	14.1592	27.6848	21.1971	57.4657	8.4419		0.122343	21.2894
2.3815	12.6217	14.9433	22.1278	18.2797	16.1752	21.2682	16.265	15.256	21.6591	21.383	45.9772	11.374		0.12766	19.7775
2.4807	17.4551	18.4092	22.6639	15.7333	15.6242	19.1118	18.4364	18.2515	22.6091	18.9819	44.2576	12.9245		0.132978	20.3715
2.5799	16.5705	16.7967	19.0981	12.5596	18.0897	19.4613	13.509	16.6945	25.0221	16.181	35.5489	10.557		0.138295	18.3407
2.6792	14.9263	18.9435	17.7922	16.8687	17.1912	16.8946	13.7081	16.3527	19.5121	15.8622	23.8263	11.4823		0.143618	16.9467
2.7784	13.7255	15.0991	18.9743	14.7166	17.4071	16.919	16.1888	15.3737	16.4951	18.1413	20.9432	13.8911		0.148936	16.4896
2.8776	16.5113	16.4591	22.7873	12.667	16.0231	19.7393	15.886	14.4661	14.3896	17.6561	15.9425	17.1706		0.154254	16.6415
2.9769	15.4213	14.6304	21.1024	19.2301	16.2749	14.5867	18.1919	11.0751	14.9286	19.5401	15.5974	13.6218		0.159577	16.1834
3.0761	13.5024	15.2385	16.526	15.4881	19.5842	13.1471	17.1434	9.1898	15.9858	18.3729	14.5855	12.3475		0.164894	15.0926
3.1753	11.4162	15.5935	16.5942	13.0777	15.3965	14.258	14.3832	8.971	13.0975	16.689	11.0684	9.9985		0.170212	13.3786
3.2745	14.4214	17.944	20.2344	11.4145	15.9521	13.709	17.3008	9.8649	12.653	17.117	9.7482	10.5539		0.175529	14.2428
3.3738	12.8008	12.8598	19.1443	15.1456	15.8818	15.6334	14.4197	12.9595	13.6829	15.3732	10.3643	11.3855		0.180852	14.1376
3.473	14.4094	13.2801	22.5038	15.9371	13.2996	10.7282	15.4463	9.0671	10.7449	15.5636	12.123	9.7178		0.18617	13.5684
3.5722	15.646	15.1531	15.3332	13.1443	13.5033	10.9064	13.7907	11.2608	13.4967	16.2718	12.3189	10.0318		0.191488	13.4047
3.6715	13.3891	14.725	16.2022	14.3437	11.2734	13.0959	13.0392	13.5015	11.0556	16.3745	11.2336	9.7692		0.196811	13.1669
3.7707	11.6541	13.3417	13.4627	13.5158	11.0732	13.6525	11.8083	13.1672	12.4569	15.9863	11.6863	8.4527		0.202128	12.5215
3.8699	13.4892	14.7192	12.1467	12.4457	9.1749	11.2863	9.9361	13.2128	11.6007	13.9333	12.9948	7.2938		0.207446	11.8528
3.9692	12.4799	13.6526	13.2535	12.6796	9.367	13.9917	12.8085	13.8362	10.9498	14.7823	10.838	9.1097		0.212769	12.3124
4.0684	13.8289	13.5551	14.4823	11.6445	12.8739	11.9512	11.5787	12.7276	9.538	16.1503	12.8408	8.7851		0.218086	12.4964
4.1676	12.1686	13.2444	13.6217	10.3282	11.501	13.9415	12.8292	8.8841	9.5787	19.1294	12.5826	8.6046		0.223404	12.2012
4.2668	11.3277	11.1659	12.1012	12.9497	10.4816	13.666	10.9699	8.4232	8.8385	16.2	14.3126	11.4813		0.228722	11.8265
4.3661	10.0074	11.4538	11.3376	11.478	13.5659	11.1007	10.5326	9.5861	9.1136	17.0012	11.5203	11.3718		0.234044	11.5058
4.4653	12.02	10.4859	11.1149	10.9082	16.2277	10.19	11.2631	8.4416	8.6296	16.4952	12.0572	10.2348		0.239362	11.5057
4.5645	9.5328	12.6623	11.8585	12.4851	15.2045	11.9303	11.8403	8.0033	9.5863	13.4404	12.9531	9.4859		0.24468	11.5819
4.6638	11.2251	12.7475	10.2482	13.3898	11.0181	11.1757	11.9718	9.6525	10.0892	11.8979	12.5551	12.1744		0.250003	11.5121
4.763	8.7332	15.9998	12.0655	13.7605	12.5019	12.7475	12.6067	9.8212	8.0305	11.2838	10.2716	10.6282		0.25532	11.5375
4.8622	10.699	14.3537	13.9952	11.6851	12.9887	9.7287	11.3644	8.4626	9.0841	11.4455	10.9282	10.3267		0.260638	11.2552
4.9614	12.3023	13.6538	11.6802	9.9898	11.022	11.2437	10.5509	9.8498	9.3657	11.1601	8.8288	8.9851		0.265956	10.7194
5.0607	9.7525	12.5757	13.1783	8.1183	12.5166	10.4054	10.4804	11.1228	9.4478	9.4443	8.1075	11.3268		0.271278	10.5397
5.1599	8.2726	10.6244	18.0863	11.0758	9.8039	10.7766	9.1519	10.6011	10.3806	11.9763	9.9383	8.9138		0.276596	10.8001
5.2591	8.6997	11.731	15.4208	8.5633	11.0578	11.12	11.9215	9.0275	8.3748	9.8326	11.3557	7.6878		0.281914	10.3994
5.3584	9.5628	13.5984	12.2168	7.6871	11.5821	10.9409	9.5354	10.1553	8.0051	9.8211	10.7337	9.7684		0.287237	10.3006
5.4576	10.5049	11.7026	13.029	10.2144	10.4892	9.7583	8.5978	12.1265	9.0854	8.3245	10.7579	10.8069		0.292554	10.4498
5.5568	9.389	10.4389	14.0945	10.6521	9.0387	9.2808	7.3653	9.9504	6.2588	9.4863	10.1805	9.9674		0.297872	9.67522
5.656	10.6553	9.985	13.1948	9.9648	10.4222	9.7679	10.2518	9.9695	8.7654	9.7158	10.1595	8.8295		0.303189	10.1401
5.7553	7.1494	10.263	12.3022	11.4555	12.0513	11.3671	10.082	8.8636	8.2686	8.924	11.6043	8.8749		0.308512	10.1005
5.8545	6.9249	10.9238	13.5691	9.0241	13.6783	11.4835	7.8637	10.7356	9.9261	8.9894	10.9964	10.1315		0.31383	10.3539
5.9537	5.7696	10.8252	13.0414	13.1911	13.5565	10.1975	9.832	8.8409	9.9643	8.4694	9.3717	10.4746		0.319148	10.2945
6.053	8.1968	10.8551	10.0537	11.9289	9.9175	13.6742	9.2983	9.0368	10.4387	8.8002	9.3148	10.0788		0.324471	10.1328
6.1522	10.6538	9.1687	8.9828	12.9922	10.9218	11.7474	7.4036	7.2901	11.1546	6.5166	7.6738	11.0017		0.329788	9.62559
6.2514	6.9082	7.5046	9.8963	11.9145	9.8368	11.3366	7.3403	10.834	8.3786	7.2524	7.5452	9.8378		0.335106	9.04878
6.3506	6.557	9.3116	7.9206	8.1522	10.7019	11.2598	8.9577	11.283	7.249	8.5545	8.0382	12.2324		0.340423	9.18483
6.4499	7.0435	8.0792	7.555	10.3435	11.5075	10.5111	7.9413	10.1095	7.6553	8.4178	7.3923	10.3571		0.345746	8.90943
6.5491	7.0555	6.4949	8.8595	7.6461	10.7929	11.987	6.1498	10.4446	9.614	7.4906	5.3623	7.682		0.351064	8.29827
6.6483	4.7236	8.025	9.1891	9.1842	12.208	12.4868	4.9535	8.76	12.3972	8.8174	5.4436	8.0033		0.356382	8.68264
6.7476	6.6611	9.2994	10.7513	7.1799	11.471	10.9048	6.9043	9.5751	7.86	8.4628	6.5592	8.8651		0.361705	8.70783
6.8468	7.557	5.7964	9.6293	7.271	13.3767	7.6436	7.2871	9.885	8.5063	8.0831	6.4234	9.944		0.367022	8.45024
6.946	6.5026	8.9255	9.1932	7.4768	12.7074	9.4417	4.8903	9.5491	12.2487	6.7762	5.7752	7.6389		0.37234	8.42713
7.0452	4.7771	12.3167	11.1181	7.7599	10.5804	9.6995	5.6167	8.3427	9.3016	7.5291	6.5469	8.9489		0.377657	8.5448
7.1445	7.7363	9.1071	12.0674	7.4023	9.7822	9.921	3.6367	10.9923	8.5904	9.0442	6.9411	8.4243		0.38298	8.63711
7.2437	6.7814	9.199	9.6238	8.6148	10.5555	8.5903	6.7183	9.0757	10.5704	9.6648	6.8441	8.717		0.388298	8.74626
7.3429	6.6851	9.3139	11.4407	7.3644	11.9	7.0053	5.828	10.6047	9.2233	10.4233	7.5774	5.9909		0.393616	8.61308
7.4422	6.9895	11.1147	7.2649	6.4406	10.4894	9.7139	4.2295	8.821	9.81	8.9736	5.4908	8.674		0.398939	8.16766
7.5414	7.3266	7.6405	8.488	7.4936	12.2384	12.0087	5.7335	10.3933	8.9628	7.8836	4.8161	7.6119		0.404256	8.38308
7.6406	5.8918	10.4172	9.271	6.6124	12.4852	8.6115	4.2527	10.4159	10.1203	7.6891	5.4662	6.7903		0.409574	8.16863
7.7398	6.5562	6.3993	11.0132	4.8851	10.3269	9.1313	3.1566	10.6309	12.5407	9.5755	6.4948	7.2367		0.414891	8.16227
7.8391	6.6187	7.0495	7.1193	7.9969	9.7817	10.0977	3.4757	13.8872	11.0831	8.0174	6.2674	7.0529		0.420214	8.20396
7.9383	7.6628	8.4716	6.093	9.6273	8.4406	8.2859	6.5465	13.8037	9.105	7.5546	6.6484	7.8599		0.425532	8.34161
8.0375	6.974	7.2062	11.3589	7.5871	10.0469	6.435	3.862	13.327	11.4888	7.5593	5.0241	7.279		0.43085	8.17903
8.1368	5.5791	8.5503	11.3011	6.1542	7.7002	9.1248	3.1892	12.6991	8.8448	6.5495	6.6546	6.8674		0.436173	7.76786
8.236	7.9467	11.115	10.7081	5.7803	8.2446	8.1031	3.7043	11.4164	11.4753	9.4048	7.0739	6.3495		0.44149	8.4435
8.3352	6.5366	9.3195	8.6348	5.2234	8.8338	9.092	4.3667	9.0659	9.3203	8.3174	6.5931	6.1119		0.446808	7.61795
8.4344	5.2677	8.8603	6.8296	5.6578	10.041	8.0947	2.4535	9.6317	9.2522	7.8445	3.753	6.4921		0.452125	7.01484
8.5337	5.7596	7.2567	9.1797	5.8464	9.8255	8.229	3.2211	7.7143	8.045	6.5308	4.2122	6.2835		0.457448	6.84198
8.6329	7.1142	8.4412	6.9783	3.2086	8.4174	7.302	3.2986	8.6807	9.5729	8.1595	4.3419	5.374		0.462766	6.74077
8.7321	6.1228	8.5948	6.9509	3.4827	8.6316	8.3386	4.3163	11.4997	11.3843	8.1999	6.206	6.1015		0.468084	7.48576
8.8314	5.9104	8.3619	9.8966	3.9915	8.3756	9.2393	3.3421	10.0266	9.7685	5.8075	5.0429	5.3582		0.473407	7.09343
8.9306	6.8141	7.6314	10.1914	4.5582	9.5804	8.3663	2.9121	10.3935	9.3531	6.9386	4.6735	5.3679		0.478724	7.23171
9.0298	5.9973	7.7085	11.2962	3.7882	9.0097	8.2531	3.9307	12.4409	8.7827	7.9491	4.1616	6.6902		0.484042	7.50068
9.129	4.8387	8.0849	8.9374	3.6466	8.7015	7.9026	2.4782	7.9314	7.9788	6.8623	5.4992	6.294		0.489359	6.5963
9.2283	4.2115	8.4514	7.4352	4.525	8.2547	6.4705	3.1448	7.9426	13.333	9.8983	4.651	7.0552		0.494682	7.11443
9.3275	6.788	7.0519	6.5274	3.985	8.8	6.9791	3.6549	7.6751	11.8172	9.0296	4.2225	6.3455		0.5	6.90635
9.4267	5.8864	8.2071	6.2861	2.2103	6.0273	8.2013	4.2547	8.6835	9.4966	9.7237	4.6708	7.2044		0.505318	6.73768
9.526	6.6614	7.1421	5.9896	3.3617	5.6391	6.5316	4.7965	8.1947	8.7839	7.0391	5.2225	6.0872		0.510641	6.28745
9.6252	5.9553	8.0833	6.4344	3.1689	7.3286	4.5508	2.6179	8.9222	8.9588	8.6675	4.5956	8.0972		0.515958	6.44838
9.7244	5.8391	6.187	9.259	2.6593	7.7927	7.0364	3.09	7.5495	8.9423	8.9782	4.6304	8.235		0.521276	6.68324
9.8236	6.1672	7.2666	6.8485	2.6882	7.8213	6.6099	2.8814	7.6992	9.933	7.7419	5.3384	8.0698		0.526593	6.58878
9.9229	5.606	8.414	7.435	2.019	7.1267	5.8861	3.2605	7.4604	10.921	4.5572	5.0935	7.0875		0.531916	6.23891
10.0221	6.6791	7.0753	7.9632	3.1852	6.9171	5.2149	4.1323	6.6848	9.6978	6.6803	4.5103	8.2972		0.537234	6.41979
10.1213	7.7614	7.6237	7.9366	4.053	8.7143	5.7852	3.8308	7.6904	8.4409	8.4676	4.4985	5.7496		0.542552	6.71267
10.2206	3.7034	8.4944	6.3536	2.3881	9.6468	7.6727	4.5906	10.1602	8.2125	8.2752	3.9883	6.8108		0.547875	6.69138
10.3198	5.6926	8.3225	6.239	3.7778	9.5926	8.3188	3.8359	8.823	10.662	7.9271	4.3481	5.3513		0.553192	6.90756
10.419	6.7554	8.2811	7.006	3.3727	8.8226	8.076	4.1019	12.3792	12.1488	7.4405	4.2801	5.5615		0.55851	7.35215
10.5183	5.553	9.1875	8.3369	3.0799	8.0918	7.1222	3.588	9.9594	9.5961	8.438	4.862	6.3163		0.563833	7.01093
10.6175	6.1977	8.9017	7.7065	2.4331	7.1641	6.532	4.5908	7.3703	9.1838	9.3705	5.6623	6.5143		0.56915	6.80226
10.7167	5.7549	7.6063	7.7109	2.957	6.4342	8.5458	4.3347	7.9792	10.446	7.0663	4.8026	6.6741		0.574468	6.69267
10.8159	6.9997	10.7317	7.1682	3.7762	6.6807	8.5908	4.3254	7.0589	7.0289	7.9116	5.005	8.3105		0.579786	6.96563
10.9152	6.4127	8.4037	6.6885	3.5416	7.3677	5.9294	6.9461	7.6023	8.804	7.8878	4.8488	8.7036		0.585109	6.92802
11.0144	5.0235	7.2561	6.9556	3.6819	7.3463	6.6492	8.9976	8.8306	9.0432	8.8177	4.0335	8.3158		0.590426	7.07925
11.1136	5.4423	6.3727	6.2562	3.6935	8.906	8.0017	6.9916	9.6275	10.2339	7.6768	4.0876	8.2798		0.595744	7.1308
11.2129	7.0391	7.959	6.6665	3.2792	9.6369	7.1733	5.8134	8.7707	10.6564	10.3062	5.3144	7.1886		0.601067	7.48364
11.3121	4.6733	9.1063	6.1545	4.5128	6.6791	8.7022	4.9317	9.7145	9.4898	10.3703	7.0287	7.3538		0.606384	7.39308
11.4113	6.7159	8.6715	5.6443	2.5408	9.3495	9.3174	4.1491	6.7602	10.6835	8.7161	5.5843	9.0606		0.611702	7.2661
11.5105	8.2446	10.1122	7.0736	2.9918	11.6428	8.3945	3.9406	6.5284	9.5577	6.4292	6.36	6.4275		0.61702	7.30857
11.6098	8.4455	8.7061	6.841	4.8069	7.5019	9.1842	2.9137	6.4279	11.1096	6.738	6.0773	5.0033		0.622343	6.97962
11.709	5.1454	8.2354	7.5033	2.9819	8.4542	10.3955	3.2839	8.3363	11.1117	7.6715	7.5635	5.9604		0.62766	7.22025
11.8082	6.4963	10.7361	9.2031	3.4293	7.4129	9.7474	3.1168	7.7947	11.371	8.8786	7.7783	6.5734		0.632978	7.71149
11.9075	7.0458	12.4563	7.2779	3.1489	10.0201	8.7906	4.8812	7.7229	10.7772	9.0426	7.1825	6.4513		0.638301	7.89978
12.0067	8.1101	11.6607	10.4144	2.5892	11.3427	8.0387	5.5134	10.3813	9.4956	8.6611	5.8122	6.4989		0.643618	8.20986
12.1059	9.2173	9.3953	9.9518	3.4018	7.4781	10.7534	5.3532	8.5439	11.2512	8.2953	8.1573	5.9533		0.648936	8.14599
12.2051	10.3705	11.4722	8.2732	3.598	6.5222	8.3621	4.3326	6.6907	8.9302	7.4136	6.1513	5.6731		0.654254	7.31581
12.3044	7.8801	11.0118	6.9034	3.8293	10.3834	8.682	3.2249	7.5912	10.9419	8.6464	5.7201	8.8774		0.659577	7.80766
12.4036	7.8684	10.6737	7.2066	3.4098	11.2758	8.8767	4.0785	6.7657	13.5196	8.2689	6.8595	7.808		0.664894	8.05093
12.5028	7.8102	10.5409	8.5855	3.1704	8.9716	8.9416	5.1845	8.2898	11.424	9.5794	7.9715	9.7181		0.670212	8.34896
12.6021	8.3277	10.7794	8.178	4.3771	12.6953	8.6606	3.9108	7.8009	11.6942	6.7747	5.4437	7.0182		0.675535	7.97172
12.7013	7.598	11.3972	8.1403	3.9427	10.5565	10.4309	4.6318	6.4594	11.4577	8.543	5.7288	5.3783		0.680852	7.85538
12.8005	9.6325	9.3124	9.9039	2.7875	10.453	9.9124	6.0483	8.5869	11.484	5.9973	8.4447	5.4306		0.68617	8.16612
12.8997	8.1184	9.4734	11.8362	5.2519	8.6605	9.1787	5.9833	9.3333	12.2193	6.7721	7.5568	7.2163		0.691488	8.46668
12.999	6.3332	8.6161	9.3672	3.3962	11.6529	9.8349	6.1294	8.4326	8.6537	6.9526	7.1802	8.9738		0.696811	7.96023
13.0982	6.2615	10.119	9.5644	4.0606	8.9034	9.3366	7.3288	6.6159	7.0018	7.0649	8.4944	7.807		0.702128	7.71319
13.1974	8.0114	9.7902	7.7679	5.0026	10.059	9.9415	7.4974	7.8507	8.123	8.3116	6.7314	6.8624		0.707446	7.99576
13.2967	10.3584	9.6044	7.9755	5.1721	10.4047	10.5325	8.9717	6.8352	8.2625	10.1819	6.1349	5.314		0.712769	8.31232
13.3959	7.8046	10.8156	8.8863	4.5494	10.4352	12.9316	8.8624	8.188	9.3905	8.221	9.0096	5.1576		0.718086	8.68765
13.4951	6.5648	12.6927	9.9011	5.4738	9.0224	11.7322	9.4156	9.0514	7.6553	7.0345	10.0984	6.6403		0.723404	8.77354
13.5943	8.7639	8.4868	7.537	8.2524	8.3955	10.6607	7.3109	7.3293	7.5632	8.6498	7.7511	4.4559		0.728722	7.92971
13.6936	7.6199	7.6844	9.9761	5.1084	12.3333	8.4864	8.5838	9.2778	7.1175	6.0801	8.1917	5.1965		0.734044	7.97133
13.7928	7.3086	7.2824	8.4466	7.4022	11.4174	9.0338	7.6129	11.1914	8.6584	5.9047	8.3061	4.2722		0.739362	8.06973
13.892	7.6626	9.9321	9.2421	8.9786	12.6853	9.5632	7.4765	7.8085	7.2005	5.419	8.8821	5.3698		0.74468	8.35169
13.9913	6.6539	9.0612	9.3931	9.932	10.5676	8.8144	5.8603	5.9158	7.8767	3.8371	8.9213	4.2325		0.750003	7.58883
14.0905	5.0094	8.7942	9.7957	9.1439	8.4786	9.4554	9.017	6.0672	8.4136	4.8671	6.1663	3.0871		0.75532	7.35796
14.1897	8.1197	9.4915	9.9745	8.2958	9.3361	7.8328	7.5259	6.1837	5.6754	3.1643	5.364	3.0676		0.760638	7.00261
14.2889	9.146	8.1932	8.8604	6.2916	7.9521	11.0014	9.1251	7.0927	4.2719	4.2871	5.9112	2.6073		0.765956	7.06167
14.3882	9.1825	7.2489	8.2697	8.0144	9.8495	10.8776	6.6229	4.1725	4.1026	4.169	6.5723	1.6564		0.771278	6.72819
14.4874	6.7454	6.5509	7.0448	6.3577	8.3696	9.2301	8.4664	3.0621	3.1498	4.5478	4.9784	2.0907		0.776596	5.88281
14.5866	8.3634	9.5575	9.6077	7.264	8.2674	10.3725	6.213	2.4216	2.2398	3.685	3.7399	2.5762		0.781914	6.19233
14.6859	6.9703	9.1334	7.6645	4.9463	8.5321	9.4039	3.877	5.1122	2.1491	2.8646	3.1566	2.7639		0.787237	5.54783
14.7851	7.4462	8.0921	4.8712	5.7235	7.5186	9.3868	5.4886	3.4412	2.3883	3.1746	3.2409	1.2906		0.792554	5.17188
14.8843	6.9629	8.045	5.4672	5.7285	9.1224	10.3876	6.5113	2.4725	1.3495	2.6066	2.5155	2.2334		0.797872	5.28353
14.9835	6.8789	6.7438	5.1644	5.516	5.3457	8.496	4.5316	0.9971	1.1875	1.9757	1.2724	2.6762		0.803189	4.23211
15.0828	5.8791	5.9662	4.8516	5.0941	5.0855	10.3581	2.8539	0.8259	2.1654	1.8541	2.5456	2.562		0.808512	4.17012
15.182	6.4057	7.4579	4.8137	4.6696	6.4266	7.047	4.0206	1.2244	1.1143	1.1284	1.8359	1.6643		0.81383	3.98403
15.2812	9.149	7.6238	5.1346	5.6013	5.6005	7.111	4.3216	1.0411	1.3592	0.8547	1.5329	2.9707		0.819148	4.35837
15.3805	7.9386	6.5208	3.9669	5.7178	4.2882	6.4887	2.9877	1.1183	0.7364	0.9	1.2402	3.0547		0.824471	3.74652
15.4797	8.4714	6.7011	3.8654	5.1452	3.6763	7.1622	2.2529	0.981	0.5215	0.9944	1.4239	3.0815		0.829788	3.68973
15.5789	9.6427	7.0733	2.6983	5.507	4.141	4.9407	1.8634	1.0118	0.8447	0.5284	2.1221	2.5387		0.835106	3.57601
15.6781	7.4073	6.6599	2.9685	5.6163	2.9128	3.8145	2.4239	0.662	0.8534	0.6597	1.5881	1.8326		0.840423	3.11658
15.7774	6.809	6.4502	1.5119	5.2179	2.4116	3.2475	2.2991	0.8965	0.6061	1.4101	1.313	1.3792		0.845746	2.79601
15.8766	7.1489	6.6831	2.5667	4.717	1.8119	3.9675	1.886	0.5549	0.5396	0.8877	1.7696	1.12		0.851064	2.80441
15.9758	7.442	5.6759	1.1737	4.2814	2.4926	4.1507	0.8601	0.4775	0.5511	0.7721	2.0588	0.9344		0.856382	2.57253
16.0751	7.586	5.0186	1.8892	3.5591	1.4644	1.5917	0.9719	0.4046	0.6526	1.3031	1.4194	0.7995		0.861705	2.22167
16.1743	7.024	6.1712	1.6695	2.2574	0.6983	2.9771	1.1861	0.5076	0.7887	0.5524	1.6585	1.0172		0.867022	2.209
16.2735	5.7504	6.0532	1.9838	2.0808	1.0324	1.6498	0.6666	0.6112	0.567	0.5816	1.3675	0.7988		0.87234	1.92859
16.3727	5.3228	5.245	1.746	1.8738	1.8384	1.1921	1.1306	0.4556	0.4645	0.2833	1.0128	1.0363		0.877657	1.8001
16.472	6.4223	3.6477	0.4145	1.6461	0.7389	1.3585	1.4179	0.3818	0.1833	0.7992	0.9631	0.8203		0.88298	1.56613
16.5712	7.0658	2.8418	0.5326	1.6018	0.6703	1.9008	1.361	0.7432	0.4215	0.3462	0.9927	1.2132		0.888298	1.64091
16.6704	5.3894	2.703	0.768	1.2121	1.1119	1.3097	0.4818	0.2896	0.3019	0.4339	0.792	0.6099		0.893616	1.2836
16.7697	4.0609	2.2769	0.8263	0.5141	0.5857	1.0767	0.4068	0.0403	0.7816	0.5026	0.6451	0.3356		0.898939	1.00438
16.8689	4.6527	1.6646	0.3491	0.7739	0.5709	1.3673	0.2197	0.1967	0.9086	0.8548	0.6342	0.4912		0.904256	1.05697
16.9681	3.2759	1.6963	0.2184	1.0338	0.0324	1.0936	0.2123	0.1618	0.1952	1.7461	2.1424	0.5371		0.909574	1.02878
17.0674	1.859	1.7691	0.2572	0.7677	0.5042	1.2259	0.5841	0.8513	0.2711	1.0205	1.0039	0.9979		0.914897	0.925992
17.1666	1.8021	0.6359	0.5925	0.6206	0.5403	0.8755	0.5742	0.4875	0.3269	0.7783	0.7958	0.5179		0.920214	0.712292
17.2658	2.4572	1.072	0.8329	0.3869	1.028	0.7224	0.5799	0.2674	0.4065	0.8078	1.2805	0.8711		0.925532	0.892717
17.365	1.8714	1.7469	0.1512	0.4537	0.6902	0.7819	0.8841	0.5527	0.1142	0.5927	1.2311	0.7797		0.93085	0.820817
17.4643	2.7504	1.3128	0.8747	0.6316	0.323	1.3608	0.4002	0.6167	0.1421	0.8856	1.8653	0.4127		0.936173	0.964658
17.5635	0.8539	1.1812	0.3424	0.367	0.5195	0.5183	0.297	0.4488	0.5784	0.7209	1.4351	0.3912		0.94149	0.637808
17.6627	1.5693	1.9517	0.2017	0.3336	0.798	0.5679	0.414	0.8462	0.1603	1.0557	0.7936	1.2061		0.946808	0.824842
17.762	1.8032	0.7332	0.6045	0.5341	0.3537	0.9702	0.5796	0.2976	0.0085	0.6801	1.0955	0.77		0.952131	0.702517
17.8612	1.7445	0.456	0.3541	0.4878	0.7763	1.0815	0.7357	0.5532	0.5844	0.3514	1.7082	0.4991		0.957448	0.777683
17.9604	1.3353	0.5657	0.5313	0.4073	0.3496	1.1393	0.7857	0.3231	0.3406	0.7799	1.1154	0.6915		0.962766	0.697058
18.0596	0.8746	0.3288	0.611	0.6618	1.1154	0.4742	0.4957	0.9741	0.0103	0.2103	0.9085	0.4828		0.968084	0.595625
18.1589	1.5214	0.9254	0.3448	0.5236	0.4907	0.2581	0.4605	0.1133	0.8331	0.8326	0.7595	0.6979		0.973407	0.646742
18.2581	1.08	0.8294	0.4045	0.6329	0.6098	0.4775	0.3728	0.482	0.4606	1.0959	0.7468	0.2166		0.978724	0.6174
18.3573	1.2537	0.813	0.5295	0.6944	0.3851	0.2361	0.6499	0.6352	0.1403	1.1003	1.2321	0.3861		0.984042	0.671308
18.4566	1.2142	1.661	0.2049	0.6655	0.9884	0.3108	0.4826	0.6313	0.0639	0.8613	1.1839	0.7377		0.989365	0.750458
18.5558	0.7371	0.9227	0.6336	0.1271	0.3665	1.0132	0.044	0.3673	0.3001	0.5869	0.9379	0.3361		0.994682	0.531042
18.655	1.044	0.6108	0.0438	0.1949	0.3821	0.7312	0.4444	0.1398	0.2665	0.2607	0.8623	0.8375		1	0.484833

## Sheet: Image16
X0	Y0	Y1	Y2	Y3	Y4	Y5	Y6	Y7	Y8	Y9	Y10	Y11	Y12	Y13	Y14	Y15	Y16	Y17			Ap-Basal to 1	Average intensities
0	15.8194	17.1198	11.3893	19.8637	17.6805	14.1761	10.9043	8.9531	13.3619	8.0875	8.8655	8.3791	6.4242	7.2587	3.9997	7.6916	7.3699	8.0511			0	10.8553
0.0992	17.3298	18.8547	12.4976	21.0434	19.1155	12.996	7.6465	9.7882	12.0381	8.2336	7.8203	8.342	6.6588	5.5682	5.252	7.0028	5.4207	7.1115			0.00471561	10.7067
0.1985	23.8955	15.8101	16.6394	17.5003	21.232	16.366	7.9018	7.7904	14.6404	10.6627	9.4493	10.001	8.9894	6.8868	5.9459	5.3377	4.2493	8.625			0.00943598	11.7735
0.2977	27.8299	19.2467	17.3012	16.3923	21.554	13.7485	10.5529	8.9508	14.8241	9.3264	7.4566	10.394	9.0208	7.6548	6.388	6.4379	4.1966	8.3335			0.0141516	12.2005
0.3969	33.3161	23.007	16.154	14.803	23.6877	14.8734	7.8546	7.2717	15.8433	10.5535	9.6435	10.796	10.0889	6.0795	5.6509	6.1523	5.6398	8.9621			0.0188672	12.7987
0.4961	35.5656	27.3197	21.3308	11.8829	19.0126	16.7413	7.9183	9.6154	11.0412	9.9867	9.3251	10.8543	8.1033	6.2417	6.2908	6.5555	5.1463	9.754			0.0235828	12.927
0.5954	30.5906	25.7721	21.0602	9.8302	23.5566	22.1709	11.47	8.9588	14.4525	12.2549	7.4911	9.7823	8.4348	6.9959	7.6669	6.0236	4.292	8.0118			0.0283032	13.2675
0.6946	31.3828	29.5281	23.5766	8.776	23.6254	23.9091	10.7409	6.6013	17.0665	10.5149	8.2703	10.2041	9.2707	8.6266	8.1003	7.022	5.5878	9.6206			0.0330188	14.0236
0.7938	32.2298	41.9823	23.2304	11.4425	31.9143	29.8152	11.8717	8.0492	14.9862	11.9154	9.7192	8.8022	9.5669	5.4038	6.4135	6.3442	7.5534	10.3393			0.0377344	15.6433
0.8931	30.9036	44.4106	24.9503	9.6826	37.1727	27.7275	14.0744	11.1257	14.6293	11.8716	10.9144	8.9949	8.0327	4.278	8.5901	7.6006	7.7377	13.9077			0.0424548	16.478
0.9923	31.2989	42.5399	32.2742	13.551	38.5503	30.3698	9.6742	9.2182	17.1806	9.9401	13.2931	12.2322	10.2364	6.1635	7.7124	8.7852	5.6916	8.5257			0.0471704	17.0687
1.0915	34.1442	37.6026	46.4519	14.224	45.1614	33.8872	9.8547	12.3779	13.4723	13.3157	11.2577	13.092	10.3962	7.9444	6.8308	8.0396	5.8337	8.2798			0.051886	18.4537
1.1907	43.3398	33.3515	54.8363	13.5809	42.5721	39.5021	13.4327	9.6551	16.9276	12.1986	15.7534	12.168	9.567	6.2997	8.6076	8.6065	8.2009	10.8914			0.0566016	19.9717
1.29	36.535	26.0251	59.0585	12.0544	39.1406	35.1397	15.4526	10.4242	14.1455	14.3027	10.545	15.9835	10.6331	6.8459	9.4457	7.5224	5.6707	13.5398			0.061322	19.0258
1.3892	35.4186	29.3363	70.2878	11.4671	35.3338	39.8817	15.2872	8.6342	13.4459	12.7523	15.1469	14.3023	9.2569	6.1779	7.9437	8.4454	4.6087	10.7953			0.0660376	19.3623
1.4884	36.2087	34.0247	70.419	16.2105	44.0678	41.7959	14.3004	10.3805	14.5162	15.8843	15.9192	16.0585	17.7923	8.2653	6.8486	7.8735	7.0525	15.3243			0.0707532	21.8301
1.5877	29.7819	30.0366	70.2835	22.2156	42.6154	34.2634	18.0482	11.8278	13.7682	14.9845	17.9565	16.6369	18.5608	9.2836	9.1705	11.6883	7.2731	12.4228			0.0754736	21.7121
1.6869	27.247	28.4355	64.3314	23.918	51.0803	24.3531	22.2079	14.0565	15.532	15.4938	18.8751	14.8667	17.963	7.551	7.4614	10.498	8.3032	11.2123			0.0801892	21.2992
1.7861	24.2576	35.563	48.7228	30.2593	43.9006	20.4019	20.9811	11.2848	18.2268	17.3234	17.7901	16.5626	16.151	6.1696	9.2475	9.5897	8.2697	14.8285			0.0849048	20.5294
1.8853	28.3941	42.1347	34.6841	43.7018	42.2502	21.8273	23.5833	15.8667	15.3258	18.0106	19.5713	20.6325	15.2536	6.8124	7.8867	13.8983	7.0251	13.2433			0.0896204	21.6723
1.9846	29.2008	36.3772	33.7207	59.8528	35.5494	21.6151	19.638	17.6736	15.1961	21.5552	18.3	18.9598	21.1347	8.2934	11.4098	12.7094	7.3132	13.4649			0.0943408	22.3313
2.0838	40.6058	37.636	33.0838	79.9266	29.6074	21.1547	19.6221	15.0707	18.7112	19.1071	17.2757	17.3272	18.2387	8.9871	9.1416	11.117	7.8772	14.4996			0.0990564	23.2772
2.183	42.0999	32.8299	30.8538	75.4258	24.3751	23.6014	18.5833	16.4182	17.3003	16.2375	16.2067	18.1135	15.5871	9.4038	9.4937	14.4508	10.8197	11.3282			0.103772	22.396
2.2823	35.0691	39.5854	24.1822	75.4613	25.5544	24.2938	22.4185	27.019	17.5455	13.9411	13.5119	15.4881	13.1957	6.98	6.0467	16.0368	9.5496	12.5956			0.108492	22.1375
2.3815	38.3286	32.4836	25.0736	64.5157	27.1641	26.7768	23.7325	27.9871	17.6858	15.5684	17.9801	11.1435	14.6463	7.1459	7.0633	17.5869	10.0423	11.2001			0.113208	22.0069
2.4807	31.7795	39.8802	18.8838	62.076	19.5831	20.7668	25.2907	25.5403	16.6441	12.7976	16.3043	13.4235	12.5038	11.2683	8.2415	20.6913	14.1624	11.046			0.117924	21.1602
2.5799	30.5286	36.6645	23.1136	54.6952	18.2244	21.9289	28.7983	28.0997	18.3378	10.9395	19.1713	13.8272	11.2112	9.8405	8.6042	17.078	11.7478	12.7799			0.122639	20.8661
2.6792	34.6316	34.1861	15.8665	49.6244	18.5942	22.2172	33.8067	33.3755	16.643	10.1527	21.103	12.4015	10.8143	13.9952	7.1242	15.6926	10.0697	10.999			0.12736	20.6276
2.7784	33.6357	34.2449	13.2392	43.7751	20.291	19.7694	30.2319	29.834	12.542	11.8325	17.1766	8.6252	10.8556	17.5697	5.8781	16.9862	12.4012	12.3384			0.132075	19.5126
2.8776	32.9162	37.3202	20.5976	38.1774	26.0578	20.1245	36.3466	31.2172	16.072	9.7342	18.2579	12.1717	12.5783	17.6874	6.8333	14.8769	14.6089	14.5828			0.136791	21.1201
2.9769	28.3714	29.4957	17.1309	27.6014	29.6695	17.274	32.5478	32.6613	13.9916	10.5682	17.8949	11.0304	12.3512	19.4892	6.7819	14.6351	13.0392	12.5429			0.141511	19.282
3.0761	29.6947	26.649	23.6566	25.3854	31.1957	16.6487	44.3082	29.4657	13.195	11.2456	17.3227	13.677	11.3094	15.9211	9.0839	13.3958	12.7456	11.7889			0.146227	19.8161
3.1753	31.0747	21.4745	25.0689	21.4407	31.8341	18.1485	34.7209	32.9265	13.5268	12.2304	19.2481	10.5332	11.7166	19.4694	8.4633	16.7435	13.6327	8.446			0.150942	19.4833
3.2745	30.9062	14.6062	23.8631	22.8685	33.3788	14.9734	26.7809	34.9083	12.1185	8.5474	16.6072	11.1644	8.7573	21.5868	8.8399	18.4976	11.1676	11.6428			0.155658	18.4008
3.3738	35.6234	18.188	16.5935	25.0707	28.9855	15.8172	23.4952	31.1256	13.2106	13.7668	16.2663	11.9405	11.1853	21.0077	8.4147	17.9696	13.8357	12.5268			0.160378	18.6124
3.473	41.4493	18.312	14.7316	21.2768	26.9509	14.3897	19.5093	28.9654	12.6619	14.8196	17.3449	11.7858	12.3193	21.4016	11.41	16.7015	14.641	13.3727			0.165094	18.4469
3.5722	44.2428	16.9336	17.1897	19.8418	30.34	14.2359	21.189	27.4569	14.6639	15.5089	21.4067	13.6113	11.9895	19.935	8.8951	13.0457	11.7081	10.5862			0.16981	18.4878
3.6715	52.3741	18.9189	16.6309	16.6971	33.9295	13.5571	11.5714	26.9836	16.0967	13.2529	19.7838	13.3086	14.518	16.2728	9.1833	10.7236	14.7753	14.8142			0.17453	18.5218
3.7707	62.3588	19.0609	14.6412	19.5088	30.8675	15.0552	12.6413	21.913	10.6814	10.194	18.6676	11.9575	10.2032	14.0395	10.7641	11.7991	16.4538	12.625			0.179246	17.9684
3.8699	52.4203	16.2591	15.1507	22.0614	35.9794	15.3755	9.5714	17.6135	11.6886	14.7135	17.4152	11.4483	11.4859	13.1118	10.222	9.4961	17.2386	12.2437			0.183961	17.4164
3.9692	41.3174	14.4618	9.5264	18.844	29.1563	13.6815	9.0193	20.5855	11.6961	12.1252	14.4847	11.7619	9.953	15.0173	10.3803	9.5902	17.0558	13.7143			0.188682	15.6873
4.0684	43.6943	17.2596	14.7504	16.6759	24.0849	11.2402	11.3901	16.1099	12.4832	9.6797	17.5594	13.5654	10.6096	13.9068	12.0606	8.517	18.1238	11.8026			0.193397	15.7507
4.1676	44.3819	14.6466	11.4982	19.3125	15.9629	9.8922	9.4754	17.2806	11.3432	9.702	18.3878	12.1092	11.2114	15.1737	11.0808	9.7713	15.2827	13.2686			0.198113	14.9878
4.2668	35.465	18.0996	10.7827	17.0561	11.4286	7.9815	11.4664	13.2068	10.2756	13.9291	17.0725	9.6175	7.9519	15.0434	9.6972	5.4421	14.8952	14.4734			0.202828	13.5491
4.3661	28.2502	12.8325	15.0841	17.1223	11.3299	10.0113	9.5595	13.0449	8.8281	12.3781	13.5857	10.3889	11.8055	14.5285	11.1483	6.7593	16.7677	11.8128			0.207549	13.0688
4.4653	28.6795	16.706	11.8395	16.9529	14.5796	12.0669	9.2599	9.2745	9.0304	11.1073	14.6595	10.6535	11.2605	14.3576	8.0433	6.2168	16.2972	13.2096			0.212264	13.0108
4.5645	28.0179	12.6502	12.711	13.9347	10.1947	10.3095	8.778	12.0392	9.2255	10.6719	13.1855	12.4519	8.7313	11.2911	9.6554	7.6883	15.5442	11.9017			0.21698	12.1657
4.6638	26.2381	11.1334	11.7727	18.5143	10.2255	8.6574	7.6139	11.7702	10.8589	9.0021	12.3584	11.8178	7.1976	11.9587	8.0429	4.9648	16.8412	8.2134			0.2217	11.5101
4.763	19.149	11.4249	10.9366	20.2807	13.0294	8.6747	5.8943	7.4293	10.3332	9.7272	11.2447	10.1995	8.8558	11	9.844	4.3509	14.9351	12.5168			0.226416	11.1014
4.8622	19.3363	11.1282	10.5782	18.7419	13.3763	12.0065	7.6186	7.4737	11.6236	11.4248	10.4949	13.2063	7.7615	12.4387	10.7312	5.5974	15.3553	9.7462			0.231132	11.5911
4.9614	20.6791	8.7787	12.7648	19.3783	8.185	9.4128	9.3882	6.4273	11.2775	12.4299	10.6216	10.895	11.0473	7.7933	9.3231	6.4155	16.8788	11.3484			0.235847	11.2803
5.0607	17.5429	10.5401	13.9878	18.3254	6.9448	9.7332	9.9191	7.2324	9.2331	13.4164	10.4539	8.9649	7.9211	10.8839	8.6864	5.8136	12.0433	8.6181			0.240568	10.57
5.1599	20.1486	10.9362	11.6574	18.2063	8.9058	11.8459	8.2529	8.3676	8.1271	11.3486	9.551	8.9456	7.7329	10.4035	8.3565	7.0661	10.8508	5.6976			0.245283	10.3556
5.2591	21.1051	8.4986	10.3942	16.4961	7.5033	8.5648	11.2777	8.2653	8.1251	14.3711	8.5746	7.5976	9.1323	8.6188	7.4807	6.2315	11.7342	5.3823			0.249999	9.96407
5.3584	17.3829	10.8744	9.6909	14.9701	9.4708	7.7664	9.7039	9.3439	13.0971	15.0979	8.4134	5.6703	9.9348	9.1261	6.7775	6.173	10.2271	5.0076			0.254719	9.92934
5.4576	18.46	11.7294	8.8704	19.9924	7.4994	9.3591	7.7163	6.6965	11.6542	11.821	9.4635	5.7487	9.1491	9.0184	8.98	9.3722	10.7448	6.3517			0.259435	10.1459
5.5568	14.6634	11.7665	11.5738	17.2898	8.787	9.1556	8.4711	8.4993	7.5287	11.977	9.8302	5.2955	10.8691	7.6258	9.0346	8.7398	7.1716	7.1783			0.26415	9.74762
5.656	16.5903	8.7985	8.7607	12.8208	7.5485	7.9088	6.3136	8.8499	10.2671	11.5798	9.0159	5.9004	10.2119	6.8509	5.9119	7.9452	7.2689	5.7985			0.268866	8.79676
5.7553	15.8307	10.5288	10.2877	13.8889	9.023	6.3536	9.2463	5.9267	7.578	11.3475	7.7022	5.1383	9.7289	6.9024	7.417	9.7409	7.5696	5.1705			0.273586	8.8545
5.8545	20.1324	9.6492	10.904	12.9379	5.8642	8.6932	7.1089	7.2887	9.5968	11.0386	9.2184	9.1669	11.1909	5.6584	6.3067	6.1274	9.7818	9.0884			0.278302	9.43071
5.9537	19.1738	10.5529	12.2929	14.2535	7.7991	9.5802	8.3	8.3436	8.3545	15.9986	6.4149	5.5982	9.7644	7.6037	5.0208	7.7491	12.8445	8.566			0.283018	9.90059
6.053	14.7788	13.4779	12.234	20.6967	8.4947	8.9919	6.7444	7.6421	7.3241	17.6597	6.7256	5.0371	7.347	7.4704	4.3713	7.2861	11.3915	6.87			0.287738	9.69685
6.1522	16.4869	12.9496	11.8458	19.2095	11.6948	9.8082	4.4276	7.318	7.9839	15.3005	7.5465	5.2546	7.4928	7.8308	6.4475	5.451	8.5856	6.8941			0.292454	9.58487
6.2514	16.9377	11.2183	10.6313	14.9029	8.9453	9.317	5.2386	8.8588	7.5357	16.9104	10.6109	5.7906	9.6652	6.1886	6.3072	7.1671	9.05	8.7882			0.297169	9.67021
6.3506	19.9848	8.5901	11.7039	17.1144	7.9529	8.7376	5.0239	8.9552	4.2208	14.7265	9.3664	5.1517	10.6472	7.8829	6.9029	6.0654	11.9003	6.5465			0.301885	9.5263
6.4499	20.6962	12.3775	10.5428	21.5903	10.6306	7.895	6.2006	7.4951	7.3657	13.7324	8.6751	7.3138	11.2878	7.5132	6.7892	6.3661	10.8086	6.1712			0.306605	10.1917
6.5491	21.8707	13.4187	9.0787	20.6245	5.7632	7.1789	5.4866	5.8319	8.7035	16.4318	6.7134	5.9574	8.3126	7.4059	9.5181	6.1529	8.0601	4.604			0.311321	9.50627
6.6483	22.062	14.0186	10.3608	13.1249	9.0771	8.1086	5.0533	6.2265	7.0344	13.5993	9.0871	5.1801	9.2361	5.666	9.4531	6.0877	8.1418	6.3975			0.316036	9.32861
6.7476	19.0627	12.5646	9.5534	16.4091	11.8279	7.7904	6.5051	5.4696	7.0775	15.6926	5.4639	5.973	5.6139	4.1395	6.1495	4.3463	10.4796	6.7513			0.320757	8.93722
6.8468	20.0147	10.0171	12.0481	18.1868	7.7858	9.8687	6.1863	5.618	8.1819	11.4848	6.0896	4.462	6.8188	4.9158	7.1203	7.1585	9.9637	6.5584			0.325472	9.02663
6.946	25.4432	10.4437	8.0053	16.7101	8.5897	9.3347	6.9741	7.3249	8.9715	13.4093	4.9802	3.6781	8.9559	5.2264	6.7033	6.0004	9.7126	6.5865			0.330188	9.28055
7.0452	21.5048	15.1528	8.2674	12.925	8.9739	8.8513	8.3808	4.9773	8.4825	9.8645	5.0592	3.898	6.3271	6.2001	5.8423	4.1429	11.8125	6.1836			0.334904	8.71367
7.1445	19.0786	11.8242	8.5803	11.6714	12.2571	8.9437	8.68	7.5165	6.2529	8.7048	4.8897	5.8344	5.7707	6.6757	8.9838	4.5506	12.1037	4.1207			0.339624	8.69104
7.2437	15.6922	9.6968	9.7311	9.0786	6.8222	6.3392	6.6044	4.983	6.2393	10.8375	4.4657	4.7253	7.3259	4.5626	5.0359	6.6128	10.7323	6.5605			0.34434	7.55807
7.3429	15.6561	10.664	10.3487	8.5697	10.401	5.3813	6.5162	5.0462	6.8128	7.7015	6.9048	3.944	4.956	4.5016	6.0594	4.6702	9.7528	6.2677			0.349055	7.453
7.4422	12.2783	13.3705	8.2805	8.998	8.22	6.8429	5.1787	5.9409	6.5612	7.4151	3.7573	4.5841	5.7705	5.2841	9.219	4.919	8.3877	4.8477			0.353776	7.21419
7.5414	14.4201	12.4049	10.083	7.9642	10.5417	6.3335	6.6016	7.9286	7.5443	9.1148	4.252	2.7082	6.1373	7.1317	7.4184	5.7718	7.5132	7.3448			0.358491	7.84523
7.6406	11.2679	8.834	9.5555	10.3859	8.1063	7.7397	8.8325	6.7537	6.1135	7.4825	3.5346	2.9544	6.0589	6.6154	6.6229	5.5571	7.6014	4.5802			0.363207	7.14424
7.7398	13.3534	13.6969	8.4925	8.1072	8.4875	7.7717	5.8721	6.3566	6.9776	6.2853	3.448	3.6701	6.6051	4.9265	4.9788	5.5581	8.4552	7.091			0.367922	7.22964
7.8391	13.9919	13.8162	9.8147	7.7148	7.1625	5.3294	4.7665	6.8677	7.3047	8.2851	4.7699	2.2745	5.2716	4.8464	8.075	6.4856	5.8287	5.9181			0.372643	7.14018
7.9383	12.9493	14.0971	7.6864	8.7648	6.0973	6.0195	7.4111	7.0552	4.8609	8.1412	5.8462	2.586	5.8574	5.3746	7.76	6.0211	6.4419	3.7531			0.377358	7.04017
8.0375	12.0402	15.648	7.9944	9.6447	8.0924	5.961	6.1273	6.5207	7.8668	5.8607	4.4125	1.7637	5.833	6.3083	5.3989	4.6558	3.7507	5.1086			0.382074	6.83265
8.1368	10.8169	13.6606	10.9647	11.6201	8.0064	5.915	5.3581	5.5864	4.382	3.9577	4.6152	1.4011	5.3635	5.1818	6.8372	4.8957	7.2652	5.5826			0.386794	6.74501
8.236	9.8171	12.4844	10.6195	8.9925	9.3801	7.4413	6.6029	6.1589	5.315	4.2695	4.2348	2.7667	6.0809	6.5697	9.4926	5.3023	6.6915	4.0794			0.39151	7.01662
8.3352	7.9045	10.5367	11.212	7.2073	9.3884	6.3151	6.5534	3.9723	6.7317	7.201	3.6576	3.2916	5.2014	8.7515	8.6462	5.5951	4.9375	5.3552			0.396226	6.80325
8.4344	10.6975	9.8949	15.2584	7.8701	10.9102	8.0269	6.8658	7.322	6.3245	6.7686	4.2077	1.7439	4.8855	6.4337	8.1358	4.126	4.8599	5.1296			0.400941	7.19228
8.5337	8.1149	13.0866	12.0291	8.3539	6.2021	6.9655	6.3147	3.6176	5.6009	7.2819	3.2079	2.8106	5.5601	6.843	8.4432	5.1422	5.0351	4.7508			0.405662	6.63112
8.6329	11.683	13.9517	8.7584	9.1379	6.6193	8.0955	5.7766	7.2228	3.2995	6.5238	3.6126	2.2707	6.7146	8.5035	5.3258	6.464	7.0472	5.664			0.410377	7.03727
8.7321	10.2209	12.4697	11.2183	9.3136	10.1412	8.3428	5.3627	6.3616	5.4291	6.8337	4.0565	2.0827	5.5632	5.4729	11.4368	4.9095	6.447	5.9284			0.415093	7.31059
8.8314	11.0407	11.9656	10.7128	9.0748	8.6733	4.014	9.3141	4.7182	4.8816	7.3746	2.9299	3.4577	6.3038	6.5472	6.0673	5.9235	5.8289	4.8379			0.419813	6.87033
8.9306	12.7213	13.6337	13.2191	9.2636	8.0027	5.0318	8.2923	7.1383	5.0944	6.7778	3.1994	2.4054	6.0297	6.997	5.8141	4.3564	4.9977	4.0772			0.424529	7.05844
9.0298	11.3005	11.998	13.0166	9.1175	7.2102	7.0368	6.488	7.304	5.0994	5.5458	5.0824	3.5107	4.2762	6.359	4.2476	3.7251	7.8588	6.4777			0.429244	6.98079
9.129	10.0521	12.413	19.1805	7.0265	8.4895	4.7839	6.713	6.9998	4.7648	7.0128	6.175	3.2739	4.8573	5.1314	5.3848	4.2232	6.122	6.6796			0.43396	7.18239
9.2283	9.6688	10.7511	13.9329	9.4232	10.5475	4.0269	8.6703	6.0184	6.0985	7.4038	6.3842	3.0113	4.1096	5.615	6.0951	4.0691	5.1017	4.4347			0.43868	6.96456
9.3275	9.4542	10.5698	16.0278	6.4685	11.7398	4.0358	7.1149	4.5988	7.1016	7.2668	3.5138	2.8707	3.998	5.9314	7.1589	2.8333	5.8212	5.7021			0.443396	6.7893
9.4267	9.2218	9.72	18.8416	7.6361	11.3668	4.8489	5.6654	5.2242	5.1533	5.9282	3.2864	3.3217	4.475	5.9969	8.3867	4.0301	5.4775	5.9404			0.448112	6.91783
9.526	15.0963	8.6702	20.613	6.4155	8.7595	4.4211	5.0152	4.9891	3.7385	6.2312	4.6046	3.6249	2.9187	5.7226	7.3762	4.8992	4.5141	4.9861			0.452832	6.81089
9.6252	11.9859	12.5303	17.0321	4.1683	9.8411	4.5784	6.2159	5.1074	4.2803	6.2835	2.8208	3.6064	3.6413	7.454	8.6163	5.5302	6.5695	4.0523			0.457548	6.90633
9.7244	14.8897	11.5944	15.7553	8.1546	7.5822	3.8681	7.1929	5.4356	4.2357	5.0313	3.7749	4.5735	5.3381	6.5562	8.1524	4.9941	8.3382	4.9392			0.462263	7.2448
9.8236	11.0713	10.1296	13.496	8.8649	5.3504	4.7813	5.7105	7.8656	4.9823	6.5757	5.0471	3.5994	5.4457	5.6272	10.0372	4.8593	5.5696	2.3427			0.466979	6.74199
9.9229	9.6722	12.9042	15.5597	7.3576	6.257	5.3781	8.6753	6.8762	6.0744	4.5473	3.5631	2.6568	3.3154	5.6618	9.1171	4.1878	7.0843	4.9099			0.471699	6.87768
10.0221	10.7983	11.0504	15.0451	7.7192	6.3582	3.4455	5.076	6.2493	4.7478	5.1915	2.1109	2.8579	1.7951	4.6554	10.4942	5.1289	5.069	4.756			0.476415	6.25271
10.1213	11.2442	11.1006	19.908	8.2669	4.9601	5.0505	5.3694	4.5343	5.9235	6.4581	4.7219	2.9661	2.6605	5.1779	13.4098	4.8046	4.9283	5.5411			0.48113	7.05699
10.2206	10.426	19.0525	14.4395	6.6457	4.8665	5.7759	6.7663	5.8424	7.2383	5.2589	3.5757	2.396	4.2083	4.8534	8.019	4.8711	7.2329	4.5031			0.485851	6.99842
10.3198	8.0773	16.2232	19.4501	6.0731	6.0927	4.1034	5.6176	6.1271	5.665	7.9759	3.9342	3.7087	4.2168	6.7179	7.1552	2.3493	6.123	4.1944			0.490566	6.87805
10.419	10.6882	11.4074	18.5061	5.7441	4.5925	4.3028	8.2469	5.8862	4.2267	4.9234	1.7605	1.5375	2.4365	7.3124	6.7732	5.2801	5.7813	4.2732			0.495282	6.3155
10.5183	10.7326	15.9379	15.6898	7.5492	5.9599	6.1167	7.1181	8.973	4.4565	5.7491	3.1191	2.0182	4.5139	5.9207	7.1117	3.8935	6.7259	6.6941			0.500002	7.12666
10.6175	9.6923	13.2085	17.2789	5.7579	4.2043	4.2164	9.179	6.1968	4.4794	5.1084	2.853	1.879	2.6434	6.7355	6.9097	4.6054	4.8134	5.3381			0.504718	6.39441
10.7167	8.8955	10.9109	14.0116	5.2753	4.8007	2.7972	7.8414	5.7308	5.8136	4.9118	4.4108	2.4491	3.9477	5.9213	7.8147	4.0033	6.611	4.8284			0.509434	6.16528
10.8159	7.217	9.9706	16.1666	6.6321	5.5534	3.4798	6.6019	5.9513	5.3575	6.082	2.7613	1.0426	4.4255	5.6324	10.42	4.5951	7.1265	5.3531			0.514149	6.35382
10.9152	5.594	10.1022	22.6759	8.2721	5.4118	3.1818	8.5611	6.5732	5.1607	5.645	4.1272	1.063	3.6706	7.4937	7.1363	4.1892	6.1158	5.0579			0.51887	6.66842
11.0144	10.4261	14.3214	18.2064	6.0998	5.1858	2.0326	5.7491	7.2956	2.4767	6.6353	3.5013	1.1315	3.3696	6.0187	7.1864	3.3944	6.8529	4.2194			0.523585	6.33906
11.1136	9.4453	12.7035	19.4446	7.5972	5.1967	2.6646	4.5844	5.0641	3.7231	5.1747	3.7704	1.4281	2.8504	9.3086	9.2207	4.8488	6.0422	5.5962			0.528301	6.59242
11.2129	6.7593	12.8821	20.9122	8.4512	3.5346	2.7757	5.038	5.9968	3.1492	4.3972	3.7164	1.917	3.0658	5.9131	8.649	4.1769	5.9034	5.5457			0.533021	6.26576
11.3121	7.2294	12.5584	19.6941	10.2123	4.2565	2.5469	5.644	5.1622	4.7954	5.32	5.9209	1.808	3.5413	5.9389	8.997	5.6684	4.9235	5.961			0.537737	6.67657
11.4113	9.9485	13.186	23.0212	7.8177	4.0653	3.1157	4.9651	5.7432	4.3811	5.5959	5.3196	0.6611	2.4813	3.985	9.8825	6.0189	5.9461	5.1224			0.542452	6.73648
11.5105	7.4725	11.1936	17.4176	6.2181	4.1925	3.2651	6.1159	7.3994	5.1267	6.4964	5.5979	1.0368	2.3202	3.1847	7.9039	4.4262	6.0797	5.8567			0.547168	6.18355
11.6098	9.0805	6.5051	17.8055	8.5699	7.1089	3.4529	4.4104	4.4983	5.0371	6.4798	3.8562	1.61	3.3662	5.752	6.9489	5.197	6.3011	5.7076			0.551888	6.20486
11.709	8.9804	10.3171	18.2267	8.5106	6.8892	2.5964	3.4817	5.6333	5.3739	7.1573	4.9494	2.0329	3.598	3.635	4.9184	6.4301	6.206	7.6216			0.556604	6.47544
11.8082	10.5285	7.3329	17.0246	6.7043	4.7832	2.4399	4.122	6.001	5.2602	4.5494	3.6243	1.4148	2.6806	5.1214	6.1386	6.7586	6.502	4.1846			0.56132	5.84283
11.9075	7.3952	10.7061	14.468	6.4024	4.4604	2.8234	2.9879	5.0773	4.7742	6.8237	4.9853	1.3704	2.4915	3.8812	7.4443	5.1401	4.799	5.9992			0.56604	5.66831
12.0067	7.915	8.1091	12.3006	6.0269	4.7157	3.4702	2.2928	7.0605	5.367	4.3753	6.9433	2.925	3.543	4.4551	6.5261	6.7661	5.662	4.487			0.570756	5.71893
12.1059	9.8175	11.0185	8.764	7.7446	3.2327	4.9283	3.7088	6.5596	5.6923	4.4848	4.7418	2.1868	4.4007	3.6055	6.6578	3.4302	5.2047	4.8223			0.575471	5.61116
12.2051	8.3031	6.1604	7.708	6.5872	4.1389	4.3075	4.6502	7.7554	4.7797	4.9721	7.2102	3.2934	2.8643	3.6264	4.2127	5.8778	5.9754	4.3409			0.580187	5.37576
12.3044	8.5079	6.6495	6.3147	6.6036	2.9382	4.0341	2.6661	4.9937	4.6202	5.3999	5.3137	2.0446	4.121	3.1079	3.4169	5.4239	4.5245	5.8889			0.584907	4.80941
12.4036	6.7612	5.4322	5.514	6.2301	4.1674	3.6111	3.2338	5.5678	4.4138	5.1219	5.5227	1.4568	2.9886	3.9594	5.9097	5.9453	5.1988	6.2213			0.589623	4.84755
12.5028	7.5418	6.7966	6.0441	5.5143	7.343	3.4696	4.7215	6.4916	4.092	5.9287	7.269	1.4195	5.1428	4.0337	5.4424	5.1716	4.7485	7.3081			0.594338	5.47104
12.6021	8.2236	7.8137	6.5472	6.2041	7.7003	2.308	2.5203	6.4138	4.4026	5.2293	6.248	2.5945	3.8993	3.1472	4.0297	6.296	4.2199	3.0482			0.599059	5.04698
12.7013	6.9539	5.9832	8.36	7.3866	8.9115	2.5486	2.2929	5.2909	5.5843	6.254	3.4334	3.6031	3.224	3.8715	2.2918	5.4351	2.942	4.147			0.603774	4.91743
12.8005	6.6051	3.8488	6.7092	8.4174	6.7154	3.0283	2.1424	6.2957	4.7466	4.7362	6.1789	1.0668	3.3828	3.4799	5.2312	6.1774	3.9775	4.4756			0.60849	4.84529
12.8997	5.7406	9.2256	4.5847	5.9525	6.6644	2.9265	1.6521	4.752	4.901	4.9961	6.4172	2.6218	2.9682	4.1203	6.0352	7.1554	3.8116	5.7727			0.613206	5.01655
12.999	10.3714	5.6866	7.3821	9.1216	5.4913	1.2754	1.4778	5.2047	5.2891	5.0546	6.3443	2.6002	5.1775	4.2991	4.5226	8.3018	4.7964	6.0172			0.617926	5.46743
13.0982	11.4924	5.4396	4.7653	7.5165	6.0997	2.9248	3.503	8.2538	5.18	4.9103	6.6104	3.5836	3.2909	3.8105	5.8551	6.1092	3.7946	3.7637			0.622642	5.38352
13.1974	8.6534	5.6367	5.223	9.2207	6.7601	3.1059	3.3959	8.3771	4.6413	3.8924	4.2432	1.5606	2.4256	3.9701	2.6576	6.6278	4.6072	4.5158			0.627357	4.97302
13.2967	11.5601	5.6853	4.8832	5.8849	5.5696	3.2761	2.7857	7.8417	5.1285	5.813	6.2394	1.997	2.9657	3.5247	4.1414	5.3794	7.7042	4.7802			0.632078	5.28667
13.3959	10.0155	6.3408	5.4212	8.0838	4.805	4.4727	4.7188	6.4605	2.8593	4.3142	5.2475	1.3726	3.8603	3.5253	4.1141	4.5982	4.2191	4.0651			0.636793	4.91633
13.4951	8.6711	4.7902	4.1438	5.6174	4.4208	2.4447	4.1668	5.4672	4.0506	7.3654	5.2673	1.5582	2.9556	3.5208	4.8731	6.8229	5.8224	4.6302			0.641509	4.81047
13.5943	8.755	5.9792	6.1842	5.3626	2.6787	4.057	2.8906	6.797	7.9043	6.2244	5.1636	1.9158	2.9264	2.9208	4.9996	5.4785	3.8562	2.2112			0.646224	4.79473
13.6936	10.169	4.8977	4.3984	6.9736	5.178	4.2164	2.4895	4.5052	3.7363	4.9774	4.7942	4.0491	4.5855	4.2247	3.044	3.7367	3.4263	4.6907			0.650945	4.67182
13.7928	7.7624	6.6362	4.8945	6.4425	6.7698	5.746	2.8679	10.0182	4.3415	6.1022	5.9968	2.2735	2.6445	3.7625	2.8688	6.6233	3.5645	4.2207			0.65566	5.19643
13.892	7.4282	6.4676	4.4986	7.1269	4.7118	7.4145	4.423	7.743	6.4034	8.249	6.3059	1.1897	3.5744	3.9328	3.7704	4.7199	2.9763	3.557			0.660376	5.24958
13.9913	9.8708	5.297	5.1442	6.8903	5.8713	11.9398	2.5042	6.8432	4.6982	8.4481	4.589	1.3271	3.6663	4.82	3.998	3.9196	5.2031	4.9815			0.665096	5.55621
14.0905	7.3662	6.2076	4.0068	5.5745	7.983	8.4092	2.8854	5.047	4.9903	10.6719	6.1345	2.5164	3.9655	4.0518	3.9505	5.8921	4.1729	3.3694			0.669812	5.39972
14.1897	6.7498	6.4229	4.2822	6.1976	7.2543	6.3655	3.2593	5.5056	6.6556	11.277	6.3853	2.7447	4.67	5.793	3.6843	3.4786	5.3768	4.1127			0.674528	5.56751
14.2889	7.2262	6.0909	3.0301	5.7596	8.0156	5.974	3.3018	6.6067	4.2605	9.6639	6.8265	0.5143	2.6032	4.5092	4.1527	3.7916	3.4375	2.9546			0.679243	4.92883
14.3882	7.5914	3.991	3.7675	7.1015	8.8273	5.043	2.3609	5.9296	5.8298	6.7457	7.4751	1.4368	5.5743	4.882	3.9051	4.487	5.6826	2.8066			0.683964	5.19096
14.4874	14.4708	6.1037	3.5992	6.3535	8.876	6.2877	2.115	5.2257	7.7429	10.6783	8.3939	3.0544	3.0658	5.1976	4.6878	6.2982	3.8956	4.0919			0.688679	6.11878
14.5866	11.7993	5.796	4.882	7.6235	4.7542	3.2219	1.7172	6.8145	7.4971	8.5239	6.0179	2.6418	4.2212	7.5271	5.0991	3.5538	3.5623	3.4203			0.693395	5.48184
14.6859	9.9839	4.6034	3.9867	8.6304	8.6833	3.7357	2.7794	6.663	5.1377	7.6725	5.9572	2.1642	2.6037	6.2167	3.8725	4.2186	4.6172	4.1604			0.698115	5.31592
14.7851	6.5319	4.7123	5.0037	8.6182	7.3391	4.3934	3.0957	6.2451	6.0263	11.1696	6.4769	2.4132	4.7422	7.3447	4.0927	2.67	2.1373	3.4346			0.702831	5.35816
14.8843	6.9208	5.5358	4.9804	9.0688	9.1285	5.2513	4.4446	5.2015	7.1337	8.8777	6.219	2.8254	3.8766	6.9464	2.4228	3.4781	5.3972	3.9031			0.707546	5.64509
14.9835	6.9552	5.5216	5.6694	8.0127	8.2876	4.1775	5.6076	6.6478	5.3148	8.0923	8.0777	4.4925	4.1174	8.3583	3.5386	3.2591	5.1517	2.8056			0.712262	5.78263
15.0828	7.8087	8.6117	5.3555	4.9369	7.449	3.4464	2.2566	4.3323	4.2583	7.2152	6.5147	2.1628	4.5999	7.175	5.6153	4.2304	5.0568	2.7967			0.716982	5.21234
15.182	8.937	4.4949	4.3718	6.418	5.5438	3.2803	2.8351	4.2962	5.701	8.3115	8.1499	3.2748	4.389	4.4928	4.1103	3.3526	4.3712	4.1614			0.721698	5.02731
15.2812	7.5868	8.4199	8.1636	6.833	4.3593	3.7334	3.1808	4.2169	4.0686	7.0818	5.0765	2.8172	3.9095	5.3261	4.3425	2.4139	3.5634	4.4326			0.726414	4.97366
15.3805	7.3521	9.3204	5.5817	7.0088	6.7481	4.7955	1.5249	6.1235	3.099	7.5526	6.6827	3.0734	7.4483	6.4194	4.5146	5.0971	4.2381	3.2729			0.731134	5.54739
15.4797	7.4121	7.5394	7.0225	5.6476	6.4477	3.0434	1.6246	6.8289	4.0764	7.3075	8.87	3.0495	5.076	8.2055	5.1839	4.9971	4.4857	3.7491			0.73585	5.58705
15.5789	6.8179	7.6222	7.3854	4.8951	5.1129	5.173	2.4834	5.7792	4.9686	10.2135	7.6906	4.4897	7.608	4.8486	4.3384	3.6434	4.0062	3.0403			0.740565	5.56202
15.6781	7.0835	7.8633	6.6984	8.306	5.7922	3.5676	1.8549	6.5812	4.0755	7.1696	7.9437	4.2012	5.2962	6.7231	3.7714	4.1866	6.2077	3.146			0.745281	5.58156
15.7774	9.9918	9.0673	7.2654	7.6941	7.8091	3.1993	4.3213	7.2426	5.4431	6.5167	10.4895	6.0585	3.2492	6.1043	2.6252	3.6481	4.8831	3.3827			0.750001	6.05507
15.8766	7.4968	7.1299	7.5197	6.7338	7.6887	3.2237	3.8006	6.3996	5.7169	5.9427	10.834	4.8477	4.4166	4.3337	3.4914	5.8977	3.4992	4.7628			0.754717	5.76308
15.9758	7.858	6.9327	10.1711	7.022	7.1617	3.6465	3.4752	8.0436	3.8728	5.4847	14.8969	5.1478	4.4351	4.1366	3.7744	1.7839	3.843	3.486			0.759432	5.84289
16.0751	7.147	8.362	8.2819	6.9508	9.298	2.9525	3.9661	5.7892	5.0469	5.1903	17.682	5.5126	4.9277	3.9182	4.3481	3.2296	2.9785	4.3947			0.764153	6.10978
16.1743	7.7567	12.0209	11.265	4.9089	7.8905	4.6067	3.5905	6.854	3.5724	5.3209	18.4704	5.7696	5.028	2.8115	3.7037	3.1233	7.686	4.7609			0.768868	6.61888
16.2735	9.0767	11.343	5.2947	5.1044	5.8374	6.3733	4.7988	6.9036	6.3228	5.0444	15.7688	3.9667	5.7888	2.7553	3.2342	4.2414	6.4769	4.1979			0.773584	6.25162
16.3727	7.1795	10.4972	9.2067	5.6849	7.0565	7.5732	4.5402	6.4466	6.5508	5.4779	9.5288	7.6235	4.0132	4.0352	4.6747	4.0406	5.1992	4.7734			0.7783	6.33901
16.472	8.031	12.563	8.7847	6.9704	6.2919	10.4697	5.423	5.5109	7.2017	6.1868	8.14	4.3528	2.1993	2.8855	4.4697	3.3566	2.7632	5.2828			0.78302	6.16017
16.5712	9.212	9.4013	8.8467	7.2327	4.8607	9.9907	4.5363	7.0406	7.6525	4.0905	6.8758	6.3687	2.8238	3.901	2.3009	4.8536	3.9339	3.8566			0.787736	5.98768
16.6704	9.5437	8.389	10.1183	5.6219	5.4175	8.8202	7.2968	5.9311	6.416	4.8028	6.5998	4.2965	3.8062	3.6739	3.7061	3.6429	3.8683	4.378			0.792451	5.90717
16.7697	9.731	8.3072	8.3275	9.432	7.8373	10.4128	8.2623	6.4757	5.9419	3.3013	8.0106	6.4184	4.563	4.5703	2.8609	4.2789	2.9294	2.3442			0.797172	6.33359
16.8689	7.8448	6.5543	9.9428	6.4895	8.3501	7.5707	5.4779	5.3034	7.1362	4.8805	5.2094	6.1788	5.7376	3.7567	4.0714	4.0766	3.9497	2.9197			0.801887	5.85834
16.9681	11.7019	6.166	7.0198	9.8272	9.5033	8.4542	7.3072	7.806	6.5842	4.5535	6.0252	8.0057	4.4512	3.0629	4.7572	2.8816	3.2134	3.1285			0.806603	6.35828
17.0674	10.0586	5.8928	10.1463	9.3374	8.6691	5.9218	6.2778	5.1402	7.0214	4.9166	5.2883	4.1006	4.2514	2.6482	2.5958	2.8862	2.5728	3.3157			0.811323	5.61339
17.1666	6.623	8.3268	7.6856	8.9397	6.5622	8.7588	7.4995	6.1935	6.8974	4.6467	4.6682	5.5684	4.8688	5.0813	3.3218	2.8147	2.5805	5.8378			0.816039	5.93748
17.2658	8.3388	8.9143	4.695	6.9363	7.9947	9.9442	7.3413	5.3549	5.1007	4.2793	6.2454	4.9196	4.2693	2.5512	3.1912	2.705	2.5485	2.5294			0.820754	5.43662
17.365	10.0272	7.2588	5.0891	7.7159	8.1462	7.9684	5.5449	6.9155	5.5454	3.6205	5.0669	4.7212	4.4469	4.6936	3.572	1.3893	2.9053	2.9418			0.82547	5.42049
17.4643	8.7885	7.628	7.6169	10.4226	6.7118	8.7693	7.9751	9.861	5.7399	4.4383	3.8091	2.6681	3.9697	2.4992	2.9029	2.4464	3.6124	4.038			0.83019	5.77207
17.5635	6.8123	8.5469	4.3885	9.2486	4.2883	8.8458	4.4458	6.6611	6.3641	2.5649	5.7628	5.2408	3.634	3.5785	3.8437	3.6022	3.7046	3.4327			0.834906	5.27587
17.6627	6.8139	7.4439	6.2076	7.0509	5.1149	8.0173	6.7084	5.5782	7.4253	5.063	4.4563	2.9765	4.0452	3.2919	4.8858	3.9997	3.5793	3.5417			0.839622	5.34443
17.762	9.0523	4.1086	5.2351	4.3403	7.7667	8.998	5.3486	5.7265	7.8718	3.3288	4.0825	5.165	3.4201	2.787	3.1737	2.0936	4.2331	3.0692			0.844342	4.98894
17.8612	6.7717	2.3364	6.1863	3.5921	6.1489	8.8564	7.102	3.4247	6.0353	4.1311	4.8272	5.3451	4.6243	3.3766	3.3946	2.8533	2.2219	1.993			0.849058	4.62338
17.9604	6.4917	4.8445	8.2812	4.4321	5.1198	9.7709	8.9787	6.7154	6.9339	4.132	5.2297	5.2509	5.8488	4.0398	4.9591	2.5423	2.7172	2.6832			0.853773	5.4984
18.0596	6.3239	4.3074	6.7202	5.6183	4.5171	7.2628	6.8019	4.0668	3.9408	5.2897	5.0822	4.4121	7.0694	3.8623	3.6232	2.44	1.275	1.6629			0.858489	4.682
18.1589	6.673	3.7317	6.1108	4.9578	5.4136	6.0759	7.4952	7.3276	3.4028	3.0339	2.6194	6.1259	4.498	3.1436	3.0957	2.4571	0.9818	1.3302			0.863209	4.35967
18.2581	5.5226	5.8372	4.2637	2.3764	1.441	7.3181	7.3098	5.4145	5.9085	5.2809	3.4167	5.9209	4.0838	3.6962	2.5478	3.188	1.6828	2.1568			0.867925	4.29809
18.3573	5.6902	5.514	4.6135	2.0964	2.2971	7.1693	8.1322	5.6019	5.5461	4.4044	3.214	4.1013	4.5311	3.3698	2.9017	2.2552	1.4579	1.4068			0.87264	4.12794
18.4566	6.0767	4.7937	5.8858	1.8997	2.4921	7.0261	7.1165	6.5574	4.6241	3.8594	2.6656	4.7149	4.2318	1.835	3.2891	3.7649	0.8564	1.5318			0.877361	4.06783
18.5558	6.0386	6.3383	4.3678	2.2372	2.5923	5.3881	5.2732	5.4796	6.0958	3.8013	5.3807	4.3479	2.9114	2.842	2.3773	3.7515	1.0038	0.7106			0.882076	3.94097
18.655	6.8594	5.2637	3.3895	0.9552	2.4987	4.6265	4.6237	4.8611	3.757	4.2917	3.425	5.3192	4.558	3.5552	3.1462	2.9244	0.5925	0.3784			0.886792	3.61252
18.7542	6.9557	4.934	4.8977	1.8179	0.815	5.6349	3.8904	3.7706	3.2054	6.0141	6.3564	4.7364	3.967	3.7699	2.3083	2.6277	2.1396	0.6865			0.891508	3.80708
18.8535	5.6971	6.0308	6.1669	1.6527	1.5295	3.3273	3.1398	3.6066	3.5054	3.1765	4.6676	4.8853	3.5623	1.8564	5.4871	1.8799	1.1289	0.8814			0.896228	3.45453
18.9527	5.8666	3.4845	4.5351	1.2751	2.7009	3.777	3.0073	3.0289	2.5442	3.3421	3.3978	4.7207	3.8187	1.8896	4.7359	2.5943	1.2716	1.2489			0.900944	3.17996
19.0519	5.9128	2.7863	4.409	1.95	2.2733	2.9714	2.2617	2.6375	3.0202	3.9592	3.5553	7.6994	4.8432	3.216	2.976	1.3647	0.9617	0.2154			0.905659	3.16739
19.1512	6.6175	2.5044	4.6848	1.795	1.6829	5.1711	3.2218	1.9327	3.0088	2.4752	5.1948	4.2489	2.0299	3.6093	1.7395	1.7945	0.5505	1.5914			0.91038	2.99183
19.2504	6.7497	2.7845	2.259	2.0482	0.8361	2.0637	3.1568	2.462	2.6942	3.8612	7.3095	5.4685	4.5998	3.2185	2.4984	1.1722	1.0562	0.8883			0.915095	3.0626
19.3496	5.9572	2.4099	1.3505	2.0159	0.9906	3.9346	2.917	2.5157	2.9019	3.602	6.631	3.5589	5.5004	2.391	2.5376	1.0319	1.2898	1.0729			0.919811	2.92271
19.4488	5.7757	4.4927	2.6155	1.7968	1.983	3.8835	4.2556	1.9762	2.2092	4.8682	4.7144	3.8321	3.8261	2.0433	1.5544	0.677	0.7046	0.6179			0.924526	2.87923
19.5481	4.923	2.7651	3.3301	1.9539	1.9031	2.2931	2.8187	1.1967	3.0829	4.4056	4.2264	6.1098	3.8053	2.508	3.5688	2.4097	0.8338	1.2759			0.929247	2.96722
19.6473	4.5581	1.7323	2.3763	4.1239	1.569	1.5162	1.9719	2.2241	1.454	4.269	6.8577	3.5474	3.4218	2.1351	1.4583	1.0857	2.176	1.0044			0.933962	2.63784
19.7465	4.716	1.9202	1.619	3.4717	0.8726	1.6969	3.1591	1.1232	0.8708	2.3866	4.461	3.3349	2.5449	1.6399	2.0967	1.1163	0.684	0.9169			0.938678	2.14615
19.8458	5.7651	0.8542	2.5743	2.0873	2.6546	1.0531	1.7914	2.355	1.8513	1.993	6.2581	1.8882	2.3775	0.637	1.0584	0.962	0.6226	1.3611			0.943398	2.11912
19.945	5.8051	1.4644	2.5926	3.2899	3.1094	3.2408	1.3881	2.2641	2.5053	5.1656	5.2974	2.6762	3.5617	1.9237	0.8181	1.1779	0.9678	0.9802			0.948114	2.67935
20.0442	4.8483	2.6182	1.8421	1.7772	3.3631	1.2661	1.8131	2.2368	1.7763	3.0545	5.7803	3.7796	3.352	0.3403	1.8417	0.5858	1.1015	0.4947			0.95283	2.3262
20.1434	4.2235	2.6846	2.4904	2.6012	1.9282	1.6587	1.4587	1.4555	2.0773	4.6125	4.547	2.552	2.4528	0.6461	1.7265	0.9036	0.5481	0.5523			0.957545	2.17328
20.2427	2.7635	2.265	1.6036	1.5294	2.854	1.8078	1.5685	2.0042	0.8747	2.0258	2.9659	2.2046	1.1362	0.4938	0.9869	0.9441	0.5891	1.6881			0.962266	1.68362
20.3419	4.4959	3.7069	1.6432	1.3435	2.0541	3.213	0.7677	1.2278	1.9732	3.8372	3.8228	2.5782	1.4043	0.9257	1.4205	1.1254	0.2726	1.4144			0.966981	2.06813
20.4411	2.925	2.3233	1.544	1.3029	2.5894	1.5379	2.5502	1.3154	1.2185	3.7613	4.6347	0.5074	1.2063	1.5481	1.7684	0.636	0.8166	1.1207			0.971697	1.85034
20.5404	2.2837	2.5995	2.4277	0.7458	2.6213	2.2607	2.5128	1.6299	1.4013	2.3323	1.9142	1.6763	1.0052	1.5173	1.0662	1.145	0.6986	1.3147			0.976417	1.73069
20.6396	2.322	2.4941	3.6638	0.7608	2.9576	3.5642	2.958	2.9661	1.1796	2.1506	3.8034	1.6738	1.5279	1.1558	1.2605	0.5806	1.7113	0.7001			0.981133	2.07946
20.7388	2.4147	3.3235	2.193	0.5285	2.5971	4.7347	5.0391	3.9016	1.5697	1.5932	1.9171	1.8404	2.3371	2.0384	1.268	0.9834	0.3145	1.2785			0.985848	2.21514
20.838	2.1141	4.6247	2.4565	0.5597	2.0073	3.5628	2.0114	1.8724	1.5392	2.0892	1.3726	2.1467	1.9984	0.6212	0.5547	0.6797	0.1715	2.711			0.990564	1.83851
20.9373	1.9909	2.792	2.703	1.3387	1.7218	4.0493	5.4731	3.0023	2.7897	1.0216	1.0914	1.5778	1.9897	0.8075	1.8689	0.6089	0.9137	1.5253			0.995284	2.07031
21.0365	2.2477	2.8883	2.8096	0.7651	1.2925	2.7652	3.5042	1.9147	3.4589	1.1717	2.0674	1.1491	1.4282	0.8872	0.8289	0.9633	0.6665	1.4533			1	1.79232

## Sheet: Image17
X0	Y0	Y1	Y2	Y3	Y4	Y5	Y6	Y7	Y8	Y9	Y10	Y11	Y12	Y13	Y14	Y15	Y16	Y17	Y18			Ap-Basal to 1	Average intensities
0	24.1882	30.109	28.099	27.5392	34.6786	27.4008	27.0602	22.2616	24.0788	28.0135	23.7127	36.1922	36.8247	46.0247	20.4168	39.5912	85.2189	47.817	61.1632			0	35.2837
0.0992	22.1517	23.0751	27.737	23.5916	42.5415	18.2308	28.32	25.3381	22.0173	26.6695	24.1324	30.4347	43.2625	44.4939	24.4619	35.7693	78.6062	50.1257	55.7043			0.00546289	34.0349
0.1985	27.237	33.405	24.303	24.8061	38.2243	24.6495	25.9058	22.2315	23.8067	24.9676	24.0152	35.29	50.3893	38.5826	28.1832	35.827	75.2356	45.7603	58.7014			0.0109313	34.8169
0.2977	29.1181	34.9034	23.315	25.3243	39.571	28.9444	27.8964	27.3857	21.5796	26.0543	23.9055	29.7667	57.1145	35.1302	25.1626	38.1652	67.4029	37.0162	51.2247			0.0163942	34.1569
0.3969	27.2467	43.3292	31.134	26.7794	40.5105	27.8544	23.3602	27.6854	28.595	21.95	21.7741	31.165	53.8951	35.3265	20.0433	38.9171	64.1102	40.6829	58.0018			0.0218571	34.8611
0.4961	36.3345	51.4428	35.191	35.6172	38.4561	34.4998	23.8295	27.2759	25.9021	24.5891	25.0617	29.7071	54.7091	40.3063	21.628	51.7602	59.9451	46.5489	51.4192			0.0273199	37.5907
0.5954	35.8229	49.5933	33.684	30.1296	38.3074	35.7011	28.5181	23.0973	29.3463	24.1147	26.936	27.2483	51.0099	37.7951	20.6412	55.3574	52.1418	50.1007	57.6108			0.0327883	37.2187
0.6946	27.462	44.6771	32.688	37.9685	43.671	38.4082	27.3549	28.2009	30.0803	35.0716	25.7787	38.4202	43.0587	42.336	29.7094	51.0067	52.5725	54.5684	38.5812			0.0382512	37.9797
0.7938	34.3334	48.3824	29.176	40.9307	36.828	34.5223	30.2658	28.5166	26.9714	34.432	31.4739	42.9538	45.4434	46.1674	28.8204	52.3508	50.5365	53.5136	44.2986			0.0437141	38.943
0.8931	29.514	55.1943	35.031	44.1004	37.203	49.2568	37.6795	27.5099	33.7484	34.4018	34.0893	41.3957	46.7956	40.2094	25.3865	55.4078	42.3547	62.3665	43.3288			0.0491825	40.7881
0.9923	41.5823	62.3116	31.285	44.4644	41.2249	65.3362	35.2702	30.255	32.9075	31.7377	33.2896	44.3738	40.1395	40.2806	30.6185	45.8728	36.4287	60.9231	44.9892			0.0546454	41.7521
1.0915	43.6029	62.58	35.933	45.8838	52.9633	79.4676	37.8813	29.5363	36.1177	43.2795	33.9173	45.8985	35.3414	41.9852	30.0754	48.8167	40.1908	58.9242	27.6648			0.0601083	43.6874
1.1907	49.3246	68.6787	47.371	52.6849	52.6753	68.1722	36.5548	33.9502	34.4353	40.0269	35.617	43.699	39.5426	37.7508	32.3896	47.9151	35.9375	59.2317	24.5899			0.0655712	44.2393
1.29	47.4611	63.7884	57.325	54.0677	52.8269	69.7133	47.4558	37.029	39.3589	43.9424	40.7243	44.2318	39.3069	30.9579	32.3012	51.1572	27.9947	58.9579	31.2131			0.0710395	45.7797
1.3892	47.6379	50.619	79.69	54.4432	43.5105	72.0642	54.012	47.2497	41.0108	44.1029	41.5949	51.2504	33.5066	34.4595	35.9791	45.5489	31.7005	53.6607	23.8633			0.0765024	46.6265
1.4884	51.4302	53.8247	97.855	55.0967	44.4894	71.6428	49.0865	46.8118	48.3971	50.8386	46.5527	51.8736	30.6645	29.0084	29.3415	46.8317	29.9584	42.2804	27.7484			0.0819653	47.5649
1.5877	51.6496	56.5494	103.805	59.3589	40.1667	64.4036	51.804	53.9535	49.161	46.1441	54.7971	53.5291	27.4874	29.7374	34.0769	44.2996	28.0077	46.1993	23.6529			0.0874337	48.357
1.6869	53.0563	67.1529	104.375	74.049	45.1502	60.1834	52.0325	59.6788	51.0637	43.9259	51.9193	54.8799	22.4345	35.2239	31.5236	40.6496	25.6115	45.8024	23.4432			0.0928966	49.5871
1.7861	57.763	59.3202	105.153	78.6796	40.706	58.306	51.2938	51.3711	49.7196	42.7686	51.934	47.4325	21.8523	33.7719	26.7256	37.1826	29.344	45.8684	24.197			0.0983595	48.0731
1.8853	52.9871	74.3632	95.868	89.1463	39.9112	56.0112	44.0466	45.4077	48.0786	41.127	54.2181	56.6173	23.56	30.1804	31.134	34.6098	31.234	38.8308	20.2666			0.103822	47.7683
1.9846	45.029	72.2084	89.816	78.4032	29.6097	44.4587	42.0264	50.4342	41.7668	34.5991	61.0477	58.3012	21.9735	22.8579	31.9004	39.0397	32.8049	38.5064	21.9226			0.109291	45.0898
2.0838	47.6784	78.4373	89.921	74.8671	22.2976	48.9451	36.8548	56.2865	42.4385	32.2275	62.2842	61.3087	21.8822	27.1216	26.6613	39.7085	28.8149	32.2863	20.4123			0.114754	44.7597
2.183	42.784	71.0592	88.119	64.8902	27.6134	37.4492	34.2539	39.5019	39.4049	34.7252	54.6379	56.5034	21.5706	23.9354	25.7176	44.7344	35.0918	36.1489	20.1647			0.120217	42.0161
2.2823	37.6605	72.9678	86.387	50.1366	28.2539	34.6217	32.647	38.4827	42.029	32.7775	44.4705	51.0949	24.8595	21.537	27.7922	36.1791	27.9369	35.4809	18.6281			0.125685	39.1549
2.3815	31.2434	58.4548	89.362	41.5063	27.4334	33.8439	29.5014	35.5126	38.5406	29.4354	35.9829	50.9651	22.4967	24.0851	29.1845	37.0017	32.7266	43.024	13.3801			0.131148	37.0358
2.4807	30.1818	55.6464	89.106	33.556	20.9592	31.7187	29.8864	35.9785	36.3116	28.1317	37.568	47.2222	18.2953	18.9757	23.6351	33.9915	35.1731	40.9386	13.9451			0.136611	34.8011
2.5799	25.4985	52.5477	69.291	29.4304	15.8949	32.5903	26.7696	34.2674	36.2227	23.6408	32.6461	43.6216	19.649	24.1116	25.2774	30.8379	24.084	41.386	16.1816			0.142074	31.7868
2.6792	27.2623	44.6153	72.68	25.2326	16.5618	24.9423	22.0262	37.9485	33.4238	22.2064	27.5947	43.114	18.8173	24.2062	24.7905	35.1718	24.2282	45.227	16.9353			0.147542	30.8939
2.7784	23.1665	38.6546	59.676	27.3815	20.4447	21.0024	18.3596	36.1437	38.7775	18.3299	25.534	37.8924	22.1542	27.5037	26.3121	31.3534	24.7664	43.2049	13.6542			0.153005	29.1743
2.8776	17.7098	35.5836	62.413	26.6051	21.7656	22.3528	17.8896	35.7165	28.9267	20.4812	23.2629	32.1042	19.259	24.4014	19.2421	26.9274	25.5671	44.1294	12.7236			0.158468	27.2137
2.9769	22.8074	32.4052	59.219	23.116	23.0811	25.3306	19.1081	34.3681	27.0194	17.6375	24.0257	29.3699	20.37	20.7152	19.7749	24.0369	31.2739	39.257	10.6568			0.163936	26.5038
3.0761	19.7395	24.3094	50.654	20.1115	22.407	25.3736	16.8219	24.251	27.2601	17.2736	18.6881	24.2851	18.4332	21.2966	19.8028	23.5636	34.4424	34.3774	13.4946			0.169399	24.0308
3.1753	16.9906	23.8913	52.371	21.1042	20.8107	23.577	16.1226	23.174	31.9348	18.7154	19.9999	27.4377	15.3606	21.4112	18.278	18.7657	31.7962	31.7495	14.3476			0.174862	23.5704
3.2745	17.6556	22.1948	52.758	18.6259	15.4904	24.941	17.3193	24.1991	28.2518	19.0727	20.227	33.4963	23.4659	21.3666	18.7093	27.2491	31.0134	31.2688	14.0382			0.180325	24.2812
3.3738	15.5849	17.4307	45.377	22.6991	13.3995	21.7092	14.0735	22.1972	28.2655	18.782	19.7776	26.2203	24.2203	20.7139	15.2367	26.5774	26.0302	32.1766	9.7859			0.185793	22.1188
3.473	12.5621	20.8408	43.961	23.8482	15.9248	21.2211	15.3613	20.2357	31.1792	13.994	23.1884	22.5572	21.9004	17.1588	22.9315	26.2233	23.1378	27.1442	9.6721			0.191256	21.739
3.5722	11.437	14.0088	39.12	20.8188	12.7349	21.7083	14.1421	22.6938	30.6734	12.6649	19.6632	26.7701	20.2103	15.3271	20.7597	29.4466	29.0283	27.7307	10.1206			0.196719	21.0031
3.6715	13.9922	16.59	27.514	24.2329	15.4247	16.2621	17.0239	23.4486	28.6575	15.8595	13.649	20.7422	21.6809	19.4338	21.3884	25.47	23.6301	26.0647	10.0097			0.202187	20.0565
3.7707	13.3115	13.1728	29.004	24.5393	12.6811	22.2882	14.5921	16.3729	21.9174	18.1534	18.1311	27.4781	23.6615	15.4277	18.9488	22.3963	32.5782	24.8782	9.932			0.20765	19.9718
3.8699	11.0717	12.8966	29.539	21.6086	18.6428	21.0196	15.6581	19.2457	18.0726	17.6875	15.2966	21.1053	22.2262	18.4888	17.3232	23.0007	28.9658	25.5647	9.1708			0.213113	19.2939
3.9692	9.9788	16.6219	29.422	18.9309	18.4188	16.7273	19.272	18.5722	18.5316	18.8054	20.1102	19.5428	18.1767	20.2772	17.9619	23.0755	30.5825	16.9421	11.684			0.218582	19.1386
4.0684	9.5051	15.6853	27.247	13.9593	22.1043	12.8857	14.8371	19.5318	21.6654	20.9449	15.6116	19.3354	20.7935	13.5779	19.419	21.5003	26.7444	15.5317	9.7191			0.224044	17.9263
4.1676	9.8712	16.327	27.614	13.5757	13.3676	9.9041	17.7269	17.7028	24.5833	22.7622	16.3449	18.5253	20.5157	9.8921	19.0967	19.9976	23.7833	17.4764	13.8571			0.229507	17.5223
4.2668	9.9031	14.2483	25.898	15.6806	16.1914	13.3135	19.1706	22.0216	20.2582	19.6702	18.3284	22.005	21.0683	10.2136	14.1799	17.4255	24.6135	14.3645	12.0233			0.23497	17.3988
4.3661	7.2368	14.1945	24	11.2936	20.1034	17.3029	15.3949	16.5078	19.5405	17.9553	19.8514	15.7745	18.8321	10.1684	17.4262	20.8676	22.9078	15.4197	17.2075			0.240439	16.9466
4.4653	3.1435	13.1264	18.821	14.8124	19.4154	17.6389	16.9341	13.3008	17.3847	18.0286	16.7372	15.8507	13.9257	13.4083	19.5115	17.829	26.2379	18.1598	11.0129			0.245901	16.0673
4.5645	5.7038	14.3011	18.109	15.9034	18.4991	18.8041	14.5078	13.4837	19.6709	15.6626	14.9029	17.9244	13.6617	11.8641	19.6212	19.8887	22.8089	18.9083	8.4347			0.251364	15.9295
4.6638	6.1138	15.8419	19.943	22.1902	15.6732	15.8534	20.3158	11.5277	22.1718	12.0028	20.3688	18.6189	13.4389	13.0516	18.2814	16.7428	24.105	14.9451	8.5547			0.256833	16.3021
4.763	8.6457	15.4056	19.87	14.2565	16.3371	14.3593	19.6528	17.3412	18.5855	16.5648	16.2936	20.7649	14.966	12.4575	16.4157	21.0142	18.9339	14.5099	5.5535			0.262296	15.8909
4.8622	9.9991	15.7398	16.475	16.8392	21.2455	14.8637	15.752	16.8464	19.4243	13.4875	14.6303	23.759	17.2361	12.0697	15.2037	19.485	21.6888	14.7765	8.9179			0.267759	16.2337
4.9614	9.4343	16.2571	15.222	13.9719	39.6447	12.5668	15.1617	17.7162	15.5611	12.1339	17.3529	19.0247	16.4877	14.4097	15.2257	23.1711	19.2358	13.3251	8.0074			0.273221	16.5216
5.0607	10.1168	14.3408	20.325	18.0632	67.8645	10.6842	13.9091	17.6222	12.8253	17.2886	13.2261	16.2351	12.7625	15.3558	11.6199	17.059	19.1554	13.2853	8.2475			0.27869	17.3677
5.1599	8.8753	13.1091	17.482	17.9945	70.2132	14.5535	15.08	14.8253	15.1545	17.6575	13.385	15.7977	10.9928	12.6919	13.0252	15.6476	17.0183	11.1159	5.333			0.284153	16.8396
5.2591	6.4177	9.9598	17.353	18.4826	46.7452	11.0151	15.021	13.5026	11.472	16.4099	17.1708	14.9768	12.1708	10.0604	11.3289	17.6057	18.9639	14.0224	8.3647			0.289616	15.3181
5.3584	7.4161	11.1143	25.23	16.7037	34.1062	15.9999	12.8065	21.0283	16.4673	15.75	14.4026	18.8934	14.1183	12.1974	10.9748	16.7538	21.2184	11.0814	6.9263			0.295084	15.9573
5.4576	6.6683	13.1992	27.769	17.1139	22.5575	13.4458	15.6976	17.8954	14.7967	12.3301	13.9796	18.4386	14.1767	12.262	12.5371	15.6898	24.0317	8.7976	7.2438			0.300547	15.1911
5.5568	7.9441	14.0616	28.454	18.2802	11.3499	11.4561	16.1778	19.197	17.0479	12.4789	13.3294	15.8458	16.5319	8.9045	16.2133	20.3873	18.088	12.91	6.9776			0.30601	15.0334
5.656	9.85	10.2455	22.6	19.4848	7.5349	13.7578	14.6074	12.5169	14.6546	11.2414	11.4278	17.2537	20.9846	9.3808	14.6979	17.1686	17.5332	13.3772	8.0446			0.311473	14.019
5.7553	4.9664	10.4441	18.253	14.2913	11.2681	15.8526	15.1636	12.6936	11.9786	15.6721	13.0665	13.2325	18.2324	11.1252	12.4929	15.5107	15.2692	12.1181	6.2132			0.316941	13.0444
5.8545	6.3707	9.5172	16.187	18.0396	6.2199	15.1226	10.4778	16.9564	13.1398	13.4945	16.3523	14.8891	18.947	12.9948	10.378	14.0275	19.3429	13.8804	7.6608			0.322404	13.3683
5.9537	10.035	12.0973	13.742	17.7079	5.7676	12.5991	16.1908	18.0543	10.9563	12.8231	16.5096	16.8293	18.9744	13.224	9.2476	16.9447	15.816	11.8336	6.3747			0.327867	13.4593
6.053	7.6959	12.3892	15.411	19.6673	6.7139	14.4683	16.8115	19.1641	16.2264	11.375	13.8983	18.176	13.9745	10.0103	8.6525	12.1894	18.5355	12.4107	8.0075			0.333335	13.462
6.1522	7.4439	10.114	11.656	22.7808	5.8638	13.24	19.652	17.9731	17.6309	14.7397	12.0239	16.9999	17.5908	10.2073	8.4927	12.4758	18.525	10.4175	8.0032			0.338798	13.4648
6.2514	7.4702	12.8917	15.179	16.609	7.5445	9.6119	26.3368	22.8708	13.9666	13.8961	18.7521	15.8603	18.9277	8.4738	8.8615	11.9411	18.4569	10.6199	7.0192			0.344261	13.9626
6.3506	5.6103	12.3286	13.332	14.6142	9.394	8.8133	22.4387	12.6492	12.5807	12.6715	12.5104	17.1841	18.5691	10.6518	10.2522	20.6814	19.6419	11.7462	5.2414			0.349724	13.2058
6.4499	7.96	10.205	14.347	15.7305	10.0086	9.2003	19.0547	17.573	12.7305	10.0267	13.8425	17.118	14.1411	11.2188	10.378	16.0309	26.304	13.713	5.185			0.355192	13.4088
6.5491	8.7712	10.6858	17.045	16.3014	7.8131	9.6116	16.7567	17.5348	13.3193	8.4618	14.042	16.1108	11.3735	10.8456	9.4007	17.7528	18.2375	15.6969	6.1543			0.360655	12.9429
6.6483	4.9517	13.1558	20.036	13.4655	8.9992	8.8408	19.1433	18.2972	14.4887	9.5784	17.4962	20.2088	12.8252	8.416	8.7618	14.6627	17.2998	11.6297	4.5792			0.366118	12.9914
6.7476	8.4868	12.566	18.047	13.8728	7.0904	6.0849	17.4939	18.8638	19.9045	12.5098	21.0531	22.3888	19.5607	11.0924	11.1043	14.716	15.3278	11.6864	5.4041			0.371586	14.066
6.8468	7.3714	10.8484	17.425	14.4541	8.4942	7.3854	14.5502	21.4902	22.6285	12.2316	17.6757	19.3924	15.0258	10.5407	13.7637	17.3886	15.6294	10.386	5.7437			0.377049	13.8118
6.946	6.9304	10.6281	18.49	16.6275	7.5669	6.3969	18.2284	16.2768	16.4266	15.0061	18.516	16.3482	14.9215	14.2724	10.4094	14.84	16.3725	8.5238	4.1295			0.382512	13.2058
7.0452	6.4956	11.9966	14.1	15.1623	10.4633	5.156	17.0949	17.0998	17.9156	15.3683	14.8871	18.7554	14.8878	17.2854	9.6576	14.8486	16.3805	6.2693	6.0532			0.387975	13.1514
7.1445	6.0573	14.1751	18.936	19.1474	8.3624	7.5253	17.2855	19.1729	18.314	16.8644	13.7954	22.1269	13.441	17.5198	14.2329	15.1744	19.4649	8.3821	4.5179			0.393443	14.4471
7.2437	6.5888	9.5007	16.981	16.1787	9.1338	6.548	18.4671	15.6827	23.6471	14.544	15.5541	15.8872	12.8858	15.2464	13.3665	13.5223	17.0997	7.3562	7.0879			0.398906	13.4357
7.3429	7.3793	10.1687	19.092	16.4119	6.9798	7.4923	19.9114	19.1672	19.3627	13.9899	17.313	16.7332	13.1837	19.6793	11.0624	16.5744	13.0291	8.1876	5.6376			0.404369	13.7556
7.4422	7.6164	11.5767	18.027	19.2613	8.6218	7.0912	20.7231	17.8927	14.3445	14.6572	15.5118	16.2884	13.0618	12.0526	9.5955	15.5708	13.8814	8.8454	8.6016			0.409838	13.3274
7.5414	7.6419	10.0531	13.652	18.8925	7.4244	7.0531	16.751	18.132	11.9702	12.6069	11.1146	22.3021	13.3835	14.207	7.899	16.091	15.5901	7.1266	6.0893			0.4153	12.5253
7.6406	5.2444	9.9527	15.909	17.4084	8.1244	6.3871	15.2127	17.061	12.2517	13.6629	14.2223	19.4891	16.0668	13.8682	10.8373	15.2834	20.3775	6.8848	6.2714			0.420763	12.8692
7.7398	5.8739	11.2455	16.069	15.2948	8.4778	4.5039	16.0798	17.676	9.8	7.8378	14.1875	21.0213	14.8079	18.2135	13.918	17.8441	19.6272	4.9202	5.02			0.426226	12.7589
7.8391	4.4886	12.048	20.774	13.1067	10.1889	8.1245	19.4068	18.9727	12.7127	7.5934	10.8845	19.1769	15.7125	17.255	8.8543	13.2959	15.5737	5.7374	7.1859			0.431695	12.6891
7.9383	3.1742	12.4637	20.919	15.5997	9.1215	10.4671	17.0109	15.6949	8.9104	8.1918	10.4291	22.9081	12.0605	13.3559	11.6342	15.2424	22.0171	5.5892	6.3572			0.437158	12.6919
8.0375	3.5287	9.4424	20.466	14.646	7.2294	9.3688	17.5765	17.9941	8.4434	5.7382	12.3784	21.2315	10.9812	15.0477	12.5446	12.7244	17.023	4.5919	10.6802			0.44262	12.1914
8.1368	4.5012	7.2639	27.07	14.982	6.5071	14.0318	16.2609	15.0449	7.9903	5.0779	14.3733	18.2474	13.9315	10.9601	10.2852	12.1304	16.7606	4.8213	9.6355			0.448089	12.0987
8.236	5.2279	11.399	21.406	17.7382	6.2696	11.5353	15.8468	19.8981	5.0119	4.1511	11.3773	18.9199	13.6273	14.34	10.227	13.3321	14.7531	7.5908	5.8891			0.453552	12.0284
8.3352	5.0896	10.6988	20.713	14.1626	4.841	13.356	18.0894	21.9295	5.0195	5.7006	12.1366	15.6813	11.4268	9.6658	13.1922	15.928	13.6513	5.8468	7.4557			0.459015	11.8202
8.4344	4.1658	14.5626	18.161	13.637	7.4215	10.7704	18.5657	18.2476	5.8991	5.9868	15.0183	16.9741	10.8041	6.6458	11.5228	12.0752	15.4	4.7141	9.8447			0.464477	11.6009
8.5337	4.8462	13.3282	19.298	9.345	8.3128	8.9907	20.0872	14.7259	6.3333	5.0392	17.2584	15.6858	10.9095	6.45	18.4923	14.9359	13.2826	6.1617	8.8867			0.469946	11.7037
8.6329	7.0915	12.4337	15.135	12.8016	11.0208	9.0473	18.7994	17.5469	8.5642	4.3853	12.4111	18.0967	14.5269	6.5691	24.8789	16.4404	16.6965	7.7606	12.3052			0.475409	12.9743
8.7321	4.6242	12.7395	19.179	13.3116	8.6636	9.7208	15.3492	12.019	6.6968	3.9123	16.6589	14.5584	18.3409	6.9135	25.1097	15.3512	18.6104	7.7111	9.8793			0.480872	12.5973
8.8314	3.6861	10.2493	19.613	14.7439	6.3783	8.3498	12.9805	18.0906	8.0213	5.5618	19.4528	21.082	14.9447	8.7009	20.351	14.1973	14.2517	9.9258	14.3527			0.48634	12.8912
8.9306	4.4225	14.5365	24.594	13.6005	7.1442	9.5921	12.9661	15.0917	6.312	6.3615	17.0268	17.2707	12.0151	6.019	18.4931	16.8286	13.7283	7.5858	13.9005			0.491803	12.4994
9.0298	3.8843	12.9597	18.709	14.7563	6.7564	4.7631	15.7463	13.7383	7.8674	4.8046	15.4721	16.8328	11.3407	8.8156	23.6563	12.5115	11.9415	6.6401	9.6467			0.497266	11.6233
9.129	4.3571	10.8563	16.777	14.7676	7.4383	5.789	10.3582	17.8162	9.2589	6.596	18.8069	19.7373	10.8215	7.7583	22.1526	13.9125	14.2201	6.3146	9.6996			0.502729	11.9704
9.2283	5.7833	11.1907	17.002	12.4638	5.2421	3.8591	13.3919	15.1299	11.5205	4.7246	17.9427	23.7939	10.9162	9.1075	16.3217	16.5151	11.3011	7.187	10.7703			0.508197	11.7981
9.3275	7.2955	6.9702	15.694	8.8685	6.5092	4.8534	9.7613	14.4719	7.9263	6.6428	12.2848	23.5412	12.251	9.125	13.7887	12.7856	12.262	5.0967	8.2918			0.51366	10.4432
9.4267	5.9434	9.6224	20.582	15.571	5.6157	5.2815	12.975	17.2418	4.2876	5.8833	10.7946	22.5446	12.1854	8.7972	9.0886	13.0445	14.0146	4.126	6.6671			0.519123	10.7509
9.526	4.5247	10.017	19.423	20.1966	10.0679	4.9759	13.328	12.9736	5.8751	9.3389	16.1114	20.6409	15.056	4.5161	5.8495	14.5677	17.4244	4.5847	5.8281			0.524591	11.3316
9.6252	6.5126	8.9261	18.416	20.4722	8.4784	5.4725	13.7366	18.6642	5.5069	8.3224	13.1674	19.2556	16.4275	4.758	5.5326	15.3941	14.5902	5.8769	6.4636			0.530054	11.367
9.7244	9.042	10.8943	15.59	19.2167	4.6812	6.445	15.312	18.1961	6.1271	7.6128	14.6025	19.0556	12.3521	6.2181	4.8811	17.5023	11.8686	7.3713	4.5923			0.535517	11.1348
9.8236	8.8853	11.4968	14.067	15.6432	7.1328	5.015	17.584	20.8481	5.0055	8.6245	13.8436	21.7996	10.9326	6.8802	6.3466	15.8341	13.4074	6.5571	5.6782			0.54098	11.3464
9.9229	7.162	12.3192	15.325	15.4278	6.63	4.645	17.7907	21.3741	4.259	6.1055	15.1099	23.5749	14.1194	5.8281	4.7433	12.581	14.1495	8.1927	5.6074			0.546448	11.3129
10.0221	5.3652	12.6954	16.823	16.0368	5.8518	5.0636	17.022	21.3659	5.1428	4.4964	9.7176	22.7817	9.6699	6.8319	5.6213	14.7246	21.0344	10.461	8.7778			0.551911	11.5517
10.1213	3.1301	11.4167	15.667	13.551	7.312	4.4743	12.7525	23.0153	5.7266	3.4083	8.3009	26.6216	12.8122	6.6893	4.5108	16.8873	16.9624	14.8612	7.0795			0.557374	11.3252
10.2206	3.9988	10.9512	23.877	16.1797	7.2485	3.5259	14.3529	17.9784	7.1715	4.1569	10.4497	18.8971	11.376	6.9967	2.7253	17.4039	16.6137	12.8258	6.7362			0.562842	11.235
10.3198	4.0691	12.2017	19.548	10.948	4.087	4.5411	14.8686	15.075	5.3956	3.0152	10.6819	21.3427	15.3735	6.8865	2.6128	15.2621	14.4156	9.58	7.2006			0.568305	10.3739
10.419	6.0797	11.9401	22.438	15.3891	6.1607	8.2985	19.8756	16.6529	7.1722	4.2545	9.0328	17.9056	14.1556	4.9978	4.7814	15.0293	20.2964	9.2039	6.8842			0.573768	11.6078
10.5183	4.5273	10.1774	18.631	17.9232	5.0975	5.4329	19.0861	15.9095	4.9307	5.4073	10.2243	17.5812	10.6652	3.1169	3.8898	11.3839	15.8283	9.1026	7.1147			0.579237	10.3174
10.6175	4.793	12.4653	22.666	19.3891	4.2685	5.5102	13.8297	23.3229	6.6077	5.2463	9.1443	14.8735	7.5716	6.3373	3.6762	12.9871	20.6816	9.6389	6.6319			0.5847	11.0337
10.7167	5.812	12.8287	22.404	16.5589	7.5614	3.9817	15.0686	20.683	8.8532	7.1229	8.8643	23.0461	12.0032	7.2567	4.0693	11.7287	15.6292	15.8739	7.3654			0.590162	11.9322
10.8159	4.6754	13.4914	24.56	14.5105	7.0702	3.7129	18.4491	17.785	7.5873	7.0641	7.6596	17.0025	10.7375	4.1886	6.3552	16.2005	19.4151	16.3606	7.3718			0.595625	11.7999
10.9152	6.029	13.1761	27.528	17.6137	8.0534	4.5958	22.2464	20.0647	5.626	7.5725	8.0103	22.0493	10.7195	5.3943	5.2326	14.7473	16.8307	18.6984	6.0952			0.601094	12.6465
11.0144	4.9815	16.5436	19.985	16.1807	12.6811	5.792	15.5561	17.601	5.9457	8.1543	7.3385	21.042	10.2271	5.7785	5.491	12.9336	15.4598	16.6442	9.5697			0.606557	11.995
11.1136	3.8092	15.6914	16.024	19.7147	15.9573	5.6888	20.9481	16.3195	4.8301	6.5129	5.0689	16.9938	13.0745	6.6006	6.1084	15.7115	13.517	17.1643	9.4078			0.612019	12.0601
11.2129	4.2831	14.8318	16.894	19.8236	12.2038	5.8167	20.7658	16.1959	4.175	4.1318	9.0366	26.7401	13.1179	8.561	7.2213	13.4503	13.0445	13.0774	12.6352			0.617488	12.4214
11.3121	3.2572	21.1572	14.931	18.2619	13.4148	3.8234	18.7067	17.5109	3.7151	4.4409	9.1833	18.4441	11.4021	10.685	7.0257	9.0686	14.8063	10.4027	12.3207			0.622951	11.7136
11.4113	3.6042	20.5034	17.933	18.9842	7.2295	5.8571	19.2423	12.7673	4.8188	4.3872	6.1436	20.0264	12.3499	7.6951	5.5625	8.7468	15.9032	5.8635	13.727			0.628414	11.1234
11.5105	5.5	17.5119	21.729	19.8015	6.4842	7.1458	17.9038	16.421	5.0939	5.4729	8.4775	22.1098	11.2433	8.7982	6.1708	11.328	14.4269	6.9213	14.1065			0.633877	11.9288
11.6098	7.5274	19.0944	20.161	26.4891	3.15	3.4205	17.6656	20.1902	4.4868	3.1858	8.9637	23.9609	10.9125	9.7182	7.0748	10.5538	13.3362	10.8697	19.169			0.639345	12.6279
11.709	5.5016	18.5814	19.872	22.6311	7.6672	4.6516	17.5918	19.1318	3.9634	6.7181	7.1833	24.0702	11.9052	10.5471	5.4655	14.4679	17.8351	8.8095	17.9695			0.644808	12.8718
11.8082	7.5131	19.1342	22.719	20.4189	8.2514	5.7269	18.0895	20.8663	6.4732	3.4682	6.9595	17.8903	15.6654	7.589	5.7592	11.5877	19.486	6.7857	16.6576			0.650271	12.6864
11.9075	9.1039	19.947	16.952	17.0419	9.1759	5.1224	22.0423	22.9027	4.2564	4.1304	7.0425	16.2652	15.2698	8.467	4.9283	14.2445	21.6233	8.637	15.2007			0.655739	12.7554
12.0067	9.7128	16.3428	21.903	21.6819	3.8812	5.4975	22.7238	14.3089	5.176	4.4781	11.7347	17.5426	14.7538	8.7122	4.7138	13.1751	17.122	8.8737	17.6317			0.661202	12.6298
12.1059	7.7838	17.9714	20.371	23.4783	5.8372	5.4755	25.4669	18.3072	6.1442	4.2582	9.7211	20.8509	13.5569	6.9921	5.9618	10.9625	23.7787	9.3912	16.9918			0.666665	13.3316
12.2051	8.3528	19.6777	26.258	24.8015	5.2864	4.444	24.0299	24.2437	4.5529	3.3064	10.5859	19.6782	13.8023	6.1978	8.8831	12.2003	19.5661	9.3582	17.1337			0.672128	13.8084
12.3044	10.6435	18.6869	27.211	25.9901	10.9752	7.1795	19.9332	23.324	10.7582	5.5112	11.6782	19.9875	15.488	5.9967	6.6331	17.5772	19.1969	10.3373	18.6392			0.677596	15.0393
12.4036	8.2831	24.9848	23.902	18.0509	8.1964	5.6202	20.2536	18.731	12.698	4.8526	9.6437	19.9406	16.3121	3.5561	6.6681	18.4503	29.543	11.1987	19.8854			0.683059	14.7774
12.5028	7.9959	22.132	20.728	16.6181	5.4273	8.9067	25.1333	21.6314	8.8303	6.8173	12.6784	21.6042	17.9429	5.3221	5.5155	21.2225	22.024	15.0753	20.734			0.688522	15.0705
12.6021	8.9221	16.2633	17.087	15.1853	8.624	8.1558	23.1406	22.4636	7.4552	5.2416	12.1194	19.0133	17.5812	4.323	6.008	21.9145	25.9862	15.208	17.7476			0.69399	14.3389
12.7013	10.0398	14.8152	19.321	12.7609	5.5062	9.0693	20.4341	21.9227	7.0768	5.3907	11.102	22.2118	19.1612	5.527	8.2052	21.1354	25.4486	12.0473	16.8898			0.699453	14.1087
12.8005	12.2381	14.905	22.749	16.2042	7.2587	9.3368	19.429	17.4325	6.3315	4.9878	10.8868	14.0296	18.4946	5.6524	9.2597	17.2602	22.2602	15.2264	18.6894			0.704916	13.8227
12.8997	13.4051	21.5111	26.595	19.696	6.6706	8.052	20.5873	25.4067	5.5222	4.9175	12.469	16.6046	21.1546	6.2673	12.05	14.8872	23.1946	16.0655	18.6804			0.710379	15.4598
12.999	19.0153	23.8862	29.801	14.9609	5.6392	6.757	23.6702	26.7644	8.8895	6.9506	12.5045	16.7168	18.5225	6.2949	11.5739	17.6375	18.5862	15.717	15.9497			0.715847	15.7809
13.0982	17.5179	25.2123	23.84	17.7675	4.2989	6.6599	18.8825	21.341	11.7958	4.0572	10.0261	19.3166	16.9685	5.7359	7.2865	16.7427	26.1036	19.8685	14.6398			0.72131	15.1611
13.1974	13.467	22.3407	22.302	17.331	4.0024	5.7354	21.2622	23.8274	6.0664	4.3657	11.1735	17.4231	19.3923	9.3032	5.9762	13.1222	25.3339	20.6923	14.9108			0.726773	14.633
13.2967	11.6293	19.1391	21.382	18.1782	5.4104	5.6654	24.8608	24.6216	9.6788	4.8842	11.4899	19.1005	23.5003	8.373	5.4414	15.5693	23.9045	22.1668	12.2565			0.732241	15.1185
13.3959	8.0654	20.869	21.418	18.2061	4.0047	6.1116	23.1984	27.3448	9.5674	5.55	9.0997	24.163	26.024	12.0547	8.5724	21.1619	26.9836	19.3499	14.4002			0.737704	16.1129
13.4951	12.7471	24.8932	28.239	19.8026	3.9407	5.6883	23.7665	23.4078	10.554	6.1697	10.8379	20.4137	16.4622	10.9506	9.4624	16.3386	19.7604	24.6454	18.6225			0.743167	16.1422
13.5943	14.9552	26.9251	25.703	16.3709	4.5139	9.1762	24.8344	25.104	12.8538	5.991	12.7692	23.5824	22.6277	10.1586	8.014	14.0096	26.7859	19.3723	17.0168			0.74863	16.8823
13.6936	13.5859	22.1268	29.865	20.183	4.4018	6.4313	25.9974	22.5917	8.6669	5.6104	12.153	23.9086	19.9963	6.2988	4.0684	15.9207	23.6459	19.108	18.7906			0.754099	15.9658
13.7928	12.686	21.3658	32.497	24.4132	7.7664	6.0707	17.9145	23.2681	9.0424	7.0082	14.1661	24.4537	16.6908	6.0561	4.234	20.7849	24.171	19.8325	23.5571			0.759561	16.6304
13.892	16.8944	26.1574	29.285	29.2369	4.7556	6.7526	18.885	22.6332	8.4651	8.2232	13.4275	27.2115	20.2613	5.3743	4.8177	20.5834	25.7493	18.2912	24.5905			0.765024	17.4524
13.9913	18.5053	26.9416	25.946	25.6871	6.2487	5.4061	19.4211	24.1659	8.3869	4.2293	16.7034	28.3221	20.8053	7.8207	4.4568	20.1664	25.6291	17.7276	20.6654			0.770493	17.2229
14.0905	21.2585	21.2293	36.755	28.9588	7.8373	7.4676	19.9222	17.822	10.5387	5.2354	18.038	27.724	19.173	8.9795	6.1661	18.5235	31.7494	18.9582	27.2563			0.775956	18.6101
14.1897	20.9926	22.1546	26.958	34.6258	10.8545	9.6682	22.5999	25.5269	6.2457	6.0958	11.7215	30.5359	18.935	9.0787	3.2094	18.7196	30.5682	24.5279	21.4998			0.781418	18.6588
14.2889	20.2866	24.7456	28.564	24.7774	12.7024	11.2518	26.185	24.6007	6.6912	5.4585	12.1461	34.8559	19.3418	7.9034	3.8969	21.996	22.102	19.2378	22.548			0.786881	18.3837
14.3882	20.5244	31.146	25.646	27.5797	12.485	9.8521	31.6092	24.7147	8.005	7.865	16.3994	28.9488	21.8516	9.9545	5.7353	22.6341	19.3152	21.1219	22.6459			0.79235	19.3702
14.4874	19.5655	30.4861	30.793	22.6086	14.6706	12.5468	28.622	24.6531	13.0223	5.924	14.6275	26.4193	23.9443	5.6639	5.0665	21.0745	16.3581	24.1803	23.8023			0.797813	19.1594
14.5866	21.1712	30.0655	24.481	22.3908	21.2523	9.6655	23.6682	34.3071	17.5321	6.3888	13.9353	29.7599	24.7654	6.052	5.4069	21.0176	16.0207	17.04	19.0216			0.803276	19.1548
14.6859	17.227	28.4845	27.517	28.325	19.7364	15.4182	25.73	33.366	15.4725	6.6991	15.915	29.361	24.3757	8.242	6.0882	26.7952	17.172	20.9873	20.6582			0.808744	20.3984
14.7851	16.4247	24.711	31.64	28.5028	20.1361	15.3146	30.9463	31.4382	12.4434	6.7064	17.8202	30.5807	22.1384	6.9508	7.938	25.7051	19.1192	21.2177	20.5844			0.814207	20.5431
14.8843	16.8358	23.2344	28.303	25.3722	18.9896	21.3483	31.6957	24.0266	8.8092	9.0586	17.861	32.974	20.2943	9.8729	7.5151	31.4247	29.0868	22.4329	16.9805			0.81967	20.8482
14.9835	18.8558	28.7602	32.221	19.4962	18.5722	18.6293	26.7805	24.1395	9.9841	7.1566	26.3178	34.0128	19.4058	9.1659	8.4528	24.2496	24.3789	21.455	15.6016			0.825133	20.4019
15.0828	17.0824	30.749	30.745	26.6351	15.187	24.6248	26.1161	29.8856	11.794	8.5194	18.3535	36.2451	18.7263	10.1218	9.4822	26.1043	21.9496	24.0415	12.5156			0.830601	20.9936
15.182	19.9783	25.3995	31.932	20.228	19.3832	27.5812	24.526	35.5599	11.5379	7.2064	20.4047	36.6475	23.3441	12.0313	9.6264	22.4268	18.636	24.8898	15.9839			0.836064	21.438
15.2812	27.393	27.2098	30.575	32.1544	18.5863	19.6179	22.7008	35.8143	12.7241	7.5861	20.8378	29.2469	26.3543	9.334	15.5365	28.5113	18.7763	24.7638	12.996			0.841527	22.1431
15.3805	21.0893	28.0532	26.401	27.8835	25.1529	19.9028	23.6189	29.6682	16.4982	6.3672	24.1784	30.6846	25.4287	8.527	13.851	27.6588	24.2007	21.7692	11.7127			0.846995	21.7182
15.4797	25.9232	30.2292	26.185	28.7157	19.7698	23.1466	26.4795	24.2059	21.319	6.6223	21.1196	30.4861	22.1365	12.6119	13.9015	29.5358	21.577	24.7796	14.8567			0.852458	22.2948
15.5789	22.4407	27.2117	21.523	24.4558	24.2286	18.103	24.6274	23.1796	24.8829	8.308	17.4533	26.1379	25.1399	10.6113	16.6037	30.2652	18.1621	24.2969	18.673			0.857921	21.3844
15.6781	21.3784	29.4471	18.97	27.8371	27.1387	18.7527	23.2826	27.4393	22.3138	11.0001	17.1901	23.0826	27.0508	14.1188	21.3482	27.3325	20.0403	22.0363	18.9981			0.863384	22.0399
15.7774	19.6078	25.7361	16.056	30.0338	28.33	26.2172	24.546	32.3036	23.269	19.431	20.5742	23.3174	21.9778	15.9108	11.8771	25.7387	21.2752	19.7809	24.4809			0.868852	22.656
15.8766	20.9618	26.2781	18.205	30.8041	26.6405	21.2656	25.9838	35.0696	21.3592	15.9057	15.4598	21.827	22.6246	16.8427	16.4777	25.358	23.4882	23.2599	26.6002			0.874315	22.8638
15.9758	18.5449	23.6707	17.593	26.0188	32.6557	28.0286	24.408	30.5448	20.8224	13.9411	16.521	29.0438	25.7156	12.6591	17.8091	20.8932	20.0423	20.4098	22.0399			0.879778	22.1769
16.0751	20.4852	23.4782	17.754	25.0712	24.0812	29.6044	28.0184	29.6406	21.6357	12.3646	12.5872	22.8619	26.1915	12.4209	20.5267	16.4078	26.5639	18.2772	14.8625			0.885246	21.2017
16.1743	18.5124	18.2062	12.644	23.4398	21.7541	29.6916	27.8981	33.6119	25.6739	12.8179	14.1692	30.7212	21.5973	12.9791	18.2029	17.9074	25.2612	17.6604	16.5684			0.890709	21.0167
16.2735	16.6319	20.8838	8.32	27.889	22.5616	28.092	26.2946	28.9321	24.196	16.4429	17.8189	28.7351	24.5667	11.5702	13.9591	16.7384	25.1456	22.0088	17.0297			0.896172	20.9377
16.3727	6.8707	15.8361	7.288	17.5955	22.9894	26.2241	20.0483	26.4068	17.4468	17.7502	18.0513	28.6909	23.1511	16.9746	14.8766	20.234	22.5924	19.0911	14.1696			0.901635	18.752
16.472	5.7958	12.7071	5.442	12.724	25.7216	27.7375	17.4528	25.2411	17.5342	22.3385	22.4457	27.1262	19.8136	18.2715	19.1433	18.5137	22.2935	15.1536	17.5256			0.907103	18.578
16.5712	4.6014	6.7363	2.967	16.0737	19.5623	24.9605	17.1582	27.8885	16.0759	25.7221	31.3449	12.3646	17.8302	16.0639	17.8723	15.0277	17.6893	15.1261	12.2389			0.912566	16.7002
16.6704	3.0416	3.5745	1.877	12.7902	20.9036	25.1698	27.2006	22.9228	19.6121	27.5227	30.8787	10.1424	20.3935	15.1347	15.8873	17.3174	14.581	17.6599	11.4253			0.918029	16.7387
16.7697	1.3172	1.5363	1.662	7.8692	19.8585	23.5905	26.5126	20.2193	16.3162	29.8925	29.7064	11.1645	29.6628	20.0685	21.4391	11.7186	13.8997	15.4547	13.5144			0.923498	16.6002
16.8689	2.6476	3.0452	1.199	5.6522	12.5159	25.0712	28.099	13.9154	23.1667	31.1677	30.9896	9.0944	22.4352	14.984	15.0588	14.2857	13.7797	9.3946	10.7593			0.92896	15.119
16.9681	2.8005	1.7085	1.371	5.8577	12.8753	24.7941	23.311	12.9593	22.7285	27.209	27.7459	3.8627	17.0665	10.5344	18.7213	10.3312	12.8381	6.6467	10.8336			0.934423	13.3787
17.0674	3.9512	1.2376	2.554	3.2124	12.3773	17.9763	16.1944	10.1002	20.5927	21.2313	20.9641	2.9927	13.0092	15.9277	12.3927	11.1571	11.5037	4.9114	9.5594			0.939892	11.1498
17.1666	2.4566	0.9444	4.895	2.465	12.4005	19.7654	10.1864	11.1183	19.5282	18.2959	18.383	2.2145	9.3025	19.1002	13.8239	6.7788	15.1413	4.8628	10.2624			0.945355	10.6276
17.2658	2.2116	0.6025	2.433	1.2894	11.7262	17.4335	6.5074	6.1585	19.9951	16.2661	17.8116	4.0287	6.3466	15.5535	12.9873	6.6632	12.3487	2.6534	11.0094			0.950818	9.15925
17.365	1.5102	1.0004	1.802	1.6409	11.4564	20.847	5.0172	5.7946	15.5228	20.4386	22.6223	1.4769	4.5498	10.6825	14.2638	4.6803	9.6744	3.7719	9.587			0.95628	8.75468
17.4643	1.6014	0.3159	0.416	0.707	9.1606	17.7651	3.8792	3.9371	17.2759	19.1382	14.863	2.9153	4.3864	4.9041	12.1006	2.4933	5.6886	2.1165	10.0827			0.961749	7.03931
17.5635	1.7331	0.2038	0.453	1.5014	6.3452	13.1317	2.8478	2.5907	20.6294	20.6951	17.0145	3.2728	5.0025	4.3017	8.5619	1.8201	6.5795	3.2599	8.7767			0.967212	6.77478
17.6627	0.9179	0.5963	0.666	0.9885	4.6463	11.0457	2.5673	2.5558	14.5701	16.154	14.714	3.1484	2.5817	2.8774	6.256	0.4631	3.8173	2.4654	7.4914			0.972675	5.1854
17.762	0.7647	0.1691	1.672	1.3915	5.2545	8.6858	2.2886	3.2486	15.0598	15.7544	13.6832	1.188	1.68	2.5471	5.0618	1.537	1.7595	2.8232	9.8794			0.978143	4.97096
17.8612	0.6168	1.0246	0.994	1.0502	2.9478	8.8925	1.1553	2.8795	13.6046	16.3183	9.8993	1.0035	1.897	2.4617	4.6097	1.8379	3.1134	2.1125	9.8341			0.983606	4.53962
17.9604	1.7958	0.4068	0.477	0.4077	3.3644	4.0752	0.9555	1.1697	12.5099	19.7706	7.3539	1.4648	1.364	2.1705	1.9278	0.8244	2.1857	3.3031	9.6746			0.989069	3.95797
18.0596	1.2775	0.8209	0.976	0.9797	1.3919	3.4692	2.2854	1.274	14.3381	22.5159	5.0204	2.067	2.2069	2.9962	2.4663	1.4713	1.8776	2.6711	11.9612			0.994532	4.31929
18.1589	0.8023	1.4167	0.531	0.7833	2.6118	1.8683	0.7273	1.1965	7.7608	24.9904	3.267	1.0836	0.5285	1.4766	1.9256	0.7214	1.8662	2.7086	11.9448			1	3.59004

## Sheet: Image18
X0	Y0	Y1	Y2	Y3	Y4	Y5	Y6	Y7	Y8	Y9	Y10	Y11	Y12	Y13	Y14	Y15	Y16	Y17		Ap-Basal to 1	Average intensities
0	19.7841	18.1007	18.7331	22.0113	18.5683	19.3397	16.2493	23.0608	24.9024	24.2664	22.9546	24.2183	20.7443	22.0087	26.6491	25.1893	24.2577	23.8171		0	21.9364
0.0992	18.9715	17.9865	13.1222	19.2601	16.5829	17.8895	20.0561	20.6809	18.8152	27.6351	19.9922	25.4688	27.6713	28.7754	29.427	24.3666	25.6311	26.4801		0.00537477	22.1562
0.1985	20.5968	19.4302	17.2975	18.6677	15.0603	21.3497	21.6025	21.9326	21.0775	26.6813	24.404	24.0868	26.1793	33.9614	27.0249	26.8903	25.9301	25.836		0.010755	23.2227
0.2977	19.1189	21.0566	18.002	19.083	11.9592	21.3093	22.8953	23.6605	23.4132	24.7488	28.6917	22.0201	22.9104	33.7295	35.7978	30.4854	24.1811	31.1357		0.0161297	24.1221
0.3969	22.6426	18.3284	18.3697	17.628	15.1888	23.2467	22.8291	24.6862	26.0326	26.6223	29.9818	22.5722	28.3599	35.4207	33.9924	31.1319	22.9214	36.7675		0.0215045	25.3735
0.4961	29.0823	20.844	16.9594	18.3848	20.8385	22.4619	22.2585	22.1411	29.5421	28.2506	27.6165	24.2069	36.4843	35.0941	38.5059	32.726	25.6672	40.8928		0.0268793	27.3309
0.5954	27.656	21.7807	18.3832	17.6051	22.4645	19.6703	19.7809	25.4094	25.8067	32.333	25.5093	24.7242	34.4512	38.6546	35.5772	39.1521	28.146	42.1946		0.0322595	27.7388
0.6946	28.197	19.9912	22.9672	19.4907	23.8217	21.8755	20.4894	29.1521	24.5051	29.3822	26.2897	30.2825	35.1033	36.099	39.0556	35.3704	30.3018	40.6636		0.0376342	28.5021
0.7938	28.3983	23.4118	24.6208	17.4474	23.8454	22.4417	22.3384	28.671	29.0592	29.8696	25.366	28.4281	35.9493	34.1579	35.2144	31.585	34.6491	38.5962		0.043009	28.5583
0.8931	28.5984	26.7855	27.2961	18.4197	26.7308	23.3746	26.2627	35.0746	31.5733	30.2293	29.6925	31.5422	35.6573	33.2311	33.9575	30.5242	35.9362	42.7233		0.0483892	30.4227
0.9923	23.2327	27.1508	28.5316	19.4735	24.9956	22.4286	28.4942	30.6058	35.2109	31.3995	30.6206	29.6672	33.3644	35.8773	43.9336	30.469	33.3421	46.296		0.053764	30.8385
1.0915	21.2537	28.5028	29.8192	21.5591	28.1723	22.8524	30.359	32.2727	33.1637	27.133	36.3545	36.6572	36.1679	34.1076	52.3743	29.4537	35.2063	44.3229		0.0591387	32.2073
1.1907	30.1266	32.5496	26.3782	19.6693	28.0491	30.3361	30.9986	40.4491	27.2036	26.0453	32.5777	38.6359	31.1144	31.1011	50.1193	29.9643	38.1643	46.2574		0.0645135	32.7633
1.29	31.3052	32.7587	23.8678	24.6476	29.2152	30.2427	31.0425	36.1141	26.677	23.9019	33.7748	39.8311	28.5377	29.2559	41.9013	33.2658	42.1395	55.0157		0.0698937	32.9719
1.3892	29.0579	32.0885	24.4574	24.2369	25.5058	29.8987	36.9262	33.2047	27.3245	24.3536	34.9751	45.9899	27.1973	23.9796	39.4607	33.3407	42.8591	56.8163		0.0752685	32.8707
1.4884	33.0409	28.3996	24.1564	25.5693	24.1498	26.4964	42.4407	34.5641	23.3003	22.8973	38.6689	48.5525	29.029	23.8997	41.7238	30.0215	41.6141	44.7237		0.0806432	32.4027
1.5877	36.7343	32.6726	28.3678	29.2616	21.4788	26.1762	38.7654	35.3698	25.5376	22.1278	39.5858	58.9773	30.1793	23.8189	38.8217	34.4714	40.9875	46.4079		0.0860234	33.8745
1.6869	35.8419	29.3147	35.8889	33.1259	24.165	32.6041	39.2922	37.5107	29.1191	22.2367	39.3671	56.2575	34.5315	24.1214	35.7066	43.1707	43.7417	48.2022		0.0913982	35.7888
1.7861	38.3411	30.0553	38.7123	34.4296	20.1103	43.438	32.7381	41.2442	29.958	25.0233	33.5183	57.6822	29.4696	22.2153	36.3444	48.2213	49.6165	50.3887		0.096773	36.7504
1.8853	33.6676	37.7759	41.6769	30.287	25.3835	46.9488	34.6171	50.9748	30.077	23.4091	34.5451	54.9191	26.7236	18.067	29.5675	39.2968	50.5871	48.1649		0.102148	36.4827
1.9846	30.9499	40.6701	41.6213	30.6123	18.5316	41.9423	42.2767	44.2483	28.9544	20.3924	28.3588	51.8549	27.6877	21.5974	30.4715	48.4919	49.8763	58.1809		0.107528	36.4844
2.0838	33.8049	34.402	41.1479	33.6367	20.6142	39.1749	42.6613	36.0106	28.1718	22.8866	20.4492	53.9055	28.4515	22.8518	32.4854	45.7368	47.1665	63.088		0.112903	35.9248
2.183	34.6745	32.4706	39.1195	35.2409	17.9153	39.5721	48.901	38.6373	29.3877	21.991	23.004	49.2136	25.669	19.6901	29.1341	42.0183	47.5537	64.7641		0.118277	35.4976
2.2823	32.8481	28.3552	36.6891	30.293	21.2363	40.4418	50.127	42.681	29.1791	20.5654	21.2158	50.0152	22.589	20.6298	29.987	37.7374	48.5534	75.2548		0.123658	35.4666
2.3815	29.1733	27.8872	39.3628	29.4893	21.4718	35.1871	55.0016	42.6724	30.4796	22.5257	20.81	49.7356	22.7596	19.2589	22.4081	37.1658	45.6604	71.2334		0.129032	34.5713
2.4807	27.8341	24.8204	44.2809	30.5243	16.9494	31.3269	68.4216	35.7067	30.1086	18.296	20.1658	50.5453	17.6951	21.5767	22.4502	40.6409	41.1714	67.4911		0.134407	33.8892
2.5799	22.7511	18.4794	42.4198	29.8578	17.9713	28.0763	65.675	38.8045	30.6471	21.3806	18.5832	48.0271	17.6418	21.5948	21.2546	40.8489	43.5989	61.8335		0.139782	32.747
2.6792	21.9643	18.4101	39.6231	32.352	18.1806	25.6644	65.4075	39.3678	24.9574	18.6616	20.646	39.8567	15.994	17.7357	19.5793	36.9752	38.6824	60.1316		0.145162	30.7883
2.7784	25.6872	15.3518	33.7178	30.1146	19.2294	31.7825	60.9191	34.3144	23.1153	18.1839	26.2392	35.2894	16.9074	16.6679	18.8838	30.9805	36.3271	58.4913		0.150537	29.5668
2.8776	22.8814	15.2765	34.1552	35.9802	20.1856	27.1285	59.0561	35.9795	24.9872	19.2546	28.1478	29.8537	15.2874	15.5716	17.78	24.8068	37.2842	51.8313		0.155912	28.636
2.9769	25.4912	15.272	33.7633	36.1606	20.5752	24.0164	54.3778	35.2745	22.2884	19.3216	24.9101	27.7926	15.0048	15.4657	15.1842	20.6185	37.2428	44.2545		0.161292	27.0563
3.0761	22.8362	18.5254	36.4507	41.7024	18.7555	21.8451	54.0709	32.6916	21.2393	15.8045	22.7218	29.5162	17.5293	17.5104	13.6359	20.8242	41.9009	35.213		0.166667	26.8207
3.1753	19.4587	15.4816	38.908	44.1551	22.9116	20.0457	50.4723	33.7227	17.1338	16.5929	22.4574	30.4513	14.1367	14.652	13.2515	21.1251	47.2833	24.8569		0.172041	25.9498
3.2745	20.2024	16.092	39.0475	45.6337	23.2975	19.4015	45.1858	37.2463	16.0921	13.9239	22.8647	27.6423	14.2399	17.9452	14.0298	17.8296	57.7863	22.1129		0.177416	26.143
3.3738	20.5986	17.2124	34.9165	46.2954	20.0092	17.9385	43.2179	38.9059	14.8513	14.7482	20.446	23.5712	18.3304	14.2934	11.1726	15.0009	72.5805	23.3551		0.182796	25.9691
3.473	22.0134	18.3964	28.4808	40.4977	21.6083	16.8799	37.5491	39.0245	17.3151	14.0701	18.7896	23.6304	19.2375	13.77	16.2657	14.3434	73.4888	24.0052		0.188171	25.5203
3.5722	19.8747	15.8688	25.5813	44.1343	22.4706	13.9227	31.7001	35.4954	16.7654	13.2593	19.1333	23.1803	18.1657	14.9032	13.757	15.2726	76.3942	21.5739		0.193546	24.5252
3.6715	16.1312	15.1048	24.4135	43.7956	26.858	15.7718	31.6306	36.7567	19.2894	13.7878	15.5514	20.4275	19.2407	16.9026	13.8944	15.8072	71.7505	17.3259		0.198926	24.1355
3.7707	21.5466	14.9571	25.7854	43.8952	23.4487	20.5578	31.6871	28.7959	20.0165	17.0833	14.4801	19.899	15.7829	11.735	12.271	15.6236	57.9769	20.8582		0.204301	23.1334
3.8699	21.3136	15.3822	25.4367	56.3092	20.6732	22.3272	35.4426	30.3558	20.3294	14.2089	15.0288	14.8481	14.8563	12.0231	14.1844	17.6664	46.4203	19.6557		0.209676	23.1368
3.9692	20.2734	16.775	24.6716	49.7243	20.5162	18.6566	35.1915	30.8572	20.4743	14.0728	13.0433	17.1074	16.2664	13.7591	13.3394	18.8512	42.3397	20.8855		0.215056	22.6003
4.0684	17.5698	15.1116	22.1587	48.7733	17.8712	14.7722	33.5741	25.8982	19.259	13.1161	13.983	17.5141	18.7467	15.0143	14.5205	16.7133	34.4627	21.7949		0.220431	21.1585
4.1676	18.4748	15.2713	22.2222	38.4205	15.6687	13.0388	29.2437	21.1448	18.9966	14.8179	15.276	15.5862	17.8754	11.739	12.9445	16.3192	29.9447	22.9138		0.225805	19.4388
4.2668	16.0163	15.048	21.8001	32.9543	18.1194	15.0843	29.517	20.4212	18.852	18.5646	12.5307	16.79	17.9664	13.9633	12.9841	17.4595	26.1374	20.5969		0.23118	19.1559
4.3661	16.5707	18.8611	20.455	34.9389	16.985	19.0098	28.459	22.3166	18.3888	13.8155	12.4025	16.7664	17.3135	12.0489	10.7347	16.8531	22.3188	18.896		0.23656	18.7297
4.4653	14.8896	16.418	19.664	34.5371	18.6241	14.8935	28.5726	18.0008	15.9825	15.1119	11.9593	15.2377	13.9468	12.5895	13.1495	15.221	23.9767	18.0663		0.241935	17.8245
4.5645	16.4701	21.9354	21.3099	33.4668	15.5777	14.8396	28.0289	18.7659	15.0647	12.9285	11.952	15.7952	13.3819	13.2952	15.3612	13.0864	22.3543	17.3305		0.24731	17.8302
4.6638	22.603	23.0769	25.85	32.6812	17.1149	13.7366	25.6688	20.3349	16.5219	12.5716	14.003	16.4485	13.6586	15.0211	15.1619	14.5364	22.1482	17.0048		0.25269	18.7857
4.763	16.1787	22.567	25.9638	29.0308	15.8054	15.8112	24.4322	19.2171	16.9679	11.5256	12.4611	15.2503	16.0792	14.4444	13.5281	13.8671	22.436	19.6325		0.258065	18.0666
4.8622	14.1799	22.9924	22.7367	26.7035	16.0929	17.9605	20.1816	16.1442	18.9651	12.0839	12.5406	15.5733	16.4521	11.3607	14.4723	15.3022	22.4987	21.5685		0.26344	17.6561
4.9614	14.6159	20.9574	21.3345	29.5287	13.1272	20.8574	19.7386	19.0521	16.2411	12.3195	14.0895	15.0044	17.7697	10.168	11.7983	11.0957	21.4135	20.6633		0.268814	17.2097
5.0607	15.8666	19.0712	21.4895	34.0491	17.6529	16.8075	19.4193	21.2752	15.2318	11.0209	12.8973	14.1751	18.9725	10.8106	12.4513	10.3253	17.2089	18.1239		0.274195	17.0472
5.1599	14.8901	15.2273	22.8656	30.4	16.0729	14.602	16.8399	21.8721	15.6303	12.4424	11.4887	12.3476	17.8003	9.1101	16.3082	12.0201	19.6672	15.2121		0.279569	16.3776
5.2591	14.6944	16.543	23.6733	23.6814	15.1661	15.4636	12.0208	22.7596	17.5263	11.7928	11.8919	14.5448	17.4876	11.7365	15.8295	13.4245	20.0161	12.9131		0.284944	16.1758
5.3584	13.395	15.6504	24.709	22.1221	14.9037	17.582	13.4595	18.5798	19.3812	12.9755	13.5477	13.9718	19.5192	13.5331	16.8675	10.8473	18.4655	15.3117		0.290324	16.379
5.4576	14.9906	18.1118	25.1011	25.3431	16.1016	14.3761	14.1982	19.3243	21.5422	12.7172	13.6394	14.1692	22.1536	10.8608	15.6419	14.2487	16.1464	24.2666		0.295699	17.3852
5.5568	15.7011	17.6654	23.0144	23.6655	16.7014	10.8747	20.1717	21.7304	19.1523	11.2114	14.4399	15.0745	17.6495	9.708	13.7147	16.1108	13.3141	21.8572		0.301074	16.7643
5.656	16.3439	13.648	21.555	22.4058	14.2563	13.1811	20.5117	20.1205	18.2881	8.9817	14.8567	15.0618	13.0802	9.0159	11.0486	18.1584	11.9917	23.3052		0.306449	15.8784
5.7553	13.6996	14.613	20.3542	24.3255	18.2033	13.1925	19.6085	15.9787	17.7967	9.2657	11.7908	15.4094	12.2647	8.047	11.5124	16.9012	10.5678	25.1173		0.311829	15.4805
5.8545	12.2798	13.4396	18.9618	19.9541	17.7842	12.9546	19.4521	17.8345	17.3164	7.9348	12.2057	14.1858	12.3777	6.2254	13.6575	13.1832	11.4502	20.2719		0.317204	14.5261
5.9537	17.1794	13.7092	18.806	23.0781	10.1841	13.3421	17.2513	18.5252	16.0627	7.4161	10.3566	12.773	10.3495	7.1014	14.4233	12.8528	12.5642	23.2854		0.322578	14.4034
6.053	19.2892	15.1509	17.6212	21.1835	9.5324	11.8711	15.9249	18.2438	14.8557	6.7045	9.0562	13.6221	11.8545	6.2133	15.36	15.1727	12.519	23.8871		0.327959	14.3368
6.1522	18.6943	15.3482	17.1735	19.0223	8.8628	13.6032	16.5602	16.5126	12.9847	4.9295	8.6559	12.9681	11.4908	7.1297	11.9559	15.6248	14.9671	22.6278		0.333333	13.8395
6.2514	13.6206	12.5673	15.7022	21.4993	10.0151	11.2624	14.7566	16.1908	15.7244	5.781	9.8594	10.774	9.436	4.2323	10.9632	14.6052	14.2574	20.1005		0.338708	12.8527
6.3506	12.1796	11.0122	15.2347	19.3056	9.0456	12.6251	14.7007	13.9347	17.6092	4.8542	9.9571	10.6167	10.3298	4.4172	10.23	14.7783	11.1962	22.3527		0.344083	12.4655
6.4499	13.7035	15.4271	13.7506	19.9666	9.6157	13.381	16.8296	15.4472	15.471	6.3175	9.6746	12.1803	11.3862	4.9144	10.3793	15.3826	12.4856	17.8045		0.349463	13.0065
6.5491	10.6026	13.5655	16.1643	18.7564	10.0084	12.4257	16.5143	16.8417	15.2203	8.1418	8.7318	11.8246	11.0091	3.9069	11.6267	13.0348	11.937	16.4833		0.354838	12.5997
6.6483	13.4845	12.6222	16.058	17.8405	8.9536	11.9002	16.5509	14.5362	15.5965	7.9538	8.3722	12.6371	10.4614	3.5337	9.6452	15.4665	13.4562	18.5567		0.360213	12.6459
6.7476	12.298	13.5281	13.7951	17.3075	9.7267	11.4541	16.5807	15.0008	12.4513	6.0348	6.3415	13.5955	9.8243	3.539	10.1081	14.3461	10.8706	17.6677		0.365593	11.915
6.8468	15.0269	14.7376	14.8548	14.9297	11.2979	13.4643	19.0753	13.7595	10.792	6.3514	7.0315	9.8254	10.4038	6.0906	11.5023	12.4759	13.021	20.3861		0.370968	12.5014
6.946	14.975	12.5359	14.9806	14.0554	12.0847	12.0336	17.8693	14.804	11.8659	4.7421	5.6195	9.9359	10.5105	4.0792	11.1608	14.245	14.0779	19.0199		0.376342	12.1442
7.0452	12.9236	11.0099	18.0426	13.9855	15.0213	11.7155	18.8007	16.2889	9.8423	4.6779	6.042	12.551	12.542	5.0031	10.1623	16.6307	18.4465	15.0235		0.381717	12.7061
7.1445	13.6617	12.0598	18.4318	15.0818	15.842	12.4721	16.6799	13.7079	9.8202	5.0056	5.1186	10.3945	12.1373	4.2027	10.4045	19.4571	17.9694	16.0513		0.387097	12.6943
7.2437	14.5889	11.5611	13.1762	15.6534	13.1031	11.3879	15.6008	15.8765	10.1277	3.9546	7.4776	10.8415	12.2198	3.3123	7.8036	18.2938	16.0429	15.2009		0.392472	12.0124
7.3429	13.1322	12.4264	12.1352	12.6181	10.8049	9.4685	17.3515	14.7239	12.5419	3.6116	8.0903	9.4214	12.3293	3.8671	9.0438	14.6832	14.8845	19.5638		0.397847	11.7054
7.4422	9.5585	10.6571	13.5498	13.0591	10.0835	9.3501	19.65	18.0874	14.6495	5.249	7.1954	9.7035	9.6743	5.0482	8.3518	13.1532	13.2133	18.2629		0.403227	11.5831
7.5414	11.5725	9.3213	15.7923	14.9155	9.3135	8.7918	17.4741	16.5136	15.454	6.0097	4.2937	9.1117	10.3791	2.7311	6.3678	15.959	10.7935	16.0991		0.408602	11.1607
7.6406	10.767	7.7403	16.3723	12.9326	6.814	8.5959	23.2266	18.0507	15.7075	4.8178	6.6101	12.7926	11.8177	3.2149	5.9035	15.4357	9.3211	17.882		0.413977	11.5557
7.7398	9.0694	5.8349	12.5229	13.6861	6.3865	8.3295	19.9012	18.2323	11.6398	5.8149	6.0874	10.9001	11.1206	3.763	5.8968	17.326	10.1432	15.8331		0.419351	10.6938
7.8391	8.3475	5.8616	11.3641	14.6488	6.1148	9.1197	15.4947	16.7144	11.1177	5.7684	5.3681	10.7986	10.5322	3.4275	6.7043	15.2481	13.0624	15.8473		0.424732	10.3078
7.9383	8.3631	7.6548	12.1562	16.8758	4.5699	7.0544	14.965	17.9779	13.1579	5.3424	7.2373	10.9932	10.5761	2.8585	6.9442	12.7801	14.5601	15.2875		0.430106	10.5197
8.0375	9.8347	6.0127	13.4942	15.2609	4.1914	5.9295	14.8673	20.9571	12.1211	4.9598	4.934	10.4931	8.7173	1.1488	7.4157	14.7821	15.0878	18.5561		0.435481	10.4869
8.1368	10.9222	5.8581	11.4787	12.181	3.0377	6.6759	14.0443	22.1966	10.5937	2.3965	4.9922	11.4952	8.8789	2.2985	7.1561	15.5308	15.3091	21.6676		0.440861	10.3729
8.236	13.8693	5.2105	13.4178	15.8379	3.3176	9.5938	11.7297	23.1232	9.348	3.0399	6.2886	11.6478	11.5684	2.8876	6.1977	15.9378	16.7936	20.0743		0.446236	11.1046
8.3352	14.9296	5.8816	14.0284	18.5782	3.4567	11.8817	11.9336	18.7196	9.6155	3.0657	5.9813	11.1981	11.1571	3.8259	5.3664	14.2003	16.0297	19.0118		0.451611	11.0478
8.4344	14.6033	3.9532	14.8903	13.461	4.7093	8.6588	13.3942	20.3546	7.8135	3.7784	4.7813	15.0342	14.6292	4.63	6.1355	14.3202	12.1295	19.0847		0.456986	10.909
8.5337	12.0737	4.0206	14.7357	15.0373	3.7265	7.231	13.1631	15.3573	9.7418	4.8542	4.2233	14.2028	12.9916	5.3679	3.9398	16.7919	11.2945	16.7693		0.462366	10.3068
8.6329	13.0189	4.479	15.5536	16.0268	4.6674	7.5487	10.8326	15.8686	11.3419	4.2113	3.9702	11.9603	10.778	4.9796	3.9664	19.8595	12.9193	16.1596		0.467741	10.4523
8.7321	13.3437	4.0138	13.8051	17.1135	4.2892	5.0509	11.0376	15.1494	12.5931	4.8019	4.8116	11.0085	8.0666	5.16	5.2337	17.9335	12.5946	13.8055		0.473115	9.98957
8.8314	12.9797	3.165	15.5404	14.7066	4.364	2.9398	12.726	13.4056	10.5572	3.866	4.3326	11.8113	7.4909	5.6016	5.7011	16.0605	10.4185	14.0352		0.478495	9.42789
8.9306	12.2591	3.9377	15.952	14.2206	4.1948	4.382	12.7204	15.3789	14.0467	2.12	6.0006	12.1629	8.8256	4.5476	3.5593	14.1819	12.2899	14.4736		0.48387	9.73631
9.0298	10.19	4.0255	13.0472	14.9324	5.0346	4.5944	12.5053	14.809	13.6713	3.4809	5.4518	11.7471	8.0235	3.7273	3.3578	12.8531	12.1907	14.4056		0.489245	9.33597
9.129	11.4882	5.2752	9.7312	13.0664	8.5054	4.0405	11.3592	15.1559	10.0322	3.8009	5.3306	11.1572	8.5691	4.6967	4.4745	14.079	13.2149	16.8034		0.49462	9.48781
9.2283	9.6823	5.1869	8.1979	11.5893	5.0688	4.7574	16.1845	13.6054	11.1476	4.4407	5.0642	11.7331	11.1787	4.1254	4.1505	15.8537	16.2443	16.839		0.5	9.72498
9.3275	10.7883	5.4834	10.7166	12.5983	4.1188	6.6376	13.5533	13.8298	13.0795	3.307	4.7952	9.0846	13.679	5.4911	4.3341	15.4328	15.5823	17.0977		0.505375	9.9783
9.4267	11.244	5.6473	10.4318	13.0451	2.7563	4.5604	13.94	14.4524	8.0469	3.1996	4.3784	10.3292	12.6795	4.3624	4.1884	17.3145	13.1683	19.9215		0.51075	9.64811
9.526	13.4104	6.7399	11.3498	14.1009	4.285	4.0189	17.006	15.3333	9.1594	3.084	2.6781	10.2	8.0589	3.3714	3.4259	15.9799	13.9974	17.9867		0.51613	9.67699
9.6252	11.7342	5.2582	11.6101	13.116	5.6233	4.446	14.9344	15.0276	11.3394	3.3049	4.4202	8.1947	6.3114	4.3302	4.8225	17.7707	13.5507	14.5911		0.521505	9.46587
9.7244	9.7291	4.639	11.0329	10.9725	4.5157	3.0932	18.5321	15.8353	9.2461	4.2331	3.2715	9.0914	7.93	5.6417	5.1122	14.2753	14.7771	14.8676		0.526879	9.26643
9.8236	10.6848	2.6404	10.7071	12.0198	3.8172	4.1461	14.6955	14.7808	6.596	3.8664	3.586	8.2306	7.5922	5.4931	5.4912	14.0493	13.1483	13.2605		0.532254	8.60029
9.9229	9.2446	5.0419	10.6165	14.5342	4.6288	5.2891	13.8578	14.0187	13.5474	2.7665	3.4241	10.0135	6.5855	5.4202	6.3497	12.9301	10.9281	17.0533		0.537634	9.23611
10.0221	11.0452	4.2844	13.0586	12.425	4.8866	3.5847	11.1349	14.746	8.44	3.6728	4.3462	10.6979	7.1553	4.2884	5.5198	13.1833	14.4176	16.6426		0.543009	9.08496
10.1213	12.6829	3.5601	13.9274	11.1482	5.7499	4.4735	11.5509	13.9758	10.2087	2.5906	5.5125	9.2685	7.9571	3.5471	4.4734	14.853	14.9019	13.3874		0.548384	9.09827
10.2206	12.0984	2.386	11.2023	13.2188	6.1297	5.7914	11.8462	13.386	13.6234	3.745	3.3442	8.0599	9.5676	3.5375	4.8653	13.336	13.3866	11.5607		0.553764	8.94917
10.3198	13.1327	2.2625	12.4508	13.0353	6.5185	4.8375	13.2418	13.9443	11.0257	2.9878	4.6727	7.3282	11.0177	3.6523	3.9464	13.8338	15.8833	16.1201		0.559139	9.43841
10.419	8.8698	2.9805	9.2064	12.4472	7.6286	3.2874	10.7428	14.4528	9.1212	3.9709	3.6812	9.8772	9.0928	4.2543	3.0686	14.5186	12.5424	16.9839		0.564514	8.70703
10.5183	11.1427	3.1346	9.6056	10.9729	7.0351	3.6097	14.0061	13.7727	8.8902	3.4531	3.773	10.3862	7.4032	5.1429	4.8945	15.3579	13.4886	15.5667		0.569894	8.97976
10.6175	8.7104	3.7613	12.802	9.7909	7.0784	6.2612	18.2421	12.6369	8.4104	2.9549	3.8028	10.492	8.6266	3.0799	5.3014	15.4311	14.3364	14.3217		0.575268	9.22447
10.7167	6.7942	4.1296	12.0904	7.306	4.6738	5.1171	14.4891	11.8074	9.8273	2.6273	4.0089	12.6734	8.5562	4.2872	4.9164	17.6833	17.5525	13.9735		0.580643	9.02853
10.8159	8.4628	4.4802	12.4483	8.2089	4.4496	7.2152	12.5326	13.7098	10.1125	2.3414	4.5144	13.7433	8.272	3.9752	4.2619	18.0111	19.448	14.7654		0.586018	9.49737
10.9152	9.7571	3.1308	7.9669	10.3855	3.807	9.8511	12.1133	14.8629	12.055	3.5528	3.9628	12.7114	6.3703	4.0913	5.3483	15.3867	21.0575	14.5019		0.591398	9.49514
11.0144	7.8508	3.5827	8.7651	12.7812	4.3514	6.5954	15.0669	12.923	10.9787	3.1772	2.9719	13.6465	7.0501	4.215	6.3042	17.6696	21.8672	18.7229		0.596773	9.91777
11.1136	8.5928	3.8248	11.619	10.7981	4.6679	6.1477	11.5342	14.9472	8.8118	3.4054	4.2082	8.4802	8.0391	3.7001	5.6133	16.7853	18.6293	19.664		0.602148	9.41491
11.2129	11.4396	4.7973	10.0257	11.0952	6.2771	5.0642	10.8838	13.5676	7.4015	3.9713	4.567	9.1954	8.4814	2.9397	3.4594	15.6827	19.2633	17.9146		0.607528	9.22371
11.3121	10.1428	6.4479	8.8968	12.5653	8.4492	6.0153	13.4313	12.9741	7.2057	3.3273	4.1407	11.3099	9.1426	1.8144	3.903	15.609	19.0026	16.6576		0.612903	9.50197
11.4113	9.0102	5.2539	11.8243	14.243	7.6668	5.0752	13.4128	10.1382	9.7637	2.7625	4.5183	9.931	9.2529	2.6451	3.8833	13.2894	17.5989	15.2376		0.618277	9.19484
11.5105	8.4451	5.1489	9.0628	12.4105	6.5796	3.8865	10.5699	13.3981	10.4602	2.748	3.0304	12.0559	10.7694	3.4338	4.0763	13.901	19.1862	19.7058		0.623652	9.38158
11.6098	8.8696	5.1203	10.9854	11.6262	3.8921	3.4457	12.1387	13.3556	10.0719	2.7364	2.8655	10.4315	11.3751	2.0934	4.0581	14.513	17.5841	13.7517		0.629032	8.82857
11.709	6.6369	6.6601	11.515	10.9574	4.1315	3.2374	9.8563	13.6117	9.746	2.5856	3.2762	9.5852	12.9855	2.5766	4.9609	11.888	19.9703	15.0273		0.634407	8.84488
11.8082	9.4585	5.525	10.454	11.6625	3.1779	2.7682	11.6596	15.2909	10.9037	3.5779	3.0868	11.2498	12.3323	3.471	5.1456	15.7027	18.5741	17.9084		0.639782	9.55272
11.9075	10.633	4.9585	10.3972	12.6522	4.8056	3.3368	13.1705	18.525	11.9796	3.7344	2.7701	12.0727	13.0169	4.0904	5.2987	16.1282	22.4154	16.4864		0.645162	10.3595
12.0067	11.686	4.6789	8.1891	11.7763	3.464	5.3042	12.7921	19.711	14.5215	3.2852	4.4986	12.1203	12.8004	3.8453	4.2793	17.401	22.6688	13.8407		0.650537	10.3813
12.1059	12.3953	4.8384	9.0191	11.3303	4.4412	4.0875	11.8689	19.453	12.4286	3.0636	4.6612	11.4905	10.7484	3.7584	4.6761	15.8908	20.1352	15.2954		0.655912	9.97677
12.2051	8.7024	4.4741	10.144	11.485	3.291	4.0524	13.1914	19.527	13.5909	3.5809	4.7597	11.5682	11.2702	4.5337	4.8628	14.3263	16.773	20.9019		0.661286	10.0575
12.3044	8.3523	4.1545	10.396	10.5491	3.0043	3.6914	15.0539	16.839	11.8684	3.4037	5.187	9.249	12.8144	4.4887	5.434	20.2445	19.7822	18.1268		0.666667	10.1466
12.4036	9.4818	2.4766	12.7087	11.3562	5.4479	4.0825	15.2203	15.4484	13.4219	4.1031	3.4692	8.9688	15.9347	3.055	4.9416	18.0962	17.6517	19.2075		0.672041	10.2818
12.5028	8.0798	2.7191	14.9754	10.0829	5.0851	3.8605	15.8584	15.9955	13.2612	4.4022	4.1912	10.0072	13.3358	3.9943	6.949	18.1446	18.326	17.2552		0.677416	10.3624
12.6021	13.7599	3.9512	13.007	8.2562	4.1472	3.8614	15.2243	14.4675	12.755	5.5496	5.4305	10.649	14.6123	5.2068	6.6994	15.1486	18.8777	16.8149		0.682796	10.4677
12.7013	11.742	2.9494	14.1548	10.4353	2.5084	3.9727	13.6578	14.505	10.0479	3.9017	4.8288	8.6995	14.8406	5.8109	5.4701	16.0611	21.5221	17.1403		0.688171	10.1249
12.8005	9.3196	4.0817	13.184	10.78	3.3282	5.9114	14.663	12.9155	10.0211	3.7985	3.7579	9.3898	11.4487	5.1873	5.4141	16.6412	19.9478	20.0973		0.693546	9.99373
12.8997	8.7819	4.3178	13.7578	9.1181	3.9805	4.5639	13.4335	15.7232	11.8761	3.4402	4.5368	11.2452	8.6769	5.1136	4.4038	16.8531	21.6847	15.7694		0.698921	9.84869
12.999	7.9652	3.9114	13.1389	9.5798	4.4193	4.3912	14.423	14.3103	13.8311	3.0916	5.5468	11.7901	10.7623	5.7084	6.4245	17.9271	20.4302	18.6477		0.704301	10.3499
13.0982	9.0341	4.5405	11.5578	8.3575	3.7633	5.6209	15.0254	12.6008	12.9317	3.2164	4.8123	13.1008	10.6391	6.0413	5.5616	16.4753	18.8928	15.6918		0.709676	9.8813
13.1974	8.5772	4.9419	12.2865	7.7527	4.3914	6.8799	11.4728	10.5643	13.389	3.8979	3.5441	12.8349	11.8398	7.5721	5.2023	13.7383	24.392	17.9067		0.71505	10.0658
13.2967	10.5277	5.1085	14.2899	8.9378	3.5281	7.0884	12.1882	10.5745	16.3524	3.9312	5.1682	11.1813	12.7296	5.9193	6.4657	15.2786	18.704	21.674		0.720431	10.536
13.3959	9.0326	5.5529	12.2818	12.532	3.1917	6.0536	12.0518	10.029	16.6355	4.5612	5.3543	10.0419	9.2802	4.2076	8.5575	16.3288	19.7637	15.9212		0.725805	10.0765
13.4951	8.8354	5.3019	14.7113	13.7633	3.4608	6.2163	13.4149	10.4992	19.5686	3.5079	6.2677	12.3234	8.794	3.3813	9.3168	15.3305	18.2694	16.9047		0.73118	10.5482
13.5943	10.2325	4.1765	12.7322	12.3398	3.0497	6.6684	12.7585	12.7605	21.0898	3.3641	5.0873	14.0928	9.9895	4.0843	8.5714	13.6299	20.8706	16.1622		0.736555	10.6478
13.6936	11.6004	4.133	14.2788	13.7552	3.2042	5.2424	15.5554	13.3214	19.164	4.5467	6.0484	12.6022	11.2949	3.6629	9.8405	15.8376	19.3022	14.4166		0.741935	10.9893
13.7928	11.4542	3.6378	16.9322	11.0016	3.3681	5.9763	14.3291	14.3214	19.5193	4.9761	8.0612	13.5914	11.7536	4.8131	11.7531	15.2495	19.6394	15.6578		0.74731	11.4464
13.892	11.7503	6.6513	16.438	13.2989	3.1129	7.4603	14.7635	15.4158	19.8979	3.6615	7.9701	13.3713	11.8861	7.2628	13.503	18.9448	21.5239	14.2418		0.752685	12.2863
13.9913	10.9664	7.0481	12.5171	12.2982	3.9042	7.5875	18.1769	13.4153	21.9836	3.9605	10.2335	11.9193	10.9954	5.0272	14.5252	18.9293	19.548	18.135		0.758065	12.2873
14.0905	11.0663	5.3377	13.802	13.6059	2.9647	7.5521	18.3239	11.6513	19.1409	3.4462	9.8721	13.2428	11.5355	5.1719	11.7242	18.5067	19.3869	17.4945		0.76344	11.8792
14.1897	10.9069	6.6283	12.1114	12.2376	4.4797	7.7623	15.3585	13.0574	14.7988	5.7646	10.3838	15.333	12.5881	3.9755	9.0281	16.5136	19.0703	16.0956		0.768814	11.4496
14.2889	11.4268	6.7671	10.7881	13.2217	4.6353	8.7132	14.4974	12.4139	18.0157	6.0017	11.1432	15.8684	13.6219	6.0196	8.8402	14.2615	17.2405	17.271		0.774189	11.7082
14.3882	11.5403	4.6581	14.2326	13.6315	3.9127	9.5959	14.0084	11.1679	19.9312	5.3221	11.0584	14.6928	11.6359	6.0995	7.2547	16.9045	14.8007	15.6728		0.779569	11.4511
14.4874	10.7055	4.5641	13.1044	12.6779	3.579	7.0725	15.2066	11.9075	20.0569	4.8629	11.8401	13.3077	15.0114	7.0849	7.5104	17.2035	17.5611	14.5707		0.784944	11.5459
14.5866	10.8559	5.1949	11.5265	12.2885	3.6676	8.6569	16.9694	10.0761	21.4429	7.0181	9.8958	14.1239	15.9191	6.6424	12.3091	14.1311	18.3305	14.4949		0.790319	11.8635
14.6859	10.3842	5.615	11.9213	14.0201	4.9489	12.111	17.5187	10.8727	20.5704	6.7407	9.5856	11.5822	16.4201	6.5934	10.6375	15.0369	14.0467	18.8467		0.795699	12.0807
14.7851	11.5712	7.1217	15.1045	15.3191	4.4208	11.9805	18.0449	11.577	18.8384	6.4125	12.8148	12.6646	14.5472	8.2964	11.3283	12.2315	16.552	16.7907		0.801074	12.5342
14.8843	11.5716	8.1889	16.6395	14.1185	5.7819	11.1368	15.6913	14.3676	16.3469	6.3588	11.6965	12.3243	11.7229	7.1955	13.3551	12.529	15.0923	17.0415		0.806449	12.2866
14.9835	10.9357	14.2722	18.5176	11.751	4.5116	9.0123	18.0329	14.7057	17.7516	6.6069	10.5999	12.7596	13.5584	7.4746	12.6412	11.4067	16.3618	17.2362		0.811823	12.6742
15.0828	12.2893	16.7338	16.1998	9.7326	3.5882	8.9123	22.3916	14.8467	18.1209	6.8539	10.6006	13.848	13.6584	6.097	11.3452	11.5738	15.4162	21.3879		0.817204	12.9776
15.182	13.5555	16.8384	15.2868	14.1129	3.8497	9.429	20.421	13.616	15.0443	7.7501	11.3952	14.0644	14.6966	5.2958	10.9424	13.1887	12.6267	18.7653		0.822578	12.8266
15.2812	16.3258	12.0183	17.2728	14.2853	5.2273	12.0785	21.4072	15.4098	17.9111	8.7836	10.8365	12.3985	13.4547	4.8624	12.649	11.5177	14.2682	20.1193		0.827953	13.3792
15.3805	15.035	11.7115	18.3103	12.9066	5.7269	11.725	17.102	13.6495	21.9058	8.2914	11.0296	13.1284	14.6018	4.5736	10.6614	9.6824	11.7767	23.5081		0.833333	13.0737
15.4797	13.7269	8.3275	20.8169	11.8697	5.4513	12.4175	15.447	15.2167	19.1511	10.041	11.1722	12.4249	14.4287	4.0271	10.4484	10.1498	12.3327	21.2818		0.838708	12.7073
15.5789	11.8776	8.4092	18.1791	12.4378	6.0816	12.9059	13.849	17.2434	15.3664	11.6335	9.0592	12.6721	14.3881	5.307	10.1445	10.4699	10.3536	20.148		0.844083	12.2514
15.6781	12.9933	10.5816	20.2413	16.8205	9.9097	9.0681	14.9711	13.5975	16.5047	11.713	12.064	11.2615	13.2012	6.3886	9.1448	9.0114	7.3154	21.6514		0.849458	12.58
15.7774	16.0834	11.476	21.9905	10.6306	9.8639	9.0114	12.8871	15.1318	16.6137	14.1951	13.6311	11.6422	14.2866	6.8231	9.27	8.0782	7.0779	22.2592		0.854838	12.8307
15.8766	13.2441	11.8298	19.1987	12.2943	8.9846	8.583	12.5784	18.5518	18.0889	11.89	16.8556	11.6357	14.8124	7.4776	7.4748	6.1529	5.6796	17.5202		0.860213	12.3807
15.9758	12.5694	13.0267	20.125	12.0153	11.0025	9.909	12.0591	14.9902	17.2161	11.894	17.0398	13.2538	11.0149	6.2096	7.8597	3.8119	5.1201	15.9727		0.865587	11.9494
16.0751	10.8818	11.5037	21.4452	15.3905	10.3559	8.2343	11.6497	12.3007	18.1552	17.2506	13.774	12.1747	11.7825	10.8796	6.6469	4.5792	4.2433	14.982		0.870968	12.0128
16.1743	11.5	10.7544	19.3862	15.9195	11.7288	8.9894	11.2225	14.7699	17.7774	11.4561	11.8881	10.5772	11.2635	9.6469	5.2603	3.8443	3.4869	14.0977		0.876342	11.3094
16.2735	11.6172	9.3899	15.3827	10.992	11.509	8.9044	9.2064	13.7583	16.2579	11.3876	12.1417	10.4111	12.5963	9.6137	6.086	3.8096	3.0661	8.3529		0.881717	10.249
16.3727	9.8228	13.0443	13.9249	12.8635	12.3084	9.8182	11.3523	14.5113	16.7189	16.8279	14.1122	12.7727	13.4674	11.3759	5.7592	2.9671	3.4977	5.6526		0.887092	11.1554
16.472	6.476	14.2457	16.6369	13.7226	9.6031	9.8806	10.6077	12.2476	17.8771	17.2672	12.982	14.5484	13.5432	9.9906	4.5269	4.6358	2.1487	6.8584		0.892472	10.9888
16.5712	7.9536	15.3198	16.2379	14.3423	12.2419	8.9205	11.9588	11.5111	17.9489	12.2961	11.9369	14.5169	11.7672	9.7639	4.3157	3.8003	2.6307	5.7496		0.897847	10.734
16.6704	8.7911	14.7173	17.1499	16.4344	10.7478	8.756	10.7748	12.5903	12.6526	14.7909	12.0701	13.609	11.2652	8.8867	3.8183	3.4216	1.267	3.8166		0.903222	10.3089
16.7697	6.4908	18.4368	19.7716	17.3584	11.6271	10.8636	10.9573	9.524	12.7356	13.693	11.6317	13.4067	8.9402	11.1038	3.555	3.0367	2.0487	3.5271		0.908602	10.4838
16.8689	5.2343	15.8449	16.6977	16.7573	8.7637	9.7288	6.7139	9.706	9.8016	10.8012	10.2112	9.8552	11.9851	10.5014	2.8695	3.0878	2.4721	3.1279		0.913977	9.11998
16.9681	5.1655	14.8377	17.5029	14.4774	8.6214	10.7181	4.4989	7.4682	10.5873	12.2289	10.281	10.5817	11.2414	10.8485	4.317	2.631	1.9651	2.6303		0.919351	8.92235
17.0674	4.1053	11.1894	18.2357	9.8405	9.9813	7.7711	4.5254	6.801	12.8837	12.2416	12.0869	9.9692	7.1793	7.5958	3.1935	3.266	2.9434	2.1376		0.924732	8.10815
17.1666	2.5581	12.8136	15.2533	13.7153	10.0539	5.4209	2.8772	6.9174	9.1058	12.3832	9.8591	7.4596	6.2706	6.2126	2.5834	3.3501	2.3997	1.7593		0.930106	7.27739
17.2658	3.1937	11.3975	14.2687	13.3483	6.9701	6.2569	2.7081	3.91	9.9677	9.1837	9.5682	8.6222	7.2991	4.4247	1.787	4.1779	1.9943	2.3772		0.935481	6.74752
17.365	2.915	11.3112	11.2548	14.1812	8.4066	5.7375	3.0138	4.1519	8.8693	11.4032	7.3376	6.7238	4.1049	4.1497	2.1205	3.1702	2.7876	2.0341		0.940856	6.31516
17.4643	3.7931	8.8208	10.6044	13.2426	10.2033	3.6906	2.4464	4.3735	8.4871	13.852	5.2397	6.048	3.5367	3.8993	3.6466	2.8071	2.1349	2.3798		0.946236	6.06699
17.5635	2.6658	5.5994	12.6775	11.9035	9.4698	3.9699	2.4602	3.1285	6.9994	12.3299	5.0904	4.3704	3.1294	3.3267	3.6295	2.7131	3.066	1.4851		0.951611	5.44525
17.6627	2.016	6.6963	10.7639	8.9891	5.0348	3.7843	2.7998	2.236	7.9322	11.0512	4.1776	6.075	3.1037	3.2407	2.9904	4.028	4.1229	1.5527		0.956986	5.03303
17.762	2.3814	5.085	11.3073	7.6365	4.3172	3.9915	1.494	2.2068	5.7935	10.8294	3.9976	5.7582	1.8853	3.6345	3.0857	3.7323	4.4554	1.3881		0.962366	4.60998
17.8612	2.9932	4.8953	6.9877	7.7473	4.2323	3.6401	1.5673	2.4777	4.8256	10.7463	4.4643	4.1864	2.9274	4.8464	2.8248	2.9431	4.9833	2.043		0.967741	4.40731
17.9604	2.6367	5.3149	7.2226	6.342	4.4688	3.4013	1.3036	2.4076	4.9898	7.589	4.2515	4.333	3.9163	3.141	2.8927	4.1523	4.0152	2.2002		0.973115	4.14325
18.0596	2.2347	3.8293	6.605	5.0468	4.4975	1.6617	1.8896	2.2311	3.8179	8.4261	2.175	3.3717	2.9591	2.852	1.8304	4.3869	3.7159	1.8595		0.97849	3.52168
18.1589	2.9277	2.7025	4.3032	5.204	3.3313	2.8648	1.8508	2.198	3.4279	7.2538	2.8204	3.1814	3.6028	2.8157	2.4439	4.9542	3.069	2.7074		0.98387	3.42549
18.2581	2.7793	3.1204	5.0155	2.7278	4.1632	2.5017	2.1792	2.0395	2.5918	6.3898	2.1839	2.8271	2.8014	2.8062	1.8245	2.8279	2.5666	1.931		0.989245	2.95982
18.3573	2.1832	1.8167	4.9627	2.7566	5.249	4.2317	2.0814	2.0855	2.4491	5.5588	2.6946	2.2805	2.381	3.4808	2.3559	3.9909	3.0877	2.0323		0.99462	3.09324
18.4566	3.021	2.1159	4.7322	2.8778	5.3027	4.605	2.0579	1.6972	2.1403	5.0244	2.172	3.8104	2.6032	3.6822	1.4653	3.0827	2.9087	2.771		1	3.11499

## Sheet: Sheet1
Image6				Image7				Image8				Image9				Image 15				Image 16				Image 17				Image 18
Ap-Basal to 1	Average intensities			Ap-Basal to 1	Average intensities			Ap-Basal to 1	Average intensities			Ap-Basal to 1	Average intensities			Ap-Basal to 1	Average intensities			Ap-Basal to 1	Average intensities			Ap-Basal to 1	Average intensities			Ap-Basal to 1	Average intensities			Distance	Image6	Image7	Image8	Image9	Image 15	Image 16	Image 17	Image 18
0	36.0316			0	32.041			0	55.1065			0	39.6433			0	19.1545			0	10.8553			0	35.2837			0	21.9364			0	36.0316	32.041	55.1065	39.6433	19.1545	10.8553	35.2837	21.9364
0.00520955	37.1921			0.0044063	30.8087			0.00537761	53.8264			0.00448534	40.6981			0.00531761	19.8332			0.00471561	10.7067			0.00546289	34.0349			0.00537477	22.1562			0.05	42.6317	34.2308	60.068	46.665	20.1333	13.8497	37.0387	26.382
0.0104191	37.9606			0.0088126	33.0785			0.0107552	53.2824			0.00897067	43.4354			0.0106406	19.9692			0.00943598	11.7735			0.0109313	34.8169			0.010755	23.2227			0.1	59.2975	41.7438	69.7829	54.9426	21.5672	21.2189	46.8537	34.0125
0.015623	38.4284			0.0132141	33.8907			0.016127	55.4143			0.0134511	44.7963			0.0159582	19.5759			0.0141516	12.2005			0.0163942	34.1569			0.0161297	24.1221			0.15	47.2691	48.9565	66.6134	48.1187	19.5812	20.6012	29.1743	33.8818
0.0208325	39.3058			0.0176204	34.7711			0.0215046	59.6853			0.0179365	47.8587			0.0212758	21.1392			0.0188672	12.7987			0.0218571	34.8611			0.0215045	25.3735			0.2	36.7118	51.6444	54.1905	38.8701	13.9663	17.0754	23.3908	25.7889
0.0260421	41.997			0.0220267	34.5171			0.0268822	61.3241			0.0224218	49.9575			0.0265934	19.963			0.0235828	12.927			0.0273199	37.5907			0.0268793	27.3309			0.25	33.1589	52.6495	40.9144	35.8803	11.8661	11.3225	17.7995	19.8511
0.0312516	42.2207			0.026433	34.8877			0.0322598	63.7223			0.0269071	51.1674			0.0319164	20.0412			0.0283032	13.2675			0.0327883	37.2187			0.0322595	27.7388			0.3	27.8946	41.6234	30.857	33.9643	10.5817	9.53544	16.0655	17.0068
0.0364611	44.0666			0.0308393	33.6651			0.0376374	65.0417			0.0313925	51.0265			0.037234	20.471			0.0330188	14.0236			0.0382512	37.9797			0.0376342	28.5021			0.35	26.5307	31.2042	28.3456	30.3875	9.70629	8.71827	13.4883	13.9389
0.041665	46.7331			0.0352408	34.3963			0.0430091	64.463			0.0358729	50.089			0.0425516	20.7965			0.0377344	15.6433			0.0437141	38.943			0.043009	28.5583			0.4	25.2258	27.3418	25.2294	25.3721	8.51437	7.19228	13.5342	12.212
0.0468746	50.9071			0.0396471	34.7002			0.0483867	64.0995			0.0403582	47.5966			0.0478746	19.5397			0.0424548	16.478			0.0491825	40.7881			0.0483892	30.4227			0.45	22.0619	23.0542	23.6201	26.7222	7.98885	6.95941	12.5756	10.8056
0.0520841	54.1053	42.6317		0.0440534	35.7409			0.0537643	64.7824	60.068		0.0448436	45.7334			0.0531922	20.9828	20.1333		0.0471704	17.0687			0.0546454	41.7521	37.0387		0.053764	30.8385	26.382		0.5	22.3251	21.8032	21.7989	24.5172	7.05682	6.83991	12.1867	9.93007
0.0572936	57.371			0.0484597	36.9638			0.0591419	64.4583			0.0493289	46.1359			0.0585098	21.052			0.051886	18.4537	13.8497		0.0601083	43.6874			0.0591387	32.2073			0.55	22.3568	21.285	24.431	22.9507	6.57158	6.41642	11.2263	9.30045
0.0624975	60.0742			0.0528612	35.5395	34.2308		0.0645137	65.7708			0.0538094	48.5072	46.665		0.0638274	21.0686			0.0566016	19.9717			0.0655712	44.2393			0.0645135	32.7633			0.6	20.925	21.618	24.2433	23.2623	7.04948	5.43499	11.3635	9.30038
0.0677071	63.3185			0.0572675	37.0404			0.0698913	64.6158			0.0582947	48.5754			0.0691504	21.6738			0.061322	19.0258			0.0710395	45.7797			0.0698937	32.9719			0.65	21.3443	20.8743	26.8976	24.8588	7.54505	5.01658	12.1587	9.47434
0.0729166	65.0649			0.0616738	37.7853			0.0752689	67.3565			0.06278	52.7743			0.074468	22.507			0.0660376	19.3623			0.0765024	46.6265			0.0752685	32.8707			0.7	23.6815	20.7882	28.1002	25.9816	7.71319	5.39672	13.9683	10.161
0.0781262	63.8076			0.0660801	39.4269			0.0806465	70.3495			0.0672654	55.854			0.0797856	22.1471			0.0707532	21.8301			0.0819653	47.5649			0.0806432	32.4027			0.75	25.5546	24.2598	30.6456	26.4367	8.18673	5.49741	15.6952	10.7197
0.0833357	61.5705			0.0704864	42.2871			0.0860241	71.7222			0.0717507	58.2483			0.0851085	21.5724			0.0754736	21.7121			0.0874337	48.357			0.0860234	33.8745			0.8	30.076	24.6063	29.9974	26.2569	6.04609	6.10656	18.2937	11.8666
0.0885396	59.4621			0.0748879	42.6498			0.0913958	74.9999			0.0762311	58.4373			0.0904262	21.5504			0.0801892	21.2992			0.0928966	49.5871			0.0913982	35.7888			0.85	41.8739	22.3096	31.4907	32.9563	3.58242	5.47903	22.2948	12.7587
0.0937491	55.3566			0.0792942	41.8691			0.0967734	75.4468			0.0807165	59.531			0.0957438	21.5675			0.0849048	20.5294			0.0983595	48.0731			0.096773	36.7504			0.9	41.4676	15.5117	13.1476	30.4291	1.72839	3.95306	21.4477	11.232
0.0989587	54.3875			0.0837005	41.9855			0.102151	73.3264	69.7829		0.0852018	57.5904			0.101061	21.5505	21.5672		0.0896204	21.6723			0.103822	47.7683	46.8537		0.102148	36.4827	34.0125		0.95	19.2457	9.80703	5.97302	18.8871	0.834491	2.71815	14.2279	7.60962
0.104168	52.562	59.2975		0.0881068	43.3127			0.107529	73.8426			0.0896872	54.9607			0.106384	21.5467			0.0943408	22.3313			0.109291	45.0898			0.107528	36.4844			1	3.49027	6.71755	3.50259	2.45013	0.64135	1.95018	5.45912	3.81209
0.109378	51.3151			0.0925131	44.6824			0.112906	75.6158			0.0941725	53.7065			0.111702	22.2739			0.0990564	23.2772			0.114754	44.7597			0.112903	35.9248
0.114582	50.8332			0.0969146	44.0529			0.118278	75.8264			0.0986529	52.8127			0.11702	22.135			0.103772	22.396	21.2189		0.120217	42.0161			0.118277	35.4976
0.119791	49.0313			0.101321	44.09	41.7438		0.123656	75.6389			0.103138	51.8785	54.9426		0.122343	21.2894			0.108492	22.1375			0.125685	39.1549			0.123658	35.4666
0.125001	44.9693			0.105727	42.9825			0.129033	74.4629			0.107624	50.2359			0.12766	19.7775			0.113208	22.0069			0.131148	37.0358			0.129032	34.5713
0.13021	45.7669			0.110134	43.0896			0.134411	70.0903			0.112109	49.1573			0.132978	20.3715			0.117924	21.1602			0.136611	34.8011			0.134407	33.8892
0.135414	48.8506			0.114535	44.5074			0.139783	68.0973			0.116589	50.7061			0.138295	18.3407			0.122639	20.8661			0.142074	31.7868			0.139782	32.747
0.140624	46.4939			0.118941	45.3245			0.14516	66.9676			0.121075	50.0452			0.143618	16.9467			0.12736	20.6276			0.147542	30.8939			0.145162	30.7883
0.145833	44.9934			0.123348	47.4391			0.150538	66.6134	66.6134		0.12556	50.7796			0.148936	16.4896			0.132075	19.5126			0.153005	29.1743	29.1743		0.150537	29.5668	33.8818
0.151043	43.1684	47.2691		0.127754	50.7392			0.155915	65.0718			0.130045	47.2812			0.154254	16.6415	19.5812		0.136791	21.1201			0.158468	27.2137			0.155912	28.636
0.156252	42.5066			0.13216	50.5298			0.161293	63.9537			0.134531	48.4157			0.159577	16.1834			0.141511	19.282			0.163936	26.5038			0.161292	27.0563
0.161456	39.1696			0.136562	52.8068			0.166665	59.7778			0.139011	47.5418			0.164894	15.0926			0.146227	19.8161			0.169399	24.0308			0.166667	26.8207
0.166666	36.726			0.140968	52.8792			0.172042	57.3565			0.143497	46.1407			0.170212	13.3786			0.150942	19.4833	20.6012		0.174862	23.5704			0.172041	25.9498
0.171875	34.711			0.145374	52.0274			0.17742	53.5602			0.147982	44.9847			0.175529	14.2428			0.155658	18.4008			0.180325	24.2812			0.177416	26.143
0.177085	33.8554			0.149781	52.4614			0.182798	51.8079			0.152467	44.0175	48.1187		0.180852	14.1376			0.160378	18.6124			0.185793	22.1188			0.182796	25.9691
0.182294	35.0886			0.154187	52.6918	48.9565		0.188175	51.1156			0.156953	45.0676			0.18617	13.5684			0.165094	18.4469			0.191256	21.739			0.188171	25.5203
0.187498	34.3634			0.158588	51.1849			0.193547	48.9375			0.161433	43.1086			0.191488	13.4047			0.16981	18.4878			0.196719	21.0031			0.193546	24.5252
0.192708	36.0011			0.162995	49.3795			0.198924	46.0672			0.165918	41.9468			0.196811	13.1669			0.17453	18.5218			0.202187	20.0565	23.3908		0.198926	24.1355
0.197917	36.9922			0.167401	47.7771			0.204302	44.2569	54.1905		0.170404	39.2439			0.202128	12.5215	13.9663		0.179246	17.9684			0.20765	19.9718			0.204301	23.1334	25.7889
0.203127	37.7043	36.7118		0.171807	51.3591			0.20968	41.5208			0.174889	39.0278			0.207446	11.8528			0.183961	17.4164			0.213113	19.2939			0.209676	23.1368
0.208336	36.945			0.176214	53.4395			0.215057	41.7708			0.179374	38.3613			0.212769	12.3124			0.188682	15.6873			0.218582	19.1386			0.215056	22.6003
0.21354	34.8372			0.180615	53.0019			0.220429	42.7523			0.183855	38.0754			0.218086	12.4964			0.193397	15.7507			0.224044	17.9263			0.220431	21.1585
0.21875	34.7599			0.185021	53.5519			0.225807	43.7153			0.18834	36.7097			0.223404	12.2012			0.198113	14.9878			0.229507	17.5223			0.225805	19.4388
0.223959	33.912			0.189428	51.425			0.231184	43.3056			0.192825	34.7831			0.228722	11.8265			0.202828	13.5491	17.0754		0.23497	17.3988			0.23118	19.1559
0.229169	33.024			0.193834	51.244			0.236562	41.6991			0.197311	34.5298			0.234044	11.5058			0.207549	13.0688			0.240439	16.9466			0.23656	18.7297
0.234373	32.1764			0.198236	52.9508			0.241934	39.514			0.201791	36.7174	38.8701		0.239362	11.5057			0.212264	13.0108			0.245901	16.0673			0.241935	17.8245
0.239582	30.418			0.202642	52.7753	51.6444		0.247311	37.4491			0.206277	36.4093			0.24468	11.5819			0.21698	12.1657			0.251364	15.9295	17.7995		0.24731	17.8302
0.244792	31.5818			0.207048	53.655			0.252689	36.5023	40.9144		0.210762	36.4691			0.250003	11.5121	11.8661		0.2217	11.5101			0.256833	16.3021			0.25269	18.7857	19.8511
0.250001	30.7756	33.1589		0.211454	53.4313			0.258066	34.9466			0.215247	36.2974			0.25532	11.5375			0.226416	11.1014			0.262296	15.8909			0.258065	18.0666
0.255211	28.6456			0.215861	54.7416			0.263444	33.7246			0.219733	35.2548			0.260638	11.2552			0.231132	11.5911			0.267759	16.2337			0.26344	17.6561
0.260415	29.4746			0.220262	57.0837			0.268816	31.8402			0.224213	34.8505			0.265956	10.7194			0.235847	11.2803			0.273221	16.5216			0.268814	17.2097
0.265624	28.9952			0.224669	56.3256			0.274193	31.3333			0.228698	37.5661			0.271278	10.5397			0.240568	10.57			0.27869	17.3677			0.274195	17.0472
0.270834	30.2856			0.229075	54.3108			0.279571	29.4907			0.233184	36.9109			0.276596	10.8001			0.245283	10.3556			0.284153	16.8396			0.279569	16.3776
0.276043	29.0714			0.233481	52.1924			0.284949	29.7987			0.237669	35.9875			0.281914	10.3994			0.249999	9.96407			0.289616	15.3181			0.284944	16.1758
0.281253	28.6687			0.237887	52.7294			0.290326	29.4444			0.242154	34.8067			0.287237	10.3006			0.254719	9.92934	11.3225		0.295084	15.9573			0.290324	16.379
0.286457	27.2752			0.242289	50.8814			0.295698	28.2593			0.246635	34.8748			0.292554	10.4498			0.259435	10.1459			0.300547	15.1911			0.295699	17.3852
0.291666	26.3337			0.246695	47.7244			0.301076	28.875	30.857		0.25112	35.2557	35.8803		0.297872	9.67522			0.26415	9.74762			0.30601	15.0334	16.0655		0.301074	16.7643	17.0068
0.296876	25.2742			0.251102	46.0683	52.6495		0.306453	29.1759			0.255605	34.0229			0.303189	10.1401	10.5817		0.268866	8.79676			0.311473	14.019			0.306449	15.8784
0.302086	24.9213	27.8946		0.255508	46.0417			0.311831	27.4977			0.260091	33.7631			0.308512	10.1005			0.273586	8.8545			0.316941	13.0444			0.311829	15.4805
0.307289	24.8382			0.259909	44.1742			0.317202	29.0301			0.264571	36.6702			0.31383	10.3539			0.278302	9.43071			0.322404	13.3683			0.317204	14.5261
0.312499	26.7549			0.264316	44.8387			0.32258	28.7153			0.269057	35.2899			0.319148	10.2945			0.283018	9.90059			0.327867	13.4593			0.322578	14.4034
0.317708	25.6644			0.268722	43.687			0.327958	28.6597			0.273542	34.5379			0.324471	10.1328			0.287738	9.69685			0.333335	13.462			0.327959	14.3368
0.322918	26.2808			0.273128	43.5394			0.333335	28.5023			0.278027	34.7229			0.329788	9.62559			0.292454	9.58487			0.338798	13.4648			0.333333	13.8395
0.328128	26.5693			0.277535	41.7447			0.338713	28.0185			0.282513	34.4378			0.335106	9.04878			0.297169	9.67021			0.344261	13.9626			0.338708	12.8527
0.333331	26.8041			0.281936	42.5511			0.344085	27.4375			0.286993	34.5014			0.340423	9.18483			0.301885	9.5263	9.53544		0.349724	13.2058			0.344083	12.4655
0.338541	27.5732			0.286342	41.1751			0.349462	27.7731			0.291478	32.0374			0.345746	8.90943	9.70629		0.306605	10.1917			0.355192	13.4088	13.4883		0.349463	13.0065
0.343751	27.967			0.290749	39.3456			0.35484	28.6459	28.3456		0.295964	31.1724			0.351064	8.29827			0.311321	9.50627			0.360655	12.9429			0.354838	12.5997	13.9389
0.34896	27.7696			0.295155	38.4354			0.360217	27.3102			0.300449	32.4513	33.9643		0.356382	8.68264			0.316036	9.32861			0.366118	12.9914			0.360213	12.6459
0.35417	25.0854	26.5307		0.299561	36.7927			0.365595	25.1388			0.304934	32.3105			0.361705	8.70783			0.320757	8.93722			0.371586	14.066			0.365593	11.915
0.359373	24.8739			0.303963	37.1549	41.6234		0.370967	23.449			0.309415	32.3847			0.367022	8.45024			0.325472	9.02663			0.377049	13.8118			0.370968	12.5014
0.364583	22.7627			0.308369	33.6181			0.376344	25.2686			0.3139	30.6359			0.37234	8.42713			0.330188	9.28055			0.382512	13.2058			0.376342	12.1442
0.369793	24.2648			0.312775	30.5188			0.381722	25.4306			0.318385	29.6956			0.377657	8.5448			0.334904	8.71367			0.387975	13.1514			0.381717	12.7061
0.375002	24.6391			0.317182	31.1075			0.3871	25.5047			0.322871	29.675			0.38298	8.63711			0.339624	8.69104			0.393443	14.4471			0.387097	12.6943
0.380206	24.9871			0.321583	30.4165			0.392471	24.9352			0.327351	29.5421			0.388298	8.74626			0.34434	7.55807			0.398906	13.4357			0.392472	12.0124
0.385416	25.2234			0.325989	32.4864			0.397849	24.9097			0.331837	29.9766			0.393616	8.61308			0.349055	7.453			0.404369	13.7556	13.5342		0.397847	11.7054
0.390625	27.4124			0.330396	32.6055			0.403227	25.1181	25.2294		0.336322	30.4429			0.398939	8.16766			0.353776	7.21419	8.71827		0.409838	13.3274			0.403227	11.5831	12.212
0.395835	26.7621			0.334802	30.8455			0.408604	24.5903			0.340807	32.0102			0.404256	8.38308	8.51437		0.358491	7.84523			0.4153	12.5253			0.408602	11.1607
0.401044	26.1062	25.2258		0.339208	31.4346			0.413982	24.5741			0.345293	30.2995			0.409574	8.16863			0.363207	7.14424			0.420763	12.8692			0.413977	11.5557
0.406248	25.5697			0.34361	29.7417			0.419354	24.0416			0.349773	29.1945			0.414891	8.16227			0.367922	7.22964			0.426226	12.7589			0.419351	10.6938
0.411458	23.3899			0.348016	29.8519			0.424731	22.9398			0.354258	28.482	30.3875		0.420214	8.20396			0.372643	7.14018			0.431695	12.6891			0.424732	10.3078
0.416667	23.3154			0.352423	30.6195	31.2042		0.430109	22.8102			0.358744	27.1371			0.425532	8.34161			0.377358	7.04017			0.437158	12.6919			0.430106	10.5197
0.421877	21.2434			0.356829	30.8965			0.435486	23.2361			0.363229	26.9957			0.43085	8.17903			0.382074	6.83265			0.44262	12.1914			0.435481	10.4869
0.427086	20.7576			0.361235	29.8348			0.440864	23.0348			0.367714	25.6283			0.436173	7.76786			0.386794	6.74501			0.448089	12.0987			0.440861	10.3729
0.43229	20.9357			0.365637	26.99			0.446236	23.75			0.372195	25.5527			0.44149	8.4435			0.39151	7.01662			0.453552	12.0284	12.5756		0.446236	11.1046
0.4375	20.6481			0.370043	27.6878			0.451613	23.6042	23.6201		0.37668	25.5156			0.446808	7.61795			0.396226	6.80325			0.459015	11.8202			0.451611	11.0478	10.8056
0.442709	21.1819			0.374449	28.2155			0.456991	21.3288			0.381166	24.2735			0.452125	7.01484	7.98885		0.400941	7.19228	7.19228		0.464477	11.6009			0.456986	10.909
0.447919	21.8331			0.378856	27.9045			0.462368	22.2963			0.385651	24.3953			0.457448	6.84198			0.405662	6.63112			0.469946	11.7037			0.462366	10.3068
0.453128	21.7439	22.0619		0.383262	28.1557			0.467746	20.7523			0.390136	24.9362			0.462766	6.74077			0.410377	7.03727			0.475409	12.9743			0.467741	10.4523
0.458332	22.4125			0.387663	27.0558			0.473118	21.3935			0.394617	24.654			0.468084	7.48576			0.415093	7.31059			0.480872	12.5973			0.473115	9.98957
0.463542	22.092			0.39207	24.5103			0.478495	21.2569			0.399102	25.5645			0.473407	7.09343			0.419813	6.87033			0.48634	12.8912			0.478495	9.42789
0.468751	22.2987			0.396476	25.4429			0.483873	20.875			0.403587	24.4403	25.3721		0.478724	7.23171			0.424529	7.05844			0.491803	12.4994			0.48387	9.73631
0.473961	22.2364			0.400882	24.0666	27.3418		0.489251	22.0672			0.408073	23.4548			0.484042	7.50068			0.429244	6.98079			0.497266	11.6233			0.489245	9.33597
0.479165	21.205			0.405284	24.0028			0.494622	22.125			0.412553	24.3274			0.489359	6.5963			0.43396	7.18239			0.502729	11.9704	12.1867		0.49462	9.48781
0.484374	21.6776			0.40969	23.1879			0.5	24.0949	21.7989		0.417038	24.1762			0.494682	7.11443			0.43868	6.96456			0.508197	11.7981			0.5	9.72498	9.93007
0.489584	22.9837			0.414096	23.6984			0.505378	24.3332			0.421524	25.2212			0.5	6.90635	7.05682		0.443396	6.7893			0.51366	10.4432			0.505375	9.9783
0.494793	23.3343			0.418503	23.9592			0.510755	25.1829			0.426009	25.3881			0.505318	6.73768			0.448112	6.91783			0.519123	10.7509			0.51075	9.64811
0.500003	22.6858	22.3251		0.422909	24.1613			0.516133	25.1088			0.430494	25.0373			0.510641	6.28745			0.452832	6.81089	6.95941		0.524591	11.3316			0.51613	9.67699
0.505207	22.3319			0.42731	22.897			0.521505	25.1296			0.434975	26.2385			0.515958	6.44838			0.457548	6.90633			0.530054	11.367			0.521505	9.46587
0.510416	22.3366			0.431717	22.8904			0.526882	24.8982			0.43946	28.9072			0.521276	6.68324			0.462263	7.2448			0.535517	11.1348			0.526879	9.26643
0.515626	21.8655			0.436123	23.1171			0.53226	23.9075			0.443946	30.5895			0.526593	6.58878			0.466979	6.74199			0.54098	11.3464			0.532254	8.60029
0.520835	22.4137			0.440529	23.1776			0.537637	24.1135			0.448431	30.5377			0.531916	6.23891			0.471699	6.87768			0.546448	11.3129			0.537634	9.23611
0.526045	22.0974			0.444936	22.4651			0.543015	23.4237			0.452916	30.0664	26.7222		0.537234	6.41979			0.476415	6.25271			0.551911	11.5517	11.2263		0.543009	9.08496
0.531249	22.9827			0.449337	21.7678			0.548387	23.9769			0.457397	28.0408			0.542552	6.71267			0.48113	7.05699			0.557374	11.3252			0.548384	9.09827
0.536458	22.4475			0.453743	21.3262	23.0542		0.553764	24.2361	24.431		0.461882	25.4089			0.547875	6.69138			0.485851	6.99842			0.562842	11.235			0.553764	8.94917	9.30045
0.541668	22.892			0.45815	20.8098			0.559142	24.6621			0.466367	24.0912			0.553192	6.90756	6.57158		0.490566	6.87805			0.568305	10.3739			0.559139	9.43841
0.546877	21.7381			0.462556	20.2082			0.56452	24.4792			0.470853	22.8394			0.55851	7.35215			0.495282	6.3155			0.573768	11.6078			0.564514	8.70703
0.552081	22.4629	22.3568		0.466958	20.7783			0.569891	24.7939			0.475333	23.0463			0.563833	7.01093			0.500002	7.12666	6.83991		0.579237	10.3174			0.569894	8.97976
0.557291	20.9797			0.471364	21.2536			0.575269	24.2616			0.479818	23.3425			0.56915	6.80226			0.504718	6.39441			0.5847	11.0337			0.575268	9.22447
0.5625	20.3537			0.47577	20.6911			0.580646	22.9305			0.484304	24.8379			0.574468	6.69267			0.509434	6.16528			0.590162	11.9322			0.580643	9.02853
0.56771	21.5047			0.480176	20.5347			0.586024	23.5671			0.488789	24.568			0.579786	6.96563			0.514149	6.35382			0.595625	11.7999			0.586018	9.49737
0.572919	20.5114			0.484583	22.3121			0.591402	23.9352			0.493274	24.6111			0.585109	6.92802			0.51887	6.66842			0.601094	12.6465	11.3635		0.591398	9.49514
0.578123	20.6433			0.488984	24.381			0.596773	24.368			0.497755	23.9726			0.590426	7.07925			0.523585	6.33906			0.606557	11.995			0.596773	9.91777
0.583333	20.8429			0.493391	22.8122			0.602151	25.1922	24.2433		0.50224	24.9305	24.5172		0.595744	7.1308			0.528301	6.59242			0.612019	12.0601			0.602148	9.41491	9.30038
0.588542	19.9921			0.497797	22.5971			0.607529	25.5742			0.506726	23.9032			0.601067	7.48364	7.04948		0.533021	6.26576			0.617488	12.4214			0.607528	9.22371
0.593752	21.4255			0.502203	23.4572	21.8032		0.612906	26.5879			0.511211	24.7187			0.606384	7.39308			0.537737	6.67657			0.622951	11.7136			0.612903	9.50197
0.598961	21.8201			0.506609	22.5479			0.618284	25.956			0.515696	23.4453			0.611702	7.2661			0.542452	6.73648			0.628414	11.1234			0.618277	9.19484
0.604165	21.1765	20.925		0.511011	23.1806			0.623656	27.3033			0.520177	23.8617			0.61702	7.30857			0.547168	6.18355			0.633877	11.9288			0.623652	9.38158
0.609375	20.3408			0.515417	23.1918			0.629033	26.1574			0.524662	22.1011			0.622343	6.97962			0.551888	6.20486	6.41642		0.639345	12.6279			0.629032	8.82857
0.614584	21.5476			0.519824	21.4956			0.634411	28.6712			0.529147	22.4005			0.62766	7.22025			0.556604	6.47544			0.644808	12.8718			0.634407	8.84488
0.619794	20.8113			0.52423	21.1885			0.639788	27.5602			0.533633	23.3866			0.632978	7.71149			0.56132	5.84283			0.650271	12.6864	12.1587		0.639782	9.55272
0.625004	20.9769			0.528636	20.9915			0.645166	27.2384			0.538118	22.3354			0.638301	7.89978			0.56604	5.66831			0.655739	12.7554			0.645162	10.3595
0.630207	21.2335			0.533038	20.2439			0.650538	27.0301	26.8976		0.542598	22.2202			0.643618	8.20986			0.570756	5.71893			0.661202	12.6298			0.650537	10.3813	9.47434
0.635417	20.2866			0.537444	19.6517			0.655915	26.5069			0.547084	21.8407			0.648936	8.14599			0.575471	5.61116			0.666665	13.3316			0.655912	9.97677
0.640627	21.9017			0.54185	20.7404			0.661293	27.1945			0.551569	22.2442	22.9507		0.654254	7.31581	7.54505		0.580187	5.37576			0.672128	13.8084			0.661286	10.0575
0.645836	22.245			0.546257	20.8673			0.666671	28.7824			0.556054	23.3196			0.659577	7.80766			0.584907	4.80941			0.677596	15.0393			0.666667	10.1466
0.65104	22.7558	21.3443		0.550658	20.0364	21.285		0.672042	27.9538			0.560535	25.2054			0.664894	8.05093			0.589623	4.84755			0.683059	14.7774			0.672041	10.2818
0.656249	22.356			0.555064	20.7583			0.67742	26.0302			0.56502	24.6464			0.670212	8.34896			0.594338	5.47104			0.688522	15.0705			0.677416	10.3624
0.661459	22.4294			0.559471	20.9553			0.682798	28.9027			0.569506	23.2418			0.675535	7.97172			0.599059	5.04698			0.69399	14.3389			0.682796	10.4677
0.666669	23.1052			0.563877	21.1218			0.688175	29.7083			0.573991	24.1224			0.680852	7.85538			0.603774	4.91743	5.43499		0.699453	14.1087			0.688171	10.1249
0.671878	23.8343			0.568283	22.0314			0.693553	27.7939			0.578476	23.0285			0.68617	8.16612			0.60849	4.84529			0.704916	13.8227	13.9683		0.693546	9.99373
0.677082	23.5945			0.572685	22.4236			0.698924	28.8055			0.582957	23.0378			0.691488	8.46668			0.613206	5.01655			0.710379	15.4598			0.698921	9.84869
0.682292	24.0919			0.577091	21.3312			0.704302	29.324	28.1002		0.587442	22.8836			0.696811	7.96023			0.617926	5.46743			0.715847	15.7809			0.704301	10.3499	10.161
0.687501	24.0543			0.581497	21.3226			0.70968	30.4236			0.591927	22.1978			0.702128	7.71319	7.71319		0.622642	5.38352			0.72131	15.1611			0.709676	9.8813
0.692711	24.6786			0.585904	22.2372			0.715057	29.3888			0.596413	22.5692			0.707446	7.99576			0.627357	4.97302			0.726773	14.633			0.71505	10.0658
0.69792	23.8999			0.59031	22.0715			0.720435	30.7917			0.600898	21.6325	23.2623		0.712769	8.31232			0.632078	5.28667			0.732241	15.1185			0.720431	10.536
0.703124	24.7712	23.6815		0.594711	20.6858			0.725807	29.426			0.605378	21.7435			0.718086	8.68765			0.636793	4.91633			0.737704	16.1129			0.725805	10.0765
0.708334	24.9676			0.599118	21.5994			0.731184	30.8332			0.609864	23.0625			0.723404	8.77354			0.641509	4.81047			0.743167	16.1422			0.73118	10.5482
0.713543	24.9155			0.603524	22.8775	21.618		0.736562	29.8912			0.614349	23.5651			0.728722	7.92971			0.646224	4.79473			0.74863	16.8823			0.736555	10.6478
0.718753	25.0867			0.60793	20.9024			0.741939	30.7293			0.618834	25.0074			0.734044	7.97133			0.650945	4.67182	5.01658		0.754099	15.9658	15.6952		0.741935	10.9893
0.723957	26.3897			0.612332	20.2408			0.747311	32.2222			0.623315	26.9588			0.739362	8.06973			0.65566	5.19643			0.759561	16.6304			0.74731	11.4464
0.729166	25.8343			0.616738	19.1203			0.752689	32.1041	30.6456		0.6278	27.1009			0.74468	8.35169			0.660376	5.24958			0.765024	17.4524			0.752685	12.2863	10.7197
0.734376	25.4178			0.621144	18.5786			0.758066	29.5509			0.632286	26.8447			0.750003	7.58883	8.18673		0.665096	5.55621			0.770493	17.2229			0.758065	12.2873
0.739585	24.3415			0.625551	19.7453			0.763444	30.4908			0.636771	27.6671			0.75532	7.35796			0.669812	5.39972			0.775956	18.6101			0.76344	11.8792
0.744795	25.9066			0.629957	21.0083			0.768822	30.9398			0.641256	26.3893			0.760638	7.00261			0.674528	5.56751			0.781418	18.6588			0.768814	11.4496
0.749999	25.9542			0.634359	22.1896			0.774193	30.1064			0.645737	23.1154			0.765956	7.06167			0.679243	4.92883			0.786881	18.3837			0.774189	11.7082
0.755208	26.732	25.5546		0.638765	23.2228			0.779571	30.1691			0.650222	21.9921	24.8588		0.771278	6.72819			0.683964	5.19096			0.79235	19.3702			0.779569	11.4511
0.760418	28.4846			0.643171	23.3853			0.784949	30.1041			0.654707	23.4211			0.776596	5.88281			0.688679	6.11878			0.797813	19.1594			0.784944	11.5459
0.765627	29.5765			0.647577	20.9623			0.790326	30.7384			0.659193	24.7277			0.781914	6.19233			0.693395	5.48184			0.803276	19.1548	18.2937		0.790319	11.8635
0.770837	29.5162			0.651984	20.2613	20.8743		0.795704	28.5371			0.663678	25.3486			0.787237	5.54783			0.698115	5.31592			0.808744	20.3984			0.795699	12.0807
0.776041	30.1968			0.656385	19.1865			0.801076	29.3402	29.9974		0.668159	24.9314			0.792554	5.17188			0.702831	5.35816	5.39672		0.814207	20.5431			0.801074	12.5342	11.8666
0.78125	28.7363			0.660792	19.3409			0.806453	29.7708			0.672644	25.6422			0.797872	5.28353			0.707546	5.64509			0.81967	20.8482			0.806449	12.2866
0.78646	28.6316			0.665198	18.7375			0.811831	30.5879			0.677129	25.6477			0.803189	4.23211	6.04609		0.712262	5.78263			0.825133	20.4019			0.811823	12.6742
0.791669	30.0263			0.669604	19.2724			0.817208	30.6459			0.681615	24.6784			0.808512	4.17012			0.716982	5.21234			0.830601	20.9936			0.817204	12.9776
0.796879	32.9369			0.674011	19.6718			0.822586	32.4884			0.6861	27.4224			0.81383	3.98403			0.721698	5.02731			0.836064	21.438			0.822578	12.8266
0.802083	32.5785	30.076		0.678412	20.4613			0.827958	32.669			0.69058	27.4575			0.819148	4.35837			0.726414	4.97366			0.841527	22.1431			0.827953	13.3792
0.807292	34.0675			0.682818	21.4645			0.833335	32.9954			0.695066	27.428			0.824471	3.74652			0.731134	5.54739			0.846995	21.7182			0.833333	13.0737
0.812502	35.4895			0.687225	21.8827			0.838713	35.1481			0.699551	27.3362			0.829788	3.68973			0.73585	5.58705			0.852458	22.2948	22.2948		0.838708	12.7073
0.817711	36.1019			0.691631	22.7002			0.84409	34.5857			0.704036	27.7379	25.9816		0.835106	3.57601			0.740565	5.56202			0.857921	21.3844			0.844083	12.2514
0.822915	39.6085			0.696032	23.0631			0.849462	29.7476			0.708517	26.2648			0.840423	3.11658			0.745281	5.58156			0.863384	22.0399			0.849458	12.58
0.828125	41.2888			0.700439	22.8891	20.7882		0.85484	26.2686	31.4907		0.713002	26.8089			0.845746	2.79601			0.750001	6.05507	5.49741		0.868852	22.656			0.854838	12.8307	12.7587
0.833334	44.2026			0.704845	22.3031			0.860217	22.8033			0.717487	29.2468			0.851064	2.80441	3.58242		0.754717	5.76308			0.874315	22.8638			0.860213	12.3807
0.838544	44.4951			0.709251	23.8382			0.865595	18.7106			0.721973	29.6224			0.856382	2.57253			0.759432	5.84289			0.879778	22.1769			0.865587	11.9494
0.843753	45.982			0.713658	24.5043			0.870973	15.9352			0.726458	30.0998			0.861705	2.22167			0.764153	6.10978			0.885246	21.2017			0.870968	12.0128
0.848957	47.5223			0.718059	23.7069			0.876344	13.5			0.730939	30.4781			0.867022	2.209			0.768868	6.61888			0.890709	21.0167			0.876342	11.3094
0.854167	49.9808	41.8739		0.722465	24.2846			0.881722	11.7616			0.735424	27.3087			0.87234	1.92859			0.773584	6.25162			0.896172	20.9377			0.881717	10.249
0.859376	47.8423			0.726872	23.8616			0.8871	10.5254			0.739909	23.536			0.877657	1.8001			0.7783	6.33901			0.901635	18.752	21.4477		0.887092	11.1554
0.864586	48.2077			0.731278	24.1989			0.892477	9.02544			0.744395	23.0436			0.88298	1.56613			0.78302	6.16017			0.907103	18.578			0.892472	10.9888
0.869795	46.7743			0.735684	24.6639			0.897855	8.62736			0.74888	21.4664			0.888298	1.64091			0.787736	5.98768			0.912566	16.7002			0.897847	10.734
0.874999	42.6062			0.740086	24.3539			0.903227	7.43982	13.1476		0.75336	22.9287	26.4367		0.893616	1.2836			0.792451	5.90717			0.918029	16.7387			0.903222	10.3089	11.232
0.880209	40.1555			0.744492	25.5167			0.908604	7.33798			0.757846	24.3129			0.898939	1.00438			0.797172	6.33359			0.923498	16.6002			0.908602	10.4838
0.885418	38.0587			0.748898	24.73			0.913982	6.8218			0.762331	24.8663			0.904256	1.05697	1.72839		0.801887	5.85834	6.10656		0.92896	15.119			0.913977	9.11998
0.890628	37.9941			0.753305	25.1551	24.2598		0.919359	6.36351			0.766816	24.0765			0.909574	1.02878			0.806603	6.35828			0.934423	13.3787			0.919351	8.92235
0.895832	36.4617			0.757706	25.2522			0.924731	6.60654			0.771297	24.3997			0.914897	0.925992			0.811323	5.61339			0.939892	11.1498			0.924732	8.10815
0.901041	35.1079	41.4676		0.762113	24.4157			0.930109	6.53935			0.775782	24.4856			0.920214	0.712292			0.816039	5.93748			0.945355	10.6276			0.930106	7.27739
0.906251	32.949			0.766519	24.8801			0.935486	5.72691			0.780267	25.8235			0.925532	0.892717			0.820754	5.43662			0.950818	9.15925	14.2279		0.935481	6.74752
0.91146	29.7555			0.770925	26.4985			0.940864	5.06249			0.784753	26.2401			0.93085	0.820817			0.82547	5.42049			0.95628	8.75468			0.940856	6.31516
0.91667	26.2576			0.775331	26.1849			0.946242	4.78939			0.789238	27.2544			0.936173	0.964658			0.83019	5.77207			0.961749	7.03931			0.946236	6.06699
0.921874	21.9396			0.779733	26.3056			0.951613	4.50921	5.97302		0.793719	28.8022			0.94149	0.637808			0.834906	5.27587			0.967212	6.77478			0.951611	5.44525	7.60962
0.927083	18.8015			0.784139	24.4699			0.956991	3.47687			0.798204	29.2006			0.946808	0.824842			0.839622	5.34443			0.972675	5.1854			0.956986	5.03303
0.932293	15.6545			0.788546	23.5753			0.962368	3.23619			0.802689	29.3638	26.2569		0.952131	0.702517	0.834491		0.844342	4.98894			0.978143	4.97096			0.962366	4.60998
0.937502	13.2723			0.792952	23.3145			0.967746	3.78942			0.807175	29.4018			0.957448	0.777683			0.849058	4.62338			0.983606	4.53962			0.967741	4.40731
0.942712	12.7522			0.797358	23.2159			0.973124	3.92826			0.81166	30.0497			0.962766	0.697058			0.853773	5.4984	5.47903		0.989069	3.95797			0.973115	4.14325
0.947916	11.6406			0.80176	22.5565	24.6063		0.978495	4.67134			0.81614	32.6349			0.968084	0.595625			0.858489	4.682			0.994532	4.31929			0.97849	3.52168
0.953125	9.43414	19.2457		0.806166	23.1126			0.983873	4.6296			0.820626	35.7165			0.973407	0.646742			0.863209	4.35967			1	3.59004	5.45912		0.98387	3.42549
0.958335	7.57315			0.810572	22.6503			0.989251	3.62036			0.825111	35.1415			0.978724	0.6174			0.867925	4.29809							0.989245	2.95982
0.963545	6.44682			0.814979	24.6373			0.994628	2.61107			0.829596	35.7607			0.984042	0.671308			0.87264	4.12794							0.99462	3.09324
0.968748	4.43611			0.81938	23.2083			1	1.56021	3.50259		0.834077	34.8043			0.989365	0.750458			0.877361	4.06783							1	3.11499	3.81209
0.973958	3.60475			0.823786	21.5281							0.838562	34.9067			0.994682	0.531042			0.882076	3.94097
0.979167	3.25415			0.828193	21.7741							0.843047	31.7114			1	0.484833	0.64135		0.886792	3.61252
0.984377	2.54657			0.832599	21.0323							0.847533	31.1915							0.891508	3.80708
0.989587	1.53237			0.837005	22.1089							0.852018	31.2002	32.9563						0.896228	3.45453
0.99479	1.28122			0.841407	22.1607							0.856499	30.588							0.900944	3.17996	3.95306
1	0.737333	3.49027		0.845813	21.8199							0.860984	30.6292							0.905659	3.16739
				0.850219	21.3726	22.3096						0.865469	30.6514							0.91038	2.99183
				0.854626	20.4204							0.869955	30.7486							0.915095	3.0626
				0.859032	19.6514							0.87444	31.4092							0.919811	2.92271
				0.863433	16.8521							0.87892	31.546							0.924526	2.87923
				0.86784	15.9773							0.883406	32.0041							0.929247	2.96722
				0.872246	15.8093							0.887891	30.434							0.933962	2.63784
				0.876652	15.2263							0.892376	30.2235							0.938678	2.14615
				0.881059	15.0493							0.896862	27.9512							0.943398	2.11912
				0.88546	14.2794							0.901342	28.5353	30.4291						0.948114	2.67935
				0.889866	13.6812							0.905828	29.155							0.95283	2.3262	2.71815
				0.894273	13.4049							0.910313	27.8202							0.957545	2.17328
				0.898679	14.2204							0.914798	27.4892							0.962266	1.68362
				0.903081	11.5684	15.5117						0.919279	26.4557							0.966981	2.06813
				0.907487	11.4309							0.923764	23.8651							0.971697	1.85034
				0.911893	11.158							0.928249	19.2283							0.976417	1.73069
				0.916299	10.4296							0.932735	14.8663							0.981133	2.07946
				0.920706	10.2936							0.93722	12.3742							0.985848	2.21514
				0.925107	9.80584							0.9417	10.5864							0.990564	1.83851
				0.929514	9.50779							0.946186	9.29234							0.995284	2.07031
				0.93392	9.71225							0.950671	6.6256	18.8871						1	1.79232	1.95018
				0.938326	10.2834							0.955156	4.86033
				0.942732	9.44935							0.959642	4.01877
				0.947134	7.93853							0.964122	3.33682
				0.95154	7.86804	9.80703						0.968608	2.68351
				0.955947	7.22587							0.973093	2.11543
				0.960353	6.31595							0.977578	1.68728
				0.964759	6.49194							0.982064	1.99716
				0.969161	7.41248							0.986544	1.59729
				0.973567	7.80273							0.991029	1.51327
				0.977973	6.80257							0.995515	1.67864
				0.98238	6.60211							1	1.46291	2.45013
				0.986781	5.92727
				0.991187	6.34992
				0.995594	6.53835
				1	6.42381	6.71755
