# Supplementary material for: Crumbs organizes the transport machinery by regulating apical levels of PI(4,5)P2 in Drosophila
Source: eLife. 2019 Nov 7;8:e50900. doi: 10.7554/eLife.50900 (PMC6881148; doi:10.7554/eLife.50900)
Supplement: Figure 3—source data 3. [file elife-50900-fig3-data3.xlsx]

## Sheet: Image12
X0	Y0	Y1	Y2	Y3	Y4	Y5	Y6	Y7	Y8	Y9	Y10	Y11	Y12	Y13	Y14	Y15	Y16	Y17	Y18	Y19	Y20			Ap-Basal to 1	Average intensities
0	14.2703	10.7923	7.3709	19.4529	9.2999	15.8721	12.8782	11.0393	15.8869	13.8214	19.7703	39.3926	19.3982	12.5346	18.7937	19.0869	19.3798	20.4901	29.4215	40.2553	17.9752			0	18.4373
0.0917	21.3077	11.5735	9.4355	19.6145	10.4609	13.4272	9.1183	11.2257	17.7898	17.5193	21.2937	52.5842	20.4114	10.2831	16.5955	21.4776	15.5101	15.4468	28.085	30.3469	19.9071			0.00413318	18.734
0.1834	20.9324	12.9802	10.2328	20.0919	14.2311	13.0555	14.7994	17.7803	19.223	20.2459	23.2161	59.081	25.9374	8.9227	14.6396	20.5308	14.3558	21.1777	37.1506	27.777	17.923			0.00826636	20.6802
0.275	19.2026	10.0646	11.632	15.4383	13.1597	12.2904	12.3529	15.1257	16.6525	23.7841	33.2073	51.43	30.1747	9.049	19.9567	24.6614	15.1101	27.795	42.2901	26.2226	21.5811			0.012395	21.4848
0.3667	21.3094	11.4224	9.2985	26.9821	18.0429	15.3357	8.9144	17.913	15.3109	21.2048	36.5642	46.2044	23.4247	13.0557	17.0957	25.6749	15.6453	30.8028	40.582	31.0821	20.9506			0.0165282	22.2294
0.4584	16.0157	8.6814	11.1952	21.3625	10.2615	11.6197	11.4558	12.5865	16.8674	19.5229	41.1653	32.4832	24.6167	14.3455	18.2451	48.7966	17.5442	21.19	37.3888	25.5073	24.9511			0.0206614	21.2287
0.5501	13.043	13.466	13.3927	26.8381	9.6656	10.1558	9.2993	13.5123	14.8268	20.0977	48.264	22.7983	26.0931	14.5836	24.5064	56.1291	22.6725	24.847	28.5813	33.1892	28.2776			0.0247946	22.5828
0.6418	16.604	9.9977	13.6194	29.9974	7.6254	14.3794	12.4205	17.4095	18.7876	24.5429	48.6168	17.5755	26.0082	13.433	26.4978	60.6279	24.9206	21.5355	29.8624	33.8509	23.198			0.0289278	23.4053
0.7334	19.5547	19.7236	16.1818	30.4162	13.3314	12.1661	14.434	11.9105	19.44	24.3866	48.3576	20.6539	20.0468	18.0191	33.7223	70.5688	22.5329	19.6176	27.4858	36.8676	22.0398			0.0330564	24.8313
0.8251	19.9751	11.859	18.1089	44.6283	13.961	10.8479	11.5848	13.7814	17.9102	19.0598	41.7918	16.8971	15.2925	16.1104	39.4408	78.2259	16.188	31.1887	17.1434	42.0886	18.3406			0.0371896	24.4964
0.9168	20.2019	12.9632	25.9059	41.9169	18.7768	12.9699	14.2895	10.7421	18.3875	23.25	34.5278	15.526	16.7489	14.9318	57.0476	67.3398	24.0409	29.8952	17.3888	55.9403	24.2186			0.0413228	26.5243
1.0085	16.6072	19.4904	25.524	48.2277	21.2768	15.13	13.095	13.6143	21.2645	20.8151	26.752	12.5787	18.7573	16.3443	58.6184	72.0481	24.325	41.529	17.6264	89.4276	17.402			0.045456	29.0692
1.1001	18.0853	15.1813	30.078	50.2866	20.0532	14.9751	9.7539	9.7496	18.8513	23.353	27.2362	15.0753	13.8766	13.8513	50.001	71.3531	23.5019	34.2335	20.0841	88.1391	32.7361			0.0495847	28.5931
1.1918	13.9904	16.3281	27.1451	62.8504	25.5016	16.2366	11.7563	11.9803	20.7964	22.3674	27.8925	18.592	10.03	15.1361	40.4402	50.8815	27.9732	29.6659	18.9007	87.6037	36.9664			0.0537178	28.2398
1.2835	18.8008	20.0439	28.3584	50.4529	30.2618	20.9377	15.7734	14.467	24.4592	22.8412	27.3345	17.7399	13.1781	25.3223	42.0316	46.0214	32.9531	21.5652	28.1575	98.3939	41.5679			0.057851	30.5077
1.3752	17.4095	16.0442	37.1151	63.3699	21.8635	12.1994	13.7044	19.0286	28.3393	23.6618	19.8727	16.2705	12.719	27.9	35.4687	40.661	31.706	26.9633	30.3897	99.1308	40.8735			0.0619842	30.2234
1.4669	22.9214	19.8768	32.743	50.0929	33.9904	14.874	10.4905	15.6138	32.6025	26.2622	14.4799	18.0346	15.0414	36.2592	33.4057	34.1596	30.4144	21.9517	30.6639	94.2671	29.7346			0.0661174	29.4228
1.5585	22.6171	17.4294	39.3007	58.1077	30.2504	17.7439	9.0248	14.1104	23.5328	30.4703	15.7102	11.8496	22.5196	27.2241	32.7788	31.246	27.3899	21.7207	33.1566	78.3179	27.4804			0.0702461	28.1896
1.6502	20.7573	16.8284	54.3066	59.8222	44.3802	18.5676	12.1821	20.243	15.0732	23.4516	12.0272	14.6353	17.5993	27.5105	33.4111	32.2258	32.4596	26.6998	28.8992	52.3276	26.9618			0.0743792	28.1128
1.7419	21.4853	17.7164	56.3325	64.3882	49.9416	19.2629	14.3491	18.21	28.8491	22.9291	16.7623	12.4002	20.9167	34.5683	25.1328	29.2232	42.4621	25.7232	25.4884	45.3459	34.2081			0.0785124	29.795
1.8336	17.0474	19.1156	53.6065	54.2373	65.2977	19.9902	12.17	21.5669	24.0939	24.4809	13.1965	12.601	12.9997	33.6137	29.0656	33.9627	32.7562	30.3117	22.0173	46.0253	41.3269			0.0826456	29.4992
1.9253	16.9709	17.9085	42.1099	67.9701	63.8592	24.359	13.3451	23.9775	25.356	21.1983	13.2169	18.4279	16.8851	45.4052	29.1364	27.1292	42.1493	29.436	24.108	39.5685	34.9245			0.0867788	30.3544
2.0169	14.2811	16.4609	41.4478	53.3258	57.9965	21.848	11.6111	21.4333	29.0276	21.567	15.0419	17.5845	13.3008	42.6094	31.5036	34.5672	50.3131	27.2949	28.401	29.5057	34.1216			0.0909075	29.202
2.1086	14.4892	19.1689	54.5245	44.3592	66.6591	24.1798	16.0926	24.1289	27.9115	20.4674	11.4092	14.2555	12.6328	44.4758	38.1467	26.492	60.1274	23.2857	35.3443	26.1136	33.1515			0.0950406	30.3531
2.2003	13.8484	18.5878	42.804	44.079	57.7644	24.8114	14.5699	20.3775	27.741	21.5153	13.9807	18.3662	12.4882	48.7153	36.59	26.2413	71.0184	16.9965	36.0251	26.8069	28.0152			0.0991738	29.5877
2.292	9.8334	18.2312	42.3338	55.9656	66.4675	22.3516	18.4948	18.3741	23.4894	23.7697	12.257	20.0474	15.1452	44.7468	32.6261	30.0074	60.9344	23.1193	30.6072	35.3069	25.2709			0.103307	29.9705
2.3836	11.0296	15.3967	34.8278	70.4851	59.7364	21.1762	17.1877	19.9957	18.3908	23.1949	12.6743	21.1426	14.9003	33.4033	36.5354	23.5181	60.8263	20.2455	31.7055	36.8556	30.5347			0.107436	29.2268
2.4753	15.3267	19.6444	30.2813	65.6908	64.778	31.5558	20.841	23.1218	22.7935	21.6939	18.8626	21.3863	13.7939	34.1677	36.9373	21.8781	48.8823	23.326	26.7143	27.4645	29.3873			0.111569	29.4537
2.567	16.1117	14.7218	31.3396	58.3084	85.2437	29.4337	21.259	27.3493	20.8892	20.6845	21.6881	12.7881	19.5034	34.1976	37.8026	25.1502	31.2433	20.6455	28.1087	22.602	16.1636			0.115702	28.3445
2.6587	16.7902	17.3845	20.0868	52.7772	76.9963	31.3602	17.4262	24.4372	21.1349	16.2821	19.2732	16.2229	16.1358	28.6988	36.7268	19.7894	32.7484	17.8803	28.8514	22.7414	18.1921			0.119835	26.2827
2.7504	18.7345	15.9465	28.5613	39.2292	67.2643	34.0949	22.9059	30.7304	31.417	21.8952	25.3242	14.2087	18.4938	31.2275	38.1922	15.3734	24.3317	15.8627	27.8992	23.0825	15.576			0.123968	26.6834
2.842	12.8929	19.6474	17.2638	34.6079	62.4206	33.3171	19.6184	32.412	22.8996	26.0014	18.5224	12.2297	18.1254	34.1488	35.2772	25.6771	11.8699	21.3229	32.4891	26.2538	16.8282			0.128097	25.4203
2.9337	9.8798	23.5508	22.978	37.0696	59.0324	30.4453	21.0997	43.3389	29.5061	24.9879	12.9668	14.5188	16.998	33.2313	32.1787	23.8613	13.8316	23.6558	33.1232	23.325	19.6033			0.13223	26.1515
3.0254	10.3825	30.5063	27.5826	26.082	51.4504	31.6249	22.3608	30.7899	25.9791	30.0738	16.2043	14.7777	13.2358	35.9163	28.8329	20.0242	11.9558	23.4751	36.1062	18.5219	25.2861			0.136363	25.2937
3.1171	10.7094	30.5199	20.1939	23.0524	58.1213	29.9625	17.2814	25.3271	34.433	33.3131	14.8346	13.8126	15.5099	36.024	29.4251	26.3459	12.3713	24.7251	22.4697	15.541	22.8877			0.140497	24.6124
3.2088	10.5453	36.0767	20.601	25.2448	46.4473	23.6699	13.7765	24.2305	33.919	29.5005	14.6971	13.2051	11.2129	48.7562	41.3859	26.205	14.1917	30.9581	23.1336	16.9581	22.1937			0.14463	25.0909
3.3004	11.6777	31.7818	23.0383	14.0287	47.6598	20.2635	12.5956	25.7281	37.9224	31.4545	16.4005	14.3405	12.4339	55.816	45.6644	21.2949	11.6604	38.7472	23.6985	22.5576	24.8674			0.148758	25.8872
3.3921	10.8261	32.4577	22.2927	24.0299	35.1703	25.9816	17.68	13.9499	40.6094	24.3277	16.1958	14.5886	14.0564	48.0921	50.7454	22.4199	13.4175	40.7463	15.7556	17.6449	30.9163			0.152892	25.3288
3.4838	16.289	33.8516	24.1297	25.2286	32.9762	26.1257	13.8226	11.3408	46.4242	22.4021	16.8442	11.9926	16.6518	32.5995	45.0525	17.2566	16.0113	45.1034	14.6463	18.2351	21.7405			0.157025	24.225
3.5755	17.721	35.4123	18.7933	19.6316	28.3733	31.0519	18.8323	12.0919	36.7321	23.3098	11.425	14.687	11.8606	32.0501	36.3673	13.3988	16.7823	41.4429	17.3513	14.9008	20.3876			0.161158	22.5049
3.6672	18.0231	29.88	20.8769	20.3872	29.8107	22.4862	18.8614	11.3797	29.7554	14.919	12.8797	18.123	11.2599	25.0113	43.8613	12.86	13.1132	43.5752	16.0044	14.4977	16.4893			0.165291	21.1455
3.7588	14.1761	38.9324	18.9191	24.4724	30.7074	23.0856	24.4343	17.8394	20.9352	19.4608	11.5558	19.9946	11.3856	27.1809	34.7605	15.9055	15.0542	47.6775	15.4666	16.9091	24.3904			0.16942	22.5354
3.8505	11.4142	29.1839	17.3583	25.1177	40.9091	22.2448	30.9641	14.5291	18.0907	19.3648	10.9627	13.6563	12.0517	24.3101	24.134	11.5638	20.6107	38.7126	15.992	14.4681	20.2528			0.173553	20.7567
3.9422	15.6707	20.9255	13.8349	20.2717	41.1761	26.1369	34.7506	13.7587	16.8051	18.1607	13.2552	12.1524	18.5159	21.888	21.9691	12.649	19.9271	45.1584	16.9486	18.2462	24.6721			0.177686	21.2797
4.0339	16.383	19.3613	13.5646	18.6362	39.5221	24.9557	18.9407	10.2744	13.4089	19.3274	9.2568	11.5783	13.556	19.6856	19.2541	18.5912	18.4926	34.5474	14.6111	12.2538	19.1256			0.181819	18.3489
4.1255	12.1925	17.8094	12.6675	17.4935	27.3266	30.1093	15.5868	9.9142	10.3182	20.1295	8.0424	14.2463	14.7204	18.4349	14.1941	20.3159	18.6492	35.7631	18.3702	12.233	20.5688			0.185948	17.5755
4.2172	8.48	23.2649	12.6427	16.8919	26.1507	25.4833	12.9747	19.3955	14.7037	20.7552	11.1329	13.0619	11.8407	16.3127	18.1165	28.5584	12.8529	47.5311	14.7463	11.5226	18.3668			0.190081	18.3231
4.3089	13.0229	22.4972	10.7584	18.59	23.6503	20.9703	17.3326	16.4411	12.0071	21.7356	8.9721	11.2452	10.8541	19.8588	21.4838	24.5755	22.0442	40.367	11.5265	11.3624	20.1793			0.194214	18.0702
4.4006	11.4661	25.3908	14.1269	20.3576	24.3789	17.928	13.9745	14.4925	11.4575	15.3243	11.9177	8.8186	9.8414	16.9003	28.6706	18.5558	22.7717	36.3619	15.3894	12.6299	16.5715			0.198348	17.4917
4.4923	12.4704	16.2693	13.4263	19.2813	26.1107	20.3542	13.833	14.6421	10.578	13.2205	10.3845	10.8412	12.2058	16.0087	21.8954	16.8985	24.2651	29.2123	13.767	10.7267	11.7395			0.202481	16.1015
4.5839	11.8671	17.0705	14.2655	18.0319	20.9095	18.8523	13.4615	15.9139	11.2331	12.8103	10.2503	12.8808	10.5212	15.1755	27.9121	12.6118	19.0485	22.5708	10.9295	9.8464	12.5051			0.206609	15.1746
4.6756	11.6781	13.9907	13.4468	13.8534	26.6521	20.1864	23.1145	17.8633	10.005	11.5502	7.5538	6.3988	10.3928	11.927	26.8411	13.8362	14.2973	20.282	13.7728	9.4235	14.991			0.210743	14.8598
4.7673	12.4873	16.7469	15.2528	14.1645	26.4922	19.731	22.2117	23.5986	13.9413	9.5284	12.6622	6.372	12.6634	12.7168	17.8568	17.0421	14.1048	13.9235	18.3619	9.7939	13.743			0.214876	15.3998
4.859	19.0142	23.6509	12.6327	12.2039	28.0375	22.0216	21.0882	17.4731	12.6497	9.9304	10.0175	7.799	10.3854	13.0217	14.7504	18.8411	20.4948	16.1419	12.6424	8.5787	8.7578			0.219009	15.2444
4.9507	25.123	18.6214	17.0296	12.4554	22.3426	15.9019	20.5207	15.4883	13.5786	12.2958	9.6127	9.1198	11.1906	11.8303	13.1762	20.0707	19.4243	11.6199	19.6042	12.083	12.7458			0.223142	15.4207
5.0423	15.4152	21.7513	12.2706	13.087	24.0197	13.8897	16.6348	14.4629	11.5979	9.3243	9.4142	7.2384	7.2223	10.206	13.3684	18.8743	22.5192	14.3163	16.2854	6.7934	17.4511			0.227271	14.102
5.134	24.1925	19.1574	15.6399	9.232	24.53	18.5577	12.3602	10.1571	10.6753	11.1624	8.8121	6.9625	9.1536	12.8243	11.8671	15.3145	24.8027	15.7361	16.1326	9.6358	18.9287			0.231404	14.5635
5.2257	16.9959	15.3935	14.5354	12.4253	17.9513	21.4198	14.8635	12.3393	10.5982	14.8446	10.5657	9.4307	7.3132	12.9866	13.0379	17.4518	20.5702	13.292	14.0251	8.1703	18.1031			0.235537	14.1102
5.3174	18.0673	14.0438	11.9713	11.0355	26.3176	16.4115	11.8156	16.086	10.0207	9.9549	9.0044	10.9321	9.3288	12.6014	12.4856	15.9172	18.1027	16.503	18.2561	10.4414	12.2954			0.23967	13.8853
5.409	13.4285	15.6141	10.9529	14.0043	17.8973	18.5779	11.1477	10.0762	15.5354	10.2318	10.3056	11.73	8.1905	9.7044	10.3665	14.1648	18.2593	14.9522	16.3963	8.7515	11.2258			0.243799	12.9292
5.5007	13.5918	16.7046	12.6352	14.5115	11.9727	14.2376	12.4723	12.7507	12.8311	7.2177	9.4436	11.0948	6.8945	11.8887	9.6046	17.8811	16.9265	18.3277	14.582	10.121	10.9796			0.247932	12.6985
5.5924	13.6722	11.3858	9.816	14.0506	17.8838	13.515	9.4175	10.1962	9.9754	6.4005	8.6772	10.2293	9.8249	10.3847	10.3938	18.8794	17.7883	13.9186	11.9686	11.4635	8.1155			0.252065	11.8075
5.6841	12.7491	12.134	11.5075	8.052	16.4928	13.4259	11.4811	11.1692	10.9463	7.9047	10.8712	11.5929	12.276	11.4924	9.3747	22.1562	18.0275	12.253	8.8151	11.8849	10.0225			0.256199	12.1252
5.7758	12.8594	12.0392	13.9337	7.438	12.6672	10.2758	10.3366	9.6295	8.9959	7.7266	7.0479	12.009	14.8651	14.9184	7.5584	16.6908	18.4045	15.7762	7.8788	13.181	10.6082			0.260332	11.6591
5.8674	11.2276	14.8797	12.5339	8.303	13.4489	11.1675	13.2768	8.2859	10.1481	7.1849	3.9606	10.9278	15.2589	10.5749	8.2138	15.0603	21.3462	16.2334	10.9811	9.7591	10.959			0.264461	11.6063
5.9591	12.9098	15.3049	15.9249	8.8135	13.5728	11.0669	14.732	11.2395	9.1961	6.0816	7.2913	9.6169	11.9095	7.1237	10.9683	13.1345	24.2118	15.1998	11.5426	12.7403	8.3632			0.268594	11.9497
6.0508	14.5719	12.8685	15.5333	9.1647	11.856	11.4978	18.0419	12.5755	11.6741	7.989	12.789	8.2692	10.2108	10.5714	12.7579	14.1084	21.1282	13.28	14.0874	12.5298	9.507			0.272727	12.6196
6.1425	10.123	13.2612	11.8244	9.1206	9.0758	8.5025	10.7679	11.9366	6.635	6.35	7.7896	7.5276	9.2809	8.8647	10.5879	12.5304	20.708	10.0892	13.4252	14.4548	10.3969			0.27686	10.6311
6.2342	13.897	11.8635	12.8576	9.4244	12.0722	7.3787	13.2455	13.0502	13.5584	8.9307	7.7877	8.6814	12.4207	10.6904	10.7779	13.8676	19.12	13.1726	9.6922	18.401	10.676			0.280993	11.9793
6.3258	11.866	16.3971	16.2261	7.8279	11.5083	8.0446	12.1586	12.8342	8.2469	8.0073	12.079	9.6375	9.2526	9.929	12.1337	17.206	15.113	9.7978	12.3763	18.3593	9.5408			0.285122	11.8353
6.4175	9.3595	14.9866	15.2063	7.1749	10.4844	9.8357	9.7467	7.4386	12.6183	9.5206	9.0287	10.7002	10.6724	13.2087	11.0545	15.9952	13.3884	13.8071	13.2479	20.8724	5.5722			0.289255	11.6152
6.5092	12.0144	14.3891	10.7678	7.2249	9.7521	8.4824	8.1815	12.3849	7.2249	12.5732	8.9824	7.9372	8.0986	11.175	14.1672	15.042	11.3781	13.458	9.9756	26.7857	11.7573			0.293388	11.512
6.6009	10.7562	9.8382	11.4393	9.6004	9.1818	9.0375	12.2073	11.5644	9.0642	11.7674	7.6318	6.5136	7.8877	12.7916	9.7928	14.4622	9.7414	8.435	10.6315	21.4975	11.659			0.297521	10.7381
6.6925	9.0128	16.0085	9.4242	12.6153	12.3123	9.1829	9.7998	10.7012	12.7366	10.1387	9.8684	6.7605	10.209	8.9224	12.5835	17.4521	11.9182	8.7574	7.7954	19.7635	12.7871			0.30165	11.369
6.7842	8.3386	8.7153	8.2511	12.5939	10.4788	8.7232	9.5307	10.991	11.9025	8.277	8.8452	7.4065	11.1564	9.7322	11.3798	14.7305	13.9617	8.9885	9.1189	11.9432	10.2149			0.305783	10.2514
6.8759	6.7209	10.6476	14.3467	12.4382	8.9935	7.4142	8.6732	10.9848	9.7562	7.1628	12.5488	9.5436	8.103	9.7421	12.5496	17.1017	14.6737	9.1055	12.1032	11.3603	10.2807			0.309916	10.6786
6.9676	7.7122	8.4618	12.7839	9.7377	14.0777	6.4683	6.2418	8.0768	11.4654	4.9535	10.6517	13.8088	6.3841	9.7945	9.5357	12.2859	11.9598	12.4612	13.4688	10.3886	9.9308			0.31405	10.0309
7.0593	9.711	12.4844	13.6847	9.7561	10.1314	7.4901	8.9162	11.9179	7.6591	6.6601	10.9431	13.1562	4.8019	7.8964	11.8288	10.7082	12.4203	8.9342	15.2204	8.9379	13.5931			0.318183	10.3263
7.1509	12.2827	19.7635	6.8986	7.8789	9.2275	8.8824	8.7021	12.7613	7.69	8.1216	9.6617	14.9644	6.9988	8.6324	10.5539	7.2121	13.7253	9.7813	17.0165	15.1665	13.4705			0.322312	10.9234
7.2426	13.3212	16.1509	12.8968	12.0064	6.9709	10.977	9.5716	14.022	9.8964	8.951	12.8354	14.776	5.385	12.5525	9.9895	6.9323	12.6022	11.5145	16.3086	20.4697	15.9393			0.326445	12.0985
7.3343	18.3587	13.2455	9.718	9.1735	9.6637	9.2196	7.1331	16.9045	8.5288	10.1067	9.4661	16.0393	6.4006	10.3986	7.666	8.8243	9.894	10.1638	20.3433	17.1583	14.5876			0.330578	11.5711
7.426	20.8045	15.7075	16.4613	7.6719	7.3917	8.6106	8.315	11.672	9.1593	10.6422	9.976	16.4821	6.8297	8.733	8.7187	7.7415	11.9208	9.6155	25.8302	12.4602	17.8482			0.334711	12.0282
7.5177	19.0153	13.8713	16.8212	9.6179	8.302	12.6589	7.4293	12.8683	7.6149	13.9208	9.8402	13.3374	8.2686	8.3373	8.8142	9.99	11.6743	7.6214	29.1318	13.8304	18.3099			0.338844	12.4417
7.6093	13.1053	11.1907	15.7766	10.1362	10.8703	10.4841	7.2589	13.4109	10.3253	10.3596	10.2517	14.446	9.2279	10.1872	12.0754	9.9888	12.9521	10.5133	23.439	16.3131	18.7915			0.342973	12.4335
7.701	9.4796	9.9472	15.0087	9.9403	7.497	9.3246	10.9482	12.2963	11.1623	10.0689	6.2194	12.0356	11.2374	5.7029	9.0247	12.7955	12.7899	12.0586	26.6368	10.799	16.458			0.347106	11.4967
7.7927	7.5534	12.453	15.6195	11.14	6.3457	7.8029	11.4342	12.1271	6.736	9.1828	9.5205	9.6514	9.2125	11.3327	8.7399	13.2842	12.2522	11.0833	20.3981	6.8588	19.5281			0.351239	11.0598
7.8844	8.2269	13.528	14.618	13.8279	9.3452	8.9678	10.4892	9.8636	6.7322	11.4113	6.2771	7.7138	10.0654	7.3245	8.4912	13.4257	12.1588	10.9512	25.0294	6.1927	17.7576			0.355372	11.0665
7.9761	7.8708	10.2643	11.5335	14.6003	7.5011	7.0859	7.7244	9.0385	6.2005	10.2265	6.1291	7.3949	8.7164	6.6623	7.5983	12.0992	17.8273	10.8106	24.5005	5.4659	17.9333			0.359506	10.3421
8.0677	13.0569	11.767	8.715	9.6119	9.0071	15.6532	7.4046	9.782	7.1776	14.4364	7.868	5.1095	8.8404	8.8521	7.5642	10.8111	20.787	12.6821	22.5898	6.7411	13.0445			0.363634	11.0239
8.1594	11.4815	8.9251	9.1144	9.458	9.5275	10.4221	11.1781	8.0531	10.58	14.4186	6.7059	6.9462	11.1782	8.6577	8.7237	13.5735	15.6548	11.2695	23.3207	5.9033	13.108			0.367767	10.8667
8.2511	14.9473	8.9744	7.1762	8.9648	8.1915	9.7939	8.6941	8.8057	11.0623	15.8334	9.1885	6.344	9.0605	9.1599	9.1574	10.4469	13.8965	12.866	26.1768	6.9164	12.0218			0.371901	10.8418
8.3428	7.6902	10.6076	13.9124	10.1169	8.8959	9.1872	8.1624	10.1596	10.2691	15.2053	6.7475	4.9608	12.5543	10.7992	9.9959	12.9185	12.7654	10.162	22.0361	6.1973	8.9825			0.376034	10.587
8.4344	10.3181	8.121	11.8907	11.8874	10.1603	8.8354	10.3379	7.9095	10.3665	13.2021	5.6239	7.7843	13.8658	6.3887	8.3507	10.4565	8.2469	14.7429	20.9751	10.4575	14.9787			0.380163	10.7095
8.5261	7.146	8.3423	10.5019	7.7893	9.9282	10.4938	12.8526	10.2005	7.8764	12.6086	8.8886	7.3542	14.1303	7.0471	9.4508	16.023	12.1918	12.4186	20.2484	5.7623	10.0798			0.384296	10.5397
8.6178	7.4434	6.7565	11.3178	7.9491	7.0254	11.9125	7.9968	9.323	7.7493	14.472	8.1955	6.3446	13.5754	11.9788	9.5408	13.784	9.955	10.614	19.9949	6.7094	11.5666			0.388429	10.2002
8.7095	11.4124	9.8498	9.9379	10.6943	10.4841	10.5937	7.9444	12.0202	7.6934	14.5457	10.9199	5.9224	19.6248	10.3955	11.3418	18.3061	14.5838	10.9829	18.1457	7.2667	14.0157			0.392562	11.7467
8.8012	12.1967	10.5214	8.1855	9.355	8.8782	12.6374	5.6064	12.4108	10.5265	15.7938	6.3749	4.9698	14.3005	13.2813	9.4355	17.8481	13.8303	12.0601	12.0347	7.0812	11.3114			0.396695	10.8876
8.8928	11.377	11.9462	10.2285	10.0147	11.2929	11.7663	7.9526	10.0266	8.4144	16.9959	12.6016	4.5693	15.2863	9.6536	8.2544	13.483	14.3667	11.8304	10.9416	7.1533	12.1994			0.400824	10.9693
8.9845	9.2766	13.0834	10.6562	9.6115	12.7399	8.6631	9.6114	10.1843	6.7309	13.6351	12.2064	5.7325	9.0962	8.7394	7.6863	10.8874	11.3748	18.0044	8.0775	4.608	14.5888			0.404957	10.2473
9.0762	12.5288	13.1492	11.5905	11.045	10.4262	9.5998	10.4102	12.5476	7.2668	14.8309	14.5958	2.2389	10.2769	11.9884	7.2846	12.4192	15.149	11.7378	9.0981	4.4704	10.962			0.40909	10.6484
9.1679	10.3957	9.969	9.1221	11.3093	13.8086	7.1491	12.2277	10.328	7.8025	14.4057	12.1703	3.7965	9.7878	10.1069	6.0411	13.6786	11.3197	11.4278	10.864	6.2168	7.5574			0.413223	9.97546
9.2596	10.4423	12.4824	10.0192	9.6203	13.6907	8.3724	11.6915	11.2559	7.0545	15.6569	8.4288	3.3676	10.2622	11.8253	7.3499	13.0042	11.3207	9.623	7.9395	8.3076	8.6754			0.417357	10.0186
9.3512	12.6964	11.2184	6.8073	13.0005	11.8676	7.3502	10.2309	6.4191	6.765	14.1872	16.1249	2.6494	10.2975	12.9508	8.3546	12.4892	11.3823	15.699	8.4959	11.8201	7.3049			0.421485	10.3862
9.4429	12.1966	9.3039	11.6018	13.0387	13.9481	7.6498	7.2452	8.9798	4.4193	12.1154	13.5139	4.4879	8.3216	13.9696	8.8594	10.7497	12.7532	14.3901	9.6301	10.831	5.8681			0.425619	10.1844
9.5346	8.072	10.5876	10.5374	13.8554	6.7278	7.3404	5.8506	9.4137	8.4685	11.3028	12.4614	3.9483	9.5646	9.651	8.8893	12.3354	14.8486	10.875	6.6831	9.9965	5.7674			0.429752	9.38937
9.6263	10.431	10.4289	9.0388	13.5734	8.2406	7.1981	8.4251	7.9404	5.5154	7.7984	16.7197	2.4134	5.6709	10.5044	7.0467	8.364	10.0865	7.1953	10.4777	6.5758	5.7713			0.433885	8.54361
9.7179	6.385	10.1521	6.5511	14.4139	9.0097	4.6992	7.691	9.288	7.2321	10.4493	16.6092	3.2592	6.6277	10.7331	11.1082	10.41	10.2867	10.4116	8.7494	5.1823	8.4583			0.438014	8.93843
9.8096	7.0509	11.4927	7.4026	12.5639	9.9749	6.0251	9.1993	5.7414	10.1426	15.4735	11.7127	1.8726	6.7368	9.106	11.2527	12.1919	9.22	9.751	5.4417	5.7222	8.9161			0.442147	8.90431
9.9013	9.3723	8.3075	9.5673	13.1293	6.6947	6.9215	10.7623	8.5671	8.1331	9.3726	9.7383	2.5287	7.4068	11.0497	14.0199	10.4866	8.5369	13.8815	9.9109	6.5837	9.6765			0.44628	9.26891
9.993	6.1354	7.8772	8.0152	11.5634	10.8032	5.9168	8.3993	10.3176	7.863	10.5178	7.8256	1.7111	6.837	11.5123	8.1256	10.3292	7.6752	13.6603	7.7556	6.6324	4.7988			0.450413	8.29867
10.0847	6.8677	10.2763	11.1006	13.5087	10.6732	7.309	11.3366	8.7118	9.8367	8.4116	7.7137	3.8211	4.4049	11.0973	6.1969	10.7323	7.91	10.754	5.9547	5.8273	4.6482			0.454546	8.43298
10.1763	9.2908	8.333	9.3429	9.8127	12.8933	7.2386	6.3686	7.3387	9.4768	9.7333	11.8352	4.0825	5.3693	12.1997	6.6955	10.2733	8.8298	12.8655	4.8115	7.5717	3.688			0.458675	8.4786
10.268	9.2608	8.7898	11.5063	8.1668	10.667	11.3786	9.1211	9.6187	10.0088	6.7335	13.0131	3.9121	5.5832	14.205	7.6172	9.9237	7.9465	10.1796	8.2794	9.6966	3.0506			0.462808	8.98373
10.3597	7.7343	8.3002	10.1264	10.3679	9.7289	7.8686	8.5959	8.2471	6.5399	6.8355	11.4354	2.409	2.6209	13.3489	10.9988	9.6653	11.7402	10.644	6.2053	6.2812	5.4264			0.466941	8.33905
10.4514	8.5556	8.9077	7.9009	10.2262	11.2563	6.3192	7.7526	4.9678	9.1705	8.8765	12.8502	6.9417	5.6874	18.7733	9.1148	12.6438	10.2332	9.6095	7.4471	8.5032	2.9266			0.471074	8.984
10.5431	9.3918	9.0088	7.7534	8.9574	11.0254	7.63	8.7741	6.2064	9.1361	9.6768	9.1359	4.8017	6.1999	13.691	10.6012	12.3571	12.9197	9.7436	8.348	11.2466	3.3662			0.475208	9.04624
10.6347	15.0598	11.1496	9.1404	11.1176	7.0818	4.5121	7.2157	8.8473	11.0623	13.2327	10.434	5.3274	6.5237	9.119	10.8537	10.2388	12.6913	12.7735	6.3767	5.7675	2.1052			0.479336	9.07762
10.7264	12.1584	7.664	10.3503	10.4777	13.4417	5.0705	7.6466	7.0308	10.9703	4.6092	7.1905	5.7091	8.307	13.4084	8.0954	10.4414	11.1989	10.0275	7.3832	7.0772	6.0511			0.48347	8.77663
10.8181	12.8791	7.2469	10.5179	11.2882	11.4484	4.3041	8.452	7.279	12.3211	8.3726	8.8592	4.761	3.6181	6.4636	9.0501	16.0183	12.7839	11.2054	7.1076	6.0018	4.1041			0.487603	8.76583
10.9098	8.4485	6.3212	12.3511	6.8336	14.3415	8.1928	8.0646	8.2508	7.461	8.1325	5.8909	8.8294	3.4088	8.1929	8.4025	17.1947	12.1526	11.4706	7.5537	10.1676	3.8149			0.491736	8.8322
11.0015	8.9093	8.0467	13.3955	7.3016	10.0916	8.5504	8.3129	6.714	11.218	9.3167	7.8636	8.0833	5.1707	6.1705	10.6806	12.6254	10.1456	13.0006	10.2892	7.7037	3.555			0.495869	8.91166
11.0931	12.041	9.2343	12.0639	5.9235	9.0235	13.0135	7.6418	5.9015	9.0535	7.7794	7.7435	6.9588	3.2556	10.7727	11.1313	16.8166	12.1132	11.3024	10.9902	7.4512	3.9453			0.499998	9.24556
11.1848	9.6655	5.5311	9.908	9.8403	12.9538	12.3682	8.2555	8.7652	8.6779	8.8756	5.674	4.9318	4.6934	13.0428	10.3615	11.9662	12.9286	19.7681	12.3036	7.1384	5.4589			0.504131	9.67183
11.2765	11.2322	8.651	10.8798	6.7773	9.0385	11.8019	11.2852	7.4139	6.9291	8.6354	4.0101	8.6534	4.157	9.6308	8.9137	9.4497	12.9155	18.8853	8.2029	7.9827	7.0502			0.508264	9.16646
11.3682	9.2952	11.7598	11.2841	7.4756	8.133	8.0447	7.2832	7.1987	8.9045	9.3723	6.7838	5.8742	5.6613	14.2179	10.6926	10.3944	14.4158	16.3899	6.1183	7.1871	7.644			0.512397	9.2443
11.4598	5.5628	10.2984	10.7831	7.839	5.747	8.4562	8.0026	8.1735	6.9578	11.0852	8.669	7.5501	4.4676	11.3728	7.3821	8.5579	17.8696	17.018	4.4848	8.3164	8.7126			0.516526	8.91936
11.5515	5.1031	8.3845	8.0158	11.49	5.955	11.9412	10.5034	9.1266	6.752	13.3206	6.1315	5.2702	3.3295	8.7162	6.75	15.8886	18.0763	18.2432	6.3363	6.2378	5.7414			0.520659	9.11015
11.6432	5.9815	9.9811	9.0562	9.0469	11.609	12.6671	6.6054	7.2722	5.7258	23.201	8.9974	7.1654	4.633	9.6667	12.8212	10.2437	15.7813	16.9779	4.0745	7.1127	7.0566			0.524792	9.79412
11.7349	7.2001	11.4558	9.483	8.8645	14.5645	11.9934	7.0291	6.3437	8.4859	20.5134	7.807	4.5971	3.521	7.1131	12.8084	10.7133	15.3051	17.6122	3.8237	6.8053	5.4374			0.528926	9.59414
11.8266	5.7328	11.3321	7.7912	10.2185	12.2868	9.3095	7.598	7.2485	6.8907	12.3168	4.4291	5.1385	4.1006	7.5028	14.1602	12.8142	19.359	21.3081	5.0229	10.4837	6.7518			0.533059	9.60932
11.9182	8.3782	9.5539	6.1045	5.9663	13.3957	9.5372	6.5233	10.7789	5.6132	10.2024	4.7675	6.6726	2.9007	6.833	16.7166	10.8569	16.6522	20.4327	2.8843	11.3211	6.4571			0.537187	9.16897
12.0099	8.2854	9.7293	7.3905	6.0754	12.6697	10.0501	6.3107	12.1425	6.4583	11.6361	3.2256	5.6943	7.3586	9.0474	13.1987	10.6472	11.3899	19.5903	3.5269	9.5594	9.3631			0.541321	9.20711
12.1016	7.915	7.8428	7.1653	6.7043	8.1233	7.5814	6.048	11.8863	7.0903	9.2029	3.6767	8.6864	2.4865	6.4419	12.5647	6.9493	13.6411	16.4671	3.5618	8.6105	6.9319			0.545454	8.07512
12.1933	6.8534	10.3576	8.6199	6.784	6.4714	8.0624	4.7198	9.5855	7.0506	10.2722	3.6881	8.0975	3.4186	10.8528	7.7382	11.1441	18.7585	11.3344	4.7093	13.1923	4.5566			0.549587	8.39368
12.285	9.3775	8.1702	8.468	8.9463	8.8878	6.1819	6.6075	8.9372	6.2829	10.9764	4.0964	6.1727	4.0622	8.9685	7.8679	9.8549	16.6455	10.5135	2.0054	10.5545	4.2766			0.55372	7.99304
12.3766	9.0552	8.318	7.6417	9.742	3.7145	9.1715	4.2969	10.3643	8.9061	8.3616	3.5404	6.6696	3.3894	6.9519	9.1286	10.4113	16.0254	12.1032	4.5957	7.9559	4.5839			0.557849	7.85367
12.4683	10.9175	8.984	4.0471	13.0854	6.1504	10.2915	5.9554	7.8011	8.8925	8.3261	5.5029	5.109	4.9738	7.2764	6.831	11.656	12.1655	9.3266	3.6141	5.9095	4.6123			0.561982	7.68705
12.56	10.0465	7.3217	6.3439	7.6166	6.1463	8.9031	7.6565	10.0848	9.4292	9.4466	2.8281	5.0225	4.6693	6.376	8.6938	7.1788	9.5036	11.6555	4.7178	6.7013	2.9216			0.566115	7.29826
12.6517	9.6169	8.7185	6.3439	7.9161	7.3533	10.7991	8.2482	6.086	11.079	11.7782	4.3348	5.3968	3.9786	9.3078	10.5028	9.5585	14.1022	16.1143	5.4603	5.9977	3.8666			0.570248	8.4076
12.7433	8.3033	9.3343	4.6703	7.2056	9.8426	13.2939	8.2594	6.567	9.4701	10.1401	5.3384	3.2185	7.1968	8.7532	9.5344	9.5571	11.5321	14.6662	5.255	8.4407	3.0554			0.574377	8.2683
12.835	9.3628	9.7907	7.7652	5.9959	10.1323	6.8982	6.4089	6.3405	8.1604	10.5822	4.0038	4.6919	4.3219	11.5154	7.492	9.4561	14.1238	16.6454	10.4249	6.6724	6.2933			0.57851	8.43229
12.9267	8.3737	8.3958	10.2193	10.7081	12.318	8.9981	7.6033	6.6037	8.1624	9.3597	2.7911	3.4592	2.4348	8.9371	12.2392	7.4144	15.979	14.4401	8.3667	6.2248	6.1338			0.582643	8.53154
13.0184	9.0566	8.4243	9.0588	6.961	9.7346	8.7176	7.163	6.557	8.359	9.1502	3.813	5.3235	4.7597	10.1734	11.1113	9.9731	12.1609	11.4597	11.6117	4.0199	6.5239			0.586777	8.29106
13.1101	8.7155	10.6323	9.0764	7.5638	12.7525	12.1867	7.1654	9.7378	8.1319	8.4264	3.8997	6.2225	3.429	9.6098	12.6584	11.4738	12.7327	14.9906	12.6905	5.1754	4.4937			0.59091	9.13166
13.2017	9.5471	11.0652	8.3455	10.9389	8.5131	9.7907	6.396	7.6291	7.6307	7.6061	3.9301	5.0269	4.591	12.2973	14.907	11.4964	10.2685	16.7041	12.8762	7.1438	5.941			0.595038	9.17356
13.2934	6.3796	8.9793	4.6594	10.7695	8.0012	8.9314	6.4565	10.3838	12.6037	5.441	4.0021	3.4652	4.6378	10.5714	12.6643	9.8653	15.0312	14.0925	6.6268	7.0362	5.5927			0.599172	8.39004
13.3851	7.3404	7.9201	5.9157	8.6718	9.1933	9.1979	9.4149	8.8313	10.5318	9.6119	3.5374	5.238	3.2706	8.9429	14.4383	8.0702	14.4412	16.0234	12.016	6.7893	5.8996			0.603305	8.82362
13.4768	8.0644	14.098	7.0985	10.4524	7.5046	6.9207	4.946	8.0098	7.898	6.3389	4.8096	4.5069	3.1616	10.406	13.9293	11.5335	10.2104	11.5093	13.5849	10.7119	9.2759			0.607438	8.80812
13.5685	4.7235	9.0741	4.8002	5.423	10.0905	5.6184	8.1487	11.054	9.6181	10.2418	2.8013	4.9687	3.1182	10.3899	15.4801	13.2136	14.3257	9.5213	15.4646	12.0562	7.4641			0.611571	8.93314
13.6601	6.3096	9.5867	5.1467	5.5165	7.5519	5.5182	6.9404	5.2679	9.6712	10.3539	4.2238	5.7984	3.7987	10.8161	15.4167	12.1139	12.6609	10.7836	10.7449	11.4086	11.0678			0.6157	8.60459
13.7518	7.0986	7.8633	4.7629	8.2412	12.8454	7.6727	6.5308	8.47	8.5073	7.9685	4.9644	6.284	5.358	10.4281	13.3044	9.4304	12.2887	14.2144	9.655	10.478	5.7297			0.619833	8.67123
13.8435	11.4002	8.7154	4.986	7.3104	9.7886	8.4979	6.2338	7.751	7.5185	9.1439	7.4617	4.3962	5.3977	7.9476	6.261	11.2457	15.6481	14.7156	13.1536	7.9497	6.5374			0.623966	8.66952
13.9352	11.3136	9.1503	8.0909	4.2675	12.6786	10.1106	10.0952	9.4216	5.493	9.0823	3.8254	5.5094	5.0019	8.2088	13.4659	7.4888	13.5898	11.2038	15.5534	9.4854	9.6542			0.628099	9.17573
14.0269	9.9168	7.4365	8.2437	6.7324	9.0106	8.5834	13.6374	10.241	5.6122	7.7969	5.4513	3.6681	4.3509	10.3234	9.5665	7.3405	12.7581	12.5427	14.2136	12.8762	11.1974			0.632233	9.11903
14.1185	8.2292	7.594	6.7074	7.9117	11.437	5.6938	11.7388	9.3555	7.6105	7.1557	5.0413	5.007	5.5175	9.099	8.1609	10.001	11.7737	9.3935	15.6928	9.3923	11.1252			0.636361	8.74466
14.2102	10.7313	5.73	7.9049	8.7389	11.4161	6.5679	12.5584	7.6228	6.098	7.3979	5.0161	3.1956	6.7223	9.3158	10.7684	9.0036	13.8275	10.4549	13.0077	7.0664	7.4402			0.640494	8.59927
14.3019	12.4707	6.0793	5.9908	10.483	10.4137	5.968	14.3365	7.3658	6.9537	8.5102	5.8024	4.6269	3.5465	8.9448	8.3693	8.3681	10.7719	14.9479	15.0389	7.8663	10.5059			0.644628	8.92193
14.3936	8.8614	6.6082	7.3707	8.9455	10.7925	7.2461	10.6976	5.3185	7.4757	5.4405	3.1065	3.4458	3.8247	10.5798	9.6388	11.7878	14.3449	15.4496	19.9548	7.6575	9.8245			0.648761	8.97007
14.4852	12.5678	6.0969	9.7078	9.6642	8.3306	8.3163	9.9729	4.225	9.0457	5.9474	4.8465	4.0274	2.5333	8.0029	7.6959	11.7981	18.5624	14.8259	14.9658	7.1332	13.1653			0.652889	9.11578
14.5769	8.8439	8.3368	9.3246	9.0755	7.8386	6.1696	12.4242	8.8148	5.7878	8.7237	6.0886	3.7363	6.5854	8.8524	9.3352	8.1923	20.1713	14.4993	15.3295	4.6706	14.6228			0.657023	9.4011
14.6686	8.8656	7.2158	6.484	9.9076	10.2254	6.3096	14.2599	7.398	7.9816	8.397	5.8096	2.8153	8.3036	11.219	11.151	9.6117	18.6808	10.8475	14.2076	8.1398	13.6173			0.661156	9.59275
14.7603	7.4496	8.1743	5.3337	6.19	9.6988	6.2488	8.7581	5.2708	9.803	8.9335	5.5077	5.2906	7.2208	10.1364	7.908	11.6675	17.2459	12.3653	16.8628	7.2274	9.0079			0.665289	8.87147
14.852	6.7215	7.3152	6.6456	7.6731	10.6996	4.9633	6.4037	5.4522	5.9371	10.9626	4.6589	4.99	5.5448	11.464	9.3194	8.302	13.7919	9.1149	15.881	5.8651	14.3892			0.669422	8.38548
14.9436	9.6382	7.5677	7.1032	10.6665	11.5931	5.5696	7.2583	7.1503	7.3228	9.9396	4.1022	6.9674	8.4145	9.797	8.978	10.5299	15.3974	14.4805	13.4067	8.0214	18.2818			0.673551	9.62791
15.0353	8.0889	12.3183	6.5479	12.7305	9.8445	3.909	5.9259	7.2793	6.4596	9.0901	3.0735	6.7153	7.2366	7.15	10.583	7.5222	14.385	14.0401	15.9763	14.0173	15.9363			0.677684	9.46808
15.127	7.1676	9.0854	7.0187	9.5327	7.4986	3.5665	5.846	6.947	10.6686	10.1644	3.2664	6.2217	9.4164	10.3663	7.3886	9.2046	14.9431	13.5729	11.8311	9.4731	13.5662			0.681817	8.89266
15.2187	5.5272	7.0896	8.9231	11.5212	7.6674	5.6452	8.3251	8.3591	6.5375	9.6868	3.6202	6.0802	7.6349	13.2052	6.5981	6.1129	11.3643	15.3735	11.9125	10.7831	15.3536			0.68595	8.92003
15.3104	6.318	6.8527	9.5422	9.0028	3.4994	5.9105	4.4299	7.4177	6.3982	9.7762	3.3536	5.0826	7.2157	8.3554	9.3942	8.6783	11.4658	16.1491	16.6107	8.4387	18.1261			0.690084	8.66751
15.402	5.8296	8.2417	8.2199	9.4065	7.8935	8.5108	8.4069	9.7514	7.7662	8.7872	3.9361	5.3682	7.9954	11.8607	9.0512	8.7616	12.0437	9.9184	16.355	9.8553	15.7164			0.694212	9.22265
15.4937	5.0786	7.0896	8.1783	8.4914	10.7577	7.1844	7.9427	6.9061	7.1387	10.5998	3.4681	5.8753	7.4254	11.5369	12.1663	6.8556	8.8214	15.2235	16.8148	9.6196	14.8246			0.698345	9.1428
15.5854	6.3053	9.3539	10.2605	9.3515	12.0064	9.111	6.5744	7.231	8.8063	14.0996	2.9287	4.1699	11.1164	11.5641	9.2224	8.1649	12.7253	20.6511	16.1018	17.5526	14.7363			0.702479	10.573
15.6771	8.3036	10.2653	6.6763	9.5653	13.6049	5.5462	5.7369	6.4588	6.6882	9.9028	2.4831	6.2742	8.7339	10.1774	7.8266	7.5147	13.5567	11.9279	18.0948	17.2607	19.1955			0.706612	9.7997
15.7687	5.4277	11.5695	8.4136	13.7556	11.2387	5.853	7.5653	4.104	9.1216	14.8815	4.2803	5.0912	9.6788	10.9129	10.8298	12.8015	13.5732	11.8284	14.4023	18.8836	24.2304			0.71074	10.8782
15.8604	7.1555	6.8606	6.2493	7.7729	9.1607	5.2036	7.3012	6.6748	7.9554	11.7377	4.1608	2.7547	12.4825	11.8673	9.4508	13.0895	12.4287	13.3773	14.7846	19.5238	20.695			0.714874	10.0327
15.9521	6.0875	6.6854	5.4224	10.0861	7.6071	6.4356	7.3719	9.3208	8.4246	12.2434	4.4065	5.3297	11.0272	6.7085	11.3252	12.4775	10.6738	15.461	16.3337	21.4621	21.3925			0.719007	10.2992
16.0438	5.2585	6.3528	8.3083	10.1876	9.3547	11.5286	8.2869	7.2296	7.1163	13.5206	2.4774	5.7211	10.6252	6.9731	12.1295	12.0261	9.9579	16.6752	15.3237	25.2593	22.8129			0.72314	10.8155
16.1355	4.7888	10.6771	5.9418	7.3145	10.8085	8.0984	7.5284	9.4212	7.2391	10.4612	2.9561	4.7805	12.8201	7.4673	6.8055	13.9341	10.2179	16.4935	14.403	22.725	25.7225			0.727273	10.505
16.2271	4.5987	9.7867	8.5716	6.9707	11.3033	8.4799	9.8312	8.0971	10.2165	14.345	7.2256	6.5789	13.167	9.9163	8.4267	11.2155	10.4222	9.5048	10.4327	25.6837	22.9053			0.731402	10.8419
16.3188	7.4049	7.2559	9.0026	7.7796	8.2325	7.2425	6.448	9.0971	6.69	11.2684	3.8927	4.458	11.0291	12.9041	8.7826	12.0193	9.9841	15.9887	11.5438	25.9812	18.3891			0.735535	10.2569
16.4105	10.1832	5.0862	8.3836	6.9629	10.2165	6.5241	9.0751	8.4038	5.9506	11.1469	5.5506	4.0189	10.3557	9.3191	9.1548	15.1517	13.6317	12.5006	7.3208	21.4447	11.1873			0.739668	9.59851
16.5022	7.7259	5.4409	8.7332	8.234	5.5558	6.108	7.9733	5.6627	6.0755	11.025	4.3578	7.1881	12.7507	10.0165	9.0116	11.9114	11.9888	13.2961	6.8875	21.6941	15.6171			0.743801	9.39305
16.5939	11.4153	5.0799	8.6415	8.0704	8.1309	6.6018	8.149	9.7723	7.3621	7.207	4.8391	3.8741	14.4107	9.1563	5.9105	8.7198	10.4164	16.1185	12.1199	11.8615	13.8682			0.747935	9.12977
16.6855	5.9485	4.7662	13.8673	6.1845	13.0687	8.0938	9.6548	6.8698	7.7712	11.302	5.0357	5.6033	9.3091	10.5446	9.1717	12.0023	10.4244	10.3879	7.6932	16.813	14.6893			0.752063	9.48578
16.7772	13.763	5.0107	10.5273	8.6119	6.7211	10.276	9.7649	11.9758	6.5294	7.076	4.0227	6.0707	12.9919	10.7473	7.787	10.8193	10.0829	13.5137	10.1126	17.1609	18.4953			0.756196	10.0981
16.8689	8.6378	4.6556	9.6269	6.6168	6.276	8.5204	13.9941	8.8869	6.1159	7.9457	5.3018	6.6664	11.3273	8.9379	8.3527	13.0837	17.7485	16.1776	12.6174	14.5826	21.0984			0.76033	10.3414
16.9606	7.8175	9.1797	11.0151	9.4572	5.8012	8.7297	14.6396	13.2014	7.625	7.2063	5.3089	4.7066	11.8822	10.7698	6.9166	10.3102	13.8253	14.5628	14.3373	17.9969	17.9163			0.764463	10.6288
17.0522	5.3365	6.0576	10.4242	6.7142	7.8414	5.9417	10.8724	9.9859	7.4475	11.0317	6.9331	6.8614	11.1126	12.0573	8.1833	13.6807	17.8481	16.6682	15.6866	14.5811	11.1279			0.768591	10.3044
17.1439	7.4843	5.4289	7.9187	6.8337	6.3848	7.3255	10.6705	9.1585	8.083	8.2541	8.7679	7.8312	10.0845	12.0531	11.7816	23.9798	15.9487	14.4518	15.8785	15.1017	10.192			0.772725	10.6482
17.2356	7.5733	4.3392	6.6085	8.5317	9.7782	8.0942	11.4021	8.7684	6.9318	7.9396	10.9198	5.8779	9.2931	10.4325	9.5582	20.9141	11.2409	13.7116	20.3974	18.5567	12.778			0.776858	10.6499
17.3273	6.8497	6.5648	6.5033	9.8691	9.9571	8.7638	8.6512	9.2848	8.0149	8.6629	8.312	4.4739	10.3693	11.2065	10.7846	17.2963	15.5479	19.1142	13.953	17.6289	17.4399			0.780991	10.9166
17.419	8.8276	6.1633	6.6833	6.7273	8.3964	7.408	10.9808	7.8084	8.2867	9.0402	10.5935	5.952	9.3061	12.483	10.8702	12.176	13.3773	23.3147	13.8693	13.6802	13.4594			0.785124	10.4478
17.5106	8.9276	7.2825	4.3432	10.0986	8.2464	8.1346	11.9452	7.1319	7.4382	12.1806	14.2992	7.0766	10.6007	13.9428	7.6182	20.3661	10.3323	19.4681	12.694	13.2465	10.9279			0.789253	10.7762
17.6023	9.4863	8.0489	7.4269	6.2192	10.1622	11.2172	7.3343	6.0708	7.9153	11.3742	8.8723	6.4519	7.2949	14.3907	6.7038	20.5857	13.2027	25.2153	12.7353	10.9794	12.1586			0.793386	10.6593
17.694	7.8741	9.3512	9.3967	9.0431	9.8498	7.1231	6.1554	5.4947	9.7797	7.2452	12.1817	6.9018	9.9634	14.9297	8.5303	15.0293	15.1644	18.01	11.3783	14.4049	23.1669			0.797519	10.9987
17.7857	7.9843	9.26	5.291	9.4157	11.7067	5.3945	6.0866	5.2013	7.945	9.2542	10.1416	10.6594	9.4976	9.8223	5.9326	12.7104	18.1363	19.5609	14.5068	13.7479	22.7098			0.801652	10.7126
17.8774	6.5806	5.8485	7.5585	10.2603	7.0525	8.2416	8.5599	7.26	9.5918	8.4579	10.8872	6.5292	8.6927	9.172	5.18	14.5289	26.7089	18.0168	16.0762	20.9675	26.4456			0.805786	11.5532
17.969	4.8119	6.8016	4.7414	8.3497	8.3841	5.7057	6.6717	6.0537	8.379	7.9434	14.4951	6.8102	10.3443	14.4322	8.1703	9.8813	19.3708	13.204	16.1791	22.5093	21.1773			0.809914	10.6865
18.0607	6.5351	8.965	6.7343	5.4396	7.9876	7.2087	6.636	5.2598	7.2359	5.5409	10.6888	4.88	8.0509	12.3165	10.1707	14.1598	20.4862	16.104	14.35	25.3618	14.8878			0.814047	10.4285
18.1524	4.4136	10.1803	9.3501	6.857	7.8712	10.1878	8.7311	4.6338	9.2634	6.8519	9.3402	10.2754	13.3101	13.4875	9.1599	16.3741	16.6638	18.0629	15.4545	28.4737	13.3243			0.818181	11.5365
18.2441	9.165	10.7361	5.6594	9.78	9.3332	5.6324	6.6348	5.7761	5.241	5.3085	11.1252	7.1285	10.3268	11.6394	11.8877	14.2295	16.3753	15.0983	19.6207	34.1463	15.3215			0.822314	11.4365
18.3358	9.0035	10.4828	8.2319	9.3949	11.5308	4.2314	4.6876	6.3135	6.2181	8.2614	14.0077	10.1729	12.1501	11.8297	9.0953	20.9828	16.9506	18.1958	19.7311	24.1156	13.4601			0.826447	11.8594
18.4274	7.94	10.2242	4.2371	9.3572	4.5435	7.5711	5.4836	4.7046	14.4588	6.3299	11.9779	8.2106	10.7444	9.6758	13.0809	14.8856	17.1933	14.5293	21.6779	21.5189	14.3237			0.830576	11.0794
18.5191	9.2414	11.514	5.9707	7.0884	6.1168	7.4323	6.0526	3.7353	13.4941	5.668	7.3264	9.161	14.5247	9.2314	17.8893	12.7497	16.0688	16.1165	17.3227	15.4909	13.1552			0.834709	10.731
18.6108	8.0509	11.1454	5.4037	7.8965	6.4263	6.2449	7.7865	4.8535	9.749	6.0724	5.6179	4.8862	11.4797	9.1945	11.1382	14.0819	18.547	13.8741	13.627	13.6489	13.6501			0.838842	9.6845
18.7025	8.9549	10.5286	6.0717	7.1627	6.9728	7.4389	6.9161	6.1456	10.6206	8.3469	9.2399	7.1393	7.5791	7.5485	10.8532	15.8351	9.1802	11.1696	16.3307	16.4274	15.8072			0.842975	9.82233
18.7941	8.1386	6.1246	5.2288	5.3877	4.6328	7.9811	6.6898	5.8203	6.5562	6.0583	7.7471	7.5508	9.989	8.2362	12.2877	15.8137	17.6272	10.7854	13.7958	18.1472	16.3063			0.847104	9.56689
18.8858	9.5675	4.368	5.1075	5.0303	8.824	6.7947	8.0915	4.1998	5.0169	8.9263	8.4267	5.9904	8.8288	7.7358	10.8723	11.7853	15.6655	14.5167	14.9418	12.0661	12.7119			0.851237	9.02228
18.9775	9.3217	5.1828	6.4564	7.0132	8.8685	4.4768	7.9911	7.0799	7.8691	9.3192	7.714	5.5334	11.0715	10.405	10.3553	10.841	16.8143	11.2882	11.7848	11.0939	14.9767			0.85537	9.30747
19.0692	8.2469	6.1033	3.3189	7.009	3.8574	6.3434	7.5383	4.133	4.9234	7.4511	9.0113	6.2677	11.1511	13.8748	12.2531	10.4592	9.5048	12.6824	14.9311	15.1663	9.4453			0.859503	8.74628
19.1609	9.4886	4.237	3.554	7.7403	6.8864	4.7256	7.001	6.6537	6.6508	7.9453	9.4978	7.1955	10.8221	12.7146	15.0351	8.9986	8.396	10.1905	9.9831	13.9076	10.2843			0.863637	8.66228
19.2525	11.0256	4.8544	2.072	6.7875	6.1281	7.0541	5.5309	5.3984	3.1076	7.7393	9.1887	6.8734	9.9043	11.2647	12.2554	9.4716	9.8953	7.5806	12.8254	13.7844	5.981			0.867765	8.03441
19.3442	10.5251	4.3764	2.707	4.9259	5.2332	5.1119	5.3639	2.8984	1.9851	8.4646	11.0796	8.3799	10.3474	10.8825	11.9633	11.7481	11.7165	8.3672	16.4461	9.0428	6.4071			0.871898	7.99867
19.4359	10.5334	2.7606	6.0761	5.9083	6.8123	3.059	3.7112	4.9647	1.7856	6.6942	6.9145	9.6273	16.1918	8.4386	11.0213	11.95	13.4034	5.6667	17.6664	12.1473	6.1398			0.876032	8.16536
19.5276	9.4903	6.1197	5.2412	6.3079	8.0293	5.5153	5.5846	6.7353	1.5962	9.1865	9.7652	5.1142	13.5148	12.4593	7.9839	8.0784	10.6149	9.6614	11.7231	7.7868	10.7482			0.880165	8.15507
19.6193	7.8346	6.8767	2.6492	5.698	6.2432	5.4983	5.8614	5.7775	1.1855	7.3063	8.008	9.7255	10.0217	6.2628	10.5549	11.7966	7.8477	13.6206	8.1298	4.9074	14.9016			0.884298	7.65273
19.7109	6.6628	5.605	3.1298	5.2634	7.1599	3.7211	4.904	5.3018	2.1684	8.6273	11.1708	9.1421	11.4251	7.8669	7.475	8.2631	5.5539	11.2383	12.752	5.9078	14.3042			0.888427	7.5068
19.8026	7.566	3.4636	3.4795	5.4874	6.4928	4.9909	6.0513	3.1334	1.5266	10.6042	9.312	10.0995	10.361	4.8327	5.9618	11.4499	5.6796	8.1346	12.752	5.9839	9.6404			0.89256	7.00015
19.8943	8.3334	3.392	3.0865	4.36	4.9738	2.9995	6.8467	1.6211	2.9501	8.7076	9.7525	6.4539	11.6929	5.2888	5.3268	8.9249	7.9319	5.9402	15.14	5.2791	4.2856			0.896693	6.34701
19.986	6.0919	5.551	2.1698	3.6266	4.6493	4.2323	5.0605	2.5749	0.8335	7.7026	5.2355	8.3862	7.4348	4.211	7.7135	7.7639	12.6272	4.6139	14.3515	6.7066	5.8623			0.900826	6.06661
20.0777	6.2567	3.957	3.755	3.701	5.9268	2.7213	2.3933	3.0767	1.8924	7.5449	8.1376	6.2941	5.6434	9.5746	5.5251	9.0788	10.3766	7.156	25.0114	5.6985	5.6509			0.904959	6.63677
20.1693	4.9481	2.4213	2.4787	4.6955	7.0055	4.0112	3.6934	2.7179	1.5831	6.4486	11.1006	9.2628	9.3101	7.6015	4.4861	8.287	6.0881	7.0597	21.4092	6.9882	7.5375			0.909088	6.62543
20.261	7.699	3.1024	3.151	5.2076	7.9579	5.8405	3.7511	0.4029	2.381	9.7065	11.3726	7.849	10.7927	8.1608	4.6389	8.6107	8.1359	9.0367	16.0184	8.0299	6.3028			0.913221	7.05468
20.3527	7.366	2.973	2.4923	7.5842	5.926	5.1987	1.4955	2.3886	2.9958	4.5078	8.9202	6.7409	8.1154	6.5275	6.0805	7.1723	4.9129	8.071	7.5086	5.4447	6.047			0.917354	5.64138
20.4444	7.3536	5.292	2.4616	5.12	5.2549	3.8632	2.9559	1.4522	4.5223	5.6093	12.9349	9.1264	9.4649	4.6977	4.0356	9.4718	6.7089	6.7552	9.8491	5.9035	4.9815			0.921488	6.0864
20.536	9.1931	7.7359	1.492	8.5693	6.4989	4.1639	1.0192	1.2787	2.9392	10.148	10.5973	9.4705	6.0452	4.5799	2.6022	9.3806	6.6876	7.1751	7.5837	7.4196	4.8556			0.925616	6.1636
20.6277	8.167	4.815	4.7592	6.4495	5.6104	5.5605	1.4462	2.2655	2.4316	5.4824	9.0654	8.6132	7.9291	2.8304	4.9147	7.6019	10.2864	7.7727	7.3157	7.3621	6.0242			0.929749	6.03348
20.7194	5.0545	5.4433	2.538	4.7497	3.566	3.9748	1.7055	1.0257	2.7736	6.6577	10.4424	8.3661	7.1967	2.4902	3.6704	6.6074	9.2595	5.581	5.098	4.1331	4.9034			0.933883	5.01129
20.8111	7.3457	5.4064	2.1829	7.1511	3.4119	8.2314	3.5567	2.0115	2.7212	6.9877	10.1279	10.7604	6.0075	2.6908	3.8523	6.5743	14.3225	5.6133	4.3842	5.4726	5.6428			0.938016	5.92643
20.9028	4.034	5.0443	2.3868	5.738	2.5137	6.1058	1.4181	3.5158	3.1915	7.0688	9.1984	12.1443	6.7733	1.9282	6.2652	5.6396	15.372	6.84	4.5294	7.4056	7.4533			0.942149	5.93172
20.9944	3.437	5.2527	4.1781	5.8201	5.7625	10.1467	2.1465	1.4531	1.8962	4.7335	7.1928	10.3508	5.6781	1.8863	6.2475	6.8369	13.7054	6.3927	5.6549	5.0195	4.2213			0.946278	5.61965
21.0861	3.9003	6.2094	3.0073	6.044	3.4802	9.2552	2.9645	1.5615	1.9283	3.4884	7.91	13.1583	6.5535	2.4818	5.767	8.0112	10.539	7.9043	6.7916	7.2973	4.6563			0.950411	5.85283
21.1778	6.1926	3.9295	5.5351	7.7503	7.3029	8.7311	2.1107	2.2773	2.2829	1.226	11.1844	9.8258	5.112	2.3213	6.7885	6.3933	8.9761	7.9395	5.671	6.0698	3.888			0.954544	5.7861
21.2695	5.389	6.5513	6.7783	7.0468	8.713	4.7545	0.9159	1.7818	2.8067	2.6019	9.9458	9.8646	4.1243	2.1205	7.5993	7.5437	12.0204	3.6267	4.0097	7.4056	2.1797			0.958677	5.60855
21.3612	4.0039	3.7281	4.5194	6.5028	10.7972	3.691	2.7121	0.8408	1.3658	2.1391	12.356	11.5632	8.1226	1.9969	8.2193	13.0175	7.8334	5.983	4.8157	8.4183	2.6456			0.96281	5.96532
21.4528	4.8739	3.1716	5.11	5.1728	10.8282	2.2486	1.8851	0.9955	1.2892	2.6547	8.6973	10.4192	6.2698	1.2277	9.8782	10.6025	7.5158	5.7643	5.1123	12.1491	2.1609			0.966939	5.62032
21.5445	4.5337	3.9153	4.2369	6.8138	6.4806	2.8117	1.5274	1.4489	1.4854	2.2352	8.2807	11.1458	3.9302	0.7306	9.8866	11.9049	8.2858	5.4303	2.8402	10.7979	1.2294			0.971072	5.23578
21.6362	3.1107	1.6826	5.8319	3.7767	7.4375	3.3719	2.0236	1.3336	0.8915	1.5939	8.5565	9.1369	3.6156	1.4464	9.005	6.4891	10.1841	5.7871	4.0475	8.9429	0.5136			0.975205	4.70374
21.7279	2.7175	1.7367	5.0488	3.2872	5.0388	2.4047	1.7807	1.1386	0.9983	1.7895	5.2183	9.2902	3.8717	1.4322	7.4957	4.2107	7.4527	4.3527	6.5799	5.1117	1.2085			0.979339	3.91262
21.8195	2.7377	3.7527	5.3038	4.9821	5.5998	2.0976	2.1562	3.1936	0.7322	1.0616	5.741	9.1812	6.0448	1.0525	6.0948	4.0083	7.8305	7.508	4.7044	9.3988	0.4864			0.983467	4.46038
21.9112	1.1514	2.6705	5.8023	4.0434	4.5086	1.9913	2.8695	1.5407	0.9397	1.5453	9.1063	8.9232	3.4228	1.6216	5.0386	4.2481	8.5651	9.9834	3.9096	10.1829	1.2118			0.9876	4.44172
22.0029	1.7679	1.5085	4.3549	2.0483	5.4177	2.5268	2.0117	3.3603	1.1592	2.6456	7.0776	5.6809	3.9806	1.495	5.8132	1.5796	9.8801	8.9834	4.058	8.341	0.9768			0.991734	4.03177
22.0946	1.3448	0.7304	6.6474	3.0396	6.7129	3.1571	1.8012	2.5916	0.8899	2.3385	7.2717	6.8559	3.5727	2.745	5.1941	2.0192	10.5486	5.4936	3.2336	12.0119	0.1309			0.995867	4.20622
22.1863	1.9034	0.6132	4.6649	3.6426	5.4051	3.1601	2.4983	8.2196	1.5015	1.519	5.6596	6.5425	2.4693	1.7674	3.6626	3.0237	8.1215	4.4271	3.7126	8.5082	0.2808			1	3.87157

## Sheet: Image11
X0	Y0	Y1	Y2	Y3	Y4	Y5	Y6	Y7	Y8	Y9	Y10	Y11	Y12	Y13	Y14	Y15	Y16	Y17			Ap-Basal to 1	Average intensities
0	49.3684	52.0794	44.0023	37.8186	55.8228	46.721	41.3848	37.563	44.7258	46.2506	49.969	34.6412	45.4196	65.5	64.8653	39.274	35.0992	77.3875			0	48.2163
0.0917	56.8732	49.5917	54.4219	40.7835	57.0602	42.136	42.251	42.945	38.9753	52.7743	48.854	33.2426	42.3756	66.441	56.1515	38.587	35.9732	65.9091			0.0048088	48.0748
0.1834	55.0376	53.1454	59.5143	43.8957	47.4249	36.476	49.5341	44.606	42.8539	44.5336	51.464	32.7454	41.3814	71.658	57.039	45.007	43.3509	69.4105			0.0096176	49.3932
0.275	47.5424	46.6883	63.0362	53.2737	39.4147	28.337	53.6969	37.499	47.776	45.0431	47.37	42.2554	44.2539	73.398	63.2215	54.009	46.5237	67.6745			0.0144212	50.0563
0.3667	43.026	48.1163	67.5947	59.3303	43.5181	33.005	56.8559	36.669	47.5084	48.6535	44.767	40.4848	44.593	69.413	61.2937	63.388	45.9104	68.5224			0.01923	51.2583
0.4584	50.8266	48.421	61.2315	54.8157	48.366	35.491	52.1877	37.242	44.0047	55.5665	47.334	42.0093	48.8261	68.8	44.982	61.724	60.5859	69.3016			0.0240388	51.762
0.5501	55.293	55.7019	59.9078	47.0015	57.7706	35.288	54.2082	39.055	41.8584	56.33	55.947	46.9295	56.8288	65.942	46.9378	57.915	67.6131	77.3103			0.0288476	54.3243
0.6418	53.3403	59.6752	61.5515	51.9217	53.93	38.025	50.3686	51.116	44.4807	55.571	61.094	53.0106	51.7683	63.585	46.6462	61.681	63.5718	68.8169			0.0336564	55.0085
0.7334	42.5774	63.384	63.1546	48.0899	55.8275	43.664	46.1705	54.558	49.768	58.3759	59.514	59.9543	42.3814	66.318	43.599	49.138	62.6757	64.214			0.0384599	54.0758
0.8251	40.615	54.0678	72.023	47.4499	70.2836	47.208	46.7005	47.103	53.1625	61.6702	54.833	41.2856	39.4846	69.462	37.2467	49.977	57.3241	55.3468			0.0432687	52.5135
0.9168	39.5674	60.3599	67.7561	42.0781	64.288	52.112	48.4627	51.745	64.4416	73.9344	50.239	31.34	41.777	65.234	42.4908	47.144	68.5025	60.9872			0.0480775	54.0255
1.0085	40.6907	67.678	60.5068	39.0704	52.2009	59.892	47.5793	56.019	83.3515	78.7171	52.529	32.0589	42.3427	71.844	54.1589	56.372	62.7599	69.4464			0.0528863	57.0676
1.1001	38.0522	66.3271	58.6113	38.1463	49.9042	79.04	49.8175	71.272	75.4698	82.2204	49.666	32.4533	45.18	66.97	52.8651	59.453	67.6802	60.2596			0.0576899	57.966
1.1918	43.8913	75.3076	48.8787	38.1347	49.3111	81.654	44.9607	86.691	72.3375	84.7995	44.331	39.3575	53.9373	60.767	51.5296	66.694	85.7663	59.5197			0.0624987	60.4371
1.2835	36.946	72.9965	51.9341	37.146	47.8988	80.265	38.5762	128.142	69.2804	83.1589	40.918	45.2545	59.1513	57.195	59.7359	74.335	73.5283	54.9911			0.0673075	61.7474
1.3752	36.3508	61.9891	57.5765	32.3617	52.3156	92.449	38.0994	134.855	71.2854	79.173	40.829	45.3812	51.146	57.96	58.4089	86.672	66.1456	54.6338			0.0721163	62.0907
1.4669	38.0414	63.8555	60.3733	31.1582	56.8706	115.709	39.8067	117.855	59.1383	74.9812	41.724	41.7694	60.0813	58.651	59.283	111.614	76.3138	44.9605			0.0769251	64.0103
1.5585	39.1531	75.4604	60.8304	37.801	50.6088	125.589	45.2018	113.895	58.9113	76.5015	38.879	41.847	53.3034	58.026	61.3595	131.916	70.7284	42.6609			0.0817287	65.704
1.6502	37.2156	83.5338	66.2231	38.358	48.8123	118.584	41.7094	104.785	50.1904	68.7833	34.083	48.5728	46.0575	67.885	63.0799	134.947	63.8161	36.0361			0.0865375	64.0374
1.7419	34.2674	84.9719	72.9399	50.115	48.9175	104.342	41.7663	101.806	47.6762	74.2318	29.791	51.599	41.0009	64.857	61.849	111.109	60.6738	33.7246			0.0913463	61.9799
1.8336	34.855	79.8409	86.4741	51.0201	56.4607	87.178	44.5716	96.682	55.963	79.8249	36.859	57.4264	39.6554	61.529	60.5181	83.606	65.352	27.8274			0.0961551	61.4246
1.9253	35.8162	69.5104	80.9776	51.694	73.1296	76.815	39.6254	77.673	65.0228	76.7753	41.341	53.3746	43.6349	68.113	59.8388	76.617	68.7308	29.0275			0.100964	60.4287
2.0169	38.7639	66.0948	71.6233	61.8058	76.5414	81.993	49.0748	60.585	60.4528	70.6854	40.259	58.0162	52.1559	83.992	69.4799	71.767	77.7008	32.9693			0.105767	62.4422
2.1086	41.5153	66.1446	77.3128	63.5981	62.8374	76.247	48.6497	47.738	67.303	59.1838	44.484	62.0329	56.3536	85.657	68.9646	70.466	85.6053	34.3503			0.110576	62.1357
2.2003	43.0159	59.7176	71.4648	55.2378	53.8018	78.156	50.6688	46.269	65.9632	50.1875	41.828	54.0433	58.4784	98.731	58.8235	74.537	77.5895	36.7699			0.115385	59.7379
2.292	40.8552	75.532	60.0553	53.0676	51.7215	72.135	57.729	55.686	66.9305	52.7425	45.525	51.8091	61.1422	106.342	49.7256	76.009	72.4424	31.849			0.120194	60.0722
2.3836	44.3922	88.16	53.8277	42.299	51.8094	68.246	55.0104	56.897	65.1863	55.8017	53.349	51.725	59.8873	107.522	55.4212	67.224	67.7567	26.015			0.124997	59.4739
2.4753	42.3013	93.0698	57.2435	39.1271	60.6624	74.105	58.7327	53.182	68.8099	52.6556	49.511	53.2281	59.7068	89.601	53.8739	65.46	66.3109	22.2536			0.129806	58.8797
2.567	44.1038	87.6738	59.0112	41.0831	57.5587	65.398	56.3164	45.779	70.0332	51.9192	47.643	59.3039	59.4101	68.482	55.2201	61.352	57.8583	37.6876			0.134615	56.9907
2.6587	45.4093	78.9463	58.339	38.1293	51.1258	75.377	53.5096	41.666	66.703	51.5464	58.188	62.1139	52.6944	54.214	52.2109	57.677	59.1539	46.6865			0.139424	55.7606
2.7504	48.0862	74.6429	50.9582	46.961	55.9552	83.425	51.0902	41.619	62.3639	49.9566	71.094	61.6763	54.0244	45.43	52.6649	56.911	67.4954	38.1434			0.144233	56.2499
2.842	43.8574	71.1625	41.3932	37.7906	56.0317	85.324	48.3942	48.087	56.7638	51.3584	73.169	57.6595	52.9222	42.415	50.964	48.962	72.1261	34.4674			0.149036	54.0471
2.9337	36.0064	71.1033	34.5386	29.3584	56.1688	94.483	35.668	50.874	68.0419	52.3691	72.087	55.9447	45.9867	38.786	51.5242	50.078	80.6419	27.2446			0.153845	52.828
3.0254	46.1307	61.1152	36.0919	32.2632	56.4276	94.939	36.5677	50.863	76.4723	52.4266	57.872	56.9912	42.1843	36.823	62.9379	41.878	91.9686	19.7166			0.158654	52.9816
3.1171	50.4408	57.1489	38.1949	35.5988	57.5951	98.814	45.6101	44.637	79.6349	51.9326	58.344	58.2502	44.6218	37.218	71.816	36.197	77.0339	25.4581			0.163463	53.8081
3.2088	61.6093	56.1053	42.2695	44.6734	68.0725	96.038	49.9045	51.979	75.9538	50.0531	54.765	53.6275	43.8177	38.984	62.0261	35.756	59.8576	28.8678			0.168271	54.1311
3.3004	66.3891	50.3089	40.2853	50.079	74.0496	90.685	42.1468	47.263	65.01	43.7298	56.881	44.6952	44.39	41.033	53.0272	47.789	51.3616	18.96			0.173075	51.5602
3.3921	74.6027	55.174	39.5582	52.5644	79.2994	96.544	39.1197	45.422	52.8537	55.6339	52.469	44.3743	46.1301	34.718	50.2695	43.68	48.8382	19.9936			0.177884	51.7358
3.4838	76.4097	70.5063	34.4723	53.3065	88.8878	88.007	40.7219	47.327	48.7688	55.068	43.445	46.9477	48.8307	35.677	44.0535	49.484	50.3597	17.0879			0.182693	52.1867
3.5755	91.2414	69.7597	39.4837	51.1521	80.8828	78.422	42.5729	42.336	48.9061	64.5473	49.332	48.0958	44.1292	39.861	51.4468	54.789	42.8577	13.4105			0.187501	52.957
3.6672	92.548	72.2068	40.7461	54.5024	77.5343	70.644	42.3404	36.761	54.5462	52.4245	48.228	54.4114	44.4466	38.898	61.1445	54.087	27.8607	17.1526			0.19231	52.249
3.7588	101.174	80.8277	39.1965	55.5495	71.5447	66.78	39.7423	41.828	65.4654	39.1438	47.187	59.8495	44.3706	29.659	55.6677	46.791	28.5748	19.0694			0.197114	51.8012
3.8505	93.8668	68.2474	35.035	60.8111	58.4322	63.771	37.1697	42.383	69.5469	36.2279	50.498	56.2293	40.4463	29.885	45.8251	33.85	28.6056	21.9162			0.201922	48.4859
3.9422	92.5358	72.0907	37.2193	75.6666	57.4985	52.838	32.7933	41.968	77.8524	37.4279	56.769	51.5921	49.8224	23.387	47.1173	36.875	29.2717	19.8616			0.206731	49.5881
4.0339	89.0633	64.5442	32.9359	75.1449	59.8382	45.815	31.7052	38.98	63.0943	37.3011	68.085	46.1072	46.179	23.807	51.9276	34.12	33.2633	19.9961			0.21154	47.8837
4.1255	77.9746	65.5279	26.8023	73.2576	58.9676	44.471	29.9087	42.852	66.8503	46.4427	83.497	42.4281	46.8845	26.054	54.4337	33.312	32.7398	24.3725			0.216344	48.7098
4.2172	69.1216	74.1382	25.3958	67.978	56.8345	54.298	34.1151	35.989	63.6888	54.0128	102.849	56.0033	41.2744	23.308	53.6747	22.348	30.3659	27.9502			0.221152	49.6303
4.3089	60.6839	68.2317	28.3152	58.1138	45.8204	46.716	44.3786	38.947	67.6051	51.7994	120.074	61.4662	35.857	20.356	48.6205	28.138	28.336	28.74			0.225961	49.011
4.4006	57.2276	67.4321	34.3347	55.9382	39.8177	37.274	46.1179	36.59	59.7745	53.3251	119.246	60.6455	39.3208	27.56	48.5962	29.082	24.073	28.8934			0.23077	48.0694
4.4923	45.8609	55.2082	31.6679	48.866	47.9921	33.624	45.8271	36.545	53.2598	43.1708	94.776	56.3956	44.4106	32.811	48.8835	25.411	24.2296	18.5014			0.235579	43.7467
4.5839	56.606	53.5647	29.7923	42.165	57.5056	37.345	40.2993	37.454	47.4417	30.5441	88.383	53.9717	38.8365	37.659	40.3628	28.689	23.5243	19.6239			0.240382	42.4316
4.6756	55.9231	50.4427	31.9853	39.8163	65.7692	36.516	42.0991	48.013	54.7273	26.8498	82.503	44.2259	31.4772	39.291	42.7665	28.269	24.2435	16.945			0.245191	42.3257
4.7673	46.9628	53.5011	35.6029	45.039	63.249	40.927	46.5453	48.615	56.3071	25.622	73.636	40.3736	30.0787	42.034	46.771	27.82	28.1495	14.5209			0.25	42.5419
4.859	40.7716	52.7518	39.8996	49.9466	64.5688	40.071	52.3883	45.069	54.6157	30.6563	64.899	36.9074	31.3996	40.228	47.8384	32.936	26.3527	15.4033			0.254809	42.5946
4.9507	36.7454	62.3337	49.4958	47.2545	75.4625	43.219	46.3119	40.015	46.4489	28.4571	58.682	35.2736	25.3497	32.322	43.5374	26.642	27.4721	17.3586			0.259618	41.2434
5.0423	45.8898	67.2651	48.3164	41.1321	62.0986	43.355	41.8852	41.283	50.3152	27.3801	55.915	43.2448	30.1823	29.949	43.5833	21.267	26.9775	21.3332			0.264421	41.1874
5.134	52.29	63.4388	43.1935	38.2088	55.4616	44.497	42.7609	45.952	38.5998	28.7157	56.469	46.859	38.9092	26.058	41.9514	21.16	28.5301	22.5198			0.26923	40.8653
5.2257	48.5777	64.3223	45.3115	40.7419	55.0982	42.751	45.2596	41.745	35.0195	28.218	64.014	48.5611	37.7586	24.408	41.2859	20.895	24.9278	23.1122			0.274039	40.6671
5.3174	53.5839	64.5371	49.0276	45.9295	56.9984	38.059	41.0305	32.593	34.0647	29.8032	61.825	42.4541	41.947	29.15	44.344	22.568	22.2844	17.4641			0.278848	40.4258
5.409	40.8448	77.8621	47.257	39.1159	62.8785	32.553	39.5061	30.841	30.2469	27.536	53.034	31.5741	43.2483	30.59	35.6564	19.633	21.9779	16.4906			0.283651	37.8248
5.5007	39.1514	77.0287	43.3117	34.7639	48.898	33.28	32.9165	31.69	29.543	28.4163	45.401	27.0925	41.694	28.219	28.8744	22.76	19.9658	19.8892			0.28846	35.1609
5.5924	34.3803	56.2064	40.8619	44.0852	46.877	36.061	25.8682	28.944	32.7295	23.7715	39.303	29.431	36.4638	27.888	29.3198	16.406	19.8777	15.3207			0.293269	32.4331
5.6841	35.9726	49.6677	40.0512	46.3355	50.2427	35.462	24.6796	40.199	28.6436	23.6683	32.777	30.0365	28.3873	31.203	23.6834	17.602	21.1472	15.4188			0.298078	31.9543
5.7758	39.4184	47.1299	42.6975	52.3833	47.475	35.139	23.3295	33.193	30.1489	24.1233	29.007	31.8538	22.5898	31.772	26.2686	19.131	25.0445	12.5644			0.302886	31.8483
5.8674	37.856	51.3191	46.4581	57.5852	44.0764	39.375	17.6036	34.28	27.25	25.1359	34.269	32.1727	27.8592	23.376	27.3961	16.382	27.2883	8.0349			0.30769	32.0954
5.9591	33.6303	51.4427	45.412	64.4553	44.4204	30.326	16.5319	28.693	27.034	19.474	40.494	33.3903	24.8572	25.645	32.6857	19.733	25.4456	11.1192			0.312499	31.9328
6.0508	31.5505	55.1195	44.6036	65.7757	45.1336	23.048	18.6382	22.385	27.4701	18.6131	32.121	26.0416	25.0763	23.624	33.4926	19.541	27.0369	11.204			0.317307	30.5819
6.1425	28.8373	50.9412	45.7556	72.718	39.9399	23.15	19.4376	28.324	23.0409	20.0931	34.985	25.7142	24.3319	23.843	30.7854	20.594	29.1765	10.3034			0.322116	30.6651
6.2342	31.499	52.7304	62.1045	72.9951	39.7699	17.55	22.1938	28.006	20.9061	19.6977	29.937	21.9023	19.3492	28.552	25.5532	25.655	25.7711	14.8953			0.326925	31.0593
6.3258	29.8986	50.5084	59.2908	70.2235	38.5198	20.899	15.2881	25.499	18.2395	18.9926	30.013	21.303	18.822	26.539	21.2798	34.18	23.9832	16.3361			0.331729	29.9897
6.4175	27.3765	55.9781	57.3253	58.4528	34.6577	20.093	15.5932	23.082	15.208	21.3698	32.755	16.4363	20.8697	26.738	13.5478	33.751	29.0265	15.6209			0.336537	28.7712
6.5092	32.3098	61.0716	51.3396	47.5541	34.0803	19.287	14.107	23.756	17.0799	23.3899	33.344	20.2384	17.8645	29.874	12.4712	28.288	32.5798	15.4224			0.341346	28.5588
6.6009	27.369	62.4805	41.2022	45.4557	29.2702	19.181	13.46	20.388	24.9601	21.2655	32.535	23.0693	25.0991	27.363	14.9055	24.971	34.5364	14.7238			0.346155	27.902
6.6925	24.4491	67.9828	33.5396	55.4333	28.6528	15.22	12.298	22.025	21.5824	18.7132	32.298	18.953	22.6778	27.869	19.0205	23.086	31.3492	15.1324			0.350959	27.2379
6.7842	25.3392	59.5437	35.3059	52.196	24.069	15.764	9.9593	24.061	22.5809	16.2953	30.258	16.0406	20.9748	16.029	18.163	19.222	30.3428	16.765			0.355767	25.1616
6.8759	24.1488	64.0005	37.7056	49.9531	29.6594	19.005	12.6788	23.11	25.0338	21.1775	31.576	12.7579	17.913	22.602	15.2241	18.573	25.7739	17.5674			0.360576	26.0255
6.9676	23.6247	71.9443	36.6391	44.3353	30.0339	25.16	13.4622	19.944	19.3093	18.7945	27.661	12.0161	16.677	20.312	17.6325	13.29	26.9233	19.6408			0.365385	25.4111
7.0593	21.7351	63.4839	49.2252	40.7238	29.0161	26.144	12.3009	19.884	22.6107	16.7852	29.011	15.7457	18.6908	26.065	14.8319	11.047	24.1383	17.6335			0.370194	25.504
7.1509	19.6342	57.5991	44.5871	30.836	29.2764	24.05	13.6091	19.536	20.5856	20.3853	28.788	16.149	20.5666	28.968	16.611	11.119	24.5453	19.3957			0.374997	24.7912
7.2426	17.8345	52.6279	40.6971	26.7834	27.5262	19.14	15.0368	21.659	26.7948	19.2617	32.83	13.1723	22.0897	27.834	17.9639	11.456	23.798	19.3999			0.379806	24.217
7.3343	22.9345	49.3528	31.9605	23.0294	21.3576	17.452	14.8173	18.285	23.5789	18.5318	27.055	13.7238	20.3294	21.755	16.2763	13.852	22.9521	20.5777			0.384615	22.1012
7.426	23.3993	52.1705	28.1936	20.8366	20.9355	17.311	15.5375	18.342	20.9442	22.5221	24.382	13.415	18.637	26.123	15.6935	14.676	23.7459	23.3637			0.389424	22.2349
7.5177	24.452	51.0616	30.2701	23.7481	20.3889	14.001	17.5013	25.629	21.7883	24.4042	18.633	8.0712	15.2577	26.955	16.1483	12.845	20.6115	25.5985			0.394233	22.0758
7.6093	23.5066	51.1305	29.1204	27.431	17.8219	10.282	20.1908	21.731	24.1448	28.8333	12.821	11.5558	17.5772	19.585	17.8292	12.76	21.9179	23.9776			0.399036	21.7898
7.701	23.3568	55.686	23.7011	27.6459	17.0314	13.541	20.4608	19.597	25.3449	32.2488	13.534	14.6966	19.9242	17.916	17.0928	14.113	21.7385	31.9739			0.403845	22.7557
7.7927	19.986	49.4425	22.1552	27.5838	14.4593	15.872	18.1833	19.357	20.5178	28.0181	13.161	12.9801	20.5615	15.526	18.0461	13.127	19.7576	28.7639			0.408654	20.9721
7.8844	18.3153	45.9977	25.3185	26.9545	17.4388	16.674	18.6669	16.615	24.8993	23.7331	17.663	14.6659	20.7785	16.004	21.2693	12.906	21.9289	25.5285			0.413463	21.4087
7.9761	18.6312	35.3281	29.1875	23.8994	18.8421	20.129	15.1237	16.466	33.9751	23.9199	20.739	15.0387	26.4763	16.966	19.7808	7.165	25.9389	24.2012			0.418271	21.7671
8.0677	19.0257	32.6726	24.1767	23.5082	18.064	16.456	16.9174	18.251	33.7185	20.8944	22.724	15.2874	21.1609	15.36	17.5262	8.066	29.4326	22.8392			0.423075	20.8934
8.1594	16.3467	30.7088	22.6587	20.1142	16.5358	14.575	17.4831	17.955	31.0075	27.0637	23.543	19.1256	21.4941	19.616	19.2717	9.207	32.6241	15.5942			0.427884	20.8291
8.2511	14.1626	36.2009	22.417	25.9045	18.5817	14.126	18.7112	13.077	27.3438	22.0942	19.056	12.3308	18.9302	18.621	21.6934	12.238	24.1224	16.9489			0.432693	19.8089
8.3428	13.2057	28.294	24.3233	26.0395	17.1347	15.421	19.9232	14.574	23.4374	15.792	18.668	11.2909	19.8968	21.064	20.401	15.332	22.7805	21.5442			0.437501	19.3957
8.4344	14.0569	35.7614	26.4648	24.5349	16.0864	18.034	20.5933	14.246	20.7732	16.3154	20.616	13.8884	25.4141	18.985	18.2361	14.884	17.8258	23.6678			0.442305	20.0213
8.5261	14.1351	36.8694	23.617	29.5584	17.8907	18.521	19.5146	16.559	22.6138	15.385	16.521	10.3733	29.6551	17.209	22.0523	18.463	15.865	17.9034			0.447114	20.1503
8.6178	14.5252	40.3466	26.4729	25.4214	23.9768	17.179	13.0194	14.971	21.1542	19.4492	19.578	10.9533	29.4384	21.912	20.2852	17.648	10.9637	13.9673			0.451922	20.0701
8.7095	18.8247	37.3685	24.128	25.169	22.8912	14.037	11.7733	13.82	22.563	17.916	16.66	8.8986	34.9207	27.657	17.1811	14.222	14.5025	14.1971			0.456731	19.8183
8.8012	13.9526	35.8731	26.2001	30.0539	17.6123	13.882	13.1588	19.092	25.9645	15.0132	17.528	8.4136	29.15	25.218	20.9553	13.65	16.3541	12.3841			0.46154	19.692
8.8928	13.8617	28.4571	28.7981	28.1995	13.4134	16.146	15.85	17.43	30.1228	13.8741	16.884	9.0271	29.6868	27.025	20.8519	12.503	23.9845	15.2245			0.466344	20.0744
8.9845	15.1597	27.4234	25.2643	19.438	14.0677	14.279	22.007	18.164	28.4992	12.98	19.519	7.6284	30.0414	23.282	17.6354	12.326	21.4319	17.5127			0.471152	19.2588
9.0762	16.2424	28.8016	24.3468	17.9285	19.0725	15.877	28.1159	16.443	31.7501	20.887	17.92	6.3475	23.6595	24.768	15.4216	14.554	18.4091	18.4035			0.475961	19.9416
9.1679	18.6841	24.9583	19.0557	20.0418	21.3714	17.315	23.2038	18.002	29.5078	20.9889	16.739	10.8697	19.6404	20.301	13.89	14.704	15.138	23.3759			0.48077	19.3215
9.2596	24.4144	25.4894	21.2204	17.7996	19.1193	21.694	24.3609	22.141	29.9546	20.3742	14.769	9.4728	18.3339	21.812	15.612	15.184	18.3933	27.5143			0.485579	20.4255
9.3512	21.928	24.2414	21.5994	20.4681	18.3771	27.41	20.1875	18.722	26.3264	22.0992	14.464	8.6161	14.6299	24.746	17.3466	14.911	17.671	29.3917			0.490382	20.1742
9.4429	20.2362	26.5484	24.0962	20.3488	16.6801	29.177	20.904	18.734	22.5509	23.0022	16.289	5.6904	12.9619	20.189	21.5706	15.877	15.7166	28.7557			0.495191	19.9627
9.5346	17.4278	26.7104	22.4383	20.1298	14.643	21.696	26.4702	19.28	27.3665	21.1751	23.276	6.8065	13.916	20.269	27.965	11.22	15.9336	22.4371			0.5	19.9534
9.6263	14.5458	27.7925	21.6298	21.4485	14.2179	20.024	21.945	20.871	34.3013	19.8529	21.225	6.0103	12.4225	15.124	31.4213	10.96	18.2209	16.7151			0.504809	19.3738
9.7179	12.8696	35.5349	20.4666	22.0583	14.5629	21.641	21.0692	22.637	31.3731	19.5733	16.633	6.0245	20.5016	14.864	27.9026	18.855	17.2558	17.1849			0.509612	20.056
9.8096	15.0117	43.9274	17.7417	26.4079	17.5924	28.362	26.6006	23.89	28.8462	23.4131	11.651	7.2742	18.1097	13.411	19.2755	23.366	20.7762	24.576			0.514421	21.6796
9.9013	18.2156	37.4669	15.9615	23.4105	19.2901	29.767	28.559	21.904	26.8297	22.5659	11.932	10.6955	22.0382	14.369	16.604	25.454	23.3152	34.2328			0.51923	22.3673
9.993	18.1777	28.2341	13.4619	23.7695	14.697	25.939	26.4592	26.928	25.1128	19.0924	8.671	11.2277	18.8198	15.486	15.5998	18.691	24.8427	40.8615			0.524039	20.8928
10.0847	16.3351	31.3445	14.1723	22.1415	15.8148	21.807	20.529	22.266	29.0268	20.6374	9.99	13.266	11.3136	18.905	17.1339	14.16	25.0416	41.4836			0.528848	20.2982
10.1763	14.958	29.0137	13.4241	20.9798	13.9898	19.287	19.751	25.823	32.0612	25.1965	10.115	15.9709	7.5085	21.348	18.6782	10.719	26.5972	41.4594			0.533651	20.3822
10.268	17.5352	20.9967	16.553	17.3932	15.8556	21.602	22.5723	18.684	34.4303	22.8564	9.221	16.7027	7.1005	20.844	18.1059	10.789	27.2011	37.5868			0.53846	19.7794
10.3597	12.2702	21.9572	14.8681	20.8861	18.789	18.767	15.3973	14.573	32.8961	28.6168	12.286	18.4992	6.735	21.457	20.6158	13.175	26.8597	39.932			0.543269	19.9211
10.4514	14.1056	23.0355	9.7833	21.3372	23.8838	20.784	12.8313	17.785	26.0588	31.3954	13.592	18.3127	7.6304	19.465	21.5758	13.493	31.4574	41.7404			0.548078	20.4593
10.5431	13.5957	22.7898	15.737	18.5066	21.9366	21.043	10.3452	16.596	18.0642	35.0277	14.737	17.1648	8.3041	17.786	21.7394	15.347	24.9196	40.864			0.552886	19.6946
10.6347	13.0109	22.0072	15.4044	21.1197	24.4416	23.305	11.7715	16.872	16.638	37.7059	13.499	11.3536	10.0268	18.087	19.2471	19.596	23.8209	32.9405			0.55769	19.4915
10.7264	20.5426	24.4227	15.8014	25.3886	22.2272	27.14	15.117	17.925	19.0096	33.2181	19.867	10.4116	9.1437	15.173	23.5825	22.071	19.4865	33.2121			0.562499	20.7633
10.8181	23.0299	26.7415	16.8904	24.0973	20.9241	17.775	17.7307	24.937	20.8623	28.4754	18.829	10.0051	7.9331	14.543	15.1057	14.884	15.1374	31.0552			0.567307	19.3865
10.9098	13.7777	25.4819	20.0291	21.2238	15.8381	16.123	14.0063	26.864	23.8933	26.3119	22.159	11.7046	6.8035	15.344	15.5007	12.373	15.4427	30.9048			0.572116	18.5434
11.0015	14.1903	22.5961	20.9746	24.4172	15.2697	17.216	9.6635	24.905	23.3386	24.005	26.325	10.0864	6.8116	23.805	19.1032	7.751	15.082	29.9623			0.576925	18.639
11.0931	16.0227	18.52	26.0595	24.6171	19.1405	16.644	11.5656	22.166	27.7274	25.2491	26.431	11.7487	9.9062	21.946	24.8465	6.986	9.9478	29.3228			0.581729	19.3804
11.1848	12.3992	18.5536	30.8164	27.4701	16.3864	19.899	16.5865	18.355	31.3575	22.4543	18.995	12.625	10.5927	19.952	26.8269	9.03	9.7541	22.6731			0.586537	19.1515
11.2765	9.0092	19.6234	23.3612	22.4517	20.2326	18.832	14.5422	23.585	27.3531	25.9732	19.14	10.3213	11.363	21.729	30.8446	10.371	10.298	25.3321			0.591346	19.1313
11.3682	9.7809	24.8984	22.8461	19.2933	23.2844	14.845	11.2954	25.669	23.0065	27.1121	17.377	10.5071	10.2552	21.763	25.3925	9.195	11.8366	23.0751			0.596155	18.4129
11.4598	11.1325	25.9187	22.3214	17.0945	25.2139	14.606	11.4699	25.36	21.396	25.9534	20.171	9.5175	10.9291	22.179	25.0389	9.737	10.1675	25.9398			0.600959	18.5637
11.5515	9.4859	26.0837	23.24	18.9272	24.4432	14.978	12.2251	21.743	24.3355	23.0829	19.846	12.7701	13.5772	18.948	18.1526	14.297	13.5511	25.272			0.605767	18.6088
11.6432	8.0088	31.288	19.1731	20.3645	23.9322	14.005	11.423	22.31	25.8983	19.1854	17.646	10.9283	11.2697	23.84	16.6754	20.207	12.5607	20.546			0.610576	18.2923
11.7349	8.1521	32.8225	20.5924	19.8948	21.9136	9.607	10.7188	26.263	37.0725	20.8292	21.356	10.3453	7.8491	20.372	18.3928	21.042	9.4497	23.9491			0.615385	18.9234
11.8266	12.9991	34.7037	20.118	18.7021	20.0602	8.919	11.2716	32.63	38.3211	23.673	15.793	7.943	9.8325	23.153	15.8107	22.582	14.947	29.8356			0.620194	20.0719
11.9182	11.7318	31.7069	16.0782	17.832	19.8374	8.917	10.9884	26.441	32.1963	23.8865	9.26	8.9108	7.7522	21.623	10.6345	15.947	20.3298	22.6837			0.624997	17.5976
12.0099	10.147	27.3477	17.4157	16.7348	23.2135	9.342	12.5327	23.043	26.9487	23.7731	8.433	11.0002	6.9107	28.755	11.0728	13.149	20.9252	20.9141			0.629806	17.3143
12.1016	13.2988	27.4059	17.8957	17.9835	23.4397	15.657	12.7397	15.762	26.4049	26.8121	11.216	9.0831	8.2461	26.03	16.8735	10.744	21.7453	23.012			0.634615	18.0194
12.1933	10.975	25.9062	18.0297	17.5859	23.5048	14.503	13.7619	19.618	29.4259	25.7484	15.656	10.9916	6.3645	26.84	21.0656	12.346	19.3217	23.7362			0.639424	18.6322
12.285	12.4661	28.1131	14.644	19.2431	21.6732	11.632	11.0258	17.01	31.2439	29.861	13.448	12.3805	10.8152	26.126	20.2407	9.32	15.5902	29.3337			0.644233	18.5648
12.3766	14.5339	27.422	12.4223	22.1429	21.1075	10.418	10.7699	23.029	31.1396	21.2939	9.324	10.6615	10.6624	26.917	22.0097	11.572	16.0765	36.6683			0.649036	18.7872
12.4683	17.1294	24.9123	14.6721	28.6206	19.433	13.588	11.3329	25.192	29.5527	22.3317	10.601	11.5729	11.3236	24.204	26.8472	8.933	13.4125	34.4945			0.653845	19.3419
12.56	16.4364	28.2968	14.5184	29.8351	18.3042	14.907	11.4304	27.322	34.0508	26.5776	14.345	11.1402	10.2414	22.526	27.5581	6.53	7.9796	28.2205			0.658654	19.4566
12.6517	14.9364	24.6206	16.5585	33.6106	16.6214	16.934	15.7534	26.635	28.4338	30.3915	21.657	11.1942	8.4119	21.808	27.4272	9.235	11.0851	20.5372			0.663463	19.7695
12.7433	12.5388	24.4324	18.4604	29.6844	17.9542	20.279	14.0466	27.859	23.207	25.9327	15.4	10.3636	6.2004	22.384	21.4888	8.882	14.2797	17.3187			0.668266	18.3729
12.835	15.528	22.4998	23.5151	30.1509	19.8629	21.965	12.9688	22.326	20.4371	28.4444	16.521	12.3885	6.0686	20.372	20.7017	10.894	20.8004	19.3472			0.673075	19.1551
12.9267	17.8959	23.1207	22.7914	30.2626	17.0551	23.582	15.6043	25.272	31.8214	26.8839	20.49	14.2991	7.0552	21.774	21.4156	15.336	19.0679	20.5519			0.677884	20.7933
13.0184	17.46	21.0874	19.1802	32.0949	16.4632	21.803	15.3312	21.491	38.6025	29.3023	18.175	16.1813	6.8801	23.601	18.7383	12.581	17.8097	19.9944			0.682693	20.3765
13.1101	18.9032	20.277	18.6879	23.256	13.6793	24.453	14.874	20.645	46.3303	24.6144	23.365	17.0408	9.6405	28.272	24.0905	11.079	18.358	25.9389			0.687501	21.3058
13.2017	18.667	25.1269	19.0849	18.6945	17.116	21.912	15.9907	27.212	43.9328	20.1567	21.383	12.4005	10.3196	30.033	28.5917	9.729	19.037	30.7357			0.692305	21.6735
13.2934	16.8803	23.0463	15.8582	23.9518	20.0078	21.111	13.6479	34.514	40.8419	21.7049	17.328	14.0138	8.9326	31.783	27.515	9.422	21.1126	32.4994			0.697114	21.8984
13.3851	17.4116	25.5524	17.7993	32.3957	18.2401	21.419	14.2985	35.045	36.8797	22.1673	21.23	13.4683	11.5705	31.967	30.357	7.77	18.683	31.9816			0.701922	22.6798
13.4768	17.7936	23.7632	17.1934	34.2439	16.2719	18.134	14.1609	29.845	40.2842	27.7081	26.117	14.4262	11.1634	34.904	29.005	6.98	12.071	25.6967			0.706731	22.209
13.5685	17.5326	24.5048	25.8415	28.1768	15.6427	21.654	17.2265	34.538	39.7987	35.0651	30.992	14.14	13.2995	25.682	21.8357	8.551	13.9253	26.5401			0.71154	23.0526
13.6601	15.6153	25.1434	24.7734	24.6773	16.248	20.635	17.9029	36.16	37.3917	30.0152	30.424	10.8104	15.7835	26.886	21.3823	16.594	17.3156	23.2918			0.716344	22.8361
13.7518	18.4193	21.8163	23.4027	25.2788	16.3036	14.449	19.1797	28.816	39.2322	29.0723	22.849	11.9752	13.1925	27.667	21.1884	19.701	16.2487	21.4702			0.721152	21.6812
13.8435	17.585	18.5544	22.1185	25.6588	17.7239	17.652	19.9898	31.252	34.3341	25.5429	21.437	9.9951	9.4349	29.654	24.5793	18.816	20.9966	22.4195			0.725961	21.5413
13.9352	15.6821	21.4177	22.5649	24.9776	19.8951	19.983	20.2915	32.226	37.0021	26.9591	17.725	9.4195	8.4905	26.56	23.5473	17.888	22.5358	24.3618			0.73077	21.7515
14.0269	14.3501	18.146	24.2181	26.1818	17.1927	24.3	19.2049	33.516	37.1328	29.1671	16.481	7.7948	8.6236	25.895	30.5118	12.644	23.5263	23.8674			0.735579	21.8196
14.1185	15.7969	17.4308	23.8048	26.5752	19.9485	25.508	21.0297	29.489	32.3217	31.5547	17.04	7.0895	9.2156	22.937	25.3078	10.943	22.7496	26.2546			0.740382	21.3887
14.2102	19.139	20.9092	20.8721	23.3252	24.4829	25.876	20.3229	24.128	28.1983	30.0013	19.103	9.0684	15.8957	27.371	36.9199	13.766	18.8419	28.8582			0.745191	22.6155
14.3019	10.6792	25.2737	23.2236	24.7572	21.6627	23.752	16.2609	37.026	24.853	34.5953	16.74	6.1085	20.5254	31.143	33.1556	13.608	22.212	33.1903			0.75	23.2648
14.3936	12.9847	22.421	21.9288	22.5936	19.8604	21.427	15.4973	35.807	27.7283	31.275	20.638	9.8839	20.4531	30.828	35.4869	15.922	21.9694	27.864			0.754809	23.0316
14.4852	18.6374	16.7966	26.6164	22.688	23.9933	19.669	11.9942	26.241	30.2308	31.9505	20.232	8.988	19.4389	27.766	33.6311	22.837	21.6927	24.9819			0.759612	22.688
14.5769	20.9458	17.0396	23.1553	24.5209	28.9942	17.943	17.331	26.502	23.0784	36.466	19.732	8.6473	17.711	24.681	22.1326	21.53	24.4467	23.1332			0.764421	22.1106
14.6686	18.9068	15.6156	25.6898	25.0582	26.5355	16.144	17.6398	26.242	22.792	32.8026	13.871	11.8033	18.3975	33.596	21.8284	23.583	27.6845	23.0365			0.76923	22.2904
14.7603	18.9475	20.0627	22.4609	28.5181	28.4159	16.41	26.9294	28.075	29.7483	26.7215	13.614	13.1808	18.8141	35.449	15.9403	27.82	27.3218	29.29			0.774039	23.7622
14.852	16.7882	26.5015	21.6291	25.6994	25.0422	20.75	24.1511	25.632	30.7626	24.5705	17.712	13.537	16.6546	37.841	20.7995	26.518	24.1178	25.152			0.778848	23.5477
14.9436	16.9367	31.3968	18.5128	19.9323	23.7674	19.369	18.3205	26.194	32.2633	22.5843	19.25	12.8321	12.2685	35.161	20.1127	21.407	20.5379	29.0426			0.783651	22.216
15.0353	15.8374	31.6247	19.6636	21.498	18.5275	17.535	18.1859	23.105	30.6265	23.7297	23.884	13.0062	9.8681	35.991	21.8015	20.958	22.0145	34.2045			0.78846	22.3367
15.127	18.3368	22.1288	16.5705	29.7616	15.5275	19.781	18.6684	28.702	25.8477	27.0477	33.412	10.8901	12.8839	29.905	21.4801	21.411	22.1265	39.0453			0.793269	22.9737
15.2187	18.4996	18.1685	19.4961	32.8262	19.2034	20.747	21.3754	37.645	32.8897	26.4812	31.365	13.0876	14.4003	25.083	24.2692	18.02	24.9021	35.5779			0.798078	24.1132
15.3104	19.6502	20.0638	21.9758	29.302	17.084	16.932	25.0307	35.839	33.2447	27.7473	27.017	9.4832	14.2101	26.798	21.5305	16.197	25.4739	26.9721			0.802886	23.0306
15.402	19.4337	19.7943	22.6763	29.3608	15.5546	20.98	19.6306	31.729	32.6079	32.2367	18.17	9.8861	12.2341	27.046	19.2502	16.61	26.987	38.4068			0.80769	22.9219
15.4937	17.7925	23.0303	20.3076	25.3588	17.9497	19.154	16.1811	25.857	26.3493	39.2833	15.603	10.587	15.0737	32.02	22.7	17.211	21.4738	37.857			0.812499	22.4327
15.5854	18.688	23.1088	16.3942	20.7211	20.3582	21.386	22.9411	26.379	27.9425	32.5734	16.742	9.4606	17.8878	34.722	29.9254	18.521	19.8018	39.734			0.817307	23.1826
15.6771	21.137	24.8445	14.0403	18.4039	18.1979	14.098	29.5472	28.466	22.5263	34.3871	18.585	9.3672	14.2035	32.078	24.3865	22.154	19.2771	39.5784			0.822116	22.5154
15.7687	19.0461	22.7111	16.0082	26.2034	22.1897	13.514	27.4972	24.698	20.1865	34.4656	19.44	9.2615	16.9077	28.029	24.7287	21.613	16.9171	47.0364			0.82692	22.803
15.8604	17.2288	24.1389	21.9969	24.9907	26.8134	15.002	25.1579	24.616	22.9216	26.1327	23.834	10.2014	18.8565	31.712	26.0552	22.782	17.1495	49.049			0.831729	23.8132
15.9521	13.8763	19.3598	24.6222	23.7002	24.1857	14.578	23.9988	19.411	27.7553	28.0473	21.946	10.6785	18.7511	29.98	28.8515	27.51	19.7597	50.5321			0.836537	23.7524
16.0438	11.8373	20.2706	29.3432	21.0731	25.8979	16.524	26.7845	20.448	26.9891	29.0852	21.12	13.8562	19.397	28.165	23.9233	26.015	16.7678	48.126			0.841346	23.6457
16.1355	10.5503	24.0468	33.2152	20.145	29.866	19.504	32.6543	21.756	28.3404	31.5997	23.082	13.6713	19.1168	26.253	23.301	26.01	18.5815	46.7514			0.846155	24.9136
16.2271	11.8895	22.954	33.6462	24.2314	26.2436	20.888	29.3817	25.284	39.0338	32.5763	25.729	18.0785	19.6078	22.405	26.6057	30.675	23.1075	41.8036			0.850959	26.3411
16.3188	15.1942	26.69	27.2675	27.3923	26.3288	14.484	29.3726	24.941	40.9923	27.1578	33.235	25.1505	20.9472	17.446	32.5571	24.791	24.0291	44.243			0.855767	26.79
16.4105	15.8941	28.7215	24.0876	34.2023	28.8083	18.553	26.3881	21.44	41.0725	25.2167	29.501	29.0857	28.6594	19.785	35.8845	24.39	23.596	52.9495			0.860576	28.2353
16.5022	18.3449	23.7667	23.1954	32.459	24.3146	18.564	27.1594	23.941	40.6844	24.3674	28.584	35.0535	28.2251	19.245	32.1308	24.568	27.0135	49.6966			0.865385	27.8507
16.5939	16.3456	18.0455	24.2776	21.8406	20.7277	20.413	24.9132	23.391	32.7828	23.3683	29.295	34.726	23.7793	22.43	27.2213	26.505	26.9973	47.6572			0.870194	25.8176
16.6855	12.9003	11.6016	23.4082	20.3	15.213	26.991	28.7893	28.755	23.796	29.4343	21.343	31.9427	24.4385	19.24	26.6766	24.265	28.0078	37.8401			0.874997	24.1635
16.7772	15.0348	15.4183	19.2381	19.751	16.1075	30.548	34.7745	32.906	19.6774	30.4138	19.377	27.8146	18.4229	15.076	22.3734	23.332	24.5147	41.0084			0.879806	23.6549
16.8689	16.8745	14.6083	19.6644	16.2744	14.4066	25.388	29.8366	33.684	19.7075	29.1435	13.868	26.0082	12.3817	10.466	21.1632	22.197	19.9604	40.0595			0.884615	21.4273
16.9606	17.7534	14.0543	20.2273	13.8289	19.1514	24.48	24.6472	34.5	15.9926	31.4186	13.585	19.1917	11.7293	8.167	18.3536	24.758	15.0873	39.0745			0.889424	20.3333
17.0522	19.1882	15.8782	20.9171	13.7005	29.495	21.447	22.5265	27.92	17.0099	29.0233	17.789	13.6979	9.6063	7.409	16.6022	28.788	14.1224	38.9			0.894227	20.2234
17.1439	15.9144	14.0295	16.8345	12.7627	30.3124	24.985	28.7064	21.864	19.7482	34.2162	20.694	12.7916	14.0001	3.881	15.5548	35.248	18.3773	40.3539			0.899036	21.1263
17.2356	17.224	17.9804	21.0637	15.493	28.3133	19.931	27.2784	22.451	21.5899	36.7957	22.153	13.0959	19.9829	1.776	18.1469	34.459	17.2125	36.9785			0.903845	21.7736
17.3273	18.3317	20.5794	26.7045	18.6405	27.5242	22.458	23.8228	20.792	20.6268	39.6424	14.934	12.4432	16.6581	0.665	21.1152	23.813	19.2265	30.3287			0.908654	21.017
17.419	17.4252	30.5833	23.6127	19.6336	20.5519	26.187	21.6255	17.222	18.6552	31.1319	11.249	11.3492	17.4636	0.601	26.7998	21.152	27.253	23.9569			0.913463	20.3585
17.5106	17.8456	25.8808	23.2295	20.1145	10.015	26.986	22.0417	12.152	13.575	15.47	6.435	12.9027	19.6627	0.844	29.2414	28.2	23.8579	18.3366			0.918266	18.155
17.6023	16.5189	18.4764	17.9518	15.7555	5.4011	21.565	26.98	7.433	5.3388	6.4585	3.281	16.4198	17.2774	1.155	21.047	26.216	19.6113	20.3074			0.923075	14.8441
17.694	18.1206	14.6739	10.5792	9.1759	2.7759	14.464	23.8911	4.318	2.3515	2.9294	2.721	21.9977	11.734	0.248	13.0695	28.836	20.3746	21.0027			0.927884	12.4035
17.7857	15.8911	9.8779	6.9333	5.7127	1.7353	7.663	20.4578	4.201	1.8426	1.2573	1.603	19.3511	6.5246	1.432	7.6263	27.523	26.1316	20.5468			0.932693	10.3506
17.8774	22.5541	5.3035	5.422	2.8341	1.5455	4.5	10.5969	2.563	1.6248	0.7739	1.294	15.8752	3.4461	0.666	3.8572	16.223	26.1822	22.6571			0.937501	8.2177
17.969	23.203	4.4085	3.5279	2.6201	1.6794	2.676	5.467	1.999	1.3102	1.1594	0.612	7.1828	1.9081	1.002	2.9589	9.041	31.4679	23.8708			0.942305	7.00522
18.0607	17.3826	2.4426	1.4686	1.2163	1.6844	1.03	3.4323	1.631	0.8753	1.1875	0.913	3.2777	2.6049	0.475	1.3547	5.049	29.1309	20.1878			0.947114	5.29687
18.1524	17.1514	2.1006	0.7256	0.83	2.1151	1.975	2.1638	0.794	0.3842	1.5274	1.339	1.894	1.3922	0.616	1.6734	2.954	24.1942	16.1111			0.951922	4.44117
18.2441	14.2051	1.9982	1.1667	1.2254	1.4573	1.677	1.4271	1.571	0.579	0.6081	1.241	2.1348	1.3372	0.774	1.7966	2.188	14.1782	9.8915			0.956731	3.30312
18.3358	9.3306	1.8924	1.1768	0.7619	1.7978	1.164	1.2209	0.96	0.9627	0.3503	0.557	1.6304	1.7105	0.719	0.7463	1.545	7.8679	6.1688			0.96154	2.25346
18.4274	5.4093	0.918	0.9217	0.5939	1.0798	1.192	2.1831	0.681	1.1926	0.5553	0.533	0.9807	0.6338	0.447	0.5868	1.228	3.9131	2.3582			0.966344	1.41152
18.5191	3.8915	0.845	0.3437	1.1414	0.7901	0.84	1.3721	0.626	0.9076	0.2291	0.226	1.321	1.1963	0.175	1.2687	1.541	2.6325	1.3607			0.971152	1.15043
18.6108	2.8686	0.6437	0.3171	1.6746	0.3678	0.746	1.1116	0.788	0.851	0.2273	0.792	0.6286	1.542	0.421	0.938	1.899	2.1214	1.4369			0.975961	1.07637
18.7025	2.6446	0.978	0.2621	1.0652	0.8721	0.479	0.7485	0.365	0.6175	0.4028	0.5	0.5103	0.1169	1.23	0.7308	3.437	1.5575	0.6858			0.98077	0.955728
18.7941	1.8993	0.6294	0.3934	1.0754	0.6522	0.558	0.4939	0.57	0.1713	0.3835	0.347	0.5113	0.6187	0.576	0.6344	2.32	0.959	0.704			0.985574	0.749822
18.8858	1.9746	0.5254	0.7181	1.1842	0.19	0.471	0.769	0.207	1.1005	0.5011	0.29	0.3094	0.583	0.406	0.6702	1.086	0.7588	0.421			0.990382	0.67585
18.9775	1.8917	0.2921	0.5927	0.7589	0.6121	0.306	0.4106	0.159	0.2151	1.0235	0.357	0.5186	0.1574	0.536	0.8695	0.761	0.7364	1.1109			0.995191	0.62825
19.0692	2.0427	0.422	0.7914	1.413	1.0406	1.08	0.8853	0.769	0.2363	1.2586	0.426	1.0414	0.0527	0.447	0.3572	0.612	0.5045	1.5391			1	0.828822

## Sheet: Image10
X0	Y0	Y1	Y2	Y3	Y4	Y5	Y6	Y7	Y8	Y9	Y10	Y11	Y12	Y13	Y14	Y15	Y16	Y17	Y18	Y19	Y20	Y21			Ap-Basal to 1	Average intensities
0	21.7294	23.3021	17.1437	28.4272	22.8003	18.2933	23.0971	16.1442	21.2592	26.3372	34.6654	20.9631	37.5767	18.228	19.471	29.1527	31.1478	22.7585	30.7144	27.513	18.2352	24.629			0	24.254
0.0917	20.7488	21.1495	21.5047	23.9954	22.6256	20.9928	27.1564	17.1215	16.8259	33.3818	34.6569	21.188	30.9739	22.862	23.854	32.1448	24.9118	22.3645	24.3169	30.004	23.1893	25.2561			0.00366385	24.6011
0.1834	14.7727	24.7453	20.6729	21.3996	25.3181	16.4377	22.8732	16.1432	19.374	30.8621	33.3879	20.0153	27.9723	29.189	25.915	31.7356	24.7444	26.9348	23.211	34.928	24.9036	24.7045			0.00732771	24.5564
0.275	16.1281	27.6033	25.0086	21.7853	22.9335	19.1551	21.1076	14.3704	24.9258	30.3616	37.2512	16.8702	21.883	27.438	22.322	26.3993	27.5659	27.519	23.1456	31.087	24.345	26.2421			0.0109876	24.3385
0.3667	18.4992	28.6477	26.6953	17.7766	24.1804	16.9878	19.1207	14.8379	25.3149	32.5106	31.1339	15.6807	30.4263	30.941	23.366	18.5776	25.4568	25.8303	25.8547	31.071	27.1707	25.7016			0.0146514	24.3537
0.4584	19.0137	28.4789	21.4753	18.9724	28.412	17.4355	18.7509	15.5677	25.5282	33.6608	38.1912	18.2226	29.8066	30.433	32.37	19.795	29.2874	30.0083	23.5437	31.466	30.0902	22.1663			0.0183153	25.5762
0.5501	18.0951	28.4015	20.3529	24.6133	20.4788	13.8025	19.8311	15.0621	27.146	26.7265	49.6494	19.3865	28.6737	32.974	25.99	23.2401	42.8759	29.8995	28.2463	40.802	30.7349	19.2655			0.0219791	26.6476
0.6418	20.7167	28.569	12.6699	22.1021	22.4226	16.057	21.4164	16.0894	28.0305	32.6333	49.6654	17.3515	23.0565	30.282	20.887	22.4514	48.3639	28.694	27.6275	35.734	25.3279	18.2968			0.025643	25.8384
0.7334	23.628	25.3181	17.2623	24.4912	28.1556	15.5507	20.2784	12.7071	23.3865	42.8211	50.5314	16.4162	22.4054	32.418	19.872	26.726	41.8212	30.6815	32.6618	34.265	27.6331	17.0344			0.0293028	26.6393
0.8251	21.2127	22.6666	15.3083	24.1128	35.3922	14.765	27.6729	15.053	19.8543	61.459	45.9725	16.7117	31.8294	34.548	18.961	26.0214	39.2969	25.0867	31.593	33.466	22.3	14.5403			0.0329667	27.1738
0.9168	19.5963	28.1179	16.3107	25.1645	38.7261	16.0968	22.58	21.0994	21.3752	66.6188	41.5288	18.5024	29.2625	32.187	16.001	30.1852	41.5038	23.4029	32.6274	27.864	26.9342	14.9314			0.0366305	27.7553
1.0085	17.5143	26.8838	18.1597	28.1932	38.344	16.1865	22.7221	23.0897	21.3306	53.664	37.5846	20.3952	28.0282	36.819	18.692	38.1864	41.8373	24.8678	34.3374	38.075	23.4693	19.9365			0.0402944	28.5598
1.1001	23.2512	27.1367	17.206	22.1903	38.1968	15.983	23.069	22.3421	16.0658	53.438	42.9885	23.9187	30.6471	47.487	18.535	38.3375	43.9212	26.4882	27.0491	39.817	22.5753	24.0289			0.0439542	29.3033
1.1918	25.2196	24.3549	18.7843	27.9312	40.283	20.9056	21.5773	22.2942	18.058	44.0956	52.6162	24.7567	34.0253	49.092	18.25	39.5481	27.7073	35.3696	27.3163	33.529	23.8857	25.1546			0.0476181	29.7616
1.2835	27.9458	23.8811	21.1946	27.4698	31.9473	20.634	17.2414	24.8774	20.6068	47.528	48.3001	25.5876	34.005	48.751	13.298	33.3114	28.1385	35.6505	32.9813	35.575	25.9397	22.1975			0.0512819	29.4119
1.3752	28.8055	26.672	23.2043	26.7992	42.3816	24.2052	16.5487	23.5498	23.0992	51.9104	58.7985	25.7311	41.1748	48.645	17.787	26.1595	28.1587	34.6764	31.1107	26.361	27.1651	20.2463			0.0549458	30.5995
1.4669	25.4207	26.0157	26.6443	23.0672	53.6118	26.8606	17.1238	27.8767	15.2606	55.9082	49.3998	19.5028	45.3288	50.584	22.277	25.0494	26.4834	37.5466	24.1179	27.996	38.8733	17.3079			0.0586097	31.0117
1.5585	30.3854	23.2613	25.4746	28.7555	46.0934	23.9759	20.0229	26.1996	16.6406	51.7719	47.8791	20.3063	43.1669	50.507	20.931	24.1823	31.987	49.7397	22.6889	30.664	41.5015	13.4324			0.0622695	31.344
1.6502	28.7414	25.868	24.4893	33.6048	48.0884	25.7885	21.6462	22.8475	21.5936	69.5732	49.2824	19.031	38.9042	39.634	20.722	27.9177	35.5108	49.4804	26.7149	31.275	47.4152	16.5369			0.0659334	32.9393
1.7419	31.862	27.329	25.9038	25.9758	48.856	31.1789	29.0795	25.218	24.3436	73.3359	45.6156	25.2264	36.9402	40.949	24.132	28.854	34.3561	44.7178	25.0536	30.073	52.5217	16.966			0.0695972	34.0222
1.8336	32.6834	26.6061	32.2646	25.243	55.2052	22.3304	23.9902	24.8064	28.8772	67.4114	52.2622	22.8802	33.6978	43.378	22.549	34.3564	35.5504	35.7607	32.214	28.301	44.3913	20.4394			0.0732611	33.8727
1.9253	31.8451	32.2112	30.1781	25.56	52.6967	24.7396	21.6547	18.9908	34.8992	58.017	51.7692	22.2725	39.7963	44.147	21.816	30.4707	38.8409	34.3178	21.787	25.205	41.7724	22.1957			0.0769249	32.9629
2.0169	35.7884	30.9185	24.7267	27.3831	61.4375	24.174	20.168	19.1031	34.3423	54.093	50.7786	26.4008	43.5096	43.395	22.826	31.8603	33.4651	38.5881	21.4276	23.438	48.8398	24.5918			0.0805848	33.6934
2.1086	38.05	33.8548	25.878	35.838	56.0091	23.8095	17.7788	18.7761	31.442	53.7395	49.43	23.7946	44.7118	62.98	25.008	33.5921	36.5036	40.5538	23.9209	24.459	60.4942	26.7203			0.0842486	35.7884
2.2003	44.022	26.7061	19.8771	36.7495	52.5418	20.0208	21.4583	20.9012	30.1908	51.1474	43.4019	27.9689	38.3996	59.487	29.469	32.6806	46.7962	34.2308	20.4606	30.45	74.644	27.1367			0.0879125	35.8518
2.292	42.2547	32.975	17.5451	35.2437	56.0962	17.4235	20.4417	23.9676	37.1421	52.4595	50.4199	29.0985	32.5425	54.447	29.358	34.2258	56.1965	25.2625	22.8642	30.166	69.3336	31.0567			0.0915763	36.3873
2.3836	41.2554	35.7822	25.8181	33.5874	56.6076	18.5711	23.1169	23.9046	32.709	51.2433	56.3928	32.616	39.5108	59.202	27.084	31.2626	62.114	24.6349	22.6657	27.373	58.8283	32.4354			0.0952362	37.1234
2.4753	51.7037	43.7161	23.0815	33.7843	56.154	20.3296	27.5185	27.3091	31.3705	44.3124	57.3257	39.5523	33.5855	63.095	35.698	29.6354	62.5386	29.8775	24.0341	22.372	60.9503	33.0249			0.0989	38.6804
2.567	47.4376	30.8473	18.234	36.9998	61.6717	19.4255	21.538	28.4308	31.6311	54.0511	50.6377	37.3021	28.6658	63.766	38.268	22.9016	75.4472	28.6185	27.5565	22.548	61.6576	47.6043			0.102564	38.8746
2.6587	42.2374	30.2773	24.2333	47.1656	69.9773	17.0466	23.5534	28.6765	39.3224	53.9195	41.0131	44.296	26.5128	74.843	38.281	25.3403	74.4659	32.7811	21.7012	25.547	72.6171	60.2674			0.106228	41.5489
2.7504	49.14	28.1467	23.3937	48.0676	85.7166	17.5229	25.5731	27.6781	42.2703	50.4636	56.4688	41.1894	27.9384	75.002	35.745	32.007	75.2147	39.9641	18.1896	21.415	72.9841	72.1643			0.109892	43.9207
2.842	47.1546	36.0404	23.7978	49.3433	73.3787	20.1681	17.9034	30.5449	46.2679	39.1976	46.0139	45.3142	39.0773	85.384	31.758	38.6473	66.8737	35.9036	22.9158	21.281	64.601	89.6172			0.113551	44.1447
2.9337	38.7333	37.1877	21.7904	48.5026	58.6891	26.3536	19.0706	25.049	45.0962	37.3734	47.0909	58.6087	41.7672	95.699	35.744	35.1442	53.6555	46.9889	22.4532	25.944	74.5236	87.181			0.117215	44.6657
3.0254	32.7992	45.3347	25.5378	60.1468	42.7123	26.1355	21.9765	23.4341	46.3814	33.9457	46.4491	66.2729	40.2857	100.458	30.823	32.5387	49.9883	43.7694	20.6075	24.905	82.9818	73.4488			0.120879	44.1333
3.1171	34.4793	40.8892	23.9319	53.8538	36.3728	26.6307	17.9526	23.4309	46.9218	28.557	41.9222	65.8764	35.7968	94.006	32.508	30.1885	44.9435	46.1285	27.0312	22.724	80.839	63.8522			0.124543	41.7653
3.2088	39.7271	36.7316	23.1815	49.4544	35.1375	27.1442	21.7119	26.0373	46.5767	26.671	44.9375	61.1919	39.3403	99.687	34.469	31.0945	48.6051	33.9481	28.1333	18.256	75.9896	56.6466			0.128207	41.1215
3.3004	44.1138	38.3733	25.3316	50.5499	44.8777	24.376	27.6529	30.9439	43.7965	32.1942	40.789	57.9563	50.1897	81.478	34.327	29.3364	45.1939	32.3957	28.6516	21.08	80.7706	46.48			0.131867	41.4026
3.3921	54.7306	38.9123	25.7556	67.1441	44.3444	29.6359	17.1222	25.9669	44.9902	35.8318	45.7001	50.82	48.7925	84.978	42.485	27.3149	39.5485	44.2797	37.9397	23.529	73.6473	38.1177			0.135531	42.7994
3.4838	62.571	41.3631	26.2999	65.7782	48.3354	26.9652	17.3752	19.9715	48.304	38.641	37.4146	52.7758	52.1831	77.262	47.996	39.4254	51.632	48.7486	41.4292	29.439	56.6058	27.8646			0.139194	43.5628
3.5755	50.8885	42.1258	28.636	51.1513	50.6813	19.9583	23.1884	21.0231	42.5884	33.4825	40.9151	42.4966	52.7934	63.046	52.634	39.5516	55.1206	58.8244	37.9044	34.351	40.8288	25.7703			0.142858	41.2709
3.6672	44.0573	39.5823	23.2928	57.8798	54.274	25.3512	20.8564	21.1809	45.9104	36.6643	32.8388	35.2338	58.4435	63.057	63.01	48.6022	73.8384	44.039	44.6409	40.718	32.1038	23.0375			0.146522	42.2096
3.7588	44.3354	38.6153	27.5061	59.8951	56.2394	28.4171	18.9839	18.8653	40.7978	33.3991	28.6401	36.9521	54.8167	64.319	71.525	41.4521	65.9324	49.4806	46.5025	37.456	33.4893	23.4241			0.150182	41.8657
3.8505	45.4429	40.6112	28.9445	72.9136	66.6971	25.725	20.866	22.4395	36.9529	27.5298	28.6219	35.1315	56.1328	60.397	53.595	41.6797	53.0222	41.8426	54.4871	43.68	30.2024	21.0615			0.153846	41.2716
3.9422	39.0314	47.6839	30.8817	77.6125	64.9123	25.1246	22.1861	25.6351	37.8618	30.618	30.1753	30.8327	57.5521	72.77	53.57	51.3016	42.715	46.8021	56.0369	41.581	26.8866	18.9042			0.15751	42.3034
4.0339	35.8288	51.8871	36.1307	79.866	54.3596	33.4017	16.547	31.7801	37.3269	26.5671	21.3502	23.8016	57.4723	84.696	63.609	46.0528	39.2605	52.0742	55.4649	51.817	25.0659	23.4494			0.161174	43.0822
4.1255	26.7407	55.1112	34.0798	68.6981	58.6495	28.4072	18.9737	29.5166	39.9007	28.4111	17.5877	13.9485	70.8078	97.441	78.254	45.9956	42.3251	65.0702	45.7125	46.816	22.4216	18.9453			0.164833	43.3552
4.2172	27.7442	55.428	40.0712	58.71	55.1279	25.1119	23.0832	34.1607	36.0061	34.2697	20.9443	14.8494	61.7236	92.727	80.69	53.9204	44.4006	69.3053	55.7583	39.368	23.4431	19.1302			0.168497	43.9079
4.3089	32.2103	49.1355	43.9879	50.5612	47.3755	25.1894	23.802	39.3238	31.3582	28.8807	14.2988	13.4129	62.831	90.161	76.065	63.3003	46.2594	59.0523	57.7316	49.122	25.2254	19.4331			0.172161	43.1235
4.4006	33.3717	47.1657	45.9908	50.3643	41.5384	33.9292	27.6672	47.6916	40.8241	34.1189	15.295	11.6947	60.3469	94.357	85.2	66.6725	41.723	48.6481	49.0817	50.445	23.8289	19.3548			0.175825	44.0595
4.4923	32.3482	45.8544	46.2749	55.3289	49.4587	33.231	29.1411	51.1632	35.63	36.9703	12.5941	13.2317	61.9227	89.95	84.051	70.3225	44.4858	54.371	47.1091	50.004	23.3423	18.3377			0.179489	44.7783
4.5839	33.5877	39.7899	49.1881	51.6603	53.6447	36.763	33.8483	58.8029	38.3441	29.6794	13.144	12.6662	67.9715	94.689	89.567	53.9187	45.7834	41.3868	45.4015	46.102	16.6951	19.8208			0.183149	44.2025
4.6756	29.9428	30.5386	49.4854	49.7033	52.3361	30.9461	35.7572	69.6122	34.7455	30.396	13.0502	12.0015	69.3332	96.637	75.108	53.2317	57.7239	37.6357	41.652	44.014	20.212	21.0114			0.186813	43.4124
4.7673	24.7808	29.8452	47.7084	47.3122	49.418	35.4166	35.8783	79.3945	25.7446	36.5995	12.1081	14.1623	53.6642	98.135	76.781	46.2785	54.8816	38.0059	27.5993	36.833	18.5399	19.6519			0.190476	41.3063
4.859	27.6351	21.9407	50.3185	50.098	49.6525	37.1163	44.0855	75.9417	24.1269	35.1809	14.329	16.6349	50.2288	96.568	79.651	49.6125	61.9789	39.0784	27.412	31.806	18.2098	16.3044			0.19414	41.7232
4.9507	29.574	23.8751	48.4163	49.1552	45.1589	42.2079	41.8696	66.9293	22.9167	30.7699	19.339	13.3065	55.5068	94.767	84.604	57.3048	57.3544	37.1565	29.666	25.606	19.4689	15.3747			0.197804	41.3785
5.0423	29.6631	26.6584	50.4239	48.5869	35.3754	46.5191	40.7328	51.4854	27.3356	28.6759	17.0567	14.2637	61.2727	91.129	98.068	57.4997	62.2279	43.9203	28.1026	27.259	22.4542	13.1852			0.201464	41.9043
5.134	29.0154	32.1556	51.2146	50.5558	38.0545	53.5734	43.5206	42.1298	31.9238	24.5798	20.4515	14.6029	56.1312	81.446	103.406	48.4524	61.6556	33.7152	29.1199	21.959	17.2987	13.8451			0.205128	40.8549
5.2257	39.2476	27.6038	46.947	56.5471	35.3797	60.5973	44.2684	42.3468	24.7595	21.0437	22.4953	17.7115	49.1022	59.589	95.094	49.4753	66.7145	37.8787	26.1659	17.908	19.6792	15.6528			0.208792	39.8276
5.3174	38.5324	29.9206	54.9912	64.1809	46.6749	54.2416	40.6365	31.436	36.1576	24.5604	18.453	18.9676	36.3852	47.508	94.756	52.974	68.5879	32.3695	27.8284	20.118	20.8337	13.6813			0.212456	39.7179
5.409	47.2394	30.4237	48.9926	86.8231	43.1667	51.8836	39.0541	27.0238	52.6491	21.2457	18.9047	21.6201	31.7659	48.199	74.888	45.7651	77.2341	41.1547	28.3522	18.969	18.1928	12.1733			0.216115	40.26
5.5007	52.2798	26.3513	38.244	81.8661	33.3319	54.7133	42.8612	28.1813	65.2556	26.4226	19.0222	24.468	32.3911	38.046	51.928	46.2913	74.2251	40.5809	25.38	20.05	17.0633	16.7302			0.219779	38.8947
5.5924	55.8223	21.4534	36.5114	87.4289	31.6319	56.842	47.8499	29.4084	64.4278	22.8299	16.3046	26.1938	31.1701	34.647	34.159	48.3968	70.0628	38.9652	23.0964	23.111	17.9932	10.8429			0.223443	37.6886
5.6841	50.806	22.7927	41.1515	75.8328	28.8531	58.317	52.2413	29.2192	56.9044	25.8237	12.22	24.2294	27.2452	36.043	26.91	40.5609	65.6097	33.8224	22.3929	25.544	18.3786	10.4883			0.227107	35.6994
5.7758	53.5878	23.3211	32.3998	62.5395	22.3904	48.3919	45.0521	28.3593	55.5157	23.4681	13.7742	23.3792	25.5191	33.615	26.559	48.0038	63.7406	39.5891	20.9208	25.17	16.354	9.8551			0.230771	33.7048
5.8674	53.0172	23.7253	38.6647	67.131	25.6952	34.7744	36.8253	29.7354	53.7018	15.423	14.2868	23.1379	26.5207	29.866	28.26	42.2869	52.879	47.2334	15.1746	26.479	13.7204	11.7838			0.234431	32.2874
5.9591	48.717	21.5805	30.761	55.2222	26.0402	28.9888	33.9623	24.2358	43.3528	14.1097	17.7971	20.8176	29.6132	23.67	19.943	53.5963	50.044	34.4592	17.017	33.253	12.9847	10.6912			0.238094	29.5844
6.0508	48.9176	19.828	24.3835	57.8232	24.967	31.9152	28.6613	20.4595	32.3082	14.1128	17.1903	18.0459	25.2067	20.374	20.029	54.2011	51.564	29.9076	15.9892	39.09	19.5731	11.4333			0.241758	28.4537
6.1425	49.4719	15.4505	22.5322	53.1193	25.4224	34.8582	21.1857	23.9793	29.5129	15.3041	19.4945	19.7281	22.2545	22.701	18.365	58.8168	41.6345	27.1301	15.5927	46.698	19.6762	12.5808			0.245422	27.9777
6.2342	39.0566	19.3876	25.1354	48.704	23.0897	29.4503	21.3178	20.3223	25.022	16.1494	17.9199	22.3288	21.3724	22.194	21.392	43.7676	30.8717	23.5317	17.5708	48.288	19.8334	10.5135			0.249086	25.7827
6.3258	30.836	25.8289	22.3017	35.3195	22.3965	30.5825	26.4358	16.4857	29.5529	16.6003	14.0516	20.3999	19.6689	16.976	17.745	37.6471	20.2722	17.3079	23.3165	50.051	16.6502	10.8186			0.252746	23.6929
6.4175	21.9016	16.0165	17.4397	40.5777	20.7294	30.7753	29.3308	21.2214	25.5618	13.4361	15.3354	21.7581	18.9387	19.692	17.718	29.7593	14.919	17.6588	15.5967	48.859	14.9406	8.4366			0.25641	21.8456
6.5092	23.2305	15.8689	20.6983	44.7233	13.4444	33.6753	26.4148	25.8105	21.9428	16.3168	17.5527	25.5443	16.0685	22.421	14.054	24.5399	16.1974	18.9267	18.8181	45.849	15.0856	9.7794			0.260074	22.1346
6.6009	18.1273	13.9552	19.6825	40.3626	12.4291	31.9973	22.9637	21.8572	17.9304	13.7874	18.9203	24.3688	13.752	23.453	14.879	15.8462	16.5003	18.4535	20.2781	54.527	19.7992	11.074			0.263737	21.1338
6.6925	18.7201	16.0398	15.8916	42.1082	11.6889	28.8188	17.9001	24.9495	22.7316	15.3833	13.9221	20.5904	15.1414	19.842	17.433	14.377	14.0633	18.8055	17.3042	57.23	20.1343	10.3496			0.267397	20.6102
6.7842	11.6877	14.52	22.0188	33.7911	10.6123	23.669	11.7803	20.0211	19.949	12.6358	14.3312	16.327	17.306	20.604	13.04	15.7452	22.2651	14.8405	20.2522	67.138	21.3897	9.7189			0.271061	19.711
6.8759	11.3407	15.1655	22.1171	36.9587	13.972	28.0812	12.9284	16.925	24.5177	14.8311	13.3988	18.3152	18.2414	18.05	11.739	18.7145	21.8255	12.8178	18.462	99.562	16.3492	9.9793			0.274725	21.5587
6.9676	9.8919	16.1884	24.0357	34.6616	13.4497	27.5829	12.2511	11.3565	25.0179	19.2797	12.3437	15.6156	16.5757	18.178	11.67	16.4215	21.2815	16.8973	21.0656	111.593	15.4077	7.923			0.278389	21.7585
7.0593	9.2491	14.1101	26.6335	37.4168	12.81	25.2101	13.0546	9.519	21.0092	18.4799	15.2445	10.7903	13.2537	17.177	13.804	15.588	19.2919	15.9764	16.196	119.083	12.6004	10.4045			0.282053	21.2228
7.1509	10.3629	15.4925	21.3594	33.5749	13.6137	20.1314	14.0417	10.4606	17.4399	20.403	13.8277	10.3859	14.0356	13.388	11.06	15.3273	21.4978	18.2835	13.7464	128.017	11.5981	9.6251			0.285713	20.8033
7.2426	10.8406	12.5129	29.1224	34.4368	16.4411	14.1587	11.9213	12.33	16.6915	14.8384	17.727	13.1013	16.2151	10.403	12.568	17.2911	19.6841	15.0707	15.1141	131.988	9.8185	9.7719			0.289376	21.0021
7.3343	13.647	13.892	31.0746	32.774	16.7442	13.9193	14.9385	10.8667	19.743	9.9087	12.2585	15.157	16.5449	8.487	15.676	16.3539	18.7065	10.7634	18.6068	127.094	10.7589	9.5354			0.29304	20.7932
7.426	19.3988	14.1549	28.4194	31.0263	21.006	13.4474	18.2314	10.5095	17.9388	12.1829	11.0588	17.9497	14.1398	9.493	16.073	19.1116	19.4224	11.0972	20.1177	102.923	8.5867	10.0907			0.296704	20.29
7.5177	16.0762	14.3006	26.4465	30.4578	15.7219	17.2004	20.7434	13.0329	16.7935	12.8755	9.4472	18.234	11.4239	10.403	15.231	18.5835	21.4266	15.5252	17.5511	81.542	12.9267	11.506			0.300368	19.4295
7.6093	12.5259	13.2881	26.8247	34.8345	16.505	18.6271	23.8593	11.2391	19.1038	13.0768	8.1716	13.8108	12.3098	10.41	18.406	23.2627	24.3445	15.1006	13.5778	52.175	12.4498	11.4383			0.304028	18.4246
7.701	12.4791	16.9823	26.7273	32.1782	12.652	15.4085	24.6643	11.9088	21.3086	15.08	8.9811	12.5917	10.9594	7.772	17.336	23.4079	23.4683	11.827	13.5788	35.076	13.1815	9.1078			0.307692	17.1217
7.7927	12.2431	13.7143	20.2167	29.6307	14.6954	16.1227	22.2475	11.9289	13.9329	15.8588	10.6061	15.4895	11.2034	9.736	17.166	21.6952	27.4138	15.5328	12.0644	28.402	11.5494	14.2435			0.311356	16.6224
7.8844	17.4269	12.9559	21.3362	23.7891	11.957	20.6462	14.7065	14.8004	21.1768	12.8871	9.2888	11.8588	11.7782	9.072	18.283	15.3378	29.3157	15.2581	13.9334	22.702	14.7893	21.9819			0.315019	16.6037
7.9761	18.2505	14.8467	20.5288	20.8443	12.7665	19.7785	11.7177	12.8883	25.3931	13.3993	6.8661	10.19	11.7014	11.883	11.137	15.0419	31.796	14.0088	20.1395	18.648	16.0249	19.8113			0.318683	16.2573
8.0677	14.0202	14.5262	14.1053	21.89	11.412	16.6743	13.3478	10.5385	27.1737	12.3473	8.0439	12.8916	8.2336	16.65	11.554	10.8908	34.7878	14.5418	17.5867	19.4	13.8224	19.9338			0.322343	15.6533
8.1594	8.7372	13.4785	11.35	18.0146	10.0225	19.9474	11.2688	12.1088	22.8795	16.1354	8.4386	13.8557	7.0412	20.728	8.858	15.7366	34.9196	17.8234	13.2802	19.831	15.1644	10.7298			0.326007	15.0159
8.2511	8.7362	16.1521	10.8596	22.9797	15.1174	22.5014	14.2106	15.1967	16.285	11.9728	9.3554	13.5714	8.1697	18.317	11.056	13.8734	39.4176	16.1564	11.5589	16.791	18.6821	12.1682			0.329671	15.5968
8.3428	6.4752	12.2662	14.4437	31.5248	18.5722	19.2267	11.2764	14.8901	20.4431	15.1425	13.0044	11.3177	7.5377	14.39	14.279	10.6578	35.4649	17.5262	11.4048	18.436	17.6764	10.1675			0.333335	15.7329
8.4344	8.0873	11.8493	22.211	34.5166	12.5498	13.9307	11.7875	18.7178	20.2763	12.6889	13.9829	10.7383	10.1791	14.635	12.125	11.3168	33.0279	17.2988	11.3751	15.466	16.4357	13.055			0.336995	15.7387
8.5261	11.3431	13.6064	25.035	33.316	10.4725	15.2498	15.7972	14.9683	15.927	10.6037	13.7281	9.6803	9.7017	10.732	16.929	13.3987	22.3425	15.207	14.2892	13.333	15.7078	11.3291			0.340658	15.1226
8.6178	12.4335	11.4599	19.3735	22.6049	8.4896	12.6359	15.1076	18.4191	15.0127	7.6887	14.8934	8.7627	7.3722	15.678	19.885	15.1668	19.5106	16.1413	13.6557	10.927	11.6294	11.738			0.344322	14.0266
8.7095	16.4231	10.8168	17.9033	29.4883	11.6282	17.9561	16.5407	25.2577	14.1209	9.2101	15.1474	11.5654	9.7278	14.271	24.638	19.1648	20.4078	15.5867	16.3624	13.083	11.5041	13.6935			0.347986	16.1135
8.8012	12.5298	8.1442	18.3403	22.9225	15.9671	15.581	17.7705	22.6162	11.0022	7.6933	11.241	10.497	8.1425	12.687	23.437	17.2664	22.0948	19.0963	13.5026	11.748	13.6422	12.603			0.35165	14.9329
8.8928	12.6126	11.1517	20.5557	19.7493	15.6661	21.2886	21.4276	27.8348	13.1861	11.1009	16.289	14.282	10.3277	11.442	23.298	13.5257	23.7887	20.6216	15.1692	16.103	12.3263	9.427			0.35531	16.417
8.9845	10.4122	12.044	15.6383	20.2384	13.0234	21.9255	19.9203	19.5994	15.3653	11.1403	16.4121	12.3831	8.4887	10.586	27.644	11.9318	20.9299	20.6168	14.2472	15.772	10.7153	8.871			0.358974	15.3593
9.0762	10.8462	10.8513	16.9059	26.9647	14.497	21.805	19.8825	18.8225	17.563	12.9248	16.6106	9.5953	9.2443	11.16	26.615	12.9532	17.5131	15.12	11.758	14.694	12.0944	8.3812			0.362637	15.3092
9.1679	13.0397	9.79	16.6393	31.3265	21.4104	24.7673	18.4503	19.0976	17.2484	14.9064	13.6997	9.0203	9.9893	10.032	29.384	11.069	22.2706	13.9172	11.3622	16.997	11.1032	5.6696			0.366301	15.9632
9.2596	12.9395	8.4889	19.109	25.755	16.6841	28.5736	14.2017	17.4306	16.4639	16.6902	12.9636	10.9074	10.1626	8.376	26.076	11.685	18.4799	15.9631	15.7812	20.062	12.5448	7.9163			0.369965	15.7843
9.3512	9.8177	10.0189	18.6914	20.9261	13.4485	19.7758	17.6822	11.4311	14.8728	14.7161	11.4147	11.1963	9.0706	8.489	27.189	10.0539	17.8884	17.3136	13.5848	23.526	11.6929	8.4289			0.373625	14.6013
9.4429	13.0652	10.7071	16.6372	19.8418	14.9843	19.2294	20.6945	11.9531	10.358	13.1733	11.4889	10.0719	8.0091	12.726	24.195	10.3292	18.7717	13.6696	12.6229	20.361	11.5505	9.0082			0.377289	14.2476
9.5346	14.7857	10.9199	13.1681	26.1844	13.7464	11.7021	13.942	13.0173	9.6144	11.938	11.5848	10.0283	8.8043	10.022	25.157	11.9395	15.1051	12.004	11.7715	19.74	11.4435	12.6103			0.380953	13.6013
9.6263	18.5727	12.7541	13.1792	23.4877	11.8382	9.7738	12.3833	13.054	11.3019	15.9961	14.7685	17.4323	9.9393	8.338	22.41	7.4249	16.077	12.412	11.3622	14.006	10.9807	7.8313			0.384617	13.4238
9.7179	22.7655	11.6691	10.8528	21.922	14.4276	11.4345	11.8948	15.1241	13.5309	11.4546	12.8875	16.1456	11.6627	10.298	18.763	10.6543	21.5651	10.0218	18.3498	16.123	10.6917	6.9364			0.388276	14.0534
9.8096	24.8076	11.438	8.9952	21.1187	13.0515	9.1011	10.4072	13.4056	17.0197	16.4226	16.3441	15.1704	11.8537	7.214	22.422	11.6116	22.2641	14.5786	18.1108	13.193	11.2262	6.316			0.39194	14.3669
9.9013	36.7811	11.5571	13.2331	18.7584	14.8839	9.4038	13.5243	12.6536	18.3652	18.0474	11.4003	18.8128	9.7289	4.816	17.704	10.4911	18.2431	13.2893	21.2663	13.565	13.6002	7.191			0.395604	14.878
9.993	42.9317	12.264	14.7232	22.6595	16.0543	10.3402	14.3732	19.7104	20.9296	18.3452	12.6217	21.1282	7.8854	4.722	11.522	10.3693	17.26	14.6298	23.409	14.34	15.2481	5.9032			0.399268	15.9714
10.0847	36.9601	12.2999	17.1457	16.6882	13.4803	13.4297	12.6341	22.4694	17.967	20.3127	11.8317	21.6943	7.6768	6.349	7.702	14.48	18.9966	13.2631	19.3478	14.808	17.7719	8.1334			0.402932	15.7019
10.1763	35.9901	11.3736	12.7712	15.9739	11.0585	13.1772	14.2373	24.031	19.7579	20.6768	12.3026	17.0826	9.4413	5.366	7.158	16.4835	17.7414	14.0002	19.2422	16.372	15.5503	8.0906			0.406592	15.3581
10.268	29.1691	10.1586	11.4143	20.0272	11.591	10.9598	13.1407	18.9846	18.9573	18.0676	12.6701	14.4785	10.9685	6.175	5.862	15.4955	21.8243	14.4329	18.3599	17.463	14.0551	8.4548			0.410256	14.6686
10.3597	27.9152	6.8014	9.7579	14.9286	13.3004	12.1439	12.5232	15.4967	16.381	17.8056	9.174	14.7669	10.5221	8.49	5.799	15.1293	18.9507	14.5571	15.0993	18.796	13.5284	9.6505			0.413919	13.7053
10.4514	32.8782	10.756	9.7171	18.0882	12.5426	10.3389	12.8118	18.4007	16.6489	13.7474	6.8322	20.889	12.9195	8.724	4.068	13.5313	17.8248	14.5146	15.0659	18.27	14.872	11.003			0.417583	14.2929
10.5431	44.8701	10.6966	11.102	18.7255	13.37	11.8762	13.6404	20.6735	17.8093	13.5386	6.7763	15.8606	13.5861	7.17	6.447	12.0734	16.8259	17.0372	14.5262	13.187	13.1894	11.8262			0.421247	14.764
10.6347	53.7206	10.636	12.5575	15.8643	12.1553	14.5291	15.2909	18.9289	11.377	12.1982	7.1649	9.8055	14.8488	7.3	4.808	8.7623	14.7827	14.2548	15.4156	12.766	14.6267	10.6943			0.424907	14.204
10.7264	56.2806	11.8947	14.7645	16.2521	14.7173	15.4588	15.7391	18.1223	13.3092	14.0115	6.6556	10.7336	12.4465	7.443	6.185	9.3239	17.6815	12.4391	16.1326	12.52	13.6337	8.083			0.428571	14.7194
10.8181	56.1226	16.2883	8.8478	16.9886	11.2974	12.2964	14.6964	18.7685	15.2159	12.7403	3.2763	6.8467	10.4299	12.648	9.912	9.7428	16.7115	17.6023	14.3565	13.823	12.039	7.5186			0.432235	14.4622
10.9098	46.9557	17.4018	7.3624	17.4866	10.9646	12.5548	11.1721	16.3553	14.0498	9.56	3.6399	7.0828	12.2922	10.503	5.843	12.2153	19.7831	14.9905	16.6412	15.082	12.3741	7.402			0.435899	13.7142
11.0015	35.1949	12.7341	7.3756	17.6992	10.6112	10.3152	13.8133	12.4113	16.3069	14.1301	4.8853	9.237	9.8733	11.649	4.778	10.9331	19.8341	15.6298	20.5372	14.809	13.5864	10.665			0.439562	13.5004
11.0931	21.0165	15.8728	9.4797	21.1171	14.0795	13.6749	17.3611	10.0465	12.4684	11.7566	7.1768	13.5001	14.1931	16.624	6.125	9.5199	18.1683	12.9173	14.3969	17.027	14.0095	5.7906			0.443222	13.4692
11.1848	19.0096	14.3619	10.8845	16.6082	15.0061	12.0113	18.6898	14.6266	13.6072	11.5747	7.1557	10.8894	9.1838	13.086	5.397	13.538	20.2752	14.4614	17.1601	13.869	16.7371	9.3503			0.446886	13.522
11.2765	18.8124	11.8132	9.7053	12.7346	17.6449	12.1261	22.5445	10.6235	20.6027	9.8382	7.9574	10.4027	11.1091	15.715	6.102	14.5103	17.8195	17.3278	16.8421	13.494	20.4332	5.9587			0.45055	13.8235
11.3682	13.8841	9.5793	13.7269	16.6486	12.9124	8.4473	19.548	12.6723	20.3832	12.9486	6.507	7.6664	12.3812	15.335	7.785	13.4002	19.5885	18.208	14.2392	13.522	14.427	10.6132			0.454214	13.3829
11.4598	11.79	15.342	13.8927	13.8407	10.5997	7.9302	17.8024	13.3674	14.9753	11.7719	7.498	6.6848	17.0737	13.127	8.101	16.3539	16.3775	26.2013	11.898	13.09	11.1696	8.1308			0.457874	13.0463
11.5515	10.9184	13.2627	14.1864	14.2415	12.6756	12.3036	20.7759	14.5273	17.9072	10.9851	7.571	8.2396	16.0155	13.353	6.908	15.5781	11.1874	21.6673	11.8457	9.62	11.2845	9.8143			0.461538	12.9485
11.6432	10.9953	15.596	13.1515	19.275	10.8815	18.8111	14.9096	14.2788	19.0291	8.6541	5.8427	13.0729	15.4709	11.195	6.83	10.8702	14.907	27.0733	9.3073	11.838	12.7006	14.0176			0.465201	13.5776
11.7349	8.6437	14.6171	9.4854	18.3884	14.1841	18.4881	14.4764	15.2169	15.7727	10.1043	4.7864	10.1958	15.7318	13.12	4.498	15.1636	19.6166	21.5192	11.8534	13.581	12.6403	12.475			0.468865	13.389
11.8266	7.1326	12.4202	12.7857	14.6429	13.849	14.0131	12.6765	12.7747	13.5093	10.2102	5.4252	11.2931	17.096	12.65	3.767	16.5629	20.5359	16.9859	18.4955	12.314	9.091	11.3043			0.472529	12.7061
11.9182	6.5165	8.6374	11.8531	13.8535	11.0674	12.9886	14.5718	16.0412	9.0915	9.3596	5.7771	10.86	20.2836	8.755	5.447	15.4661	21.2682	12.2864	22.1564	12.935	8.3897	9.7241			0.476189	12.1513
12.0099	6.1539	9.5662	9.4364	16.2143	8.9165	11.9958	14.0918	13.534	13.238	8.5533	5.2157	12.9391	17.4152	6.611	5.29	14.5743	23.4568	14.8582	21.7353	17.472	8.8979	6.8334			0.479853	12.1363
12.1016	5.6319	8.7584	10.119	15.6571	11.3655	10.9989	11.8625	17.8449	12.1438	10.0688	5.9647	10.5614	16.7888	5.48	7.508	11.3724	19.8307	13.4861	23.8034	18.181	13.2028	6.1368			0.483517	12.1258
12.1933	8.8551	7.5133	11.7453	11.9929	11.5184	13.6801	9.1293	19.9559	12.5955	9.6597	6.1326	8.7436	19.5479	5.119	6.908	11.1749	21.9125	10.0887	22.4687	20.185	14.0184	8.715			0.487181	12.3482
12.285	6.6865	6.9875	10.1204	16.2787	15.9428	13.621	9.9265	21.9878	10.8241	7.9597	7.6621	8.6736	24.3692	4.573	8.477	12.4789	19.1987	12.3305	27.3005	13.484	17.3367	8.3851			0.490844	12.9366
12.3766	5.9255	7.7581	12.1773	14.2918	18.7374	10.3965	10.0559	17.1992	9.4222	8.9946	6.9472	12.4499	21.5632	3.939	4.928	13.8614	17.4168	10.7613	28.1974	9.217	16.3192	9.2812			0.494504	12.2655
12.4683	5.8767	7.2518	12.1966	17.8921	10.8025	11.2165	11.5097	19.1297	11.8342	12.2325	3.5059	9.5878	18.5917	5.666	4.879	15.9952	16.9112	14.0579	30.2637	15.55	16.3619	7.0336			0.498168	12.6521
12.56	5.8413	5.9519	9.878	13.8037	10.3933	7.9883	12.2147	18.1652	15.366	10.4943	4.814	10.8363	17.2892	6.28	5.228	15.0819	15.6471	18.3988	40.3467	15.387	13.2995	8.0456			0.501832	12.7614
12.6517	5.1146	5.933	10.9196	13.2837	13.2961	10.904	17.9575	19.1335	15.484	8.6083	5.1436	7.5518	18.9626	8.463	4.931	15.3179	15.9281	18.4396	39.6318	15.632	11.9036	6.0983			0.505496	13.1199
12.7433	4.4503	7.0074	10.7534	10.7846	11.6925	13.5748	18.6353	19.7959	15.7446	10.4322	6.2204	6.8411	13.9728	6.399	7.836	17.83	13.9956	15.8063	41.9913	19.839	13.3525	5.272			0.509156	13.283
12.835	5.083	5.6214	9.3797	13.899	11.4242	16.4981	20.3371	20.3709	15.1143	10.7674	5.3	8.5054	14.4526	7.453	8.256	16.0108	19.7227	16.8707	39.6508	14.918	13.7887	6.5533			0.512819	13.6353
12.9267	5.15	10.2922	9.6277	15.5531	16.7735	18.0735	17.02	15.8624	18.2291	7.6817	4.3637	9.9852	11.6071	5.213	8.943	18.1013	21.2973	18.301	39.6013	14.577	19.6501	9.8981			0.516483	14.3546
13.0184	4.0586	5.6973	11.0263	16.4441	14.3679	17.4325	19.0406	15.435	18.5204	6.9664	3.7404	13.3013	13.3397	3.672	13.697	21.2079	18.7519	14.8524	27.5729	17.774	20.699	7.5382			0.520147	13.8698
13.1101	4.6188	5.1673	12.5087	16.2268	13.8459	13.1994	19.0359	17.3042	18.1657	8.3691	4.5207	9.2995	14.8945	7.005	12.726	20.6665	15.9064	16.5332	23.4478	18.578	23.8259	7.6192			0.523811	13.7938
13.2017	6.536	6.8493	17.2125	16.2701	14.2849	14.6802	21.2579	13.4751	21.2061	7.5763	2.9704	8.858	15.296	7.229	15.191	17.0354	18.9442	12.4717	27.2283	13.704	19.1904	6.8228			0.527471	13.8313
13.2934	5.8614	8.7829	13.1892	24.0775	10.5209	16.9277	19.5483	12.7124	17.5593	11.9598	5.6373	11.213	15.8407	6.641	11.884	15.8772	15.1355	14.9134	22.2656	11.726	13.7643	7.3419			0.531135	13.3354
13.3851	6.5248	7.7523	12.3548	22.5809	9.9242	15.0912	23.8302	15.6297	18.6115	12.2234	5.6016	14.8625	13.7498	7.372	10.226	18.0167	13.267	18.1092	23.2083	11.082	15.335	9.4202			0.534799	13.8533
13.4768	5.4541	8.2642	18.2312	25.8738	9.6309	18.7389	26.024	18.7849	19.4752	9.8905	5.6108	27.4759	16.738	6.889	9.145	14.4051	11.2399	19.8431	19.1811	14.043	16.4402	10.2607			0.538462	15.0745
13.5685	8.5051	10.9016	17.729	18.8559	12.8997	15.7198	20.5911	26.2958	22.7897	11.303	7.1961	20.2321	15.7063	5.948	8.916	11.8918	10.1428	18.4424	17.3839	13.585	15.0944	8.3795			0.542126	14.4777
13.6601	7.8066	11.0179	18.2957	19.909	14.8434	15.7571	20.9611	22.8879	21.2443	13.1131	4.8092	18.7045	15.72	4.123	8.788	10.5923	9.9922	13.2744	20.1379	12.791	15.1909	4.7399			0.545786	13.85
13.7518	7.3335	11.1211	16.6402	13.9179	15.5888	21.0861	16.5553	20.22	16.4784	9.5241	4.8924	18.9904	18.9438	4.907	8.082	11.5526	13.7256	18.4906	20.3816	12.842	15.5136	8.5676			0.54945	13.8798
13.8435	7.1068	7.2572	13.8137	14.1479	16.7461	20.1229	25.7252	21.8047	14.1129	8.2929	5.479	20.4189	19.0213	5.309	5.839	13.6877	14.2999	17.3785	20.8616	15.419	11.6897	4.2127			0.553114	13.7612
13.9352	4.4314	5.0682	14.0218	14.5798	12.7644	20.7328	28.7387	22.0981	14.2696	6.572	7.549	25.3863	17.6804	9.162	5.198	16.2175	20.0823	16.3203	21.4647	17.546	12.2083	6.3332			0.556778	14.4739
14.0269	6.1042	2.6343	14.5839	17.1168	13.6176	18.2651	28.5015	23.9544	14.3192	4.7929	7.6523	24.4603	18.2996	7.524	5.506	13.9498	20.3156	13.8903	18.3491	17.841	10.9298	9.6559			0.560442	14.1938
14.1185	3.4587	3.1267	13.7536	12.6832	13.6968	14.9968	24.7115	23.8445	13.0796	4.9486	7.9401	16.0031	13.4633	4.768	8.2	11.7652	20.3633	13.7485	21.7018	15.037	10.9365	7.571			0.564101	12.7181
14.2102	4.0928	2.7518	14.418	15.1198	14.7432	17.2322	22.1827	16.1686	14.4109	6.231	8.0027	18.6127	12.4527	4.015	11.141	10.3199	19.415	17.3849	22.1975	17.597	10.5621	10.4633			0.567765	13.1598
14.3019	5.0317	3.5176	12.1288	18.3511	12.3279	17.1637	11.3385	13.5757	16.1759	4.8621	6.2389	20.235	15.3909	3.678	8.6	10.0564	18.1603	15.295	27.5203	15.251	13.5399	11.2144			0.571429	12.7115
14.3936	4.6748	3.8953	10.2066	16.4841	16.9603	17.5403	9.9068	17.8657	11.4646	6.3757	6.7803	17.3887	16.0395	2.469	7.579	8.9341	21.8302	20.5649	22.6515	14.865	14.0012	15.6903			0.575093	12.9167
14.4852	4.964	3.9606	10.82	14.5441	12.764	15.2965	12.7593	15.8345	16.0238	7.4116	9.1608	20.9748	17.7154	3.045	6.866	11.9008	20.8029	25.6241	15.9836	13.992	14.5805	17.0858			0.578753	13.2777
14.5769	5.5859	4.5673	10.5848	18.6335	13.312	15.1303	13.5317	13.7115	17.2739	5.9078	7.9209	20.4127	16.133	2.796	5.634	9.8183	15.2334	27.0944	17.442	16.109	15.6647	18.7553			0.582417	13.2387
14.6686	5.7195	7.564	10.9266	17.0478	13.381	12.3946	12.8085	16.4364	13.312	6.9474	6.3358	20.6732	18.2889	4.381	6.699	13.6495	15.2151	22.8913	12.3153	16.475	15.6272	22.4855			0.586081	13.2534
14.7603	5.5368	5.8264	11.2209	15.2343	9.6726	11.7181	11.49	14.5849	23.3807	5.742	5.3992	25.5993	19.7181	4.796	3.954	14.2313	18.0824	22.279	14.0475	18.327	16.2759	19.1817			0.589744	13.4681
14.852	5.1344	3.9442	15.5015	12.3757	11.6302	16.0097	14.869	19.3814	19.6041	4.8678	6.2629	23.15	15.6013	3.882	3.316	15.8081	19.2916	22.8815	16.0255	18.396	17.63	13.1706			0.593408	13.5788
14.9436	6.9205	4.2824	16.8914	19.5593	7.7599	14.8542	11.0333	16.4001	14.4086	6.9093	4.7068	21.6882	13.4062	5.206	4.699	15.5382	20.4927	21.9425	18.2774	19.951	14.6564	13.746			0.597068	13.3332
15.0353	9.2993	6.4306	21.919	20.2027	7.4302	16.0406	9.9567	18.3204	12.2931	5.7254	5.6528	28.4027	11.0854	4.92	4.708	14.1135	22.0837	20.2646	17.8488	17.772	11.6415	17.5131			0.600732	13.8011
15.127	18.3864	7.6279	17.96	19.7539	11.174	13.4147	10.9875	16.0513	13.9275	7.3078	3.5752	36.5378	14.1351	7.25	5.63	14.5143	23.6283	16.6326	23.4139	13.222	16.0406	16.3212			0.604396	14.886
15.2187	13.2155	9.2411	14.5551	16.7162	10.6856	16.2934	10.057	17.1137	14.3936	6.772	2.4593	41.7645	11.729	6.213	4.987	11.0079	25.4444	18.1922	25.6364	13.23	11.3196	12.5359			0.60806	14.2528
15.3104	12.7244	8.5883	15.4524	18.1915	9.7679	12.8772	14.3659	13.6161	11.9417	7.2225	4.8972	42.8347	12.3904	6.708	5.036	16.8641	20.6589	16.1502	18.1604	15.277	9.66	18.471			0.611724	14.1753
15.402	12.1616	8.3184	14.083	18.0493	11.0014	12.397	14.6628	16.3634	13.6306	6.5288	5.8279	34.8915	14.1995	4.623	5.175	23.2064	22.4755	15.7301	13.1297	12.648	10.0476	15.5884			0.615383	13.8518
15.4937	9.1456	8.1204	16.7843	12.7566	13.8269	13.1242	21.8428	17.5649	11.948	8.5605	7.7267	28.1861	12.0212	4.505	5.433	24.6375	22.565	17.3468	14.6257	8.566	10.6378	17.294			0.619047	13.9645
15.5854	5.7255	7.3699	16.9031	16.3253	12.7957	14.1846	20.4365	17.0315	14.0455	12.5494	8.3429	34.8181	15.2479	5.517	6.183	18.9204	24.919	19.7986	20.8977	11.942	11.2653	13.8109			0.622711	14.9559
15.6771	6.4577	6.2651	16.2323	20.2914	16.7178	14.971	15.9286	15.9859	12.3452	10.7888	8.588	60.0849	12.4331	8.32	3.505	17.1469	24.9717	20.7032	19.9851	8.81	13.3537	14.2275			0.626375	15.8233
15.7687	9.0963	8.9531	16.6779	19.6593	16.1703	15.3278	15.2054	21.1478	12.2129	13.0579	8.9287	65.1591	15.2486	6.088	6.181	15.8131	24.9602	22.1111	17.1293	14.004	15.1556	17.9517			0.630035	17.1018
15.8604	9.4535	6.1318	12.2698	18.6383	17.1633	16.1676	17.9409	15.0752	16.6566	9.2405	8.4047	59.8699	19.0081	6.5	7.677	13.1892	21.435	18.3373	14.1671	10.591	19.9539	22.5385			0.633699	16.3822
15.9521	8.2173	11.9231	13.2572	17.0692	17.9633	20.0139	19.9646	17.0502	17.5311	8.961	5.3233	44.6543	26.6048	8.282	8.619	12.2356	24.9446	14.0848	14.5983	13.794	23.3144	25.9552			0.637363	17.0164
16.0438	9.44	14.1854	12.5887	15.6556	17.5965	16.831	22.4777	17.8094	18.4188	12.1559	4.4153	37.2033	20.5584	6.843	9.767	16.0401	30.5713	12.9609	17.8294	17.451	18.0777	20.6233			0.641026	16.7954
16.1355	8.6034	15.7122	12.0155	22.9409	17.5749	17.1606	20.7577	15.2365	17.2285	16.0198	6.431	37.0618	24.4459	5.805	9.697	23.291	29.1855	12.3172	16.7258	18.315	16.6927	21.2385			0.64469	17.4753
16.2271	8.3966	17.6417	11.7914	22.7775	13.8539	14.0929	18.215	18.1481	20.087	15.3298	7.9562	32.2616	31.9914	5.149	9.009	17.7572	26.6822	12.3056	20.9293	12.53	15.8062	18.2539			0.64835	16.8621
16.3188	8.755	15.0174	12.8134	23.7524	13.0681	14.3279	17.4317	25.5433	19.6615	10.2352	10.5445	21.7628	30.5148	4.263	9.892	27.1157	20.2436	17.6951	21.268	15.67	16.2935	17.1571			0.652014	16.9557
16.4105	8.6458	11.7781	16.6749	21.4346	13.9971	16.4799	16.612	24.517	18.7344	10.8252	5.6543	18.2112	31.5674	5.362	14.545	29.3655	15.7368	16.1748	14.807	14.129	12.2522	16.5965			0.655678	16.0955
16.5022	8.7935	12.4936	15.4013	15.543	16.3968	18.144	19.8401	20.5432	12.1522	10.1985	5.569	16.6621	30.9411	6.182	20.165	25.0609	15.5107	16.3203	16.4316	13.877	15.5991	17.7522			0.659342	15.8899
16.5939	12.0701	8.2959	9.7986	16.2244	14.2352	23.0862	23.9243	20.7753	10.1528	10.1396	6.1498	19.0676	20.2057	6.542	23.134	20.7474	17.9037	16.1535	20.1876	17.529	16.2676	18.0969			0.663005	15.9403
16.6855	9.8004	9.9906	10.2611	13.3579	16.8605	21.9109	29.6521	16.2799	14.5954	9.483	6.7976	14.3802	18.9307	7.469	23.254	16.1625	21.0656	15.555	13.7492	15.509	14.0797	22.9172			0.666665	15.5482
16.7772	10.0705	12.0221	12.1141	17.3613	11.6317	22.6506	28.5965	21.9686	13.0334	16.5393	6.1608	18.9094	18.3368	7.053	15.83	16.498	21.322	16.5653	14.9378	13.816	16.1541	20.1711			0.670329	15.9883
16.8689	9.8876	10.6133	10.444	17.8399	13.3733	18.847	18.9956	23.1056	15.8483	17.1299	7.8277	23.2732	17.4154	6.31	10.314	13.4536	23.7185	18.2738	16.6962	14.159	16.0566	18.3916			0.673993	15.5443
16.9606	10.9821	11.4336	12.377	15.9452	14.4898	16.8602	18.1625	23.594	13.6965	20.2419	7.4366	27.0266	16.9721	7.969	12.945	11.3103	22.9098	18.3698	14.7437	12.394	17.0258	18.7476			0.677657	15.7106
17.0522	9.0046	11.7771	12.7302	15.5725	16.2007	17.761	19.2354	23.8482	16.4334	17.3689	4.8993	28.6081	15.6305	7.494	11.288	13.2976	22.7412	20.2245	14.752	12.812	15.6317	17.3589			0.681317	15.6668
17.1439	7.8468	12.4519	15.8229	19.4907	18.103	25.1371	19.4638	24.1653	15.4892	17.7309	5.7983	36.0019	17.1937	8.923	10.629	15.8308	22.6252	16.7528	17.8465	13.519	17.7073	13.7885			0.684981	16.9235
17.2356	6.1486	11.898	15.5113	21.8707	22.0818	27.4996	19.9665	19.4739	13.73	20.8694	6.3949	42.7711	18.2404	8.012	7.933	13.1366	21.841	18.4685	18.0591	14.029	17.2538	9.4169			0.688644	17.0276
17.3273	8.7272	14.2276	18.4261	19.8015	22.6002	29.3198	22.8381	20.0859	14.4466	22.1066	3.8006	36.1541	20.4358	8.805	10.574	14.5041	21.1989	22.3386	16.2508	15.444	21.9861	8.1237			0.692308	17.8271
17.419	8.371	14.1304	14.2158	22.9894	20.9484	25.1736	21.6572	19.2819	13.8637	22.3405	6.5843	25.6047	16.8342	8.901	11.43	17.7858	21.8515	21.7916	17.2983	15.731	21.9659	9.0226			0.695972	17.1715
17.5106	9.2648	12.9044	17.0559	21.7384	19.4141	25.1592	14.0634	22.4398	16.5084	22.5796	8.8464	18.2255	12.8892	10.903	8.412	18.934	25.2049	24.3746	16.1358	14.377	19.182	10.343			0.699632	16.7707
17.6023	12.2334	15.7751	17.1873	22.1557	23.2909	22.6264	16.8456	22.5112	14.3503	19.8441	7.3211	11.3053	17.2251	11.564	9.484	14.7815	20.0994	17.447	18.4708	9.674	20.0838	8.2469			0.703296	16.0238
17.694	10.7599	17.8399	23.0776	27.6191	25.0406	20.7186	19.6267	17.9551	12.2924	22.0491	6.2525	7.7237	18.4174	11.969	9.442	12.613	21.6402	14.8543	17.9317	14.728	17.621	6.891			0.70696	16.2301
17.7857	13.4795	19.0248	21.3216	27.6788	27.8814	18.6647	23.5343	16.8974	12.7046	23.454	7.3328	7.9114	14.9096	12.166	6.065	12.9587	27.3543	13.1166	19.1641	15.389	17.2496	11.1232			0.710624	16.7901
17.8774	14.5447	15.2545	16.7645	24.3094	23.3239	16.8449	25.8187	18.1951	16.7262	17.5054	8.9311	10.7225	11.7829	9.46	6.843	14.1379	19.6579	19.9485	15.2625	25.529	20.5778	10.2454			0.714287	16.4721
17.969	13.8639	14.2693	12.3949	19.6771	22.1569	15.3333	22.6937	17.604	15.5702	18.1812	8.151	12.1388	8.3957	11.564	3.913	16.5908	23.0923	15.6735	14.9341	33.024	19.7966	10.4277			0.717947	15.8839
18.0607	12.2471	15.1007	12.5954	21.5627	21.7829	20.4099	17.012	18.2946	19.4662	23.1333	6.8206	16.9285	9.5328	16.822	5.31	19.284	21.2336	18.7782	12.5179	27.462	19.3068	12.8926			0.721611	16.7497
18.1524	11.3228	19.5757	12.3349	23.0145	30.2479	18.0187	18.958	20.7801	14.4278	17.5204	8.0311	17.4923	10.1636	18.189	5.068	22.0699	22.7302	19.2683	15.5029	22.312	22.5819	13.6737			0.725275	17.422
18.2441	10.6598	19.6414	12.6536	19.6203	27.8006	15.1745	20.308	19.2844	14.8495	17.7777	7.9391	15.9651	14.6978	19.429	5.474	22.8477	22.9518	20.2537	18.3185	18.269	20.5407	11.8913			0.728939	17.1067
18.3358	10.9629	18.8598	11.5718	21.1296	21.9969	17.3582	15.4516	19.9989	14.3893	14.7909	10.9327	15.6722	22.0136	16.341	6.352	29.1159	20.8957	23.7067	23.5079	16.452	20.2304	11.1787			0.732603	17.4049
18.4274	14.8063	18.0656	15.7938	28.2956	15.7739	20.5164	17.5741	22.0055	15.5235	16.3711	11.0489	14.738	23.2365	16.35	4.619	25.8722	16.0228	19.8229	25.1697	18.58	27.1782	7.9818			0.736263	17.9703
18.5191	12.1835	21.7727	18.4774	24.3166	16.2324	21.9056	20.9379	22.7207	17.2489	12.7594	11.0157	10.2763	17.5946	17.991	4.25	21.8574	15.8433	20.4954	22.3417	14.547	23.5436	10.7806			0.739926	17.2314
18.6108	14.851	26.8824	17.2932	23.6975	15.9947	17.9303	29.1386	24.6837	22.2152	11.5006	15.7914	10.3062	21.5289	20.024	3.856	20.5079	15.9881	17.8882	20.0999	15.419	19.8157	10.0011			0.74359	17.9733
18.7025	14.0056	25.118	19.4635	22.1066	18.5279	18.8075	26.6875	21.02	23.2603	9.4876	23.1852	10.9317	20.2077	21.335	4.124	16.7018	16.6854	16.3479	15.6574	14.122	18.4531	13.7882			0.747254	17.7284
18.7941	14.3295	23.4942	19.3655	23.2477	16.1837	19.6216	24.3194	21.5841	21.8569	16.0021	23.5429	12.5239	14.6915	19.59	5.276	15.8667	17.2953	21.9283	16.9257	17.572	15.381	14.1876			0.750914	17.9448
18.8858	16.0178	21.7671	23.283	31.9618	17.7245	20.6613	24.861	21.0116	20.8982	16.1648	23.8895	12.0821	12.2425	21.409	7.005	16.6138	20.1004	20.7363	18.2363	19.729	14.3369	11.397			0.754578	18.7331
18.9775	13.9451	22.7692	20.3572	25.9762	21.3038	16.7622	21.3069	22.6356	22.4797	15.705	21.3733	11.8347	12.1475	21.481	8.023	18.6571	19.4182	20.4541	24.982	19.388	10.5796	12.7459			0.758242	18.3784
19.0692	12.0915	20.167	20.0688	23.8835	26.1308	16.4642	24.8705	23.3554	24.7471	15.1	18.9543	16.6565	11.258	18.493	12.481	20.5439	21.6175	17.8272	29.313	13.777	13.1497	15.5958			0.761906	18.9339
19.1609	16.5565	15.3523	19.9945	24.7357	24.7613	15.8533	17.4757	24.0326	24.3802	12.5341	17.7533	16.9188	11.4053	12.725	10.81	14.3091	22.6273	14.5057	20.4983	14.78	15.7787	13.8228			0.765569	17.3459
19.2525	16.6489	12.5497	18.0271	27.1809	23.3111	19.7532	15.1804	19.8111	26.3153	10.6587	14.7348	15.3577	15.898	13.812	8.786	12.9712	25.9951	19.1121	16.4727	16.7	16.9281	15.0477			0.769229	17.3296
19.3442	14.5419	12.9654	20.7214	25.7469	26.571	25.1224	15.7572	19.1932	24.1166	12.8791	12.7063	14.6246	15.3763	14.791	10.841	14.9436	27.0967	23.0312	19.1738	15.264	20.4361	23.9709			0.772893	18.6305
19.4359	13.6336	12.9917	21.1182	23.941	26.0959	28.7487	18.5602	25.8094	27.936	12.9967	15.0127	15.569	18.2516	16.011	6.196	9.9715	28.2924	20.6357	17.5921	11.495	21.0639	18.2128			0.776557	18.6425
19.5276	12.3173	10.645	24.7492	20.7209	24.2882	30.3027	22.4079	27.3046	28.6648	15.4962	13.3862	15.0383	19.2164	14.71	8.56	11.4568	30.371	21.3343	12.825	18.008	20.0144	16.0364			0.780221	18.9933
19.6193	12.2142	11.5322	25.7224	22.3532	25.5434	32.7603	28.2698	26.8788	27.3641	14.2582	12.9566	17.6352	18.9985	12.928	9.959	11.9976	25.9722	20.1759	17.0683	13.374	22.6241	16.2298			0.783885	19.4007
19.7109	11.6616	13.3394	21.5455	19.423	28.7773	28.0052	26.6875	28.5409	28.9635	13.7853	11.9042	17.4201	21.1636	14.979	10.205	13.7584	20.5768	18.2989	19.2035	15.612	18.1144	15.5745			0.787544	18.9791
19.8026	16.059	15.2504	17.4867	24.2301	25.6173	19.5209	22.2841	22.5352	32.297	17.91	10.024	19.7009	22.3315	11.638	11.116	14.7171	15.9218	15.4647	21.361	17.283	18.8216	17.7813			0.791208	18.6069
19.8943	14.4425	13.226	16.5357	24.0928	16.1494	20.699	19.9536	21.4039	26.7716	22.3102	12.0147	17.0745	25.7594	12.444	13.863	13.2521	14.7016	24.3665	19.8898	24.357	21.4995	20.8179			0.794872	18.892
19.986	8.4996	13.1061	20.5223	23.6758	11.5446	17.9007	15.6241	21.0071	29.9253	17.8328	10.7446	15.0454	29.1382	9.428	10.884	12.872	17.3151	25.6451	16.8827	24.715	21.1625	20.7163			0.798536	17.9176
20.0777	8.7802	13.2727	18.3276	26.4827	12.8961	18.6638	16.5954	20.0031	29.4398	22.2221	8.1453	14.8787	27.2605	9.505	11.124	10.8844	13.9705	22.6974	14.8289	20.338	23.3149	24.128			0.8022	17.6254
20.1693	10.8628	13.6398	14.2899	27.3675	13.0972	19.6874	16.499	20.5731	28.8547	15.2887	11.826	15.9774	19.883	12.288	11.906	14.0667	18.2622	19.0951	20.3952	19.66	23.453	21.4841			0.80586	17.6571
20.261	9.9533	13.7841	11.4075	26.1508	15.5009	18.9752	18.9563	18.2669	32.4276	17.3669	13.543	13.5006	19.1556	11.412	12.081	16.3483	18.0746	19.4568	14.7413	11.41	25.2479	17.9732			0.809524	17.0788
20.3527	10.9737	16.5982	15.4778	22.4418	19.8979	19.8915	16.4448	18.7568	29.2373	18.3109	11.8614	14.7493	17.0374	13.984	9.852	15.6446	23.0588	17.1646	14.6025	17.354	38.2948	13.3758			0.813187	17.955
20.4444	9.2049	19.9206	20.3818	23.9264	26.6527	16.1412	16.5293	19.0877	33.8957	19.4404	9.9311	13.4921	14.4727	16.535	7.569	18.3864	23.3962	16.8931	17.3965	15.167	43.696	17.7014			0.816851	19.0826
20.536	10.2881	16.1192	14.9758	18.799	32.2498	21.6325	20.5916	21.1358	30.1846	15.8581	12.5137	13.929	18.6864	12.994	9.76	18.4092	18.602	24.6808	15.4311	13.381	41.6782	18.423			0.820511	19.1056
20.6277	18.7716	15.0345	13.1805	22.718	31.9386	18.4169	21.2372	20.8529	30.4079	15.1161	14.0215	14.7602	19.3495	13.784	10.994	19.6049	20.2556	24.7228	16.7702	13.533	30.8532	16.7353			0.824175	19.2299
20.7194	17.4217	13.1995	19.2279	18.3479	36.573	21.2348	23.636	20.6537	29.0006	12.7918	17.97	19.504	22.82	17.522	13.032	14.2688	19.6477	21.2361	15.198	17.77	23.7502	14.9583			0.827839	19.5347
20.8111	20.9209	14.8611	19.736	18.2307	32.8047	23.3033	30.7147	19.8672	21.5719	11.9178	16.4571	26.6927	19.5836	17.507	15.839	13.0349	16.9695	19.5778	14.0847	18.286	16.5182	15.663			0.831503	19.2792
20.9028	23.9224	14.2138	14.4244	17.1158	23.8335	22.3273	28.0366	20.2789	21.0912	11.0829	19.222	31.4338	18.2787	16.756	19.688	15.7839	19.1	16.9978	15.8788	15.623	6.2634	22.7988			0.835167	18.825
20.9944	16.6928	20.1219	15.0422	17.812	21.0269	22.7044	31.3589	19.6506	20.1659	11.584	20.9629	28.9984	20.2439	13.975	13.697	18.6658	17.9848	14.9966	14.7601	13.324	4.3351	27.6722			0.838826	18.4443
21.0861	16.3083	22.0648	17.1353	22.9466	24.381	25.9697	35.6473	22.5647	19.0574	9.4508	16.83	22.2319	15.1494	9.077	12.053	13.438	19.1856	14.2214	14.5103	16.558	2.926	29.8958			0.84249	18.2546
21.1778	14.107	18.2103	15.7857	21.9598	22.3206	27.3929	26.4923	20.7939	18.1264	12.7867	16.1091	15.6045	15.3738	11.28	10.847	15.4822	17.2328	15.5156	14.4034	9.713	2.0841	18.3852			0.846154	16.3639
21.2695	11.1038	15.3802	17.0668	29.2822	21.6275	27.9396	22.9326	21.6531	23.9305	13.9091	14.9064	22.6227	16.5511	13.909	11.915	21.8033	17.3399	16.3658	19.8496	9.056	1.8129	15.0337			0.849818	17.545
21.3612	13.882	12.9673	20.667	27.4981	21.2372	19.0362	17.1675	24.1562	20.1481	11.8647	17.5485	26.9171	17.8646	14.62	17.952	21.047	23.1714	23.5377	18.3206	8.556	1.0534	8.6375			0.853482	17.6295
21.4528	11.6558	14.9645	22.7061	20.937	16.5564	22.1561	22.707	24.6018	24.2057	23.4183	20.9737	23.7803	16.9629	13.636	14.96	15.1126	28.1097	25.0262	17.8658	6.105	0.8482	4.652			0.857142	17.8155
21.5445	9.7217	15.3304	16.8561	17.8512	20.1471	21.7875	24.0294	28.5136	21.8915	21.2445	19.459	21.0651	18.7658	11.531	17.823	16.3106	26.271	25.0652	25.3216	5.347	0.8576	3.0295			0.860806	17.6463
21.6362	8.0839	24.1483	16.9605	16.9148	18.8025	17.9311	17.9769	18.8717	18.6546	17.7649	20.7096	18.4148	18.5639	11.238	15.247	15.3999	18.5364	25.4043	32.2048	5.107	0.5151	3.6797			0.864469	16.415
21.7279	7.0961	30.015	18.6352	18.5061	16.1599	20.3067	19.3954	14.7327	20.4423	24.4762	19.9123	16.6817	14.7968	9.131	11.393	15.8091	20.2112	38.4303	41.1304	4.26	1.0594	1.7793			0.868133	17.4709
21.8195	6.6602	34.8649	24.6151	15.4812	15.5946	21.1896	20.5088	14.1831	20.3955	22.2742	23.5882	16.7101	14.4841	11.593	8.485	23.0514	22.1376	44.8606	29.8521	3.354	0.586	1.3209			0.871793	17.9905
21.9112	4.2205	37.0666	22.2127	18.1774	16.79	19.5442	25.0454	17.9701	19.42	23.0599	21.7352	19.1406	14.7405	12.037	9.821	19.4574	24.2585	31.0483	21.0729	1.67	0.7959	1.0656			0.875457	17.2886
22.0029	3.0368	31.7518	18.786	24.9456	17.0276	13.9049	28.4167	16.5284	21.3527	25.2208	22.0725	16.5453	15.1385	13.445	12.477	19.5211	21.5387	29.0728	16.5669	1.801	0.7586	1.1009			0.879121	16.8641
22.0946	3.219	29.9981	21.1885	28.1159	23.8945	16.0131	28.6863	18.223	28.9019	25.3171	20.9514	17.6741	10.8359	15.323	13.189	18.2916	20.3999	21.0646	8.1954	1.724	1.167	1.1296			0.882785	16.9774
22.1863	2.4752	28.641	16.7583	29.4983	22.1859	18.9925	27.8057	24.4018	17.5805	21.9237	21.5204	22.1725	10.3562	15.335	8.177	10.1698	16.7118	17.8018	3.8481	1.17	0.5707	0.2703			0.886449	15.3803
22.2779	1.3406	14.536	14.0131	23.6542	20.4246	16.0501	25.381	35.4363	17.1627	28.8113	28.5035	34.8901	12.3242	17.193	9.465	12.6747	13.5115	16.3427	3.1321	1.91	0.5182	0.8247			0.890108	15.8227
22.3696	2.0323	7.8513	13.0966	24.8319	17.004	14.4522	22.1452	32.7051	20.0125	34.8741	28.8227	49.5696	18.3431	19.305	12.699	16.9552	12.7046	15.5773	2.0267	2.098	0.3918	0.7566			0.893772	16.7389
22.4613	0.7329	5.3682	17.4182	25.4601	22.3086	15.1478	22.4007	29.8802	23.889	36.2323	32.7069	50.0925	25.535	21.201	13.576	17.5305	16.3877	17.4182	2.1756	1.33	0	0.2218			0.897436	18.0461
22.553	0.8783	4.4988	19.1375	22.2972	23.4593	15.0558	20.2497	17.9178	29.0316	31.2801	29.9844	43.1749	27.1508	22.012	22.747	14.9096	17.2991	12.8909	1.6133	1.165	0.2267	0.5237			0.9011	17.1593
22.6447	0.5826	3.8658	23.3952	22.0664	18.9096	20.4948	22.7911	9.7807	29.9532	22.3899	23.6313	24.4876	34.2404	21.025	27.059	9.6541	22.7289	10.5335	1.6237	0.679	0.4825	1.0325			0.904764	15.973
22.7363	1.4457	2.0603	33.1119	23.0103	16.3628	29.9529	16.273	5.8447	21.8391	13.542	21.2039	13.1038	46.9275	20.365	30.846	5.5827	27.9024	8.1968	1.812	0.635	0.2319	0.4486			0.908424	15.4863
22.828	1.025	1.2021	37.4133	29.7564	21.3918	50.8765	19.208	4.5298	15.3342	6.9994	22.2674	2.8738	34.1531	15.615	28.501	3.4641	41.2799	6.5808	0.7806	0.856	0.2392	0.1262			0.912088	15.6579
22.9197	0.6479	2.4095	32.6754	36.3588	26.8745	52.4289	23.321	1.7913	9.1336	6.9418	17.4211	3.6666	23.4454	19.539	22.673	2.7593	38.0854	6.5904	1.1719	0.38	0.2282	0.63			0.915751	14.9624
23.0114	1.4282	1.5453	27.6786	29.6696	29.0136	37.1818	22.2408	1.3191	4.3323	5.4569	15.3414	2.4923	16.0155	22.988	16.741	2.9049	18.7141	4.0688	1.6999	0.754	0.1244	0.1484			0.919415	11.9027
23.103	1.477	1.6855	16.5085	27.3827	32.8426	21.0693	14.4163	0.9129	3.4887	2.3924	15.5903	2.8923	11.9537	24.723	12.507	2.4983	8.8077	2.8647	0.9944	1.03	0.2124	0.4779			0.923075	9.39671
23.1947	1.0596	0.7185	15.5746	14.1921	24.6913	12.44	10.3758	0.9271	1.421	2.2258	13.9534	1.7667	6.4537	26.388	5.766	1.6808	4.6354	1.6127	0.8971	0.938	0.3457	0.188			0.926739	6.7387
23.2864	0.7984	0.5189	11.5951	7.4741	20.6436	5.5088	4.9482	0.7931	2.3183	1.3785	8.6759	2.1096	3.9951	17.466	3.705	0.9936	3.6658	1.0215	0.3198	0.455	0.2172	1.0119			0.930403	4.52788
23.3781	0.4575	0.5314	9.8796	4.5977	12.7673	2.291	1.6093	0.6236	2.2731	0.8076	5.2333	1.5471	2.5887	7.388	2.438	0.6417	1.6999	0.9793	0.3531	0.547	0.1536	0.5562			0.934067	2.72564
23.4698	0.5132	0.8131	6.4236	4.331	8.6594	1.4296	0.6595	0.3345	0.7345	0.4798	4.3579	0.5582	1.7493	2.039	2.64	1.04	1.639	0.4185	0.5332	0.36	0.3655	0.2099			0.93773	1.8313
23.5614	0.2916	0.9318	4.3097	3.368	4.824	1.0894	0.5421	0.4345	1.2884	1.2437	2.8858	0.5414	1.3189	1.859	1.491	1.5447	1.3132	0.7524	0.1687	0.328	0.2077	0.2482			0.94139	1.40828
23.6531	0.1882	0.4491	1.9539	2.4857	1.6588	2.199	0.8439	0.9429	0.6475	0.9489	1.9976	0.9262	1.0238	1.69	1.158	0.5808	1.2114	0.9186	0.5858	0.267	0.385	0.0444			0.945054	1.0503
23.7448	0.6446	0.7126	1.3716	3.2862	1.2857	0.9344	0.9062	1.168	0.3934	0.7189	1.1506	0.7918	0.9211	1.366	1.049	0.397	0.4904	1.6935	0.2808	0.009	0.7728	0.1132			0.948718	0.929855
23.8365	0.1198	0.3929	1.5256	1.481	1.8339	1.0703	0.6202	1.1593	0.5802	0.7622	0.746	0.8984	0.7376	0.844	0.54	0.3319	0.4592	0.9759	0.2381	0.149	0.4962	0.1363			0.952382	0.731727
23.9282	0.0619	0.8055	0.8904	0.6379	0.7277	0.9735	1.0881	0.1438	1.0003	1.1724	1.4202	0.7359	0.685	0.491	0.58	0.3059	0.7006	0.5009	0.0839	0.152	0.7489	0.0282			0.956046	0.633364
24.0198	1.2974	0.5923	2.2677	1.6466	0.4763	0.4695	0.3542	0.2851	0.7945	0.5624	2.1573	0.4108	0.2496	0.825	1.378	0.3274	1.7116	0.273	0.3859	0.06	1.1849	0.1958			0.959706	0.813877
24.1115	1.0745	0.0065	2.1857	1.0299	0.6807	0.3704	0.1581	0.1925	0.4625	0.7133	0.9407	0.1619	0.2453	0.953	0.719	0.484	1.2582	0.2938	0.2859	0.432	1.0284	0.3195			0.963369	0.636173
24.2032	1.7861	0.005	0.784	1.0504	1.7205	0.1492	0.2918	0.0639	0.8287	0.3201	0.999	0.0634	0.3042	0.232	0.519	0.2855	0.1836	0.113	0.1241	0.189	0.8337	0.3849			0.967033	0.510505
24.2949	1.7122	0.3173	0.2763	1.0094	0.508	0.5505	0.743	1.1729	0.168	0.6363	0.4338	0	0.5898	1.077	1.119	0.344	0.0636	0.4851	0.1942	0.207	1.6496	0.2827			0.970697	0.615441
24.3866	1.7124	0.6191	0.5229	0.6431	0.5336	0.9024	1.0574	0.1524	0.0915	0.6527	1.0587	0.3352	0.6474	0.353	0.626	0.7838	0.3504	0.1682	0.0451	0.604	2.0313	0.316			0.974361	0.645755
24.4782	2.8724	0.1657	1.049	0.5824	0.2951	0.3333	1.3078	0.2394	0.2623	0.3246	0.5032	0.7203	0.3549	0.621	0.334	0.5463	0.1142	0.2408	0.1569	0.498	1.6307	0.2988			0.978021	0.611414
24.5699	2.6329	0.4608	0.5905	0.1348	0.7425	0.209	0.6653	0.1904	0.5263	0.2669	0.4321	0	0.7272	0.235	0.727	0.9866	0.3292	0.3691	0.2119	0.364	0.832	0.0431			0.981685	0.530755
24.6616	2.3841	0.0587	1.1637	0.1492	0.1315	0.1273	0.3091	0.3672	0.5021	0.4927	0.6359	0.0955	0.2328	0.321	0.117	0.4097	0.4176	0.6486	0.3173	0.276	0.7258	0.1697			0.985349	0.456932
24.7533	0.1314	0.0399	0.8154	0.9856	0.8812	0.3003	0.3585	0.3084	0.3683	0.1083	0.6782	0.1672	0.7502	0.728	0.201	0.3294	0.7428	0.1151	0.0204	0.469	0.4151	0.185			0.989012	0.413577
24.8449	0.7308	0.0556	0.7249	0.9948	0.3883	0.2067	0.4884	0.3105	0.4717	0.0556	0.4254	0.5432	0.3664	0.688	0.727	0.1627	0.5563	0.3848	0	0.176	0.7778	0.128			0.992672	0.425586
24.9366	0.2585	0.0183	0.5503	0.2737	0.118	0.1584	0.5953	0.3985	0.0164	0.1975	0.391	0.2822	0.0474	0.072	0.167	0.0661	0.4883	0.478	0.0491	0.017	0.5237	0.4565			0.996336	0.2556
25.0283	0.3583	0.0858	0.3518	0.1967	0.0602	0.0813	0.0419	0.1753	0.1011	0.197	0.3658	0.3653	0.142	0.302	0.129	0.2843	0.3338	0.1991	0.0974	0.426	0.5173	1.971e-05			1	0.218701

## Sheet: Image19
X0	Y0	Y1	Y2	Y3	Y4	Y5	Y6	Y7	Y8	Y9	Y10	Y11	Y12	Y13	Y14		Ap-Basal to 1	Average intensities
0	35	30.65	29.55	42.5	24.65	39.05	39.85	37.55	31.55	27.15	34.95	52.65	50.95	35.9	30.3		0	36.15
0.0992	32.5	28.75	31.55	44.1	30.75	34.95	44.8	35.5	30.75	27.2	36.7	51.6	48.25	28.55	32.6		0.00438469	35.9033
0.1985	35.35	31.15	29.7	52.05	36.1	35.05	47.2	41.85	33.95	29.7	40.6	54.75	53.25	35.8	31.75		0.00877379	39.2167
0.2977	36.05	28.5	29	56.75	29.6	34.15	47.7	42	31.45	30.6	42.15	52.8	49.45	40.3	36.65		0.0131585	39.1433
0.3969	41.2	25.2	25.25	57.8	34.75	34.2	48.9	45.2	36.9	31.25	42.05	59.45	51.2	36.5	30.65		0.0175432	40.0333
0.4961	33.6	21.9	37	59.9	26.4	31.95	45.8	45.4	28.3	36.45	34.75	51.8	48.85	30.4	34.05		0.0219278	37.77
0.5954	30.5	26.25	39.95	57.4	23.7	33.65	50	40.45	32.55	29	32.85	53.45	40.2	32.2	33.85		0.026317	37.0667
0.6946	34.9	24.5	35.65	55.35	21	32.4	47.3	40.05	28.95	28.35	33.15	47.95	59.95	34.75	48.4		0.0307016	38.1767
0.7938	31.35	32.65	34.4	48	28.4	32.85	47.7	56.7	37.95	34.1	31.4	49.75	64.25	33.8	38.95		0.0350863	40.15
0.8931	26.4	30.65	34.85	49.1	28.2	32.95	52.35	46.8	34.7	31.45	35.35	41	74.1	29.7	41.25		0.0394754	39.2567
0.9923	26.15	39.35	30.6	49.55	29.6	24.95	42.6	43	28	31.6	34.1	52.3	80.45	30.7	42.3		0.0438601	39.0167
1.0915	22.1	34.2	24.9	41.2	25.1	27.25	46.4	42	29.3	35	40.6	48.35	84.1	30.35	46.55		0.0482448	38.4933
1.1907	29.75	35.1	28.95	46.3	26	28.2	55.4	41.7	26.25	34.35	32.45	51.1	86.7	35.95	44.6		0.0526295	40.1867
1.29	38.6	33.6	25.2	39.95	27.6	25.1	47.4	42.9	29.4	37.45	27.35	56.6	95.95	37.8	47.05		0.0570186	40.7967
1.3892	44.25	36.7	27.95	41.7	25.85	27.6	51.2	45.6	21.95	44.45	32.05	65.8	85.4	42.1	59.9		0.0614033	43.5
1.4884	43.75	30.45	29.45	37.1	22.85	26.45	42.2	53.95	22.3	49.05	36.85	68.55	73.55	45.55	59.55		0.065788	42.7733
1.5877	37.15	32.8	29.35	36.7	23.7	25.65	41.95	47.3	27.3	40.65	33.05	69.15	65.95	59	63.7		0.0701771	42.2267
1.6869	31.4	33.15	27	31.7	28.6	25.8	38.15	40.9	31.55	46.8	25.75	69.6	64.65	75	82.9		0.0745618	43.53
1.7861	25.8	37.2	34.05	33.3	24.9	25.75	43.35	46.55	30.65	44.5	30.25	67.65	66.9	92.7	81.55		0.0789464	45.6733
1.8853	29.8	46	35.6	33.1	27.5	29.75	48.2	45.05	30.95	34.45	32.85	59.85	59.5	99.9	84.15		0.0833311	46.4433
1.9846	30.05	46.15	30.65	35.05	22.4	26.15	41.45	41.6	32	35.4	32	58.45	59.35	98.5	77.25		0.0877202	44.43
2.0838	32.5	47.65	30.7	42.95	28.7	23.4	42.65	47	27.7	37.3	36.6	65.35	54.65	110.65	74.05		0.0921049	46.79
2.183	32.3	39.65	33.75	37.3	34.6	28.25	49.15	37.3	33	38.65	27.95	62.45	56.65	95.7	62.45		0.0964896	44.61
2.2823	32.75	40.1	34.4	45.1	28.65	27.3	45.55	33.65	29.75	41.2	27.15	63.9	51.8	99.2	61.55		0.100879	44.1367
2.3815	31.95	47.85	38.8	44.75	27	34.3	35.2	30	32.15	50	27.95	56.95	47.55	99.95	55.4		0.105263	43.9867
2.4807	29.45	51.5	34.65	35.15	27.4	33.65	36.2	34.05	36.05	37.2	29.4	73.25	40.2	78.45	59.25		0.109648	42.39
2.5799	25.1	56.6	51.7	37.6	27.9	29.9	40.25	34.2	39.15	42.5	28.7	74.65	43.35	66.75	57.5		0.114033	43.7233
2.6792	24.1	63.35	45.4	27.55	27	32.45	45.45	34.8	39.1	43.85	36.4	68.55	31.6	58.9	56.4		0.118422	42.3267
2.7784	21.95	69.1	44.35	35.45	28.65	28.75	44.3	33.1	45.4	44.85	36.9	68.25	25.15	68.8	58.95		0.122807	43.5967
2.8776	29.85	60.55	58.4	30.95	36.45	35.25	42.6	31.15	52.55	43.15	35.65	65.1	19.95	73.55	54.75		0.127191	44.66
2.9769	26.35	48.5	55.95	34.15	34.55	27.8	40.35	31.4	58.35	45.3	32.35	65.75	19.85	75.5	57.15		0.13158	43.5533
3.0761	31.2	54.5	49.7	31.75	26.6	38.4	38.2	30.3	60.6	45.8	29.55	67.85	23.45	73.3	55.75		0.135965	43.7967
3.1753	35.3	49.7	56.15	35.8	33.65	38.25	35.5	24.15	56.2	49.5	31.75	64.1	24.15	64.1	51.55		0.14035	43.3233
3.2745	37.7	51.7	53.05	32.75	36	39.1	28.6	20	55.2	48.05	29.2	46.7	23.95	56.6	49.45		0.144734	40.5367
3.3738	36.75	46.2	59.75	28.85	30.55	41.1	28.95	21.15	55.15	40.3	29.45	51.8	23.7	51.3	53.6		0.149124	39.9067
3.473	30.6	51.25	64.95	31.35	32.65	43.1	29.7	30.55	50.3	37.55	33.1	55.1	24.7	49.75	53.05		0.153508	41.18
3.5722	27.15	53.45	67.55	31.4	29	47.6	24.4	26.15	44.75	40.3	34.2	54.8	23.85	41.7	46.9		0.157893	39.5467
3.6715	30.65	57.75	54.95	25.4	30.1	58.6	31.2	24.35	45.2	41.55	41.5	39.6	20.9	37.5	42.75		0.162282	38.8
3.7707	32.7	58.85	58.1	28.6	32.25	59.8	30.2	28.35	36	34.85	39.1	32.75	19	33.6	43.2		0.166667	37.8233
3.8699	36.05	46.8	53.75	27.8	37.15	73.3	40.8	32.75	28.5	25.35	31.9	31.6	22.65	27.95	36.8		0.171051	36.8767
3.9692	33.3	42.25	57.8	22.7	47.2	82.85	31.25	41.2	28	29.25	28.05	35.9	23.25	22.15	46.35		0.17544	38.1
4.0684	29.05	40.8	56.95	28.2	38.05	79.75	30.6	46.8	28.15	29.05	29.95	39.9	17.85	25.05	34.1		0.179825	36.95
4.1676	30.6	46.75	53.05	19.85	37.45	81.75	38.5	54.65	29.85	23.95	26.15	34.2	26.45	24.85	39.1		0.18421	37.81
4.2668	26.85	45.55	38.8	24.1	35	75.1	36.3	45.95	24.65	22.4	25.7	24.65	23.2	26.1	41.7		0.188595	34.4033
4.3661	28.35	40.15	42.6	27.95	41.5	81.75	31.4	44.4	32.5	24.8	21.1	30.9	21.55	23.05	38.25		0.192984	35.35
4.4653	29.05	35.85	34.75	21.7	32.4	70.1	26.95	38.5	26.55	26	19.3	28.7	17.9	26.35	34.95		0.197368	31.27
4.5645	27.8	36.05	34.7	24.65	26.1	63.8	24.9	32.5	25.55	23.85	22.1	28.05	24.55	19.45	37.4		0.201753	30.0967
4.6638	31.55	32.85	28.65	23.7	28.25	72.9	26.1	30.3	27.2	35.9	18.15	22.5	25.95	17.6	38.45		0.206142	30.67
4.763	27.3	30.7	29.5	21.15	26.55	61.7	26.45	31.05	25.6	28.6	22.7	29.45	25.35	16.95	34.55		0.210527	29.1733
4.8622	31.6	26.9	28.15	18.8	29.9	62.4	27.05	23.55	23.8	22.3	23.05	32.8	28.95	20.25	27.55		0.214911	28.47
4.9614	37.35	20.85	30.2	19.75	26.65	60.9	27.7	27.05	18	22.4	27.05	35.15	31.9	19.3	33.7		0.219296	29.1967
5.0607	29.5	24.9	26.15	25.4	23.65	63	25.95	22.55	18.8	22.95	19.55	26.9	27.6	19.3	27.95		0.223685	26.9433
5.1599	28.3	28.7	23	17.3	20.15	57.45	22.9	28.7	21.9	18.4	24.2	31.45	25.55	20.1	24.6		0.22807	26.18
5.2591	27.75	25.35	33.4	17.9	19.95	69.15	19.4	26.8	23.35	22.95	25.95	30.5	31.25	19.25	26.3		0.232455	27.95
5.3584	29.6	28.2	41.65	24.2	19.35	59.65	24.7	29.25	25.45	18.35	25.6	27.4	32.3	16.65	20.1		0.236844	28.1633
5.4576	27.35	24.35	32.75	28.1	20.85	62.85	23.15	28.35	24.4	15.35	20.5	29.1	26.45	15	21		0.241228	26.6367
5.5568	23.15	29.8	32.9	23.6	27.95	65.1	21.6	25.4	22.3	14.1	18.35	25.75	25.65	21.6	20.9		0.245613	26.5433
5.656	27.25	32.55	31	22.85	17.6	56.75	24.75	25.75	21.15	15.65	24.75	27.4	26.9	15.4	18.7		0.249998	25.8967
5.7553	30.95	28.6	26.95	22.35	19.35	51.1	22.85	28.3	21.7	19.55	20.85	32.2	26.75	15.35	18.25		0.254387	25.6733
5.8545	31.25	28.05	25.2	17.2	18.9	35.65	25.8	23.5	21.25	14.15	24	32.2	25.65	13.35	19.1		0.258772	23.6833
5.9537	28.05	24.75	23.5	18.9	22.35	24.3	23.85	22.85	25.8	13.9	21.55	43.35	27.4	12.25	20.2		0.263156	23.5333
6.053	25.4	21.2	28.45	17.6	21.05	23.15	24.65	27.85	19.15	13.4	19.95	39.35	20.9	15.65	15.8		0.267545	22.2367
6.1522	21.25	23.5	29.1	15.45	20.55	20.2	27.6	21.5	21.7	16.15	16.6	31.1	30.35	11.6	13.35		0.27193	21.3333
6.2514	20.45	20.1	22.2	19	21.25	23.4	27	17.1	26.5	13.85	15.15	23.35	30.8	15.3	20.7		0.276315	21.0767
6.3506	23.25	19.35	25.65	20.9	21.5	23.6	24.55	17.75	18.85	15.5	18.85	18.35	21.4	17.55	21.8		0.280699	20.59
6.4499	25.65	23.95	27.2	20.6	19.25	23.3	27.85	13.65	16.7	19.65	16.65	21.1	27.8	17.15	19.5		0.285089	21.3333
6.5491	22.65	19.3	24.5	20.45	16.1	25.5	24.25	19.35	16.5	20.05	16.65	19.75	24.1	21.55	21.85		0.289473	20.8367
6.6483	20.05	18.1	26.9	22.3	14.4	26.2	30.15	15.7	15	14.35	19.55	21.15	21.2	16.15	19.5		0.293858	20.0467
6.7476	17.3	17.4	17.95	16.35	14.4	22.5	23.4	15.85	18.15	14.75	16.35	18.4	19.5	13.7	18.4		0.298247	17.6267
6.8468	18.45	17.2	21	13.15	17.85	20.05	24.7	20.65	18.75	18.25	18.4	17.05	20.2	18.35	15.65		0.302632	18.6467
6.946	16.2	18.2	23.5	16.8	17.65	15.95	28.9	20.75	20.15	21.3	22.55	19.6	17.45	16.65	17.7		0.307016	19.5567
7.0452	20.85	20.15	21.95	22.45	18.8	15.9	27.1	21.2	21.45	19.3	16.35	17.15	21.1	16.95	16.45		0.311401	19.81
7.1445	21.7	19.05	19	23.65	23.3	18.8	26.05	17.85	21.05	24.9	19.6	16.1	19.75	13.65	20.4		0.31579	20.3233
7.2437	23.5	16.6	17.2	20.8	23	19.25	21.4	23.65	20.85	20.1	18.4	12.9	25.45	15.35	15.65		0.320175	19.6067
7.3429	23.4	15.4	19.2	21.45	19.75	17.9	18.9	19.2	23.15	19.95	17.3	19.6	25	15.8	18.35		0.32456	19.6233
7.4422	22.7	13.85	20.35	20.4	17.4	16.7	21.85	23.15	25	16.7	18	19.95	26.8	11.7	17.6		0.328949	19.4767
7.5414	20.35	16.35	14.3	15.6	18.7	15.2	21.05	15.95	18.7	17.35	18.45	20.15	24.95	14.4	15.15		0.333333	17.7767
7.6406	17.65	16.7	11.9	15.95	22.75	16.45	19.6	18.65	20.7	18.7	21.05	24.35	20.3	13.75	15.95		0.337718	18.2967
7.7398	22.35	17.95	11.6	16.05	22.15	17.3	21	27.1	24.45	18.55	17.1	22.75	17.55	10.9	15.8		0.342103	18.84
7.8391	13.35	16.05	15.35	16	18.7	14.8	15.35	21.25	18.05	15.8	17.05	20.8	18.3	10.8	17.05		0.346492	16.58
7.9383	18.65	18.55	14.55	17.5	22.85	12.6	17.05	16.1	20.1	13.5	16	25.6	17.05	9.9	16.1		0.350876	17.0733
8.0375	17.5	13.15	15.1	16.75	20.2	13.4	19.75	14.55	18.45	11.2	15.9	22.25	22.6	11.3	14.3		0.355261	16.4267
8.1368	16.9	14.15	12.95	24.3	20.6	10.6	17.5	19.95	19.3	12.25	13.65	21.8	22.4	14.5	16.55		0.35965	17.16
8.236	21.15	13.3	15.05	20.95	18.8	15.8	14.65	14.05	19.75	11.2	17.2	22.7	17.5	12.75	15		0.364035	16.6567
8.3352	13.15	13.95	15.8	19.05	16.15	15.85	20.7	15.35	18.85	16.1	13.95	20.1	17.8	17.4	16.5		0.36842	16.7133
8.4344	14.8	9.1	18.45	18.3	20.05	16.4	17.5	16.6	19.3	17.55	14.85	19.55	17.9	16.9	17.2		0.372804	16.9633
8.5337	14.4	9.55	16.45	16.1	15.65	18.2	18.4	13.95	16.4	19.75	12.9	20	18.65	16.65	20.25		0.377193	16.4867
8.6329	15.5	7.6	13.5	18.2	15.1	17	23.5	16.65	22.65	16.2	23.2	18.4	24.1	21.8	17.25		0.381578	18.0433
8.7321	17.4	8.05	16.65	19.1	17	12.4	21	12.25	23.85	16.85	17.8	13.7	21.9	16.55	17		0.385963	16.7667
8.8314	18.7	8.25	15.7	22.4	17.25	12.5	18	13.5	19	16.1	19.25	12.25	18.2	15.75	11.5		0.390352	15.89
8.9306	13.85	4.75	17.15	23.5	10.8	14.7	14.45	10.15	18.75	13.7	15.8	16.65	16.25	15	14.05		0.394737	14.6367
9.0298	18.5	7.4	13.8	20.45	11.95	15.3	13.5	12.55	16.55	11.75	24.65	11.35	16.95	15.8	12.8		0.399121	14.8867
9.129	18.25	5.65	11.85	14.6	8.8	19.6	14.85	14.35	19.15	13.5	20.9	15.1	16.85	16.7	14.05		0.403506	14.9467
9.2283	18.45	3.85	9.4	18	13.1	19.05	14.65	13.75	16.6	14.75	17.8	13.55	16.5	15.3	13.6		0.407895	14.5567
9.3275	20.05	3.15	9.5	15.8	9.7	16.65	17.95	13.1	18.95	16.9	18.9	12.8	21.25	16.1	11.55		0.41228	14.8233
9.4267	21.15	6.3	12.05	16.75	14.4	19.4	17.6	12.4	20.8	15.15	13.1	16.6	19.4	14.65	11.65		0.416664	15.4267
9.526	15	4.7	12.85	16	13.15	15.4	23.2	18.3	20.9	15.35	12.25	12.35	21.45	19.85	11.4		0.421054	15.4767
9.6252	15.4	4.55	11.7	21.9	11.05	15	18.8	20.8	24	13.5	8.15	11.85	30.4	17.1	15.35		0.425438	15.97
9.7244	15.45	6.7	9.8	12.1	10.7	14.05	16.1	21.8	23.3	13.55	10.55	14.75	26	16.8	14.15		0.429823	15.0533
9.8236	13.4	5.85	7.1	17.9	12.75	13.4	16.05	17.6	17.35	13.05	8.3	13.65	25.6	14.4	14.1		0.434208	14.0333
9.9229	12.25	2.5	8.4	15.2	14.6	15.2	17.05	17.45	16.55	13.7	5.9	17.75	22.1	17.75	14.45		0.438597	14.0567
10.0221	11.5	4.15	11.35	13.1	21	13.25	17.5	11.6	15.1	11.9	7.9	13.55	17.9	13.5	11.65		0.442981	12.9967
10.1213	14.5	4.6	11.55	17.65	14.75	13.85	18.4	14.7	14.35	13.05	6.95	14.75	17.1	14.05	13.75		0.447366	13.6
10.2206	11.95	3.7	12.15	14.7	19.4	8.85	19.65	12.35	16.1	12.9	7.35	11.3	16.2	16.65	15.05		0.451755	13.22
10.3198	11.3	3.65	8.6	15.65	18.45	11.7	15.85	9.95	11.15	13.8	8.85	10.35	18.2	14.05	13.2		0.45614	12.3167
10.419	10.95	3.7	11.65	16	12.4	9.65	16.3	11.4	11.9	14.2	5.55	11.8	19.8	10.7	12.8		0.460525	11.92
10.5183	9.2	3.8	10.05	21.4	14.2	10.75	16.05	11.4	12.9	14.7	6.35	8.65	20.3	13	6.7		0.464914	11.9633
10.6175	8.05	4	7.65	23.8	19.15	14.05	15.9	17.1	13.3	17.5	5.1	6.8	23.65	19.05	7.55		0.469298	13.51
10.7167	8.5	4.2	7.3	17.8	11.55	15.65	22.15	13.65	11.85	13.9	5.6	7.3	22.1	19.45	8.35		0.473683	12.6233
10.8159	9.8	4	7.35	25.95	14.1	17.05	20.85	13.4	12.25	16.25	5.95	9.4	25.7	15.35	7.25		0.478068	13.6433
10.9152	10.2	4.85	5.6	29.6	14	13	20.95	12	12.1	18.4	6.2	9.5	24.95	14.35	9.35		0.482457	13.67
11.0144	9.65	4.7	4.45	24.65	13	14.45	15.5	13.65	12.25	14.55	7.55	9.45	20.25	18.4	8.8		0.486842	12.7533
11.1136	9.55	5.3	3.6	24.05	10.6	16.45	15.15	14.6	12.05	11.05	6.1	7.7	20.7	17.3	7.5		0.491226	12.1133
11.2129	12.95	5.1	4.8	25.8	12.45	17.6	12.25	12.75	13.45	10.2	6.6	7.1	20.3	15.35	8.35		0.495615	12.3367
11.3121	11.4	5.95	6.05	31.7	11.45	15.6	15.35	14.6	15.4	14.95	6.5	9.5	20.95	21.5	7.95		0.5	13.9233
11.4113	12.9	6.85	6.05	26.55	9.9	16.15	17.9	11.35	15.5	13.75	7.75	5.5	19.25	18.1	9.6		0.504385	13.14
11.5105	9.5	5.15	4.1	22.05	12.1	14.25	18.9	7.8	17.4	12.55	5.4	5.4	12.85	17.5	8.65		0.508769	11.5733
11.6098	12.05	5	6.4	18	12.5	18.5	17.8	7.95	13.75	11.15	5	6.5	14.05	21.3	8.35		0.513158	11.8867
11.709	12.4	5.45	4.7	18.85	14.05	14.65	13.1	13.95	16.1	17.15	9.55	7.75	12.6	20.65	9.9		0.517543	12.7233
11.8082	11.75	5	6.1	13.4	13.15	10.35	16.35	7.15	12.75	14.9	8.85	6.05	16.75	24.85	8.85		0.521928	11.75
11.9075	11.35	5.55	4.55	12	12.65	13.8	15.95	11.5	12.5	15.6	6.6	4.6	20.3	17.7	10.1		0.526317	11.65
12.0067	7.8	4.8	3	14.9	11.05	10.2	16.35	8.15	14.3	14.05	6.05	4.6	20.85	18.8	9.65		0.530702	10.97
12.1059	11.75	2.6	4.4	20.35	12.2	11.35	16.2	10.45	13.45	15.35	3	5.85	18.35	16.75	6.4		0.535086	11.23
12.2051	9.05	3.9	3.35	24.6	12.45	10.15	11.3	12	12.05	20.5	4.6	7.5	14.55	17.5	7.6		0.539471	11.4067
12.3044	10.1	4.5	3.25	20.75	13.6	13.35	15.75	8.8	15.3	22.4	5.05	5.05	14.1	22.7	10.65		0.54386	12.3567
12.4036	12.25	3.4	4.25	17.8	11.5	13.9	14.4	12.55	12.9	17	5.65	4.85	16.8	18.15	10.65		0.548245	11.7367
12.5028	11.05	3.5	5.8	14.4	15.15	16.6	13.6	12.45	12.85	14.4	5.3	6.35	14.8	16.3	17.2		0.552629	11.9833
12.6021	12.1	6.15	3.55	15.6	18.5	14.9	16.25	13.15	12.6	13.85	5.55	3.35	16.65	17.7	14.95		0.557019	12.3233
12.7013	13.55	5.8	3.8	13.1	12.45	11.9	18.35	12.95	12.8	12.9	6.2	3.25	27.45	17.45	13.45		0.561403	12.36
12.8005	11.2	4.8	4	14.95	10.65	14.65	18.45	12.7	16.2	17.9	6.1	5.8	21.4	15.6	16.95		0.565788	12.7567
12.8997	12.6	4.5	6.1	18.3	9.75	22.05	20.25	11.75	11.3	17	6.7	7.35	23.25	14.5	19.45		0.570173	13.6567
12.999	10.5	4.4	3.5	14.45	12.6	19.55	23.55	13.85	17.45	17.6	3.95	7.6	24.7	13.85	16.8		0.574562	13.6233
13.0982	9.8	4.3	2.45	16.6	13.75	16.75	24.7	14.05	14.05	17.4	3.2	6.15	22.2	12.05	15.75		0.578946	12.88
13.1974	9.95	4.2	6	20.3	12.5	15.8	16.8	8.95	15.55	18.2	7.85	5.6	22.75	19.7	14.15		0.583331	13.22
13.2967	12	6.4	3.05	20.6	11.6	15.65	17.55	10.95	16.1	15.2	7.3	9.25	21.85	15.75	14.55		0.58772	13.1867
13.3959	15	4.5	3.8	29.45	15.7	12.5	17.85	8.85	18.25	16.3	9.3	8.65	22.5	19.7	11.25		0.592105	14.24
13.4951	13.25	5.4	4.05	23.6	13.4	14.9	12.7	8.15	16.2	13.35	9	6.95	27.95	20.25	9.85		0.59649	13.2667
13.5943	11.5	5.45	4	22.15	12.15	12.95	15.15	8.05	10.75	15.75	7.2	5.6	20.6	16.65	11.3		0.600874	11.95
13.6936	11.05	4.5	3.8	24.65	15.25	11.05	15	7.75	13	14.05	9	6.9	17.25	17.1	12.75		0.605263	12.2067
13.7928	10.05	5.8	5.5	20.5	17.65	10.8	17.2	12.4	16.35	19.2	7.35	9.6	19.7	13.85	12.55		0.609648	13.2333
13.892	16.75	5.4	6.15	20.25	19.9	11.5	18.2	15.9	25.8	17.05	7.8	5.9	12.5	16.5	9.7		0.614033	13.9533
13.9913	10.15	4.95	6.55	17.8	12.8	8.25	16.1	15.4	29.3	25.7	6.95	5	17.25	14.25	9.9		0.618422	13.3567
14.0905	12.4	4.8	5.65	12.5	13.7	12.8	19.1	18.55	25.45	17.4	6.5	6.25	21.95	14.75	9.75		0.622807	13.4367
14.1897	11.3	4.45	5.55	17.1	11.8	12.05	15.75	18.2	21.65	17.85	11.45	5.25	22.45	13.6	6.9		0.627191	13.0233
14.2889	14.15	5.8	4.15	15.15	12.1	13.35	18.7	15.2	18.15	18.7	13.7	5.55	22.7	14.1	3.45		0.631576	12.9967
14.3882	15.4	4.8	4.5	16.3	13.95	16.05	19.6	13.65	17.2	21.45	9.65	6.75	25.15	18.25	6.05		0.635965	13.9167
14.4874	12.3	4.7	3.3	19.05	14.2	15.5	16.15	9.6	19.8	21.55	6.4	3.55	25.3	17.7	3.15		0.64035	12.8167
14.5866	12.6	5.4	5.35	17.55	11.65	14.25	17.3	10.85	13.35	22.45	8.7	4.8	24.7	19.15	7.25		0.644734	13.0233
14.6859	13.65	4.15	5.1	16.9	10.55	14.2	20.55	9.3	13.25	19.25	10.6	6.5	29.2	20.45	9.85		0.649124	13.5667
14.7851	18.4	4.1	9.4	18.4	13.2	11.2	13.6	12	17.4	19.95	7.6	5.6	22.45	24.4	12.15		0.653508	13.99
14.8843	16.4	4.75	3.65	12.7	19.35	12.45	12.05	13.65	22.4	23.45	8.45	6.7	15.05	17.2	8.55		0.657893	13.12
14.9835	16.75	3.9	7.5	12.8	15.35	10.45	18.2	15.2	18.35	20.65	7.9	4.95	21.9	19.75	10.85		0.662278	13.6333
15.0828	15.85	4.3	6.6	15.25	18.65	18.75	17.7	10.5	18.2	20.1	4.85	5.75	23.15	17.6	11.25		0.666667	13.9
15.182	11.25	3.4	6.05	12.8	22.65	19.95	18.85	10.65	18.35	24	10.05	6	21.3	16.6	6.7		0.671051	13.9067
15.2812	12.95	4.15	4.5	15.9	15.05	16.4	20.25	13.35	12.1	23.9	14.45	7.5	21.95	13.4	10.35		0.675436	13.7467
15.3805	14.75	4.25	7.7	13.5	16.35	14.7	17.95	11.45	15	26.4	11.15	5	26.55	14.9	12.15		0.679825	14.12
15.4797	15.35	2.4	4.3	13.4	15.3	13.8	19.25	14.8	14.65	29.25	11.25	9.45	21.3	17.6	13.2		0.68421	14.3533
15.5789	14.2	3.55	5.55	17.3	18.65	15	16.25	15.4	15.75	22.35	7.25	7.2	23.05	22.2	10.7		0.688595	14.2933
15.6781	13	6.15	8.55	15.65	16.85	17.4	14.95	13.45	15.4	16.4	8.25	5.95	18.85	20.8	9.65		0.692979	13.42
15.7774	11.55	6.45	6.05	13.95	20.35	14.25	16.95	14.25	18.1	17.45	10.3	6.75	18.15	18.5	6.7		0.697368	13.3167
15.8766	15.2	6.95	6.6	16.4	21.5	14.05	18.05	12.65	19.1	19.9	9.85	7.75	22.35	16.35	6.15		0.701753	14.19
15.9758	13.35	6.65	4.95	15.25	20.05	18.9	17.6	13.8	16.2	23.75	13.75	9.85	19.4	20.9	5		0.706138	14.6267
16.0751	22.3	4.1	9	11.7	21.25	20.5	19.6	13.3	14.8	23.85	9.4	9.6	19.85	21.25	6.5		0.710527	15.1333
16.1743	20.95	4.1	6.55	14.9	15.55	23	25.1	19.05	13.75	21.4	10.2	6.85	17.7	18.15	9.05		0.714911	15.0867
16.2735	19.25	5.2	10.65	18.05	22.75	22.35	23.05	10.95	13.6	20.05	20.1	9.2	14.7	17.3	7.6		0.719296	15.6533
16.3727	16.5	5.55	11.5	19.8	24.25	20.95	22.5	14.9	20.85	18.2	16.8	10.55	14.95	17.15	5.5		0.723681	15.9967
16.472	17.8	4.9	11.55	23.2	22.35	21.85	25.3	13.1	25.5	22.25	14.8	9.35	22.25	22.95	5.9		0.72807	17.5367
16.5712	17.5	6.55	13	19.85	18.9	18.3	20.45	14.95	19.35	19.35	13.95	8.35	22.6	24.6	4.5		0.732455	16.1467
16.6704	18.05	7.3	9.7	18.95	22	21.25	21.9	13.75	20.8	22.9	16.2	9.15	21.6	27.4	3.9		0.736839	16.99
16.7697	22.4	6.85	12.95	17.1	22.8	21.2	19.3	16.7	23.1	28.75	17.4	11.4	21.1	20.05	4.6		0.741228	17.7133
16.8689	17.7	6.65	12.35	21.6	20.9	22.7	22.3	20.9	23.5	26.15	17.7	14.3	18.1	17.7	3.25		0.745613	17.72
16.9681	23.35	6.65	13.05	24.6	23.95	23.55	23.45	25.9	18.05	25.8	18.55	17.25	16.35	16.3	6.35		0.749998	18.8767
17.0674	23.4	8.15	12.45	18.45	27.75	21.9	28.5	21.5	19.45	26.3	18.45	15.5	19.7	18.7	4.95		0.754387	19.01
17.1666	17.7	8.9	16.9	25.6	21.55	22.2	30	24.2	18.85	27.55	14.75	13.65	22.35	19.45	3.75		0.758772	19.16
17.2658	16.5	11.55	16.15	22.2	25.5	26.05	30.95	19.65	18.1	27.6	14.65	14.05	23.55	20.2	5.55		0.763156	19.4833
17.365	19.85	12.7	14.05	21.7	22.1	19.1	27.3	19.4	24.1	22.75	18.75	13.9	27.1	22.9	8.15		0.767541	19.59
17.4643	20.55	8.75	16	24.5	25	20.1	22.05	20.8	22.6	20	21.35	16	28.95	23.45	9.35		0.77193	19.9633
17.5635	23.4	10.8	17.45	25.75	26.5	22.45	21.1	20.9	22.65	22.95	22.45	14.05	27.1	20.8	7.35		0.776315	20.38
17.6627	20.45	10.3	17.35	26.45	19.95	20.15	18.7	17.7	19.2	21	21.85	20.85	26.45	21.95	5.35		0.780699	19.18
17.762	23.35	13.65	15.3	23.75	22.2	21.5	17.05	21.1	19.25	25.25	16.9	19.15	20.8	27.7	4.2		0.785089	19.41
17.8612	23.5	14.55	17.05	23.15	25.05	24.35	21.9	20.55	20.45	24.55	15.2	18.95	22.6	29.65	4.15		0.789473	20.3767
17.9604	23.9	10.1	15.15	21.7	15.25	20.15	25.6	29.3	20.75	20.9	23	15	24.05	30.55	5.65		0.793858	20.07
18.0596	23.45	12.1	19.05	25.3	21.6	23.95	20.5	26.7	23.65	22.35	17.6	12.9	22.7	21.65	8.35		0.798243	20.1233
18.1589	24.1	12.15	21.1	19.7	20.1	17.45	21.1	26.8	25.3	20.15	21.5	20.8	16.9	20.5	8.7		0.802632	19.7567
18.2581	30.65	14.25	21.05	20.5	24.5	19.3	21.75	21.4	21.2	19.9	22.2	19.4	21.25	19.8	9.65		0.807016	20.4533
18.3573	25.35	15.1	21.55	21.75	20.5	21.65	19.1	21.5	19	19.8	30	18.95	28.55	21.9	9.65		0.811401	20.9567
18.4566	24.65	19.95	17.45	24.45	19.15	20.1	18.15	25.4	26.05	23.25	33.05	22.45	21.6	15	14.55		0.81579	21.6833
18.5558	26.3	19.7	22.05	18.9	23.7	25.75	20.35	25.2	24.15	26.75	28.75	19.15	24.65	20.15	12.6		0.820175	22.5433
18.655	32.05	16.2	23.5	25.65	19.45	23.85	20.9	20.8	26.55	25.8	26.65	19.7	25.45	21.35	10.1		0.82456	22.5333
18.7542	31.05	17.35	19.3	27.9	22.8	26.95	23.8	22.1	23.65	26.35	25.4	20.25	25.95	23.75	12.35		0.828944	23.2633
18.8535	25.6	15.4	19.5	26	24.85	32.7	25.75	24.75	18.15	26.1	23.95	23.55	32.35	18.4	16.05		0.833333	23.54
18.9527	24.55	17.75	23.5	27.6	29	29.45	24	23.3	20.4	33.35	28.9	34.75	27.2	20	17.9		0.837718	25.4433
19.0519	30.8	16.3	29.45	21.8	26.75	25	24.7	16.75	19.15	24.25	30.4	29.1	27	20.65	12.7		0.842103	23.6533
19.1512	28.6	16.15	36.7	22.2	30.4	25.45	22.15	23.1	23.75	26.4	25.2	27.6	26.25	18.8	14.4		0.846492	24.4767
19.2504	32.45	20.95	30.65	23.4	31.8	25.8	25.9	24.35	24.3	28.8	25.2	25.05	24.25	25.15	11.85		0.850876	25.3267
19.3496	28.6	16.3	26.65	26.65	34.85	22.8	29.6	23.3	25.9	30.45	28.05	36.15	30.7	24.2	10.85		0.855261	26.3367
19.4488	25.6	20.75	25.55	24.95	29.9	23.25	29.1	21.2	37.5	25.2	25.85	32.5	24.05	23.6	12.65		0.859646	25.4433
19.5481	28.1	22.75	30.2	31	30.65	23.4	25.75	21.95	32.25	29.9	21.8	32.3	22.85	20.65	19.3		0.864035	26.19
19.6473	30.45	21.95	27.95	29.95	31.6	31.15	23.3	19.9	38.25	31.8	24.8	24.55	23.85	25.4	16.2		0.86842	26.74
19.7465	25.3	18.4	25.05	22.6	26.65	31.85	26.65	18.05	42	32.95	23.4	23.45	22.55	21.45	15.4		0.872804	25.05
19.8458	18.9	26.6	18.9	26.3	24.4	26.45	27.15	25.8	40.75	26	22.85	24.75	21.55	23.3	24.4		0.877193	25.2067
19.945	18.55	19.1	15.1	22.1	28.4	22.35	21.55	30.65	42.55	32.9	23.9	23.95	20.35	25.95	23.4		0.881578	24.72
20.0442	15.25	23.8	12.3	26.35	31.35	22.8	28.65	28.65	34.85	21	18.9	25.45	23.75	18.95	18.8		0.885963	23.39
20.1434	12.2	22.35	11.8	25.1	24.95	22.5	26.85	29.55	31.25	22.75	22.45	28.55	22.9	21.1	23.95		0.890348	23.2167
20.2427	17.1	20	13.35	22.75	24.65	34.1	28	24.7	39.35	21.05	24.45	26.25	23.55	21.6	20.8		0.894737	24.1133
20.3419	13.4	11.4	9.6	24.9	21.85	25.75	23.8	34.5	27.3	24.4	23.85	32.15	26.2	34.25	22.55		0.899121	23.7267
20.4411	12.1	14.1	11.1	24.95	16.4	27.6	25.3	23.75	25.2	22.95	21.8	24.5	31.25	29.95	21.1		0.903506	22.1367
20.5404	12.65	8.65	13	29.85	19.2	22.8	36.25	20.8	17.05	26.55	21.95	25.7	29.5	28.65	18.95		0.907895	22.1033
20.6396	11.05	8.1	8.75	21.85	14.9	27	27.45	16.95	26.1	26	25.15	22.65	30.85	21.65	19.6		0.91228	20.5367
20.7388	10.5	9.85	9.5	24.4	10.65	22	32.2	14.85	18.6	27.25	24.8	23.25	29.3	27.25	19.55		0.916664	20.2633
20.838	10.65	7.4	8	20.25	8.65	30.5	27	11.25	16.8	26.65	23.4	17.65	31.2	30.05	21.75		0.921049	19.4133
20.9373	7.1	13.35	4.15	17.05	9.4	28.45	24.4	8.7	16.85	28.25	23.8	23.5	23.15	28.45	20.9		0.925438	18.5
21.0365	7.65	11.2	4.9	13.95	7.95	16.75	28.4	7.65	13.15	26	27.35	19.3	25.25	36.7	18.25		0.929823	17.63
21.1357	9.4	8	5.8	8.25	9.25	17.45	20.05	3.15	13.75	19.15	28.1	14.05	16.1	31.85	21.95		0.934208	15.0867
21.235	7.55	9.6	7.15	8.65	7.8	14.4	19.85	3.7	8.75	21	25.55	18.1	17.95	37.15	25.45		0.938597	15.51
21.3342	8.25	4.6	6.45	4.35	7.95	10.9	20.95	2.95	7.05	10.2	23	15.2	18.55	34.35	33.6		0.942981	13.89
21.4334	10.1	8	8.55	5.35	8.25	7.45	16.35	2.55	7.85	7.2	16.25	15.9	20.9	29.55	29.6		0.947366	12.9233
21.5326	7.35	4.45	8.8	5	7.7	10.25	16.5	1.7	6.9	9.2	18.9	13.4	12.5	38.5	18.5		0.951751	11.9767
21.6319	6.95	5.5	10.4	3.5	4.85	10.65	14.45	1.9	5.35	12.2	18.5	9.05	14.7	32.65	21		0.95614	11.4433
21.7311	5	5.4	8.25	5.5	4.45	11.05	10.5	2.15	7.05	9.2	21.7	9.15	13.3	30.3	25.05		0.960525	11.2033
21.8303	5.65	6.15	7.95	3.65	4.7	6.95	7.8	1.95	6.25	10.1	16.85	6.85	17.45	22.5	25.6		0.964909	10.0267
21.9296	8.1	6.3	7.7	3.4	2.95	4.05	6	1.1	5.7	12.65	12.5	4.25	11.2	17.4	22.4		0.969298	8.38
22.0288	3.9	5.95	8.7	4.95	4.6	4.8	4.55	1.7	6.8	6.75	7.2	3.1	6.4	17.3	20.6		0.973683	7.15333
22.128	5.7	5.4	8.4	5.45	3.45	4.75	2.5	1.8	9.5	7.05	11.25	2.9	5.9	19.35	18.2		0.978068	7.44
22.2272	7.75	5.15	8.65	6.55	3.8	4.7	3.95	1.2	5.95	6.3	10.35	1.85	5.35	17.2	22		0.982452	7.38333
22.3265	5.1	4.05	9	4	3.5	4.75	3.45	5.75	5.3	5.55	8.05	1.1	4	20.4	23.75		0.986842	7.18333
22.4257	7.6	4.2	10.15	3.45	3.9	3.45	3.1	6.25	3.25	7.75	5.2	0.55	2.05	19.3	16.65		0.991226	6.45667
22.5249	8.5	4.95	7.65	4.2	3.3	3.1	3.25	7.35	3.2	8.4	6.4	0.95	3.85	15	15.75		0.995611	6.39
22.6242	5.85	6.55	5.2	5.3	3	5.45	2.3	9.2	3.5	6.9	3.95	2.2	2.9	16.2	13.75		1	6.15

## Sheet: Image20
X0	Y0	Y1	Y2	Y3	Y4	Y5	Y6	Y7	Y8	Y9	Y10	Y11	Y12	Y13	Y14			Ap-Basal to 1	Average intensities
0	24.5509	23.6226	21.0984	21.989	23.9439	18.5482	19.3518	18.7707	19.101	15.9454	15.6997	19.3558	15.2802	13.475	17.0411			0	19.1849
0.0992	29.7441	21.7611	21.3786	25.0378	24.0792	20.962	23.7473	20.1325	19.2202	15.1329	17.3279	17.3399	17.0331	15.7557	19.398			0.00387485	20.5367
0.1985	33.0549	19.6882	21.2568	27.6157	21.0634	23.1045	25.8138	23.9501	18.7135	17.1771	22.1239	17.3226	14.7438	14.3047	16.0588			0.0077536	21.0661
0.2977	36.0146	24.3822	22.9193	29.3158	21.9466	29.9693	27.5256	19.7961	14.2817	16.4668	21.2524	19.9681	15.3109	17.3175	20.4478			0.0116285	22.461
0.3969	33.2919	23.4177	27.7946	26.6644	20.208	32.6344	36.9875	20.7216	16.8316	21.2213	18.909	23.5945	19.2628	17.9468	18.9657			0.0155033	23.8968
0.4961	38.4586	22.7068	25.6578	25.1099	16.2568	37.3538	30.4862	21.193	19.2906	22.4083	18.4721	25.6071	22.4339	18.3932	17.1527			0.0193781	24.0654
0.5954	35.3819	20.6919	27.5955	25.1349	18.6795	33.5711	36.113	21.6788	15.267	23.4703	20.0143	23.4093	20.0526	18.8076	16.5499			0.0232569	23.7612
0.6946	36.9756	17.5035	34.2792	27.834	21.9222	31.7777	38.1533	24.4819	16.0054	23.2054	24.3554	19.3641	17.5196	19.7244	15.3868			0.0271318	24.5659
0.7938	33.4832	16.21	36.4092	27.434	24.2576	32.2401	39.1571	20.0442	22.8206	25.0461	21.9199	19.1641	18.9771	19.6274	13.3123			0.0310066	24.6735
0.8931	33.0953	19.8333	36.2214	27.8629	23.4397	27.5294	42.8106	24.4113	21.6713	25.2631	20.9007	19.8145	18.787	21.9055	16.1744			0.0348854	25.3147
0.9923	32.3353	22.9541	36.1258	29.3465	22.5424	27.1801	42.7801	23.1954	18.7927	28.3138	22.4081	16.0993	18.6258	15.6044	17.1826			0.0387602	24.8991
1.0915	31.3854	25.6927	35.9493	31.1705	25.8044	26.6147	45.6244	24.2418	18.8853	24.1038	22.3865	20.5215	23.2622	14.4366	19.893			0.0426351	25.9981
1.1907	30.104	28.4078	38.473	31.317	33.2935	26.0459	46.0043	22.9622	18.4654	24.6122	22.5983	22.4913	24.6356	15.2175	20.6903			0.0465099	27.0212
1.29	34.4793	32.0113	37.3651	28.749	35.3515	24.6946	44.8137	22.3995	18.9426	25.5915	28.2075	24.2506	25.5727	20.4163	24.5308			0.0503887	28.4917
1.3892	41.1227	29.4262	40.6812	32.1852	41.4578	22.5051	49.6578	24.9291	19.94	32.2687	28.0344	23.4421	27.4995	18.5655	25.8451			0.0542635	30.504
1.4884	40.7402	27.557	40.1102	31.7218	36.7309	27.1973	50.3403	21.1617	19.241	28.175	30.8918	19.9586	26.6055	17.7493	21.7511			0.0581384	29.3288
1.5877	41.0523	29.1465	48.3886	30.2431	36.2757	21.4535	51.1846	23.0025	20.9762	23.8037	36.0178	17.8927	21.5779	20.4707	23.4631			0.0620171	29.6633
1.6869	42.4717	29.1759	45.1019	30.1159	39.6388	25.0301	42.941	24.349	29.453	20.4112	32.5854	20.3181	22.1492	20.22	24.7391			0.065892	29.9134
1.7861	40.009	25.3187	48.0548	29.12	36.7056	29.1676	37.4453	28.4973	29.3676	26.3159	26.0128	20.898	20.6685	22.994	23.6194			0.0697668	29.613
1.8853	40.5689	26.3958	48.2939	35.7353	38.6264	25.5123	33.7709	28.7152	33.211	27.2305	25.5518	19.1977	19.5151	26.6885	27.015			0.0736417	30.4019
1.9846	40.2525	26.2156	45.2067	33.9772	41.1428	25.2183	30.8684	22.7796	34.3457	28.6413	25.2709	19.7384	17.8239	24.5041	30.1388			0.0775204	29.7416
2.0838	41.8198	28.7735	39.3025	32.2546	39.0086	24.5405	28.1799	22.3293	33.802	31.7993	25.692	25.7356	20.1791	27.8627	35.7482			0.0813953	30.4685
2.183	42.6768	33.9659	33.2746	30.3877	34.3666	27.5104	28.1341	27.0036	31.045	36.8931	28.7923	26.2589	26.9431	27.3865	32.3457			0.0852701	31.1323
2.2823	41.2602	38.6846	35.8088	29.2475	31.5994	27.6388	25.0143	24.8138	27.9871	42.4361	27.5708	22.8526	30.3023	24.4954	30.135			0.0891489	30.6564
2.3815	43.1393	42.5286	39.4224	32.6481	32.1589	25.3765	24.4437	25.2181	32.0016	40.8374	32.9631	27.5871	29.5376	27.3855	36.0946			0.0930237	32.7562
2.4807	43.3049	39.2806	46.2028	34.9662	33.4539	24.8877	22.0245	24.247	31.9125	37.2327	35.6872	30.5909	28.2425	23.6966	39.3676			0.0968986	33.0065
2.5799	37.8864	33.3604	46.7799	35.4438	36.0781	23.0843	21.3939	22.1449	26.1599	28.1359	33.8564	30.4412	25.2339	23.6221	36.1702			0.100773	30.6528
2.6792	32.5394	33.7173	49.2529	30.3484	36.7872	18.1632	23.4127	23.1093	32.2889	42.1231	32.2427	36.3859	26.9701	21.9987	35.7018			0.104652	31.6694
2.7784	37.0608	33.6648	51.5894	29.7311	31.5898	18.947	28.6824	24.5912	35.4722	46.0029	32.9223	33.0343	30.3997	22.0381	30.7545			0.108527	32.432
2.8776	35.7752	36.6043	46.5686	29.2862	38.1921	19.6387	25.6439	27.3221	37.2843	47.9276	34.5396	35.7593	30.7942	24.9254	32.7106			0.112402	33.5315
2.9769	35.5562	35.2051	38.035	26.5518	32.7726	20.8898	24.4216	28.9266	39.1737	44.2556	29.545	36.7847	35.711	22.8496	39.8039			0.116281	32.6988
3.0761	36.2701	37.255	34.1009	25.4621	31.3282	23.4048	27.961	34.6552	41.9989	42.7136	30.6855	29.2145	30.8941	23.0252	43.452			0.120155	32.8281
3.1753	39.3078	38.1521	37.259	25.896	36.7329	21.7676	27.9852	40.6794	37.548	44.8466	31.5753	28.9998	29.2946	23.4731	39.242			0.12403	33.5173
3.2745	34.6238	44.1458	35.3011	27.9602	36.6172	19.6915	27.2485	35.2606	34.4206	41.4413	25.9609	28.4805	31.7378	30.1324	37.3014			0.127905	32.6882
3.3738	35.6305	40.9536	33.326	25.6363	42.2932	17.9147	27.7441	33.455	39.9303	53.1777	24.636	38.2304	30.2394	30.1558	40.2723			0.131784	34.2397
3.473	35.0122	37.0324	34.3682	24.2903	38.999	19.435	27.3292	27.1409	39.74	50.8423	26.0741	38.2455	25.9019	33.3254	40.5154			0.135659	33.2168
3.5722	30.7796	33.5113	36.9879	31.2298	32.5042	19.4268	24.4375	24.1858	39.4295	54.751	31.1374	40.4473	28.2247	35.555	38.0089			0.139534	33.3744
3.6715	28.2756	30.7633	35.7365	32.1446	37.115	19.6576	33.554	25.1871	36.593	49.4456	30.3989	42.8186	24.2628	32.7968	45.4878			0.143412	33.6158
3.7707	34.9955	30.3767	36.1289	34.4303	37.1066	19.9293	35.1525	31.8506	33.0505	47.7027	28.2126	41.198	22.0589	30.5461	46.5747			0.147287	33.9543
3.8699	35.8019	32.4201	30.5298	29.1475	37.3635	23.0936	34.805	33.1117	32.6265	54.1873	27.897	38.4622	25.4054	31.2318	39.1369			0.151162	33.6813
3.9692	38.4783	36.2765	27.9812	22.2562	34.6843	21.9227	35.0179	36.0401	37.7722	54.7988	27.0223	27.5801	31.1878	25.2466	32.4804			0.155041	32.583
4.0684	39.8785	34.1922	34.8174	25.269	32.739	23.7266	32.8777	36.9195	35.0456	53.3797	30.3484	28.3402	33.1105	28.6322	28.1027			0.158916	33.1586
4.1676	37.0041	37.4257	36.7145	24.1163	35.6341	21.602	29.6043	32.361	33.852	55.9756	33.0163	30.7779	32.9103	28.0724	23.4874			0.162791	32.8369
4.2668	37.7507	35.5	31.1593	20.1711	38.6232	26.5141	31.9925	30.1647	38.1834	56.1907	31.658	36.9479	31.1234	29.3934	21.8581			0.166665	33.1487
4.3661	40.117	34.9417	29.1193	21.3698	37.6804	26.929	28.9845	29.0503	39.8799	54.4221	34.1025	36.8416	33.8074	31.1047	22.6902			0.170544	33.4027
4.4653	42.3099	33.295	27.2424	23.2496	45.6701	26.0048	23.3632	26.7511	38.9763	53.4668	38.4329	36.8572	31.1295	28.4455	24.8032			0.174419	33.3332
4.5645	37.2621	34.6	24.0481	23.1532	43.5033	23.4869	23.6602	24.2572	41.5666	42.5763	39.2934	40.5037	36.3136	34.3783	24.4146			0.178294	32.8678
4.6638	41.3812	36.1406	22.0279	28.9982	37.688	24.6212	21.7781	22.0109	38.1368	41.2553	38.2916	42.4878	39.0293	32.3361	26.8927			0.182173	32.8717
4.763	40.4772	38.0708	24.2621	29.9522	43.1174	27.5869	23.526	25.4031	36.5902	38.4937	37.8813	41.8882	34.6577	32.608	23.8483			0.186047	33.2242
4.8622	38.1154	42.4085	19.4766	26.8195	40.2018	33.1333	24.9774	33.5837	37.1723	31.0494	35.7207	39.3155	30.6978	33.3602	21.009			0.189922	32.4694
4.9614	40.1208	35.1576	17.5652	31.3394	44.2346	30.4888	22.1128	34.4565	44.3886	32.2771	32.2047	40.1454	28.5357	29.6628	21.9106			0.193797	32.3067
5.0607	39.6205	29.3818	18.9751	29.5364	42.2353	23.8762	18.2519	28.8105	48.6577	36.2868	30.615	37.1176	25.867	34.6454	24.8778			0.197676	31.2503
5.1599	45.8861	32.8694	19.5486	32.8159	43.1208	22.1407	19.4931	33.3151	43.2508	33.8086	31.2659	38.5622	28.3865	35.946	28.8729			0.201551	32.6188
5.2591	46.1162	38.9118	23.5192	27.8067	42.5526	22.1786	20.1845	37.6678	39.0049	35.6588	25.8333	42.1381	33.056	37.1046	25.7764			0.205426	33.1673
5.3584	42.8506	39.8699	21.3561	26.3897	40.0726	21.7237	20.15	39.104	34.4028	37.7492	32.2459	40.8467	31.8339	38.4254	22.2616			0.209304	32.6188
5.4576	35.6124	35.9487	21.9416	29.0184	37.9533	22.9522	17.6346	36.4163	28.2041	31.4847	32.6157	34.9308	29.2171	32.6595	21.3984			0.213179	29.8659
5.5568	37.5006	33.6414	19.9269	29.2022	32.8105	22.035	18.4281	34.6595	28.3516	29.5943	27.2322	34.0923	25.4832	25.0721	20.5564			0.217054	27.9058
5.656	38.8835	33.6908	16.67	26.3965	31.8111	23.4567	24.4906	28.1914	25.5813	33.8862	24.7485	24.7929	23.0852	26.8447	20.9068			0.220929	26.8957
5.7553	36.7167	29.7718	20.9395	30.7329	33.561	21.477	29.7447	29.5765	24.3533	29.7749	24.7314	30.7728	21.733	23.983	18.9684			0.224808	27.1225
5.8545	32.2901	31.2625	18.8487	26.99	32.789	19.349	24.9171	29.9389	23.1055	33.1147	26.31	33.165	20.5351	20.8174	23.0066			0.228682	26.4293
5.9537	27.5867	25.1493	14.637	25.5717	34.3	16.3815	23.0092	28.8492	22.8467	31.1502	21.9489	36.3789	20.7278	20.82	26.3186			0.232557	25.045
6.053	25.85	23.0045	17.8392	27.4134	33.506	20.7606	20.3949	26.0577	25.9844	32.4737	27.0731	37.8867	22.1792	21.4465	28.7069			0.236436	26.0385
6.1522	28.5405	22.2547	17.4728	24.8151	32.5272	19.4439	17.6403	24.6933	23.365	31.2159	29.1955	31.0146	23.5418	21.4935	26.4521			0.240311	24.9111
6.2514	25.0856	26.1819	19.0837	17.5067	34.1981	18.039	18.7084	23.5216	25.6619	29.8829	26.8815	32.4728	25.2447	21.1195	22.61			0.244186	24.4132
6.3506	26.7571	24.4885	19.4846	20.0744	36.9054	17.1802	17.7605	29.5595	24.9948	27.5852	26.9681	29.8244	23.2885	20.8465	21.4854			0.248061	24.4802
6.4499	29.7952	22.6829	22.7477	23.0088	34.7357	18.5983	17.7278	26.6438	19.476	27.0402	30.3454	27.8756	22.7091	20.911	23.3979			0.251939	24.513
6.5491	33.1391	23.9098	22.0953	23.0393	30.4094	18.0088	16.3706	23.2332	18.0527	28.3063	28.7574	24.0467	23.3412	23.5117	20.5127			0.255814	23.7823
6.6483	29.4615	22.7512	21.6203	24.7272	32.5619	18.0579	18.222	21.1728	17.28	24.8226	24.3268	22.2675	21.9594	23.5743	24.5486			0.259689	23.1569
6.7476	27.2187	25.3581	23.0563	21.4075	34.7066	15.9193	23.4426	24.3989	22.6072	25.4737	24.2944	21.4018	16.7912	22.8299	24.6671			0.263568	23.5716
6.8468	22.2448	19.0211	21.1895	19.8219	28.8981	20.4462	26.8063	26.2509	22.0102	29.939	21.5533	22.6531	16.553	17.3705	24.3057			0.267443	22.6042
6.946	21.8318	20.9308	22.5017	25.0589	26.5927	18.9364	29.3212	30.0943	20.9809	29.6669	22.9301	16.4936	16.9627	14.0347	22.0184			0.271318	22.557
7.0452	22.7478	24.1134	20.8787	25.8185	26.4219	14.5371	19.8854	22.8045	21.4029	27.9338	20.5419	19.5875	17.1214	16.9863	20.4549			0.275192	21.4157
7.1445	24.2431	23.9218	15.6492	22.3343	24.069	17.8219	15.6813	30.2758	18.5928	24.3554	23.6219	20.2215	14.8466	21.1321	18.1867			0.279071	20.9969
7.2437	26.3597	24.2087	16.2967	18.0745	27.6441	19.4792	14.7754	25.7981	17.8656	21.2144	20.1158	21.6627	15.9873	20.341	17.2234			0.282946	20.4698
7.3429	24.0502	24.5046	15.9725	14.6558	31.1241	16.1013	15.5668	25.7418	19.7542	23.4111	19.1885	21.5313	14.5559	18.164	21.2253			0.286821	20.3698
7.4422	28.0927	20.6272	14.997	15.8633	31.1766	15.7901	15.7531	22.4601	20.6167	22.0353	19.4008	19.5562	16.042	22.431	20.9213			0.2907	20.3842
7.5414	24.1192	19.638	14.0524	17.1039	30.1739	15.9048	19.7818	20.2547	19.443	22.1393	17.0852	19.4476	15.5882	19.7658	20.5861			0.294574	19.6723
7.6406	22.8047	19.5508	14.699	16.5302	30.7137	17.3007	19.4775	18.9361	16.3488	23.6503	18.1741	17.2995	14.7511	19.2929	20.0473			0.298449	19.3051
7.7398	22.5206	19.2469	15.1662	17.6737	26.2768	14.861	17.6339	17.832	16.5126	24.6207	22.9224	17.8158	9.9945	18.1176	17.9687			0.302324	18.6109
7.8391	22.6053	17.5366	17.8884	20.1075	20.7168	15.8741	20.5591	15.8316	19.4985	24.0778	22.8788	19.5711	14.9469	18.3072	19.8121			0.306203	19.3475
7.9383	24.4476	17.9618	20.3265	22.9002	19.8215	18.2543	17.8722	17.0117	21.1874	23.0919	20.8135	14.7419	15.925	19.8283	21.9714			0.310078	19.7437
8.0375	22.7979	18.0906	16.1274	21.27	20.8799	16.8852	16.002	17.8044	21.9659	24.6434	21.2736	12.3556	14.7365	17.2882	24.6736			0.313953	19.1196
8.1368	20.1316	15.8303	15.6273	18.9632	17.1393	18.3026	17.2085	18.4781	21.7016	20.1662	19.9109	15.6293	14.7426	17.0468	22.5668			0.317831	18.2297
8.236	21.5186	17.0892	17.5381	18.2276	15.7434	17.5991	16.6002	22.8445	17.7725	21.0544	18.3418	17.1082	16.4952	19.4571	15.0352			0.321706	18.1617
8.3352	21.5759	15.5377	17.5245	17.8968	21.9537	19.8668	17.2202	21.9331	19.291	23.4204	16.3298	18.6362	14.0352	17.3585	14.4133			0.325581	18.4662
8.4344	19.0818	17.697	18.5205	18.3819	23.5433	16.0689	22.8366	23.2674	19.3361	20.197	17.7703	15.9554	14.1946	14.1237	12.8761			0.329456	18.2567
8.5337	23.1741	18.4908	18.4576	19.9056	24.1157	13.409	21.7502	18.9427	14.2107	19.0394	19.3503	13.4737	15.0047	15.4789	13.1602			0.333335	17.8642
8.6329	28.5288	18.2283	23.9479	21.3057	27.266	12.7449	21.7717	17.4151	14.6259	16.4152	15.6189	16.681	15.3302	13.922	14.0742			0.337209	18.5251
8.7321	30.1416	20.4053	20.1653	18.2949	23.1792	13.3069	20.5622	14.5386	14.0437	18.8397	19.713	19.0252	15.4682	13.5406	15.7916			0.341084	18.4677
8.8314	27.6039	22.7116	20.7225	14.3272	18.6533	15.7625	19.0042	18.018	18.7138	18.4883	16.4727	13.6734	12.9579	14.8134	16.8834			0.344963	17.9204
8.9306	25.1687	21.0287	22.3054	13.5118	16.1197	13.7045	16.7102	18.1603	15.9588	20.0924	16.2049	20.0583	12.9426	19.3935	16.1282			0.348838	17.8325
9.0298	24.5351	17.4572	20.5148	17.9459	14.3239	12.9302	14.8338	18.3572	15.7713	19.5835	18.5071	18.5751	13.1231	15.6365	18.6387			0.352713	17.3822
9.129	25.5307	18.7723	18.3949	20.9857	21.155	15.0215	13.6066	20.1808	16.2951	15.2119	19.4255	21.741	11.9316	19.166	19.0821			0.356588	18.4334
9.2283	21.0999	20.9624	17.4228	21.7095	18.4562	15.3575	16.7932	17.8163	17.3359	12.3492	15.9805	17.3715	10.6035	18.7132	15.8			0.360466	17.1848
9.3275	21.4985	18.5962	16.5993	19.844	16.6487	15.8566	14.4443	17.3027	18.4742	13.3455	18.2062	15.1741	15.7399	19.0666	18.1481			0.364341	17.263
9.4267	20.761	18.8382	17.7161	14.0555	17.5747	13.0452	15.5711	14.5783	16.1981	15.2305	17.0464	19.8534	13.674	20.5161	15.8815			0.368216	16.7027
9.526	18.4757	14.8661	15.757	11.6356	18.3302	11.6712	15.1603	15.3778	11.5145	16.791	16.6261	22.9199	12.2091	20.0717	19.1192			0.372095	16.035
9.6252	17.9235	18.0029	17.2125	14.576	12.4616	13.0314	15.7227	14.5491	10.3377	13.6945	18.3562	23.896	15.5349	16.0915	20.8496			0.37597	16.1493
9.7244	17.4259	19.5065	15.2092	18.8472	14.287	13.5522	17.4292	15.2163	13.0494	17.8064	14.6408	18.3412	17.1437	17.1189	17.5274			0.379845	16.4734
9.8236	20.4016	15.0404	15.0156	17.9521	16.7072	14.9283	15.0852	15.6215	12.3965	20.0931	14.8066	16.3058	14.731	13.7723	20.8245			0.383719	16.2454
9.9229	22.1684	16.1996	16.3129	15.6777	14.7167	12.6362	17.1682	16.3577	16.3696	18.9357	17.0418	14.9331	13.4903	14.2317	21.4928			0.387598	16.5155
10.0221	22.3476	18.7478	18.6426	18.126	17.4484	13.3309	19.5655	12.5404	13.5567	15.2799	15.8134	12.0451	12.635	17.4082	21.7849			0.391473	16.6182
10.1213	21.5157	18.8082	18.365	16.8555	24.1442	12.1144	21.2828	15.5017	14.3899	14.2011	14.6064	13.5305	12.807	14.5087	20.7777			0.395348	16.8939
10.2206	15.3126	19.1351	20.134	14.6109	23.0237	13.2776	17.2714	18.6108	15.9565	15.6011	15.328	11.0244	14.1842	12.0989	19.8208			0.399227	16.3593
10.3198	16.4804	24.8836	17.7731	16.7405	20.4514	15.2737	13.1936	12.479	15.7536	17.1369	14.7426	10.6806	13.3392	15.8027	17.0301			0.403101	16.1174
10.419	15.5526	22.3993	14.7507	15.1289	17.8887	15.0117	12.6819	9.548	12.8128	24.1958	17.3581	13.7619	12.9949	16.3709	14.6758			0.406976	15.6755
10.5183	16.3696	16.9565	15.8439	17.4791	16.9201	13.3473	16.1197	14.068	13.2997	26.3249	16.5204	15.0416	13.8039	18.7345	14.3952			0.410855	16.3483
10.6175	14.208	17.6396	13.8191	21.284	14.5957	10.807	17.2546	16.6528	14.9718	22.8375	12.8759	12.7191	16.6771	16.1506	14.6497			0.41473	15.8095
10.7167	18.0505	15.5647	14.279	20.6119	15.0488	12.5332	19.507	15.4142	13.4128	18.0804	12.3478	13.9262	21.7544	18.1451	14.7862			0.418605	16.2308
10.8159	20.6723	14.8465	16.621	18.9804	12.739	13.1282	17.9391	16.0719	15.3151	15.8016	15.6814	16.8479	18.6818	15.2884	15.2152			0.42248	16.2553
10.9152	19.9819	14.5257	13.9249	18.5582	15.6133	13.6447	17.2161	14.5057	17.5534	9.1426	18.7187	14.6917	13.0485	15.9402	14.1772			0.426358	15.4162
11.0144	15.4373	14.3185	11.9314	18.6183	15.4756	17.8062	18.0263	16.8966	16.6975	10.5449	13.9636	14.1641	16.9913	19.9933	14.8362			0.430233	15.7134
11.1136	14.2285	15.0874	10.8037	16.424	16.3951	16.4651	16.797	15.7339	19.5259	11.8932	11.9846	13.6936	17.0924	17.5877	14.6854			0.434108	15.2265
11.2129	17.0814	14.3406	11.1858	15.9178	16.5555	17.2819	16.7787	15.77	14.9891	14.5179	13.6037	14.4064	19.6386	18.5331	16.0903			0.437987	15.7794
11.3121	17.3829	11.8746	12.6534	15.8997	16.8269	15.51	13.1374	16.7675	12.4663	15.7577	12.1194	16.9495	23.0095	14.5254	20.2465			0.441862	15.6751
11.4113	15.3307	14.4729	18.3955	12.472	19.7311	11.4302	11.7487	14.2936	13.4731	17.0915	14.1114	13.0447	23.3208	14.8735	23.1316			0.445736	15.7948
11.5105	13.7466	12.4512	18.5941	14.7457	18.7241	13.1836	12.7259	14.1459	13.4101	15.7624	14.2158	13.0887	17.3451	16.331	18.9464			0.449611	15.1611
11.6098	17.9864	13.9747	17.8294	15.0236	20.0841	14.4479	15.7258	15.9037	13.1398	12.1786	14.9865	12.3316	17.1432	12.3238	15.9724			0.45349	15.2701
11.709	16.6308	14.4942	17.8307	12.109	14.1033	16.466	19.4016	14.9036	15.895	14.2373	16.6127	14.3013	16.4108	15.1729	14.2431			0.457365	15.5208
11.8082	17.8674	15.4517	14.2507	11.8742	17.164	16.8361	15.1463	13.8192	15.4622	17.4436	15.8219	12.5851	13.6925	10.3672	14.2674			0.46124	14.8033
11.9075	16.6395	17.0885	13.691	15.6546	16.6103	13.5469	13.184	12.9713	14.1788	21.8367	14.2056	12.3133	15.5692	11.9756	14.2021			0.465119	14.9112
12.0067	13.6364	17.813	12.3565	13.8629	21.9818	13.8298	17.0085	16.7948	11.0255	20.2514	14.5282	16.7645	16.8864	17.2651	13.2606			0.468993	15.8177
12.1059	15.4886	15.5831	14.8999	12.8764	18.778	13.3015	16.4789	14.4256	15.0038	19.7311	14.4402	18.4652	14.4632	17.7897	11.4761			0.472868	15.5468
12.2051	13.8375	15.9281	11.7056	12.6405	16.848	14.9558	15.3537	14.8702	15.1733	14.9354	12.6012	17.5862	12.5272	14.5298	10.3129			0.476743	14.2537
12.3044	13.1842	21.4149	10.4256	12.7694	15.2133	13.8924	15.1108	17.4295	17.1465	14.0085	12.6753	15.089	12.064	13.8609	9.6155			0.480622	14.26
12.4036	12.9179	15.5323	11.8443	11.9905	17.715	14.1299	18.9022	20.3528	17.6074	12.1932	12.0118	12.7816	10.207	13.2128	9.118			0.484497	14.0344
12.5028	9.5949	16.6157	12.379	10.64	18.5768	14.7973	13.5432	16.2322	16.2846	14.4635	15.4933	12.139	11.2873	13.5902	7.2352			0.488372	13.5248
12.6021	12.542	14.4529	15.5381	10.7494	17.0138	13.274	13.8098	17.2889	14.5685	14.982	18.5462	14.0693	13.4221	11.7456	8.4827			0.49225	14.0324
12.7013	12.1189	14.0639	13.479	10.8719	21.2692	12.4135	15.5976	16.417	15.348	14.2169	18.0753	21.7051	13.1285	16.618	11.4887			0.496125	15.1208
12.8005	11.2747	13.9248	14.8335	11.0015	18.1238	10.9888	14.8268	13.8489	13.5914	11.9348	15.1721	20.1392	11.8199	14.3903	9.7306			0.5	13.7067
12.8997	9.8861	14.6871	15.5809	11.0213	12.4061	10.6691	15.2775	10.6242	13.8471	11.4363	12.9818	22.4166	11.6004	14.1966	9.219			0.503875	13.0567
12.999	10.8212	16.6522	18.1967	6.5238	15.2777	10.1049	15.1056	9.4968	15.7498	12.0931	15.5912	20.7699	13.7297	12.5196	11.0393			0.507754	13.5781
13.0982	8.5965	12.7508	13.7981	6.885	15.0761	11.8589	12.1616	10.147	14.2572	11.287	14.0642	17.9581	15.1064	12.5372	10.8738			0.511628	12.4905
13.1974	7.5727	11.1279	14.0128	6.2409	15.4821	10.5977	13.8089	11.9044	14.5753	11.191	13.3681	16.9099	15.7031	13.056	10.5137			0.515503	12.4043
13.2967	6.0459	8.7513	13.0863	7.7704	17.3138	11.1699	14.3869	11.7838	13.3692	10.5598	14.6729	16.1395	14.586	13.337	8.0702			0.519382	12.0695
13.3959	7.5283	11.1734	11.5226	8.0895	15.8682	14.2373	12.6457	11.8617	15.6995	9.6447	18.0085	14.2098	16.0767	13.701	10.1069			0.523257	12.6916
13.4951	8.3186	10.1488	13.291	10.1573	12.9904	12.5671	14.0741	8.1718	12.8272	12.8443	18.1007	14.2496	14.4422	14.5756	12.9378			0.527132	12.6464
13.5943	8.4933	10.713	12.7697	7.3946	11.8017	13.3315	12.6128	6.5951	16.1805	14.257	18.2636	16.6015	16.9176	13.7788	11.4568			0.531007	12.7445
13.6936	10.1865	11.4815	13.5342	7.5374	15.7427	15.8745	11.9338	6.8541	14.2046	12.2443	17.7751	16.7306	18.9476	16.1201	14.6451			0.534885	13.5875
13.7928	8.9621	12.7995	13.8833	9.1058	18.6466	14.7501	12.7954	6.9535	11.0092	15.2418	15.6768	14.9364	18.4653	16.2059	14.822			0.53876	13.6169
13.892	7.1043	13.4893	11.8695	11.5167	15.5084	13.748	13.0385	7.58	16.1147	15.8239	16.3649	12.4156	19.0466	15.4672	14.6537			0.542635	13.5828
13.9913	5.6463	10.4704	12.1485	11.2922	13.1466	14.8327	9.1612	8.2057	13.7007	14.4881	14.6958	13.1884	17.866	16.4329	14.6912			0.546514	12.6644
14.0905	5.0016	17.0132	8.9321	11.0625	11.5055	9.7757	14.4053	9.4239	14.7125	13.9565	11.5723	14.107	11.8127	17.6825	14.7914			0.550389	12.3836
14.1897	7.089	18.7474	8.6999	10.8336	11.4826	10.7537	12.3951	9.6809	14.008	12.8415	13.3605	17.1628	11.3554	16.9807	15.897			0.554264	12.7525
14.2889	6.985	13.4489	7.8305	8.8635	14.3304	12.8972	14.4575	12.9082	12.9305	13.0519	13.0949	14.3409	12.0684	18.1013	16.9712			0.558138	12.8187
14.3882	6.9091	12.542	8.51	10.3062	17.7765	10.3329	13.39	14.4397	11.4607	16.2937	12.1929	14.3498	11.8608	18.1912	12.965			0.562017	12.768
14.4874	5.5261	13.455	9.0098	11.2931	20.8289	10.9302	11.8006	16.273	14.8725	14.7606	13.2138	15.4546	16.5615	13.4694	11.6561			0.565892	13.2737
14.5866	5.7362	16.358	9.1217	10.0299	20.0724	10.1305	13.7096	14.4987	14.5742	16.5094	10.8805	14.3725	13.8003	15.7227	12.3852			0.569767	13.1935
14.6859	6.0916	18.2817	8.2459	7.5157	14.4632	7.5889	14.8428	13.5232	13.066	14.5601	11.6936	13.089	12.2514	14.4301	11.2262			0.573646	12.058
14.7851	6.2046	13.2809	8.7285	6.4673	13.0083	7.953	14.1721	12.368	12.4231	12.1648	11.8589	12.0872	14.8681	14.8733	12.5866			0.57752	11.5363
14.8843	5.6811	15.698	11.3873	6.5698	10.9828	10.8641	15.1882	15.5355	11.6392	9.8559	11.0366	10.4402	19.7068	13.1573	14.2943			0.581395	12.1358
14.9835	7.5988	11.5533	11.9452	6.8433	11.6933	13.1781	15.9818	18.3635	13.8193	11.3703	11.714	14.2834	19.3706	13.5806	11.9343			0.58527	12.882
15.0828	7.1774	8.036	10.4224	7.1742	11.269	14.9308	16.8401	12.107	16.1475	12.4762	13.5741	14.7089	17.8786	12.6952	9.9918			0.589149	12.3619
15.182	7.2411	6.3056	8.8263	7.853	11.9368	16.897	16.0769	13.2061	15.8787	17.3075	15.8535	13.7859	15.9302	13.8435	10.2355			0.593024	12.7452
15.2812	7.1608	4.1962	8.1555	7.1992	14.0888	10.2006	17.9513	13.6045	20.8332	11.891	13.6447	10.886	14.1923	14.8561	12.6092			0.596899	12.098
15.3805	8.9153	3.8157	9.1269	7.6766	16.155	9.9045	18.3037	12.9278	17.4767	12.0613	11.7882	8.3138	15.1759	15.8133	10.1748			0.600777	11.842
15.4797	8.7814	4.5739	8.8846	7.5384	17.3243	11.5844	18.037	13.0898	17.2118	12.5393	8.243	9.7131	17.6849	15.634	12.1929			0.604652	12.2022
15.5789	7.894	4.1787	8.77	6.9157	14.4051	9.7246	14.8738	12.4543	16.7504	15.9839	8.4126	12.2674	15.4815	14.8285	11.6071			0.608527	11.6365
15.6781	4.2301	3.0049	6.6884	6.1021	15.9729	11.0898	11.3539	13.7089	16.5844	18.1155	9.3745	13.4185	16.9764	14.0764	11.913			0.612402	11.5073
15.7774	6.1941	3.3547	6.8549	5.9661	14.2048	11.8906	14.9875	14.106	15.6395	17.0562	9.0257	14.0564	16.3679	11.9974	11.4586			0.616281	11.544
15.8766	5.3317	5.6544	7.2225	7.3429	12.8762	12.3607	15.1202	15.0272	16.0324	14.9322	10.8033	12.8908	15.4291	14.3338	13.0728			0.620155	11.8953
15.9758	5.8649	4.1651	6.6662	6.7856	13.1576	11.5487	15.197	15.4559	16.5012	16.3847	8.3312	11.73	16.7072	15.2066	10.9546			0.62403	11.6438
16.0751	4.9728	3.2395	7.0817	4.9909	14.2277	14.8556	16.1865	14.101	15.931	15.5527	9.233	12.9247	15.5706	12.2874	14.811			0.627909	11.7311
16.1743	5.2735	3.7629	6.1904	6.7357	12.9518	11.2001	14.7688	11.513	19.5079	16.433	12.0465	15.6142	20.3976	16.1165	16.9727			0.631784	12.6323
16.2735	6.7411	3.6749	5.7984	5.1715	11.9337	12.0814	16.085	13.1558	20.1329	17.0398	12.5909	17.0206	23.4686	17.6665	15.8544			0.635659	13.2277
16.3727	5.3837	4.8095	5.5225	5.9814	14.9205	11.6106	18.8368	16.0454	18.842	19.0539	13.4981	21.5232	21.6894	15.4867	12.7801			0.639534	13.7323
16.472	4.8111	5.0915	6.455	4.5314	15.9709	11.4256	20.4973	15.9636	14.8411	15.4425	12.7956	19.9672	22.268	16.8305	14.3909			0.643412	13.4188
16.5712	3.7235	3.9632	5.2396	6.3401	13.2565	11.6965	19.4784	17.0865	15.7325	12.055	14.9208	16.4272	19.8313	16.4927	13.1559			0.647287	12.6266
16.6704	3.0624	3.866	5.8028	7.7481	13.2892	12.9083	15.9903	17.1573	15.9196	12.2989	15.4824	21.693	22.0905	19.4657	13.527			0.651162	13.3534
16.7697	3.5245	4.9227	6.7926	9.9466	12.3187	11.5475	11.845	13.1531	15.9242	10.9809	13.5172	20.1383	19.3079	17.8561	11.4806			0.655041	12.2171
16.8689	4.2407	5.3826	6.1725	9.1653	14.3531	13.2854	12.4881	10.0887	14.1837	13.9625	9.7805	19.9253	19.9509	20.2854	11.7915			0.658916	12.3371
16.9681	4.4383	5.0793	7.7532	8.7748	17.6693	15.6747	9.141	11.5102	15.3373	12.3848	11.0537	17.1036	20.2065	19.8636	12.4232			0.662791	12.5609
17.0674	5.5456	4.2548	7.4783	10.9638	20.2384	14.7199	7.514	11.4197	16.6054	11.5881	13.0772	17.7044	15.6732	20.6761	16.9768			0.666669	12.9624
17.1666	3.8869	4.6696	8.2615	8.8486	16.3642	16.9706	12.1714	10.2649	16.309	10.3861	13.819	18.2364	14.7149	17.123	21.4161			0.670544	12.8961
17.2658	3.5497	6.0606	8.7349	7.3649	11.4633	18.4206	13.9444	9.9093	19.3205	13.78	14.3271	20.0313	20.415	14.0315	18.7373			0.674419	13.3394
17.365	3.5026	6.9939	7.7886	8.364	10.3611	23.1158	15.528	10.6985	17.269	15.547	13.2226	16.7931	20.9405	17.4025	17.3611			0.678294	13.6592
17.4643	5.2085	7.7321	7.3641	8.4398	9.7178	20.176	13.722	12.1176	19.0137	15.8461	13.0117	16.3918	16.5342	19.4366	13.8892			0.682173	13.2401
17.5635	2.9809	6.1619	7.5111	10.8787	11.8805	14.7392	12.8342	13.3913	19.1708	16.3461	13.2674	16.374	18.4931	18.8676	13.7819			0.686047	13.1119
17.6627	3.8407	6.3532	7.8884	9.5294	11.0401	14.6289	13.5038	17.7348	20.9415	18.2826	16.2768	17.6132	13.0777	18.7748	13.5049			0.689922	13.5327
17.762	4.3938	6.4581	9.2474	10.7195	10.7408	16.0551	12.6208	17.1735	18.468	23.5443	15.3825	21.9666	15.3258	17.9702	12.8665			0.693801	14.1955
17.8612	3.8824	7.3938	9.5807	10.1784	12.5935	15.1256	11.5657	16.0745	22.0265	22.71	18.6685	24.3205	16.638	18.2576	12.8217			0.697676	14.7892
17.9604	2.6853	6.8202	7.0202	9.1913	14.5419	16.9378	14.1339	14.0921	20.3313	19.1292	16.38	24.1652	14.8205	19.4035	14.2432			0.701551	14.2597
18.0596	4.2367	3.9261	7.8874	7.6646	12.6577	20.0691	11.9659	11.505	17.1917	20.3304	12.3833	22.7437	14.9369	18.9899	12.4745			0.705426	13.2642
18.1589	3.8074	6.5876	10.6141	7.5047	13.8296	18.4994	11.6114	11.5075	18.0085	19.0483	11.6395	20.4324	16.4039	18.8234	10.7665			0.709304	13.2723
18.2581	4.1674	6.2473	7.885	8.3621	15.7873	17.4414	17.419	12.5422	19.4771	23.1291	12.8815	18.2472	19.8231	15.2354	12.3146			0.713179	14.064
18.3573	4.8764	6.4673	8.4628	9.0507	16.0547	13.0975	17.0212	15.2197	17.2829	21.9237	13.1235	17.0989	19.1947	11.4616	16.3074			0.717054	13.7762
18.4566	3.3713	4.4298	9.8366	7.1719	17.787	18.8272	18.0368	15.136	21.636	23.8733	14.304	18.1584	17.5854	11.4843	17.5064			0.720933	14.6096
18.5558	4.4045	6.0952	8.2099	10.3574	18.1293	17.2499	15.0213	15.789	18.1797	23.2524	13.4394	19.7364	22.3908	16.1855	18.0096			0.724808	15.0967
18.655	3.4983	6.6933	10.5018	9.8039	13.7982	14.6784	14.9789	15.6114	19.3319	24.3679	14.3563	18.9865	27.0892	17.0239	19.7976			0.728682	15.3678
18.7542	5.1343	7.0015	12.534	9.8526	12.4304	20.6126	13.9202	16.25	18.0197	21.62	14.0655	16.4067	24.7845	20.7213	20.7776			0.732557	15.6087
18.8535	5.0031	7.8534	14.3922	11.4979	14.8165	19.5558	15.0292	15.4617	18.5276	18.0435	14.0602	15.5201	22.3011	18.7673	19.8987			0.736436	15.3819
18.9527	5.2091	7.7221	11.9093	11.3898	16.019	21.2279	15.6028	15.1572	21.3757	18.5547	14.9055	15.1358	18.51	16.973	18.8864			0.740311	15.2386
19.0519	6.8864	7.5326	12.505	9.985	15.9268	22.9828	17.2531	15.9351	20.9186	21.2682	17.2409	15.5114	18.0679	18.3768	14.9619			0.744186	15.6902
19.1512	5.9495	9.5013	15.5607	10.9385	16.3433	20.6314	16.6824	21.724	21.8557	17.2084	15.2296	18.4839	20.3973	21.724	17.8773			0.748065	16.6738
19.2504	5.968	10.0676	15.6458	12.6096	16.2565	18.2407	15.5719	21.358	19.5735	18.4779	11.4069	17.9572	21.5764	22.4946	17.8189			0.751939	16.3349
19.3496	5.0065	10.1019	14.0716	8.9324	16.9914	20.8682	13.5662	21.808	19.8989	22.7172	13.3701	20.6365	24.0881	19.4434	14.8149			0.755814	16.421
19.4488	4.2687	8.7549	16.5359	11.4786	18.2812	16.3363	12.992	19.6213	22.5313	30.3092	12.7979	22.5763	22.1779	21.1001	14.9115			0.759689	16.9782
19.5481	5.6047	10.7401	15.7615	13.98	18.1128	15.3254	15.5329	19.1118	17.8105	28.9855	12.9205	21.4745	22.9211	19.9358	13.5296			0.763568	16.7831
19.6473	7.2313	11.3872	16.3717	14.3976	18.2047	15.1113	17.6483	17.799	16.5303	24.5773	16.5822	23.0613	22.9987	19.0879	12.6254			0.767443	16.9076
19.7465	5.5212	10.2801	13.3705	17.7563	20.8816	13.329	19.5293	19.876	20.4464	21.5409	16.7738	19.846	25.0761	14.8634	10.4294			0.771318	16.6347
19.8458	4.3329	11.8119	15.9843	18.8979	23.5029	14.9187	17.3164	22.873	26.4661	24.4934	17.9074	16.9586	23.8429	15.1054	7.5415			0.775196	17.4636
19.945	4.0862	12.2595	16.9205	20.3442	22.7983	16.2611	14.7172	21.733	23.6497	26.3433	18.2819	18.179	21.1476	13.7255	7.841			0.779071	17.2192
20.0442	4.1649	16.4683	15.5752	20.8555	25.5709	22.1174	12.9723	22.7741	17.6066	25.0524	16.1154	18.7939	25.7151	12.4541	5.717			0.782946	17.4635
20.1434	5.6837	16.9094	15.6234	17.912	26.9063	22.7677	10.6983	21.7706	16.5401	21.5809	15.133	19.0147	23.5808	8.8128	2.7534			0.786821	16.3791
20.2427	6.3072	17.1924	16.1395	18.0659	24.5185	20.5904	11.5216	23.092	17.2368	23.9237	14.6278	21.7212	28.1335	9.9014	2.6851			0.7907	17.0438
20.3419	5.8999	18.4311	16.3814	17.5267	25.401	20.8918	13.8098	21.1937	18.4093	31.4891	12.368	24.7791	28.1063	8.2673	2.6061			0.794574	17.704
20.4411	7.3132	17.6986	18.4275	14.0243	22.251	19.0318	17.4613	24.3243	17.387	26.2654	11.3375	26.3683	35.8896	6.6709	1.8303			0.798449	17.7521
20.5404	7.6802	16.5101	18.6714	16.0046	23.9996	20.5777	19.6463	25.7688	20.8177	24.416	10.9072	22.8581	36.9619	6.7309	0.9963			0.802328	18.1698
20.6396	9.4267	13.8553	20.2295	12.8936	21.6222	20.5775	17.5623	23.8113	19.2394	17.39	13.7658	22.4691	31.4009	3.6569	0.8981			0.806203	16.5866
20.7388	12.3338	13.8669	19.8113	15.5972	23.2627	21.5818	20.1083	23.9675	19.4419	16.9065	15.445	20.3457	31.8589	4.1239	0.9303			0.810078	17.3054
20.838	14.4259	13.3286	21.2666	17.5036	22.4452	23.7064	22.3397	20.8576	22.6454	17.2448	14.8657	18.0917	23.7725	3.9078	1.0577			0.813953	17.1639
20.9373	13.8847	14.2566	17.5699	18.3517	19.2636	21.5283	18.5154	20.5416	27.5071	17.3175	15.0999	15.039	26.9129	2.372	0.5648			0.817831	16.5817
21.0365	15.6449	16.3924	17.4354	13.116	22.1755	25.59	22.0321	18.2014	24.6915	16.627	17.4705	15.3506	26.3671	2.0901	1.0281			0.821706	16.9475
21.1357	16.762	15.2827	20.5413	18.3343	20.0076	22.9572	27.2446	18.3613	23.9405	20.7038	14.1337	13.0801	26.6596	1.8261	0.2844			0.825581	17.3413
21.235	16.6057	19.7752	21.3207	18.988	17.525	24.1623	32.1215	24.5895	24.3821	24.2727	17.1671	14.1684	22.8904	1.1913	0.2288			0.82946	18.6259
21.3342	12.9233	19.7728	22.216	20.1257	22.2297	23.6182	30.6811	20.7605	25.5527	26.6915	19.2071	15.3037	20.6556	1.0052	0.2546			0.833335	18.7332
21.4334	14.1142	15.1427	19.5605	19.7501	23.3361	21.05	28.2062	18.6206	26.3907	28.0993	19.3832	18.2426	16.8782	1.0612	0.3125			0.837209	18.0099
21.5326	13.5598	19.8957	20.7431	18.2614	21.6267	25.8988	21.9041	19.4313	34.0683	24.8703	17.3146	20.5498	18.6468	0.3785	0.8116			0.841084	18.5307
21.6319	16.6876	19.5694	19.1406	18.426	23.1416	30.3656	24.7365	17.8803	35.3838	22.6146	19.1035	21.3436	14.5755	0.5552	0.6688			0.844963	18.9462
21.7311	14.0809	17.0377	21.4489	20.4951	23.3933	25.3168	19.9009	23.5479	33.6212	22.9677	20.2639	17.8871	10.7547	0.8	1.0706			0.848838	18.1724
21.8303	15.0091	21.662	24.6242	20.8437	19.415	19.6515	27.688	26.9359	35.0558	25.7268	22.2606	19.4992	8.796	0.6012	0.5605			0.852713	19.222
21.9296	13.5677	21.6651	25.9796	23.8246	18.0514	20.6954	27.5121	22.3272	30.7769	27.0743	22.5102	20.2133	6.8803	1.0288	0.2936			0.856592	18.8267
22.0288	14.5466	18.3144	23.4705	23.6859	17.7578	22.422	25.9999	24.4873	28.4806	28.5472	19.1451	17.8939	3.3141	0.6702	0.4602			0.860466	17.9464
22.128	11.6611	15.2155	26.9339	18.5684	16.8079	20.1293	22.4233	21.8182	30.5643	30.4984	18.9367	17.5597	2.4901	0.1948	0.3475			0.864341	16.9433
22.2272	16.7474	17.8697	25.1239	20.0116	20.5323	23.2037	21.7244	16.4981	33.4155	25.3425	23.3039	13.6159	1.1726	0.7194	0.4103			0.868216	17.3127
22.3265	16.3092	17.2528	25.6719	20.9478	23.537	25.1895	19.7977	14.3107	31.5836	24.2604	19.5441	12.646	0.6162	0.428	0.2901			0.872095	16.8257
22.4257	14.5727	17.1932	25.5276	27.7346	24.0509	27.5173	17.4838	14.0457	22.9856	27.5965	17.9203	13.3018	0.743	0.1841	0.5889			0.87597	16.7631
22.5249	17.7011	17.9888	26.0237	33.6075	24.3062	31.9247	15.4473	10.3033	24.1202	28.3468	19.3611	10.4155	1.1463	0.4721	0.8426			0.879845	17.4671
22.6242	18.4194	14.3217	24.2231	30.762	24.5936	28.7764	16.55	8.7003	27.4563	27.2174	13.0781	7.1964	0.5316	0.0872	0.377			0.883723	16.1527
22.7234	20.5105	14.6223	17.4052	27.9791	30.0325	27.8693	13.2943	6.4932	21.6799	26.5217	14.9363	6.079	0.8101	0.6787	0.151			0.887598	15.2709
22.8226	24.1169	12.7212	14.6249	24.8827	31.2402	23.9342	13.7956	8.0064	16.4481	23.7814	16.9017	4.2252	0.7389	0.4671	0.1173			0.891473	14.4001
22.9218	24.1975	13.8972	13.3479	20.6051	26.9265	24.5446	11.5147	5.0024	17.6462	25.4501	15.2678	3.3207	0.473	0.5918	0.3022			0.895348	13.5392
23.0211	22.3099	16.4833	10.7113	16.5827	22.8549	25.1049	10.7045	3.7661	15.1467	28.9009	13.1718	2.6799	0.3968	0.6308	0.2357			0.899227	12.6453
23.1203	29.7824	18.7264	13.7	14.8855	22.3136	22.5225	8.1436	2.1402	14.9102	28.4961	13.7605	2.8984	0.1875	0.2418	0.3541			0.903101	12.8709
23.2195	27.8518	19.5631	13.155	10.5298	17.4624	19.7908	7.5569	1.6546	11.7397	18.3993	10.7597	2.2377	0.9726	0.1903	0.0053			0.906976	10.7913
23.3188	22.8141	16.1099	10.0404	9.4209	12.0727	15.5473	5.7891	1.1555	9.9264	17.7156	9.7016	1.686	0.6388	0.5893	0.1939			0.910855	8.89343
23.418	21.6224	14.4967	8.0211	7.8873	13.5829	18.2748	5.487	1.3923	8.8563	14.5129	7.6431	0.834	0.5358	0.4403	0.2226			0.91473	8.25397
23.5172	21.4222	12.3593	6.5922	6.9923	12.4801	16.4046	3.9534	1.3506	6.3955	14.7253	5.3753	0.877	0.1121	0.0505	0.376			0.918605	7.29776
23.6164	21.7757	13.0091	6.1453	6.5359	14.1214	14.2316	3.6126	0.7435	3.6613	12.0667	2.8324	1.17	0.1044	0.1188	0.0529			0.92248	6.67877
23.7157	15.4571	10.6027	4.4955	4.8829	12.6999	11.234	3.7746	0.7735	2.2365	9.7715	1.876	1.268	0.5027	0.1512	0.1974			0.926358	5.32823
23.8149	15.7393	8.1403	3.1953	5.1303	10.3495	11.5747	2.2387	0.8693	1.2596	7.5573	1.8228	0.6483	0.7177	0.0929	0.1026			0.930233	4.62924
23.9141	21.9724	9.3955	2.8402	2.9907	10.3364	12.6833	1.6731	1.2388	1.3365	3.358	1.1987	0.5163	0.1702	0.3429	0.3253			0.934108	4.69189
24.0134	22.1362	8.3582	2.6346	2.9226	7.722	9.9945	1.3633	0.7429	0.7124	2.7474	0.725	0.4259	0.1041	0.2959	0.2929			0.937987	4.07853
24.1126	19.7159	5.9623	2.0703	2.5054	6.181	6.0838	0.8892	0.579	0.3056	1.7855	0.6063	1.0408	0.4629	0.19	0.0298			0.941862	3.22719
24.2118	13.8621	2.9016	2.7154	3.6947	5.078	4.2474	1.1945	0.6511	0.1183	1.1565	0.4504	0.6976	0.6967	0.0484	0.0357			0.945736	2.50323
24.3111	10.1199	2.5704	2.7175	2.8558	5.7374	4.1224	0.8949	0.5735	0.3351	0.6013	0.4656	0.3653	0.2345	0.0015	0.0487			0.949615	2.10959
24.4103	11.6916	0.8769	2.2729	2.1699	7.4929	3.8075	0.1996	0.3985	0.3606	0.1831	0.8256	0.4409	0.4553	0.0924	0.0011			0.95349	2.08459
24.5095	9.3465	1.2988	2.2475	1.8303	8.6031	2.4725	0.3016	0.4483	0.0518	0.3534	0.5715	0.2723	0.0882	0.0076	0.0703			0.957365	1.86425
24.6087	10.6485	0.7561	1.6715	1.3374	11.0314	2.425	0.5543	0.5794	0.2569	0.7754	1.0838	0.712	0.5918	0.0026	0.4817			0.96124	2.19385
24.708	9.7057	0.7164	1.7909	1.8464	9.3926	2.0881	0.3791	0.1918	0.549	0.2888	0.2842	1.301	0.4922	0.0661	0.3303			0.965119	1.96151
24.8072	7.1047	0.3136	1.6207	1.4295	8.06	1.7023	0.5616	0.222	0.5214	0.1884	0.4179	1.4993	0.2804	0.0101	0.0469			0.968993	1.59859
24.9064	5.3136	0.8228	1.4874	0.6518	5.5967	2.041	0.5936	0.5726	0.3439	0.4407	0.1299	0.6761	0.2616	0.2105	0.0432			0.972868	1.27903
25.0057	3.882	0.6521	2.3707	1.4577	5.1225	1.0447	0.2025	0.1361	0.3458	0.1517	0.2502	0.2869	0.2484	0.3366	0.0185			0.976747	1.10043
25.1049	3.8295	0.4266	1.055	1.6329	3.6407	1.2626	0.421	0.3242	0.3774	0.1176	0.1299	0.2175	0.1301	0.0798	0.141			0.980622	0.919053
25.2041	3.4331	0.1418	1.3759	1.7239	2.8247	0.931	0.0114	0.3068	0.2995	0.086	0.2481	0.2578	0.4453	0.1927	0.0645			0.984497	0.822833
25.3033	4.2251	0.6709	1.223	1.1978	2.1666	0.6977	0.1231	0.1789	0.2687	0.3833	0.0764	0.4691	0.7246	0.0143	0.1472			0.988372	0.83778
25.4026	2.8859	0.5516	1.3824	1.6812	1.6221	0.5942	0.4045	0.0615	0.1823	0.1772	0.5634	0.2127	0.0343	0.2789	0.0012			0.99225	0.708893
25.5018	2.9798	0.7143	1.5784	1.2713	1.4743	0.1986	0.4014	0.2389	0.1245	0.1112	0.7007	0.0786	0.0229	0.1579	0.1129			0.996125	0.677713
25.601	2.7564	0.6478	1.1493	1.1685	1.2655	0.2442	0.4711	0.0532	0.4927	0.1679	0.7243	0.1041	0.2348	0.2053	0.1503			1	0.655693

## Sheet: Image21
X0	Y0	Y1	Y2	Y3	Y4	Y5	Y6	Y7	Y8	Y9	Y10	Y11	Y12	Y13	Y14	Y15	Y16		Ap-Basal to 1	Average intensities
0	39.4236	32.4313	27.6587	33.2073	41.969	33.773	27.8193	31.1048	32.0487	36.8181	53.0088	41.3305	40.8781	44.6077	35.6895	36.5025	35.8822		0	36.7149
0.0992	43.2498	30.3922	24.7651	35.0017	39.0908	34.7726	34.3677	33.2746	34.0601	41.2387	53.2546	45.1966	36.5392	48.9475	41.603	40.633	38.4459		0.00526162	38.5196
0.1985	43.8254	35.7217	25.9084	28.2729	36.9742	35.2214	37.3202	34.4925	31.5459	46.0395	45.1056	46.8106	35.4861	46.5331	46.391	36.8495	34.0447		0.0105285	38.0319
0.2977	40.9476	38.6514	28.2737	27.5554	33.5327	40.9915	37.9319	32.7157	32.8176	51.6143	48.3608	47.6399	36.8243	48.9893	48.2252	32.6151	35.4585		0.0157902	39.0085
0.3969	40.9879	38.5881	29.264	26.4448	32.1797	45.8941	34.9827	30.767	33.0312	62.8663	49.4707	53.5964	36.684	46.4929	46.0837	36.1273	41.9132		0.0210518	40.3161
0.4961	37.3716	41.8905	34.6364	26.2098	31.218	44.2968	34.4324	26.355	37.6961	59.3612	52.7241	44.8705	34.0688	43.2636	46.1844	31.0697	43.3441		0.0263134	39.3525
0.5954	37.1231	36.5259	35.2062	27.9494	28.9557	43.9233	29.1675	32.2798	35.05	54.0095	52.7818	39.0481	31.7701	44.6307	44.5168	37.1845	40.1924		0.0315803	38.2538
0.6946	40.6554	36.4918	32.2417	31.3459	28.5934	39.2789	28.7969	30.3271	33.8597	58.4973	48.2391	40.0486	30.097	40.1873	44.708	43.6566	34.7037		0.036842	37.7487
0.7938	33.7173	38.7021	29.1446	29.0042	28.6049	35.9243	31.5985	36.0656	29.3205	63.8804	40.5586	37.4647	36.4778	40.3155	42.7573	42.2031	31.0754		0.0421036	36.8715
0.8931	25.8405	36.5459	27.8248	34.1925	31.8942	39.1294	34.9748	33.107	26.6026	62.5276	44.4788	40.1225	39.4395	50.8899	37.4732	39.5812	25.8978		0.0473705	37.0895
0.9923	24.3332	32.419	28.491	30.9543	35.2235	42.6426	41.3875	33.4935	30.0947	63.2559	43.0491	45.5259	32.7993	46.0295	40.461	44.0728	25.7888		0.0526321	37.6483
1.0915	26.7203	39.7122	30.1672	27.9134	35.0686	37.4764	41.7976	34.4433	34.2502	67.3267	41.041	42.866	39.954	46.9486	42.0963	39.8141	25.1948		0.0578938	38.3995
1.1907	30.9713	36.7556	27.2011	25.7736	30.0946	34.5894	31.8996	34.1454	36.8794	72.2635	45.126	41.9647	40.5125	57.6201	46.3423	38.67	19.0824		0.0631554	38.2289
1.29	30.8992	36.8457	32.3808	30.0861	29.1754	34.4197	27.2757	30.5589	36.1934	76.2325	37.0326	44.364	40.1363	61.6714	44.3504	40.0501	27.0895		0.0684223	38.7507
1.3892	34.751	38.7472	33.4864	30.3073	27.52	34.5568	25.3044	26.3697	34.3564	64.2736	33.9754	47.1536	37.6311	66.4293	48.7192	34.2203	26.7748		0.0736839	37.9163
1.4884	34.0804	42.4764	36.8579	33.4781	29.1604	32.6249	29.6043	24.9298	33.7946	62.6842	35.2451	46.1153	40.2109	73.659	48.8203	35.0104	25.3388		0.0789456	39.0642
1.5877	37.791	44.134	36.0576	35.2289	33.6747	33.519	29.598	23.5414	35.8264	64.6455	39.6682	50.3856	39.4408	75.909	48.5817	43.8708	27.5612		0.0842125	41.1432
1.6869	40.4478	39.9301	32.2716	40.7431	37.6083	30.2098	32.0945	23.5406	35.8708	60.4409	44.2611	50.8476	34.1836	69.6348	47.9215	42.9845	34.2827		0.0894741	41.0161
1.7861	35.8601	43.5019	34.634	42.0276	31.4464	31.8292	36.0502	25.7569	38.3972	61.9631	39.0009	51.1216	30.0043	68.6276	47.3067	42.3427	31.6371		0.0947357	40.6769
1.8853	34.0157	43.1233	35.2744	38.2842	31.3198	29.0871	31.1009	23.9941	40.6768	52.0148	40.0561	51.9207	30.3056	64.5919	41.5856	43.1386	26.0609		0.0999973	38.6206
1.9846	33.5708	44.0538	29.8408	42.2526	41.2621	31.5766	30.3441	23.8863	40.2925	39.8675	36.4963	42.0326	28.3833	55.6707	42.1156	39.6528	23.2412		0.105264	36.7376
2.0838	37.0007	44.7371	25.2088	50.7633	44.7111	35.7348	25.9348	19.5312	41.6471	36.8732	32.4838	34.3389	32.926	57.0005	44.6574	40.355	21.6608		0.110526	36.7979
2.183	33.8922	42.7585	28.2792	55.1086	49.0724	31.2151	25.0118	21.7325	40.1847	29.8895	35.3892	35.4567	31.8093	49.3973	42.5708	36.9269	20.9606		0.115788	35.8621
2.2823	36.2371	40.7261	30.7799	53.7986	47.1443	33.6858	27.2832	24.7744	29.9957	29.2942	34.8825	37.3591	31.6499	50.8761	40.4024	37.1906	21.1505		0.121054	35.7194
2.3815	36.8314	40.5918	33.7505	59.8588	44.88	37.1471	22.9168	29.4261	25.3406	30.0198	37.0222	36.6589	35.3802	38.8275	37.1685	31.4034	21.0468		0.126316	35.1924
2.4807	38.1376	43.1157	32.3553	60.2991	45.2602	39.8931	22.1407	25.4955	28.4863	36.5622	32.0788	31.9067	34.6506	30.2146	29.459	25.9059	23.0745		0.131578	34.0609
2.5799	35.7025	42.8283	32.8313	50.0598	39.03	42.3048	29.1147	20.6187	34.2507	33.906	33.6417	33.376	37.3682	26.9913	30.1365	22.1005	23.687		0.136839	33.4087
2.6792	36.386	38.2017	31.8462	44.1273	36.6007	40.8492	27.2184	19.138	32.3679	28.4593	28.3015	30.9223	39.2597	24.3811	31.7241	22.3886	20.8182		0.142106	31.3524
2.7784	35.9873	37.9057	27.4842	32.1912	35.1267	41.8824	27.6555	22.6191	28.9777	24.2902	29.0745	29.6233	49.5423	23.909	25.8391	23.0605	21.6492		0.147368	30.4011
2.8776	35.4617	39.9184	28.9001	28.4443	34.1256	31.3755	32.5738	17.1368	26.7769	21.9801	33.8484	26.0861	55.6843	21.8666	24.0731	21.5492	24.8042		0.152629	29.6827
2.9769	44.9388	40.2683	28.0867	29.8699	33.9927	31.0513	27.2125	16.9114	26.1505	24.85	27.5248	27.2863	54.4399	20.5989	24.6057	16.8241	20.7061		0.157896	29.1363
3.0761	43.8002	40.8091	32.4241	29.598	33.4181	32.987	23.2963	17.9492	27.2801	18.1001	27.711	22.9139	42.0217	21.0637	22.2864	18.7838	21.9799		0.163158	28.0249
3.1753	35.2782	37.7977	32.9842	27.458	30.4724	33.1463	22.5278	15.702	29.9752	23.9844	23.6863	24.5763	37.4515	20.32	22.1612	20.1916	18.8229		0.16842	26.8551
3.2745	33.9467	30.9535	28.1806	28.1073	32.6278	32.4437	23.6234	15.1299	30.4548	20.2665	27.1512	26.6795	33.731	20.006	20.7498	20.2502	18.972		0.173681	26.0749
3.3738	33.423	28.802	32.452	23.9912	36.0265	36.8615	24.5383	18.6791	26.3347	19.5127	25.6654	30.1698	27.6705	24.141	18.6174	15.8799	17.9864		0.178948	25.9266
3.473	38.2516	30.5608	31.5209	24.0724	33.8568	34.495	30.6867	18.9642	27.1121	23.6226	21.3611	24.1124	30.1488	23.0934	16.3968	17.9963	18.3026		0.18421	26.1503
3.5722	37.1721	30.3416	29.8004	21.5638	31.0899	31.1504	26.1389	19.1117	26.3614	17.7886	25.0612	24.1945	30.0408	25.1733	16.0374	17.8302	20.283		0.189471	25.2435
3.6715	39.6765	31.2484	28.0041	24.726	25.4285	31.2317	31.0465	19.0452	25.0631	17.869	27.9826	25.8137	24.6171	25.2825	16.8238	18.773	14.3834		0.194738	25.1185
3.7707	37.7201	28.6304	35.1221	22.0156	25.8338	31.0401	27.5483	19.8114	24.6398	19.8143	28.0635	22.3728	25.7514	22.7071	12.9435	18.8605	13.7306		0.2	24.5062
3.8699	37.7609	30.4645	35.3095	25.9061	26.8124	30.4181	23.7308	19.9838	21.9813	17.5589	25.7122	29.4787	24.7248	20.5084	15.3296	17.3093	15.7006		0.205262	24.6288
3.9692	32.2891	33.5289	32.3952	24.4547	23.378	26.9219	25.5658	19.1926	22.1667	19.0116	26.534	27.0759	21.8982	20.253	16.9555	16.6771	16.4802		0.210529	23.8105
4.0684	28.9712	31.0519	32.6912	22.8513	21.4239	31.0684	24.1899	22.3276	17.4247	19.6895	24.9294	22.9408	21.0557	18.1778	17.6701	18.0748	13.5565		0.21579	22.8291
4.1676	30.9187	28.2774	30.7688	21.566	22.0752	23.6563	22.5223	21.7969	16.2699	19.7812	31.3247	22.1506	17.4478	17.5602	21.9384	18.5949	13.4769		0.221052	22.3604
4.2668	29.5908	27.2236	32.6039	20.2472	21.6442	22.2484	23.2017	19.5502	17.7126	18.5793	24.0507	25.0423	18.3493	15.6203	20.1557	16.8799	13.142		0.226313	21.5201
4.3661	30.7312	27.6811	32.2254	15.0523	21.6461	22.8185	21.7837	14.702	14.6646	22.1152	23.24	20.8648	18.998	18.8715	19.0767	16.4143	17.0006		0.23158	21.0521
4.4653	33.1167	27.7199	32.71	16.683	23.0508	24.6046	21.17	16.2813	16.0813	21.243	22.6476	19.8455	15.8899	19.5019	21.6348	17.4225	14.8601		0.236842	21.439
4.5645	25.7659	21.636	28.4629	22.1072	24.0616	21.8533	20.4613	14.9551	15.7393	19.4707	25.6462	22.3392	20.1171	17.108	16.9076	18.796	13.2759		0.242104	20.512
4.6638	25.8939	22.281	25.5771	19.2054	22.4612	21.7469	20.7676	15.9144	14.434	15.9666	22.9634	26.4751	20.0404	14.992	16.5547	18.3182	18.6151		0.247371	20.1298
4.763	25.4605	20.6626	24.3929	21.0846	21.8361	21.4694	20.4041	18.2832	14.0689	17.9263	20.4733	27.6774	20.2866	15.4244	16.3659	16.8628	15.3508		0.252632	19.8841
4.8622	27.4396	22.5194	26.0598	19.8432	21.9218	15.7579	22.8242	15.1503	14.3141	19.0294	21.7817	25.306	22.4387	14.8511	14.427	20.4619	17.0718		0.257894	20.0705
4.9614	27.3911	24.3961	23.5721	18.632	20.1792	17.0805	19.6658	16.4443	13.1478	17.3815	21.9305	21.5743	18.9927	13.2841	13.0111	17.0436	15.8051		0.263155	18.796
5.0607	21.4271	23.3065	21.2706	18.5299	22.388	17.938	22.8943	14.1261	14.0968	13.9301	21.1337	23.0538	22.3913	13.1851	14.7945	16.3967	16.2495		0.268422	18.6536
5.1599	17.8314	25.6954	23.3681	15.3022	20.0566	19.7779	21.2981	16.4614	11.4235	14.8065	19.1277	25.4817	21.2305	16.873	16.9549	13.3696	18.1863		0.273684	18.6615
5.2591	18.3981	27.4458	23.5799	16.2351	17.6328	22.1997	20.5745	16.2394	14.0482	12.5918	21.7755	19.2289	17.3237	13.9375	16.8517	11.7816	15.1332		0.278946	17.9398
5.3584	16.9569	24.4699	23.9212	15.4248	17.0226	19.8622	19.3416	16.967	15.3144	14.11	16.5637	20.9142	15.1633	14.3343	15.6866	11.2254	12.255		0.284212	17.0314
5.4576	15.0444	16.9523	20.553	14.3087	13.8957	15.4843	19.025	15.6442	15.4618	15.8913	15.3576	20.2576	15.7139	12.585	14.5013	13.0753	14.0663		0.289474	15.754
5.5568	14.1214	17.0443	18.2565	16.3649	18.3229	16.1017	21.2276	12.9628	13.306	14.4904	16.052	18.4487	13.8079	12.7946	16.1368	12.6648	14.5629		0.294736	15.6862
5.656	14.9269	18.6842	20.8371	15.0805	15.4154	19.3619	18.9949	17.5824	12.934	16.601	18.1637	15.9782	14.3824	12.6372	15.9574	9.6191	11.9207		0.299997	15.8281
5.7553	16.0114	22.4035	21.1004	18.7942	15.8169	21.5293	14.5429	14.3439	12.5298	18.3961	18.5425	14.2103	16.6628	12.9177	13.7765	10.7354	12.6239		0.305264	16.1728
5.8545	17.5886	21.0691	19.314	14.4498	17.583	17.8656	15.3576	10.6408	11.7469	14.525	17.2376	13.0328	15.6423	13.4568	13.2414	8.7866	9.8408		0.310526	14.787
5.9537	16.6414	26.1143	22.6529	12.9842	18.1282	19.2086	13.746	13.4341	13.9669	14.276	18.5752	15.1845	19.0086	17.2153	12.8094	9.3976	11.9763		0.315788	16.1953
6.053	14.0015	24.6966	25.2487	15.3826	17.4191	21.8173	16.1644	15.4752	14.986	13.1194	20.056	15.569	17.047	16.6834	14.657	8.3267	11.4156		0.321054	16.5921
6.1522	12.9405	21.0412	21.4139	13.0175	18.5838	20.9683	17.7839	14.4941	15.4615	14.927	16.5391	15.6806	16.2122	12.0071	18.4442	10.4188	10.7734		0.326316	15.9239
6.2514	13.434	20.4733	17.4796	11.046	17.5612	16.4784	18.5274	17.3593	14.5097	15.1065	15.4593	15.9897	13.689	10.5027	18.0376	10.8726	9.3575		0.331578	15.052
6.3506	12.5485	21.6991	17.0717	12.306	15.1876	14.8717	16.7373	18.0933	14.1563	13.9619	15.7118	15.6675	11.4762	12.5677	20.0969	8.6603	10.687		0.336839	14.7942
6.4499	13.0632	18.0805	16.1745	11.4683	9.9923	15.2174	15.6446	22.4027	12.4876	13.6262	14.6294	17.1935	12.4543	12.5375	20.1982	9.9598	10.7364		0.342106	14.4627
6.5491	11.6393	17.2044	14.8574	11.8936	11.5264	20.2655	16.2482	21.4095	12.6912	14.2762	11.0552	17.6789	14.2124	12.3864	18.5287	11.8771	11.3917		0.347368	14.6554
6.6483	12.7759	16.1584	16.0731	12.4813	11.3353	19.4074	14.7853	14.1202	13.1834	13.9814	10.5564	14.5161	15.1141	8.4607	18.5911	9.1956	13.7858		0.352629	13.7954
6.7476	15.0265	15.7071	19.6857	9.7369	9.9922	18.5317	15.0832	11.2133	13.5835	16.3518	12.6585	14.5026	16.2562	12.4869	17.1075	13.1649	12.4962		0.357896	14.3285
6.8468	14.7768	16.4512	16.9422	12.7647	9.8055	16.0734	15.423	12.2911	12.1509	16.9185	12.5057	13.5998	15.2848	11.9239	15.7197	10.9781	12.8		0.363158	13.9064
6.946	8.6791	20.1321	16.3172	11.5812	12.5041	15.6729	19.5311	14.1836	10.4221	16.2455	13.4942	11.0493	16.2134	10.6512	15.8596	10.0236	12.1995		0.36842	13.8094
7.0452	6.0559	17.9632	15.5717	11.4855	11.7424	15.1521	18.18	14.259	11.8129	14.1069	12.7421	14.0176	13.8938	11.198	15.1646	12.1916	14.2969		0.373681	13.5197
7.1445	4.2406	14.1208	18.2819	9.7626	12.2652	13.1311	16.9615	15.5079	12.8827	9.5376	11.9363	14.2651	13.3846	8.5009	11.742	12.3158	12.7474		0.378948	12.4461
7.2437	5.0749	15.7267	15.4701	12.4102	13.0361	13.4672	16.8317	15.8541	11.3989	9.0655	13.9945	13.3524	14.518	6.8581	10.8201	11.9432	11.9724		0.38421	12.4585
7.3429	5.568	15.9381	13.3925	11.5399	12.9205	11.8835	16.4372	12.8636	10.9766	9.4296	13.7991	13.3574	12.1135	9.2383	13.3868	13.2439	9.7019		0.389471	12.1053
7.4422	6.6616	13.8836	14.7889	8.3746	11.6581	12.0515	14.0262	13.1589	11.9062	8.6637	13.1392	14.1055	11.647	7.6021	12.6347	10.7605	11.8481		0.394738	11.583
7.5414	5.2593	17.9147	13.9503	10.2343	9.7013	11.8341	12.2776	12.1908	13.2038	8.3832	10.9992	16.0992	13.5178	7.7475	14.2275	10.5324	8.6136		0.4	11.5698
7.6406	4.289	16.5552	13.7633	11.7401	10.9312	12.2566	10.4516	12.3302	12.1946	8.2664	10.0406	14.9406	13.5877	8.6518	12.8172	10.9695	8.0266		0.405262	11.2831
7.7398	4.7068	10.5084	15.0637	12.6356	8.4298	13.4555	11.282	11.3789	10.6049	9.1714	9.59	16.2321	17.7287	7.117	15.2869	14.0507	7.3515		0.410523	11.4467
7.8391	4.2545	13.8518	12.8948	14.9394	10.6607	13.0263	10.4109	11.6147	9.9752	8.1319	7.6979	14.8051	17.3307	7.51	13.2459	12.0505	10.7256		0.41579	11.3603
7.9383	4.3448	13.7534	15.1064	14.0496	9.4988	12.3243	8.0356	11.0912	9.9723	8.4574	7.7927	15.4587	15.8575	7.2234	9.3747	9.6907	9.0279		0.421052	10.6506
8.0375	3.5348	14.3406	15.7673	12.0618	11.0535	12.2616	6.658	11.7007	11.7729	7.8578	8.0853	14.4478	12.6471	9.73	12.0964	7.5895	10.3783		0.426313	10.7049
8.1368	4.1457	16.9672	13.7837	13.6023	9.5939	10.7367	7.1526	12.6744	9.7858	7.6163	8.6576	11.709	10.9333	8.7256	12.2375	9.7148	10.7462		0.43158	10.5166
8.236	4.7797	15.5082	12.7277	13.0601	6.9164	11.4896	6.3087	11.9273	9.2659	6.942	6.1363	15.1305	12.3162	7.197	13.9821	8.8052	11.9386		0.436842	10.2607
8.3352	5.0912	15.1982	15.0573	14.0245	7.2631	11.2214	6.8331	8.5238	9.7351	5.258	4.6041	14.6044	9.7223	7.1617	13.934	9.3739	11.9996		0.442104	9.97681
8.4344	7.8262	14.9035	18.1056	14.1807	8.3545	9.2327	6.9799	11.5806	8.2802	6.2149	6.3588	14.9604	9.6371	7.5957	13.996	8.8996	13.8499		0.447365	10.6445
8.5337	6.5664	15.5779	17.6922	8.484	9.3362	8.5841	8.1506	13.2529	9.3904	7.8282	6.3923	16.0172	10.7634	5.2614	11.8171	9.3442	14.3139		0.452632	10.516
8.6329	6.0902	15.5727	17.3466	6.1874	7.1669	10.6024	7.0237	12.7844	9.2933	6.0466	5.2266	15.8952	12.5832	7.6418	14.6172	7.2409	13.2226		0.457894	10.2672
8.7321	5.789	12.0089	16.8344	5.7255	6.1734	10.789	6.3871	11.1094	8.4455	6.9813	5.9011	16.3327	11.9449	6.3822	12.9278	7.3376	12.0508		0.463155	9.59533
8.8314	5.7231	12.9721	14.9034	7.515	6.5851	10.1793	7.0298	9.2021	7.1664	6.4609	5.1214	12.148	12.2362	5.882	14.5161	8.1485	10.0982		0.468422	9.16986
8.9306	5.9274	13.2911	18.3046	8.1356	6.1859	9.3537	7.8882	10.1607	8.888	5.5996	6.0792	10.4806	12.4965	5.8613	11.3058	8.1317	9.7824		0.473684	9.28661
9.0298	4.7862	13.8925	16.3729	6.555	6.5976	9.6455	5.2507	10.0972	7.5942	4.8833	5.0691	11.3114	12.6455	8.2998	15.5077	7.6202	11.8814		0.478946	9.29472
9.129	4.4095	13.4791	15.8035	8.0293	5.2191	7.3784	5.1319	9.4911	11.052	5.8061	5.3148	10.4816	13.2484	5.628	11.8951	8.8785	11.9212		0.484207	9.00986
9.2283	3.5746	12.7101	13.9837	6.6192	6.2931	6.1186	6.8529	8.4366	10.0357	6.7159	6.5168	11.6149	15.0211	7.2831	11.6997	7.72	12.9128		0.489474	9.06522
9.3275	6.1521	11.1729	16.5908	6.3573	6.4927	6.5082	10.1361	10.8148	10.5998	8.0945	7.9712	10.3318	12.3781	8.0979	12.3867	8.1425	14.3723		0.494736	9.79998
9.4267	4.1725	10.9023	12.4579	7.0546	7.3342	8.8858	4.4436	11.679	11.4145	7.2344	8.444	10.3703	9.3139	8.9077	13.3844	7.049	11.8406		0.499997	9.1111
9.526	3.5369	13.5173	14.9344	7.5435	6.1761	8.1674	6.316	10.102	11.0353	7.1477	7.2788	13.2947	11.2016	8.5333	13.3958	6.3023	10.8336		0.505264	9.37157
9.6252	3.7807	12.4063	15.2195	5.8784	5.3126	9.4143	6.4678	7.2616	10.6566	3.8123	9.2469	11.0062	9.7025	5.7006	10.7808	8.6701	11.8961		0.510526	8.65961
9.7244	3.6281	12.1596	13.357	6.8102	6.7463	8.7349	5.9707	7.8109	9.3485	2.8876	5.8228	11.8769	9.7054	5.1334	11.5393	9.3383	12.9194		0.515788	8.45819
9.8236	4.1663	17.2317	15.1532	5.3878	6.3591	8.756	4.8848	9.4666	9.114	3.4035	5.145	12.566	9.7407	5.1684	8.0051	9.9936	12.4116		0.521049	8.64432
9.9229	3.1279	14.9112	14.6161	5.148	5.1029	8.8695	4.8949	8.7521	9.0159	5.1179	6.15	12.4151	9.9465	5.9211	9.9804	9.5049	11.7493		0.526316	8.54257
10.0221	2.9112	14.2069	15.1769	4.1789	3.5548	9.9675	3.7638	6.9325	9.1095	4.5617	6.4602	10.6671	9.6523	4.8241	10.1639	7.8718	12.035		0.531578	8.00224
10.1213	3.928	14.9454	16.3155	4.4319	5.1127	7.2633	6.9447	8.0629	8.1341	3.7008	5.2906	9.4896	9.4634	3.8702	10.5283	7.8756	12.8192		0.536839	8.12801
10.2206	3.2675	12.4572	18.3933	6.0828	6.8941	9.4121	5.436	7.8867	7.2464	4.3001	4.9013	10.745	8.3063	5.0754	8.8001	7.9614	11.4752		0.542106	8.15535
10.3198	2.2577	13.0767	16.8666	7.1648	7.7713	7.8025	5.409	8.5853	10.6106	3.5064	4.9261	9.6696	9.071	5.946	10.1999	5.6032	10.8993		0.547368	8.198
10.419	3.5365	11.1077	19.1058	6.9266	5.4449	7.9397	4.4982	9.2413	9.422	4.0416	3.2067	11.9643	8.3571	6.5671	12.4381	8.523	13.4508		0.552629	8.57479
10.5183	3.8501	11.8684	18.3401	6.4135	5.8128	7.8638	3.6125	9.6383	8.322	3.7547	3.7207	10.5781	9.3238	5.853	13.4258	8.9434	10.1306		0.557896	8.32068
10.6175	4.0443	11.0189	14.875	7.5348	6.3095	6.8778	4.0467	10.0441	8.1202	4.4387	4.5482	11.1286	9.0484	6.0624	9.2817	8.2231	10.217		0.563158	7.98938
10.7167	3.9916	9.9095	17.4341	5.4313	5.9721	8.9398	4.6218	5.7664	6.219	2.3406	3.5581	11.129	9.8495	5.8645	8.137	7.5364	10.0905		0.56842	7.45831
10.8159	3.5515	10.6169	15.6499	4.1507	5.3948	7.6197	6.6406	7.3473	7.6867	3.5992	4.7277	12.1932	8.0865	4.8212	10.8904	7.2005	7.9007		0.573681	7.53397
10.9152	3.911	10.0455	17.0398	5.16	4.6545	6.4489	6.2836	10.1419	10.4525	3.7899	3.7096	11.0661	7.7885	4.0519	11.5728	8.6935	10.7773		0.578948	7.97572
11.0144	2.3849	11.4927	15.0565	4.5415	5.7297	8.2512	5.5047	9.2183	9.3892	3.0809	3.5688	9.7842	7.2637	4.6097	9.9932	9.0295	7.7568		0.58421	7.45032
11.1136	3.3174	13.2998	17.0048	4.2703	6.928	7.5827	5.0978	8.916	7.9843	3.681	2.5776	9.0402	6.8751	5.0683	11.203	10.142	9.1516		0.589471	7.77294
11.2129	5.119	11.9721	15.2861	4.2585	5.5857	8.6245	4.9796	9.4862	6.8768	2.9824	3.2824	10.1895	8.0816	4.2138	13.7554	8.5832	9.0311		0.594738	7.78282
11.3121	4.9908	12.4805	18.7903	5.2463	7.23	7.8534	5.2589	9.8008	8.7276	2.7778	2.8178	10.6231	7.0639	3.9399	11.1138	7.0794	6.7764		0.6	7.79828
11.4113	5.9629	13.7565	19.2165	4.5667	5.9651	6.5358	6.9955	8.2047	10.6507	3.9149	3.7312	10.309	7.5022	5.4495	11.9034	5.692	9.2337		0.605262	8.21119
11.5105	5.4756	11.0765	18.2229	3.2784	5.1625	7.5789	6.9331	10.5342	8.3994	4.4456	2.7586	9.3512	8.7792	3.339	11.1938	7.8141	10.3532		0.610523	7.92331
11.6098	5.932	11.9685	15.4479	4.1857	5.6707	9.5349	5.389	10.8875	8.1718	2.9976	2.6301	10.5748	9.951	3.9422	13.4533	7.2691	11.0936		0.61579	8.18234
11.709	7.0342	11.9431	16.7371	4.9476	5.1828	7.2869	8.0422	11.453	10.0651	2.4583	3.7142	11.6638	7.5654	6.0052	11.5121	8.0961	8.0177		0.621052	8.33675
11.8082	6.2415	11.4899	15.9127	4.8534	6.0842	8.1633	8.3307	9.607	7.637	3.5012	4.9062	10.1901	5.7996	7.6044	12.0789	9.0758	8.0699		0.626313	8.20858
11.9075	4.8088	12.6317	18.3159	6.162	6.443	10.1806	6.6859	13.4538	9.6309	4.6559	4.4529	8.6473	7.7304	6.7562	11.9249	10.153	9.7974		0.63158	8.96651
12.0067	5.7451	10.5155	18.0127	6.4824	6.2252	12.2553	5.1963	13.9712	8.1536	4.1166	4.1792	8.7477	8.6136	6.4963	13.3565	10.363	11.2617		0.636842	9.0407
12.1059	5.3809	11.7321	19.9393	6.7826	7.2779	12.1205	5.8232	11.0974	7.6048	3.0339	4.03	8.2151	7.3804	4.6084	10.9475	7.8895	10.9513		0.642104	8.51852
12.2051	5.1132	12.9149	16.7145	7.1985	5.3707	12.7591	6.62	12.2406	9.1394	4.6945	4.0085	10.6894	8.8032	5.4511	10.1944	8.6373	9.8359		0.647365	8.84619
12.3044	4.7836	9.6	20.0653	8.4544	6.339	14.1202	6.2522	12.8616	7.9489	3.3961	4.816	11.8642	7.7687	7.7946	10.4006	8.9305	11.1576		0.652632	9.20903
12.4036	4.614	10.0573	20.6593	9.5713	5.753	12.8671	5.2671	13.5066	10.2379	2.4469	4.7398	10.6841	8.3388	10.4435	12.4325	9.0721	10.8861		0.657894	9.50455
12.5028	2.5458	10.5497	26.9621	7.5165	6.4735	17.0282	7.3755	13.5966	9.7647	4.0629	4.6062	12.0847	10.328	8.5904	13.3221	9.8322	11.3208		0.663155	10.3506
12.6021	3.6517	10.8294	28.4632	9.5343	5.6087	16.0398	6.4435	12.1508	9.3086	5.5435	5.7107	11.6517	8.3707	6.4745	15.0115	12.2129	11.6772		0.668422	10.5107
12.7013	6.0293	13.9822	28.4864	9.9508	8.6143	14.3431	6.0051	11.7758	9.6876	4.7479	6.4461	10.2718	8.1719	6.8529	13.357	10.3166	11.8675		0.673684	10.6415
12.8005	4.1391	11.3376	27.5591	7.0604	6.3833	13.6875	6.7112	12.5933	8.6869	4.8274	4.1498	11.7302	7.9048	5.5824	15.2422	12.345	11.5915		0.678946	10.0901
12.8997	3.0543	10.5673	26.7045	10.1018	7.3646	11.2896	6.4502	12.1147	9.0842	4.6617	3.8702	10.5389	6.601	7.8499	16.9127	12.0816	12.9325		0.684207	10.1282
12.999	3.1725	10.5507	21.363	10.0719	7.7057	13.6828	7.9442	10.9421	10.4487	4.3811	4.2049	11.3686	9.5725	8.174	15.49	11.0867	13.216		0.689474	10.1986
13.0982	3.5777	9.6839	22.4562	9.6732	7.1433	15.9394	6.8906	13.7191	11.3068	3.2778	5.17	11.3319	8.9581	7.5299	15.505	10.8765	15.4444		0.694736	10.499
13.1974	2.5629	9.9374	20.6835	6.1397	8.9942	14.2599	7.5081	10.4951	11.7661	5.5774	4.0096	10.7919	10.3628	7.6258	15.4159	12.7432	12.6273		0.699997	10.0883
13.2967	3.6792	9.0866	20.641	5.7749	7.0468	16.7098	8.0186	9.4366	10.1501	6.3119	2.8205	10.0713	11.698	6.7922	16.1557	13.2515	12.5856		0.705264	10.0135
13.3959	4.3064	8.1588	26.1409	7.2406	7.8158	15.855	7.916	15.4369	11.4192	7.1565	3.2394	10.4071	12.8917	7.7451	14.0363	13.6304	12.8165		0.710526	10.9537
13.4951	4.8581	10.6442	24.842	7.384	6.5832	17.4262	7.2271	14.8207	10.8609	6.0425	6.2315	9.1835	10.4426	8.2553	13.4954	12.9803	11.8589		0.715788	10.7727
13.5943	6.1261	11.9179	21.408	9.5076	8.9706	16.8541	7.1253	18.824	13.1833	6.3881	5.2103	11.9252	9.5179	7.9013	16.4054	14.2075	11.7331		0.721049	11.6003
13.6936	5.9401	11.8799	21.4493	11.4095	7.4087	16.0118	8.4558	20.0093	12.621	5.429	6.2875	12.3995	10.6606	7.657	17.3902	12.3991	11.0813		0.726316	11.6759
13.7928	5.0965	11.4701	20.7325	10.3509	8.0752	16.2674	10.2412	15.1829	14.1818	5.6433	4.9631	12.4891	10.4916	7.8947	15.4582	9.5948	13.5801		0.731578	11.2773
13.892	6.222	14.0095	23.2447	12.2739	9.0628	15.9141	8.7616	15.1268	13.9311	5.1993	5.903	10.9369	10.0535	8.8156	16.4663	10.2912	13.9288		0.736839	11.773
13.9913	6.5092	12.7778	22.5827	10.8609	10.2135	17.4291	10.0186	17.0774	13.0147	5.8013	4.1755	12.5253	10.6428	10.1664	16.823	14.0396	12.2761		0.742106	12.1726
14.0905	7.9204	14.9946	18.6141	13.4138	10.6867	18.0843	11.862	13.1885	13.3617	6.2288	4.255	15.0861	12.2004	10.8147	16.3635	16.4881	12.928		0.747368	12.7347
14.1897	8.2344	16.9566	21.8443	12.7621	11.0695	17.5946	12.8354	15.1527	10.9996	7.4654	4.5985	15.6181	13.3646	11.0767	16.5909	13.9416	10.6329		0.752629	12.9846
14.2889	10.5633	19.0362	17.9212	13.3453	10.2461	19.8233	10.609	16.9837	12.052	8.8712	5.0578	14.2809	11.5519	8.7783	20.3359	16.5526	14.1952		0.757891	13.5414
14.3882	10.7046	18.6797	20.8711	14.4165	12.1152	17.0014	9.67	18.2882	13.8597	8.4853	6.738	13.9431	11.2873	7.6339	20.5046	13.9269	12.3632		0.763158	13.5582
14.4874	9.3853	14.6745	22.3272	13.6772	11.9345	18.8606	9.6479	18.3117	16.12	7.0154	5.4421	14.8715	9.8731	9.4501	17.9645	12.1106	14.2457		0.76842	13.2889
14.5866	7.4048	18.0907	25.0781	15.9563	13.8563	20.7704	11.0885	17.7329	17.2826	9.6731	5.7701	12.738	10.463	10.8113	17.193	12.6727	12.6998		0.773681	14.0754
14.6859	7.6103	15.7563	25.2846	14.2471	14.2469	15.2383	13.574	16.8864	15.3568	9.1114	4.9545	13.7508	12.448	10.4567	15.345	13.5649	14.3898		0.778948	13.6601
14.7851	9.1834	16.8713	21.8385	14.5568	13.0571	18.4368	14.1963	14.0804	12.9871	10.0642	6.5655	13.5971	12.7419	11.5425	18.3018	14.5062	15.6007		0.78421	14.0075
14.8843	9.2781	16.9749	16.9556	14.7635	12.54	19.8914	12.1204	14.8474	13.1288	9.2645	7.3335	14.4651	12.1404	9.5486	14.5438	12.2317	13.8173		0.789471	13.1674
14.9835	7.9906	15.6629	17.5185	17.3623	12.268	18.2683	11.9604	17.2629	14.5543	9.9804	6.7402	15.4899	14.2354	12.2176	12.7391	16.3196	15.2841		0.794733	13.8738
15.0828	8.1975	12.9054	19.8064	18.5306	15.1261	17.8004	12.2336	15.9757	13.4895	11.2593	8.7474	14.6286	12.6869	11.2361	15.4477	11.4743	14.3678		0.8	13.7596
15.182	6.4781	12.4448	17.2696	17.1233	11.4401	16.9801	14.5092	18.272	13.7017	13.8474	8.074	14.2497	15.4885	9.7177	19.3392	10.0987	12.5608		0.805262	13.6232
15.2812	5.0155	11.6195	19.6491	19.3281	11.309	14.1017	13.4848	15.9996	12.1086	11.5726	5.8534	13.3659	16.7209	11.3132	17.8813	12.6092	15.1996		0.810523	13.3607
15.3805	5.3144	11.3902	18.6561	18.5071	9.5413	16.706	15.7186	14.7626	12.6699	11.8128	8.9419	13.7844	16.2241	14.6095	19.5651	14.8059	17.4969		0.81579	14.1475
15.4797	5.7609	10.1098	21.8987	15.8337	8.1883	16.8129	15.6784	19.8523	11.8984	11.5508	9.0857	14.2414	16.9857	15.0517	19.7861	13.6854	16.1709		0.821052	14.2701
15.5789	4.553	9.7185	19.823	16.4657	10.2576	16.0581	14.334	17.6908	12.3989	12.7573	9.125	13.9828	17.5295	12.8575	17.6737	13.5955	17.3937		0.826313	13.895
15.6781	3.56	9.1594	17.6178	14.1781	9.7165	14.9542	15.0011	17.6777	12.136	12.943	10.6495	11.8107	14.6423	12.1519	18.9875	14.4167	15.1455		0.831575	13.2205
15.7774	4.0586	8.6869	14.4405	14.8752	13.2543	19.3587	16.4406	16.0413	12.0938	12.1347	9.3654	11.1361	13.7508	9.4588	18.8752	15.1939	16.4484		0.836842	13.2714
15.8766	4.0215	5.6794	12.794	14.1545	14.0657	16.9444	14.9661	16.0019	12.4943	13.2572	11.162	11.0125	14.7659	14.5647	15.9977	15.3098	15.9967		0.842104	13.1287
15.9758	3.7032	5.4504	10.6901	16.7805	12.2387	18.8447	14.4837	13.9802	11.3749	14.8482	13.1308	13.4987	13.4171	9.8483	15.7454	13.8555	15.5875		0.847365	12.7928
16.0751	3.0161	3.7989	9.3363	15.3585	14.7748	18.7341	15.5959	14.2242	12.1595	14.4783	12.8639	13.9764	12.9906	13.1962	15.9809	12.2217	15.5655		0.852632	12.8395
16.1743	2.0011	4.4234	7.8248	14.985	14.8381	18.3238	14.8259	12.9963	10.6981	14.3908	16.197	12.2706	14.1865	13.2758	15.8685	11.9465	13.7084		0.857894	12.5153
16.2735	1.2549	4.3857	6.7207	14.7593	14.9954	16.0445	17.1842	14.2227	12.1343	12.8983	14.0242	15.0604	14.9649	12.8131	15.8264	13.5457	14.2106		0.863155	12.6497
16.3727	1.8044	6.1304	5.1111	12.1156	12.8132	15.5454	18.2673	15.3623	11.4895	11.2771	14.4911	16.7536	11.2791	10.1551	16.5095	14.7593	10.3598		0.868417	12.0132
16.472	1.5498	4.5895	4.2006	11.348	11.5317	13.6452	15.8376	12.4403	13.0329	10.8865	10.6542	14.2233	11.4811	12.1393	12.3752	13.1861	10.7647		0.873684	10.8168
16.5712	3.0115	4.7386	4.6611	10.1055	13.0858	11.7241	11.8838	11.564	13.9141	12.4161	12.8876	13.1353	13.2996	11.9034	13.9553	11.1671	9.3246		0.878946	10.7516
16.6704	1.9987	3.0479	4.7631	9.5016	9.7967	11.104	11.4341	12.1673	14.6845	12.3485	10.992	14.6702	13.2139	7.6675	14.6326	9.6742	7.6669		0.884207	9.96257
16.7697	2.1755	2.9099	3.8086	6.7677	8.1046	8.8042	11.2861	12.6445	13.8373	13.713	11.8262	14.9812	13.7854	9.0389	11.6636	10.3195	7.4265		0.889474	9.59369
16.8689	1.4793	4.7813	3.6325	5.3557	7.1235	8.6428	12.7592	13.6645	10.9338	14.3309	12.8409	16.1184	13.8698	11.0814	14.0329	7.9951	6.0715		0.894736	9.68903
16.9681	2.7722	4.5559	3.4513	3.5581	6.1144	8.1813	14.2061	14.447	10.1839	13.0143	12.254	11.8743	10.4344	11.4129	12.1021	10.6175	5.8109		0.899997	9.11709
17.0674	2.5437	4.9998	3.4892	2.9572	5.3148	6.564	14.5191	11.389	11.9381	14.5343	14.1317	15.1695	9.7753	10.8553	10.656	9.0772	5.8191		0.905264	9.04314
17.1666	2.8279	6.9401	2.5515	4.0442	4.4373	6.9873	11.4933	8.6235	10.341	15.929	12.4377	13.8952	8.8941	11.6953	9.9599	9.6697	5.2778		0.910526	8.58852
17.2658	2.8241	6.6465	1.8659	2.8455	3.2268	6.5216	10.275	8.3409	10.5224	12.6359	12.7832	14.2541	8.8158	12.8655	7.7607	8.5109	6.2175		0.915788	8.05366
17.365	2.0449	3.9526	2.3125	3.7772	4.9391	5.7381	5.6414	6.603	12.1299	11.7283	16.7513	18.875	6.4128	11.3186	6.232	6.4342	4.2034		0.921049	7.59378
17.4643	2.1494	2.1531	2.3532	2.2032	5.3802	4.7702	5.7365	6.1292	9.5666	11.2477	11.3056	14.1546	6.368	10.7222	5.6264	4.7451	4.151		0.926316	6.39778
17.5635	1.4372	2.9576	1.7715	3.9844	5.1688	5.157	7.0976	5.5259	7.2438	13.0884	12.7403	12.7275	5.9634	7.7453	3.6127	5.1124	5.6211		0.931578	6.29146
17.6627	2.2117	2.0578	2.1056	3.6826	2.7596	4.625	5.4016	5.4522	5.5202	10.3866	12.92	11.0138	4.7925	7.8652	3.9304	3.9502	5.3285		0.936839	5.52962
17.762	2.5494	1.842	1.9354	3.275	2.7128	4.4733	4.8171	4.5715	5.7694	7.1969	14.3872	10.5011	5.7852	4.8204	4.3103	3.8814	6.1798		0.942106	5.23578
17.8612	2.4832	2.171	1.708	2.6622	2.7735	2.6222	4.9626	3.4626	5.4152	5.0497	12.1903	9.0909	4.1375	6.2105	3.7883	1.9249	5.5734		0.947368	4.48388
17.9604	1.8255	2.7379	0.9935	3.1536	2.2305	3.2886	5.1425	4.0113	5.0364	4.9794	12.0015	9.7748	3.9122	3.7746	3.8405	1.1445	4.6159		0.952629	4.26254
18.0596	1.5051	2.6995	1.0743	2.8435	4.3961	3.1584	3.769	2.8507	3.4994	3.5133	11.6905	7.2891	4.0132	3.3529	2.4692	1.2164	4.6419		0.957891	3.76368
18.1589	1.1787	3.053	2.0119	3.3843	4.1369	3.7373	3.8682	3.0272	2.5758	3.7435	9.6505	4.9169	2.1858	2.7039	2.3362	2.052	3.5848		0.963158	3.42041
18.2581	1.1328	2.5649	2.1449	2.8357	3.7003	2.6378	5.7266	4.1816	2.8577	2.6709	7.5335	3.9505	1.5529	2.2339	2.4971	1.5055	3.8894		0.96842	3.15388
18.3573	1.9388	2.4116	1.6404	2.3512	3.6348	1.7139	4.7391	3.9469	3.8734	1.005	5.8399	4.3618	1.577	2.427	1.5841	1.3168	4.427		0.973681	2.86992
18.4566	1.9164	2.2859	1.7389	2.7104	3.7223	1.6858	3.8717	3.7609	2.8117	1.0581	6.0287	4.7836	1.6044	2.1149	2.0226	0.7066	4.0007		0.978948	2.75433
18.5558	1.5287	3.6003	1.5032	2.4462	2.9875	2.8096	3.9251	4.3215	2.0386	0.9702	3.6542	5.0352	1.1901	3.1802	2.2988	1.666	2.7936		0.98421	2.70288
18.655	1.072	2.2184	1.5936	3.049	1.6758	2.4607	3.7123	4.903	2.2014	1.5883	5.1911	3.7757	1.5406	2.8073	1.8638	1.6325	1.811		0.989471	2.53509
18.7542	1.5727	2.3306	2.3221	2.1797	2.347	1.8355	2.6268	2.5347	1.4972	2.7517	3.7809	3.2936	1.4118	1.9318	1.0972	2.9863	3.1865		0.994733	2.33448
18.8535	2.1462	1.8806	1.4109	3.5336	2.2417	1.8473	2.5702	2.8017	1.9883	1.5867	3.1958	3.2957	1.353	3.0645	1.192	3.502	1.2805		1	2.28769

## Sheet: Image22
X0	Y0	Y1	Y2	Y3	Y4	Y5	Y6	Y7	Y8	Y9	Y10		Ap-Basal to 1	Average intensities
0	17.7289	11.9148	20.2065	21.292	13.2355	16.584	14.7609	16.3705	17.4922	19.2984	31.1538		0	18.1852
0.0992	18.1391	13.1669	18.6591	15.402	14.3217	14.9548	15.8455	19.0687	15.9698	19.113	26.6076		0.00482951	17.3862
0.1985	18.384	13.9418	25.039	17.1954	15.6869	14.451	17.9305	19.1552	17.7509	19.3309	27.5238		0.00966388	18.7627
0.2977	18.2112	14.2446	35.4815	18.1204	15.2983	17.7458	21.9502	18.7055	19.2012	19.7241	25.5576		0.0144934	20.3855
0.3969	18.3723	14.1614	29.6825	21.0981	13.9736	14.5767	22.6891	18.2462	15.1582	24.2409	20.5847		0.0193229	19.344
0.4961	17.2478	14.7591	31.1712	22.5405	14.9425	18.3238	21.5529	18.4041	15.6109	23.8207	22.2093		0.0241524	20.053
0.5954	19.7342	14.0403	36.4879	20.5188	17.1094	15.8962	23.8511	15.8005	18.423	22.4232	22.2454		0.0289868	20.5936
0.6946	14.8182	14.4738	35.0969	20.0526	15.4403	16.0078	25.8059	16.9005	18.4742	23.3372	18.6217		0.0338163	19.9117
0.7938	17.8659	13.6436	37.9083	19.4694	17.0849	18.0885	30.6312	16.4498	18.9007	24.2206	20.7046		0.0386458	21.3607
0.8931	16.8841	12.9079	33.8362	16.9543	13.9627	16.6138	33.0284	19.7027	21.4869	26.3693	20.7606		0.0434802	21.137
0.9923	19.0459	13.7329	23.1849	16.9944	14.6079	19.3163	35.2684	18.4977	22.2864	27.7654	19.5973		0.0483097	20.9361
1.0915	15.8641	12.6775	23.5563	17.3143	15.7028	18.4494	34.0905	18.6964	23.3283	25.854	22.8075		0.0531392	20.7583
1.1907	14.9203	16.6064	26.5194	14.2726	13.7505	16.9843	36.8707	17.6433	23.2956	29.7267	19.9496		0.0579687	20.9581
1.29	17.1337	15.8877	27.1315	15.7296	14.6921	14.8483	32.4008	17.4075	26.0312	31.0942	21.2162		0.0628031	21.2339
1.3892	23.5922	19.5511	29.5831	18.5016	16.6723	20.2502	33.0278	17.1468	35.8687	28.8499	21.2275		0.0676326	24.0247
1.4884	23.9823	18.1182	25.9245	18.6321	15.6599	25.9567	37.7151	17.1098	36.1703	31.1713	20.7156		0.0724621	24.6505
1.5877	22.4669	15.9485	25.7248	17.1557	15.4944	28.1438	32.2693	16.8135	36.117	33.0182	19.2595		0.0772964	23.8556
1.6869	24.6797	16.5099	25.7059	13.8802	18.6413	26.4341	29.6978	18.0488	37.9909	25.4311	19.4373		0.082126	23.3143
1.7861	28.5125	15.2771	24.4829	14.9989	20.9769	29.9752	29.8002	14.7146	29.1886	22.2446	23.6042		0.0869555	23.0705
1.8853	28.5784	14.3497	26.0987	17.4112	20.8481	32.3427	28.8635	13.5409	31.1894	22.3567	27.0692		0.091785	23.8771
1.9846	30.5925	17.4724	21.5359	17.0723	21.1355	29.7016	25.9074	13.6141	34.295	23.126	27.4796		0.0966193	23.812
2.0838	30.3155	13.7925	22.9787	17.0505	25.0752	25.5352	25.5964	15.7227	37.5455	25.7157	30.187		0.101449	24.5014
2.183	31.1214	16.1577	19.9291	17.34	21.4849	28.039	23.8089	16.2168	38.8489	27.146	25.5808		0.106278	24.1521
2.2823	32.2246	16.4217	23.6959	21.2281	26.3549	30.4594	18.2697	16.6586	34.3408	28.3081	21.2423		0.111113	24.4731
2.3815	31.4347	15.5795	19.9493	18.2548	24.2563	30.3348	19.5631	16.1252	27.375	29.2086	24.7191		0.115942	23.3455
2.4807	27.0634	16.8421	19.1641	13.5924	25.5705	39.0943	15.8662	13.611	25.6676	27.2445	23.3212		0.120772	22.4579
2.5799	26.7689	15.3492	18.5397	14.0352	25.1451	39.5549	15.5887	11.6779	27.8491	29.1662	24.996		0.125601	22.6064
2.6792	30.0882	15.1288	15.636	15.7581	22.0098	40.1511	16.4164	14.5027	24.9487	32.6981	22.2151		0.130436	22.6866
2.7784	31.3333	18.2041	16.7467	17.0427	29.4517	34.6295	16.2208	13.9014	26.7738	31.7046	19.4115		0.135265	23.22
2.8776	25.5006	19.302	17.6543	14.9828	29.6445	36.7109	16.1986	14.2691	25.603	30.5554	19.4027		0.140095	22.7113
2.9769	27.2323	17.6625	17.1044	12.2381	31.8822	33.3569	18.0851	14.949	19.7633	25.112	19.939		0.144929	21.575
3.0761	19.9262	22.4261	16.3276	11.1193	35.1257	37.2128	20.1156	14.2815	21.8589	25.5519	25.402		0.149759	22.668
3.1753	17.4273	22.7101	14.3674	13.1262	32.975	32.8399	14.2219	14.479	17.9589	28.0768	28.0931		0.154588	21.4796
3.2745	13.2977	19.8392	14.7774	16.2813	28.5091	31.4605	15.1763	13.6336	16.2745	27.5501	26.7805		0.159418	20.3255
3.3738	16.0115	19.718	16.9701	11.9531	30.7511	28.8315	12.9312	11.4036	16.2279	25.1949	26.3617		0.164252	19.6686
3.473	14.0653	17.9531	19.7388	14.073	28.4235	27.3446	13.4494	11.7973	12.983	25.1243	26.2298		0.169081	19.1984
3.5722	9.4015	16.3354	17.6047	11.622	25.8401	17.5863	13.9415	12.2526	14.4327	26.4144	24.9853		0.173911	17.3106
3.6715	10.7742	14.2838	21.4553	15.9927	27.008	15.9242	11.789	14.2401	14.877	31.537	31.0177		0.178745	18.9908
3.7707	12.6233	15.2963	20.7601	15.3188	28.6914	17.6848	12.815	13.2804	12.6589	31.4815	27.9223		0.183575	18.9575
3.8699	13.5705	15.7019	22.6134	16.134	26.6423	13.2491	14.4899	13.8026	13.9619	31.3761	23.9422		0.188404	18.6804
3.9692	12.0419	14.5511	18.8143	16.5795	19.3279	12.9816	14.2878	11.2607	16.4912	30.239	23.3839		0.193239	17.269
4.0684	13.6146	12.3234	17.0525	13.7681	21.3476	11.3851	15.5116	11.5978	12.4466	27.2309	23.06		0.198068	16.3035
4.1676	11.9972	12.9089	19.0644	13.0639	18.2199	10.0438	11.8685	13.0194	11.7668	20.531	22.0356		0.202898	14.9563
4.2668	9.2274	10.3104	17.3421	12.1138	17.7352	11.3483	13.7382	13.6689	13.1722	18.6959	21.7225		0.207727	14.4614
4.3661	8.8826	12.0406	16.8392	12.5155	15.7426	9.7501	11.3382	11.6603	14.3778	19.4349	22.5265		0.212562	14.1008
4.4653	11.1934	8.9282	17.0229	11.0294	12.4914	13.2935	11.631	11.7525	12.436	18.131	23.7941		0.217391	13.7912
4.5645	12.3697	9.1631	16.695	13.9185	11.751	13.8756	10.2422	10.8955	13.271	18.2365	24.5517		0.222221	14.0882
4.6638	9.6281	10.9058	14.2279	10.7319	11.0493	11.5525	12.1952	10.3012	12.7633	16.2741	20.5559		0.227055	12.7441
4.763	11.9567	12.019	15.7017	12.2072	13.4809	11.0296	15.2287	13.2492	11.638	15.6769	18.4898		0.231884	13.698
4.8622	10.5077	11.8685	17.0566	12.9632	12.0153	10.5203	14.1659	12.7329	10.8426	14.4362	15.5989		0.236714	12.9735
4.9614	9.2507	12.8031	16.9136	12.5229	10.6366	9.9802	11.6748	10.1354	11.0912	15.2164	14.3498		0.241543	12.2341
5.0607	8.8786	10.3747	17.3016	9.1429	11.3982	11.9718	15.2681	11.1504	12.0853	13.3734	15.2961		0.246378	12.3856
5.1599	7.2105	12.0312	16.3348	11.1397	8.9328	12.8638	12.3743	11.3999	11.1645	13.3667	14.6318		0.251207	11.95
5.2591	6.9347	11.2135	13.0569	10.5869	11.3296	11.9078	13.0454	11.1156	9.3741	11.3879	14.1668		0.256037	11.2836
5.3584	7.6882	11.7508	12.419	11.0139	10.8014	10.7311	11.5591	10.8354	11.5662	11.019	14.2481		0.260871	11.2393
5.4576	7.9113	13.3729	11.3748	11.7734	12.1183	10.4929	11.7913	13.339	15.9163	10.7472	14.4016		0.265701	12.1126
5.5568	6.2986	11.613	11.8486	8.1893	11.6714	11.9832	12.4399	12.6765	13.9088	13.6182	14.5218		0.27053	11.7063
5.656	7.596	10.6523	10.1042	9.3712	10.1975	10.757	13.8051	12.3461	10.0234	12.0035	13.9916		0.27536	10.9862
5.7553	9.4886	8.4881	9.5468	10.5872	11.9108	11.2054	10.9583	13.3355	10.769	12.2987	14.2633		0.280194	11.1683
5.8545	9.0726	10.9274	11.4346	10.3515	11.0422	12.1288	11.3444	12.3888	10.6066	11.0475	12.2063		0.285024	11.141
5.9537	9.3627	9.9938	12.6468	8.8865	10.0531	10.9834	13.0021	12.1588	10.5726	14.0166	11.9973		0.289853	11.2431
6.053	8.3115	9.7989	8.67	8.6949	10.5372	11.8881	9.7474	10.4519	8.5395	11.4102	10.6403		0.294688	9.8809
6.1522	7.52	10.1463	7.9884	7.9337	9.5614	12.8045	10.4934	9.3607	8.003	11.1787	12.504		0.299517	9.77219
6.2514	6.8185	8.7839	9.157	7.9254	6.5495	15.2114	10.6057	9.6171	9.4022	11.3132	12.5942		0.304347	9.81619
6.3506	7.238	10.8512	8.6002	10.5662	8.9865	12.9321	10.5553	8.5329	11.8135	10.7422	9.9515		0.309176	10.07
6.4499	10.7782	11.363	9.4551	10.5368	6.98	10.337	14.5341	7.2026	7.4026	10.8451	10.1792		0.31401	9.96488
6.5491	8.4601	9.5827	8.8127	9.1213	8.5243	10.8556	12.8585	8.254	10.6801	9.6687	9.1004		0.31884	9.62895
6.6483	9.1394	9.0322	8.1936	9.2179	12.4174	10.0603	9.9173	8.79	9.6624	8.3245	9.5823		0.323669	9.48521
6.7476	8.8939	7.4405	7.8246	10.2861	9.4725	12.0164	8.2097	10.0176	8.1672	9.0379	9.5414		0.328504	9.17344
6.8468	8.6435	9.7074	10.4978	11.0147	8.8834	9.2363	10.3913	9.4531	9.3057	8.6738	11.6943		0.333333	9.77285
6.946	7.1004	10.1021	8.5573	9.0288	8.5907	10.7421	11.4201	10.7354	9.4428	10.2291	9.158		0.338163	9.55516
7.0452	6.81	10.0141	8.217	8.7713	8.8815	11.4659	8.526	9.7525	8.4285	8.35	8.4476		0.342992	8.87858
7.1445	7.4659	9.5521	6.9542	7.5806	9.2355	8.861	10.0655	10.2763	9.1702	12.8312	8.747		0.347827	9.15814
7.2437	6.9627	9.0486	8.5037	7.6522	7.3422	11.1785	11.0497	10.0715	8.4641	11.0217	10.1518		0.352656	9.22243
7.3429	7.9955	9.2369	10.2676	8.6389	10.127	10.4647	8.2265	10.1567	7.1196	8.3419	10.46		0.357486	9.18503
7.4422	6.9651	10.147	9.2208	6.3817	8.4599	8.26	7.8055	11.3953	7.3029	8.628	9.5037		0.36232	8.55181
7.5414	8.8706	9.6504	8.5468	7.7533	8.1572	8.8296	7.1141	8.1888	9.3112	8.2363	8.1691		0.36715	8.43885
7.6406	7.9502	7.7726	6.8259	9.7908	7.2802	7.4018	7.0111	9.4905	10.2182	8.1694	10.6641		0.371979	8.41589
7.7398	8.8614	7.3375	8.0161	10.3559	9.8338	7.6688	8.3002	9.3719	7.5008	7.9058	9.9388		0.376809	8.64464
7.8391	7.5328	8.8518	7.7821	8.9197	7.6447	8.3768	8.1931	8.4196	8.6587	6.321	8.3243		0.381643	8.09315
7.9383	7.9384	8.2766	8.8058	9.3561	9.371	10.2936	8.6886	8.0828	8.6161	7.3161	8.3867		0.386473	8.64835
8.0375	8.9297	8.0428	7.6978	8.335	7.7525	7.1162	9.02	9.6152	10.4301	8.5899	10.3153		0.391302	8.71314
8.1368	9.4769	7.5339	10.3249	9.1253	8.3894	7.2042	8.634	9.9379	8.8336	8.366	10.1329		0.396136	8.90536
8.236	10.945	8.9001	7.4999	7.5359	7.9791	8.1062	9.5991	8.5804	9.5159	9.0544	8.0895		0.400966	8.70959
8.3352	7.8766	8.4379	8.2386	7.7727	8.4005	9.2338	7.3254	8.3461	8.7472	11.0657	9.7366		0.405795	8.65283
8.4344	8.8417	6.8231	8.5691	10.116	9.9877	9.0098	7.0154	9.171	11.5558	8.5086	8.4505		0.410625	8.91352
8.5337	8.2438	7.4232	9.2165	8.0372	9.5999	8.4707	8.493	7.4129	9.0328	8.5912	8.3759		0.415459	8.44519
8.6329	9.8547	6.4699	9.3693	7.105	8.18	9.3955	9.7629	7.1793	8.3273	7.5974	8.1552		0.420289	8.30877
8.7321	9.7856	7.8345	8.8542	8.0993	7.3162	9.8266	7.6664	9.1586	6.986	5.6655	10.6006		0.425118	8.34486
8.8314	8.1604	7.0339	6.908	9.5728	8.9927	10.1055	9.56	8.1665	8.7202	6.9093	9.1543		0.429953	8.48033
8.9306	6.1093	5.9848	8.3034	8.4901	10.994	7.6251	6.8203	6.8615	10.6265	7.0641	8.171		0.434782	7.91365
9.0298	8.2292	7.0682	9.6896	8.927	10.1558	7.3632	7.3762	7.5441	8.0564	6.6389	6.6054		0.439612	7.96855
9.129	5.1538	8.0054	7.9426	8.8123	9.7085	8.3266	6.7826	8.3988	9.1286	7.8716	7.7208		0.444441	7.98651
9.2283	4.3771	7.766	7.8262	7.9025	8.3519	9.0197	5.6115	8.3624	12.7764	7.2296	8.1287		0.449276	7.94109
9.3275	6.6492	6.8443	7.7429	6.866	8.5817	11.1427	5.0946	7.0658	11.6087	10.0496	4.648		0.454105	7.84486
9.4267	6.7454	5.2706	8.2664	8.4372	8.0572	8.6458	4.9297	8.7275	11.9407	5.7315	5.3069		0.458935	7.4599
9.526	7.1647	5.6146	8.3513	6.848	7.1874	7.333	3.9833	8.8176	9.695	7.4769	6.0312		0.463769	7.13664
9.6252	6.3807	6.1175	7.6857	9.0902	5.9182	8.1125	3.9517	6.731	9.0399	6.1894	7.5237		0.468598	6.97641
9.7244	7.2198	5.0527	8.0345	7.6675	6.298	7.1503	4.0924	7.6802	10.8423	6.3985	6.7653		0.473428	7.01832
9.8236	4.1191	5.3203	8.3931	5.2331	8.642	7.2667	4.7434	9.1678	11.0139	5.8695	7.925		0.478257	7.06308
9.9229	4.7875	4.3201	5.8326	4.9904	9.6345	9.5845	3.6949	10.8613	9.5425	8.2325	3.6559		0.483092	6.83061
10.0221	4.9547	5.2401	6.683	6.1505	8.6183	9.8969	4.3353	9.5008	10.0062	6.767	4.2644		0.487921	6.94702
10.1213	4.3998	5.5665	7.1967	5.7597	8.9647	7.9771	3.9897	9.5462	10.6663	6.9062	3.6209		0.492751	6.78125
10.2206	5.7833	5.2206	10.3527	5.1136	8.6591	8.8131	6.9774	7.3125	10.6158	9.0032	3.9941		0.497585	7.44049
10.3198	5.7929	3.3537	9.6541	5.1878	11.1245	8.8709	4.9937	6.1762	12.0004	9.2477	4.2891		0.502415	7.33555
10.419	4.3758	2.5903	9.261	4.4988	9.1118	8.3259	3.388	7.5257	13.4016	7.1507	4.5111		0.507244	6.74006
10.5183	5.8948	4.1919	8.0921	4.1176	8.0149	7.594	3.2864	5.2006	13.1988	5.4483	4.8718		0.512079	6.35556
10.6175	7.1432	3.9729	10.6576	7.3102	7.7712	7.3559	2.6578	7.3522	12.084	5.4957	5.2551		0.516908	7.00507
10.7167	5.1721	4.2316	9.028	6.0925	8.9994	7.182	4.7411	5.7522	10.4741	6.1307	3.6302		0.521738	6.49399
10.8159	3.8937	4.1471	8.6053	5.281	6.5697	7.8172	4.5254	6.9844	9.9121	5.265	4.8713		0.526567	6.1702
10.9152	5.0022	2.867	6.5393	4.6749	7.064	5.7999	2.9611	6.7584	8.6559	5.7805	4.2965		0.531402	5.49088
11.0144	7.6373	4.079	7.3959	7.0612	7.1059	6.2062	2.3484	5.6754	7.9245	7.1132	4.0763		0.536231	6.05666
11.1136	5.2556	4.1593	7.2307	6.7341	8.8418	5.8736	2.2275	4.1242	10.6123	6.0681	5.1167		0.541061	6.02217
11.2129	4.9056	3.2268	8.2118	5.3567	10.0946	6.9469	2.6721	6.3364	9.1462	7.0627	5.586		0.545895	6.32235
11.3121	3.2522	3.763	7.2308	7.8063	8.955	6.6119	2.2876	3.5228	11.4706	5.6002	4.4475		0.550724	5.90435
11.4113	3.8637	3.1865	9.3249	5.3991	10.2467	7.0446	2.9029	5.377	12.8775	5.1882	6.0404		0.555554	6.49559
11.5105	2.8447	3.5286	9.021	5.0657	8.9921	5.376	3.0022	5.2488	10.1852	7.0258	6.0591		0.560383	6.03175
11.6098	4.3725	2.4738	6.5392	5.4359	8.0127	5.4481	2.6069	5.571	8.5589	6.1415	5.0007		0.565218	5.4692
11.709	4.7077	2.7408	7.3462	4.8776	7.1247	5.5127	2.7512	5.5824	10.4855	8.0609	5.3333		0.570047	5.86573
11.8082	4.2856	3.3544	8.827	6.1499	10.4553	7.1311	3.356	6.835	8.7452	5.7091	4.4142		0.574877	6.29662
11.9075	5.2327	2.1919	8.156	4.7606	10.5416	6.0381	2.8942	6.3383	8.6253	5.0798	5.354		0.579711	5.92841
12.0067	3.2041	1.9524	7.4727	5.9966	8.1429	3.7591	2.5646	6.4025	6.8952	6.239	6.2144		0.584541	5.34941
12.1059	4.3172	3.3376	7.399	6.8758	7.5055	4.3084	2.8069	5.145	7.2626	6.0964	5.1752		0.58937	5.47542
12.2051	4.3404	3.2202	7.3891	7.2937	8.2033	4.5757	3.4983	5.5497	7.7257	5.3937	4.2881		0.5942	5.5889
12.3044	3.9872	3.0546	6.2964	7.0177	8.2796	4.1343	3.5801	6.0252	6.8932	5.7847	4.1376		0.599034	5.38096
12.4036	5.4926	2.4528	6.4095	9.8842	7.3497	3.8185	2.3352	5.6566	7.4863	7.958	4.687		0.603864	5.77549
12.5028	3.7313	2.2053	7.9054	7.8157	8.0285	4.3049	3.1265	5.2473	9.6864	7.7894	4.3		0.608693	5.83097
12.6021	2.3156	2.87	7.7482	7.5808	6.8071	4.3402	3.4291	5.6691	10.0061	6.9063	4.713		0.613527	5.67141
12.7013	2.6787	2.3305	7.2886	7.1407	7.0088	3.8576	3.6913	7.5938	9.1827	7.8615	4.0721		0.618357	5.70057
12.8005	3.2952	2.8028	9.6752	7.2777	8.5256	3.0903	5.5383	7.1308	8.8509	5.2648	4.3912		0.623187	5.98571
12.8997	3.8564	2.0738	6.973	7.223	8.0543	3.7095	3.5568	8.8178	5.7994	6.5172	4.3931		0.628016	5.54312
12.999	3.8784	3.6563	6.1207	7.726	7.9647	3.9141	2.4358	6.5547	8.4305	6.4818	3.9657		0.63285	5.55715
13.0982	3.8758	3.7602	7.0526	7.7095	9.1211	6.1371	3.4667	5.4142	5.4345	5.8377	3.3651		0.63768	5.56132
13.1974	4.2977	3.0323	5.5794	6.2164	8.1965	5.7142	2.6632	4.5238	7.305	7.5792	4.5577		0.642509	5.42413
13.2967	4.0529	2.7671	6.4147	6.0305	7.5825	5.7556	4.2223	5.1689	9.2672	7.3064	3.6568		0.647344	5.65681
13.3959	4.2054	3.7081	5.6948	5.8157	7.3489	5.9003	2.5694	4.4946	7.9653	8.6782	3.8831		0.652173	5.47853
13.4951	4.7399	2.5393	6.9463	7.4215	7.0015	5.1846	3.1745	4.9893	6.6967	6.8384	4.1075		0.657003	5.42177
13.5943	5.6928	2.6487	6.7551	6.5862	7.2581	4.8436	3.0089	5.4852	8.0215	9.4955	3.3596		0.661832	5.74138
13.6936	5.181	4.8993	7.0285	5.7061	7.2459	5.9097	4.4613	5.5933	8.8253	6.786	5.3691		0.666667	6.09141
13.7928	5.1497	3.4811	6.0786	6.3188	6.6188	5.4112	3.0449	5.0631	5.7748	7.4921	4.4126		0.671496	5.34961
13.892	2.8079	4.2171	6.597	7.7633	7.6184	5.7004	3.4296	4.2506	8.1385	7.8414	3.4772		0.676326	5.62195
13.9913	4.3783	4.092	5.8755	8.0552	8.0274	5.9913	3.0598	4.1885	8.6381	7.9851	4.5371		0.68116	5.89348
14.0905	3.7846	3.252	5.6398	6.6896	8.1794	5.1692	2.7171	4.0279	7.9813	6.5207	4.5109		0.68599	5.31568
14.1897	5.0074	3.7571	7.8323	9.0593	8.9209	6.2377	2.9155	6.2215	6.9032	9.8468	4.9867		0.690819	6.51713
14.2889	4.0908	4.167	8.5088	9.1211	9.4311	5.5826	4.2815	5.657	8.2867	7.1556	5.477		0.695649	6.52356
14.3882	4.8672	3.3222	7.4456	6.9717	10.0852	5.4581	3.8466	2.9305	8.3166	7.3348	6.8219		0.700483	6.12731
14.4874	4.6615	5.0965	7.4699	7.8766	8.0543	7.7125	2.1972	3.616	11.1794	6.7839	6.7632		0.705312	6.49191
14.5866	6.3731	4.2718	7.8278	8.3435	7.9757	8.4706	2.9934	5.6242	10.8629	8.2501	6.8605		0.710142	7.0776
14.6859	3.9652	6.9254	8.3266	6.7977	8.3617	6.927	4.128	5.9364	9.7245	5.9776	6.2997		0.714976	6.66998
14.7851	6.4731	6.7661	7.0935	7.6939	9.0974	6.4025	2.6664	5.4542	11.0204	8.0723	7.203		0.719806	7.08571
14.8843	5.7865	10.4255	6.8902	8.4962	9.2874	5.5227	3.1594	7.0564	10.9208	9.7914	6.4252		0.724635	7.6147
14.9835	4.3212	9.9583	6.5693	6.748	7.2726	4.4763	2.77	6.1303	9.1337	8.9412	7.6874		0.729465	6.72803
15.0828	5.087	6.9164	7.128	6.6489	10.2066	5.9387	4.4733	6.6875	11.3751	10.0807	7.3706		0.734299	7.44662
15.182	5.7922	4.8012	8.7339	7.5461	8.8448	6.1404	3.5954	5.7372	11.2015	9.9613	7.9365		0.739129	7.29914
15.2812	6.4057	6.094	7.4307	8.0253	7.2008	5.3806	2.7292	4.5908	8.4997	8.1101	8.6779		0.743958	6.64953
15.3805	6.3085	3.827	8.4087	8.7973	6.5728	5.4953	2.8054	5.4351	10.1381	7.2371	8.3039		0.748793	6.66629
15.4797	6.6327	3.2481	7.5811	7.4187	7.2619	5.6033	3.5941	5.462	8.7489	8.2302	8.0572		0.753622	6.53075
15.5789	7.4488	3.8362	5.9745	6.4602	7.9383	6.4708	4.7781	5.7354	8.3494	6.6548	8.2359		0.758452	6.53476
15.6781	7.6965	2.7331	7.6654	7.7041	9.0124	6.6387	3.3553	7.6196	8.0425	8.4205	9.5222		0.763281	7.12821
15.7774	7.2854	2.9602	5.9669	6.5138	6.9512	8.1184	2.9109	8.4285	8.2743	8.0521	8.6416		0.768116	6.73666
15.8766	6.9576	3.8629	8.0074	6.4819	6.7466	6.9501	4.8457	11.4404	8.4075	7.6703	7.9871		0.772945	7.21432
15.9758	6.4791	4.6626	7.0837	6.0552	8.5864	7.2923	7.2015	8.7856	10.4515	8.6342	7.8833		0.777775	7.55595
16.0751	5.1617	3.814	8.6843	5.6966	8.3218	8.9343	4.3519	9.2876	9.1221	7.6589	6.7776		0.782609	7.07371
16.1743	5.6004	4.1359	9.0096	6.7359	6.3561	8.7477	2.8184	8.1095	8.6025	7.3112	10.5285		0.787438	7.08688
16.2735	5.626	2.7502	7.2143	6.2829	7.8268	6.1729	2.7552	7.0379	6.6996	8.8177	8.4395		0.792268	6.32936
16.3727	7.9142	1.995	8.8453	5.752	8.5775	6.8809	3.1699	7.783	8.203	7.6564	7.9621		0.797097	6.79448
16.472	6.2786	3.3041	7.1356	5.8429	7.2987	9.1369	3.9987	7.4664	6.6775	7.9696	7.3131		0.801932	6.58383
16.5712	5.6169	4.3487	8.2023	7.5685	7.4214	9.2745	3.815	7.0761	6.7163	7.3413	6.6417		0.806761	6.72934
16.6704	6.1072	3.5175	7.4402	7.9142	5.5444	8.9947	4.9303	10.1287	7.9341	7.2758	9.0459		0.811591	7.16664
16.7697	7.424	2.7363	7.1238	7.3558	7.5525	9.7533	5.4643	10.4894	8.0831	7.2213	7.6505		0.816425	7.35039
16.8689	6.3868	3.4353	6.5049	8.1482	7.5905	8.2522	5.4327	9.845	10.7215	7.8981	10.2072		0.821255	7.67476
16.9681	6.7014	3.0198	7.5627	8.0574	5.2695	7.4813	6.1468	9.8915	9.9941	8.8599	8.2228		0.826084	7.38247
17.0674	7.2865	2.1471	7.8173	7.6806	7.6772	6.9555	7.3932	8.962	9.0496	8.2226	8.6789		0.830919	7.44277
17.1666	8.0456	2.6404	6.2814	6.828	7.8017	8.1182	8.1054	8.7221	10.5248	8.5327	8.3196		0.835748	7.62908
17.2658	6.0407	2.679	7.1644	7.0603	6.9352	6.7823	7.937	9.0649	8.5353	9.145	7.8649		0.840578	7.20082
17.365	6.9011	3.8309	6.9814	6.9436	6.4413	8.5189	10.0787	9.6991	7.4282	7.2076	5.7924		0.845407	7.25665
17.4643	7.3175	5.684	5.7074	8.0167	7.3385	9.5193	7.6192	8.2751	5.727	8.4786	7.0526		0.850241	7.33963
17.5635	6.6341	6.6661	7.0238	8.5101	5.9889	6.4615	6.9513	8.7288	8.3766	8.865	8.4411		0.855071	7.51339
17.6627	5.8981	6.971	8.0409	7.3442	5.3247	6.0932	7.9472	7.7121	9.0142	6.9896	8.5665		0.8599	7.26379
17.762	7.3433	5.6149	7.3602	7.3822	7.0265	8.1523	7.8082	8.5059	6.5592	7.9497	8.8052		0.864735	7.50069
17.8612	5.9597	6.3805	6.5977	7.5222	8.9616	6.5764	7.4191	8.4099	8.095	9.8721	8.6727		0.869564	7.67881
17.9604	4.0482	6.6441	7.1173	5.7648	9.1473	6.1441	6.5628	8.8354	8.1166	6.8608	8.294		0.874394	7.04867
18.0596	5.5101	6.8131	7.0591	6.501	7.8262	4.6967	7.7078	8.3107	9.2929	9.4151	8.4379		0.879223	7.41551
18.1589	7.0422	8.0117	6.5382	7.5587	7.8179	6.6354	7.0998	10.5362	8.6818	7.7197	6.9454		0.884058	7.68973
18.2581	4.1377	8.9799	8.2367	5.5517	6.9334	5.6613	5.948	7.977	8.6051	7.6721	6.9525		0.888887	6.96867
18.3573	3.7094	7.3955	6.4331	6.0719	6.3275	7.8674	6.6111	8.3595	7.7424	7.9444	9.5296		0.893717	7.09016
18.4566	5.5744	6.3697	7.6873	7.7239	5.0339	7.0868	6.6732	8.773	9.1947	8.4388	9.7349		0.898551	7.48096
18.5558	5.1362	6.6793	9.0481	4.9312	5.2753	7.3953	6.2958	6.7884	8.308	9.5749	8.7647		0.903381	7.10884
18.655	4.5229	5.7815	8.383	5.508	7.784	7.4945	6.694	8.4225	6.2666	8.1176	5.7714		0.90821	6.79509
18.7542	5.2918	4.8307	7.5842	5.7517	5.5239	6.9831	7.3785	9.433	7.9259	9.2157	8.3866		0.91304	7.11865
18.8535	4.7624	3.6368	7.1976	5.479	6.9695	7.2796	6.9612	9.3695	8.8255	7.5014	8.4998		0.917874	6.95294
18.9527	7.1632	5.4612	6.8116	6.5617	5.558	5.6723	6.4007	10.2833	6.4842	5.3541	7.3082		0.922704	6.64168
19.0519	5.6635	7.9827	6.2671	6.241	4.8686	5.173	7.8666	10.4592	7.0313	7.1333	8.3456		0.927533	7.0029
19.1512	5.7417	7.9438	7.0555	6.9125	5.0332	6.4441	7.9704	8.1879	6.4768	6.194	6.9384		0.932367	6.80894
19.2504	5.6117	7.8571	6.3004	7.0245	6.3894	8.0118	8.0125	7.5787	6.2723	5.8384	6.9158		0.937197	6.89205
19.3496	5.5215	6.305	6.5862	6.9366	5.4405	4.9804	8.3102	8.1476	5.8458	6.9544	7.92		0.942026	6.63165
19.4488	3.5334	6.941	6.1243	5.9747	4.8	5.1901	7.9838	8.0701	7.2031	6.1727	6.8663		0.946856	6.25995
19.5481	4.29	7.8066	6.5936	6.6587	3.7918	5.0304	8.4014	6.9755	6.4721	6.4643	5.2898		0.95169	6.16129
19.6473	4.6977	5.8474	6.4641	5.7004	4.5094	5.8318	7.4279	4.735	6.3483	7.242	6.8443		0.95652	5.96803
19.7465	4.9969	4.5138	5.4666	5.5609	4.7372	5.0953	7.5379	5.1915	6.2895	6.2956	5.5158		0.961349	5.56373
19.8458	4.2749	5.2787	5.3712	5.021	4.5578	5.1244	6.8576	5.7895	4.1583	6.549	5.2354		0.966184	5.29253
19.945	3.2719	5.1938	5.4255	5.2843	3.3182	5.7657	4.7326	6.2508	3.3767	5.2023	4.9458		0.971013	4.79705
20.0442	3.7229	5.2364	5.7321	4.3431	3.9763	5.5105	4.5254	6.0724	2.1449	3.0411	3.2009		0.975843	4.31873
20.1434	2.5568	5.7648	3.92	4.6113	2.8004	3.3133	4.9477	4.9333	2.4852	4.0973	3.478		0.980672	3.90074
20.2427	2.3624	6.4102	5.9937	3.4408	3.049	2.4537	5.0665	4.0751	2.1448	4.3467	4.7529		0.985507	4.00871
20.3419	2.6545	5.2649	4.6879	3.9053	2.9878	3.4658	5.0086	3.5932	1.8581	3.5685	3.5995		0.990336	3.69037
20.4411	2.5288	4.3458	4.684	2.3865	1.9963	3.9685	4.5277	3.2434	1.7244	3.4016	2.6542		0.995166	3.22375
20.5404	1.5083	5.165	3.6244	1.954	4.024	2.7256	3.9664	2.6831	1.2383	2.5037	2.5638		1	2.90515

## Sheet: Image23
X0	Y0	Y1	Y2	Y3	Y4	Y5	Y6	Y7	Y8	Y9	Y10	Y11	Y12	Y13	Y14	Y15	Y16	Y17	Y18		Ap-Basal to 1	Average intensities
0	35.7776	33.3804	26.708	23.1222	67.834	27.193	46.6026	46.0449	33.683	35.518	53.6566	38.0078	45.9088	39.2009	53.5006	69.8304	42.081	41.373	65.1225		0	43.3971
0.0992	34.0938	29.309	32.4536	24.1354	55.072	28.8611	50.4057	43.2838	47.302	39.872	65.2573	56.3491	36.5987	40.0156	50.0327	72.5025	42.537	52.551	62.5858		0.00399884	45.4325
0.1985	39.0104	31.8964	37.1203	19.9119	57.786	29.7365	53.9103	40.1563	43.581	33.528	56.2852	51.2507	46.6522	39.7482	54.2708	71.2153	45.409	40.591	69.6511		0.00800171	45.3532
0.2977	40.4879	33.2954	37.7996	23.4596	64.616	28.8684	44.1982	42.7082	35.848	34.339	53.4768	45.565	53.8726	39.4391	56.4046	78.5135	40.177	39.806	98.0868		0.0120005	46.8927
0.3969	45.5912	33.3634	37.705	25.4569	64.847	29.267	37.1838	35.6803	39.781	39.485	61.4454	45.568	51.3196	39.693	55.6793	66.9908	36.231	40.421	86.7645		0.0159994	45.9196
0.4961	38.984	33.6472	25.8998	28.3731	78.601	35.532	40.9608	37.4753	33.933	41.897	63.3316	56.6329	43.7102	43.7003	51.8862	67.0337	30.909	42.31	84.5721		0.0199982	46.2836
0.5954	41.1011	32.0559	33.2598	33.0596	74.248	35.0228	36.889	34.9177	45.534	43.675	59.8409	68.6102	43.5537	43.3644	48.031	61.5226	36.245	52.189	85.043		0.0240011	47.798
0.6946	32.1191	31.8611	38.658	29.7829	86.946	38.9838	34.3299	32.2551	47.516	40.464	49.6694	81.4312	53.0125	37.7899	41.0214	57.2528	52.984	49.7	88.0119		0.0279999	48.6205
0.7938	33.9405	36.1702	32.5528	34.3659	84.053	28.8873	40.9638	33.6143	49.477	42.947	49.1848	77.9722	51.5296	32.0424	44.5439	51.4475	52.967	51.655	83.1534		0.0319988	47.972
0.8931	34.1663	45.2855	31.3317	31.6319	97.214	34.6751	39.6971	37.3754	60.926	52.172	45.451	75.3583	47.2339	33.9768	33.9697	46.7574	65.324	54.14	67.9028		0.0360016	49.1889
0.9923	24.8882	49.43	26.7152	26.6082	90.961	33.7861	48.5426	37.6902	57.849	49.819	42.3064	74.6226	42.5908	45.8364	36.2987	55.4224	67.274	52.69	71.3251		0.0400005	49.1924
1.0915	23.7294	42.5871	33.5272	28.2148	100.78	40.9608	48.037	36.3787	58.707	63.513	37.973	69.6186	45.8339	42.8928	41.53	44.0246	62.84	49.718	71.5889		0.0439993	49.6029
1.1907	30.8391	42.4126	30.6784	29.6169	97.309	41.7385	52.5523	39.9497	53.863	72.516	39.803	57.613	45.0665	42.5396	39.2958	41.2937	71.831	56.826	71.6897		0.0479982	50.3913
1.29	33.2779	47.6889	28.2552	30.542	95.741	42.5086	55.5687	38.7165	74.32	78.218	39.0777	59.9183	48.2705	38.8908	38.3122	43.9414	58.394	62.438	74.8609		0.052001	52.0495
1.3892	39.4302	57.6064	28.8974	41.8444	95.64	52.0682	50.4691	34.4536	87.575	96.045	39.3328	51.0307	56.2901	45.5407	37.0937	45.0306	55.777	85.987	73.9036		0.0559999	56.5271
1.4884	42.1871	61.2837	24.5717	34.3769	91.019	47.453	46.9388	37.4587	92.55	100.463	35.6154	47.8456	48.8636	48.9349	44.5368	44.749	61.965	80.519	64.3076		0.0599987	55.5599
1.5877	37.7435	71.1222	22.8371	35.6084	88.758	47.6687	52.6664	37.7203	107.499	90.247	33.254	44.4243	48.3474	41.8306	48.4443	43.5365	69.925	72.267	68.1411		0.0640016	55.8969
1.6869	33.3539	74.1985	21.1585	30.4059	83.201	49.5382	53.0168	32.7752	102.683	74.186	33.6835	57.0228	49.5235	44.3231	59.3821	48.3922	67.918	76.398	58.0556		0.0680004	55.2219
1.7861	31.0221	70.8682	26.6968	29.2516	88.444	52.72	59.3518	38.2993	90.315	61.525	28.0701	55.8472	41.0739	47.5263	73.6467	43.2737	66.444	69.367	67.9101		0.0719993	54.8238
1.8853	37.9504	70.0522	21.5164	42.4107	94.583	55.3398	58.5231	37.4661	84.582	57.68	28.0934	52.0223	38.3615	56.4342	67.7518	36.8108	78.827	70.744	60.1693		0.0759981	55.2273
1.9846	34.4412	67.017	24.1986	45.3835	87.26	55.7436	51.2676	33.3458	67.065	60.566	28.0167	49.218	46.449	76.078	62.584	35.647	85.584	70.975	64.0645		0.080001	54.995
2.0838	32.824	65.5124	25.0848	50.0205	79.442	56.9308	51.9688	52.3108	66.686	56.547	30.0228	50.406	45.7027	87.2033	64.1928	40.4097	96.186	65.957	63.5937		0.0839998	56.8948
2.183	39.2214	61.8402	26.1315	38.8435	80.525	49.0707	45.4076	58.8308	59.499	56.114	29.6042	49.2057	46.8032	74.4231	66.5802	33.189	103.095	79.515	60.7178		0.0879986	55.7167
2.2823	41.0426	53.5417	30.9576	44.8395	69.766	57.5334	40.283	69.2169	51.051	59.979	32.9201	51.2153	46.8013	76.4221	76.3856	43.2858	94.285	90.987	59.9422		0.0920015	57.3924
2.3815	37.026	61.4677	23.1972	46.0912	72.235	53.3996	32.8354	61.6362	54.39	55.188	30.6565	48.974	39.4084	77.6357	89.1814	36.1624	91.408	90.293	52.8939		0.0960004	55.4779
2.4807	30.2533	48.1049	24.4286	47.3028	85.949	52.1063	36.2637	73.1194	47.281	64.646	37.7841	48.934	39.7162	79.463	86.0825	36.9104	84.268	97.211	58.4819		0.0999992	56.753
2.5799	34.8046	43.0435	29.133	32.5067	84.179	59.3648	32.0614	67.3757	49.882	71.901	34.5062	58.3411	36.1824	72.4955	76.0898	35.4872	80.186	83.275	55.3023		0.103998	54.5325
2.6792	32.9323	35.5222	31.6449	33.0524	96.921	47.3032	33.966	74.3677	53.066	69.812	37.0558	55.4467	37.7224	76.6977	67.5559	34.945	96.257	81.689	46.4816		0.108001	54.8652
2.7784	30.2993	34.1792	27.4517	37.0927	84.765	54.3089	28.0817	72.8148	55.665	71.857	32.6861	55.0511	33.0893	72.6082	86.6693	33.8292	90.93	79.335	39.44		0.112	53.6923
2.8776	36.4994	30.0483	28.0247	30.6104	61.188	48.0785	28.7375	61.1539	50.623	62.587	39.6333	51.2204	35.2853	69.7943	85.5152	36.1981	84.055	78.978	46.0779		0.115999	50.7531
2.9769	37.5505	33.6534	25.573	28.0547	49.93	55.6671	23.6336	55.7878	51.748	64.863	34.9754	44.7802	43.0692	67.1711	74.5125	36.9856	73.707	78.277	47.0387		0.120001	48.7883
3.0761	34.6452	30.7951	26.0087	22.9939	50.97	41.5986	28.808	55.2588	42.495	57	38.7457	40.6707	49.1977	58.6836	61.959	39.2274	77.854	85.57	43.7524		0.124	46.6439
3.1753	41.0643	41.389	27.8207	21.3314	51.771	32.3722	26.166	47.6235	44.711	51.022	36.0053	40.6449	52.5765	54.1822	60.5353	29.1495	79.28	80.47	55.3363		0.127999	45.9711
3.2745	41.2118	39.9307	24.4635	17.3969	38.576	30.3899	33.6454	36.1818	46.5	44.846	41.0816	42.1668	48.2043	51.9874	63.9698	31.234	73.688	99.718	60.1843		0.131998	45.5461
3.3738	43.9976	36.796	24.0402	25.5825	31.821	34.534	26.9576	34.4965	44.07	42.339	38.0177	50.3488	40.0362	51.8914	52.5936	32.6562	82.519	102.595	49.3513		0.136001	44.4549
3.473	38.9065	39.1541	25.3922	22.8367	34.833	26.1166	27.3003	33.2963	40.56	33.388	38.1043	58.3488	33.2871	53.4769	46.539	32.0711	79.226	95.887	42.1084		0.14	42.1491
3.5722	44.8015	42.125	18.6745	28.6347	36.277	21.8528	25.2053	33.1996	35.937	37.76	36.4093	65.4075	32.6798	50.1392	33.7377	36.5212	70.092	94.834	37.1256		0.143999	41.127
3.6715	49.2241	40.0195	25.7376	26.6534	28.191	23.7552	27.258	32.6592	30.689	33.074	32.4821	59.6322	31.8794	40.8881	32.6968	31.3526	66.224	95.542	47.055		0.148001	39.7375
3.7707	39.9752	35.9461	28.3372	23.0627	29.96	24.0595	16.4954	26.5884	26.136	31.729	28.5502	51.4508	33.8843	40.9176	33.3927	31.0377	60.961	83.219	45.8758		0.152	36.3989
3.8699	29.0545	36.2401	25.2065	19.1531	30.226	23.6265	22.6577	24.687	28.691	27.76	26.2979	41.5605	36.8736	40.0988	35.3647	31.5087	62.084	85.352	37.9407		0.155999	34.9675
3.9692	26.7602	34.04	19.1707	17.5473	30.979	23.748	20.6315	28.0706	26.887	27.09	22.6321	47.4303	39.7596	43.2512	34.6195	29.3748	56.792	71.615	35.3583		0.160002	33.4609
4.0684	25.7631	38.4175	22.371	20.4257	24.426	22.3444	19.4546	22.5576	26.742	24.809	22.19	44.6792	31.4665	44.7162	26.3399	28.0686	62.653	61.568	35.9891		0.164001	31.8411
4.1676	32.7613	42.9168	21.9033	22.264	27.655	18.9102	21.0593	20.7941	21.23	24.253	27.5656	43.4086	31.1948	40.1349	23.907	25.1652	69.745	56.699	42.4761		0.168	32.3181
4.2668	33.9282	50.4716	25.6724	17.7004	23.75	18.6674	22.4529	23.1009	26.936	26.64	23.0152	35.7859	27.3987	44.9917	23.835	19.2326	59.948	57.721	43.9321		0.171998	31.8516
4.3661	38.2544	47.8105	25.001	19.1913	27.753	16.4811	31.091	22.8672	22.265	17.922	22.1201	36.5164	30.9616	48.4622	24.6786	22.5672	63.294	47.634	38.5278		0.176001	31.7578
4.4653	38.3672	48.6211	25.9943	18.0209	22.684	14.0355	33.8848	28.3384	22.882	17.168	27.1433	30.213	36.2858	45.26	21.5671	19.9449	52.696	43.379	45.4902		0.18	31.1566
4.5645	38.4512	46.9754	21.7303	16.372	20.682	12.3496	30.1996	22.5445	22.925	19.273	21.3562	31.6949	27.8117	54.6819	21.8547	20.8342	74.717	31.825	41.4919		0.183999	30.409
4.6638	40.3369	36.8627	24.8121	19.4618	19.864	12.294	26.754	28.9846	23.659	15.888	19.4844	26.0637	33.8299	55.6519	18.0565	22.7673	70.638	23.042	41.062		0.188002	29.448
4.763	38.5664	34.1385	18.3147	19.9692	16.074	14.7586	22.8987	25.7975	19.068	15.28	20.7683	25.1441	36.551	59.9453	17.024	20.5405	72.887	20.66	42.5187		0.192001	28.4687
4.8622	36.6883	34.0672	18.5398	24.5861	13.512	19.0023	20.4483	23.0485	20.422	14.171	20.2845	24.9692	34.8398	44.8656	14.8787	24.3785	53.908	22.388	45.302		0.196	26.8579
4.9614	32.4302	36.8578	18.6024	23.5174	15.751	17.1567	22.7493	20.5759	15.928	14.671	19.9656	29.1035	31.3079	48.5272	15.7252	26.0293	47.138	20.368	34.1817		0.199998	25.8203
5.0607	35.4538	42.1919	15.8635	23.8478	19.818	21.318	18.5112	23.1716	14.537	18.324	19.3463	27.2444	28.9307	32.1596	19.0293	23.7988	34.829	23.758	29.04		0.204001	24.7986
5.1599	27.3794	33.2129	19.1681	32.335	15.064	21.3708	26.1484	19.401	15.68	21.063	21.546	23.2914	25.5991	36.3294	19.9854	24.1314	34.317	19.384	33.8207		0.208	24.6962
5.2591	23.7797	33.469	18.8886	29.8288	17.463	24.7257	18.3528	19.2139	18.214	21.414	23.6197	26.2489	23.1904	32.2547	21.8936	20.3288	30.309	17.137	36.5756		0.211999	24.0477
5.3584	24.7716	22.9391	22.4128	25.3702	24.226	20.8094	22.098	20.9563	16.037	11.707	24.8236	25.1647	18.0424	28.9126	15.9236	18.678	26.95	16.758	36.569		0.216002	22.271
5.4576	26.8017	26.5397	23.9748	27.8835	21.923	21.4709	22.9699	21.2926	17.243	15.747	20.5621	25.9724	23.0987	29.5231	20.9042	15.9718	22.432	14.489	36.7039		0.220001	22.9212
5.5568	24.8678	28.1889	25.9833	28.8545	25.237	21.3328	23.3117	19.1095	17.238	19.941	22.8882	21.7892	22.2099	23.7113	15.5299	17.8599	22.303	16.4	40.362		0.223999	23.0062
5.656	22.4551	28.8256	19.9037	24.3328	19.407	23.0566	24.4449	16.5283	18.649	23.026	19.6001	26.132	22.7949	22.4854	18.8998	18.3632	22.46	14.564	28.1104		0.227998	21.7915
5.7553	18.2497	25.8642	18.6758	27.4124	22.444	20.0599	21.6632	13.8707	21.274	22.192	15.8183	24.8334	21.6435	17.3988	17.2439	14.5588	20.246	15.562	32.5032		0.232001	20.606
5.8545	18.8436	28.9057	16.2477	26.9453	20.775	22.9829	28.9076	18.1353	18.108	16.676	20.2355	23.2519	26.0226	17.518	17.353	20.3779	19.901	17.749	24.8907		0.236	21.254
5.9537	18.8042	17.3658	18.4372	26.7352	19.857	22.1852	25.2742	15.0159	14.727	14.039	23.2045	20.9536	24.1067	23.1365	19.7295	14.6537	18.235	17.57	24.0461		0.239999	19.8988
6.053	20.3658	18.5538	21.3779	28.0835	18.412	27.7635	26.2352	22.6612	19.957	17.531	19.0459	23.0077	25.1248	20.7662	16.7053	22.8895	20.794	21.166	28.5532		0.244002	22.0523
6.1522	26.7949	16.0525	17.0664	24.2755	25.699	20.6928	25.1267	22.607	16.399	17.313	12.6241	21.9208	21.4817	16.0743	13.3857	19.4139	21.138	18.814	27.9875		0.248001	20.2561
6.2514	21.8872	17.4356	17.1603	23.2434	24.683	22.3603	26.1485	25.8769	19.081	21.093	15.6593	24.3467	22.9026	14.3939	22.1095	19.3131	20.666	14.116	25.2768		0.251999	20.9344
6.3506	22.0193	21.8907	19.6766	22.5585	20.587	20.7479	27.2374	26.4455	16.013	17.816	15.3682	24.7954	17.8361	14.4931	23.0169	18.4118	19.715	19.78	24.1782		0.255998	20.6625
6.4499	23.03	24.2687	24.3434	26.5421	22.179	23.6015	26.0961	29.6029	21.825	13.331	17.838	23.1937	22.934	18.6158	19.0376	19.2596	21.543	21.256	31.5987		0.260001	22.6366
6.5491	21.9607	25.4485	21.7324	32.6836	22.046	17.4997	26.0112	26.402	21.696	15.75	22.5268	27.5307	22.1675	17.4508	18.7233	21.9531	29.709	20.047	36.3766		0.264	23.5639
6.6483	23.9686	25.5416	25.7056	22.6835	15.033	23.9331	30.8121	21.1723	22.125	14.835	26.5788	28.4903	27.8835	17.1749	17.0644	25.3829	21.923	14.205	37.2895		0.267999	23.2527
6.7476	19.1902	23.7033	24.4089	24.1802	20.404	27.099	22.7005	19.4075	15.911	19.459	19.6009	33.6793	24.7713	19.2072	18.9075	26.0975	20.827	10.394	32.0232		0.272002	22.209
6.8468	22.1784	19.2185	28.4259	28.5076	16.015	31.7237	20.5726	20.791	17.391	17.115	21.6825	29.1792	25.6182	19.4236	16.3733	25.1038	22.765	15.834	30.2883		0.276001	22.5372
6.946	22.486	23.4714	24.3529	25.7113	21.777	27.0418	21.5921	18.38	14.889	20.076	20.1389	21.5387	27.1237	16.6924	15.6365	23.7438	20.582	11.378	29.6591		0.279999	21.3827
7.0452	22.3497	24.9793	22.6689	24.518	17.609	21.5994	16.4166	24.0115	17.757	17.857	26.7617	16.57	24.969	20.1259	18.9082	16.0423	21.567	11.135	25.2754		0.283998	20.5853
7.1445	22.2524	23.4183	22.7279	27.6693	20.804	25.8111	20.2392	19.3265	22.233	16.939	22.7892	22.68	32.2524	21.9244	15.7121	16.0958	18.274	17.651	28.843		0.288001	21.9812
7.2437	20.319	15.2469	23.2336	19.4792	19.806	23.4932	20.6819	20.5723	14.989	17.261	20.2294	23.6177	30.78	23.32	18.6953	13.6145	18.621	18.854	32.5739		0.292	20.8099
7.3429	22.0129	22.4978	22.6795	23.1775	21.959	18.4219	17.652	19.8096	20.567	15.218	25.548	26.8558	25.3993	17.0593	16.9009	15.1378	20.937	21.899	24.7499		0.295999	20.9727
7.4422	22.5403	21.2767	25.0842	23.9052	20.728	16.4213	17.7385	15.9378	17.395	14.269	26.7377	23.998	26.2241	14.9507	17.3115	15.3678	18.988	16.228	25.507		0.300002	20.032
7.5414	27.7176	22.1104	23.9305	26.3351	24.519	16.2355	20.2825	17.7327	17.627	11.268	22.0677	26.9924	25.2373	15.6171	19.1047	15.9988	18.488	17.138	27.2712		0.304	20.8249
7.6406	28.1038	23.622	26.9997	23.0506	24.448	19.7251	14.914	19.4543	20.368	13.686	25.4679	27.7276	27.194	15.0859	23.7749	15.1907	21.511	20.331	24.0405		0.307999	21.8261
7.7398	27.5686	18.8679	25.7445	22.3551	25.519	20.5116	10.7716	20.5062	23.403	18.627	21.0857	26.329	31.0301	18.2924	20.2846	16.7508	22.179	22.185	25.2892		0.311998	21.9632
7.8391	22.88	27.0106	24.7156	19.5648	22.98	20.9418	12.7695	17.0817	25.79	14.656	19.8938	20.0651	30.1473	15.6295	17.7186	15.7909	30.838	24.713	22.1055		0.316001	21.3311
7.9383	20.5752	24.1397	21.9807	21.8745	19.882	17.486	9.5725	14.7236	23.028	17.51	18.0394	22.8582	31.6863	16.8135	15.0334	14.6654	28.043	22.857	25.6374		0.32	20.3371
8.0375	18.1225	20.582	17.6838	25.5184	20.654	16.9485	12.0002	15.1558	23.002	15.544	15.678	25.9184	22.0035	20.6103	12.9115	17.3979	29.283	23.507	20.39		0.323999	19.6269
8.1368	17.8809	22.0218	20.483	26.2237	20.478	14.3351	18.428	15.0681	19.465	12.795	18.1715	25.2069	22.339	23.7037	12.6125	21.6215	26.857	28.033	20.1495		0.328002	20.3091
8.236	19.4711	23.0156	21.3126	21.0492	16.79	16.8582	17.6406	14.5887	19.265	17.476	17.8786	22.1358	21.035	17.4562	11.7586	23.3442	27.573	26.056	23.4282		0.332	19.9017
8.3352	16.7957	22.6141	23.1884	17.7366	20.599	21.0707	16.2562	16.3604	20.306	16.221	20.2637	26.7502	18.9067	17.9268	14.3172	18.339	22.22	24.545	22.772		0.335999	19.852
8.4344	18.7917	21.9144	21.5949	20.8729	14.968	22.0269	14.1838	15.5492	20.282	14.727	17.4387	25.236	18.7845	14.1866	11.2122	21.0096	17.989	26.619	23.0098		0.339998	18.9682
8.5337	14.2074	20.5168	13.7611	18.3194	14.587	21.9213	12.6062	13.6492	20.189	18.069	21.9466	20.7813	18.8288	17.2556	12.9036	22.397	18.608	25.22	24.6156		0.344001	18.4412
8.6329	11.9239	16.5892	12.6496	21.101	14.724	21.4262	11.273	18.5874	18.292	16.534	24.053	19.0034	20.7639	18.8474	11.6611	23.1253	19.961	17.372	18.2647		0.348	17.6922
8.7321	15.7676	21.6196	13.0491	13.1537	18.419	17.5714	11.5294	11.7385	21.802	12.534	23.2337	22.3861	17.5806	22.0181	12.2357	21.8321	14.655	19.079	23.8422		0.351999	17.5814
8.8314	14.9845	16.0195	11.7884	17.0629	14.524	17.9523	11.4024	13.1977	16.932	14.825	31.6028	21.0672	16.8133	23.2973	11.7405	21.4654	18.695	24.161	18.9867		0.356001	17.7115
8.9306	16.3667	17.0315	15.672	17.6384	16.215	15.4115	10.4223	14.9977	21.402	18.037	29.1903	22.5945	17.8254	14.0164	14.0947	19.4657	13.706	22.397	21.5998		0.36	17.7939
9.0298	14.7177	14.7407	16.2674	15.9585	17.745	15.7486	10.3763	14.8686	21.019	18.158	26.0641	18.001	19.1354	16.4881	14.5816	20.9703	12.416	20.508	21.093		0.363999	17.3083
9.129	13.5077	15.5806	16.3787	17.4837	17.035	25.2139	8.8007	8.6592	19.618	17.893	26.9839	13.9188	15.5346	18.0497	18.9237	25.1508	13.772	23.558	20.6354		0.367998	17.7209
9.2283	12.0748	19.3608	13.2928	13.7644	18.638	19.6146	7.822	11.5373	23.478	19.594	28.1693	10.3656	18.3506	16.3187	19.0719	20.1731	19.634	25.196	18.2828		0.372001	17.6178
9.3275	13.3356	15.9707	11.012	10.7086	17.682	19.8536	10.8143	10.2541	22.701	14.765	25.1464	17.2547	9.8525	15.6255	19.4791	21.148	19.615	28.22	22.2523		0.376	17.1416
9.4267	17.8274	21.2225	11.2218	12.709	19.179	22.0232	11.6451	10.8293	20.074	11.993	19.651	17.6234	15.0851	16.9336	12.8384	14.8748	17.802	26.441	22.6934		0.379999	16.9825
9.526	15.2242	26.1692	10.8825	10.3738	27.167	25.7148	10.2971	9.0113	17.237	14.771	16.6833	15.9647	13.4535	18.5357	10.9632	18.3771	18.318	25.021	24.4789		0.384001	17.297
9.6252	19.1284	19.2089	11.3532	14.7757	24.633	25.7898	8.7521	9.6922	21.607	17.314	25.4128	24.2006	12.1016	21.4572	11.7597	18.0119	16.395	20.815	16.349		0.388	17.8293
9.7244	14.1727	22.9716	10.0925	14.0493	26.663	21.3454	8.1444	9.236	21.821	15.199	29.817	9.4589	13.8255	15.813	11.3939	20.6208	18.031	22.908	18.4989		0.391999	17.0559
9.8236	15.7852	19.3333	11.6748	13.2109	14.406	18.7067	8.8087	7.7281	21.33	13.381	24.7081	10.7163	13.9619	21.7449	13.4026	17.7071	18.072	20.544	18.4572		0.395998	15.9831
9.9229	13.6748	16.716	15.2088	14.2027	15.938	16.532	10.2565	11.286	14.698	13.116	22.5114	15.3158	11.5419	20.6394	12.2579	16.7066	23.799	19.023	14.3075		0.400001	15.6701
10.0221	13.5528	18.6571	14.4048	15.8286	17.338	21.6325	12.2712	12.3592	16.875	14.988	23.7742	13.2282	11.1051	15.6602	17.0139	14.2493	18.918	13.101	14.0368		0.404	15.7365
10.1213	12.1982	20.1556	12.5913	10.9715	19.971	17.9831	12.5193	8.4758	14.748	14.438	21.9336	10.4802	10.3627	12.8394	13.7462	16.9023	17.366	13.285	13.0815		0.407998	14.4236
10.2206	15.0771	19.0435	18.335	10.4037	23.038	19.9976	13.7642	12.1888	16.643	11.945	25.1296	12.3462	7.2521	15.3733	14.8339	18.2504	17.999	13.417	14.969		0.412001	15.7898
10.3198	14.5552	18.5479	15.301	8.1469	18.868	17.79	9.9146	6.7124	17.01	14.247	18.2592	10.86	9.3958	12.124	11.7595	19.3715	11.073	14.197	15.313		0.416	13.8656
10.419	12.1577	19.2451	17.1551	8.3845	19.62	20.2426	9.7798	6.8501	17.272	17.912	23.8483	9.6309	10.5043	16.0756	13.3522	16.7077	12.271	15.106	22.9278		0.419999	15.2128
10.5183	9.5915	23.6956	13.3098	8.4352	20.229	21.798	9.6858	10.5889	21.619	21.742	23.0513	9.3626	6.5818	13.6591	12.3739	17.6215	14.86	20.18	25.7336		0.424002	16.0062
10.6175	11.3368	22.8646	16.7347	6.3882	22.246	21.6023	9.1767	9.149	17.626	15.625	21.0273	10.8155	5.8856	15.0609	12.164	20.3741	17.629	19.965	21.7944		0.428001	15.6561
10.7167	7.1402	21.4999	13.973	6.9943	17.415	22.7547	9.9075	8.7685	16.213	14.013	16.4437	10.9547	6.8007	14.1851	18.4444	21.2899	14.758	17.814	18.2024		0.432	14.6091
10.8159	9.9063	18.5577	17.7058	6.7037	16.594	25.1007	10.0799	9.8867	16.948	16.35	17.6173	9.3321	5.6148	20.7566	20.2561	22.3362	10.711	17.298	19.9329		0.435998	15.352
10.9152	8.2773	18.0513	12.7659	5.0697	24.758	19.2917	11.8163	7.9907	16.931	15.188	21.3213	9.6306	5.608	15.5817	16.2141	19.3635	11.019	14.014	16.6507		0.440001	14.1865
11.0144	7.7141	21.1963	15.522	7.2019	23.305	21.6069	11.0355	6.9276	13.596	13.051	17.4663	5.2894	5.7653	18.2098	20.7277	17.9783	19.951	16.96	22.7992		0.444	15.0686
11.1136	6.9869	24.7354	12.5727	8.6557	18.726	22.9875	9.8466	6.0609	15.706	15.513	21.7179	8.3508	3.4006	21.2055	16.4423	18.8309	22.571	16.058	16.5739		0.447999	15.1022
11.2129	8.94	31.1571	11.0157	6.9693	21.386	23.0389	7.4525	6.334	18.512	16.646	19.6681	7.3611	3.425	14.2152	14.6531	16.9064	20.33	13.499	20.2495		0.452002	14.8294
11.3121	9.9541	29.3195	13.7195	9.5002	18.237	17.4448	6.2852	8.1869	17.32	14.116	22.2013	6.9206	6.8133	13.1634	18.5108	20.4554	18.453	10.906	22.1386		0.456001	14.9287
11.4113	11.1776	21.0874	13.1613	8.7894	17.318	17.1306	6.567	7.2358	19.3	21.53	18.4413	9.5957	7.1161	12.5418	19.506	13.6369	19.903	13.245	23.3547		0.46	14.7704
11.5105	10.644	23.3245	11.4069	8.92	17.001	19.5662	7.178	7.6879	19.663	19.593	21.0793	9.7204	6.0778	15.6101	20.3316	16.1945	15.542	14.33	19.599		0.463998	14.9194
11.6098	10.1985	21.8708	7.9385	6.0828	16.821	15.6815	8.3711	6.488	15.73	22.154	15.3737	11.2537	9.0946	16.5877	21.9603	16.1958	17.014	11.511	25.935		0.468001	14.5401
11.709	12.7429	12.7968	4.9523	3.0698	15.127	13.7294	10.5881	7.9107	20.522	22.287	15.0762	8.2812	5.7926	15.2902	12.1331	15.9277	14.435	9.868	22.626		0.472	12.7977
11.8082	10.4573	16.31	5.0755	5.9269	18.013	18.5594	6.9523	15.4566	21.901	20.129	20.1538	6.0008	6.2305	15.5512	15.873	18.6076	21.957	11.619	26.4948		0.475999	14.8036
11.9075	7.7078	24.8211	4.8615	7.6923	15.24	17.9172	6.7239	21.769	16.591	19.117	19.1974	9.4234	6.6329	23.0752	16.4757	21.3013	16.196	12.164	22.8395		0.480002	15.2498
12.0067	8.4043	25.6251	4.8744	7.598	14.411	16.8147	5.7535	21.439	19.043	17.761	21.8703	6.7486	5.9428	17.4414	14.3472	22.6746	17.711	11.615	20.3528		0.484001	14.7594
12.1059	9.9541	20.6344	7.9624	8.6555	14.591	20.8817	6.5582	26.4945	18.57	16.157	19.9015	7.7155	5.851	22.0991	14.1374	21.4502	16.434	14.482	21.6194		0.487999	15.4815
12.2051	8.9924	20.0785	7.3725	6.6349	15.032	20.7626	6.0102	44.7811	20.981	18.156	16.1803	8.7933	6.8329	16.271	14.2241	24.8503	22.01	18.626	22.6449		0.491998	16.8018
12.3044	7.7111	12.7157	8.1573	6.5119	13.558	21.3769	6.3061	59.6466	17.618	19.065	11.0737	7.7786	3.8486	17.8506	19.2376	23.5495	20.219	14.274	21.5522		0.496001	16.4237
12.4036	8.6223	21.1423	7.6153	6.4745	12.499	17.2375	5.7266	59.1298	16.497	19.029	15.5155	8.6762	6.42	15.744	20.0758	20.7278	25.795	11.962	17.7648		0.5	16.666
12.5028	10.5833	21.303	7.2658	5.8588	8.777	20.683	6.1161	59.7541	17.968	14.804	17.2934	8.3621	4.3728	14.8703	15.4052	21.0444	23.393	9.831	18.5817		0.503999	16.1193
12.6021	11.3578	25.2641	10.6457	7.021	14.192	17.3169	5.3246	41.5655	16.318	18.575	15.9416	10.6312	3.0411	16.7633	17.8185	19.6091	18.998	13.136	16.8836		0.508002	15.8107
12.7013	8.5032	21.6753	9.2224	8.1513	13.27	16.9021	6.5085	21.1336	16.919	13.733	12.4633	6.3666	4.3707	13.9932	17.6873	25.6906	23.028	26.167	15.832		0.512001	14.822
12.8005	11.3132	23.3516	5.8809	9.485	15.371	14.9862	9.4786	10.2932	12.261	13.481	13.878	8.5374	4.518	13.0668	15.7428	23.2737	23.581	22.505	23.9459		0.515999	14.4711
12.8997	9.401	27.9498	5.9116	15.1349	16.755	19.7673	7.6574	5.1325	12.305	16.927	14.7664	9.4681	5.204	15.1141	17.6829	19.8266	20.673	15.997	23.2419		0.519998	14.6798
12.999	8.7982	27.6483	9.2346	21.0455	16.405	16.7864	4.9494	4.9033	20.403	14.04	11.7257	11.1103	5.8066	14.757	14.6211	25.3904	25.9	12.981	21.3794		0.524001	15.1519
13.0982	10.0389	21.0324	7.0715	18.5839	12.484	18.4662	4.2627	4.1505	17.874	15.453	10.8689	10.3885	4.5355	15.5022	15.7689	18.0359	27.87	11.931	19.113		0.528	13.8648
13.1974	8.1969	16.8302	5.5301	20.6738	13.679	17.2651	5.6121	4.2048	15.554	13.7	15.3819	4.0711	4.664	13.0148	17.1972	20.1922	22.259	10.127	17.417		0.531999	12.9247
13.2967	7.1152	20.955	3.9345	20.9818	11.981	19.3786	4.5498	4.12	15.365	15.449	16.2931	6.6775	5.6036	13.6382	14.669	25.4691	11.229	13.631	16.676		0.536002	13.0377
13.3959	8.7248	17.6799	4.4949	29.7861	11.14	13.6655	7.5201	4.1811	13.738	17.648	14.8057	6.6202	5.9282	16.023	19.6263	27.5216	13.933	12.445	23.0141		0.54	14.1313
13.4951	7.7908	21.1643	5.7279	37.4752	11.005	11.5862	5.8344	4.7581	15.103	22.778	14.2676	5.2529	7.318	14.5708	15.8922	23.4066	20.274	10.654	23.9952		0.543999	14.6765
13.5943	9.2461	21.9647	6.4668	36.93	12.527	12.1594	5.4179	3.0414	12.164	20.875	13.9238	5.7916	11.6136	13.345	20.5295	21.4944	22.788	11.599	19.1784		0.547998	14.7924
13.6936	6.5039	25.0528	5.8904	29.258	9.462	14.7771	5.9887	3.0852	13.008	19.987	15.7889	7.5885	10.6196	12.7703	16.6827	18.5041	28.424	13.284	21.0971		0.552001	14.6196
13.7928	5.0996	22.0065	5.618	19.1694	9.923	15.4927	6.9259	3.3832	14.193	25.891	21.2619	6.2517	11.0835	11.6272	16.765	20.6265	22.66	10.663	19.5835		0.556	14.1171
13.892	6.4009	21.959	5.8256	16.0311	9.694	14.2297	4.584	9.5149	11.306	23.1	16.0545	7.824	9.9298	18.3853	16.6475	20.9687	12.94	9.648	21.5725		0.559999	13.5061
13.9913	6.9903	28.8085	5.0011	15.9017	12.739	21.0835	4.3974	8.6159	17.495	21.978	18.8727	9.1363	7.001	18.8787	14.0957	22.1801	12.902	13.783	25.1577		0.564002	15.0009
14.0905	7.3496	23.2462	7.2769	13.9918	15.494	18.9813	7.5339	8.6425	18.211	19.216	18.2696	10.9396	6.1877	17.9019	16.797	18.5524	10.292	15.377	19.1088		0.568	14.3879
14.1897	10.889	18.0077	6.5884	8.9711	13.125	22.4252	7.8857	6.2547	18.43	18.784	13.8469	12.9474	5.3621	17.5108	16.2464	21.2013	12.98	17.104	23.1115		0.571999	14.2985
14.2889	7.7699	18.4781	7.6562	14.608	8.257	23.5327	5.9379	5.3756	16.866	20.847	12.7308	15.3764	8.0816	18.9934	20.2183	19.1355	10.169	15.485	20.1166		0.575998	14.1913
14.3882	10.0208	17.4421	4.9275	15.7807	11.713	19.2494	5.7669	5.6702	20.834	25.122	14.5809	22.4209	9.3377	10.487	16.8036	24.781	14.059	11.452	22.9472		0.580001	14.9156
14.4874	8.0588	22.636	5.5519	17.0592	12.79	16.1066	5.3533	6.3777	16.109	23.118	12.6303	18.4565	8.9347	15.1574	24.2517	22.124	13.38	13.5	22.9164		0.584	14.9743
14.5866	8.9205	19.6718	6.0408	12.2307	10.881	16.3026	5.1419	4.9355	13.603	21.125	15.6179	19.6593	10.7756	14.9988	19.917	22.2013	13.745	10.482	18.2881		0.587999	13.923
14.6859	9.5087	17.7754	5.2215	7.5942	13.561	15.6158	5.3435	6.1929	18.759	20.551	18.5705	15.7039	7.6248	13.3129	19.6943	24.2709	17.68	12.519	18.3619		0.592002	14.098
14.7851	8.4343	19.2069	6.6289	7.2667	7.537	15.5449	4.5495	6.9763	16.873	16.657	18.0439	13.0001	6.4689	17.5679	15.5307	22.561	16.555	15.13	18.1739		0.596	13.3003
14.8843	7.1206	22.0237	8.1316	6.1021	8.041	18.2843	5.8672	4.2221	23.178	24.263	19.4499	9.0397	10.7182	15.0611	18.3619	22.3431	19.392	15.29	21.9479		0.599999	14.6757
14.9835	8.1447	22.8928	7.7354	7.6735	8.495	20.4291	5.2761	6.7021	18.39	23.884	23.0367	10.5068	16.6412	17.8193	24.2471	23.0601	18.583	12.06	20.794		0.603998	15.5985
15.0828	8.6865	19.0171	6.6612	4.2507	10.025	19.0512	6.6346	5.2726	16.95	24.868	26.0011	8.4334	13.3673	16.6875	27.8521	22.0822	19.613	14.797	19.1837		0.608001	15.2334
15.182	9.3644	20.2606	5.0028	4.2457	8.833	19.9198	8.1456	2.947	22.565	26.776	19.4543	7.5026	13.9424	19.7504	28.4485	29.2533	16.579	15.133	15.9073		0.612	15.4753
15.2812	12.673	15.9196	7.108	5.4457	6.695	15.0525	6.5749	5.3791	14.127	17.675	19.6916	5.6035	17.7677	14.1729	28.4509	30.3204	16.68	12.956	17.8802		0.615999	14.2196
15.3805	11.3524	16.2862	7.0286	4.6508	9.104	17.801	4.8813	4.4542	14.055	21.094	16.2721	5.6497	13.7988	18.6682	22.3413	29.4051	16.87	10.765	23.7134		0.620001	14.1153
15.4797	10.1026	19.0596	6.6964	5.2563	10.833	22.2597	6.0514	7.2577	21.348	31.972	21.1607	8.0864	16.2249	19.7839	28.9099	29.6502	18.201	12.064	18.9602		0.624	16.5199
15.5789	11.7627	19.396	8.3562	5.2572	8.668	17.0565	7.31	4.7459	21.979	26.373	17.0187	6.7097	13.4787	20.6118	26.315	28.4739	18.557	13.348	21.2874		0.627999	15.616
15.6781	12.602	19.4164	6.6306	5.2594	9.978	19.9379	5.9698	3.6104	24.764	30.177	18.9662	7.2937	12.8757	20.6919	26.3334	25.5132	16.815	13.334	26.7119		0.631998	16.1516
15.7774	16.8607	22.0997	7.2637	4.6019	12.878	22.4858	5.4952	5.5999	26.97	22.702	19.8205	10.1246	13.1571	21.9935	21.6509	26.5342	17.343	13.427	28.9608		0.636001	16.8404
15.8766	13.9603	16.0452	7.9382	5.5229	10.067	21.6751	5.7424	4.9507	20.176	28.618	21.2191	13.0755	9.8762	19.5341	23.6558	27.3125	16.965	11.345	27.8687		0.64	16.0815
15.9758	16.9782	18.0349	7.5535	7.1282	7.872	26.0947	4.6797	4.8449	18.882	31.649	29.6161	10.1622	8.0835	28.9497	23.4395	25.5734	20.113	11.899	25.2501		0.643999	17.2002
16.0751	10.7195	19.2801	5.1264	5.469	7.71	24.1275	5.4768	4.8025	13.876	29.218	21.1424	5.7031	8.5514	21.7204	24.0608	24.9792	14.654	13.221	21.8829		0.648001	14.8274
16.1743	13.2901	16.7043	5.6345	4.2356	11.22	25.0405	4.5146	7.7377	16.969	24.889	20.6302	6.4467	11.6918	25.2694	24.0917	26.9362	15.862	12.976	21.8128		0.652	15.5764
16.2735	12.2988	22.9802	6.5897	4.2054	9.613	27.7372	7.7804	7.5637	16.102	26.466	16.0547	5.0118	9.4651	21.9301	23.7317	28.014	15.384	8.539	15.7497		0.655999	15.0114
16.3727	12.5519	24.1199	5.5671	3.7778	11.445	25.1116	6.709	5.7732	18.743	26.034	22.9804	6.3372	7.3817	22.1219	20.6556	25.6463	18.063	11.483	18.9055		0.659998	15.4425
16.472	16.8534	23.7232	6.8125	4.8465	9.526	25.7311	7.0334	3.3366	20.982	24.651	24.8111	6.2337	7.0813	23.1306	30.9291	24.0959	18.842	10.009	15.9801		0.664001	16.032
16.5712	15.7675	26.5428	4.2923	4.7049	7.032	25.7746	10.4295	5.9571	24.027	29.483	18.7175	6.2541	8.3851	32.008	28.7604	27.4642	10.98	15.219	17.8695		0.668	16.8247
16.6704	18.6755	28.3102	5.6087	3.1632	7.305	24.1416	11.1996	4.1841	25.345	24.779	26.6302	6.0618	8.367	27.3924	25.2153	28.0355	12.018	14.647	20.1041		0.671998	16.9044
16.7697	12.8103	25.2045	5.1999	3.9389	9.294	26.9212	9.9594	4.5961	26.658	26.621	21.5156	4.787	11.4707	29.9899	22.8886	22.8582	18.895	12.458	33.0193		0.676001	17.3203
16.8689	16.5698	23.4764	5.3938	3.8831	10.234	32.0526	11.1323	4.1921	35.52	33.401	22.4672	6.0968	13.6491	27.1259	24.4063	24.0252	17.321	16.954	23.2599		0.68	18.4821
16.9681	15.5606	22.3779	9.1423	8.0062	12.64	26.2724	16.5361	5.9093	32.609	27.83	18.6294	4.3875	13.5922	22.6453	19.1755	26.0639	17.036	14.787	26.0719		0.683999	17.8564
17.0674	18.2984	23.1554	8.7025	4.5864	11.511	25.2384	15.2528	7.1109	35.226	32.483	17.7484	4.0315	6.6331	26.3128	20.1571	24.8007	19.587	13.496	27.5351		0.688002	17.993
17.1666	15.6345	24.1205	7.9557	3.3287	9.514	23.3197	17.821	6.7066	32.117	29.463	16.3523	3.8675	7.6596	21.7593	22.5605	24.2446	19.488	12.014	26.4143		0.692001	17.0706
17.2658	14.5074	27.1609	5.9846	3.2117	12.794	27.4541	19.2212	6.1421	24.53	28.757	17.4165	3.3634	5.5458	27.7409	17.786	20.5685	20.139	16.956	29.7849		0.696	17.3192
17.365	14.2771	23.6901	7.1054	4.7318	15.368	21.0377	13.8417	5.4127	22.962	30.116	19.2536	3.9038	6.6856	22.3962	23.3623	22.7497	19.769	15.526	28.4866		0.699998	16.8776
17.4643	14.081	24.0786	6.4394	5.2999	12.146	21.2627	17.2984	7.5248	25.314	33.734	20.5353	3.938	6.2419	26.5138	29.1941	23.5839	20.071	18.797	31.4471		0.704001	18.2895
17.5635	21.8138	15.3678	7.8556	2.8473	13.06	23.2363	16.8562	5.0326	25.625	38.99	22.4043	5.2778	7.0511	22.5563	27.6459	21.2419	21.494	16.37	37.2113		0.708	18.523
17.6627	22.2373	21.56	6.0515	6.3036	13.659	29.8	20.1737	8.8313	19.64	33.208	22.8354	5.3371	5.514	24.1141	27.3108	28.2766	19.232	15.571	37.3935		0.711999	19.3184
17.762	21.9594	16.8794	5.7574	5.4432	15.085	28.7541	19.9909	8.9501	25.476	34.862	23.2348	5.2353	4.2261	24.4143	27.4956	23.1244	18.584	18.078	31.3914		0.716002	18.8917
17.8612	23.5115	22.9435	6.5893	3.3431	13.092	26.2179	22.841	11.6582	27.993	29.354	24.5921	7.0015	5.8048	32.3701	26.8382	23.2155	18.45	20.651	29.981		0.720001	19.813
17.9604	23.7393	23.9078	7.8092	6.9587	13.441	25.8279	24.436	12.8736	22.928	33.857	30.0064	7.8107	6.1279	35.8726	25.47	34.6649	19.139	23.309	23.9272		0.723999	21.1635
18.0596	25.4095	30.99	10.7443	4.7953	16.183	29.042	23.6721	13.7077	30.021	32.426	32.2626	7.8758	5.2249	35.0262	31.2186	34.6061	20.577	27.234	27.1594		0.727998	23.0619
18.1589	28.7011	25.2705	10.0537	3.9358	19.076	28.5193	23.9509	14.0099	25.384	36.22	32.3333	6.9032	7.9332	43.6859	32.9957	27.8517	15.22	20.984	21.8598		0.732001	22.3625
18.2581	31.6085	26.7157	7.7339	7.8381	16.01	27.1274	29.1579	15.9936	30.012	34.943	31.6086	5.9045	7.0849	31.7425	34.8187	30.9895	19.502	25.194	23.5912		0.736	23.0303
18.3573	37.7139	25.7086	10.6671	6.5219	19.39	30.8042	29.6471	17.4552	30.785	27.759	32.2732	5.017	6.5053	28.6399	32.0312	30.9979	18.522	23.916	23.9486		0.739999	23.0686
18.4566	29.7568	23.4416	11.3483	4.7767	19.739	22.6256	31.7856	19.3878	30.62	33.034	33.1347	7.6708	7.9323	27.9285	35.3332	30.0241	21.681	25.631	32.1297		0.744002	23.5779
18.5558	31.5374	24.819	14.8465	7.1593	18.934	28.5368	30.2903	17.0468	37.874	29.379	29.3197	8.5528	10.3616	24.9315	31.6164	30.8208	23.642	26.876	27.4098		0.748001	23.8923
18.655	27.0111	27.1393	17.732	5.4929	21.992	26.0815	27.0226	14.8587	37.31	32.456	36.5543	6.3526	11.4686	31.6778	23.7449	24.2727	24.831	26.702	28.1819		0.751999	23.7306
18.7542	27.7735	29.61	19.2949	7.3437	24.106	27.4754	34.305	14.1873	32.135	35.532	32.9018	5.7203	10.7974	33.7551	27.48	29.4655	26.765	23.45	27.7842		0.755998	24.7306
18.8535	30.8152	24.8248	20.2406	6.3661	23.455	25.7117	33.8324	18.8445	26.673	33.107	30.7047	6.911	11.1131	34.6467	29.9754	26.4298	25.991	24.329	31.2741		0.760001	24.4866
18.9527	34.0035	33.6911	21.6357	8.7458	23.154	28.0623	37.9596	16.6954	22.843	31.621	29.1722	9.2698	12.3779	32.1794	29.2673	35.0866	24.898	24.002	34.4977		0.764	25.7454
19.0519	36.145	43.3697	19.1651	6.0206	22.94	23.5709	33.6453	22.7315	30.514	29.55	27.6046	9.7821	12.7343	31.7059	28.5964	31.3821	23.238	35.357	29.6851		0.767999	26.1967
19.1512	33.2783	39.0931	20.3974	7.8129	25.081	25.6411	28.6666	26.3368	24.974	37.28	31.5966	10.1659	15.1519	31.0204	29.323	33.7764	28.098	35.308	25.7082		0.772002	26.7742
19.2504	30.0384	29.294	19.4546	7.2677	24.049	32.2592	28.1711	22.8208	36.647	28.51	37.8224	13.3428	17.3351	25.3949	37.4125	37.2746	27.842	37.644	28.3415		0.776001	27.4169
19.3496	29.1697	29.1271	19.0258	6.6186	21.608	32.5606	25.0538	25.0401	31.137	24.912	28.5698	13.6788	16.4124	26.4713	36.8573	33.7996	26.52	34.466	30.1866		0.779999	25.8534
19.4488	22.94	30.3786	17.5236	9.2215	20.227	28.4473	27.6167	37.6161	31.776	25.473	33.3602	15.3501	16.0787	26.7043	36.5035	29.2479	28.757	30.673	33.0448		0.783998	26.3652
19.5481	29.645	34.7934	19.3438	12.1898	25.11	27.9008	32.9879	37.2693	29.378	31.324	31.1718	19.4359	16.7558	28.0806	31.5502	24.7429	22.246	33.14	32.8688		0.788001	27.3649
19.6473	29.2967	31.7399	17.7614	15.1328	30.042	25.1851	32.3363	33.3314	29.435	30.604	31.2549	16.8444	18.1695	29.812	34.4143	29.182	25.993	34.01	34.6937		0.792	27.8547
19.7465	35.8075	30.2258	21.8793	17.0203	24.59	22.8222	25.0141	34.4572	32.152	30.306	31.8441	17.353	21.6551	33.1896	38.0477	28.5025	22.551	30.343	32.0508		0.795999	27.8848
19.8458	28.8463	28.3794	19.5171	18.4923	27.122	21.8047	25.4254	29.5934	26.459	37.334	31.9416	17.4512	21.4849	33.5857	39.2366	35.3275	23.949	34.381	26.6782		0.800002	27.7373
19.945	36.6785	29.132	20.9009	19.0776	28.978	25.2117	22.7788	25.2489	31.699	29.649	28.9851	21.2444	22.1032	27.8298	33.3943	33.7157	21.865	36.716	19.3525		0.804	27.0821
20.0442	25.9454	27.6244	23.9075	21.0536	27.902	27.6668	28.0728	29.6416	30.313	26.686	26.2435	15.8419	19.8208	29.5641	36.7402	36.542	24.768	36.84	26.3937		0.807999	27.4509
20.1434	25.9059	38.6594	26.0962	17.7045	25.848	23.6308	24.7256	28.059	29.444	35.26	31.5792	21.4386	20.8208	26.897	43.1244	41.3529	26.149	41.732	28.8595		0.811998	29.3309
20.2427	30.2287	41.6484	25.9622	16.1251	32.592	24.1336	31.2174	28.9351	33.208	40.52	28.8584	17.7462	23.8008	38.502	32.8353	33.8007	34.729	41.164	27.5592		0.816001	30.714
20.3419	37.8771	37.7627	27.4537	14.3214	28.93	26.173	29.2334	36.2374	25.666	41.665	41.5889	22.2724	23.9241	36.6364	32.6332	35.213	31.422	37.594	31.3483		0.82	31.4712
20.4411	34.1455	35.2548	28.2614	19.9485	34.402	30.8785	28.1762	40.9003	26.545	39.181	38.1068	31.5026	31.7784	36.7248	33.6322	27.2244	30.038	32.293	33.7031		0.823999	32.2472
20.5404	38.446	25.6526	27.9609	20.4886	32.098	24.2421	24.012	34.4803	26.679	42.679	35.3325	30.8583	36.2918	38.2712	32.2815	21.6563	33.672	42.238	34.0332		0.828002	31.6512
20.6396	38.9489	31.9548	26.5683	22.8011	31.453	30.6895	29.4426	33.378	40.405	33.039	33.5667	27.0523	40.9333	29.9019	30.2903	26.6893	29.48	34.163	36.9933		0.832	31.9869
20.7388	31.5873	30.0003	29.318	25.4437	28.318	35.9089	26.325	29.1399	30.511	43.01	32.8677	26.6092	38.1233	35.0244	26.8047	22.4568	30.959	27.671	31.2664		0.835999	30.5971
20.838	41.4644	35.5795	26.436	30.0182	26.986	38.8811	27.6784	25.7717	40.84	36.646	26.2281	28.944	37.459	33.0658	34.9367	26.321	27.41	34.644	34.6744		0.839998	32.315
20.9373	42.9152	39.7033	28.2679	31.0557	35.011	37.0289	30.9346	28.8608	35.936	33.969	27.1086	35.888	33.8252	37.9911	25.062	25.2568	23.561	23.522	30.799		0.844001	31.9314
21.0365	34.3284	41.6857	35.7709	36.1141	32.984	36.9767	35.5562	28.616	36.482	38.488	28.5982	36.9985	36.6975	36.3117	35.0951	25.5904	23.581	27.937	30.7415		0.848	33.608
21.1357	37.3524	45.9248	32.0944	36.1238	34.399	35.5645	29.6353	30.0796	30.529	38.831	26.2933	32.1139	45.6372	35.8057	41.024	31.161	25.502	26.677	32.2153		0.851999	34.0507
21.235	31.6002	43.1456	28.5251	37.7267	30.489	32.6358	28.9178	26.4858	31.467	38.147	26.4572	33.7127	48.2125	31.0954	33.7848	27.7955	29.958	31.25	31.9833		0.856001	32.81
21.3342	35.6876	42.8177	28.8214	44.6644	25.486	33.3921	26.6029	28.0599	33.745	34.408	30.3482	32.2697	39.8401	31.0088	29.2624	29.5222	29.821	29.21	38.3478		0.86	32.8061
21.4334	32.5424	36.3745	27.6059	42.0512	27.978	28.7699	22.0196	34.1913	33.42	31.734	28.1003	30.8129	40.1973	28.3535	27.2524	41.721	30.424	23.339	32.7597		0.863999	31.5604
21.5326	40.2024	36.0316	31.3057	54.9408	31.739	27.4916	30.5219	35.6079	31.663	28.784	24.426	31.3526	37.0416	31.2415	23.8888	39.7996	31.281	27.594	35.2757		0.867998	33.1678
21.6319	37.5942	26.2962	25.242	45.7754	35.791	30.1221	28.4167	34.9408	27.391	29.128	24.3216	34.5184	40.0173	33.4454	20.2564	37.2568	29.412	24.341	36.4491		0.872001	31.6166
21.7311	33.613	32.941	27.2643	50.0913	31.263	24.2112	26.8549	30.8113	29.278	26.869	26.2829	29.5816	35.3918	32.7569	25.058	28.49	31.525	27.992	32.5139		0.876	30.6731
21.8303	34.2881	28.8453	31.6179	42.507	32.536	19.6004	35.4773	31.1832	31.54	25.969	20.9986	36.3604	37.32	36.7549	24.5659	25.5553	42.651	24.93	32.9818		0.879999	31.3517
21.9296	28.5823	28.5444	32.9359	33.1814	39.378	24.2286	36.9884	34.9478	26.159	28.088	23.4638	31.6063	30.3024	31.4116	25.7174	30.2344	44.852	28.864	37.4322		0.884001	31.4167
22.0288	31.0362	39.8762	30.9563	33.7527	42.508	23.0066	29.3489	33.6446	28.096	26.724	26.734	22.6755	34.0506	37.6243	26.4781	37.6492	40.087	29.092	30.2572		0.888	31.7683
22.128	29.3148	43.5736	33.8324	30.9992	38.789	27.667	26.5115	37.4963	33.765	26.015	18.2367	19.4909	32.8592	28.7254	26.6743	31.0787	27.661	24.414	36.9115		0.891999	30.2113
22.2272	31.8122	34.9258	31.178	31.8004	36.305	36.43	29.1619	35.4857	31.497	28.382	19.499	20.2725	37.4499	25.8216	25.2851	20.8296	28.012	27.796	34.6157		0.895998	29.8189
22.3265	36.2876	35.4233	26.7713	24.3375	34.206	38.0899	26.542	30.4483	33.785	24.162	15.6362	17.7732	35.1458	16.3354	26.1691	24.3457	21.383	30.279	24.8779		0.900001	27.4736
22.4257	42.7859	31.6534	28.2137	28.1907	31.481	43.2357	26.7482	32.7029	29.782	21.525	12.5858	13.2714	23.5949	19.2533	26.6386	23.1147	19.528	20.665	28.1717		0.904	26.4812
22.5249	49.8779	22.6633	25.945	25.6993	33.333	29.1641	24.7113	35.0816	27.403	15.859	10.1155	11.4122	22.7539	17.2497	19.6641	27.3315	14.472	21.436	23.548		0.907998	24.0905
22.6242	44.8055	24.5896	26.0657	26.4111	32.03	31.256	21.6986	29.1741	25.758	13.577	11.2063	16.7303	28.0465	16.9575	26.1988	21.3923	7.936	19.77	23.866		0.912001	23.551
22.7234	46.3096	17.9282	27.5591	13.2308	27.355	35.0749	27.0683	33.5828	26.252	13.24	9.8003	9.3466	21.8319	17.3575	30.5138	22.0805	4.997	21.816	22.3165		0.916	22.5085
22.8226	40.4814	18.5928	18.1733	15.8455	27.793	31.2317	25.7539	28.9191	23.794	13.861	4.3231	6.8312	12.2458	15.7389	19.4029	16.6351	4.915	12.583	19.2455		0.919999	18.7561
22.9218	38.2755	24.7022	9.8626	6.6546	25.032	25.8714	12.1668	32.1362	21.673	12.561	4.1765	4.3091	6.6286	8.2059	15.5814	19.1267	3.747	9.715	20.6647		0.923998	15.8469
23.0211	43.3723	21.0695	4.4422	5.1049	26.259	21.3614	6.4976	27.5155	14.861	6.089	0.8736	1.8378	5.3764	5.2586	16.4968	22.5828	2.92	8.273	19.8132		0.928001	13.6845
23.1203	42.1628	18.0512	3.6434	3.2147	20.786	23.0702	4.851	25.5719	17.701	2.993	2.5105	1.3521	2.7855	1.8446	17.0574	16.1779	2.79	6.262	22.4123		0.932	12.3809
23.2195	24.1817	24.906	2.2831	0.6707	19.562	25.1335	2.8439	16.8789	11.549	2.106	0.6759	0.9657	2.5933	1.7436	17.9521	19.4244	2.517	4.35	15.7131		0.935998	10.3184
23.3188	20.1041	16.776	2.469	1.1738	17.305	28.0262	1.3705	22.0364	5.196	1.364	1.0081	1.1221	1.4016	1.162	6.4126	12.4686	2.716	2.248	13.9299		0.940001	8.33105
23.418	22.574	18.3356	0.7861	0.9574	17.029	19.332	2.2862	22.3193	3.56	1.012	0.5725	0.5937	1.6135	1.1008	3.4553	5.9951	0.775	3.023	15.7174		0.944	7.42305
23.5172	18.5976	13.2417	2.2231	0.6655	14.722	16.2783	1.983	19.4255	4.202	1.167	1.1265	0.4445	1.4242	0.8467	2.9037	3.4272	1.28	1.335	10.7529		0.947999	6.10771
23.6164	22.2105	9.6069	1.2428	0.8038	11.431	10.5218	2.0291	8.7285	1.253	0.36	0.7476	0.7057	2.1516	0.5499	1.356	1.4341	0.75	0.805	5.0704		0.951998	4.30304
23.7157	21.613	4.7293	0.9375	1.3765	5.697	5.8122	1.5106	1.7346	1.553	0.505	0.5105	1.1763	3.1814	0.7412	0.4124	1.5379	1.06	1.001	3.8415		0.956001	3.10163
23.8149	20.0182	2.0568	0.374	0.5082	2.786	2.1835	0.8797	2.5279	1.034	0.851	0.5917	0.5738	1.1255	0.1613	0.8995	1.6535	0.658	1.811	2.5417		0.96	2.27554
23.9141	12.5175	1.7	1.2339	0.6965	0.709	2.1603	1.0337	1.4902	0.852	0.791	0.4947	0.451	0.755	0.3454	1.148	0.3601	0.345	0.807	2.6799		0.963998	1.60896
24.0134	10.1363	1.885	0.3098	0.5972	1.046	2.5973	1.2766	1.1612	0.353	1.003	0.1152	0.1942	0.6531	1.0422	1.5961	0.843	0.366	0.879	2.4523		0.968001	1.50034
24.1126	7.2675	0.8635	0.3341	0.2996	0.594	1.4437	1.0703	0.3665	0.588	0.342	0.2964	0.4564	0.868	0.603	0.5191	1.0136	0.704	0.757	2.1045		0.972	1.07848
24.2118	3.3802	1.8481	0.932	0.7944	0.408	0.5795	0.5544	0.8371	0.255	0.247	0.2149	0.7926	1.227	0.4664	0.7916	0.5057	1.224	1.321	1.1991		0.975999	0.925158
24.3111	1.6015	0.8839	0.4026	0.1624	0.592	2.2001	0.4553	0.6153	0.502	0.681	0.8352	0.3576	0.1091	1.3352	0.2568	1.0301	0.462	0.413	1.1001		0.980002	0.736589
24.4103	1.258	1.0591	1.1898	0.4913	0.73	0.8798	0.9364	0.8385	0.698	0.12	0.2478	0.2028	1.18	0.2023	0.5937	0.6623	0.617	0.851	1.4097		0.984001	0.745658
24.5095	2.0928	1.1148	0.9992	0.2569	1.25	1.2915	0.9032	0.5384	0.212	0.15	1.2313	0.4875	0.2208	0.3069	0.5442	0.2942	1.352	1.585	0.8875		0.987999	0.827274
24.6087	1.1819	1.1817	0.2652	0.4458	1.547	0.9488	0.9962	0.3126	1.075	0.105	0.5176	0.2526	0.4381	0.5017	0.5062	0.3076	1.429	0.562	0.518		0.991998	0.689053
24.708	0.8049	0.452	0.8603	0.103	0.569	0.1731	0.4484	0.3487	0.468	0.749	0.5017	0.403	0.4897	0.3216	0.5469	0.4432	0.458	0.71	0.8535		0.996001	0.510737
24.8072	0.5142	0.5046	1.2741	0.342	0.445	1.2986	0.5606	0.8387	0.265	0.146	0.4028	0.2471	0.363	1.4005	0.4011	0.6543	1.193	1.58	0.9887		1	0.706279

## Sheet: Sheet1
Image10				Image11				Image12				Image 19				Image 20				Image 21				Image 22				Image 23				Distance	Image10	Image11	Image12	Image19	Image20	Image21	Image22	Image23
Ap-Basal to 1	Average intensities			Ap-Basal to 1	Average intensities			Ap-Basal to 1	Average intensities			Ap-Basal to 1	Average intensities			Ap-Basal to 1	Average intensities			Ap-Basal to 1	Average intensities			Ap-Basal to 1	Average intensities			Ap-Basal to 1	Average intensities			0	24.254	48.2163	18.4373	36.15	19.1849	36.7149	18.1852	43.3971
0	24.254			0	48.2163			0	18.4373			0	36.15			0	19.1849			0	36.7149			0	18.1852			0	43.3971			0.05	26.5847	52.148	23.6097	38.5049	23.9955	38.1414	19.9012	47.721
0.00366385	24.6011			0.0048088	48.0748			0.00413318	18.734			0.00438469	35.9033			0.00387485	20.5367			0.00526162	38.5196			0.00482951	17.3862			0.00399884	45.4325			0.1	34.5108	61.9826	29.6015	44.0827	30.603	39.0554	23.3298	55.7707
0.00732771	24.5564			0.0096176	49.3932			0.00826636	20.6802			0.00877379	39.2167			0.0077536	21.0661			0.0105285	38.0319			0.00966388	18.7627			0.00800171	45.3532			0.15	42.647	58.0562	26.4813	42.7483	33.1883	29.6827	22.8523	45.844
0.0109876	24.3385			0.0144212	50.0563			0.012395	21.4848			0.0131585	39.1433			0.0116285	22.461			0.0157902	39.0085			0.0144934	20.3855			0.0120005	46.8927			0.2	42.8435	52.1897	19.8632	36.0933	32.7748	26.3374	18.1661	30.2428
0.0146514	24.3537			0.01923	51.2583			0.0165282	22.2294			0.0175432	40.0333			0.0155033	23.8968			0.0210518	40.3161			0.0193229	19.344			0.0159994	45.9196			0.25	33.8876	46.3938	14.183	27.6247	27.1851	21.8166	13.2427	21.978
0.0183153	25.5762			0.0240388	51.762			0.0206614	21.2287			0.0219278	37.77			0.0193781	24.0654			0.0263134	39.3525			0.0241524	20.053			0.0199982	46.2836			0.3	20.9456	37.8368	11.6367	20.9948	21.2997	17.4594	10.9409	21.7188
0.0219791	26.6476			0.0288476	54.3243			0.0247946	22.5828			0.026317	37.0667			0.0232569	23.7612			0.0315803	38.2538			0.0289868	20.5936			0.0240011	47.798			0.35	15.9259	29.8794	11.2784	18.8148	18.409	15.1398	9.49096	19.8966
0.025643	25.8384			0.0336564	55.0085			0.0289278	23.4053			0.0307016	38.1767			0.0271318	24.5659			0.036842	37.7487			0.0338163	19.9117			0.0279999	48.6205			0.4	14.977	23.8243	10.8151	16.2981	16.6916	12.8585	8.63058	17.176
0.0293028	26.6393			0.0384599	54.0758			0.0330564	24.8313			0.0350863	40.15			0.0310066	24.6735			0.0421036	36.8715			0.0386458	21.3607			0.0319988	47.972			0.45	14.1695	20.5317	9.47975	14.4739	15.7197	10.736	8.25456	15.0645
0.0329667	27.1738			0.0432687	52.5135			0.0371896	24.4964			0.0394754	39.2567			0.0348854	25.3147			0.0473705	37.0895			0.0434802	21.137			0.0360016	49.1889			0.5	12.7448	19.8622	8.92608	12.7976	14.6277	9.39714	7.09893	15.1785
0.0366305	27.7553			0.0480775	54.0255			0.0413228	26.5243			0.0438601	39.0167			0.0387602	24.8991			0.0526321	37.6483	38.1414		0.0483097	20.9361			0.0400005	49.1924			0.55	13.8657	20.4459	9.02298	11.8672	12.8859	8.37368	6.25613	14.5463
0.0402944	28.5598			0.0528863	57.0676	52.148		0.045456	29.0692			0.0482448	38.4933			0.0426351	25.9981			0.0578938	38.3995			0.0531392	20.7583	19.9012		0.0439993	49.6029			0.6	13.3942	19.1463	8.35739	13.0421	12.4973	7.78693	5.78704	14.3836
0.0439542	29.3033			0.0576899	57.966			0.0495847	28.5931			0.0526295	40.1867	38.5049		0.0465099	27.0212			0.0631554	38.2289			0.0579687	20.9581			0.0479982	50.3913			0.65	15.7499	18.5595	8.86109	13.2933	12.3963	8.54431	5.64097	15.6548
0.0476181	29.7616			0.0624987	60.4371			0.0537178	28.2398	23.6097		0.0570186	40.7967			0.0503887	28.4917	23.9955		0.0684223	38.7507			0.0628031	21.2339			0.052001	52.0495	47.721		0.7	16.2949	20.5481	9.23046	13.8182	13.3155	10.2025	5.86033	17.0326
0.0512819	29.4119	26.5847		0.0673075	61.7474			0.057851	30.5077			0.0614033	43.5			0.0542635	30.504			0.0736839	37.9163			0.0676326	24.0247			0.0559999	56.5271			0.75	17.1467	22.216	10.0863	16.7075	14.9522	11.7716	6.93275	21.7028
0.0549458	30.5995			0.0721163	62.0907			0.0619842	30.2234			0.065788	42.7733			0.0581384	29.3288			0.0789456	39.0642			0.0724621	24.6505			0.0599987	55.5599			0.8	18.4578	22.9182	10.5985	19.7721	17.1477	13.6591	6.90382	26.5342
0.0586097	31.0117			0.0769251	64.0103			0.0661174	29.4228			0.0701771	42.2267			0.0620171	29.6633			0.0842125	41.1432			0.0772964	23.8556			0.0640016	55.8969			0.85	18.2847	23.6322	10.6172	23.0794	17.859	13.4549	7.31477	34.0507
0.0622695	31.344			0.0817287	65.704			0.0702461	28.1896			0.0745618	43.53			0.065892	29.9134			0.0894741	41.0161			0.082126	23.3143			0.0680004	55.2219			0.9	17.0473	23.7633	7.80357	24.6892	15.9203	10.6152	7.34157	31.2229
0.0659334	32.9393			0.0865375	64.0374			0.0743792	28.1128			0.0789464	45.6733			0.0697668	29.613			0.0947357	40.6769			0.0869555	23.0705			0.0719993	54.8238			0.95	7.38019	12.209	6.04864	17.0758	5.42828	6.27078	6.72651	14.9064
0.0695972	34.0222			0.0913463	61.9799			0.0785124	29.795			0.0833311	46.4433			0.0736417	30.4019			0.0999973	38.6206			0.091785	23.8771			0.0759981	55.2273			1	0.520591	1.30334	4.82034	8.11	1.2183	2.86915	4.36688	1.22548
0.0732611	33.8727			0.0961551	61.4246			0.0826456	29.4992			0.0877202	44.43			0.0775204	29.7416			0.105264	36.7376	39.0554		0.0966193	23.812			0.080001	54.995
0.0769249	32.9629			0.100964	60.4287	61.9826		0.0867788	30.3544			0.0921049	46.79			0.0813953	30.4685			0.110526	36.7979			0.101449	24.5014	23.3298		0.0839998	56.8948
0.0805848	33.6934			0.105767	62.4422			0.0909075	29.202			0.0964896	44.61			0.0852701	31.1323			0.115788	35.8621			0.106278	24.1521			0.0879986	55.7167
0.0842486	35.7884			0.110576	62.1357			0.0950406	30.3531			0.100879	44.1367	44.0827		0.0891489	30.6564			0.121054	35.7194			0.111113	24.4731			0.0920015	57.3924
0.0879125	35.8518			0.115385	59.7379			0.0991738	29.5877			0.105263	43.9867			0.0930237	32.7562			0.126316	35.1924			0.115942	23.3455			0.0960004	55.4779
0.0915763	36.3873			0.120194	60.0722			0.103307	29.9705	29.6015		0.109648	42.39			0.0968986	33.0065			0.131578	34.0609			0.120772	22.4579			0.0999992	56.753
0.0952362	37.1234			0.124997	59.4739			0.107436	29.2268			0.114033	43.7233			0.100773	30.6528	30.603		0.136839	33.4087			0.125601	22.6064			0.103998	54.5325	55.7707
0.0989	38.6804			0.129806	58.8797			0.111569	29.4537			0.118422	42.3267			0.104652	31.6694			0.142106	31.3524			0.130436	22.6866			0.108001	54.8652
0.102564	38.8746	34.5108		0.134615	56.9907			0.115702	28.3445			0.122807	43.5967			0.108527	32.432			0.147368	30.4011			0.135265	23.22			0.112	53.6923
0.106228	41.5489			0.139424	55.7606			0.119835	26.2827			0.127191	44.66			0.112402	33.5315			0.152629	29.6827	29.6827		0.140095	22.7113			0.115999	50.7531
0.109892	43.9207			0.144233	56.2499			0.123968	26.6834			0.13158	43.5533			0.116281	32.6988			0.157896	29.1363			0.144929	21.575			0.120001	48.7883
0.113551	44.1447			0.149036	54.0471			0.128097	25.4203			0.135965	43.7967			0.120155	32.8281			0.163158	28.0249			0.149759	22.668			0.124	46.6439
0.117215	44.6657			0.153845	52.828	58.0562		0.13223	26.1515			0.14035	43.3233			0.12403	33.5173			0.16842	26.8551			0.154588	21.4796	22.8523		0.127999	45.9711
0.120879	44.1333			0.158654	52.9816			0.136363	25.2937			0.144734	40.5367			0.127905	32.6882			0.173681	26.0749			0.159418	20.3255			0.131998	45.5461
0.124543	41.7653			0.163463	53.8081			0.140497	24.6124			0.149124	39.9067			0.131784	34.2397			0.178948	25.9266			0.164252	19.6686			0.136001	44.4549
0.128207	41.1215			0.168271	54.1311			0.14463	25.0909			0.153508	41.18	42.7483		0.135659	33.2168			0.18421	26.1503			0.169081	19.1984			0.14	42.1491
0.131867	41.4026			0.173075	51.5602			0.148758	25.8872			0.157893	39.5467			0.139534	33.3744			0.189471	25.2435			0.173911	17.3106			0.143999	41.127
0.135531	42.7994			0.177884	51.7358			0.152892	25.3288	26.4813		0.162282	38.8			0.143412	33.6158			0.194738	25.1185			0.178745	18.9908			0.148001	39.7375
0.139194	43.5628			0.182693	52.1867			0.157025	24.225			0.166667	37.8233			0.147287	33.9543			0.2	24.5062	26.3374		0.183575	18.9575			0.152	36.3989	45.844
0.142858	41.2709			0.187501	52.957			0.161158	22.5049			0.171051	36.8767			0.151162	33.6813	33.1883		0.205262	24.6288			0.188404	18.6804			0.155999	34.9675
0.146522	42.2096			0.19231	52.249			0.165291	21.1455			0.17544	38.1			0.155041	32.583			0.210529	23.8105			0.193239	17.269			0.160002	33.4609
0.150182	41.8657	42.647		0.197114	51.8012			0.16942	22.5354			0.179825	36.95			0.158916	33.1586			0.21579	22.8291			0.198068	16.3035			0.164001	31.8411
0.153846	41.2716			0.201922	48.4859	52.1897		0.173553	20.7567			0.18421	37.81			0.162791	32.8369			0.221052	22.3604			0.202898	14.9563	18.1661		0.168	32.3181
0.15751	42.3034			0.206731	49.5881			0.177686	21.2797			0.188595	34.4033			0.166665	33.1487			0.226313	21.5201			0.207727	14.4614			0.171998	31.8516
0.161174	43.0822			0.21154	47.8837			0.181819	18.3489			0.192984	35.35			0.170544	33.4027			0.23158	21.0521			0.212562	14.1008			0.176001	31.7578
0.164833	43.3552			0.216344	48.7098			0.185948	17.5755			0.197368	31.27			0.174419	33.3332			0.236842	21.439			0.217391	13.7912			0.18	31.1566
0.168497	43.9079			0.221152	49.6303			0.190081	18.3231			0.201753	30.0967	36.0933		0.178294	32.8678			0.242104	20.512			0.222221	14.0882			0.183999	30.409
0.172161	43.1235			0.225961	49.011			0.194214	18.0702			0.206142	30.67			0.182173	32.8717			0.247371	20.1298			0.227055	12.7441			0.188002	29.448
0.175825	44.0595			0.23077	48.0694			0.198348	17.4917			0.210527	29.1733			0.186047	33.2242			0.252632	19.8841	21.8166		0.231884	13.698			0.192001	28.4687
0.179489	44.7783			0.235579	43.7467			0.202481	16.1015	19.8632		0.214911	28.47			0.189922	32.4694			0.257894	20.0705			0.236714	12.9735			0.196	26.8579
0.183149	44.2025			0.240382	42.4316			0.206609	15.1746			0.219296	29.1967			0.193797	32.3067			0.263155	18.796			0.241543	12.2341			0.199998	25.8203
0.186813	43.4124			0.245191	42.3257			0.210743	14.8598			0.223685	26.9433			0.197676	31.2503			0.268422	18.6536			0.246378	12.3856			0.204001	24.7986	30.2428
0.190476	41.3063			0.25	42.5419	46.3938		0.214876	15.3998			0.22807	26.18			0.201551	32.6188	32.7748		0.273684	18.6615			0.251207	11.95	13.2427		0.208	24.6962
0.19414	41.7232			0.254809	42.5946			0.219009	15.2444			0.232455	27.95			0.205426	33.1673			0.278946	17.9398			0.256037	11.2836			0.211999	24.0477
0.197804	41.3785			0.259618	41.2434			0.223142	15.4207			0.236844	28.1633			0.209304	32.6188			0.284212	17.0314			0.260871	11.2393			0.216002	22.271
0.201464	41.9043	42.8435		0.264421	41.1874			0.227271	14.102			0.241228	26.6367			0.213179	29.8659			0.289474	15.754			0.265701	12.1126			0.220001	22.9212
0.205128	40.8549			0.26923	40.8653			0.231404	14.5635			0.245613	26.5433			0.217054	27.9058			0.294736	15.6862			0.27053	11.7063			0.223999	23.0062
0.208792	39.8276			0.274039	40.6671			0.235537	14.1102			0.249998	25.8967			0.220929	26.8957			0.299997	15.8281			0.27536	10.9862			0.227998	21.7915
0.212456	39.7179			0.278848	40.4258			0.23967	13.8853			0.254387	25.6733	27.6247		0.224808	27.1225			0.305264	16.1728	17.4594		0.280194	11.1683			0.232001	20.606
0.216115	40.26			0.283651	37.8248			0.243799	12.9292			0.258772	23.6833			0.228682	26.4293			0.310526	14.787			0.285024	11.141			0.236	21.254
0.219779	38.8947			0.28846	35.1609			0.247932	12.6985			0.263156	23.5333			0.232557	25.045			0.315788	16.1953			0.289853	11.2431			0.239999	19.8988
0.223443	37.6886			0.293269	32.4331			0.252065	11.8075	14.183		0.267545	22.2367			0.236436	26.0385			0.321054	16.5921			0.294688	9.8809			0.244002	22.0523
0.227107	35.6994			0.298078	31.9543			0.256199	12.1252			0.27193	21.3333			0.240311	24.9111			0.326316	15.9239			0.299517	9.77219			0.248001	20.2561
0.230771	33.7048			0.302886	31.8483	37.8368		0.260332	11.6591			0.276315	21.0767			0.244186	24.4132			0.331578	15.052			0.304347	9.81619	10.9409		0.251999	20.9344	21.978
0.234431	32.2874			0.30769	32.0954			0.264461	11.6063			0.280699	20.59			0.248061	24.4802			0.336839	14.7942			0.309176	10.07			0.255998	20.6625
0.238094	29.5844			0.312499	31.9328			0.268594	11.9497			0.285089	21.3333			0.251939	24.513	27.1851		0.342106	14.4627			0.31401	9.96488			0.260001	22.6366
0.241758	28.4537			0.317307	30.5819			0.272727	12.6196			0.289473	20.8367			0.255814	23.7823			0.347368	14.6554			0.31884	9.62895			0.264	23.5639
0.245422	27.9777			0.322116	30.6651			0.27686	10.6311			0.293858	20.0467			0.259689	23.1569			0.352629	13.7954	15.1398		0.323669	9.48521			0.267999	23.2527
0.249086	25.7827			0.326925	31.0593			0.280993	11.9793			0.298247	17.6267			0.263568	23.5716			0.357896	14.3285			0.328504	9.17344			0.272002	22.209
0.252746	23.6929	33.8876		0.331729	29.9897			0.285122	11.8353			0.302632	18.6467	20.9948		0.267443	22.6042			0.363158	13.9064			0.333333	9.77285			0.276001	22.5372
0.25641	21.8456			0.336537	28.7712			0.289255	11.6152			0.307016	19.5567			0.271318	22.557			0.36842	13.8094			0.338163	9.55516			0.279999	21.3827
0.260074	22.1346			0.341346	28.5588			0.293388	11.512			0.311401	19.81			0.275192	21.4157			0.373681	13.5197			0.342992	8.87858			0.283998	20.5853
0.263737	21.1338			0.346155	27.902			0.297521	10.7381			0.31579	20.3233			0.279071	20.9969			0.378948	12.4461			0.347827	9.15814			0.288001	21.9812
0.267397	20.6102			0.350959	27.2379	29.8794		0.30165	11.369	11.6367		0.320175	19.6067			0.282946	20.4698			0.38421	12.4585			0.352656	9.22243	9.49096		0.292	20.8099
0.271061	19.711			0.355767	25.1616			0.305783	10.2514			0.32456	19.6233			0.286821	20.3698			0.389471	12.1053			0.357486	9.18503			0.295999	20.9727
0.274725	21.5587			0.360576	26.0255			0.309916	10.6786			0.328949	19.4767			0.2907	20.3842			0.394738	11.583			0.36232	8.55181			0.300002	20.032	21.7188
0.278389	21.7585			0.365385	25.4111			0.31405	10.0309			0.333333	17.7767			0.294574	19.6723			0.4	11.5698	12.8585		0.36715	8.43885			0.304	20.8249
0.282053	21.2228			0.370194	25.504			0.318183	10.3263			0.337718	18.2967			0.298449	19.3051			0.405262	11.2831			0.371979	8.41589			0.307999	21.8261
0.285713	20.8033			0.374997	24.7912			0.322312	10.9234			0.342103	18.84			0.302324	18.6109	21.2997		0.410523	11.4467			0.376809	8.64464			0.311998	21.9632
0.289376	21.0021			0.379806	24.217			0.326445	12.0985			0.346492	16.58			0.306203	19.3475			0.41579	11.3603			0.381643	8.09315			0.316001	21.3311
0.29304	20.7932			0.384615	22.1012			0.330578	11.5711			0.350876	17.0733	18.8148		0.310078	19.7437			0.421052	10.6506			0.386473	8.64835			0.32	20.3371
0.296704	20.29			0.389424	22.2349			0.334711	12.0282			0.355261	16.4267			0.313953	19.1196			0.426313	10.7049			0.391302	8.71314			0.323999	19.6269
0.300368	19.4295	20.9456		0.394233	22.0758			0.338844	12.4417			0.35965	17.16			0.317831	18.2297			0.43158	10.5166			0.396136	8.90536			0.328002	20.3091
0.304028	18.4246			0.399036	21.7898			0.342973	12.4335			0.364035	16.6567			0.321706	18.1617			0.436842	10.2607			0.400966	8.70959	8.63058		0.332	19.9017
0.307692	17.1217			0.403845	22.7557	23.8243		0.347106	11.4967			0.36842	16.7133			0.325581	18.4662			0.442104	9.97681			0.405795	8.65283			0.335999	19.852
0.311356	16.6224			0.408654	20.9721			0.351239	11.0598	11.2784		0.372804	16.9633			0.329456	18.2567			0.447365	10.6445			0.410625	8.91352			0.339998	18.9682
0.315019	16.6037			0.413463	21.4087			0.355372	11.0665			0.377193	16.4867			0.333335	17.8642			0.452632	10.516	10.736		0.415459	8.44519			0.344001	18.4412
0.318683	16.2573			0.418271	21.7671			0.359506	10.3421			0.381578	18.0433			0.337209	18.5251			0.457894	10.2672			0.420289	8.30877			0.348	17.6922
0.322343	15.6533			0.423075	20.8934			0.363634	11.0239			0.385963	16.7667			0.341084	18.4677			0.463155	9.59533			0.425118	8.34486			0.351999	17.5814	19.8966
0.326007	15.0159			0.427884	20.8291			0.367767	10.8667			0.390352	15.89			0.344963	17.9204			0.468422	9.16986			0.429953	8.48033			0.356001	17.7115
0.329671	15.5968			0.432693	19.8089			0.371901	10.8418			0.394737	14.6367			0.348838	17.8325			0.473684	9.28661			0.434782	7.91365			0.36	17.7939
0.333335	15.7329			0.437501	19.3957			0.376034	10.587			0.399121	14.8867			0.352713	17.3822	18.409		0.478946	9.29472			0.439612	7.96855			0.363999	17.3083
0.336995	15.7387			0.442305	20.0213			0.380163	10.7095			0.403506	14.9467	16.2981		0.356588	18.4334			0.484207	9.00986			0.444441	7.98651			0.367998	17.7209
0.340658	15.1226			0.447114	20.1503			0.384296	10.5397			0.407895	14.5567			0.360466	17.1848			0.489474	9.06522			0.449276	7.94109			0.372001	17.6178
0.344322	14.0266			0.451922	20.0701	20.5317		0.388429	10.2002			0.41228	14.8233			0.364341	17.263			0.494736	9.79998			0.454105	7.84486	8.25456		0.376	17.1416
0.347986	16.1135			0.456731	19.8183			0.392562	11.7467			0.416664	15.4267			0.368216	16.7027			0.499997	9.1111			0.458935	7.4599			0.379999	16.9825
0.35165	14.9329	15.9259		0.46154	19.692			0.396695	10.8876			0.421054	15.4767			0.372095	16.035			0.505264	9.37157	9.39714		0.463769	7.13664			0.384001	17.297
0.35531	16.417			0.466344	20.0744			0.400824	10.9693	10.8151		0.425438	15.97			0.37597	16.1493			0.510526	8.65961			0.468598	6.97641			0.388	17.8293
0.358974	15.3593			0.471152	19.2588			0.404957	10.2473			0.429823	15.0533			0.379845	16.4734			0.515788	8.45819			0.473428	7.01832			0.391999	17.0559
0.362637	15.3092			0.475961	19.9416			0.40909	10.6484			0.434208	14.0333			0.383719	16.2454			0.521049	8.64432			0.478257	7.06308			0.395998	15.9831
0.366301	15.9632			0.48077	19.3215			0.413223	9.97546			0.438597	14.0567			0.387598	16.5155			0.526316	8.54257			0.483092	6.83061			0.400001	15.6701	17.176
0.369965	15.7843			0.485579	20.4255			0.417357	10.0186			0.442981	12.9967			0.391473	16.6182			0.531578	8.00224			0.487921	6.94702			0.404	15.7365
0.373625	14.6013			0.490382	20.1742			0.421485	10.3862			0.447366	13.6			0.395348	16.8939			0.536839	8.12801			0.492751	6.78125			0.407998	14.4236
0.377289	14.2476			0.495191	19.9627			0.425619	10.1844			0.451755	13.22	14.4739		0.399227	16.3593			0.542106	8.15535			0.497585	7.44049			0.412001	15.7898
0.380953	13.6013			0.5	19.9534	19.8622		0.429752	9.38937			0.45614	12.3167			0.403101	16.1174	16.6916		0.547368	8.198			0.502415	7.33555	7.09893		0.416	13.8656
0.384617	13.4238			0.504809	19.3738			0.433885	8.54361			0.460525	11.92			0.406976	15.6755			0.552629	8.57479	8.37368		0.507244	6.74006			0.419999	15.2128
0.388276	14.0534			0.509612	20.056			0.438014	8.93843			0.464914	11.9633			0.410855	16.3483			0.557896	8.32068			0.512079	6.35556			0.424002	16.0062
0.39194	14.3669			0.514421	21.6796			0.442147	8.90431			0.469298	13.51			0.41473	15.8095			0.563158	7.98938			0.516908	7.00507			0.428001	15.6561
0.395604	14.878			0.51923	22.3673			0.44628	9.26891			0.473683	12.6233			0.418605	16.2308			0.56842	7.45831			0.521738	6.49399			0.432	14.6091
0.399268	15.9714			0.524039	20.8928			0.450413	8.29867			0.478068	13.6433			0.42248	16.2553			0.573681	7.53397			0.526567	6.1702			0.435998	15.352
0.402932	15.7019	14.977		0.528848	20.2982			0.454546	8.43298	9.47975		0.482457	13.67			0.426358	15.4162			0.578948	7.97572			0.531402	5.49088			0.440001	14.1865
0.406592	15.3581			0.533651	20.3822			0.458675	8.4786			0.486842	12.7533			0.430233	15.7134			0.58421	7.45032			0.536231	6.05666			0.444	15.0686
0.410256	14.6686			0.53846	19.7794			0.462808	8.98373			0.491226	12.1133			0.434108	15.2265			0.589471	7.77294			0.541061	6.02217			0.447999	15.1022
0.413919	13.7053			0.543269	19.9211			0.466941	8.33905			0.495615	12.3367			0.437987	15.7794			0.594738	7.78282			0.545895	6.32235			0.452002	14.8294	15.0645
0.417583	14.2929			0.548078	20.4593			0.471074	8.984			0.5	13.9233	12.7976		0.441862	15.6751			0.6	7.79828	7.78693		0.550724	5.90435	6.25613		0.456001	14.9287
0.421247	14.764			0.552886	19.6946	20.4459		0.475208	9.04624			0.504385	13.14			0.445736	15.7948			0.605262	8.21119			0.555554	6.49559			0.46	14.7704
0.424907	14.204			0.55769	19.4915			0.479336	9.07762			0.508769	11.5733			0.449611	15.1611			0.610523	7.92331			0.560383	6.03175			0.463998	14.9194
0.428571	14.7194			0.562499	20.7633			0.48347	8.77663			0.513158	11.8867			0.45349	15.2701	15.7197		0.61579	8.18234			0.565218	5.4692			0.468001	14.5401
0.432235	14.4622			0.567307	19.3865			0.487603	8.76583			0.517543	12.7233			0.457365	15.5208			0.621052	8.33675			0.570047	5.86573			0.472	12.7977
0.435899	13.7142			0.572116	18.5434			0.491736	8.8322			0.521928	11.75			0.46124	14.8033			0.626313	8.20858			0.574877	6.29662			0.475999	14.8036
0.439562	13.5004			0.576925	18.639			0.495869	8.91166			0.526317	11.65			0.465119	14.9112			0.63158	8.96651			0.579711	5.92841			0.480002	15.2498
0.443222	13.4692			0.581729	19.3804			0.499998	9.24556			0.530702	10.97			0.468993	15.8177			0.636842	9.0407			0.584541	5.34941			0.484001	14.7594
0.446886	13.522			0.586537	19.1515			0.504131	9.67183	8.92608		0.535086	11.23			0.472868	15.5468			0.642104	8.51852			0.58937	5.47542			0.487999	15.4815
0.45055	13.8235	14.1695		0.591346	19.1313			0.508264	9.16646			0.539471	11.4067			0.476743	14.2537			0.647365	8.84619			0.5942	5.5889			0.491998	16.8018
0.454214	13.3829			0.596155	18.4129			0.512397	9.2443			0.54386	12.3567			0.480622	14.26			0.652632	9.20903	8.54431		0.599034	5.38096			0.496001	16.4237
0.457874	13.0463			0.600959	18.5637	19.1463		0.516526	8.91936			0.548245	11.7367			0.484497	14.0344			0.657894	9.50455			0.603864	5.77549	5.78704		0.5	16.666	15.1785
0.461538	12.9485			0.605767	18.6088			0.520659	9.11015			0.552629	11.9833	11.8672		0.488372	13.5248			0.663155	10.3506			0.608693	5.83097			0.503999	16.1193
0.465201	13.5776			0.610576	18.2923			0.524792	9.79412			0.557019	12.3233			0.49225	14.0324			0.668422	10.5107			0.613527	5.67141			0.508002	15.8107
0.468865	13.389			0.615385	18.9234			0.528926	9.59414			0.561403	12.36			0.496125	15.1208			0.673684	10.6415			0.618357	5.70057			0.512001	14.822
0.472529	12.7061			0.620194	20.0719			0.533059	9.60932			0.565788	12.7567			0.5	13.7067	14.6277		0.678946	10.0901			0.623187	5.98571			0.515999	14.4711
0.476189	12.1513			0.624997	17.5976			0.537187	9.16897			0.570173	13.6567			0.503875	13.0567			0.684207	10.1282			0.628016	5.54312			0.519998	14.6798
0.479853	12.1363			0.629806	17.3143			0.541321	9.20711			0.574562	13.6233			0.507754	13.5781			0.689474	10.1986			0.63285	5.55715			0.524001	15.1519
0.483517	12.1258			0.634615	18.0194			0.545454	8.07512			0.578946	12.88			0.511628	12.4905			0.694736	10.499			0.63768	5.56132			0.528	13.8648
0.487181	12.3482			0.639424	18.6322			0.549587	8.39368			0.583331	13.22			0.515503	12.4043			0.699997	10.0883			0.642509	5.42413			0.531999	12.9247
0.490844	12.9366			0.644233	18.5648			0.55372	7.99304	9.02298		0.58772	13.1867			0.519382	12.0695			0.705264	10.0135	10.2025		0.647344	5.65681			0.536002	13.0377
0.494504	12.2655			0.649036	18.7872			0.557849	7.85367			0.592105	14.24			0.523257	12.6916			0.710526	10.9537			0.652173	5.47853	5.64097		0.54	14.1313
0.498168	12.6521			0.653845	19.3419	18.5595		0.561982	7.68705			0.59649	13.2667			0.527132	12.6464			0.715788	10.7727			0.657003	5.42177			0.543999	14.6765
0.501832	12.7614	12.7448		0.658654	19.4566			0.566115	7.29826			0.600874	11.95	13.0421		0.531007	12.7445			0.721049	11.6003			0.661832	5.74138			0.547998	14.7924
0.505496	13.1199			0.663463	19.7695			0.570248	8.4076			0.605263	12.2067			0.534885	13.5875			0.726316	11.6759			0.666667	6.09141			0.552001	14.6196	14.5463
0.509156	13.283			0.668266	18.3729			0.574377	8.2683			0.609648	13.2333			0.53876	13.6169			0.731578	11.2773			0.671496	5.34961			0.556	14.1171
0.512819	13.6353			0.673075	19.1551			0.57851	8.43229			0.614033	13.9533			0.542635	13.5828			0.736839	11.773			0.676326	5.62195			0.559999	13.5061
0.516483	14.3546			0.677884	20.7933			0.582643	8.53154			0.618422	13.3567			0.546514	12.6644			0.742106	12.1726			0.68116	5.89348			0.564002	15.0009
0.520147	13.8698			0.682693	20.3765			0.586777	8.29106			0.622807	13.4367			0.550389	12.3836	12.8859		0.747368	12.7347			0.68599	5.31568			0.568	14.3879
0.523811	13.7938			0.687501	21.3058			0.59091	9.13166			0.627191	13.0233			0.554264	12.7525			0.752629	12.9846	11.7716		0.690819	6.51713			0.571999	14.2985
0.527471	13.8313			0.692305	21.6735			0.595038	9.17356			0.631576	12.9967			0.558138	12.8187			0.757891	13.5414			0.695649	6.52356			0.575998	14.1913
0.531135	13.3354			0.697114	21.8984			0.599172	8.39004			0.635965	13.9167			0.562017	12.768			0.763158	13.5582			0.700483	6.12731	5.86033		0.580001	14.9156
0.534799	13.8533			0.701922	22.6798	20.5481		0.603305	8.82362	8.35739		0.64035	12.8167			0.565892	13.2737			0.76842	13.2889			0.705312	6.49191			0.584	14.9743
0.538462	15.0745			0.706731	22.209			0.607438	8.80812			0.644734	13.0233			0.569767	13.1935			0.773681	14.0754			0.710142	7.0776			0.587999	13.923
0.542126	14.4777			0.71154	23.0526			0.611571	8.93314			0.649124	13.5667			0.573646	12.058			0.778948	13.6601			0.714976	6.66998			0.592002	14.098
0.545786	13.85			0.716344	22.8361			0.6157	8.60459			0.653508	13.99	13.2933		0.57752	11.5363			0.78421	14.0075			0.719806	7.08571			0.596	13.3003
0.54945	13.8798			0.721152	21.6812			0.619833	8.67123			0.657893	13.12			0.581395	12.1358			0.789471	13.1674			0.724635	7.6147			0.599999	14.6757
0.553114	13.7612	13.8657		0.725961	21.5413			0.623966	8.66952			0.662278	13.6333			0.58527	12.882			0.794733	13.8738			0.729465	6.72803			0.603998	15.5985	14.3836
0.556778	14.4739			0.73077	21.7515			0.628099	9.17573			0.666667	13.9			0.589149	12.3619			0.8	13.7596	13.6591		0.734299	7.44662			0.608001	15.2334
0.560442	14.1938			0.735579	21.8196			0.632233	9.11903			0.671051	13.9067			0.593024	12.7452			0.805262	13.6232			0.739129	7.29914			0.612	15.4753
0.564101	12.7181			0.740382	21.3887			0.636361	8.74466			0.675436	13.7467			0.596899	12.098			0.810523	13.3607			0.743958	6.64953			0.615999	14.2196
0.567765	13.1598			0.745191	22.6155			0.640494	8.59927			0.679825	14.12			0.600777	11.842	12.4973		0.81579	14.1475			0.748793	6.66629			0.620001	14.1153
0.571429	12.7115			0.75	23.2648	22.216		0.644628	8.92193			0.68421	14.3533			0.604652	12.2022			0.821052	14.2701			0.753622	6.53075	6.93275		0.624	16.5199
0.575093	12.9167			0.754809	23.0316			0.648761	8.97007			0.688595	14.2933			0.608527	11.6365			0.826313	13.895			0.758452	6.53476			0.627999	15.616
0.578753	13.2777			0.759612	22.688			0.652889	9.11578	8.86109		0.692979	13.42			0.612402	11.5073			0.831575	13.2205			0.763281	7.12821			0.631998	16.1516
0.582417	13.2387			0.764421	22.1106			0.657023	9.4011			0.697368	13.3167			0.616281	11.544			0.836842	13.2714			0.768116	6.73666			0.636001	16.8404
0.586081	13.2534			0.76923	22.2904			0.661156	9.59275			0.701753	14.19	13.8182		0.620155	11.8953			0.842104	13.1287			0.772945	7.21432			0.64	16.0815
0.589744	13.4681			0.774039	23.7622			0.665289	8.87147			0.706138	14.6267			0.62403	11.6438			0.847365	12.7928			0.777775	7.55595			0.643999	17.2002
0.593408	13.5788			0.778848	23.5477			0.669422	8.38548			0.710527	15.1333			0.627909	11.7311			0.852632	12.8395	13.4549		0.782609	7.07371			0.648001	14.8274
0.597068	13.3332			0.783651	22.216			0.673551	9.62791			0.714911	15.0867			0.631784	12.6323			0.857894	12.5153			0.787438	7.08688			0.652	15.5764	15.6548
0.600732	13.8011	13.3942		0.78846	22.3367			0.677684	9.46808			0.719296	15.6533			0.635659	13.2277			0.863155	12.6497			0.792268	6.32936			0.655999	15.0114
0.604396	14.886			0.793269	22.9737			0.681817	8.89266			0.723681	15.9967			0.639534	13.7323			0.868417	12.0132			0.797097	6.79448			0.659998	15.4425
0.60806	14.2528			0.798078	24.1132			0.68595	8.92003			0.72807	17.5367			0.643412	13.4188			0.873684	10.8168			0.801932	6.58383	6.90382		0.664001	16.032
0.611724	14.1753			0.802886	23.0306	22.9182		0.690084	8.66751			0.732455	16.1467			0.647287	12.6266			0.878946	10.7516			0.806761	6.72934			0.668	16.8247
0.615383	13.8518			0.80769	22.9219			0.694212	9.22265			0.736839	16.99			0.651162	13.3534	12.3963		0.884207	9.96257			0.811591	7.16664			0.671998	16.9044
0.619047	13.9645			0.812499	22.4327			0.698345	9.1428			0.741228	17.7133			0.655041	12.2171			0.889474	9.59369			0.816425	7.35039			0.676001	17.3203
0.622711	14.9559			0.817307	23.1826			0.702479	10.573	9.23046		0.745613	17.72			0.658916	12.3371			0.894736	9.68903			0.821255	7.67476			0.68	18.4821
0.626375	15.8233			0.822116	22.5154			0.706612	9.7997			0.749998	18.8767			0.662791	12.5609			0.899997	9.11709			0.826084	7.38247			0.683999	17.8564
0.630035	17.1018			0.82692	22.803			0.71074	10.8782			0.754387	19.01	16.7075		0.666669	12.9624			0.905264	9.04314	10.6152		0.830919	7.44277			0.688002	17.993
0.633699	16.3822			0.831729	23.8132			0.714874	10.0327			0.758772	19.16			0.670544	12.8961			0.910526	8.58852			0.835748	7.62908			0.692001	17.0706
0.637363	17.0164			0.836537	23.7524			0.719007	10.2992			0.763156	19.4833			0.674419	13.3394			0.915788	8.05366			0.840578	7.20082			0.696	17.3192
0.641026	16.7954			0.841346	23.6457			0.72314	10.8155			0.767541	19.59			0.678294	13.6592			0.921049	7.59378			0.845407	7.25665	7.31477		0.699998	16.8776
0.64469	17.4753			0.846155	24.9136			0.727273	10.505			0.77193	19.9633			0.682173	13.2401			0.926316	6.39778			0.850241	7.33963			0.704001	18.2895	17.0326
0.64835	16.8621			0.850959	26.3411	23.6322		0.731402	10.8419			0.776315	20.38			0.686047	13.1119			0.931578	6.29146			0.855071	7.51339			0.708	18.523
0.652014	16.9557	15.7499		0.855767	26.79			0.735535	10.2569			0.780699	19.18			0.689922	13.5327			0.936839	5.52962			0.8599	7.26379			0.711999	19.3184
0.655678	16.0955			0.860576	28.2353			0.739668	9.59851			0.785089	19.41			0.693801	14.1955			0.942106	5.23578			0.864735	7.50069			0.716002	18.8917
0.659342	15.8899			0.865385	27.8507			0.743801	9.39305			0.789473	20.3767			0.697676	14.7892			0.947368	4.48388			0.869564	7.67881			0.720001	19.813
0.663005	15.9403			0.870194	25.8176			0.747935	9.12977			0.793858	20.07			0.701551	14.2597	13.3155		0.952629	4.26254	6.27078		0.874394	7.04867			0.723999	21.1635
0.666665	15.5482			0.874997	24.1635			0.752063	9.48578	10.0863		0.798243	20.1233			0.705426	13.2642			0.957891	3.76368			0.879223	7.41551			0.727998	23.0619
0.670329	15.9883			0.879806	23.6549			0.756196	10.0981			0.802632	19.7567	19.7721		0.709304	13.2723			0.963158	3.42041			0.884058	7.68973			0.732001	22.3625
0.673993	15.5443			0.884615	21.4273			0.76033	10.3414			0.807016	20.4533			0.713179	14.064			0.96842	3.15388			0.888887	6.96867			0.736	23.0303
0.677657	15.7106			0.889424	20.3333			0.764463	10.6288			0.811401	20.9567			0.717054	13.7762			0.973681	2.86992			0.893717	7.09016			0.739999	23.0686
0.681317	15.6668			0.894227	20.2234			0.768591	10.3044			0.81579	21.6833			0.720933	14.6096			0.978948	2.75433			0.898551	7.48096			0.744002	23.5779
0.684981	16.9235			0.899036	21.1263			0.772725	10.6482			0.820175	22.5433			0.724808	15.0967			0.98421	2.70288			0.903381	7.10884	7.34157		0.748001	23.8923
0.688644	17.0276			0.903845	21.7736	23.7633		0.776858	10.6499			0.82456	22.5333			0.728682	15.3678			0.989471	2.53509			0.90821	6.79509			0.751999	23.7306	21.7028
0.692308	17.8271			0.908654	21.017			0.780991	10.9166			0.828944	23.2633			0.732557	15.6087			0.994733	2.33448			0.91304	7.11865			0.755998	24.7306
0.695972	17.1715			0.913463	20.3585			0.785124	10.4478			0.833333	23.54			0.736436	15.3819			1	2.28769	2.86915		0.917874	6.95294			0.760001	24.4866
0.699632	16.7707			0.918266	18.155			0.789253	10.7762			0.837718	25.4433			0.740311	15.2386							0.922704	6.64168			0.764	25.7454
0.703296	16.0238	16.2949		0.923075	14.8441			0.793386	10.6593			0.842103	23.6533			0.744186	15.6902							0.927533	7.0029			0.767999	26.1967
0.70696	16.2301			0.927884	12.4035			0.797519	10.9987			0.846492	24.4767			0.748065	16.6738							0.932367	6.80894			0.772002	26.7742
0.710624	16.7901			0.932693	10.3506			0.801652	10.7126	10.5985		0.850876	25.3267	23.0794		0.751939	16.3349	14.9522						0.937197	6.89205			0.776001	27.4169
0.714287	16.4721			0.937501	8.2177			0.805786	11.5532			0.855261	26.3367			0.755814	16.421							0.942026	6.63165			0.779999	25.8534
0.717947	15.8839			0.942305	7.00522			0.809914	10.6865			0.859646	25.4433			0.759689	16.9782							0.946856	6.25995			0.783998	26.3652
0.721611	16.7497			0.947114	5.29687			0.814047	10.4285			0.864035	26.19			0.763568	16.7831							0.95169	6.16129	6.72651		0.788001	27.3649
0.725275	17.422			0.951922	4.44117	12.209		0.818181	11.5365			0.86842	26.74			0.767443	16.9076							0.95652	5.96803			0.792	27.8547
0.728939	17.1067			0.956731	3.30312			0.822314	11.4365			0.872804	25.05			0.771318	16.6347							0.961349	5.56373			0.795999	27.8848
0.732603	17.4049			0.96154	2.25346			0.826447	11.8594			0.877193	25.2067			0.775196	17.4636							0.966184	5.29253			0.800002	27.7373	26.5342
0.736263	17.9703			0.966344	1.41152			0.830576	11.0794			0.881578	24.72			0.779071	17.2192							0.971013	4.79705			0.804	27.0821
0.739926	17.2314			0.971152	1.15043			0.834709	10.731			0.885963	23.39			0.782946	17.4635							0.975843	4.31873			0.807999	27.4509
0.74359	17.9733			0.975961	1.07637			0.838842	9.6845			0.890348	23.2167			0.786821	16.3791							0.980672	3.90074			0.811998	29.3309
0.747254	17.7284			0.98077	0.955728			0.842975	9.82233			0.894737	24.1133			0.7907	17.0438							0.985507	4.00871			0.816001	30.714
0.750914	17.9448	17.1467		0.985574	0.749822			0.847104	9.56689			0.899121	23.7267			0.794574	17.704							0.990336	3.69037			0.82	31.4712
0.754578	18.7331			0.990382	0.67585			0.851237	9.02228	10.6172		0.903506	22.1367	24.6892		0.798449	17.7521							0.995166	3.22375			0.823999	32.2472
0.758242	18.3784			0.995191	0.62825			0.85537	9.30747			0.907895	22.1033			0.802328	18.1698	17.1477						1	2.90515	4.36688		0.828002	31.6512
0.761906	18.9339			1	0.828822	1.30334		0.859503	8.74628			0.91228	20.5367			0.806203	16.5866											0.832	31.9869
0.765569	17.3459							0.863637	8.66228			0.916664	20.2633			0.810078	17.3054											0.835999	30.5971
0.769229	17.3296							0.867765	8.03441			0.921049	19.4133			0.813953	17.1639											0.839998	32.315
0.772893	18.6305							0.871898	7.99867			0.925438	18.5			0.817831	16.5817											0.844001	31.9314
0.776557	18.6425							0.876032	8.16536			0.929823	17.63			0.821706	16.9475											0.848	33.608
0.780221	18.9933							0.880165	8.15507			0.934208	15.0867			0.825581	17.3413											0.851999	34.0507	31.1105
0.783885	19.4007							0.884298	7.65273			0.938597	15.51			0.82946	18.6259											0.856001	32.81
0.787544	18.9791							0.888427	7.5068			0.942981	13.89			0.833335	18.7332											0.86	32.8061
0.791208	18.6069							0.89256	7.00015			0.947366	12.9233			0.837209	18.0099											0.863999	31.5604
0.794872	18.892							0.896693	6.34701			0.951751	11.9767	17.0758		0.841084	18.5307											0.867998	33.1678
0.798536	17.9176							0.900826	6.06661	7.80357		0.95614	11.4433			0.844963	18.9462											0.872001	31.6166
0.8022	17.6254	18.4578						0.904959	6.63677			0.960525	11.2033			0.848838	18.1724											0.876	30.6731
0.80586	17.6571							0.909088	6.62543			0.964909	10.0267			0.852713	19.222	17.859										0.879999	31.3517
0.809524	17.0788							0.913221	7.05468			0.969298	8.38			0.856592	18.8267											0.884001	31.4167
0.813187	17.955							0.917354	5.64138			0.973683	7.15333			0.860466	17.9464											0.888	31.7683
0.816851	19.0826							0.921488	6.0864			0.978068	7.44			0.864341	16.9433											0.891999	30.2113
0.820511	19.1056							0.925616	6.1636			0.982452	7.38333			0.868216	17.3127											0.895998	29.8189
0.824175	19.2299							0.929749	6.03348			0.986842	7.18333			0.872095	16.8257											0.900001	27.4736	31.2229
0.827839	19.5347							0.933883	5.01129			0.991226	6.45667			0.87597	16.7631											0.904	26.4812
0.831503	19.2792							0.938016	5.92643			0.995611	6.39			0.879845	17.4671											0.907998	24.0905
0.835167	18.825							0.942149	5.93172			1	6.15	8.11		0.883723	16.1527											0.912001	23.551
0.838826	18.4443							0.946278	5.61965							0.887598	15.2709											0.916	22.5085
0.84249	18.2546							0.950411	5.85283	6.04864						0.891473	14.4001											0.919999	18.7561
0.846154	16.3639							0.954544	5.7861							0.895348	13.5392											0.923998	15.8469
0.849818	17.545							0.958677	5.60855							0.899227	12.6453											0.928001	13.6845
0.853482	17.6295	18.2847						0.96281	5.96532							0.903101	12.8709	15.9203										0.932	12.3809
0.857142	17.8155							0.966939	5.62032							0.906976	10.7913											0.935998	10.3184
0.860806	17.6463							0.971072	5.23578							0.910855	8.89343											0.940001	8.33105
0.864469	16.415							0.975205	4.70374							0.91473	8.25397											0.944	7.42305
0.868133	17.4709							0.979339	3.91262							0.918605	7.29776											0.947999	6.10771
0.871793	17.9905							0.983467	4.46038							0.92248	6.67877											0.951998	4.30304	14.9064
0.875457	17.2886							0.9876	4.44172							0.926358	5.32823											0.956001	3.10163
0.879121	16.8641							0.991734	4.03177							0.930233	4.62924											0.96	2.27554
0.882785	16.9774							0.995867	4.20622							0.934108	4.69189											0.963998	1.60896
0.886449	15.3803							1	3.87157	4.82034						0.937987	4.07853											0.968001	1.50034
0.890108	15.8227															0.941862	3.22719											0.972	1.07848
0.893772	16.7389															0.945736	2.50323											0.975999	0.925158
0.897436	18.0461															0.949615	2.10959											0.980002	0.736589
0.9011	17.1593	17.0473														0.95349	2.08459	5.42828										0.984001	0.745658
0.904764	15.973															0.957365	1.86425											0.987999	0.827274
0.908424	15.4863															0.96124	2.19385											0.991998	0.689053
0.912088	15.6579															0.965119	1.96151											0.996001	0.510737
0.915751	14.9624															0.968993	1.59859											1	0.706279	1.22548
0.919415	11.9027															0.972868	1.27903
0.923075	9.39671															0.976747	1.10043
0.926739	6.7387															0.980622	0.919053
0.930403	4.52788															0.984497	0.822833
0.934067	2.72564															0.988372	0.83778
0.93773	1.8313															0.99225	0.708893
0.94139	1.40828															0.996125	0.677713
0.945054	1.0503															1	0.655693	1.2183
0.948718	0.929855
0.952382	0.731727	7.38019
0.956046	0.633364
0.959706	0.813877
0.963369	0.636173
0.967033	0.510505
0.970697	0.615441
0.974361	0.645755
0.978021	0.611414
0.981685	0.530755
0.985349	0.456932
0.989012	0.413577
0.992672	0.425586
0.996336	0.2556
1	0.218701	0.520591
