# Supplementary material for: Crumbs organizes the transport machinery by regulating apical levels of PI(4,5)P2 in Drosophila
Source: eLife. 2019 Nov 7;8:e50900. doi: 10.7554/eLife.50900 (PMC6881148; doi:10.7554/eLife.50900)
Supplement: Figure 3—source data 4. [file elife-50900-fig3-data4.xlsx]

## Sheet: Im10
X0	Y0	Y1	Y2	Y3	Y4	Y5	Y6	Y7	Y8	Y9	Y10	Y11	Y12	Y13	Y14	Y15	Y16	Y17	Y18	Y19	Y20	Y21	Y22	Y23		Ap-Ba	Average int.
0	13.7645	11.8825	8.1584	14.9949	20.1743	16.3038	9.433	9.4168	11.3656	10.5959	9.6604	16.5427	14.4512	22.6725	19.2882	9.6535	13.7252	11.3318	12.9285	13.8628	11.6733	11.5626	11.105	10.2577		0	13.1169
0.119	17.4185	11.3886	11.162	13.9979	16.4553	14.2899	9.2557	14.9534	12.3194	11.3006	15.1382	12.4381	12.3511	20.8789	16.3491	8.0267	13.2602	11.6401	9.0652	7.9531	13.7096	11.2689	11.1897	6.7391		0.00602236	12.6062
0.2381	15.7367	11.6073	10.6057	14.3566	14.1093	16.0355	7.621	10.1668	11.7608	12.8322	17.5212	9.6011	14.8366	28.0811	15.5369	11.5419	9.8577	8.3294	9.0031	7.5582	12.4262	11.7846	6.7462	11.434		0.0120498	12.4621
0.3571	18.8787	13.2363	8.4092	10.2797	15.1943	12.1297	8.4461	9.8698	7.0099	8.9411	11.3018	16.7072	12.8692	16.422	15.7561	11.1618	6.3584	10.7661	7.9155	9.4317	13.1196	13.6392	13.1086	9.8432		0.0180721	11.6998
0.4761	17.5897	8.3272	8.1695	7.9552	8.4988	16.0784	11.8687	10.5378	8.9662	8.9565	10.3137	14.1908	12.2998	18.9896	12.6698	9.8095	9.6321	14.9929	14.3208	11.9762	12.7544	11.5308	12.7303	7.5137		0.0240945	11.6947
0.5952	15.2176	6.4859	9.0915	11.2874	12.443	15.1388	11.5575	6.1133	9.3108	11.1599	13.4862	12.6536	14.1737	16.7421	7.8449	10.7981	11.7451	11.009	10.4391	8.5305	11.6488	8.0221	10.2178	9.4036		0.0301219	11.0217
0.7142	8.0618	9.991	5.2189	10.1982	13.1664	13.755	12.2837	9.4445	5.835	13.5871	10.3967	12.1247	14.7188	18.8329	9.3263	11.4802	12.6139	7.6868	7.1692	10.9435	11.4275	8.2088	12.308	10.2375		0.0361443	10.7923
0.8332	13.4193	7.317	7.0024	9.2462	11.3805	6.8922	9.7813	8.0633	4.4696	12.3962	9.4116	12.3489	12.4597	21.7769	9.2185	14.3976	16.9155	11.3124	5.4894	11.1933	8.873	11.3082	9.1431	7.6501		0.0421666	10.4778
0.9523	11.0135	8.8106	8.197	12.2533	12.1854	7.6838	14.9258	6.743	5.1744	10.8977	6.3464	15.467	8.6188	15.2772	9.7019	7.3085	12.2917	10.6848	5.5064	8.0983	7.2081	11.1792	8.282	7.1067		0.0481941	9.6234
1.0713	10.0586	8.7106	7.0798	10.0445	12.4639	10.6052	12.6111	6.8935	6.2289	8.4078	7.1464	12.1064	8.2864	13.9331	8.047	8.6247	11.1293	16.5983	8.203	10.4242	5.9987	5.9265	9.6175	9.9848		0.0542164	9.54709
1.1903	7.2966	6.4822	5.6641	9.2718	11.1889	15.8096	10.6041	6.0697	7.5976	10.7663	7.3401	10.9468	9.2474	10.7086	9.73	8.2909	7.1221	11.8985	10.0932	8.1671	11.3384	8.549	9.2136	10.4402		0.0602388	9.32653
1.3094	11.1821	5.7367	8.6864	6.809	8.4219	12.8888	10.311	7.7187	5.1541	9.3942	8.4618	5.3322	6.2942	13.1284	8.4366	7.7642	9.6604	11.0851	7.2403	6.8939	5.9311	11.5299	9.1421	11.6952		0.0662662	8.7041
1.4284	8.8421	5.5891	6.7253	5.2733	5.3956	8.8592	7.6706	4.8471	12.9798	6.1799	6.376	5.2488	8.8682	9.5286	13.3983	7.9541	10.1496	12.2276	10.3116	6.145	6.021	10.7122	4.5764	10.9028		0.0722885	8.11592
1.5474	12.6078	6.1872	6.8567	7.7608	6.7784	8.1609	7.5765	6.1686	9.5134	10.3772	11.761	6.4374	9.3316	11.3832	10.0832	8.601	8.9829	11.8009	9.7187	5.0305	7.9273	10.5678	6.0229	6.6733		0.0783109	8.59622
1.6665	10.8965	8.2603	7.062	6.1805	8.3053	6.9067	8.9664	5.2273	8.7275	5.6115	9.3414	6.4896	10.2418	13.2737	8.2686	4.7251	7.9053	9.9299	6.7072	5.4661	3.9288	6.9337	7.9561	5.0439		0.0843383	7.59813
1.7855	11.7037	4.8412	7.2373	3.3817	9.4993	8.3306	6.8505	7.4338	9.0325	6.4455	6.2119	5.2764	8.0732	8.4131	10.2791	7.1063	10.4531	9.698	4.8875	9.1757	8.5882	8.74	10.0318	4.2885		0.0903607	7.74912
1.9046	7.6957	5.993	4.896	7.8709	6.4761	4.3449	7.674	8.76	7.6728	5.8879	7.1999	5.7207	7.536	5.8657	9.5378	7.0188	8.0858	11.2263	8.5294	5.9201	5.4742	7.6684	8.8731	6.3966		0.0963881	7.18017
2.0236	8.8726	6.4649	3.6613	4.4321	5.6635	4.954	4.3523	9.5287	10.1815	6.792	10.0001	12.6946	9.3823	10.7674	7.9015	5.6325	9.066	8.678	10.9618	6.8961	4.5381	6.7488	7.5699	6.2058		0.10241	7.58107
2.1426	3.6877	5.3762	4.9662	3.2019	5.2588	6.4658	4.0255	5.6793	6.5907	8.1346	6.4195	6.1336	6.0159	11.093	9.278	9.9217	10.6213	6.5123	7.0728	9.6458	7.0472	7.3196	8.3426	6.195		0.108433	6.87521
2.2617	6.4705	4.9902	8.5082	5.0573	6.6925	12.6824	4.6349	6.4346	5.4372	6.7636	9.7102	6.1418	7.618	9.4787	9.0332	7.7352	8.9909	8.1694	8.1638	7.0482	5.5648	7.212	7.2963	7.9458		0.11446	7.40749
2.3807	6.1702	4.2699	5.6339	5.2153	8.0273	5.053	3.7153	8.2415	4.3467	6.6838	7.7545	5.0855	5.1335	10.3114	8.6734	5.631	9.9968	11.6504	9.0892	6.1933	8.7095	8.6809	7.8267	7.7583		0.120483	7.07714
2.4997	6.6903	4.8398	8.1154	4.4554	6.2631	4.6677	6.2459	9.8541	7.434	4.9676	5.4735	3.0537	7.9624	7.9359	7.6914	6.2482	9.8768	8.635	6.6791	8.0348	6.485	8.3943	7.4861	9.6354		0.126505	6.96354
2.6188	8.9109	6.6149	8.9373	5.7778	5.5843	3.7306	8.3115	7.4523	12.6113	2.8238	6.3277	3.919	9.0678	11.1797	8.797	8.7948	12.58	4.6682	10.0614	7.0508	11.5531	7.1135	11.3394	6.3326		0.132532	7.89749
2.7378	6.3757	9.227	7.2039	6.8699	6.8172	6.6858	6.0576	6.5283	8.3098	3.7711	6.6635	4.8572	6.9589	8.3049	6.8156	4.7539	8.3108	2.8387	8.2462	5.8781	10.4602	9.9416	6.0726	3.783		0.138555	6.73881
2.8568	9.1029	6.5641	8.3669	5.514	5.7356	6.584	5.9368	6.4549	12.4427	4.0561	8.1055	4.4481	7.2473	7.1472	7.5933	4.2711	10.2242	6.7377	9.6186	7.0838	9.5126	9.7453	6.745	5.3136		0.144577	7.27297
2.9759	7.5962	5.6429	7.3375	1.5198	5.9505	5.9146	9.5772	6.2425	10.6509	5.2796	5.9221	6.5361	11.6871	10.0239	4.1345	7.6039	8.5687	5.271	4.7155	8.5023	7.8749	5.9741	6.307	4.7427		0.150605	6.81565
3.0949	6.5516	2.3816	8.1163	4.6681	6.6825	7.0033	5.2593	6.2897	10.6238	5.358	6.1847	7.4437	7.3977	7.8233	6.2802	4.6492	7.5434	4.6943	6.1877	5.3938	13.5963	6.4423	5.9953	4.7449		0.156627	6.55463
3.2139	3.6493	6.0417	5.0872	5.3659	4.0655	5.0881	3.7417	6.1928	11.5075	3.7708	8.5105	8.7549	7.1855	7.3782	4.3068	4.511	7.9716	8.8256	8.8557	6.5053	9.0485	6.6076	3.2967	4.5874		0.162649	6.28566
3.333	9.4304	4.3027	5.1407	6.3482	3.1839	7.3816	6.0626	5.4176	8.2845	4.6342	2.6947	8.3328	3.5673	9.9436	10.3323	5.544	6.5433	13.1661	8.911	5.7253	11.8104	8.9392	5.5726	6.4142		0.168677	6.9868
3.452	6.29	5.4902	4.9582	6.5526	3.9383	3.5436	3.7079	7.1371	11.2643	5.2105	5.2671	6.006	3.8762	8.221	6.8663	4.5146	5.3672	7.4555	8.2509	5.8401	14.0758	5.087	6.1311	8.3421		0.174699	6.3914
3.571	8.681	4.1389	6.002	9.5473	4.3213	4.2544	2.0157	6.0855	12.6173	5.5375	2.7888	9.145	4.3292	7.3424	5.02	6.4406	5.5738	10.0062	12.6126	4.672	12.0199	5.8614	4.7972	9.8474		0.180721	6.81906
3.6901	5.5295	7.0124	4.2541	6.5755	5.8899	3.1602	3.4884	4.5157	9.4895	2.9233	4.992	8.2203	5.2845	8.0496	5.191	5.6561	9.9875	10.9765	8.998	4.6726	8.4096	6.5598	6.6908	8.3561		0.186749	6.45345
3.8091	7.7235	8.7234	6.8315	5.7654	6.4882	4.8356	3.3648	5.0339	9.6404	6.8991	5.4198	5.9998	6.6376	6.4296	5.4918	5.3486	8.014	12.4196	6.4582	2.6503	9.7775	4.4958	6.0586	8.5739		0.192771	6.62837
3.9281	6.2151	6.842	5.3735	5.3941	4.7181	6.2091	3.1664	6.2319	5.7234	5.9433	4.618	5.901	7.1019	10.7837	3.4173	9.1964	5.8888	12.5321	7.143	5.6967	8.5025	7.3954	7.8487	7.9733		0.198794	6.65899
4.0472	4.809	4.4682	2.4029	3.6839	6.1934	6.2821	6.1905	7.1316	6.4692	3.8254	7.8329	3.9384	5.3785	6.6016	7.1826	8.4344	4.3809	7.4512	9.9647	1.8873	10.0361	5.8754	4.1665	7.2885		0.204821	5.91147
4.1662	5.614	4.1056	4.91	5.898	7.697	8.1767	6.3527	6.2152	5.7197	3.4726	7.9248	5.9215	9.6008	5.5964	3.4364	6.7619	5.1577	7.6641	6.3787	4.5376	4.8832	6.095	5.686	10.94		0.210843	6.19773
4.2852	4.3788	7.809	6.6498	3.3954	6.5228	7.4505	8.8735	6.0621	7.5827	5.0647	6.5953	5.2687	6.0861	7.5536	5.3466	6.8575	4.8175	7.6683	5.839	8.0442	5.4928	5.197	5.9446	9.6124		0.216866	6.42137
4.4043	8.9218	5.0585	4.9968	2.9659	3.3299	5.3985	8.3778	6.8815	5.9465	5.6936	4.5659	7.7115	9.2408	10.5077	4.0124	10.7534	7.9179	7.0505	6.0223	5.7182	11.161	7.1669	6.581	11.1136		0.222893	6.96225
4.5233	8.4266	7.689	5.9822	2.9236	3.8553	7.2503	4.9102	6.0264	4.8764	3.9456	3.2417	10.0048	6.4796	10.2787	4.7206	8.7854	5.563	4.866	5.5181	4.587	13.0243	4.3702	4.9636	11.6095		0.228915	6.41242
4.6423	9.2109	10.1684	5.5219	2.1378	5.1233	7.5338	5.5091	4.985	3.6348	3.9285	1.9319	4.8053	13.9572	7.8449	6.7898	10.6357	6.836	4.8608	6.0375	6.813	10.2109	6.7044	4.948	5.875		0.234938	6.50016
4.7614	7.1643	5.777	5.7777	3.5864	3.4248	5.6546	4.8824	8.2902	4.4517	3.5797	5.4392	4.8492	11.7149	8.4154	7.6564	7.8026	5.8386	6.5061	4.4634	5.9247	9.0656	5.9865	5.6704	4.1533		0.240965	6.08646
4.8804	4.7436	2.9993	5.6394	5.1511	4.9281	4.7623	2.9638	7.7684	5.4526	3.5193	8.4947	12.4353	9.5163	13.6017	5.41	6.1094	5.4745	5.5772	3.9904	4.3998	8.4269	4.7539	5.5931	4.2572		0.246988	6.08201
4.9995	3.8426	4.2888	5.2698	4.9637	4.354	6.3356	3.2268	5.9967	4.9956	5.7017	8.9403	7.1842	6.7254	8.93	3.9283	6.8799	8.5122	5.6553	2.2992	3.5294	9.9616	5.2254	6.7376	3.2018		0.253015	5.69525
5.1185	6.6378	7.1064	8.0965	8.8825	7.0621	5.7794	4.1212	5.0746	6.6793	6.146	9.3482	5.9081	6.0504	12.8829	5.9278	9.2218	10.2466	5.6306	5.1648	3.0872	12.3604	4.9534	6.3363	7.0552		0.259037	7.07331
5.2375	5.7969	6.0729	6.1911	11.8543	4.5187	7.1279	5.5585	7.4953	9.7313	5.6154	7.1469	7.9942	11.106	7.7299	5.4786	7.8375	10.0112	6.9686	8.4815	2.3279	8.6727	6.8792	5.4294	6.5685		0.26506	7.19143
5.3566	4.4765	6.9505	4.7631	10.6967	3.1049	6.0244	8.6266	5.4903	5.0098	4.9632	8.7718	7.2703	9.0117	11.6051	3.8086	4.7105	3.9272	10.0025	7.5845	5.1009	5.3424	6.8042	3.543	8.3821		0.271087	6.49878
5.4756	6.6081	6.5092	5.8876	3.6935	3.6555	9.2525	8.8718	6.6274	8.2175	3.698	9.3176	5.5457	11.557	5.6157	9.4319	4.7726	8.1109	4.2893	6.0975	7.2699	6.2506	4.7299	4.9018	6.3808		0.277109	6.55385
5.5946	6.6265	7.9373	4.9633	4.8464	3.6994	7.3563	6.1048	4.6539	5.7893	4.6955	10.4976	7.7333	7.3268	7.1623	7.7388	5.7118	8.1069	5.0529	4.3764	6.0706	7.9758	3.7774	4.9085	6.408		0.283132	6.22999
5.7137	4.4871	7.404	7.2292	5.0101	2.7185	6.5317	7.7344	5.9734	3.0966	3.1677	6.1261	8.1874	6.1513	4.5081	4.1875	6.6427	7.7852	3.8917	2.1362	10.4409	5.1414	7.7411	4.7232	7.273		0.289159	5.76202
5.8327	4.048	5.163	8.9865	5.6903	4.4241	5.2829	5.2357	5.4748	3.6321	4.2952	9.7572	5.7655	5.9634	1.1827	3.9643	8.2872	5.0839	6.9878	2.6784	7.9346	8.5028	7.6853	3.5753	7.481		0.295182	5.71175
5.9517	6.1855	5.9435	9.7229	5.2489	4.8323	5.9189	4.4478	6.4201	5.2029	8.3843	7.8696	6.6921	4.2941	1.5379	5.9006	7.5365	4.9812	6.5424	3.163	6.0364	7.6838	5.6096	5.1584	5.1191		0.301204	5.85132
6.0708	5.0937	6.1014	10.2394	4.2393	7.0179	3.7249	10.054	4.6781	5.6071	8.2816	7.6922	4.3242	5.9782	4.556	7.7853	8.5069	5.9231	6.6086	4.9508	7.2526	5.9177	2.8613	5.6908	2.466		0.307231	6.06463
6.1898	5.8051	4.9315	4.599	4.2	4.7269	4.2018	3.8427	2.3427	7.6406	7.0847	8.7732	4.1614	4.3431	6.0057	7.6055	8.321	6.8714	6.7429	7.8415	5.3518	5.3768	2.456	2.0269	5.7498		0.313254	5.45842
6.3088	9.1763	7.5269	7.1623	4.0705	7.0977	3.2975	5.418	3.1218	6.1164	5.7063	6.6976	6.6652	5.5512	2.447	7.6908	10.823	6.7838	6.4842	6.4716	6.715	6.336	6.1911	6.0149	4.4952		0.319276	6.16918
6.4279	10.0463	6.87	5.1918	3.476	7.7539	6.4123	7.5916	3.9879	6.309	8.7636	7.7441	9.0456	10.1174	4.3969	6.1544	12.8536	6.2488	10.3634	8.0809	6.0472	10.3225	5.8024	6.0343	4.1971		0.325304	7.24213
6.5469	6.8259	7.7813	7.3616	4.3061	6.3308	4.4805	4.5703	3.5611	6.7319	7.8729	7.8334	5.2395	7.774	5.6022	7.8625	9.2798	4.7187	6.4051	6.0729	8.4173	5.9279	4.3944	3.5422	6.0654		0.331326	6.20657
6.6659	4.8547	7.7469	9.9318	3.7984	3.7722	3.8787	5.7254	2.7911	5.3317	7.2779	5.1228	6.2338	5.3949	7.647	7.0735	9.6379	7.6393	7.0532	5.0807	7.0394	4.249	2.3984	4.5106	3.4925		0.337348	5.73674
6.785	4.494	10.8152	5.1873	2.4978	3.8617	6.4939	2.423	3.2119	6.5678	6.2502	6.131	4.9564	4.8929	8.4247	8.546	5.8138	5.065	6.0906	5.8291	5.9371	7.448	2.215	6.2119	8.0351		0.343376	5.72498
6.904	4.8852	5.6446	5.5188	2.6369	2.6966	5.633	2.3419	4.2745	9.8836	5.9054	7.552	4.7467	9.0942	7.3095	6.5723	5.1862	6.8744	1.8354	5.6869	6.6239	4.9366	3.5794	5.6316	6.1978		0.349398	5.46864
7.023	5.1154	5.7127	9.6435	5.242	4.5983	6.0215	5.1406	4.9825	10.4898	3.9406	9.1707	2.6823	5.9458	5.1951	4.9797	8.4223	8.2238	4.8043	9.5786	5.3954	5.2718	3.0951	5.5386	6.5322		0.35542	6.07177
7.1421	5.3054	12.9864	9.2659	4.3619	5.2579	8.1334	3.4866	6.1872	3.9947	7.1072	8.9387	5.3676	4.9355	7.8473	6.526	9.822	6.2539	8.2916	10.5678	4.7875	6.9006	5.1194	7.4043	7.748		0.361448	6.94153
7.2611	6.4766	14.0197	5.7428	1.8993	5.4467	6.4912	3.7117	3.856	9.1924	3.9012	10.6848	6.4319	6.3287	5.8677	5.5871	8.9977	6.8843	6.2957	4.2579	4.6796	2.0527	5.5812	7.2957	6.7144		0.36747	6.18321
7.3801	9.5887	9.27	5.3249	4.8859	4.9155	6.6842	6.0664	5.5769	6.6587	7.5191	14.9277	6.4591	4.0599	5.4238	6.0978	10.478	5.1751	3.715	6.8786	4.4405	3.1827	5.0832	6.3207	3.744		0.373493	6.35318
7.4992	6.5983	7.4581	5.7748	5.9458	3.2851	7.3964	7.18	5.7892	5.9741	11.4108	13.4386	5.2766	5.271	7.721	9.7586	7.9988	7.93	3.0576	5.9266	7.865	2.7078	4.1556	4.6132	6.1644		0.37952	6.61239
7.6182	5.216	6.8415	6.7021	7.7058	4.7118	8.822	7.454	5.4556	6.6192	6.4378	13.9996	4.4269	8.358	12.0473	4.9224	2.8856	5.9395	6.3289	3.8614	6.2655	2.2454	2.3824	7.9535	6.3229		0.385542	6.41271
7.7372	5.1383	6.0754	5.6172	6.5385	4.2087	6.3058	9.9812	6.93	6.6233	6.4281	9.4264	4.1051	7.7329	14.9701	6.8499	5.7663	8.0202	5.276	6.485	4.4888	3.1939	1.1792	10.8015	11.804		0.391565	6.83108
7.8563	5.629	9.7184	8.7742	5.7184	6.7504	5.9926	6.4451	4.2238	5.0196	6.9312	10.3298	4.8967	3.8446	13.7605	6.3438	5.2392	5.7751	6.1712	6.1329	7.8877	5.4949	1.6081	9.1163	8.4791		0.397592	6.67844
7.9753	4.0981	9.0458	11.3767	3.9259	7.1827	6.4918	4.8255	8.2377	5.6501	7.2421	10.7693	3.8061	3.3588	7.7645	3.7339	4.9115	6.3162	4.0357	6.9689	11.1586	4.4088	1.2631	6.0807	10.0685		0.403614	6.36338
8.0943	6.3173	5.9243	6.7749	5.9376	2.675	5.1275	4.4322	9.7836	6.2951	6.6824	8.8381	3.8582	2.0655	10.6091	4.2232	3.1122	8.0148	5.7347	4.4792	5.6117	2.4272	1.9656	5.3574	7.3388		0.409637	5.56607
8.2134	5.6217	7.8516	5.3227	3.8651	4.6877	6.4633	2.6871	5.4004	4.8047	6.4631	8.4768	3.4862	5.7172	7.9865	5.3299	6.34	7.7906	4.5623	5.0039	5.7189	3.4247	0.4034	5.6304	9.2471		0.415664	5.51189
8.3324	6.8477	6.37	3.9727	3.0902	11.9072	7.246	3.1193	2.1431	4.8122	6.7655	6.5279	2.7537	2.5126	6.342	7.3145	9.8696	8.2896	6.9815	9.2092	6.6772	2.2051	1.674	7.2783	7.1034		0.421687	5.87552
8.4515	4.811	6.5924	3.6546	3.0247	11.3337	6.4052	3.6891	2.8911	2.5735	7.1405	9.5029	2.8133	2.4929	9.6303	5.816	7.5051	6.9124	3.8544	8.4869	4.8033	3.0508	2.4284	3.7335	5.9824		0.427714	5.38035
8.5705	4.7598	6.8939	3.9013	5.1038	7.4288	8.2096	5.9102	7.6073	4.9047	8.2207	6.7153	3.9866	3.1992	9.4305	6.855	8.2812	5.1864	2.4505	5.3099	3.9456	4.968	0.594	3.2594	5.7502		0.433736	5.53633
8.6895	6.3099	5.4975	6.8608	6.4724	6.7025	8.9646	4.3453	4.8595	6.1085	4.1012	7.2155	4.658	2.4557	6.1451	5.6169	8.3101	8.6466	2.6177	6.6639	3.6704	3.0821	3.3998	3.6882	9.8461		0.439759	5.6766
8.8086	8.933	3.0336	4.0098	5.9464	9.2071	7.0841	5.5484	3.6101	7.519	3.4329	5.9302	6.1824	4.9343	4.9854	5.9026	6.883	11.2624	5.8831	6.8397	4.8384	2.4153	3.6087	4.3836	8.0411		0.445786	5.85061
8.9276	11.9604	3.9694	4.4111	5.0094	11.0404	4.6252	6.5232	6.8311	6.2462	5.1348	6.1753	5.182	5.0425	5.0374	7.3318	4.5522	9.4536	5.2128	2.4937	5.8879	2.975	1.683	4.0178	6.52		0.451808	5.72151
9.0466	8.908	5.7073	6.1935	6.2267	5.2396	3.2799	6.1126	6.7281	4.7921	6.2874	5.2871	4.4694	4.4121	7.0515	6.7455	3.4203	11.301	7.2066	4.206	7.7128	1.3336	0.9511	1.7815	8.8357		0.457831	5.59122
9.1657	6.7004	8.458	3.8758	3.1005	5.5039	6.9363	2.5562	3.8721	4.5426	2.8344	4.7767	6.4994	3.9025	3.1468	5.853	5.9123	7.3708	6.0337	6.5891	5.9392	1.8448	1.9625	1.7572	10.6541		0.463858	5.02593
9.2847	8.9679	7.2226	7.2559	4.4628	6.2781	5.7677	3.919	5.3205	5.2878	4.8117	5.7178	3.8626	5.9596	2.3824	6.0053	2.3566	5.6288	5.8039	5.6011	7.34	1.4608	1.8115	1.953	10.1585		0.469881	5.22233
9.4037	10.9426	6.942	4.9151	9.0339	4.7818	9.4597	6.0729	3.0118	3.1985	6.4741	5.3936	1.8213	5.0736	4.8659	5.1488	5.0517	7.4677	6.8307	7.1918	8.8632	3.2953	2.9562	4.7047	6.8948		0.475903	5.84965
9.5228	9.1857	9.2776	4.5635	12.3409	5.9411	8.4644	6.6794	4.9937	2.7117	4.5136	5.4405	3.0077	3.0493	3.9932	3.4389	8.0652	7.5596	2.6345	4.9939	8.1629	2.2056	0.2065	2.7334	7.535		0.48193	5.48741
9.6418	7.9373	11.1043	2.5905	10.3179	3.9606	10.5613	6.5446	3.3131	4.6665	4.5286	5.1006	3.7136	3.0954	3.4818	5.4061	4.6413	8.044	3.9685	6.4965	7.1381	3.1315	1.3135	2.7465	6.774		0.487953	5.44067
9.7608	4.7451	7.1248	3.6888	8.9343	4.8492	6.5774	3.8819	3.405	4.8263	5.2826	7.5075	3.0541	4.3496	2.5231	3.1884	3.8885	6.9882	3.602	8.2236	8.0348	1.5158	0.7971	3.2663	7.088		0.493975	4.88927
9.8799	8.7024	10.4351	5.5838	5.1156	4.2449	4.8309	1.0924	3.76	5.1017	6.3976	5.1138	5.1581	4.2247	2.8088	3.3801	5.817	7.2527	1.4723	7.2089	8.8846	4.874	0.8085	1.8835	4.4867		0.500003	4.94325
9.9989	11.3424	6.2474	6.3539	7.8027	5.2866	5.6611	2.0459	5.4279	3.7066	3.9063	5.2509	2.7093	3.0867	1.8925	4.4922	5.275	5.7103	3.4687	6.7461	5.2272	4.1003	1.0769	3.5349	7.3449		0.506025	4.90403
10.1179	11.1169	8.5788	4.2627	6.2751	4.4945	4.0481	5.3159	4.0616	7.0675	3.0678	9.1101	1.9959	4.411	3.7681	7.2424	5.9678	7.339	2.9882	9.2414	9.4099	3.2321	2.7465	3.4997	6.0109		0.512047	5.6355
10.237	12.2928	5.8401	4.962	6.8147	2.8706	2.9492	3.919	2.5732	9.4029	4.5764	6.8137	2.7063	5.8424	3.8293	4.1575	8.135	6.9925	2.3573	7.6946	8.5017	3.7966	2.8401	0.7034	3.6012		0.518075	5.17385
10.356	9.6592	8.4619	4.6021	4.928	6.0889	4.0337	0.881	5.4041	5.9917	8.6314	6.0186	4.1401	4.1911	3.6399	6.077	6.7789	7.5997	5.2726	3.8463	3.297	4.9769	1.6863	3.3421	4.8007		0.524097	5.18122
10.475	12.4688	8.4378	3.0079	7.8127	6.0474	5.1326	3.4157	2.084	5.8668	4.0155	5.8403	3.2536	3.8673	3.4414	6.573	3.2842	6.8118	6.0571	5.6739	6.7168	4.856	2.3252	2.4052	4.8283		0.530119	5.17597
10.5941	8.2356	7.1786	5.0905	5.3906	5.3396	5.7656	6.2495	2.9336	6.7673	3.7838	9.3553	1.5257	3.734	3.6279	6.7617	6.4483	6.2907	7.5128	4.352	4.8649	3.6544	2.1745	0.8832	3.5753		0.536147	5.06231
10.7131	8.4101	6.6333	5.404	7.5242	4.2956	3.5048	5.1376	3.2734	4.6491	5.9868	7.4884	3.7193	4.5563	2.8446	9.5387	3.4458	5.7542	1.7292	5.6807	5.8684	1.8485	3.0181	1.8105	5.3631		0.542169	4.8952
10.8321	8.64	5.6551	4.3285	6.2185	4.546	3.9906	5.1312	4.0441	4.8293	6.5364	7.6455	6.1217	3.0282	4.0169	8.5893	4.3924	4.0099	4.267	2.7046	5.3973	4.2835	3.3363	2.4248	5.2029		0.548192	4.9725
10.9512	5.7652	5.1612	4.3199	4.9088	7.2478	4.0599	4.7558	4.5438	10.8521	5.1276	7.2518	4.7244	3.5835	2.3336	6.4089	7.5275	5.4627	3.4778	7.1352	3.0402	2.633	1.563	5.2807	2.8174		0.554219	4.99924
11.0702	6.1194	4.557	3.8745	6.5056	9.3107	3.3207	2.3014	6.1621	12.0963	5.5565	2.4971	6.8019	2.7092	4.817	8.3027	9.9891	3.986	3.9374	3.6371	3.0172	1.9044	3.3722	3.0624	3.1646		0.560241	5.04177
11.1892	6.5634	2.4971	3.7579	1.7717	6.7562	4.0917	2.8072	6.5822	7.6058	4.6847	2.5615	6.5659	2.1955	6.1841	6.6913	4.0459	4.5662	3.3558	5.4784	3.9972	3.5183	1.4123	2.0528	6.068		0.566264	4.4088
11.3083	6.6724	5.7081	6.9849	5.1069	4.9656	3.4023	2.274	4.0745	8.612	4.5552	3.8466	5.1056	1.7078	5.2766	7.6121	8.684	5.2198	5.0919	4.8461	4.4051	2.3324	1.2173	2.4681	8.3983		0.572291	4.94032
11.4273	4.0598	5.4985	7.2024	3.4997	5.9307	2.5698	2.3441	3.01	10.2408	3.3879	3.6232	5.5428	1.7057	7.6641	8.8916	6.288	3.0639	3.0686	3.1239	6.3808	1.9935	1.7622	2.5986	7.6194		0.578313	4.62792
11.5463	7.7751	3.4903	5.7474	3.4929	9.1914	6.3544	3.5439	2.5518	4.7679	3.9237	4.0746	6.1584	2.8181	5.6744	8.4219	5.6368	6.5376	0.7709	5.545	5.2218	2.7969	3.5387	1.1492	4.7319		0.584336	4.74646
11.6654	10.1531	1.6592	3.9415	4.3192	7.9365	2.2597	4.3236	3.1378	2.8507	7.4985	3.5264	3.4804	3.2913	4.6173	6.9267	6.8385	5.1056	0.9682	3.7014	4.1507	3.5992	3.0418	1.5986	8.6957		0.590363	4.48423
11.7844	5.6617	4.7956	6.3833	4.5646	6.9203	2.7435	4.507	3.7286	4.59	2.9854	4.8784	2.6107	3.7032	4.7153	5.5686	7.0819	3.4757	0.9839	5.1171	6.257	2.1189	3.7297	2.2842	7.3929		0.596386	4.4499
11.9035	3.6072	6.2125	5.2575	6.2114	5.759	3.3332	4.7358	5.3646	4.0228	4.7439	5.5216	5.0545	4.3413	5.2164	5.146	8.8085	3.4861	4.4878	5.1162	8.5731	2.5485	2.6939	2.389	5.288		0.602413	4.91328
12.0225	4.0792	6.636	2.8274	4.3459	8.4279	2.998	3.8948	3.9047	5.9198	4.2895	3.1582	4.4479	5.9122	6.4311	6.8297	6.6711	6.1617	3.8183	4.9108	9.5435	1.7481	1.7989	1.4056	5.2099		0.608435	4.80709
12.1415	7.2953	2.7994	5.1676	8.0293	6.3811	4.5897	4.159	3.4706	3.7395	2.3005	4.4538	4.9478	2.0411	4.3417	4.9749	8.6975	6.9062	3.4629	4.6738	7.2279	0.8464	2.188	1.0667	6.0018		0.614458	4.57344
12.2606	2.6181	4.4011	5.8114	8.4496	6.7353	4.0832	3.3679	3.6514	2.9185	2.7145	3.7767	3.4192	2.7038	5.4264	6.7552	4.7465	6.2591	2.098	3.1901	7.069	2.0571	1.0213	1.1636	5.9743		0.620485	4.1838
12.3796	3.3818	3.7319	4.5955	4.1106	4.4137	3.7797	3.9737	4.0919	2.731	5.6323	4.6525	5.4803	2.4715	6.6356	5.1074	6.7768	7.866	2.6132	5.5827	5.6408	1.9103	1.3259	2.7444	7.5475		0.626507	4.44988
12.4986	3.6688	8.8451	6.162	6.2426	5.2868	2.7523	2.9199	2.2402	3.9257	4.5451	6.6077	3.8482	3.8053	4.5911	3.6894	4.0545	3.774	4.4718	7.114	5.4031	1.3711	2.3603	1.6162	8.3913		0.63253	4.48694
12.6177	3.36	6.281	5.0771	6.9566	4.0912	8.1769	2.6557	2.709	3.9173	4.6976	4.7991	4.5016	2.7613	5.2906	5.1788	3.9364	4.4569	2.1596	8.8044	7.461	3.6567	1.0065	2.5389	7.353		0.638557	4.65947
12.7367	2.1789	4.2003	6.245	8.9026	4.1726	5.6864	5.851	4.3745	3.6017	5.8515	2.3275	6.0865	6.0946	3.6177	7.3929	7.2576	4.2631	2.5559	4.7507	6.9176	3.7339	0.4876	2.5746	4.2812		0.64458	4.72525
12.8557	8.1575	4.3554	4.8877	7.7091	5.6239	5.9858	4.8347	2.813	2.4918	3.4512	2.9822	5.3584	8.8381	3.6953	6.7182	3.5469	6.203	2.6542	4.505	8.0179	4.6015	1.7146	3.0281	8.4929		0.650602	5.02777
12.9748	5.6786	3.5283	6.1514	5.8932	5.8228	4.9481	4.2275	4.346	3.1443	4.7705	5.483	4.8344	7.5432	6.9698	5.9975	3.0647	5.5021	3.8606	5.1359	5.6744	3.4023	0.8877	3.9105	5.573		0.656629	4.84791
13.0938	4.0123	4.182	7.1568	4.0142	2.2454	3.454	2.7298	6.3421	4.9711	5.8713	6.4189	3.6385	5.4726	5.5528	4.4632	5.5645	7.3446	6.1275	3.4509	5.636	4.665	3.0351	3.4608	6.8025		0.662652	4.85883
13.2128	5.3605	5.5274	6.0353	2.9133	3.2075	4.3768	2.2664	6.4207	3.5193	5.669	6.0916	3.9149	4.6102	4.139	6.5271	5.986	6.8029	5.9297	3.1718	5.4623	6.0736	2.1473	2.6335	6.0145		0.668674	4.78336
13.3319	4.9391	5.1917	6.4417	7.013	5.9167	3.1073	5.4838	4.1876	2.8782	4.5899	2.2664	4.8324	2.2753	4.8696	2.1254	7.2037	11.9729	7.7462	4.2525	8.3305	4.7388	1.3788	1.9061	5.4997		0.674702	4.96447
13.4509	5.5163	6.5945	4.2566	9.6774	3.0821	4.4389	5.0948	3.6064	3.6637	5.3048	6.2358	4.3107	1.6086	3.4756	4.8068	5.9202	4.6505	2.9631	5.1775	7.089	4.7531	2.2537	3.3044	5.1436		0.680724	4.70534
13.5699	4.3372	5.6412	2.7256	6.5773	2.5431	7.1433	5.601	3.6498	3.7931	2.0988	3.8656	6.9203	2.0312	2.9182	5.1989	11.2989	6.7548	3.9504	2.2048	5.2738	3.9476	1.0332	2.3814	4.3716		0.686746	4.42755
13.689	4.0575	5.3742	3.086	4.2866	4.1663	4.1522	3.5722	3.9784	4.2835	2.064	2.1302	4.3991	3.1633	4.7645	2.6234	5.6584	5.2246	5.6576	3.8699	4.9941	7.2385	2.0606	1.1779	4.8582		0.692774	4.03505
13.808	7.2186	5.8173	3.598	4.7059	2.8185	4.4258	5.2763	3.0355	4.3653	1.9598	4.0124	8.7166	3.3533	3.2858	5.8707	5.7785	6.3044	3.8335	4.4627	7.5526	4.965	1.9857	4.4348	4.2263		0.698796	4.6668
13.927	6.4803	5.3767	6.0534	4.9262	4.5107	3.9733	5.0833	7.1324	4.0299	3.4351	5.8427	2.7157	4.492	5.3748	2.2889	5.1798	4.0231	2.8187	4.0938	3.5426	4.7483	1.148	3.4283	4.1604		0.704818	4.3691
14.0461	4.6291	2.7847	3.8061	5.9039	2.4816	2.7519	2.0283	8.318	4.6028	4.9326	5.3504	3.6862	3.5435	6.2698	3.854	4.5535	8.4056	5.4354	3.6642	2.9324	6.2255	0.4641	2.4366	8.7798		0.710846	4.49333
14.1651	6.2952	3.0932	5.3407	5.8464	2.5526	6.0495	4.96	9.1607	4.0237	3.1011	6.9675	4.8125	3.5915	4.4467	3.7028	5.174	6.164	6.252	4.5296	5.2691	5.4716	0.5674	6.2142	5.9195		0.716868	4.9794
14.2841	3.4475	4.6982	5.4737	3.3878	1.4612	3.6413	3.3466	7.7927	6.2195	1.9705	7.1113	4.6434	3.1351	4.2634	5.0024	7.8207	4.2149	4.4892	4.2367	5.4596	3.9709	0.5312	7.8761	2.9964		0.722891	4.46626
14.4032	4.1731	3.8174	4.2498	0.9977	2.049	3.0282	5.445	7.5644	4.7835	2.3835	4.5717	6.0219	3.6179	8.0374	3.5837	8.292	4.7236	7.9696	4.6142	6.7498	5.6587	3.8525	5.9698	5.2862		0.728918	4.89336
14.5222	1.7456	3.5431	4.6065	1.7666	2.3259	2.8274	3.0337	3.7163	5.1053	3.0356	5.9505	5.6918	4.0653	6.2833	4.3345	7.3646	4.7341	9.1237	3.9785	4.4765	5.1996	2.1056	4.6356	6.6054		0.73494	4.42729
14.6412	2.2878	6.0792	2.4024	2.7478	2.6067	2.4184	3.0563	5.0767	3.7319	2.155	5.6856	4.36	5.1654	4.4114	5.8741	4.734	4.5331	6.8734	4.2902	3.9505	2.9845	3.6969	5.4159	6.9513		0.740963	4.22869
14.7603	3.1383	6.9314	4.2548	1.213	3.4505	3.9767	1.3657	2.6365	3.3239	5.2759	10.3503	4.5102	3.0159	6.1638	4.473	6.501	6.2008	4.4424	4.0853	2.9225	4.7209	2.8829	6.761	6.5298		0.74699	4.54694
14.8793	3.9036	3.7137	2.6926	3.7355	2.2008	2.7272	2.2632	4.3843	2.2179	0.6985	4.4358	5.0947	2.5268	3.714	2.8204	4.9373	4.4167	4.5475	4.9953	3.3535	3.6711	3.8623	5.228	6.7182		0.753012	3.70245
14.9984	4.7916	2.4816	8.362	4.5276	1.2067	2.4853	3.7074	6.1272	2.4346	2.3977	4.6345	4.3875	3.4468	1.9409	4.0167	6.5097	4.3355	3.0862	7.7601	4.7421	3.4028	1.4985	3.5154	3.281		0.75904	3.96164
15.1174	1.9899	3.5917	5.8235	5.4999	2.4559	3.5753	3.7949	4.2066	2.1349	1.0614	1.6497	5.0892	3.4317	3.4543	2.161	5.5066	5.5007	5.981	8.1965	2.3965	3.6882	3.3398	3.2309	5.1537		0.765062	3.87141
15.2364	4.1752	3.4155	4.0387	4.1509	3.3775	4.491	0.4192	5.4709	1.8708	0.712	4.1641	4.7057	7.2551	6.5851	4.3709	4.9501	4.92	4.4276	6.5871	3.5868	6.3835	6.8273	5.476	4.6193		0.771085	4.45751
15.3555	3.1391	3.3459	4.7323	2.3409	4.5309	4.4622	1.5647	3.3216	1.4406	0.4661	2.6703	5.6743	3.8161	2.5814	2.7113	4.128	1.5871	5.5501	5.5697	4.7461	2.4806	2.3335	2.2967	6.9489		0.777112	3.43493
15.4745	3.3869	5.4938	7.1812	7.5944	4.5524	9.327	3.378	1.3351	2.0497	2.7109	3.0235	4.9833	2.3646	2.8718	3.4009	3.9378	2.1506	4.5906	5.5226	4.9977	2.3706	2.8842	4.11	5.3169		0.783134	4.14727
15.5935	2.3188	2.7501	6.7102	6.6011	2.816	7.8502	1.5902	3.5388	3.1328	1.4299	4.1495	1.4919	3.1227	1.8785	2.6175	3.5644	2.4718	3.3494	6.1514	4.3557	5.1104	4.4947	5.0889	7.1338		0.789157	3.90495
15.7126	2.144	3.5483	6.3722	3.8267	3.292	8.4424	1.7208	3.5604	0.1857	2.0218	2.0938	2.4665	5.2191	4.2313	4.1041	3.3859	6.3466	2.045	7.1611	3.5081	4.178	6.2916	5.0115	5.3893		0.795184	4.02276
15.8316	2.0959	4.6296	12.5087	8.8749	4.8606	10.795	1.8668	2.6257	0.7936	2.4285	1.1333	2.562	3.2261	2.6562	2.9686	6.1266	6.9334	3.3954	3.7845	4.967	5.1276	4.4784	7.3755	4.7688		0.801206	4.62428
15.9506	3.8567	8.8856	6.5838	3.9055	7.7663	10.2173	3.3379	1.593	1.0707	1.1024	3.2892	3.1615	2.5278	2.2241	3.7477	2.109	5.7891	3.5259	6.4788	8.0268	8.0475	4.3165	4.3277	4.6281		0.807229	4.60495
16.0697	4.6387	10.3712	5.3182	2.5863	9.0321	11.248	3.4768	1.7726	1.702	1.6168	2.7956	3.3323	4.1588	2.6699	4.6457	2.922	4.1745	4.7102	4.9675	6.7434	4.5311	3.9418	4.8738	4.5011		0.813256	4.61377
16.1887	4.808	11.345	5.4734	6.4943	10.9795	10.9188	3.6314	1.8907	0.2339	0.6288	1.951	3.0877	5.1231	4.7831	3.2054	4.637	5.7691	5.0752	4.4221	6.3606	5.8776	3.8519	3.753	5.4927		0.819279	4.99139
16.3077	7.9293	12.5754	4.9834	2.8282	13.4023	9.8674	5.0802	3.84	0.3586	1.1567	0.9506	2.0397	3.158	2.3482	3.4237	3.4147	7.4821	4.1727	4.419	5.7325	6.1804	3.145	3.2076	4.5681		0.825301	4.84433
16.4268	9.9058	10.5413	5.556	7.3242	9.0095	13.7553	4.9965	2.2209	0.7751	2.1222	0.6474	2.3347	6.1076	3.5126	5.5628	3.2017	7.0368	4.1654	6.3197	6.0795	7.0898	2.9232	3.6924	4.4973		0.831328	5.39074
16.5458	10.275	6.557	4.099	7.6596	8.191	10.993	4.3986	1.5613	2.2484	0.7837	1.9513	3.9734	6.7506	3.7136	4.5535	1.8923	6.5043	3.181	3.8653	4.8	7.638	2.4258	6.1647	2.5167		0.837351	4.86238
16.6648	15.5297	5.0879	4.341	15.4061	12.0422	9.9563	5.0572	1.0851	1.8996	1.3766	1.3179	4.199	8.3639	2.8184	5.9873	3.4857	6.3449	5.3235	3.5978	3.9013	4.4758	2.8872	4.201	1.6652		0.843373	5.43127
16.7839	13.0736	6.3191	6.4552	15.8698	12.1579	9.4317	2.7414	2.4111	1.9401	2.326	1.6431	2.7107	8.4476	6.7893	5.8489	2.2028	5.6272	5.5032	3.0245	6.1222	2.9039	4.656	4.1357	1.9754		0.849401	5.59652
16.9029	11.6606	4.6305	7.1934	20.315	12.1432	12.1045	4.4345	2.4174	1.3539	0.8664	0.1457	0.6729	10.8143	3.1106	6.6395	0.4606	3.828	5.3265	1.943	4.85	3.4712	3.4545	3.8159	0.5881		0.855423	5.26001
17.0219	12.4162	6.1082	8.6727	21.2282	14.3312	14.9019	3.9493	1.137	0.8082	2.1546	2.8225	0.3469	5.9194	2.8511	8.1443	4.6371	3.6552	4.9096	3.5248	4.7163	4.7702	2.9523	4.7822	1.9725		0.861445	5.90466
17.141	11.3882	6.8372	5.5445	35.749	21.177	13.1039	4.46	2.1873	2.9396	1.7311	1.6688	0.4974	9.5613	3.0117	8.1711	4.351	5.7427	5.2355	3.5966	6.3557	5.4681	4.8333	4.8618	1.0287		0.867473	7.06256
17.26	9.7495	7.5677	6.4824	31.0783	27.8684	10.4545	7.7721	4.2167	1.7059	1.39	1.7928	2.0142	13.5156	3.7133	7.7826	1.6409	5.7392	4.34	3.2054	6.1648	6.276	2.7364	5.0378	2.2893		0.873495	7.27224
17.379	10.0356	8.451	6.1031	26.8271	28.2937	5.0696	9.4458	1.443	1.445	1.1012	0.8376	1.6455	10.609	6.5139	12.293	2.9561	5.0744	7.8378	2.6918	5.1419	5.771	4.5337	2.24	1.162		0.879517	6.98012
17.4981	9.4175	9.1859	7.8866	33.8705	23.6778	8.8539	9.5256	0.9669	0.6079	0.5417	1.4695	1.5553	13.0552	7.1104	7.0166	5.24	4.1601	6.1574	2.6495	5.8617	2.4501	4.8346	2.8669	0.4528		0.885545	7.05893
17.6171	8.9459	7.6824	9.387	26.0994	20.6175	8.5543	6.2474	1.3405	0.924	0.9867	1.0551	0.8945	12.2816	5.8967	7.4402	2.6483	5.4083	5.9612	2.1797	3.0846	5.9818	5.5388	3.3332	1.101		0.891567	6.39959
17.7361	6.1248	6.7901	6.7897	20.8763	17.0391	7.2236	5.7634	1.0368	2.1899	1.2151	1.4395	1.8154	9.5608	7.9439	8.4686	2.5256	7.7983	6.4751	3.3511	3.1249	6.1477	2.8778	2.6673	1.03		0.89759	5.84478
17.8552	4.6686	6.2161	11.2368	16.5703	13.6054	5.8402	5.5917	1.116	1.6435	0.6226	0.4204	1.3099	8.2932	5.3738	7.7071	1.5315	6.0747	3.6858	8.8309	3.2386	5.5402	4.9491	0.7431	0.8311		0.903617	5.23503
17.9742	5.2106	3.1948	9.3266	18.0166	9.5651	10.6841	4.3573	0.6255	1.6524	0.5708	0.315	1.1286	4.8102	6.8648	5.0101	1.7684	6.8971	2.9902	5.5013	6.5663	3.0932	6.581	2.2822	0.7992		0.909639	4.90881
18.0932	5.0474	4.0972	8.5888	14.7708	8.5603	9.7719	2.1205	1.506	1.9906	0.0422	0.9862	1.7553	4.2982	5.6001	4.9658	2.2372	3.297	0.7646	8.3938	2.7587	5.607	4.5133	3.2183	2.2839		0.915662	4.46563
18.2123	2.8084	5.1039	12.8026	12.3884	8.6947	9.972	2.176	0.3518	1.3994	0.3484	3.1572	0.3997	3.1469	4.8397	4.5665	2.3078	5.1848	4.5291	6.577	3.3429	2.6386	6.2323	2.0845	1.712		0.921689	4.44853
18.3313	3.3637	4.0669	7.4676	19.5562	9.1739	9.385	0.7569	1.5156	1.1229	1.1067	1.239	1.2316	4.1564	4.1611	3.2809	1.7689	5.9269	5.8099	4.0756	6.1423	6.4181	4.511	1.7598	0.9534		0.927711	4.5396
18.4504	5.3938	4.7459	8.3804	17.666	10.5323	7.2469	2.6314	3.043	1.5223	0.3797	1.4586	0.9168	2.1829	3.2614	5.0943	1.4651	9.0085	4.6796	6.0652	4.6612	3.0728	2.3648	0.8435	0.3959		0.933739	4.45885
18.5694	4.7311	5.504	10.7223	16.0238	12.8169	6.5201	1.7467	2.2133	0.5068	1.6586	1.1334	0.2933	1.6071	1.8474	4.9641	4.082	5.6116	1.2045	4.4543	3.8267	3.7514	4.3991	1.4073	0.1998		0.939761	4.21773
18.6884	4.428	4.2053	9.2237	15.5829	11.68	3.0008	1.0449	0.3024	0.5678	1.275	0.1607	0.4042	1.3677	4.7395	3.5452	1.0581	5.3149	1.8436	4.6933	2.9408	6.0769	3.1214	0.7369	0.2163		0.945784	3.6471
18.8075	4.4604	5.596	9.6599	15.7768	9.8998	2.3295	1.7612	0.0157	0.1845	0.5172	0.4257	1.5656	1.8674	2.3446	3.5271	0.0745	6.9842	2.0898	3.5279	1.0079	3.1212	1.784	0.5757	1.3566		0.951811	3.35222
18.9265	4.8991	2.054	10.5211	17.1935	12.3379	2.817	0.4826	0.2473	0.9144	0.8966	0.633	1.695	0.4559	1.995	4.0804	3.1752	4.5692	1.8417	2.7662	2.3825	5.3744	1.8413	0.8205	1.9882		0.957833	3.58258
19.0455	2.382	1.3228	12.6202	15.5364	11.2388	1.7458	1.8476	0.5672	1.9232	1.1593	0.8552	0.6796	0.3099	1.7473	2.4939	2.6378	2.2594	3.9979	2.4304	1.8378	6.4512	2.3663	0.4033	1.1732		0.963856	3.33277
19.1646	2.5978	1.6404	13.7398	16.7682	11.346	1.2782	1.1602	1.9818	1.6868	0.5785	0.6342	0.8467	0.4061	1.1566	1.612	1.2565	2.663	2.9831	4.5763	2.7684	8.4016	3.2826	0.2078	0.0686		0.969883	3.48505
19.2836	0.9574	1.918	11.5554	19.4196	8.0613	2.2205	0.8984	1.9232	0.0832	0.7258	1.0407	0.8564	1.4419	2.8648	1.6096	2.2777	4.3223	0.7065	3.3682	3.9655	7.0003	1.9016	0.3631	0.977		0.975906	3.35243
19.4026	3.0312	2.6067	17.4919	21.4145	11.9353	2.2226	0.3472	1.0289	0.104	1.1077	1.1139	0.9692	0.3006	2.3671	3.405	0.8314	4.1088	0.5406	3.7618	3.0095	6.9309	0.3425	0.1804	1.0604		0.981928	3.75884
19.5217	3.05	2.7993	9.827	23.7619	10.3439	1.7943	1.5001	1.4644	0.6075	0.6338	2.9417	0.2906	2.6382	2.4344	2.4875	1.381	1.4098	1.565	5.7872	2.2485	4.6705	0.5175	1.7468	0.4182		0.987955	3.59663
19.6407	4.2642	1.891	9.3294	24.2786	10.6563	1.7733	0.9849	1.0137	0.0107	1.0324	0.1857	1.4476	0.911	4.0301	1.175	1.296	0.4115	0.9227	2.6506	1.6921	4.462	1.4666	1.0455	0.4776		0.993978	3.22535
19.7597	0.7462	2.8118	9.6882	25.5769	13.0166	0.9695	0.8625	0.7289	2.0138	0.1294	0.5461	0.4249	0.7414	3.8593	0.8618	0.897	0.9016	0.9336	1.0357	1.6654	2.0926	1.2558	0.6553	1.2311		1	3.06856

## Sheet: Im8
X0	Y0	Y1	Y2	Y3	Y4	Y5	Y6	Y7	Y8	Y9	Y10	Y11	Y12	Y13	Y14	Y15	Y16	Y17	Y18	Y19	Y20	Y21	Y22	Y23	Y24		Ap-Ba	Average int.
0	30.8889	28.0556	33.1111	44.5	38.1667	40.2778	51	27.4444	38.2222	38	32.3889	31.7778	20.1111	27.8333	26.8333	25.0556	17.7222	26.8333	15.9444	14.9444	17.7778	21.6667	17.1667	16.7778	14.3889		0	27.8756
0.119	28.7222	25.2222	21.3333	26.3333	45.5556	43.3889	44.6667	24	30.0556	28.4444	33.3333	24.8889	17.5556	24.6111	31.0556	22	24.5	23.6667	11	17.6667	14.9444	26.8333	12.7222	19.0556	14.2778		0.00609578	25.4333
0.2381	31.5556	29.8333	24.0556	27.9444	35.5	46.8889	41.2222	23.7778	28.8889	33.6667	32.6667	22.6111	22.3889	32.2778	25.9444	20.7222	23.2222	18.7222	12.7222	16.7222	14.2778	14.7222	7.9444	14.1667	13.1111		0.0121967	24.6222
0.3571	19.8889	25.1111	25.3889	20.3333	37.3889	24.9444	37.7222	18.6111	26.5	30.1111	30.2222	26.4444	25.9444	22.7222	27.4444	24.1111	20.2222	13.8333	9.0556	16.6667	18.7778	17.0556	12.6111	12.8889	11.5		0.0182925	22.22
0.4761	25.6667	16.5	24.1111	38.0556	28.8333	39.5	42.3889	14.4444	30.7222	24.2778	33.3889	34.4444	27.8333	30.7222	30.7778	18.2222	22.1111	24.2222	9.7778	12.1667	11.7222	8.2222	14.3889	12.6111	10		0.0243882	23.4044
0.5952	22.2222	17.7778	21.1111	21.3889	36.7778	31.4444	37	20.0556	18.3333	26	31.2778	20.8333	20.4444	20.2778	27.1667	18.7222	21.8889	22.7222	9.8889	11.9444	15.3889	8.5	18.8333	14.5	12.3333		0.0304891	21.0733
0.7142	20.8889	24.7222	19.5556	21.7222	34.0556	30.1111	31.1111	14.8333	23.2778	24.5	28.8889	18.6667	21	22.2778	24.4444	21.8333	18.2778	17.2778	7.7222	9.2222	11.4444	12.1667	15.3889	13.1667	7.3333		0.0365849	19.7556
0.8332	11.5556	26.7778	26.2778	22.5556	26.5556	29.8333	26.8889	17.5556	21.8889	20.7778	24.8333	24.0556	24.9444	27.2222	18	20.4444	17	22.8889	2.9444	7.6667	7.3889	10	9.7778	14.5556	8.8333		0.0426807	18.8489
0.9523	19.1667	16	24.8333	23.3333	23.1667	24	31.4444	10.9444	19.6111	16.0556	25.6111	24.2222	20.3333	18.9444	13.6667	21.5	21.2778	19.1111	4.5	8.6111	8.4444	10.5	11.1667	10.7778	19		0.0487816	17.8489
1.0713	23.2222	14.7778	19.2778	18	22.4444	25.3889	29.1667	18.1667	18.9444	21.4444	20.6111	20.2222	16.6667	21.2778	19.9444	14.5556	18.7778	11.1111	5.2778	9.5556	8.3333	12.6111	12.9444	6.8333	7.7778		0.0548774	16.6933
1.1903	14	15.8333	20.4444	23.3889	25	25	22.6111	14.7778	15.6111	16.1667	27.2778	25.5556	16.7222	20.2222	15.9444	15.6111	16	19.3889	1.5556	8.0556	10.5	8.2222	11	12.1111	9.0556		0.0609732	16.4022
1.3094	21.1111	14.0556	20.0556	16.8333	22.8889	27.1667	20.7222	19	17.6111	9.0556	26.6111	17.0556	22	21.7778	11.2778	10.6667	15.2222	13.0556	5.1667	6.7778	11.6111	7.8333	12.1111	10.3333	10.2778		0.0670741	15.6111
1.4284	16.7778	13.7222	11.6111	18	17.2778	26.6111	15.3333	19.4444	20.3333	21.3333	10.2222	14.4444	13.6111	11.1667	17.5556	21.7778	16	14.3889	3.3889	8.6667	8.1111	8.1111	9.9444	12.8333	3		0.0731699	14.1467
1.5474	15.4444	15.1667	17.5556	18.2778	24.1667	22.5	16.5	20.3333	13.2222	13.3889	21.9444	19	16.2778	20.5	7.6667	10.3889	11.1667	12.7222	6.7778	7.2778	4.7778	10.2778	4.9444	7.9444	6.7222		0.0792656	13.7978
1.6665	15.2222	13.8889	15.4444	17	20.3333	24.0556	16.9444	19.9444	10.7222	16.1111	16.2778	14.2222	14.7222	13.1111	14.3333	14.8333	14.1111	11.7222	2.7778	11.3333	5.4444	5.0556	12.3889	9.1667	11.2222		0.0853665	13.6155
1.7855	17.3333	14.5556	13.7222	13.7222	13.7778	16.5	15.5	19.8333	14.7778	14.4444	15.6667	10.6111	14.8333	15.6667	20.3333	14.5	13.4444	16.7778	4.1111	7.3889	7.2222	7.6111	8	8.1111	6.1667		0.0914623	12.9844
1.9046	8.5	6.8889	17.0556	17.2778	16	17.8333	8.2222	12.8333	10.3889	12.7222	16.6667	9.2222	11.3889	11.6111	14.6111	20.7222	11.1667	10.1667	2.8889	5.5556	7.1111	10	7.2778	7.8333	4.8889		0.0975632	11.1533
2.0236	10.7778	13.4444	11.8889	19.5	17.3333	10.1667	12.8889	10.8333	9.6111	12.3333	13.4444	11.5556	10.6667	10.6111	9.2222	9.9444	10.2222	5.0556	2	5.2222	6.2222	4.1667	8.5	6.3889	10.5556		0.103659	10.1022
2.1426	10	16.1111	8.8889	20.5	12.6667	12.3889	15.8333	13.0556	7.0556	8.5556	15	12.6111	13.1111	8.7222	7	9.7222	13.2778	7.8333	8.1667	5.1111	1.7778	5.1111	7.5556	11.9444	7.6111		0.109755	10.3844
2.2617	22.2778	9.0556	8.2778	19.5556	15.2778	8.8333	13.0556	4.3333	6.8333	8.8889	8.8333	7.8333	12.1667	4.9444	11.3333	11.2778	13.4444	10.1111	4.5556	7.2778	3.8889	2.2222	6.8889	4.4444	3.7778		0.115856	9.17556
2.3807	16.1111	6.8333	8.4444	19	12.6111	12.4444	7.3889	5.7778	6.6111	13.3333	15.3333	12.0556	13.5556	6.9444	7	8.8889	7.5	3.2222	4.3889	5.1111	3.2778	3.1111	8.0556	4.6667	4.7778		0.121951	8.65778
2.4997	14.9444	13.2222	6.5	16.5	17.4444	11.6111	16.3889	4.8333	4.6667	14.1667	14.1111	13.6111	8.8333	5.3333	6.8333	12.6667	13.9444	9.3889	2.7222	5.2778	4.1111	6.3889	7.8889	3.6667	7.0556		0.128047	9.68444
2.6188	17.7222	11.1111	14.0556	11.3889	10.1111	11.9444	12.2778	2.3333	7.9444	16	14.5556	9.1667	10.4444	9.0556	8.2778	19.2778	9.3333	6.7222	4.3333	5.3333	8.2778	5.4444	10.7778	3.6667	4.5556		0.134148	9.76444
2.7378	18.0556	7	10.6667	16.3333	11.3333	11.9444	14.2778	9.5556	6.9444	12.5	14.6667	13.1667	6.1111	6.7778	9.0556	10.1667	9.1111	7.1667	4.9444	4.1667	7.7222	6.1667	4.7222	7.0556	6.9444		0.140244	9.46223
2.8568	13.3333	9.2222	6.9444	20.8333	10.6667	12.3889	15.4444	9	7.8333	10.3889	18.4444	9.8889	4.1111	8.6667	11.1111	7.3889	7.6667	9.9444	3.1667	8.5556	3.4444	7.0556	6	11.5	4.6111		0.14634	9.50444
2.9759	13.5556	12.3333	10.6667	10.8333	10.7778	17.2778	14.1667	8.1111	10.1111	11.2222	10.3889	10.8889	7.0556	5.2778	14.6667	8.3889	8.7222	7.7778	3.1111	2.9444	4.9444	4.6667	4.8333	8.4444	6.9444		0.152441	9.12444
3.0949	13.4444	11.7222	8.0556	15.8889	11.1111	14.3333	9	8.2778	7.5556	11.8889	10.6111	9.0556	8.3889	3.8889	4.3889	10.4444	9.5	9.6111	4.0556	2.8889	4.0556	7.0556	7.1667	7.7222	4		0.158536	8.56445
3.2139	11.2222	7.5556	15.3889	14.5556	13.7222	19.3889	14.6667	5.7778	5.8333	11.6667	12.2778	10.6667	4.2778	7	9.6111	5	10.2778	7.5556	5.2778	6.6667	4.0556	9.8333	5.5	5.2778	5.1667		0.164632	9.1289
3.333	10.9444	13.3333	10.3889	17.1667	11	17.4444	19.6667	8.4444	5.8889	9.6111	16.2778	10.7222	7.1111	6.0556	6.6667	9.3333	8.2778	5.1111	3.2778	4.1111	3.9444	4.2222	3.3889	9.3333	3.8889		0.170733	9.02444
3.452	7.8333	5	8.5556	14.3889	15.1667	17.4444	10.9444	8.8333	9.7222	9	10.8889	7.1667	5.3333	4.8333	6.2222	7.4444	7.1667	9.1667	6.2222	2.3889	4	3.3333	8.1667	8.2778	6.5		0.176829	8.16
3.571	10.5	7.8889	11.3333	10.1667	12.6111	15.0556	12.8889	13.6667	7	15.3889	12.5	18.8889	5.7222	2.2222	3.3333	4	7.1111	12	6.2778	5.6111	3	2.8889	2.9444	6.8333	12.3889		0.182925	8.88889
3.6901	11.5556	11.3333	7.3889	13.8889	5.3889	21.0556	10.9444	4.6667	3.1667	6.1111	12.3333	7.7222	7.6111	5	5	9.2778	4.3333	11.1111	2.8889	5.9444	3.3333	7.2778	3.6111	5.5	7.9444		0.189026	7.77555
3.8091	12.2778	8.4444	6.8333	8.2222	12.3333	15.1667	14.2222	7.4444	5.2778	11.5556	14	6.1667	7.7222	4.7222	2.7222	7	5.3889	4.9444	7.2778	5.7222	2.4444	3.1111	6.3333	10.1111	3.5556		0.195121	7.71999
3.9281	12.3333	4.7222	10.2222	7.4444	11	16.6111	9.4444	5.3889	5.2778	9.1667	12.5556	15.8889	5.2222	4.4444	5.2222	7.0556	8.5556	6.7222	7.1667	3	2.6111	2.5	5.6111	6.2222	13.1667		0.201217	7.90222
4.0472	8	7.1667	7.0556	10	16	27.4444	10.7222	11.5556	5.4444	7.2222	8.5556	9.6667	13.6667	4	6.3333	6.3889	6.3889	7.2778	6.9444	6.2778	5.8333	4.8333	4.7222	7.9444	2.5		0.207318	8.47778
4.1662	8.4444	8.8333	12.7778	10.4444	13.3889	25.6111	6.1111	7.8889	7.8333	15.7222	6.1111	6.2778	8.2222	6.7778	5.8889	2.7778	6.1667	7.2778	3.6667	7.6667	3.3333	4.7778	4.3889	11.6667	6.3333		0.213414	8.33556
4.2852	15.5	5.4444	14.7222	8.8889	13.8333	21.5556	10.8889	6.9444	10.5	12.8333	6	6.1667	7.7222	5.7778	7.1667	6.2222	5.6667	7.8889	3.7778	2.8889	9.8889	4.0556	7.3889	16.6111	6.9444		0.21951	9.01111
4.4043	10.7222	9.7778	9.4444	10.4444	18.9444	19.7222	5.8333	9	5.1111	7.8333	3.6667	4.7222	8.4444	4.7222	2.8889	8	9.0556	3.5	5.1667	3.5556	4.7222	5.5	13	7.7778	4.5		0.22561	7.84222
4.5233	13.7778	10.1111	13.3889	12.1111	15.1111	17.5	9.2778	5.7778	2.9444	6.6111	5.1111	3.1667	7.6111	6.3889	8.0556	7.2778	11.5	7	6.3333	5.8889	6.6667	3	2.6667	9.3333	5.6111		0.231706	8.08889
4.6423	7.6111	14.0556	12.2222	13.9444	25	18	11.1111	6.9444	5.1111	11.1667	5.3333	4.7778	2.9444	4.3889	7.8889	5.9444	6.7778	8.9444	7.0556	3.7778	5.0556	4.2778	7.2778	8.0556	6.3889		0.237802	8.56222
4.7614	8.6111	8.5556	9.1111	12	13.6111	28.6667	7.6667	11.4444	6.3333	9.3889	5.1667	6.2778	4.8889	3.8333	7.1111	4.4444	3.5	5.5	7.1667	3.7778	3	8.1111	3.0556	3.8889	4.6111		0.243903	7.58889
4.8804	8.4444	6.1111	8.2222	9.2222	12.9444	21.9444	8.6111	6.3333	10	9.6667	4.3333	4.2778	5.3889	5.9444	6.5556	4.2778	5.4444	11.3889	4.3889	5.1111	3.7222	3.4444	3.2222	7.6111	9.5		0.249999	7.44443
4.9995	16.2222	7.3333	6.2778	15.7222	14.7222	21.3333	9.9444	11.5	5.1111	8.9444	5.6667	6	3.4444	4.8333	8.4444	3.5556	5.4444	7.7222	5.5556	4.1667	4.3333	7.2222	3.4444	6.1111	5.5556		0.2561	7.94443
5.1185	9.1667	5.6111	7.3889	12.8333	13.8889	17.6111	8.1667	12.7778	3.5556	6.1111	12.1111	2.8889	4.5556	2.3889	4.6111	5.3333	3.4444	5.4444	7.0556	1.5556	6.5	7.7222	3.2222	5.6667	3.7222		0.262195	6.93334
5.2375	14.7222	13.1111	7.2222	17.8889	11.3333	15.7778	9.0556	8.1111	6.8889	10.3889	6.1111	6.7222	4.1667	6.3889	6.6111	3.6111	5.3889	4.3889	6.3333	5.5	4.7778	6	4.0556	3.4444	6.3333		0.268291	7.77333
5.3566	6.3333	10.0556	7.3889	14.8333	16.1667	19.0556	5.8889	6.7778	7.1667	7.6111	5.9444	3.5556	2.1111	4.8333	6.3889	4.2778	6.1667	12.4444	2.8333	4.1111	4.3333	7.6111	4.6667	7.4444	4.3889		0.274392	7.29556
5.4756	13.8333	11.1111	8.9444	11.2778	17.3889	6.7222	12.9444	8.1111	3.8333	7.9444	6.2778	5.2778	7.6111	6.7222	5.9444	5.2778	9.4444	8.1111	1.4444	4.7222	6.1667	4.1111	5.6111	6	3.3333		0.280488	7.52665
5.5946	10.1667	9.5	7.2222	13	17.6111	15.5	10.5	15.7778	8.2222	7.5556	8.1667	4.1111	2.1667	2.7778	6.2222	4.2778	3.9444	6.1111	6.2222	8.3333	3.2778	8.1667	3.7778	5.5556	6.7222		0.286584	7.79556
5.7137	7.5556	8.8889	10.6667	14.6111	8.3889	9.5556	8.1111	11.5	7.0556	11	8.5	5.8333	4.1667	8.1111	6.7778	9.8333	3.2778	4.6111	5.7778	6.8333	8.6667	10.2222	5.7778	10.8889	8.8333		0.292685	8.21778
5.8327	9.8889	8.9444	8.5	11.9444	8	6.9444	12.8889	10.4444	6.3889	8.3333	8.5	8.5	7.8889	3.8333	5.8889	3.0556	8.2222	1.1111	9.5556	6.5556	5.0556	7.5	2.2222	6.8889	7		0.29878	7.36222
5.9517	9.3333	8.6111	8.5	9.2222	8.6111	13.7778	9.0556	11.6667	7.1667	7.2222	11.3333	4.3333	4.1667	3	12	5.2778	3.1111	6	6.1111	7.6667	5.3889	6.6667	5.3889	6.1111	6.4444		0.304876	7.44667
6.0708	8.6667	14.3333	4.8889	12.4444	17.1667	12.6111	12.6111	12.7222	8.7778	5.8333	11.7778	3.9444	2.3333	2.4444	6.4444	4.0556	5.1111	6.1111	6.6667	5.5	11.8333	4.8889	7.8889	4.1667	7.3889		0.310977	8.02444
6.1898	5.8889	14.2222	4.1111	14.2778	9.6111	7.5	12.5	4.8333	3.8889	6.1111	9.5	9.1667	2.3889	4.1111	6.7222	7.6667	8	4	5.5	6.2222	3.1667	4.4444	6.1667	2.2778	5.8333		0.317073	6.72444
6.3088	9.2222	10.8889	12.1667	13.1667	16.6111	4.6111	7.7222	12.7222	8.5	5.6667	8.2222	4.1667	4.0556	5.5556	4.7222	5.8889	3.3889	5.2222	6.6667	10.9444	8.6667	3.2778	6.9444	10.3333	7.8889		0.323169	7.88889
6.4279	8.2778	10.0556	6.4444	17.0556	14.1111	9.1667	11.1111	9	6.8333	5.1111	9.9444	6.5	4	4.7778	4.4444	3.3889	3.2778	5.2778	5.5	4.9444	5.7778	5.8333	6.5556	5.6111	5.7778		0.329269	7.15111
6.5469	8.2222	7.2222	9.7778	15.2778	9.1667	7.0556	6.5556	8.1111	5.3889	8.8889	11	3.9444	5.8889	5.1667	9.7222	6.6667	5.5	4.3333	4.7778	5.2778	6	5.5	8.1111	6.1111	7.3333		0.335365	7.24
6.6659	7.8333	4.8333	5.9444	14.1111	12.7778	5.1667	8.9444	7.9444	8.8889	3.7222	11.2222	4.8333	5.8333	3.3333	3.7222	10.7778	5.3889	5	3.2222	3.2222	8.1111	5.9444	4.8889	6.1111	2.7222		0.341461	6.57998
6.785	4.6667	2.6111	6.7778	12.1667	14.5556	5.8889	8.0556	7.0556	9.6111	7.7222	5.3889	3.6667	3.5	3.1667	2.4444	3.2222	6.1667	6.2778	14.1667	5.4444	7.8333	3	3.7222	5.0556	1.1667		0.347562	6.13334
6.904	12.5556	5.5	10.5	11.6111	13.2778	10.6111	4.7778	5.5556	6.8889	5.2222	8.6111	4.5	2.5556	3.1111	6.8333	3.8333	5	6.8333	9.3333	5.4444	5.3889	4.3333	7.0556	6.0556	8.9444		0.353658	6.97333
7.023	5.2222	6.5	7.6111	7.9444	15.3333	6.4444	8.2778	7.0556	4.1667	7.8333	6.5556	4	4.6667	1.9444	5.2222	4.6667	4.0556	5.2778	6.0556	4.7778	7.5	0.8889	9.6667	7.0556	6.8333		0.359754	6.22223
7.1421	7.8333	6.0556	5	5.9444	13.8889	7.0556	8.0556	5.6667	6.1111	10.2222	4.5	3.8333	4.8333	4.5556	5.0556	2	3.1111	3.8333	7.6111	5.6111	6.1667	4.4444	6.8889	5.2222	5.2778		0.365854	5.95111
7.2611	6.8333	4	7.6111	10.8333	22.4444	8.6667	5.5556	10.2778	7.9444	9.7778	7.6111	5.7222	3.3889	4.2778	4.5	2.6667	6.0556	5.2778	7.7222	7.1111	6.0556	2.8333	5.4444	4.7778	6.1667		0.37195	6.94222
7.3801	6	8.6667	3.2222	9.3333	16.7222	9.1667	5.3333	6.5	8.6667	5.7222	3.7778	6.1667	3	1.6111	3	3.2778	3.2222	4.8889	7.1667	9	3.2222	2.0556	5.6111	9	3.6111		0.378046	5.91778
7.4992	8.3889	6.8333	3.7222	13.1667	13	6.8333	5.9444	7.4444	6.7222	11.3333	5.3889	4.8889	1.5	3.3889	4.5556	6.2778	9.5	3.6111	5.5556	4.3889	3.1667	1.4444	9.7222	5.7222	1.6111		0.384147	6.16444
7.6182	6.2778	5.5556	6.6667	12.8333	11.1111	3.9444	4.5556	4.7778	11.5	9.0556	4.1667	3.1667	3.1667	5.9444	9.3889	6.0556	5.2778	4.5	5.5	6.3333	2.8889	1	6.5556	4.3333	7.0556		0.390243	6.06446
7.7372	4.1111	4.6667	4.3333	18.3889	14.2778	5.7222	8.1667	4.0556	8.5556	6.6667	5.7222	4.8889	5.1667	4.8333	8.7778	6.7222	2	4.2778	9.1667	8	2.5556	4.6667	5.8333	3.6111	4.9444		0.396338	6.40445
7.8563	5.7222	5.4444	5.8889	12.7778	10.8889	4.5556	11.3889	4.0556	7.6111	8.4444	4.2222	7.7222	1.6667	3.7222	3.6111	4.6667	3.7222	8.4444	6.3889	9	6.0556	2.7778	2.9444	6.2778	4.2778		0.402439	6.09111
7.9753	8.7222	8.4444	5.6667	9.7222	15.1667	6.9444	7.7778	10.2778	4.2222	2.7778	1.6667	4.7778	5	2.6111	2.7222	6	5	5.7222	5.7778	6.2222	2.6667	1.6111	3.4444	7.7778	2.8333		0.408535	5.74222
8.0943	13.2778	6.6111	3.6111	10.2222	17.8333	3.6667	7.3889	7.1111	5.7778	3.1111	5	2.6111	5.8333	6.6667	4.0556	6.2778	2.8333	8.1111	10.4444	4.1667	4.8333	3.8333	2.3889	6.0556	9.1111		0.414631	6.43333
8.2134	9	4.7222	6.8889	8.9444	10.7778	3	4.8889	6.5	14.7222	4.2778	8.7222	5.2222	3.2222	6.8333	4.6667	3.6667	3.1667	6.6667	4.0556	7.9444	3.7778	1.5556	5.9444	5.3333	5.0556		0.420732	5.98222
8.3324	9	3.3333	8.7222	8.6111	8.3333	8	8.5	4.4444	5.8333	3.8889	5.5	5.2222	2.6667	5.5556	7.1667	4.7222	4	6.7778	8.1111	4.5556	1.2778	2.8333	7.1111	7.4444	2.2778		0.426828	5.75555
8.4515	6.6111	8	5.2778	7.3889	5.9444	3.6111	5.4444	3.6111	3.2778	6.6667	4.4444	7.0556	4.6111	4.1111	2.8889	3.2222	4.3889	6.4444	7.2222	3.9444	4.6667	0.2778	4.3333	4.7778	7.6111		0.432928	5.03333
8.5705	6.2778	4.1667	8.9444	7.2778	7.1111	7.1111	3.2222	5.6111	1.9444	3.6667	9.6111	6.3333	5.5556	6.5556	6.6111	5.3889	3.3889	2.0556	5.7778	4.4444	1.2778	3.8889	3.5556	5.0556	5.6667		0.439024	5.22001
8.6895	6.9444	5.7778	2.7778	5.2778	7.1111	6.3889	8.2778	3.5	2.2778	6.6667	8.0556	5.8333	4.6111	5.0556	4.8333	7.5	1.9444	4.5	4.3889	6.8889	2.5	2.6111	2.5556	4.3889	5.5556		0.44512	5.0489
8.8086	3.5556	8.1667	6.3889	4.3333	9.7778	3.6111	6.9444	5.3333	4.9444	2	5.7778	5.7222	3.2778	6.3889	4.2778	3.6111	3.9444	3.2222	6.5	5.2778	6.1111	1.0556	2.5	4	7.6111		0.451221	4.97333
8.9276	5.0556	7.9444	5.7222	10.3889	4.3889	4.1667	5.2222	2.9444	3	7.6111	11.2222	8.7778	2.6111	5	3.2778	5.7778	4.4444	4.3889	9.1111	3.9444	2.6111	2.1111	2.7222	5.7222	7.1667		0.457317	5.41333
9.0466	6.1667	2.8889	6.0556	12.7222	5.7222	4.5	3.0556	2.6667	5.2222	5.6667	10.9444	6.2222	5.8333	6.9444	5.5556	5.1111	0.8889	5	5.6667	4.0556	2.6667	4.4444	4.6667	9.2778	5.8889		0.463413	5.51334
9.1657	10.8333	7.7778	6.8889	8.5556	3.1667	8.1111	8.3333	6.1111	3.7778	5.6111	5.5	9.6667	4.6111	6.2222	5.5556	1.8889	4.3889	3.9444	7.3889	4.2222	2.6111	1.1667	2.1111	4.1111	6.7778		0.469513	5.57334
9.2847	7.2778	6.2222	4.2222	8.7222	6.6667	7.5	3.2222	3.6111	2.2778	3.6111	2	10.9444	5.9444	2.5	6.0556	4.6667	4.5	4.8333	8.6667	4.4444	3.4444	0.6111	2.7778	5.7778	8.3333		0.475609	5.15333
9.4037	9.1667	3.3889	3.2778	6	4.3889	4.7778	4.7778	2.1111	2.6667	5.5556	3.5556	8	2.5556	5.1667	8.2222	3.8333	6.1111	3.4444	4.1667	2.1111	1.2778	1.6667	1.8889	4.3333	6.1111		0.481705	4.34223
9.5228	4.3333	8.2778	2.7222	10.2778	7	5.5556	6.6111	1.9444	1.8333	5.5556	6.0556	5	5.2222	6.7778	6.6667	3.5556	7.0556	2.6667	4.3333	5.1111	3.8889	0.6667	0.5	4.7222	8.0556		0.487806	4.97556
9.6418	9.3889	7	7.5556	7.3889	8.8333	6.1667	3.9444	4	4.1111	2.4444	4.8889	6.6111	2.7778	4.3889	5.2778	7.6111	2.9444	2.8333	7.8889	5.8889	1.7222	1.5556	2.1111	4.2222	5.8889		0.493902	5.09778
9.7608	8	4.2222	5.7778	4.1111	6.8889	3.8889	4.3889	1.3333	4.1667	4.2778	3.2222	8.3889	4.5556	8.0556	5.3889	4.7222	3.6111	5.8889	8.9444	7.1667	2.5	2.6667	2.7778	8.8889	4.8889		0.499997	5.1489
9.8799	2	3.9444	5.7222	4.2778	4.6667	1.9444	6.1667	2.1111	2.5556	3.7222	4.3889	7.4444	3.7778	2.8889	6.7778	2.7222	5	2.0556	3.7778	4.8333	5.3333	2.1111	3.3333	6.8889	5.1667		0.506098	4.14444
9.9989	3.2778	7.2222	4.6111	7.0556	7.2778	6.3333	3.1111	4.1667	2.8333	4.5556	1.6111	6.2222	3.3333	6.5	6.7778	5.4444	4.2222	2.8333	7.1111	5.9444	0.7222	1.7778	2.5	6.7778	4.0556		0.512194	4.65111
10.1179	2.1667	3.2778	2.1111	4.9444	4.6667	4.8889	4.8889	3.6667	0.1667	2.5	6.8889	4.8889	5.3889	10.6667	4.4444	4.5	4.2778	2.2222	7.0556	2.6111	0.8889	2.9444	1.5556	3.5556	6		0.51829	4.04668
10.237	5.0556	9.2778	3.3889	5.3333	7.5556	5.4444	8.1667	1.8889	2.6111	5.6667	7.8889	6.2778	4.8889	4.2222	9.2778	3.5	6.4444	2.4444	6	6.6667	1.6111	2.6667	1.1111	4.6111	3.5556		0.524391	5.02223
10.356	2.2778	8.8333	5.3889	7.6111	4.4444	9	5.1667	1	0.5	4	4.7778	8.4444	4.9444	4.0556	2.1667	7.7778	4.4444	0.3333	5.8333	3.8889	1.2222	0.7778	2.1111	2.8333	8.1667		0.530487	4.4
10.475	3.7222	5.7222	3.4444	7.9444	4.8889	5.2222	2.2778	2.9444	1.4444	7.5556	0.7222	4.5	5.8333	4.6667	7.2778	5.8333	2.4444	3.2222	7.1111	1.6111	0.6111	1.2222	1.8333	4.3889	3.6111		0.536582	4.00221
10.5941	5.2778	7.4444	5.7778	3.5	6.5	5	4.5556	1.7222	3.0556	2.9444	5.8889	8.1111	6.1667	3.5556	5.5	4.4444	5.1111	3.1111	5.6111	6.9444	2.7778	2.7222	1.3889	4.6111	2.3889		0.542683	4.56444
10.7131	6	5.8333	5.8889	5.7778	3.8333	3.6111	2.7222	1	1.9444	5.6111	4	7.2222	1.8333	4.7778	3.8333	4.2778	3.5556	2.7778	3.1111	5.3889	2.1667	0.2222	2.8889	3.6111	6.8333		0.548779	3.94888
10.8321	2	5.5	3.6667	4.3889	6.1111	2.7778	4.3889	1.2222	3.2222	2.2222	5.6667	6.9444	1.9444	3.9444	2.7778	3.6111	4.5556	4.1111	5.6667	2.8333	0.7222	1.2222	1.6667	2.8889	6.2222		0.554875	3.61111
10.9512	1.5	2.2222	6.9444	3	7.2222	3.2222	4.3889	1.6667	3.7222	1.2222	5.1667	7.2222	9.9444	9.4444	1.6667	6.6111	2.7222	4.8333	4.7778	3	1.6111	0.8889	3.5556	2.2778	1		0.560976	3.99333
11.0702	5.2778	3.1667	2.3333	4.3333	6.1111	6.8889	3.3333	2.8333	2	4.8889	5.3333	6.2222	2.1667	8.4444	2.6667	2.3333	6.4444	2.2778	4.5556	3.8333	1.8889	1.1667	2.3333	3.8889	7.1667		0.567072	4.07555
11.1892	2.8889	2.7222	5.9444	6.5	5.0556	6.1667	5.7778	2.7778	0.7222	4.6667	1.2222	6.4444	5.5	10.3889	2	4.6111	3.0556	4.1111	4.2222	2.3889	0.5556	0.8333	3.5556	3.8333	4.6667		0.573167	4.02445
11.3083	2.7778	6.1667	6.1667	4.8333	6.7778	5.4444	2.7222	2.7778	2.0556	3.8889	1.7222	7.2222	2.7778	9.9444	3.2778	6	2.7222	3.9444	5.3333	5.8333	2.8333	2.7778	2.8889	4.1111	8.5		0.579268	4.54
11.4273	3.9444	3.0556	9	6.5556	2.8889	3.9444	4.2222	0.7222	3.1667	3.8333	3.2778	2.9444	3	7.7778	3.0556	4.2222	6	5.7778	10.1667	5.2222	3.2778	0.3889	2.4444	4.5556	5.6111		0.585364	4.36222
11.5463	2.1111	1.5556	6.6667	5.8333	4.5	6.1667	6.4444	3.0556	2.1111	2.2778	4.1111	4	2.7778	8.6667	4.6111	2.7222	4	2.2222	5	7.1111	0.3889	2.5556	1.9444	3.8333	5.1111		0.59146	3.99111
11.6654	5.2778	2.2778	4.8333	3.9444	3.0556	7.3333	5.8889	0.5556	3.1111	1.7222	2.8889	4.4444	2.4444	12.8333	3.4444	1.4444	3.5	2.7778	6.1111	3.1667	1.7222	1.1111	3.7222	2.1667	4.6667		0.597561	3.77777
11.7844	2.8333	2.2222	1.4444	4.8333	6.6111	4.6111	4.3333	0.1667	2.3333	0.9444	4.0556	4.8889	8.2222	7.5	3.3333	4.0556	4.5556	1.4444	5.1111	12.6111	2.8333	1.3333	3.1111	1.8889	3.7778		0.603656	3.96221
11.9035	2.8333	2.8889	8.0556	7.7222	4.9444	5.8333	6.7222	2.4444	1.0556	1.2222	2.8333	6.6111	1.6111	6.3889	2.4444	3.6111	2.5556	2.6667	5.3333	4.7778	1.5	1.8333	1.1111	3.1667	2.9444		0.609757	3.72444
12.0225	3.6667	7.2778	5	5.4444	5.6111	6.1667	4.5556	2.8333	2.0556	2.8333	5.3889	3.1667	3.8889	14.9444	3.2778	3.3889	1.8889	2.6667	8.8333	4.7778	2.3889	2.2778	2.7778	3.6667	5.7778		0.615853	4.58223
12.1415	3.5	3.5556	7.8333	7	4.6111	4.9444	5.5	1.5556	2.7778	2.7222	4.5	3.4444	4.8889	9.1667	6.8333	3.2222	4.0556	1.4444	6.6111	7.2222	1.6111	1.2222	2.2222	5.7778	4.2778		0.621949	4.42
12.2606	3.3889	4.6667	4.0556	4.8333	2.1667	4.8333	6.3889	2.1111	1.6111	6.2778	2.0556	9.0556	4.5556	4.0556	2.7222	1.9444	6.1667	1.7778	4.1111	4	1.2222	1	0.4444	3.8333	4.0556		0.62805	3.65334
12.3796	3.5	0.6667	7.1667	2.1667	1.2222	7.5556	6	0.7222	2.2222	1.8889	3.2778	4.3333	3.5556	7.1667	3.6111	2.3333	4.3333	2.8889	1.6667	3.4444	0.4444	1	1.9444	3.2778	7.0556		0.634146	3.33778
12.4986	3.8333	2.2778	4	3.9444	4.2222	2.2778	6.1667	4.0556	3.4444	1.5	4.6667	6.6111	3.7778	8.7222	7.5	8.3333	2.4444	5.4444	6.7778	3.7222	2.8333	0.3889	1.7778	5.0556	7.0556		0.640241	4.43333
12.6177	3.8333	6.3333	4.4444	2.8889	3.7222	6.5556	4.4444	1.3889	1	1.9444	4.3889	6.5	5.4444	6.0556	5.3889	3.7778	3.1111	2.6667	6.6111	4.8889	0.6111	1.3889	3.2778	3.2778	6.8333		0.646342	4.03111
12.7367	4.9444	6.4444	3.8889	6.5	6.8889	5.3889	2.9444	4.1111	4.2778	1.6111	1.7222	6.9444	1.6667	5.3333	5.7222	7.3889	2.3333	5.2778	5	5.2222	0.6667	1.7778	2.6667	5.8333	3.6667		0.652438	4.32888
12.8557	2.6667	4.3333	5.1111	2.9444	4.6667	4	3.6111	1.1111	2	2.4444	1.9444	6.7222	3.8889	8.3333	9.3889	1.9444	4.5556	2.6111	5.5	3.5556	1.5	1.7222	2.6667	4.3333	5.5		0.658534	3.88222
12.9748	4.3333	2.5	3.6667	4.2222	3.2778	4.7222	2.5556	2.4444	4.2778	1.7778	6.0556	4.7222	3.5556	5.2222	5.3333	2.7778	3.1111	5.8333	6.9444	2.2222	3	0.5	2	4.7222	9.6111		0.664635	3.97555
13.0938	7.1111	3.5556	3.3889	2.0556	2.6667	2.8333	4.5	2.2778	1.9444	1.2778	4.7222	4.8333	4.2222	6.6667	6.2778	4.3333	3.2778	4	8.2778	4.7778	1.0556	2.0556	1.2222	4.0556	5.8333		0.670731	3.8889
13.2128	5.9444	3.5556	3.2222	2	4.7778	0.5	5.0556	3.3333	2.7778	2.6111	1.8333	6.6111	2.8889	2.7222	5.0556	4.0556	2.9444	4.2222	8.0556	4.3333	1.3333	2.5	0.8333	4.0556	7.1111		0.676826	3.69333
13.3319	2.7778	4.0556	3.3889	2.2222	6.6111	4.3889	2.8889	0.6111	1.1111	3.0556	5.2778	5.5556	4.3333	5.5556	7.7222	3.3889	7.3889	1.8333	3.2222	4.5556	4.5	1.0556	1.7778	5.8333	5.0556		0.682927	3.92668
13.4509	2.6667	2.5556	2.6111	2.6111	4.3333	7.0556	3.5	4.7222	1.6667	3.4444	1.6667	5.1111	4.3333	6.6111	5.9444	1.1111	2.3333	3.1667	3.3333	4.7778	2.1667	1.3333	1.7222	5.5556	2.5		0.689023	3.47333
13.5699	4.2778	2.7222	4.4444	1.9444	5.0556	5	6.1111	2.0556	2.2778	1.1111	5.1111	8.6667	3.6111	2.6667	4.1667	3.4444	2.7222	4.3889	3.0556	3.2778	1	0.5556	4.6111	4.8333	4		0.695119	3.64445
13.689	3.3333	1.4444	0.5	5.7222	2.2778	3.3333	4.2222	1.7778	0.6111	0	5	3.7222	5.0556	3.7778	3.1111	0.6667	5.2222	3.5556	7.5	2.2222	2.2778	1.7222	4	4.1667	2.6111		0.70122	3.11333
13.808	7	3.8333	3.8333	1.4444	2.9444	2.7222	5.7222	3.3333	1.5556	2.5556	6.3333	7.0556	4.7222	4.3889	2.9444	0.5	2.8889	5.9444	3.4444	3	2.7222	2.8333	2.4444	4.6111	1.7222		0.707315	3.61998
13.927	6.8889	3.2778	5.6667	5.3889	4.2222	6.8333	2.6111	1.4444	2	1.5	3.3889	6.5	3.5556	4.6667	2.7222	2.8333	3.7778	7.3889	3.1111	5.1111	2.2222	0.0556	3.3889	5.4444	5		0.713411	3.96
14.0461	4.5556	8.1667	7.2222	4.3333	1.4444	4.9444	4.3333	0.9444	2.5556	2.6667	4.7778	5.7222	2.8333	5.4444	7.3333	3.6667	1.3333	3.5	5.2222	1.4444	4.1667	0	1.2222	5.0556	2.5556		0.719512	3.81777
14.1651	5.4444	4.4444	4.9444	2.5556	7.1111	4.1111	3.4444	2	1.5	5.0556	5.9444	7.2778	6.1667	4	10.3889	1.0556	5.2778	1.7778	4.1111	1.3889	2.2778	2.0556	1.5556	4.4444	2.5556		0.725608	4.03556
14.2841	4.2222	5.4444	6.7222	2.3333	4.4444	6.4444	5.4444	0.8889	4.0556	2	4.3333	3.6667	6.1667	2.8889	3.7778	3.3333	2	3	1.6667	0.9444	4.2778	1.6667	1.2778	3.5	4.1667		0.731704	3.54666
14.4032	2.8889	2.7778	8.3333	1.7222	3.7222	3.3333	3	3.9444	1.6111	0.8333	3.5	5.8889	3.3333	4.1111	3.5556	0.6667	3.3889	3.6111	4.5556	3	1.2778	1.8333	2.5556	1.1667	3.8333		0.737805	3.13778
14.5222	2.6667	5.7778	6.8333	4.9444	2.5556	5.6667	2.3889	1.6667	3.4444	4.6111	4.5	8.6111	3.0556	3.3889	1.5	5	4.5556	2.5	4.1667	1.7778	1.5556	2.6667	2.8333	5.3889	8.1111		0.7439	4.00668
14.6412	3.1111	5.3333	1.0556	3.4444	4	4.6111	5.8889	4.7222	2	0.3333	3.5556	6.7778	2.1111	4.4444	0.8333	5.0556	3.0556	3.4444	6.5556	5.3889	2.5	1.5556	1.8889	4.5	5.1667		0.749996	3.65334
14.7603	4.0556	3.5	6.5556	4	7.2222	4.8333	5	2.6667	4.1667	4.7778	3.5	6.0556	2.6111	4.9444	1.5	1.7778	2.8889	3	4.1111	1.7778	1.5556	1.6111	0.9444	1.7778	4.2222		0.756097	3.56223
14.8793	2.2778	3.2778	6.3889	2.5	6.0556	5.8889	5.1667	0.9444	2.3889	1.8333	4.5	5.4444	2.2778	5.6111	1.4444	2.7778	2.2778	4.2778	8.2778	2.6667	3.2222	1.2778	3.6667	2.0556	3.4444		0.762193	3.59778
14.9984	6.6667	0.7222	5.2778	1.6111	3.1111	4.4444	2.3333	0.3333	1.2222	0.7222	5.7778	3.8889	5.1111	3.1667	3.1111	6.8889	2.3333	3.1667	7.2778	9.0556	1.7778	1.7222	2.5556	2.5	3.9444		0.768294	3.54889
15.1174	5.0556	2.3889	4.1667	2.8889	2.8889	2.6111	3.3333	2.2222	2.2222	3.9444	6.2778	3.8333	3.2778	4.2778	5.3889	4.4444	4.2778	3.2222	4.1111	2.3889	0.1667	0.8333	2.2222	2.1667	3.2778		0.77439	3.27556
15.2364	3.5	2.4444	2.7778	2.9444	4.1111	3.3889	3.6667	6.4444	4.8889	3.9444	3.7222	2.2778	2.3889	5.7222	7	5.2778	3.9444	5.8889	5.5556	4.0556	4.1111	0.7222	2.1111	1.6667	4.2222		0.780485	3.87111
15.3555	2.8333	3.8333	4.3333	3.0556	8.2222	6.4444	2.8333	2.8889	1.8889	2.6111	4.5556	10.4444	0.9444	3.7222	3.5556	6.3889	3.9444	1	7.2778	4	1.1667	1.0556	5.1111	3.1667	2.0556		0.786586	3.89333
15.4745	4.5	6.9444	2.8333	5.1667	6.1111	2.0556	6.0556	5.5	4.0556	2.1667	5.1111	4.9444	2.0556	4.4444	5.7222	6.6111	1.3333	2.6111	5.8333	5.5556	2.4444	1	0.7222	0.6111	5.8889		0.792682	4.01111
15.5935	1.9444	3.3333	6.9444	3.8333	5.2778	7.1667	5.2222	5.8889	1.3889	3.4444	3.8889	4.6111	1.7778	2.8333	5.1111	8.5556	1.9444	2.8333	7.1667	6.3889	3.1667	3	0.8889	6.8333	4.5556		0.798778	4.32
15.7126	2.1111	5.1111	6.0556	2.7778	2.7222	4.1111	4.3889	3.5	1.8889	2.8333	5.2778	2.7222	1.2222	3.1667	3.5556	3.1667	1.8889	5.2222	5.2778	3.8889	4.7778	3.5	2.1667	2.7222	3.2778		0.804879	3.49334
15.8316	2.6667	3.2222	4.7222	4.5	7.2778	7.7222	1.8333	3.6111	2.7222	2.6111	6.2778	3.5556	4.3889	2.0556	3.7222	6.7778	3.8889	1.6667	4.3333	5.6667	2.1667	0.3333	1.5556	1.3889	7.5556		0.810974	3.8489
15.9506	4.5556	6.5	2.4444	0.7222	3.3333	5.4444	6.6111	1.7222	1.7222	1.8333	5	2.7222	2.5556	4.2222	5.2778	5.8333	3.2222	3.1667	4.9444	3.4444	4.3333	1.1111	0.2778	5.4444	4.0556		0.81707	3.61999
16.0697	3.3889	4.8333	1.8333	3.6667	4.8333	8.2222	3.5	6.5	4.6667	1.7222	5.1667	3.4444	4.6111	2.9444	2	2.4444	3.5	2.0556	5.3889	4.1667	1.6667	4.1667	3.0556	4.6111	2.3889		0.823171	3.79111
16.1887	2.5556	3.9444	4.4444	4.9444	3.0556	5.1667	8.9444	5.1667	1	5.2778	1.1111	4.5	3.3333	4.8333	3.4444	3.3889	1.6111	3.5556	3.5556	1.2778	0.6667	2.6667	0.7778	6.5	5.0556		0.829267	3.63112
16.3077	4.1111	6.6111	6.8333	4.5556	6.0556	9.3889	3	4.7778	5.2222	0.7778	5.2222	1.6111	1.6667	2.8333	2.6667	1.3333	0.8889	5	2.7778	4.7778	2.3333	3.4444	2.2222	3.2222	8.4444		0.835363	3.99111
16.4268	3.0556	3.3333	3.9444	2.7778	1.8333	6.3333	3.8889	3.6667	5.3333	3.4444	5.7222	2.2778	2.5556	2.1667	4.2222	4.6667	1.8889	4.6667	5.8889	3.6667	0.6111	2.7778	4.5556	3.0556	2.3889		0.841464	3.5489
16.5458	3	2.7778	1.8333	2.6111	2.6111	4.6111	9.6111	6.2778	1	3	1.5	3.1667	1.7778	2.3333	2.5556	1.7778	1.2222	3.1111	6.5	3.8333	1.1667	1.5	1.8333	3.6111	0.7222		0.847559	2.95778
16.6648	1.5	3.6111	3.5556	4.6667	5.2222	2.1111	8.6111	7.5556	1.7222	2.2778	4.2778	2.1667	0.3333	1.7222	5.6667	5.3333	3.2222	3.3333	5.6111	8.1667	2.9444	2.4444	5.6111	5.6667	7.3333		0.853655	4.18666
16.7839	7.7222	2.2222	5.0556	2.9444	3.6111	5.7222	6.3889	3.1111	2.5556	2.0556	2.2778	0.7778	2.6667	2.6667	3.6111	4.8889	2.9444	2.2778	1.4444	2.6111	2.4444	3.3333	4.6111	5.2778	7.8333		0.859756	3.64222
16.9029	3.2222	0.5	4.5556	1.7222	3.3889	7.1667	4.1667	4.2222	2.4444	3.2222	1.3333	2.8333	0.7222	1.8889	2.1111	2.7222	1.2222	0.8889	7	7.5	2.5	0.2778	3.5	6.3889	2.7222		0.865852	3.12888
17.0219	3.7222	3.3889	4	5.1667	5.3889	2	5.1111	5	3.6111	2.6111	4.8889	1.7222	0.8333	1.9444	3.3889	4.2222	2.0556	1.5556	5.3333	4.5556	1.7222	0	3.2222	6.0556	5.6667		0.871948	3.48667
17.141	5.6667	4.6667	5.4444	5.3333	5.7222	3.1667	6.8333	3	5.3889	5.6111	4.3333	1.6111	2.1111	4.3333	4.7222	0.4444	3.7778	1.5556	4.7222	4.0556	2.5556	1.4444	4.5	1.7778	3.3889		0.878049	3.84666
17.26	5.2222	4	5	4.1111	1.8889	1.8889	4.6667	5.5	3.2222	4.1667	2.3889	2.1667	1	2.8333	4.3889	1.5	2.4444	0.7222	2.0556	7.6111	0.7222	2.1667	7.6667	2.5556	6.2778		0.884144	3.44667
17.379	2.4444	4.3889	4.2222	7.5	3.7222	2.9444	2.7222	4.0556	2.9444	1.5556	2.7778	1.2778	0.7222	0.8889	5.7778	3.1667	1.4444	0.6111	7.8889	4.6667	3.6667	1.9444	3.7778	3.6111	3.8333		0.89024	3.30222
17.4981	5.2778	2.2222	4	2.1667	1.2222	6.5556	3	9.3889	5.2222	4.5556	4.2222	0	1.3333	2.4444	5.3889	4.3889	2.7778	0	4.5	5.8889	3.3889	1.5556	4.8333	3.6111	2.6667		0.896341	3.62445
17.6171	4.9444	1.8333	6.4444	6.5	0.2222	5.3333	2.9444	5.3889	4.7778	1.5	2.8333	2.1111	1.3889	1.2222	1	4.1667	1.9444	1.8889	3.6111	4.3333	5.2222	1.1111	3.5	4.6111	4.0556		0.902437	3.31554
17.7361	3.9444	4	2	6.4444	3.3333	5.2778	5.7222	3.5556	5.5	2.3889	3.2222	0	0.8333	3.3889	0.8889	2.1667	3.1667	1.3889	3.3889	3.4444	4.4444	1.6667	2.7778	2.1667	11.5556		0.908533	3.46667
17.8552	4.2778	0.8889	4.0556	5.9444	3.6667	2.8889	2.9444	2.7778	3.2778	4.8333	1.1111	0	0	3.1667	3.1111	2.8889	3.3333	2.7778	3	6.7778	1.5	1.8889	5	3.5556	2.3333		0.914633	3.04
17.9742	5.2778	4.5556	2.8333	3.7222	2.2778	4.5	2.6111	3.2222	3.3889	2.7778	0.7222	0.5556	0.7222	1.5	2.5556	3.7222	4.7778	1.9444	4.6111	4.5556	4.1111	2.3333	4	2.8889	8.8889		0.920729	3.32222
18.0932	2.7222	1.7778	4.9444	5.2222	3.0556	6.5	2.6667	5.6111	3.0556	4.6111	1.2222	0.5	0.6667	1.3333	3.6111	5.9444	1.8889	1.2222	1.6667	3.3889	2	2.4444	4.2778	8.4444	10.9444		0.926825	3.58888
18.2123	8.6667	4.6111	1.7222	4.9444	5.3889	4.2222	6.8889	2.6667	6.2222	4.3333	2.3333	0.4444	1.3889	1.8333	4.6111	2.3333	1.4444	1.1111	1.4444	2.8333	3.1111	2.1667	7.5	6.5	5		0.932926	3.74888
18.3313	5	3.9444	4.7222	7.2778	2.6667	6.2222	1.6111	9.8333	3.6111	5.5	3.0556	1.1111	0	1.6111	2.9444	2.1111	2.4444	0	1.3889	5.6111	2.2778	3.7222	6.6667	5.3333	5.9444		0.939022	3.78444
18.4504	6.3333	1.1111	2	2.0556	3.1111	7.0556	2.1111	5.3889	3.3333	8.5556	1.1111	0.6111	1.0556	2.1111	2.3889	3.2222	1.3333	0.8333	1.1111	3.5	2.8889	3.4444	6.0556	6.3333	10.6667		0.945123	3.50889
18.5694	3.6667	2.5	6.5	4.1111	4.3333	5.2778	3.9444	6.6111	2.2778	1.8889	0.5556	2.2222	0	0.5556	1.8889	2.6111	2.2222	0.7778	1.8333	3.7222	4.8889	1.3333	5.3333	2.3333	8.1667		0.951218	3.18222
18.6884	6.1667	2.2778	2.9444	1.3889	2.9444	4.1667	2.3333	11.6111	5	6	0.5556	0.6667	1.1111	2.3889	0.1667	5.3333	0.7222	0.3333	1.8333	8.2778	2.6111	1.6111	3.3889	5.7778	9.3333		0.957314	3.55778
18.8075	1.4444	4.2778	2.0556	4.2222	1.8889	4.2222	4.8333	9.3333	1.6667	4.1111	1.0556	0.8889	1.1667	0.8333	1.4444	4.1111	0.6111	1.4444	3.2222	2.3889	4.2778	4.7778	5.6667	4	5.1667		0.963415	3.16444
18.9265	5.1667	3.5	2.9444	3.5	4.3889	3.8889	5.4444	11.1111	3.8889	8.1111	0.6111	0	0.3333	0.5556	2	3.0556	1.6111	0.0556	0	4.8889	3.3333	5.8333	3.7778	5.6667	8.3889		0.969511	3.68222
19.0455	3.2778	3.8889	2.6111	3.6111	2.8333	3.2778	5.3889	8.9444	5.0556	6.5	0.7778	0.3333	0.4444	1.0556	0.4444	1.7222	1.5	0	1.0556	2.8333	3.7222	1.4444	4.8333	6.3889	7.1667		0.975607	3.16444
19.1646	4.7778	1.0556	2.8889	2.5556	4.5556	2	5.8333	9.8889	1.8333	5.8333	1.7778	0.9444	0.0556	0.7778	0.7222	2.6667	0	1.2222	3.8333	3.7778	4.7222	2.3889	2.8889	5.1667	5.3889		0.981708	3.10223
19.2836	3.2778	3.7222	3.4444	3.5556	4	2.8889	2.7778	7.9444	6.4444	6.7778	1.9444	0.1111	0	0	0.5	4.0556	1.7222	1.7222	0	4.5	6.7222	2.6667	2.7778	13.8889	4.3333		0.987803	3.59111
19.4026	1.7222	2.8889	0.8333	3.9444	3.3889	2.5	3.6667	9.5556	4.9444	1.4444	0.6111	0.3333	0.5	0.7778	0.5	1.4444	0.7222	0.7222	0.7778	4.2778	3.8889	0.4444	2.9444	11	4.2778		0.993899	2.72444
19.5217	3.1111	2.7222	0.8333	3.3333	2.5556	4.3333	6.1111	10.2778	2.1111	2.8889	0.5556	0.3889	0	0.9444	0.2222	1.9444	0.7778	0.1111	0	4.9444	6.3333	4.4444	2.0556	14.8333	3.7778		1	3.18444

## Sheet: Im7
X0	Y0	Y1	Y2	Y3	Y4	Y5	Y6	Y7	Y8	Y9	Y10	Y11	Y12	Y13	Y14	Y15		Ap-Ba	Average int.
0	10.8023	11.2537	9.06099	18.0082	20.4753	15.3572	21.8675	22.9738	29.8582	18.7439	20.0031	19.8082	22.7772	15.771	14.5057	18.1015		0	18.0855
0.119	7.6598	9.6072	9.14704	18.0869	16.3523	16.3588	15.5581	18.9886	28.2931	17.6815	19.1491	13.2855	30.7666	19.1318	17.5228	15.4749		0.00510055	17.0665
0.2381	9.7801	14.0816	9.51422	17.3183	17.046	18.7504	22.4149	18.1216	31.4127	18.8141	16.2536	17.1992	22.6769	18.5315	16.0562	15.5366		0.0102054	17.7192
0.3571	13.9587	9.5879	8.7443	14.733	19.284	17.3539	23.1005	20.3603	28.2372	22.484	15.7208	14.9685	26.1192	16.1689	11.0541	17.5704		0.0153059	17.4654
0.4761	5.3108	10.534	6.7589	16.4193	17.1419	15.6736	18.9073	20.8901	22.3123	15.1185	15.8444	22.5709	24.6245	16.9124	15.5969	16.8656		0.0204065	16.3426
0.5952	5.4624	10.5828	4.30789	12.4008	16.6555	19.3562	20.1462	21.2466	26.0658	20.1831	15.9384	15.9576	15.5841	13.7355	15.1319	9.5468		0.0255113	15.1438
0.7142	5.8976	12.3302	4.68823	12.9256	17.7047	15.1584	17.0989	19.8939	24.8459	15.3236	11.4878	18.7673	19.1169	17.1872	14.7541	9.7465		0.0306119	14.8079
0.8332	7.0119	10.8951	6.20958	14.9314	13.8899	8.1183	16.87	16.8972	15.047	11.4191	9.829	17.8485	16.8726	16.3869	18.7541	13.0948		0.0357124	13.3797
0.9523	5.9845	9.2613	4.66205	10.648	11.5328	10.7648	13.7888	18.2375	18.3063	13.8501	13.4238	14.992	15.6297	7.3822	23.2091	15.8451		0.0408173	12.9699
1.0713	9.6934	11.2233	4.89603	13.4126	16.3811	13.3913	17.7197	14.2284	23.6923	12.4047	12.1499	16.2874	13.3022	10.3022	14.4077	13.7246		0.0459178	13.5761
1.1903	8.0517	9.4018	3.38499	7.6221	14.62	11.7429	14.0828	12.5753	19.6997	13.4297	13.0034	18.194	17.5491	14.364	9.6773	16.3703		0.0510184	12.7356
1.3094	7.2473	8.1833	7.9723	4.4325	8.992	13.0496	12.4623	13.7276	20.9914	10.486	14.7071	13.9094	13.502	16.5082	10.9157	19.4696		0.0561232	12.2848
1.4284	8.3162	8.4911	5.95338	7.2849	10.9287	14.2618	10.5431	14.6123	20.5714	10.8227	10.5841	14.5406	12.4371	16.7667	11.5996	13.954		0.0612238	11.9792
1.5474	9.3328	8.8199	7.4046	6.4179	13.0586	10.1906	10.347	17.8737	21.9455	11.2102	10.0961	9.8857	17.9703	13.2069	12.1686	15.3962		0.0663243	12.2078
1.6665	8.3489	6.7401	4.21198	7.9113	14.6609	8.0837	9.1056	13.7267	17.984	5.8947	5.9217	11.6451	16.5275	10.524	10.0181	12.5592		0.0714292	10.2415
1.7855	5.6055	6.087	3.8219	7.8195	13.6972	8.83	13.7934	16.036	17.3898	10.2956	7.4207	11.0017	14.6658	14.2907	8.651	14.1832		0.0765297	10.8493
1.9046	4.2358	8.5448	5.41462	7.223	12.6257	8.0125	12.6702	16.0864	20.7459	10.0175	8.7506	10.511	15.3411	15.4069	7.9085	13.5929		0.0816346	11.068
2.0236	7.0184	7.795	3.7657	7.3422	11.9536	6.8048	8.8878	13.446	13.4116	16.0468	13.3938	8.4216	13.619	14.3541	9.1543	15.7021		0.0867351	10.6948
2.1426	8.3506	5.1709	2.85594	6.8343	13.4606	9.6602	7.7251	16.8039	18.8915	11.3412	8.1426	10.4732	8.23	10.4491	7.6518	12.9639		0.0918357	9.9378
2.2617	6.6828	6.1449	5.58717	6.8619	13.4105	10.7874	12.8991	12.2951	17.3728	8.2208	11.384	13.389	8.0348	15.8299	8.9259	14.7422		0.0969405	10.7855
2.3807	6.74	5.5619	3.34832	4.31	10.7479	8.0628	15.1363	7.3157	14.11	10.6837	10.9448	13.2956	9.5703	16.8671	7.3234	11.8664		0.102041	9.74276
2.4997	8.3627	6.2379	2.28714	5.8832	15.1721	7.6889	9.4991	9.1709	11.7027	12.9443	9.6345	8.6869	8.6482	11.4725	13.2618	13.2611		0.107142	9.61962
2.6188	7.1338	5.0061	3.7326	3.1235	11.3242	7.0022	9.2447	10.7896	12.9874	8.0177	6.6796	7.0248	8.7373	12.0752	15.8456	9.1404		0.112246	8.61654
2.7378	6.1704	6.6627	3.5516	6.239	10.3232	7.9028	8.6047	14.2	19.7265	8.0706	4.4504	7.4261	8.3017	12.6208	13.4369	9.2392		0.117347	9.18291
2.8568	6.0117	8.6517	5.22467	5.2607	9.6903	6.7118	7.0764	18.7972	17.9679	7.0754	6.1395	6.9555	8.6521	10.7199	10.9895	7.5651		0.122448	8.96809
2.9759	4.6866	7.2251	5.98784	4.1699	7.0654	8.7558	8.1063	8.7772	19.2729	8.4166	5.985	7.1022	6.7989	8.9346	8.2955	7.5955		0.127552	7.94846
3.0949	5.3435	5.0772	3.21347	2.66	11.3335	9.6517	7.9677	6.697	18.0742	7.9256	4.1359	6.577	8.9872	8.8082	6.7344	8.2766		0.132653	7.59145
3.2139	6.2932	6.445	5.64415	1.9246	10.675	12.091	11.2734	8.765	12.8051	6.7757	5.0173	6.3862	7.7353	7.0155	11.3471	9.6788		0.137754	8.11702
3.333	4.7321	6.4769	4.49463	4.6527	7.9719	11.5937	11.6974	13.6194	12.9423	6.2176	4.6221	5.901	10.4745	8.7192	8.8343	8.6948		0.142858	8.22778
3.452	5.8283	4.9029	3.37008	3.0251	5.5869	11.5663	5.3412	11.2395	16.1362	8.0168	5.5006	7.6921	6.5788	10.8724	13.2028	9.3837		0.147959	8.01523
3.571	8.3095	5.9964	1.80563	6.0385	4.7381	6.2691	8.1659	10.8888	15.795	8.2352	2.9344	6.3891	6.4439	13.5096	9.8182	12.2231		0.153059	7.97253
3.6901	5.0949	8.0825	3.67496	4.2726	8.1901	7.5912	4.623	12.4377	10.8427	10.0687	6.0323	6.0312	6.0353	14.9176	7.6655	11.2398		0.158164	7.925
3.8091	8.0227	4.5328	5.0102	2.492	7.4805	6.4029	4.6439	11.7553	11.0422	10.1393	6.7706	3.9596	6.6384	9.9214	8.3431	10.4352		0.163265	7.34938
3.9281	9.9688	7.438	3.21756	2.5423	6.3068	6.2114	6.3793	7.6923	14.6617	8.3543	5.4867	4.8517	6.1325	8.5415	5.1969	7.0527		0.168365	6.87715
4.0472	5.8436	6.248	4.24788	4.9749	8.3461	5.4924	5.7513	9.4876	17.5524	9.9283	5.9279	3.4717	6.2239	7.925	7.4298	9.2758		0.17347	7.38291
4.1662	7.0034	4.9407	4.77761	5.3308	8.8019	7.3943	6.9592	8.6984	13.1491	11.2783	10.124	6.9478	8.1507	9.1296	7.7836	14.9622		0.178571	8.46448
4.2852	5.3431	4.3596	5.82415	3.0341	6.7267	6.6401	6.0038	8.2467	13.6794	8.9659	7.1962	5.8041	8.3383	6.7926	7.7189	9.753		0.183671	7.15167
4.4043	4.3244	4.1022	6.76301	4.2181	8.7738	9.4916	3.4518	9.4154	9.986	9.4592	12.3677	6.3861	7.5412	11.053	5.261	8.9592		0.188776	7.59711
4.5233	5.684	6.7675	6.43042	3.6398	6.3101	8.9974	5.7523	11.7024	11.1912	8.1158	9.1644	4.8512	11.0169	9.9668	3.387	10.0506		0.193877	7.68924
4.6423	4.4304	8.0502	2.90927	4.0974	3.3763	6.2521	6.9123	9.4623	13.0778	6.3656	8.3013	4.3823	8.8303	12.7731	7.77	6.5289		0.198977	7.09497
4.7614	4.25	3.7083	2.55125	4.2459	4.7477	8.9266	5.7711	10.4964	13.9358	4.9128	6.0812	8.1602	5.2049	13.6029	4.3906	7.2721		0.204082	6.76611
4.8804	7.0597	2.5579	7.19055	4.144	5.4326	6.7225	6.4193	7.3626	11.9694	4.8961	5.2375	6.5765	4.6215	10.2013	5.1048	9.1775		0.209183	6.54211
4.9995	6.361	3.6176	4.56696	5.149	7.7356	3.9317	4.1565	11.248	8.8642	8.2408	6.6526	7.1122	10.7091	6.9825	6.4127	7.8167		0.214288	6.84732
5.1185	5.2974	3.4859	5.29729	4.1464	4.8547	7.2891	8.8221	8.911	9.6439	8.4229	9.9308	7.9252	16.2369	8.2305	5.9339	8.7311		0.219388	7.69744
5.2375	4.67	3.5459	7.32249	3.3256	4.2214	6.7813	9.3439	7.0611	9.667	10.7431	6.702	9.3572	8.984	9.2113	6.9949	7.8015		0.224489	7.23329
5.3566	3.742	2.5743	6.16304	4.5217	2.5344	4.4741	6.5092	9.683	8.8541	8.715	5.1218	9.9907	10.5991	9.9737	8.0894	8.7165		0.229593	6.89138
5.4756	2.9024	3.5005	6.58767	5.3866	4.3961	11.1398	6.7641	10.6768	7.9119	7.4932	9.9133	10.601	8.1027	8.5067	9.8118	5.9843		0.234694	7.47993
5.5946	5.5857	2.9653	4.10108	8.6034	4.8434	6.5788	6.6244	11.4575	10.1532	8.9028	9.5288	9.3629	6.944	9.2132	7.4402	4.7996		0.239795	7.31902
5.7137	3.896	3.8287	5.70314	8.5816	5.3656	3.672	12.3025	6.9211	7.5955	11.1817	7.9629	7.3731	9.2961	9.124	8.0716	8.7171		0.244899	7.47454
5.8327	5.1765	4.0743	5.31029	7.3215	5.6022	5.5527	10.2766	8.9853	10.3398	7.7781	9.6097	10.3966	7.4823	8.0601	8.3422	5.9528		0.25	7.51631
5.9517	7.6446	4.7653	3.19472	3.9998	4.578	6.2867	6.5678	7.2334	10.9913	9.047	4.9062	8.5192	7.2228	4.3224	4.15	8.8258		0.255101	6.39094
6.0708	4.8903	4.8897	7.26413	5.0594	7.2469	5.7118	8.431	6.5571	13.2709	7.043	6.8237	9.6865	8.6261	8.0307	6.6196	12.6097		0.260205	7.67253
6.1898	6.982	4.8787	6.66723	4.4753	4.3121	10.2089	8.8759	7.616	8.3601	9.4024	9.4081	8.4477	10.1725	6.6743	10.3249	8.8625		0.265306	7.85429
6.3088	3.6759	5.8076	4.98672	2.3109	5.3316	11.3687	9.4548	9.0434	10.9111	6.7688	7.8641	8.1426	8.4077	4.763	7.4815	11.77		0.270407	7.38053
6.4279	3.7143	4.7334	4.56613	2.2885	5.7171	10.4162	13.1683	7.9239	9.3733	7.598	8.4779	8.5388	6.7781	7.3831	6.9609	10.7782		0.275511	7.40101
6.5469	4.2247	5.255	4.90781	3.3169	5.1444	9.7033	12.9934	7.9132	12.9603	2.1392	10.8423	10.5172	8.4549	5.7786	7.3226	7.1411		0.280612	7.41343
6.6659	2.8222	4.3532	7.40685	2.9896	4.3645	6.9665	9.0306	6.073	6.8139	6.0805	8.9403	17.7874	14.2345	4.8552	11.7422	10.1602		0.285712	7.78879
6.785	5.1801	3.3799	3.81622	7.3255	4.8969	5.4179	8.6494	7.3448	8.3128	7.1862	11.8405	12.6446	10.694	4.6076	6.1847	7.3104		0.290817	7.17447
6.904	3.5931	6.1986	3.06019	6.5544	5.1353	6.1907	7.0897	8.6196	11.0078	5.5055	10.1859	12.316	13.0053	4.7878	5.9346	6.1218		0.295918	7.20664
7.023	2.6621	4.055	4.05708	6.4162	2.5014	6.8198	6.5406	10.7807	8.6865	4.6095	10.8279	14.234	13.38	4.1557	4.6752	5.7572		0.301018	6.88493
7.1421	4.3346	3.9472	4.97298	5.889	3.474	7.3463	8.5624	6.3971	13.5787	6.3519	13.6714	9.8773	10.7058	4.5744	3.5463	2.7961		0.306123	6.87659
7.2611	1.7928	2.1134	5.10465	5.6721	3.9125	9.9442	9.1782	8.4625	9.1443	10.7682	14.4623	11.6525	11.9216	8.2187	3.9565	5.2285		0.311224	7.59581
7.3801	2.6379	3.2312	2.04236	4.2286	4.6615	8.9346	7.2187	6.6377	11.2368	6.745	14.2524	6.721	7.9513	8.0064	6.7742	4.7305		0.316324	6.62564
7.4992	3.9687	6.1338	4.05147	4.2132	3.1561	9.5252	8.3607	9.8319	12.104	7.9677	11.8019	10.7231	6.909	11	6.1484	4.8094		0.321429	7.54404
7.6182	3.2975	3.9515	3.32658	4.157	4.7887	7.1791	8.8663	5.747	6.0242	9.0383	8.7921	10.6561	10.1415	5.7032	3.7698	8.8948		0.32653	6.52086
7.7372	4.433	4.8108	4.89057	5.336	3.0847	6.9497	7.098	8.4497	6.5728	6.6645	7.9827	11.4163	6.4041	6.5924	7.7237	8.0353		0.33163	6.65277
7.8563	2.4209	4.9172	2.03035	5.776	6.7558	8.2847	8.8911	6.269	6.7796	4.2072	6.1291	10.4318	6.1085	9.7409	10.0552	8.1923		0.336735	6.68685
7.9753	2.3808	5.8089	3.02248	5.4067	9.0063	6.5868	6.0899	5.3587	5.6861	4.7025	9.9039	9.2139	9.6908	10.0565	10.9086	9.8803		0.341836	7.10645
8.0943	3.6158	5.5892	4.6481	5.3822	6.6918	6.7062	8.1485	7.7021	7.1683	5.5688	7.2054	8.3626	8.9356	6.7526	6.1101	5.0431		0.346936	6.4769
8.2134	3.8849	4.9557	6.22426	3.5033	4.5488	3.7438	6.0462	6.3397	7.3496	5.5547	4.9638	6.8063	5.2872	6.1796	6.8129	6.6793		0.352041	5.555
8.3324	3.3757	7.3903	4.18728	3.4343	3.4552	4.9419	8.6266	2.7006	6.5783	6.8865	4.3521	6.3158	4.8461	3.9715	7.0602	6.0475		0.357142	5.26062
8.4515	3.9251	2.9071	2.97209	7.461	5.0842	5.0863	4.8732	5.8832	6.0513	6.4977	8.2349	6.1417	6.8564	3.2674	4.6659	7.95		0.362246	5.49109
8.5705	5.3372	1.8475	2.11472	2.7836	5.1795	6.2991	6.2759	5.7089	8.2318	5.123	4.9456	5.6838	4.6881	5.0566	5.1273	16.4365		0.367347	5.67744
8.6895	6.1088	4.895	2.98171	3.7472	5.1727	8.1801	5.0623	6.8323	6.9465	6.0529	11.33	11.3365	5.049	7.0103	6.9427	8.1965		0.372448	6.61528
8.8086	3.7039	4.2508	3.88349	3.1466	2.8223	5.0364	4.5665	8.0399	6.7434	5.4501	6.8933	7.4718	3.8406	4.2501	4.0226	5.0304		0.377552	4.94701
8.9276	3.3935	5.0405	3.27719	3.1017	4.9276	6.2992	5.8976	5.0057	5.8662	6.4819	6.4247	8.6454	6.6996	5.2624	4.5267	7.2116		0.382653	5.50384
9.0466	3.0874	8.0205	3.06884	4.6648	8.1436	7.8661	3.4649	6.4898	3.3882	7.8885	9.0967	8.6907	3.1798	4.943	4.44	7.8455		0.387754	5.8924
9.1657	5.1618	6.0845	2.01653	3.0756	5.455	4.8133	4.7698	8.0297	6.4652	5.6489	6.7714	10.6671	7.6709	7.0615	6.6323	5.8909		0.392858	6.0134
9.2847	5.5757	4.4338	2.39429	2.1018	3.2996	4.0663	6.9671	7.4344	7.682	3.1673	8.9477	8.6659	5.2306	7.963	7.1916	4.6995		0.397959	5.61379
9.4037	4.3107	4.6302	2.79369	2.4267	2.7407	3.0425	8.4546	8.742	3.0094	6.3044	9.0074	11.498	7.4278	3.9653	6.2962	6.6074		0.403059	5.70356
9.5228	3.1478	4.9904	2.14048	1.0983	3.5692	2.3561	7.5897	5.6872	3.9016	6.1672	10.598	7.2943	7.906	7.0268	7.7503	6.2865		0.408164	5.46937
9.6418	3.1753	4.609	0.73288	1.7125	3.8376	6.2327	6.6104	4.4243	5.8556	5.5496	7.3659	5.4509	10.2209	9.0713	4.94	5.6854		0.413265	5.34214
9.7608	5.6359	3.6629	1.13688	3.1859	3.9313	5.5213	7.2093	7.852	6.0653	3.2292	8.4157	5.6017	7.458	8.7083	4.5481	5.0508		0.418365	5.45079
9.8799	3.1032	2.6599	0.89555	2.2224	6.1866	3.8486	9.6963	6.5741	6.0928	7.7052	5.2238	5.7958	9.7397	7.5835	4.3248	4.7962		0.42347	5.40303
9.9989	4.7247	4.7697	1.09643	1.186	4.9818	3.7141	9.2659	5.6899	4.8136	9.6171	5.6805	8.5508	10.8224	4.3605	4.1458	6.006		0.428571	5.58908
10.1179	4.8053	4.2619	3.27853	1.8142	3.878	3.836	8.9784	4.7068	3.9264	8.6749	9.4338	4.3084	14.3313	4.57	4.7541	8.9438		0.433671	5.90636
10.237	5.2733	6.2017	2.20682	1.7278	3.4713	4.3208	4.7207	5.1323	3.4891	9.1097	11.1934	8.2951	6.585	2.3986	4.7961	8.0441		0.438776	5.43536
10.356	2.754	5.3103	1.45711	1.6425	3.432	6.9857	6.9579	5.3684	4.1894	8.2158	7.9888	7.0877	6.7419	3.3165	6.9809	6.9229		0.443877	5.33449
10.475	5.3001	5.7989	2.0433	2.4844	6.8666	5.6602	3.9768	2.9969	5.3753	9.2109	6.4899	8.7765	8.0894	5.6454	3.0942	5.6279		0.448977	5.46479
10.5941	4.5826	2.8488	2.97954	3.1129	6.3563	6.5195	7.1844	3.8436	5.041	10.8234	6.9768	8.7452	7.7675	10.5203	5.397	6.2257		0.454082	6.18278
10.7131	4.9971	3.739	1.91279	4.3368	7.9978	7.0199	4.57	6.6715	3.3759	10.7167	6.3916	8.6556	9.1373	6.5601	7.8703	7.9768		0.459183	6.37057
10.8321	4.9695	2.176	3.35057	3.3551	3.7862	5.7325	5.5854	7.4137	3.0343	7.1524	6.582	6.2248	7.5433	6.9596	11.6729	4.0511		0.464283	5.59934
10.9512	5.1682	3.4467	1.45866	2.346	6.4021	5.6467	3.7772	8.0378	3.7228	9.4468	8.1465	8.1232	8.343	4.8043	8.4324	5.0834		0.469388	5.77411
11.0702	6.1374	2.8961	1.19915	0.8797	5.3311	3.1576	3.4567	5.6521	4.1059	9.8557	6.4355	9.9576	12.5084	3.6086	7.3675	7.4615		0.474489	5.62566
11.1892	3.6084	1.9491	1.74491	0.5639	5.0609	3.8793	3.172	3.8979	7.2603	6.8441	10.8984	6.6996	17.2016	5.3558	4.7842	5.0825		0.479589	5.50018
11.3083	2.2359	3.6333	1.60947	0.5788	5.8809	7.0198	5.0329	5.234	7.2925	8.3802	11.1207	10.851	10.2779	8.5329	6.1977	3.8685		0.484694	6.10915
11.4273	5.9432	2.5285	2.83687	1.5224	3.6661	7.2457	4.2519	5.6698	6.5978	8.3135	8.527	7.5191	15.0025	11.5361	4.9447	2.8123		0.489795	6.18234
11.5463	3.3685	2.1476	3.17313	3.141	5.6541	5.3733	4.3202	9.3525	3.9879	9.5877	7.9931	6.3087	14.8307	8.9665	7.1664	6.2583		0.494895	6.35185
11.6654	3.413	3.0995	0.30907	1.194	5.0614	6.2256	5.9362	11.8038	3.1537	6.4694	10.3191	6.8726	12.5944	6.8733	6.5396	5.4061		0.5	5.95442
11.7844	3.4976	3.967	0.1943	0.8492	4.6567	6.5552	6.0709	9.2361	7.8126	4.9835	5.1304	7.0582	15.2135	5.1685	4.7123	3.7994		0.505101	5.55659
11.9035	1.3122	2.0186	0.64623	3.2462	5.115	6.3681	10.8597	9.5221	7.6186	7.7639	4.4786	5.8559	11.5161	7.5277	4.1094	2.8098		0.510205	5.67301
12.0225	1.9752	2.5557	2.10016	1.6361	4.5945	8.0942	9.7377	9.3936	4.2977	9.464	6.6664	9.1915	9.2222	10.5106	5.0126	3.3714		0.515306	6.11397
12.1415	6.9201	3.3453	0.85132	2.7013	6.4177	4.72	9.4661	6.4618	2.9183	6.4518	2.3806	5.6894	9.2684	6.6918	5.885	5.4048		0.520407	5.34836
12.2606	3.7932	1.6304	3.56744	0.9658	4.3517	4.5533	7.5023	5.9703	2.3314	4.4111	4.5418	4.1967	9.2976	7.1915	7.2906	4.6072		0.525511	4.76265
12.3796	4.4627	2.3882	3.1852	2.1404	5.0839	5.1912	8.9735	6.5721	2.6602	3.9895	3.6401	4.5794	8.4661	8.7591	4.3876	4.6983		0.530612	4.94859
12.4986	2.7981	3.289	1.80162	2.9367	3.7491	3.4674	6.4588	3.5212	5.5068	5.8144	4.5795	5.767	11.6586	12.3952	5.9934	5.704		0.535712	5.34005
12.6177	4.1727	2.9719	1.34723	1.6621	3.5062	2.3392	6.9924	5.7902	3.0492	7.4879	5.2272	5.9908	10.4965	6.7648	6.745	4.9253		0.540817	4.96679
12.7367	2.5436	3.0343	0.45251	1.4831	4.1239	6.3	4.6794	5.8369	4.0767	4.1187	1.9268	5.1911	9.0907	9.937	6.2666	3.756		0.545918	4.55108
12.8557	2.9523	1.9206	0.93767	2.6951	4.8602	5.7419	5.116	7.3033	3.4413	5.3623	6.7164	4.1843	7.7182	8.0727	12.0992	3.8256		0.551018	5.18419
12.9748	4.685	0.3085	1.04433	1.1862	2.6717	8.5077	5.0515	4.776	4.0748	4.3282	8.1445	6.9418	10.8872	5.2269	9.1947	2.928		0.556123	4.99731
13.0938	5.2398	2.2825	1.40168	1.1751	3.1462	11.4772	4.9375	5.8023	3.5201	4.2259	6.4581	6.0435	5.1357	4.3988	5.9027	3.4175		0.561224	4.66029
13.2128	6.6064	2.2891	2.21859	4.108	4.5763	7.0881	5.3534	5.9231	2.5524	7.1318	9.0308	10.3214	7.8173	4.5512	6.2115	3.3618		0.566324	5.57132
13.3319	5.0707	3.5896	1.23622	2.2052	4.1796	10.4186	4.9956	8.888	3.8961	8.4923	7.5826	8.3917	6.811	7.4936	5.9841	2.7075		0.571429	5.7464
13.4509	4.3947	2.0972	0.84707	1.4081	2.5455	9.5566	5.1304	4.9917	7.9988	7.6824	7.2566	7.0244	7.655	6.2311	7.544	1.6721		0.57653	5.25223
13.5699	4.8564	2.6023	0.64119	3.0549	3.0521	8.9424	5.9285	8.6596	5.0365	7.8005	8.1458	4.7075	4.2114	6.0359	5.0019	3.0914		0.58163	5.11052
13.689	2.7805	1.4646	1.34874	1.5964	2.7232	8.2686	6.2064	7.162	3.4906	4.2479	10.2027	7.5751	6.1128	7.0702	2.9826	3.7556		0.586735	4.81175
13.808	3.2688	0.4589	1.39995	0.8869	2.9992	9.3965	5.9331	8.6871	4.8396	7.2958	10.3605	8.4951	9.3949	6.8039	4.0697	2.7045		0.591836	5.43715
13.927	4.1954	0.4717	2.53612	0.9676	3.7024	5.9516	5.8669	8.4765	5.092	7.1157	9.8711	10.5307	9.4287	5.3186	6.2804	3.4892		0.596936	5.58091
14.0461	2.5282	1.2958	1.86536	2.034	3.4191	7.1833	4.6167	9.7546	4.756	6.1441	5.336	8.4863	7.3305	4.5701	3.3656	3.7384		0.602041	4.7765
14.1651	3.3146	1.3656	1.08067	3.2009	3.952	5.0963	4.7584	7.7383	5.9862	4.7372	4.6147	6.1215	5.4847	4.4141	5.7335	3.8206		0.607142	4.4637
14.2841	2.8201	2.279	1.89092	1.4355	4.7005	4.2302	7.482	10.333	7.5811	5.6449	7.3436	7.5203	7.331	5.6058	4.8804	2.6152		0.612242	5.23084
14.4032	3.3388	1.3	0.99676	1.1984	5.8872	4.3943	7.8903	7.4548	4.4545	8.4813	6.622	5.7717	6.1339	5.4902	5.2428	1.5485		0.617347	4.76284
14.5222	4.044	2.2963	0.50244	1.8062	6.2928	5.7002	6.1129	9.179	4.986	5.1456	4.9173	6.4466	5.1008	6.7016	4.6996	1.7273		0.622448	4.72867
14.6412	2.007	2.7106	1.58567	1.7286	4.0384	4.6642	9.9043	7.2036	4.5402	4.5197	6.3527	7.2065	6.9338	7.9362	4.1135	3.9413		0.627548	4.96164
14.7603	3.6869	1.8765	1.96509	3.2967	5.2303	3.9013	12.9691	6.2915	3.6477	6.4195	9.8033	8.8066	4.3262	7.8521	5.1878	3.0973		0.632653	5.52237
14.8793	1.9914	2.3713	1.37047	2.1805	6.2578	5.825	10.918	6.8691	4.2081	8.5252	7.5202	7.8297	3.2716	4.4134	4.7298	2.6744		0.637754	5.05975
14.9984	1.8809	3.2489	0.44794	2.7959	6.3425	5.093	8.2885	10.0752	4.8889	5.3429	4.5558	4.6418	3.9704	2.1915	2.6968	2.9277		0.642858	4.33679
15.1174	3.9479	3.0008	1.7813	0.8454	3.8205	1.5078	9.4095	9.6302	4.9015	5.2081	5.2473	3.9984	4.9118	5.383	4.9192	1.8759		0.647959	4.39929
15.2364	3.588	1.3409	1.99225	0.2531	5.97	3.2827	10.5488	8.9153	5.7819	8.4097	10.4083	5.1297	5.8081	8.7565	2.9837	1.5427		0.653059	5.29448
15.3555	5.3987	0.6802	1.32004	1.0674	6.4148	3.5599	7.8138	11.6488	4.987	7.2557	7.0084	8.0226	7.5324	5.9721	4.4731	2.8188		0.658164	5.37336
15.4745	3.5324	2.6174	0.56076	0.8623	4.3012	2.3777	9.3814	6.5778	5.1119	8.2348	6.387	4.8146	7.0517	3.9679	4.0742	3.607		0.663265	4.59125
15.5935	5.3299	2.2998	1.07196	0.9786	2.8981	5.5632	6.0367	6.1601	2.8046	3.1796	4.124	4.8744	8.0377	4.8029	5.3075	1.9206		0.668365	4.08685
15.7126	2.7958	2.5943	2.80679	1.2887	4.1826	5.0464	6.4893	5.1959	4.277	4.3518	5.5441	7.9515	7.0794	6.634	5.398	1.1135		0.67347	4.54682
15.8316	2.2561	2.5171	2.94849	2.0828	6.303	6.254	7.0273	7.1493	2.3441	3.2999	7.2363	7.5426	7.4143	4.8962	5.1928	2.4269		0.678571	4.8057
15.9506	5.1445	1.3072	1.47953	1.9671	5.1754	5.711	4.0637	10.6799	3.2597	3.5693	9.0171	6.4397	10.0379	4.3995	2.9129	2.8975		0.683671	4.87887
16.0697	5.0328	0.725	1.24983	0.3353	3.6773	3.6843	2.6215	8.3161	5.1704	5.4021	6.471	7.5219	6.2645	5.5994	4.7756	2.9275		0.688776	4.36091
16.1887	3.9365	2.1366	0.46704	0.4621	3.7639	5.9289	4.7404	4.6238	4.1739	9.13	9.4851	7.6498	11.1637	6.3937	5.2459	1.8221		0.693877	5.07022
16.3077	3.1005	1.0466	4.03364	0.691	6.7671	3.0804	3.6591	4.2676	2.8643	6.0823	8.9258	7.4725	5.7321	4.992	7.8994	3.4211		0.698977	4.62721
16.4268	3.2689	1.307	1.545	1.5287	5.1259	3.4106	3.3072	3.979	4.6318	6.8971	3.1767	7.2327	7.3428	6.6868	6.4118	1.3851		0.704082	4.20232
16.5458	4.2262	1.1336	1.90425	2.3337	4.139	3.4458	4.3055	5.6986	6.9222	6.987	4.7103	12.2481	7.9018	5.3708	5.4611	2.4555		0.709183	4.95272
16.6648	3.6195	2.5037	0.90003	1.1658	8.232	4.1806	3.4581	5.4089	3.3611	7.3727	4.7661	10.5749	5.0352	5.507	5.0652	2.5041		0.714283	4.60343
16.7839	2.3754	0.2923	0.83994	3.164	7.5692	4.7861	3.1447	6.4395	5.4305	8.4722	7.3185	9.5322	7.7156	8.3907	3.9378	2.6047		0.719388	5.12583
16.9029	3.5862	0.4733	0.63633	1.0768	7.308	3.5865	5.897	4.6947	6.5367	6.1487	7.1664	6.797	4.072	10.0398	5.9394	1.7522		0.724489	4.73194
17.0219	2.9843	1.7249	0.80261	3.6946	8.535	4.3021	2.7921	4.7781	6.8533	3.8151	4.757	6.7703	4.1589	6.8949	4.1092	2.7017		0.729589	4.35463
17.141	1.8031	1.4233	2.09394	2.2068	5.9787	4.4046	5.161	7.4758	5.8783	3.8996	3.4877	10.8991	7.031	10.5573	3.993	0.5763		0.734694	4.80435
17.26	3.9474	0.5395	1.56635	2.8349	6.3713	2.1978	4.1419	4.1676	4.6106	3.4637	5.708	10.0734	9.313	8.1373	3.7772	0.4434		0.739795	4.45583
17.379	4.336	0.9668	2.29932	0.7501	5.6694	2.5036	4.8666	3.5956	2.617	7.5192	5.3738	12.1769	9.3915	6.6933	4.1941	0.8887		0.744895	4.61512
17.4981	2.2007	1.6833	2.87844	2.0403	3.2884	4.0304	3.6639	6.2572	3.8833	4.7556	5.9846	7.9216	6.6536	7.7809	6.5226	2.821		0.75	4.52287
17.6171	3.2263	1.0894	1.2603	2.2167	4.8166	5.4955	3.5973	6.7445	5.4688	5.1918	4.4073	6.1754	5.9009	6.3658	9.8494	0.7043		0.755101	4.53189
17.7361	5.104	0.9853	1.13434	2.4084	3.3835	3.6031	4.5415	10.901	5.0892	7.6312	5.4577	7.2045	5.7527	8.4415	7.9988	1.3225		0.760201	5.05995
17.8552	4.904	1.0588	1.78313	3.5944	4.5575	3.3874	4.9781	7.08	5.4404	6.472	5.7966	10.8751	5.0082	8.6763	13.3455	4.3275		0.765306	5.70531
17.9742	4.8248	0.7101	1.08491	0.4901	5.8153	1.8858	9.6933	7.7638	5.0806	6.1119	4.0702	8.2479	3.4355	6.6314	10.5968	3.4079		0.770407	4.99064
18.0932	6.0845	1.4453	1.26406	1.0809	5.3131	1.9524	7.0073	6.8333	4.5211	8.0524	3.9793	4.4261	6.5685	7.9002	8.5202	1.7182		0.775507	4.79168
18.2123	3.1766	3.3815	1.27806	4.7048	4.5564	3.4505	4.9969	4.8033	3.6598	4.2569	3.3274	5.1701	9.2915	8.0767	5.7704	0.3859		0.780612	4.39292
18.3313	3.8114	1.1868	1.85492	1.8676	7.3942	5.3657	4.6776	2.2638	3.5449	5.9149	3.1418	7.0009	6.2859	7.2095	5.7428	0.7614		0.785712	4.25151
18.4504	3.3996	1.3961	3.42885	1.6021	5.8292	6.0728	3.4793	3.4842	4.7756	6.4051	4.7892	5.1364	6.493	8.6142	5.9591	1.5002		0.790817	4.52281
18.5694	3.9513	2.5682	1.57193	1.064	5.0255	3.4589	4.2309	3.1185	6.0008	5.4998	5.5246	5.7567	6.5222	5.948	6.6139	2.8258		0.795918	4.35506
18.6884	2.583	1.2093	0.6554	1.8605	4.1466	6.104	2.746	5.4096	4.7731	3.7314	2.851	5.3833	7.5378	8.7641	2.8008	1.804		0.801018	3.89749
18.8075	3.5989	1.2339	1.23341	1.355	6.2503	6.0006	4.8296	6.1307	2.4169	6.9284	5.7509	4.7034	6.8233	10.8653	1.1267	0.7959		0.806123	4.3777
18.9265	2.8837	0.7357	0.41995	3.2995	3.5541	7.3653	3.5192	5.1295	2.1936	4.7688	4.5565	10.2073	10.8812	4.551	4.8307	2.1632		0.811224	4.4412
19.0455	2.4125	1.1361	0.9328	1.829	4.6113	8.8602	6.2675	6.6184	3.5491	4.8976	7.1505	8.7725	9.8598	3.644	5.4681	2.3381		0.816324	4.89672
19.1646	1.7899	2.8328	2.30012	3.5655	4.8357	7.2797	3.8609	9.1081	3.1136	3.1122	5.0273	7.1682	9.4126	2.7433	3.3268	5.1547		0.821429	4.66446
19.2836	3.5522	2.5379	1.39656	2.7491	5.4396	4.6213	5.1071	3.9726	7.0152	5.101	6.5462	7.8728	8.9711	4.4982	4.4197	2.9287		0.82653	4.79558
19.4026	2.8999	1.2952	1.82611	4.0088	6.6275	4.8241	4.9149	4.2247	3.9853	5.3214	6.4069	6.2403	9.5752	7.5168	3.1462	2.5272		0.83163	4.70878
19.5217	1.4513	1.3854	0.94462	6.0388	2.3889	3.9205	4.4991	2.6479	5.1377	6.0559	6.5677	9.5273	9.2593	5.7076	3.7769	2.2803		0.836735	4.47433
19.6407	2.6103	2.8454	0.59658	2.614	5.2874	4.2671	5.7019	4.6295	4.3196	5.4283	4.9962	10.8704	8.3763	4.2728	3.7058	1.8556		0.841836	4.52357
19.7597	3.3792	3.7251	0.56279	4.1078	4.4919	3.3514	3.3619	4.3232	3.3037	5.3212	5.2161	5.5815	8.2681	4.3917	7.4487	4.9823		0.846936	4.48854
19.8788	3.6409	2.1411	3.39598	3.2817	6.0827	4.8129	3.4471	5.6106	1.7238	4.9326	6.5562	4.4389	6.759	6.0149	6.6373	4.4704		0.852041	4.62163
19.9978	3.236	3.5025	4.09059	3.8512	4.6055	3.4625	4.4144	4.3497	2.2817	6.2056	5.724	5.4852	4.8439	5.9537	5.8952	2.5975		0.857142	4.4062
20.1168	3.3494	5.0523	3.77036	4.4213	1.4147	3.3386	4.0469	7.483	2.9114	6.7231	4.3525	5.5557	6.7767	4.1152	7.5148	3.8941		0.862242	4.67
20.2359	4.3949	3.3826	6.14316	2.985	2.056	3.267	4.5506	7.2724	4.0006	7.9591	4.8914	4.563	8.6603	6.3976	4.5001	3.1463		0.867347	4.88563
20.3549	4.1382	1.6245	2.99386	2.2579	3.1206	2.451	4.4013	4.9178	5.4206	8.9105	3.9594	6.6653	5.0309	4.3404	3.7023	2.7239		0.872448	4.16615
20.4739	3.9386	0.6186	1.12087	3.6604	2.6629	3.6858	4.6076	4.6091	4.6127	8.0013	3.9325	5.9718	5.0184	5.8731	4.935	3.5672		0.877548	4.17599
20.593	2.4075	1.3121	1.9147	4.2684	7.2171	2.0057	4.4835	4.2247	2.5577	5.9923	3.0968	4.1604	5.8789	4.7683	5.8859	4.4333		0.882653	4.03796
20.712	2.8952	1.8332	2.85665	4.3244	7.3441	1.9085	4.2837	3.0929	5.1796	7.6463	4.1828	3.3577	4.798	6.9191	6.0642	5.5209		0.887754	4.51295
20.831	3.665	2.8241	3.68428	1.5788	3.9838	3.5066	2.3192	5.0719	4.7997	3.864	3.4657	4.8146	5.7341	6.0795	6.7663	5.2844		0.892854	4.21512
20.9501	4.0679	2.3199	1.70254	2.8935	6.5029	3.5726	3.0806	3.6796	5.5999	2.8727	3.9637	5.328	5.366	5.7109	4.0041	4.3997		0.897959	4.06653
21.0691	4.3453	4.1297	1.99867	1.7184	6.2367	1.7331	2.9511	1.3679	4.1652	2.5363	3.9678	7.255	6.2919	7.0315	6.5456	6.3718		0.903059	4.29037
21.1881	2.811	3.3532	1.42261	4.3745	3.1077	5.2405	5.5085	2.4751	4.1163	2.8073	4.0251	2.5322	7.7019	3.6178	4.7069	5.8251		0.90816	3.97661
21.3072	5.0388	5.507	5.22334	2.3908	4.4514	3.324	6.2323	4.8395	4.1536	2.7618	5.327	3.9127	8.9516	2.6617	3.4028	6.2696		0.913265	4.653
21.4262	2.1464	3.3103	2.31157	1.8692	4.9405	3.7746	5.9717	2.8955	3.5913	3.9209	6.907	3.7348	7.1121	3.9407	3.3426	7.9565		0.918365	4.23285
21.5452	4.4537	2.5017	2.23663	2.2904	3.2593	1.8916	3.8226	2.9686	1.3266	3.8655	6.7204	5.5204	4.6754	4.1291	3.5506	8.172		0.923466	3.83653
21.6643	3.9444	2.925	4.6449	5.4245	5.4295	3.2369	3.1807	2.1549	2.351	6.8317	3.0222	6.3446	4.8169	5.0894	2.7112	5.2926		0.928571	4.21252
21.7833	3.2581	1.9415	3.16235	7.4654	7.9586	4.2984	5.0505	4.6421	2.7552	4.5715	5.1397	6.0011	3.6225	5.6379	3.6071	8.5985		0.933671	4.8569
21.9024	3.7528	1.5556	4.32144	3.4636	6.0588	2.3716	4.7017	4.663	2.3415	4.9278	6.6728	3.8322	5.3029	3.9362	2.9446	4.4288		0.938776	4.07971
22.0214	3.6338	2.4337	0.76656	4.1325	6.193	4.8221	5.1762	4.1226	2.8671	2.9697	6.4711	5.9415	6.9224	4.325	2.8976	6.1081		0.943877	4.36144
22.1404	5.746	2.566	1.7984	5.5272	6.1893	2.7724	1.3239	3.711	3.6363	3.7687	3.847	3.6568	3.95	6.8481	3.2808	9.269		0.948977	4.24318
22.2595	2.296	2.0572	1.94129	4.5795	2.7139	3.2024	0.9889	1.9747	1.5367	2.3201	4.5547	4.5468	4.859	3.4322	2.6764	5.2575		0.954082	3.05858
22.3785	2.638	2.0764	1.58692	4.3939	4.7322	5.3827	3.0595	3.5378	1.4995	4.2763	5.954	4.4866	3.057	2.7306	1.4054	3.1022		0.959183	3.36994
22.4975	1.3254	2.4646	2.27846	2.4303	2.8101	5.6571	2.0576	1.4635	1.1182	1.4539	6.5577	4.4064	3.2309	2.8577	0.9179	2.7528		0.964283	2.73641
22.6166	1.3441	3.3261	2.52617	5.7369	4.5112	2.9034	2.0931	0.8548	3.2154	2.4352	6.434	5.9763	2.9081	2.9027	1.2299	2.6384		0.969388	3.18974
22.7356	1.7597	1.2381	0.86739	2.1691	2.196	3.7586	1.5775	1.4922	1.2173	1.5186	5.6743	6.7578	6.0809	1.8206	1.3587	1.0946		0.974489	2.53634
22.8546	0.6264	2.0559	1.15323	1.1278	2.0758	4.9276	1.8835	1.1672	0.44	1.0612	6.7169	8.2067	4.6436	1.1385	0.9848	2.8856		0.979589	2.56842
22.9737	0.9757	0.4751	2.31766	2.0003	4.8516	3.1875	1.2391	1.864	1.3632	1.2602	6.7559	10.0855	2.211	3.8885	0.9531	4.2236		0.984694	2.97825
23.0927	1.1511	0.1708	0.7868	2.3165	2.7377	2.3615	1.3824	2.7398	2.0968	0.3568	5.1541	5.4416	1.5646	1.9953	1.0883	1.6547		0.989795	2.06243
23.2117	1.3223	2.0629	0.93627	2.5029	1.741	2.6374	1.8269	2.1128	0.7047	1.1282	3.104	4.8713	1.5162	0.5425	0.4936	1.2595		0.994895	1.79765
23.3308	1.8035	1.2167	0.19917	1.2203	1.6117	3.3158	2.1879	1.72	0.5748	1.1497	0.8602	5.2022	4.1186	0.2257	0.8329	1.9945		1	1.7646

## Sheet: Image11
X0	Y0	Y1	Y2	Y3	Y4	Y5	Y6	Y7	Y8	Y9	Y10	Y11	Y12	Y13	Y14	Y15	Y16	Y17	Y18	Y19	Y20	Y21	Y22	Y23		Ap-Ba	Average int.
0	22.787	26.9795	20.1866	23.5501	24.5449	21.9644	24.5183	28.2054	24.5774	20.9256	29.4204	20.0773	29.7492	24.5662	25.0742	19.6117	19.8552	21.7099	14.8886	5.9726	15.6957	11.7995	5.0228	15.2283		0	20.7046
0.119	22.543	19.1837	21.0399	20.8892	26.8454	16.1284	22.0863	25.2219	23.2706	21.6661	23.1753	19.7112	30.9493	21.8202	21.5023	18.8133	24.6129	18.4406	13.0031	7.4129	18.5935	11.0217	10.6457	12.1059		0.0053176	19.6118
0.2381	18.9594	20.1549	17.29	16.081	28.3638	15.2946	15.4168	24.5965	21.9134	20.0404	21.1174	21.3306	28.0969	27.6263	24.6787	10.9049	21.9323	16.4923	12.5469	12.279	18.8438	14.263	7.7416	10.1462		0.0106397	18.5879
0.3571	22.3873	16.0657	12.5092	14.3977	32.2159	15.8461	11.8802	24.6533	23.7632	18.5373	19.1767	22.7328	27.2113	21.0592	24.9929	10.461	16.2973	15.0478	11.4611	5.8895	16.0526	11.0215	7.513	14.8877		0.0159573	17.3358
0.4761	20.9335	12.6325	10.3372	15.0025	22.8563	13.8915	13.6093	21.6439	22.9583	14.5661	17.1823	17.6158	19.6726	15.7925	21.296	14.1353	15.0684	15.2506	16.2443	6.5379	19.7467	13.8912	10.2195	11.4821		0.0212749	15.9403
0.5952	24.9139	12.0301	13.64	14.243	23.2314	23.6567	14.4375	22.7875	24.813	11.4658	17.6824	15.3966	17.0192	17.5948	15.3947	10.8823	15.6282	14.8421	16.6901	6.7699	20.9953	10.9784	13.0557	13.0964		0.026597	16.3019
0.7142	18.0288	17.6597	10.8817	12.3846	19.8389	26.012	8.0773	22.9502	22.6456	11.3745	19.7157	14.048	18.3269	22.9387	14.6978	8.9312	12.3086	13.8363	18.4683	7.2552	24.4749	11.1714	9.7053	12.5632		0.0319146	15.7623
0.8332	18.0975	21.1746	8.8264	14.5916	16.0891	24.8628	10.336	16.1645	23.6471	17.2636	19.4084	12.958	17.1585	17.0988	17.8659	12.7364	12.5984	17.5395	13.702	8.4554	25.1275	11.1354	10.8469	13.0616		0.0372322	15.8644
0.9523	22.3645	19.4444	7.1958	16.809	19.5597	21.9691	9.9559	14.44	19.2206	17.5207	19.7778	15.9431	14.9902	22.9323	13.5836	12.1801	13.8625	12.3193	11.851	7.2175	19.7674	8.9741	10.9903	13.8038		0.0425542	15.278
1.0713	17.9207	9.7007	11.166	16.8815	18.3584	18.56	9.8269	14.4436	18.0202	13.6214	16.3306	13.7542	14.8187	19.1382	12.8901	12.3882	11.7814	8.8803	10.8882	9.3989	19.722	8.2891	7.328	10.3389		0.0478718	13.5186
1.1903	17.3909	10.0926	9.9438	13.2844	14.9947	16.8949	8.069	20.3353	15.5426	13.5274	16.2694	14.0499	14.0654	17.6509	14.4834	9.8352	9.0823	9.4165	12.5303	12.0698	14.2955	4.8385	8.5324	12.1069		0.0531894	12.8876
1.3094	17.2492	11.192	7.005	15.5062	15.7546	15.663	8.7835	17.8778	14.7193	10.6897	14.3578	16.1471	15.1315	19.2511	13.7863	10.7759	7.5095	9.9578	8.2372	9.1636	11.0997	5.0585	13.2965	13.647		0.0585115	12.5775
1.4284	17.7113	11.0808	8.6051	13.6414	14.7542	11.0352	10.3801	14.8864	15.2148	9.128	17.5751	15.4113	13.52	13.6778	15.2441	12.1118	8.0304	10.3036	6.0784	8.7071	14.3531	8.3047	10.2254	9.9947		0.0638291	12.0823
1.5474	9.8727	15.5181	9.0033	7.5367	12.5549	12.4082	12.3947	13.9566	16.1143	10.386	17.5451	12.7185	13.44	9.1614	13.783	11.7752	5.645	5.9726	9.2816	6.6541	12.6895	8.5143	7.5869	16.3589		0.0691467	11.2863
1.6665	14.2708	9.5298	11.2532	5.9389	10.5292	14.2833	11.9633	11.021	13.7515	9.5851	14.3786	11.8004	10.5396	10.9839	13.8823	8.9466	7.8843	10.2723	10.487	6.2492	10.2382	6.9431	7.214	10.5509		0.0744688	10.5207
1.7855	16.7668	9.6427	8.4311	8.4558	10.0491	8.5027	9.5261	10.617	15.5288	7.5974	12.6883	13.413	9.9732	14.7333	14.7206	9.9165	12.8103	9.4442	5.2219	9.2431	9.1464	6.8569	10.1962	8.3045		0.0797864	10.4911
1.9046	13.0969	9.8214	9.975	10.2993	10.6631	7.9953	9.8696	13.5873	11.6332	8.1969	12.2608	15.2193	8.0324	13.2252	11.212	10.3058	11.1962	7.6018	6.2148	7.7089	11.5982	9.3539	11.2672	9.5029		0.0851085	10.4099
2.0236	9.6072	5.9741	8.2034	11.6534	11.0482	11.6905	7.9998	10.5586	8.0482	6.2949	14.3166	15.7736	6.4931	14.3235	11.9861	10.1364	9.2124	6.3189	7.1412	7.4712	12.1734	10.7611	8.5339	6.7447		0.0904261	9.68602
2.1426	12.3494	6.2322	5.6531	8.0372	8.0394	11.5295	11.2973	12.6078	10.7476	3.1011	12.2998	14.572	8.5782	12.9523	13.8315	8.4317	7.8351	8.6516	7.1069	7.7706	6.2709	6.3251	9.6104	6.9793		0.0957437	9.20042
2.2617	8.1481	8.9158	8.0988	6.0054	9.8662	10.2566	8.1539	11.2818	8.9995	4.9945	13.0739	11.5795	10.0458	9.0489	15.1354	9.8945	8.6831	9.5754	10.4171	9.6204	9.192	8.4674	6.2443	8.627		0.101066	9.34689
2.3807	5.7963	6.4075	8.9948	7.2376	13.8491	9.2828	12.5153	12.5525	11.6634	5.4935	12.0947	9.6809	6.3406	14.6721	14.8424	5.7397	7.3718	14.7587	11.0132	8.9124	7.9501	6.0282	9.2494	11.7383		0.106383	9.75772
2.4997	4.9782	6.5364	8.1322	7.1661	11.323	6.8969	12.7948	12.1791	11.6817	5.5999	6.7898	11.1616	10.0756	13.825	14.7302	6.6336	8.9431	9.3339	8.8083	9.4964	10.0558	8.9555	9.6198	6.2269		0.111701	9.24766
2.6188	3.8128	8.6938	8.2061	10.7641	8.2958	5.8979	10.8444	12.2533	8.6565	4.981	9.5449	13.5177	5.4291	12.2554	12.1411	9.9722	9.9677	11.0195	7.0302	9.2952	12.3105	9.0658	6.1684	8.5711		0.117023	9.11227
2.7378	6.8299	8.2754	4.1385	9.3572	9.2703	7.399	9.922	12.3964	7.3433	5.9641	10.4217	11.4923	7.3736	12.1149	15.4278	7.3649	8.2736	8.8354	8.3597	8.2885	14.1318	6.9364	7.264	11.2278		0.122341	9.10035
2.8568	7.9743	6.2357	8.2537	10.4366	6.5445	6.736	10.629	14.1772	8.8757	7.0359	10.4454	11.3186	8.1693	11.2204	12.7881	6.8215	10.002	7.6516	8.8875	10.4722	9.8314	7.2812	8.1945	7.8179		0.127658	9.07501
2.9759	8.406	5.9963	8.3473	9.5384	6.1497	7.4337	8.6682	11.7394	7.3555	9.5809	10.4088	12.1659	6.9944	12.9374	14.2573	7.2348	9.3438	6.1476	8.79	9.3564	7.4225	6.1633	9.8676	6.9914		0.13298	8.80403
3.0949	9.0851	7.0559	10.2844	10.9741	10.8122	11.3289	10.0622	12.3333	10.3219	11.3782	12.7127	9.6141	7.1513	12.5983	9.1723	10.6465	10.7327	11.272	11.6139	11.5798	6.4709	6.8461	7.0825	8.8256		0.138298	9.99812
3.2139	7.7084	7.7428	5.961	7.7755	7.2093	9.0514	9.888	12.1331	12.0546	14.013	10.5026	11.8204	7.36	14.6546	9.188	11.0898	7.6919	5.9961	8.1377	8.7218	10.7624	8.4142	11.3215	9.2285		0.143616	9.51778
3.333	4.9556	6.6317	10.0961	9.3815	4.8505	8.574	9.8132	10.3971	9.8701	9.9445	8.5538	14.5694	6.7971	19.0966	10.9944	8.0203	8.261	6.894	8.6731	10.8191	8.7705	9.3096	12.1301	10.2247		0.148938	9.4845
3.452	9.2912	4.9257	5.0075	7.4414	7.6926	7.5105	9.9768	11.0489	9.8014	9.7325	5.0558	10.1112	8.822	15.9611	11.1679	8.5725	9.1642	5.5793	10.0186	7.8338	8.8228	9.7623	11.0614	8.7273		0.154255	8.8787
3.571	7.0421	6.2468	6.6613	7.0368	7.6598	4.9182	11.5522	11.1021	8.4156	9.2467	6.7451	12.9156	7.6035	17.8537	10.3684	8.1501	9.1268	7.888	7.7955	7.5242	9.9249	9.7443	13.665	5.7076		0.159573	8.95393
3.6901	9.0873	6.1836	8.451	9.2383	6.0067	8.3607	8.9807	8.4029	10.4514	9.1917	10.8886	8.9536	7.2542	11.3632	11.3408	7.0593	8.5815	7.3542	10.5417	8.0193	13.4049	11.1479	7.865	4.8829		0.164895	8.87547
3.8091	5.8003	9.0283	10.5027	8.3566	9.3195	4.4399	7.1987	7.8328	9.9382	11.5589	8.0475	7.9422	6.6847	14.064	10.553	6.2936	8.8085	8.0173	9.5263	11.346	11.6293	8.7085	7.9239	9.2854		0.170212	8.86692
3.9281	5.1486	7.1689	9.4948	11.9129	7.3057	2.5318	4.9804	12.6395	7.7949	11.8446	9.6559	5.6915	11.0879	14.0613	13.0494	6.5433	10.947	10.7385	10.0795	10.7838	10.3788	7.3851	6.2305	8.7638		0.17553	9.0091
4.0472	7.1169	5.5687	7.041	9.1375	8.336	4.731	5.9967	8.6702	9.4871	9.682	6.1626	11.1548	12.693	11.9969	9.8075	7.1814	6.3043	8.657	11.2942	13.0682	7.8752	7.0338	7.908	8.0087		0.180852	8.53803
4.1662	9.8737	8.1662	6.6977	9.0282	6.5722	5.5884	6.4593	11.7885	7.7068	6.4587	5.1924	9.2508	9.1899	9.1408	5.4416	7.2527	9.8029	7.6368	9.2077	9.3471	9.7802	5.5709	6.4208	9.9619		0.18617	7.98068
4.2852	3.8111	10.3424	5.503	8.1781	12.2229	5.6288	10.2987	11.3921	10.3449	10.0409	8.082	8.8649	7.8456	9.8182	8.6997	7.5385	5.9711	8.493	6.6734	7.6556	8.7802	4.8888	6.8912	5.1441		0.191487	8.04622
4.4043	2.8399	8.2954	8.3605	6.0235	12.5942	6.928	8.6282	9.8819	10.5879	11.6013	8.2594	7.1702	7.6535	11.1725	10.1823	8.3372	10.939	8.3887	8.4039	6.9562	8.621	6.8067	5.3888	4.256		0.196809	8.26151
4.5233	6.3951	8.0332	4.7101	8.0208	9.7346	4.3384	8.6209	14.3337	10.3118	11.3815	6.0654	7.4312	6.0598	8.4569	8.0334	6.7778	10.8096	8.7114	7.6767	7.1858	6.7191	8.4425	5.9242	5.1916		0.202127	7.89023
4.6423	7.1395	6.3118	8.0367	10.673	6.948	4.3296	7.2295	11.1511	8.6788	10.7047	4.904	6.9195	6.4917	7.2887	5.9555	5.6325	11.4234	10.9944	7.6448	7.0027	9.2741	6.8186	9.2568	5.0127		0.207445	7.74259
4.7614	7.6256	9.5303	5.493	11.2844	6.8154	4.0899	5.4819	9.6926	7.1788	10.2257	4.6041	7.2745	6.8906	8.5324	6.1038	5.8118	7.7599	8.4928	8.8923	9.3218	9.1115	5.2143	7.0125	5.9181		0.212767	7.43158
4.8804	6.9836	6.0665	5.633	9.7528	4.4568	4.8163	8.1034	14.4565	10.2394	7.7007	4.973	6.3803	6.0525	7.7248	6.7814	5.4455	7.3774	6.0214	7.4379	6.987	7.8103	6.6757	4.8393	6.8255		0.218084	7.06421
4.9995	7.34	8.706	5.579	8.3286	3.6286	4.3262	4.9657	9.996	12.0738	6.9185	6.6088	8.4473	7.5687	10.8322	6.4256	8.2251	7.1747	11.656	7.309	5.2766	4.9828	10.1473	4.9498	7.2048		0.223406	7.44463
5.1185	7.9011	6.6405	3.9041	7.6148	4.4242	4.3655	6.3273	12.7795	17.5698	9.0613	4.9794	4.2664	9.784	14.5351	9.1478	7.8283	8.8866	10.6905	9.5091	4.2383	5.5176	8.2414	4.8644	8.8677		0.228724	7.9977
5.2375	7.5544	6.5651	3.7899	7.8992	3.2617	5.9014	4.7826	10.2827	12.5734	10.9768	6.1006	4.0369	5.2588	8.54	4.8733	10.7192	7.3911	8.7044	6.9615	4.2666	3.4011	8.0619	7.3074	7.8084		0.234042	6.9591
5.3566	6.978	5.4783	7.2556	9.9467	7.2092	5.9438	4.4207	9.9738	10.5801	9.435	7.7454	3.3158	3.7453	6.3077	6.7837	8.7684	11.12	10.2484	7.653	6.7091	3.9639	9.32	6.3197	7.0927		0.239364	7.34643
5.4756	8.2773	6.7728	6.4275	12.1118	4.8377	3.4839	4.8814	8.9339	10.5265	7.0833	4.8851	4.9376	6.008	5.5477	10.3472	4.0104	7.6313	7.5221	6.8221	4.9701	1.69	6.0652	11.4173	8.1641		0.244681	6.80643
5.5946	6.3842	9.4835	9.0667	10.5113	4.6393	4.9252	4.0236	9.939	9.9963	11.6505	4.8485	7.9962	3.3666	8.7652	7.7859	4.4651	7.6556	9.3802	7.2165	7.4647	2.4363	6.8653	9.2067	9.2724		0.249999	7.38937
5.7137	8.0851	6.6659	5.9606	10.5931	8.5281	6.6366	5.472	9.0311	8.8628	8.869	2.6335	11.9681	4.9544	9.4264	6.921	8.0109	8.4948	6.3983	3.1861	6.367	2.0126	5.471	8.5691	5.0748		0.255321	7.00801
5.8327	6.4751	7.6257	7.4097	9.9386	6.3612	4.3775	4.7246	13.4422	9.9901	10.8754	1.8534	6.6609	5.4864	6.5307	4.5607	9.355	7.8541	6.5038	9.989	4.8468	3.4023	5.6456	11.2178	5.0073		0.260639	7.08891
5.9517	4.9081	7.5495	6.6576	8.9394	5.8295	6.3945	8.3275	8.831	10.4936	8.1806	2.6832	6.3127	7.6179	6.2717	5.9216	7.0548	7.3372	7.9889	6.361	8.1111	4.7216	6.0689	7.5641	3.7853		0.265956	6.82964
6.0708	5.3691	8.1584	6.4927	11.291	3.884	5.6783	4.4581	8.3014	12.9141	7.855	4.9219	7.3726	8.8757	9.9239	6.3698	6.124	6.6988	7.2135	7.9316	8.4327	3.2063	7.8798	6.7168	5.986		0.271278	7.16898
6.1898	3.3538	9.1866	6.8513	7.9548	3.7973	5.4559	4.7697	9.0458	6.1947	11.067	4.8485	6.0485	5.5645	8.5971	3.9539	3.5137	8.1113	4.7715	9.796	6.8956	3.3706	6.6671	7.7132	10.7317		0.276596	6.59417
6.3088	3.0065	5.5783	6.456	8.0465	3.8469	5.0853	3.6621	9.7676	5.6872	8.4829	4.7077	3.8127	5.2972	9.8981	6.4218	4.5006	6.1601	9.8595	6.6531	7.4501	5.6639	9.8106	6.6132	9.1003		0.281913	6.48201
6.4279	2.036	9.0145	6.8716	10.4457	5.2157	2.7145	2.5628	5.1985	9.0605	8.0814	4.4642	3.4642	4.183	11.1447	6.2917	3.9344	9.0848	9.186	5.6396	9.2594	4.7997	9.661	5.4116	5.8302		0.287236	6.39815
6.5469	6.0642	7.329	6.5403	6.0818	5.5885	6.0929	6.8787	4.8559	7.7869	6.0931	4.5149	1.9391	5.991	8.4693	5.3726	5.6658	10.3425	7.8045	6.7152	7.2812	5.2647	6.4243	6.4628	6.7636		0.292553	6.34678
6.6659	7.0579	7.0002	5.011	6.275	4.5955	4.1878	3.6963	6.4527	9.0676	5.5218	5.3768	2.0283	5.6615	4.6088	3.1009	9.1515	7.2649	8.8041	8.3653	6.0552	4.5376	7.574	3.5802	4.1028		0.297871	5.7949
6.785	2.1358	2.182	8.5426	4.3481	5.2569	5.1098	3.1119	6.672	8.1673	6.8897	4.3779	2.9224	4.5653	7.7764	4.2078	4.5839	9.0358	9.8987	5.2365	8.8181	7.02	5.8581	3.9695	5.4983		0.303193	5.67437
6.904	3.3879	4.9697	4.4235	6.7673	3.7132	4.1474	2.737	6.6153	7.2122	6.652	6.5891	4.0713	5.0089	7.1116	5.4616	5.2994	9.0509	6.0434	7.3074	7.3572	6.4968	6.0172	5.3632	3.844		0.30851	5.65198
7.023	3.6603	8.1107	5.4031	6.6315	6.8975	4.4003	4.1537	4.8749	8.0055	6.0873	4.6288	4.0552	4.5462	5.635	5.3401	7.1661	7.7497	6.4669	5.5039	7.2261	4.6382	5.6841	5.0622	4.0127		0.313828	5.66417
7.1421	4.1743	8.4238	6.6583	5.4932	7.2943	5.1703	3.7717	6.5349	7.4315	6.5803	1.3941	5.4782	4.8147	6.2244	4.2019	3.6218	7.7846	7.4282	6.8379	8.7449	5.1832	6.5261	5.6994	7.1848		0.31915	5.94403
7.2611	5.4731	4.3161	3.6148	7.6867	5.5574	3.7823	5.254	6.6905	2.9468	8.6442	4.0775	4.0489	5.1459	8.2288	4.2882	4.4671	4.4503	6.5251	6.2267	6.41	4.5277	4.8219	5.1377	6.4765		0.324468	5.36659
7.3801	4.9846	3.385	8.4283	9.1097	7.0155	2.0093	3.5002	8.0656	5.3245	9.1406	4.7358	8.4165	4.0078	8.2248	4.1403	4.3953	2.8127	6.2828	8.058	6.4982	7.2792	4.7374	5.3111	8.6841		0.329785	6.0228
7.4992	2.4006	6.2404	5.94	9.9061	7.0606	3.6999	2.0529	7.4446	6.0086	9.263	3.3717	7.8826	5.5618	2.891	4.4638	4.0409	5.878	5.0464	6.7018	8.1436	10.6486	8.1516	6.9491	5.5352		0.335107	6.05345
7.6182	5.5008	5.5747	4.2255	9.2758	6.3798	3.9973	3.1827	8.2989	5.5912	9.8628	6.9498	5.3358	6.8411	3.2698	2.5727	3.7503	5.6689	5.7419	5.097	5.8972	11.3365	6.7441	7.9258	2.9198		0.340425	5.91418
7.7372	4.7551	5.8174	3.8089	4.8937	8.151	1.4757	5.3273	4.2648	6.7112	8.1348	7.1879	5.091	5.7895	4.8693	5.8701	4.1509	2.7484	4.0316	5.5609	3.7788	8.2377	5.7981	8.3734	4.4597		0.345743	5.38697
7.8563	4.7123	4.6346	2.9134	4.6278	6.0239	3.106	2.2331	3.1249	5.329	5.5782	5.1487	3.562	6.3868	3.2966	5.9786	1.3696	2.7919	6.1154	5.2655	5.3533	8.1989	7.4143	5.5362	2.948		0.351065	4.65204
7.9753	3.5748	3.4315	4.1429	7.9945	5.0475	4.1123	2.4552	3.8497	5.8114	6.3954	4.475	5.0904	8.1527	4.2221	4.053	2.0951	4.9512	4.7034	5.0209	5.746	10.4451	7.3681	5.2327	2.4614		0.356382	5.03468
8.0943	4.6864	3.0009	5.2892	7.0841	4.6291	4.304	1.029	3.8035	5.2194	4.2186	6.6714	7.0973	6.5064	5.465	4.9522	3.5438	3.3492	4.81	5.8246	6.4977	8.9818	5.2148	6.6728	3.3458		0.3617	5.09154
8.2134	4.8209	3.0539	2.9424	5.3997	6.2061	3.8021	1.6135	4.7693	5.7033	4.9769	4.3138	8.3908	6.3821	4.9167	3.5359	4.0551	4.4202	5.8698	4.6961	4.7855	7.6811	2.8306	5.6437	5.8821		0.367022	4.86215
8.3324	7.0126	5.2101	2.8715	5.6967	3.607	3.2752	1.7209	4.5999	6.124	8.9159	5.8983	5.3958	3.8288	2.1081	2.8234	3.3542	3.1997	4.2271	5.808	7.6978	4.4449	8.4189	6.1847	4.8885		0.37234	4.888
8.4515	3.4233	4.2952	3.0663	4.6891	6.1114	2.4951	2.6547	3.5475	4.4536	4.2887	8.0095	3.9529	2.4698	4.3856	4.7647	3.3118	3.2399	2.5397	5.6596	5.6185	6.6794	5.5536	5.6005	3.7401		0.377662	4.35627
8.5705	4.6788	3.9007	5.2243	6.247	7.4224	1.2624	1.549	2.6518	6.2859	4.0255	6.0718	5.3972	6.0669	6.1674	5.2378	3.81	3.745	3.5841	7.9111	6.8575	7.0971	7.0989	6.0279	5.6706		0.382979	5.1663
8.6895	4.5986	3.7677	4.5353	6.8375	5.771	3.1555	3.1086	3.9538	8.1372	6.537	5.3117	9.6633	6.3044	5.5516	5.3342	3.4677	4.0105	1.5733	6.4147	8.7114	6.293	5.8205	6.9452	3.5813		0.388297	5.39104
8.8086	0.9642	5.3473	6.2808	5.448	4.7947	3.4517	6.8208	5.0064	6.2855	6.1225	7.964	5.0054	4.9917	4.5159	3.505	2.5797	4.9439	1.576	3.6659	8.0112	8.2792	8.873	2.8675	5.4085		0.393619	5.11287
8.9276	2.7479	3.6548	5.1599	4.418	2.398	4.9489	2.1322	4.33	3.5522	6.8369	4.2398	8.0163	5.1054	6.0904	3.7547	2.8008	5.0687	1.8401	2.4075	5.7785	6.7623	7.3347	5.168	6.0157		0.398936	4.60674
9.0466	2.4523	6.2988	5.9733	3.5579	6.0639	2.6415	2.6861	2.8301	2.3874	3.2738	5.2414	7.758	6.4976	4.164	4.9896	3.612	3.8589	3.9898	3.6196	5.7869	6.2827	6.137	4.6196	4.5862		0.404254	4.55452
9.1657	3.5818	5.6817	3.9183	2.0761	5.3757	4.47	2.5969	2.1718	3.281	6.2255	6.5565	4.7189	7.8596	3.8425	3.4059	5.162	2.8124	3.3517	3.8657	5.4624	9.1113	6.3772	6.0624	4.6854		0.409576	4.69386
9.2847	2.312	5.4009	4.3988	5.3478	2.4698	6.6852	1.1798	3.1658	4.0637	6.0679	5.1452	1.8658	6.0385	4.6533	3.1793	3.2622	4.577	2.0336	5.1176	5.2548	7.6125	3.9859	4.5674	3.8465		0.414894	4.25964
9.4037	4.7797	6.2294	6.4048	6.4826	3.2531	3.8951	1.1966	3.0707	3.3159	3.3135	3.1641	3.3409	5.6469	4.2315	2.9594	4.4712	2.2618	2.0923	5.0419	5.9075	8.4226	5.1078	4.2921	4.9184		0.420211	4.32499
9.5228	5.1855	3.4918	6.8434	4.2908	6.2186	3.6884	1.0888	2.3347	2.1545	8.5034	3.6418	3.1193	5.9792	3.6018	8.4651	4.7565	2.7891	1.7133	4.3818	6.2897	4.0249	3.7201	2.8342	3.6449		0.425533	4.28173
9.6418	4.4718	4.2573	9.125	6.2174	4.4964	2.2781	2.0304	2.9819	3.9264	7.5948	5.2724	4.8543	6.6537	3.0656	7.4444	5.9971	4.7821	1.0344	3.3078	2.954	5.4594	4.1319	8.1485	3.1877		0.430851	4.73637
9.7608	5.283	6.1666	7.5959	4.5349	3.8606	3.3789	1.23	2.8154	4.4896	5.807	6.2892	5.3212	6.0567	3.3561	5.1055	6.5607	5.4353	1.1322	3.2899	3.935	4.2772	4.0644	9.5012	5.7092		0.436169	4.79982
9.8799	4.3464	4.8026	6.8781	8.5789	3.6492	5.7622	2.5974	2.3539	2.8345	7.6593	5.6736	5.5217	4.7332	6.1402	4.7188	8.8569	2.7955	1.9575	4.3111	2.7963	4.9176	3.0338	7.5915	6.6047		0.441491	4.96312
9.9989	5.3438	3.5039	8.0443	6.9924	6.4451	3.88	2.0628	4.1218	4.3166	6.1546	4.3064	4.7555	2.7831	3.7316	6.6543	7.404	0.9903	2.5535	5.2627	5.1509	5.7512	3.7329	8.401	4.5405		0.446808	4.87013
10.1179	7.0228	5.6076	6.1346	8.6521	3.6032	1.8275	2.1313	2.6196	6.5185	6.9202	3.516	4.485	3.2308	3.859	6.7141	4.8225	1.2465	2.6414	2.5077	4.3139	6.0842	3.2689	6.1124	4.1239		0.452126	4.49849
10.237	4.242	4.5116	6.3674	8.649	3.7603	2.2214	1.7249	5.4088	4.3333	8.0531	6.4613	6.6002	4.9833	2.3688	8.3619	4.728	1.9897	3.2491	2.8556	8.5452	5.6937	4.0759	6.461	4.4202		0.457448	5.00274
10.356	4.5443	4.5461	3.8358	6.5327	4.3795	1.0019	2.6428	2.9941	6.9762	7.9656	5.6988	6.698	6.2758	2.8048	5.9731	4.395	1.4201	2.2069	4.2022	5.8788	5.7508	3.8899	4.3183	3.4702		0.462766	4.51674
10.475	3.8642	2.4675	2.9142	8.3709	4.933	1.1491	2.8712	1.4514	5.1788	6.513	3.8022	6.7615	7.3667	3.4241	2.6866	3.2312	2.921	1.4751	3.4479	5.4465	5.8064	1.8583	3.9525	2.5117		0.468083	3.93354
10.5941	3.6493	3.0212	3.711	6.4875	6.229	4.0542	2.8372	2.3159	6.8464	8.0195	5.7939	5.31	8.2109	3.5808	5.1287	2.9647	2.4511	1.0157	3.4584	5.7181	5.223	3.2272	2.5449	3.3231		0.473405	4.38007
10.7131	3.6296	4.217	3.0933	9.6162	6.9296	3.3653	1.9143	0.7808	7.3144	7.557	5.9068	3.8524	8.0152	4.3505	5.1695	2.3489	2.8376	1.3951	2.8957	6.1614	6.0613	4.6043	3.8052	6.0648		0.478723	4.66193
10.8321	3.7034	6.7579	6.1235	7.0441	1.6207	3.7613	0.7189	2.5143	5.4753	3.7149	5.9827	3.0272	4.1419	4.9224	4.8873	2.5692	1.3696	0.6994	2.8046	4.5318	5.8588	3.6349	4.9914	4.4336		0.48404	3.97038
10.9512	3.7094	3.845	3.9106	5.0598	3.2055	3.5082	1.206	2.2067	7.1903	5.6573	4.1618	3.725	5.6619	6.2174	4.9219	4.2379	0.4318	1.5026	1.7554	2.8942	6.2465	4.386	5.748	6.0245		0.489363	4.0589
11.0702	3.6746	1.5436	5.8564	5.3665	4.7432	1.3658	2.4582	2.5226	6.6731	6.941	4.08	4.4944	4.6052	3.2908	4.089	2.2938	0.8479	2.5131	2.4407	5.2437	4.1648	6.3789	2.2234	7.2546		0.49468	3.96105
11.1892	2.0567	2.9944	6.1585	4.9785	6.3206	2.254	2.397	0.2518	3.927	4.3336	4.7669	3.8688	5.5094	3.5344	5.1886	3.6933	1.8739	3.5467	3.9156	4.1442	4.7101	5.3853	3.4892	5.4223		0.499998	3.9467
11.3083	1.7355	4.0269	3.9559	5.3949	3.8966	1.6102	1.2622	1.144	6.0348	3.7198	4.5883	1.5419	4.946	4.0519	5.0876	2.3411	2.7578	1.7761	1.555	5.0954	6.2135	4.8032	4.8031	5.6928		0.50532	3.6681
11.4273	1.7369	1.6939	3.0407	4.111	4.9985	2.2582	2.0189	0.9055	4.7914	4.0494	3.5737	3.2305	4.622	3.1214	3.7553	3.2929	2.0997	3.2421	0.6271	5.1318	7.1623	6.9639	2.1135	4.2295		0.510637	3.44875
11.5463	4.8119	3.7169	4.347	3.7243	4.8421	2.3589	1.104	2.2753	5.6945	6.0479	7.3264	2.6865	4.2613	1.901	5.922	3.1769	2.3563	2.0917	1.5304	4.7639	6.0147	4.6878	2.5378	3.1395		0.515955	3.80496
11.6654	4.1649	2.3357	4.7437	3.5232	5.5605	3.426	3.4062	1.7287	8.2604	4.6742	7.325	3.6597	6.9899	5.0245	5.2862	2.9389	0.7137	1.4412	1.2271	2.3146	5.1927	5.4025	3.8976	2.8685		0.521277	4.0044
11.7844	3.5557	2.5396	3.8828	4.4411	4.7956	3.1414	0.7014	2.2085	7.4671	5.0775	6.2721	3.739	6.036	4.5408	3.3153	1.251	1.8905	1.8376	0.5952	5.3852	5.4589	7.0405	2.8006	3.2938		0.526595	3.8028
11.9035	4.3667	2.5038	2.867	2.8658	2.271	2.8606	0.6469	1.1589	1.679	4.7136	8.0255	2.9855	5.1334	4.0984	4.374	0.689	2.1507	1.4285	1.9416	6.3243	5.2949	6.2409	3.4171	3.5937		0.531917	3.40128
12.0225	2.8181	3.0301	2.7852	2.4864	6.81	2.1153	1.7408	0.623	3.4162	5.5341	8.9785	2.5293	5.8115	3.6655	4.77	1.8692	1.1357	1.1543	2.1219	4.2498	3.9926	5.3952	2.3547	2.2143		0.537234	3.40007
12.1415	3.4773	0.9421	3.265	2.8275	7.7758	1.6263	2.3299	3.3242	4.7526	6.5533	8.0767	2.079	3.465	4.1483	4.503	3.9533	1.7234	1.7534	2.535	2.3775	2.9762	7.5229	3.3551	2.1348		0.542552	3.6449
12.2606	3.8826	1.6442	4.1158	5.1091	7.5063	3.0575	1.1655	1.6395	5.5549	3.8231	5.787	1.9282	2.3462	3.9323	4.8561	2.5433	1.4362	1.9107	1.0856	2.3525	4.3335	9.2541	3.6124	4.5077		0.547874	3.64101
12.3796	5.074	3.1757	5.2667	6.3253	6.4837	3.8582	1.6586	0.9504	4.0685	2.3609	7.0086	3.2999	4.6513	4.6575	4.5056	2.224	1.537	1.4859	1.6983	3.4003	6.6253	6.9851	2.2673	2.9082		0.553192	3.85318
12.4986	3.525	3.6991	3.5896	5.0472	7.6065	4.0454	1.089	0.8223	5.2612	3.8223	4.0579	3.3764	5.1946	4.3435	4.5539	3.5135	2.2364	0.6302	1.5759	2.8774	6.0953	6.0386	2.5082	4.1971		0.558509	3.73777
12.6177	3.3149	4.6062	4.5451	3.3425	6.8027	3.7183	2.1627	2.3954	4.389	6.0591	6.5235	3.046	4.8123	4.2369	6.5893	4.9252	2.395	0.6745	0.5099	3.8587	3.6751	7.068	4.4771	3.3058		0.563831	4.05972
12.7367	2.8462	2.8831	5.0078	2.745	5.0751	0.7915	2.8301	1.9338	4.0665	5.117	6.5434	4.3819	4.1169	2.2798	4.0993	3.6157	1.7571	0.7002	1.1517	5.4924	3.7364	4.0558	2.958	4.736		0.569149	3.45503
12.8557	2.778	4.5348	5.4149	1.575	5.0347	1.9698	3.7215	0.6817	4.8491	4.2333	6.1729	3.8044	5.9681	2.8588	4.0475	0.8909	1.2402	1.1692	1.187	3.7133	8.8891	5.6681	3.9382	6.5895		0.574467	3.78875
12.9748	1.9683	5.4471	4.2726	3.6766	6.6785	1.416	0.5369	0.7929	2.7457	3.8624	2.6999	4.5356	4.0854	2.6642	8.8232	1.7947	0.6836	0.9073	2.6974	4.2139	7.267	4.0407	4.3113	6.087		0.579789	3.59201
13.0938	2.5766	4.5259	3.9774	3.9591	5.471	2.1803	0.3265	1.6415	5.341	5.2319	2.8436	3.4741	2.3306	5.998	5.8577	3.4498	3.2487	0.6391	3.2011	3.8982	9.887	4.9675	1.6381	3.9761		0.585106	3.7767
13.2128	2.1724	1.6567	8.1181	3.6235	6.2786	2.3295	0.8052	2.439	4.0568	4.5561	4.1074	3.6576	5.0283	5.4833	7.3359	3.5616	0.8784	0.1078	1.8329	3.4111	10.6883	3.6043	2.7155	5.7176		0.590424	3.92358
13.3319	2.6772	1.5312	4.2952	7.6199	4.3203	2.748	1.817	1.1565	3.9558	6.9346	4.2138	4.5945	3.8925	6.0463	5.1175	2.7875	1.3355	0.0544	1.3958	5.0598	8.4348	2.2511	2.5845	7.4854		0.595746	3.84621
13.4509	1.9731	3.012	4.3824	3.2244	6.5071	1.6012	2.9543	1.6919	4.7479	3.5808	3.0994	3.6882	4.6124	3.4986	4.2815	4.9494	2.148	0.1786	2.7422	5.66	8.1456	1.6208	4.898	5.5175		0.601064	3.69647
13.5699	2.8415	4.2023	8.8811	3.0084	3.3142	1.4693	2.4544	2.5627	3.3094	4.2157	3.1719	3.6737	4.5139	4.4689	2.1588	4.5747	2.7047	1.1444	1.5294	3.176	8.9107	3.0614	4.3099	3.831		0.606381	3.64535
13.689	3.0501	3.9844	7.8742	5.8112	6.0828	2.0035	2.3627	1.5913	4.1954	2.8807	5.3066	5.3579	6.346	4.2767	3.9542	2.185	2.5035	0.5333	1.9057	4.0679	4.511	3.6854	3.6298	5.4518		0.611703	3.89796
13.808	3.7409	2.1242	9.3158	6.2653	5.4185	0.4969	1.7467	1.8428	3.8666	4.2039	4.2255	3.8943	5.6882	2.0467	5.1048	4.3676	1.4073	1.2522	1.9341	4.4476	3.2973	3.4487	2.7695	5.2324		0.617021	3.67241
13.927	2.0733	3.1388	7.2837	4.2886	3.189	2.3316	1.4204	2.0867	4.6874	6.1758	5.1141	3.7856	5.4786	4.3711	2.3135	2.6012	3.3729	1.3447	3.6916	4.1553	5.5554	4.054	4.8152	4.538		0.622338	3.82777
14.0461	2.5026	3.952	5.6545	3.9126	2.6486	3.627	1.1714	1.0395	3.38	5.2	3.4451	3.4271	6.3098	3.7971	2.7147	2.1959	0.9549	1.8179	3.3287	2.3922	6.6168	5.9932	1.1328	8.2449		0.62766	3.5608
14.1651	2.3151	5.263	6.551	2.5853	3.885	3.1457	0.5848	1.5269	2.4587	1.4502	3.8495	4.4089	3.3467	3.5715	6.837	1.5557	0.9396	1.6368	1.8739	3.8132	6.0617	6.247	2.0612	4.4413		0.632978	3.3504
14.2841	1.4439	4.3092	6.6639	1.6573	7.0561	0.6274	2.029	0.7325	2.6406	3.9192	6.2782	2.3135	2.7836	3.2151	4.7403	1.5513	3.1971	1.6104	0.5206	3.9547	6.3844	5.3174	4.3329	2.4838		0.638296	3.32343
14.4032	3.774	3.8854	7.7558	2.3426	4.1576	2.5562	1.6196	1.5401	2.8744	4.2198	6.4725	1.7964	3.4637	2.2205	4.136	2.8251	1.0079	1.0375	0.7551	3.7918	8.0753	4.5235	1.9753	4.5623		0.643618	3.39035
14.5222	2.4892	2.0098	2.9505	2.3989	3.0803	2.4861	1.2951	1.1917	2.5426	4.7905	8.3627	3.7688	6.2154	5.4183	2.2128	4.4834	0.2325	1.5443	1.4337	3.8766	4.6785	3.6847	4.3578	4.9034		0.648935	3.35032
14.6412	1.436	5.0139	4.8682	4.5618	2.2514	2.1721	1.3728	0.7636	2.8447	2.6166	6.6098	4.2874	6.3501	2.3734	4.1273	2.1239	0.8288	1.2468	1.6906	2.6842	4.723	4.8543	3.7882	4.1374		0.654253	3.2386
14.7603	1.7534	5.5462	4.5983	3.5248	3.691	2.2555	1.053	1.1443	4.6061	6.2749	5.4684	2.905	3.834	6.0304	3.5159	2.2303	0.6816	0.9818	1.8052	4.6579	3.1864	3.3271	4.2775	3.4118		0.659575	3.36503
14.8793	1.0452	3.8067	3.3437	2.1844	2.328	5.0035	1.99	0.8016	1.8582	5.7983	4.7479	3.8026	5.8012	5.6863	4.5253	1.7581	0.1068	1.5676	0.5118	3.644	3.5081	4.931	4.4102	5.2074		0.664893	3.26533
14.9984	2.1479	1.8422	2.7171	2.7204	3.3365	6.9746	1.5505	1.1746	0.9525	3.6062	4.7536	2.63	3.843	4.6105	4.5006	3.81	1.718	0.1582	2.0867	5.3499	4.6006	6.3892	2.9723	4.8376		0.670215	3.30345
15.1174	4.267	2.1273	2.0986	6.6746	5.7036	4.1663	2.9296	1.7618	4.0138	5.2298	3.9824	1.8951	5.3931	5.1499	2.3774	2.7397	1.6467	0.4608	1.5418	4.5705	4.7063	3.8553	3.8185	2.6322		0.675532	3.48925
15.2364	2.6566	1.9389	2.3688	5.5331	2.8842	4.4598	2.2611	2.2233	2.6176	4.6544	5.7335	2.1418	5.7696	4.6433	0.8821	1.8634	0.3016	0.7417	0.7398	4.6522	2.6364	3.1108	3.4268	2.7038		0.68085	2.95603
15.3555	3.2339	2.444	5.8813	5.4075	5.815	5.9754	2.5438	1.5392	2.9631	6.5067	4.358	2.188	7.9437	5.2178	2.771	1.9499	0.5241	0.368	0.307	4.5538	4.2431	5.3273	5.3581	2.7226		0.686172	3.75593
15.4745	3.9635	3.0452	5.46	4.4144	3.7696	2.6152	3.0335	1.2314	6.3814	4.79	4.4426	3.8906	6.1346	5.4139	3.4004	3.2669	1.257	2.3888	0.5715	5.6842	3.8968	4.5328	4.8298	2.7115		0.69149	3.7969
15.5935	3.8414	3.1117	3.3981	4.1589	5.2024	3.2111	4.7221	1.8016	2.9463	5.8198	5.2652	3.8142	6.5077	3.0953	4.2069	3.5002	2.1807	0.6614	0.3881	4.9297	3.8378	1.5518	4.3639	2.5921		0.696807	3.54618
15.7126	3.5895	3.4817	4.8634	7.0062	2.3969	2.4016	2.8495	2.3381	4.0381	7.1218	7.0662	2.6066	8.0445	5.9711	4.3519	3.5681	1.5635	0.8549	0.7062	2.7896	4.3736	4.51	5.3647	2.7289		0.702129	3.94111
15.8316	3.1061	3.2906	4.4445	4.5415	4.0123	2.4404	3.2713	1.8756	4.6481	6.2913	3.5538	5.2394	8.323	4.8388	2.3378	2.6752	1.2044	1.2194	1.8123	4.6657	5.9568	5.3474	4.1383	3.9605		0.707447	3.8831
15.9506	4.0315	3.0608	4.0987	5.8366	3.9939	2.9493	2.8374	3.0361	3.7171	5.2925	4.0947	3.7188	11.3572	2.7168	3.6293	2.4318	0.8478	2.0724	1.043	3.0935	5.2512	2.8555	3.2104	4.8634		0.712764	3.75165
16.0697	5.3671	4.038	3.9855	6.0614	2.4294	2.0487	1.4896	1.7011	4.7177	5.6	6.131	3.9361	7.0481	3.0533	3.8009	2.1941	0.4716	1.7116	1.0601	3.8952	3.1751	4.3478	5.2079	2.1339		0.718087	3.56688
16.1887	3.749	6.2402	6.4416	4.7542	2.6935	1.9362	1.9572	0.7806	2.7053	5.4814	6.9859	4.8825	7.1248	1.8942	3.638	1.2904	2.0754	0.6665	0.7441	4.0116	4.213	7.4605	5.6482	6.8945		0.723404	3.92787
16.3077	2.8996	5.3272	4.6513	3.0848	2.5627	2.1227	1.7303	2.0139	1.3873	5.8605	5.7055	6.2269	5.2833	2.8794	4.8359	1.933	1.7873	0.1414	0.0189	2.2185	3.5366	6.5374	6.4802	7.536		0.728722	3.61502
16.4268	2.5908	7.3952	4.6752	2.4972	3.0038	4.3265	2.5779	1.3239	2.0867	4.1873	4.9636	3.0025	4.668	2.8646	1.6626	3.9566	2.3246	0.7178	0.0575	3.7936	4.6912	5.2684	5.7236	4.3528		0.734044	3.44633
16.5458	4.9202	3.9485	2.7794	4.4142	7.2047	2.4195	0.8039	1.4794	2.7808	4.3653	4.2327	4.0325	3.6584	2.8288	2.6213	2.8852	3.1473	0.4189	0.7596	3.2741	6.0819	5.2176	6.6336	5.5847		0.739361	3.60385
16.6648	2.2082	4.7443	4.3421	5.8709	3.1551	3.1611	2.0296	1.1382	6.8289	3.1995	3.4641	7.0063	3.8016	2.5888	3.4315	3.1136	1.4949	0.5907	0.4617	4.4992	3.9745	4.9768	4.0534	5.0831		0.744679	3.55075
16.7839	4.7187	4.5934	3.6129	7.1111	3.3219	8.34	2.8663	1.2341	6.8541	4.0543	5.0692	6.1004	2.867	3.1719	3.1928	1.6706	0.5431	0.6652	0.4388	2.1414	4.1561	4.5005	4.2584	4.4758		0.750001	3.74825
16.9029	4.1286	2.3382	2.4556	6.5464	4.5085	4.5402	2.8015	2.1764	3.963	5.706	4.9314	4.5306	4.0026	3.2688	1.6547	3.8223	1.787	1.0994	0.1945	4.6093	6.4033	6.1666	5.2947	5.8444		0.755319	3.86558
17.0219	4.1631	4.7173	3.697	3.4243	2.3779	1.9787	0.7304	0.6086	6.0529	6.7747	5.2043	3.0521	5.4231	1.7571	5.1491	3.0734	1.0743	1.3652	0.6872	6.2992	8.5225	2.1643	5.6534	2.0512		0.760636	3.58339
17.141	3.7996	6.2231	3.713	3.2657	3.4412	2.1159	1.6001	1.6221	3.3719	4.8212	5.8564	4.7095	3.687	4.1865	2.9707	5.1659	0.205	0.5421	0.1694	2.9727	5.2131	2.2148	4.0445	3.7273		0.765958	3.31828
17.26	3.7101	6.0118	2.7993	3.3164	3.7662	5.1205	4.123	3.1957	3.9487	3.4696	5.7529	2.5117	3.5323	3.2944	4.2302	3.8484	0.5221	0.5431	0.4855	3.3393	3.384	3.8129	4.1703	6.0801		0.771276	3.54035
17.379	4.9025	6.1977	0.9966	3.846	4.2687	6.7431	2.0739	4.4551	2.3676	6.4639	4.6364	4.2519	1.4684	3.7325	4.9398	4.1503	0.8335	0.8994	1.1582	5.5262	3.2992	3.8403	7.9261	4.9585		0.776594	3.91399
17.4981	2.7035	5.1515	3.3776	2.9132	3.4774	6.0332	1.2559	1.2116	4.112	3.5797	7.1476	5.0327	3.0696	6.6769	2.5498	3.6348	0.8574	1.3594	0.445	4.3618	4.3015	3.1326	9.2037	3.7246		0.781916	3.72137
17.6171	2.091	3.2756	3.0625	3.1041	6.6745	4.3133	0.832	1.6539	3.7516	5.419	3.6478	2.8709	3.7782	8.1098	2.9196	2.2027	1.625	0.2979	1.5115	5.6619	4.8595	5.3318	5.0887	3.7546		0.787233	3.57656
17.7361	3.4666	2.848	1.1211	1.902	4.4234	3.4304	2.0688	2.5827	3.5674	5.6293	3.5504	4.4506	4.1602	6.8957	2.403	1.8754	1.1338	0.4436	1.8421	3.4434	4.379	4.5637	7.3509	1.2802		0.792551	3.28382
17.8552	2.1356	3.2096	1.4593	4.0715	3.5014	4.0633	2.5677	2.235	4.9315	5.334	3.0366	2.6222	6.2943	6.1097	4.0608	1.2576	2.5586	2.3475	4.6189	3.0473	3.9102	4.7738	5.4489	5.057		0.797873	3.69385
17.9742	2.3542	3.4147	3.1744	4.089	4.8639	6.7422	1.5349	1.4888	4.1384	3.5273	4.6874	2.6142	4.8373	5.8249	3.8143	2.0226	2.742	1.6271	1.0002	2.7514	2.0701	3.5293	5.7171	6.2275		0.803191	3.53305
18.0932	3.103	3.2845	1.5291	2.1418	4.0327	5.6844	0.3653	1.6338	2.8631	4.6271	6.1818	6.0124	2.977	3.5236	4.1782	2.9933	2.1809	0.4062	1.3105	4.5748	3.6644	3.2417	5.2828	6.4263		0.808508	3.42578
18.2123	3.6167	1.9799	2.7994	1.0564	3.5301	6.213	1.4848	2.1282	2.026	3.5061	5.3475	8.0249	2.3849	2.9135	2.465	4.3814	2.4316	0.8817	0.8958	2.0077	3.6375	5.1575	7.5695	6.719		0.81383	3.46492
18.3313	4.2912	3.6222	4.2458	3.2313	2.1701	6.17	1.0286	1.0207	5.0902	2.6718	4.6494	7.8317	2.9249	3.3912	3.6575	6.1802	2.509	0.4685	1.44	3.5701	5.7042	4.3573	5.9288	5.2916		0.819148	3.81026
18.4504	5.767	5.2366	2.722	3.5496	3.0533	3.3259	1.7529	2.7977	3.9661	3.2259	8.6553	5.6093	3.5569	4.7657	5.8378	4.5796	0.7873	0.5247	2.6215	1.3906	4.7355	4.376	5.0685	4.9739		0.82447	3.86998
18.5694	8.4471	4.2909	3.6823	2.6086	1.2759	6.6934	2.5396	2.0719	4.6623	3.6507	7.0311	6.4452	7.6975	5.4259	4.7344	5.5463	1.723	1.0268	1.3406	1.4146	3.8616	5.0632	10.6816	3.9408		0.829788	4.41064
18.6884	4.7823	4.1503	3.3095	3.3696	3.2213	3.315	2.9629	2.0926	3.0192	1.3625	7.2432	7.5643	4.4192	2.1349	3.1412	8.0333	1.0641	0.7176	0.8472	3.6778	5.1773	5.6622	6.3757	3.522		0.835105	3.79855
18.8075	5.2838	4.5026	4.0791	2.3543	3.9363	3.9944	3.1803	2.1886	3.1299	2.198	8.1119	4.0008	3.7625	1.4216	4.2385	9.0217	1.0857	1.0398	2.0443	1.6741	2.8435	5.7138	8.9823	4.0612		0.840427	3.86871
18.9265	7.2149	3.1719	5.733	2.7018	3.2994	4.9648	1.1322	2.2312	3.5898	3.6097	7.2677	3.2613	5.2319	2.1643	3.1954	9.1821	1.2253	1.79	1.5012	2.3186	3.6533	6.6291	5.9142	4.0235		0.845745	3.95861
19.0455	7.9259	3.0325	4.9218	5.1679	5.3629	5.4821	2.1417	2.6577	2.3201	4.1972	8.3818	4.8513	5.0524	3.0025	2.7052	4.6948	1.5879	1.2358	0.841	3.6228	5.9109	4.1489	7.8905	4.3681		0.851062	4.22932
19.1646	5.4861	6.196	4.4646	3.0841	4.7237	4.8318	2.9719	2.148	4.3348	3.9737	5.2452	4.4168	6.9457	2.9516	2.7917	3.1008	1.2482	0.4723	1.5412	4.0892	3.5444	1.9032	7.9439	6.8737		0.856384	3.97011
19.2836	5.8344	6.727	2.1953	2.5514	3.4467	7.1308	5.4761	2.33	3.9842	2.2992	4.349	4.1031	6.6632	4.1629	3.9472	6.2803	1.5848	1.0305	2.547	4.3038	4.6213	4.1839	4.5999	5.6181		0.861702	4.16542
19.4026	5.9406	3.7843	1.9672	2.4754	1.7618	6.1045	3.2432	1.8502	2.6497	4.255	3.0015	4.3951	6.3387	4.1086	3.0443	3.9616	1.5801	1.0682	2.223	4.9601	6.1815	5.8519	4.4893	6.696		0.86702	3.83049
19.5217	7.5871	5.0656	3.7322	3.1837	2.1027	5.5925	5.9901	3.008	2.0245	2.5527	1.9699	4.1702	5.1549	4.4444	4.4551	5.2601	2.4865	1.3794	2.609	3.5845	5.1738	6.9554	3.0032	2.5566		0.872342	3.91842
19.6407	4.4831	4.5969	3.6189	2.6308	2.7475	4.5324	6.0998	1.0484	1.5094	2.356	3.0186	4.9352	9.9956	2.8949	4.3411	5.2389	1.1871	1.4411	2.7482	3.407	5.505	3.3831	4.4933	3.8161		0.877659	3.75118
19.7597	6.8402	5.398	5.9786	1.1776	1.5654	2.9419	5.3317	3.2507	3.6192	1.5752	1.9165	4.4322	8.0656	4.4232	1.6521	4.6188	1.7158	1.4804	2.669	4.9685	2.5339	4.6952	5.9047	5.0797		0.882977	3.82642
19.8788	6.1152	5.3157	2.253	2.0142	2.011	4.6055	6.5245	3.6921	4.0888	0.8848	1.2817	5.7536	4.8026	6.2314	2.1135	3.193	1.6849	0.3693	3.203	3.8898	4.7814	4.5544	5.6201	4.9191		0.888299	3.74594
19.9978	7.6711	5.7036	1.4577	2.0834	2.0794	3.6786	4.8578	3.7051	3.6382	2.6933	2.0598	5.8011	4.2517	4.8079	3.8486	2.4797	3.1588	1.4544	5.2096	8.36	5.2295	5.6652	3.2261	3.7163		0.893617	4.03487
20.1168	5.8746	4.3628	2.0521	4.2264	1.7712	3.2187	3.8462	3.0708	6.6597	1.9858	0.4462	4.5174	5.0774	5.5932	3.6792	4.4784	1.9483	1.2998	4.9226	6.2268	3.9113	4.8982	2.7564	4.4468		0.898934	3.80293
20.2359	11.2886	4.2228	1.9269	2.4717	2.1702	5.2753	4.0471	2.7023	8.0088	3.3332	1.6626	4.4094	4.4492	5.089	5.5823	5.0946	2.1669	1.5889	6.4469	5.7932	4.4664	4.8158	4.3413	3.9722		0.904256	4.38857
20.3549	7.1302	4.5988	1.7202	1.9154	0.4293	4.6584	5.4134	3.4173	7.003	3.2321	1.7423	1.556	3.2902	6.7509	6.794	2.7794	2.7226	3.4015	4.8325	4.8276	3.8518	4.4533	5.844	2.8431		0.909574	3.96697
20.4739	5.3209	4.1161	3.3548	1.6849	1.3153	1.7585	5.5922	6.9772	6.0613	3.239	2.9256	3.2204	4.4532	4.3719	5.9748	2.5107	2.788	0.9246	3.9972	3.7331	5.8482	4.5188	5.5361	1.0046		0.914892	3.80114
20.593	3.9541	3.5412	1.0171	2.8713	1.2848	3.5806	5.8654	4.7614	3.9004	1.6136	1.5429	2.3651	3.6773	2.317	6.3016	3.3347	1.6306	3.2836	3.4121	3.9039	2.6539	6.6874	4.7853	2.4739		0.920214	3.36497
20.712	1.4546	3.0284	1.5818	2.5214	1.3202	2.1695	5.0889	2.6226	5.6657	2.063	0.8733	2.3592	4.2965	1.2673	5.6454	3.6423	2.0757	1.4633	6.3967	6.7291	3.0149	4.1808	3.6807	1.5919		0.925531	3.11388
20.831	2.557	2.1608	1.482	3.0415	1.0741	2.3019	3.7521	3.91	5.2127	1.8194	1.069	2.2049	4.848	0.9338	3.1435	3.6587	0.7347	1.9914	3.7317	4.4498	4.204	3.8383	3.8332	2.7663		0.930849	2.86328
20.9501	2.7403	3.3779	0.8003	2.6174	1.1912	1.1099	3.9846	4.3096	7.0104	0.8931	1.433	2.2506	2.7567	1.1292	5.0434	4.5987	0.8452	1.4842	2.8884	1.8069	5.0751	4.7408	3.2927	2.8904		0.936171	2.84458
21.0691	3.0332	4.5431	1.4104	1.6579	0.2974	0.7879	6.0054	2.5474	4.8895	0.3258	0.1883	1.1408	1.8785	3.3125	1.8014	3.8071	0.6929	1.5002	2.8208	2.2681	4.4373	3.1707	2.6577	3.3175		0.941488	2.43716
21.1881	3.9949	2.4886	0.7328	1.9965	0.7593	2.3197	3.1475	2.3903	5.3475	1.2254	0.6521	1.6955	2.9064	3.8767	1.9119	1.7682	1.8495	1.6527	4.4609	1.8292	4.9126	3.4789	1.1314	5.3446		0.946806	2.57805
21.3072	1.4993	1.9927	1.2036	0.5387	1.7072	0.4934	2.9232	3.8589	6.4131	0.0108	1.9888	1.2463	3.6725	1.6621	3.8713	4.0026	1.2918	5.1175	6.6254	3.6557	2.375	3.7036	1.6272	1.3146		0.952128	2.61647
21.4262	2.4656	1.5339	1.3579	1.281	0.2974	0.5352	4.2353	4.8331	6.9609	0.406	1.602	1.8257	4.8947	3.3873	3.2984	7.7152	2.435	3.3398	5.0356	3.8856	3.8497	5.19	3.0941	1.6888		0.957446	3.13118
21.5452	3.0066	1.0747	0.6502	1.0764	0.1338	0.5108	2.7921	5.7613	2.0389	0.1211	1.7408	1.5865	6.4742	2.2988	2.2743	6.3053	2.7649	1.712	7.0388	1.6398	5.494	4.4519	2.6321	1.6416		0.962763	2.71754
21.6643	2.4295	0.9557	0.6692	0.4627	0.2558	0.8114	1.0776	5.6441	1.6222	0	0.4519	0.6391	4.4772	1.6738	4.0742	4.1961	2.7155	0.8418	6.0181	3.5926	3.8174	6.2375	2.1408	2.2971		0.968085	2.37922
21.7833	2.378	1.5283	0.3035	0.1707	0.0029	1.3178	1.1658	5.8256	2.6396	0.3199	0.3745	1.1924	3.5252	0.8045	4.0417	3.8797	4.1724	1.3961	5.7764	5.0707	2.9452	2.9978	2.3245	2.6767		0.973403	2.36791
21.9024	2.8329	1.2621	0.4228	1.0986	0.3719	1.1666	2.0661	4.9677	3.4871	0.7428	0.8101	0.6707	3.2585	2.1919	3.1496	4.2915	1.6863	0.8533	5.2961	2.3877	2.5203	3.7342	1.7557	2.4627		0.978725	2.22863
22.0214	2.0626	1.7044	1.0811	1.0948	0.4101	2.6031	1.4645	3.4766	1.5984	0.2551	0.4563	0.7301	1.3268	1.9986	3.9399	2.6874	2.5932	1.3549	3.0248	2.1008	4.189	4.8911	1.5055	2.3006		0.984043	2.0354
22.1404	0.918	0.8333	0.2453	0.8173	0.492	0.8489	1.1783	3.0686	4.1584	0.2084	1.0303	1.6509	3.5665	2.7661	3.9505	4.2068	2.8048	1.7841	3.2682	1.2931	3.9019	5.4617	3.1523	1.4694		0.98936	2.21146
22.2595	1.6685	0.3549	0.4262	0.7029	0.0321	1.8585	1.9558	5.0683	1.5322	1.6626	2.2819	2.1397	3.6968	2.7159	3.2528	6.5897	1.2555	3.2258	5.8632	2.1553	2.4441	5.0986	2.5089	1.406		0.994682	2.49567
22.3785	2.224	0.0775	0.435	1.1736	0.3363	0.7247	1.7662	5.2315	0.6507	0.2778	0.6282	1.3189	2.6935	2.0247	1.3081	5.5594	1.4806	1.6388	2.7501	2.0344	3.8326	4.1516	1.8461	1.9838		1	1.92284

## Sheet: Image10
X0	Y0	Y1	Y2	Y3	Y4	Y5	Y6	Y7	Y8	Y9	Y10	Y11	Y12	Y13	Y14	Y15	Y16	Y17	Y18	Y19	Y20	Y21	Y22	Y23	Y24	Y25		Ap-Ba	Average int.
0	26.9669	20.3895	22.401	14.6227	10.2448	16.2184	21.6275	26.4501	22.4524	9.5685	13.7049	14.0565	19.8443	21.2459	20.6443	26.0033	27.0561	24.8468	31.0097	26.9227	25.1672	30.1037	28.955	20.3965	24.8222	16.0233		0	21.6055
0.119	21.0109	25.6723	24.6549	20.3651	10.8041	12.2952	17.3909	28.5369	28.0112	13.3469	13.1014	15.7265	25.9976	27.1455	23.7362	28.8424	31.8923	36.1351	33.7471	28.5007	35.2862	26.8538	35.6596	25.9587	29.4612	15.8893		0.00564808	24.4624
0.2381	23.9508	19.5131	17.506	19.6619	14.7919	12.7081	20.5716	21.4335	32.1911	9.0694	7.5622	20.4568	24.0181	38.3261	23.3134	35.4856	41.0223	40.2074	47.5967	30.3484	34.6632	25.7564	30.3551	29.9162	30.1369	15.4912		0.0113009	25.6174
0.3571	25.5354	24.1926	20.9912	19.679	10.9766	8.9852	19.5661	20.7929	19.8996	12.0215	16.6018	20.3879	31.8012	41.1371	26.0328	36.0964	45.7826	32.6925	48.3006	31.3231	43.6773	23.3742	34.3538	28.3214	36.4338	16.6397		0.016949	26.7537
0.4761	18.7756	22.3328	17.8691	18.2513	8.9185	6.4807	11.8337	22.1524	24.2069	10.4946	17.7395	14.2509	39.0502	31.0858	30.2028	27.3515	45.798	43.4272	51.3965	40.1645	47.125	23.9428	37.2687	28.7599	34.1203	22.0779		0.0225971	26.7337
0.5952	21.2387	23.6325	19.2888	17.1553	7.2511	7.8674	11.7907	19.2607	20.4628	11.7987	19.934	16.2911	37.0864	38.1864	34.354	32.9071	43.2073	54.2864	66.0629	40.8626	43.2987	29.0953	42.7219	40.0964	28.2954	25.743		0.0282499	28.9298
0.7142	20.0424	23.8548	14.7251	16.9962	9.5038	6.6934	12.8933	12.8963	19.3449	8.9144	19.3124	18.9926	39.8752	43.2456	27.7041	37.5644	43.7724	43.1577	69.3937	50.8723	45.621	24.5738	40.7691	35.0611	26.9832	18.5064		0.033898	28.1258
0.8332	19.0916	16.3871	16.9476	19.3551	14.2058	5.0685	15.6975	15.6924	19.0699	16.3643	26.4221	22.2184	43.7881	36.6638	41.0712	29.6501	42.4975	56.3702	62.5613	69.3774	42.7613	21.0577	41.6644	28.8196	31.3766	21.6616		0.0395461	29.84
0.9523	15.4386	20.1589	19.7583	18.3519	9.5401	4.8391	16.095	13.2251	15.6741	12.8133	18.4321	17.8354	40.5895	40.9148	37.2955	25.5463	43.7767	42.0074	54.8883	60.6603	47.9761	23.4989	44.6109	31.4561	28.5615	26.7737		0.0451989	28.1045
1.0713	12.9689	20.3723	19.5831	16.9359	7.8853	7.7034	9.0714	20.5248	10.7065	11.4549	17.3187	11.0143	40.564	41.411	33.8692	28.5054	56.6205	40.9951	57.7758	60.0362	63.168	30.0978	51.5308	24.3581	37.0631	20.0535		0.050847	28.9072
1.1903	16.7886	14.1767	16.964	19.4752	9.214	5.1998	8.8322	13.089	14.766	9.565	13.6201	15.975	40.3803	36.9276	38.9261	23.6606	43.5302	30.6243	64.4199	73.498	54.0316	33.4156	52.3522	26.2917	34.4951	16.8676		0.0564951	27.9649
1.3094	21.0941	14.5128	18.4687	20.5543	8.7353	5.2737	11.638	9.8857	10.143	10.4584	19.7692	12.2027	31.8975	37.8006	34.4616	27.863	57.2632	28.3153	67.2555	81.0896	59.4163	32.6656	45.9875	30.1157	35.5281	20.0088		0.0621479	28.9386
1.4284	16.651	14.9776	16.7464	20.0181	5.1078	2.2647	6.9435	7.1164	12.5008	13.5508	19.6439	17.6946	31.1101	31.1908	36.035	27.3808	46.5441	38.0224	63.4506	80.4928	56.9853	32.2581	46.9684	28.3224	31.6005	22.3175		0.067796	27.919
1.5474	15.1016	17.0973	18.9966	16.9533	7.4144	3.5152	6.9656	8.4764	10.546	13.1288	15.622	20.9966	33.4854	41.1818	40.2276	31.8657	48.3495	35.202	66.7299	80.2468	60.0708	23.8182	52.3738	30.1199	38.6268	17.6898		0.073444	29.0308
1.6665	12.1163	15.6333	15.1945	15.1343	10.0826	4.6144	7.686	5.5608	8.1841	8.8461	11.4623	13.4464	31.6657	39.6636	44.532	23.4461	48.3512	36.9234	56.8472	75.4534	66.2669	31.4107	52.4945	32.7688	33.1509	20.7777		0.0790969	27.7582
1.7855	10.9799	11.5499	12.8374	16.7518	7.853	4.1054	3.1051	6.0254	9.3953	14.5449	13.506	14.7621	34.3313	40.9685	32.8023	26.0798	51.4848	29.1892	55.6698	71.1144	63.4046	28.1956	49.0541	28.537	32.5634	16.5086		0.084745	26.3584
1.9046	14.2509	19.0427	15.9154	13.8979	8.511	2.9262	4.1793	5.0918	7.8131	10.4934	15.0666	12.9909	37.3248	33.9856	32.0958	31.6851	54.3796	36.3111	53.8759	72.2747	53.4872	30.2693	54.8101	27.822	31.0045	15.5129		0.0903978	26.7315
2.0236	17.3999	16.1077	10.4043	15.0542	8.3517	3.2956	7.3886	7.3755	6.8245	18.585	11.9073	16.9944	32.9251	28.5344	34.3964	26.5361	53.8991	36.996	59.8383	72.1251	55.0264	27.9078	42.6673	28.5415	35.5995	16.8438		0.0960459	26.5971
2.1426	16.6913	20.8119	12.6261	17.2667	6.439	3.8013	4.6582	3.8731	7.3053	11.0443	11.3867	12.9803	32.859	20.0916	35.3956	21.8585	47.1899	29.9819	62.6403	69.013	62.1879	31.6393	55.8321	27.6732	34.1723	12.2593		0.101694	25.8338
2.2617	14.8502	12.681	11.6693	13.119	9.6751	1.8342	3.3466	7.5063	6.6179	11.0083	18.2919	18.0114	36.6108	23.4231	30.0215	25.5937	59.4846	29.0577	49.3707	73.5205	62.9357	36.6274	53.6114	21.392	33.185	13.3223		0.107347	26.0295
2.3807	14.6871	11.1269	10.3339	16.1709	4.4364	3.2146	3.5163	5.2443	6.5474	15.033	16.2089	15.3536	19.0065	25.4861	36.5117	18.1224	59.8652	23.4634	53.6176	74.2686	52.3668	39.2021	49.684	24.525	27.6946	14.0118		0.112995	24.6038
2.4997	14.7909	12.1989	14.4975	12.9959	5.7092	3.5332	3.4851	5.3052	7.1461	10.9951	13.0856	20.4848	22.8549	20.7535	36.9403	20.5345	48.9046	28.8768	52.2965	72.7389	42.4836	36.0124	53.5447	17.777	23.1989	12.3996		0.118643	23.5978
2.6188	12.035	9.1218	15.247	13.6961	4.4439	5.463	7.0024	6.5473	4.1962	10.7484	13.0461	11.2055	25.4295	20.9947	39.2906	21.8183	43.762	25.7983	51.2331	76.9163	52.0164	37.6893	47.5263	22.2422	27.3685	11.8064		0.124296	23.7171
2.7378	10.9876	13.4849	12.175	15.2577	6.1087	4.771	6.0162	3.9083	5.7256	10.0004	15.1779	12.6829	20.3884	14.2009	37.139	17.7583	51.1612	27.1828	47.3286	74.4983	49.0423	29.7584	48.7723	17.2329	29.5676	10.5468		0.129944	22.7259
2.8568	14.7074	13.555	10.3496	12.7709	3.7283	3.1102	2.3337	3.2361	4.0168	10.6851	12.3317	12.9099	20.641	18.6148	28.0658	19.7771	46.2235	30.5702	51.0547	77.4194	44.3178	34.9432	36.2611	15.6758	25.2265	8.8715		0.135592	21.5922
2.9759	14.2367	15.1631	12.078	12.0888	6.7708	3.6742	2.5043	5.0574	4.322	8.8349	10.7697	13.924	16.442	13.7554	23.6019	15.6179	41.3051	31.5814	47.4209	71.7167	35.312	31.731	45.4193	14.7696	20.7651	8.9997		0.141245	20.3024
3.0949	14.4119	11.4732	7.5679	13.5613	3.9271	3.6651	5.7535	2.6375	6.463	6.4819	11.0263	11.579	13.5896	14.1303	28.6836	15.4779	39.0074	27.3623	37.8793	71.308	44.9169	29.1899	40.8943	16.9684	25.7057	4.6979		0.146893	19.5523
3.2139	10.4326	10.9241	12.9586	15.9048	3.3046	2.8922	3.7113	1.5082	2.9856	9.3266	11.665	11.3588	17.5759	16.3488	36.2231	19.3657	43.1729	22.2487	48.1415	81.6533	43.3938	26.208	37.434	19.9014	25.8467	5.7648		0.152541	20.7789
3.333	9.2716	6.2372	7.7009	12.7878	4.2714	5.5185	3.1281	3.2713	2.4054	6.5466	13.1025	14.2244	17.7714	16.9597	35.9562	18.0427	39.358	27.8193	38.5076	73.6623	47.5238	33.4139	39.5616	21.7186	32.9371	5.5951		0.158194	20.6651
3.452	10.7822	15.5204	7.8221	10.9329	3.6508	7.4797	3.1657	5.9728	3.4455	2.2331	10.0302	11.2938	17.2527	17.8711	24.9189	22.1794	28.4969	31.23	43.6162	83.2689	47.9193	31.6828	40.3209	16.6313	29.3623	4.6292		0.163842	20.4503
3.571	8.8686	16.3693	8.4252	8.1385	3.5306	6.7568	1.91	3.3398	6.3253	3.3325	7.9454	14.0383	11.5977	20.3271	17.9104	20.255	27.9553	28.9874	33.5654	72.9793	44.8217	28.7627	40.884	16.7701	28.2299	4.8008		0.16949	18.7241
3.6901	8.5825	15.439	7.9254	8.4477	4.4579	3.4747	1.8226	2.7568	5.4181	5.2166	7.7541	14.5786	19.2057	16.042	20.5582	18.3803	21.804	21.7251	33.4672	64.209	37.0732	22.3655	35.9406	15.2029	20.0814	4.8172		0.175143	16.7979
3.8091	10.1949	11.2526	8.9401	10.5353	3.7373	5.791	1.8362	3.8286	4.3347	5.7797	10.7527	8.2531	14.4302	17.9301	18.5477	22.7351	29.1794	30.2602	36.4562	63.8111	49.1208	18.2176	34.5969	17.8232	25.1853	6.3841		0.180791	18.0736
3.9281	12.3917	6.7843	5.9711	8.1552	5.1414	6.4294	2.2675	4.0785	4.6411	7.5327	7.5831	10.2425	19.4128	21.6943	18.9252	20.3298	26.6829	29.5979	32.7838	52.7501	39.7193	26.6889	41.0449	14.8217	11.1283	6.0348		0.186439	17.032
4.0472	9.0847	6.2788	8.1846	12.2444	3.9371	5.3833	6.2744	4.1911	2.1024	5.1698	6.5812	10.2997	13.4774	19.3752	11.7484	17.2473	30.7319	21.6138	27.212	63.8998	36.7523	23.7653	39.0292	15.6118	15.6381	6.0701		0.192092	16.2271
4.1662	6.333	9.3373	8.9745	14.5455	4.4569	4.2258	3.6538	2.7219	6.3815	3.416	4.9508	12.176	18.0713	20.781	11.9406	16.1392	25.9059	28.3695	30.8991	49.4823	36.8174	17.862	33.0296	16.5233	12.8894	5.526		0.19774	15.5927
4.2852	7.9151	5.3938	5.0229	5.649	3.2986	5.1475	3.0051	2.499	5.4386	5.6529	7.4669	11.0578	15.9535	18.4823	11.2093	14.7863	25.7709	17.2295	26.8938	44.6463	31.7872	18.061	37.9049	17.4602	10.2794	8.1453		0.203388	14.083
4.4043	5.7487	5.6999	5.566	9.6612	2.5724	4.8703	2.9706	2.8373	3.6662	8.1742	6.0074	8.1355	9.2272	18.8434	16.4676	14.4277	21.9063	18.2594	28.7082	63.9961	26.7077	17.9935	36.6239	15.6341	11.3925	7.9987		0.209041	14.3883
4.5233	10.8567	3.1556	4.9254	6.4614	2.5723	4.5242	0.9847	3.4156	3.8834	4.4813	10.0497	10.8471	10.211	20.4625	12.4485	16.3139	21.5733	14.0766	28.1847	54.9461	22.6263	21.2093	34.539	11.5383	8.7519	7.1065		0.214689	13.4671
4.6423	9.2618	4.9609	8.8498	6.6296	3.4321	3.6396	0.9483	3.0432	5.729	3.301	9.9486	4.7079	11.5454	21.2063	10.5532	20.3966	19.9752	12.6342	31.6245	42.3926	27.266	18.9268	22.6402	16.0934	5.8123	7.7186		0.220337	12.8168
4.7614	6.7993	6.412	7.4018	5.9197	3.6015	7.3658	1.4884	2.0539	4.1526	3.5874	8.6893	6.4849	12.0721	23.4631	12.678	16.4853	18.1172	15.8068	28.1722	41.496	19.5421	11.2408	26.2881	15.8428	8.9192	6.9812		0.22599	12.3485
4.8804	8.1261	8.3655	8.3311	7.312	3.6439	6.143	2.7167	2.5633	2.4442	4.8281	7.321	10.0202	12.0604	19.3487	14.1322	9.774	19.3044	16.81	31.4026	49.0074	23.9474	16.1675	29.8205	19.1594	9.4226	7.0941		0.231638	13.4333
4.9995	6.476	5.6342	8.7646	7.098	5.1309	5.2284	2.852	3.1964	4.3204	5.2198	5.3566	10.3244	10.3771	20.8093	16.7375	9.8525	22.7823	15.5672	22.8514	44.6785	23.6329	9.5158	27.4116	20.0148	12.0493	7.687		0.237291	12.8296
5.1185	6.1377	8.8461	7.535	9.9735	5.124	5.212	3.6513	3.4403	6.6328	6.2718	9.0326	7.3111	14.5406	16.8571	17.4533	9.9326	21.1603	16.6278	30.9862	59.4795	20.0763	12.4674	31.7506	13.8958	9.6798	7.5217		0.242939	13.9076
5.2375	6.4625	10.7212	10.5565	11.5098	2.8284	2.8709	1.5589	3.8436	4.2323	3.0828	13.8512	10.7532	9.6087	21.4054	15.1129	11.1198	20.9555	17.4733	29.4721	45.3563	21.9161	10.372	27.0985	18.5392	7.5912	6.2276		0.248587	13.2508
5.3566	4.7557	9.7529	6.8751	12.4871	3.7989	2.1666	4.5943	2.2139	2.9148	4.5618	11.6583	6.3209	12.633	18.5244	22.7436	11.4978	21.3164	15.501	20.4821	45.3702	13.991	12.6797	31.2848	15.9756	8.5068	7.8693		0.25424	12.7106
5.4756	3.5293	6.1782	7.8296	9.1818	1.6975	4.7377	1.6562	1.1391	4.6101	4.4204	7.9664	7.3826	12.2799	14.9912	22.0718	11.8093	18.6709	16.1234	15.1252	36.8226	16.5149	11.8564	26.4392	16.16	12.7513	5.374		0.259888	11.4353
5.5946	3.8956	2.8234	12.0154	6.206	1.9668	3.571	3.478	2.7419	5.1955	9.0189	10.6513	8.2139	11.7923	16.975	14.2317	10.1608	25.0571	11.8962	15.2703	28.1991	18.813	13.0323	37.2744	16.3971	9.7789	7.3067		0.265536	11.7678
5.7137	4.9191	2.4088	9.8666	10.8756	1.297	2.2709	2.4832	3.4218	2.1257	7.0731	6.7185	8.5169	16.1617	15.9586	18.6122	8.3559	21.1269	12.6479	19.7701	31.964	17.5883	18.5938	24.6971	19.6478	9.4774	4.7002		0.271189	11.5877
5.8327	7.3895	4.4918	8.6257	7.8356	0.8892	4.0834	2.9772	3.2705	4.4036	3.3573	8.9034	10.0482	17.1945	16.3328	12.3931	7.739	19.4828	12.4398	17.3703	29.5645	15.2636	21.6028	27.7445	18.5305	9.2994	6.869		0.276837	11.4655
5.9517	8.6219	4.6733	8.2797	9.2006	2.5298	4.897	4.6088	2.9252	3.2767	3.9537	4.6173	6.2179	14.5812	19.6562	14.5017	13.8703	16.1835	10.3436	21.1628	30.5531	15.0991	28.0075	19.8349	15.4729	8.0428	10.6113		0.282485	11.6047
6.0708	4.0726	3.415	7.3304	9.8414	1.6567	5.0276	4.3458	8.2567	2.7249	6.6304	7.5346	8.8619	15.7105	19.2417	14.5836	7.3556	13.9879	9.7274	11.9375	36.0047	18.9906	25.865	22.9121	18.9169	8.4801	5.1451		0.288138	11.4829
6.1898	2.1634	5.0298	5.2925	11.1538	3.4044	5.2592	5.8977	9.4002	7.8227	4.9243	6.41	7.5136	17.5112	10.2535	12.2686	9.3543	21.0422	10.2248	17.5424	26.9596	15.1921	28.6149	29.2959	13.5282	13.6785	6.0175		0.293786	11.7598
6.3088	5.3375	3.6119	8.0214	12.6255	4.1706	5.8844	4.1866	9.8769	4.2249	3.2991	7.5181	7.8959	25.6506	12.7681	18.8027	8.6577	20.411	8.606	15.4116	29.1131	19.5897	18.6429	39.634	12.0704	8.2158	6.8294		0.299434	12.3483
6.4279	6.5402	2.1311	9.8273	11.2284	5.5386	5.2631	2.8693	6.3118	2.1437	3.9505	8.4525	6.0087	19.5601	11.8058	12.0115	10.2069	13.983	14.252	14.2982	18.2119	14.7901	19.7673	42.1776	12.3427	9.4676	4.0782		0.305087	11.0468
6.5469	5.6326	6.7004	8.9839	8.594	5.4992	8.2953	3.4884	2.5443	2.5868	6.5228	7.4538	9.4013	16.4066	11.2046	12.9925	11.0349	19.2829	10.6395	12.6096	21.9371	15.4113	15.3309	31.6484	16.1587	8.0987	8.339		0.310735	11.0307
6.6659	4.9551	5.7665	10.0515	8.3474	6.2581	7.7678	3.5445	3.902	2.8885	6.1511	8.4189	8.9742	14.1489	10.6277	13.1352	9.812	22.0292	11.044	18.7341	18.8366	13.0074	14.0498	28.4437	14.3702	12.0409	4.921		0.316383	10.8549
6.785	6.7935	7.5998	13.2767	5.1635	7.9822	5.5864	5.3902	2.5996	4.7693	4.5543	5.7708	6.2657	14.3253	11.6791	9.0627	12.9595	19.8512	13.4142	17.4062	15.9003	21.3365	17.2989	21.2988	22.7201	4.2673	9.4501		0.322036	11.0278
6.904	8.9379	5.8929	8.0519	6.6147	3.487	6.1665	3.3695	1.2456	1.5552	1.8349	4.1919	7.0199	9.9903	10.8205	11.3469	11.4154	18.6976	22.4682	19.7772	18.8569	20.1786	21.5771	19.5073	21.2257	5.2336	8.58		0.327684	10.694
7.023	4.6279	5.4401	10.4355	4.6723	3.8008	4.9015	2.2064	3.4377	3.445	6.9348	6.7306	8.1636	10.3383	8.0972	9.5035	11.6254	15.353	15.7831	18.2932	16.123	17.0488	21.0401	20.1189	23.8586	8.7079	8.4975		0.333332	10.3533
7.1421	3.4777	5.8483	6.6085	8.131	6.5804	5.1183	3.4043	2.1115	6.8378	3.2478	3.9377	11.0104	9.298	12.3966	11.102	7.7425	9.965	14.1926	19.6143	14.0479	16.2169	34.3205	13.0778	17.7221	9.7177	7.5249		0.338985	10.1251
7.2611	3.4053	4.3301	8.8529	8.3657	1.9037	6.0162	3.7994	5.0718	6.1018	4.1751	5.6189	10.0917	12.692	9.1291	9.2242	14.8087	14.9853	10.5076	17.5202	15.4921	24.3503	28.1394	15.9258	22.6076	10.0389	8.8563		0.344633	10.8465
7.3801	4.5604	3.3676	7.3596	9.4882	4.0317	3.3127	4.3213	2.8681	5.2661	5.185	4.3247	10.3834	9.6507	6.9792	13.4146	13.0302	16.9574	13.124	24.7977	16.7133	17.6426	24.2162	14.0115	21.4979	2.9137	9.1198		0.350281	10.3284
7.4992	3.4758	2.9001	5.2843	7.4773	3.0685	6.157	3.4154	3.6054	11.8739	5.6428	4.1291	7.6779	6.4585	11.7174	12.6466	16.3669	20.4683	9.9482	28.959	16.6982	13.0411	20.0262	14.524	21.4306	10.9515	8.3972		0.355934	10.6285
7.6182	6.5566	3.3917	7.134	6.3603	3.0738	5.3699	2.4001	3.498	7.0278	7.6031	4.8445	8.6529	4.8783	8.1812	10.6223	15.2421	13.9083	18.4278	26.0077	14.8325	15.4987	13.9612	20.3521	17.4941	8.8951	8.8972		0.361582	10.1197
7.7372	7.5899	5.7781	6.4545	6.0103	4.6573	3.6688	4.9691	3.4055	8.2081	3.467	6.5642	5.4249	5.2889	11.6438	13.2427	14.3716	15.0151	15.3469	19.3418	17.179	14.6186	19.229	16.004	16.4824	5.4122	11.3293		0.36723	10.027
7.8563	5.3154	8.6143	8.3416	8.5426	4.485	4.2094	10.0423	2.6811	7.3816	4.0419	4.3928	10.1688	5.0754	7.3581	15.7651	11.9149	20.4825	9.9485	20.7039	13.1395	13.3637	19.8326	14.6368	11.5961	4.6132	10.092		0.372883	9.87458
7.9753	4.5432	4.9699	4.2995	7.5979	5.8915	2.6395	9.5046	3.74	5.4421	5.4201	5.4345	13.1869	4.0251	7.0342	10.2178	8.4551	18.2417	14.8099	23.3786	18.6402	15.7789	18.1527	11.0186	14.9072	5.9869	8.5025		0.378531	9.68535
8.0943	6.8488	1.6149	7.2961	7.8002	4.7077	1.9718	4.8246	4.1794	8.4894	4.45	4.6858	11.9961	5.9346	11.1346	5.2823	10.5444	18.3056	11.1569	21.0388	14.0398	12.2699	10.934	10.006	13.6112	6.3731	8.6073		0.384179	8.7732
8.2134	5.2329	3.0526	11.7987	6.698	3.1247	4.236	4.0677	2.6335	7.5003	5.9596	4.646	11.6541	7.0562	11.1897	9.2718	17.4119	18.4534	11.5653	18.5252	15.1106	13.9304	8.7746	7.844	13.2881	7.612	6.1024		0.389832	9.10537
8.3324	5.4362	2.8554	8.0843	3.4202	4.6653	7.1554	2.3781	1.8801	3.1221	2.5927	5.7014	10.77	4.1815	8.1691	6.4343	13.5334	13.4401	9.3246	12.209	17.4701	18.5598	9.3342	10.1815	15.4615	6.6175	4.7994		0.39548	7.99143
8.4515	5.1904	4.6539	4.295	4.6068	3.2916	8.7017	5.5516	2.1353	6.0036	1.5335	4.4432	5.2287	4.9421	14.1958	8.1526	10.6528	10.5196	12.7373	11.1663	12.1164	16.8264	13.1122	9.1348	18.6801	10.3256	3.7011		0.401132	8.14994
8.5705	7.8541	2.5155	4.1735	8.0511	2.5119	5.8657	2.5743	3.6424	2.8596	3.7045	5.1027	10.408	4.4092	9.1918	8.9019	9.3604	13.9572	9.5399	10.5774	14.325	22.3557	13.7167	8.662	21.6444	8.1046	4.7967		0.406781	8.41562
8.6895	7.8761	5.0229	6.1044	5.794	3.0042	3.9951	1.8018	4.4458	4.509	2.9903	5.5073	7.1602	4.7707	15.1409	7.7372	11.6198	10.6649	12.3637	12.2367	14.4306	14.7554	12.5244	8.7513	23.4701	10.2068	4.4309		0.412429	8.5121
8.8086	4.1422	10.3194	5.2918	5.6884	5.0622	3.4259	3.9783	4.9637	5.9858	2.4966	4.4511	8.3028	4.2584	10.0554	8.0463	14.1961	8.4122	12.95	6.9125	13.2447	22.0914	8.5454	12.1928	15.771	5.3244	7.5665		0.418081	8.21828
8.9276	6.3662	7.2669	4.863	5.0149	2.2065	6.3937	3.2828	5.9279	3.3383	3.6075	5.9699	10.4172	2.5453	11.0447	9.0989	13.9176	9.8542	9.1635	11.4449	14.8125	15.2648	14.1458	9.7281	16.3498	8.9163	4.8179		0.42373	8.29843
9.0466	4.3446	6.0938	3.045	3.4083	4.6275	2.3415	3.5167	2.163	8.5502	1.7939	5.5245	8.1398	4.0404	8.176	13.2237	15.0478	9.5071	13.0687	6.609	16.9016	14.7031	13.6141	9.684	16.0938	12.2328	4.8261		0.429378	8.12604
9.1657	6.8908	5.4841	4.6926	4.7182	1.977	6.1413	2.6784	4.0675	9.8439	3.4357	4.7571	6.974	3.8129	13.8298	4.3616	17.65	12.0502	8.828	5.3516	15.1169	18.459	17.7639	11.2907	14.7999	8.6184	2.5577		0.43503	8.31351
9.2847	7.2019	5.8573	7.6691	7.2898	3.1335	5.7188	1.9428	1.969	10.3096	4.7991	6.8373	6.9511	7.25	7.8127	7.6523	12.3253	12.7804	6.3111	2.7622	13.5793	12.8718	12.7227	12.6676	16.1095	10.2395	6.4694		0.440679	8.12435
9.4037	3.6082	2.3509	8.4977	4.7021	4.2741	4.7142	2.2996	0.6363	10.8597	4.1211	4.1709	7.6582	4.8067	8.1681	7.2131	12.8439	16.8659	5.6063	5.7266	14.0203	22.1759	15.6496	12.8877	16.1712	6.5225	4.7816		0.446327	8.12817
9.5228	3.4557	4.3959	6.6066	2.3985	4.5319	5.1011	2.7422	2.7914	7.2852	2.7802	2.6474	10.5409	4.4074	7.4415	5.7141	8.1608	11.367	10.182	6.7912	19.1362	12.2416	12.0121	15.6203	15.207	5.2312	3.9216		0.451979	7.41196
9.6418	4.0309	3.5484	7.961	3.4136	3.7765	7.223	2.0979	2.6718	5.5714	4.55	3.659	9.0639	8.6428	10.7669	9.4537	7.3414	11.2369	8.3584	3.5719	14.2297	15.725	10.4335	12.5492	10.2028	7.0143	5.2612		0.457628	7.39827
9.7608	4.3375	7.3949	6.4554	5.0606	2.7299	2.3849	4.6254	3.1347	1.8269	4.2001	4.7012	4.3591	9.6936	9.7087	9.382	7.1078	16.4142	4.7441	4.4602	13.5733	14.8712	10.9408	12.2048	9.3461	7.7579	5.9274		0.463276	7.20549
9.8799	4.7179	5.1985	5.7083	7.0987	1.1865	7.238	4.4469	0.8666	0.8174	2.8963	3.8861	7.6225	9.6315	5.8738	4.9351	9.7138	12.9247	5.4628	3.8032	11.9303	13.3523	16.9359	16.6439	8.0213	6.9369	4.2132		0.468928	7.0024
9.9989	6.2367	4.6956	4.1905	4.7007	4.2263	5.7042	2.7166	1.8768	4.9048	6.4661	3.6086	5.3724	7.8195	5.8879	7.998	5.5758	13.659	6.4886	4.8918	10.6475	6.3249	20.1496	12.089	4.2333	6.2291	2.4773		0.474577	6.50656
10.1179	4.0189	2.7158	6.3264	3.2843	2.4023	2.0657	2.1142	1.8422	3.9273	5.4184	5.9688	6.2691	7.6886	4.9297	8.0486	6.018	16.3822	3.7297	5.1057	12.6468	7.9523	19.5896	11.2897	6.417	6.9181	3.646		0.480225	6.41213
10.237	6.5347	3.5764	3.833	5.1241	2.1961	1.9111	2.3507	1.3624	4.0965	2.1289	5.661	6.4992	7.2464	3.4081	8.7441	4.0406	9.3828	5.342	3.5487	9.9097	10.0956	26.9524	10.7241	6.8147	5.3995	2.2399		0.485877	6.1201
10.356	5.9574	3.5699	7.5309	6.7851	1.8762	4.0324	2.5087	2.1432	8.0797	5.8096	5.2512	5.6431	4.739	5.1916	11.5985	6.2562	9.0093	7.0053	3.4743	8.2025	10.3782	27.35	13.9322	9.3625	7.0271	1.2678		0.491526	7.07623
10.475	4.0487	4.2042	5.8796	8.2446	2.9375	5.0361	1.3095	2.083	8.6742	5.4464	4.9661	7.8373	7.2864	3.1113	9.2464	5.1838	15.2194	6.9014	2.4972	8.567	9.0025	16.599	11.189	6.0009	6.4	5.2882		0.497174	6.65999
10.5941	6.4363	3.4412	6.1118	9.4164	4.0404	5.1069	3.1104	3.9275	6.5535	8.3981	3.0304	5.0153	7.3212	5.3501	10.1077	5.4931	13.0597	4.5939	1.8061	10.7587	8.8785	17.3359	9.1246	5.9494	7.8774	6.5464		0.502826	6.87657
10.7131	5.8678	2.8293	6.7137	6.2891	3.428	4.0304	2.501	3.066	8.1331	6.2495	4.8307	6.038	4.4988	3.375	10.2971	6.3364	12.8373	3.8493	3.9336	14.6524	10.4807	15.506	10.495	5.9369	8.2186	3.2234		0.508474	6.67758
10.8321	7.7609	3.82	6.6351	4.7609	4.1109	4.2302	0.9436	2.6439	5.3161	5.74	3.5642	5.3551	5.5432	4.5146	9.888	8.7592	12.277	4.5055	2.5398	14.7855	11.4604	17.579	8.4254	5.2088	3.6436	5.1216		0.514123	6.5051
10.9512	5.9956	3.0311	5.9467	3.9083	2.7316	4.6971	1.2303	1.417	4.2337	3.171	4.8621	3.9319	7.8165	4.9209	9.3147	4.09	11.9518	2.5745	1.5901	14.3657	12.2921	12.6496	5.2763	7.5745	7.3702	3.5465		0.519775	5.78807
11.0702	5.6781	2.9989	6.9994	4.3104	1.7976	4.2644	0.7336	1.7089	5.5169	5.4382	3.891	7.0145	5.635	9.1692	11.4804	5.5114	9.2739	3.8356	4.6596	14.3443	9.9716	11.1719	10.4219	6.7524	6.362	2.4214		0.525423	6.20625
11.1892	5.9823	1.8968	4.5433	5.7448	3.0945	3.842	1.4194	0.834	6.9265	3.5989	3.8635	8.5427	7.8155	3.6811	11.9594	8.1633	11.9315	3.0114	1.2517	15.5453	8.4347	12.5678	6.6389	10.0928	4.3304	4.0266		0.531072	6.14381
11.3083	6.1451	2.8202	6.1121	6.9165	4.4314	3.5783	1.2996	0.6117	5.7361	1.8828	2.4421	8.0264	5.582	5.2095	6.1836	9.7985	13.7925	3.8519	2.3803	11.7486	10.8416	16.837	8.4722	6.6129	4.8283	5.4249		0.536724	6.21408
11.4273	2.1237	4.5887	6.1401	4.6131	8.4378	6.4221	3.1851	0.8702	5.476	3.91	1.0514	9.4632	7.2022	3.996	13.8651	10.036	11.3675	2.624	1.2643	9.1375	11.6401	9.2594	8.1448	14.4188	4.4091	6.3317		0.542372	6.53761
11.5463	5.4489	3.0668	5.5485	5.9425	6.8701	3.229	0.5063	0.6032	4.5117	3.3969	3.8888	6.7018	4.0183	3.7294	11.3116	6.6725	9.9457	2.2506	0.7046	15.268	11.9068	7.3905	6.3605	16.8678	4.7565	7.2508		0.548021	6.08262
11.6654	4.4286	3.3536	4.4845	2.1912	7.0255	4.5805	1.2951	1.5375	5.5511	5.6425	3.4012	6.6855	5.4997	4.9621	9.3876	5.1585	10.766	4.0088	1.5775	18.6931	11.7605	10.8158	9.3109	10.1544	1.7485	3.7752		0.553673	6.06905
11.7844	4.6332	2.7083	3.3123	1.7637	3.7159	4.6971	3.1539	1.8277	5.8486	6.7926	3.263	10.9435	3.9884	2.9628	10.9274	7.6242	9.8242	1.6358	1.2346	14.3037	10.5358	12.7188	10.7938	10.9508	4.2649	6.5333		0.559321	6.1907
11.9035	5.7085	4.4131	4.2869	2.7803	3.0566	5.8166	2.4149	0.523	2.861	4.4154	3.0449	4.4379	3.2585	4.6777	9.8016	10.1184	8.4434	2.2904	0.8487	12.6456	6.3078	7.0983	8.6566	9.2168	3.0873	4.2202		0.564974	5.1704
12.0225	4.4995	2.4559	4.168	4.305	5.0328	6.9374	1.1653	1.7213	1.8321	3.0469	4.0663	6.3589	2.738	2.1014	7.3265	8.2914	11.8302	5.935	1.8913	10.0768	6.6623	10.6715	10.9226	9.2504	3.2528	1.7226		0.570622	5.31778
12.1415	7.5675	2.5323	6.7227	7.6364	5.0683	8.4399	2.4891	1.4643	2.0638	1.6977	5.1192	5.0548	3.2702	4.501	10.0918	6.4324	13.564	2.4698	1.409	12.6156	5.1037	11.149	11.5713	8.3492	3.1227	0.8464		0.57627	5.78277
12.2606	5.3811	4.9662	4.3015	5.0096	5.5832	6.184	0.0082	0.8883	4.556	5.5956	4.7394	8.5449	4.8801	3.7605	5.7122	8.9343	11.6988	4.1757	2.2075	8.8086	5.8342	8.1931	10.3073	9.7376	2.8492	1.9333		0.581923	5.56886
12.3796	3.5315	5.3879	6.0741	3.2467	1.5617	4.9809	0.377	1.3312	3.2371	4.2137	2.6926	5.3047	3.5292	3.6012	9.6116	10.4943	13.8559	3.8395	4.7641	5.6798	6.5816	16.7912	9.6947	9.2567	5.057	6.1413		0.587571	5.80143
12.4986	4.69	4.2327	3.934	5.7835	3.239	7.8442	0.6733	1.5356	3.4082	2.4688	5.2751	4.7657	4.4991	4.4242	6.5497	6.9562	16.602	1.6461	1.2736	7.278	8.372	11.595	9.7569	8.8783	4.1697	3.0893		0.593219	5.4977
12.6177	3.3979	5.9137	6.962	4.8595	5.7654	4.6797	1.3508	0.9239	2.1606	2.9575	3.3606	7.6781	3.8757	2.6108	4.7443	8.1252	16.5036	3.4828	1.0247	6.1027	2.8643	13.1131	18.5978	8.9922	6.4796	6.8088		0.598872	5.89751
12.7367	4.2419	5.6039	5.5369	2.0505	5.4149	5.8988	0.4424	0.4528	2.7543	5.9831	4.5841	6.9053	3.7001	2.3876	6.132	5.3859	13.5052	1.4655	1.192	4.5114	8.5674	8.4283	15.9733	5.7502	6.3212	6.3215		0.60452	5.36579
12.8557	6.156	3.5059	6.4251	2.2426	3.4307	4.2194	2.0829	0.9658	1.3037	2.3965	5.3896	5.5235	2.6334	2.2196	9.6778	9.3368	8.7315	0.6409	2.5745	6.7713	7.1167	10.474	15.6641	9.4377	6.7132	6.6123		0.610168	5.47098
12.9748	5.34	3.9475	6.7977	5.5174	3.3772	5.1056	0.9503	1.2458	1.8325	3.8627	1.3064	4.7177	1.0985	2.9657	1.8871	8.1965	8.0791	1.8975	2.0998	9.7152	10.071	12.146	13.5736	5.8829	7.5563	9.1683		0.615821	5.3207
13.0938	6.3546	3.5759	4.5833	5.5425	3.7157	3.4859	2.0942	2.4166	1.3035	4.1625	1.6029	7.4688	2.4343	2.643	2.7086	11.3099	10.7217	1.4083	2.2444	7.63	7.6433	14.9612	11.3306	3.215	2.1924	10.2712		0.621469	5.27001
13.2128	6.5508	1.5058	3.3395	3.5084	5.9711	2.7631	1.1702	0.8446	1.4732	4.2806	3.3729	7.675	2.74	3.1075	3.6973	13.4092	9.7985	1.2623	1.6396	9.3163	8.8403	18.2222	10.844	6.9611	4.3194	6.7298		0.627117	5.51318
13.3319	3.0816	1.5405	5.1876	6.0297	2.6191	2.6342	2.9922	1.4106	2.4587	3.2105	5.3809	4.469	1.7833	2.6954	3.3414	5.9825	8.775	1.2642	1.7018	8.0309	6.9997	11.4995	12.203	11.3904	5.5329	6.6637		0.63277	4.95686
13.4509	3.4364	4.0979	5.9057	4.3368	3.7629	2.3315	1.7543	1.0246	0.8602	3.3709	5.1012	3.151	1.9714	3.2313	6.6097	4.875	7.8177	1.788	1.124	5.34	8.3566	11.8592	9.9136	4.0002	4.8607	4.1174		0.638418	4.42301
13.5699	4.4835	5.9973	7.5313	5.5942	2.8832	1.4477	0.7156	0.6763	3.7985	1.8921	3.8138	5.1545	4.6835	4.4289	6.0426	6.1743	12.9093	1.7841	1.5809	3.6097	9.1202	6.9832	8.7767	5.1351	7.2602	6.6573		0.644066	4.96669
13.689	4.3796	4.4845	9.3594	4.3225	3.6524	1.1063	0.2309	0.1898	1.9147	0.7489	3.3711	3.4743	3.0136	5.2764	9.0112	5.9252	14.0165	1.0238	1.5136	4.6984	8.4361	8.381	9.8477	8.7863	6.9292	5.977		0.649719	5.00271
13.808	1.1442	3.348	6.6456	6.9431	2.9457	3.5053	2.8437	1.5241	0.9173	2.2967	3.5544	7.5981	3.0253	6.0694	3.8018	8.1228	16.0359	2.961	0.4486	7.1041	9.8832	7.6248	11.0645	8.7378	3.7327	3.196		0.655367	5.19516
13.927	4.2731	3.4885	6.7788	7.3537	2.6835	2.839	1.9359	2.0449	2.4927	4.4838	3.3883	1.9403	3.3859	3.6476	4.7181	4.959	13.5323	2.4303	3.5178	6.1681	9.3461	6.897	10.7598	13.1937	6.6109	5.3382		0.661015	5.31567
14.0461	4.5784	3.0715	5.5333	5.2451	3.8726	1.3632	2.0176	0.8161	0.311	5.8984	5.2523	4.9743	2.9188	1.9446	9.4993	8.4338	12.086	1.2694	2.8062	3.2837	8.8899	9.6771	9.8706	7.0405	7.4661	3.5477		0.666668	5.06413
14.1651	4.2999	1.4628	3.7002	3.9167	5.271	2.2695	1.233	2.5795	1.4209	4.5682	3.532	6.2363	2.6153	2.5956	4.5615	9.84	14.0069	1.8552	1.8954	3.7417	8.4378	7.5906	13.4748	8.6215	7.4623	3.9516		0.672316	5.04385
14.2841	4.4844	2.174	3.1627	5.0578	3.2566	3.1909	0.3523	0.5695	1.532	3.7378	4.9501	2.8735	2.4972	1.5411	3.0618	5.5006	10.719	0.6738	2.3201	5.9215	9.4244	10.3242	14.7987	8.5387	8.538	2.6812		0.677964	4.68777
14.4032	3.8372	3.6994	0.3808	4.3443	2.6554	3.0166	1.2813	4.4273	2.4063	4.7072	4.2095	3.5385	2.9397	3.4742	3.387	4.092	9.2556	2.7062	3.1377	5.7546	9.2387	11.1639	16.835	13.1862	8.0694	5.3087		0.683617	5.27126
14.5222	3.3426	3.323	1.5332	7.8548	1.3791	3.0574	2.0879	1.846	3.8959	3.2805	5.5765	2.8061	1.1569	4.6523	4.8174	3.4364	6.6015	4.3648	3.1868	4.7119	8.8425	5.1251	15.5463	8.4027	9.1979	6.3858		0.689265	4.86197
14.6412	3.7466	2.2165	0.6674	7.1515	3.1161	5.7796	0.5668	0.7884	1.5636	4.515	5.6095	4.3723	2.6532	2.8043	4.0785	2.57	6.4488	4.2745	1.5815	7.7696	9.0917	9.3876	10.3817	10.2669	8.0215	6.3405		0.694913	4.83706
14.7603	3.4243	2.9749	3.2938	4.8184	2.3393	7.6513	0.6791	2.1873	1.7551	8.2411	4.8094	3.4895	6.9943	3.3927	2.1883	6.2434	4.455	2.1943	0.789	7.7407	8.191	6.8846	12.8637	9.6185	9.6779	3.5952		0.700566	5.01893
14.8793	3.1052	3.3596	5.8881	5.8392	2.3912	9.4317	0.3823	1.352	0.4995	4.718	5.6319	2.7107	1.9887	0.7654	5.5536	6.9353	8.9034	3.012	1.1769	4.2479	10.3323	7.4945	11.955	4.4316	8.3958	5.808		0.706214	4.85807
14.9984	3.8839	3.0188	2.8664	4.8813	2.0906	7.4774	0.4526	0.7028	3.2241	2.5945	4.6158	2.9533	2.4226	1.1939	3.3955	8.6626	8.4372	3.5293	0.4988	5.7107	11.2629	8.6972	8.8902	10.4991	6.62	3.7877		0.711867	4.70651
15.1174	5.2124	3.9343	1.7192	5.564	2.814	9.0264	2.1925	0.8466	3.255	3.1528	5.8297	1.8094	1.207	2.9444	4.3144	6.0258	5.6914	1.5688	2.1152	4.0891	11.0477	12.4029	8.7637	11.8049	5.695	5.3159		0.717515	4.93625
15.2364	3.0479	4.0474	1.671	6.1312	2.109	4.1953	0.5688	1.7901	2.9423	2.6308	4.4605	6.4853	3.6561	2.0813	7.2535	7.5534	7.3186	1.9703	1.5621	6.3126	10.524	10.6114	7.6907	16.0676	5.0616	6.3365		0.723163	5.1569
15.3555	3.7402	4.1712	1.805	6.6798	4.0804	5.348	1.3069	0.2583	4.0049	3.1713	6.0356	4.7897	3.8626	3.0537	5.9897	2.9416	5.2707	3.1042	1.6577	3.9007	7.7001	11.587	14.4597	19.0809	6.723	2.6047		0.728816	5.28183
15.4745	2.7782	3.8652	1.8397	5.7804	5.0993	2.0548	2.0758	0.546	2.0581	5.4196	3.8216	5.8881	1.4056	1.7784	3.7068	3.3754	5.737	2.2052	4.0513	5.5562	6.9126	8.0973	11.4472	13.5323	9.0818	2.2011		0.734464	4.6275
15.5935	3.5085	4.8526	5.3638	6.6226	4.3688	1.9624	0.8614	1.3423	2.9571	3.5482	4.9627	7.0072	1.51	3.5128	4.2632	6.3309	4.0745	1.7852	2.9546	6.1638	7.3935	8.5808	8.8621	12.6125	6.3535	2.9832		0.740112	4.79762
15.7126	3.6851	5.5779	3.0179	4.6542	5.6912	4.1717	0.451	1.0549	4.8454	2.1653	5.7762	4.1177	3.2378	0.747	1.742	4.8977	4.8636	2.0566	2.6652	3.3573	5.6451	11.0312	9.7335	10.595	3.1555	2.2857		0.745765	4.27776
15.8316	3.1335	5.7864	8.135	3.3613	7.235	2.0964	2.4093	0.6245	2.4432	4.472	3.519	8.5118	2.2566	2.9686	1.4421	6.1637	5.3041	3.8362	2.093	6.9368	4.3496	12.6579	11.8753	13.8293	5.6587	6.6802		0.751413	5.29921
15.9506	2.435	3.2001	5.8287	2.789	4.3633	3.2629	2.8158	1.9242	2.4879	7.2424	1.0209	7.5411	0.8226	2.9498	4.7127	7.9221	6.486	1.6638	2.2393	5.2829	6.9804	13.6838	8.55	10.9795	6.8199	3.5238		0.757061	4.90492
16.0697	1.9121	2.5476	5.5701	2.5894	7.0851	2.1402	1.652	1.0766	4.4287	3.1254	2.8983	6.0772	2.1499	5.5238	4.4786	6.7939	3.2931	1.9918	2.617	6.7033	8.0833	13.2116	13.3218	12.4649	8.1843	6.0994		0.762714	5.23152
16.1887	4.2186	4.6218	5.4855	2.865	4.9836	4.4133	1.5422	2.0981	3.1274	2.7006	5.1823	6.098	1.9774	1.5594	2.9753	8.254	3.6459	1.6971	1.9812	5.1153	5.4902	16.8824	11.3011	9.8772	4.896	6.025		0.768362	4.96207
16.3077	2.6094	2.8405	7.5089	2.5244	5.1227	2.5404	1.8866	0.9925	2.5425	3.2813	3.6267	5.6215	1.7794	0.4663	5.6254	3.6159	3.1918	1.7624	2.301	8.1516	6.8244	13.3884	10.6591	8.7456	5.498	8.3232		0.77401	4.67038
16.4268	1.8737	2.2473	5.0855	5.0301	7.0369	2.3825	1.8863	0.7597	5.0576	0.6847	3.4297	7.4676	2.2711	5.0367	5.0793	3.7133	3.4039	1.6911	2.7097	8.2168	4.1846	16.2962	10.4812	8.8612	6.1251	2.7431		0.779663	4.7598
16.5458	2.2349	3.0186	2.2478	4.7058	3.1687	3.1631	1.4714	0.766	4.9861	1.7271	2.5566	6.6819	0.3834	4.1604	7.3832	5.022	2.5706	1.9089	1.6812	6.3994	6.0364	17.8382	8.7666	14.7347	8.6775	3.1299		0.785311	4.82386
16.6648	1.6679	3.8108	4.1159	4.6612	5.0784	3.6329	0.6808	0.9009	4.5545	1.8933	2.7536	5.8746	0.865	3.4501	4.2731	3.7119	7.1025	2.0435	0.1716	3.7121	5.834	14.5614	12.2274	11.1189	4.5626	4.5685		0.790959	4.53182
16.7839	3.5267	4.3037	6.1553	5.9498	3.4456	5.4298	2.1703	1.5036	2.3525	3.311	2.607	4.525	1.0299	2.3702	3.3833	3.7605	5.9092	1.2683	0.8155	4.2438	10.8283	14.8217	9.1292	7.6048	9.2981	4.3925		0.796612	4.77445
16.9029	2.5037	2.1094	5.7431	3.5122	3.5126	2.4929	2.0065	1.9691	2.9291	2.2706	2.266	6.5998	2.4477	2.6133	5.5487	2.1154	3.6904	1.5776	1.3122	4.7927	5.6488	14.6931	6.8441	4.5729	6.9792	3.8915		0.80226	4.02472
17.0219	4.0966	3.0323	4.3712	2.4711	2.1247	2.037	1.7507	0.9107	2.5354	4.5524	2.3355	3.0534	2.0694	3.4055	2.2949	5.0343	7.4256	0.7094	1.4719	6.0468	4.2909	10.207	10.7336	4.3637	11.9055	3.5832		0.807908	4.10818
17.141	4.0174	2.148	5.4777	0.9973	1.3977	3.3248	1.5954	1.4275	3.4017	3.6453	3.4549	5.655	1.2841	4.4299	5.571	7.2773	2.8397	2.999	0.8241	6.0233	7.5058	14.292	9.6261	8.8789	12.6624	6.8462		0.813561	4.90779
17.26	2.2017	2.7051	3.1738	1.8216	1.2973	1.2358	0.7978	1.3671	2.6653	1.8304	5.3219	3.2808	1.6394	1.8964	4.3758	3.9445	4.0078	2.2586	2.6623	4.2263	8.6109	13.4373	14.5791	2.131	16.4688	6.1383		0.819209	4.3875
17.379	1.4131	2.4537	2.5856	1.9313	0.9646	3.3314	0.4164	0.8947	3.2126	3.787	6.5185	4.2565	2.7924	2.4903	5.886	7.0924	4.9801	2.9753	1.8988	2.8569	8.4493	8.5973	11.994	4.799	8.0371	5.0291		0.824857	4.21705
17.4981	2.2245	2.9412	2.9039	1.5769	1.3503	2.6249	1.2782	1.6899	2.3246	4.4813	8.0447	1.9248	3.5498	1.7673	7.7881	4.476	4.7507	3.0035	2.5506	4.8648	7.1259	5.9313	10.6746	5.3295	6.9656	6.3519		0.83051	4.17288
17.6171	0.4612	1.8589	5.5333	2.0746	1.8169	0.938	1.9558	1.172	3.0151	3.5419	4.9412	3.2192	2.3776	1.3068	6.859	3.274	5.0817	3.4847	2.1709	6.8927	7.6681	8.4963	8.4287	4.6234	8.5053	5.6075		0.836158	4.05018
17.7361	1.4883	3.0661	6.2882	2.2106	1.5912	4.0084	4.1109	1.198	0.9677	3.7465	2.2144	5.0137	0.9521	2.7206	11.0584	3.6518	6.3033	6.4294	0.7083	7.9356	6.442	10.9093	6.4137	5.5571	11.0243	8.3244		0.841806	4.78209
17.8552	5.3011	2.0776	2.876	1.1832	1.4426	7.6816	2.7813	1.0504	2.8066	4.0085	3.523	5.6483	0.9323	2.1906	7.894	6.2431	6.7115	3.2254	2.0396	5.5793	8.2412	6.9491	7.0647	6.1912	10.4986	7.7349		0.847459	4.68753
17.9742	3.2503	4.8569	3.3342	1.8833	1.9559	4.8881	2.464	0.4827	3.8537	5.1211	4.3213	6.2518	0.8569	3.3708	6.1781	6.4975	11.8509	4.9059	2.38	5.1371	9.4083	4.6769	8.3352	3.5308	7.0135	9.3804		0.853107	4.85329
18.0932	3.2767	3.1071	3.5729	2.4683	0.5157	3.8095	4.3428	1.5124	1.0241	3.5375	3.4424	6.3841	2.9905	2.8735	3.8076	6.4701	10.6382	6.7006	1.2891	7.7507	5.1559	8.105	4.2585	3.4984	7.1539	8.2252		0.858755	4.4581
18.2123	4.5955	3.9026	3.1488	2.1781	2.1132	4.9069	4.9554	2.0733	3.1035	2.9155	4.3291	4.6915	3.854	1.8111	3.2734	5.5952	5.5939	7.2742	2.5448	4.6069	5.3625	7.6286	4.3942	2.8724	6.9792	3.9897		0.864408	4.18052
18.3313	4.306	3.2766	6.8811	5.2289	1.8385	3.2088	8.4155	0.7824	3.4445	2.3406	3.9299	1.9905	5.0529	2.8455	1.9724	3.8985	5.7193	4.8611	4.1497	8.1373	6.8653	6.0743	8.0908	3.6922	5.8993	7.453		0.870056	4.62903
18.4504	4.9295	1.3409	6.0859	2.3058	0.9265	2.0036	6.1996	0.7495	2.9833	2.3206	3.0489	5.6558	2.7977	1.2573	2.8978	4.9152	4.5268	2.6598	2.4693	8.5943	9.7091	5.2339	4.3096	2.0758	4.8797	9.748		0.875709	4.02401
18.5694	2.1766	3.8054	4.9876	2.4142	0.0602	3.6109	2.5252	2.7483	3.8081	2.1418	7.6171	5.1051	5.5369	1.2885	5.6956	7.3616	9.5483	4.898	1.2104	7.6882	7.3178	4.0248	5.4523	3.014	4.1812	10.1627		0.881357	4.55311
18.6884	3.9389	1.6961	5.1437	2.8765	0.8884	7.8477	3.1303	1.7771	4.1778	3.3662	6.3363	4.9425	8.426	3.6305	2.2296	7.2259	7.5292	5.9511	0.3824	11.6482	11.1183	4.9221	5.4801	4.1392	5.7416	5.2975		0.887005	4.99397
18.8075	2.6131	3.684	5.6377	3.5582	0.679	5.605	3.0203	3.3674	3.2191	4.1299	5.0201	6.8261	10.0347	4.5435	3.5766	3.2019	9.9772	7.3333	2.9647	7.0706	7.3884	6.4806	3.6045	5.1744	3.2358	6.0479		0.892658	4.92285
18.9265	0.9555	1.8843	5.0562	3.8858	0.3662	4.3369	1.7422	2.1463	6.6254	3.7561	5.4552	6.7137	6.9443	2.4452	2.1892	5.1724	7.0546	6.365	4.0468	13.1162	4.1295	3.8144	4.6711	2.1384	4.7143	7.2991		0.898306	4.50093
19.0455	0.7557	1.7524	1.1973	2.4712	0.0714	2.1794	1.5228	1.8225	5.3042	5.1685	2.9225	7.1631	5.5252	4.4136	2.8903	7.3838	3.3214	5.4293	5.3274	10.349	6.6193	4.0792	3.3528	2.4375	3.8371	10.3971		0.903954	4.14208
19.1646	0.7896	2.9795	1.5113	5.0779	1.5567	2.3772	0.8846	2.2341	7.2876	2.3195	4.3727	7.4724	3.5147	1.3872	3.5695	8.3718	4.2213	6.15	4.067	5.195	4.667	2.5915	3.2147	1.6217	4.9575	5.7823		0.909607	3.77593
19.2836	2.704	0.9922	0.9824	4.5352	0.2027	3.2147	3.5775	2.9717	3.9306	4.0746	1.8545	8.7229	5.0667	2.3749	5.7429	7.797	3.9285	5.5138	2.5033	4.4365	9.4346	1.8245	4.0038	0.3625	5.3307	10.2329		0.915255	4.08906
19.4026	2.2374	2.7731	0.9602	2.2507	1.1051	4.4498	3.6033	6.3981	3.5321	2.0664	4.8291	4.1417	4.2355	2.3454	6.1045	3.7124	2.838	5.3388	5.0569	3.8152	7.233	2.1542	5.1773	1.6537	2.2915	8.2708		0.920903	3.79132
19.5217	5.3045	2.2232	3.9609	2.8003	1.7919	5.1986	3.6013	4.4777	3.2401	3.8968	3.0266	3.0547	3.6385	2.9774	10.0918	5.4516	4.6738	4.7884	6.5223	6.5932	5.6173	3.8384	2.7301	1.0385	5.3818	8.2342		0.926556	4.39053
19.6407	3.6933	1.8628	3.3115	2.7863	0.3163	3.2934	2.2409	6.0025	2.1557	2.1743	1.4526	4.1051	5.0277	2.0735	4.0189	4.206	6.5467	10.9964	8.9435	3.8437	5.065	2.3426	2.8858	1.9638	5.6902	10.4878		0.932204	4.13409
19.7597	2.9313	1.5875	1.1539	0.9212	0.1829	3.9731	4.0095	2.7185	3.3713	3.0378	1.0689	3.1217	6.4719	0.7118	4.0826	8.499	2.8827	9.3724	7.8306	7.2924	4.1334	1.4985	1.9892	1.4498	4.1764	9.8127		0.937852	3.78004
19.8788	2.1784	3.2699	3.8389	0.2543	0.0596	3.6726	5.2707	1.4486	2.2698	2.9252	2.229	1.8528	6.5191	3.1087	7.0395	3.4367	5.4048	9.0902	12.4955	2.7675	5.5762	0.8641	4.7736	1.1033	4.1627	10.2695		0.943505	4.07235
19.9978	2.6571	0.9298	4.4684	1.4186	0.2819	1.3676	3.7916	4.5371	2.0303	2.1127	1.0431	2.2173	6.9813	3.5491	5.0113	4.4151	7.5701	8.0754	10.1437	6.0905	5.9038	2.0239	1.8495	0.5651	2.7086	8.379		0.949153	3.85084
20.1168	2.0943	0.852	1.1028	1.1666	0.041	3.0008	4.7382	3.9924	3.7727	1.948	1.6534	0.7282	4.4404	2.2147	7.4854	3.6041	4.1152	9.1217	11.2459	8.7294	4.8427	0.5125	0.6888	0.8597	2.2868	8.6054		0.954801	3.60935
20.2359	2.1389	2.8051	2.2534	1.6761	1.0022	1.3891	6.678	6.5621	3.1721	0.3359	0.7733	1.1207	4.0747	2.2738	5.7827	5.3604	7.1225	7.6812	6.1689	5.8909	1.4122	0.5736	0.7968	2.104	4.7486	7.741		0.960454	3.52455
20.3549	4.3562	3.9112	3.6658	0.9919	0.3738	0.7633	5.4755	3.7135	1.5845	0.5319	0.2104	1.6927	4.0994	2.4599	3.5789	2.8481	7.7032	7.5567	7.3972	3.6642	2.5387	1.1458	1.0417	0.5209	3.5665	4.0731		0.966102	3.05635
20.4739	4.7737	0.528	3.0462	0.0958	0.0587	0.6801	2.2884	3.8191	3.58	0.6332	0.7031	2.9824	6.0122	2.9786	6.7316	3.5211	4.4248	6.866	6.2715	6.5842	2.8241	0.5601	1.351	0.543	2.3615	2.571		0.97175	2.95344
20.593	4.6013	0.9465	1.4787	0.0102	0.0355	0.732	0.8982	4.208	2.4625	1.6261	0.2176	0.6471	5.8679	3.4325	7.2456	2.4798	8.325	9.8141	4.9046	6.1267	0.7345	0.703	1.2337	1.026	2.2881	3.4148		0.977403	2.90231
20.712	6.6552	0.0765	1.9394	1.1082	0.1065	0.5828	2.4613	5.9803	3.15	0.925	0.042	0.198	3.8476	6.1418	5.9814	1.3918	5.6611	5.7054	9.2485	5.1669	1.4895	0.6916	1.5476	1.0175	1.1354	1.7071		0.983051	2.84455
20.831	3.5773	0.7631	2.3622	3.0594	0.4897	0.0694	3.1223	2.5201	5.7082	0.9515	0.643	0.4191	3.2963	5.8198	3.6057	0.8444	4.0166	4.7403	6.4839	7.8682	1.3776	0.3244	0.6842	0.786	1.3229	0.2594		0.988699	2.50442
20.9501	2.44	2.0775	3.1012	1.8172	0.1052	0.8014	1.9524	2.1479	2.0164	0.3276	0.7906	3.0442	1.8263	4.6604	6.0391	1.2069	3.6882	4.5481	6.3065	5.9965	0.7001	1.801	1.7789	0.8402	0.8888	1.4068		0.994352	2.39652
21.0691	2.7212	0.7443	0.9566	0.1101	0.8422	1.2545	2.9734	4.6639	2.715	0.0052	1.1304	2.1755	4.2932	3.8372	3.227	1.3544	1.4629	6.9335	6.3383	3.2376	1.3651	1.7204	2.0831	0.9999	0.1151	2.67		1	2.305

## Sheet: Image9
X0	Y0	Y1	Y2	Y3	Y4	Y5	Y6	Y7	Y8	Y9	Y10	Y11	Y12	Y13	Y14		Ap-Ba	Average int.
0	2.00671	1.04577	2.93467	1.02802	2.02141	3.00237	2.2544	2.61531	4.26868	3.51716	5.01158	4.38482	1.39698	1.7199	2.7961		0	2.66693
0.119	1.75297	0.2017	3.75614	2.25535	1.9197	2.52167	2.29166	3.34783	4.76534	3.62853	4.94878	2.71796	1.36086	3.4993	4.776		0.00617105	2.91625
0.2381	2.29222	0.25141	3.65862	4.48832	1.34992	2.56373	2.92129	3.46288	3.1954	3.08954	2.81481	4.73686	2.00463	3.019	7.6734		0.0123473	3.16814
0.3571	2.67394	1.58727	3.04727	2.46117	1.20844	4.05741	2.00675	2.82646	4.27005	4.24408	6.0057	3.91586	2.05222	2.5843	6.8083		0.0185183	3.31661
0.4761	2.20912	0.97682	2.31243	4.23719	0.83952	2.5776	3.48848	2.92925	5.85086	5.73868	5.81493	3.77146	2.19917	3.4071	6.3172		0.0246894	3.51132
0.5952	2.16618	1.01059	2.68162	3.86532	1.25809	3.03146	5.46219	3.73245	3.10193	5.95604	4.68556	3.70325	1.31058	4.0695	5.8302		0.0308656	3.45766
0.7142	1.71669	0.8341	2.23702	6.04149	3.71274	2.24659	4.01167	3.31007	3.76724	8.65211	5.31637	5.57375	1.18448	3.1393	7.9796		0.0370367	3.98155
0.8332	2.32829	2.43781	1.02943	5.51516	1.06225	2.14974	3.42041	2.89277	5.26903	5.94512	7.42071	2.94984	2.16936	6.3584	10.401		0.0432077	4.08995
0.9523	2.30856	1.15387	3.56142	1.68253	1.38826	1.31297	3.12977	2.36504	4.12519	5.29515	5.7214	3.22129	1.39126	5.9961	9.0514		0.0493839	3.44695
1.0713	3.7666	2.32636	2.21862	0.89596	1.97138	3.56142	2.13896	2.44033	4.82357	6.5931	3.79873	3.94749	2.56387	5.9682	8.0942		0.055555	3.67392
1.1903	2.89494	1.82406	1.54708	3.1625	1.86983	2.15728	2.72752	1.63453	3.52142	7.18994	3.93033	1.51402	2.52234	9.2014	12.6224		0.061726	3.88797
1.3094	0.61083	2.62375	2.40742	2.71115	1.95898	3.28253	1.92248	1.827	3.84476	4.04798	4.31978	1.60503	2.47746	8.3868	10.0768		0.0679023	3.47352
1.4284	2.47626	3.03856	1.67013	1.23663	2.62585	3.29789	1.80796	1.33646	5.35784	3.73183	4.16664	4.69862	5.86702	6.911	7.3395		0.0740733	3.70415
1.5474	1.39865	2.49402	2.30755	2.04556	3.0035	2.50547	1.64373	2.10639	3.81414	2.98301	2.43229	3.63108	5.74799	7.6315	6.6823		0.0802444	3.36181
1.6665	2.98622	0.82143	1.16013	2.07728	2.78251	1.95334	1.05912	2.33361	2.35863	2.87961	1.55538	3.03468	6.52047	6.9597	11.7181		0.0864206	3.34668
1.7855	1.38872	0.29587	2.26435	2.23999	1.45795	1.37108	2.01976	2.20672	1.81367	2.50699	2.55708	2.49809	7.91646	8.4386	11.2546		0.0925916	3.34866
1.9046	0.97671	1.16436	3.70099	3.41471	2.46675	1.80209	2.09408	0.62267	1.27314	4.45177	2.09221	3.26074	7.94343	13.5304	9.9497		0.0987679	3.91625
2.0236	2.22712	0.37665	4.4913	3.01323	3.49056	1.57852	1.84245	0.64205	2.54275	3.86907	2.13333	1.39052	5.35959	10.0805	9.5365		0.104939	3.50494
2.1426	2.03554	0.26845	5.31346	1.80082	2.24768	1.85105	0.97747	1.20145	2.81095	3.65634	2.69081	2.60196	6.32876	12.2304	7.3976		0.11111	3.56085
2.2617	2.27806	0	4.52565	2.99849	1.7652	2.36506	2.86726	1.26916	5.96536	3.43805	2.43047	2.4254	7.55561	7.6983	9.1862		0.117286	3.78455
2.3807	1.00643	0.65353	4.26158	2.63305	3.10581	1.94028	2.16069	1.76711	3.6906	2.23159	2.59354	2.07128	4.14664	4.7722	6.3566		0.123457	2.89273
2.4997	3.03801	0.81224	1.85381	2.22034	1.58918	1.67108	1.81843	2.20929	5.64054	3.18907	1.91425	2.94471	5.3263	5.8123	5.5626		0.129628	3.04014
2.6188	0.70294	1.72465	1.51299	2.11908	2.00833	2.88257	2.81477	2.44503	2.26492	2.33507	1.42137	2.78997	4.5448	6.1313	6.1019		0.135805	2.78665
2.7378	1.55506	2.28967	1.891	2.46004	1.87143	3.26141	0.58871	1.37952	4.22869	3.93811	1.10936	3.44383	6.99416	5.6305	7.8133		0.141976	3.23032
2.8568	1.83264	1.19218	0.65039	2.79441	2.58095	2.44499	2.61723	0.32188	3.55319	3.26861	1.58766	2.52821	6.75173	5.1384	7.9923		0.148147	3.01698
2.9759	0.73384	3.59799	0.8257	2.66682	2.48998	1.08347	2.17232	0.08551	3.5096	3.09448	1.20328	2.35139	5.75085	4.4007	5.3195		0.154323	2.61903
3.0949	1.21359	1.99557	2.61924	1.70748	0.71291	1.4505	1.81191	2.41779	1.34568	1.16256	1.21025	4.07741	5.00011	4.1802	8.1325		0.160494	2.60251
3.2139	2.98015	2.17226	4.77628	1.56202	1.43621	3.78152	2.26321	2.0514	2.50012	2.57104	2.20998	3.40462	4.39446	3.6718	9.1364		0.166665	3.26076
3.333	1.5934	1.72245	3.05312	2.69503	1.74122	2.71665	3.30409	2.31044	1.66064	2.6084	4.73606	2.26638	3.67671	2.6257	5.8197		0.172841	2.83533
3.452	1.29336	0.53656	1.25365	2.46971	2.17213	1.81589	2.80954	2.04074	1.18715	3.08504	3.74476	2.21325	3.05612	3.4238	4.3368		0.179012	2.36257
3.571	1.42596	1.3437	0.85041	1.60724	2.7048	1.58156	2.12559	1.34706	2.93874	2.53567	2.33268	1.40553	2.88816	7.9451	3.7956		0.185183	2.45519
3.6901	1.35282	1.13899	2.5587	0.85722	2.40876	1.60214	2.77843	2.35222	2.2905	1.6591	1.94361	1.12611	4.43915	7.5969	3.3516		0.191359	2.49708
3.8091	3.40275	2.18109	2.06578	0.57449	1.02346	1.37051	3.87291	4.20831	2.00608	1.65369	3.08893	1.9566	6.44532	3.9282	3.6506		0.197531	2.76191
3.9281	2.31854	1.15357	1.43208	1.53045	3.91803	1.17698	3.02689	1.3938	1.4868	0.74968	3.66358	1.56252	7.20337	5.7357	2.075		0.203702	2.5618
4.0472	2.90036	1.30443	2.35629	2.55293	1.86442	2.60201	1.05643	0.94205	3.51598	1.79877	2.40862	1.22676	4.76855	4.8448	0.8389		0.209878	2.33209
4.1662	3.92123	1.78249	1.99	3.74557	2.81287	2.00595	2.6046	2.14192	2.28907	3.39236	1.83328	3.17061	6.94058	4.3039	1.1115		0.216049	2.9364
4.2852	0.91742	1.37596	2.6791	2.53666	2.99026	2.90797	2.56189	1.84183	2.98339	3.1097	3.10121	1.11267	4.14893	1.8957	1.3664		0.22222	2.36861
4.4043	1.07623	2.51861	2.81499	2.4947	2.15221	1.20484	3.06442	1.20598	2.78366	2.02986	1.34439	0.87111	5.10817	1.6354	2.1678		0.228396	2.16482
4.5233	0.14517	0.63524	2.19419	2.41852	3.12837	2.13081	4.73016	3.61938	2.78685	2.57033	1.71796	0.67494	5.04065	2.3649	2.838		0.234567	2.46636
4.6423	0.7378	0.70416	3.23309	1.39693	2.06237	3.06851	2.92417	4.46225	1.535	3.12285	0.30928	2.02536	4.24629	4.1337	3.516		0.240738	2.49852
4.7614	1.00944	2.5954	4.28175	2.22625	2.1996	2.91862	2.29854	2.97079	3.55127	1.65034	2.92433	1.01506	5.54429	2.1597	3.7717		0.246914	2.74114
4.8804	1.82341	3.91895	1.9455	2.39529	1.51142	2.58625	1.57738	2.26194	2.93149	2.39981	1.86739	2.30806	3.48069	1.3149	2.49		0.253086	2.32083
4.9995	1.21196	2.1206	0.70476	3.95938	1.93288	4.29596	3.71545	1.39363	1.70131	3.27355	1.01948	2.4277	3.85142	2.191	1.756		0.259262	2.37034
5.1185	0.44025	1.89132	2.22236	2.2514	1.8764	1.64791	2.37833	1.59704	1.82847	3.8586	1.26011	1.65536	6.24436	2.4076	1.4472		0.265433	2.20045
5.2375	2.53019	2.84992	2.79131	1.96907	2.91825	2.07405	2.14124	0.96481	4.29911	3.81216	3.23327	1.73621	5.53196	1.5871	3.4748		0.271604	2.79423
5.3566	3.35269	2.87232	2.3249	1.99252	3.06604	1.42261	3.39897	1.07028	1.89544	3.5764	1.08072	3.09594	3.89965	2.2509	2.9079		0.27778	2.54715
5.4756	1.25875	3.58281	2.73426	1.93598	2.32564	3.11762	4.35878	2.97716	2.76849	1.99354	1.62915	0.58918	3.83505	0.5056	1.5699		0.283951	2.34546
5.5946	0.82568	2.71405	1.60045	1.02272	2.90314	2.44595	3.59434	3.65403	2.26655	4.69442	1.52899	1.39096	3.73277	1.0064	0.9502		0.290122	2.28871
5.7137	2.9564	2.61357	2.34757	1.55125	2.35442	2.98908	2.17555	1.68259	2.92195	1.7284	1.94189	2.15046	3.26164	1.4803	1.309		0.296298	2.23094
5.8327	1.46047	2.98298	2.31265	2.56803	3.90162	1.57262	1.19481	1.29012	2.26998	3.97432	3.82526	2.80791	4.29432	1.9681	0.9969		0.302469	2.49467
5.9517	1.30425	2.364	2.24614	2.35742	2.06622	2.13417	1.81068	3.0009	1.61383	7.35257	4.25876	0.72937	2.65145	1.8229	1.8556		0.308641	2.50455
6.0708	1.20647	0.9358	1.00275	0.73459	2.09548	2.5802	2.05843	4.87224	3.59106	4.51948	2.56798	1.86559	2.20399	0.4634	2.0381		0.314817	2.18237
6.1898	2.50228	1.80914	1.38668	0.896	2.13004	3.03585	1.49615	6.32576	2.68551	3.00938	2.95392	1.0321	3.49813	1.0705	2.4573		0.320988	2.41925
6.3088	2.09777	2.14285	1.08786	1.68093	3.17137	2.57327	2.55838	3.28144	3.08576	2.24202	4.10481	1.9654	2.59477	2.2064	2.4222		0.327159	2.48102
6.4279	1.21761	3.14843	1.33594	1.98693	3.40425	3.3104	2.14793	2.61425	2.89868	1.94436	3.25536	0.8683	3.03999	1.2639	2.5561		0.333335	2.33283
6.5469	3.35843	2.14024	1.23852	2.02452	0.957	4.45695	1.39327	2.41492	2.22409	2.83299	2.56181	0.89002	1.77214	0.5608	0.7802		0.339506	1.97373
6.6659	2.85229	2.10047	1.60165	0.88849	1.47315	3.72634	3.18765	2.54681	2.25756	2.44122	2.36905	1.50931	1.25981	1.6947	1.4228		0.345677	2.08875
6.785	2.38297	1.49613	2.18733	1.46507	2.63444	3.6985	1.64318	3.77297	3.10667	1.48428	2.34068	2.40382	1.58206	1.9721	1.0394		0.351853	2.21397
6.904	2.50155	0.77092	2.30915	2.0292	2.94336	2.70341	2.35151	1.89566	3.00991	3.88582	3.49794	0.95547	2.48018	2.8893	2.3239		0.358024	2.43649
7.023	0.71208	1.04881	0.49413	1.73244	2.06118	1.49344	2.4869	0.88628	3.05901	5.53164	2.52823	1.54344	4.49472	1.3343	1.4114		0.364195	2.05453
7.1421	0.85918	2.15347	0.90272	2.7621	1.91565	2.58782	1.96959	2.47524	3.95017	5.35805	6.32771	2.85704	3.38271	1.3131	0.9258		0.370372	2.64936
7.2611	0.73805	1.82337	1.93784	2.4805	2.62294	2.73415	1.70608	0.76231	5.48143	4.44341	5.03618	1.98212	3.70772	1.5363	1.1137		0.376543	2.54041
7.3801	0.47131	2.60614	1.18384	1.95766	2.92828	2.25473	1.78199	1.09879	3.97947	6.51516	5.1617	0.72984	3.44001	1.1517	0.5152		0.382714	2.38505
7.4992	2.07093	3.60705	0.38656	1.79246	3.23184	1.35062	1.73693	2.03727	5.14744	5.4736	3.55891	1.68163	2.97839	0.1643	0.7094		0.38889	2.39516
7.6182	1.6136	1.68869	0.46837	1.12707	2.50164	2.8459	2.34601	2.71707	4.86677	3.97862	3.42285	1.14499	3.88774	0.809	1.7944		0.395061	2.34751
7.7372	2.08322	2.14855	0.79619	2.74103	1.37667	2.37689	1.59218	1.47806	3.55815	3.61441	4.78071	2.22555	2.19863	3.1735	1.5322		0.401232	2.3784
7.8563	1.27895	2.4692	0.23581	1.36048	2.52045	1.4815	1.0313	0.55718	2.26988	4.58037	5.17897	2.21699	1.78346	2.915	0.8357		0.407408	2.04768
7.9753	1.79702	1.03541	0.85458	2.22175	2.48018	3.43424	0.7732	0.99127	3.30175	4.54543	3.99895	1.26442	0.70664	1.8913	1.2739		0.413579	2.038
8.0943	0.87561	0.92287	1.26247	3.69322	2.41837	5.34163	2.3385	0.38848	2.82736	2.33388	2.39081	2.0273	0.77631	0.8633	1.0763		0.41975	1.96909
8.2134	0.57322	3.50926	1.17911	0.52108	2.20256	4.2707	2.11135	0.60342	2.99461	4.1771	3.86488	2.49819	3.12221	2.0594	1.1755		0.425927	2.32417
8.3324	1.35804	2.18515	0.53738	0.1811	1.5409	3.5978	1.27188	2.07123	4.25649	0.52355	3.73232	1.54812	3.73472	1.5252	3.2134		0.432098	2.08515
8.4515	1.63938	1.34596	2.015	1.57575	1.36391	1.9273	1.13836	0.63104	4.71477	1.91231	3.09039	0.90181	2.86224	1.0675	2.9431		0.438274	1.94192
8.5705	1.68935	1.63058	1.13261	3.08132	1.74368	1.3254	1.60693	0.92897	3.79385	2.2551	2.82496	2.49651	2.66846	1.1048	1.5415		0.444445	1.98827
8.6895	1.17778	0.78229	1.08267	2.8005	1.57033	1.78901	1.90792	0.5188	4.05385	1.52681	4.48815	2.19958	1.65042	1.6495	0.5546		0.450616	1.85015
8.8086	0.547	1.49818	0.46988	1.73333	2.88587	1.42611	3.27583	0.84408	3.30576	2.51251	4.34431	2.62936	2.97035	1.9536	2.0016		0.456792	2.15985
8.9276	1.44579	1.7914	2.17045	2.09478	1.75123	2.17944	3.27747	1.36657	2.96263	2.88856	2.54765	0.82154	2.9422	1.976	3.8408		0.462963	2.27043
9.0466	0.1696	1.83979	0.89846	3.13725	2.31914	3.18261	1.05671	1.17327	3.32765	5.3493	2.64397	0.69085	2.3649	3.0488	1.6863		0.469134	2.19257
9.1657	0.25009	0.64517	1.02203	3.01095	3.12621	2.32844	0.57424	2.75687	3.8351	4.25875	3.77433	1.12919	3.89717	1.0174	0.712		0.475311	2.15586
9.2847	0.57093	2.77078	2.03503	1.74264	2.05169	2.85527	1.63688	1.85014	3.83276	2.84134	3.43894	1.50935	3.57826	1.1022	1.5155		0.481482	2.22211
9.4037	1.31098	1.1142	2.16711	1.14312	2.41927	1.60354	2.52896	1.2555	3.03583	3.61179	3.09	1.82394	1.95214	3.3292	1.4207		0.487653	2.12042
9.5228	1.16538	2.2795	2.80806	0.61407	5.07891	1.79393	3.39701	0.37679	2.32636	2.74118	4.40677	0.70223	2.49336	1.7081	1.2687		0.493829	2.21069
9.6418	2.0787	0.64003	1.38375	2.8063	1.85792	1.59451	1.28478	0.93184	4.63974	2.15814	4.33873	1.31353	2.04858	0.9959	0.5804		0.5	1.91019
9.7608	1.49451	1.12308	1.15099	1.77001	0.9224	2.31982	1.8722	1.97599	2.27841	2.085	8.10395	1.18029	2.47559	1.6664	2.3177		0.506171	2.18242
9.8799	0.83605	0.66608	0.79651	0.16471	0.75684	1.61055	1.22633	1.87905	3.87081	4.01713	5.32834	1.24998	1.51201	1.3368	1.2143		0.512347	1.76437
9.9989	2.33946	2.07902	0.88987	0.96382	3.07127	2.13791	2.06293	2.13952	3.3943	5.14162	2.72014	0.51783	0.51614	3.0935	1.3133		0.518518	2.15871
10.1179	3.83809	1.0997	0.18833	2.08966	1.99594	2.2593	2.37353	2.05044	2.60498	5.91284	1.84095	1.4547	1.48458	1.6868	1.605		0.524689	2.16566
10.237	1.7228	0.86086	0.39949	0.90161	2.87847	3.34269	2.55991	0.89012	0.81498	5.54102	3.44027	1.41745	2.06013	0.7492	2.0427		0.530866	1.97478
10.356	2.32882	2.53342	1.03306	1.96704	2.91563	3.71115	2.5585	1.81178	1.02386	4.99748	2.31475	1.83283	2.10091	1.4562	2.5263		0.537037	2.34078
10.475	0.98849	1.0375	0.48548	1.58119	3.25609	4.6494	1.91125	1.28448	1.77434	4.4403	1.95854	1.28773	0.83904	1.2307	0.9054		0.543208	1.842
10.5941	0.81671	0.94839	0.69209	2.44392	1.42665	1.92707	1.2702	1.83618	1.93603	4.20227	2.34008	1.46749	1.1141	2.161	1.4055		0.549384	1.73251
10.7131	0.24814	1.98965	0.44872	1.4003	1.6447	3.98788	1.93359	0.38645	3.68213	5.42357	2.59954	1.16287	3.17804	2.152	2.0151		0.555555	2.15018
10.8321	0.13943	1.03596	1.26276	1.48751	1.19847	3.36124	1.58786	0.76718	1.42982	4.865	2.6095	0.90936	2.68166	2.8574	1.876		0.561726	1.87128
10.9512	0.74097	0.85414	1.00721	1.73695	1.87283	4.2627	0.80356	0.91959	3.25971	7.27084	1.13047	2.20356	2.19621	3.1336	0.6859		0.567902	2.13855
11.0702	0.99474	1.02003	0.28906	2.51128	3.03279	4.90296	0.27081	2.7209	3.51806	5.33748	1.11216	1.05967	1.56336	2.7956	2.3399		0.574073	2.23125
11.1892	1.01751	1.10432	1.42197	1.16524	2.49855	4.10456	1.71509	1.60135	1.67623	2.76175	3.12959	0.5293	1.49502	1.5047	2.5572		0.580244	1.88549
11.3083	1.89524	1.08062	1.75811	3.79384	0.42829	3.56385	2.67495	1.08885	1.14759	3.64896	2.43601	1.12044	1.36912	2.0615	3.5442		0.586421	2.10744
11.4273	1.83997	1.21922	2.00348	1.20251	1.54993	1.46148	3.17182	1.57731	1.03416	2.96487	1.7591	1.1025	2.42914	1.868	5.3775		0.592592	2.0374
11.5463	3.20073	2.72489	1.27622	1.9698	1.14116	2.29169	1.72124	3.02986	2.41088	2.3625	1.32946	3.50847	2.85635	1.007	3.14		0.598763	2.26468
11.6654	1.48143	1.42784	0.88847	1.56492	1.28998	4.5911	1.26112	1.68528	2.16797	3.00123	2.60533	1.87975	1.16684	1.4117	2.5665		0.604939	1.93263
11.7844	1.82378	0.92495	2.53542	3.56491	2.03537	3.10338	2.92572	2.18746	1.9784	3.60919	1.11335	0.62409	1.33251	2.3413	3.0595		0.61111	2.21062
11.9035	2.59104	0.61982	3.4434	0.86219	2.17881	3.87333	2.70074	0.40679	3.51029	3.62998	0.05979	1.47343	1.70285	2.9067	3.7923		0.617286	2.2501
12.0225	4.41262	0.13662	1.20465	0.16997	2.5146	5.14898	2.27168	0.7273	1.28513	2.69322	2.63936	2.61026	2.328	2.2159	1.3671		0.623457	2.11503
12.1415	1.98283	0.71798	1.58705	1.42405	2.8266	2.80311	0.93697	1.77042	2.36208	3.48507	3.57975	1.8623	2.53479	3.1832	1.9949		0.629628	2.20341
12.2606	2.03896	1.16144	1.72555	2.01008	3.49898	2.04932	2.52288	1.66964	1.26664	4.68001	2.27379	0.5305	0.87592	2.8702	7.3659		0.635805	2.43599
12.3796	2.25752	1.83785	2.5088	4.40505	1.82296	2.19315	3.86165	1.9003	3.54488	3.20561	1.06662	0.77629	2.16898	4.3132	4.6631		0.641976	2.70173
12.4986	0.40763	2.66566	2.66656	3.1828	1.14578	2.04777	0.83982	1.03881	4.32353	5.73248	1.40235	1.99007	2.44904	1.9456	2.8191		0.648147	2.31047
12.6177	0.88232	1.47522	1.59024	0.49779	1.41299	4.3608	1.17044	0.44583	1.96303	3.13985	0.37983	2.25465	1.76653	1.6385	2.3293		0.654323	1.68715
12.7367	1.79951	1.31828	0.42381	0.21935	3.92657	2.79512	0.81635	1.03669	0.87395	3.69497	1.2119	2.20761	2.08005	1.3596	3.586		0.660494	1.82332
12.8557	1.40255	0.99507	0.29965	2.87393	2.76142	2.16373	2.24073	0.93007	1.6304	2.40742	0.95694	3.23927	4.00559	1.0567	6.402		0.666665	2.22436
12.9748	0.68963	1.916	0.42168	3.28122	2.20156	2.02054	2.06861	2.02152	2.72353	2.6897	1.44828	4.46159	2.75676	1.8976	3.1037		0.672841	2.24679
13.0938	1.6119	0.92691	1.8931	1.83186	1.77468	4.05782	1.10775	2.08528	3.28688	4.05048	1.81826	4.08498	0.92681	0.4987	1.9597		0.679012	2.12767
13.2128	3.46496	1.7179	1.78794	0.87382	1.40238	1.52088	3.90379	1.56055	2.85092	4.26846	4.52689	4.64117	1.52722	2.8311	2.529		0.685183	2.62713
13.3319	2.35971	3.49699	0.18696	1.96984	1.10738	1.79819	2.29499	0.28336	2.12489	2.92401	3.82272	4.58496	2.67182	2.1376	2.74		0.691359	2.30023
13.4509	3.9019	1.94059	0	2.1583	1.64692	0.94331	1.5556	1.19223	2.9363	6.21114	2.19701	2.3233	2.11037	2.0362	3.8059		0.697531	2.3306
13.5699	2.12618	1.31998	0.07726	2.21207	0.81926	1.85537	1.71492	3.24547	1.85164	5.9567	0.64841	1.87939	1.1227	2.276	2.6903		0.703702	1.98638
13.689	0.53253	1.52569	0.81458	1.35367	1.77518	2.99247	0.64685	1.42497	1.9955	2.70572	2.75408	3.39579	2.1882	0.6518	2.3937		0.709878	1.81005
13.808	1.01232	2.3525	0.95936	1.36963	1.60173	2.8619	2.00161	0.91176	2.40713	3.1288	2.14423	2.30279	4.28947	1.85	3.0491		0.716049	2.14949
13.927	0.8095	1.66637	0.94277	3.26731	1.35985	2.497	2.28671	2.73843	3.30264	4.63004	1.36149	1.99886	2.09277	2.6362	6.1022		0.72222	2.51281
14.0461	1.30317	1.83296	0.54882	2.64565	2.26876	4.29237	1.91219	2.08494	2.20922	0.50333	0.74402	4.3552	2.99073	2.2082	5.3269		0.728396	2.34843
14.1651	1.12407	2.40472	0.44059	2.10453	2.69298	0.91613	4.33818	1.24911	3.53713	1.45598	2.8612	2.3743	1.60373	1.0631	1.5561		0.734567	1.98146
14.2841	0.53022	4.04691	0.7626	3.48234	1.28263	1.22536	3.25912	1.79867	2.66627	1.94784	0.88733	2.13203	1.75714	2.4758	2.2092		0.740738	2.0309
14.4032	2.59901	1.90629	0.05741	1.82421	2.88695	3.27736	0.76997	1.85199	0.48929	1.11933	2.8096	4.63033	3.16812	2.1356	2.3624		0.746914	2.12586
14.5222	2.47919	2.0263	0.13778	0.03673	2.72932	2.49947	1.25933	2.72532	2.964	1.24286	1.6719	1.05215	3.5743	2.7186	1.0135		0.753086	1.87538
14.6412	1.67914	0.67865	0.45963	1.25377	1.9831	1.57781	3.13133	2.63996	2.55211	2.70655	0.69099	1.39478	3.32705	4.1293	1.3254		0.759257	1.96864
14.7603	2.28873	1.09468	1.1119	2.87051	1.79373	1.16837	2.93731	1.95288	2.03482	0.85562	0.74657	1.35866	1.60425	4.5764	1.2962		0.765433	1.84604
14.8793	0.88509	2.29834	0.69158	3.221	2.25856	2.4009	1.00341	0.47854	2.50941	1.98477	1.01581	2.25572	1.85336	2.3723	0.8271		0.771604	1.73706
14.9984	1.89477	2.09937	0.21121	2.60144	1.96757	0.88582	1.90265	1.1599	2.54774	1.5349	0.61728	2.39891	1.76871	0.4502	0.3683		0.77778	1.49392
15.1174	2.41112	2.42323	0.40943	2.50562	1.40543	2.15371	2.65582	0.54514	3.11843	1.20929	2.22717	0.8608	0.83399	2.2731	4.9702		0.783951	2.00017
15.2364	2.30539	0.995	0.82172	0.9023	2.16788	1.76711	1.86663	0.80539	1.24218	0.6498	2.9455	0.67253	1.2916	2.376	1.3153		0.790122	1.47496
15.3555	1.60524	1.84295	1.0261	0.17901	0.49473	1.83124	1.11725	0.82409	0.56137	1.70366	0.77234	0.66012	2.64226	1.6051	1.2802		0.796298	1.20971
15.4745	2.05209	1.96893	1.01365	1.50053	0.78736	0.91006	1.90047	0.50003	2.51176	1.52385	0.77312	1.81942	3.5887	1.9307	0.4455		0.802469	1.54841
15.5935	0.97347	1.70332	0.81604	1.52723	2.58657	2.05763	2.94503	1.07863	1.31249	2.35461	0.72461	1.37318	3.44536	3.0833	0.9838		0.808641	1.79768
15.7126	3.83917	1.35956	1.57759	1.7761	2.56059	3.41086	1.54819	1.49763	1.58348	0.80726	2.10197	2.38797	0.73942	3.3374	1.1006		0.814817	1.97519
15.8316	1.73702	0.7225	0.48775	0.91236	1.22184	1.08818	1.65894	2.70936	1.4346	1.40031	3.65609	2.40876	1.59176	0.99	1.0318		0.820988	1.53675
15.9506	1.67919	1.12577	0.7017	1.22261	2.70075	0.98063	1.85177	1.46623	1.32654	0.77657	1.69069	2.2626	0.74289	2.9775	2.2454		0.827159	1.58339
16.0697	1.15965	0.55872	0.56716	1.23775	2.18314	1.89466	0.83347	2.46907	1.12769	0.7729	1.58903	1.93075	2.32226	2.3864	1.7924		0.833335	1.52167
16.1887	1.23818	1.185	0.72825	0.77041	2.94499	1.83379	1.36945	0.80968	0.24321	1.40306	1.82205	1.38573	2.69794	1.1484	2.4682		0.839506	1.46989
16.3077	2.39422	0.75666	1.22086	0.43205	2.13491	1.30375	1.77524	2.5419	0.47696	1.76352	0.94444	1.64542	0.50031	1.6619	0.5402		0.845677	1.33949
16.4268	1.05682	0.33618	0.61432	0.73592	0.74525	1.81379	3.20369	3.59712	1.91592	1.25123	2.7269	2.48252	1.21086	2.0544	1.747		0.851853	1.69946
16.5458	0.78998	0.47016	0.42402	2.31586	1.17286	3.10976	1.45584	1.80399	1.3015	1.6353	2.6315	0.45611	1.65668	1.8546	2.3612		0.858024	1.56262
16.6648	0.49816	0.55428	0.62146	1.80346	3.04478	1.50678	1.20322	1.05489	1.20893	0.11885	2.91041	2.22454	4.82861	2.4238	3.0231		0.864195	1.80168
16.7839	0.60026	0.41787	1.56427	0.7371	2.1587	2.24983	2.16132	1.6302	1.37213	0.27702	0.91728	1.77648	2.21295	2.5034	1.4536		0.870372	1.46883
16.9029	1.06605	0.95935	1.75399	1.11173	1.17438	1.83144	1.50692	2.00504	0.65852	1.83443	2.4951	1.88076	1.59681	1.5567	0.8416		0.876543	1.48485
17.0219	1.1755	0.47777	1.08449	1.45518	1.5559	0.58733	2.2162	0.54961	0.40549	1.00528	1.73067	2.54476	2.55451	1.1695	1.7459		0.882714	1.35054
17.141	2.6374	1.14827	2.82094	1.57062	1.83119	0.82865	3.597	2.0918	1.13052	1.25196	1.98152	2.99892	2.34085	1.1214	0.6437		0.88889	1.86632
17.26	1.12202	0.76608	2.23255	1.7962	1.10578	2.09051	1.31135	2.34862	0.62194	1.27257	0.43303	1.70697	4.75982	1.3387	1.6272		0.895061	1.63556
17.379	0.76201	0.53715	0.6922	3.3113	0.47565	0.91289	2.09313	1.56633	0	0.84234	0.60582	2.56006	2.93345	1.1701	1.7935		0.901232	1.3504
17.4981	1.30512	0.24045	1.57061	2.62761	0.70794	5.63144	2.52336	2.42628	0.06995	0.86459	2.38767	0.9647	3.16	1.0076	0.658		0.907408	1.74302
17.6171	0.83356	0.57592	0.86334	1.18927	1.56543	3.72065	1.94908	0.50282	0.42495	0.22861	2.07269	2.50056	2.0718	2.492	0.9957		0.913579	1.46576
17.7361	0.55244	1.01834	0.1585	2.2736	1.99338	1.01253	0.51268	1.85362	1.92362	0.76786	1.4666	1.22095	2.46294	1.8504	0.707		0.91975	1.3183
17.8552	0.26505	3.69529	0.60179	1.4193	1.89837	1.81402	1.52784	2.55067	2.20621	0.17099	1.8407	1.34659	1.26838	0.8517	0.9568		0.925927	1.49425
17.9742	0.82731	2.83297	1.21223	1.32717	1.12532	1.67714	1.21233	2.19113	2.11653	1.36137	1.81742	1.67689	1.60545	1.1287	0.3803		0.932098	1.49948
18.0932	1.21465	0.54997	1.67516	1.22508	0.80708	1.81823	1.86813	2.17424	1.59838	0.85167	2.81151	1.30773	1.39156	2.7004	1.3327		0.938269	1.5551
18.2123	1.25165	1.12836	1.1078	1.03876	1.67848	1.89039	3.16271	2.43289	1.00573	0.47293	1.46616	1.20717	2.55418	1.0651	0.3685		0.944445	1.45539
18.3313	1.34434	2.13116	0.33048	0.22014	0.99835	1.84953	1.86565	3.399	0.90905	0.59463	2.11627	0.44632	4.96147	0.8893	0.6497		0.950616	1.51369
18.4504	2.03707	1.82423	1.76349	1.30868	1.24268	1.71439	0.41305	1.13139	0.47521	0.90895	0.69108	1.3889	3.03453	2.6693	0.8393		0.956792	1.42948
18.5694	1.45572	1.22331	1.51854	1.38945	3.75714	0.72283	0.89428	1.86012	1.13053	2.18853	0.5441	1.20828	1.35198	1.0503	1.7047		0.962963	1.46665
18.6884	0.6231	0.04902	0.51262	2.1837	2.39621	0.55326	0.57589	1.14236	0.61615	2.4535	1.68458	2.59297	3.80732	0.8798	0.5186		0.969134	1.37261
18.8075	0.25952	0.84966	1.18842	0.70805	0.98896	1.00248	2.49082	1.3118	0.93261	1.13841	1.356	2.38348	1.68309	2.0051	1.8583		0.975311	1.34378
18.9265	0.16567	1.71011	1.67492	0.57223	3.24263	1.45466	2.42329	1.22767	0.79496	2.2934	0.9856	1.10772	1.07761	1.0633	1.1523		0.981482	1.3964
19.0455	0.4078	2.88191	1.5592	2.52289	1.09028	0.87179	2.20733	1.78712	2.6814	1.56199	1.67006	1.3208	0.72426	1.7724	0.4106		0.987653	1.56466
19.1646	1.49111	2.75933	1.09546	2.11382	1.91761	1.72452	1.63014	2.66867	1.32017	1.52923	0.88504	1.70216	1.02695	0.4757	1.264		0.993829	1.57359
19.2836	2.17507	0.94898	0.57265	1.47194	0.91041	0.93357	0.68557	1.25896	2.43623	1.13035	1.41164	4.07492	2.39612	1.0549	1.0477		1	1.5006

## Sheet: Image8
X0	Y0	Y1	Y2	Y3	Y4	Y5	Y6	Y7	Y8	Y9	Y10	Y11	Y12	Y13	Y14	Y15	Y16	Y17		Ap-Ba	Average int.
0	12.2974	6.3759	7.8302	4.008	1.6901	3.9046	8.018	7.9716	3.8013	3.1439	4.936	7.6084	5.2467	5.074	7.5295	5.99715	1.5103	8.3975		0	5.85225
0.119	9.0308	6.9096	8.7739	4.1546	2.1777	4.0303	8.8536	10.4219	4.4452	3.6972	7.2874	8.2111	4.0525	7.116	7.1298	6.83791	5.7104	5.2028		0.00632726	6.33571
0.2381	8.852	7.7728	6.1528	4.269	1.9247	4.1801	8.1151	8.2669	3.7833	5.3188	7.6196	6.3103	4.4472	5.9211	8.7925	4.07143	4.0771	4.4009		0.0126598	5.79309
0.3571	6.1072	6.6289	2.0101	5.8332	2.6036	4.0042	7.0739	8.4631	4.9557	3.5753	7.0114	7.1784	6.4653	3.7271	9.3871	7.8103	5.3016	4.7914		0.0189871	5.71821
0.4761	6.8586	7.6077	7.4865	4.2709	3.5662	6.0955	6.1993	3.6984	4.0814	8.1802	8.1496	5.0775	7.0493	3.5251	7.0964	9.45889	4.8762	4.1986		0.0253144	5.9709
0.5952	7.5551	9.0638	8.6302	9.6402	2.8289	3.5664	7.5048	5.0873	7.2419	10.0088	5.8285	4.8543	7.3729	6.1475	8.2596	5.81773	5.1151	4.2475		0.0316469	6.59836
0.7142	9.5406	6.9976	8.3169	11.038	3.7153	3.6608	9.1348	5.2452	11.5629	9.4312	12.4525	7.2329	5.5062	5.9263	9.6803	7.52158	1.8729	5.0261		0.0379742	7.43678
0.8332	11.7076	6.4981	9.9858	14.2877	4.0126	6.8572	7.3345	5.7202	6.9932	6.1813	7.2295	6.7638	5.3712	7.8873	6.8431	8.11593	3.6281	7.2371		0.0443015	7.36968
0.9523	12.0378	7.1231	8.0321	11.8594	4.9609	8.5499	9.1515	9.8385	6.1952	8.4772	3.9942	6.0384	7.741	4.2579	6.3424	10.5478	4.9072	8.6473		0.0506341	7.70565
1.0713	7.1101	7.2609	11.661	12.2479	4.8885	9.21	7.7678	8.2362	4.7349	5.1553	5.0981	6.6791	8.1566	4.5734	5.7199	7.40837	4.0394	9.0014		0.0569613	7.16383
1.1903	11.5584	12.6326	16.1606	12.6224	8.9681	11.585	7.6645	11.1971	2.6844	9.9535	5.2866	3.5396	3.775	6.4104	4.9279	5.68322	5.2041	7.5606		0.0632886	8.18967
1.3094	8.4222	7.8142	15.2125	10.8473	6.9105	11.0123	9.8429	7.426	6.507	6.2669	4.0736	4.9161	6.3577	5.7143	3.7186	10.6752	4.2621	10.6573		0.0696212	7.81315
1.4284	7.3566	7.087	14.9877	11.0217	8.8475	15.9069	8.4676	8.1399	4.6642	6.4947	3.1523	5.5839	6.3706	4.5345	5.2731	8.76219	3.5659	6.3451		0.0759484	7.58674
1.5474	8.3972	13.2333	22.0422	10.3784	12.6424	14.2645	6.5555	8.6205	8.4751	7.8957	3.4888	4.7149	4.6771	5.2439	9.992	6.17679	3.2368	8.811		0.0822757	8.82478
1.6665	6.9741	10.0619	24.1095	10.8952	12.7581	15.6701	7.0613	9.2296	9.4145	8.3782	5.3189	7.5465	5.5897	3.7681	6.1994	7.36494	3.3297	6.4114		0.0886083	8.8934
1.7855	8.4312	10.1486	20.9117	14.2857	9.4593	16.0393	8.396	4.5952	9.1426	8.4512	5.6081	9.1249	7.2921	3.0156	5.8169	9.86554	3.1789	3.8571		0.0949355	8.75666
1.9046	10.4745	10.1158	21.7921	10.2114	10.7559	14.0184	9.8375	8.6848	7.6075	10.9303	5.2934	10.4744	5.8565	2.73	4.7524	8.63514	3.7036	7.4141		0.101268	9.07154
2.0236	9.9433	10.0789	16.6011	7.4462	14.5364	20.9018	12.4503	11.2224	10.2124	6.1009	3.9901	5.5451	4.8389	2.1488	6.3827	6.70556	4.7069	4.7652		0.107595	8.80983
2.1426	9.7734	10.8271	27.6229	9.3177	14.8285	21.3725	7.2405	14.3312	11.9653	11.5079	4.9437	3.9637	4.8515	3.0468	7.0172	5.53604	4.6581	4.6489		0.113923	9.8585
2.2617	8.7781	7.5269	22.9218	6.5862	12.8466	15.6107	10.3617	18.9696	10.5032	7.7214	8.2192	4.2881	3.7377	5.2078	13.6965	6.61208	8.7359	4.6532		0.120255	9.83204
2.3807	9.5738	10.7393	22.6632	9.1901	12.382	20.3021	8.0798	18.5289	10.8115	7.8056	4.7928	2.0289	4.4016	5.0673	14.3593	7.78759	4.9046	4.2905		0.126582	9.87272
2.4997	10.2223	9.849	30.629	10.351	10.6124	16.4114	10.33	19.0727	13.5961	6.2601	6.302	2.8765	2.6793	2.2124	13.7706	4.97067	5.2829	3.5137		0.13291	9.94123
2.6188	12.3588	5.893	30.0736	13.5739	12.4032	11.1984	11.8113	18.026	10.1458	13.6309	4.5288	5.4302	2.4099	2.895	12.8602	8.89125	5.2832	2.1486		0.139242	10.1979
2.7378	9.8758	10.7008	25.8132	20.4658	16.188	11.242	10.4281	16.1506	11.2557	11.3307	6.0973	3.3913	4.5502	6.5924	10.7726	3.43785	6.5532	4.999		0.14557	10.5469
2.8568	11.3745	9.1325	22.8084	10.5656	17.8025	13.6596	11.5082	16.3196	9.6488	7.8199	4.0632	4.6931	4.4814	4.7004	9.8064	3.99626	5.0129	7.059		0.151897	9.69179
2.9759	10.8596	10.8183	23.6572	14.3001	18.6024	12.5847	14.4163	21.9191	10.8071	7.5176	4.2131	7.0711	4.2017	5.2632	10.855	6.57656	3.0136	9.3947		0.158229	10.8929
3.0949	7.9406	14.76	24.6763	13.0039	14.4743	11.7121	15.0531	19.9919	8.8533	8.5533	4.1915	4.591	5.4446	5.0676	4.8661	7.24917	6.7305	6.7485		0.164557	10.2171
3.2139	6.351	11.6528	23.6349	13.2608	16.4364	11.6397	15.9509	17.054	10.2032	5.0945	5.0067	4.8142	4.7882	5.2886	7.3049	5.17549	8.4452	5.0045		0.170884	9.83922
3.333	9.1089	15.9425	15.7652	10.4186	12.495	12.3178	16.3052	20.2889	8.581	5.0519	4.0364	3.4652	3.7056	3.8968	8.0532	7.40808	7.687	7.286		0.177217	9.54518
3.452	11.0318	16.9969	20.7084	13.0381	10.722	12.1	15.7911	16.1108	12.3311	3.7157	3.0381	5.1672	4.0309	4.3831	6.1895	6.34712	7.2526	11.3843		0.183544	10.0188
3.571	6.4878	13.1798	18.6899	18.4144	14.893	11.5702	16.3625	18.2489	9.402	5.0809	2.7405	4.1161	4.9293	5.9275	7.5829	6.88446	6.3067	5.6574		0.189871	9.80413
3.6901	9.9912	14.4153	16.902	15.6955	9.2219	10.1481	14.1034	23.7465	8.4742	4.9262	5.0989	4.4614	2.5556	8.1116	7.764	7.50816	6.4506	10.9236		0.196204	10.0277
3.8091	4.0619	8.5115	18.8261	19.5335	11.5155	12.7316	14.8754	15.8976	6.7265	2.5808	6.7259	6.6417	1.5488	7.5096	6.7234	4.6548	6.0623	8.0265		0.202531	9.06408
3.9281	5.9383	9.3943	16.9	18.4638	12.5525	12.8961	17.0292	15.2577	3.9195	5.5493	6.2631	4.3245	5.9398	6.7885	8.0179	4.64543	5.6512	7.6694		0.208858	9.28892
4.0472	10.4584	11.1412	20.0878	18.611	10.5637	14.9259	15.0827	11.8255	4.9156	7.5027	4.3699	3.5674	4.229	4.9998	2.3015	3.4564	8.144	5.3942		0.215191	8.97648
4.1662	9.2197	11.242	20.9775	17.5922	12.8929	19.1567	20.3438	12.6836	9.4498	7.1709	9.3977	4.6925	3.1484	4.4706	6.5265	3.27267	13.2334	5.8883		0.221518	10.6311
4.2852	7.459	13.3848	18.2497	18.1063	16.8564	23.4272	16.78	11.7383	9.3613	7.6387	8.2378	3.7048	3.9564	4.6656	5.2968	4.63351	7.6511	8.4443		0.227845	10.5329
4.4043	10.9143	12.4018	23.8753	15.254	12.0255	14.6409	21.9888	17.3721	6.6758	5.1048	5.0614	6.6992	3.8026	5.6187	6.2082	5.02135	6.7437	5.806		0.234178	10.2897
4.5233	6.1087	12.213	19.495	18.8447	12.4773	14.9506	19.7775	9.8012	7.7751	3.0116	5.9586	5.1298	3.8455	4.7549	4.1518	7.07181	6.7031	6.6163		0.240505	9.37147
4.6423	8.1784	12.5459	15.8528	16.6642	12.967	16.2566	20.2863	12.7949	8.3746	4.3766	7.1386	4.2148	7.1098	4.1278	6.7122	4.51648	5.837	7.0467		0.246832	9.72226
4.7614	9.2306	13.514	16.1778	15.2312	8.551	16.0122	16.3903	8.9174	5.6672	3.3029	3.6445	6.0345	5.0959	6.0431	4.0685	3.14616	5.8714	7.6547		0.253165	8.5863
4.8804	9.8463	13.9751	16.3577	14.4256	6.7847	18.6961	15.8473	7.491	7.5471	4.1206	4.6361	3.423	5.5499	3.7511	6.0533	5.15787	3.8633	5.9556		0.259492	8.52676
4.9995	7.5283	10.3107	12.5084	14.3548	8.9575	15.5917	13.2292	4.4181	5.0014	4.8409	5.3613	3.8649	2.4744	4.2298	5.3589	2.38097	5.4295	8.6889		0.265825	7.47387
5.1185	5.8427	14.1866	10.3984	13.3973	10.5476	13.0143	17.3384	4.071	5.6746	4.3862	3.5481	5.5138	3.2502	9.25	5.3608	1.64586	6.9788	6.2936		0.272152	7.81657
5.2375	7.7629	9.1978	11.2697	10.4972	7.7352	15.8939	13.5667	7.0403	7.9284	6.8404	7.2715	4.2874	2.2467	6.777	5.8822	2.47193	7.6214	6.5008		0.278479	7.82175
5.3566	9.139	10.6561	10.2898	7.7479	8.0447	14.9736	14.7827	6.4579	6.7595	5.547	9.2471	5.2578	3.3868	5.6276	8.1033	2.44537	5.6396	6.4336		0.284812	7.80774
5.4756	9.3143	8.6553	7.7618	10.8729	9.4845	19.5026	15.1529	7.6808	4.9251	4.4969	7.022	2.8302	5.7672	8.1745	8.7265	3.78427	4.7296	6.6637		0.291139	8.08584
5.5946	9.3625	8.086	7.5663	10.8272	11.28	17.4643	11.9802	2.822	6.7964	4.9742	7.7151	4.8017	7.196	7.9697	3.1718	5.833	3.5633	6.3406		0.297466	7.65279
5.7137	7.6031	8.4661	12.4872	13.5301	12.5521	16.8912	13.5371	5.6772	7.1052	5.5841	6.6565	4.8132	6.9059	5.9756	4.1721	3.35126	4.2846	7.5927		0.303799	8.17696
5.8327	12.8098	7.57	10.4916	11.2128	7.9961	14.9941	15.4031	5.6052	5.6205	5.9877	7.8248	3.7339	6.0226	6.9115	3.7423	3.69391	6.1654	4.7543		0.310126	7.80776
5.9517	10.1483	10.215	11.422	13.5249	11.0735	16.7989	14.4296	4.4258	3.0258	2.6778	6.961	4.5004	4.9208	7.0415	3.6354	5.8007	1.593	6.5879		0.316454	7.71013
6.0708	15.5395	9.9862	10.3032	12.1532	10.7537	14.5885	13.0763	5.5842	5.1491	3.8355	5.8213	3.8915	5.7554	5.796	2.4521	4.56225	4.6408	6.5219		0.322786	7.80059
6.1898	13.1669	10.3891	14.6248	13.5666	10.8635	14.8303	11.0482	7.7195	3.3547	5.6765	5.4658	5.1272	3.9784	6.651	3.6421	2.37647	6.9671	13.3446		0.329113	8.48849
6.3088	13.6813	10.7932	9.9354	10.8285	12.6605	15.7109	16.3086	2.1741	3.3987	5.5711	5.2905	3.1265	4.4737	6.5721	3.6681	2.19255	4.6653	6.1927		0.335441	7.62465
6.4279	16.273	9.206	8.8915	10.6984	12.8647	17.2261	14.5679	3.2131	3.2036	4.8934	8.9283	6.853	3.2248	9.0176	6.8993	4.57382	4.4403	4.5474		0.341773	8.30679
6.5469	11.6322	10.1245	11.5809	7.872	16.0298	17.4366	12.695	3.3151	4.8583	4.216	5.9001	3.9476	6.6424	9.1752	4.843	3.87266	4.2418	5.8881		0.3481	8.01507
6.6659	11.7726	10.636	10.4469	6.4612	12.2351	16.6906	11.2898	2.2824	4.4686	4.1127	4.7799	7.897	3.6552	5.4922	4.1271	3.53825	3.772	6.6147		0.354428	7.23735
6.785	12.9217	7.3338	10.0362	11.3767	13.7203	13.3951	13.822	1.7353	6.6911	4.5067	7.1341	7.4312	6.0204	8.6442	8.6728	3.3111	4.4825	7.8173		0.36076	8.28069
6.904	16.63	7.8214	11.0764	13.2758	17.5509	17.8953	14.617	4.9	5.6685	7.7083	7.0037	5.7252	4.0028	7.7161	7.0126	4.00516	3.3301	7.7679		0.367088	9.09484
7.023	16.5292	10.1639	12.0999	14.6107	19.624	14.7501	12.8159	5.2071	7.0295	3.87	8.5422	3.6327	3.6207	5.366	5.2135	5.29249	4.3124	9.4356		0.373415	9.00644
7.1421	8.3026	11.3041	10.2105	10.1479	14.2869	17.6434	13.1883	2.4884	4.8904	6.3232	7.8464	4.2639	3.8595	6.6524	10.2161	4.31985	2.1357	7.6109		0.379747	8.09391
7.2611	12.4501	7.3173	15.9058	9.4049	19.3041	18.2893	11.7739	3.3121	4.2633	6.5769	6.1492	3.8552	7.5634	7.0205	5.1574	5.42892	5.0036	5.5626		0.386075	8.57436
7.3801	13.3703	4.9173	9.0805	9.159	20.0307	20.0561	13.3448	6.4782	7.6176	5.1205	5.8759	8.5733	5.5176	6.7637	5.5537	4.6764	4.5563	5.3334		0.392402	8.66807
7.4992	14.5849	4.6472	11.0466	11.2863	18.1434	17.2228	8.8059	3.5219	8.2183	6.9093	9.5295	9.0314	4.8108	6.0197	8.8254	1.6493	5.3461	8.5042		0.398735	8.7835
7.6182	15.4325	6.2985	12.8615	13.8112	17.3935	9.2542	8.644	5.1152	5.5893	4.2291	10.072	4.3736	6.1833	7.2081	7.6628	2.19244	4.756	10.0757		0.405062	8.39739
7.7372	13.2771	3.8735	9.3082	13.1186	12.9684	10.6108	8.5208	4.1335	3.9287	3.7603	6.032	3.3552	6.1255	6.2457	9.0991	2.60955	3.1175	9.6782		0.411389	7.20904
7.8563	14.8711	7.2898	9.5297	13.9507	16.5104	16.3771	12.9398	3.2725	7.2467	8.3507	9.6152	3.4057	8.2058	3.4091	8.1816	1.67679	4.1907	10.349		0.417722	8.85402
7.9753	8.9219	7.4685	10.5427	16.4629	22.8855	19.026	15.3528	4.8487	2.7007	8.749	11.1227	4.427	12.4199	8.1333	6.3638	2.84388	5.2111	8.9144		0.424049	9.79971
8.0943	11.232	5.6217	9.6146	14.6351	23.904	13.7281	8.8045	3.4419	4.0052	3.555	7.2641	2.0757	4.8272	7.5453	8.9896	3.28586	4.2063	4.2972		0.430376	7.83519
8.2134	9.3996	6.4805	15.1919	9.0579	23.9373	13.2433	8.7671	6.077	9.6729	3.5323	8.6276	4.5849	7.3619	9.3318	4.5521	3.95113	1.6799	6.644		0.436709	8.44962
8.3324	13.0512	8.1597	9.6589	11.4044	24.8817	14.4304	11.6088	2.6899	5.598	4.6324	11.8482	7.1634	10.0246	11.9405	4.309	6.04067	2.5124	8.8962		0.443036	9.38058
8.4515	12.8249	8.5487	12.5657	11.2592	23.8588	13.2914	7.3825	2.3654	4.907	5.3717	12.1125	5.9934	7.0082	9.1971	3.3798	5.85297	2.5393	9.5067		0.449369	8.77585
8.5705	10.081	8.7553	10.382	13.3648	21.7308	10.0575	7.87	3.4495	3.3037	5.5398	12.8913	5.8344	4.17	9.6697	7.3202	4.11787	2.8714	11.7776		0.455696	8.51038
8.6895	7.822	8.841	8.5043	11.9251	15.5543	10.2873	7.8395	6.5261	2.15	5.7486	10.4984	5.7445	4.7495	13.0529	8.128	2.73612	2.1261	7.9911		0.462023	7.79027
8.8086	10.2743	7.7257	10.9405	14.8154	17.0135	10.6248	3.5179	3.4549	3.6685	4.7157	9.4275	5.1032	6.9234	10.817	3.8932	3.90692	2.1226	7.6276		0.468356	7.58737
8.9276	11.5631	8.1525	9.7664	13.7411	15.0395	10.6655	5.5938	4.0544	3.871	7.3435	8.4749	8.1207	3.1875	9.8468	5.5825	3.99034	2.1815	4.5658		0.474683	7.54116
9.0466	10.1351	8.0783	8.5821	10.23	17.1153	16.0694	6.059	4.4655	3.3017	5.7629	10.1537	4.443	4.1008	8.2181	7.3595	4.26441	1.7914	3.1771		0.48101	7.40596
9.1657	8.7771	4.6279	8.2464	10.0679	13.8335	14.2688	8.4138	4.445	5.2303	5.6292	7.425	3.8005	5.6914	9.9813	8.3194	4.69662	3.5433	6.8329		0.487343	7.43502
9.2847	9.7273	3.4589	7.6731	11.6877	15.2426	8.8221	5.8644	4.9172	2.7613	6.2692	7.5999	4.7335	5.575	9.8158	7.2541	10.178	2.0615	6.6653		0.49367	7.23927
9.4037	12.5507	5.4479	9.6654	10.0689	11.9774	9.9283	7.5578	2.9179	4.0078	6.4597	10.7304	7.6448	3.077	9.9753	6.3669	7.52972	1.5963	7.8264		0.499997	7.51826
9.5228	16.3305	4.4206	10.5887	8.8872	12.9869	10.4824	12.0256	3.6544	3.6458	7.3492	12.9896	8.1319	7.95	12.9742	4.3773	4.62251	2.5385	5.9434		0.50633	8.32771
9.6418	9.6008	5.8185	6.5882	12.9031	14.1603	11.612	8.7933	2.5529	4.0267	6.2994	13.4272	3.5942	5.6829	9.9599	2.5389	5.45361	0.8104	5.6601		0.512657	7.19347
9.7608	14.1241	6.1745	10.1054	7.0403	15.8976	9.8968	6.1112	5.6565	4.4264	6.6721	8.0386	5.77	6.4257	11.3729	3.6149	5.41274	0.9202	5.3951		0.518984	7.39195
9.8799	12.0111	5.9633	8.5031	7.1909	12.7776	12.804	6.8477	7.2079	4.7264	5.5094	8.5855	3.2965	9.0802	9.2268	5.115	5.04325	2.304	5.9504		0.525317	7.34128
9.9989	17.2165	8.3752	7.8204	12.4052	15.046	9.595	5.6501	6.3949	6.8258	4.2082	10.7121	4.0213	6.6346	13.3102	6.2468	4.34216	4.1558	4.2102		0.531644	8.17614
10.1179	17.1597	7.9826	9.1906	9.5415	8.7593	7.4374	8.2097	5.1502	4.7542	3.8607	10.2421	4.1432	5.2001	10.1175	4.9843	5.34299	2.9442	3.5188		0.537972	7.14106
10.237	14.9387	12.2633	5.9024	7.3181	14.1911	4.7353	8.0588	3.6785	7.6387	6.166	7.1495	6.253	5.5706	8.2822	5.6208	4.21394	3.5418	9.4956		0.544304	7.50102
10.356	13.6473	8.1908	8.9589	8.5979	11.3456	8.3963	4.2972	4.0902	1.8404	3.4381	9.1212	5.3925	5.784	11.2676	4.4568	3.52832	3.8476	5.0109		0.550631	6.73398
10.475	12.3234	9.1743	5.5614	11.2219	10.6868	7.8318	5.4007	4.8525	3.6774	5.0942	5.1812	4.5015	5.5703	10.7477	3.7507	1.70164	2.2314	6.7753		0.556959	6.46023
10.5941	6.4171	6.9835	5.3051	14.1181	8.7009	7.0697	4.8267	4.5824	7.131	4.7632	7.4554	7.0762	5.4701	7.5813	2.6975	4.05659	1.2408	4.3481		0.563291	6.10132
10.7131	11.7775	7.7616	7.0061	11.2681	13.3985	6.3452	7.1704	5.3502	5.1415	2.0809	5.9222	6.0141	7.8906	7.0611	5.8976	1.44577	0.72	5.4964		0.569619	6.54154
10.8321	9.2767	6.9552	8.0156	11.2696	14.2856	5.3449	9.1239	5.1803	6.1401	2.0997	8.6085	7.0941	9.4277	10.2175	4.7824	2.81006	1.7042	2.93		0.575946	6.95923
10.9512	6.3598	6.3986	9.0838	11.4152	11.1474	7.0293	6.69	4.2894	5.9327	2.9393	9.3284	6.977	7.864	10.6994	7.5938	3.75719	2.1832	5.0839		0.582278	6.9318
11.0702	9.8693	8.4091	8.425	12.3923	8.8821	8.4498	5.8399	4.851	5.6937	6.6232	8.5958	8.3282	6.9825	6.0342	5.7757	2.90478	2.0413	5.5322		0.588606	6.97945
11.1892	9.0762	9.0096	10.0456	11.4329	10.0889	4.5941	7.7291	5.3786	4.3852	3.8626	8.2882	5.0549	11.2108	8.3563	6.744	3.36245	2.4869	4.7631		0.594933	6.99275
11.3083	10.5294	6.4375	4.5222	13.9752	9.5255	5.5598	6.5173	3.0872	3.4858	1.9601	7.7979	7.074	10.1156	9.4056	5.4818	4.8448	3.3717	6.4479		0.601265	6.67441
11.4273	14.0661	6.3192	3.8243	11.0475	10.912	8.0604	7.5972	7.1425	5.7737	5.8513	8.0496	6.4554	12.0702	12.2394	6.5648	2.15226	2.4067	2.6836		0.607593	7.4009
11.5463	13.3003	8.3387	5.9983	14.7673	12.1407	9.6915	6.4172	7.4447	7.5927	4.9884	6.0989	5.2891	7.8447	9.7952	5.3744	2.54609	2.5332	4.0554		0.61392	7.45649
11.6654	15.6188	6.1201	4.328	8.6776	10.1221	6.9298	4.9757	10.5242	9.3691	3.8614	3.7989	6.3362	7.731	9.4286	3.7449	1.78134	1.2716	3.9042		0.620253	6.58464
11.7844	15.2717	6.711	6.6441	12.3261	13.1018	7.5912	7.1458	9.2823	6.2501	7.6797	4.5467	5.6827	10.2279	10.9093	5.1585	2.71473	2.2989	5.6865		0.62658	7.73495
11.9035	11.4647	7.6447	3.1775	10.269	9.2527	10.4423	4.9425	6.8962	6.5129	6.2151	7.2665	4.7985	16.2663	10.451	3.1157	4.36071	2.6755	8.5187		0.632912	7.45947
12.0225	11.055	2.6919	5.1307	8.2261	9.5189	6.9736	6.7103	7.95	6.4386	5.2078	6.512	4.1893	10.0468	12.755	4.4246	3.38844	3.8757	6.3496		0.63924	6.74691
12.1415	13.4613	4.3141	5.8909	13.2406	9.5445	11.7891	6.975	5.1036	5.4944	3.1755	4.3954	5.6108	11.9572	12.0166	3.934	2.88694	3.4843	2.8522		0.645567	7.00702
12.2606	12.7682	6.1989	4.8089	15.411	8.3195	13.6535	7.1202	3.493	2.9892	6.6735	6.315	7.2127	10.0265	8.3996	3.4034	3.44705	4.4595	4.2866		0.6519	7.1659
12.3796	7.3359	4.3785	7.0905	14.4621	10.467	9.6578	4.8723	3.9288	4.4558	5.5908	6.3146	6.2528	11.556	9.5371	1.1558	4.33718	3.0588	4.0209		0.658227	6.58182
12.4986	11.613	8.7545	7.1143	17.8265	10.5912	5.8939	4.065	9.3815	6.6092	5.3534	9.9037	9.2183	12.4511	10.0884	6.322	5.08716	1.2509	4.4864		0.664554	8.11169
12.6177	12.846	8.6357	7.032	14.0485	10.4806	5.5529	7.7954	6.9325	5.4188	3.3357	10.9255	9.4128	10.8062	9.0004	3.7324	3.60483	2.6469	3.6438		0.670887	7.54727
12.7367	7.3964	7.1889	4.4755	12.6338	5.5829	3.8714	6.5245	5.6711	6.119	5.2222	11.0089	8.5297	9.3249	9.0861	3.077	6.50112	2.4557	5.9259		0.677214	6.69972
12.8557	8.706	3.7646	5.5892	13.2295	9.4439	7.0334	5.4339	10.3805	3.7536	5.6427	9.4233	8.2313	11.4111	6.1859	3.5383	4.63984	4.2987	5.5376		0.683541	7.01352
12.9748	11.399	4.1352	5.9412	13.4176	10.55	6.4292	6.3708	5.3215	5.3084	3.1103	12.2177	15.0936	11.7903	5.9538	4.185	5.70491	3.1161	4.9981		0.689874	7.50237
13.0938	11.7094	3.5067	7.973	12.8565	17.2823	7.1549	4.3126	4.069	6.3774	3.1639	7.0414	11.7642	11.8475	7.3105	5.7857	3.68064	2.0001	3.096		0.696201	7.27399
13.2128	11.9145	9.7216	5.0613	14.124	10.4242	5.5576	3.3502	4.7023	4.5474	5.9381	10.0347	7.8104	11.9325	6.298	6.1781	3.34601	3.1405	7.2964		0.702528	7.29877
13.3319	15.3804	7.5665	7.5328	13.2649	12.7437	8.1115	7.1152	9.2213	3.8279	5.13	10.57	14.1202	9.9733	4.3118	6.4141	2.94375	1.3323	5.4769		0.708861	8.05759
13.4509	14.4061	6.7226	6.5309	7.7391	10.6462	10.5272	8.4235	4.4535	9.0505	5.89	7.824	11.5538	9.3876	6.674	5.3918	4.0587	2.9481	5.4853		0.715188	7.65072
13.5699	11.11	10.0887	4.2897	5.8733	7.2381	12.0128	3.1858	2.6946	7.2125	7.1581	9.9772	10.4124	11.7114	5.858	6.4308	5.54713	1.5146	7.2174		0.721515	7.19625
13.689	7.214	8.7908	6.3563	12.1766	8.9842	9.993	7.731	4.021	3.8748	6.5371	15.1226	15.5349	10.2632	4.0756	6.379	3.04503	2.5335	7.4705		0.727848	7.78351
13.808	14.1111	9.0006	5.3512	10.898	7.7483	10.581	6.9985	6.1366	5.4234	4.0372	12.8616	10.0594	7.0686	6.3503	3.449	5.68836	1.3257	4.7628		0.734175	7.32509
13.927	6.7542	12.4449	6.6921	11.68	10.2852	12.3405	5.4989	8.6924	5.5322	3.7532	14.9203	15.3606	7.5678	9.708	3.7741	6.73279	1.2993	5.8466		0.740502	8.27128
14.0461	9.7418	9.2388	6.1009	10.339	9.9962	11.2767	3.7566	8.8413	5.7298	7.696	11.7898	10.2216	6.9094	6.3991	5.5165	3.54809	3.172	7.5598		0.746835	7.65741
14.1651	9.6685	6.6988	4.2955	8.5471	10.6445	12.4541	6.5655	7.0735	5.8758	5.3004	11.7531	9.7859	6.6643	7.9676	5.3703	5.66845	1.9928	4.5554		0.753162	7.2712
14.2841	10.1769	5.384	4.746	12.6501	10.022	7.8884	7.7852	4.6089	3.2256	6.1718	15.5879	10.0254	6.7763	8.3633	5.3825	4.34517	2.3753	4.6732		0.75949	7.23267
14.4032	9.0257	6.7496	3.7338	9.2065	14.3749	14.0634	9.3534	9.4586	4.1254	5.2519	11.6615	15.1547	4.54	6.7343	4.0368	3.42672	2.3623	5.328		0.765822	7.69931
14.5222	10.5675	6.82	6.171	8.5012	9.4989	6.1395	5.4796	2.8811	6.9708	4.9047	12.0041	9.469	7.6445	9.1701	3.0801	2.97904	2.7115	3.6957		0.772149	6.5938
14.6412	7.1407	6.4903	5.8629	6.511	9.925	6.5201	3.7869	4.3699	5.3404	6.4093	13.8109	10.7756	5.3447	7.0962	5.6845	3.92432	3.8113	4.1623		0.778477	6.49813
14.7603	7.4837	6.71	4.7427	11.8864	6.7095	7.9823	7.0783	4.7164	4.1626	7.1765	12.4506	10.9398	6.8745	5.0007	8.2191	3.95739	2.5695	2.1462		0.784809	6.71145
14.8793	6.4236	8.5209	5.1707	12.5819	6.6254	6.8562	5.7856	5.53	5.3955	2.4851	13.4392	7.7341	8.0691	6.2375	5.1231	3.29675	3.4635	6.6913		0.791137	6.63497
14.9984	8.443	7.5413	5.6499	7.0197	6.8364	5.1749	6.0485	7.9786	4.1863	4.1294	13.3012	7.9709	7.3419	5.3812	5.0669	2.48239	1.5284	7.2104		0.797469	6.29396
15.1174	12.6965	8.0828	6.8159	6.2318	7.9173	3.6678	3.7927	8.4558	6.4013	7.1069	12.8071	4.7171	7.5807	8.7101	2.8334	5.27341	3.0765	4.8281		0.803796	6.72196
15.2364	8.3157	5.4871	5.275	10.5731	6.8842	5.0858	5.2388	7.5908	6.53	5.0233	9.2722	9.2894	7.6955	4.1354	1.7269	8.02504	3.1051	4.6854		0.810124	6.32993
15.3555	8.7833	6.1318	5.7909	9.9184	3.5376	6.7357	4.9102	8.1574	5.3657	3.8674	9.6115	6.9088	12.3938	5.0156	3.0727	6.33453	2.4315	5.8396		0.816456	6.37814
15.4745	10.6879	4.9381	3.5813	13.4083	6.6525	6.9633	6.7394	7.2649	7.1094	4.1373	8.9626	7.2639	11.5281	6.858	2.9787	5.01194	2.6856	4.7486		0.822783	6.7511
15.5935	7.4082	7.3402	4.437	9.7693	9.9067	4.5678	4.1386	4.7522	6.15	3.1466	11.2727	8.1988	10.7154	5.745	4.258	4.30657	3.7756	5.4086		0.829111	6.4054
15.7126	14.3087	6.8856	4.7478	5.8251	9.37	6.0381	1.2537	7.224	3.9039	4.0745	12.1409	10.7175	11.9418	6.7417	3.3422	6.86753	3.8821	4.3979		0.835443	6.87017
15.8316	10.5443	7.0214	5.5339	7.9421	7.6664	7.4327	3.6167	5.9487	3.5811	5.4344	14.0637	11.2404	15.7593	4.7924	4.6339	5.982	2.4766	2.4881		0.841771	7.00878
15.9506	11.843	6.0458	5.4162	6.6798	10.8307	7.0393	5.4544	3.6335	2.6421	4.5065	12.5653	11.8522	13.6082	5.8648	4.2308	6.35067	1.4104	4.5241		0.848098	6.91654
16.0697	11.6376	6.6562	5.4978	9.5397	8.6424	8.5854	4.9147	2.2877	6.7882	5.2686	8.4801	8.3548	16.3226	5.2667	2.5076	9.24794	1.767	4.6572		0.85443	7.02346
16.1887	8.385	4.9318	3.6075	5.5169	8.365	9.0766	4.5171	6.3681	6.057	7.4423	11.6497	11.3252	14.1536	7.5171	4.0784	10.2215	2.5466	6.2051		0.860758	7.33136
16.3077	11.9365	3.6246	5.3792	8.133	8.3444	13.9618	4.7674	7.1477	4.3777	5.4534	10.6305	10.965	11.3594	7.5394	3.3337	7.85745	3.0974	4.7097		0.867085	7.36768
16.4268	11.6535	5.8973	5.6561	4.8539	8.3835	11.7478	6.1569	5.3969	2.2513	6.585	9.1362	8.9299	9.2851	9.0838	3.9914	8.38009	2.656	4.555		0.873418	6.92221
16.5458	5.4551	3.9195	7.9871	4.691	4.3837	8.1111	6.535	4.9054	5.4783	7.0664	9.7672	11.2695	5.961	11.2433	1.4346	7.07207	1.9503	5.9392		0.879745	6.28721
16.6648	4.9863	4.5062	7.0803	6.7636	6.711	13.0373	5.9436	7.1889	7.1397	7.1148	7.8418	14.6264	5.8627	9.9537	2.335	7.96236	2.6266	6.2889		0.886072	7.1094
16.7839	5.4889	5.4865	4.8599	3.6181	5.3315	12.3	5.4096	7.5169	5.2414	4.3874	13.8264	11.1199	10.3346	12.2009	3.9997	6.26131	3.7492	4.3047		0.892405	6.96872
16.9029	6.7066	7.137	1.4648	3.3676	6.0465	9.8875	4.9582	10.0859	3.1728	2.522	13.2073	9.4596	8.0361	8.6097	3.5814	8.46505	2.6641	7.5195		0.898732	6.49398
17.0219	6.93	6.3555	5.4844	5.1828	8.5939	9.5177	6.73	5.8654	4.3015	3.0273	7.6796	11.5192	12.0026	5.2693	4.2584	4.94645	2.3713	7.4865		0.905059	6.52899
17.141	6.5192	4.1809	3.4449	6.764	6.098	9.4855	11.2121	4.4704	3.5077	2.797	6.571	5.9536	5.775	7.1338	2.2049	8.90681	4.0084	6.951		0.911392	5.88801
17.26	7.9248	4.8264	4.7522	7.0246	8.2419	7.5576	7.6828	4.5057	3.9559	3.7745	6.7102	5.6577	5.8302	6.9338	1.2077	7.55487	3.9387	6.3656		0.917719	5.80251
17.379	5.3944	5.8136	3.554	5.4572	6.2591	10.1241	7.1572	5.5107	6.4039	2.7002	8.0811	9.4706	4.7677	9.6071	2.3227	5.74724	4.5023	6.4153		0.924046	6.07158
17.4981	4.3637	5.1381	1.1774	2.7892	3.5463	7.7749	8.4078	4.9457	2.3145	4.1712	8.0235	8.9692	5.4448	6.8297	1.7075	7.31972	4.1418	5.6646		0.930379	5.15165
17.6171	4.7973	5.3747	7.1091	2.6361	9.4039	5.8208	10.5579	2.3077	4.8984	2.362	12.3007	7.6812	6.3323	9.2713	3.082	5.17816	4.5126	7.8045		0.936706	6.19059
17.7361	5.5172	5.0591	5.0923	4.725	6.7352	6.3088	6.6937	3.1227	2.8194	2.6775	10.5701	9.9229	8.3957	9.0855	1.7427	7.76637	3.9504	4.3604		0.943033	5.80805
17.8552	5.9946	6.3192	4.3204	4.523	6.8052	7.2106	9.3523	4.7102	2.4915	1.8559	14.5076	7.2219	6.361	10.2993	1.7695	7.00122	4.5905	3.5361		0.949366	6.04833
17.9742	6.5224	4.2181	5.6851	2.1395	6.6131	7.7551	11.0356	3.8101	2.614	1.7491	21.1251	12.6273	8.6991	12.0906	0.7169	4.34525	4.9346	3.7744		0.955693	6.69196
18.0932	4.2095	5.3651	5.4037	3.6713	4.353	7.8567	7.0132	1.928	2.7699	2.5949	12.6864	15.4992	12.6379	12.0749	0.9778	3.93011	3.2979	4.4559		0.96202	6.15141
18.2123	6.3857	4.9145	4.3518	3.1891	6.2536	5.9724	5.8138	0.46	3.5381	0.9311	12.5087	9.9068	13.0815	10.6678	1.8671	2.19368	4.046	5.3593		0.968353	5.63561
18.3313	5.1143	4.6909	3.4433	2.8071	4.4755	3.3496	5.0921	1.4605	1.4078	1.1697	15.8728	8.312	15.6711	5.3633	2.121	2.48616	6.9165	5.3861		0.97468	5.28554
18.4504	6.3692	4.6263	3.576	3.6182	4.7234	1.7351	3.9661	1.5847	1.3593	1.5721	13.675	9.3487	13.4754	2.8044	1.691	2.01626	4.9348	4.0283		0.981013	4.72801
18.5694	4.0013	4.5178	3.3828	1.5931	3.7482	5.3582	3.1455	1.3695	3.1755	0.9394	13.0788	4.0447	17.1939	2.6581	1.8512	1.72002	4.5452	5.1233		0.98734	4.52481
18.6884	2.3	4.7512	1.8483	3.1244	2.9946	3.748	3.0404	1.1754	2.7799	2.3453	7.0202	5.371	11.3398	1.0429	1.2855	0.68056	5.2923	6.7989		0.993667	3.71881
18.8075	2.9691	4.4574	3.7347	2.3656	2.3563	1.5071	2.677	2.0877	1.2431	3.7164	7.5151	8.1673	8.9807	1.6146	2.3024	1.00196	3.2929	2.5293		1	3.47326

## Sheet: Image7
X0	Y0	Y1	Y2	Y3	Y4	Y5	Y6	Y7	Y8	Y9	Y10	Y11	Y12	Y13
0	1.8437	2.1699	2.04602	4.9423	9.8699	7.6495	9.94735	7.67	6.2968	9.0305	7.41749	5.0322	6.55338	7.432		0	6.27865
0.119	1.9704	2.7154	4.93008	6.16595	6.4414	5.4374	7.55355	8.8656	6.7002	6.411	7.43514	4.3694	6.61071	6.6842		0.00555395	5.87789
0.2381	3.172	2.4367	4.20318	9.18923	10.2229	7.0216	4.98958	8.6239	9.0057	6.3305	4.67071	5.1985	4.79321	7.0096		0.0111126	6.20481
0.3571	4.9787	3.5758	6.11114	7.99238	8.7472	4.8584	5.79549	4.9748	10.459	5.078	4.8921	6.7707	5.40918	6.2327		0.0166665	6.13397
0.4761	4.9739	1.562	4.0822	4.95111	9.3076	5.7496	6.66909	6.2343	6.6295	9.4726	4.08086	4.794	3.78713	5.0298		0.0222205	5.52312
0.5952	3.1161	4.4272	4.60192	6.28506	6.7149	6.4602	4.68761	3.2992	3.5098	7.1208	3.14908	4.0434	3.89111	4.1193		0.0277791	4.67326
0.7142	4.7648	2.2696	3.13523	9.26861	8.0789	9.0428	6.0249	3.3731	8.362	4.7775	4.87241	4.8398	6.28029	2.5588		0.033333	5.54634
0.8332	4.2981	1.7939	3.66938	3.15908	7.5671	8.2487	9.27067	4.2764	9.3482	7.3604	6.82846	3.9004	4.41021	3.5317		0.038887	5.54734
0.9523	3.6688	2.9517	4.91029	6.56924	7.8715	4.9758	5.70935	6.2374	6.8033	6.08	6.44502	3.0477	6.50356	5.4446		0.0444456	5.51559
1.0713	3.3817	3.7846	3.18199	7.70512	11.1421	6.2979	9.97002	4.2143	6.3554	10.9451	4.70787	4.6984	5.05758	7.8522		0.0499995	6.37816
1.1903	4.3264	3.0086	2.90824	7.26247	7.4848	7.9983	8.00338	4.1849	6.0421	9.0503	7.50527	3.2678	5.35156	8.9369		0.0555535	6.09507
1.3094	5.6459	2.3294	4.73863	4.86618	3.2432	10.247	4.50464	4.2342	7.3406	7.063	4.89551	3.9578	4.76323	9.1461		0.0611121	5.49824
1.4284	6.5977	4.0296	3.76591	4.20673	6.1004	4.1799	3.67203	4.8763	6.2231	5.5761	3.38511	3.7088	3.96687	5.2176		0.066666	4.67901
1.5474	7.7888	3.7129	5.20351	7.17021	7.3799	8.4349	6.7502	4.7706	4.9152	4.7467	4.79205	7.5477	5.56565	8.2509		0.07222	6.21637
1.6665	5.0181	4.6283	6.14534	4.89104	7.5158	7.5111	6.95798	6.3433	6.9528	6.0526	3.95014	9.0038	4.85448	5.9801		0.0777786	6.12892
1.7855	8.29	5.6931	4.03828	3.38504	5.9788	9.3552	4.34923	6.1688	6.9388	6.7712	3.17337	4.5804	4.61337	3.9383		0.0833326	5.51956
1.9046	6.1101	6.4294	3.88263	3.98796	10.4679	7.5971	5.19225	5.1354	9.7245	4.5828	4.20767	5.1843	6.1962	4.223		0.0888912	5.92294
2.0236	5.8752	4.0104	6.62023	7.35827	7.3626	5.1635	2.72672	1.7645	5.9455	6.483	2.48837	7.5209	6.42899	4.3054		0.0944451	5.28954
2.1426	5.0234	3.95	6.18247	4.19861	9.896	4.6618	5.20668	4.1409	5.1774	5.7062	3.46016	9.6099	5.89403	4.9164		0.0999991	5.57314
2.2617	8.4531	2.4976	3.65156	4.27071	10.8066	9.3893	6.49103	2.3573	4.2248	4.8663	6.57388	6.8055	4.89436	4.7358		0.105558	5.71556
2.3807	5.7776	2.5912	2.75164	3.80796	9.704	6.8199	6.20577	4.2954	9.4552	4.5018	3.36476	5.796	4.46331	3.7152		0.111112	5.23212
2.4997	3.8122	3.8555	4.22357	3.93104	12.8306	4.4625	7.01371	3.656	7.3709	5.6926	6.77038	6.8625	7.18607	1.9322		0.116666	5.6857
2.6188	4.909	3.7659	3.44898	5.31213	10.4312	5.7855	6.78579	2.886	7.4132	3.2329	5.56126	8.0732	4.96936	3.4357		0.122224	5.42929
2.7378	3.4516	2.8093	3.94681	3.33757	7.9383	7.0663	5.33911	3.6025	5.8997	6.6511	3.13146	5.3948	3.90233	6.0642		0.127778	4.89536
2.8568	5.7217	2.8021	3.96078	3.87231	9.5247	3.676	3.03347	4.295	4.2995	6.675	2.22251	7.1159	4.78627	6.4664		0.133332	4.8894
2.9759	6.6271	1.025	4.88836	4.3932	9.948	5.5889	6.99389	4.4513	3.83	5.546	2.56752	6.8067	6.81433	5.0316		0.138891	5.32228
3.0949	6.4923	3.3634	9.83298	3.60608	9.7078	5.7135	3.82327	2.3781	6.4384	4.32	3.04992	6.4037	7.58591	2.934		0.144445	5.40353
3.2139	5.8634	4.3853	4.36137	5.6638	5.0604	5.5903	3.3529	2.6031	3.141	6.1607	3.33295	8.1502	6.30206	2.5997		0.149999	4.7548
3.333	5.0138	5.9483	5.12174	6.65798	4.606	7.6582	8.4556	2.5379	4.0636	4.4195	4.53813	9.4096	3.06191	5.1402		0.155557	5.47375
3.452	5.9605	5.0282	3.77533	7.18129	8.2016	4.4641	5.43556	3.2218	2.9911	4.8049	3.2817	7.9986	2.18923	3.8085		0.161111	4.8816
3.571	6.0303	3.2503	2.69047	7.08784	10.4699	3.7638	5.12758	2.449	2.5677	3.4586	4.74392	8.14	2.2456	4.5137		0.166665	4.75277
3.6901	6.3822	4.2464	3.10329	5.995	8.5332	3.4707	6.22455	3.3961	1.6989	4.0183	5.22605	6.4502	6.97406	4.1822		0.172224	4.99294
3.8091	6.7153	3.9532	2.0188	4.75706	8.7307	3.6243	4.89951	5.6205	4.3131	6.7537	6.04485	5.5454	2.73684	2.0801		0.177778	4.84238
3.9281	8.1115	2.9445	3.04957	4.64925	9.4814	4.3801	5.79599	3.4803	3.9894	3.5124	6.32103	7.8194	6.21336	5.0427		0.183332	5.34221
4.0472	6.8336	3.2605	1.83431	3.65728	8.1976	6.4371	4.70394	4.0692	2.3226	3.8383	5.69429	4.2252	5.30323	4.9626		0.18889	4.66713
4.1662	3.6674	2.5195	0.87516	4.17263	7.7598	4.1078	5.73136	6.2025	2.7446	1.8202	5.88319	4.6138	7.04317	3.6201		0.194444	4.34009
4.2852	5.8339	3.0331	1.71461	4.67051	8.7118	3.6369	5.94363	7.6159	4.3671	2.3541	5.36346	5.3184	9.12019	6.8922		0.199998	5.32684
4.4043	5.8337	2.3656	2.19586	6.37123	6.4247	3.3078	6.10461	7.7955	3.5316	3.6337	4.78749	5.5446	3.32603	6.5122		0.205557	4.83819
4.5233	8.0953	2.6699	2.77195	4.04336	5.6603	4.7774	5.65689	4.9781	2.2964	7.3265	3.93738	3.6219	5.19361	8.7326		0.211111	4.98297
4.6423	10.4835	2.6879	2.05163	4.2	5.29	4.8854	8.66682	4.2806	2.2353	7.4308	4.42076	6.5532	5.06623	7.5443		0.216665	5.41403
4.7614	7.0481	1.721	2.14775	4.21183	4.6763	3.3865	8.71269	2.1715	2.1997	4.0235	4.52287	5.8316	5.59665	8.9422		0.222223	4.65658
4.8804	9.9415	2.8722	0.53247	3.69219	7.7628	2.4566	5.13695	4.5863	2.8711	5.0151	3.8963	4.3549	5.47753	7.5136		0.227777	4.72211
4.9995	11.0791	2.1956	0.80273	4.25346	4.3729	3.1607	4.49952	5.489	3.0802	5.4177	5.28971	6.1228	6.89967	5.9321		0.233336	4.89966
5.1185	7.1338	2.5403	3.07835	3.47223	3.5868	5.26	5.28974	2.7866	3.7776	4.6348	2.22299	4.8893	7.40259	3.6674		0.23889	4.26732
5.2375	3.2336	4.2721	1.57936	4.19601	5.1424	1.7793	6.2226	4.5266	2.0842	7.4803	5.16625	5.7625	5.52981	4.0099		0.244444	4.35607
5.3566	5.1948	2.3554	0.67416	4.53543	4.8921	4.3062	6.31143	6.3406	2.4868	8.5996	4.5921	5.8051	7.2104	7.4457		0.250002	5.05356
5.4756	6.5063	3.6434	1.91465	0.99587	4.7197	6.2993	6.87636	4.7353	4.4201	5.5999	5.13615	5.6776	9.84874	4.0262		0.255556	5.02854
5.5946	6.578	2.0187	1.77598	1.99822	1.8443	4.0519	7.91278	3.2129	3.2102	8.8072	4.30355	6.752	9.62176	3.7924		0.26111	4.70571
5.7137	5.9929	1.1169	1.73971	3.00791	7.5962	4.7766	5.52063	4.4165	3.326	9.5815	4.29496	4.5582	7.38133	2.9921		0.266669	4.73582
5.8327	2.1334	1.2526	3.73199	2.97066	5.1395	4.8771	7.52587	6.6621	3.002	9.4544	5.97255	5.5192	8.10507	4.0577		0.272223	5.02887
5.9517	5.38	1.196	3.27656	3.65959	5.8039	3.5248	7.46399	4.502	2.7775	9.6083	5.10177	6.6679	6.95016	6.1442		0.277777	5.1469
6.0708	4.1161	1.4489	3.58983	4.68346	4.6899	4.2744	6.2689	2.3983	3.2426	8.0713	6.06447	5.9951	6.75326	5.5341		0.283335	4.79504
6.1898	3.5497	1.6503	1.96163	4.38198	3.0366	3.7465	6.98894	1.6334	3.4319	10.3005	2.7289	3.1528	6.51224	5.4122		0.288889	4.17768
6.3088	6.5747	3.4974	1.342	4.35274	3.1528	3.1225	7.56781	1.3855	4.977	9.8916	2.48862	4.237	10.0712	4.1046		0.294443	4.76896
6.4279	7.4106	3.1383	2.11968	4.55825	5.1722	4.5834	8.18456	1.9041	3.8265	11.2829	7.71802	6.0536	9.43929	4.2698		0.300002	5.69009
6.5469	7.7312	1.5986	4.03411	3.93206	4.7696	7.186	7.42356	2.1666	3.2707	7.7025	6.7183	6.3577	7.71115	5.7697		0.305556	5.45513
6.6659	4.2505	4.6223	3.70035	2.46484	2.8002	7.1398	7.50704	2.3405	2.3942	7.4747	7.47658	5.7641	10.2556	4.7976		0.31111	5.21345
6.785	3.692	3.3353	3.22121	4.03973	3.89	4.414	6.71377	1.1447	2.6261	9.6176	6.86294	4.6466	5.84808	7.0965		0.316668	4.79632
6.904	9.3577	0.4981	3.97088	3.82204	4.552	4.2749	7.71499	2.2187	4.5322	9.4153	5.18809	6.8379	8.05451	6.4558		0.322222	5.49236
7.023	6.2581	2.3966	1.22868	2.41545	5.5098	4.4606	5.65938	2.3035	1.9737	7.231	7.07127	6.0603	8.12165	6.8875		0.327776	4.82697
7.1421	8.6669	1.7686	0.48296	2.98801	6.6104	5.9942	6.0579	1.283	4.4864	9.2574	6.98229	4.0529	7.55953	5.3526		0.333335	5.11022
7.2611	9.8678	3.1447	0.35692	2.42136	5.7044	6.3964	4.46505	1.3773	3.9172	8.6825	9.33071	5.9991	9.65175	6.1016		0.338889	5.52977
7.3801	9.9171	2.7763	1.94921	2.41073	5.4073	5.1492	3.98515	0.7507	2.0614	10.5421	7.41028	5.9801	6.44431	5.1645		0.344443	4.99631
7.4992	8.7684	1.8301	1.87935	3.04614	3.7062	5.5959	6.55415	1.8938	2.5129	10.0145	7.61397	5.6628	6.77617	5.6367		0.350001	5.10651
7.6182	10.5619	1.6109	2.77199	3.87807	6.6929	6.2383	5.71538	1.1749	1.4156	7.9062	8.85696	9.7133	7.55614	7.0818		0.355555	5.79817
7.7372	9.5879	2.1405	2.50045	1.47072	7.8207	3.8281	4.86729	1.7639	4.3049	11.0343	7.65477	10.1659	5.57488	6.186		0.361109	5.63574
7.8563	5.8959	1.9528	2.44664	1.87158	5.8653	3.4979	3.46202	1.769	3.1304	10.9047	11.5187	8.0137	8.21631	7.543		0.366668	5.43486
7.9753	7.0527	2.6432	1.12919	3.69316	3.7497	3.437	4.48798	1.7622	3.501	10.9905	11.0823	8.7719	7.34466	7.9079		0.372222	5.53952
8.0943	4.115	1.1141	1.15216	4.3289	4.5537	5.4821	5.25288	1.0718	4.9342	10.1446	9.5143	6.7291	5.80524	7.7943		0.377776	5.14231
8.2134	6.2283	3.5282	2.72672	3.97955	7.1067	8.0445	4.51718	1.2922	1.9855	10.1	10.9182	7.5234	10.3284	4.9984		0.383334	5.94838
8.3324	5.3548	2.7655	4.34236	3.42154	9.2536	4.8271	2.85244	3.2657	2.992	8.8186	11.5333	7.8889	8.34908	6.2556		0.388888	5.85147
8.4515	5.9015	1.6272	0.96209	3.3584	7.1696	6.8342	4.5712	1.94	3.1656	10.0647	7.13172	11.6978	6.98538	6.2319		0.394447	5.54581
8.5705	5.2921	1.8084	1.15024	4.54375	6.5857	6.603	4.21061	4.0429	3.4628	11.5177	7.10504	9.0203	7.01097	5.9353		0.400001	5.59206
8.6895	4.0958	1.0733	1.3073	3.3005	3.656	4.902	4.51464	3.6547	1.0565	12.9097	7.92468	5.7633	8.36353	6.8301		0.405555	4.95372
8.8086	4.0065	2.2885	2.56099	2.38655	3.1599	5.3818	5.55547	2.724	2.3493	21.2637	5.85277	4.9581	7.15028	6.6065		0.411113	5.44603
8.9276	4.1371	2.0016	0.75203	2.07572	4.8802	8.3035	4.6273	1.2587	0.7698	14.9343	6.81734	9.1942	6.04205	8.1648		0.416667	5.28276
9.0466	3.5419	1.9806	0.92741	1.57248	10.3429	7.8335	4.19487	0.364	2.2789	10.9984	7.64181	8.1975	6.59983	6.1585		0.422221	5.18804
9.1657	5.7938	1.7127	0.86607	2.36477	9.674	6.3261	2.4306	1.6528	3.6711	13.1444	11.4032	5.5255	8.90132	7.8042		0.42778	5.80504
9.2847	8.2363	2.1757	1.40625	1.17836	8.5093	4.8389	2.58877	1.666	2.6503	16.5498	11.9433	4.9239	5.84121	8.6684		0.433334	5.79832
9.4037	4.885	3.8682	1.83501	2.11674	9.8349	6.6728	4.56572	2.8378	2.3058	14.0688	10.6732	4.7206	4.09031	8.1872		0.438888	5.76158
9.5228	6.2511	2.1164	1.23634	3.92744	9.4453	7.898	3.52009	2.921	2.9302	12.2494	8.0432	5.303	5.67328	9.656		0.444447	5.79791
9.6418	7.2299	1.5569	1.81506	1.96097	7.4525	4.624	5.21102	1.5421	3.9384	15.2814	6.84135	6.4949	5.9577	8.6464		0.45	5.6109
9.7608	4.8949	2.1923	2.13525	3.19769	10.7708	3.0418	5.56091	1.7006	2.5858	10.436	9.693	4.3213	6.45353	8.8957		0.455554	5.41997
9.8799	7.5584	2.2191	2.16392	1.20355	8.3621	5.9809	5.35727	2.0106	3.4412	10.4525	5.13031	5.0166	6.93406	13.8165		0.461113	5.68907
9.9989	4.8532	2.287	0.54677	2.05876	10.8412	5.6161	6.69091	1.2994	2.0495	10.922	6.39612	6.8414	7.27831	9.3468		0.466667	5.50196
10.1179	5.4052	2.4145	0.53586	4.91254	12.556	5.0319	7.66051	1.6996	0.8982	10.8175	7.50896	6.8653	9.51275	3.4674		0.472221	5.6633
10.237	4.3607	1.5728	1.68684	3.13246	9.3707	3.6989	6.96633	2.5934	1.9151	13.6873	5.22458	8.1479	7.70608	6.8322		0.47778	5.49252
10.356	6.6226	2.6113	1.15576	1.60006	9.6051	2.9446	8.08527	1.1054	2.7026	12.3894	6.45364	6.1009	2.90452	6.7929		0.483333	5.07672
10.475	4.9571	2.319	1.23074	2.3569	6.9635	4.1569	2.80564	0.9596	1.6402	11.0014	5.2775	4.9295	4.70267	8.7346		0.488887	4.43109
10.5941	5.0591	1.5021	1.44604	3.06379	7.3622	7.7033	4.39178	3.3508	3.5208	9.0198	3.40212	4.3508	7.05745	10.3841		0.494446	5.1153
10.7131	5.3602	2.0975	2.0463	5.02976	8.1898	5.1499	4.36578	2.0148	1.2226	11.4037	5.34575	3.5985	7.50069	12.6602		0.5	5.42753
10.8321	6.5722	2.9913	1.6001	4.23686	8.4894	5.0901	4.26994	2.1313	1.9667	12.6632	6.19494	3.2044	4.19453	9.4948		0.505554	5.22141
10.9512	9.8884	2.0351	0.68661	3.14945	6.4644	4.9734	4.88961	1.1119	2.0528	10.6843	6.72193	4.0178	6.57437	10.121		0.511113	5.24079
11.0702	8.2198	0.7652	1.83152	2.0294	9.4948	5.9334	4.89947	1.7724	2.5647	11.0318	5.39388	2.7095	6.27765	11.1564		0.516667	5.29142
11.1892	6.9367	2.0003	1.24102	3.47686	6.2605	4.8772	4.29095	1.6338	2.8906	10.3907	4.44037	6.6148	8.63802	13.1629		0.52222	5.48962
11.3083	7.5007	0.8858	1.00001	1.21483	6.8803	3.385	5.32474	0.9666	1.8507	12.3075	8.90622	4.6806	5.83716	8.7873		0.527779	4.96625
11.4273	4.3493	1.2879	2.01024	0.47405	8.9877	5.8529	4.86375	1.2437	1.5899	14.3723	6.68184	3.6997	6.34538	9.2432		0.533333	5.07156
11.5463	4.1839	3.5362	1.36173	2.03672	10.4586	5.0451	4.13721	2.0977	2.8308	11.7697	8.20198	4.9949	5.59743	9.764		0.538887	5.42971
11.6654	5.1533	5.783	2.23877	2.68992	7.7591	4.8965	4.31547	2.3455	1.2731	10.9019	9.32066	3.4091	6.79062	9.2899		0.544446	5.44049
11.7844	6.0918	2.19	2.27219	1.82191	7.2822	5.6394	3.45931	1.3349	1.1627	16.0728	6.34578	3.6483	8.05713	9.8523		0.55	5.37362
11.9035	4.8399	3.6585	1.80667	1.7209	8.9877	5.2751	3.61823	2.5757	2.9048	14.0888	4.91712	3.8347	6.12591	10.0166		0.555558	5.31219
12.0225	6.8378	1.4134	1.66503	1.5201	7.054	7.7098	4.18728	1.6384	1.8323	11.0587	7.47382	3.1372	5.78604	13.8533		0.561112	5.36908
12.1415	5.1555	0.4951	1.90092	3.60685	6.6638	10.2559	3.89646	1.2127	1.3502	10.3549	9.90705	3.4142	5.787	6.3121		0.566666	5.02233
12.2606	6.0912	1.715	2.43163	2.97373	4.9575	7.0599	2.98745	1.5187	1.7131	12.0048	10.6305	4.3051	4.67509	6.0817		0.572225	4.93895
12.3796	6.4679	1.7342	1.96462	2.98664	4.6091	4.5249	4.60088	3.1118	1.6046	11.2129	8.77146	3.5549	5.93448	9.7868		0.577779	5.0618
12.4986	2.9982	2.8893	2.49885	4.02577	3.742	7.2431	6.61592	2.8465	2.5739	6.9875	3.20409	4.0052	5.76472	6.497		0.583333	4.42086
12.6177	5.8094	1.9731	2.40953	1.58236	5.8103	7.1826	4.69578	1.6264	1.3736	7.8241	4.59707	5.2142	4.28651	4.7265		0.588891	4.22225
12.7367	6.072	1.2671	1.75021	2.89423	8.162	6.5648	3.0885	1.3556	1.6386	10.3886	4.04205	5.881	6.34432	7.2965		0.594445	4.76754
12.8557	5.6474	1.0889	1.22299	1.53192	7.5123	4.8942	3.47913	3.3034	0.7121	9.5659	3.41624	1.8256	5.92128	7.3058		0.599999	4.10194
12.9748	5.4175	1.8899	2.88269	2.89054	8.0771	8.8577	5.19683	3.1747	0.6287	9.7028	3.38525	6.1029	9.73185	10.657		0.605558	5.61396
13.0938	6.279	3.8533	1.6905	3.34164	7.9616	5.4129	6.6978	1.8084	2.9739	9.4541	5.29058	4.0987	9.90088	8.5834		0.611112	5.52476
13.2128	4.8251	2.7548	1.96943	1.71891	9.3139	9.7819	3.87009	1.2476	1.6958	12.7962	3.00796	2.7917	10.3436	7.7937		0.616666	5.27934
13.3319	4.5457	2.3057	2.31142	1.76026	6.5239	7.3493	5.66387	1.4092	2.9205	6.6328	2.70839	3.2541	5.32335	9.6085		0.622224	4.45121
13.4509	4.8002	3.0334	2.05243	1.80134	3.5469	2.8132	10.0145	2.2561	1.5024	8.2124	4.69679	5.5432	7.82849	6.7913		0.627778	4.63519
13.5699	4.1245	3.8511	2.24358	2.25659	5.7425	3.3196	7.21211	3.4848	1.8783	7.5666	5.00787	3.6808	8.97703	6.9676		0.633332	4.73664
13.689	2.533	2.1028	2.25486	2.43422	7.9607	7.3939	7.83035	3.5495	1.3186	11.4848	4.74599	4.961	6.79372	4.7363		0.638891	5.00712
13.808	2.4558	4.1108	1.83624	3.23299	4.9865	6.4624	5.63214	1.0985	3.4834	10.0021	6.08405	3.641	6.40652	5.9851		0.644445	4.67268
13.927	4.2928	3.2791	1.68117	4.22935	4.4437	5.0397	6.60131	0.7244	3.1509	7.3701	7.14106	2.0898	7.43097	7.3309		0.649999	4.62895
14.0461	3.1213	1.5014	2.26446	1.65949	3.6369	4.453	5.75182	2.0143	3.0502	9.0288	5.36595	2.9814	6.82787	5.7816		0.655557	4.10275
14.1651	5.3984	1.6248	2.74748	3.47331	3.5806	4.6056	4.24616	3.9068	1.5405	8.315	3.45421	3.6781	6.31986	3.3321		0.661111	4.01592
14.2841	4.5394	3.442	1.54428	2.84509	5.5001	6.2551	3.35832	4.3445	1.5324	11.2183	3.95911	1.6017	6.36746	6.8342		0.666665	4.52443
14.4032	3.7215	1.5986	1.82354	1.56226	5.8925	5.391	2.93599	2.2797	0.2998	8.4071	3.62802	1.4097	8.7946	6.5216		0.672224	3.87614
14.5222	4.5662	1.3317	0.98874	2.11518	4.5185	4.1617	4.85961	0.8023	1.0515	6.5614	5.406	3.2789	6.96074	2.6944		0.677778	3.52121
14.6412	3.2825	1.4707	2.30358	2.18344	4.6083	5.2659	4.83049	1.9542	2.0725	8.7296	4.56976	3.836	6.29991	5.373		0.683332	4.05571
14.7603	3.9778	4.128	1.56573	3.44906	3.8764	4.3578	3.38725	1.0218	2.2387	7.2951	2.2597	3.5638	9.22643	6.3543		0.68889	4.05013
14.8793	5.225	1.8764	4.91106	3.34221	4.6667	9.475	5.74281	2.5357	2.0068	8.2872	3.69741	3.3362	6.6266	3.6588		0.694444	4.67056
14.9984	6.3574	2.0783	2.08811	3.47149	5.1252	4.7049	5.52377	2.2774	2.8625	5.2868	4.95555	3.0232	6.27624	7.4875		0.700003	4.39417
15.1174	5.6902	3.634	1.89511	4.17297	3.567	4.5808	6.26169	4.2446	1.0312	4.4411	3.04468	5.484	7.98775	7.0178		0.705557	4.50378
15.2364	6.3288	4.4023	2.01506	4.35815	4.9694	5.3386	6.38531	3.9095	1.7944	5.6138	3.07039	4.1618	5.24857	7.0968		0.711111	4.62092
15.3555	5.3363	5.4877	1.49602	4.36548	4.9134	3.0983	5.58026	2.5142	2.2714	4.773	3.2167	2.3001	10.3944	7.2793		0.716669	4.5019
15.4745	6.1443	3.9962	1.95938	5.95139	3.8512	4.1166	5.98021	3.6646	2.6404	4.0099	5.02016	2.8087	7.09318	4.7838		0.722223	4.43
15.5935	4.4871	3.3253	2.90045	4.40334	5.3116	5.3566	4.3551	2.4091	1.6022	5.437	5.91016	2.4307	6.79298	6.7789		0.727777	4.3929
15.7126	8.4257	4.3926	3.75494	3.47677	4.7723	3.1349	8.08002	3.7694	1.8016	4.6099	3.97909	4.0316	5.45661	9.7656		0.733336	4.96079
15.8316	5.4127	6.131	3.17908	3.73792	3.1237	2.4495	5.09815	0.9225	0.9377	4.8721	3.90014	1.6563	5.12802	10.8495		0.73889	4.09988
15.9506	7.7782	5.2659	3.43299	2.82278	6.661	4.39	6.19841	2.0633	1.6805	4.6814	5.65985	3.2138	3.33377	13.7044		0.744444	5.06331
16.0697	7.4686	5.6106	3.5027	2.56806	5.7945	4.4002	6.67179	4.0129	1.6013	4.3724	5.77282	2.7462	6.6814	8.9172		0.750002	5.00862
16.1887	7.5639	7.5968	1.8559	4.05265	4.6765	7.5722	6.35772	3.4739	3.057	7.0575	5.97191	2.252	7.78138	8.6465		0.755556	5.56542
16.3077	7.0099	7.389	3.00789	4.16196	8.3245	7.0536	8.87591	3.9824	1.8463	6.3838	5.87565	2.3944	5.09148	8.2619		0.76111	5.68991
16.4268	4.0895	5.9624	4.18997	3.42406	4.8782	5.8884	11.5383	3.9516	3.4191	7.3931	7.20775	1.3245	8.74053	7.9311		0.766669	5.70989
16.5458	2.8424	8.2372	3.50567	4.27074	5.0383	6.8508	8.03654	2.1239	2.5109	6.1781	7.67086	2.6078	3.73367	8.4435		0.772223	5.14646
16.6648	5.414	9.3368	3.84896	2.4007	6.353	8.7092	8.02785	3.4272	3.1252	9.0896	7.94233	3.7177	5.70017	9.3071		0.777777	6.17141
16.7839	4.7279	9.8605	6.08165	5.18997	5.8664	6.5732	7.07065	2.9368	4.4364	4.2761	8.19674	1.5671	4.90581	8.4997		0.783335	5.72778
16.9029	3.6149	10.5817	3.98528	4.47848	3.2143	5.2355	8.05597	3.7634	1.9396	3.0897	8.94484	1.795	4.87681	6.3084		0.788889	4.99171
17.0219	5.6739	8.616	4.94316	3.43112	4.7714	3.4856	7.1166	4.3284	1.8195	4.3554	5.23095	2.7504	9.16856	5.8494		0.794443	5.11003
17.141	5.5426	10.3369	3.27018	5.42372	5.6642	5.7259	8.5525	3.2214	2.0367	5.3879	5.80079	2.1666	4.82469	7.3127		0.800002	5.3762
17.26	8.6958	9.4431	4.21403	5.04633	7.3323	4.2774	4.36103	4.4433	1.8692	4.9709	6.77092	3.0692	5.66502	8.6798		0.805556	5.63131
17.379	3.7449	8.6768	3.64319	5.35895	6.9436	5.607	7.06947	4.0475	2.1566	5.2923	4.43193	8.4442	5.50918	8.2981		0.81111	5.65884
17.4981	6.4573	8.4128	7.43033	9.02724	7.2022	5.5118	5.45259	3.8589	1.9947	5.4345	6.3198	4.6927	3.3085	5.7742		0.816668	5.77697
17.6171	8.4313	5.135	10.3141	6.62746	5.105	6.1979	3.28704	8.4523	2.0056	7.1646	6.45694	5.2155	3.595	7.8877		0.822222	6.13396
17.7361	5.9605	3.9233	9.0686	7.54772	8.1829	5.6827	4.89088	7.6566	3.5463	4.6232	4.53608	2.9665	7.347	8.2043		0.827776	6.00976
17.8552	12.7813	5.3776	6.19002	4.7905	4.4561	12.5698	4.15398	3.8276	2.2415	2.53	4.62321	4.8413	4.29197	6.2529		0.833335	5.6377
17.9742	10.0053	8.4887	5.25076	3.10541	6.1454	10.3954	2.67302	8.8405	2.116	3.0181	6.33333	4.9118	4.70991	5.6537		0.838889	5.83195
18.0932	9.4047	5.3215	7.32768	5.54872	5.0299	8.3343	1.6984	7.3766	5.3114	4.6894	6.51778	4.6101	7.56583	5.127		0.844443	5.99024
18.2123	7.2957	3.4916	3.67456	5.10615	5.5934	5.9709	3.96828	6.1223	2.59	5.5555	4.36737	3.4923	7.20213	5.2282		0.850001	4.9756
18.3313	7.6912	2.696	4.68979	6.61418	3.3932	3.9184	3.70112	8.872	4.0075	6.1659	7.44836	6.2647	6.48705	5.8238		0.855555	5.55523
18.4504	6.8326	5.2909	6.97494	7.09262	4.4415	3.9317	4.08214	6.3389	3.2323	5.2985	8.20294	7.4596	7.15686	4.9775		0.861114	5.80807
18.5694	6.0106	3.4888	6.01494	6.12965	4.46	7.9304	1.87911	8.1523	3.585	4.9996	7.98184	4.8956	9.50355	5.3064		0.866668	5.73841
18.6884	8.0911	2.7205	5.43014	5.40182	3.1065	6.2042	2.68461	11.449	3.5058	6.6938	7.07661	3.987	6.10167	6.4377		0.872222	5.63503
18.8075	4.2397	4.9765	3.01004	6.04868	4.7627	8.9823	2.528	14.7046	2.1891	3.8337	5.50696	4.4382	8.19281	3.7222		0.87778	5.50968
18.9265	6.2726	3.84	4.44871	4.84563	4.1707	10.3268	2.33312	8.6096	3.4908	1.5339	8.7244	5.2567	8.2928	4.017		0.883334	5.4402
19.0455	6.6252	6.6596	5.78488	6.86724	3.2711	9.1416	3.57102	11.3568	2.9408	2.5156	7.19229	3.7906	4.98221	3.8406		0.888888	5.60997
19.1646	8.0333	3.8165	4.24712	6.3411	5.3716	10.7419	3.05588	5.1178	4.2159	3.3508	7.5861	3.5318	5.27931	5.6711		0.894447	5.4543
19.2836	3.783	4.3206	5.46682	5.49197	5.2564	9.7953	1.69144	9.6296	6.5031	5.0653	7.55904	3.9877	5.22018	4.5035		0.900001	5.591
19.4026	7.2275	4.2285	7.69741	5.18042	6.3152	8.6346	2.47964	8.0777	6.6488	5.672	6.82214	5.2115	4.74066	4.1428		0.905555	5.93421
19.5217	9.9978	4.2455	6.05327	4.27371	4.8014	9.2078	2.05459	10.6183	3.6855	7.2335	6.59538	5.2304	4.65162	8.1156		0.911113	6.19745
19.6407	8.4251	5.0501	6.17145	4.09378	3.5254	9.7486	4.40652	8.0316	3.6826	4.8099	5.60583	3.7342	6.14344	4.7088		0.916667	5.58124
19.7597	6.7315	6.527	4.9502	3.36814	2.378	10.0366	5.28876	6.8229	3.8589	3.533	3.9988	2.874	6.68519	6.3928		0.922221	5.24613
19.8788	6.117	2.7066	6.42175	2.83805	5.2016	7.6831	4.0507	5.6603	2.2613	7.1186	2.435	3.5902	4.06966	6.1085		0.92778	4.73303
19.9978	7.556	4.172	3.59021	3.15539	5.6808	4.4869	3.46223	4.7391	2.6652	7.5289	3.64217	4.1753	5.43447	6.1508		0.933334	4.74568
20.1168	5.7276	5.4497	2.54204	4.46552	3.1408	3.6049	5.03518	6.3589	4.9608	5.5645	5.62564	4.4182	5.19091	7.553		0.938888	4.97412
20.2359	3.6689	7.3084	2.66989	3.51171	4.7215	5.5553	6.80317	8.1764	5.6073	5.8521	4.80581	4.4691	5.71044	5.0168		0.944447	5.27692
20.3549	2.6541	4.3449	2.89068	4.72522	6.7736	5.6713	5.16367	5.9805	3.0696	6.6142	7.4604	4.4704	4.80373	5.6364		0.95	5.01848
20.4739	1.5233	5.7293	2.87646	4.0304	5.5158	6.0131	4.18599	6.5932	4.8327	7.3497	6.2857	7.2095	6.46061	6.5131		0.955554	5.36563
20.593	1.8935	3.9521	5.79179	2.65766	5.2663	5.4171	5.48498	7.6982	6.696	7.375	4.57168	6.6818	7.65877	4.1897		0.961113	5.38104
20.712	1.5207	1.9741	3.4015	1.65528	5.7935	6.5645	4.80474	6.0201	7.8733	9.4013	6.08501	3.58	4.43143	2.3153		0.966667	4.67291
20.831	2.7436	4.3352	0.47382	1.13823	3.6032	8.2076	6.14063	3.8372	5.4018	9.3042	7.32159	5.4486	2.65655	1.1757		0.972221	4.41342
20.9501	2.0806	4.6549	1.2002	2.83217	3.9597	7.1969	5.2937	4.4896	4.6973	6.5347	7.93184	4.0538	4.46441	3.3757		0.97778	4.48325
21.0691	2.2081	3.9768	3.86706	2.88555	3.5411	5.7397	4.2844	3.97	3.1804	6.551	5.26946	5.9827	5.8798	2.8757		0.983333	4.30084
21.1881	2.7817	2.3141	1.86505	2.3793	1.6318	9.7017	2.99794	6.6693	2.4375	2.2957	9.52737	6.3051	6.05054	3.5344		0.988887	4.32082
21.3072	2.3904	1.3919	0.8819	2.54252	3.9997	4.3699	4.71138	4.566	2.1867	3.7466	7.10042	6.2986	6.53572	2.8663		0.994446	3.82772
21.4262	1.4854	3.1299	1.68512	1.12717	2.1105	2.2111	2.85845	3.7512	3.2337	3.2035	7.38232	6.0889	2.63823	4.3893		1	3.23534

## Sheet: Sheet1
Image7				Image8				Image9				Image10				Image11				Im7				Im8				Im10				Distance	Image7	Image8	Image9	Image10	Image11	Im7	Im8	Im10
Ap-Ba	Average int.			Ap-Ba	Average int.			Ap-Ba	Average int.			Ap-Ba	Average int.			Ap-Ba	Average int.			Ap-Ba	Average int.			Ap-Ba	Average int.			Ap-Ba	Average int.			0	6.27865	5.85225	2.66693	21.6055	20.7046	18.0855	27.8756	13.1169
0	6.27865			0	5.85225			0	2.66693			0	21.6055			0	20.7046			0	18.0855			0	27.8756			0	13.1169			0.05	5.79765	6.53118	3.42293	26.908	16.5267	15.3902	21.7776	11.3042
0.00555395	5.87789			0.00632726	6.33571			0.00617105	2.91625			0.00564808	24.4624			0.0053176	19.6118			0.00510055	17.0665			0.00609578	25.4333			0.00602236	12.6062			0.1	5.61592	8.28747	3.568	27.4591	10.6223	10.9791	13.4767	8.10641
0.0111126	6.20481			0.0126598	5.79309			0.0123473	3.16814			0.0113009	25.6174			0.0106397	18.5879			0.0102054	17.7192			0.0121967	24.6222			0.0120498	12.4621			0.15	5.2318	9.84386	3.11641	22.5444	9.29761	8.42596	9.46972	7.13104
0.0166665	6.13397			0.0189871	5.71821			0.0185183	3.31661			0.016949	26.7537			0.0159573	17.3358			0.0153059	17.4654			0.0182925	22.22			0.0180721	11.6998			0.2	4.88713	9.92613	2.66715	17.5162	8.49134	7.4298	8.39556	6.52109
0.0222205	5.52312			0.0253144	5.9709			0.0246894	3.51132			0.0225971	26.7337			0.0212749	15.9403			0.0204065	16.3426			0.0243882	23.4044			0.0240945	11.6947			0.25	4.79404	9.67488	2.46657	13.2392	7.319	7.22237	8.16889	6.29471
0.0277791	4.67326			0.0316469	6.59836			0.0308656	3.45766			0.0282499	28.9298			0.026597	16.3019			0.0255113	15.1438			0.0304891	21.0733			0.0301219	11.0217			0.3	4.89751	7.92028	2.41452	11.611	6.48644	7.31676	7.58839	6.35906
0.033333	5.54634			0.0379742	7.43678			0.0370367	3.98155			0.033898	28.1258			0.0319146	15.7623			0.0306119	14.8079			0.0365849	19.7556			0.0361443	10.7923			0.35	5.16967	7.87385	2.27456	10.6576	5.62847	6.76409	7.08944	6.01589
0.038887	5.54734			0.0443015	7.36968			0.0432077	4.08995			0.0395461	29.84			0.0372322	15.8644			0.0357124	13.3797			0.0426807	18.8489			0.0421666	10.4778			0.4	5.60981	8.6124	2.39836	9.37279	4.90641	5.67184	6.21973	6.54699
0.0444456	5.51559			0.0506341	7.70565	6.53118		0.0493839	3.44695			0.0451989	28.1045			0.0425542	15.278			0.0408173	12.9699			0.0487816	17.8489			0.0481941	9.6234			0.45	5.51603	8.6018	2.03056	8.17205	4.60313	5.55782	5.52361	5.63986
0.0499995	6.37816			0.0569613	7.16383			0.055555	3.67392	3.42293		0.050847	28.9072	26.908		0.0478718	13.5186			0.0459178	13.5761			0.0548774	16.6933	21.7776		0.0542164	9.54709	11.3042		0.5	5.31305	7.50247	2.15527	6.80642	4.21002	5.94085	5.15222	5.30622
0.0555535	6.09507	5.79765		0.0632886	8.18967			0.061726	3.88797			0.0564951	27.9649			0.0531894	12.8876	16.5267		0.0510184	12.7356	15.3902		0.0609732	16.4022			0.0602388	9.32653			0.55	5.29678	7.47582	2.0346	6.24713	3.66682	5.24453	4.26568	5.11109
0.0611121	5.49824			0.0696212	7.81315			0.0679023	3.47352			0.0621479	28.9386			0.0585115	12.5775			0.0561232	12.2848			0.0670741	15.6111			0.0662662	8.7041			0.6	4.83541	6.70509	2.05859	5.62144	3.76403	5.19444	4.09083	4.70158
0.066666	4.67901			0.0759484	7.58674			0.0740733	3.70415			0.067796	27.919			0.0638291	12.0823			0.0612238	11.9792			0.0731699	14.1467			0.0722885	8.11592			0.65	4.78207	7.19454	2.23931	5.12437	3.52574	4.87604	4.06389	4.6142
0.07222	6.21637			0.0822757	8.82478			0.0802444	3.36181			0.073444	29.0308			0.0691467	11.2863			0.0663243	12.2078			0.0792656	13.7978			0.0783109	8.59622			0.7	4.13853	7.25364	2.20831	5.01258	3.49102	4.65435	3.69972	4.62871
0.0777786	6.12892			0.0886083	8.8934			0.0864206	3.34668			0.0790969	27.7582			0.0744688	10.5207			0.0714292	10.2415			0.0853665	13.6155			0.0843383	7.59813			0.75	4.62023	7.65163	2.1043	4.88241	3.67708	4.68519	3.72222	4.46722
0.0833326	5.51956			0.0949355	8.75666			0.0925916	3.34866			0.084745	26.3584			0.0797864	10.4911			0.0765297	10.8493			0.0914623	12.9844			0.0903607	7.74912			0.8	5.49876	6.79828	1.65986	4.74262	3.60302	4.64993	3.73037	4.05309
0.0888912	5.92294			0.101268	9.07154	8.28747		0.0987679	3.91625			0.0903978	26.7315			0.0851085	10.4099			0.0816346	11.068			0.0975632	11.1533			0.0963881	7.18017			0.85	5.73848	6.71044	1.61544	4.46294	3.87075	4.59925	3.69694	5.06615
0.0944451	5.28954			0.107595	8.80983			0.104939	3.50494	3.568		0.0960459	26.5971			0.0904261	9.68602			0.0867351	10.6948			0.103659	10.1022	13.4767		0.10241	7.58107	8.10641		0.9	5.59354	6.87619	1.5651	4.4894	3.94344	4.34269	3.47417	6.46974
0.0999991	5.57314			0.113923	9.8585			0.11111	3.56085			0.101694	25.8338	27.4591		0.0957437	9.20042			0.0918357	9.9378			0.109755	10.3844			0.108433	6.87521			0.95	5.3008	5.95659	1.50562	3.94372	3.06517	4.15113	3.45527	4.25481
0.105558	5.71556	5.61592		0.120255	9.83204			0.117286	3.78455			0.107347	26.0295			0.101066	9.34689	10.6223		0.0969405	10.7855			0.115856	9.17556			0.11446	7.40749			1	4.44455	4.78821	1.45597	2.81089	2.38776	2.55597	3.27139	3.42528
0.111112	5.23212			0.126582	9.87272			0.123457	2.89273			0.112995	24.6038			0.106383	9.75772			0.102041	9.74276	10.9791		0.121951	8.65778			0.120483	7.07714
0.116666	5.6857			0.13291	9.94123			0.129628	3.04014			0.118643	23.5978			0.111701	9.24766			0.107142	9.61962			0.128047	9.68444			0.126505	6.96354
0.122224	5.42929			0.139242	10.1979			0.135805	2.78665			0.124296	23.7171			0.117023	9.11227			0.112246	8.61654			0.134148	9.76444			0.132532	7.89749
0.127778	4.89536			0.14557	10.5469			0.141976	3.23032			0.129944	22.7259			0.122341	9.10035			0.117347	9.18291			0.140244	9.46223			0.138555	6.73881
0.133332	4.8894			0.151897	9.69179	9.84386		0.148147	3.01698			0.135592	21.5922			0.127658	9.07501			0.122448	8.96809			0.14634	9.50444			0.144577	7.27297
0.138891	5.32228			0.158229	10.8929			0.154323	2.61903	3.11641		0.141245	20.3024			0.13298	8.80403			0.127552	7.94846			0.152441	9.12444	9.46972		0.150605	6.81565	7.13104
0.144445	5.40353			0.164557	10.2171			0.160494	2.60251			0.146893	19.5523			0.138298	9.99812			0.132653	7.59145			0.158536	8.56445			0.156627	6.55463
0.149999	4.7548			0.170884	9.83922			0.166665	3.26076			0.152541	20.7789	22.5444		0.143616	9.51778			0.137754	8.11702			0.164632	9.1289			0.162649	6.28566
0.155557	5.47375	5.2318		0.177217	9.54518			0.172841	2.83533			0.158194	20.6651			0.148938	9.4845			0.142858	8.22778			0.170733	9.02444			0.168677	6.9868
0.161111	4.8816			0.183544	10.0188			0.179012	2.36257			0.163842	20.4503			0.154255	8.8787	9.29761		0.147959	8.01523			0.176829	8.16			0.174699	6.3914
0.166665	4.75277			0.189871	9.80413			0.185183	2.45519			0.16949	18.7241			0.159573	8.95393			0.153059	7.97253	8.42596		0.182925	8.88889			0.180721	6.81906
0.172224	4.99294			0.196204	10.0277			0.191359	2.49708			0.175143	16.7979			0.164895	8.87547			0.158164	7.925			0.189026	7.77555			0.186749	6.45345
0.177778	4.84238			0.202531	9.06408	9.92613		0.197531	2.76191			0.180791	18.0736			0.170212	8.86692			0.163265	7.34938			0.195121	7.71999			0.192771	6.62837
0.183332	5.34221			0.208858	9.28892			0.203702	2.5618	2.66715		0.186439	17.032			0.17553	9.0091			0.168365	6.87715			0.201217	7.90222	8.39556		0.198794	6.65899
0.18889	4.66713			0.215191	8.97648			0.209878	2.33209			0.192092	16.2271			0.180852	8.53803			0.17347	7.38291			0.207318	8.47778			0.204821	5.91147	6.52109
0.194444	4.34009			0.221518	10.6311			0.216049	2.9364			0.19774	15.5927			0.18617	7.98068			0.178571	8.46448			0.213414	8.33556			0.210843	6.19773
0.199998	5.32684			0.227845	10.5329			0.22222	2.36861			0.203388	14.083	17.5162		0.191487	8.04622			0.183671	7.15167			0.21951	9.01111			0.216866	6.42137
0.205557	4.83819	4.88713		0.234178	10.2897			0.228396	2.16482			0.209041	14.3883			0.196809	8.26151			0.188776	7.59711			0.22561	7.84222			0.222893	6.96225
0.211111	4.98297			0.240505	9.37147			0.234567	2.46636			0.214689	13.4671			0.202127	7.89023	8.49134		0.193877	7.68924			0.231706	8.08889			0.228915	6.41242
0.216665	5.41403			0.246832	9.72226			0.240738	2.49852			0.220337	12.8168			0.207445	7.74259			0.198977	7.09497			0.237802	8.56222			0.234938	6.50016
0.222223	4.65658			0.253165	8.5863	9.67488		0.246914	2.74114			0.22599	12.3485			0.212767	7.43158			0.204082	6.76611	7.4298		0.243903	7.58889			0.240965	6.08646
0.227777	4.72211			0.259492	8.52676			0.253086	2.32083			0.231638	13.4333			0.218084	7.06421			0.209183	6.54211			0.249999	7.44443	8.16889		0.246988	6.08201
0.233336	4.89966			0.265825	7.47387			0.259262	2.37034	2.46657		0.237291	12.8296			0.223406	7.44463			0.214288	6.84732			0.2561	7.94443			0.253015	5.69525	6.29471
0.23889	4.26732			0.272152	7.81657			0.265433	2.20045			0.242939	13.9076			0.228724	7.9977			0.219388	7.69744			0.262195	6.93334			0.259037	7.07331
0.244444	4.35607			0.278479	7.82175			0.271604	2.79423			0.248587	13.2508			0.234042	6.9591			0.224489	7.23329			0.268291	7.77333			0.26506	7.19143
0.250002	5.05356	4.79404		0.284812	7.80774			0.27778	2.54715			0.25424	12.7106	13.2392		0.239364	7.34643			0.229593	6.89138			0.274392	7.29556			0.271087	6.49878
0.255556	5.02854			0.291139	8.08584			0.283951	2.34546			0.259888	11.4353			0.244681	6.80643			0.234694	7.47993			0.280488	7.52665			0.277109	6.55385
0.26111	4.70571			0.297466	7.65279			0.290122	2.28871			0.265536	11.7678			0.249999	7.38937			0.239795	7.31902			0.286584	7.79556			0.283132	6.22999
0.266669	4.73582			0.303799	8.17696	7.92028		0.296298	2.23094			0.271189	11.5877			0.255321	7.00801	7.319		0.244899	7.47454			0.292685	8.21778			0.289159	5.76202
0.272223	5.02887			0.310126	7.80776			0.302469	2.49467	2.41452		0.276837	11.4655			0.260639	7.08891			0.25	7.51631	7.22237		0.29878	7.36222			0.295182	5.71175
0.277777	5.1469			0.316454	7.71013			0.308641	2.50455			0.282485	11.6047			0.265956	6.82964			0.255101	6.39094			0.304876	7.44667	7.58839		0.301204	5.85132	6.35906
0.283335	4.79504			0.322786	7.80059			0.314817	2.18237			0.288138	11.4829			0.271278	7.16898			0.260205	7.67253			0.310977	8.02444			0.307231	6.06463
0.288889	4.17768			0.329113	8.48849			0.320988	2.41925			0.293786	11.7598			0.276596	6.59417			0.265306	7.85429			0.317073	6.72444			0.313254	5.45842
0.294443	4.76896			0.335441	7.62465			0.327159	2.48102			0.299434	12.3483			0.281913	6.48201			0.270407	7.38053			0.323169	7.88889			0.319276	6.16918
0.300002	5.69009	4.89751		0.341773	8.30679			0.333335	2.33283			0.305087	11.0468	11.611		0.287236	6.39815			0.275511	7.40101			0.329269	7.15111			0.325304	7.24213
0.305556	5.45513			0.3481	8.01507			0.339506	1.97373			0.310735	11.0307			0.292553	6.34678			0.280612	7.41343			0.335365	7.24			0.331326	6.20657
0.31111	5.21345			0.354428	7.23735	7.87385		0.345677	2.08875			0.316383	10.8549			0.297871	5.7949			0.285712	7.78879			0.341461	6.57998			0.337348	5.73674
0.316668	4.79632			0.36076	8.28069			0.351853	2.21397	2.27456		0.322036	11.0278			0.303193	5.67437	6.48644		0.290817	7.17447			0.347562	6.13334			0.343376	5.72498
0.322222	5.49236			0.367088	9.09484			0.358024	2.43649			0.327684	10.694			0.30851	5.65198			0.295918	7.20664			0.353658	6.97333	7.08944		0.349398	5.46864
0.327776	4.82697			0.373415	9.00644			0.364195	2.05453			0.333332	10.3533			0.313828	5.66417			0.301018	6.88493	7.31676		0.359754	6.22223			0.35542	6.07177	6.01589
0.333335	5.11022			0.379747	8.09391			0.370372	2.64936			0.338985	10.1251			0.31915	5.94403			0.306123	6.87659			0.365854	5.95111			0.361448	6.94153
0.338889	5.52977			0.386075	8.57436			0.376543	2.54041			0.344633	10.8465			0.324468	5.36659			0.311224	7.59581			0.37195	6.94222			0.36747	6.18321
0.344443	4.99631			0.392402	8.66807			0.382714	2.38505			0.350281	10.3284	10.6576		0.329785	6.0228			0.316324	6.62564			0.378046	5.91778			0.373493	6.35318
0.350001	5.10651	5.16967		0.398735	8.7835			0.38889	2.39516			0.355934	10.6285			0.335107	6.05345			0.321429	7.54404			0.384147	6.16444			0.37952	6.61239
0.355555	5.79817			0.405062	8.39739	8.6124		0.395061	2.34751			0.361582	10.1197			0.340425	5.91418			0.32653	6.52086			0.390243	6.06446			0.385542	6.41271
0.361109	5.63574			0.411389	7.20904			0.401232	2.3784	2.39836		0.36723	10.027			0.345743	5.38697			0.33163	6.65277			0.396338	6.40445			0.391565	6.83108
0.366668	5.43486			0.417722	8.85402			0.407408	2.04768			0.372883	9.87458			0.351065	4.65204	5.62847		0.336735	6.68685			0.402439	6.09111	6.21973		0.397592	6.67844
0.372222	5.53952			0.424049	9.79971			0.413579	2.038			0.378531	9.68535			0.356382	5.03468			0.341836	7.10645			0.408535	5.74222			0.403614	6.36338	6.54699
0.377776	5.14231			0.430376	7.83519			0.41975	1.96909			0.384179	8.7732			0.3617	5.09154			0.346936	6.4769			0.414631	6.43333			0.409637	5.56607
0.383334	5.94838			0.436709	8.44962			0.425927	2.32417			0.389832	9.10537			0.367022	4.86215			0.352041	5.555	6.76409		0.420732	5.98222			0.415664	5.51189
0.388888	5.85147			0.443036	9.38058			0.432098	2.08515			0.39548	7.99143			0.37234	4.888			0.357142	5.26062			0.426828	5.75555			0.421687	5.87552
0.394447	5.54581			0.449369	8.77585			0.438274	1.94192			0.401132	8.14994	9.37279		0.377662	4.35627			0.362246	5.49109			0.432928	5.03333			0.427714	5.38035
0.400001	5.59206	5.60981		0.455696	8.51038	8.6018		0.444445	1.98827			0.406781	8.41562			0.382979	5.1663			0.367347	5.67744			0.439024	5.22001			0.433736	5.53633
0.405555	4.95372			0.462023	7.79027			0.450616	1.85015	2.03056		0.412429	8.5121			0.388297	5.39104			0.372448	6.61528			0.44512	5.0489			0.439759	5.6766
0.411113	5.44603			0.468356	7.58737			0.456792	2.15985			0.418081	8.21828			0.393619	5.11287			0.377552	4.94701			0.451221	4.97333	5.52361		0.445786	5.85061
0.416667	5.28276			0.474683	7.54116			0.462963	2.27043			0.42373	8.29843			0.398936	4.60674			0.382653	5.50384			0.457317	5.41333			0.451808	5.72151	5.63986
0.422221	5.18804			0.48101	7.40596			0.469134	2.19257			0.429378	8.12604			0.404254	4.55452	4.90641		0.387754	5.8924			0.463413	5.51334			0.457831	5.59122
0.42778	5.80504			0.487343	7.43502			0.475311	2.15586			0.43503	8.31351			0.409576	4.69386			0.392858	6.0134			0.469513	5.57334			0.463858	5.02593
0.433334	5.79832			0.49367	7.23927			0.481482	2.22211			0.440679	8.12435			0.414894	4.25964			0.397959	5.61379			0.475609	5.15333			0.469881	5.22233
0.438888	5.76158			0.499997	7.51826	7.50247		0.487653	2.12042			0.446327	8.12817			0.420211	4.32499			0.403059	5.70356	5.67184		0.481705	4.34223			0.475903	5.84965
0.444447	5.79791			0.50633	8.32771			0.493829	2.21069			0.451979	7.41196	8.17205		0.425533	4.28173			0.408164	5.46937			0.487806	4.97556			0.48193	5.48741
0.45	5.6109	5.51603		0.512657	7.19347			0.5	1.91019	2.15527		0.457628	7.39827			0.430851	4.73637			0.413265	5.34214			0.493902	5.09778			0.487953	5.44067
0.455554	5.41997			0.518984	7.39195			0.506171	2.18242			0.463276	7.20549			0.436169	4.79982			0.418365	5.45079			0.499997	5.1489	5.15223		0.493975	4.88927
0.461113	5.68907			0.525317	7.34128			0.512347	1.76437			0.468928	7.0024			0.441491	4.96312			0.42347	5.40303			0.506098	4.14444			0.500003	4.94325	5.30622
0.466667	5.50196			0.531644	8.17614			0.518518	2.15871			0.474577	6.50656			0.446808	4.87013			0.428571	5.58908			0.512194	4.65111			0.506025	4.90403
0.472221	5.6633			0.537972	7.14106			0.524689	2.16566			0.480225	6.41213			0.452126	4.49849	4.60313		0.433671	5.90636			0.51829	4.04668			0.512047	5.6355
0.47778	5.49252			0.544304	7.50102			0.530866	1.97478			0.485877	6.1201			0.457448	5.00274			0.438776	5.43536			0.524391	5.02223			0.518075	5.17385
0.483333	5.07672			0.550631	6.73398	7.47582		0.537037	2.34078			0.491526	7.07623			0.462766	4.51674			0.443877	5.33449			0.530487	4.4			0.524097	5.18122
0.488887	4.43109			0.556959	6.46023			0.543208	1.842			0.497174	6.65999			0.468083	3.93354			0.448977	5.46479			0.536582	4.00221			0.530119	5.17597
0.494446	5.1153			0.563291	6.10132			0.549384	1.73251			0.502826	6.87657	6.80642		0.473405	4.38007			0.454082	6.18278	5.55782		0.542683	4.56444			0.536147	5.06231
0.5	5.42753	5.31305		0.569619	6.54154			0.555555	2.15018	2.0346		0.508474	6.67758			0.478723	4.66193			0.459183	6.37057			0.548779	3.94888			0.542169	4.8952
0.505554	5.22141			0.575946	6.95923			0.561726	1.87128			0.514123	6.5051			0.48404	3.97038			0.464283	5.59934			0.554875	3.61111	4.26568		0.548192	4.9725
0.511113	5.24079			0.582278	6.9318			0.567902	2.13855			0.519775	5.78807			0.489363	4.0589			0.469388	5.77411			0.560976	3.99333			0.554219	4.99924	5.11109
0.516667	5.29142			0.588606	6.97945			0.574073	2.23125			0.525423	6.20625			0.49468	3.96105			0.474489	5.62566			0.567072	4.07555			0.560241	5.04177
0.52222	5.48962			0.594933	6.99275			0.580244	1.88549			0.531072	6.14381			0.499998	3.9467			0.479589	5.50018			0.573167	4.02445			0.566264	4.4088
0.527779	4.96625			0.601265	6.67441	6.70509		0.586421	2.10744			0.536724	6.21408			0.50532	3.6681	4.21002		0.484694	6.10915			0.579268	4.54			0.572291	4.94032
0.533333	5.07156			0.607593	7.4009			0.592592	2.0374			0.542372	6.53761			0.510637	3.44875			0.489795	6.18234			0.585364	4.36222			0.578313	4.62792
0.538887	5.42971			0.61392	7.45649			0.598763	2.26468			0.548021	6.08262			0.515955	3.80496			0.494895	6.35185			0.59146	3.99111			0.584336	4.74646
0.544446	5.44049			0.620253	6.58464			0.604939	1.93263	2.05859		0.553673	6.06905	6.24713		0.521277	4.0044			0.5	5.95442	5.94085		0.597561	3.77777			0.590363	4.48423
0.55	5.37362			0.62658	7.73495			0.61111	2.21062			0.559321	6.1907			0.526595	3.8028			0.505101	5.55659			0.603656	3.96221	4.09083		0.596386	4.4499
0.555558	5.31219	5.29678		0.632912	7.45947			0.617286	2.2501			0.564974	5.1704			0.531917	3.40128			0.510205	5.67301			0.609757	3.72444			0.602413	4.91328	4.70158
0.561112	5.36908			0.63924	6.74691			0.623457	2.11503			0.570622	5.31778			0.537234	3.40007			0.515306	6.11397			0.615853	4.58223			0.608435	4.80709
0.566666	5.02233			0.645567	7.00702			0.629628	2.20341			0.57627	5.78277			0.542552	3.6449			0.520407	5.34836			0.621949	4.42			0.614458	4.57344
0.572225	4.93895			0.6519	7.1659	7.19454		0.635805	2.43599			0.581923	5.56886			0.547874	3.64101			0.525511	4.76265			0.62805	3.65334			0.620485	4.1838
0.577779	5.0618			0.658227	6.58182			0.641976	2.70173			0.587571	5.80143			0.553192	3.85318	3.66682		0.530612	4.94859			0.634146	3.33778			0.626507	4.44988
0.583333	4.42086			0.664554	8.11169			0.648147	2.31047			0.593219	5.4977			0.558509	3.73777			0.535712	5.34005			0.640241	4.43333			0.63253	4.48694
0.588891	4.22225			0.670887	7.54727			0.654323	1.68715	2.23931		0.598872	5.89751			0.563831	4.05972			0.540817	4.96679			0.646342	4.03111			0.638557	4.65947
0.594445	4.76754			0.677214	6.69972			0.660494	1.82332			0.60452	5.36579	5.62144		0.569149	3.45503			0.545918	4.55108			0.652438	4.32888	4.06389		0.64458	4.72525
0.599999	4.10194			0.683541	7.01352			0.666665	2.22436			0.610168	5.47098			0.574467	3.78875			0.551018	5.18419	5.24453		0.658534	3.88222			0.650602	5.02777	4.6142
0.605558	5.61396	4.83541		0.689874	7.50237			0.672841	2.24679			0.615821	5.3207			0.579789	3.59201			0.556123	4.99731			0.664635	3.97555			0.656629	4.84791
0.611112	5.52476			0.696201	7.27399			0.679012	2.12767			0.621469	5.27001			0.585106	3.7767			0.561224	4.66029			0.670731	3.8889			0.662652	4.85883
0.616666	5.27934			0.702528	7.29877	7.25364		0.685183	2.62713			0.627117	5.51318			0.590424	3.92358			0.566324	5.57132			0.676826	3.69333			0.668674	4.78336
0.622224	4.45121			0.708861	8.05759			0.691359	2.30023			0.63277	4.95686			0.595746	3.84621			0.571429	5.7464			0.682927	3.92668			0.674702	4.96447
0.627778	4.63519			0.715188	7.65072			0.697531	2.3306			0.638418	4.42301			0.601064	3.69647	3.76403		0.57653	5.25223			0.689023	3.47333			0.680724	4.70534
0.633332	4.73664			0.721515	7.19625			0.703702	1.98638	2.20831		0.644066	4.96669			0.606381	3.64535			0.58163	5.11052			0.695119	3.64445			0.686746	4.42755
0.638891	5.00712			0.727848	7.78351			0.709878	1.81005			0.649719	5.00271			0.611703	3.89796			0.586735	4.81175			0.70122	3.11333	3.69972		0.692774	4.03505
0.644445	4.67268			0.734175	7.32509			0.716049	2.14949			0.655367	5.19516	5.12437		0.617021	3.67241			0.591836	5.43715			0.707315	3.61998			0.698796	4.6668
0.649999	4.62895			0.740502	8.27128			0.72222	2.51281			0.661015	5.31567			0.622338	3.82777			0.596936	5.58091			0.713411	3.96			0.704818	4.3691	4.62871
0.655557	4.10275	4.78207		0.746835	7.65741			0.728396	2.34843			0.666668	5.06413			0.62766	3.5608			0.602041	4.7765	5.19444		0.719512	3.81777			0.710846	4.49333
0.661111	4.01592			0.753162	7.2712	7.65163		0.734567	1.98146			0.672316	5.04385			0.632978	3.3504			0.607142	4.4637			0.725608	4.03556			0.716868	4.9794
0.666665	4.52443			0.75949	7.23267			0.740738	2.0309			0.677964	4.68777			0.638296	3.32343			0.612242	5.23084			0.731704	3.54666			0.722891	4.46626
0.672224	3.87614			0.765822	7.69931			0.746914	2.12586			0.683617	5.27126			0.643618	3.39035			0.617347	4.76284			0.737805	3.13778			0.728918	4.89336
0.677778	3.52121			0.772149	6.5938			0.753086	1.87538	2.1043		0.689265	4.86197			0.648935	3.35032			0.622448	4.72867			0.7439	4.00668			0.73494	4.42729
0.683332	4.05571			0.778477	6.49813			0.759257	1.96864			0.694913	4.83706			0.654253	3.2386	3.52574		0.627548	4.96164			0.749996	3.65334	3.72222		0.740963	4.22869
0.68889	4.05013			0.784809	6.71145			0.765433	1.84604			0.700566	5.01893	5.01258		0.659575	3.36503			0.632653	5.52237			0.756097	3.56223			0.74699	4.54694
0.694444	4.67056			0.791137	6.63497			0.771604	1.73706			0.706214	4.85807			0.664893	3.26533			0.637754	5.05975			0.762193	3.59778			0.753012	3.70245	4.46722
0.700003	4.39417	4.13853		0.797469	6.29396			0.77778	1.49392			0.711867	4.70651			0.670215	3.30345			0.642858	4.33679			0.768294	3.54889			0.75904	3.96164
0.705557	4.50378			0.803796	6.72196	6.79828		0.783951	2.00017			0.717515	4.93625			0.675532	3.48925			0.647959	4.39929			0.77439	3.27556			0.765062	3.87141
0.711111	4.62092			0.810124	6.32993			0.790122	1.47496			0.723163	5.1569			0.68085	2.95603			0.653059	5.29448	4.87604		0.780485	3.87111			0.771085	4.45751
0.716669	4.5019			0.816456	6.37814			0.796298	1.20971			0.728816	5.28183			0.686172	3.75593			0.658164	5.37336			0.786586	3.89333			0.777112	3.43493
0.722223	4.43			0.822783	6.7511			0.802469	1.54841	1.65986		0.734464	4.6275			0.69149	3.7969			0.663265	4.59125			0.792682	4.01111			0.783134	4.14727
0.727777	4.3929			0.829111	6.4054			0.808641	1.79768			0.740112	4.79762			0.696807	3.54618			0.668365	4.08685			0.798778	4.32			0.789157	3.90495
0.733336	4.96079			0.835443	6.87017			0.814817	1.97519			0.745765	4.27776			0.702129	3.94111	3.49102		0.67347	4.54682			0.804879	3.49334	3.73037		0.795184	4.02276
0.73889	4.09988			0.841771	7.00878			0.820988	1.53675			0.751413	5.29921	4.88241		0.707447	3.8831			0.678571	4.8057			0.810974	3.8489			0.801206	4.62428	4.05309
0.744444	5.06331			0.848098	6.91654			0.827159	1.58339			0.757061	4.90492			0.712764	3.75165			0.683671	4.87887			0.81707	3.61999			0.807229	4.60495
0.750002	5.00862	4.62023		0.85443	7.02346	6.71044		0.833335	1.52167			0.762714	5.23152			0.718087	3.56688			0.688776	4.36091			0.823171	3.79111			0.813256	4.61377
0.755556	5.56542			0.860758	7.33136			0.839506	1.46989			0.768362	4.96207			0.723404	3.92787			0.693877	5.07022			0.829267	3.63112			0.819279	4.99139
0.76111	5.68991			0.867085	7.36768			0.845677	1.33949			0.77401	4.67038			0.728722	3.61502			0.698977	4.62721			0.835363	3.99111			0.825301	4.84433
0.766669	5.70989			0.873418	6.92221			0.851853	1.69946	1.61544		0.779663	4.7598			0.734044	3.44633			0.704082	4.20232	4.65435		0.841464	3.5489			0.831328	5.39074
0.772223	5.14646			0.879745	6.28721			0.858024	1.56262			0.785311	4.82386			0.739361	3.60385			0.709183	4.95272			0.847559	2.95778			0.837351	4.86238
0.777777	6.17141			0.886072	7.1094			0.864195	1.80168			0.790959	4.53182			0.744679	3.55075			0.714283	4.60343			0.853655	4.18666	3.69694		0.843373	5.43127
0.783335	5.72778			0.892405	6.96872			0.870372	1.46883			0.796612	4.77445			0.750001	3.74825	3.67708		0.719388	5.12583			0.859756	3.64222			0.849401	5.59652
0.788889	4.99171			0.898732	6.49398			0.876543	1.48485			0.80226	4.02472	4.74262		0.755319	3.86558			0.724489	4.73194			0.865852	3.12888			0.855423	5.26001	5.06615
0.794443	5.11003			0.905059	6.52899	6.87619		0.882714	1.35054			0.807908	4.10818			0.760636	3.58339			0.729589	4.35463			0.871948	3.48667			0.861445	5.90466
0.800002	5.3762	5.49876		0.911392	5.88801			0.88889	1.86632			0.813561	4.90779			0.765958	3.31828			0.734694	4.80435			0.878049	3.84666			0.867473	7.06256
0.805556	5.63131			0.917719	5.80251			0.895061	1.63556			0.819209	4.3875			0.771276	3.54035			0.739795	4.45583			0.884144	3.44667			0.873495	7.27224
0.81111	5.65884			0.924046	6.07158			0.901232	1.3504	1.5651		0.824857	4.21705			0.776594	3.91399			0.744895	4.61512			0.89024	3.30222			0.879517	6.98012
0.816668	5.77697			0.930379	5.15165			0.907408	1.74302			0.83051	4.17288			0.781916	3.72137			0.75	4.52287	4.68519		0.896341	3.62445			0.885545	7.05893
0.822222	6.13396			0.936706	6.19059			0.913579	1.46576			0.836158	4.05018			0.787233	3.57656			0.755101	4.53189			0.902437	3.31554	3.47416		0.891567	6.39959
0.827776	6.00976			0.943033	5.80805			0.91975	1.3183			0.841806	4.78209			0.792551	3.28382			0.760201	5.05995			0.908533	3.46667			0.89759	5.84478
0.833335	5.6377			0.949366	6.04833			0.925927	1.49425			0.847459	4.68753			0.797873	3.69385			0.765306	5.70531			0.914633	3.04			0.903617	5.23503	6.46974
0.838889	5.83195			0.955693	6.69196	5.95659		0.932098	1.49948			0.853107	4.85329	4.46294		0.803191	3.53305	3.60302		0.770407	4.99064			0.920729	3.32222			0.909639	4.90881
0.844443	5.99024			0.96202	6.15141			0.938269	1.5551			0.858755	4.4581			0.808508	3.42578			0.775507	4.79168			0.926825	3.58888			0.915662	4.46563
0.850001	4.9756	5.73848		0.968353	5.63561			0.944445	1.45539			0.864408	4.18052			0.81383	3.46492			0.780612	4.39292			0.932926	3.74888			0.921689	4.44853
0.855555	5.55523			0.97468	5.28554			0.950616	1.51369	1.50562		0.870056	4.62903			0.819148	3.81026			0.785712	4.25151			0.939022	3.78444			0.927711	4.5396
0.861114	5.80807			0.981013	4.72801			0.956792	1.42948			0.875709	4.02401			0.82447	3.86998			0.790817	4.52281			0.945123	3.50889			0.933739	4.45885
0.866668	5.73841			0.98734	4.52481			0.962963	1.46665			0.881357	4.55311			0.829788	4.41064			0.795918	4.35506			0.951218	3.18222	3.45527		0.939761	4.21773
0.872222	5.63503			0.993667	3.71881			0.969134	1.37261			0.887005	4.99397			0.835105	3.79855			0.801018	3.89749	4.64993		0.957314	3.55778			0.945784	3.6471
0.87778	5.50968			1	3.47326	4.78821		0.975311	1.34378			0.892658	4.92285			0.840427	3.86871			0.806123	4.3777			0.963415	3.16444			0.951811	3.35222	4.25481
0.883334	5.4402							0.981482	1.3964			0.898306	4.50093			0.845745	3.95861			0.811224	4.4412			0.969511	3.68222			0.957833	3.58258
0.888888	5.60997							0.987653	1.56466			0.903954	4.14208	4.4894		0.851062	4.22932	3.87075		0.816324	4.89672			0.975607	3.16444			0.963856	3.33277
0.894447	5.4543							0.993829	1.57359			0.909607	3.77593			0.856384	3.97011			0.821429	4.66446			0.981708	3.10223			0.969883	3.48505
0.900001	5.591	5.59354						1	1.5006	1.45597		0.915255	4.08906			0.861702	4.16542			0.82653	4.79558			0.987803	3.59111			0.975906	3.35243
0.905555	5.93421											0.920903	3.79132			0.86702	3.83049			0.83163	4.70878			0.993899	2.72444			0.981928	3.75884
0.911113	6.19745											0.926556	4.39053			0.872342	3.91842			0.836735	4.47433			1	3.18444	3.27139		0.987955	3.59663
0.916667	5.58124											0.932204	4.13409			0.877659	3.75118			0.841836	4.52357							0.993978	3.22535
0.922221	5.24613											0.937852	3.78004			0.882977	3.82642			0.846936	4.48854							1	3.06856	3.42528
0.92778	4.73303											0.943505	4.07235			0.888299	3.74594			0.852041	4.62163	4.59925
0.933334	4.74568											0.949153	3.85084			0.893617	4.03487			0.857142	4.4062
0.938888	4.97412											0.954801	3.60935	3.94372		0.898934	3.80293			0.862242	4.67
0.944447	5.27692											0.960454	3.52455			0.904256	4.38857	3.94344		0.867347	4.88563
0.95	5.01848	5.3008										0.966102	3.05635			0.909574	3.96697			0.872448	4.16615
0.955554	5.36563											0.97175	2.95344			0.914892	3.80114			0.877548	4.17599
0.961113	5.38104											0.977403	2.90231			0.920214	3.36497			0.882653	4.03796
0.966667	4.67291											0.983051	2.84455			0.925531	3.11388			0.887754	4.51295
0.972221	4.41342											0.988699	2.50442			0.930849	2.86328			0.892854	4.21512
0.97778	4.48325											0.994352	2.39652			0.936171	2.84458			0.897959	4.06653
0.983333	4.30084											1	2.305	2.81089		0.941488	2.43716			0.903059	4.29037	4.34269
0.988887	4.32082															0.946806	2.57805			0.90816	3.97661
0.994446	3.82772															0.952128	2.61647	3.06517		0.913265	4.653
1	3.23534	4.44455														0.957446	3.13118			0.918365	4.23285
																0.962763	2.71754			0.923466	3.83653
																0.968085	2.37922			0.928571	4.21252
																0.973403	2.36791			0.933671	4.8569
																0.978725	2.22863			0.938776	4.07971
																0.984043	2.0354			0.943877	4.36144
																0.98936	2.21146			0.948977	4.24318
																0.994682	2.49567			0.954082	3.05858	4.15113
																1	1.92284	2.38776		0.959183	3.36994
																				0.964283	2.73641
																				0.969388	3.18974
																				0.974489	2.53634
																				0.979589	2.56842
																				0.984694	2.97825
																				0.989795	2.06243
																				0.994895	1.79765
																				1	1.7646	2.55597
