# Supplementary material for: Crumbs organizes the transport machinery by regulating apical levels of PI(4,5)P2 in Drosophila
Source: eLife. 2019 Nov 7;8:e50900. doi: 10.7554/eLife.50900 (PMC6881148; doi:10.7554/eLife.50900)
Supplement: Figure 3—source data 5. [file elife-50900-fig3-data5.xlsx]

## Sheet: Im2
X0	Y0	Y1	Y2	Y3	Y4	Y5	Y6	Y7	Y8	Y9	Y10	Y11	Y12	Y13	Y14	Y15	Y16	Y17	Y18	Y19	Y20	Y21	Y22	Y23	Y24		Ap-Ba	Average int
0	62.897	69.128	61.255	71.51	85.674	56.396	48.006	41.662	65.0495	52.796	76.4267	64.6695	22.9733	78.288	80.1006	73.2775	69.112	60.2542	44.3138	73.647	70.3782	49.0547	57.0941	81.693	99.481		0	64.6055
0.119	77.405	72.322	66.335	76.355	89.231	87.382	36.283	52.61	62.3483	75.626	73.6795	57.2835	25.3187	76.701	83.6834	72.5433	80.9317	62.4247	43.2389	68.856	66.6278	54.0823	61.3872	76.365	102.893		0.00510055	68.0765
0.2381	70.867	78.503	73.971	80.814	101.019	80.722	45.895	60.794	78.7727	84.431	66.6012	66.038	30.6473	78.518	74.5436	65.0652	79.9303	65.8047	54.4074	68.187	72.9121	53.2878	55.4382	79.681	106.321		0.0102054	70.9269
0.3571	77.376	72.993	86.122	77.891	109.637	92.616	54.924	69.034	75.8195	85.65	77.2173	55.0281	31.2893	89.739	75.6813	79.4428	77.2542	69.4725	69.113	77.884	88.0151	51.7785	58.2175	85.388	112.464		0.0153059	76.0019
0.4761	67.789	93.767	93.962	75.94	108.951	104.23	65.316	65.049	62.4961	73.61	77.2299	58.0113	35.2308	89.982	93.7121	74.4746	69.3388	68.6519	61.8496	93.443	69.8107	57.8335	71.1473	88.206	108.128		0.0204065	77.1264
0.5952	80.377	105.322	113.89	86.999	110.827	94.477	86.93	84.9	70.48	93.209	72.5282	55.6846	38.6394	94.702	77.903	76.3844	78.5566	78.4022	71.3195	83.304	79.2645	62.4645	75.0825	97.749	109.507		0.0255113	83.1561
0.7142	82.437	92.371	110.975	82.895	124.011	105.664	78.564	78.374	74.4627	89.178	76.4897	50.8239	37.2383	108.158	86.0671	83.1432	80.4115	73.0674	81.0017	85.066	65.6903	53.0802	69.7988	110.726	112.755		0.0306119	83.698
0.8332	91.594	119.758	124.762	102.009	147.383	131.915	87.727	69.458	71.6786	113.756	78.4117	49.1927	31.5133	120.719	74.8786	77.2246	85.3951	76.124	69.7493	90.696	68.2186	75.8403	64.142	89.832	120.442		0.0357124	89.2968
0.9523	93.403	136.357	109.529	97.219	150.207	121.76	81.613	87.381	82.8914	98.233	77.4638	43.6707	40.2646	101.177	94.9186	82.1867	100.656	76.9839	77.5126	78.067	64.8826	65.495	62.4361	90.271	119.961		0.0408173	89.3816
1.0713	94.01	124.281	110.461	94.771	159.487	121.153	91.437	95.671	70.0639	95.295	76.1717	53.7637	57.6449	106.697	90.4773	86.5078	82.5228	92.1803	68.5962	93.498	68.5536	63.0762	75.1757	87.948	109.968		0.0459178	90.7764
1.1903	88.6	122.844	111.601	109.169	154.927	125.247	103.899	105.895	64.4779	97.061	62.8725	62.9159	50.6767	122.475	95.8655	78.4274	83.8254	83.4867	77.312	95.516	73.2846	56.3874	68.6904	97.033	107.322		0.0510184	91.9925
1.3094	93.712	123.358	122.033	94.084	153.263	127.394	96.509	118.379	67.121	97.09	61.0936	56.081	41.451	105.242	90.5791	85.5713	96.3807	73.5416	88.1466	96.235	82.6783	53.1848	72.0973	95.253	112.988		0.0561232	92.1387
1.4284	92.27	126.209	94.164	99.574	145.892	144.554	103.934	109.565	68.4956	99.408	78.3301	51.1691	35.5393	93.869	91.5888	85.0355	89.1731	89.564	86.3128	95.107	79.2093	63.1403	75.5477	91.356	120.089		0.0612238	92.3639
1.5474	91.222	123.107	116.455	108.209	152.35	139.338	102.557	123.832	69.8983	100.957	66.1073	44.8972	42.4129	101.868	77.5113	82.3721	86.3954	83.9661	89.5794	105.577	68.0541	55.8786	80.3808	75.79	116.871		0.0663243	92.2235
1.6665	95.299	138.63	117.014	88.917	159.455	124.196	104.506	137.156	81.9275	82.05	71.3515	42.9758	38.5665	99.985	91.2321	74.0214	86.7477	78.2333	81.3666	103.167	68.7434	40.0104	75.9401	81.487	118.092		0.0714292	91.2428
1.7855	77.735	128.425	115.238	86.092	159.988	118.43	105.645	129.034	89.1899	99.983	57.6485	42.7293	42.2788	101.285	89.2908	71.1083	86.926	76.7944	80.3054	100.895	73.4624	47.4719	85.2421	89.158	119.966		0.0765297	90.9729
1.9046	77.428	140.809	119.921	81.497	173.101	123.383	99.398	134.184	75.578	74.92	77.6934	45.9591	42.6885	96.005	91.1176	78.4968	78.3607	88.8104	79.4182	104.726	77.8072	48.2518	86.7276	77.918	91.623		0.0816346	90.6329
2.0236	86.818	121.823	127.899	72.221	157.718	121.242	100.893	131.097	94.0457	83.938	74.2028	56.5339	39.6556	99.594	76.8124	71.0557	82.1917	68.5247	66.0243	92.567	69.4202	40.8048	83.6002	83.825	112.41		0.0867351	88.5967
2.1426	93.3	125.559	115.872	82.917	169.905	117.773	100.477	134.572	93.2517	80.04	58.3757	46.0334	42.4356	101.236	82.1654	82.6906	81.1109	78.1895	61.7261	94.388	75.4407	45.86	88.2036	94.881	99.664		0.0918357	89.8427
2.2617	98.078	127.633	105.416	75.575	169.258	124.563	114.118	141.208	82.8887	88.186	66.9131	37.8467	41.5572	106.609	88.0848	79.0417	71.7372	71.7175	62.1018	84.544	72.227	39.2702	78.2861	96.586	83.983		0.0969405	88.2972
2.3807	90.012	129.499	142.522	63.946	174.027	143.782	116.195	139.333	85.6414	75.515	64.1045	32.7253	28.5949	106.623	78.2519	59.7348	63.5656	72.0777	64.4233	83.992	68.6426	45.2223	83.5141	86.78	97.501		0.102041	87.849
2.4997	97.19	125.672	109.805	87.485	155.729	145.546	122.168	127.725	89.252	82.877	61.2355	42.4181	26.1741	92.012	72.3619	57.4606	65.8176	65.1155	63.801	83.594	59.4556	38.1044	80.262	77.821	93.339		0.107142	84.8969
2.6188	92.15	107.871	122.335	73.32	150.907	163.634	124.488	128.979	85.3363	72.344	51.6249	48.7032	30.6138	91.271	59.9558	51.6132	60.2771	71.7895	69.6731	83.764	62.3053	32.6058	80.7374	87.296	88.004		0.112246	83.6639
2.7378	78.004	124.727	112.443	72.067	161.986	170.774	129.791	130.408	97.7613	56.39	56.5146	42.2305	32.0742	115.874	64.4644	71.0384	74.3175	67.7013	62.2575	75.209	57.0845	39.8976	81.7559	78.005	95.865		0.117347	85.9456
2.8568	83.844	117.229	100.455	69.642	150.13	164.647	114.454	120.929	93.6714	64.746	55.3595	41.9898	29.5628	108.815	62.2126	61.2479	68.8147	66.3792	57.6622	75.636	54.8176	35.3513	85.0074	83.83	98.382		0.122448	82.5926
2.9759	80.726	114.818	120.348	68.944	143.598	149.829	120.303	136.527	91.9583	57.788	61.4093	39.7126	22.3877	91.968	59.0097	54.8976	68.2741	74.7432	66.768	74.644	57.2597	33.2364	73.4418	77.365	87.032		0.127552	81.0795
3.0949	91.484	108.944	121.264	72.323	151.208	149.26	133.154	125.291	100.457	57.68	57.7221	34.5945	28.664	87.866	68.2497	61.3294	63.1574	61.7284	56.7016	78.583	64.3696	31.6191	78.6404	81.376	76.507		0.132653	81.6869
3.2139	92.301	125.554	121.358	64.79	145.523	150.317	133.605	129.107	76.7424	65.402	41.8981	48.3594	29.8828	95.874	73.1428	63.9303	71.9289	64.2649	56.9944	84.184	63.4966	33.0883	68.7489	64.585	82.703		0.137754	81.9112
3.333	94.565	109.368	113.914	50.331	136.468	150.064	142.988	132.52	76.6591	54.521	51.6504	31.8413	20.0167	99.44	52.2379	46.6572	66.3615	54.6873	58.7839	70.726	55.9973	37.1662	62.5205	66.552	75.146		0.142858	76.4473
3.452	81.255	113.354	97.665	54.936	144.945	142.576	130.661	126.466	64.8842	46.76	52.5039	35.6915	29.0071	98.511	49.4879	40.7868	60.3986	53.8739	72.272	75.321	52.571	45.1997	75.2826	55.206	90.64		0.147959	75.6102
3.571	87.057	106.668	99.679	50.812	130.548	145.803	131.184	130.386	60.4432	61.798	46.6804	32.9751	21.7713	90.319	61.267	39.8307	67.7596	73.8369	49.6289	59.409	49.3608	38.5995	57.053	66.274	74.381		0.153059	73.341
3.6901	90.005	99.784	88.149	53.924	137.5	145.401	127.932	123.333	68.0912	56.131	43.4987	27.4315	23.0611	94.889	60.8482	41.0245	55.48	53.9012	45.0601	55.373	48.4239	38.6379	59.106	72.298	91.709		0.158164	72.0397
3.8091	94.281	101.06	94.348	45.138	124.432	153.352	121.602	125.879	71.9498	59.367	54.3602	32.4199	20.0753	97.181	61.9544	31.6869	42.2092	47.3486	36.4908	63.241	56.4136	40.0209	54.1858	64.218	88.098		0.163265	71.2525
3.9281	86.925	108.144	85.821	53.617	130.887	153.657	115.563	133.656	59.5532	61.447	59.1931	31.6501	19.5719	99.721	58.1046	37.6246	63.939	46.9368	27.0778	58.415	60.8309	33.7628	52.1022	63.277	72.782		0.168365	70.9704
4.0472	82.024	115.501	68.116	48.351	110.357	132.177	117.905	121.176	57.4159	66.242	49.4284	36.7479	19.8565	84.92	51.6117	36.4638	60.6118	53.437	27.2002	67.913	56.2153	41.9748	48.2183	51.434	77.567		0.17347	67.3146
4.1662	75.817	111.768	84.877	57.251	98.269	127.979	129.384	122.353	50.3439	59.834	48.5017	38.904	16.5181	81.992	42.42	41.0507	51.3734	42.943	20.1997	50.746	60.4243	32.9725	48.0123	52.61	64.784		0.178571	64.4531
4.2852	81.135	94.818	99.353	52.976	116.273	121.693	123.872	129.052	55.0269	53.605	39.81	38.5139	20.913	83.646	50.592	34.4898	52.1621	35.7936	20.2784	55.569	55.0341	31.8504	47.2856	52.706	70.38		0.183671	64.6731
4.4043	94.075	98.838	82.409	47.849	105.616	131.606	102.104	114.062	54.6721	53.252	52.0681	37.9269	21.4357	76.542	55.4613	29.5486	48.141	36.499	26.9662	43.058	47.2089	33.0815	40.1966	42.928	66.295		0.188776	61.6736
4.5233	80.343	112.191	81.942	50.37	91.175	136.961	111.029	130.586	51.3202	59.197	35.957	25.8987	19.44	70.034	51.6432	31.3976	33.7637	37.7917	21.9484	45.991	48.887	37.047	42.5279	46.891	54.945		0.193877	60.3711
4.6423	90.485	104.633	79.407	44.007	101.664	145.948	109.876	115.656	49.4101	66.369	39.5861	30.8435	16.51	64.639	59.6627	30.5845	41.5957	37.8163	17.7182	46.534	43.8557	36.4456	31.4455	37.931	52.668		0.198977	59.8116
4.7614	101.815	101.565	79.697	47.634	105.831	139.365	127.35	110.275	40.4672	67.576	41.1355	29.3802	16.3842	60.102	49.0298	27.0407	38.1278	29.5482	15.0415	42.431	40.3099	27.2191	27.6387	38.073	62.045		0.204082	58.6033
4.8804	87.524	111.112	89.191	36.775	94.49	126.74	120.029	121.317	54.0127	66.218	33.7127	31.5402	12.0262	52.164	39.8063	28.3999	32.0625	44.2753	16.0068	37.828	45.8663	22.8788	37.1671	33.072	61.981		0.209183	57.4478
4.9995	72.376	98.193	76.66	47.488	91.411	123.493	101.783	100.795	43.6089	60.609	39.7048	27.5384	16.587	43.129	36.7255	30.3292	31.0394	36.6521	16.8907	37.915	36.3745	25.6613	22.7614	30.471	56.579		0.214288	52.191
5.1185	92.343	100.97	87.818	40.871	76.299	142.3	98.838	109.189	57.0806	61.19	37.6744	28.9191	10.204	42.473	39.3712	24.7689	30.7205	27.9348	12.2235	23.249	30.3749	22.71	25.0218	30.432	63.257		0.219388	52.6493
5.2375	79.735	104.158	74.843	37.351	76.663	119.841	104.045	113.592	43.6246	60.088	30.8833	28.2849	12.8819	37.056	31.8687	24.8414	23.0525	24.4452	15.275	27.417	23.9279	23.6469	27.5178	24.875	44.047		0.224489	48.5584
5.3566	83.201	101.942	70.069	45.962	73.254	133.668	103.28	123.368	42.4024	64.483	31.0765	27.8481	12.7644	41.218	31.6125	21.5769	29.5572	27.2959	17.8833	29.745	32.5178	17.5449	21.2798	27.854	36.515		0.229593	49.9167
5.4756	71.175	102.773	81.44	47.301	75.376	102.991	114.483	114.648	43.986	54.524	25.7807	30.1407	23.6883	38.806	34.714	21.0727	26.1103	22.6446	14.3179	21.784	26.9819	22.096	14.5423	19.364	36.036		0.234694	47.4711
5.5946	66.348	98.819	86.464	36.38	78.14	108.99	105.036	117.692	51.4769	52.394	30.875	22.1758	16.2181	36.784	30.7023	22.5389	20.3177	19.9967	14.8692	23.511	32.8068	14.2401	13.9813	23.569	42.933		0.239795	46.6904
5.7137	73.944	108.075	73.087	34.717	75.407	114.663	103.776	106.393	46.4674	59.362	29.0238	19.7259	18.3874	29.535	32.5304	16.2795	23.0249	22.5072	18.5287	18.495	25.3761	15.8474	11.5671	31.446	34.596		0.244899	45.7105
5.8327	72.462	92.063	68.209	43.323	73.123	112.277	103.782	108.19	51.3473	59.537	18.7322	16.6126	12.949	20.866	32.8348	12.5053	25.9584	24.7707	19.3893	16.023	26.8829	16.3048	13.8839	17.932	30.572		0.25	43.6212
5.9517	70.279	92.625	73.618	38.926	71.13	108.899	96.191	116.137	44.7427	59.388	31.656	16.3867	21.4706	27.69	28.2747	15.7797	21.6276	27.347	20.4141	15.459	27.5141	10.4106	11.9983	19.895	29.12		0.255101	43.8792
6.0708	68.895	99.384	73.444	37.84	75.546	106.092	87.647	114.23	46.4301	43.454	33.2399	14.6796	12.0132	24.961	36.865	13.4613	24.7994	16.804	21.8714	14.414	37.8965	13.5661	20.1402	25.618	35.404		0.260205	43.9478
6.1898	52.751	93.225	72.333	36.606	71.267	103.626	87.67	123.56	50.5241	47.877	26.3058	17.1076	13.638	21.161	29.1889	17.0116	26.3562	15.3239	17.6575	11.122	34.5459	16.0206	13.2896	24.391	17.923		0.265306	41.6193
6.3088	61.564	77.093	68.175	28.224	54.783	106.029	86.445	100.856	47.2547	52.321	25.8635	14.0697	14.7371	22.761	30.6614	17.818	19.1103	22.4649	21.3839	11.374	27.5592	13.7399	12.8297	20.124	25.384		0.270407	39.305
6.4279	54.95	88.896	59.399	37.836	64.908	92.349	92.517	110.615	49.9849	45.502	25.5788	15.6186	5.7675	21.648	33.7921	10.8895	20.6581	18.0668	20.7096	10.362	29.6861	14.6786	8.6448	17.566	21.843		0.275511	38.8987
6.5469	53.121	80.159	48.962	34.931	50.538	97.976	77.638	108.258	47.0445	41.751	21.4828	21.7234	11.0938	19.927	26.6593	15.9064	14.997	21.6453	11.1199	9.449	32.3492	15.8028	9.299	17.405	19.764		0.280612	36.3601
6.6659	55.136	63.45	51.481	31.197	56.734	82.459	76.567	92.659	51.0336	46.3	20.7547	20.9871	14.0106	20.367	20.4253	23.6481	16.8894	28.1572	12.6425	8.017	28.9093	13.4993	12.4011	20.122	26.07		0.285712	35.7567
6.785	51.681	61.811	55.822	28.249	53.661	85.393	77.003	103.045	57.323	39.338	20.7135	14.8257	13.9709	20.52	21.3369	15.0156	10.8711	17.267	11.3633	10.584	24.5549	13.4992	15.0273	17.195	28.933		0.290817	34.7601
6.904	59.501	64.841	56.637	39.684	55.087	67.176	75.435	117.677	52.3865	30.544	18.0562	17.0311	11.5981	19.3	19.5232	15.1256	13.0659	18.5434	12.4659	8.707	23.6568	11.7466	13.662	16.221	21.82		0.295918	34.3797
7.023	52.39	62.109	50.021	41.176	42.468	69.011	81.73	118.608	51.799	27.933	18.7476	11.9566	18.8516	21.848	21.2695	19.3931	12.6521	21.397	14.849	8.516	22.9624	19.8961	8.9424	17.079	21.916		0.301018	34.3009
7.1421	46.299	64.391	43.211	34.388	44.601	52.647	67.152	111.963	53.567	32.415	14.1441	15.1	17.2906	17.383	20.4935	24.5484	15.1026	17.1397	13.4702	8.118	18.3956	17.7006	7.2613	13.999	22.339		0.306123	31.7248
7.2611	45.307	51.232	40.823	33.242	52.964	54.395	69.284	108.364	44.6377	31.465	20.1579	10.7973	13.0309	14.592	20.4205	16.1724	11.3509	22.1464	14.4528	8.144	19.578	14.7396	16.2316	13.025	17.08		0.311224	30.5453
7.3801	39.779	52.172	35.351	32.687	56.586	52.994	63.112	94.641	43.8925	25.636	19.2528	12.0936	17.1158	20.67	14.1743	12.8447	13.8295	13.7348	21.0994	6.67	27.4055	14.9072	12.3276	15.539	17.816		0.316324	29.4532
7.4992	40.014	38.021	31.366	38.945	67.64	50.248	59.999	97.145	36.9283	34.89	24.5428	14.6104	9.4793	27.62	9.9463	18.9618	14.0878	17.9656	14.8051	5.518	24.1031	11.9291	6.2939	18.215	12.462		0.321429	29.0295
7.6182	46.176	38.263	28.745	24.923	61.599	44.764	58.3	95.38	41.6626	26.113	22.233	13.4479	15.1498	27.264	10.478	13.6543	13.395	23.0191	18.1386	5.241	19.9343	10.269	6.3908	16.666	18.082		0.32653	27.9715
7.7372	29.467	30.062	29.536	30.093	67.652	47.51	55.885	88.667	42.0123	23.61	21.8454	11.0867	13.3315	41.284	12.5492	16.4229	21.1298	16.0016	15.1912	10.382	20.8665	7.4546	8.8898	16.326	15.707		0.33163	27.7185
7.8563	38.256	32.702	22.159	32.722	61.029	45.853	60.534	85.454	42.3666	24.562	23.0851	19.2778	16.1586	33.087	12.2058	16.2151	11.9109	17.0928	11.2488	7.134	18.9997	8.8805	8.2883	18.789	15.599		0.336735	27.3444
7.9753	27.65	29.238	28.115	24.384	56.657	44.179	60.436	84.139	41.944	31.54	19.7553	17.094	18.3261	34.853	15.3984	20.9194	16.1105	13.8266	11.191	8.772	19.8269	12.3987	7.1846	15.456	11.317		0.341836	26.8285
8.0943	30.196	39.292	24.101	28.941	55.105	44.758	65.871	87.11	34.1148	28.538	21.1591	16.0468	12.1831	25.722	12.1661	15.6258	14.6556	12.8673	12.4901	5.71	22.4965	10.7266	5.5156	12.087	10.147		0.346936	25.905
8.2134	26.452	29.787	27.476	24.246	58.951	53.174	64.924	87.149	38.5752	29.226	15.8404	10.7384	11.899	21.302	14.7147	14.6127	11.9995	16.6316	11.8046	4.619	16.0545	13.515	5.589	23.179	13.087		0.352041	25.8219
8.3324	29.524	29.584	25.252	28.577	42.198	55.553	73.274	73.519	35.6821	29.404	14.8887	16.6043	13.3115	16.598	16.2446	13.2733	13.0075	9.0131	11.3565	6.604	16.656	18.8862	7.229	16.544	11.353		0.357142	24.9655
8.4515	17.381	23.824	19.902	25.766	35.197	44.137	77.953	59.393	37.8586	28.33	16.5667	11.3902	10.9874	18.976	11.3068	10.4696	13.853	12.6132	13.9893	7.582	14.481	15.6037	9.3474	9.848	9.47		0.362246	22.249
8.5705	21.402	30.032	15.93	28.706	31.004	51.01	70.753	62.948	43.5575	23.867	13.1485	15.8476	9.7904	22.381	18.0492	9.2301	12.3855	9.1875	9.2857	4.424	18.0604	13.3727	10.3308	12.543	10.865		0.367347	22.7244
8.6895	29.483	18.402	18.193	19.828	23.628	54.416	81.099	61.142	34.6121	24.444	15.9517	13.1095	14.8844	29.402	14.802	6.9522	16.5741	8.6059	10.9553	5.054	18.4112	11.8307	6.9076	10.318	11.287		0.372448	22.4117
8.8086	21.787	26.243	10.907	22.978	20.511	59.417	72.196	60.695	40.3872	21.549	14.7504	18.1706	9.5238	32.165	16.1088	5.5592	12.1209	9.678	10.7699	7.8	14.1286	10.6884	6.0532	11.597	12.545		0.377552	21.9332
8.9276	17.881	27.289	8.593	22.35	23.937	62.968	59.465	51.632	47.0593	27.912	23.1218	13.7526	9.0946	25.863	9.9187	10.3896	11.93	10.2182	11.973	6.919	10.3956	15.558	3.9802	12.033	13.133		0.382653	21.4947
9.0466	22.039	23.045	15.857	18.319	25.467	70.727	60.872	42.448	46.7822	23.603	16.1961	13.8175	6.375	24.279	19.0165	5.8575	14.7968	9.2867	10.0932	2.664	6.058	10.1729	9.9194	9.02	7.541		0.387754	20.5701
9.1657	21.691	23.403	13.52	18.741	24.939	67.154	62.887	41.063	44.7469	28.341	17.9245	5.7602	8.7027	19.925	15.6762	12.1921	14.1294	8.6395	6.7823	4.35	5.6592	9.3579	6.5692	5.14	13.659		0.392858	20.0381
9.2847	21.276	19.395	13.779	18.97	19.005	49.854	64.137	38.255	36.5422	33.524	9.4358	9.9468	6.4288	13.426	16.1086	10.3738	13.2165	10.4875	10.7557	3.512	7.8335	10.5076	7.0097	5.689	8.985		0.397959	18.3381
9.4037	23.369	14.559	8.436	16.961	25.108	47.234	64.565	29.054	46.0379	36.596	13.1481	7.6848	6.093	11.093	13.8095	7.0516	12.8234	8.1555	9.3993	2.173	5.6764	8.6867	7.3195	7.34	6.823		0.403059	17.5679
9.5228	19.503	10.998	5.784	17.058	33.4	49.368	54.025	24.653	38.9922	29.24	14.0406	10.7328	5.6116	8.842	16.2293	12.255	12.2168	7.8574	15.4381	4.509	5.0637	10.659	3.6573	10.503	8.87		0.408164	17.1803
9.6418	16.918	11.248	6.933	21.821	37.688	42.187	50.229	26.211	33.0204	27.928	13.6256	10.8668	4.3326	9.788	19.1386	12.2775	11.3259	6.9061	7.9237	4.23	5.0895	13.1679	5.3182	7.548	6.117		0.413265	16.4736
9.7608	14.92	10.482	10.521	23.052	29.679	33.062	53.077	34.31	44.3758	28.729	15.483	12.8785	4.3907	6.142	16.7463	15.5346	9.6299	10.082	12.3868	2.855	6.6042	14.5571	4.1836	6.119	6.692		0.418365	17.0597
9.8799	23.452	16.793	8.489	18.584	32.291	36.865	58.913	33.859	50.122	29.139	8.6298	13.0003	2.5009	7.41	14.9702	16.3418	11.4618	4.4691	10.3484	3.612	4.5234	13.0292	3.6406	9.332	6.742		0.42347	17.5407
9.9989	19.566	13.771	6.692	20.947	26.328	19.396	49.755	31.089	45.2042	23.784	10.3748	9.486	5.1919	2.397	13.6211	17.7022	9.2476	8.1803	8.9084	8.287	6.8388	8.5544	6.4375	4.257	8.147		0.428571	15.3665
10.1179	24.156	14.051	7.648	15.757	28.079	25.173	41.144	36.961	42.884	25.526	12.8072	7.2159	4.8069	4.392	10.6951	15.8718	9.9854	10.9497	8.8586	6.537	5.824	8.6937	6.9677	6.163	7.302		0.433671	15.538
10.237	21.851	7.953	15.424	18.646	25.68	22.671	39.669	35.136	36.3852	19.492	11.7396	9.1301	4.5583	7.278	16.7272	14.2888	9.1019	7.4623	10.2161	2.989	5.1139	12.045	9.6035	2.474	5.967		0.438776	14.8641
10.356	20.245	10.341	9.666	12.498	22.427	25.961	43.668	28.833	31.8696	22.862	10.2017	6.5302	4.4634	5.847	11.7098	8.8892	9.937	8.5829	9.2959	4.252	3.5572	5.8585	7.8406	5.116	6.196		0.443877	13.4659
10.475	25.234	9.482	9.801	18.616	18.587	25.799	38.529	25.198	33.0443	25.064	13.1865	9.3642	3.6679	4.981	13.7776	16.7855	8.6508	8.5379	9.3301	1.674	3.8106	11.7718	4.2583	8.205	6.618		0.448977	14.1589
10.5941	19.71	6.511	5.518	17.039	24.558	28.49	34.915	24.356	37.4155	25.174	9.2179	10.1165	4.1613	3.268	12.2725	6.6267	9.8932	9.6224	8.4199	1.968	4.1963	8.277	5.0899	4.826	5.134		0.454082	13.071
10.7131	23.173	6.541	8.548	11.618	25.497	34.462	42.743	20.275	26.924	30.565	9.6087	7.0298	3.7863	5.113	12.2433	10.195	13.5836	14.1133	6.7829	2.107	2.5138	9.8045	5.4197	4.914	7.49		0.459183	13.802
10.8321	32.008	8.821	7.474	8.547	20.071	31.196	48.987	29.748	32.7155	31.078	11.958	7.3434	3.0602	4.991	14.4054	7.3109	7.0412	12.4516	8.0281	2.795	1.5274	9.7322	6.7879	5.371	2.954		0.464283	14.2561
10.9512	22.372	11.192	2.442	12.416	17.114	39.611	40.365	22.311	37.5996	42.297	9.6981	5.439	4.4919	2.635	15.6337	8.7833	6.859	9.8426	11.1808	5.945	3.9142	9.6835	10.1251	3.009	6.259		0.469388	14.4488
11.0702	21.074	4.695	6.284	14.596	19.417	34.395	46.827	24.365	34.4848	33.66	7.1742	4.5576	4.7641	5.324	14.2704	11.4978	7.9198	11.71	9.0273	3.462	3.2004	9.9496	4.8618	4.483	4.511		0.474489	13.8604
11.1892	17.334	4.423	7.097	10.401	18.798	31.625	58.298	21.858	31.1125	34.069	12.3621	4.9576	2.7081	2.084	10.2623	8.9276	9.5426	7.0892	11.0176	5.648	2.0477	8.1239	9.2125	5.199	7.156		0.479589	13.6541
11.3083	16.616	7.599	6.552	6.797	13.234	30.207	66.079	23.555	24.7625	29.545	7.3765	4.0563	2.5739	1.946	12.4109	15.0571	7.6535	6.5687	12.0053	2.539	1.9474	6.298	8.0809	3.328	5.543		0.484694	12.8932
11.4273	15.657	8.658	7.085	13.831	15.534	28.608	52.531	21.199	16.428	29.125	12.8381	7.4751	5.508	3.251	9.0064	11.4983	10.2343	7.9241	13.3739	1.142	1.8452	4.6298	7.8279	5.166	6.242		0.489795	12.6647
11.5463	10.981	8.33	6.023	20.625	16.155	27.466	50.483	26.084	19.992	26.065	15.7466	8.4769	1.9803	1.261	7.7465	9.2404	7.7798	7.6431	12.7312	3.337	4.5101	6.9005	6.5374	3.945	3.491		0.494895	12.5412
11.6654	8.935	3.715	3.329	16.509	17.938	26.06	44.388	20.757	19.6697	18.877	19.1324	9.0089	3.7749	2.668	13.3874	9.8801	10.5271	8.0947	15.8673	3.086	2.0173	10.5861	5.7457	5.073	6.661		0.5	12.2275
11.7844	12.525	4.946	2.557	16.471	23.743	27.192	39.28	28.538	26.7085	14.816	12.8269	9.9139	3.6524	3.205	8.0334	7.2657	10.2773	2.8477	13.7094	5.692	1.338	4.6001	6.2113	6.341	8.817		0.505101	12.0603
11.9035	16.954	4.801	5.33	13.108	16.516	25.573	33.767	25.697	28.6467	22.938	19.3116	9.1957	2.3359	3.496	14.7648	4.8213	9.343	5.3538	11.175	5.277	0.7842	8.5438	5.0529	4.81	5.208		0.510205	12.1121
12.0225	9.22	9.974	4.361	12.586	11.429	39.446	44.229	26.662	26.1284	15.876	18.253	8.2992	3.6658	3.192	9.3676	7.8114	8.9841	7.5533	11.3956	3.085	1.47	3.9322	3.7139	6.156	2.412		0.515306	11.9681
12.1415	10.651	5.401	2.379	9.366	12.831	29.228	42.421	25.65	29.6147	19.045	17.3735	9.62	3.4485	3.168	12.137	9.817	9.1232	12.2691	9.7538	3.209	1.6981	11.1226	6.0864	7.068	3.737		0.520407	12.2487
12.2606	11.591	6.839	6.191	8.633	12.123	26.909	44.827	33.494	35.4476	15.128	18.0148	8.8037	5.2626	3.42	11.0995	6.8163	6.493	7.9901	6.4189	2.72	2.4047	8.3079	2.0868	3.399	4.482		0.525511	11.9561
12.3796	8.884	5.541	3.487	6.615	11.992	29.095	49.981	23.208	36.1616	25.656	13.9211	9.1279	3.8689	2.304	7.0943	7.1934	9.2657	8.2024	6.8335	1.925	2.7921	6.3541	3.2045	4.267	3.768		0.530612	11.6297
12.4986	11.309	4.859	3.096	8.922	16.412	27.545	38.857	23.852	42.3953	18.134	23.321	10.114	1.7747	5.351	6.8277	6.7814	10.235	6.9037	6.888	2.798	4.1281	8.0928	5.0176	6.803	2.524		0.535712	12.1177
12.6177	9.68	7.602	3.6	9.052	12.641	31.079	28.121	25.919	39.9813	16.134	19.2374	8.8891	3.4779	5.29	10.3738	7.9401	6.2706	7.4925	9.2539	3.934	5.4095	6.2872	6.0374	3.395	4.93		0.540817	11.6811
12.7367	9.984	5.82	2.747	7.121	16.354	27.032	40.975	26.168	39.4328	12.684	18.8042	10.5899	3.9511	0.876	11.7182	4.7675	5.998	4.1249	10.4615	3.42	2.7477	4.9581	4.8132	3.08	2.646		0.545918	11.251
12.8557	10.089	5.571	3.987	8.083	13.468	25.956	41.752	21.184	34.3912	14.212	16.7682	13.2001	3.0244	2.791	6.9068	6.2033	9.5972	2.8002	7.6731	2.888	2.9653	6.723	6.2046	2.391	3.246		0.551018	10.883
12.9748	7.291	4.258	4.287	7.9	14.909	21.708	41.268	22.618	34.4493	22.041	16.1943	6.1687	4.9054	1.532	10.4152	11.8085	8.6254	7.1144	8.2324	1.978	0.6153	7.8715	10.6907	2.481	3.25		0.556123	11.3045
13.0938	9.54	5.718	2.63	7.866	11.644	26.423	40.673	19.508	27.0243	16.604	11.047	10.0893	2.4583	4.589	13.5506	4.6162	8.2935	5.3378	7.4612	2.49	0.7051	9.675	8.7873	4.508	5.178		0.561224	10.6567
13.2128	9.791	5.782	3.602	5.25	12.627	19.086	39.479	19.863	29.4053	17.638	9.4537	5.9789	3.0807	3.929	11.3058	9.4264	7.355	5.9266	5.924	3.279	1.4511	13.1635	12.7523	3.186	5.68		0.566324	10.5766
13.3319	10.158	4.646	5.65	7.457	16.403	17.553	40.774	21.409	37.1849	21.918	11.8337	8.0432	5.3854	3.052	10.3355	5.3937	7.8003	5.4381	7.7437	2.417	2.07	3.809	12.5805	4.002	0.99		0.571429	10.9619
13.4509	10.644	7.249	5.333	11.353	10.075	23.273	42.5	18.107	26.7382	20.374	9.0976	6.5185	2.5603	2.081	5.9468	6.6028	4.9171	5.2625	9.1115	1.432	2.7897	7.0615	9.3043	3.303	3.798		0.57653	10.2173
13.5699	14.21	7.832	5.092	15.615	9.025	16.966	40.983	21.469	24.8631	23.916	10.8957	4.8426	3.1155	1.655	10.4019	6.7269	7.7206	9.0984	4.6623	4.958	2.009	8.4701	11.8541	1.646	1.684		0.58163	10.7884
13.689	8.241	9.511	3.855	11.76	9.228	13.397	34.341	15.014	22.6791	17.579	11.2642	7.8943	1.8877	1.811	11.6452	4.2621	4.0332	5.3423	6.8336	4.614	2.6751	8.1569	11.9465	4.769	4.969		0.586735	9.50837
13.808	7.946	7.163	3.041	7.951	10.619	15.025	26.442	20.727	24.9215	25.555	12.2941	7.6343	1.2909	2.005	13.4963	8.4344	7.7759	9.7735	9.5701	2.858	4.0064	6.4047	9.969	4.841	3.24		0.591836	10.1194
13.927	12.835	8.604	1.772	13.961	13.345	11.839	36.851	20.464	20.2249	23.061	16.4146	4.1595	2.3549	3.954	11.8548	6.2323	7.907	7.6495	7.8663	5.4	3.6983	8.5755	10.1099	2.949	2.25		0.596936	10.5733
14.0461	9.527	4.41	7.149	10.143	13.178	13.998	31.713	15.196	18.9142	21.027	19.0174	5.428	2.2408	1.984	10.4841	7.5604	10.1483	7.0764	6.0915	3.078	4.5075	9.7299	5.8238	2.247	1.299		0.602041	9.67885
14.1651	10.022	4.108	4.047	6.18	9.601	21.968	27.049	15.865	11.251	28.663	18.4003	8.7318	3.511	4.935	5.9312	6.8278	14.6805	11.2297	7.5723	6.06	3.2125	8.3831	6.4365	4.214	1.893		0.607142	10.0309
14.2841	14.667	6.596	2.817	5.561	10.845	19.592	31.997	14.557	23.3237	24.362	14.9654	5.295	4.1976	3.594	11.6472	3.829	11.935	4.9662	5.5485	2.714	4.8817	6.5376	11.2178	4.036	1.587		0.612242	10.0508
14.4032	10.746	6.146	2.491	5.032	14.589	21.561	27.795	9.032	23.6889	29.098	18.0387	6.4367	2.8951	2.078	6.8474	5.8698	7.697	5.9675	2.0466	4.904	1.0131	8.6011	9.2336	6.178	1.131		0.617347	9.56466
14.5222	9.019	5.015	5.383	6.537	14.295	26.232	25.568	7.187	21.3536	26.434	16.3464	6.0531	3.9741	5.684	7.3436	7.6786	7.6687	5.0534	5.0671	4.966	4.1345	3.8463	6.4465	8.066	3.148		0.622448	9.7
14.6412	7.549	14.537	5.233	5.095	11.345	19.434	19.255	8.912	22.8237	20.595	18.1539	8.679	2.001	5.281	6.5321	6.1193	5.7967	5.9485	10.6012	3.545	3.7276	4.4374	12.4483	4.391	1.761		0.627548	9.36807
14.7603	11.099	8.56	3.65	6.562	9.133	12.102	13.885	10.962	16.1438	17.633	13.4667	8.6188	3.9659	2.457	10.3565	7.5937	8.1509	7.101	9.2396	3.174	6.4508	10.5975	7.2774	5.221	2.972		0.632653	8.6549
14.8793	11.011	8.62	5.123	4.622	12.107	15.589	17.076	8.197	18.1055	17.884	13.6755	5.6401	4.3679	4.282	7.0215	4.8631	5.6	6.6709	8.2386	2.56	6.3426	10.9182	7.6233	3.614	2.765		0.637754	8.50069
14.9984	13.479	6.258	2.748	5.118	6.997	14.442	12.662	11.346	12.4421	11.301	8.5598	8.0415	5.5611	3.562	6.4949	4.7692	3.8076	4.2355	9.5003	5.306	1.1823	7.6577	6.731	3.762	3.834		0.642858	7.19192
15.1174	7.417	8.595	5.11	4.392	10.564	12.705	12.296	18.228	13.0503	12.731	12.9782	8.0861	6.7346	2.577	8.5694	5.9347	5.0169	5.7239	13.6591	3.75	2.9671	5.5872	4.016	3.414	2.603		0.647959	7.86822
15.2364	5.164	5.255	4.882	3.093	14.926	9.962	16.39	13.178	10.4734	14.654	12.4853	10.1117	4.79	6.976	7.7608	5.155	5.5678	5.6536	9.796	5.442	3.3982	8.5338	4.9506	7.61	2.721		0.653059	7.95717
15.3555	8.801	5.781	2.73	9.659	9.261	10.273	14.432	13.079	8.3419	11.594	15.4916	9.0799	5.3288	4.328	9.6573	8.9526	5.2696	4.1339	6.9251	5.696	7.14	4.4611	5.2591	5.979	4.067		0.658164	7.82884
15.4745	7.531	11.857	3.557	7.733	10.536	8.356	11.688	14.68	11.7267	15.913	18.5478	9.8364	6.5381	6.295	8.1577	6.5628	4.3492	9.3833	7.1488	2.922	3.9938	7.6682	5.243	8.211	4.725		0.663265	8.52639
15.5935	8.043	6.705	5.939	7.628	16.057	14.728	8.752	14.998	7.7559	18.089	13.0585	3.4275	3.1163	5.406	10.3332	4.7081	8.4532	8.3471	6.4266	3.124	3.8469	4.5665	7.8671	4.502	2.63		0.668365	7.94032
15.7126	8.702	9.482	5.983	8.071	16.333	19.303	10.365	17.394	13.9224	17.727	11.9007	2.9646	1.9243	1.962	8.3646	4.3729	5.7966	4.745	4.6109	4.415	6.2029	6.8116	6.1817	8.252	4.331		0.67347	8.40473
15.8316	9.12	9.664	4.892	7.935	15.667	8.346	7.556	11.588	12.8912	16.382	10.6797	6.6588	3.7938	4.067	7.9668	7.7085	6.9777	4.3867	6.907	5.89	7.4299	6.1082	2.0382	7.467	3.476		0.678571	7.82386
15.9506	11.809	7.524	3.262	9.948	9.933	8.357	9.91	10.725	7.2143	9.324	18.5927	8.6462	3.9405	4.26	7.4508	4.8418	5.419	4.827	4.8024	4.659	5.2831	7.4412	2.0748	8.179	1.448		0.683671	7.19487
16.0697	10.197	5.903	4.671	11.688	9.483	11.462	10.86	10.028	11.574	7.216	15.2773	5.3359	7.6137	2.53	9.4148	5.9293	3.3591	5.1961	3.4286	3.939	3.7031	7.1619	2.9866	5.919	5.321		0.688776	7.2079
16.1887	9.684	3.797	3.396	7.409	10.485	8.271	13.672	17.855	10.2623	7.669	15.2909	8.6137	5.022	5.868	7.3464	5.2844	4.8371	4.8198	3.6759	4.218	4.1603	6.82	4.0027	5.285	3.891		0.693877	7.26542
16.3077	10.708	11.827	5.967	5.371	12.059	11.732	10.362	20.973	9.707	9.35	10.1707	8.9243	5.2042	6.786	5.6117	2.5674	8.2531	6.4779	7.1416	4.091	6.5989	3.9923	5.9051	8.045	3.831		0.698977	8.06625
16.4268	10.088	9.333	9.511	7.834	9.039	12.639	12.701	13.274	11.236	6.576	7.2998	5.0601	4.7123	4.965	8.4682	3.6636	3.6323	5.5755	3.3213	3.33	5.1018	8.0368	5.8637	6.093	4.382		0.704082	7.26946
16.5458	9.274	14.411	5.46	6.587	4.941	7.204	7.412	10.07	5.2902	7.198	9.0536	5.1413	5.4786	7.236	8.2311	7.596	4.1759	6.6724	4.1371	3.545	4.4735	7.1504	2.9491	9.201	10.23		0.709183	6.92473
16.6648	7.388	10.423	7.64	4.18	10.561	8.028	10.193	10.39	8.8447	5.66	10.4032	4.3181	6.5018	4.556	5.0695	6.5818	4.423	4.8851	2.3398	4.985	6.9196	6.2893	4.4566	12.141	5.822		0.714283	6.91998
16.7839	10.095	7.796	11.234	8.002	11.491	8.071	15.091	9.066	12.5789	8.405	9.816	3.446	9.1073	4.775	9.811	3.9916	1.6248	7.0252	6.8944	7.879	7.5583	6.7172	5.7568	10.378	7.223		0.719388	8.15334
16.9029	7.062	10.904	7.628	14.531	6.621	11.308	14.435	9.227	8.3191	3.424	10.6385	6.2378	7.5679	3.924	10.7863	2.9435	4.4549	4.8062	3.2647	9.068	5.8668	10.219	6.9008	9.922	7.939		0.724489	7.91994
17.0219	7.506	10.306	9.884	14.467	6.696	13.393	7.171	8.068	10.636	6.072	12.5349	10.4084	3.9961	8.723	4.7721	5.2389	4.9172	5.0151	1.6703	7.104	6.8872	2.706	8.3296	6.936	9.277		0.729589	7.70859
17.141	8.581	11.076	13.709	18.713	4.248	10.019	10.606	9.755	11.3063	9.451	7.3789	9.5091	6.9937	3.408	2.3555	3.5684	5.9538	5.8312	2.7171	7.925	7.8558	8.9978	5.6936	7.038	5.637		0.734694	7.93309
17.26	9.927	12.428	10.644	24.078	7.919	11.488	9.79	6.942	10.41	6.709	14.2035	9.6234	6.5177	2.822	4.2782	2.2692	4.3836	5.696	5.2981	10.2	8.9348	5.9247	3.8115	7.433	4.985		0.739795	8.26863
17.379	10.662	10.302	9.054	24.113	5.145	9.265	13.528	10.131	9.3995	5.304	13.3799	7.4336	6.2337	3.873	4.3847	3.0209	6.9838	4.7631	2.5945	8.77	12.836	5.2321	4.7075	8.069	4.195		0.744895	8.13521
17.4981	10.971	12.114	12.818	21.294	4.474	9.628	9.75	9.701	11.6183	4.575	12.5234	6.7453	6.2724	4.99	5.3979	3.6161	3.9146	3.9382	3.2169	8.572	8.1238	5.163	7.997	5.512	8.094		0.75	8.0408
17.6171	8.663	6.737	9.557	22.462	8.319	13.808	13.915	7.396	14.4223	6.064	10.6883	7.1533	5.1334	3.28	6.5198	4.5316	4.9283	3.0714	2.9373	7.83	8.3074	7.5872	6.798	4.281	5.136		0.755101	7.98105
17.7361	6.262	7.9	6.638	19.486	10.959	7.29	6.132	9.176	11.7027	3.954	10.9318	9.6532	3.5236	4.052	2.6247	5.5731	5.3161	3.1887	3.7756	3.986	8.1837	5.105	5.032	5.327	5.863		0.760201	6.86541
17.8552	9.279	11.503	5.817	18.685	8.48	9.933	9.471	10.438	14.4257	3.982	7.8616	7.4832	4.5061	5.981	3.2801	5.2905	4.5669	2.1027	3.7028	0.885	6.5484	4.2116	5.3203	3.813	7.714		0.765306	7.01124
17.9742	8.961	10.791	7.297	17.747	5.827	13.007	6.862	9.529	16.6619	3.544	9.64	11.8095	6.0887	5.727	4.5209	6.8621	2.9301	5.4538	4.7326	5.825	12.3599	2.169	3.3622	3.67	6.483		0.770407	7.67443
18.0932	7.21	10.299	7.408	9.486	10.338	9	8.508	8.323	7.4976	2.989	7.1245	9.7499	4.8348	9.985	4.5665	6.1361	5.1701	5.6368	3.2073	4.516	4.2024	1.5655	4.7693	4.171	8.773		0.775507	6.61867
18.2123	5.515	10.063	8.196	11.792	9.57	4.722	7.028	8.911	7.0976	4.705	8.6099	8.1477	5.7005	5.604	4.8764	4.903	4.7369	2.7025	4.5171	5.802	4.383	3.956	3.5953	8.665	6.934		0.780612	6.42932
18.3313	7.068	9.987	9.894	11.903	7.169	10.093	7.668	9.686	6.1179	6.898	9.5827	5.5871	3.8201	5.149	2.5783	4.6095	5.2511	4.5986	2.6496	5.886	7.7744	3.7696	1.7479	7.81	8.246		0.785712	6.62175
18.4504	6.326	12.629	4.361	12.095	11.689	8.348	9.402	5.707	6.2857	6.202	5.3977	7.6446	3.9917	3.297	0.9292	6.6033	3.1202	6.5183	4.2363	6.033	4.5219	4.0581	2.9374	1.898	9.407		0.790817	6.14554
18.5694	9.455	10.275	7.508	6.695	11.511	12.626	11.035	11.725	12.3429	1.63	10.6033	4.7297	4.5079	7.675	4.1015	5.0736	3.9289	3.3026	3.6851	3.949	3.527	5.3934	5.3051	4.926	2.531		0.795918	6.72168
18.6884	11.279	8.49	3.224	3.696	11.392	12.686	7.241	8.04	11.4172	2.871	8.8722	6.4628	5.4962	3.124	3.5213	1.7195	6.3698	4.4892	3.0678	4.282	8.0851	7.8627	4.8425	5.661	8.468		0.801018	6.50641
18.8075	7.633	10.954	7.609	3.506	9.521	7.285	10.748	9.694	11.8813	3.245	7.9249	4.8301	3.0677	3.684	3.8202	6.3388	3.4433	4.1143	3.8719	8.244	5.6467	6.0567	2.7816	4.726	9.446		0.806123	6.4029
18.9265	7.578	11.668	13.726	5.302	7.332	4.95	13.363	9.357	10.1309	3.157	12.0108	7.7915	4.9001	4.586	3.4219	3.5365	1.7362	5.9938	5.5045	9.367	7.481	8.4469	6.3232	2.474	8.865		0.811224	7.16009
19.0455	5.832	8.65	7.921	9.539	5.076	12.199	12.822	7.939	11.6027	6.633	12.4501	11.589	4.2582	4.998	5.0438	3.9138	3.9891	3.0743	3.6235	5.375	5.4781	7.8752	2.1852	3.514	7.166		0.816324	6.90988
19.1646	7.111	6.679	11.651	6.328	5.688	11.073	8.76	13.34	11.8835	4.326	11.5886	8.4038	3.9341	4.554	2.3483	3.7066	3.4029	2.4491	3.4906	5.83	4.8472	9.5698	3.8647	3.957	5.398		0.821429	6.56737
19.2836	6.262	7.734	10.956	1.662	7.626	8.144	7.354	9.98	17.2082	4.815	12.5251	5.294	4.1303	3.504	6.5614	2.7021	3.6917	3.9584	2.5504	6.745	3.6997	5.3587	7.3306	7.103	8.46		0.82653	6.61422
19.4026	6.476	6.68	14.492	3.588	8.043	9.16	6.052	7.825	14.7634	3.946	10.9906	6.5007	2.7859	4.897	3.5477	3.0471	2.3216	2.9875	3.549	8.173	3.1481	5.7859	5.465	6.022	5.704		0.83163	6.23802
19.5217	7.619	5.809	9.71	3.655	4.789	8.014	12.042	11.186	14.6327	4.211	17.4962	6.0295	0.8411	4.594	2.4606	5.23	4.7525	3.0383	4.2112	6.452	3.9954	3.4954	8.1161	5.437	3.829		0.836735	6.46584
19.6407	8.505	3.33	11.469	3.937	6.069	11.931	7.199	8.143	14.7337	5.686	10.3248	3.1781	2.0173	4.353	2.0381	2.0747	3.1712	3.2361	2.1262	7.964	4.1845	2.6367	6.4042	10.231	4.161		0.841836	5.96414
19.7597	6.423	6.783	9.146	6.715	6.652	9.082	6.869	9.632	10.4424	3.329	11.2945	6.6915	1.6487	6.771	2.9241	1.6963	1.2607	4.1859	4.0711	5.582	3.4442	6.1016	3.9791	7.614	2.562		0.846936	5.796
19.8788	5.362	3.587	9.876	3.66	7.303	10.549	5.465	8.461	10.6064	6.569	10.6895	7.1574	3.1956	4.278	3.8456	3.3267	1.5323	2.8176	4.1687	5.289	8.6582	3.9839	6.0445	5.426	0.821		0.852041	5.7069
19.9978	9.373	1.151	10.627	4.942	7.693	7.046	8.571	12.606	7.7959	5.272	5.8874	5.3208	5.8473	6.139	4.8804	1.7455	4.3802	2.4981	3.1326	5.981	2.3881	7.5352	6.0048	6.105	4.474		0.857142	5.89585
20.1168	5.645	2.748	4.854	5.925	6.719	10.721	10.626	11.839	6.8688	3.24	7.793	4.6059	4.6487	3.948	2.948	3.4872	3.3525	2.7638	5.1294	5.522	3.3407	3.0164	7.3868	9.326	2.793		0.862242	5.56989
20.2359	8.525	2.677	6.622	5.429	8.761	5.314	6.401	9.195	11.1738	4.501	2.8021	5.8131	3.9765	2.613	4.2553	3.35	4.433	4.7533	2.2988	5.526	6.2528	3.0595	6.4529	8.231	8.73		0.867347	5.64584
20.3549	4.468	4.016	2.951	3.49	4.97	3.577	5.954	6.968	4.6337	3.823	4.523	2.8755	4.3514	3.422	3.069	2.282	5.3034	7.9347	3.7206	6.063	5.6441	3.383	11.815	8.529	7.047		0.872448	4.99254
20.4739	3.057	4.985	2.883	5.223	9.367	8.116	3.935	8.161	11.1101	7.306	10.2984	3.8582	3.2246	3.041	2.8698	4.5752	2.837	6.3514	1.566	3.769	6.8348	4.0479	4.119	7.221	7.024		0.877548	5.43122
20.593	5.804	4.455	3.99	8.112	7.019	5.142	7.93	8.17	11.4326	5.643	13.2013	4.8357	6.1188	3.396	3.4034	3.6283	3.5701	3.6249	2.4363	6.085	7.8059	7.087	5.3346	10.939	3.342		0.882653	6.10024
20.712	6.67	2.838	1.673	2.227	12.014	4.462	10.244	9.557	10.7662	5.321	7.7786	4.4516	2.9883	1.231	3.8215	5.0034	4.5432	2.8481	2.1504	3.116	5.2501	5.9218	7.7638	7.777	4.738		0.887754	5.4062
20.831	8.251	4.277	1.206	5.752	11.753	8.539	8.115	9.676	9.4331	6.206	8.9938	9.2011	4.0969	2.053	5.2205	2.575	2.7555	3.3433	1.0622	3.1	5.9425	6.1769	5.449	8.384	5.821		0.892854	5.89531
20.9501	3.673	4.125	2.247	5.727	6.773	5.392	4.756	4.738	10.033	5.974	13.1531	9.7084	4.4937	1.23	4.7015	4.6155	2.8115	4.2906	3.2454	7.206	4.5591	6.2355	6.9607	9.228	4.59		0.897959	5.61868
21.0691	4.538	6.381	3.842	5.314	8.827	2.389	3.447	4.109	7.9687	11.711	7.8067	4.8568	3.1968	1.542	2.8149	6.3184	3.029	4.4262	1.32	3.424	3.1676	7.9382	7.2336	4.854	6.983		0.903059	5.09752
21.1881	9.121	5.001	4.397	3.038	3.986	8.101	4.744	9.516	10.3893	7.284	8.0314	6.2095	4.0624	4.27	4.0189	6.3907	5.8503	5.671	2.9942	1.644	5.9354	6.3086	5.8405	9.73	8.302		0.90816	6.03345
21.3072	7.322	4.253	5.474	3.617	5.751	5.192	1.6	2.683	6.0985	9.398	9.1006	2.8889	2.0997	2.82	3.1802	5.1729	2.2596	3.2579	1.8178	3.381	8.7347	5.4605	7.9639	9.417	8.01		0.913265	5.07813
21.4262	3.272	2.89	4.338	2.19	4.705	6.345	6.193	3.088	6.5329	18.996	5.5107	3.9246	2.79	1.453	3.0006	8.9449	2.3569	3.2837	2.3758	2.499	15.3709	6.9444	9.2639	8.042	7.341		0.918365	5.66605
21.5452	5.754	5.35	4.856	1.403	3.702	5.087	4.843	4.622	8.3464	10.59	5.5039	6.2407	3.0915	2.581	5.0306	5.365	4.5526	3.0388	4.5551	3.996	8.1945	6.2609	10.0377	13.883	8.827		0.923466	5.82847
21.6643	5.353	3.078	5.856	3.579	4.776	5.379	4.207	2.528	4.3664	16.149	4.0511	3.952	2.4604	2.786	4.5213	6.5964	2.0573	4.9342	2.1105	4.266	6.6231	9.9979	14.6105	9.519	8.085		0.928571	5.67368
21.7833	3.47	2.824	4.906	3.2	5.392	4.848	2.369	3.31	5.9317	11.928	2.763	3.9857	2.9243	5.051	1.401	5.3821	3.4936	3.1635	2.4158	5.202	6.6755	8.5935	15.11	9.601	10.777		0.933671	5.38871
21.9024	4.784	5.385	4.944	2.634	2.655	4.588	2.686	3.448	4.2273	8.848	2.2003	4.6275	5.608	4.898	1.9042	4.5167	3.5769	6.2751	2.5994	3.419	11.7742	13.0778	7.0022	9.6	5.97		0.938776	5.24994
22.0214	2.942	5.776	4.24	5.627	2.634	3.917	2.392	4.649	5.5457	12.046	3.0402	6.759	3.8128	1.812	1.7792	4.3248	3.4844	6.9896	1.9712	2.423	10.4139	7.1432	7.7247	7.887	7.402		0.943877	5.06943
22.1404	6.91	4.149	3.499	3.656	2.953	2.654	2.62	6.374	6.6223	11.532	4.7881	3.0278	2.5436	2.818	3.1207	5.3165	3.9042	4.881	3.0513	2.98	9.5974	9.4153	13.0386	10.837	12.125		0.948977	5.69655
22.2595	4.781	4.654	4.722	4.258	5.23	3.297	7.349	4.796	5.8403	10.833	4.3501	4.5454	7.3463	4.766	3.0506	2.6401	3.3494	3.4592	2.2428	3.157	11.4917	6.0984	9.882	7.994	9.328		0.954082	5.57845
22.3785	5.455	2.006	7.636	3.525	4.495	5.131	3.324	5.027	7.1109	8.569	3.6199	4.7678	2.351	3.081	2.6114	7.6157	2.7088	3.3037	1.9497	2.502	7.6925	4.4237	11.2367	7.886	11.944		0.959183	5.19891
22.4975	3.897	1.866	5.165	4.01	3.875	3.179	3.126	5.011	8.8294	5.251	5.1298	4.7951	3.4158	2.383	3.1792	4.7084	4.4575	7.4741	2.9331	2.628	13.302	7.6118	13.6848	6.149	11.219		0.964283	5.4912
22.6166	3.847	6.211	3.984	3.502	7.077	4.563	3.65	4.238	7.1049	1.942	3.3751	5.5984	4.8053	4.445	2.7015	5.9072	2.8204	5.5844	2.1656	3.969	13.0512	11.1255	10.5898	5.522	14.933		0.969388	5.70849
22.7356	4.374	6.082	2.237	4.47	4.956	2.611	3.296	3.068	7.6395	2.815	3.6903	5.2199	3.0572	1.696	7.1546	5.2175	6.2696	8.1944	2.7919	3.197	12.4419	9.755	6.824	6.561	10.92		0.974489	5.38155
22.8546	1.5	6.078	5.736	6.452	4.093	3.936	4.641	1.878	8.2257	4.559	6.2366	5.7561	3.4615	5.429	1.0481	4.3531	3.7702	6.9491	2.1365	2.365	4.54	13.1404	10.0098	6.655	10.736		0.979589	5.3474
22.9737	4.225	3.266	3.809	3.203	5.316	5.458	6.342	4.423	3.3784	3.355	2.2237	4.876	4.2929	1.828	3.0787	3.6007	3.1342	6.9853	1.1224	3.347	4.9091	11.5501	4.8054	5.536	12.114		0.984694	4.64716
23.0927	6.42	5.742	3.513	5.569	4.698	5.523	4.919	3.525	2.7597	3.765	2.5577	3.7696	3.4709	3.944	2.8362	4.9623	3.0126	3.917	2.8365	0.773	6.4641	10.6909	10.671	8.62	11.898		0.989795	5.0743
23.2117	2.362	5.623	4.108	3.078	4.36	3.935	4.956	4.612	3.5943	7.71	3.2128	3.3992	4.1466	3.72	5.1047	1.7516	1.751	3.2728	2.295	0.653	9.7932	7.2821	7.3737	10.129	6.427		0.994895	4.586
23.3308	4.046	5.693	7.068	1.847	3.656	4.172	2.883	1.142	7.2919	1.919	3.1946	3.3378	4.6513	3.92	1.4092	4.9206	2.6308	5.9329	2.294	0.872	8.0119	10.4046	7.4737	5.717	5.833		1	4.41285

## Sheet: Im1
X0	Y0	Y1	Y2	Y3	Y4	Y5	Y6	Y7	Y8	Y9	Y10	Y11	Y12	Y13	Y14	Y15	Y16	Y17	Y18	Y19	Y20	Y21	Y22	Y23	Y24	Y25	Y26	Y27		Ap-Ba	Average int
0	101.778	67.012	59.689	70.7549	67.3011	50.3242	39.6359	49.554	45.7299	72.593	47.981	70.973	63.9296	77.108	69.03	66.829	61.117	68.775	54.645	74.5604	33.0498	20.5857	35.3612	65.6202	50.2665	85.632	57.697	68.252		0	60.5637
0.119	92.267	72.913	55.065	78.4254	72.4176	57.1762	37.5896	53.702	61.3271	76.846	60.096	70.535	57.3166	85.471	90.306	64.742	74.232	79.289	67.975	70.4524	41.0427	31.8927	34.8401	60.1467	47.3373	101.021	59.541	64.171		0.00421818	64.9334
0.2381	96.494	78.022	60.273	61.0916	75.2256	59.5059	50.4233	56.8184	54.0761	79.747	77.59	67.874	65.9883	81.42	85.113	73.293	64.048	78.198	72.107	66.7527	35.3492	25.7632	33.272	52.4208	50.3389	77.513	58.703	75.75		0.00843991	64.7561
0.3571	108.272	75.715	67.89	58.739	79.8512	65.7451	52.7987	55.5434	50.4142	73.917	68.921	79.766	87.7735	73.778	84.874	96.338	70.247	80.194	64.402	78.8618	38.6218	37.5797	32.1398	55.1458	61.913	73.795	65.284	74.491		0.0126581	68.3218
0.4761	115.4	94.756	63.221	50.238	76.3515	59.2616	55.9724	60.087	60.0536	89.747	85.502	85.163	61.6301	87.714	68.566	91.071	67.711	85.816	76.816	62.0445	31.2137	34.4398	39.3671	55.3547	55.1609	106.338	80.651	81.959		0.0168763	70.7716
0.5952	113.207	98.036	85.747	58.8009	67.617	57.3846	60.4374	59.2633	65.89	95.075	95.617	76.861	54.1202	78.608	99.791	95.225	62.532	89.729	75.074	72.6876	35.1432	35.6958	28.4039	60.1892	53.4427	98.318	83.727	81.195		0.021098	72.7792
0.7142	105.727	98.306	78.042	55.511	50.5952	75.877	61.1812	60.1101	55.2902	75.227	102.137	80.796	73.4978	90.391	95.503	92.445	57.333	105.907	89.374	63.6023	34.3071	27.0811	30.1757	68.9605	68.2739	111.555	96.427	67.554		0.0253162	73.971
0.8332	104.455	87.969	80.706	46.2742	52.1279	57.2518	56.0686	67.9537	42.8852	71.879	95.374	69.827	64.2066	95.261	103.161	102.425	63.446	96.602	80.992	66.7575	34.5818	29.23	29.6304	60.3994	78.0903	103.052	105.094	74.801		0.0295344	72.1608
0.9523	121.343	96.126	96.592	48.2142	57.5704	59.2724	60.7824	63.6102	41.3217	83.875	92.583	76.283	60.7956	94.451	100.258	95.748	66.674	94.646	92.464	73.4606	33.0282	29.3565	39.1737	76.9019	72.9772	103.645	114.363	99.15		0.0337561	76.5952
1.0713	123.726	99.428	81.311	70.1495	55.3778	59.377	60.257	63.1032	55.2672	89.897	105.302	81.87	60.7833	83.469	110.002	95.319	65.009	100.78	84.645	74.6729	36.417	30.6765	31.6055	78.1312	76.4739	99.511	115.482	94.595		0.0379743	77.9514
1.1903	115.938	98.891	79.074	54.2074	58.7196	69.0436	62.6185	57.782	55.506	88.279	107.961	90.107	66.5434	87.336	113.737	114.182	56.419	106.287	99.454	74.3317	35.3918	30.5549	32.3427	69.6237	70.5631	109.639	125.751	103.314		0.0421925	79.7713
1.3094	125.99	103.524	85.882	55.4263	62.8975	52.0358	66.9505	53.6722	42.4794	89.656	101.499	102.917	78.5348	112.213	119.431	102.274	59.156	102.703	88.882	69.8314	35.0339	41.8453	33.1474	70.3878	82.895	100.253	133.697	110.441		0.0464142	81.5591
1.4284	109.127	95.613	93.507	55.9567	51.2569	51.0382	61.0955	52.8673	46.7214	91.745	101.028	110.132	65.7626	103.137	115.982	95.623	69.504	105.759	92.521	66.0116	45.9163	44.0012	40.4152	65.0482	66.3062	102.187	133.782	112.357		0.0506324	80.1572
1.5474	113.308	98.552	88.087	63.2545	51.1438	54.681	68.0033	46.6718	42.0117	93.069	96.491	110.013	74.3284	97.576	101.302	97.662	65.965	89.534	92.479	74.716	31.4954	47.35	23.8694	76.4565	64.7282	109.402	119.966	111.748		0.0548506	78.7094
1.6665	138.161	103.733	94.622	56.9629	47.1025	52.6387	56.672	58.5426	43.598	94.197	101.14	109.151	78.1618	95.622	100.383	96.004	82.642	112.703	98.549	62.6993	37.425	39.5492	26.9609	81.0789	70.1449	113.929	128.328	111.521		0.0590723	81.8651
1.7855	122.995	95.501	97.372	64.7128	55.9023	50.0473	63.5408	68.2025	41.4654	91.471	100.403	117.534	65.8325	103.549	106.04	93.572	75.09	94.422	108.834	72.7512	31.5833	42.8171	32.8981	85.1591	65.0546	110.808	134.823	128.26		0.0632905	82.88
1.9046	126.119	93.274	83.214	55.4809	59.4917	54.4229	72.1955	71.9323	46.8968	93.088	96.222	114.33	84.5369	108.245	112.698	99.532	74.067	99.156	107.794	61.1508	36.2215	38.7773	35.6579	73.3302	69.781	95.231	129.937	114.614		0.0675122	82.407
2.0236	118.156	101.05	103.576	64.1437	76.9699	53.8792	71.9446	44.8837	44.5305	105.92	104.627	96.803	80.1786	92.859	108.988	97.938	65.515	107.34	107.903	66.1855	33.5398	28.7301	25.4945	70.8626	64.1675	93.935	121.407	114.916		0.0717304	80.9444
2.1426	125.378	104.943	96.741	69.988	59.3293	62.8862	64.1142	44.6802	37.5073	101.878	109.031	93.906	72.993	109.162	108.083	110.536	81.974	102.151	108.825	66.6349	47.577	37.2307	36.6048	81.0549	74.0363	103.892	115.841	116.949		0.0759486	83.7117
2.2617	114.803	95.159	103.207	55.4068	60.7032	52.2114	59.1419	48.8575	46.2782	105.576	101.891	92.69	74.629	102.172	85.286	107.507	80.011	109.15	115.93	53.3612	40.2912	32.945	31.6903	68.5849	65.2961	91.882	120.149	114.033		0.0801703	79.6015
2.3807	114.466	93.104	88.343	60.1401	52.1646	51.2446	60.3551	48.4502	57.4351	112.089	102.166	103.834	78.3565	98.598	93.817	100.801	85.567	90.744	113.319	70.5624	34.5645	32.9013	29.4079	68.2862	63.4205	110.225	130.16	104.22		0.0843885	80.3122
2.4997	120.828	80.209	100.736	62.4312	58.1204	51.403	60.393	53.0017	47.3415	91.507	95.86	112.638	71.6934	90.118	96.132	94.733	89.35	102.088	101.845	59.3304	40.8028	35.4873	24.4258	66.1611	61.6745	115.702	130.309	115.785		0.0886067	79.6466
2.6188	117.986	95.036	93.551	66.1385	55.8664	53.3424	69.6098	55.7426	47.7571	101.667	97.309	122.022	83.4747	95.424	95.913	75.639	97.563	90.174	95.166	68.0461	33.428	42.0814	22.8033	56.6599	64.3006	113.35	109.68	105.632		0.0928284	79.4772
2.7378	115.419	104.742	98.777	63.5281	61.2437	59.1569	74.2149	57.3192	43.9213	97.849	102.632	116.987	59.8366	108.544	96.746	96.429	68.6	99.158	96.833	58.6968	32.212	38.8852	29.4632	72.3241	67.3356	95.807	133.988	111.627		0.0970466	80.7956
2.8568	112.568	96.171	95.166	76.5194	69.3182	55.2538	79.9224	58.7341	35.8145	101.126	108.282	119.59	58.395	100.862	100.572	87.894	85.766	105.798	101.413	55.3552	37.966	48.9436	20.4787	69.0221	67.121	110.435	130.98	107.634		0.101265	82.0393
2.9759	120.905	91.718	85.757	72.6203	71.7312	55.0156	74.1017	58.3033	39.4652	102.081	115.751	110.279	62.8365	111.337	102.266	93.684	91.785	89.467	98.874	51.6465	40.7309	34.4959	20.4099	70.3857	67.8128	108.545	121.022	107.856		0.105486	81.1029
3.0949	104.58	87.77	80.61	68.5604	57.0249	56.245	78.7144	53.0901	44.3781	92.126	111.845	114.335	56.2546	98.045	110.216	113.872	103.591	95.852	100.356	55.1718	49.075	34.7625	21.2024	62.2022	70.496	111.591	143.452	111.244		0.109705	81.6665
3.2139	114.372	92.707	100.824	68.1354	55.7944	61.9639	81.1667	60.6325	45.8023	120.53	106.926	120.81	60.401	81.726	107.009	102.459	86.631	101.697	99.999	56.0581	44.9203	36.9757	25.2773	66.5824	66.5565	118.11	149.345	111.127		0.113923	83.7335
3.333	108.361	95.935	98.824	63.7969	63.4909	59.7818	72.8206	56.9701	37.5278	103.56	101.34	124.513	65.0665	98.317	106.82	102.301	98.549	95.894	90.785	48.8673	54.7006	43.5738	24.2047	66.5351	59.7635	102.751	147.273	106.364		0.118145	82.096
3.452	115.789	86.581	103.27	59.0332	52.6831	51.0585	66.7586	41.0605	42.6196	118.494	113.908	109.938	64.7341	95.855	111.286	110.325	89.071	113.22	87.845	50.8669	39.8164	38.9173	22.5562	55.5124	71.6005	115.574	146.539	100.897		0.122363	81.2789
3.571	117.541	84.293	89.643	69.6908	55.0744	65.5142	58.6326	58.8527	39.4464	110.041	117.284	135.996	65.0769	88.383	111.564	102.523	95.784	111.744	96.627	47.8267	32.0803	33.7526	22.7091	63.4444	64.7405	120.187	130.684	110.563		0.126581	82.1321
3.6901	110.053	84.385	98.528	75.2554	54.4987	81.6328	64.3343	66.546	36.473	106.389	103.36	125.286	58.4862	104.223	109.543	126.794	94.687	98.818	95.421	48.655	44.8387	31.2593	23.0766	72.2477	73.3503	125.377	118.066	117.978		0.130803	83.9129
3.8091	100.804	102.295	82.685	81.1493	52.6766	86.7057	65.5557	57.2557	30.5896	113.182	107.164	118.035	69.7495	96.587	109.976	110.518	96.573	105.528	107.591	51.4403	34.8687	31.0508	16.4177	63.0379	79.5009	108.887	112.882	119.145		0.135021	82.5661
3.9281	122.245	89.606	78.361	65.5484	48.7336	75.5238	69.9882	54.0611	26.0795	112.197	107.19	128.354	78.3117	85.147	105.948	113.244	77.21	96.87	100.482	53.3071	35.3664	34.4309	23.3598	67.6978	80.1708	117.729	115.586	126.755		0.139239	81.768
4.0472	120.86	88.985	88.229	63.4672	54.5738	78.905	69.5399	45.698	27.6484	108.743	91.944	129.408	75.1037	84.855	107.866	104.901	80.051	88.372	93.677	30.9686	38.7155	37.4318	26.6006	74.0817	91.3841	104.918	134.291	124.618		0.143461	80.9227
4.1662	109.72	80.784	93.652	65.4284	53.9726	63.7175	68.0987	60.5469	33.5689	114.186	97.711	132.917	70.7723	98.382	109.669	118.738	93.478	86.589	97.864	34.398	43.1357	29.0084	35.9268	63.2981	82.8456	103.297	119.79	122.575		0.147679	81.5739
4.2852	106.082	95.861	86.855	57.4044	70.0206	63.3448	64.3866	47.0911	34.5611	106.104	106.103	113.727	56.6152	105.742	103.954	103.027	86.643	106.981	86.525	39.8267	42.7059	34.464	26.3791	63.7571	79.666	96.866	127.829	122.714		0.151897	79.8298
4.4043	106.655	90.883	77.107	71.9193	65.2316	66.2202	58.3149	56.7743	35.9927	100.62	116.885	130.917	58.7226	106.997	104.404	103.331	90.075	94.584	94.818	38.7194	37.3206	31.39	22.4873	47.6721	61.436	95.494	122.815	116.47		0.156119	78.7234
4.5233	109.475	101.406	82.837	64.6562	54.9732	56.5813	53.541	61.3903	30.0963	89.221	126.852	113.455	75.2747	88.959	106.723	99.831	94.702	107.211	95.792	50.8198	38.5944	33.5655	23.4889	56.8618	63.5168	113.508	128.267	114.269		0.160337	79.8524
4.6423	99.814	93.538	86.047	65.51	51.8421	59.4748	63.1463	64.8721	31.3084	96.545	104.936	124.416	56.651	97.002	91.314	109.931	97.752	106.332	89.112	44.208	49.643	33.6797	27.1483	51.029	64.5287	89.995	117.684	117.934		0.164555	78.0498
4.7614	114.532	106.035	93.271	77.8611	57.5269	62.4757	46.12	56.8382	29.9125	111.27	102.557	133.711	54.143	110.675	102.484	109.504	103.809	86.432	88.954	45.4954	40.9206	32.0846	29.2268	66.0565	67.8452	102.744	115.76	116.163		0.168777	80.8717
4.8804	111.95	93.136	92.506	75.9055	52.97	68.3079	59.1172	52.6226	38.7255	104.611	88.359	136.476	58.5242	112.02	112.816	120.163	109.636	92.759	87.425	48.5022	30.6727	29.194	31.1441	51.5181	49.8737	104.64	118.823	122.482		0.172995	80.5314
4.9995	112.706	97.784	94.727	74.0128	57.5311	71.7776	51.9223	60.7418	34.639	122.333	97.953	115.099	60.5335	115.475	104.171	111.224	102.38	99.078	89.486	42.6601	27.8431	34.1567	29.5677	59.1638	56.9543	108.946	116.329	126.558		0.177217	81.2769
5.1185	133.357	94.907	93.261	64.8055	60.2164	70.8282	49.1074	49.2068	26.5519	100.814	116.188	123.476	66.3487	107.093	92.395	103.852	113.555	98.821	96.522	46.7473	34.2722	34.238	16.1261	53.682	60.0761	110.436	123.632	132.69		0.181435	81.1859
5.2375	106.286	101.667	88.771	63.5594	49.3841	73.0344	50.1528	45.17	25.1991	105.316	112.917	118.409	78.2885	89.423	101.356	101.128	109.663	90.145	95.386	32.2868	39.3091	37.7071	21.9183	67.7817	67.2043	111.663	115.265	125.314		0.185653	79.418
5.3566	101.608	100.207	87.755	63.651	41.26	73.5462	60.5315	49.1572	23.2909	101.468	108.713	121.329	71.2748	88.435	106.217	107.445	104.397	95.255	102.053	29.3225	27.4897	42.3047	20.449	65.1711	69.3037	120.579	114.465	129.873		0.189875	79.5197
5.4756	111.825	96.348	90.564	70.6027	47.1064	75.8305	52.6291	50.0522	27.4309	111.364	95.324	115.305	61.2862	105.818	97.042	84.814	114.767	82.788	88.557	35.0279	32.2571	33.2567	19.8951	64.8891	64.8011	99.53	116.601	128.03		0.194093	77.6336
5.5946	100.16	96.564	97.658	71.7811	43.9815	66.9544	61.0121	53.1264	20.3729	103.434	93.184	100.535	64.6832	101.719	106.068	93.757	93.583	80.611	92.44	36.2746	27.4981	32.1232	18.0073	47.6107	63.832	97.569	106.522	123.567		0.198311	74.8082
5.7137	96.602	84.647	111.81	63.2472	43.4658	75.2681	66.2689	44.1993	25.3631	94.313	111.582	106.409	65.736	105.858	117.674	102.286	81.514	82.434	94.712	36.5703	31.8017	35.1512	18.6466	65.2033	66.6031	109.136	110.922	111.801		0.202533	77.1152
5.8327	86.639	91.217	99.287	77.8479	23.4989	68.3949	57.8796	48.5662	24.951	85.067	107.756	96.646	62.328	91.903	102.458	93.228	81.237	80.095	83.411	41.2368	18.5453	28.5453	22.7108	68.0028	59.0444	104.16	120.74	110.716		0.206751	72.7183
5.9517	96.795	80.714	103.534	78.5504	44.7486	58.2539	58.027	56.0312	23.765	86.163	115.834	103.183	53.4661	83.924	95.886	110.151	89.024	90.321	98.686	26.7241	24.1178	19.8376	25.66	59.9997	61.8365	93.491	122.98	108.54		0.210969	73.9373
6.0708	92.518	92.801	115.195	84.3626	35.0388	57.0002	58.5316	55.2317	21.5983	92.218	105.925	98.07	54.9274	87.382	111.546	107.598	96.967	87.481	92.983	36.8181	24.1824	16.4863	27.6615	48.9387	66.6828	85.736	116.278	121.405		0.215191	74.6987
6.1898	90.896	89.063	108.603	76.1681	45.3852	69.3117	58.0136	53.4024	17.97	101.252	96.996	89.509	47.7532	81.125	90.954	97.438	98.593	89.067	115.695	32.7006	23.8539	22.8522	25.3959	56.8622	61.9405	91.832	115.984	118.563		0.219409	73.8278
6.3088	94.084	79.653	85.238	66.7076	37.8607	77.3466	65.6287	39.5617	20.0574	84.316	110.725	101.788	51.0709	82.65	95.722	111.969	95.545	74.62	92.161	31.0543	18.6102	21.5291	17.0662	47.8971	59.3323	100.036	121.513	114.885		0.223627	71.3796
6.4279	101.85	85.076	104.527	61.9816	40.2336	76.8155	70.5044	38.8732	16.4681	90.123	103.725	100.249	32.2361	89.813	97.974	102.192	98.705	71.41	102.942	31.9294	19.923	19.9681	14.0605	53.6193	53.9342	102.535	113.367	119.117		0.227849	71.934
6.5469	107.577	86.123	102.05	70.9886	35.1342	55.1354	64.9502	43.2421	17.6195	94.899	86.679	83.52	27.5423	81.837	92.28	92.068	86.675	77.131	103.841	30.4054	16.9981	25.3435	15.5008	52.4261	63.5878	89.14	141.328	104.529		0.232067	69.5911
6.6659	88.614	89.289	91.907	60.7592	35.1855	54.8332	61.1797	35.3189	18.4322	87.809	97.353	92.708	23.0442	66.043	87.574	96.35	73.562	71.346	93.785	27.145	19.6116	19.1272	14.1531	51.5686	56.3153	91.665	128.3	113.636		0.236286	65.9505
6.785	92.796	91.359	103.954	62.6331	41.8467	58.0753	61.7982	50.8404	15.0082	86.868	95.037	83.831	21.0678	82.625	106.927	86.024	79.748	76.021	104.6	27.8409	19.6998	15.8279	20.7515	45.4534	64.4688	72.736	126.595	95.021		0.240507	67.4805
6.904	99.382	84.08	96.432	82.5226	41.3516	53.5888	61.2918	41.2575	10.6479	82.44	80.746	84.442	22.5564	74.236	104.343	88.851	85.059	75.545	101.182	32.0132	19.538	17.4499	16.7222	49.5692	52.8953	80.531	125.479	113.429		0.244725	67.0565
7.023	95.841	80.822	109.528	63.0525	38.1515	58.3051	54.6247	40.7915	12.0957	84.441	89.721	110.911	23.2828	78.209	92.838	99.987	84.831	77.63	94.156	30.7511	18.064	18.419	13.791	55.431	64.6478	68.197	117.513	96.426		0.248944	66.8735
7.1421	98.684	68.944	101.371	59.0863	40.552	57.5198	53.7099	44.0513	12.0097	84.745	91.973	111.451	24.0135	90.71	93.577	118.423	77.771	85.106	104.32	37.2719	19.0432	18.4545	17.1905	58.4959	62.9652	67.076	110.1	95.489		0.253165	68.0037
7.2611	89.093	86.909	105.418	63.2555	35.7452	54.0778	53.4703	36.6341	18.2593	84.635	88.493	101.464	17.7159	87.218	110.775	103.732	70.625	89.795	101.854	33.262	20.3129	17.3985	14.9771	51.2171	57.5069	59.996	105.442	96.135		0.257384	66.2649
7.3801	95.323	93.4	99.871	59.5445	34.993	42.246	55.7039	50.3553	11.2558	92.334	89.336	105.268	20.0731	88.391	103.312	102.001	67.991	73.381	91.681	31.6163	17.5016	12.9849	14.0542	43.0426	52.4904	78.96	109.557	88.625		0.261602	65.189
7.4992	91.829	89.056	95.428	64.9397	39.0188	62.8699	61.7613	39.8143	11.6088	81.156	91.134	109.545	16.6222	83.451	96.826	93.71	72.062	62.985	104.105	29.8437	11.94	10.64	10.3016	43.3561	45.5083	61.689	115.597	91.833		0.265824	63.8797
7.6182	92.227	86.206	91.074	63.1337	36.0059	68.6442	62.904	50.328	18.8809	76.886	104.25	81.885	18.6014	88.961	105.289	101.258	62.512	65.053	92.934	32.2209	21.2064	14.5294	10.3664	41.9811	49.3868	66.036	115.418	78.997		0.270042	64.1848
7.7372	89.459	89.107	99.91	66.1749	36.9584	64.6969	45.7762	53.511	15.1066	78.83	115.712	88.51	18.6864	82.57	109.929	119.539	47.576	59.418	84.674	24.3104	14.656	13.7875	10.494	36.6042	50.9108	67.815	111.366	78.842		0.27426	63.3904
7.8563	85.516	93.917	99.85	63.1456	41.1879	65.1295	55.0219	55.2434	20.1329	74.106	119.028	77.96	15.5797	78.137	118.572	108.64	58.396	72.031	101.249	33.9858	15.3936	15.3779	16.2994	34.7603	44.6921	76.362	108.018	75.687		0.278482	65.1221
7.9753	94.559	85.025	92.59	77.1342	35.8177	61.0765	51.6089	48.5688	18.3495	66.509	104.15	83.83	12.4942	75.055	107.631	99.861	59.677	59.625	89.651	27.8791	16.4152	12.8024	13.4441	29.5483	41.265	66.624	108.648	63.927		0.2827	60.8488
8.0943	93.848	94.104	108.35	71.903	32.3728	54.5043	55.1209	41.9554	16.0666	68.251	107.938	75.617	15.0265	75.081	105.657	111.808	66.48	58.487	88.297	25.596	15.7527	8.7573	13.7698	33.4121	54.9162	79.904	103.273	60.556		0.286918	62.0287
8.2134	92.489	80.013	98.546	64.768	32.0456	63.3048	52.6353	31.0721	11.0989	66.297	97.183	72.852	11.6421	71.176	102.187	107.962	61.451	62.436	97.702	25.4905	17.4085	12.1066	13.9612	32.3851	54.8919	57.541	91.159	62.122		0.29114	58.7117
8.3324	86.694	80.65	88.408	67.5471	23.7385	49.2922	47.7232	32.6241	11.8776	70.404	104.434	50.846	12.0518	68.838	101.594	97.234	46.067	57.262	90.597	24.9632	11.6259	15.9929	13.3983	29.2992	47.1227	52.248	84.929	54.675		0.295358	54.362
8.4515	91.212	90.299	91.496	62.6036	27.8257	52.7911	48.0564	33.3574	10.5732	72.803	101.051	48.989	11.9231	63.676	98.402	85.419	62.804	62.478	86.332	24.1359	10.4031	11.7861	12.6602	33.9766	46.7074	35.725	102.856	57.63		0.29958	54.9276
8.5705	80.288	79.566	95.286	54.0656	19.6159	56.3837	47.9653	32.2043	12.1576	65.124	97.7	46.702	9.7885	61.03	102.206	83.824	44.031	56.699	89.073	22.714	14.1698	9.111	15.7975	44.1574	61.2783	32.914	95.767	64.739		0.303798	53.3699
8.6895	88.543	82.418	87.741	55.2146	19.0813	50.4687	34.8346	28.0917	5.5037	75.14	96.441	40.536	5.697	59.85	82.575	93.03	52.41	57.639	90.277	24.635	14.1673	15.7288	13.6998	23.054	43.0308	38.153	103.74	45.566		0.308016	50.9738
8.8086	79.968	83.924	80.516	53.0177	13.3061	50.5673	43.2902	27.4883	8.6212	67.022	100.25	33.398	8.9055	39.926	94.304	80.37	57.078	51.501	90.969	28.3586	12.336	14.9636	7.1199	27.5115	58.6545	34.776	106.822	49.968		0.312238	50.1762
8.9276	71.648	65.029	82.755	54.3137	14.4946	46.2039	37.3531	19.7345	4.4008	67.726	88.274	27.081	10.7091	40.955	91.559	95.79	65.41	57.64	77.309	22.2541	9.0602	11.4163	7.9466	24.7976	52.4942	31.561	111.104	53.804		0.316456	47.958
9.0466	79.304	85.847	65.558	43.9649	22.5191	41.858	49.2993	20.2495	5.1375	70.155	95.278	25.917	9.648	36.909	88.782	91.722	61.604	51.467	84.796	24.4518	10.5685	16.6478	12.1192	28.1825	52.4833	21.801	91.595	51.709		0.320674	47.8419
9.1657	82.078	83.698	68.449	24.9687	15.9172	36.5061	43.4942	21.2399	7.8429	59.812	94.446	22.462	4.9073	34.746	87.479	85.686	51.175	44.599	76.698	19.354	7.3275	11.9301	12.3831	29.9194	63.1345	28.668	100.256	36.049		0.324896	44.8295
9.2847	70.517	87.111	75.771	27.8174	16.7317	44.1689	43.2093	23.1166	9.9075	57.361	89.392	18.762	2.9614	22.063	89.252	90.046	50.138	46.08	76.206	15.6951	9.1427	14.8028	9.4354	22.8062	65.5981	23.724	106.307	34.49		0.329114	44.379
9.4037	84.906	91.299	67.169	28.2593	15.3756	43.2869	43.2827	20.972	3.8878	62.17	93.832	23.915	6.242	20.104	82.483	74.159	43.237	41.762	78.832	22.4901	9.1988	8.847	9.0999	31.3369	57.4022	26.052	94.99	34.771		0.333332	43.5486
9.5228	74.479	94.47	83.359	21.7581	13.9603	45.2853	40.1056	16.9632	7.048	49.954	81.499	24.966	3.6395	30.333	75.154	85.625	48.111	42.977	77.569	24.1351	8.7868	12.6807	10.3478	19.577	49.3978	16.817	110.121	33.281		0.337554	42.9429
9.6418	80.602	82.303	65.975	23.5208	12.7945	50.4724	47.0067	22.311	8.5638	62.547	104.709	21.766	4.6659	22.674	72.158	86.953	40.976	52.635	75.859	16.079	5.8834	10.056	11.5308	20.1974	39.5942	20.141	82.345	25.579		0.341772	41.7821
9.7608	80.488	75.42	74.827	26.7786	8.8983	45.1295	34.7056	28.1271	4.8122	61.957	87.345	25.944	6.0543	25.508	63.307	78.363	41.323	36.338	72.173	16.0175	9.2151	5.1303	12.4744	21.2176	54.8626	20.136	72.628	27.653		0.34599	39.8869
9.8799	72.054	82.301	88.075	18.1839	9.1062	41.7583	34.3865	19.5166	9.054	36.021	70.13	19.84	2.0978	21.479	63.573	77.965	43.316	43.308	80.822	17.6834	4.0098	9.885	9.1484	22.6715	49.746	24.281	69.101	30.319		0.350212	38.2083
9.9989	74.187	78.6	78.76	21.4325	8.4756	46.8728	28.2506	21.2255	2.8139	48.007	87.998	22.036	1.6637	23.565	56.956	81.086	50.1	31.963	71.886	20.6503	9.9141	8.9396	9.2803	21.2887	49.8549	19.614	61.678	29.641		0.35443	38.0978
10.1179	77.567	79.04	80.581	21.9535	7.1451	44.8067	29.4918	25.9344	4.0592	39.066	79.934	19.714	4.4703	23.865	56.675	78.743	43.583	42.999	77.7	20.8073	9.4475	9.0684	10.3668	22.8759	44.5581	21.178	53.628	30.922		0.358648	37.8636
10.237	79.207	70.047	75.878	12.1444	9.7401	48.0193	24.5888	26.4351	5.5449	34.777	73.55	25.416	2.3424	22.796	43.946	80.706	38.256	40.615	63.175	14.2445	6.298	10.156	8.3415	28.1267	52.5391	19.038	45.415	14.875		0.36287	34.8649
10.356	78.844	77.028	65.473	17.2195	10.7069	37.0325	29.3873	24.5561	8.7156	24.797	74.896	25.661	4.5951	23.697	42.337	81.327	34.078	41.842	62.983	15.0121	5.8061	8.7685	8.4815	26.32	48.7204	15.415	38.861	22.021		0.367088	34.0922
10.475	90.202	83.975	58.679	12.7269	11.4243	39.8924	25.0276	22.2239	7.6533	32.154	79.824	22.56	5.3519	18.981	46.261	76.439	25.221	35.136	66.356	16.4644	9.6645	8.8215	4.666	23.003	44.2804	19.637	46.042	25.706		0.371306	34.2276
10.5941	98.412	80.1	56.48	13.4767	11.5753	45.3505	21.9913	25.7939	4.0292	22.956	67.644	14.83	2.2894	23.85	52.494	72.405	19.963	38.063	71.274	11.2985	12.7099	4.5365	5.5917	20.338	47.3744	17.856	44.944	33.158		0.375528	33.5994
10.7131	83.473	83.838	45.666	15.4403	11.8592	36.5759	15.8766	22.8589	3.5171	19.366	65.548	17.642	2.0164	20.908	42.552	68.182	21.826	37.603	72.93	14.6898	7.8824	8.9269	4.9351	18.9902	35.2202	23.295	39.656	24.842		0.379746	30.9327
10.8321	77.335	75.154	38.497	12.277	14.5746	37.383	20.8756	21.3479	3.5837	18.606	56.76	24.556	3.9746	23.331	40.438	72.314	18.169	41.323	57.618	13.331	6.701	5.5864	3.7364	19.8181	34.5093	21.423	39.372	22.123		0.383965	29.4542
10.9512	81.361	77.981	29.398	18.3889	12.5338	25.7969	27.3873	17.6896	7.4559	16.042	57.973	24.321	4.4179	16.814	49.179	70.195	23.489	42.219	74.179	15.0112	4.862	4.4835	3.772	18.4568	41.1114	20.106	43.522	26.211		0.388186	30.5128
11.0702	76.304	79.176	29.18	12.7591	9.4902	23.145	24.6031	19.9907	4.3047	12.358	47.921	18.606	5.7321	17.862	44.84	55.944	23.931	26.153	58.04	13.5069	5.1839	4.8024	4.0312	17.5919	34.8013	16.873	38.867	19.816		0.392404	26.6362
11.1892	80.264	81.661	23.317	18.5891	6.5004	23.3201	23.5272	19.6754	5.121	15.703	42.39	14.788	3.3504	17.841	40.942	60.309	15.761	30.747	66.105	17.2753	8.8676	6.0754	5.8376	18.7005	37.5586	12.529	33.46	14.294		0.396623	26.5896
11.3083	71.217	84.312	16.256	18.1456	8.8699	14.6811	23.262	15.4409	3.3338	12.86	39.242	11.042	2.2671	20.466	35.659	46.63	14.785	36.537	55.046	11.0396	5.7396	1.8278	1.4531	21.0458	41.1938	14.431	26.125	15.73		0.400844	23.8799
11.4273	65.506	95.43	19.281	14.3661	7.903	18.8529	18.2406	16.4868	5.7579	23.402	32.122	10.058	5.569	18.025	34.131	50.328	11.639	29.837	56.689	11.2771	11.3323	5.1774	1.2674	16.3903	34.4019	18.907	29.954	11.489		0.405063	24.065
11.5463	66.674	82.026	14.815	9.7546	14.1368	21.1027	18.2136	23.2346	6.1257	24.567	35.21	3.723	3.0952	16.076	33.225	48.122	11.773	34.895	61.606	10.0006	9.0207	4.4215	3.4131	18.9113	44.3159	14.325	28.823	12.811		0.409281	24.0863
11.6654	78.967	80.127	15.094	11.9484	11.2843	17.2569	14.5105	15.6692	4.5423	22.353	31.693	9.442	2.5007	14.36	31.492	37.774	20.804	34.371	41.601	10.8469	3.9108	3.3693	3.5737	16.6823	29.1192	12.857	32.832	9.729		0.413502	22.0968
11.7844	60.267	88.247	8.739	12.136	13.521	10.4647	13.0389	13.1963	5.7549	22.761	32.961	8.758	2.3498	15.318	45.264	29.388	25.41	37.488	49.385	10.0297	3.7084	4.6434	1.4209	16.9155	34.4061	20.902	30.122	12.256		0.417721	22.459
11.9035	52.176	84.387	9.3	10.9912	4.8474	17.4538	8.9621	10.9059	9.5156	22.701	22.509	7.472	3.9354	15.309	37.219	29.171	18.311	26.691	57.317	10.4003	4.062	4.4589	2.3714	18.2395	29.4978	25.247	21.834	9.677		0.421942	20.5344
12.0225	59.818	96.145	9.938	11.1727	9.7855	18.7419	7.4369	7.0026	9.29	18.731	29.446	5.928	0.6758	14.943	43.48	27.558	13.49	23.811	55.586	8.6928	5.2044	4.9775	2.9711	10.3842	24.8858	18.383	18.333	8.16		0.426161	20.1775
12.1415	72.113	98.73	11.579	9.0959	16.0657	15.3318	8.6294	9.0841	8.427	19.748	29.587	3.588	5.5832	11.874	43.184	23.432	11.664	25.702	35.463	13.3067	4.918	5.8481	1.4303	12.6535	25.0357	17.131	15.417	8.015		0.430379	20.0942
12.2606	61.863	91.947	12.341	11.6515	7.9677	22.5968	9.149	9.8403	6.4805	18.251	22.98	2.419	2.6826	11.424	26.591	23.914	19.564	30.565	33.365	12.5214	1.5142	2.2889	2.4553	9.145	25.9788	12.907	18.576	6.058		0.4346	18.4656
12.3796	60.824	86.774	10.506	5.5342	8.7509	12.4331	7.0344	9.3126	9.9469	19.125	19.523	5.558	3.7902	9.277	31.763	18.678	24.166	25.923	37.285	13.0098	3.65	2.4122	2.9453	9.309	23.6142	14.114	15.125	7.417		0.438819	17.7786
12.4986	47.41	81.745	10.418	6.5508	10.0809	12.2161	10.5731	8.339	9.2506	19.196	21.114	4.495	5.2351	9.109	29.196	22.83	17.484	24.935	37.12	9.9176	1.7913	2.5729	1.5899	8.1071	28.9433	13.697	13.467	2.414		0.443037	16.7785
12.6177	49.373	85.294	12.904	6.9129	7.9751	8.9289	9.8861	7.2492	4.592	14.268	19.705	5.239	3.3117	18.264	31.773	18.311	13.612	20.366	31.2	9.3934	7.0064	3.1662	0.2696	11.8833	26.7594	12.96	18.228	6.568		0.447259	16.6214
12.7367	69.293	67.384	12.977	7.4018	6.9421	8.9496	11.8	7.8167	5.7417	13.989	32.743	3.702	3.9145	11.161	19.554	17.004	13.627	23.995	28.474	10.2021	4.0324	1.3671	0.9679	10.8044	27.341	14.987	13.315	4.87		0.451477	16.227
12.8557	54.014	75.447	8.73	3.0953	7.2027	14.6219	8.9908	7.0047	7.2105	18.695	29.637	4.059	2.1401	14.315	21.89	14.63	16.941	27.281	31.451	10.7175	7.1235	3.0221	2.3416	8.3659	29.8572	14.263	10.011	4.653		0.455695	16.3468
12.9748	51.03	70.842	11.934	5.1692	8.2636	11.0534	7.9245	9.2196	5.3515	11.474	19.002	3.955	3.3707	14.747	24.368	14.37	18.701	31.468	18.677	11.9399	4.9773	2.0451	2.0817	7.945	28.9966	12.575	12.58	6.173		0.459917	15.3655
13.0938	53.713	77.888	10.004	6.1721	9.6511	13.1111	10.7948	6.3299	8.6961	17.379	22.854	4.35	1.6601	11.34	17.041	15.958	17.101	22.55	20.858	12.7205	3.7147	1.9183	1.1399	10.8978	30.459	11.29	8.893	7.105		0.464135	15.5568
13.2128	41.447	63.448	10.829	6.1658	10.4779	7.5611	6.9072	3.6243	7.378	10.565	29.008	5.176	1.4028	9.262	14.56	21.153	16.573	20.376	25.225	8.1844	2.2963	3.0433	3.811	10.6418	29.2206	13.294	7.529	7.328		0.468353	14.1603
13.3319	38.466	55.717	5.519	7.6321	14.316	8.1547	8.3735	6.5104	4.7474	14.644	28.476	2.356	2.6423	8.016	12.342	12.789	13.918	24.674	23.578	13.5725	4.8584	0.1468	1.4855	8.0447	23.9542	10.922	8.823	3.304		0.472575	13.1422
13.4509	38.864	48.27	8.638	8.5555	15.4227	12.253	9.8976	4.3784	6.9465	12.544	25.274	5.729	1.7288	5.384	14.964	14.057	10.223	23.869	22.958	12.5384	7.902	5.2581	1.2026	8.1313	24.3136	9.725	7.882	3.612		0.476793	13.2329
13.5699	32.112	42.999	12.823	5.2215	16.2255	12.5042	11.4041	10.3141	2.4717	9.258	20.82	4.154	0.6778	7.056	15.365	13.955	15.73	22.297	22.857	8.67	3.4633	1.3968	3.1006	8.5587	19.259	12.807	6.59	2.829		0.481011	12.3185
13.689	34.813	40.919	12.439	4.4064	16.6924	16.4137	7.1584	5.7597	3.9588	9.622	25.881	2.244	4.7946	5.333	16.806	18.505	13.404	17.156	24.77	10.347	4.1845	2.3046	1.9382	8.5181	26.1663	10.872	8.582	3.86		0.485233	12.7803
13.808	28.6	37.169	9.055	6.6101	19.934	16.8051	11.2024	4.7479	2.7431	8.538	22.612	4.955	1.8727	5.451	22.322	16.199	10.227	20.127	19.923	10.0202	3.6247	4.2561	3.1945	9.2675	25.1629	13.534	2.747	5.762		0.489451	12.3808
13.927	39.133	33.492	17.023	7.7374	11.7942	18.5983	12.0243	5.9589	1.1762	11.265	29.149	6.156	2.6468	7.997	21.24	10.351	13.905	17.156	19.453	7.8628	2.5162	2.3593	0.688	14.3774	25.7263	11.976	5.65	6.147		0.493669	12.9843
14.0461	36.161	22.918	9.341	8.3359	8.0344	7.3725	7.966	5.3173	3.5596	11.318	29.243	5.104	3.0901	6.036	17.504	14.095	12.048	26.738	18.215	8.5039	1.5656	7.5683	1.8374	7.9226	25.214	8.503	6.745	3.941		0.497891	11.5785
14.1651	29.8	22.7	5.313	4.294	5.7044	18.0544	6.7445	3.9385	2.7885	10.009	31.238	4.164	0.5834	6.542	22.986	16.334	15.45	19.266	19.351	5.2417	0.8044	4.347	0.6939	10.2107	17.4374	10.058	6.259	4.377		0.502109	10.8818
14.2841	42.905	24.5	6.615	5.7737	6.3658	13.2343	6.3537	2.4063	3.6422	15.556	14.964	2.704	0.9291	2.188	16.78	13.414	11.78	15.608	15.415	7.8332	3.4743	2.8601	2.8787	5.4546	22.9181	9.108	7.064	2.794		0.506327	10.1971
14.4032	34.492	24.864	11.754	7.8935	7.3843	11.2626	6.8224	1.8469	4.4272	20.077	14.718	2.789	2.5231	6.224	17.728	14.865	12.355	16.274	22.397	5.5999	1.6913	0.6466	2.768	7.7757	20.3617	8.414	2.795	5.121		0.510549	10.5668
14.5222	25.794	20.349	10.085	6.8831	5.51	14.9521	7.6335	2.1409	4.127	10.109	10.225	2.398	3.9257	2.278	16.265	12.476	12.321	15.525	15.618	4.3776	4.9425	0.9641	3.0624	7.9456	17.7987	9.008	3.914	2.747		0.514767	9.04911
14.6412	45.961	18.757	9.352	3.2596	7.93	12.2236	8.0221	2.5531	1.8452	11.55	10.981	2.587	4.8124	3.694	15.891	17.565	7.332	16.123	18.25	8.6574	2.6633	2.3544	3.0745	8.7047	18.9497	6.649	2.584	1.855		0.518985	9.79218
14.7603	41.578	15.039	8.271	5.0544	8.6752	9.9993	11.3486	4.541	4.0557	9.734	9.775	2.662	2.9156	3.295	16.143	11.657	7.94	13.956	18.022	10.1757	2.41	3.5684	4.4425	9.9732	14.0485	5.294	4.169	3.259		0.523207	9.35722
14.8793	38.633	18.685	6.886	4.7798	6.1908	11.1419	9.1391	2.3526	1.1913	8.968	9.646	3.444	2.0351	7.017	13.954	11.189	7.568	13.949	15.874	7.2415	1.8372	2.2975	3.5857	11.3166	15.165	6.6	5.791	2.649		0.527425	8.8974
14.9984	38.239	13.251	5.364	5.1275	9.6827	8.8979	6.014	1.5312	2.7054	14.072	12.649	2.343	4.2913	5.184	12.64	15.715	13.092	23.145	16.554	6.1332	3.6361	5.043	3.2579	9.4278	12.9764	8.128	3.666	1.923		0.531647	9.45319
15.1174	24.177	20.255	5.436	4.0842	8.0245	5.8279	7.2253	1.5588	3.8084	13.404	15.804	3.742	2.2217	6.846	14.932	14.416	6.905	15.959	23.436	6.7748	3.5427	2.0693	2.9974	9.2897	15.3776	8.365	3.842	2.53		0.535865	9.0304
15.2364	23.114	19.296	3.034	3.4985	5.5018	5.8687	3.5293	3.7697	3.6289	10.107	8.381	0.366	2.6552	4.238	12.165	9.035	8.834	14.619	17.888	6.009	2.3158	4.6312	2.4296	6.1295	17.607	6.299	5.619	4.818		0.540083	7.6924
15.3555	12.466	22.549	5.374	3.4626	3.6335	3.3948	8.7051	2.7364	3.9744	14.693	15.81	3.608	1.7016	4.276	11.035	9.638	4.996	14.9	20.486	9.5684	1.9137	1.3686	1.1484	6.1909	20.5154	13.209	4.361	1.485		0.544305	8.11428
15.4745	20.989	16.951	4.005	3.1691	7.2173	4.1167	3.6046	4.5607	3.4978	17.419	15.12	5.08	5.3031	5.488	12.479	9.351	3.922	13.6	21.293	11.4039	3.1355	1.3752	2.2789	6.5702	17.1893	10.805	4.884	3.796		0.548523	8.52158
15.5935	17.321	17.052	3.948	4.0182	9.1462	7.1647	4.7931	6.898	6.2177	23.329	19.569	2.86	4.5096	3.635	15.309	8.714	3.004	15.174	20.839	6.5723	5.0648	1.454	3.9783	5.6046	19.7377	6.036	4.268	2.877		0.552741	8.89622
15.7126	18	16.877	3.858	4.9175	6.5596	6.1035	3.2256	2.9432	3.4341	16.28	16.774	0.652	2.1027	9.434	15.727	13.953	6.193	12.523	30.236	8.4077	4.0752	0.4637	1.2166	3.3573	17.0875	6.439	6.259	2.244		0.556963	8.54797
15.8316	23.707	14.931	4.651	2.7717	5.6416	2.632	2.7319	5.4498	4.6291	10.734	14.066	1.609	1.4428	5.175	12.707	13.401	4.647	8.372	12.812	8.9292	2.908	2.9173	3.3069	4.4403	10.4993	7.102	3.85	2.417		0.561181	7.0886
15.9506	12.531	15.245	3.046	6.8987	5.1647	5.2271	8.2911	2.6163	2.0338	11.909	14.94	2.616	2.6016	5.382	11.308	14.269	2.009	11.057	12.861	11.1822	2.0176	2.423	1.3293	5.3841	17.251	9.582	3.391	4.487		0.5654	7.39477
16.0697	11.499	10.29	5.086	7.3069	8.0918	8.345	5.2626	2.973	4.8847	12.635	17.34	5.639	1.6639	3.399	13.858	11.639	1.698	10.105	13.257	6.9511	2.7887	2.794	1.8138	3.2098	16.1053	9.468	4.291	2.205		0.569621	7.30713
16.1887	15.347	11.1	3.072	3.4928	7.104	6.0192	4.8308	6.1679	5.4224	7.76	11.007	1.514	3.9873	2.983	13.967	12.354	3.798	9.253	14.517	8.4559	2.1042	0.5723	2.2559	6.2923	17.4815	5.162	3.277	3.056		0.573839	6.86977
16.3077	18.222	9.41	2.941	7.8384	3.1745	5.2705	3.6221	4.131	3.9881	11.187	9.779	1.545	4.5897	3.519	14.228	13.211	2.077	7.972	11.257	9.892	4.4136	1.5331	3.4473	3.3935	14.4623	8.762	2.16	3.24		0.578058	6.7595
16.4268	18.684	15.162	2.987	11.6599	5.402	6.1086	1.8956	7.7905	3.2992	10.524	11.862	4.437	2.1282	2.769	14.502	9.692	6.279	11.035	11.784	8.5405	5.3333	2.1666	1.4144	5.7636	17.0508	9.393	3.838	3.453		0.582279	7.67694
16.5458	15.348	12.097	5.145	4.5282	6.3072	4.7815	2.7444	5.7598	4.303	6.271	12.538	1.79	3.2507	4.392	9.063	8.138	5.641	14.553	13.389	6.6912	1.9707	1.7079	5.1736	2.9397	26.4347	9.589	5.782	3.043		0.586498	7.26327
16.6648	18.194	10.444	5.799	6.6282	5.6808	6.1327	1.9646	3.1292	1.797	8.724	7.372	1.387	2.42	3.097	15.102	11.834	8.649	9.912	8.294	7.2756	2.5973	1.5007	6.2975	4.796	19.9499	4.694	3.479	4.935		0.590716	6.8602
16.7839	13.972	13.107	3.383	4.3663	10.8693	6.7158	2.0746	3.7968	3.227	6.684	10.95	4.669	2.5442	2.165	18.091	11.558	5.154	9.45	12.23	6.9687	2.5018	1.6029	1.0814	3.5791	27.0596	5.815	3.883	3.764		0.594937	7.18795
16.9029	11.349	15.451	4.787	3.9126	7.2839	7.4153	7.4399	4.7236	9.3887	11.23	6.691	2.608	3.2524	4.744	13.508	11.355	3.948	7.919	9.369	8.3833	2.657	2.4273	3.9111	3.2957	18.4708	6.704	4.289	5.47		0.599156	7.2137
17.0219	15.506	17.725	3.721	6.4651	10.8703	5.4252	3.2907	2.6928	4.8911	6.395	8.24	3.26	1.0338	3.93	14.065	8.482	5.225	10.151	10.927	8.4372	0.9939	2.1951	4.3606	5.3347	15.5494	8.804	2.751	1.34		0.603374	6.85935
17.141	18.822	12.992	3.946	4.4622	3.7824	3.4715	2.3118	4.2017	8.9027	10.807	5.441	3.737	1.7985	2.659	13.198	15.71	4.288	8.368	13.12	5.8181	3.1815	3.0049	1.1403	6.6002	11.5597	6.909	1.121	3.927		0.607596	6.61716
17.26	17.751	24.96	2.459	5.4268	7.073	6.5565	4.2698	6.6248	4.6435	7.906	7.588	2.425	1.4748	3.124	11.017	8.961	4.391	4.082	9.539	6.8299	2.4972	2.2953	2.3412	2.8942	11.2014	2.551	2.737	7.483		0.611814	6.46794
17.379	17.907	25.367	3.01	4.6741	4.7179	4.2517	3.9286	3.997	4.8856	9.676	11.563	2.601	1.8007	3.609	10.497	11.28	2.499	8.677	13.864	9.6385	1.5819	1.8813	1.9012	4.9817	8.1748	5.981	3.226	1.915		0.616032	6.71739
17.4981	11.051	18.079	3.411	11.5056	3.2382	7.0891	3.0196	3.477	8.3629	11.248	11.52	1.116	2.6257	3.798	12.769	7.142	1.437	6.493	9.575	8.2433	2.8671	2.8981	2.947	4.5847	10.7813	8.525	6.876	3.115		0.620254	6.70695
17.6171	14.526	19.553	4.035	8.2645	4.6227	10.1332	1.1306	4.1241	6.9915	14.831	10.522	2.905	2.3182	2.162	14.603	8.252	3.407	3.31	7.503	11.8932	3.9757	1.7459	1.9782	2.1709	6.9297	15.301	3.466	2.437		0.624472	6.89612
17.7361	16.789	23.054	6.252	5.6301	5.2122	5.0657	5.7748	3.5631	5.9272	11.979	17.737	3.424	3.6086	3.012	9.166	11.448	3.712	4.744	11.799	8.9038	3.4237	3.1172	0.825	6.3157	8.8157	8.828	1.642	3.042		0.62869	7.24324
17.8552	15.697	13.585	6.349	5.6748	6.5623	9.5097	4.8939	4.2671	4.4588	10.296	9.244	2.033	1.4279	2.253	12.17	12.007	3.859	6.431	7.097	5.933	3.6636	4.6446	1.0197	3.6839	11.3203	18.517	1.436	4.57		0.632912	6.8787
17.9742	19.58	11.02	2.225	5.4953	3.0478	11.8534	2.4271	2.4502	4.2088	9.482	15.696	1.486	2.0658	5.275	16.016	5.604	7.026	6.028	12.914	4.0543	1.7085	2.4892	1.9937	5.5805	8.9196	15.406	3.358	1.796		0.63713	6.75736
18.0932	20.065	12.287	5.59	5.6775	2.938	9.9847	5.7547	5.4825	4.7857	7.434	11.574	3.102	2.532	1.776	16.989	5.667	6.086	5.85	8.558	6.2182	2.0618	3.4608	1.8849	8.2407	13.0443	14.787	4.42	4.198		0.641348	7.15889
18.2123	11.836	8.673	4.285	3.9325	7.5562	7.9577	3.3401	2.4565	6.7376	4.945	8.182	4.801	5.06	2.293	12.931	5.184	2.517	6.295	9.254	6.3075	2.7955	1.2908	2.5208	5.7502	13.781	16.022	3.041	3.579		0.64557	6.19016
18.3313	13.669	8.588	3.334	2.3936	9.5915	5.2353	2.6784	3.2177	2.1629	8.529	12.111	4.234	2.8083	1.514	9.993	10.344	4.435	4.596	8.558	9.8593	2.1264	0.8641	2.5852	0.6366	18.6266	19.131	5.949	2.654		0.649788	6.44375
18.4504	11.704	10.303	3.857	4.5071	6.5117	10.2695	3.5697	3.1737	3.9388	5.356	4.988	1.598	3.366	1.7	16.203	9.611	8.223	5.069	5.806	4.373	2.6946	0.9894	1.5108	1.7124	7.31	13.264	3.5	3.208		0.65401	5.65417
18.5694	12.821	7.404	6.794	3.4805	3.8872	9.8543	5.2565	3.2784	1.7775	10.85	9.524	1.144	3.5199	0.817	13.329	10.651	5.799	2.536	7.595	6.0175	3.41	2.0174	1.3516	2.8452	12.9186	14.912	2.873	1.913		0.658228	6.02059
18.6884	20.664	11.103	9.387	2.7479	4.2805	6.0583	7.1597	1.8925	3.2762	8.375	9.63	4.225	3.1758	3.135	18.297	10.216	6.377	3.163	11.819	7.1459	3.6656	2.0537	3.5676	2.2851	17.7585	10.905	4.179	4.013		0.662446	7.16269
18.8075	13.853	7.028	5.283	4.4947	9.3798	5.021	4.5454	6.2982	3.1333	7.998	9.666	4.367	4.6387	4.654	9.732	7.424	5.139	11.217	7.691	1.9212	3.4237	1.1395	1.6142	2.1184	16.0294	10.103	1.751	0.801		0.666668	6.08802
18.9265	14.181	5.261	5.09	3.4019	6.1146	8.3689	5.7417	3.7151	1.9114	8.07	6.881	2.305	4.1668	6.013	11.385	9.423	6.39	6.78	7.625	5.2172	4.185	1.7041	1.3147	3.079	17.1877	16.793	4.345	2.458		0.670886	6.39672
19.0455	10.196	10.455	3.055	3.4614	6.4677	5.0223	4.6266	5.6288	3.398	7.555	9.562	2.045	4.5832	2.204	10.546	4.64	3.035	6.143	6.838	3.4582	3.7614	3.5511	2.9098	3.3704	15.8539	11.397	3.348	2.804		0.675104	5.71128
19.1646	9.662	7.766	3.846	1.4042	3.2959	4.6485	5.3177	4.5947	3.352	8.202	9.765	2.394	2.6381	1.102	7.531	5.055	2.007	5.538	4.03	7.1078	3.4333	2.635	1.6087	0.503	16.5771	9.586	4.285	4.386		0.679326	5.08111
19.2836	9.013	4.011	4.249	2.1671	4.8275	5.4976	5.7589	4.7252	3.9928	8.857	7.693	4.653	8.5306	4.499	7.824	4.016	3.221	2.709	7.002	3.6224	3.1789	5.4851	2.87	6.8483	10.0185	10.15	2.693	3.927		0.683544	5.43
19.4026	5.434	4.34	5.557	0.9652	8.6633	4.6759	10.8202	7.8609	4.2538	6.214	5.31	2.997	6.0357	3.644	6.101	6.147	3.266	4.226	5.909	4.3804	2.4565	2.6225	3.4339	4.537	7.4294	15.03	3.863	6.542		0.687762	5.4541
19.5217	9.962	10.156	2.852	1.5471	4.2394	6.0148	10.6867	7.0154	1.6035	9.642	5.786	4.112	4.2993	1.523	7.822	7.205	6.914	4.775	7.126	6.7448	2.8927	1.7	1.6293	2.787	8.7319	12.18	4.551	3.549		0.691984	5.64453
19.6407	9.765	5.251	2.705	2.9338	4.4949	3.2295	5.092	9.4321	2.4076	9.695	4.462	3.651	5.0989	2.129	8.655	5.708	4.851	4.29	2.932	8.2769	6.2888	2.7363	2.6456	2.8979	9.0275	11.388	4.235	4.341		0.696202	5.30785
19.7597	9.801	5.039	5.179	4.1589	8.2237	4.5581	3.7645	4.517	2.6799	4.873	6.111	2.895	4.379	2.946	4.682	5.953	4.35	3.742	3.687	4.5427	4.2774	1.8226	5.78	4.6994	7.3182	14.255	3.596	4.938		0.70042	5.09887
19.8788	10.256	4.754	3.765	4.1078	7.8805	5.9128	6.2773	8.6008	3.8592	9.241	8.635	5.11	6.0245	1.376	6.599	5.861	7.357	2.451	6.473	6.5367	4.1328	1.6719	2.5129	4.9729	6.6687	18.635	3.494	3.833		0.704642	5.96424
19.9978	9.514	6.468	1.926	4.5682	6.9981	6.6846	3.3982	5.0557	0.898	3.072	7.886	5.118	7.4335	3.762	4.666	9.445	5.188	3.577	6.312	4.1007	2.008	0.7276	0.6561	2.0538	9.1058	15.086	3.801	3.518		0.70886	5.10812
20.1168	10.55	4.132	4.211	3.9317	10.3132	7.8372	3.8399	4.2842	3.3589	5.097	4.072	6.242	4.3157	2.807	7.233	7.851	3.371	5.364	3.269	5.7728	2.4833	2.6162	0.3276	2.4597	8.5152	20.905	3.947	5.688		0.713078	5.52838
20.2359	12.792	4.821	4.779	3.5102	4.4242	10.3161	5.4579	3.2867	1.6612	5.574	4.561	7.832	4.8853	5.516	4.483	4.763	5.752	7.619	5.17	5.018	4.1375	2.2492	5.9126	4.6429	6.0098	14.804	4.545	3.582		0.7173	5.64659
20.3549	15.657	4.167	6.284	3.5721	6.6391	4.5206	5.9376	4.4484	2.7926	2.427	7.926	4.588	3.9765	2.618	7.049	10.257	4.943	7.556	3.924	6.3089	2.2229	2.0309	0.9933	4.9782	4.0352	9.947	3.859	6.31		0.721518	5.35601
20.4739	6.732	5.352	7.377	2.5914	7.5171	5.5708	5.5186	4.1472	0.262	8.308	8.248	5.111	2.3409	2.335	4.195	8.674	2.896	1.57	11.01	4.7777	4.609	1.7873	2.1252	3.9636	4.7807	10.158	4.925	5.028		0.725737	5.06823
20.593	8.59	3.267	8.697	3.9413	3.2518	7.0949	6.4184	5.7179	2.5722	2.146	4.901	5.11	3.1212	4.091	5.981	5.321	5.355	2.839	3.791	7.2933	5.2204	2.7193	2.9647	1.1808	7.709	12.431	6.901	2.853		0.729958	5.05283
20.712	7.512	5.22	5.113	5.1767	2.6462	8.6816	6.7819	7.8665	1.0826	5.585	9.378	3.44	2.7941	2.896	10.004	8.772	4.582	1.681	7.047	7.6381	6.4882	3.2888	3.2302	4.1236	8.2792	11.401	6.152	6.694		0.734176	5.84124
20.831	10.131	4.739	8.265	3.4432	5.2415	7.1801	3.4928	7.0602	0.2538	8.281	14.158	6.38	3.7069	2.416	7.161	5.382	2.071	2.622	5.467	3.8715	2.7088	2.0993	4.678	4.1778	5.6848	13.247	4.872	8.572		0.738395	5.6201
20.9501	4.993	7.039	5.418	3.5167	2.1549	5.9845	4.6124	3.8879	2.1686	4.884	10.743	4.294	3.2249	0.599	3.895	5.33	6.127	2.036	2.994	3.5698	4.325	1.3823	4.2672	2.0515	5.7613	14.076	5.649	9.235		0.742616	4.79354
21.0691	9.635	8.529	3.164	5.1541	2.1361	10.0997	4.2129	4.3158	2.5822	5.978	6.67	8.18	3.6315	5.873	2.499	5.659	5.432	3.176	2.995	6.2347	4.7164	1.669	1.862	2.5067	6.3283	11.836	3.127	9.032		0.746835	5.25837
21.1881	7.449	10.642	5.109	6.3786	3.1224	4.9189	5.1393	7.6847	0.7569	5.323	6.744	4.49	3.4265	5.393	4.909	3.592	3.75	3.52	4.991	11.8346	3.4705	3.8754	3.8623	2.5905	10.2421	13.445	5.728	10.857		0.751053	5.83017
21.3072	12.693	4.782	2.875	3.647	2.0518	4.3609	4.5728	10.8075	4.4071	6.585	10.611	7.719	6.963	6.706	4.889	6.626	2.645	2.171	6.675	7.385	4.722	2.3688	2.5086	2.5801	9.876	17.411	8.953	14.623		0.755275	6.50766
21.4262	8.676	14.003	5.277	2.6698	3.9267	2.1617	6.4518	5.9145	0.1507	5.559	10.3	4.548	2.538	3.554	7.972	3.711	6.832	0.464	5.938	6.6082	4.9973	3.6562	3.8188	3.1818	10.5019	13.214	8.432	13.076		0.759493	6.00476
21.5452	8.234	8.019	2.752	4.5979	2.6285	5.9281	1.4529	4.2989	1.8834	7.202	9.786	7.475	4.5588	4.134	4.89	9.412	2.453	2.281	2.787	6.3164	2.5523	3.2208	5.8861	3.4825	16.1587	14.486	7.84	19.444		0.763711	6.22001
21.6643	4.967	4.462	4.953	3.7743	5.215	5.3066	5.4988	4.0723	1.3953	4.38	8.52	5.978	4.2932	7.374	6.156	5.939	0.36	1.559	3.508	5.9501	1.3319	4.3139	4.0264	3.8704	9.9066	11.963	7.312	17.158		0.767933	5.48371
21.7833	8.013	2.743	3.31	1.3993	4.475	7.3746	5.9904	6.9764	2.8813	1.983	6.662	3.077	4.1282	6.393	4.922	8.755	4.087	3.521	7.392	8.9766	1.1531	1.8731	2.9126	3.6493	7.1688	12.631	7.533	20.04		0.772151	5.71502
21.9024	8.355	5.048	2.908	2.9596	2.4322	6.649	4.7083	5.5449	1.2693	5.586	6.856	5.907	2.8893	8.334	8.322	4.867	4.637	3.293	2.678	7.6479	2.7719	3.0186	4.0275	1.8305	5.4618	7.707	11.251	20.698		0.776373	5.63064
22.0214	6.713	8.002	6.32	4.353	1.2634	3.7467	4.3453	3.8852	0.6133	4.991	4.55	4.051	4.8677	5.318	4.848	6.216	4.681	3.588	4.565	4.1611	3.1339	4.5173	4.4506	1.9218	8.3566	8.503	6.582	24.54		0.780591	5.46728
22.1404	5.409	4.026	3.279	1.6137	1.5145	3.4195	2.8943	3.2097	1.3483	4.031	9.018	5.564	1.9375	5.934	8.363	5.85	4.015	3.317	4.958	6.1702	1.6718	2.4577	2.5911	0.908	10.0885	9.498	10.066	23.546		0.784809	5.23924
22.2595	3.665	5.609	6.624	2.5101	3.7487	1.6516	5.84	7.3142	1.8116	4.827	8.296	2.525	4.1929	1.697	8.446	3.03	3.315	2.527	4.662	4.1343	3.5303	4.2792	2.0592	4.051	9.0788	7.695	10.263	29.802		0.789031	5.61375
22.3785	4.106	3.343	2.255	1.0712	3.584	6.8631	2.7162	4.1325	2.3308	2.914	7.95	3.905	0.5432	3.513	5.797	10.65	5.21	4.529	8.013	4.9395	1.29	3.8277	4.9871	3.4695	5.7205	6.325	17.246	25.791		0.793249	5.60794
22.4975	4.784	1.223	3.869	2.5236	3.0186	5.2459	3.8044	4.5644	1.2845	7.313	6.842	5.982	2.5921	6.867	6.27	5.375	3.228	1.324	2.915	5.0368	0.0868	5.8411	5.0727	3.7085	8.993	4.758	15.579	24.054		0.797467	5.43412
22.6166	4.567	3.159	3.016	2.4798	1.7347	3.6457	5.6742	4.101	3.3404	3.983	2.932	4.42	2.4647	6.039	3.742	5.273	6.453	3.253	4.404	5.2705	0.005	4.7328	5.9975	5.0202	5.3412	5.562	20.938	19.019		0.801689	5.23456
22.7356	3.368	2.406	2.278	2.978	1.8239	4.2432	4.0635	3.4067	2.0781	3.944	4.458	3.939	2.0674	2.409	9.074	4.834	5.03	3.337	5.065	8.2615	0.705	2.8796	3.1642	6.0308	7.1802	3.191	17.831	14.547		0.805907	4.8069
22.8546	6.379	5.303	7.102	2.1492	2.2047	5.4873	3.6833	3.3666	1.7427	3.172	4.445	5.534	2.2737	6.079	2.58	4.939	5.071	3.939	5.406	2.852	1.972	3.4111	4.777	3.9858	4.4555	5.781	12.546	11.753		0.810125	4.72821
22.9737	6.955	3.71	0.873	4.1492	0.4612	4.881	7.0017	4.2471	1.3955	8.931	5.613	6.413	1.9131	3.846	5.129	5.461	6.302	2.912	4.872	2.6881	1.4772	5.1569	3.3361	4.0821	6.2993	6.532	20.957	16.568		0.814347	5.43438
23.0927	5.484	4.971	1.46	3.0862	1.7365	5.2822	4.4049	4.115	0.912	4.645	6.045	4.152	5.3851	2.959	9.157	5.861	5.431	2.186	4.986	5.6685	1.2505	2.8727	1.1048	8.0179	3.179	3.609	23.28	13.271		0.818565	5.16115
23.2117	3.549	3.593	3.223	3.3505	2.8873	5.8222	2.7047	5.7316	1.0788	5.794	5.912	5.075	2.5098	2.809	5.348	4.112	11.621	5.165	5.099	5.4357	1.8962	3.4563	2.3877	4.8495	7.7733	4.374	23.098	12.788		0.822783	5.4087
23.3308	3.219	5.218	3.238	0.8518	1.7528	6.3274	5.2333	4.6316	1.7665	3.629	2.903	2.394	4.705	3.926	8.988	3.741	5.44	1.493	2.028	4.472	0.4351	1.1369	3.4992	9.234	4.9031	4.333	16.479	17.549		0.827005	4.76881
23.4498	1.584	2.582	2.198	4.0162	3.1146	8.7304	2.6053	4.3091	4.1348	5.582	2.946	1.308	5.505	3.785	7.903	3.676	7.715	5.757	1.55	4.8994	1.3524	0.4155	2.2303	3.8502	8.1392	1.549	16.726	14.407		0.831223	4.73466
23.5688	6.731	7.788	3.585	3.1801	2.7237	3.7993	4.5344	3.6949	1.4853	2.252	5.267	3.881	2.2847	4.594	5.197	2.045	7.622	5.147	2.849	2.933	0.377	4.4333	5.8461	6.3638	6.1016	1.583	11.154	14.971		0.835441	4.7294
23.6879	3.542	5.228	2.913	1.8712	2.2271	5.1597	4.3001	2.9339	1.0811	2.975	3.289	3.598	2.4147	2.415	3.453	4.25	5.696	2.241	3.215	2.5891	1.7345	3.7587	5.8675	5.9666	3.8991	3.252	10.321	10.192		0.839663	3.94226
23.8069	5.324	6.005	2.15	6.3348	3.3122	5.4625	4.5377	4.1695	0.4894	0.984	4.918	4.087	4.142	3.949	6.302	3.658	3.666	2.96	5.556	4.7821	2.4081	4.2271	4.8481	5.9178	4.966	3.183	12.586	6.576		0.843881	4.55362
23.9259	3.585	5.446	2.744	3.1273	3.0279	7.5221	6.1043	2.5412	1.6187	1.191	4.818	2.201	3.902	3.042	4.886	5.779	3.304	3.101	4.721	3.39	2.3957	1.7529	2.4522	4.1155	6.7266	2.555	10.986	4.102		0.848099	3.96919
24.045	8.414	3.77	1.01	3.7621	2.9639	3.6304	4.2666	1.5474	2.5884	3.699	6.291	3.381	3.6837	4.201	5.956	4.735	5.331	3.154	2.397	4.1927	0.3696	3.7778	1.2349	5.7894	4.0426	1.296	7.451	10.791		0.852321	4.06166
24.164	7.336	3.574	1.571	1.3125	0.6552	8.229	2.7913	0.623	3.3771	2.87	6.993	4.355	5.011	3.034	5.817	3.713	2.424	5.231	2.615	1.8088	2.9289	2.5559	3.1396	3.532	9.0481	1.754	5.133	5.925		0.856539	3.83419
24.283	5.784	8.954	2.804	1.4001	2.224	3.2073	4.7503	3.1521	1.6599	3.669	3.659	0.815	1.3324	4.479	7.058	1.636	3.791	2.997	4.399	3.1572	0.157	0.9898	0.3285	2.971	7.4589	1.444	15.681	6.655		0.860757	3.80763
24.4021	2.639	4.83	1.025	1.0876	1.6025	4.2683	4.0513	0.5082	1.2998	3.279	3.323	1.08	2.0267	3.757	5.838	3.419	1.27	2.631	6.46	4.0285	0.7345	2.0291	2.8083	3.5217	10.1143	1.4	9.645	3.66		0.864979	3.29774
24.5211	3.412	7.876	1.299	2.6089	2.4183	3.886	5.2422	2.3612	1.0418	2.078	8.501	4.39	2.6068	2.089	4.127	5.331	1.702	2.048	6.063	4.2334	1.3603	0.7339	1.6116	3.6969	6.2851	1.074	11.427	0.41		0.869197	3.56834
24.6401	5.41	3.573	2.301	1.3665	3.3054	8.0186	2.3503	1.2837	0.9066	3.287	5.606	4.236	3.0994	2.526	5.582	1.876	1.739	5.144	3.294	1.6519	0.4694	4.8223	1.6077	4.5815	6.7961	0.755	11.474	0.147		0.873416	3.47176
24.7592	4.434	3.821	5.286	1.4504	2.6668	4.3844	3.7217	3.0033	1.45	1.277	4.36	6.267	2.0982	1.619	4.45	2.461	3.962	5.552	3.814	1.1323	0.845	0.89	3.5261	3.1999	4.7538	1.245	9.812	4.651		0.877637	3.43332
24.8782	4.059	3.162	0.933	2.303	1.088	3.3246	4.1363	0.549	0.9107	1.636	3.466	2.002	2.6653	1.498	9.211	1.542	1.299	5.055	3.585	3.5888	1.4772	1.6356	0.4157	3.4503	8.5864	0.196	11.908	1.435		0.881855	3.03993
24.9972	5.828	1.765	2.751	0.8296	2.9052	6.1116	4.18	1.3401	2.1174	1.747	3.271	1.869	1.6724	2.135	6.367	1.291	4.033	3.584	5.882	4.0684	2.6659	1.247	2.9955	8.3094	4.2275	1.509	8.051	2.914		0.886074	3.41668
25.1163	13.722	5.485	3.473	1.1302	2.1444	4.5506	1.6012	3.49	1.8575	1.564	2.893	3.718	2.1224	1.605	4.27	4.177	1.504	6.186	4.664	0.8472	0.6599	1.7746	1.4977	6.1588	3.3889	2.43	9.702	2.383		0.890295	3.53569
25.2353	4.04	5.715	3.296	1.8892	1.5172	5.4273	1.0336	1.5575	0.8393	1.845	2.499	4.939	2.0242	0.304	5.969	5.274	2.374	3.515	6.693	1.7254	2.9907	3.2584	1.7009	3.8531	6.1489	1.359	4.546	3.484		0.894514	3.20778
25.3544	5.319	4.504	2.358	0.2086	1.2887	4.8156	3.4357	5.1064	0.668	0.558	5.447	3.483	2.8824	1.562	6.056	2.102	0.945	1.733	3.927	3.0533	1.331	2.0307	0.7624	3.138	4.5801	0.532	4.899	2.761		0.898735	2.83882
25.4734	4.354	3.993	2.264	1.6463	2.2298	4.4644	4.4436	3.4419	1.8739	1.278	1.832	3.969	1.9639	3.495	2.4	1.493	2.596	2.992	3.961	1.2597	1.6799	2.6628	2.786	4.732	5.4394	0.054	3.259	0.405		0.902953	2.74888
25.5924	3.608	5.438	0.925	2.1356	1.3259	2.5507	3.7957	2.5711	2.9832	1.602	1.899	2.267	2.1533	1.573	4.748	0.77	1.839	2.6	2.435	0.3693	0.7165	2.353	1.6133	4.9865	7.4438	0.37	2.796	1.32		0.907172	2.471
25.7115	8.156	6.203	1.669	1.165	1.1927	0.2849	3.5671	1.9527	1.1311	2.956	2.863	2.537	2.1656	3.074	4.335	3.034	2.849	1.452	5.378	1.1009	0.1777	0.9732	0.7796	6.149	6.6683	0	6.141	2.413		0.911393	2.87028
25.8305	8.359	4.448	1.294	2.7685	1.4327	2.7739	5.5561	1.6296	0.6411	2.009	1.994	3.328	1.8421	0.568	2.437	4.186	6.708	2.556	5.053	1.2563	0.7142	2.4021	1.6057	6.4067	6.9959	0	3.726	1.622		0.915612	3.01118
25.9495	4.058	4.299	2.075	1.3793	1.9495	2.9675	7.3855	3.5558	1.6955	2.942	3.348	1.482	2.2357	0.969	3.238	3.679	1.498	5.734	3.817	1.1674	4.4847	0.6863	2.4716	3.9709	2.7968	0.41	0.962	0.631		0.91983	2.7103
26.0686	6.297	5.299	1.851	3.013	2.9558	1.3823	3.6399	1.8158	2.8275	2.163	2.594	3.033	1.469	3.642	2.016	1.87	0.79	4.453	3.242	1.0344	1.7056	2.266	0.9594	3.3438	4.656	2.102	1.129	1.825		0.924051	2.62052
26.1876	3.302	3.124	0.299	2.4693	1.6717	3.5	4.526	2.657	3.7049	2.054	2.323	5.172	3.8467	3.605	2.291	2.884	1.852	2.222	6.024	1.0687	1.7817	1.6242	1.9931	7.5485	7.3216	1.555	2.459	1.776		0.92827	3.02341
26.3066	4.823	3.019	1.432	0.307	3.3184	5.2809	1.8431	5.1723	4.7059	3.919	3.391	2.761	3.5678	2.738	2.052	1.542	2.65	4.148	6.358	2.2564	1.3883	1.4789	1.3124	4.707	5.1962	0.084	1.829	1.977		0.932488	2.97349
26.4257	7.498	5.387	1.957	1.5066	1.7949	3.518	0.9977	2.5842	1.9585	7.704	3.192	1.574	2.0897	1.713	2.862	2.879	3.436	5.926	6.522	1.1384	1.7718	0.7641	0.5071	3.4344	8.5264	0.007	0.957	1.513		0.93671	2.98996
26.5447	6.416	2.158	0.274	3.1045	1.2342	4.2253	4.1915	2.9987	2.1785	2.548	4.238	1.968	2.4166	4.46	1.76	2.996	2.755	4.16	8.195	0.9812	1.1571	1.6029	0.4392	6.3656	6.4641	0.499	1.841	0.516		0.940928	2.93369
26.6637	4.455	0.97	2.47	1.5046	3.103	3.7073	3.0245	2.2508	4.3907	2.824	7.572	1.303	3.6197	4.75	1.021	1.149	3.147	4.591	3.101	1.043	0.5015	0.7167	1.5833	8.1806	9.438	0.733	0.683	0.65		0.945146	2.94581
26.7828	7.944	3.876	3.357	2.0817	2.8309	3.0885	6.5261	1.0071	7.0947	1.855	3.007	4.714	4.312	2.325	2.613	2.495	1.341	0.509	3.431	4.7454	0.7981	0.127	0.9577	4.3647	8.2315	0.165	1.846	0.426		0.949368	3.07391
26.9018	7.818	1.568	2.61	3.3394	2.2018	2.2796	4.0527	2.4374	1.0767	4.088	1.108	2.624	1.4839	1.717	1.543	0.61	0.771	3.323	5.163	2.2958	1.7412	0	0.2479	5.5923	4.342	1.137	0.743	1.389		0.953586	2.40367
27.0208	3.701	2.173	1.866	2.3838	2.0342	2.1388	3.0336	2.3027	0.12	0.842	3.664	3.697	1.6132	3.279	2.762	1.688	0.736	1.965	4.257	2.2041	0.8414	0.6554	0.4797	5.606	9.8047	1.802	0.378	1.058		0.957804	2.39591
27.1399	3.124	3.263	4.705	2.6024	1.8816	1.7928	3.7075	0.5557	2.724	0.895	2.884	3.859	4.1298	1.778	1.71	1.789	1.354	7.065	6.087	1.309	0.492	3.0976	0.982	5.2644	8.4392	1.724	0.737	2.049		0.962026	2.85718
27.2589	5.156	1.892	2.571	3.1088	2.7956	4.4522	2.2708	0.5751	3.6175	1.603	4.358	0.682	2.7768	5.071	4.176	1.764	1.006	3.942	1.614	2.1769	0.6821	0.5187	1.2098	1.6547	6.2851	1.024	0.844	0.218		0.966244	2.43018
27.3779	4.853	5.066	1.975	1.4504	0.4222	4.9726	3.0439	1.4739	4.7784	0.226	1.521	1.899	1.1332	2.376	1.675	3.36	0.397	2.453	3.643	0.6644	0.6103	0.2336	0.3209	3.6558	6.0294	0.961	1.462	1.981		0.970462	2.23704
27.497	1.482	2.753	4.617	2.054	0.9651	0.7932	1.3587	1.7781	3.2637	2.308	4.145	3.261	1.7461	3.841	4.48	0.509	0.699	2.311	2.99	1.7396	1.3972	0.1613	1.088	4.0922	5.1049	0.703	0.14	0.882		0.974684	2.16654
27.616	2.415	3.59	1.008	2.2823	1.4489	1.1761	2.9908	2.2861	2.3703	1.693	4.51	2.793	4.5311	1.636	5.131	4.878	1.427	0.579	5.217	1.3502	1.4444	0.5748	0.0872	3.0869	5.7875	0.959	0.475	0.004		0.978902	2.34756
27.735	2.702	2.806	1.597	0.84	1.3703	2.6705	3.0277	0.7448	2.2547	0.918	3.086	0.39	3.0593	3.775	6.431	2.073	1.588	2.79	2.969	0.6871	0.1805	1.6003	3.1159	2.5989	4.8191	0.902	1.882	0		0.98312	2.17422
27.8541	1.705	0.316	1.645	1.5101	2.396	3.6478	1.8886	2.5779	2.0674	2.309	3.14	1.597	2.3329	3.61	2.019	0.941	1.255	2.015	4.233	2.9307	1.2331	0.1573	1.2052	4.7499	5.1648	1.048	1.94	0.003		0.987342	2.12992
27.9731	2.402	4.698	1.281	1.4672	1.9643	3.0738	0.9881	0.4367	1.4185	2.217	4.903	3.522	2.9437	5.724	2.087	0.999	2.102	3.519	4.204	1.3648	1.645	0.2091	0.8226	2.0129	3.7276	0.816	0.736	0.028		0.99156	2.18973
28.0921	3.184	0.539	2.209	2.0187	1.5192	5.4981	0.4444	1.6627	1.3561	3.457	1.025	1.345	0.9588	1.966	2.015	0.669	1.346	1.797	5.609	0.3781	1.0283	0.2806	1.1786	1.2054	5.7369	1.501	1.836	0.165		0.995778	1.8546
28.2112	3.141	2.762	1.964	0.5008	0.3765	1.5225	3.8297	0.3923	1.9136	1.515	2.285	3.503	2.537	6.383	2.245	1.719	3.994	2.184	1.916	0.3974	1.7114	1.5959	0.0967	0.8551	7.1435	0.087	1.283	1.129		1	2.10651

## Sheet: Image6
X0	Y0	Y1	Y2	Y3	Y4	Y5	Y6	Y7	Y8	Y9	Y10	Y11	Y12	Y13	Y14	Y15	Y16	Y17	Y18	Y19	Y20	Y21	Y22	Y23	Y24	Y25	Y26	Y27	Y28		Ap-Ba	Average int.
0	37.9097	50.953	40.1538	40.0709	32.26	36.8805	44.7522	39.1346	25.7326	18.1507	20.9596	43.5037	58.9397	30.8233	38.915	45.9615	46.678	43.588	48.938	58.4958	42.069	67.5189	66.631	70.42	67.098	55.676	38.791	43.6663	68.6152		0	45.6306
0.119	44.4695	48.0381	42.0336	34.1412	28.504	35.3481	41.2062	38.8421	25.3101	18.4574	27.012	42.131	66.1055	28.879	48.3963	40.2895	45.216	51.038	47.417	54.1205	47.159	68.0503	70.76	95.767	79.702	50.058	56.641	44.0477	80.4292		0.0039829	48.261
0.2381	47.9904	53.265	43.978	36.4074	32.231	35.3324	38.6543	43.5452	29.017	20.1083	33.7701	55.0981	66.3467	37.1137	59.8701	42.223	48.531	54.269	56.107	57.6388	62.021	76.5355	77.794	86.222	92.782	71.814	63.912	55.5567	85.4979		0.00796915	53.9183
0.3571	59.2171	54.8297	43.7826	41.0817	39.936	44.6997	33.9682	41.6344	28.0262	24.4584	23.9917	53.152	70.114	42.2023	52.0118	49.0704	53.539	50.162	53.542	60.9344	62.87	72.8672	67.306	93.648	84.968	86.289	72.613	59.2952	89.0918		0.0119521	55.4932
0.4761	63.2139	66.7512	46.9723	43.9281	42.051	51.6154	39.4066	49.0144	34.9502	22.8806	36.8042	51.6481	72.7837	57.9927	44.7657	53.1276	61.619	54.47	52.77	52.5809	70.883	74.6639	71.064	100.869	90.908	118.912	92.367	75.7488	94.9342		0.015935	61.7136
0.5952	69.415	66.5595	46.7092	51.5183	47.569	48.7824	48.8448	50.7781	34.8558	33.1167	31.3886	45.5595	76.1041	71.1267	45.1484	56.3229	67.673	57.554	64.645	50.2836	57.349	82.3969	82.713	99.427	107.725	131.768	105.603	71.7177	74.5043		0.0199212	64.7296
0.7142	73.9248	71.1516	39.5225	65.1865	57.846	57.4556	46.7028	65.3059	47.4148	39.448	35.8302	50.5705	74.9555	57.9077	50.9639	55.3603	72.764	57.869	64.333	60.5444	58.338	57.0915	79.591	109.888	112.242	151.16	126.4	78.9803	73.2767		0.0239041	68.6905
0.8332	74.4431	64.6506	44.3896	77.7066	48.275	74.418	48.6397	83.1744	44.6969	39.7729	39.9647	59.0809	78.6394	74.7511	63.5928	57.8625	72.744	65.308	64.141	64.1088	81.852	61.9564	73.595	97.751	118.901	163.782	138.827	85.881	68.4513		0.027887	73.4951
0.9523	69.2094	68.8048	39.9805	68.0643	62.924	68.3096	52.3546	73.0559	44.6226	46.1511	48.342	63.4292	73.8276	77.9753	48.485	78.2583	79.722	71.602	62.745	81.2808	74.452	82.3638	82.468	116.542	125.141	176.995	143.623	81.258	65.9436		0.0318733	76.8252
1.0713	76.1279	66.7065	45.0627	81.8234	68.569	80.6523	54.2039	66.2184	55.2446	44.4897	39.0458	53.4345	68.374	71.5824	64.4616	74.8753	84.202	66.642	81.281	74.4284	74.658	68.2217	90.814	113.295	130.648	178.489	163.918	80.8577	75.0161		0.0358562	79.0808
1.1903	78.6738	67.955	58.9488	73.0022	65.94	87.2948	48.201	70.6789	58.5776	47.3544	46.546	40.2422	64.1981	73.823	74.126	78.6317	90.423	79.209	81.589	79.6865	78.816	68.2493	83.117	109.678	138.675	181.03	192.585	88.4238	67.1907		0.0398391	81.823
1.3094	83.9344	79.2644	63.2269	75.234	63.421	76.6837	48.3382	65.5988	56.9127	58.6199	43.8609	39.0396	63.4118	76.2157	66.2794	72.7463	87.473	84.983	72.049	96.8667	76.401	66.4205	86.788	112.247	142.146	162.516	172.231	93.8287	73.0178		0.0438253	81.3709
1.4284	83.8738	72.0572	69.8451	78.0522	80.205	87.3588	49.4468	66.8224	66.0582	70.6549	37.9014	43.6855	66.8993	78.2621	67.5778	73.4685	89.518	82.282	86.279	87.5699	82.084	73.9899	81.272	117.48	147.326	179.601	180.989	78.9059	64.4489		0.0478082	84.2729
1.5474	74.0144	74.7062	65.4344	80.5486	76.195	92.5384	56.553	71.5121	64.4658	55.9368	42.9403	44.8507	78.9696	76.2144	74.7207	65.8638	89.859	80.314	90.674	99.4989	90.919	75.3369	101.403	102.328	134.102	173.63	182.23	90.8982	68.8425		0.0517911	85.3621
1.6665	87.5063	76.3296	52.9906	77.4416	79.652	88.1792	55.9234	67.9339	80.3331	66.2239	42.478	39.1942	61.4058	73.7131	66.9555	67.778	91.137	85.22	97.416	99.0126	97.416	73.8696	98.944	96.262	148.186	167.982	182.951	82.3575	74.0565		0.0557774	85.4775
1.7855	76.1811	84.5689	49.2074	76.5769	90.511	96.6122	59.0308	66.2854	69.3008	62.1657	41.4931	35.0211	69.4542	74.3507	60.8633	70.5914	99.683	87.337	97.909	87.918	104.849	79.6583	97.583	106.881	141.125	181.185	177.965	79.1697	69.6941		0.0597603	85.9714
1.9046	67.0218	88.7895	44.6073	90.7727	70.905	81.2606	53.423	66.3151	71.9478	58.9455	32.8547	48.2479	70.0569	67.2033	76.1253	81.0079	92.697	87.011	99.16	86.4791	113.2	80.4422	95.754	93.143	134.4	166.183	178.192	80.9845	75.1992		0.0637465	84.5631
2.0236	84.5474	83.3321	47.7812	95.1443	75.111	76.3742	56.5102	70.0867	74.7454	51.8707	38.6428	34.3848	59.7909	89.4238	81.8199	90.5706	109.798	102.507	90.249	88.076	104.172	83.4739	98.193	92.876	120.156	176.956	200.105	83.9655	73.7158		0.0677294	87.3924
2.1426	79.6223	75.7546	54.3154	81.3604	79.019	77.7661	50.7965	67.2086	79.0988	54.9503	41.0817	34.4348	68.4143	72.9727	76.1567	74.3544	123.559	99.73	101.118	89.2865	92.885	88.6463	106.397	94.889	131.24	177.639	177.195	76.9675	92.659		0.0717123	86.8799
2.2617	70.2285	86.9961	41.2321	94.144	87.215	83.5875	63.5949	74.0136	80.9882	57.1667	45.4912	41.9996	57.0112	79.682	78.1109	73.5932	110.481	103.452	97.437	87.5361	110.899	76.082	109.846	94.008	136.119	162.993	167.271	82.9909	88.5134		0.0756986	87.6787
2.3807	71.1883	76.3567	46.2908	91.9054	101.935	86.0683	52.0709	68.9779	70.878	62.8333	43.191	40.9513	59.3476	74.9825	67.1768	83.4167	117.446	117.218	105.384	75.0441	101.927	68.6116	100.49	87.089	131.049	151.94	161.298	79.1377	85.6136		0.0796815	85.511
2.4997	70.6413	71.6186	49.2473	90.2624	94.717	65.7568	56.607	65.2616	76.581	57.8885	40.1266	33.5822	56.6784	75.685	84.9116	81.609	102.32	100.465	88.713	87.442	99.49	72.5949	107.025	76.714	116.598	158	181.578	70.7192	82.2369		0.0836644	83.2783
2.6188	61.9825	77.9154	49.2833	93.8389	109.08	74.4706	58.0256	74.7612	72.2551	52.6088	42.644	28.5541	53.1585	67.4493	78.1881	67.828	110.44	99.213	83.04	87.7985	97.976	65.0625	115.802	86.856	118.328	161.598	170.404	64.3179	86.5454		0.0876507	83.0836
2.7378	75.6355	68.3363	47.2525	92.2791	95.867	72.8123	52.7073	69.4009	78.6224	62.7072	40.7882	36.4625	58.0499	56.7007	65.6378	81.8618	108.458	109.415	80.528	82.3729	103.707	64.7816	109.383	79.33	106.62	146.038	166.046	77.9049	75.1012		0.0916336	81.5451
2.8568	69.8729	68.6832	41.9175	93.0157	104.646	81.8253	52.8632	69.9622	74.7153	65.8243	51.7737	24.3885	55.4864	57.9529	73.7362	79.6955	98.323	110.824	85.76	77.9558	91.779	53.298	101.127	77.181	111.099	168.881	173.84	83.4647	86.693		0.0956165	82.296
2.9759	67.925	66.7311	41.6837	93.1601	96.007	71.9754	67.0735	79.0951	74.6814	60.8365	49.6644	22.6205	57.7777	76.8297	64.5369	70.475	98.851	110.748	88.433	78.5243	96.055	54.5483	104.1	84.63	111.752	151.594	178.658	82.5771	76.6684		0.0996027	82.0073
3.0949	62.0856	59.3286	47.1779	89.3296	103.539	61.4072	52.921	79.2571	80.0236	66.7674	45.1964	19.1253	57.3942	70.7438	65.4397	66.6032	108.529	115.928	87.574	75.3036	103.357	57.8141	96.466	78.242	95.318	149.623	171.854	96.8311	59.5988		0.103586	80.0958
3.2139	65.0007	76.3626	45.9796	93.23	95.579	75.3936	53.2674	64.8397	68.1695	69.2677	46.3471	20.1019	57.3146	71.4705	68.4421	67.8888	107.581	105.459	91.077	76.2931	105.476	52.2349	88.653	79.923	106.649	159.181	183.504	91.2881	76.0461		0.107569	81.449
3.333	62.8336	71.2621	39.7276	89.046	103.104	76.2395	53.2043	71.1913	60.1444	64.2586	47.5133	19.725	45.9349	69.4095	72.5314	62.7755	108.999	106.055	83.267	62.4492	98.284	42.345	104.553	73.021	107.27	146.996	161.616	89.7606	66.474		0.111555	77.9307
3.452	53.2167	62.8274	33.0597	79.3457	105.127	66.5119	47.135	58.7299	61.4153	59.5323	45.6934	23.4993	51.9348	72.6173	48.7997	65.5254	109.096	95.063	74.609	62.6872	81.087	48.3557	97.145	63.625	102.837	147.361	163.498	81.1007	66.5658		0.115538	73.3794
3.571	54.492	57.086	40.0528	81.8886	103.246	64.0919	50.1114	64.8798	62.3434	57.2364	35.3757	19.6878	45.6203	77.6308	53.9771	66.2426	99.393	111.177	75.378	61.7883	79.416	48.1039	93.918	58.428	97.601	145.647	162.102	89.7598	70.1813		0.119521	73.3399
3.6901	68.7714	64.7873	41.6059	76.0525	84.645	60.5174	53.3643	72.0523	61.8707	49.2022	38.8653	19.2578	62.8422	66.1225	54.0756	59.4014	108.388	94.74	76.868	63.1756	83.768	51.7972	94.773	58.972	97.091	142.415	160.071	76.4882	65.9081		0.123507	72.6858
3.8091	55.4304	61.2304	43.5945	75.0142	87.728	62.0299	57.9863	67.8516	61.3793	52.1882	28.3329	24.3686	57.0644	62.4217	58.9705	64.0075	108.143	86.956	74.064	62.1881	86.182	51.6168	104.747	50.444	98.144	145.285	145.922	95.6437	58.7258		0.12749	71.9883
3.9281	63.2311	67.8306	49.0172	76.0431	95.337	62.3629	44.5999	63.3479	61.2519	52.1249	32.2718	23.0208	49.8114	67.7542	50.5066	67.3404	88.622	83.125	72.28	62.1261	71.258	47.222	107.798	56.377	111.368	157.46	148.917	84.4308	65.9475		0.131473	71.8201
4.0472	63.4694	63.8511	44.1565	71.6387	89.804	64.6842	35.1996	53.4988	60.2184	58.1606	30.2247	15.9869	44.1212	75.1102	46.8924	62.4678	93.111	80.827	66.507	58.8989	79.863	42.597	99.582	48.658	118.658	152.491	149.168	83.2201	73.7745		0.135459	69.891
4.1662	76.2519	61.7364	36.0028	77.0802	74.019	57.4881	35.804	53.606	66.3968	53.2491	29.2258	19.1816	44.9641	52.6776	47.52	57.8364	81.334	81.81	68.399	63.2584	71.664	33.2858	86.755	48.662	121.962	137.87	137.718	72.0521	54.0752		0.139442	65.5823
4.2852	65.0926	53.4931	45.8526	78.6863	88.11	56.9983	33.36	52.4584	53.4065	50.204	32.9511	15.2795	38.5394	62.8492	42.6927	54.5374	85.438	79.128	55.332	58.1053	57.555	32.3719	80.411	49.052	113.609	135.428	138.699	73.8407	54.817		0.143425	63.3896
4.4043	63.6159	50.802	47.9783	61.628	77.088	47.5539	32.8836	57.2225	49.8113	56.0952	28.8637	16.0731	43.8527	53.0957	53.6083	51.1089	86.345	79.625	62.436	54.4132	54.657	29.446	79.108	42.928	106.738	137.769	130.361	58.5069	52.4508		0.147411	60.8988
4.5233	64.0572	57.0348	38.2566	77.2539	69.422	56.9783	30.1466	52.4551	45.3218	44.6126	32.3066	23.2646	43.4749	59.3219	45.0735	53.3076	90.4	76.715	61.403	48.7539	55.829	30.7003	81.324	47.766	117.526	147.834	137.629	67.9556	43.9213		0.151394	62.0705
4.6423	68.8284	59.0527	39.1711	71.8072	67.058	56.5232	40.4951	55.2338	50.355	30.8041	23.6011	24.0829	39.6173	51.2977	46.0082	51.7159	85.012	74.61	61.983	41.6772	51.042	34.8012	78.729	54.107	111.259	134.169	137.555	71.1907	38.8172		0.155377	60.3657
4.7614	67.4948	55.5443	43.4992	64.7503	63.194	45.6188	31.3808	53.0759	42.393	33.796	26.2549	16.4442	36.4599	46.7192	48.3139	42.6142	87.893	87.894	46.458	44.7905	49.926	38.5067	77.096	56.389	97.285	137.334	118.973	75.7262	33.5347		0.159363	57.5641
4.8804	61.4648	58.5406	42.9212	66.9043	54.696	40.6978	29.116	54.0698	45.6499	33.8028	23.1385	17.3331	38.741	49.0333	42.7253	43.69	80.088	82.124	45.78	41.5073	52.541	38.9107	71.574	43.902	103.145	135.036	124.808	77.5629	36.9223		0.163346	56.4285
4.9995	62.7183	56.8905	33.0892	64.9359	54.309	44.4745	33.547	58.3879	33.4882	28.1314	19.7516	17.3992	31.8811	37.3874	52.7089	40.5623	76.768	82.665	45.565	41.5694	57.203	31.6299	76.75	53.141	93.187	119.157	140.613	87.5766	37.2596		0.167332	55.612
5.1185	58.6121	62.5579	33.3579	62.3055	48.651	48.616	26.6313	44.6984	46.3304	25.82	18.9494	13.9274	37.0545	33.8058	56.999	42.755	79.96	82.445	41.345	37.5369	58.144	31.8703	66.546	56.013	88.769	118.172	125.29	82.5979	46.2479		0.171315	54.3451
5.2375	62.5285	47.8157	26.1541	67.256	41.651	42.3694	23.93	44.3159	41.2475	25.4353	23.4383	13.2698	35.2381	40.4745	47.0653	35.9863	70.961	70.426	45.175	31.8763	58.892	29.2471	66.862	54.044	101.598	120.55	120.09	59.0533	40.7435		0.175298	51.2998
5.3566	62.1224	51.7341	36.6882	57.3904	34.936	50.1419	28.9675	36.3345	40.2542	25.8826	21.2663	13.4655	35.8268	27.8037	48.6403	34.9963	59.429	75.553	48.522	34.097	49.404	30.2344	63.092	55.649	96.977	127.282	111.64	62.935	48.3538		0.179284	50.6765
5.4756	54.1071	49.3031	31.3711	53.8685	41.195	40.1853	26.79	43.3308	37.8305	28.8185	17.6906	14.469	41.1143	27.1559	41.6947	30.9983	58.681	66.452	49.927	33.8021	49.594	27.0272	61.345	66.327	85.504	114.414	95.98	69.5409	44.0836		0.183267	48.3655
5.5946	54.5517	49.1093	21.8726	60.1341	39.203	42.5349	21.8207	39.6681	45.6624	28.5832	19.8368	14.0027	34.0176	31.7331	42.9979	38.2282	53.515	65.776	58.452	28.0453	46.462	24.5816	56.41	59.829	89.007	89.863	87.545	68.1244	40.5726		0.18725	46.6255
5.7137	57.2743	40.6445	20.7194	49.6666	31.709	45.5194	28.8133	40.7486	35.1757	21.3659	14.903	9.6222	37.1001	30.2615	38.188	36.0562	55.086	61.448	49.668	33.7466	42.066	22.8774	56.842	44.762	70.845	82.512	91.501	59.1313	33.9211		0.191236	42.8336
5.8327	60.1164	45.4682	25.0239	43.3778	24.075	44.1773	23.6854	48.476	31.239	26.9282	17.4683	12.6596	32.7059	24.1222	41.2742	29.1264	38.212	53.997	46.346	43.4788	50.444	27.9474	62.083	50.822	64.955	74.618	92.329	60.4381	31.5934		0.195219	42.3168
5.9517	60.1038	36.643	28.1001	39.0784	34.498	40.677	28.1227	28.6495	24.6196	21.5979	20.1932	10.5743	32.3667	25.4105	32.9655	28.407	47.855	51.043	45.651	36.8587	44.936	18.6994	53.433	51.695	69.159	64.729	89.843	71.5944	26.3709		0.199202	40.1336
6.0708	58.898	33.563	22.6442	39.5157	24.803	38.554	20.4141	27.1922	28.3204	21.7267	15.2544	9.3558	30.139	25.2581	23.6509	26.3223	47.541	53.563	52.783	35.4608	34.774	19.2748	52.276	49.538	67.572	61.277	81.509	77.6008	24.3585		0.203188	38.0393
6.1898	66.4209	27.8237	20.9199	46.1886	26.765	45.3381	25.1342	22.3004	34.9087	21.5116	14.0364	8.8914	21.4424	27.9262	27.5444	27.5464	43.059	43.354	49.655	48.311	30.287	25.5448	47.274	48.673	66.768	45.705	80.931	78.7232	23.1829		0.207171	37.7988
6.3088	60.0526	28.9954	19.1821	41.4779	30.16	49.846	26.3944	23.927	26.5009	17.4444	15.625	9.9443	23.3703	21.8302	23.6368	28.9708	42.125	50.042	43.494	43.8171	27.204	19.6738	40.228	35.912	67.22	37.899	72.704	60.7309	19.6119		0.211154	34.7593
6.4279	62.1983	26.2378	17.5315	37.4542	33.127	42.4625	23.6359	23.4251	26.4463	16.9884	9.4188	16.2361	24.5983	18.9789	22.5858	31.8822	43.373	44.873	45.959	36.2126	27.483	24.9726	37.448	47.096	51.712	37.867	82.008	64.564	17.4588		0.21514	34.2839
6.5469	64.4088	26.9226	21.6855	37.6502	30.702	38.7097	22.4587	24.5715	28.8589	22.8316	13.9433	9.486	20.766	21.2749	24.1907	25.7098	39.101	42.204	47.131	28.8208	31.217	26.6648	28.002	39.775	48.752	37.924	76.378	61.9352	16.1906		0.219123	33.0436
6.6659	63.9809	27.5001	18.3034	42.7578	40.805	28.6797	21.9659	18.5936	25.14	20.6394	11.8494	6.7867	19.2464	20.8779	26.9566	25.0634	46.489	47.179	36.563	27.0893	25.777	33.8427	27.503	32.966	51.921	41.293	85.106	55.3976	14.0605		0.223106	32.5632
6.785	67.1071	21.4864	23.1674	35.3151	40.162	39.6304	22.2561	18.0753	26.7603	12.8971	19.6016	8.8182	21.3917	18.9102	20.9695	23.801	49.501	43.96	35.146	24.7105	19.839	37.16	23.205	33.627	58.343	36.879	71.671	50.798	17.6572		0.227092	31.8223
6.904	66.1465	23.5585	15.9112	25.8325	35.944	36.7992	22.9169	24.1095	23.053	13.3728	18.6942	6.9884	22.9808	21.0159	20.7614	25.3354	37.746	40.495	32.628	24.432	21.624	38.8717	25.559	24.857	48.341	37.725	60.026	51.7145	14.7835		0.231075	29.7318
7.023	56.9604	25.6419	15.9373	31.7669	37.8	25.1859	28.1357	22.4155	20.825	19.4575	14.0532	8.5568	23.3613	22.8426	22.6085	28.812	40.994	54.194	32.313	19.86	27.181	38.2847	27.723	22.595	39.788	31.699	60.133	52.4917	14.9378		0.235058	29.8812
7.1421	62.5492	16.5424	17.7278	40.4457	38.102	23.2898	26.1513	18.4964	18.6728	14.7104	8.0973	10.8121	20.4286	21.0118	18.5218	27.5615	34.832	58.872	41.564	22.7406	33.389	25.064	26.986	24.292	40.818	29.743	51.532	39.6705	13.128		0.239045	28.4742
7.2611	60.6396	22.147	19.539	28.7219	30.068	25.0036	21.0246	22.8108	20.426	14.6258	10.3552	10.4187	14.0564	22.2096	23.5846	21.1525	34.671	52.913	36.276	21.1035	31.342	25.8219	22.043	20.659	39.969	25.831	48.925	44.3964	21.5488		0.243027	27.3201
7.3801	60.7836	22.8838	16.2784	31.3523	35.051	25.6498	25.7392	21.2254	20.215	15.6152	13.9925	14.0787	21.3738	14.969	14.4834	22.4868	30.446	47.734	36.582	20.2759	39.115	25.352	23.779	15.957	40.573	27.357	53.186	45.1005	12.9031		0.24701	27.3979
7.4992	51.2148	22.724	19.227	33.4316	28.229	26.3276	19.9358	23.6681	21.2646	19.3784	10.1962	9.879	16.9002	18.5399	21.2381	22.4394	36.37	37.14	27.066	25.0372	35.408	22.3777	22.003	19.063	38.354	25.307	49.464	28.4405	18.2734		0.250997	25.8241
7.6182	46.5256	22.8678	18.3434	30.2963	23.355	21.3269	19.3276	23.7816	20.4115	13.4731	12.2358	9.2455	15.8922	14.8565	17.1444	17.2283	29.788	32.24	37.874	21.6733	27.321	17.8785	19.368	12.51	36.783	26.71	50.42	31.1452	15.7266		0.254979	23.6465
7.7372	44.1986	19.8933	15.8449	28.1481	33.168	25.0984	19.6149	19.7965	13.9249	18.7531	9.6249	11.8269	20.2376	16.3852	11.312	18.2292	25.551	40.429	32.852	20.4678	25.412	18.2106	21.405	16.663	26.973	22.917	35.267	26.568	11.4407		0.258962	22.4211
7.8563	33.7691	24.9167	16.7745	30.6582	22.04	22.8107	23.7722	20.9684	11.8959	17.9496	11.0141	8.3141	17.1351	19.4307	14.8342	23.4548	23.029	31.635	24.868	24.4399	27.474	14.9027	22.128	18.856	25.139	28.91	33.2	37.9626	16.2862		0.262949	22.3644
7.9753	32.3152	21.436	20.0365	32.3183	22.139	27.7368	24.4356	19.5702	16.8913	11.1845	12.1528	7.7654	16.9645	16.9774	13.7908	20.6757	21.904	40.503	30.48	27.4048	20.578	11.9771	22.018	11.393	23.685	29.082	34.575	35.8721	12.5093		0.266932	22.0128
8.0943	31.0201	24.0997	19.9118	27.6457	19.124	25.1139	21.2892	17.4917	10.8341	18.7681	15.908	7.0165	18.3005	13.2084	9.4893	21.8346	19.819	44.858	31.744	29.8284	19.985	11.085	23.913	14.502	30.469	20.917	25.955	30.4052	18.5315		0.270914	21.4851
8.2134	38.1076	32.25	20.5862	27.0455	12.754	25.3929	17.141	15.0367	13.2255	17.2518	16.6028	9.0412	23.884	15.8818	13.8948	17.883	28.897	29.043	36.593	25.7584	19.089	15.8866	23.097	13.798	31.352	28.777	29.249	23.4853	16.5876		0.274901	21.9859
8.3324	36.6401	31.2255	16.3926	26.647	15.723	19.6109	18.4452	16.2894	14.1386	17.3877	11.693	10.3348	17.9279	21.9436	14.7516	20.7807	18.712	25.683	31.922	25.991	23.891	8.179	15.659	13.662	33.93	19.567	30.741	18.2318	17.6057		0.278884	20.4726
8.4515	28.7312	29.5994	12.8998	19.3431	11.846	23.1894	10.2038	15.7908	16.9851	17.9113	9.368	7.7725	19.6614	18.0948	14.3569	16.1447	26.458	29.271	29.256	23.6931	20.824	10.9398	15.494	15.597	32.871	23.166	24.5	22.957	15.4562		0.28287	19.3925
8.5705	29.3741	30.621	11.0578	19.3346	13.795	19.8959	12.1362	19.1026	13.4624	17.3295	11.0638	10.2389	15.7017	16.7124	11.2515	17.8224	20.271	29.618	29.358	26.8263	12.906	15.5481	17.682	14.821	30.773	22.433	20.108	21.1926	19.5322		0.286853	18.9644
8.6895	28.0169	31.2865	14.8212	20.1104	13.031	13.6965	13.4458	15.6392	14.8471	18.6142	8.8806	10.3543	24.316	19.3567	11.077	13.2484	15.744	29.067	24.34	22.8008	11.457	13.3137	19.885	15.697	23.754	19.831	26.181	15.8372	18.3636		0.290836	18.1729
8.8086	29.4404	31.1564	9.976	23.4913	14.506	16.3764	10.7189	21.7722	17.159	14.4452	8.0385	17.3014	16.8603	16.7246	12.6493	11.9467	20.198	28.868	23.296	21.8763	16.175	11.404	20.105	15.265	20.052	19.034	20.269	20.8659	17.1063		0.294822	18.1751
8.9276	25.6045	30.727	7.9276	25.178	16.785	17.5952	17.2367	13.7437	17.6405	13.5165	6.0259	9.3405	16.6988	15.494	12.4216	15.9677	19.984	22.042	24.751	21.4717	11.666	14.0807	15.332	12.454	22.336	28.68	27.359	18.6076	14.669		0.298805	17.7702
9.0466	19.561	28.9155	11.7141	22.3428	12.517	18.4736	16.9312	14.7679	13.9866	12.7162	8.8043	12.3242	14.115	13.1001	11.6795	15.6066	22.921	29.643	28.423	18.8436	11.897	9.3391	22.685	14.142	18.843	20.595	31.553	17.6038	14.0129		0.302788	17.5192
9.1657	20.5439	28.1391	12.8531	24.3702	13.494	12.5381	7.0114	14.0981	11.8084	14.2243	11.8042	7.9094	17.5037	12.9696	13.2257	13.2148	19.026	26.504	28.815	17.2858	22.957	11.4982	18.117	14.363	21.18	21.79	22.757	20.1521	15.7285		0.306774	17.0994
9.2847	19.5943	18.5535	7.7835	25.3151	12.044	16.3878	11.0091	11.659	15.4922	20.5841	8.781	10.3095	15.7918	10.9264	15.602	18.0706	24.197	22.835	24.523	14.9163	19.897	10.3641	18.241	17.265	23.292	22.594	23.543	22.6558	15.707		0.310757	17.1701
9.4037	19.4166	22.2079	13.1517	21.4039	13.891	18.4317	18.1622	19.6547	11.8149	11.3973	10.0249	12.134	9.583	13.7346	15.3168	16.2559	18.79	26.644	21.603	12.8056	11.167	7.4839	16.113	21.726	21.936	17.585	34.331	23.3887	18.8325		0.31474	17.2064
9.5228	14.9862	13.7184	6.6279	21.7369	16.929	18.3863	16.5994	9.1197	15.9149	7.2119	5.2126	12.6852	13.8367	14.7065	9.3888	12.6011	18.816	31.936	30.812	10.72	9.711	7.8197	19.055	20.395	22.05	16.083	27.448	22.6486	16.6218		0.318726	15.9923
9.6418	17.9927	15.8939	12.8551	24.1955	12.536	14.9854	8.5749	8.2484	13.3648	5.7881	7.209	7.1303	11.3618	12.5265	8.9335	9.1344	23.365	31.046	28.123	18.7301	11.848	9.1522	19.84	15.223	22.589	16.99	28.338	18.2692	19.0383		0.322709	15.6304
9.7608	15.7514	12.8866	8.9169	21.2084	12.955	19.2586	12.2116	8.6368	9.2485	5.5686	10.0072	7.7389	14.5449	11.7632	10.7565	8.6848	22.037	31.342	33.861	17.0524	8.616	7.4269	17.656	17.834	19.906	15.922	25.437	19.0146	14.2681		0.326692	15.19
9.8799	11.2142	20.4652	16.2322	15.9424	12.669	14.7495	11.5881	8.9014	12.7761	11.4177	8.9473	12.8647	13.4807	13.2752	11.2893	15.8706	18.128	24.508	29.655	14.3799	7.702	4.2815	24.799	23.288	29.04	10.028	24.869	15.1639	18.8011		0.330678	15.7354
9.9989	10.6423	14.7905	13.2534	23.1772	16.052	15.7508	11.578	11.6328	16.4967	11.4121	3.5697	10.1161	11.7265	11.7689	7.7015	12.2058	22.347	22.381	25.885	14.73	6.513	7.3795	20.563	24.37	18.634	12.726	27.405	17.6229	10.5089		0.334661	14.929
10.1179	10.4986	15.6445	16.0819	17.0429	14.35	18.8934	15.205	11.1878	17.0723	9.5996	5.5884	9.2484	11.2754	13.0078	5.6335	11.0618	28.741	21.607	31.915	15.7851	7.343	7.1548	23.821	18.96	18.744	14.963	25.441	12.8747	14.7991		0.338644	15.2945
10.237	11.443	13.0968	9.7808	17.1567	13.661	17.7983	17.2735	12.6707	17.4218	7.7386	5.5975	14.4586	12.442	12.1383	11.9391	9.895	25.204	27.386	30.023	12.1297	11.334	9.1256	17.593	22.933	12.853	9.662	22.57	14.1496	13.947		0.34263	14.9456
10.356	9.0628	14.8049	15.9222	20.7474	6.462	18.6386	11.4618	9.1841	14.7191	9.7247	6.3414	12.7008	14.3506	9.3572	7.781	16.2734	22.949	26.362	23.05	17.5315	9.913	10.2751	20.696	20.93	15.612	10.982	20.892	14.8852	10.5871		0.346613	14.5585
10.475	15.0838	13.6671	13.8161	17.3282	10.949	16.2906	17.9672	11.4986	16.7483	10.7327	7.1612	10.3553	12.0655	10.4449	9.2026	15.6683	22.168	34.373	21.473	15.9415	7.129	11.1827	15.536	22.426	17.804	9.285	22.235	14.6936	7.2023		0.350596	14.8424
10.5941	14.0266	12.0105	18.2731	18.2833	14.272	17.5411	19.9681	12.0987	14.6096	11.7545	7.7393	8.1648	8.7882	8.2923	6.4348	13.4863	21.753	28.001	17.371	13.3843	8.211	9.3926	15.479	27.307	20.346	12.296	20.628	13.4776	8.6498		0.354582	14.5531
10.7131	21.1643	12.4208	15.6562	18.1143	10.346	18.8148	16.2217	8.7486	9.617	6.2678	6.3703	8.23	9.4624	7.5424	8.1484	15.3939	29.678	30.637	16.032	11.0448	12.71	12.1946	15.713	20.676	27.286	10.081	26.169	19.2074	9.5043		0.358565	14.9466
10.8321	14.6965	12.5162	16.1099	11.7608	13.34	12.909	12.3189	10.3963	7.8433	5.9267	5.8207	11.6375	10.4167	7.8091	5.1238	12.3651	26.732	28.85	12.857	10.0931	12.286	13.5963	10.892	18.914	27.526	8.669	26.329	17.9599	11.6033		0.362548	13.6999
10.9512	14.6695	14.3986	18.6186	13.385	12.816	15.4141	8.1218	12.5171	9.7081	10.7007	7.2208	9.5052	9.978	11.2597	6.3802	8.1709	19.894	33.502	8.537	9.7878	8.717	9.0031	7.647	16.702	28.789	12.392	29.386	14.7782	8.5973		0.366534	13.4689
11.0702	12.8382	16.3681	13.1043	13.452	10.549	15.556	12.2273	12.0511	8.639	7.6235	12.3652	5.3803	10.9527	14.3343	5.4997	9.3697	19.795	28.193	10.802	9.3435	7.552	6.2568	11.975	13.097	36.568	10.08	31.111	18.5732	7.6735		0.370517	13.4942
11.1892	10.4519	10.1742	14.2684	15.3823	13.623	17.755	11.7417	11.0786	8.798	8.8827	5.7153	6.4129	4.9416	17.6154	9.4984	7.5797	20.329	20.443	10.812	5.3365	7.779	8.5522	14.805	21.436	28.639	9.981	24.634	23.1802	8.9136		0.3745	13.0607
11.3083	9.9474	12.8083	14.6238	12.4971	6.901	11.9856	13.1061	10.6072	5.7389	5.5053	9.9331	7.4646	4.1508	16.0608	7.8876	7.5272	18.68	23.13	10.894	9.667	6.776	8.4112	16.279	17.031	29.651	12.878	32.407	21.1876	7.3829		0.378486	12.7972
11.4273	11.7824	9.3401	11.1246	19.6298	11.026	11.7156	12.0844	9.9436	6.5984	4.4489	11.632	6.6395	4.1461	11.3467	8.5499	10.9691	22.027	19.55	5.927	13.514	7.368	5.8788	13.173	9.619	29.05	11.935	25.804	14.8258	17.5113		0.382469	12.3159
11.5463	13.4286	8.5898	13.664	20.9213	10.763	9.2794	9.8772	9.52	9.1275	4.4589	8.6394	7.2335	6.9675	13.3941	9.779	10.2143	17.918	27.737	6.105	15.1157	6.288	5.1531	10.114	7.342	21.082	8.844	20.904	20.1314	13.3473		0.386452	11.9289
11.6654	11.8777	8.9252	14.1418	18.2861	10.281	11.0069	13.0574	14.3231	5.2655	4.8755	9.5131	8.1724	5.1187	15.1591	12.2165	10.185	17.974	19.628	11.52	14.1299	11.106	6.2681	10.713	12.689	23.785	9.934	12.9	22.7505	8.2539		0.390438	12.2088
11.7844	7.8655	9.3221	12.6376	21.0355	16.742	7.8573	8.6741	8.7748	4.299	4.4511	9.2636	6.8927	6.4186	13.6832	8.0094	7.4713	16.19	17.588	7.1	11.6863	11.393	8.6559	7.748	6.423	22.338	10.074	18.489	22.084	11.1333		0.394421	11.1828
11.9035	13.8941	12.3577	7.7617	23.2733	16.216	8.8555	8.6123	11.4348	5.4707	5.0692	10.7287	7.0134	8.1792	13.267	6.7981	10.7152	13.063	14.782	11.297	10.5503	9.768	7.251	7.404	9.211	22.637	9.319	14.138	22.4708	13.1257		0.398408	11.5401
12.0225	9.0405	5.7464	9.0352	23.873	9.385	9.084	10.711	16.7316	9.1632	6.346	7.7851	3.4136	4.9677	11.7013	9.0542	6.6113	15.388	18.851	7.471	12.3182	14.08	6.5124	9.115	9.496	20.689	10.673	14.562	20.0413	14.2448		0.40239	11.2445
12.1415	5.6591	7.3147	14.122	15.541	8.316	11.7904	12.6445	12.01	8.2092	4.1105	9.2998	7.1028	6.2458	11.3774	6.9009	7.2844	13.291	14.558	9.262	12.3808	12.915	5.5787	11.525	11.957	17.22	14.858	11.754	18.5755	14.6857		0.406373	10.9134
12.2606	5.0194	10.3299	14.0458	12.2125	6.707	10.7603	8.2508	9.1724	7.1103	9.0964	10.5971	6.364	3.6302	12.8522	10.256	12.0091	16.677	14.255	5.056	7.8609	12.338	7.8869	11.941	11.154	20.997	12.073	10.851	22.4223	21.3462		0.41036	11.1473
12.3796	6.4456	9.1044	13.2759	14.2971	9.083	9.0436	6.6088	10.8452	9.1693	5.1685	10.2637	8.3078	4.9375	11.7981	5.7328	10.2937	17.798	13.932	8.454	8.9623	12.625	10.8941	15.836	8.466	21.819	12.345	10.429	20.024	20.3119		0.414342	11.2507
12.4986	6.812	10.0586	15.2513	9.6751	11.97	9.843	5.8429	8.7077	8.5355	5.8349	9.7586	7.1319	6.6674	11.1019	5.2517	6.1086	13.062	10.875	10.549	9.6013	9.964	8.8848	15.674	13.434	19.76	10.8	10.807	26.4432	15.1592		0.418325	10.8126
12.6177	2.7426	9.4001	15.313	9.0142	10.85	14.3389	5.4131	12.5364	5.9713	8.8344	8.0766	6.8043	5.9845	6.6488	6.2139	4.3731	9.986	10.763	11.824	10.4576	6.752	13.9538	14.575	12.954	15.429	6.482	6.295	18.9836	15.2885		0.422312	9.87099
12.7367	4.0479	6.3664	21.0445	13.5698	5.717	9.5151	5.1149	12.1407	6.6959	7.7582	7.503	4.6679	10.4332	8.4311	8.4585	7.0063	14.267	11.276	9.572	9.7287	7.438	10.9335	13.6	9.976	19.087	6.854	10.989	12.3874	19.379		0.426295	10.1365
12.8557	3.6621	10.3407	19.6912	11.682	7.46	7.9902	6.0029	20.0149	8.5529	7.9395	8.4288	5.9019	9.8457	12.0003	7.2639	10.0217	11.389	15.272	7.828	9.4614	9.493	8.3456	13.751	10.441	16.168	6.672	12.98	11.9382	15.7921		0.430277	10.5631
12.9748	3.7634	7.9726	18.506	8.6935	8.253	10.2888	5.0703	10.6801	5.1469	4.5108	8.8261	5.8042	7.2772	7.3166	7.7431	7.1454	16.886	13.683	10.064	13.9202	10.072	8.7061	11.024	11.125	16.032	2.873	13.585	9.6844	13.6587		0.434264	9.59694
13.0938	2.071	8.1062	13.9807	8.3071	11.997	8.4958	7.837	8.9625	7.4756	3.7812	7.0892	4.9526	4.8741	6.4653	8.2771	9.6363	10.964	14.995	8.959	16.6527	10.965	9.5754	10.21	13.576	20.62	6.477	12.652	10.7875	11.4522		0.438247	9.66188
13.2128	4.6908	3.3062	11.886	12.5648	8.645	10.7852	6.0372	8.7177	7.6373	5.6621	6.187	5.6688	5.0773	7.7495	6.3017	9.7941	11.284	15.592	8.313	25.9678	6.769	14.3199	10.928	14.154	21.786	4.728	12.898	13.9045	11.7895		0.442229	10.1084
13.3319	2.1098	9.2885	15.2549	11.3669	6.61	5.7126	5.0451	5.6279	6.2317	7.1156	7.3762	5.861	3.8556	6.4348	5.8638	7.4084	15.681	14.478	9.925	25.5838	8.2	11.7036	9.57	12.101	21.194	5.562	8.017	12.8275	10.1486		0.446216	9.52256
13.4509	2.6763	6.3019	19.4714	6.9834	6.962	6.1639	5.8079	6.8831	10.1701	7.4599	6.6432	10.526	5.4857	8.2748	5.9688	4.3106	17.587	16.186	13.013	17.668	10.926	12.3744	12.116	15.776	22.191	8.675	6.356	8.5463	7.8307		0.450199	9.97705
13.5699	1.5972	3.3678	18.2411	9.8244	7.023	7.8558	2.6214	5.4277	9.6182	8.0074	5.8413	6.0582	4.4644	6.2832	5.3205	3.5165	14.553	17.746	15.998	30.2228	8.886	13.7381	11.266	10.145	20.366	7.993	3.85	7.6631	7.2571		0.454182	9.47421
13.689	2.4945	3.8702	11.5365	5.2289	5.307	5.9248	7.0497	6.1525	7.567	7.4683	7.0788	7.881	6.6755	7.1589	3.6827	6.7606	18.001	17.737	13.489	19.2753	11.281	9.9653	13.181	11.487	17.785	10.474	2.755	9.3722	5.8977		0.458168	9.05301
13.808	3.5788	3.0539	12.5517	8.2392	3.117	8.9895	5.6356	4.3753	7.9516	8.7527	7.4093	11.3529	6.33	3.3706	4.7988	8.8067	29.959	13.934	13.786	22.657	8.546	12.4619	11.42	7.055	17.108	3.782	4.789	11.0882	6.1899		0.462151	9.34792
13.927	2.3977	6.1502	12.1887	4.9381	5.291	5.3136	4.487	7.4169	8.3601	4.9831	9.0644	8.5356	3.2495	4.4059	6.1585	4.4263	27.173	11.102	13.135	19.5787	8.447	9.3022	15.924	12.543	17.781	3.566	3.606	9.299	8.8868		0.466134	8.88656
14.0461	5.5064	2.74	11.8963	11.1419	7.558	5.5492	5.4478	6.0082	9.1292	6.2355	6.4325	7.3541	6.1306	5.2984	3.9978	3.271	27.765	13.022	11.915	12.8808	10.744	9.7786	12.914	10.782	15.105	4.235	6.021	9.5404	7.5133		0.47012	8.82459
14.1651	6.0363	3.5761	16.3946	8.8296	3.369	3.3543	7.5788	4.6647	5.0254	5.4255	9.952	4.8163	3.4531	2.7985	4.8106	9.5691	22.401	14.765	12.572	10.7011	13.354	8.2141	10.358	14.273	14.782	3.858	3.654	9.8821	4.9004		0.474103	8.39202
14.2841	2.1391	3.4269	11.6119	6.0668	5.585	5.1612	5.2085	6.0634	6.201	7.2414	11.0452	7.4285	5.4494	1.4111	5.7093	8.6879	17.61	9.963	12.477	11.4788	13.038	10.7896	12.347	11.791	15.967	4.835	5.489	8.476	13.6906		0.478086	8.49616
14.4032	2.0655	3.0941	11.9708	5.5406	2.982	5.7359	4.7119	6.9172	6.5522	4.2629	5.1372	7.8544	2.2428	2.5149	6.395	11.2415	17.406	13.785	14.293	14.8593	9.7	14.9455	11.033	16.045	13.715	4.475	5.278	4.6202	9.6554		0.482072	8.24239
14.5222	1.8207	4.3199	11.7077	3.1626	4.295	5.3532	4.8495	6.6745	3.6496	6.234	5.4064	8.0329	3.7884	6.0225	2.6961	8.4907	25.344	15.982	9.89	21.9391	11.106	9.086	8.895	13.836	15.425	4.264	2.829	3.5779	8.3958		0.486055	8.17495
14.6412	3.3119	3.5288	12.9632	2.0258	4.288	4.0083	8.1437	9.4514	4.7487	4.1732	7.071	8.2535	6.0531	3.7995	4.3683	6.7516	17.312	11.556	7.228	25.491	8.398	13.2473	12.545	15.254	12.75	5.058	2.184	5.6743	11.508		0.490038	8.31537
14.7603	2.7614	2.9306	9.0013	4.3467	2.765	4.5905	5.7733	5.4171	4.7738	4.088	7.4785	5.9466	6.0608	7.0143	4.8458	6.772	16.484	12.957	9.162	29.941	8.873	20.0134	11.433	21	12.922	6.767	2.002	5.2718	14.1075		0.494024	8.81032
14.8793	3.622	3.1923	10.5872	3.6799	2.22	4.3884	7.0787	5.8418	2.5049	4.2539	4.1416	5.6462	4.9283	7.0659	3.674	9.2929	25.054	11.089	5.827	29.5723	12.767	25.4481	7.701	19.6	11.74	5.185	1.358	5.3988	12.0242		0.498007	8.78905
14.9984	1.2011	5.7606	8.9361	2.5776	4.256	6.7189	5.285	6.3439	3.4311	5.9346	4.4233	7.6681	2.5846	4.8183	4.6772	8.9824	16.36	12.182	4.017	28.379	11.344	37.0108	9.51	26.751	14.196	4.919	3.572	5.9213	14.6168		0.501993	9.39233
15.1174	3.21	3.5983	8.5516	7.5025	4.886	7.1429	5.1793	4.4047	3.7877	3.8705	7.4969	7.7149	3.9679	0.9116	2.0657	6.8406	13.447	10.842	3.488	21.8188	11.568	27.2879	10.051	17.866	11.772	3.604	3.692	4.5828	14.6878		0.505976	8.13236
15.2364	3.5223	4.9045	11.6494	4.1132	5.376	8.5271	4.474	6.6625	6.5166	5.2622	8.3172	3.3969	2.7422	2.0745	2.9254	8.6597	20.625	15.175	5.488	13.8712	9.721	24.3533	7.512	18.919	8.991	5.252	2.753	7.7216	19.2841		0.509959	8.57896
15.3555	2.7833	3.0352	9.7304	4.2106	4.205	5.4486	5.535	2.9729	4.0497	4.7519	7.8356	5.2744	5.5255	0.9461	3.1223	10.0995	23.328	19.203	7.003	12.0625	8.378	21.5149	7.164	17.83	10.563	3.956	1.489	3.9716	18.9329		0.513945	8.10076
15.4745	3.3752	2.203	16.1743	3.9769	3.874	3.9517	4.2169	5.3907	2.6629	7.5884	7.8523	11.2937	4.3019	3.7166	7.7761	6.624	15.469	17.192	7.775	9.8578	8.479	14.2657	5.562	18.813	8.619	4.191	5.21	4.795	15.9926		0.517928	7.9724
15.5935	2.0174	3.9464	11.024	5.9092	3.718	4.9368	5.6119	2.4428	3.1354	6.1464	10.1526	7.9756	1.8203	4.3812	3.0088	7.0693	15.08	10.832	3.641	6.1046	8.325	12.0992	9.65	11.844	8.655	3.403	3.456	3.3777	13.1624		0.521911	6.65262
15.7126	2.9847	3.7057	10.242	5.8798	3.923	5.6903	5.6814	3.6261	2.8937	10.8049	10.5685	6.731	3.5022	2.7228	2.0262	11.6355	15.69	15.135	2.847	4.2655	10.867	15.7429	7.953	13.006	9.062	5.019	3.609	3.2526	10.8386		0.525897	7.23812
15.8316	1.954	3.2643	9.6687	4.0494	3.427	5.9698	6.769	3.6169	2.7966	11.0934	10.915	4.3466	4.1035	3.3865	1.995	12.7453	11.697	9.774	4.512	5.5119	6.991	22.569	7.542	9.656	14.955	4.568	2.664	5.0698	7.674		0.52988	7.00982
15.9506	1.772	1.661	7.0027	3.9217	4.507	3.7765	7.4983	5.0409	2.4792	4.1127	8.3981	4.2679	3.8533	4.1256	1.6267	13.178	10.585	6.624	5.428	5.3217	4.838	22.5565	6.459	11.154	7.159	5.111	3.774	4.1517	9.989		0.533863	6.21974
16.0697	3.2665	5.9349	9.5616	4.6264	2.81	2.6728	6.9069	2.054	2.6688	5.5219	5.3684	4.6072	2.3315	2.1536	1.9133	8.4356	9.255	8.316	3.694	3.641	8.573	16.4959	11.497	11.451	6.299	3.533	2.956	2.2311	7.2524		0.537849	5.7251
16.1887	2.5879	3.7675	7.4563	4.7675	5.549	3.2825	6.4768	1.8474	2.3779	7.6421	5.6396	4.1332	1.8247	1.9812	4.45	8.9395	9.137	7.815	5.639	4.1906	7.397	20.3668	8.366	10.266	8.191	2.97	6.739	4.1549	10.4111		0.541832	6.15057
16.3077	2.6441	3.3448	6.7302	3.3465	3.624	2.5464	7.8547	3.6271	4.6313	7.1845	6.8359	5.0001	2.854	2.1944	2.1311	6.8701	10.033	8.076	5.115	3.4247	10.444	19.0969	6.312	24.56	9.769	2.162	3.168	7.0785	8.8025		0.545815	6.53313
16.4268	1.7783	4.4549	6.9836	3.5566	3.804	3.138	9.5799	3.8727	3.9617	5.8537	5.7866	7.517	3.5392	0.787	1.8078	5.0829	9.88	6.771	6.144	5.1887	8.445	19.5617	7.427	28.85	8.177	3.082	1.959	8.7533	9.6033		0.549801	6.73607
16.5458	3.2466	5.4571	9.4675	1.6439	3.644	2.7856	5.7033	2.9491	3.2435	4.1499	4.711	8.5542	1.3511	1.7154	2.3351	5.1069	13.433	8.121	5.294	5.6291	8.909	21.2559	6.729	23.494	6.839	1.35	0.99	5.5421	6.8327		0.553784	6.22355
16.6648	1.8511	3.886	10.8607	3.092	5.672	0.8711	5.5015	2.5776	1.1699	6.7316	4.7179	9.348	1.6885	4.5181	2.536	8.3221	12.225	4.811	3.518	5.9523	9.565	24.487	7.415	16.694	6.026	3.598	3.768	6.4532	6.1238		0.557767	6.34415
16.7839	1.7128	3.7284	9.9049	4.9702	2.395	1.6107	7.8647	2.4269	4.8321	6.9831	3.3308	6.2858	2.3948	3.7673	1.1779	6.9448	15.935	6.681	6.501	7.5169	7.329	27.5257	9.452	30.446	7.582	4.963	4.617	6.336	7.049		0.561753	7.31944
16.9029	1.5723	2.384	13.2244	3.0549	1.808	2.0621	8.2099	4.4359	3.8654	12.3866	2.7898	7.6491	3.1057	2.5821	1.4561	8.2029	15.586	9.191	3.307	8.9398	12.773	20.3158	8.451	18.669	9.483	3.618	2.632	5.5609	8.9903		0.565736	7.114
17.0219	3.1875	3.1146	13.9686	2.5007	3.429	3.0202	12.8469	2.3959	2.8266	4.9496	5.0201	3.6161	3.4466	4.1118	2.2256	5.4398	13.51	7.881	4.562	10.3158	12.591	17.9671	5.255	16.506	12.504	3.968	2.828	3.8792	9.3488		0.569719	6.80053
17.141	1.3563	2.2303	8.4821	3.5298	4.168	1.888	7.1937	2.0787	1.4459	8.7348	5.8311	6.9512	3.3676	2.5994	1.2891	6.6348	12.867	5.576	4.093	6.5382	16.29	20.3004	9.331	16.786	10.327	4.043	1.385	5.9425	9.6584		0.573705	6.58339
17.26	1.8104	4.2539	10.9253	5.0827	3.301	2.7517	7.0481	4.1027	2.3994	9.5403	4.9748	6.8206	1.0285	2.9339	2.1681	6.4195	19.918	6.147	4.126	8.464	13.233	12.1596	7.638	10.698	5.922	2.752	0.558	7.2947	11.419		0.577688	6.41001
17.379	3.0316	4.0053	9.5912	8.2889	2.096	4.1426	4.787	3.5513	2.5579	4.1977	8.489	7.9392	3.81	2.8971	3.7958	7.8164	16.844	7.384	3.712	5.2804	14.484	19.707	9.263	9.646	7.493	2.409	2.729	5.7647	11.1337		0.581671	6.78782
17.4981	2.8425	4.8275	8.3298	5.0851	3.454	5.7758	6.2066	2.7416	3.6839	4.2105	4.4453	6.2253	1.9335	2.1652	2.1706	9.5789	24.911	6.104	2.993	6.057	19.668	17.4278	8.839	6.83	8.253	1.654	2.694	9.4624	12.5927		0.585658	6.93662
17.6171	0.6312	3.3711	6.2669	8.916	2.811	3.3971	4.7932	2.3572	2.795	3.112	6.5153	4.6546	2.2346	2.2458	4.4033	7.3822	18.388	6.758	3.652	6.4425	18.97	8.5849	10.516	7.812	10.638	1.563	3.61	9.0243	12.471		0.58964	6.35573
17.7361	1.5148	5.4386	6.3975	3.574	2.035	3.6931	6.0465	1.9409	3.7236	3.2171	6.8083	4.5154	3.0897	1.1365	2.5526	6.1292	20.236	7.533	2.344	9.336	13.69	10.9288	12.153	12.166	13.568	3.782	2.441	8.8729	9.4261		0.593623	6.49274
17.8552	3.4655	4.8058	5.3485	6.553	2.097	6.8597	2.0542	2.1556	3.5544	3.2878	6.1126	2.8087	1.5022	2.0967	2.5225	6.3637	18.53	7.282	3.402	7.8055	13.842	11.0323	12.128	11.242	8.41	4.469	4.954	8.0692	9.7143		0.59761	6.29201
17.9742	2.1631	5.0751	9.0333	5.3466	2.626	6.3739	2.2629	2.3362	3.3601	4.2454	8.0949	8.1172	0.5967	3.1203	4.0796	7.7304	17.71	12.349	3.54	8.0581	14.395	10.3753	11.784	7.672	11.16	2.118	2.974	6.0711	7.9084		0.601592	6.57506
18.0932	2.9361	6.0808	6.3996	6.2318	2.676	4.2371	4.1389	3.231	2.9854	5.2319	7.8076	10.4573	2.2895	1.9553	1.6584	9.3449	16.334	10.138	7.167	7.4904	13.222	7.0187	7.986	8.215	11.586	2.117	6.312	8.4447	8.6793		0.605575	6.63351
18.2123	1.412	7.6142	5.7583	4.7498	2.265	4.7719	4.9013	3.1425	4.6288	6.144	8.7393	6.1459	7.5537	4.7075	1.9281	8.9464	13.658	8.91	9.807	8.4205	14.955	7.5918	11.721	9.245	9.728	5.421	3.76	7.455	6.8778		0.609562	6.92961
18.3313	1.7803	6.8575	11.428	5.235	4.731	4.7915	6.8585	5.6759	4.0268	7.4843	8.5489	5.3804	2.2142	2.6175	2.7379	7.9938	9.468	7.524	16.403	6.6659	11.602	8.0959	13.274	9.327	14.381	3.875	2.571	13.3981	4.9742		0.613545	7.23864
18.4504	1.1679	9.2974	7.3167	5.1756	3.059	4.1408	6.0423	3.0421	1.9816	11.3376	9.5894	7.8176	5.0914	1.5001	1.988	9.7471	17.794	4.717	17.485	6.7155	13.965	9.9187	8.551	9.218	11.993	3.295	4.385	11.3827	4.8063		0.617531	7.3283
18.5694	1.778	4.8446	5.9539	1.8208	3.799	2.4106	5.5285	4.288	3.533	11.2561	10.5932	6.7664	6.1186	0.853	3.1627	9.0199	16.253	2.79	19.618	8.0388	14.925	13.6575	8.434	8.098	9.555	4.742	2.163	8.4685	5.8397		0.621514	7.04513
18.6884	1.1144	8.0422	6.4468	7.4976	3.106	2.5059	4.3184	3.184	2.4698	7.1163	10.115	7.7726	1.9042	2.2192	6.6609	10.6571	13.302	3.547	22.205	8.2351	12.288	13.7747	11.429	6.423	18.255	5.241	3.918	6.1573	6.6575		0.625497	7.46769
18.8075	1.488	6.076	7.7895	4.6598	3.782	4.7372	3.6005	2.5964	2.2127	7.9713	6.0753	7.5236	1.8689	2.5928	4.4754	10.7285	10.822	6.235	9.478	10.562	15.547	13.6011	5.812	10.428	25.353	3.102	3.12	8.8316	8.7795		0.629483	7.23618
18.9265	4.301	7.6201	9.5806	4.3087	2.105	2.9736	5.3683	1.0847	1.5224	8.4337	5.4576	5.5364	2.4056	2.7062	3.913	9.0867	9.09	6.719	5.322	5.6144	18.342	7.7811	11.32	5.212	19.928	2.702	2.652	10.6166	5.1111		0.633466	6.44186
19.0455	3.0858	6.3096	3.4882	1.7207	3.061	1.1176	4.1661	2.9862	2.8206	7.8992	2.8741	3.3709	2.4742	3.4929	4.0064	7.198	15.157	9.319	7.226	4.1011	23.685	11.8181	6.789	4.952	28.478	2.06	1.485	11.8167	6.9963		0.637449	6.68809
19.1646	1.9908	6.111	6.0339	3.6029	4.042	4.5976	5.8237	1.7456	3.5755	4.9585	8.7222	5.2659	4.0428	2.4281	2.8115	8.2363	12.127	11.91	2.699	2.7826	21.297	16.2228	8.808	11.08	14.525	2.82	2.293	15.9099	8.8159		0.641435	7.07857
19.2836	0.967	7.8277	6.5033	1.5809	2.995	3.7767	3.9378	2.7189	1.1002	7.6376	5.8777	7.0802	4.5114	2.2977	4.0484	7.2971	11.664	13.836	5.97	3.5779	25.49	14.4543	7.779	10.056	17.111	3.692	1.251	14.5282	10.2505		0.645418	7.23509
19.4026	1.6432	5.7859	10.7307	3.4218	1.228	1.9285	9.4331	6.3098	3.5397	6.2922	4.8586	6.4413	2.7949	2.5044	1.7005	6.6342	11.614	11.847	6.622	4.0939	22.877	14.1908	12.531	8.402	16.22	4.13	2.734	17.6704	9.5003		0.649401	7.50618
19.5217	1.7144	4.6145	10.6738	1.7257	2.774	1.8348	5.928	4.7796	3.9318	6.7078	4.6337	6.0567	1.263	2.1098	1.4259	6.3454	8.344	13.097	8.02	6.2941	14.225	17.1968	10.416	8.948	13.414	2.347	2.773	13.6529	7.5983		0.653387	6.64983
19.6407	3.5568	5.9213	4.3608	5.8762	0.913	2.2333	3.5978	4.6791	3.6569	7.5696	1.377	6.694	1.4497	2.2488	1.477	6.6009	8.432	12.137	6.636	4.5034	13.525	15.1613	11.302	8.508	12.298	2.843	1.378	13.3697	10.6422		0.65737	6.30854
19.7597	1.1927	3.8444	8.2412	4.2365	0.46	4.2222	7.9467	8.3298	1.569	6.2011	6.57	10.5546	2.4235	2.2586	3.2034	4.1333	8.766	19.15	9.882	5.8173	12.092	19.4665	9.923	6.875	8.406	1.575	1.507	21.087	6.489		0.661353	7.11803
19.8788	1.3984	6.6099	6.957	2.9583	3.554	2.1415	4.9489	6.006	0.4433	8.2825	5.3022	7.4083	4.2537	2.3264	4.6343	3.8557	6.367	21.454	7.341	7.4432	10.525	14.9877	7.251	6.08	8.536	3.155	2.36	15.0528	13.8123		0.665339	6.7395
19.9978	2.0704	3.7818	9.3627	3.6086	2.884	4.5768	5.1662	4.4511	2.6142	6.1168	4.7798	4.9834	3.6318	1.6062	3.7462	4.2236	10.743	21.281	10.67	7.6687	14.369	13.6093	7.593	5.479	4.302	2.319	1.737	12.9978	12.6332		0.669322	6.65537
20.1168	1.7572	5.8178	8.9898	6.2206	2.946	6.1792	7.2479	3.5101	4.1295	6.5858	6.4322	6.9306	3.211	2.1161	4.5119	1.7903	11.444	14.501	5.91	6.7048	10.772	15.0436	4.902	5.104	8.598	2.228	5.017	18.0027	6.8134		0.673305	6.66953
20.2359	2.1694	6.3625	2.9302	6.8359	4.894	2.6698	8.9212	4.4524	0.9195	5.7069	5.4917	5.2441	5.9375	4.3867	5.6658	6.8826	10.95	15.275	4.225	7.7981	17.241	16.1653	3.44	3.294	8.544	3.092	1.922	12.0882	7.6047		0.677291	6.58998
20.3549	3.7677	4.2015	8.8508	4.2697	3.437	4.2634	9.4088	5.3362	1.8026	3.9393	5.9166	11.5672	1.6961	2.9824	5.0067	4.7122	8.701	17.107	3.676	9.0845	17.118	13.2667	3.637	5.244	7.434	3.937	2.058	12.1549	6.8056		0.681274	6.59938
20.4739	2.7233	4.7233	8.8241	4.2888	2.667	5.3284	3.8413	4.7001	3.5967	4.2523	7.3751	8.7214	2.9528	2.7961	3.4737	10.3738	8.411	11.577	6.483	11.2336	13.414	9.5842	9.831	8.577	11.453	4.554	2.301	14.1587	6.632		0.685257	6.85682
20.593	2.3665	8.9166	9.2667	4.3409	2.483	8.1528	3.8221	4.0348	5.8903	3.9743	8.3483	9.5974	4.8528	2.5854	4.3513	6.7372	14.544	13.716	6.154	10.192	14.081	10.1586	4.565	8.268	10.839	5.344	2.068	15.5085	6.0846		0.689243	7.28424
20.712	3.0337	9.6761	9.1753	3.4681	4.826	3.3474	5.2715	1.6563	5.3167	4.5561	6.0638	12.0515	4.8699	0.5397	2.7418	7.154	14.251	16.699	6.319	14.0813	11.883	10.0045	3.968	7.187	11.136	5.36	4.75	16.0359	5.0896		0.693226	7.25904
20.831	3.344	7.3993	10.7524	3.1793	2.928	6.2794	5.1548	2.4071	3.1002	6.6507	3.9737	9.5111	1.5005	2.234	5.0731	6.2933	17.14	16.814	5.393	6.0794	14.171	11.011	3.4	4.879	10.276	7.533	4.234	17.6766	9.5275		0.697209	7.1695
20.9501	2.5985	5.2813	5.5186	2.2438	1.169	4.5875	7.27	3.332	4.8196	6.8894	2.9278	9.1438	2.9201	3.3416	4.93	8.5814	12.024	15.142	6.101	5.624	8.93	7.9839	6.3	4.462	12.832	10.662	2.396	13.2267	11.1003		0.701195	6.63236
21.0691	2.4691	5.8018	6.897	3.2621	2.675	2.4644	6.6376	4.548	5.1837	6.5249	2.8526	5.0299	3.7786	2.3634	3.4776	7.9542	14.901	20.294	5.563	9.3325	12.495	4.9764	10.316	7.203	14.723	2.114	2.68	10.8949	9.6186		0.705178	6.79418
21.1881	5.0771	7.5149	5.4694	5.8716	2.014	3.9746	2.7791	4.3457	4.7003	5.9411	8.029	3.4266	7.9534	3.0518	7.2184	7.8261	17.291	15.817	5.455	8.2385	8.99	9.7094	6.742	5.355	14.878	4.788	1.229	15.7022	7.6134		0.709161	7.13799
21.3072	8.679	5.6385	5.6186	3.5835	4.472	3.8407	3.0859	4.0647	5.3696	4.0852	8.1874	2.285	5.1176	6.4043	4.8658	5.8362	14.447	18.173	6.537	8.6201	10.002	8.0021	7.436	5.409	14.487	4.622	3.534	12.4249	8.4463		0.713147	7.00946
21.4262	4.9801	5.1852	3.0839	4.408	5.198	4.4455	2.772	4.6925	1.8044	3.6288	3.0153	4.7207	5.3642	1.6812	3.1198	7.4875	13.837	11.775	10.824	15.5846	6.436	5.9278	8.776	6.11	13.051	6.629	2	7.2842	10.15		0.71713	6.34385
21.5452	4.5252	9.8296	4.8016	3.7898	2.48	6.8745	5.0608	2.5091	3.7664	3.6801	9.9465	6.1998	6.8342	2.2649	5.9321	7.5446	13.764	10.717	5.932	19.6509	7.969	6.0038	11.528	5.01	10.591	4.886	4.467	9.9578	9.8094		0.721113	7.11466
21.6643	3.92	6.5513	4.1687	3.1356	4.179	7.5771	4.4894	1.936	4.0252	5.626	6.843	3.9335	8.7249	3.0395	6.7057	6.786	10.51	8.058	6.317	15.5311	9.385	6.3226	11.282	4.518	11.208	4.91	4.205	11.7753	14.4947		0.725099	6.90199
21.7833	3.1806	2.0608	3.7418	2.6652	2.824	4.0537	4.9888	4.5573	7.5913	1.7422	4.9332	2.7079	6.0052	3.8253	5.9051	8.1526	8.587	4.671	10.5	20.0773	12.265	6.194	9.081	6.77	8.008	7.979	2.453	9.1038	13.294		0.729082	6.47993
21.9024	2.8393	3.9668	4.6759	3.1042	5.598	8.8464	6.0291	4.9793	7.0406	4.6119	4.8969	7.6229	4.2308	1.7803	10.6111	7.7861	7.371	8.952	13.378	21.0589	12.854	7.636	10.46	5.112	7.786	3.593	4.394	10.6966	10.8231		0.733068	7.33566
22.0214	3.2257	8.9144	4.853	4.9116	2.845	9.2889	7.8446	4.1855	5.1396	3.1248	6.3418	3.7922	7.3267	3.3629	15.0127	6.3666	10.519	6.643	8.987	26.6496	12.315	6.7982	9.486	7.258	12.266	3.662	5.997	9.8226	7.5967		0.737051	7.74262
22.1404	4.6084	8.3965	4.779	4.8705	3.9	6.6271	6.226	4.1019	6.5574	4.3512	7.8157	3.2821	8.0259	2.8092	9.8723	8.4476	5.52	11.658	10.407	23.4255	15.589	7.9498	11.718	10.759	8.587	2.453	6.447	6.7711	9.5571		0.741034	7.77629
22.2595	4.9294	9.4044	6.6781	3.4072	3.714	6.476	3.4778	1.928	5.8872	6.3991	5.8109	6.3663	6.9831	2.3362	15.8238	5.9837	7.379	16.32	10.808	22.044	8.493	8.4764	14.21	7.264	10.568	5.985	5.712	10.0458	10.0443		0.745021	8.03292
22.3785	4.6021	5.5683	6.2888	4.5226	3.959	10.7851	4.0896	1.5719	3.2282	5.0132	5.9736	3.8837	5.8958	4.0256	16.716	8.3388	6.463	13.756	5.809	26.0419	7.281	8.551	14.715	4.88	9.713	8.052	6.682	11.6489	12.3558		0.749003	7.9452
22.4975	3.9513	5.2161	4.7241	7.247	1.878	5.1835	4.26	2.7097	4.5095	4.9453	6.4748	6.2509	8.394	2.5218	14.2005	7.1505	9.404	16.986	6.3	24.0885	12.413	12.1021	12.038	3.715	9.559	7.769	7.128	10.0779	11.7663		0.752986	8.03323
22.6166	3.9823	6.4597	2.6161	5.0108	2.707	9.6329	6.3717	4.4712	5.1459	4.548	4.3264	5.4455	11.5649	4.2878	12.6411	7.8784	5.393	13.869	16.763	27.7928	8.466	10.2711	13.852	4.924	7.881	9.881	5.159	14.01	18.4748		0.756973	8.75263
22.7356	4.3596	8.0413	4.233	5.0543	3.447	6.1887	8.9422	4.1285	5.4905	2.057	3.1527	6.0379	12.4768	4.884	12.7535	7.0724	8.534	10.998	10.903	29.6765	6.618	8.3966	14.682	5.523	7.248	10.736	8.858	13.5557	14.7448		0.760955	8.57907
22.8546	7.0814	8.6327	5.0822	5.8376	5.048	5.2206	8.3038	2.4823	7.1823	6.6544	3.4485	4.2999	5.8224	3.0871	13.7961	7.8218	4.248	9.918	13.945	25.6046	9.232	6.6291	14.23	5.296	9.44	9.241	6.708	14.5086	12.6468		0.764938	8.3258
22.9737	7.2141	10.2246	3.5101	6.8326	3.739	5.7803	9.0263	3.6486	6	6.9521	3.4379	4.7049	9.912	3.1226	13.6863	6.1596	7.482	11.905	12.45	28.7474	11.35	7.4513	13.239	6.44	12.575	10.709	3.317	13.5768	12.231		0.768925	8.80774
23.0927	6.0396	9.4121	5.424	6.7309	3.088	4.6165	4.0088	3.5627	5.8994	7.0164	3.3584	5.4846	10.1741	1.8512	13.2073	6.5658	6.268	10.469	15.495	30.5577	13.172	9.204	8.454	4.227	18.279	12.49	8.396	21.6936	12.5294		0.772908	9.23016
23.2117	7.0779	9.109	5.6967	6.1755	4.391	2.0144	7.6754	6.7882	4.8394	6.1414	4.3013	6.2699	8.7968	2.3868	13.876	9.6678	7.679	9.493	13.299	28.5019	10.449	6.7327	10.363	4.429	15.856	12.666	10.952	15.9178	8.5481		0.77689	8.96876
23.3308	4.9464	11.9003	9.0815	5.2136	3.803	4.0309	5.2175	6.0954	3.1077	5.2031	2.5844	6.8765	8.7804	4.7264	13.2982	4.1661	9.539	8.826	14.498	22.1354	13.164	3.6766	10.965	5.423	15.935	8.42	7.663	16.3458	6.2957		0.780877	8.342
23.4498	4.8721	11.6711	5.4624	3.5006	3.295	3.0048	6.807	3.089	5.6855	7.4308	2.3061	7.4704	8.6359	7.4293	14.8391	6.8665	9.009	5.334	15.612	22.2914	11.441	2.8932	9.988	4.937	8.651	10.003	11.594	12.2021	6.5042		0.78486	8.02847
23.5688	3.486	9.4021	5.0288	6.1193	4.595	2.8159	6.3368	3.7199	3.5518	8.019	5.1908	5.7465	7.4045	5.8218	12.0951	5.1479	11.617	4.927	18.174	16.3431	17.625	3.2747	10.095	4.453	11.327	13.746	14.04	10.385	8.7775		0.788843	8.25053
23.6879	5.606	11.5162	4.0219	5.8849	7.108	6.7902	2.3893	6.9522	6.2628	5.2923	3.3877	5.5738	9.2708	2.6205	13.7197	3.4855	7.126	7.463	14.674	17.4562	14.43	2.8529	6.124	2.963	15.653	13.476	14.374	10.0502	5.0727		0.792829	7.9861
23.8069	5.2711	11.1757	7.5461	6.8686	2.679	9.6757	2.9435	5.0942	5.6285	7.0635	5.3135	3.7194	8.4396	2.4378	6.5775	4.6957	9.857	5.97	14.313	19.8447	14.439	3.6571	6.842	2.78	15.856	14.378	15.071	8.6979	6.4433		0.796812	8.04408
23.9259	5.0553	8.3157	7.3304	3.8154	3.503	6.1648	3.3576	6.1609	4.5153	6.7416	6.8558	3.9383	5.4945	2.8996	6.8878	3.5853	12.646	9.407	14.195	18.3877	16.116	5.7307	5.393	3.059	17.526	13.395	11.261	9.9849	4.1978		0.800795	7.79036
24.045	6.3883	9.4615	7.2597	6.2585	4.383	4.4635	5.6514	3.8224	5.6994	4.1118	6.4252	3.4027	5.7187	5.8615	10.1192	3.5606	9.866	8.826	12.441	14.0558	16.987	3.0621	6.125	1.716	14.285	10.907	7.853	10.8893	8.5516		0.804781	7.52249
24.164	4.328	6.8323	7.6457	7.3264	6.099	8.2638	10.5679	3.5718	5.7645	7.2827	7.1634	0.9294	8.4596	7.9343	3.8724	7.5685	13.063	5.823	9.215	20.1358	13.034	4.3552	4.599	1.389	18.315	12.945	13.163	10.8313	6.1646		0.808764	8.16009
24.283	5.8405	5.9097	6.293	8.6081	3.815	5.1302	4.5193	6.4617	2.8308	6.6914	6.799	2.609	5.1945	4.2969	6.0684	4.1896	11.012	5.452	12.371	16.3525	12.476	3.9238	2.974	1.427	16.757	12.64	12.947	8.9435	7.712		0.812747	7.24982
24.4021	5.3959	5.5879	4.6545	7.1489	3.05	5.6468	4.9665	6.7606	4.7493	5.3638	8.1905	3.391	6.027	4.9201	5.0674	3.5158	8.925	4.527	10.162	19.782	8.526	2.1594	2.807	2.921	13.691	14.714	10.117	7.5564	8.6995		0.816733	6.86287
24.5211	8.0463	8.4097	3.064	5.2487	8.446	6.0567	7.8105	6.3736	6.927	2.6597	7.5241	3.0861	6.1366	4.0314	6.9061	2.8528	5.587	6.689	9.044	25.0732	12.868	3.1473	1.874	2.767	11.69	16.038	11.271	20.9708	4.8329		0.820716	7.7735
24.6401	7.7966	7.9894	5.3934	5.1125	7.565	6.063	8.4571	4.271	3.8715	4.9025	8.9991	4.1469	6.8401	7.232	8.8289	3.1869	7.123	9.528	8.109	18.0908	10.687	1.4803	1.972	3.436	12.762	11.145	12.486	16.292	7.9207		0.824699	7.6444
24.7592	9.8209	6.6346	4.6016	5.5481	4.252	5.372	7.0051	5.4149	6.1731	3.0162	6.33	5.1427	8.1771	8.1129	12.971	3.9275	5.9	7.297	11.033	19.9736	7.923	2.2561	2.442	1.574	6.707	11.614	6.732	12.7489	5.1534		0.828685	7.02944
24.8782	7.8898	7.721	6.3947	6.3273	6.587	7.8938	7.1004	6.4971	6.5925	8.9381	7.4418	5.3085	4.7632	6.5859	9.5656	2.3067	7.026	9.404	6.368	17.0387	6.005	1.4981	2.276	2.453	6.169	9.393	11.008	12.7868	6.5777		0.832668	7.10058
24.9972	6.2207	4.4909	6.4299	4.3645	2.461	6.558	8.5331	6.8489	4.922	6.4431	5.5087	2.0427	9.3576	4.643	12.7402	3.618	7.595	11.596	6.252	12.232	5.524	2.3803	1.282	0.691	8.467	10.365	13.062	9.4694	8.5925		0.836651	6.6445
25.1163	11.6631	3.8089	8.1944	3.6636	8.005	4.7823	4.0267	7.3881	3.8171	6.8606	7.6335	1.227	9.7354	5.8229	7.2226	1.7273	9.998	8.311	8.612	7.5457	3.817	1.5899	1.321	2.49	13.004	12.359	8.973	8.485	6.3821		0.840637	6.49883
25.2353	13.0301	3.1694	5.2082	6.9819	6.165	6.8395	6.1913	6.8546	2.3183	8.2772	8.901	3.7924	12.2929	8.5309	6.7548	2.2457	6.509	15.396	8.297	8.26	5.119	1.6564	1.665	2.109	9.391	16.786	10.011	11.4129	9.1929		0.84462	7.35719
25.3544	9.9744	5.4284	3.2933	4.9677	6.03	6.6415	3.7274	4.6621	5.0753	7.7215	12.585	4.9007	11.9357	17.117	7.9287	3.1564	6.865	15.345	11.672	10.3982	7.143	1.1055	2.49	0.751	5.825	13.382	7.807	13.0858	6.8296		0.848606	7.51187
25.4734	8.2162	5.1995	4.4907	4.0397	6.665	3.2892	5.5231	6.4089	5.8756	7.6402	8.9307	2.9122	7.9848	11.9393	7.4234	3.7677	5.445	14.541	10.202	5.6241	4.291	1.9286	3.62	1.11	6.227	11.364	11.246	13.8655	10.1533		0.852589	6.89392
25.5924	12.3841	4.0262	6.189	1.8924	3.235	4.0667	5.127	3.4846	3.7037	5.0097	6.4757	1.2068	11.3705	12.9139	7.8276	0.4328	6.449	13.772	10.916	8.6674	4.292	1.3277	1.372	2.937	9.923	9.784	12.413	7.1638	6.3946		0.856572	6.37094
25.7115	10.9946	5.9725	5.4614	6.2772	7.783	5.5594	1.4054	4.4189	8.2115	7.7312	6.075	0.5902	8.7461	14.8621	8.1411	1.4382	8.1	16.86	11.185	3.9196	3.079	2.0485	2.491	1.461	13.636	12.053	9.385	7.2141	5.66		0.860558	6.92276
25.8305	6.6695	3.7552	2.001	6.174	5.237	4.6247	2.4383	4.0496	4.4789	7.1985	7.1	1.4126	7.3611	11.3981	12.4997	1.7519	9.14	10.72	9.039	9.7919	4.283	1.3491	1.961	1.416	10.658	8.534	9.337	4.745	4.9588		0.864541	6.00286
25.9495	7.7375	3.5148	3.8335	5.6416	4.387	5.4245	3.9727	8.8449	6.7796	5.0139	6.0076	1.8546	6.4105	9.3823	14.1092	1.0512	5.002	14.052	6.113	7.9476	1.696	2.0501	0.871	0.297	14.171	10.428	11.081	5.1715	4.4886		0.868524	6.11497
26.0686	8.4964	3.5693	5.5652	7.0234	3.199	5.1558	2.8948	12.4466	8.6983	7.3139	3.8786	0.9766	6.8518	5.7934	13.5778	1.5135	5.779	7.291	10.058	3.5792	2.318	3.2112	2.435	1.004	15.921	10.811	12.318	6.9382	6.6603		0.87251	6.38891
26.1876	6.6087	6.0982	5.6243	9.3272	3.852	7.1847	3.3674	12.44	6.4368	6.7205	5.2776	1.6752	6.9987	4.711	17.5974	2.53	5.394	6.459	8.624	3.4531	3.476	4.3412	0.588	3.727	7.65	9.94	13.493	5.9532	1.6231		0.876493	6.24729
26.3066	7.6052	8.5466	4.8765	6.233	4.811	3.8951	4.8283	8.4163	7.4549	2.7869	4.2856	2.9978	6.7678	5.7917	12.7402	1.1559	2.727	4.948	5.851	2.1338	3.002	2.2024	2.39	2.31	9.087	8.303	14.346	1.2495	4.371		0.880476	5.38322
26.4257	12.4582	4.5606	5.2021	2.7691	4.652	5.3103	1.3863	4.9301	5.491	6.5533	4.3203	2.2582	4.0379	7.8727	11.3995	1.5692	4.708	4.633	3.037	2.5485	3.692	1.5485	2.924	4.022	6.805	9.845	13.626	2.9366	2.3277		0.884462	5.08359
26.5447	7.8203	6.9285	2.6413	4.0366	8.493	6.3718	1.0235	6.0953	6.7462	4.1455	2.6765	2.1162	5.1922	4.9825	6.253	2.7812	4.883	3.871	5.74	1.2474	3.327	0.6602	2.07	3.849	6.836	11.243	6.79	2.1643	2.5024		0.888445	4.603
26.6637	8.4834	5.2055	2.8376	4.8611	5.548	5.563	1.693	6.6583	3.5983	3.82	5.2695	2.2443	6.6982	5.4291	7.5526	1.6361	5.608	8.523	5.489	2.4314	3.05	1.3799	1.089	3.093	5.823	15.11	10.677	1.2868	4.9576		0.892428	5.02123
26.7828	7.3044	6.7191	2.9272	2.4006	5.106	6.488	2.4426	6.3416	7.7742	5.3397	2.6081	4.5663	5.5743	9.2829	6.5296	3.4009	4.234	9.562	3.183	2.5937	2.446	3.6262	1.932	1.626	5.081	8.101	9.502	4.1534	1.0059		0.896414	4.89144
26.9018	7.2498	3.087	3.9284	4.7598	5.547	6.0843	2.5617	4.6534	6.5384	2.4472	1.4943	2.8861	4.9332	8.2221	5.4915	2.5682	2.673	5.684	3.276	3.0963	2.324	1.1978	3.412	1.459	4.767	11.75	8.72	3.4774	1.6074		0.900397	4.34125
27.0208	5.6529	3.029	3.5196	4.8401	3.889	3.1603	2.6934	7.8445	3.0888	3.7853	4.0239	1.5522	3.9959	8.3718	4.9431	1.3889	3.293	5.595	2.584	3.0292	2.887	2.6804	4.238	2.113	7.523	10.932	12.203	2.6279	0.3027		0.90438	4.33748
27.1399	6.3667	4.8493	3.962	3.2312	2.712	1.17	3.4737	3.5895	4.2375	3.4392	4.3206	4.7089	2.8576	9.0194	4.0532	2.2349	3.828	6.462	4.857	2.9014	2.136	2.4623	1.208	3.314	8.134	8.035	7.125	3.1146	1.5428		0.908366	4.11537
27.2589	6.5037	2.848	2.2071	3.7452	1.98	0.9914	5.5928	2.0835	8.6868	6.5891	2.6279	6.36	3.3471	10.419	3.2628	2.6893	1.035	6.399	4.182	1.7418	2.062	4.1556	1.113	1.998	3.339	5.8	8.433	2.3824	2.1356		0.912349	3.95552
27.3779	4.7521	4.3992	3.1695	6.145	3.263	1.8883	5.0898	4.4779	6.7334	5.4735	3.0708	7.1634	3.1669	8.2344	2.7234	2.6952	3.456	6.923	2.92	2.7976	1.274	2.789	0.883	3.302	1.832	10.257	7.049	0.628	1.8714		0.916332	4.08372
27.497	5.02	5.1202	2.5713	5.6431	3.582	3.1826	4.4574	3.0289	6.106	4.1295	3.579	4.608	2.8558	8.4851	4.7491	3.5771	1.046	7.461	1.923	2.9897	2.936	1.9791	2.516	2.106	3.794	4.168	5.523	0.746	2.8212		0.920318	3.81738
27.616	4.2885	2.3954	2.017	6.008	2.87	3.6239	4.7155	4.8578	4.9857	3.6935	2.9954	2.6354	2.5138	6.1923	2.4517	2.5346	4.047	5.601	2.818	2.6911	1.485	4.0968	4.074	2.321	3.018	7.228	4.154	1.9538	1.3043		0.924301	3.5714
27.735	5.6163	4.1147	4.6851	3.6374	3.036	1.3819	4.2191	2.4099	6.1676	2.5386	2.0721	4.0676	3.0639	11.3055	2.2708	2.0162	4.281	6.479	2.148	2.4921	1.69	3.7499	3.519	1.471	1.579	2.083	6.634	2.028	0.7027		0.928284	3.4986
27.8541	2.4155	4.3242	2.6928	5.3193	1.26	1.2171	6.4518	1.6084	3.6949	1.7696	2.956	2.6272	2.132	11.2462	2.2422	1.0485	3.165	3.703	3.038	2.6473	1.858	1.6767	2.968	1.692	3.728	1.786	3.401	1.1125	0.2607		0.932271	2.898
27.9731	2.2794	1.4456	2.8918	1.7847	2.511	3.3613	5.5195	2.5427	3.4783	3.2433	2.2796	2.2285	2.3545	7.5279	1.0237	2.1332	2.71	4.46	4.425	4.7083	1.624	2.6655	2.102	4.688	4.82	2.639	2.513	2.9736	0.6764		0.936253	3.02103
28.0921	3.3279	1.5083	2.3854	4.2031	2.992	3.1657	6.3974	3.0868	1.8221	1.8183	3.7523	4.2795	3.602	6.5721	2.7565	3.9619	3.956	2.239	2.726	4.1692	2.21	5.9284	1.947	2.327	4.214	0.977	2.501	2.952	0.6512		0.940236	3.18721
28.2112	3.2285	2.8504	4.49	2.8842	5.028	5.1913	4.22	2.5018	3.8607	1.9018	4.0073	6.2533	2.5915	8.6949	0.9782	2.4667	1.48	3.183	2.506	2.772	3.177	4.2458	3.253	2.1	3.938	2.781	2.218	2.1547	0.2268		0.944223	3.2822
28.3302	2.3407	4.8149	4.8068	4.6628	5.203	7.3029	3.0511	3.6789	2.6295	4.9598	4.3129	5.0634	1.3308	6.8947	1.5989	1.2893	2.284	1.845	2.352	2.578	2.333	3.3929	2.435	3.192	3.336	1.758	1.389	1.4848	0.3623		0.948206	3.19594
28.4493	3.2335	5.7183	7.7172	3.6373	5.489	4.7034	5.8349	2.8894	1.7967	0.5639	4.9511	4.7964	2.6583	7.1505	0.6206	3.0888	2.527	2.24	2.289	2.6509	3.462	5.6917	3.787	2.621	3.076	2.527	1.448	0.8266	1.3097		0.952192	3.42432
28.5683	4.3149	2.6771	5.0328	6.5289	4.934	2.8312	4.8905	2.0771	1.5817	4.3812	5.152	5.1735	2.2295	7.165	4.5496	1.5668	3.348	0.404	2.24	2.8088	7.14	2.1696	2.686	2.729	1.301	2.022	3.106	1.1454	0.9536		0.956175	3.34963
28.6873	4.0168	1.8842	4.7133	7.0024	5.394	3.0427	5.4104	1.3581	2.7141	2.8372	5.8218	6.2106	1.666	5.0792	3.8757	1.3804	2.284	2.001	3.026	1.6575	3.52	1.7944	0.477	3.821	1.622	2.312	3.072	1.5634	1.0375		0.960158	3.12396
28.8064	5.6256	4.2446	4.7864	5.3424	3.902	4.0558	3.965	4.3569	2.7697	4.0876	4.8635	4.9817	0.2482	1.795	2.8638	3.2191	2.567	1.91	2.31	1.9592	1.743	2.5347	3.693	3.499	1.407	1.242	0.537	0.9109	0.8707		0.964144	2.97554
28.9254	2.9378	4.8044	7.5111	5.3264	2.507	6.8608	3.2458	2.3663	2.5261	3.5333	6.9871	3.2487	2.794	3.4582	1.5381	2.3218	3.165	3.237	4.917	3.0668	2.685	2.4709	3.34	2.218	1.166	2.588	1.468	1.2414	1.1911		0.968127	3.26624
29.0444	4.1525	4.5873	8.1961	5.2433	5.319	7.2183	4.0709	5.2807	2.7875	2.7542	5.4364	5.0969	2.3177	4.9282	2.1959	2.291	4.019	3.464	2.61	2.8102	3.23	1.8654	4.235	0.692	3.792	2.571	0.493	2.0259	0.4764		0.97211	3.59172
29.1635	6.2659	4.3853	13.542	4.8876	4.57	6.0332	6.2051	6.931	4.6847	3.7015	8.0324	6.1132	2.2192	2.9295	1.0562	2.2058	1.75	2.506	3.51	3.5945	1.937	3.14	3.212	1.537	1.161	3.588	1.27	2.3605	0.7324		0.976096	3.93314
29.2825	4.5458	5.1945	9.0946	2.2141	3.702	6.7699	4.3482	7.3972	3.7483	4.1625	9.0939	6.4917	0.9192	1.1286	1.5751	2.1554	2.138	2.078	3.349	3.4902	2.594	2.8921	1.585	1.861	1.826	2.767	1.675	1.4294	1.894		0.980079	3.52137
29.4015	4.4545	6.3391	8.025	4.0888	3.447	8.8648	7.0256	6.9628	3.7331	2.1922	6.2018	5.0699	3.9172	0.2092	2.582	3.8558	4.36	3.158	2.234	3.0327	5.393	6.6289	2.962	2.221	4.155	3.786	3.819	1.6604	0.9285		0.984062	4.18301
29.5206	4.6804	7.2364	5.9615	6.474	3.566	4.8741	13.0887	4.386	4.107	4.8012	8.2938	4.6895	2.4781	1.4862	3.9853	1.9285	4.851	1.877	2.264	2.8761	5.627	4.3199	5.467	3.016	2.439	2.105	2.5	1.2927	0.8815		0.988048	4.19148
29.6396	5.798	6.2719	3.9852	3.6464	3.982	5.2048	6.2644	7.1899	4.7536	4.9923	8.3983	7.6468	1.7548	2.9615	4.2554	1.9444	2.378	2.282	2.917	2.7973	2.476	1.74	2.306	2.731	1.324	1.294	1.901	1.7083	1.2536		0.992031	3.66062
29.7586	6.1993	5.9091	7.2593	2.4531	4.262	4.2941	6.3332	6.0585	5.7487	3.6575	11.7064	2.8994	1.9759	2.3174	5.2071	2.666	1.248	3.679	2.751	3.79	4.137	3.0595	3.116	4.011	0.936	3.262	1.114	1.7288	0.9506		0.996014	3.88724
29.8777	5.5226	4.8809	5.988	4.7334	4.948	3.9897	6.9469	6.25	6.6497	5.629	12.8733	4.6997	0.9695	3.9538	1.5871	5.0924	2.268	2.027	2.859	2.5846	1.699	1.9838	1.681	2.174	0.287	2.048	0.687	0.7999	3.0708		1	3.75459

## Sheet: Image5
X0	Y0	Y1	Y2	Y3	Y4	Y5	Y6	Y7	Y8	Y9	Y10	Y11	Y12	Y13	Y14	Y15	Y16	Y17	Y18	Y19	Y20	Y21	Y22	Y23	Y24	Y25		Ap-Ba	Average int.
0	69.5817	53.635	51.498	48.605	56.651	72.534	137.262	107.893	110.673	110.389	74.231	67.3268	59.7903	60.022	72.7637	58.1403	65.2457	58.1451	51.6053	50.7081	67.5394	62.6845	60.0656	66.0686	74.593	92.196		0	71.5326
0.119	63.2122	54.223	68.25	49.319	49.792	66.536	137.644	112.432	116.252	114.36	81.871	63.4012	62.2002	64.7774	74.4301	62.0346	66.1611	68.3798	48.4669	53.0358	70.94	56.9193	50.2227	62.4082	68.787	94.453		0.0047833	72.3273
0.2381	59.5834	57.169	77.374	58.606	52.958	69.235	131.089	115.637	122.17	110.987	76.69	65.0389	64.2386	67.9804	67.034	56.7971	58.2164	76.2541	47.0009	54.5261	70.8375	53.3989	55.6355	60.1044	89.862	100.186		0.00957063	73.7927
0.3571	60.5157	56.561	80.553	63.496	53.272	81.279	136.506	121.908	136.74	117.413	95.277	68.921	67.862	68.4731	67.882	57.7646	68.539	68.9724	46.5757	61.0846	63.7081	51.5269	51.6494	56.3195	92.698	90.69		0.0143539	76.3918
0.4761	53.3196	55.874	80.36	66.088	52.926	65.487	138.97	122.96	134.678	111.526	99.539	62.246	63.5551	63.381	61.2809	57.0205	53.4072	65.1312	47.3517	71.3866	61.0319	57.7041	43.8245	54.4075	89.283	89.816		0.0191372	73.9444
0.5952	52.9427	54.944	89.311	64.426	57.584	68.356	138.049	136.531	143.333	118.396	102.585	64.3572	60.3148	63.3443	57.8145	55.2475	57.2843	77.8172	48.9003	67.8214	64.9213	58.324	49.1473	57.7806	97.145	97.446		0.0239246	77.0817
0.7142	67.7829	54.706	87.264	70.378	64.534	59.342	149.973	132.578	150.027	112.106	102.154	70.8181	56.7794	56.2381	49.2569	56.5114	53.176	66.018	56.2817	70.1576	57.8972	52.6	50.2782	63.8324	98.503	104.318		0.0287079	77.4427
0.8332	73.8951	55.161	90.996	66.973	50.524	56.3	140.944	135.093	161.059	112.681	90.679	67.6437	55.3971	53.7783	58.2118	50.979	54.8065	55.9895	75.273	63.0267	54.0134	50.6436	50.4774	57.5475	97.356	97.076		0.0334912	76.0202
0.9523	68.2841	61.736	101.139	61.551	52.196	54.978	143.629	153.713	157.739	104.198	97.434	63.3818	58.1138	60.6318	54.5894	50.3838	50.4762	72.7936	65.3335	64.1778	52.7881	49.8461	50.5312	56.4713	105.563	97.693		0.0382785	77.2835
1.0713	57.0789	55.577	93.654	71.802	62.379	68.231	135.346	156.419	151.27	115.284	92.899	68.1813	51.4656	57.6396	56.1942	53.4013	48.1902	73.7203	59.392	66.6752	61.2474	55.0023	41.9311	51.5439	106.235	102.78		0.0430618	77.4438
1.1903	59.8479	58.776	89.75	66.087	59.804	69.418	146.559	152.11	149.832	116.672	97.72	66.4703	52.6008	55.6934	59.9155	59.599	40.1084	71.037	56.2216	65.4705	60.8193	62.8852	39.2971	66.1052	99.21	109.825		0.0478451	78.1475
1.3094	63.7918	53.205	88.246	67.018	58.234	55.972	153.551	152.54	151.221	137.298	97.136	65.0666	51.3742	60.1385	59.0889	67.7548	49.1853	69.1173	51.3505	68.3077	50.4948	47.8079	51.8522	57.0019	105.893	109.981		0.0526324	78.5626
1.4284	63.7961	63.503	86.383	70.592	53.803	55.27	144.218	164.805	156.243	147.671	104.922	68.7442	48.5688	51.1198	62.045	62.2427	52.3277	70.1457	52.1547	85.6992	54.7432	46.1201	55.7839	55.2156	110.611	120.776		0.0574157	81.0578
1.5474	57.5243	59.805	100.043	81.57	67.141	49.651	139.972	169.764	157.788	158.259	99.692	63.738	50.3281	67.161	56.7223	60.6964	49.982	65.7874	62.5986	80.1087	61.81	49.1548	56.7784	60.8795	112.582	114.93		0.062199	82.8641
1.6665	61.8608	63.489	86.847	78.671	64.856	55.713	150.569	166.106	161.337	157.961	103.823	78.9589	47.8631	59.1119	55.8788	69.0585	51.2712	70.2965	65.0653	80.4488	62.9972	51.4946	66.0894	57.7317	116.527	99.367		0.0669864	83.9766
1.7855	57.7221	68.81	82.141	69.329	71.761	59.126	152.352	148.744	163.073	161.453	112.963	66.0703	51.2997	56.4561	53.7133	61.8019	54.8325	73.5143	62.7103	69.9696	65.7623	55.6687	69.0077	56.7747	122.185	95.422		0.0717697	83.1793
1.9046	62.6147	70.613	92.331	80.185	73.001	61.799	160.199	168.75	157.294	164.865	108.3	65.4576	56.0725	60.7005	56.3356	66.4797	49.0287	64.5855	57.2991	75.2155	57.9691	63.7998	73.2223	57.8939	123.453	92.201		0.076557	85.3718
2.0236	57.5934	65.954	96.207	84.515	81.03	72.167	162.532	169.191	166.345	170.554	118.262	69.6406	55.0853	64.3659	53.3758	67.6902	49.5555	58.2606	64.2575	78.2116	55.4165	69.0613	69.3844	62.3709	121.235	94.183		0.0813403	87.5556
2.1426	55.9141	72.359	98.033	84.276	73.209	62.052	170.02	181.298	170.989	168.989	123.953	71.4228	59.3238	62.905	60.7145	62.4397	41.4353	67.1867	68.7269	75.1747	58.4257	60.0299	68.395	60.6901	99.99	99.909		0.0861236	87.61
2.2617	57.5337	76.341	91.513	83.353	67.183	75.043	151.46	182.097	182.002	160.724	139.822	63.2113	57.1523	72.4741	60.4597	51.9837	53.5184	65.2366	61.3906	66.7039	56.7166	65.9005	75.6917	60.6617	103.494	98.426		0.0909109	87.6959
2.3807	55.8821	63.763	89.904	71.548	76.527	76.977	157.069	190.903	183.616	158.208	147.295	79.6083	49.825	65.4271	73.28	66.9702	60.8619	60.2653	69.2893	64.688	57.6109	76.3277	79.9992	61.4715	91.964	98.17		0.0956942	89.5173
2.4997	54.8393	70.56	85.703	82.317	76.312	78.537	146.987	182.148	182.331	160.334	148.135	75.8537	57.4243	66.992	65.6355	70.2568	59.7089	61.452	61.6409	61.877	52.5422	58.6886	77.731	67.087	95.787	99.006		0.100478	88.4572
2.6188	58.8666	72.105	90.014	100.398	88.13	85.673	143.353	167.643	173.068	151.795	157.237	92.1746	64.4877	66.9564	72.367	71.7593	50.4697	84.4525	68.0231	57.9538	62.1187	72.5001	83.0931	61.1673	81.96	98.152		0.105265	91.3815
2.7378	58.4092	66.665	84.758	87.835	84.713	81.427	151.493	173.027	189.764	158.748	154.198	92.3097	61.9337	58.9445	65.4064	77.882	46.802	81.555	66.9835	67.0152	56.3652	74.8011	94.4879	63.9545	82.022	102.206		0.110048	91.681
2.8568	65.1226	65.804	91.94	86.609	87.12	86.736	126.13	164.603	176.238	158.184	165.956	86.818	64.8945	61.7251	72.8259	70.0552	50.0256	81.9338	69.0641	77.3753	61.2171	74.5277	81.8971	63.3186	88.041	104.858		0.114831	91.6546
2.9759	57.5954	69.378	78.745	90.67	84.6	104.398	133.423	164.062	171.005	154.966	160.708	80.8613	69.3342	70.6453	69.2977	68.9398	52.06	89.1427	58.2548	68.8312	63.0333	65.2124	81.3497	68.3785	97.187	106.539		0.119619	91.4853
3.0949	59.6511	78.966	77.647	86.444	79.134	99.285	133.921	180.293	169.372	159.288	164.78	72.2402	67.1703	76.1795	68.1564	71.1268	54.76	92.5298	60.722	69.1282	54.139	76.9663	79.569	77.1232	77.668	99.818		0.124402	91.7722
3.2139	60.4549	80.072	74.534	84.568	102.466	84.611	114.159	180.487	181.418	156.492	150.892	77.4416	72.8804	57.5032	72.333	70.1344	50.1808	81.438	59.1719	59.6117	52.6485	80.3267	75.601	58.9685	78.272	97.717		0.129185	89.0147
3.333	72.5119	83.266	82.745	87.556	105.81	93.128	122.578	183.82	181.407	159.658	162.966	72.5277	65.4329	61.0983	80.2265	71.2582	45.2663	77.3392	57.4792	64.5946	57.6763	72.9218	77.0705	69.8772	65.494	101.685		0.133973	91.3613
3.452	64.9648	77.877	81.932	101.869	94.371	111.335	111.058	189.004	188.753	169.999	167.118	69.9844	66.8196	65.4741	68.0068	68.223	49.2403	70.8624	57.6068	64.7717	51.3204	71.6252	76.8897	73.8324	57.315	101.134		0.138756	91.2072
3.571	66.5177	76.594	95.465	90.43	95.898	101.873	112.781	183.42	196.025	169.424	177.777	62.4774	69.4819	64.7032	69.6501	70.8624	52.4172	70.639	63.8648	70.446	47.9923	65.1209	84.1194	70.5416	67.928	89.348		0.143539	91.7614
3.6901	75.2742	80.619	94.436	102.356	100.68	97.487	112.774	181.621	204.491	170.46	168.269	58.8105	63.5997	62.8745	62.8142	75.5065	53.8017	67.2121	65.1654	69.4653	46.9588	68.72	77.3735	68.4739	71.989	96.613		0.148327	92.2248
3.8091	75.6912	89.814	93.405	88.284	89.444	90.685	116.672	180.411	206.58	174.183	169.666	58.7264	66.5992	63.1099	66.1939	70.0658	46.4541	65.5745	57.7028	62.7784	49.3406	73.7899	80.783	71.1808	61.612	97.643		0.15311	91.015
3.9281	68.3688	81.415	98.734	84.91	89.213	82.132	111.508	164.002	198.269	187.065	176.157	63.5394	67.0048	63.6983	77.3063	60.6547	47.2442	67.4397	58.5501	64.811	45.6084	80.0146	75.866	68.639	66.561	102.47		0.157893	90.4301
4.0472	65.7822	89.792	103.298	94.213	88.668	92.286	110.109	165.665	198.031	187.696	155.988	56.0714	71.8946	54.9098	67.9168	68.9905	43.9176	66.9386	68.9782	58.9468	43.6864	72.5822	74.7081	76.0673	65.677	108.131		0.162681	90.4209
4.1662	73.2358	101.779	94.875	101.298	86.106	97.278	99.562	166.333	189.335	191.681	140.066	49.3127	71.1658	63.0735	65.9637	64.6762	51.0203	57.4817	76.9982	72.8156	51.4878	75.5156	69.3218	72.1587	56.908	103.958		0.167464	90.131
4.2852	60.2854	106.897	94.722	97.867	94.166	87.822	107.279	171.899	193.973	190.22	120.929	55.9283	75.0805	58.7817	76.0664	62.8684	47.6379	67.2597	79.4747	81.6717	44.8667	68.1203	81.6371	69.7346	63.49	97.605		0.172247	90.6262
4.4043	58.8574	107.618	104.481	108.256	87.268	82.226	110.71	173.448	196.932	204.002	108.357	50.7204	66.9068	67.2881	80.4379	67.5556	40.1325	56.0854	74.9582	73.3697	55.2116	75.1732	76.1942	65.993	67.295	90.788		0.177035	90.3948
4.5233	71.132	111.095	98.682	105.576	87.78	86.631	109.778	168.768	193.035	203.447	96.999	48.6543	59.0457	69.3379	79.2886	59.7089	39.9818	57.292	66.9843	64.9406	64.5282	83.2995	74.8523	67.6598	57.971	92.929		0.181818	89.2076
4.6423	68.1549	113.174	93.248	118.511	93.558	79.566	109.656	171.713	190.225	197.803	101.848	49.1397	73.9005	65.0079	72.9385	57.5793	44.3998	49.7689	66.0553	61.149	60.2497	86.929	65.2908	67.9251	65.324	96.841		0.186601	89.2291
4.7614	68.9916	106.405	93.171	117.694	86.85	67.557	122.548	166.077	190.31	205.515	85.055	32.8984	70.8426	66.582	69.1795	69.9979	40.9743	57.3816	67.3449	64.2374	56.8063	81.2361	73.8444	70.2023	77.041	101.764		0.191388	88.8656
4.8804	69.4139	113.005	94.596	112.211	79.034	50.101	115.58	162.023	192.001	205.39	69.683	31.5092	71.7552	72.016	80.2544	58.8076	38.9234	54.1382	54.964	61.6231	61.0306	86.4374	72.4253	63.92	59.589	101.274		0.196172	85.8348
4.9995	67.6198	114.603	110.932	116.505	86.628	43.062	119.601	163.806	196.481	188.961	62.663	29.9025	79.441	67.807	77.5842	52.608	39.682	44.8745	55.0238	70.4362	66.5273	85.83	63.6915	70.1844	61.482	88.07		0.200959	85.5387
5.1185	72.6956	107.37	109.983	119.6	87.014	44.387	115.682	164.016	195.803	188.728	51.533	22.5361	76.7469	63.0463	82.8663	56.6188	38.2811	51.6312	53.115	63.7787	60.4984	75.2099	66.5527	65.6059	59.56	103.254		0.205742	84.4659
5.2375	70.5137	109.67	113.136	128.314	92.827	39.076	107.836	162.623	200.48	185.673	44.822	18.4203	75.4482	55.5252	74.8103	56.4033	33.2536	45.343	56.6147	66.0085	50.6041	86.8942	64.8182	60.2034	59.356	103.048		0.210526	83.1431
5.3566	70.3042	114.474	102.56	128.247	99.716	41.033	111.296	178.556	219.48	175.641	29.775	18.99	69.4358	55.0703	77.3999	49.8992	31.9282	37.7132	42.7547	70.0879	45.3153	84.4832	70.7827	64.3042	63.343	94.927		0.215313	82.5968
5.4756	77.5978	103.618	101.314	130.622	85.957	45.47	110.457	168.154	220.721	163.143	32.155	22.34	76.0492	72.7474	75.6892	61.3234	27.7004	42.5012	43.4198	74.8211	43.2328	90.2945	59.6731	60.3862	70.927	104.446		0.220096	83.26
5.5946	75.9744	116.259	99.36	146.138	78.954	34.544	128.532	167.507	222.889	167.119	27.45	18.9222	76.7034	71.933	72.864	67.2969	21.1135	44.7838	52.2038	90.5845	50.0214	87.1043	55.2545	65.1271	70.109	93.224		0.22488	84.6912
5.7137	92.1149	115.276	96.97	143.443	61.555	25.828	123.13	174.958	219.062	163.078	24.461	14.3806	75.51	61.4485	68.5726	68.8664	22.1275	43.708	54.3553	78.252	44.2822	93.7648	61.0722	72.007	62.423	90.229		0.229667	82.726
5.8327	97.6343	117.496	88.551	135.151	58.25	22.927	133.222	180.103	213.592	151.44	23.662	15.3786	73.4694	71.1903	76.2532	72.3523	19.3585	31.5175	48.9149	71.6617	45.6599	87.47	64.1139	68.3354	63.609	93.448		0.23445	81.7216
5.9517	94.2237	131.454	89.006	124.262	65.013	19.714	140.046	191.46	218.588	158.811	27.011	19.4235	72.945	58.2044	79.303	60.847	21.8674	37.885	53.6107	83.8718	39.9903	76.6802	56.0104	69.0776	68.527	93.531		0.239234	82.7447
6.0708	98.723	134.439	87.347	112.824	64.427	17.401	137.628	197.489	225.951	162.529	27.853	18.0485	75.9972	62.0137	73.424	52.5564	14.8908	36.1985	49.8838	88.9781	40.9036	66.1928	63.857	67.8218	61.902	91.127		0.244021	81.9387
6.1898	97.6901	120.555	81.72	106.633	65.873	20.866	135.941	193.261	219.863	166.021	25.554	13.3714	80.9462	71.3817	67.5415	62.6525	13.0213	34.5935	48.3949	83.0817	36.642	77.1058	72.0003	62.6752	65.681	91.981		0.248804	81.348
6.3088	98.146	116.448	93.675	111.9	65.239	18.813	128.948	199.565	214.366	178.603	21.744	13.8721	79.1207	67.8492	62.1756	58.4957	12.1329	33.487	43.5489	84.4939	36.4633	72.7329	62.951	62.7172	54.348	92.759		0.253587	80.1767
6.4279	95.0516	109.796	86.867	125.148	60.79	17.7	123.179	201.586	211.583	166.827	20.938	16.5163	75.3785	61.6656	67.1824	43.5802	16.5886	33.627	47.6999	72.2945	39.6508	72.2134	64.8886	66.9629	58.914	94.068		0.258375	78.8729
6.5469	83.4743	105.106	88.463	114.854	54.136	22.282	120.223	194.453	205.531	179.036	25.427	16.4069	72.2435	62.7609	54.2375	45.7323	16.9195	33.7618	39.818	65.4787	32.7779	53.9423	60.9689	73.7792	66.871	69.164		0.263158	75.3018
6.6659	83.7649	100.373	101.908	105.747	56.426	22.34	125.732	185.675	208.395	191.233	28.181	17.4929	69.3921	67.5004	58.2857	39.8918	17.3035	28.8998	47.7015	64.7315	29.9204	61.9583	57.3502	67.3184	64.579	80.915		0.267941	76.2698
6.785	74.0878	99.343	92.142	116.543	51.425	17.043	124.814	176.322	207.32	203.604	22.473	14.8281	69.8479	55.3865	62.004	40.8942	18.8596	30.3257	46.4735	64.6006	38.0484	55.0151	51.281	77.0541	64.961	75.453		0.272729	75.0058
6.904	71.2564	101.797	90.151	112.62	36.105	22.917	124.569	178.584	203.531	196.083	15.354	19.4795	76.6566	56.0201	64.212	41.0373	18.1017	26.7341	41.9495	70.8856	31.2723	49.5368	40.0562	67.7647	70.91	75.602		0.277512	73.1995
7.023	69.0071	93.526	93.129	88.95	27.326	23.291	114.655	179.45	211.02	205.92	21.956	20.0593	79.4169	56.4937	69.1393	37.8758	13.0085	29.1707	48.8674	79.0689	29.2529	50.8991	39.8185	57.1953	64.044	68.933		0.282295	71.9797
7.1421	67.2911	74.581	88.408	92.797	23.375	24.066	106.231	181.79	216.634	200.041	19.342	26.5162	70.351	50.1502	60.5588	36.7768	18.2698	27.9158	52.9313	70.4088	23.3125	47.6705	39.0378	50.2975	72.417	65.581		0.287083	69.4904
7.2611	57.0418	70.29	98.144	99.209	26.63	24.8	105.632	184.946	226.959	194.098	12.803	27.8069	72.2192	47.8887	59.1289	33.2711	15.6176	26.9025	43.3399	66.6088	17.6526	41.6127	33.5495	56.2303	69.255	61.051		0.291866	68.1803
7.3801	58.6057	65.305	92.217	87.787	18.688	21.612	91.419	186.155	228.943	201.178	17.204	24.9315	68.7125	55.9736	61.1793	24.5639	14.185	23.8893	46.5178	62.3785	19.4679	38.3582	34.2213	45.9883	76.557	65.736		0.296649	66.6067
7.4992	57.359	56.068	96.824	76.954	19.127	21.708	80.805	183.963	226.262	200.535	16.77	27.2503	71.1551	52.8002	58.4091	25.2997	15.5823	21.9996	49.3122	66.9453	20.2406	36.9185	41.0976	54.5756	77.555	60.72		0.301437	66.0091
7.6182	51.9291	44.157	89.54	72.769	14.508	20.293	72.394	187.057	212.561	200.013	16.964	19.1288	59.6804	45.8812	65.723	26.808	14.4029	18.9593	48.2563	65.1573	18.5329	30.3945	33.4419	48.0784	81.153	56.862		0.30622	62.1017
7.7372	54.4696	47.514	87.249	81.689	10.178	22.719	70.523	200.482	205.591	183.255	19.051	19.1699	61.9101	44.177	66.7801	29.293	9.6347	27.2848	48.0913	73.4154	24.8616	29.4487	34.7461	39.0149	70.896	55.621		0.311003	62.1948
7.8563	35.3564	46.152	81.202	72.113	13.269	17.373	67.706	205.575	192.164	179.599	14.803	19.3727	47.4013	44.5371	65.1014	22.8503	6.2431	22.2806	47.772	71.7155	13.9868	26.9326	41.3996	35.2575	64.694	67.019		0.315791	58.5337
7.9753	27.6431	38.464	85.416	56.408	16.224	16.944	74.403	216.77	185.85	170.721	14.199	16.0667	48.2459	51.3853	53.3884	21.9748	6.859	17.1632	35.4695	72.6037	18.6964	21.1713	46.856	32.8446	59.792	58.31		0.320574	56.3026
8.0943	27.6806	33.678	86.545	59.095	15.207	16.234	68.331	218.543	202.833	158.155	15.282	16.3605	50.1771	53.9563	48.4229	22.1997	10.5405	14.6043	40.5754	73.9035	15.7306	22.3981	49.563	29.5559	45.56	64.692		0.325357	56.1471
8.2134	19.3713	29.424	107.212	53.916	18.192	13.564	88.097	210.653	205.248	129.294	18.703	18.9747	51.6845	75.8857	42.9459	23.7225	10.738	15.9097	39.513	68.6737	15.0054	21.4088	40.0493	31.9921	43.002	58.312		0.330144	55.8266
8.3324	11.8172	21.171	91.773	47.812	17.398	10.858	85.416	201.919	210.283	110.309	16.436	14.7825	43.5573	76.7566	30.4464	26.6835	12.6154	14.6589	38.6313	56.9814	18.1945	16.6224	45.7758	31.1673	38.531	63.576		0.334928	52.0836
8.4515	15.0502	21.431	86.021	46.821	13.784	13.71	76.927	186.332	216.037	97.693	16.958	14.1655	45.7989	74.3358	28.8147	19.8881	10.6317	17.9474	38.9267	56.6912	15.2046	22.4249	46.6197	22.2045	38.975	63.079		0.339715	50.2489
8.5705	18.2416	26.002	75.155	33.91	12.219	10.091	73.212	183.492	219.939	81.95	21.282	15.1639	29.7225	68.7208	30.0604	22.2158	12.1051	24.1182	29.9045	54.8043	18.8331	19.9951	45.4939	25.5271	31.555	68.492		0.344498	48.1617
8.6895	13.5837	22.792	78.328	30.269	9.12	10.749	67.149	180.47	215.732	68.472	24.131	19.0262	25.1513	69.9699	35.4191	20.048	9.1706	20.7553	26.3877	42.0761	19.3153	19.5146	39.7644	22.1697	29	70.212		0.349282	45.7221
8.8086	17.9237	20.735	63.466	24.666	9.158	12.195	66.95	180.571	214.871	67.448	25.878	15.3538	26.1406	54.4092	27.8146	21.3673	8.573	16.156	18.9334	37.0083	12.5046	17.3396	37.7662	15.855	31.758	59.604		0.354069	42.4787
8.9276	19.0603	20.321	63.734	20.314	6.239	9.823	61.147	179.542	203.969	53.055	17.42	14.7722	22.3168	49.802	23.5949	20.1807	13.0771	15.783	20.36	34.5542	9.8435	15.1014	32.9347	10.8621	20.333	65.615		0.358852	39.3752
9.0466	18.5039	19.535	66.106	16.806	5.827	9.991	59.163	182.062	219.359	48.256	18.782	15.9716	22.19	42.8533	23.9434	19.7912	8.7482	14.5317	23.7422	34.2051	10.9477	17.2813	31.4721	12.7053	23.857	60.978		0.363636	39.5234
9.1657	11.7721	16.999	62.958	17.87	4.716	10.014	59.914	176.267	203.435	47.162	14.106	18.3363	17.5317	49.3898	18.5455	17.4307	9.2803	16.9109	22.4809	35.3561	13.5771	14.5149	21.0707	10.44	19.365	50.968		0.368423	36.9389
9.2847	13.2519	15.668	65.443	6.523	5.489	9.994	60.426	167.418	199.925	38.49	13.05	17.6724	14.5527	34.9078	23.6542	12.8659	9.1622	16.1623	28.6218	26.2437	14.4274	10.988	19.6606	8.8767	26.878	49.849		0.373206	35.0077
9.4037	11.9921	17.03	49.601	7.42	3.315	10.886	76.923	160.54	191.335	31.757	16.197	16.6861	17.3803	25.962	20.73	13.1605	4.493	12.5687	24.8463	28.4284	12.6647	14.9503	14.0777	7.3682	19.823	48.098		0.37799	33.009
9.5228	9.0866	11.962	37.162	4.393	2.785	12.701	72.76	164.052	184.674	23.168	11.824	23.6501	16.7017	28.0476	24.8242	19.2682	4.5174	9.4019	26.1917	23.2895	16.3162	13.6289	12.5915	7.3886	21.019	52.601		0.382777	32.0771
9.6418	10.272	12.803	37.726	8.499	2.141	11.782	77.318	169.391	166.026	27.009	8.978	21.0626	13.4407	27.5507	22.5759	14.4361	6.8784	11.8199	32.0118	25.6001	18.511	11.3607	10.1265	4.6695	23.008	36.956		0.38756	31.229
9.7608	14.2541	11.744	32.582	4.31	5.429	10.717	90.236	194.409	163.478	25.18	10.97	20.2556	14.7478	19.2345	19.7164	16.2806	11.9648	11.8435	23.7433	29.3636	10.8441	11.3853	9.4089	5.3068	18.284	39.526		0.392343	31.739
9.8799	18.385	12.274	30.072	4.595	3.335	7.463	97.855	218.905	148.451	22.381	11.413	20.2705	19.3818	18.1086	22.181	17.4974	14.9963	10.347	24.86	26.4779	8.7289	12.232	10.141	4.8905	15.891	35.786		0.397131	32.1892
9.9989	17.9574	11.713	22.741	4.282	1.802	8.558	98.904	224.262	138.875	17.017	9.691	14.3921	14.9675	18.543	17.9403	18.8385	14.5626	16.278	20.0725	18.3586	13.3502	9.5258	10.1902	3.0775	20.97	46.91		0.401914	31.2992
10.1179	16.9215	13.36	21.782	3.023	2.882	8.114	99.591	202.525	127.208	16.923	8.721	21.4342	16.2086	19.7847	16.3662	18.9518	14.4359	13.2912	13.9888	16.7024	12.062	3.9915	9.6453	2.3926	14.53	27.311		0.406697	28.5441
10.237	12.0904	13.575	26.618	3.568	3.73	9.06	75.644	185.289	120.22	15.636	10.806	22.1241	18.0485	18.8571	17.1502	16.6047	8.9423	12.2709	19.0963	17.7272	12.283	4.4778	6.5973	3.0609	10.756	30.675		0.411485	26.7272
10.356	9.6737	10.052	24.449	3.42	2.624	7.803	60.525	154.14	89.806	13.815	13.007	19.2996	17.7575	25.5549	13.0549	12.6661	6.4521	11.3381	12.8166	21.1041	11.9485	5.9715	4.2184	2.0486	12.482	21.936		0.416268	22.614
10.475	13.5883	11.037	26.918	1.424	1.602	7.559	53.005	135.25	85.942	13.491	10.121	22.4983	18.9488	18.1606	8.6202	10.5463	7.8261	12.4766	11.487	16.3995	14.9119	4.2014	7.0974	1.9654	9.513	22.601		0.421051	21.0458
10.5941	13.0748	9.927	20.49	2.32	3.508	8.719	39.611	109.409	69.118	12.438	10.156	18.9209	22.0589	18.5784	8.807	11.7895	11.4233	13.7844	11.8565	16.0231	14.8822	5.6765	6.4966	2.285	13.288	27.097		0.425839	19.2976
10.7131	14.3283	9.66	17.782	3.661	5.893	12.906	25.402	88.503	61.239	7.57	10.48	20.4025	16.1276	18.0442	10.6852	12.5748	11.9876	13.6851	8.6281	18.2519	14.5543	6.2777	9.0138	3.5979	7.294	26.438		0.430622	17.4995
10.8321	13.9191	10.239	12.574	2.579	2.586	14.426	21.589	68.13	42.198	9.329	9.978	18.5773	17.5092	14.2367	8.2603	12.8374	13.4171	15.3561	9.1845	12.3922	16.6681	4.9566	7.9014	2.3306	9.083	32.552		0.435405	15.4927
10.9512	17.9262	13.512	11.153	3.336	3.567	14.992	27.601	55.384	36.341	5.808	10.532	19.63	19.3785	10.8542	9.0281	14.6752	13.5166	9.8031	12.8877	12.49	16.6257	4.9153	7.0805	3.2504	9.873	33.901		0.440193	15.3101
11.0702	14.9681	10.782	13.779	2.163	4.634	10.45	22.821	45.954	27.278	9.135	10.519	17.4858	15.8171	12.8943	12.1199	11.0466	13.6454	8.0551	12.562	11.5687	16.0861	5.6944	6.0772	4.1768	5.46	25.576		0.444976	13.4903
11.1892	12.7087	10.58	9.552	3.118	4.069	18.204	24.09	36.671	20.701	6.856	9.379	20.5965	20.2371	18.5153	9.8315	11.2468	15.684	7.7452	11.2281	10.8396	13.9999	5.3147	3.8253	3.4047	5.503	28.722		0.449759	13.1778
11.3083	12.9054	12.384	8.837	3.208	3.152	18.641	27.307	24.044	25.028	8.273	10.802	16.7349	23.293	15.6035	7.7513	7.9734	11.3497	10.2522	12.4285	11.4668	14.9546	5.6034	3.9718	4.0276	10.895	26.299		0.454547	12.9687
11.4273	15.5471	10.578	4.163	3.707	4.006	17.237	31.605	16.45	16.159	4.038	11.046	18.7658	22.4076	14.008	11.2602	8.5708	12.5205	9.2371	11.9365	8.3606	13.0508	4.2759	1.6636	0.9856	6.954	20.031		0.45933	11.4832
11.5463	15.3036	10.728	4.663	2.655	4.914	22.237	28.083	17.921	14.296	4.468	10.384	16.2278	21.196	13.6078	11.0283	7.4717	16.3616	8.1533	6.5965	9.2666	14.7997	3.9912	1.6972	1.5985	9.277	18.953		0.464113	11.38
11.6654	12.6865	8.753	6.856	1.735	4.83	13.259	33.646	17.409	13.419	7.073	10.013	17.5459	17.322	14.8049	11.3478	9.594	10.028	9.6915	8.6412	4.8437	16.5949	2.8469	2.0973	2.7153	7.597	19.878		0.4689	10.9703
11.7844	14.592	10.647	4.675	2.105	6.226	11.082	30.911	20.904	11.713	10.331	7.722	17.6891	22.2797	14.3655	8.1637	10.5157	9.3202	6.602	11.3576	4.7127	12.1392	2.7821	7.047	1.1621	8.684	19.833		0.473684	11.0601
11.9035	12.8687	11.796	5.963	2.462	5.99	10.881	28.256	13.349	10.649	5.818	7.698	17.7732	12.754	12.2703	10.0372	13.9403	8.2058	7.142	9.6274	7.5671	10.9105	5.464	3.8051	2.051	8.771	17.604		0.478471	10.1405
12.0225	11.2899	13.031	5.566	1.661	4.623	9.828	30.213	12.553	9.887	6.493	9.263	17.3942	10.933	13.7057	15.9262	14.1322	8.9395	7.4531	7.7214	9.8119	11.3502	2.9343	2.8432	3.7927	7.634	21.889		0.483254	10.418
12.1415	8.6981	13.102	6.181	1.916	3.048	8.817	32.487	16.08	10.523	5.628	12.642	15.3545	15.7982	12.6164	14.754	9.5402	10.5704	13.1632	10.1122	10.3337	7.9178	3.5533	3.7112	3.0685	4.533	20.679		0.488038	10.5703
12.2606	7.1168	9.46	6.325	4.381	3.319	14.4	29.887	12.162	8.77	5.376	13.616	17.8094	18.1111	11.827	10.7442	8.255	13.3673	11.6281	12.4044	13.0838	7.9102	4.286	2.7203	2.7843	5.074	23.975		0.492825	10.7228
12.3796	6.6065	9.154	6.622	3.803	2.79	12.872	18.902	14.35	8.608	5.742	11.106	14.194	12.1221	15.5399	10.803	9.7767	8.8276	8.0268	11.3792	9.6703	8.2196	2.6772	2.4403	4.8005	3.083	26.821		0.497608	9.57449
12.4986	4.9772	7.852	5.72	1.725	3.382	9.142	16.45	9.317	9.924	2.361	12.812	10.7886	12.6644	16.9893	12.412	12.1807	10.3408	6.5311	9.5669	10.1539	11.8019	3.7717	3.2827	2.6687	4.551	19.774		0.502392	8.89
12.6177	5.4319	7.558	5.957	1.186	1.461	8.266	20.836	5.741	5.643	1.692	12.198	12.3751	14.8913	14.6508	13.7312	12.8454	10.6821	4.4907	11.0049	10.8476	13.8783	3.5291	2.157	1.1732	5.706	18.074		0.507179	8.69256
12.7367	9.2149	5.877	3.804	2.102	2.916	9	17.94	8.588	5.628	3.503	8.955	15.2938	17.6689	14.0854	12.3305	9.4799	8.3805	7.024	10.1853	12.6389	10.3848	2.5159	3.0685	0.773	4.617	16.251		0.511962	8.54713
12.8557	11.5211	11.477	6.905	1.37	2.295	7.601	14.943	9.09	9.51	2.358	11.303	15.6754	17.7315	16.618	13.8805	13.8949	11.5751	8.8491	7.3835	8.2713	8.2037	1.9519	1.5392	1.1533	4.742	18.178		0.516746	9.15463
12.9748	14.3798	9.463	7.775	0.773	3.932	9.76	11.568	6.536	4.741	5.166	15.292	13.9952	17.6469	14.8979	12.0767	14.4615	12.3302	12.9684	11.1625	11.3491	14.0086	1.7862	2.419	3.711	6.962	20.62		0.521533	9.99158
13.0938	15.4345	6.171	4.525	2.84	2.841	11.436	11.122	8.078	3.959	5.019	13.872	10.0178	20.8006	18.1565	12.6171	12.2026	7.6545	10.4279	6.9463	6.9893	15.0713	1.6151	2.9803	2.7713	3.082	16.315		0.526316	8.95943
13.2128	15.5269	9.738	3.183	1.535	1.678	9.382	9.371	5.268	7.485	3.368	17.39	11.8216	15.6099	12.5374	11.7603	14.0975	10.9283	7.2451	4.5735	7.6221	12.2642	5.587	2.6362	2.2336	4.789	15.15		0.5311	8.56848
13.3319	15.8817	7.14	2.767	0.581	5.258	10.298	11.94	5.307	11.477	4.684	12.618	11.1172	12.0429	17.7914	11.7772	17.4937	11.3513	7.5298	6.1853	8.8057	13.7017	4.0425	1.5415	1.2757	4.367	11.885		0.535887	8.80229
13.4509	11.3801	12.183	1.57	1.653	3.419	10.15	8.169	4.8	9.197	5.533	12.021	8.3192	15.5408	15.4085	13.714	15.5996	13.0338	8.7591	8.2508	7.8805	8.3658	5.0604	3.2524	0.7038	2.387	15.761		0.54067	8.54276
13.5699	7.3031	10.057	3.435	1.763	3.324	13.767	6.276	6.331	8.321	5.525	11.753	10.196	11.8508	13.4201	16.6641	15.7573	13.2973	13.0791	7.7785	7.8135	8.3629	3.0555	2.8002	4.1743	3.798	10.097		0.545453	8.46153
13.689	6.8549	11.857	2.237	1.399	2.913	18.508	6.563	3.997	5.146	6.22	9.123	16.101	13.256	13.4793	13.2552	14.13	11.819	8.3896	7.8495	6.4959	8.6138	1.7715	2.1734	3.7176	5.294	12.669		0.550241	8.22433
13.808	8.3145	12.387	5.066	2.585	1.757	16.232	7.583	5.219	5.044	3.237	6.241	13.4036	15.1718	16.4033	11.2288	15.2836	11.0741	9.1922	5.098	10.5821	6.4118	3.4212	2.7382	4.5253	5.034	14.542		0.555024	8.37598
13.927	8.2079	9.693	4.827	3.85	3.361	12.949	5.471	5.559	1.924	3.915	5.594	12.1247	12.4349	14.7111	12.6692	13.9196	12.8407	12.3353	3.7273	8.9534	8.3822	2.8379	1.4766	1.2623	3.57	15.418		0.559807	7.76977
14.0461	8.5907	7	1.665	4.073	2.468	15.503	9.06	4.366	1.781	5.655	4.873	16.9589	13.3865	12.5186	13.0026	13.5747	14.0791	12.7054	6.9939	8.2945	7.7519	2.7615	1.353	4.8627	3.789	15.914		0.564595	8.19158
14.1651	5.8922	6.189	2.959	1.86	1.616	11.776	11.706	4.801	2.467	2.987	6.199	15.8696	10.616	17.4019	14.8831	10.8397	13.9931	11.7829	6.8281	7.2018	6.6853	4.2054	2.7313	3.281	5.201	15.071		0.569378	7.88628
14.2841	5.4957	8.849	2.779	2.271	4.103	10.125	13.047	5.801	4.401	2.041	9.017	11.0979	10.3139	17.3505	10.7016	9.1444	12.6114	8.3972	8.3774	11.6898	12.6108	2.7419	3.3286	1.7599	5.945	10.579		0.574161	7.86842
14.4032	8.3882	8.522	2.177	2.251	4.632	10.649	10.425	4.962	4.012	2.223	5.355	14.5975	16.1748	17.4389	15.4324	9.4144	8.6274	10.7614	9.3938	10.3039	10.6348	4.8688	2.9638	2.6225	4.718	10.062		0.578949	8.13887
14.5222	7.7938	9.954	2.861	3.205	1.71	11.048	8.609	3.718	4.324	3.633	7.214	11.6415	16.5811	14.577	17.3694	13.3347	9.1198	12.6342	9.8979	5.4981	8.3181	3.2926	2.3779	1.2368	5.624	8.44		0.583732	7.84665
14.6412	6.2332	12.771	2.41	2.351	2.061	15.297	9.898	4.771	4.252	4.786	7.468	14.6565	14.7244	10.8572	11.566	9.3027	6.1108	13.1411	10.2479	7.7692	9.5991	1.5831	2.0031	2.3064	5.697	7.824		0.588515	7.68026
14.7603	9.7442	14.484	2.056	1.928	3.14	15.933	7.495	3.013	2.142	4.119	8.418	11.8175	12.1241	13.3948	10.5931	10.1109	6.924	11.388	8.3158	7.3408	11.9037	1.5854	3.6578	1.9389	5.965	10.059		0.593303	7.67658
14.8793	5.9716	15.276	2.694	2.195	2.568	16.644	13.495	3.962	4.492	6.31	10.216	14.3708	15.0317	9.8815	14.525	11.4377	7.3881	12.4137	6.2983	6.552	7.9249	3.3996	3.842	2.2702	2.532	10.059		0.598086	8.14423
14.9984	5.4591	11.345	1.968	4.022	3.277	18.979	11.049	3.611	4.323	5.798	11.263	12.4728	12.2412	12.6889	17.94	13.075	7.4761	11.3641	5.2394	9.9831	6.6826	2.6539	0.7003	2.1205	2.706	8.484		0.602873	7.95854
15.1174	5.3934	11.435	1.581	2.935	3.642	16.569	11.411	2.605	4.271	4.776	11.878	9.5917	13.2443	13.8351	17.8762	15.924	4.8839	5.1948	7.9063	14.3113	12.0143	1.9853	1.3558	1.0688	2.706	11.327		0.607657	8.0662
15.2364	7.9843	7.691	0.937	2.17	4.106	15.435	10.427	3.492	5.025	5.627	10.982	11.6125	11.0826	17.9241	18.4512	17.3584	6.7754	6.6539	7.1122	9.1041	8.6139	3.6813	3.0814	1.0295	6.842	10.369		0.61244	8.21415
15.3555	9.7171	6.541	3.236	2.093	2.112	14.732	14.106	4.566	3.473	4.411	14.652	16.2972	14.2151	12.4983	18.1842	12.4255	10.4725	9.4213	5.0933	13.1848	9.8793	2.6883	3.9039	2.552	7.147	8.125		0.617227	8.6818
15.4745	15.6789	6.71	2.581	3.007	2.667	14.357	11.891	2.731	3.938	5.143	13.45	14.0177	11.1762	15.5564	16.0402	12.4327	9.3855	6.2045	10.0187	10.1362	6.72	2.5807	3.7422	1.6376	2.946	6.931		0.62201	8.14152
15.5935	16.6666	6.388	2.923	1.693	4.989	14.677	16.42	3.047	4.024	6.597	17.535	15.5788	9.2604	13.1956	14.8531	9.7846	10.0168	7.9027	12.3174	12.1331	9.9509	2.4583	3.4327	3.5319	3.286	8.229		0.626794	8.88042
15.7126	11.5973	7.652	2.149	4.368	2.108	12.098	9.25	2.529	2.357	5.046	23.539	14.0706	12.5774	19.4193	9.6207	9.1261	10.7485	6.8669	9.5393	10.6453	7.565	4.1825	4.4373	2.7834	4.756	5.475		0.631581	8.25025
15.8316	13.7887	6.893	2.79	3.391	2.742	15.268	8.523	2.716	3.213	4.947	27.974	20.4691	10.3854	12.4706	8.9498	8.5186	10.6708	10.323	9.9363	9.4104	5.2552	3.9053	2.2728	2.1668	5.31	7.509		0.636364	8.4538
15.9506	12.8027	4.845	3.84	3.416	4.722	20.682	8.973	2.893	3.354	3.156	31.744	23.5783	14.1075	11.1729	7.9356	6.2688	9.892	12.8619	14.5993	8.4051	7.4952	5.3084	1.7278	1.7785	5.145	8.301		0.641148	9.1925
16.0697	12.5822	5.27	2.086	3.848	4.242	17.738	10.342	3.564	3.584	3.225	34.413	31.636	11.0902	13.2126	14.9624	10.9125	11.7501	8.6061	12.6893	6.9835	3.4748	3.8649	2.8941	1.9004	6.326	11.19		0.645935	9.7072
16.1887	14.0453	6.271	1.691	4.436	3.114	17.489	8.482	2.524	2.413	3.228	48.965	31.4869	11.752	11.8913	19.2957	13.5237	12.2533	14.5476	11.3082	7.5647	3.9597	6.213	3.7718	0.9383	6.041	10.53		0.650718	10.6821
16.3077	13.1458	11.395	3.628	2.979	4.819	16.661	7.712	3.433	4.662	1.723	43.37	27.6729	13.1498	13.8983	15.5186	11.2275	11.9336	12.7908	8.2177	3.5526	3.3651	6.8186	2.3708	2.2027	8.917	8.402		0.655502	10.1371
16.4268	6.8979	15.533	3.431	2.926	3.221	12.883	7.938	2.228	6.447	4.316	48.642	33.4487	13.6356	16.2929	13.6023	10.3889	10.2877	8.6384	9.2751	4.0065	6.2751	5.7377	3.6092	2.1151	9.144	12.025		0.660289	10.4979
16.5458	10.0515	17.357	3.075	3.142	3.828	13.111	13.335	2.064	2.882	3.887	39.89	31.6102	13.9569	17.111	14.9995	8.3838	9.3784	9.8822	7.971	8.2148	8.9138	3.4743	3.7562	2.4544	7.314	10.844		0.665072	10.4187
16.6648	7.8776	29.288	3.959	2.876	9.764	11.934	13.144	3.358	2.915	3.023	36.843	22.8056	19.6675	17.0994	17.6881	6.3891	5.6268	5.5233	6.9891	5.0461	6.8186	4.5375	2.2607	1.4059	7.422	12.062		0.669856	10.2432
16.7839	8.8612	33.445	3.11	2.928	4.971	8.712	22.684	1.638	3.036	5.522	35.854	18.5411	28.3502	21.8097	15.9344	9.4272	7.2033	7.9556	8.1361	9.5776	7.663	5.5794	2.8404	3.1959	5.553	9.906		0.674643	11.2475
16.9029	7.2937	31.356	3.282	2.341	4.766	8.424	24.836	3.542	2.788	4.988	24.807	17.1515	24.9974	14.4692	14.5974	11.5803	7.9719	8.9486	6.629	8.2216	8.8267	3.9974	6.1365	4.3365	5.818	13.136		0.679426	10.5862
17.0219	4.5566	25.349	2.932	2.203	7.24	7.979	30.803	2.272	2.55	5.487	24.51	17.192	27.147	11.0028	15.9069	13.131	8.9096	13.2406	7.4222	7.2418	10.2064	6.9771	3.3153	1.8998	6.962	9.055		0.684209	10.5958
17.141	9.8791	23.204	4.108	2.665	5.436	11.07	28.784	0.624	1.942	7.545	19.936	18.4178	22.4425	12.8727	20.6347	10.6686	8.7715	11.4499	5.6994	3.9601	13.7483	5.7157	1.8781	4.9932	6.402	9.845		0.688997	10.4882
17.26	8.1384	18.663	5.734	1.723	6.217	10.863	17.786	1.615	1.75	5.528	20.816	18.8982	13.3721	10.7237	20.1962	7.5728	15.3018	11.4014	7.2252	10.3567	10.8382	5.1738	1.4567	2.992	4.705	13.038		0.69378	9.69558
17.379	8.1859	15.609	4.523	3.541	9.08	10.384	21.056	1.974	2.083	5.01	18.162	17.3275	15.7631	10.9177	16.5455	17.2932	13.9472	11.5337	11.6472	7.6002	9.7525	8.8565	1.0736	3.2707	2.403	13.745		0.698563	10.0494
17.4981	4.7279	17.405	1.289	3.128	8.209	7.291	12.112	2.768	1.746	3.227	20.334	16.7403	18.0317	8.6146	10.7205	12.0802	11.7153	12.2447	10.4404	9.1885	9.3553	7.3989	1.2312	3.3581	3.6	12.49		0.703351	8.82487
17.6171	4.1943	21.344	3.627	1.328	14.717	8.213	13.435	1.861	1.574	5.784	20.911	18.5819	10.5609	9.4324	18.9898	11.5148	11.3028	13.3327	9.506	7.5261	13.1494	8.7246	1.3668	4.4421	3.137	13.754		0.708134	9.70422
17.7361	4.8435	21.648	3.435	1.865	16.409	10.553	15.985	1.793	1.932	4.764	19.293	19.1945	12.4413	10.9271	16.7424	13.4929	13.2515	10.9508	8.8132	9.1232	9.797	11.1789	3.6689	3.7365	4.848	10.848		0.712917	10.059
17.8552	10.2835	24.556	2.176	4.593	9.839	6.717	20.774	1.743	3	6.291	16.688	18.6514	8.5309	8.9341	14.2438	12.7899	9.0171	10.1061	8.4837	12.9705	10.0061	10.2409	0.9457	3.7941	4.605	8.621		0.717705	9.56157
17.9742	10.183	22.599	3.384	4.022	9.735	3.363	17.643	2.265	2.905	9.92	20.935	18.3622	14.0162	12.4353	15.6895	9.716	12.0383	11.5159	16.089	10.904	9.0571	8.8707	2.3087	7.4095	2.388	10.719		0.722488	10.3259
18.0932	13.2363	21.728	4.482	3.511	12.941	5.406	11.3	3.488	2.785	7.406	15.023	19.1376	15.5686	9.5536	11.47	11.3091	7.9066	12.5858	13.4059	9.643	7.9836	7.6356	2.6726	4.3607	4.62	10.645		0.727271	9.60785
18.2123	11.5181	19.492	6.947	3.089	12.382	5.266	13.047	5.316	3.103	7.563	15.115	17.1784	12.8991	8.806	10.422	10.4991	6.4839	12.2401	12.263	6.9272	10.6127	8.371	3.5476	7.4943	7.365	13.596		0.732059	9.67475
18.3313	9.554	12.475	5.431	3.303	10.468	2.868	15.639	4.814	2.548	7.592	19.12	17.9267	8.6539	7.8371	12.5482	12.954	7.0127	12.345	11.3073	8.9515	9.7377	12.3272	4.2357	5.6441	4.733	20.32		0.736842	9.6287
18.4504	9.1567	21.094	4.303	1.438	12.03	3.319	17	3.402	3.228	11.156	18.061	17.0689	7.3001	9.5042	12.678	10.446	8.462	14.2121	8.6327	10.762	8.5435	7.9125	3.4442	8.3453	7.092	16.985		0.741629	9.82985
18.5694	8.403	13.301	5.16	2.909	11.102	1.973	18.747	1.895	3.025	14.387	19.442	19.2805	8.904	7.6445	10.685	11.8098	7.2115	6.9701	9.6717	8.0393	12.5086	3.9898	4.1894	6.669	7.332	16.927		0.746413	9.31447
18.6884	10.1895	14.715	5.464	4.027	9.423	2.452	17.246	2.789	1.848	18.832	16.407	19.9338	10.4818	10.9263	11.8746	10.3168	5.4493	9.1445	9.1187	6.5578	7.2175	4.4335	2.1334	6.5237	4.247	19.572		0.751196	9.28166
18.8075	11.9461	14.328	5.687	4.194	10.357	4.574	21.932	3.749	2.664	22.227	13.595	14.4453	11.8342	10.4619	19.1891	9.4188	8.0011	8.0996	9.259	9.8548	8.2384	4.5297	1.7488	7.1512	2.176	19.346		0.755983	9.96181
18.9265	7.9921	11.496	4.035	3.859	10.946	3.515	18.309	6.717	2.202	22.406	12.997	15.1859	10.5668	10.3466	16.2468	10.0184	7.2775	9.2659	8.4696	8.9979	13.8424	5.1334	2.9965	6.4471	2.424	24.041		0.760766	9.83592
19.0455	11.3309	14.394	5.931	4.777	4.308	0.9	16.467	3.505	5.485	21.803	12.393	12.7839	6.1674	11.0314	17.6654	10.3406	6.9711	11.5502	6.3259	13.1736	11.5474	4.5976	3.8927	4.5424	4.843	16.218		0.76555	9.34402
19.1646	7.628	11.461	5.358	2.834	5.969	2.04	16.084	4.931	3.421	13.785	12.298	8.1165	11.4532	8.1493	17.5827	7.8645	7.8521	8.851	5.4785	12.6299	10.4264	6.6294	5.023	4.9878	9.547	12.225		0.770337	8.56251
19.2836	9.4802	10.175	3.032	4.815	10.614	4.224	15.247	4.723	1.921	15.673	11.768	13.0842	15.1814	11.4029	16.0734	11.4047	8.7809	4.8644	3.9969	10.8504	10.3995	7.2466	5.4313	5.8075	4.111	13.689		0.77512	8.99986
19.4026	8.71	10.768	4.674	8.222	7.449	3.039	13.004	6.565	2.905	12.687	8.612	10.6784	12.3617	14.2129	16.6896	6.8715	8.5628	9.5973	6.0638	10.0214	7.5651	9.211	7.1271	5.16	8.291	13.82		0.779904	8.95648
19.5217	8.2564	11.176	5.173	5.837	6.424	2.628	13.376	6.172	5.843	10.142	7.932	12.6209	14.8043	13.117	12.9201	9.4464	7.6564	12.1558	8.6482	14.5927	11.4946	4.6967	8.2251	8.4636	7.327	13.751		0.784691	9.34151
19.6407	7.4935	16.634	5.538	7.194	7.41	3.601	11.12	4.231	7.945	10.394	5.955	9.3042	9.143	12.1807	9.5714	10.4729	9.8719	11.0131	6.3639	11.7428	9.911	3.5481	6.5206	6.9383	3.973	11.071		0.789474	8.42852
19.7597	3.9248	11.615	7.491	12.162	11.283	1.829	8.609	4.669	4.048	10.317	6.365	8.6428	12.6302	11.0214	12.975	12.1651	11.1708	9.3842	5.3031	8.0728	11.4712	6.4259	6.2424	9.8119	6.143	12.973		0.794258	8.72098
19.8788	5.8372	7.503	8.285	7.565	9.585	0.924	13.965	6.144	2.103	7.016	8.203	6.7502	9.6536	13.3269	11.7941	6.1475	10.7322	8.5038	8.1218	7.8092	6.964	5.9686	4.4287	10.1194	7.923	13.348		0.799045	8.02774
19.9978	3.6099	6.499	6.979	10.146	8.923	1.983	13.93	2.506	3.918	8.018	6.483	5.4242	12.6307	10.8455	11.6431	7.9461	12.4324	11.8328	7.0949	11.0406	8.2454	3.6859	6.5779	10.2306	10.77	11.264		0.803828	8.25612
20.1168	2.6417	9.137	5.733	14.655	7.679	3.514	11.403	4.428	4.097	5.898	1.768	5.6977	11.0237	9.9067	14.9234	9.2054	13.4865	17.771	8.8456	14.0762	8.9767	5.8622	6.6841	14.2638	14.696	12.007		0.808612	9.16845
20.2359	2.5979	8.303	8.147	15.046	6.284	3.782	13.03	4.075	4.248	5.16	1.37	4.2844	10.187	10.827	13.3695	6.1641	9.6966	18.0207	7.8757	8.8588	8.5708	5.9214	3.9804	11.4642	11.694	12.578		0.813399	8.28983
20.3549	1.8483	5.967	11.141	12.442	3.987	2.248	10.027	3.707	3.282	8.392	1.179	3.0073	13.0411	8.5269	15.3629	9.3606	7.9026	21.2294	10.5277	7.7389	7.9611	6.2948	5.7428	10.6985	11.849	10.408		0.818182	8.22584
20.4739	1.5949	7.5	15.745	13.488	2.172	6.074	10.102	8.584	2.624	13.487	1.406	5.5948	13.7283	6.1509	10.4347	9.1999	8.9229	16.4785	14.9385	6.5804	9.1059	3.9906	7.9597	10.3433	10.906	7.779		0.822965	8.64963
20.593	2.425	9.881	15.207	15.384	3.627	4.48	10.618	9.548	4.281	12.414	2.399	4.0607	11.7944	8.3974	9.9573	8.4404	6.8958	16.9362	13.4395	5.699	7.9008	7.6132	8.3714	9.7809	8.41	9.22		0.827753	8.73773
20.712	1.7544	13.1	14.109	16.411	3.44	2.941	8.532	11.734	5.825	17.296	1.972	1.9345	5.9552	6.7156	11.4336	13.5573	5.551	15.291	10.3025	7.6064	10.0213	5.0826	6.5313	7.2874	9.962	6.189		0.832536	8.48212
20.831	2.4568	7.923	15.864	19.479	3.409	2.749	8.301	19.826	9.019	17.492	3.049	3.1733	5.6956	6.01	12.6624	17.6646	6.9639	15.139	8.9897	7.5354	10.5047	8.3316	7.0058	6.6179	11.764	9.29		0.837319	9.49676
20.9501	1.8525	6.487	13.189	11.577	3.508	3.189	10.534	20.514	6.125	14.638	3.073	1.9543	6.6863	7.375	10.388	14.6617	4.7841	11.3891	9.9025	7.7809	10.0272	5.909	5.4992	8.1184	12.829	6.331		0.842107	8.39701
21.0691	1.6452	4.112	20.658	10.662	4.598	2.673	11.743	20.547	3.696	13.414	2.773	0.3859	7.6631	8.457	13.6087	20.4344	4.9157	15.2773	11.3988	11.2874	14.9116	7.4317	4.9895	9.0655	9.766	9.383		0.84689	9.44218
21.1881	3.3027	5.221	17.625	9.968	4.377	1.569	8.124	25.381	2.829	12.667	3.686	0.6881	13.6855	13.0939	13.0264	15.8915	3.1529	17.8414	5.3138	7.7094	11.6875	6.0347	6.6471	3.98	14.929	8.055		0.851673	9.09561
21.3072	1.9836	3.528	10.855	7.886	1.704	0.961	5.519	28.578	3.678	12.226	3.157	1.4514	11.5777	10.6897	18.112	14.8052	2.8743	17.1418	4.4517	8.7858	8.7021	6.1228	9.4741	4.7869	11.048	9.782		0.856461	8.45697
21.4262	3.0973	4.086	16.342	8.063	2.194	1.84	7.253	20.561	4.837	14.4	1.743	2.7736	10.3807	10.1786	16.3905	17.254	2.6229	12.0948	7.2296	9.9401	7.9162	6.4109	10.1263	5.1504	7.269	9.777		0.861244	8.45888
21.5452	2.1265	2.742	17.636	5.841	2.743	1.507	5.385	20.199	5.707	16.101	2.311	3.275	8.3704	10.0944	11.4959	13.231	1.7494	8.3967	8.4227	9.7779	8.0012	4.8424	9.3628	3.9076	10.108	11.433		0.866027	7.87565
21.6643	2.6402	2.647	13.349	2.899	2.264	3.208	4.783	18.206	5.9	18.398	2.557	1.3327	9.7704	13.0185	11.2446	12.4502	0.9882	7.9617	10.2659	9.2187	5.1087	1.9885	8.113	3.6888	8.33	11.032		0.870815	7.36012
21.7833	1.6766	2.502	6.918	4.924	2.922	2.244	6.544	10.029	5.298	15.868	1.783	2.1608	16.2009	14.0949	11.9623	11.1479	1.1302	9.2777	11.9043	8.797	5.2468	3.2868	9.6068	2.9229	5.029	8.45		0.875598	6.99719
21.9024	1.4768	1.672	7.403	5.336	3.14	2.096	9.213	12.696	6.988	16.556	1.282	2.7492	15.6939	9.4182	9.6031	9.9304	1.7436	10.6481	9.8904	12.7238	6.5676	1.7156	10.01	1.8766	6.378	10.181		0.880385	7.19186
22.0214	2.076	1.918	6.948	3.087	1.896	3.05	4.18	16.083	9.951	13.71	2.236	2.3292	16.7984	10.0692	5.2489	8.8021	2.4442	9.0174	7.1629	8.5169	5.9584	1.1645	8.9599	3.7359	7.785	9.757		0.885169	6.64942
22.1404	2.7405	2.982	7.522	1.826	4.036	2.101	8.851	13.32	8.636	11.176	2.505	1.4859	17.0494	9.108	6.2866	9.5038	2.7395	7.778	13.0578	8.7494	4.3409	2.2117	5.5531	3.0958	7.16	12.497		0.889952	6.78125
22.2595	1.1601	1.654	8.773	1.935	3.788	3.054	8.054	15.222	12.458	9.763	3.779	1.7636	13.4599	11.8843	7.2102	10.6216	1.6703	7.7933	10.4262	8.849	4.529	4.3478	8.5326	3.9867	6.784	11.935		0.894739	7.05514
22.3785	1.1311	3.474	8.275	2.317	1.946	5.286	5.156	13.081	7.84	10.339	1.77	1.3168	15.0028	10.7662	6.9174	7.7371	0.8395	9.6864	8.5084	6.3485	4.1431	5.1532	8.1671	1.6428	3.421	13.766		0.899522	6.3089
22.4975	1.7735	2.354	6.853	1.737	2.066	3.25	6	9.687	10.088	10.513	1.183	1.0534	18.6863	10.6529	8.6527	6.2217	0.5703	11.0766	8.0186	5.7127	3.1945	2.0283	7.1082	2.0599	4.72	10.011		0.904306	5.97198
22.6166	1.867	0.722	4.099	1.705	3.82	4.596	5.921	13.416	12.342	11.616	1.05	1.9525	18.8618	8.766	13.3792	9.4775	0.1694	10.0232	8.1315	8.5952	3.2611	1.3977	6.8466	1.197	2.983	12.093		0.909093	6.47264
22.7356	1.5942	2.116	3.704	1.936	4.638	2.54	5.607	11.779	10.876	17.456	2.932	2.8874	23.3321	7.5579	17.0015	8.3661	0.9958	11.0398	13.7209	5.67	1.7478	1.004	4.8958	1.9288	2.872	10.476		0.913876	6.87208
22.8546	1.0481	1.718	4.295	3.795	3.329	1.866	4.161	13.372	8.631	25.692	4.129	2.0188	20.4201	16.2621	13.3056	4.0367	1.0905	9.6889	15.2729	6.6025	2.0323	0.4914	2.7774	0.8459	2.204	11.12		0.91866	6.93097
22.9737	2.4401	0.681	2.991	1.722	1.316	3.82	3.64	12.784	8.646	20.806	2.351	3.2978	16.3853	12.148	9.8286	5.7065	0.1823	8.266	13.6333	5.6631	1.1794	0.527	5.8912	1.0446	1.495	12.696		0.923447	6.12082
23.0927	2.4312	1.932	2.865	2.133	3.14	5.087	2.078	14.556	13.085	19.376	1.496	2.4758	7.8948	7.3608	8.567	4.8595	0.6638	10.0418	12.569	7.9609	1.1987	1.8144	3.3207	0.1559	2.369	12.936		0.92823	5.86028
23.2117	2.2689	2.369	4.19	0.563	2.504	3.227	3.947	12.916	13.266	18.592	1.408	1.1152	5.6449	9.1184	9.4451	3.8765	0.8489	5.298	14.4083	7.4073	0.6133	1.3725	2.5613	2.1982	2.843	11.657		0.933014	5.52534
23.3308	2.7313	1.857	4.154	2.586	2.864	1.487	3.207	12.173	11.786	15.508	1.372	3.0804	5.3977	11.5731	8.4879	3.0947	1.7434	6.9203	15.3801	6.871	2.407	0.5444	2.0451	3.5198	2.814	9.652		0.937801	5.50985
23.4498	0.8141	0.249	5.11	2.026	1.749	2.699	2.722	15.707	11.9	15.589	1.153	2.4322	5.0271	12.4837	7.1642	2.2075	0.74	7.8687	13.5321	8.1254	2.6566	1.379	1.6726	2.231	2.451	13.389		0.942584	5.50301
23.5688	0.8098	1.314	1.951	3.195	0.432	2.27	2.714	17.706	14.628	11.802	2.144	2.8707	4.1822	10.2826	6.8903	2.0385	1.4576	6.9455	12.139	8.1387	0.4955	2.6657	2.0929	0.657	0.559	15.016		0.947368	5.20758
23.6879	0.9808	1.03	2.109	2.322	2.776	4.534	2.305	16.995	17.074	10.045	0.962	2.0455	4.1856	10.5661	9.0539	1.6338	3.8326	5.9403	9.7527	7.3016	0.6072	0.8191	3.5945	1.2223	1.023	10.453		0.952155	5.12169
23.8069	1.9467	1.506	1.85	2.783	4.438	3.003	0.94	17.58	17.541	9.154	1.619	0.8614	3.49	7.8928	7.9229	3.892	1.9118	6.029	9.574	9.2121	1.5608	1.6306	2.3272	1.5185	1.922	13.473		0.956938	5.21457
23.9259	1.1	2.047	1.273	2.304	2.245	5.502	0.992	15.625	18.573	9.591	1.445	2.885	4.6405	9.0195	9.9571	1.3822	1.7918	3.8125	9.6474	5.5378	0.7629	2.1018	1.2398	1.7664	1.111	13.89		0.961722	5.00933
24.045	0.9021	2.188	1.13	2.278	4.635	3.12	2.819	13.098	18.337	8.043	1.044	2.5234	2.4799	10.1358	6.5491	1.4047	1.1334	4.6861	7.2836	5.11	1.4755	2.1114	0.8889	2.1115	1.634	14.628		0.966509	4.68267
24.164	1.256	2.52	1.524	1.796	4.436	1.964	2.696	15.297	18.96	5.065	2.724	2.5964	2.2207	6.892	5.7702	2.2972	0.3603	5.6821	5.473	7.9402	0.8564	1.1059	2.5143	1.135	1.493	13.225		0.971292	4.53076
24.283	0.3811	3.324	2.32	2.596	4.548	2.959	2.927	12.406	18.612	3.826	2.451	3.2075	0.52	5.2354	1.7879	1.1542	1.5017	2.8521	4.8126	6.6503	1.205	1.6365	2.3938	0.8345	2.139	13.213		0.976075	4.05745
24.4021	2.1726	1.575	2.003	3.655	4.293	3.322	3.234	15.453	14.097	4.777	3.224	3.6605	1.2274	3.7891	2.574	1.3177	1.6866	2.8649	6.9707	4.1726	1.7963	2.5654	1.5232	0.7111	2.503	14.055		0.980863	4.20089
24.5211	2.0997	1.274	4.189	2.53	2.017	5.732	1.731	17.746	12.59	2.997	2.332	1.0975	3.5994	4.6311	0.9142	2.1805	0.9799	2.4447	8.5777	3.921	1.1703	1.6219	1.6849	1.4364	1.987	11.169		0.985646	3.9482
24.6401	2.7407	1.326	3.62	2.193	3.648	4.797	2.892	14.08	12.869	2.442	4.26	1.7588	2.0128	4.317	0.546	0.8684	0.3403	2.3688	5.7405	2.8239	0.4459	0.6526	1.2723	1.0299	0.87	9.239		0.990429	3.429
24.7592	1.7456	1.924	2.864	2.047	2.621	2.612	1.282	11.865	13.977	1.795	2.881	0.9365	1.131	4.8114	1.6094	2.2303	1.4165	1.0759	8.8871	2.572	0.3749	0.5406	0.4415	0.4459	1.282	9.497		0.995217	3.18714
24.8782	2.9026	2.691	3.251	1.703	2.98	3.137	2.167	16.109	11.749	0.955	2.747	2.0856	3.5332	4.8124	1.2247	1.8703	1.2443	1.3575	7.4898	0.5293	1.9234	0.1662	3.2273	1.659	1.537	6.144		1	3.4306

## Sheet: Image3
X0	Y0	Y1	Y2	Y3	Y4	Y5	Y6	Y7	Y8	Y9	Y10	Y11	Y12	Y13	Y14	Y15	Y16	Y17	Y18	Y19	Y20		Ap-Ba	Average int.
0	70.5926	75.7593	97.207	75.211	89.716	94.716	104.479	102.167	72.9543	118.612	115.935	85.033	89.011	97.729	123.804	141.441	116.356	173.939	156.744	174.867	150.924		0	110.819
0.119	63.5854	81.8493	80.331	94.947	87.013	93.514	112.598	83.6956	81.8869	133.283	119.451	93.779	90.736	97.443	145.049	141.285	116.358	187.392	168.171	177.454	131.618		0.00444315	113.402
0.2381	71.3148	94.6256	92.912	85.217	86.4	107.343	117.113	92.5023	81.4563	119.608	123.144	99.337	87.392	108.538	149.564	142.216	129.012	184.011	165.257	168.098	134.789		0.00889003	116.183
0.3571	65.8904	79.1466	85.711	92.41	92.281	97.573	111.44	101.74	85.7069	99.315	128.905	112.282	107.163	114.133	135.82	144.734	129.382	193.557	176.618	184.341	133.144		0.0133332	117.681
0.4761	77.1544	87.8862	98.966	108.669	68.26	107.128	115.644	77.754	79.9991	98.618	141.787	120.025	94.96	102.713	149.482	162.399	120.604	201.452	186.924	193.193	143.6		0.0177763	120.82
0.5952	79.2723	85.9887	91.69	96.649	91.855	113.991	121.405	80.9399	81.411	96.709	145.349	134.85	105.223	109.666	144.81	166.806	139.161	201.159	191.224	182.875	139.947		0.0222232	123.856
0.7142	70.4906	82.1749	88.234	102.743	93.356	111.112	108.554	74.5679	87.0405	95.189	150.359	125.11	111.762	122.363	160.137	156.623	122.204	191.646	184.05	200.932	137.236		0.0266664	122.661
0.8332	77.103	71.078	79.607	114.886	92.89	120.132	125.883	72.4823	88.7804	106.972	154.802	116.529	110.072	107.938	174.923	141.837	129.448	181.859	187.885	186.494	137.907		0.0311095	122.834
0.9523	63.3669	67.7012	91.617	114.29	104.974	131.218	137.9	66.4447	84.9938	96.48	140.203	133.003	107.009	135.393	192.955	134.751	121.002	188.506	199.823	186.298	143.133		0.0355564	125.765
1.0713	59.2216	91.0352	100.378	128.601	102.059	140.167	137.069	66.9765	87.828	104.347	146.615	122.126	126.443	136.98	184.022	134.133	126.057	200.358	195.675	177.466	131.173		0.0399996	128.511
1.1903	65.7522	62.0214	89.879	117.769	102.499	135.417	128.824	74.7585	78.2892	93.332	145.016	144.031	110.306	124.806	172.935	137.77	134.708	186.737	198.553	176.376	142.067		0.0444427	124.85
1.3094	71.2928	75.6125	97.826	118.557	119.886	135.316	149.62	65.0587	73.5208	91.1	150.873	147.366	119.839	130.521	162.861	150.176	148.881	196.086	191.579	180.943	166.548		0.0488896	130.641
1.4284	68.0016	69.7389	95.091	119.962	123.947	143.721	128.777	63.4226	76.5566	77.303	150.303	139.051	108.966	111.69	169.887	151.148	150.625	178.575	193.039	187.403	158.167		0.0533327	126.923
1.5474	66.3334	75.1403	78.987	132.12	130.645	127.473	146.07	69.443	78.3991	98.055	135.274	143.356	145.342	117.191	185.229	147.204	145.536	186.989	194.193	178.024	174.858		0.0577759	131.232
1.6665	55.3666	70.8876	97.452	128.478	128.135	145.988	147.848	68.1832	68.3146	92.404	143.754	177.324	142.205	134.067	174.599	157.161	145.906	179.258	191.192	206.556	177.182		0.0622228	134.87
1.7855	58.2639	68.4531	90.54	115.338	148.008	126.609	156.462	76.0613	70.4614	87.632	158.443	162.095	135.594	115.351	157.901	176.22	152.982	192.259	186.548	199.629	167.175		0.0666659	133.43
1.9046	58.309	63.3695	86.047	122.236	135.959	121.674	150.071	67.908	70.1075	94.142	147.685	158.375	138.403	123.173	171.942	174.457	137.814	191.3	187.285	183.7	184.286		0.0711128	131.821
2.0236	57.099	66.7955	96.433	122.579	131.339	122.67	150.097	67.2859	76.7328	91.926	139.671	158.131	137.13	124.648	154.769	171.272	159.222	190.087	211.11	181.353	174.343		0.075556	132.604
2.1426	58.7964	64.5813	96.336	105.981	132.871	138.159	166.871	63.7839	74.8582	84.843	148.945	154.916	145.949	127.494	162.31	199.655	168.951	182.755	214.215	176.097	191.141		0.0799991	136.167
2.2617	61.0862	63.8893	105.204	113.486	138.53	118.404	168.023	60.7749	69.4826	83.187	128.999	172.44	133.059	133.707	178.286	190.05	169.513	188.902	218.002	176.825	191.102		0.084446	136.331
2.3807	60.3136	53.689	98.589	120.319	139.299	140.041	145.868	68.0981	76.6863	82.028	137.161	176.579	131.638	131.213	183.518	173.643	155.945	169.366	210.547	170.129	175.105		0.0888891	133.323
2.4997	57.8309	62.6672	108.766	128.686	142.301	124.985	141.209	70.2204	72.2733	73.184	143.158	157.858	131.059	125.251	175.322	182.08	167.158	165.051	187.01	185.099	168.849		0.0933323	131.906
2.6188	61.5908	55.4938	103.11	118.569	131.441	139.896	137.14	59.443	79.7861	78.025	144.178	171.648	130.157	135.44	162.796	156.377	155.795	179.942	205.771	197.501	189.073		0.0977792	133.008
2.7378	60.4641	62.3904	94.838	136.141	132.124	132.045	133.784	50.4074	78.6317	78.827	141.236	182.984	133.676	143.738	156.42	157.987	147.742	180.022	194.658	199.237	189.056		0.102222	132.686
2.8568	58.108	64.4348	105.695	130.257	131.082	136.129	137.914	53.1184	81.3655	82.715	151.675	171.63	128.129	134.923	162.12	168.574	158.751	171.521	206.905	187.948	168.011		0.106665	132.905
2.9759	60.0219	58.3791	113.765	133.309	155.486	134.014	130.896	51.7635	77.2511	73.631	148.666	183.393	138.816	134.546	169.666	177.509	167.382	179.219	216.794	190.453	173.953		0.111112	136.615
3.0949	62.9303	59.3934	125.455	137.425	148.357	144.018	123.442	62.0987	81.1338	74.359	149.819	187.895	150.4	136.639	169.71	174.417	160.266	193.119	202.751	190.312	179.218		0.115556	138.722
3.2139	67.9747	53.8071	117.361	148.753	139.583	144.065	120.556	55.8347	74.1345	79.959	142.768	186.802	155.295	120.905	156.126	165.225	160.014	181.882	208.453	187.762	188.279		0.119999	135.978
3.333	57.8508	65.582	127.869	152.929	150.242	153.073	124.815	67.6677	69.0982	84.038	151.423	176.279	152.749	120.585	154.071	168.316	153.838	186.92	198.497	185.238	185.94		0.124446	137.477
3.452	54.5062	49.2134	125.685	148.749	145.202	153.205	118.695	58.6708	80.3695	76.371	154.421	175.056	156.977	126.506	159.166	161.438	147.372	170.835	201.411	191.116	153.249		0.128889	133.724
3.571	63.3722	59.5765	119.132	147.769	155.29	148.071	140.743	53.3651	81.2895	83.316	155.478	197.517	159.242	122.647	151.17	140.225	163.752	158.606	199.756	195.304	164.551		0.133332	136.199
3.6901	55.2677	59.1502	126.583	138.548	157.224	154.722	127.938	58.6603	74.8688	70.662	160.892	183.056	183.307	140.02	164.769	153.375	144.031	151.872	205.891	200.153	179.987		0.137779	137.666
3.8091	59.2062	61.8941	113.757	150.948	139.003	156.625	135.738	69.3594	55.3953	60.56	143.896	186.541	178.774	133.066	153.246	151.521	132.625	164.497	205.501	209.544	180.972		0.142222	135.365
3.9281	61.462	42.9711	115.905	139.658	134.273	156.014	138.874	65.9482	66.8101	72.45	152.441	155.987	170.096	117.847	147.834	165.001	156.654	155.576	208.32	212.712	162.471		0.146665	133.3
4.0472	68.732	52.1336	121.009	147.562	140.938	142.78	120.997	57.67	60.8125	57.93	146.875	169.193	166.005	115.963	154.609	148.911	136.614	154.759	220.592	211.668	158.583		0.151112	131.159
4.1662	61.238	66.1316	115.106	152.045	144.939	146.591	125.245	65.515	63.145	64.782	162.328	163.55	167.163	134.778	163.751	160.715	136.772	136.624	220.825	207.717	172.577		0.155555	134.835
4.2852	61.879	56.7144	105.401	151.444	151.743	152.007	130.229	61.9469	70.6917	72.67	146.42	165.593	179.583	140.013	161.059	155.593	145.037	138.057	210.922	199.06	159.374		0.159998	134.068
4.4043	56.3076	54.5936	112.878	152.261	157.21	166.985	139.623	49.271	63.3959	59.821	148.29	159.775	187.731	123.965	160.989	165.38	159.741	133.355	199.424	199.612	171.723		0.164445	134.397
4.5233	64.3216	51.5249	106.997	159.524	134.358	141.788	122.925	55.8002	54.3613	67.903	149.683	174.629	190.629	117.261	158.433	167.207	140.396	137.781	206.564	192.226	190.657		0.168888	132.618
4.6423	62.1729	48.5937	109.633	155.179	146.418	142.24	141.74	52.7219	56.6137	68.059	129.145	185.611	186.634	109.997	170.406	162.105	143.9	118.972	209.113	210.316	188.246		0.173331	133.229
4.7614	66.3424	49.0832	124.107	148.343	157.083	136.658	117.944	41.9358	68.0241	56.386	137.566	175.084	199.22	114.29	154.637	162.776	133.496	132.158	188.861	192.855	169.298		0.177778	129.817
4.8804	65.6027	53.381	107.857	140.002	149.351	142.065	121.577	39.3816	63.0939	53.869	138.627	173.579	179.083	119.814	140.073	174.232	140.522	145.009	179.291	210.055	159.276		0.182221	128.369
4.9995	63.2042	65.1223	117.849	154.15	140.54	144.533	122.96	44.4091	65.382	54.29	134.732	195.943	173.09	121.121	151.135	171.182	147.214	121.97	185.475	192.841	162.053		0.186668	129.962
5.1185	61.0354	57.4675	115.005	149.074	137.78	147.43	120.783	49.8604	62.6592	62.239	142.302	177.152	157.432	115.384	155.445	166.118	156.19	110.023	189.777	199.578	184.092		0.191111	129.373
5.2375	62.0032	58.5501	113.28	147.031	135.698	142.93	119.017	49.3913	55.9577	55.363	154.345	182.816	163.55	127.299	161.524	164.561	166.225	113.654	192.393	194.274	165.333		0.195555	129.771
5.3566	65.9613	43.0606	127.992	139.83	125.098	149.551	101.531	45.8511	63.9913	45.715	158.131	203.407	170.136	130.733	155.35	161.242	151.198	110.718	205.258	203.259	157.58		0.200001	129.314
5.4756	54.7589	52.7618	125.774	156.192	141.277	151.787	128.846	41.3113	60.0877	49.228	154.821	194.487	166.861	122.719	144.14	177.345	139.903	104.146	191.892	203.53	171.756		0.204445	130.173
5.5946	54.062	54.8504	127.096	126.914	152.14	138.646	125.365	50.5804	68.1166	55.219	133.324	202.448	173.186	110.813	133.097	173.938	150.836	113.387	197.029	183.732	149.369		0.208888	127.34
5.7137	46.9386	45.2439	128.689	137.719	141.608	165.521	116.966	44.3937	54.3737	42.072	128.914	185.565	164.794	126.38	152.935	174.618	155.89	100.452	195.988	176.598	185.852		0.213335	127.215
5.8327	62.5224	46.2867	125.355	146.283	134.672	161.014	115.031	51.4308	61.6437	54.22	131.746	184.357	169.016	119.609	164.842	163.225	159.594	114.601	186.459	186.471	173.977		0.217778	129.16
5.9517	50.5256	54.2095	124.242	148.315	140.408	155.067	110.235	48.4525	49.4511	36.807	121.096	175.993	180.185	106.828	162.678	169.331	155.837	123.122	172.784	187.512	175.29		0.222221	126.113
6.0708	55.7493	53.7471	115.02	140.055	142.911	156.51	109.088	50.179	36.703	43.454	129.362	178.583	181.66	119.241	157.222	176.37	156.501	93.239	198.007	178.512	171.983		0.226668	125.909
6.1898	52.7793	52.1464	115.147	142.832	161.05	165.057	117.848	52.1471	42.7665	46.907	124.399	195.795	195.772	112.027	169.027	172.549	145.899	84.553	177.263	181.309	169.128		0.231111	127.448
6.3088	46.609	48.8048	109.769	153.893	159.085	152.002	126.332	54.6487	41.8761	45.101	144.662	182.002	204.554	123.84	161.949	172.749	150.345	89.034	175.699	179.213	156.57		0.235554	127.559
6.4279	45.0973	55.0089	113.944	160.329	155.692	169.271	123.554	48.1128	44.6083	36.121	135.896	185.399	200.094	124.768	169.051	165.331	155.359	77.48	190.458	192.54	162.103		0.240001	129.058
6.5469	57.9564	54.2307	105.375	156.707	151.565	155.63	121.3	32.6421	49.8463	46.738	126.962	184.109	195.014	127.561	170.293	160.614	146.474	89.52	181.865	186.495	168.287		0.244444	127.104
6.6659	60.9382	55.051	110.416	151.384	149.377	160.769	129.587	48.4503	44.3952	46.969	119.583	183.223	166.754	125.482	151.503	152.427	151.253	83.64	172.758	184.658	168.244		0.248887	124.612
6.785	51.1622	47.4007	103.503	155.707	135.593	166.664	125.09	47.9286	40.3758	53.845	115.523	169.103	180.532	114.435	165.924	152.522	147.668	97.307	190.141	182.572	177.864		0.253334	124.803
6.904	49.0076	50.8191	104.883	165.931	154.613	171.008	119.877	32.1631	52.1502	49.055	123.355	177.749	198.429	117.751	157.287	158.542	146.368	103.707	200.766	198.455	176.901		0.257777	128.991
7.023	62.0036	44.939	108.091	155.463	156.829	166.644	127.108	40.495	47.0068	43.033	118.327	176.184	186.224	145.946	159.373	154.266	150.786	107.162	188.058	176.381	170.216		0.262221	127.835
7.1421	56.2304	52.1835	104.371	141.478	161.543	156.418	122.79	38.4399	56.2732	38.198	115.262	175.877	177.052	139.76	148.91	140.201	132.148	96.408	187.093	181.886	180.963		0.266667	123.975
7.2611	53.1792	49.7295	110.442	149.803	132.591	152.026	124.12	31.5499	37.6985	37.518	122.913	162.874	193.788	136.187	144.293	133.965	129.547	93.959	168.641	185.247	171.081		0.271111	120.055
7.3801	50.8346	53.1843	106.151	143.687	136.976	168.735	113.429	35.3085	49.9089	37.222	113.269	163.883	186.782	139.333	147.141	129.286	115.412	98.4	183.037	192.214	170.992		0.275554	120.723
7.4992	55.1387	56.2232	119.79	130.998	150.801	159.82	101.342	36.2436	50.6286	47.214	126.398	169.685	196.339	136.685	142.977	134.709	130.874	89.874	171.46	186.888	174.918		0.280001	122.334
7.6182	47.0307	41.789	110.748	128.781	134.446	154.039	112.459	37.5513	43.4589	32.698	117.126	156.375	208.913	147.265	143.868	128.925	134.862	94.459	163.463	174.781	195.619		0.284444	119.46
7.7372	51.9078	36.8484	98.944	138.466	140.053	168.038	94.044	23.9509	34.1874	35.679	100.648	162.818	198.07	146.354	158.736	139.593	150.059	102.791	156.083	191.607	178.672		0.288887	119.407
7.8563	54.1918	40.3499	108.073	131.993	133.363	159.008	103.574	35.9267	36.5309	33.477	99.526	154.157	176.41	143.165	146.742	146.338	131.018	87.662	178.049	174.949	189.074		0.293334	117.313
7.9753	54.1831	35.0148	83.156	126.442	132.548	137.598	94.237	43.9398	39.5266	41.316	110.824	162.495	178.561	162.625	144.31	137.365	129.872	97.041	177.447	163.516	179.282		0.297777	115.776
8.0943	53.1859	39.3089	95.472	124.714	128.896	141.821	94.114	55.2021	36.3516	38.503	116.39	144.639	154.023	156.247	160.245	134.056	131.505	109.423	170.489	167.441	184.643		0.30222	116.032
8.2134	52.0441	42.4394	95.146	114.059	151.836	164.786	83.368	52.9489	30.344	30.555	117.312	163.861	147.903	157.356	160.179	133.25	126.283	91.296	185.723	164.092	177.766		0.306667	116.312
8.3324	45.791	41.5603	63.152	100.012	138.84	140.499	92.697	43.5047	32.8434	28.374	103.074	154.774	149.875	158.545	167.964	144.419	141.158	80.09	180.095	164.193	175.229		0.31111	111.747
8.4515	41.1492	48.4005	55.907	118.129	121.569	151.174	87.261	31.4502	30.8909	17.789	89.752	161.769	140.732	159.162	164.91	134.885	138.121	79.635	168.583	162.459	170.985		0.315557	108.32
8.5705	41.2836	40.7657	47.221	128.695	139.166	153.42	85.002	30.4198	32.9822	18.524	93.392	153.218	151.578	161.396	157.84	107.616	107.271	80.661	159.507	159.351	168.156		0.32	105.594
8.6895	44.8872	46.3646	47.157	121.577	113.424	136.025	99.93	32.7242	31.802	18.576	73.538	149.556	156.329	148.54	134.538	129.268	89.899	79.906	139.072	146.033	162.501		0.324443	100.078
8.8086	44.6143	38.1185	31.913	109.082	110.345	123.257	64.428	31.1505	31.4895	17.138	89.397	149.243	143.322	156.28	142.745	124.207	99.173	96.272	138.215	169.658	165.078		0.32889	98.8155
8.9276	41.6941	27.901	28.66	117.476	130.358	137.33	63.056	29.114	23.4747	24.848	80.846	151.932	162.8	143.853	134.015	129.343	107.564	90.682	128.65	138.44	166.226		0.333333	98.0125
9.0466	49.7391	37.5616	26.783	123.515	119.172	146.795	66.189	20.5217	32.375	16.199	78.541	157.835	147.97	151.721	130.475	125.975	99.355	84.558	121.906	156.015	161.849		0.337776	97.8595
9.1657	40.4175	35.0998	28.632	124.783	106.554	141.55	55.651	18.2935	24.4137	17.988	77.831	130.425	137.478	146.502	128.819	133.587	84.544	86.781	125.45	155.267	153.661		0.342223	93.0346
9.2847	36.8142	34.776	29.468	124.654	111.529	135.161	55.945	18.8106	22.3395	14.634	58.502	150.928	141.546	136.139	113.311	129.94	84.865	78.821	122.098	139.094	138.087		0.346667	89.403
9.4037	36.8256	32.2633	20.709	115.287	114.363	136.335	54.615	17.4184	16.4858	7.5	51.15	131.614	151.651	141.907	129.469	130.623	92.373	74.093	114.847	162.801	127.792		0.35111	88.5772
9.5228	32.0245	38.2297	18.44	110.52	121.636	121.417	40.222	14.8944	13.8315	12.571	44.56	126.505	161.289	146.17	119.345	106.76	74.807	66.205	121.607	141.804	132.989		0.355557	84.087
9.6418	32.795	35.0791	17.063	98.877	122.913	120.902	45.065	13.8613	13.3361	9.487	51.609	131.179	145.611	127.598	102.126	119.885	55.534	72.35	98.519	129.549	116.872		0.36	79.0576
9.7608	30.7664	34.4519	14.171	88.438	97.655	102.86	55.813	10.9633	14.5659	11.117	49.708	129.828	152.517	122.525	111.059	108.871	59.216	61.551	101.416	150.398	118.166		0.364443	77.4313
9.8799	20.3504	22.9995	17.669	63.136	106.193	108.498	53.355	13.0453	17.1338	6.562	47.797	116.254	129.886	122.249	108.742	94.691	52.157	75.799	95.282	142.245	107.509		0.36889	72.4549
9.9989	21.1127	21.9585	11.288	50.337	102.284	109.262	39.196	11.3085	9.386	7.623	53.368	95.962	137.689	119.433	128.34	89.499	39.72	59.869	80.28	127.264	94.737		0.373333	67.1389
10.1179	20.9024	23.0749	9.64	51.159	100.799	108.52	40.504	8.4058	11.0075	9.143	39.749	99.121	126.171	118.021	125.852	84.65	36.503	69.787	85.561	113.705	86.108		0.377776	65.1611
10.237	22.1765	19.4093	11.255	47.145	102.035	105.754	27.366	7.4	12.5981	5.465	41.29	102.186	117.043	115.242	135.517	116.937	37.839	69.504	68.752	108.948	70.825		0.382223	64.0327
10.356	18.8583	20.4402	15.775	42.293	95.974	105.923	28.063	10.1499	17.1488	7.494	43.263	95.575	124.39	83.976	138.043	108.362	36.7	60.698	59.706	95.144	81.19		0.386666	61.3889
10.475	20.5193	15.6019	8.642	37.493	94.191	96.341	29.206	8.2638	9.8457	3.374	40.545	82.489	104.682	76.917	128.77	80.598	35.187	62.013	69.813	87.031	70.906		0.391109	55.3537
10.5941	21.6406	24.466	7.57	31.156	90.756	102.681	35.287	10.7971	8.1587	8.379	39.448	75.021	80.392	67.366	100.796	82.67	28.832	53.276	70.449	81.358	71.106		0.395556	51.9812
10.7131	21.7561	27.4164	13.396	29.998	94.23	112.545	35.016	7.8227	9.1287	6.319	36.675	68.822	67.234	63.677	106.203	74.721	28.603	49.504	59.688	88.254	78.677		0.399999	51.4136
10.8321	13.9878	25.0119	12.798	22.868	96.259	111.633	27.805	9.7479	7.9382	6.241	41.402	74.032	74.874	52.205	85.234	76.209	27.54	67.296	68.21	98.673	59.799		0.404442	50.4649
10.9512	19.4439	19.1399	14.373	26.487	100.431	109.966	35.609	8.8372	9.9384	5.186	35.61	55.432	68.176	30.582	85.11	71.414	25.058	56.229	73.423	86.848	64.803		0.408889	47.7189
11.0702	15.0246	19.166	9.669	24.244	87.315	99.029	30.558	9.3426	8.4364	7.181	39.887	47.91	61.234	40.247	78.54	77.374	22.199	59.406	60.371	74.754	61.075		0.413332	44.4268
11.1892	18.1881	13.4018	11.801	17.418	74.516	90.196	26.957	8.0817	8.1642	5.165	25.516	59.091	55.399	27.252	78.576	56.944	23.737	52.496	61.884	83.772	54.822		0.417776	40.637
11.3083	18.3563	18.1844	9.923	11.669	67.372	81.968	22.759	8.6967	5.9067	6.085	28.575	53.291	54.333	29.365	63.843	61.659	19.487	55.981	65.622	69.898	52.48		0.422222	38.355
11.4273	14.0201	13.1965	8.819	8.928	51.481	64.612	22.028	7.9517	9.1352	3.956	28.553	41.78	42.807	21.437	67.097	49.519	18.115	50.709	63.129	66.389	42.789		0.426666	33.1644
11.5463	18.2075	14.3693	10.639	10.64	43.393	74.538	24.141	8.6511	6.2414	9.062	15.81	30.48	26.812	19.86	68.59	50.862	14.38	39.039	61.733	59.659	51.021		0.431109	31.3394
11.6654	17.9769	15.3941	7.864	6.267	36.903	61.403	22.901	6.9848	8.5769	5.383	17.076	30.809	24.852	14.319	61.415	64.419	22.9	40.713	56.269	54.376	39.437		0.435556	29.3447
11.7844	14.7848	18.5459	6.639	10.837	31.483	56.37	14.833	8.3416	7.4498	6.293	17.247	23.433	13.78	19.322	69.961	57.896	19.398	34.133	53.055	45.421	47.017		0.439999	27.44
11.9035	11.5721	11.9422	8.843	11.993	24.099	43.493	19.037	8.0762	4.663	5.404	16.989	21.931	16.44	15.084	66.592	54.828	13.731	27.219	50.589	45.184	42.976		0.444446	24.7945
12.0225	12.4444	11.5942	8.464	9.747	23.081	31.149	23.321	7.3679	7.3834	4.614	9.762	30.162	14.905	18.801	57.538	48.496	13.654	16.41	40.198	49.778	39.775		0.448889	22.7926
12.1415	10.992	14.7576	6.496	10.072	22.157	27.957	17.577	6.7007	9.1808	5.069	7.269	34.009	10.51	12.386	53.806	49.926	15.491	25.332	42.373	52.83	38.722		0.453332	22.553
12.2606	9.8977	9.0996	8.672	11.602	15.508	23.936	17.55	6.6301	5.4603	4.102	5.7	30.073	9.44	17.198	45.708	46.298	15.786	25.616	33.842	42.683	33.023		0.457779	19.8964
12.3796	10.5534	13.8971	9.884	9.031	17.187	17.887	17.028	6.629	6.0987	4.625	3.795	22.683	13.664	10.576	42.163	32.676	15.695	20.96	30.702	38.734	31.533		0.462222	17.9048
12.4986	9.5603	12.3072	14.28	6.595	17.791	16.629	21.032	7.086	9.2087	5.232	9.027	21.687	11.184	15.242	25.412	48.295	17.102	28.544	34.37	38.809	36.193		0.466665	19.3136
12.6177	13.0371	9.6093	10.699	6.539	15.579	18.451	26.442	9.878	6.212	7.646	7.798	21.983	10.753	14.727	27.336	35.822	16.845	21.104	26.173	29.281	30.877		0.471112	17.4663
12.7367	9.5015	10.431	4.998	6.539	9.162	18.471	17.885	8.6051	4.8722	3.886	5.261	11.15	6.258	12.017	26.173	25.24	14.22	22.142	23.117	31.858	30.116		0.475555	14.3763
12.8557	5.4305	11.9013	8.239	8.255	5.668	7.126	13.969	4.6282	5.0148	3.282	5.503	10.728	7.18	17.88	22.706	27.35	12.523	25.101	24.791	35.971	31.9		0.479998	14.0546
12.9748	8.7966	10.5886	9.655	9.462	4.705	6.516	13.321	7.8527	6.3123	1.73	9.566	12.644	7.271	14.918	27.42	24.028	11.055	26.054	30.097	32.525	28.909		0.484445	14.4489
13.0938	8.8189	11.547	8.25	6.415	6.494	8.933	18.705	10.9779	6.0393	5.804	6.657	11.163	7.273	9.519	21.257	29.206	14.625	28.038	21.428	21.64	24.546		0.488888	13.6827
13.2128	7.3995	8.7915	9.346	5.219	8.853	4.242	13.29	9.0381	5.3553	2.346	6.328	9.038	3.972	10.575	24.7	22.573	15.43	19.399	19.201	23.74	30.196		0.493332	12.3349
13.3319	9.1007	9.7278	7.416	7.409	7.14	6.546	9.563	10.572	1.1498	2.434	6.356	13.611	4.776	13.752	13.154	29.36	17.686	17.249	25.015	30.204	29.256		0.497778	12.9275
13.4509	8.5355	7.7718	9.563	8.15	5.695	7.731	10.211	8.7077	3.1031	1.884	6.513	8.884	3.534	6.368	13.45	26.191	11.59	20.57	26.933	27.632	29.569		0.502222	12.0279
13.5699	8.3781	10.0362	10.913	10.816	4.852	7.502	11.261	7.4255	5.6235	4.496	8.527	8.983	7.353	9.15	13.8	35.163	12.059	21.174	21.381	26.256	30.075		0.506665	13.1059
13.689	9.7971	9.2668	9.715	7.534	8.355	8.087	6.422	10.0429	4.9861	2.726	7.485	8.825	4.201	8.869	11.092	33.567	13.516	17.828	17.805	22.971	31.792		0.511112	12.1373
13.808	9.247	9.2683	10.281	13.231	3.393	7.315	11.324	6.2334	5.59	3.612	5.36	10.627	3.924	11.392	13.787	21.801	9.433	16.295	16.055	32.7	30.009		0.515555	11.9466
13.927	8.2708	9.1547	10.461	4.204	3.063	8.135	16.019	5.7132	3.619	3.698	2.286	9.506	3.732	11.814	12.91	12.796	8.157	22.237	21.387	21.468	24.077		0.519998	10.6051
14.0461	10.6411	10.7178	9.147	5.658	4.961	6.97	11.886	6.0037	1.9832	0.345	5.456	8.988	3.336	7.606	12.802	10.726	7.934	15.588	26.05	26.023	24.018		0.524445	10.3257
14.1651	5.6014	6.8658	12.182	6.309	4.125	7.457	13.689	5.5296	1.3969	1.204	4.456	10.997	4.523	4.437	18.028	11.377	10.253	16.058	22.095	23.165	24.39		0.528888	10.1971
14.2841	7.8864	6.3663	9.042	5.485	2.556	3.938	10.6	4.495	3.0587	2.91	5.276	6.621	3.802	3.767	12.049	10.697	11.351	13.481	18.501	20.067	14.079		0.533331	8.3823
14.4032	7.7494	7.2244	11.082	6.292	4.386	5.042	12.039	4.2385	2.5286	2.858	7.689	7.93	4.539	7.262	9.925	12.991	11.85	13.704	17.275	12.918	16.281		0.537778	8.8478
14.5222	9.0705	9.5809	10.116	5.79	5.81	7.967	6.272	5.7215	4.3401	3.47	4.258	7.252	7.304	9.227	9.302	10.232	9.646	15.137	20.384	19.753	17.529		0.542221	9.43629
14.6412	9.0664	8.6068	10.76	7.695	6.723	6.908	10.38	6.3318	3.7358	2.399	6.235	6.307	2.64	5.424	12.931	7.949	10.224	12.722	15.977	20.533	16.795		0.546664	9.06394
14.7603	4.6364	7.7784	9.499	6.184	3.181	7.68	12.279	8.288	5.0096	3.057	5.98	5.061	3.043	6.103	13.853	10.649	15.753	13.827	14.595	15.251	14.571		0.551111	8.8704
14.8793	8.1873	5.5684	15.935	8.513	5.122	5.259	8.579	10.3248	4.387	3.939	5.332	5.65	5.913	8.405	12.39	9.362	15.202	9.589	18.454	20.436	13.239		0.555554	9.51364
14.9984	6.1782	7.4525	13.271	6.312	5.28	6.313	12.412	7.8346	5.3529	3.554	5.836	7.071	4.004	4.694	12.741	7.354	9.413	14.486	17.806	14.363	21.148		0.560001	9.18458
15.1174	5.3612	7.8508	7.894	6.184	6.324	4.076	9.854	4.2475	4.4942	3.276	4.63	8.741	7.539	3.987	6.535	6.357	12.339	12.648	15.541	15.487	16.297		0.564444	8.07918
15.2364	8.3154	10.2334	6.735	10.665	3.676	6.067	14.02	3.128	2.6756	4.022	6.037	6.581	1.5	4.429	9.636	11.264	15.474	8.938	13.852	13.805	13.596		0.568887	8.31664
15.3555	4.7196	5.9545	11.276	12.741	5.02	6.221	9.726	6.9218	2.6338	3.121	9.931	4.782	6.544	6.058	8.021	11.504	13.278	12.202	13.744	15.214	15.606		0.573334	8.81994
15.4745	7.2792	10.4113	12.539	9.343	3.064	6.645	11.89	8.5356	4.5035	2.099	9.008	3.384	2.783	4.078	8.402	10.96	10.907	8.568	16.783	17.623	17.091		0.577778	8.85222
15.5935	4.3275	10.7088	9.744	19.56	2.229	9.195	7.494	5.6277	4.1829	3.973	7.013	3.581	4.314	4.451	9.92	10.106	12.304	10.487	8.881	15.918	12.616		0.582221	8.41109
15.7126	6.9084	11.7631	9.371	16.732	3.312	8.147	18.393	6.3706	3.2061	2.486	2.637	4.292	5.706	4.717	9.696	12.455	17.146	12.489	7.595	16.941	17.757		0.586668	9.4343
15.8316	8.0838	8.0577	8.608	18.83	4.491	5.993	7.96	5.8823	0.906	1.189	8.11	4.321	3.333	3.415	9.204	11.856	18.046	11.612	9.899	12.38	16.604		0.591111	8.51337
15.9506	6.0495	9.2068	5.998	15.798	4.966	3.358	7.084	6.4841	5.4184	1.364	4.252	7.958	4.956	4.325	10.392	11.263	10.952	7.71	10.925	12.516	15.88		0.595554	7.94551
16.0697	10.6104	6.7394	10.364	13.422	3.958	6.692	6.475	9.0667	2.4784	2.865	5.14	5.361	5.042	3.966	9.183	13.292	12.66	15.596	16.21	14.951	15.327		0.600001	9.019
16.1887	5.0427	10.2907	8.089	10.571	4.174	8.719	9.514	8.2275	2.1602	3.026	1.528	7.8	3.606	5.302	9.942	9.476	16.158	7.911	14.331	17.839	15.386		0.604444	8.52824
16.3077	6.9839	10.349	3.885	8.061	3.723	6.244	8.8	8.894	2.9039	3.248	2.546	5.412	3	4.832	6.975	12.315	10.369	12.118	17.715	15.057	14.632		0.608887	8.00299
16.4268	6.0691	5.776	4.101	5.352	2.977	3.159	7.664	7.1483	3.3984	3.174	3.792	6.96	2.931	5.13	7.145	8.908	14.949	12.474	13.072	12.469	9.129		0.613334	6.9418
16.5458	6.7212	6.1843	7.678	7.574	8.38	3.023	9.117	5.1239	2.1226	2.636	4.017	3.596	4.705	4.776	10.744	7.503	11.592	10.199	19.625	10.342	10.79		0.617777	7.44995
16.6648	11.7904	12.0553	6.752	4.929	6.842	4.356	8.472	4.2048	5.7804	2.795	3.286	7.2	5.042	5.958	13.623	6.1	12.733	6.331	14.277	11.012	11.311		0.62222	7.85
16.7839	5.5098	12.9897	9.931	5.614	5.849	7.24	7.569	5.2947	3.5427	0.949	2.124	5.83	3.991	4.967	9.387	9.933	10.272	11.147	23.968	13.243	13.459		0.626667	8.22904
16.9029	8.3672	7.7649	7.051	10.467	4.182	4.705	8.998	5.1442	4.0266	4.293	5.011	3.167	3.498	3.641	11.558	8.169	12.436	6.052	13.326	10.296	12.806		0.63111	7.379
17.0219	5.1251	11.2373	9.699	10.282	2.173	4.126	5.014	10.0384	3.2445	0.891	5.879	7.128	1.195	2.052	11.156	8.3	16.22	8.514	9.271	9.469	15.807		0.635553	7.46768
17.141	7.1169	10.1208	8.901	10.13	4.304	5.028	6.468	6.083	4.2315	1.382	4.002	6.317	1.83	3.655	11.74	9.148	14.533	6.906	16.67	8.16	7.698		0.64	7.35353
17.26	5.0769	11.5511	6.434	11.375	7.761	7.891	6.379	5.3517	3.5301	1.235	4.333	5.511	2.464	4.493	8.318	7.87	7.309	8.067	12.869	9.072	7.5		0.644443	6.87575
17.379	7.6805	7.7137	5.624	8.156	5.059	8.792	8.434	6.7533	2.5461	1.122	2.37	4.377	0.916	2.315	10.69	7.852	10.706	7.531	11.147	7.725	10.365		0.648887	6.56546
17.4981	5.477	4.9927	9.245	7.474	7.351	10.404	9.194	6.0235	4.3633	3.901	4.916	2.499	5.519	2.521	14.99	7.783	7.897	9.257	6.537	12.315	12.139		0.653333	7.37136
17.6171	6.2632	10.3236	7.486	5.569	5.085	9.763	7.889	7.0227	5.9369	1.447	5.953	2.563	2.702	5.262	9.331	7.913	8.179	8.535	15.599	6.022	6.552		0.657777	6.92364
17.7361	6.8587	4.1287	5.475	10.302	4.501	4.266	9.906	7.4008	2.1482	2.446	3.586	3.997	5.55	2.458	11.235	10.601	8.845	8.898	10.963	11.058	6.52		0.66222	6.72111
17.8552	7.4397	3.7052	7.073	9.63	2.586	9.357	12.178	5.3562	1.6033	3.073	4.267	6.295	8.229	1.874	11.235	13.28	7.057	10.396	9.142	11.448	12.797		0.666667	7.52483
17.9742	3.545	6.2332	9.126	12.106	4.757	5.137	6.324	4.2575	2.998	1.203	3.628	3.563	3.114	1.346	11.008	9.435	8.656	6.624	10.015	6.588	8.674		0.67111	6.11132
18.0932	8.4071	6.1999	7.802	9.651	4.507	8.359	1.968	6.2626	5.8985	1.575	3.004	5.161	1.319	5.788	5.712	5.458	12.965	11.671	11.355	4.597	11.575		0.675553	6.63024
18.2123	8.0156	3.3143	6.157	10.021	6.596	7.113	4.395	9.8821	4.1338	3.199	1.875	2.523	2.632	4.67	7.481	6.497	8.05	7.485	10.752	9.95	11.013		0.68	6.46451
18.3313	7.371	4.0974	5.455	5.829	7.544	8.208	7.068	4.691	3.2644	2.711	2.913	3.847	3.778	3.139	5.676	4.821	10.351	11.064	12.366	10.392	11.71		0.684443	6.49028
18.4504	7.3369	4.5745	7.197	12.459	4.79	6.521	6.32	3.7888	3.5003	1.979	3.068	4.316	4.932	3.433	7.757	5.175	13.03	8.251	7.284	6.476	8.247		0.68889	6.21121
18.5694	8.8002	5.5687	8.307	5.268	4.913	7.062	5.846	3.4784	3.4838	1.956	3.29	6.085	2.777	3.14	5.924	5.816	10.857	7.861	7.631	10.982	10.049		0.693333	6.14739
18.6884	6.9346	1.9842	8.48	8.954	6.986	5.656	6.265	5.3544	1.3365	4.364	2.608	4.678	2.936	3.556	8.086	10.078	12.142	7.727	11.12	10.379	10.596		0.697776	6.67718
18.8075	7.4024	3.9628	5.918	6.937	7.094	5.986	7.628	2.671	2.118	3.592	4.358	4.838	4.64	4.529	9.285	7.78	13.365	7.765	10.923	3.741	11.281		0.702223	6.46734
18.9265	6.2903	3.1307	6.623	10.784	5.441	5.044	4.908	3.9106	1.7618	2.884	4.234	7.257	2.579	1.441	8.179	7.493	10.537	10.137	5.818	16.045	12.09		0.706666	6.50416
19.0455	4.4976	2.8674	4.173	7.576	6.712	6.634	7.548	6.0806	3.7093	4.993	4.253	3.81	4.179	0.682	8.458	4.525	10.688	7.208	6.857	9.799	7.213		0.711109	5.83157
19.1646	7.6008	3.3708	7.56	3.802	2.494	8.047	7.009	4.7573	3.5338	2.368	1.514	6.556	4.803	3.811	8.426	8.249	9.942	8.781	8.276	7.873	7.124		0.715556	5.99513
19.2836	7.1998	4.8908	5.211	10.883	6.111	5.568	8.047	8.1821	2.7341	1.189	2.206	7.814	3.199	2.281	11.777	7.837	13.867	5.836	9.197	4.957	7.841		0.719999	6.51561
19.4026	3.0055	4.2589	5.652	4.552	6.964	6.524	6.799	6.8729	3.1508	6.615	2.696	7.527	2.784	4.158	7.5	7.214	5.225	8.138	9.399	4.949	11.187		0.724443	5.96053
19.5217	3.6255	5.2982	7.037	7.053	4.152	10.691	7.403	4.9096	3.4171	1.993	3.984	8.32	1.384	4.829	5.729	8.446	7.422	2.903	8.101	8.437	11.115		0.728889	6.01188
19.6407	4.1245	2.9623	7.577	7.289	6.316	7.056	7.729	7.5731	3.4664	2.346	2.182	11.715	1.793	3.408	5.859	7.78	8.604	8.094	7.548	13.491	5.462		0.733333	6.30359
19.7597	5.5884	4.1816	6.546	8.277	5.652	8.467	5.911	4.3931	2.1177	1.163	2.079	7.001	2.243	0.985	5.542	11.935	10.148	11.252	9.545	10.365	6.944		0.737776	6.20647
19.8788	4.1613	5.5747	11.346	5.935	5.869	4.343	3.517	5.1767	1.3456	1.011	1.135	9.476	3.481	4.507	3.013	9.497	11.4	7.613	8.487	5.075	9.105		0.742223	5.76516
19.9978	6.3473	8.2446	9.133	8.915	6.736	6.963	6.967	9.1712	5.7504	3.082	2.137	3.424	3.893	2.36	4.095	9.022	10.511	8.11	10.855	7.189	7.124		0.746666	6.66807
20.1168	7.2149	7.0293	9.74	8.585	3.797	3.679	6.637	5.2806	4.6768	3.382	6.49	7.48	1.786	2.078	4.301	15.349	5.202	7.461	5.669	9.678	7.381		0.751109	6.32841
20.2359	2.0315	8.1244	6.716	10.539	7.743	6.979	8.986	5.7791	2.6641	1.303	1.918	6.359	2.113	1.979	6.246	7.045	10.39	6.182	7.57	8.921	6.041		0.755556	5.98234
20.3549	4.8256	5.7643	7.197	5.606	4.858	6.195	10.412	9.2533	4.1687	4.139	5.078	5.439	3.234	3.784	6.611	14.358	7.899	10.826	7.093	10.145	8.093		0.759999	6.90376
20.4739	6.8006	7.3588	12.081	5.633	5.543	9.941	7.257	6.8533	1.7772	3.177	4.476	4.228	4.087	3.753	5.389	9.534	9.744	4.959	6.782	8.212	5.83		0.764442	6.35314
20.593	5.1689	4.8322	10.991	9.145	3.798	9.325	9.08	8.6009	3.3459	4.732	1.771	4.541	4.53	1.202	2.226	14.603	7.481	8.113	5.946	6.725	5.316		0.768889	6.26061
20.712	2.8175	5.9709	8.884	10.356	6.232	7.662	6.893	7.1051	2.2126	1.758	2.752	5.99	2.417	1.865	4.486	8.853	4.679	1.45	7.796	7.122	6.557		0.773332	5.42181
20.831	2.5996	6.0693	12.245	8.035	7.168	7.197	6.911	7.8308	1.8593	1.896	5.292	10.451	4.387	3.142	5.133	10.13	8.838	5.992	5.131	9.962	7.402		0.777775	6.55576
20.9501	2.4613	4.9993	12.536	7.302	7.975	6.854	6.586	6.1151	0.8239	3.603	2.913	3.687	3.408	3.244	6.449	12.558	6.347	6.03	10.324	6.271	7.25		0.782222	6.0827
21.0691	1.9844	4.7925	8.334	11.156	6.172	7.468	6.626	10.4857	2.5173	0.665	3.425	3.351	3.209	3.583	4.511	11.465	5.182	5.621	5.924	8.229	7.378		0.786665	5.81328
21.1881	3.4236	5.7489	11.931	7.203	10.353	7.333	6.418	5.7184	4.004	3.855	4.185	5.955	3.409	4.485	2.095	8.996	5.302	5.302	9.118	5.683	9.398		0.791108	6.18647
21.3072	3.5989	4.3915	13.274	8.542	9.012	8.318	6.195	8.3795	4.0653	2.446	3.379	12.646	2.146	3.556	2.572	7.885	5.848	4.468	7.754	5.495	10.725		0.795555	6.4141
21.4262	7.0369	2.7925	8.454	10.936	8.384	5.48	6.913	11.8506	2.3629	1.761	3.342	7.727	3.586	4.636	4.979	5.569	10.638	3.505	10.648	5.045	6.309		0.799999	6.28357
21.5452	4.8693	7.444	13.252	13.976	10.79	7.481	6.748	9.2298	4.4693	3.243	5.584	7.854	5.197	2.46	3.016	5.931	7.389	3.816	7.792	5.546	4.795		0.804442	6.70869
21.6643	4.0826	11.5736	8.443	13.119	6.924	8.537	7.705	10.011	4.0945	3.99	2.851	9.422	3.27	2.507	2.445	8.307	7.601	5.496	8.676	3.273	11.154		0.808889	6.83246
21.7833	3.0902	6.7949	11.605	10.588	7.557	5.979	6.404	5.2506	5.6168	2.817	2.134	8.689	3.69	1.916	4.594	8.85	12.064	10.717	5.914	7.239	8.457		0.813332	6.66507
21.9024	5.2363	5.6255	9.03	9.619	6.428	3.815	5.759	5.5625	2.7469	2.143	2.97	7.62	8.278	2.439	3.431	4.8	9.075	11.642	5.305	8.953	3.358		0.817779	5.89696
22.0214	11.5112	5.5409	4.042	7.242	6.514	8.173	8.292	3.3405	4.5839	2.099	4.571	4.706	4.315	1.576	5.1	9.419	8.003	4.848	5.241	3.79	3.477		0.822222	5.54212
22.1404	6.8177	6.9942	7.474	10.6	5.163	5.975	3.629	3.3228	3.0463	5.91	2.704	11.017	4.912	0.733	1.62	9.111	8.609	6.455	2.816	4.975	3.752		0.826665	5.50648
22.2595	4.2036	7.7073	3.732	10.063	7.59	9.021	8.235	6.1972	1.6451	4.176	1.559	10.311	5.759	4.873	1.113	11.354	7.123	5.512	2.441	2.532	5.582		0.831112	5.74901
22.3785	5.9251	2.9206	5.217	7.635	5.126	10.091	9.43	6.8381	3.3231	5.998	0.962	5.33	4.196	4.623	1.789	5.808	11.387	8.388	4.642	5.169	7.187		0.835555	5.8088
22.4975	9.6322	5.999	6.235	12.201	4.479	6.593	6.563	2.8504	1.6107	2.172	1.881	8.132	5.22	3.662	3.336	5.483	11.722	5.793	7.371	8.108	4.194		0.839998	5.86844
22.6166	4.4817	7.3374	10.076	5.969	5.258	4.757	7.382	2.8539	2.906	5.145	2.294	12.92	4.743	2.672	3.901	4.413	10.844	3.952	6.517	8.032	5.92		0.844445	5.82733
22.7356	4.3934	7.576	11.258	6.919	5.91	6.875	6.276	5.4702	3.972	2.482	0.897	6.702	2.937	3.138	5.837	10.901	5.773	6.938	3.997	6.893	5.862		0.848888	5.76222
22.8546	3.6857	5.3504	8.01	7.708	13.092	9.072	6.007	2.8044	3.3895	2.21	4.557	7.719	5.158	4.119	6.734	6.948	3.986	7.602	8.112	7.956	1.242		0.853331	5.97438
22.9737	4.3924	3.8008	9.295	8.585	11.087	10.519	8.955	7.45	4.9516	1.982	6.019	10.137	5.55	2.503	5.369	5.971	3.059	4.273	8.794	5.813	3.38		0.857778	6.28028
23.0927	6.2422	5.5978	8.522	10.77	8.833	11.156	4.649	2.3847	2.9252	3.766	5.179	9.083	4.135	3.583	9.981	6.863	6.925	6.064	5.15	4.738	3.369		0.862221	6.18647
23.2117	5.0441	5.0028	7.891	10.681	15.229	8.82	10.405	4.8357	5.4053	3.267	3.348	9.399	3.377	0.948	3.974	8.714	5.156	5.77	7.128	9.793	5.83		0.866664	6.66752
23.3308	8.9134	5.7609	11.83	8.147	8.907	8.485	6.996	6.5498	7.9488	4.105	2.127	7.708	8.446	2.703	3.211	6.565	4.415	5.022	5.369	5.228	4.46		0.871111	6.32842
23.4498	6.8163	10.117	11.39	9.191	7.004	10.678	6.127	3.4836	7.2645	2.696	2.317	8.891	7.889	4.845	1.83	4.306	2.986	6.538	8.313	3.929	5.048		0.875554	6.2695
23.5688	4.9919	3.719	12.283	7.325	9.093	6.608	10.217	6.1362	3.1549	5.148	0.695	7.482	5.457	6.264	2.136	5.07	6.815	3.684	10.899	12.917	4.646		0.879998	6.41624
23.6879	4.9155	8.7452	8.308	7.415	10.42	11.447	6.503	4.9691	5.006	4.225	2.828	10.14	4.997	2.667	7.028	8.797	6.712	7.56	12.178	5.63	3.419		0.884444	6.85285
23.8069	4.2199	9.2915	7.456	9.313	15.308	10.575	6.16	7.7172	3.1893	4.371	2.869	5.625	7.146	5.924	4.124	7.508	5.086	8.547	8.577	5.669	4.533		0.888888	6.81947
23.9259	4.2664	4.1652	6.638	7.764	11.398	10.281	8.883	4.3611	7.8185	2.498	1.919	6.32	10.297	5.061	2.276	4.268	8.364	7.741	3.27	5.36	6.319		0.893331	6.15563
24.045	9.7545	6.164	3.557	8.171	4.977	7.193	9.713	6.3313	5.5637	4.361	2.972	6.29	7.214	7.94	3.728	5.56	9.629	9.663	8.982	6.063	6.986		0.897778	6.70536
24.164	10.5337	10.547	4.386	4.175	7.305	9.184	6.807	7.0391	9.8583	2.197	4.831	2.565	8.53	4.436	4.096	4.413	8.523	7.414	8.492	4.76	8.312		0.902221	6.59067
24.283	4.2085	8.6713	5.977	5.32	5.373	5.713	9.101	6.7531	5.644	3.003	7.678	5.002	6.478	7.159	2.837	5.599	9.917	7.418	6.338	4.13	6.392		0.906664	6.12914
24.4021	6.5233	7.9887	3.038	5.738	6.188	10.956	6.822	5.1293	7.0209	3.239	5.8	6.636	4.311	4.532	4.227	8.458	9.145	4.932	9.482	4.096	3.896		0.911111	6.10277
24.5211	6.0399	8.8374	3.788	5.852	5.433	8.619	3.834	7.5439	6.0204	1.808	3.417	4.543	5.163	6.831	4.504	6.015	11.045	7.66	8.241	4.942	6.328		0.915554	6.02212
24.6401	8.4123	8.7647	6.503	2.147	3.806	7.243	9.132	6.6196	5.3925	2.865	5.201	10.704	6.239	4.167	4.168	6.309	8.238	5.111	5.989	4.173	8.963		0.919997	6.19748
24.7592	8.2246	7.9723	2.445	7.898	3.499	5.486	6.667	8.2278	4.9716	2.913	3.641	9.885	6.035	3.842	1.771	6.38	10.796	11.458	8.018	5.762	1.688		0.924444	6.07525
24.8782	5.0601	6.3723	5.106	9.202	3.718	7.423	6.293	7.0778	10.2106	2.991	4.263	6.692	7.816	7.672	2.212	6.531	10.498	10.475	8.998	6.493	3.01		0.928887	6.57685
24.9972	4.7858	5.8949	4.437	13.936	6.95	10.294	6.585	8.2244	8.2175	4.474	5.288	4.445	5.146	8.132	6.704	5.876	14.461	8.928	7.477	5.66	5.681		0.93333	7.21889
25.1163	7.2166	4.1947	4.315	3.853	3.609	7.753	9.877	6.5565	9.3929	4.337	3.621	5.252	4.662	9.977	4.864	4.701	10.586	10.706	7.594	7.528	2.675		0.937777	6.34622
25.2353	6.327	5.802	3.287	9.907	11.904	11.573	9.381	9.112	8.0177	4.617	6.21	5.693	4.873	9.512	2.648	4.375	7.467	6.409	7.851	5.711	7.083		0.94222	7.03618
25.3544	6.4983	4.8146	8.768	7.635	6.966	5.838	9.067	8.3204	7.4193	7.499	8.355	7.8	3.846	8.914	4.947	7.134	6.698	5.795	6.41	4.479	6.276		0.946667	6.83236
25.4734	8.0851	5.3806	4.831	7.298	10.598	10.127	7.629	8.7282	7.5602	6.557	8.633	5.085	2.886	4.881	2.438	11.013	7.591	4.701	6.133	9.215	8.885		0.95111	7.05977
25.5924	5.3676	6.3427	7.712	9.742	8.068	14.33	4.588	6.973	5.7968	3.678	7.492	6.556	2.904	8.373	4.475	12.414	10.082	4.54	5.961	4.728	3.453		0.955554	6.83696
25.7115	5.6047	3.2985	4.216	11.635	7.021	12.546	6.696	9.0009	5.2102	6.647	6.422	9.34	6.939	6.892	4.262	4.409	7.77	8.296	5.911	4.911	6.626		0.96	6.84063
25.8305	9.8342	4.8494	3.781	10.596	6.322	8.614	5.939	6.4808	6.9727	6.822	3.816	3.448	10.943	5.65	3.828	6.571	6.721	5.445	4.162	6.833	5.44		0.964444	6.33658
25.9495	9.2638	6.4778	4.276	8.76	9.181	7.959	8.374	8.6582	4.8895	3.636	8.718	3.628	6.122	6.077	5.47	5.476	8.08	6.507	7.6	7.471	7.008		0.968887	6.83963
26.0686	8.7799	4.1949	4.224	9.387	9.659	8.851	3.685	4.753	8.7421	5.399	6.285	3.943	7.547	7.655	3.949	5.931	9.11	3.844	5.394	6.945	2.076		0.973334	6.20733
26.1876	4.3915	4.2267	3.923	6.138	7.73	10.905	6.724	8.5138	5.7692	4.714	4.439	5.651	5.389	7.76	5.032	11.162	8.515	3.821	4.781	2.049	7.749		0.977777	6.1611
26.3066	6.2771	6.6007	5.644	9.358	10.721	12.021	5.791	3.8752	3.9414	9.934	8.202	7.266	7.333	10.125	4.394	4.449	5.746	5.125	6.168	6.245	6.115		0.98222	6.92054
26.4257	4.7904	6.0522	5.196	11.858	8.652	8.938	9.604	5.0722	8.1973	2.836	5.053	3.767	8.552	6.263	5.151	5.718	3.918	4.487	3.318	4.217	5.168		0.986667	6.03848
26.5447	5.893	6.4304	6.698	11.655	10.908	7.853	7.985	4.5959	2.3743	3.605	3.697	4.242	6.95	7.623	5.636	5.9	4.332	4.892	3.489	6.843	6.262		0.99111	6.08874
26.6637	3.4957	1.5572	4.765	6.277	4.545	6.007	4.579	5.7465	4.5022	6.429	4.552	4.026	5.62	5.603	8.753	4.325	4.148	6.607	3.946	5.412	5.957		0.995553	5.08822
26.7828	2.9758	4.8015	8.723	6.999	9.918	8.32	3.526	4.2401	3.9981	7.176	3.956	3.423	5.838	6.654	4.785	6.116	5.983	5.165	3.994	7.817	6.885		1	5.77588

## Sheet: Image2
X0	Y0	Y1	Y2	Y3	Y4	Y5	Y6	Y7	Y8	Y9	Y10	Y11	Y12	Y13	Y14	Y15	Y16		Ap-Ba	Average int.
0	144.184	101.569	96.769	122.534	157.085	105.056	137.895	149.627	108.136	71.321	123.164	96.058	81.565	48.803	78.731	79.881	39.1765		0	102.444
0.119	125.974	113.777	107.061	135.946	160.999	111.285	133.634	154.256	96.99	75.438	114.899	95.46	84.824	54.3	75.217	84.223	37.7728		0.00429061	103.65
0.2381	133.061	124.183	106.173	134.253	164.324	108.15	132.323	159.36	108.843	72.034	122.733	115.369	75.565	59.357	83.627	89.601	38.7919		0.00858482	107.515
0.3571	141.78	121.967	100.788	124.883	152.468	118.152	134.485	166.427	114.293	80.847	123.593	120.573	75.456	56.766	92.114	88.106	39.2761		0.0128754	108.94
0.4761	149.703	129.451	102.501	131.312	156.266	117.156	136.59	167.451	110.641	86.139	137.739	128.973	86.293	55.467	87.549	84.822	39.0962		0.017166	112.185
0.5952	169.562	133.548	94.712	134.115	169.801	105.1	141.195	161.932	110.83	88.209	147.367	123.984	80.789	53.333	90.022	86.386	38.7345		0.0214602	113.507
0.7142	171.181	128.091	94.619	143.958	168.158	116.609	146.297	149.325	118.716	95.451	149.007	123.397	86.419	50.346	94.138	93.268	44.7126		0.0257509	116.1
0.8332	181.857	125.641	81.288	141.589	175.003	107	137.644	153.137	121.294	94.399	152.755	128.992	85.461	52.663	90.399	101.279	49.1664		0.0300415	116.445
0.9523	184.785	138.01	83.981	136.027	178.54	117.412	136.907	143.158	125.484	94.294	166.684	123.977	91.114	54.308	89.45	115.191	45.5343		0.0343357	119.109
1.0713	185.976	155.852	99.699	144.896	185.847	138.449	143.802	154.389	122.024	97.879	162.371	127.623	101.575	50.009	98.406	121.087	49.2647		0.0386263	125.832
1.1903	194.356	149.247	101.378	159.98	178.041	118.934	136.125	141.051	134.474	103.534	162.296	144.324	84.336	62.224	93.72	114.347	54.4413		0.0429169	125.459
1.3094	189.976	153.428	103.181	163.815	182.865	143.709	147.144	142.703	139.366	115.761	159.409	142.389	92.847	61.942	116.045	116.409	45.7193		0.0472111	130.395
1.4284	191.647	161.68	102.762	166.165	187.55	153.506	150.297	134.275	124.362	112.312	163.044	143.203	95.25	60.512	122.753	110.45	60.3502		0.0515017	131.772
1.5474	187.488	166.335	100.31	167.279	176.321	154.35	146.486	132.973	136.418	107.296	167	141.392	99.068	66.694	116.701	113.736	49.4766		0.0557923	131.137
1.6665	185.983	177.27	112.585	179.536	176.161	158.709	150.311	142.329	132.966	114.011	172.253	149.841	98.289	70.344	118.675	116.348	51.4919		0.0600865	135.712
1.7855	168.272	173.516	113.884	177.393	180.687	164.162	144.383	145.735	138.084	120.982	168.609	143.622	105.374	79.25	101.003	122.988	55.0295		0.0643771	135.469
1.9046	185.388	185.853	127.041	174.227	177.385	165.413	140.164	155.433	144.731	127.068	172.656	146.893	103.502	92.357	100.183	118.462	52.1313		0.0686714	139.346
2.0236	189.141	190.319	133.266	186.997	172.521	168.373	136.742	170.627	144.031	129.254	178.792	147.831	106.958	85.314	109.412	108.982	59.412		0.072962	142.234
2.1426	188.644	193.243	139.23	179.181	184.13	172.101	138.618	169.005	132.81	151.483	174.993	144.938	106.39	99.067	120.119	112.997	61.525		0.0772526	145.204
2.2617	182.027	187.549	151.292	172.398	177.039	162.739	130.008	159.548	153.596	145.873	179.33	161.214	109.406	95.962	114.793	115.6	53.127		0.0815468	144.206
2.3807	175.401	192.177	157.593	185.886	179.802	160.174	131.46	165.127	152.04	130.715	194.416	159.157	112.849	90.444	110.899	111.99	56.2298		0.0858374	145.08
2.4997	180.141	189.77	145.738	178.862	180.508	161.374	128.552	160.71	151.629	142.154	184.884	152.025	111.821	98.929	128.562	108.78	57.0454		0.090128	144.793
2.6188	175.472	191.618	151.382	181.797	177.457	164.524	140.873	153.032	143.321	151.393	190.595	154.529	119.615	93.97	120.092	117.541	57.2038		0.0944222	146.142
2.7378	172.527	193.853	148.325	173.124	187.246	167.451	140.382	162.841	140.837	145.251	183.905	165.115	117.352	101.116	122.17	107.101	59.9647		0.0987128	146.386
2.8568	159.437	187.942	158.99	171.654	194.059	167.527	144.255	150.038	135.728	147.356	180.455	155.802	113.873	92.15	112.518	115.808	49.4811		0.103003	143.357
2.9759	164.788	206.214	161.061	163.33	194.444	183.574	146.279	162.787	128.256	164.039	182.711	165.524	112.205	92.391	120.932	123.906	55.2322		0.107298	148.687
3.0949	160.666	189.269	152.946	177.649	197.044	184.079	143.699	152.835	126.454	161.273	188.816	171.82	110.951	95.383	124.084	119.336	51.913		0.111588	147.542
3.2139	162.694	183.568	160.646	173.032	190.646	180.004	138.182	157.278	127.818	149.466	195.183	163.824	108.215	86.29	122.447	115.697	53.9186		0.115879	145.23
3.333	172.727	186.617	154.65	172.898	199.826	190.952	137.149	146.431	129.665	154.712	188.783	160.454	112.61	95.924	119.057	120.291	57.9919		0.120173	147.102
3.452	159.654	187.682	153.526	182.784	200.342	171.303	131.789	148.163	129.166	153.324	193.249	164.119	117.918	99.303	120.469	106.643	48.4046		0.124464	145.167
3.571	164.653	189.616	149.542	183.686	203.402	181.255	124.307	160.591	141.674	161.739	185.892	164.25	113.883	92.03	122.767	103.504	58.9379		0.128754	147.161
3.6901	152.649	185.776	147.539	197.969	189.782	190.599	131.426	163.854	142.07	161.979	200.504	162.469	106.254	97.939	128.499	100.303	60.5435		0.133048	148.244
3.8091	156.846	190.345	158.528	205.302	181.002	191.699	145.09	160.866	125.082	168.828	202.404	174.099	112.507	97.874	122.882	102.914	55.0412		0.137339	150.077
3.9281	164.907	182.199	158.515	198.418	187.596	193.077	137.698	149.724	124.626	166.566	196.667	168.377	128.639	111.845	126.2	118.869	58.7862		0.14163	151.336
4.0472	158.907	182.101	148.501	206.066	177.505	193.767	142.802	148.779	130.919	174.523	188.568	179.262	119.561	95.309	134.549	110.112	59.8205		0.145924	150.062
4.1662	157.84	180.61	148.251	196.875	193.578	182.952	130.886	142.021	115.377	177.427	194.325	173.538	118.659	97.51	127.409	100.112	50.8412		0.150215	146.365
4.2852	171.227	183.061	159.869	213.815	189.046	179.495	131.509	146.646	117.653	164.805	196.251	164.881	116.274	94.978	131.03	98.656	51.4914		0.154505	147.687
4.4043	147.496	198.283	160.882	209.428	198.748	178.63	139.263	163.223	123.683	169.188	192.721	172.224	128.467	100.993	130.985	98.534	51.8192		0.158799	150.857
4.5233	148.867	201.108	147.28	212.764	198.642	189.866	126.506	159.51	123.502	177.049	198.65	178.106	123.38	102.95	130.836	101.162	55.882		0.16309	151.533
4.6423	147.156	187.863	137.444	202.663	199.454	187.207	122.568	152.462	141.601	177.79	203.341	177.962	127.351	94.974	119.238	97.455	64.4924		0.167381	149.472
4.7614	149.846	191.581	149.445	200.605	191.767	191.873	132.237	149.392	143.813	181.359	199.448	181.368	124.332	101.083	105.605	95.169	59.4194		0.171675	149.902
4.8804	143.128	198.759	161.086	198.883	194.099	183.244	131.121	152.909	132.183	178.285	196.486	173.786	132.567	111.719	102.133	95.366	62.3441		0.175965	149.888
4.9995	148.093	188.667	166.641	186.828	197.678	190.111	130.038	152.565	148.065	195.705	178.245	170.385	130.317	109.415	122.839	86.546	54.9704		0.18026	150.418
5.1185	164.04	173.936	148.344	195.607	195.564	184.037	134.671	143.217	154.513	211.325	193.867	182.017	142.056	105.829	120.905	85.469	57.3213		0.18455	152.513
5.2375	176.424	160.144	144.149	203.693	192.477	172.474	130.574	149.099	150.457	195.504	187.24	177.15	125.127	97.604	109.775	77.638	61.0482		0.188841	147.681
5.3566	168.637	165.634	151.299	211.313	187.441	176.527	118.366	153.948	142.736	193.394	190.112	175.24	131.42	96.184	99.562	74.875	54.8882		0.193135	146.563
5.4756	159.984	173.772	145.416	205.199	204.645	178.041	121.25	163.544	142.152	201.011	195.079	174.643	125.363	86.015	92.908	76.322	56.3123		0.197426	147.156
5.5946	167.194	179.462	144.663	204.594	197.122	182.105	122.391	149.752	148.252	201.966	194.031	169.674	133.141	78.37	105.637	65.646	51.254		0.201716	146.78
5.7137	179.767	174.343	148.128	212.629	181.67	184.699	115.101	154.195	146.727	207.78	203.566	180.049	130.153	79.528	102.282	72.234	48.4852		0.20601	148.314
5.8327	179.991	166.445	154.202	209.658	182.041	188.064	128.267	158.941	144.316	206.001	201.176	179.465	124.998	75.847	91.709	72.738	48.5258		0.210301	147.787
5.9517	168.356	169.392	152.951	201.276	183.284	186.071	122.209	159.949	144.779	199.59	191.836	178.126	117.707	75.129	94.385	71.909	40.9963		0.214592	144.585
6.0708	154.986	154.579	156.121	209.418	187.876	185.074	115.577	164.411	132.524	205.419	201.319	170.839	115.889	78.866	77.281	61.785	44.327		0.218886	142.135
6.1898	160.231	176.944	157.334	207.654	191.613	180.277	116.281	166.042	146.667	199.172	195.104	175.07	126.609	78.649	70.582	59.835	36.2452		0.223176	143.783
6.3088	168.216	188.817	159.799	209.528	196.377	165.269	130.976	162.258	140.039	190.179	193.438	180.625	130.819	63.835	72.648	57.039	35.4713		0.227467	143.843
6.4279	164.049	187.522	158.352	206.774	179.178	167.572	127.833	173.002	151.232	198.897	205.836	185.145	132.122	61.489	64.124	47.1	27.47		0.231761	143.394
6.5469	156.228	175.232	158.443	201.277	166.044	158.375	128.473	167.511	135.653	188.944	198.428	176.029	123.538	51.921	52.215	48.003	31.9423		0.236052	136.368
6.6659	155.879	171.168	157.69	212.59	189.149	180.098	123.627	159.955	138.064	197.072	207.844	188.92	120.681	42.022	59.074	54.154	24.631		0.240343	140.154
6.785	148.586	164.425	155.348	199.244	188.86	178.109	132.211	160.254	137.726	200.976	208.218	203.707	109.434	38.606	51.462	51.466	28.9897		0.244637	138.684
6.904	152.769	173.32	156.21	192.421	182.862	182.819	127.075	175.148	152.471	205.38	201.774	202.86	110.687	41.024	46.54	56.588	24.1057		0.248927	140.238
7.023	146.819	168.643	153.358	194.595	184.355	183.724	111.779	169.27	149.565	204.022	200.871	198.524	111.38	36.538	46.377	43.636	21.3696		0.253218	136.754
7.1421	164.206	164.269	154.119	201.964	196.75	181.427	128.626	157.937	141.911	213.834	201.825	204.725	108.691	35.2	38.613	41.573	20.4201		0.257512	138.594
7.2611	176.186	155.491	158.692	204.345	206.824	170.802	121.633	167.558	138.795	210.735	197.15	191.628	113.992	25.834	39.485	40.971	22.2668		0.261803	137.788
7.3801	168.663	159.237	158.697	204.254	204.359	178.956	139.69	160.061	126.22	209.693	205.122	186.236	107.715	28.279	38.143	39.495	20.8514		0.266093	137.392
7.4992	160.909	166.742	158.091	204.323	209.601	178.695	144.686	164.778	134.869	213.093	201.309	192.778	104.823	22.26	46.06	32.703	20.2455		0.270388	138.586
7.6182	148.471	147.287	155.891	199.107	201.227	180.642	127.107	175.765	130.106	216.866	206.168	190.91	108.226	20.7	34.027	30.336	23.2386		0.274678	135.063
7.7372	162.447	157.134	156.905	206.539	201.679	170.029	134.57	168.618	137.918	211.914	202.035	196.142	106.197	21.308	33.382	35.488	19.1692		0.278969	136.557
7.8563	164.247	150.522	145.605	212.069	207.181	173.823	120.087	152.634	129.173	210.148	197.947	184.885	98.485	22.821	29.501	30.325	21.9146		0.283263	132.433
7.9753	163.359	146.22	141.569	198.064	201.703	173.015	109.096	136.995	126.506	215.502	196.419	190.995	99.594	18.842	27.752	29.483	14.9162		0.287554	128.825
8.0943	172.774	153.735	145.211	195.395	209.255	182.388	116.392	135.301	118.968	215.5	203.688	199.013	100.205	21.616	29.246	27.002	14.365		0.291844	131.768
8.2134	173.949	154.556	127.849	206.241	195.094	183.432	117.958	129.727	137.492	206.173	209.037	202.487	81.042	19.03	27.343	22.944	18.153		0.296138	130.147
8.3324	175.132	160.646	132.724	206.188	202.02	182.511	124.402	125.61	126.465	201.75	206.148	178.108	92.997	22.309	19.848	29.709	18.2585		0.300429	129.696
8.4515	183.213	157.27	139.323	214.753	203.169	181.978	128.985	139.8	126.669	202.346	204.968	176.642	69.315	26.628	26.932	28.017	13.0153		0.304723	130.766
8.5705	178.262	149.1	142.64	208.568	210.942	178.708	116.384	132.962	122.992	194.657	207.715	171.637	61.018	18.379	29.523	18.946	13.638		0.309014	126.828
8.6895	172.395	146.005	138.192	206.373	200.053	175.877	113.623	137.985	138.445	182.736	202.462	164.293	68.546	22.227	22.414	22.883	16.5892		0.313304	125.359
8.8086	157.709	135.824	133.76	206.298	198.232	189.18	109.992	141.891	131.473	183.618	179.336	165.53	66.166	18.891	24.285	23.879	12.1155		0.317599	122.246
8.9276	161.671	131.198	133.797	194.718	185.845	184.978	126.585	140.792	142.496	173.07	179.498	161.282	69.31	22.148	30.403	18.967	11.7792		0.321889	121.679
9.0466	173.498	129.963	127.734	202.71	198.841	174.376	145.479	143.431	132.961	168.23	178.166	159.074	64.539	13.61	20.406	18.974	12.0662		0.32618	121.415
9.1657	176.018	124.699	123.937	200.693	190.843	170.434	132.75	154.553	136.388	188.356	182.712	161.543	65.759	13.792	18.411	25.585	14.5392		0.330474	122.412
9.2847	156.288	119.452	112.758	202.014	190.153	168.167	135.458	156.238	128.36	191.499	180.063	160.49	56.917	17.657	18.921	19.377	13.8122		0.334765	119.272
9.4037	165.328	117.549	119.901	202.481	204.067	185.515	143.431	143.52	130.562	170.837	184.743	166.068	44.846	18.862	17.055	21.643	16.9727		0.339055	120.787
9.5228	162.681	121.39	125.27	201.792	191.337	179.292	124.338	137.092	133.686	179.713	181.229	167.038	50.279	15.468	17.098	19.617	14.3322		0.34335	118.921
9.6418	155.086	118.877	131.567	203.477	192.507	178.322	132.19	138.094	129.959	185.068	185.323	167.123	47.23	15.945	18.931	17.533	15.8698		0.34764	119.594
9.7608	152.773	114.159	120.218	201.995	199.461	175.708	130.175	145.241	114.401	167.503	177.438	156.982	36.207	14.784	16.928	18.708	10.9471		0.351931	114.919
9.8799	157.01	126.58	116.194	201.626	200.465	179.196	137.629	147.477	132.478	157.458	176.827	166.346	40.965	12.111	15.274	14.129	14.5197		0.356225	117.429
9.9989	166.995	117.885	114.593	205.748	208.218	168.809	139.446	134.64	147.881	163.36	176.714	166.126	40.348	9.299	10.584	16.474	14.4486		0.360516	117.739
10.1179	174.561	116.132	102.982	202.373	203.254	170.43	128.528	141.249	144.8	168.076	179.798	156.357	35.046	8.543	15.868	17.924	13.0151		0.364806	116.408
10.237	168.251	111.91	98.49	193.543	211.047	160.736	130.654	143.216	137.908	160.742	181.931	148.368	28.01	9.956	16.414	18.057	10.9543		0.3691	113.54
10.356	162.323	89.229	103.952	201.488	200.933	164.449	135.732	131.465	148.825	166.392	173.883	148.59	27.15	8.763	17.788	15.62	12.9041		0.373391	112.323
10.475	153.866	91.946	105.576	205.895	198.885	171.658	133.272	141.541	139.604	165.08	171.842	139.02	26.166	8.861	17.118	11.938	8.9265		0.377682	111.247
10.5941	135.138	99.893	92.217	212.783	217.6	171.176	125.33	132.124	136.597	161.83	163.66	145.017	29.974	9.822	10.727	15.742	9.5093		0.381976	109.949
10.7131	133.815	72.376	94.429	216.629	218.118	171.576	128.778	130.042	146.47	160.326	148.195	148.006	24.374	8.321	14.976	12.885	13.115		0.386266	108.378
10.8321	106.41	76.412	95.007	208.643	218.231	187.266	126.008	131.195	137.604	154.029	114.703	153.419	18.845	7.511	12.552	12.977	10.1969		0.390557	104.177
10.9512	90.145	72.754	92.323	202.329	217.683	178.586	125.174	142.029	131.092	147.808	100.559	144.32	22.905	6.884	19.154	11.889	11.3209		0.394851	100.997
11.0702	82.275	54.391	90.114	193.453	212.994	162.016	130.159	134.981	139.751	128.212	90.516	118.406	22.858	7.901	16.324	12.199	15.4704		0.399142	94.8247
11.1892	69.207	54.096	80.192	185.75	203.508	165.489	132.423	136.086	139.744	112.632	80.408	113.344	25.085	5.996	14.309	11.842	11.9703		0.403432	90.7107
11.3083	64.291	59.911	58.22	174.651	202.351	160.098	137.895	137.485	144.102	105.26	76.794	123.259	25.756	5.834	11.08	11.316	11.5675		0.407727	88.8159
11.4273	48.421	56.221	56.273	170.579	202.615	160.823	120.657	132.942	148.262	85.113	59.955	114.088	21.233	5.629	11.358	10.207	7.6682		0.412017	83.0614
11.5463	52.253	44.564	39.312	160.878	190.863	144.633	118.453	134.134	148.166	70.315	55	106.713	12.383	4.193	13.935	10.638	14.1587		0.416308	77.6819
11.6654	48.292	40.145	35.209	133.508	190.03	142.437	116.565	124.191	149.663	51.051	34.836	88.096	14.33	4.692	10.798	12.773	6.5968		0.420602	70.7772
11.7844	41.981	42.358	38.435	132.596	193.679	117.782	128.258	129.095	153.006	45.635	31.523	74.765	15.756	4.485	5.794	8.028	8.121		0.424893	68.8998
11.9035	41.356	39.461	30.655	112.187	178.498	106.796	123.293	125.229	143.092	34.815	34.292	68.254	20.499	6.925	6.623	6.661	16.0832		0.429187	64.3952
12.0225	37.588	32.68	19.078	109.141	190.112	101.724	115.439	122.046	131.931	30.855	31.191	69.927	18.544	6.157	6.044	7.904	14.7653		0.433478	61.478
12.1415	39.373	31.554	22.576	87.772	180.448	106.281	108.343	117.406	144.956	23.343	26.106	51.628	15.444	4.438	7.632	6.487	11.8854		0.437768	57.9807
12.2606	38.56	28.095	18.272	70.927	164.815	95.119	108.922	113.173	141.17	25.141	18.608	44.531	21.769	3.699	6.679	6.852	11.1035		0.442062	53.9668
12.3796	35.295	25.634	22.29	63.869	157.474	88.607	100.111	113.003	143.899	24.27	29.238	38.304	22.014	3.114	5.684	12.461	9.1788		0.446353	52.6145
12.4986	30.617	25.647	17.626	55.996	139.491	78.538	102.555	117.981	138.771	20.402	28.427	28.149	23.555	4.311	5.36	9.991	8.4638		0.450644	49.1695
12.6177	29.124	15.614	16.528	47.636	133.288	64.522	95.197	113.043	128.556	18.798	19.492	25.996	22.784	7.935	8.566	4.212	7.5884		0.454938	44.64
12.7367	29.946	18.804	25.58	43.5	110.49	51.345	105.031	108.096	131.426	16.816	14.344	21.762	18.53	8.848	9.715	6.582	4.8601		0.459228	42.6868
12.8557	26.332	14.261	23.287	40.666	86.069	41.937	94.46	111.956	120.553	15.187	12.39	18.316	13.085	4.465	6.694	6.323	7.8639		0.463519	37.8732
12.9748	33.415	14.553	23.488	32.687	70.311	45.266	95.684	99.366	122.237	9.581	8.407	19.232	10.926	5.157	5.18	7.014	7.0761		0.467813	35.8577
13.0938	38.426	12.919	17.796	31.802	61.244	35.77	78.72	95.403	122.144	7.869	8.306	23.033	7.15	4.984	4.164	9.167	6.5887		0.472104	33.2639
13.2128	34.301	11.589	19.804	30.681	49.187	34.124	72.706	85.353	109.74	10.528	10.647	18.983	8.499	7.354	5.175	7.545	4.5498		0.476394	30.6333
13.3319	29.706	16.235	21.836	28.943	37.144	33.477	75.49	80.324	122.287	6.241	6.939	15.914	6.044	4.387	5.749	8.37	5.6019		0.480689	29.6875
13.4509	32.674	10.995	24.085	30.189	34.033	31.709	66.239	84.517	119.604	9.748	8.667	10.624	7.271	4.64	5.539	8.432	4.7892		0.484979	29.0444
13.5699	25.663	12.738	21.418	28.458	32.413	38.461	53.789	78.769	97.181	7.415	9.192	10.85	9.689	5.191	7.23	7.737	4.4642		0.48927	26.5093
13.689	33.095	16.467	18.856	23.611	31.766	27.653	45.25	73.844	93.038	8.035	5.775	10.25	6.884	2.881	5.005	7.5	8.1114		0.493564	24.5895
13.808	27.33	10.071	19.812	23.214	29.35	28.535	47.051	46.202	76.029	11.293	2.977	12.158	5.669	3.008	5.076	5.948	8.8036		0.497855	21.3251
13.927	27.657	11.418	19.243	21.697	33.981	26.32	39.319	53.587	76.009	7.581	5.079	8.78	9.311	3.735	5.493	9.516	7.5429		0.502145	21.5452
14.0461	21.082	10.857	15.888	18.752	28.782	24.703	36.333	51.956	71.75	1.911	4.206	11.304	8.612	5.711	7.948	8.672	6.54		0.50644	19.7063
14.1651	23.139	13.672	15.801	24.68	32.013	26.616	26.056	41.255	58.298	6.493	5.357	13.019	7.204	6.076	3.983	9.272	6.7394		0.51073	18.8043
14.2841	18.336	14.928	15.573	27.314	25.302	23.637	20.97	34.86	65.348	4.864	6.236	11.811	8.038	5.212	5.335	7.943	4.8508		0.515021	17.6799
14.4032	12.406	14.908	19.491	21.595	31.901	17.934	20.128	23.308	62.016	3.122	6.581	5.996	7.581	3.547	5.963	9.935	3.1591		0.519315	15.8571
14.5222	14.464	15.049	19.589	26.415	38.062	18.153	20.046	21.911	51.963	6.144	2.761	7.26	10.497	6.466	3.98	9.456	4.1293		0.523606	16.2556
14.6412	13.849	12.703	17.593	27.207	31.704	17.231	17.812	22.325	51.83	5.072	3.35	12.316	9.639	3.663	4.36	7.347	3.4083		0.527896	15.377
14.7603	10.897	9.728	16.645	25.245	30.252	15.478	21.791	26.107	39.308	6.042	2.543	11.501	8.428	4.233	8.608	7.874	4.0934		0.53219	14.6337
14.8793	10.302	10.418	17.499	16.351	17.786	21.481	28.326	20.442	48.099	6.252	3.11	9.942	11.706	5.456	8.911	6.499	5.9325		0.536481	14.6184
14.9984	10.096	14.208	15.578	13.668	15.806	17.936	16.686	15.266	39.04	6.505	4.275	6.564	8.709	4.245	7.291	9.544	3.0421		0.540775	12.2623
15.1174	9.515	14.947	12.278	21.272	18.767	12.845	13.421	13.405	34.755	6.591	2.095	8.95	11.971	3.997	5.91	8.298	5.2405		0.545066	12.0151
15.2364	9.476	14.262	8.698	20.508	18.751	12.911	10.956	15.213	32.866	4.077	4.294	11.812	12.16	4.145	6.313	9.902	4.3396		0.549356	11.8049
15.3555	8.003	13.379	17.204	19.45	15.758	15.426	11.731	14.298	24.489	2.558	4.541	8.039	7.88	7.511	7.171	7.51	3.6456		0.553651	11.0937
15.4745	7.407	11.482	13.203	16.331	11.793	14.481	13.543	12.762	22.389	5.133	2.339	7.494	7.727	5.074	5.823	7.757	6.6901		0.557941	10.084
15.5935	6.083	11.382	8.195	21.486	17.393	10.178	12.055	12.38	16.653	3.078	4.802	8.997	11.473	4.597	5.093	7.369	7.0205		0.562232	9.89615
15.7126	5.84	8.526	8	21.913	11.092	9.513	19.675	12.205	16.69	4.995	4.446	7.958	8.818	4.084	5.778	6.004	4.902		0.566526	9.43759
15.8316	6.625	8.769	14.779	20.237	14.999	11.271	13.756	9.552	13.161	4.593	6.202	10.423	8.722	4.199	5.457	2.496	4.1809		0.570817	9.37776
15.9506	5.876	8.273	8.806	15.171	16.363	9.774	11.471	10.178	11.906	2.814	4.499	12.91	11.475	3.65	7.571	7.706	4.0068		0.575107	8.96764
16.0697	3.411	6.595	8.39	13.68	12.867	11.988	12.196	13.277	19.609	2.371	4.439	13.516	14.397	5.776	6.791	4.416	3.9047		0.579401	9.27198
16.1887	4.766	6.503	9.824	10.425	13.785	8.6	16.051	9.302	16.65	2.444	4.611	18.057	9.659	5.625	8.426	4.142	5.1913		0.583692	9.06243
16.3077	9.269	9.382	7.38	11.099	13.708	12.127	15.232	10.322	16.291	1.583	3.576	16.379	8.117	6.61	4.833	2.431	4.1066		0.587983	8.96739
16.4268	6.243	4.714	5.618	10.295	14.091	10.509	13.812	15.119	9.29	2.634	5.383	15.037	7.306	2.81	6.953	4.1	2.8963		0.592277	8.04766
16.5458	5.316	8.185	10.537	12.439	14.599	10.983	15.892	12.875	13.173	3.451	6.251	11.523	8.296	5.638	6.598	3.99	3.0655		0.596568	8.98891
16.6648	5.901	9.266	9.789	8.943	12.116	12.963	18.129	11.907	16.121	3.286	5.297	12.552	13.777	3.407	5.813	5.643	3.0691		0.600858	9.29289
16.7839	5.109	6.446	7.879	8.032	14	12.322	17.361	9.986	15.96	3.088	6.145	7.864	12.427	5.356	4.388	5.546	3.2144		0.605152	8.53667
16.9029	6.665	8.843	6.583	6.976	12.959	15.995	23.635	12.131	15.219	4.272	3.705	6.219	10.067	4.619	6.088	8.024	2.1714		0.609443	9.06891
17.0219	6.23	7.461	7.019	10.581	12.403	16.798	16.596	11.079	24.251	3.688	4.561	7.426	16.067	5.021	7.316	8.84	2.2983		0.613734	9.8609
17.141	4.014	7.653	5.46	14.326	12.216	16.428	18.472	17.852	16.066	4.155	2.022	6.202	10.286	7.545	6.323	4.688	1.2891		0.618028	9.11748
17.26	4.585	4.769	4.379	11.54	11.193	13.462	19.85	18.389	18.117	2.199	3.744	6.906	8.214	6.059	8.618	4.429	1.907		0.622318	8.72706
17.379	7.277	4.393	3.707	12.63	13.904	13.298	19.542	20.131	20.604	1.774	5.308	8.669	8.064	7.004	10.515	4.179	1.6318		0.626609	9.56652
17.4981	7.785	7.969	2.522	11.146	15.891	9.491	13.588	15.428	19.957	1.85	4.542	11.248	7.275	4.864	7.749	4.888	2.9215		0.630903	8.77144
17.6171	8.489	7.65	2.733	14.228	16.855	9.375	16.313	11.824	16.42	4.688	3.249	11.232	7.252	4.562	4.788	5.45	2.0022		0.635194	8.65354
17.7361	6.922	6.928	2.072	13.467	13.449	9.084	15.757	7.952	13.121	2.956	3.452	9.796	8.444	4.868	5.459	2.716	3.9284		0.639484	7.66891
17.8552	2.525	4.027	4.717	15.136	10.755	8.429	13.92	8.124	16.84	1.645	5.553	9.143	10.388	4.567	4.127	2.518	2.0687		0.643779	7.32251
17.9742	3.845	3.472	4.269	15.177	6.716	6.964	8.605	7.303	16.321	2.873	4.813	7.646	6.668	4.198	4.196	2.677	2.283		0.648069	6.35447
18.0932	5.235	1.871	8.275	14.728	9.478	9.288	9.683	7.949	13.745	5.651	4.782	5.974	4.473	4.351	6.872	3.841	2.9379		0.65236	7.00788
18.2123	2.781	3.452	3.865	17.455	11.588	9.309	10.921	11.801	9.44	3.573	4.298	4.7	3.326	2.631	6.996	4.561	2.1368		0.656654	6.63728
18.3313	1.989	4.19	8.647	12.806	15.014	8.17	10.7	12.459	13.463	2.174	3.424	8.116	3.911	2.724	6.79	1.829	3.0138		0.660945	7.02469
18.4504	2.999	4.125	8.586	16.163	14.508	10.149	7.441	12.323	7.171	4.461	3.319	8.493	3.94	3.747	5.05	3.61	3.8115		0.665239	7.05274
18.5694	2.855	3.833	6.553	15.506	16.236	8.925	6.815	10.636	8.587	3.007	8.613	6.507	3.282	4.412	7.156	3.401	1.0972		0.669529	6.90713
18.6884	0.906	3.89	14.25	13.606	13.915	11.633	10.384	10.418	5.906	3.966	5.13	5.899	3.72	4.009	4.981	1.48	0.8169		0.67382	6.75941
18.8075	2.848	4.428	15.942	12.855	12.985	7.398	10.045	15.608	9.413	3.713	2.57	7.588	4.432	2.532	3.884	2.609	2.7277		0.678114	7.15163
18.9265	4.606	5.75	9.576	23.537	9.179	8.462	11.227	7.414	9.645	4.037	4.355	8.148	2.591	2.066	2.256	2.345	3.4971		0.682405	6.98183
19.0455	5.621	3.96	13.761	22.698	11.041	10.092	9.096	5.265	7.486	3.82	3.75	5.252	4.26	5.718	3.881	2.492	3.1502		0.686696	7.13784
19.1646	2.47	4.707	11.804	25.258	11.544	8.187	9.069	9.04	6.871	4.235	5.032	6.915	4.467	5.979	3.762	6.618	1.8727		0.69099	7.51945
19.2836	5.153	4.94	10.813	23.015	12.2	8.577	11.573	7.784	5.991	6.559	6.993	5.254	4.516	4.115	5.4	3.475	2.3934		0.69528	7.57361
19.4026	4.161	6.711	9.575	15.908	16.02	8.874	9.316	7.804	5.631	6.18	5.966	4.648	4.628	3.804	5.379	2.129	2.059		0.699571	6.98782
19.5217	2.678	4.47	10.851	16.362	16.85	8.679	9.677	6.489	8.993	6.782	5.385	3.843	5.335	3.95	2.996	3.917	1.4618		0.703865	6.98346
19.6407	2.208	3.902	8.963	16.112	17.007	8.814	11.092	7.801	4.064	4.825	6.897	3.991	4.664	5.136	2.749	2.11	2.5291		0.708156	6.63906
19.7597	1.532	4.249	9.355	11.581	16.583	11.681	10.39	9.083	6.392	3.319	6.29	4.691	6.279	3.006	4.483	1.167	2.9895		0.712446	6.65121
19.8788	2.248	3.708	11.873	7.872	13.742	12.775	6.807	8.976	2.552	4.801	5.471	7.251	4.003	3.6	5.285	3.142	3.1292		0.716741	6.30795
19.9978	3.597	2.938	12.314	9.838	16.531	9.962	10.231	9.741	3.211	6.325	7.547	8.189	5.05	2.651	2.335	2.617	2.5991		0.721031	6.80448
20.1168	2.538	2.306	8.038	12.607	11.059	7.443	10.314	9.639	4.386	2.998	5.943	4.621	7.24	4.368	3.999	1.896	1.2213		0.725322	5.91861
20.2359	2.213	2.715	7.493	7.312	14.34	8.199	13.405	12.038	3.318	1.921	3.242	6.849	8.023	6.385	7.619	3.498	1.0123		0.729616	6.44602
20.3549	3.379	5.423	7.192	9.499	10.09	10.026	9.321	12.026	4.315	1.795	5.288	8.297	5.103	4.199	4.707	3.851	2.7769		0.733907	6.31105
20.4739	3.382	4.175	7.258	10.562	14.26	7.616	7.324	10.242	7.016	1.776	5.592	9.435	5.678	3.888	4.965	4.352	2.6028		0.738197	6.47787
20.593	3.365	6.404	8.671	11.346	11.46	11.455	6.546	8.209	5.045	3.795	9.601	10.59	4.378	4.773	5.14	3.664	2.7277		0.742491	6.89234
20.712	2.219	5.371	10.308	14.889	8.504	7.75	4.733	11.938	5.795	5.071	7.378	7.237	4.476	3.523	3.988	3.16	3.3406		0.746782	6.4518
20.831	1.346	5.913	5.639	15.735	7.227	5.685	5.33	11.15	4.953	2.404	5.359	5.863	4.343	3.453	4.712	1.635	1.3812		0.751073	5.41931
20.9501	3.212	4.399	8.559	13.388	6.617	6.28	6.223	11.236	6.643	5.323	9.316	6.936	1.856	3.87	3.38	5.003	1.5228		0.755367	6.10375
21.0691	5.103	3.194	6.445	16.165	6.158	8.832	7.667	12.612	5.719	2.704	6.642	5.592	2.913	2.155	1.935	2.115	1.742		0.759657	5.74665
21.1881	1.936	2.215	4.944	16.308	8.478	7.686	9.484	15.651	7.269	4.507	8.321	5.859	3.555	5.209	2.369	1.023	1.2166		0.763948	6.23709
21.3072	2.835	3.749	3.918	13.623	8.469	8.179	10.622	8.919	5.066	4.33	9.306	5.415	5.369	4.032	4.648	2.353	2.4375		0.768242	6.07474
21.4262	2.599	3.805	4.165	14.142	10.985	5.045	10.334	10.65	10.368	5.762	6.146	4.586	4.367	2.523	1.412	2.223	2.8481		0.772533	5.99765
21.5452	3.592	2.779	3.854	12.123	3.894	7.805	8.766	5.553	6.557	4.702	8.918	3.715	4.712	1.832	2.635	2.568	3.6669		0.776824	5.15717
21.6643	2.241	2.695	4.948	12.941	3.718	9.83	5.348	9.356	7.411	6.853	10.872	4.585	3.185	3.004	2.842	2.33	2.2299		0.781118	5.55229
21.7833	2.877	4.65	6.658	11.203	5.393	4.896	3.912	8.407	6.326	10.961	6.896	2.862	5.713	2.57	3.369	3.374	2.4835		0.785408	5.44415
21.9024	4.051	5.044	9.515	7.403	8.581	4.085	4.643	6.691	6.29	5.683	8.581	5.392	4.843	1.703	3.141	3.406	4.218		0.789703	5.48647
22.0214	3.231	8.522	6.067	7.66	5.665	4.93	6.679	5.648	8.928	5.408	7.811	3.732	5.401	3.497	0.88	2.31	3.5551		0.793993	5.28965
22.1404	5.69	7.151	4.951	9.566	5.181	3.677	6.284	5.195	12.435	4.82	8.986	5.101	8.255	2.472	2.802	2.289	1.661		0.798284	5.67741
22.2595	3.468	7.059	10.807	8.367	6.371	4.055	4.449	5.874	9.539	5.92	8.56	3.364	5.751	2.931	4.136	3.205	3.5613		0.802578	5.73043
22.3785	2.493	8.018	7.016	7.357	8.353	5.273	8.402	8.312	11.571	3.224	6.938	4.505	6.299	4.104	5.42	4.304	3.6787		0.806869	6.19222
22.4975	3.998	10.231	7.913	9.958	9.167	6.178	6.088	3.981	17.918	3.779	5.076	5.379	4.762	4.225	3.975	5.34	2.3878		0.811159	6.49152
22.6166	3.33	8.681	5.244	7.758	9.795	8.264	4.935	4.883	16.865	5.632	6.463	5.097	3.037	2.995	5.289	2.62	1.6841		0.815453	6.03365
22.7356	3.888	10.334	5.092	5.844	7.421	10.893	5.565	9.43	15.974	4.076	6.191	5.357	2.5	3.124	4.624	2.806	1.7937		0.819744	6.17134
22.8546	3.622	5.211	8.782	5.783	8.756	7.483	9.432	10.762	13.549	5.259	3.781	7.17	5.264	1.094	3.711	2.064	2.5703		0.824035	6.1349
22.9737	4.508	5.401	6.795	13.251	11.393	6.326	3.779	7.973	11.463	4.627	4.6	6.639	4.402	3.036	2.858	1.053	5.3487		0.828329	6.08545
23.0927	4.668	5.94	6.7	10.701	9.952	5.986	7.682	13.243	11.403	6.377	5.512	6.165	5.631	1.132	3.69	1.829	1.017		0.832619	6.33106
23.2117	1.219	2.099	6.312	7.178	7.767	5.656	6.533	8.781	9.638	4.579	4.662	5.488	4.86	1.209	4.916	3.921	0.3328		0.83691	5.00887
23.3308	3.301	1.947	5.482	5.315	6.956	6.476	3.405	8.231	13.537	4.451	2.542	3.889	3.971	1.146	2.239	0.526	1.0601		0.841204	4.38083
23.4498	3.459	5.091	4.754	8.749	9.253	6.363	3.089	8.075	13.469	7.956	3.039	4.487	4.801	2.62	1.6	1.031	1.4556		0.845495	5.25245
23.5688	4.983	6.501	6.06	4.825	10.129	6.656	6.885	10.307	8.022	6.071	2.501	4.185	3.586	4.143	4.098	2.983	0.4053		0.849785	5.43178
23.6879	5.82	4.524	6.178	5.455	13.534	4.68	7.313	14.143	7.451	5.81	4.688	3.215	7.495	2.191	3.417	1.216	2.8543		0.85408	5.88143
23.8069	5.072	3.788	8.012	8.075	9.594	6.71	4.844	12.578	9.407	5.477	4.729	1.874	3.104	2.763	3.87	4.391	1.6814		0.85837	5.64526
23.9259	4.957	9.477	4.414	9.39	11.975	5.289	9.509	10.801	12.691	4.114	2.529	2.58	3.579	2.851	3.234	1.642	1.6446		0.862661	5.92215
24.045	5.116	7.643	4.315	7.446	13.545	5.758	5.13	8.398	13.064	6.899	6.377	3.936	0.888	0.698	3.517	1.806	3.0008		0.866955	5.73746
24.164	4.058	6.767	4.021	6.185	17.296	7.66	6.262	6.935	10.953	8.158	3.262	2.024	0.858	2.108	1.67	2.47	1.5614		0.871246	5.42638
24.283	6.284	8.408	6.665	7.377	10.888	7.401	4.1	11.658	7.436	7.404	3.397	1.616	3.39	1.139	2.696	1.728	0.5793		0.875536	5.42155
24.4021	2.786	8.331	5.173	5.975	6.852	6.636	4.713	14.322	8.987	5.985	2.1	2.622	1.525	3.935	1.248	3.25	1.7005		0.879831	5.06709
24.5211	4.833	14.661	4.177	4.484	7.4	4.458	4.56	10.898	6.091	6.088	1.644	2.013	1.1	4.198	2.099	3.866	3.1356		0.884121	5.04151
24.6401	4.338	15.852	2.081	8.721	6.599	6.291	6.448	13.569	11.237	6.761	1.571	5.096	3.015	2.648	3.832	3.689	2.7732		0.888412	6.14831
24.7592	6.149	13.148	4.664	4.012	5.373	7.237	7.078	10.464	10.816	5.008	2.42	2.599	1.857	2.969	1.301	3.195	1.0125		0.892706	5.25309
24.8782	7.823	13.772	7.162	4.631	5.232	4.906	4.041	10.333	9.921	3.044	1.93	2.406	2.511	2.588	1.422	1.655	2.1722		0.896997	5.03231
24.9972	5.071	13.539	6.509	7.732	4.418	5.378	8.103	11.237	12.534	4.745	3.111	2.104	2.617	1.172	0.939	3.413	4.0652		0.901287	5.68748
25.1163	5.305	16.839	6.559	3.911	7.03	5.414	6.159	7.626	13.097	3.935	3.191	2.638	2.946	1.102	1.917	3.299	1.3819		0.905581	5.43235
25.2353	4.297	11.995	6.412	5.806	6.84	5.994	5.351	8.122	11.141	5.072	1.779	3.759	2.636	2.192	2.297	2.045	1.4091		0.909872	5.1263
25.3544	6.238	6.817	5.743	4.856	5.159	8.439	2.722	10.537	9.24	4.167	2.347	0.942	1.886	2.546	2.834	3.839	4.8862		0.914166	4.89401
25.4734	9.744	9.711	7.995	7.374	5.739	6.468	4.156	10.031	7.917	3.832	2.943	2.276	4.246	1.608	2.357	5.179	4.329		0.918457	5.64147
25.5924	11.515	7.574	3.991	5.124	4.008	4.474	5.716	9.072	8.595	2.905	1.747	2.611	6.099	1.747	1.809	1.572	2.3534		0.922747	4.75955
25.7115	10.431	10.345	6.02	4.485	2.724	6.908	5.516	6.568	7.896	3.001	1.117	3.364	2.392	1.424	1.385	1.862	2.13		0.927042	4.56282
25.8305	12.138	9.097	5.997	4.789	7.995	5.077	6.252	5.55	6.089	1.687	2.589	1.274	2.434	2.29	2.288	3.376	2.0502		0.931332	4.76307
25.9495	10.089	6.055	6.114	7.213	3.418	3.09	5.543	5.117	5.465	2.742	0.911	1.33	1.639	4.018	0.685	1.149	0.9042		0.935623	3.85189
26.0686	8.277	5.675	2.365	3.645	4.981	1.855	3.744	8.43	4.985	3.029	1.393	2.436	1.648	3.626	1.776	2.855	2.0304		0.939917	3.6912
26.1876	9.282	6.35	3.105	3.958	2.984	4.07	2.501	5.576	7.589	2.183	4.107	2.075	4.347	1.041	2.893	3.061	1.5439		0.944208	3.92152
26.3066	5.891	7.465	2.999	6.317	4.138	5.274	3.451	4.901	6.671	2.334	2.225	2.816	4.43	3.948	2.336	3.187	1.5963		0.948498	4.11643
26.4257	5.913	8.359	3.538	6.399	1.077	4.754	5.978	7.086	7.056	2.414	1.665	1.704	2.402	3.632	3.981	1.78	2.2875		0.952793	4.11915
26.5447	7.316	7.108	5.714	3.86	4.264	3.643	4.839	6.838	8.767	1.036	1.915	4.096	3.384	2.481	2.255	1.83	1.0333		0.957083	4.13996
26.6637	6.284	4.966	4.308	6.327	4.023	3.469	3.434	8.365	7.581	2.083	1.745	0.932	3.063	5.282	2.865	1.325	2.4169		0.961374	4.02758
26.7828	7.436	8.636	2.269	7.611	2.68	3.877	6.644	7.105	7.083	1.896	1.728	1.627	1.297	3.926	1.782	1.372	1.7686		0.965668	4.04339
26.9018	8.89	7.473	2.943	7.013	3.455	3.51	6.711	7.319	6.343	2.121	3.405	2.015	0.264	3.111	1.4	1.794	1.4821		0.969959	4.07348
27.0208	5.415	6.529	2.01	7.086	5.218	3.033	6.135	8.156	7.911	2.108	4.573	3.332	2.193	2.996	2.794	2.519	2.4085		0.974249	4.37744
27.1399	5.954	5.61	5.105	9.673	4.363	4.018	2.401	9.197	5.034	2.013	1.895	2.564	2.31	2.502	1.892	2.839	1.3947		0.978543	4.04498
27.2589	5.696	6	4.061	10.894	4.015	2.643	3.547	6.126	4.391	1.428	1.096	2.074	3.254	3.132	1.595	2.421	0.8491		0.982834	3.71895
27.3779	2.367	6.021	4.659	5.25	2.084	2.065	2.445	9.948	2.963	3.37	1.53	1.748	5.591	2.012	3.089	2.349	1.6456		0.987125	3.47862
27.497	3.355	6.166	3.895	5.421	5.099	1.864	3.607	9.749	2.743	2.522	1.297	3.045	2.038	1.331	2.274	1.31	2.4636		0.991419	3.42233
27.616	5.724	3.102	9.019	5.344	4.735	5.99	4.768	11.758	7.238	1.16	2.242	3.389	3.885	2.944	2.956	3.064	1.4829		0.995709	4.63535
27.735	1.475	3.175	4.988	3.831	3.792	6.07	6.398	8.599	4.267	1.945	0.497	1.986	2.216	1.226	4.549	2.602	1.8561		1	3.49836

## Sheet: Image1
X0	Y0	Y1	Y2	Y3	Y4	Y5	Y6	Y7	Y8	Y9	Y10	Y11	Y12	Y13	Y14	Y15	Y16	Y17	Y18	Y19	Y20	Y21		Ap-Ba	Average int.
0	19.7875	18.8382	27.6544	24.094	31.244	22.0485	36.3959	33.2013	35.3983	31.0258	26.5818	31.841	30.1106	53.7396	43.6081	45.335	67.852	68.441	114.348	133.389	88.736	67.435		0	47.7775
0.119	17.7082	14.3954	26.9744	23.6936	29.6817	25.1823	35.3554	29.8708	26.4564	39.1968	27.9622	32.5619	29.1682	45.7527	62.8816	43.605	52.338	75.441	104.352	126.62	97.414	74.372		0.00485296	47.3174
0.2381	18.0833	18.4166	21.3085	26.1429	24.5886	21.7504	34.5699	42.2607	26.176	34.2372	30.2774	29.3207	34.753	44.8645	53.3543	42.962	55.87	69.2	102.638	130.238	95.088	72.405		0.00971	46.7502
0.3571	15.4937	16.2814	18.1803	25.5455	29.5475	23.8956	35.4018	40.3725	29.9113	33.4914	32.0897	27.8333	37.8547	54.5968	54.247	61.059	55.852	79.668	113.749	113.066	85.068	74.535		0.014563	48.0791
0.4761	20.4953	18.5486	21.4511	32.3342	27.5849	26.0798	36.5248	34.8005	36.7379	42.3985	32.3878	30.1268	30.8051	56.9295	61.5283	46.821	60.881	81.446	123.932	140.533	91.581	65.52		0.0194159	50.884
0.5952	18.3124	19.0023	25.0683	29.2163	30.07	17.3308	41.1199	38.0894	28.8227	34.5385	42.0723	34.4507	31.8655	43.889	48.2417	50.485	59.54	75.051	109.484	137.095	102.426	60.523		0.024273	48.9406
0.7142	17.5773	17.2082	23.7992	31.9452	31.6777	16.797	39.7109	34.9053	30.8681	44.4041	38.4924	33.139	33.8692	46.0646	53.3152	50.806	61.954	64.493	106.423	137.006	107.658	69.575		0.0291259	49.6222
0.8332	23.2997	19.4447	19.7528	29.1124	31.2271	24.9927	41.4861	39.8403	29.1492	35.4562	41.6096	27.5259	29.113	48.0188	57.1214	49.155	57.189	71.487	94.959	143.252	103.546	76.028		0.0339789	49.6712
0.9523	26.0335	18.9258	22.222	24.6617	23.7282	26.7719	48.4939	40.6619	30.5681	36.3417	42.8982	26.5265	33.1215	48.088	62.2631	56.48	52.213	64.172	103.242	138.364	111.638	72.041		0.0388359	50.4298
1.0713	25.1177	22.1646	21.4145	24.6045	31.6087	26.9399	32.6314	38.573	29.3002	39.0432	44.0974	27.656	38.5211	50.6895	63.6256	50.055	50.837	65.059	114.112	121.948	123.933	63.056		0.0436889	50.2267
1.1903	27.557	20.7332	29.5125	32.1243	28.5298	24.0352	31.6804	34.3966	30.2116	36.4062	46.9442	28.0664	30.793	49.8659	62.4917	53.756	44.523	69.275	100.087	131.375	120.774	63.4		0.0485419	49.8426
1.3094	29.0281	15.1391	27.4562	37.621	29.0507	20.37	35.249	30.3955	30.9939	35.0751	39.3813	32.4674	32.0038	46.7471	61.7926	60.605	45.129	67.643	107.154	136.895	119.501	80.371		0.0533989	50.9122
1.4284	22.6029	13.4364	26.8698	31.9462	30.6681	24.595	34.9821	27.7701	30.0658	34.2274	40.8137	30.6666	31.5812	40.3534	65.9571	60.266	44.382	68.589	122.188	126.349	132.052	70.183		0.0582519	50.4793
1.5474	23.6818	16.2043	25.7909	30.3322	29.704	25.6133	35.115	35.7864	32.9101	36.9057	47.1265	33.7753	39.347	47.8412	68.2962	55.694	46.897	61.409	108.103	151.889	112.858	68.473		0.0631048	51.5342
1.6665	31.2014	16.4899	29.727	34.9349	37.9754	26.5887	40.2868	37.4945	28.8096	37.6876	43.2639	33.0318	37.4993	52.4207	71.479	63.494	55.496	73.419	113.532	159.184	109.651	77.95		0.0679619	55.0735
1.7855	25.8802	15.3879	34.7142	40.5001	33.2022	26.0674	43.9423	53.0178	26.1434	35.0077	56.3399	34.8658	31.5065	57.0647	70.3832	73.751	53.211	66.628	111.066	152.716	117.616	83.729		0.0728148	56.4882
1.9046	25.0017	15.2112	31.4927	48.7198	39.3336	24.8038	48.0753	48.3217	34.0129	41.8935	56.8112	40.5555	31.6572	47.8868	65.5752	75.529	56.359	61.938	96.761	158.492	134.189	82.073		0.0776719	57.4861
2.0236	30.0604	21.1433	25.3989	39.1886	39.689	23.8303	40.8502	39.9371	39.3065	36.509	50.9555	37.938	36.3371	47.6684	59.4766	69.996	55.862	72.971	101.798	149.815	130.718	79.782		0.0825248	55.8741
2.1426	25.5576	18.7201	25.3716	32.3642	31.9175	23.2049	39.1405	54.722	37.4481	37.5421	51.1663	41.2018	36.0221	46.5433	67.3977	69.047	51.234	67.328	107.937	151.92	122.359	80.513		0.0873778	55.3935
2.2617	25.8616	22.585	27.0064	34.7482	33.1881	23.8326	47.9711	38.6619	41.161	47.0263	49.4511	47.5047	38.4364	54.1676	67.6796	70.522	50.902	68.771	109.244	145.783	117.967	78.306		0.0922349	56.3989
2.3807	28.975	29.2092	37.5498	35.0372	36.5466	25.4164	47.4446	40.9257	29.7166	39.7732	48.4824	47.8302	36.2353	56.867	58.1108	73.987	57.229	61.426	114.14	137.218	130.107	74.944		0.0970878	56.6896
2.4997	29.8632	17.5061	27.4937	49.2672	41.5159	20.8152	32.0272	38.4615	32.5729	36.9031	53.1465	46.5475	35.7519	51.9333	57.8196	75.11	67.342	63.421	110.593	143.513	136.896	87.818		0.101941	57.1054
2.6188	36.4152	19.7812	25.6179	43.823	41.3454	28.4558	42.7027	46.2636	31.7866	37.521	53.2986	50.6944	40.484	43.4787	62.5804	78.408	72.183	67.02	104.403	150.837	136.114	88.703		0.106798	59.178
2.7378	36.3809	24.9512	29.0262	37.9565	40.5445	31.5373	41.762	41.7518	41.089	41.5647	47.7906	57.7384	41.543	42.4312	67.2299	69.471	73.445	68.461	102.484	140.219	147.565	91.087		0.111651	59.8195
2.8568	27.0218	20.4407	28.7009	44.7618	40.7326	25.0007	32.0275	43.3659	33.9338	42.6356	53.4248	52.6259	35.5159	42.0235	65.1409	71.735	77.358	56.427	106.827	135.467	155.126	95.094		0.116504	58.4267
2.9759	36.4643	29.1657	29.1092	44.3152	44.6143	28.6359	47.055	42.9511	39.0272	47.7822	53.9142	54.2813	44.0412	42.0776	65.8471	70.036	74.145	62.606	112.951	158.289	155.595	89.321		0.121361	62.3738
3.0949	34.8421	25.8556	32.0502	44.5664	44.5086	28.3719	48.212	45.4584	40.1423	35.6097	46.8758	61.3036	35.8639	51.0176	67.459	65.264	66.218	66.461	97.926	159.792	143.452	92.764		0.126214	60.637
3.2139	28.9833	26.0073	28.9123	47.8885	40.61	28.1308	44.9172	46.8165	39.7812	38.1905	56.2112	61.2587	42.704	56.102	65.7383	70.534	76.959	65.464	90.409	154.348	153.384	80.019		0.131067	61.0622
3.333	34.4546	29.9917	29.8714	47.0145	53.4679	30.5607	47.6986	47.5285	38.5093	40.8953	52.9904	59.4076	39.4667	46.1796	72.7859	71.415	74.771	68.98	101.285	142.233	156.303	95.493		0.135924	62.7865
3.452	29.0002	27.5345	32.0116	36.6805	36.9461	34.7167	44.8238	45.0824	32.4145	37.6988	57.4209	59.5662	46.255	54.4089	80.6613	78.769	82.036	67.379	103.764	141.054	158.823	97.523		0.140777	62.935
3.571	30.3329	28.0613	37.7462	47.4871	43.8395	23.755	44.8662	43.9022	33.2384	35.5265	56.4113	65.3645	35.4436	57.8485	65.9996	67.65	78.794	65.007	93.975	152.626	144.297	93.814		0.14563	61.1812
3.6901	29.3704	25.2579	37.9469	43.0224	47.0885	26.751	46.3517	46.384	45.3458	37.1375	64.3121	57.7158	33.2631	55.0261	74.6173	67.88	80.448	56.545	91.311	157.271	150.458	98.492		0.150487	62.3634
3.8091	32.5102	27.5402	30.0973	45.45	50.3143	29.4504	54.466	56.6677	36.5407	40.6102	55.6606	49.5541	39.8673	60.8795	81.4355	63.735	89.34	64.265	93.693	140.19	150.887	92.147		0.15534	62.9682
3.9281	28.7433	30.6652	34.468	52.5673	52.225	32.1166	43.9209	64.3506	35.3516	43.3706	60.3739	54.4237	48.1147	60.3326	71.6209	73.484	87.871	74.496	90.378	154.011	167.709	96.105		0.160193	66.2136
4.0472	34.5092	32.2605	38.7162	40.8993	49.6005	33.2555	41.7008	57.2078	39.6418	46.9941	56.4054	49.1975	53.0087	48.4712	74.2376	77.396	83.215	60.049	85.456	150.289	152.605	98.803		0.16505	63.8145
4.1662	32.3195	32.1158	31.0081	52.7166	52.1182	30.111	49.7879	60.9286	37.5679	42.5089	53.4718	58.4046	43.972	51.7237	78.2721	78.602	83.962	57.003	98.486	134.074	153.998	83.787		0.169903	63.4972
4.2852	32.2362	31.8814	37.9965	50.7084	56.8682	34.9169	46.7921	61.2757	47.6385	45.905	52.3326	51.9249	48.2959	46.7429	71.9954	83.278	96.856	62.085	92.023	153.592	154.211	86.074		0.174756	65.7104
4.4043	29.2761	31.1943	36.1482	51.3684	44.0982	34.6891	38.9906	55.2512	46.0361	39.6349	54.4709	62.3272	42.0026	51.4425	83.9933	81.01	86.037	68.247	92.757	148.797	137.715	94.36		0.179613	64.0839
4.5233	32.9173	26.2266	36.1794	48.0796	52.6567	39.6145	48.4241	63.6995	45.235	41.111	61.1922	70.7564	49.4223	47.6976	85.4761	77.17	80.269	62.841	95.981	140.76	149.166	89.094		0.184466	65.635
4.6423	31.0926	33.6762	35.9983	53.5064	57.834	33.2631	51.9977	60.7954	48.352	45.3282	59.3977	73.292	53.8993	50.6988	68.6422	81.246	88.6	69.343	100.065	131.839	146.992	102.21		0.189319	67.185
4.7614	36.4261	33.1917	40.7138	53.9399	59.8726	40.6132	53.4171	61.5783	39.3023	41.8644	64.5531	70.4954	51.3837	49.5163	70.4028	77.621	79.656	77.601	99.628	138.514	151.741	94.417		0.194176	67.5658
4.8804	39.1446	36.8544	35.5042	44.8963	56.8511	47.2003	52.0678	59.7973	45.9021	48.9578	56.4478	61.026	48.6072	51.8765	69.0674	75.328	78.058	81.178	88.637	145.412	138.845	122.442		0.199029	67.4591
4.9995	35.4429	35.5238	32.7439	51.5302	55.4686	41.7571	53.4632	68.005	43.2501	38.1932	58.4832	76.7308	48.426	64.4688	70.1929	81.3	78.795	71.615	98.071	145.68	141.874	109.496		0.203886	68.205
5.1185	38.1766	34.2838	43.7803	55.4885	60.3616	38.8857	48.2599	73.0103	47.4801	52.3122	50.3184	78.2453	48.2845	60.069	72.7828	84.331	90.551	71.538	105.553	144.906	135.93	119.717		0.208739	70.6484
5.2375	34.9217	44.6643	36.9562	61.2565	66.6324	39.0033	46.8078	68.3361	55.4958	38.1322	71.1534	73.1696	48.4902	53.5509	78.9643	82.03	82.546	79.118	104.023	129.851	133.644	111.91		0.213592	70.0298
5.3566	33.0454	48.2655	42.5628	53.1334	66.4819	34.8194	56.1971	67.422	54.7855	44.3329	71.9142	74.1531	44.5888	60.1928	83.8605	78.828	78.617	74.47	97.582	107.007	151.944	115.556		0.218449	69.9891
5.4756	37.0341	36.175	41.9845	68.5198	57.9332	39.6264	61.7376	70.4126	49.4811	45.6088	71.0377	78.6349	53.3991	54.1276	83.3858	80.926	86.831	78.702	111.147	109.476	139.408	133.08		0.223302	72.2122
5.5946	33.8438	30.468	45.7334	58.9993	68.8159	34.7604	68.0579	80.6264	55.7681	41.0964	66.6245	76.9344	55.7225	61.2952	72.7615	87.995	92.306	80.364	109.903	110.37	129.247	134.257		0.228155	72.5432
5.7137	36.0941	38.6396	43.798	74.9629	61.8665	43.2105	71.4639	77.1519	56.2238	44.5317	65.7515	74.7864	43.7175	63.3894	68.5934	86.546	98.231	83.807	101.973	124.681	115.3	147.092		0.233012	73.7187
5.8327	36.4241	33.4203	40.6837	71.2097	72.9776	48.8305	59.177	76.2375	57.7152	43.0275	63.2855	81.1105	44.9202	53.6481	83.478	87.516	91.548	79.16	97.42	114.69	147.763	160.432		0.237865	74.7579
5.9517	33.2671	42.6166	37.2836	67.0564	77.9853	50.5483	61.7589	74.5835	66.0553	37.4464	83.5524	77.7573	50.975	58.1738	90.9256	87.357	80.554	86.462	107.797	112.038	151.323	147.414		0.242717	76.4968
6.0708	37.129	39.2899	41.3749	78.2433	72.2545	54.01	63.7826	70.2594	72.1646	52.8893	78.4727	69.3693	55.6729	59.2572	81.6056	92.445	89.643	81.321	109.794	113.277	146.704	128.567		0.247575	76.7057
6.1898	34.2424	37.5431	34.2755	73.4058	68.3178	46.2672	62.0486	76.1484	79.0755	48.5223	73.8118	74.6798	55.5419	58.4352	85.7642	93.894	86.942	86.706	96.707	101.11	150.227	139.541		0.252428	75.6003
6.3088	38.2224	40.3195	33.4554	70.9446	60.7273	36.6456	71.3956	75.4744	74.8572	47.3542	75.7829	77.6599	49.6891	54.8901	80.1807	102.115	80.245	92.092	85.935	102.91	139.374	142.836		0.25728	74.2321
6.4279	36.8971	38.1735	40.5791	69.8376	58.4723	43.234	65.5339	85.9575	73.3807	41.0679	66.5672	78.5831	51.0581	57.6353	86.1823	91.191	86.074	90.679	80.474	110.738	132.513	159.535		0.262138	74.7438
6.5469	35.2371	38.6395	39.1315	73.6505	68.2997	47.2944	58.2679	81.33	69.2135	44.159	66.5342	79.3254	60.9218	62.906	80.6417	87.214	100.105	90.441	84.694	100.999	131.704	172.186		0.26699	76.0407
6.6659	36.2659	45.2142	35.2429	71.1489	65.9012	42.2578	68.633	76.6224	72.9608	52.0978	75.6185	79.8601	65.4876	55.9696	77.1448	85.962	91.577	92.422	83.98	100.699	131.26	154.948		0.271843	75.5124
6.785	35.2386	36.3665	32.9754	63.5121	74.3257	60.0657	61.2176	72.6379	79.037	45.1291	74.8329	75.785	59.1682	52.1597	72.5494	96.331	86.633	85.778	92.478	93.939	129.812	158.881		0.2767	74.4933
6.904	41.6633	39.0687	38.1207	58.6183	72.1073	58.3188	70.3295	79.7207	89.0311	47.8442	71.5895	73.8999	50.4585	62.9133	78.8752	98.047	80.164	84.878	88.563	97.485	121.014	150.76		0.281553	75.1577
7.023	37.2804	37.503	38.2734	54.6535	66.8753	56.5241	80.2937	78.08	79.9054	47.8097	81.1347	74.367	57.4873	58.1426	88.8482	96.26	93.624	73.817	89.084	99.446	118.205	137.154		0.286406	74.7622
7.1421	28.8815	39.6808	36.5691	55.453	67.8867	52.761	73.3472	78.8785	76.7213	55.6159	79.756	66.3932	64.4659	55.3811	88.6494	98.402	90.812	87.21	88.158	103.522	122.956	150.429		0.291263	75.5423
7.2611	33.7829	31.0168	32.4738	56.7415	75.7883	59.9862	82.6551	67.7832	76.8514	52.9704	83.1759	67.826	66.4198	61.6307	91.689	105.298	93.228	89.086	93.376	110.912	130.97	142.875		0.296116	77.5698
7.3801	29.9842	37.8601	41.4366	56.4241	69.1718	62.0129	73.7189	64.0064	67.33	60.809	83.8764	79.7042	69.6194	56.7944	88.1362	106.399	98.049	100.772	92.382	115.986	115.941	139.127		0.300969	77.7064
7.4992	25.3313	32.6787	43.7634	59.1152	62.1113	58.72	72.7619	63.2679	75.5672	65.9207	75.2898	74.0549	63.5753	59.7471	87.4692	87.198	100.053	85.849	90.219	113.371	125.107	140.027		0.305826	75.509
7.6182	26.8899	30.5347	47.5798	64.4246	63.9592	62.4038	73.9571	71.1824	80.2012	59.7875	67.0045	81.7531	61.1015	58.0373	67.7438	85.401	100.374	96.845	95.815	113.848	111.831	132.177		0.310679	75.1296
7.7372	20.8271	27.2505	40.9047	59.5118	64.1276	70.696	77.7065	75.5723	71.1643	63.0018	73.1235	76.3662	61.2428	45.965	86.3156	96.501	103.734	88.858	108.746	104.059	111.451	149.178		0.315532	76.1956
7.8563	18.8166	30.4761	39.2288	57.8439	58.9853	63.3288	67.6353	76.1271	72.2807	73.2817	77.2042	77.3885	67.8765	46.5131	89.6243	86.242	105.488	96.276	116.66	117.678	122.372	131.351		0.320389	76.9399
7.9753	20.2664	33.0622	33.3719	55.1571	67.6941	58.5057	75.2772	76.1499	73.6884	61.7732	72.44	76.141	57.6602	45.8742	73.8778	96.442	96.537	82.644	106.062	136.642	114.558	127.896		0.325242	74.6236
8.0943	21.1961	39.2433	34.9491	55.9917	59.6541	55.8605	75.2236	76.1342	69.1288	87.2841	68.1949	75.0522	61.5181	49.3312	78.217	96.883	89.751	92.064	109.457	138.353	129.257	137.873		0.330095	77.3008
8.2134	21.4869	29.5902	36.5924	50.5886	67.5437	65.8821	65.8105	73.0732	66.766	81.622	80.7516	69.8412	70.4692	53.1595	85.1836	83.786	99.129	90.132	109.117	136.54	152.891	124.449		0.334952	77.9275
8.3324	12.2771	29.8935	35.3872	47.7433	70.878	59.6574	68.664	83.0724	72.5756	80.5679	71.3464	79.6115	71.3796	45.7141	74.5667	79.162	98.768	86.2	113.407	154.43	149.44	136.999		0.339805	78.2609
8.4515	14.8516	22.9329	34.1447	50.7361	64.8923	57.5402	72.1237	71.924	72.0011	77.6851	67.468	78.303	65.1117	45.809	80.0198	83.919	90.646	88.442	110.467	159.534	153.423	139.32		0.344662	77.3316
8.5705	15.2505	25.1025	37.4654	47.6712	63.4441	58.1429	64.51	86.9136	79.7416	60.4278	69.8123	78.9804	67.1454	48.5031	90.7343	78.539	100.086	83.94	101.963	149.876	152.236	141.752		0.349515	77.3744
8.6895	13.0389	22.2489	33.778	58.0533	68.5238	54.3298	67.9459	76.981	71.8642	49.4976	72.0432	71.0623	76.3086	47.614	83.0165	81.507	85.294	87.709	103.068	148.388	163.608	150.731		0.354368	76.6641
8.8086	11.9374	24.5501	28.0414	61.0755	58.8298	49.6035	78.0914	77.5282	67.8508	47.6019	75.9884	79.9873	64.8882	49.4201	75.3586	83.444	102.084	86.512	117.074	141.213	175.742	155.195		0.359225	77.8189
8.9276	8.6829	17.0132	30.4222	66.6377	64.2387	57.085	75.5157	69.4144	72.4214	50.7146	67.353	74.9625	61.5376	58.9179	71.9923	80.044	88.516	91.713	122.281	138.189	175.258	142.152		0.364078	76.5937
9.0466	12.1516	16.2514	23.7222	60.0898	69.357	68.325	69.4718	74.0849	58.5326	48.8072	70.6296	58.5068	62.8239	75.5277	81.4717	84.416	92.935	94.911	111.135	135.841	170.626	149.359		0.368931	76.7716
9.1657	13.061	13.8998	23.4641	48.3843	69.4581	60.5054	62.3297	94.1973	58.7225	44.2857	77.6817	61.0484	57.1232	66.5195	90.7762	79.489	92.161	107.66	99.721	146.688	179.505	157.486		0.373788	77.4621
9.2847	12.7774	13.7562	25.8109	52.7526	66.3923	61.1138	63.8607	89.7508	57.7968	45.7204	73.9655	58.8845	52.0105	64.1673	78.2768	87.931	89.92	108.749	85.614	127.854	173.339	141.626		0.378641	74.185
9.4037	8.7774	15.3137	19.843	51.3576	68.5684	59.1409	61.4863	92.6927	51.3818	48.3265	73.8231	65.6338	55.307	61.5417	79.4925	84.922	95.527	100.856	97.806	124.053	179.808	152.555		0.383494	74.9188
9.5228	6.8413	9.7171	23.8869	46.5328	54.9266	42.9763	67.5306	100.168	50.289	44.7968	66.0146	62.5485	44.4507	62.6315	77.5325	77.06	92.306	92.046	98.786	128.68	179.543	157.468		0.388351	72.1242
9.6418	7.1118	7.8815	29.4282	49.6868	51.5529	38.9614	65.8894	96.1693	64.41	45.7941	64.6924	63.297	33.4342	55.8348	71.8284	82.724	96.238	90.776	90.621	126.261	172.82	157.048		0.393204	71.0209
9.7608	7.0302	10.0767	24.8052	36.7201	57.8944	43.2801	54.3024	86.6896	60.2272	42.8175	64.8493	61.2875	30.3019	51.9535	81.6502	84.823	97.926	85.542	82.111	120.797	167.911	163.467		0.398057	68.9301
9.8799	3.9394	9.7344	15.2427	45.0415	48.7097	40.8377	48.6355	85.3954	58.8877	41.8243	53.6234	66.2729	31.9543	48.1279	70.1447	74.353	99.184	75.147	86.811	116.352	167.848	157.71		0.402914	65.7171
9.9989	7.8665	6.8632	14.7018	44.1905	52.2882	44.5641	55.3051	78.6236	70.1688	35.6625	52.4054	63.0238	26.2057	51.083	62.2949	81.985	104.745	80.531	84.619	116.151	162.837	141.769		0.407767	65.3584
10.1179	8.5826	8.2434	15.0044	40.5704	51.8653	40.461	51.2839	76.8075	70.2552	29.3732	48.7498	54.5898	18.8622	34.3218	56.7686	61.672	100.077	86.672	94.195	137.891	163.963	147.075		0.41262	63.5129
10.237	8.1887	10.558	13.6551	29.3844	44.8306	36.8433	47.4892	73.3321	63.9647	30.8146	44.639	65.4187	16.6944	29.8089	50.7605	51.786	95.416	83.864	104.827	121.269	158.741	158.511		0.417477	60.9453
10.356	4.3938	7.5466	13.0152	29.631	33.2774	40.3898	54.7986	77.0926	68.3627	29.2828	37.756	61.6549	17.8822	26.1556	47.3129	48.031	98.27	90.212	100.13	118.927	146.03	161.215		0.42233	59.6076
10.475	5.4636	5.6555	11.9505	29.2637	28.5642	42.3843	50.7968	82.2335	60.9174	26.3858	29.1049	54.6666	17.7378	25.5903	51.488	37.459	95.471	70.281	98.017	117.931	142.067	159.711		0.427183	56.5064
10.5941	5.6966	7.26	13.9803	28.0492	20.1818	29.4678	43.6224	78.6767	62.0474	31.137	29.9776	56.2366	16.4473	22.2993	40.6933	40.775	84.125	61.29	77.961	103.84	142.817	169.061		0.43204	52.9837
10.7131	3.6854	3.5147	13.3978	24.7282	19.944	28.5826	36.0739	76.2479	62.1359	28.7256	19.594	43.2989	12.5976	24.2779	37.9411	26.871	82.972	63.795	73.867	100.97	139.241	147.15		0.436893	48.6187
10.8321	2.7349	3.76	9.9553	18.5799	15.4992	23.8807	37.2718	81.7808	60.7541	30.008	19.1749	43.9411	10.7238	22.0488	35.2767	26.181	76.067	58.937	65.187	92.045	135.855	141.858		0.441746	45.9782
10.9512	1.8273	5.4139	9.857	13.6514	15.7762	25.3457	33.182	73.2737	65.6867	29.8315	16.5455	34.4071	10.5716	21.7057	36.8204	27.184	61.915	51.735	60.071	77.601	127.369	143.86		0.446603	42.8923
11.0702	1.7483	4.8196	9.6914	19.9844	16.9272	22.802	31.9286	76.3401	49.5936	25.4204	21.2855	30.8873	8.5216	18.5169	37.0835	32.409	60.19	47.239	58.017	69.07	124.789	145.506		0.451456	41.4896
11.1892	0.6264	3.5335	8.0797	17.4226	14.7735	18.0233	18.8723	62.1701	58.1689	23.4924	17.9379	25.0599	7.4461	17.9259	37.7694	26.043	53.255	38.822	58.079	75.144	109.801	114.934		0.456309	36.6991
11.3083	0.703	3.3904	10.5728	22.8566	18.5195	15.7737	18.2444	71.3674	46.5742	18.7735	15.1441	19.8803	8.8504	11.6934	26.7496	31.955	43.626	33.214	51.099	67.392	104.304	88.314		0.461166	33.1362
11.4273	0.6482	3.7275	9.4099	18.824	15.766	17.5024	21.2387	76.4748	45.5036	14.2433	12.7549	13.992	7.5551	13.6202	19.8498	25.048	36.666	36.019	56.042	73.616	99.306	81.174		0.466019	31.7719
11.5463	2.7664	1.7841	6.0032	16.6287	14.0368	15.3284	18.3762	66.1744	46.4108	11.0508	15.3663	13.8544	4.104	12.3731	15.204	23.591	32.049	31.52	54.601	64.163	87.884	62.229		0.470872	27.9772
11.6654	2.7712	3.3293	10.5587	15.8395	16.9283	13.1459	12.7458	68.3784	31.0484	9.5175	15.2593	11.8109	5.1721	9.5399	12.7786	22.038	27.259	25.751	46.51	61.942	90.258	54.705		0.475729	25.7858
11.7844	3.5277	2.2637	10.7603	16.0753	16.5764	14.4641	15.3166	58.6467	29.9188	8.0826	15.071	13.9083	2.1624	7.2784	11.6705	20.313	32.326	26.819	44.942	63.297	81.539	45.87		0.480582	24.5831
11.9035	1.5861	3.9299	11.141	13.6359	18.3308	7.6538	15.4203	65.0031	23.4362	7.9185	13.6162	16.6724	4.2393	6.7427	10.7956	23.421	29.499	26.463	42.774	60.589	75.888	39.157		0.485439	23.5415
12.0225	2.0122	4.3317	8.6985	8.9762	10.4249	7.5212	20.5726	63.8039	16.0477	6.7289	14.6952	15.8954	3.6102	9.3852	11.9636	20.748	28.181	16.608	38.982	56.748	84.03	37.124		0.490292	22.1404
12.1415	0.4876	2.1101	6.5577	10.8827	11.8186	7.2709	15.6864	61.7296	16.272	7.9032	12.1888	11.5042	4.1826	7.1366	11.9857	26.772	22.599	15.39	38.127	46.411	73.143	31.279		0.495145	20.0653
12.2606	1.528	1.2044	4.5013	13.4908	12.4626	7.6965	16.0284	57.5602	14.1221	3.9847	12.65	10.6214	5.8674	4.4059	10.6633	24.72	23.842	14.437	27.706	39.897	67.435	43.79		0.500002	19.0279
12.3796	0.9193	1.1551	3.3073	12.4509	12.3162	10.1603	14.043	62.3653	12.5366	5.2425	17.2264	12.5611	4.9614	4.0451	10.2125	23.554	32.951	10.792	24.159	36.834	60.258	35.899		0.504855	18.5432
12.4986	0.9892	1.6679	4.4408	11.3638	8.0597	8.2056	14.4393	51.2742	7.2889	3.0549	12.219	9.7376	4.3312	7.8141	9.013	22.108	32.585	16.395	26.423	27.043	51.489	30.603		0.509708	16.3884
12.6177	0.1465	1.8011	5.4044	14.8244	6.5365	9.9002	16.6162	45.8053	6.27	3.9171	10.1868	9.6638	4.0992	6.283	8.3521	15.761	20.856	15.47	21.189	21.421	54.201	25.716		0.514565	14.7464
12.7367	0.1968	1.9345	3.7524	14.4171	10.8916	8.4156	17.4761	40.6007	5.0694	4.6612	11.1551	10.2577	8.757	6.2581	5.9373	18.442	25.001	17.275	18.154	27.935	44.034	23.529		0.519418	14.7341
12.8557	1.8946	1.6915	5.4027	14.9601	6.9779	13.7264	10.6078	36.8885	4.865	1.9013	12.5051	11.7856	10.247	6.7134	8.5833	12.305	23.444	17.676	11.914	29.682	39.988	30.861		0.524271	14.3009
12.9748	2.1874	2.6177	8.46	12.7443	5.0586	10.9848	10.7618	40.2658	3.0618	4.2734	9.6059	8.0423	4.2987	7.9291	12.5311	8.331	29.261	15.707	13.849	26.683	37.645	34.638		0.529128	14.0426
13.0938	1.1644	2.0647	5.5758	13.3639	2.8423	10.4584	14.3164	33.5886	1.4425	2.852	11.5539	7.6782	6.1596	8.3079	6.1813	11.268	25.817	11.924	12.355	29.121	35.268	31.327		0.533981	12.9377
13.2128	1.4947	2.1066	6.1785	7.2535	2.4249	12.3105	8.0436	23.8164	3.2029	1.6316	13.4184	6.2247	2.4852	3.5471	9.7624	19.329	26.105	12.993	9.471	18.621	33.771	28.539		0.538834	11.4877
13.3319	1.9693	4.2645	5.6812	10.6602	3.183	16.556	9.2826	15.194	2.1463	2.0335	9.282	8.6581	3.7308	3.4482	13.8539	15.223	25.905	11.941	13.585	25.89	28.475	26.839		0.543691	11.7183
13.4509	0.3418	1.8607	4.5246	11.7161	2.7571	19.9134	10.9854	21.8169	2.2389	0.838	10.6577	6.7173	4.7221	4.8663	8.806	17.304	28.896	10.35	11.068	24.106	28.707	21.753		0.548544	11.5885
13.5699	0.0629	2.7105	3.8895	7.6004	3.4031	20.1193	13.2878	17.2722	1.878	2.2827	9.52	8.5298	3.928	6.5988	14.5097	24.402	22.1	9.079	10.711	20.673	23.478	19.95		0.553397	11.1812
13.689	0.2942	1.9861	3.6387	5.6688	5.0503	19.808	8.1369	18.6767	3.2751	1.8748	10.6687	7.6113	2.7326	3.7562	17.2302	24.476	21.082	6.178	12.244	17.229	26.336	19.022		0.558254	10.7716
13.808	0.0999	0.9255	4.1783	6.8034	3.8332	14.5858	6.9857	15.8991	2.3698	2.0428	9.1249	5.7891	2.7338	8.6196	10.0656	24.76	15.219	8.094	12.876	16.568	23.788	16.126		0.563107	9.61307
13.927	0.1522	0.9061	3.2535	5.2381	5.9065	18.1108	8.6672	8.9243	2.9345	1.5966	10.0381	5.4334	4.3269	7.5577	9.9286	23.948	14.754	6.207	9.631	14.285	18.37	14.235		0.56796	8.83657
14.0461	1.5501	0.1964	7.4351	7.7646	2.8836	14.2536	7.0848	8.8093	1.602	1.6252	11.4961	5.5305	4.9716	8.9241	9.1431	28.03	11.219	7.21	7.861	12.495	23.625	14.953		0.572817	9.03014
14.1651	0.3728	1.8345	3.1514	5.6075	3.85	10.1992	6.0619	8.6508	2.8412	2.0462	11.2412	6.1154	7.1234	6.3232	9.3677	24.096	10.635	5.786	6.265	8.379	21.769	19.759		0.57767	8.24888
14.2841	1.4727	2.1927	4.9616	7.2438	4.4625	12.2157	5.1948	12.1493	1.2869	3.2585	12.5112	3.4389	3.7504	5.2167	9.0891	15.473	10.613	6.179	6.127	7.403	17.297	16.345		0.582523	7.63099
14.4032	0.7428	2.2614	5.6369	6.8502	4.14	8.8454	9.3626	9.7117	3.4047	3.2892	12.9001	5.5432	5.3989	2.2597	10.8635	15.994	8.915	8.923	8.994	10.367	17.338	15.251		0.58738	8.0451
14.5222	0.6541	0.9459	3.9153	4.2541	4.7887	9.5457	8.5557	5.7122	3.0187	2.8178	12.6438	7.7135	7.7957	3.9442	9.1501	9.446	8.364	8.127	7.683	12.536	17.173	12.809		0.592233	7.34516
14.6412	1.8147	2.1417	3.2601	3.7616	6.5556	12.6825	13.3042	8.996	1.0092	3.4561	9.9703	5.8832	2.098	6.957	7.6743	10.009	15.056	5.791	5.499	13.528	14.561	13.797		0.597086	7.62752
14.7603	1.0537	1.1685	3.227	3.5684	6.7712	14.5621	12.6646	9.7668	2.0797	3.5647	6.6115	4.9265	4.2014	6.3588	7.3876	10.424	12.03	5.268	7.108	13.886	16.688	9.981		0.601943	7.42261
14.8793	2.416	1.7259	3.3076	5.0795	3.653	13.3212	15.5196	6.1144	1.5396	3.4714	7.9345	3.1071	3.8581	5.2918	10.5489	8.219	11.29	7.254	6.898	9.112	14.791	8.119		0.606796	6.93507
14.9984	2.8278	0.7813	1.2117	4.0325	3.4101	12.3241	15.5827	4.5342	2.2763	2.4992	4.7963	7.4187	2.8465	5.5462	7.5547	7.134	13.408	6.274	6.037	8.855	12.968	11.67		0.611653	6.54492
15.1174	1.7907	1.4034	1.6446	7.043	3.6203	11.5828	11.9259	3.5524	2.3084	2.8601	4.954	6.5513	3.8042	7.2327	4.9688	6.447	12.418	5.639	5.681	8.584	19.618	9.979		0.616506	6.52766
15.2364	0.7291	1.9359	5.5751	5.7704	6.2022	9.2126	14.2454	7.0906	3.1945	3.0755	5.2054	6.3389	5.9671	6.8877	6.6222	7.261	12.469	7.784	6.171	7.989	16.523	9.118		0.621359	7.06216
15.3555	0.3831	1.3653	2.9757	5.5835	3.4903	13.7033	15.0151	4.0414	2.4342	4.846	4.3609	4.7878	5.4081	4.7192	8.1869	5.494	8.204	4.423	7.809	6.545	14.038	7.821		0.626216	6.16522
15.4745	1.0028	1.5444	2.8402	6.635	4.3526	7.6747	15.1699	5.8917	1.3642	2.2317	2.3288	8.0681	5.4984	3.5344	6.9503	9.136	8.294	7.691	6.69	10.585	11.871	10.118		0.631069	6.33965
15.5935	0.2701	1.9744	2.9546	7.2543	5.7959	7.5623	19.2899	5.8989	2.1775	4.121	3.8672	7.4987	5.1038	3.345	9.0603	8.863	11.292	8.137	6.341	6.888	10.661	9.365		0.635922	6.71459
15.7126	0.4455	1.0877	3.0814	5.1016	5.2176	8.7854	22.368	7.3	2.0672	4.0849	6.9644	5.1595	6.7486	5.3152	8.5382	6.583	7.2	8.172	2.84	6.209	7.52	8.071		0.640779	6.31183
15.8316	0.1056	0.962	1.6832	5.6279	4.5545	6.6682	18.503	4.2616	1.9473	2.5282	7.1678	2.4426	10.1383	6.4237	5.7721	7.675	10.155	7.213	4.951	8.825	11.47	8.165		0.645632	6.23818
15.9506	0.1263	1.3757	1.902	3.8973	4.5749	7.9941	17.3025	5.3116	1.8915	1.5365	5.6601	5.39	6.3069	5.5563	6.1712	6.365	6.751	6.176	4.715	7.121	8.822	8.884		0.650485	5.62868
16.0697	0.658	1.443	2.3725	4.4454	5.4289	4.9285	13.9938	4.1522	2.5282	2.5031	3.9235	7.3148	6.2311	4.243	4.9601	6.452	7.898	4.939	6.583	4.982	8.196	8.058		0.655342	5.28337
16.1887	1.4364	1.6767	3.5937	5.7819	6.6019	2.6336	12.0145	4.4569	2.3354	1.7194	4.0097	4.0326	6.9384	5.028	3.85	3.262	11.188	4.997	7.312	5.843	8.96	6.335		0.660195	5.1821
16.3077	1.8391	1.3727	1.3908	8.9601	4.9178	3.6532	7.2358	3.6599	3.1143	3.1236	4.1577	2.7115	5.4648	7.6777	6.6949	5.757	6.68	3.572	6.823	6.246	10.308	8.358		0.665048	5.169
16.4268	1.0386	1.6212	2.3205	7.808	7.2953	4.35	6.1028	3.4699	1.2648	3.5389	4.8256	4.8376	9.3077	4.1916	5.9881	5.214	8.695	4.631	4.716	4.627	9.328	8.133		0.669905	5.15021
16.5458	0.5091	1.9047	0.4323	7.715	3.9584	4.3662	5.0946	3.1463	2.2973	2.1343	3.6091	3.5006	6.0057	2.2689	7.0797	3.905	7.22	2.927	5.913	7.347	6.234	10.206		0.674758	4.44428
16.6648	1.3247	2.4813	0.8072	10.046	5.1691	6.9355	3.9063	3.794	2.7121	1.9986	4.6657	4.9458	4.6991	3.8205	3.4326	4.049	5.461	3.386	3.633	6.26	7.804	10.007		0.679611	4.6063
16.7839	0.8378	2.5948	1.6641	5.3584	5.5401	3.9769	2.4177	2.4302	1.6163	0.6134	2.5163	6.829	5.8023	3.601	5.3535	5.818	6.527	6.87	3.863	5.335	11.917	11.951		0.684468	4.70149
16.9029	0.8727	1.3674	1.4733	5.585	8.1378	6.2886	3.1651	4.03	0.6305	2.0433	2.6509	3.4932	7.3773	4.6743	9.4674	6.599	5.895	8.65	6.442	6.77	13.341	14.073		0.689321	5.59213
17.0219	0.0094	1.0444	1.1627	6.6086	6.3261	4.9729	9.8734	5.9403	0.8149	1.7101	3.1798	3.1971	4.1439	7.277	5.3643	7.538	4.527	5.589	4.353	8.65	11.764	15.595		0.694174	5.43822
17.141	1.326	2.2775	1.7662	7.1604	3.8559	3.9264	9.7831	5.7191	1.7655	0.8603	1.4272	6.995	5.1883	4.0834	4.3803	4.909	6.426	9.842	4.275	4.154	15.537	21.095		0.699031	5.76148
17.26	0.6171	0.883	1.7283	5.7729	6.1518	2.2292	10.798	4.1621	0.6585	1.2277	2.2041	7.9687	5.0548	1.441	7.4635	4.531	6.21	12.37	4.691	2.939	13.609	14.871		0.703884	5.34462
17.379	1.4812	1.354	4.5798	2.6425	8.6043	2.5947	9.9055	2.5344	3.6492	2.2737	1.3651	7.4654	4.9913	5.7741	7.3656	3.375	6.997	8.5	7.42	3.088	11.692	25.092		0.708737	6.03385
17.4981	0.688	1.3127	5.2721	5.5147	4.0645	3.059	6.5578	3.1277	1.8277	1.3293	1.8803	6.94	6.333	4.4858	9.9831	4.253	8.143	11.997	6.381	2.356	12.818	23.277		0.713594	5.98185
17.6171	1.9702	2.917	4.1096	5.8372	2.0592	7.348	6.2882	6.5828	1.6932	1.084	1.5497	5.7842	7.7451	1.6565	7.8017	4.72	10.989	9.099	5.99	4.975	13.766	23.568		0.718447	6.25153
17.7361	0.145	3.4364	6.2593	5.2473	1.846	7.6322	5.3464	6.7989	1.3723	2.3908	2.7049	5.9637	4.8264	3.8218	10.2028	2.76	8.123	8.435	6.397	4.118	14.309	21.644		0.7233	6.08092
17.8552	0.2311	1.2182	3.61	2.7563	2.3902	8.3853	5.4725	2.4589	0.86	1.4648	3.5965	6.8548	5.8309	2.6319	9.5802	5.776	8.588	14.188	6.283	3.04	10.397	15.906		0.728157	5.52362
17.9742	1.1859	0.9564	2.8704	3.159	3.4541	8.1478	3.9418	1.45	2.1089	1.8818	2.4003	5.8545	8.0887	2.8966	8.4009	6.407	4.974	14.103	7.111	3.681	9.363	18.469		0.73301	5.49569
18.0932	3.7872	2.621	3.2646	8.9157	3.9686	9.3749	7.548	1.0515	0.7935	1.976	5.9841	7.5924	8.1817	4.4888	7.3267	5.714	7.278	7.62	10.354	4.109	8.058	15.481		0.737862	6.15858
18.2123	1.5203	3.4888	3.1877	7.1722	4.0866	8.3639	7.5447	1.9528	0.9838	1.6857	6.3458	6.1492	7.9198	6.9967	4.6121	3.057	6.912	7.862	8.422	2.106	6.973	10.736		0.74272	5.36719
18.3313	0.4965	1.3357	3.9988	7.3694	4.3591	7.8755	5.2586	2.4696	0.6391	1.2819	6.6561	9.6466	6.2747	7.5603	4.1149	5.768	5.556	8.839	9.101	3.513	8.799	9.361		0.747572	5.46699
18.4504	3.2729	0.4703	4.2244	3.9007	2.6946	8.4882	4.8599	1.1898	1.0254	2.18	3.8159	7.7802	5.0533	9.0258	5.7195	5.514	3.928	6.901	8.083	5.067	6.221	7.685		0.75243	4.86818
18.5694	1.6562	3.3065	3.0963	1.9525	4.477	8.9975	9.4178	3.7928	0.5117	3.477	3.1711	9.0306	5.7615	7.2714	6.4585	5.949	2.914	8.31	6.151	4.247	3.859	6.314		0.757283	5.00556
18.6884	1.3854	2.7545	2.9661	4.4183	3.2882	11.4906	6.975	3.5834	1.8027	1.895	3.888	10.0436	6.1382	5.7464	3.8937	6.45	3.156	6.01	6.981	7.76	4.683	7.197		0.762135	5.11391
18.8075	1.0867	1.009	4.4186	4.2629	3.8079	10.4769	5.2887	4.5996	1.2242	0.6004	3.568	5.5526	6.4201	8.3967	5.953	4.351	2.858	3.842	6.652	4.847	4.69	8.932		0.766993	4.67442
18.9265	2.3776	1.7922	3.3855	5.3346	5.2235	12.0321	6.5155	2.3704	0.6707	1.6069	3.0979	3.8089	6.455	8.2007	5.7176	5.524	5.607	4.679	4.598	7.069	2.953	7.282		0.771845	4.83187
19.0455	0.845	0.9641	3.5799	7.8676	5.5854	8.8771	5.5847	3.3372	1.5962	0.4412	3.8267	3.9206	5.3012	6.2216	4.2723	5.534	4.791	5.872	3.702	6.834	5.968	10.016		0.776698	4.7699
19.1646	0.9833	1.3826	4.4703	5.7303	3.8659	8.0359	5.367	2.9732	1.4424	1.1397	2.6032	5.7978	8.7647	7.3275	4.9249	5.487	6.07	2.994	5.395	6.423	9.218	6.427		0.781555	4.85558
19.2836	0.4533	1.61	4.2277	4.2707	3.1136	7.8522	5.9252	1.5374	0.6897	1.7331	2.1205	5.1384	7.244	3.9933	6.3843	6.59	9.111	5.579	3.436	5.813	5.659	6.951		0.786408	4.51965
19.4026	1.1908	0.7047	4.1759	5.536	6.4334	7.4378	4.1123	2.7378	1.6815	1.9086	2.622	4.1216	9.7521	4.9718	5.5987	8.323	6.875	3.437	4.997	9.794	3.68	7.419		0.791261	4.88682
19.5217	2.6688	0.1913	4.6572	6.0612	6.0574	8.47	8.3852	3.8692	2.5097	0.352	3.7476	6.136	7.8429	4.3403	5.8579	7.068	9.259	1.767	5.196	8.515	8.412	9.762		0.796118	5.50571
19.6407	1.0736	2.1644	1.9244	4.4927	5.4105	9.9754	4.4109	6.2586	0.0754	0.5977	2.6963	6.7411	4.2368	8.8105	3.9638	5.907	5.035	4.922	5.132	8.363	3.657	10.464		0.800971	4.83237
19.7597	0.7629	2.4301	4.4234	4.1788	5.6732	11.1857	2.223	4.3717	0.1041	0.6116	1.9637	6.3344	8.2933	7.3765	2.5463	7.617	6.414	5.099	3.904	9.359	3.406	7.475		0.805824	4.80694
19.8788	1.8532	1.5576	1.3415	6.2799	4.8584	6.9039	3.1347	4.3518	1.4563	0.0305	2.2116	6.922	10.3266	6.738	7.2358	11.175	6.89	4.152	3.389	7.562	4.912	10.418		0.810681	5.16817
19.9978	2.0575	2.3335	3.7687	5.407	5.5304	5.9236	6.3869	6.186	1.921	1.9878	4.9361	5.8222	8.1791	7.2616	5.0339	7.971	5.4	5.225	4.569	10	8.121	8.487		0.815534	5.56856
20.1168	3.7568	2.2218	3.1872	4.5618	5.3026	3.6332	3.7579	7.8332	3.8461	2.9981	3.7681	7.6006	7.5423	4.1903	6.6612	7.901	4.793	3.658	4.553	6.899	7.604	11.172		0.820387	5.33824
20.2359	2.4092	2.0526	4.3659	3.3166	4.3521	5.7526	6.1702	7.5062	4.1616	2.4835	2.5116	9.3049	6.5213	1.7425	5.0649	6.755	4.524	3.029	3.288	8.581	14.274	9.015		0.825244	5.32644
20.3549	5.1575	2.4756	3.1332	1.9133	8.5972	6.2868	5.8505	4.2564	3.2843	0.8334	2.0114	6.0029	2.3741	4.8519	4.9845	8.702	5.766	3.813	4.402	6.065	9.54	10.469		0.830097	5.035
20.4739	4.148	2.7002	8.9958	3.3707	7.1748	3.7614	6.2899	7.0514	3.1237	0.9537	2.6398	4.8565	2.2275	4.0012	3.9451	9.876	7.2	7.633	7.995	6.658	11.226	9.93		0.83495	5.71626
20.593	3.0022	2.9836	5.1204	4.0328	6.4366	3.8281	8.8666	6.0777	3.0972	1.4184	3.101	5.4571	2.9505	3.4969	5.3849	6.269	8.132	8.048	9.117	6.665	10.538	10.664		0.839807	5.66759
20.712	4.1965	1.5527	4.4446	4.6487	9.0194	3.6382	7.581	10.2805	4.4963	2.7981	3.0452	4.873	4.1998	4.1204	3.7432	7.693	6.042	6.449	9.874	12.091	12.453	8.406		0.84466	6.16571
20.831	5.7815	2.9061	4.0587	5.1049	6.9016	6.7577	9.1886	10.6775	4.0178	3.3896	1.6302	5.7312	4.4814	3.6225	5.1696	9.405	7.348	4.282	7.77	5.925	8.634	10.603		0.849513	6.063
20.9501	6.4378	2.2606	9.0104	4.2155	8.1514	6.9401	8.7219	9.9324	2.3546	1.7376	2.97	8.0713	6.0573	4.3715	4.365	11.281	3.745	5.819	6.693	8.778	19.372	8.343		0.85437	6.80129
21.0691	4.0571	2.361	7.2668	3.884	7.2281	5.6959	6.7029	9.1781	1.9027	2.8015	0.8702	10.8153	4.5918	6.2424	3.828	7.724	6.239	4.801	10.592	11.803	11.692	12.032		0.859223	6.46858
21.1881	2.3473	1.2851	8.0328	7.2455	8.4319	8.4824	2.5967	9.1197	6.2507	2.6063	2.7441	9.4114	4.3473	8.2999	4.0845	10.118	7.5	6.29	9.495	9.361	16.014	7.83		0.864076	6.90425
21.3072	4.7407	2.5761	3.9024	6.5933	12.2594	4.6796	1.5372	8.417	3.3518	4.2195	2.6179	5.3786	3.7684	6.3902	5.9541	11.885	6.712	3.313	5.695	10.076	16.9	8.04		0.868933	6.31851
21.4262	7.7079	3.852	4.2179	5.1462	12.3116	4.0553	3.2274	10.404	4.6118	4.2716	2.5927	7.8932	8.9223	7.3597	5.6645	8.867	4.511	3.103	6.081	7.573	16.499	12.402		0.873786	6.8761
21.5452	6.6679	2.5657	7.3766	5.5597	7.5733	4.3459	3.6815	9.633	3.8125	2.9864	3.2433	7.9729	4.0351	7.6074	8.0401	8.653	7.168	5.935	4.262	8.836	18.463	9.619		0.878639	6.72897
21.6643	6.5163	5.4757	6.1438	5.5642	12.9497	6.105	5.1648	6.2097	4.3326	3.3515	3.5029	7.4276	4.1607	5.0642	6.073	14.454	6.565	2.702	6.273	12.398	19.686	11.923		0.883496	7.36558
21.7833	4.9244	5.6322	3.4393	9.3256	7.9938	4.2585	4.2159	7.0219	3.7556	3.2228	2.8727	6.2506	3.6963	6.2216	7.3052	9.776	6.91	4.078	6.151	10.399	18.147	11.372		0.888349	6.68043
21.9024	6.171	6.8622	6.2623	6.3119	9.5327	4.1335	3.9104	7.3733	6.9972	5.6491	2.6065	4.9972	2.8968	5.5368	11.4071	5.979	7.162	4.534	7.418	6.731	12.533	11.263		0.893206	6.64855
22.0214	3.9404	4.6595	4.4244	5.4096	7.3325	5.9239	3.4232	6.1164	4.589	8.7123	4.5096	3.8987	4.9701	7.9337	11.4274	6.809	8.284	6.376	8.887	7.606	9.569	8.442		0.898059	6.51108
22.1404	4.2539	4.4228	6.0533	3.5623	5.8591	6.4404	3.2377	7.4101	8.6395	6.3711	8.7988	7.5651	4.8175	8.1042	10.5198	5.658	6.409	9.205	7.984	7.259	7.767	7.36		0.902912	6.71353
22.2595	3.765	7.1605	5.4301	5.3663	6.845	5.6617	3.1041	7.4665	8.2026	8.864	7.8668	4.7888	10.0303	8.5246	10.2352	6.604	9.294	5.473	6.277	8.773	5.946	5.57		0.907769	6.87493
22.3785	4.8183	7.8052	5.0736	6.0324	5.7787	8.6552	3.0976	9.8031	11.19	8.0951	9.1687	7.225	12.01	4.7228	15.8066	6.918	6.697	3.184	9.649	7.703	7.003	7.119		0.912622	7.61615
22.4975	4.6239	4.3303	6.9141	5.3903	7.2748	16.1365	6.5674	9.6701	7.2199	4.6308	9.3686	5.1241	14.8266	8.2375	12.3063	10.09	7.984	3.095	11.982	5.099	8.273	4.926		0.917475	7.91228
22.6166	2.343	6.0485	5.5035	4.7204	3.8656	7.9302	7.0948	6.2386	7.0032	6.4125	13.1197	8.069	9.3765	6.3365	9.1185	7.273	6.993	5.576	7.203	6.334	8.438	5.627		0.922332	6.84657
22.7356	4.8865	8.4008	5.4969	4.0789	6.9071	8.2225	9.2267	5.123	9.1133	9.3984	10.7124	6.0534	9.0097	5.6753	10.952	5.669	8.622	5.936	7.351	5.552	10.44	6.877		0.927185	7.44109
22.8546	3.8436	7.6319	3.0592	4.1347	7.0073	7.4844	7.0147	5.3861	8.0686	9.1254	11.7045	5.5667	10.8499	9.6198	8.4299	6.696	6.875	6.526	9.291	4.936	10.374	4.57		0.932038	7.19067
22.9737	2.3486	5.4084	3.9445	2.0875	6.2798	10.5729	5.8568	11.4438	8.9324	8.1556	7.2017	10.2777	9.359	9.7204	7.9512	7.853	8.033	5.496	8.655	2.322	9.088	3.844		0.936895	7.03779
23.0927	2.5741	7.0855	5.931	4.0521	4.4992	12.0891	7.8252	10.3762	9.3822	6.309	8.9178	14.2757	8.4527	5.4376	8.626	9.7	7.409	5.399	9.128	4.837	9.608	6.698		0.941748	7.6642
23.2117	4.2055	2.8602	5.1077	3.0434	5.5102	11.8216	8.8984	8.6141	7.9582	5.4147	8.0102	7.3455	8.8609	4.7554	4.6196	4.625	7.17	7.858	11.058	5.21	10.454	7.774		0.946601	6.87157
23.3308	4.3174	3.3013	6.7486	4.8551	3.7858	10.6816	9.0628	10.1227	7.6264	2.4755	10.9423	7.3783	6.0963	3.0299	6.5583	3.45	5.105	6.551	6.14	7.639	10.71	6.897		0.951458	6.52156
23.4498	2.9703	3.4872	8.168	2.6609	6.0901	7.2397	8.6833	7.6348	8.1094	4.1956	7.2177	6.5153	10.1773	3.5462	7.3004	4.141	4.366	6.751	6.53	7.823	11.77	4.512		0.956311	6.3586
23.5688	3.4585	4.2701	5.0458	1.9889	10.8265	7.2909	7.8476	6.7029	6.1059	5.6586	4.7182	5.5591	6.1475	2.7877	8.5786	4.011	3.189	6.147	6.197	9.553	6.374	7.216		0.961164	5.89426
23.6879	4.4468	2.615	4.6774	1.8851	9.8865	3.4807	5.8549	5.411	5.121	6.6436	7.5693	4.1865	5.501	3.0354	8.0861	2.438	2.925	4.532	7.506	8.402	9.945	8.854		0.966021	5.59101
23.8069	1.4587	2.1593	5.285	1.7683	8.2355	2.6071	5.585	6.9275	4.5106	5.4724	10.1418	4.8084	5.8886	3.1403	8.383	3.574	1.295	2.63	6.196	9.79	9.734	9.244		0.970874	5.40157
23.9259	2.3049	1.5619	3.2621	2.5576	5.2172	3.5307	8.2691	7.9572	3.4972	7.1324	7.4297	3.4617	3.868	2.0441	3.0234	2.191	1.431	4.753	8.1	8.761	7.663	10.015		0.975727	4.91051
24.045	3.0677	0.2121	4.3787	4.2531	5.7504	3.3556	7.3866	8.8311	3.1319	3.8605	9.7255	4.6913	5.0211	3.392	4.6727	1.059	1.016	1.961	10.205	10.257	7.535	11.881		0.980584	5.25656
24.164	1.3882	1.0499	2.9043	3.4602	6.1571	2.1532	7.7411	8.1951	2.3162	3.2574	6.1041	3.815	4.8107	4.3651	5.2917	1.693	1.132	2.394	10.038	7.075	8.975	12.853		0.985437	4.87133
24.283	1.225	2.1196	3.0891	2.7688	3.5528	1.6258	4.6959	4.4936	1.3496	3.6568	4.6455	2.4797	2.6996	2.4308	2.3216	1.074	0.433	3.346	11.363	10.215	7.635	10.897		0.99029	4.00533
24.4021	4.1745	2.1595	3.7426	2.751	2.4549	1.8344	3.8365	3.406	4.8536	2.4969	2.0602	1.4569	2.7909	1.2748	1.1998	0.52	0.401	2.426	12.242	8.177	7.478	9.821		0.995147	3.70716
24.5211	1.3819	1.2932	2.2762	2.0416	3.2869	1.999	2.7706	2.1522	3.0273	0.8691	0.6568	2.7917	0.8448	0	1.8499	0.042	0.691	2.255	12.286	8.937	5.162	9.718		1	3.0151

## Sheet: Sheet1
Image1				Image2				Image3				Image5				Image6				Im1				Im2						Distance	Image1	Image2	Image3	Image5	Image6	Im1	Im2
Ap-Ba	Average int.			Ap-Ba	Average int.			Ap-Ba	Average int.			Ap-Ba	Average int.			Ap-Ba	Average int.			Ap-Ba	Average int			Ap-Ba	Average int					0	47.7775	102.444	110.819	71.5326	45.6306	60.5637	64.6055
0	47.7775			0	102.444			0	110.819			0	71.5326			0	45.6306			0	60.5637			0	64.6055					0.05	49.2045	116.412	121.919	75.8309	68.619	72.6378	80.458
0.00485296	47.3174			0.00429061	103.65			0.00444315	113.402			0.0047833	72.3273			0.0039829	48.261			0.00421818	64.9334			0.00510055	68.0765					0.1	55.2523	141.589	133.398	85.7286	84.2908	81.0325	90.416
0.00971	46.7502			0.00858482	107.515			0.00889003	116.183			0.00957063	73.7927			0.00796915	53.9183			0.00843991	64.7561			0.0102054	70.9269					0.15	61.0763	147.907	135.374	91.3235	70.3688	81.882	80.7175
0.014563	48.0791			0.0128754	108.94			0.0133332	117.681			0.0143539	76.3918			0.0119521	55.4932			0.0126581	68.3218			0.0153059	76.0019					0.2	65.6671	149.204	131.432	89.0679	49.5851	79.0822	65.1163
0.0194159	50.884			0.017166	112.185			0.0177763	120.82			0.0191372	73.9444			0.015935	61.7136			0.0168763	70.7716			0.0204065	77.1264					0.25	73.2702	142.17	127.208	82.6193	31.075	70.2876	49.3618
0.024273	48.9406			0.0214602	113.507			0.0222232	123.856			0.0239246	77.0817			0.0199212	64.7296			0.021098	72.7792			0.0255113	83.1561					0.3	75.5761	134.259	121.082	72.0916	20.3371	61.0233	38.3207
0.0291259	49.6222			0.0257509	116.1			0.0266664	122.661			0.0287079	77.4427			0.0239041	68.6905			0.0253162	73.971			0.0306119	83.698					0.35	76.6597	122.017	100.705	53.6183	15.7162	44.7752	28.2343
0.0339789	49.6712			0.0300415	116.445			0.0311095	122.834			0.0334912	76.0202			0.027887	73.4951			0.0295344	72.1608			0.0357124	89.2968					0.4	73.5543	108.144	64.9972	34.2388	12.8032	31.7293	21.2293
0.0388359	50.4298			0.0343357	119.109			0.0355564	125.765			0.0382785	77.2835			0.0318733	76.8252			0.0337561	76.5952			0.0408173	89.3816					0.45	53.7893	66.2583	32.9606	18.7425	10.2968	19.9487	15.4719
0.0436889	50.2267			0.0386263	125.832			0.0399996	128.511			0.0430618	77.4438			0.0358562	79.0808			0.0379743	77.9514			0.0459178	90.7764					0.5	26.4728	31.4713	15.3122	10.521	8.78453	13.3941	13.372
0.0485419	49.8426			0.0429169	125.459			0.0444427	124.85			0.0478451	78.1475			0.0398391	81.823			0.0421925	79.7713			0.0510184	91.9925	80.458				0.55	13.7881	15.009	10.2653	8.79447	7.02101	9.13066	11.7908
0.0533989	50.9122	49.2045		0.0472111	130.395			0.0488896	130.641			0.0526324	78.5626	75.8309		0.0438253	81.3709			0.0464142	81.5591			0.0561232	92.1387					0.6	8.45717	9.21767	8.73541	7.95792	6.66763	7.25243	10.4385
0.0582519	50.4793			0.0515017	131.772	116.412		0.0533327	126.923	121.919		0.0574157	81.0578			0.0478082	84.2729			0.0506324	80.1572	72.6378		0.0612238	92.3639					0.65	6.4468	8.38802	7.50123	8.74805	7.03682	6.64432	8.88873
0.0631048	51.5342			0.0557923	131.137			0.0577759	131.232			0.062199	82.8641			0.0517911	85.3621	68.619		0.0548506	78.7094			0.0663243	92.2235					0.7	5.15211	7.05974	6.579	10.2531	6.82352	5.76325	7.7528
0.0679619	55.0735			0.0600865	135.712			0.0622228	134.87			0.0669864	83.9766			0.0557774	85.4775			0.0590723	81.8651			0.0714292	91.2428					0.75	5.72284	6.3927	6.19005	9.6988	7.28061	5.42232	7.77826
0.0728148	56.4882			0.0643771	135.469			0.0666659	133.43			0.0717697	83.1793			0.0597603	85.9714			0.0632905	82.88			0.0765297	90.9729					0.8	4.89958	5.70812	6.24719	8.94868	8.42547	5.67989	6.85755
0.0776719	57.4861			0.0686714	139.346			0.0711128	131.821			0.076557	85.3718			0.0637465	84.5631			0.0675122	82.407			0.0816346	90.6329					0.85	5.6052	5.78296	5.94848	8.79852	7.24996	4.69158	6.38254
0.0825248	55.8741			0.072962	142.234			0.075556	132.604			0.0813403	87.5556			0.0677294	87.3924			0.0717304	80.9444			0.0867351	88.5967					0.9	6.72156	5.48932	6.47931	7.19158	5.61429	3.35006	5.56533
0.0873778	55.3935			0.0772526	145.204			0.0799991	136.167			0.0861236	87.61			0.0717123	86.8799			0.0759486	83.7117			0.0918357	89.8427					0.95	7.19768	4.57331	6.50882	5.91243	3.56832	2.8356	5.52629
0.0922349	56.3989			0.0815468	144.206			0.084446	136.331			0.0909109	87.6959			0.0756986	87.6787			0.0801703	79.6015			0.0969405	88.2972					1	4.90114	3.95095	6.28492	4.16906	3.61988	2.26267	5.09421
0.0970878	56.6896			0.0858374	145.08			0.0888891	133.323			0.0956942	89.5173			0.0796815	85.511			0.0843885	80.3122			0.102041	87.849	90.416
0.101941	57.1054	55.2523		0.090128	144.793			0.0933323	131.906			0.100478	88.4572	85.7286		0.0836644	83.2783			0.0886067	79.6466			0.107142	84.8969
0.106798	59.178			0.0944222	146.142			0.0977792	133.008			0.105265	91.3815			0.0876507	83.0836			0.0928284	79.4772			0.112246	83.6639
0.111651	59.8195			0.0987128	146.386			0.102222	132.686	133.398		0.110048	91.681			0.0916336	81.5451			0.0970466	80.7956			0.117347	85.9456
0.116504	58.4267			0.103003	143.357	141.589		0.106665	132.905			0.114831	91.6546			0.0956165	82.296			0.101265	82.0393	81.0325		0.122448	82.5926
0.121361	62.3738			0.107298	148.687			0.111112	136.615			0.119619	91.4853			0.0996027	82.0073			0.105486	81.1029			0.127552	81.0795
0.126214	60.637			0.111588	147.542			0.115556	138.722			0.124402	91.7722			0.103586	80.0958	84.2908		0.109705	81.6665			0.132653	81.6869
0.131067	61.0622			0.115879	145.23			0.119999	135.978			0.129185	89.0147			0.107569	81.449			0.113923	83.7335			0.137754	81.9112
0.135924	62.7865			0.120173	147.102			0.124446	137.477			0.133973	91.3613			0.111555	77.9307			0.118145	82.096			0.142858	76.4473
0.140777	62.935			0.124464	145.167			0.128889	133.724			0.138756	91.2072			0.115538	73.3794			0.122363	81.2789			0.147959	75.6102
0.14563	61.1812			0.128754	147.161			0.133332	136.199			0.143539	91.7614			0.119521	73.3399			0.126581	82.1321			0.153059	73.341	80.7175
0.150487	62.3634	61.0763		0.133048	148.244			0.137779	137.666			0.148327	92.2248			0.123507	72.6858			0.130803	83.9129			0.158164	72.0397
0.15534	62.9682			0.137339	150.077			0.142222	135.365			0.15311	91.015	91.3235		0.12749	71.9883			0.135021	82.5661			0.163265	71.2525
0.160193	66.2136			0.14163	151.336			0.146665	133.3			0.157893	90.4301			0.131473	71.8201			0.139239	81.768			0.168365	70.9704
0.16505	63.8145			0.145924	150.062			0.151112	131.159	135.374		0.162681	90.4209			0.135459	69.891			0.143461	80.9227			0.17347	67.3146
0.169903	63.4972			0.150215	146.365	147.907		0.155555	134.835			0.167464	90.131			0.139442	65.5823			0.147679	81.5739			0.178571	64.4531
0.174756	65.7104			0.154505	147.687			0.159998	134.068			0.172247	90.6262			0.143425	63.3896			0.151897	79.8298	81.882		0.183671	64.6731
0.179613	64.0839			0.158799	150.857			0.164445	134.397			0.177035	90.3948			0.147411	60.8988			0.156119	78.7234			0.188776	61.6736
0.184466	65.635			0.16309	151.533			0.168888	132.618			0.181818	89.2076			0.151394	62.0705	70.3688		0.160337	79.8524			0.193877	60.3711
0.189319	67.185			0.167381	149.472			0.173331	133.229			0.186601	89.2291			0.155377	60.3657			0.164555	78.0498			0.198977	59.8116
0.194176	67.5658			0.171675	149.902			0.177778	129.817			0.191388	88.8656			0.159363	57.5641			0.168777	80.8717			0.204082	58.6033	65.1163
0.199029	67.4591			0.175965	149.888			0.182221	128.369			0.196172	85.8348			0.163346	56.4285			0.172995	80.5314			0.209183	57.4478
0.203886	68.205	65.6671		0.18026	150.418			0.186668	129.962			0.200959	85.5387	89.0679		0.167332	55.612			0.177217	81.2769			0.214288	52.191
0.208739	70.6484			0.18455	152.513			0.191111	129.373			0.205742	84.4659			0.171315	54.3451			0.181435	81.1859			0.219388	52.6493
0.213592	70.0298			0.188841	147.681			0.195555	129.771			0.210526	83.1431			0.175298	51.2998			0.185653	79.418			0.224489	48.5584
0.218449	69.9891			0.193135	146.563			0.200001	129.314	131.432		0.215313	82.5968			0.179284	50.6765			0.189875	79.5197			0.229593	49.9167
0.223302	72.2122			0.197426	147.156			0.204445	130.173			0.220096	83.26			0.183267	48.3655			0.194093	77.6336			0.234694	47.4711
0.228155	72.5432			0.201716	146.78	149.204		0.208888	127.34			0.22488	84.6912			0.18725	46.6255			0.198311	74.8082			0.239795	46.6904
0.233012	73.7187			0.20601	148.314			0.213335	127.215			0.229667	82.726			0.191236	42.8336			0.202533	77.1152	79.0822		0.244899	45.7105
0.237865	74.7579			0.210301	147.787			0.217778	129.16			0.23445	81.7216			0.195219	42.3168			0.206751	72.7183			0.25	43.6212	49.3618
0.242717	76.4968			0.214592	144.585			0.222221	126.113			0.239234	82.7447			0.199202	40.1336			0.210969	73.9373			0.255101	43.8792
0.247575	76.7057			0.218886	142.135			0.226668	125.909			0.244021	81.9387			0.203188	38.0393	49.5851		0.215191	74.6987			0.260205	43.9478
0.252428	75.6003	73.2702		0.223176	143.783			0.231111	127.448			0.248804	81.348			0.207171	37.7988			0.219409	73.8278			0.265306	41.6193
0.25728	74.2321			0.227467	143.843			0.235554	127.559			0.253587	80.1767	82.6193		0.211154	34.7593			0.223627	71.3796			0.270407	39.305
0.262138	74.7438			0.231761	143.394			0.240001	129.058			0.258375	78.8729			0.21514	34.2839			0.227849	71.934			0.275511	38.8987
0.26699	76.0407			0.236052	136.368			0.244444	127.104			0.263158	75.3018			0.219123	33.0436			0.232067	69.5911			0.280612	36.3601
0.271843	75.5124			0.240343	140.154			0.248887	124.612			0.267941	76.2698			0.223106	32.5632			0.236286	65.9505			0.285712	35.7567
0.2767	74.4933			0.244637	138.684			0.253334	124.803	127.208		0.272729	75.0058			0.227092	31.8223			0.240507	67.4805			0.290817	34.7601
0.281553	75.1577			0.248927	140.238			0.257777	128.991			0.277512	73.1995			0.231075	29.7318			0.244725	67.0565			0.295918	34.3797
0.286406	74.7622			0.253218	136.754	142.17		0.262221	127.835			0.282295	71.9797			0.235058	29.8812			0.248944	66.8735			0.301018	34.3009	38.3207
0.291263	75.5423			0.257512	138.594			0.266667	123.975			0.287083	69.4904			0.239045	28.4742			0.253165	68.0037	70.2876		0.306123	31.7248
0.296116	77.5698			0.261803	137.788			0.271111	120.055			0.291866	68.1803			0.243027	27.3201			0.257384	66.2649			0.311224	30.5453
0.300969	77.7064	75.5761		0.266093	137.392			0.275554	120.723			0.296649	66.6067			0.24701	27.3979			0.261602	65.189			0.316324	29.4532
0.305826	75.509			0.270388	138.586			0.280001	122.334			0.301437	66.0091	72.0916		0.250997	25.8241	31.075		0.265824	63.8797			0.321429	29.0295
0.310679	75.1296			0.274678	135.063			0.284444	119.46			0.30622	62.1017			0.254979	23.6465			0.270042	64.1848			0.32653	27.9715
0.315532	76.1956			0.278969	136.557			0.288887	119.407			0.311003	62.1948			0.258962	22.4211			0.27426	63.3904			0.33163	27.7185
0.320389	76.9399			0.283263	132.433			0.293334	117.313			0.315791	58.5337			0.262949	22.3644			0.278482	65.1221			0.336735	27.3444
0.325242	74.6236			0.287554	128.825			0.297777	115.776			0.320574	56.3026			0.266932	22.0128			0.2827	60.8488			0.341836	26.8285
0.330095	77.3008			0.291844	131.768			0.30222	116.032	121.082		0.325357	56.1471			0.270914	21.4851			0.286918	62.0287			0.346936	25.905
0.334952	77.9275			0.296138	130.147			0.306667	116.312			0.330144	55.8266			0.274901	21.9859			0.29114	58.7117			0.352041	25.8219	28.2343
0.339805	78.2609			0.300429	129.696	134.259		0.31111	111.747			0.334928	52.0836			0.278884	20.4726			0.295358	54.362			0.357142	24.9655
0.344662	77.3316			0.304723	130.766			0.315557	108.32			0.339715	50.2489			0.28287	19.3925			0.29958	54.9276			0.362246	22.249
0.349515	77.3744			0.309014	126.828			0.32	105.594			0.344498	48.1617			0.286853	18.9644			0.303798	53.3699	61.0233		0.367347	22.7244
0.354368	76.6641	76.6597		0.313304	125.359			0.324443	100.078			0.349282	45.7221			0.290836	18.1729			0.308016	50.9738			0.372448	22.4117
0.359225	77.8189			0.317599	122.246			0.32889	98.8155			0.354069	42.4787	53.6183		0.294822	18.1751			0.312238	50.1762			0.377552	21.9332
0.364078	76.5937			0.321889	121.679			0.333333	98.0125			0.358852	39.3752			0.298805	17.7702			0.316456	47.958			0.382653	21.4947
0.368931	76.7716			0.32618	121.415			0.337776	97.8595			0.363636	39.5234			0.302788	17.5192	20.3371		0.320674	47.8419			0.387754	20.5701
0.373788	77.4621			0.330474	122.412			0.342223	93.0346			0.368423	36.9389			0.306774	17.0994			0.324896	44.8295			0.392858	20.0381
0.378641	74.185			0.334765	119.272			0.346667	89.403			0.373206	35.0077			0.310757	17.1701			0.329114	44.379			0.397959	18.3381
0.383494	74.9188			0.339055	120.787			0.35111	88.5772	100.705		0.37799	33.009			0.31474	17.2064			0.333332	43.5486			0.403059	17.5679	21.2293
0.388351	72.1242			0.34335	118.921			0.355557	84.087			0.382777	32.0771			0.318726	15.9923			0.337554	42.9429			0.408164	17.1803
0.393204	71.0209			0.34764	119.594			0.36	79.0576			0.38756	31.229			0.322709	15.6304			0.341772	41.7821			0.413265	16.4736
0.398057	68.9301			0.351931	114.919	122.017		0.364443	77.4313			0.392343	31.739			0.326692	15.19			0.34599	39.8869			0.418365	17.0597
0.402914	65.7171	73.5543		0.356225	117.429			0.36889	72.4549			0.397131	32.1892			0.330678	15.7354			0.350212	38.2083	44.7752		0.42347	17.5407
0.407767	65.3584			0.360516	117.739			0.373333	67.1389			0.401914	31.2992	34.2388		0.334661	14.929			0.35443	38.0978			0.428571	15.3665
0.41262	63.5129			0.364806	116.408			0.377776	65.1611			0.406697	28.5441			0.338644	15.2945			0.358648	37.8636			0.433671	15.538
0.417477	60.9453			0.3691	113.54			0.382223	64.0327			0.411485	26.7272			0.34263	14.9456			0.36287	34.8649			0.438776	14.8641
0.42233	59.6076			0.373391	112.323			0.386666	61.3889			0.416268	22.614			0.346613	14.5585			0.367088	34.0922			0.443877	13.4659
0.427183	56.5064			0.377682	111.247			0.391109	55.3537			0.421051	21.0458			0.350596	14.8424	15.7162		0.371306	34.2276			0.448977	14.1589
0.43204	52.9837			0.381976	109.949			0.395556	51.9812			0.425839	19.2976			0.354582	14.5531			0.375528	33.5994			0.454082	13.071	15.4719
0.436893	48.6187			0.386266	108.378			0.399999	51.4136			0.430622	17.4995			0.358565	14.9466			0.379746	30.9327			0.459183	13.802
0.441746	45.9782			0.390557	104.177			0.404442	50.4649	64.9972		0.435405	15.4927			0.362548	13.6999			0.383965	29.4542			0.464283	14.2561
0.446603	42.8923			0.394851	100.997			0.408889	47.7189			0.440193	15.3101			0.366534	13.4689			0.388186	30.5128			0.469388	14.4488
0.451456	41.4896	53.7893		0.399142	94.8247			0.413332	44.4268			0.444976	13.4903			0.370517	13.4942			0.392404	26.6362			0.474489	13.8604
0.456309	36.6991			0.403432	90.7107	108.144		0.417776	40.637			0.449759	13.1778			0.3745	13.0607			0.396623	26.5896			0.479589	13.6541
0.461166	33.1362			0.407727	88.8159			0.422222	38.355			0.454547	12.9687	18.7425		0.378486	12.7972			0.400844	23.8799	31.7293		0.484694	12.8932
0.466019	31.7719			0.412017	83.0614			0.426666	33.1644			0.45933	11.4832			0.382469	12.3159			0.405063	24.065			0.489795	12.6647
0.470872	27.9772			0.416308	77.6819			0.431109	31.3394			0.464113	11.38			0.386452	11.9289			0.409281	24.0863			0.494895	12.5412
0.475729	25.7858			0.420602	70.7772			0.435556	29.3447			0.4689	10.9703			0.390438	12.2088			0.413502	22.0968			0.5	12.2275	13.372
0.480582	24.5831			0.424893	68.8998			0.439999	27.44			0.473684	11.0601			0.394421	11.1828			0.417721	22.459			0.505101	12.0603
0.485439	23.5415			0.429187	64.3952			0.444446	24.7945			0.478471	10.1405			0.398408	11.5401			0.421942	20.5344			0.510205	12.1121
0.490292	22.1404			0.433478	61.478			0.448889	22.7926			0.483254	10.418			0.40239	11.2445	12.8032		0.426161	20.1775			0.515306	11.9681
0.495145	20.0653			0.437768	57.9807			0.453332	22.553	32.9606		0.488038	10.5703			0.406373	10.9134			0.430379	20.0942			0.520407	12.2487
0.500002	19.0279	26.4728		0.442062	53.9668			0.457779	19.8964			0.492825	10.7228			0.41036	11.1473			0.4346	18.4656			0.525511	11.9561
0.504855	18.5432			0.446353	52.6145			0.462222	17.9048			0.497608	9.57449			0.414342	11.2507			0.438819	17.7786			0.530612	11.6297
0.509708	16.3884			0.450644	49.1695	66.2583		0.466665	19.3136			0.502392	8.89	10.521		0.418325	10.8126			0.443037	16.7785			0.535712	12.1177
0.514565	14.7464			0.454938	44.64			0.471112	17.4663			0.507179	8.69256			0.422312	9.87099			0.447259	16.6214			0.540817	11.6811
0.519418	14.7341			0.459228	42.6868			0.475555	14.3763			0.511962	8.54713			0.426295	10.1365			0.451477	16.227	19.9487		0.545918	11.251
0.524271	14.3009			0.463519	37.8732			0.479998	14.0546			0.516746	9.15463			0.430277	10.5631			0.455695	16.3468			0.551018	10.883	11.7908
0.529128	14.0426			0.467813	35.8577			0.484445	14.4489			0.521533	9.99158			0.434264	9.59694			0.459917	15.3655			0.556123	11.3045
0.533981	12.9377			0.472104	33.2639			0.488888	13.6827			0.526316	8.95943			0.438247	9.66188			0.464135	15.5568			0.561224	10.6567
0.538834	11.4877			0.476394	30.6333			0.493332	12.3349			0.5311	8.56848			0.442229	10.1084			0.468353	14.1603			0.566324	10.5766
0.543691	11.7183			0.480689	29.6875			0.497778	12.9275			0.535887	8.80229			0.446216	9.52256			0.472575	13.1422			0.571429	10.9619
0.548544	11.5885			0.484979	29.0444			0.502222	12.0279	15.3122		0.54067	8.54276			0.450199	9.97705	10.2968		0.476793	13.2329			0.57653	10.2173
0.553397	11.1812	13.7881		0.48927	26.5093			0.506665	13.1059			0.545453	8.46153			0.454182	9.47421			0.481011	12.3185			0.58163	10.7884
0.558254	10.7716			0.493564	24.5895			0.511112	12.1373			0.550241	8.22433	8.79447		0.458168	9.05301			0.485233	12.7803			0.586735	9.50837
0.563107	9.61307			0.497855	21.3251			0.515555	11.9466			0.555024	8.37598			0.462151	9.34792			0.489451	12.3808			0.591836	10.1194
0.56796	8.83657			0.502145	21.5452	31.4713		0.519998	10.6051			0.559807	7.76977			0.466134	8.88656			0.493669	12.9843			0.596936	10.5733
0.572817	9.03014			0.50644	19.7063			0.524445	10.3257			0.564595	8.19158			0.47012	8.82459			0.497891	11.5785			0.602041	9.67885	10.4385
0.57767	8.24888			0.51073	18.8043			0.528888	10.1971			0.569378	7.88628			0.474103	8.39202			0.502109	10.8818	13.3941		0.607142	10.0309
0.582523	7.63099			0.515021	17.6799			0.533331	8.3823			0.574161	7.86842			0.478086	8.49616			0.506327	10.1971			0.612242	10.0508
0.58738	8.0451			0.519315	15.8571			0.537778	8.8478			0.578949	8.13887			0.482072	8.24239			0.510549	10.5668			0.617347	9.56466
0.592233	7.34516			0.523606	16.2556			0.542221	9.43629			0.583732	7.84665			0.486055	8.17495			0.514767	9.04911			0.622448	9.7
0.597086	7.62752			0.527896	15.377			0.546664	9.06394			0.588515	7.68026			0.490038	8.31537			0.518985	9.79218			0.627548	9.36807
0.601943	7.42261	8.45717		0.53219	14.6337			0.551111	8.8704	10.2653		0.593303	7.67658			0.494024	8.81032			0.523207	9.35722			0.632653	8.6549
0.606796	6.93507			0.536481	14.6184			0.555554	9.51364			0.598086	8.14423			0.498007	8.78905			0.527425	8.8974			0.637754	8.50069
0.611653	6.54492			0.540775	12.2623			0.560001	9.18458			0.602873	7.95854	7.95792		0.501993	9.39233	8.78453		0.531647	9.45319			0.642858	7.19192
0.616506	6.52766			0.545066	12.0151			0.564444	8.07918			0.607657	8.0662			0.505976	8.13236			0.535865	9.0304			0.647959	7.86822
0.621359	7.06216			0.549356	11.8049			0.568887	8.31664			0.61244	8.21415			0.509959	8.57896			0.540083	7.6924			0.653059	7.95717	8.88873
0.626216	6.16522			0.553651	11.0937	15.009		0.573334	8.81994			0.617227	8.6818			0.513945	8.10076			0.544305	8.11428			0.658164	7.82884
0.631069	6.33965			0.557941	10.084			0.577778	8.85222			0.62201	8.14152			0.517928	7.9724			0.548523	8.52158			0.663265	8.52639
0.635922	6.71459			0.562232	9.89615			0.582221	8.41109			0.626794	8.88042			0.521911	6.65262			0.552741	8.89622	9.13066		0.668365	7.94032
0.640779	6.31183			0.566526	9.43759			0.586668	9.4343			0.631581	8.25025			0.525897	7.23812			0.556963	8.54797			0.67347	8.40473
0.645632	6.23818			0.570817	9.37776			0.591111	8.51337			0.636364	8.4538			0.52988	7.00982			0.561181	7.0886			0.678571	7.82386
0.650485	5.62868	6.4468		0.575107	8.96764			0.595554	7.94551			0.641148	9.1925			0.533863	6.21974			0.5654	7.39477			0.683671	7.19487
0.655342	5.28337			0.579401	9.27198			0.600001	9.019	8.73541		0.645935	9.7072			0.537849	5.7251			0.569621	7.30713			0.688776	7.2079
0.660195	5.1821			0.583692	9.06243			0.604444	8.52824			0.650718	10.6821	8.74805		0.541832	6.15057			0.573839	6.86977			0.693877	7.26542
0.665048	5.169			0.587983	8.96739			0.608887	8.00299			0.655502	10.1371			0.545815	6.53313			0.578058	6.7595			0.698977	8.06625
0.669905	5.15021			0.592277	8.04766			0.613334	6.9418			0.660289	10.4979			0.549801	6.73607			0.582279	7.67694			0.704082	7.26946	7.7528
0.674758	4.44428			0.596568	8.98891			0.617777	7.44995			0.665072	10.4187			0.553784	6.22355	7.02101		0.586498	7.26327			0.709183	6.92473
0.679611	4.6063			0.600858	9.29289	9.21767		0.62222	7.85			0.669856	10.2432			0.557767	6.34415			0.590716	6.8602			0.714283	6.91998
0.684468	4.70149			0.605152	8.53667			0.626667	8.22904			0.674643	11.2475			0.561753	7.31944			0.594937	7.18795			0.719388	8.15334
0.689321	5.59213			0.609443	9.06891			0.63111	7.379			0.679426	10.5862			0.565736	7.114			0.599156	7.2137			0.724489	7.91994
0.694174	5.43822			0.613734	9.8609			0.635553	7.46768			0.684209	10.5958			0.569719	6.80053			0.603374	6.85935	7.25243		0.729589	7.70859
0.699031	5.76148			0.618028	9.11748			0.64	7.35353			0.688997	10.4882			0.573705	6.58339			0.607596	6.61716			0.734694	7.93309
0.703884	5.34462	5.15211		0.622318	8.72706			0.644443	6.87575			0.69378	9.69558			0.577688	6.41001			0.611814	6.46794			0.739795	8.26863
0.708737	6.03385			0.626609	9.56652			0.648887	6.56546			0.698563	10.0494			0.581671	6.78782			0.616032	6.71739			0.744895	8.13521
0.713594	5.98185			0.630903	8.77144			0.653333	7.37136	7.50123		0.703351	8.82487	10.2531		0.585658	6.93662			0.620254	6.70695			0.75	8.0408	7.77826
0.718447	6.25153			0.635194	8.65354			0.657777	6.92364			0.708134	9.70422			0.58964	6.35573			0.624472	6.89612			0.755101	7.98105
0.7233	6.08092			0.639484	7.66891			0.66222	6.72111			0.712917	10.059			0.593623	6.49274			0.62869	7.24324			0.760201	6.86541
0.728157	5.52362			0.643779	7.32251			0.666667	7.52483			0.717705	9.56157			0.59761	6.29201			0.632912	6.8787			0.765306	7.01124
0.73301	5.49569			0.648069	6.35447			0.67111	6.11132			0.722488	10.3259			0.601592	6.57506	6.66763		0.63713	6.75736			0.770407	7.67443
0.737862	6.15858			0.65236	7.00788	8.38802		0.675553	6.63024			0.727271	9.60785			0.605575	6.63351			0.641348	7.15889			0.775507	6.61867
0.74272	5.36719			0.656654	6.63728			0.68	6.46451			0.732059	9.67475			0.609562	6.92961			0.64557	6.19016			0.780612	6.42932
0.747572	5.46699			0.660945	7.02469			0.684443	6.49028			0.736842	9.6287			0.613545	7.23864			0.649788	6.44375			0.785712	6.62175
0.75243	4.86818	5.72284		0.665239	7.05274			0.68889	6.21121			0.741629	9.82985			0.617531	7.3283			0.65401	5.65417	6.64432		0.790817	6.14554
0.757283	5.00556			0.669529	6.90713			0.693333	6.14739			0.746413	9.31447			0.621514	7.04513			0.658228	6.02059			0.795918	6.72168
0.762135	5.11391			0.67382	6.75941			0.697776	6.67718			0.751196	9.28166	9.6988		0.625497	7.46769			0.662446	7.16269			0.801018	6.50641	6.85755
0.766993	4.67442			0.678114	7.15163			0.702223	6.46734	6.579		0.755983	9.96181			0.629483	7.23618			0.666668	6.08802			0.806123	6.4029
0.771845	4.83187			0.682405	6.98183			0.706666	6.50416			0.760766	9.83592			0.633466	6.44186			0.670886	6.39672			0.811224	7.16009
0.776698	4.7699			0.686696	7.13784			0.711109	5.83157			0.76555	9.34402			0.637449	6.68809			0.675104	5.71128			0.816324	6.90988
0.781555	4.85558			0.69099	7.51945			0.715556	5.99513			0.770337	8.56251			0.641435	7.07857			0.679326	5.08111			0.821429	6.56737
0.786408	4.51965			0.69528	7.57361			0.719999	6.51561			0.77512	8.99986			0.645418	7.23509			0.683544	5.43			0.82653	6.61422
0.791261	4.88682			0.699571	6.98782			0.724443	5.96053			0.779904	8.95648			0.649401	7.50618			0.687762	5.4541			0.83163	6.23802
0.796118	5.50571			0.703865	6.98346	7.05974		0.728889	6.01188			0.784691	9.34151			0.653387	6.64983	7.03682		0.691984	5.64453			0.836735	6.46584
0.800971	4.83237	4.89958		0.708156	6.63906			0.733333	6.30359			0.789474	8.42852			0.65737	6.30854			0.696202	5.30785			0.841836	5.96414
0.805824	4.80694			0.712446	6.65121			0.737776	6.20647			0.794258	8.72098			0.661353	7.11803			0.70042	5.09887	5.76325		0.846936	5.796
0.810681	5.16817			0.716741	6.30795			0.742223	5.76516			0.799045	8.02774			0.665339	6.7395			0.704642	5.96424			0.852041	5.7069	6.38254
0.815534	5.56856			0.721031	6.80448			0.746666	6.66807			0.803828	8.25612	8.94868		0.669322	6.65537			0.70886	5.10812			0.857142	5.89585
0.820387	5.33824			0.725322	5.91861			0.751109	6.32841	6.19005		0.808612	9.16845			0.673305	6.66953			0.713078	5.52838			0.862242	5.56989
0.825244	5.32644			0.729616	6.44602			0.755556	5.98234			0.813399	8.28983			0.677291	6.58998			0.7173	5.64659			0.867347	5.64584
0.830097	5.035			0.733907	6.31105			0.759999	6.90376			0.818182	8.22584			0.681274	6.59938			0.721518	5.35601			0.872448	4.99254
0.83495	5.71626			0.738197	6.47787			0.764442	6.35314			0.822965	8.64963			0.685257	6.85682			0.725737	5.06823			0.877548	5.43122
0.839807	5.66759			0.742491	6.89234			0.768889	6.26061			0.827753	8.73773			0.689243	7.28424			0.729958	5.05283			0.882653	6.10024
0.84466	6.16571			0.746782	6.4518			0.773332	5.42181			0.832536	8.48212			0.693226	7.25904			0.734176	5.84124			0.887754	5.4062
0.849513	6.063			0.751073	5.41931	6.3927		0.777775	6.55576			0.837319	9.49676			0.697209	7.1695			0.738395	5.6201			0.892854	5.89531
0.85437	6.80129	5.6052		0.755367	6.10375			0.782222	6.0827			0.842107	8.39701			0.701195	6.63236	6.82352		0.742616	4.79354			0.897959	5.61868
0.859223	6.46858			0.759657	5.74665			0.786665	5.81328			0.84689	9.44218			0.705178	6.79418			0.746835	5.25837			0.903059	5.09752	5.56533
0.864076	6.90425			0.763948	6.23709			0.791108	6.18647			0.851673	9.09561	8.79852		0.709161	7.13799			0.751053	5.83017	5.42232		0.90816	6.03345
0.868933	6.31851			0.768242	6.07474			0.795555	6.4141			0.856461	8.45697			0.713147	7.00946			0.755275	6.50766			0.913265	5.07813
0.873786	6.8761			0.772533	5.99765			0.799999	6.28357			0.861244	8.45888			0.71713	6.34385			0.759493	6.00476			0.918365	5.66605
0.878639	6.72897			0.776824	5.15717			0.804442	6.70869	6.24719		0.866027	7.87565			0.721113	7.11466			0.763711	6.22001			0.923466	5.82847
0.883496	7.36558			0.781118	5.55229			0.808889	6.83246			0.870815	7.36012			0.725099	6.90199			0.767933	5.48371			0.928571	5.67368
0.888349	6.68043			0.785408	5.44415			0.813332	6.66507			0.875598	6.99719			0.729082	6.47993			0.772151	5.71502			0.933671	5.38871
0.893206	6.64855			0.789703	5.48647			0.817779	5.89696			0.880385	7.19186			0.733068	7.33566			0.776373	5.63064			0.938776	5.24994
0.898059	6.51108			0.793993	5.28965			0.822222	5.54212			0.885169	6.64942			0.737051	7.74262			0.780591	5.46728			0.943877	5.06943
0.902912	6.71353	6.72156		0.798284	5.67741			0.826665	5.50648			0.889952	6.78125			0.741034	7.77629			0.784809	5.23924			0.948977	5.69655
0.907769	6.87493			0.802578	5.73043	5.70812		0.831112	5.74901			0.894739	7.05514			0.745021	8.03292			0.789031	5.61375			0.954082	5.57845	5.52629
0.912622	7.61615			0.806869	6.19222			0.835555	5.8088			0.899522	6.3089			0.749003	7.9452			0.793249	5.60794			0.959183	5.19891
0.917475	7.91228			0.811159	6.49152			0.839998	5.86844			0.904306	5.97198	7.19158		0.752986	8.03323	7.28061		0.797467	5.43412			0.964283	5.4912
0.922332	6.84657			0.815453	6.03365			0.844445	5.82733			0.909093	6.47264			0.756973	8.75263			0.801689	5.23456	5.67989		0.969388	5.70849
0.927185	7.44109			0.819744	6.17134			0.848888	5.76222			0.913876	6.87208			0.760955	8.57907			0.805907	4.8069			0.974489	5.38155
0.932038	7.19067			0.824035	6.1349			0.853331	5.97438	5.94848		0.91866	6.93097			0.764938	8.3258			0.810125	4.72821			0.979589	5.3474
0.936895	7.03779			0.828329	6.08545			0.857778	6.28028			0.923447	6.12082			0.768925	8.80774			0.814347	5.43438			0.984694	4.64716
0.941748	7.6642			0.832619	6.33106			0.862221	6.18647			0.92823	5.86028			0.772908	9.23016			0.818565	5.16115			0.989795	5.0743
0.946601	6.87157			0.83691	5.00887			0.866664	6.66752			0.933014	5.52534			0.77689	8.96876			0.822783	5.4087			0.994895	4.586
0.951458	6.52156	7.19768		0.841204	4.38083			0.871111	6.32842			0.937801	5.50985			0.780877	8.342			0.827005	4.76881			1	4.41285	5.09421
0.956311	6.3586			0.845495	5.25245			0.875554	6.2695			0.942584	5.50301			0.78486	8.02847			0.831223	4.73466
0.961164	5.89426			0.849785	5.43178			0.879998	6.41624			0.947368	5.20758			0.788843	8.25053			0.835441	4.7294
0.966021	5.59101			0.85408	5.88143	5.78296		0.884444	6.85285			0.952155	5.12169	5.91243		0.792829	7.9861			0.839663	3.94226
0.970874	5.40157			0.85837	5.64526			0.888888	6.81947			0.956938	5.21457			0.796812	8.04408			0.843881	4.55362
0.975727	4.91051			0.862661	5.92215			0.893331	6.15563			0.961722	5.00933			0.800795	7.79036	8.42547		0.848099	3.96919
0.980584	5.25656			0.866955	5.73746			0.897778	6.70536			0.966509	4.68267			0.804781	7.52249			0.852321	4.06166	4.69158
0.985437	4.87133			0.871246	5.42638			0.902221	6.59067	6.47931		0.971292	4.53076			0.808764	8.16009			0.856539	3.83419
0.99029	4.00533			0.875536	5.42155			0.906664	6.12914			0.976075	4.05745			0.812747	7.24982			0.860757	3.80763
0.995147	3.70716			0.879831	5.06709			0.911111	6.10277			0.980863	4.20089			0.816733	6.86287			0.864979	3.29774
1	3.0151	4.90114		0.884121	5.04151			0.915554	6.02212			0.985646	3.9482			0.820716	7.7735			0.869197	3.56834
				0.888412	6.14831			0.919997	6.19748			0.990429	3.429			0.824699	7.6444			0.873416	3.47176
				0.892706	5.25309			0.924444	6.07525			0.995217	3.18714			0.828685	7.02944			0.877637	3.43332
				0.896997	5.03231			0.928887	6.57685			1	3.4306	4.16906		0.832668	7.10058			0.881855	3.03993
				0.901287	5.68748	5.48932		0.93333	7.21889							0.836651	6.6445			0.886074	3.41668
				0.905581	5.43235			0.937777	6.34622							0.840637	6.49883			0.890295	3.53569
				0.909872	5.1263			0.94222	7.03618							0.84462	7.35719			0.894514	3.20778
				0.914166	4.89401			0.946667	6.83236							0.848606	7.51187			0.898735	2.83882
				0.918457	5.64147			0.95111	7.05977	6.50882						0.852589	6.89392	7.24996		0.902953	2.74888	3.35006
				0.922747	4.75955			0.955554	6.83696							0.856572	6.37094			0.907172	2.471
				0.927042	4.56282			0.96	6.84063							0.860558	6.92276			0.911393	2.87028
				0.931332	4.76307			0.964444	6.33658							0.864541	6.00286			0.915612	3.01118
				0.935623	3.85189			0.968887	6.83963							0.868524	6.11497			0.91983	2.7103
				0.939917	3.6912			0.973334	6.20733							0.87251	6.38891			0.924051	2.62052
				0.944208	3.92152			0.977777	6.1611							0.876493	6.24729			0.92827	3.02341
				0.948498	4.11643			0.98222	6.92054							0.880476	5.38322			0.932488	2.97349
				0.952793	4.11915	4.57331		0.986667	6.03848							0.884462	5.08359			0.93671	2.98996
				0.957083	4.13996			0.99111	6.08874							0.888445	4.603			0.940928	2.93369
				0.961374	4.02758			0.995553	5.08822							0.892428	5.02123			0.945146	2.94581
				0.965668	4.04339			1	5.77588	6.28492						0.896414	4.89144			0.949368	3.07391
				0.969959	4.07348											0.900397	4.34125	5.61429		0.953586	2.40367	2.8356
				0.974249	4.37744											0.90438	4.33748			0.957804	2.39591
				0.978543	4.04498											0.908366	4.11537			0.962026	2.85718
				0.982834	3.71895											0.912349	3.95552			0.966244	2.43018
				0.987125	3.47862											0.916332	4.08372			0.970462	2.23704
				0.991419	3.42233											0.920318	3.81738			0.974684	2.16654
				0.995709	4.63535											0.924301	3.5714			0.978902	2.34756
				1	3.49836	3.95095										0.928284	3.4986			0.98312	2.17422
																0.932271	2.898			0.987342	2.12992
																0.936253	3.02103			0.99156	2.18973
																0.940236	3.18721			0.995778	1.8546
																0.944223	3.2822			1	2.10651	2.26267
																0.948206	3.19594
																0.952192	3.42432	3.56832
																0.956175	3.34963
																0.960158	3.12396
																0.964144	2.97554
																0.968127	3.26624
																0.97211	3.59172
																0.976096	3.93314
																0.980079	3.52137
																0.984062	4.18301
																0.988048	4.19148
																0.992031	3.66062
																0.996014	3.88724
																1	3.75459	3.61988
