# Supplementary material for: Crumbs organizes the transport machinery by regulating apical levels of PI(4,5)P2 in Drosophila
Source: eLife. 2019 Nov 7;8:e50900. doi: 10.7554/eLife.50900 (PMC6881148; doi:10.7554/eLife.50900)
Supplement: Figure 5—figure supplement 1—source data 1. [file elife-50900-fig5-figsupp1-data1.xlsx]

## Sheet: Control
Image 1
Volume (¬µm^3)	Surface (¬µm^2)	Nb of obj. voxels	Nb of surf. voxels	IntDen	Mean	StdDev	Median	Min	Max	X	Y	Z	Mean dist. to surf. (¬µm)	SD dist. to surf. (¬µm)	Median dist. to surf. (¬µm)	XM	YM	ZM	BX	BY	BZ	B-width	B-height	B-depth
158.492	558.169	12585	9555	12585	1	0	1	1	1	470.438	426.756	20.55	4.699	1.609	4.873	470.438	426.756	20.55	421	386	13	89	87	15
113.218	377.903	8990	4883	8990	1	0	1	1	1	321.786	306.172	20.772	4.263	1.269	4.251	321.786	306.172	20.772	277	281	16	90	46	11
148.757	516.693	11812	7603	11812	1	0	1	1	1	473.454	288.458	24.71	4.888	1.783	4.933	473.454	288.458	24.71	412	252	17	111	59	17
150.546	496.417	11954	6679	11954	1	0	1	1	1	313.505	393.933	25.344	4.961	1.625	5.111	313.505	393.933	25.344	258	378	19	113	37	16
Image 2
Volume (¬µm^3)	Surface (¬µm^2)	Nb of obj. voxels	Nb of surf. voxels	IntDen	Mean	StdDev	Median	Min	Max	X	Y	Z	Mean dist. to surf. (¬µm)	SD dist. to surf. (¬µm)	Median dist. to surf. (¬µm)	XM	YM	ZM	BX	BY	BZ	B-width	B-height	B-depth
267.302	567.893	21225	9135	21225	1	0	1	1	1	366.517	351.438	18.849	4.801	1.515	4.781	366.517	351.438	18.849	312	324	10	105	52	16
152.372	356.195	12099	5350	12099	1	0	1	1	1	518.687	449.922	20.541	4.062	1.427	3.977	518.687	449.922	20.541	471	432	15	98	45	12
161.981	392.975	12862	6334	12862	1	0	1	1	1	284.583	438.326	21.219	3.819	1.118	3.845	284.583	438.326	21.219	247	419	15	82	46	13
206.751	494.331	16417	8590	16417	1	0	1	1	1	545.112	358.959	22.093	4.594	1.838	4.52	545.112	358.959	22.093	485	326	18	126	56	12
Image 3
Volume (¬µm^3)	Surface (¬µm^2)	Nb of obj. voxels	Nb of surf. voxels	IntDen	Mean	StdDev	Median	Min	Max	X	Y	Z	Mean dist. to surf. (¬µm)	SD dist. to surf. (¬µm)	Median dist. to surf. (¬µm)	XM	YM	ZM	BX	BY	BZ	B-width	B-height	B-depth
130.937	475.398	10397	6876	10397	1	0	1	1	1	603.352	301.611	21.604	5.03	1.844	4.966	603.352	301.611	21.604	544	283	16	125	49	13
127.386	415.846	10115	7306	10115	1	0	1	1	1	314.865	255.438	30.808	4.964	2.088	4.747	314.865	255.438	30.808	248	227	26	141	51	11
165.318	532.526	13127	6848	13127	1	0	1	1	1	402.566	355.285	32.096	5.302	1.87	5.31	402.566	355.285	32.096	341	340	26	126	50	15
199.346	443.402	15829	8104	15829	1	0	1	1	1	270.353	368.772	46.937	4.713	1.881	4.645	270.353	368.772	46.937	208	350	43	124	44	10
Image 11
Volume (¬µm^3)	Surface (¬µm^2)	Nb of obj. voxels	Nb of surf. voxels	IntDen	Mean	StdDev	Median	Min	Max	X	Y	Z	Mean dist. to surf. (¬µm)	SD dist. to surf. (¬µm)	Median dist. to surf. (¬µm)	XM	YM	ZM	BX	BY	BZ	B-width	B-height	B-depth
177.679	510.3	16620	10538	16620	1	0	1	1	1	300.009	355.406	21.48	4.93	1.87	4.873	300.009	355.406	21.48	250	329	16	107	79	16
183.003	632.338	17118	10691	17118	1	0	1	1	1	575.905	369.726	25.995	5.751	2.176	5.759	575.905	369.726	25.995	506	347	17	144	56	21
137.065	432.016	12821	6378	12821	1	0	1	1	1	349.251	501.338	26.66	4.85	1.689	4.998	349.251	501.338	26.66	298	486	18	114	29	20
102.641	355.575	9601	5360	9601	1	0	1	1	1	501.335	494.182	32.246	4.275	1.467	4.508	501.335	494.182	32.246	459	474	23	93	34	18
112.637	377.053	10536	5457	10536	1	0	1	1	1	644.477	508.769	33.43	4.432	1.487	4.5	644.477	508.769	33.43	596	479	25	102	46	19
Image 12
Volume (¬µm^3)	Surface (¬µm^2)	Nb of obj. voxels	Nb of surf. voxels	IntDen	Mean	StdDev	Median	Min	Max	X	Y	Z	Mean dist. to surf. (¬µm)	SD dist. to surf. (¬µm)	Median dist. to surf. (¬µm)	XM	YM	ZM	BX	BY	BZ	B-width	B-height	B-depth
68.175	237.875	6377	3464	6377	1	0	1	1	1	606.156	357.325	29.33	3.602	1.249	3.708	606.156	357.325	29.33	566	348	21	73	23	16
85.044	287.923	7955	4081	7955	1	0	1	1	1	641.988	431.423	28.57	3.967	1.406	4.061	641.988	431.423	28.57	590	420	21	100	22	15
85.098	308.341	7960	4114	7960	1	0	1	1	1	296.349	490.406	28.409	3.865	1.245	4.117	296.349	490.406	28.409	255	468	21	84	42	16
77.037	251.756	7206	4393	7206	1	0	1	1	1	410.65	389.535	31.046	3.741	1.644	3.537	410.65	389.535	31.046	367	371	26	105	37	11
Image 13
Volume (¬µm^3)	Surface (¬µm^2)	Nb of obj. voxels	Nb of surf. voxels	IntDen	Mean	StdDev	Median	Min	Max	X	Y	Z	Mean dist. to surf. (¬µm)	SD dist. to surf. (¬µm)	Median dist. to surf. (¬µm)	XM	YM	ZM	BX	BY	BZ	B-width	B-height	B-depth
70.794	229.266	6622	4308	6622	1	0	1	1	1	261.887	290.474	16.836	3.059	0.985	3.088	261.887	290.474	16.836	226	269	12	75	41	10
116.154	343.376	10865	5201	10865	1	0	1	1	1	156.76	316.812	19.278	4.225	1.593	4.327	156.76	316.812	19.278	90	292	12	107	44	17
56.361	187.881	5272	2687	5272	1	0	1	1	1	328.492	364.291	23.325	2.941	1.116	3.056	328.492	364.291	23.325	300	355	17	67	24	14
64.892	223.667	6070	3464	6070	1	0	1	1	1	453.368	343.365	28.04	3.406	1.137	3.476	453.368	343.365	28.04	418	320	21	76	37	14
76.203	273.94	7128	4012	7128	1	0	1	1	1	565.722	331.628	34.49	3.628	1.208	3.859	565.722	331.628	34.49	526	314	27	78	34	16
Image 1 (2)
Volume (¬µm^3)	Surface (¬µm^2)	Nb of obj. voxels	Nb of surf. voxels	IntDen	Mean	StdDev	Median	Min	Max	X	Y	Z	Mean dist. to surf. (¬µm)	SD dist. to surf. (¬µm)	Median dist. to surf. (¬µm)	XM	YM	ZM	BX	BY	BZ	B-width	B-height	B-depth
145.056	573.567	15219	12643	15219	1	0	1	1	1	695.324	308.386	17.097	5.176	1.921	5.006	695.324	308.386	17.097	615	263	12	152	86	13
194.208	634.62	20376	14553	20376	1	0	1	1	1	507.474	388.095	23.154	4.956	1.853	4.819	507.474	388.095	23.154	421	320	17	134	109	12
205.455	566.93	21556	10154	21556	1	0	1	1	1	350.273	520.869	28.391	4.998	1.558	4.973	350.273	520.869	28.391	283	501	22	134	49	17
141.272	605.261	14822	9771	14822	1	0	1	1	1	578.504	481.768	32.576	5.799	2.213	5.475	578.504	481.768	32.576	516	454	26	156	89	14
Image 2 (2)																										D52
Volume (¬µm^3)	Surface (¬µm^2)	Nb of obj. voxels	Nb of surf. voxels	IntDen	Mean	StdDev	Median	Min	Max	X	Y	Z	Mean dist. to surf. (¬µm)	SD dist. to surf. (¬µm)	Median dist. to surf. (¬µm)	XM	YM	ZM	BX	BY	BZ	B-width	B-height	B-depth
84.075	350.08	8821	5697	8821	1	0	1	1	1	363.413	461.41	27.089	4.4	1.359	4.434	363.413	461.41	27.089	308	422	21	107	61	11
112.364	359.249	11789	6833	11789	1	0	1	1	1	651.373	540.523	31.395	4.15	1.502	4.006	651.373	540.523	31.395	593	519	23	123	43	14
77.174	319.376	8097	4966	8097	1	0	1	1	1	432.371	531.201	33.74	3.919	1.377	3.802	432.371	531.201	33.74	382	515	29	113	46	12

## Sheet: CrbKD
Image 7
Volume (¬µm^3)	Surface (¬µm^2)	Nb of obj. voxels	Nb of surf. voxels	IntDen	Mean	StdDev	Median	Min	Max	X	Y	Z	Mean dist. to surf. (¬µm)	SD dist. to surf. (¬µm)	Median dist. to surf. (¬µm)	XM	YM	ZM	BX	BY	BZ	B-width	B-height	B-depth
163.882	474.627	13013	6216	13013	1	0	1	1	1	282.637	366.937	29.364	3.483	1.1	3.536	282.637	366.937	29.364	243	331	25	79	65	9
208.842	445.721	16583	6892	16583	1	0	1	1	1	277.624	443.737	32.355	4.007	1.142	3.996	277.624	443.737	32.355	220	415	25	99	58	14
169.461	390.296	13456	6745	13456	1	0	1	1	1	171.834	365.515	29.631	4.535	1.711	4.5	171.834	365.515	29.631	118	312	26	107	95	8
Image 8
Volume (¬µm^3)	Surface (¬µm^2)	Nb of obj. voxels	Nb of surf. voxels	IntDen	Mean	StdDev	Median	Min	Max	X	Y	Z	Mean dist. to surf. (¬µm)	SD dist. to surf. (¬µm)	Median dist. to surf. (¬µm)	XM	YM	ZM	BX	BY	BZ	B-width	B-height	B-depth
130.975	308.538	10400	5107	10400	1	0	1	1	1	149.025	404.458	13.305	3.534	1.206	3.497	149.025	404.458	13.305	109	369	8	73	64	10
141.415	399.125	11229	6503	11229	1	0	1	1	1	304.554	399.736	16.393	4.101	1.527	4.115	304.554	399.736	16.393	254	365	11	110	67	10
104.125	308.66	8268	4749	8268	1	0	1	1	1	305.897	311.864	16.171	3.363	1.097	3.279	305.897	311.864	16.171	262	286	12	86	50	9
132.851	364.494	10549	5828	10549	1	0	1	1	1	116.705	272.203	25.546	3.563	1.219	3.529	116.705	272.203	25.546	72	243	20	87	64	11
Image 9
Volume (¬µm^3)	Surface (¬µm^2)	Nb of obj. voxels	Nb of surf. voxels	IntDen	Mean	StdDev	Median	Min	Max	X	Y	Z	Mean dist. to surf. (¬µm)	SD dist. to surf. (¬µm)	Median dist. to surf. (¬µm)	XM	YM	ZM	BX	BY	BZ	B-width	B-height	B-depth
265.841	617.813	21109	10040	21109	1	0	1	1	1	200.25	503.409	26.913	4.465	1.362	4.631	200.25	503.409	26.913	144	472	19	104	71	15
258.575	482.778	20532	10850	20532	1	0	1	1	1	459.862	452.391	27.883	4.432	1.479	4.298	459.862	452.391	27.883	412	419	21	112	73	11
308.736	646.862	24515	10060	24515	1	0	1	1	1	206.799	381.898	30.7	4.789	1.702	4.803	206.799	381.898	30.7	159	332	22	108	94	16
217.67	482.934	17284	7624	17284	1	0	1	1	1	439.306	398.882	37.206	4.032	1.369	3.934	439.306	398.882	37.206	389	364	32	106	66	12
Image 12
Volume (¬µm^3)	Surface (¬µm^2)	Nb of obj. voxels	Nb of surf. voxels	IntDen	Mean	StdDev	Median	Min	Max	X	Y	Z	Mean dist. to surf. (¬µm)	SD dist. to surf. (¬µm)	Median dist. to surf. (¬µm)	XM	YM	ZM	BX	BY	BZ	B-width	B-height	B-depth
148.468	420.788	11789	6356	11789	1	0	1	1	1	110.615	323.09	9.862	3.702	1.09	3.658	110.615	323.09	9.862	79	297	4	76	73	13
134.854	372.345	10708	5870	10708	1	0	1	1	1	256.998	310.767	15.587	3.535	1.114	3.429	256.998	310.767	15.587	219	285	11	78	61	10
125.396	353.358	9957	4671	9957	1	0	1	1	1	256.006	463.015	22.402	3.875	1.137	3.948	256.006	463.015	22.402	210	440	16	89	39	15
112.109	361.152	8902	5413	8902	1	0	1	1	1	494.169	301.224	25.086	3.882	1.401	3.808	494.169	301.224	25.086	445	277	20	88	58	14
127.726	417.945	10142	5729	10142	1	0	1	1	1	614.078	255.567	26.919	4.223	1.339	4.248	614.078	255.567	26.919	569	233	21	96	59	14
129.804	373.191	10307	5606	10307	1	0	1	1	1	124.718	466.101	34.542	3.585	1.222	3.485	124.718	466.101	34.542	94	435	27	73	53	14
Image 2
Volume (¬µm^3)	Surface (¬µm^2)	Nb of obj. voxels	Nb of surf. voxels	IntDen	Mean	StdDev	Median	Min	Max	X	Y	Z	Mean dist. to surf. (¬µm)	SD dist. to surf. (¬µm)	Median dist. to surf. (¬µm)	XM	YM	ZM	BX	BY	BZ	B-width	B-height	B-depth
199.413	461.302	18653	7750	18653	1	0	1	1	1	159.053	275.658	31.826	4.417	1.294	4.315	159.053	275.658	31.826	106	254	25	109	53	16
115.107	248.312	10767	4806	10767	1	0	1	1	1	357.56	270.302	45.481	3.351	1.098	3.146	357.56	270.302	45.481	312	253	42	89	34	11
193.288	372.914	18080	6813	18080	1	0	1	1	1	566.211	412.147	50.213	4.061	1.263	3.988	566.211	412.147	50.213	526	387	42	95	57	15
358.159	716.96	33502	12664	33502	1	0	1	1	1	191.234	447.891	51.31	5.216	1.93	5.184	191.234	447.891	51.31	135	410	44	137	79	18
Image 3
Volume (¬µm^3)	Surface (¬µm^2)	Nb of obj. voxels	Nb of surf. voxels	IntDen	Mean	StdDev	Median	Min	Max	X	Y	Z	Mean dist. to surf. (¬µm)	SD dist. to surf. (¬µm)	Median dist. to surf. (¬µm)	XM	YM	ZM	BX	BY	BZ	B-width	B-height	B-depth
237.601	710.294	22225	9899	22225	1	0	1	1	1	467.761	491.864	38.819	6.057	2.044	6.255	467.761	491.864	38.819	402	472	24	132	36	32
262.296	685.936	24535	11014	24535	1	0	1	1	1	101.4	484.538	39.708	5.056	1.821	4.894	101.4	484.538	39.708	54	452	32	114	65	21
254.866	536.226	23840	8902	23840	1	0	1	1	1	283.878	495.89	45.725	4.493	1.444	4.215	283.878	495.89	45.725	227	468	40	113	63	15
276.29	553.841	25844	10193	25844	1	0	1	1	1	610.483	497.534	57.861	4.461	1.309	4.344	610.483	497.534	57.861	554	450	51	107	82	15

## Sheet: DidumKD
Image 1
Volume (¬µm^3)	Surface (¬µm^2)	Nb of obj. voxels	Nb of surf. voxels	IntDen	Mean	StdDev	Median	Min	Max	X	Y	Z	Mean dist. to surf. (¬µm)	SD dist. to surf. (¬µm)	Median dist. to surf. (¬µm)	XM	YM	ZM	BX	BY	BZ	B-width	B-height	B-depth
207.205	610.677	16453	9484	16453	1	0	1	1	1	486.605	314.491	21.005	5.431	1.675	5.624	486.605	314.491	21.005	421	291	13	124	61	18
150.596	389.202	11958	6267	11958	1	0	1	1	1	287.775	322.526	22.702	4.411	1.638	4.308	287.775	322.526	22.702	234	307	18	113	33	11
185.833	502.357	14756	7771	14756	1	0	1	1	1	440.22	427.23	27.656	4.075	1.248	4.067	440.22	427.23	27.656	396	395	21	92	68	15
290.286	838.785	23050	14249	23050	1	0	1	1	1	123.038	482.029	31.927	5.237	1.382	4.989	123.038	482.029	31.927	67	439	22	108	79	19
122.94	401.694	9762	6756	9762	1	0	1	1	1	596.034	413.513	29.431	4.092	1.535	4.169	596.034	413.513	29.431	548	392	23	100	46	14
Image 2
Volume (¬µm^3)	Surface (¬µm^2)	Nb of obj. voxels	Nb of surf. voxels	IntDen	Mean	StdDev	Median	Min	Max	X	Y	Z	Mean dist. to surf. (¬µm)	SD dist. to surf. (¬µm)	Median dist. to surf. (¬µm)	XM	YM	ZM	BX	BY	BZ	B-width	B-height	B-depth
155.142	608.673	12319	8286	12319	1	0	1	1	1	137.39	342.759	20.853	4.951	1.648	5.084	137.39	342.759	20.853	82	300	14	101	92	15
308.068	1291.76	24462	18157	24462	1	0	1	1	1	466.117	528.342	25.487	6.418	1.981	6.122	466.117	528.342	25.487	422	441	17	89	137	19
198.112	674.411	15731	9275	15731	1	0	1	1	1	239.506	470.332	27.902	4.928	1.738	5.088	239.506	470.332	27.902	192	426	19	94	87	21
235.717	885.133	18717	11961	18717	1	0	1	1	1	517.068	274.733	28.976	6.125	1.483	6.363	517.068	274.733	28.976	466	222	21	98	115	20
207.066	674.833	16442	9426	16442	1	0	1	1	1	353.561	259.298	43.489	5.01	1.936	5.136	353.561	259.298	43.489	298	215	34	113	88	19
Image 3
Volume (¬µm^3)	Surface (¬µm^2)	Nb of obj. voxels	Nb of surf. voxels	IntDen	Mean	StdDev	Median	Min	Max	X	Y	Z	Mean dist. to surf. (¬µm)	SD dist. to surf. (¬µm)	Median dist. to surf. (¬µm)	XM	YM	ZM	BX	BY	BZ	B-width	B-height	B-depth
121.945	315.694	9683	4674	9683	1	0	1	1	1	430.521	445.937	17.915	3.246	0.904	3.238	430.521	445.937	17.915	392	419	12	75	52	12
108.558	313.377	8620	4898	8620	1	0	1	1	1	453.411	352.826	21.319	3.381	1.022	3.481	453.411	352.826	21.319	421	325	16	66	72	11
116.895	289.568	9282	4591	9282	1	0	1	1	1	222.269	352.884	25.639	3.289	1.108	3.351	222.269	352.884	25.639	182	324	22	78	50	9
171.665	402.272	13631	7296	13631	1	0	1	1	1	625.56	462.427	26.141	3.917	1.338	3.982	625.56	462.427	26.141	580	417	22	83	84	11
137.536	384.275	10921	5720	10921	1	0	1	1	1	284.097	476.888	28.839	3.567	1.154	3.619	284.097	476.888	28.839	241	444	23	92	60	12
Image 4
Volume (¬µm^3)	Surface (¬µm^2)	Nb of obj. voxels	Nb of surf. voxels	IntDen	Mean	StdDev	Median	Min	Max	X	Y	Z	Mean dist. to surf. (¬µm)	SD dist. to surf. (¬µm)	Median dist. to surf. (¬µm)	XM	YM	ZM	BX	BY	BZ	B-width	B-height	B-depth
111.618	286.165	8863	3883	8863	1	0	1	1	1	416.072	340.439	14.834	3.318	1.189	3.367	416.072	340.439	14.834	380	325	8	74	31	15
91.254	252.094	7246	3399	7246	1	0	1	1	1	598.647	300.144	16.67	2.942	0.873	2.895	598.647	300.144	16.67	565	280	11	60	40	12
72.162	264.098	5730	3735	5730	1	0	1	1	1	710.919	400.354	15.674	3.199	1.036	3.189	710.919	400.354	15.674	670	380	11	70	36	11
70.097	265.979	5566	3439	5566	1	0	1	1	1	210.982	277.552	23.46	3.503	1.049	3.496	210.982	277.552	23.46	171	256	18	73	37	10
61.231	193.227	4862	2340	4862	1	0	1	1	1	212.446	331.302	24.151	3.164	1.017	3.361	212.446	331.302	24.151	181	323	19	72	22	11
Image 5
Volume (¬µm^3)	Surface (¬µm^2)	Nb of obj. voxels	Nb of surf. voxels	IntDen	Mean	StdDev	Median	Min	Max	X	Y	Z	Mean dist. to surf. (¬µm)	SD dist. to surf. (¬µm)	Median dist. to surf. (¬µm)	XM	YM	ZM	BX	BY	BZ	B-width	B-height	B-depth
84.92	343.314	6743	5933	6743	1	0	1	1	1	469.471	429.751	13.264	3.871	1.29	3.947	469.471	429.751	13.264	426	400	10	91	59	7
135.169	384.319	10733	7256	10733	1	0	1	1	1	316.962	437.75	14.922	3.849	1.489	3.774	316.962	437.75	14.922	266	410	10	107	52	10
126.995	307.484	10084	5843	10084	1	0	1	1	1	403.541	340.938	13.834	3.548	1.245	3.492	403.541	340.938	13.834	369	319	11	90	60	8
75.311	250.064	5980	3201	5980	1	0	1	1	1	600.973	443.958	23.421	3.62	1.29	3.722	600.973	443.958	23.421	560	428	19	80	41	11

## Sheet: KstKD
Image 6
Volume (¬µm^3)	Surface (¬µm^2)	Nb of obj. voxels	Nb of surf. voxels	IntDen	Mean	StdDev	Median	Min	Max	X	Y	Z	Mean dist. to surf. (¬µm)	SD dist. to surf. (¬µm)	Median dist. to surf. (¬µm)	XM	YM	ZM	BX	BY	BZ	B-width	B-height	B-depth
136.907	412.013	10871	6348	10871	1	0	1	1	1	314.689	387.384	54.28	4.447	1.6	4.567	314.689	387.384	54.28	271	348	46	92	56	17
115.472	295.928	9169	4221	9169	1	0	1	1	1	383.007	290.84	55.177	3.714	1.075	3.959	383.007	290.84	55.177	342	278	49	75	32	13
178.907	472.055	14206	7523	14206	1	0	1	1	1	505.262	295.784	55.864	4.292	1.292	4.429	505.262	295.784	55.864	465	277	49	86	55	14
111.769	277.205	8875	4280	8875	1	0	1	1	1	559.158	389.802	56.031	3.879	1.399	3.789	559.158	389.802	56.031	515	375	52	95	32	10
Image 7
Volume (¬µm^3)	Surface (¬µm^2)	Nb of obj. voxels	Nb of surf. voxels	IntDen	Mean	StdDev	Median	Min	Max	X	Y	Z	Mean dist. to surf. (¬µm)	SD dist. to surf. (¬µm)	Median dist. to surf. (¬µm)	XM	YM	ZM	BX	BY	BZ	B-width	B-height	B-depth
115.548	343.263	9175	5223	9175	1	0	1	1	1	208.445	377.956	34.162	3.721	1.404	3.433	208.445	377.956	34.162	151	360	28	109	41	12
86.179	279.428	6843	3825	6843	1	0	1	1	1	387.787	336.05	35.929	3.27	1.097	3.25	387.787	336.05	35.929	351	316	31	72	51	12
128.179	343.372	10178	5219	10178	1	0	1	1	1	326.856	424.465	37.285	3.457	1.164	3.314	326.856	424.465	37.285	278	406	32	95	41	11
77.036	285.053	6117	3781	6117	1	0	1	1	1	505.094	341.977	41.348	3.258	1.108	3.147	505.094	341.977	41.348	465	318	36	81	47	11
75.235	327.141	5974	4482	5974	1	0	1	1	1	520.103	426.333	38.732	4.226	1.603	3.78	520.103	426.333	38.732	462	399	36	112	53	8
Image 8
Volume (¬µm^3)	Surface (¬µm^2)	Nb of obj. voxels	Nb of surf. voxels	IntDen	Mean	StdDev	Median	Min	Max	X	Y	Z	Mean dist. to surf. (¬µm)	SD dist. to surf. (¬µm)	Median dist. to surf. (¬µm)	XM	YM	ZM	BX	BY	BZ	B-width	B-height	B-depth
93.886	269.48	7455	4278	7455	1	0	1	1	1	370.365	333.476	16.181	3.856	1.238	3.967	370.365	333.476	16.181	323	323	12	87	35	11
70.84	166.356	5625	2927	5625	1	0	1	1	1	260.011	333.822	15.883	2.808	0.89	2.665	260.011	333.822	15.883	220	323	13	82	32	7
81.796	228.238	6495	3185	6495	1	0	1	1	1	392.94	384.63	16.757	3.717	1.553	3.3	392.94	384.63	16.757	338	374	13	106	21	9
105.271	261.563	8359	4203	8359	1	0	1	1	1	506.321	336.442	17.946	3.622	1.294	3.297	506.321	336.442	17.946	462	324	14	101	35	9
82.816	189.784	6576	3208	6576	1	0	1	1	1	626.726	330.765	20.455	2.897	0.925	2.661	626.726	330.765	20.455	588	318	18	78	31	7
Image 9
Volume (¬µm^3)	Surface (¬µm^2)	Nb of obj. voxels	Nb of surf. voxels	IntDen	Mean	StdDev	Median	Min	Max	X	Y	Z	Mean dist. to surf. (¬µm)	SD dist. to surf. (¬µm)	Median dist. to surf. (¬µm)	XM	YM	ZM	BX	BY	BZ	B-width	B-height	B-depth
113.268	497.724	8994	6514	8994	1	0	1	1	1	242.938	484.712	21.425	4.606	1.871	4.644	242.938	484.712	21.425	181	452	14	132	47	17
115.85	417.035	9199	5737	9199	1	0	1	1	1	269.192	307.758	23.284	4.533	1.723	4.552	269.192	307.758	23.284	209	288	17	114	48	13
98.181	387.263	7796	5361	7796	1	0	1	1	1	477.599	470.064	22.14	4.03	1.129	3.799	477.599	470.064	22.14	417	439	19	93	56	10
121.303	454.455	9632	5952	9632	1	0	1	1	1	429.494	325.678	26.819	5.003	2.527	4.445	429.494	325.678	26.819	370	305	20	170	46	13
110.976	428.976	8812	5580	8812	1	0	1	1	1	607.752	290.176	27.552	3.954	1.203	3.811	607.752	290.176	27.552	558	264	21	89	69	13
Image 10
Volume (¬µm^3)	Surface (¬µm^2)	Nb of obj. voxels	Nb of surf. voxels	IntDen	Mean	StdDev	Median	Min	Max	X	Y	Z	Mean dist. to surf. (¬µm)	SD dist. to surf. (¬µm)	Median dist. to surf. (¬µm)	XM	YM	ZM	BX	BY	BZ	B-width	B-height	B-depth
113.268	497.724	8994	6514	8994	1	0	1	1	1	242.938	484.712	21.425	4.606	1.871	4.644	242.938	484.712	21.425	181	452	14	132	47	17
115.85	417.035	9199	5737	9199	1	0	1	1	1	269.192	307.758	23.284	4.533	1.723	4.552	269.192	307.758	23.284	209	288	17	114	48	13
98.181	387.263	7796	5361	7796	1	0	1	1	1	477.599	470.064	22.14	4.03	1.129	3.799	477.599	470.064	22.14	417	439	19	93	56	10
121.303	454.455	9632	5952	9632	1	0	1	1	1	429.494	325.678	26.819	5.003	2.527	4.445	429.494	325.678	26.819	370	305	20	170	46	13
110.976	428.976	8812	5580	8812	1	0	1	1	1	607.752	290.176	27.552	3.954	1.203	3.811	607.752	290.176	27.552	558	264	21	89	69	13
Image 11
Volume (¬µm^3)	Surface (¬µm^2)	Nb of obj. voxels	Nb of surf. voxels	IntDen	Mean	StdDev	Median	Min	Max	X	Y	Z	Mean dist. to surf. (¬µm)	SD dist. to surf. (¬µm)	Median dist. to surf. (¬µm)	XM	YM	ZM	BX	BY	BZ	B-width	B-height	B-depth
72.175	178.482	5731	2583	5731	1	0	1	1	1	454.017	445.543	18.154	2.8	0.86	2.666	454.017	445.543	18.154	429	432	12	57	29	12
136.869	354.837	10868	5418	10868	1	0	1	1	1	203.9	452.191	20.147	3.89	1.136	3.962	203.9	452.191	20.147	162	433	13	83	38	15
74.19	186.171	5891	2628	5891	1	0	1	1	1	318.377	387.745	19.599	3.142	0.874	3.195	318.377	387.745	19.599	287	377	14	71	28	12
83.862	219.321	6659	3076	6659	1	0	1	1	1	182.582	379.861	21.517	3.204	0.987	3.272	182.582	379.861	21.517	158	365	17	67	33	11
59.027	176.388	4687	2484	4687	1	0	1	1	1	504.391	371.705	21.42	2.988	1.02	3	504.391	371.705	21.42	465	360	17	76	26	9
