# Supplementary material for: Crumbs organizes the transport machinery by regulating apical levels of PI(4,5)P2 in Drosophila
Source: eLife. 2019 Nov 7;8:e50900. doi: 10.7554/eLife.50900 (PMC6881148; doi:10.7554/eLife.50900)
Supplement: Figure 5—figure supplement 1—source data 2. [file elife-50900-fig5-figsupp1-data2.xlsx]

## Sheet: All Glands
Salivary gland length (mm) measured in live glands expressing PLCdelta-PH-EGFP
	Controls	CrbRNAi	PtenRNAi	CrbRNAi+PtenRNAi	Pi3KRNAi	CrbRNAi+Pi3KRNAi
	502.944	309.082	299.019	316.224	169.733	240.806
	354.062	293.525	326.369	371.074	236.404	272.187
	313.249	361.562	262.328	317.254	289.607	202.284
	354.615	330.102	348.772	279.354	241.915	235.902
	360.538	342.885	314.354	297.409	183.949	226.16
	317.732	318.156	324.195	389.66	194.624	242.835
	325.581	386.381	444.34	484.312	253.929	276.732
	391.284	297.899	327.456	361.371	275.144	261.832
	409.269	443.143	509.953	415.785	239.911	319.555
	584.085	325.8	354.159	304.781	244.386	201.627
	286.833	425.369	445.013	302.718	205.454	242.164
	337.99	281.862	470.928	434.073	204.23	281.536
	530.648	345.62	539.106	314.6	272.574	272.772
	605.129	515.951	384.63	529.388	201.69	285.766
	325.286	257.138	368.419	270.209	173.088	192.115
	312.724	299.849	411.211	378.367	232.378	187.539
	541.707	336.121		270.208	181.108	191.555
	395.966	366.834		350.577	209.982	227.181
		257.363		324.853	210.001	203.35
		343.517			187.945	311.654
					260.328	174.687
					321.301	311.006
					205.505
					262.886
					202.275
					202.459
					196.87
					237.188
					231.821
