# Supplementary material for: Crumbs organizes the transport machinery by regulating apical levels of PI(4,5)P2 in Drosophila
Source: eLife. 2019 Nov 7;8:e50900. doi: 10.7554/eLife.50900 (PMC6881148; doi:10.7554/eLife.50900)
Supplement: Figure 5—figure supplement 1—source data 3. [file elife-50900-fig5-figsupp1-data3.xlsx]

## Sheet: Image9
X0	Y0	Y1	Y2	Y3	Y4	Y5	Y6	Y7	Y8	Y9	Y10	Y11	Y12	Y13	Y14	Y15	Y16	Y17	Y18	Y19	Y20	Y21	Y22	Y23	Y24	Y25	Y26	Y27	Y28	Y29	Y30	Y31	Y32		Ap-basal	Avg int
0	13.7778	19.556	25.5	23	23.389	11.222	10.222	16.5	14.8889	19.611	9.889	8.6111	10.7778	34.2222	32.0556	40.4444	30.7222	10.1111	9.667	8.444	8.0556	9	12.0556	11.4444	14.2222	16.1111	36.8889	19.5	23.6667	16.1111	16.4444	20.9444	28.2222		0	18.3417
0.1191	14.1111	22.333	30.444	30.833	23.667	11.444	11.944	22.5	21.3333	23.278	12.5	9.9444	11.6667	36.1667	29.1111	43.5	33.7778	11.9444	11.944	11.556	8.7222	9.6111	14.3889	14.7222	18.1111	19.5	42.0556	20.2222	25.8889	17.7778	19.6667	24.9444	26.7778		0.00595033	20.7996
0.2383	13.2222	29	31.111	32.556	36.056	12.778	15.444	24.9444	22.2222	29	16.611	12.5	11.1111	38.5	33.2778	44.0556	41.5	14.2222	14	15.444	12.2778	11.5	14.6667	15.0556	19.5556	22	44.3333	22.1667	27.5	23.1111	22	30.1667	30.7222		0.0119057	23.7155
0.3574	15.6667	37	44.389	46.889	41.722	18.222	17.222	32.8333	28.6111	39.611	21.944	15.6667	15	36.1667	36.3889	40.6667	44.5556	17.5556	25.167	23.444	17.7222	17	18.3333	17.5	23.3333	28.8889	47.8333	26.8889	33.2778	24.1111	28.1111	30.6667	35.8889		0.017856	28.7357
0.4766	15.8889	41.889	45	51.222	53.722	23.556	22	36.3889	36.8333	51.5	28.889	19.3889	18.9444	33.9444	36.2222	42.9444	51.3333	23.1111	35.056	36.722	28.1111	20.1111	24.6667	20.0556	26.8333	30.1667	53.9444	30	40.8889	30.4444	30	36.6667	36.8333		0.0238113	33.7357
0.5957	17.0556	53.444	55	63.444	69.222	31.444	25.278	40.8333	44.2778	64.944	47.222	26.9444	21.7778	33.5	41.1111	45.9444	56.9444	32.7222	51.389	54	41.2778	26.6111	26.7222	25.3333	35.6667	34.6667	54.6111	33.9444	42.1111	31.8889	33.6111	36.2222	42.2778		0.0297616	40.6498
0.7148	20.4444	59.222	72.333	73.722	85.611	44.333	30.5	44.6111	53	76.889	62.833	39.5556	27.3333	31.2778	41.5556	42.4444	59.8333	46.5556	73.5	74.167	57.6111	28.6667	33.8889	27.6111	38.7778	40.2778	59.8333	41.9444	48.7222	40.2222	38.3889	46.4444	43.2222		0.035712	48.6464
0.834	20.5	66.056	79.444	80.722	99.944	58.667	39.167	51.2222	62.1667	92.5	78	53.2222	35	30.5	46.2778	46.3333	60.5	58.7222	83.222	90.667	70	36.3889	39.1111	30.0556	41.1111	45.2222	64.2222	44	52.0556	45.6111	42.0556	52.6111	44.2778		0.0416673	55.7441
0.9531	27.2778	74.389	90.111	89.889	116.111	72.833	45.5	67.1667	74.6667	93.722	90.167	66.0556	40.1111	34	52.2222	50.7222	71.8333	70.8333	97.5	99.556	84.7778	44.5	39.8333	35.0556	44.5	51.2778	63.8889	48.7778	58.7778	51.6667	53.5	55.8333	49.9444		0.0476176	63.8485
1.0723	32.2778	86.222	100.056	105.167	125.833	86	50.5	69.7778	82.0556	101.889	105.5	81.2222	53.7778	39	63.8889	57.8333	66.1111	76.6667	103.167	102.833	87.1111	48.5556	47.6667	39.5556	47.8333	50.2222	69	55.0556	63.1667	61.7222	55.2222	59.9444	54.0556		0.0535729	70.5724
1.1914	33.5556	91.944	110.167	110.167	138.222	106.944	59.389	76.9444	86.4444	98.611	114.167	93	62.8889	45.0556	69.1111	64.2778	72.5	81.8333	104.944	105.389	95.1667	56.0556	55.2778	43.6667	50.6667	56.6667	68.5	59.9444	67.0556	62.7778	61.7778	60.5556	53.7778		0.0595233	76.2862
1.3106	41.9444	101.222	108.5	122.389	133.222	116.944	68.333	83.6667	86.1111	95.722	115.944	93.4444	75.0556	56.3889	77.4444	72.2222	71.2222	85.2778	89.611	91.222	87.1111	57.6667	59	45.2222	56.5556	54.1111	64.8889	61.2222	72.6667	65.3333	62	63.9444	52.2222		0.0654786	78.4191
1.4297	49.1111	103	110	125.889	128.333	127.5	81.722	88.8333	85.7222	83.833	108.278	92.0556	77.2222	64.4444	83.2778	83.7778	69.7778	85.3889	80.556	79.389	72.1667	63.5556	60.0556	49.9444	58.3333	57.5556	60.7778	64.0556	78.7778	75.1667	71.8889	68.5556	49		0.0714289	79.9377
1.5488	55.9444	104.833	105.444	127.111	115.778	132.5	89.667	91.6667	90	63.5	99	89.3333	78.7222	73.6111	89.3889	88	68.5556	77.7778	64.222	55	64.8889	65.3333	64.2222	49.1667	57.5	61.4444	62.6667	70.1111	84.3889	80.0556	71.8889	67.3333	50.0556		0.0773793	79.064
1.668	59.6667	102.222	100.611	120.444	95.389	126.944	97.056	93.6111	74.4444	51.444	79.5	72.3889	78.3333	77.5	92.5	92.3333	64.3333	66.5556	53.722	47.389	49.6667	71	66.8333	47.2222	58.8333	57.7778	55.4444	72.3889	84.1667	79.3333	72.0556	62.6111	45.8889		0.0833346	74.8367
1.7871	65.1111	96.944	87.833	110.111	87.222	113.278	103.778	90.6111	70.3889	42.778	59.333	59.1111	70.2222	89.1111	87	92.0556	59	56.2778	41.667	37.611	44.3333	64.9444	60.8333	50.6667	54.7778	60.2778	49.0556	67.6111	81.8333	72.9444	65.8889	60.7222	40.8889		0.0892849	69.5219
1.9063	69	82.333	78.889	96.722	68.833	99.444	97.333	80.8333	60.2778	35.556	50.333	55.0556	71.5556	90.3333	84.6111	78	49.3889	49.7778	35.833	30.333	38.7778	61.9444	60.8333	51.4444	48.2222	54.7222	43.2222	64.1111	73.2222	72.4444	61.8889	54.1667	35.5556		0.0952402	63.1818
2.0254	73.4444	70.778	59.056	77.944	59.722	80.944	92	75.7778	55.5556	22.5	37.056	46.8333	66.5556	93.7778	67.6111	67.2222	41.5556	36.3889	30.889	26	28.3889	55.7778	57.3333	49.8333	48.0556	53.5	40.8333	64.6111	68.0556	65.6111	54.3889	46.7222	27.2222		0.101191	55.8165
2.1445	69.5556	58.556	44.389	60	50.944	70.444	92.667	64.6111	42.3333	18.944	28.667	41	59.9444	92.2778	51.6111	43.6667	36	32.5556	25.833	21.611	24.5556	52.3889	51.1111	49.0556	45.7778	46.9444	35.4444	53.3889	61.0556	60.2778	50.6667	42.1667	24.2222		0.107141	48.5656
2.2637	62.2222	51	37.667	48.833	37.167	54.944	85.889	54.7778	37.6111	16.056	24.444	30.2778	58.7778	94.7222	40.5	32.3333	29.4444	24.8333	19.722	17.056	20.8889	38.8889	45.6667	41.1111	41.3333	47.8889	34.8333	53.3333	54.7222	57.3333	44.3333	39.1667	16.7222		0.113096	42.2576
2.3828	61.1667	42.556	29.889	39.556	31.722	49.444	75.778	41.9444	34.1111	12.889	20	28.8889	51.5556	89.1667	27.1111	25.8889	25.3889	21.3333	19.722	15.333	19.1111	33.4444	36.5556	39.6667	37.1667	38.8333	30.3333	44.1111	43.9444	48.7222	38.1667	30.8889	16.8333		0.119047	36.4007
2.502	57.7222	36.111	23.667	34.444	26.5	39.333	71.444	37.3889	29.6667	10.611	16.444	24.3333	46.1667	69.6111	20.5556	19	20.6111	20.2778	16	13.667	14.7222	31.5	30.9444	35.9444	34.1111	35.5	23.2222	42.8333	38.3333	42.7778	34.7778	23.4444	14.7778		0.125002	31.4074
2.6211	56.8889	29.056	20.056	27.222	18.889	37	58.5	26.8889	24.2778	10.611	15.611	17	41.5556	57.3889	16.1111	16.3889	18.9444	17.7222	13.833	11.056	14.9444	27.8889	29.3333	34.2778	28	36.7222	21.8889	34	28.1111	38.2222	28.1667	19.5	10.7778		0.130952	26.8738
2.7402	49.7778	26.889	17.833	24.611	18.222	32	54.722	24.1667	20.7222	9.556	14.111	15.4444	37.3889	44.6667	12.2222	15.2778	16.3333	15.8333	12.667	10.556	11.1111	22.1667	24.5556	31.2222	25.2778	31.8889	15.6667	34.4444	22.3333	35.8889	26.6111	16.9444	9.6667		0.136903	23.6599
2.8594	47.2222	25.278	15.833	21.667	13.944	24.833	50.5	17.7222	18.1667	7.833	11.222	14.5556	32.1667	30.2222	11.2222	10.6667	12.7222	14.2778	10.333	8.944	9.7778	21.0556	22.6111	27	25.7222	29.8889	14.8889	26.0556	16.5	23.5556	21.6111	12.5556	8.2778		0.142858	19.9646
2.9785	39.8333	22.111	12.167	20.222	10.944	22	42.833	17.0556	16.2222	7.056	9.889	13.0556	27.0556	27.3889	9.7778	8.5556	11.6667	12.3333	11.111	9.611	9.2222	16.3333	17.9444	28.2778	24.7222	24.5556	9.1667	21.2222	12.9444	18.3889	17.8889	11.8889	8.5556		0.148808	17.3333
3.0977	39.6111	19.667	11.222	16.056	9.5	20.222	42.222	14.0556	15.5556	7.556	11.389	10.8889	23.1667	21.6111	8.3889	7.9444	8.8333	13.4444	8.778	8.722	8.8889	14.7222	18.3889	23.4444	25.9444	26.4444	8.5556	16.2222	11.2778	14.8889	13.6111	10.3889	8		0.154764	15.7458
3.2168	31.6667	17.944	10.611	15.778	8.389	15.556	36	12.1111	11.7222	6.167	9.111	9.4444	21.3333	19.3333	6.7222	6.5556	10.9444	10.5556	9.167	7.333	7.7222	16.5	17.0556	21.6667	21.3333	23.9444	5.6667	14.7778	11.2222	10.2778	12.0556	8.6667	6.5556		0.160714	13.7542
3.336	36.7222	16.111	10.556	13.833	7.056	13.722	30.833	12.3889	10.3333	5.611	9.278	9.0556	20.3889	17.3889	6.9444	6.8333	9.6111	9.1111	8.222	8.611	6.4444	10.7222	14.3889	23.6111	22.7778	23.7778	5.8333	13.0556	9.5556	8.8333	11.5556	8.7778	5.8333		0.166669	12.963
3.4551	35.6667	15.833	8.667	12.778	6.389	12.611	28.944	12.3889	10.5	6.278	7.278	9.8333	17.8333	16.1667	7.2778	4.8889	7.7778	9.2778	8.556	5.889	6	10.3889	10.2222	21.6111	19.4444	21.1111	4.8889	10.8889	9.6667	6.8333	10.0556	7.2778	6.9444		0.172619	11.8233
3.5742	30.9444	13.556	7.611	11.167	4.556	13	26.778	9.3889	8.9444	4.944	7	7.0556	16.6667	12.7778	6.2222	4.1111	8.9444	9.2222	6.611	6.333	7.1111	10.5	12.1667	19.3889	19.7222	17.9444	4.2778	11.1667	8.3333	7.1667	10.7222	7.1667	5.3333		0.17857	10.8131
3.6934	30.3333	10.111	6.722	9.278	6.056	12.556	20.444	9.3889	9.0556	4.167	5.833	8.7222	15.5	11.7778	6.4444	4.2222	7.4444	8.5556	6.167	6.333	6.6111	7.8889	12.6667	19.6111	18.3333	15.4444	3.8889	9.1667	8.7222	5.9444	10.4444	5.9444	5.5		0.184525	9.97812
3.8125	33.2222	8.889	7.111	6.722	4.778	10.333	19	7.7222	7.5	4.722	6.222	7.5556	13.6111	11.3333	5.9444	4.4444	8.4444	8.7778	5.667	6.444	6	8.2222	10.8889	18.7778	17.6667	10.9444	3.5	10.7778	8.1111	5.4444	8.2222	7.0556	5.9444		0.190475	9.39391
3.9317	32.9444	8.389	7.056	8.167	5.333	10.5	17.944	8.7222	7.0556	4.444	5.278	6.4444	12.8333	9.9444	4.3333	4.6667	7.4444	9.1667	5.778	5.778	6.0556	9.3333	10.1667	16.6111	14.5	9.2222	4.5	10.1111	6.5556	4.9444	7.1667	5.9444	5.1111		0.196431	8.86196
4.0508	29.2222	8.611	6.444	6.278	3.333	9.889	15.667	6.8333	5.0556	3.833	5.167	7.7222	13.0556	8.5556	4.5556	3.5556	7.5	9.2222	5.944	5.167	6.8333	6.8333	10.6667	19.1111	12.7778	7	3.4444	8.7778	7.5556	4.3889	7.7222	4.5	5.0556		0.202381	8.19023
4.1699	29.5556	8.167	5.778	6.167	3.389	7.056	16.667	6.5	4.6667	4.611	3.944	5.3333	10.9444	9.1667	4.2778	3.7222	6.8889	8.8333	5.444	6.056	6.2222	6.8889	10	15.6667	11.5556	5.9444	3.6667	8.1667	5.5556	4.5556	6.6111	4.3889	5.3333		0.208331	7.62799
4.2891	25.3889	6.611	6.722	4.667	3.778	5.333	14.167	6.0556	5.2222	3.667	5.222	5.3333	8.8333	6.9444	3.7222	3.3333	6.3889	7.3333	5.167	5.889	5.2222	6.2222	9.3889	14.1111	8.8889	4.5	2.6667	8	4.8333	4.7778	5.0556	4.2222	4.2222		0.214287	6.72392
4.4082	24.2778	6.667	5.111	4.056	3.111	5.444	18.167	4.5	4.6111	3.389	4.611	5.1667	9.2778	9.0556	3.8889	3.7222	7.6667	7.4444	5.722	5.389	5.2778	6.3333	7.7778	13.3889	7	4.7778	3.2778	7.8889	4.3889	4.2222	4.9444	4	4.1667		0.220237	6.62796
4.5274	19.3889	4.778	4.833	4.611	2.333	4.167	15.056	4	3.8333	3.389	4.5	5.8333	7.3889	9.3889	3.1111	3.4444	7.5	7	4.722	5.556	4.8333	5.8889	8.2222	11.5556	7	3.3889	3	8.1111	4.8333	3.7778	3.4444	3.1667	3.2778		0.226192	5.91921
4.6465	17.3889	5.278	3.833	4.389	3.667	4.778	17.222	5.4444	3.9444	3.222	3.444	5.6111	6.8333	7.8889	4.5	3.5	6.6111	7.1667	5.556	4.5	4.7778	5.7778	8.1111	8.8889	5.0556	3.6667	3.6667	7.7778	5.1111	3.5556	4.8889	3	3.3889		0.232143	5.83166
4.7657	14.6667	5.111	3.778	3	3.111	3.667	14.278	3.6111	3.4444	2.667	3.333	6.3889	7.4444	8.2778	3.7222	4.1667	5.9444	6.2778	4.444	5.667	4.6111	4.8333	6.9444	6.6667	3.7778	3.8889	3.5	8.6111	4.1111	3.1667	4	3.2222	4.2778		0.238098	5.29126
4.8848	15.4444	4.944	4.389	3.833	3.556	3.556	12.444	3.5556	3.3889	3.056	2.778	4.4444	6.3889	7.6111	3.5	3.0556	6.1111	5.4444	4.611	4.556	3.3333	5.2778	8.2778	7.2222	3.6667	3.3333	2.8333	8.0556	3.2778	3.1111	2	2.3333	4.1111		0.244048	4.95457
5.0039	13.2222	3.722	3.278	3.944	2.778	5.5	13.056	3.5	2.7778	2.944	3.556	5.2778	6.1111	9.7222	2.7222	2.3333	5.6111	4.5556	4.333	5.111	3.3333	3.8889	6.3889	5.2222	3.2778	3.7222	3.6111	7.1111	3.8889	3.3333	4.1667	2.5	4.4444		0.249999	4.81649
5.1231	11.0556	4.722	4	3.778	2.556	3.889	12.833	3.6111	3.5	3	3.722	3.7778	5.1667	9.5556	4.0556	2.7222	5.2222	4.7778	4.222	4.5	3.8333	4.8333	5.1667	6.2222	3.1111	3.7778	3	7.8889	3.5556	2.6111	4.3333	2.5556	5.1111		0.255954	4.74747
5.2422	10.7778	3.667	2.833	3.333	3.222	3.5	11.889	4.5	3.7222	2.444	3.167	4.6111	4.5556	11.5	3.1667	3.0556	4.5556	4.3889	4.611	4.944	3.7222	3.3889	5.5	5.3889	3.0556	3.2778	2.8333	7.9444	3.1111	3.2778	3.4444	2.2778	4.1667		0.261904	4.54038
5.3614	11.0556	3.056	3.556	3.333	2.611	3.111	9.778	3	2.4444	3.611	3	3.9444	4.5556	11.7778	3.6111	2.9444	6.3333	4.0556	4.111	3.889	3.5	2.9444	5.3333	6	2.4444	2.7222	2.8333	7.8889	4.4444	3.6111	2.9444	2.1667	3.5556		0.26786	4.36869
5.4805	9.9444	3.444	4.389	3.444	2.5	3.778	9.333	2.9444	2.0556	2.722	4.889	3.8889	3.9444	10.0556	3.1667	2.8889	6.7222	3.5	4.944	3.778	2.5	2.2222	4.3889	5.1667	3	3.1111	3.2222	8.3889	4.1111	3.6667	2.5556	1.8889	4.2222		0.27381	4.26596
5.5996	8.8889	4.111	3.222	3.222	3.333	3.333	8.944	2.8889	3	2.111	2.944	3.5556	4.5556	10.2222	2.6667	2.4444	7.1667	4.6111	4.444	2.5	2.4444	2.7778	4.6111	5.0556	3.6111	2.8889	2.5556	7.5	3.2778	2.7778	2.5556	2	5		0.27976	4.09757
5.7188	9.8333	3.556	3.556	4	2.111	3.389	7.611	3.2222	2.5	2.333	4.167	3.6111	4.7222	9.0556	3.3889	2.2222	6.6111	3.4444	4.611	3.111	1.8889	1.9444	4.4444	4.7778	2.2778	2.7778	3.3889	6.9444	3.3889	3.1111	3	1.9444	5.3889		0.285716	4.01011
5.8379	6.8333	3.167	2.944	3	2.889	2.944	9.556	2.4444	2.2778	1.889	2.5	2.7778	4.5	9.6667	2.8333	2.7222	5.7778	3.1667	3.5	3	3.1111	2.7222	4.3889	3.8333	3.1111	2.3333	2.8333	7.1111	2.7778	2.3889	3.8333	2.2222	4.2778		0.291666	3.73737
5.9571	7.8889	2.889	2.222	3.222	2.333	2.611	9.611	2	2.3333	2.5	2.278	3.7778	3.3333	10.1111	3.4444	2.3889	5.7778	3.5	3.556	3.222	1.6111	2.1111	4.1667	3.6111	1.9444	2.3889	3	6.8333	3.3333	2.7222	2.5556	1.7222	4.2778		0.297621	3.61446
6.0762	7.8333	2.222	2.278	2.389	2.111	3.222	9.5	2.3333	2.3889	2.222	2.556	2.9444	4.0556	11.7778	2.0556	2.3889	6.5556	3.0556	2.778	3.444	1.6111	2.0556	3.9444	3.5556	2.1111	2.8889	2.9444	7.2222	2.9444	2.2778	3.2222	2.2222	5.2778		0.303572	3.64814
6.1953	7.2778	2.389	2.556	3.333	1.833	3.444	8	2.2778	2.2778	2.5	2.667	2.5556	3.6111	10.5	2.5556	2.8889	6.8889	4.3333	3.556	3.389	1.9444	1.6667	4.8889	3.5556	2.2222	2.7778	3.2778	7.4444	2.8333	3.3889	2.0556	2.2222	3.8333		0.309522	3.665
6.3145	7.6667	2.444	2.722	2.778	2.667	3.278	8.944	2.6111	2.1111	2.833	2.444	2.3889	3.3333	9.2778	2.6667	3.1667	8.7778	3.5	4.056	2.5	2.1111	2.8333	4.6667	4	1.8333	2.2222	3.5	6.9444	3	3	2.2778	1.5556	3.9444		0.315477	3.69863
6.4336	7	2.167	2.944	2.556	2.722	2.833	9.222	2.6667	2.7222	3.056	2.222	2.4444	3.6667	9.0556	2.8333	3.4444	8.1667	3.8333	3.222	2.833	1.6667	1.8333	4.9444	3.3889	2.8333	2.7778	3.3333	6	3.7778	3.4444	1.6667	1.4444	4.1667		0.321428	3.66327
6.5528	6.7222	2.944	2.556	3.5	2.389	2.667	8.944	1.9444	2.1667	3.167	1.944	2.7778	4.2222	10.4444	2.3333	4.6667	9.6111	3.5	3.611	2.611	2.4444	2.1111	3.3889	4.2222	1.3889	2.2222	3.3889	7.4444	2.8889	1.9444	2.2222	2	4		0.327383	3.70874
6.6719	5.9444	2.389	2.667	2.889	2.611	2.889	9.944	3	2.5556	2.167	2.889	2.4444	3.8889	10.7778	2.5556	5.1111	13.7778	3.3333	2.278	2.278	1.7778	1.9444	4.8889	2.8889	1.8333	1.5556	2.7778	7.1667	3	2.7778	2.5	1.5556	4.6667		0.333333	3.8098
6.7911	5.2778	2.778	3.056	2.556	2.722	2.167	10.056	2.7778	2.3889	2.778	2.333	1.7778	4.3333	13.7778	2.7222	5.8333	15.9444	2.6667	2.944	1.389	1.2778	1.8889	4.8333	3.3889	2.5	2.1667	3.4444	8.3333	3.1111	2.1667	1.9444	1.6111	5.2222		0.339289	4.00508
6.9102	5.4444	2.722	2.778	2.944	2.833	2.944	10.444	2.7222	1.5	3.556	2.444	2.3333	3.6667	18.6111	2.5556	5	17.1111	3.3333	2.444	2.556	1.8333	1.7778	6.0556	3.3889	2.6111	2.2222	3.0556	8.3333	2.8333	2.2778	1.6667	1.9444	4.5556		0.345239	4.25752
7.0293	4.8889	2.111	2.056	2.056	2.167	2.778	11.722	1.9444	2.8333	3	2.5	2.7778	4.7222	27.1667	3	3.5556	18.5	3.6667	3.111	2.111	1.7778	2.2778	5.1111	3.5556	2.2778	2.3333	2.9444	8.2778	2.7778	2.6111	1.8333	1.9444	4.3333		0.351189	4.50676
7.1485	4.4444	2.389	2.833	1.778	2.611	3.167	9.611	2.2778	2.5	2.278	2.056	1.7222	4.6667	27.0556	3.1667	3.1667	22.4444	4.2222	2.667	1.5	1.5	1.7778	7.5	3.7222	2.1111	2.4444	3.1111	8.1111	3.6111	3.2222	2.6667	1.5556	6.5		0.357145	4.67848
7.2676	4.2222	2.611	2.5	2.667	2.222	2.722	10.5	3	1.8333	2.333	2.389	3.2222	4.5556	37.2778	3.1111	2.6111	24.2778	3.6667	2.833	3.333	1.8889	1.8889	6.7778	2.6111	2.3889	2.0556	3.2222	8.8889	3.8333	2.2778	2.1111	2.5	6.5		0.363095	5.11613
7.3868	5.2778	1.833	3	1.833	2.333	3.167	12.722	3.8889	1.9444	2.667	3.667	2.5	4.2222	40.4444	2.9444	2.7222	24.9444	3.6667	3.333	2.222	1.9444	2.0556	7.2778	2.8889	2.8333	2.6111	3.3889	7.2222	2.8333	2.2222	2.2778	1.7778	5.8889		0.36905	5.28953
7.5059	5.2222	2	2.167	3.222	2.222	2.833	13.611	3.1111	2	1.889	2.556	2.2778	5.5	42.3889	2.3889	3.0556	28.5556	3.7778	2.667	2.056	1.6111	2.2222	8.0556	3.1667	3.2222	2.7222	3.3889	9.5556	3.2778	2.5	2.3333	2.2222	5.2778		0.375001	5.54717
7.625	4.2778	2.722	2.167	2.222	2.556	3.833	13.889	2.6667	2.6111	2.833	2.111	2.3889	4.7778	41.1667	3.8889	2.7222	28.7778	3.8889	2.611	3.111	1.8889	2.6111	9.8889	3.7222	2.5	1.8333	4.2222	8.8333	3.8333	2.5	2.0556	2.6111	5.5556		0.380951	5.67507
7.7442	4.8333	2.333	2.722	3	1.778	3.111	12.944	2.2778	2.7222	2.556	2	1.7778	6.5	45.3333	2.6667	2.3889	33.7222	3.7222	2.389	2.278	1.7222	2.1667	10.3333	3.7222	2.4444	2.2222	6.1111	9.1667	4.2778	3.1111	2	2.1667	5.2778		0.386906	5.93265
7.8633	4.9444	2.611	2.389	1.944	1.778	3.056	13.222	2.3889	2.2778	2.278	2.167	2.3333	5.4444	40.9444	3.1111	2.3889	35.6667	4.3333	2.833	2.556	2.1111	2.3333	10.2778	2.5	2.1667	2.4444	4.8333	8.9444	3.6667	3.1667	2.1111	2	5.3333		0.392857	5.77442
7.9825	4.9444	2.167	2.278	2.389	1.778	2.778	13.444	2.6667	2.8333	2.5	1.722	2.5556	6.3889	36.2778	3.6667	2.7222	39.6111	4.4444	2.111	2.5	1.8889	3.1111	10.5556	2.6667	2.7222	2.8889	6.1111	8.2222	4	2.3889	2.4444	1.9444	5.7778		0.398812	5.89395
8.1016	3.7222	2.778	2.333	1.778	2.056	2.778	14.889	3.0556	2.3889	2.444	2.389	2.3333	8.4444	33.2222	3.8333	3.6111	39.7222	4.1111	3.444	2.278	1.1111	2.0556	12.1667	3.5	2.7222	2.6667	5.1667	9.7778	3.0556	2.3333	2.5556	1.6111	7.6111		0.404762	5.99833
8.2207	4.8889	2.111	2.222	2.5	2.278	2.833	16.778	2.3889	2.3333	2.778	2.5	3.2778	8	31.9444	3.7222	2.4444	41.6667	6.4444	3	2.444	2.5556	2.4444	14.2778	3.7222	2.6667	3.4444	6.0556	10.2222	4.4444	2	2.1667	2.5	7.7778		0.410713	6.38887
8.3399	5	1.611	1.833	1.833	2	3.444	18.111	2.6111	2	2.556	2.389	2.7778	9.8889	30.2222	4.1111	3.5556	33.2778	5.3333	2.833	2.833	1.6667	2.5	13.4444	3.1111	3.0556	3	4.8889	11.7222	3.6111	2.0556	2.8333	1.7222	9.0556		0.416668	6.0875
8.459	4.3333	2.667	2.833	2.611	1.889	3.333	18.611	2.2778	1.8889	2.111	2.833	3.0556	10.3333	28.5556	3.8889	3.8889	34.6667	6	3.5	2.722	2	2.5	13.9444	3.6667	4.1111	3.0556	6.5556	11.6667	3.8333	1.8889	2.1667	1.4444	8.5		0.422618	6.2828
8.5782	5.6111	1.722	1.722	2.056	2.389	3.444	20.278	2.4444	2.4444	2.167	2.5	3.5	12.1667	25.1111	4.1111	3.8889	32.3333	5.0556	3.167	2.5	1.7222	2.3889	15.1111	3.3333	3.4444	2.8333	6.2222	10.5556	3.4444	2.8889	1.7778	1.6667	9.3889		0.428574	6.16331
8.6973	4.2222	2.556	1.722	1.778	2.778	3.833	23.944	2.6111	2.2222	2.111	2.056	3	9.8889	21.7222	3.7778	3.2778	29.7222	4.1667	3.389	3.222	2.2778	2.8889	14.3333	3.1667	3.6667	3.8889	7.5556	11.9444	3.4444	2.3889	1.4444	2.1667	10.1667		0.434524	6.10102
8.8165	4.7778	2.056	2.778	2	2.167	3.611	25.389	2.7778	2	2.556	1.889	2.7222	10.8889	20.8333	3.1111	5.5	26.5556	4.8889	3.556	2.111	2.1111	2.1111	14.0556	3.2778	4.1667	4	7.6667	13.7222	4.2222	2.3333	1.7778	1.7222	10		0.440479	6.16168
8.9356	5	2.611	2.278	2.056	2.611	3.056	27.722	2.6667	2	2.222	2.556	2.8333	9.2222	18.2222	3.6667	7.2778	20.6111	5.1667	2.889	2.278	2.5	3.2778	15.6111	3.5556	4.1667	4.4444	8.7778	12.7222	4.0556	3	2.0556	2.2778	9.4444		0.44643	6.14651
9.0547	4	2.667	2.222	2.667	2.167	4.167	29.056	2.2222	2.7778	3.111	2.944	3.6667	8.7778	14.8889	3.1667	13.5556	20.3333	6.5556	3.222	3.5	2.8889	2.3889	15.3889	3.5556	3.2778	4.2222	10.4444	12.1111	4.1667	3.4444	2.3333	1.7222	9.6667		0.45238	6.40238
9.1739	5.2222	2.944	2.722	2.222	1.889	5.167	31.611	2	2.5	2.5	2.444	2.5	8.7222	17.4444	3.4444	20.2778	17.6111	5.1667	3.333	2.444	2.2778	2.8333	18.3333	4.3333	3.1667	4.5	12.2222	12.6111	4.5556	2.3889	2.7222	1.3333	8.2222		0.458335	6.71711
9.293	3.3889	2.056	2.056	2.278	2.389	5.222	36.778	2.4444	2.2222	2.611	2.5	3.7222	8.3889	16.1111	4.3889	26.5556	15.8333	4.3889	3.889	2.333	1.5556	2.5556	18.6111	3.4444	3.8333	4.3333	12.2778	10.3889	3.7222	2.6667	2.5	1.6111	7.6111		0.464286	6.80811
9.4122	4.5	2.333	1.944	2.444	2.278	7	41.889	2.5556	2.7222	2.778	2.167	3.1111	7.7222	16.8889	4.7778	28.6111	17.1667	6.0556	3.944	2.5	2.6667	3.4444	19.7778	4.2222	4.9444	4.3889	14.0556	11.7778	3.1111	2.8333	2.6111	1.5	6		0.470241	7.4158
9.5313	4.1111	2.111	1.667	1.667	2.5	5	41.722	2.3333	2.6111	2.111	2.611	4.6111	6.8889	16.3333	4.4444	31.8889	16	6	3.278	2.444	1.6667	2.5556	19.7778	4.7222	4	5.2222	16.4444	9.3333	3.2778	2.6111	2.2778	2.2222	6.8333		0.476191	7.31144
9.6504	3	2.278	2.611	2.333	1.722	6.5	44.889	2.2778	2.0556	1.833	2.444	3.9444	7.1111	18.4444	4.5556	32.3333	14.1111	6.2222	4.111	2	1.7778	2.3333	18.9444	3.3333	3.7778	4	17.1111	11.0556	3	2.3889	2.1667	2.1667	5		0.482142	7.32825
9.7696	4.2222	2.5	2.167	2.389	2.611	6.333	45.889	2.0556	2.9444	2.667	2.167	4	5.7222	18.9444	3.8333	35.6667	12.8889	8.1111	3.056	2.667	2.2778	3.2778	22.5	3	3.6667	4.7778	15.7222	11.2778	3.3333	2.6111	2.6667	2.2778	4.3333		0.488097	7.65325
9.8887	4.1111	2.389	3	2.889	3	5.667	50.944	3.5556	2.5556	2.222	2.167	5.5	6.3889	14.4444	4.2778	33.5556	10	6.4444	3.778	3.444	1.9444	2.1111	23.7222	2.7222	5.8333	5.5	16.1111	11.6667	2.8889	2.7222	2.2222	2.2222	5.1111		0.494047	7.73064
10.0079	3.7222	2.611	2.722	1.778	2.222	5.722	45	2.6111	2.4444	3.167	3.778	3.7778	6.1111	12.7778	4	28.2222	8.6667	7.1667	4.444	2.667	2.1111	3	25.2778	3.3889	4.7222	4.4444	13.3889	9.7778	3.3889	1.5	2.1667	1.8889	5.1111		0.500002	7.08417
10.127	2.8889	3.111	2.667	1.611	2.056	5.167	44.5	2.1111	2.9444	2.222	2.667	4.8333	6.1667	10.1111	3.8889	25	5.8333	6.6667	3	2.611	2.7222	3.3889	25.7778	3.5556	4.5556	5.2778	15.3889	8.7778	2.8333	2.1667	3.1111	1.7778	4.5556		0.505953	6.78623
10.2462	3.1667	2.111	3.333	1.833	3.056	4.444	49	2.2778	2.8333	2.944	3.333	5.1111	5.3889	9.5	2.7778	20.3889	6.2778	6.8333	3.611	2.444	2	3.1667	26.6111	3.6667	4.2222	5.2222	15	7.6111	2.5	2.8889	2.5556	3.3333	3.6667		0.511908	6.76088
10.3653	2.6667	2.389	1.944	2.944	2	4.222	47.889	2.2222	2.0556	2.389	2.5	5.3889	5.7778	8.1111	3.7778	16.9444	5.0556	6.6111	3.444	1.833	2	4.2222	27	3.1111	5.3889	5.3889	15.0556	6.6111	3.2778	2.7778	2	2	3.1667		0.517858	6.42925
10.4844	3	2.222	2.611	2.833	2.722	4.278	48.389	2.3333	1.7778	2.778	3.056	5.4444	6	10.1111	3.6111	14.0556	4.7222	4.6667	3.667	3.167	2.1111	3.5556	27.2222	3.3889	4.6667	5.0556	10.0556	6.6111	3	2.4444	2.2778	1.8889	3.8889		0.523809	6.29127
10.6036	2.7222	1.944	2.389	1.667	3.111	3.667	41	2.2222	2.8333	2.5	2.778	4.5	6.8333	8.5556	3.6667	12.8333	5	4.8333	3.778	2.889	2.3333	3.1111	26	3.0556	5.1667	5.5556	12.5556	8.0556	3	2.0556	2	1.4444	3.2222		0.529764	5.97814
10.7227	3.5	2.667	1.833	2	1.722	4.889	40.389	2.0556	2.8889	2.667	1.889	4.8333	6.3333	8.2778	3.3333	13.7778	3.7778	4.3333	4.111	2.5	2.4444	3.6667	23.3889	3.5	3.8889	4.6111	13.1667	6.8889	2.9444	2.2222	2	3.1111	3.5		0.535714	5.85186
10.8419	3.3889	2.333	2.5	1.611	1.667	4.333	34.778	2	2.8333	2.778	2.5	3.4444	6.5	9.2222	3.6111	11.2778	3.5556	3.6667	4.444	2.944	1.4444	4.1667	20.1111	3	4.7222	5.4444	13.5	9.6111	3.0556	2.7778	2.3889	2.0556	2.8889		0.54167	5.59257
10.961	2.4444	2.722	2.5	1.944	2.944	5.667	32	1.6111	3.3889	2.778	2.5	4.3333	6.5	8.3333	3.3889	13.5556	4.7778	2.9444	6.167	3.167	2.3889	3.9444	18.9444	3.0556	4.9444	5.5	13.7222	8.3889	3.0556	3.1111	2	2.1667	3.5		0.54762	5.70875
11.0801	2.5	2.333	2.056	3.056	2.056	5.556	26.333	2.2778	2.8889	2.389	2.222	3.6111	5.8889	7.7778	3.9444	13.2778	4.1667	4.1667	3.833	2.722	2.1111	4.5556	20.6667	3.2222	4.3333	5.7222	14.2222	6.3889	3	2.9444	2.5556	2.4444	3.3889		0.55357	5.41247
11.1993	2.7778	2.333	3	2.056	2.778	6.056	21.889	2.2222	2.1667	3.222	2.889	4.0556	4.7778	8.1111	4.3333	15.3333	4.6111	3.5556	3.611	4.056	2.1111	3.6667	17.7222	3.1667	3.7778	6.3333	15.6667	5.9444	2.1111	1.9444	2.2222	2.9444	3.5		0.559526	5.30138
11.3184	2.2778	3.111	2.889	1.778	1.833	6.944	16.111	2.3333	2.3889	2.056	2.556	3	5.5	8.4444	5.2778	12.0556	4.2222	2.7778	4.056	3.444	2.2222	4.5556	18.8889	3.8333	4.1667	6.3889	16.9444	5.8889	2.6667	2.3333	2.5	1.9444	3.5		0.565476	5.11785
11.4376	3.3333	2.444	2.333	2.944	2.722	6.444	11.167	2.7222	2.9444	2.667	2.167	4.0556	4.7778	8	5.0556	14	5.2778	3.6667	3.833	3.722	1.8889	5.0556	17.6667	3	3.3889	6.2778	18.7222	5.9444	2.3333	2.2222	2.5556	2.5	3.0556		0.571431	5.11781
11.5567	2.1667	2	2.333	3.222	2.333	6.167	7.667	1.8889	3	3.167	2.611	3.3889	4.6667	7.7778	4.3889	12.2778	4.2778	3.4444	4.056	3.667	3.9444	5.3333	17	2.6667	3.3889	6.1111	20.1667	5.8889	2.6667	2.3333	1.8889	2.8333	2.8889		0.577382	4.89733
11.6758	3.3333	2.167	2.556	1.889	2.722	4.389	6.222	2.3333	3.5	1.944	2.556	3	4.1667	8.6667	6.2222	11.5	5.2778	3.2778	4.444	3.167	2.6111	4.4444	15.3889	3.6111	4.2222	6.0556	20.4444	7.9444	3.8333	2.1667	1.8333	2.3333	4.3889		0.583332	4.92762
11.795	3.0556	1.944	2.556	2.833	2.778	3.167	5.667	2.7222	2.6667	3.5	2.222	3.1667	4.7778	9.5556	6.2778	13.5	4.8333	3.2222	4.222	3.556	2.2222	5.3333	16.8333	2.9444	3.5556	6.4444	19.2222	5.6667	2.1111	1.7222	2.5	2.1111	3.2222		0.589287	4.85187
11.9141	2.1667	2.444	2.556	1.833	2.611	4.5	4.5	1.8889	3.3889	1.944	2.056	2.5556	4.1111	10.1111	5.7778	12.8889	5.7222	4	4.167	4.056	2.8889	5.7778	19.1111	3.8889	4.1667	5.4444	24.6667	5.2222	2.6667	2.2778	1.7778	1.9444	4.3333		0.595238	5.07409
12.0333	2.7778	2.222	2.111	2.111	2.5	2.944	4.889	1.8889	2.8333	2.222	2.278	2.8889	4.3333	8.0556	6.1111	13	6.3333	3.1667	4	4.556	2.4444	4.8333	15.8889	2.3889	4.0556	4.8333	27.4444	6.3333	2.7778	2.2778	1.6667	2.2222	4.2222		0.601193	4.9276
12.1524	1.8889	2.111	3.222	2.5	3.222	4	5	1.8333	2.7778	3.111	2.278	3.5556	5	8.7778	6.7222	15.3333	5.5	3.5	3.722	3.444	3.6667	5.5	16.7778	2.7222	3.8333	5.3889	27	6.2222	2.6111	2.2778	1.8333	1.6667	3.3889		0.607143	5.16327
12.2716	3.2778	2.667	2.556	1.833	2.111	4.278	4.889	2.8333	2.5	3.111	1.944	2.5	3.9444	8.5556	6.7222	14.4444	5.3889	2.4444	3.5	3.278	2.6111	4.6667	15.7778	2.5556	3.6667	6.3889	32.6111	7.3889	2.1667	1.7778	1.6667	2.1667	2.7222		0.613099	5.11954
12.3907	2.6667	1.556	1.833	2.222	1.778	5.111	5	1.2222	2.6667	2.722	2.833	3	4.3333	8.7778	5.7222	14.1111	5.2778	2.7778	3.611	3.278	2.7222	5.0556	15.8333	2.6111	2.8889	5.5556	35.8889	5.6111	1.8889	2.6111	1.6667	2	4.3333		0.619049	5.12625
12.5098	3.0556	2.389	2.167	2.944	2.556	4.944	5.444	2.0556	2.6667	2.167	3.444	2.9444	2.7222	10.1667	5.6111	15.4444	4.3333	3.4444	3.667	4	2.5556	4.5556	13.8333	2.3889	2.8889	4.8333	34.7222	6.0556	2.2778	2.8333	1.5	1.7778	2.8889		0.624999	5.12962
12.629	2.8889	2.222	2.389	2.389	2.333	5.389	5.389	1.7778	3	3.111	2.944	2.9444	3.4444	8.8333	4.5	13.0556	4.2222	2.5556	2.833	3.167	3	3.7778	12.5556	2.3889	3.5	6.0556	39.3333	7.2222	2.3333	3	1.6667	2.5	4.1111		0.630955	5.17675
12.7481	2.5556	2.5	2.222	2	2.167	6.278	4.389	2.4444	2.2222	2.056	2.389	2.5	3.8889	7.6667	6	12.8889	3.3333	4.7778	4.278	2.833	2.3333	4.6111	12.0556	2.7778	3.3889	4.6111	40.8889	5.7778	1.4444	2.6667	2.0556	2.1667	3.9444		0.636905	5.09431
12.8673	2.3333	2.111	2.889	2.278	2.222	7.222	5.111	1.7222	3.0556	1.722	2.333	3.2222	4.0556	11.3333	6.3889	11.2222	3.8333	4.1111	4.222	2.556	3.4444	4	11.3333	2.2222	2.1667	4.9444	40.6667	5.9444	2.5556	2.7222	2.2778	2.5556	3.5		0.64286	5.22052
12.9864	2.8333	2.444	2.667	2.389	2.5	8.556	4.5	2.1667	2.2222	2.833	2.222	3.3889	3.2778	9.4444	8.1667	12.1667	3.6667	2.9444	3.056	4.5	2.5	4.2222	12.1667	2.0556	2.3333	5.2222	40.0556	5.2222	2.2222	2.2222	1.5556	2.7222	3.2222		0.648811	5.20203
13.1055	3.5556	2.111	2.389	2.778	2.167	8.889	4.611	2	2.3333	2.667	2.889	3.1111	4.0556	10.2222	8.0556	11.8333	3.6111	3.8333	3.333	2.167	2.8889	3.7222	11.2778	1.9444	2.2778	5.2778	43.7778	6.8333	2.5556	2.1667	2.6111	1.5556	2.3889		0.654761	5.33
13.2247	3.0556	2.222	1.611	2.556	1.944	9.278	3.556	1.8333	2.3889	2.833	2.611	3.2222	4.0556	10.7778	6.5556	13.4444	3.6667	2.3889	2.444	2.611	2.5	3.7222	11.2222	2.6667	2.2778	4.5	43.8889	6.3889	2.2778	2.0556	2.3333	1.9444	2.8333		0.660716	5.202
13.3438	3.1667	2.944	2.389	2.889	2.889	9.611	3.167	2.6667	2.8333	3.222	2.833	3.6111	2.9444	10.1667	6.8889	12.9444	3.1667	2.9444	2.722	2.222	2.6111	5.1111	9.9444	1.5556	2.5	4	48.5	5.9444	2.7222	2.0556	1.9444	2.3333	2.6667		0.666667	5.39728
13.463	2.3333	2.333	3.056	2.722	3.278	9.889	3.389	1.6667	2.1111	3.111	2.389	2.7222	3.4444	11.1111	7.2778	14.8889	4.1111	3.2778	2.889	2.333	3.1111	4	9.9444	2.2222	2.1667	4.7778	46.8889	6.2778	2.0556	2.2778	1.5556	2.1111	3.0556		0.672622	5.41752
13.5821	3.5	2.111	3	2.167	2.778	8.333	3.167	1.7222	2.6667	2.278	2.444	2.7778	4.2778	10.7222	7.3889	14.9444	3.8889	3.5	2.278	2.722	2.7778	4.5	9.3889	1.3333	1.7778	4	46.5556	5.7222	2.5556	2.0556	1.8333	1.8333	3		0.678572	5.27274
13.7012	2.1667	1.722	2.611	2.667	3.278	9.222	2.556	1.6667	2.7222	2.611	2.889	2.1667	3.7778	9	7.2222	17.3889	4.1667	2.3889	2.444	2.167	2.7778	3.7778	8.3889	2.3333	1.6667	4.6667	48.1667	7.3333	2.7222	2	2.2778	1.8889	2.9444		0.684523	5.32662
13.8204	2.5556	2.444	3.278	2.667	3.222	10.222	3.056	1.8889	3.3889	2.667	2	2.6111	3.8333	10.4444	7.2222	17.6111	3.8889	3.8333	2.5	2.389	2.4444	3.8889	9.0556	2.3333	1.6111	4.3333	43.5	10.1667	2.3333	2.0556	1.9444	1.7778	3.5556		0.690478	5.47645
13.9395	2.6667	1.778	2.444	2.667	2.556	9.333	3.167	1.9444	2.6111	2.444	2.778	2.2778	4.1111	9.3889	5.4444	20	3.6111	2.3889	2.5	2.5	2.5556	3.8333	8.8333	1.9444	1.9444	4.1111	46.1667	10.7222	2.3333	2.1667	1.8333	1.7778	3.3889		0.696428	5.40068
14.0587	3.1111	2.222	2.556	2.889	2.722	9.722	2.056	1.8333	2.7222	2.556	2.889	2.9444	3.8889	9.1111	6.6111	20.7778	4.5	2.6111	3.167	2.667	1.9444	4.2222	8.0556	1.6667	1.9444	3.6667	43	10.6667	2.9444	2.2222	2.3889	1.9444	2.2222		0.702384	5.40745
14.1778	3.2222	2.278	2.056	3.278	2.611	10.5	2.944	2	3.2778	2.944	2.722	2.7778	4.1111	10	6.2778	20.5556	4.5	2.5556	2.167	2.278	2.6667	4.0556	7.7778	2.2222	2.0556	3.7222	44.4444	11.3889	2.2222	1.8889	2.0556	1.5556	2.9444		0.708334	5.51685
14.297	3.2778	1.722	2.222	2.167	3	11.056	1.833	2.4444	2.5556	2.333	2.389	3.0556	3.3889	10.9444	6.2222	20	3.9444	3.1111	2.611	3.167	3.1667	4.7222	6.9444	1.5556	1.8889	3.8889	43.7778	9.1667	3.0556	2.6111	2.2778	2	2.6667		0.714289	5.4293
14.4161	2.5	2.389	2.556	2.611	2.389	11.889	2.389	2.7222	3.1667	2.722	2.056	2.1667	3.1667	10.1111	6.8333	16.1667	3.8333	2.5	1.667	2.5	2.0556	4.1111	6.8333	1.7222	2.2222	4.8889	42.0556	13.8333	2.5	2.2778	1.6111	2.1111	2.7222		0.72024	5.31149
14.5352	3.2778	2.167	2.611	2.611	2.5	12.944	2.611	1.8889	2.8333	1.611	3.333	2.6111	3	13.0556	6.3333	17.2222	4.6667	2.2778	3	2.333	2.7778	3.7222	7.0556	2.1111	1.7778	3.2778	43.2222	11.7222	2.5556	2.7222	2.6667	1.8889	2.7778		0.72619	5.48987
14.6544	2.3889	1.889	2.333	2.611	3.667	12.556	2.556	1.8333	2	1.833	3.389	2.7778	3.2222	12.1667	6.5	14.8889	4.2778	2.6667	2.722	2.611	2.7222	4.0556	6.2778	2.1667	2.4444	3.6667	45	12.5	2.1111	2.4444	2.0556	1.3333	2.1667		0.732145	5.3889
14.7735	3.3889	2.389	2.278	3.778	3.056	15.056	2.944	1.8889	2.6667	1.889	2.389	2.7778	3.3333	11	5.7778	14.1667	4.7222	2.5556	2.778	2	2.9444	4.6111	4.7778	1.6111	1.8333	3.0556	44.8889	11.5	3.6111	2.3333	2.3333	2.2778	2.3333		0.738096	5.4226
14.8927	3.8889	2.111	2	2.556	2.833	14.444	3.333	1.7778	2.8333	2.778	1.889	2.2222	3.4444	12	7.6111	13.8889	3.8889	1.7778	2.778	2.833	2.2222	3.6111	6	1.9444	1.8333	3.1111	49.8889	12.5	2.1111	2.3889	2.3333	2	1.6667		0.744051	5.53028
15.0118	3	2.611	2	2.333	2.833	15.222	2.944	2.2222	2	2.667	2.444	2.8333	3.8889	11.7778	6.2778	16.2222	3.9444	2.2222	3.056	2	2.0556	4.4444	4	1.8333	2.1111	4.2222	48.8889	12.4444	2.5	2.4444	1.7222	2.2222	1.9444		0.750001	5.55551
15.1309	3.6111	2.167	2.222	3.111	2.944	16.667	3.222	2.7222	2.7222	2.167	2.778	2.6111	3.6667	10.5	5.7778	14.9444	3.7778	3.3889	3.111	2.778	1.6111	3.6667	4.9444	1.9444	2.5556	3.8333	54.2778	12	4.0556	2.3889	1.5	2.5	1.8889		0.755952	5.81988
15.2501	4	3.389	2.222	3	3.222	15.889	2.889	2.4444	2.5	2.389	2.5	2.5	3.7222	11	6.4444	14.6111	5	2.7222	2.5	3.278	2.6667	5.0556	5.2778	1.9444	2.0556	3.9444	52.3333	14	3	2.5556	2.1667	2.1667	2.0556		0.761907	5.92257
15.3692	3.5	2.778	2.556	3.222	3.667	15.889	2.556	2.5	3.0556	2.167	2.333	2.1111	3.3333	11.7222	6.2778	11.9444	4.2778	3.1667	2.444	3.167	2.3333	5.2778	5.8333	1.8889	2.1111	4.1667	53.1667	15.1667	3.4444	2.3333	2.4444	2.3889	2.0556		0.767857	5.91755
15.4884	3.6667	1.944	3	2.278	2.889	17.944	2.722	2.6111	2.2778	2.5	2.222	2.8333	3.0556	12.0556	5.6667	14.0556	4.1111	2.5556	2.222	1.556	2.8889	3.9444	4.1111	1.0556	2.6111	5.5	55	16.0556	3.6111	2.2222	1.6111	2.0556	1.6667		0.773813	5.89392
15.6075	3.5556	3.389	2.389	3.056	2.778	19.056	3.556	2.9444	2.7778	2.944	2.611	2.6111	3.7778	10.1111	6.5556	15.1111	4.6111	2.6667	3	3	2.5556	4.5	6.9444	1.3889	1.8889	5.3889	49.9444	17.8333	3.8333	2.6667	1.9444	1.2778	2.1667		0.779763	6.1465
15.7266	5.6111	2.5	2.5	3	3.889	15.778	2.667	2.6111	1.3889	2.611	3	2.5	3.5556	10.8333	7.1667	16.8333	4.6667	3.0556	1.889	2.667	2.4444	4.9444	7.0556	2.1667	1.8889	7.6667	47.6667	20.3889	3.4444	2.1667	2.1667	2.1667	2.2778		0.785713	6.21721
15.8458	5.1667	2.667	3.056	2.889	3.667	15.889	2.167	2.2222	2.6667	2.722	2.111	2.4444	3.4444	12.7222	5.8889	18.0556	3.2778	2.5	2.278	1.833	2.3333	5.2778	6.4444	2.1111	2.6111	9.7222	43.2778	20.7778	2.5556	2.1667	1.8333	1.2222	2.8889		0.791669	6.08758
15.9649	4.7778	3.278	1.944	3.056	4.556	17.889	3.889	2.3333	3.6667	2.111	2	2.8333	3.3333	12.5556	4.1111	18	4.6667	2.6111	2.611	2.444	2.7222	5.2778	5.9444	2.1667	1.5	10	41.5556	18.3333	5.1111	2.2222	1.7778	1.6111	2.8333		0.797619	6.17341
16.0841	6.9444	3	2.722	2.222	3.444	18.833	3.278	2.4444	3	2.111	2.389	2.2778	3.8889	11.6667	5.3333	17.7222	4.6667	2.5	3.111	2.222	3.2222	4.4444	9.1667	1.7222	2.9444	10.9444	35.0556	20	3.2778	2.9444	1.5556	1.8333	2.5		0.803574	6.16325
16.2032	5.2778	5.111	3.333	1.722	4.222	20.556	4.222	2.5	2.3333	2.5	3.056	1.8333	4.2778	11.6111	4.6667	17.7222	4.7222	1.9444	2.167	2.611	2.7222	5.8889	10	2	1.8889	12.9444	29.5	19.6111	4.7778	2.3889	2.1111	1.7778	2.3333		0.809525	6.19192
16.3224	7.2778	5.056	3.333	3.389	5.389	17.778	3.778	3.3333	2.6667	2.833	2.944	3.3889	3.6111	12.7222	4.7778	13.3889	4.4444	2.5	2.111	2.5	2.2778	4.5556	10.5556	2.4444	1.9444	15.0556	30.7222	22.6667	5.3889	2.8333	2.2778	1.8333	2.3889		0.81548	6.42929
16.4415	6.2778	4.389	4.222	3	5.167	17.611	4.333	3.6111	2.6667	3	2.611	2.8889	5.8889	13.0556	5.3889	15.3333	3.8333	3.1111	2.222	2.944	2.8333	5.3333	11.6667	2.5	2.3333	16.3333	24.1111	22.6667	4.7778	2.6111	1.7222	1	2.5		0.82143	6.42253
16.5606	7.6111	3.944	4.5	3.889	5.389	16.667	5.944	3.9444	2.4444	2.444	2.389	2.6667	4.1111	13.8333	4.3889	15.8889	4.4444	2.3333	2.5	2.444	2.7778	6.3333	14.2222	2.2222	2.3333	18.5	20.7778	25.6667	5.3333	2.3333	1.7222	2.4444	2.6667		0.827381	6.63969
16.6798	8.8889	5.722	3.833	2.944	6	19.5	6.056	5.8333	3.1111	3.333	2	2.6667	5.4444	17.4444	5	14.5556	4.1667	2.6667	2.111	2.333	2	4.7778	16.1667	1.9444	2.5	19.0556	18.1111	25.4444	6.1667	2.8333	2.3889	2	2.8333		0.833336	6.96461
16.7989	9.5556	5.5	4.5	3.5	7.111	18.889	7.278	8.6667	2.7222	2.944	3.389	2.8333	5	19.4444	4.5556	14.2222	3.5	2.7222	2.778	1.944	3.1667	5.6111	19.7222	2.0556	3.0556	23.3333	12.1111	25.8889	7	2.3333	2	1.3333	2.6111		0.839286	7.31144
16.9181	11	5.556	4.611	3.778	8.111	21.056	11.556	12.0556	2.4444	2.944	2.944	3.0556	5	18.2778	3.8889	13.8889	4.6667	2.1667	2.5	1.889	3.4444	4.1111	19.6667	2.5	3.1111	23.1667	12.6111	26.1667	8.1667	2.5	2.7778	1.8889	3.8889		0.845241	7.73908
17.0372	14.2778	5.944	4.722	3	7.278	18.556	14.056	16.8889	2.3333	2.833	2.389	2.6111	5.1111	17.7778	4.3333	15.6667	4.4444	2.7778	2.722	1.722	3.6111	4.8889	20.6111	1.9444	3.6111	30.0556	9.3889	25.6667	10.2222	3.1667	2.1667	2.0556	2.6111		0.851192	8.16498
17.1563	16.2222	8.222	4.389	3.778	7.333	19.111	17.278	18.8889	3.3333	3.222	2.667	4.3333	4.7222	20.7222	5.5	15.6111	4.1667	2.9444	2.556	2.444	3.4444	5.8889	21.1667	2.2222	4.2778	35.8889	8.5556	26.2222	10.9444	2.5556	2.2778	1.5	3.6667		0.857142	8.97138
17.2755	18.9444	8.111	4.611	3.667	7.889	18.722	13.333	25.5	4.0556	3.111	2.944	4.5556	6.3333	17.5556	6.3333	17.9444	6.3333	2.4444	1.944	2.778	4.0556	4.7778	18.6667	2.6667	3	33.8889	7.3889	26.2222	11.3333	3	2.3889	2.4444	2.8889		0.863097	9.08582
17.3946	21.2222	9.611	6.056	4	9.111	18.333	13.333	28.0556	3.3889	2.611	3.167	3.1667	5.6111	15.1111	7.7222	20	4.8333	2.1667	2.556	2.333	3	6.5	20.3333	3.3333	3.5	36.5	7.3333	28.5556	12.6667	2.7778	3.1667	1.7222	4.1111		0.869048	9.57239
17.5138	22	12	6.333	4.556	9.222	16.944	11.667	29.7778	3.5	3.667	3.111	4.3889	6.0556	18.6111	9.5	22	5.2778	2.1111	2.389	2.556	3	5.2222	18.2222	2.5556	4.9444	40.3333	5.3333	30.7222	12.9444	3.8889	1.8889	1.7778	3.8889		0.875003	10.0118
17.6329	26.3333	12.889	6.667	4.222	9.778	18.056	11.389	34.6667	3.8889	3.222	2.333	5.2778	8.6111	19.4444	8.2222	23.2778	8.5	3.5	1.944	2.278	3.2778	6.0556	17.3333	2.4444	4.1667	32.6667	5.0556	31.7778	16.1111	3.7222	2.1111	2.3889	4.4444		0.880953	10.4865
17.7521	27.3333	15.778	6.889	5.056	9.667	21.444	12.389	33.4444	5.2222	4.056	2.222	5.1111	7.0556	19.4444	6.3889	25.2222	9	1.8333	3.056	2.056	2.8889	5.0556	16.2778	2.8333	4.5	32.3889	3.8333	28.4444	20.2222	4.2778	1.9444	2.2222	6.0556		0.886909	10.7155
17.8712	32.3889	19.833	8.222	5	8.778	23.444	13.833	35.8333	7.5556	3.944	2.778	4.7222	8.4444	22	6.3889	26.7222	10.0556	2.3889	2.111	2.278	2.6667	5.2222	17.8333	3.1667	4.7778	29.9444	3.8889	27.6111	23.6111	5.5556	3.3333	2.2778	4.6667		0.892859	11.5538
17.9903	28.8889	22.333	9.944	4.444	11.056	25.722	13.222	35.6667	10.1111	5.889	2.611	5.2778	8.6667	21.2778	5.2778	21.1667	11.7778	3.2778	2.333	2.444	2.7222	5.0556	17.8333	2.7778	5.9444	29.6667	2.7778	24.5	24.7778	4.5	2.3889	3.2778	5.6667		0.898809	11.6144
18.1095	34.9444	35.333	10	6.722	13.556	30.722	16.889	37.1667	10.8333	5.5	2.889	7.3333	9.6667	24.6667	6.6667	23.7222	15	2.2222	2.667	2.722	2.7778	4.9444	19.6667	4.2778	7.1111	27.6111	3.4444	18.0556	31.1111	4.2222	2.5556	2.4444	6.7778		0.904765	13.1582
18.2286	36.8333	38.944	13.222	5.833	15.056	30.889	17.056	37.1667	12.2222	5.556	3.722	6.5556	10.5	26.6111	7.5556	25.1667	16.3333	3.2222	2.389	3.111	2.3333	5.5556	19.5556	4.9444	7.1667	23.5	1.5	14.6667	32.1667	5.5556	3	3.8333	6.2778		0.910715	13.5758
18.3478	44.6111	39.778	14.556	8	19.556	35.667	21.056	39.6111	16.5556	6.778	3.944	8.8889	9.8333	28.6111	7	26.1667	14.6111	3	2.611	1.556	3.1111	4.5556	23.8889	6.1111	9.7222	24.1111	1.9444	10.1111	31	5.3889	2.3889	3.4444	7.6111		0.91667	14.7206
18.4669	45.9444	32.556	19.667	8.167	26.111	38.556	27.944	38.0556	15.8333	8.556	5	10.8333	10.8333	32.3333	8.1111	30.1667	16.1667	3.7222	2.389	3	3.1111	4.7222	23.8333	8.8333	11.5	23.3889	1.8889	7.3333	30.2222	7.3889	3.8889	4.2222	10.5556		0.922621	15.9041
18.586	37.7222	24.111	26.056	11.333	31	49.333	28.056	34.3889	19.7222	10.389	4.556	13.0556	11.7222	33	9.2778	30.1667	17.3333	3.7778	2.611	2.167	3.0556	6.5	25.9444	10.8333	10.0556	17.6111	1.2222	5.2778	23.5	7.0556	3.9444	5.7222	10.4444		0.928571	16.0893
18.7052	33.6111	13.611	30.889	15	37	53.722	28.111	31.7778	22.5	13.167	5.444	12.8889	11.8889	37.1667	11.3889	28.9444	18.5	2.8889	2.5	3.556	4.2778	6.4444	28.6111	11.8333	10.1111	11.8333	1.2222	4.2222	21.7778	10	3.4444	8.5	16.5556		0.934526	16.7694
18.8243	26.5	7.722	38.556	18.944	40.5	64.5	32.722	17.5556	24.8889	14.778	6.167	15.3333	13.3889	39.7778	12.6667	30.9444	21.0556	2.7778	2.222	2.278	3.8333	6.3333	32.5556	11.5556	13	10	0.6667	2.2778	13.9444	9.7778	4.7222	8.0556	21.8889		0.940477	17.33
18.9435	17.6111	5.722	40.167	21.111	43.667	73.944	39.222	11	28.7222	14.889	6	17.1111	12.2222	37.4444	10.5	36.3333	28	4.5556	2.389	2.444	3.5	7.7222	35	11.1667	13	6.3889	0.9444	1.9444	9.5	13.3333	5.1111	12.7222	23.3333		0.946432	18.0825
19.0626	11.5556	4.111	32.389	28.222	47.222	77.944	41.611	9.1667	34.7778	16.944	8.778	19.7778	12.2778	38	11.1667	33.5556	31.3333	4.3889	2.611	2.833	3.2222	8.5556	38.5	13.3333	13.2778	5.3889	0.5556	2	7.5	14.1111	6.0556	13.7222	31.3889		0.952382	18.9781
19.1817	7.7222	2.722	24.056	41.667	46.056	80.722	34.056	8.1667	39.0556	19	9.444	23.9444	12.7778	36.1111	14.8333	28.7778	29.7778	5.4444	2.222	3.389	3.8333	9.7778	41.3333	11.7778	14.7778	3.8889	0.7778	1.4444	4.5	17.1667	8.6667	15.8889	28.8333		0.958333	19.1701
19.3009	4.7222	2.056	12.889	48.778	35.056	72.278	20.778	5.9444	39.3333	19.333	10.889	24.9444	13.3889	30.7778	20.1667	25.5	31.7778	7.3889	2.556	2.667	3.0556	9.3889	44.8333	14.7222	18	2.1111	0.7778	1.2222	5	17.1111	12	17.3333	33.9444		0.964288	18.5068
19.42	4.5556	2.667	6.833	41.111	22.667	57.056	12.389	4.1111	26.4444	19.889	13.333	27.6111	16.5	24.3333	24.3889	19	31.3889	9	2.944	3.167	3.5	11.0556	45.5556	13.3889	18.6667	2.2222	0.6667	1	2.8333	21.7222	15	17.9444	28.6667		0.970238	16.7155
19.5392	2.8889	1.611	6.222	28.611	16.167	38.722	9.778	2.6667	13.5	22.111	18.833	27.8333	17.6111	19.2778	27.6667	16.6111	36.3889	8.9444	2.722	3.611	5.3333	11.3889	46.9444	19.8889	15.7778	1.8889	0.8889	1.2778	2.2222	19.7222	20.6111	18.5556	22.5		0.976194	15.4175
19.6583	2.3889	2.056	4.111	17.889	10.611	27.778	8.167	3	9.2222	16.556	20	30.2222	19.5	14.7778	24.1667	13.5556	39	11.4444	3.111	4.056	3.8889	14.8889	42.5556	27.6667	13.8889	1.3333	0.8889	0.6667	1.7778	19.5556	22.3889	21.5	16.6667		0.982144	14.2206
19.7775	2.1111	1.278	2.667	10.722	6.889	15.056	5.833	2.5	6.8333	11.278	23.556	24.5	20.2222	12.1667	17.8889	13.2778	39.1111	12.8333	2.333	3.444	5.2222	17.6667	37.0556	27.5556	9.2778	1.2778	0.6667	0.7778	1.1667	18.4444	24.3889	23.7222	14.1111		0.988099	12.601
19.8966	1.9444	1.722	2.5	6.556	6.222	13.111	4	2.3889	5.6667	8.556	22.778	23.6667	18.1111	9.7778	15.0556	12.8889	32.1111	14.3333	3.222	2.444	4.8333	19.0556	28.3889	18.8889	6.7778	1.1111	0.2222	0.6111	1.2222	17.5556	24.8889	22.8333	10.1111		0.99405	11.0168
20.0157	1.6111	1.5	1.722	4.833	3.333	10	3.389	1.7778	3.8333	6.222	21.111	24.2222	16.7778	6.3889	8.8889	10.5	28.0556	17.4444	3.556	3.056	3.5	18.2778	24.2778	15.1667	4.5	1	0.3889	0.6667	1.3889	12.8889	26.1111	26.0556	7.5		1	9.69528

## Sheet: Image8
X0	Y0	Y1	Y2	Y3	Y4	Y5	Y6	Y7	Y8	Y9	Y10	Y11	Y12	Y13	Y14	Y15	Y16	Y17	Y18	Y19	Y20	Y21	Y22	Y23	Y24	Y25	Y26	Y27	Y28	Y29	Y30	Y31		Ap-basal	Avg int
0	32.2937	29.9806	24.622	23.2465	15.976	23.445	29.513	35.1285	38.82	25.6592	15.848	22.008	29.7597	29.828	26.2142	14.527	28.7553	31.1308	22.3468	26.3976	19.5977	17.4034	22.2949	24.688	23.4225	23.3348	28.834	11.154	10.139	9.205	8.114	29.4221		0	23.5347
0.1191	35.6019	33.7564	28.5071	27.1716	16.795	29.666	37.608	40.6278	43.746	32.3232	19.578	24.814	34.3476	36.6177	29.1182	18.2573	29.875	35.701	23.6541	29.1644	22.3958	20.4014	25.6715	27.0318	27.0652	24.3286	30.04	15.014	13.609	11.097	11.121	33.6789		0.00490027	27.137
0.2383	38.8134	37.1447	32.6831	30.8394	20.414	36.043	43.49	46.6673	49.203	41.6245	24.697	28.92	44.3494	42.4094	34.8237	22.3154	31.2651	38.3943	24.5915	31.7969	26.6765	26.5794	28.8458	33.9465	29.2914	26.2502	34.972	20.353	17.203	15.011	15.617	35.1474		0.00980465	31.5743
0.3574	42.9219	41.3343	37.9538	32.8975	25.728	39.917	49.131	52.1849	54.896	50.5728	32.986	33.974	51.9378	45.6984	40.4609	26.152	35.8432	42.9818	31.0009	37.5589	29.486	32.8152	35.8828	38.6762	33.1479	28.0699	39.418	26.904	23.189	22.027	22.192	36.0647		0.0147049	36.6876
0.4766	48.7028	46.2388	42.2098	35.1705	28.893	48.138	57.841	55.2008	62.901	62.3466	40.39	42.928	59.6664	54.8173	47.2866	29.7678	38.5703	48.9088	33.7664	42.6671	32.403	40.5137	42.3083	44.8226	38.7916	31.5869	47.278	34.601	38.146	32.282	33.405	38.9448		0.0196093	43.1717
0.5957	56.1733	48.6062	46.7758	40.0569	33.651	59.095	69.124	60.7015	67.877	74.8992	48.299	51.597	64.2433	62.1883	52.9652	36.5254	42.3715	53.935	37.5244	45.2691	33.7224	48.4971	47.5825	49.139	44.0441	34.6966	55.276	46.16	56.127	44.149	40.769	44.2488		0.0245096	49.8841
0.7148	61.9762	53.9572	46.575	43.9844	40.051	68.364	75.479	68.3374	78.416	84.6677	58.351	63.233	70.6324	65.2814	59.5345	40.9829	46.4038	58.4635	39.4421	49.6167	39.7335	56.2511	53.3327	53.1977	46.7141	38.114	61.169	63.031	78.941	59.984	50.243	46.476		0.0294098	56.9043
0.834	64.3537	56.0376	52.4097	46.713	43.89	72.485	86.1	75.2324	84.246	92.092	72.835	74.121	77.7446	74.9423	67.5911	44.7156	49.3121	64.9133	40.8718	52.5177	44.2468	61.9126	63.8599	57.2492	52.015	40.5847	72.303	76.128	100.21	79	61.354	47.5476		0.0343142	64.048
0.9531	68.9746	58.5982	56.5406	51.013	50.384	81.151	92.785	80.6379	93.85	92.2801	87.442	88.287	81.7039	76.0252	75.2425	47.4093	51.8671	67.3053	46.0699	52.3242	46.7739	71.1326	68.4768	61.9219	56.1437	43.7102	82.825	92.444	119.077	101.714	68.572	53.1988		0.0392145	70.8088
1.0723	69.2192	66.2452	60.6179	55.1506	54.199	88.748	96.647	85.0946	94.384	93.1349	97.741	101.221	88.8312	84.2065	80.6443	53.9242	56.9483	66.7069	53.6482	55.9322	52.4469	76.5977	72.7095	65.4908	56.9258	44.2822	88.754	99.044	136.956	124.105	78.939	59.0822		0.0441189	76.8305
1.1914	71.5725	65.9775	57.5277	55.1617	56.162	95.92	102.221	81.7613	97.82	95.6283	104.373	109.479	91.2325	81.4285	83.8756	53.35	61.0071	72.8281	59.5905	57.314	55.8862	80.4418	76.6178	69.0864	59.0571	46.1067	92.605	108.549	144.954	139.689	83.534	65.4782		0.0490191	80.5074
1.3106	77.248	65.6931	60.8595	60.9297	63.157	97.588	97.52	85.832	103.323	88.2678	108.672	113.46	99.5626	80.2547	84.7831	56.9171	63.1538	76.422	65.5233	62.2848	56.6184	86.8984	74.9053	72.6148	56.7463	48.602	98.431	111.371	149.562	153.842	83.627	69.1158		0.0539235	83.5558
1.4297	77.7259	67.7677	59.9038	63.5623	69.336	103.52	96.136	85.2336	99.904	78.8718	106.736	113.115	97.6007	80.4935	83.4942	56.8933	64.979	76.0816	73.2887	65.4203	61.6529	90.3068	75.4369	72.8885	59.8221	51.369	100.717	111.096	149.067	159.795	91.009	72.759		0.0588238	84.8745
1.5488	81.6761	66.4394	58.0815	64.1368	69.798	106.856	91.012	84.5933	89.373	69.0396	99.674	114.06	94.5064	75.2587	82.5217	59.5881	70.5883	78.9251	76.7373	69.2411	69.8559	98.458	75.5453	70.8157	59.0984	50.9792	104.681	100.243	139.077	157.046	96.244	78.4189		0.063724	84.4553
1.668	82.1313	69.2997	60.6848	64.1417	76.192	104.564	82.222	83.9825	82.42	59.8348	86.776	118.037	92.2273	66.3869	81.9815	62.0175	78.2383	83.724	78.5653	73.8793	73.0617	98.1043	71.7151	64.9463	57.644	51.2967	105.48	85.35	127.869	152.61	102.741	83.8529		0.0686284	83.1868
1.7871	79.3149	71.8525	59.1062	62.666	87.762	105.564	72.439	78.7119	71.44	51.7754	75.819	108.102	85.9286	63.4112	77.2224	62.025	80.1292	80.7395	80.0726	73.2494	75.3127	94.73	68.1769	62.7788	55.439	52.7279	98.966	78.586	114.284	138.432	108.488	85.9427		0.0735287	80.0373
1.9063	75.1716	71.0551	57.1228	68.4793	90.926	97.843	61.147	69.6335	61.158	43.2647	56.802	103.626	79.3543	58.4713	75.1238	61.0215	84.396	83.8013	82.5549	74.9638	73.3319	91.7688	60.5336	58.1121	54.8726	56.7004	95.923	67.116	97.691	119.704	106.47	89.6		0.0784331	75.8669
2.0254	79.7434	71.5088	54.2967	68.8164	100.02	92.139	58.064	64.5077	51.518	35.9946	46.685	92.061	71.1418	53.3869	69.8302	60.0886	89.9196	83.6129	86.2547	77.0238	77.6991	85.8911	57.6274	52.1016	50.8317	55.6067	86.15	58.962	79.771	98.445	101.587	92.6516		0.0833333	71.998
2.1445	80.584	68.4229	50.5081	69.1636	109.694	80.495	52.593	59.6403	41.998	32.3894	39.763	79.155	66.196	56.0486	63.6603	59.9049	92.8986	86.3783	91.6135	78.2727	76.8128	80.0352	48.6526	48.5409	50.329	56.8735	73.997	53.596	61.848	82.487	98.113	96.2697		0.0882336	68.3417
2.2637	77.0683	66.6416	52.0442	68.7182	110.906	71.441	47.699	51.9866	31.205	29.9825	33.368	71.752	61.204	58.5122	60.5526	60.6113	94.4729	85.4827	89.7759	76.392	73.1155	65.7355	46.4289	45.8504	50.9748	59.1508	70.81	48.283	53.032	71.397	92.126	91.4497		0.093138	64.6303
2.3828	76.8853	69.4141	47.8945	63.4842	110.809	56.543	44.574	46.698	21.907	26.2144	31.857	63.14	61.0103	55.0141	59.2741	60.1569	95.9795	87.1536	86.6536	73.984	70.2846	59.6273	40.6165	40.0031	54.1562	58.0732	64.371	39.572	44.158	56.807	86.942	85.3629		0.0980382	60.5819
2.502	75.2863	60.2333	47.6101	59.8357	110.642	50.564	39.551	41.2001	16.542	21.6991	27.206	53.596	55.641	56.4956	59.367	62.32	96.8041	85.6956	89.8207	74.4398	64.2018	49.7732	36.1507	40.1217	53.5579	55.7599	59.895	38.9	36.727	48.149	78.987	81.4475		0.102943	57.1319
2.6211	72.7079	54.7527	43.4046	61.8365	108.646	41.315	34.237	36.4267	12.793	19.628	23.757	41.999	50.4045	54.0908	54.0229	60.7366	96.2146	82.3782	92.5602	74.3554	55.2967	35.7676	30.1453	37.5795	52.3031	54.7753	48.466	35.825	30.581	42.657	67.577	74.0993		0.107843	52.5419
2.7402	71.6771	52.5147	43.8326	60.1777	110.237	35.779	29.658	34.4417	11.12	21.1308	24.537	33.936	48.8713	47.4165	54.8559	58.1794	90.5223	85.6337	86.4155	66.7491	46.9364	28.8967	27.4174	35.2882	52.9723	53.6882	40.295	30.63	25.169	37.973	57.728	67.2906		0.112743	49.1241
2.8594	67.7975	53.9286	39.4145	59.1626	106.62	33.035	25.582	24.0373	9.306	17.6073	19.19	28.179	46.8106	50.1703	53.427	56.191	88.7961	78.672	85.6423	60.8935	39.5639	27.2812	23.1136	33.1996	51.0935	57.3604	32.297	27.041	23.113	32.867	52.825	57.5873		0.117648	45.6814
2.9785	63.9912	49.4634	39.9819	57.3466	101.245	26.271	25.143	20.7175	8.52	17.0067	15.928	21.193	43.3113	51.0161	51.9922	59.38	82.7786	71.4847	82.0315	54.4078	34.2865	24.9197	20.9934	30.1165	48.51	57.7376	28.579	26.332	19.712	28.926	46.135	54.7073		0.122548	42.6301
3.0977	66.464	49.6279	43.5191	52.5537	93.25	22.4	21.512	15.4698	9.125	15.6604	14.287	19.371	40.9487	43.5666	49.8732	59.0939	76.0519	61.1382	70.9759	50.2084	32.1224	23.0107	19.3209	28.5656	43.7385	58.6122	23.704	24.436	17.187	26.373	40.136	49.4533		0.127452	39.4299
3.2168	61.6509	49.0004	43.3399	50.8139	92.38	19.263	17.213	12.559	9.714	13.1345	13.01	18.041	38.8532	39.681	49.3071	57.2119	66.8608	49.7588	64.6302	44.8684	27.8706	21.0067	16.3625	25.9419	38.8117	60.852	20.948	22.269	19.884	25.255	34.186	45.5619		0.132352	36.57
3.336	56.7992	48.943	41.2028	49.5564	82.693	17.317	13.572	12.0941	9.101	11.2926	10.492	18.19	36.2886	36.923	52.2827	61.2796	57.0003	38.6735	55.2546	39.9723	21.4543	19.9127	15.5507	21.7967	33.4287	64.8173	18.697	21.675	15.459	21.436	30.036	39.542		0.137257	33.5229
3.4551	53.6895	49.4045	38.2397	48.7249	75.088	16.817	10.681	9.6264	8.852	11.9867	9.002	18.367	34.6271	35.05	49.3963	59.6965	46.0338	29.3497	48.6214	34.7992	19.9799	17.313	12.4269	20.3774	30.1978	64.5759	16.883	19.642	14.174	20.128	24.291	35.0657		0.142157	30.7221
3.5742	50.4058	43.3719	38.0018	47.5509	63.652	16.392	9.351	8.2744	8.536	9.5231	8.509	16.282	34.8122	32.6328	47.648	59.7679	36.2542	23.318	42.5499	33.9915	19.1716	15.4397	10.6309	18.5779	26.4029	66.0429	15.818	19.822	12.26	19.304	19.905	33.0778		0.147057	28.3524
3.6934	44.1962	44.1323	34.1141	44.6457	50.837	14.356	8.647	6.2889	9.389	7.7825	6.817	18.573	32.6581	31.6961	46.3226	58.7965	28.6054	19.6824	36.9155	31.5093	16.176	14.5833	10.0725	14.6648	25.6166	63.3885	14.95	18.572	12.875	16.536	17.729	34.0487		0.151962	26.0993
3.8125	38.0217	39.1266	32.311	43.2463	36.084	13.122	6.6	5.8798	8.885	6.9655	6.125	15.511	30.4398	30.815	48.267	58.8247	23.2309	18.0778	29.6152	27.843	15.6631	12.7434	8.579	12.5472	22.5982	60.6972	13.013	16.667	11.154	15.165	16.49	32.7388		0.156862	23.6577
3.9317	32.5108	37.2912	29.1852	44.6304	27.531	10.343	7.125	5.6619	7.732	5.6076	5.806	16.516	30.3549	28.0615	49.6363	65.1251	21.114	18.7523	26.7667	22.188	14.6047	12.073	8.8104	10.6762	22.0836	59.3183	11.572	14.43	9.899	13.628	13.744	28.7237		0.161766	22.2344
4.0508	26.3272	38.6754	28.4375	45.1942	21.803	9.84	6.483	5.2483	8.199	5.8252	5.114	14.992	26.2399	29.7294	47.1366	68.3101	18.6297	17.9244	25.0272	19.2952	12.6923	10.3543	8.4836	7.8345	18.235	54.9237	9.347	12.958	9.741	12.817	11.829	26.4671		0.166667	20.7536
4.1699	22.3962	37.422	28.5426	41.0904	22.623	9.78	5.512	4.3582	7.01	4.4518	4.116	14.649	26.5153	29.852	45.2601	65.989	19.6721	19.4896	24.4121	17.5265	11.3433	9.4483	7.1595	7.9445	16.8598	50.006	8.06	12.824	9.752	11.206	11.671	25.445		0.171567	19.7621
4.2891	21.6313	33.1511	28.2285	40.1014	26.1	7.821	4.383	4.5724	5.984	4.7826	4.614	12.685	24.3586	29.4475	45.554	69.9944	17.5742	21.4655	24.192	13.6956	8.9921	9.0206	6.4141	6.9188	15.6629	48.0995	9.002	11.144	8.336	9.652	10.42	21.9304		0.176471	18.9353
4.4082	20.0338	31.8203	28.595	37.4082	28.381	5.781	3.731	4.5025	6.157	4.2955	4.1	10.299	22.3653	27.0381	45.1945	71.3483	16.8911	21.9902	23.1381	10.9425	7.7721	8.5636	6.1364	6.5862	14.2105	43.9396	9.286	9.223	7.265	8.315	9.977	18.8509		0.181372	17.9418
4.5274	16.915	31.4886	27.339	36.7447	29.7	4.721	4.116	3.9348	5.97	3.1289	4.196	8.18	22.7142	26.9746	44.2167	71.9342	16.7089	20.2603	23.6155	9.4843	7.451	7.9234	5.9568	5.6486	13.0968	36.832	8.66	8.032	8.29	9.018	10.282	18.0023		0.186276	17.2355
4.6465	16.5548	27.3529	27.2747	33.6531	29.152	3.688	4.195	4.5771	6.045	3.4464	3.712	8.035	17.9936	24.1828	44.2374	72.9176	14.8278	19.1638	23.1205	9.8512	6.7435	7.3846	5.5338	5.1905	12.6657	29.3724	8.396	6.701	7.258	7.82	9.318	15.9026		0.191176	16.1333
4.7657	13.3866	25.256	23.4859	33.1823	25.804	3.151	3.978	4.3018	5.273	3.8186	3.609	7.295	15.8412	22.3507	44.8246	68.8569	13.0444	15.6884	24.418	9.0707	5.5545	6.477	5.1504	5.0545	12.1482	22.8622	8.845	6.36	6.424	7.775	8.496	12.2113		0.196081	14.8123
4.8848	11.9281	24.3559	22.5157	29.053	19.75	4.159	3.47	3.5026	4.907	3.2096	2.953	7.791	16.1442	20.2672	45.3875	68.5137	12.6698	15.859	23.9611	7.8541	4.9639	5.9879	4.5386	4.2615	9.6035	19.2444	9.008	6.613	5.743	8.167	7.964	10.0497		0.200981	13.8874
5.0039	10.2282	22.3969	21.1935	24.2269	15.562	3.391	3.449	2.9651	4.893	3.0106	3.597	6.595	16.2158	19.4706	44.882	73.3627	11.7907	14.6516	23.8593	7.8028	4.5688	6.1771	4.9635	4.6542	8.1005	15.2941	7.188	5.595	5.713	7.213	6.963	8.2424		0.205881	13.0693
5.1231	10.2239	19.5588	21.0376	21.153	14.314	2.874	3.373	3.5931	4.371	3.1228	2.894	7.135	16.4176	19.068	44.9468	72.2416	11.8776	14.1577	20.9358	6.1336	5.5483	6.0151	4.7709	4.2398	6.9374	12.1644	5.758	5.155	5.352	6.826	6.907	7.3215		0.210786	12.3883
5.2422	9.3771	18.6324	19.0036	17.6536	10.718	3.435	3.101	3.4459	4.831	2.7177	2.491	6.286	15.5457	18.0044	44.7361	71.4455	11.5995	10.8311	16.9017	5.6965	4.956	5.1881	4.7301	3.9974	5.9381	12.0104	6.002	4.274	4.855	6.424	6.731	7.1511		0.215686	11.5222
5.3614	8.7678	16.5414	18.2327	16.8795	9.132	3.81	2.546	3.04	4.872	3.6027	2.523	6.079	15.0483	15.1103	42.1949	69.1336	12.0169	10.2839	12.8295	5.7209	4.6426	5.0436	4.871	3.4087	5.5239	12.8168	6.259	4.091	5.683	6.689	6.116	6.0188		0.22059	10.9227
5.4805	7.1797	17.0126	16.5769	14.574	9.522	2.728	2.33	3.0676	4.794	3.8874	2.657	6.098	12.6751	15.085	38.6437	67.5026	11.7098	9.7159	10.5998	5.9036	4.4287	4.8872	4.8609	3.1532	5.8225	12.2913	6.532	4.172	5.367	5.855	6.011	5.2601		0.22549	10.3407
5.5996	7.4164	15.8298	15.0626	14.0967	8.233	2.933	2.595	3.0067	5.223	3.2694	2.749	5.71	12.6006	14.4936	35.528	66.9138	9.7663	8.0422	8.6189	4.9383	4.1006	5.5934	5.5407	2.9999	5.101	13.0252	6.08	4.398	4.285	5.52	5.977	5.2915		0.230391	9.84183
5.7188	7.5401	15.2628	14.2029	12.0934	7.45	2.737	1.905	3.118	4.35	2.8921	2.222	5.731	12.8373	14.3058	32.6765	69.147	8.6617	8.1409	7.5775	4.3284	4.1408	5.5399	4.5615	2.6818	4.6586	15.8028	5.977	3.955	4.214	4.764	6.825	4.9933		0.235295	9.54041
5.8379	7.6835	13.7048	14.0328	9.8146	7.137	2.407	2.497	3.1616	5.187	2.8041	2.197	6.437	11.4491	12.1739	31.2444	64.4149	8.5173	8.2117	6.5468	4.0075	4.5242	4.3084	4.4832	2.7069	4.0586	14.7971	5.582	3.871	3.325	5.167	5.469	4.5745		0.240195	8.953
5.9571	6.9602	10.4559	14.4538	10.0028	7.434	2.537	2.449	2.592	4.891	3.9493	2.629	6.1	9.7194	10.1178	27.3378	55.7209	9.3168	7.8262	5.6069	3.5643	4.2508	4.6227	4.1956	2.6978	4.3644	12.5761	6.067	3.621	3.804	5.467	5.271	4.33		0.2451	8.27911
6.0762	5.9284	8.2465	13.3696	9.5176	5.689	3.624	1.931	3.3419	5.394	3.2922	2.285	6.647	9.2112	8.494	22.0883	51.3116	8.2391	6.3613	5.3386	3.4691	3.5971	4.5774	5.6335	2.6209	4.3689	13.8444	5.876	3.138	3.192	4.473	4.414	4.7899		0.25	7.63452
6.1953	5.776	8.2393	12.3395	7.8506	6.961	2.66	2.192	3.8809	5.691	2.9222	2.035	7.212	7.7715	8.4227	18.3846	46.5767	7.8871	6.1506	4.8789	3.6054	4.1706	4.6637	4.7081	2.4926	4.2459	13.0419	6.486	3.428	3.093	4.915	4.326	4.1026		0.2549	7.2222
6.3145	5.9544	7.396	12.1195	7.541	6.913	2.143	2.881	2.7303	5.432	2.7807	2.651	6.376	5.2779	7.6819	13.8982	36.9077	6.8564	6.566	4.7012	2.9697	4.0209	4.3643	4.8715	2.6826	4.3725	12.573	5.431	3.556	2.88	4.084	4.828	3.977		0.259805	6.4818
6.4336	6.526	6.6088	10.4422	6.31	5.919	2.65	2.708	2.5197	5.487	3.1399	2.936	5.733	3.8799	6.6007	10.2601	30.1243	6.2878	6.1036	4.7731	3.373	3.5212	4.6742	5.2634	1.9032	4.6254	11.3464	5.877	4.172	2.441	3.409	4.187	4.3892		0.264705	5.88097
6.5528	6.1242	6.0398	9.4804	5.9662	7.194	2.84	2.479	2.7464	4.709	3.6168	2.717	5.917	3.5655	5.1386	8.5791	25.883	6.6973	5.4748	5.376	3.2959	3.1185	4.3841	5.2779	2.274	3.7648	11.4087	5.312	3.328	2.905	3.25	4.826	4.4694		0.269609	5.56745
6.6719	6.1517	6.8229	8.0724	5.9076	6.635	2.092	2.485	2.761	4.766	2.9736	3.345	6.161	2.8121	5.2959	6.4784	20.7818	6.4435	6.2573	4.8037	3.1535	3.5241	4.7641	6.0648	2.9267	4.1573	12.5246	5.126	3.838	2.446	3.364	4.248	3.76		0.27451	5.34197
6.7911	4.8428	5.7462	6.2866	6.2296	6.202	2.181	2.945	3.1808	4.383	2.832	2.516	6.696	3.2619	5.7098	6.9728	19.4452	6.2538	6.786	4.6295	2.7861	2.6952	4.8114	5.9976	2.3226	3.2483	10.7236	6.207	3.893	2.377	3.036	4.343	3.2006		0.279414	5.08567
6.9102	4.41	6.3973	5.6279	4.4773	6.013	2.279	2.397	3.5816	4.392	3.4966	2.731	6.431	3.841	5.1403	7.2433	16.1195	5.8239	6.2745	3.5051	2.5529	2.9248	5.2585	5.6866	2.6451	2.6222	8.3137	7.738	3.299	2.243	2.915	4.088	3.9152		0.284314	4.82448
7.0293	4.7693	5.1078	5.7186	5.0272	5.765	2.855	1.775	2.9949	5.142	3.8962	2.314	6.51	4.0636	4.9263	6.6845	15.9923	5.6607	6.1961	3.84	3.3961	2.9597	4.7663	5.585	2.0158	2.3339	6.8137	8.005	4.038	2.255	2.78	3.176	3.8791		0.289214	4.72632
7.1485	4.9223	4.904	5.4911	4.6181	5.071	3.303	2.385	3.63	5.494	4.3873	2.319	7.126	3.4212	4.9581	5.3977	12.605	5.6672	6.6509	4.3693	3.3081	2.6017	6.0592	6.4282	2.0817	2.2039	5.9676	8.188	3.337	2.609	3.025	3.23	4.0847		0.294119	4.68263
7.2676	4.9832	4.5415	4.4876	5.5325	5.308	2.961	2.911	3.8391	6.774	4.3852	2.619	7.478	3.9059	4.0864	5.5205	11.9844	6.1875	6.1474	4.5824	3.6093	2.876	6.8153	7.6178	2.5028	2.6356	4.6744	10.242	3.744	3.011	2.349	3.039	4.4129		0.299019	4.86762
7.3868	4.9297	5.2235	4.7811	4.5268	6.307	3.088	2.198	3.4552	7.14	5.14	2.833	7.546	3.208	4.1963	5.5352	9.8037	7.1223	6.2237	4.1864	2.7092	2.8726	7.5724	8.2625	2.1215	2.4557	5.0946	11.899	4.215	2.487	2.935	3.369	4.9065		0.303924	4.94825
7.5059	4.4433	5.6832	4.7197	3.7178	5.189	4.583	2.404	3.8219	6.906	5.0187	2.614	8.036	3.2327	3.2127	4.9533	6.986	6.5386	6.4907	3.9598	2.7879	2.4267	8.886	9.1045	2.2952	1.7304	4.1876	13.707	4.547	2.098	2.5	2.989	4.0592		0.308824	4.80715
7.625	4.7475	4.7592	4.5291	3.8045	5.965	3.889	2.334	4.3962	7.688	5.3166	1.961	7.193	2.8301	3.3824	4.6742	7.1136	6.3756	6.1354	3.3867	2.8209	2.2408	9.6856	7.538	2.2429	2.2365	3.8047	15.302	4.079	2.224	2.591	2.951	4.2125		0.313724	4.76281
7.7442	4.4093	4.8878	4.105	4.0575	5.413	3.588	2.567	3.9502	7.686	5.3831	2.078	8.459	2.6969	3.0759	5.0326	7.3778	5.7102	7.1788	4.0724	2.9748	2.7788	8.8829	8.3212	3.4768	2.5513	3.6848	12.911	4.129	2.994	2.714	2.559	3.5922		0.318628	4.79057
7.8633	4.2073	4.9594	4.435	3.8661	5.318	4.061	2.962	4.8207	9.622	5.8715	2.322	8.874	2.6813	3.0459	4.6327	5.4241	6.4051	7.1925	4.1176	2.9658	2.9765	9.8975	9.46	3.1186	2.2947	3.2442	12.805	5.136	2.667	2.788	3.524	4.036		0.323529	4.99161
7.9825	4.4422	4.0593	3.84	3.259	5.249	4.11	1.896	4.98	10.565	6.5615	2.681	7.835	3.3547	3.3808	4.18	7.1064	6.0813	6.447	3.2704	3.359	2.6079	10.1715	9.1995	2.8432	1.8514	3.5481	13.231	5.489	3.196	2.562	2.692	3.4755		0.328433	4.92265
8.1016	4.7274	5.3416	3.8599	3.0963	5.885	3.904	2.699	5.2405	12.312	5.8878	2.922	7.848	3.2434	3.1356	4.366	6.1398	5.7643	7.0802	4.0348	3.3049	3.1464	11.1174	10.054	2.5484	2.1903	3.37	12.429	5.269	3.099	2.498	2.231	2.7484		0.333333	5.04667
8.2207	4.4459	5.3673	3.1233	3.5211	5.967	3.867	3.716	4.561	14.774	5.6434	2.567	8.716	3.0079	2.7865	4.632	5.6677	6.2517	7.3421	4.7947	3.0799	2.9656	10.4028	11.3491	2.1622	2.7081	3.3964	15.689	5.255	2.526	2.834	2.688	3.8746		0.338234	5.30257
8.3399	4.7059	4.1809	4.3534	2.8941	5.899	4.037	3.543	5.8773	15.664	6.0495	2.935	9.108	2.8881	2.9096	3.8537	6.0037	5.5753	7.2623	4.745	3.1497	2.5535	11.3164	11.7755	2.0357	2.4656	2.8183	15.519	5.598	2.373	2.328	3.362	3.7126		0.343138	5.35913
8.459	4.6629	4.7364	3.4661	3.0769	7.321	3.777	2.097	7.5353	19.545	5.5546	3.006	9.731	2.9072	2.5729	4.4315	5.834	6.5357	6.8687	4.1598	2.9828	3.0009	12.8483	11.7196	2.1435	2.0706	3.1385	15.667	5.348	2.531	1.935	2.546	3.7102		0.348038	5.54564
8.5782	4.6209	5.1223	4.3123	3.7266	7.58	3.944	2.505	9.211	20.48	5.8064	2.886	8.847	3.2801	2.3894	4.2088	5.6625	7.1171	6.8942	3.6928	3.3725	3.1332	12.0658	11.1859	2.478	2.647	4.1367	17.589	5.019	2.661	1.46	1.909	3.8597		0.352943	5.74385
8.6973	5.0354	4.905	4.1287	3.0669	7.493	4.548	2.332	11.1461	21.216	6.5997	2.929	9.861	2.5831	1.9313	3.8627	5.0153	8.022	7.0343	3.3978	3.4795	2.8811	13.5207	11.4982	2.3557	2.4809	3.407	17.167	5.661	2.514	2.192	2.134	4.604		0.357843	5.90633
8.8165	4.2571	4.8619	3.7179	3.2882	8.726	4.717	2.288	15.066	24.759	7.6653	2.538	9.687	2.4777	2.5348	3.9453	5.1381	6.8325	8.0629	3.7279	3.1849	2.8908	14.8722	12.6952	2.43	1.8355	3.3526	16.873	4.964	2.124	2.276	2.951	4.0963		0.362747	6.21363
8.9356	4.3997	3.9234	3.4704	2.5238	8.76	4.249	2.336	19.0158	26.992	6.7651	2.631	10.259	3.0916	2.6048	3.2296	5.5208	7.4246	8.9272	3.427	3.4557	2.6241	17.9317	14.4518	2.4578	1.6867	4.0247	15.731	4.038	2.483	2.08	2.331	4.1637		0.367648	6.46906
9.0547	4.3351	4.0878	3.6495	3.6005	9.124	5.766	2.407	21.1779	24.862	7.4818	2.837	9.697	2.8119	2.322	3.7549	5.4321	7.2307	8.1357	3.9757	3.6125	2.961	17.7206	18.4784	2.9495	1.8482	5.6712	16.888	5.538	2.186	2.504	3.005	3.7307		0.372548	6.86818
9.1739	4.7772	4.5823	5.2284	3.7682	10.508	5.233	2.677	23.6175	22.064	7.857	3.259	11.704	3.1343	2.8901	3.3449	5.9024	6.0433	9.815	3.8523	3.6596	3.0804	18.7057	21.4694	2.6364	2.5891	7.9119	17.146	5.66	1.863	2.168	2.87	3.8282		0.377452	7.30768
9.293	4.5111	4.5504	5.2408	3.7282	11.814	5.539	2.508	25.6548	20.627	8.6555	3.243	12.728	3.1576	2.4773	2.9137	5.3719	5.7977	9.4313	4.5104	3.9978	4.0418	17.8496	21.5188	3.5178	2.4812	9.2979	18.566	5.592	2.494	1.857	2.637	4.6515		0.382352	7.53007
9.4122	4.9442	4.9803	5.5602	4.0015	12.547	5.002	2.786	23.5004	19.281	7.6263	3.032	14.345	2.4927	2.0748	3.5978	4.9045	6.5254	11.0577	4.5124	4.7768	3.5343	16.4511	22.8676	2.8608	2.3425	11.2545	21.978	5.484	2.841	2.038	3.191	3.5269		0.387257	7.68493
9.5313	5.1154	5.499	6.632	4.6711	10.887	4.498	2.77	24.3762	14.398	8.3037	3.038	16.424	2.4763	2.2401	3.1231	4.7038	6.421	11.4039	5.5562	4.2063	3.4189	16.0217	28.8069	2.6441	2.043	11.4083	26.319	4.702	2.617	2.033	3.331	4.0689		0.392157	7.9424
9.6504	5.0199	5.3627	8.2033	4.4338	12.187	4.628	3.002	24.5448	11.133	7.8861	3.724	18.341	2.5278	2.0142	3.4283	5.1686	6.6706	12.1856	5.3011	4.0162	4.1153	15.1234	34.4095	2.1541	1.6679	11.7692	29.487	6.294	2.725	2.118	2.709	3.7229		0.397057	8.31479
9.7696	4.4173	5.5277	7.6151	4.9875	10.683	4.994	2.799	21.6929	9.034	6.7222	2.846	19.524	3.2937	2.0292	3.7467	4.4436	6.9315	11.7424	6.2094	4.4813	4.2081	13.2382	38.0266	2.8429	2.0674	12.4502	27.812	5.41	3.127	1.937	2.542	3.7496		0.401962	8.16036
9.8887	5.9966	5.411	8.3045	6.4497	9.418	4.639	3.362	17.7375	8.075	6.8774	2.852	22.137	3.5679	2.1651	3.496	4.8224	7.8651	11.9233	5.7267	5.2599	3.4912	14.0922	39.9584	2.5134	2.3616	12.857	26.778	5.21	2.721	2.449	2.864	3.5784		0.406862	8.28001
10.0079	7.7598	5.8901	7.7507	7.9142	10.782	5.189	3.506	14.29	7.778	6.1265	2.988	23.819	3.7309	2.2001	3.4168	4.7801	7.7671	12.9527	5.6286	4.9974	3.8779	16.5799	37.621	3.1481	2.8279	13.9728	24.352	4.833	2.277	2.091	3.317	4.5418		0.411766	8.39708
10.127	8.9776	7.9744	8.3708	8.1557	9.427	4.372	3	11.8512	7.478	5.4394	3.672	23.486	4.0796	2.6341	2.767	4.71	7.7887	11.8163	5.9794	5.3241	3.5386	16.3246	38.7903	2.6645	3.1507	13.6683	21.361	4.877	2.886	2.432	3.489	4.5449		0.416667	8.28219
10.2462	8.7182	8.8836	8.2393	8.8224	8.709	4.396	2.945	12.5952	7.05	6.0753	3.411	29.107	4.4144	1.9956	2.9671	5.4506	7.9617	11.1619	6.276	5.2401	3.6374	15.6072	39.493	2.9673	2.6194	13.1409	22.639	4.962	2.046	1.794	2.84	4.3999		0.421571	8.45517
10.3653	7.9122	8.5724	7.6017	8.9609	7.836	5.212	3.194	12.055	7.833	5.7474	2.992	30.515	4.2443	1.926	3.7285	3.8347	7.7319	11.9631	7.5397	6.2482	4.1043	17.9076	35.5018	3.0059	2.8231	12.8106	20.39	4.361	2.647	2.103	2.719	3.6277		0.426471	8.36403
10.4844	8.6102	9.8738	9.6826	10.6354	7.727	5.832	3.287	11.8607	9.63	5.2878	3.034	33.669	4.1904	2.2917	3.6262	4.1926	8.5259	11.7	9.2644	6.6858	3.9142	17.7319	31.0265	2.8744	2.4219	13.1894	19.434	4.859	2.532	2.135	2.858	3.9715		0.431372	8.64232
10.6036	10.7508	11.5235	10.1973	9.6204	8.341	5.201	3.576	14.7121	11.804	6.0919	3.435	37.285	3.5081	1.8359	2.822	5.6464	8.7328	14.5763	10.3483	7.0241	3.752	17.8854	25.9805	2.8836	2.5237	10.6114	19.311	4.664	2.94	3.019	2.74	3.3852		0.436276	8.96024
10.7227	12.8754	14.1358	11.0501	12.334	9.473	5.947	3.821	18.353	11.637	5.1585	4.043	38.093	3.6207	2.0583	2.7617	4.832	9.4077	14.1995	11.1394	6.8559	3.9223	19.5397	19.7456	3.416	2.671	9.0708	17.934	4.784	2.58	2.502	2.456	3.6529		0.441176	9.1897
10.8419	14.6317	15.581	11.6341	12.8451	10.115	6.243	4.052	21.4639	11.015	5.18	4.17	38.752	4.8942	2.2449	3.1078	4.7341	11.4718	14.177	13.2453	5.7078	5.3189	18.2643	17.4922	3.039	2.533	7.8006	15.194	4.65	2.651	2.355	2.93	3.8954		0.446081	9.41841
10.961	15.0754	18.5592	12.1907	13.8028	9.849	5.756	4.252	25.536	10.755	5.3422	3.188	34.042	4.5232	2.3947	3.6167	4.6044	11.4179	15.0416	15.7838	5.222	4.9368	16.9157	15.6314	3.1142	2.5525	7.7181	13.255	4.324	3.38	2.832	2.459	3.336		0.450981	9.41898
11.0801	12.9817	19.0149	13.6066	14.2957	13.881	5.552	3.918	27.0545	11.77	4.9181	3.068	30.027	4.776	2.5341	3.4824	4.077	11.8151	17.7757	16.7688	5.478	4.1235	15.16	14.3257	3.2229	2.7811	7.18	12.716	4.021	3.841	2.839	2.74	3.8418		0.455881	9.48708
11.1993	12.2215	19.6904	13.6688	13.8763	16.012	5.672	3.581	31.7968	9.843	4.6014	3.992	27.406	4.1907	2.4774	4.0069	4.1897	14.0473	18.5841	16.6739	5.6458	4.6754	13.8498	12.1016	3.3408	2.4486	6.5753	13.283	4.645	2.835	2.564	2.595	3.6855		0.460786	9.52425
11.3184	10.6058	20.8326	14.9767	13.5676	14.999	7.42	3.508	38.6099	7.798	4.4059	4.44	24.281	5.5793	2.831	4.4873	4.9481	15.0141	17.6661	20.194	6.2199	4.1751	12.8838	12.2721	3.6322	2.1218	5.6383	11.289	4.675	2.862	2.676	3.56	4.0118		0.465686	9.75567
11.4376	7.8042	23.3889	18.3029	14.6616	16.078	6.436	4.102	36.8914	8.704	3.9868	3.759	20.064	5.106	2.299	3.6688	3.9659	13.1552	17.5343	21.8544	5.9057	5.394	11.707	11.999	2.6406	2.4442	6.2518	11.654	3.937	2.793	2.416	3.246	4.4558		0.47059	9.58145
11.5567	7.7404	27.1791	16.3511	14.142	15.907	5.582	4.61	35.7567	8.272	4.7121	3.889	17.838	5.9246	2.196	3.8514	5.991	14.7075	19.7544	21.5966	5.7421	5.299	9.3207	12.0464	3.0986	2.4611	6.0673	12.572	4.107	3.406	2.826	3.291	4.6302		0.47549	9.71463
11.6758	5.6017	31.7287	17.7387	15.8946	15.917	4.718	4.563	36.8964	8.353	4.8888	4.201	15.38	6.8165	2.761	4.5154	6.1585	13.539	21.3113	24.0791	5.4164	4.6565	7.6642	11.8566	3.3753	2.9156	5.8157	9.613	4.841	2.626	2.658	2.67	4.2639		0.480391	9.79481
11.795	5.724	35.7865	21.2161	15.2107	14.952	5.579	4.694	38.5814	8.961	4.0758	5.377	13.306	6.1795	2.6078	4.2615	5.738	12.2392	19.1224	22.591	6.0564	5.3588	7.5382	11.5986	2.5798	2.351	5.6175	10.987	5.282	2.706	3.315	2.86	5.0655		0.485295	9.92246
11.9141	6.3729	37.5627	22.991	13.2067	13.525	5.783	4.579	37.3396	9.874	4.614	5.458	12.013	6.2176	2.4908	5.0771	5.9094	11.2771	21.4383	21.3974	4.8245	5.1782	6.9612	11.1107	3.1085	2.6664	5.1511	9.546	5.506	2.546	2.794	3.037	5.1783		0.490195	9.83545
12.0333	5.7329	36.0755	22.303	12.163	12.848	5.603	4.492	35.7043	9.196	3.8693	5.034	12.858	6.2787	2.4728	5.1033	5.4557	10.4227	22.082	22.9011	5.3605	4.7742	6.9522	9.5107	3.8488	2.7851	4.0531	9.325	4.602	2.847	2.631	3.06	4.2446		0.4951	9.51842
12.1524	5.58	34.5752	25.2195	11.0473	12.346	6.069	4.946	31.8598	9.512	3.9136	4.24	10.918	5.4479	2.9833	5.0006	7.5117	9.5361	22.9719	20.0962	5.6779	5.1818	8.7943	9.6825	2.8487	2.5639	4.3667	9.924	4.133	2.624	3.037	2.478	3.7724		0.5	9.33932
12.2716	6.112	29.362	24.5698	9.8038	9.971	5.367	4.462	29.5998	10	4.2566	5.247	12.371	5.6221	2.7419	4.4447	7.0192	9.5936	25.7562	14.2202	6.3517	5.4532	7.815	9.6959	2.5838	2.7611	4.6202	11.939	3.958	2.98	2.293	2.355	3.6261		0.504904	8.96725
12.3907	6.0908	23.5793	23.2121	8.6253	9.928	6.408	4.415	27.1312	9.343	3.8757	5.76	13.092	7.3409	3.414	6.1161	7.8937	10.2071	25.2253	10.7166	7.2924	5.2819	7.7163	9.7007	3.0129	2.8848	4.2275	10.439	3.479	2.659	2.379	2.703	4.1639		0.509805	8.6973
12.5098	6.3578	19.9614	22.837	7.2271	9.117	5.403	3.907	21.3182	9.954	4.3572	5.541	14.164	6.6027	3.7276	7.2463	8.9232	9.23	23.35	8.3877	7.1447	5.6696	8.0893	9.6814	2.6196	2.5283	4.615	11.569	3.918	2.464	2.615	3.438	4.255		0.514705	8.31935
12.629	8.7448	17.5555	20.9036	6.3759	9.927	4.364	3.655	16.3906	11.389	4.9907	4.523	14.113	5.9517	2.9921	6.034	9.3965	9.0275	23.361	7.0442	6.9574	5.2221	7.0369	7.5784	3.0896	2.4161	5.6535	11.381	3.356	2.624	2.424	3.129	4.2928		0.519609	7.87187
12.7481	10.6662	14.195	18.9681	5.2497	9.462	4.519	3.352	14.5518	11.484	4.7218	5.242	17.766	5.9686	4.3059	5.7099	9.2838	8.6245	19.2244	7.0618	7.7853	5.4135	8.6264	7.8922	2.749	2.5763	5.3381	10.384	4.211	2.89	2.426	2.889	3.6059		0.52451	7.72322
12.8673	10.4452	9.6047	16.2813	5.989	10.366	5.301	3.061	13.2129	11.891	3.8518	5.121	18.713	6.7623	4.3537	6.4832	8.4003	7.4682	18.9791	8.7893	7.6937	6.9311	8.4501	8.3411	3.2	2.7564	4.2454	10.502	3.197	2.753	2.429	2.494	3.512		0.529414	7.54934
12.9864	11.1079	8.1196	12.0394	5.0687	12.306	5.054	3.652	12.6933	12.899	4.2204	5.507	17.846	6.3774	3.9057	6.4195	10.3676	8.4897	18.3413	8.05	8.5386	7.1825	7.3305	8.2391	4.0081	2.6572	5.0502	11.232	3.522	3.046	2.91	3.437	3.0278		0.534314	7.58267
13.1055	10.7124	7.83	10.2245	5.9565	12.138	4.333	4.768	11.1341	11.351	3.7746	5.691	17.625	6.2239	4.6053	7.204	10.3379	8.8762	19.6092	8.1156	9.0447	8.1098	7.8673	8.4738	3.5574	2.4393	4.6654	10.899	3.851	2.979	2.961	3.367	2.6283		0.539214	7.54229
13.2247	10.4073	7.1288	9.745	6.526	13.073	4.668	4.185	10.3559	10.777	4.2906	5.382	16.684	5.5967	4.9542	7.4288	10.6637	10.6517	19.0146	9.9585	9.7369	9.3025	7.2922	8.9566	3.3948	2.7699	5.0659	9.884	4.499	3.364	2.818	2.588	2.8172		0.544119	7.62437
13.3438	10.1205	8.0459	9.7897	6.4439	14.893	5.574	3.294	9.7722	12.664	4.3494	6.112	16.795	6.751	5.7354	8.2406	11.4747	10.3099	19.9226	12.6888	9.3974	10.9356	7.2846	9.8207	3.713	2.9241	5.4076	10.521	4.215	2.531	2.228	2.671	1.9878		0.549019	8.01917
13.463	10.5675	8.0941	9.7162	7.7049	15.863	5.27	4.011	9.6742	12.447	4.1441	6.257	14.353	5.4641	6.4967	9.5349	13.0554	9.3725	20.1188	12.3615	9.4674	9.7562	7.0512	8.976	4.2176	2.5921	4.5879	10.775	3.712	2.908	2.009	2.696	3.1578		0.553924	8.01288
13.5821	8.8175	7.4327	9.4688	7.7526	16.056	4.873	4.059	10.1579	15.278	3.7608	6.545	14.9	6.011	6.6849	9.4901	13.9529	10.5609	23.7174	12.8126	10.0596	11.2217	6.9513	7.5713	3.8236	2.2713	3.77	12.003	4.104	2.367	2.583	2.716	3.0872		0.558824	8.27688
13.7012	10.4944	8.4882	8.577	8.12	17.763	5.664	3.574	10.0739	16.296	4.1169	7.347	13.213	6.0625	7.2149	8.9673	16.5255	9.3154	24.5315	11.7735	8.4212	11.0472	6.3902	8.7367	4.0454	2.5346	4.2217	12.64	4.192	2.191	2.752	2.856	2.8476		0.563724	8.46855
13.8204	9.1703	8.2618	8.768	8.1085	19.242	5.148	3.408	11.3338	18.34	4.1233	6.154	13.125	5.3664	7.1912	8.7641	15.8747	10.1525	26.9615	9.7732	8.6977	11.0226	7.0709	7.8718	4.4606	2.5732	4.1961	11.616	3.776	2.648	2.341	3.225	3.1276		0.568628	8.49665
13.9395	10.9788	7.1924	9.123	8.4345	20.22	5.489	3.493	10.3554	15.077	4.7587	6.036	13.945	4.995	7.2369	10.4185	13.0379	11.6227	29.3767	7.8276	8.6628	12.7847	6.9589	8.3396	3.9869	2.7652	4.4411	11.091	3.385	2.429	2.339	2.45	3.5332		0.573529	8.52452
14.0587	13.1727	7.5699	9.0233	11.0349	21.012	5.304	3.208	11.1982	13.722	4.9541	6.774	14.53	5.4778	7.3159	9.6259	12.2847	11.5318	26.5545	4.9467	8.158	12.6412	7.4994	7.6725	4.2193	2.6186	3.8128	10.202	4.143	2.527	2.406	2.735	3.0583		0.578433	8.46667
14.1778	16.19	6.7316	8.1465	10.4026	21.681	4.905	3.485	10.5217	11.754	5.2556	7.34	12.731	5.4428	6.6661	9.9287	14.2086	11.0071	26.5118	4.7098	7.7518	13.3449	7.6988	8.3105	3.2289	2.4871	4.4514	11.299	3.491	2.842	2.275	3.179	2.6191		0.583333	8.45617
14.297	21.144	6.2626	7.4873	10.8733	21.066	5.303	3.839	11.3207	10.287	6.8359	7.336	11.715	5.5658	6.6963	9.6609	13.8485	10.86	27.6985	4.001	7.6875	12.8338	7.2322	10.004	3.7318	2.8252	5.0784	10.715	3.297	2.993	2.717	2.945	2.3939		0.588238	8.63296
14.4161	25.6828	5.726	6.7378	11.7646	18.847	5.43	4.006	10.5388	10.14	7.1454	7.481	12.151	4.8857	6.4519	8.5244	13.963	10.9341	28.7927	4.8359	7.6182	12.9219	7.4392	11.4179	3.9371	2.3866	4.4997	9.936	3.538	2.71	2.309	2.568	3.2104		0.593138	8.70407
14.5352	29.3681	5.209	8.3018	13.6089	18.761	4.282	3.653	10.8835	8.064	7.2492	7.794	12.262	4.8534	6.2267	7.9141	15.1886	11.5718	29.6906	5.2677	7.2339	12.829	7.5253	10.6351	4.4301	2.6473	4.6298	9.831	3.541	2.712	2.794	2.062	4.0217		0.598038	8.90755
14.6544	30.4042	4.4779	7.5827	14.2605	18.021	4.863	3.236	10.0266	7.607	9.6816	8.87	12.497	5.2077	5.6331	7.8236	15.6338	12.456	29.2958	4.6388	7.4986	13.846	7.8905	10.3741	4.3301	3.2514	4.6443	10.175	4.153	2.376	2.693	2.09	2.8301		0.602943	9.01151
14.7735	33.2002	4.7036	7.0913	15.6788	16.685	3.906	4.093	11.2114	7.904	9.2243	9.896	12.454	4.1544	5.8304	8.9525	14.7886	12.0924	28.494	3.9071	6.3408	14.365	8.4437	10.4693	4.4941	3.3403	4.6387	10.531	4.232	2.407	3.318	2.472	2.828		0.607843	9.12959
14.8927	34.9279	4.0754	5.3792	17.2172	18.639	4.146	3.685	11.853	7.235	9.5382	10.362	12.394	3.8708	4.8991	8.5677	12.4742	11.311	27.7949	3.8046	5.8895	15.4695	9.1209	9.6432	4.7865	2.7134	4.1049	12.235	4.215	2.936	2.977	2.845	3.3962		0.612747	9.14082
15.0118	35.9861	3.2147	5.7833	17.6862	17.975	3.702	3.865	11.1096	8.334	10.4651	10.876	11.552	3.9312	4.8246	10.6035	11.8408	11.2592	27.2579	4.5407	5.7669	13.6559	7.2566	8.6519	5.0432	3.0824	3.5091	11.798	3.692	3.418	2.832	3.034	3.1497		0.617648	9.05302
15.1309	41.5233	2.9099	6.1571	18.494	17.188	3.573	3.798	11.9067	9.179	9.7566	12.2	14.485	4.8543	4.5366	11.3704	11.5792	11.1213	26.7786	4.1318	4.9811	13.7803	7.8696	10.0208	4.2466	3.0695	3.2335	11.648	3.502	3.001	2.695	2.797	2.5578		0.622548	9.34203
15.2501	38.9879	3.8143	6.7168	21.0489	18.085	3.352	3.903	11.6945	9.381	10.5364	13.754	15.122	4.7207	4.4284	11.8834	10.1887	12.1244	25.5613	4.2256	4.0215	13.8104	9.528	8.7641	4.2363	2.8655	3.6639	12.829	3.365	2.994	2.809	2.44	2.0782		0.627452	9.46666
15.3692	39.1772	3.0166	6.4207	25.9725	18.481	4.422	3.71	12.0133	10.61	11.3513	15.328	16.698	4.5479	4.6194	10.5036	9.8509	12.2412	26.1122	4.7284	3.7813	12.9672	9.6125	8.3748	3.4591	2.7187	3.621	11.846	3.618	3.086	2.091	2.828	2.4535		0.632352	9.69567
15.4884	37.2461	2.848	6.1526	27.0947	21.034	4.298	4.017	11.3007	9.864	11.1964	18.754	18.278	4.2991	4.4543	10.8005	8.328	11.9916	25.3736	4.7739	3.8559	14.58	8.3724	7.2587	3.9126	3.128	4.0024	11.649	3.766	2.746	2.532	2.773	3.0951		0.637257	9.80549
15.6075	35.3332	2.774	5.2282	32.003	20.733	4.259	3.403	10.4481	9.558	12.9523	21.063	19.41	4.5509	3.6297	11.6985	8.407	13.3142	25.9368	4.5491	3.0392	12.9076	7.8254	6.7272	3.5886	2.8986	3.3491	12.485	3.117	2.954	3.317	2.262	2.7549		0.642157	9.88989
15.7266	34.2925	2.7376	5.797	35.17	20.07	3.952	3.808	10.4495	10.392	13.0236	24.628	20.136	4.9909	4.6018	11.6226	8.4269	13.9637	25.6073	4.4698	2.7474	12.96	9.1866	8.0731	3.5243	3.0319	3.889	13.02	3.801	3.022	2.527	2.1	2.2432		0.647057	10.2583
15.8458	34.1787	2.8911	5.9857	40.5868	21.912	4.04	3.348	9.9714	9.79	12.6957	27.249	19.1	4.754	4.4171	11.4316	7.329	15.0296	24.4717	5.5534	2.9357	11.9508	9.577	6.4468	3.9863	3.2275	4.1161	11.99	3.655	3.187	2.628	2.528	2.6559		0.651962	10.4256
15.9649	32.1159	3.3702	5.3726	45.1804	22.185	4.867	3.961	9.7404	10.278	12.0811	28.355	18.6	3.812	3.8572	13.5772	9.0432	14.478	23.1894	5.6307	2.7515	12.9954	8.9054	6.3553	3.7243	3.0619	5.0813	11.826	3.445	2.371	2.382	2.907	2.6699		0.656862	10.5678
16.0841	34.4909	2.8195	5.0054	46.5742	21.685	4.451	3.397	8.8087	9.728	11.1924	29.591	16.726	3.9952	4.2502	14.348	10.0503	15.6985	21.3525	4.3411	2.4077	11.7156	7.7145	7.6664	3.3266	3.0183	3.5868	11.341	2.953	2.81	2.685	2.461	2.6204		0.661766	10.4003
16.2032	31.4317	3.5505	4.772	46.9599	22.587	4.47	3.525	8.1388	7.417	11.9387	28.681	14.515	3.9915	4.2536	16.1432	11.9059	16.1587	21.5164	5.3136	1.9904	11.0006	7.76	6.8183	3.3627	2.6756	4.2571	12.08	2.887	2.794	2.845	2.319	2.4231		0.666667	10.3276
16.3224	29.0967	2.6685	5.6136	46.3292	25.146	5.218	3.861	8.7996	7.916	12.8299	27.41	13.541	4.096	4.5313	16.1786	11.6877	16.554	19.4153	5.8418	2.3169	10.2751	7.6616	6.5188	3.9376	2.1634	4.2789	10.062	3.864	2.421	2.443	2.285	2.3918		0.671571	10.2298
16.4415	28.1691	3.2872	4.9983	50.4623	23.877	5.045	3.471	9.0562	8.263	12.7091	26.785	11.565	4.623	4.9236	13.1979	11.475	18.016	20.551	5.9694	2.711	9.3162	8.0895	5.8134	3.5113	2.9527	3.9802	10.218	3.36	3.496	2.465	2.413	2.7897		0.676471	10.2363
16.5606	26.0684	3.1981	4.7484	47.3108	23.813	5.212	3.733	8.0074	8.294	15.0562	26.474	11.744	3.971	5.2738	11.6606	15.1516	17.7591	20.3688	6.2018	2.7811	9.3528	9.0963	6.002	4.0565	2.7917	3.9165	9.319	4.169	3.066	2.115	2.103	2.6891		0.681372	10.172
16.6798	27.7733	3.2863	5.1854	47.4762	23.744	5.139	4.953	8.1306	8.511	15.5189	26.454	13.103	4.2604	4.5342	11.6556	16.7965	16.6767	17.1715	5.6676	3.059	9.1849	9.0052	5.5549	4.04	3.0352	4.0072	9.665	4.207	3.143	2.667	1.823	2.9329		0.686276	10.2613
16.7989	26.6132	2.798	3.9562	49.9494	26.301	5.006	4.734	8.6202	9.244	15.7916	25.707	11.879	4.293	5.4952	10.1471	16.7847	17.2839	19.4162	5.7693	2.7502	8.868	9.298	6.2685	4.1147	2.2129	4.3218	10.027	4.203	3.057	2.631	2.144	2.5164		0.691176	10.3813
16.9181	22.9256	2.9065	4.6729	51.0401	27.015	4.653	4.179	8.3502	7.296	15.5029	27.432	12.472	5.0503	5.3448	10.6985	18.282	15.2853	18.1131	5.5125	2.3258	8.7245	9.4888	5.5785	3.8853	2.7517	3.3501	10.778	3.704	2.729	2.751	2.185	2.4474		0.696081	10.2322
17.0372	25.796	3.0628	5.0341	52.7154	26.154	5.117	3.829	7.6067	7.628	17.62	25.398	12.865	4.7657	6.128	9.6721	17.849	17.6062	19.4489	4.8621	2.2628	7.062	9.0522	5.7145	3.4713	3.2913	3.6821	11.209	3.971	2.811	2.932	2.642	2.4724		0.700981	10.4291
17.1563	26.3271	2.9798	4.6664	53.2045	23.607	4.358	3.826	8.0601	8.333	18.7505	23.67	12.732	5.7791	5.2045	8.2367	17.8549	17.4993	18.6173	5.9955	3.0061	6.254	9.2798	5.9101	4.265	2.8802	3.6427	10.649	3.479	3.122	2.762	2.46	2.5554		0.705881	10.3115
17.2755	25.4974	2.8205	5.1107	52.9327	23.617	4.498	4.456	8.521	8.155	18.7951	23.307	13.582	5.7053	4.5169	7.9941	16.2698	18.7945	18.7412	5.1816	2.2945	6.9537	9.2743	6.5021	3.8631	2.8407	4.6314	10.165	3.346	2.633	2.768	2.845	2.559		0.710786	10.2866
17.3946	24.1284	2.8876	5.2215	52.9806	23.049	4.171	5.234	8.7679	9.094	19.062	20.986	13.667	4.8073	4.6007	9.4191	16.2947	17.8228	20.4079	5.2797	2.7817	6.6785	9.8359	6.5766	4.1324	2.4062	4.2922	11.607	4.674	2.628	2.375	2.968	2.6464		0.715686	10.3588
17.5138	24.5701	3.0776	4.5468	54.3286	21.18	4.12	4.401	8.1393	8.053	17.9467	19.53	13.006	4.6697	4.3738	8.5247	13.8786	19.8273	21.0317	4.9542	2.5813	5.8957	10.5658	6.3193	3.39	3.0987	3.6118	9.86	4.413	2.514	2.833	2.573	2.399		0.72059	10.0067
17.6329	25.3864	3.0529	4.9816	55.5348	18.199	4.144	4.232	8.806	7.899	17.4889	18.916	12.462	4.6069	4.2322	7.6861	12.0868	21.545	22.2994	5.1628	2.936	5.877	11.5515	6.3704	4.134	2.9149	4.5812	11.562	4.583	2.784	2.259	2.531	2.8099		0.72549	10.113
17.7521	26.132	2.9759	5.9345	51.9781	17.978	4.648	4.281	8.9368	10.302	14.6825	20.212	13.65	5.7168	3.9932	7.6516	10.9358	23.6073	24.1368	5.8331	2.6041	5.1723	12.2663	5.9564	3.8825	2.7331	4.2555	11.079	3.981	3.014	2.303	2.518	2.1807		0.730395	10.1729
17.8712	23.8448	3.0532	4.9185	52.4066	18.393	4.97	4.351	8.6737	9.287	13.4309	20.91	15.702	4.629	3.6459	6.3951	10.2011	23.7213	25.4185	6.5574	2.3237	6.2922	12.5582	6.1606	3.6008	2.7458	4.6212	13.168	4.584	2.853	2.595	2.508	3.117		0.735295	10.2386
17.9903	24.7673	3.138	4.8703	51.0102	19.363	4.367	4.117	8.4316	8.395	10.7933	18.951	13.786	4.4674	4.3938	7.0638	11.3806	24.1386	28.8985	7.4192	2.0735	5.9586	14.7555	5.935	3.6744	2.9759	4.5739	11.728	4.112	2.938	3.11	3.325	2.7504		0.740195	10.2394
18.1095	23.4497	3.0317	5.581	47.0871	17.909	4.073	5.043	7.2388	8.42	10.4928	19.183	13.945	5.2016	4.2747	7.2494	10.3886	27.4908	32.1442	7.579	2.7917	5.8909	15.1169	6.165	3.2114	3.8003	4.2919	11.95	3.614	2.839	2.575	2.676	3.0554		0.7451	10.2425
18.2286	23.2496	3.2868	6.0688	43.6611	18.217	3.657	3.935	6.7533	8.667	10.2341	19.396	16.158	5.8537	4.7435	7.2435	11.6407	30.6476	31.2435	9.9753	3.4712	5.9439	16.5982	5.1522	2.8935	3.1724	4.4019	12.03	3.635	3.569	2.808	1.894	3.3865		0.75	10.4246
18.3478	25.9218	3.2573	6.3176	43.731	15.265	4.138	4.485	8.499	8.667	9.0019	22.215	17.175	6.3137	5.5992	6.3891	12.2039	30.3092	33.1425	10.3491	2.6609	5.4476	15.7711	5.3294	3.311	3.1133	4.5519	12.828	3.521	3.102	2.614	2.457	2.7087		0.754904	10.6374
18.4669	25.311	3.5211	7.4459	37.5904	15.396	4.965	3.718	8.8497	8.529	9.4886	22.036	16.518	4.9202	5.3944	6.8552	11.4977	33.7213	34.7979	11.1343	2.7089	5.5324	15.1989	5.4136	3.3562	2.9346	3.9381	11.805	3.567	2.908	2.958	2.164	2.7677		0.759805	10.5294
18.586	23.6627	4.0328	7.483	35.8684	16.134	4.813	4.22	7.8361	7.271	9.1183	22.234	16.968	5.4438	6.0892	6.5244	10.9785	35.6216	34.7662	13.4804	2.632	8.022	14.9223	5.1815	2.8105	2.8742	4.7593	14.743	3.649	3.109	2.909	2.166	2.8479		0.764705	10.7241
18.7052	23.0094	4.166	9.3262	35.3689	15.85	4.632	4.603	8.5278	6.656	9.6347	23.345	15.875	5.2549	5.5169	7.0055	12.2238	36.3535	33.9679	17.1425	2.8316	8.3649	15.0001	5.1628	2.421	2.7474	3.8926	13.581	3.743	3.35	2.294	2.516	2.8624		0.769609	10.8508
18.8243	23.6978	3.6571	11.3678	36.7115	13.795	4.393	4.787	7.8669	6.313	9.4826	23.399	16.652	6.3858	5.1055	6.4152	13.6425	38.3536	33.3563	20.7561	3.3352	9.4398	14.5928	5.0584	3.3824	2.524	4.1733	13.197	3.54	2.852	2.238	2.166	3.0113		0.77451	11.114
18.9435	24.3184	3.4074	11.7837	36.2772	15.926	4.71	5.148	8.8028	6.59	9.5868	23.623	16.089	6.9406	5.3853	6.735	11.6985	37.8974	34.7423	22.0904	3.6122	10.0347	14.6496	4.8455	3.7311	3.0212	3.9118	13.094	3.515	3.221	2.81	1.711	3.1475		0.779414	11.3455
19.0626	25.4439	4.0873	12.2245	35.1918	17.659	4.952	6.456	9.0332	6.659	9.5584	24.071	15.697	8.2286	5.6592	6.0925	12.0925	38.1641	37.9746	22.1211	3.2973	11.0487	14.711	4.7341	2.7435	2.4652	4.0841	14.573	3.979	3.087	2.943	1.901	2.5263		0.784314	11.6706
19.1817	24.4049	4.1977	14.7127	34.1493	19.167	4.715	6.578	9.8318	6.841	8.7145	27.038	14.901	8.6803	5.8053	5.6746	13.3804	36.7052	40.1519	22.1455	3.9975	11.8587	14.2509	5.1816	2.4929	3.266	4.4707	12.893	3.658	3.02	2.742	2.443	2.8437		0.789214	11.9035
19.3009	24.495	4.7041	15.4848	31.4412	21.75	4.837	6.746	8.9705	5.879	10.4112	28.846	15.232	7.8618	5.403	5.7501	12.4014	37.9197	38.5105	21.6161	6.6874	12.2411	16.3066	4.3482	3.0014	3.142	3.8181	14.443	3.513	3.587	2.346	2.215	3.1157		0.794119	12.0945
19.42	23.5529	5.1632	18.1187	30.9821	21.352	5.386	7.452	9.2828	7.23	9.9795	27.695	16.862	7.7416	4.7257	6.1181	11.7722	40.8699	39.0756	22.8001	12.5795	12.48	17.7981	5.3951	2.8629	2.5926	3.6296	14.205	4.467	3.41	3.118	1.563	2.4951		0.799019	12.5861
19.5392	22.5956	4.8586	20.8706	28.7868	19.307	4.895	8.874	9.6827	6.857	11.7042	29.697	14.353	7.5613	5.2492	5.8775	10.7112	41.0482	39.1504	23.6786	17.0801	12.7277	16.5508	6.2086	2.394	2.51	3.9907	11.564	4.12	3.477	2.74	2.248	3.6189		0.803924	12.6559
19.6583	22.0897	5.0675	21.8474	28.6165	18.225	6.235	8.323	10.7891	7.596	12.6678	31.638	14.705	6.9205	5.5202	5.3249	9.8728	41.4234	36.9188	22.6774	21.7548	13.0321	17.6948	5.8668	2.1719	2.8466	3.6402	12.486	5.667	3.915	2.525	2.682	3.1867		0.808824	12.9352
19.7775	23.4361	5.4265	20.9929	32.2523	16.811	6.55	8.607	10.8292	7.642	13.1915	34.707	17.437	6.5998	6.3948	5.3995	10.5045	40.6084	35.6514	22.0005	24.8682	15.1968	19.1674	5.0987	2.4157	3.4928	3.902	11.954	5.968	4.122	3.468	2.493	2.6401		0.813728	13.4321
19.8966	21.6413	7.5499	22.8665	29.5485	17.365	7.02	9.306	13.0559	7.755	13.5683	35.378	16.483	6.1653	7.0919	5.629	9.5191	40.9185	32.1423	23.4319	24.7957	13.919	20.1178	5.2971	2.3639	3.0145	3.8654	12.373	5.756	4.592	3.15	1.973	3.2639		0.818628	13.4661
20.0157	21.532	7.0916	22.3375	29.9042	17.417	8.291	10.221	13.0369	9.196	14.7261	40.833	18.76	4.8326	6.7096	5.3936	9.0923	41.9485	30.06	25.306	23.6358	15.6141	20.6194	5.6986	3.0018	2.9379	3.5258	12.663	6.117	3.934	2.632	2.287	3.9177		0.823529	13.8523
20.1349	21.4432	7.4972	22.4229	28.4331	18.029	7.553	10.051	14.8452	9.948	13.8934	42.995	19.502	4.9359	6.6772	6.1353	9.134	41.3626	26.6592	27.4737	22.6346	16.3122	21.0618	6.6109	3.4869	2.9537	3.4903	12.182	8.115	5.126	3.239	2.568	3.9991		0.828433	14.0866
20.254	19.849	8.6998	23.1662	26.203	19.778	7.847	10.305	15.483	9.595	12.2672	43.319	20.334	5.1717	6.3296	4.9144	9.539	40.0669	22.4449	25.8607	21.2283	16.3301	23.7323	7.3892	2.927	2.8369	4.281	12.99	10.014	5.284	3.374	2.183	2.7175		0.833333	13.9519
20.3732	18.6008	9.2517	24.7494	23.7397	21.191	9.167	10.958	15.7741	11.61	11.299	45.774	22.996	5.2685	6.7838	4.8792	9.432	36.9125	18.7057	29.1395	18.4056	16.9171	26.7686	8.034	2.5968	3.1766	4.1138	13.351	14.164	5.061	3.321	2.823	3.8067		0.838238	14.3366
20.4923	19.5089	10.035	23.0393	24.813	20.831	9.309	10.019	15.3293	11.022	11.7066	46.386	26.642	4.388	6.5268	5.8885	8.8926	32.2815	16.5679	31.7999	17.7957	18.67	29.1704	8.7009	2.6916	3.2118	4.842	15.694	18.944	5.593	3.006	2.607	4.1565		0.843138	14.6897
20.6114	19.454	11.0671	22.1164	24.7402	23.743	11.019	9.518	15.1762	12.086	11.9637	48.754	31.012	4.6541	7.1049	6.1118	9.4192	26.2801	12.6516	34.3197	15.9768	20.6595	32.9248	8.8904	3.3106	4.2097	4.071	20.847	22.104	5.866	3.656	2.389	3.2375		0.848038	15.2917
20.7306	20.6115	12.3969	22.3375	23.233	26.837	14.255	10.898	13.1107	14.181	11.71	48.307	30.712	5.0566	7.9592	5.5311	8.7153	24.2222	8.8551	36.8512	15.5517	23.3839	32.0354	10.2227	3.0569	3.3156	3.9246	25.338	23.051	6.794	3.321	2.937	3.7307		0.852943	15.7013
20.8497	18.8166	11.6428	20.4892	23.1907	31.331	15.406	11.563	14.2426	15.692	11.3408	47.727	32.443	5.9233	7.7363	5.9393	8.5977	19.9767	7.9124	37.8987	16.0086	25.5664	37.283	9.7195	3.2203	3.5741	4.395	31.097	21.431	8.394	3.397	2.978	4.1899		0.857843	16.2226
20.9689	21.3501	12.4245	18.1101	23.2293	35.343	16.93	12.208	13.9731	17.474	10.7866	48.865	34.46	7.2778	7.4374	4.976	8.5844	15.4353	6.3794	41.1751	15.9145	29.4529	40.5008	11.9852	2.5889	4.1205	4.2773	36.608	20.338	10.586	3.457	2.665	4.4805		0.862747	16.9811
21.088	21.6543	11.5315	17.8623	21.8245	40.001	19.572	13.602	13.0546	19.558	10.9419	49.992	33.664	7.5592	8.7275	5.8778	8.2033	12.5142	5.604	38.7606	16.7917	28.0932	41.7838	14.0574	2.5913	4.0443	4.145	38.654	22.691	12.935	4.367	2.399	4.3004		0.867648	17.4174
21.2071	20.5411	9.7576	15.9783	19.8845	40.66	23.537	16.592	15.6771	22.382	13.203	47.097	32.559	8.6766	7.0601	5.8759	7.4897	11.1136	3.9594	32.1977	16.0685	29.0156	44.667	13.0905	3.8667	4.1589	4.4241	44.737	22.264	14.693	4.376	2.669	5.3928		0.872548	17.6145
21.3263	23.2172	10.3927	15.294	20.0817	45.658	26.991	17.132	17.2195	28.911	16.0437	48.9	32.514	10.0775	8.0515	5.6981	7.5481	9.2191	3.3545	25.0353	19.6539	33.1596	43.8322	14.0825	4.3023	3.6073	4.8625	50.537	23.903	18.091	3.399	2.503	4.9304		0.877452	18.6938
21.4454	25.5723	11.1054	15.6292	20.5472	50.835	33.298	20.81	17.1366	36.158	18.1809	48.539	30.897	10.264	8.6427	5.2438	7.561	7.4499	2.2658	19.1091	19.8337	35.125	44.9283	13.4554	4.4051	3.998	4.1937	52.374	26.566	21.565	4.509	3.238	5.0966		0.882352	19.6416
21.5646	26.2886	10.5364	13.959	18.9128	55.026	38.801	23.722	21.0278	42.709	23.0109	44.485	30.713	14.3489	9.3852	5.0643	7.4019	5.53	1.6871	12.1001	23.1493	34.5553	45.131	15.9079	5.3819	4.3509	4.5952	54.126	31.211	21.745	4.222	3.083	6.411		0.887257	20.5806
21.6837	26.2826	11.8649	15.0579	21.604	54.563	42.25	25.179	23.2124	47.9	26.0019	41.95	31.801	17.3572	9.8534	5.5706	7.5723	5.0326	1.3632	6.8992	26.8475	36.5659	43.3372	20.0562	5.6906	4.2041	5.1717	49.408	34.846	21.521	4.954	3.057	6.9731		0.892157	21.3734
21.8029	28.024	11.1712	15.3932	20.66	50.429	36.194	26.924	24.5673	55.044	29.9902	37.901	31.187	18.463	8.1792	5.0197	8.148	4.7531	1.2364	4.6597	30.6301	37.3158	39.6046	20.9988	6.8255	4.8519	4.4891	41.919	36.603	21.819	6.099	3.734	8.1873		0.897061	21.2819
21.922	29.7594	12.4262	15.0447	21.4286	44.575	34.241	31.096	28.189	59.015	34.6335	34.957	27.425	22.8293	8.7796	4.5833	7.4551	2.9839	1.1732	3.4329	34.8892	32.9286	34.2065	24.1058	7.8931	4.886	4.5093	31.428	37.41	26.536	5.417	3.508	8.433		0.901962	21.2556
22.0411	29.7419	12.2316	15.5548	23.9434	38.395	35.594	36.128	33.0325	61.243	37.3788	31.202	26.49	27.3707	10.0538	5.8498	7.7491	3.0711	1.292	2.2985	34.7683	29.5663	28.8498	27.0794	8.5607	4.7824	5.1914	23.554	41.595	26.37	5.178	3.472	8.7382		0.906862	21.4477
22.1603	30.3732	13.6939	13.6917	26.5929	33.979	30.995	38.896	39.89	58.878	35.0736	25.816	23.141	25.6915	10.0618	6.3455	8.0664	2.134	1.2278	2.1691	30.9767	26.072	23.4102	27.4283	9.9754	5.2541	5.0956	16.482	41.703	28.66	5.865	3.403	11.5164		0.911766	20.7049
22.2794	33.3062	14.7726	14.1796	27.9254	28.54	25.805	39.218	44.9561	54.516	32.8706	23	20.882	27.6749	10.1338	6.6357	8.2958	1.7427	0.95	1.478	24.201	21.5436	20.2126	28.3969	12.5642	6.3794	4.7402	11.743	42.735	30.615	7.093	3.457	15.1429		0.916667	20.1783
22.3986	32.8128	16.3225	14.5858	28.1831	27.709	24.345	39.015	47.4612	48.566	30.9148	23.022	20.906	29.9191	10.6538	7.6351	9.2601	1.3718	0.6822	1.076	16.4864	18.7664	15.6099	25.5828	16.2107	6.8973	5.6694	7.776	36.854	31.758	7.829	3.531	16.6618		0.921571	19.5023
22.5177	34.1082	17.9821	15.1158	27.4811	25.248	20.865	36.928	47.8664	47.589	28.4714	22.245	19.968	30.4343	11.9937	5.9921	8.8787	1.4795	0.7059	1.2705	11.0648	14.2648	11.4355	22.5596	17.5139	7.644	5.8995	6.457	28.31	35.813	8.872	4.53	24.2648		0.926471	18.8516
22.6368	35.9796	17.9798	15.3149	27.4008	21.785	19.218	31.234	43.116	38.678	27.3592	19.881	17.429	32.1354	12.8789	6.6898	10.5047	1.685	0.6674	1.0534	6.8396	9.0375	8.4782	19.2168	20.9053	9.7699	6.8852	5.681	20.321	36.545	9.901	4.999	27.991		0.931372	17.7363
22.756	32.4601	19.4112	14.7729	21.6043	19.23	16.36	28.14	42.1182	30.876	22.8821	18.685	14.325	29.1495	15.2124	7.9942	13.7597	1.1534	0.5262	0.8206	4.7893	5.7807	6.4274	15.8008	24.0242	15.3307	8.032	4.515	13.752	37.108	12.463	6.898	31.3579		0.936276	16.7425
22.8751	31.0972	23.8172	17.0404	18.2169	16.587	14.889	23.127	38.0008	24.755	19.5359	18.102	12.208	26.104	15.3874	7.7032	17.9869	1.0133	0.6943	0.7256	3.9455	3.949	4.489	12.0895	25.156	18.2486	8.5261	3.577	10.014	37.92	14.012	7.049	34.5228		0.941176	15.9528
22.9943	32.2189	26.7775	17.4463	17.4728	12.349	12.45	20.294	28.3032	21.055	16.7504	17.29	11.631	25.1788	14.4672	8.3614	18.9846	1.1104	0.6439	0.5673	4.0188	3.3666	3.5474	7.6701	23.6095	21.3237	10.4797	2.675	6.916	38.387	17.559	7.494	38.6287		0.946081	15.2821
23.1134	29.2881	27.4235	17.2864	16.2424	12.117	9.116	18.061	22.6022	19.051	13.168	16.975	8.455	23.2584	13.296	10.6833	21.834	0.9747	0.3309	0.5517	2.8998	2.6447	3.0254	6.4377	23.4098	25.7644	14.1522	2.366	5.203	30.975	18.053	8.424	40.641		0.950981	14.5222
23.2325	28.6129	28.1036	18.2051	16.1127	10.365	9.297	15.372	17.4854	14.49	10.6784	13.024	5.928	21.7102	16.7766	11.3147	22.6326	0.8429	0.453	0.6338	1.6566	2.2921	2.3901	5.1579	19.5088	28.3897	20.2412	2.141	4.317	23.988	23.479	10.54	36.8761		0.955881	13.8442
23.3517	27.5166	28.5073	19.265	15.8686	9.311	7.912	12.233	14.5542	11.126	8.6704	11.035	5.786	19.1531	21.0827	11.8366	23.0698	0.6971	0.3582	0.5805	2.0587	2.0388	2.0693	4.9872	16.2872	28.636	25.2013	1.529	3.725	18.191	25.44	11.573	34.0661		0.960786	13.2614
23.4708	24.8738	27.6356	21.7027	13.9449	6.821	6.531	10.624	11.8933	7.855	7.1353	9.114	4.689	18.7924	21.9846	10.7036	21.2359	0.8954	0.5292	0.3005	1.4762	1.6676	1.8401	3.5781	14.3299	29.011	28.7654	1.218	2.683	15.277	25.833	14.474	24.5553		0.965686	12.2491
23.59	23.652	26.3451	20.0617	14.6258	6.483	6.172	8.344	8.2878	6.694	5.2563	7.647	4.734	17.7049	21.0971	13.0756	20.712	0.6454	0.3204	0.4724	1.9544	1.0651	1.7873	3.7957	12.1562	27.826	27.5324	0.927	1.779	11.087	25.609	14.702	16.9957		0.97059	11.2359
23.7091	18.5613	26.5	22.9901	12.557	6.164	5.319	8.554	6.4166	4.704	5.0423	5.983	3.811	14.9957	22.7941	13.9409	19.5104	0.6529	0.4028	0.3105	1.3982	1.0483	1.9639	3.4056	9.7938	22.3451	21.5611	0.992	1.624	6.837	24.937	16.386	10.2458		0.97549	10.0546
23.8283	17.166	26.327	25.5302	11.7399	4.889	4.401	6.518	5.2116	3.805	3.1973	5.469	2.463	13.8784	22.4863	14.4007	19.22	0.3804	0.2333	0.2744	1.1093	1.0744	1.5888	2.8727	8.1083	17.6998	16.8265	1.157	1.489	5.9	20.742	17.015	7.9356		0.980395	9.09715
23.9474	16.7356	25.6095	26.5994	12.3409	4.758	4.125	5.931	4.4055	2.934	2.9246	5.075	2.659	11.0231	22.9038	14.1795	15.7253	0.4789	0.1589	0.3536	0.9123	1.2721	0.9968	2.1184	6.3983	13.1363	15.4439	1.119	1.744	5.079	15.362	17.147	6.8852		0.985295	8.32922
24.0665	13.5741	25.4226	27.0485	11.5908	3.902	3.619	5.91	4.109	2.636	2.5699	3.87	2.487	8.1678	19.6153	14.4066	12.3188	0.5762	0.2703	0.4699	0.8538	1.1104	0.648	2.381	5.7207	10.8248	13.7389	0.697	0.949	3.058	10.381	15.183	6.3507		0.990195	7.32688
24.1857	10.0146	23.1331	27.9605	9.9694	3.984	3.58	5.248	3.4499	2.421	2.7485	2.8	1.751	7.4279	20.9774	14.2243	9.8065	0.3917	0.2712	0.3121	0.7934	0.8901	1.103	1.6037	5.3392	8.2316	9.955	0.599	0.882	2.179	7.207	15.801	6.1439		0.9951	6.59997
24.3048	9.0574	22.8669	25.8656	8.5434	3.33	3.543	3.834	2.6474	2.042	1.9717	2.352	1.548	6.2202	21.1992	14.0998	7.9577	0.6757	0.2545	0.2851	0.7885	0.6547	1.0334	1.7614	4.7257	6.0857	8.0935	0.394	0.775	2.161	6.08	14.9	5.0167		1	5.96135

## Sheet: Image7
X0	Y0	Y1	Y2	Y3	Y4	Y5	Y6	Y7	Y8	Y9	Y10	Y11	Y12	Y13	Y14	Y15	Y16	Y17	Y18	Y19	Y20	Y21	Y22	Y23	Y24	Y25	Y26	Y27	Y28	Y29	Y30	Y31	Y32		Ap-basal	Avg int
0	12.6619	8.2611	14.4103	23.3326	20.2619	21.9072	12.3477	15.3328	12.1079	7.8893	11.2777	6.5916	10.3099	7.1353	7.6072	16.0827	16.7535	11.5876	6.9592	12.3914	22.9384	18.047	21.3943	12.2605	12.0806	12.9502	15.4506	14.8785	17.9734	23.6131	24.4936	27.2474	17.4807		0	15.0308
0.1191	15.5744	7.8715	18.681	26.4855	21.6315	21.8504	14.6581	16.0544	13.5463	7.3183	12.8961	8.4707	13.7195	9.7448	8.7511	20.0965	18.9351	13.3501	6.9501	13.3515	25.8738	20.9349	26.1332	13.2307	13.6968	14.475	15.8698	15.3627	23.2917	24.5758	27.3686	25.8993	18.0526		0.00454388	16.8091
0.2383	17.0131	8.522	22.8735	29.2727	23.3511	23.7653	18.4305	19.0222	15.1569	8.9442	15.484	11.1436	18.2184	10.5545	12.2632	21.9246	22.0329	14.5821	9.1894	16.0852	27.3138	21.3415	25.2195	17.3631	16.7263	17.9671	19.6754	17.007	26.1207	24.8648	32.5327	26.2799	18.7861		0.00909157	19.0614
0.3574	16.8457	12.098	23.3844	33.3041	26.4085	25.5325	21.0913	22.7312	18.0342	11.4948	19.2601	14.0012	22.0195	12.7202	12.5059	21.498	21.7158	16.4549	8.9655	16.8035	28.6617	23.8742	28.6803	17.4253	17.5868	19.0391	22.9825	18.3771	26.7056	22.8464	35.0742	28.5247	24.1043		0.0136354	20.9319
0.4766	17.263	12.1672	27.154	33.8515	29.0245	24.5464	22.0444	23.6125	22.0759	14.4163	23.3415	18.3023	26.5772	15.2843	15.2812	25.3743	27.0418	17.7099	10.3575	21.3459	32.2929	25.5646	27.0329	22.2924	20.4853	21.0412	20.3163	19.9312	27.1455	24.308	36.5145	29.268	22.5408		0.0181831	22.8941
0.5957	20.4951	16.4873	27.4912	34.4447	28.3914	27.5236	24.3458	26.6675	24.6413	15.5535	25.8234	21.3448	27.7747	17.4888	16.8489	28.2918	30.5665	21.9292	12.2709	26.7823	35.0142	27.8349	29.2811	25.8115	23.0262	21.5402	23.5034	21.1484	29.1194	26.5806	38.7869	28.7651	25.1862		0.022727	25.1746
0.7148	24.5057	19.9067	30.6228	32.9375	31.367	31.2246	28.2026	27.0766	31.1299	22.2292	31.4416	26.3086	32.066	22.7587	21.8445	29.2488	35.9727	27.7297	15.3591	30.016	39.0415	34.0013	33.4748	28.3886	23.8036	25.1866	24.2664	21.1441	27.0607	26.8418	41.4701	31.0085	26.9873		0.0272709	28.3219
0.834	25.3145	23.8277	32.62	31.5369	32.2176	33.6022	30.3028	31.9021	33.5258	28.2021	36.1654	29.3411	36.5054	26.3249	24.5352	30.7846	39.9493	33.0844	20.9125	37.1789	42.9061	34.4322	33.2474	30.6209	24.6246	25.9333	25.4677	22.204	26.8398	24.3172	38.8701	30.0793	26.6304		0.0318186	30.4244
0.9531	26.77	26.5864	34.2364	31.304	33.455	35.8945	34.0445	35.2943	40.5153	31.8982	41.8965	34.3985	36.8508	29.2996	26.6865	35.0641	42.5115	43.4313	26.2735	44.2857	42.3878	35.2692	35.5364	33.5403	25.9621	29.2532	27.0912	22.8366	27.6539	25.1103	40.0755	32.8258	27.5822		0.0363625	33.2067
1.0723	29.218	33.3673	30.9744	31.0854	35.4962	42.2172	38.8415	42.9916	44.5962	39.4994	44.7476	41.0362	40.8428	32.4329	30.2032	40.1147	48.7015	50.0819	29.0014	48.5362	44.1463	36.5403	38.7577	37.9224	28.1295	28.0026	25.5123	24.3178	29.744	26.355	43.0762	34.8924	29.7353		0.0409101	36.3975
1.1914	30.0268	32.4346	31.1142	34.0287	38.7631	46.8227	39.4905	47.2735	43.3106	37.6413	48.9391	39.485	38.6148	34.0592	28.5503	39.6897	51.7047	53.4821	36.5987	54.8139	46.0802	40.3039	41.0404	39.6125	31.0382	30.044	28.7609	23.8087	28.0801	24.9731	39.7474	33.0448	27.4377		0.045454	37.6005
1.3106	29.4343	34.5666	27.3779	34.8086	39.9281	48.4314	40.604	46.5736	43.5161	43.6192	48.7239	46.8338	37.395	33.8615	29.6168	41.8544	54.791	58.5555	46.3643	55.6489	53.3384	42.5158	40.3188	42.3785	31.9085	28.8282	26.4481	23.9891	27.9195	26.7434	36.6688	32.8001	28.8151		0.0500017	38.9448
1.4297	33.5878	32.6075	26.7812	34.855	39.1855	50.3111	42.8809	45.7303	44.5526	43.6302	51.2514	44.8463	36.8121	35.6053	31.3096	40.7659	51.9225	57.0727	56.3369	61.8794	48.868	41.8913	40.6819	43.2347	30.9995	30.5956	24.4606	24.0993	28.4148	25.172	35.5392	28.2223	30.5295		0.0545456	39.2313
1.5488	33.8414	30.1366	25.787	32.3859	40.4122	50.5713	44.3153	44.6556	43.3138	42.4786	47.0285	48.2827	32.4594	31.8674	31.0901	39.6319	43.0374	55.4726	62.6326	62.8331	45.7627	41.8782	40.9037	42.8417	31.681	29.9687	24.2643	24.2396	27.6432	24.776	31.3495	28.0752	29.6999		0.0590895	38.3429
1.668	31.8105	27.1616	26.0305	30.9236	38.23	51.3972	41.3669	40.5588	36.2418	37.2881	48.6655	43.7035	29.6426	29.0198	29.295	38.6401	36.5087	43.2627	64.6799	60.147	46.1621	43.353	40.8517	44.7323	30.3084	30.6377	25.345	23.1626	28.7049	25.5889	28.8578	26.1485	29.0202		0.0636372	36.5893
1.7871	30.3501	25.9715	27.2296	26.8624	42.1958	49.4474	34.3162	36.2427	30.1541	32.3611	41.5059	41.3225	27.7823	26.0479	26.6976	31.7136	30.6784	34.8968	63.1601	48.1045	42.7723	39.2116	39.9393	42.5005	29.4454	26.6543	22.4865	22.0434	26.4571	26.1615	29.436	27.4872	27.6333		0.068181	33.6142
1.9063	29.756	23.6992	26.4301	27.8769	40.6839	47.5762	31.2857	32.7181	26.6134	27.0289	35.1623	33.5708	25.3648	27.146	26.8888	26.6352	23.9014	26.0847	54.6602	39.8665	39.2313	38.2549	41.352	40.1268	28.1616	28.7242	20.8236	23.0658	29.5863	26.8114	27.8432	25.663	29.1248		0.0727287	31.2642
2.0254	26.4548	21.662	24.9417	29.6367	37.7421	38.1251	25.213	25.5213	19.9971	24.9912	33.8824	29.7941	22.3092	25.1745	23.4883	21.7453	19.7533	20.4009	44.7869	34.7882	41.8486	38.224	36.9965	39.6591	27.8493	26.2153	20.6613	19.8471	32.0896	23.9967	25.3724	20.8299	28.7067		0.0772726	28.2638
2.1445	26.3243	21.4773	21.1809	28.6263	36.3806	31.3964	20.8672	19.126	17.4391	21.1424	27.6958	24.9623	21.9782	23.4164	25.5421	16.782	16.5257	16.3059	35.3476	27.7493	35.6714	33.3433	32.0758	36.1024	27.0097	26.4036	21.0991	20.3933	29.6352	23.1077	21.9203	21.156	27.9773		0.0818165	25.3382
2.2637	23.5575	21.2168	21.0046	27.9866	35.1908	25.2757	17.4615	15.7394	14.9703	18.4671	28.9576	25.0076	22.2025	21.3416	25.016	13.1417	11.3767	14.8022	28.1738	24.3452	29.178	31.9034	23.2189	38.0505	23.8057	25.9619	20.0266	18.4611	28.7965	21.7654	21.7565	19.7516	27.039		0.0863642	23.1803
2.3828	21.2382	19.1482	22.5821	25.6958	32.8716	17.2012	14.45	12.5651	14.7234	18.6888	24.1589	23.8364	19.1618	22.0113	24.7657	13.1643	8.8536	11.3958	20.3758	18.2985	24.7112	29.3498	20.4984	32.1883	23.3519	25.9462	19.0909	18.4566	27.8566	20.7926	19.4058	18.7439	23.2704		0.0909081	20.8742
2.502	19.5496	18.6519	21.331	23.0652	23.3814	15.4706	11.4801	10.839	12.6295	15.7083	25.104	19.9629	16.9463	20.1493	22.7371	10.3957	7.9148	8.7565	17.9104	16.1989	24.4957	27.2824	18.1543	30.8075	24.6641	22.191	17.5924	17.2236	27.2323	17.775	17.0563	14.3405	23.7574		0.0954557	18.8108
2.6211	18.9697	18.675	19.7236	25.2945	18.3706	11.2586	9.0409	8.9903	11.4373	13.3138	22.9492	16.9122	17.3844	17.3469	23.214	9.4283	6.603	7.9868	16.1142	16.389	21.9836	22.5842	15.5866	26.3497	21.1757	21.5116	17.0886	17.2262	23.6535	14.8437	14.8406	15.076	23.2076		0.0999996	17.107
2.7402	16.7073	16.1103	18.2067	23.4246	18.6816	8.5602	8.2284	8.0857	9.3993	11.9785	21.7526	14.0294	15.4224	17.5776	23.9952	7.5063	5.7124	6.2227	12.4232	13.2241	19.4081	22.6178	14.6918	23.8722	19.6135	18.7803	15.6204	15.5905	20.6172	15.1479	12.9793	15.5473	22.3784		0.104543	15.5792
2.8594	13.8206	16.345	16.8543	21.508	16.0226	7.6517	8.1998	8.0961	7.731	11.6069	21.7515	11.1735	13.5702	17.7993	23.1273	6.338	5.9877	5.1073	10.8375	14.1238	19.2007	20.0977	14.2377	19.5273	19.2627	17.793	12.734	14.9923	18.6202	14.2077	14.3079	11.1706	22.2113		0.109091	14.4247
2.9785	14.5587	16.0992	14.098	20.5327	12.437	6.8785	5.1662	7.104	7.4874	10.6195	20.744	11.8474	10.5966	13.143	21.4482	5.2688	4.1629	5.6276	10.236	12.0507	16.6682	19.4841	10.7056	17.4878	15.4266	17.1946	11.6631	14.9419	14.9628	14.168	12.5996	11.1916	19.4103		0.113635	12.9094
3.0977	15.9344	13.4666	14.528	20.6406	10.5899	6.2161	6.1023	6.5373	6.825	8.9561	17.6342	10.0465	8.6882	14.6219	19.9583	5.9761	4.5243	4.8468	7.1022	10.4169	15.2047	17.4831	9.404	16.9299	14.6807	14.0787	10.752	11.7311	14.9857	10.2783	13.0845	10.2575	16.6659		0.118183	11.7924
3.2168	12.5332	12.1803	15.0317	18.6033	8.3095	4.3535	5.9419	5.6174	5.431	8.6201	17.2467	7.8212	8.5874	11.5394	17.086	5.2839	3.3081	4.1024	7.017	9.3509	14.1788	15.1062	9.716	13.9662	13.7767	13.7623	10.569	11.1677	13.6261	9.1858	10.5819	9.314	16.7059		0.122727	10.5946
3.336	10.3835	12.1906	12.4883	16.8227	7.2352	4.1848	5.5973	6.4589	5.1961	7.7773	15.7618	9.0653	8.1851	12.3095	14.4213	5.0561	3.7831	3.7222	6.0991	8.7585	13.5303	13.4955	9.1962	10.4843	12.9363	12.0694	9.753	9.8336	10.5881	8.8467	9.4914	8.7002	15.5052		0.127274	9.69475
3.4551	7.9165	10.34	11.7785	16.655	5.907	4.8474	4.4723	5.8301	5.0172	7.377	12.7821	7.227	5.9718	10.8775	14.2546	4.0815	2.6464	4.1323	6.2681	8.3401	12.0401	12.7769	7.3846	9.1201	11.479	11.0354	8.8631	10.5681	10.69	8.2801	9.2146	8.4539	14.2094		0.131818	8.81326
3.5742	8.7392	9.3541	11.6728	15.7817	6.8132	4.2785	3.88	4.8286	4.3122	6.9946	12.2338	6.5297	5.3508	9.138	12.0219	3.6471	3.0004	4.1193	6.0887	7.8294	11.6699	11.6583	7.6031	9.5421	11.9902	11.2279	6.6183	10.2618	10.3013	7.3757	8.2588	7.34	13.2374		0.136362	8.2939
3.6934	8.8877	7.4886	9.957	13.5261	5.6066	4.3058	3.67	5.1526	4.2931	5.6317	10.8239	7.2866	6.8517	9.5473	12.0188	4.2848	3.7581	4.3003	4.1403	7.1911	10.5239	11.6387	6.5941	8.2366	9.4221	10.0501	7.6947	8.1177	9.4313	5.7221	8.446	6.3385	12.9899		0.14091	7.69478
3.8125	7.6962	7.7109	9.9702	13.5947	5.2533	4.1437	4.2636	3.9815	4.2608	5.9272	10.3463	6.6549	5.8493	8.6282	10.8382	4.1669	3.4506	3.2353	4.3136	5.6654	9.0051	11.2393	6.7456	8.1274	11.178	8.188	8.2794	7.3201	7.8229	6.552	8.6755	6.6424	10.9078		0.145454	7.29195
3.9317	6.2962	6.98	7.5693	11.8653	4.0987	2.8074	3.3789	3.6006	4.0131	5.6725	8.8137	4.6344	6.461	7.8867	8.4536	4.1392	2.5786	3.4686	4.6175	5.8311	7.8792	9.0742	5.5849	7.1004	10.6592	7.8815	8.1669	6.4425	6.8484	6.4888	6.6811	7.2081	10.9297		0.150001	6.48822
4.0508	6.4939	7.1748	6.1448	8.6465	5.1125	2.8123	3.3975	3.9833	3.5543	5.1828	8.716	5.0227	4.5607	6.4416	7.9394	3.6304	2.6419	3.1781	4.2186	5.5033	6.4626	7.4355	4.5482	7.0879	10.3078	8.7174	6.051	7.0813	7.1585	5.4942	7.7063	6.4094	9.5962		0.154545	6.01248
4.1699	5.6034	5.6333	6.1749	9.4152	4.8914	3.1434	3.6538	3.4527	3.2742	4.5126	8.8948	4.9907	5.6248	6.3704	7.3082	4.029	2.5975	3.4114	3.9063	6.3638	5.3228	8.4968	3.7627	6.3144	10.0616	6.6038	5.893	6.9279	6.427	4.8639	6.412	5.9445	11.6433		0.159089	5.81592
4.2891	4.4687	4.8433	4.4157	7.2226	4.8856	3.1848	3.5217	2.861	3.3856	4.0275	8.0231	4.7391	4.9403	7.0726	6.1188	3.1813	2.2719	3.5301	3.3276	5.3262	5.9392	8.1873	4.4175	5.9543	9.0611	7.321	5.4996	5.8285	6.866	5.0089	5.6282	4.6964	8.8461		0.163637	5.29096
4.4082	4.2842	4.1139	4.7367	6.0445	4.3732	3.2194	3.1255	3.3711	3.6823	4.8633	7.6847	4.6457	3.9241	6.6987	5.1142	2.5357	2.4701	3.3002	3.1277	5.009	5.7998	6.6115	4.0745	6.0253	7.9253	6.0885	5.2389	5.6423	5.3461	4.9115	6.6024	5.4574	8.2159		0.168181	4.97768
4.5274	3.99	4.0957	4.8761	5.5968	4.2532	2.7303	3.2682	2.8564	2.448	4.1675	7.787	4.2271	3.8673	5.247	5.3394	2.4134	2.7584	2.5701	3.0241	5.6647	5.2359	6.1682	4.5625	6.0136	8.4779	5.3236	5.3714	5.1399	5.4236	5.1992	5.9401	4.9919	7.0685		0.172728	4.73021
4.6465	3.3576	4.0707	4.4295	5.334	4.0199	2.9315	2.6935	2.7917	4.1721	3.4095	8.2488	4.2725	4.3132	4.695	4.8241	3.0438	2.2533	2.8043	2.7265	6.1688	4.3544	5.2657	3.6471	4.7092	7.1769	5.1497	4.4152	5.5324	4.8019	5.5742	5.924	4.6058	7.4578		0.177272	4.52044
4.7657	4.315	3.7098	3.9478	5.5253	4.2214	3.6528	3.3601	2.7946	2.608	3.1658	6.8955	3.9709	3.5108	4.1364	4.876	2.8238	2.3754	2.771	4.1459	5.0564	5.266	5.3618	3.1036	4.9273	6.8631	4.9674	4.1734	5.6601	6.024	5.3692	5.4945	5.6901	7.2994		0.18182	4.48675
4.8848	3.3347	3.8636	3.2358	5.2701	4.6322	2.5327	3.283	2.694	2.4904	2.8275	6.4401	3.0546	2.2988	4.0409	5.063	2.0741	2.1979	2.2298	3.0659	4.3996	4.7917	6.3437	3.5369	4.7669	6.207	5.2002	4.9285	5.7009	6.1608	4.7696	5.2623	4.2586	6.6618		0.186364	4.17023
5.0039	2.2998	3.3745	3.669	5.1693	3.1232	2.5408	3.325	3.1149	2.8272	3.3909	6.306	2.7578	3.1974	2.9145	3.8867	2.934	2.4918	2.6149	3.7023	5.1611	4.8266	5.725	3.7498	3.7062	5.1616	5.1809	4.7723	5.6484	5.4905	4.7856	4.827	4.0073	6.0096		0.190908	4.02097
5.1231	3.3994	3.1452	3.8511	4.1489	4.0034	3.1581	2.7236	2.7166	3.4182	3.5021	5.1224	2.6152	3.1313	3.3105	4.2278	3.0302	2.8984	2.3783	3.4039	5.7139	4.2533	4.9716	2.5835	3.6059	5.6287	5.4202	4.1548	5.3105	5.3144	4.5056	5.2666	4.3365	6.251		0.195455	3.98488
5.2422	3.4866	3.3541	3.7549	4.9055	3.579	2.6244	2.7502	2.0406	3.103	3.3266	5.1295	3.0303	2.6671	3.2111	4.726	3.2052	2.3098	2.2262	3.4694	4.8997	4.7593	4.4861	2.8076	3.7655	4.9405	5.3927	4.7065	4.222	5.0875	4.1689	4.845	4.1994	6.2778		0.199999	3.86236
5.3614	3.0426	3.0554	3.4647	3.6301	3.5632	3.4072	2.0034	2.3861	2.2954	3.2386	4.5253	2.5309	2.5757	5.1822	5.1116	2.4744	2.3497	3.2187	2.9038	5.1526	4.6641	4.0772	2.5523	3.1424	4.541	4.7893	4.4989	4.025	4.5911	4.7409	4.7403	3.6455	5.8638		0.204547	3.69647
5.4805	2.4064	4.5792	2.7486	3.8901	3.5403	2.7532	2.3213	2.4043	2.4107	3.6686	3.7156	2.2186	2.6766	3.6688	4.6987	3.5623	2.0169	2.5204	2.9417	5.4273	4.0197	4.3301	2.4167	3.4716	5.4457	5.0579	4.3832	4.4029	4.9107	4.5591	4.6297	4.4984	5.5264		0.209091	3.69157
5.5996	2.6691	3.241	3.1004	4.5529	3.692	3.4578	1.9494	2.8595	2.003	2.8287	4.0719	2.2403	2.9146	3.1421	4.3175	3.2309	2.1745	2.3601	2.848	5.0679	3.3409	4.4002	3.2898	3.5827	6.5883	4.6186	4.4663	4.4858	6.0874	4.4871	3.869	3.1645	6.1133		0.213635	3.6732
5.7188	2.7198	3.172	2.8701	3.924	3.6478	3.3975	2.2577	2.7801	3.0329	2.6456	3.2235	1.8937	1.876	2.7191	3.7729	3.0248	2.1756	2.2849	2.3901	5.1315	4.2621	3.9479	1.948	3.2499	5.006	3.5979	3.6795	4.5658	4.9983	4.4615	3.8481	3.4954	5.4824		0.218182	3.37825
5.8379	3.6413	3.1741	2.7641	4.5252	2.516	2.6696	2.031	2.8188	2.2983	2.4502	3.7249	2.245	2.2792	2.9169	3.8665	2.5756	1.8959	2.576	3.5982	4.79	4.3822	3.7475	2.1277	3.4074	5.1538	3.6399	3.6598	4.4259	4.1966	4.1423	4.7407	3.569	4.9125		0.222726	3.37764
5.9571	3.1057	2.4791	3.2185	3.4619	3.0564	2.5428	2.9076	2.4442	2.251	3.0912	3.1044	1.987	1.8559	3.2396	3.9375	2.7268	1.9684	2.1703	2.3852	4.3556	4.0128	3.7891	2.2883	3.3185	5.2338	4.1655	3.6988	4.4998	3.6746	4.5155	4.7993	4.1644	5.4985		0.227274	3.33176
6.0762	2.4028	3.2539	3.1796	3.0906	3.2533	2.2623	2.7638	2.2441	1.9625	2.4874	1.8892	1.0802	1.8836	3.3534	3.5405	3.0382	1.5277	1.7614	2.704	3.6623	3.8323	3.5313	2.1645	2.8709	5.8015	4.149	3.7738	4.1685	4.1085	3.7826	3.9224	3.5089	5.1505		0.231818	3.09411
6.1953	3.1457	3.299	3.1822	3.5772	2.8189	2.8742	2.3064	2.3317	2.2971	2.4673	2.6952	1.7975	1.8281	3.0495	4.8755	3.0951	2.0181	2.0331	2.5563	4.0988	3.4565	3.5893	2.6707	2.3923	5.2928	3.943	4.434	4.3709	4.0172	3.3153	3.979	3.9349	4.648		0.236362	3.22396
6.3145	2.995	3.2062	2.4314	3.2052	3.9572	3.167	1.9939	1.9035	2.0363	3.2587	3.0104	1.8848	2.1066	2.3653	5.2392	2.6861	2.0187	2.1325	2.872	4.0123	3.4135	2.9742	2.7098	2.8796	5.6533	2.9524	4.0887	4.9923	4.2342	3.2639	3.6614	3.6239	4.1752		0.240909	3.18499
6.4336	2.668	2.815	2.9688	3.6181	2.6318	2.8384	1.8007	2.1328	1.9887	2.1818	2.7269	1.4948	1.9119	2.2854	4.8206	2.4404	1.9756	1.6712	2.6805	4.545	3.0688	3.2387	1.9207	3.0361	4.9251	3.445	3.8262	4.3853	4.0568	2.8008	4.279	3.3465	4.5291		0.245453	3.00165
6.5528	2.1143	2.8067	2.0816	4.5082	3.5729	1.9711	2.4698	2.3488	2.6239	3.0102	2.4727	1.2594	2.2729	2.0405	4.4992	3.156	1.7495	2.2321	2.6847	3.5605	2.6808	3.0941	2.7882	3.6576	5.3454	3.5558	3.8049	4.0315	3.7647	3.4827	3.9921	2.8443	4.3781		0.250001	3.05622
6.6719	2.8096	2.4237	2.1073	3.3072	2.3771	3.034	2.2121	2.4491	2.4453	2.8203	2.4341	2.0951	2.0242	2.5976	4.1326	2.158	1.5549	2.3307	2.7537	4.4959	3.0713	3.0835	3.0081	2.708	5.1649	3.4812	3.4613	3.6359	3.8884	3.406	4.1716	4.5696	3.8729		0.254545	3.03288
6.7911	2.3198	2.839	2.4838	3.1668	2.8832	2.9117	2.272	1.9169	2.2972	2.8745	2.4802	2.6231	2.6605	2.4	4.032	2.5817	2.242	2.2152	2.8516	4.7336	3.0237	2.8158	2.4072	2.639	5.3271	3.4734	3.3706	4.1768	3.1066	3.5355	3.2383	2.9004	4.8751		0.259093	3.02043
6.9102	2.9261	3.1946	2.5164	2.733	3.1652	2.9836	2.3151	2.2444	2.384	3.6291	1.8508	2.6865	2.2338	2.2313	4.1401	2.7648	1.9535	2.0965	2.6749	4.6561	2.71	2.811	2.3516	2.8963	4.4412	3.2673	3.1682	4.091	3.8432	4.1072	3.4504	2.9519	4.1825		0.263636	3.01975
7.0293	2.1102	1.9187	2.2698	2.8303	2.128	3.6283	2.456	2.3037	1.8355	3.7523	2.2105	2.0979	2.907	2.7979	4.3825	2.7626	2.2076	1.8139	2.7432	4.349	3.0672	2.5417	2.8453	1.958	5.065	3.4761	2.9564	4.5048	3.7234	4.0185	3.6476	3.122	3.9172		0.26818	2.98025
7.1485	1.7798	2.8294	2.9903	3.3147	2.7708	2.9998	2.3589	2.0572	1.7977	3.8561	2.1355	2.3935	2.0872	2.4754	4.1078	2.1617	2.2292	2.1191	2.4232	3.9524	3.0742	2.1654	2.3445	3.1458	5.2258	3.2508	3.101	3.649	4.1757	3.7857	3.0294	2.9138	3.7297		0.272728	2.92214
7.2676	2.914	1.9406	2.494	2.4312	3.0196	3.1458	2.5316	1.6213	1.7397	3.8926	2.1347	1.8655	2.8287	2.443	4.4731	2.6638	1.7027	2.4556	3.005	3.2896	2.7112	2.3917	2.5057	2.7952	4.8548	2.7336	3.3231	5.4027	3.7184	4.2507	3.5457	3.0557	3.4311		0.277272	2.94884
7.3868	2.3969	2.691	2.3372	2.9845	2.6499	3.8785	2.7995	2.1171	1.5931	2.7277	1.6938	2.4983	2.5963	2.1969	5.1009	2.7816	2.0312	2.3932	2.5826	4.1676	2.5322	2.5469	2.7137	3.4487	4.7098	2.7559	3.1152	3.4294	3.1177	4.2673	4.1036	3.0124	3.5349		0.28182	2.95471
7.5059	2.2356	2.4024	2.849	2.9366	3.2552	4.1384	2.2983	2.35	2.8323	2.6814	1.9928	2.4318	2.0103	2.5856	5.3613	2.1898	1.5652	2.0868	2.3555	4.5368	2.6843	2.1934	3.4883	3.152	5.2737	2.6296	2.81	4.3744	4.1106	3.5149	3.7919	2.512	3.4398		0.286363	3.00212
7.625	2.0752	2.5499	3.3125	2.8661	2.6522	4.3642	2.7347	2.1311	3.06	3.8791	1.8014	2.1327	2.5292	3.1078	4.7452	2.5644	1.9401	2.2756	3.1497	5.1662	2.4433	2.6786	3.7917	2.6943	5.0121	2.978	3.2977	3.2843	4.553	3.638	3.1075	3.1652	3.6417		0.290907	3.13099
7.7442	2.7703	2.31	3.1637	3.0993	3.3319	3.4224	2.1807	2.0267	1.9437	4.3927	1.9465	1.6167	1.918	2.9586	5.8951	2.4496	2.5991	2.0324	2.6941	5.0801	1.9879	2.9341	3.1326	2.5748	4.3064	2.0299	2.9589	3.9966	4.2164	4.2049	4.058	3.007	3.0966		0.295455	3.04048
7.8633	2.4241	2.0263	2.6557	2.4893	2.96	3.1501	2.0364	2.542	1.636	3.9664	2.5253	1.8854	2.3373	2.9116	5.5263	3.2	1.9647	2.4055	2.4718	4.6851	2.2724	3.3344	3.1082	2.9344	5.1542	3.6859	3.0323	3.4902	3.6293	3.8204	3.4924	2.7564	2.8733		0.299999	3.01161
7.9825	2.7548	3.1415	3.4879	3.0905	2.5391	3.3708	2.3164	2.3849	1.2855	4.2702	1.9354	2.2755	1.8347	2.725	5.6171	3.2367	2.0862	2.4439	2.8329	5.3814	2.6638	2.2559	3.4757	3.211	4.5632	2.8063	3.1443	2.7803	3.3136	3.2394	2.6491	2.3717	2.8736		0.304547	2.98055
8.1016	3.1691	1.8273	3.1046	3.1876	2.7663	4.0326	2.4442	1.5187	2.1183	5.0146	1.9265	2.2509	2.5382	2.151	5.6077	2.922	1.7456	2.0418	3.5002	5.43	2.6798	2.3696	3.2861	3.0806	4.3277	3.0952	2.9106	3.2808	3.6958	3.8877	2.9047	3.0739	3.5197		0.30909	3.07301
8.2207	2.5278	2.5067	3.7957	2.9061	2.8692	3.9004	3.1904	1.7882	1.6574	4.8564	1.8728	1.512	2.0669	2.3056	5.2256	3.2432	1.4478	2.1262	3.1312	5.1298	2.2907	2.6138	4.768	2.9745	4.8522	3.3011	2.6424	4.2802	2.5737	3.9377	2.8487	1.945	2.7821		0.313634	3.02635
8.3399	2.2191	2.2174	3.2992	3.5628	2.5297	3.6972	2.7357	1.595	1.6688	5.3318	1.7739	1.2684	1.6939	1.9452	4.1351	3.5554	1.7115	1.7182	3.2484	4.8129	2.5685	1.9646	4.041	3.264	4.2201	2.9769	2.6745	2.9524	3.305	3.7444	2.8958	2.0712	2.9142		0.318182	2.85795
8.459	2.4668	1.6286	3.2975	3.4006	3.9453	3.8278	2.4859	1.5883	2.1606	6.1833	2.0138	1.789	1.5284	3.0703	4.3312	3.6917	1.4034	1.847	2.6648	6.6169	3.0204	2.5692	3.5438	3.1876	4.2132	2.9687	3.3545	2.7768	3.5507	4.1466	3.3824	2.4055	3.1361		0.322726	3.09687
8.5782	2.4226	2.0994	3.384	3.9892	3.1631	3.6948	2.0151	1.9395	2.0411	6.5801	1.7033	1.81	1.5153	2.5194	4.7461	2.8605	1.8244	2.0945	2.137	7.1405	2.0351	2.8173	4.337	2.9245	4.3124	3.226	2.1932	3.0987	2.8853	3.9427	2.6217	2.2975	3.1748		0.327274	3.01655
8.6973	2.8752	1.9133	3.2767	3.9585	3.8467	4.8288	2.6118	2.2849	1.787	8.002	1.757	2.1615	1.5384	2.3672	5.0856	3.1146	1.5502	1.8311	2.723	6.6835	2.8632	3.0511	3.879	3.3459	4.7786	3.4108	1.915	3.3054	2.8858	3.3584	3.173	1.8553	2.9065		0.331817	3.17955
8.8165	2.9967	2.3502	3.8241	4.0816	3.5721	4.8091	2.6965	2.7663	2.0144	7.9726	1.6775	2.5963	1.6671	3.1612	5.1891	4.122	1.3228	1.7855	2.8914	6.8187	2.9867	3.1309	4.1094	3.2278	4.332	2.895	2.6589	3.7593	3.7947	4.5919	3.0962	2.6471	2.6544		0.336365	3.39998
8.9356	2.2566	2.622	3.6544	5.1271	5.065	4.919	2.5993	1.7522	2.1256	8.962	1.5525	2.0939	2.6956	2.9556	4.3573	4.3816	2.2393	1.9312	3.657	7.5745	2.4204	2.3105	3.335	3.0443	4.6401	3.4925	2.8159	3.265	3.1378	4.1629	2.7772	2.5565	2.4958		0.340909	3.4235
9.0547	2.8387	3.1465	3.52	5.3383	7.3656	4.4686	2.5917	1.7786	2.7871	9.1441	1.4247	2.2225	2.6252	2.6367	4.6414	4.2159	1.7777	2.2196	2.9513	8.2833	3.0256	2.8366	3.8616	2.6944	4.2313	2.9523	2.1814	3.0405	2.8644	3.9496	3.0785	1.954	2.2664		0.345453	3.48225
9.1739	3.0983	3.031	3.5187	6.169	6.8706	5.7505	2.0286	1.7088	1.9553	9.879	1.6435	1.9627	2.0742	3.1241	4.9031	3.4868	1.9254	1.8132	2.8778	8.7194	3.2298	2.9528	3.5698	2.8947	4.7638	3.3628	2.5403	3.7645	3.7748	4.4844	3.3118	2.7417	2.4576		0.350001	3.64815
9.293	2.8096	2.6322	4.2981	7.0957	6.6013	6.1629	2.0068	2.2787	1.7789	10.8629	1.4679	2.2156	2.1118	2.8683	5.6425	4.5526	1.7779	1.4521	3.2654	10.7612	3.1046	2.5854	3.1878	3.1641	4.3945	3.0858	2.9411	2.8178	3.3	4.353	2.9877	2.5454	2.0354		0.354544	3.73167
9.4122	3.0312	3.249	3.739	7.1452	7.3758	4.6438	2.7703	2.2697	2.223	9.9548	1.7161	2.1633	1.7134	3.2294	5.5423	4.4603	1.2929	1.8436	4.0614	11.9613	2.0785	3.0886	2.8115	2.9251	4.0175	4.6086	3.1443	3.4066	3.8079	4.2345	2.6698	2.6202	2.7636		0.359092	3.83523
9.5313	3.3792	3.1585	4.2666	6.7926	5.7653	5.7011	2.6414	2.3544	2.3507	9.8016	2.2605	1.926	2.2778	3.0224	6.4847	4.6927	2.2136	2.5545	3.3184	13.5437	2.8716	3.3634	2.699	2.3665	4.6812	4.353	3.2311	4.5351	3.3764	4.3447	2.7064	2.3226	2.7164		0.363636	4.00222
9.6504	3.251	3.3788	4.6766	8.1522	6.1614	5.3343	2.7119	2.0919	1.977	11.8652	2.4333	1.8039	1.9339	2.9838	7.9546	3.8941	1.9387	1.6109	3.5017	15.3853	2.6033	3.8037	3.3962	2.8723	4.6077	3.876	3.0025	3.912	3.2036	4.2343	2.8651	2.7949	2.0214		0.36818	4.12829
9.7696	2.6049	2.9099	4.9398	9.2844	6.815	5.6475	2.6504	2.0281	2.3346	11.7023	2.4466	1.8272	1.8209	3.0217	8.0392	4.3426	1.2155	1.7729	3.4007	14.057	2.366	3.3628	2.3866	2.9194	4.4483	4.415	3.5077	4.4878	3.817	5.0302	3.1951	1.8091	2.4808		0.372728	4.15415
9.8887	3.38	3.6869	5.7345	9.7627	6.4283	5.5004	3.2912	1.7684	2.6849	12.2839	2.5656	1.5815	1.6239	2.9263	9.6299	4.2808	1.7837	1.5523	2.9405	15.2189	2.6697	3.8909	2.5876	3.4	4.1516	4.7509	3.5155	5.7874	2.3293	4.3636	2.8626	2.3691	1.9071		0.377271	4.33969
10.0079	2.6645	4.1443	5.1148	9.3141	6.2175	4.8325	2.2377	1.5787	2.9939	12.6093	2.0709	1.4859	2.6608	3.0589	11.0553	4.7634	2.4094	1.9283	3.0036	14.7534	2.3304	5.1908	3.1083	2.9701	4.3865	4.7881	3.2972	6.3391	3.1767	4.9705	3.5218	2.4318	2.5543		0.381819	4.48372
10.127	2.6561	3.4955	5.3704	10.4878	6.4189	5.2827	2.7689	2.0084	2.3611	13.8822	2.0632	1.9877	2.4897	3.1402	12.9805	5.2214	1.7129	1.5347	3.3865	13.7157	2.7377	5.2819	3.3873	2.2728	4.3242	4.5361	2.9694	7.2355	3.5061	4.8959	3.6419	2.3963	2.3394		0.386363	4.62088
10.2462	3.2906	4.038	4.6381	9.8172	7.8703	5.8067	2.6018	1.7591	2.7529	13.2137	2.7677	1.6997	2.2981	3.1083	12.8758	3.9044	1.4557	2.1626	2.909	12.8759	2.5086	5.7028	3.6535	2.5993	4.2033	4.3512	3.4636	8.1692	3.1973	4.4227	3.2722	2.3655	2.1288		0.390911	4.60253
10.3653	3.1658	4.0855	5.2992	11.0297	4.9298	5.5831	2.6458	1.5921	2.1675	14.1662	2.1158	2.2212	2.4674	4.3223	14.2238	4.4679	1.6458	2.481	2.3255	11.3453	2.5385	8.4584	2.4105	3.2457	4.4519	4.5769	2.6725	8.3109	3.3821	5.0178	3.4588	1.9797	2.4633		0.395455	4.70448
10.4844	3.2614	5.6504	5.4017	10.7137	4.8426	4.36	2.7946	1.9016	2.1804	13.46	2.2286	2.125	2.1312	3.1697	12.8726	3.4562	1.6702	1.7881	3.0034	11.3958	3.0291	9.4849	2.7399	2.9861	3.9547	5.7577	3.1556	7.1587	3.3283	5.4786	3.0626	2.2226	1.8384		0.399998	4.62438
10.6036	3.3065	5.1126	6.5005	10.9809	4.8023	4.6021	2.169	1.4689	1.5196	11.6413	1.8534	2.0584	2.1218	4.3364	12.9292	3.8441	1.7608	2.0281	2.7227	8.7442	2.6238	12.7101	2.8859	2.7933	3.3766	6.2246	3.0266	8.1513	3.1096	5.1864	2.9517	2.0917	2.2327		0.404546	4.60203
10.7227	3.3148	5.4113	7.3368	12.5009	4.0712	4.3705	3.1351	2.3816	2.4766	10.9308	1.6695	2.3806	2.4788	4.6319	12.5347	3.4702	1.9765	2.0428	2.759	9.3032	3.5342	12.9075	2.4337	2.7959	3.0437	5.6489	2.9264	9.7168	2.8162	5.7733	3.0818	2.252	2.3379		0.40909	4.80137
10.8419	3.6618	6.8323	5.9813	13.3868	5.7765	5.7678	2.9517	2.3254	1.9926	9.5098	2.117	1.4621	2.3813	6.0093	9.4901	2.8776	2.1294	1.806	2.4081	8.5626	3.5858	14.4799	2.9616	2.9245	3.071	6.7075	4.1506	11.0245	2.3937	6.071	2.4063	1.8152	2.1483		0.413638	4.88392
10.961	3.874	6.9446	5.6185	13.4649	6.0642	5.4963	3.023	1.8328	2.2731	9.5422	1.8957	1.6199	2.2285	5.1354	8.6234	2.8974	1.7673	2.5669	3.0999	8.2853	3.6181	15.4495	2.4665	2.5159	2.5972	7.0548	3.7469	9.1794	2.6122	5.5224	3.4725	1.2594	2.462		0.418182	4.79425
11.0801	4.4752	8.5533	6.6658	12.9289	4.6243	6.0814	2.3781	2.7239	2.5902	8.8806	2.1443	1.7692	2.5306	5.4272	8.5467	2.3426	2.1788	2.4011	2.9799	7.5253	4.1456	12.2373	3.3415	3.1943	3.0074	8.0675	3.5527	9.6107	2.4499	6.0954	2.6533	2.3779	2.1499		0.422725	4.8676
11.1993	4.4713	9.3382	6.1418	11.1773	5.0433	5.6719	2.568	1.9015	2.6582	9.491	2.0057	2.1068	2.1622	4.7456	8.0946	2.5676	1.7678	2.0507	2.667	7.1243	4.4936	11.7902	2.621	2.8415	3.8855	10.5243	4.786	9.7829	2.9291	5.7909	3.1546	1.9688	2.3779		0.427273	4.86973
11.3184	5.1725	10.2212	6.5453	11.2782	5.2279	5.3509	3.2472	2.0458	2.5307	9.7398	2.1171	1.894	2.2818	5.4701	6.8889	2.7056	1.3486	2.5728	3.3988	7.3681	4.3644	14.0389	2.5513	2.5002	3.354	10.8217	5.1328	10.9321	2.603	5.9685	3.7615	1.6697	2.4415		0.431817	5.07712
11.4376	4.608	11.7832	8.1447	10.0615	5.5808	5.5722	2.8915	2.4449	2.3113	8.6185	1.9134	1.9472	2.5641	6.2868	6.7052	2.9669	2.3866	1.9647	3.347	6.8731	4.1594	10.7456	3.3982	2.9955	3.1673	12.1052	5.2157	11.8029	2.5652	5.4698	3.8343	2.3063	2.1605		0.436365	5.11811
11.5567	6.3449	10.8383	7.5855	10.3387	5.6908	3.9751	3.0125	2.0014	3.1209	8.8023	1.795	2.1354	2.5296	6.2627	6.6384	2.6769	1.5788	1.9184	2.8344	7.3672	4.5665	11.3367	2.5335	2.5984	2.9011	12.4039	5.0997	12.6293	2.8263	5.5536	4.0181	2.217	2.2391		0.440909	5.10213
11.6758	4.7365	13.1533	7.6794	9.594	5.5141	4.3988	3.1865	1.9222	2.1258	8.1208	2.2387	2.0795	1.6015	5.13	6.2481	2.6826	2.1128	2.0981	3.5122	7.4901	4.7681	9.4421	3.0473	2.688	2.9278	13.7127	4.3109	11.5673	2.8348	6.0613	4.0361	2.2843	1.7878		0.445452	5.00283
11.795	6.0946	13.8019	8.5525	10.0347	4.511	5.0056	3.3862	2.2502	2.2781	9.2029	1.7856	1.5687	2.4868	4.7513	4.8022	1.5904	1.7777	2.5187	3.5754	6.4426	4.0759	8.5635	2.8502	2.6083	3.1044	14.5831	4.9902	13.0745	2.8857	5.974	3.4286	2.0109	1.7458		0.45	5.03976
11.9141	5.5832	12.2252	7.2704	9.4802	6.5218	4.4307	2.9249	2.3729	2.1997	10.3931	1.2988	1.7006	2.268	4.6863	6.3126	1.9958	1.8871	2.2564	3.7939	7.2532	4.8027	5.295	3.4778	2.8638	2.5626	14.7527	5.5987	12.5979	2.2138	5.9824	3.5704	2.5268	2.1053		0.454544	5.0062
12.0333	5.3915	12.9439	7.5685	10.0738	7.6622	4.8288	2.0794	1.642	2.1965	10.6013	2.0739	1.628	2.0645	5.1401	6.7546	2.4412	2.0306	1.7573	3.6719	6.7715	4.6866	5.1582	3.0543	2.0932	2.9323	14.1374	6.1588	12.7509	2.3817	6.3569	4.8985	2.561	2.038		0.459092	5.10695
12.1524	5.6816	12.7937	8.2848	8.4649	8.3069	4.0835	2.4599	1.8151	2.4805	11.6155	2.0187	1.0354	1.5114	5.7635	5.9359	2.3065	2.0513	1.6887	3.2582	6.8152	5.1731	4.4089	3.0849	2.7619	3.0267	13.1455	6.2136	13.4271	2.9197	5.8684	4.5451	2.4073	2.8562		0.463636	5.09726
12.2716	4.4918	12.1399	6.8822	9.614	6.887	4.4112	2.949	2.1447	2.6987	9.1358	1.9598	1.738	2.1965	7.0558	6.1389	1.5017	1.5926	2.4777	3.9579	6.6994	5.8498	3.7972	3.7894	3.0271	3.1761	12.2975	8.0889	13.6858	2.5186	5.5901	4.9636	2.5973	1.8657		0.468183	5.08848
12.3907	5.1216	13.1167	6.9549	9.5119	7.3562	4.2115	2.2674	2.0914	2.8126	9.9121	2.1684	1.9361	1.9681	5.8544	7.4642	2.3271	2.2582	1.5166	3.4095	6.5481	5.0383	4.0145	3.4465	2.2126	3.1972	12.7867	7.6007	13.0029	2.9774	6.031	5.427	2.1173	1.9751		0.472727	5.11013
12.5098	6.7042	12.1883	8.0128	8.8315	8.8239	4.6465	1.9366	2.0206	2.4415	9.6867	2.0431	1.4782	2.4157	6.1747	7.0673	2.4952	2.0396	2.1735	2.9038	6.6645	5.8364	3.303	2.6315	2.5608	2.9097	11.9717	8.6457	13.5181	2.5303	5.7524	5.949	1.7219	2.5528		0.477271	5.17065
12.629	6.6717	13.1827	7.1744	8.1598	7.4014	3.6815	2.3102	2.225	1.9625	8.783	1.7493	1.3394	2.7369	6.0416	6.3382	2.0367	1.8128	2.1565	2.8162	7.6211	6.1568	2.9029	3.4257	2.6687	3.0237	11.1558	11.5593	13.5128	2.1574	6.0501	6.1939	1.8365	2.3661		0.481819	5.12759
12.7481	6.1752	11.3636	7.503	7.2116	7.0242	3.2458	2.2629	1.9222	3.3474	8.6511	1.55	1.9479	2.4053	7.0578	6.7517	2.0925	1.4232	2.1807	3.6216	6.9368	7.6908	3.6939	2.5496	2.7163	3.0526	9.291	9.6356	12.0853	2.3827	6.3255	6.0363	1.9209	1.888		0.486363	4.96797
12.8673	5.8589	12.9275	8.2114	7.4068	6.4139	3.5914	2.4194	2.1217	2.617	8.179	1.8125	1.5475	1.8146	6.3677	6.929	2.6303	2.2532	2.0964	3.4009	7.245	7.1348	3.6654	2.9372	3.0579	1.9763	8.2322	11.0218	13.3776	1.8905	5.9881	6.8762	1.7238	1.8423		0.49091	5.01722
12.9864	6.0026	13.3317	6.0647	7.3317	5.4462	4.1196	2.1331	2.685	2.618	7.5916	1.8032	1.4841	1.8434	7.3587	7.1403	2.2278	1.981	2.6494	2.7611	7.6576	7.0852	3.6624	1.915	2.6737	2.6165	7.3319	11.7469	10.1881	2.5403	5.9194	6.7618	2.2755	2.0049		0.495454	4.87735
13.1055	5.4193	10.303	6.8231	5.846	5.0462	4.0376	2.3582	2.6649	3.1822	6.8969	2.0703	2.0612	2.3405	7.2205	6.7738	2.5454	1.5645	1.5632	2.5241	7.8127	6.8975	3.7702	2.407	2.3797	3.0155	6.9538	11.6933	8.7731	2.3272	6.3749	7.8064	2.4096	2.1177		0.499998	4.72665
13.2247	7.2928	12.1401	6.7516	6.4912	6.1978	4.4197	2.7904	2.3669	2.1093	7.4643	2.1592	1.5358	2.0546	7.916	6.9711	2.0027	1.7749	1.5775	2.4621	7.0184	8.572	2.453	3.8422	2.5927	3.4204	7.0674	10.6532	7.7196	2.2555	5.3022	7.3008	1.9655	2.155		0.504546	4.812
13.3438	7.5231	8.9703	7.1002	6.1515	7.114	3.2436	2.2218	2.0348	2.1537	6.6991	1.6238	2.2311	2.0954	7.7637	7.5373	2.6569	2.096	2.2626	2.2215	7.2093	8.3018	2.8624	2.2321	2.2834	2.7901	6.7067	12.3969	6.0956	1.1535	4.85	7.8066	1.7035	2.7656		0.50909	4.63206
13.463	6.5021	9.1787	7.4051	6.6228	5.0908	2.533	2.931	1.7971	2.2624	6.7448	1.7841	1.802	2.2307	9.3396	6.0732	2.1254	1.7842	2.1364	2.7198	6.0804	8.5637	2.7135	2.4859	2.0656	3.6645	6.9632	14.2683	5.0031	2.0325	4.643	10.1903	1.9798	2.3249		0.513637	4.66794
13.5821	7.6049	7.9015	6.6105	7.0155	5.2584	2.7835	2.5303	2.6297	2.6573	6.1877	1.8578	2.3426	2.5541	7.0024	6.2812	2.2146	2.2086	1.9789	2.9247	7.2673	9.4894	2.9562	2.1834	2.2726	2.8498	5.5188	15.9633	4.525	2.0299	4.1743	10.3431	2.2454	1.9781		0.518181	4.67699
13.7012	6.9381	7.4478	6.9819	6.3345	4.5935	2.7428	2.0392	2.2231	2.9186	7.0643	1.996	1.8867	2.1882	6.3235	6.0268	2.701	2.0605	2.119	2.6236	6.6124	8.6277	2.5664	3.0238	2.9786	3.1121	6.233	15.1226	5.013	2.5969	3.6193	10.2261	1.9906	2.1901		0.522725	4.57945
13.8204	7.9568	6.5626	5.4141	7.1233	4.4596	2.4222	2.181	2.4691	2.6452	7.8489	1.9022	1.5578	2.3035	6.0398	6.2269	1.9187	1.9681	1.7105	2.8336	6.6581	7.6532	3.4892	2.8299	2.3563	3.0575	6.6799	15.6075	3.6657	2.2446	3.7794	10.3711	1.8837	1.8517		0.527273	4.4749
13.9395	6.7402	7.7485	5.4586	7.8415	3.9386	2.5991	2.4793	2.3242	2.1102	6.3846	2.3589	1.2925	2.0342	6.7473	5.8868	1.914	2.4229	1.6146	2.8706	5.7005	7.836	2.8574	2.1925	2.2078	2.229	4.7426	14.8625	3.2592	2.4055	3.2682	10.8438	1.6147	2.3246		0.531817	4.27609
14.0587	5.8585	6.4833	6.4226	7.8107	4.5522	3.3707	2.2476	1.9582	2.19	7.6978	2.1636	2.1146	2.1971	4.5871	5.3019	2.3876	2.1025	2.3107	2.4708	5.3709	7.9087	2.9729	2.489	3.3634	2.7384	5.408	12.9592	3.9382	2.2606	3.2754	11.1971	1.9311	2.0296		0.536364	4.30515
14.1778	5.1266	4.7192	6.0568	8.3962	3.3061	2.1514	2.5892	1.9243	2.5583	8.1306	1.676	1.6169	2.327	5.0914	4.8632	2.8847	2.2493	2.3847	2.0641	6.9706	8.1559	2.9107	3.0555	2.504	2.4419	4.7122	13.818	3.1491	2.4835	2.9731	10.9082	1.9544	1.4868		0.540908	4.17091
14.297	5.1957	4.4051	6.5698	8.0946	3.9528	2.5019	2.0873	2.6261	2.2164	8.7587	2.2151	1.7158	1.9713	4.1301	4.9672	3.1294	2.8208	2.2742	2.1658	6.3109	7.0697	2.6446	2.9047	2.2976	3.0056	5.4564	12.4369	3.02	2.2287	3.5398	10.4711	2.3531	2.0244		0.545456	4.16853
14.4161	4.7302	4.4509	5.9389	6.7034	3.7561	3.3376	2.1305	2.3209	2.0779	9.2421	1.7272	2.1073	2.172	4.1693	4.4788	3.0121	2.4657	1.9427	2.1747	5.9293	6.2359	2.563	2.7924	2.3105	3.5194	5.7622	12.0206	3.8938	2.0968	3.53	10.9525	1.4608	1.9614		0.55	4.0596
14.5352	4.636	4.6943	6.2281	6.0917	3.8521	3.0406	1.8646	2.2775	2.1578	9.3979	1.958	1.9017	2.3646	3.5021	3.932	3.4352	1.9513	2.3981	2.318	5.8094	5.8436	2.2516	2.6358	2.7425	3.3078	3.9296	13.3802	3.8787	1.7489	2.7719	11.1209	1.6432	1.6426		0.554544	3.96086
14.6544	3.6849	3.0911	5.4765	5.8164	4.2373	2.6072	2.6353	2.6964	2.6539	9.6134	1.6495	1.7727	1.4892	4.1072	3.6442	2.423	1.6331	2.3089	2.5805	5.6942	4.6474	2.2315	2.7764	2.4732	3.1318	4.9641	12.9272	3.243	1.5384	3.1597	11.6728	1.9381	1.9932		0.559091	3.83369
14.7735	3.6705	3.7498	6.2442	6.1157	3.9659	3.1809	2.2274	2.2388	2.1645	8.9997	2.2245	1.3744	1.4424	3.5738	3.7264	2.895	1.8417	2.1878	2.7668	6.0017	4.4634	2.8207	2.5925	2.6349	2.9385	5.0426	11.5531	4.4364	1.527	3.0638	10.8037	2.2533	1.7379		0.563635	3.83211
14.8927	3.8309	3.3599	6.5442	5.6081	3.8772	2.1388	1.9198	2.8186	2.2187	7.8783	1.6066	1.3907	1.5705	3.6802	3.7571	2.9257	2.0174	1.8196	2.8522	5.7805	4.05	2.7118	2.9673	2.8923	3.6111	3.5981	12.2468	4.1204	1.5581	3.1152	9.679	2.4003	1.6352		0.568183	3.70244
15.0118	3.6501	3.2169	6.0112	4.3794	3.9455	2.8885	2.0194	1.8342	2.5763	9.234	2.0975	1.8007	2.5041	3.447	4.0578	3.1437	2.0959	1.7262	2.4751	6.1663	4.0031	2.6904	3.2095	3.043	3.174	4.2909	11.7086	3.6884	1.9763	2.1297	8.8999	2.5387	1.1837		0.572727	3.69109
15.1309	3.6258	3.0271	6.5438	5.3558	3.6378	2.6779	2.2352	2.3463	2.4749	8.2143	2.299	1.9285	2.0024	3.2471	3.8591	3.0842	2.2906	1.7662	2.8419	6.5769	2.6732	2.8599	2.9361	2.2123	3.2884	3.3794	10.5807	2.9228	1.5175	2.1994	11.2692	2.1487	1.7122		0.577271	3.62832
15.2501	3.0228	3.0619	6.0813	4.6305	3.8202	1.8152	2.3373	2.1302	2.5748	7.583	1.9954	2.0132	1.9831	2.8041	4.3504	2.8885	2.9416	2.6879	2.3696	7.215	3.1511	2.3616	2.751	3.1847	3.6978	4.0649	10.6351	2.9729	2.0153	2.445	11.4667	1.9607	1.3434		0.581818	3.64716
15.3692	2.9546	3.0863	6.4224	4.9469	3.5876	2.2618	2.2534	2.1758	2.3148	6.9847	1.8276	1.7012	2.2379	3.0064	3.269	3.1481	2.6094	1.8248	2.8696	6.9093	4.4861	2.2474	2.2312	3.5662	3.6265	4.4562	10.4279	2.6838	1.4026	2.3555	8.9458	1.7573	1.746		0.586362	3.52497
15.4884	2.4602	3.7932	7.0576	5.1137	3.7846	2.3408	2.5956	1.9407	2.4318	7.9482	2.2124	2.3665	2.257	3.4653	3.8114	2.5613	3.2425	2.1576	3.2536	7.7277	3.8568	2.7237	2.1354	2.8328	3.1858	4.8358	9.1884	2.8826	1.8481	3.0706	9.2443	1.3652	2.2141		0.59091	3.6941
15.6075	3.3596	2.6487	6.7312	5.5168	3.8554	1.8014	2.7515	2.2389	3.0574	8.0379	2.2409	2.099	1.9654	3.1434	4.0188	3.1001	3.0274	2.5893	2.84	8.9622	4.2297	2.5423	2.6274	2.3116	3.0834	4.1679	8.9303	2.9039	1.2803	2.5004	9.1297	2.2098	1.9072		0.595454	3.69119
15.7266	3.1774	3.0664	6.7226	4.323	4.7378	1.9269	2.0391	1.7695	2.8246	6.8341	2.1119	1.8895	2.2328	2.9045	4.1012	2.4809	2.6822	2.1929	2.332	7.5704	3.6554	2.3143	2.6749	2.5568	2.8975	4.7213	6.9087	2.8288	1.9313	1.7383	9.9088	1.9109	2.1568		0.599998	3.45829
15.8458	2.9349	3.0745	7.582	3.3373	3.879	2.3819	1.7066	2.0662	2.58	6.5122	2.0928	2.3319	1.7794	2.4743	3.789	3.2631	3.4127	2.0227	2.4531	8.678	5.3243	2.3667	2.5039	3.0153	2.9154	4.3744	6.7137	2.8681	1.2761	2.6427	9.2057	1.6601	1.363		0.604545	3.47215
15.9649	2.8507	3.8279	6.3484	3.9335	3.9959	2.1878	1.4555	2.3583	2.5602	6.4658	2.406	2.1109	2.2457	2.318	4.2428	3.2851	3.3104	1.7961	2.9433	8.487	4.3745	2.0982	2.909	2.8071	3.0774	4.1604	6.1688	3.1227	1.641	2.0037	7.5838	2.1021	2.4636		0.609089	3.44368
16.0841	3.1732	3.0962	6.959	4.0526	5.1055	2.1884	1.7595	1.7931	2.8838	6.0225	1.9377	1.543	2.0199	2.4177	4.043	2.7661	3.3434	2.1542	2.7484	8.5836	5.3563	2.1108	3.3467	2.4354	4.2785	3.9629	6.5347	2.2889	2.0659	2.4802	7.5334	2.3346	1.3028		0.613637	3.47339
16.2032	3.4083	3.9809	6.3876	3.3198	3.6335	2.0432	2.61	1.747	3.6396	6.1006	1.9546	1.6149	1.6491	2.2972	3.7235	3.6979	2.8921	2.7597	2.9966	8.6484	5.7881	2.9757	2.9523	2.932	3.0808	4.1735	7.2912	3.0846	1.5874	2.7027	6.1961	2.8389	1.6528		0.618181	3.52608
16.3224	3.5217	3.7426	6.2409	4.4319	3.6217	3.0077	2.5151	2.4598	3.0974	5.2086	2.1951	1.8882	2.0799	3.0108	3.2144	3.0741	3.1012	2.0138	2.9929	8.818	4.8077	2.7848	2.8238	3.6169	3.6618	3.6169	7.0736	2.9155	1.9489	1.8865	5.7516	1.4942	1.9874		0.622729	3.47289
16.4415	4.5877	3.8741	6.6076	4.6155	4.3349	3.1152	1.9363	2.8776	3.047	5.6881	2.2142	1.73	1.8484	2.843	3.3487	3.0259	3.5567	2.2498	3.5557	8.3649	5.767	3.14	3.2463	3.6592	2.7935	3.9326	6.4361	2.8984	1.9078	1.8636	4.6939	1.7911	1.1578		0.627272	3.53662
16.5606	3.8885	4.2321	6.7814	4.0518	4.8232	3.2238	2.6212	2.9789	2.7758	5.4646	1.9292	1.3806	2.0474	4.5613	2.7452	3.1122	2.6566	2.3316	2.6291	7.2544	5.5034	2.8976	3.6931	3.1382	2.9388	5.2114	6.9048	3.2634	1.3707	2.2529	5.0773	2.2213	1.8203		0.631816	3.56915
16.6798	4.2539	3.7253	6.1112	4.2077	4.6643	2.383	2.1803	2.5589	3.2196	5.9209	2.1707	1.7863	1.9195	2.9958	3.4181	3.7099	3.0627	2.9438	2.6136	7.3464	6.268	2.8846	3.8737	3.3704	3.5755	5.176	7.4122	3.0806	2.0483	2.3773	6.3704	1.812	2.3003		0.636364	3.68913
16.7989	4.1936	3.6238	6.5481	3.7986	3.952	2.6451	2.78	2.3151	3.2014	4.9265	2.2904	1.8504	2.5285	3.5681	3.5525	3.7885	3.8558	2.6739	2.4414	9.6591	6.2096	2.5303	2.9032	3.8652	3.5066	4.0258	7.6612	2.7934	1.4177	1.7001	5.4949	2.2521	1.6116		0.640908	3.64135
16.9181	4.6967	3.3462	6.2097	5.0372	3.1503	2.4631	2.0836	2.7854	2.879	5.6298	1.8656	2.1651	2.1584	2.9605	2.5382	2.8709	3.3267	3.0278	3.0441	8.9033	7.1482	3.2878	3.8624	3.2239	3.5858	4.2117	8.7591	3.0186	1.9281	2.2307	7.0102	2.6398	2.0377		0.645456	3.76017
17.0372	3.4595	3.3577	8.3137	3.9209	3.3027	2.0875	1.9435	2.8227	3.356	5.2368	2.0506	2.0125	1.8829	3.6108	3.5208	3.6571	3.5201	2.6176	3.3375	8.6414	7.1419	2.841	3.7748	3.4735	3.541	3.8644	10.5016	2.547	1.8952	1.8483	5.2951	2.409	1.5947		0.649999	3.73878
17.1563	3.735	3.2061	6.4251	3.6047	3.6136	1.6997	1.7472	2.3567	3.8266	5.6253	2.1467	2.2582	2.2066	2.9169	3.4678	3.6441	2.8898	2.7932	3.3005	9.3415	6.9819	3.0579	3.5379	2.8501	4.1824	4.2945	9.1638	3.3336	2.0464	2.4098	5.8151	2.0724	1.5656		0.654543	3.70051
17.2755	4.1864	3.4652	7.0317	3.9836	3.4999	1.9525	1.292	2.3404	2.9766	5.8346	1.9553	2.1986	2.1044	3.584	3.6635	3.3271	3.5429	2.7212	4.1534	9.4369	7.4254	3.1661	3.5558	2.958	3.4835	3.683	9.3749	3.5404	1.885	1.7891	6.2556	2.3081	1.8064		0.659091	3.77217
17.3946	4.0783	3.1953	7.6664	4.865	3.4978	1.9335	2.1358	2.1151	3.3422	4.4207	1.6276	1.2604	2.1234	2.7963	3.3989	3.3981	3.6924	2.6396	3.8569	9.2177	7.3718	3.4135	4.9579	2.7966	3.7845	3.1213	10.6473	3.2347	1.5736	1.4224	5.504	1.6851	1.6994		0.663635	3.71132
17.5138	3.4723	3.7522	6.6571	4.357	2.3594	2.326	2.0768	1.9176	3.4798	4.6049	1.4271	1.6629	1.8043	2.4815	3.3028	3.1284	2.2876	2.3165	2.6132	12.1168	10.0097	2.6029	4.8174	3.4005	3.9632	3.7935	10.2883	3.4156	1.6839	1.5179	5.3204	2.6513	1.7491		0.668183	3.73812
17.6329	3.6903	3.4988	7.0713	4.2516	3.1239	2.5829	1.8181	2.1531	3.3747	4.1238	1.9893	1.5312	2.4466	2.5851	3.036	3.4066	3.1761	2.8779	3.4321	11.7908	11.5073	3.2254	3.9133	3.0364	3.5571	4.2693	10.1184	3.5971	1.545	2.326	5.2111	1.6739	1.7455		0.672726	3.86927
17.7521	2.8605	3.4691	6.3537	3.7591	3.4907	2.5366	2.1902	2.8828	3.7027	4.5004	1.8656	1.8505	2.0421	2.7002	3.453	3.3135	3.0781	3.0664	3.4774	9.9357	10.9271	3.038	4.7688	3.2723	3.1437	5.0021	11.1378	3.2768	2.1145	1.8218	6.6097	2.0443	1.5028		0.677274	3.91479
17.8712	2.8863	4.035	6.154	4.3692	3.1531	2.0172	1.5662	2.8485	3.7733	3.9838	1.6893	1.7745	1.8409	2.873	3.5329	3.1291	3.4413	2.7108	4.1856	11.1215	10.7347	3.2774	4.4196	3.0569	3.6221	4.7412	11.3774	2.825	2.1775	1.8885	5.7135	1.5786	1.8799		0.681818	3.89024
17.9903	2.916	3.3989	6.5295	3.9173	3.3014	1.566	1.898	2.6371	2.5651	3.5423	1.5783	1.5739	1.8382	3.2566	3.3598	3.1661	3.6146	2.5151	3.4554	12.1979	13.4154	2.7819	4.9321	3.7093	3.5259	4.9367	12.2752	3.4198	1.344	1.8204	6.2079	1.8748	1.3041		0.686362	3.95076
18.1095	3.8412	2.6933	8.3666	4.4578	3.6894	1.5726	1.3796	2.5652	3.5815	4.9511	1.6869	2.598	2.0557	3.3733	3.5266	3.6905	3.5138	3.0217	3.0961	13.1637	15.2859	3.4723	4.4293	3.3052	3.8837	5.2525	11.9982	3.5755	1.8355	1.4029	5.7114	2.005	2.2188		0.69091	4.27881
18.2286	1.7924	3.2803	7.13	4.8102	3.4691	1.8465	1.3098	2.7038	3.6643	3.5421	1.384	2.0494	2.3015	3.0619	4.2068	3.3438	2.6828	3.2477	3.2902	12.4065	16.3847	3.4884	3.9322	4.3565	2.8689	4.4162	11.491	3.4929	2.3221	1.6831	5.1726	1.933	1.9839		0.695453	4.09238
18.3478	2.7541	3.8062	7.2008	5.3479	3.7369	2.0423	1.9691	3.1706	4.0269	4.5189	2.0426	1.7313	2.1239	3.4264	3.9168	3.5179	3.5221	3.6186	2.8299	11.741	17.6915	2.7046	4.3426	4.0867	3.233	3.9714	12.6506	3.9053	1.7036	1.867	5.7933	2.0818	2.0288		0.700001	4.3365
18.4669	3.5155	2.8095	6.5732	4.3676	3.7399	2.2185	2.2525	3.0259	3.7671	3.9749	2.309	1.4421	1.93	3.6067	3.1948	3.3621	3.585	3.3372	2.9889	11.4319	17.3681	3.3241	4.4329	5.0578	2.8762	4.5417	12.6777	3.6493	1.6427	1.9978	5.61	2.8643	2.2652		0.704545	4.29515
18.586	3.5439	3.2877	6.6552	4.4292	3.7044	2.0222	2.0451	3.1207	4.1795	3.7736	2.2782	1.9027	2.1431	3.1459	3.7496	2.897	3.2206	2.5281	2.9942	12.4106	16.0746	2.5961	4.5957	4.3684	3.5845	4.1521	13.6305	3.7339	2.3185	1.7782	6.026	2.8028	2.0962		0.709089	4.29664
18.7052	2.8657	3.2159	6.7245	5.2381	3.5266	2.375	2.2566	2.7727	3.7115	3.1993	2.7785	2.6471	1.6972	2.751	3.038	3.4514	3.4945	3.4704	3.755	13.6281	20.4127	3.7964	5.8088	3.8736	2.9153	4.5233	14.7243	3.8653	1.8572	2.485	6.1562	2.4679	1.9843		0.713637	4.58992
18.8243	3.3684	3.7509	7.7962	5.2489	3.2274	2.2377	2.1413	3.3261	4.2828	3.7282	2.0654	2.0448	2.1938	3.0345	3.4515	3.4656	3.6556	3.1161	3.4616	12.2922	20.6103	4.0699	6.6383	4.7773	3.3854	4.7473	13.9822	3.7069	2.2897	2.3082	5.2664	2.5824	2.6099		0.71818	4.69282
18.9435	3.6495	3.7707	7.8505	5.4223	3.4244	2.2734	2.6243	3.0528	4.6677	4.0742	2.3128	2.2844	2.2109	3.3863	4.8069	2.9811	3.0694	2.8652	3.6946	11.456	18.0089	3.5363	6.6595	5.2854	4.2695	4.6297	14.7713	3.1511	1.7317	2.0199	5.845	2.5569	1.6213		0.722728	4.66557
19.0626	3.8853	4.0169	7.5559	5.3424	2.9812	1.9213	2.5305	3.3428	4.0582	4.4144	2.3458	2.2098	2.7136	3.9818	2.8523	3.3093	3.5824	2.9347	3.0407	11.5633	18.4927	3.5096	6.2887	5.11	3.3738	5.0013	14.3432	2.6321	2.1436	1.7615	5.6702	2.1809	1.7901		0.727272	4.57213
19.1817	3.3304	3.1462	8.7112	5.0302	3.3417	1.9722	2.8859	2.974	4.4439	4.7312	1.8787	1.9656	1.9014	3.3777	4.292	2.9382	3.3134	3.1861	3.8689	9.8812	20.0816	3.7688	7.4518	5.4342	3.8396	5.0244	15.1149	2.9463	1.9187	1.1583	5.4135	2.6977	1.9915		0.731816	4.66701
19.3009	3.6023	2.9506	8.5093	5.1607	4.0079	2.4611	2.2609	3.3369	4.468	4.0927	2.1615	2.0045	2.0515	4.0833	3.788	3.8199	3.7133	2.5467	3.4226	10.9509	15.1256	4.3757	6.6764	5.1926	3.8765	5.002	16.2624	4.0042	2.4063	1.5657	6.566	2.3583	2.1634		0.736364	4.69599
19.42	3.5268	3.4274	7.3962	4.2966	3.6717	2.1042	2.5263	4.5688	4.6021	4.7122	2.1126	2.1615	2.1769	3.2126	4.3383	3.5284	3.2197	3.1059	4.1714	9.3899	18.2682	4.2014	6.1553	5.3465	3.3288	4.9213	18.5093	3.5743	2.3578	1.7763	6.011	1.7945	1.9474		0.740907	4.74065
19.5392	4.0931	3.4729	8.6877	7.0009	2.7107	2.4446	2.5432	3.6216	4.4768	4.0421	2.3814	2.3569	2.5636	3.6306	4.1477	3.2077	3.9255	3.1898	4.7375	7.3404	18.0725	6.0943	8.2783	4.4735	3.9401	4.2286	19.4858	3.324	1.4893	2.2308	6.3902	2.1253	2.0176		0.745455	4.93106
19.6583	3.4538	3.4022	8.9236	6.6808	2.7157	1.5609	2.2634	3.3066	5.2655	4.326	2.1402	1.9576	2.4677	4.0246	4.2353	3.084	2.8088	3.2598	4.924	7.1362	15.3132	4.5822	8.5689	5.6325	5.104	5.4539	18.8709	3.5046	1.8996	1.8519	6.1017	1.9958	1.866		0.749999	4.80854
19.7775	4.2943	3.1548	8.7315	5.9014	3.1052	2.0541	2.0992	3.0751	5.4629	3.9118	2.1565	1.7998	2.7327	3.5618	3.6766	3.622	3.3559	3.3457	4.2765	7.4509	14.81	5.3649	8.2116	6.9644	4.0377	5.329	20.0658	3.8032	2.507	1.9749	7.1151	2.0696	1.6848		0.754547	4.9002
19.8966	3.6056	4.2718	10.3149	5.5442	3.0283	1.914	2.7274	3.6798	5.3078	3.568	2.1904	1.9579	3.2864	3.7646	3.5069	3.614	3.3283	4.0717	5.4583	6.7696	14.1011	5.4973	8.2178	5.8692	4.5517	6.0471	21.1551	3.6857	2.2995	1.7709	5.096	1.9055	1.6857		0.759091	4.96341
20.0157	3.2322	4.469	10.6791	6.3316	2.7716	1.7943	2.4234	3.947	5.2551	4.6001	2.1122	2.653	2.7665	4.6609	3.3791	3.1153	3.9366	3.0119	4.9579	8.3579	13.6432	6.6196	8.6183	6.6585	5.3881	5.9709	19.8254	3.8661	2.7418	1.8665	6.6074	2.0134	2.5569		0.763634	5.17669
20.1349	3.9039	3.8245	11.6469	4.9472	3.1078	2.2324	2.1317	4.0479	5.9636	4.5683	2.7633	2.3526	2.0563	4.8345	4.1279	3.6695	3.9537	3.1705	5.0375	7.5965	13.5846	6.3943	9.342	8.1357	5.3786	5.0209	20.7455	3.9828	2.574	1.3822	7.0559	2.5977	2.1362		0.768182	5.28082
20.254	4.0211	4.2827	11.1955	6.5685	2.8167	1.559	2.1306	4.4071	5.28	3.8006	2.5861	1.7194	2.6667	4.5976	3.8114	2.7016	2.5463	3.1361	5.8295	6.7776	11.6885	5.9712	10.1025	6.7989	4.603	5.2863	19.6391	4.0005	1.8375	1.6119	5.0917	2.0847	1.6242		0.772726	4.93255
20.3732	4.4943	3.7116	11.1662	5.5336	3.5304	2.0403	1.9451	4.5106	5.9349	4.0968	2.454	1.7951	3.0122	4.3373	4.553	3.9321	2.5553	4.4635	4.5506	6.4441	12.1368	6.5638	10.8177	8.5781	5.3685	5.9208	17.6221	4.5376	2.1041	1.8706	5.6376	2.2449	1.5626		0.777274	5.15231
20.4923	3.8189	4.2148	12.1611	7.0868	3.7225	2.0851	2.4549	4.292	5.3274	3.4871	2.0068	1.5803	2.9188	4.286	3.889	4.0052	2.7052	3.3342	4.8388	6.2972	10.0142	6.7666	11.8277	10.1727	6.5735	5.1706	19.9327	3.9047	2.1114	2.2792	5.3579	2.3745	1.5971		0.781818	5.23015
20.6114	4.1823	4.4841	12.6215	5.7224	3.0276	2.1155	2.5937	3.8582	7.0357	3.0342	2.6954	2.4461	2.3588	5.0255	3.5419	3.4389	3.8102	3.6994	5.3716	8.2201	9.6156	7.2743	11.363	10.3128	7.6286	5.0499	21.8633	4.3376	1.9317	1.995	4.6227	2.3823	1.4936		0.786362	5.42889
20.7306	4.1698	4.6602	12.0079	5.6907	4.0861	1.8068	3.0553	4.2927	6.8893	3.0673	2.2674	3.1885	3.0659	5.0841	3.5436	5.1365	3.4124	2.7	5.0655	6.8891	9.6921	8.066	12.3505	11.2967	7.0833	5.7038	21.0371	4.0464	2.1083	1.7547	6.6337	2.6863	1.7575		0.790909	5.58471
20.8497	3.7423	4.5118	11.9559	5.3491	2.9825	2.5438	3.3529	4.613	6.7505	3.5062	2.0217	2.8373	3.616	4.1762	2.9017	4.7491	3.0499	3.0753	4.9475	6.9659	10.3602	8.2391	12.8528	11.343	7.037	6.0483	19.3014	4.556	2.2259	2.2039	5.0136	2.8264	2.1499		0.795453	5.50928
20.9689	4.3709	4.0165	13.4929	5.0643	2.8866	2.3801	2.4938	5.1447	7.5266	3.5353	2.1374	2.543	4.0354	5.3639	3.5893	4.9296	3.6944	3.1622	5.5766	7.1447	10.1311	9.1486	12.9519	11.6339	7.1404	6.4945	20.8095	4.283	2.1239	1.5417	3.837	2.4594	1.7547		0.800001	5.67872
21.088	4.2477	4.1507	13.152	6.3846	3.5051	2.1286	2.1102	5.0464	7.4599	3.18	3.371	2.4818	3.617	5.4089	3.5245	4.9291	2.9015	3.001	5.8434	6.4389	9.5094	9.594	12.5479	12.662	7.6579	6.5809	21.7493	4.2099	1.5635	1.788	3.5672	3.2518	2.6361		0.804545	5.76364
21.2071	4.6297	6.084	15.5051	5.4058	3.4485	2.5546	2.9695	6.1197	7.612	3.1191	3.268	2.564	4.2961	5.556	4.9138	6.116	2.6753	3.3841	4.9934	6.4472	8.1995	9.328	14.9507	14.7951	7.4043	7.1334	21.9772	3.9915	2.2931	1.5681	3.884	2.8296	1.5893		0.809089	6.10926
21.3263	4.7088	6.937	15.7434	5.8269	2.7957	1.9947	3.0854	5.541	8.5875	3.4132	2.7922	2.6269	3.7169	6.3626	3.8457	4.8501	3.0804	3.9404	5.9927	7.1046	8.0949	10.8756	16.9885	14.2879	8.3707	6.8909	18.1076	4.2769	1.788	1.3219	3.7031	2.4877	2.2963		0.813636	6.13443
21.4454	5.1385	6.2687	14.3651	5.4947	3.7541	2.7081	2.4227	5.0771	8.8602	2.9866	3.8355	2.1486	4.147	6.2469	3.9882	5.2299	3.2109	4.6032	5.1504	6.6262	7.7124	10.3549	17.2426	15.6715	7.6686	7.5845	20.4883	4.7457	1.7913	1.5778	3.4716	3.1607	1.9202		0.81818	6.2319
21.5646	5.4514	5.6235	15.7566	6.3712	2.7811	2.6403	3.5551	5.8127	7.6271	3.9343	3.4667	2.7599	4.1647	6.2187	4.0422	4.4757	3.8374	4.8036	5.6887	6.6566	8.2606	12.1746	15.3148	15.8092	7.2522	7.3773	18.364	4.5064	1.7526	1.9281	2.9815	3.1748	1.6898		0.822728	6.2501
21.6837	4.5197	6.2151	16.03	5.7155	3.4668	2.2422	2.7936	5.3563	6.6856	4.0621	3.3462	2.965	4.6737	7.0081	4.2985	4.6263	3.3787	5.4814	5.2197	5.6189	8.2267	11.5952	15.4767	15.1738	7.3423	8.5538	18.4222	5.1044	1.8508	2.7035	3.4552	3.3257	1.9669		0.827272	6.26972
21.8029	4.806	7.2451	15.5222	5.3609	2.9494	2.5113	2.6886	6.124	8.5457	4.2647	4.1029	2.8854	4.4069	5.3447	3.8901	4.1093	2.9366	6.2485	5.3882	6.7226	6.7497	12.2434	15.2436	17.5517	8.8969	8.0936	18.5955	6.0285	1.7073	2.2013	2.7165	3.2971	2.0006		0.831819	6.40542
21.922	4.778	7.9234	14.8124	6.2741	3.5553	2.5279	3.9789	7.9009	9.1133	4.888	4.3466	3.1469	4.5757	7.4924	4.5897	3.8495	2.9339	5.2857	5.1377	4.861	8.5888	13.7579	13.6212	17.3845	7.2127	8.4183	16.165	6.741	2.2216	2.4266	2.5352	3.4597	2.0348		0.836363	6.56178
22.0411	5.3634	8.0688	16.482	6.6609	3.5672	2.3828	3.7845	7.8082	8.8982	4.8109	4.9666	4.4636	5.1515	6.3155	5.2339	3.6023	3.6875	5.5475	3.9276	5.6008	7.9273	11.2605	13.9189	17.7008	7.4478	9.599	14.4547	5.9418	2.0264	2.1461	2.7615	4.2918	1.9756		0.840907	6.59927
22.1603	4.1426	10.4626	18.1353	6.1183	3.8491	2.8707	3.3484	8.0639	7.6512	4.1633	5.1406	3.4108	5.3486	6.9331	4.8816	3.51	3.4177	5.9585	4.8327	5.6301	7.0757	14.3494	11.8585	18.2465	7.6184	10.7929	14.6868	6.1581	1.5026	2.1817	3.3665	4.2747	1.8014		0.845455	6.72068
22.2794	5.826	9.5222	17.2244	5.888	3.4893	2.4065	4.0088	7.8416	6.9978	5.3023	6.1538	3.7487	5.0402	7.458	5.0224	3.2715	2.3892	5.7759	4.0395	4.002	7.0459	13.1202	11.7622	17.1111	8.2625	10.1251	13.678	6.5453	2.3711	2.1956	3.2465	5.1172	1.4		0.849999	6.58754
22.3986	6.1705	10.0533	19.2345	6.8322	3.9951	2.7515	4.4468	6.9362	7.6095	6.1643	6.6786	4.2161	5.3977	7.7425	4.7871	3.2772	3.1496	4.2388	3.8	4.8211	6.0362	11.25	11.9374	17.9245	7.6138	10.0032	15.2074	7.0934	2.1165	2.3123	3.1927	5.5667	1.7305		0.854546	6.79658
22.5177	6.3867	12.4741	17.3582	6.2483	3.6443	2.6777	4.8875	8.5183	7.0001	4.8761	7.1478	5.3897	6.0876	8.6636	4.9655	2.1188	2.6675	4.1102	3.155	3.7875	5.7312	10.1717	10.4368	18.5993	7.7656	9.4721	15.0699	6.6412	2.2863	2.4188	3.0637	4.9934	1.8065		0.85909	6.68548
22.6368	6.8822	12.9938	17.8376	6.7116	5.0918	2.3212	4.2778	8.4513	7.5773	5.4989	5.7957	4.6709	6.8501	8.6438	4.3911	2.9009	2.7036	3.5422	3.7626	3.242	5.4738	10.0134	9.2242	16.002	7.129	9.684	13.2745	6.6564	2.6496	2.1004	2.7543	6.3977	1.6299		0.863634	6.57987
22.756	7.6557	15.4234	18.5092	6.3938	5.6759	1.9988	4.852	8.5674	8.1234	6.4514	6.4989	5.493	6.897	7.3202	4.9723	2.5794	3.2415	2.694	3.8122	3.3903	4.7376	8.5436	9.6432	17.1483	7.5348	10.4057	13.4291	6.7463	2.2218	2.8098	3.2925	5.7513	2.2445		0.868182	6.81995
22.8751	8.0452	16.2831	16.6963	6.6825	4.034	2.6106	5.0127	8.0868	6.0049	7.587	6.5805	7.2637	8.4115	8.8476	5.5028	2.8526	3.0319	3.1581	3.4949	2.916	5.6264	8.0436	9.2169	17.799	7.6708	11.0719	13.1876	7.7104	1.9317	2.7868	3.1268	6.8186	1.6852		0.872726	6.96298
22.9943	9.8549	17.9282	15.4424	6.2555	4.4664	2.6824	5.2874	8.68	6.879	7.0566	7.9367	8.8386	7.8692	8.6761	4.2498	3.1159	2.7326	2.0575	2.6234	2.7873	5.3921	7.5582	7.6271	15.4025	8.0937	8.9711	14.1375	7.6145	2.1202	2.5205	3.4061	7.5602	2.1907		0.877273	6.90952
23.1134	9.9989	20.2783	15.1449	6.8155	5.6318	2.2496	5.4244	9.0766	7.5043	8.2701	7.9428	9.3818	11.2898	9.3069	4.9617	2.1674	2.275	2.1354	2.5523	2.4169	3.8875	7.7494	7.4835	15.6502	7.9464	9.4592	11.3728	7.4077	2.4151	2.6889	2.9336	8.2238	1.7746		0.881817	7.08537
23.2325	11.8321	21.1408	14.1877	7.1923	5.0616	2.2546	6.1213	7.6187	7.3748	8.1166	8.591	10.6592	12.8613	10.0862	5.1902	2.1715	2.1459	1.9364	2.1699	2.257	3.1684	7.5352	6.8447	14.5261	8.5529	9.3682	10.3664	6.6693	1.816	2.7733	4.125	8.1482	1.9325		0.886361	7.11501
23.3517	13.1912	22.3241	11.1332	6.8159	5.2337	3.2818	6.1318	9.4408	7.8323	8.3837	9.1116	10.415	12.3921	8.3821	5.4559	2.7938	1.7595	1.033	2.0233	2.2567	3.7889	7.6527	6.8137	13.5714	10.1788	9.9286	10.6449	7.973	2.4496	3.0965	4.5383	7.5533	1.9301		0.890909	7.25792
23.4708	15.0474	24.5757	10.6571	6.5257	4.9242	3.5163	6.0475	10.6111	7.5425	10.1975	8.7488	12.4451	14.899	8.7637	4.6107	2.4684	1.2454	1.1551	1.7904	2.0009	3.4309	6.4009	5.2137	13.63	10.1175	9.9058	9.3134	8.7325	2.3115	3.3512	4.2357	8.4263	1.7814		0.895453	7.41283
23.59	17.1094	23.6457	8.8796	6.6658	5.9689	3.2269	8.0298	11.235	8.8643	9.6268	9.4852	10.0714	17.0107	10.2041	4.3002	2.0717	1.388	1.5329	1.8628	2.1835	3.1815	5.8967	4.7298	11.949	9.2498	9.6554	9.9219	7.6747	1.6075	3.1566	3.6283	9.3862	1.8938		0.9	7.43315
23.7091	18.104	21.7286	8.9244	7.9484	6.3103	3.5138	8.0333	13.2614	10.4512	11.6145	9.497	9.8522	18.9251	9.8233	5.096	1.7421	1.3786	1.6525	1.909	1.7465	3.1378	4.5958	3.977	9.2292	10.7705	9.8483	11.4539	9.2634	2.7356	3.3488	4.6527	8.78	2.56		0.904544	7.75349
23.8283	21.1171	22.1352	8.6084	8.1186	6.9594	3.6581	10.033	14.6311	9.0255	10.5359	9.0882	9.6066	16.3901	8.3835	5.2076	1.5951	1.525	1.1637	1.978	1.5885	2.8959	4.512	4.4634	9.254	9.8449	9.1248	10.3226	7.9876	2.9467	3.2946	4.9765	9.1517	2.2852		0.909092	7.64874
23.9474	20.1155	20.4639	7.2251	10.2416	6.3706	4.5356	10.3594	14.0945	10.4736	10.7102	7.5134	7.3609	14.0113	7.7139	3.4309	1.7298	1.1779	1.3599	2.0698	1.4241	2.5892	5.0882	3.0151	7.8122	10.7113	8.5074	8.6086	8.9662	2.2867	3.6495	5.263	10.1264	2.7799		0.913636	7.32684
24.0665	26.247	19.0378	7.9999	8.8386	7.1563	3.5553	10.9443	15.2591	10.7515	10.2618	7.1008	6.6033	14.2851	7.7535	3.2681	1.2247	1.3797	1.0849	1.7925	1.4773	1.8925	3.2687	2.9072	7.3668	11.6971	7.5227	8.9104	8.4638	3.1218	3.063	4.8376	8.6758	2.7581		0.91818	7.28809
24.1857	27.7505	16.1302	6.8318	9.8044	7.4751	5.9273	12.824	16.3977	10.7308	9.9752	5.9632	5.1805	12.7477	7.6414	2.6576	1.1774	1.351	1.2389	1.0575	1.3437	1.9728	3.4359	2.7782	4.9796	12.3211	7.7267	9.7376	8.901	3.1425	3.7092	6.3092	11.1463	2.6621		0.922727	7.36449
24.3048	25.9626	12.9407	5.7534	8.5902	6.1316	5.4638	13.6093	18.3544	11.7387	10.8146	5.1074	5.3654	13.3035	5.8722	2.5754	1.3227	1.5305	1.2402	1.0507	1.9698	1.5426	3.2755	3.0972	5.6907	12.2955	7.222	9.1658	9.5745	2.7368	3.9369	7.0189	9.3202	3.0805		0.927271	7.17134
24.424	22.8072	12.1331	5.6482	8.9044	7.4954	4.7585	14.9527	19.23	11.4473	10.459	3.3499	3.9994	9.5037	5.4345	2.6575	0.7382	1.0432	1.021	0.9858	1.1473	1.6827	4.1043	3.811	4.2481	11.7005	7.5373	9.9968	7.9142	3.3963	3.7366	6.5974	8.4651	2.3541		0.931819	6.76548
24.5431	22.3202	10.765	5.3234	9.3514	7.9475	6.218	17.9712	20.7485	11.0559	9.7163	3.3787	3.7867	7.1846	5.5237	2.4207	0.5961	0.9333	1.0109	1.0781	0.894	1.46	3.7583	2.0833	3.6614	11.2462	8.0402	9.7832	7.6129	3.5705	3.7595	7.4961	10.0709	3.5755		0.936363	6.79825
24.6622	18.8656	8.3577	3.9507	9.5932	6.6379	7.2265	18.4707	17.3625	10.1929	9.0479	2.4476	3.8895	5.9895	4.021	1.8622	0.8977	0.8804	1.0095	1.1007	1.5256	1.5259	3.1786	1.6706	4.3019	11.3099	6.8227	9.6479	8.185	3.0825	4.5277	9.1599	8.6708	2.9603		0.940907	6.31433
24.7814	14.8273	6.7876	4.0849	9.1781	8.9908	8.0535	21.485	18.4448	11.8795	7.2332	2.7433	2.5854	4.9744	3.2737	1.2905	0.7168	1.0893	1.1327	0.8355	1.3405	1.2507	2.6138	2.3077	4.2195	9.0989	7.4858	10.409	7.4394	3.5726	4.34	8.8791	10.0852	2.9108		0.945454	6.22907
24.9005	11.6723	5.5068	4.2264	9.6099	7.8454	8.8988	22.9665	18.1056	10.2356	4.9331	1.7704	3.3148	3.7665	2.6493	1.2466	0.4393	1.0213	1.0331	1.1154	1.0625	1.8119	2.3334	1.8882	3.7923	8.5858	8.7515	10.3757	7.2788	3.5019	3.7666	8.2872	10.0492	3.9267		0.949998	5.93239
25.0197	8.3917	4.5751	3.848	9.6315	8.4703	9.1955	23.0964	15.7481	8.8737	3.663	1.7601	2.6629	2.8098	2.5989	1.0896	0.6641	0.5565	0.9512	0.8212	1.0798	1.2596	2.0226	1.4968	3.8522	9.0798	7.8693	10.2931	8.3355	4.4214	4.7273	9.797	9.7152	5.0899		0.954546	5.71052
25.1388	8.1356	4.4641	3.3951	8.6069	8.3003	10.4169	22.4708	12.4036	7.3278	3.4671	1.4338	2.1191	1.9733	1.7703	1.1826	0.4714	0.9109	0.4366	0.9549	1.4374	1.1328	1.5934	1.9046	2.7597	6.6145	8.1162	9.5122	9.2353	4.8261	4.1999	8.4096	10.7637	5.2825		0.95909	5.33421
25.258	6.6282	3.8632	2.2593	10.0681	8.0842	12.191	20.5488	10.7843	6.9182	3.2388	1.0902	1.8516	1.6532	1.892	1.142	0.5207	0.7135	1.0214	0.7955	0.891	0.7758	2.505	1.9113	2.5787	5.5932	7.837	9.5318	7.6705	4.4374	5.3095	7.2215	12.1389	5.6789		0.963638	5.13166
25.3771	4.9486	2.9183	2.6894	8.734	9.1081	11.8012	17.8372	6.8339	5.4491	2.3506	1.295	1.2055	1.926	1.2726	1.1224	0.4918	0.8362	1.1406	1.0826	0.9842	1.4614	1.8309	1.558	2.7275	6.0741	7.3198	8.3955	7.7763	6.6948	5.4097	8.1035	11.0292	6.3126		0.968181	4.80972
25.4962	4.0177	2.8863	2.7562	7.6125	9.7493	12.9349	15.2601	6.3857	5.445	1.785	1.3768	1.7107	1.4267	0.925	0.6574	0.549	0.6822	0.672	1.0706	0.5785	1.3761	2.0127	1.5933	1.9406	5.8897	7.3718	7.9482	7.4954	7.0551	6.0418	7.6085	9.4075	6.2534		0.972725	4.55987
25.6154	3.965	3.1076	2.401	5.8425	8.8627	12.2108	11.6722	4.8729	4.1004	2.004	1.1652	1.5642	0.9959	1.3331	1.0588	0.5152	0.2965	0.7054	1.0166	0.7269	1.0767	1.4708	1.4477	2.0978	4.7458	8.2715	6.7064	8.1852	5.9971	4.7745	7.0667	10.4133	7.3517		0.977273	4.18249
25.7345	3.8277	2.7464	2.1031	5.5116	9.5116	12.1089	8.6147	4.6664	3.5345	1.4845	0.9741	0.8794	1.1169	0.7407	0.8889	0.5012	0.4411	0.8652	0.9323	0.9738	1.3503	0.9382	0.7503	1.699	4.3825	9.9642	6.1977	8.152	5.7033	5.1939	7.9374	8.7799	8.4445		0.981817	3.99746
25.8537	3.4842	1.8007	1.7579	5.0018	9.1201	9.4123	6.3594	3.4896	3.0631	0.6675	0.5356	0.8063	1.1791	0.9588	0.975	0.271	0.4784	0.6814	0.962	1.2026	1.1429	1.1332	1.003	2.4327	4.9028	8.2533	6.5335	7.6066	5.5191	5.8473	6.565	9.1686	8.8455		0.986365	3.67152
25.9728	3.1356	2.3484	1.5796	5.062	7.6425	8.0424	5.0729	2.9033	3.075	0.9453	0.3036	0.7178	0.6925	0.6286	0.3153	0.2792	0.5688	0.7955	0.7231	0.2947	1.3493	1.3572	1.1696	2.0313	4.3237	9.5278	5.5519	6.6134	6.0359	5.2727	5.6216	8.6769	8.9907		0.990908	3.38328
26.0919	3.2725	2.4572	1.8022	4.4651	6.6802	7.7998	4.0306	1.9648	1.6041	1.4518	0.6394	1.0311	0.6706	0.7058	0.7237	0.3214	0.5738	0.9607	0.9089	0.9792	0.9464	1.4341	1.0722	2.0455	3.2765	6.9124	5.0865	7.5137	5.4016	5.5975	5.9041	6.2638	9.623		0.995452	3.15516
26.2111	2.2524	1.5122	1.8372	3.3276	6.7135	7.6486	3.7796	2.3384	1.6102	0.6117	0.1516	0.6521	0.7559	0.5118	0.5005	0.7322	0.118	0.9248	0.5449	0.6541	0.7912	0.9414	1.0273	1.1519	3.5137	5.0784	5.6231	6.9633	5.0401	6.2314	4.9191	7.064	13.9512		1	3.01435

## Sheet: Image6
X0	Y0	Y1	Y2	Y3	Y4	Y5	Y6	Y7	Y8	Y9	Y10	Y11	Y12	Y13	Y14	Y15	Y16	Y17	Y18	Y19	Y20	Y21	Y22	Y23	Y24	Y25	Y26	Y27	Y28	Y29		Ap-basal	Avg int
0	43.055	20.6111	11.381	13.1427	31.4958	19.757	13.4517	7.7346	7.6024	9.1882	6.7653	14.6165	12.6227	14.081	11.5921	19.1585	21.2925	10.4461	10.8022	28.4788	16.0826	13.976	23.7923	19.1037	23.7691	16.5037	32.7958	29.1111	35.163	27.069		0	18.8214
0.1191	45.6562	22.3966	11.4717	14.0651	30.0428	20.3149	17.284	8.6698	9.1845	11.9591	8.6076	14.8536	14.6203	15.2715	12.086	21.1764	25.9654	10.1307	12.0126	31.1564	17.5463	13.149	22.3935	18.9404	24.0622	18.0627	31.4193	26.5551	36.9878	32.345		0.0047377	19.9462
0.2383	50.3189	24.2662	12.3606	15.7585	31.1011	22.2763	15.1619	9.8255	14.2288	15.4525	9.1055	18.2361	15.4987	16.7062	15.5879	28.1527	30.896	10.6711	17.3707	35.3747	21.9022	14.4347	24.3543	22.3779	28.1488	18.3639	33.389	29.7494	42.0401	37.675		0.00947937	22.6928
0.3574	50.1138	26.5867	13.2476	20.2277	30.437	26.2276	16.0904	12.8208	17.3553	21.9549	10.994	21.1238	18.2516	17.1854	17.7247	31.4954	41.8585	12.3547	16.0663	40.1659	25.0227	18.5804	25.3081	23.1833	28.5724	19.489	33.3714	29.345	45.6645	46.486		0.0142171	25.2435
0.4766	52.7649	30.6144	14.9905	18.6488	30.5032	28.8315	19.2946	15.9305	21.8976	24.3848	13.0863	25.3593	23.9846	19.8934	19.7393	35.6726	42.3873	18.6076	20.9154	37.466	27.5398	20.72	27.4965	24.4017	36.9916	19.4618	34.0176	29.7018	52.0071	50.998		0.0189587	27.9436
0.5957	52.8925	32.8576	17.7339	24.453	30.4411	31.8268	19.7739	20.9777	28.8887	35.6123	17.9078	27.378	25.9207	21.6392	20.7426	38.5056	49.0083	24.5707	22.9134	39.693	33.7012	20.909	30.6775	27.8598	35.0416	19.2669	33.2922	28.4001	53.7113	57.955		0.0236964	30.8184
0.7148	56.2343	36.1819	16.8091	25.5516	35.4684	38.0015	23.7862	24.6275	33.5757	41.2252	21.8374	32.6864	29.5384	23.4488	21.9062	42.7695	53.3684	31.6537	26.7398	38.8906	35.0839	27.2875	31.432	30.4632	37.3631	20.1576	34.1894	31.6424	62.7405	65.778		0.0284341	34.3479
0.834	59.0553	36.9315	21.4589	28.5743	35.9324	42.3337	30.079	30.5354	43.9951	57.6206	26.9077	38.4049	31.2031	25.2069	23.5152	47.0659	57.7209	35.9723	30.8129	37.5945	35.6191	32.8905	31.129	33.4891	42.3692	22.9991	37.0269	28.4817	68.6683	77.613		0.0331758	38.3735
0.9531	57.06	41.9982	26.2969	29.4008	41.9967	52.2632	36.1092	41.1475	54.9215	64.0433	32.7427	43.7933	36.2656	28.7315	24.7754	53.9096	58.4135	41.9398	35.7377	43.0473	38.0354	38.6343	35.1002	38.5737	44.953	23.7576	34.5115	31.7761	72.1356	83.725		0.0379135	42.8599
1.0723	60.8112	50.2353	26.43	32.8591	38.518	63.2813	41.7083	43.8683	63.7614	70.9312	40.8491	45.3194	36.8167	28.8802	27.3874	52.8617	62.671	49.214	37.307	39.7769	41.0231	40.2664	40.3909	40.2147	47.3803	25.0794	35.9927	25.8016	76.8393	92.44		0.0426552	45.9639
1.1914	57.0778	50.1739	30.2656	33.7115	40.7072	70.5061	52.1091	50.5981	67.9859	76.2126	47.6289	46.3618	39.3383	29.5792	30.9466	51.0805	58.2514	55.3204	37.1417	41.893	39.8628	44.8292	43.3935	45.1955	49.9389	27.8865	37.1549	30.0241	78.6824	98.237		0.0473929	48.7365
1.3106	51.3381	51.6362	31.2525	34.3901	45.674	72.6348	54.9677	58.5366	75.532	75.0204	51.9477	48.1749	41.0016	30.377	35.2499	52.4885	55.5762	62.4693	42.9707	37.2096	35.9022	46.7564	49.9458	45.6931	53.9505	31.9953	38.0399	28.8532	77.0566	111.991		0.0521345	50.9544
1.4297	55.0715	60.7845	32.1429	35.0545	47.7324	79.8905	62.5927	63.9229	77.0968	80.4185	58.8354	44.8289	40.1219	30.441	37.1721	52.3926	48.7359	59.4689	46.7826	36.7404	33.8918	48.9549	54.0994	46.7471	55.2776	32.9885	38.4207	31.1856	83.9439	118.104		0.0568722	53.128
1.5488	52.4703	59.8723	35.696	38.0416	46.8037	86.0791	66.4438	68.7814	74.07	73.963	58.0745	41.0154	37.6659	31.0554	36.9578	51.3284	45.28	62.8457	48.6604	39.0802	31.8354	50.1282	54.5745	44.424	58.2955	34.7257	39.9089	32.0214	83.2744	115.456		0.0616099	53.2943
1.668	52.0256	62.5229	35.986	40.335	51.5082	84.8418	70.4222	73.3642	70.3818	70.4594	61.497	38.336	39.6832	30.4687	37.2105	49.4296	39.9681	60.372	49.6745	37.0121	27.843	51.077	58.819	45.2575	54.5583	40.8694	37.3821	31.5396	81.4022	110.822		0.0663516	53.169
1.7871	49.7509	62.1723	39.8194	40.1539	51.2839	82.9884	72.5066	73.1764	64.1644	57.6066	57.2756	35.4549	33.5159	29.9953	42.56	48.1306	36.0156	55.5418	48.8292	34.2561	23.4889	48.013	56.448	44.1036	54.873	40.9308	39.5244	30.6027	79.0274	107.787		0.0710893	51.3332
1.9063	48.0398	66.141	41.6966	38.7752	54.9001	79.8453	73.4913	69.3336	51.6553	48.4475	59.0699	30.0449	30.0128	30.2652	34.8767	48.2012	30.7678	53.5973	52.059	30.0059	23.0752	48.6914	58.7277	48.9027	60.4466	42.5168	39.1221	31.9603	76.9393	101.243		0.075831	50.0951
2.0254	47.2689	69.7492	45.7905	38.7682	54.23	72.6875	69.8273	61.0042	43.4332	41.2308	59.4777	27.942	27.1511	26.3494	41.1672	42.1287	28.6177	48.7929	49.5301	27.856	22.7956	48.4631	59.4652	46.9078	57.892	45.6627	38.8757	34.0243	71.2453	91.713		0.0805687	48.0016
2.1445	44.5568	69.8622	47.0294	39.5298	56.2035	63.4756	66.1039	60.4798	35.2758	32.6307	57.1543	24.2358	22.7078	23.883	35.9331	41.5216	26.9352	45.2317	51.0975	25.9505	20.2758	44.8979	55.6935	48.542	55.0077	46.068	41.4669	38.1762	69.719	86.118		0.0853064	45.8588
2.2637	38.4288	68.0976	48.5819	44.0428	64.0508	55.7522	58.3385	48.3003	34.8367	30.1989	54.1611	20.8718	19.0831	18.9531	35.6887	37.4349	21.5904	36.5129	49.0903	24.9163	18.3349	37.7801	57.3506	45.069	55.7578	50.4417	39.5163	40.991	70.8155	81.357		0.0900481	43.5448
2.3828	37.2424	72.7882	55.4064	41.6042	64.6028	44.1096	53.2684	41.458	29.4766	24.2248	51.4092	16.3517	18.1467	16.2385	31.3612	32.2978	19.782	30.5705	44.3773	22.285	19.9639	37.0928	52.8632	48.1988	53.437	50.6849	35.0119	37.6261	62.8069	72.671		0.0947857	40.5786
2.502	34.9948	67.6157	52.3008	45.3908	61.5498	31.6392	48.2435	37.8058	28.8134	24.352	42.7322	17.0192	13.9371	14.0828	27.5016	30.1412	16.5207	29.8408	43.2747	19.2224	18.8249	33.7575	53.1515	48.5435	42.2622	52.4498	34.3494	38.6547	60.466	68.742		0.0995274	37.9393
2.6211	28.5048	60.9441	54.9035	47.4221	63.0363	26.7254	41.5429	34.8179	23.5809	21.0529	40.9984	14.4478	13.2151	15.4007	25.8704	27.8203	16.5401	26.1839	38.028	20.3441	17.8264	31.5045	46.2835	44.697	36.9946	55.3675	32.762	41.615	58.8459	58.861		0.104265	35.5379
2.7402	25.0229	56.4275	57.1307	46.0704	63.6077	20.1399	34.7794	30.839	20.9891	19.2916	30.2946	11.105	9.2471	11.7953	22.1276	24.0348	13.9585	22.1972	36.3709	19.9116	16.5756	28.7823	44.0216	43.5404	30.2666	59.0545	29.5599	42.2024	53.0058	52.808		0.109003	32.5053
2.8594	22.4841	53.2105	55.0612	45.5454	65.4265	17.3615	33.8856	26.9839	20.7896	17.2179	24.9937	12.4016	9.7662	9.3587	20.5542	18.1797	14.6701	21.9713	28.2694	17.6303	14.7097	27.2797	38.349	47.0087	28.0383	53.0011	29.413	42.2218	50.6613	48.189		0.113744	30.4878
2.9785	21.2594	47.9118	55.5313	45.0226	66.4408	15.1105	27.0855	23.1807	19.3026	15.2474	21.1551	9.7611	6.8105	9.751	17.2029	19.4341	11.3522	19.5761	23.2124	17.6629	13.4311	22.8518	31.3004	46.0165	20.3748	50.3321	25.4757	37.9743	44.7683	43.699		0.118482	27.6078
3.0977	18.1438	44.1298	51.9162	48.8386	59.2048	12.8354	22.947	21.7652	17.4731	15.7243	18.1743	9.0131	7.9643	9.3498	13.865	16.7471	8.7651	17.2385	20.3327	16.1568	12.6705	19.198	29.4982	45.2388	14.3186	50.3868	24.0447	37.5764	41.9186	39.507		0.123224	25.4981
3.2168	13.5854	41.4462	53.0342	45.3631	53.4163	11.2021	22.0003	20.9304	14.5789	13.5805	18.1451	8.3836	6.6111	8.8523	14.6741	13.5989	10.2015	15.8383	17.5185	15.6508	11.0563	16.6719	23.1931	41.1255	13.2495	48.2625	19.4997	40.3363	35.2025	37.656		0.127962	23.4955
3.336	16.1186	36.5993	47.1217	45.8555	46.691	10.6649	18.7655	19.0155	13.8255	11.8397	14.1088	8.6242	7.9845	6.4316	13.379	11.7278	8.4583	11.2814	13.9565	14.383	10.3669	16.3427	14.6342	40.9968	11.0952	43.655	15.6912	39.6315	34.1411	33.661		0.132703	21.2349
3.4551	13.6506	30.7855	44.6565	43.5703	36.0842	9.6689	16.0722	17.0217	13.8163	12.3417	12.006	6.4718	6.4496	7.1399	12.2629	11.9328	6.239	10.3524	11.8713	13.638	9.4602	13.7783	11.2918	39.5126	8.7507	38.465	14.5854	39.1835	28.4874	30.128		0.137441	18.9892
3.5742	13.1285	28.6054	41.4125	44.3662	31.7877	8.2012	17.0186	14.5303	12.1111	10.9104	10.7722	6.5963	7.2753	7.3416	11.4047	10.2087	6.3668	10.0473	9.4281	13.229	9.0796	13.0009	8.6467	38.8868	8.8423	34.0117	12.1684	35.9897	26.311	27.977		0.142179	17.6552
3.6934	12.2841	28.7627	41.3943	48.1851	27.7026	8.055	12.9409	12.5659	10.3141	9.6889	11.0103	6.9239	7.6164	6.4929	9.9865	9.1084	6.017	7.9074	10.8613	12.5263	8.3559	9.2347	7.6656	32.8387	7.8927	25.482	10.741	33.9248	24.4179	26.045		0.14692	16.2314
3.8125	11.5019	24.3316	38.3361	47.6123	22.7341	7.9438	14.6399	12.0786	9.26	8.551	12.0797	6.7633	6.6599	5.3314	8.7278	7.2521	5.035	8.1373	8.7579	11.6694	7.794	9.7523	6.5583	29.4731	6.2146	18.7659	10.223	30.1025	21.684	24.309		0.151658	14.7427
3.9317	10.9501	21.2445	37.6279	44.8139	21.818	6.4022	11.3561	11.7272	10.9484	9.1382	12.1377	5.8836	6.6038	6.007	8.3161	6.4672	4.2061	7.1908	7.593	9.7259	7.0924	9.1038	5.4684	27.6425	6.711	13.171	11.3408	31.3177	19.1889	22.299		0.1564	13.7831
4.0508	10.122	22.6365	33.6369	43.732	19.4537	5.5778	9.2556	11.8647	10.391	7.4949	12.1128	5.1879	7.7175	6.5282	7.4647	4.7784	5.0166	6.1727	5.8853	11.1422	6.865	9.0347	5.3865	25.5738	7.1811	12.4363	9.8643	28.4286	17.9568	19.955		0.161137	12.9618
4.1699	7.9982	18.6223	30.2301	40.1054	18.938	6.2945	9.9438	10.5252	9.2828	8.2337	13.6826	5.1067	7.4505	5.6393	6.1513	5.4346	4.713	5.6111	6.944	10.6958	7.2048	6.8414	5.7519	21.4396	5.9588	9.1211	9.4822	24.1081	18.5612	19.212		0.165875	11.9761
4.2891	6.8148	19.8182	27.7612	38.5683	17.312	6.1741	8.6652	9.2404	10.1111	6.6554	10.784	5.3922	6.1584	5.6449	5.8746	5.2407	3.5146	5.1896	6.9468	9.6797	6.3742	7.6279	5.1338	19.2935	5.7992	7.3301	8.1369	23.4918	17.8084	15.19		0.170617	11.0577
4.4082	8.1964	18.5871	24.7709	33.9341	16.2611	5.8956	7.7367	9.0503	9.0358	6.9115	10.619	5.8976	6.1543	5.0361	5.5523	4.4148	3.8916	5.2445	5.8322	9.6473	6.3992	6.6723	5.799	17.5515	6.7281	6.0755	8.2842	17.6195	17.929	14.598		0.175354	10.3442
4.5274	7.5462	15.3229	21.2104	30.6278	16.2114	5.5456	5.6685	7.9698	7.5011	7.6276	10.3277	3.2452	6.0075	6.1722	5.7236	5.0993	3.8735	4.1632	5.4362	9.744	6.5114	7.199	5.1714	14.2487	6.41	7.0399	5.8269	15.7412	18.0699	14.568		0.180096	9.527
4.6465	7.7413	15.0805	17.5843	27.0642	15.1405	4.0863	7.0149	7.7948	6.6681	6.99	9.1122	4.1003	5.9449	4.8283	4.69	4.6084	3.0211	5.2526	4.585	8.5147	6.1868	6.7323	5.8997	10.3233	7.6314	5.5569	4.7395	13.6961	17.2058	11.64		0.184834	8.64781
4.7657	7.8975	13.8871	18.0526	23.9211	14.7048	5.3541	5.4053	8.335	5.8321	7.4881	8.3894	4.5713	5.6974	4.5554	5.2995	4.6409	3.0591	4.8738	5.0752	8.865	5.6192	5.6263	6.0578	8.4632	6.4972	7.0104	5.4107	13.7357	15.0547	10.528		0.189575	8.33026
4.8848	7.6717	15.2634	14.0033	20.0933	14.4205	4.6994	4.8607	7.5521	7.2131	6.8932	6.6538	2.7184	4.3768	4.3341	5.8187	4.7401	2.4531	4.3893	5.2061	7.3811	5.2174	5.7737	5.661	8.9055	4.6906	5.6497	5.1797	13.9472	14.8872	10.529		0.194313	7.70611
5.0039	7.0957	12.1468	15.5662	18.0052	11.6517	4.5709	4.4077	6.9581	6.5537	7.1942	7.285	4.2528	3.0748	4.7632	5.5617	3.5098	4.5951	4.0333	4.3076	6.3007	5.3125	6.4241	5.6484	8.2403	6.2399	5.3072	3.5019	13.3778	12.4192	8.575		0.199051	7.22935
5.1231	6.8357	14.0373	14.3591	16.9677	12.061	4.0712	4.7481	5.9739	5.7856	6.0187	7.6965	3.2831	3.8099	4.3256	4.2787	2.6144	3.2878	3.5037	3.8297	6.0498	5.728	4.1722	5.4028	7.3711	5.354	5.3672	3.8841	10.1953	12.9415	7.98		0.203793	6.73112
5.2422	6.2188	13.3067	14.6058	15.2973	12.0861	4.2885	3.8114	6.3859	4.6471	8.4505	5.9257	3.7764	3.3479	4.5135	4.4513	2.9525	2.2892	3.1913	3.2242	5.4474	4.8744	6.8892	4.5634	7.3318	5.0972	5.4606	4.2239	8.8079	11.2357	7.022		0.20853	6.45745
5.3614	6.8917	12.1056	13.5284	15.1787	9.5089	2.8726	4.6502	5.8653	4.61	8.233	5.7256	3.0297	3.4388	4.4372	4.8083	2.8359	2.439	3.0425	3.8634	5.3318	5.0346	4.6228	4.6257	7.0789	4.2033	5.9975	4.1431	6.831	8.6211	7.741		0.213272	6.04319
5.4805	5.2717	12.3094	12.5775	14.6682	11.6486	3.8776	4.4385	5.1333	5.0995	6.4027	5.272	2.4645	2.2006	5.0331	5.2272	2.7001	2.8106	3.5342	4.2178	6.2122	3.9367	5.7428	3.6858	7.977	4.5753	4.7121	5.4211	7.515	10.3304	6.89		0.21801	6.06285
5.5996	5.9828	11.8971	14.7743	15.062	10.5558	3.3485	4.8519	4.1365	4.6369	6.7373	4.9139	3.1182	2.506	4.2037	5.9869	1.9696	1.7807	3.5494	2.8808	5.1525	3.5128	5.409	4.6193	7.4993	5.3334	4.3631	4.1616	6.6689	8.64	5.126		0.222747	5.77927
5.7188	5.6936	10.9453	14.8478	14.1578	11.0816	3.1173	4.231	5.0187	4.7256	6.1075	4.3506	3.6167	3.0752	4.8982	5.61	2.8485	2.8174	2.7817	2.5098	4.4069	3.8424	6.105	3.734	7.2319	4.0872	4.2952	4.7429	6.245	8.7558	5.651		0.227489	5.71772
5.8379	6.2865	10.4159	15.7141	13.032	10.3926	3.5153	3.6766	3.7866	4.4041	5.4525	4.2178	2.6942	2.8389	4.6994	6.0343	2.3686	2.3249	3.6157	2.7364	4.3394	4.7207	5.2497	3.798	6.3568	5.0976	4.6723	5.1124	7.5599	5.6127	5.754		0.232227	5.54933
5.9571	5.793	10.569	12.8664	16.3491	10.3483	4.1322	3.5938	4.1888	4.6037	5.4545	5.1446	2.3702	2.2915	4.3126	5.5836	2.3366	1.9892	2.9424	3.1089	3.7242	4.5246	5.1369	4.0517	6.5359	5.0882	4.7587	3.89	7.2437	6.2494	6.104		0.236968	5.50952
6.0762	4.8112	8.6127	12.5672	15.1009	11.5494	3.7191	3.6225	4.2276	4.7739	4.8077	5.5449	2.3318	2.356	4.1751	5.4947	2.5065	2.1189	2.5224	2.4123	3.1793	3.6951	4.3183	4.0517	5.8913	3.7638	5.0337	3.9677	6.9294	6.0011	5.433		0.241706	5.18397
6.1953	4.5179	8.7207	12.431	14.8671	9.6259	4.1683	3.2619	4.2213	4.593	4.5272	4.2645	2.8126	2.6003	4.8078	5.6436	1.8556	1.9329	2.7818	2.2654	4.0707	4.6708	4.671	4.3302	6.9602	4.3272	4.048	4.5009	8.0424	5.898	4.785		0.246444	5.20677
6.3145	4.0068	8.4245	11.9218	11.7647	9.5474	3.4134	4.2325	3.2656	5.0757	4.7594	4.8955	2.0586	2.9852	5.0378	5.0647	1.9231	1.5166	2.2479	2.2723	3.776	5.6212	3.747	2.6211	5.9909	4.902	5.874	3.7612	6.9429	5.5175	4.672		0.251185	4.92798
6.4336	3.9818	8.5106	11.8761	12.2555	10.0016	3.3318	3.7632	3.8157	5.1786	4.3561	3.477	2.5044	2.6442	4.6404	6.3474	1.7862	1.8369	1.9587	1.5524	2.6449	5.0949	4.2396	3.2306	6.3662	5.2041	6.0146	3.8504	6.9839	5.349	5.98		0.255923	4.95923
6.5528	4.2627	8.964	9.7275	9.4628	8.0491	3.1873	3.5659	2.8537	4.9159	3.9858	3.0466	2.5835	3.2931	4.807	6.0151	1.936	1.6529	2.701	2.0631	3.3033	5.632	3.5206	2.9732	5.9596	6.0822	6.0557	3.558	5.8901	5.2174	4.739		0.260665	4.6668
6.6719	5.7877	8.7049	8.0086	9.573	10.1245	4.2636	2.8107	3.2318	4.5018	3.8158	2.6282	2.4365	2.6005	4.2933	6.4728	2.2226	1.6927	2.6154	1.8536	3.3	5.4294	3.8518	2.7986	5.9866	4.8496	4.7488	3.1543	6.7823	4.7744	4.819		0.265402	4.60443
6.7911	4.4031	8.5118	7.454	9.5831	10.0717	2.7887	3.7777	2.7553	3.8327	3.5765	4.0856	2.7033	3.0145	4.8008	5.3592	1.3753	1.7374	1.7559	1.6192	2.9508	6.5594	3.2547	2.8984	5.6913	6.8248	5.2628	2.9768	5.7054	4.4604	4.665		0.270144	4.48185
6.9102	3.5117	7.8514	7.0836	9.1258	9.8004	3.4248	2.5175	2.2371	4.0998	3.1282	4.3997	2.4174	2.7402	4.3596	6.1246	2.4656	1.4052	2.0248	1.6319	1.9882	5.9829	4.4243	2.3002	5.2494	7.2864	5.6669	3.0866	5.3247	4.5817	4.486		0.274882	4.35755
7.0293	4.7813	7.6628	7.6569	8.6316	7.9134	3.6341	3.1964	2.256	4.2496	3.3596	3.8572	2.8515	2.4104	4.52	4.6745	2.8662	1.5793	1.4419	1.556	1.8589	5.9063	2.8486	2.2406	5.4581	7.2969	4.9208	3.4734	5.2391	5.0392	5.442		0.27962	4.29409
7.1485	4.5562	7.3697	6.8841	8.6244	8.1972	2.9523	2.8093	3.0749	3.5319	2.7732	3.6639	2.3743	1.8244	4.7001	4.598	1.9131	1.8195	1.8033	1.5587	2.4054	6.4964	2.6808	2.62	3.8023	8.472	4.414	3.2036	6.1277	4.1383	3.866		0.284361	4.1085
7.2676	4.4714	7.5923	6.0667	9.1067	6.4595	3.4099	2.9737	2.9984	3.7717	3.4696	4.7603	2.7337	2.5057	4.1222	4.6844	1.7027	1.8653	1.7364	1.5397	2.8679	5.6238	2.9483	3.5891	4.203	7.8646	4.7971	3.3261	5.1828	4.038	4.759		0.289099	4.17233
7.3868	4.5684	6.6668	7.4561	8.8075	6.3263	3.4477	2.7942	3.4293	4.1696	3.0281	5.1394	2.5285	3.1397	5.499	5.165	2.2612	1.1866	1.384	1.695	3.388	7.7344	2.5633	3.2376	4.7501	6.444	5.9017	2.7533	4.1266	3.3803	5.078		0.293841	4.26832
7.5059	3.8567	6.4142	6.9322	9.8474	6.6879	3.0982	2.0688	2.6934	2.9466	3.2484	4.8028	2.5935	2.2164	7.1584	3.8286	2.3026	1.5271	1.4456	1.2735	2.1194	6.5459	2.9193	2.6293	5.3424	7.8116	4.1928	3.2531	4.8392	4.9089	5.191		0.298578	4.15651
7.625	4.2458	6.4647	6.8991	9.4291	5.632	2.696	2.6808	2.2332	3.6886	3.4544	5.1929	2.4182	2.5432	5.9392	4.8578	2.3049	1.115	2.0907	1.4331	2.4017	7.1964	4.3729	2.2566	5.7429	5.8941	3.9023	2.9011	3.6273	5.0634	5.129		0.303316	4.12688
7.7442	3.7839	6.9362	7.1629	8.9014	4.621	2.4404	2.4884	3.1255	3.8507	3.384	5.9777	3.176	2.9067	5.5364	3.7937	1.8225	1.8683	1.7973	1.931	1.9792	6.8992	2.9588	3.8596	5.278	8.2038	4.3698	2.7962	4.2289	4.5257	5.451		0.308058	4.20181
7.8633	4.3813	5.8366	5.8983	8.4552	5.0514	2.6419	2.9139	3.427	3.3854	3.1316	5.7769	3.6228	2.1798	6.3476	3.8619	2.1549	1.3224	2.0723	1.8248	2.5257	6.4746	3.3281	4.4264	5.8053	6.9015	4.4449	2.3942	4.0008	5.1093	4.301		0.312795	4.13326
7.9825	3.4144	5.4324	6.7649	7.575	5.0007	2.9753	2.6702	3.5836	3.5929	3.102	5.4708	2.7503	2.0135	6.0185	3.7698	1.7025	1.3471	2.0023	1.4803	2.0352	7.2836	3.0405	3.5574	5.9204	8.0193	3.7549	1.9493	4.2122	3.8734	4.504		0.317537	3.96056
8.1016	3.7728	5.0804	6.0997	7.9082	4.1973	2.3666	2.5729	2.8497	2.8965	3.4682	5.6376	2.8777	2.4255	7.0635	3.354	2.2797	1.3104	1.8706	1.2879	2.2238	9.5046	2.9267	3.1215	6.0406	7.4157	3.6847	2.464	3.7262	4.6817	4.071		0.322275	3.97266
8.2207	3.2966	5.7444	6.153	8.5661	4.2732	2.6068	2.5049	3.1711	3.0376	3.1468	5.4418	2.9252	2.3742	7.1082	3.4425	2.0496	1.4512	1.0231	1.2793	1.9918	8.892	3.2567	2.9172	4.9827	8.0802	5.4858	2.7401	3.8404	4.9608	3.236		0.327012	3.99931
8.3399	3.0742	6.0779	6.4606	9.9514	4.5639	2.856	1.6495	2.8567	3.6739	3.4269	5.642	2.8624	2.4579	7.3209	2.9683	1.4613	1.6756	1.2065	1.3682	2.3643	9.5683	3.8652	2.0908	5.6888	6.7508	4.5128	2.3177	4.7064	4.5605	3.032		0.331754	4.03372
8.459	3.0856	5.1229	6.1299	8.3771	4.0273	2.1446	2.3252	3.4022	3.6282	2.6414	6.6153	2.8745	2.2851	5.6907	3.6792	1.5226	1.6176	1.846	1.9741	2.4546	9.5096	2.9535	2.4928	4.5784	7.7534	4.8413	2.4671	2.6488	4.8439	3.453		0.336492	3.89953
8.5782	4.3476	6.0039	5.4278	9.8989	4.7949	3.1898	2.5601	3.8141	2.9502	3.3493	5.9577	2.7263	2.8108	7.0239	3.3444	1.6697	1.1817	1.8497	1.5792	2.1504	10.8263	2.7912	1.7239	5.2511	7.7027	3.9812	2.9924	4.8513	3.9666	2.938		0.341233	4.12184
8.6973	4.2015	6.8426	8.2506	10.4827	4.6339	2.1122	2.7161	4.0171	3.2862	2.8801	5.8605	3.1565	2.4738	5.0567	3.3136	1.8135	1.2418	1.4838	1.303	2.6341	10.2245	2.9013	2.7041	5.635	8.3565	4.1597	2.5433	3.86	3.9646	2.448		0.345971	4.15191
8.8165	4.4504	7.2303	6.4362	10.5656	3.6608	2.6694	2.3221	2.939	2.1843	2.1761	4.5859	2.4145	2.507	6.7573	3.5341	1.993	1.1615	1.3201	1.5995	1.965	13.6886	3.07	2.7295	5.2541	8.6821	3.7343	3.1597	3.7104	4.3446	3.81		0.350713	4.15518
8.9356	4.3898	8.2906	5.6699	10.1113	3.5382	2.6161	3.008	2.9859	2.7949	3.0302	4.9762	3.0144	2.4133	7.1021	3.3801	1.8589	1.3975	1.546	1.2053	2.8621	13.1653	3.3766	2.2415	5.2837	7.7795	3.7137	3.413	4.9206	4.6132	3.255		0.355451	4.2651
9.0547	2.9401	8.118	6.6213	10.2165	4.0284	2.9108	1.8119	3.1107	2.6457	2.2018	4.4554	2.6371	3.5347	5.4514	2.6757	2.2258	1.5948	1.2609	1.1347	1.7613	12.3815	3.3834	2.0097	5.4705	8.6323	4.2159	3.7929	4.0844	4.539	2.976		0.360188	4.09409
9.1739	3.496	8.3009	6.9132	11.7703	4.6842	2.0532	2.172	2.6663	2.7695	2.9655	4.1403	3.0906	2.6588	5.2788	3.7158	1.932	1.3542	1.3998	1.5403	2.1517	14.4538	2.7661	2.9053	5.9705	9.0209	3.6017	3.4713	5.3096	5.512	2.728		0.36493	4.35975
9.293	3.5026	7.1132	6.0473	12.469	3.0247	3.0135	2.6856	2.7553	2.6149	3.2687	5.6809	2.6805	2.2092	6.2204	4.6087	2.0893	1.2171	0.9243	1.9112	2.1673	11.8193	3.9759	2.8852	4.6655	8.7335	4.2721	4.1359	4.8635	5.4345	3.227		0.369668	4.34054
9.4122	3.3468	6.9847	7.145	12.1652	3.3203	1.8734	2.1439	3.4564	2.2394	2.5708	6.4885	3.4889	2.8244	7.0312	3.6018	1.7997	0.7156	1.7429	1.2548	2.4175	14.3905	3.0336	2.6467	5.3759	8.5333	5.3338	3.5457	4.7008	6.1069	2.714		0.374409	4.43308
9.5313	3.2463	6.7724	6.5477	11.6931	4.2183	2.556	2.1658	2.9741	2.7922	3.183	6.1174	2.8374	2.2172	7.4538	3.5496	1.9251	1.264	1.7685	1.052	2.5184	12.0752	4.0161	2.3352	5.4123	9.9559	5.1044	4.4561	5.5002	5.4803	2.549		0.379147	4.4579
9.6504	3.0056	6.3811	6.4559	14.0399	4.099	2.1888	2.4957	2.04	1.742	4.7696	6.1913	3.6083	2.9487	9.0367	3.8529	1.7218	0.6797	1.7671	1.5075	2.1812	13.415	2.9916	2.2313	5.0281	10.7034	4.8753	3.7685	5.9472	5.6366	2.907		0.383885	4.60723
9.7696	3.3974	6.013	8.1199	14.963	3.6585	2.097	2.6414	1.6282	2.3034	4.1401	6.5451	3.6254	2.6527	6.7219	3.4014	2.42	0.7573	1.2311	1.7416	2.3763	11.8244	2.9396	2.2698	5.5398	10.5761	4.4336	3.3551	4.9204	5.0736	3.316		0.388626	4.48944
9.8887	3.1164	7.5738	5.8036	16.643	3.7347	2.7913	2.389	2.5468	3.4348	3.4288	7.5469	3.6737	3.0012	7.4502	4.0481	2.8551	0.8178	1.3617	1.4664	2.4794	14.7836	3.6555	2.7526	6.4797	10.7352	4.5445	2.9545	6.2023	5.9117	2.552		0.393364	4.89114
10.0079	2.7732	7.7235	6.8048	17.2273	3.6083	2.3965	2.129	2.6499	2.7197	2.9231	8.5038	3.1506	2.6405	6.3408	4.6961	2.1253	1.1982	1.5976	1.4299	1.9073	13.2006	3.7517	2.1039	7.1353	11.1099	4.9078	2.2464	4.4994	5.9483	3.175		0.398106	4.75412
10.127	3.0472	7.6143	7.6887	18.8527	3.9113	1.7383	2.1438	2.5725	3.0293	2.0788	9.9752	3.4255	2.3074	7.8291	3.7607	1.996	1.2856	1.1074	1.0007	2.3336	13.6292	3.0173	2.9661	7.3912	10.6069	4.5339	2.7826	4.6655	5.7529	2.582		0.402843	4.85419
10.2462	3.1212	7.3923	7.8805	21.2377	3.6192	1.9117	2.2403	2.9975	2.8817	3.2649	11.0181	2.753	2.5788	7.6853	3.879	1.8116	1.0865	1.2331	2.0742	3.4579	13.9307	3.4938	3.1576	7.6558	10.7553	4.77	3.1613	3.8012	5.7346	2.273		0.407585	5.09526
10.3653	2.6751	7.5097	7.0873	22.7933	4.8223	2.8185	1.8149	2.484	2.2711	3.5258	11.089	2.8977	2.5139	8.0707	4.7091	2.1693	1.3439	1.3312	1.5865	2.5043	12.7292	3.8744	2.0291	7.1817	10.58	5.0283	3.7794	3.5128	6.0774	2.868		0.412323	5.1226
10.4844	3.3495	8.5336	7.3532	23.8531	4.5032	1.918	3.0461	2.4928	3.2787	3.4409	11.3672	2.5437	3.5218	7.9352	4.6193	2.2655	0.9956	1.2058	1.5712	2.2598	10.7749	3.7842	2.5957	6.3476	11.3726	5.0144	2.4113	4.8403	5.9239	3.237		0.41706	5.21187
10.6036	2.7071	8.0265	9.0738	23.9692	2.3013	2.5028	2.2104	2.2071	2.2688	3.8077	9.0277	2.1684	2.9824	8.3829	4.1742	2.0953	1.5158	1.6789	1.6259	1.9156	12.5387	3.2506	2.4045	7.275	11.9848	3.8041	3.3215	4.7044	6.9758	2.555		0.421802	5.11521
10.7227	3.3338	9.1806	9.178	27.5185	4.7077	2.219	1.956	1.9677	2.1767	4.0591	8.7502	1.9891	2.1022	6.1108	4.3278	1.8358	1.4826	1.819	1.8237	2.0834	10.7312	3.1593	2.0447	6.7165	11.513	4.7577	3.0339	3.8061	7.9542	2.893		0.42654	5.17438
10.8419	2.8026	8.0138	9.2422	25.6269	4.0067	3.082	1.9733	2.206	3.2653	3.6026	8.5139	3.574	2.3385	6.5185	4.6431	2.5476	0.877	1.5249	1.767	2.1428	9.887	3.7465	2.1824	5.9295	14.922	4.0431	2.8987	4.3755	9.3272	2.115		0.431282	5.25652
10.961	2.8665	7.4186	7.8643	24.5541	3.886	2.3798	1.9603	2.6376	2.737	4.8081	8.2356	2.385	2.5295	6.4432	4.3342	2.0586	1.5613	1.5863	1.1329	2.5454	9.1859	3.3209	2.9857	7.0124	14.3985	4.0873	2.5986	4.1538	9.9317	3.331		0.436019	5.16434
11.0801	3.2824	6.6079	11.3604	22.1674	3.7008	2.106	1.9244	2.3935	2.2468	3.6922	6.7232	2.3472	3.4263	7.4183	4.6741	2.3285	1.6229	1.8921	1.7791	2.018	8.9375	4.1945	3.1122	5.8263	14.8025	4.1538	2.5659	3.9274	10.1192	2.325		0.440757	5.12253
11.1993	2.5586	8.2629	9.3985	20.7235	4.689	1.8805	1.6976	3.2254	1.5872	3.6333	6.8026	2.71	2.9131	7.0034	4.9219	2.3151	1.2036	1.2804	1.2723	1.9469	8.4232	3.5081	2.9049	5.4367	14.6404	3.5064	2.1135	4.7254	9.9018	2.701		0.445499	4.92957
11.3184	3.0246	6.9503	10.1462	18.152	4.1989	1.8157	2.619	1.704	2.9858	4.4336	6.0032	2.0382	2.8536	5.885	4.0649	2.1924	1.1456	1.0722	1.2397	1.8465	7.5026	3.9358	3.0623	5.546	12.0714	4.0756	2.1457	5.7595	11.2007	2.528		0.450236	4.73997
11.4376	3.021	7.9715	11.0339	18.6975	4.1688	2.1423	2.122	2.0258	2.6521	4.6476	5.1556	2.116	2.2632	5.5982	3.761	1.6705	1.5465	0.879	1.5075	2.4914	6.5687	4.1403	3.9751	6.7023	14.0534	3.6389	1.5063	5.4289	10.8195	2.6		0.454978	4.83016
11.5567	2.3791	8.0992	9.1883	19.6572	4.6068	1.7141	2.0879	2.6838	2.3097	4.0721	3.902	2.3865	3.0397	6.3832	3.22	2.4052	1.1454	1.3161	2.0709	2.5655	6.6135	4.883	4.1591	5.6911	13.6769	4.8238	2.1296	5.1332	14.6556	2.628		0.459716	4.98755
11.6758	3.3037	8.0471	10.285	16.7428	4.488	1.661	1.8065	2.3419	2.5293	3.4206	5.2876	2.497	2.4979	6.3185	3.1918	2.5321	1.5987	1.0219	1.4468	2.2291	6.14	5.0098	4.1562	7.2378	14.402	3.466	1.7225	5.6168	12.5677	2.639		0.464453	4.8735
11.795	2.6619	6.5494	9.1957	15.2207	3.9569	2.0618	2.0544	2.4109	2.219	4.575	4.3045	2.454	2.2715	6.8557	2.6107	2.455	1.1821	1.2104	1.3614	2.4813	5.5248	6.319	4.0244	6.3978	14.4804	5.2874	1.9615	5.3	13.5559	2.933		0.469195	4.79588
11.9141	2.3282	7.4898	6.4793	16.7213	4.094	1.9972	2.3328	1.925	2.1207	5.6138	4.7803	2.524	3.5069	5.1326	3.9476	2.5042	1.938	1.297	1.068	1.8093	4.8488	4.8091	4.1878	7.3321	14.9129	4.3862	2.9749	3.6918	16.1186	2.731		0.473933	4.85344
12.0333	3.5363	6.9968	7.4995	16.9128	4.0421	2.06	1.984	2.5643	2.6718	4.2938	4.2996	1.5242	3.1597	5.7119	4.2299	1.9861	1.1487	1.0857	1.5626	2.2387	3.7036	4.8633	5.0687	6.0287	11.6295	4.1063	2.3217	4.2276	12.785	2.549		0.478674	4.55973
12.1524	2.777	9.3956	6.5662	15.5617	4.2812	1.8684	1.787	2.3768	2.0741	4.9536	4.6288	2.02	3.3084	5.2317	3.948	1.8763	0.945	1.0069	2.0455	2.7683	4.3544	7.3585	4.4872	6.0128	13.3425	3.4738	2.5128	4.3217	13.9321	2.694		0.483412	4.73034
12.2716	2.8541	9.2563	6.015	14.8424	4.0179	2.0497	2.0869	2.0685	2.2474	3.7702	4.807	2.6015	2.4616	4.9117	3.5917	2.6258	1.2819	1.6015	1.3345	2.4395	3.6631	6.6882	4.6074	5.7744	11.8144	4.4719	2.5052	3.5612	13.8728	2.829		0.488154	4.55509
12.3907	3.4695	8.7575	5.8736	15.1348	4.773	2.6947	1.4385	2.7322	2.4353	3.4665	4.6493	2.5864	2.3133	4.3702	4.3169	2.5805	1.4436	1.6018	1.7215	2.1213	3.5787	7.3219	4.139	6.9824	15.2179	3.1978	2.7622	3.5919	14.753	2.922		0.492891	4.76491
12.5098	2.7294	8.4487	6.2437	14.4332	4.9188	2.0096	1.9842	2.995	2.845	3.3642	3.9416	2.8784	2.7706	5.0409	3.3783	2.9747	1.9793	1.0658	1.2804	2.6916	2.9323	6.8359	4.9274	4.9467	13.218	3.5896	2.3224	4.249	16.2688	2.78		0.497629	4.66812
12.629	3.0811	7.5375	6.7262	13.0795	5.1361	2.942	1.9217	2.6862	2.4199	2.9554	4.9042	2.4525	2.7579	4.1268	4.1557	2.7695	1.1067	1.3781	1.1241	1.9072	2.4098	8.5124	5.0746	6.3844	12.3158	3.7573	2.7976	5.28	13.3063	2.384		0.502371	4.57968
12.7481	2.205	7.3712	5.5143	14.5587	5.6457	1.916	2.3828	2.1332	2.3725	4	4.3247	2.006	2.6939	4.4818	4.2759	2.5338	1.6212	0.9277	1.4907	2.0279	3.3064	8.6433	4.3921	7.849	12.5744	3.9	3.3781	4.543	15.0349	2.337		0.507109	4.68137
12.8673	3.3651	7.8949	7.0827	12.8478	5.7647	2.0237	2.0295	2.371	2.5022	3.5356	3.3553	1.7666	3.0359	3.3402	4.4912	2.52	1.321	1.2135	1.8391	1.8687	3.1126	9.5897	4.5968	6.3422	13.5397	4.213	2.7548	4.4042	16.0765	2.525		0.51185	4.71077
12.9864	3.006	6.7223	5.1452	15.3882	6.2937	2.2725	1.4558	2.4617	3.3313	3.4281	3.544	2.7409	2.6491	3.7914	3.7462	2.47	1.5987	1.1686	1.9642	1.7523	2.8162	10.3944	5.7795	8.013	11.602	4.2546	2.7133	3.6399	16.3723	2.222		0.516588	4.75791
13.1055	2.4503	8.8898	5.5794	13.6864	6.0177	2.0938	2.761	3.368	2.6394	3.5617	4.7157	2.0213	2.6008	3.2621	3.4909	2.4423	1.007	1.0581	2.2578	2.2408	3.3507	11.935	5.3701	8.7309	10.6821	4.3	2.4971	4.0453	16.2557	2.221		0.521326	4.85107
13.2247	2.9891	9.5646	4.1449	12.3077	7.1567	1.9602	2.7404	3.0132	2.429	3.8234	3.2126	2.8239	2.7564	3.5237	4.0833	2.2376	1.2555	1.4621	1.1142	2.3086	2.8074	11.6959	4.3115	8.6138	11.4782	4.5793	3.1802	4.9837	15.9727	2.583		0.526067	4.83709
13.3438	2.6411	7.6058	5.5088	12.5274	7.2073	1.5908	1.833	2.3174	3.0015	3.937	4.7706	2.3366	2.5421	4.1058	3.6103	2.9118	1.4369	0.9954	1.6737	2.1099	2.51	11.2869	4.5846	9.0902	11.7468	3.5329	3.1245	4.4989	14.7414	2.784		0.530805	4.75211
13.463	2.6846	8.0567	4.8391	12.2353	8.1569	2.3304	2.6256	2.0266	3.0769	3.2563	4.6095	2.3623	2.0272	3.4083	3.8132	2.6361	1.5009	1.4564	1.3153	1.9765	2.5471	12.9911	4.5457	10.2302	11.3809	3.1671	2.839	3.2604	13.9151	2.636		0.535547	4.73022
13.5821	2.6856	8.3422	4.8421	14.2945	9.2109	2.4146	2.3018	2.4096	2.8582	4.0472	3.977	1.9882	2.2984	2.566	4.2776	2.0749	1.6921	1.5423	2.1628	1.289	2.5274	10.5582	5.3783	11.0602	10.4294	3.9047	2.1029	3.3496	13.7529	2.701		0.540284	4.76799
13.7012	3.3549	8.127	4.9664	12.0562	8.598	1.5569	1.8735	3.0131	3.3299	3.9711	3.847	2.378	2.2849	2.3708	2.9709	2.2474	1.4582	1.9341	1.667	1.7435	2.4638	11.4149	6.4506	9.706	12.3495	4.1015	2.7638	3.7466	13.6733	2.871		0.545022	4.77633
13.8204	2.7334	7.985	4.2581	12.5217	10.3244	2.3654	2.0481	2.1635	3.1616	3.5065	4.7678	2.5323	2.2203	2.8129	4.311	3.1529	1.7928	1.0078	1.3535	1.9642	2.52	12.8483	6.4405	10.6287	11.6187	4.2776	2.7049	3.2958	14.3658	2.826		0.549764	4.95032
13.9395	2.9462	8.8784	4.2626	11.2563	11.5421	1.9729	2.2383	3.0144	3.2824	4.5518	5.2212	2.6921	2.9159	2.6288	3.2861	3.6094	1.5448	1.2851	1.7213	2.0546	2.3078	12.0971	5.7263	11.5293	12.394	4.0498	2.6928	3.9183	13.8949	2.273		0.554501	5.0596
14.0587	2.652	9.4442	4.1905	10.6237	10.7055	1.9829	2.1261	2.5407	2.7306	4.69	5.2251	2.3112	2.7677	2.9444	3.9692	2.1662	1.3684	1.3077	1.3615	2.0506	2.5545	11.0259	4.5357	12.7506	14.9977	5.3268	4.1809	3.4921	15.8987	2.985		0.559243	5.16354
14.1778	2.6022	8.5471	4.2677	12.5693	9.404	2.3593	3.0612	2.8898	2.8897	3.7844	5.0306	2.376	1.798	2.2898	4.7033	3.1621	1.4495	1.6068	1.9729	2.1211	2.8931	12.4294	5.6702	12.3014	15.6024	5.3008	2.2922	4.0914	15.1498	3.192		0.563981	5.26025
14.297	2.9713	7.8806	4.3603	10.1132	11.8655	2.622	2.4482	2.7553	4.0075	4.2801	4.6742	2.5027	3.1018	2.6283	4.8024	2.6658	1.7905	1.3362	1.1645	1.881	1.6888	12.7954	6.0039	13.4774	14.3107	4.9918	2.8491	3.5932	17.6008	2.657		0.568722	5.32732
14.4161	2.8996	8.9407	2.662	9.6361	11.4607	2.1886	1.711	2.2007	3.7177	3.1592	4.7633	2.2836	1.8765	2.4746	5.532	3.0164	1.4767	1.8318	1.8443	1.8211	3.1679	13.3774	4.5646	15.0796	19.0272	4.8633	4.5156	4.0397	17.5441	2.781		0.57346	5.4819
14.5352	2.6211	10.2704	3.4868	9.2253	10.5176	2.3397	1.6418	2.5669	3.4925	4.4336	4.5994	2.5129	2.2844	1.9531	4.5681	2.8544	1.831	1.914	1.5333	2.3493	2.2977	13.7683	5.295	14.5596	14.7314	5.2533	4.2528	3.5533	16.1096	3.255		0.578198	5.33572
14.6544	2.8587	10.2455	3.5418	8.8771	9.9952	2.6662	2.4479	2.8607	3.2315	3.928	4.4712	2.1653	2.5419	2.9435	4.8477	2.5046	0.9364	1.4326	1.6126	1.9903	2.2553	11.1136	5.4699	15.5979	17.6764	4.8923	3.3575	3.7245	16.1699	2.885		0.58294	5.30803
14.7735	2.3281	11.1421	3.1245	10.9661	11.2874	1.9369	2.1925	2.4286	3.096	4.2266	3.6197	2.2156	2.8609	2.4343	5.115	2.724	1.2352	1.4785	1.4131	2.1076	2.3907	14.0453	6.0894	17.6467	20.8726	5.0517	3.1602	4.2546	18.659	2.497		0.587677	5.75333
14.8927	3.6783	10.8424	3.2874	7.663	11.818	2.0935	2.4081	3.056	3.4947	4.4095	3.2634	2.1226	2.3043	2.7577	5.9502	3.0524	1.4759	1.7155	2.0632	1.8275	2.1269	16.2506	6.6498	17.0165	17.127	5.1457	3.1218	3.3766	16.5591	2.658		0.592419	5.64385
15.0118	2.7984	8.9775	2.9587	7.1423	11.5492	2.7591	2.4597	2.3718	3.2095	5.0573	4.0031	2.5827	1.8187	2.6273	7.5362	3.369	2.0436	1.7109	1.8389	2.1666	2.9647	14.4711	6.8541	17.6462	18.8491	4.0389	2.812	3.6066	14.2412	3.209		0.597157	5.58911
15.1309	3.2382	9.3873	3.2346	7.5796	11.1438	2.1094	2.1698	2.5301	4.4187	5.2462	4.3647	2.8509	2.4643	2.7923	7.387	2.9758	1.9324	1.3443	1.8912	1.9287	2.5333	13.5053	8.409	15.659	17.9527	5.1566	3.1726	4.1524	14.5236	2.017		0.601894	5.60236
15.2501	2.4488	10.394	2.3895	6.8772	11.1818	2.5173	3.0388	2.0767	3.5718	5.9242	4.4182	2.1945	2.6865	2.5832	7.607	3.3377	1.5251	1.4373	1.7665	1.9295	2.3413	14.2792	7.6555	16.0048	21.1344	5.0479	3.4515	4.2694	16.6615	2.497		0.606636	5.77494
15.3692	3.0769	9.5882	3.1114	7.0974	10.6867	2.8901	2.353	2.7462	3.7189	5.4331	3.9314	3.4945	1.5388	2.7241	7.7769	3.3057	1.6194	1.801	1.8494	2.1798	2.2412	13.7198	7.5014	14.772	19.8584	5.1799	3.1335	3.5567	16.1582	2.533		0.611374	5.65257
15.4884	2.9105	9.2575	2.4613	6.2293	11.43	2.6656	2.7495	1.9327	3.5277	5.2143	4.1667	2.2026	2.1573	3.0819	7.3201	2.8204	1.7962	1.6363	1.9429	2.2127	2.8699	15.3788	9.1708	13.6982	18.3654	4.3541	3.4805	4.528	16.1673	2.576		0.616115	5.61015
15.6075	4.1878	7.7328	2.1969	6.7303	11.2433	3.0703	2.5351	2.5716	3.241	5.7905	4.2747	2.6187	2.6279	2.8747	7.3503	4.1343	1.6026	1.2969	1.9173	2.2559	1.8895	14.6553	8.3235	13.6887	16.5256	4.3971	3.0346	3.7301	18.3605	2.194		0.620853	5.56839
15.7266	3.2016	9.7002	3.0804	5.8129	10.9554	2.585	1.8939	2.5813	3.4071	5.354	4.4732	2.8688	2.4353	1.9743	8.4371	3.5945	1.449	1.1428	1.4056	1.9864	2.0537	15.4143	8.6999	12.8437	17.1087	4.8131	3.298	4.2314	17.2782	2.386		0.625591	5.54886
15.8458	2.9178	9.477	2.7216	5.8613	12.123	2.4264	3.237	3.2802	3.0323	4.6888	3.5991	2.3032	1.9853	2.8272	9.3554	3.6043	1.0084	1.7593	1.7027	1.7212	1.5072	15.2826	8.333	11.1399	16.2515	4.9026	3.8715	3.5691	16.5896	2.434		0.630332	5.45042
15.9649	2.6899	8.052	2.5386	6.3191	13.4344	2.6559	2.9129	3.0326	3.176	4.7914	3.6751	2.8807	1.8592	2.2415	10.7179	3.8618	1.2648	1.4327	1.6572	2.2639	1.6735	15.7484	10.9902	10.7508	15.9957	4.1813	4.8035	3.8596	16.3619	2.907		0.63507	5.62432
16.0841	3.2536	8.6357	2.6216	5.4191	12.3586	2.7121	2.3593	2.8733	3.9099	4.6729	3.6361	2.0867	1.6445	2.4665	9.9423	4.802	1.8436	1.7249	1.2066	2.2728	1.9852	14.4969	9.5499	9.3463	15.0741	4.3461	4.8117	4.3226	20.4649	2.999		0.639812	5.59463
16.2032	2.2707	8.6481	2.5472	5.7237	11.7669	2.9455	2.509	2.9564	3.4199	4.6425	4.215	2.3903	2.5531	2.794	9.5192	5.6807	1.481	1.3336	2.2038	1.6285	2.3007	14.3795	10.0009	9.2507	14.2444	3.8629	4.2698	4.3875	20.4194	2.409		0.644549	5.55846
16.3224	3.3449	8.3545	2.3635	5.5276	13.8433	2.5843	2.8101	3.0298	3.996	5.2044	4.063	1.7155	2.2615	2.4115	11.7205	4.8645	1.4538	1.327	1.6083	2.4684	2.3045	16.2305	10.3927	10.1916	13.3489	4.0581	4.07	4.3262	19.7626	3.313		0.649291	5.76502
16.4415	2.8451	9.1191	2.397	4.9987	11.722	3.1329	2.5049	3.2079	2.9178	4.6481	4.212	2.3969	2.0168	2.5749	10.4519	5.2231	1.7967	1.6077	1.8235	2.542	1.7653	14.6519	11.5127	8.6472	13.6997	4.9904	4.1678	4.5174	20.025	3.28		0.654029	5.64655
16.5606	4.2778	6.8311	2.5944	3.9163	12.999	2.1188	2.3102	3.5825	3.7824	5.0658	3.568	2.4315	2.7172	2.3509	10.6059	4.4616	2.1236	1.5089	2.2774	1.6791	1.9402	15.9532	11.5798	8.2329	12.1245	5.1458	3.7558	3.333	21.4768	2.868		0.658767	5.58708
16.6798	2.9385	8.277	2.2124	4.0706	13.7685	2.7253	2.501	2.3793	2.5545	4.6571	3.2083	2.4598	1.6829	2.4656	10.829	4.1353	1.6693	1.5056	1.8616	1.8577	2.3686	13.4721	11.3698	8.2297	13.1389	6.7184	4.8389	3.1699	21.3698	2.558		0.663508	5.49978
16.7989	3.1165	6.8937	2.3099	3.9621	14.7717	3.4318	3.2762	2.7362	3.1283	5.3766	3.6778	2.5872	1.8049	2.1555	11.9114	4.1132	1.9799	1.3871	1.8255	2.009	2.1282	13.7149	11.0399	8.1649	11.7979	6.5946	5.4327	3.669	19.3435	2.822		0.668246	5.57207
16.9181	3.7587	7.6817	2.6002	3.9203	13.2666	3.7355	1.76	2.73	3.7221	4.7629	3.7651	2.2509	2.711	2.4869	11.7833	4.7356	1.7483	1.6425	2.2408	2.4583	2.1664	13.2782	11.9598	8.8194	13.6043	6.4983	5.0729	4.3097	21.7603	2.685		0.672988	5.79717
17.0372	3.7912	6.7719	2.8128	4.0252	13.9744	4.2072	2.5837	3.4634	4.0699	4.0684	4.1077	2.1355	1.7586	2.9562	11.0797	3.3253	1.7906	1.7061	1.7519	1.9968	2.0413	12.976	12.5497	10.5309	13.0461	5.1312	5.0715	4.5517	21.2588	2.911		0.677725	5.74816
17.1563	2.8923	7.2655	2.4569	3.6188	13.7888	3.1656	2.1957	2.4299	4.0923	4.2377	3.3158	2.7553	1.7311	2.5045	12.8156	4.796	1.6824	1.2527	2.4658	1.9526	1.7919	14.5607	10.2504	11.6568	12.3476	4.9394	5.4515	4.4191	19.9878	3.092		0.682463	5.66375
17.2755	3.8507	7.0042	2.3371	3.7298	14.6644	3.147	3.3429	3.3889	4.2102	4.5171	3.2302	1.3167	2.3165	2.377	12.8977	5.1312	2.2071	1.7404	1.5914	2.5457	1.6452	14.118	11.8701	12.4931	13.437	6.901	5.4301	4.9306	19.914	3.389		0.687205	5.98914
17.3946	3.4985	7.1795	2.5208	3.5024	13.5722	4.1239	2.0159	3.0006	2.9146	5.4823	3.5755	1.8352	1.7032	2.3576	10.3891	4.1974	1.7797	2.0641	2.121	2.5707	1.7584	13.9857	12.3246	11.6948	12.0776	5.873	4.6465	4.2437	19.7884	3.33		0.691942	5.6709
17.5138	3.3498	6.0418	2.9693	4.3294	15.6562	3.3393	3.0867	2.9266	3.7666	4.9494	3.2902	2.4131	1.9511	2.553	11.2722	3.7639	1.6793	1.7282	1.9534	1.5738	2.1577	15.2119	13.676	12.6856	13.7962	5.7644	5.8902	3.7741	18.5733	2.542		0.696684	5.88882
17.6329	3.4775	5.6956	2.3484	3.6412	13.4414	3.8699	2.2816	3.2144	3.3392	4.8529	3.7371	1.7054	2.3703	2.8499	11.3362	3.506	1.5553	1.85	1.9003	2.7337	1.8449	16.9665	13.9525	10.8802	14.8297	6.9068	5.934	4.0868	19.9526	2.607		0.701422	5.92224
17.7521	3.0146	4.8862	2.3972	3.0073	12.5076	4.1366	2.6243	2.9577	3.7583	4.9503	3.8588	1.401	2.4052	2.7131	12.7635	3.9103	1.9027	1.3863	2.3767	2.1135	2.3585	16.2549	13.7501	10.7098	12.6073	6.1092	5.1954	5.4937	18.6921	3.04		0.706163	5.77607
17.8712	3.636	5.3462	2.3129	3.4136	13.8095	4.7129	2.6591	2.7439	3.4317	5.9388	3.7541	2.6229	1.5987	2.8366	9.6572	4.1704	1.5185	1.3129	1.875	2.5343	2.3956	13.3988	11.7546	12.0429	13.9972	6.8504	5.0124	6.7967	15.7642	3.229		0.710901	5.70423
17.9903	3.8044	4.592	2.6242	2.3449	12.2492	3.6014	3.1382	3.5733	4.2315	4.2239	3.3752	2.0525	2.1075	2.3749	10.6446	5.3461	1.469	1.5842	2.1614	2.6776	2.4924	15.614	13.6584	11.1328	15.6807	5.1029	6.859	5.7881	17.3323	2.498		0.715639	5.81115
18.1095	4.7158	5.1329	1.9383	3.7344	11.5866	4.3896	2.944	3.2929	3.7427	4.3641	4.4534	2.4844	2.0935	2.4061	8.8309	4.9617	1.4878	1.5013	1.983	2.1718	1.8629	13.2228	14.001	10.8158	15.5649	6.5236	7.4511	4.589	17.9126	2.924		0.72038	5.76943
18.2286	4.3566	5.0913	1.7127	2.8215	12.435	4.3304	3.2612	2.9389	4.0259	5.025	3.8801	2.6999	1.5155	2.3044	9.9917	5.2841	1.5924	1.8961	1.5387	2.4902	2.2278	12.8935	12.178	10.9733	14.9649	6.6591	7.1056	5.9345	19.2833	2.789		0.725118	5.80669
18.3478	4.966	3.8813	2.2101	3.0765	12.0369	6.295	2.893	3.562	4.0109	4.5713	4.8164	2.907	2.339	3.0104	9.608	6.9814	1.7974	2.5263	1.8653	2.0059	1.8885	13.2114	13.5175	11.2573	15.724	5.6294	7.742	5.934	21.1335	3.511		0.72986	6.16362
18.4669	4.3785	4.751	2.4577	3.276	12.7548	4.3358	3.3168	3.3017	4.4338	5.1884	3.8947	2.0375	2.5957	2.5423	9.5205	6.6753	1.0895	2.2868	2.3047	2.4962	2.7689	12.9264	12.7744	11.2326	13.6242	6.8672	6.7092	5.8583	22.0069	3.863		0.734598	6.07563
18.586	5.4358	3.9118	1.9293	2.9974	12.8774	4.3486	3.6633	2.8304	3.6765	4.1586	5.1102	2.3337	2.2157	2.7204	8.3957	6.9781	1.8063	2.2977	2.0032	1.7476	1.8674	12.4154	12.7071	11.7375	14.9282	6.0887	8.1651	6.6412	24.7541	2.87		0.739335	6.12041
18.7052	5.956	4.312	2.1726	2.5019	13.3577	5.6769	3.4699	3.4458	3.9877	4.9679	5.1477	3.4344	2.0799	2.7945	7.2553	8.2363	1.9946	1.548	1.8322	2.0275	1.8072	14.2682	14.3153	11.5111	15.7163	7.3167	8.0181	6.3062	22.6559	2.588		0.744077	6.35673
18.8243	6.9209	4.2794	2.1987	2.8779	14.5367	5.3884	2.8474	3.2865	3.6783	4.3883	3.3986	2.4326	1.8353	2.1048	7.5927	7.9162	2.199	1.3473	2.2014	2.2014	2.2355	10.8099	15.674	11.1038	14.5092	7.5767	7.5921	6.6605	24.8181	2.847		0.748815	6.24862
18.9435	7.6172	4.3306	1.9507	2.5495	14.2755	6.177	2.9066	3.8111	3.7879	5.2905	4.2612	3.0462	2.3104	2.8689	8.2531	9.2721	1.8709	2.3197	2.1208	2.0302	2.4398	12.8286	14.3174	11.5115	16.654	6.9823	6.4495	5.8995	24.1358	3.351		0.753556	6.52065
19.0626	7.4588	3.3767	2.7791	2.9231	14.0452	6.3543	3.2699	3.4945	4.0828	4.7998	4.6529	2.4808	2.7706	3.3022	6.9833	10.1641	2.1136	1.6445	2.195	2.928	1.9966	13.5197	14.9318	8.7272	16.2545	8.963	6.4859	6.7716	25.6594	3.006		0.758294	6.6045
19.1817	8.3102	4.211	2.4023	3.0226	15.7572	6.0307	3.4561	2.9555	3.2381	5.2151	4.9975	2.9176	2.9521	3.116	10.0019	8.5938	2.0303	1.7455	2.0438	1.8826	1.7634	13.8824	13.6816	10.3207	18.9664	9.1857	7.7443	7.3534	28.1602	4.033		0.763032	6.99903
19.3009	6.6658	4.8352	2.5605	2.1943	16.063	7.5686	5.0229	4.0224	4.8633	5.5763	5.465	2.6808	2.482	3.3523	9.6479	11.3164	1.5683	1.7008	2.1916	2.1052	2.7335	13.6835	13.004	11.0702	17.394	8.8595	6.027	5.7174	29.0503	3.462		0.767773	7.09613
19.42	8.7928	4.227	3.0502	2.3699	16.0457	6.6632	4.5276	3.5548	3.5351	6.7348	4.4966	2.7012	2.9243	3.875	9.3909	10.7901	2.1844	2.0037	2.0213	3.3386	2.1087	11.7232	16.02	10.3005	17.5581	9.0011	7.5728	6.7026	31.1116	3.128		0.772511	7.28179
19.5392	7.5158	3.6601	2.7444	2.2399	16.0254	8.0796	4.0038	4.6707	4.4842	5.1122	5.1701	3.1033	3.6527	3.6719	8.776	12.3356	1.7405	1.8784	2.1103	2.3993	1.7822	11.5549	13.1796	11.0045	19.5257	6.8318	7.9792	6.5538	29.2964	3.659		0.777253	7.15804
19.6583	10.1048	4.4548	2.3327	3.1093	16.7686	8.0276	4.2262	4.9177	4.3635	5.5653	6.3054	2.9343	3.144	4.4819	7.7335	16.2521	1.353	1.9414	2.5732	2.5498	1.9793	8.9655	15.1729	11.278	19.667	8.0638	5.5807	6.9425	32.307	3.833		0.78199	7.56429
19.7775	10.4996	3.0212	3.2901	2.5716	16.1064	7.794	3.217	5.7839	4.8458	5.8463	6.086	3.5365	3.1887	3.9652	7.1919	15.3819	1.6205	1.1948	2.3907	2.2139	2.0892	8.8683	16.2766	10.6375	18.3	7.4674	5.3368	6.9212	31.5848	3.758		0.786732	7.36619
19.8966	12.0333	4.203	2.9095	3.3979	14.2393	8.8548	3.1922	6.4614	4.8954	6.0992	5.3918	3.6618	3.5156	4.4188	8.1781	16.9357	1.5452	1.9464	2.3139	2.7214	2.838	8.0211	15.2845	12.1489	17.7677	7.7638	5.8275	9.3996	29.219	3.644		0.79147	7.62763
20.0157	11.5818	4.5838	3.0155	2.6246	14.2666	9.4487	5.1821	7.9234	4.9069	4.9003	4.5702	3.9093	4.3452	4.0802	9.7959	19.2165	1.7899	2.1695	2.5476	2.725	1.9425	7.6459	18.3949	10.498	17.5468	7.4635	7.2582	9.2855	30.7843	4.557		0.796207	7.96532
20.1349	11.4092	3.9831	3.1342	2.0387	12.7896	9.306	4.4327	9.9558	5.8224	6.1863	6.0106	3.9321	3.8172	4.3998	7.0383	19.9014	1.9951	2.1159	1.9831	2.9077	2.2012	8.4125	14.4027	14.8184	15.5596	9.0297	6.6078	6.9584	32.8063	4.471		0.800949	7.94756
20.254	12.3393	3.4302	3.0045	2.6659	12.5305	11.1566	4.0246	9.5539	5.8794	6.9372	6.6669	4.4537	4.1087	4.9765	6.8371	19.555	2.347	2.261	1.6841	2.3751	2.3806	6.5198	17.1873	14.7833	17.1945	9.446	6.2553	9.8185	33.4275	5.441		0.805687	8.30803
20.3732	11.2569	3.283	4.2709	2.994	13.4028	12.4049	4.9514	12.0738	6.9062	7.7604	6.3021	4.4952	5.3228	5.2395	9.8191	20.9647	2.2878	2.1904	2.0951	2.1935	1.979	8.3688	15.1175	14.6092	15.7757	10.1798	6.6098	9.4488	31.2428	5.686		0.810429	8.64106
20.4923	12.2871	4.1056	3.9838	2.625	14.5017	12.136	4.8173	12.7492	7.4511	8.1892	6.8049	5.2074	4.6048	5.9532	9.5854	19.3612	2.12	1.6199	2.3592	2.1116	1.5251	7.7563	17.3992	14.8718	14.228	9.143	6.6479	10.8004	33.7399	5.005		0.815166	8.78967
20.6114	12.8546	4.5407	3.3288	2.7782	13.6232	13.3273	5.8958	14.0047	10.1028	9.7793	6.5144	5.3538	4.6846	5.3791	10.7202	20.7341	2.3204	1.7193	1.5922	2.4117	2.0286	8.1752	17.7935	14.4211	16.4095	7.4775	6.0459	9.0839	29.7975	5.346		0.819904	8.94146
20.7306	13.2265	3.4124	3.5486	2.7073	14.4851	15.5712	5.4916	14.687	12.2963	9.2382	7.4425	6.3193	4.7921	5.8917	10.8151	22.6452	2.0781	1.4156	2.4611	2.8354	2.138	7.6081	19.9798	14.7227	16.3498	10.3587	7.9998	10.4771	34.9369	7.159		0.824646	9.76967
20.8497	15.1102	4.5748	5.9218	2.8647	13.8855	17.3801	5.8212	15.3096	14.6173	8.2211	6.3072	5.6324	5.8381	5.9209	12.3246	23.1458	2.3108	1.7838	2.4979	2.3279	2.7855	6.3283	18.1681	13.6642	15.0335	8.9658	8.3031	12.2412	32.5036	6.403		0.829383	9.87307
20.9689	13.0682	5.0175	4.2232	2.5717	12.7701	16.3721	6.466	13.3396	14.4671	7.3804	8.5288	7.7759	6.1852	6.2353	12.3022	22.4152	2.0327	2.0516	2.2798	2.2539	2.4328	7.6454	20.4338	13.5951	15.0287	12.0611	8.2029	11.6784	35.0106	8.931		0.834125	10.0919
21.088	14.7268	6.03	4.1569	2.8918	15.7532	18.8404	6.015	15.5299	19.2472	7.6499	8.3724	7.8092	6.534	5.9908	13.8354	22.8306	2.1306	2.1793	2.1699	2.6173	2.2697	7.0391	21.4345	12.8761	13.6351	10.3092	7.8714	12.2275	36.0019	10.627		0.838863	10.6534
21.2071	16.1326	7.1696	5.16	3.3865	15.8424	21.8659	6.6506	12.8234	19.9097	6.5358	8.6134	6.7569	7.6888	6.6755	13.1558	23.4209	2.8735	1.8395	2.2282	2.6593	3.1114	7.1776	20.2317	12.3118	16.9788	12.1709	8.9465	11.1958	35.4561	11.255		0.8436	11.0075
21.3263	13.6234	9.2767	5.2281	3.4481	15.6315	24.4745	7.5371	12.982	19.5505	6.4833	7.4584	9.5881	7.9425	6.234	13.78	22.4826	3.088	1.6025	1.8952	3.1529	3.2297	8.481	22.9756	12.8019	16.8176	11.0478	10.0743	12.2596	38.0206	14.304		0.848342	11.5157
21.4454	16.9144	9.5803	6.3622	3.1507	19.7297	25.1624	7.3992	13.6488	19.7312	6.4216	6.7488	9.6732	9.6532	6.7475	14.1785	21.4879	3.5642	2.6047	2.146	2.8182	3.9918	8.4963	21.5934	10.3847	17.9847	11.994	8.1626	13.4349	37.7441	15.274		0.85308	11.8928
21.5646	16.2139	11.0176	6.5643	4.045	22.9144	30.867	8.1436	13.2665	20.0271	7.5347	10.0061	10.3044	10.5686	7.8739	16.1401	22.6666	3.8468	2.0577	2.4278	3.5772	2.7267	7.8165	23.3108	11.1614	19.3439	13.4024	9.0544	13.0246	35.2231	15.315		0.857821	12.6814
21.6837	18.4264	15.1013	6.8871	3.9048	23.7217	35.9965	7.8438	14.5114	17.3691	7.0628	9.0228	11.7521	10.6557	6.9538	17.5405	21.969	3.3354	2.0808	2.6696	3.498	3.322	7.211	24.1152	12.1435	19.8986	12.6494	8.6028	14.1391	39.3737	18.953		0.862559	13.357
21.8029	18.4217	16.6293	9.0279	3.8254	27.8216	41.3863	8.8124	15.422	19.2491	6.7175	12.2041	12.2427	12.3928	7.0157	19.1668	22.3122	3.4524	2.4817	1.8955	2.7807	3.4516	7.8952	24.5163	12.9551	20.4782	14.7586	7.9054	13.3869	38.0805	19.838		0.867301	14.2175
21.922	21.3615	19.2809	12.0123	4.2945	28.702	43.7328	8.7334	15.5893	19.4762	8.2688	12.9276	12.8516	11.7585	7.963	18.6185	21.126	4.0735	3.3665	2.9162	3.8915	3.7102	8.732	26.6355	11.4327	18.9941	15.1767	8.754	13.5669	39.0779	17.153		0.872038	14.8059
22.0411	20.5044	16.132	14.12	4.8808	30.8308	49.5969	9.3472	15.3744	20.3493	8.0582	11.501	14.3971	15.5988	8.8222	20.744	20.688	3.9469	2.4033	2.5881	4.3092	3.143	8.2802	26.0392	13.9803	18.767	15.6001	9.3346	13.0631	42.0627	22.06		0.876776	15.5508
22.1603	21.9616	15.4485	20.2796	4.9291	32.1785	48.838	11.2331	15.1102	18.7754	7.8206	13.2652	18.4615	16.1632	9.7862	20.356	20.2932	5.1713	2.9226	1.6305	2.9198	3.0403	9.3896	29.0758	15.6062	21.8013	16.4644	9.5335	12.2797	42.8297	25.897		0.881518	16.4487
22.2794	22.6836	17.2709	25.5973	6.3596	34.2874	51.7956	10.6125	15.671	21.6293	9.4712	11.7724	18.8681	19.0457	10.1835	22.8937	18.6189	5.9878	2.1219	2.3378	3.8296	3.8812	10.0928	29.6729	16.4378	18.973	17.9145	10.4317	16.1981	44.6253	29.26		0.886256	17.6175
22.3986	21.3826	18.2479	26.971	7.4046	33.9429	54.7771	12.2023	17.2712	20.962	10.9273	12.7499	19.7057	22.2214	13.2411	24.6652	18.3536	5.6883	1.839	3.1017	3.8736	3.0052	12.6326	33.2379	14.4408	24.5437	19.5524	10.0392	15.5174	45.9001	30.079		0.890997	18.6159
22.5177	25.0165	23.2392	27.9976	7.372	30.5896	59.2227	14.9704	17.7718	23.7871	9.7413	12.9577	20.0555	21.8997	14.4075	23.5573	20.0512	7.4212	2.5593	2.2032	3.4989	3.3407	16.2559	32.5574	14.0964	22.7593	17.9537	10.9537	15.8933	42.8641	34.301		0.895735	19.3098
22.6368	26.5212	27.2943	31.2354	9.4132	31.3025	54.5343	17.3552	19.8878	24.7858	11.7273	15.8946	24.6228	21.8764	14.3173	25.1694	20.6782	7.24	2.719	3.2968	5.941	3.1889	22.8726	37.0154	13.3851	25.9302	21.2089	10.9162	18.4374	41.7803	41.415		0.900473	21.0654
22.756	26.9332	27.873	33.2781	10.1647	25.404	50.0985	20.5774	18.9155	25.7047	12.5466	16.2894	23.11	19.5592	16.4276	27.6209	21.6068	7.2771	2.7703	3.0639	4.5958	4.5978	29.586	38.1491	14.2759	24.2359	19.6526	12.421	21.9037	37.9785	51.069		0.905214	21.5895
22.8751	29.6875	31.0212	36.0525	12.6139	28.0343	46.1044	24.3969	21.3342	26.318	12.9274	18.348	23.221	18.2826	16.6531	29.59	19.805	8.3648	1.8462	2.3688	6.0269	4.5701	31.3144	39.2939	16.4684	26.3737	21.3375	11.8459	24.1276	31.3848	51.931		0.909952	22.3881
22.9943	34.3162	31.0599	36.042	13.9348	26.2146	37.0858	28.0569	23.0409	26.705	15.2501	22.4744	19.7295	17.8113	16.4482	23.8786	19.2013	8.0197	1.8823	4.0643	5.2273	3.8157	34.2601	38.403	16.5759	30.4914	17.2158	17.2186	27.8086	23.2728	55.435		0.914694	22.498
23.1134	36.3927	31.6803	33.6003	15.5324	23.9277	28.7103	30.92	26.5507	28.1966	15.0058	21.9371	22.0541	17.9602	15.4662	26.3595	21.9974	9.4088	2.844	3.1701	6.4382	5.1118	37.2004	38.9564	19.596	29.3563	21.5785	16.9015	30.723	23.2943	57.4		0.919431	23.2757
23.2325	41.0435	28.7553	28.8211	15.233	19.8572	19.5854	34.6881	28.0241	26.5691	15.7642	26.2999	19.3503	14.7381	17.9913	25.2085	19.1971	8.1948	2.8378	3.4098	7.6694	5.6436	35.2349	39.7347	18.3894	28.3569	22.0315	19.7232	33.0133	16.7785	66.635		0.924169	22.9593
23.3517	40.9148	26.5156	25.2126	15.175	17.8246	14.0334	38.8874	32.257	28.7531	17.9628	32.0057	20.3827	12.8685	14.8568	23.1639	19.9967	9.0631	3.056	3.8253	7.5694	4.1763	31.9443	38.9996	18.4452	32.5296	21.6755	26.3706	30.7406	13.3819	67.276		0.928911	22.9955
23.4708	44.7619	25.5639	19.6825	16.7141	11.5434	12.9297	49.3804	37.7972	31.2759	22.6187	36.5571	18.2051	12.4644	14.2027	20.3101	21.731	9.6388	2.7249	2.822	7.6034	5.4686	29.2613	38.6499	18.2218	32.5264	23.8094	28.3638	28.5034	11.9268	70.811		0.933648	23.5357
23.59	43.6139	21.1207	15.5324	16.1276	9.3175	10.0259	56.8301	45.2813	31.9803	23.3016	38.7406	18.4862	10.3478	13.8947	20.655	21.0597	10.0931	2.4049	3.3812	8.4137	5.5139	29.0637	37.9201	19.7552	33.7958	24.4213	33.8652	23.972	8.5477	67.835		0.93839	23.5099
23.7091	43.1876	21.022	11.9762	15.0587	7.6358	5.9731	60.1532	50.8474	33.6283	24.8823	43.7459	18.165	8.5558	12.6278	19.8079	23.7549	12.6075	3.3093	3.1492	10.0633	5.5328	25.5447	34.7225	19.4497	35.1086	26.7949	35.7676	20.6702	6.4056	65.308		0.943128	23.5152
23.8283	46.0854	16.3859	9.187	13.1133	5.5087	6.4794	61.5618	58.2442	36.4362	30.1328	40.6429	15.5039	6.902	10.8528	19.5515	22.6862	13.0497	3.7281	4.0098	10.9071	6.2769	25.7175	36.6511	20.0079	40.1205	29.3672	36.3117	14.9312	4.5298	63.076		0.947869	23.5986
23.9474	41.5682	12.9133	8.3964	11.5462	4.5024	4.4241	68.0612	62.8074	43.1241	35.7651	39.3824	14.623	7.4073	9.8361	15.5066	28.4113	13.9768	2.7644	3.7347	12.9429	6.4978	26.5365	38.0741	18.0896	41.2564	29.4124	36.5574	12.2416	3.7308	52.154		0.952607	23.5415
24.0665	34.7134	11.127	8.0172	10.9296	3.9014	3.9408	59.9639	67.7788	48.926	39.4048	32.338	12.0933	5.2057	7.4807	13.0351	28.1529	15.1896	3.2292	5.317	13.1524	6.5748	29.7903	38.0761	18.8537	36.6941	32.3796	39.1324	8.0762	3.6782	43.879		0.957345	22.701
24.1857	29.1587	6.8108	6.1752	8.2659	3.6313	4.3427	48.0119	71.441	49.833	41.8514	24.7624	12.4578	6.5567	7.1583	11.7165	30.5123	16.3214	4.2419	5.7585	14.4998	7.1475	29.6711	36.8781	21.6222	40.3772	32.4397	36.5105	5.9786	2.6549	35.693		0.962086	21.7493
24.3048	23.1982	6.8353	5.6205	6.7562	3.9267	4.0961	36.7026	77.4802	54.4659	41.2163	21.7997	10.4656	5.5565	6.2206	9.9991	30.0343	14.8721	4.6019	5.1302	15.7708	8.0653	36.1923	33.1254	22.2514	39.1537	34.6524	33.0626	5.1769	2.0277	26.203		0.966824	20.822
24.424	18.513	4.9698	5.8732	7.7635	3.1087	3.0048	28.166	82.1943	56.2776	42.0492	16.3899	10.2842	5.1624	5.4021	7.5878	31.731	19.9452	4.5636	6.6868	16.8052	8.7578	38.5725	34.7001	21.6454	37.6605	40.1372	29.9486	3.4239	2.7001	19		0.971566	20.4341
24.5431	15.795	4.141	5.0019	7.2547	3.4074	2.8859	20.2384	82.4962	60.0032	34.6568	14.2806	9.2391	4.237	3.7079	5.456	35.4812	20.4945	3.829	7.5942	21.1759	8.7985	42.2705	32.3613	20.1442	35.2795	37.7184	27.1187	3.5282	2.0023	16.65		0.976304	19.5749
24.6622	12.9871	3.9033	3.9617	6.4175	3.169	2.991	15.8168	81.9319	62.2493	27.4373	10.2657	7.6995	3.8486	5.4121	4.2282	31.3685	21.1342	3.7305	6.5115	20.5903	9.4103	51.7017	30.1979	20.2512	29.8574	38.9485	28.9203	2.804	1.1793	12.898		0.981041	18.7274
24.7814	10.5263	3.9509	3.434	5.3463	2.4914	2.1083	11.1526	73.1551	52.3175	20.7183	9.5218	6.568	3.486	3.955	4.2878	33.8565	25.9184	4.2176	9.3567	25.2513	10.7456	55.3958	23.6382	21.9606	24.9851	42.6559	23.0953	2.2239	0.9999	11.464		0.985783	17.6261
24.9005	8.1022	3.4841	2.3014	5.0811	1.7871	1.4017	10.6791	51.4389	40.5163	17.8626	8.6013	5.7785	3.3005	3.4923	3.6715	32.8951	28.7702	5.5373	10.2776	31.5233	11.7953	59.8352	22.789	21.727	20.76	43.2992	21.3304	2.1746	1.207	9.819		0.990521	16.3746
25.0197	5.7151	2.7289	2.8727	4.8172	1.9472	1.6718	8.5636	38.8215	29.5688	12.6913	6.5104	5.3053	2.6659	2.2355	3.0565	26.509	29.6443	5.2458	10.5438	35.7791	13.5004	61.0619	19.4411	21.9589	17.9954	49.6296	15.6039	2.7517	0.4671	6.714		0.995262	14.8673
25.1388	6.9579	2.171	2.226	2.9009	1.611	1.5025	6.987	25.8203	20.5047	10.9258	7.6609	4.6402	2.8819	1.7394	2.3924	22.8282	34.2604	6.2523	10.734	38.3012	18.7482	62.6436	17.9948	22.2164	11.7589	48.2445	11.5748	1.6353	1.4232	5.837		1	13.8458

## Sheet: Image13
X0	Y0	Y1	Y2	Y3	Y4	Y5	Y6	Y7	Y8	Y9	Y10	Y11	Y12	Y13	Y14	Y15	Y16	Y17	Y18	Y19	Y20	Y21	Y22	Y23	Y24	Y25	Y26	Y27	Y28	Y29	Y30		Ap-basal	Avg int
0	18.2443	8.9579	9.1889	7.8809	12.7727	12.2165	13.5475	11.7596	11.0467	5.8318	6.198	4.4907	9.6774	20.1424	9.767	8.764	22.108	17.6144	15.6122	15.0879	31.0624	20.1997	17.287	24.7529	28.831	15.7191	27.3615	29.0892	11.699	32.85	56.4486		0	17.2971
0.1191	16.6172	8.7828	10.532	8.7876	14.1583	14.4308	16.6577	13.8224	9.8453	5.054	8.556	6.4267	11.9412	22.6024	14.037	12.784	26.697	14.7553	16.9728	16.2655	36.2408	24.1881	21.932	31.2569	31.811	18.6136	28.5735	34.59	12.9982	36.455	60.0595		0.00571486	19.5627
0.2382	16.0512	11.0688	10.7535	9.8391	13.8411	18.3343	19.3448	16.9022	11.6092	7.3774	10.617	8.745	14.6917	25.6582	14.51	13.935	27.23	20.7667	22.3068	18.7772	35.0603	30.6335	26.977	38.2297	32.629	26.0793	36.7478	45.9438	18.3627	44.566	64.6279		0.0114297	22.9747
0.3573	15.7993	13.8276	12.8448	9.0164	15.07	20.9626	21.8013	21.1002	13.2896	7.1924	13.498	9.7028	14.62	24.8645	18.721	16.464	33.041	23.6376	26.7601	23.6763	37.5619	32.6194	33.554	43.0274	41.555	28.4462	49.0934	52.494	16.4983	49.673	56.3782		0.0171446	25.7029
0.4764	20.5566	17.4771	12.4232	9.6246	15.0813	18.8736	23.2239	22.4102	15.2382	7.6134	14.399	11.942	16.5589	28.5553	18.554	22.258	33.366	26.755	30.8333	31.6879	42.1481	38.72	39.76	49.3344	47.729	30.1915	58.7167	51.5418	21.1026	64.109	56.9493		0.0228594	28.9592
0.5954	20.8556	22.8358	14.3642	9.8597	12.2068	22.0678	23.4016	24.7936	19.3144	9.7433	16.514	16.3173	17.9846	34.9893	25.62	27.618	37.211	28.5013	35.0707	40.8821	47.1147	47.3662	51.143	54.4411	57.958	36.157	69.0382	58.4732	29.8309	68.396	55.6478		0.0285695	33.4102
0.7145	27.2888	27.2762	18.211	10.4049	16.3596	27.8435	31.8848	25.6685	21.1521	10.176	19.852	17.7808	18.7324	36.9221	31.606	33.993	34.112	33.2042	43.1642	53.3564	56.9177	56.7776	62.34	60.7013	63.918	47.7868	77.8846	63.3821	38.2525	82.421	58.0578		0.0342844	38.9493
0.8336	34.3479	36.8095	22.3308	12.697	17.2006	25.751	31.9836	31.4204	24.2429	12.3412	25.245	26.0227	21.6691	36.1508	37.521	34.573	47.91	33.5175	48.4504	64.6077	66.0377	70.8254	75.938	68.919	78.621	58.1383	80.5966	70.2718	50.3743	94.146	60.0454		0.0399992	45.1195
0.9527	38.4526	42.7265	23.4454	16.9742	19.1888	31.8861	34.7808	35.7133	28.8264	16.1753	29.989	29.904	25.0098	41.5533	47.604	36.941	59.366	38.06	55.241	81.4136	84.3264	83.7507	98.722	68.3988	91.191	72.2179	87.794	80.3746	62.0172	105.028	63.123		0.0457141	52.5869
1.0718	43.3162	44.6664	27.2216	19.2686	24.5644	51.649	38.7411	36.6713	31.7875	19.8413	35.688	36.9321	35.1409	49.1039	58.642	50.314	71.686	43.3661	57.8447	85.625	100.441	98.2868	107.552	71.0677	92.573	82.3437	87.4191	84.1253	71.7517	106.016	65.9253		0.051429	59.0184
1.1909	42.7727	53.4138	32.1237	24.9598	28.8467	66.9785	41.8651	39.8917	39.3385	23.6554	45.169	42.9494	41.7677	58.6762	63.37	57.947	80.681	49.1524	61.7497	94.0837	97.0141	99.2498	107.378	67.6158	104.974	90.1802	82.6711	82.5207	84.8267	100.88	70.3491		0.0571438	63.7759
1.31	43.1244	59.259	41.8059	30.2587	33.9225	77.7769	48.9478	50.7683	44.9057	32.96	52.918	55.0482	52.4924	62.7882	72.743	77.948	92.327	54.6336	63.8837	90.517	100.391	99.2275	93.492	70.5855	106.448	93.9984	75.5434	74.9956	96.8135	94.971	71.6251		0.0628587	68.2942
1.4291	47.7718	73.8229	54.846	34.8961	39.6758	77.0815	64.9708	60.0032	57.7983	47.45	66.182	72.5589	54.7511	64.5494	88.401	100.142	97.632	64.4677	68.9789	95.1269	86.4835	81.8248	77.794	67.0965	97.915	93.7931	51.989	64.2205	94.2879	81.855	72.189		0.0685735	70.9856
1.5481	53.7775	79.5092	54.9015	39.709	40.5073	78.1113	71.9325	68.3683	67.3882	67.2053	86.314	80.5369	57.6582	63.5013	101.582	123.025	107.115	65.4785	70.1402	87.3224	63.2241	63.888	58.293	67.5631	86.224	89.8957	39.2495	52.1999	82.8414	71.37	70.1613		0.0742836	71.2579
1.6672	58.6874	77.8897	59.106	39.8959	42.6627	75.8915	79.1518	68.2251	67.1244	73.1704	95.212	86.0786	66.4759	66.1929	114.686	139.415	87.112	69.6665	71.4924	75.4723	43.1757	45.8473	45.945	65.5062	73.37	87.2515	24.8251	36.5232	71.9758	52.628	59.4871		0.0799985	68.3917
1.7863	69.5737	81.927	67.4254	43.2774	47.1965	72.2891	82.327	62.9765	74.7909	81.1024	107.516	82.2297	78.5692	68.1606	116.856	133.408	73.189	64.1392	71.1755	58.688	35.1083	38.849	37.082	57.6033	56.232	77.8146	20.3554	24.6897	49.7395	42.719	47.8444		0.0857133	65.3179
1.9054	76.107	77.7496	63.3455	44.0674	53.9669	65.9598	87.8403	54.8274	70.9393	86.7196	113.457	84.5063	83.5872	68.4617	110.757	120.901	48.306	59.5094	67.161	52.509	24.5302	29.7088	34.293	53.4744	42.61	66.9837	15.3297	15.6585	32.8614	34.519	37.1149		0.0914282	60.573
2.0245	76.462	77.6415	57.0581	43.5386	46.3215	61.2098	83.5889	42.8918	67.1284	87.6853	113.059	85.039	89.5028	66.5816	91.799	85.432	32.787	54.9379	63.1948	35.3284	23.2902	22.4735	30.95	47.5827	34.443	60.684	13.6302	12.3797	23.0771	33.231	32.6674		0.097143	54.6967
2.1436	80.4722	75.7526	53.6822	48.3244	41.4511	54.587	80.7968	36.1158	58.3979	88.7661	108.693	89.0094	91.7855	64.8983	72.905	58.663	21.924	42.9311	58.3272	27.796	21.3169	17.6581	25.237	38.5823	27.61	46.8566	11.7521	11.4847	20.1631	25.886	28.175		0.102858	49.3549
2.2627	78.3665	75.7024	49.3804	52.3922	40.8607	46.2505	81.6254	29.031	51.1559	82.2314	94.018	99.2474	88.8043	57.3803	56.65	38.33	19.435	41.6809	57.8423	22.6966	17.7977	16.0809	23.393	37.4533	20.605	34.3781	8.6406	9.053	18.4093	23.463	24.3805		0.108573	45.056
2.3818	72.1706	66.6165	41.6466	50.1648	35.5142	36.1893	80.3192	22.9074	40.892	67.232	76.867	93.8364	85.2061	45.8672	43.057	27.88	16.622	31.9965	54.2534	18.4323	13.7478	14.9709	21.511	32.2127	16.548	27.0976	7.7987	6.1255	15.0481	20.583	18.8644		0.114288	38.7799
2.5008	67.131	63.3508	33.781	47.8746	31.9826	33.4412	73.6086	18.6825	37.9257	53.0288	57.011	90.4335	72.0611	36.1615	34.751	23.35	14.363	27.7404	48.8451	14.4008	11.7267	14.6758	20.063	24.4673	15.018	20.1326	6.6659	5.14	14.6197	19.004	15.2275		0.119998	33.7634
2.6199	56.5221	56.0083	31.2131	40.9857	26.2849	23.6665	67.7991	15.2938	33.6851	41.2469	36.156	83.1477	56.0715	34.2804	31.996	20.424	10.592	25.2905	49.997	16.8331	10.0658	13.8686	17.711	25.8775	12.286	14.9215	5.5793	3.8918	16.3438	18.796	17.1808		0.125713	29.4844
2.739	44.9225	48.0364	30.3512	39.6045	23.539	21.4474	66.1034	12.4861	30.1423	36.4155	32.248	67.597	42.8395	34.2645	30.433	16.501	10.16	16.464	43.7609	15.5599	8.634	12.4336	15.836	24.1509	9.851	9.8413	4.7844	4.8984	13.0831	16.106	14.4441		0.131427	25.7077
2.8581	41.7733	39.3795	24.3696	33.4581	22.7879	16.1538	57.0686	12.902	24.4499	31.2227	26.245	52.1315	38.4072	30.7428	33.756	16.335	10.766	16.6305	40.7262	12.2269	8.1671	10.788	15.441	21.4109	7.694	9.4293	4.83	3.9936	11.9294	15.481	14.492		0.137142	22.748
2.9772	35.3504	35.3999	21.5652	26.7657	18.1969	16.6095	47.2941	11.7711	21.5014	25.7748	17.424	44.5574	30.4091	27.7746	33.378	15.953	9.564	17.5521	35.3951	12.5027	6.8788	10.387	14.569	19.8599	8.01	6.1539	3.5473	4.6054	10.8474	15.335	14.5099		0.142857	19.982
3.0963	33.6505	30.9089	23.649	22.5293	15.6577	12.9295	38.5639	11.381	18.9781	21.2734	15.51	37.3147	24.0551	25.4003	28.987	16.111	10.64	13.8254	34.0597	12.1284	7.6537	9.0188	14.18	19.0743	7.05	6.1554	3.1132	3.9126	9.6104	15.432	18.1657		0.148572	18.0942
3.2154	30.6838	25.5052	19.69	20.9796	13.104	11.7581	32.3251	8.3455	15.9112	20.2958	16.167	30.5629	14.4485	20.2284	30.462	16.214	9.508	11.7172	29.9261	8.9642	6.4787	9.0837	16.878	16.0009	6.399	4.9249	3.8018	3.1685	8.6335	15.908	15.8122		0.154287	15.9318
3.3345	29.6596	24.4601	17.2566	17.9658	11.1596	11.3359	26.9987	8.785	14.6089	16.6694	13.509	26.5219	14.9989	18.6957	27.355	15.693	10.061	11.0295	29.8313	9.8893	6.1629	8.5777	17.16	13.8029	7.169	4.8356	4.1032	4.8312	8.6942	13.236	15.5096		0.160002	14.857
3.4535	27.3302	18.8292	18.3648	16.2619	9.1952	8.4992	19.2428	8.0696	13.3929	15.2588	11.962	23.2181	11.9709	15.8126	26.061	16.958	9.319	12.0862	28.286	9.7779	6.5545	7.4394	18.634	12.9624	6.212	4.4722	4.9452	3.4739	7.5511	13.074	14.2065		0.165712	13.5297
3.5726	23.6776	17.1527	19.9282	16.7434	9.5542	8.9948	16.7276	8.2449	10.7825	12.5508	11.253	18.967	10.1305	15.3496	23.896	16.31	9.268	14.2434	30.4195	7.1746	6.8271	8.114	19.351	12.2417	6.042	3.6629	4.0848	3.8524	7.1746	12.423	11.8174		0.171427	12.8051
3.6917	20.9017	15.8845	18.9416	14.0336	10.3108	11.1109	12.9122	7.4273	13.0462	10.2083	10.678	16.5467	9.2802	14.6727	23.802	13.651	10.728	19.8513	28.0845	7.9066	6.9071	5.111	22.345	12.5604	6.339	4.4452	3.6817	3.5165	6.6635	11.413	11.5756		0.177142	12.4044
3.8108	17.9765	12.4061	20.193	14.6376	7.6286	9.2534	11.171	6.8442	12.7763	9.1675	12.853	13.1648	8.7132	12.384	21.58	13.215	9.521	18.9715	27.9184	9.1007	6.1944	6.498	17.578	8.8675	5.37	4.0435	3.7712	3.8876	7.9124	11.511	10.2015		0.182856	11.4616
3.9299	16.2119	12.8251	18.4956	14.2899	7.0691	8.9209	7.2355	6.6663	11.781	9.6575	11.182	11.6298	7.3815	11.8048	18.137	13.673	8.799	16.6271	30.5841	7.6805	7.1769	4.5783	16.766	8.5373	6.801	3.8687	4.2185	4.6192	7.0254	10.091	10.9783		0.188571	10.8165
4.049	14.9065	13.5328	17.8862	10.9563	6.9755	8.7733	8.7347	6.5641	11.2399	9.3702	11.812	11.7999	7.631	12.0149	14.146	11.717	8.389	16.1551	29.6745	7.1757	7.0131	5.2504	15.068	7.4226	5.483	3.9153	4.7528	4.6984	7.4564	8.369	10.0559		0.194286	10.2884
4.1681	13.8202	11.9681	16.2406	8.5848	5.6731	8.1442	7.8334	6.8278	12.8777	9.4835	11.366	10.4695	7.7133	11.8512	15.299	11.019	9.504	18.76	28.5004	7.0454	6.1142	4.6825	19.354	7.4692	5.849	3.1217	5.5082	4.8933	8.9165	10.501	9.0506		0.200001	10.2723
4.2872	12.2976	13.5238	18.3599	9.2768	4.6334	7.2451	8.3313	5.0374	12.9764	7.8075	9.617	11.4932	6.9272	11.1539	13.583	8.632	9.105	17.9261	23.2373	7.7312	5.3969	5.721	20.092	7.8375	4.851	4.2614	4.7148	4.4011	7.6838	9.657	9.0843		0.205716	9.76116
4.4063	15.3169	13.8227	16.3626	9.7553	5.1706	7.2347	8.9973	5.277	11.0566	7.4704	9.627	11.017	6.6447	10.2869	11.021	10.389	9.651	19.5488	21.5283	6.6305	6.0791	4.5047	21.728	7.2425	5.221	4.0617	3.9686	4.1656	6.6153	12.736	8.2796		0.211431	9.72292
4.5253	9.3	11.3005	15.348	7.5265	4.1406	6.4882	7.4521	5.9693	11.4528	7.9299	7.107	11.3484	5.2883	9.9658	10.687	11.276	9.64	20.2588	18.7857	7.7146	5.3138	4.457	22.02	6.659	5.235	3.604	4.6151	5.3715	9.1107	15.471	7.6999		0.217141	9.30763
4.6444	10.0602	11.4678	17.3551	8.559	4.2641	5.9636	7.6867	4.6925	11.9013	8.202	6.553	11.5368	5.4805	10.169	9.793	11.338	10.415	19.9943	14.4477	8.1192	5.0757	5.5538	21.393	7.4004	4.849	4.1848	4.379	4.7938	8.2192	19.022	6.4		0.222856	9.33127
4.7635	8.322	10.4585	15.6404	6.939	3.8583	5.4003	5.6591	4.5966	11.9328	7.6573	8.286	10.7233	4.531	11.7425	10.35	13.054	12.975	22.3657	14.5166	7.0944	5.2393	4.4667	23.641	6.5876	4.796	3.9827	5.0793	5.0865	8.3644	20.159	7.4859		0.22857	9.38681
4.8826	7.3879	9.7341	17.3285	7.8948	4.6107	3.5604	5.8612	4.8	15.1896	6.7142	7.703	11.164	5.666	10.9234	11.553	13.254	13.43	23.9672	12.2442	8.4452	5.1823	3.8376	26.755	5.251	5.222	3.8035	4.8031	4.5899	8.5078	26.821	7.3085		0.234285	9.79075
5.0017	6.8945	9.9322	15.7343	6.8379	4.536	4.7003	5.6975	3.9688	14.6368	7.5675	7.137	8.8852	4.9244	10.8324	14.364	12.357	19.113	26.8392	11.9451	8.6794	5.6801	4.5414	29.928	5.7115	4.723	4.498	4.5794	5.7757	9.3874	29.25	8.0042		0.24	10.2471
5.1208	6.7829	10.5337	18.2389	7.92	4.3139	4.9392	3.8476	6.0103	17.8548	6.0745	6.99	7.8117	4.6216	10.3608	17.703	15.439	18.176	32.377	10.588	6.2346	4.3766	5.066	28.285	5.5856	4.419	3.5981	5.1148	5.4816	10.6043	31.007	10.2101		0.245715	10.6634
5.2399	5.9286	8.0972	19.1939	6.3198	4.8507	4.2146	5.4644	4.8619	16.9912	5.9283	7.488	6.438	4.8707	10.4304	18.111	15.145	17.664	32.145	10.1503	7.5192	4.6161	3.7204	26.524	5.3433	5.141	3.4802	4.5407	4.0942	10.0718	28.23	8.8417		0.25143	10.207
5.359	6.3435	9.3328	21.0538	8.3359	3.991	4.6925	4.5966	4.3449	19.2538	6.4513	8.211	5.4994	5.4835	10.2763	15.189	18.018	18.932	30.2097	9.9233	8.1434	4.9229	4.639	22.924	6.0304	5.367	3.7645	4.0759	5.0614	9.1975	31.223	9.6725		0.257145	10.489
5.478	5.6102	9.7461	18.7574	7.1508	4.2105	5.1456	4.486	4.4964	16.6325	6.2445	7.964	4.3712	4.5046	12.0531	14.042	16.133	17.638	29.1968	10.3476	8.0077	4.3956	4.9454	23.679	6.2983	4.899	3.0522	4.8356	6.5003	12.8569	30.866	10.5381		0.262855	10.3098
5.5971	5.8862	7.8174	22.6349	7.2921	4.4724	4.7691	3.8578	4.9669	15.8084	5.432	8.968	6.1335	4.6806	10.1549	11.139	16.752	15.882	27.3686	9.5269	9.1503	5.5813	6.8336	24.857	4.8283	5.181	3.0808	4.4325	5.7677	12.1368	28.982	12.2918		0.26857	10.215
5.7162	5.0043	7.2409	22.7864	7.2504	3.574	4.1334	4.1292	3.5791	17.1997	5.3196	8.995	4.4602	5.4083	10.0931	11.802	17.217	15.203	23.8293	8.7288	6.6852	4.3571	5.6629	24.611	6.3628	6.141	2.8142	4.0508	6.7147	12.609	27.455	12.7078		0.274285	9.87501
5.8353	5.1737	7.2561	22.9657	7.8117	4.8481	4.2882	3.8099	3.3409	16.8368	6.5123	8.882	4.5866	4.6885	9.144	15.303	17.391	15.63	18.9772	8.6395	7.5046	4.4558	7.3029	26.333	5.7806	4.567	3.877	4.9103	7.1276	13.6539	28.582	13.8577		0.279999	10.1302
5.9544	4.7168	6.7211	15.9671	8.1227	3.8227	4.5231	4.0254	3.6885	16.7623	4.7272	8.344	4.901	4.7758	7.6378	13.99	17.204	16.514	17.4524	10.5007	6.4187	5.8795	5.9633	27.455	5.6161	4.683	4.107	5.488	7.2032	16.752	23.144	11.4622		0.285714	9.63125
6.0735	4.6832	6.0282	12.9265	9.6757	4.0037	5.2006	4.792	3.1701	14.4057	5.9298	9.74	4.1693	5.1336	9.3852	14.212	17.27	16.62	18.2307	9.3696	7.1906	5.2202	6.291	25.498	7.0982	4.596	4.1353	5.9317	6.8096	14.5739	25.812	13.2463		0.291429	9.72093
6.1926	4.3028	5.9612	11.3889	13.2363	4.071	4.1986	4.1188	3.8174	13.4309	7.883	9.309	5.059	4.0553	9.4523	16.82	18.132	17.099	14.5719	8.6177	7.0141	5.914	6.7522	24.903	5.3862	4.927	4.0032	4.6849	7.0801	13.856	21.342	13.3796		0.297144	9.50863
6.3117	4.9519	4.9401	10.2068	15.6106	3.774	4.4345	4.0695	4.2117	13.3533	5.8305	9.682	4.5786	4.0088	8.8703	12.394	18.788	20.711	13.6925	8.4269	7.474	5.5357	6.5908	24.212	6.0769	4.224	4.2223	4.4914	6.525	15.9635	23.213	11.1654		0.302859	9.42674
6.4307	3.8894	4.8284	14.9323	20.8406	4.0677	3.5463	4.5318	3.6688	13.0966	6.7205	9.865	5.5119	4.0408	7.3984	12.873	19.478	20.77	16.1062	7.9498	6.6045	5.8133	6.543	20.598	6.0932	5.906	4.8957	5.8896	7.1799	13.8639	21.933	11.5864		0.308569	9.71039
6.5498	3.7075	5.474	14.1873	26.1092	4.7521	4.4191	3.6407	4.3437	13.1608	7.0551	7.662	5.1089	3.522	7.703	12.751	17.465	19.171	12.8766	9.8887	5.8606	6.5591	6.9937	22.659	5.1929	3.852	4.5318	4.5431	6.1293	14.1957	19.858	9.9123		0.314284	9.46081
6.6689	3.6687	4.2264	21.0552	26.0377	4.9008	4.7455	3.2996	4.7192	16.4709	8.6752	9.247	5.3449	4.0507	9.3101	14.384	14.773	15.835	17.8963	9.7072	5.8831	6.6379	7.9803	20.218	6.4729	4.436	3.2972	4.6242	5.7362	13.3856	19.351	9.6735		0.319999	9.87236
6.788	3.845	4.2648	25.4703	22.5601	4.5649	4.4554	3.9109	4.5617	13.8413	9.76	10.273	4.9394	3.3028	9.0747	18.972	14.217	14.432	17.1795	8.6564	6.8368	8.1853	8.9252	22.439	7.7739	4.588	4.0222	3.3776	4.1944	12.5872	20.098	8.7049		0.325714	10.0004
6.9071	3.9951	4.5766	26.129	21.6362	4.1078	5.4055	3.8842	3.8415	15.5045	9.9627	10.222	4.6867	4.3199	11.1866	18.29	13.866	15.174	17.4687	8.3449	5.8121	6.6343	11.2949	20.009	5.7678	4.174	5.0952	3.7295	4.6962	9.4563	20.404	7.9544		0.331428	9.92354
7.0262	2.9949	3.6872	28.1947	22.4983	4.362	4.6332	3.856	4.1606	17.2796	11.2597	12.436	4.5927	4.3335	9.1973	17.457	14.173	15.135	16.3157	9.0629	5.492	6.2503	13.6873	22.246	5.3012	4.064	4.7119	3.6992	3.5733	11.554	17.139	6.8121		0.337143	10.0051
7.1453	3.2606	4.2826	26.249	19.6887	5.5083	4.7804	3.7003	4.6627	20.4975	10.5934	11.341	5.5747	3.3852	9.6463	18.615	11.621	13.246	18.7029	9.7436	6.4311	7.345	15.4014	21.441	5.7018	4.912	3.9205	3.4484	5.3547	9.0899	18.688	5.7561		0.342858	10.0835
7.2644	3.2349	4.4493	25.3052	19.9076	4.4177	5.3872	4.451	4.2611	18.4249	10.5257	11.61	4.2315	3.3333	10.8026	16.452	9.918	14.249	17.4063	10.0296	7.6629	6.9141	19.593	20.186	5.5015	4.947	5.6517	3.1348	3.8672	10.5055	17.623	6.3113		0.348573	10.0095
7.3834	2.8242	4.4933	22.7587	18.0686	5.1596	4.3247	3.0177	4.4942	16.7135	13.9264	11.329	5.7277	5.1451	12.3311	18.21	10.361	13.992	18.5628	9.1524	7.5796	6.1167	21.7055	16.522	5.4895	4.263	5.1603	4.4819	2.9122	9.7291	16.439	6.1106		0.354283	9.9065
7.5025	2.6612	3.2266	20.3406	14.7211	6.1004	4.4813	3.3281	3.4245	13.4773	17.3928	12.309	5.4415	5.1632	12.3875	17.943	9.181	13.235	19.959	9.6966	7.2201	7.8478	26.8476	14.55	6.983	4.245	4.4989	3.4949	4.1602	10.5673	19.057	5.6605		0.359998	9.98716
7.6216	3.4729	3.1775	15.5593	13.5434	4.3307	4.567	4.3781	3.2955	13.8332	20.6609	11.889	6.5381	5.2954	14.5576	18.854	9.559	11.812	18.1852	9.3729	6.4807	7.9782	30.5948	12.179	6.1608	4.779	4.3658	3.1569	3.3648	10.4184	19.194	5.0648		0.365713	9.89093
7.7407	3.9971	3.7801	13.2261	13.4904	5.3953	4.6459	3.0533	4.2295	12.9154	23.7552	10.323	5.6721	6.8659	15.6002	15.219	9.738	10.802	20.6772	11.9142	6.4991	8.0556	34.192	9.566	5.6032	5.06	4.8151	4.1213	3.5417	8.5046	17.142	5.7766		0.371428	9.9412
7.8598	3.6946	2.9684	13.4359	10.6684	4.6592	4.5868	3.86	4.6231	12.4683	27.0539	8.993	6.4965	6.8176	17.7885	14.125	9.081	10.405	20.1432	11.3976	4.9554	7.6686	37.7872	9.169	4.9865	3.547	3.828	2.9524	3.7373	9.2666	19.468	5.8128		0.377142	9.88532
7.9789	3.5427	2.8556	10.8123	9.1648	4.7058	3.8462	3.4641	5.2069	13.3274	29.0587	10.931	6.3459	6.1154	19.9918	12.283	11.1	9.643	19.1903	11.3342	7.0923	7.4647	36.8764	10.357	4.8882	3.942	3.7921	2.9199	3.2914	8.4955	16.887	6.3188		0.382857	9.84659
8.098	2.9536	3.0702	11.9615	8.1698	4.6797	4.6561	3.8163	5.4678	13.1529	28.6874	9.042	6.2478	6.8443	19.5006	12.093	11.764	10.043	16.4499	14.5343	7.14	7.5763	38.8938	10.651	5.4424	4.802	5.1674	2.6907	3.1408	12.4366	17.633	5.2858		0.388572	10.1288
8.2171	3.3342	2.9774	16.0254	7.9117	5.8074	3.9436	4.3279	4.1725	12.1855	34.0237	8.406	5.7471	8.1807	16.9736	11.845	11.488	8.055	14.7827	12.6646	5.5494	8.098	33.3974	10.045	6.0596	4.962	4.9634	3.6062	4.0491	11.7947	16.237	3.6784		0.394287	9.84814
8.3362	2.2564	2.8276	14.6691	7.1958	4.6828	5.6217	3.8425	4.4358	13.7987	36.0343	8.947	6.7398	7.0702	19.0594	9.499	10.95	7.088	13.0854	15.7743	4.7315	8.0438	32.0533	9.742	5.2086	4.941	3.9737	2.9585	3.5541	10.2284	14.062	4.5863		0.400002	9.60197
8.4552	3.1126	2.8191	16.0174	8.3522	6.4003	4.1004	4.7954	4.1839	13.1749	37.4506	7.425	6.1761	8.6234	18.9035	8.993	10.342	6.852	12.4885	16.3678	6.1913	7.1335	32.8007	8.856	5.601	5.315	3.4789	4.1514	3.6046	11.5954	13.859	4.7491		0.405712	9.80368
8.5743	3.0181	2.6035	15.1761	9.6332	4.9015	3.8256	3.7588	4.4911	13.3855	38.5343	7.215	6.6453	7.5856	17.7852	8.002	9.873	5.187	10.5501	16.739	5.7226	9.0896	28.0671	9.313	6.4732	4.284	4.1791	2.9368	3.5382	14.3636	11.628	3.8257		0.411427	9.43003
8.6934	3.0849	2.9247	12.5975	9.1259	5.0291	4.5658	5.1646	4.2973	12.9904	35.7526	7.446	6.2343	8.3982	17.091	7.033	9.405	5.199	9.557	16.5183	6.5774	7.4976	28.1878	7.061	5.6749	3.851	4.2438	2.4079	3.359	12.3321	9.997	4.6481		0.417142	8.97588
8.8125	3.9266	2.4325	14.2371	8.7579	4.9643	4.4203	4.3812	3.8025	12.4477	30.1961	6.215	8.465	9.1967	16.5516	8.601	8.452	5.388	9.2743	15.7805	5.7012	7.0369	27.6174	7.564	4.9321	4.675	4.0727	3.2113	2.959	13.0523	8.961	4.913		0.422857	8.7802
8.9316	2.8029	2.155	11.6013	8.0393	4.8262	3.4201	3.0714	4.0931	11.2789	32.1558	6.44	7.4749	9.4834	14.7985	8.32	8.027	5.522	9.6734	13.1845	6.4688	7.6129	27.9275	7.27	5.0995	3.409	3.7991	3.3373	3.6094	12.2976	10.503	4.3718		0.428571	8.45399
9.0507	3.254	3.067	15.2462	6.6651	4.8862	4.875	4.3227	4.3574	12.4336	30.5798	5.525	7.8104	11.7982	15.43	6.022	8.202	5.037	11.6224	13.5302	7.0278	8.3681	25.0883	6.968	4.8127	4.016	3.0464	2.6674	2.9254	13.3322	9.712	4.1115		0.434286	8.60452
9.1698	2.5302	2.2801	13.9756	7.7826	4.4098	4.625	3.7221	4.6811	9.8144	24.4269	6.781	6.3946	9.9074	17.1832	7.6	7.672	5.726	10.5231	13.2066	5.9274	7.7195	23.8958	6.825	4.645	3.943	3.3158	2.1964	2.999	13.6314	6.813	3.9938		0.440001	8.03699
9.2889	3.4226	2.2247	13.1902	8.0167	4.0891	3.8885	3.4458	4.3685	10.3434	28.2126	5.359	7.9601	12.0962	15.0824	7.985	6.539	5.578	9.9575	11.9817	6.2427	8.077	25.6947	6.828	5.3317	4.047	3.4221	3.016	3.6611	13.6351	7.068	4.4512		0.445716	8.23276
9.4079	3.4595	2.6773	13.2481	8.4983	4.3656	4.0019	3.9587	3.907	8.9194	29.312	6.452	8.7617	14.1426	14.2643	6.968	6.584	6.428	10.3762	12.4172	4.6276	8.0313	26.0372	6.417	4.3559	3.881	3.1481	3.0133	2.7436	13.5953	7.867	4.5958		0.451426	8.29209
9.527	2.1418	2.4335	15.7185	7.1741	4.8604	3.4433	4.0253	3.2249	9.5715	31.9111	7.709	11.0373	13.3301	17.0371	7.904	5.563	7.491	10.8231	11.2973	5.9026	7.1275	22.6835	6.094	4.3461	4.147	3.8729	2.7235	3.3686	14.4496	7.786	4.6262		0.457141	8.51045
9.6461	2.0918	1.5596	16.0349	8.8933	4.4799	4.1497	4.017	4.2956	8.5453	32.3492	6.888	11.761	16.9397	18.0739	6.683	5.455	6.058	8.9215	10.5668	5.1812	6.3793	18.43	4.315	4.4141	3.403	2.7812	3.0881	4.1161	13.4355	8.492	3.5922		0.462856	8.23842
9.7652	3.0766	2.1983	18.7391	8.3468	5.5737	3.2792	4.5172	3.4865	8.5034	31.7172	7.542	14.5879	17.4426	15.0566	7.395	5.798	5.181	8.8636	9.1536	6.3992	6.3419	18.0349	4.05	4.9487	4.355	3.2897	3.5221	2.8488	13.4174	6.684	3.9864		0.468571	8.33343
9.8843	4.0014	1.6615	21.3279	8.5238	4.0963	3.0733	2.2607	3.6129	8.2336	33.9496	8.794	12.3736	19.533	16.3486	7.203	4.691	4.789	8.6196	8.8622	5.6572	6.6458	17.0123	5.488	4.1942	3.717	4.6726	2.8914	3.4867	13.73	5.676	4.036		0.474286	8.36007
10.0034	3.207	2.1672	18.8686	8.2826	4.5802	4.4014	3.5389	4.2677	8.6276	34.9092	10.011	13.5579	20.0892	13.9873	5.599	5.875	5.635	8.3225	8.6629	6.2311	6.8999	16.0138	5.215	4.1081	3.199	2.2277	3.2855	3.7704	13.9075	5.471	3.8637		0.48	8.34784
10.1225	3.537	2.6953	18.3459	7.942	3.2234	4.3934	3.6853	4.1212	8.7354	34.6398	10.889	14.4475	15.7238	15.6673	6.579	4.396	6.629	6.8984	9.2064	6.7438	7.7132	14.5133	3.913	5.1332	3.031	3.0659	3.4877	4.2772	15.4837	6.471	3.9781		0.485715	8.3731
10.2416	3.098	2.1508	17.6862	8.5714	2.7567	4.141	2.9109	3.8042	7.3332	34.3056	11.504	15.5987	14.8382	17.4132	5.129	4.431	6.445	8.743	10.8917	6.2755	7.238	14.9375	4.742	5.5454	4.232	2.9261	3.5419	3.5841	15.3955	5.183	3.1254		0.49143	8.33801
10.3606	2.9181	1.8839	16.8168	7.974	3.9812	4.7213	3.1168	4.2348	9.3613	35.2746	12.247	14.0279	16.5682	20.3727	6.073	4.028	7.029	7.416	10.1624	7.3994	6.2335	13.5082	4.83	4.5168	3.802	3.4298	3.4788	3.5135	12.8863	5.651	2.6773		0.49714	8.39141
10.4797	2.5789	2.5662	19.5939	7.0629	3.3038	3.4295	4.3766	3.9315	8.5397	34.9449	14.564	16.4201	14.9165	19.756	6.253	3.951	6.638	6.1924	9.7714	8.0628	7.3482	13.3139	4.324	5.4407	4.481	3.4294	2.7954	3.3263	12.4278	5.891	3.0077		0.502855	8.47221
10.5988	2.3577	2.6115	20.156	6.7306	2.7844	4.6377	3.4894	2.9472	8.482	28.3936	20.51	16.0038	17.696	19.6927	4.79	3.74	7.064	5.3849	10.5941	7.9133	6.1518	16.3325	4.917	5.3869	3.835	2.3872	2.8376	3.3895	12.121	4.967	3.322		0.50857	8.43956
10.7179	2.9881	2.4641	23.4653	6.0646	4.0302	3.9618	3.273	3.2572	8.0172	27.5818	23.034	17.209	19.1899	20.1589	5.734	3.663	6.994	6.0197	11.2684	8.7519	7.4524	15.571	4.281	5.4928	2.962	3.663	3.1701	3.3105	12.3501	4.16	3.5203		0.514285	8.80836
10.837	2.7952	2.1517	22.6993	5.2684	3.9288	4.4181	3.5667	3.0135	8.5273	25.6518	28.537	18.3066	21.0319	18.1387	5.288	4.171	6.536	7.0406	11.3877	8.7452	8.5561	13.3397	4.124	4.2986	3.484	3.3597	2.7488	2.2895	12.7035	4.893	3.7702		0.52	8.86357
10.9561	3.4092	3.2769	22.5453	4.8867	4.8276	4.1155	3.4971	3.9311	9.1739	21.7541	38.14	18.197	19.3581	15.3522	4.846	3.191	4.604	7.5969	11.496	9.2006	9.5807	17.688	4.105	4.7246	3.883	3.3383	3.2729	2.6815	12.2618	3.749	3.6204		0.525714	9.10659
11.0752	2.9549	2.7642	21.9043	4.2527	3.7466	4.3083	4.0126	4.1382	7.9565	24.1873	39.041	17.4194	20.9145	13.1972	4.518	2.838	5.189	6.7786	12.4528	9.2787	10.3183	15.2407	4.9	3.7326	3.266	3.4495	3.1406	2.8164	12.9617	4.859	3.9739		0.531429	9.04876
11.1943	3.0742	3.436	21.1847	5.0892	4.0645	3.9471	4.0462	2.9102	6.7494	27.5073	46.396	17.3913	19.7134	12.3263	4.657	2.529	3.846	8.0754	10.9647	9.3329	10.0852	14.5829	4.724	4.1357	3.45	3.1699	2.8707	3.011	13.7563	4.657	3.6559		0.537144	9.2045
11.3133	2.455	2.8777	20.3227	5.1707	3.129	4.067	3.7296	3.8703	7.184	25.2529	47.031	16.1329	17.9709	9.2188	5.26	2.271	3.274	7.4526	11.8454	10.2371	12.3247	14.9266	3.815	4.3341	3.18	3.157	3.8024	3.2759	15.808	4.398	3.9139		0.542854	9.08672
11.4324	2.7913	2.6587	17.7897	5.3303	2.4824	3.7304	3.5499	3.7097	7.2905	28.7946	48.267	16.1919	15.3715	8.9363	3.722	2.824	3.907	7.1197	12.7721	11.4435	12.5921	14.8378	3.387	4.0847	3.016	3.2976	4.0859	3.6528	13.8621	4.443	3.5637		0.548569	9.0163
11.5515	2.7467	2.0604	18.2263	5.4782	3.7588	3.754	3.0392	4.1904	5.945	28.8218	44.138	17.9041	16.5529	9.8199	4.756	2.388	3.598	6.7384	12.4776	10.1661	12.7273	13.1164	4.173	3.7994	3.62	3.6399	3.6457	4.5634	15.5331	3.962	3.221		0.554284	8.98584
11.6706	2.8169	2.6472	20.4697	5.0428	3.2822	3.5419	4.2419	2.82	6.2114	25.0576	45.317	14.7721	16.8832	11.7973	3.288	2.709	4.244	6.8075	12.1173	11.8053	11.5922	12.8042	3.879	4.4707	3.301	3.533	2.7266	2.5805	13.3759	3.342	3.0865		0.559999	8.72787
11.7897	3.3852	2.2528	20.6791	5.4645	4.2092	3.8741	2.9992	3.5752	5.1575	23.3065	42.307	15.4153	18.8441	10.1789	2.426	2.205	3.306	7.0467	13.5456	10.0684	12.9479	10.9037	4.156	3.7025	3.7	3.2919	3.1722	4.1657	14.0478	3.786	3.9977		0.565714	8.64896
11.9088	2.9925	3.3369	21.9947	4.7889	3.8327	4.7554	3.3007	4.1037	5.3542	24.5573	37.302	16.1652	18.3977	8.8777	3.614	2.384	3.754	7.9203	12.4206	10.3107	15.3943	11.0873	4.326	4.3215	3.883	2.8895	3.1128	3.6099	13.5823	3.24	3.2515		0.571429	8.67295
12.0279	2.8044	2.567	26.5888	5.0653	3.5385	4.0552	3.4235	3.2957	6.5026	22.2562	29.568	14.5328	17.1987	10.6627	4.029	2.342	3.11	6.152	11.5654	13.4673	14.1348	8.73	4.43	2.7978	2.855	3.2758	3.0728	2.9158	11.9209	4.136	3.4507		0.577143	8.20789
12.147	2.6589	2.4087	24.5842	5.2189	3.704	3.6729	3.1793	3.5159	6.8958	20.3456	28.009	14.8576	16.9658	12.0361	3.797	3.135	3.721	6.632	10.0445	12.6568	15.1922	10.712	3.025	3.3274	3.598	3.1077	4.1096	3.2943	10.5904	3.518	3.6429		0.582858	8.13408
12.2661	3.4305	3.1971	26.5917	5.9571	3.3085	2.7779	2.8357	3.7471	6.1576	18.7283	26.235	14.0833	20.2912	10.5302	4.276	2.838	5.401	6.2516	11.2937	12.4261	17.0037	9.7447	4.37	2.972	2.414	2.9617	2.6451	3.6002	11.0598	3.764	3.2384		0.588573	8.19778
12.3851	4.119	2.8776	23.7831	4.9218	3.7738	3.4854	2.8567	3.2445	6.3444	19.3236	23.937	12.1055	20.7631	11.3874	3.93	2.273	4.032	5.5191	12.1285	12.4291	16.0472	9.9188	3.996	4.0338	3.514	3.4245	2.9991	3.3483	12.8973	2.765	4.5509		0.594283	8.08805
12.5042	3.2002	2.2989	23.3875	4.4566	3.1051	3.7656	3.0855	4.3835	5.1921	19.4949	23.015	12.9985	19.4711	11.5892	3.895	2.135	3.491	5.986	11.1516	13.0954	16.3784	8.9509	3.646	3.4941	2.935	3.0637	3.9544	2.9709	12.5878	3.379	3.4646		0.599998	7.87169
12.6233	3.5208	1.9843	19.991	3.9999	4.6102	3.4801	2.8359	4.1859	5.6307	19.8848	22.729	12.5732	19.8376	11.6656	3.048	2.053	3.471	6.6682	11.2122	10.2169	16.4634	8.9581	4.014	3.5517	3.32	3.0313	3.167	3.7088	11.1383	3.699	2.9641		0.605713	7.66497
12.7424	3.4078	2.5905	16.2669	4.477	3.2993	4.5379	3.2953	3.4018	6.2078	20.3287	21.41	12.2482	19.0368	12.4176	3.069	2.509	3.641	5.5954	11.5601	10.5467	16.9135	8.1003	4.468	3.8518	3.29	2.9179	3.529	3.0086	13.0503	3.628	3.2911		0.611428	7.60953
12.8615	3.2705	2.2901	17.1192	3.835	3.6403	3.9	2.5742	4.3901	6.3051	21.1983	19.057	11.5326	17.2183	11.5811	3.913	3.979	3.799	5.8419	11.5726	11.4143	17.5914	7.3121	3.899	3.3116	2.396	2.8724	3.0025	3.2194	11.5893	3	3.2996		0.617143	7.41693
12.9806	2.9534	2.5188	17.3344	4.6343	3.9336	4.1506	2.2246	3.2476	6.0034	22.6023	21.13	12.3291	18.5377	10.266	3.952	2.806	3.919	7.2862	12.3362	10.1846	18.8551	6.9556	3.749	2.9635	2.282	2.6912	3.2754	2.9614	12.5887	3.703	3.6401		0.622858	7.61338
13.0997	3.2952	2.5601	16.8888	4.1938	3.7272	3.5029	3.3654	3.2709	7.2008	20.0459	19.2	12.4283	18.955	9.4665	4.227	2.848	4.208	6.8021	10.7145	11.7616	19.2088	7.129	3.488	3.8408	2.952	2.5805	4.2385	3.4578	12.0315	3.468	3.7416		0.628572	7.57415
13.2188	3.6254	3.0535	21.0116	4.228	3.3741	4.4622	2.9031	3.7446	5.9721	19.4852	18.456	10.0119	17.2007	8.8795	3.757	3.536	3.568	6.5683	11.5632	12.2574	19.0732	5.191	2.824	3.8852	3.246	3.6719	3.0048	2.9563	13.3437	3.521	3.7094		0.634287	7.48659
13.3378	2.7382	3.2023	16.6343	4.7096	3.6425	3.4064	3.0776	2.8273	7.0874	20.1597	16.97	10.6777	15.1323	8.3353	2.739	2.572	4.016	5.5509	12.4029	12.2406	17.6017	5.0909	3.653	3.307	2.576	4.4555	4.0345	2.948	14.7838	4.23	3.1274		0.639997	7.22354
13.4569	3.7754	2.7361	18.519	3.8442	3.7287	3.3386	3.5037	3.5389	6.2931	18.6898	17.395	11.2937	15.2216	7.4981	3.125	2.191	2.98	4.7075	12.0173	11.3592	19.5363	5.4808	3.127	3.0541	2.611	3.7646	3.0806	2.7426	13.8059	3.581	3.8339		0.645712	7.10883
13.576	3.8403	3.2442	18.6894	3.7375	3.883	3.255	3.3331	4.8594	6.9434	18.1915	15.587	11.1978	13.6808	6.821	2.429	2.65	3.209	6.813	13.6112	11.5851	18.627	4.7733	2.641	3.5987	3.266	3.1341	3.4434	2.5249	13.008	2.901	3.8074		0.651427	7.07373
13.6951	3.7537	2.7051	17.5918	4.5455	3.3489	2.4527	3.3395	3.3262	7.7489	16.7547	17.996	12.0998	13.0191	5.3765	3.133	2.603	3.274	5.4538	13.9544	10.3392	20.2946	4.2304	2.823	3.0312	2.792	3.402	2.9425	3.3639	11.6954	2.262	3.4088		0.657142	6.87295
13.8142	3.7908	3.0049	18.7544	4.1568	3.4846	2.9474	3.4842	3.8252	7.1166	16.1278	16.058	13.149	12.1472	4.5789	2.626	2.319	2.795	4.2738	16.8783	12.3696	17.1701	4.4482	2.524	2.958	3.236	3.1968	3.6377	2.6029	12.3367	3.341	3.2647		0.662857	6.85818
13.9333	3.6128	3.0636	21.3838	4.6961	2.8383	3.7469	3.0655	4.2486	8.4337	15.7327	16.297	11.3977	9.9028	5.5414	3.493	3.777	2.71	4.3903	14.9707	12.2642	18.1159	4.9154	3.241	3.2664	2.655	3.0293	3.1719	3.3789	11.295	3.975	4.0259		0.668572	6.98825
14.0524	2.8731	2.3157	21.5143	4.3888	2.9608	3.4274	3.0608	3.5621	7.5254	16.3344	15.913	12.6707	12.059	4.9685	4.062	3.127	2.476	5.098	18.1734	12.2264	17.5286	4.7125	3.411	3.6367	1.962	2.2961	3.9807	4.4796	13.619	3.161	4.4444		0.674286	7.16027
14.1715	3.1628	2.9831	22.0938	3.2557	3.508	3.5589	2.852	3.3135	9.4478	14.597	16.593	12.7961	10.8719	3.5276	3.308	3.388	3.423	5.2134	19.1358	11.2081	19.8044	4.343	2.718	2.5723	3.009	3.0323	3.5879	3.1004	14.9954	3.248	3.2654		0.680001	7.1585
14.2905	3.355	2.481	18.1172	3.0772	3.8873	3.4315	2.6101	3.7044	7.8937	13.9558	15.216	13.9568	9.5503	4.5529	3.442	2.926	2.17	3.8288	19.2022	12.8859	20.752	4.1818	4.166	3.7474	2.848	3.4264	3.4087	3.1844	14.6039	2.85	3.2128		0.685711	6.98792
14.4096	2.8216	3.0443	20.2849	4.417	2.8927	3.0217	3.0212	2.6699	7.276	16.4456	16.129	16.0767	10.1855	3.3863	3.608	3.09	3.239	4.4804	18.7961	12.1483	18.2884	4.9296	3.829	3.2308	2.419	2.7067	3.5213	2.9281	15.3733	3.332	3.4182		0.691426	7.12937
14.5287	3.2927	2.9942	21.2969	4.05	3.6729	2.9859	3.2847	4.0689	7.5896	14.4116	18.98	14.6902	9.0985	3.7101	2.467	2.684	2.61	3.8261	16.6742	14.1792	15.7573	5.9568	3.712	2.2433	2.996	2.6281	4.0063	4.412	13.6836	3.225	3.5264		0.697141	7.05527
14.6478	3.2877	3.3336	19.6245	4.8867	2.3916	3.8545	3.1917	4.0774	7.7535	14.9205	16.38	17.1617	8.2033	4.9632	2.912	3.409	3.017	5.0411	21.1014	13.6066	17.4595	4.4883	2.784	2.902	3.263	2.1725	3.0056	3.852	14.4451	2.926	3.3787		0.702856	7.21915
14.7669	2.6201	3.0805	19.5947	4.2771	2.6565	3.1541	2.9593	3.5408	8.8903	17.5346	17.129	17.5063	8.5198	4.8071	2.877	3.521	2.897	2.8435	17.5423	13.9665	18.3152	3.8785	3.063	3.4165	2.547	3.4129	2.818	4.0121	15.0506	3.206	3.8747		0.708571	7.21006
14.886	3.8857	3.9504	18.7219	3.7811	3.4987	3.1184	3.4089	3.5082	7.7433	18.1564	18.573	17.9323	8.1049	5.1959	3.413	3.588	3.06	4.9367	15.0626	17.4875	19.5284	4.0246	2.661	2.8552	2.819	3.3866	3.3932	3.6723	15.2147	2.849	3.5285		0.714286	7.45353
15.0051	3.0079	4.0463	17.2033	3.6679	3.2843	2.7942	3.9693	4.1603	9.09	17.9595	19.441	17.2533	7.2786	5.1262	2.494	2.292	2.806	4.7585	13.5291	17.869	17.9176	3.6786	3.013	2.8564	3.466	2.7325	3.2934	3.4827	16.9594	3.263	3.0842		0.720001	7.28315
15.1242	2.7142	3.3912	16.7824	3.4118	3.7945	2.6702	3.1613	4.6735	6.0704	18.7845	21.586	16.3132	6.7213	4.92	2.72	2.866	2.859	4.102	15.7289	21.6761	19.6569	3.592	2.654	3.8649	3.401	2.4331	3.061	3.7052	19.589	3.21	4.0454		0.725715	7.55352
15.2432	3.9675	4.348	14.3033	4.0976	3.6179	2.8461	3.8602	5.0973	8.8862	19.3155	20.323	17.8412	6.3632	3.6162	2.697	2.557	3.123	3.8038	14.2133	22.7287	15.2014	4.3935	3.65	3.4419	2.694	1.7691	3.7598	4.9201	18.6521	2.645	2.886		0.731426	7.47158
15.3623	3.2297	4.6048	14.6232	2.8623	3.7731	4.2623	4.0471	5.3049	7.6241	17.0552	20.523	18.7193	7.2065	3.9217	3.154	2.462	4.189	4.1875	13.9261	23.2515	14.2581	4.1778	2.259	3.1844	2.886	2.494	3.7097	4.2804	18.719	3.127	4.4044		0.73714	7.49765
15.4814	3.2996	5.2481	13.4335	3.961	3.4713	3.3878	3.2032	5.9014	10.0558	19.3841	23.518	17.0137	8.2351	4.4567	3.546	2.245	3.563	3.6728	12.864	27.4867	13.2623	3.9236	2.534	3.8713	2.346	2.849	3.4715	3.6081	19.2519	3.815	3.8526		0.742855	7.76555
15.6005	2.7916	4.9339	13.9066	3.7064	3.5616	3.7761	4.219	5.8809	9.8312	20.2054	22.19	19.5822	6.5927	4.7258	3.687	3.81	3.342	3.3971	14.8646	29.1567	12.1865	3.343	3.218	3.2892	2.762	2.8653	3.5933	4.6981	15.3865	3.355	3.956		0.74857	7.8327
15.7196	2.8191	4.876	11.9919	3.8627	3.9875	3.6334	3.4142	7.2874	10.0673	24.5641	24.242	16.6042	8.6396	4.8301	2.866	2.36	3.004	3.0525	13.8582	38.6154	9.5703	3.0955	2.867	3.1132	2.639	4.2976	4.0014	4.0125	14.822	3.569	3.5481		0.754285	8.0681
15.8387	3.7209	5.2189	11.3843	3.8765	4.1744	4.0165	4.5958	8.4359	12.3791	23.3625	26.244	20.2961	7.2017	4.8046	3.479	3.085	3.947	3.3573	18.4877	43.4911	8.2946	3.6056	2.092	2.7268	2.986	3.4153	3.6163	4.8317	15.6308	3.624	3.8761		0.76	8.71798
15.9578	4.2442	6.691	12.2894	4.4774	3.2983	4.0753	3.5978	9.807	13.1286	24.6913	31.305	16.1982	8.2646	4.0455	3.041	2.379	4.68	2.4436	19.4515	42.1897	7.9645	3.4864	2.394	3.2885	2.905	2.8148	4.4809	5.2088	15.0852	3.551	5.3567		0.765715	8.93014
16.0769	4.375	7.646	10.0841	3.2129	3.5764	4.6731	4.1313	9.8889	16.2465	28.8441	36.958	16.7901	7.943	3.3177	2.448	3.633	4.149	4.0442	16.9949	41.5986	6.946	4.9598	2.785	3.3404	2.539	3.2722	4.9601	5.8391	15.2952	5.077	5.3415		0.77143	9.3842
16.196	3.792	8.8861	9.9885	4.4504	3.3938	3.7243	5.0387	11.2599	18.3088	34.6914	37.601	17.7241	7.5446	3.3286	3.043	2.844	4.03	3.8659	18.0038	42.7595	6.0881	3.5236	3.456	2.1413	3.051	3.1761	4.3915	5.7543	17.2354	3.763	5.6936		0.777144	9.75975
16.315	4.1821	9.3517	9.2571	3.7714	4.9576	4.9379	4.7186	13.9374	18.3036	34.5823	41.16	13.8409	6.6657	4.2517	2.998	2.163	5.029	3.5456	15.0935	39.7807	7.8183	2.7633	2.965	3.3642	3.077	3.0873	4.2489	5.0293	16.1375	4.096	6.3797		0.782854	9.72562
16.4341	4.2294	10.8425	8.6562	3.8425	2.8399	5.7018	4.677	16.2153	23.3993	38.8042	39.39	14.0317	8.2814	4.4212	2.959	2.77	5.999	3.1395	13.2242	34.8602	6.5859	3.8766	3.213	2.8076	2.531	2.6367	4.0999	4.809	15.7003	3.615	6.9915		0.788569	9.84357
16.5532	3.0598	12.9026	7.9997	5.1425	5.1831	4.7586	4.8329	18.3967	26.4358	37.4065	38.288	14.2386	7.6109	4.0544	3.55	2.056	4.781	3.9314	14.3761	35.3928	5.8464	3.6511	2.71	2.4545	3.084	2.8887	4.6542	4.9619	15.9982	3.083	6.653		0.794284	10.0123
16.6723	4.2604	17.289	7.128	4.26	5.0778	5.4895	6.7796	22.848	34.7306	42.7469	44.573	13.5212	6.8232	3.8517	3.977	2.842	4.69	3.7518	13.2209	30.1189	7.7041	4.5869	2.661	2.5847	2.767	2.2324	4.6165	5.7556	16.8689	4.114	7.3753		0.799999	10.9434
16.7914	4.8209	15.9109	7.7349	4.5604	6.6653	6.4667	4.7322	26.9013	38.3747	44.6652	46.419	14.1863	6.7093	3.432	3.987	2.72	5.333	5.5524	11.3112	31.8171	6.5271	4.2034	3.336	3.1466	2.322	3.916	4.2217	6.4979	13.8131	4.738	8.1048		0.805714	11.3912
16.9105	5.1825	15.0171	6.2041	4.0481	4.9283	6.4083	5.6086	31.0383	38.8045	48.7721	48.916	14.2627	5.3614	5.6722	4.328	3.122	3.891	4.7951	10.4877	29.7105	5.4171	3.8732	2.59	2.3271	3.544	3.5749	4.5076	5.9607	15.5506	5.624	10.068		0.811429	11.5999
17.0296	6.633	18.122	6.1433	4.1277	8.0289	7.8763	5.9525	34.0209	36.0341	53.4029	49.044	16.8776	5.3179	4.1966	3.862	3.203	6.635	4.7541	10.7506	29.8792	5.4951	3.6521	2.657	2.4791	2.757	3.4044	5.5445	7.2678	16.662	5.056	12.2189		0.817144	12.3244
17.1487	6.8531	18.9464	7.7074	5.1537	7.4212	10.0008	6.7137	34.3278	39.4924	55.6583	45.379	19.4459	5.7049	4.4911	5	3.583	6.654	5.6909	8.5385	31.0994	6.0612	3.8716	2.46	2.7149	2.679	3.2272	5.0264	8.0524	18.2091	5.767	14.2588		0.822858	12.9093
17.2677	8.4079	24.0065	7.5248	5.4043	9.1837	15.4578	8.421	31.7646	42.2848	51.8735	54.314	21.8123	5.2607	4.4831	3.241	3.255	6.929	5.5169	8.2376	26.173	6.4734	2.5505	2.315	3.0232	2.386	3.6859	6.7677	9.3979	17.7483	6.686	17.1976		0.828569	13.6059
17.3868	10.6199	27.7648	7.8346	6.4202	11.4067	23.0803	8.9344	25.2943	43.8884	60.6405	43.596	24.207	5.7567	5.286	3.712	3.757	5.773	6.6694	8.5641	25.2539	5.6096	3.7629	2.397	2.4975	2.875	3.2191	8.4034	11.2556	18.6267	6.215	19.12		0.834283	14.2723
17.5059	13.515	29.852	10.6075	5.7602	17.129	33.1849	10.1106	19.7186	38.2376	61.2145	41.452	25.7299	6.323	5.0475	3.303	4.024	6.946	6.6669	8.3386	26.1493	4.6933	3.8437	2.82	2.3091	3.62	3.3338	8.782	13.5768	18.5969	5.881	20.4036		0.839998	14.8765
17.625	18.3091	29.117	11.0711	8.044	25.9561	40.4973	14.313	16.3578	34.7752	55.4385	37.583	25.826	5.6626	3.7773	4.145	4.592	7.972	6.3994	7.8323	27.3744	4.8296	3.3097	2.255	2.7806	3.181	3.9453	10.7292	15.967	18.5136	6.146	22.1671		0.845713	15.4473
17.7441	21.4341	31.6994	12.0523	6.7517	40.1667	39.8849	18.6117	17.1103	33.4039	47.6541	30.44	32.7377	6.8438	4.7568	4.823	4.083	9.053	7.0305	9.1395	28.9952	6.3121	3.5668	1.901	3.2065	3.844	3.6227	12.6942	18.354	19.1024	6.865	22.1717		0.851428	16.3972
17.8632	26.8281	32.1265	15.1448	9.5709	49.9025	41.7473	23.3936	13.7518	26.4275	41.5257	31.328	34.3971	8.8229	5.4618	5.36	4.337	8.899	8.0744	9.6252	25.6003	4.3575	2.7311	2.359	2.2243	3.963	3.4097	14.298	21.0313	19.3828	7.577	25.7325		0.857143	17.0771
17.9823	29.2228	34.4697	15.2986	10.4064	59.9023	42.7864	29.0303	10.6815	23.1601	34.5885	26.719	37.0559	10.2614	5.1182	5.671	5.031	10.323	7.6405	9.9299	25.7551	5.3954	3.1512	2.622	2.262	3.539	3.0022	19.0086	27.5871	22.4922	9.024	25.0582		0.862858	17.9417
18.1014	30.1377	35.966	20.4067	11.9915	62.7856	40.9356	34.2746	7.9756	17.7205	24.9728	20.671	34.4948	13.2019	5.8831	6.803	6.353	12.916	8.7945	8.1518	25.0307	5.2937	3.1282	2.779	2.3751	2.777	4.5901	24.9363	38.5438	18.9928	10.38	27.0945		0.868573	18.3986
18.2204	33.5129	40.908	22.7279	14.6858	66.5368	31.6147	43.3059	8.3784	16.8564	21.1694	16.812	39.8746	17.0854	5.2352	6.662	7.281	13.658	11.3125	8.8311	24.1018	5.3626	2.3811	3.128	2.4457	4.155	4.0757	31.9412	52.5609	23.08	14.973	23.4532		0.874283	19.9389
18.3395	32.4712	40.7765	26.3658	18.5647	54.805	20.1176	38.8256	6.5335	15.418	16.9716	16.933	39.897	19.0583	5.0993	8.524	8.915	15.219	12.8286	8.1464	23.3692	5.6885	3.3417	2.899	2.7115	4.103	4.8838	36.2994	49.6693	21.8182	16.854	23.4058		0.879998	19.3714
18.4586	30.3796	46.9039	28.9573	26.994	44.3178	10.8064	25.7107	5.266	12.7459	16.4993	13.022	38.8005	18.5881	7.4015	9.282	9.965	15.833	15.9659	9.5207	21.4972	3.8554	2.8522	2.663	3.6018	3.793	5.0709	41.5715	51.3024	24.2638	20.826	22.5531		0.885712	19.0584
18.5777	29.1685	47.5104	35.2508	35.1886	30.987	7.3193	18.982	3.901	10.0547	14.8767	13.055	32.4763	23.7964	6.3264	11.432	9.769	15.68	15.7645	9.9837	20.9138	4.2882	2.5509	3.092	2.5695	4.41	4.9547	43.407	50.0368	25.9997	23.379	25.4026		0.891427	18.7912
18.6968	29.904	48.8523	37.5355	50.6891	24.0356	6.776	11.214	3.6158	8.1329	10.8293	12.134	32.3289	22.2044	7.4735	13.009	9.917	14.453	20.5114	9.9849	25.2265	5.4829	3.4362	2.275	3.3384	5.064	5.5619	34.4632	47.138	26.7361	27.089	22.9807		0.897142	18.7869
18.8159	38.9065	47.8528	39.5197	57.4067	16.7112	5.0125	9.554	2.5469	9.0001	10.0716	9.841	30.1037	23.896	9.4035	16.125	12.88	13.343	20.083	11.6248	23.8256	5.4659	2.8318	2.812	3.5399	5.092	5.32	23.1139	37.848	29.0827	27.31	20.458		0.902857	18.4059
18.935	43.3383	43.2242	38.0163	56.2429	10.5653	3.7131	6.6808	2.743	6.134	8.2442	9.073	26.7654	24.8644	12.1583	17.388	12.54	16.456	17.8705	13.9521	23.0495	5.1685	3.4705	2.81	3.8277	4.421	7.7715	10.2811	25.8474	31.3724	31.517	19.4082		0.908572	17.3843
19.0541	55.0925	48.8367	35.4704	48.454	5.9761	3.2577	7.3577	2.5565	5.6228	7.2164	7.783	20.4181	22.7977	11.0678	20.922	14.939	18.127	19.186	15.7331	21.9697	5.7492	3.5775	3.215	4.3735	5.089	9.3836	4.549	13.8774	35.1542	37.468	19.6662		0.914287	17.2544
19.1731	62.0864	45.6501	26.2275	39.1201	5.1607	2.5528	4.4778	2.3727	4.7189	6.5101	5.472	17.2055	19.024	12.0823	21.94	13.233	19.461	20.4499	15.4675	23.011	4.3465	3.2119	3.458	4.1025	5.237	11.8589	3.3929	7.2084	37.8549	36.623	15.1373		0.919997	16.0856
19.2922	67.9334	39.6177	16.8129	26.4878	3.3298	2.0639	4.5276	1.7766	3.5696	4.8876	4.68	16.5221	18.3346	13.2693	23.533	13.331	19.195	19.1542	16.5936	19.878	5.5606	3.9633	3.417	4.3744	5.479	14.3639	2.53	5.4377	46.4568	42.94	14.0901		0.925712	15.6165
19.4113	75.4132	35.2839	14.8894	22.0713	3.5046	2.9946	3.2451	2.1847	2.7455	4.9026	4.476	13.2986	13.5685	16.6918	26.919	12.087	19.45	21.2027	17.8527	23.3042	4.9142	3.1991	3.926	3.8669	5.646	19.5122	2.3022	3.9318	48.493	44.881	12.3775		0.931426	15.7786
19.5304	77.5351	28.2689	12.1366	12.5838	2.5348	1.6471	2.7747	1.253	2.7536	3.9062	2.505	11.6857	11.9595	20.8094	26.882	11.273	24.165	21.3525	17.7664	24.2227	6.6449	3.5684	3.785	3.8082	6.952	32.3119	1.5616	2.8823	52.3293	47.634	13.0077		0.937141	15.8871
19.6495	73.528	25.7402	8.4389	8.7213	1.9502	1.7597	2.0364	1.0782	3.0249	3.2897	3.164	9.2911	9.2715	25.0995	28.644	11.016	25.973	23.6777	19.8379	24.9646	8.1885	4.1301	3.323	3.0887	8.025	43.3536	1.5712	2.5624	55.2614	51.461	10.8607		0.942856	16.2043
19.7686	56.8341	21.6231	8.1747	5.1955	1.9308	1.2862	3.0281	0.8573	2.1093	2.8428	3.5	8.2896	8.7213	31.6628	27.716	8.841	25.193	24.2683	20.0507	27.0921	9.2891	3.8268	4.466	3.6139	9.1	42.2078	1.3223	1.7111	49.6147	56.855	11.0763		0.948571	15.5581
19.8877	40.4765	14.3925	5.7915	4.2549	2.0176	0.9584	1.8072	1.1508	2.1787	3.5747	2.688	5.6107	8.2727	28.9727	26.1	9.798	21.981	23.2336	19.6546	29.9358	9.268	4.8621	3.871	3.7189	11.755	29.5432	0.6617	1.7043	44.358	58.808	11.0537		0.954286	13.9501
20.0068	23.9261	14.7169	4.0697	3.955	1.7924	1.2239	1.1771	0.7457	2.1711	2.8746	2.571	4.7294	5.9324	28.8292	23.599	12.786	21.027	21.1084	19.026	30.2925	12.3444	4.9372	4.233	3.8189	11.896	18.6409	0.4988	0.9226	28.9527	66.059	12.9523		0.960001	12.639
20.1259	17.6956	12.6237	3.3597	2.5614	1.2636	0.8605	1.7253	0.8181	2.1978	2.7524	1.817	3.6874	6.3842	24.7354	21.862	13.833	16.159	23.1046	21.2272	31.9252	15.4337	5.538	3.467	5.3309	17.059	7.5522	1.0174	1.4496	19.8948	69.558	14.8112		0.965716	11.9905
20.2449	11.0016	11.7855	2.6838	1.7822	0.8376	0.6307	0.78	0.5203	1.5813	2.8526	2.08	3.5296	6.6997	21.1475	17.743	10.27	13.586	22.7142	21.2383	34.3116	22.6941	4.7504	3.815	5.3344	20.25	4.4987	0.7101	0.8286	12.5254	68.801	13.5649		0.971426	11.1467
20.364	8.9032	8.6984	2.3825	2.3982	1.4452	0.1993	1.1633	1.194	1.2806	2.0138	1.636	3.5892	4.603	16.7495	13.514	11.091	9.443	22.9636	23.5008	40.0005	28.0468	5.3227	4.987	7.8635	27.225	3.1302	0.4007	0.6258	7.6231	64.956	16.5422		0.977141	11.0804
20.4831	7.1216	6.9757	2.4568	1.6718	0.809	0.6875	1.3135	1.0319	1.3454	1.7816	2.202	2.4898	4.4898	12.6648	11.592	9.62	8.055	26.1528	24.6554	48.8059	36.0954	7.1882	4.808	7.637	33.652	2.3346	0.2385	0.7886	5.1469	53.337	19.4393		0.982855	11.1803
20.6022	6.8912	7.356	1.2093	2.0217	0.7393	0.7834	1.0251	0.6325	1.2675	1.4587	1.301	2.9391	3.7803	9.2723	8.505	7.016	7.852	20.9133	25.7737	49.6158	44.131	9.0555	5.53	9.1356	28.053	1.8774	0.3542	0.2064	3.4258	44.299	24.5444		0.98857	10.6763
20.7213	6.1939	6.3661	1.6526	1.7414	1.1381	0.4496	0.5361	0.728	1.0109	2.2335	1.854	1.8861	3.98	8.1017	6.505	6.184	6.951	20.0278	27.2316	48.2436	54.472	9.7388	7.379	11.1835	18.988	1.2683	0.5404	0.6041	2.6926	30.032	22.6702		0.994285	10.0834
20.8404	4.4876	5.0273	1.3966	1.774	0.7962	0.4079	0.5467	0.601	1.2518	1.8165	0.998	2.2569	2.6467	6.0532	5.105	5.216	6.545	14.9268	35.4785	54.0424	67.8327	14.4538	8.384	16.0409	8.615	1.7934	0.6502	0.6642	2.4824	23.505	24.8554		1	10.3436

## Sheet: Image12
X0	Y0	Y1	Y2	Y3	Y4	Y5	Y6	Y7	Y8	Y9	Y10	Y11	Y12	Y13	Y14	Y15	Y16	Y17	Y18	Y19	Y20	Y21	Y22	Y23	Y24	Y25	Y26	Y27	Y28	Y29	Y30	Y31	Y32	Y33	Y34		Ap-basal	Avg int
0	10.315	12.327	15.787	17.581	25.512	35.389	38.382	39.416	27.243	42.062	41.233	35.955	55.485	60.004	19.653	24.309	31.109	25.473	56.6073	54.4964	29.6703	37.7726	22.969	29.376	15.166	17.542	34.868	62.365	68.2816	52.4441	57.9375	43.6186	27.195	18.635	24.0532		0	34.5781
0.1191	11.397	20.971	20.632	21.386	30.102	38.929	42.903	42.563	35.926	60.118	56.227	48.557	53.794	81.56	20.728	24.177	30.905	28.862	59.2395	58.6087	33.0396	44.8472	27.107	38.768	16.995	17.123	37.938	70.328	67.8094	54.5205	64.8509	41.6928	34.874	20.082	25.543		0.00425574	39.5172
0.2382	19.614	29.881	29.483	24.258	35.302	45.635	46.597	41.344	45.838	79.758	74.254	55.656	62.021	99.825	28.821	28.67	35.947	35.322	64.441	62.065	34.0231	51.5748	33.387	49.957	18.487	23.732	39.347	73.426	70.7125	57.3328	61.8372	47.4824	44.301	28.235	33.566		0.00851149	46.0609
0.3573	21.829	36.822	42.849	33.09	36.764	45.079	52.642	42.615	55.75	92.026	86.755	68.669	60.882	122.059	36.53	32.791	38.872	41.531	68.1749	70.6224	39.576	59.4583	43.618	64.513	21.808	26.313	45.92	71.641	73.1693	59.7809	63.765	51.8174	52.934	33.741	39.0344		0.0127672	52.384
0.4764	33.145	52.684	72.516	39.847	41.34	56.771	58.975	44.727	65.215	112.387	94.476	84.087	68.38	131.647	54.828	38.985	48.545	51.755	71.806	66.8762	36.6134	63.9857	52.911	81.754	28.78	33.172	47.428	75.788	76.9418	65.6109	60.5054	56.027	64.657	43.688	44.8503		0.017023	60.6201
0.5954	41.62	67.99	93.525	54.505	46.64	65.684	60.07	48.44	80.169	122.465	108.039	94.608	77.375	153.131	80.698	50.138	57.812	60.193	74.3777	69.2121	40.6651	68.9213	60.792	93.426	40.406	48.113	53.637	78.059	70.8809	67.984	61.1561	66.0941	75.204	53.851	54.6963		0.0212752	69.7308
0.7145	54.657	85.449	121.23	64.826	51.014	70.67	68.363	52.901	90.301	132.6	117.882	100.13	85.045	157.192	99.452	70.264	71.317	78.064	74.1862	70.9196	39.699	77.5259	76.113	104.104	52.403	64.21	61.026	81.88	68.5504	63.4073	60.0409	70.0222	81.762	68.746	59.6157		0.0255309	78.4448
0.8336	70.602	109.418	146.436	82.943	61.516	77.305	70.746	60.375	107.585	148.28	115.623	111.492	95.681	160.754	125.769	91.747	85.204	98.283	71.8035	72.3529	40.8398	81.3546	82.86	113.11	72.679	76.265	71.606	84.426	77.0921	61.694	58.6585	76.3551	91.145	79.333	69.6201		0.0297866	88.5987
0.9527	86.24	119.387	154.935	95.946	76.254	85.104	72.852	75.9	121.572	155.245	115.005	102.418	98.218	156.106	138.854	117.922	95.291	107.509	81.2834	80.2657	42.2631	91.9289	92.509	116.234	84.508	92.741	73.169	80.748	75.6973	64.0982	57.9567	80.3924	97.262	92.32	73.3958		0.0340424	95.758
1.0718	96.638	131.151	163.639	110.865	90.154	85.972	81.496	86.46	124.098	146.524	116.271	105.475	97.731	144.078	154.327	134.359	112.634	120.936	75.1579	78.5408	47.6467	93.3282	94.78	102.128	101.339	103.176	85.361	81.693	75.1914	61.9229	56.2298	81.5773	104.073	99.935	77.2556		0.0382981	100.633
1.1909	103.979	132.713	156.02	114.424	106.192	96.281	88.433	98.009	132.333	146.849	115.028	99.169	104.14	130.403	164.717	144.061	122.569	138.789	82.3185	78.7414	48.9615	93.3213	103.258	93.774	121.159	111.776	90.549	90.213	73.6075	57.4421	52.134	76.2357	100.278	104.356	84.5914		0.0425539	104.481
1.31	111.503	130.423	137.298	115.834	126.029	110.129	91.446	112.167	128.386	140.263	112.27	94.871	110.886	117.799	162.433	155.885	127.206	142.383	86.902	82.1844	49.5836	96.3808	94.337	83.316	130.59	119.07	95.391	88.57	74.2502	62.0401	54.8836	73.4108	101.193	105.466	89.1525		0.0468096	106.112
1.4291	115.871	119.664	127.827	121.593	143.587	122.795	98.117	125.783	128.445	133.202	103.636	98.909	122.153	116.565	159.025	160.337	130.685	146.161	92.7808	80.3819	56.345	91.0512	92.024	75.436	136.151	117.78	101.73	91.832	77.936	58.5825	55.6789	68.4329	97.453	102.088	85.6477		0.0510654	107.305
1.5481	109.489	110.035	105.767	110.172	150.115	122.034	110.268	132.638	129.503	126.84	100.815	92.92	116.489	97.519	133.511	161.963	133.328	152.963	94.5106	81.2447	57.942	90.1751	82.551	65.691	136.968	100.121	105.657	106.929	84.6365	57.2933	58.5259	65.7513	90.011	87.916	86.508		0.0553175	104.251
1.6672	107.493	92.172	89.224	101.634	161.313	115.492	111.62	139.056	121.834	108.589	93.785	86.462	125.408	82.257	119.498	154.475	132.187	153.896	94.646	83.2691	64.5175	88.4132	77.631	55.315	120.857	97.762	105.683	115.97	80.5885	55.9579	50.3355	62.6406	78.798	82.196	72.1379		0.0595733	99.5175
1.7863	101.358	76.24	82.09	94.744	172.833	109.078	113.568	135.74	121.351	109.073	89.283	87.142	125.995	69.555	100.214	137.467	116.906	134.238	91.3621	81.2224	61.3797	89.5101	69.164	44.699	106.05	92.99	98.328	114.116	86.0215	56.4095	54.3669	61.5534	70.494	73.204	59.6261		0.063829	93.9249
1.9054	98.691	65.164	70.216	83.428	168.256	108.702	108.804	139.381	118.033	95.291	83.695	93.163	125.337	56.966	82.817	115.709	107.152	122.757	94.6629	80.4561	62.3787	90.1374	62.502	39.665	86.091	87.824	84.023	116.52	88.7843	56.1468	51.3362	50.5604	62.578	65.786	54.5109		0.0680848	87.9293
2.0245	94.089	61.203	61.217	75.182	156.885	93.729	100.068	137.566	110.717	82.909	76.005	85.687	128.805	48.318	74.534	95.567	94.157	103.107	90.604	78.023	61.4733	89.5951	53.164	32.015	73.594	74.029	69.791	111.244	85.5781	59.9202	48.9941	50.0956	46.944	53.73	43.3305		0.0723405	80.0534
2.1436	87.158	47.149	49.224	64.275	147.099	79.983	94	128.795	100.035	77.854	74.492	89.125	127.526	44.208	61.315	89.484	78.658	91.415	87.5747	74.5948	66.3963	76.9985	44.689	26.052	56.087	62.153	54.068	107.59	90.3859	64.2736	50.2759	42.6017	40.315	45.802	37.106		0.0765963	73.1074
2.2627	77.926	43.463	41.547	50.442	126.982	64.284	82.728	118.117	98.236	71.478	71.783	87.871	126.853	40.777	56.549	76.095	71.804	80.122	80.1425	72.0985	67.2723	70.974	40.394	25.862	51.592	55.755	42.681	94.448	92.3321	64.6985	57.262	37.6906	32.335	38.468	26.7855		0.080852	66.7957
2.3818	66.43	38.173	38.73	48.273	111.795	49.78	76.002	107.022	84.556	67.501	63.831	86.093	116.013	31.608	49.538	69.654	60.88	67.214	75.5539	67.0498	70.3412	63.6088	36.653	22.585	42.057	47.656	26.41	85.828	88.4125	61.2001	61.972	29.3386	28.103	31.065	21.3411		0.0851078	59.7791
2.5008	56.057	31.469	31.292	43.006	83.302	41.559	60.825	96.318	72.918	59.987	64.547	84.306	106.934	28.29	44.029	60.388	56.103	54.157	70.7819	68.8526	68.1981	54.2009	33.81	17.964	35.964	38.705	18.335	66.642	87.4754	67.669	66.9646	18.824	22.477	28.189	15.2786		0.0893599	53.0234
2.6199	49.891	29.76	32.193	40.132	67.181	25.759	51.55	81.656	64.368	59.307	59.247	77.895	92.003	25.305	41.151	58.298	46.334	47.744	55.8319	65.7701	71.2959	40.5912	29.353	19.777	31.194	28.494	12.641	50.633	83.8472	69.9367	67.5223	15.0428	16.922	22.84	13.1635		0.0936157	46.9894
2.739	46.807	28.302	25.48	34.847	52.488	19.263	41.119	70.353	57.268	56.834	53.533	72.54	78.102	21.656	31.707	48.663	40.355	37.27	41.8026	65.6464	77.5515	31.8506	27.306	15.667	25.876	23.655	9.438	33.178	72.1643	76.8575	73.2033	11.0716	13.559	16.061	11.5123		0.0978714	41.2282
2.8581	38.265	21.574	24.9	34.263	36.48	11.534	30.874	59.927	53.98	50.774	49.241	73.046	66.691	20.608	23.944	44.73	33.218	31.212	34.5889	68.6361	85.2573	23.4529	23.447	14.323	21.232	22.289	7.035	22.672	63.7067	73.494	72.7574	9.6249	9.967	11.937	9.744		0.102127	36.555
2.9772	35.298	21.828	22.179	29.671	28.552	10.722	25.665	49.461	47.084	47.494	49.555	67.703	65.98	16.384	23.518	38.233	32.093	24.12	21.9997	65.5512	82.0831	16.1295	22.018	12.264	16.822	19.26	7.042	16.241	50.6592	75.6708	77.3639	7.7469	6.563	10.842	7.5817		0.106383	32.8965
3.0963	34.316	18.347	19.485	26.238	22.487	7.61	17.551	42.295	42.081	44.295	44.093	63.117	52.825	15.271	23.553	35.52	26.15	18.446	14.82	65.1989	83.8121	14.2527	19.901	12.032	15.707	15.78	5.113	13.148	36.7306	73.0515	77.3789	6.7581	7.294	8.67	6.599		0.110639	29.4265
3.2154	31.7	16.843	17.121	21.287	20.985	5.244	16.456	31.226	43.929	40.949	40.58	60.124	49.526	13.742	20.242	27.849	24.753	18.726	11.2682	63.3711	87.0847	9.3418	19.405	9.226	15.702	13.268	5.815	12.103	25.7364	68.5969	76.8355	5.7915	5.296	6.647	5.6765		0.114894	26.927
3.3345	26.511	14.789	15.89	21.739	15.546	5.241	12.606	27.62	35.007	37.295	37.106	57.93	39.213	12.762	17.279	24.589	18.801	14.91	8.8079	55.9096	84.3117	8.2763	18.753	11.717	11.66	12.261	5.478	10.618	17.7842	64.9016	69.0655	5.5669	5.528	6.515	5.125		0.11915	23.9175
3.4535	23.66	11.289	15.221	18.143	14.757	4.901	11.743	21.55	32.544	33.752	38.825	53.691	38.517	11.662	15.575	20.755	16.784	12.081	8.9323	50.4064	69.4024	7.4429	15.873	9.444	13.201	12.426	4.708	9.858	12.3331	58.8503	64.9743	4.7123	4.583	4.491	4.6977		0.123402	21.4796
3.5726	25.085	12.246	16.098	13.362	12.655	5.138	13.818	18.024	30.661	34.165	37.722	51.537	34.742	11.396	13.842	17.011	14.592	10.529	6.8692	43.995	56.9546	5.5999	15.063	8.617	7.888	10.425	3.992	9.777	8.3737	46.1877	69.0279	5.1574	6.121	5.02	3.2492		0.127658	19.5697
3.6917	20.747	11.377	12.43	12.496	12.493	5.645	11.417	16.3	27.599	27.702	35.251	44.1	30.204	8.686	13.744	13.433	12.26	10.534	6.8681	32.4165	48.2768	4.6423	14.118	6.51	8.743	8.181	3.288	7.393	7.2863	39.3334	60.6022	4.8696	4.605	5.562	4.2238		0.131914	16.9525
3.8108	19.975	10.876	14.433	9.549	12.064	5.754	10.766	14.834	24.371	28.913	28.9	41.444	25.324	9.224	13.062	11.715	9.459	7.286	6.7149	22.4904	30.9576	4.3371	11.513	7.842	6.904	7.086	3.476	8.354	5.9126	29.2364	54.0542	4.5828	4.22	3.591	4.3856		0.13617	14.6745
3.9299	17.483	10.274	11.156	9.145	11.22	5.97	11.296	11.5	21.65	25.729	29.485	34.784	21.302	8.258	12.417	10.88	8.623	7.726	6.9912	15.8678	23.9227	3.9266	12.09	7.009	6.886	5.749	2.981	8.955	6.7183	20.0098	48.6906	3.6562	3.821	3.342	3.542		0.140425	12.9445
4.049	15.914	7.709	10.988	6.39	10.049	5.574	10.477	12.335	17.716	24.924	26.774	35.746	16.675	6.119	9.829	8.278	8.006	6.109	6.219	8.54	16.1838	5.1214	10.16	5.123	8.702	5.099	3.404	8.522	4.763	14.6559	35.8849	5.7016	3.023	3.597	3.1537		0.144681	11.0704
4.1681	16.602	7.814	11.586	6.29	10.68	6.031	9.479	11.505	17.057	20.868	23.478	33.772	18.153	5.35	10.407	7.932	5.247	6.141	7.3529	7.7952	13.2161	3.8984	9.186	5.382	5.813	4.552	2.462	7.945	4.9954	9.553	27.3931	5.7477	3.551	3.21	3.4342		0.148937	10.1108
4.2872	14.303	8.817	10.132	6.02	9.85	6.398	8.322	11.34	16.557	19.265	22.297	31.481	16.743	5.742	7.641	7.701	5.138	5.331	6.4131	6.5851	14.2566	4.665	8.89	4.368	5.912	5.056	3.411	7.618	5.4079	7.0934	18.0717	5.3349	3.657	2.246	1.8335		0.153193	9.25421
4.4063	12.246	7.029	10.001	4.849	10.148	6.931	8.191	12.355	10.659	15.536	19.865	25.97	13.82	4.481	7.157	6.012	3.749	5.891	5.9788	6.458	12.2564	3.8336	7.124	4.645	5.956	4.295	2.818	7.139	4.6351	6.5768	13.2029	4.5705	3.706	2.799	3.0538		0.157448	8.11251
4.5253	13.121	6.946	8.701	5.503	10.668	9.694	7.653	9.824	11.772	14.429	20.153	23.03	10.776	3.718	5.59	5.596	3.641	5.029	5.9267	4.6655	9.1284	4.6008	6.787	4.229	3.968	3.815	2.719	7.123	4.4107	6.036	8.568	5.3513	2.501	2.063	2.1087		0.1617	7.42415
4.6444	12.868	6.472	7.08	5.628	9.441	10.459	6.889	10.018	9.437	12.492	17.935	25.356	11.716	3.036	5.685	5.926	3.284	4.724	5.7761	4.0653	10.7553	4.4177	5.76	3.808	4.14	2.673	3.469	7.666	4.5281	6.2334	7.2413	4.7076	3.61	2.251	1.8454		0.165956	7.18266
4.7635	12.666	7.161	9.876	4.351	9.63	10.611	6.922	11.122	8.824	10.894	16.668	21.078	9.768	3.517	5.038	4.038	2.398	5.772	5.9943	4.9462	10.3061	2.9917	4.648	4.525	3.148	2.401	3.403	6.514	3.5208	5.1503	6.6406	4.6362	2.838	1.776	2.3159		0.170212	6.7454
4.8826	12.368	7.352	7.873	5.042	11.15	8.719	10.044	9.656	6.913	10.222	15.743	19.149	9	2.642	4.022	3.281	2.365	4.943	4.8884	4.2277	8.806	3.225	3.975	2.612	3.317	3.112	3.838	6.606	4.5256	5.3164	7.2168	5.1681	2.188	2.395	2.2808		0.174468	6.40519
5.0017	10.188	5.878	7.944	5.251	7.278	6.994	10.52	8.883	5.544	10.48	16.376	17.479	8.399	3.93	3.534	3.754	3.476	5.092	5.0619	3.2936	9.4896	3.9267	3.738	3.583	3.595	1.7	2.975	6.806	3.9692	5.0139	6.1705	5.513	3.32	1.972	2.4302		0.178723	6.10165
5.1208	9.222	7.046	6.195	4.353	7.033	5.731	7.186	8.644	5.493	8.002	13.873	17.084	8.03	2.236	2.978	2.878	3.046	6.164	4.2718	3.1902	9.8922	3.59	4.185	3.169	3.496	2.688	3.012	7.143	4.4228	7.3195	6.5948	4.2178	2.391	2.315	2.5595		0.182979	5.70433
5.2399	10.67	5.955	5.771	5.318	7.413	5.204	10.605	8.931	4.329	6.503	12.446	15.026	7.768	2.893	2.449	2.281	2.175	4.745	4.3647	3.6391	9.8971	3.1619	3.225	2.55	3.035	3.252	4.274	6.182	3.6519	6.9812	5.973	4.4394	2.351	2.457	2.3347		0.187235	5.49289
5.359	8.427	6.385	5.645	4.001	5.92	4.994	8.061	8.554	2.889	6.085	12.399	14.263	6.627	2.164	1.936	1.768	2.538	5.439	4.422	3.1969	8.9482	2.9231	2.261	2.595	2.897	2.288	3.522	6.7	3.9567	6.9525	6.4116	3.4243	2.95	2.086	2.3199		0.191491	5.02712
5.478	9.888	5.23	5.171	4.868	7.088	4.279	7.794	8.127	3.83	6.874	10.384	13.006	6.915	2.024	2.467	1.669	2.614	5.189	4.059	3.7319	7.6528	2.2762	2.982	3.303	2.788	1.96	2.851	6.913	3.5004	6.3718	7.0717	5.2164	1.807	2.401	1.6157		0.195743	4.96908
5.5971	9.379	5.905	4.051	4.278	6.145	3.943	7.598	8.105	2.367	7.069	8.557	9.978	6.626	3.188	2.361	2.729	1.916	4.277	5.1367	3.5094	8.3551	3.4418	2.11	2.254	2.571	1.779	2.739	6.605	3.6328	6.0195	6.7128	3.9693	2.024	2.097	1.7235		0.199999	4.66148
5.7162	9.171	4.651	4.747	4.096	8.366	4.088	7.413	9.626	2.391	4.576	8.2	11.451	8.682	2.176	1.949	1.496	2.274	4.434	5.2769	3.4391	8.1989	2.3246	2.806	1.827	1.864	1.989	3.366	6.994	3.3133	5.28	7.7291	4.8896	2.755	1.866	1.599		0.204254	4.72299
5.8353	9.238	4.12	4.282	4.457	6.746	3.359	6.262	8.203	3.468	4.844	7.095	8.915	8.129	2.243	1.767	2.07	2.753	4.406	3.7709	3.5888	8.3027	2.6009	1.702	2.05	2.05	1.802	3.678	5.555	3.8088	5.0674	7.8167	5.1187	2.414	2.038	1.6789		0.20851	4.43999
5.9544	9.028	4.094	3.324	5.002	6.955	4.421	6.519	8.21	2.733	3.974	7.193	9.704	9.074	1.868	1.903	2.358	2.289	4.117	4.9679	3.5207	9.5855	2.3425	1.701	1.546	2.142	1.802	3.627	6.948	5.1421	5.3688	5.5603	5.2688	2.512	1.781	1.9764		0.212766	4.53023
6.0735	9.969	3.138	2.864	5.675	7.44	3.667	6.268	7.168	2.937	4.25	6.436	7.033	9.085	1.954	1.814	2.02	2.852	4.031	4.1683	3.6073	9.6065	2.1385	1.835	1.746	1.779	2.198	3.569	7.182	3.2984	4.3664	6.7672	4.6354	1.989	1.621	1.9341		0.217022	4.31549
6.1926	9.627	4.282	2.99	4.911	7.122	3.012	5.435	7.434	3.2	3.194	4.519	4.868	7.616	2.592	1.894	1.792	2.67	4.346	4.21	3.866	9.0656	2.3634	2.216	1.739	1.88	2.446	3.48	7.012	4.3522	4.2585	6.4735	5.4198	3.063	2.357	2.4689		0.221277	4.23357
6.3117	9.686	3.758	3.735	4.747	7.375	3.064	5.383	6.706	3.057	2.648	3.875	5.946	9.079	2.558	2.431	2.233	2.657	4.945	4.7447	3.1172	9.0388	2.0905	1.639	1.443	1.433	1.94	3.798	5.952	3.9004	4.6005	5.6989	4.7268	2.134	1.612	1.7687		0.225533	4.10059
6.4307	9.416	3.935	2.589	5.091	6.535	3.077	6.362	6.914	2.863	1.944	3.485	5.017	9.757	1.532	1.439	2.339	2.672	4.549	4.9432	3.3106	9.7576	2.6603	2.189	1.699	2.096	1.928	3.409	6.122	3.3352	4.1751	6.6368	5.3347	2.013	1.963	1.5451		0.229785	4.07525
6.5498	8.824	4.139	2.904	4.639	6.925	3.277	6.312	6.374	2.028	2.209	2.179	4.641	8.701	1.82	1.453	2.212	2.195	3.485	4.7536	2.2042	8.8657	2.0375	1.758	1.741	1.601	2.344	3.172	6.407	4.4049	4.4308	6.9605	6.669	2.023	1.486	1.7944		0.234041	3.91342
6.6689	8.346	3.775	3.146	6.252	6.608	3.013	5.961	5.75	2.761	1.718	1.981	4.213	9.064	1.918	1.715	1.484	3.122	2.959	5.5292	3.7896	9.8542	2.2508	1.632	1.468	2.22	2.31	3.959	7.306	4.0802	4.7706	7.2509	7.6737	1.79	1.647	2.1649		0.238297	4.09949
6.788	8.119	3.724	2.849	5.141	6.124	3.157	5.602	7.464	2.253	2.688	1.939	3.336	8.718	1.741	1.254	2.326	3.292	4.376	5.9273	3.0864	10.8072	2.5816	1.952	1.709	1.478	1.263	4.133	7.157	2.9377	4.8047	7.0753	7.1163	2.22	1.279	1.9102		0.242552	4.04402
6.9071	5.346	2.878	2.746	4.218	6.424	2.825	8.329	6.389	2.108	1.656	1.538	2.594	9.984	1.703	2.045	1.712	2.526	3.703	4.7825	2.2585	9.2	2.0013	1.608	1.106	1.628	1.445	3.608	8.119	2.664	3.7011	8.2475	6.5604	2.291	1.324	1.6615		0.246808	3.74085
7.0262	5.787	3.584	2.526	5.147	5.362	2.837	7.443	6.833	2.641	1.889	1.459	3.023	9.432	1.737	2.57	1.639	2.848	4.777	4.8492	3.2179	8.7756	2.364	1.581	2.137	1.9	1.745	4.427	7.217	3.351	4.0412	9.1525	6.077	1.988	1.789	1.7092		0.251064	3.93873
7.1453	4.736	2.716	1.992	5.843	5.864	3.647	8.507	7.724	2.829	1.87	1.513	2.724	9.993	1.566	1.936	2.347	2.651	4.414	5.9851	4.2051	9.9102	2.1596	1.153	2.189	1.92	2.128	4.393	8.355	3.4533	4.2716	7.1264	6.4572	1.801	1.775	1.5371		0.25532	4.04833
7.2644	3.276	2.91	3.338	7.969	6.036	3.294	8.23	7.301	2.602	2.084	1.518	3.044	10.877	1.559	1.729	2.519	2.36	4.602	5.9757	3.786	8.8097	2.5106	1.561	1.671	2.199	1.876	4.377	8.496	3.5743	5.0941	6.7116	7.209	1.943	1.426	1.2942		0.259575	4.10749
7.3834	3.672	3.188	3.087	5.692	6.077	2.376	7.446	6.783	2.737	2.787	1.455	2.749	8.096	1.764	1.746	1.804	2.375	5.083	5.1129	3.5941	8.1699	2.2858	1.987	1.572	1.577	1.276	4.49	7.682	4.0012	4.2708	9.3645	8.3043	1.735	2.07	1.545		0.263828	3.94156
7.5025	2.84	3.278	2.272	7.365	4.646	3.326	7.396	7.048	2.992	2.428	1.646	2.576	11.279	1.47	1.765	2.28	2.799	4.672	6.6512	3.8409	9.7991	1.9687	1.294	1.85	1.372	1.265	4.495	9.745	2.9582	4.1797	7.1869	7.451	2.039	1.681	1.7512		0.268083	4.04588
7.6216	2.797	2.163	2.662	7.227	6.493	3.526	7.296	5.806	2.823	1.943	1.362	2.698	12.376	2.175	2.041	1.905	3.23	5.312	7.2875	3.4592	10.6225	2.0683	1.373	1.547	1.544	1.448	4.866	9.257	4.6513	3.7832	8.2175	7.1175	1.826	1.819	1.7911		0.272339	4.18609
7.7407	2.716	1.889	2.724	8.159	7.04	2.72	5.195	6.981	2.95	1.733	1.467	3.224	12.307	1.424	1.335	1.242	2.559	5.805	6.3747	3.6873	9.5688	2.0119	1.283	1.994	1.617	1.85	4.972	8.391	3.2755	3.598	8.5942	7.7136	1.788	1.367	1.3817		0.276595	4.02679
7.8598	2.684	2.44	2.96	8.13	6.073	2.489	4.953	7.356	1.705	1.783	1.75	3.001	13.221	1.862	1.909	1.969	2.908	5.94	6.7283	4.3787	11.5557	1.8888	1.941	1.034	1.331	2.818	5.853	8.774	3.7957	2.5906	8.2542	7.5082	1.764	2.531	1.475		0.280851	4.21012
7.9789	2.32	2.36	2.806	7.847	5.901	2.395	7.977	6.194	2.031	2.095	1.375	2.269	12.541	1.545	1.677	1.472	3.119	5.406	7.0599	4.7181	11.0125	2.1985	1.69	1.22	2.354	2.62	5.973	10.311	3.7516	3.2809	8.9095	4.7529	2.083	1.891	1.7285		0.285106	4.1967
8.098	2.26	2.233	2.691	8.337	5.837	3.216	6.049	9.306	2.518	1.846	1.617	2.277	13.653	2.911	2.11	1.557	3.18	6.5	6.6302	4.5327	11.5437	2.4738	1.348	1.37	1.707	1.969	6.272	11.254	3.4851	3.8144	6.6046	6.4754	2.237	1.783	2.1201		0.289362	4.39194
8.2171	2.117	2.016	3.829	9.344	5.131	2.671	5.765	7.026	2.51	2.36	1.662	2.891	14.408	1.657	1.73	1.91	3.284	6.499	6.7562	5.2566	8.647	2.5122	1.419	1.51	1.592	2.335	4.763	9.76	3.6409	3.1404	6.6791	6.1956	2.342	2.137	2.3891		0.293618	4.22529
8.3362	2.129	2.339	2.6	9.287	6.04	2.944	6.306	7.173	2.315	2.563	1.776	2.601	16.145	2.179	1.697	1.662	3.232	7.086	6.3054	5.4327	8.7058	2.5107	1.425	2.18	2.248	2.408	6.284	10.535	3.6338	3.4339	8.0927	6.0953	3.385	1.755	1.7473		0.297874	4.46433
8.4552	3.375	2.076	3.511	9.622	5.498	2.832	6.389	8.129	3.873	2.064	1.776	2.825	19.749	2.04	1.299	1.976	3.114	7.313	3.8897	5.6023	8.6229	1.5978	1.79	1.707	1.452	2.037	5.804	10.821	4.9566	3.8036	7.8947	5.9949	2.1	2.027	1.9349		0.302126	4.55704
8.5743	2.995	1.98	3.815	9.251	5.665	2.949	7.076	8.024	2.428	1.724	1.456	2.182	22.11	1.278	1.303	1.446	2.478	8.195	4.09	6.2333	8.7318	1.9674	1.39	1.969	1.328	2.148	5.745	9.773	5.8265	3.5521	9.1504	6.0655	1.93	1.787	2.0467		0.306381	4.57396
8.6934	2.944	1.766	2.954	9.414	5.173	2.913	7.8	8.149	2.75	1.793	1.934	2.332	23.063	1.965	1.425	2.018	2.059	9.405	5.612	8.7223	7.8855	1.874	1.531	1.889	1.596	2.526	5.533	10.301	3.9535	3.198	8.2384	6.3428	2.449	1.992	1.2723		0.310637	4.70779
8.8125	2.219	1.907	3.109	13.884	6.369	2.398	8.169	6.139	2.069	1.61	1.866	2.475	24.172	1.274	1.526	1.655	2.868	8.341	5.9376	8.4559	8.5485	2.2102	1.678	1.531	1.639	1.985	6.032	12.154	5.1661	4.7019	7.3049	6.3829	1.66	2.147	1.4451		0.314893	4.88655
8.9316	2.982	2.239	3.141	12.786	4.386	3.646	8.393	7.926	1.763	2.31	1.506	2.099	27.299	1.709	2.281	1.23	2.17	9.453	7.8568	9.0053	9.3904	2.3052	1.241	1.394	1.118	1.87	7.188	12.031	7.6229	3.9938	9.1637	7.0295	2.259	1.831	1.6942		0.319149	5.26608
9.0507	2.36	1.653	2.901	11.178	6.031	2.669	10.272	5.732	2.14	2.084	1.541	2.058	26.196	1.477	1.335	1.51	2.559	8.287	6.5442	9.0973	8.8055	2.5395	1.74	2.121	2.263	2.479	7.335	12.466	5.1657	3.4405	11.544	6.2473	2.983	1.709	1.4573		0.323404	5.14058
9.1698	2.546	2.735	3.525	9.2	5.292	3.248	9.472	8.003	2.539	2.062	1.582	2.376	24.021	1.935	1.096	1.539	2.352	7.899	8.34	10.5105	8.6814	1.9633	1.446	1.227	1.063	2.102	6.979	11.008	6.1525	3.2806	9.2147	5.531	2.199	2.25	1.5819		0.32766	4.99863
9.2889	2.556	2.733	3.029	9.092	6.058	4.15	10.554	7.608	2.479	1.996	1.858	2.719	21.54	2.019	1.05	1.557	2.453	8.962	9.9053	11.3077	9.6236	1.9294	1.711	1.119	1.536	1.962	9.44	13.057	6.5251	3.6782	10.0729	5.8232	1.922	1.422	1.7225		0.331916	5.29057
9.4079	3.104	2.72	2.434	8.936	5.938	3.199	12.076	7.161	1.807	1.678	1.839	2.414	17.026	2.257	1.508	1.544	2.764	9.194	7.9856	12.7074	7.7839	1.6969	1.796	1.426	1.717	1.79	9.412	13.815	9.0946	3.7325	10.194	7.0842	2.096	1.794	1.2782		0.336168	5.22864
9.527	2.809	2.258	2.898	8.55	7.119	3.038	11.049	5.881	1.623	2.132	1.91	2.017	14.172	1.66	0.966	1.705	2.602	9.594	11.2241	13.9502	9.7461	1.8128	1.153	2.182	1.601	2.806	9.314	12.572	6.7826	4.2196	10.7644	6.1622	2.6	1.754	1.5012		0.340424	5.20366
9.6461	2.414	2.17	3.232	9.693	5.718	4.576	9.907	5.734	2.789	1.887	1.319	1.746	13.839	2.114	1.52	1.696	2.15	12.049	12.1738	17.1606	8.7752	2.1536	1.463	1.571	1.734	2.322	11.205	12.422	7.7595	5.937	10.3705	4.7115	2.239	1.355	1.6341		0.34468	5.41542
9.7652	2.941	2.951	2.638	9.406	5.306	3.658	9.329	5.947	1.928	1.694	2.036	2.215	14.026	1.528	1.448	1.462	2.359	11.012	11.9474	17.307	10.0853	1.7194	1.577	1.824	1.531	2.173	12.336	13.385	8.4299	4.0507	11.496	5.1596	2.574	1.47	1.4754		0.348935	5.44071
9.8843	2.786	2.018	3.213	11.948	5.955	4.236	12.011	6.701	1.941	1.64	2.151	2.327	13.148	2.069	0.878	2.164	1.949	9.423	9.8062	21.1464	8.6658	2.3611	2.08	1.325	1.453	2.1	10.501	14.47	8.5601	3.6776	12.8291	5.5431	1.856	1.487	1.7836		0.353191	5.6058
10.0034	2.191	2.262	3.152	12.174	4.356	3.653	12.658	6.091	2.254	1.445	2.002	1.87	14.331	2.038	1.293	1.914	2.488	10.185	10.0926	23.3187	6.5645	2.0849	1.241	1.385	1.952	2.81	12.357	15.515	9.8459	4.2356	12.0056	5.1536	2.034	1.886	1.9915		0.357447	5.738
10.1225	2.818	1.783	3.765	12.808	5.563	3.669	12.641	5.883	1.759	1.914	1.328	2.516	14.249	1.669	1.702	1.794	1.846	10.383	9.0966	25.4534	8.5635	3.1293	0.903	1.938	1.831	2.681	13.218	15.426	8.0803	4.4085	10.7042	4.9433	1.723	1.606	2.205		0.361703	5.82857
10.2416	2.504	2.76	3.401	14.339	6.567	3.123	14.095	5.081	1.991	2.07	1.573	2.242	13.304	1.728	1.511	1.315	2.745	10.528	9.2991	25.2016	8.0585	1.9184	1.094	1.772	1.628	2.399	11.484	13.325	6.5592	4.356	11.6517	4.1741	2.312	1.353	2.1206		0.365958	5.70238
10.3606	2.561	2.317	4.255	12.439	5.764	4.548	16.008	5.129	1.733	1.56	1.581	2.211	14.968	1.658	1.286	1.536	3.083	12.08	8.097	26.3318	6.9633	2.0177	1.281	1.021	2.034	2.651	11.281	14.321	8.8108	4.9301	9.0462	4.147	2.74	1.513	1.9503		0.370211	5.82438
10.4797	3.511	2.848	3.368	13.074	6.017	3.59	15.699	5.303	2.375	1.62	1.484	2.127	15.782	1.562	2.243	1.62	2.633	10.996	7.9851	28.9606	7.5996	2.2255	1.179	1.303	1.458	2.727	9.914	12.707	7.0156	5.2024	12.7997	3.6995	1.613	1.561	1.5613		0.374466	5.86752
10.5988	3.061	2.369	2.91	12.449	4.324	4.894	19.63	5.299	1.659	1.809	1.254	2.297	15.122	2.095	1.691	1.57	2.197	10.928	8.0709	28.68	6.8899	1.9869	1.935	2.331	1.927	2.747	10.151	11.068	7.3118	4.9933	12.7034	4.1405	3.096	1.723	2.1039		0.378722	5.92619
10.7179	2.362	3.209	3.476	11.789	5.509	5.604	15.67	5.485	2.024	1.907	1.762	1.734	19.489	1.562	1.335	1.926	2.473	10.097	8.4158	28.269	5.7584	2.2278	1.918	1.571	1.586	2.396	9.318	11.699	7.1877	4.0983	13.9593	3.2835	2.867	1.756	2		0.382978	5.87782
10.837	3.251	2.689	3.639	11.444	4.575	4.839	19.735	4.542	2.992	1.611	2.301	2.322	20.614	1.354	1.52	1.927	2.24	7.884	7.8598	29.0671	5.4507	1.6539	1.68	1.41	1.388	2.864	9.195	9.988	6.6474	4.6389	16.8893	4.0349	2.494	2.289	1.4677		0.387233	5.95705
10.9561	2.863	2.575	4.037	11.452	4.883	6.501	18.376	5.03	1.837	1.647	1.162	2.27	20.723	1.58	1.325	1.716	2.612	10.312	8.8403	30.4526	4.6441	1.6551	1.831	1.087	1.787	2.279	11.183	10.604	7.7026	4.399	16.4704	3.4757	2.199	1.538	1.5796		0.391489	6.0751
11.0752	2.8	2.976	4.327	9.653	4.955	6.752	16.119	5.751	2.926	1.72	1.567	1.884	18.599	1.607	1.642	1.49	1.839	9.29	8.8441	33.1302	5.3616	1.9743	1.232	1.661	1.698	2.749	13.376	8.932	8.9712	5.0063	19.3962	3.6663	2.041	1.68	1.5128		0.395745	6.20369
11.1943	2.964	3.072	4.132	10.42	6.919	6.262	15.76	6.921	2.448	1.394	1.207	2.604	17.021	1.9	1.698	1.928	2.21	8.586	9.6179	29.9977	5.317	1.477	1.069	1.224	1.237	2.427	13.711	9.852	8.3525	5.0552	19.2784	2.6995	2.439	1.516	2.008		0.400001	6.13498
11.3133	2.435	2.703	3.754	9.934	6.053	6.119	14.839	5.251	2.584	1.988	1.883	2.261	14.463	1.887	1.015	1.7	2.122	9.385	11.7667	26.9444	5.6632	1.4337	2.115	1.601	1.716	3.814	13.412	8.574	8.9468	5.9005	17.7319	3.2861	2.293	1.611	1.4518		0.404253	5.96106
11.4324	2.628	1.973	3.774	9.092	6.512	5.429	15.125	5.022	2.795	1.779	2.326	2.144	16.103	2.028	1.632	1.538	1.612	7.307	12.2841	28.463	4.7224	1.4354	1.014	1.455	2.601	3.257	12.47	10.478	10.3786	6.6345	15.941	3.5034	1.757	1.688	1.6404		0.408509	5.95834
11.5515	2.708	2.914	3.731	8.197	5.345	6.427	15.127	5.956	2.454	1.402	1.028	3.121	16.682	2.1	1.542	1.702	2.686	7.579	13.9005	21.9878	3.9124	1.6992	1.728	1.79	1.996	3.971	14.163	9.815	12.5108	6.2472	16.7701	4.146	2.746	1.737	1.8232		0.412764	6.04698
11.6706	3.027	2.968	4.852	8.866	7.293	5.974	14.135	3.832	2.062	2.092	1.314	2.339	13.685	1.675	2.262	1.493	2.112	9.42	15.4008	20.632	4.3574	1.7585	2.368	1.38	1.597	3.903	14.091	8.698	12.1877	6.2195	17.2808	3.2901	1.944	1.82	1.6917		0.41702	5.94344
11.7897	3.707	2.922	3.664	11.017	7.236	5.892	15.073	4.817	2.877	1.529	1.886	1.939	15.157	2.493	0.778	1.683	2.154	9.243	12.4086	18.5358	3.7416	1.59	1.471	1.277	2.464	4.16	11.599	10.584	13.3322	5.491	14.2451	2.8134	1.94	1.24	2.4662		0.421276	5.81217
11.9088	3.227	2.891	4.052	8.479	5.1	5.55	13.088	3.572	2.601	1.976	1.796	2.171	12.41	2.16	1.681	1.085	2.026	7.916	12.769	18.9152	3.8505	1.6672	1.274	1.549	1.78	4.936	12.379	11.248	12.3095	8.1839	14.5088	4.3837	2.136	1.726	1.5873		0.425532	5.62812
12.0279	2.279	2.92	4.457	8.061	5.044	6.013	13.275	4.13	2.831	2.079	2.05	1.584	14.453	1.92	1.781	1.943	2.131	7.563	11.5139	19.7446	3.2346	1.4558	1.288	1.892	2.188	5.105	11.633	13.537	9.7357	6.7702	13.7866	3.1853	1.911	2.33	1.5493		0.429787	5.58211
12.147	3.066	2.875	3.829	8.866	4.988	5.402	13.269	3.799	2.117	2.306	1.828	1.697	13.363	2.031	2.144	1.662	1.627	8.367	14.646	16.9689	3.3257	2.8364	2.283	1.669	1.907	4.747	12.116	13.225	10.3702	7.1074	15.9941	4.0971	1.573	2.094	1.392		0.434043	5.70251
12.2661	3.321	3.102	5.222	7.46	4.988	3.937	11.927	3.581	3.011	2.282	1.323	1.759	12.702	1.773	1.814	1.423	1.937	9.638	13.358	20.7895	2.9249	1.9146	1.206	1.82	1.709	5.437	10.378	14.759	8.2419	7.6605	14.4701	3.3046	1.769	1.705	1.8744		0.438299	5.55776
12.3851	3.141	2.277	5.518	8.604	4.185	5.025	15.002	3.07	2.805	2.291	1.013	2.166	14.754	2.139	1.644	1.689	1.972	7.204	13.9172	18.2138	3.7455	1.7463	1.459	1.292	1.496	5.145	9.215	15.931	9.2635	10.687	14.6621	3.2925	2.478	1.629	2.0761		0.442551	5.73566
12.5042	3.623	2.428	3.44	8.312	3.905	4.818	13.866	4.022	2.142	2.096	1.387	2.057	15.079	1.531	1.936	1.784	1.965	7.52	14.3602	18.2057	3.147	1.8552	1.872	1.884	2.226	4.403	11.255	15.156	7.2657	8.965	14.2163	3.397	1.964	1.943	1.9832		0.446807	5.60027
12.6233	3.356	3.211	3.926	10.803	4.705	5.396	14.574	3.745	2.352	1.759	1.45	1.926	14.3	1.879	1.458	1.959	2.409	5.734	14.7951	19.5717	3.1769	1.8684	1.531	1.31	2.42	3.217	11.925	15.07	6.6124	11.0502	16.3692	3.3521	2.761	2.015	1.5292		0.451063	5.81475
12.7424	3.517	3.392	4.04	7.935	5.249	4.761	15.232	4.783	2.208	1.706	1.977	2.222	15.599	1.27	2.017	1.404	2.208	6.544	20.3815	17.7022	2.9801	1.3452	1.828	2.012	2.26	3.302	11.469	16.323	7.0504	12.6939	16.7363	3.4082	2.412	2.253	2.3801		0.455318	6.07431
12.8615	2.442	3.111	4.806	9.569	6.436	4.426	14.732	4.241	2.505	2.688	1.445	2.092	13.761	2.527	1.885	1.844	1.801	6.329	21.2721	18.989	2.1997	2.2342	1.494	1.511	1.883	3.618	9.637	16.099	6.0954	13.1872	18.8059	3.1813	2.001	1.844	1.8013		0.459574	6.07123
12.9806	3.964	2.217	4.866	9.441	5.346	5.125	15.627	4.307	1.425	2.013	1.792	1.535	14.614	1.768	1.805	1.632	2.218	6.542	22.5277	20.4398	2.6593	2.4783	1.837	1.758	1.767	2.825	11.827	14.81	5.9058	16.8241	16.7501	2.7728	2.115	2.059	2.3801		0.46383	6.2278
13.0997	3.493	3.015	3.918	11.182	7.117	5.381	16.238	4.402	2.749	2.405	1.884	1.849	16.822	1.869	1.775	1.711	2.273	5.963	27.128	20.0188	3.8307	1.9713	1.882	0.938	1.727	3.267	10.297	17.619	6.6313	18.8615	21.0403	2.892	2.923	2.19	1.934		0.468085	6.8342
13.2188	3.723	3.191	4.216	12.217	8.552	4.069	15.376	3.98	2.536	3.082	2.642	2.339	15.905	1.76	1.787	1.292	1.618	5.011	28.4864	16.6064	2.5127	1.4946	1.926	1.979	1.975	3.203	9.396	15.7	5.7759	17.5142	19.7587	3.4157	2.628	1.951	2.1819		0.472341	6.56573
13.3378	3.77	2.855	5.02	9.533	8.139	5.89	14.746	3.952	1.362	1.837	1.68	2.156	15.577	2.534	2.526	1.293	1.985	6.108	29.7106	14.1254	2.2322	2.3097	1.768	1.471	1.777	3.113	10.36	17.322	7.2168	22.4759	21.3391	3.9226	2.599	1.937	2.492		0.476593	6.77527
13.4569	3.107	4.005	4.288	10.057	8.088	6.089	14.809	4.882	2.053	1.512	1.944	1.677	16.54	1.957	1.587	1.966	2.336	5.887	29.6358	13.1043	2.7919	2.0621	2.439	2.465	1.594	2.724	10.744	17.887	5.6481	21.7353	23.5031	3.9255	2.246	1.912	2.367		0.480849	6.8448
13.576	4.257	2.839	4.625	9.218	8.227	6.34	17.073	4.239	2.157	2.211	1.877	1.934	14.239	2.111	1.568	1.574	3.23	5.968	26.8261	11.9426	2.6701	1.8842	2.177	1.475	1.838	3.534	12.021	16.775	5.9326	21.0564	21.9592	3.4898	1.748	2.399	2.4056		0.485105	6.68059
13.6951	4.254	3.239	4.945	9.777	8.719	6.053	17.438	3.904	2.23	2.208	1.531	1.793	16.195	1.562	2.409	1.329	1.812	7.131	30.0165	10.9222	2.8534	1.2908	2.193	1.417	1.927	2.766	12.716	14.906	6.134	22.2082	21.7847	2.9516	2.164	1.36	1.9928		0.489361	6.74663
13.8142	5.078	3.288	4.112	9.761	7.714	6.174	17.857	4.113	2.319	2.06	2.408	2.039	15.301	1.892	1.66	1.527	2.526	5.159	34.7601	9.156	2.724	1.8097	1.516	1.912	1.679	3.31	11.559	15.403	5.8174	21.6383	22.1689	2.7864	2.417	1.171	1.8435		0.493616	6.76169
13.9333	4.535	3.644	4.4	9.916	8.268	5.798	17.626	3.986	2.124	2.061	1.916	1.905	16.834	2.644	2.307	2.042	1.985	4.961	32.2771	7.84	2.5583	1.1957	1.87	2.037	1.778	2.515	13.992	12.408	4.8554	22.2348	23.565	3.2039	2.056	1.688	2.1234		0.497872	6.71856
14.0524	3.923	3.252	6.123	9.665	8.301	6.263	14.912	4.383	2.26	2.32	2.145	1.556	14.351	2.768	1.772	2.378	2.237	5.17	34.7914	7.9745	2.2725	1.7649	2.751	1.463	1.98	3.291	13.441	13.114	5.2342	23.0023	20.4088	2.5315	1.955	2.082	2.3876		0.502128	6.69211
14.1715	3.362	3.216	6.067	9.27	7.903	6.259	15.445	3.055	1.925	1.584	2.057	1.819	15.643	1.788	1.347	2.056	3.195	4.312	33.0039	8.3231	2.674	1.5453	1.541	1.46	1.619	4.301	13.71	12.725	5.1883	19.6111	19.8536	3.7433	2.165	1.832	1.7239		0.506384	6.43779
14.2905	4.796	3.68	5.466	8.812	6.749	6.377	15.836	3.331	1.528	2.366	1.15	1.586	15.308	1.762	2.213	1.465	2.769	5.494	32.9919	6.9081	2.683	1.7409	1.878	2.03	1.615	3.78	12.908	13.733	4.8163	19.2023	15.4624	3.1444	2.4	1.625	2.1452		0.510636	6.27861
14.4096	3.742	3.293	3.774	9.955	8.675	6.99	14.234	2.631	2.6	1.446	2.016	2.378	12.799	2.157	2.072	1.99	2.543	4.516	33.4411	7.7259	2.3402	2.0646	2.209	1.664	1.114	4.222	16.411	10.876	4.7601	16.9872	17.4371	3.3794	3.149	1.946	1.895		0.514892	6.2695
14.5287	4.318	3.366	4.659	9.877	8.322	7.039	15.251	4.075	2.403	2.493	2.137	2.461	13.623	2.108	3.179	1.666	2.113	5.651	32.3178	7.403	2.594	1.9273	2.106	1.591	1.504	3.076	16.444	10.869	4.6783	16.7957	16.6771	3.5464	2.021	1.82	1.792		0.519147	6.3401
14.6478	4.864	3.313	5.008	10.785	7.295	7.291	13.586	3.479	2.299	1.893	2.059	1.861	15.675	2.446	1.996	2.313	2.538	7.244	34.5963	5.8734	2.7003	1.2899	2.034	2.063	2.272	2.427	15.895	11.176	4.8487	17.0634	18.2514	3.5432	2.572	1.883	1.6019		0.523403	6.45816
14.7669	4.39	3.161	4.361	9.588	6.985	8.393	14.375	4.374	1.854	2.098	2.265	2.108	15.471	3.287	1.83	2.418	2.671	5.055	32.8295	5.8418	3.0242	1.8861	1.282	2.44	2.087	3.288	17.444	11.058	3.6947	16.2537	16.7053	3.027	3.095	1.22	2.2081		0.527659	6.34481
14.886	4.599	3.209	4.788	10.357	6.679	8.923	14.551	3.414	3.256	2.024	1.663	1.872	15.384	1.587	1.918	1.826	1.859	5.99	36.7191	4.6463	2.0858	2.4636	1.498	2.091	1.626	3.242	18.302	10.644	4.4063	16.5915	15.834	2.7227	3.41	2.231	1.8881		0.531915	6.40858
15.0051	3.659	3.206	4.324	8.709	7.026	11.345	14.908	3.049	1.987	1.675	1.903	3.115	14.369	2.134	2.286	1.358	2.466	6.606	37.3585	6.13	2.2876	1.6936	2.395	2.485	2.213	2.948	16.56	9.247	4.0302	15.5984	17.6	3.4319	3.074	2.172	1.2119		0.53617	6.41603
15.1242	4.606	3.372	4.518	9.442	6.115	10.865	15.063	4.555	1.617	1.826	2.505	2.926	15.965	1.696	1.785	2.062	2.772	5.134	34.0223	3.9212	2.0864	2.1724	2.108	1.576	1.736	2.893	18.661	9.367	3.7292	12.9872	20.4547	3.766	2.802	2.049	1.9659		0.540426	6.37489
15.2432	4.866	3.092	3.542	10.003	6.498	9.776	13.936	4.414	1.343	2.175	1.914	2.422	17.263	1.739	2.378	2.161	2.057	5.726	36.4045	5.4049	2.0981	1.3717	1.517	1.317	2.038	3.24	15.053	10.51	3.6511	13.6016	19.2088	3.3245	2.505	2.316	2.1298		0.544678	6.31417
15.3623	4.472	3.53	3.741	9.483	6.795	7.562	13.768	3.12	2.325	2.521	1.902	1.835	17.048	2.425	1.936	1.742	2.524	5.66	37.2493	4.4142	2.3945	1.2479	1.952	2.418	1.943	4.045	17.002	8.585	4.0783	14.2261	18.8168	3.2121	2.779	1.783	2.0084		0.548934	6.30125
15.4814	5.12	3.381	5.07	10.236	7.48	7.282	14.916	3.183	1.909	1.194	2.053	2.353	18.092	1.898	2.257	1.661	2.906	5.196	40.372	4.9532	2.8097	1.6053	1.712	1.443	1.873	4.596	16.901	9.418	4.6253	11.811	21.4574	3.2457	2.824	1.831	1.8069		0.55319	6.55633
15.6005	4.35	1.956	4.002	9.597	6.716	7.359	12.337	2.909	1.703	2.096	2.342	2.218	18.616	2.041	2.34	2.258	2.482	6.35	38.6893	3.8838	2.5113	1.7216	2.4	2.1	1.715	4.775	15.331	9.657	4.4448	13.3862	19.7506	3.7863	2.1	2.288	2.1931		0.557445	6.35443
15.7196	3.627	2.799	4.025	9.804	7.398	7.967	15.662	2.518	1.902	1.719	1.565	1.521	16.877	2.188	2.29	2.143	2.954	5.226	36.1424	3.3918	2.5243	1.4667	2.719	1.567	1.505	4.367	14.309	8.936	4.945	13.1567	20.1957	3.0431	2.566	1.481	2.1598		0.561701	6.1903
15.8387	3.932	3.077	4.814	9.253	8.125	5.984	13.293	2.513	2.752	1.595	1.994	2.436	18.123	2.394	1.373	1.861	2.727	5.748	37.3235	3.7102	2.7114	1.559	2.358	1.785	1.795	2.909	13.291	7.873	5.7051	12.4121	20.7662	1.9831	2.492	1.613	1.2092		0.565957	6.09971
15.9578	4.182	2.751	4.866	10.134	8.217	7.095	14.375	3.967	2.246	1.993	2.388	3.042	18.434	2.041	2.24	2.351	2.84	5.33	33.2261	4.2349	1.9637	1.9309	2.307	1.16	2.036	3.042	14.286	7.265	4.9681	13.1475	18.9908	2.6588	1.927	1.589	1.9054		0.570213	6.14658
16.0769	5.055	3.06	4.027	10.532	7.011	6.917	13.074	2.652	2.475	1.566	2.084	2.526	16.963	2.47	2.156	1.748	1.965	6.037	34.201	3.7403	1.8696	1.6474	2.317	2.104	1.74	3.976	14.713	6.964	5.2175	11.881	16.0452	2.4553	2.078	2.671	1.92		0.574468	5.93881
16.196	4.55	3.135	4.959	10.355	5.887	7.031	14.172	2.972	1.56	2.217	1.305	1.98	16.077	2.135	1.687	2.032	2.65	7.557	33.1667	3.2027	2.1461	1.8746	2.141	1.542	1.649	4.17	14.405	7.487	3.837	11.6568	17.8797	2.8347	2.566	1.782	1.8585		0.578724	5.89885
16.315	4.327	2.727	5.041	9.844	8.289	7.907	12.4	3.573	2.439	1.844	1.832	2.601	16.089	1.855	1.891	2.358	2.309	5.596	31.2721	3.0954	2.6791	2.2938	1.842	1.743	1.902	3.255	14.924	7.98	4.9857	11.9997	16.8957	2.6405	2.248	2.028	2.153		0.582976	5.91026
16.4341	4.79	3.206	3.362	10.301	7.779	7.111	12.564	2.697	2.169	1.615	2.143	1.841	16.379	1.652	2.272	2.165	2.399	8.195	31.0912	2.9557	2.7892	1.8197	1.82	1.343	2.339	3.956	14.29	8.051	3.994	12.7105	12.8816	2.9396	2.767	2.136	1.4567		0.587232	5.77086
16.5532	4.171	2.16	4.053	10.119	6.776	7.405	11.829	2.534	2.11	1.688	1.876	1.909	17.899	2.064	1.652	2.036	2.201	7.611	28.6728	2.9875	2.6734	1.3617	2.189	1.797	2.238	3.606	13.861	10.924	4.0438	11.6312	13.7991	2.8305	2.073	2.686	1.6755		0.591488	5.68979
16.6723	3.711	3.157	4.77	10.469	7.446	7.346	11.651	3.446	2.063	2.101	1.884	1.647	15.56	2.937	2.101	1.739	2.442	9.645	30.5608	3.9629	2.467	1.4229	2.06	1.412	1.501	3.945	13.617	9.898	4.2457	13.2524	16.0225	3.3418	1.82	1.748	1.7368		0.595744	5.91797
16.7914	3.237	2.884	4.067	11.808	7.515	6.887	10.261	2.744	1.889	1.489	1.966	3.259	16.588	2.233	1.984	2.141	1.865	7.261	28.4597	2.7908	2.7033	2.4199	1.912	1.93	1.879	3.735	13.523	9.082	4.1778	13.0798	14.9336	3.2022	2.464	2.137	2.0231		0.599999	5.72943
16.9105	4.047	2.35	4.203	12.664	7.529	7.363	13.83	3.088	3.042	1.526	2.439	2.247	16.409	2.351	2.28	2.628	2.371	8.394	29.3617	3.7565	2.3798	1.8345	1.67	2.519	2.097	4.81	13.96	9.536	3.3109	14.5965	14.5982	2.8639	1.833	1.926	1.5107		0.604255	6.03785
17.0296	3.522	2.362	4.805	12.16	7.099	6.182	13.134	2.982	2.226	1.73	2.227	2.828	15.658	1.842	2.138	1.649	2.281	9.317	25.3939	2.8674	2.0352	1.7917	1.494	2.516	2.263	3.522	14.696	10.665	3.8371	14.5107	15.6833	3.1617	2.749	2.368	2.7587		0.608511	5.89871
17.1487	3.62	2.636	4.08	14.079	8.596	6.67	14.17	3.36	2.332	2.078	2.061	2.047	17.573	2.355	2.641	2.011	2.963	10.924	26.5466	2.5574	2.2841	1.5464	2.348	2.198	2.172	4.136	15.626	9.293	3.7746	14.7497	16.3456	2.3846	1.953	2.301	1.8696		0.612767	6.17947
17.2677	3.796	2.601	3.534	11.773	8.639	7.632	12.919	2.576	2.173	1.763	1.817	2.138	21.44	2.183	2.2	1.716	2.559	12.252	28.398	3.6332	2.1299	1.7069	2.014	1.981	1.792	3.54	13.927	8.687	3.617	14.8507	17.4319	2.1712	2.217	1.695	1.9523		0.617019	6.15586
17.3868	4.328	2.933	4.74	11.11	8.798	7.016	12.479	3.547	1.726	1.945	1.566	2.591	18.669	2.39	1.924	1.629	3.464	11.392	24.7543	2.31	2.5314	1.9203	2.312	1.668	1.616	5.099	14.385	8.564	4.3796	15.0176	21.0203	2.1732	2.057	1.978	1.8917		0.621274	6.16927
17.5059	3.297	2.309	4.67	10.894	8.724	6.848	14.513	2.898	1.954	2.087	1.549	2.019	18.632	2.498	1.872	2.448	2.025	13.267	24.6495	3.4158	2.1901	1.6001	2.153	1.087	1.963	4.337	13.202	8.358	3.0014	14.3278	20.4227	2.7767	1.577	1.827	1.7414		0.62553	6.03239
17.625	3.632	1.641	4.212	10.411	8.571	7.057	12.122	2.806	2.016	1.557	1.615	2.306	23.63	2.219	2.288	2.49	2.958	14.493	22.7291	2.4772	1.6075	2.435	1.71	1.954	2.319	3.935	12.718	7.646	4.103	14.341	22.0172	3.0013	2.155	1.533	2.1504		0.629786	6.13873
17.7441	3.593	2.193	5.004	11.322	9.63	8.097	15.386	2.394	1.875	1.533	2.285	2.33	22.319	1.973	1.701	2.435	2.379	17.639	26.31	2.5754	1.8994	2.0613	1.512	1.751	2.598	4.656	13.212	8.835	4.1437	14.0775	22.5195	2.6366	1.788	1.582	1.7104		0.634042	6.51302
17.8632	4.084	1.769	3.02	12.688	9.703	6.167	10.321	2.439	1.701	2.068	2.084	2.344	21.732	2.591	1.707	2.287	2.496	20.881	23.8098	3.3899	1.7004	2.0585	1.714	1.62	1.9	4.108	13.052	8.988	4.7465	13.3016	20.3378	2.862	1.824	2.09	2.1741		0.638297	6.27882
17.9823	3.154	2.804	4.561	11.263	9.189	7.686	11.523	3.029	1.557	2.11	2.34	2.274	20.737	2.669	1.582	2.003	2.14	20.355	22.3378	2.8635	1.5192	1.6365	1.501	2.26	1.54	5.054	11.247	8.534	3.5499	13.1133	19.1707	2.2772	2.026	1.971	2.2185		0.642553	6.10845
18.1014	3.002	1.993	4.134	11.555	10.632	8.215	13.636	2.828	2.19	2.107	2.009	2.396	18.925	2.999	2.511	2.795	3.236	24.252	22.2303	2.7836	2.6427	2.3474	2.542	1.656	1.935	4.743	12.35	10.393	3.9057	11.6357	17.4038	3.1632	1.173	1.955	1.8435		0.646809	6.40337
18.2204	2.75	4.087	3.847	13.471	10.422	9.222	12.339	2.622	2.359	1.519	1.73	1.959	17.737	2.517	1.364	2.383	2.291	24.784	23.4165	2.464	1.8749	2.0601	1.809	2.37	1.487	4.375	11.262	6.591	2.8914	12.4686	17.1492	2.4818	1.556	2.39	2.3433		0.651061	6.18265
18.3395	3.929	2.511	4.02	10.639	9.333	8.826	13.198	2.287	2.068	2.101	2.333	2.106	16.698	2.412	2.074	1.817	2.454	27.012	20.5422	2.8361	1.5257	2.2463	1.854	1.597	1.601	4.868	10.847	7.266	3.9735	12.4348	14.2036	2.8468	2.731	2.092	2.2104		0.655317	6.04267
18.4586	2.576	2.241	3.711	13.045	9.611	10.37	13.642	3.236	2.305	1.565	1.56	2.578	15.471	2.763	2.271	1.403	2.589	23.549	18.1148	2.4098	2.4908	1.4112	1.398	1.869	2.594	5.064	11.276	7.113	4.0344	10.6404	15.5907	2.6586	1.946	2.071	2.5215		0.659573	5.93398
18.5777	2.625	2.25	3.376	11.252	11.829	9.343	12.468	2.242	2.383	1.914	1.556	2.306	18.129	2.322	2.406	2.334	2.466	25.292	18.4694	2.5482	2.4755	1.9477	2.298	2.251	2.577	4.963	10.604	6.384	3.3228	10.5757	16.9407	3.2428	1.69	1.535	1.6476		0.663828	5.99901
18.6968	2.897	1.868	4.052	11.81	11.809	11.983	14.855	1.578	2.78	1.923	2.17	2.363	17.699	2.189	1.468	2.032	2.762	26.308	15.264	2.5803	1.7666	1.5265	1.837	2.097	2.025	5.866	9.958	6.638	3.4002	12.2204	15.2264	3.5582	2.011	1.669	1.8664		0.668084	6.05874
18.8159	3.346	2.422	4.845	11.938	9.83	14.091	14.107	2.623	2.064	2.109	2.71	2.724	17.878	1.967	2.404	2.281	2.476	24.878	13.1119	1.6523	2.7387	2.0784	2.039	1.874	1.959	4.724	10.142	6.31	3.7813	9.4925	15.0089	1.7945	2.251	1.933	1.7152		0.67234	5.92282
18.935	3.818	2.639	3.002	10.591	13.931	13.387	12.979	1.863	2.16	1.397	2.952	2.539	16.932	2.286	1.864	2.745	2.587	25.888	10.3846	2.3246	1.3432	2.1336	1.659	1.829	2.258	5.221	10.314	6.896	2.4922	9.8876	14.1268	2.7213	2.68	1.94	1.4315		0.676596	5.80578
19.0541	2.426	2.18	3.616	11.578	15.482	14.762	13.437	2.265	2.517	2.361	1.243	3.033	19.711	2.892	1.753	2.093	2.886	22.581	10.0374	2.2473	1.3231	1.573	2.175	1.648	2.478	5.137	10.175	6.141	3.2738	9.926	15.0009	2.1638	2.14	1.679	2.5718		0.680851	5.90017
19.1731	2.549	2.706	4.566	12.77	16.574	16.021	13.696	2.567	2.629	2.251	2.272	2.873	20.404	1.924	2.236	2.168	3.53	24.249	8.5199	3.0066	1.7848	1.73	1.777	1.767	2.323	4.925	11.287	6.214	4.1727	11.3659	13.896	3.0323	2.115	1.365	2.2659		0.685103	6.2152
19.2922	3.705	2.258	3.429	10.697	18.449	16.34	11.079	2.413	2.544	1.685	1.814	2.517	17.061	1.567	2.884	1.989	2.202	22.929	8.8483	2.0722	1.6852	1.884	1.887	2.038	1.878	4.594	10.561	5.894	4.1059	9.4571	13.1606	2.4026	2.505	1.733	1.6034		0.689359	5.76775
19.4113	2.736	3.146	3.794	10.926	21.167	15.588	10.816	2.293	2.028	2.885	1.575	2.556	18.502	2.307	2.585	1.912	2.814	21.829	7.8362	2.4784	1.492	1.3999	2.294	1.897	2.19	4.698	11.398	5.701	4.3483	10.4939	13.6909	2.2081	2.713	2.536	2.4018		0.693615	5.97816
19.5304	2.538	3.124	4.149	9.781	21.665	15.099	10.875	2.261	2.319	2.889	1.999	2.349	18.568	2.446	1.919	2.05	3.111	22.583	7.8433	2.4621	2.4753	2.4516	2.263	1.688	1.514	4.514	10.531	5.588	4.636	9.3857	16.3912	1.9318	2.276	2.581	2.4337		0.697871	6.01973
19.6495	2.553	2.407	3.564	10.684	23.504	13.338	10.769	1.924	2.434	2.535	1.641	2.816	20.506	2.06	1.393	2.556	2.721	22.057	6.4327	2.5421	1.9417	2.3593	2.197	1.613	1.91	4.816	11.766	4.983	3.6024	8.775	14.6364	2.3609	1.701	1.771	2.2681		0.702126	5.86107
19.7686	2.672	1.998	3.762	8.884	26.053	14.84	11.329	2.38	2.136	2.451	1.9	2.408	20.13	3.467	2.503	3.571	3.424	22.504	6.5794	2.1229	1.7826	2.1028	1.988	1.527	1.88	5.882	10.247	4.029	3.0285	10.0344	12.6433	2.2328	2.728	1.873	1.9774		0.706382	5.97343
19.8877	2.707	2.198	3.667	8.86	30.901	14.554	10.738	2.318	2.192	2.387	1.903	2.211	19.489	1.826	1.918	2.702	2.443	21.51	6.3234	3.0108	1.8378	1.6474	2.187	1.711	2.13	5.124	10.663	4.787	5.4003	9.8762	14.9132	2.776	2.051	2.027	1.6814		0.710638	6.0763
20.0068	2.965	1.89	3.576	8.821	33.041	14.301	11.319	1.947	2.667	1.54	1.782	2.828	19.27	2.213	1.945	2.085	2.753	21.202	5.8233	1.7895	1.6092	1.785	2.06	2.139	2.973	6.718	10.973	4.887	5.2885	9.9704	13.0044	3.0995	2.175	2.928	2.2482		0.714894	6.16046
20.1259	3.546	3.098	4.292	10.447	34.061	13.21	9.981	2.435	1.676	2.329	1.803	2.126	19.743	2.824	2.383	2.114	2.694	21.556	4.6528	2.4618	1.6351	2.7362	1.761	2.676	1.986	5.804	9.963	5.489	3.5341	10.2497	12.9923	2.594	2.518	1.755	2.493		0.719149	6.16054
20.2449	2.768	2.97	4.041	9.228	35.475	11.033	10.291	2.477	2.824	2.326	2.325	2.504	17.318	2.421	2.213	1.705	3.45	23.286	4.9747	2.308	1.9587	2.3956	1.668	1.591	2.45	5.644	8.537	5.517	3.6763	10.0429	11.2438	2.6396	2.54	2.225	2.1134		0.723402	6.00514
20.364	2.686	2.044	3.904	9.104	39.055	12.682	8.761	2.361	1.926	1.357	1.65	2.665	18.917	2.578	2.098	1.735	3.392	23.582	6.496	1.7816	1.2094	1.9946	1.922	1.92	2.263	7.401	9.855	5.806	4.5564	7.7686	11.1515	2.1694	2.738	1.674	2.2101		0.727657	6.09753
20.4831	2.564	2.029	3.619	11.299	38.602	12.499	7.292	2.642	1.694	1.699	2.76	2.819	19.539	1.744	2.183	1.877	3.02	21.192	4.8738	2.0007	1.4574	1.6279	1.91	1.576	3.488	6.535	9.489	4.725	3.6507	9.2649	11.7611	2.4462	1.812	2.097	2.5391		0.731913	6.00934
20.6022	2.511	2.294	3.722	10.621	39.56	13.992	7.26	1.985	2.379	2.296	2.613	2.744	19.569	2.273	2.735	2.249	3.779	20.071	3.6953	1.6759	1.6157	2.3001	1.721	2.835	1.874	6.554	9.513	4.493	4.8717	9.3267	11.6793	2.7404	2.672	2.345	2.1786		0.736169	6.13553
20.7213	2.325	1.996	3.002	11.66	37.407	13.783	6.867	2.086	1.912	1.433	2.125	2.538	20.649	2.217	2.051	2.269	3.21	25.288	3.9466	1.7298	2.1549	2.1051	2.244	2.337	1.984	7.702	10.054	7.263	4.7225	8.7477	11.7755	2.5159	1.616	1.944	1.7879		0.740425	6.2128
20.8404	2.83	2.021	3.311	11.974	36.957	13.917	6.626	2.632	2.063	2.247	1.915	3.231	20.381	2.098	2.647	2.228	4.133	22.352	4.0154	1.8248	2.1013	2.3639	1.896	1.64	1.689	7.892	9.81	5.841	5.0155	8.1396	13.6432	1.6922	1.864	1.906	2.2225		0.74468	6.20341
20.9595	2.808	2.806	3.533	12.143	37.882	14.999	9.278	2.763	1.804	2.016	1.69	3.277	19.212	2.898	1.911	2.373	3.457	23.867	4.176	1.9236	1.8207	1.6762	2.004	1.66	2.157	7.648	9.944	6.426	4.8752	8.9551	12.9745	2.4197	2.341	2.048	1.9876		0.748936	6.39296
21.0786	2.557	2.887	4.281	15.513	36.695	13.896	7.142	2.376	2.283	1.878	2.163	2.546	19.207	2.578	2.036	2.071	3.836	25.026	3.6791	1.9786	2.2471	1.359	2.402	1.865	2.245	9.125	9.373	5.424	4.1053	7.2807	13.4528	2.6916	2.34	2.223	2.2265		0.753192	6.37111
21.1976	2.875	2.964	3.427	17.428	33.736	16.316	7.642	1.768	1.717	2.102	2.556	2.84	20.146	3.133	1.765	2.536	4.016	22.584	3.2868	1.7711	1.8687	1.2184	2.257	2.389	2.166	9.713	10.762	6.384	3.3889	7.8185	15.3666	1.9666	2.166	2.364	2.218		0.757444	6.47587
21.3167	3.055	2.427	2.822	17.005	31.333	16.296	7.359	2.598	2.226	1.977	2.271	3.614	17.838	2.748	1.945	1.799	3.805	21.095	4.136	2.3567	1.889	1.6722	1.986	1.369	2.748	10.579	10.361	6.159	4.4101	8.4188	14.7008	2.4866	2.715	2.544	2.2914		0.7617	6.37245
21.4358	2.442	2.316	4.132	18.234	26.64	19.283	8.654	2.57	2.382	1.522	2.767	2.795	20.31	2.895	1.631	2.484	3.948	22.784	2.9446	2.0192	1.6913	1.8609	2.202	1.875	2.278	10.416	10.328	5.7	3.5388	8.9257	13.8854	1.8609	1.829	1.601	1.8691		0.765955	6.3604
21.5549	2.63	3.075	3.632	16.876	27.167	19.178	9.326	2.418	2.553	2.119	3.055	2.791	20.789	2.449	1.858	1.935	4.945	19.644	3.6827	2.588	1.6765	2.0599	1.287	1.679	2.599	13.956	10.671	5.087	5.2765	8.9188	15.259	2.2733	1.588	2.177	1.9255		0.770211	6.54698
21.674	3.314	3.163	2.993	15.502	27.715	21.552	8.856	2.709	1.574	2.175	2.68	3.462	19.444	2.54	2.489	2.023	3.309	21.506	3.1497	2.1909	1.629	2.6284	1.624	1.369	1.809	13.952	11.007	5.762	5.1194	7.2291	12.951	2.0245	2.314	2.236	2.4783		0.774467	6.47084
21.7931	2.401	2.98	3.509	15.671	27.931	22.866	8.813	2.254	1.93	2.612	3.412	2.746	21.465	2.631	2.168	2.16	4.119	21.177	2.7852	1.9154	2.0958	2.1492	1.554	2.526	2.391	13.356	10.297	5.271	4.9772	8.165	13.2395	2.4804	1.961	1.796	2.2695		0.778723	6.57355
21.9122	2.891	2.496	4.814	16.444	26.074	28.598	7.231	2.453	1.711	2.029	2.177	2.981	19.068	2.008	1.857	2.412	4.072	20.561	3.1957	2.0485	2.0048	2.05	1.648	2.217	2.609	13.155	11.014	6.311	4.5627	8.3764	13.2824	2.1213	2.312	1.76	1.8749		0.782978	6.58342
22.0313	2.055	2.412	4.754	14.863	25.432	32.507	8.125	1.991	1.713	2.464	2.284	2.631	18.873	2.445	1.963	2.221	5.162	21.726	4.1509	2.1079	1.6585	2.2784	1.873	1.993	2.557	14.895	10.693	6.452	5.2861	6.6002	12.9823	2.1252	2.076	1.89	2.5792		0.787234	6.73768
22.1503	2.605	2.228	4.437	14.26	23.075	37.665	8.65	2.563	2.231	2.467	2.981	2.739	16.693	2.641	2.302	2.104	4.037	22.52	2.2716	2.0454	2.5334	1.7405	1.266	1.772	2.258	12.349	11.319	7.441	4.5632	6.7838	12.1437	2.3389	2.084	2.094	2.145		0.791486	6.66704
22.2694	2.389	3.747	4.114	16.198	22.047	38.716	7.823	2.222	1.563	2.171	1.986	2.931	17.745	2.963	2.334	1.654	5.362	19.549	3.0907	2.0148	2.0057	2.7062	1.696	1.137	2.085	15.855	11.413	6.362	6.0228	7.6165	13.9704	3.1282	2.028	2.622	1.7643		0.795742	6.88662
22.3885	3.105	2.427	3.856	16.339	23.608	47.136	9.7	2.415	1.924	1.762	1.287	2.975	18.814	2.797	1.916	2.486	5.28	20.486	3.0065	2.1027	1.5799	2.1363	1.847	2.235	1.911	15.743	11.02	6.645	4.3799	8.5611	14.7364	2.3235	2.626	2.299	1.7864		0.799998	7.23576
22.5076	2.996	3.011	3.853	13.699	26.689	46.796	9.113	2.274	1.732	2.135	2.183	2.456	18.469	2.5	2.815	1.732	4.268	18.655	3.043	1.7516	1.9412	2.0129	1.389	1.674	3.176	13.118	12.428	6.266	5.5661	7.8524	15.8219	2.1912	1.853	1.777	2.0907		0.804254	7.12366
22.6267	2.509	3.062	4.72	13.36	26.843	44.899	9.269	2.199	2.062	2.566	2.298	2.442	18.753	2.616	2.692	1.785	4.168	18.712	3.7832	1.7873	1.7461	1.7504	2.255	2.125	2.648	12.852	11.786	8.157	6.3791	7.6066	15.6457	2.6861	2.708	2.34	1.7757		0.808509	7.22818
22.7458	2.148	3.507	4.392	14.499	27.664	42.332	9.207	3.028	1.782	2.337	2.275	2.437	20.331	2.009	1.798	2.714	4.786	17.758	3.7117	2.4526	1.8616	2.2585	1.465	1.581	2.171	12.136	12.631	6.964	5.9423	8.1962	13.4839	2.2487	2.065	1.97	2.9287		0.812765	7.11632
22.8649	3.339	2.817	5.319	13.828	30.454	41.859	9.055	2.327	2.06	2.029	2.187	3.022	19.989	1.958	2.274	2.224	5.257	16.925	3.247	2.3023	2.3174	1.9527	1.642	2.476	1.926	12.477	15.566	8.502	5.8143	8.7135	14.9962	2.7741	2.467	2.364	2.1256		0.817021	7.38817
22.984	3.969	3.16	3.435	14.253	32.113	45.07	9.91	2.109	2.06	2.205	1.87	2.242	18.48	2.238	1.816	2.108	4.493	18.278	2.4627	1.7509	2.0445	2.2474	1.832	2.268	2.569	11.646	15.551	10.08	6.4981	8.3704	14.203	2.7054	1.892	1.852	2.7477		0.821277	7.44369
23.103	3.008	2.526	4.98	14.606	32.223	43.038	11.251	2.321	2.931	2.53	2.322	3.436	17.935	2.192	2.076	2.498	4.493	14.729	2.541	2.3132	1.8436	2.2391	1.948	2.499	2.464	13.742	13.449	9.632	5.0621	8.9411	14.7584	2.0193	1.965	2.151	1.6396		0.825529	7.38007
23.2221	2.821	3.504	4.695	16.639	35.949	48.213	9.765	2.624	2.929	1.521	2.211	2.871	20.274	2.092	2.31	1.733	4.732	16.338	3.6156	1.9589	2.129	2.1357	2.243	2.082	1.945	14.701	14.964	11.298	6.1237	10.8776	13.7317	2.8352	2.406	2.952	2.3807		0.829784	7.98857
23.3412	2.39	2.993	6.243	17.733	35.949	47.354	12.605	3.818	1.973	2.238	2.239	3.117	22.253	1.776	2.122	2.936	5.443	14.93	3.0275	2.2306	2.1378	2.3068	1.53	2.717	2.117	14.028	16.88	15.089	7.4909	9.871	16.4109	2.5807	2.615	2.261	1.926		0.83404	8.38089
23.4603	4.092	3.808	5.944	21.724	37.89	49.615	12.932	4.789	1.965	1.729	2.315	2.75	21.778	2.19	2.002	2.308	6.006	15.78	3.0742	1.9654	1.5595	1.9131	1.838	1.963	2.475	15.076	17.607	16.354	6.5507	11.1122	15.1427	2.3356	2.401	3.217	3.1233		0.838296	8.78071
23.5794	3.496	3.398	6.016	21.967	34.513	51.635	12.554	4.012	2.324	1.604	2.766	1.724	22.515	2.464	2.111	2.968	5.237	13.982	3.5412	1.6931	2.3944	1.7136	1.92	1.899	2.935	15.055	22.425	21.479	7.8807	11.6352	13.3668	2.8494	2.105	1.962	2.2867		0.842552	8.92649
23.6985	3.305	4.06	8.344	20.495	43.124	61.832	13.912	4.043	2.138	2.797	2.025	3.437	21.074	3.103	2.371	2.478	7.405	13.025	2.2861	3.1444	1.7667	2.1941	2.02	2.016	2.438	15.331	19.598	25.531	8.5972	13.3183	12.0182	2.517	2.223	2.719	2.2504		0.846807	9.6839
23.8176	2.645	3.626	8.237	26.163	48.683	69.291	13.68	5.049	2.529	2.028	2.693	2.356	26.865	2.8	2.289	2.469	7.918	12.049	3.5663	2.0245	1.9354	3.2062	2.065	1.749	3.095	15.657	21.442	26.097	10.1263	12.2437	14.0065	2.7549	1.928	2.008	2.2353		0.851063	10.5003
23.9367	4.228	2.97	9.666	27.988	52.769	78.968	14.096	5.275	2.394	2.582	1.678	1.935	23.46	1.392	2.102	2.748	7.807	11.37	3.3999	2.5206	1.8387	1.587	1.753	1.7	2.618	16.136	20.558	31.548	8.0645	11.8765	14.9254	3.6717	1.973	2.172	2.1929		0.855319	10.9132
24.0558	4.03	4.106	10.175	32.993	62.105	89.659	14.928	4.711	2.168	2.481	2.346	2.831	25.12	2.189	1.605	2.969	7.868	11.433	3.115	2.5543	1.5471	2.3098	1.91	1.538	1.93	17.94	23.816	30.545	8.4913	10.8855	13.8669	3.2303	1.973	1.818	1.633		0.859575	11.7949
24.1748	4.269	4.01	9.874	39.265	76.272	99.264	15.906	5.405	2.932	3.17	2.627	2.841	25.138	2.437	2.816	2.841	11.656	11.104	3.9925	1.9093	1.8521	1.743	2.177	2.145	2.956	18.643	20.764	30.686	11.2097	10.5502	11.5435	3.7226	1.605	2.499	2.291		0.863827	12.9176
24.2939	4.738	4.254	12.682	51.791	92.493	101.113	18.824	6.434	2.725	2.083	3.091	2.869	27.031	2.786	1.811	3.032	12.398	11.155	2.9817	2.217	1.5818	1.5543	2.635	2.178	2.268	21.05	24.226	28.811	10.9138	12.1772	11.8888	3.6052	2.307	2.492	2.0062		0.868083	14.1772
24.413	4.112	5.734	13.626	64.149	106.817	108.694	22.269	8.283	3.482	2.467	1.615	2.916	25.177	3.232	1.821	2.797	10.843	10.369	3.9464	2.0934	2.3399	2.4831	1.525	1.776	2.635	18.289	29.478	33.028	11.5036	11.3439	13.9441	3.3304	1.433	2.016	2.0634		0.872338	15.4752
24.5321	5.852	5.03	13.716	75.629	111.78	105.032	30.515	9.544	3.547	1.934	2.022	2.538	24.307	2.382	2.737	2.729	11.973	11.764	3.0913	2.6206	1.8484	2.1939	1.914	1.554	2.521	20.999	35.438	36.936	12.7233	12.2192	11.7098	3.9626	2.794	2.083	2.9421		0.876594	16.588
24.6512	6.008	7.449	18.87	81.769	107.466	106.921	38.661	10.835	3.491	2.533	2.247	2.854	26.868	2.46	1.798	3.119	13.769	9.898	2.6513	2.8021	1.8465	1.9913	1.995	2.582	3.445	21.947	36.413	40.787	14.3583	13.5848	12.8486	3.7931	2.778	1.832	2.2376		0.88085	17.5688
24.7703	6.498	7.52	20.687	88.078	101.645	113.798	52.308	14.495	4.036	2.685	1.899	3.11	26.836	3.369	2.062	2.551	14.763	8.859	3.5272	2.3173	2.0262	2.9766	1.753	2.329	2.643	23.126	40.727	51.027	17.3582	15.9541	12.5191	3.9827	2.211	2.345	2.1695		0.885106	18.9769
24.8894	6.597	8.381	27.708	82.785	90.698	91.771	62.613	21.06	3.985	2.1	2.52	2.36	25.308	2.711	1.3	2.481	14.876	9.549	4.2814	3.2118	2.308	2.697	2.585	2.445	2.532	22.132	46.442	55.673	17.8103	17.5255	12.4295	4.0919	2.014	2.619	2.1139		0.889361	18.9061
25.0085	7.423	12.503	35.394	78.101	61.609	66.56	77.592	27.377	4.713	1.866	2.089	2.968	25.415	2.419	1.951	3.156	17.722	10.299	4.8089	2.1512	1.7593	2.5133	1.856	2.149	2.888	25.031	49.665	66.052	20.4323	17.9248	11.2178	4.9592	2.483	1.91	1.8766		0.893617	18.8238
25.1275	9.054	12.977	45.96	64.559	39.647	49.663	94.007	35.974	4.277	3.144	1.659	4.206	27.6	3.462	1.868	1.788	17.542	10.017	5.201	2.562	2.1361	2.5675	2.276	2.105	2.56	27.831	59.047	69.953	20.8085	19.2876	10.0738	4.9012	2.698	2.661	2.257		0.897869	19.038
25.2466	7.691	14.81	54.774	51.783	28.013	32.062	89.845	47.04	4.781	2.453	2.463	3.599	27.367	3.988	2.17	2.934	16.03	11.707	5.464	2.8063	2.7224	2.6912	1.356	2.307	3.194	27.334	62.739	69.081	22.1426	22.9443	12.4448	4.0745	3.458	1.786	1.9453		0.902125	18.6286
25.3657	7.479	24.169	61.308	35.311	19.875	29.054	90.198	64.343	5.238	2.831	2.239	3.941	30.435	3.946	1.446	2.976	17.76	10.453	5.2896	2.8612	2.8671	2.1724	1.743	2.07	3.134	30.673	58.878	60.426	23.5311	23.5205	11.5133	6.0388	2.191	3.118	2.5452		0.906381	18.7307
25.4848	10.426	30.603	55.937	21.258	13.888	20.364	85.057	77.928	6.676	3.017	2.095	4.711	32.656	4.388	1.816	3.138	20.947	11.51	6.7558	3.1497	3.5016	2.5832	2.34	3.032	2.511	35.551	54.766	44.862	29.5369	29.6266	11.4718	6.2028	3.471	3.288	1.9788		0.910637	18.6012
25.6039	10.353	40.194	62.77	14.56	9.592	15.253	76.18	84.826	6.52	2.111	2.8	3.448	32.421	5.338	2.543	3.724	23.746	15.025	9.3198	3.1896	3.2927	2.794	2.496	3.134	3.475	32.04	44.241	32.832	36.2447	30.5177	12.5458	6.5454	2.667	2.408	2.3566		0.914892	18.3287
25.723	11.731	44.381	62.256	10.687	8.375	12.855	64.999	80.414	7.107	2.82	3.598	3.586	32.622	5.711	2.386	3.938	19.832	17.894	8.2008	3.0712	3.3147	3.6272	2.416	2.346	3.48	34.317	32.701	20.986	47.6562	34.6467	12.3191	6.4662	2.915	2.773	2.4082		0.919148	17.681
25.8421	16.55	51.427	59.367	8.485	5.73	7.79	61.861	68.519	8.074	2.984	3.407	3.516	32.699	8.233	2.773	3.515	21.068	19.006	10.2237	3.8225	3.4945	4.0345	2.076	2.601	2.393	33.996	20.371	12.809	56.1371	34.1647	13.5048	10.0863	4.138	2.811	2.3184		0.923404	17.2567
25.9612	20.375	58.464	51.809	6.083	4.907	7.393	42.771	52.672	11.843	3.787	2.001	4.792	34.066	9.827	3.223	4.704	22.755	24.431	14.1467	4.8958	3.4133	5.7049	1.998	2.302	3.839	30.465	14.452	9.103	65.2678	36.8456	12.9921	12.5898	4.242	2.796	2.0763		0.927659	16.9438
26.0802	25.766	61.632	36.31	4.347	5.082	5.587	37.634	37.281	13.683	3.301	3.109	4.797	41.116	14.073	2.679	4.311	24.383	27.829	19.7679	3.5349	3.0254	4.7737	3.305	2.982	3.86	36.504	8.954	6.121	79.6448	40.476	15.1624	18.4125	4.501	3.047	2.5671		0.931912	17.416
26.1993	34.692	71.227	26.63	4.408	3.271	5.083	24.881	25.575	15.774	3.946	3.385	4.379	42.5	20.911	2.932	5.611	28.73	33.778	24.624	5.5942	4.211	7.1305	3.042	3.184	4.366	41.9	7.442	4.7	86.5743	45.4755	15.6079	23.0199	5.44	3.952	2.4961		0.936167	18.4706
26.3184	43.449	76.636	16.687	3.653	3.094	3.706	19.767	20.382	22.755	4.329	3.405	5.413	40.235	28.648	3.255	6.894	29.058	41.726	26.4078	4.8124	5.3351	9.0645	2.719	3.113	4.309	46.494	5.964	5.119	87.6341	48.3554	17.8563	31.8328	5.763	2.993	2.5495		0.940423	19.5261
26.4375	53.469	85.523	12.188	3.587	2.178	3.419	17.35	18.864	29.107	4.069	3.295	5.726	45.034	32.765	4.642	7.13	29.18	47.449	31.5263	5.3144	6.5007	11.4133	3.197	3.923	6.36	55.622	4.907	4.528	74.0547	55.8464	24.6903	49.7683	7.22	3.702	2.071		0.944679	21.5891
26.5566	66.042	77.125	9.337	2.715	2.317	3.315	15.243	13.85	35.462	5.791	3.938	6.392	49.124	39.058	4.262	7.359	29.048	51.695	38.1765	5.8397	6.4674	15.3665	3.083	2.961	6.21	55.256	3.71	3.754	59.4388	55.1569	28.3717	57.4295	8.126	3.964	3.5736		0.948935	22.2559
26.6757	75.07	63.16	8.356	2.98	2.223	2.358	9.251	10.201	40.253	6.448	3.026	6.813	55.239	45.029	3.363	6.91	31.944	54.115	39.9188	8.0099	8.1567	20.7265	3.161	3.811	6.183	56.391	3.179	2.924	40.9261	66.3049	33.3854	68.2299	10.107	3.535	3.1577		0.95319	22.9956
26.7948	74.687	45.981	6.157	2.23	1.362	2.825	6.409	7.278	34.081	7.928	5.22	6.958	62.722	57.925	5.07	8.683	32.361	48.417	32.8549	9.1089	8.5905	22.7899	3.664	4.473	9.419	68.122	3.218	3.09	26.5891	68.0044	40.1065	78.9787	15.127	4.147	3.6705		0.957446	23.3785
26.9139	55.012	29.18	5.693	1.907	1.927	1.477	5.936	5.781	30.239	8.735	4.931	8.762	78.55	60.066	6.106	8.177	33.405	35.025	28.0206	12.6604	11.618	29.282	3.896	4.705	12.756	69.507	3.265	1.714	17.3525	77.8733	47.5352	69.3343	23.331	4.299	2.5458		0.961702	22.8744
27.0329	31.735	16.807	4.048	1.229	1.376	1.022	4.225	6.676	23.995	12.353	6.701	9.877	81.498	67.262	7.962	9.969	40.195	21.259	16.9242	13.3467	15.0493	27.2493	5.277	6.366	13.808	69.234	3.08	2.759	12.9053	81.1495	56.4366	48.8435	29.113	4.957	3.6074		0.965954	21.6656
27.152	20.307	12.418	2.852	1.075	1.236	1.263	4.401	4.671	18.733	14.891	7.149	11.955	85.115	68.202	11.082	10.392	43.107	17.04	12.0091	21.548	21.9147	22.9678	6.964	6.911	16.123	62.585	2.85	2.527	9.3027	87.4337	64.653	28.7078	40.285	5.968	5.0797		0.97021	21.5348
27.2711	14.76	8.249	3.53	1.636	1.332	1.434	2.698	4.387	10.861	17.139	8.011	14.938	82.345	71.383	11.202	10.042	50.372	10.438	8.3279	23.7221	27.5549	18.0063	8.317	6.438	21.585	58.167	2.335	1.808	7.6369	87.9692	69.2669	15.8081	50.747	5.884	6.4556		0.974466	21.2796
27.3902	11.229	8.251	2.367	0.943	0.792	1.229	2.554	4.08	8.852	22.682	11.017	14.388	67.753	63.746	13.835	11.888	52.782	8.883	6.3328	25.4584	36.1382	10.7394	10.169	8.806	26.238	47.076	2.04	1.063	4.1783	78.2344	79.9446	10.0603	67.95	8.428	6.1571		0.978721	21.0367
27.5093	9.971	7.713	2.062	1.212	0.942	0.731	3.05	2.474	7.992	28.044	12.824	19.463	63.663	62.184	18.549	11.953	51.539	8.601	5.6218	23.5952	43.3123	9.0772	12.931	9.411	32.461	34.724	1.879	1.049	5.0827	66.8997	90.7874	6.8702	75.18	12.449	7.1511		0.982977	21.47
27.6284	7.568	5.709	1.766	1.323	0.944	1.203	2.786	2.459	5.805	37.897	18.296	21.605	50.772	51.086	23.353	15.545	50.716	7.296	4.9551	17.6974	48.4716	7.6449	19.639	11.704	39.556	25.613	1.462	1.168	2.8654	52.2745	100.333	4.9875	79.496	14.029	9.545		0.987233	21.3592
27.7475	4.533	4.388	1.136	0.736	0.816	0.903	1.962	1.721	6.271	41.942	19.161	29.783	32.871	44.513	29.206	19.164	42.347	5.314	5.0699	11.3071	40.2028	4.7553	26.084	12.304	46.637	17.268	1.158	1.212	3.1409	30.9196	103.207	3.9892	88.005	18.098	11.5787		0.991489	20.3344
27.8666	3.308	4	1.361	0.513	0.573	0.682	2.082	1.277	3.393	42.242	26.258	34.322	22.274	35.639	35.529	25.448	28.877	4.069	3.1564	8.0103	29.8298	3.9408	30.481	16.617	53.812	13.898	1.056	1.057	2.5561	18.4286	94.1188	3.7063	85.55	20.368	15.0232		0.995744	19.2416
27.9857	3.391	3.725	1.181	0.5	0.709	0.503	1.24	1.348	3.608	41.516	29.082	43.987	12.976	27.392	45.065	28.274	20.278	4.738	2.43	8.6351	21.3376	3.2327	41.625	18.858	64.77	11.092	1.435	0.424	2.2787	13.0522	85.2752	2.4049	66.961	22.982	16.2627		1	18.6448

## Sheet: Image2 (3)
X0	Y0	Y1	Y2	Y3	Y4	Y5	Y6	Y7	Y8	Y9	Y10	Y11	Y12	Y13	Y14	Y15	Y16	Y17	Y18	Y19	Y20	Y21	Y22	Y23	Y24	Y25	Y26	Y27	Y28	Y29		Ap-basal	Avg int
0	33.1018	33.3088	20.495	24.431	37.321	27.71	22.97	17.891	11.701	8.42	22.456	38.238	65.738	43.014	40.688	37.838	39.805	39.945	45.667	54.711	41.697	41.707	48.826	35.112	37.221	48.714	61.705	58.563	33.135	29.854		0	36.7328
0.1191	37.0477	37.2805	20.873	26.484	39.141	28.303	22.171	21.24	13.379	8.935	24.414	43.209	73.814	46.828	44.536	38.455	39.829	44.154	48.67	60.292	42.458	45.424	60.474	40.822	39.122	53.562	64.701	60.153	42.881	34.263		0.00341332	40.0972
0.2382	42.3937	38.2576	20.69	29.564	45.239	31.819	23.047	21.747	15.454	10.324	28.391	49.073	83.584	47.627	48.567	45.462	41.517	44.216	49.656	66.394	43.579	51.035	67.673	45.568	45.277	63.597	77.153	65.144	44.238	34.241		0.00682664	44.0176
0.3573	45.4175	42.5197	23.469	32.288	48.37	32.798	25.553	27.374	19.234	12.839	40.192	60.984	96.591	54.051	57.056	52.577	55.277	48.122	58.648	73.323	49.106	54.189	76.539	48.584	51.873	70.062	85.329	71.258	50.71	44.288		0.01024	50.2874
0.4764	49.9204	46.9868	23.227	33.438	52.103	33.029	28.389	33.878	23.518	16.398	51.88	66.443	110.414	60.566	61.525	59.892	59.652	51.908	60.761	73.625	58.199	58.986	86.999	57.091	56.875	78.062	92.137	80.721	67.582	56.092		0.0136533	56.3432
0.5954	50.9879	50.5701	24.833	40.926	58.775	37.192	33.377	42.728	31.085	22.008	58.834	75.329	130.131	68.558	69.687	74.307	66.868	61.765	63.69	88.736	64.532	73.254	98.497	65.284	67.043	92.363	112.241	93.214	76.722	75.25		0.0170637	65.6262
0.7145	60.253	54.7936	29.035	45.058	65.608	46.103	41.578	56.737	43.321	28.868	70.194	90.108	147.267	73.741	78.503	86.658	73.965	76.763	71.865	99.149	77.968	77.909	117.545	79.187	81.668	105.237	132.404	115.232	107.752	90.466		0.0204771	77.4979
0.8336	62.689	60.2227	30.657	50.405	73.949	48.167	51.274	74.6	62.824	39.053	85.472	113.842	162.137	75.059	95.746	99.337	91.779	83.683	77.365	106.987	86.091	95.216	135.473	89.616	101.442	120.537	145.138	135.885	140.202	116.205		0.0238904	90.3684
0.9527	68.9795	69.6375	35.674	59.006	82.443	53.227	64.414	93.021	96.957	51.13	101.699	133.549	171.728	79.07	110.465	113.896	102.374	90.688	81.525	104.864	98.428	108.951	156.598	110.792	119.341	136.508	165.188	156.547	172.847	137.617		0.0273037	104.239
1.0718	74.4925	70.0504	40.718	73.428	97.672	62.158	80.754	115.441	124.331	74.907	117.732	159.647	183.198	90.89	120.724	132.878	118.041	103.557	92.76	119.306	114.327	125.353	168.497	137.889	141.311	149.556	182.471	184.96	209.457	167.89		0.030717	121.147
1.1909	82.6064	68.2092	44.32	89.282	104.781	74.085	89.37	127.955	155.464	102.709	135.771	178.694	194.08	95.948	134.627	146.547	128.447	113.938	100.95	129.928	133.741	148.542	199.431	167.454	163.972	163.183	198.677	208.363	235.879	192.53		0.0341303	136.983
1.31	87.7349	72.4097	51.309	104.14	109.766	79.255	112.493	154.892	186.167	133.816	153.379	196.19	207.299	107.947	154.59	161.165	139.316	123.899	113.618	134.551	150.594	163.591	209.28	188.417	179.883	185.711	208.849	231.963	241.88	203.325		0.0375437	151.581
1.4291	89.3087	74.1158	51.015	121.054	118.044	90.366	129.855	169.026	198.753	157.41	170.202	209.516	217.304	119.919	167.53	170.014	154.926	136.058	120.42	138.022	166.812	178.974	223.425	207.538	193.699	197.096	219.879	242.756	248.157	220.713		0.040957	163.397
1.5481	88.0471	68.9015	59.166	132.074	127.419	100.662	141.79	178.521	210.288	181.19	185.719	218.266	217.034	124.652	177.641	182.242	160.866	147.323	123.632	148.407	174.576	193.972	229.933	219.484	203.983	204.89	224.361	248.251	251.137	231.391		0.0443674	171.861
1.6672	80.3614	68.8964	62.705	138.859	139.376	106.376	149.687	183.478	205.394	196.755	202.307	223.367	225.405	142.233	183.642	178.674	170.533	152.235	135.27	149.654	184.319	205.926	234.674	230.468	215.61	212.296	232.531	250.042	252.115	241.577		0.0477808	178.492
1.7863	72.33	66.102	71.166	142.482	140.696	115.775	143.929	174.55	191.925	208.327	207.091	220.585	222.632	156.335	193.395	188.118	173.37	155.631	143.254	151.833	194.043	214.463	237.526	230.814	216.867	221.905	232.795	251.008	251.889	247.204		0.0511941	181.268
1.9054	64.4102	65.3156	74.767	146.61	133.733	118.814	146.039	165.078	171.885	214.619	203.547	214.304	225.56	173.667	198.527	180.059	174.752	165.878	151.61	161.968	196.973	223.353	237.271	232.524	215.725	225.362	226.605	246.924	248.58	251.639		0.0546074	181.87
2.0245	61.3676	58.9456	77.526	143.465	132.579	122.83	146.465	148.902	141.647	207.474	195.803	201.599	209.139	189.833	198.201	159.02	179.978	161.943	146.23	156.513	201.09	226.08	226.874	227.406	207.954	227.361	220.986	246.278	240.501	250.256		0.0580207	177.142
2.1436	54.7419	61.1015	87.155	141.596	123.165	128.129	136.445	134.879	118.708	195.162	189.416	188.221	203.151	200.297	188.455	140.949	168.676	158.503	152.45	156.63	190.645	229.476	213.751	222.693	197.304	230.35	205.854	234.088	219.463	246.33		0.0614341	170.593
2.2627	49.4141	54.9709	95.799	127.447	120.875	130.055	128.776	110.614	98.051	188.535	176.338	175.699	191.216	206.707	179.926	125.077	156.685	154.33	151.495	151.783	197.434	226.267	190.604	199.746	178.202	227.781	195.874	221.79	196.544	236.259		0.0648474	161.476
2.3818	42.7099	52.9159	103.884	117.764	113.721	124.457	129.485	97.109	78.008	157.933	152.6	168.779	177.779	200.49	164.39	109.033	145.716	141.288	146.368	142.911	183.049	216.584	174.687	182.709	165.872	226.155	181.217	204.986	161.341	217.117		0.0682607	149.369
2.5008	37.466	48.7095	109.508	108.012	97.249	130.725	117.668	84.672	70.395	136.041	130.675	148.771	161.97	198.768	153.877	98.916	135.347	129.502	140.746	136.643	179.143	202.607	155.062	147.81	145.197	219.073	171.405	169.871	131.422	197.399		0.0716712	136.488
2.6199	31.2128	45.07	116.291	95.821	95.775	128.829	113.07	70.563	61.813	107.662	126.951	131.861	142.437	198.094	138.401	82.787	120.785	115.479	130.944	130.675	170.544	189.859	133.301	126.374	132.39	206.087	163.043	154.477	114.287	179.519		0.0750845	125.147
2.739	29.4819	43.7814	121.002	85.282	88.812	130.541	102.101	62.299	49.445	96.91	110.682	111.755	127.908	191.964	122.799	77.96	110.147	107.633	120.145	120.368	157.376	174.731	116.887	106.937	122.453	190.375	157.899	148.005	100.075	156.437		0.0784978	114.74
2.8581	26.5156	39.8118	125.48	82.423	77.664	120.145	89.722	50.581	44.68	83.688	95.518	96.559	106.67	182.59	114.597	68.436	103.493	97.661	107.416	107.739	140.861	151.71	104.814	93.807	109.891	180.826	150.866	133.356	88.653	138.002		0.0819111	103.806
2.9772	27.4007	36.4756	128.092	70.375	67.102	120.026	85.711	40.892	37.762	70.776	79.873	83.26	87.665	167.851	106.634	58.252	87.376	90.279	97.975	91.771	127.25	132.611	93.336	80.485	101.207	170.885	141.132	113.326	76.447	124.63		0.0853244	93.2286
3.0963	23.8632	35.3143	125.485	60.579	60.591	108.27	77.672	40.686	35.196	58.365	69.738	70.308	71.321	169.963	98.23	55.63	79.648	81.882	87.148	85.139	110.919	115.906	85.291	74.125	86.555	160.61	137.855	102.761	71.624	106.235		0.0887378	84.897
3.2154	21.3544	30.8931	127.452	54.653	54.659	99.576	69.225	36.524	29.488	51.714	57.485	58.323	53.709	154.993	89.012	52.312	69.478	77.953	81.903	75.375	94.433	99.985	72.561	66.275	80.92	138.586	132.823	98.574	66.239	88.859		0.0921511	76.1779
3.3345	20.2511	29.4138	114.782	49.547	43.458	83.857	63.553	32.043	25.639	41.322	49.274	49.359	45.1	138.682	83.066	46.746	61.749	75.006	71.82	64.579	81.289	83.343	64.485	61.836	71.759	125.028	122.781	85.991	57.358	77.225		0.0955644	67.3447
3.4535	17.6635	29.6626	103.021	39.689	36.842	73.196	56.355	30.541	23.884	36.582	40.949	42.252	36.482	121.152	71.042	43.543	55.733	66.301	71.153	56.371	68.346	74.807	55.037	56.677	64.964	107.731	117.08	76.508	54.748	63.449		0.0989749	59.7254
3.5726	19.3362	27.0672	90.661	30.495	31.738	64.509	48.649	25.876	21.33	33.948	34.424	39.518	27.611	103.842	65.512	36.735	51.939	57.429	66.322	47.342	59.461	63.722	51.212	51.773	59.859	97.056	111.396	71.162	50.008	55.768		0.102388	53.19
3.6917	18.2383	26.0751	79.689	27.046	28.537	55.699	43.926	22.696	19.826	29.229	30.631	31.083	20.269	88.927	59.437	32.881	43.892	51.462	58.334	40.969	51.963	55.41	43.272	49.236	56.352	79.449	102.906	67.63	47.546	48.282		0.105802	47.0297
3.8108	17.4214	26.7042	71.719	23.862	23.245	46.776	35.395	23.091	19.74	25.529	29.565	24.734	18.304	76.218	52.102	28.002	40.116	50.927	52.971	33.513	45.503	48.282	38.498	42.076	45.713	67.033	101.107	60.988	44.303	45.622		0.109215	41.9687
3.9299	17.1548	28.8573	62.436	17.525	20.238	39.958	33.864	20.244	18.981	21.844	24.573	23.958	16.986	63.035	47.041	24.25	35.331	49.545	45.002	24.708	40.899	43.169	34.085	36.261	41.986	55.518	94.523	55.307	42.627	39.541		0.112628	37.3149
4.049	17.3945	28.9642	53.755	14.224	16.261	33.244	26.529	17.537	17.663	20.549	18.641	20.2	13.082	50.245	38.403	22.139	33.011	44.383	40.211	18.663	33.241	37.314	30.4	33.884	38.712	47.487	89.31	47.078	37.494	39.422		0.116041	32.648
4.1681	17.1075	30.2793	44.862	14.082	14.1	27.378	21.795	16.953	15.956	20.447	19.005	16.715	10.98	38.942	32.369	19.36	30.811	39.665	33.735	17.588	28.194	34.315	29.77	32.426	31.652	39.431	82.614	48.915	31.187	32.769		0.119455	29.1134
4.2872	16.3366	31.2945	35.724	11.955	13.348	24.391	19.493	15.87	13.938	17.673	17.872	14.748	11.518	34.15	30.749	15.485	24.951	31.253	31.596	15.906	25.314	30.989	25.57	31.424	29.291	30.813	77.512	46.306	31.059	29.261		0.122868	26.193
4.4063	13.3227	31.0978	32.29	9.578	11.046	22.144	17.203	14.345	13.572	16.955	14.772	12.468	9.803	27.818	24.379	14.985	23.289	31.403	27.606	13.077	26.145	26.415	23.17	27.615	25.268	26.361	71.739	38.447	29.49	26.576		0.126281	23.4127
4.5253	15.7364	29.3628	29.22	7.9	8.928	17.821	13.617	11.263	13.391	16.125	15.446	11.001	9.142	23.77	21.799	12.547	21.883	28.356	25.978	13.689	21.433	24.249	21.077	25.639	21.587	20.441	66.431	38.831	28.507	25.469		0.129692	21.3546
4.6444	16.7875	31.8402	22.987	7.528	6.791	16.132	12.985	11.137	12.226	13.797	11.89	9.719	8.911	21.804	19.273	11.728	21.114	27.889	24.667	10.351	16.745	20.923	16.73	21.925	21.044	15.445	63.036	35.648	25.16	25.181		0.133105	19.3798
4.7635	15.8392	30.6642	19.762	6.058	7.185	12.766	11.083	10.015	11.625	14.538	10.424	7.856	7.382	20.316	17.331	9.331	18.801	23.76	19.299	10.902	16.721	18.248	17.159	20.746	20.169	13.856	59.722	32.019	23.31	22.627		0.136519	17.6505
4.8826	15.4363	28.7476	15.358	6.155	5.758	11.567	10.244	8.696	9.179	13.297	10.452	7.585	8.036	20.885	13.939	7.941	16.539	21.721	15.958	8.468	13.161	16.533	15.149	18.244	14.434	14.018	49.478	25.808	22.687	19.855		0.139932	15.511
5.0017	16.0121	27.1769	13.975	6.086	5.214	9.746	10.253	8.444	9.978	13.455	9.532	6.269	7.734	20.185	11.321	6.402	14.573	21.314	14.788	8.419	10.373	15.619	12.113	17.888	15.334	11.853	42.428	24.578	18.579	19.301		0.143345	14.2981
5.1208	16.7149	28.5178	13.779	5.006	5.28	10.134	8.607	7.025	10.182	12.123	8.633	4.935	6.361	15.562	9.59	5.149	12.421	19.725	12.142	7.05	10.307	12.405	11.456	12.714	13.444	8.333	38.83	21.635	19.466	18.508		0.146758	12.8678
5.2399	17.4391	24.9796	11.507	4.66	4.163	9.391	7.239	6.591	8.228	9.619	7.908	4.355	5.977	13.231	7.411	5.715	11.117	15.875	11.648	7.294	9.072	11.872	9.986	12.993	12.899	7.483	33.447	21.883	19.013	16.6		0.150172	11.6532
5.359	15.8806	21.3557	10.076	4.828	3.159	6.363	6.776	6.464	7.255	8.832	7.791	3.458	5.753	13.471	7.217	4.602	9.498	13.37	9.733	7.346	9.293	8.826	8.468	12.108	10.217	7.977	32.918	18.022	16.175	15.436		0.153585	10.4223
5.478	14.5866	18.937	10.294	4.948	4.54	5.995	7.258	6.084	6.799	9.26	7.961	3.088	6.052	10.506	5.203	4.718	9.943	12.21	8.659	6.802	9.363	7.449	8.39	11.321	9.043	5.55	28.895	18.358	13.222	13.124		0.156996	9.61862
5.5971	14.9417	17.1562	8.103	4.79	3.848	7.377	7.033	4.512	7.528	8.864	6.498	2.623	6.515	10.581	5.286	4.394	7.294	11.234	7.812	6.108	7.169	7.151	7.669	9.505	8.565	5.323	26.613	17.546	14.571	13.336		0.160409	8.9982
5.7162	14.6697	16.519	7.723	4.812	3.684	6.474	5.449	5.351	7.205	8.733	5.137	2.192	4.621	10.142	5.315	3.541	5.659	9.01	6.516	6.303	6.83	4.749	7.568	8.66	8.012	5.63	24.856	16.222	12.571	13.651		0.163822	8.26016
5.8353	12.8969	15.9458	7.164	3.726	2.628	5.861	5.85	4.37	6.835	7.971	4.355	2.49	5.653	10.243	5.935	3.583	5.361	8.223	5.324	5.951	7.736	4.173	5.878	7.547	6.517	5.244	22.371	13.488	11.589	11.536		0.167236	7.54816
5.9544	13.7652	14.2797	5.803	3.492	2.283	4.484	5.314	4.203	5.456	6.224	4.705	2.768	5.822	10.997	4.586	3.504	4.585	7.786	4.609	5.233	7.166	4.366	3.992	7.013	5.764	6.02	19.672	11.222	11.693	9.971		0.170649	6.8926
6.0735	13.8731	12.3261	6.94	3.157	3.323	4.563	4.771	4.159	4.849	6.862	4.229	2.159	4.611	10.621	3.831	3.119	3.947	6.12	3.165	5.331	7.597	4.236	4.317	5.798	5.661	5.341	19.653	11.39	9.417	8.134		0.174062	6.45001
6.1926	12.2974	11.6604	5.497	3.445	2.641	4.713	5.455	3.683	5.109	5.972	3.593	2.488	4.662	12.627	4.06	2.928	3.753	5.943	3.979	5.259	7.641	3.752	3.392	5.69	4.629	5.17	15.526	9.977	9.539	7.586		0.177476	6.08889
6.3117	10.1504	9.6098	6.069	2.926	2.251	5.25	5.007	3.793	4.413	4.976	4.013	2.439	4.72	10.18	4.496	3.231	3.727	6.49	3.738	4.141	7.1	4.294	3.154	4.773	4.887	4.356	14.453	9.815	7.92	6.888		0.180889	5.64201
6.4307	10.9317	8.9948	7.146	3.021	2.42	4.557	5.05	2.997	3.592	4.523	3.162	2.354	4.225	11.125	3.709	3.165	2.838	5.195	3.19	4.334	7.897	4.375	2.411	3.292	3.489	4.309	13.389	6.422	8.404	6.83		0.184299	5.24492
6.5498	9.7257	7.5646	6.904	2.352	2.49	3.408	3.881	2.462	3.522	4.083	2.932	2.461	3.966	12.683	3.553	3.496	3.278	5.639	2.952	4.6	6.708	4.573	2.446	3.846	3.433	3.963	11.571	7.845	6.244	5.723		0.187713	4.94348
6.6689	9.4999	6.8708	5.199	2.582	2.451	3.568	3.58	3.67	4.219	3.621	3.663	2.333	4.519	12.952	3.063	3.21	2.642	4.128	2.585	3.757	6.712	3.005	2.502	3.184	4.028	3.541	10.629	7.006	7.343	5.713		0.191126	4.72586
6.788	8.6697	6.715	5.534	2.451	2.83	3.258	4.193	2.643	3.601	3.686	2.994	2.139	5.17	14.695	3.013	2.539	2.851	3.245	2.896	4.298	6.267	2.655	2.377	2.978	3.67	3.774	11.426	6.043	4.831	5.6		0.194539	4.56806
6.9071	7.1574	7.3793	5.437	3.237	2.985	3.682	4.709	2.821	3.553	3.573	2.4	2.579	4.005	13.488	3.659	2.41	3.165	3.281	2.901	3.214	6.348	3.874	2.115	3.535	3.239	3.212	11.395	4.954	6.034	4.46		0.197953	4.49339
7.0262	6.2179	6.4076	5.509	3.161	2.506	3.485	5.354	2.954	3.359	2.782	2.802	2.59	4.126	14.123	3.535	1.995	2.82	4.114	2.878	4.072	6.552	2.854	2.4	3.482	3.227	2.692	9.232	5.633	5.225	3.942		0.201366	4.33432
7.1453	5.5984	5.8809	5.338	4.044	2.41	3.949	5.066	1.855	2.877	2.94	2.894	1.977	4.265	15.514	2.921	2.272	2.928	3.133	2.491	4.033	6.235	3.256	2.241	2.593	2.471	2.205	10.421	4.154	4.681	4.357		0.204779	4.16668
7.2644	4.6179	4.9207	4.017	3.244	2.166	3.3	4.391	1.594	2.68	3.302	2.593	2.791	3.732	16.381	2.691	2.941	2.786	3.062	2.922	4.556	7.967	2.856	2.745	2.648	2.809	3.743	9.862	3.886	4.678	3.377		0.208193	4.10862
7.3834	4.7653	4.7343	5.393	2.694	2.214	2.837	4.454	2.602	3.118	3.322	2.312	2.119	3.688	15.035	3.101	3.09	2.317	2.79	2.423	4.69	6.586	3.094	2.107	2.399	3.21	2.665	10.652	3.468	4.332	3.844		0.211603	4.00185
7.5025	4.6776	4.9149	5.008	3.277	1.995	2.787	4.317	1.975	2.826	2.849	2.512	2.503	3.909	15.986	3.645	2.347	1.875	2.883	2.251	3.69	6.435	2.79	2.104	2.67	2.849	3.232	9.623	4.009	3.758	3.073		0.215016	3.89235
7.6216	5.4494	4.8617	5.757	3.324	2.145	3.462	4.403	3.041	2.162	2.298	1.458	2.004	3.115	17.495	3.068	2.482	2.339	2.612	2.522	4.287	6.496	2.992	2.283	2.529	3.105	2.307	11.334	3.748	4.02	3.577		0.21843	4.02254
7.7407	4.6176	5.2097	4.838	2.373	2.84	3.071	4.354	2.394	2.216	1.881	1.806	2.532	3.625	16.05	2.963	2.015	2.543	2.415	2.12	3.446	5.822	2.536	1.373	2.107	2.843	2.707	11.456	3.95	3.447	2.928		0.221843	3.74928
7.8598	3.5025	5.0078	4.231	2.267	2.452	2.154	3.754	2.347	2.344	1.983	1.57	2.429	4.278	16.139	3.31	2.524	2.326	1.879	1.817	3.24	7.773	2.228	2.165	1.88	2.612	2.829	10.953	4.029	3.305	2.581		0.225256	3.66364
7.9789	4.2304	3.705	4.447	3.079	1.915	2.9	3.875	1.865	1.565	2.126	1.429	1.735	4.268	15.442	3.481	2.008	2.027	2.254	2.232	4.105	6.924	3.053	2.07	2.724	2.084	3.17	10.162	3.28	3.706	2.998		0.22867	3.62865
8.098	3.8882	4.2002	4.045	2.887	2.551	2.683	4.308	1.922	2.422	2.42	1.949	1.893	4.141	17.831	3.181	2.238	2.69	1.695	2.171	3.418	6.668	2.781	1.844	2.689	1.873	3.097	9.058	3.71	2.827	3.012		0.232083	3.66975
8.2171	3.3836	3.6743	4.507	3.239	2.438	3.071	3.673	2.075	2.128	1.95	2.206	2.297	3.875	17.805	3.307	2.479	2.654	1.853	2.025	3.418	7.984	2.456	1.971	2.16	1.927	2.571	10.539	2.321	3.678	3.243		0.235496	3.69693
8.3362	3.262	2.9972	4.328	3.625	2.768	3.638	3.886	2.259	2.223	2.379	1.833	2.511	3.303	17.391	3.66	2.548	2.119	1.792	2.782	3.264	7.482	2.755	2.129	1.944	2.339	3.065	9.449	2.382	3.918	3.779		0.23891	3.72701
8.4552	4.1345	2.8323	3.869	3.34	2.108	3.674	3.696	1.653	1.875	2.317	1.466	1.652	3.347	18.238	2.344	2.319	2.132	2.131	2.215	2.845	6.89	2.417	2.575	1.59	2.379	3.347	10.226	2.392	2.888	3.308		0.24232	3.53999
8.5743	3.7588	4.4402	4.915	2.887	3.218	3.023	4.399	2.051	2.399	2.195	1.746	1.695	3.274	18.977	3.443	2.176	2.835	2.774	2.571	3.744	7.238	2.591	1.729	2.001	2.319	3.437	9.901	2.23	2.84	3.705		0.245733	3.81707
8.6934	4.3221	4.2374	5.073	2.896	3.495	2.799	4.264	2.414	2.148	2.395	1.786	1.939	3.144	19.361	3.379	2.098	2.074	2.508	2.477	2.861	7.473	2.644	1.515	2.596	2.117	3.247	10.62	2.08	2.615	2.732		0.249147	3.77698
8.8125	3.2884	3.4411	4.717	2.897	2.729	2.306	4.955	2.349	1.719	2.492	2.194	2.435	4.406	18.949	3.529	2.087	2.102	2.33	2.127	3.456	7.178	2.182	1.312	2.163	2.166	3.512	11.826	2.799	3.116	2.771		0.25256	3.78445
8.9316	3.0331	3.6361	4.017	3.022	2.381	2.532	4.308	2.132	1.794	1.841	2.06	2.474	3.607	19.929	3.084	1.921	2.434	2.009	2.063	3.931	7.352	2.606	1.572	2.213	2.333	3.165	10.65	2.216	3.069	2.942		0.255973	3.67754
9.0507	3.184	3.6807	3.866	2.35	2.645	2.434	5.141	2.451	1.566	1.399	1.604	1.659	3.939	21.024	3.705	1.879	1.981	1.745	2.25	3.521	7.813	2.246	1.053	2.045	2.756	3.003	8.966	2.192	2.269	3.125		0.259387	3.58306
9.1698	3.263	3.1931	4.106	2.031	2.086	2.739	5.266	2.406	1.399	1.716	2.421	2.051	3.788	21.712	3.341	2.42	2.627	1.831	2.231	3.41	7.895	3.221	1.308	1.597	2.261	3.587	9.757	2.437	2.786	2.712		0.2628	3.71994
9.2889	2.4366	3.4257	4.397	2.807	2.323	2.346	5.159	2.389	1.978	1.899	1.761	1.959	4.016	21.713	3.122	2.398	2.408	2.799	2.359	3.818	7.651	2.814	1.955	2.411	2.402	3.426	9.785	2.228	2.313	3.28		0.266213	3.79261
9.4079	2.6701	2.6809	4.843	3.152	2.853	2.775	4.485	1.753	1.72	1.51	2.162	2.899	4.201	23.753	4.016	2.924	1.896	2.232	1.634	3.425	7.606	1.967	2.318	2.364	1.573	3.122	9.891	2.135	2.538	2.852		0.269624	3.79833
9.527	2.6451	3.846	5.203	2.281	2.93	2.018	5.827	2.378	2.081	2.061	2.191	3.069	4.713	23.368	3.1	3.043	2.186	1.892	2.039	3.346	8.797	2.456	1.977	2.063	2.176	3.825	11.248	3.223	2.948	2.946		0.273037	4.06254
9.6461	3.0233	3.0164	4.094	2.704	2.709	2.14	5.522	1.802	1.662	1.49	2.216	2.372	3.699	22.308	3.159	2.702	2.041	2.034	2.394	3.667	8.351	2.852	1.978	1.493	1.771	2.875	10.826	1.95	3.184	2.39		0.27645	3.74749
9.7652	2.98	3.1895	3.826	2.476	3.28	2.848	5.568	2.534	1.728	1.787	1.872	1.978	3.916	22.079	3.569	2.309	1.865	2.214	2.216	3.199	7.472	2.688	1.581	1.607	2.209	2.76	10.387	2.074	2.773	2.516		0.279864	3.71668
9.8843	3.0318	3.3888	4.289	2.857	3.35	2.305	5.503	1.492	1.974	1.884	1.995	2.708	4.715	23.623	2.958	2.483	2.16	2.793	1.655	3.239	10.352	3.096	1.911	1.706	1.995	2.916	11.095	2.59	1.978	2.687		0.283277	3.95765
10.0034	2.1599	2.3371	5.509	3.503	2.938	2.4	5.463	1.49	2.048	1.861	1.931	2.449	3.804	22.582	3.478	2.002	2.117	2.324	2.131	3.453	9.335	2.644	2.016	2.76	2.532	3.098	11.545	3.031	2.354	2.398		0.28669	3.9231
10.1225	2.2922	2.4039	5.431	3.133	2.455	3.017	6.101	2.015	2.132	1.982	2.34	2.92	3.94	27.755	3.393	2.175	2.179	1.959	2.257	3.364	10.77	2.403	2.072	2.106	2.371	3.023	12.212	2.388	2.462	2.321		0.290104	4.17907
10.2416	2.548	2.8221	5.437	3.518	3.294	3.202	5.042	1.69	1.517	1.423	1.973	2.275	3.54	27.317	3.012	2.141	2.525	2.345	1.834	3.661	9.62	2.792	1.754	2.039	2.41	4.019	11.394	2.36	2.111	2.094		0.293517	4.05697
10.3606	2.0906	2.8162	5.636	3.382	3.484	3.124	5.902	1.399	1.804	1.649	2.407	2.198	4.041	23.149	3.963	2.306	2.315	2.151	2.225	3.306	9.492	2.831	2.196	2.276	2.318	3.258	12.83	2.846	2.92	2.379		0.296927	4.08979
10.4797	2.0624	3.9709	5.36	2.956	2.296	2.8	5.777	2.102	1.748	1.617	1.992	2.536	3.539	23.386	3.841	2.057	2.973	2.028	2.51	4.054	9.87	2.357	1.939	2.619	2.359	3.092	13.91	2.029	2.508	2.087		0.300341	4.07918
10.5988	2.3765	2.9474	5.622	3.23	3.298	2.458	5.924	2.083	1.952	1.606	2.327	2.284	4.308	25.216	4.145	2.476	2.562	2.476	2.681	2.976	11.163	2.526	1.98	2.158	1.675	3.859	13.737	1.787	2.391	2.458		0.303754	4.22273
10.7179	2.5831	2.8261	5.834	3.28	3.862	3.127	6.989	1.275	1.604	1.75	2.14	2.385	4.039	25.253	3.626	2.522	2.475	1.984	2.043	3.564	9.119	2.198	1.319	2.19	2.818	3.702	14.426	2.21	2.353	2.941		0.307167	4.21457
10.837	1.8921	2.9108	6.454	4.232	3.48	2.403	7.246	1.849	1.712	1.377	2.054	2.534	3.822	27.864	3.526	1.903	1.996	2.042	2.299	3.358	9.918	2.613	2.303	1.868	2.297	3.433	14.862	2.176	2.205	2.779		0.310581	4.3136
10.9561	1.9995	2.7315	7.772	4.672	3.369	3.423	8.096	2.489	1.259	2.038	1.836	2.169	3.676	27.637	3.866	2.326	2.196	2.333	1.935	3.556	9.211	2.848	1.745	2.392	2.531	2.999	14.984	1.813	2.493	3.25		0.313994	4.45483
11.0752	2.0194	2.6749	6.486	3.225	2.841	3.016	8.935	2.05	1.661	1.752	1.801	2.688	3.908	26.76	3.284	2.363	2.894	2.389	1.94	2.716	11.526	2.124	1.719	2.155	1.925	2.721	14.204	2.326	2.85	2.81		0.317407	4.32544
11.1943	1.8076	3.5073	6.565	3.882	3.274	2.646	9.427	1.488	1.619	1.95	2.22	2.363	3.577	29.368	3.17	1.662	2.079	2.237	1.923	3.276	10.576	2.469	2.189	2.06	2.229	3.033	16.462	1.878	2.257	2.167		0.320821	4.44536
11.3133	1.5166	3.0917	7.826	3.684	3.213	2.354	10.848	2.359	1.881	2.236	2.241	2.943	3.108	27.75	3.857	2.032	2.312	2.696	2.064	3.241	11.908	2.248	1.833	1.747	2.598	3.761	17.114	2.159	2.445	2.447		0.324231	4.65044
11.4324	2.2102	3.4898	9.366	3.35	2.558	2.505	13.865	2.394	2.268	1.361	2.021	2.409	3.347	25.832	3.667	2.958	2.524	3.003	2.021	2.76	12.261	2.792	2.039	2.268	3.67	4.282	17.353	2.185	2.724	2.516		0.327644	4.86663
11.5515	1.9955	3.0887	7.29	3.514	3.056	3.019	17.1	2.076	2.249	1.693	2.375	2.77	4.13	25.934	4.031	2.567	2.019	2.217	2.308	3.002	12.876	3.093	2.332	2.646	2.412	3.31	17.771	2.128	2.057	2.834		0.331058	4.92977
11.6706	1.8908	3.2839	6.552	3.709	3.354	3.1	18.062	2.309	1.898	2.002	2.48	2.344	4.24	25.091	4.746	2.474	2.598	2.277	2.243	3.345	14.56	3.592	2.375	2.504	2.563	2.752	20.764	2.439	1.875	2.889		0.334471	5.14372
11.7897	2.6669	3.1584	7.398	2.896	2.73	3.099	19.207	2.256	1.701	2.206	2.216	2.813	3.994	26.01	4.587	2.41	2.654	1.917	2.189	3.676	15.47	3.516	2.693	2.301	2.565	3.234	25.452	2.165	2.982	2.836		0.337884	5.43328
11.9088	2.8704	3.2079	7.644	3.623	3.003	3.309	19.023	2.835	2.239	1.947	2.816	2.853	3.33	27.294	3.376	2.073	2.5	2.284	2.419	3.663	14.272	2.792	1.999	2.65	2.531	2.983	29.63	2.6	2.498	2.529		0.341298	5.55978
12.0279	2.8547	3.5073	8.742	3.85	3.009	3.91	20.847	2.206	1.638	2.299	2.463	3.169	3.089	27.99	5.202	1.992	2.451	3.005	2.6	4.051	15.281	3.223	2.328	2.449	2.696	3.203	34.807	2.21	2.848	2.984		0.344711	6.03013
12.147	2.3323	4.1894	7.95	3.149	2.904	3.464	19.864	2.726	1.938	2.282	2.598	3.175	2.851	25.611	4.6	2.436	2.881	2.48	2.156	3.3	16.701	2.887	1.957	2.283	2.46	3.388	41.579	2.459	2.181	2.611		0.348124	6.04642
12.2661	3.1419	3.707	6.951	3.405	3.14	2.781	18.495	2.699	1.575	1.72	1.923	2.421	2.96	24.935	4.665	2.898	2.401	2.434	2.226	4.166	19.568	3.077	1.726	2.765	2.543	4.151	43.099	2.605	1.644	2.457		0.351538	6.07596
12.3851	2.9382	4.2877	8.28	3.058	2.912	2.482	18.295	2.343	2.3	2.013	2.126	2.594	2.93	23.574	5.338	2.53	2.076	2.024	2.277	4.006	24.199	3.831	1.971	2.149	2.256	3.842	49.727	2.228	1.598	3.068		0.354948	6.44176
12.5042	2.7981	4.1715	7.531	3.725	3.01	3.372	16.853	1.985	2.211	1.808	2.279	2.464	3.247	24.491	5.186	1.921	2.395	2.096	2.102	3.925	30.633	3.94	2.661	2.504	2.567	3.669	45.604	2.105	2.061	3.135		0.358361	6.54832
12.6233	2.8547	3.9284	7.742	3.785	3.285	4.167	18.772	2.273	1.968	0.941	2.608	2.165	3.48	23.449	4.149	2.679	2.533	2.502	1.978	3.82	33.607	3.973	2.633	2.704	3.274	4.437	36.618	1.903	2.639	2.869		0.361775	6.45787
12.7424	3.4083	3.9066	8.494	3.404	3.937	4.294	20.295	2.94	1.351	1.969	2.425	2.42	3.842	21.945	5.006	2.524	2.704	2.899	2.307	4.312	34.665	3.138	2.446	2.512	2.767	4.005	33.96	1.966	2.202	3.22		0.365188	6.5088
12.8615	4.5424	4.5608	9.528	2.778	3.172	4.24	20.401	2.42	1.971	2.294	2.405	2.134	3.264	18.904	4.568	2.576	2.96	2.749	2.717	5.223	34.581	4.066	2.662	2.598	2.929	3.867	35.34	2.476	2.699	2.664		0.368601	6.57631
12.9806	3.2847	5.0357	9.742	3.357	2.844	4.856	22.63	2.349	1.847	2.139	1.782	2.292	3.491	20.095	4.347	2.701	2.802	2.93	2.386	5.154	29.564	4.159	2.654	2.086	3.85	4.081	31.884	2.264	2.641	3.402		0.372015	6.42165
13.0997	3.165	5.4154	8.569	3.33	3.5	3.528	24.12	2.292	1.513	1.996	2.333	3.174	3.633	17.274	5.561	2.494	2.104	2.315	2.456	3.915	27.566	4.428	2.415	2.756	2.98	3.737	38.74	2.657	2.823	2.91		0.375428	6.45665
13.2188	3.7383	5.3452	8.924	3.855	3.268	4.07	23.482	2.314	2.117	2.18	2.286	2.695	3.143	19.32	5.502	2.983	2.572	3.003	2.255	5.279	27.696	4.424	2.961	2.605	2.937	4.299	49.396	3.218	2.721	3.135		0.378841	7.05745
13.3378	2.9798	5.9553	8.515	4.197	3.537	4.458	24.764	2.471	2.4	2.324	2.159	2.538	3.008	16.951	5.657	2.57	1.913	3.275	2.262	5.374	29.208	4.355	2.809	3.276	2.959	3.503	51.077	3.228	2.525	3.093		0.382252	7.11137
13.4569	3.4158	7.0654	7.689	3.856	3.454	4.827	26.579	2.625	2.534	1.904	2.292	2.457	3.202	18.677	5.445	3.07	2.694	2.897	3.113	4.292	31.982	4.797	2.728	2.311	3.778	4.142	51.445	3.335	2.565	2.689		0.385665	7.39534
13.576	3.2247	7.0992	7.957	3.872	4.441	4.225	25.702	2.83	2.361	1.871	2.596	2.633	3.749	18.441	5.576	3.064	3.088	2.829	3.094	5.243	33.275	5.191	2.713	2.67	3.331	3.837	60.2	2.55	2.367	2.624		0.389079	7.75513
13.6951	3.2024	7.3478	8.222	3.097	3.904	4.407	26.951	3.376	2.828	2.159	2.417	2.897	3.518	16.695	6.286	3.048	2.621	3.823	2.863	4.932	37.805	5.799	3.071	2.789	3.09	3.32	64.091	2.397	2.173	2.961		0.392492	8.06967
13.8142	3.5222	8.1353	7.923	4.062	3.237	4.262	29.517	3.059	2.518	2.3	2.293	1.93	3.35	19.128	6.735	2.284	2.445	3.026	2.788	5.496	32.63	5.387	3.09	3.653	2.664	3.537	69.677	1.877	2.189	2.538		0.395905	8.17508
13.9333	3.0951	8.1997	9.359	3.606	4.418	4.294	32.914	2.785	2.35	1.47	2.427	2.741	3.113	16.392	5.708	2.504	2.688	3.119	2.406	5.888	38.159	5.363	3.403	3.137	2.893	4.009	66.709	3.486	3.226	3.362		0.399318	8.44079
14.0524	4.1615	8.1852	9.235	3.37	2.891	5.021	34.374	3.273	2.613	1.998	2.301	3.332	3.011	13.28	5.896	2.82	3.078	3.611	3.193	5.705	37.959	6.265	3.253	3.499	2.894	4.44	73.959	2.833	2.403	3.125		0.402732	8.73262
14.1715	5.7363	10.0225	8.38	3.32	3.754	4.533	33.075	3.24	2.651	2.146	2.207	2.79	2.942	12.354	6.138	2.983	2.515	3.156	3.282	6.202	41.369	6.72	3.925	3.188	2.838	4.649	74.06	2.911	2.837	3.545		0.406145	8.91563
14.2905	6.7704	11.5981	8.39	3.593	3.604	4.341	30.919	3.427	2.62	1.692	1.805	2.395	2.675	12.575	5.84	2.868	2.636	2.557	3.376	5.653	45.504	6.204	3.207	2.223	2.923	4.04	75.29	3.377	2.586	3.461		0.409556	8.93832
14.4096	7.1487	11.6473	7.416	4.458	4.273	5.204	27.579	2.512	1.871	1.789	1.991	2.884	2.759	12.407	6.882	3.185	2.746	2.59	2.936	5.554	48.833	6.883	2.713	2.819	2.901	3.679	70.244	3.819	2.607	3.155		0.412969	8.8495
14.5287	8.5648	11.68	6.308	4.545	3.989	5.464	27.914	2.457	1.949	1.603	2.782	2.84	3.021	12.03	7.054	2.913	3.753	2.543	3.277	5.641	54.371	6.486	3.545	3.118	2.84	3.194	69.303	3.857	2.609	3.081		0.416382	9.09106
14.6478	10.7066	13.9694	4.952	3.691	3.415	5.072	28.053	3.53	2.409	1.941	2.02	3.208	3.196	10.355	8.08	2.472	3.274	2.889	2.776	5.508	59.43	7.503	2.889	2.771	2.639	3.371	65.82	2.934	2.233	2.967		0.419796	9.1358
14.7669	11.5748	15.3688	5.449	4.052	3.892	5.001	25.532	3.223	2.193	2.076	1.736	2.641	2.867	11.903	8.308	3.083	2.987	2.179	2.941	4.399	60.294	7.678	2.982	2.493	3.088	3.073	63.49	3.769	2.665	3.17		0.423209	9.13692
14.886	9.8356	18.1596	6.906	3.9	4.279	5.089	22.537	2.79	2.144	1.946	2.01	2.33	3.1	10.618	9.419	3.432	2.535	2.699	3.519	4.291	63.925	7.389	2.859	2.546	3.771	4.25	69.263	4.165	3.135	4.188		0.426622	9.56767
15.0051	11.5594	20.5804	5.589	3.648	4.231	4.067	23.837	3.32	1.768	1.921	2.412	2.702	3.188	9.486	10.254	3.055	3.207	2.921	2.603	4.807	70.301	7.63	3.221	2.307	3.571	3.542	67.38	4.022	3.041	3.201		0.430036	9.77906
15.1242	10.9786	22.031	6.451	3.509	3.044	4.958	24.352	3.416	2.283	1.655	2.079	2.698	3.313	12.087	11.227	3.169	3.244	2.213	2.928	4.819	74.928	7.64	3.478	2.661	2.616	3.359	68.017	4.242	2.415	3.208		0.433449	10.1006
15.2432	11.335	22.8977	5.373	4.061	3.48	5.415	26.484	3.185	2.053	1.73	2.442	2.842	3.025	10.275	11.618	4.051	2.433	2.836	3.472	4.986	79.927	7.549	3.42	2.688	3.227	3.792	65.683	4.52	3.209	3.483		0.436859	10.3831
15.3623	9.4734	23.6539	6.555	3.28	3.899	4.807	25.231	2.806	2.644	1.679	2.606	2.511	2.556	9.561	11.821	2.746	2.09	2.378	3.111	4.488	89.464	8.895	2.416	2.993	3.57	3.654	67.564	4.043	3.443	3.639		0.440273	10.5859
15.4814	9.6355	24.7871	7.184	2.888	3.896	5.309	25.949	3.593	3.147	1.984	2.565	2.231	2.239	9.266	12.267	3.269	2.395	3.125	3.176	3.711	93.137	8.673	2.303	3.753	3.268	3.425	70.228	4.583	2.938	2.244		0.443686	10.9056
15.6005	8.3593	28.4756	6.133	3.126	4.2	4.693	29.78	3.32	2.878	2.164	2.544	2.582	3.038	8.541	13.331	3.803	2.811	2.934	2.554	4.254	107.361	9.406	2.951	2.914	3.463	3.249	76.373	4.829	2.716	2.896		0.447099	11.856
15.7196	8.9176	27.0901	5.439	2.527	4.17	4.619	29.461	3.456	2.872	2.661	2.327	2.889	3.581	9.258	14.108	3.023	2.579	2.243	2.987	4.452	112.687	9.611	3.285	3.356	3.337	3.212	78.401	4.97	2.745	3.189		0.450513	12.1151
15.8387	9.8281	26.688	5.603	2.383	3.1	5.06	28.273	3.078	2.052	2.582	2.323	3.025	3.451	8.242	15.862	3.453	2.525	2.328	1.959	4.657	118.169	8.21	3.09	2.377	3.788	3.06	80.386	5.363	3.682	3.576		0.453926	12.2724
15.9578	7.5604	29.5748	6.153	2.617	3.405	4.438	27.457	3.282	2.455	2.445	2.244	2.918	2.864	7.898	17.504	3.563	2.335	2.798	2.773	3.318	118.954	7.452	3.222	2.92	2.945	3.392	80.951	5.379	3.102	3.512		0.457339	12.3144
16.0769	8.5575	31.8556	6.328	2.293	2.873	4.325	29.909	3.876	2.314	2.557	2.023	2.628	2.987	8.44	19.502	2.95	2.473	2.567	2.205	4.057	129.789	8.748	3.732	3.174	2.312	4.058	79	5.981	2.821	3.511		0.460753	12.9282
16.196	7.3377	31.7857	6.457	2.661	3.06	4.427	30.341	3.288	2.749	2.529	2.536	2.572	2.542	7.554	23.148	2.683	3.027	3.094	2.03	3.957	127.035	8.312	4.283	3.343	2.722	3.447	79.536	5.645	3.171	3.696		0.464166	12.9656
16.315	8.2177	32.0528	5.53	2.728	3.008	4.685	29.082	2.902	2.569	2.177	2.425	2.273	3.64	6.487	26.312	3.717	2.93	3.182	2.861	3.995	128.925	7.994	3.311	2.324	2.777	3.996	80.872	6.984	2.903	3.461		0.467576	13.144
16.4341	7.1696	32.1431	4.672	2.764	2.834	4.457	30.132	3.928	2.68	2.578	1.968	2.895	2.96	6.637	30.573	3.152	3.101	3.093	2.76	3.788	130.476	8.225	3.398	3.369	2.767	3.818	86.539	6.588	2.512	3.262		0.47099	13.508
16.5532	4.8231	33.9812	4.869	2.419	3.172	5.702	30.328	3.697	2.84	2.236	1.91	2.559	2.431	5.807	31.249	2.817	2.785	2.917	2.461	3.962	122.823	9.297	2.47	2.816	2.744	3.667	92.687	7.232	2.814	2.865		0.474403	13.4127
16.6723	5.4512	33.8538	4.711	2.455	3.47	5.582	30.852	4.582	2.308	2.078	2.422	2.183	3.152	5.342	32.637	3.162	3.039	2.838	2.261	5.011	116.5	9.226	2.571	2.923	3.064	3.641	87.291	6.646	3.713	2.663		0.477816	13.1876
16.7914	5.2433	35.2954	4.726	2.194	3.151	4.518	31.753	3.487	2.935	2.693	2.612	2.762	3.543	5.815	33.986	3.445	3.003	2.708	2.97	5.29	106.889	8.88	2.803	3.134	3.217	3.14	93.206	6.093	2.917	3.633		0.48123	13.2014
16.9105	5.0704	33.2744	4.407	2.527	2.682	5.443	31.548	3.404	2.921	2.212	2.477	2.648	2.685	5.405	36.429	3.331	2.936	2.198	2.612	7.449	89.607	9.517	2.82	2.56	2.598	2.727	92.469	6.503	3.043	3.443		0.484643	12.5649
17.0296	6.8951	33.223	4.508	3.061	2.827	6.433	30.155	3.829	2.769	2.506	2.602	2.219	2.675	5.957	39.761	2.704	2.814	2.113	2.849	6.295	86.136	9.756	3.482	2.508	3.539	3.486	97.916	5.772	3.462	3.324		0.488056	12.8525
17.1487	6.4693	32.4552	4.714	2.93	3.213	5.721	29.544	3.453	2.873	2.009	3.11	2.256	2.513	6.11	41.342	2.716	3.372	2.362	2.644	7.218	73.901	9.011	2.919	2.901	3.126	3.271	94.456	5.639	2.651	3.112		0.49147	12.2671
17.2677	6.5548	35.274	4.021	3.024	3.334	5.333	29.54	4.042	2.292	2.433	2.102	2.442	2.632	6.358	44.515	3.454	2.468	2.408	2.529	5.908	68.301	8.418	2.759	1.973	2.633	4.291	90.08	6.763	3.69	3.339		0.49488	12.097
17.3868	7.0685	33.9468	3.862	3.063	3.258	6.257	28.899	4.023	2.199	2.034	1.862	2.093	2.826	4.862	48.371	3.014	2.68	2.548	2.931	6.485	60.344	7.898	2.984	2.283	3.063	2.644	84.266	7.033	2.942	3.037		0.498293	11.6259
17.5059	7.9988	28.7956	4.08	2.638	3.591	5.985	26.962	4.15	2.092	2.371	1.862	2.708	2.734	4.86	51.614	3.911	2.834	2.462	2.46	5.585	58.74	8.423	2.584	3.016	3.302	2.458	76.577	7.193	2.71	3.279		0.501707	11.2658
17.625	9.4292	27.5195	3.428	3.121	2.452	5.117	26.326	3.934	2.273	2.044	2.313	3.082	2.453	4.69	54.701	3.284	2.328	2.687	2.672	5.662	56.365	8.24	2.365	2.942	3.782	3.499	63.365	7.129	3.428	3.247		0.50512	10.7959
17.7441	9.9426	27.3986	4.444	2.963	2.854	5.756	24.147	3.817	3.466	2.938	2.148	3.167	2.355	4.322	57.548	4.044	2.311	1.929	2.928	6.228	54.948	6.975	2.604	3.162	3.466	3.219	59.5	6.153	2.458	3.79		0.508533	10.6994
17.8632	10.4489	25.7401	4.128	3.339	3.406	5.846	23.894	3.527	2.285	2.654	2.791	2.695	2.575	3.922	61.425	3.578	1.765	1.965	2.039	5.296	50.347	7.959	3.351	3.514	3.312	3.292	52.416	6.573	2.646	3.509		0.511947	10.3413
17.9823	11.7378	27.516	3.645	2.989	3.648	5.745	24.226	3.104	1.814	2.449	2.795	2.928	1.965	4.087	63.057	3.593	2.345	2.208	2.956	4.725	46.579	7.368	3.01	2.626	3.557	2.555	48.919	7.17	3.27	4.001		0.51536	10.2196
18.1014	11.8361	26.0764	3.127	2.865	3.136	5.936	23.472	3.472	2.048	2.682	2.041	2.539	2.781	4.119	61.522	3.564	2.56	2.329	2.778	5.329	43.691	7.249	3.57	2.868	3.382	3.033	47.064	8.194	2.541	3.429		0.518773	9.97445
18.2204	13.8076	24.6012	3.706	3.862	3.198	6.321	23.964	3.254	2.616	2.337	2.366	2.35	2.651	3.712	60.942	3.352	2.766	2.064	3.056	5.824	41.853	6.825	3.545	2.41	2.887	2.719	44.176	6.816	3.495	3.06		0.522184	9.81786
18.3395	15.5882	26.5464	3.066	3.129	3.622	6.219	26.287	3.941	2.538	1.891	2.451	2.387	2.269	4.265	64.432	3.343	2.676	2.227	2.722	5.527	41.343	6.203	3.605	2.477	3.277	3.247	43.33	8.165	3.069	3.428		0.525597	10.109
18.4586	16.2496	23.5567	3.745	2.687	3.077	7.186	25.57	3.272	2.091	2.131	2.133	1.963	2.76	3.442	65.275	3.404	2.754	1.759	2.551	4.529	40.643	6.629	3.211	2.157	2.743	3.145	42.377	8.775	3.301	3.966		0.52901	9.90274
18.5777	17.2972	23.252	3.62	2.927	3.382	6.82	24.995	3.169	1.934	1.928	2.053	2.696	2.373	3.973	66.522	3.572	2.596	2.345	4.005	4.266	37.216	7.112	2.584	2.514	2.535	3.375	36.893	8.473	3.195	3.677		0.532424	9.70997
18.6968	19.2498	24.9801	3.665	3.048	3.299	7.589	26.48	3.128	2.918	2.428	2.078	2.066	2.138	4.653	72.61	3.779	2.43	2.054	2.718	5.153	34.278	7.593	3.195	2.498	3.176	3.591	31.637	8.049	2.462	3.281		0.535837	9.87413
18.8159	21.8902	22.5616	3.922	2.353	3.364	7.803	27.575	3.342	2.608	1.742	2.01	2.529	1.992	4.458	76.374	3.125	2.679	2.326	2.749	4.241	36.117	7.411	3.313	3.072	2.902	3.006	30.27	7.595	2.666	2.758		0.53925	9.95846
18.935	23.9391	19.759	3.539	2.394	3.081	7.337	27.201	3.73	2.388	1.81	2.603	2.593	2.224	4.483	79.227	4.06	2.737	1.888	2.638	4.077	34.113	7.731	3.71	2.284	2.68	2.936	30.427	7.987	2.664	3.367		0.542664	9.9869
19.0541	27.9188	18.1984	3.575	3.086	3.33	7.174	28.19	3.763	2.751	1.456	2.577	2.452	2.355	3.464	82.949	3.533	2.261	2.318	2.505	3.987	31.728	7.468	3.338	2.243	3.144	3.443	24.355	9.553	2.893	3.477		0.546077	9.98284
19.1731	27.2794	16.4647	4.189	3.043	3.418	7.515	28.167	3.485	3.069	2.369	2.655	3.016	2.68	4.098	81.695	2.795	1.851	1.895	2.525	4.466	37.138	7.664	3.232	2.758	2.693	3.607	22.382	9.414	3.028	3.077		0.549487	10.0556
19.2922	29.0347	15.6216	3.838	3.653	3.576	8.407	28.788	3.487	2.689	1.713	2.399	2.171	1.94	4.768	77.23	3.263	2.315	2.26	3.019	4.159	35.353	7.347	3.175	2.296	2.372	3.274	23.627	8.936	4.16	2.832		0.552901	9.92344
19.4113	32.0317	15.3269	3.31	3.11	2.754	8.595	27.911	3.415	3.015	2.446	2.581	2.637	1.883	3.999	73.741	3.348	2.255	2.325	2.34	3.553	32.647	6.865	3.883	2.944	3.289	3.029	20.206	10.08	2.991	2.888		0.556314	9.64662
19.5304	34.3595	14.8066	3.736	3.424	3.48	7.148	30.806	3.228	2.884	2.469	1.864	2.084	1.976	4.173	72.938	3.215	2.175	2.35	2.987	3.964	32.734	5.071	2.767	2.699	2.551	2.949	18.629	10.628	2.998	3.502		0.559727	9.61984
19.6495	33.8301	14.4086	3.319	3.561	3.196	7.012	33.839	3.6	2.735	2.181	2.038	2.088	2.231	3.509	69.49	2.91	2.533	2.599	3.457	2.789	31.596	6.589	3.032	2.528	2.931	2.55	17.031	10.564	3.296	2.99		0.563141	9.48109
19.7686	37.9112	13.3941	3.399	3.024	3.112	8.687	34.747	3.709	2.341	2.585	2.539	2.704	2.018	4.008	62.762	3.67	2.347	2.553	2.85	3.871	34.135	6.826	3.609	2.537	2.437	2.878	15.471	9.382	2.442	3.349		0.566554	9.50991
19.8877	42.7591	12.8459	3.621	2.074	2.811	10.455	37.607	3.607	2.843	2.286	1.934	2.35	2.303	3.957	60.027	3.229	2.465	3.037	2.702	3.616	37.794	7.583	2.909	3.371	3.148	2.988	16.501	9.462	2.767	3.857		0.569967	9.89697
20.0068	42.6627	12.0526	3.782	2.282	3.152	9.461	37.299	4.646	2.24	2.6	2.034	2.057	2.15	4.063	53.119	3.161	2.465	2.206	1.789	3.401	37.136	7.054	3.201	3.08	2.974	3.325	15.056	9.197	2.964	3.747		0.573381	9.47854
20.1259	42.6047	11.8445	2.736	2.617	3.691	9.255	33.504	4.27	2.141	2.325	1.987	2.384	2.402	2.731	53.613	3.333	2.034	2.314	2.258	3.582	40.759	7.025	4.105	2.711	2.921	3.285	15.958	9.43	3.147	2.978		0.576794	9.46484
20.2449	45.6519	10.6526	3.481	2.655	3.786	8.2	31.753	2.98	3.007	2.434	2.08	2.16	1.654	3.368	50.176	4.408	2.406	2.605	3.097	3.014	41.688	6.229	3.234	2.801	3.286	3.45	16.453	9.59	2.887	2.7		0.580204	9.39622
20.364	48.1628	10.4998	3.392	1.869	3.635	11.213	30.103	3.563	3.296	1.988	2.039	1.865	1.916	3.992	44.442	3.176	1.934	2.12	2.726	3.886	44.342	6.465	3.229	2.683	2.612	3.557	15.728	9.782	2.979	2.719		0.583618	9.33045
20.4831	46.1218	9.9175	2.656	2.023	3.466	10.246	27.551	4.051	2.873	1.794	2.143	2.215	2.519	3.76	42.104	3.83	2.119	2.343	2.605	4.232	49.594	6.371	2.95	2.455	2.587	3.2	14.386	9.338	2.866	3.212		0.587031	9.18428
20.6022	49.1839	10.4133	3.2	2.946	3.202	10.307	25.883	3.939	3.081	1.989	2.521	2.267	2.983	3.66	38.98	4.067	1.798	2.441	2.333	3.293	47.969	7.618	3.149	2.711	3.052	3.428	12.878	9.308	2.812	2.354		0.590444	9.12554
20.7213	48.2095	11.3338	2.541	2.392	3.235	11.854	26.072	3.882	3.171	2.034	2.325	2.097	2.759	3.024	33.808	5.093	2.241	2.329	2.332	3.363	52.306	8.842	3.564	2.438	3.063	3.205	11.705	7.967	2.961	3.058		0.593858	9.10681
20.8404	46.4025	11.8255	2.788	2.595	3.352	11.764	24.381	3.825	2.133	2.164	2.119	2.268	2.464	3.405	29.401	4.717	2.214	2.26	2.428	3.603	57.557	9.177	2.889	2.778	2.993	2.746	11.925	9.512	3.408	2.74		0.597271	9.06113
20.9595	47.897	11.7921	3.075	3.466	3.485	11.902	23.643	3.46	2.092	2.306	2.412	2.362	2.411	3.784	27.295	4.636	2.239	2.206	2.791	3.35	60.519	9.459	2.578	1.881	2.727	3.498	11.707	9.465	2.474	3.196		0.600684	9.13694
21.0786	48.6874	12.7206	3.179	2.95	3.38	12.233	20.858	3.826	2.357	2.402	2.08	2.42	2.626	4.002	23.94	5.221	1.932	2.174	2.405	3.842	62.556	8.382	3.002	2.455	3.077	4.095	13.248	9.57	2.587	3.196		0.604098	9.1801
21.1976	50.114	11.6698	3.056	3.298	3.015	13.127	19.803	4.405	2.176	2.409	1.842	2.609	2.547	3.583	20.82	5.587	2.11	2.153	2.317	4.042	56.815	10.18	3.172	2.523	3.18	3.294	13.049	9.214	2.256	3.166		0.607508	8.91773
21.3167	51.5862	12.9202	2.957	2.76	3.194	12.201	22.011	4.035	2.527	2.469	1.988	2.467	2.049	3.311	18.717	6.487	2.091	2.112	2.687	3.9	51.859	10.4	3.301	2.212	2.829	2.904	11.408	9.039	3.291	3.152		0.610921	8.76215
21.4358	50.4869	13.3905	2.812	2.831	4.315	10.156	19.973	3.177	2.828	2.242	2.432	2.223	1.838	3.209	16.129	7.578	1.659	1.574	2.155	4.133	50.9	10.388	3.991	2.69	3.358	2.76	13.505	10.089	3.481	2.855		0.614335	8.63861
21.5549	52.4434	13.212	2.914	3.059	3.616	8.487	21.586	3.259	2.047	1.996	2.114	2.62	2.285	3.204	17.527	8.084	2.177	1.885	2.558	3.624	51.103	9.446	3.869	3.484	2.569	2.617	14.052	9.895	2.675	2.152		0.617748	8.68531
21.674	55.1027	12.7453	3.398	3.076	3.201	9.334	25.34	3.368	2.126	1.835	2.292	2.699	2.311	3.916	16.55	8.171	2.168	2.44	2.561	3.955	50.599	8.661	4.823	2.938	2.797	2.487	11.904	8.855	3.35	3.35		0.621161	8.87843
21.7931	55.08	13.1846	3.756	2.294	2.864	7.682	24.542	4.027	2.586	2.497	2.251	2.442	3.128	3.345	15.519	9.113	2.071	2.292	2.629	3.91	51.552	8.251	4.133	3.457	2.906	2.972	10.683	9.22	3.236	3.157		0.624575	8.82599
21.9122	56.2135	11.2186	3.41	2.537	3.474	9.099	25.096	3.502	2.258	2.602	1.737	2.267	2.645	2.681	14.573	9.753	2.444	2.464	2.112	3.809	55.791	7.132	3.712	3.122	2.196	2.844	10.093	9.44	2.447	2.964		0.627988	8.78787
22.0313	56.9216	12.2511	3.386	2.511	3.267	8.668	25.064	3.952	3.231	2.17	1.883	2.233	2.344	2.852	13.462	11.495	2.212	2.04	2.244	4.152	55.428	6.663	3.479	3.294	2.668	2.637	10.456	10.96	3.726	2.674		0.631401	8.94412
22.1503	54.4357	11.3818	3.193	2.526	3.097	7.745	24.509	2.915	2.696	2.346	2.002	2.056	2.105	2.898	13.486	14.422	2.047	1.85	2.356	4.334	52.325	6.825	2.784	2.778	2.636	2.509	9.517	12.581	3.071	3.466		0.634812	8.69642
22.2694	51.7894	12.9696	3.379	2.605	3.505	8.163	28.279	3.887	2.8	2.084	2.002	2.185	2.423	3.165	13.973	18.496	2.192	2.264	2.204	4.035	58.776	6.421	2.887	3.065	2.761	2.085	10.916	11.827	3.341	3.011		0.638225	9.24967
22.3885	51.0766	13.1628	2.954	2.975	2.99	7.28	27.918	3.387	2.449	2.162	2.401	2.349	2.029	2.771	12.977	24.661	2.241	2.264	2.257	5.224	60.311	5.746	3.12	2.211	2.494	2.6	9.351	11.83	3.413	3.178		0.641639	9.32608
22.5076	50.0016	13.0151	2.942	2.212	2.946	9.341	28.04	3.19	2.364	2.803	2.997	2.446	2.503	2.429	12.238	32.251	2.367	2.652	2.473	5.337	58.112	5.459	3.055	3.379	2.958	2.102	9.271	12.413	2.716	2.633		0.645052	9.55486
22.6267	49.278	15.0814	3.33	3.205	3.196	8.014	26.218	3.777	2.329	2.018	2.109	2.709	2.514	2.607	11.463	34.784	2.559	2.189	2.097	4.854	55.368	5.527	3.353	3.106	3.104	3.103	10.02	11.665	2.845	2.269		0.648465	9.48971
22.7458	50.4494	15.2551	2.947	3.079	3.184	7.533	25.58	3.891	2.067	2.425	2.659	2.51	2.636	2.733	10.958	38.552	1.982	2.605	2.564	4.869	53.404	5.46	2.725	2.739	2.918	2.945	8.661	11.79	3.191	3.381		0.651878	9.52308
22.8649	47.5823	15.1365	3.012	2.842	3.909	7.408	26.881	4.047	1.955	2.606	2.272	2.428	2.929	2.939	10.009	42.417	2.06	1.804	2.323	4.209	53.975	5.086	2.531	2.767	2.895	3.412	9.782	11.751	3.492	2.523		0.655292	9.56609
22.984	44.583	15.9713	2.871	2.534	3.03	8.929	26.727	4.443	2.583	2.559	1.881	2.33	2.774	3.666	10.446	44.246	2.72	2.166	2.191	4.501	50.544	5.194	2.302	3.256	3.167	2.996	12.554	11.823	4.022	2.504		0.658705	9.65044
23.103	45.6302	17.4816	3.433	3.263	3.268	7.678	24.203	4.791	2.573	2.918	2.132	2.67	2.769	3.835	8.491	45.539	2.09	2.611	2.835	4.476	50.353	4.512	2.168	3.002	3.257	3.259	10.224	11.639	3.456	2.316		0.662116	9.56243
23.2221	46.6497	19.5193	3.002	2.697	3.177	7.548	24.062	4.1	2.735	2.653	2.776	2.702	2.162	4.109	9.721	52.328	2.334	2.364	2.761	5.737	47.621	4.582	2.151	2.333	3.493	2.774	11.597	10.739	3.158	1.998		0.665529	9.7861
23.3412	40.8495	17.9621	3.481	2.502	3.485	6.101	24.231	4.95	2.914	2.402	2.428	2.394	2.504	3.252	9.661	52.832	2.926	2.507	2.362	5.651	43.883	4.128	2.684	2.575	3.178	2.508	12.857	9.435	3.149	2.017		0.668942	9.39362
23.4603	41.0077	20.2212	3.475	2.993	3.334	6.625	21.746	4.698	2.265	2.406	1.957	2.384	2.986	3.971	9.588	54.7	2.562	2.183	2.662	6.885	40.803	4.736	2.801	2.429	3.084	3.194	14.356	9.38	3.343	2.719		0.672356	9.51646
23.5794	34.1955	22.4541	3.423	3.086	2.48	7.648	20.347	3.109	2.483	2.327	2.002	2.358	2.594	4.154	8.375	52.669	2.593	3.093	2.339	7.622	39.231	4.452	2.714	2.613	2.69	2.497	14.29	11.049	3.18	2.78		0.675769	9.16159
23.6985	33.8635	25.6509	3.542	2.604	2.886	6.54	23.034	3.665	2.551	2.798	2.188	2.294	2.538	3.514	8.945	51.632	2.81	3.119	2.803	9.1	39.384	3.461	2.832	2.6	2.742	2.508	13.166	10.927	2.816	2.176		0.679182	9.28965
23.8176	31.7519	27.9177	2.861	3.355	3.065	6.998	25.54	4.257	2.428	2.67	2.24	2.032	3.024	3.478	8.177	55.432	3.049	2.738	3.93	9.371	35.364	3.622	2.295	3.075	2.919	3.458	13.48	9.587	3.007	2.699		0.682595	9.46069
23.9367	31.9434	26.122	2.284	2.22	2.76	7.624	29.843	3.869	2.413	2.055	3.058	2.248	2.761	4.007	8.105	56.688	2.94	2.986	2.896	12.77	33.32	4.351	2.282	3.046	2.841	2.123	13.203	9.483	2.29	2.57		0.686009	9.50338
24.0558	30.2223	27.6137	2.877	2.567	3.484	6.867	31.093	4.041	2.359	2.195	2.336	2.189	2.63	2.526	7.368	56.499	2.827	3.312	2.832	16.96	27.488	3.886	2.283	3.209	2.936	2.673	10.167	8.573	2.506	2.968		0.689422	9.31623
24.1748	30.4728	26.5843	2.794	3.482	3.74	6.521	31.712	3.303	2.468	2.886	2.436	1.798	2.595	3.141	7.742	59.691	2.758	2.468	2.916	21.386	28.674	4.283	3	2.59	2.114	2.885	10.965	9.71	2.898	2.584		0.692833	9.68657
24.2939	30.6385	30.5314	2.713	2.74	3.516	5.273	34.722	3.198	2.487	2.954	1.774	2.486	2.246	4.097	6.484	56.89	3.005	2.946	3.842	21.675	28.051	3.654	2.441	2.842	2.789	1.822	10.043	9.198	2.487	2.455		0.696246	9.66666
24.413	31.0649	33.4774	2.715	2.451	2.865	3.96	34.019	3.299	2.915	2.733	1.864	2.652	2.676	4.416	7.457	57.552	3.276	2.7	4.337	24.872	24.143	4.144	3.029	2.749	2.797	2.177	10.69	9.401	2.385	2.131		0.699659	9.83158
24.5321	28.7441	35.8936	3.196	2.631	3.81	5.351	39.568	4.201	3.281	2.799	2.117	3.26	3.065	3.736	7.03	58.768	3.088	2.698	4.777	26.507	22.998	3.784	2.422	2.118	2.69	2.215	12.137	10.66	2.217	2.76		0.703073	10.2841
24.6512	27.0672	36.7128	3.057	2.628	3.663	5.967	42.21	4.082	2.632	2.473	2.59	2.857	3.442	3.778	6.784	57.975	3.806	2.693	4.332	30.351	23.973	3.718	3.073	2.531	2.993	3.034	14.63	9.018	2.311	2.426		0.706486	10.5602
24.7703	29.7804	37.5016	3.143	2.792	3.274	4.945	44.397	3.457	2.325	2.593	2.255	2.274	2.715	3.327	6.731	59.313	3.439	2.527	5.081	32.722	22.043	3.371	3.039	2.793	2.467	3.394	16.427	9.565	2.775	2.243		0.709899	10.757
24.8894	30.3844	39.3808	2.651	3.472	3.163	5.139	42.55	3.862	2.429	2.705	2.056	2.885	2.962	4.24	6.773	57.511	3.209	2.959	6.457	33.786	19.866	2.877	2.794	2.708	3.325	2.612	15.59	9.742	2.974	2.077		0.713313	10.7713
25.0085	27.2113	38.5064	3.344	2.602	2.745	4.604	41.317	4.169	2.247	2.37	2.43	2.582	3.263	3.778	6.937	58.769	3.773	2.498	6.242	33.417	17.88	3.461	2.734	2.71	3.16	3.081	17.348	8.786	3.071	2.348		0.716726	10.5795
25.1275	26.3337	38.1595	2.946	2.208	2.167	4.321	35.811	4.214	1.585	2.509	2.401	2.469	3.401	4.013	7.255	62.649	3.944	2.706	5.567	32.579	17.61	4.37	2.767	3.078	2.369	3.59	20.277	7.679	2.408	2.585		0.720136	10.4657
25.2466	26.5237	35.9544	3.112	2.419	3.12	4.97	35.31	4.232	2.237	2.671	2.201	2.141	3.305	4.066	8.163	65.115	3.962	3.273	5.944	30.553	16.337	3.615	3.147	2.995	2.265	2.64	22.501	8.373	2.039	2.663		0.72355	10.5282
25.3657	26.0971	37.7381	3.461	2.376	3.949	4.417	36.642	4.346	2.942	2.533	2.106	2.804	3.093	4.19	7.612	56.51	4.41	3.664	6.556	31.152	14.29	2.994	2.376	2.487	2.345	2.805	24.802	7.536	2.305	2.342		0.726963	10.3627
25.4848	27.6082	35.9302	2.893	2.692	3.665	4.671	36.096	4.271	2.374	2.128	2.207	2.299	2.895	4.424	8.649	53.673	5.442	2.937	5.963	28.708	13.392	2.884	2.143	2.213	2.681	2.825	27.133	8.071	2.609	2.596		0.730376	10.2024
25.6039	25.0745	36.1166	3.451	2.699	3.384	3.489	33.051	4.061	1.996	2.74	2.435	1.852	3.134	4.694	9.686	50.282	5.792	3.08	5.824	28.269	11.453	2.864	2.62	2.758	2.576	3.102	29.947	8.345	2.667	2.478		0.73379	9.99734
25.723	28.3891	34.9282	3.699	2.906	3.082	3.935	28.263	3.914	1.592	2.384	2.449	2.192	2.59	3.996	10.986	42.365	7.006	4.172	6.746	27.664	10.158	2.687	2.125	2.632	2.675	2.915	35.179	9.11	2.504	2.875		0.737203	9.87061
25.8421	26.1585	31.596	3.168	2.997	3.406	4.239	25.9	3.612	1.791	2.823	2.366	2.585	3.38	4.438	12.817	34.549	7.631	2.998	5.618	29.258	10.338	2.741	1.959	2.025	2.702	2.84	34.196	8.815	3.366	2.663		0.740616	9.43252
25.9612	27.3201	31.7662	3.34	2.72	3.209	3.82	29.841	4.79	2.325	2.93	2.712	3.029	3.336	5.089	15.348	32.992	7.837	3.484	6.76	30.83	9.951	2.553	2.095	1.842	2.773	2.731	35.652	8.82	2.597	2.837		0.74403	9.84431
26.0802	27.6627	30.2847	3.541	2.547	2.886	4.479	26.745	4.883	1.781	2.547	2.189	2.553	3.381	5.295	17.322	32.165	8.47	3.631	8.11	30.538	9.684	2.629	2.634	2.217	2.586	3.369	32.713	9.863	2.341	2.978		0.74744	9.73415
26.1993	29.6021	27.4829	3.259	2.782	2.925	3.953	29.157	4.486	1.947	2.14	2.049	2.184	4.022	6.106	17.084	30.372	11.195	3.537	7.502	31.269	8.66	3.136	2.451	2.235	2.381	3.121	36.986	10.473	3.817	2.977		0.750853	9.97637
26.3184	31.8984	29.7454	3.545	3.053	3.397	3.807	29.625	4.224	1.861	2.443	2.202	2.207	4.048	6.202	18.412	29.335	12.974	4.228	8.264	32.319	7.354	2.368	2.115	2.399	2.357	3.257	35.522	12.252	2.893	2.379		0.754267	10.2229
26.4375	31.2994	27.121	3.472	2.841	3.143	3.669	30.901	4.29	2.308	2.857	2.275	2.498	4.062	7.649	21.883	31.019	16.029	4.335	7.724	31.251	7.983	2.66	2.391	2.084	2.31	3.577	36.733	12.662	2.205	2.36		0.75768	10.5197
26.5566	32.0529	27.2171	3.793	3.437	2.746	3.784	30.195	4.654	2.312	2.703	2.713	2.232	4.353	9.456	24.615	29.44	20.613	4.289	9.318	29.754	6.705	2.561	2.015	2.715	1.866	3.237	33.553	11.009	2.916	3.233		0.761093	10.6496
26.6757	30.4332	25.3753	3.244	2.75	2.84	3.189	28.996	4.595	1.502	2.435	2.246	2.344	4.657	10.465	25.371	27.5	24.677	4.368	8.961	31.369	7.044	3.593	2.495	2.629	2.979	4.088	31.803	11.529	2.311	2.36		0.764507	10.605
26.7948	33.2801	23.9986	3.637	2.549	3.475	3.858	29.952	5.045	1.988	1.968	2.521	2.689	5.24	11.013	29.213	28.939	30.293	5.372	8.968	31.552	8.214	2.852	2.736	2.23	2.726	4.08	30.127	12.984	1.635	1.629		0.76792	11.1588
26.9139	35.3617	25.217	3.187	3.686	3.589	4.316	32.024	5.34	1.867	1.998	2.47	2.381	6.047	12.726	31.797	26.258	33.186	4.464	9.174	32.146	8.652	2.349	3.011	1.923	2.402	4.245	31.757	11.88	1.882	2.126		0.771333	11.5821
27.0329	34.5394	25.697	2.8	3.833	3.409	4.712	34.184	6.428	1.864	2.888	1.737	2.095	4.424	14.48	32.398	26.624	35.541	5.683	9.505	28.826	7.463	2.713	2.521	2.28	2.73	3.523	27.818	10.841	2.51	1.681		0.774744	11.5249
27.152	37.064	25.1253	3.111	3.44	2.89	3.649	34.19	5.705	1.823	2.945	2.256	2.169	5.94	20.675	39.221	27.935	43.966	5.208	10.745	28.824	7.779	2.169	1.724	2.602	2.044	4.161	32.609	8.712	2.639	2.306		0.778157	12.4542
27.2711	34.191	26.3407	3.125	2.84	3.348	5.062	32.03	6.334	2.315	2.137	2.648	2.321	6.583	21.343	40.038	24.039	49.171	5.872	10.329	30.224	7.684	2.19	2.696	2.339	2.108	4.944	29.03	7.746	2.018	2.592		0.78157	12.4546
27.3902	34.7301	27.2642	3.494	2.817	3.263	5.315	33.399	7.35	2.002	2.504	2.424	3.324	6.61	20.646	37.338	23.442	57.173	5.235	11.835	30.866	8.716	2.256	2.448	2.372	2.874	4.186	31.021	6.815	2.637	2.26		0.784984	12.8872
27.5093	36.4055	27.7181	3.952	3.097	3.577	3.95	36.168	6.442	2.147	2.1	1.955	3.454	5.241	21.662	35.354	22.487	62.709	6.542	14.644	32.91	10.421	2.709	2.66	2.217	2.761	4.844	31.813	6.142	2.946	2.268		0.788397	13.3765
27.6284	34.1988	27.7643	3.424	3.522	3.667	4.226	38.883	7.001	1.995	2.142	1.965	3.076	7.061	24.913	30.864	20.936	69.832	6.145	16.646	34.121	11.152	2.88	2.549	2.2	2.144	4.501	29.885	6.543	2.692	2.447		0.79181	13.6458
27.7475	31.9151	27.4888	3.476	3.571	3.852	4.381	40.662	7.696	2.227	2.275	2.08	2.928	8.942	26.406	31.065	22.281	76.373	6.544	20.747	38.952	12.015	2.412	2.381	2.029	2.307	4.912	30.868	6.158	2.757	2.643		0.795224	14.4115
27.8666	30.9758	28.0775	3.838	3.468	2.773	4.426	39.798	7.574	2.934	2.213	2.117	2.88	10.527	26.15	31.026	19.806	76.339	8.798	25.097	41.78	14.103	2.896	2.343	2.641	2.803	6.071	31.774	5.881	2.142	2.62		0.798637	14.7957
27.9857	29.2975	28.1598	4.763	3.008	2.924	5.59	40.001	7.889	2.201	1.704	1.763	2.916	12.318	23.983	31.793	18.414	75.231	8.693	29.478	42.714	16.446	3.038	2.168	2.572	2.835	7.922	37.313	5.093	2.876	3.189		0.80205	15.2097
28.1047	32.8982	26.8331	3.901	2.792	3.791	5.129	36.259	7.739	2.179	2.115	2.515	3.702	14.461	24.084	34.352	20.054	78.993	10.899	38.445	44.413	18.083	3.065	2.285	1.962	2.728	9.099	38.31	4.09	3.119	2.323		0.805461	16.0206
28.2238	35.0135	27.132	3.761	3.358	3.155	5.655	36.86	8.442	2.58	2.215	2.681	3.633	17.807	23.134	36.767	23.85	77.209	14.01	45.056	44.641	21.843	2.959	2.365	2.308	2.787	9.385	40.874	4.784	2.84	2.315		0.808874	16.9806
28.3429	37.143	26.413	3.637	3.997	4.327	5.014	37.038	9.009	1.805	2.231	2.524	3.329	21.89	23.901	40.305	26.422	77.632	16.207	54.242	45.865	25.555	3.02	1.961	2.481	2.95	12.229	46.152	3.936	2.721	2.212		0.812287	18.2049
28.462	37.9711	25.818	3.966	3.542	3.865	5.282	40.725	7.344	2.511	2.747	2.437	3.135	25.929	26.409	44.526	31.504	70.064	17.9	59.996	45.994	26.34	2.696	1.8	2.733	3.02	17.414	47.247	3.075	2.66	2.877		0.815701	19.0509
28.5811	39.4788	27.0691	4.918	3.401	3.69	6.224	41.229	7.169	2.214	2.201	2.973	3.718	29.361	28.683	46.941	34.652	67.665	25.571	61.944	46.066	26.101	2.808	2.25	2.756	2.778	23.621	51.665	3	2.662	2.483		0.819114	20.1764
28.7002	40.6828	30.9213	4.293	4.649	4.063	4.952	38.55	7.703	2.336	2.301	2.268	3.664	32.739	29.946	48.076	35.958	60.852	32.651	63.039	42.159	26.604	4.138	2.708	2.176	2.473	28.624	48.857	4.051	2.703	2.574		0.822527	20.557
28.8193	44.1447	33.3118	4.475	4.656	4.649	5.817	39.773	7.101	2.62	2.728	2.193	3.841	44.37	35.177	50.719	40.323	60.022	43.526	67.852	42.659	25.669	3.144	2.941	2.698	2.695	35.517	46.698	3.862	3.019	2.766		0.825941	22.2989
28.9384	44.1929	33.4568	5.408	4.587	4.035	6.732	44.288	6.607	2.518	2.066	2.824	4.619	52.458	39.362	50.619	37.421	54.171	49.246	67.449	40.717	26.837	3.5	2.193	3.068	3.067	41.564	47.699	4.38	2.882	3.014		0.829354	23.0327
29.0574	45.261	32.6068	4.81	5.104	3.944	7.171	47.225	7.727	2.652	3.293	2.702	5.165	63.266	36.672	54.74	39.128	51.598	64.344	69.457	33.379	27.314	3.622	2.312	2.787	2.81	40.222	43.895	4.729	2.652	3.166		0.832764	23.7918
29.1765	47.357	32.3311	5.179	5.818	3.826	7.621	48.367	7.572	3.604	2.538	2.793	6.594	72.976	35.902	56.67	38.046	43.832	72.512	72.393	31.511	25.749	3.168	3.578	3.203	3.698	44.195	45.002	4.267	3.064	2.65		0.836178	24.5339
29.2956	45.2745	30.9886	5.175	5.918	3.834	7.005	44.177	8.753	2.768	2.625	2.978	8.594	71.397	39.675	59.013	38.11	39.499	74.501	73.451	25.987	24.393	4.043	2.485	2.432	3.236	49.534	42.396	3.772	2.718	2.785		0.839591	24.2506
29.4147	45.3448	30.7827	6.346	6.054	4.077	7.799	46.513	9.34	3.058	3.222	2.866	11.882	65.669	39.98	58.503	38.308	36.123	77.527	68.214	27.883	24.963	4.44	3.059	2.76	2.924	48.403	46.37	4.176	2.285	3.173		0.843004	24.4015
29.5338	46.4542	32.221	6.73	6.184	3.868	9.644	48.308	7.55	3.528	2.881	3.351	12.817	46.508	42.785	62.29	37.45	33.32	80.097	63.841	25.414	25.636	4.56	2.994	2.684	4.037	46.606	48.112	3.323	2.568	2.815		0.846418	23.9525
29.6529	48.4163	33.596	7.882	6.171	4.332	9.631	49.619	7.712	3.166	3.482	3.702	17.099	32.338	40.465	60.826	38.633	32.303	79.133	57.078	21.425	26.579	3.855	2.948	3.018	3.623	51.466	51.44	3.531	2.981	3.1		0.849831	23.6517
29.772	49.8385	36.7997	7.447	6.696	5.447	11.506	45.317	9.485	3.556	3.579	2.869	19.756	19.445	38.406	57.975	37.44	28.73	67.141	52.23	20.666	30.114	5.556	3.329	2.979	3.155	43.512	55.214	3.719	3.364	3.636		0.853244	22.6302
29.8911	46.895	39.9714	8.325	8.496	4.562	13.01	43.476	8.699	3.129	3.224	3.96	21.912	13.735	36.957	53.415	37.647	31.034	64.708	47.275	19.453	34.071	6.139	2.918	3.492	2.857	39.978	59.679	3.598	3.304	3.654		0.856658	22.3191
30.0101	45.5065	39.6801	8.866	9.518	5.134	11.618	46.014	8.973	3.53	2.492	4.47	25.737	9.104	27.955	48.786	30.984	31.751	59.574	41.861	17.155	39.239	7.991	3.009	3.696	3.635	39.84	63.278	4.266	3.508	3.66		0.860068	21.6944
30.1292	44.8551	41.8751	10.435	10.949	5.384	12.701	46.705	9.366	3.125	2.542	4.977	30.099	8.049	21.533	43.643	25.297	30.594	54.878	37.549	14.346	37.878	9.615	2.921	2.799	4.186	38.521	66.952	3.659	4.007	3.504		0.863481	21.0981
30.2483	49.5314	43.3633	11.151	12.5	5.509	14.981	48.343	10.019	3.349	2.633	5.915	32.636	5.96	16.073	34.164	20.991	27.366	48.842	33.149	10.85	32.956	11.579	4.168	3.511	4.671	38.806	75.766	4.675	4.035	3.17		0.866895	20.6888
30.3674	47.6373	46.9552	12.975	13.176	5.932	18.022	49.172	10.957	3.757	2.674	6.037	34.815	5.271	13.03	28.966	17.225	30.813	44.053	31.66	10.477	32.169	13.186	3.969	3.834	4.226	40.261	85.044	4.421	3.829	3.072		0.870308	20.9205
30.4865	46.5454	47.7867	14.175	16.356	6.696	21.248	49.958	12.574	3.853	3.611	6.418	38.659	5.302	12.383	24.527	12.197	28.595	37.329	28.339	9.561	30.95	17.6	4.219	3.827	4.244	43.631	87.178	5.047	4.292	4.465		0.873721	21.0522
30.6056	45.7887	45.6888	17.128	20.227	7.124	24.742	53.454	15.604	3.759	4.093	6.719	42.464	4.907	10.16	20.959	10.966	31.87	33.922	23.928	8.029	27.585	24.654	4.794	4.629	4.888	44.615	83.477	5.549	4.925	4.305		0.877135	21.3651
30.7247	49.0096	47.725	19.147	24.583	7.819	26.652	53.782	17.242	4.119	3.461	7.611	50.868	3.59	8.208	16.039	9.969	29.366	28.977	18.658	6.632	26.408	36.039	4.689	4.499	4.696	48.324	79.557	5.851	6.243	3.839		0.880548	21.7868
30.8438	42.6872	49.981	22.603	34.735	10.718	31.979	57.889	19.344	4.234	2.975	9.406	50.425	3.721	6.777	13.429	7.519	22.937	28.12	16.166	6.022	23.384	46.453	4.231	3.86	5.505	58.684	75.717	5.618	5.175	4.405		0.883961	22.49
30.9628	40.3548	52.9759	27.5	42.057	14.081	31.452	59.388	23.64	4.496	3.562	10.358	53.127	2.884	7.251	11.89	6.221	16.519	25.127	12.5	5.627	18.326	61.585	5.521	4.575	6.95	66.782	71.175	5.773	5.494	4.806		0.887372	23.3999
31.0819	40.1789	54.812	31.968	45.175	13.539	30.307	62.352	26.079	4.363	3.94	11.528	48.998	2.88	6.564	10.337	4.828	11.678	24.86	9.978	3.744	15.772	70.56	7.39	4.499	8.033	73.448	71.219	6.251	7.075	4.172		0.890785	23.8843
31.201	36.628	55.4712	34.401	48.287	15.348	31.98	64.332	28.352	4.136	4.194	12.483	41.891	2.729	5.095	8.598	3.816	8.537	19.701	6.74	4.24	15.092	83.245	7.329	4.508	9.123	82.829	74.625	6.848	7.986	4.275		0.894198	24.4273
31.3201	33.9263	53.1551	35.059	40.684	17.997	34.106	67.182	30.923	5.691	4.175	14.581	33.839	2.229	4.433	7.024	3.658	6.384	16.806	5.591	2.215	12.822	87.097	7.45	5.113	12.664	92.825	72.07	7.342	6.147	4.983		0.897612	24.2724
31.4392	36.1874	51.0729	36.944	42.686	23.461	42.094	73.983	30.766	5.176	5.465	20.207	25.688	2.294	3.753	5.365	3.258	5.071	12.951	5.083	2.094	11.499	94.061	8.772	5.522	19.922	95.255	68.98	6.249	7.465	5.616		0.901025	25.2313
31.5583	35.5244	52.1396	36.74	41.026	26.522	45.375	84.677	31.187	6.391	5.805	23.586	17.691	2.018	4.363	4.498	2.271	5.211	11.161	4.692	1.379	9.439	96.648	10.572	5.377	31.258	91.422	73.942	7.119	7.401	6.478		0.904438	26.0638
31.6774	35.9159	46.0856	41.036	43.163	30.554	49.163	86.207	30.25	7.891	5.998	26.909	12.411	1.929	2.966	3.816	2.103	4.699	7.476	3.728	1.316	7.43	98.581	13.289	6.063	43.36	72.372	77.102	7.622	8.301	7.748		0.907852	26.1828
31.7965	35.6381	46.1955	41.734	43.601	37.263	54.131	85.665	32.982	7.88	7.279	33.072	9.668	1.801	2.665	2.493	1.503	2.959	6.186	3.022	1.327	7.006	91.585	15.043	8.208	51.514	57.295	81.331	8.584	8.553	8.408		0.911265	26.4864
31.9156	40.0384	44.9511	44.809	45.053	39.598	62.33	83.476	31.364	9.107	9.03	36.568	7.678	1.482	1.996	2.612	0.91	3.177	3.857	3.338	2.205	6.544	82.245	17.603	10.468	65.107	41.282	89.258	10.139	10.071	11.51		0.914678	27.2602
32.0346	39.574	41.7903	47.248	45.521	45.909	70.821	82.671	35.029	11.553	11.605	48.945	6.409	1.072	1.706	2.926	1.351	2.471	4.083	2.291	1.568	5.24	71.377	19.867	15.29	76.594	28.216	94.649	12.66	12.444	16.041		0.918089	28.564
32.1537	37.189	38.9544	46.514	44.999	46.978	76.436	75.47	37.815	12.813	11.31	61.409	4.823	1.251	1.703	2.542	0.949	1.858	3.67	2.124	1.255	4.816	61.29	20.957	27.441	79.293	18.219	95.944	15.685	17.288	21.492		0.921502	29.0829
32.2728	34.5686	42.0699	44.347	48.284	50.107	79.387	74.926	44.28	16.315	14.256	73.766	4.074	0.74	1.453	1.926	1.144	1.948	2.821	1.365	1.223	3.961	56.914	24.57	39.285	73.509	10.773	103.584	22.026	24.502	25.355		0.924916	30.7827
32.3919	33.528	46.4653	43.726	52.791	58.467	79.454	63.666	51.622	23.716	17.013	75.558	3.851	0.993	1.186	1.582	1.276	1.929	2.868	1.372	1.521	3.073	50.363	23.062	54.751	68.419	6.138	111.698	28.582	38.661	29.657		0.928329	32.5663
32.511	32.6128	39.8057	41.026	52.463	58.784	72.414	48.286	56.716	27.127	18.406	77.182	3.44	1.08	1.026	0.894	0.714	1.544	2.344	1.126	1	3.613	45.361	27.199	74.806	62.037	4.518	118.554	34.983	52.82	35.683		0.931742	33.2522
32.6301	31.7256	37.9593	38.137	55.898	55.485	66.529	35.323	60.332	30.551	21.981	64.999	3.601	0.821	0.907	1.025	0.737	1.285	2.016	1.185	1.087	3.077	38.563	30.713	80.415	53.52	2.919	112.54	35.296	65.089	40.259		0.935155	32.4658
32.7492	31.4046	34.7154	35.377	46.313	51.024	53.762	27.489	65.397	34.364	23.475	55.758	3.119	0.768	0.791	1.132	0.368	1.275	2.069	0.639	0.912	2.147	38.001	31.01	81.458	48.825	2.159	102.068	37.132	70.511	37.633		0.938569	30.7032
32.8683	30.2513	29.2062	29.212	37.942	43.816	43.405	20.694	74.993	35.192	27.607	42.951	2.981	0.652	0.576	0.779	0.621	1.127	1.643	1.124	1.121	1.911	33.716	33.19	71.503	46.994	2.404	77.665	35.444	76.205	36.639		0.941982	28.0521
32.9873	31.6448	24.7142	22.365	28.43	39.193	36.986	17.809	80.202	33.507	31.001	33.455	2.771	0.686	0.53	0.612	0.635	1.115	1.184	1.163	0.991	2.711	28.95	36.801	55.377	53.289	1.396	54.814	34.284	84.585	36.55		0.945393	25.925
33.1064	28.1395	19.6872	18.306	22.246	28.889	29.641	14.324	83.186	32.553	30.545	23.371	1.944	0.816	0.55	0.555	0.655	0.89	1.094	0.886	0.598	2.24	26.434	45.299	41.172	55.533	1.287	33.288	37.364	89.46	38.049		0.948806	23.6334
33.2255	22.3163	17.924	15.255	13.939	22.228	21.943	11.444	83.199	32.677	35.419	18.767	2.109	0.485	0.494	0.464	0.388	0.843	0.846	0.624	0.669	1.904	22.83	52.489	35.533	59.06	1.402	17.699	41.364	91.341	41.389		0.952219	22.2348
33.3446	19.4904	12.6508	9.269	10.043	18.435	18.972	8.824	75.831	32.761	40.375	15.172	1.747	0.242	0.526	0.692	0.514	0.671	0.89	0.902	0.467	1.733	16.262	59.527	31.383	56.573	1.267	9.744	42.484	83.375	42.872		0.955633	20.4565
33.4637	18.3845	11.8343	7.124	7.183	11.642	14.153	5.552	58.694	36.605	49.477	12.354	1.633	0.428	0.37	0.592	0.291	0.61	0.922	0.512	0.615	1.534	13.76	67.183	32.641	55.825	1.012	5.88	41.813	71.907	46.04		0.959046	19.219
33.5828	15.2467	8.2242	6.619	6.803	7.753	10.451	4.65	42.939	44.006	57.004	8.754	1.663	0.46	0.414	0.472	0.342	0.51	0.543	0.536	0.539	1.518	9.701	74.138	31.476	54.124	0.872	3.981	46.343	65.914	49.879		0.962459	18.5292
33.7019	13.9003	5.9968	4.418	4.522	6.914	6.499	4.717	29.638	47.313	60.159	7.653	1.251	0.304	0.439	0.304	0.291	0.682	0.681	0.65	0.279	1.05	7.006	68.597	35.754	46.468	0.615	2.744	54.575	58.135	42.977		0.965873	17.1511
33.821	12.3284	3.83	3.387	3.461	5.066	4.958	3.127	21.898	51.305	72.139	6.994	1.304	0.236	0.478	0.201	0.381	0.572	0.825	0.68	0.362	0.634	5.355	59.284	41.869	36.877	0.614	1.966	60.404	57.661	35.363		0.969286	16.452
33.94	12.2302	4.2569	2.739	4.465	3.37	3.902	2.291	16.697	48.342	80.169	5.923	1.483	0.225	0.39	0.239	0.323	0.267	0.647	0.538	0.357	0.737	3.979	51.173	46.417	25.643	0.303	1.291	63.79	63.695	23.903		0.972696	15.6595
34.0591	9.788	3.3227	2.19	3.487	2.933	2.884	1.989	12.29	41.57	85.545	5.075	1.04	0.156	0.234	0.303	0.289	0.245	0.749	0.431	0.167	0.557	3.885	39.836	50.846	16.794	0.43	1.005	53.517	69.2	15.938		0.97611	14.2232
34.1782	9.3362	2.8757	2.059	2.505	2.205	2.3	2.141	8.018	29.001	82.374	4.094	0.646	0.169	0.224	0.107	0.321	0.357	0.744	0.548	0.238	0.465	3.137	26.938	54.916	10.844	0.487	0.971	36.636	63.128	10.816		0.979523	11.9534
34.2973	9.8389	3.1995	1.766	2.015	1.683	1.769	1.555	5.658	20.676	71.567	3.136	0.884	0.238	0.23	0.186	0.156	0.352	0.59	0.363	0.37	0.358	2.513	19.777	64.356	7.232	0.228	0.735	27.078	48.429	6.221		0.982936	10.1053
34.4164	7.0151	2.9372	1.973	1.861	1.769	1.193	1.484	4.224	14.541	57.613	3.787	0.88	0.176	0.314	0.263	0.396	0.249	0.43	0.495	0.257	0.155	2.356	12.779	60.825	4.934	0.204	0.593	16.366	30.289	4.695		0.98635	7.83511
34.5355	6.2514	2.0786	1.443	1.262	1.504	0.652	1.191	4.673	10.675	43.759	3.08	0.805	0.092	0.354	0.258	0.28	0.344	1.048	0.388	0.158	0.252	2.187	6.852	47.084	3.221	0.303	0.667	11.109	18.112	2.849		0.989763	5.7644
34.6546	7.77	2.0185	1.126	1.471	1.291	0.937	0.899	3.237	9.316	28.272	2.856	0.599	0.164	0.292	0.171	0.131	0.186	0.491	0.612	0.346	0.17	1.527	5.852	32.235	3.077	0.122	0.376	7.887	10.882	2.246		0.993176	4.21865
34.7737	5.4476	1.8202	0.983	1.162	0.91	0.936	0.869	2.557	9.531	19.379	2.74	0.618	0.284	0.22	0.197	0.297	0.249	0.231	0.301	0.323	0.15	1.72	4.512	19.19	2.081	0.214	0.405	5.415	6.215	2.379		0.99659	3.04453
34.8927	5.0897	1.6761	1.212	0.745	0.447	0.971	1.231	2.119	8.424	11.986	1.974	0.603	0.197	0.185	0.239	0.441	0.228	0.328	0.104	0.119	0.218	1.607	4.055	13.115	2.394	0.123	0.435	3.907	5.279	1.17		1	2.35406

## Sheet: Image1 (3)
X0	Y0	Y1	Y2	Y3	Y4	Y5	Y6	Y7	Y8	Y9	Y10	Y11	Y12	Y13	Y14	Y15	Y16	Y17	Y18	Y19	Y20	Y21	Y22	Y23	Y24	Y25	Y26	Y27		Ap-basal	Avg int
0	14.972	25.416	27.7229	18.3126	16.6278	16.2051	25.4705	18.6956	12.1661	16.5282	19.4006	23.5525	25.256	24.117	19.3708	17.4314	22.7896	22.1514	21.3699	16.271	16.325	15.053	11.351	15.0318	14.9711	29.391	51.509	33.753		0	21.1147
0.1191	14.414	26.523	29.8138	21.4255	19.1213	20.7065	26.1565	22.9159	13.2463	21.6737	19.5587	25.3832	26.327	26.4968	21.5844	17.5704	25.0999	20.568	22.9405	18.121	19.637	17.113	12.4252	16.4428	13.9991	33.863	53.148	35.77		0.00341332	22.9302
0.2382	17.942	30.644	31.1668	23.1886	18.7672	20.1193	27.3164	24.4584	13.8542	19.8895	22.6648	28.6314	27.437	28.663	21.5848	22.3911	25.3649	20.5486	23.6697	18.764	20.864	19.601	12.3679	19.7222	16.8958	36.681	60.383	33.718		0.00682664	24.5464
0.3573	17.851	26.79	35.7946	21.3046	20.2532	22.8801	28.8855	26.8463	14.6166	19.1202	24.4464	32.9908	32.289	27.8279	25.8966	23.0301	26.293	21.3971	23.295	21.963	21.464	18.559	13.9881	21.4427	20.4029	38.94	67.772	32.809		0.01024	26.041
0.4764	19.084	33.964	40.4155	22.8641	21.0127	25.2734	30.4644	31.348	17.1867	23.291	29.4763	34.1917	32.36	30.8758	29.9724	26.6427	29.9614	22.5569	23.9843	24.534	23.754	25.369	15.486	23.7823	24.659	49.426	65.803	36.476		0.0136533	29.0791
0.5954	22.983	37.76	36.1415	24.7525	23.2078	29.6691	35.0668	33.4593	18.9518	24.0422	32.4449	38.186	32.848	37.4871	34.5443	27.8011	31.4254	22.3911	26.0987	26.152	29.438	27.935	18.1926	32.4657	30.775	57.609	69.158	40.09		0.0170637	32.1813
0.7145	24.565	42.878	37.7178	26.875	26.6182	30.1212	37.0161	37.0313	21.7722	27.6193	42.0645	39.5045	34.723	40.7038	38.7434	32.8995	38.1116	22.7522	25.5769	27.826	35.365	34.988	21.1719	35.6546	37.9101	66.95	76.278	42.519		0.0204771	35.927
0.8336	27.333	43.59	42.5229	25.3007	25.9881	30.0065	41.0158	41.2149	21.2548	29.3238	45.5415	48.9253	38.126	43.6451	43.101	37.5547	41.5476	24.2606	28.1071	30.195	45.323	41.609	23.9548	36.3937	43.4217	71.134	82.929	45.447		0.0238904	39.2417
0.9527	35.337	50.431	44.987	28.7502	27.721	34.2585	46.0087	44.9829	23.6337	31.4435	48.7446	56.414	41.257	49.7116	46.9624	44.5844	45.1675	26.352	29.4667	36.171	56.991	51.371	25.9559	43.2763	51.6249	85.193	92.526	47.255		0.0273037	44.5206
1.0718	42.769	52.778	44.7578	29.8399	31.8932	35.1896	51.9878	52.1811	25.1144	33.471	55.659	63.283	46.508	55.8173	59.9419	49.9819	52.3217	29.8566	33.5585	40.352	66.119	68.373	30.5516	46.4585	56.6896	93.568	99.585	47.449		0.030717	49.8591
1.1909	53.178	60.621	49.3866	31.0739	35.3393	40.8341	53.6549	57.1892	28.9374	35.7763	59.724	73.6723	52.053	60.4988	64.1633	56.0111	55.9384	34.1234	36.6338	47.39	80.729	77.603	38.6132	52.3215	63.278	101.061	105.453	48.121		0.0341303	55.4778
1.31	60.553	64.14	56.314	31.1204	36.2418	42.2245	58.3619	62.4822	30.3727	42.435	60.9844	80.3633	57.9	65.3593	75.0785	64.6422	64.446	38.9239	40.6227	57.827	91.904	88.944	48.9075	55.3967	76.2025	110.726	124.986	52.16		0.0375437	62.1293
1.4291	73.907	69.245	58.1843	31.9982	41.728	42.8832	59.6656	70.8953	33.7161	42.1544	66.0646	80.4804	64.8	65.1895	77.3447	75.4644	69.5381	43.1261	44.4337	63.133	102.748	96.127	54.8521	60.9772	83.5911	125.827	125.486	55.579		0.040957	67.1121
1.5481	84.517	73.735	65.1057	34.2202	42.1296	47.1838	63.1577	74.9113	40.1463	43.8211	67.4731	82.557	71.11	69.7052	79.8229	79.6931	74.3216	43.0615	47.6559	72.851	110.177	102.755	71.0894	65.6441	90.2063	133.222	139.861	61.658		0.0443674	72.564
1.6672	100.01	81.477	67.5692	35.9011	45.836	46.3597	70.1878	80.4462	43.2352	49.3992	72.9363	87.656	83.403	70.3517	79.7457	90.6844	79.0517	49.9426	53.1367	80.463	105.976	99.382	81.8818	67.3763	90.3917	138.888	147.937	62.426		0.0477808	77.2161
1.7863	110.994	85.65	66.5228	42.4589	48.0213	47.553	68.6929	83.1013	47.1337	48.5045	76.4384	92.0487	89.864	76.6326	89.3866	95.6583	81.2861	50.676	59.4903	96.177	108.532	99.322	89.9016	68.5323	95.8802	145.495	144.992	67.449		0.0511941	81.2998
1.9054	127.969	91.8	68.2424	41.9904	50.1404	54.1704	74.6983	86.4251	52.004	51.1789	75.4509	93.9351	94.047	78.3188	86.3864	96.0824	79.095	54.7184	62.6986	100.486	102.453	96.036	96.8669	74.418	96.4451	147.709	145.327	67.366		0.0546074	83.8021
2.0245	140.916	98.011	77.0521	49.904	55.6032	52.8434	81.156	87.8869	52.9308	56.8289	72.2445	96.5485	95.856	76.923	89.5192	94.682	87.0025	58.4167	61.1297	107.572	100.164	90.175	98.2289	72.84	92.5869	146.987	140.193	77.2		0.0580207	86.1215
2.1436	149.473	104.149	76.5451	54.0537	61.9162	54.1811	81.1392	88.1701	58.2437	56.9007	67.854	94.814	104.864	79.6967	88.717	91.2739	88.2585	62.1639	63.9546	106.99	88.596	86.758	98.7573	73.8828	93.0863	141.905	133.515	87.41		0.0614341	87.0453
2.2627	160.218	113.908	77.9347	53.9827	64.4358	57.1227	77.7428	93.1981	59.1353	58.9537	60.4231	91.1055	102.232	80.5539	84.2457	89.0506	81.3482	66.0753	64.9327	101.429	80.809	78.792	94.9658	72.5138	96.4677	134.672	126.971	96.914		0.0648474	86.4333
2.3818	162.964	125.903	77.6453	55.1416	73.4549	57.2543	78.6595	87.2532	61.7521	57.524	49.2611	79.5644	107.144	77.2402	86.4434	87.3456	83.5285	68.2544	60.8256	99.818	68.169	76.344	85.8476	75.6052	92.8871	124.964	119.389	114.718		0.0682607	85.5322
2.5008	169.315	125.678	77.1134	61.6994	80.0734	58.492	72.9333	81.6177	62.2331	48.9452	39.162	65.2648	105.549	72.9992	81.4179	82.6251	79.309	67.9911	58.5093	90.589	60.833	73.372	73.5838	70.4214	91.1702	111.482	113.867	127.615		0.0716712	82.2808
2.6199	169.569	131.26	79.6298	59.3261	77.6514	58.6465	74.782	74.7063	63.2589	43.6557	26.867	43.7465	96.321	66.7709	75.9144	84.8556	76.6008	64.868	58.381	77.056	49.3	65.104	68.4735	69.0695	80.3679	99.78	106.99	138.123		0.0750845	77.8955
2.739	170.164	129.045	81.6851	59.2705	78.1649	54.3292	75.3659	73.683	64.1548	41.7418	22.0338	34.7479	88.616	62.8914	74.1416	76.968	70.4116	69.5265	58.0958	66.362	46.019	57.687	59.4705	74.1246	76.4157	81.603	95.322	148.038		0.0784978	74.6457
2.8581	164.867	124.448	85.8748	58.446	80.187	57.0664	69.2085	64.8574	67.9639	36.64	15.0944	24.4517	66.452	58.2691	69.3265	73.8557	70.5679	68.8223	56.0822	52.493	40.895	53.176	52.7864	64.3494	75.3098	67.686	89.283	154.094		0.0819111	70.0912
2.9772	154.461	119.697	88.863	59.3651	79.0942	53.764	64.0001	65.5998	64.6842	29.032	11.506	17.1031	51.645	52.1105	63.6843	68.7915	67.1243	65.1419	51.4338	43.823	36.576	45.129	45.6829	63.9179	68.8023	61.317	80.392	150.814		0.0853244	65.127
3.0963	142.852	110.023	90.3503	63.1486	72.7089	58.1183	63.6986	57.2152	65.0953	25.6315	9.0317	12.9702	36.44	45.5621	53.8405	65.4137	66.7023	60.8079	45.6161	39.152	32.488	37.935	41.4529	69.6682	65.2598	55.289	73.443	154.738		0.0887378	61.2376
3.2154	129.614	102.895	87.9121	62.5642	68.8395	56.6635	64.0198	53.0253	65.9379	21.6458	7.7389	8.5028	26.922	44.5874	51.4545	60.1346	63.6392	62.6939	40.6854	33.703	31.044	35.168	35.3928	67.3451	63.9466	45.09	69.37	151.683		0.0921511	57.5792
3.3345	105.006	92.961	88.63	66.3331	60.867	51.6601	55.9835	46.6048	61.7846	19.0811	6.4146	6.395	20.694	37.4787	49.9291	52.4414	53.5191	57.9883	39.0034	30.046	28.079	30.341	32.2176	63.6785	62.3839	41.423	58.917	140.969		0.0955644	52.1725
3.4535	85.492	84.377	86.6015	69.6987	59.5698	49.7414	48.5323	40.4578	56.4476	16.9222	7.0659	6.1399	17.712	35.6111	47.7798	45.5836	52.8849	53.6598	34.4347	27.984	25.499	27.604	27.3228	65.7644	61.6511	38.49	61.781	134.968		0.0989749	48.9206
3.5726	71.158	79.314	86.8189	67.8095	48.3809	46.807	44.2975	40.7392	51.9005	16.8994	6.6628	4.7022	15.596	32.9278	41.9697	40.8278	49.353	55.3962	35.0109	27.134	22.211	25.027	26.274	59.2205	58.3829	31.994	57.224	124.265		0.102388	45.2966
3.6917	51.283	69.668	85.4969	67.553	42	43.953	45.9303	38.617	47.6635	16.9539	5.6665	4.4741	13.235	27.9358	42.0263	37.021	44.8101	48.4995	31.1187	26.19	22.597	23.844	24.6068	61.3923	59.8114	28.386	49.405	107.289		0.105802	41.6938
3.8108	44.153	62.115	86.0194	70.0821	34.6715	43.6644	40.3007	33.7495	45.842	15.3924	5.8816	4.5429	12.105	25.2417	38.2885	35.3	40.7747	43.9792	28.6439	23.836	20.77	19.847	22.7883	55.7658	57.1081	25.188	44.678	88.393		0.109215	38.1829
3.9299	41.364	53.552	83.5598	68.6081	27.5327	40.9261	36.6587	30.9628	39.031	14.5342	4.2239	4.0102	11.705	20.5646	31.4102	31.9919	37.3675	42.3094	28.1833	23.322	18.769	19.391	20.7767	53.0918	52.2948	21.927	41.717	69.296		0.112628	34.61
4.049	33.815	45.571	77.2838	70.1614	22.758	37.9303	36.7278	28.0488	34.757	13.1836	3.7499	3.9176	9.395	15.9645	28.8962	29.2744	37.0379	39.1883	23.8332	22.002	15.084	18.528	18.5903	54.4124	49.3045	22.354	39.212	53.71		0.116041	31.5961
4.1681	30.712	39.315	72.5162	72.1199	20.8012	31.8108	33.205	26.6826	32.1534	12.1743	3.2512	3.8356	10.233	14.3988	24.7338	27.1099	33.31	36.4253	23.1449	18.108	14.273	15.956	16.7314	48.119	48.0999	19.72	37.315	42.193		0.119455	28.8732
4.2872	25.987	39.732	72.2483	74.4513	16.0416	28.7585	30.6616	23.3832	27.7578	12.1803	3.0909	3.1494	10.073	12.0877	20.8741	25.9969	28.6747	32.388	21.1197	16.154	13.527	15.355	15.3094	42.046	45.9296	18.819	38.574	32.773		0.122868	26.6837
4.4063	24.591	35.055	68.4479	77.9908	15.5659	25.7632	29.0458	22.2117	25.7907	11.6984	2.9529	3.0345	8.531	11.312	20.115	23.5703	26.754	33.2657	18.8933	16.736	11.688	14.664	15.75	42.8597	44.4275	16.501	38.8	29.938		0.126281	25.5698
4.5253	22.425	31.611	68.712	75.1855	13.0718	19.8162	29.1856	19.8343	22.6842	11.3497	3.4811	3.2843	8.297	9.341	17.6801	20.2651	22.3086	32.2123	19.291	14.965	12.539	13.676	14.1144	41.0419	41.3391	15.977	36.666	27.308		0.129692	23.8451
4.6444	20.435	27.468	68.5457	75.1419	12.2419	13.9444	26.3651	18.3108	22.6241	10.3601	2.8133	3.6318	8.154	7.8772	18.2154	19.8376	21.0557	29.8503	15.065	10.458	10.104	11.106	13.9059	34.7776	35.3244	16.707	32.649	24.132		0.133105	21.825
4.7635	16.005	24.629	67.8961	78.2713	12.9245	11.4183	25.7377	18.1153	21.1948	10.5072	2.1739	2.6978	7.237	8.3839	16.3143	19.036	20.952	28.4837	13.698	11.188	11.243	10.041	12.311	33.2004	35.3577	14.857	30.777	20.214		0.136519	20.888
4.8826	16.499	24.767	69.0399	79.4666	10.4151	9.6522	22.5198	14.625	19.3867	9.8975	2.339	3.2221	8.255	6.5729	14.057	18.0834	18.1665	25.0024	14.0174	12.148	10.701	9.397	12.7075	34.2914	34.7199	13.939	30.375	20.56		0.139932	20.1723
5.0017	15.304	21.538	67.2374	73.4408	10.1838	7.2997	21.233	16.2208	16.8785	8.2027	2.1508	3.4493	7.353	5.8203	12.4199	16.3439	15.251	23.9302	13.2555	11.061	9.144	9.858	11.0389	31.2463	34.406	11.852	27.784	17.908		0.143345	18.6361
5.1208	14.326	20.036	68.1919	71.7743	9.7886	6.0734	22.8514	14.5894	12.9078	8.1115	2.6529	3.4445	6.82	6.1892	10.6292	14.8149	15.063	22.2866	10.8338	8.88	8.616	9.025	9.7336	28.2336	30.5817	12.592	24.032	16.134		0.146758	17.4719
5.2399	13.462	18.491	61.9419	66.7287	9.9756	6.3889	18.3025	10.7361	11.7778	8.0631	2.5431	3.563	7.463	6.7453	10.2639	13.4653	10.9413	19.6339	9.309	10.288	7.763	9.271	9.7209	25.6516	28.7756	10.072	24.262	15.304		0.150172	16.1037
5.359	12.761	15.794	60.884	56.0964	9.9451	4.9817	16.2326	9.6235	10.9975	6.4436	2.4659	2.9834	7.918	5.2477	9.3477	12.317	10.9679	19.0747	11.0458	8.099	7.046	8.481	8.306	26.552	29.0999	11.407	20.226	13.327		0.153585	14.9168
5.478	10.897	14.78	58.7516	47.0898	8.74	5.2813	13.6985	8.8325	9.7615	6.8869	2.6479	2.7252	6.388	4.8503	9.2896	12.3352	10.5508	19.3121	9.8817	8.562	5.816	7.26	8.4608	21.7104	28.229	9.584	19.184	12.89		0.156996	13.7284
5.5971	11.468	12.282	59.0189	39.9511	10.0965	4.6585	10.5277	6.8004	7.0779	6.8931	2.4408	2.7329	7.24	5.8066	7.7499	10.6634	8.6079	16.031	8.2864	7.869	6.368	7	8.943	20.081	22.5499	9.38	17.607	12.495		0.160409	12.5224
5.7162	9.478	12.653	55.8385	30.4489	8.743	4.4143	8.3863	5.4851	7.0544	8.2571	2.0547	2.5473	7.443	4.6236	7.2092	10.1091	7.7819	14.8295	6.4944	6.512	5.716	6.39	6.9941	16.5776	21.1978	8.933	15.966	12.017		0.163822	11.2198
5.8353	9.258	10.219	53.1622	24.9072	7.9751	4.1267	6.6093	4.0368	6.1766	7.532	2.9187	3.262	7.54	3.765	6.8093	7.2507	7.175	15.7907	8.0811	6.433	5.832	6.712	7.7803	15.4067	16.1575	8.205	13.218	13.74		0.167236	10.36
5.9544	7.955	10.935	48.7716	19.4175	8.4806	4.0575	5.9643	4.5925	4.9725	7.0615	2.1986	2.8168	7.059	3.7638	5.8996	9.1388	6.8322	14.4752	6.5252	6.736	4.522	6.336	7.4802	13.5063	14.8686	8.008	10.649	11.819		0.170649	9.45865
6.0735	7.743	9.163	44.135	15.8781	7.4368	3.2689	5.8842	3.3236	4.665	6.3025	1.8576	3.6533	6.481	3.2507	5.4789	6.8775	7.0417	13.4633	6.3884	4.7	4.264	5.801	5.9444	12.174	15.1834	9.216	8.16	11.795		0.174062	8.55465
6.1926	7.133	9.122	44.0054	12.7549	7.239	3.5822	5.3439	3.1631	5.2359	7.3408	2.0787	2.8233	6.567	4.365	4.5509	7.5144	5.3906	13.1595	6.463	4.64	5.046	5.024	5.6316	13.6482	12.066	7.855	7.093	10.395		0.177476	8.18684
6.3117	5.482	7.85	38.5015	10.8051	7.0691	4.2942	4.7223	2.8658	3.3694	6.5092	1.2903	3.1925	5.364	4.1966	4.7237	7.3694	5.3292	11.7376	6.1033	4.493	3.974	5.799	4.8929	12.7367	11.284	8.184	6.931	10.433		0.180889	7.48224
6.4307	5.171	7.434	32.5036	8.9797	5.7307	4.1935	4.2997	2.7102	3.8833	6.9774	1.6254	3.5177	4.918	3.4663	3.8706	6.7369	4.9953	11.1494	5.6031	3.946	3.642	5.564	5.1952	11.286	10.5783	7.372	6.983	10.447		0.184299	6.88498
6.5498	5.704	6.07	28.3527	7.8971	5.2531	3.8301	3.7494	3.1002	4.2297	6.975	1.9988	3.6819	6.745	3.7787	3.4028	5.9196	5.0033	9.9979	5.3914	3.655	3.582	5.066	4.4285	11.7897	10.6653	6.644	6.008	9.789		0.187713	6.52529
6.6689	5.184	5.485	23.2267	6.0549	6.1517	4.1821	3.8633	2.7761	3.7398	7.5362	2.2287	3.6637	7.075	3.4666	3.4308	5.051	4.3806	10.0703	5.2749	3.474	3.499	3.577	4.1314	11.4118	9.8543	5.998	5.679	11.713		0.191126	6.14925
6.788	3.872	6.482	20.3993	5.9418	5.1994	4.1359	3.2905	2.4932	2.3932	6.3715	2.2307	3.3769	6.565	2.6502	3.8387	4.535	4.3878	9.0959	5.2788	3.61	3.674	4.173	3.7992	9.6369	9.0184	5.473	6.409	10.839		0.194539	5.68465
6.9071	4.13	5.087	14.9062	5.4136	7.1464	4.3454	3.1846	2.994	3.0931	5.6223	2.56	3.3349	7.215	2.6488	3.6491	3.9472	4.4763	9.5779	4.371	3.54	3.895	4.154	4.5982	8.5002	9.0002	5.21	4.892	10.72		0.197953	5.43616
7.0262	3.63	5.612	13.5625	4.94	6.5641	3.7312	3.4347	2.9799	3.1661	6.582	2.022	3.0881	6.071	3.1331	3.4071	3.1135	3.9075	9.6595	5.7859	3.192	3.236	3.437	4.3243	8.8533	7.7884	4.801	4.275	9.668		0.201366	5.14161
7.1453	4.372	5.8	13.7716	4.7135	6.8739	3.4472	3.7572	2.7489	2.8741	7.7447	2.1851	3.7701	6.365	3.3536	3.5985	3.4665	3.8395	9.6864	5.0657	3.874	3.159	3.2	3.8131	9.0057	6.826	4.708	3.57	9.577		0.204779	5.18451
7.2644	3.468	5.367	12.9128	4.2943	6.3014	3.0906	2.4727	2.9808	2.8205	6.0261	2.2934	3.3525	8.103	3.0138	3.3036	3.4749	4.6627	9.9388	5.4841	3.67	3.684	2.98	4.2242	8.0937	6.5198	4.192	4.485	10.581		0.208193	5.06395
7.3834	3.367	4.475	10.9626	5.0663	5.6259	3.0138	2.5372	2.7184	2.4906	5.6703	1.8291	3.7042	6.909	3.266	2.9989	3.1748	4.1376	10.4499	4.5291	3.439	2.383	2.845	3.7614	9.3083	6.1118	3.747	4.036	12.02		0.211603	4.80633
7.5025	3.328	5.14	9.3681	4.0196	6.9188	3.251	2.9296	2.7577	2.9078	5.6887	2.2069	4.4186	8.035	2.7984	3.1958	3.507	3.3335	10.5956	5.3766	2.814	2.795	3.207	2.7112	10.2634	5.4573	3.806	4.08	10.753		0.215016	4.84513
7.6216	3.597	4.844	8.6365	3.664	6.5259	4.1489	2.2807	2.6567	2.5257	6.6107	2.1945	3.5873	8.61	2.7753	3.2373	3.548	4.1562	7.4329	3.8505	3.103	3.029	2.876	3.4393	10.7454	5.1373	3.712	3.548	10.181		0.21843	4.66618
7.7407	4.211	4.304	8.0169	3.299	6.5983	4.5409	3.1286	1.9162	3.4217	6.0432	2.1312	4.2057	7.829	2.782	3.1689	3.2763	3.7669	9.3976	4.5556	3.541	3.233	2.709	3.2045	9.2358	5.0026	3.339	4.269	10.224		0.221843	4.6911
7.8598	3.941	3.985	7.973	3.4582	7.073	4.4739	2.2165	2.2764	2.6383	6.2983	2.2051	4.4476	7.687	2.5935	3.5429	3.1553	2.6075	9.7863	4.4447	2.806	2.873	2.276	3.5871	8.9403	5.3247	3.138	3.431	11.054		0.225256	4.57977
7.9789	3.41	3.334	6.7361	4.5746	5.6085	4.2042	2.5368	1.8106	2.0183	6.8278	1.7499	4.2393	8.584	3.2262	4.1148	3.3185	3.7688	9.8876	4.888	3.984	2.743	3.24	3.6609	9.4021	5.5884	2.561	3.031	10.011		0.22867	4.60926
8.098	2.861	3.802	7.7495	3.3284	6.3047	4.2425	2.647	2.0113	2.2432	7.0265	2.1918	4.7587	9.526	4.0373	3.2287	3.6511	3.0876	8.7965	4.7186	3.317	2.683	1.951	2.933	9.9312	6.0255	2.854	2.816	9.685		0.232083	4.586
8.2171	3.47	4.914	5.7771	3.6087	5.6312	4.2143	2.1733	1.9232	2.2564	8.2053	1.8529	5.2514	11.223	3.1232	2.6474	3.0853	2.9229	9.8137	3.9109	3.207	2.661	2.177	3.779	9.4474	5.7502	2.964	3.119	10.934		0.235496	4.64439
8.3362	2.512	4.512	6.1077	4.0255	6.3773	5.337	2.2584	2.3991	2.4354	6.7925	1.8545	5.813	9.722	2.7522	2.5753	3.1162	2.9579	8.9099	3.607	2.841	3.222	2.683	4.1552	12.3678	5.4086	3.11	3.416	10.838		0.23891	4.71809
8.4552	2.83	4.396	6.3507	4.4797	6.8884	5.5762	2.6184	2.299	2.3769	6.9487	2.2166	6.204	10.671	3.0689	2.6751	3.5109	3.6186	8.8419	3.8951	4.025	3.202	3.065	4.042	11.6844	4.5424	3.085	3.471	11.607		0.24232	4.93535
8.5743	2.806	3.758	5.7087	3.7671	6.8564	5.5555	2.7208	2.2204	2.042	7.6274	2.0584	6.2244	10.853	3.2113	2.8464	3.9956	4.3866	9.9978	3.7162	3.465	3.365	3.052	2.9014	12.2732	4.4449	2.902	2.986	12.096		0.245733	4.92277
8.6934	2.972	4.804	5.3319	3.6979	6.8738	5.6536	2.5818	2.1474	2.7562	7.816	2.4027	6.2198	10.437	3.1415	2.1772	3.3517	3.2284	8.5085	3.4601	3.222	2.607	2.85	4.0227	12.1933	4.4899	2.981	2.962	13.96		0.249147	4.88748
8.8125	2.987	3.706	7.2541	3.325	6.4439	4.606	3.1636	2.173	2.1637	9.4127	1.8967	6.6836	11.153	2.5847	2.4567	3.0015	3.6947	9.4852	4.1229	2.726	2.188	2.913	3.442	12.1859	3.8769	2.77	2.495	13.658		0.25256	4.87746
8.9316	2.866	3.593	7.1526	4.1575	6.3919	4.0076	2.4343	1.7198	2.8493	8.9204	2.0817	6.129	10.311	3.0387	2.7629	3.1728	3.3195	10.4819	4.2097	2.979	2.978	2.914	3.5829	10.7571	3.5791	2.696	3.161	12.679		0.255973	4.81877
9.0507	3.006	4.632	6.4086	4.1171	7.1902	4.5677	2.4713	2.1994	1.9335	9.0738	2.5085	6.6223	10.587	2.9066	2.4288	2.713	3.2987	11.3094	3.6737	2.786	2.471	2.475	3.1562	12.8077	3.4252	3.381	3.34	13.494		0.259387	4.9637
9.1698	3.012	4.855	6.0456	4.2939	8.8361	4.4351	2.1163	2.0641	2.0299	8.449	2.4822	7.8021	9.626	2.8958	2.0773	2.4062	3.7179	8.5441	3.6186	2.696	2.654	2.895	3.3994	12.1707	3.2603	2.525	3.168	15.814		0.2628	4.92463
9.2889	2.853	3.638	6.3069	2.916	7.3833	5.5407	2.6239	2.1917	2.8936	8.0511	1.9947	8.3276	9.041	2.5359	2.8317	3.2503	2.6857	9.9982	4.2055	3.063	2.291	2.697	3.2089	12.2389	3.667	2.064	3.86	16.072		0.266213	4.94395
9.4079	3.779	3.879	5.7482	3.2442	6.725	6.0192	2.8262	2.2584	2.4523	8.3338	2.7227	9.1368	9.382	2.6908	2.6333	2.6729	3.1076	9.1438	3.957	3.356	2.393	2.626	3.0393	13.4701	2.9103	2.694	3.537	16.414		0.269624	5.04114
9.527	2.789	3.93	5.9457	3.8912	6.4511	6.4139	3.0238	1.8159	2.3508	7.6128	2.6554	10.0539	10.761	2.1746	2.1746	2.834	3.4976	10.3384	3.7167	3.555	3.737	3.179	3.577	16.3239	3.0086	2.425	3.289	15.842		0.273037	5.2631
9.6461	2.391	3.653	5.4241	3.4233	7.1834	5.2433	2.2577	2.3706	2.4387	9.8777	3.1833	12.6969	10.823	2.8172	2.1205	3.0034	3.1147	10.7479	4.08	2.877	2.681	2.458	4.1179	15.5104	2.7459	2.549	3.276	16.15		0.27645	5.3291
9.7652	2.406	3.995	5.6308	4.0436	6.9161	4.7168	2.5514	1.9187	2.5639	10.1433	2.6654	13.6523	10.584	3.6251	2.1654	3.0013	3.2429	12.5348	4.4034	3.171	2.555	2.66	3.8057	18.5738	3.2162	2.964	3.215	16.811		0.279864	5.63328
9.8843	2.421	4.219	5.7179	3.9217	7.6734	5.169	2.7086	1.892	2.3578	11.0731	2.5045	16.0611	10.916	3.7469	2.2539	2.9588	3.14	9.7581	4.3265	3.276	2.62	2.445	3.6707	17.7222	2.8744	2.793	2.78	17.988		0.283277	5.67816
10.0034	2.7	5.109	5.5242	4.0158	7.761	5.8059	2.5358	1.9336	2.6234	10.3377	3.0625	16.6537	11.595	2.3816	2.3552	2.4906	2.8635	11.5027	4.3917	3.553	2.991	2.845	4.3826	17.9287	2.2745	2.598	2.808	17.558		0.28669	5.80649
10.1225	2.249	4.753	6.3938	4.4527	7.9182	5.7062	2.6264	2.3152	3.1786	10.6028	2.2565	18.1792	13.005	2.2487	2.1618	2.3103	3.4664	12.3472	4.3667	2.586	3.167	2.402	3.9096	18.9156	2.5883	1.805	2.901	20.152		0.290104	6.03444
10.2416	3.684	5.016	5.983	3.5192	8.094	6.1055	2.174	2.0402	3.2473	13.7478	2.4366	22.3477	12.483	2.6593	2.0424	2.6531	3.1665	10.8073	4.1747	3.532	2.831	2.733	3.8264	21.9232	2.6004	1.74	3.599	21.103		0.293517	6.4382
10.3606	2.397	6.031	6.7638	3.6178	7.9011	8.165	2.7184	2.1143	2.6179	13.1972	2.9962	22.198	14.386	2.5313	2.7818	2.7862	3.1623	10.8594	3.9242	3.568	2.812	3.185	4.5156	21.9616	2.6724	2.489	3.15	22.893		0.296927	6.72841
10.4797	2.927	5.268	6.4136	3.9325	9.7677	7.2678	2.4825	2.6589	2.4448	15.4061	2.9814	21.5571	13.388	2.3404	2.9219	2.4708	3.3824	12.5889	3.8054	3.223	2.466	2.847	3.9157	21.2313	2.0642	2.473	3.058	28.04		0.300341	6.90441
10.5988	3.455	5.116	6.253	4.0736	9.8594	7.6625	3.7421	3.0481	2.2147	15.8496	2.6043	25.9254	12.579	3.0657	3.2756	2.8551	2.9156	12.4472	4.4282	3.286	2.532	3.605	3.81	21.2144	2.1662	2.34	3.29	28.889		0.303754	7.23224
10.7179	3.47	4.915	5.7541	3.8006	10.3231	7.0306	3.1603	2.9772	1.6931	16.3245	2.6679	26.0984	9.382	2.9192	2.7308	2.8475	3.1879	13.1994	5.0756	3.127	3.082	3.073	4.1367	24.4932	2.3343	2.42	3.368	27.153		0.307167	7.16944
10.837	2.46	6.004	6.6383	3.7284	9.3931	8.768	3.5648	2.1476	2.6029	17.206	2.6961	29.3951	9.28	3.5719	3.5049	3.1327	2.9536	12.9834	4.7454	3.185	2.59	2.638	4.0856	25.071	2.2808	2.255	3.812	27.672		0.310581	7.44163
10.9561	2.638	5.063	6.0922	4.2003	11.0615	8.2345	2.6576	2.0037	2.3654	17.2174	2.5912	29.7263	7.708	3.2409	2.9807	3.4258	3.1725	16.548	3.9168	3.208	2.446	2.726	4.3229	26.9204	2.503	2.441	3.255	27.375		0.313994	7.50147
11.0752	3.047	6.659	5.8574	4.0668	9.4785	9.1567	3.6136	2.6946	2.5192	18.4547	2.8897	28.7129	5.73	3.2071	2.308	2.9988	3.699	17.16	5.0205	3.447	2.511	2.83	4.397	26.4106	1.7598	1.714	3.08	28.403		0.317407	7.56521
11.1943	3.05	5.138	6.8268	3.8078	11.4891	8.1748	3.5202	1.6505	3.6884	17.9743	3.5812	27.3465	6.026	3.0832	2.6956	3.6717	3.4607	18.711	4.3465	3.86	2.88	3.184	5.2019	29.3392	2.2348	1.913	3.315	30.104		0.320821	7.86694
11.3133	2.879	5.126	5.9322	5.0775	11.6121	7.7915	3.8487	1.9303	3.6368	20.1888	2.9512	28.2841	5.663	4.0634	2.3038	3.3802	3.6086	16.0688	5.0551	3.707	2.973	2.734	4.5395	26.9441	2.6067	1.735	4.001	30.92		0.324231	7.84148
11.4324	3.163	5.243	7.2445	5.1428	12.7296	8.0103	3.7778	2.7167	3.0076	19.9408	3.3095	28.1165	5.195	3.7278	2.3213	3.0567	3.4117	19.8116	4.5688	3.697	3.375	2.869	4.2821	24.4354	3.0597	1.388	3.987	28.896		0.327644	7.87444
11.5515	3.823	6.409	7.188	3.9817	13.7175	10.5628	3.5483	2.5833	3.2847	20.2667	2.8558	24.6589	6.138	2.9055	2.4607	3.3476	3.4363	21.4803	4.7493	3.284	2.654	3.152	4.3356	25.7159	3.2671	2.112	3.355	26.928		0.331058	7.93575
11.6706	4.399	5.058	7.3678	4.1499	12.1836	12.3631	2.8934	2.4477	3.5974	23.4511	3.8219	24.4033	6.948	3.5196	2.8607	2.3435	4.4337	23.6424	5.4988	3.49	3.094	3.286	3.6582	26.4902	3.7213	2.134	3.818	26.017		0.334471	8.25327
11.7897	2.693	5.841	7.837	4.8392	12.9293	11.9955	3.7528	2.1919	3.3149	23.8162	3.0791	23.9184	6.571	3.1837	2.6436	3.9932	3.7314	23.0737	5.3399	3.756	3.165	2.674	3.9291	29.2588	2.8786	1.679	4.766	23.332		0.337884	8.22083
11.9088	2.182	6.124	7.4853	4.477	13.1299	9.8683	3.4028	2.1944	3.0162	22.5771	3.1242	22.119	5.541	3.355	2.2067	3.3173	4.2107	25.1368	5.4004	4.322	2.813	2.324	3.6944	30.5691	2.6887	2.146	4.076	21.349		0.341298	7.95894
12.0279	2.416	5.573	7.0405	5.0484	11.2897	10.4278	3.5311	2.441	2.9095	21.6739	2.864	20.4046	5.337	2.3851	2.7884	2.7334	4.2945	23.8864	5.8565	4.165	2.492	2.293	3.493	32.832	3.6771	2.048	3.254	20.63		0.344711	7.77803
12.147	2.688	4.778	9.0866	5.8178	12.8615	10.8067	4.2871	2.5307	3.1345	24.1212	3.2673	19.7872	5.71	2.9611	3.3914	3.2476	3.873	26.3852	5.6774	4.161	2.874	2.777	3.3827	29.7662	2.8514	2.206	3.316	21.519		0.348124	8.11663
12.2661	3.179	5.929	8.4821	6.0369	13.8539	10.687	2.8622	2.8685	3.519	22.3229	3.7546	20.0051	6.107	3.8933	2.4434	2.877	4.5709	28.7506	4.9794	3.731	2.167	2.966	4.1638	29.8609	3.1312	2.394	3.764	21.076		0.351538	8.2277
12.3851	2.775	6.764	8.6277	6.67	13.3436	10.5848	3.0943	3.1302	3.117	22.6547	3.1667	18.0387	5.58	3.6203	2.6876	3.7098	3.9452	28.0993	5.8579	3.854	3.359	3.183	5.3535	29.0117	3.4254	2.273	4.538	19.036		0.354948	8.19644
12.5042	2.668	5.137	8.1683	5.9369	12.6009	10.0277	3.3557	2.715	3.4718	22.3281	3.2227	17.8541	6.015	3.5326	2.6632	3.488	4.222	29.0223	5.4685	3.83	2.978	2.338	4.8377	28.0476	3.0708	2.819	4.107	17.533		0.358361	7.90925
12.6233	3.057	5.679	10.206	6.9132	12.6098	9.9711	4.0048	2.2971	4.4305	20.5488	4.4496	19.9583	5.494	2.6912	2.9256	3.0022	4.0866	33.7957	5.4049	3.832	3.11	2.694	4.78	27.1994	3.3132	2.625	4.9	16.732		0.361775	8.23968
12.7424	3.755	5.427	10.7076	6.4606	11.4263	11.0982	3.5379	2.3832	4.4609	22.3971	3.4247	21.5455	6.608	3.1387	2.5438	2.8509	4.0282	31.0142	4.7161	4.637	2.357	3.105	4.8994	29.9851	2.4633	2.081	5.232	16.693		0.365188	8.3206
12.8615	3.094	6.121	9.9643	6.5567	13.6826	13.6684	3.6236	2.4863	3.4642	22.2932	3.9513	23.2548	5.849	3.3948	2.4887	3.1325	3.4677	32.6098	4.7908	3.59	2.217	2.527	4.9406	30.424	2.8233	2.205	6.44	16.254		0.368601	8.54695
12.9806	2.588	6.244	10.4373	7.1046	14.3569	13.356	4.2381	2.5227	4.3475	21.7976	4.0158	22.9228	4.951	2.9644	3.6953	3.2643	3.7106	34.4192	4.8305	3.147	3.162	2.266	5.3147	28.5055	3.0156	2.381	6.731	15.808		0.372015	8.64634
13.0997	2.723	8.143	9.85	6.0584	12.6971	11.5323	4.3722	2.2382	3.42	22.5448	3.4624	22.5113	5.606	2.9646	3.6231	3.2529	3.0562	32.3536	4.6617	3.206	2.385	2.858	4.8623	27.9435	2.7858	2.641	6.625	14.798		0.375428	8.32769
13.2188	3.719	8.949	9.7109	6.2377	12.1308	12.9523	3.6144	2.7202	3.9731	20.2181	4.5207	22.9765	5.553	2.786	3.4828	3.8363	3.3528	36.3054	6.5105	3.318	3.149	3.116	4.2618	26.8343	3.464	2.117	6.711	15.315		0.378841	8.63699
13.3378	3.392	8.634	8.5025	6.0199	10.3163	12.8125	4.4363	2.6175	5.1801	20.3737	4.1583	19.0855	5.704	3.0096	3.3225	3.2081	4.2574	40.1755	5.9387	3.133	2.733	3.366	3.8185	28.6579	3.4864	2.893	8.55	15.989		0.382252	8.70611
13.4569	3.177	9.483	9.3481	5.3651	12.325	15.3016	5.2917	2.7076	4.5259	20.3809	4.4199	18.3795	6.188	3.2463	3.8781	3.9363	4.2602	38.9038	5.9087	3.296	2.65	3.063	4.0895	27.3095	3.4687	2.772	8.8	16.904		0.385665	8.90641
13.576	2.544	9.662	9.1481	5.3899	11.7513	17.3436	5.417	2.7399	5.2809	20.7085	4.3582	19.3227	7.019	3.4432	3.4958	3.4372	3.8761	38.3027	5.2084	3.288	2.454	2.434	4.4228	26.4955	2.6295	2.2	9.903	17.869		0.389079	8.93372
13.6951	3.051	10.474	9.7931	6.8474	12.0385	18.5081	4.3019	3.1462	5.192	20.3731	3.3165	19.5284	5.969	2.6325	3.373	4.2108	4.3595	39.8527	5.8198	3.12	2.618	3.132	3.6905	23.504	3.5501	2.668	11.622	17.609		0.392492	9.08218
13.8142	2.77	10.912	8.4234	5.6021	11.3175	16.9318	5	3.1546	5.4094	22.344	3.4051	21.9654	5.481	3.1318	2.6638	3.8269	5.9515	40.697	4.8652	3.592	2.232	3.188	4.1319	22.1111	3.8471	2.895	14.07	17.526		0.395905	9.19449
13.9333	3.96	10.875	8.3718	6.2924	12.1105	18.0345	4.6255	2.7654	6.0514	21.7447	3.8263	21.1775	5.121	2.6287	2.9863	3.1788	5.2001	41.0072	4.6261	3.077	2.327	2.09	4.1358	20.9378	3.4311	2.323	15.185	16.873		0.399318	9.10582
14.0524	3.823	11.057	6.7511	7.0478	11.1081	16.9672	5.1705	3.0033	6.7187	20.4231	3.8541	22.7642	5.254	2.8765	2.6232	4.0041	5.5039	41.1439	4.9327	3.352	2.736	3.19	3.587	21.9653	3.6099	2.51	15.421	16.634		0.402732	9.21541
14.1715	4.03	11.511	8.1998	7.2708	9.7597	17.2355	4.9584	2.4457	6.358	18.4482	4.0436	24.0172	5.556	2.9022	2.9369	4.2535	4.9962	43.8584	4.9416	3.497	3.422	3.18	3.5546	27.1252	3.8478	1.872	15.549	15.143		0.406145	9.46119
14.2905	2.95	12.067	8.394	7.296	9.8836	20.2481	5.4598	2.9227	7.5251	17.5652	3.9617	22.1991	5.848	2.6615	2.4674	3.9807	5.6127	43.5818	5.938	3.801	3.349	2.845	3.5312	27.0582	3.5801	2.487	18.576	13.745		0.409556	9.62625
14.4096	3.086	12.227	8.7074	7.4292	9.5727	21.9464	6.1344	3.6211	7.2402	15.2833	2.771	23.023	5.467	3.3826	2.9455	4.422	5.4239	45.911	5.3388	3.444	2.563	2.958	3.9663	28.1323	4.6099	2.233	21.456	13.577		0.412969	9.88829
[truncated: 172 more rows]

## Sheet: Image2 (2)
X0	Y0	Y1	Y2	Y3	Y4	Y5	Y6	Y7	Y8	Y9	Y10	Y11	Y12	Y13	Y14	Y15	Y16	Y17	Y18	Y19	Y20	Y21	Y22	Y23	Y24	Y25	Y26	Y27		Ap-basal	Avg int
[truncated: 228 more rows]

## Sheet: Image1 (2)
X0	Y0	Y1	Y2	Y3	Y4	Y5	Y6	Y7	Y8	Y9	Y10	Y11	Y12	Y13	Y14	Y15	Y16	Y17	Y18	Y19	Y20	Y21	Y22	Y23	Y24	Y25	Y26	Y27	Y28	Y29		Ap-basal	Avg int
[truncated: 230 more rows]

[truncated: 2 more sheets: Image2, Sheet1]
