# Supplementary material for: Crumbs organizes the transport machinery by regulating apical levels of PI(4,5)P2 in Drosophila
Source: eLife. 2019 Nov 7;8:e50900. doi: 10.7554/eLife.50900 (PMC6881148; doi:10.7554/eLife.50900)
Supplement: Figure 5—figure supplement 1—source data 4. [file elife-50900-fig5-figsupp1-data4.xlsx]

## Sheet: Image4
X0	Y0	Y1	Y2	Y3	Y4	Y5	Y6	Y7	Y8	Y9	Y10	Y11	Y12	Y13	Y14	Y15	Y16	Y17	Y18	Y19	Y20	Y21	Y22	Y23	Y24	Y25	Y26	Y27	Y28	Y29	Y30	Y31	Y32		Ap-basal	Avg int
0	20.1953	20.4443	28.46	44.409	52.771	42.3725	35.1859	34.914	62.854	17.403	61.276	60.8684	97.1983	68.935	57.533	47.3481	57.7069	56.6207	59.3842	56.1561	45.9	63.812	63.262	44.571	56.424	35.456	22.8528	69.2005	59.5287	69.5056	60.1172	58.1462	59.129		0	51.2103
0.1191	22.1294	21.4751	32.1404	44.97	54.27	41.189	35.6555	35.507	72.905	18.76	57.618	58.066	87.6487	74.874	62.172	50.533	57.9233	52.5256	62.1102	53.452	50.926	68.384	67.298	49.888	61.578	40.082	25.304	72.9205	61.5744	70.4083	60.0946	61.406	62.921		0.00528917	52.9912
0.2383	24.1328	26.4702	38.2693	46.298	51.235	43.0369	36.8582	36.505	85.998	21.07	51.787	60.662	88.2772	76.34	60.129	53.0542	59.843	51.2909	66.9273	56.6826	56.573	74.251	76.647	53.2	72.164	49.848	26.3913	75.8406	68.0444	65.9291	60.2181	63.296	67.119		0.0105828	55.8905
0.3574	23.8502	29.5893	42.843	53.099	54.455	46.6217	37.5961	40.067	96.421	24.092	45.69	60.7551	84.8751	78.638	62.785	61.8441	64.7879	48.2583	64.0206	57.5698	63.604	80.71	85.513	57.621	86.457	55.999	31.4493	79.8265	72.6565	66.8635	63.4571	61.8228	69.699		0.015872	59.1981
0.4766	27.4094	34.1808	48.4647	54.051	55.691	46.5481	41.9093	43.235	107.767	25.991	42.649	57.9801	83.3703	81.317	66.071	64.6895	66.1602	50.305	69.6327	56.2382	70.103	87.207	88.275	66.961	92.322	65.298	32.8492	79.3229	73.1682	68.4395	63.3144	68.2811	75.62		0.0211656	62.2673
0.5957	30.6622	37.8369	53.1292	57.057	60.653	48.6649	43.8717	49.382	113.316	30.627	44.061	54.3903	85.1906	87.235	66.829	68.2716	63.2997	49.3553	69.3001	57.9702	78.89	95.674	93.093	73.362	96.565	71.827	37.2825	79.4723	73.4982	66.5802	64.1035	68.7302	82.09		0.0264547	65.2203
0.7148	32.759	44.5184	58.3277	62.608	59.495	55.9883	45.4894	52.154	127.066	38.023	45.527	55.2317	82.2988	91.909	67.209	72.1718	67.3448	47.0086	69.9158	56.8625	83.893	106.576	97.388	76.398	104.412	82.059	39.2185	79.7822	77.4263	66.5726	66.2235	68.697	85.976		0.0317439	68.6827
0.834	38.3717	53.2916	62.8935	66.874	61.105	60.5347	44.2891	58.946	132.885	44.217	49.214	49.2143	76.8447	100.768	71.486	81.0947	68.7764	49.3356	68.6293	58.1692	86.42	114.099	104.903	84.227	106.641	89.523	44.9812	76.7205	74.3104	70.4513	68.209	71.1028	83.779		0.0370375	71.8881
0.9531	41.0583	60.3346	65.5176	80.589	65.195	59.5853	47.7598	65.471	143.023	54.652	58.636	51.1022	84.5014	104.058	74.176	85.6741	67.9854	48.5517	67.8798	55.1307	89.96	118.205	116.558	94.483	112.892	95.269	49.5118	78.3994	77.2509	68.6093	69.8057	74.392	86.533		0.0423267	76.1439
1.0723	45.8271	73.2531	73.8159	86.415	72.43	62.779	52.0758	71.186	149.22	65.054	65.285	50.3152	88.8682	112.229	78.999	86.0844	68.0047	47.3172	69.434	59.3119	99.688	129.291	117.29	94.372	115.027	100.103	58.4757	78.7006	76.9729	68.8188	75.0885	76.4532	97.725		0.0476203	80.7852
1.1914	48.3287	79.0314	78.9006	91.884	80.435	66.3628	53.5218	78.844	155.778	77.645	74.294	49.6425	90.0256	112.206	85.639	91.6221	67.6872	50.8445	69.5903	62.426	109.688	133.522	121.723	99.54	112.948	99.738	63.7462	73.5687	81.4776	69.9612	84.2101	78.9783	101.519		0.0529095	84.7069
1.3106	49.1177	83.6033	79.8923	95.56	83.32	68.5682	54.4163	89.218	152.207	90.627	82.675	53.2477	87.2659	112.788	88.513	89.631	68.2682	48.4355	69.3438	62.9053	116.542	140.389	126.15	106.076	108.701	102.34	67.1235	77.5038	83.069	71.6197	89.3329	80.4526	102.329		0.0582031	87.3101
1.4297	55.6396	83.8363	81.8397	98.151	90.094	72.405	59.4626	96.641	151.717	100.563	92.526	58.5797	91.366	110.097	92.026	91.922	68.7326	49.9236	68.8228	63.7947	126.432	149.484	134.586	109.74	108.459	104.792	68.5058	81.526	85.4229	70.5536	87.0486	85.1655	101.941		0.0634923	90.6605
1.5488	60.9947	85.5149	89.9009	100.383	95.738	76.8048	61.5116	100.657	145.918	111.77	100.873	60.098	94.9182	112.578	94.584	95.4668	70.2412	48.59	67.6763	66.2365	136.107	156.388	143.314	108.911	106.193	103.879	67.5037	81.1803	88.0219	78.5524	91.7031	81.0045	98.1		0.0687814	93.3731
1.668	64.745	88.9858	87.6864	99.676	104.054	79.9382	62.9693	109.858	124.036	126.084	106.308	64.4529	92.9142	108.712	100.803	90.0533	71.6295	47.3353	67.2693	67.5971	145.468	159.425	139.491	115.689	101.261	101.826	72.8036	77.7294	87.4167	79.3283	93.1834	79.8132	99.986		0.0740751	94.5008
1.7871	69.0152	87.4858	87.8831	100.394	103.289	81.594	63.5419	114.635	108.138	136.472	107.704	65.6997	92.3442	107.614	102.22	90.6434	70.2075	47.8457	66.0032	68.5826	145.701	166.255	139.253	120.018	102.232	101.3	75.8728	77.9139	90.3441	77.6582	89.9892	80.4713	100.352		0.0793642	95.1113
1.9063	75.4422	83.8966	84.3558	102.934	103.765	84.6426	67.245	122.65	90.73	145.218	105.471	69.354	88.8109	108.34	104.104	89.6427	74.729	50.931	63.3857	66.432	147.283	170.071	139.134	117.254	103.727	97.117	76.5024	81.4557	89.4117	79.8134	86.6989	81.0439	108.538		0.0846578	95.7615
2.0254	80.1546	78.5164	84.1859	101.316	103.776	88.3369	69.7747	129.156	73.475	157.32	104.428	75.2392	91.3029	107.044	106.019	89.7481	70.0403	51.4876	62.7419	68.1419	151.255	175.073	145.945	118.829	100.533	94.233	75.624	86.6324	87.5015	75.794	81.7717	81.5819	104.79		0.089947	96.1142
2.1445	80.8595	76.7915	85.4161	100.844	103.446	88.0987	73.0866	126.635	58.236	148.427	100.922	78.2323	87.6918	108.283	110.02	84.196	72.1134	53.767	60.1426	62.9647	150.861	176.44	143.355	113.204	98.927	91.914	80.3582	88.1671	84.9105	76.9079	84.4662	82.3229	102.323		0.0952362	94.9797
2.2637	81.8912	75.9692	82.6285	98.249	99.788	91.7289	71.1259	126.676	47.808	140.724	95.017	77.2982	86.9835	108.726	105.763	81.8013	71.9488	53.0638	60.7608	59.0741	150.941	165.362	136.086	115.121	96.983	85.975	85.6776	89.135	83.7068	76.1056	82.7669	80.7277	100.651		0.10053	92.9171
2.3828	81.9128	72.6941	80.991	98.419	92.817	89.6918	73.8473	120.828	39.223	129.186	87.673	80.658	89.5691	105.617	97.363	75.2978	75.3795	52.2325	56.2214	57.5629	141.83	169.415	128.626	111.82	88.697	79.261	87.9252	96.2118	85.0186	75.4382	80.4545	80.7906	99.292		0.105819	90.3625
2.502	77.058	68.641	82.0242	92.852	93.164	90.314	75.7549	116.586	32.588	108.407	81.855	83.1413	85.5846	100.359	89.396	66.9759	74.8144	49.1013	57.3199	49.8323	145.633	166.669	119.664	104.412	80.261	71.912	86.9782	95.6852	78.7571	71.7071	74.3863	79.8209	94.71		0.111113	86.2535
2.6211	75.9657	67.8402	79.4746	88.92	93.812	94.834	75.0396	108.018	29.317	88.973	76.656	81.8176	85.9295	98.759	70.727	59.3601	74.7144	48.4649	56.6877	48.4071	144.336	154.905	105.936	93	80.97	74.885	88.5356	95.0469	80.4172	76.2313	74.4819	73.0053	96.653		0.116402	83.0946
2.7402	74.0938	66.8925	76.9364	82.901	91.326	96.8893	79.1588	96.184	23.934	72.248	70.627	78.424	79.9867	96.368	57.439	54.7534	73.209	50.5102	54.2605	41.9402	138.458	137.799	94.72	76.982	76.1	65.728	95.535	92.4379	78.7141	77.0535	71.1606	71.6431	92.196		0.121691	78.3821
2.8594	65.3351	60.395	71.5639	81.595	94.893	90.7586	80.1455	83.461	23.733	59.886	66.94	80.0151	78.2886	91.167	44.019	47.2223	68.1683	49.913	49.0758	36.08	127.383	124.034	81.444	65.584	70.78	60.031	92.548	92.7609	77.0318	74.6264	72.9507	72.03	88.866		0.126985	73.4159
2.9785	56.8362	56.2223	70.4228	75.734	86.172	90.617	80.9127	73.264	22.133	49.164	64.828	81.3638	72.0529	93.394	33.86	42.0654	64.3919	47.902	44.324	30.9073	114.308	104.141	68.955	56.268	67.738	56.073	95.5243	90.2078	76.3394	76.2352	69.6638	66.537	87.747		0.132274	68.6759
3.0977	55.9643	54.589	67.0402	68.387	82.661	88.2638	82.5859	64.321	19.603	42.763	58.832	81.8574	67.9598	89.63	27.713	37.2996	59.8461	50.3929	41.6454	27.2194	109.281	81.212	59.188	43.664	60.257	50.166	96.7861	92.0747	75.9379	73.6767	66.0471	64.8104	79.882		0.137567	64.2896
3.2168	56.7645	53.3498	61.0911	67.27	79.225	86.7086	79.2834	53.303	16.57	36.466	54.368	76.818	60.8462	89.588	21.925	33.568	59.4027	46.7649	36.8503	25.0631	94.825	62.269	48.104	35.158	57.761	47.988	97.6442	93.5006	75.2277	72.1057	64.9261	65.7068	79.84		0.142857	60.3116
3.336	57.0316	51.1548	58.0067	57.202	75.576	83.1538	79.4232	47.101	15.626	30.465	50.504	72.2612	58.6711	86.567	16.802	27.5753	56.7545	47.2966	34.3335	20.2865	85.166	48.457	40.095	32.573	54.545	47.525	88.4781	91.5919	74.2895	70.2885	63.2848	59.4505	75.662		0.14815	56.2787
3.4551	54.2243	45.9538	50.3797	46.623	68.83	79.1562	80.5411	37.16	14.689	29.13	44.927	70.0359	53.1395	86.94	13.706	25.3193	53.424	49.906	31.6297	17.7836	80.039	38.073	34.183	26.312	52.644	46.16	85.2049	91.67	74.0903	67.4366	67.1559	56.4792	72.866		0.153439	52.9034
3.5742	52.3038	40.7435	45.0043	41.171	57.555	72.7088	77.9202	28.375	13.039	24.049	38.208	68.3478	49.0907	81.215	11.847	20.8914	46.1906	52.278	28.2328	15.6852	70.019	28.825	25.416	23.537	51.587	38.032	78.9586	84.5089	71.8026	66.3169	64.711	56.4922	70.02		0.158728	48.3358
3.6934	50.9705	35.0583	39.7546	34.513	44.802	66.357	79.1954	23.415	13.211	20.306	36.749	55.7048	45.7278	74.964	10.657	17.5254	42.6764	46.5215	28.1213	13.8475	57.345	23.875	22.064	19.233	46.963	35.419	75.4653	85.1081	68.607	66.8546	60.1026	54.5348	66.309		0.164022	44.3018
3.8125	45.2366	34.6259	34.6047	28.549	38.203	57.9051	77.0811	18.796	11.636	18.864	31.522	48.7656	40.6096	67.626	9.301	16.4942	43.4069	43.4742	25.1983	11.7618	46.833	21.13	18.4	14.845	45.935	33.387	70.2876	83.5296	66.803	66.7567	57.894	47.0275	63.435		0.169311	40.6038
3.9317	40.1488	27.6002	31.9758	23.265	29.391	48.9547	66.8105	17.124	10.787	16.628	28.972	45.039	36.4833	65.494	8.668	15.1137	37.0295	41.3402	18.8703	10.8655	34.157	17.255	16.023	12.743	45.294	31.973	61.3597	76.8452	62.2593	59.4385	59.3289	47.2592	58.602		0.174605	36.4575
4.0508	35.3279	26.174	27.2339	19.433	21.765	40.9946	58.8418	12.953	9.131	15.887	25.782	37.3702	27.4614	64.661	8.176	12.6182	34.7578	39.0416	14.258	9.4285	24.114	13.258	13.672	12.222	43.257	27.363	56.7145	67.8884	59.8573	56.2396	59.6068	43.8864	56.44		0.179894	32.6005
4.1699	32.5499	22.9259	22.7905	16.622	16.439	31.4356	52.743	11.245	7.828	14.821	24.481	34.0583	25.082	58.818	7.058	10.9946	31.5014	37.6516	12.6983	7.8876	18.679	10.559	12.184	11.476	40.323	28.31	53.0252	63.3861	55.0847	52.1528	59.5177	40.904	54.552		0.185183	29.6904
4.2891	27.9377	22.6802	19.3051	14.271	11.569	22.8668	40.6363	9.381	6.834	14.346	23.006	32.0603	19.906	57.14	6.164	9.1283	29.5349	37.1945	11.4698	7.5326	17.4	8.982	9.34	10.869	38.296	24.539	46.2155	59.1385	49.909	46.7174	53.2413	35.0125	49.595		0.190477	26.4309
4.4082	23.3817	20.5559	18.9889	14.089	7.858	17.733	32.3931	8.242	6.347	13.484	22.743	27.5363	15.7722	54.703	5.93	8.0936	24.0448	33.5018	9.8691	6.9914	13.735	8.363	8.911	11.919	31.757	25.135	37.667	47.7965	40.2201	43.8531	50.0602	33.3523	46.098		0.195766	23.3674
4.5274	20.229	16.6789	18.2383	14.325	6.796	13.3597	27.5884	6.649	6.373	13.081	22.886	24.4036	11.4209	48.954	5.783	7.1641	20.255	30.9735	8.7032	6.7704	11.07	7.845	7.558	10.341	27.128	22.87	32.5918	39.6643	30.8997	38.8004	51.7362	31.7236	41.101		0.20106	20.7261
4.6465	16.1183	16.373	16.6631	12.244	5.987	10.4948	23.4614	5.575	5.227	10.348	20.89	22.7047	12.2326	45.718	5.181	7.5096	17.5833	29.989	7.9103	5.4712	11.046	7.918	7.655	10.068	24.183	23.395	26.3773	29.9221	25.6306	30.5677	48.1535	27.3435	36.327		0.206349	18.3718
4.7657	15.2222	14.0981	14.8777	10.303	5.13	8.7805	24.1582	5.069	4.67	9.199	17.634	20.0574	11.7026	41.635	4.214	6.4876	14.4927	26.5945	8.0536	5.3578	9.607	6.938	6.736	11.68	22.156	19.071	24.9006	24.9451	20.535	26.5585	43.7428	26.5283	30.564		0.211642	16.4151
4.8848	13.9783	13.2513	15.638	9.809	4.155	7.5196	22.684	5.262	4.3	8.852	14.859	16.0651	12.9324	39.991	4.626	5.9135	11.4079	24.3959	7.8647	4.8417	8.107	6.07	5.793	10.93	19.077	17.726	21.1881	19.2815	18.7484	24.0031	37.5847	22.8585	29.292		0.216932	14.8184
5.0039	13.3212	11.9705	15.5664	9.131	3.828	7.2268	21.6537	4.636	3.684	7.904	12.632	13.9418	13.3274	41.537	4.066	4.9608	10.0055	21.017	7.501	4.3571	6.836	4.701	4.755	11.661	18.667	15.846	18.6357	16.208	15.3047	20.1404	37.4175	21.1567	23.953		0.222221	13.5621
5.1231	13.5056	10.0069	13.5911	6.746	4.185	6.7798	22.7852	4.201	3.586	5.95	10.519	11.7776	14.6519	41.25	3.373	4.9411	8.1058	18.0217	8.3983	3.9583	7.56	4.392	4.472	9.762	20.1	13.349	16.1009	14.2555	12.4696	16.5806	32.7257	19.0179	20.285		0.227514	12.3456
5.2422	10.4088	9.9553	12.1309	4.988	3.611	6.2421	20.5619	3.41	3.385	5.961	9.382	10.3079	15.9075	43.355	3.066	5.5481	6.5595	17.4402	9.2006	4.7229	6.871	4.65	3.963	8.346	20.142	10.819	15.467	9.7795	10.8262	15.0498	27.8549	16.5043	18.356		0.232804	11.3567
5.3614	9.6506	10.6472	10.663	5.417	3.272	5.1856	18.6534	3.15	2.907	4.889	7.774	9.9412	16.0099	43.736	3.162	4.8199	5.3578	15.4657	9.9296	3.8345	7.192	3.968	3.875	8.314	20.463	8.57	14.9189	8.8713	9.8164	13.6103	29.0728	14.3222	15.507		0.238097	10.6959
5.4805	9.4638	8.9814	9.7115	4.263	2.599	4.8507	20.1166	4.135	3.467	5.573	6.312	9.0317	11.0007	38.606	2.937	4.6937	4.2558	13.6131	7.4978	4.0612	7.006	3.26	4.162	7.422	21.692	6.847	14.5142	8.1804	10.3566	10.6744	25.5924	14.1673	12.483		0.243386	9.74325
5.5996	9.6623	8.569	10.6515	4.5	2.199	5.3614	19.4695	3.673	3.281	4.913	5.96	7.3281	8.247	29.832	2.915	4.6322	4.3714	12.7078	6.2974	3.9144	6.897	3.317	4.208	6.168	22.315	6.111	12.9915	5.7368	8.7519	10.4245	20.9506	12.4875	12.574		0.248675	8.83084
5.7188	9.8091	6.9127	9.4602	4.39	2.416	4.1381	19.495	3.437	3.165	4.684	4.183	7.2828	6.3894	24.571	3.214	4.5693	4.4061	13.0293	6.4744	3.5597	7.065	3.591	3.824	6.171	20.317	5.343	10.9183	5.8966	7.5521	8.9583	19.702	10.796	12.468		0.253969	8.12692
5.8379	7.7304	7.0079	8.2707	4.192	2.633	4.1349	17.7215	3.139	2.655	3.579	4.458	7.6987	4.7912	19.16	3.233	4.5297	4.1822	11.014	5.0739	3.1194	7.127	3.474	3.596	5.72	19.497	4.708	9.7201	5.3491	7.9504	7.1113	19.2725	9.781	11.002		0.259258	7.35248
5.9571	7.9766	6.4405	7.9754	3.853	2.498	3.7146	19.247	3.969	2.56	3.104	4.026	8.3377	4.7525	16.466	2.912	3.7693	4.3345	9.8307	3.7344	2.8146	6.758	2.426	2.928	6.788	14.869	4.88	10.287	4.6174	6.7578	5.9266	16.2886	8.9764	10.196		0.264552	6.78832
6.0762	7.4579	6.2685	8.6123	3.787	2.313	3.8742	18.7087	3.163	2.111	3.975	3.682	7.464	5.0875	14.719	2.811	3.4293	4.0029	8.2547	4.4626	3.1433	6.5	2.356	2.9	5.07	14.731	3.986	9.5276	4.2745	5.7561	5.4611	13.7051	10.0444	9.564		0.269841	6.40008
6.1953	7.333	6.0697	7.6189	3.648	2.413	3.6372	17.5351	3.426	1.937	3.374	3.361	7.6692	4.5962	12.529	2.603	3.4927	3.6678	7.4901	5.1761	3.3451	5.707	2.89	2.559	6.604	11.666	4.268	7.3337	3.5618	5.6753	4.3735	12.3008	8.6667	8.668		0.27513	5.91503
6.3145	6.9807	5.5312	6.6592	3.82	2.293	3.4999	16.8023	3.33	1.728	2.665	3.415	7.3302	5.1005	11.949	1.934	2.0704	3.625	6.6826	5.5101	2.6202	5.703	2.375	2.728	6.166	8.212	4.238	9.2811	3.4874	5.8001	3.4932	11.8276	8.4269	8.949		0.280424	5.58284
6.4336	6.635	5.9367	6.6786	3.704	1.911	3.6994	16.2389	2.949	2.234	2.779	3.859	6.9148	4.1014	10.53	1.661	2.5114	3.0141	5.7194	5.7345	2.5464	5.718	1.821	3.111	5.608	6.87	4.338	7.0584	3.4176	4.9296	3.4468	10.8242	8.0496	9.075		0.285713	5.26136
6.5528	6.2234	5.5303	7.3402	3.353	1.815	2.963	15.8469	2.367	2.138	2.581	3.204	7.0221	4.2993	9.812	1.697	1.9965	2.8587	4.6515	5.4066	2.3153	5.585	2.137	2.817	5.244	7.651	3.876	7.444	3.0957	3.6534	2.8628	9.6652	8.2502	9.996		0.291007	5.02115
6.6719	6.7786	5.5476	6.1408	3.738	2.194	3.5489	15.9734	2.124	2.77	2.972	2.419	6.532	4.1341	9.3	1.347	2.2148	3.4257	4.0921	4.8605	2.4792	5.644	2.365	3.033	4.674	6.022	4.03	7.4772	2.4721	3.7421	2.7135	8.5714	7.5778	10.47		0.296296	4.89042
6.7911	7.2007	5.0156	5.8528	3.717	2.388	3.715	16.3172	2.937	2.06	3.099	3.063	6.3825	3.6636	7.474	1.726	2.4039	3.8074	4.6979	4.4134	3.0789	4.69	2.294	2.353	4.226	6.117	3.338	6.521	3.402	2.6734	2.6763	8.6905	7.1121	10.389		0.301589	4.77258
6.9102	6.2969	4.1934	6.8051	3.165	2.177	3.4585	15.1591	2.37	2.598	2.291	2.657	7.1739	3.503	7.218	1.659	2.1677	3.9922	4.3778	4.0781	3.5782	4.77	2.01	2.411	3.755	6.067	2.961	6.423	2.4515	2.8337	2.9097	8.3937	7.3318	10.111		0.306879	4.58628
7.0293	6.3573	4.3721	6.2503	3.007	1.982	2.8292	15.8096	2.799	1.57	2.154	3.051	7.5175	3.5953	6.542	1.831	2.6222	3.256	4.8351	4.6138	3.0441	4.995	2.471	2.114	3.784	5.556	2.84	6.7999	2.335	3.4144	3.0108	7.0455	7.0782	9.517		0.312168	4.51513
7.1485	5.8749	4.2415	6.1552	2.923	2.369	3.0246	14.9687	2.399	2.171	2.377	2.363	6.3763	2.7079	6.846	1.503	2.1243	2.3526	4.3916	4.0822	2.4866	4.619	2.287	2.392	2.915	4.979	2.616	7.0183	2.6649	2.6291	2.7932	7.81	6.6343	9.584		0.317461	4.26301
7.2676	5.9962	4.1187	5.1793	3.956	2.05	3.3186	15.0893	2.858	1.72	2.009	2.514	5.9403	3.1332	6.796	1.742	1.655	2.9573	3.7456	3.9102	1.9508	5.423	2.504	2.1	3.229	5.58	3.66	6.8657	2.7655	2.0288	2.4325	8.6591	5.1619	7.105		0.322751	4.18648
7.3868	6.6588	4.0286	5.9134	2.933	1.63	3.294	13.0746	2.802	1.597	2.112	2.734	5.6986	3.6223	5.525	2.034	2.1096	2.7042	3.5878	3.9427	2.3424	5.386	2.574	2.145	3.573	5.816	3.306	5.909	2.5734	2.0756	2.7509	7.7697	4.6788	6.63		0.328044	4.04641
7.5059	5.5586	4.5359	5.5797	2.712	2.021	3.1464	13.4221	2.127	1.699	2.2	2.916	6.0376	3.8274	4.254	2.021	1.9368	2.854	3.6195	3.3959	2.4674	4.944	2.216	2.637	3.396	6.365	3.422	6.2996	2.2378	1.7293	3.1233	6.8963	4.4631	6.914		0.333333	3.96893
7.625	5.531	4.0988	5.902	2.832	2.287	2.8361	11.9632	2.39	1.641	1.804	3.436	6.0448	3.0785	4.327	1.702	1.3694	2.9672	3.8314	4.3375	1.8003	4.771	1.797	2.727	3.645	5.836	3.093	6.7467	2.2334	1.8822	2.5032	7.2679	4.3724	6.992		0.338623	3.88018
7.7442	5.104	4.3854	6.2113	3.028	2.192	2.7209	13.1629	2.222	1.876	2.131	3.026	7.1645	3.6903	3.615	1.772	1.7264	2.7698	3.51	4.7573	2.1538	5.65	2.063	2.267	3.456	5.808	2.775	6.0904	2.5018	1.7662	2.1875	6.3972	3.8594	6.557		0.343916	3.89688
7.8633	5.3192	3.929	4.8293	2.624	2.158	2.3281	14.4248	2.358	1.776	2.182	2.994	7.9776	2.6409	4.3	1.664	1.8582	2.6702	3.7213	4.5471	2.7346	5.038	2.064	2.242	2.914	5.697	3.137	6.2769	2.014	1.7863	2.2791	6.5033	4.2667	7.186		0.349205	3.89214
7.9825	5.3065	3.4261	5.1033	2.964	2.344	2.5744	13.71	1.967	1.628	2.194	3.312	9.194	3.1955	4.53	1.536	1.8765	2.5926	2.921	3.711	2.2554	4.606	1.564	2.223	3.425	6.09	3.163	5.6938	2.3484	1.9329	1.8919	7.0881	3.4817	8.077		0.354499	3.87655
8.1016	6.0123	2.8991	5.3053	2.869	2.082	2.2784	11.8006	2.774	2.084	1.823	2.713	8.8453	3.0573	3.361	2.063	2.0892	2.6739	3.4522	3.5983	2.1073	5.069	1.532	2.252	2.935	5.231	2.884	5.9625	2.067	1.9238	2.2698	6.6387	3.0822	7.786		0.359788	3.74307
8.2207	5.0401	2.8198	5.0892	2.328	2.478	2.3895	10.7275	2.154	2.255	1.965	2.224	8.9784	3.2592	3.33	2.14	2.0741	2.9892	3.2477	4.121	2.8661	5.194	1.89	2.179	3.097	5.046	3.136	4.7812	2.0678	1.7738	1.7793	7.1431	3.4891	6.159		0.365077	3.64276
8.3399	5.3099	3.2296	4.854	3.12	2.041	2.157	10.0439	2.203	2.768	2.174	3.232	9.0487	3.3848	3.297	1.771	1.97	3.0282	3.2318	3.6825	2.2883	5.291	2.086	2.589	3.671	4.48	3.265	4.8576	2.3063	1.693	1.9292	7.6066	3.5306	7.378		0.370371	3.74297
8.459	5.1723	2.7639	5.0206	3.027	1.699	1.9339	9.7031	2.426	2.55	2.136	3.745	9.3584	3.3707	2.96	2.063	1.8525	3.0084	2.8812	3.7583	2.5244	4.647	2.075	2.18	3.119	5.655	3.249	5.6687	2.4408	1.4354	1.9446	7.1097	4.1897	8.332		0.37566	3.75756
8.5782	5.1756	3.0573	5.3151	3.094	1.931	1.9048	8.8987	2.017	2.311	1.841	3.098	9.3889	3.4156	3.025	1.641	1.9144	3.0656	2.7527	3.8303	2.8966	4.374	2.389	1.83	2.875	5.364	2.881	5.9411	1.8942	1.8872	1.9137	6.1137	3.8013	7.4		0.380954	3.61327
8.6973	5.2436	3.0785	4.9626	2.823	1.658	1.8193	10.5377	2.154	1.785	1.682	2.977	10.2835	3.7613	2.597	1.876	1.7314	3.0893	3.2547	4.3768	3.5207	4.725	2.602	1.85	3.094	5.634	2.88	5.6701	1.4753	1.9577	2.5601	6.3619	3.6965	7.755		0.386243	3.74161
8.8165	4.0303	3.5224	4.6109	3.688	1.41	2.6526	10.9008	2.338	2.472	1.933	3.186	11.6047	3.6313	2.613	1.571	1.7089	3.8007	2.6759	4.0786	3.1872	5.679	2.593	2.264	3.034	5.89	2.613	5.5041	2.423	2.2478	2.3722	5.7394	4.0548	7.35		0.391536	3.85999
8.9356	4.2813	3.7342	4.3876	5.023	1.364	2.6003	9.887	2.35	2.519	2.108	3.133	14.4528	3.3772	2.509	2.024	1.595	4.3245	2.4641	3.7496	2.3266	5.48	2.224	1.892	2.612	6.182	2.267	5.8238	2.3306	1.7116	2.1635	6.8674	3.075	6.938		0.396826	3.87203
9.0547	5.275	2.8431	4.7612	6.258	2.134	2.1747	9.2268	2.551	2.116	2.198	2.988	15.7057	3.3637	2.427	1.985	1.5401	3.2567	3.0485	3.7724	2.7305	5.894	1.913	2.579	2.896	6.385	2.623	4.5895	2.1375	1.5399	1.9355	6.3263	3.6144	6.927		0.402115	3.93077
9.1739	4.9532	2.5675	5.6668	6.881	1.95	2.5145	8.4135	2.345	2.425	1.785	2.966	14.9753	4.2089	2.325	1.743	1.4992	4.0267	3.0453	4.3242	2.6141	5.056	2.738	2.761	3.545	5.686	2.984	4.6217	1.9217	1.7908	2.3908	5.7948	4.7998	6.878		0.407408	4.00596
9.293	5.5029	3.222	4.2544	6.334	2.071	2.8145	8.1095	1.792	2.252	2.474	2.614	16.0586	4.5586	2.915	1.571	1.7991	4.1972	3.6979	5.0375	2.0408	5.081	2.266	2.238	3.053	6.138	2.738	4.5911	1.717	2.1783	2.102	5.9679	3.8957	6.839		0.412698	4.00367
9.4122	5.0781	2.922	4.508	7.416	2.148	2.0803	7.4428	1.791	1.879	2.462	2.995	17.2167	5.0613	2.72	2.012	1.5674	4.7302	4.3737	5.4853	2.3718	5.042	2.765	1.765	2.635	6.34	2.552	4.7498	2.1874	1.8331	2.3637	6.0771	3.4872	6.6		0.417991	4.08054
9.5313	6.0244	3.2888	4.0933	7.756	1.911	2.2993	7.5335	2.317	2.757	1.989	2.94	17.565	7.2124	2.42	1.653	1.8939	4.9062	3.5989	4.8865	2.598	5.488	2.583	2.454	2.743	6.542	2.783	4.1012	1.7884	1.7926	2.3644	5.3981	4.3591	6.146		0.42328	4.18745
9.6504	5.1428	3.0577	4.7382	7.398	2.143	2.5623	8.3328	2.197	2.824	2.03	3.187	18.9574	8.2193	2.628	2.111	2.073	4.4827	3.8904	5.9278	2.331	6.803	2.087	2.695	3.048	6.11	2.94	4.7429	1.8161	1.8094	2.0152	5.1442	4.5542	6.207		0.42857	4.36986
9.7696	4.8532	2.8371	5.533	5.966	2.219	2.7563	7.4203	2.331	2.164	2.699	3.201	18.436	8.3323	2.934	2.366	2.5684	4.6294	3.3742	5.5654	2.4761	6.146	2.384	2.403	2.942	5.979	2.921	4.429	2.3922	1.9321	2.4138	5.2086	4.3662	6.205		0.433863	4.31465
9.8887	4.8355	3.7174	5.2243	5.763	2.167	2.4391	8.5132	2.473	2.612	2.584	3.918	20.3182	8.6093	2.608	2.309	2.1468	5.6277	3.1647	6.7267	2.2739	6.505	2.139	2.511	2.568	6.388	2.984	3.5074	2.4798	2.2135	2.3294	5.45	3.7058	7.775		0.439152	4.50263
10.0079	4.896	3.0421	4.5352	5.427	1.991	2.6997	7.8603	3.348	2.445	2.71	4.479	17.4478	9.255	2.614	2.243	2.054	6.0827	3.247	7.6167	2.8441	8.476	1.878	2.276	3.065	7.876	3.236	4.2792	1.7429	1.79	2.7544	4.0931	3.8167	8.454		0.444446	4.56288
10.127	5.3291	2.4343	4.6957	4.493	1.979	2.3393	8.4809	2.507	3.004	1.974	5.402	15.7524	8.8315	2.615	1.47	1.738	6.8909	3.2281	9.5653	2.5794	10.414	2.133	2.393	3.235	6.811	2.391	4.9958	1.7324	1.9286	2.5597	4.3112	4.6645	8.867		0.449735	4.59834
10.2462	5.7146	3.5274	4.8305	4.807	2.34	2.254	8.1969	2.637	2.177	2.252	5.38	14.3045	8.3397	2.489	1.779	1.8672	8.1736	2.8818	8.6361	2.5726	12.666	1.922	2.578	3.199	7.238	2.412	5.469	1.6499	1.9451	2.2616	4.6707	5.6527	9.1		0.455029	4.72497
10.3653	6.0683	3.6381	4.8583	4.75	1.529	2.1651	8.3676	2.292	2.577	2.773	5.341	15.8844	9.3699	2.739	2.076	1.9187	9.8837	3.9096	8.2363	2.1943	14.127	2.698	2.074	3.164	8.187	2.645	5.5599	1.4552	2.3198	2.3185	4.5629	4.7462	10.802		0.460318	5.00699
10.4844	7.0623	3.1703	4.5392	5.104	2.052	2.6183	8.6999	2.546	3.071	3.023	5.216	16.9887	9.6696	2.826	2.044	1.9608	11.3293	3.5359	9.6102	2.2779	15.965	3.053	2.562	3.5	8.184	2.303	5.009	1.446	1.862	2.333	4.6473	4.8096	10.341		0.465607	5.25331
10.6036	6.0578	3.497	4.1865	6.044	2.308	2.6428	9.0224	2.898	2.441	2.627	5.297	17.8633	9.8707	2.655	2.595	2.3031	11.3739	3.038	9.64	2.2692	15.714	2.643	2.289	3.675	7.929	2.659	5.0452	1.918	1.7087	2.0498	3.7356	4.2071	10.224		0.470901	5.22506
10.7227	5.5549	3.057	5.3925	6.925	2.271	2.2363	9.0906	2.807	2.607	2.314	5.282	18.6545	10.9928	2.537	2.482	2.3003	11.4056	3.1494	9.4914	2.0188	17.148	2.773	2.001	3.414	7.737	2.365	5.1277	2.4949	1.8919	1.9837	3.2851	4.807	9.43		0.47619	5.30386
10.8419	6.3234	3.4166	5.494	7.212	2.059	2.9347	9.6513	2.38	2.626	2.679	6.248	21.0708	13.0118	2.215	2.058	2.241	12.7478	2.8329	8.5539	2.2784	19.244	2.939	2.206	4.268	8.419	2.347	6.1358	2.1895	2.452	1.7154	4.1665	6.3854	9.39		0.481483	5.75428
10.961	7.5655	3.5333	5.3822	6.446	2.316	2.4558	9.1274	2.359	2.198	2.372	6.482	26.0582	13.8995	2.682	2.403	2.1493	14.4776	3.5009	8.8571	2.1778	20.234	3.14	2.434	4.816	7.416	2.223	6.3271	2.4045	1.9969	2.0471	3.6275	5.637	9.523		0.486773	6.00814
11.0801	7.9376	2.6575	5.6205	6.823	2.61	2.1615	9.6059	2.526	2.388	2.244	6.065	25.7997	14.8169	2.156	2.436	1.9745	15.0617	4.0513	8.5533	2.4372	21.566	3.805	2.273	4.284	7.288	2.836	5.5926	2.0498	1.8404	2.0999	4.4367	6.252	8.505		0.492062	6.08345
11.1993	8.7393	3.0709	5.3488	7.003	2.382	2.3036	11.0391	2.795	2.749	2.276	7.69	27.4573	17.5538	2.593	2.184	1.9546	16.9088	4.2265	8.58	2.4378	22.573	4.179	2.303	3.677	7.227	2.993	5.9889	1.802	1.851	1.6896	4.3551	6.369	9.667		0.497355	6.48385
11.3184	7.3365	3.2042	5.442	6.108	2.654	2.2076	10.2975	2.848	2.455	2.492	6.52	28.9816	20.5037	2.702	2.253	2.204	15.466	4.3289	8.2656	2.9606	25.303	3.31	2.131	3.747	7.864	3.006	6.7308	2.0976	2.0551	1.8948	3.5511	7.0087	11.191		0.502645	6.64001
11.4376	8.4897	4.2131	5.6361	5.208	2.751	2.3859	10.9791	2.942	2.502	3.081	6.616	30.6076	19.8396	2.355	1.989	2.2007	16.0657	4.5575	9.5249	2.5925	27.699	3.54	2.346	2.957	8.644	2.748	7.0804	1.715	1.7447	2.2755	3.5607	6.6902	12.187		0.507938	6.90072
11.5567	9.1971	3.8011	5.4493	4.786	2.522	3.0125	11.7288	2.718	2.444	2.507	6.127	29.7619	21.6615	2.649	1.718	1.9346	17.0733	4.8365	7.3271	3.0183	29.818	3.099	2.873	3.425	9.036	2.976	6.7653	2.5075	2.1153	2.2948	3.7449	8.1447	13.43		0.513227	7.10614
11.6758	9.3942	3.6531	6.9362	4.475	2.88	3.3213	11.1434	2.971	2.511	3.231	7.131	28.8236	23.0367	2.505	1.972	2.1136	14.9661	4.8089	7.411	3.318	29.733	2.844	2.652	4.365	10.418	3.468	5.9616	2.3293	2.273	1.9058	3.9824	8.8299	14.092		0.518517	7.25625
11.795	10.0487	3.5818	7.1463	4.725	2.744	2.3406	10.5963	3.084	2.373	3.331	6.423	29.3828	24.5866	2.442	1.609	2.4359	15.0554	5.1298	6.7314	2.9636	32.553	3.074	2.46	4.837	9.552	3.723	7.4652	1.8109	2.6073	2.2302	3.7898	9.5071	14.901		0.52381	7.43154
11.9141	9.1784	3.5946	8.9107	4.509	2.519	2.3839	9.8397	2.616	2.452	3.042	6.74	30.4402	25.6807	2.324	1.808	2.1597	15.6302	7.2194	8.2161	2.7113	31.643	3.617	2.504	4.185	9.844	4.567	8.2767	2.428	2.7855	1.8038	4.8421	9.3168	14.447		0.529099	7.64348
12.0333	8.6532	3.9388	8.5865	5.035	2.279	2.2257	11.6082	3.051	2.298	3.393	5.53	30.0599	28.7693	2.622	2.402	2.0325	16.2559	9.1029	8.4616	2.6102	27.953	3.001	2.449	3.652	9.738	4.396	7.2425	2.4287	3.0239	2.4538	4.7831	11.2545	13.89		0.534393	7.73273
12.1524	9.3929	4.7453	8.2531	4.923	2.233	2.3885	12.1332	3.387	2.352	3.3	6.215	31.8863	32.1448	2.604	2.028	2.7239	15.788	9.7297	6.5158	3.0727	25.89	3.367	3.075	3.602	10.763	3.563	7.7665	2.3649	2.7179	2.7539	4.7209	11.6828	15.423		0.539682	7.98503
12.2716	9.824	4.4904	7.3706	5.071	3.864	2.4	11.8689	2.345	2.837	2.758	5.457	33.6726	33.6619	2.453	2.019	3.0024	15.2446	11.6672	7.2712	2.8587	24.581	3.628	3.293	3.902	13.492	3.249	9.3223	2.304	2.6352	2.2515	4.4209	14.2537	15.737		0.544976	8.27897
12.3907	12.0084	3.9484	7.7281	7.636	3.611	2.6168	12.9579	2.726	2.67	2.88	5.342	31.5768	35.7063	2.401	1.879	2.9594	12.8698	12.9948	7.4561	2.6249	26.387	3.678	2.724	4.122	12.969	3.621	9.5533	1.927	2.8769	2.5533	4.7538	15.5401	14.202		0.550265	8.4697
12.5098	13.0556	3.7786	8.4586	7.572	2.327	3.1474	13.7599	2.662	2.986	3.426	6.347	34.5337	37.3988	2.376	2.344	2.0245	13.7029	15.142	7.8411	2.6753	26.701	3.435	2.098	4.161	13.231	3.458	9.6948	1.9503	2.3126	2.9408	4.6713	15.309	14.807		0.555554	8.79782
12.629	12.5758	3.9563	9.3555	7.968	2.509	3.4871	14.3557	3.067	2.502	2.949	5.699	38.2207	37.0626	2.583	2.366	2.4175	12.713	18.0082	8.033	2.8589	27.639	3.938	2.834	4.074	12.298	3.623	9.5012	2.1777	2.3306	3.6214	5.3968	16.1702	14.904		0.560848	9.12713
12.7481	13.7264	4.2148	8.8722	9.587	2.53	3.4258	15.1007	2.506	2.683	3.091	4.934	36.55	38.6014	2.8	2.424	2.5266	13.1882	19.7827	7.1943	2.6085	28.257	4.131	2.975	3.483	12.589	3.208	7.8965	2.5702	2.7796	2.8264	5.3609	15.993	14.003		0.566137	9.16422
12.8673	14.7728	3.9252	9.4673	9.662	2.379	3.795	15.9135	2.572	2.687	3.237	5.912	38.321	39.0104	3.13	2.125	1.741	14.3121	22.2525	7.3821	3.1127	30.942	3.51	2.969	3.185	13.96	3.414	8.1658	2.3776	3.1816	2.7554	5.8241	15.4214	12.851		0.57143	9.52323
12.9864	15.7711	4.0951	8.8945	8.806	2.588	4.3982	13.5297	2.393	2.129	3.625	6.599	39.3586	40.257	2.618	2.332	2.4019	13.8285	24.6758	6.5684	2.8581	32.243	4.409	2.735	3.753	14.059	3.254	7.945	2.5698	2.6336	3.1838	5.6944	16.6928	14.059		0.57672	9.72601
13.1055	15.7994	4.6455	7.7121	8.466	2.429	3.3962	12.8249	2.755	2.918	3.038	7.139	36.1736	37.0586	3.416	2.007	2.8243	14.7225	24.1405	6.6161	2.91	34.065	4.421	2.612	3.616	14.18	4.084	8.31	2.6782	1.8423	2.9582	5.1372	17.682	15.396		0.582009	9.63556
13.2247	16.6955	4.799	8.9117	6.864	2.511	3.4597	12.2119	2.984	2.919	3.15	6.621	36.1499	33.2353	3.478	2.257	2.141	15.8041	22.1265	5.9296	2.5525	34.571	3.866	2.358	3.409	15.105	4.714	9.1023	2.4891	2.0082	2.8703	4.8449	17.6506	15.899		0.587302	9.5057
13.3438	16.5906	5.256	8.8974	7.781	2.737	5.3892	12.2862	2.439	2.281	3.237	6.094	32.2095	29.4908	2.751	2.418	2.5641	17.8259	21.8422	5.3291	2.4292	36.346	3.744	2.947	3.505	16.417	4.36	7.8565	2.7444	2.4474	2.8051	4.77	17.0069	14.799		0.592592	9.38171
13.463	18.6229	4.8166	7.7033	6.67	3.266	4.4239	12.7179	2.759	2.377	3.216	7.796	31.2712	23.8667	2.539	2.044	2.7321	19.7601	21.0409	5.1229	2.4948	35.314	3.419	2.905	4.421	16.361	4.663	8.7229	2.9653	2.1743	3.1787	5.4265	15.7509	14.958		0.597885	9.25757
13.5821	19.9069	4.8285	8.0915	6.779	3.554	6.147	12.9127	2.765	2.757	3.62	6.202	30.5936	20.4942	2.477	1.741	3.1569	21.3413	17.962	4.5482	2.7406	30.862	3.362	2.25	4.151	17.228	4.666	7.9889	3.0357	2.1566	2.647	5.5567	16.6144	15.164		0.603174	9.03942
13.7012	20.121	5.3551	9.0298	5.939	3.017	6.3719	11.3897	2.6	2.612	3.055	7.243	31.7184	17.7479	2.217	1.882	2.9831	22.6428	15.3653	4.4479	2.7099	30.194	3.945	2.537	4.111	19.343	4.181	7.5881	3.8712	2.5072	3.4478	5.1277	15.7849	13.146		0.608464	8.91611
13.8204	20.4136	6.1996	8.3083	5.431	3.038	6.6136	11.4644	2.884	2.594	3.154	8.041	28.827	14.0421	2.65	1.986	3.2877	24.0708	15.6435	4.2791	3.0751	28.265	3.488	2.453	4.188	20.33	5.381	8.3755	4.2815	2.531	3.9263	5.2548	15.7157	14.708		0.613757	8.93638
13.9395	18.4977	5.6022	7.3631	5.499	3.741	7.7015	9.8787	3.307	2.408	3.396	8.59	26.5708	11.268	2.341	2.103	3.3568	22.2841	14.9007	4.721	3.0241	27.393	4.526	2.377	4.07	19.918	6.267	7.6125	3.3819	2.3976	3.1499	5.0022	17.357	13.39		0.619046	8.58775
14.0587	19.2026	6.273	7.0598	5.242	4.106	8.4042	8.8406	3.044	2.522	3.584	7.419	27.8979	10.089	2.937	2.38	3.5012	22.7994	16.9927	4.0112	2.7653	25.792	3.971	2.984	3.281	18.363	6.49	7.2739	3.6255	2.4735	2.7538	5.1809	19.9029	10.964		0.62434	8.54928
14.1778	19.3118	6.355	8.0551	6.381	4.287	11.7293	7.6392	3.03	3.081	2.904	6.755	28.9562	8.2249	2.789	2.036	4.3704	22.9801	15.829	3.8825	2.4219	21.977	3.734	2.809	2.938	16.344	5.996	8.3418	3.551	2.7909	3.0265	5.0848	21.3726	10.025		0.629629	8.45482
14.297	20.1545	6.8281	7.9148	5.963	3.891	10.6617	6.9595	3.088	2.538	3.321	5.976	33.0043	8.4871	2.648	2.206	3.7895	19.471	14.8115	4.2233	2.8271	22.481	3.652	2.586	3.921	18.365	7.342	6.1435	3.6705	2.4612	2.5707	4.9259	24.239	10.483		0.634923	8.53346
14.4161	20.164	7.5312	6.9073	5.365	4.505	11.3161	6.0329	3.609	3.023	3.637	6.38	32.5308	6.8755	2.432	2.512	3.3096	18.5853	13.5668	3.8909	2.8064	20.658	3.594	2.154	4.008	17.947	8.203	6.8376	3.3742	2.7752	2.523	4.5743	27.2486	11.047		0.640212	8.48254
14.5352	20.3554	8.008	6.5124	5.671	4.726	13.538	6.7726	3.742	2.657	3.714	6.393	35.3503	7.2325	2.655	2.616	3.4562	17.8646	11.8444	3.0434	2.9047	17.551	3.809	2.132	3.406	16.844	9.995	7.8728	3.595	2.0506	2.9188	4.6571	29.9391	10.319		0.645501	8.61048
14.6544	18.8862	8.8655	6.3336	6.278	4.6	15.1547	6.6831	2.835	2.691	3.635	6.964	33.734	7.5377	2.227	2.366	3.2729	18.6891	11.0218	4.2042	2.8185	16.222	3.89	3.127	3.393	16.357	13.174	6.4456	2.9945	2.1905	3.703	4.4039	30.4337	8.187		0.650795	8.58541
14.7735	20.0173	8.7049	6.278	4.521	3.901	15.3192	7.0311	3.106	2.747	3.014	6.208	32.7275	6.8369	2.717	1.85	4.5516	17.5915	9.8319	3.9248	2.4587	14.379	2.958	3.053	2.909	15.351	14.561	7.5642	3.649	2.6202	3.1533	3.5452	28.0555	6.885		0.656084	8.24305
14.8927	18.573	8.3801	7.9458	5.396	3.883	15.5848	5.2537	3.605	2.344	3.619	6.982	32.9084	6.6343	2.585	1.941	4.2479	17.5074	8.4172	3.2617	2.532	14.38	3.045	2.865	3.252	15.623	16.675	7.8334	3.7805	2.3284	3.5451	3.7744	32.9347	7.826		0.661377	8.4686
15.0118	19.1408	9.1516	8.0443	5.528	4.314	15.7474	5.7641	2.981	3.171	3.798	7.696	33.6519	6.751	1.931	2.404	4.705	17.3668	8.2605	2.8952	2.5815	11.292	2.916	3.018	2.739	15.782	16.893	7.0872	4.5691	2.8325	2.9591	3.979	39.8998	7.221		0.666667	8.69912
15.1309	17.7083	9.1019	7.2135	5.416	5.004	14.4807	5.6231	4.277	3.192	3.802	6.854	34.6618	5.1127	2.006	2.169	4.8262	17.3769	8.1767	4.197	2.4513	11.061	2.776	2.443	3.188	13.781	18.332	7.4862	3.3421	2.4017	2.8751	4.6663	40.2342	6.96		0.671956	8.58172
15.2501	18.5844	8.1647	7.2616	5.071	4.145	13.5909	5.0346	3.852	3.191	3.279	7.1	38.6879	4.8359	2.249	2.145	5.2837	16.5406	7.5598	3.6744	1.8418	10.543	3.864	2.697	3.462	13.281	16.212	7.4172	2.9014	2.6544	3.658	3.9933	45.0246	7.208		0.677249	8.63661
15.3692	18.1859	8.4261	7.9245	4.807	4.267	13.1238	4.9863	2.85	2.534	3.995	5.761	42.7073	5.0498	2.724	2.096	5.4756	16.8429	7.6125	3.6067	2.3348	8.837	3.466	2.194	3.319	12.769	16.319	6.3544	3.3545	3.2768	3.6313	3.9704	47.1578	6.877		0.682539	8.69201
15.4884	17.959	9.1632	7.1175	4.846	4.637	13.9647	4.782	2.793	3.262	4.146	6.078	45.4736	5.0831	2.441	2.363	5.8807	16.4479	7.2262	3.7375	2.5021	8.348	3.147	3.174	2.414	11.744	16.186	6.0261	2.6775	3.06	2.9357	5.0723	51.6883	7.417		0.687832	8.90283
15.6075	18.1503	9.2146	7.6317	4.895	4.334	12.2722	5.4351	3.129	3.152	3.399	7.424	48.7681	5.521	2.651	2.528	6.5468	15.3324	7.7818	3.1095	2.1564	7.987	3.169	3.103	2.652	11.27	14.081	5.6853	2.8456	2.453	3.1251	4.6157	55.8259	7.638		0.693121	9.02674
15.7266	16.8062	10.4711	7.354	5.675	4.906	12.9043	5.4325	3.531	3.389	4.553	7.164	48.4019	5.5244	2.701	2.848	5.2036	16.2705	7.1218	2.9044	3.044	7.476	3.152	3.082	3.193	11.135	12.593	6.3345	3.141	2.4418	3.8234	3.5493	56.6879	6.553		0.698411	9.07175
15.8458	16.4315	10.4128	7.3926	5.669	4.753	12.4292	4.7586	2.713	2.846	4.689	7.465	46.8773	5.6741	2.068	2.307	4.9908	14.249	7.4953	2.3712	3.0358	8.171	3.67	2.636	2.786	10.77	12.081	6.0719	3.0175	2.6051	3.8061	4.1726	57.6868	6.359		0.703704	8.86246
15.9649	18.8177	11.0402	8.506	4.418	5.031	14.7854	4.506	3.102	3.094	4.465	7.751	50.41	5.4051	2.994	3.174	4.7453	13.0065	8.348	2.7225	2.2973	6.864	2.658	2.777	2.506	11.336	12.893	6.1279	2.8232	3.0512	3.7079	4.1044	57.7994	6.055		0.708993	9.13097
16.0841	19.4152	12.3772	7.3874	4.182	5.416	12.5987	6.0827	2.826	2.929	3.952	7.504	52.5149	4.2283	2.463	2.497	6.1517	12.2833	7.4092	2.7312	2.2177	8.261	2.734	3.082	2.697	11.284	14.338	6.643	2.8575	2.913	3.8069	3.5429	56.7703	5.762		0.714287	9.14722
16.2032	20.011	13.1386	9.0155	4.219	5.251	14.9009	5.1782	2.502	3.347	4.094	8.335	52.9452	4.3388	2.194	2.356	6.7166	11.6786	8.0718	3.0447	2.1316	8.238	2.885	2.593	3.158	11.453	14.986	6.9053	3.1892	2.8236	3.175	3.6429	56.9558	4.801		0.719576	9.34168
16.3224	23.0226	12.0831	10.4783	5.057	5.263	15.8496	4.8955	2.62	3.197	4.441	9.99	54.1788	4.6158	2.322	3.204	7.2775	11.2791	7.026	2.7722	2.2962	7.461	3.242	2.257	3.201	12.161	15.882	6.6298	3.3051	3.363	3.4046	3.6095	56.8762	5.728		0.72487	9.66633
16.4415	22.4379	11.5845	9.8505	5.313	4.732	15.3719	4.7462	2.936	3.493	4.246	10.099	52.7003	5.0796	2.58	2.885	8.8984	10.5928	7.6455	2.6702	2.6079	6.414	3.26	2.429	3.371	13.87	15.903	6.194	2.5573	2.3111	3.3803	2.9165	55.7153	5.267		0.730159	9.51692
16.5606	27.31	13.5739	10.1556	5.151	5.199	13.5343	4.2881	3.122	3.062	3.793	11.984	50.7221	5.0356	2.556	2.402	9.4621	11.6309	7.2182	2.5075	2.5705	7.518	2.536	2.133	2.953	13.06	15.138	5.7099	3.1998	2.4354	3.5747	4.1276	51.1858	4.656		0.735448	9.50015
16.6798	25.6874	13.9165	10.5733	5.221	5.639	14.4022	3.8721	2.465	3.832	4.174	14.611	52.1986	4.2281	2.38	2.842	10.939	10.8699	5.5303	2.1245	2.3726	6.985	2.746	1.994	2.899	12.874	15.319	5.9641	3.0857	2.4287	4.1244	4.3892	51.6824	5.618		0.740742	9.636
16.7989	26.6043	15.0244	11.0934	4.805	4.718	13.9089	4.2867	3.356	3.082	3.859	13.669	46.6062	3.7844	2.63	2.902	12.5811	11.8861	6.1168	2.3684	2.2059	6.985	3.173	1.758	3.645	13.587	14.796	6.2652	3.7552	2.5633	2.893	4.884	53.1981	4.918		0.746031	9.63359
16.9181	27.0947	16.2653	10.9383	5.562	4.394	15.3792	4.2445	3.218	3.102	3.736	14.11	48.039	3.6046	2.125	2.627	13.327	11.2367	5.3369	2.347	2.0682	6.769	4.024	2.396	3.63	14.22	14.806	5.7319	3.3186	2.3265	2.9229	4.0584	51.2315	4.957		0.751325	9.67113
17.0372	27.6471	20.2885	11.0433	5.384	4.88	14.144	4.6734	2.36	3.914	3.581	15.014	46.6733	3.2503	2.13	1.966	16.6669	12.2648	5.0673	2.3252	1.9736	7.344	3.067	2.84	3.067	14.17	12.533	6.1874	3.9273	2.6236	2.7387	4.0217	49.9869	4.861		0.756614	9.77619
17.1563	25.9566	18.955	8.6821	5.346	4.935	13.5092	4.7097	2.51	3.245	4.393	16.542	41.902	2.9822	2.61	2.194	16.4689	12.2955	4.9909	2.2377	2.3028	5.02	2.475	2.092	3.168	13.396	13.155	5.5795	3.4543	2.9343	3.1311	3.8489	49.0407	5.704		0.761903	9.38686
17.2755	24.0336	20.334	8.1364	6.077	5.14	14.0095	4.2737	2.307	3.24	4.27	18.543	36.5926	3.2084	1.889	2.507	17.298	11.3068	4.615	2.5449	2.3976	5.738	2.289	2.347	2.283	14.169	11.742	4.4628	3.5501	2.3527	2.9305	4.0991	45.9388	7.033		0.767196	9.14117
17.3946	23.4403	23.9008	9.934	6.787	5.027	15.6325	4.7998	3.099	3.359	3.804	19.832	29.7655	2.999	2.311	2.094	21.2191	11.2915	3.9103	2.3303	2.5416	5.534	2.66	2.572	2.818	11.818	11.718	5.3087	3.2529	2.8778	3.1913	3.8548	44.6414	7.281		0.772486	9.26078
17.5138	24.6433	24.5904	9.1538	6.226	4.971	14.127	4.8465	3.009	3.52	3.013	22.522	25.4109	3.4411	1.787	2.167	22.9488	12.5055	3.9962	2.415	2.9483	5.06	2.771	2.692	2.811	10.262	12.311	5.381	3.1516	2.3288	3.087	4.0659	43.717	6.389		0.777779	9.15967
17.6329	27.6694	26.6433	9.287	6.771	4.886	14.0242	5.0442	2.633	3.382	3.745	25.091	22.4612	2.5506	2.141	2.869	23.7135	11.7842	4.0969	2.2076	2.3865	4.443	1.991	1.992	2.424	10.917	10.965	4.904	3.3849	2.3764	2.372	3.6507	45.0174	8.799		0.783068	9.29161
17.7521	26.0857	27.8861	8.5198	7.601	4.696	15.4105	4.7484	3.756	3.404	3.653	30.051	19.2143	3.1247	2.167	2.986	23.1698	10.3732	3.8855	2.2811	3.0123	4.503	2.402	2.261	2.837	9.302	11.413	4.7871	3.2773	2.9916	2.7858	3.6736	48.2927	10.173		0.788362	9.53711
17.8712	22.4579	26.819	8.9471	7.963	4.854	14.0504	4.1897	3.45	3.256	4.138	32.109	14.4803	3.2121	2.585	1.9	22.0895	10.9443	3.9193	2.0692	1.9875	5.335	2.745	2.33	2.943	8.279	10.87	4.8133	3.3383	2.7571	3.1997	3.8505	47.0575	10.564		0.793651	9.19708
17.9903	18.9693	29.5505	10.5	8.443	3.809	14.1136	4.7844	3.566	3.56	4.081	34.057	13.443	3.4064	2.607	2.437	19.8614	11.0265	3.4297	2.5929	2.9308	4.72	2.578	2.731	3.116	7.954	12.542	4.575	2.9614	2.4385	2.9933	2.8688	50.6835	10.814		0.79894	9.3377
18.1095	18.0928	32.8813	10.0579	7.351	4.227	14.2546	6.4431	3.506	4.273	4.604	33.392	11.8592	3.8116	2.288	2.589	21.6272	12.151	3.7022	2.6952	3.2676	4.85	3.171	3.144	2.823	8.405	13.99	4.3814	2.5204	2.3697	3.5634	3.3657	52.691	11.772		0.804234	9.70062
18.2286	17.2244	35.2494	11.172	8.537	4.603	14.7935	6.2709	3.749	4.058	4.105	36.161	10.2124	3.242	1.955	2.305	18.956	12.7258	3.3119	2.9828	3.037	4.362	2.747	2.81	3.16	7.292	13.142	5.1586	3.0417	2.1549	2.8661	3.4859	53.2461	14.389		0.809523	9.77292
18.3478	17.9685	36.1223	12.4402	8.443	4.74	15.0032	6.874	4.025	4.037	3.806	37.659	9.8972	3.1237	1.707	3.225	18.9792	12.598	3.8608	2.666	3.2614	3.946	2.748	1.907	2.353	7.866	13.36	5.6954	2.5971	2.3391	2.4826	3.4279	56.8571	14.03		0.814817	10.0014
18.4669	19.3282	40.1397	13.0277	8.096	3.966	14.9797	8.2196	3.882	4.054	3.525	40.528	7.87	2.259	2.078	3.031	18.7129	11.9158	3.3565	3.0077	3.1156	3.569	3.052	2.328	2.715	8.007	12.809	5.4378	2.8315	2.5061	2.7206	3.8321	59.5975	14.763		0.820106	10.2806
18.586	21.7878	39.6958	14.7554	8.071	4.316	15.7635	8.6161	4.306	3.23	4.123	43.268	6.9175	2.7583	2.077	2.92	19.4425	14.3791	4.0701	2.9584	3.2292	3.97	2.971	2.632	2.703	6.926	14.094	5.8441	2.7457	2.3163	2.2507	3.9072	56.1555	13.43		0.825395	10.5039
18.7052	26.0985	40.4662	15.1485	9.713	3.853	15.3197	7.9779	4.361	3.472	4.318	44.571	5.5053	2.9037	2.174	3.518	17.4673	13.7463	3.9628	2.7788	3.9035	3.986	2.731	2.561	3.183	7.446	14.949	5.6065	2.4525	2.7424	2.6278	3.9882	55.888	14.409		0.830689	10.7221
18.8243	28.3883	42.7688	16.5763	10.12	4.492	17.3484	11.1872	5.178	3.997	3.915	51.116	6.7534	3.6296	2.038	2.715	19.6975	13.9863	3.7849	2.6449	4.1211	3.852	2.828	2.251	2.985	7.759	15.579	5.8719	3.5301	2.839	2.7509	3.1442	52.3703	15.02		0.835978	11.3709
18.9435	29.0499	45.3893	18.4348	10.849	4.01	18.9277	12.7698	5.886	4.451	4.534	51.869	6.6617	3.2944	2.284	2.723	21.4604	12.4321	3.99	2.847	4.8428	3.966	2.596	1.915	3.112	7.816	16.168	6.5013	3.0458	2.8694	2.7137	3.4354	49.1329	15.023		0.841272	11.6667
19.0626	31.7215	41.6198	17.81	11.696	3.483	17.9703	13.1754	6.949	4.924	4.601	60.673	5.2484	3.1373	2.234	2.964	20.6215	12.2777	3.5351	3.3294	5.1629	4.022	3.133	2.239	3.046	9.019	17.299	5.9212	2.634	2.5954	2.3026	3.636	46.8264	15.728		0.846561	11.8647
19.1817	31.9281	37.5457	18.2691	12.165	3.625	17.3682	15.7067	7.424	5.359	4.99	60.654	5.6343	2.5564	2.263	2.504	18.0559	13.4778	3.7747	4.0954	5.6626	3.657	3.225	2.304	3.566	8.796	19.064	5.5144	2.4029	2.3514	2.5453	3.4474	41.0379	18.625		0.85185	11.8059
19.3009	37.3434	40.2316	19.1467	14.64	3.556	16.2393	17.0283	8.313	6.421	5.357	59.335	5.171	2.8343	2.009	2.435	18.5482	11.7725	3.7277	4.7364	6.2232	3.437	1.953	2.857	3.747	7.724	21.392	5.7834	3.1217	2.5735	2.5601	2.7612	36.4816	16.845		0.857143	12.0092
19.42	35.211	34.404	20.2281	15.503	4.102	17.5184	20.0155	9.643	7.348	5.169	57.502	5.2596	2.9101	1.803	3.165	17.7444	11.7752	3.4316	4.8089	6.2667	2.933	3.017	2.475	3.36	7.306	20.416	5.8657	2.831	2.7027	3.0223	3.423	37.3528	19.377		0.862433	12.0573
19.5392	37.2969	30.2101	17.7407	16.828	4.256	17.6806	20.8349	13.252	8.988	5.634	56.086	5.5622	2.7941	2.142	2.911	18.6274	13.0273	4.2138	5.4051	8.1788	3.11	3.41	2.774	2.942	7.667	19.605	6.1387	2.6078	2.822	2.498	3.4741	34.2352	18.895		0.867726	12.1772
19.6583	38.8525	27.8175	17.3004	16.669	4.48	18.2943	22.4501	18.157	10.317	5.455	53.952	5.0772	2.5103	2.243	2.531	18.7644	12.6177	4.6377	6.6787	8.8769	3.64	2.624	2.853	2.74	7.749	20.609	6.7053	2.263	2.7143	2.2234	2.7025	32.2677	19.592		0.873015	12.3141
19.7775	36.314	26.9126	16.4382	19.105	4.574	18.1917	23.468	20.806	12.381	6.274	50.71	4.7403	3.3126	2.28	2.574	18.9758	12.3261	4.5106	9.1556	11.144	3.093	2.703	2.626	3.341	6.455	20.85	7.3774	2.364	2.6942	2.059	3.0984	25.5606	18.283		0.878309	12.2636
19.8966	35.7154	26.4819	14.9661	19.285	5.409	17.7355	26.9647	22.541	16.399	6.691	44.415	5.767	2.8326	2.203	3.776	20.0536	12.1108	4.9252	9.3468	13.9968	3.293	2.425	2.507	3.156	6.23	21.249	7.0872	2.8257	3.0779	2.448	2.8943	24.8477	19.073		0.883598	12.5069
20.0157	31.4153	23.6072	13.2393	16.902	5.416	17.8588	26.5963	22.733	22.534	7.824	41.94	6.2062	2.1858	2.328	3.297	17.3902	13.3964	5.6964	10.2235	15.3275	3.217	2.441	2.553	3.088	7.172	21.932	6.6359	3.2382	2.7992	3.0759	2.5023	21.9736	18.762		0.888887	12.2881
20.1349	27.5945	22.9616	12.4289	17.734	6.457	21.0564	29.6523	23.064	25.632	8.381	36.943	5.927	2.7093	2.729	3.058	18.3182	13.4285	6.151	12.508	18.8567	3.09	3.144	1.96	3.082	6.983	24.249	6.7191	2.5019	2.5419	2.5987	2.5877	20.7628	19.929		0.894181	12.5982
20.254	23.8152	20.8045	10.7617	16.382	7.642	21.7935	29.5969	24.375	28.763	9.526	30.914	6.1784	2.4759	3.317	2.906	19.3815	15.2439	6.6103	14.2677	21.6748	2.787	3.81	2.682	3.57	6.862	21.366	6.5951	3.1622	2.3756	2.0855	3.3005	18.3167	20.279		0.89947	12.534
20.3732	20.5824	21.7998	9.6859	15.676	10.413	23.2944	34.156	25.981	34.422	11.337	30.636	5.6199	2.5871	2.47	2.863	19.6022	15.9717	7.883	16.333	25.3048	3.146	3.407	2.818	3.171	6.986	20.957	7.7765	2.8229	2.4065	2.1108	3.9827	16.9835	18.897		0.904764	13.0934
20.4923	16.3203	20.5055	9.4978	12.215	12.051	21.6087	40.1292	26.12	41.132	10.991	29.497	5.8121	2.6776	2.382	3.598	22.5319	17.539	10.9273	19.116	31.1608	3.262	3.312	2.939	3.013	7.816	19.733	8.3308	3.2914	2.5946	2.1055	3.5355	15.5587	19.616		0.910053	13.6642
20.6114	13.1259	18.0476	8.1096	10.109	13.219	21.9677	42.4585	29.943	41.598	11.771	28.409	6.6081	2.5711	2.484	3.569	26.7735	20.1318	15.025	18.5215	37.4595	2.812	2.529	2.445	3.364	7.325	19.048	8.6976	2.301	2.7025	2.4027	3.0406	14.1566	17.055		0.915342	13.9328
20.7306	9.5638	17.0711	6.845	10.277	15.098	22.8538	44.3199	31.871	43.833	14.333	27.734	4.7494	1.914	2.672	3.505	28.7523	22.035	15.8875	18.9684	42.4846	3.294	2.332	2.641	3.579	7.345	18.178	8.397	2.8229	2.6703	2.1235	3.3468	12.9826	17.767		0.920636	14.3105
20.8497	7.6343	15.1609	6.7953	7.719	15.984	22.0159	42.4171	34.044	46.321	16.201	28.447	5.024	2.587	2.342	4.16	29.608	26.3171	19.2257	18.4304	45.552	2.931	2.156	3.165	3.194	7.361	18.673	8.3896	2.7643	2.5148	2.3667	3.5121	13.3929	17.776		0.925925	14.6722
20.9689	6.0094	11.5087	6.9358	7.567	15.757	20.3013	36.3183	33.654	49.206	19.447	29.413	5.276	2.8209	2.417	3.392	31.2752	29.7553	22.2757	15.7683	46.6933	2.779	2.596	2.837	2.987	7.743	17.588	8.6397	2.5274	2.9169	2.6021	2.7852	12.9714	16.141		0.931219	14.5729
21.088	5.1509	9.0723	5.9214	7.207	14.754	20.0269	31.8764	32.71	53.851	23.376	30.398	4.7635	2.8217	2.301	4.755	38.7749	34.0113	24.0253	15.414	43.2771	3.157	2.217	2.786	3.341	9.183	16.89	8.5569	2.0856	2.4494	2.0584	3.2268	11.184	14.888		0.936508	14.7428
21.2071	4.1722	7.5329	4.477	6.251	13.177	19.5288	24.5329	27.903	57.186	26.628	29.945	4.2865	2.4156	2.58	5.142	43.205	35.6844	27.3615	12.5336	39.762	3.342	2.322	2.874	3.507	9.166	19.391	9.3055	1.7621	2.899	2.7105	3.0613	11.1852	12.7		0.941797	14.5009
21.3263	3.5491	6.3638	4.0398	4.562	11.062	21.3706	16.6785	27.176	61.589	29.512	33.27	4.8465	2.8535	2.348	4.886	46.5999	36.5911	26.214	9.1865	34.4561	2.912	2.901	3.233	3.339	9.012	19.23	9.9122	2.4704	2.1769	1.8868	2.6785	10.8126	12.536		0.947091	14.2501
21.4454	3.0195	5.8744	3.0863	4.969	9.592	22.504	11.8259	21.095	62.926	36.002	34.054	5.3429	3.5412	1.975	5.161	48.8393	34.6257	26.8546	7.0662	29.1485	2.715	2.638	2.469	3.553	9.236	19.258	10.2686	3.0528	2.594	2.3067	2.5001	11.6001	12.205		0.95238	13.9969
21.5646	3.2565	4.0399	3.4761	3.932	8.903	21.8693	8.9047	15.746	60.364	42.685	41.189	5.2356	2.9369	2.759	5.848	50.879	29.3081	26.9091	6.173	24.7805	3.162	2.386	2.973	3.737	9.211	19.379	11.1515	3.1551	3.0438	2.7174	3.0716	10.2559	10.572		0.957673	13.7579
21.6837	2.0901	3.2703	3.0119	3.289	7.777	20.077	7.655	12.118	51.762	45.544	42.265	5.4468	3.1412	2.026	6.196	55.7487	24.1318	22.5218	3.8599	22.0403	3.458	2.967	2.391	3.421	8.792	19.393	12.3198	2.6279	3.1514	2.4711	3.0905	9.7514	12.645		0.962962	13.044
21.8029	2.1709	2.8357	2.1922	3.18	6.764	16.9739	5.7955	10.275	43.485	54.182	44.097	5.1422	3.0315	2.542	6.92	56.6406	19.4975	17.6799	2.8983	18.3475	2.552	3.018	2.158	3.466	10.033	24.154	12.871	2.7339	2.4498	2.5326	2.6981	9.9706	12.816		0.968256	12.6092
21.922	2.1688	2.2542	1.4868	2.841	6.34	16.0496	4.9193	7.091	32.025	54.987	45.316	5.0805	3.0258	2.829	9.471	52.0304	14.7115	12.4933	2.1397	16.0362	3.501	2.69	2.228	3.675	9.307	22.581	12.0767	2.7078	2.2837	3.0662	2.6241	9.9295	13.583		0.973545	11.6227
22.0411	1.7008	2.2236	1.3931	2.762	5.389	13.7322	4.4492	5.111	22.144	56.893	42.819	6.4038	2.9571	2.493	10.222	47.8916	10.7623	9.4145	2.3256	11.3943	4.678	2.248	2.019	3.965	8.948	20.875	12.2837	3.846	3.3188	3.2698	2.6964	9.9598	15.238		0.978834	10.7826
22.1603	1.4688	1.8869	1.2373	2.46	3.878	10.1095	3.7504	4.502	17.069	56.72	41.78	6.5495	3.6501	2.462	10.842	42.0062	7.0606	6.2016	2.2036	9.9149	3.931	2.805	2.738	3.75	9.188	21.965	12.0136	3.0371	3.1746	2.9036	2.4183	9.5992	17.814		0.984128	10.033
22.2794	1.1167	2.2315	1.2101	2.378	3.989	7.9473	3.3331	4.02	11.196	59.608	37.55	8.0385	3.7607	2.844	14.805	30.1183	5.2878	5.2608	1.935	7.7734	3.908	2.898	2.861	3.603	8.045	21.173	13.6983	3.132	2.7353	2.9815	2.4553	8.6259	18.281		0.989417	9.35759
22.3986	1.0819	1.4299	0.5312	1.515	3.331	6.02	3.129	3.192	7.946	54.257	35.272	8.9607	4.2212	2.93	18.34	17.4964	4.3401	3.7744	1.9768	5.4934	4.129	2.848	2.522	3.691	9.011	23.727	15.5889	2.9241	3.1701	3.2365	2.593	7.9773	22.082		0.994711	8.74963
22.5177	1.4698	1.1948	0.8088	1.271	3.138	4.8698	2.879	3.944	6.765	47.53	31.066	11.5223	4.6452	2.742	22.191	11.8953	3.0423	2.807	1.6419	4.6758	4.785	2.643	2.76	4.854	10.426	21.905	16.5603	3.3112	2.9259	2.5536	2.1549	6.7315	22.261		1	8.30213

## Sheet: Image3
X0	Y0	Y1	Y2	Y3	Y4	Y5	Y6	Y7	Y8	Y9	Y10	Y11	Y12	Y13	Y14	Y15	Y16	Y17	Y18	Y19	Y20	Y21	Y22		Ap-basal	Avg int
0	43.7631	53.6853	107.954	112.949	83.4541	52.181	44.436	100.364	154.606	127.057	135.719	79.823	70.676	125.273	133.319	98.397	99.372	90.433	137.762	163.06	145.978	124.901	126.246		0	104.844
0.1191	35.6611	53.6773	111.616	116.69	81.6191	41.751	41.822	92.12	164.427	124.574	130.588	81.387	74.487	126.774	131.481	101.072	103.659	88.777	140.915	175.605	148.044	128.578	124.077		0.00577836	105.191
0.2383	34.5129	54.2049	111.059	123.223	82.6108	36.834	41.573	86.369	163.574	125.128	128.469	88.693	78.698	129.992	128.938	107.163	106.731	91.261	151.614	178.962	147.724	140.287	121.778		0.0115616	106.93
0.3574	30.6897	57.5734	115.673	119.355	83.8008	33.105	48.525	80.417	162.96	125.693	123.741	91.85	82.751	137.863	122.282	110.652	106.509	95.752	151.846	171.896	148.668	142.042	126.147		0.0173399	107.382
0.4766	29.8719	60.6894	120.023	119.179	83.7096	32.348	57.805	74.662	167.685	121.54	124.18	94.478	86.91	136.976	118.844	112.527	107.505	96.528	148.583	169.589	152.196	142.607	118.419		0.0231231	107.689
0.5957	28.5741	60.0347	123	119.94	83.9734	28.407	72.024	70.737	172.414	121.798	120.005	91.932	89.619	132.445	112.253	106.156	103.112	96.915	145.371	167.606	162.051	142.433	117.053		0.0289015	107.298
0.7148	25.3537	64.2667	123.227	127.164	77.051	31.3	89.361	62.748	162.48	121.812	113.005	97.679	93.03	129.412	107.043	102.501	101.675	103.944	142.533	163.394	169.114	136.972	121.596		0.0346798	107.246
0.834	27.6865	66.4676	122.079	133.493	77.561	32.806	101.966	56.708	163.707	126.033	111.98	100.864	95.006	122.842	104.031	102.069	104.086	107.811	142.859	163.085	175.84	152.717	122.452		0.040463	109.311
0.9531	31.2462	71.0022	123.577	135.062	74.9469	35.712	113.711	59.373	166.955	137.717	111.835	106.213	96.892	119.732	101.526	101.024	102.982	105.001	140.771	152.839	181.497	158.662	117.918		0.0462414	110.704
1.0723	31.0329	76.7241	126.116	137.845	70.7831	39.846	118.122	72.822	171.5	141.346	109.548	107.189	98.533	120.928	94.663	100.758	104.176	106.054	132.889	149.517	183.363	173.795	113.84		0.0520246	112.234
1.1914	32.0211	77.9769	124.168	139.723	68.3112	44.019	133.133	99.142	171.127	141.905	117.565	104.611	96.769	115.695	93.449	102.571	104.885	106.569	124.843	150.389	180.092	170.605	112.279		0.057803	113.559
1.3106	33.1619	80.2972	119.562	133.761	72.6975	53.774	141.691	123.002	179.642	143.593	117.024	101.209	95.63	116.672	89.561	106.303	109.299	104.856	116.861	150.518	184.453	163.935	103.063		0.0635862	114.807
1.4297	35.8306	83.3608	118.443	125.728	72.0738	62.627	144.654	133.693	182.91	144.106	120.881	95.268	99.966	108.815	91.296	100.899	105.274	105.415	112.674	154.126	183.588	161.445	98.721		0.0693645	114.861
1.5488	36.7823	91.7304	115.013	119.587	71.0634	71.25	143.709	146.225	180.379	144.516	123.846	94.865	106.667	111.132	92.722	100.034	105.655	114.382	107.363	157.598	182.12	164.215	94.053		0.0751429	116.3
1.668	35.9734	87.8281	109.525	116.313	70.617	85.865	146.505	154.332	188.164	158.854	129.357	88.095	106.386	103.278	97.226	95.58	98.189	107.479	101.804	158.771	180.793	164.134	96.063		0.0809261	116.571
1.7871	37.8737	89.1914	106.926	116.316	69.2824	99.413	139.657	163.209	192.341	169.144	136.971	82.999	98.654	99.31	99.598	90.719	91.478	109.768	95.377	158.458	170.628	159.362	94.916		0.0867044	116.156
1.9063	42.5397	90.5912	105.692	116.615	66.1621	100.539	131.124	167.1	195.625	179.634	132.016	78.979	96.112	92.382	94.129	82.928	80.211	109.259	92.643	155.002	152.889	146.555	101.248		0.0924877	113.477
2.0254	41.1123	89.4305	104.985	112.764	64.447	108.167	117.217	163.853	195.606	186.018	128.277	75.999	96.72	89.962	93.588	77.512	71.387	107.103	93.204	149.544	140.913	133.121	113.547		0.098266	111.064
2.1445	45.0969	91.4351	103.885	112.514	66.4848	111.27	100.58	145.015	196.814	189.963	126.608	71.345	96.606	87.032	86.191	72.469	67.601	110.013	85.49	138.772	123.78	116.614	123.054		0.104044	107.332
2.2637	49.0282	93.284	103.146	105.033	68.3113	109.194	94.07	128.313	182.646	195.833	116.712	65.16	94.761	91.142	76.702	67.603	64.952	101.955	89.123	128.384	104.514	103.767	125.2		0.109828	102.558
2.3828	49.8284	89.5974	101.153	95.166	67.7045	107.122	81.857	105.16	171.793	188.266	113.112	65.752	91.166	95.78	70.534	61.915	60.603	93.639	88.983	118.064	92.337	95.327	134.336		0.115606	97.3563
2.502	57.5415	88.1316	99.138	91.899	70.1405	110.909	68.542	85.043	156.974	173.279	109.979	65.733	93.752	98.62	67.054	59.146	54.984	85.071	91.343	105.596	83.427	90.724	144.094		0.121389	93.527
2.6211	61.8941	90.0412	100.288	87.036	65.9646	103.375	58.838	71.104	141.07	155.201	105.345	65.438	92.797	101.675	61.296	55.252	50.164	76.722	91.389	96.298	73.935	85.234	139.68		0.127167	88.2625
2.7402	65.9109	87.7146	91.798	85.315	65.528	87.065	48.916	62.593	120.075	133.018	98.686	64.656	90.667	98.477	56.885	51.18	47.362	71.697	91.14	86.657	71.143	81.095	138.506		0.132946	82.4385
2.8594	68.3934	87.4373	90.068	85.176	60.2625	74.662	44.585	54.556	103.023	105.719	89.754	59.871	88.681	90.496	52.842	43.919	43.078	64.806	92.128	78.349	67.365	74.674	124.741		0.138729	75.8516
2.9785	69.8074	86.1821	86.7	83.695	54.1961	62.749	37.156	47.298	90.168	83.205	82.859	53.268	83.616	83.339	47.709	41.779	40.478	59.113	99.084	67.978	61.39	68.422	117.886		0.144507	69.9164
3.0977	73.694	80.0444	85.044	86.92	48.4266	57.448	33.32	45.334	75.195	71.329	71.254	47.305	80.47	78.803	42.857	40.999	38.261	50.445	98.171	61.932	61.749	63.924	111.186		0.150291	65.3961
3.2168	71.96	81.3777	78.95	80.249	46.0899	55.908	30.438	41.463	62.419	60.923	62.729	47.225	76.638	75.781	38.144	40.466	34.133	44.687	98.383	53.872	58.375	59.472	104.618		0.156069	61.0565
3.336	68.7845	78.1424	72.392	73.63	39.4591	49.154	24.264	37.043	56.065	48.355	53.887	44.272	70.156	74.554	36.874	38.186	32.38	41.362	92.211	45.312	53.833	55.287	99.799		0.161852	55.887
3.4551	63.5203	76.4162	67.137	64.752	38.4517	43.402	22.3	35.161	49.596	44.34	41.89	44.033	65.248	75.006	32.754	34.715	31.213	39.205	87.997	38.369	49.508	54.242	95.599		0.167631	51.9502
3.5742	55.0575	77.3188	62.51	61.792	36.5491	38.265	20.373	32.482	45.517	39.521	31.713	43.369	53.55	75.072	31.003	33.877	30.307	34.213	78.357	37.084	47.933	47.728	89.844		0.173409	47.9755
3.6934	44.4828	71.2402	50.762	56.975	36.5756	32.387	17.588	29.463	43.339	36.714	26.198	35.616	50.569	71.897	30.771	32.695	25.903	29.083	71.39	35.806	43.488	42.268	82.593		0.179192	43.3828
3.8125	34.7836	65.8207	42.107	48.588	32.7292	30.893	16.548	27.709	39.717	36.284	21.661	36.192	45.12	68.823	33.636	29.55	24.574	27.751	67.857	34.266	39.699	42.436	82.047		0.18497	40.3822
3.9317	26.4939	60.6717	34.178	43.741	29.2592	27.27	13.266	27.772	36.906	34.819	18.568	32.234	40.71	63.313	31.585	26.254	24.614	26.984	65.916	32.881	37.146	39.79	76.77		0.190754	37.0062
4.0508	20.6139	50.7159	27.68	35.816	26.0309	24.369	12.094	26.129	32.83	35.283	16.522	30.99	33.911	56.835	34.306	22.471	22.981	23.835	61.898	29.877	34.862	37.272	73.584		0.196532	33.5176
4.1699	17.2389	40.1594	20.163	30.01	24.1012	23.161	10.69	24.289	31.399	34.25	14.921	30.549	30.34	46.813	33.861	21.142	20.287	22.632	57.077	28.964	31.92	34.755	69.932		0.20231	30.3763
4.2891	13.9303	33.5319	18.552	26.408	22.6824	20.092	10.246	23.056	30.411	33.579	12.684	29.419	30.241	40.131	30.35	20.166	17.896	20.657	53.041	27.894	30.397	32.249	66.767		0.208094	28.0165
4.4082	13.3762	26.6464	15.679	21.985	22.2611	19.813	10.439	20.29	27.466	33.806	10.316	26.684	28.619	34.486	27.167	19.346	16.978	17.334	52.509	25.874	28.002	30.411	63.697		0.213872	25.7906
4.5274	10.9996	21.1028	14.414	17.337	27.3045	19.6	10.036	18.142	25.541	33.066	8.994	23.19	26.49	29.49	25.889	18.666	15.038	16.413	50.035	23.005	28.088	28.226	60.951		0.219655	24.0008
4.6465	9.7613	18.2708	13.231	16.059	26.5179	20.133	11.29	18.504	23.974	29.958	7.152	21.976	22.517	24.583	20.45	16.504	12.197	15.408	47.59	19.815	27.898	28.481	57.057		0.225433	22.1447
4.7657	8.4531	12.0591	12.124	13.747	23.366	19.63	12.357	18.474	22.125	25.74	5.8	17.432	19.781	22.279	18.575	14.496	11.917	14.984	44.31	19.305	27.047	24.607	52.78		0.231217	20.0604
4.8848	8.5399	10.4182	9.822	12.461	22.1599	18.686	13.071	16.55	21.608	23.159	4.714	15.545	17.879	21.033	16.153	12.201	12.282	14.075	41.661	18.848	26.539	24.122	48.046		0.236995	18.6771
5.0039	8.0916	9.2995	7.747	11.723	22.4944	18.22	14.899	15.909	22.286	20.098	3.836	14.141	15.356	19.051	14.259	12.636	10.663	12.218	36.707	18.288	24.983	23.919	45.269		0.242773	17.4823
5.1231	8.0017	7.1964	7.342	10.978	23.0097	17.504	14.922	15.451	23.391	17.585	2.975	11.902	13.657	17.348	13.724	12.802	9.671	10.75	33.049	16.349	22.645	24.357	40.377		0.248557	16.3038
5.2422	6.8109	6.1205	6.786	10.718	23.2191	15.296	15.766	14.348	23.989	13.732	3.196	9.706	11.669	15.072	11.829	11.951	9.352	9.404	32.185	12.751	20.711	24.943	40.458		0.254335	15.2179
5.3614	7.0891	5.5178	5.434	11.667	23.9428	14.506	16.237	13.763	24.748	10.964	2.785	9.821	10.943	13.899	10.828	10.728	8.202	9.145	29.091	12.393	20.865	24.834	38.747		0.260118	14.6152
5.4805	7.3266	5.1075	4.967	11.299	24.8739	14.821	16.186	14.177	24.945	9.309	3.452	7.811	10.3	13.256	9.441	8.237	7.041	9.612	25.518	11.119	17.927	24.222	34.13		0.265897	13.699
5.5996	6.9768	5.2795	5.388	11.088	26.8462	15.276	15.186	14.075	26.391	7.943	2.828	8.33	9.621	12.709	8.173	8.459	6.701	7.649	22.124	11.335	17.789	24.296	30.74		0.271675	13.2697
5.7188	5.3923	4.4804	4.348	10.305	27.3071	14.951	14.342	14.112	27.92	5.911	1.918	6.534	9.11	13.24	9.071	7.747	7.496	8.153	19.603	10.694	16.214	23.21	28.097		0.277458	12.6155
5.8379	5.4842	4.9222	4.322	9.342	28.1368	14.247	13.023	13.721	26.026	5.753	2.441	6.099	8.304	12.426	9.054	6.714	5.878	7.191	14.883	10.018	15.405	21.937	24.403		0.283236	11.7274
5.9571	5.2034	4.7449	3.951	8.969	30.4521	13.633	11.583	13.152	25.057	4.969	2.788	4.818	7.935	11.812	8.347	5.984	5.935	7.406	14.675	9.27	14.936	21.414	23.446		0.28902	11.3252
6.0762	4.835	4.0926	4.004	9.309	28.0536	14.996	12.547	12.976	28.607	4.47	2.585	5.22	7.166	11.556	7.747	5.036	5.118	7.304	14.982	10.519	13.433	22.59	20.577		0.294798	11.2054
6.1953	4.4612	3.3501	3.626	9.294	26.6965	14.656	14.42	12.587	27.587	3.246	2.181	5.236	6.855	11.832	7.177	5.756	5.496	6.264	15.646	10.62	12.522	23.327	20.97		0.300576	11.035
6.3145	4.0364	3.118	4.465	9.811	27.4177	14.151	16.182	13.235	25.926	2.981	2.701	5.116	7.476	12.354	8.256	5.865	5.651	6.544	14.518	10.329	10.669	23.177	22.328		0.30636	11.1438
6.4336	3.9488	3.7193	4.043	12.103	27.4482	15.801	15.835	13.18	22.496	3.149	2.204	5.119	7.778	13.011	7.475	6.777	4.612	6.972	12.764	9.845	9.361	19.024	23.797		0.312138	10.8897
6.5528	3.8767	3.4369	3.731	11.037	26.3921	16.362	16.592	15.286	22.629	3.042	2.259	4.956	7.217	11.953	7.737	6.429	4.572	7.733	13.477	9.792	9.176	19.047	21.026		0.317921	10.7721
6.6719	3.6384	3.6703	3.642	12.464	24.1779	16.793	16.304	15.79	20.744	2.947	1.856	4.986	7.226	11.403	7.491	6.242	4.839	7.602	13.978	8.937	8.734	18.747	23.251		0.3237	10.6723
6.7911	3.324	4.6354	3.517	11.721	21.7015	18.611	15.877	17.016	19.863	2.35	1.816	5.364	6.927	12.507	7.47	6.67	5.692	7.43	13.8	8.687	8.402	16.011	26.137		0.329483	10.6752
6.9102	3.661	2.9821	3.428	11.414	20.0396	20.385	16.453	21.066	19.186	2.055	1.769	4.17	7.187	12.1	8.354	6.13	4.866	7.886	11.644	10.141	8.721	16.313	24.489		0.335261	10.6278
7.0293	3.2584	3.4928	3.332	11.717	19.7129	20.956	18.153	24.703	18.579	2.509	1.61	4.755	6.427	13.373	7.348	5.456	4.614	8.057	11.11	9.817	9.074	13.063	23.331		0.341039	10.6282
7.1485	3.332	3.8044	2.915	10.937	20.0467	22.571	19.112	24.846	20.865	1.934	1.502	4.133	5.186	13.178	7.585	6.832	4.55	8.489	11.012	9.444	7.768	14.754	22.318		0.346823	10.7441
7.2676	3.5392	2.9606	3.239	10.859	19.599	24.185	19.538	28.55	20.904	1.796	1.777	4.968	5.634	12.608	8.072	6.812	5.641	9.643	11.43	10.131	6.729	14.043	22.845		0.352601	11.1088
7.3868	3.7877	3.085	3.3	10.373	20.4062	23.987	20.754	32.467	21.741	2.54	1.715	4.787	6.094	12.506	7.977	6.122	5.704	10.784	11.713	11.235	7.307	12.519	20.661		0.358384	11.3724
7.5059	3.8708	2.9157	3.098	9.453	19.9767	26.289	21.51	38.783	19.738	2.537	1.964	5.397	5.94	12.096	7.45	6.233	4.778	10.798	10.986	12.089	7.831	11.232	19.343		0.364163	11.4917
7.625	4.1142	4.029	3.017	9.222	20.8103	28.784	22	41.828	20.288	2.246	1.92	4.278	6.313	11.836	7.806	6.374	4.427	11.527	11.868	13.388	7.742	9.886	17.842		0.369941	11.8063
7.7442	3.5186	3.3891	3.371	9.749	23.2123	31.146	21.893	41.181	20.667	2.54	2.423	5.061	5.711	11.671	7.589	5.642	4.857	12.901	11.661	15.615	6.987	9.577	17.762		0.375724	12.0923
7.8633	3.6645	3.2734	2.637	8.678	26.0157	30.668	20.78	34.669	20.616	2.502	2.099	4.448	6.093	13.076	8.089	5.086	6.003	12.182	10.726	18.168	8.334	8.57	17.814		0.381502	11.9214
7.9825	2.916	3.6997	3.516	8.072	26.846	29.553	19.814	32.996	18.309	1.573	1.94	4.617	6.025	11.76	6.675	5.248	4.938	11.861	11.62	20.538	7.218	7.253	17.229		0.387286	11.4877
8.1016	3.4016	3.8004	3.424	7.917	30.4516	29.542	18.835	29.136	15.674	1.951	1.957	4.087	5.629	11.977	6.483	5.339	4.556	14.521	12.219	21.569	7.051	7.327	17.642		0.393064	11.4995
8.2207	3.6368	4.1132	3.135	7.003	33.6699	27.318	18.393	28.431	14.15	2.116	1.902	4.28	5.854	12.915	7.599	5.553	5.456	15.344	13.171	20.453	7.109	6.596	15.737		0.398842	11.4754
8.3399	3.7873	3.8203	2.711	6.339	31.6486	26.315	16.693	28.221	12.36	1.804	1.574	4.545	5.081	13.32	6.777	5.876	5.094	16.045	13.932	20.008	7.175	7.983	17.279		0.404626	11.2343
8.459	4.2785	3.5369	2.894	6.293	27.2797	26.427	16.711	28.885	10.418	1.74	1.494	5.271	5.475	12.88	6.42	5.051	4.948	14.617	15.243	20.981	9.554	7.009	17.173		0.410404	11.0687
8.5782	4.6855	3.5605	2.888	5.55	23.1488	27.338	19.244	26.027	9.656	2.092	1.689	4.601	5.529	12.288	7.157	5.286	4.859	15.456	16.648	20.585	10.375	7.883	17.203		0.416187	11.0326
8.6973	4.8741	3.7615	3.64	5.756	22.3166	30.307	19.549	26.889	7.724	1.872	1.724	5.305	5.759	13.577	7.459	6.214	4.886	15.37	17.427	22.576	13.039	8.503	17.871		0.421966	11.5826
8.8165	4.616	2.9971	3.103	5.305	22.1156	31.844	18.156	25.503	8.305	2.427	1.892	5.254	5.684	13.509	7.749	6.96	5.221	16.78	18.48	21.185	14.456	8.393	17.252		0.427749	11.6168
8.9356	4.0839	3.0566	3.972	5.68	19.909	33.587	19.542	27.514	7.387	2.006	2.238	4.795	4.456	14.362	8.176	7.327	5.45	18.443	17.428	21.078	15.331	8.662	16.116		0.433527	11.7652
9.0547	4.4995	3.0932	3.658	5.221	18.7395	29.635	18.36	28.345	6.92	1.717	1.757	5.221	5.822	15.943	8.929	6.515	5.908	17.762	16.398	18.556	13.568	9.281	16.181		0.439305	11.3926
9.1739	4.7483	3.1894	3.092	4.707	20.9693	24.398	20.622	27.868	6.643	1.502	1.902	5.111	5.349	15.516	8.155	6.394	5.641	19.294	14.427	14.818	16.518	10.216	14.538		0.445089	11.1138
9.293	4.5916	3.6446	3.284	5.784	18.2205	23.585	21.615	30.366	7.423	2.06	2.333	5.648	5.186	16.269	8.099	5.794	5.581	19.291	13.953	12.641	15.976	10.887	14.13		0.450867	11.1462
9.4122	4.7288	3.5072	3.036	6.482	20.0365	23.302	20.448	32.02	6.523	1.761	1.992	5.567	6.165	15.185	8.496	6.596	5.674	16.284	13.353	10.848	14.388	11.453	13.945		0.45665	10.9474
9.5313	4.7826	3.2119	3.558	5.85	22.4523	22.625	21.021	31.878	6.702	1.706	1.886	5.486	6.136	14.25	8.384	6.89	5.211	18.326	12.612	10.125	14.843	13.824	12.874		0.462429	11.071
9.6504	5.0365	3.2266	2.97	5.925	24.4757	21.792	22.802	32.381	6.003	1.943	2.151	5.073	6.551	13.49	9.418	7.186	6.44	15.83	11.385	9.639	15.934	14.983	12.924		0.468207	11.1982
9.7696	4.7008	3.9078	2.802	5.562	25.9926	21.998	20.061	30.622	5.146	2.198	2.182	5.834	7.184	14.773	10.031	7.701	6.354	15.301	10.548	8.017	15.17	13.652	13.339		0.47399	11.0033
9.8887	4.9118	4.4622	3.498	5.394	31.2966	22.376	19.962	27.905	5.21	2.667	2.574	5.235	6.592	13.868	10.589	7.827	5.915	15.977	11.954	7.66	15.214	14.595	12.878		0.479768	11.2418
10.0079	4.8037	3.4511	3.526	5.303	36.5177	24.785	20.763	30.015	5.238	2.161	2.631	4.605	6.489	12.913	10.894	7.403	7.185	16.36	10.664	7.382	14.906	15.193	12.827		0.485552	11.5659
10.127	4.374	3.8499	2.788	6.393	38.5843	23.933	20.108	28.362	5.546	2.242	2.914	5.115	7.061	13.251	11.853	7.309	7.101	15.224	11.133	7.811	13.603	15.966	11.093		0.49133	11.5484
10.2462	4.2132	3.8659	3.053	5.98	38.4019	25.631	20.108	29.883	6.308	2.571	2.993	4.343	7.146	13.419	10.68	7.366	6.942	19.108	12.487	8.128	12.197	15.529	10.431		0.497113	11.7732
10.3653	3.9993	3.1211	2.817	6.048	41.3475	21.855	18.404	30.23	5.877	2.589	2.047	4.671	7.685	14.408	9.835	7.391	7.434	19.935	12.466	8.734	10.309	16.419	8.456		0.502892	11.5686
10.4844	4.1309	2.972	3.466	5.824	42.3077	20.611	17.688	28.608	5.999	2.947	2.183	5.455	7.99	15.314	9.548	8.762	8.751	19.164	13.211	9.131	9.053	17.957	7.562		0.50867	11.6798
10.6036	4.7897	3.4999	3.718	4.957	39.6153	20.005	15.559	29.625	6.733	2.923	2.587	5.695	7.863	15.769	7.689	7.873	8.555	19.986	15.955	8.616	8.394	19.217	6.646		0.514453	11.577
10.7227	4.5544	3.3814	2.979	5.047	39.2275	17.993	15.106	29.977	6.831	3.713	2.082	4.244	8.039	14.699	7.153	7.389	8.216	21.476	16.187	8.011	8.874	17.252	6.272		0.520232	11.248
10.8419	4.5315	3.6402	2.967	5.516	36.2039	18.946	14.074	30.116	7.344	3.603	2.547	4.975	8.191	14.347	7.751	6.881	8.268	22.27	17.418	7.839	7.425	17.629	4.927		0.526015	11.1917
10.961	4.9539	3.3667	2.539	5.633	33.9961	19.036	13.408	32.468	8.396	3.655	3.287	5.611	9.161	13.396	6.829	6.614	8.784	22.311	17.66	8.82	8.555	18.704	4.355		0.531793	11.3712
11.0801	4.4838	3.7618	2.468	6.374	28.7405	17.302	12.46	34.79	8.067	3.386	3.046	5.067	9.052	12.081	7.857	7.054	9.422	21.033	18.489	8.327	7.654	18.025	4.066		0.537571	11.0003
11.1993	5.1188	3.1145	3.009	6.376	24.4843	16.806	11.401	33.818	7.711	4.268	3.161	4.294	8.546	11.863	7.305	8.228	8.995	23.7	17.939	8.841	9.387	18.46	3.186		0.543355	10.8701
11.3184	5.4115	3.1524	2.428	5.867	23.0038	16.419	11.231	32.176	8.882	5.506	3.906	4.336	7.744	12.246	6.785	9.232	10.595	26.767	17.032	9.245	9.107	17.347	3.015		0.549133	10.9319
11.4376	4.6884	3.5767	2.73	5.313	22.7354	13.093	10.25	32.648	9.835	6.153	3.869	3.561	7.781	12.709	7.184	8.256	10.949	28.569	16.826	9.311	9.708	18.239	2.981		0.554916	10.9115
11.5567	4.5211	3.124	3.669	5.258	21.4509	13.358	10.858	32.164	7.869	6.615	4.002	4.192	9.491	14.199	6.79	8.269	10.764	28.094	13.168	10.091	10.271	16.342	3.011		0.560695	10.764
11.6758	4.8787	3.2312	3.666	5.714	21.096	12.188	12.714	29.172	7.475	7.91	5.233	4.15	9.203	14.171	5.752	8.481	10.385	30.163	13.169	10.594	11.164	16.054	2.817		0.566473	10.8426
11.795	3.8614	3.1202	3.383	5.811	20.1851	12.868	14.438	25	8.219	9.707	5.212	3.807	9.739	14.081	6.153	9.268	11.801	31.238	13.299	11.205	10.507	14.651	2.684		0.572256	10.8799
11.9141	3.5093	2.9056	2.95	4.717	18.8466	10.856	16.698	22.981	9.457	8.366	4.043	4.901	9.493	14.767	6.487	9.159	12.291	30.942	12.498	10.594	12.286	13.55	2.304		0.578034	10.6348
12.0333	4.3168	3.1009	3.949	4.434	19.8666	10.093	15.075	22.738	10.483	8.693	3.655	4.851	10.432	13.494	7.664	9.663	13.369	32.765	10.693	11.253	14.433	13.47	3.295		0.583818	10.9472
12.1524	4.4365	2.5573	2.888	4.379	19.2358	8.926	19.288	21.177	11.883	8.909	4.549	4.671	10.87	14.592	6.156	8.142	15.26	32.954	11.122	9.825	17.57	12.106	3.346		0.589596	11.0801
12.2716	4.8153	2.5971	3.033	4.662	18.7628	9.896	22.195	20.819	12.832	9.147	4.242	4.904	12.367	14.86	6.118	8.919	16.565	29.947	10.716	11.158	18.322	11.756	2.931		0.595379	11.3724
12.3907	4.8927	2.8503	2.925	4.116	18.3856	9.117	23.993	17.278	13.678	11.215	3.546	4.935	9.757	13.874	6.182	9.131	15.37	29.747	10.676	11.682	16.747	12.679	2.345		0.601158	11.0922
12.5098	4.188	3.1346	3.003	4.742	17.3604	10.154	24.074	16.759	16.974	11.971	3.94	3.987	11.345	14.334	5.779	9.758	17.116	29.322	10.586	11.496	19.679	11.179	2.281		0.606936	11.4418
12.629	4.132	2.588	2.881	4.432	15.3829	10.462	26.65	14.341	20.046	10.452	2.805	3.484	10.963	15.474	6.699	8.368	16.084	29.141	11.195	14.929	20.51	10.587	1.91		0.612719	11.4572
12.7481	4.0326	3.2782	2.707	5.609	16.9824	11.013	29.965	14.675	21.996	10.987	3.079	3.286	12.825	13.584	6.978	7.281	19.469	30.138	11.161	19.094	20.533	9.387	2.29		0.618498	12.1891
12.8673	4.2918	3.2309	2.655	4.708	14.8906	11.297	28.172	14.026	23.48	8.361	3.304	2.667	14.248	13.72	6.505	7.26	21.565	30.532	11.869	21.899	22.795	8.028	2.247		0.624281	12.2501
12.9864	4.5628	3.266	3.176	4.669	13.481	10.717	26.781	12.019	24.024	7.554	2.848	2.963	14.208	15.075	5.789	6.967	22.342	28.009	11.865	24.465	23.87	7.862	2.153		0.630059	12.1159
13.1055	3.834	2.5343	3.614	5.221	15.4151	10.928	26.949	12.6	25	7.731	2.76	3.568	14.754	13.086	6.154	7.853	22.747	25.749	13.612	24.528	22.255	6.792	2.647		0.635837	12.1883
13.2247	4.9629	3.3523	3.118	5.421	16.5538	11.861	24.532	13.308	25.806	7.431	3.062	2.86	17.088	12.89	5.679	7.353	24.815	24.244	11.476	24.626	22.895	5.529	2.021		0.641621	12.2123
13.3438	4.6583	3.3151	3.126	4.511	16.3734	11.503	21.306	13.176	28.541	7.798	3.145	2.989	17.157	12.383	5.932	6.9	27.502	22.738	12.049	24.186	25.099	5.081	2.395		0.647399	12.2549
13.463	3.7427	3.1202	2.837	4.435	16.4795	12.676	22.188	12.799	28.265	9.211	3.167	3.44	19.153	10.638	5.623	6.446	24.977	22.582	12	23.818	23.995	4.43	2.295		0.653182	12.1008
13.5821	4.4441	2.5992	3.151	4.179	17.2384	12.907	23.401	14.234	30.479	11.688	3.456	4.055	18.311	10.617	4.936	6.523	26.32	19.144	13.164	23.456	24.958	3.671	2.392		0.658961	12.4054
13.7012	4.7506	3.146	3.105	4.315	16.844	13.081	24.66	15.666	28.881	13.731	3.721	3.34	20.528	9.923	4.462	7.167	24.681	18.441	11.966	22.214	26.285	3.179	2.665		0.664739	12.4675
13.8204	4.381	3.1063	3.211	4.425	15.7443	12.597	28.463	16.43	23.565	15.119	3.773	3.529	20.9	9.996	6.251	8.474	25.618	17.409	12.48	21.472	27.198	2.91	2.147		0.670522	12.5739
13.9395	4.3256	2.8555	2.616	4.229	14.7693	12.439	27.093	14.726	22.823	15.752	3.271	3.294	19.57	10.848	5.537	9.051	25.216	15.565	11.11	22.898	23.656	3.106	2.687		0.6763	12.0625
14.0587	3.9628	3.0021	3.124	4.141	16.7796	13.118	26.99	14.473	22.115	16.521	3.931	4.239	20.716	9.253	5.275	8.579	27.395	15.265	10.967	21.965	21.719	2.503	2.952		0.682084	12.1298
14.1778	4.0642	3.0552	2.543	4.403	16.7924	12.643	25.091	14.223	18.126	15.836	3.353	3.869	21.356	10.21	4.521	8.671	30.229	12.477	10.057	20.901	23.088	2.345	2.559		0.687862	11.7571
14.297	4.0315	3.3183	2.572	4.252	17.2445	12.535	23.058	13.413	15.507	16.571	3.683	3.046	21.067	9.632	4.917	9.502	32.788	13.085	10.286	18.538	23.774	2.847	2.722		0.693645	11.6691
14.4161	3.7986	3.9581	2.772	4.061	15.9546	13.752	22.529	13.501	12.555	13.377	4.863	3.644	22.055	9.219	5.618	10.734	32.867	12.926	8.093	18.714	20.848	1.778	2.729		0.699424	11.3194
14.5352	3.5977	3.3553	2.69	4.614	16.7468	16.316	19.654	10.529	9.318	13.741	4.512	3.176	22.281	9.177	5.296	11.148	34.84	12.15	7.751	19.812	22.058	2.466	2.189		0.705202	11.1921
14.6544	3.8722	3.3319	2.982	4.598	18.5824	16.304	18.32	8.351	8.087	13.536	4.699	4.642	21.643	9.965	5.495	10.622	36.394	13.087	8.442	18.157	20.56	2.935	2.467		0.710985	11.1771
14.7735	3.8351	2.8652	3.182	5.034	16.5846	17.239	17.795	7.889	7.748	11.261	5.267	4.076	21.88	9.678	5.18	9.892	37.015	14.212	7.313	18.899	18.181	2.5	2.924		0.716764	10.8891
14.8927	3.9559	2.4271	2.848	4.108	15.733	18.779	15.73	7.002	6.491	10.307	4.615	3.858	22.895	8.766	5.182	12.341	38.417	12.931	6.476	20.459	18.892	2.441	2.427		0.722547	10.7427
15.0118	4.5116	2.8897	2.71	4.193	15.1968	18.201	14.819	6.67	5.822	9.699	4.121	3.991	25.75	7.501	5.844	13.728	39.749	13.807	5.981	20.602	16.437	2.72	2.512		0.728325	10.7589
15.1309	5.4933	3.8743	3.589	4.565	14.5946	19.999	11.39	5.013	5.251	9.044	4.507	4.865	25.228	6.932	5.126	15.043	39.7	13.581	6.118	18.673	15.717	2.367	2.007		0.734103	10.5512
15.2501	4.2192	3.4087	3.305	4.924	15.6386	20.323	11.508	5.388	4.051	7.58	4.374	4.69	24.435	8.04	4.797	14.634	37.363	13.962	7.545	22.768	15.194	2.099	2.871		0.739887	10.5703
15.3692	4.5528	3.7709	2.949	5.551	16.3642	21.452	9.952	4.679	4.323	8.172	5.177	4.498	26.884	8.374	4.917	14.291	34.959	14.022	8.735	20.292	12.302	2.057	2.868		0.745665	10.4844
15.4884	4.8582	2.7878	2.794	5.341	15.9191	23.772	7.969	3.434	4.144	7.984	5.509	5.485	29.138	7.472	4.056	17.421	30.179	11.453	8.116	23.392	10.267	2.326	2.215		0.751448	10.2623
15.6075	4.0778	3.1779	2.309	4.09	15.7651	24.34	7.462	3.563	3.977	7.382	5.501	6.118	29.384	7.187	4.382	19.324	30.15	12.54	6.151	25.453	11.047	1.851	1.809		0.757227	10.3061
15.7266	4.0095	2.9606	2.755	5.622	16.4781	23.556	6.999	4.054	4.367	7.204	3.762	8.147	27.816	8.509	4.607	20.423	29.884	10.248	6.272	26.255	9.648	2.177	2.169		0.763005	10.3444
15.8458	3.9789	2.931	2.904	5.446	16.0731	24.343	5.855	3.139	4.194	8.037	5.783	8.761	28.062	8.502	4.625	22.456	23.609	12.036	7.382	28.366	6.895	2.194	2.047		0.768788	10.3313
15.9649	4.4894	2.6865	2.961	5.131	16.1326	21.841	6.675	3.485	3.154	8.401	4.468	11.484	28.001	8.532	4.526	23.756	20.492	11.699	8.142	30.614	5.831	1.635	1.779		0.774567	10.2572
16.0841	5.5463	3.0815	3.332	5.829	17.1187	21.62	5.324	3.519	2.825	8.786	3.248	13.899	27.693	9.509	5.36	25.862	21.907	11.795	7.872	32.716	5.939	1.671	2.399		0.78035	10.7327
16.2032	4.6712	4.0516	3.695	5.868	19.699	21.14	5.363	3.265	4.083	8.073	3.449	16.092	27.843	9.683	4.693	25.336	19.315	11.067	8.8	35.339	4.883	1.966	2.201		0.786128	10.8946
16.3224	4.9985	3.7714	3.305	5.616	22.9829	19.845	5.925	3.405	3.642	8.313	4.31	19.082	27.854	10.097	4.66	26.408	19.913	10.295	7.81	37.184	3.973	1.758	2.207		0.791911	11.1893
16.4415	4.3766	4.1745	3.601	5.776	24.4024	17.129	5.818	3.371	2.976	8.43	3.969	20.716	27.07	8.217	4.504	28.17	18.807	10.742	8.038	35.079	3.5	1.655	2.497		0.79769	11.0008
16.5606	4.4326	3.3253	2.9	5.513	27.6503	18.571	5.479	2.58	2.866	7.956	3.648	23.025	26.462	8.379	5.878	28.805	18.744	10.849	8.527	37.771	3.262	1.731	1.845		0.803468	11.313
16.6798	4.5011	3.7195	3.376	6.371	27.5648	16.84	6.351	3.249	2.669	6.813	4.473	26.472	28.309	8.301	8.62	28.266	17.253	9.79	8.186	38.366	3.272	1.564	1.854		0.809251	11.5731
16.7989	5.0818	3.8013	3.167	6.844	26.9806	18.208	6.726	2.936	3.147	6.077	4.149	28.744	29.331	7.588	8.629	29.805	18.798	9.232	8.06	38.196	3.035	1.538	2.072		0.81503	11.8324
16.9181	4.8652	3.4012	4.196	7.207	29.9294	19.559	7.973	3.075	2.81	6.053	3.018	31.817	30.361	7.26	11.031	28.766	17.188	10.656	8.733	39.451	2.728	1.518	1.989		0.820813	12.3298
17.0372	5.0411	5.0922	4.43	7.342	31.5495	24.848	8.281	3.812	2.214	4.885	3.221	32.947	32.696	9.088	14.798	23.193	16.179	10.666	8.908	40.128	2.792	1.776	1.994		0.826591	12.8644
17.1563	5.6874	4.204	4.344	7.414	29.3694	25.8	8.574	3.412	2.656	5.919	3.389	35.594	33.914	12.432	17.301	19.662	17.112	11.427	10.235	36.673	2.516	1.27	2.284		0.832369	13.0952
17.2755	4.7722	3.9987	5.11	7.981	28.4053	24.382	8.616	3.192	3.822	5.146	3.033	37.606	32.603	16.273	21.358	18.925	17.182	11.656	11.732	33.591	2.348	1.315	1.961		0.838153	13.2612
17.3946	5.2713	4.5432	5.837	9.995	24.9179	23.662	8.657	3.471	3.168	4.922	2.773	39.341	33.05	22.677	24.638	16.234	18.057	11.332	11.391	31.827	2.374	1.25	1.654		0.843931	13.5236
17.5138	5.3322	5.0966	7.332	11.667	21.9775	23.426	8.227	4.112	2.994	4.612	3.756	44.471	32.607	28.875	32.19	16.433	19.122	12.398	12.133	31.012	2.231	1.309	2.068		0.849714	14.4948
17.6329	5.5778	6.533	7.587	12.94	19.3174	25.472	8.114	4.132	3.391	3.772	3.046	41.589	34.023	36.07	36.888	17.272	18.154	11.509	12.231	32.511	1.945	1.231	1.688		0.855493	14.9997
17.7521	5.6517	5.9092	9.667	16.249	14.8199	26.57	9.206	4.937	2.537	3.816	2.909	36.965	29.123	48.479	41.895	14.676	15.79	10.965	13.699	31.758	2.248	1.45	1.891		0.861276	15.27
17.8712	6.8795	6.6588	12.898	22.187	11.1373	28.201	9.988	4.853	2.778	4.315	2.845	29.551	27.394	55.767	45.415	17.92	17.036	12	15.312	31.142	1.697	1.475	1.841		0.867054	16.0561
17.9903	6.5918	6.8527	14.089	31.442	9.3012	28.216	10.591	4.197	3.128	3.97	3.066	22.654	25.317	57.299	47.403	17.302	14.954	12.453	16.601	31.809	2.156	1.328	2.814		0.872833	16.2406
18.1095	7.1482	7.3851	18.733	37.296	9.3259	26.006	9.513	5.732	2.591	4.119	2.779	20.969	22.522	56.754	47.023	18.078	13.918	12.33	19.022	30.41	1.977	1.04	1.93		0.878616	16.374
18.2286	8.352	8.0466	20.588	37.396	8.7178	19.648	6.988	5.524	2.799	3.454	3.238	17.907	18.901	51.228	45.481	19.524	13.995	12.977	18.838	27.813	2.312	0.931	1.749		0.884394	15.496
18.3478	8.6599	10.0824	23.25	33.819	8.2462	14.616	4.61	5.525	3.252	5.209	2.944	12.181	15.078	49.189	44.117	20.598	14.128	14.142	18.109	27.064	2.216	0.837	2.153		0.890177	14.7837
18.4669	10.5114	10.9734	28.035	30.718	7.7833	11.532	4.58	4.799	3.062	4.118	2.798	9.818	13.728	46.587	43.448	21.326	13.496	14.049	21.236	25.685	2.016	1.749	1.932		0.895956	14.5209
18.586	9.6356	13.0648	26.127	29.217	8.7856	8.666	4.742	4.332	3.363	3.35	3.627	7.621	14	47.757	41.611	24.118	14.337	16.136	22.728	23.363	1.529	1.143	2.049		0.901734	14.4044
18.7052	10.9003	14.6598	21.822	25.831	7.9493	9.075	3.319	4.679	4.248	2.995	3.945	5.524	15.501	48.002	43.335	26.418	16.181	19.459	19.679	21.843	1.416	1.119	2.227		0.907517	14.3534
18.8243	11.957	14.1889	14.345	20.217	6.9655	7.084	2.616	4.226	4.649	3.392	4.266	4.117	13.878	46.926	45.884	28.026	14.315	20.08	20.6	21.532	2.009	1.255	1.93		0.913296	13.6721
18.9435	13.0548	15.0795	10.932	15.387	5.2114	6.099	2.49	3.819	4.975	4.017	4.426	3.933	12.479	40.582	44.164	30.242	15.877	20.443	24.292	20.891	2.169	1.432	1.326		0.919079	13.1879
19.0626	13.9814	11.8963	6.887	9.966	4.4102	5.655	2.602	2.317	4.719	3.898	4.323	3.97	12.249	40.05	47.304	30.323	14.483	18.258	25.551	18.627	2.013	1.276	1.97		0.924857	12.4665
19.1817	11.9966	9.0331	4.451	6.884	4.1166	3.998	2.219	1.698	5.642	4.232	5.252	2.882	11.414	34.313	49.497	26.618	14.341	17.589	26.038	16.732	1.54	0.997	1.571		0.930635	11.4371
19.3009	8.502	6.175	3.478	5.505	3.5086	3.435	1.791	1.935	5.262	4.215	6.01	2.054	9.237	33.026	54.98	26.834	15.764	16.835	26.255	14.912	1.662	1.073	2.102		0.936419	11.0674
19.42	5.7317	4.0608	2.763	4.92	2.8022	3.173	1.917	2.162	4.719	4.962	6.036	2.011	7.491	29.808	55.855	25.175	12.559	14.781	28.261	11.84	1.557	1.068	1.982		0.942197	10.245
19.5392	4.0433	2.9029	2.391	3.732	2.518	2.284	1.614	1.655	3.484	5.307	6.715	1.668	6.268	24.573	58.357	21.277	14.192	14.485	30.161	11.629	2.115	1.573	1.759		0.94798	9.7697
19.6583	2.5053	2.088	2.318	3.086	1.7564	1.815	1.089	1.151	2.74	6.247	6.543	1.045	5.85	18.724	62.339	19.226	13.485	14.002	30.492	10.575	1.958	1.104	1.688		0.953759	9.20986
19.7775	2.261	1.6927	1.64	2.509	1.1619	1.837	1.508	0.82	2.064	4.749	5.126	1.605	3.352	14.571	65.504	18.98	12.919	14.152	30.985	9.911	1.721	1.508	2.217		0.959542	8.81711
19.8966	1.6928	1.4401	1.64	1.9	1.3792	1.316	1.095	0.844	2.285	4.711	3.564	1.446	2.749	8.767	64.949	18.397	11.385	15.561	30.704	8.933	1.74	1.333	1.763		0.96532	8.24322
20.0157	1.7559	1.2261	1.123	1.471	1.4604	0.981	0.66	1.026	2.04	4.68	2.737	0.97	2.227	6.247	60.683	17.296	11.684	15.14	31.247	8.108	2.068	1.074	1.773		0.971099	7.7251
20.1349	1.4828	1.0503	1.181	1.337	0.8995	1.069	0.587	0.897	1.607	4.147	2.534	0.863	1.871	4.322	58.975	16.151	10.737	16.14	30.01	7.441	1.516	1.186	1.795		0.976882	7.29559
20.254	1.3635	1.0161	0.994	1.05	0.9164	1.088	0.716	0.762	1.577	2.608	2.077	0.971	1.375	2.888	54.97	17.136	10.743	16.197	32.399	8.904	1.675	1.753	1.956		0.98266	7.17978
20.3732	0.9079	0.6661	0.793	0.862	0.7943	1.044	0.528	0.888	1.389	2.134	1.584	0.808	1.502	2.494	49.288	16.402	9.878	16.61	31.582	8.135	1.886	1.016	1.778		0.988443	6.65084
20.4923	0.9214	0.2951	0.754	0.913	0.6453	1.189	0.534	0.813	1.17	2.288	1.884	0.742	1.042	1.612	43.188	19.121	9.338	17.532	32.358	7.15	1.996	1.139	1.678		0.994222	6.44795
20.6114	0.4951	0.6683	0.648	0.765	0.8902	0.936	0.362	0.683	1.496	1.706	1.361	0.603	1.058	1.748	36.056	18.64	10.138	16.777	35.242	6.313	1.796	1.368	1.228		1	6.12946

## Sheet: Image2
X0	Y0	Y1	Y2	Y3	Y4	Y5	Y6	Y7	Y8	Y9	Y10	Y11	Y12	Y13	Y14	Y15	Y16	Y17	Y18	Y19	Y20	Y21	Y22	Y23	Y24	Y25	Y26		Ap-basal	Avg int
0	31.02	29.673	48.143	81.14	94.518	51.399	45.366	89.345	77.315	63.641	128.317	67.063	165.063	69.404	25.46	36.17	51.9987	92.5937	31.7128	112.985	64.26	77.052	59.946	68.922	44.766	51.066	51.9474		0	67.0477
0.1191	32.129	30.435	51.98	78.148	94.335	54.91	46.077	97.671	73.841	64.18	136.578	68.402	162.93	66.154	25.341	32.423	54.2379	82.6524	35.1962	106.251	55.465	76.045	61.281	67.993	49.1192	53.663	51.3032		0.00528917	66.9904
0.2383	34.928	30.827	58.697	89.44	101.974	58.772	52.51	103.766	71.986	64.82	146.86	75.096	164.97	65.408	25.968	38.156	54.0393	73.7659	45.574	92.449	53.628	77.749	55.256	68.487	48.8262	56.078	51.9476		0.0105828	68.9621
0.3574	38.77	34.789	65.465	97.03	107.326	60.065	60.187	116.206	72.056	64.561	156.469	76.15	171.291	64.744	29.093	44.679	58.5307	70.7666	52.0027	82.582	57.154	77.648	58.307	71.419	45.7981	62.388	54.3819		0.015872	72.217
0.4766	40.679	39.145	71.104	109.984	114.685	66.848	70.088	129.435	75.71	63.071	163.139	81.874	170.89	68.163	33.131	56.33	70.9808	73.3534	61.5085	77.629	61.96	77.505	63.392	70.959	46.4854	63.213	56.9966		0.0211656	76.9725
0.5957	48.515	47.222	78.647	124.252	125.62	76.968	90.479	135.114	82.562	61.498	168.908	85.356	176.58	71.374	39.092	66.249	75.5161	83.7863	68.3733	79.33	64.294	76.461	66.388	76.326	47.593	68.918	62.6598		0.0264547	83.2623
0.7148	62.969	54.352	83.027	138.728	133.293	84.416	97.253	138.225	92.009	61.2	163.208	85.454	172.898	83.069	46.85	83.58	81.7919	87.261	76.548	85.761	69.399	75.016	69.371	89.73	57.8697	70.042	66.5836		0.0317439	89.2557
0.834	72.535	63.827	86.711	155.956	142.595	92.114	102.312	148.269	99.884	65.481	151.032	86.411	179.079	94.367	61.986	98.127	86.2013	90.7619	84.4247	84.752	73.723	75.968	77.11	91.133	58.6888	71.913	75.3581		0.0370375	95.2118
0.9531	80.449	65.354	83.459	159.861	149.73	97.548	111.502	150.061	112.835	74.189	143.418	96.456	180.181	107.504	77.511	114.579	80.5347	92.1207	80.1018	85.361	86.602	75.556	89.969	98.147	65.3108	77.078	78.6737		0.0423267	100.522
1.0723	83.796	70.977	84.288	159.08	155.48	103.706	119.657	151.745	118.32	79.266	129.761	103.042	176.956	123.636	91.213	126.794	79.5353	95.3759	78.3355	87.707	96.949	72.827	97.739	107.202	69.4104	81.06	85.8273		0.0476203	104.803
1.1914	92.735	81.768	82.929	156.57	149.416	110.517	128.498	157.713	123.428	90.045	118.638	114.319	160.215	120.112	106.808	134.089	76.4949	92.4571	75.3873	92.981	100.875	70.857	101.016	105.565	70.3018	86.439	86.4794		0.0529095	106.913
1.3106	100.893	85.796	82.474	152.786	145.914	116.987	137.265	154.946	129.188	99.77	110.721	121.568	146.826	118.227	122.873	135.094	77.5377	89.5344	74.9392	91.417	110.922	73.636	110.748	100.819	70.6505	84.857	90.1818		0.0582031	108.762
1.4297	99.436	93.822	87.157	135.216	145.79	121.966	138.477	149.894	132.041	110.545	95.357	130.226	137.212	116.168	123.097	124.885	74.7838	90.2205	73.4337	93.555	118.689	73.015	116.649	101.663	67.0388	87.624	88.7528		0.0634923	108.397
1.5488	105.989	100.386	89.977	120.836	137.212	131.637	143.621	140.348	133.258	119.478	85.512	136.49	114.151	109.599	121.129	114.834	76.3263	85.7504	74.0734	87.71	127.902	71.976	118.71	97.482	69.5745	94.362	84.1776		0.0687814	107.13
1.668	115.504	103.842	96.706	97.492	132.607	130.969	145.151	129.022	129.473	126.968	75.845	148.747	100.042	95.192	119.777	95.771	79.0079	84.822	70.5374	85.373	136.015	68.978	123.533	92.808	67.221	96.974	82.3154		0.0740751	104.84
1.7871	113.023	115.458	99.046	84.448	127.764	133.248	147.69	116.046	124.517	134.334	66.263	160.159	92.706	90.248	113.684	78.122	76.4566	85.8274	65.7104	82.565	127.674	69.633	121.699	92.746	68.8603	103.675	75.6545		0.0793642	102.491
1.9063	109.78	115.445	104.93	74.92	113.635	130.226	145.83	106.621	117.117	141.021	65.182	162.79	78.607	74.662	108.246	69.794	76.2127	86.9347	66.3403	73.881	129.044	74.986	122.367	92.516	65.4122	92.218	75.6828		0.0846578	99.0519
2.0254	99.64	117.288	116.541	65.746	105.523	120.255	145.903	92.281	113.474	137.848	58.685	162.165	69.135	61.671	97.365	63.552	75.8619	82.3792	61.8153	75.334	128.234	75.719	117.463	94.62	61.264	93.565	67.7125		0.089947	94.8533
2.1445	89.173	118.179	121.241	55.974	93.64	109.21	143.269	86.216	109.774	133.811	51.202	152.485	62.945	57.433	88.354	54.383	76.2461	81.9708	64.2788	72.077	124.193	79.087	117.104	84.426	61.9926	86.441	56.1205		0.0952362	90.0454
2.2637	79.824	122.733	127.906	54.623	81.516	105.494	135.408	79.472	104.459	114.732	44.821	142.379	55.5	52.898	74.236	48.292	77.7554	73.6253	63.6471	65.166	115.656	86.719	113.563	88.308	60.4272	79.602	46.7555		0.10053	85.0192
2.3828	76.336	116.862	134.53	47.228	78.651	105.281	131.09	69.61	98.194	94.542	41.218	114.715	49.739	44.03	65.934	45.71	77.6239	69.3202	61.6044	67.039	117.88	92.726	105.386	84.23	62.2134	68.398	34.5184		0.105819	79.8003
2.502	75.321	117.864	131.071	50.518	71.927	99.495	121.03	61.627	87.868	70.005	37.539	93.13	42.877	37.321	53.655	39.326	75.026	67.7504	63.1918	62.411	112.221	94.273	107.932	82.838	63.0215	58.052	26.3668		0.111113	74.2095
2.6211	72.993	115.93	129.273	46.888	65.123	97.054	115.372	61.821	83.569	50.051	36.839	73.382	39.884	35.776	48.526	35.255	70.3199	61.762	63.0897	56.88	107.458	99.679	108.147	78.149	59.6342	46.996	19.2452		0.116402	69.5961
2.7402	73.41	114.465	115.706	43.058	61.557	96.682	103.611	56.781	69.871	39.756	34.734	55.32	39.741	32.914	42.968	29.999	70.9658	57.6756	60.7337	57.914	103.107	101.837	101.219	77.385	59.2043	42.478	16.1167		0.121691	65.1559
2.8594	71.841	111.707	97.132	43.57	64.395	100.183	92.666	50.122	63.151	33.184	33.046	37.613	36.252	27.109	40.643	29.109	71.2709	60.6061	55.0616	52.304	101.934	107.954	95.405	71.963	59.6921	38.935	14.675		0.126985	61.5379
2.9785	74.659	105.256	78.101	38.508	62.647	102.596	83.554	48.732	63.577	29.453	31.87	31.699	34.666	24.798	34.931	25.789	66.8097	55.2463	47.9633	46.878	98.628	113.265	88.7	69.67	59.8643	38.505	13.8835		0.132274	58.1574
3.0977	72.954	110.089	57.802	38.998	62.027	98.382	74.472	45.966	63.65	29.666	30.939	26.551	31.047	20.018	32.555	24.85	62.4323	48.6776	41.5928	41.633	99.396	122.071	81.617	64.526	58.1	40.48	11.0676		0.137567	55.2429
3.2168	72.49	107.416	46.819	34.985	58.176	95.598	63.516	42.498	60.226	27.025	30.524	24.489	30.479	19.18	27.756	22.932	58.1249	44.6499	36.6772	36.127	97.128	124.372	75.395	60.644	57.5646	36.605	9.297		0.142857	51.8775
3.336	69.501	104.976	37.938	34.536	53.193	90.061	51.454	39.193	61.819	23.399	30.549	21.776	27.785	18.398	25.861	21.197	51.6145	38.1445	30.2101	29.682	99.309	125.199	81.148	57.209	58.2422	34.048	9.702		0.14815	49.1165
3.4551	72.265	101.906	35.035	30.167	51.449	84.685	42.211	37.917	59.866	22.376	31.104	21.602	24.064	18.223	22.708	19.718	41.8589	30.6555	25.7702	26.49	99.428	121.374	88.29	55.229	55.6656	30.737	8.7679		0.153439	46.6504
3.5742	71.484	105.77	29.668	30.404	49.86	88.283	35.742	33.63	55.124	19.459	29.683	21.352	21.815	18.427	20.418	18.724	34.8915	23.5749	21.6974	24.729	101.645	128.163	86.266	50.601	54.1325	25.426	7.5695		0.158728	44.7607
3.6934	68.482	106.192	26.89	29	48.233	79.867	32.155	31.792	49.778	16.288	26.371	19.436	21.425	15.677	17.774	17.185	30.2961	17.6226	18.079	19.067	99.469	129.625	86.38	48.244	53.5181	24.368	7.5654		0.164022	42.2511
3.8125	72.943	103.92	26.24	26.44	41.922	70.306	29.43	29.805	42.736	16.565	25.446	18.411	23.096	13.692	17.68	17.848	22.3014	15.1032	15.0361	17.702	98.491	117.893	88.352	48.972	54.5632	21.043	7.1757		0.169311	40.1153
3.9317	70.031	92.898	23.911	23.503	36.002	69.878	27.84	26.197	39.751	15.99	20.006	14.634	20.859	14.514	17.582	17.09	15.745	11.5239	13.9252	16.329	96.674	110.079	86.675	42.078	49.6301	19.576	6.5031		0.174605	37.0157
4.0508	64.631	81.902	22.917	21.987	30.171	61.207	25.7	24.081	36.079	14.908	18.56	15.32	21.466	11.77	15.146	13.812	11.9769	8.6579	11.6767	15.87	102.026	100.425	89.227	42.067	51.8442	21.773	6.332		0.179894	34.8716
4.1699	63.39	64.483	21.402	21.28	27.695	58.512	22.561	22.073	30.932	14.063	18.292	14.369	19.911	12.512	13.398	12.293	12.5882	7.9664	10.7415	13.64	102.426	88.809	92.703	38.864	47.4798	22.185	7.1719		0.185183	32.6571
4.2891	54.999	52.89	18.606	21.362	24.625	54.924	20.443	21.136	29.533	14.44	16.066	14.285	17.932	13.19	12.345	11.871	10.2367	8.1043	10.2075	12.407	97.287	80.245	95.007	39.344	47.466	21.013	7.9704		0.190477	30.6643
4.4082	47.593	43.161	17.828	20.168	22.312	48.281	19.59	18.003	26.578	13.715	14.992	12.77	15.888	12.284	12.862	12.692	9.2825	7.3536	8.6005	11.46	100.073	74.753	92.811	34.81	50.069	20.139	6.1946		0.195766	28.6764
4.5274	40.439	39.492	16.976	19.173	22.967	44.449	18.03	17.567	24.647	11.465	13.322	13.121	14.591	11.286	11.253	9.972	9.4894	7.6175	7.4486	11.266	97.657	71.824	89.97	36.145	45.0947	20.654	7.2854		0.20106	27.1556
4.6465	34.796	34.293	15.909	16.396	23.533	40.799	15.918	17.339	22.142	11.824	14.305	12.795	13.104	9.97	10.13	8.913	7.9609	6.8419	6.8046	10.091	102.019	66.585	86.219	30.721	42.452	18.435	6.0399		0.206349	25.4198
4.7657	30.303	31.331	15.439	14.353	24.29	34.007	15.718	16.215	19.923	11.265	11.896	13.018	14.29	9.103	9.754	7.554	8.0794	7.3485	6.0311	8.428	100.763	66.623	86.554	29.666	44.6106	18.436	5.6775		0.211642	24.4695
4.8848	28.684	27.853	13.4	13.326	21.082	30.061	15.904	15.302	19.28	8.495	11.29	14.69	12.375	10.279	9.538	6.376	7.3335	7.2236	6.0179	8.013	97.502	62.501	86.951	29.86	42.3201	17.507	7.6241		0.216932	23.3625
5.0039	28.742	29.218	13.325	12.099	19.554	26.573	13.45	15.244	18.587	9.806	10.709	13.529	11.864	10.159	11.033	7.289	7.93	5.5599	5.35	7.154	100.953	59.296	88.574	30.538	42.2131	14.691	6.9014		0.222221	22.9756
5.1231	24.051	27.366	13.066	10.922	17.825	26.042	13.45	13.935	18.181	9.118	12.431	13.337	13.038	8.543	10.098	6.88	7.4977	6.5827	6.1374	6.73	100.035	61.744	91.425	28.148	43.4254	14.872	5.6408		0.227514	22.6119
5.2422	21.792	25.859	11.325	11.979	17.268	20.347	12.629	13.53	19.012	8.707	10.524	13.187	13.731	9.036	11.8	6.245	6.1853	5.8981	7.7176	6.712	98.052	61.058	93.94	25.711	43.2689	14.583	5.7433		0.232804	22.0682
5.3614	23.239	24.809	12.416	12.447	14.204	18.577	12.61	13.631	19.214	7.281	11.404	13.106	12.925	7.695	10.176	4.83	5.5456	5.9497	10.329	5.591	95.254	59.401	91.538	26.018	41.5136	13.191	4.8929		0.238097	21.3995
5.4805	23.367	25.568	11.496	10.398	14.653	16.65	12.492	13.099	17.073	6.463	9.838	11.598	13.054	7.946	9.732	5.565	5.088	5.1418	10.2777	6.624	87.036	59.962	89.632	23.553	43.2746	14.939	4.9816		0.243386	20.7223
5.5996	20.676	22.275	11.856	11.406	14.671	14.46	12.803	11.311	16.485	6.326	10.071	11.044	12.145	7.877	10.595	5.404	5.5727	6.2419	10.4284	7.047	85.264	61.974	84.793	21.867	41.8332	11.338	5.6891		0.248675	20.0538
5.7188	19.565	19.477	10.621	11.138	15.711	12.591	10.831	11.037	15.068	8.213	8.713	10.57	12.008	7.628	12.758	5.155	5.2437	7.0184	10.3014	6.207	81.413	64.599	82.903	21.135	44.3128	10.962	5.1527		0.253969	19.6419
5.8379	17.37	19.094	10.041	10.952	17.412	11.938	9.945	9.746	14.39	8.154	8.96	10.94	12.582	7.161	12.667	5.824	5.3534	7.719	9.3169	6.951	87.478	60.987	80.182	21.296	43.6481	13.369	4.2228		0.259258	19.5444
5.9571	17.495	17.754	10.608	10.444	18.691	11.626	10.257	10.306	14.774	7.066	8.362	10.889	11.823	7.814	13.501	5.075	5.7448	7.5746	9.9372	5.86	90.214	62.016	78.882	22.111	42.5991	11.286	5.831		0.264552	19.5756
6.0762	17.179	16.575	10.928	9.996	17.118	10.224	9.322	9.385	12.936	6.947	8.514	10.838	12.011	6.199	13.397	4.552	6.0041	10.1303	9.5366	5.615	91.537	64.098	79.832	18.383	43.004	11.662	5.1802		0.269841	19.3001
6.1953	15.148	14.877	11.148	8.605	16.414	9.085	8.718	10.082	12.555	6.033	8.764	12.791	11.921	6.479	13.66	4.003	4.9937	10.173	9.6239	7.061	97.209	60.609	82.498	18.256	40.2266	10.51	5.1532		0.27513	19.1332
6.3145	12.667	13.302	11.867	9.163	16.905	10.258	9.289	9.331	11.179	5.278	9.171	14.445	10.438	7.256	14.811	4.562	5.373	13.7331	9.3622	6.4	100.775	56.342	88.691	17.616	40.2968	10.421	5.1069		0.280424	19.4089
6.4336	11.994	11.095	14.812	9.517	15.967	9.755	10.641	9.665	10.289	5.887	8.289	16.535	10.434	6.237	14.36	4.674	5.2107	12.4676	10.3416	6.405	106.055	55.509	84.808	15.095	36.3948	10.596	5.5315		0.285713	19.2061
6.5528	12.938	10.821	17.227	11.121	15.943	8.327	11.691	9.243	11.081	4.827	9.988	19.812	8.708	5.989	13.966	4.349	6.964	11.394	11.8453	6.52	108.291	50.025	90.229	12.54	33.0363	10.209	5.588		0.291007	19.3582
6.6719	12.497	11.728	20.102	9.962	16.523	8.073	12.036	8.628	10.723	5.452	10.364	28.363	9.431	5.484	15.665	4.849	6.8504	8.6219	11.161	5.888	115.713	51.132	91.261	12.135	31.2777	12.649	6.1117		0.296296	20.0993
6.7911	11.102	9.672	20.794	9.936	15.987	7.422	11.42	7.994	9.589	4.667	9.762	29.898	9.082	5.763	17.416	3.735	6.6957	8.7035	12.2047	6.624	117.966	45.746	93.733	11.534	28.4617	12.451	5.8754		0.301589	19.7864
6.9102	12.257	10.565	20.831	11.13	16.828	7.082	12.72	7.688	11.107	5.378	8.874	35.288	9.157	5.021	19.837	4.144	7.5121	7.6252	11.2352	6.334	108.878	41.227	94.445	10.422	23.4691	11.083	5.1232		0.306879	19.4541
7.0293	10.493	11.319	23.982	10.741	14.716	7.884	13.06	8.477	11.467	5.387	9.004	39.121	8.819	5.385	21.843	4.042	8.4638	7.383	11.711	6.288	118.704	39.599	95.567	9.091	24.0268	9.857	6.2175		0.312168	20.0981
7.1485	11.675	9.295	27.364	10.733	16.622	6.909	12.636	7.749	13.394	5.221	9.609	40.72	11.269	4.71	23.882	4.62	8.66	9.1976	11.3051	6.072	127.986	37.879	89.36	8.658	21.7745	11.232	5.9552		0.317461	20.5366
7.2676	11.502	10.997	31.408	13.181	16.962	8.164	14.45	7.284	12.721	4.235	11.117	41.41	13.13	5.514	22.805	4.004	12.1038	9.6979	10.1532	6.083	132.036	31.732	91.681	8.852	21.3653	11.073	5.882		0.322751	21.0942
7.3868	12.056	12.236	31.966	14.936	18.659	8.664	15.829	8.494	14.528	4.547	11.889	34.286	13.79	5.478	23.069	5.207	15.4598	9.6256	9.8667	6.729	131.39	34.234	90.034	8.17	20.6507	10.873	6.7172		0.328044	21.4587
7.5059	12.729	10.542	29.07	15.603	18.401	7.83	16.22	7.49	16.224	5.424	14.904	29.058	13.114	5.996	25.953	5.137	17.292	9.309	9.8852	6.103	128.382	32.031	92.852	7.562	19.7286	12.936	7.2385		0.333333	21.3709
7.625	10.526	11.104	27.688	17.992	18.966	7.916	20.907	7.467	17.142	5.401	18.347	25.554	10.637	5.02	27.298	4.415	18.273	9.7429	9.5445	5.722	130.024	30.08	90.803	8.419	19.7545	12.314	7.5762		0.338623	21.4309
7.7442	9.843	11.627	25.383	20.02	18.189	7.311	24.035	8.492	18.637	6.275	23.794	22.02	9.4	5.053	28.852	4.747	17.476	8.6288	10.3016	7.248	126.987	30.579	89.553	8.079	19.3549	13.8	7.9294		0.343916	21.6154
7.8633	8.63	13.149	23.64	20.523	17.986	8.258	25.163	8.116	20.265	5.199	21.134	20.955	8.718	5.344	23.361	4.185	16.4559	9.4608	10.3469	8.114	119.076	29.79	85.061	7.708	20.1825	14.933	8.3641		0.349205	20.8933
7.9825	9.704	11.894	21.852	24.213	17.918	9.173	24.779	8.058	21.812	5.065	20.878	21.947	11.832	4.878	17.227	4.427	17.2841	8.8121	9.941	6.85	120.393	24.474	83.589	8.085	19.0441	14.531	8.9161		0.354499	20.651
8.1016	10.024	14.735	19.945	25.949	18.642	7.961	29.325	6.861	20.718	4.835	21.438	18.61	11.074	5.201	15.231	4.74	16.6041	12.0229	10.1784	6.199	105.383	20.914	81.079	8.684	19.5781	16.189	9.8346		0.359788	20.0724
8.2207	9.414	16.418	18.681	25.737	16.722	8.281	28.405	7.421	20.643	5.072	23.204	15.206	10.418	6.979	12.643	3.926	17.9424	11.6754	11.7933	7.258	91.62	19.808	79.705	9.031	18.5914	14.673	8.6434		0.365077	19.256
8.3399	9.857	16.599	16.793	23.577	18.557	7.931	26.549	6.239	21.793	5.046	26.282	12.938	10.669	6.834	11.561	4.73	16.6348	10.4044	11.7507	6.864	83.055	18.28	75.09	9.832	16.3192	14.863	10.8396		0.370371	18.5144
8.459	9.353	18.616	17.682	22.08	19.575	9.105	27.271	7.876	24.554	5.699	25.268	10.362	13.321	6.804	10.299	4.31	17.5166	7.5045	12.611	7.598	76.671	16.497	76.401	9.137	15.4016	19.062	9.6314		0.37566	18.5262
8.5782	9.514	19.993	16.347	21.308	20.172	10.4	27.736	6.661	27.004	5.313	24.447	8.39	11.665	7.654	12.759	4.765	14.4209	8.307	11.4711	7.64	68.33	13.844	67.085	9.793	14.4638	18.734	9.7011		0.380954	17.7007
8.6973	8.076	20.231	15.416	17.851	24.818	9.412	26.628	6.105	27.923	4.93	21.064	7.3	11.764	6.951	15.886	4.998	13.3248	7.2189	10.7898	7.051	55.451	12.227	67.845	9.206	14.5242	19.974	9.9905		0.386243	16.9243
8.8165	7.324	23.296	16.024	17.956	27.959	9.342	22.055	7.103	26.538	4.9	17.069	7.277	11.287	7.348	16.614	3.973	10.4272	6.0402	9.3316	6.674	50.099	11.434	64.274	10.091	12.7514	18.952	10.049		0.391536	16.1551
8.9356	7.676	25.605	16.196	18.532	28.659	9.878	20.988	7.87	28.369	5.323	13.541	5.256	10.953	7.751	17.887	3.745	10.2003	6.4105	9.3171	7.275	43.846	9.778	58.476	9.822	12.7144	20.314	10.94		0.396826	15.8268
9.0547	8.529	24.453	14.289	19.777	28.843	10.168	17.073	7.641	30.92	5.269	11.547	5.808	11.143	9.423	16.327	3.876	8.8768	5.7389	10.1407	6.991	36.408	10.429	60.388	10.646	10.9917	19.095	10.9514		0.402115	15.3979
9.1739	7.53	26.471	14.235	21.243	29.184	8.95	15.765	7.917	39.827	6.721	9.567	5.573	9.281	10.713	16.757	4.746	8.0797	6.002	11.3582	7.647	30.363	10.419	58.02	11.959	9.9528	20.067	10.085		0.407408	15.4975
9.293	7.516	28.142	12.383	22.616	28.909	9.13	12.758	7.561	41.729	6.415	8.154	5.515	9.377	10.692	15.27	3.819	8.6947	5.5529	12.8043	8.741	23.313	9.313	53.627	10.579	10.4227	17.043	12.7406		0.412698	14.9192
9.4122	8.031	22.624	12.445	27.84	27.927	9.628	11.917	8.358	44.907	5.831	7.03	5.303	8.639	11.88	13.162	4.347	9.3214	5.4367	12.8032	8.375	16.824	7.582	43.953	11.025	9.3482	16.181	12.1533		0.417991	14.1804
9.5313	10.326	21.455	11.426	30.079	29.377	8.824	11.707	7.817	46.412	5.862	6.548	4.702	6.322	12.217	11.036	4.574	9.0182	5.3786	11.2379	7.406	13.333	7.158	37.796	11.77	8.8414	14.901	11.9113		0.42328	13.6087
9.6504	9.659	21.752	11.374	34.017	29.253	8.088	9.294	9.126	42.839	5.167	5.923	4.507	6.683	13.608	9.616	4.061	9.5917	6.171	11.4435	9.129	11.593	6.062	35.574	13.201	7.9216	15.497	13.0944		0.42857	13.4906
9.7696	9.768	19.61	12.343	31.656	27.697	9.818	9.358	7.34	42.616	5.853	6.075	5.479	6.07	13.403	7.507	4.45	8.5124	6.8824	10.3919	9.223	9.539	5.982	32.429	14.312	8.9884	14.577	12.737		0.433863	13.0599
9.8887	9.645	19.087	11.775	28.361	24.961	9.289	9.357	8.384	37.491	5.882	5.351	4.589	6.267	12.414	6.586	4.374	10.0718	6.3312	9.7513	9.724	7.523	4.516	25.339	18.787	7.8591	14.87	13.4459		0.439152	12.2975
10.0079	9.581	17.572	11.726	25.826	23.864	8.563	10.089	8.53	35.055	6.574	5.958	4.961	5.511	13.095	5.261	3.468	8.9627	5.8467	8.6193	10.571	7.1	4.26	19.805	20.568	6.9697	15.671	15.8029		0.444446	11.8448
10.127	10.718	15.966	13.538	24.813	26.068	9.471	9.197	8.268	31.585	5.759	5.797	4.51	4.719	12.821	5.421	3.251	9.5869	5.547	8.4794	10.527	5.859	4.858	17.315	21.408	6.6657	18.021	17.9046		0.449735	11.7805
10.2462	11.232	15.795	13.362	23.648	28.718	8.178	8.28	7.454	28.986	5.83	4.985	4.572	5.131	12.495	4.571	3.604	8.5333	5.009	7.426	13.868	3.574	3.435	13.791	22.128	6.1674	15.895	20.1841		0.455029	11.3649
10.3653	10.653	17.339	14.142	20.573	30.431	8.687	8.633	8.158	27.766	6.253	5.134	4.78	4.874	12.421	5.204	3.761	9.4518	5.8011	8.6816	13.699	4.097	4.241	12.384	21.327	5.953	17.02	21.1133		0.460318	11.577
10.4844	11.214	17.203	13.785	16.992	32.758	8.263	9.85	7.867	28.766	5.263	4.986	4.052	6.018	12.478	4.351	4	9.7838	4.5729	8.3119	12.863	4.156	4.298	12.095	19.736	5.0863	15.2	21.9172		0.465607	11.3284
10.6036	14.119	16.814	13.086	15.682	31.726	8.081	10.53	8.788	28.357	4.349	5.508	4.765	5.521	10.219	4.944	3.724	9.9346	4.8582	8.2321	12.351	3.528	4.491	10.167	20.222	5.0314	15.058	21.4522		0.470901	11.1681
10.7227	14.976	18.573	13.573	14.561	29.81	7.176	9.739	8.245	29.294	4.736	5.15	4.831	4.607	9.817	4.663	4.485	9.7346	6.6803	8.9205	14.623	4.252	4.904	8.905	17.697	4.7989	13.436	20.27		0.47619	11.054
10.8419	13.864	20.218	13.776	12.026	27.102	7.237	11.04	8.367	28.824	5.506	5.172	4.293	4.276	9.601	4.571	3.951	9.3435	5.8271	10.0729	15.34	3.866	4.494	6.891	15.588	5.0183	11.988	19.6281		0.481483	10.6623
10.961	15.665	22.224	12.927	9.191	23.339	8.009	11.302	9.329	27.023	5.371	5.181	4.389	4.116	9.568	5.23	4.999	8.7327	5.9813	8.882	12.653	3.555	4.893	7.017	14.75	4.7179	12.616	18.2142		0.486773	10.3657
11.0801	18.406	21.413	13.254	8.751	20.421	8.211	13.433	7.781	30.232	4.916	4.901	3.568	3.985	9.18	5.901	3.677	9.9278	4.9594	9.2805	14.709	3.439	3.458	6.052	14.344	4.6641	12.711	17.3948		0.492062	10.3322
11.1993	20.045	20.323	15.227	7.899	18.887	7.201	12.158	8.356	26.757	4.9	4.736	4.606	4.269	8.619	4.743	4.054	9.2734	6.509	11.3219	17.603	3.118	4.284	4.895	15.756	4.7637	13.462	19.3859		0.497355	10.4871
11.3184	23.44	18.614	14.251	7.832	15.255	7.257	13.803	8.424	26.845	4.987	4.856	4.597	4.593	8.647	4.284	4.201	9.2235	5.8997	10.8544	16.961	3.616	4.542	5.821	17.939	4.9232	10.142	18.7244		0.502645	10.3901
11.4376	25.913	19.801	15.633	8.619	16.126	7.421	13.714	8.221	26.31	5.828	5.422	4.454	4.238	7.474	3.732	3.896	7.7917	4.376	11.5967	18.376	3.075	4.556	5.233	16.49	4.6654	9.278	19.114		0.507938	10.4205
11.5567	32.277	17.734	14.257	7.262	13.721	6.989	11.454	9.248	24.437	5.744	4.957	4.646	3.54	8.279	4.049	3.653	8.2202	4.8888	11.4324	18.974	3.02	4.774	4.233	19.522	4.3836	9.963	17.9681		0.513227	10.3565
11.6758	38.256	18.834	15.153	6.284	15.233	7.674	11.363	8.652	21.38	5.175	5.727	5.161	4.069	7.359	3.523	4.018	7.8564	4.3406	11.6396	17.349	3.509	4.657	4.015	18.803	5.1659	9.222	23.4672		0.518517	10.6624
11.795	44.878	18.186	15.693	5.86	14.971	7.194	11.651	8.137	20.435	4.942	4.831	4.003	3.866	7.493	3.181	3.359	7.7962	5.2675	11.9647	19.251	3.639	3.52	3.844	19.042	4.6418	9.188	22.9397		0.52381	10.7324
11.9141	42.631	18.872	15.884	5.406	15.233	6.053	11.374	8.91	18.848	5.713	5.047	3.003	3.444	7.011	3.188	3.196	6.7942	4.741	11.9335	18.001	3.061	4.041	3.714	20.757	4.0578	7.889	25.2679		0.529099	10.5211
12.0333	43.506	18.295	14.472	6.523	17.41	5.669	12.139	9.097	15.951	5.932	5.136	4.261	3.584	7.027	3.186	3.649	7.3941	4.2138	11.4435	15.422	3.316	4.388	2.93	20.66	3.3955	6.975	24.6171		0.534393	10.3923
12.1524	42.305	19.675	15.694	5.253	18.013	5.596	12.022	9.448	15.981	5.658	5.111	4.232	3.885	6.604	3.721	2.922	5.5003	4.5737	12.1752	15.181	3.612	4.037	4.014	25.296	4.3723	6.761	24.5714		0.539682	10.6005
12.2716	41.589	21.645	16.254	5.616	18.441	6.017	11.125	10.59	13.315	6.728	4.054	4.248	4.264	7.132	3.357	2.843	6.2105	4.5014	11.7538	15.432	3.754	4.104	3.049	26.604	4.3687	6.953	28.9659		0.544976	10.8487
12.3907	31.575	19.09	15.534	5.136	16.947	5.35	10.508	12.592	12.075	5.43	4.228	4.369	4.014	7.275	4.303	2.704	7.1883	4.4273	11.1166	15.41	4.103	4.733	2.888	24.143	3.4373	6.67	32.413		0.550265	10.2837
12.5098	28.991	18.442	15.622	4.635	16.468	6.012	9.906	13.088	11.761	4.521	3.68	4.335	4.16	8.315	3.557	2.491	7.7562	3.9441	10.5461	15.394	3.818	4.091	2.954	24.2	3.6683	6.941	31.0448		0.555554	10.0126
12.629	25.417	19.859	14.523	4.733	18.828	5.795	9.536	11.754	11.218	4.484	4.279	4.259	4.256	8.987	2.506	3.766	6.2869	4.4843	11.5137	15.091	3.642	4.519	2.342	23.38	4.3968	6.177	31.8858		0.560848	9.92291
12.7481	20.569	18.519	14.758	5.283	20.574	5.8	8.439	12.67	9.024	5.069	4.629	3.477	4.225	10.192	2.586	3.391	6.5057	4.0406	10.8058	16.12	3.061	4.225	2.214	22.647	3.7231	6.046	32.9372		0.566137	9.68631
12.8673	19.627	19.369	13.854	5.415	20.965	5.452	7.976	13.382	9.147	5.468	4.019	3.943	3.68	10.751	3.226	3.071	6.6232	3.5964	11.6832	16.919	3.811	4.896	2.725	22.552	3.4755	5.139	32.0045		0.57143	9.73221
12.9864	18.153	18.887	14.333	4.445	23.227	5.811	7.773	11.368	9.437	6.102	3.861	3.953	4.854	9.662	3.049	3.084	5.8156	4.0342	10.9992	17.57	3.315	4.214	3.016	18.576	3.434	5.885	26.4916		0.57672	9.30924
13.1055	18.359	18.768	13.677	4.622	28.397	5.43	8.371	11.972	8.062	5.771	4.575	3.555	4.256	11.806	2.955	3.692	5.8091	4.1038	12.219	17.201	3.246	3.502	3.074	17.107	3.9336	5.323	26.1436		0.582009	9.47889
13.2247	18.426	19.593	12.085	5.205	29.089	5.289	7.9	12.113	8.085	5.943	3.809	4.561	3.505	12.181	2.855	3.797	6.0696	3.9598	11.9809	20.092	3.84	3.845	2.525	18.146	3.1042	4.503	27.2333		0.587302	9.61981
13.3438	19.903	19.216	12.948	4.92	32.162	5.354	7.774	12.984	7.487	5.417	3.736	4.204	4.356	12.421	3.074	3.256	5.6502	4.0026	13.9016	19.233	3.17	4.194	2.838	16.603	3.7821	4.571	27.5842		0.592592	9.80525
13.463	18.805	17.85	13.888	3.659	29.504	5.359	6.55	12.359	7.018	5.082	3.879	3.819	3.386	13.385	3.138	3.292	6.2943	3.6983	12.0771	21.331	3.446	3.699	2.692	16.464	3.7231	5.746	24.7532		0.597885	9.44063
13.5821	21.543	16.183	12.991	4.269	21.706	5.068	7.173	13.799	6.703	5.744	3.703	4.001	3.732	13.52	3.456	2.828	5.1712	3.2076	12.2145	18.475	3.013	4.315	3.315	15.614	3.6159	4.488	24.7472		0.603174	9.05909
13.7012	22.512	15.37	13.179	4.183	19.088	5.353	7.185	13.123	7.674	5.364	4.021	3.648	3.654	15.914	3.011	2.787	5.8996	3.6465	13.7888	18.328	3.376	3.963	2.772	14.426	3.139	4.519	22.7583		0.608464	8.98823
13.8204	21.2	18.21	12.741	4.075	19.867	5.242	7.727	13.186	6.285	5.868	3.597	3.096	3.541	18.829	2.67	2.552	5.7369	3.0579	14.752	19.092	3.03	3.919	2.267	13.722	3.4752	4.615	21.7129		0.613757	9.03948
13.9395	24.158	17.082	10.71	4.44	21.743	5.249	7.413	13.999	7.468	5.458	3.497	3.207	4.017	18.257	3.847	2.923	4.8169	3.4436	14.6831	17.609	2.947	3.293	3.211	12.603	3.9424	5	22.8804		0.619046	9.18139
14.0587	27.086	15.247	10.753	4.506	20.964	4.72	8.359	13.106	6.902	5.323	3.714	3.246	3.223	18.724	3.33	3.336	3.8709	4.0672	14.5565	16.511	3.243	3.467	3.134	13.944	3.6101	4.485	20.973		0.62434	9.05188
14.1778	28.555	16.348	12.352	4.156	17.98	6.036	7.995	13.239	7.121	5.25	3.755	2.955	3.356	19.192	3.335	2.969	4.7846	3.6195	14.8927	17.111	2.346	3.726	2.786	14.896	3.6968	4.965	20.1242		0.629629	9.16821
14.297	31.026	17.478	10.047	4.406	17.239	4.587	7.573	13.637	6.617	4.575	3.813	4.584	4.518	18.578	3.361	2.657	4.2564	3.922	13.8616	17.174	2.971	3.938	2.758	13.545	3.1254	4.857	19.9519		0.634923	9.07616
14.4161	33.451	17.889	10.355	4.212	15.847	4.9	6.883	13.058	6.692	4.95	2.749	3.901	3.687	19.072	4.014	2.74	3.931	3.0151	12.7238	19.192	3.486	3.239	2.473	12.493	3.3385	3.865	17.8127		0.640212	8.88774
14.5352	34.479	19.567	10.726	4.646	17.175	5.672	7.383	14.372	6.755	6.033	3.526	4.104	3.514	18.719	3.216	2.665	4.5196	3.4917	14.9818	19.078	2.782	3.531	3.047	14.224	2.8796	4.377	18.1303		0.645501	9.39237
14.6544	36.793	17.708	10.634	3.942	17.627	5.789	7.403	14.144	5.632	5.166	3.314	3.418	3.376	20.001	2.914	3.216	3.8776	3.3502	14.5642	18.576	3.431	4.166	2.977	13.794	3.0308	4.612	17.0195		0.650795	9.27686
14.7735	40.508	17.886	10.781	3.884	19.137	4.787	7.169	15.303	4.778	4.234	2.814	3.612	3.541	19.791	3.386	2.569	4.5997	3.24	14.303	18.104	3.105	4.334	2.857	12.211	2.6408	4.259	16.9957		0.656084	9.28997
14.8927	44.805	18.056	9.569	3.938	18.18	4.669	6.52	14.415	4.358	4.572	4.222	4.096	3.977	18.313	3.685	2.536	4.1099	3.0626	15.1751	17.155	2.835	4.044	3.195	13.187	3.2813	5.072	16.765		0.661377	9.39974
15.0118	45.752	16.702	10.537	4.349	16.023	4.847	6.64	15.175	4.775	4.326	3.555	4.431	3.377	17.204	3.306	2.731	4.692	3.6462	16.0025	16.362	2.789	3.417	2.766	12.68	2.9167	5.073	15.6271		0.666667	9.2482
15.1309	45.607	16.791	9.685	3.783	17.527	5.252	6.969	15.715	4.785	4.139	3.584	3.61	3.935	17.795	3.277	3.302	4.5763	3.9357	17.0591	15.955	2.457	4.255	2.167	13.009	3.5385	3.58	17.3128		0.671956	9.39264
15.2501	47.015	18.306	10.062	4.489	19.938	3.76	8.137	16.633	5.241	4.415	3.373	3.289	4.325	18.686	3.02	3.375	3.7534	4.503	18.0808	17.921	2.731	3.665	2.583	12.147	3.4503	3.485	17.1481		0.677249	9.76043
15.3692	48.423	16.864	9.396	5.052	25.814	5.154	7.575	17.569	4.659	4.887	3.348	4.032	2.947	17.867	3.016	3.326	3.1191	3.5922	17.2425	18.121	2.709	3.503	2.844	14.103	3.6197	4.645	17.813		0.682539	10.0459
15.4884	51.412	18.302	9.646	3.549	26.202	5.496	7.646	18.598	4.383	4.359	3.02	3.972	2.789	17.39	2.52	2.986	3.0675	4.0316	16.3408	16.55	2.864	3.371	2.473	13.537	3.6537	4.072	16.2847		0.687832	9.94501
15.6075	50.149	17.961	9.976	4.316	24.804	5.398	7.416	19.665	5.071	4.287	3.413	3.55	3.197	18.377	3.422	3.652	3.6836	4.6565	19.8057	18.753	3.019	3.26	2.787	14.345	3.4164	4.242	16.3894		0.693121	10.3338
15.7266	54.759	19.004	9.783	4.163	24.975	5.076	6.464	20.19	5.573	4.184	3.321	3.179	3.694	18.905	3.844	3.167	4.5463	4.2818	20.614	18.097	2.658	3.294	2.986	14.288	2.7253	3.787	18.0296		0.698411	10.5773
15.8458	51.847	19.258	11.075	3.876	23.367	4.5	7.041	21.962	5.386	4.881	3.896	3.469	2.763	21.594	3.623	3.399	3.7323	3.7691	19.8725	16.312	2.957	3.295	3.087	13.749	3.184	3.509	17.8583		0.703704	10.4912
15.9649	49.727	18.738	9.897	3.137	23.647	4.738	6.19	23.41	4.614	5.62	3.367	4.463	3.322	21.128	4.104	3.329	3.2292	3.4078	19.252	17.193	2.98	2.943	2.919	13.828	3.7054	3.585	15.8693		0.708993	10.309
16.0841	48.485	20.627	9.682	4.047	24.67	4.528	6.76	23.09	5.185	4.561	4.048	4.045	3.087	21.761	4.032	2.957	3.4897	3.8499	18.4885	15.968	1.669	3.684	2.923	13.765	3.1837	3.961	17.1809		0.714287	10.3603
16.2032	51.504	22.271	7.766	4.349	23.777	4.695	6.703	24.777	5.111	4.292	3.886	4.032	4.019	21.564	3.661	2.683	3.6175	4.0073	18.2674	15.871	2.677	3.214	2.985	13.613	2.7459	4.6	16.8019		0.719576	10.4996
16.3224	49.092	21.106	6.892	3.793	21.332	4.901	6.987	25.051	5.052	4.749	3.85	3.314	3.293	18.67	3.574	3.152	3.1841	5.0023	17.8703	17.73	2.446	2.611	2.239	14.695	2.9919	3.627	14.1337		0.72487	10.0496
16.4415	48.951	20.143	6.929	4.107	21.91	4.516	7.253	22.761	4.94	4.375	2.997	3.836	3.849	19.255	4.184	2.442	3.3739	5.6597	18.4895	17.161	2.899	2.995	2.806	14.406	2.6775	4.703	17.0388		0.730159	10.1725
16.5606	49.477	18.707	6.952	3.947	21.096	4.459	7.179	22.572	5.422	3.714	3.906	3.789	3.716	20.363	3.057	2.85	3.0643	4.8589	18.5348	17.024	3.159	3.711	2.765	14.293	3.4686	4.668	17.6998		0.735448	10.1649
16.6798	50.366	19.545	6.684	4.435	20.276	4.788	7.377	22.683	5.676	3.966	3.301	3.221	3.103	18.119	3.898	2.978	2.9696	4.8989	19.0223	17.704	2.335	3.409	2.763	15.165	3.5278	3.857	19.3828		0.740742	10.2019
16.7989	50.149	18.464	7.659	3.783	18.327	5.27	7.092	24.258	5.568	3.672	3.402	4.389	3.22	18.534	3.97	3.181	3.3355	3.9533	20.4642	18.992	3.18	2.897	2.349	13.683	2.7278	4.125	16.6142		0.746031	10.1207
16.9181	49.246	18.932	8.861	3.493	18.147	5.138	7.304	24.508	5.299	3.841	3.711	3.643	3.3	20.147	4.817	2.808	3.4552	4.457	16.9804	17.678	2.711	3.138	1.932	16.543	3.0365	4.036	17.4897		0.751325	10.1723
17.0372	47.846	19.319	7.752	3.721	19.188	4.082	7.913	23.815	4.898	4.174	3.975	4.445	3.606	19.603	4.688	2.987	3.2049	4.5186	19.1249	17.446	2.415	2.62	2.638	14.253	2.6754	4.436	15.1308		0.756614	10.0176
17.1563	43.798	19.077	7.501	3.744	19.202	4.188	8.024	24.892	4.935	3.325	3.633	3.928	3.542	18.826	4.705	3.052	3.2229	4.8293	20.6195	18.546	2.311	2.951	2.692	15.574	2.9726	4.196	15.1094		0.761903	9.97762
17.2755	44.103	17.241	7.841	3.117	18.289	5.055	9.677	22.748	5.493	3.987	3.477	4.149	3.614	19.267	5.98	3.184	3.3839	4.2398	19.1517	19.023	2.431	2.947	2.643	14.154	2.8358	4.047	15.977		0.767196	9.92797
17.3946	44.606	16.282	8.149	3.723	16.209	5.667	9.122	20.08	5.482	3.755	3.48	3.684	2.901	20.746	8.46	3.175	3.5608	4.7504	19.3628	15.568	3.051	3.289	2.001	14.511	2.4735	3.665	14.7171		0.772486	9.72113
17.5138	43.909	14.075	7.84	4.016	14.811	5.485	10.986	20.931	6.142	3.678	3.641	3.443	3.372	18.482	8.229	3.809	3.4426	4.3987	23.4754	16.017	2.61	2.513	2.679	13.311	2.8715	4.295	13.642		0.777779	9.70756
17.6329	40.004	11.756	7.298	3.352	15.903	5.368	10.864	24.704	5.391	3.991	4.062	4.146	3.964	20.157	11.016	3.937	3.9679	3.9142	23.0023	16.45	2.972	2.568	2.583	11.798	2.8466	4.135	13.4455		0.783068	9.7628
17.7521	38.352	12.228	7.142	3.282	15.284	5.328	11.431	24.824	5.035	3.858	3.764	3.241	3.851	20.688	14.304	4.167	3.4269	4.0313	23.3937	13.978	3.31	3.638	2.917	13.139	2.9089	4.347	13.4968		0.788362	9.82836
17.8712	42.052	12.26	7.378	3.029	16.371	4.857	11.494	24.736	5.025	3.816	3.36	3.616	3.535	21.014	17.602	4.087	2.9539	4.9099	24.403	12.779	2.479	3.248	2.742	14.466	2.4702	4.262	12.9276		0.793651	10.0694
17.9903	41.006	10.937	7.748	4.062	17.781	5.464	11.058	22.852	4.549	3.432	4.364	4.142	3.281	22.047	26.74	4.513	4.1293	4.5607	22.5439	12.382	2.87	2.828	2.239	16.232	3.0144	4.779	12.3072		0.79894	10.4393
18.1095	36.943	10.692	6.466	3.834	16.927	5.936	11.106	22.498	6.392	3.596	4.741	4.393	3.29	22.155	35.835	5.242	3.4003	5.4087	21.8148	11.793	2.184	2.726	2.655	15.226	3.3469	4.693	11.6691		0.804234	10.5542
18.2286	33.911	9.995	5.734	3.716	14.753	5.344	11.203	18.485	6.07	3.724	4.221	4.648	3.311	24.254	40.609	5.917	3.9747	5.6594	20.8331	8.964	1.807	2.806	2.375	15.819	2.8247	5.407	13.0223		0.809523	10.3477
18.3478	34.917	11.218	6.114	3.164	14.934	6.335	9.623	17.582	8.978	3.288	4.269	5.158	3.466	25.843	52.691	7.112	4.078	5.2557	19.4158	7.244	2.385	2.696	2.808	16.008	3.2212	5.571	14.046		0.814817	11.0156
18.4669	36.744	9.833	7.311	4.014	14.222	5.52	11.114	16.53	8.613	3.871	4.705	5.162	2.894	27.786	55.212	8.252	5.2811	5.6612	22.1901	6.015	2.49	2.777	2.593	16.33	3.7053	6.178	13.9007		0.820106	11.4409
18.586	34.983	10.848	6.903	3.723	15.625	5.903	12.774	18.482	8.982	3.722	6.75	4.407	4.133	29.872	57.9	14.801	5.9595	7.254	21.0294	6.528	2.324	2.586	2.592	17.787	2.9802	7.01	13.3382		0.825395	12.1925
18.7052	36.264	10.622	6.291	4.2	14.853	5.285	14.997	19.708	10.828	3.288	5.881	4.169	5.176	30.553	61.738	19.634	6.2032	9.0301	20.2723	7.38	2.971	3.229	2.061	14.743	3.6024	7.791	14.4793		0.830689	12.787
18.8243	37.726	10.183	6.755	3.555	14.373	6.314	15.391	19.201	11.574	3.597	6.391	5.029	5.667	32.867	60.368	29.229	6.348	10.9734	21.4492	7.293	2.022	2.378	1.856	14.055	3.3426	7.528	13.3391		0.835978	13.289
18.9435	35.916	10.513	5.556	3.792	13.342	5.729	16.903	20.688	13.923	4.151	7.994	5.354	6.584	31.193	54.982	36.572	6.3474	10.9937	23.1116	6.821	2.036	2.917	2.239	15.204	3.2681	7.502	14.4951		0.841272	13.6343
19.0626	38.274	11.184	4.998	3.886	13.172	5.318	19.361	22.355	14.839	3.67	10.61	4.97	8.727	30.674	52.164	43.684	6.7295	11.9093	21.9928	7.548	2.126	2.373	1.899	15.409	4.543	6.506	14.5458		0.846561	14.2025
19.1817	36.19	11.204	4.934	3.845	13.625	5.664	21.963	21.946	15.92	3.263	14.133	5.277	11.865	34.536	45.255	46.991	6.0634	14.0645	23.3202	7.652	2.219	2.14	2.934	13.416	4.526	6.208	15.1737		0.85185	14.6047
19.3009	39.492	12.541	4.93	5.131	13.606	7.038	27.416	25.978	16.201	4.099	17.689	6.349	15.17	37.89	40.268	42.826	6.5855	15.9074	25.4941	8.577	1.875	2.829	2.604	12.202	5.0214	6.867	13.9191		0.857143	15.5002
19.42	36.838	11.053	5.247	5.296	13.8	7.668	32.87	27.715	17.762	3.708	19.973	6.835	18.133	46.322	37.581	42.29	7.2384	18.4054	27.9837	9.146	2.804	2.581	2.617	11.529	5.066	7.155	12.5755		0.862433	16.3034
19.5392	37.664	10.352	4.695	6.296	12.837	6.855	40.678	27.36	16.507	4.212	25.993	6.585	20.899	57.3	30.647	37.373	7.0949	22.1956	30.421	10.622	2.03	2.243	2.647	11.338	6.0887	6.422	12.3694		0.867726	17.0268
19.6583	32.88	11.527	5.377	6.347	13.128	8.453	42.057	28.866	15.512	4.021	31.829	7.985	21.149	74.52	20.947	26.242	8.9916	24.1581	38.144	10.486	2.237	2.198	2.57	10.025	4.8946	7.683	10.8051		0.873015	17.5197
19.7775	30.194	11.788	6.08	6.702	13.966	8.18	43.478	30.199	16.714	4.192	36.457	9.199	23.249	84.378	15.007	18.774	10.6846	28.7136	45.0734	11.317	2.402	1.942	2.533	10.451	5.7199	7.007	10.1935		0.878309	18.3183
19.8966	28.319	11.526	5.936	8.606	16.532	8.613	43.465	29.01	18.165	5.076	42.304	10.827	25.623	79.119	10.856	11.82	15.417	34.6078	56.8918	13.15	2.219	1.938	2.177	8.596	6.1908	8.564	9.2828		0.883598	19.0678
20.0157	26.61	13.015	5.295	9.005	20.059	9.294	46.36	28.151	20.498	5.52	47.561	13.118	26.125	64.478	8.919	10.214	19.4168	39.9999	64.2266	13.872	1.767	1.726	2.519	8.558	6.2978	8.82	8.3799		0.888887	19.6224
20.1349	25.602	12.526	5.072	11.001	23.094	9.327	44.899	31.672	21.781	7.378	48.474	15.998	24.549	48.811	7.527	7.336	22.4721	44.4829	66.6498	12.126	2.048	1.9	2.012	6.785	6.0028	8.67	9.7904		0.894181	19.555
20.254	25.022	11.958	5.366	13.242	29.392	9.96	49.919	33.078	26.888	8.015	46.357	17.28	20.604	30.786	5.725	5.025	30.1868	49.5274	49.6895	11.663	1.579	2.093	2.591	6.213	5.4995	10.506	7.9844		0.89947	19.1167
20.3732	24.144	11.098	5.988	16.777	31.24	13.235	52.919	37.613	32.298	10.458	33.169	17.942	14.18	19.891	4.718	4.173	33.6524	51.6541	28.8112	13.756	2.053	2.391	2.304	3.64	5.908	10.551	6.0808		0.904764	18.172
20.4923	21.7	11.206	7.096	19.941	33.56	16.337	67.377	48.994	34.991	13.186	28.547	19.524	10.925	14.912	4.246	3.143	34.3257	50.1691	16.7885	13.966	1.635	2.269	2.01	2.295	7.3515	10.158	6.4939		0.910053	18.6351
20.6114	23.662	12.04	7.13	21.94	35.742	18.03	75.903	61.071	33.336	14.165	27.059	19.133	7.723	12.426	3.769	2.552	33.5515	40.3793	11.6669	14.085	1.616	2.018	1.97	2.297	6.3625	9.324	6.7558		0.915342	18.7299
20.7306	23.656	13.038	9.252	22.116	35.609	21.909	80.32	69.489	33.321	14.27	18.977	18.876	6.97	8.652	2.704	2.182	35.4601	35.155	9.5084	12.673	1.696	2.289	2.317	1.867	6.4747	8.272	5.8927		0.920636	18.6276
20.8497	21.808	11.184	11.031	26.687	32.815	23.865	79.161	80.954	30.94	18.957	13.989	15.57	6.016	6.54	1.961	2.072	32.4334	30.1295	5.7031	10.474	1.544	2.3	2.093	1.165	5.845	8.369	4.5534		0.925925	18.08
20.9689	22.757	11.49	14.293	27.852	36.175	26.418	76.667	93.285	27.999	21.901	9.941	12.791	6.196	5.228	1.736	1.428	25.3715	21.9235	5.6627	6.544	1.853	1.753	2.179	1.44	5.3719	7.992	3.7098		0.931219	17.7762
21.088	23.765	13.94	16.382	31.124	40.009	30.294	73.905	91.629	26.428	21.63	6.751	10.571	4.423	4.325	1.827	1.377	18.3638	13.7769	3.9463	5.374	1.887	1.828	2.662	0.805	4.7114	7.798	2.5784		0.936508	17.1152
21.2071	23.452	14.904	19.389	34.022	44.002	38.309	59.736	83.873	25.894	20.306	6.316	8.298	3.465	3.861	1.846	1.412	14.483	11.0122	2.4089	5.175	1.424	1.485	2.625	0.938	3.6576	8.282	2.0896		0.941797	16.395
21.3263	23.247	17.694	22.75	31.983	50.662	47.844	44.717	67.685	23.768	18.07	4.436	7.856	2.686	2.984	1.217	1.007	10.1537	7.3188	2.1682	3.574	1.966	1.866	2.11	0.775	2.6162	8.563	1.6323		0.947091	15.2352
21.4454	23.574	23.825	30.265	28.308	53.861	62.237	34.488	48.283	21.103	16.66	4.242	6.162	2.677	1.788	0.687	1.075	9.1229	6.0044	2.0741	3.789	2.031	1.907	2.819	0.783	1.9001	7.476	1.398		0.95238	14.7607
21.5646	23.527	27.569	41.226	25.093	51.085	72.722	25.486	32.015	16.529	15.239	3.131	5.988	2.642	2.41	0.493	1.262	6.0728	5.6692	1.4675	2.968	2.791	1.901	2.571	0.447	2.061	7.021	1.2107		0.957673	14.0962
21.6837	24.761	37.639	47.495	21.212	38.794	75.205	20.453	24.895	14.018	12.415	2.76	5.259	2.118	1.971	0.764	0.866	5.1721	3.8998	1.3505	2.039	1.934	2.523	2.41	0.781	1.3462	5.922	1.1894		0.962962	13.3034
21.8029	23.283	46.872	49.694	16.929	29.636	71.272	17.691	18.727	12.089	9.778	1.907	3.915	1.255	1.131	0.752	0.579	4.0669	2.8168	1.039	2.07	1.948	1.755	2.308	0.46	1.5159	5.843	0.9292		0.968256	12.2319
21.922	23.083	57.713	46.217	12.874	22.843	57.343	13.285	14.869	9.333	9.326	1.993	3.708	1.744	0.731	0.512	0.609	2.5042	2.1589	1.2072	1.849	1.842	2.658	2.079	0.431	0.9142	6.509	0.9107		0.973545	11.0832
22.0411	25.606	60.256	41.566	10.612	18.317	38.83	11.158	12.192	7.839	7.322	1.38	3.169	2.087	1.175	0.449	0.408	2.8261	1.8091	0.8376	2.139	2.524	2.153	1.997	0.438	0.713	5.115	0.4392		0.978834	9.75396
22.1603	25.604	65.076	31.934	8.296	13.806	24.981	8.726	10.088	7.409	5.887	1.449	3.463	1.293	0.704	0.249	0.587	2.1389	2.2308	0.7919	1.278	2.442	2.998	2.441	0.471	0.6585	5.188	0.6564		0.984128	8.54987
22.2794	23.738	61.156	23.767	7.455	13.029	18.631	7.783	8.226	5.995	5.458	1.438	2.747	0.894	0.557	0.461	0.35	2.1189	1.4437	0.5805	1.756	1.907	2.253	2.506	0.382	1.0603	5.189	0.9999		0.989417	7.47709
22.3986	25.506	66.215	17.129	6.213	9.959	15.105	5.563	6.696	5.789	4.785	1.427	1.963	0.599	0.677	0.121	0.415	1.3281	1.2846	0.5417	1.216	2.13	2.574	2.48	0.325	0.7709	4.384	0.6604		0.994711	6.88358
22.5177	25.168	60.7	13.183	5.265	8.67	10.408	4.418	6.124	4.525	4.838	1.074	2.255	0.722	0.695	0.47	0.265	1.2809	1.5093	0.6537	1.059	2.31	2.287	2.706	0.435	0.8177	3.496	0.4551		1	6.14036

## Sheet: Image25
X0	Y0	Y1	Y2	Y3	Y4	Y5	Y6	Y7	Y8	Y9	Y10	Y11	Y12	Y13	Y14	Y15	Y16	Y17	Y18	Y19	Y20	Y21	Y22	Y23	Y24	Y25	Y26	Y27	Y28	Y29	Y30	Y31		Ap-basal	Avg int
0	73.726	90.924	63.074	42.365	37.235	87.966	103.43	107.127	50.316	64.425	48.032	72.561	71.841	102.182	90.381	119.605	70.943	50.102	43.752	27.355	23.521	83.629	141.187	114.229	138.412	77.743	87.499	110.061	66.069	42.408	147.798	156.317		0	81.4442
0.1191	75.723	94.716	59.448	40.095	40.1	90.282	116.255	118.748	52.093	64.906	52.466	68.099	73.325	103.164	83.706	124.964	72.724	56.371	51.213	31.734	25.534	92.529	154.022	127.283	140.441	82.198	90.505	108.007	69.282	47.591	149.46	165.455		0.00442522	85.0762
0.2382	76.273	94.112	57.926	38.977	39.79	93.958	124.51	109.283	60.949	67.583	62.091	63.663	74.215	99.818	81.81	122.524	80.122	58.611	52.855	33.315	27.186	105.439	165.953	143.04	147.537	88.136	87.546	103.881	72.89	52.987	166.262	183.063		0.00885045	88.6345
0.3573	81.846	109.277	62.585	43.819	42.865	94.716	129.117	117.248	85.856	75.963	67.78	67.854	74.124	89.81	77.247	111.222	82.892	70.74	56.465	40.98	31.056	111.745	174.653	140.736	138.428	97.506	87.466	98.259	78.158	46.06	163.867	193.057		0.0132757	91.9812
0.4764	88.875	118.924	65.094	43.495	52.715	95.424	138.152	103.149	102.678	91.527	73.811	65.976	71.25	80.101	75.444	102.642	91.145	74.824	63.458	48.215	34.723	116.492	173.541	151.654	143.831	95.233	82.347	82.005	77.983	51.921	170.369	210.339		0.0177009	94.9168
0.5954	91.908	137.316	63.287	45.517	54.768	93.254	133.616	93.19	122.446	100.597	89.435	75.965	70.197	75.286	76.001	85.768	91.261	80.613	61.026	56.444	35.194	127.121	175.132	153.211	142.169	98.519	67.705	66.86	75.887	48.279	177.231	199.083		0.0221224	95.7589
0.7145	94.127	140.717	66.572	52.626	59.029	97.098	132.267	86.141	128.277	106.688	112.516	83.494	69.371	59.182	82.074	80.712	98.726	88.513	63.845	62.219	39.905	141.21	181.529	159.764	147.48	107.571	68.372	61.452	77.948	50.672	180.127	201.75		0.0265476	99.4367
0.8336	96.909	163.728	67.816	55.745	66.686	96.125	120.686	85.175	123.288	107.276	133.714	81.718	69.867	61.561	78.705	75.55	110.13	89.478	66.126	66.126	45.032	147.27	187.82	174.856	143.285	107.613	66.237	52.161	75.536	57.26	175.167	186.782		0.0309728	101.107
0.9527	103.14	181.964	68.368	65.213	72.676	100.937	120.782	77.498	111.54	101.627	151.128	85.752	67.684	58.68	82.887	71.667	118.648	107.765	65.749	70.987	47.449	148.106	199.354	171.487	128.173	112.403	71.55	45.768	76.956	62.875	182.237	186.161		0.0353981	103.663
1.0718	99.457	190.936	82.868	75.305	80.942	96.212	106.104	73.727	107.354	101.85	152.86	91.97	68.854	56.04	84.782	66.954	123.461	118.08	65.631	63.395	53.081	146.948	200.117	171.449	129.165	106.472	74.411	40.555	78.881	59.342	191.705	182.815		0.0398233	104.429
1.1909	115.313	188.608	99.735	86.678	87.338	97.407	95.108	67.739	94.326	97.707	161.392	105.893	67.95	54.083	89.767	64.247	121.258	112.904	65.063	64.045	60.072	139.626	187.958	182.402	116.398	109.72	77.266	39.643	78.658	65.374	192.487	194.893		0.0442485	105.658
1.31	122.235	180.357	111.219	98.013	97.639	98.95	84.979	64.774	86.204	96.353	163.867	114.501	68.995	54.239	95.432	59.434	124.239	126.204	64.408	61.908	70.434	137.281	185.578	177.534	111.316	102.324	76.369	39.59	81.514	64.241	197.531	199.286		0.0486737	106.78
1.4291	129.935	186.736	128.503	111.952	100.618	103.017	78.645	63.882	82.507	97.743	147.412	117.986	69.621	54.941	92.507	56.107	117.089	127.815	62.922	63.076	72.84	125.88	176.487	176.805	98.393	98.68	78	44.429	75.564	68.054	208.365	195.062		0.053099	106.612
1.5481	145.987	180.184	136.558	127.032	114.232	102.991	68.38	54.822	75.085	95.676	132.452	120.393	65.462	50.194	89.347	54.55	126.333	144.151	67.33	58.984	76.03	121.376	180.364	179.309	96.818	102.185	87.19	39.617	78.031	68.327	188.81	196.597		0.0575205	107.025
1.6672	152.535	187.987	153.567	145.865	123.891	97.649	62.953	50.693	76.697	91.956	118.955	127.004	69.867	48.998	85.011	54.137	135.654	151.006	70.899	58.334	75.7	110.82	172.486	169.541	95.438	96.76	91.107	44.037	78.953	72.988	183.605	195.057		0.0619457	107.817
1.7863	159.904	163.077	159.279	153.777	124.283	100.305	55.608	48.872	74.824	91.204	98.603	118.679	64.696	56.411	88.853	51.313	133.458	146.988	65.525	61.79	80.07	107.877	176.958	141.354	101.541	97.945	103.68	40.056	80.84	74.53	179.031	186.524		0.0663709	105.87
1.9054	173.925	168.286	169.707	172.967	133.776	101.637	55.962	50.73	65.072	83.895	89.598	115.318	65.907	60.945	93.509	47.564	130.957	149.078	71.366	58.969	84.916	93.468	179.129	137.757	103.497	100.664	109.546	45.575	82.383	81.835	175.734	185.717		0.0707961	107.481
2.0245	175.246	168.479	167.623	175.588	133.506	94.641	53.628	43.821	62.17	78.646	85.781	114.879	65.983	56.861	90.327	47.906	127.245	149.329	75.876	67.67	90.884	87.282	176.891	128.853	105.314	102.764	114.528	52.088	82.605	86.169	169.767	185.849		0.0752214	106.819
2.1436	171.205	157.358	170.659	188.496	120.459	92.669	54.048	43.593	60.518	71.773	82.559	104.729	67.113	58.869	87.931	47.003	128.305	145.557	70.137	62.053	98.362	77.179	186.698	131.89	115.023	97.02	113.31	49.854	81.683	97.748	166.427	187.141		0.0796466	105.855
2.2627	167.841	150.713	178.738	182.541	116.533	79.052	54.196	46.101	57.918	71.095	86.531	109.429	61.838	56.259	86.673	45.9	127.671	140.126	70.423	65.364	104.048	75.803	184.732	135.997	121.162	98.315	112.009	48.37	74.187	101.999	167.022	183.218		0.0840718	105.056
2.3818	161.852	148.31	166.179	177.223	113.68	80.691	52.81	49.626	52.714	68.198	87.611	111.044	60.152	56.623	90.426	43	124.112	144.145	72.168	68.975	103.269	68.659	182.943	151.351	121.36	95.772	115.719	54.513	75.406	107.456	166.398	184.166		0.088497	104.892
2.5008	157.778	131.415	170.464	164.581	102.695	71.769	48.236	51.136	57.456	65.341	81.235	105.237	59.247	56.028	89.705	46.366	114.007	139.208	67.112	67.502	102.681	64.108	180.046	151.805	131.14	94.742	113.722	60.354	77.903	110.385	180.373	175.835		0.0929185	102.8
2.6199	146.859	128.966	156.044	149.627	101.392	69.27	54.04	55.048	58.316	60.809	85.517	105.37	53.876	57.454	92.883	43.972	116.732	133.418	75.702	75.3	108.701	66.967	176.672	158.987	135.523	100.119	106.976	59.967	78.27	117.124	179.204	169.71		0.0973438	102.463
2.739	137.113	118.564	140.094	137.4	94.336	63.445	57.641	59.652	55.195	56.338	90.437	107.148	50.81	55.769	91.546	44.015	116.557	127.565	72.83	79.958	114.291	60.078	174.826	164.531	140.403	104.045	99.945	68.912	76.868	127.28	185.439	163.927		0.101769	101.155
2.8581	127.828	115.647	128.707	114.196	86.928	56.654	53.884	58.799	59.427	64.596	78.739	96.932	50.578	46.478	91.349	44.162	115.588	126.18	74.912	80.941	111.68	54.504	171.471	159.225	145.34	102.89	94.735	71.406	89.058	131.769	180.149	153.58		0.106194	98.0729
2.9772	117.631	115.503	110.295	107.351	88.443	52.828	57.224	71.07	58.305	60.297	82.922	100.209	43.956	46.002	88.126	43.788	119.985	131.974	81.61	82.492	112.609	50.438	156.096	158.684	149.173	96.627	93.211	75.876	93.092	140.995	176.791	144.75		0.110619	97.136
3.0963	112.231	109.581	112.925	104.788	84.178	48.838	58.566	70.477	60.896	60.932	79.968	97.086	40.14	42.333	73.527	45.295	126.98	130.126	83.49	89.137	114.964	45.577	157.773	158.868	157.538	97.62	91.945	78.689	96.506	146.327	174.675	135.446		0.115045	96.4819
3.2154	101.559	110.324	101.334	103.962	82.81	45.615	56.644	78.549	66.79	57.021	74.948	94.359	35.807	34.182	65.691	44.796	129.848	141.86	90.984	86.462	105.302	41.904	145.498	156.34	160.579	95.546	86.084	84.028	101.703	150.668	182.383	129.395		0.11947	95.093
3.3345	96.924	108.066	101.828	100.342	81.122	47.685	63.572	83.536	73.283	56.012	71.705	95.383	31.537	30.581	63.591	45.32	136.757	150.155	98.61	85.497	100.966	40.424	131.629	154.516	157.788	103.247	83.171	93.188	107.815	159.128	190.353	126.708		0.123895	95.9512
3.4535	96.825	106.66	96.707	105.695	83.12	41.934	62.622	88.833	76.275	54.186	71.785	91.091	26.435	30.606	51.683	46.754	137.119	150.165	102.228	81.126	88.897	38.876	126.254	152.837	155.311	99.992	81.436	98.625	107.725	154.291	198.689	125.947		0.128317	94.7103
3.5726	96.645	110.749	97.026	112.991	83.838	48.833	64.405	95.735	84.419	51.465	60.297	81.536	26.278	27.633	45.387	49.955	141.14	150.857	102.346	88.318	92.06	29.953	111.8	150.573	152.461	103.749	85.636	103.954	111.339	145.689	206.187	123.214		0.132742	94.8896
3.6917	92.426	108.759	98.135	116.994	86.657	44.493	61.119	101.402	91.016	46.659	59.665	72.867	24.929	29.839	43.857	51.711	148.708	156.439	108.279	87.976	77.168	32.967	102.255	144.367	153.907	104.216	85.629	115.909	112.372	134.785	195.287	123.931		0.137167	94.2101
3.8108	82.622	114.439	97.708	118.109	85.94	44.774	65.253	108.135	94.146	43.205	57.207	59.993	25.159	29.017	42.495	53.297	148.033	145.931	108.405	83.958	73.458	24.553	99.456	131.308	148.142	103.038	85.717	120.468	124.034	122.507	196.476	127.232		0.141592	92.6317
3.9299	81.348	114.395	95.461	123.479	86.001	39.174	67.472	104.355	97.304	45.824	54.532	51.971	23.513	27.415	38.108	55.898	143.908	146.718	101.659	90.477	71.055	23.603	97.305	124.148	144.542	100.817	84.959	124.698	126.593	118.326	195.281	128.931		0.146017	91.5397
4.049	80.46	108.54	106.381	129.629	90.704	39.633	61.383	110.239	105.823	39.955	51.282	44.84	22.856	33.291	38.234	58.516	145.062	149.743	97.267	96.895	66.172	20.78	97.147	126.638	142.2	101.033	82.68	120.759	126.96	100.303	195.093	133.093		0.150443	91.3622
4.1681	77.281	103.27	97.775	124.159	91.215	38.268	57.638	117.252	106.956	38.052	52.693	41.026	24.729	33.21	39.14	65.378	137.562	142.926	94.684	93.005	60.158	20.346	87.612	118.919	141.817	96.819	84.432	115.771	135.856	99.168	183.51	131.194		0.154868	89.1194
4.2872	88.151	111.401	104.462	127.379	91.445	33.118	51.738	123.53	107.948	38.722	48.447	36.786	26.872	32.868	40.378	67.753	131.395	139.116	91.872	99.237	64.512	17.717	89.946	111.458	131.185	97.997	81.317	109.771	130.986	101.307	176.945	130.668		0.159293	88.6383
4.4063	84.384	112.883	99.903	130.879	101.072	36.826	52.962	128.637	116.953	37.118	42.571	34.487	28.38	34.836	48.249	70.734	126.736	142.982	90.163	103.089	60.141	19.026	89.615	114.877	130.916	93.954	81.162	100.548	128.755	95.319	172.894	127.159		0.163718	88.6941
4.5253	84.852	113.3	103.281	125.373	96.069	35.9	54.304	133.187	122.92	35.736	37.684	27.855	29.058	36.07	46.315	73.16	109.354	142.857	83.622	112.802	53.023	16.41	86.437	103.723	126.385	91.457	79.238	101.971	127.966	94.042	169.762	135.297		0.16814	87.1691
4.6444	85.395	113.899	106.728	123.428	96.971	34.439	45.846	128.88	121.162	34.226	32.696	29.856	32.903	36.84	49.886	69.07	103.08	141.216	92.162	114.721	54.502	16.482	85.239	100.788	111.477	82.871	78.412	100.37	123.111	93.955	167.892	126.379		0.172565	85.4651
4.7635	81.088	114.836	99.726	134.964	100.609	33.623	44.623	121.466	117.351	35.969	33.42	27.826	36.854	42.157	53.986	70.506	86.745	124.243	98.618	115.744	53.378	13.556	89.755	92.898	111.663	79.635	75.686	97.762	120.098	94.016	162.657	123.971		0.17699	84.0447
4.8826	78.442	111.551	100.144	137.927	105.94	33.619	43.701	123.891	107.826	36.279	27.841	24.843	39.176	42.34	57.451	70.262	78.11	120.625	108.595	114.734	44.658	15.156	85.045	91.595	104.935	69.502	78.167	93.253	114.669	93.637	154.937	115.292		0.181416	82.0045
5.0017	74.299	110.355	102.621	149.802	102.262	34.224	43.879	115.612	110.238	34.156	29.881	26.1	41.321	43.774	62.201	72.066	66.55	111.678	102.82	107.568	44.846	14.486	82.996	87.092	100.119	68.237	81.656	89.097	101.568	95.707	159.578	115.937		0.185841	80.7102
5.1208	64.299	113.626	98.801	151.135	100.715	33.856	37.906	111.901	106.565	31.686	32.117	25.932	48.369	46.445	61.518	66.643	55.957	108.506	106.303	99.342	44.193	13.144	82.124	93.855	98.458	59.21	76.224	93.357	105.181	91.571	151.347	120.168		0.190266	79.0767
5.2399	58.349	105.472	104.933	147.972	104.54	33.576	41.551	108.221	102.073	30.711	30.527	26.731	48.934	47.582	65.828	59.855	47.983	105.672	100.99	97.414	43.231	13.473	81.875	91.903	95.274	56.334	75.588	98.184	107.001	88.192	148.681	115.247		0.194691	77.6218
5.359	53.445	107.776	105.529	160.638	102.455	33.833	40.607	112.674	101.164	30.433	31.8	25.276	54.607	54.094	63.243	60.557	41.99	97.413	101.535	89.378	42.522	14.646	78.145	94.838	91.737	50.033	76.881	97.283	108.521	82.558	146.6	116.229		0.199116	77.1387
5.478	45.59	102.835	110.318	166.074	98.005	34.999	40.051	109.085	95.446	32.845	33.138	26.812	63.52	54.25	68.849	54.011	38.394	93.15	101.071	84.286	42.615	13.506	78.53	98.281	89.785	49.282	81.419	92.813	101.243	82.505	149.225	109.412		0.203538	76.292
5.5971	39.467	95.051	112.695	172.171	92.321	33.707	42.281	95.361	96.784	35.863	33.593	27.58	74.141	60.318	70.254	52.617	39.13	94.656	88.993	84.982	41.38	14.505	76.238	96.258	87.898	44.093	90.796	94.691	99.01	78.101	145.204	108.352		0.207963	75.5778
5.7162	36.348	88.038	119.204	161.244	91.699	36.245	40.426	101.671	90.385	32.547	32.013	26.944	72.228	63.106	76.617	47.522	36.334	94.052	85.786	89.461	39.281	16.182	77.027	94.605	84.328	38.464	101.903	87.096	95.801	79.501	141.455	102.591		0.212388	74.3782
5.8353	29.555	78.645	123.107	168.19	90.962	30.663	40.904	107.413	84.196	31.814	30.687	26.538	77.838	62.021	79.491	50.206	33.74	89.032	87.189	92.958	40.636	13.879	75.242	93.409	72.48	35.912	113.703	96.351	96.415	73.223	133.981	96.401		0.216814	73.6494
5.9544	20.674	72.448	131.987	165.462	88.669	32.732	40.787	97.647	79.065	33.267	33.363	27.107	87.296	63.446	82.294	42.85	28.548	88.456	86.642	94.56	40.318	14.573	75.585	94.383	67.345	32.483	124.41	105.46	99.439	68.717	130.79	88.697		0.221239	73.1094
6.0735	19.865	60.367	137.302	164.381	92.165	35.053	40.311	103.923	72.702	32.42	40.209	28.722	89.374	65.945	92.005	46.489	24.261	89.473	87.381	97.424	36.184	15.098	74.108	93.161	66.59	29.958	130.82	107.446	99.734	67.86	119.77	86.597		0.225664	73.3468
6.1926	18.348	56.524	134.718	152.839	76.753	33.123	43.523	100.825	69.787	31.875	44.959	31.261	102.441	68.458	92.069	48.509	26.442	89.35	78.786	96.881	35.835	14.949	73.897	96.014	64.717	27.466	139.05	116.112	97.882	67.076	113.136	84.392		0.230089	72.7499
6.3117	18.549	49.664	138.109	149.363	81.595	28.22	43.643	104.111	60.27	30.4	50.35	29.059	106.381	71.087	98.206	48.992	26.992	85.577	74.708	107.267	34.937	13.185	74.208	93.148	70.268	22.073	142.318	117.35	101.701	64.407	106.808	85.286		0.234515	72.7572
6.4307	17.502	42.795	135.478	137.566	66.306	27.928	41.393	96.807	58.463	30.763	57.372	30.503	118.005	80.45	100.519	49.47	20.787	77.233	68.514	104.586	33.251	13.387	69.309	87.011	66.209	19.31	151.112	123.798	100.965	62.447	93.779	83.49		0.238936	70.8284
6.5498	15.609	42.372	147.755	120.336	60.104	27.541	41.264	97.384	56.326	29.739	55.04	31.361	116.253	84.817	94.823	46.902	21.484	69.522	65.29	104.623	28.672	14.838	67.091	82.061	65.579	17.945	148.372	118.555	100.52	62.196	79.18	92.616		0.243361	68.9428
6.6689	16.864	35.831	143.782	102.987	53.975	26.44	44.821	95.526	52.182	30.897	53.038	33.976	124.756	83.448	105.961	45.779	19.506	67.544	57.807	98.763	25.51	13.302	61.632	80.744	65.869	15.506	146.992	129.169	105.71	63.515	85.98	95.052		0.247786	68.2145
6.788	16.715	31.046	145.352	81.187	51.605	26.08	44.098	98.559	51.084	26.905	52.186	34.023	135.707	87.119	108.067	44.241	19.207	64.196	57.081	99.294	25.653	14.127	65.231	84.573	66.45	13.261	146.218	129.353	103.094	60.067	78.538	95.86		0.252212	67.3805
6.9071	15.324	29.809	145.948	67.988	40.635	25.978	45.707	94.836	44.953	29.416	52.291	33.698	139.617	92.43	109.257	43.116	16.332	64.11	59.263	98.737	26.777	13.766	55.03	76.487	64.272	14.072	141.053	123.883	103.575	50.922	80.048	105.212		0.256637	65.7669
7.0262	17.776	25.794	145.609	48.87	36.073	24.018	42.975	101.24	39.865	30.089	54.387	35.973	143.219	99.647	103.335	40.871	19.012	64.494	56.235	90.914	25.925	13.032	62.753	77.244	64.235	12.577	138.058	130.799	106.669	44.976	68.4	106.327		0.261062	64.731
7.1453	18.429	23.444	156.553	35.088	35.293	24.423	44.611	99.828	38.857	30.896	51.371	39.605	147.949	101.266	108.472	36.237	14.863	61.433	57.249	80.894	24.062	13.352	59.853	79.578	60.66	11.399	129.594	130.726	102.659	38.666	63.834	100.752		0.265487	63.1843
7.2644	19.489	24.211	145.578	23.697	34.394	28.121	42.967	100.503	37.727	32.269	49.069	41.928	141.126	103.314	112.476	36.462	15.546	59.887	60.82	84.586	25.831	13.245	60.494	78.783	59.781	10.166	129.729	118.625	103.653	33.308	59.309	104.118		0.269913	62.2254
7.3834	19.207	24.21	144.519	15.446	33.603	29.268	40.921	103.155	37.577	28.914	49.468	46.049	141.285	106.627	113.519	31.036	17.866	50.468	65.022	75.585	25.141	14.875	54.606	74.262	58.387	9.83	128.482	108.493	98.823	31.232	60.432	97.634		0.274334	60.4982
7.5025	24.183	22.529	138.962	10.323	36.53	29.662	41.255	100.127	38.783	28.342	50.699	45.6	141.299	109.704	98.506	33.368	13.853	49.725	68.54	82.183	23.455	13.545	57.544	75.71	55.082	7.69	124.418	100.443	96.368	29.812	54.589	102.932		0.278759	59.555
7.6216	22.895	22.056	122.899	7.715	38.878	25.304	41.149	100.41	41.973	30.053	46.379	50.808	147.224	105.233	99.122	29.781	15.141	42.28	78.162	78.129	27.464	12.618	51.837	71.864	49.97	9.29	123.783	93.937	91.932	23.192	53.867	102.676		0.283185	58.0632
7.7407	32.903	21.282	94.758	6.787	37.354	33.267	42.309	95.105	40.069	28.003	52.92	48.803	149.262	107.912	95.332	29.07	16.323	42.886	78.333	76.453	28.282	14.525	50.407	69.594	48.932	8.638	115.169	96.686	97.856	25.913	47.632	101.965		0.28761	57.3353
7.8598	34.774	16.179	67.533	6.279	29.909	32.376	38.444	94.769	42.192	29.453	51.997	48.412	148.264	107.851	91.461	29.093	14.728	38.562	73.37	89.568	29.018	13.585	46.454	69.171	42.319	9.151	104.896	95.455	94.241	21.521	43.134	99.96		0.292035	54.8162
7.9789	39.163	16.141	42.683	4.755	27.156	34.393	44.608	92.374	42.523	34.797	53.59	51.292	157.579	106.185	95.259	30.784	13.279	37.913	79.478	90.098	27.719	13.357	43.734	66.285	38.554	6.766	93.425	101.533	95.996	20.407	39.607	89.727		0.29646	54.0988
8.098	37.276	15.935	27.367	5.536	21.444	36.868	42.166	90.298	43.472	37.474	59.097	55.012	162.089	98.771	98.664	27.867	11.791	33.561	68.635	94.437	30.292	13.783	40.063	67.282	29.727	8.582	91.875	108.199	103.191	18.107	38.743	84.952		0.300885	53.2049
8.2171	33.403	17.109	17.304	4.293	18.867	36.131	41.133	81.332	42.179	33.955	59.156	61.487	157.518	106.144	109.162	28.582	10.926	31.535	70.326	103.977	28.031	13.762	36.522	68.095	25.984	6.878	79.555	97.777	103.322	16.521	37.301	80.878		0.305311	51.8483
8.3362	27.257	17.462	12.241	5.099	16.418	37.509	38.493	85.688	37.61	34.675	57.936	60.258	161.035	118.01	112.994	28.047	12.821	28.112	62.288	103.943	26.935	13.118	40.394	70.329	25.985	6.622	78.802	94.404	105.995	14.083	33.93	78.926		0.309736	51.4818
8.4552	24.715	15.63	7.97	4.499	15.81	36.564	39.744	87.536	38.676	28.641	59.721	66.657	157.204	114.795	111.775	32.338	11.513	24.959	61.676	112.248	26.595	14.131	39.851	71.074	21.722	5.967	78.089	85.689	106.5	12.777	32.019	86.439		0.314157	51.0476
8.5743	20.923	14.817	7.404	4.578	16.474	37.067	36.965	77.948	33.77	32.05	55.455	66.556	157.994	119.163	115.673	31.966	10.784	23.712	62.084	100.218	24.06	15.845	45.445	70.847	21.658	5.495	78.935	90.202	108.031	13.441	31.89	81.709		0.318583	50.4112
8.6934	19.289	13.775	6.341	3.609	16.701	38.253	39.005	72.818	30.958	26.429	51.027	66.477	158.988	113.056	122.085	36.748	10.94	19.318	61.776	100.074	21.644	14.994	47.171	72.878	22.77	6.18	72.108	99.461	107.987	12.856	29.47	81.987		0.323008	49.9117
8.8125	19.925	12.06	6.374	3.607	16.281	35.468	36.856	64.076	29.763	25.512	57.315	67.922	163.015	119.168	122.918	34.482	10.215	18.273	61.046	99.452	21.251	15.965	47.201	71.483	21.98	5.36	63.871	102.128	105.871	11.753	26.204	77.752		0.327433	49.2046
8.9316	19.769	15.136	4.105	3.62	18.099	31.795	38.502	59.922	27.07	22.513	54.377	65.87	154.514	124.595	133.448	36.17	10.165	18.058	65.89	101.631	18.54	14.902	45.08	68.433	21.677	5.781	58.501	106.911	110.337	11.505	26.441	73.028		0.331858	48.9495
9.0507	22.976	9.48	5.162	2.952	19.821	31.424	35.42	51.618	26.563	22.951	54.035	62.013	153.162	123.653	139.843	35.469	8.39	12.747	58.375	96.46	20.345	15.014	41.097	67.927	21.528	5.609	54.569	113.813	100.666	11.043	26.225	71.928		0.336283	47.5712
9.1698	22.682	11.571	4.057	3.7	20.794	35.316	39.105	46.111	28.074	18.798	56.24	65.064	152.216	122.583	147.163	39.504	9.318	11.247	59.225	93.9	18.227	13.177	40.729	66.441	17.933	5.377	45.005	115.908	92.499	8.552	21.708	72.09		0.340709	47.0098
9.2889	26.35	12.633	3.255	3.975	21.005	30.76	44.631	42.249	24.931	19.254	54.89	64.765	151.152	120.472	142.586	38.234	9.547	10.207	57.255	92.845	19.018	15.881	35.249	65.896	16.118	5.963	39.421	116.398	84.16	11.726	22.289	73.267		0.345134	46.1369
9.4079	27.31	9.165	3.15	3.798	22.113	28.09	41.609	39.122	24.8	17.614	52.635	69.232	151.836	117.25	144.567	36.55	7.92	7.144	49.9	90.7	16.132	18.024	34.028	60.262	14.568	5.614	34.865	115.712	71.556	12.156	21.085	65.275		0.349555	44.1807
9.527	29.732	8.654	4.902	3.81	19.623	28.599	39.096	38.456	27.155	17.744	48.483	62.998	150.503	117.647	146.228	36.315	6.457	7.239	54.022	83.143	15.632	16.874	33.594	49.947	14.666	5.587	31.447	103.068	62.458	9.309	24.433	63.969		0.353981	42.5559
9.6461	31.714	9.18	3.121	3.989	17.293	28.759	37.115	37.262	27.746	17.41	48.783	70.23	151.168	120.231	150.142	37.006	6.87	7.479	51.16	84.12	16.482	16.472	30.362	47.177	12.721	4.702	23.145	98.137	54.774	10.367	22.648	65.412		0.358406	41.9743
9.7652	30.109	7.753	4.075	3.105	16.923	31.151	37.282	39.418	25.127	17.204	48.654	70.84	145.603	118.806	143.575	32.544	6.537	6.143	50.825	79.684	14.262	17.699	34.768	44.014	9.959	4.188	18.783	88.557	47.08	10.276	24.448	62.539		0.362831	40.3728
9.8843	24.192	7.8	4.248	2.967	13.882	30.665	32.935	37.862	25.845	18.144	52.269	70.622	152.576	115.159	118.459	32.022	7.095	7.574	47.677	84.854	13.895	16.931	36.832	37.796	7.354	4.211	17.115	90.668	45.47	10.4	24.989	61.796		0.367256	39.197
10.0034	21.628	6.495	3.731	2.767	13.781	31.903	32.99	38.413	26.418	21.286	52.285	68.756	155.87	123.538	97.165	31.97	6.043	6.746	45.938	76.829	11.128	17.428	46.696	32.151	6.156	4.84	12.695	91.011	37.788	7.367	25.379	58.94		0.371682	38.0041
10.1225	19.328	8.447	4.109	3.404	14.776	32.096	31.189	40.116	25.547	22.262	47.159	62.498	157.423	130.39	70.874	29.253	6.209	5.853	42.913	65.278	10.697	17.59	49.886	30.327	7.539	4.644	10.87	81.233	31.018	8.294	24.873	57.963		0.376107	36.0643
10.2416	17.818	6.21	2.988	3.427	11.887	29.566	31.472	38.221	23.055	20.977	46.375	64.258	166.365	129.477	47.257	29.526	4.252	5.888	42.698	60.714	11.979	18.847	54.724	24.028	5.873	5.009	9.912	78.097	32.993	6.871	24.859	64.635		0.380532	35.0081
10.3606	17.361	6.112	4.02	3.015	11.923	32.379	31.51	35.113	24.575	21.638	41.948	63.511	153.725	139.346	31.109	28.072	4.702	6.83	42.044	53.601	9.971	18.961	54.799	23.985	5.836	4.555	9.435	75.358	31.081	8.019	25.633	67.815		0.384953	33.9994
10.4797	15.404	5.346	3.251	2.736	10.517	27.541	33.027	36.366	27.357	20.735	39.755	66.108	158.644	139.246	19.818	29.051	5.596	6.496	37.315	45.545	9.447	20.933	60.007	24.636	5.66	5.064	10.885	72.445	31.805	7.806	24.031	71.474		0.389379	33.564
10.5988	15.53	5.633	3.503	2.943	9.878	25.212	31.852	38.765	25.158	20.717	39.627	57.105	163.773	131.721	14.105	26.516	5.309	5.017	35.949	40.503	11.69	20.935	61.727	21.601	5.708	3.619	8.619	68.572	34.036	8.639	25.569	73.62		0.393804	32.5985
10.7179	14.471	4.339	3.075	4.444	10.527	27.017	29.05	38.093	23.359	17.099	34.247	57.741	158.254	124.672	10.969	26.683	4.842	5.178	29.851	31.112	8.964	18.529	55.45	19.011	4.52	4.145	10.402	66.09	33.147	9.133	25.083	66.088		0.398229	30.487
10.837	13.622	4.872	3.887	2.835	8.362	24.366	28.076	34.765	25.997	20.752	33.552	54.93	154.322	119.315	9.881	26.749	4.944	4.36	27.41	22.651	8.55	18.461	54.662	19.854	4.3	4.081	10.276	64.804	37.383	10.965	27.248	68.313		0.402654	29.8295
10.9561	14.424	4.731	2.809	3.075	7.89	23.805	27.009	34.569	29.648	22.154	31.993	56.328	146.088	111.204	8.67	26.144	4.68	4.291	20.465	17.816	8.156	19.148	51.909	18.407	4.574	3.473	8.361	60.499	31.74	10.197	23.714	69.062		0.40708	28.3448
11.0752	13.934	4.235	3.856	3.629	9.449	22.583	26.809	34.281	27.821	22.548	30.379	52.043	151.724	95.367	8.646	27.275	4.9	3.914	16.683	13.906	8.223	19.457	49.582	20.798	5.7	3.529	8.689	53.668	31.492	10.203	24.058	72.385		0.411505	27.5552
11.1943	12.61	3.958	3.679	4.133	7.83	22.519	22.528	31.971	26.583	22.463	30.583	48.029	144.008	92.301	8.168	29.663	5.282	5.676	11.506	11.558	8.07	20.924	45.799	19.177	4.06	3.993	8.878	40.855	28.008	10.733	22.567	68.328		0.41593	25.8263
11.3133	12.096	3.959	3.101	4.798	8.404	20.714	22.554	33.432	26.492	19.382	25.933	47.163	136.368	89.075	6.892	29.9	3.759	4.591	8.994	11.169	7.725	21.423	43.557	18.184	3.688	4.18	8.116	31.607	23.766	8.902	20.384	70.501		0.420352	24.4003
11.4324	12.307	4.364	3.579	2.94	5.833	20.028	21.291	28.233	25.663	22.255	21.547	49.25	118.619	82.794	7.502	26.268	4.035	4.191	7.398	10.976	8.201	17.44	40.74	15.941	4.186	3.89	5.754	24.611	22.529	9.266	21.332	68.916		0.424777	22.5587
11.5515	11.356	4.576	3.187	3.594	5.396	20.084	18.991	30.194	24.521	20.438	22.187	45.986	113.644	84.333	7.58	25.641	5.262	5.015	5.329	10.525	6.811	20.584	37.425	14.172	4.249	3.577	4.682	20.84	23.174	9.054	22.129	61.372		0.429202	21.7471
11.6706	11.587	4.718	3.791	3.003	5.576	20.12	23.179	31.518	25.697	18.676	17.746	43.89	107.074	84.171	5.13	26.263	4.077	3.915	4.54	11.663	5.363	16.118	29.643	12.595	3.843	3.054	4.825	13.648	25.294	6.807	19.777	58.703		0.433627	20.5001
11.7897	13.023	3.981	3.325	3.623	6.318	18.632	21.01	30.442	25.304	16.551	16.646	36.096	98.847	77.387	6.169	25.769	3.856	4.703	4.353	9.2	8.552	15.855	29.725	10.274	4.287	3.111	5.051	11.98	25.763	5.768	17.186	55.545		0.438052	19.3229
11.9088	12.488	3.307	2.963	3.579	6.841	22	21.671	28.074	21.152	16.005	13.965	36.975	98.042	71.49	6.767	26.108	4.87	3.946	4.957	10.051	10.019	16.858	28.049	6.568	3.689	2.699	4.404	12.011	25.556	5.863	20.761	51.677		0.442478	18.8564
12.0279	11.17	3.502	2.97	3.49	5.347	22.203	20.193	26.885	18.481	15.981	14.388	34.34	89.021	62.305	6.495	27.469	4.829	3.927	4.06	9.897	10.592	16.261	27.997	8.902	3.97	3.338	4.953	9.387	26.878	4.728	19.249	49.795		0.446903	17.9063
12.147	11.223	2.657	3.506	2.681	4.205	20.053	24.458	27.031	14.621	12.859	9.079	32.235	86.271	54.51	7.428	21.387	3.753	3.818	3.951	9.355	10.621	17.466	26.081	7.849	4.265	3.856	4.393	7.175	25.159	4.392	22.339	46.605		0.451328	16.7276
12.2661	10.551	3.595	3.479	2.749	4.502	17.083	23.972	26.793	16.181	11.927	10.354	29.551	81.318	52.484	5.874	22.099	4.848	4.829	4.184	8.433	10.069	16.746	28.578	7.032	3.873	4.315	4.297	7.644	26.469	4.873	24.299	43.407		0.455753	16.4502
12.3851	10.645	4.564	3.111	3.058	3.904	19.094	25.515	27.644	15.45	11.282	8.826	27.776	68.178	44.216	5.404	18.793	5.237	4.673	4.494	10.443	9.706	17.364	24.552	6.95	4.442	4.109	4.206	7.848	23.468	4.986	24.343	36.242		0.460175	15.3288
12.5042	10.942	3.359	3.161	3.688	5.644	18.376	27.253	24.638	12.827	11.274	7.585	23.943	61.74	39.73	6.105	21.464	3.71	4.265	3.596	9.065	9.275	17.162	26.875	6.525	4.333	3.62	4.267	6.925	25.036	5.995	22.573	33.457		0.4646	14.6377
12.6233	10.688	3.483	3.168	2.789	4.63	19.763	28.72	28.001	12.4	8.892	7.458	24.024	54.234	33.636	6.235	20.37	4.124	3.884	4.707	9.051	9.689	19.626	25.281	5.15	4.481	2.808	3.72	7.303	22.951	4.777	25.686	31.181		0.469025	14.1534
12.7424	10.093	3.539	2.686	3.638	4.837	18.532	33.242	30.043	11.104	9.088	6.733	21.138	41.684	24.88	5.182	17.269	4.484	3.64	3.549	11.191	7.472	19.072	24.656	4.707	3.282	3.511	4.385	7.3	19.842	4.764	32.168	29.615		0.473451	13.3539
12.8615	9.9	4.766	2.379	2.576	5.908	18.96	34.945	29.316	12.599	10.217	5.982	16.029	33.972	20.472	6.118	16.359	4.937	3.726	3.182	9.917	6.995	19.041	27.114	5.367	3.962	3.404	4.233	7.587	18.441	4.558	27.703	27.065		0.477876	12.7416
12.9806	10.842	3.191	2.595	2.65	4.435	17.688	37.962	30.243	12.395	8.583	5.881	19.214	27.936	13.929	6.024	16.268	3.96	4.212	4.075	8.663	7.938	17.555	26.915	5.188	4.044	2.94	4.082	7.137	15.22	4.159	29.509	25.391		0.482301	12.2133
13.0997	10.511	3.202	2.168	2.638	4.632	17.333	41.377	28.611	10.347	7.513	5.354	12.974	27.813	11.402	6.52	18.383	3.933	3.411	4.125	8.326	7.739	18.252	23.354	5.201	3.55	3.433	3.587	8.219	14.761	5.259	31.511	23.115		0.486726	11.8298
13.2188	9.565	3.947	3.494	3.094	4.355	20.907	41.091	29.327	9.726	6.632	5.964	10.434	23.193	8.363	6.721	18.962	3.755	4.307	3.422	9.002	7.56	20.074	24.407	5.032	3.583	3.193	4.502	6.825	17.467	5.112	28.153	24.743		0.491151	11.7785
13.3378	9.776	3.961	2.507	2.899	4.35	20.394	38.207	29.234	9.988	6.143	5.566	9.188	24.29	8.652	7.929	16.026	5.046	4.506	4.931	9.19	8.842	16.406	26.691	4.057	3.809	3.646	3.241	8.767	15.603	4.411	32.535	25.818		0.495573	11.769
13.4569	8.619	2.724	2.228	3.556	4.307	17.407	34.982	28.95	10.709	6.195	5.556	9.431	26.608	8.134	6.876	16.663	4.234	3.243	4.306	8.252	7.535	19.127	26.211	3.912	3.643	4.404	2.909	7.34	13.062	3.801	29.511	28.228		0.499998	11.3332
13.576	9.611	3.521	3.376	3.399	3.489	19.349	30.017	26.475	9.508	5.374	4.151	9.113	23.992	7.327	7.566	19.58	3.633	3.551	3.736	10.5	6.489	21.922	26.467	4.922	3.084	2.79	2.858	8.908	13.466	5.234	31.159	24.867		0.504423	11.2323
13.6951	9.831	4.067	2.784	3.799	3.957	19.251	30.837	27.06	9.507	5.532	3.988	7.563	26.739	6.346	7.496	19.155	3.087	3.339	4.039	8.534	7.135	21.867	23.006	4.677	4.385	3	3.606	8.317	13.64	4.274	31.315	27.069		0.508849	11.2251
13.8142	11.141	4.045	2.499	3.06	3.566	17.907	31.097	26.108	8.951	4.693	4.464	6.832	27.39	7.593	7.757	18.638	4.876	3.621	4.233	8.239	7.116	21.534	25.118	3.388	3.54	2.942	3.595	7.782	11.49	3.934	32.638	24.425		0.513274	11.0691
13.9333	9.399	3.587	3.081	2.925	4.903	18.571	31.253	28.721	9.418	4.33	3.996	7.788	27.246	5.934	9.229	17.19	3.933	4.245	3.961	8.439	6.804	21.918	24.145	3.472	3.139	3.711	3.389	8.512	11.727	4.439	29.805	24.245		0.517699	11.0455
14.0524	7.887	2.326	2.799	3.449	4.645	17.849	31.511	26.848	8.467	3.651	3.376	7.732	24.452	7.145	7.273	19.092	5.142	3.739	4.362	9.384	6.839	21.297	23.098	3.83	2.811	3.209	3.63	7.921	9.866	4.719	27.507	20.615		0.522124	10.5147
14.1715	10.058	3.693	2.711	2.443	4.134	20.218	24.235	25.963	8.237	4.412	3.064	7.602	21.76	6.136	7.395	17.465	5.388	3.943	4.503	8.669	7.87	21.207	23.263	3.846	2.425	3.066	3.144	8.816	10.152	3.803	27.821	19.184		0.526549	10.2071
14.2905	8.809	3.413	2.266	2.953	5.606	23.303	25.756	24.686	7.423	3.985	4.224	7.205	20.562	7.035	8.592	16.769	3.4	3.295	4.299	8.768	7.741	19.422	19.983	3.676	3.735	2.909	2.818	9.281	7.897	4.792	29.134	16.581		0.530971	10.0099
14.4096	9.442	3.123	2.815	2.991	4.642	23.964	33.119	24.771	8.695	2.957	3.219	6.901	17.17	8.032	7.696	16.96	4.412	2.846	3.774	7.706	8.121	21.172	18.918	3.925	3.482	3.543	3.879	9.011	9.379	3.951	26.317	17.93		0.535396	10.152
14.5287	9.112	3.728	3.037	3.651	4.217	22.711	31.027	24.962	7.957	5.146	4.57	6.234	15.742	4.398	6.986	18.062	3.547	2.986	4.186	8.09	7.238	21.111	15.957	3.251	2.873	2.961	4.683	10.99	9.715	3.249	28.476	15.654		0.539821	9.89084
14.6478	10.098	3.426	2.072	3.974	4.353	20.155	32.93	25.871	7.327	3.487	3.457	6.401	15.337	5.626	7.448	18.294	4.109	4.022	4.22	7.691	7.788	17.328	13.538	3.551	2.917	2.34	3.49	10.888	6.818	2.973	25.945	15.7		0.544247	9.48669
14.7669	8.318	3.358	2.246	3.292	4.794	17.682	31.269	25.654	7.9	4.286	4.073	7.161	13.24	7.141	6.91	18.293	3.964	4.925	4.275	8.357	6.749	15.163	11.397	3.579	3.46	2.704	3.283	10.657	6.53	3.866	25.626	14.796		0.548672	9.21713
14.886	9.144	3.038	2.357	2.742	4.083	18.237	30.984	25.891	6.654	4.988	2.919	6.228	14.138	5.701	5.686	15.824	4.326	4.189	3.943	9.217	7.176	19.193	11.368	3.172	3.398	2.148	3.088	10.878	7.872	5.689	26.665	14.972		0.553097	9.24712
15.0051	9.778	1.963	2.381	2.61	4.903	16.141	33.018	25.62	6.764	3.949	4.172	5.338	10.352	5.177	6.47	17.729	2.899	3.052	5.084	8.694	6.784	21.387	9.675	3.384	1.638	2.294	4.287	11.013	6.855	4.686	30.159	17.796		0.557522	9.25163
15.1242	8.981	2.872	2.877	2.873	4.357	19.179	29.418	24.996	6.681	2.508	3.726	5.164	10.538	5.92	6.393	18.419	3.548	3.076	4.269	9.645	7.167	18.99	10.605	3.306	3.184	2.795	4.263	9.287	6.09	3.405	30.995	20.939		0.561948	9.26456
15.2432	10.879	3.107	2.509	2.233	3.065	14.561	28.201	25.473	6.34	3.933	2.636	4.128	12.503	5.883	5.344	17.224	4.518	2.205	3.046	10.748	8.488	18.03	8.116	3.811	2.474	3.072	4.341	9.338	8.978	4.406	33.279	19.804		0.566369	9.14603
15.3623	11.129	2.908	2.209	2.523	3.702	13.426	28.351	27.294	6.103	2.694	3.531	4.485	12.389	5.124	5.061	21.49	3.608	3.518	4.891	9.295	7.365	17.668	8.288	3.072	2.792	2.863	2.916	8.529	6.633	3.969	32.372	20.111		0.570794	9.07216
15.4814	10.721	2.755	3.099	2.863	4.299	13.33	27.181	28.526	5.073	3.263	3.734	5.278	11.212	4.913	5.479	20.797	2.9	2.804	3.204	9.391	6.784	19.075	8.289	2.997	2.926	2.964	2.924	7.405	7.209	4.019	30.55	17.384		0.575219	8.85463
15.6005	11.6	3.103	3.301	2.704	3.342	12.075	26.878	30.404	3.885	3.231	3.372	4.411	14.356	6.033	6.098	20.849	3.544	4.164	4.52	9.411	7.125	20.654	6.687	3.88	3.328	2.46	3.684	7.825	7.212	3.108	29.413	16.322		0.579645	9.03059
15.7196	13.27	2.936	1.97	3.066	3.571	12.404	27.578	26.446	4.914	2.894	3.351	5.171	12.232	5.093	5.897	20.335	3.753	3.776	4.047	10.399	7.713	20.597	5.678	3.502	2.723	2.907	3.57	7.458	7.724	3.325	24.041	15.078		0.58407	8.66934
15.8387	12.422	3.218	2.995	3.287	3.884	14.772	26.115	24.416	4.426	3.114	3.137	4.278	11.194	4.681	5.189	19.874	3.726	3.493	3.281	9.161	6.701	20.533	7.147	3.243	2.561	2.726	5.02	7.436	7.536	3.958	20.667	18.367		0.588495	8.51744
15.9578	14.279	3.5	3.373	2.716	3.352	11.791	25.845	26.389	4.2	3.672	2.755	3.988	12.708	4.671	5.114	17.694	3.079	3.12	4.064	7.403	6.803	17.948	4.361	3.604	2.708	2.466	4.068	7.092	6.901	3.467	19.859	16.94		0.59292	8.12281
16.0769	14.471	3.123	2.59	2.633	2.423	11.149	29.417	24.78	4.031	2.669	2.657	3.908	11.203	5.232	6.181	17.123	4.08	3.456	3.324	7.374	6.973	17.917	4.054	2.952	2.829	3.186	2.833	8.625	7.514	3.221	19.097	15.412		0.597346	8.01366
16.196	15.958	3.14	3.849	1.754	3.491	13.485	31.164	25.021	4.379	2.376	2.695	5.333	11.238	5.645	5.23	18.137	2.774	3.396	2.88	8.171	7.287	21.173	4.462	2.55	2.54	2.25	4.142	8.262	8.647	3.149	18.285	15.507		0.601771	8.38656
16.315	15.268	2.941	3.507	2.651	3.402	11.272	31.257	26.075	3.948	3.111	3.522	3.939	10.231	5.619	6.283	17.794	3.114	3.83	3.966	7.426	6.048	22.642	5.15	3.052	2.765	2.797	3.768	8.968	8.998	3.757	20.149	14.582		0.606192	8.49475
16.4341	16.215	2.809	2.838	2.906	2.85	10.175	32.884	22.541	5.057	2.449	2.54	4.165	11.423	5.707	6.506	17.838	3.25	3.93	3.295	6.573	6.697	24.172	5.094	2.449	2.663	3.486	3.701	8.879	8.876	2.608	20.984	16.494		0.610618	8.50169
16.5532	15.837	3.217	2.812	3.014	3.651	13.595	32.509	24.932	3.812	3.115	1.918	4.437	9.002	6.71	5.651	17.915	3.508	2.786	3.282	7.151	7.025	27.663	5.075	3.057	2.439	2.832	4.506	9.524	6.64	2.888	20.894	15.943		0.615043	8.66687
16.6723	17.958	2.295	2.809	4.229	3.126	11.227	33.313	24.831	3.464	3.397	2.468	3.578	8.587	5.292	6.463	15.824	3.817	3.872	3.201	7.217	8.375	26.854	4.755	3.365	2.739	2.196	4.016	9.166	9.392	3.621	21.55	14.385		0.619468	8.66819
16.7914	18.442	3.367	2.455	3.441	3.406	10.829	33.347	21.767	3.927	2.542	2.65	3.538	11.835	6.533	6.353	17.246	3.618	3.32	3.396	7.108	8.678	29.806	3.395	3.084	2.849	2.648	2.967	9.497	7.139	3.471	24.896	14.72		0.623893	8.82094
16.9105	16.742	2.871	1.493	2.787	4.59	11.64	35.309	25.948	3.715	2.375	3.09	3.947	12.56	6.099	6.087	16.295	3.829	3.052	3.283	5.363	8.039	26.569	4.779	2.674	2.609	2.019	3.419	8.656	8.767	3.612	20.255	12.247		0.628318	8.585
17.0296	20.5	2.402	2.578	2.406	3.564	11.476	36.963	27.015	4.196	2.449	2.101	3.618	9.676	6.589	5.88	15.612	3.494	3.907	3.164	7.256	7.22	31.421	4.021	2.39	2.205	2.469	3.035	10.205	5.765	3.115	22.262	12.589		0.632744	8.79822
17.1487	22.877	2.602	2.498	2.861	4.272	12.297	38.072	22.753	3.472	2.208	2.867	3.512	9.025	7.658	6.155	16.989	3.861	2.748	3.911	5.285	7.669	30.661	4.784	2.874	2.498	2.755	2.957	9.758	6.725	2.88	22.772	13.036		0.637169	8.91537
17.2677	23.815	3.564	2.693	2.408	3.236	11.506	38.146	24.141	3.65	3.572	3.604	3.128	10.603	7.432	7.388	16.144	4.289	3.091	2.836	6.565	6	30.261	4.12	2.329	3.429	3.316	3.429	9.601	6.347	3.377	27.676	12.881		0.64159	9.20553
17.3868	22.735	2.813	3.177	2.086	3.615	12.446	36.665	22.817	3.534	2.54	3.437	3.778	11.259	7.236	6.165	17.674	3.94	3.429	3.607	8.166	6.935	31.488	3.735	3.052	3.48	2.269	3.043	10.615	6.093	3.68	23.152	12.738		0.646016	9.10622
17.5059	21.921	2.312	3.246	2.317	3.83	10.059	39.16	24.965	3.773	3.589	2.482	3.757	13.21	6.115	6.708	16.475	3.621	2.693	2.683	7.056	6.626	29.672	4.584	2.664	2.637	3.064	2.859	10.527	5.592	3.255	23.706	12.174		0.650441	8.97912
17.625	22.628	3.485	3.635	2.421	3.798	11.947	40.125	25.197	4.32	2.976	2.539	3.436	12.29	7.998	7.301	17.961	3.27	3.678	3.844	6.009	5.22	28.149	3.681	3.238	2.33	2.273	3.798	9.448	6.654	3.032	26.674	11.271		0.654866	9.20706
17.7441	22.502	3.145	2.208	2.534	4.316	10.97	38.25	20.067	4.413	2.726	3.068	3.258	10.535	8.861	7.08	19.262	3.652	3.142	3.44	6.187	5.162	30.372	3.809	2.57	2.701	2.757	2.955	10.903	6.862	3.675	27.091	11.046		0.659291	9.04747
17.8632	19.979	2.422	2.513	2.701	3.023	11.307	41.934	20.086	4.248	3.982	2.299	2.862	10.072	8.839	5.981	19.582	4.029	3.4	3.109	5.306	5.816	32.629	4.305	2.717	2.464	2.666	2.491	9.928	5.732	2.732	26.555	11.046		0.663717	8.96109
17.9823	24.412	3.013	2.594	2.73	4.575	10.961	38.783	21.097	3.083	2.978	2.321	2.707	9.043	7.415	7.052	20.34	4.025	3.315	3.669	5.105	6.283	29.202	3.551	2.833	2.051	2.74	2.847	10.575	5.414	2.997	30.645	10.084		0.668142	9.01375
18.1014	20.967	2.625	3.28	3.371	3.415	8.646	38.304	21.434	3.185	2.826	2.491	3.081	8.911	10.066	6.451	17.961	4.193	3.404	3.429	6.119	4.703	26.603	3.655	3.429	1.873	2.079	3.963	9.85	5.092	2.762	29.372	11.073		0.672567	8.70666
18.2204	22.984	2.224	2.63	3.129	3.535	6.658	40.434	19.103	3.387	2.76	2.802	3.326	9.875	10.367	8.507	18.568	3.736	3.866	2.523	5.819	4.515	29.654	4.405	2.537	1.705	2.269	2.813	11.564	3.932	3.706	31.091	9.783		0.676988	8.88147
18.3395	26.745	2.452	2.738	2.869	3.421	7.308	39.846	19.381	3.226	3.131	3.416	2.121	10.976	10.448	7.56	19.263	4.23	4.21	2.941	6.778	3.515	31.422	2.505	3.239	2.445	2.572	3.617	10.182	4.429	3.418	26.137	9.564		0.681414	8.94078
18.4586	25.22	2.777	2.542	2.795	2.795	8.094	42.539	17.522	2.846	3.361	1.961	2.904	10.006	9.616	6.988	22.085	4.154	2.963	3.417	7.226	3.907	30.35	4.039	2.2	2.459	2.788	3.634	13.466	5.526	2.379	23.961	8.733		0.685839	8.91416
18.5777	25.861	3.173	3.059	3.554	3.593	6.98	43.422	17.475	3.931	2.387	3.118	2.463	8.586	11.357	7.894	20.23	3.12	3.518	3.52	7.667	3.635	34.37	3.403	2.867	2.575	3.105	2.706	11.808	5.325	3.489	19.474	8.802		0.690264	8.95209
18.6968	24.357	2.688	2.39	2.88	3.469	5.98	40.963	17.858	2.772	2.611	2.314	2.735	9.256	8.988	7.434	18.054	3.019	3.122	2.303	7.435	4.024	31.209	2.404	2.844	2.679	2.285	4.177	9.329	5.015	3.332	20.96	7.972		0.694689	8.33931
18.8159	28.003	2.899	2.996	2.711	3.631	5.825	42.958	12.841	3.164	2.268	2.962	2.656	7.948	11.034	7.599	19.539	3.686	3.693	4.148	5.843	3.776	30.619	3.381	2.315	2.753	3.249	3.406	10.201	5.23	2.201	18.186	8.375		0.699115	8.4405
18.935	27.777	2.385	2.501	2.703	3.857	5.568	40.676	13.67	3.511	1.943	2.189	2.568	8.333	10.091	7.335	18.604	3.624	3.653	3.493	7.272	3.595	31.87	3.277	1.957	2.527	2.531	3.005	11.836	3.955	3.502	16.168	6.567		0.70354	8.20447
19.0541	29.972	1.94	3.868	2.111	3.362	6.657	41.009	12.182	3.271	3.109	2.73	2.039	8.791	10.815	7.195	20.757	3.384	3.563	3.671	6.973	3.307	31.787	3.69	3.353	2.138	2.376	3.326	8.568	4.282	4	14.556	6.24		0.707965	8.28194
19.1731	26.249	2.904	3.72	3.299	3.325	6.46	39.321	13.596	3.379	2.22	2.325	2.456	6.571	10.168	6.473	20.062	3.505	4.353	3.156	8.564	3.496	31.752	3.618	2.51	2.071	2.986	2.764	10.382	4.801	2.893	11.883	6.259		0.712387	8.04753
19.2922	28.371	2.748	2.659	3.264	2.537	5.324	41.586	11.411	2.495	3.301	2.798	1.862	8.711	9.555	7.541	21.429	4.632	3.654	3.262	7.581	3.861	29.352	2.936	3.62	2.966	2.563	3.639	10.414	4.631	3.685	12.316	6.121		0.716812	8.15078
19.4113	28.314	3.496	3.032	2.124	3.167	5.505	36.004	10.83	4.564	2.447	2.396	3.155	8.863	11.077	7.374	22.248	3.713	3.59	2.796	6.925	3.56	29.376	3.784	2.205	1.671	2.814	2.977	10.801	4.372	3.709	13.208	4.829		0.721237	7.96644
19.5304	26.016	2.975	3.037	2.564	3.07	4.456	37.557	9.984	4.064	1.773	2.364	3.019	8.339	10.619	8.628	22.849	3.096	2.877	4.438	6.745	3.43	30.462	3.042	2.697	2.528	2.738	3.315	9.495	4.542	2.657	11.256	5.089		0.725662	7.80378
19.6495	27.862	3.323	2.792	2.467	3.259	4.508	35.957	9.497	3.932	2.532	2.797	2.607	6.667	10.058	7.625	24.354	3.316	2.762	3.213	7.26	3.771	31.552	3.109	2.845	2.379	2.643	2.752	9.765	4.816	3.131	13.193	4.597		0.730087	7.85441
19.7686	29.755	3.471	3.399	2.481	3.203	6.356	35.644	10.009	3.524	2.402	2.516	2.426	8.238	10.387	7.284	24.457	3.175	3.275	3.275	7.069	3.436	29.49	2.663	3.173	2.802	3.346	2.741	12.041	4.262	4.103	11.699	3.838		0.734513	7.99813
19.8877	27.779	3.464	2.571	2.247	2.925	5.761	36.662	10.57	3.397	3.608	2.201	3.148	7.985	11.051	8.52	24.749	3.13	3.017	3.62	8.114	4.126	28.967	3.842	2.744	2.212	2.135	2.702	10.597	3.777	3.955	11.293	5.104		0.738938	7.99916
20.0068	29.154	3.621	2.624	2.435	2.995	5.363	36.357	8.653	3.251	3.112	2.169	3.135	8.019	10.169	6.839	26.195	4.189	2.972	3.333	7.917	3.652	28.988	3.404	2.368	2.066	1.888	2.832	10.556	4.561	3.927	11.458	4.708		0.743363	7.90344
20.1259	28.934	2.46	3.327	2.432	2.47	4.939	36.001	8.038	3.253	3.23	2.368	3.293	8.018	12.007	8.906	24.778	3.412	2.977	3.327	7.813	3.88	28.568	3.076	2.601	2.768	2.408	3.604	10.695	5.631	4.27	11.522	5.512		0.747788	8.01619
20.2449	29.729	2.415	2.696	2.415	3.445	3.893	36.042	8.63	3.128	3.337	1.912	2.424	6.488	11.409	7.371	24.866	3.445	3.223	4.192	8.824	3.608	31.071	3.714	2.256	2.025	2.576	3.18	10.717	6.198	2.793	11.882	4.142		0.75221	7.93894
20.364	29.64	2.617	2.596	3.534	2.917	4.371	36.393	9.319	2.636	2.504	2.775	2.61	6.516	12.336	9.071	26.181	2.954	3.121	3.223	9.16	2.464	29.909	3.467	2.524	2.681	2.625	3.548	9.629	5.865	2.952	10.239	3.681		0.756635	7.93931
20.4831	28.416	3.179	2.181	3.064	3.003	5.022	37.464	9.838	2.699	2.139	2.151	2.212	6.851	11.874	9.159	26.21	2.715	2.303	3.246	8.982	3.611	29.224	3.589	2.245	2.11	1.901	3.762	9.964	5.094	3.623	10.348	3.53		0.76106	7.86591
20.6022	27.454	2.245	2.201	2.83	2.531	4.396	41.32	8.61	2.713	2.817	2.353	2.823	5.864	11.564	8.669	21.877	2.538	3.218	3.656	8.069	4.064	25.617	4.509	2.792	1.966	2.896	3.625	9.442	5.401	2.508	11.881	3.837		0.765485	7.69644
20.7213	26.476	3.175	2.748	2.759	2.234	4.509	36.296	9.999	3.957	2.037	1.988	2.816	4.999	11.567	9.068	25.446	3.599	3.571	3.75	7.866	4.885	24.666	3.271	2.02	2.68	2.864	3.593	9.632	4.501	3.15	9.886	2.861		0.769911	7.58966
20.8404	27.961	2.373	3.034	2.392	2.74	4.124	41.888	9.616	3.21	2.532	2.063	2.576	5.184	11.372	9.557	24.944	3.253	3.218	3.86	9.462	3.163	24.9	3.703	2.621	2.427	2.612	3.708	11.003	4.287	2.953	8.203	3.208		0.774336	7.75459
20.9595	28.894	2.913	2.444	3.748	2.566	4.58	39.844	10.987	3.759	2.505	1.773	2.284	5.142	12.337	9.281	24.737	2.787	2.477	3.665	9.268	3.524	24.577	2.849	2.067	2.863	3.537	4.441	8.779	4.455	2.709	8.346	2.891		0.778761	7.71966
21.0786	31.253	2.739	2.361	2.711	2.794	3.502	43.336	9.249	3.602	3.492	2.317	2.636	5.965	9.805	9.483	27.425	3.517	3.042	3.912	10.159	2.724	22.784	4.153	2.57	2.567	3.033	3.352	10.866	4.687	2.854	7.558	2.976		0.783186	7.9195
21.1976	30.596	2.424	3.874	2.823	3.016	4.482	39.395	10.438	4.783	2.181	2.982	3.021	6.785	12.504	9.634	25.688	4.151	2.999	3.465	9.691	4.328	22.01	3.097	2.694	3.004	2.679	3.731	9.269	3.703	2.652	7.435	3.462		0.787608	7.90612
21.3167	30.285	2.49	3.458	2.686	3.07	4.477	41.417	11.018	3.126	2.98	2.38	2.276	5.836	12.555	9.306	24.084	3.403	3.474	4.4	8.1	2.648	19.729	3.902	2.505	3.133	2.975	3.148	8.303	4.307	2.954	6.419	3.899		0.792033	7.64822
21.4358	30.497	1.976	2.886	2.741	2.366	4.518	41.344	8.794	4.172	2.923	2.262	2.612	6.32	11.467	7.109	26.048	3.146	3.786	3.496	9.74	3.688	19.948	3.858	2.457	1.959	2.109	4.406	8.471	4.002	2.444	6.002	3.465		0.796458	7.53163
21.5549	28.202	2.743	2.323	2.285	2.688	4.313	41.931	9.479	3.981	2.946	2.557	2.762	5.375	11.192	9.244	21.808	3.722	3.634	5.043	7.51	3.493	16.83	4.221	2.508	2.55	1.854	3.712	9.426	3.9	2.241	4.606	4.047		0.800884	7.28519
21.674	30.068	3.616	2.693	2.629	2.351	4.025	42.491	9.172	3.192	2.534	1.765	2.612	6.104	11.109	10.053	21.996	3.404	2.79	4.343	8.883	3.938	19.355	3.255	3	2.213	3.209	3.592	10.38	2.972	2.698	5.62	4.383		0.805309	7.51391
21.7931	33.145	3.903	2.854	2.592	2.897	5.183	40.074	9.592	3.237	2.485	2.041	2.642	4.104	10.2	10.167	21.432	3.829	3.935	3.276	9.843	2.772	16.537	3.423	1.628	2.292	2.483	4.679	10.462	4.468	3.089	5.426	3.57		0.809734	7.44562
21.9122	35.044	4.104	2.671	2.791	2.718	5.226	41.779	8.785	3.949	2.364	2.551	2.299	7.073	11.458	10.185	21.288	4.012	3.192	3.908	11.253	3.563	13.135	3.5	2.338	2.839	2.434	4.312	9.274	3.438	2.599	4.94	4.221		0.814159	7.60134
22.0313	33.238	3.361	2.103	1.881	2.346	5.077	41.754	12.226	3.564	2.893	2.47	2.618	5.075	13.296	9.57	22.648	3.44	3.354	3.754	9.902	2.927	14.744	3.446	2.557	1.892	2.508	3.826	9.444	3.75	2.832	4.548	3.591		0.818584	7.51984
22.1503	33.893	4.626	2.14	2.153	2.987	4.329	39.424	12.844	4.422	2.192	1.978	2.469	5.741	14.324	10.069	22.511	3.412	2.66	3.961	11.062	2.591	12.875	3.69	2.658	2.487	2.153	3.319	9.286	4.434	2.52	5.543	2.726		0.823006	7.54622
22.2694	35.769	3.54	3.223	3.397	3.324	3.585	46.204	12.064	4.418	1.936	2.382	2.537	5.095	13.107	10.949	23.481	2.969	3.518	3.66	10.446	3.634	14.697	3.089	1.862	2.922	2.337	5.481	9.407	4.205	2.576	4.206	3.528		0.827431	7.92337
22.3885	37.542	3.256	2.886	2.745	3.328	4.62	42.527	13.357	3.677	2.684	2.067	2.738	5.792	12.974	11.017	20.699	2.592	3.727	3.89	11.039	3.48	16.488	3.352	3.638	2.134	2.161	4.554	10.597	3.311	3.031	5.288	3.374		0.831856	7.95516
22.5076	30.517	4.061	2.064	3.198	3.793	4.449	44.868	12.117	2.877	2.435	3.121	2.521	5.428	12.52	9.446	21.264	3.036	3.3	4.379	9.324	2.781	16.332	3.71	2.727	2.479	2.411	4.022	10.047	4.113	3.527	4.14	3.21		0.836282	7.63178
22.6267	33.348	3.663	2.814	2.931	3.507	4.256	45.699	11.965	4.166	2.498	2.42	2.293	6.095	11.841	11.495	22.536	3.397	2.869	2.751	10.449	3.139	16.569	3.54	2.521	2.57	2.489	4.353	12.428	3.603	2.948	5.093	3.553		0.840707	7.93122
22.7458	31.468	3.564	2.841	2.884	3.42	4.871	42.128	14.519	4.07	2.434	2.474	1.701	5.976	10.121	10.607	22.178	3.404	2.906	4.226	10.566	3.826	15.121	3.396	2.237	1.447	2.426	4.396	9.644	4.063	3.195	4.06	2.976		0.845132	7.59828
22.8649	31.471	3.391	3.157	3.581	2.554	4.766	36.755	12.263	4.205	2.855	2.494	2.405	7.018	10.402	10.568	22.008	3.593	2.831	3.632	11.586	3.034	12.187	2.606	3.459	2.286	2.813	5.007	10.671	3.881	2.897	4.486	3.204		0.849557	7.43956
22.984	30.693	3.285	2.319	3.166	2.895	4.416	42.995	12.554	3.665	2.433	3.385	2.587	6.338	11.582	10.232	21.252	3.735	4.346	3.593	10.429	2.705	12.332	3.029	2.349	1.624	1.715	4.362	11.023	4.246	2.671	3.899	3.383		0.853983	7.47619
23.103	27.481	3.661	3.026	3.763	3.216	2.79	36.045	13.932	3.52	2.292	2.044	2.45	4.721	12.427	11.609	21.215	4.419	2.41	3.528	11.589	3.115	10.324	2.871	2.208	2.1	2.195	4.494	9.871	3.464	2.576	3.65	2.631		0.858404	7.05116
23.2221	29.71	4.19	3.017	4.064	3.577	3.773	33.422	14.297	2.915	3.287	2.66	2.444	6.739	10.036	11.831	20.533	3.84	2.56	3.187	10.857	3.382	9.474	2.526	2.912	2.636	2.83	5.105	9.803	3.196	3.345	3.163	3.188		0.862829	7.14059
23.3412	26.768	3.654	3.004	3.321	3.045	3.961	32.827	12.43	4.223	2.468	3.094	2.915	5.539	10.622	12.578	20.922	3.315	2.275	4.456	12.986	3.883	8.567	3.938	2.762	2.113	2.606	5.681	9.092	3.751	3.714	4.907	2.748		0.867254	7.13016
23.4603	27.138	4.565	4.258	4.55	3.401	4.484	36.582	13.013	4.764	2.366	2.429	1.848	5.065	10.99	10.36	21.166	4.013	3.037	4.325	13.835	2.867	8.481	3.627	1.873	2.526	2.909	4.584	10.27	3.861	4.414	4.173	2.558		0.87168	7.32287
23.5794	28.723	5.635	3.078	4.113	2.655	4.345	38.668	14.294	3.375	2.196	2.992	1.707	5.49	9.882	12.408	20.463	4.059	3.51	5.232	12.23	3.618	7.973	3.824	2.45	1.872	3.296	4.347	8.643	3.563	4.159	4.865	2.685		0.876105	7.38594
23.6985	27.822	5.539	3.99	4.181	3.769	3.344	35.92	14.827	2.898	3.265	2.716	2.199	5.614	9.718	12.169	19.089	3.847	4.434	4.838	10.897	3.59	7.324	3.212	2.514	2.525	2.649	5.308	8.638	3.976	4.987	4.095	2.524		0.88053	7.26306
23.8176	28.614	6.177	3.596	4.258	3.785	4.385	36.099	15.192	4.386	2.55	2.114	2.429	4.284	11.415	13.249	19.821	3.925	3.143	5.616	13.869	3.543	6.057	4.825	2.081	1.969	3.273	5.88	9.076	3.78	4.56	4.677	2.923		0.884955	7.54847
23.9367	25.449	4.954	3.75	5.183	3.522	4.716	35.562	14.468	4.421	2.195	2.544	2.775	5.111	11.984	10.737	20.293	3.012	3.527	4.435	13.353	3.158	6.676	4.297	2.952	2.247	2.973	5.023	10.041	3.985	6.702	4.419	3.269		0.889381	7.42916
24.0558	26.141	6.445	5.099	4.684	4.307	4.34	37.078	14.755	3.986	2.651	3.363	2.172	4.973	10.253	12.439	18.851	2.981	3.239	4.035	13.023	3.361	5.155	4.233	2.141	1.852	2.808	5.906	9.973	4.02	6.089	4.485	2.513		0.893806	7.41722
24.1748	23.938	7.796	4.809	5.508	5.329	4.725	36.443	13.553	4.775	3.32	2.759	2.475	4.547	10.668	12.966	17.945	3.178	3.096	5.339	14.42	3.606	4.957	3.279	2.634	3.557	2.871	4.676	10.21	4.413	7.813	3.555	2.462		0.898227	7.55069
24.2939	22.081	8.347	5.357	6.117	6.749	3.671	37.189	13.415	4.797	3.228	2.644	2.613	4.142	12.954	10.995	21.076	3.147	3.323	4.694	14.199	4.15	5.892	3.732	2.851	1.969	3.293	5.218	11.867	3.749	6.724	4.995	3.104		0.902653	7.75881
24.413	19.79	11.629	6.564	8.801	8.049	4.264	37.725	14.063	4.133	3.425	3.147	2.515	4.19	10.091	12.085	17.616	2.713	3.277	4.77	14.464	4.127	4.256	3.314	2.57	2.781	3.228	6.019	11.959	4.653	10.194	4.105	1.92		0.907078	7.88866
24.5321	22.785	11.005	5.333	8.156	9.86	3.747	36.419	14.421	5.205	3.21	2.968	3.021	5.048	12.355	12.649	16.867	3.078	3.166	4.252	15.771	3.769	5.26	2.799	2.918	2.621	3.097	5.698	9.484	4.704	10.012	3.74	3.279		0.911503	8.02178
24.6512	23.043	14.23	7.757	10.361	14.368	4.832	37.422	13.474	5.434	1.894	3.324	2.516	3.703	11.615	11.394	19.727	3.957	4.864	4.296	13.776	4.156	4.806	3.532	3.02	2.484	3.044	6.328	11.018	4.995	8.924	2.904	2.489		0.915928	8.42772
24.7703	22.143	19.831	8.46	12.102	23.326	5.164	37.4	14.671	4.537	2.807	2.826	2.396	3.716	12.138	12.725	19.397	3.747	3.741	5.443	14.037	5.496	4.869	3.909	3.24	2.491	2.523	6.467	10.182	4.427	10.63	3.709	2.897		0.920353	9.10772
24.8894	25.776	21.603	9.233	16.356	27.289	5.512	40.644	16.815	5.071	3.436	4.096	2.448	4.587	11.572	10.762	19.565	3.556	4.189	5.318	14.005	5.269	4.938	3.945	2.838	1.843	3.605	5.839	10.237	5.089	9.945	3.59	2.955		0.924779	9.74769
25.0085	23.5	26.966	9.332	22.507	32.529	4.42	40.932	15.369	4.633	3.69	3.544	2.354	3.63	10.513	11.293	19.139	3.274	3.979	4.376	16.153	4.376	4.545	4.357	3.381	3.192	3.972	7.717	8.677	5.54	10.685	3.728	2.896		0.929204	10.1625
25.1275	26.095	31.382	11.649	30.842	35.343	6.044	39.071	15.756	5.227	3.975	3.955	2.831	3.748	9.434	10.606	19.761	3.698	3.854	5.617	15.01	4.48	4.889	3.844	2.581	2.447	3.531	6.112	9.98	5.455	10.885	3.162	2.521		0.933625	10.7433
25.2466	27.036	35.742	11.75	38.388	40.983	6.661	38.72	17.5	5.681	2.953	4.318	2.797	4.275	11.238	11.796	20.725	3.646	3.183	5.466	13.264	5.866	6.153	4.704	3.203	2.425	4.208	7.498	9.65	4.139	7.811	3.011	3.324		0.938051	11.5036
25.3657	28.05	40.816	19.118	44.092	44.104	9.066	35.329	18.269	5.003	4.497	4.663	2.813	4.012	9.235	12.859	18.285	3.655	3.935	5.455	13.252	4.689	6.529	4.795	3.28	2.887	4.181	7.298	9.461	5.322	8.914	2.67	3.572		0.942476	12.1908
25.4848	27.976	45.48	19.669	43.581	39.112	13.32	35.121	19.312	4.867	3.819	4.773	2.74	4.03	11.554	11.828	20.57	3.356	3.595	5.946	12.27	5.305	6.765	4.611	2.585	2.768	4.03	6.143	10.558	5.354	7.753	3.73	2.798		0.946901	12.3537
25.6039	32.497	43.396	23.619	42.808	33.977	11.128	34.147	21.366	6.564	3.451	6.135	2.577	3.924	12.187	14.535	21.661	3.599	3.503	5.413	11.75	6.428	6.496	3.922	3.128	3.008	3.551	5.945	9.091	4.945	8.001	3.511	2.657		0.951326	12.4662
25.723	29.141	49.063	23.88	37.877	28.934	15.802	38.321	23.338	5.997	4.462	5.645	3.497	3.718	10.902	12.668	21.043	3.55	4.959	5.561	10.436	5.802	6.116	4.576	4.519	3.087	3.596	7.589	8.052	5.661	6.827	3.194	3.124		0.955751	12.5293
25.8421	41.48	48.793	24.427	32.79	23.136	18.892	38.326	26.384	5.818	3.415	7.41	3.559	5.209	13.218	12.084	19.458	3.948	3.509	4.684	11.228	5.415	7.18	4.718	4.001	3.013	3.344	7.86	8.854	5.837	8.758	3.58	2.971		0.960177	12.9156
25.9612	38.267	41.385	20.744	25.156	20.338	24.934	35.948	28.556	6.551	3.782	9.212	4.379	4.313	13.889	12.985	20.037	3.854	3.936	6.65	12.38	6.081	6.217	4.525	4.53	2.201	3.775	6.759	7.808	4.915	9.142	3.825	3.308		0.964602	12.5119
26.0802	39.461	42.853	20.855	20.512	16.008	27.135	44.061	35.079	7.562	5.524	9.497	5.267	3.094	13.318	13.78	20.835	4.034	3.662	5.246	12.715	6.317	7.622	5.648	4.011	3.074	3.795	8.28	9.547	4.71	8.959	3.424	3.019		0.969023	13.0907
26.1993	41.639	42.035	21.273	14.849	12.742	27.632	50.287	35.547	7.796	4.328	10.466	7.759	3.652	13.311	12.534	20.675	4.582	4.188	5.646	13.28	6.988	7.892	6.54	3.186	2.467	4.49	9.438	9.571	5.272	10.558	3.502	3.472		0.973449	13.3624
26.3184	35.345	36.441	17.648	14.618	12.317	34.048	45.658	36.979	7.647	6.484	11.029	8.513	5.028	12.362	13.062	20.678	5.033	5.348	7.281	13.256	6.557	8.107	5.743	3.881	3.477	5.039	8.797	9.439	5.599	11.206	3.535	4.17		0.977874	13.2602
26.4375	24.902	33.853	13.622	13.154	10.703	34.998	46.542	39.537	6.995	7.393	14.931	13.337	3.611	11.508	12.38	19.597	5.441	4.63	7.178	14.338	7.77	7.675	7.257	5.31	3.504	4.56	7.665	10.513	4.84	13.138	4.483	3.471		0.982299	13.0886
26.5566	19.638	21.744	11.53	9.666	11.413	34.999	42.728	44.154	7.379	10.079	16.651	17.394	4.538	14.476	12.196	19.984	5.36	5.056	8.794	11.356	6.76	7.755	7.17	4.851	3.353	5.941	8.068	9.766	5.767	13.75	4.683	2.99		0.986724	12.8122
26.6757	15.798	19.022	9.069	7.953	8.754	33.692	47.676	43.438	9.744	9.708	17.843	22.626	4.254	12.335	14.942	19.058	4.3	7.382	7.495	12.009	7.167	8.296	6.36	5.079	3.343	5.888	9.733	9.962	6.466	11.351	4.907	4.021		0.99115	12.8022
26.7948	13.432	16.796	9.82	7.605	7.135	28.282	48.571	50.535	9.222	10.064	18.007	24.308	4.011	10.045	15.409	19.429	5.573	6.813	7.836	13.503	7.558	9.753	7.429	5.557	3.581	7.032	9.377	9.619	6.219	12.532	4.575	3.653		0.995575	12.915
26.9139	12.274	17.132	8.829	6.099	7.367	24.059	52.845	49.628	10.986	12.43	20.289	31.951	5.416	8.638	16.488	18.347	5.607	7.748	8.842	11.859	6.868	9.338	7.242	4.918	4.052	8.458	11.409	9.253	6.956	11.806	4.241	2.51		1	13.2464

## Sheet: Image9 (2)
X0	Y0	Y1	Y2	Y3	Y4	Y5	Y6	Y7	Y8	Y9	Y10	Y11	Y12	Y13	Y14	Y15	Y16	Y17	Y18	Y19	Y20	Y21	Y22	Y23	Y24	Y25	Y26		Ap-basal	Avg int
0	22.53	51.267	55.114	58.757	79.814	78.4	80.779	79.411	99.028	63.999	71.045	64.3718	33.411	28.4632	51.37	32.2154	34.018	39.499	48.404	63.073	46.012	59.9999	45.331	44.441	28.843	99.929	56.015		0	56.1311
0.1191	22.611	54.001	58.122	63.795	82.33	71.772	90.581	91.141	108.472	65.818	69.778	67.7127	37.338	29.5678	61.571	36.9067	41.453	42.332	52.333	72.438	51.477	61.3875	48.718	49.659	31.254	111.875	66.94		0.0046301	60.792
0.2382	22.311	56.562	63.15	64.823	83.288	69.061	106.672	101.506	116.479	71.992	72.055	73.0661	42.947	32.3389	69.884	41.2774	47.433	49.778	57.361	82.756	58.823	62.6457	57.111	55.504	39.422	122.372	77.262		0.0092602	66.5882
0.3573	21.257	53.994	69.491	68.272	87.527	68.303	120.47	111.959	123.97	81.448	71.861	73.7646	45.855	36.9734	85.796	46.9858	60.904	59.835	71.62	94.086	70.518	70.9161	60.518	58.473	41.915	131.277	86.988		0.0138903	73.1473
0.4764	24.875	59.105	70.271	69.165	89.213	76.414	123.367	113.148	128.578	95.007	68.605	72.1549	48.607	43.6835	98.655	56.9934	72.18	70.424	86.534	104.442	78.761	71.8024	71.765	63.438	46.008	137.733	86.07		0.0185204	78.7777
0.5954	30.848	65.188	78.048	78.095	93.412	76.215	122.281	116.665	133.684	106.743	70.072	74.0548	48.678	47.7126	115.435	64.9508	76.33	78.175	99.816	111.442	84.813	80.7272	89.5	74.759	53.394	143.842	89.353		0.0231466	85.342
0.7145	47.544	77.807	85.412	79.75	97.301	79.551	118.333	130.757	142.984	114.61	69.303	67.4876	50.231	47.9635	126.62	74.5536	84.173	91.24	118.651	116.769	96.594	85.6151	94.995	84.968	56.888	154.889	98.333		0.0277767	92.3453
0.8336	59.852	88.142	89.724	84.583	106.065	90.334	123.225	142.233	141.249	121.572	66.229	60.5561	50.691	49.0675	130.745	88.2232	82.992	104.117	131.545	119.1	106.315	90.8518	103.273	89.802	67.771	147.893	97.546		0.0324068	97.5443
0.9527	82.151	103.146	98.343	95.006	109.079	97.563	134.127	151.984	133.969	128.399	73.267	55.2564	50.877	50.9808	134.588	94.7246	91.261	116.041	145.306	117.072	111.587	97.0981	114.728	96.906	76.049	149.495	103.409		0.0370369	104.163
1.0718	111.727	117.678	107.692	96.873	116.983	108.802	140.223	160.56	133.141	122.56	79.735	48.5367	51.593	51.1562	128.308	95.6726	96.296	112.885	152.54	109.274	110.064	101.029	118.131	107.516	80.713	157.773	109.47		0.041667	108.405
1.1909	133.348	134.412	117.086	99.629	123.419	118.387	150.509	165.942	127.057	117.574	90.069	40.7376	46.588	47.4681	123.407	96.5922	103.549	108.779	158.76	108.68	109.482	101.695	120.738	108.565	90.158	156.455	110.113		0.0462971	111.452
1.31	156.896	145.734	120.723	97.912	128.7	129.64	146.253	168.716	124.368	111.052	98.88	39.1372	41.059	50.5283	100.241	94.3094	109.235	96.602	155.784	104.757	105.337	97.25	126.754	112.507	99.25	148.957	115.021		0.0509272	112.059
1.4291	174.339	148.599	126.446	103.177	131.428	138.503	140.911	167.352	123.298	109.582	99.963	34.4779	39.803	52.0328	84.234	85.3545	111.087	88.48	141.42	98.233	95.73	84.8205	127.671	107.278	118.04	138.375	129.931		0.0555573	111.132
1.5481	177.727	152.797	123.141	97.096	131.429	140.098	138.171	174.87	112.942	107.885	108.539	32.9802	37.23	51.0213	74.456	86.9201	99.929	65.281	121.739	89.255	90.071	68.8805	123.164	101.587	124.968	135.315	135.182		0.0601835	107.506
1.6672	168.476	138.552	124.554	91.458	130.946	145.277	123.472	166.764	110.458	110.506	111.294	31.4194	42.991	53.8909	72.357	83.0885	94.189	47.947	98.375	81.63	85.695	57.3526	115.137	90.071	142.719	120.954	142.327		0.0648136	103.033
1.7863	157.132	116.696	116.534	94.35	135.179	143.255	105.095	163.748	98.313	98.123	108.218	30.776	42.586	53.275	66.913	82.9951	82.667	39.438	80.433	75.936	76.208	48.4544	105.804	82.906	150.53	118.57	141.12		0.0694437	96.8613
1.9054	145.755	103.672	112.304	94.078	125.65	141.872	95.121	142.499	93.905	85.157	113.717	27.8548	49.858	51.2857	67.408	82.9488	66.526	27.958	67.888	71.861	68.787	41.2503	95.468	75.736	157.601	111.473	137.343		0.0740738	90.9251
2.0245	128.667	85.488	102.458	92.118	108.343	138.424	84.252	118.008	83.566	77.288	107.94	28.7978	51.61	49.8012	67.271	76.8069	54.82	23.25	55.09	69.12	61.224	35.0754	88.896	75.211	153.502	109.518	133.381		0.0787039	83.701
2.1436	112.342	63.801	90.273	91.522	104.251	130.582	77.688	92.874	78.913	65.849	107.69	27.2525	59.844	50.9469	67.669	78.8944	47.807	21.036	48.717	63.398	57.92	34.0433	75.886	71.571	152.52	110.362	134.372		0.083334	78.4453
2.2627	100.776	49.041	77.769	91.039	93.235	114.567	65.996	72.256	72.588	61.102	93.209	25.3217	67.365	52.3282	70.934	78.1889	39.101	18.113	47.382	62.082	55.008	28.56	71.254	63.722	146.481	110.882	137.44		0.0879641	72.8052
2.3818	91.408	43.062	62.406	84.895	81.965	104.784	59.743	55.398	68.358	60.573	84.942	28.2002	75.987	48.9088	71.291	78.5852	33.175	16.883	46.186	63.283	57.485	28.8061	66.637	66.725	136.414	107.03	130.61		0.0925942	68.657
2.5008	89.616	35.122	50.44	81.158	82.341	95.474	60.189	45.735	63.139	55.352	69.929	24.7022	74.962	52.6288	70.965	77.0918	31.228	15.523	47.463	59.193	62.371	28.2475	64.642	65.691	115.668	100.64	128.801		0.0972204	64.7523
2.6199	85.844	28.882	41.239	76.572	76.803	84.139	58.087	43.01	66.027	50.647	61.065	23.3663	79.889	54.3139	72.283	75.1157	26.414	13.459	39.049	56.281	63.63	24.5392	60.101	64.314	101.962	100.219	133.645		0.10185	61.5147
2.739	84.334	25.393	32.83	74.933	75.784	74.065	55.557	36.623	68.084	52.772	54.549	23.2269	85.124	55.762	77.859	72.8903	23.578	13.749	38.299	57.633	63.185	23.8856	57.73	62.767	87.179	97.899	138.22		0.106481	59.7745
2.8581	79.242	22.127	31.12	67.242	77.954	73.99	56.567	33.114	67.897	52.668	49.875	21.562	85.973	57.8555	77.61	74.1468	22.147	11.265	35.662	55.662	66.557	21.5863	54.852	61.803	75.226	97.715	132.808		0.111111	57.9343
2.9772	78.471	20.602	29.311	63.998	76.435	69.737	54.905	30.238	70.625	54.402	48.312	19.8096	83.818	51.5037	77.606	74.6674	18.842	11.883	30.098	58.976	63.518	20.131	54.991	64.061	63.851	92.254	133.048		0.115741	56.1516
3.0963	75.241	19.649	29.354	61.907	74.835	63.788	53.888	30.454	71.443	52.65	42.483	20.0921	80.431	52.2962	77.974	74.0576	18.81	12.612	27.436	63.376	65.389	18.7663	52.408	62.982	56.634	95.819	122.256		0.120371	54.7049
3.2154	66.911	19.252	28.992	61.974	74.085	58.527	57.49	26.352	72.673	50.641	41.847	21.1527	78.863	51.549	77.253	78.0826	16.343	11.848	23.695	60.721	68.709	17.9037	50.488	62.079	52.455	93.47	117.876		0.125001	53.379
3.3345	65.287	18.325	28.02	60.303	69.657	58.563	54.502	25.135	74.346	56.425	36.738	24.9359	74.117	50.9997	74.401	77.048	15.715	8.89	20.772	71.133	69.466	17.8834	48.251	63.686	45.388	90.647	114.645		0.129631	52.4177
3.4535	61.955	17.695	26.637	57.052	67.596	56.094	49.606	24.084	72.634	57.403	34.752	25.5838	73.908	51.9335	76.319	74.132	13.997	9.389	19.31	75.163	67.969	19.0941	45.757	62.011	42.017	89.887	107.957		0.134257	51.1087
3.5726	58.199	18.58	25.008	62.867	66.075	56.051	51.37	23.277	70.302	58.861	37.318	29.2993	67.068	51.801	76.776	77.4594	14.774	9.918	16.809	80.253	63.766	17.1224	43.138	61.909	38.881	92.627	104.785		0.138887	50.8998
3.6917	53.071	15.156	24.511	64.931	62.704	54.82	51.236	23.18	72.366	59.262	37.377	32.1789	65.446	50.9129	80.581	73.9586	16.38	8.377	13.055	84.281	61.71	17.997	41.972	57.128	32.289	92.331	103.036		0.143517	50.0092
3.8108	47.988	15.008	23.336	63.667	61.08	61.041	48.324	19.614	69.819	61.323	35.674	33.9076	64.19	49.0409	78.762	74.909	16.939	9.916	12.818	90.418	60.685	18.2167	40.865	60.996	30.222	90.891	99.534		0.148148	49.5994
3.9299	46.917	14.176	23.471	59.312	61.592	58.655	48.704	18.379	67.782	54.723	40.709	31.5908	61.891	48.0559	77.495	73.0109	13.912	9.891	10.543	87.262	64.257	17.1726	41.056	62.589	30.558	89.304	97.911		0.152778	48.5526
4.049	47.841	13.269	26.024	61.375	59.362	62.006	45.934	17.619	65.412	52.837	41.474	32.4668	59.342	50.8271	78.307	71.7003	15.585	7.816	11.103	85.592	63.63	18.4638	39.909	60.34	26.537	87.976	95.308		0.157408	48.0761
4.1681	47.374	12.756	27.535	55.149	53.907	63.385	46.495	14.822	67.378	53.431	39.688	31.4084	58.595	53.6057	78.476	68.8952	17.726	6.823	11.575	80.771	67.525	17.9742	36.867	62.131	24.889	87.547	96.368		0.162038	47.5221
4.2872	42.805	12.35	25.937	58.429	52.621	66.265	48.587	16.013	65.521	54.313	40.479	27.7452	57.329	53.2484	80.092	65.5576	17.548	8.26	9.505	79.95	70.177	18.9951	35.936	58.236	22.449	85.283	99.85		0.166668	47.166
4.4063	42.636	11.995	28.746	62.561	54.708	62.979	51.961	14.629	72.174	57.987	37.342	23.4842	60.073	56.2475	79.357	68.2633	17.843	7.808	10.621	82.298	66.835	18.8914	36.975	57.628	25.366	82.945	98.167		0.171298	47.7971
4.5253	41.405	11.202	28.526	65.971	56.883	64.085	49.324	14.276	68.414	64.656	37.344	21.4263	57.489	57.1139	87.093	68.1075	17.415	8.363	10.168	84.762	70.297	17.204	35.992	57.907	26.417	85.298	103.782		0.175924	48.5526
4.6444	44.43	11.188	24.13	67.172	57.966	70.842	49.89	16.641	64.706	66.492	37.01	20.6626	60.41	61.0439	86.384	67.6833	19.439	8.879	11.335	84.059	70.075	18.3646	34.538	55.481	26.019	80.643	112.768		0.180554	49.1945
4.7635	42.548	9.887	23.185	68.398	62.131	75.567	54.879	16.073	66.885	68.639	39.182	16.9286	59.723	59.0097	87.372	68.0737	18.087	8.731	11.409	87.916	70.715	21.0115	33.568	54.63	25.232	83.466	111.88		0.185184	49.8195
4.8826	44.213	10.133	24.519	66.863	61.749	75.9	55.273	14.093	67.309	69.613	37.565	14.6469	58.394	62.4505	87.815	68.4201	18.708	7.526	10.748	92.787	73.596	19.9918	31.968	56.272	27.445	84.002	117.327		0.189815	50.3455
5.0017	42.716	10.726	22.59	63.332	62.205	77.942	55.966	13.425	69.823	74.24	38.6	13.493	57.637	63.2988	89.175	60.4933	20.832	9.261	10.834	93.906	74.721	18.3544	35.519	56.812	30.244	85.242	118.688		0.194445	50.7435
5.1208	36.874	11.149	21.749	66.005	68.035	77.619	55.98	12.192	72.019	75.332	40.12	13.1503	57.486	64.1012	91.515	60.288	22.121	9.548	13.008	88.75	76.105	20.449	33.838	59.23	31.95	84.211	118.536		0.199075	51.1615
5.2399	33.296	11.906	19.375	60.914	74.541	79.587	58.947	10.658	73.132	70.651	42.293	12.4485	57.367	61.5323	86.392	53.9927	21.552	10.558	11.52	80.931	80.273	22.2654	33.542	59.239	34.933	82.364	117.116		0.203705	50.4195
5.359	33.689	11.039	17.846	58.522	80.331	84.477	63.858	12.412	72.921	73.186	48.01	11.1915	50.899	59.3022	86.108	51.6183	23.731	12.233	11.459	82.396	80.258	28.8038	32.195	58.122	34.313	80.037	114.239		0.208335	50.8591
5.478	32.776	10.959	19.719	53.749	84.49	89.784	65.619	11.858	70.446	74.764	48.765	11.2073	49.803	57.0257	84.794	49.4144	22.497	12.046	11.377	84.737	75.409	30.6375	30.703	55.734	39.117	78.383	108.704		0.212961	50.5377
5.5971	29.797	12.141	18.004	47.205	90.639	93.551	67.992	12.254	72.246	72.377	49.361	8.434	48.987	54.5088	84.272	45.9563	23.16	12.194	10.573	88.023	79.827	30.6854	25.496	50.778	37.523	80.079	105.344		0.217591	50.0521
5.7162	27.607	12.284	18.989	43.819	96.05	94.956	68.01	12.639	74.056	74.325	51.355	8.3567	43.843	57.4846	88.987	39.854	26.464	14.566	11.707	91.168	78.482	29.8721	26.099	50.586	40.651	81.201	106.758		0.222221	50.747
5.8353	25.357	12.458	18.615	42.428	94.952	98.323	74.746	11.797	75.75	77.248	52.086	9.026	39.533	53.0608	82.515	31.159	28.702	12.055	11.343	91.639	78.27	29.3019	23.869	46.703	43.3	84.954	103.796		0.226851	50.1106
5.9544	24.282	12.305	21.287	38.1	100.602	106.814	76.258	13.038	78.405	82.37	48.37	8.5893	39.375	52.2257	83.346	21.0825	31.221	11.044	11.673	94.581	77.084	29.2759	24.058	38.95	46.563	82.305	103.09		0.231482	50.2331
6.0735	24.981	13.255	22.024	30.896	101.406	109.676	72.664	13.481	76.639	84.16	48.375	8.6649	33.459	51.0572	77.454	16.1098	32.532	11.363	11.912	84.639	76.729	28.935	24.81	39.015	52.122	85.123	106.556		0.236112	49.557
6.1926	24.076	15.601	24.967	25.714	108.388	107.615	75.282	17.188	73.21	86.934	44.751	7.1724	31.832	48.3059	73.516	12.1661	37.462	12.067	12.351	82.911	77.041	28.3465	23.026	29.12	55.212	84.613	108.133		0.240742	49.1482
6.3117	22.429	15.842	26.184	21.678	106.148	111.904	70.416	17.039	72.685	88.249	43.524	7.5187	28.298	49.3701	65.928	10.9444	44.567	9.911	9.954	80.783	79.887	25.5515	22.624	22.631	59.051	88.138	115.343		0.245372	48.7629
6.4307	21.265	17.487	28.454	18.464	110.416	110.844	69.847	16.936	69.445	96.25	47.136	7.6993	27.605	45.9955	61.858	11.3863	54.673	8.847	10.203	87.123	82.673	23.8998	21.189	16.899	60.848	90.759	114.447		0.249998	49.3574
6.5498	18.109	19.05	32.508	17.302	112.456	116.428	65.704	19.647	65.621	94.782	51.61	7.762	26.822	44.5096	50.549	11.124	60.526	8.368	9.933	90.69	82.526	26.1475	17.612	15.308	62.356	95.247	112.794		0.254628	49.4626
6.6689	15.407	20.952	34.108	15.935	111.558	120.938	56.627	18.395	62.102	96.298	58.293	6.9035	24.239	47.1657	47.621	10.0108	63.643	8.641	11.523	102.084	78.239	25.9375	16.308	12.082	69.261	100.89	117.718		0.259258	50.1066
6.788	13.214	22.409	33.887	16.089	117.265	126.607	48.252	17.319	59.861	95.811	62.048	6.0011	22.617	46.2062	35.743	10.8134	69.066	8.176	11.683	108.397	81.838	31.4671	16.817	11.464	69.926	110.259	116.27		0.263888	50.7224
6.9071	11.737	25.711	35.44	12.125	118.528	124.232	42.778	15.665	57.03	95.671	64.226	7.1465	19.765	44.1989	27.815	12.4437	71.214	7.855	11.314	120.77	85.582	30.4678	15.716	9.357	76.722	112.414	116.972		0.268518	50.848
7.0262	10.364	26.765	33.072	9.013	126.265	131.263	37.625	13.668	51.925	98.711	74.031	7.1162	18.324	44.9861	19.952	13.0267	70.421	7.176	10.154	120.55	83.851	32.1486	14.676	9.389	81.115	114.414	117.783		0.273149	51.0291
7.1453	10.912	29.964	30.178	8.031	134.581	132.467	33.795	14.158	44.888	101.883	75.47	6.9344	17.865	43.8147	14.604	16.2882	64.514	7.036	10.696	130.106	84.264	34.5665	12.869	7.631	83.965	120.04	121.099		0.277779	51.5785
7.2644	9.122	29.367	29.254	7.716	132.185	130.513	34.126	13.514	40.35	101.833	75.556	6.3609	17.049	43.3773	13.281	15.76	61.914	7.227	12.037	128.649	79.647	34.9231	13.645	6.552	85.028	120.903	130.748		0.282409	51.1347
7.3834	8.514	28.6	28.92	6.427	137.799	131.603	35.725	12.626	37.492	104.69	73.256	5.9823	15.985	45.1628	12.34	17.8376	53.397	8.019	9.865	125.856	75.939	42.4821	14.874	5.202	89.008	125.07	126.311		0.287035	51.0734
7.5025	7.367	29.173	29.296	6.907	140.854	128.239	33.676	13.325	33.613	103.876	71.194	6.5945	15.99	44.6876	10.997	20.1047	45.343	8.195	10.424	122.543	79.692	43.4062	15.141	5.502	98.105	131.922	126.412		0.291665	51.2066
7.6216	7.526	29.149	26.484	6.155	134.335	126.088	36.282	12.14	32.559	104.869	73.895	7.7874	16.963	48.5036	11.128	21.1269	41.156	6.362	11.153	125.958	78.748	50.0616	15.967	4.602	98.444	138.059	125.446		0.296295	51.5166
7.7407	7.696	29.021	24.176	5.875	125.424	125.565	34.478	11.21	28.02	107.094	68.869	7.3993	14.893	48.6331	11.243	20.9691	36.885	6.215	10.097	131.001	76.748	46.5549	17.701	5.414	98.981	144.358	121.497		0.300925	50.5932
7.8598	7.343	25.793	18.731	5.737	127.841	126.823	31.716	9.654	23.646	101.354	69.933	6.9084	12.088	48.4928	10.185	20.0367	33.664	6.128	9.654	135.364	75.84	45.3453	16.226	5.877	101.746	143.722	117.833		0.305555	49.5437
7.9789	7.794	27.064	16.422	5.585	121.334	130.366	34.171	9.427	20.883	98.056	72.567	7.4618	12.306	45.5811	8.82	20.1243	30.815	6.049	9.127	134.399	74.676	44.3761	16.535	4.56	101.799	139.999	124.372		0.310185	49.0618
8.098	8.116	27.226	17.427	5.309	120.364	132.389	32.568	9.307	17.423	96.138	68.869	7.4923	14.267	46.8418	8.789	19.2362	29.023	6.872	7.368	125.958	70.085	42.57	14.953	4.702	98.854	137.241	122.164		0.314816	47.8353
8.2171	7.436	28.743	16.25	4.372	115.184	132.127	31.326	8.458	17.269	89.996	76.513	8.4813	14.322	46.4186	8.218	20.7153	27.511	6.593	8.357	129.677	73.276	43.6886	12.742	3.943	104.417	148.992	123.846		0.319446	48.4767
8.3362	7.826	29.085	14.615	5.154	110.414	128.015	32.236	8.645	13.022	89.984	77.903	9.4949	12.539	46.1452	7.169	16.8155	24.799	7.194	8.57	126.575	73.542	38.9758	12.385	5.078	100.544	149.219	122.279		0.324076	47.3416
8.4552	8.004	30.409	13.563	5.376	107.332	125.074	30.762	8.217	12.462	89.872	77.711	11.1262	13.447	41.9157	8.106	15.1906	22.506	5.922	8.348	116.812	78.392	36.9894	10.819	4.966	89.535	149.945	115.908		0.328702	45.8781
8.5743	8.005	26.392	12.466	5.323	99.9	121.55	29.05	7.709	10.561	85.831	73.736	8.7918	13.154	39.1082	5.705	14.3498	22.705	7.355	8.306	111.026	82.913	33.9133	12.113	4.877	81.938	156.436	101.127		0.333332	43.8645
8.6934	6.843	24.368	10.779	5.109	88.698	107.24	29.444	6.688	7.697	81.214	70.597	9.6812	14.169	41.1673	4.868	15.9892	20.386	6.042	7.703	102.808	78.253	33.8216	12.47	3.462	69.54	162.583	88.842		0.337962	41.1282
8.8125	7.311	27.477	10.954	4.976	78.151	98.547	30.027	6.054	6.838	80.185	62.076	8.9279	14.635	37.9292	5.116	17.0225	20.232	6.798	7.775	99.711	78.285	36.7501	12.432	4.592	56.875	164.177	83.289		0.342592	39.5238
8.9316	7.755	29.128	10.151	4.08	63.653	87.227	28.95	4.946	7.374	75.79	51.857	9.4893	14.829	37.419	5.293	16.7106	20.28	6.115	7.215	99.365	81.882	36.8777	13.08	4.935	49.77	158.654	74.929		0.347222	37.3242
9.0507	6.437	30.21	8.817	3.411	54.266	72.517	30.133	4.909	7.6	75.218	41.802	10.6135	12.602	38.3958	4.369	16.2122	18.173	6.439	8.065	105.544	79.441	41.7712	11.999	4.538	40.998	157.37	63.606		0.351852	35.3873
9.1698	7.086	34.211	9.103	4.091	49.625	62.22	29.646	5.335	7.697	73.524	36.68	10.6343	13.636	36.8725	4.221	15.5084	17.729	6.008	8.469	109.748	80.854	42.3037	12.509	4.089	32.169	150.97	61.198		0.356483	34.3014
9.2889	7.682	38.083	7.688	5.184	41.084	54.944	29.579	5.793	6.29	74.217	30.579	10.6022	14.078	37.3627	4.144	17.1933	18.43	6.411	7.877	119.54	77.654	43.3713	12.298	4.17	24.438	136.874	51.665		0.361113	32.8604
9.4079	7.949	39.502	7.867	5.415	33.38	46.885	30.078	5.789	5.389	73.766	25.928	14.044	14.708	38.0414	5.168	14.071	17.578	6.264	7.778	127.363	74.207	41.8218	13.141	3.89	21.992	125.163	38.771		0.365739	31.3315
9.527	7.506	41.967	7.328	4.398	23.502	34.52	29.998	5.738	5.152	73.974	22.276	17.8099	14.473	37.5732	4.813	14.4473	16.977	6.348	8.448	127.948	70.871	49.6046	12.584	3.217	20.344	115.103	26.945		0.370369	29.7728
9.6461	8.025	40.92	6.716	3.795	16.682	26.011	31.68	5.46	5.842	73.261	20.323	17.4806	15.094	37.2421	4.131	14.1726	16.039	5.332	8.802	135.01	65.165	49.8795	11.045	3.861	16.804	104.025	22.701		0.374999	28.3518
9.7652	8.663	43.256	5.84	4.834	13.197	19.066	29.696	6.028	5.182	70.836	17.133	21.3365	12.982	38.4001	4.255	13.6861	16.242	5.054	9.143	133.566	60.151	50.1295	10.592	3.325	14.783	93.764	17.151		0.379629	26.9737
9.8843	8.912	43.714	6.574	4.403	9.901	13.601	30.085	5.559	4.448	72.039	14.555	20.9262	13.607	39.3647	3.902	14.68	16.165	4.619	8.242	136.816	61.776	49.5881	10.14	3.403	15.292	83.179	14.985		0.384259	26.3139
10.0034	7.051	41.612	6.133	3.491	8.124	12.204	29.057	5.701	4.475	64.836	13.06	22.5581	12.969	42.8456	4.263	14.0376	17.359	5.116	7.906	137.019	62.539	54.0857	10.768	4.588	13.6	71.387	12.264		0.388889	25.5203
10.1225	8.703	46.401	6.312	4.01	7.465	9.818	30.698	5.18	4.337	63.535	12.446	19.494	12.5	45.0233	4.774	11.9049	14.64	5.632	8.776	139.649	60.238	56.8761	11.42	4.381	13.665	62.754	8.237		0.393519	25.1433
10.2416	9.82	46.101	5.989	3.731	5.386	7.836	30.027	4.484	4.746	59.681	11.353	18.6182	12.697	40.004	4.974	12.4455	14.065	5.773	9.059	138.672	54.259	57.7942	11.503	3.913	14.262	55.252	6.685		0.39815	24.0418
10.3606	9.041	50.316	4.687	4.247	5.495	5.521	29.871	4.597	4.675	54.593	10.114	18.5095	11.968	39.9949	4.589	11.2526	14.902	5.289	8.458	139.287	53.008	54.8282	11.175	4.096	15.217	47.173	6.424		0.402776	23.3085
10.4797	8.693	56.614	4.751	4.111	3.99	6.429	31.042	4.207	4.667	47.661	10.8	17.5416	10.827	41.8365	4.551	11.4423	13.328	5.956	8.121	137.132	52.317	52.7974	9.259	4.926	14.384	39.188	6.976		0.407406	22.724
10.5988	9.137	55.957	5.115	3.63	3.64	5.428	29.001	4.321	4.365	43.22	11.085	16.5341	11.245	38.8567	4.196	11.3656	12.826	6.221	7.317	138.296	53.435	51.4805	10.149	4.106	14.075	32.153	5.667		0.412036	21.9564
10.7179	9.305	58.036	5.614	3.474	3.582	5.432	25.96	4.126	3.186	33.785	11.479	16.6807	10.976	35.5358	3.783	10.7615	13.213	5.55	7.798	126.431	50.641	46.3208	9.328	4.597	13.208	26.519	7.073		0.416666	20.4591
10.837	9.466	61.34	5.262	3.287	3.682	5.084	29.225	3.72	3.135	27.578	12.077	15.2815	11.571	33.0323	4.252	11.4979	11.807	5.291	7.629	117.038	48.991	44.7988	8.48	3.543	13.648	20.461	6.368		0.421296	19.5387
10.9561	9.597	64.718	5.137	3.466	3.069	4.101	30.019	4.547	3.979	23.074	12.307	14.8969	11.063	30.8029	4.408	12.1384	12.422	5.652	7.87	114.214	52.387	43.25	8.238	3.345	12.412	16.461	6.444		0.425926	19.2599
11.0752	10.994	62.895	4.542	3.83	2.846	4.152	28.632	3.99	3.949	18.226	11.957	14.1117	11.045	28.5398	4.036	14.4673	13.203	4.863	7.575	104.861	49.129	46.0312	8.78	3.466	11.903	14.354	5.979		0.430556	18.4577
11.1943	11.674	59.49	4.449	3.39	3.021	4.495	24.567	3.742	3.388	14.389	12.156	13.8359	10.813	25.4797	4.118	13.6816	11.32	5.252	7.198	95.464	48.82	45.1271	9.344	2.965	11.473	12.31	4.787		0.435186	17.287
11.3133	10.995	57.249	4.682	3.451	2.879	4.037	24.727	3.857	3.628	10.1	11.528	14.3727	10.099	24.8039	4.752	13.5392	10.455	4.936	6.639	83.855	48.894	48.2612	8.512	3.815	10.164	10.159	4.871		0.439813	16.4911
11.4324	9.445	57.68	6.034	2.752	3.202	3.969	24.556	3.676	3.678	8.21	10.16	12.4552	9.22	23.8923	4.075	13.6651	10.033	5.987	5.335	75.203	48.325	47.5764	8.856	3.556	8.912	8.31	6.778		0.444443	15.7608
11.5515	8.233	55.646	5.379	2.718	3.327	4.434	24.231	3.954	3.446	6.531	9.591	12.1346	10.939	19.8212	4.537	13.7415	9.542	5.43	5.739	65.115	48.416	52.615	8.511	3.846	9.147	6.019	7.097		0.449073	15.1904
11.6706	9.545	53.57	5.3	2.931	2.512	4.952	23.593	4.261	2.775	5.649	9.922	12.3071	12.101	19.2423	4.248	13.9017	8.674	4.724	6.271	53.821	46.931	57.4225	7.269	3.901	9.535	5.437	5.604		0.453703	14.6815
11.7897	8.49	52.879	4.108	3.101	2.542	4.179	20.598	5.258	3.463	3.872	10.473	13.6256	12.39	16.9667	4.279	13.3254	9.012	5.422	5.329	44.192	47.543	55.4784	7.518	3.761	8.767	5.2	6.801		0.458333	14.0212
11.9088	9.04	51.316	5.241	2.971	3.082	4.275	21.176	4.844	3.373	3.602	11.947	17.0799	11.345	14.0063	4.458	15.2138	8.27	5.246	6.129	39.939	44.242	54.5392	7.769	3.681	8.213	4.216	7.006		0.462963	13.7859
12.0279	8.698	52.256	5.737	4.184	2.897	4.082	19.981	4.599	2.601	3.129	10.166	15.9593	10.058	11.9702	4.215	14.5074	7.401	5.235	5.689	33.98	40.225	50.6485	6.652	3.436	7.074	4.999	6.91		0.467593	12.8626
12.147	8.609	48.962	5.045	4	3.317	5.147	18.564	4.863	2.799	3.876	10.163	16.2986	10.2	9.9177	3.91	15.7693	7.589	5.676	6.477	26.155	40.472	49.1984	6.676	3.762	6.637	4.008	6.316		0.472223	12.3854
12.2661	8.392	44.921	4.998	2.744	3.01	3.502	20.143	4.22	3.645	2.951	10.514	16.2728	7.166	8.5862	4.576	16.2085	6.76	4.933	5.653	19.146	37.721	47.2406	5.894	4.69	5.6	2.828	7.665		0.476853	11.4807
12.3851	8.264	41.993	5.555	2.982	2.905	4.208	19.812	4.651	3.302	3.225	10.042	16.2707	8.46	7.2833	3.833	15.7981	6.451	5.104	6.077	15.676	35.64	42.9427	7.497	4.829	6.052	3.229	6.686		0.48148	11.0655
12.5042	9.483	43.618	5.943	3.054	2.68	3.216	21.286	4.762	2.929	3.355	10.22	18.147	8.043	7.394	3.765	15.7508	6.763	4.408	5.472	14.068	32.675	40.7269	5.755	3.222	6.144	3.095	7.565		0.48611	10.8718
12.6233	8.541	40.605	4.586	3.583	3.076	3.594	21.309	5.004	2.577	2.914	10.568	19.621	8.309	7.0283	3.675	16.78	7.427	4.78	5.621	13.184	28.759	41.8199	6.012	3.777	6.44	2.761	8.29		0.49074	10.7645
12.7424	9.855	39.249	4.921	3.224	3.779	3.366	21.74	4.426	3.723	2.527	10.502	19.5085	9.218	6.4892	3.48	16.8439	6.916	4.834	6.25	13.985	28.045	41.5945	5.88	3.679	5.135	2.837	7.815		0.49537	10.7342
12.8615	8.953	38.992	4.787	2.795	3.448	3.229	22.908	3.836	3.75	3.124	10.67	18.9988	9.565	7.0904	4.428	19.2606	6.35	4.796	6.155	10.129	26.891	41.0115	6.209	4.108	4.989	3.635	9.092		0.5	10.7111
12.9806	10.186	38.243	5.401	2.711	2.56	3.189	22.624	4.62	3.637	3.17	10.863	17.2194	9.305	6.5892	4.29	18.6359	6.791	4.4	4.894	9.019	24.049	37.972	6.382	4.788	6.261	2.544	9.265		0.50463	10.3559
13.0997	10.188	37.618	5.066	2.903	2.042	3.178	24.479	4.798	3.405	2.966	8.499	17.4736	9.77	6.2857	4.642	18.0839	5.79	4.585	5.734	8.539	22.401	37.6673	5.006	4.14	5.755	2.52	8.599		0.50926	10.079
13.2188	11.592	39.542	4.524	2.54	2.41	4.023	24.128	3.939	3.588	3.178	9.237	15.3375	11.56	6.2642	5.178	18.387	5.719	4.161	5.532	8.026	19.907	38.1347	6.583	4.17	5.085	3.166	8.604		0.51389	10.1672
13.3378	11.779	36.202	4.381	3.081	2.555	3.398	23.05	4.83	2.63	3.139	11.005	17.0827	10.233	6.0789	4.304	19.2735	5.229	4.306	4.67	6.889	20.803	40.201	5.296	4.767	5.378	3.792	9.504		0.518517	10.1429
13.4569	11.302	35.802	5.161	2.281	2.557	3.896	22.444	4.778	2.934	3.353	8.554	14.9	9.062	5.2194	4.65	19.6024	5.078	5.163	6.105	6.475	20.857	42.6025	4.577	3.91	5.427	3.135	9.995		0.523147	9.99334
13.576	9.986	33.457	4.194	3.075	2.51	3.206	22.989	3.569	3.1	2.848	9.603	16.4067	8.744	5.457	5.314	19.9877	4.725	5.02	6.506	5.657	18.403	46.6526	4.098	3.656	5.768	3.451	11.691		0.527777	10.0027
13.6951	11.192	33.616	4.32	3.34	3.139	3.666	22.406	4.794	2.684	3.264	8.211	14.473	8.445	6.1948	4.266	16.8295	5.145	4.13	4.621	6.568	16.368	49.3246	5.287	4.435	5.461	3.487	10.862		0.532407	9.87144
13.8142	8.286	32.811	5.442	3.285	2.685	3.979	25.613	5.262	2.563	3.857	8.295	14.5746	8.142	5.3688	5.267	18.6092	4.594	4.653	5.4	6.294	18.171	51.3093	5.943	4.142	4.868	3.176	11.785		0.537037	10.162
13.9333	7.715	34.834	5.128	2.63	1.896	3.973	24.843	3.985	2.765	3.857	9.858	14.5091	8.441	5.5208	5.624	20.1152	5.567	4.205	4.679	5.377	17.498	51.6587	5.541	4.471	6.027	2.683	10.122		0.541667	10.1305
14.0524	6.525	31.962	3.884	2.256	2.258	4.22	27.149	3.649	3.643	3.64	8.419	13.7834	9.631	4.6981	4.346	19.25	4.333	4.016	5.082	6.078	16.832	48.3107	4.237	4.318	5.635	4.094	10.669		0.546297	9.73771
14.1715	6.945	30.717	4.241	2.669	2.447	3.131	25.82	4.203	3.03	2.555	7.336	16.1565	9.075	4.8928	5.064	19.8266	5.244	4.927	5.252	5.921	15.241	43.6918	5.476	4.069	4.547	3.129	13.431		0.550927	9.59399
14.2905	6.455	31.712	3.5	2.597	1.869	2.763	28.317	4.036	2.697	1.921	6.899	17.1952	7.877	4.6361	4.816	19.6392	4.656	4.2	5.281	6.186	14.443	42.9208	4.914	4.583	4.467	2.876	11.178		0.555553	9.35683
14.4096	5.947	30.828	3.86	2.507	2.802	3.771	30.259	4.75	2.376	2.327	5.738	16.3651	9.528	5.5318	5.154	21.3897	4.065	4.545	5.238	5.243	13.57	35.2454	4.921	3.978	4.198	2.608	10.583		0.560183	9.1603
14.5287	5.712	32.138	3.367	2.257	2.465	3.619	28.287	3.919	2.541	3.921	5.498	17.0894	8.531	5.5137	5.265	20.1465	4.967	4.547	5.064	5.731	12.769	34.5796	4.367	5.005	3.998	2.836	10.744		0.564814	9.06953
14.6478	5.289	33.399	3.701	2.253	2.318	4.305	27.132	4.705	2.19	3.051	4.727	17.8895	8.45	7.2033	5.977	21.1805	4.7	3.235	3.557	5.7	10.758	31.8131	4.312	4.844	3.932	3.058	11.855		0.569444	8.94572
14.7669	4.623	38.303	3.095	2.685	2.062	3.725	26.007	3.78	2.984	2.858	6.124	17.9004	8.746	6.3537	6.226	21.5231	4.187	4.616	3.919	4.504	13.191	27.4901	4.565	5.162	4.568	3.218	13.042		0.574074	9.09101
14.886	6.053	38.149	3.283	2.611	2.683	3.109	26.656	4.287	3.356	2.945	6.042	17.1186	8.803	5.2587	7.047	21.4324	4.744	4.571	3.413	4.593	14.294	30.3787	3.443	5.158	4.554	3.496	13.324		0.578704	9.28898
15.0051	6.358	35.619	3.275	2.403	2.778	3.052	25.191	4.388	2.586	2.859	4.981	16.2781	7.694	6.0977	6.22	22.0368	3.282	3.955	4.455	4.391	12.995	30.531	2.946	5.095	4.193	3.904	12.826		0.583334	8.90332
15.1242	6.32	34.991	3.917	3.205	2.551	3.276	23.71	5.064	3.111	2.901	5.723	14.4552	7.435	6.2557	5.678	22.0777	4.497	3.94	4.996	4.844	13.054	30.523	3.693	5.173	4.608	3.397	14.337		0.587964	9.02713
15.2432	6.603	37.687	3.717	2.608	2.483	3.776	24.43	3.863	2.993	2.882	5.275	14.4084	6.973	5.8347	4.774	21.5817	4.775	4.272	4.295	5.755	11.985	32.687	3.825	5.001	4.301	3.409	14.286		0.59259	9.05481
15.3623	7.074	33.743	3.634	2.249	2.542	2.741	25.974	4.421	3.045	3.007	4.783	15.4658	7.004	5.4957	5.637	23.2465	4.768	3.943	4.047	5.276	11.407	34.3268	3.859	4.582	4.523	3.417	14.512		0.59722	9.06381
15.4814	6.796	32.088	4.058	2.203	2.443	3.011	25.858	4.138	2.795	3.311	4.509	15.5103	7.589	6.2238	4.698	22.9982	4.285	3.529	3.766	4.743	11.221	34.6807	3.984	4.968	4.427	2.644	15.602		0.60185	8.96589
15.6005	6.214	32.701	3.429	2.067	2.057	4.021	26.662	4.27	2.47	3.246	3.925	16.3778	7.824	5.5199	5.852	22.4388	4.263	3.289	3.63	4.935	10.416	31.8756	3.938	5.698	4.095	3.39	14.83		0.606481	8.86793
15.7196	6.628	32.834	3.642	2.487	2.321	2.959	27.218	4.076	2.726	2.99	3.903	14.3297	8.059	5.9204	7.097	23.2934	4.415	4.092	4.233	4.668	11.714	28.6228	4.157	5.584	4.097	3.738	15.305		0.611111	8.92997
15.8387	6.695	31.186	3.038	2.183	1.991	3.055	29.915	4.33	2.411	2.591	4.089	12.8003	7.954	6.5063	7.536	24.569	4.048	3.992	4.284	5.043	11.832	25.2105	3.52	6.24	4.304	3.516	14.315		0.615741	8.78349
15.9578	5.54	34.269	3.32	2.845	2.44	3.175	28.355	4.932	2.948	2.588	3.419	13.5941	8.049	5.4737	6.637	22.6018	3.48	3.845	4.161	3.975	11.925	26.2422	3.532	6.838	3.669	3.896	14.931		0.620371	8.76596
16.0769	5.918	31.815	3.616	2.414	2.536	2.854	27.025	4.417	2.867	2.416	4.185	13.5943	8.762	5.7549	5.808	20.9591	4.83	4.044	3.88	4.658	12.59	26.6099	3.845	6.843	3.975	3.468	17.35		0.625001	8.77904
16.196	5.904	31.757	2.99	2.412	2.101	3.34	24.737	3.878	2.636	2.105	4.202	12.8048	8.049	5.498	5.568	20.9907	3.627	4.172	3.75	4.729	11.432	24.8412	3.189	5.579	3.241	3.536	18.299		0.629631	8.34695
16.315	6.094	32.525	3.251	2.249	1.996	3.524	22.304	4.238	2.339	2.697	4.428	13.569	8.404	4.944	5.518	20.1512	4.57	4.319	4.146	4.5	11.222	22.3788	3.957	5.547	4.441	2.932	16.752		0.634257	8.25911
16.4341	5.738	30.806	4.171	2.371	2.054	2.728	23.716	4.346	2.644	2.7	3.576	13.9192	8.275	4.9022	5.601	19.705	3.256	4.302	4.496	4.18	11.994	21.3325	3.874	7.62	4.335	2.894	15.483		0.638887	8.18589
16.5532	5.355	32.826	3.218	2.802	2.164	2.64	26.889	4.133	2.53	2.96	3.514	13.247	8.235	6.0162	5.746	21.4375	3.673	3.974	4.266	4.23	10.611	19.4662	3.21	8.516	4.289	3.755	18.125		0.643517	8.43807
16.6723	5.543	32.647	3.851	2.545	1.9	3.596	29.543	3.742	2.866	2.329	3.94	13.9382	7.92	5.3931	5.641	20.898	3.663	3.763	4.028	3.941	11.601	19.3559	3.223	8.055	3.537	3.611	18.306		0.648148	8.49541
16.7914	5.824	31.472	3.001	2.192	2.204	3.525	25.795	4.274	3.424	2.354	4.393	14.1166	8.293	6.064	7.592	22.2768	3.276	4.385	3.347	3.844	12.236	20.7263	3.265	7.298	3.451	3.585	18.177		0.652778	8.53299
16.9105	5.367	33.591	3.473	2.028	2.743	3.511	23.269	4.015	2.716	3.321	3.478	14.1529	8.788	6.4476	7.313	22.5714	3.781	3.365	3.06	3.908	13.893	19.394	2.925	7.291	3.437	3.275	17.623		0.657408	8.47174
17.0296	4.72	35.298	3.326	1.903	2.42	3.075	23.663	4.413	3.214	2.814	4.086	14.1046	9.208	6.0111	7.085	20.816	3.588	3.694	3.379	4.354	14.113	18.3166	3.609	7.463	4.176	3.568	20.473		0.662038	8.62557
17.1487	5.395	36.796	3.537	2.204	2.648	3.307	24.454	4.586	3.085	2.961	4.029	13.8503	9.504	6.7218	8.94	21.1025	3.311	4.098	3.982	3.694	16.135	18.1542	3.242	8.943	4.357	3.935	20.538		0.666668	9.01888
17.2677	4.674	39.65	4.491	2.056	2.093	3.357	24.473	4.409	2.804	2.447	3.751	13.7956	9.379	6.632	8.349	19.5656	2.962	4.136	4.375	4.103	15.107	18.8564	3.24	7.681	4.447	4.394	24.114		0.671294	9.08673
17.3868	4.417	41.539	3.106	2.081	2.402	3.223	23.838	3.853	2.472	2.489	3.411	14.2274	10.284	6.0325	8.366	18.6071	2.885	3.647	5.258	4.496	15.491	16.8455	2.42	7.31	3.419	3.755	22.898		0.675924	8.84343
17.5059	5.68	43.092	3.901	2.341	2.207	2.864	23.228	3.605	2.968	3.233	4.158	13.8856	10.355	6.67	7.874	18.7215	3.925	3.793	4.771	4.256	16.937	16.7978	2.531	8.644	3.633	4.062	23.176		0.680554	9.15959
17.625	5.388	39.359	3.906	2.601	2.609	3.201	24.163	4.844	2.483	3.376	4.025	15.1462	10.919	6.2302	7.745	17.9435	3.588	4.207	4.344	4.234	17.109	14.3626	3.005	9.119	2.861	2.874	24.524		0.685184	9.0432
17.7441	5.503	34.538	3.078	3.126	2.537	3.592	26.158	3.913	3.435	2.946	3.833	13.2025	12.693	5.3654	8.312	16.772	3.911	4.094	4.223	3.653	15.522	14.9071	3.359	9.326	3.454	3.982	24.578		0.689815	8.88937
17.8632	5.943	33.012	2.727	2.49	1.937	3.101	25.307	4.026	3.032	3.22	4.605	13.4805	12.351	6.4856	8.508	15.1546	3.955	3.725	4.853	3.534	15.097	12.6687	2.798	9.366	3.835	3.207	21.443		0.694445	8.51339
17.9823	5.192	31.312	3.297	2.474	2.185	2.55	26.688	4.272	3.201	2.747	3.559	12.926	15.774	7.1868	8.523	14.5482	3.378	4.184	4.31	3.937	13.685	12.8216	3.191	10.001	3.388	4.072	21.904		0.699075	8.56691
18.1014	5.44	32.126	3.326	2.417	2.149	2.623	24.982	4.515	3.501	2.535	3.594	14.1908	15.335	6.6377	8.975	14.2988	3.597	3.379	4.224	3.598	14.512	12.585	2.667	9.865	3.227	4.062	23.802		0.703705	8.59864
18.2204	5.626	31.869	3.121	2.809	2.486	3.007	24.115	4.033	3.227	2.76	2.914	13.1835	16.449	7.081	10.208	12.8986	3.294	3.166	3.933	3.254	14.305	13.6559	3.19	10.138	2.304	3.872	22.037		0.708331	8.47911
18.3395	6.341	30.166	3.522	2.426	2.395	3.208	23.298	3.871	2.893	2.8	3.222	12.4732	16.535	7.9161	9.59	12.9474	3.739	3.682	4.085	3.547	15.852	12.2197	3.551	9.761	2.934	4.247	22.62		0.712961	8.51264
18.4586	6.238	32.451	3.442	2.253	2.564	3.632	23.81	4.09	2.962	2.469	3.687	10.312	19.024	7.52	11.359	12.1712	3.73	4.133	3.945	3.496	14.642	11.1015	3.787	10.794	4.224	4.342	21.287		0.717591	8.64688
18.5777	6.626	31.834	3.427	2.587	2.654	3.408	22.998	4.71	3.851	2.827	3.403	12.0646	19.123	8.0448	11.934	9.5597	3.028	4.058	4.286	3.737	15.7	11.0218	3.115	10.342	4.163	4.164	19.452		0.722221	8.59696
18.6968	6.711	31.659	3.762	2.104	2.834	3.565	23.732	4.86	2.945	2.494	4.407	12.1592	18.9	9.5157	13.21	8.8666	2.548	4.71	4.263	3.715	14.727	11.6772	2.994	8.863	3.381	4.646	16.381		0.726851	8.5048
18.8159	5.564	34.003	4.038	2.314	2.672	2.601	26.24	4.194	2.791	2.821	3.846	12.3591	20.768	7.7397	13.536	8.0705	2.915	5.473	4.396	3.336	15.06	10.5694	3.021	10.501	3.528	4.854	16.43		0.731482	8.65336
18.935	5.238	34.796	4.058	2.39	2.476	3.224	28.131	5.138	3.278	2.839	3.588	11.7919	21.364	7.6828	14.905	7.3595	3.305	4.387	4.607	3.436	14.285	10.5108	2.714	12.226	3.501	4.669	15.274		0.736112	8.78422
19.0541	4.929	33.898	3.648	2.191	2.709	2.841	26.859	5.269	2.744	3.312	3.775	10.2554	23.687	7.9933	15.088	6.7175	2.999	3.433	5.022	3.138	15.804	9.8427	3.62	11.296	2.993	5.284	12.762		0.740742	8.59666
19.1731	4.608	32.435	3.237	1.797	2.497	3.415	25.237	3.881	3.947	2.591	4.713	9.8576	25.204	9.1314	16.648	5.9666	3.686	4.136	4.444	3.747	18.136	9.084	2.932	11.883	3.024	4.923	12.74		0.745368	8.66299
19.2922	4.549	32.017	3.884	2.183	3.199	2.147	26.576	4.421	2.988	2.959	3.484	9.5827	26.786	8.5719	17.601	5.7815	3.536	4.168	4.567	3.743	17.205	9.7235	2.841	13.296	3.398	5.359	11.915		0.749998	8.75858
19.4113	6.526	32.611	3.947	2.762	2.671	2.559	27.132	4.337	2.879	2.799	3.792	9.6239	31.197	7.2486	17.673	5.9738	2.918	3.571	5.069	3.676	16.437	7.4949	2.678	12.981	2.948	4.677	11.483		0.754628	8.80238
19.5304	6.094	34.806	4.045	3.059	2.127	3.052	23.345	3.6	3.119	2.445	4.58	9.8365	30.925	7.1979	21.575	5.4083	3.763	3.895	5.307	3.448	18.469	7.4176	3.658	12.778	3.307	5.933	11.392		0.759258	9.0586
19.6495	6.393	33.84	3.053	2.866	2.914	2.817	25.337	3.429	2.773	2.735	3.689	9.1347	34.057	8.5109	20.65	4.8254	3.94	3.636	4.1	4.135	17.43	8.3378	3.08	12.811	3.175	6.091	10.86		0.763888	9.05999
19.7686	6.373	30.081	3.539	2.914	2.391	2.571	23.994	3.958	3.175	3.06	3.539	10.9403	36.488	8.9121	22.273	4.471	3.808	3.513	4.525	4.161	18.733	7.2563	3.921	13.787	3.296	6.202	10.464		0.768518	9.19799
19.8877	6.454	29.951	4.062	2.443	2.321	2.831	23.219	4.049	3.278	3.384	3.86	9.7111	37.353	10.258	24.834	4.4656	3.774	3.249	4.823	4.108	17.899	6.7728	3.128	13.428	3.411	7.233	8.293		0.773149	9.20713
20.0068	6.804	29.429	3.193	2.281	2.474	3.248	24.903	4.863	2.61	3.343	4.7	10.2318	34.236	10.1397	24.518	3.8003	3.6	3.974	3.787	3.409	20.629	5.9065	3.837	14.351	3.14	7.724	8.06		0.777779	9.22931
20.1259	6.346	27.09	3.289	2.584	2.113	3.05	23.573	3.932	2.935	3.033	4.709	9.3716	31.885	11.2077	24.639	3.559	4.97	3.209	4.837	4.191	21.847	6.5059	4.032	15.092	3.341	6.057	7.503		0.782409	9.07041
20.2449	5.589	26.526	3.995	2.09	2.045	2.834	24.32	3.501	2.32	3.073	3.524	9.5019	31.792	11.8911	26.066	4.4596	4.034	3.534	3.978	4.406	20.796	5.9677	3.35	15.331	3.016	6.123	6.572		0.787035	8.91242
20.364	5.487	28.086	4.163	2.21	3.118	2.564	23.34	3.959	3.338	3.596	4.357	9.7681	31.313	12.262	31.655	4.9229	4.16	4.033	3.841	4.211	19.465	5.7682	3.397	15.756	3.537	7.6	6.122		0.791665	9.33441
20.4831	5.198	28.173	4.158	2.556	2.715	3.312	24.077	3.623	3.581	3.352	3.146	9.6424	27.057	12.5887	28.6	4.5638	4.602	4.442	3.698	4.338	19.705	5.822	4.007	16.485	3.612	8.134	6.205		0.796295	9.1627
20.6022	5.528	28.95	4.969	3.266	2.494	3.279	24.778	4.447	3.472	3.387	3.559	7.754	28.312	14.7033	27.671	5.1383	4.627	4.332	4.557	4.462	21.441	4.6262	3.606	16.669	3.765	8.865	5.733		0.800925	9.42188
20.7213	6.039	31.231	4.084	2.753	1.886	2.088	25.242	4.672	2.712	2.969	4.43	7.9846	27.457	16.2683	32.591	5.0459	4.095	4.75	5.024	4.48	23.091	6.6079	3.676	19.387	3.248	10.034	4.767		0.805555	9.87454
20.8404	6.982	31.26	3.369	2.464	2.132	3.05	24.927	4.464	2.888	3.086	4.154	6.9489	27.654	18.6523	33.611	5.4063	4.806	4.545	4.067	4.163	24.278	5.0868	3.893	18.595	3.286	8.738	4.292		0.810185	9.88142
20.9595	6.814	32.182	3.92	2.262	2.47	3.137	24.371	4.529	3.822	3.535	3.888	8.4942	28.266	18.3519	34.393	6.0714	5.27	5.069	3.731	5.343	23.121	4.7555	3.685	19.951	3.455	9.668	5.508		0.814816	10.2246
21.0786	6.523	32.97	4.172	2.334	2.56	3.093	25.427	5.454	3.975	3.293	4.316	10.099	28.332	21.2217	29.86	9.2076	5.184	5.366	4.5	5.416	19.469	5.6068	3.847	17.809	2.49	11.122	4.965		0.819446	10.319
21.1976	6.143	32.758	4.327	2.196	2.193	3.288	26.698	4.937	3.798	3.708	4.546	9.6228	27.545	24.0773	30.601	8.7391	5.96	5.972	4.291	5.43	22.415	5.9932	4.137	19.91	3.619	13.107	4.338		0.824072	10.7537
21.3167	6.06	37.272	5.251	1.96	2.131	2.951	26.024	7.084	4.293	3.213	4.883	9.7199	27.09	25.4565	33.958	9.6208	6.439	6.698	3.858	5.773	27.501	5.9985	3.265	19.423	3.747	15.603	4.902		0.828702	11.488
21.4358	7.003	41.701	5.013	2.603	2.073	2.432	24.75	5.373	3.932	3.744	3.948	7.7562	27.868	27.6803	34.488	12.4119	7.048	7.224	4.618	5.927	27.036	5.6723	3.037	18.227	3.242	15.216	5.035		0.833332	11.6688
21.5549	6.132	43.396	4.809	2.723	2.607	3.101	24.237	6.101	3.503	3.958	4.757	9.039	29.37	27.8804	35.495	15.5204	8.107	8.186	4.878	5.482	26.885	4.923	3.69	21.162	3.661	17.582	4.863		0.837962	12.2981
21.674	6.914	45.091	5.063	2.656	2.705	3.292	25.629	6.093	3.072	4.039	4.886	10.0164	28.119	29.5985	35.812	17.4004	9.386	11.818	4.541	5.545	27.175	4.6677	4.187	21.284	3.789	18.481	4.403		0.842592	12.8023
21.7931	6.898	43.791	6.12	2.824	2.248	2.542	29.455	6.107	3.942	3.876	4.101	10.6399	29.98	33.2621	35.985	19.5498	10.442	13.593	6.611	6.134	24.304	3.6503	4.448	19.301	3.994	21.869	4.966		0.847222	13.3568
21.9122	6.806	44.452	5.983	2.754	2.797	3.017	31.179	6.756	4.944	4.2	4.881	9.8791	32.118	33.6562	38.422	23.5063	11.831	16.645	6.535	6.809	24.389	3.921	4.586	20.693	3.452	22.876	4.861		0.851852	14.1462
22.0313	6.568	40.646	6.787	3.436	2.342	2.826	31.901	7.6	4.602	4.116	6.396	10.0636	30.468	39.3408	41.194	27.207	11.216	18.814	6.646	6.979	25.256	4.9067	5.151	20.642	3.262	25.933	5.336		0.856483	14.8013
22.1503	7.422	41.126	6.392	2.222	2.291	2.807	29.579	6.427	5.328	3.733	5.309	9.4732	33.829	42.1417	47.307	30.0061	13.681	20.485	8.211	9.263	22.996	5.3134	5.075	20.759	4.031	26.33	4.167		0.861109	15.3965
22.2694	8.376	42.574	6.457	1.979	2.125	3.057	30.124	6.043	5.013	5.209	5.482	10.2074	35.527	42.542	47.989	29.9515	15.645	23.8	9.312	11.096	26.457	4.3739	4.301	20.214	3.978	27.592	4.487		0.865739	16.0708
22.3885	7.859	44.283	6.879	2.117	2.667	3.454	27.707	6.109	4.668	4.974	6.22	10.7246	38.437	45.74	46.9	31.3524	15.036	29.791	13.189	10.9	25.204	4.5533	4.37	19.865	3.985	29.135	5.565		0.870369	16.729
22.5076	9.412	47.783	8.951	2.958	3.229	4.1	26.157	7.022	5.055	4.461	7.55	11.5596	38.414	47.7873	48.834	24.5719	16.369	32.678	15.651	13.066	26.634	5.5075	5.486	21.754	4.085	33.041	6.254		0.874999	17.7174
22.6267	9.673	49.42	9.067	3.528	3.691	4.205	24.345	8.231	5.31	5.447	6.521	12.0485	40.557	49.8504	51.338	18.1379	15.01	32.06	19.209	17.764	25.586	5.2024	5.856	21.475	4.605	32.358	6.731		0.879629	18.0454
22.7458	10.309	51.611	9.697	3.359	3.803	3.733	23.239	8.085	4.659	5.791	6.457	13.6157	38.985	54.6608	51.149	11.929	12.711	28.769	22.495	18.718	26.12	5.2718	6.408	20.443	3.558	35.53	7.423		0.884259	18.0937
22.8649	11.296	51.655	9.926	4.207	3.348	4.248	23.622	8.04	5.674	6.246	7.58	14.9312	40.863	59.3525	44.813	8.2689	9.471	23.989	25.983	22.254	29.796	4.7195	5.522	22.846	3.841	34.757	7.404		0.888889	18.3205
22.984	13.139	55.814	11.687	5.106	3.361	5.296	24.421	8.923	7.025	5.961	8.086	15.3201	39.755	64.7073	34.249	7.2116	8.008	18.921	24.935	27.697	28.774	5.3115	6.86	21.54	4.5	34.851	8.07		0.893519	18.5011
23.103	15.62	61.704	13.502	5.984	2.745	4.429	25.771	11.418	7.085	5.914	7.019	16.6642	44.404	62.7007	22.194	5.7255	6.843	12.82	26.113	36.581	32.407	5.897	6.319	23.996	4.358	34.205	10.108		0.898146	18.9825
23.2221	17.459	72.862	18.302	6.742	3.913	4.837	27.422	11.952	7.405	7.114	8.296	16.8402	46.299	66.4328	13.279	5.6975	4.672	9.578	22.07	46.51	34.327	6.1738	6.847	21.062	6.116	33.674	12.202		0.902776	19.929
23.3412	22.944	78.338	23.417	8.552	3.424	4.564	28.983	12.051	8.569	8.207	10.46	17.0837	52.366	66.2186	9.315	3.8158	4.279	6.082	18.374	54.183	37.081	6.6433	7.882	22.465	5.559	31.458	14.438		0.907406	20.9908
23.4603	26.62	85.886	28.567	7.859	3.371	5.144	34.793	13.086	10.178	9.245	11.276	18.1016	56.93	69.0383	7.46	3.2737	3.685	5.578	12.388	54.427	39.279	7.9379	6.997	24.772	4.74	33.536	16.806		0.912036	22.2583
23.5794	31.275	89.069	38.578	9.654	4.159	6.111	37.609	15.778	10.976	9.909	13.416	17.3953	59.637	70.793	5.502	3.0384	3.36	4.187	9.845	43.258	42.291	8.9059	7.057	24.543	5.809	28.523	17.576		0.916666	22.8983
23.6985	39.807	90.557	47.533	11.732	4.967	6.833	43.822	19.637	12.199	11.046	13.76	15.1947	66.163	77.9778	4.175	2.3636	2.966	2.118	7.435	34.065	46.989	10.0177	8.195	25.041	5.458	27.667	16.796		0.921296	24.2413
23.8176	47.008	81.3	56.689	15.123	6.029	9.386	48.66	23.924	16.078	12.788	16.424	15.8614	73.726	85.1898	3.483	2.2187	2.166	2.296	4.476	23.71	48.163	11.6562	9.378	24.053	5.824	26.447	13.234		0.925926	25.3812
23.9367	55.724	74.678	61.074	17.045	7.249	11.186	53.713	29.958	19.678	15.503	21.309	15.0716	77.541	91.2458	3.907	2.253	1.487	1.493	3.535	14.855	49.502	15.9163	11.845	25.33	7.406	28.407	10.908		0.930556	26.9563
24.0558	56.857	55.787	54.804	20.589	8.858	12.464	55.36	34.87	22.96	19.834	23.784	15.0865	80.905	94.2826	2.538	1.6755	1.805	0.82	3.336	9.949	46.927	20.9124	12.817	25.582	7.651	24.131	6.69		0.935186	26.7139
24.1748	60.105	37.147	43.721	26.068	12.477	15.982	59.173	41.508	29.123	21.023	32.434	14.0395	89.899	97.0065	2.168	1.7887	1.39	1.417	3.397	5.569	44.507	26.9123	12.25	24.945	9.904	23.82	5.168		0.939813	27.5164
24.2939	59.998	24.211	30.526	30.855	15.038	19.573	58.197	45.503	38.228	28.277	35.396	15.8471	87.19	97.6049	2.393	1.4574	1.086	1.383	2.715	4.576	39.209	35.0211	12.885	26.87	10.453	28.824	4.413		0.944443	28.0641
24.413	55.302	16.48	23.975	34.086	17.568	25.513	58.789	53.442	47.358	36.984	43.489	17.9443	87.814	101.202	2.045	1.3844	1.425	1.832	2.409	4.566	33.987	37.0417	13.468	25.546	12.519	29.763	3.717		0.949073	29.2463
24.5321	46.852	11.553	15.55	35.418	22.475	31.66	61.546	60.67	63.577	41.198	46.966	19.2751	90.709	102.546	2.174	1.3893	1.073	1.532	2.315	3.087	24.006	39.1059	13.52	26.623	15.051	27.979	3.164		0.953703	30.0376
24.6512	35.005	8.55	8.638	35.871	25.535	39.045	67.833	71.427	76.071	49.288	51.74	21.6306	91.069	104.016	2.069	1.2085	0.74	1.469	2.294	2.676	16.848	33.9697	14.937	27.956	18.715	24.328	2.233		0.958333	30.9319
24.7703	23.831	7.858	7.732	36.227	28.375	46.798	69.55	76.639	85.487	54.912	55.272	21.8956	97.922	98.4831	1.288	0.9367	0.733	1.41	1.606	1.657	10.377	26.885	18.226	26.503	23.917	18.023	1.881		0.962963	31.275
24.8894	13.39	6.822	7.784	32.166	32.711	58.09	69.696	83.413	97.8	61.109	61.737	23.4386	98.623	92.6847	1.466	1.0487	0.664	0.867	1.492	2.316	6.67	19.2463	19.716	27.68	32.71	12.744	1.877		0.967593	32.1467
25.0085	9.552	6.681	6.857	25.657	29.992	70.764	67.202	86.114	105.145	68.688	62.789	26.9809	105.413	81.9176	1.379	0.6283	0.758	1.227	1.465	1.29	5.195	13.4168	20.763	33.851	40.664	10.428	1.665		0.972223	32.8327
25.1275	7.497	3.863	4.334	18.954	29.457	74.662	60.098	83.548	109.439	76.846	61.426	28.4256	107.812	69.9047	1.369	0.4368	0.752	0.794	1.377	1.534	4.27	8.4724	26.53	36.854	52.473	9.407	1.576		0.97685	32.6708
25.2466	5.995	3.327	4.248	14.677	26.915	66.869	50.38	78.74	108.64	81.846	56.446	33.0847	102.711	59.6924	0.847	0.3548	0.968	0.654	1.198	1.356	3.27	7.2189	26.372	44.034	57.354	7.656	1.727		0.98148	31.3548
25.3657	4.045	2.415	3.183	11.061	21.6	62.603	47.614	69.867	103.881	82.807	53.836	35.8199	107.199	44.2201	0.988	0.3019	0.807	0.992	1.216	0.966	3.768	4.3262	24.626	46.117	66.599	5.652	1.506		0.98611	29.9265
25.4848	3.65	2.131	3.488	8.404	18.06	53.002	35.807	54.14	91.318	76.741	44.05	41.3987	113.533	32.4666	0.745	0.3285	0.668	0.864	1.157	1.185	3.77	4.1339	21.847	47.586	72.15	4.018	0.722		0.99074	27.3098
25.6039	3.289	1.675	2.456	7.08	14.35	40.659	23.744	37.903	72.085	64.176	37.202	45.639	116.722	22.4539	0.685	0.4099	0.482	0.501	1.017	1.054	2.888	4.8339	16.682	44.489	72.648	3.486	0.561		0.99537	23.673
25.723	2.748	1.273	2.411	5.669	12.531	30.682	13.618	29.473	59.305	49.81	26.834	50.9433	113.391	15.9629	0.789	0.4143	0.724	0.667	0.731	1.153	2.49	3.4806	9.657	33.924	74.098	2.968	0.851		1	20.2444

## Sheet: Image12
X0	Y0	Y1	Y2	Y3	Y4	Y5	Y6	Y7	Y8	Y9	Y10	Y11	Y12	Y13	Y14	Y15	Y16	Y17	Y18	Y19	Y20	Y21	Y22	Y23	Y24	Y25	Y26	Y27		Ap-basal	Avg int
0	57.185	83.748	43.681	83.863	28.712	19.08	26.398	37.6418	30.188	36.659	23.319	60.81	65.309	44.425	22.57	22.994	18.081	33.81	38.777	9.655	14.299	31.484	20.209	26.8161	19.11	37.386	29.168	15.56		0	35.0335
0.1191	62.546	98.294	43.227	82.895	35.569	20.37	27.827	43.4963	32.897	39.256	24.479	66.221	79.131	50.788	29.785	34.079	22.015	38.403	47.39	11.771	16.178	33.289	26.637	29.4874	27.392	42.871	36.746	20.542		0.00518187	40.1279
0.2382	71.888	106.972	48.841	86.327	39.085	22.02	27.851	46.8748	34.62	38.235	25.984	80.535	82.503	60.244	33.534	47.549	25.696	40.116	55.164	15.368	18.9	46.993	38.373	36.2959	28.447	48.958	42.116	25.096		0.0103637	45.5209
0.3573	88.999	113.016	56.066	89.714	55.734	29.852	31.091	45.6294	39.221	46.256	31.81	83.864	87.044	63.904	41.653	69.592	38.48	49.877	56.992	18.25	22.173	55.241	47.354	39.0205	31.826	53.051	50.903	34.039		0.0155456	52.5233
0.4764	101.706	112.126	61.329	100.344	66.184	45.345	33.13	49.0407	40.641	53.182	33.055	89.781	86.76	76.274	57.272	94.351	50.872	54.179	62.88	25.598	29.445	74.299	59.16	46.7959	40.271	56.001	54.411	34.707		0.0207275	60.3264
0.5954	124.116	115.411	73.793	104.043	83.377	59.949	40.835	54.037	41.729	52.248	39.752	95.571	84.377	87.078	86.096	129.699	65.9	58.431	67.969	32.135	32.504	91.358	69.159	52.2915	45.617	65.002	60.846	39.459		0.025905	69.7422
0.7145	156.171	117.25	84.55	114.203	105.944	86.985	53	63.4928	47.985	57.142	49.518	101.385	82.551	116.774	116.992	155.018	82.732	61.7	73.254	43.224	39.74	94.526	74.295	52.0753	51.304	66.121	69.735	44.033		0.0310868	80.775
0.8336	179.992	119.752	89.888	112.955	132.51	119.719	69.374	71.2079	53.508	60.493	58.89	109.998	80.083	138.214	158.13	172.133	95.829	61.605	75.853	60.631	49.9	106.211	80.283	63.0444	50.91	76.69	74.317	47.114		0.0362687	91.7584
0.9527	191.775	124.949	95.122	124.564	164.989	143.768	91.49	77.1162	52.982	65.786	70.826	109.249	77.604	150.798	183.476	190.03	127.923	54.389	80.338	83.65	72.733	106.849	92.897	71.3918	63.607	74.131	85.76	60.269		0.0414506	103.159
1.0718	200.329	130.367	99.444	152.798	185.277	158.482	125.302	89.9879	58.448	65.712	78.526	99.293	81.633	165.22	207.016	198.165	137.849	55.141	92.592	100.934	89.331	112.652	95.794	78.4412	65.242	79.352	87.801	65.017		0.0466324	112.72
1.1909	205.749	134.268	100.442	186.46	197.731	182.878	135.526	89.779	63.609	75.811	98.945	92.625	80.138	167.366	212.08	198.282	143.04	58.801	111.262	114.161	104.578	105.888	98.54	77.2078	66.665	75.412	93.83	72.401		0.0518143	119.41
1.31	216.913	133.043	109.264	221.957	207.511	185.863	145.176	90.5049	62.915	82.842	104.404	88.43	86.862	164.962	207.635	200.094	149.445	59.004	136.931	131.32	121.646	109.003	101.444	80.9456	68.52	74.528	101.013	84.142		0.0569962	125.94
1.4291	206.666	139.738	105.576	240.485	219.189	178.809	143.172	82.8304	60.302	95.397	107.742	77.438	84.036	166.292	196.629	203.632	148.947	61.818	150.402	135.784	126.924	111.359	96.696	83.1274	74.996	78.208	103.262	88.642		0.062178	127.432
1.5481	196.086	138.26	118.244	247.637	213.438	153.73	130.207	74.3707	71.104	99.048	114.473	65.726	91.644	159.047	165.331	204.297	154.038	65.967	160.175	139.27	139.553	120.554	103.218	87.3309	80.312	91.006	100.272	97.085		0.0673556	127.908
1.6672	178.65	137.065	122.228	253.39	207.517	126.957	108.253	58.1121	71.626	93.763	109.697	67.518	101.319	138.119	110.487	205.731	165.711	89.083	142.439	126.625	159.206	114.035	99.036	83.3152	93.177	90.977	104.898	91.937		0.0725374	123.245
1.7863	147.251	136.524	128.298	253.958	217.378	102.081	88.527	44.2672	84.08	99.69	109.967	65.276	116.026	118.79	70.641	192.918	166.406	99.659	140.671	106.553	173.863	104.948	102.559	80.3966	95.574	101.326	96.566	93.814		0.0777193	119.215
1.9054	123.539	129.783	139.471	254.871	218.151	85.142	69.59	38.228	89.613	96.353	101.688	64.643	127.166	99.27	54.028	181.255	159.251	107.908	130.092	90.815	175.215	92.96	95.198	70.4933	108.989	103.318	97.779	86.839		0.0829011	113.987
2.0245	103.318	131.97	159.976	252.538	220.867	70.662	52.182	29.4353	91.592	105.045	85.835	60.446	135.281	82.5	36.083	161.687	154.92	109.578	127.469	81.843	184.777	83.562	84.666	65.2874	115.398	102.757	92.871	87.068		0.088083	109.629
2.1436	90.364	125.02	171.705	250.112	218.59	60.062	38.489	23.3671	87.79	104.712	74.206	60.157	149.212	74.939	28.117	138.911	148.755	124.496	126.313	71.674	186.017	75.532	78.219	61.2481	121.787	103.833	92.382	94.624		0.0932649	106.451
2.2627	80.917	112.169	178.042	245.92	216.238	49.74	30.916	18.7004	91.015	105.765	54.689	55.943	157.24	68.232	19.318	111.809	141.558	135.754	120.538	69.313	174.678	73.429	71.163	52.7606	127.707	114.821	93.729	93.45		0.0984467	102.341
2.3818	73.713	98.262	189.261	234.848	209.658	43.437	24.019	17.148	94.835	116.18	38.559	54.758	168.541	63.12	16.646	81.625	138.791	145.862	128.516	59.753	156.979	68.02	64.601	41.3568	129.426	116.971	91.114	100.172		0.103629	98.7918
2.5008	72.58	89.324	202.659	225.334	202	37.094	22.974	16.1721	103.994	112.742	30.796	56.333	175.676	55.25	13.161	60.852	143.491	149.523	127.761	53.367	131.595	60.195	60.868	31.5429	140.279	118.826	96.314	116.766		0.108806	96.6953
2.6199	65.074	86.703	201.416	209.017	182.769	35.719	22.016	13.1378	118.014	122.387	20.645	59.947	197.453	48.958	12.802	44.446	141.818	154.329	118.689	49.823	101.679	59.007	58.541	22.3343	130.772	133.809	101.113	128.969		0.113988	94.3353
2.739	71.501	80.503	208.75	188.102	156.923	29.086	21.268	14.1715	114.464	129.214	18.788	54.799	205.982	42.205	13.01	39.41	133.18	156.725	102.568	49.174	69.629	60.512	52.46	16.3992	116.615	130.311	99.306	136.8		0.11917	89.7091
2.8581	63.016	67.622	202.183	163.326	145.194	22.752	18.405	11.0575	113.305	134.495	13.977	58.691	213.324	36.382	11.29	28.409	135.786	158.814	99.102	48.968	43.929	57.941	49.857	12.2069	97.825	131.933	93.474	145.045		0.124352	84.9396
2.9772	56.801	58.479	191.761	142.721	136.606	22.102	20.15	12.039	116.665	130.932	12	58.359	225.505	28.232	10.842	24.388	129.156	163.945	91.485	45.824	34.471	57.59	50.361	10.4096	74.738	136.097	101.213	150.158		0.129534	81.8939
3.0963	59.68	52.849	187.384	118.399	120.225	16.722	19.73	10.5785	117.963	132.196	8.435	55.835	224.247	21.991	11.974	22.658	120.811	158.933	86.078	42.487	26.618	51.59	46.695	6.3425	55.374	123.252	94.294	142.842		0.134715	76.2922
3.2154	55.465	43.433	177.789	100.263	109.626	13.873	20.487	11.2491	114.035	134.404	9.74	55.74	216.871	14.804	12.98	17.177	119.319	153.759	85.301	43.965	21.451	50.911	39.303	6.561	43.783	130.338	101.626	130.092		0.139897	72.6552
3.3345	49.041	35.922	163.834	80.399	100.11	12.208	21.82	10.0364	108.805	134.488	10.949	55.901	210.085	13.636	9.918	15.674	100.381	146.718	79.378	42.663	20.311	49.434	37.207	6.0036	32.033	119.586	98.147	124.51		0.145079	67.4714
3.4535	43.463	29.15	132.885	70.316	102.145	10.062	25.166	9.6551	116.281	138.769	7.406	55.189	208.032	11.693	9.956	12.046	96.273	119.236	64.067	41.147	18.732	40.098	33.234	6.6118	28.132	118.59	98.052	109.199		0.150257	62.6995
3.5726	39.133	23.267	106.123	59.471	98.962	8.72	24.86	9.2801	111.724	130.873	8.118	54.952	197.36	11.147	10.315	10.887	93.746	101.688	52.151	39.572	18.482	34.407	28.713	5.93	26.249	106.916	92.636	93.347		0.155439	57.1082
3.6917	34.942	21.478	79.213	50.801	88.67	8.729	24.968	11.9862	110.87	143.248	7.928	45.29	181.411	10.636	10.858	8.872	82.402	79.344	44.62	37.365	16.285	24.008	22.624	5.4119	20.694	94.496	90.538	73.872		0.16062	51.1271
3.8108	33.418	17.935	61.755	45.866	86.406	7.807	27.662	9.9629	107.341	140.334	6.739	43.11	172.395	12.534	9.336	6.198	69.558	62.688	29.511	33.805	15.56	15.031	15.523	4.4239	21.496	82.474	81.567	56.042		0.165802	45.5885
3.9299	30.786	15.163	50.511	40.696	82.719	6.982	24.578	10.4886	107.256	150.175	6.786	35.424	159.703	12.262	9.23	7.388	60.249	43.624	20.897	27.205	13.301	9.54	12.245	5.4351	21.653	66.001	73.645	41.318		0.170984	40.9022
4.049	25.331	16.453	41.667	29.083	74.741	8.122	21.73	9.2797	111.645	144.547	6.199	34.06	143.808	11.499	6.367	5.208	48.969	32.744	13.622	24.336	12.052	7.2	7.975	6.3711	19.393	61.321	64.795	25.152		0.176166	36.2025
4.1681	24.996	15.457	32.307	29.743	62.538	7.239	24.451	9.1348	116.876	135.943	6.281	31.777	125.171	11.567	6.254	5.35	35.501	27.326	13.21	16.532	14.039	7.196	6.996	6.1735	19.277	45.685	52.154	15.784		0.181348	32.3199
4.2872	19.414	12.701	27.952	23.97	61.085	6.775	25.553	10.5866	124.72	126.269	5.425	27.221	100.182	10.265	5.381	4.07	27.525	22.427	8.778	13.744	13.706	5.466	6.387	4.263	16.173	34.143	42.248	13.982		0.18653	28.5861
4.4063	18.31	13.965	23.874	22.213	49.748	6.517	20.182	10.1221	123.532	120.582	5.26	24.413	83.286	9.513	4.809	3.331	17.89	20.714	8.073	8.842	13.068	4.722	4.897	5.568	14.945	24.857	31.62	9.946		0.191712	25.1714
4.5253	14.367	13.989	22.397	17.89	44.256	5.82	22.341	10.4348	121.732	104.921	4.8	22.407	62.296	8.907	3.724	3.856	12.884	18.991	6.864	8.572	13.942	4.189	3.537	4.8185	15.459	15.6	26.297	10.14		0.196889	22.3368
4.6444	14.414	12.629	15.368	16.443	35.405	6.593	23.752	9.3737	120.435	94.518	5.833	14.034	41.133	10.244	5.083	4.177	8.485	18.08	6.179	5.518	14.103	3.456	3.556	4.3345	14.342	13.056	18.197	8.327		0.202071	19.5382
4.7635	11.061	9.971	15.24	12.569	29.144	6.139	20.298	11.7274	112.965	80.088	5.092	11.291	23.208	9.812	4.802	2.651	7.035	15.053	7.365	5.724	14.348	3.948	3.184	5.0404	15.152	9.075	12.426	6.578		0.207253	16.821
4.8826	10.428	10.313	10.955	13.52	18.534	7.008	19.321	9.2919	100.447	67.757	4.476	6.94	12.655	9.036	3.553	1.821	5.988	15.882	5.221	4.919	15.442	2.363	3.211	3.9411	14.499	7.746	8.711	7.149		0.212435	14.326
5.0017	8.816	9.841	7.795	9.617	12.139	6.41	20.047	8.8996	95.639	45.739	4.472	4.712	9.189	9.522	4.715	2.604	5.528	13.378	3.776	3.803	13.65	2.274	2.989	4.5612	13.195	6.063	7.126	6.864		0.217617	12.263
5.1208	5.916	10.678	8.946	9.59	9.35	5.77	21.74	8.4619	87.868	30.808	4.987	4.049	5.72	9.285	4.389	3.246	4.822	11.502	4.267	5.084	18.239	2.919	2.65	3.1951	15.657	5.703	5.65	8.249		0.222798	11.3836
5.2399	5.197	10.473	6.725	7.403	7.177	4.769	21.444	9.8453	75.867	20.849	5.185	3.113	5.868	9.448	3.518	2.253	5.592	9.575	3.403	3.499	19.204	2.389	2.76	2.9003	12.645	4.992	5.342	7.023		0.22798	9.94495
5.359	5.117	9.9	7.612	7.948	4.95	5.281	22.556	8.2106	71.335	17.117	4.986	3.753	4.956	9.8	4.021	2.403	4.123	8.287	3.522	4.075	20.288	2.571	3.1	3.1438	15.341	5.495	5.33	7.569		0.233162	9.74251
5.478	4.476	8.665	7.362	5.678	3.185	6.24	21.056	7.9603	65.419	13	6.03	2.751	4.675	9.335	3.962	2.753	4.477	7.158	2.951	2.687	17.894	2.403	2.099	4.3218	15.694	4.412	5.042	7.129		0.23834	8.88625
5.5971	4.902	10.196	6.83	5.858	3.533	5.937	21.813	9.8938	60.654	10.24	5.227	3.306	4.259	10.408	4.515	2.258	4.4	6.142	3.45	3.387	23.437	2.801	2.095	3.0328	15.775	5.469	5.912	7.569		0.243522	9.04641
5.7162	3.993	11.734	7.507	4.697	3.153	5.934	25.585	9.5233	53.13	8.65	5.921	2.701	4.234	12.882	3.113	2.557	5.036	7.24	2.068	2.703	22.539	2.364	2.696	3.6776	16.111	4.657	5.015	7.185		0.248703	8.80735
5.8353	3.954	13.216	6.498	4.6	3.244	6.269	23.476	7.3582	45.922	6.318	7.368	3.587	4.341	13.021	4.403	2.667	5.162	6.06	3.473	3.923	24.338	2.638	2.736	2.489	18.014	5.233	4.501	7.737		0.253885	8.66236
5.9544	4.676	16.321	5.738	3.987	3.372	6.152	21.724	7.7783	39.505	5.374	8.558	3.295	3.561	13.582	3.664	1.829	4.069	6.091	2.726	3.855	23.624	2.325	2.304	2.462	20.001	4.705	4.212	7.176		0.259067	8.30951
6.0735	5.981	15.873	6.38	4.167	3.305	6.745	22.885	6.099	33.313	5.066	9.039	2.523	3.702	14.206	3.717	2.526	3.745	6.197	2.374	3.255	24.083	1.762	2.146	2.9151	21.945	4.593	5.692	8.296		0.264249	8.30465
6.1926	3.464	18.326	5.963	4.465	2.619	6.175	22.667	6.6906	28.911	3.427	11.503	2.677	2.509	15.534	3.101	2.223	4.919	6.494	2.496	3.362	26.573	2.278	1.947	3.8107	26.614	5.366	4.638	9.42		0.269431	8.50615
6.3117	4.586	20.214	6.063	4.537	2.267	6.837	23.335	5.0828	25.269	3.806	9.658	2.53	3.474	16.447	3.072	2.579	5.289	5.496	2.631	2.954	24.506	2.162	1.762	3.2347	27.095	4.94	4.573	9.258		0.274613	8.34491
6.4307	5.172	17.25	5.67	3.431	3.207	5.371	20.806	6.535	18.372	3.37	9.917	2.511	3.956	17.658	3.07	2.254	4.397	4.932	2.533	3.612	26.565	2.766	2.393	4.2732	29.838	6.224	4.764	10.128		0.27979	8.24911
6.5498	4.385	19.413	5.063	4.431	3.491	7.059	19.848	6.4381	13.375	2.826	10.994	2.608	4.282	17.68	3.131	1.988	6.13	5.987	3.347	2.748	25.85	3.141	2.317	4.856	30.873	4.679	4.307	10.116		0.284972	8.26297
6.6689	4.329	19.468	5.43	4.056	2.754	6.174	20.95	6.5409	8.242	2.187	10.28	2.255	3.873	16.707	3.129	1.967	5.077	5.374	2.521	3.664	28.061	2.627	2.267	4.015	25.806	6.185	5.242	9.973		0.290154	7.82693
6.788	5.684	20.054	4.993	4.685	2.873	7.362	18.373	5.9858	5.387	1.927	11.537	2.984	4.647	17.414	2.654	1.829	5.57	5.731	2.248	3.896	28.644	2.744	2.09	3.644	24.418	4.857	4.23	9.307		0.295336	7.70599
6.9071	5.239	20.255	5.459	4.373	2.618	8.634	16.46	6.4	3.244	4.403	10.748	3.035	3.941	16.629	3.611	1.794	5.852	5.364	2.858	2.49	30.519	2.558	2.027	4.433	22.275	4.508	4.272	7.769		0.300518	7.56314
7.0262	5.884	21.684	5.62	3.823	2.266	8.565	15.967	7.0578	3.62	2.775	9.938	3.619	4.82	17.401	2.956	2.577	6.306	5.882	2.3	3.212	31.803	2.119	2.186	3.3966	18.83	4.906	5.038	6.738		0.3057	7.54605
7.1453	8.331	21.68	4.807	2.99	2.606	11.013	16.038	5.8043	2.524	2.688	10.24	2.826	4.003	18.361	2.548	1.961	7.145	6.105	2.878	2.591	32.93	2.66	2.337	3.8298	14.579	4.409	5.544	7.226		0.310881	7.52336
7.2644	10.066	20.139	5.007	3.246	2.789	12.223	18.617	5.4119	2.668	2.856	8.802	2.102	4.409	16.403	2.54	2.181	8.483	6.239	2.276	3.008	39.18	2.247	2.43	3.4533	14.982	4.53	3.618	7.213		0.316063	7.75426
7.3834	12.339	18.463	5.512	4.109	2.739	12.936	16.276	5.6024	2.445	2.61	11.092	2.47	4.492	16.319	2.631	2.365	11.539	5.868	2.338	3.196	40.146	2.851	2.372	3.991	12.981	3.934	5.082	6.497		0.321241	7.97126
7.5025	11.61	19.321	5.43	2.929	3.44	11.825	18.204	5.4719	2.469	2.691	10.357	2.961	4.605	15.904	2.502	2.407	14.059	6.001	2.959	4.133	36.304	2.538	2.102	3.9421	14.595	6.002	4.466	5.515		0.326423	8.02654
7.6216	11.751	22.089	5.665	2.816	2.423	14.419	21.173	5.7946	2.528	4.059	11.55	2.972	4.377	17.945	2.72	1.973	12.025	4.659	2.108	3.428	34.856	2.225	3.019	4.014	13.637	5.796	5.642	5.056		0.331605	8.23999
7.7407	10.201	20.176	5.259	3.652	2.385	15.227	18.61	6.9282	2.533	2.451	11.077	3.356	5.604	19.717	1.696	2.634	12.623	5.15	2.174	3.491	28.925	2.057	2.152	5.0001	13.327	6.467	4.987	4.751		0.336786	7.95037
7.8598	9.091	20.507	6.571	2.772	1.991	14.734	20.809	7.2483	2.267	2.483	12.523	2.945	5.834	20.009	2.259	2.253	14.892	5.412	2.203	4.117	31.647	2.798	2.328	4.0821	10.299	5.252	5.18	5.126		0.341968	8.12973
7.9789	6.682	20.326	5.967	3.267	2.535	14.398	23.053	6.8439	2.95	3.005	11.416	3.183	6.161	19.729	2.636	2.22	14.831	4.22	2.465	3.473	30.815	2.798	2.376	3.3972	11.116	6.579	4.7	5.882		0.34715	8.108
8.098	6.397	21.088	5.548	2.661	2.311	14.5	20.17	6.2669	3.19	2.959	11.754	2.305	6.282	22.034	3.047	2.289	13.173	3.398	2.463	3.38	26.16	2.729	2.421	4.3749	9.606	7.562	5.387	5.525		0.352332	7.82074
8.2171	4.854	18.267	6.638	3.613	2.587	14.494	19.04	7.9984	2.301	3.028	13.935	3.138	6.347	18.641	2.015	2.301	14.757	3.42	2.462	2.694	24.231	2.154	2.1	4.1847	10.102	8.164	6.32	4.851		0.357514	7.66561
8.3362	5.932	16.143	4.385	3.203	2.506	13.61	20.616	8.399	2.798	2.898	11.52	2.403	6.302	16.845	2.352	1.974	14.89	3.294	1.677	2.99	26.766	2.19	2.346	4.2367	10.277	7.926	6.205	5.503		0.362696	7.50667
8.4552	4.762	13.263	5.426	3.531	1.875	12.862	24.358	6.5784	2.474	2.65	14.656	2.273	6.862	16.903	2.756	1.968	14.31	3.026	2.329	3.066	25.441	2.13	2.773	4.0324	9.264	8.455	7.382	4.794		0.367873	7.50714
8.5743	4.641	12.504	4.39	3.911	2.602	13.742	25.039	5.1965	2.138	2.585	11.687	2.2	7.493	14.27	1.92	2.648	14.504	3.197	2.379	3.5	22.976	2.248	2.656	3.5084	7.933	7.7	6.512	6.846		0.373055	7.17592
8.6934	5.048	11.324	4.245	2.694	3.248	12.11	26.879	5.2421	2.766	2.624	13.999	3.297	7.885	14.179	1.772	2.12	16.614	3.067	1.81	4.503	24.674	1.775	2.378	4.4273	9.074	8.463	7.286	5.924		0.378237	7.47955
8.8125	4.765	11.794	4.236	2.776	2.185	13.296	30.787	3.6188	2.604	3.593	13.469	3.319	7.29	15.053	2.327	1.722	18.007	2.723	2.595	3.6	23.161	2.728	2.591	4.7573	8.172	7.127	7.848	6.713		0.383419	7.60204
8.9316	5.588	11.429	5.017	2.834	2.929	13.349	31.903	3.9843	2.274	3.303	13.778	2.804	7.532	15.103	2.033	2.258	22.653	3.241	3.071	3.85	25.025	2.245	2.588	3.8698	9.154	7.632	8.411	8.31		0.388601	8.07743
9.0507	6.141	10.039	3.968	3.504	2.157	11.746	30.179	4.2314	2.455	2.527	16.568	3.099	8.017	14.415	1.659	1.798	23.337	2.315	2.418	5.061	26.394	2.874	1.876	3.6558	9.096	6.758	10.888	6.597		0.393783	7.9919
9.1698	6.96	11.02	4.648	3.112	2.434	13.929	34.3	4.4626	2.079	2.344	16.149	2.477	8.309	15.998	2.707	2.507	26.144	2.427	2.034	4.336	30.541	2.24	2.881	3.8063	7.57	6.441	11.06	6.6		0.398964	8.55414
9.2889	8.388	9.19	3.765	3.305	2.184	15.777	34.228	4.391	2.949	1.894	19.393	2.247	7.565	14.679	2.257	2.406	24.672	3.451	2.043	3.732	33.496	3.131	3.065	3.2706	7.504	6.38	10.999	7.654		0.404146	8.71484
9.4079	8.678	9.287	3.137	2.803	2.389	12.762	30.405	4.0734	2.917	1.888	18.665	2.56	9.369	13.409	2.581	2.687	26.167	2.741	2.321	3.909	32.736	2.99	2.706	3.3074	6.19	8.03	11.41	6.385		0.409324	8.44653
9.527	11.937	10.184	3.729	3.334	3.158	13.183	32.512	4.6915	1.682	2.481	19.984	3.536	9.566	12.798	1.924	2.01	26.789	2.505	2.417	4.07	36.951	2.77	2.503	3.3528	9.278	8.16	12.557	5.372		0.414506	9.05123
9.6461	12.929	8.183	3.881	4.112	2.199	13.857	25.969	4.6257	2.673	3.383	21.581	3.836	8.746	14.301	2.19	2.041	30.5	2.251	2.099	3.286	37.468	3.051	2.71	3.9683	7.044	7.004	11.092	5.871		0.419688	8.95896
9.7652	13.542	7.613	3.876	3.782	2.23	12.269	24.83	4.7074	2.526	2.774	23.67	3.734	8.307	13.574	2.491	1.605	28.071	2.533	2.543	4.016	34.905	2.889	2.066	3.8635	6.912	8.565	10.185	6.341		0.424869	8.72928
9.8843	18.781	6.467	3.572	3.143	2.775	14.113	21.662	3.5844	2.579	2.171	24.483	2.822	8.962	14.127	2.893	2.736	25.372	3.165	2.45	3.479	34.126	1.958	2.45	2.8829	5.258	8.867	10.706	5.479		0.430051	8.6094
10.0034	23.723	6.101	3.559	2.899	2.503	14.104	19.901	4.1104	2.403	3.004	21.298	2.902	9.965	11.943	2.355	2.274	24.36	2.527	1.309	3.251	28.709	2.582	3.054	3.193	7.219	9.587	10.392	6.249		0.435233	8.40987
10.1225	26.579	5.485	3.578	2.409	2.714	15.512	17.483	3.9217	2.302	3.99	21.881	3.208	10.74	11.062	1.894	2.793	22.824	2.472	2.092	3.991	33.818	3.555	2.584	2.7096	4.578	9.912	10.279	5.015		0.440415	8.54933
10.2416	27.626	5.291	3.36	2.439	2.618	11.039	14.311	4.7036	2.978	3.359	19.662	2.667	9.8	12.241	2.416	2.57	21.659	2.344	2.149	3.19	36.027	2.942	2.794	3.9402	5.034	11.527	8.573	4.655		0.445597	8.28267
10.3606	28.516	4.678	4.039	2.501	2.473	14.235	13.158	5.4843	2.629	3.533	20.394	4.617	10.485	9.319	2.212	2.462	21.827	2.915	2.136	3.504	35.585	2.754	2.296	3.3763	5.627	10.882	11.167	7.25		0.450774	8.57338
10.4797	27.442	4.047	3.285	2.543	2.348	13.46	16.341	3.5081	2.632	3.495	17.767	3.353	8.612	9.312	2.281	2.971	21.976	2.974	2.976	4.504	34.052	2.219	2.17	4.299	5.134	11.279	10.901	5.867		0.455956	8.27672
10.5988	25.674	4.349	4.814	2.613	2.31	15.606	13.87	3.8815	2.394	2.927	18.675	3.335	9.892	9.199	3.38	3.371	19.824	2.293	2.327	4.091	37.311	2.828	3.274	3.6662	4.727	9.878	8.778	6.336		0.461138	8.27228
10.7179	28.776	4.207	3.484	3.534	1.768	15.587	13.964	4.6746	3.063	2.953	16.489	3.302	10.373	9.868	2.227	3.108	19.672	2.443	1.98	3.738	37.703	2.784	2.168	4.2545	5.399	11.821	9.903	7.138		0.46632	8.44218
10.837	29.001	4.296	3.899	3.317	2.116	14.534	13.811	3.5378	2.099	2.925	17.195	3.647	10.819	7.973	2.734	3.612	20.249	2.961	3.026	3.446	37.618	3.221	2.281	3.7939	4.631	11.272	8.295	4.783		0.471502	8.25331
10.9561	27.713	4.519	4.176	2.603	2.519	15.736	13.905	4.0317	2.664	3.224	13.835	3.768	11.006	7.362	2.186	2.832	17.372	2.211	2.593	3.761	36.375	2.578	3.501	4.0808	4.352	13.541	8.104	6.786		0.476684	8.11909
11.0752	29.867	4.111	3.529	2.555	2.35	15.164	14.016	3.5845	2.181	3.447	12.722	3.425	12.797	7.335	2.107	3.127	18.072	2.163	2.018	3.516	34.627	3.307	2.452	4.416	3.912	13.164	9.025	6.641		0.481866	8.05823
11.1943	36.28	4.648	3.333	3.537	3.322	16.63	12.293	4.2503	1.818	3.227	13.105	4.51	12.261	7.282	2.997	3.293	18.48	2.556	2.905	3.318	34.009	2.572	3.517	4.2131	4.96	12.386	9.533	6.673		0.487048	8.49673
11.3133	40.831	3.806	3.914	2.45	2.743	16.504	14.429	4.5835	2.479	3.021	10.932	3.602	12.739	7.251	2.461	3.664	14.391	2.44	2.773	3.686	30.067	2.894	2.59	3.3417	5.336	12.35	9.336	7.028		0.492225	8.27294
11.4324	44.009	4.229	3.13	2.41	2.34	16.544	15.053	5.9024	2.556	3.402	9.445	3.544	14.226	6.217	2.801	4.081	17.081	2.419	2.398	3.114	25.675	3.267	2.464	4.1104	5.222	13.33	9.171	7.079		0.497407	8.40071
11.5515	43.432	3.936	2.92	2.641	3.124	14.571	13.32	4.4528	2.673	3.517	13.265	3.124	12.5	5.527	2.955	4.236	13.725	2.816	2.036	3.956	28.659	2.432	1.751	3.8221	4.956	12.097	10.649	7.696		0.502589	8.24246
11.6706	42.715	3.839	2.727	2.556	2.559	16.794	10.047	4.9595	2.842	3.564	12.933	4.564	13.238	7.224	2.574	4.71	14.021	2.234	2.646	4.034	29.682	2.317	2.086	4.0562	5.471	9.705	8.418	7.77		0.507771	8.22449
11.7897	38.571	3.758	3.575	3.083	1.921	17.166	9.883	2.8856	3.032	4.267	13.08	4.357	14.781	6.048	2.873	4.352	12.361	2.447	1.8	4.463	30.574	2.281	3.173	3.491	4.82	11.192	9.402	8.555		0.512952	8.1497
11.9088	38.591	3.65	2.884	2.637	1.867	17.556	11.088	4.6916	2.694	3.593	11.336	4.76	14.019	4.886	2.315	5.389	9.564	3.123	2.845	3.688	28.979	2.772	2.95	3.2879	4.285	11.022	10.194	8.284		0.518134	7.96252
12.0279	33.545	3.052	3.199	2.853	2.345	17.317	8.907	3.7714	2.62	3.553	13.403	4.22	13.689	3.535	2.659	6.282	9.793	2.104	2.289	2.821	28.903	3.077	2.815	4.2738	4.835	8.35	10.747	9.35		0.523316	7.65386
12.147	32.18	3.37	3.557	2.441	2.153	15.316	7.056	2.9088	2.336	4.008	12.354	3.829	15.943	4.775	2.757	7.29	8.393	2.319	2.278	3.377	31.339	3.246	2.967	4.0437	5.8	7.227	10.243	9.304		0.528498	7.60038
12.2661	24.952	4.205	3.848	2.284	2.379	19.509	7.445	2.7272	2.281	3.884	13.416	3.606	14.685	5.443	3.113	6.623	8.548	2.505	2.661	3.741	29.315	3.182	3.606	3.4821	4.939	8.483	9.349	8.654		0.53368	7.45947
12.3851	23.184	3.357	2.7	2.622	2.818	19.246	7.423	4.9207	2.706	4.02	13.467	4.744	16.417	5.546	2.942	8.199	8.223	2.439	2.157	3.69	31.625	2.151	2.651	4.2117	5.464	9.278	11.015	7.933		0.538857	7.68391
12.5042	25.123	3.3	3.117	2.807	2.222	22.136	7.809	3.4735	2.242	4.434	13.911	4.407	21.085	4.448	3.041	10.746	7.494	2.281	2.104	2.805	35.367	2.604	2.753	3.4386	4.624	9.089	11.493	7.84		0.544039	8.07836
12.6233	23.211	3.555	2.899	1.829	2.345	22.784	6.939	3.2442	2.259	4.069	12.915	4.449	20.92	3.036	1.62	9.927	7.518	2.598	2.174	4.054	32.178	2.032	2.64	3.8325	3.726	10.016	15.486	8.053		0.549221	7.86817
12.7424	20.383	3.477	3.084	2.607	1.9	23.752	6.757	2.716	2.714	4.52	11.502	4.468	22.5	4.945	2.172	11.517	6.895	2.675	2.678	4.961	31.473	2.227	2.399	3.2403	5.064	10.507	14.515	8.615		0.554403	8.0094
12.8615	21.794	3.497	3.3	2.161	2.374	25.114	6.395	3.5555	2.533	4.336	12.788	4.338	24.811	4.274	2.303	13.919	6.823	2.661	3.109	4.478	34.045	3.109	2.782	3.763	5.404	9.8	11.155	7.138		0.559585	8.27713
12.9806	19.527	3.171	2.136	2.389	3.238	26.674	6.24	2.9977	2.377	4.298	13.3	4.779	23.523	4.922	2.418	13.472	5.137	2.846	1.677	3.864	35.123	2.376	2.173	3.761	5.371	8.247	11.334	7.362		0.564767	8.02617
13.0997	15.518	2.826	3.082	3.254	2.896	27.189	4.805	3.2732	2.163	3.951	14.233	5.192	25.929	4.298	3.136	15.221	5.579	2.932	2.763	4.611	33.669	2.3	3.508	4.5847	5.678	9.426	12.027	6.769		0.569949	8.24332
13.2188	14.58	3.009	2.837	2.849	2.085	26.772	6.597	2.8418	2.879	4.028	14.37	4.226	22.912	3.992	2.053	17.347	4.4	2.514	2.846	3.021	35.849	1.928	2.656	4.5314	4.601	9.802	9.8	6.975		0.575131	7.93933
13.3378	10.147	3.169	2.691	3.223	2.016	28.436	6.412	2.7281	2.487	5.044	13.162	5.927	22.06	3.73	2.004	19.047	4.841	2.619	2.66	3.179	32.272	2.345	2.712	3.7864	4.663	9.134	10.413	8.223		0.580308	7.82609
13.4569	10.23	2.673	2.863	1.869	2.545	28.753	4.75	2.3951	2.873	5.132	12.659	5.316	19.453	3.795	2.343	18.445	5.029	3.041	2.452	3.491	29.883	2.701	2.582	3.4195	4.004	9.808	10.561	8.129		0.58549	7.54266
13.576	10.931	2.802	2.301	3.412	2.053	29.561	5.329	2.25	2.305	4.627	14.536	4.692	22.371	3.806	2.379	21.41	4.152	2.697	2.497	3.88	28.558	2.077	3.048	4.44	4.277	7.902	8.122	7.148		0.590672	7.62725
13.6951	7.049	2.93	2.348	2.273	2.562	29.309	4.906	2.9359	2.741	5.424	16.276	5.182	18.436	3.355	3.054	21.098	3.607	2.703	3.252	3.273	28.879	2.594	2.119	3.832	3.544	8.996	8.517	7.527		0.595854	7.45435
13.8142	7.732	3.683	2.552	2.769	2.758	29.105	5.086	2.4926	2.119	5.589	14.518	5.996	19.833	3.924	2.971	21.11	3.379	2.813	2.924	4.469	31.627	2.278	3.129	3.5907	4.251	8.99	10.341	8.157		0.601036	7.79237
13.9333	8.159	3.238	2.321	2.258	2.06	29.585	6.053	3.1974	2.183	5.065	15.394	5.604	21.62	3.841	2.676	21.884	3.481	2.35	3.268	4.003	26.225	2.354	2.74	3.6149	4.622	7.692	9.746	10.2		0.606217	7.69408
14.0524	7.043	2.152	2.911	1.787	2.911	30.608	5.689	2.7425	3.353	5.423	18.743	5.222	19.341	3.153	2.75	22.043	3.444	2.353	2.479	4.262	31.099	2.121	2.304	4.1965	3.781	8.556	10.608	11.102		0.611399	7.93489
14.1715	6.925	2.812	2.774	2.706	3.202	29.503	4.491	2.2252	2.565	6.125	21.045	5.911	18.216	4.336	2.713	23.234	4.863	2.559	3.021	3.892	27.285	2.493	2.933	4.7932	4.125	7.744	10.903	9.688		0.616581	7.96723
14.2905	6.754	3.139	3.059	3.016	1.838	30.989	5.087	1.884	2.365	6.277	18.894	6.272	19.909	3.149	2.355	23.477	3.652	2.413	2.891	5.697	24.328	2.181	2.5	5.2902	4.726	8.345	10.444	11.655		0.621759	7.94951
14.4096	5.961	3.687	3.73	2.084	3.163	32.212	5.826	2.5937	2.168	7.302	21.076	5.898	20.569	3.94	2.046	21.71	3.729	1.963	2.477	4.8	22.773	2.579	3.101	4.6937	4.034	7.938	9.618	12.396		0.62694	8.00241
14.5287	5.026	2.436	2.002	1.853	2.599	33.057	5.406	2.1557	2.166	7.182	25.641	5.104	18.175	3.437	2.104	27.825	3.206	2.213	3.283	3.891	23.342	2.968	3.214	4.5609	3.927	8.784	8.971	11.753		0.632122	8.08149
14.6478	6.699	3.573	2.717	2.006	1.865	33.204	5.157	2.4664	2.839	7.65	26.038	4.719	20.395	3.294	2.725	21.887	4.008	2.116	2.526	4.168	25.455	2.438	2.843	4.6565	3.803	9.457	8.981	10.315		0.637304	8.14289
14.7669	4.956	2.982	2.625	3.314	2.362	30.466	4.522	2.868	2.886	8.441	26.076	5.578	20.311	3.071	2.141	21.512	4.175	2.554	2.465	4.5	23.498	3.318	2.914	4.8983	4.984	9.709	8.474	10.3		0.642486	8.06787
14.886	4.787	2.154	2.059	2.842	2.553	29.077	7.241	2.7103	1.874	10.54	24.594	5.238	21.035	2.426	2.487	22.037	2.975	1.989	2.791	5.196	23.192	1.945	2.517	4.3933	3.058	8.37	8.376	12.242		0.647668	7.88209
15.0051	4.507	3.808	2.077	2.037	3.208	30.178	6.996	2.5596	3.387	10.614	26.711	5.574	21.246	3.119	2.368	22.421	3.443	2.236	2.869	4.031	27.761	1.939	2.647	5.4128	4.952	8.788	8.658	13.533		0.65285	8.46716
15.1242	4.399	2.502	2.943	2.222	2.711	29.578	8.991	3.0355	2.673	10.229	23.194	5.065	22.283	3.427	2.571	20.961	1.837	2.314	2.886	3.859	27.794	2.521	2.82	6.4898	4.32	8.657	7.876	13.9		0.658032	8.2878
15.2432	5.117	3.422	2.927	2.341	3.088	30.949	6.532	3.422	2.876	10.308	22.827	6.553	20.92	3.377	2.347	23.679	2.827	3.589	2.543	5.31	24.665	2.815	2.229	4.6574	4.573	8.052	9.806	16.724		0.663209	8.51698
15.3623	4.519	2.814	3.342	2.68	2.406	33.012	7.054	2.2713	2.762	11.391	26.451	6.591	18.18	3.786	2.451	20.016	2.615	3.309	2.527	4.372	28.008	2.543	2.557	5.2956	4.855	9.111	8.229	17.861		0.668391	8.60746
15.4814	3.314	2.347	2.304	2.645	2.668	30.4	7.331	2.9244	1.822	11.82	28.833	6.798	16.635	2.677	1.785	22.551	2.759	3.062	2.745	3.975	30.07	2.145	2.542	4.7852	4.841	6.633	9.927	18.526		0.673573	8.53088
15.6005	4.386	2.933	2.326	2.375	2.581	32.792	7.678	3.1988	2.613	10.519	24.439	7.236	14.488	3.04	2.606	21.754	2.782	3.14	3.843	4.845	30.574	1.946	3.097	5.4479	3.608	8.783	7.497	16.759		0.678755	8.47452
15.7196	3.575	3.44	2.589	3.093	3.054	32.53	5.994	2.762	2.458	11.113	24.689	6.97	15.655	3.009	2.15	21.766	2.156	2.985	2.538	5.078	32.113	2.41	2.989	5.6094	3.941	8.13	7.452	16.537		0.683937	8.45662
15.8387	3.481	4.009	2.588	2.67	3.127	35.098	6.937	2.9931	2.733	10.818	26.813	7.793	15.126	3.286	2.008	21.915	2.682	2.829	3.598	4.192	31.295	2.433	2.446	5.0446	3.922	6.149	7.298	16.282		0.689119	8.55592
15.9578	3.679	2.899	2.139	2.08	4.056	41.115	5.802	2.9643	2.197	9.677	28.656	8.987	15.126	3.434	1.913	22.531	2.484	3.498	2.986	4.9	32.264	2.306	2.532	5.3548	3.927	7.647	9.505	14.99		0.6943	8.91604
16.0769	4.304	2.359	3.74	1.805	3.906	36.474	6.218	2.5803	2.566	11.288	28.396	9.024	16.307	3.234	1.729	21.114	2.709	2.809	3.33	4.451	28.795	1.681	3.102	5.9286	3.856	7.18	10.09	15.27		0.699482	8.72307
16.196	3.514	3.359	2.355	1.912	4.395	39.882	5.895	3.3152	2.838	11.178	30.075	10.317	12.594	3.34	2.958	21.462	2.679	2.034	2.679	5.452	29.197	2.964	2.876	5.4429	3.461	7.343	10.89	15.482		0.704664	8.92461
16.315	4.213	2.417	2.914	1.689	3.366	46.205	5.219	1.9505	3.688	12.249	28.289	9.947	13.705	2.882	2.709	24.065	3.241	2.652	2.518	5.27	33.066	2.839	3.547	6.2231	3.924	7.15	10.713	13.56		0.709842	9.29324
16.4341	3.155	2.752	2.038	2.8	3.221	46.049	4.494	3.0766	2.981	10.568	31.361	11.838	13.973	3.503	2.843	23.988	3.105	2.364	3.007	5.753	32.376	2.534	2.636	6.1454	3.011	7.02	12.407	12.974		0.715023	9.35618
16.5532	3.099	3.432	2.875	2.904	4.236	48.688	5.146	2.7896	2.852	11.083	29.89	11.814	12.555	3.816	2.55	22.24	2.968	2.578	2.743	5.2	36.823	1.709	2.629	6.7798	3.443	6.765	13.256	11.514		0.720205	9.51348
16.6723	2.965	3.103	2.48	2.403	4.567	42.535	4.673	2.1837	3.562	11.745	28.161	11.17	11.554	3.779	2.425	24.649	2.728	2.801	2.841	6.32	37.423	3.31	3.913	5.9256	3.604	5.036	15.322	12.13		0.725387	9.40387
16.7914	3.611	3.15	3.276	2.676	4.772	40.783	4.647	2.4948	2.717	12.007	29.437	11.993	10.118	3.393	2.213	25.478	2.645	2.366	2.418	5.092	39.633	2.502	2.52	5.9517	3.056	5.352	14.604	11.926		0.730569	9.31541
16.9105	3.05	2.279	2.554	2.114	5.301	39.559	4.817	2.2318	3.425	11.063	27.164	13.28	9.766	2.061	2.856	23.321	2.964	3.25	2.468	4.91	44.331	2.246	2.214	6.7725	3.515	4.089	13.782	13.062		0.735751	9.23019
17.0296	2.971	2.444	2.438	2.572	5.049	35.985	3.486	2.7665	2.885	12.286	28.342	13.222	11.244	3.159	2.788	22.885	2.716	3.126	2.789	6.248	42.989	2.862	2.622	6.6316	3.169	5.431	14.078	15.958		0.740933	9.39793
17.1487	3.349	2.956	3.362	2.08	4.701	36.019	4.89	2.3729	2.945	10.57	29.377	15.92	11.336	2.986	3.051	19.338	2.266	2.024	2.534	6.7	42.418	2.551	3.559	6.8946	2.882	4.968	12.822	16.054		0.746115	9.31877
17.2677	3.194	2.596	2.259	2.169	6.754	35.709	4.24	2.256	3.129	14.47	26.819	15.294	9.043	3.03	3.016	19.332	2.78	2.285	3.132	7.105	49.671	3.113	2.717	7.3155	4.182	6	13.613	14.854		0.751292	9.64562
17.3868	2.266	3.224	2.816	2.317	5.777	34.878	4.699	2.8679	3.267	14.368	29.724	17.166	7.181	2.186	2.856	17.983	2.095	2.133	2.927	7.955	52.157	2.226	3.146	7.3704	4.065	4.694	12.51	14.628		0.756474	9.62437
17.5059	3.068	2.573	2.884	2.428	8.368	36.477	4.094	2.5215	3.695	15.137	26.07	17.593	8.712	3.418	2.646	18.918	2.946	2.595	2.799	7.058	59.861	2.269	3.722	7.7632	4.46	4.83	15.532	13.687		0.761656	10.2187
17.625	2.936	2.539	2.56	2.727	10.509	34.544	4.493	2.4686	3.91	15.326	30.876	17.594	8.147	2.438	2.644	16.203	2.395	2.656	3.272	6.871	65.413	2.929	3.309	8.8603	3.74	5.356	12.271	16.141		0.766838	10.4689
17.7441	2.804	1.874	4.454	2.988	11.716	36.381	4.651	2.7494	3.053	17.159	29.739	16.531	7.044	3.282	2.628	16.069	3.444	2.874	4.141	7.453	74.916	2.432	2.288	8.5997	3.662	4.86	15.986	14.497		0.77202	11.0098
17.8632	2.542	2.428	2.891	2.479	11.493	35.117	4.266	2.7327	3.617	16.346	33.432	19.712	7.644	2.643	3.614	15.281	2.61	2.797	3.345	6.064	70.105	2.257	2.621	7.7222	4.029	3.834	14.485	17.821		0.777202	10.8546
17.9823	3.507	2.697	3.161	2.178	11.186	39.904	3.639	2.7419	3.931	16.286	32.768	18.581	6.793	2.976	3.23	13.688	2.841	3.01	3.025	7.449	72.587	2.98	2.379	8.4983	3.641	5.455	15.88	18.46		0.782383	11.1954
18.1014	3.967	2.54	2.57	3.303	13.014	36.783	3.553	2.9704	3.892	16.601	29.45	19.665	6.991	3.105	4.466	15.88	2.65	3.173	3.351	8.148	64.665	2.769	3.178	8.4675	3.68	4.977	14.642	21.614		0.787565	11.0737
18.2204	2.331	2.688	3.085	3.006	13.977	36.096	3.526	3.0863	3.879	16.87	33.313	19.517	5.226	2.704	4.805	13.486	2.519	3.719	3.457	8.255	57.932	4.186	2.657	10.729	2.647	4.28	16.956	18.373		0.792743	10.8323
18.3395	2.246	2.511	3.533	2.25	13.565	39.124	3.835	3.181	5.5	18.888	33.237	20.107	6.223	2.982	6.163	12.989	3.641	3.456	2.885	7.663	48.222	2.791	2.711	10.1417	5.037	4.947	19.655	19.438		0.797925	10.9615
18.4586	2.743	2.575	3.943	2.486	13.196	41.228	4.391	2.6181	5.48	18.647	33.815	21.756	6.323	2.58	7.096	13.678	2.675	2.839	2.97	10.174	44.371	2.501	2.955	9.5164	4.833	5.182	18.319	18.89		0.803107	10.9922
18.5777	1.868	2.828	2.708	2.923	14.009	40.389	3.286	2.0899	5.645	20.601	34.5	19.268	6.591	2.276	6.289	12.335	2.383	2.965	3.078	9.966	37.766	2.1	3.252	12.0868	4.911	3.563	18.303	18.653		0.808288	10.594
18.6968	2.913	3.101	3.053	2.591	15.682	38.161	3.874	2.4853	6.554	22.835	39.109	20.96	5.64	2.425	6.653	12.819	2.186	2.344	3.428	11.27	37.047	2.16	3.017	13.8047	4.017	4.514	22.648	18.343		0.81347	11.2012
18.8159	2.986	2.428	3.087	2.88	17.877	36.493	3.407	3.3118	6.632	27.017	40.45	22.365	7.193	2.873	7.317	10.393	2.14	2.45	3.447	10.018	31.85	2.636	3.373	14.7881	4.473	4.672	22.03	18.833		0.818652	11.3364
18.935	3.871	3.654	4.956	3.463	16.162	35.449	3.12	3.3385	8.281	29.829	42.171	24.377	8.244	3.809	8.51	8.635	1.94	2.553	3.992	11.378	24.753	2.854	2.711	16.8222	5.02	4.51	22.233	17.622		0.823834	11.5806
19.0541	3.273	2.47	3.68	4.718	19.258	34.703	3.974	3.2247	9.259	33.426	41.282	29.574	7.581	2.863	11.115	8.915	2.574	2.614	4.235	11.432	21.285	3.503	2.626	14.5358	5.94	4.455	23.274	19.275		0.829016	11.9666
19.1731	3.499	2.524	3.543	4.266	19.994	32.64	2.959	4.1333	12.452	34.97	43.334	33.163	8.72	3.017	11.246	8.279	3.557	3.217	5.019	12.737	14.79	2.927	4.178	13.1579	7.254	4.655	25.842	19.622		0.834193	12.3463
19.2922	4.35	2.271	4.368	6.212	22.96	30.516	3.295	2.5552	14.033	41.546	42.717	35.892	10.243	2.983	12.783	9.693	2.744	3.68	5.073	12.505	11.385	4.001	3.95	13.908	7.697	4.726	26.272	23.512		0.839375	13.0668
19.4113	3.221	2.772	4.31	7.889	29.333	32.254	3.311	3.1098	13.883	44.55	44.986	36.34	10.201	2.918	12.406	9.167	3.036	3.348	6.536	13.407	8.523	4.363	3.681	13.7744	8.097	5.042	25.208	22.615		0.844557	13.51
19.5304	4.846	2.558	3.871	8.874	35.852	32.148	3.354	3.7256	19.47	52.372	42.153	41.43	10.808	3.614	15.015	10.488	2.832	3.12	8.485	17.462	5.145	3.848	4.426	15.6492	8.712	4.258	26.415	23.918		0.849739	14.816
19.6495	4.104	2.389	4.809	13.617	41.381	30.862	3.186	3.7735	20.915	57.32	44.752	43.025	10.937	4.132	14.977	9.605	2.65	4.987	10.088	20.181	4.138	5.584	5.581	15.0945	11.628	4.14	24.345	26.498		0.854921	15.8821
19.7686	3.294	1.912	5.88	21.282	46.482	33.587	3.258	3.0295	22.99	56.402	44.557	43.937	9.99	5.52	19.054	9.689	3.284	4.157	11.382	24.845	4.063	6.009	5.447	16.092	12.561	5.496	25.014	24.734		0.860103	16.9267
19.8877	3.31	2.442	4.843	28.722	56.868	30.812	3.139	3.9334	26.285	54.448	40.127	50.418	12.2	5.142	21.689	12.825	2.615	3.946	15.899	28.312	2.954	7.804	4.976	12.2961	14.993	5.862	23.492	30.511		0.865285	18.2451
20.0068	3.686	2.328	5.563	36.863	66.422	30.277	3.39	4.0352	27.867	52.477	42.172	58.038	13.889	5.297	24.435	12.461	2.12	4.306	24.499	30.862	1.68	11.927	6.978	10.8074	13.82	6.656	25.933	32.941		0.870466	20.0618
20.1259	3.92	2.142	6.834	41.514	69.173	29.83	3.734	5.3737	33.445	43.371	41.313	54.962	15.475	5.001	25.811	12.764	3.336	5.594	27.972	37.558	2.588	16.053	7.699	8.82	13.298	5.232	27.296	39.82		0.875648	21.0689
20.2449	3.043	1.981	8.609	43.922	65.35	31.283	3.685	5.1681	31.398	37.988	42.795	62.015	17.683	8.08	31.256	13.644	3.157	7.946	35.268	39.189	1.21	18.464	11.805	7.9066	11.528	6.902	28.306	37.479		0.880826	22.0379
20.364	3.814	2.513	10.113	42.937	67.708	29.099	4.385	6.6425	33.45	26.93	45.504	63.773	19.977	9.625	31.275	14.598	3.555	10.104	42.733	28.702	0.945	18.226	12.596	6.7635	11.867	6.763	34.578	42.376		0.886008	22.5554
20.4831	4.742	3.239	13.564	42.55	53.981	31.3	5.276	8.4701	27.775	21.545	44.2	65.02	22.277	10.695	36.372	14.637	3.149	12.007	47.38	17.674	0.796	14.389	14.121	5.3667	11.087	7.348	32.859	41.199		0.89119	21.8935
20.6022	4.799	3.732	19.343	40.326	44.099	32.364	5.151	9.991	31.586	15.069	43.636	77.766	23.557	11.261	41.283	14.8	2.9	17.612	48.243	11.499	1.077	8.907	14.697	4.5058	9.903	7.715	34.492	41.579		0.896371	22.2105
20.7213	5.224	4.034	25.908	38.573	30.888	31.133	5.665	11.6035	27.321	9.658	45.612	85.24	25.002	14.825	44.707	16.056	4.333	18.806	46.359	8.263	0.98	8.503	15.647	4.0093	6.539	9.302	34.77	41.583		0.901553	22.1623
20.8404	4.69	3.49	34.523	28.657	20.573	34.442	7.463	14.5327	25.307	6.416	41.436	87.308	30.546	19.489	54.277	16.91	4.76	27.636	32.166	8.04	0.528	12.554	10.301	3.7936	4.43	9.235	31.505	41.097		0.906735	22.0038
20.9595	7.141	5.022	50.788	20.084	12.411	34.866	8.287	16.4616	18.372	4.642	38.933	90.18	33.946	24.17	53.824	19.977	6.016	42.283	17.088	5.468	0.714	12.748	9.236	3.9394	4.66	12.623	36.185	36.335		0.911917	22.3714
21.0786	9.166	4.581	60.221	10.089	8.481	35.773	10.332	18.8501	11.013	3.532	39.47	79.64	33.629	26.181	50.804	20.643	5.641	51.896	9.036	5.987	0.622	10.102	8.606	2.7193	6.062	11.887	32.555	34.943		0.917099	21.5165
21.1976	12.673	6.448	68.772	6.936	6.742	35.701	11.953	20.4238	8.332	2.287	41.349	60.793	34.067	31.662	47.054	20.915	6.963	47.578	6.969	3.527	0.499	7.565	6.835	1.9236	4.244	11.183	30.177	26.278		0.922276	20.3518
21.3167	16.258	8.823	75.226	5.376	5.169	30.578	14.389	17.2682	5.884	2.161	41.404	45.17	31.299	27.278	38.283	22.213	8.605	46.078	5.677	2.738	0.349	4.255	7.263	1.6687	3.07	12.089	31.858	20.119		0.927458	18.9482
21.4358	19.695	10.986	70.82	4.883	3.916	33.79	17.63	15.1591	5.961	1.66	36.727	29.668	27.394	25.181	31.205	26.031	11.052	40.664	3.852	1.871	0.446	4.979	5.615	1.1843	3.305	10.429	26.227	14.313		0.93264	17.3087
21.5549	24.891	15.297	54.704	3.287	2.652	26.653	22.691	15.7209	5.367	1.613	35.694	18.032	18.275	20.545	26.674	32.021	15.412	26.811	3.864	1.951	0.975	3.63	5.393	1.7779	2.716	9.038	21.398	10.115		0.937822	15.2571
21.674	26.009	22.039	40.532	2.838	1.56	25.159	29.852	12.3283	4.074	1.042	31.359	15.091	16.085	21.238	19.301	34.802	19.394	14.851	2.206	0.801	0.188	3.391	4.109	1.3504	2.252	8.573	13.229	5.546		0.943004	13.5428
21.7931	23.598	28.997	21.959	2.67	1.915	19.603	31.109	7.9759	3.926	1.644	27.056	12.127	12.281	16.471	16.458	34.752	22.861	5.911	2.721	1.191	0.429	3.944	3.764	0.8162	1.818	6.148	12.222	4.412		0.948186	11.7421
21.9122	22.779	37.486	11.625	2.221	0.82	14.868	35.936	4.2147	3.927	0.735	22.726	8.472	11.476	15.927	14.011	33.498	24.358	6.115	2.317	1.023	0.411	2.657	3.548	0.8439	1.444	4.92	5.62	3.327		0.953368	10.6181
22.0313	16.957	47.109	6.309	2.257	1.321	8.994	34.76	4.2959	2.657	0.942	15.267	8.167	9.847	11.155	8.558	32.232	24.721	5.534	1.297	0.836	0.271	1.755	3.565	0.5575	0.75	2.585	3.55	2.636		0.958549	9.24591
22.1503	13.242	48.295	5.305	1.596	0.648	5.808	26.882	2.8941	2.035	1.129	9.743	6.268	7.769	9.759	6.073	21.332	26.346	3.436	1.642	0.562	0.326	2.472	2.236	0.6645	1.043	2.575	3.495	1.968		0.963727	7.69799
22.2694	6.59	42.436	3.862	1.241	0.714	3.741	18.012	4.1297	1.574	0.375	7.082	4.499	6.343	8.942	6.023	14.691	19.737	2.796	1.137	1.188	0.387	1.962	1.946	0.4979	0.98	2.462	2.167	1.479		0.968909	5.96406
22.3885	3.535	33.539	3.534	1.481	0.66	3.823	13.709	2.5711	1.826	0.753	5.406	3.496	5.813	8.391	3.934	9.132	15.998	2.165	0.961	0.59	0.073	1.42	2.379	0.394	0.866	2.229	2.052	1.258		0.974091	4.71386
22.5076	2.993	23.999	2.478	0.926	0.549	3.188	7.892	2.719	1.525	0.541	3.819	2.591	4.821	7.447	3.621	4.907	6.006	1.934	0.77	0.65	0.262	1.631	1.592	0.3458	0.602	2.4	2.558	1.654		0.979273	3.37217
22.6267	1.929	15.307	1.934	1.156	0.508	2.455	5.099	2.6573	1.484	0.35	2.433	2.068	4.582	5.88	3.221	4.96	4.404	1.548	1.103	0.443	0.124	1.3	1.475	0.269	0.39	1.597	1.589	1.239		0.984454	2.55373
22.7458	1.889	6.628	1.62	0.66	0.657	2.2	5.027	2.3519	0.734	0.509	2.155	2.478	2.775	5.303	2.607	2.86	3.302	1.267	0.727	0.286	0.107	1.156	1.762	0.1193	0.38	1.569	1.215	1.274		0.989636	1.91494
22.8649	1.898	5.836	1.41	0.395	0.456	1.352	4.585	2.2329	0.666	0.393	1.892	1.734	2.128	4.634	2.369	3.196	2.91	1.454	0.993	0.176	0.061	0.77	0.915	0.2136	0.395	0.963	1.178	0.791		0.994818	1.64273
22.984	1.217	3.737	1.403	0.488	0.327	1.6	2.1	1.1984	0.236	0.438	1.872	1.744	1.867	2.499	1.684	2.356	2.602	1.211	0.499	0.325	0.166	0.501	1.042	0.2205	0.275	1.138	1.176	0.765		1	1.23882

## Sheet: Image7
X0	Y0	Y1	Y2	Y3	Y4	Y5	Y6	Y7	Y8	Y9	Y10	Y11	Y12	Y13	Y14	Y15	Y16	Y17	Y18	Y19	Y20	Y21	Y22	Y23	Y24	Y25	Y26	Y27	Y28	Y29	Y30	Y31		Ap-basal	Avg int
0	39.389	31.722	53.833	114.611	63.222	104	102.167	91.667	88.1667	63.5556	68.167	58.278	76.778	92.056	83.278	85.444	55.333	43.5	29.9444	78.3889	54.833	46.3333	39.722	35.1111	24.222	24.667	18	16.6111	23.9444	14.5556	18.6111	29.389		0	55.2969
0.1191	42.333	33.722	62.111	117.833	71.722	111	100.611	94.667	85.2778	64.3333	79.056	61.278	89.278	107.444	91.722	97	58	62.5	34.3333	83.3889	62	55.9444	45.444	40.5556	28.389	29.389	23.5	25.1667	28.5	17.2778	19.6111	32.944		0.00510257	61.1354
0.2382	54.667	39.444	60.5	122.889	91.722	125.944	90.222	104.056	82.7778	63.5556	87.889	63.944	110.222	120.444	95.944	92.5	60.778	72.6111	44.1667	84.8889	72.778	58.6667	52.5	40.6111	37.5	34.278	29.667	23.4444	31.0556	19.2222	27.6667	39.111		0.0102051	66.7396
0.3573	63.889	47	64.056	120.722	107.056	133.556	89	111.111	86.1667	66.3333	92.611	71.611	113.944	133.944	103.5	72.5	62.389	76.8889	51.1667	88.7222	89.111	60.4444	56.889	43.7778	47.056	47.111	44.556	27.1111	34.3889	30.1111	30.9444	36.111		0.0153077	71.9931
0.4764	78.111	59.222	80.833	118.5	127.611	151.167	88.444	111.778	91.6667	63.0556	94.944	80.278	122.667	138.556	101.111	57.889	57.278	83.7778	59.8333	81.3889	94.5	68.9444	59.5	45.6111	53.111	61.667	53.444	31.0556	33.1111	40.1111	37.7222	38.444		0.0204103	77.0417
0.5954	93.389	85.222	111.889	138.111	148.111	162.556	89.833	118.833	86.5556	61.8333	100.5	85.944	110.556	131.833	85.222	48.556	56.833	85.3889	60.8333	91.1667	100.667	72.3333	76	52.0556	61.778	68.667	68.222	38.6667	40.8889	52.0556	38.7778	39.333		0.0255085	83.2066
0.7145	112.389	122.278	138.556	156.5	164.556	169.5	94.278	116.056	82.5556	56.8889	112.5	90.111	89.278	119.944	75.056	45.167	54	76.5556	70.1111	83.5	103.111	74.3889	82.389	51.4444	74	75.667	82.833	44.2222	46.4444	67.9444	45.8889	42.389		0.0306111	88.1407
0.8336	131.889	155.111	190.5	180.5	185.556	180.111	92.889	115.167	73.2222	58.7222	115.611	98.444	63.556	110.278	61.833	42.5	51.5	74.4444	72.5556	78.9444	105.389	86.8889	79.556	57	87.778	94.778	99.5	58.8889	48.5556	78.5556	50.6111	42.722		0.0357137	94.4862
0.9527	151.056	179.444	214.222	189.222	190	198.222	93.889	120.944	62.5556	56.0556	129.333	109.167	45.889	100.722	56.278	38.278	51.167	70.6111	77.5	82.5556	99.778	84.5556	80.167	56.2778	94.278	106.944	111.056	67.8889	58.5	83.1111	54.2222	44.444		0.0408162	98.6979
1.0718	172.444	207.111	229.5	181.833	191.611	205.167	108.611	121.722	51.2222	51.4444	150.833	113	33.611	91.278	48.389	34.556	47.333	58.8889	76.8889	77.2222	100.056	89.4444	76.111	58.6667	102.278	119.333	115.722	81.2222	66.7778	87.8889	58.5556	38.167		0.0459188	101.465
1.1909	193.056	225.833	237.833	164.778	174.778	212.722	117.889	121.222	46.3333	47.2778	155.333	117.611	28.5	81.778	40.722	30.556	52.556	54.9444	68.7222	79.3333	100.611	86.7778	81.944	58.6667	103.111	124.333	129.056	87.8889	67.6111	79.5	54.3889	40.056		0.0510214	102.054
1.31	203.778	234.667	247.889	148.778	140.444	214.444	142.833	117.056	35.2222	43.7778	173.556	150.611	27.5	72.333	35.056	30.167	53.889	56.2222	64.8333	70.5556	99.444	88.6667	87.667	64.7778	101.778	112.222	125.833	88.2222	75.5556	69.3889	50.1111	42.5		0.0561239	102.181
1.4291	212.389	247.5	246	135.222	110.389	217.556	149.222	116.389	33.1667	35.4444	177.778	164.778	24.111	70.889	29.111	28.389	57.333	40	61.2222	71.8889	97.944	82.7778	97.611	63.1667	105.889	102.722	125.222	90.5556	73.7778	64.6667	46.5	50.556		0.0612265	100.943
1.5481	212.833	249.889	242.222	114.944	80.5	215.5	159.222	111.611	29.9444	31.5	194.167	176.722	23.778	65.222	28.056	24.5	60.056	44.5556	56.3889	70.6111	99.889	80.9444	97.222	67.5	104.611	84.111	114.833	82.1667	81.6111	50.6111	56.6111	53.722		0.0663248	98.9392
1.6672	202.611	252.389	232.222	102.278	66.667	211.944	161.667	108.833	26.9444	24.2222	186.889	186.944	28.5	69.556	22.333	23.5	65.222	39.5	56.2222	71.3889	95.167	80.8333	94.167	66.7778	99.111	73.333	112.111	77.3889	87.6111	43.7778	55.3889	57.111		0.0714273	96.3316
1.7863	190.222	253.667	212.222	93.889	57.333	211.111	165.667	101.111	29.0556	22.9444	195.722	197.278	30.889	65.333	22	23.5	66.444	31.9444	50.1111	61.6111	86.611	74.4444	104.278	70.0556	93.556	59.611	106.056	69.9444	81.1667	44.0556	59.7222	70.167		0.0765299	93.8038
1.9054	164.611	253.667	197	76.444	47.722	195.444	162.056	90.389	30.7222	21.2222	192.278	197.111	27.667	71.333	21.667	21.722	67.667	28.0556	43.3333	52.0556	79.444	75.6111	108.833	68.2222	81.333	48.389	94.444	68.8333	88.8333	37.2222	55.7222	72.389		0.0816325	88.7951
2.0245	142.167	254.111	189.333	71.333	40.722	198.778	147.056	73.167	27.5	19.5	191.278	195.944	32.111	69	17.667	19.667	66.667	23.4444	38.8889	43.3333	75.889	75.3889	116.389	79.2222	68.222	36.444	77.722	62.3889	81.8333	38	62.8889	77.722		0.086735	84.8056
2.1436	123.889	253.944	178.722	60.889	38.722	181.389	134.111	61.611	24.6667	19.7222	185.444	191.889	38.056	65	16.5	17.722	63.444	17.3889	35.3333	37.1111	71.167	72.6667	119.5	78.3889	54.722	31.222	53.833	57.6667	74.6111	33.8889	58.2778	84.333		0.0918376	79.2447
2.2627	119.556	252.444	168.167	53.5	31.056	179.556	125.278	45.444	25.6667	18	182.278	198.944	46.333	70.556	15.222	17.222	66.278	15.4444	33.5556	31.1111	67.111	72.9444	125.889	77.8889	47.167	28.5	37.444	56.9444	68.9444	33.8889	54.5556	96.5		0.0969402	76.9809
2.3818	105.611	251.944	158.5	41.833	22.333	176.167	115.556	36.333	21.6111	19.7222	182.167	196.556	53.722	66.611	17.278	14.111	61.5	16	29.6667	31.8889	63.222	70.5	128.167	79.0556	38.611	22.667	22.222	49.1667	60.3889	27.1111	55.5	102.944		0.102043	73.0833
2.5008	98.056	243.889	131.833	38.944	21.278	161.667	105.667	32.222	21.5	19.2778	181.222	187.111	59.722	66.556	18.056	13	64.389	15.3333	25.1111	30.1111	55.778	64.8889	130.111	66.3889	38.222	19.889	17.278	44.1667	56.2778	24.7222	51.7778	114.333		0.107141	69.3368
2.6199	79.5	247.111	112.556	37.889	20.833	162.944	93.944	25.944	27.0556	15.6111	191.556	187.778	65.333	65.778	18.722	12.556	58.667	13.2778	22.1111	23.6667	58.889	62.4444	125.667	62.5	36.167	16.111	12.611	36.2778	52.1667	20.7778	43.3333	117.833		0.112244	66.4879
2.739	78.778	242.944	81.667	33	16.167	156.556	76.722	22	25.8889	17.8333	185.111	173.444	73.222	69.889	17.333	7.944	62.722	12.3889	22.0556	17.6111	54.389	59	123.111	51.5	30.722	13.556	9.444	35.1667	46.3889	21.0556	48.3333	138.333		0.117346	63.2586
2.8581	64.667	243.944	62.056	28.611	16.611	140.833	66.611	18.889	23.4444	18.7222	180.556	170.222	80.611	72.611	20.333	8.722	63.778	12.1111	24.3889	14.9444	56.667	56.2778	124.333	44.4444	34.889	12.111	7.944	27.7222	42.7778	16.9444	47.5	140.5		0.122449	60.7743
2.9772	52.056	239.278	50	27.167	14.389	126.833	63.389	18	23.6667	17.1667	182	162.944	78	70.444	20.889	8.889	61.333	11.5556	21.8889	10.6667	54.333	52.7222	122.111	38.7222	30.111	11.222	6.167	24.5556	42.1111	15.9444	46.4444	137.611		0.127551	57.5816
3.0963	43.833	244.5	38.833	26.167	15.556	112.389	52.111	15.889	22.6667	16.6667	170	174.111	80.111	74.167	25.944	9.444	58.611	11.2778	19.9444	10.6667	53.056	46.6667	118.111	35.1111	28.333	8.444	7.111	20.2778	41.9444	15.4444	46.8333	133.278		0.132654	55.5468
3.2154	35.611	243.5	26.667	25.889	18.056	99.833	46.889	17	20.3333	16.8333	172.222	166.278	85.611	68.889	24.167	11.222	62.222	9.6667	20.2778	9	50.889	42.8889	119.389	28.1667	25.111	6.222	5.556	16.4444	35.8333	11.2222	46.1111	127.667		0.137756	52.9896
3.3345	27.111	245.167	18.556	26.556	14.056	78.167	39.167	16.056	20.2222	15.8333	169.722	167.667	84.722	69.722	24.833	14.556	60.667	8.5	21.1667	8.6667	47.278	32.3333	103.333	23.6111	27.778	6.444	4.667	13.5	29.6667	11.8889	50.4444	135.611		0.142859	50.5522
3.4535	22.722	245.333	16.333	25.278	15.611	60	33.5	15.5	21.1667	15.6667	167.611	159.111	85.111	68.5	27.278	16.889	66.889	6.0556	19.6667	6.5	49.889	25.5	91.056	22	25.056	6.5	3.5	15.0556	22.1667	10	46.5556	136.944		0.147957	48.4045
3.5726	19	236.5	16.611	27.111	15.222	49.056	23.556	16.556	22.3333	15.0556	168.556	160.944	93.278	80.722	29.222	20.389	62.556	7.0556	20.1667	7.2778	45.389	20.2778	83.389	21	22.5	4.111	4.167	11.1667	20.1667	11.3333	48.6111	134		0.15306	47.415
3.6917	17.944	227.333	12.722	24.333	13.444	38.5	24.889	15.556	17.8333	15.0556	160.056	172.667	94.667	87.389	27.278	25.889	74.389	8.2778	18.6111	6.0556	42.5	19.2222	68.222	17.6667	19.722	5	3.833	12.4444	15.7778	11.8333	42.3889	123.667		0.158162	45.7865
3.8108	13.444	207.222	10.667	26.889	12.611	28.333	21.611	14.833	20.8889	14.7222	172.833	179.889	101.833	87.278	24.389	31.278	79.667	7.3333	18.7222	5.8333	41.278	15.1111	63.056	14.8889	22.667	6.167	3.722	11.2778	14.5556	12.9444	46.2778	136.444		0.163265	45.8958
3.9299	11.944	183.944	9.889	26.167	14.222	20.556	17	14.556	21.7222	16.1667	176.5	171.111	105.333	89.889	18.667	36.889	86.611	6.2222	18.8333	6.6111	38.667	13.1111	51.944	10.2778	21.556	7.556	3.5	10.7778	12.1111	10.7222	44.6667	123.833		0.168368	43.7986
4.049	12.056	166.278	9.222	26.333	10.778	18.333	12.833	16.167	21.0556	12.7778	168.833	173.611	106.944	101.167	20.722	40.667	87.889	7	17.0556	6.6667	37.944	14.5556	45.111	10.4444	20.611	6.667	2.611	11.2222	9.1111	10.3889	38.2222	121.333		0.17347	42.6441
4.1681	9	134.111	9.944	26.278	12.722	16.889	13.389	15.667	22.1111	12.7222	164.389	170.222	118.944	107	17.167	43.944	91	6.8333	21	4.8889	36.111	11.2778	34.889	10.5556	20.667	8.389	3.611	9.4444	8.1667	10.6667	35.3333	118.5		0.178573	41.4323
4.2872	10	105.222	7.167	26.278	10.5	14.444	14.611	15	22.3333	13.1667	155.667	168.389	122.167	116.167	20.778	50.889	97.611	8	19.1111	5.1111	29.722	12.2778	25.611	11.3889	17.278	12	2.944	10.6667	6.5	10.8889	34.0556	117.889		0.183675	40.4323
4.4063	7.833	80.944	8.5	25.889	11.333	11.833	14.667	15.222	21.3333	12.2222	150.722	168.5	129.444	119.389	21.722	51.333	97.389	6.5556	20.3333	4.8889	31.444	11.1111	15.667	12.1667	18.556	14.722	3.778	8.8889	6.3889	13.6111	32.1667	115.444		0.188778	39.4999
4.5253	7.389	64.222	7.667	25.278	12.056	8.056	12.944	15.944	20.1667	11.0556	139.944	161.611	137.556	120.889	19.5	61.722	105.556	7.2778	18	4.5	24.111	10.5556	10.444	9.6111	16.944	16.167	3.444	10.6667	5.3889	11.7222	24.6667	112.444		0.193876	38.0469
4.6444	7.444	47.444	6.611	26.222	14.111	7.222	12.111	19.389	22.1111	12.5	134.944	150.889	143.278	131.111	23.722	65.5	111.778	6.8333	18.5556	5.2222	17.056	10.8333	8.389	13.2778	16	20.056	2.944	9.5556	4.3889	13.2222	22.4444	105.056		0.198979	37.8194
4.7635	7.722	28.333	7.833	23.111	13	8.167	14.611	15.389	21.5556	12.2778	121.889	139.778	149.722	147.222	19.278	75.333	106.889	9	17.1667	4.8333	11.833	10.8333	4.333	10.3889	14.5	19.667	2.667	10.7222	3.2778	11.4444	20.1111	112.222		0.204081	36.7222
4.8826	6.444	17.389	6.889	23.833	11.889	6.556	15.611	16.611	19.8333	12.8333	103	130.778	139.389	146.944	20.556	81.944	109.667	8.7222	16.6667	5.1667	9.5	10.2778	4	12.2778	14.833	18.722	2.778	9.1667	3.5556	14.6667	15.8333	108.333		0.209184	35.1458
5.0017	7.333	11.111	6.611	25.111	12.611	6.722	12.556	14.5	16.8889	13.5556	81.389	120.556	144.056	152	22.5	83.389	117.5	8.0556	18.5556	4.0556	7.389	9.1667	2.778	11.1667	14.111	18.722	2.667	10.0556	4.3333	14.4444	14.7778	100.556		0.214286	34.0382
5.1208	6.222	9.444	6.222	29.5	13.278	7.278	14.778	18.444	18.6111	11.2222	60.444	105.889	140.167	150	24.722	81.722	124	10.2222	14.3333	4.9444	4.167	9.6111	3.389	11.0556	14.722	17.833	2.778	8.8889	2.7778	15.3333	12.2778	95.389		0.219389	32.8021
5.2399	7.056	7.444	7	27.111	12.167	6.833	11.333	16.778	15.2222	13.8889	41.556	86.944	136.389	141	25.111	87.722	131.778	9.3889	15.9444	4.1667	4.278	10.4444	2.444	12.1111	14.5	17.944	2.333	9.7222	3	14.7778	12.3889	87.556		0.224491	31.1354
5.359	6.333	6.667	6.333	26.389	11.556	7	10.611	18.389	18.6667	12.1667	31.833	63.056	131.833	151.056	27	93	120.833	9.6111	16.5	4.7222	3.722	9	3.056	12.6111	12.944	19.278	3.611	8.7778	3.2778	13.0556	8.1667	81.333		0.229594	29.7621
5.478	4.778	5.833	5.778	24.833	13.611	7.111	11.111	16.889	19.9444	11.8889	21.833	41.667	122.222	142.611	27.444	100.333	115.389	10.6111	16.3889	3.7778	4.444	8.9444	2.167	10.7222	13	21.278	2.833	9.6111	3.2222	14.1111	7.2222	67.667		0.234692	27.7899
5.5971	5.889	6.333	4.833	26.111	14.278	7.167	8.611	18.722	20.3889	13	15.944	27.278	115.111	140.944	31.444	107.389	113.944	10.4444	13.8333	2.9444	3.833	8.9444	2.389	9.0556	13.611	21.556	3.111	8.1667	3.5556	15.2778	7.5	60.222		0.239795	26.9322
5.7162	5.167	5.667	5.278	27.278	15	6.778	10	16.667	21.2222	12.6667	9.333	21.167	110.667	132.667	31.833	102.5	112	11.1667	11.6667	3.2778	3.5	10.6111	2.722	7.3889	11.944	19.833	3.111	9.3889	3.2778	13.3333	5.5	44.778		0.244897	25.2309
5.8353	4.833	5.667	5.056	27.444	17.111	7.222	9.389	19.444	23.0556	12.7778	9.611	17	110.389	135.889	29.889	101	112.056	12.4444	12.9444	3.2778	3.5	12.0556	3	5.8333	10.5	13.833	2.667	8.8889	3.1111	12.5	4.5	38.778		0.25	24.8646
5.9544	5.222	5.111	5.278	31.944	13.556	6.222	8.222	17.944	21.1111	12.5556	8.444	16	105.389	131.278	30	96.5	105.944	14.2778	12.0556	4	3.944	9	2.444	5.7222	10.333	13.667	3.333	8.7222	3.6111	13.2222	4.5556	26.389		0.255103	23.6249
6.0735	4.889	5.556	5.778	30.778	16.833	6.444	9	18.944	24.8333	11.6667	7.944	20.778	103.389	127	32.111	94	93.333	15.2222	13.2778	2.7222	4.833	8.0556	2.333	3.5556	11.389	12.944	2.056	8.8889	3.6111	11.9444	4.5	20.444		0.260205	23.0954
6.1926	4	6.944	5.389	29.833	13.889	5.778	7.778	18.778	18.6111	11.5556	9.333	14.5	101	125.111	32.167	89.556	95.333	16.2778	13.0556	3.8889	3.167	9.3333	2.556	3.7222	11.444	12.944	3.667	9.1667	3.6111	12.3889	3.2222	12.389		0.265308	22.1997
6.3117	5.556	5.333	4.444	30.556	15.5	5.5	7.333	21.278	19.3889	12.2222	6.611	17	95.5	115.722	26.222	79.944	86.889	16.0556	13.0556	2.9444	4	7.2778	2.333	3.6667	12	12.389	4.167	9.6111	3.6111	13.3333	3.3889	7.056		0.27041	20.934
6.4307	3.333	4.5	6.056	32.889	14.944	7.778	8.667	20.722	19.2778	11.2778	6.667	15.111	84.333	101.333	23.556	73.667	79.444	14.6667	13.2778	3.6667	3.889	8.8889	2.278	3.2778	9.5	10.556	3.389	10.3333	4.0556	10.5	3.6667	5.944		0.275509	19.4202
6.5498	4.056	5.111	5.333	36.333	15.667	7.389	8.167	21.278	17.6111	12.3333	5.111	15.389	69.333	86.889	20.778	60.333	66.444	16.5556	12.2222	3.2222	3.833	8.5556	2.389	2.7222	10.389	9.722	2.833	7.7222	3.5556	11.8889	2.8889	4.5		0.280611	17.5173
6.6689	4.056	4.111	5.944	36.667	15.389	6.778	8.833	22.167	17.0556	14.3889	5.611	13.333	62.611	73.278	21.111	56.722	53.778	18.5	11.3889	3.0556	4.333	6.9444	1.778	3.2778	10.556	8.333	2.944	11.2778	4.2222	10.9444	2.6667	2.389		0.285714	16.3889
6.788	4.722	4	5.222	36.333	15.889	8.389	8.389	17.833	17.8889	14.2778	5.667	14.167	48.222	55.778	19.611	46.556	38.611	20.4444	11.2222	3.5	4.444	7	2.222	3.2222	11.111	6.278	3.167	11.0556	3.4444	8.8889	2.3889	3.5		0.290816	14.4826
6.9071	4.722	4.389	6.444	34.278	16.833	6.667	8.167	16.556	16.7778	12.3333	6.667	12.333	37.889	40	21.722	36.667	22.556	22.6667	10.5556	3.1667	4.111	4.8333	2.222	3.2222	8.722	5.889	2.611	10.3333	3.9444	11.2222	3.1111	2.778		0.295919	12.6372
7.0262	4	3.611	6	30.889	18.222	7.889	8.667	17.944	17	14.5	5.056	10.611	32	28.556	16.056	35.278	13.167	23.4444	10.2222	3.7778	4.111	4.6111	2.111	3.7222	11.222	3.167	3.167	11.8889	4.1667	8.6111	2.7778	2.5		0.301021	11.5296
7.1453	2.556	4.333	6.611	35.333	17.5	7	8.556	21.5	16.6111	10.1111	5.111	12.611	21.333	21	19.833	24	10.278	22.1111	7.6667	3.6111	4.389	5.3889	2.444	4	9.722	2.556	3.278	11.9444	5.0556	9.3333	2.9444	2.722		0.306124	10.6701
7.2644	3.778	3.111	4.444	27.5	18.889	6.889	8.889	17.389	19.3333	11.1667	7	12.778	13.611	15.611	23.222	17.722	7.167	24	8.1667	4.0556	4	6.8889	1.889	4.1667	9.444	2.667	2.556	9.6111	5.2222	9.6111	3.1667	2.444		0.311227	9.88716
7.3834	3.333	3.722	4.5	30.722	16.722	7.778	8.833	18.5	17.7778	10.3889	6.833	15.278	11.722	12	28.111	9.722	5.222	26.5556	7.8889	3.8889	3.389	5.5556	2.167	3.2222	10.111	2.444	3.833	11.1667	5.3333	9.2778	3.1111	3.111		0.316325	9.75687
7.5025	4.5	3.167	5.833	29	19.444	7.389	8.333	24.611	19.1667	9.4444	7.833	15.333	8.167	8.944	29.444	4.5	4.889	26.9444	7.8333	2.9444	4.944	6.1111	2.444	2.5556	8.833	2.444	2.111	11.5556	5.2778	7.9444	3.0556	3.389		0.321427	9.63704
7.6216	4.333	3.167	7.111	28.167	22.5	8.056	10.611	24.333	17.3333	6.3333	6.333	13.778	6.889	6.389	36.333	3.556	5.722	25.1111	7.6667	4.1111	3.167	5.3889	1.611	4	9.611	3.167	2.111	12.7222	6.0556	7.6111	3.2778	3.389		0.32653	9.68578
7.7407	4.5	3.222	5.611	26.833	18.556	6.611	9.889	25.5	14.7222	5.5	7.722	19.333	6.556	5.611	41.778	3.5	4.444	25.0556	5.5556	3.7778	3.056	6	2	3.8333	9.333	2.722	2.556	11.4444	7.0556	5.1111	2.1667	3.389		0.331632	9.46701
7.8598	3.833	3.556	4.278	26.389	21.278	6.944	11.889	25.778	16.8333	7.5	7	20.333	4	5.333	43.944	2.167	5.389	22.8333	7.5556	3.8333	3	6.5556	2.222	4.3333	8.944	2.722	2.611	12.8333	6.7222	5.3333	2.8333	2.556		0.336735	9.72914
7.9789	4.111	3.333	6.278	23.944	20.833	6.556	10.556	25.833	13.6111	5.2778	7.111	19.722	4.167	5.278	46.611	3.667	5.667	25.3333	8.3333	3.7778	3.167	6.6111	2.5	3	5.944	1.944	3.667	13.8889	6.8889	7.1667	2.7778	2.611		0.341838	9.69271
8.098	4.278	3.667	5.167	23.333	17.278	7.944	11.667	22.778	15.5	6.8889	8.444	25.222	2.778	3.778	38.167	2.111	5.056	25.7222	6.5	4.3333	4.056	6.5556	2.444	3.2222	5.167	3.111	2.833	14.7778	8.2222	7.5556	2.3889	2.833		0.34694	9.49308
8.2171	4.944	3.222	5.5	23.944	17.667	6.778	9.833	21.833	14.1111	6	8.611	22.056	3.389	5.278	37.944	2.278	5.722	27.1667	6.8333	4	3.444	7	2.278	2.9444	6.222	1.889	2.278	14.8889	8.2222	6.0556	3.3889	2.167		0.352043	9.309
8.3362	3.778	2.389	5.222	23.222	17.111	7.722	12.056	21	14.8333	6.5556	6.833	18.889	4.056	4.889	28.444	3	5.444	27.5556	6.7778	3.9444	3.333	9.3333	2.5	3.2778	5.167	2.5	3.278	12.7778	7.9444	5.0556	2.6111	2.5		0.357145	8.87499
8.4552	3.833	3.389	5.778	21.889	14.889	7.556	13.167	22.222	14.7778	5.5556	7.611	16.333	2.278	3.5	23.444	2.444	6.222	29.5556	5.3333	3.4444	3.111	8.5556	2.667	4.3889	4.889	1.889	3.278	14.6111	9.4444	5.3333	3.7778	2.611		0.362244	8.68056
8.5743	4.833	4	5.611	21.222	13.833	6.389	10.611	21.389	13.7778	5.8889	8.333	19.611	3.278	4	20.556	3	6.222	31.1111	4.6667	3.3333	3.333	13.4444	3.111	5.5	4.389	3	3.5	14.3889	9.6667	5.2222	3.6111	2.833		0.367346	8.86453
8.6934	3.389	3.167	6.611	22.611	14.556	6.222	12.944	19.056	13.1667	5.1667	7.333	18.389	2.667	3.444	17.722	3.111	6.444	35.7222	6.4444	4.1111	4.056	15.2778	2.556	4.1111	4.444	1.5	3.444	14	10.5	5.0556	2.6667	2.889		0.372449	8.83679
8.8125	3.389	3	5.056	20	15.889	8.278	14.778	20.333	14.1111	6.6667	6.389	16.389	1.889	3.944	15.222	3.167	6	35	6.3333	3.2222	3.722	19.8889	2.944	5	5.056	1.556	2.944	16.2778	13.7222	4.6111	2.8333	2.167		0.377551	9.05558
8.9316	4	4	5.222	19.944	13.278	6.444	14.944	16.389	17.3889	5.8333	8.278	18.167	3.111	3.5	12.056	2.333	6.167	33.5	6.6111	4.1111	3.778	20.7778	2.667	6.5556	3.722	3.444	3.667	19.1667	12.8889	4.8333	2.7778	2.389		0.382654	9.12327
9.0507	4.5	3.389	6.556	21	14.389	7.222	15.333	17.111	17.7222	4.2778	7.444	16	2.444	3.722	11.667	2.5	6.889	35.1111	5	3	4.333	20.5	2	6.1667	4.222	2.556	2.833	17.8889	13.7778	4.6667	3.5556	2.833		0.387756	9.08156
9.1698	4.278	3.667	6.278	18.611	14.556	7.667	16.833	17.333	15.7778	5	9.556	16.056	2.333	3.333	9.778	2.833	6.222	32.3333	6.1667	2.6111	4.5	27.5556	1.833	6.1111	3.778	1.889	4.111	18.9444	15.3333	4.8333	2.6111	1.889		0.392859	9.20662
9.2889	4.889	3.611	5.944	18.778	18.444	7.389	15.556	16.667	17.5556	4.8333	9.556	14.778	2.111	4.778	9.833	3.167	6.833	33.6667	4.3333	3.9444	3.556	26.7222	2.333	8.1667	3.889	2.056	3.389	19.2778	14.1667	4.9444	2.3889	2.722		0.397962	9.38372
9.4079	4.222	3.778	5.111	17.5	19.778	6.389	14.333	15.556	16.5556	4.7222	7.667	16.389	2.111	4.833	7.778	3.722	6.389	33.6667	5.0556	3.2222	3.222	29.0556	2.778	8.4444	4.167	3.167	2.278	21.1111	16.4444	3.6111	2.3889	2.389		0.40306	9.30734
9.527	3.556	4.111	6.389	18.889	22.944	6.667	16.278	16.444	18.5556	3.4444	8.667	17.111	2.111	3.667	6.944	2.167	6.333	30.3889	4.2778	2.6111	4.722	29.4444	3.056	7.7778	3.389	2.5	3.833	20.9444	15.8889	5.1667	1.8889	1.944		0.408162	9.44097
9.6461	3.667	3.111	3.778	16.944	26.389	6.833	15.944	12.5	22.8889	5.3889	9.056	17.167	2.111	4.5	7.167	2.944	6	29.0556	5.6111	3.3333	4.389	33.1667	2.333	9.2222	3.167	2.056	3.111	23	16.5556	3.9444	2.9444	3.333		0.413265	9.73785
9.7652	4.667	4	5	18.778	29.944	7.389	13.5	13.278	22.8333	3.8889	9.333	17.167	2.833	4.056	6	3.111	8.444	29.3333	4.6111	3.5556	4.444	31.6667	2.056	9.1667	3.889	1.722	3.389	24.0556	16.8333	4.1111	2.4444	2.611		0.418368	9.94097
9.8843	4.167	3.889	5.556	22.389	29.5	5.389	14.389	14.444	18.4444	4.1667	10	18.556	2.611	4.111	5	2.444	7.5	27.5556	5.3889	3.8333	3.944	33.3889	2.111	9.6667	4.167	2.889	3.222	24.7778	16.7222	5.1667	2.6111	3.389		0.42347	10.0434
10.0034	3.889	3.056	6.389	24.167	33.333	5.722	15.056	12.833	21	4.3333	12	17.222	3	4.5	6.056	2.778	6.667	25.5	4.1667	3.6667	4.333	32.8333	2.444	12.6111	3.944	2.556	3.333	25.4444	16.0556	3.8889	2.8333	2.778		0.428573	10.2622
10.1225	3.167	2.944	4.556	26.278	29.833	5.667	19.333	11.167	16.8889	4.1111	12.222	20.5	2.222	4.333	4.778	2.056	7.389	20.6667	5	3.3889	3.444	35.4444	1.833	14.1667	3.778	1.611	3.333	26.1667	16.2778	3.6667	2.4444	1.611		0.433675	10.0087
10.2416	4.778	3.444	3.944	25.444	34	5.556	18.833	11.444	12.6667	3.5	9.056	22.444	2	5.833	4.833	2.333	8.5	20.2778	5.3333	4.2222	4.5	32.7222	2.667	17.1667	2.333	2.056	2.778	32	18.3889	3.4444	3	3.167		0.438778	10.3958
10.3606	4	3.056	4.889	23.556	24.222	6.722	23.667	11.5	11.5556	4.3333	10.889	22.944	2.778	5.889	5.278	2.222	8.278	15.9444	5.9444	4.6667	3.5	30.6667	2.111	18.3889	3.5	2.389	3.278	30.9444	14.8889	3.1667	2.0556	2.833		0.443876	10.0018
10.4797	3.667	3.111	5	24.333	21.111	6	26.222	11.444	9	3.9444	10.278	21.389	2.611	6.222	4.556	2.611	9.833	15.9444	5.6667	3.5556	3.556	30.4444	3.111	21.1667	3.5	2.222	3.389	35.6111	16.5556	3.5556	4.0556	3.444		0.448979	10.2222
10.5988	3.944	3.278	4.889	21	16.944	7.833	25.667	10.056	8.9444	3.6667	9.556	21.5	2.444	7.056	5.278	2.111	11.556	15.7222	5.3333	3.8333	4	31.6667	3.222	20.5	2.944	2.778	3.111	32.9444	15.3889	4.8889	2.8333	2.889		0.454081	9.93057
10.7179	4	3.944	5.833	24.222	16.056	5.778	25.944	12.056	8.2778	4.6667	8.056	18.5	2.5	7.222	4.444	2.5	10.833	12.7778	6.8333	3.7778	3.389	30.7222	3.333	22.1111	2.056	2.778	2.389	35	16.8889	3.6667	3.1667	2.278		0.459184	9.875
10.837	3.056	3.667	5.167	22.333	12.5	6.5	30.111	12.5	6.2778	4.6111	7.778	16.944	2.333	8.167	5	3.222	11.722	12.8333	5.3889	4	3.444	31.1111	2.944	23.8333	3.389	2.5	4.5	30.6111	17.4444	2.7778	2.2222	2.111		0.464286	9.71872
10.9561	4.389	2.611	5.333	22.5	13	6.778	29	9.944	5.6667	3.9444	10.278	13.889	2.611	10.444	4.278	2.167	12.444	12.4444	5.7778	3.7778	3.167	33.5	2.222	20.1111	2.889	2.667	2.778	26.6667	18.8333	3.6667	2.2222	3.333		0.469389	9.47916
11.0752	5.111	3.444	5.833	23.889	15.056	7.167	26.611	10.278	6.6111	4.3333	9.778	12.444	2.5	11.556	3.611	2.889	13.389	11.9444	6.5	4.2222	3.833	35.2778	3.667	22.3333	3.111	2.111	2.222	29.4444	16.5	2.8889	2.1667	2.5		0.474491	9.78819
11.1943	4.833	2.667	5.778	23.167	11.778	5.389	26.222	9.611	5.6667	4.8333	11.889	12.889	2.5	14.833	4.222	3.222	15.611	11.1111	6.7222	3.5	3.278	35.5556	2.5	21.6111	3.278	3.167	2.667	27.5556	12.9444	3.3333	2.6667	3.111		0.479594	9.6285
11.3133	3.278	3.222	5.389	22.389	12.278	5.278	19.444	13.444	6.1111	4.7222	11.111	11.944	2.667	14.611	3.778	2.944	16.889	10.5	5.7778	3.3889	3.333	34.0556	3.056	20.7778	2.778	1.667	4.222	26	12.7778	2.6111	2.8889	2.778		0.484692	9.25348
11.4324	3.722	3.278	4.611	27.111	12.389	5.167	15.111	9.778	5.6667	5.3333	10.389	11.667	2.056	14.944	3.944	2.611	18.111	9.5	4.3889	4.0556	3.667	34.6667	3.389	17.8333	2.5	2.167	3.278	23.8889	14.7222	2.7222	3.0556	3.333		0.489795	9.03301
11.5515	3.111	4.5	6.111	28.111	11.611	6.278	17.444	10.5	6.2222	5.2222	10.389	11.444	2.556	15.889	4.444	2.667	20.722	10.1111	4.4444	3.5	4	38.4444	3.556	20.8333	3.167	2.222	3.333	23.1111	13.8889	2.7222	1.7222	3		0.494897	9.53991
11.6706	3.222	3.278	6.444	25.944	12.444	6.944	14.278	10.778	5.5	6	10.167	10.667	2.278	18.5	4.278	3.444	23.833	9.9444	4.2778	4.6667	3.667	34.2222	3.111	18.6111	2.389	3.167	2.944	22.8333	12.9444	2.4444	3.4444	2.833		0.5	9.35933
11.7897	3.444	3.778	5.278	23.389	12.944	7.167	13.5	11.444	5.7222	4.7778	9.833	12.056	2.611	16.111	4.167	3.111	25.389	9.1667	4.1667	4.3889	4.778	33.9444	4.278	18.6111	3	2.278	3.667	22.2222	11.5	3.2778	2.6667	2.944		0.505103	9.23786
11.9088	4.111	3.722	5.722	23.833	14.833	5.5	14.111	12.833	5.9444	6.0556	10.667	10.944	3.167	17.333	3.833	3.222	31.111	9.2222	3.8333	4	4	34.6111	2.278	19.6667	1.944	2.278	3.667	22.2778	13.9444	2.5556	2.3889	2.833		0.510205	9.57631
12.0279	4	4.222	5.944	27.667	15.611	6.111	16.111	12.389	5.1667	5.7778	9.278	10.056	2.667	17.889	3.5	2.778	29.833	9.1111	4.4444	2.8889	4.278	37.4444	3.667	17.8889	2.278	2.667	2.5	20.4444	12.4444	3.5556	2.2778	3.444		0.515308	9.63545
12.147	3.833	3.444	6.778	27.778	17.278	7.111	15.167	12.611	6.4444	6	12.056	10.056	2.056	15.389	3.389	2.722	30.778	8.3889	4.2222	3.2778	4.389	38.1667	3.667	19.0556	3.889	2.167	3.111	20.7222	10.8889	3.3333	3.4444	3.167		0.52041	9.83689
12.2661	3.5	3.167	5.333	25.333	16.556	6.389	14.5	11.5	6.1667	6.6111	10.556	10.333	3.167	15.833	3.667	1.889	28.722	6.7778	3.8333	3.8889	5.5	38.2222	3.889	19.1111	2.333	2.667	3.444	19.2222	12.4444	3.7778	2.6111	3.444		0.525513	9.51214
12.3851	4	3.778	4.556	27.167	16.556	5.833	15.5	13.556	6.3889	5.1667	12.333	12	3.278	15.722	3.444	2.944	26.556	6.7778	4	2.8889	3.944	38.6667	4.667	18.9444	2.333	2.222	3.111	21.7778	12.8889	3.5556	3.3333	4.278		0.530611	9.75522
12.5042	4.167	4.556	4.444	25.667	16.5	4.167	15.556	16.389	5.3333	5.9444	11.667	11.222	3.222	16.278	3.889	3.444	25.444	7.5556	3.6111	2.8333	4.722	33.3333	3.778	17.8889	2.889	2.556	2.556	21.0556	12.9444	2.8889	2	4.778		0.535714	9.47749
12.6233	3.111	3.444	4.833	29.333	19	7	15.5	16.556	4.2778	8.0556	11.667	9	2.611	15.278	2.889	3.056	24.722	6.8333	4	3.9444	4.444	36.0556	4.056	17.7222	2.278	2.667	3.389	17.6667	10.3333	3.0556	3.0556	4.333		0.540816	9.50522
12.7424	3.333	3.333	4.556	34.389	16.722	5.944	14.111	14.667	5.6667	5.6667	15.5	9.778	3.444	15.389	2.444	3.889	25.5	7.6111	4.0556	2.5	3.944	34.7778	4.333	17.8889	2.833	1.833	3.667	17.7222	13.2778	2.9444	2.8889	3.444		0.545919	9.62666
12.8615	3.056	3.778	5.778	31.389	15.889	5.667	17.222	13.278	4.7778	5.3333	15.833	7.778	3.278	17.5	2.889	2	25.278	7.9444	2.8889	2.7778	3.389	32.1111	4.944	16.8333	2.222	3.222	3.722	19	11.8333	2.7222	2.9444	4.167		0.551021	9.42017
12.9806	3.944	4.333	5.333	36.667	19.389	5.778	16.444	13.833	5.7778	5.2778	14.444	7.778	2.778	19.889	3.944	3.944	22.5	6.3333	3.5	3.3889	4.667	32.7778	4.944	16.3889	2.389	2.722	3.444	18.5556	10.9444	4.1667	2.5	4.444		0.556124	9.7881
13.0997	3.778	4.111	5.389	38.389	15.444	5.944	18	16.389	5.8889	6	15.278	6.778	3.556	18.056	3.333	3.056	22.556	5.1111	3.6667	3.6111	4.722	33.2222	5.778	18.0556	2.278	2.333	3	19.6667	10.7222	3.1111	2.2778	4		0.561227	9.79692
13.2188	3.333	4.778	4.833	34.167	17.333	6.556	18.667	15	6.2222	6.3889	16.222	5.667	2.667	18.944	3.111	3.333	26.833	5.7778	3.6667	4.3889	4.722	26.8333	4.722	18.8333	2.278	2.722	3.333	20.7778	9.4444	3.3333	2.7222	3.944		0.566329	9.73606
13.3378	4.389	3.667	7.222	34.944	13.944	5	18.833	15.278	4.4444	6.5556	14.333	6.778	4.667	17.667	2.444	3.667	26.389	6.3333	3.2778	3.3889	4.278	26.8333	4.444	15.6667	2.611	2.444	3.389	21.0556	9.9444	1.9444	2.3333	4.333		0.571427	9.45308
13.4569	5	4.444	6.167	41.167	13.833	5.778	15.944	15	4.7222	7	17.556	6	3.389	19.722	3.667	3.333	32.111	5.5556	3.5	4.3333	4.667	25.0556	5.056	19.1667	2.611	2.056	4.278	22.0556	7.6111	3.6111	2.7222	4.222		0.57653	10.0417
13.576	5	4.111	5.556	38	14.333	5.611	18.278	15.944	5.7778	5.9444	16.833	4.389	2.833	17.667	3	3.944	28.111	5.4444	4.1667	3.9444	5.833	24.5	4.556	15.2222	2.5	2.111	3.222	19.5556	7.4444	2.7778	2.8333	3.556		0.581632	9.46872
13.6951	3.444	3.611	6.611	38.333	11	6.667	18.944	16.278	5.3889	6.4444	16.611	4.611	3.611	19.5	2.611	5.167	31	5.1111	3.7222	3.9444	5.333	24.1667	4.5	15.9444	2.333	2.333	4	19.2778	7.8889	3.7778	2.9444	4.833		0.586735	9.68569
13.8142	2.833	4.389	4.778	40.167	12.444	7.833	18.278	17.611	5	7.7778	18.556	4.556	3.389	20.167	3.167	4.444	33.889	4.6667	4.2222	3.4444	5.167	27.4444	3.667	14.9444	2.389	2.556	4.222	18.2778	8.2778	4.0556	2.3333	4.944		0.591838	9.99658
13.9333	3.167	3.056	6.222	40.222	11.5	7.333	19.389	15	5.2222	6	17.556	5.667	3.389	18.556	2.889	3.722	32.889	3.9444	3.6111	3.6667	6.833	23.5556	4.778	14.8889	1.889	2.056	4.389	18.3889	6.7778	2.8333	2.5	5.222		0.59694	9.59728
14.0524	4.278	4.5	5.556	40.5	11.278	7.778	20.222	15.556	4.1667	5.7222	19.611	6.278	3.167	17.5	3	3.556	31.222	4.7222	2.8333	4.3889	5.444	23.3889	5.278	14	2.444	2.333	4.111	18.7222	7.6111	3.2778	2.6111	6.222		0.602043	9.72745
14.1715	3.389	5.5	6.444	39.333	8.111	7.444	22.444	15.833	3.9444	6.8889	18.722	3.556	3.222	19.278	3.556	4.167	30	4.2222	4.3889	3	5.167	24	4.111	11.0556	1.667	2.167	4.111	17.8333	7.2222	3.1667	2.7778	4.5		0.607145	9.41319
14.2905	3.889	4.5	4.5	43.667	12.111	6.111	16.944	16.667	4.0556	7.6667	19	3.889	3.667	22.278	2.778	4.667	31.111	4.5556	3.8333	2.8889	5.778	23.7222	4.778	11.3889	1.667	2.222	3.889	17.3333	8.2778	3.5556	3.1667	4.889		0.612244	9.67021
14.4096	4.889	4.444	4.889	42.111	9.222	7.333	20.056	17.833	3.5556	7.6667	18.667	4.5	3.611	21.056	2.778	3.611	31.278	5.6667	3.2778	3.1667	6	22	4.778	9.3333	1.778	2.5	4.278	21.1667	9.7222	2.5556	2.1667	4		0.617346	9.68406
14.5287	3.667	3.778	5.278	46.667	11.222	9.167	18.5	18.111	4.0556	7.8889	17.778	4.167	3.611	20.611	3.167	4.222	29.833	3.5	3.1667	3.7222	6.833	22.3333	4.611	8.2778	2.056	2.667	3.222	19.2222	7.7778	3.3333	2.4444	4.833		0.622449	9.67885
14.6478	4.167	4.611	5.5	48.222	8.944	7.667	20.722	17.778	4.3333	9.1111	18.222	4.111	3.556	22.056	3.278	4.333	30.278	4.7222	3.0556	2.8333	8.278	20.2222	5.889	6.1667	1.833	2.5	4.111	19.6111	8.3889	2.5556	2.8333	4.611		0.627551	9.82813
14.7669	3.167	4	5.333	46.167	11.444	10	20.222	15.222	4.8333	8.3333	16.389	3.444	4.333	21.389	3.944	4.5	32.111	4.7778	4.3889	3.6111	9.5	19.5556	6.167	6.7778	1.889	2.667	4.333	21.2778	8.9444	3.1667	2.2222	5.056		0.632654	9.97393
14.886	3.222	4.222	5.833	44.333	10.056	9.222	19.722	16.444	4.3889	9.0556	16.556	4.333	4.611	19	2.278	5.167	33.167	4.6111	2.8889	3.8333	9.778	17.6111	3.611	5.2222	2.944	2.611	3.889	22.8889	8.2778	2.5556	2.7222	4.278		0.637756	9.66664
15.0051	3.333	3.5	5.667	46.333	9.667	8.5	23.389	15.444	4.6111	9	13.222	4.333	3.889	20.444	2.722	4.056	32.111	5.2222	4.0556	3.2778	10.333	16.7222	5.333	4.6111	2.833	3.444	5.333	23.1111	8.9444	2.1667	3.4444	4.222		0.642859	9.78983
15.1242	2.611	3.833	5.889	44.833	9	7.278	20.611	15.556	4.1111	10.7222	15.444	3.611	3.611	18.333	2.667	5.389	32.056	3.6667	4.1667	2.8333	12.889	19.7222	4.556	5	2.333	3.444	4.444	22.6667	9.3889	2.9444	3	5.444		0.647962	9.75169
15.2432	3.111	4.056	6.222	42.278	11.056	7.444	21.278	16	3.8333	11.3333	14.389	3.222	4.444	20.333	4.167	4.111	30.667	3.4444	4.1111	2.9444	12.833	16.7222	6.056	4.1111	2.278	2.333	4.611	22.2778	8.9444	2.7222	3.0556	6.611		0.65306	9.71874
15.3623	3.889	3.389	6.5	41.667	8.889	9.722	21.111	16.389	4.3889	10.7222	11.444	2.889	5.389	19.556	3.056	4.778	30.333	4.5	3.4444	3.5556	14.056	17.3889	5.444	4.6667	2.611	2.778	4.167	25.2222	9.3889	2.3889	2.5556	6.778		0.658162	9.78304
15.4814	2.667	3.389	6.111	41.5	10.222	7.222	19.889	17.056	3.2778	10.0556	12.444	3.889	4.611	16.556	3.778	4.556	27.167	3.5556	3.5556	2.7222	17	18.5	7	4.5	2.778	2.833	6.111	23.7222	6.8889	2.7778	2.2222	5.556		0.663265	9.50353
15.6005	3.833	4.056	6.167	45.722	9.278	7.778	19.944	18.389	4.1111	11.2222	11.056	3.444	5.556	19.222	3.111	6.222	26.5	3.1111	4.1111	2.6667	19.111	18.4444	8.944	4.6667	3.111	2.778	5.167	23.7222	7.8889	3.2778	3.3333	5.444		0.668368	10.0434
15.7196	3.222	3.167	5.944	41.722	11	8.889	20.722	16.667	4.8333	11.7778	11.611	3.278	5.833	16.722	3.222	4.722	25.167	2.9444	2.8333	3.3889	17.389	19	9.667	4.5556	2.444	2.722	5.056	20.2778	9.6667	2.3889	1.9444	5.722		0.67347	9.6406
15.8387	2.556	4	6.222	43.556	10.556	8.5	18	14.222	4.7778	12.9444	11.333	2.944	7.167	16.278	2.667	5.278	21.833	3.0556	3.5556	2.8889	19.5	19.2222	11.611	3.8333	2.444	2.278	5.389	22	9.3889	3.1111	3.2778	5.444		0.678573	9.6823
15.9578	2.778	3.222	6.444	42.278	10.389	10.556	19.167	14.722	5	14.4444	11.556	3.389	6.056	15.167	3.056	5.167	22.111	4.1111	2.9444	3.3333	20.944	15.8333	12.556	4.1111	1.111	2.222	5.389	22.3333	6.5556	2.4444	2.9444	5		0.683675	9.60423
16.0769	3.056	4.556	6.722	41.944	8.778	9.222	19.056	18.111	3.7778	17.0556	11.611	3.778	6.333	15.333	2.778	7.111	20.556	3.3889	2.8889	3	20.889	16.2778	13.444	3.7778	2	1.722	6.167	22.5	8.3333	2.6111	4	6.5		0.688778	9.91494
16.196	2.833	4.722	5.889	41.944	10.056	11.389	18.389	16.056	4.2778	11.4444	11.722	3.389	6.833	16.667	3.111	6.667	18.167	3.1667	3.7222	3.6111	25.278	16.6667	14.833	3.8889	2.056	2.444	5.389	20.5	8.1667	2.3889	3.4444	5.778		0.69388	9.84031
16.315	3.5	3.556	7.333	48.556	9.833	13.722	19.5	17.056	4.8889	13.7778	9.889	3.778	9.222	20.889	2.778	6.444	18.889	3.5	2.6111	3.1111	24.667	16.0556	16	4.2222	2.167	2.778	6.889	19	6.3333	2.6667	2.5	6.389		0.698979	10.3907
16.4341	2.556	3.444	6.611	44.111	10.833	13.611	19.611	17.056	5.2222	16.4444	10.778	3.444	9.111	16.722	3.889	7.889	17.889	4.4444	3.3889	3.5	25.389	11.1667	15.889	3.4444	2.556	2.444	7.111	18.7222	5.5556	3.3333	2.5556	6.056		0.704081	10.1493
16.5532	3.222	3.556	7.167	47.389	11.611	14.5	19.056	18.389	4.1111	15.1667	9.611	3	10.667	16.611	3.5	7.778	12.667	4.0556	2.7778	3.1667	27.278	14.1111	16.556	4.1667	2.611	2.889	6.389	18.1667	7.2222	2.1667	2.7222	5.667		0.709184	10.2484
16.6723	3.167	3.111	7.444	49.833	12.056	15.667	20.222	16.222	5.8889	14.0556	10.611	3.111	10	13.944	2.611	8.056	13.111	3.5	3.0556	3.5556	28.778	11.3333	18.889	2.7778	2.5	1.944	4.556	20.3333	6.2222	2.5556	3	6.444		0.714286	10.2673
16.7914	2.056	4.556	7.944	47.389	11.278	18	19.778	15.389	4.3889	16.1667	11.5	2.556	10.667	12.222	3.056	8.667	9.889	2.6111	3.8333	2.8889	30.944	13.8889	18.611	2.8333	2.222	3	6.278	19.5556	6.2222	2.4444	2.8333	5.222		0.719389	10.2778
16.9105	2.5	4.278	8.556	53.111	11.556	18.167	17	15.667	4.2222	19.7778	10.056	2.833	10.778	12.056	2.722	8.167	7.778	2.8889	2.8889	3	29.778	15	18.056	3.1111	3.5	2.889	5.778	18	8.2778	3.2222	3.5	5.778		0.724491	10.4654
17.0296	2.833	4.167	7.556	51	10.667	20.222	13.389	16.833	4.1111	18.2778	11.389	2	11.611	11.444	2.611	9.222	8.722	2.1667	2.8889	3.0556	29.167	14.6111	20	2.1111	2.333	2.444	7.333	16.9444	8	3.1111	2.7778	6.222		0.729594	10.2881
17.1487	2.611	4.333	7	50.111	10.833	17.778	12.389	14.222	5.2222	18.4444	10.278	2.222	12	10.833	3.5	9.167	6.833	3.3333	3.3889	4.3889	32.278	14.2778	15.833	2.6111	2.222	2.944	7.056	15.1111	6.7778	2.1111	3.0556	6.222		0.734697	9.98085
17.2677	2.389	4.222	7.333	51.667	11.556	20.611	13.444	15.167	4.8333	18.6111	9.222	3.222	13.667	7.611	3.278	9.722	6	3.3333	2.6667	3.4444	32.889	14.9444	19.778	2.3889	2.833	3.278	8.056	15.5	7.6111	2.8889	2.7778	6		0.739795	10.342
17.3868	2	4.167	7.611	45.833	9.444	22.222	12.333	14.556	4.8333	17.5	7.667	3.389	16.111	6.722	2.778	10.444	5.111	3.7778	3.3333	3.2222	33.833	15.8333	18.444	2	2.833	2.611	7.333	16.6667	8.0556	2.2222	3.2778	5.667		0.744897	10.0572
17.5059	2.889	5.278	6.556	45.5	10.556	21.333	13.5	14.944	4.9444	16.1667	8.444	2.667	17.611	7.778	3.722	9.444	6.444	3.2778	3.0556	4.1667	31.333	13.1667	19.611	2.8333	2.444	2.5	8.444	16.2778	7	2.2222	2.5556	6.167		0.75	10.0885
17.625	2.389	2.944	7.222	41.111	8.556	21.5	12.222	14.167	5.5	15.5556	7.944	2.556	17.778	5.667	2.667	15	5.056	3.1667	3.1111	3.3889	33.944	14.8889	17.333	2.5556	2.833	2.611	8.389	18.3333	6.5556	2.5	2.2222	7.667		0.755103	9.91668
17.7441	3.389	3.111	8.278	42.611	11.5	23.833	11.278	14.278	4.3333	19.7222	6.778	2.278	21.056	4.667	4.056	14.722	4.444	2.8889	2.5	3.8333	35.389	13.5556	17.667	2.8889	3.111	2.944	8.111	14.5556	6.7222	2.5556	2.2778	6.5		0.760205	10.1823
17.8632	2.889	4.611	9.556	45.056	9.389	22.833	9.833	14.056	6.3333	16.1667	7.167	1.944	18.889	5.611	2.778	17.056	5.278	3.2222	3.5556	3.1111	30.722	14.0556	18.056	2.3889	3.222	2.167	10.278	15.1111	5.9444	3.3889	2.7778	6.722		0.765308	10.1303
17.9823	3.111	3.889	9.611	44.389	9.611	23.833	11.5	16.111	5.6111	20.2778	6.222	3.111	22.667	4.889	2.5	16.611	4.5	3.5	2.6667	3.3889	33.944	13.0556	15.611	1.5556	3	2.944	9.944	12.7222	6.8333	2.6667	3.3889	6.5		0.77041	10.3177
18.1014	4.5	4.444	10.278	38.389	12.111	26.278	10.833	15.389	6.3889	17.8889	4.833	2.444	20.444	5.333	2.833	20.889	5.944	3.1667	2.8889	3.8889	39.167	14.6111	17	3.3333	3.444	3.056	9	14.5	7.6111	3	2.7222	6.278		0.775513	10.7152
18.2204	4.056	4.222	10.833	38.833	10.667	27.222	10.056	15.667	4.9444	17.7222	7.278	3.056	19	4.778	3	21.278	5.278	3.1111	2.8889	3.2222	37.333	9.3889	14	1.5556	2.056	3.444	9.667	15.2778	6.1111	2.5	2.8889	6.778		0.780611	10.2535
18.3395	3.611	3.278	10.611	37.833	10.222	27.722	10.611	13.889	6.8889	16.5556	5.167	2.722	19.722	4.611	3.222	20.667	5.056	3.7222	3.1111	3.4444	43.722	9.7222	13.167	2.9444	3.722	4.167	8.222	16.2778	7.5556	2.3889	2.6667	8.167		0.785714	10.4809
18.4586	3.556	4.056	8.111	40.222	10.611	28.833	9.667	14.5	7.0556	16.7778	5.056	3	19	4.556	3.056	20.333	4.111	3.5556	2.6667	3.5	46.778	10	15.611	1.8333	4.611	4	11.333	13.4444	6.7778	2.6111	2.6667	8.278		0.790816	10.6303
18.5777	4.056	3.778	10.833	41.889	10.111	28.167	9.944	15.611	6.2778	17.3333	3.833	2.944	18.056	4.278	3.611	20.889	4.722	3.0556	2.7778	3.6111	51.722	9.1111	15.167	2.2222	3.333	3.944	11.722	15.1667	8.3889	2.6111	2.7778	7.667		0.795919	10.9253
18.6968	3.389	3.889	11.667	43.056	11.333	27.5	8.5	16.278	5.8333	19.7222	4.056	2.833	20.889	3.167	3.444	21.222	4.167	2.6667	3.5556	4.2778	49.667	9.7778	15.722	2.6667	3.611	3.611	13.778	15.1667	6.0556	2.0556	3.2778	8.111		0.801021	11.0921
18.8159	3.944	3.556	10.722	43.667	11.611	27.833	8.111	13.778	5.1667	19.6667	4.278	2	21.778	4.611	2.944	22.611	3.167	2.4444	3.1111	3.5	54.167	8.2778	13.722	2.5556	3.722	3.167	12.278	13.8889	6.1667	2.7778	2.8333	7.333		0.806124	10.9184
18.935	4.056	4.833	11.5	45.333	12.389	26.5	7.278	16.389	8	20.6667	5.111	2.778	22.833	4.167	3.722	23.5	4.056	3.1667	3.7222	3.5556	51.333	9.5556	12.222	2.1667	4.556	3.278	12.611	16.3889	6.3333	1.6667	3.4444	8.556		0.811227	11.4271
19.0541	5.611	5.389	13.333	46.5	12.833	25.5	9.722	14.222	6.4444	22.1667	3.556	3.111	23.333	4.278	3.444	23.222	4	2.6667	2.7778	3	61.611	6.5556	11.167	3.4444	3.833	3.444	16.944	16.2778	5.1667	3.1111	2.8333	8.556		0.816329	11.8142
19.1731	5	4.5	12.667	48.278	10.667	26.778	8.556	15.333	7.2222	23.8333	3.167	1.944	26.5	4.444	2.889	24.444	3.5	2.9444	2.7222	3.7222	52.944	8.9444	8.778	2.7778	4.611	3.889	14.333	16.7778	7	2.5556	1.8889	7.722		0.821427	11.6041
19.2922	5.111	4.611	16.556	50.389	13.722	27.778	9.667	15.5	8.0556	20.8889	4.222	2.722	24.556	4.167	3.833	24.833	4.667	3.1111	2.2778	4.2222	55.389	7.6667	8.167	2.8889	5.667	3.333	19.778	18.7778	6.7778	1.7778	2.1111	6.944		0.82653	12.1927
19.4113	5.667	5.5	16.833	57.333	14	27.889	9.556	12.444	9.7778	24.8889	3.222	2.111	27.722	4.333	4.611	23.111	4.111	3.0556	2.9444	3.1667	43.167	6.6111	6.778	2.3889	5.889	4.111	19.167	17.7778	5.8333	2.8889	2.2222	7.722		0.831632	12.0885
19.5304	4.5	4.778	16.389	59.167	17.556	33.056	8.056	14.056	10.3333	22.7222	3.167	2.778	28.278	4.389	4.056	25.056	3.778	2.4444	2.8889	3.6667	41.111	7.7778	5.722	1.7778	5.222	4	19.111	19.2778	6.8333	2.1667	2.1111	8.167		0.836735	12.3248
19.6495	4.556	3.944	18.5	66	14.667	33.5	8.667	14.056	9.3889	20.6667	3.556	2.778	26.889	2.389	3.056	24.278	4.5	2.5	3.1111	3.5	38.278	6.4444	5.833	2.2778	5.611	4.722	18.389	21.7778	6.1667	1.9444	2.5	9.778		0.841838	12.3195
19.7686	5.111	5.222	17.667	64	17.389	34.722	8.722	13.667	11.2222	19.2222	3.056	2.778	26.222	3.944	4.333	24.444	3.889	3.2778	2.5	4.9444	35.556	6.0556	4.722	2.5	6.611	4.333	19.778	20	7.4444	1.6667	3.0556	10.056		0.84694	12.441
19.8877	4.333	4.611	21.889	69.556	17.5	37.222	11	14.833	11.8333	19.1111	3.056	3.611	26.611	2.611	4.222	26.611	4.222	3.5556	3.2222	4.7222	31.444	6.7778	4.167	1.8889	5.556	4.111	19.611	18.3889	8.2222	2.1667	2.7778	9		0.852043	12.7639
20.0068	5.889	3.611	25.778	67.222	19.667	41.389	10.778	13.167	13.7222	16.7222	4.056	3.111	27.944	3.167	4.5	26.556	3.611	2.3333	2.6111	4.3333	29.556	6.9444	3.444	2.2222	6.889	4.889	19.556	19.7222	6.5	2.0556	3.2222	9.667		0.857145	12.9636
20.1259	7.111	4.944	28.278	71.333	19.944	37	12.278	15.167	12.6111	17.3333	3	2.5	25.944	3.167	3.833	26.389	3.611	3.3333	2.5	4.8889	27.111	7.7778	2.667	2.2778	8.667	4.389	23.5	23.2222	7.5	2.6667	2	11.722		0.862248	13.3958
20.2449	8	4.667	27.722	74	22.056	36.889	11.333	17.167	12.1667	14.9444	3.389	2.944	26.556	3.278	3.833	26.611	4.167	2.8333	3.0556	5.1667	22.556	6.3889	3.278	2.5	9.889	5.5	23.722	24.5	6.7222	2.5	2.6667	12.222		0.867346	13.5382
20.364	7.833	4.222	27.944	75.556	22.889	36.444	10.778	19.222	14.7778	14.5	2.722	2.889	26.833	3.5	4	26.5	3.722	2.7778	3.3333	5.2778	18.889	7.1667	3.556	3.0556	9.167	4.444	27.111	23.1667	7.7222	2.6111	2.8889	12.778		0.872449	13.6962
20.4831	6.722	5.278	32.222	73.556	26.667	39.667	12.278	18.389	14.6667	14.8889	2.444	3.167	30.167	3.5	3.667	27.222	5.222	2.2778	2.8889	5.2222	18.722	6.4444	3.222	1.9444	11.222	5.5	29	26.5556	7.2222	3.2778	2.8333	13.944		0.877551	14.375
20.6022	9.778	5.611	32.111	80.333	31.111	39.944	10.722	20.5	15.1667	14.3333	3.056	2.833	28.444	3.111	4.389	26.111	5.5	2.2778	2.5556	5	21.778	7.5556	3.111	3	13.333	4.611	33.667	32.1667	7.0556	2.5	3	14.278		0.882654	15.2795
20.7213	10.611	4.611	31.056	78.167	33.389	41.111	11.833	23.389	14.7222	13.1667	4.278	2.833	24.111	3.167	5.056	27.778	3.833	3.1667	3.5556	7.1111	18.167	7.2222	2.444	1.7222	13.667	7.667	34.167	33.0556	7.8889	3.2222	3.7778	19.444		0.887756	15.6059
20.8404	14.889	5.056	33.333	78.944	34.056	42.778	11.889	24.556	16.6667	14.5	3.056	3.556	25.556	3	3	29.889	6.667	3.1111	2.7778	9.2778	14.722	7.7778	2.833	3	16.722	7.667	37.778	33.1111	11.3333	2.7778	3.1111	18.611		0.892859	16.4376
20.9595	21	5.389	32.944	79.5	37.056	39.056	12	21.333	17.9444	16.7778	2.5	2.833	23.333	2.833	4.056	30.722	5.389	2.2222	2.9444	7.7778	15.167	6.1667	2.222	3.5556	17.722	7.333	42.167	40.3333	9.4444	3.5556	3.3889	18.556		0.897962	16.7882
21.0786	29.889	6.667	35.056	78.944	39.944	35.778	13.444	21.278	17.3889	14.8889	2.667	3.056	22.889	2.833	3.333	30.389	7.222	2.7222	3.8889	10.5	15.556	6.3889	2.833	2.8889	20.889	9.278	43.222	41.6667	9	3.3889	3.2778	20.333		0.903064	17.5469
21.1976	45.056	6.722	37.556	66.389	37.167	35.111	16.444	22.111	17.4444	16.1111	3.278	3.333	24.667	2.944	4.167	30.111	7	3.3333	4.1667	11.4444	16.333	6.1111	3.222	3.6667	21.944	11.222	44.556	42.4444	11.3333	3.9444	4.3889	22.667		0.908162	18.3246
21.3167	62.444	6.222	36.056	48.167	30.556	32.944	16.833	22	22.8889	19.2778	2.278	4.056	20.222	2.889	3.611	32.5	5.944	2.7222	3.1111	11.8889	14	6.9444	3.111	3.6111	25.833	14.167	43.111	41.1667	11.2778	3.8333	5.7778	28		0.913265	18.3576
21.4358	78.833	8.278	38.778	26.056	22.778	32.444	14.278	24.333	24.0556	18.4444	2.722	3.444	21.444	2.889	3.667	29.778	8.667	2.2222	3.2778	13.3333	14.389	5.3889	2.722	2.3889	31.278	16.667	43.778	41.8889	11.9444	4.2778	6.2222	28.444		0.918368	18.4097
21.5549	91.333	9.056	40.556	16.5	13.556	28.667	16.222	22.333	28.2222	20.8889	2.833	4.389	20.556	2.5	3.278	30.944	8.111	3.3889	2.6111	14.7778	14.611	5.7778	2.667	2.6667	35.5	19.278	41.722	39.9444	12.0556	5.4444	8.6667	28.611		0.92347	18.6771
21.674	91.944	10.444	43	10.667	9.389	24.111	15.222	19.5	27.3889	21.7778	3	5.167	17.111	2.611	4.611	34.5	8.889	2.7778	2.8333	18.3889	11.389	6.9444	2.611	3.3889	35.389	18.667	40.111	40	14.2222	6.5	12.3333	25.722		0.928573	18.4566
21.7931	64.389	9.944	49.556	7.667	7.611	19.778	17.722	22.278	29.2222	26.7778	2.722	4.111	17.722	2.5	3.556	34.056	11.111	2.6667	2.8889	17.8889	12.611	7.3889	3.556	3.7778	28.5	23.222	42.111	36.3889	11.7778	7.2222	12.6111	25.278		0.933675	17.7691
21.9122	38.833	12.222	49.556	5.444	6.833	12.111	17.556	20.611	34.5	27.6111	2.278	4.278	14.667	2.667	3.833	33.833	11.111	3.2778	3.6111	18.5556	12.333	6.9444	2.389	4.2778	22.333	25.389	39.444	33.3333	15.1111	9.0556	20.0556	20.667		0.938778	16.71
22.0313	16.778	17	51.722	4.222	4.222	10.5	20.167	23.833	39.3889	25.8333	3.611	5.111	12.833	2.889	4.5	32.833	11.444	2.7778	3.1111	14.0556	14.111	8.3333	4.556	5.1111	17.556	26.444	38.333	30.2778	15.8333	9.7778	26.3889	15.222		0.94388	16.2117
22.1503	10	18.222	46.111	3.222	3.722	7.222	21.389	19.778	41.5556	26.8889	2.389	4.167	11.389	3	3.722	35.167	14.056	2.8333	4.6667	16.1111	15.167	7.6111	3.111	5.1667	11.389	34.056	34.056	25	16.5556	12.2778	36.1667	11.944		0.948979	15.8785
22.2694	8.667	19.056	42.222	2.389	3.889	7.111	20.5	19.722	46.4444	26.8889	2.5	5.444	8.667	3.944	3.556	33.778	14.722	4.2222	5.3889	14.3889	15.611	6.6667	4.111	6.8333	7.889	38.444	29.556	23.2222	20.7778	14.6667	34.5556	8.5		0.954081	15.7604
22.3885	5.722	26.833	36.722	2.778	2.333	5.611	20.833	23.167	46.6667	26.5556	3.5	5.278	8.111	2.778	4.333	32.667	16	3.7222	5.5	19	14.667	10.6111	3.833	7.7778	5.667	35.778	25.833	16.0556	25	15.9444	36.5	6.167		0.959184	15.6858
22.5076	5.389	36.833	21.222	1.778	1.722	4.778	25.333	27.056	64	25.0556	3.722	6.278	7.889	3.444	4.5	32.111	18.333	4.0556	5.7778	18.5	14.556	8.3889	5.389	8.2778	4.444	26.111	19.833	12.3889	27.7222	19.1667	35.2778	4.389		0.964286	15.7413
22.6267	3.389	46.611	15.556	2.167	2.278	3.889	22.667	29.778	84.6667	25.3889	3.389	6.333	10.444	3.444	5.889	35.778	20.5	3.8889	7.0556	18.2222	14.611	10.3333	5	9.1111	3.778	20.722	12.833	6.8889	33.1667	21.8889	27.5556	2.167		0.969389	16.2309
22.7458	2.333	58.444	8.889	1.389	1.111	3.722	22.722	34.389	94.4444	30.7778	3.778	7.389	9.667	4.333	7.444	39.889	21.667	3.1667	7.6667	16.8889	14.222	9.3889	6.167	12.5	3.167	19.444	9.611	4.7778	36	26.1667	22.2778	1.556		0.974491	17.0434
22.8649	2.056	68.111	7.278	1.389	1.889	3.389	22.167	35.778	99.5556	31	3.444	7.389	9.722	4.222	8.222	41.778	22.667	4.2778	10.3333	13.7778	11.889	11.0556	7.556	14.2222	1.833	11.611	7.722	3.7222	35.8333	25.5	13.5	1.833		0.979594	17.0226
22.984	2.778	70.389	5.889	1.278	1.5	2.722	25.111	39.333	98.5556	36.9444	2.889	9.667	9.333	4.889	8.111	43.167	33.722	4.5	10.7222	11.7778	13.611	11.6111	8.889	15.1111	2.556	7.833	5.389	2.7222	38.5556	22.6667	9.5556	2.056		0.984697	17.6198
23.103	1.278	51	5	1.722	1.056	1.944	24.944	47	85.6111	41.8333	4.278	10.667	9.111	8.556	9.833	45.389	40.111	4.8333	16.5556	11.5556	15.722	13.4444	11.056	17.5556	2	7.444	3.722	2.7222	33.5556	17.5556	6.1667	1.611		0.989795	17.3385
23.2221	1.833	28.667	3.944	0.778	1.556	2	28.722	46.444	56.5556	51.8889	4.167	13.833	12	10.333	11.278	40.111	47.167	5.2778	19.0556	11.5	11.944	13.1111	16.611	18.6667	1.389	5.333	2.778	1.8333	33.9444	11.5556	4.2222	1		0.994897	16.2344
23.3412	1	12.667	2.278	0.389	1.389	1.278	28.167	47.556	31.5	57.1111	5.056	15.722	14.833	14.222	13.778	41	49.667	5.3889	16.7778	7.8889	16.778	15.7222	20.667	16.2778	1.5	4.778	2.944	1.5	23.8889	9.1667	4.6667	1		1	15.2049

## Sheet: Image6
X0	Y0	Y1	Y2	Y3	Y4	Y5	Y6	Y7	Y8	Y9	Y10	Y11	Y12	Y13	Y14	Y15	Y16	Y17	Y18	Y19	Y20	Y21	Y22	Y23	Y24	Y25	Y26	Y27	Y28	Y29	Y30	Y31		Ap-basal	Avg int
0	107.378	87.36	44.662	37.274	33.072	36.209	32.902	38.631	40.003	6.816	39.375	16.313	13.914	31.243	37.053	32.106	28.232	12.702	14.849	8.032	23.4526	41.502	26.631	7.6	10.46	15.901	14.64	9.6658	11.1637	15.8742	19.199	24.147		0	28.6988
0.1191	113.485	84.716	47.204	41.487	37.855	39.442	44.576	50.855	46.179	8.262	51.427	14.816	16.715	35.554	43.247	35.311	32.067	16.637	18.172	11.366	30.7644	54.107	39.311	8.456	13.222	15.898	15.32	14.236	12.5219	22.57	24.889	25.08		0.00526369	33.3046
0.2382	121.01	88.872	47.305	51.588	44.934	45.334	55.628	68.411	56.144	11.223	57.599	17.414	22.256	40.44	47.073	43.545	42.238	20.041	27.398	15.098	32.1832	71.004	52.958	6.364	13.176	20.594	19.057	15.1821	17.7343	29.327	29.3	31.905		0.0105274	39.448
0.3573	126.006	86.329	46.134	63.216	51.494	53.746	79.094	100.152	69.244	18.293	61.365	20.61	24.71	45.195	48.415	47.33	53.511	27.907	42.471	25.04	38.5568	85.396	65.621	10.521	15.12	20.608	23.37	17.1216	21.0878	34.371	30.199	36.948		0.0157911	46.5369
0.4764	137.974	88.518	48.899	76.798	63.799	61.191	105.418	140.124	82.015	34.253	74.339	28.62	28.846	57.486	56.569	48.443	63.523	49.465	67.971	34.43	45.0977	100.117	79.163	10.912	20.602	24.795	27.75	21.2553	24.7254	40.2486	30.708	42.85		0.0210548	56.7783
0.5954	139.316	95.066	52.371	93.89	74.722	73.041	114.291	169.426	95.62	49.645	78.375	36.106	39.327	66.833	64.601	60.768	66.476	65.992	94.645	47.865	58.4402	119.852	93.984	12.129	21.331	30.909	30.274	26.3013	28.0459	46.9861	33.668	55.921		0.026314	66.7568
0.7145	151.593	103.342	58.596	106.564	90.12	87.131	122.774	201.486	108.358	70.258	90.561	44.077	44.307	92.173	77.696	61.901	75.077	93.253	130.794	68.389	65.8537	135.029	109.043	17.049	29.481	37.948	36.29	29.5141	34.3376	60.4115	40.924	63.597		0.0315777	79.3102
0.8336	152.697	116.709	64.627	129.962	107.599	95.718	127.204	205.709	124.174	100.993	93.958	52.948	63.393	114.172	87.473	71.451	86.117	125.607	169.131	86.361	68.3914	155.595	124.072	21.2	36.754	46.502	41.768	34.4439	44.4997	64.1238	51.049	80.03		0.0368414	92.0135
0.9527	162.811	115.657	72.846	133.509	128.56	115.743	134.621	207.899	137.036	128.234	99.101	63.73	76.118	144.217	93.669	71.214	108.187	148.241	209.761	102.318	73.4331	164.65	130.794	29.061	51.679	70.815	51.734	43.9214	52.8911	67.3888	58.837	103.156		0.0421051	104.745
1.0718	169.21	116.342	68.708	132.825	144.065	127.919	143.8	213.637	138.887	152.602	103.02	79.113	92.781	170.461	108.717	83.46	120.627	177.018	217.319	123.965	70.5339	181.549	141.017	37.086	62.649	95.151	69.501	51.65	59.9721	73.7782	73.38	117.73		0.0473688	116.202
1.1909	168.782	113.451	73.234	122.498	156.579	130.31	145.576	193.461	153.884	171.704	101.876	98.846	104.925	179.907	115.074	92.481	133.625	182.222	225.42	138.692	77.7513	175.762	137.765	51.035	85.828	122.542	94.09	64.2695	70.2281	79.9405	90.619	121.649		0.0526325	124.188
1.31	163.435	110.94	79.537	105.08	169.141	131.602	151.116	178.976	158.79	190.937	101.894	116.603	104.438	181.446	116.411	103.712	152.493	175.289	210.033	141.322	78.0276	183.817	141.604	73.731	108.902	138.865	106.534	80.7966	68.2364	83.065	101.548	121.89		0.0578962	129.069
1.4291	168.204	109.529	90.582	91.527	168.364	135.03	146.045	155.674	164.471	203.651	110.843	119.643	104.526	172.454	122.899	126.981	161.734	166.789	203.779	140.864	83.2967	185.498	137.558	93.938	131.166	159.636	123.278	80.1223	70.3645	93.2431	104.535	110.269		0.0631599	132.39
1.5481	153.28	107.531	102.718	71.023	159.254	137.227	148.25	132.749	171.201	200.631	112.757	127.696	102.251	150.161	123.431	133.817	169.667	142.011	184.014	131.515	89.6251	187.324	125.583	122.777	142.863	153.059	129.14	80.2449	71.1136	93.1782	110.234	97.104		0.0684192	130.107
1.6672	141.708	112.96	114.327	54.629	139.215	136.124	145.171	113.929	167.14	187.544	116.936	130.103	97.021	117.296	124.329	139.725	170.005	123.832	171.581	128.679	98.5113	191.274	109.859	149.384	153.306	158.374	115.789	76.5884	71.7945	85.145	101.664	82.597		0.0736829	125.829
1.7863	132.85	103.93	117.03	44.27	108.409	124.255	138.24	94.885	169.931	170.17	128.765	122.042	92.309	92.013	137.826	136.804	160.512	114.144	156.238	128.581	101.426	187.786	95.424	172.478	148.814	142.766	99.508	59.1551	70.2159	80.8955	87.483	68.069		0.0789466	118.351
1.9054	100.137	106.514	123.577	35.873	87.11	116.448	136.155	76.594	169.976	153.57	141.077	105.137	81.16	65.137	138.772	134.467	136.381	96.288	153.678	120.034	96.4905	192.596	74.009	176.828	130.304	113.586	74.749	50.3677	67.5296	74.1702	80.251	52.788		0.0842102	108.18
2.0245	86.9	95.723	133.177	32.896	66.121	99.572	128.523	67.425	156.5	151.297	149.748	88.128	70.136	49.679	139.611	113.323	111.425	80.755	141.149	116.638	96.5476	179.564	76.915	165.298	109.081	85.4	55.776	43.4846	69.2025	63.5212	67.935	50.362		0.0894739	98.1817
2.1436	68.748	98.349	128.205	32.442	49.03	84.573	116.967	57.205	148.599	137.109	159.699	71.318	65.391	36.406	138.88	99.144	87.5	75.504	135.745	108.889	81.6091	169.454	83.026	130.66	85.312	59.848	37.646	35.278	68.573	55.7593	56.785	44.548		0.0947376	87.7563
2.2627	63.05	92.602	118.2	30.023	43.555	63.611	110.541	44.569	134.165	124.557	155.79	62.455	58	27.692	126.65	96.357	63.507	63.202	131.96	103.243	72.8511	155.337	83.212	103.122	64.491	38.538	22.904	32.8454	66.4271	44.2478	53.731	38.542		0.100001	77.8118
2.3818	61.859	91.728	115.038	26.011	31.967	53.107	109.728	38.814	120.757	122.992	162.674	51.746	47.539	23.53	110.123	83.413	52.757	47.78	126.783	98.422	74.9727	137.913	82.668	73.978	52.14	25.839	13.01	24.5395	67.2767	44.81	47.296	31.904		0.105265	70.4098
2.5008	65.874	92.507	100.326	27.966	31.299	38.74	100.447	33.113	106.467	115.62	156.536	42.466	39.914	19.283	84.716	66.197	40.227	32.433	119.814	92.734	70.5178	124.538	77.165	46.851	41.476	16.676	9.51	16.1126	69.3791	39.1462	41.622	30.237		0.110524	62.1847
2.6199	60.262	103.808	101.15	20.465	26.046	32.899	87.352	27.386	94.675	109.434	157.77	37.262	34.19	17.287	54.282	47.463	33.714	30.167	114.664	83.52	62.0252	104.769	68.84	33.611	32.86	10.025	7.148	9.6187	66.3395	36.5316	36.155	29.855		0.115788	55.3617
2.739	62.199	107.959	92.548	24.7	23.326	29.64	74.518	30.109	90.265	100.289	153.006	42.273	27.594	14.047	32.888	35.499	31.915	21.262	118.804	79.913	56.5409	89.292	73.121	22.111	27.003	6.438	5.622	8.5132	52.4764	32.1215	29.243	31.055		0.121052	50.8216
2.8581	50.561	115.176	84.617	28.539	21.231	29.659	70.674	23.662	77.458	91.88	140.591	36.367	22.136	11.42	18.595	24.175	31.539	18.907	108.591	66.672	56.6671	86.761	80.176	17.746	23.419	4.543	4.455	6.5376	51.2831	29.2813	28.935	26.831		0.126315	46.5339
2.9772	43.546	130.27	92.729	30.324	22.18	24.602	56.921	25.975	65.321	79.129	132.392	34.178	22.124	11.356	12.462	15.858	30.612	17.23	94.461	66.508	52.4747	91.123	80.552	13.254	22.492	5.073	4.588	5.041	45.6939	28.7469	24.796	26.323		0.131579	44.0105
3.0963	44.397	139.849	93.151	30.723	20.507	25.895	47.296	23.673	64.824	76.24	118.191	34.194	20.487	9.274	9.276	13.429	28.237	13.747	83.106	59.181	47.9058	81.627	94.378	10.469	22.637	3.854	3.471	4.147	41.0472	30.8214	19.816	23.916		0.136843	41.8677
3.2154	49.331	150.123	92.031	28.708	17.122	25.319	40.14	25.58	54.058	75.008	104.482	31.924	21.666	10.343	8.053	10.069	21.62	10.274	74.322	53.456	48.4926	79.981	103.855	8.274	20.965	3.563	2.703	4.4998	41.0916	27.1934	23.341	26.907		0.142106	40.453
3.3345	51.876	150.827	96.331	25.978	13.413	26.734	32.826	23.753	64.488	69.983	95.839	33.315	23.051	9.801	7.426	8.343	16.185	10.117	72.002	48.742	47.9785	88.495	105.317	7.964	18.97	3.125	3.263	4.1424	46.6399	25.0098	21.399	22.309		0.14737	39.8638
3.4535	48.9	156.311	94.844	24.171	12.245	26.268	27.532	20.833	60.361	65.016	88.349	33.165	18.747	9.4	9.268	10.237	15.338	6.765	55.922	43.041	42.3499	84.624	103.792	6.654	21.837	3.067	2.46	3.5765	43.1946	20.4246	23.207	21.175		0.152629	37.5961
3.5726	52.446	157.24	93.439	20.326	11.805	27.055	25.62	22.241	60.157	64.093	86.176	32.413	17.217	10.029	5.886	9.375	13.998	6.119	51.158	40.409	35.8012	89.234	108.83	6.288	19.74	2.268	2.705	4.6578	41.8985	19.9495	21.382	19.375		0.157893	36.8541
3.6917	69.342	165.742	87.347	21.107	10.04	26.366	19.078	20.814	55.954	65.039	80.687	32.012	20.577	10.375	7.583	9.849	13.541	5.947	38.42	37.317	34.5565	86.645	122.538	5.439	20.079	3.184	2.454	4.4608	37.6568	15.4721	19.569	21.583		0.163157	36.5867
3.8108	77.369	173.237	79.148	22.701	10.102	29.89	17.282	21.009	43.013	63.113	72.696	29.949	25.94	11.599	7.773	8.967	18.183	4.589	25.833	28.523	30.1932	96.36	116.007	5.106	15.248	3.481	2.262	3.4903	30.4316	15.132	18.621	19.78		0.16842	35.2196
3.9299	84.841	175.282	74.263	21.997	11.237	25.934	14.901	19.269	48.002	65.601	67.784	29.571	26.962	10.613	7.815	7.491	17.368	4.296	21.73	24.323	29.6737	108.89	116.568	4.453	17.601	2.754	2.176	3.6494	29.8747	13.7891	16.681	18.562		0.173684	35.1235
4.049	88.122	173.75	75.298	19.887	9.646	28.959	12.729	18.692	48.422	59.588	56.698	27.092	20.411	8.263	8.606	8.644	16.975	4.276	17.17	22.837	28.2946	107.16	114.403	4.374	17.499	3.424	2.505	4.6273	27.1372	12.7828	14.403	16.856		0.178948	33.7353
4.1681	91.012	169.561	61.897	22.364	8.336	26.513	9.187	16.669	46.485	54.088	43.391	28.15	17.129	8.243	8.979	9.957	16.162	3.706	12.552	19.588	24.4218	116.511	113.624	5.162	18.928	2.334	2.011	4.7539	20.8988	11.803	10.047	19.22		0.184212	31.9901
4.2872	88.277	171.296	63.116	23.392	10.639	24.456	7.855	18.562	41.026	58.043	42.996	27.726	15.819	8.182	8.32	13.297	21.006	2.955	10.195	15.757	22.468	114.81	115.825	5.467	23.94	3.072	2.328	4.1506	16.5288	11.8664	10.572	14.805		0.189475	31.8359
4.4063	90.881	190.6	60.84	23.665	10.314	22.317	6.631	17.07	41.964	49.229	39.818	28.564	15.487	8.661	10.731	17.863	21.124	3.389	7.021	14.952	23.3855	115.582	110.73	4.738	25.946	1.65	2.247	3.5194	16.2114	15.5588	9.006	15.248		0.194739	32.0295
4.5253	88.736	212.203	57.903	25.366	10.746	19.982	6.037	17.993	38.008	45.811	35.18	32.589	15.918	8.318	12.482	17.114	28.731	3.094	6.389	13.266	19.6859	107.183	121.214	5.464	28.523	2.121	1.845	4.6276	16.4432	16.4791	6.94	13.691		0.199998	32.5026
4.6444	90.89	216.22	53.125	22.973	12.838	22.744	5.12	18.07	33.405	46.5	37.124	36.506	15.728	10.278	13.994	19.984	34.646	2.458	4.146	11.339	18.1807	98.063	120.293	6.157	27.499	2.078	2.068	4.2345	14.4803	17.3923	6.96	13.246		0.205262	32.4606
4.7635	92.647	217.453	53.624	19.921	11.44	20.654	4.639	16.714	33.119	41.29	29.598	34.783	14.756	7.254	13.44	19.527	34.792	3.442	3.861	11.104	19.9095	83.058	125.143	5.414	29.779	2.703	2.153	4.9934	14.3223	16.9969	7.972	15.825		0.210526	31.6352
4.8826	96.363	224.681	47.612	19.982	9.475	19.83	4.822	16.208	25.281	35.391	29.272	36.417	11.571	10.047	13.479	16.779	29.165	2.722	3.049	9.62	17.9654	68.56	115.613	6.998	24.998	2.798	1.81	4.4823	13.6935	14.393	7.069	13.17		0.215789	29.7911
5.0017	98.823	230.35	42.92	17.443	10.832	15.799	5.071	14.515	23.864	35.249	31.665	39.376	12.301	9.522	10.299	17.484	20.211	3.06	3.519	9.836	16.6286	63.972	112.243	7.709	23.456	2.571	2.961	4.8236	12.5683	13.6031	5.867	14.197		0.221053	29.1481
5.1208	93.657	233.525	41.015	14.503	11.109	17.791	4.951	12.407	13.951	29.128	33.243	35.978	10.599	9.142	10.583	16.483	18.582	3.305	2.284	8.358	16.8697	53.665	106.049	8.828	19.728	2.431	2.675	4.4537	15.158	9.7629	5.192	13.359		0.226317	27.4614
5.2399	94.038	235.658	39.122	11.458	10.093	15.223	4.19	12.896	13.177	29.226	38.867	34.157	9.842	11.481	9.085	19.716	15.25	2.131	2.757	9.159	15.8887	47.679	104.554	10.006	18.531	2.097	2.758	4.7851	11.5386	10.5979	4.515	15.203		0.23158	27.0525
5.359	93.835	236.932	36.59	13.31	11.898	13.372	4.342	11.179	10.526	26.34	41.549	40.708	8.519	10.899	8.377	18.464	11.156	2.606	3.388	7.864	13.6889	46.485	103.626	9.513	18.478	1.733	2.345	4.9206	13.1386	9.0569	4.006	14.26		0.236844	26.6595
5.478	90.677	233.144	35.683	12.516	14.251	14.611	3.734	9.879	6.98	20.108	42.382	36.392	8.371	9.845	8.384	15.173	8.31	2.962	2.728	6.809	15.85	37.617	96.673	11.085	17.128	2.361	2.823	5.1365	13.5119	6.5084	3.547	15.097		0.242103	25.3211
5.5971	82.976	219.482	29.812	13.157	12.978	10.764	3.577	6.495	7.112	18.917	44.275	30.225	7.809	10.334	7.299	18.827	7.706	2.511	3.308	6.598	16.2813	36.511	99.841	11.498	15.139	2.147	3.04	6.4738	11.0957	5.1987	4.959	17.445		0.247367	24.181
5.7162	72.519	203.792	27.991	11.455	11.803	10.503	3.768	6.068	6.532	16.836	41.328	23.036	7.309	10.598	8.12	15.972	7.028	2.218	2.29	7.693	15.9827	30.9	99.509	11.178	14.876	1.662	2.251	3.921	10.1874	5.6688	4.228	14.703		0.252631	22.2477
5.8353	65.989	196.406	26.367	10.195	11.548	7.579	3.504	4.835	6.503	12.716	40.301	19.783	8.626	8.93	7.023	14.376	5.216	1.915	2.411	7.438	12.6968	32.276	100.107	12.437	12.907	1.431	2.107	4.2016	10.7112	5.7412	4.921	15.02		0.257894	21.1318
5.9544	63.535	188.415	23.067	13.723	11.732	5.182	3.01	4.185	5.487	13.71	45.127	16.591	5.795	8.249	7.893	12.187	5.177	1.896	1.893	8.406	12.7319	27.985	94.662	11.972	11.902	1.223	2.327	5.3032	9.6698	5.0282	4.17	13.579		0.263158	20.1817
6.0735	56.93	163.768	20.809	13.556	10.939	6.093	3.067	4.01	4.619	11.56	37.101	14.836	6.856	7.117	6.967	12.304	4.893	1.859	2.127	9.747	10.65	25.467	102.507	11.028	11.309	2.185	2.155	5.4643	8.4148	5.7992	5.521	13.304		0.268422	18.8426
6.1926	47.988	140.136	21.947	12.579	11.771	4.914	2.471	3.001	5.73	10.085	32.781	14.386	5.572	5.367	5.945	11.152	5.306	1.706	2.652	10.876	12.0857	21.658	96.68	12.265	10.912	1.572	2.188	4.957	10.3282	6.2589	5.632	16.188		0.273686	17.4091
6.3117	47.799	114.445	20.812	13.455	9.701	3.529	1.814	4.097	5.25	8.427	37.353	14.858	5.353	4.117	4.762	13.015	4.024	2.063	2.62	14.234	11.1353	20.29	91.848	9.167	11.435	1.668	2.102	6.254	9.1029	6.1634	6.331	14.796		0.278949	16.3131
6.4307	38.462	77.013	17.578	11.734	13.262	3.805	3.172	3.322	4.075	8.872	37.329	11.434	4.893	4.167	3.168	13.127	4.596	2.464	2.957	11.627	11.1855	22.501	81.401	7.127	12.099	1.649	2.19	5.637	9.8249	5.5377	6.756	13.341		0.284208	14.2596
6.5498	34.781	56.147	17.471	13.007	14.008	3.604	2.327	3.003	4.011	7.831	33.48	11.192	5.388	4.644	3.015	12.176	3.101	2.153	2.652	13.291	11.3	17.527	73.135	5.333	12.177	1.994	1.999	5.0183	9.9088	6.6692	7.916	14.611		0.289472	12.9647
6.6689	30.986	34.77	20.068	14.187	17.6	3.496	1.899	2.294	5.206	9.101	34.612	9.754	4.86	3.927	3.41	13.841	2.88	2.029	2.997	16.271	11.0109	12.698	56.849	5.08	10.691	1.839	2.221	6.7636	9.9042	7.0675	7.835	11.059		0.294736	11.7877
6.788	24.848	20.169	18.444	13.111	19.131	3.189	1.841	3.278	6.062	5.778	36.644	8.564	4.553	3.476	2.857	17.166	3.835	1.87	2.685	17.858	13.6566	12.755	53.423	5.072	11.795	1.754	2.497	6.3796	10.9461	6.9388	8.043	11.458		0.3	11.2524
6.9071	19.699	14.51	18.007	13.549	22.507	3.45	3.085	2.51	5.351	6.317	39.758	8.097	7.002	2.816	4.096	19.098	4.08	2.53	3.564	16.185	13.4415	13.75	44.626	6.133	10.041	1.506	2.453	6.2854	11.1575	8.0276	8.987	10.134		0.305263	11.0235
7.0262	14.978	10.039	15.943	11.407	21.925	3.096	2.208	3.175	5.817	5.554	39.735	9.347	5.66	3.355	3.428	18.973	2.745	2.226	3.623	18.172	14.7934	13.453	39.745	7.023	11.375	1.393	2.315	6.4992	12.1029	8.3537	10.636	11.244		0.310527	10.6356
7.1453	12.427	7.847	16.05	12.1	25.097	2.252	1.661	2.366	4.851	5.716	42.291	8.148	5.078	3.432	3.111	19.489	2.102	2.47	2.94	23.88	13.3608	11.119	31.601	4.905	9.829	2.345	2.421	6.9694	11.9537	9.7459	12.741	8.902		0.315791	10.2875
7.2644	7.423	7.42	15.839	9.282	31.144	2.691	2.188	2.813	5.943	5.493	36.435	6.234	4.025	2.608	3.236	18.766	2.485	2.521	3.161	23.608	15.7074	12.895	36.787	6.29	11.457	2.44	2.501	7.8431	12.5559	11.4279	12.593	9.658		0.321054	10.4834
7.3834	8.335	6.82	16.454	9.668	31.585	3.174	2.271	2.741	7.031	4.294	40.824	6.896	5.457	2.7	3.237	18.672	3.053	1.891	3.458	24.163	14.8496	11.362	36.723	6.72	10.758	1.512	2.236	7.9663	14.8832	12.3273	13.82	11.458		0.326314	10.8544
7.5025	5.734	7.061	16.662	9.839	35.456	2.925	2.511	2.309	6.55	5.586	42.115	5.692	3.203	4.033	4.856	16.494	2.223	2.345	3.451	24.779	17.5994	10.289	36.776	7.469	10.378	1.981	2.573	6.9037	14.3356	12.5745	17.645	11.875		0.331577	11.0695
7.6216	4.114	8.134	16.351	9.576	35.601	3.219	2.486	2.753	5.382	4.945	44.49	4.996	3.151	3.445	4.308	15.217	2.245	1.659	4.445	23.552	14.2512	10.538	32.679	7.59	10.402	1.381	2.152	9.7273	15.7184	12.6509	17.707	10.151		0.336841	10.7818
7.7407	4.213	8.876	18.541	10.731	32.208	2.908	2.659	3.041	7.106	5.341	49.715	5.169	3.525	2.498	4.273	14.587	1.926	2.042	4.1	25.361	16.4125	8.748	28.152	7.81	10.394	2.052	2.42	7.6798	15.0263	15.8475	16.631	10.254		0.342105	10.9452
7.8598	2.803	11.22	15.132	11.374	29.471	3.228	2.05	2.698	5.221	5.269	52.534	4.661	2.715	3.411	5.307	15.352	1.998	2.17	4.088	24.649	13.5094	9.937	23.432	8.167	9.411	2.426	2.42	6.5972	15.9951	15.779	19.114	10.643		0.347368	10.7119
7.9789	2.834	12.696	18.65	12.229	28.613	2.644	1.977	2.918	7.107	4.682	52.883	4.674	3.053	3.358	4.626	15.067	1.951	1.687	3.287	23.966	12.956	10.217	17.685	8.782	6.942	1.441	2.468	6.7053	15.9025	18.6243	14.392	10.765		0.352632	10.4932
8.098	3.26	17.044	15.864	15.607	24.285	3.441	1.971	2.831	4.289	5.924	54.119	5.455	3.509	2.834	4.168	14.363	2.207	1.739	5.03	25.204	12.4139	8.606	15.83	10.336	7.685	2.004	1.882	5.9956	15.9709	19.0075	14.044	10.518		0.357896	10.5449
8.2171	2.781	15.08	18.09	15.988	25.447	2.161	1.881	2.257	3.536	6.256	51.963	4.17	3.345	4.093	5.345	11.896	2.597	2.031	4.438	26.102	12.1608	8.831	13.802	10.598	6.965	1.687	1.72	7.8646	17.1729	20.521	15.112	9.806		0.363159	10.4905
8.3362	3.48	17.407	20.078	16.235	26.285	2.861	2.38	2.25	3.97	4.899	49.631	5.144	2.467	3.423	7.8	13.251	3.314	2.012	4.342	24.903	11.2379	8.096	14.618	8.755	6.266	1.858	2.081	6.7779	19.0111	21.6423	16.855	9.735		0.368423	10.7208
8.4552	3.157	14.526	18.742	20.451	28.961	2.638	1.994	2.381	3.735	6.593	50.378	5.151	2.728	4.944	8.899	10.02	2.168	2.487	5.057	23.048	10.8978	8.149	12.986	11.14	6.576	2.251	2.494	7.2929	16.7989	21.6661	14.998	9.027		0.373682	10.698
8.5743	2.835	13.395	19.288	20.953	21.564	2.142	2.548	2.081	3.909	7.436	47.981	5.895	2.452	4.373	9.744	10.732	1.851	2.474	3.615	20.615	9.9231	8.267	13.176	11.419	6.164	1.269	2.483	8.6414	19.4331	23.7444	16.11	7.383		0.378946	10.4342
8.6934	3.278	10.546	23.012	23.918	19.939	3.101	2.198	2.944	3.545	8.276	44.933	4.366	3.539	4.901	10.848	10.483	2.365	2.474	4.414	21.486	11.7404	9.839	12.954	11.212	3.533	1.641	2.778	10.2488	22.4091	23.4179	18.115	8.247		0.38421	10.8344
8.8125	4.154	10.037	22.669	26.495	16.278	2.148	2.517	3.503	3.359	9.267	45.945	4.327	3.42	5.337	8.965	10.337	2.157	2.32	4.705	21.919	13.8141	7.984	14.386	10.593	4.345	1.415	2.888	10.3685	21.3272	21.893	17.051	6.523		0.389473	10.7015
8.9316	3.521	9.173	21.233	27.893	15.393	2.338	2.494	2.856	4.128	10.854	44.442	3.702	2.53	5.157	7.869	8.897	2.461	2.645	4.77	22.695	12.3353	9.101	12.88	10.564	3.568	1.625	2.587	14.5504	22.1559	23.8021	15.021	5.169		0.394737	10.5753
9.0507	4.213	9.997	22.101	28.976	14.225	2.223	2.909	3.063	3.984	13.536	45.035	3.876	2.149	4.89	7.909	7.698	2.162	2.387	4.581	20.969	14.3978	8.879	12.247	10.755	3.752	1.213	2.593	11.2138	20.8961	21.7286	14.571	6.587		0.400001	10.4911
9.1698	3.752	9.696	18.043	32.833	12.807	2.66	2.958	2.505	3.606	13.353	45.875	3.184	2.629	4.728	6.416	7.833	2.476	2.646	3.129	19.468	13.4989	8.34	13.065	11.29	3.985	1.901	3.087	12.3307	20.7448	18.5339	14.5	5.044		0.405265	10.2162
9.2889	3.549	9.673	23.496	31.888	11.846	2.758	2.855	2.433	3.346	8.326	40.078	3.096	2.951	4.975	7.14	7.091	2.362	2.153	3.867	20.14	13.9577	8.367	14.753	13.676	2.631	1.701	2.564	11.2704	21.1206	19.4872	14.113	5.157		0.410528	10.0882
9.4079	3.909	9.406	20.996	35.082	11.159	2.828	2.125	3.38	4.582	7.691	41.039	3.239	2.293	5.059	7.998	6.65	1.393	3.312	3.876	20.016	13.3965	6.869	16.339	15.17	2.36	1.851	2.96	11.8876	22.6497	15.6813	13.225	3.864		0.415788	10.0714
9.527	4.18	8.856	20.634	33.456	14.468	1.696	3.174	3.339	3.907	6.401	39.942	2.949	1.987	5.059	9.006	6.706	2.058	2.145	4.411	19.094	11.4847	7.608	14.714	15.634	2.512	2.326	3.16	11.3162	23.9841	14.1025	12.671	3.95		0.421051	9.90408
9.6461	4.418	13.747	18.232	31.283	11.253	1.846	2.149	3.609	3.544	6.482	39.209	2.971	2.578	5.688	8.762	6.292	2.341	2.206	4.6	16.506	11.2104	7.753	15.567	15.821	2.821	2.446	2.892	11.4332	23.8022	16.4803	10.088	3.534		0.426315	9.73638
9.7652	4.568	15.622	17.918	27.829	11.189	2.843	3.14	3.31	4.393	6.095	38.264	2.506	3.063	5.476	10.428	4.651	2.49	2.127	5.144	19.463	12.0458	8.622	13.249	15.337	2.714	2.6	3.156	9.5154	24.2894	16.1604	12.397	4.444		0.431579	9.84528
9.8843	4.878	16.048	18.457	27.261	8.581	1.975	2.18	3.29	4.561	6.075	35.574	3.428	1.965	5.121	10.081	3.945	2.316	2.94	4.991	14.892	11.6147	7.304	14.091	15.436	2.692	1.859	3.338	11.5195	23.4751	17.0309	10.646	3.462		0.436842	9.4071
10.0034	4.783	17.24	17.945	24.069	8.133	3.17	2.634	3.252	4.34	5.791	32.621	2.748	2.226	5.463	12.67	6.204	3.13	2.793	4.917	15.567	10.4572	8.911	14.806	17.245	2.248	2.828	3.237	10.7984	28.0248	18.5438	8.767	3.447		0.442106	9.65654
10.1225	4.747	18.535	16.233	23.756	8.632	2.607	3.044	3.763	4.837	6.162	29.271	2.003	2.384	5.458	10.831	5.789	2.479	2.574	5.196	17.166	8.3773	7.102	11.474	15.353	2.101	2.271	2.651	10.3812	21.4763	16.9109	9.391	3.981		0.44737	8.96677
10.2416	4.856	19.71	16.957	24.339	6.661	2.543	2.583	3.191	4.681	5.918	25.396	2.566	2.281	6.445	9.742	4.198	2.234	2.009	4.781	15.596	7.9518	8.203	12.086	15.434	2.316	2.066	2.828	11.8736	24.5662	17.3677	8.153	4.216		0.452633	8.86713
10.3606	5.903	22.301	16.433	24.011	7.381	3.165	2.467	4.852	4.368	6.498	28.746	1.879	2.754	6.216	11.775	5.542	3.064	2.468	5.187	15.243	8.7292	9.853	10.171	16.011	1.543	2.779	3.479	11.0479	21.9181	15.6785	7.575	3.663		0.457893	9.1469
10.4797	6.894	22.985	18.458	25.963	6.942	2.816	2.731	6.131	5.567	6.83	21.972	2.268	2.676	7.121	11.891	4.564	2.275	2.223	5.171	12.754	8.0238	8.616	9.053	15.809	1.582	2.158	2.249	10.7504	23.5057	16.9374	6.441	3.705		0.463156	8.9707
10.5988	6.189	23.571	16.251	25.593	6.898	2.66	2.802	7.241	6.492	5.633	20.22	2.551	2.439	7.16	12.028	3.75	2.288	2.02	5.409	12.57	8.5568	8.501	7.153	14.92	1.819	1.938	2.686	11.2542	22.6116	14.9309	8.334	3.005		0.46842	8.73358
10.7179	7.496	21.663	14.327	23.591	4.978	2.456	2.279	8.128	6.178	6.48	18.574	2.528	3.906	8.595	12.707	4.424	2.751	2.202	7.256	11.019	8.2132	8.579	5.957	14.207	2.361	1.978	3.585	11.3613	25.4737	13.3991	6.766	2.985		0.473684	8.6376
10.837	9.006	23.474	14.25	20.317	5.38	2.619	2.101	7.771	5.711	5.517	16.951	1.701	2.358	8.834	10.907	4.42	2.407	3.081	8.496	11.483	7.7499	7.503	7.199	16.559	2.167	2.1	3.162	11.3285	25.2062	13.7543	6.698	3.643		0.478947	8.55793
10.9561	9.326	19.545	13.487	18.461	5.307	3.229	2.276	7.012	7.428	7.16	15.643	1.657	2.936	10.226	12.651	3.742	2.061	2.947	7.953	9.65	8.3226	7.185	7.233	16.281	2.362	1.866	3.017	14.5681	21.9475	12.0616	5.812	2.951		0.484211	8.32199
11.0752	8.598	20.096	14.057	19.488	5.206	2.481	2.326	6.164	7.299	6.75	13.754	2.902	1.942	8.594	13.463	3.419	2.466	3.281	6.478	8.651	7.6895	7.347	5.977	15.279	1.964	1.522	3.301	12.6891	21.1519	12.8217	5.755	2.65		0.489475	7.98632
11.1943	12.291	17.008	13.516	21.445	4.71	3.213	2.264	6.063	7.357	6.55	12.024	3.525	2.852	10.857	12.335	3.174	2.298	4.134	7.916	9.763	7.006	7.546	6.054	18.018	1.595	2.653	4.521	13.0226	20.3351	13.3651	5.171	3.246		0.494739	8.30712
11.3133	12.258	16.755	13.295	21.007	4.648	2.231	2.662	6.281	6.361	7.717	13.468	3.151	3.041	10.64	15.178	3.422	2.224	3.29	11.07	6.989	5.498	6.776	6.884	18.672	2.109	2.042	3.378	13.7015	19.4354	13.3089	5.674	2.898		0.499998	8.31453
11.4324	10.033	15.998	12.836	19.631	5.082	2.83	3.335	5.556	6.282	7.061	11.754	2.7	3.043	11.98	13.705	3.462	2.165	3.28	9.59	6.552	5.4558	7.801	5.194	18.035	1.568	2.488	3.946	15.6987	18.9766	12.895	4.799	3.003		0.505261	8.02297
11.5515	12.161	15.478	11.877	16.233	3.528	3.384	2.206	4.422	8.244	6.189	10.761	2.295	2.778	11.466	16.176	3.263	1.97	3.17	10.701	5.997	5.8419	5.955	6.104	18.191	2.317	2.03	3.416	17.7717	17.0789	11.0346	4.016	2.937		0.510525	7.781
11.6706	13.45	12.931	10.991	16.149	3.163	2.043	2.934	3.454	7.754	6.704	8.685	1.382	3.253	12.602	14.936	2.806	3.059	3.164	11.797	6.258	5.4262	5.868	4.559	16.943	1.963	1.806	4.712	18.7168	17.664	9.8304	3.658	2.78		0.515789	7.54504
11.7897	12.73	13.495	8.764	18.565	4.828	3.104	2.646	3.471	8.657	8.157	7.195	2.011	3.121	13.691	15.327	2.187	1.916	2.733	11.831	4.873	3.6904	6.569	5.89	16.817	1.878	2.071	3.846	18.5809	13.8537	8.3533	3.908	2.025		0.521053	7.39951
11.9088	12.999	11.21	10.403	15.624	3.589	2.58	3.139	2.897	7.461	7.889	5.816	2.086	3.297	14.002	13.941	3.512	2.055	2.86	11.405	3.277	4.4942	5.696	4.977	15.146	1.351	1.957	5.11	23.301	13.1434	7.467	3.5	3.037		0.526316	7.16317
12.0279	14.001	11.571	10.266	17.498	3.562	2.286	2.488	3.528	6.641	9.214	3.762	2.448	3.323	12.585	14.385	2.857	1.75	3.308	12.289	3.87	4.4225	5.414	5.302	13.625	2.37	2.213	4.446	25.5061	11.4482	6.9521	3.915	2.719		0.53158	7.1864
12.147	12.207	11.865	8.36	16.989	3.651	3.275	2.798	3.359	8.139	9.792	5.093	2.064	3.427	13.02	12.346	2.106	2.733	2.91	10.569	3.563	4.5686	4.946	4.467	13.194	1.923	2.153	5.291	24.6433	12.3658	5.3517	4.15	2.195		0.536844	6.98482
12.2661	13.611	10.629	9.545	15.932	3.397	2.841	3.491	3.579	7.264	8.55	4.324	2.025	3.46	14.866	12.482	2.89	3.071	2.635	11.345	3.273	4.6092	4.076	5.247	11.19	2.34	1.723	6.618	25.8356	11.6979	7.1081	3.153	2.746		0.542107	7.04856
12.3851	10.191	8.575	9.573	14.902	3.187	2.965	2.659	2.97	7.844	7.839	3.69	2.708	3.183	15.384	10.168	3.098	2.667	3.11	12.434	2.868	4.4391	4.048	4.704	11.702	1.935	2.554	5.82	27.5519	10.6843	5.7575	3.396	2.805		0.547367	6.73162
12.5042	11.452	8.808	10.369	14.132	2.308	3.257	2.526	3.428	7.68	10.656	3.801	2.057	3	13.688	9.275	3.083	2.754	3.156	11.414	3.931	4.0642	5.896	4.616	9.98	2.274	1.811	6.155	28.0046	12.7598	5.0395	3.046	3.096		0.55263	6.79741
12.6233	11.463	9.856	8.974	14.731	3.393	3.828	3.365	4.177	7.622	10.688	4.01	2.864	4.066	15.504	10.15	3.175	2.143	2.886	11.781	2.938	4.9793	4.209	4.067	9.529	2.391	2.456	7.573	32.2297	10.1073	4.1072	2.638	2.731		0.557894	7.01973
12.7424	12.209	8.865	10.906	12.832	2.775	2.827	3.18	3.462	6.872	12.275	3.346	2.405	3.468	13.859	8.593	2.915	2.07	2.736	13.347	3.191	5.6125	4.642	4.54	7.631	2.006	2.222	7.782	29.061	12.004	4.7349	3.337	2.833		0.563158	6.82933
12.8615	11.274	8.278	8.52	13.06	3.193	3.053	3.163	3.182	7.629	11.915	3.618	2.15	3.249	13.372	9.128	2.247	2.337	3.053	13.206	3.002	3.1567	4.551	3.946	5.592	2.719	2.382	6.217	30.564	8.5581	3.3872	3.139	2.701		0.568421	6.42319
12.9806	12.477	9.952	10.735	12.055	3.488	4.016	3.015	3.506	8.744	15.585	3.834	2.261	3.555	12.038	9.517	2.644	2.713	3.131	11.795	2.756	3.9841	3.573	3.188	6.621	2.272	2.343	6.693	32.3471	8.9238	4.2134	3.21	2.757		0.573685	6.8107
13.0997	12.686	8.778	10.325	14.879	3.047	3.168	3.395	3.842	7.895	13.327	3.529	2.202	3.913	12.596	7.803	2.286	2.945	3.083	15.867	2.831	3.0295	3.301	4.016	5.111	2.397	2.702	6.86	31.6893	7.9234	3.9205	3.43	2.994		0.578949	6.74283
13.2188	12.991	8.056	10.511	10.654	3.537	2.365	3.163	3.926	8.17	17.109	4.071	2.09	4.626	12.736	8.395	3.364	3.016	3.16	14.494	3.818	4.262	3.465	3.781	4.1	1.878	3.055	7.655	35.7263	7.1217	4.364	3.711	2.437		0.584212	6.9315
13.3378	12.456	9.44	12.66	11.212	2.754	3.286	3.039	4.79	7.925	14.086	2.826	2.436	4.528	12.617	8.011	2.89	2.791	3.327	18.099	2.415	3.92	2.431	4.095	3.589	1.723	2.141	7.05	32.1623	6.6726	3.917	2.592	3.162		0.589472	6.72009
13.4569	10.288	7.555	12.303	11.125	3.015	3.218	3.167	4.16	8.945	16.077	3.538	2.491	4.391	13.321	7.389	2.974	2.821	3.21	15.228	2.317	2.6473	3.371	3.815	3.899	1.644	2.519	7.672	33.4986	4.8265	4.26	3.437	2.623		0.594735	6.61704
13.576	11.253	9.988	12.964	8.415	3.095	2.951	3.518	5.096	9.424	17.759	3.71	2.528	4.214	13.524	5.855	2.936	3.281	3.546	15.956	2.787	3.0764	4.579	3.051	4.071	2.52	2.888	8.507	31.0205	5.541	3.6363	2.501	2.732		0.599999	6.77885
13.6951	11.436	9.282	14.315	9.575	2.79	2.169	2.686	4.591	8.456	19.145	3.346	3.01	4.561	13.022	6.648	2.785	2.707	3.588	17.164	2.538	3.359	3.812	3.93	2.912	2.307	2.755	9.106	33.6955	7.4221	2.9286	3.363	2.776		0.605263	6.94313
13.8142	11.825	9.602	14.198	9.155	3.342	3.389	3.694	3.953	9.612	21.276	2.52	2.322	4.639	12.707	7.461	2.048	2.756	2.853	17.07	2.676	2.8458	3.069	3.538	3.487	2.906	2.359	9.495	32.6704	4.9262	3.6658	3.615	2.032		0.610527	6.92835
13.9333	10.98	8.602	14.482	7.565	2.159	3.311	3.55	4.562	10.114	21.086	3.643	2.486	4.939	12.259	5.939	2.407	2.386	3.314	15.452	2.864	3.1274	3.054	3.519	2.899	2.69	2.705	10.761	31.3345	5.3033	5.139	2.7	2.118		0.61579	6.79532
14.0524	9.663	8.994	15.922	6.417	2.853	3.448	3.793	4.425	11.235	19.649	3.244	2.93	4.581	11.11	6.532	2.883	2.929	2.964	17.897	2.892	3.1126	3.589	3.862	3.582	2.978	2.708	12.252	34.1373	5.6557	3.0324	3.15	2.544		0.621054	7.03012
14.1715	11.637	8.682	15.888	7.584	2.285	2.99	3.461	4.79	11.316	25.073	2.784	2.062	6.535	13.773	5.361	2.089	3.297	2.814	19.501	2.435	2.5848	2.91	2.926	1.895	2.033	3.391	13.352	32.3844	4.3831	3.556	3.51	2.781		0.626318	7.18948
14.2905	11.87	9.843	15.249	6.693	2.854	2.791	3.462	4.93	11.157	22.722	2.646	2.78	5.521	13.278	5.21	2.068	2.843	3.129	18.991	1.849	2.7422	3.094	3.27	2.849	2.377	3.013	12.528	29.4595	4.4238	2.6935	2.713	2.875		0.631577	6.93512
14.4096	12.469	8.745	16.802	5.9	2.86	3.127	3.606	4.286	11.186	21.703	2.024	2.399	6.08	9.043	4.817	3.064	2.129	2.332	19.685	2.154	3.0741	3.428	2.816	2.652	2.259	3.407	12.727	29.2124	5.5396	3.5209	3.503	2.635		0.636841	6.84953
14.5287	12.203	7.947	15.081	5.898	2.95	2.317	3.548	4.197	12.675	19.225	2.338	2.808	6.255	9.682	4.692	2.833	2.338	3.882	17.874	2.679	3.0295	2.559	4.196	2.761	2.352	2.632	14.659	27.6082	5.2885	2.6989	2.752	3.121		0.642104	6.72122
14.6478	13.44	7.506	14.593	5.3	2.896	2.717	3.068	4.072	12.962	20.385	1.674	1.974	7.967	9.453	4.493	2.212	2.958	3.338	20.715	2.253	2.1393	3.916	3.272	2.447	2.42	2.702	15.235	28.0826	3.8288	2.9738	3.126	1.959		0.647368	6.75242
14.7669	12.567	8.283	14.585	4.753	2.834	2.952	2.935	4.612	13.53	23.927	2.125	3.281	8.663	10.206	3.989	2.252	2.671	3.736	22.644	2.53	2.6998	2.958	3.628	2.042	2.034	2.619	15.542	27.0016	3.6681	2.5658	2.401	2.679		0.652632	6.96604
14.886	11.07	7.722	15.318	3.773	3.163	3.268	3.753	3.48	13.181	20.594	2.487	2.831	8.821	9.061	4.774	3.065	2.898	4.071	18.647	2.405	2.8259	3.653	3.752	2.406	1.846	3.333	17.89	24.8431	4.5106	3.401	2.558	2.331		0.657895	6.80411
15.0051	11.665	8.72	16.01	3.988	2.991	2.216	3.52	4.372	13.971	20.92	2.628	3.115	8.02	7.2	3.968	2.042	2.133	3.465	20.89	2.13	2.0946	3.134	2.585	2.696	2.326	3.209	17.658	25.7647	3.9457	2.8883	3.262	2.882		0.663159	6.76279
15.1242	9.913	7.523	17.914	4.182	3.797	2.299	4.017	5.37	13.245	23.035	1.858	2.687	11.151	9.045	3.657	2.559	3.584	3.7	22.363	2.448	3.0443	2.148	3.814	2.21	3.105	3.473	19.734	23.6716	4.373	3.5641	2.192	2.782		0.668423	7.13931
15.2432	12.254	6.157	18.546	3.646	2.172	3.136	3.56	4.487	16.162	23.385	2.39	2.95	9.229	8.592	5.224	2.538	2.85	3.517	20.818	2.32	2.9923	3.057	2.772	1.911	2.456	3.121	19.427	23.2857	3.062	2.6713	2.777	2.79		0.673682	7.00798
15.3623	12.408	6.985	18.374	3.613	2.897	2.665	2.628	4.252	17.738	20.875	2.247	2.806	9.895	7.628	3.529	2.085	2.306	3.634	19.375	2.537	3.5829	2.909	3.481	2.306	2.194	3.555	21.738	21.7069	3.9803	2.2305	2.866	2.551		0.678946	6.9243
15.4814	13.134	6.971	19.847	3.852	2.812	3.168	3.152	4.144	16.3	21.625	2.225	2.7	11.054	8.672	3.682	2.463	2.852	3.498	21.084	2.764	3.0535	2.826	3.043	1.825	2.32	3.311	21.725	21.5436	2.9086	2.5464	3.01	2.522		0.684209	7.08228
15.6005	14.609	6.538	18.794	2.724	3.367	2.929	3.448	5.119	18.646	22.953	2.368	3.314	9.709	6.667	3.946	2.56	2.551	3.968	17.493	2.412	2.9516	3.512	3.163	2.252	2.292	4.652	23.696	15.0588	3.4193	2.1839	2.461	2.163		0.689473	6.93499
15.7196	13.817	8.245	19.374	3.527	2.168	2.366	3.585	5.023	19.776	22.734	1.707	2.533	10.3	5.942	2.748	2.258	3.088	4.132	17.819	2.861	3.0614	3.049	3.711	2.487	2.66	3.569	25.322	12.1447	3.2311	1.994	1.728	3.102		0.694737	6.87694
15.8387	12.96	6.611	18.22	4.074	2.043	2.724	3.637	6.832	24.216	22.347	2.591	3.57	8.89	6.256	3.648	2.215	3.374	3.298	17.07	2.532	2.4285	2.57	3.44	1.967	2.003	4.68	25.579	11.7843	3.4477	1.8537	2.546	3.354		0.7	6.96129
15.9578	11.201	6.045	17.56	3.174	2.139	3.02	2.724	6.182	26.414	19.287	1.849	3.749	10.238	6.423	3.437	2.185	3.015	5.5	15.745	2.19	2.4625	3.287	2.997	2.518	2.086	3.912	27.239	11.3789	2.7903	2.6211	2.903	3.103		0.705264	6.85546
16.0769	12.115	7.028	19.867	4.236	1.862	2.702	3.365	5.01	26.663	21.399	1.989	2.508	10.744	6.192	3.84	2.834	2.388	5.028	15.459	2.671	2.8686	3.576	2.972	2.849	2.117	4.384	29.368	8.2134	2.7137	1.3898	2.862	3.188		0.710528	7.01255
16.196	10.698	7.985	18.224	3.49	2.551	2.78	3.404	5.32	28.869	15.946	1.984	3.616	10.277	5.292	3.63	2.128	2.215	5.348	15.712	1.963	3.0007	4.079	3.232	2.678	2.23	5.542	33.418	9.1569	2.6089	1.6262	2.636	3.439		0.715792	7.03371
16.315	11.624	8.073	19.388	3.528	2.502	2.597	3.267	5.657	28.28	15.392	1.795	3.768	10.067	4.738	3.605	2.156	2.811	4.586	12.948	1.876	3.0759	2.76	2.478	2.028	2.086	5.639	30.235	10.6031	3.3819	2.5248	2.55	3.598		0.721051	6.86305
16.4341	12.202	8.427	18.734	2.273	2.578	2.46	3.174	4.231	29.503	13.223	2.294	3.058	11.03	4.797	3.076	2.546	2.565	6.485	13.039	2.244	3.2059	2.224	3.224	2.464	2.117	5.392	33.011	5.6685	3.5743	1.9125	2.51	4.561		0.726314	6.80635
16.5532	11.873	8.818	19.172	2.43	2.247	3.224	3.472	4.91	29.831	11.4	2.361	3.601	11.141	5.994	3.367	2.22	2.899	6.327	11.376	2.777	2.0695	2.616	2.666	1.872	2.358	6.525	34.466	6.7908	2.725	1.6895	1.939	4.659		0.731578	6.86924
16.6723	8.768	8.528	17.183	2.998	3.157	2.698	3.466	5.334	27.622	9.334	2.568	2.737	10.999	4.852	2.808	1.736	2.9	6.396	12.101	3.547	3.1214	2.288	3.676	1.519	2.279	6.814	35.683	5.239	3.5848	2.433	2.547	6.392		0.736842	6.72838
16.7914	9.816	9.357	18.21	2.347	2.755	3.099	3.628	5.027	27.091	8.812	2.25	3.263	14.296	4.064	2.87	2.228	3.366	6.01	9.072	2.816	2.4589	2.681	3.035	1.671	2.215	10.254	36.188	5.7561	3.8806	2.6079	2.678	7.676		0.742106	6.9212
16.9105	11.951	9.219	17.627	2.963	3.468	2.686	2.872	4.216	27.052	7.563	1.897	4.037	13.41	4.056	2.964	2.311	3.298	6.343	9.66	2.777	2.9986	2.229	3.661	2.37	2.066	8.677	38.092	5.222	3.7483	2.3385	3.375	9.676		0.747369	7.02573
17.0296	9.944	10.559	15.46	2.492	2.19	3.146	2.747	4.242	31.225	6.354	2.153	3.43	17.509	4.407	2.163	2.283	3.867	6.622	9.842	2.407	2.448	2.828	3.12	2.602	2.122	10.32	40.117	5.2092	5.1636	1.9857	2.41	12.389		0.752633	7.30489
17.1487	11.624	11.641	18.541	2.255	3.181	3.103	2.357	4.297	31.554	5.643	2.603	4.054	17.926	3.518	2.81	2.359	2.792	6.966	8.55	2.158	3.0852	2.795	3.065	2.072	2.113	12.169	42.457	4.8426	4.297	2.4583	2.39	14.783		0.757897	7.63935
17.2677	10.525	12.153	17.532	2.61	2.248	2.445	2.724	4.482	29.872	5.479	2.488	4.455	19.215	3.182	2.484	2.517	3.207	6.308	9.255	2.625	2.6218	2.538	2.528	2.419	2.499	13.839	40.719	4.4391	4.2311	2.6789	2.716	18.264		0.763156	7.66559
17.3868	10.176	12.067	17.91	3.073	2.587	2.71	3.032	3.913	31.253	6.159	2.686	4.059	18.023	3.597	2.384	2.815	2.642	10.36	7.189	1.642	2.1274	2.026	2.256	1.844	2.737	18.997	46.914	4.0241	3.7821	2.6821	3.292	22.948		0.76842	8.18458
17.5059	9.667	11.369	14.935	3.261	2.998	2.002	2.682	4.421	34.606	4.23	2.834	3.703	19.595	3.483	2.994	2.493	2.464	10.619	5.428	2.149	2.7046	1.944	2.72	2.098	2.716	23.114	48.687	5.1827	3.8102	3.6736	2.985	20.629		0.773683	8.31866
17.625	10.852	14.015	15.775	3.873	2.5	2.756	3.204	5.43	33.094	5.089	1.72	4.49	19.709	3.236	2.767	2.742	3.046	12.306	5.174	2.195	2.451	2.556	2.728	1.998	2.998	24.944	53.373	5.5277	4.3077	3.7283	3.703	21.064		0.778947	8.85474
17.7441	11.144	14.644	14.861	3.158	2.214	3.267	2.197	5.54	32.121	4.199	2.071	4.667	19.792	4.06	2.963	3.003	2.891	11.455	4.184	2.077	2.1211	3.059	3.302	1.829	3.688	28.324	60.941	6.2591	4.3459	3.7363	5.043	18.534		0.784211	9.11533
17.8632	11.01	16.372	14.023	2.547	2.188	3.132	2.392	5.668	29.739	4.57	2.634	5.053	20.306	3.277	2.973	1.751	3.491	14.392	3.369	2.036	3.2786	2.845	3.549	2.051	6.817	27.382	62.585	5.55	3.831	3.7753	6.163	20.319		0.789474	9.3459
17.9823	10.052	16.609	12.885	3.45	2.007	2.507	2.612	5.605	34.357	3.883	2.159	5.824	18.998	3.391	2.073	3.31	3.764	15.373	3.743	2.505	2.7233	2.999	3.11	1.593	8.882	29.784	65.999	6.1304	5.9356	4.4812	7.604	16.192		0.794738	9.70439
18.1014	12.482	20.826	12.187	3.864	2.551	2.785	2.118	5.752	34.587	4.054	3.202	5.787	24.146	3.309	2.948	2.427	3.629	19.786	2.534	1.69	3.2076	2.529	2.9	1.766	11.114	23.952	45.037	6.0962	6.8372	7.8391	8.354	14.435		0.800002	9.52285
18.2204	9.128	21.483	11.202	3.602	2.717	3.104	2.681	4.951	35.604	3.126	2.662	5.429	22.891	3.615	2.259	2.768	3.085	21.511	3.3	2.22	2.8872	2.566	2.946	2.18	13.29	21.668	32.269	8.6922	9.5229	8.8421	11.214	11.654		0.805261	9.22092
18.3395	10.791	20.671	9.526	2.871	2.236	2.627	2.617	5.814	39.221	4.729	2.786	7.184	21.509	2.675	2.194	3.415	3.416	23.085	2.834	2.685	2.949	2.81	3.582	1.762	14.651	16.347	15.315	14.0384	11.4062	13.8171	14.596	8.727		0.810525	9.15271
18.4586	12.112	22.887	9.973	3.894	2.052	3.344	3.467	3.743	37.452	3.532	2.678	6.348	20.423	4.122	2.421	2.761	4.131	25.068	2.286	2.249	2.2613	2.284	3.56	2.219	18.31	8.631	9.267	16.599	16.4375	15.7961	15.913	6.429		0.815788	9.14531
18.5777	9.912	20.407	10.542	3.195	2.208	3.756	2.538	5.176	34.374	3.648	2.26	7.384	22.481	3.882	2.18	2.43	4.736	24.88	2.777	2.627	1.9701	2.837	4.017	2.676	19.14	5.419	7.293	27.8511	15.1351	15.6962	18.291	4.657		0.821052	9.26173
18.6968	10.253	22.207	10.174	3.135	2.225	2.352	3.257	5.077	36.573	3.488	3.118	8.33	19.696	2.646	2.391	2.047	4.718	24.108	2.156	1.424	2.887	2.39	3.955	2.058	18.738	3.009	6.471	34.5351	17.9895	18.3429	13.468	4.091		0.826316	9.29092
18.8159	9.763	27.374	8.597	2.459	2.467	3.085	3.41	4.613	34.544	2.62	2.676	7.414	18.298	4.413	2.589	2.275	3.659	24.602	3.105	1.882	2.3748	2.174	3.046	2.598	14.173	2.498	4.738	33.2443	17.4407	16.3239	14.6	2.536		0.83158	8.92474
18.935	9.808	24.833	7.558	2.747	2.534	3.208	4.177	4.242	35.675	2.781	3.19	10.232	18.855	3.307	2.552	2.528	3.734	25.291	2.351	1.889	3.1462	2.246	4.129	3.259	6.689	2.437	3.061	20.7779	13.9557	17.9616	12.368	3.07		0.836843	8.26851
19.0541	10.236	27.413	6.735	2.336	1.784	2.398	2.405	5.467	34.811	2.955	2.324	10.402	18.342	4.45	2.137	3.253	4.528	27.585	3.288	2.389	1.9313	2.4	4.132	2.785	3.63	1.414	3.467	12.5451	13.2371	14.4563	10.006	1.719		0.842107	7.71752
19.1731	10.083	28.386	7.962	2.545	2.446	3.301	3.19	4.689	37.766	4.248	3.571	13.433	21.305	4.833	2.435	2.887	4.304	22.9	2.874	1.578	2.0644	2.472	4.794	5.068	2.012	1.178	2.118	4.8939	8.3981	11.0219	7.285	1.211		0.847366	7.41413
19.2922	11.534	31.247	6.182	2.798	2.34	3.057	3.033	5.703	33.613	2.844	2.862	14.36	21.796	3.183	2.767	3.111	4.988	22.717	3.139	1.554	3.3466	3.691	4.817	7.733	1.706	1.425	1.406	2.3998	4.5772	7.903	5.816	1.326		0.85263	7.15546
19.4113	11.003	34.557	6.288	2.377	2.482	3.533	3.371	4.775	31.628	2.476	3.263	15.737	23.815	3.251	2.351	3.215	6.125	25.567	3.317	1.735	3.4238	2.894	5.544	13.471	1.567	0.91	1.263	3.1473	2.8217	5.5962	3.318	1.147		0.857894	7.37403
19.5304	11.3	35.047	5.591	2.532	2.241	3.512	3.629	5.705	30.059	2.456	3.069	19.5	24.235	3.361	1.805	2.989	4.471	25.652	2.484	2.41	3.0811	2.558	5.179	18.219	0.695	0.846	1.84	2.7353	2.0069	4.7006	2.673	0.67		0.863157	7.41412
19.6495	12.791	34.209	6.438	2.922	2.608	4.313	2.906	6.344	27.388	3.237	3.343	17.481	21.801	3.229	2.941	3.183	6.54	24.577	2.636	2.276	3.4672	2.648	6.172	20.621	1.109	0.607	1.024	1.2089	3.3879	3.4416	2.229	0.721		0.868421	7.43124
19.7686	11.622	34.496	4.961	2.3	3.186	3.89	3.962	5.713	28.511	3.285	3.636	17.38	22.919	2.897	2.202	4.316	6.783	30.774	2.463	1.946	3.1775	2.628	7.032	14.838	1.503	1.104	1.493	1.1947	2.2116	3.1713	2.153	0.417		0.873685	7.44266
19.8877	13.515	33.71	5.484	2.335	2.264	2.997	4.486	6.255	28.172	2.384	3.35	23.173	25.886	3.731	2.246	3.535	8.234	26.337	2.939	2.382	3.3071	3.37	9.639	11.506	0.624	0.608	1.556	1.1136	1.8615	2.8487	1.731	0.445		0.878948	7.56328
20.0068	13.009	31.679	5.459	2.833	2.863	4.077	3.81	5.45	25.749	2.227	2.836	22.368	30.531	2.884	1.974	2.912	9.807	26.009	1.945	2.594	4.2467	2.504	9.268	5.082	1.031	0.449	0.922	1.1684	1.401	1.8952	1.82	0.663		0.884212	7.23332
20.1259	14.148	35.514	4.918	3.482	3.908	4.962	4.369	5.348	24.713	3.151	3.188	22.016	35.089	3.576	2.994	2.781	11.644	29.67	2.975	1.736	4.7518	1.878	11.406	2.474	0.28	0.387	0.659	0.8785	1.3215	1.5588	0.774	0.399		0.889476	7.71717
20.2449	18.897	35.692	5.384	2.434	2.591	4.823	4.773	5.719	24.355	2.773	4.458	22.483	40.72	3.607	2.338	3.102	15.023	28.031	3.076	1.932	4.4216	3.24	13.581	1.27	0.396	0.461	0.356	0.9426	1.0021	2.2003	0.842	0.654		0.894735	8.1743
20.364	20.104	34.577	6.465	3.396	3.218	6.67	4.773	5.75	26.875	2.86	3.327	21.986	41.967	3.474	2.573	3.982	15.686	29.144	2.618	2.388	5.8224	3.226	16.354	0.902	0.662	0.602	0.485	0.4492	0.9631	1.8722	1.154	0.233		0.899999	8.57993
20.4831	22.369	36.551	7.33	2.909	4.03	7.2	5.223	6.824	23.847	3.271	4.111	23.122	42.22	4.177	2.793	4.373	18.034	32.822	3.96	2.698	4.9966	3.034	20.249	0.835	0.604	0.116	0.563	0.7702	0.6768	0.6248	0.402	0.525		0.905262	9.10189
20.6022	28.763	38.762	8.894	4.345	5.847	8.021	6.733	9.067	23.061	3.361	6.014	23.418	38.724	5.838	3.035	4.074	21.475	30.64	3.879	2.611	5.7849	3.687	22.032	0.832	0.076	0.284	0.767	0.675	0.8174	0.8411	0.607	0.287		0.910526	9.78914
20.7213	30.726	43.516	9.255	5.028	7.471	8.946	8.779	7.559	23.644	2.843	5.343	25.452	37.272	6.435	2.739	4.683	25.319	32.76	4.231	2.361	6.064	4.068	23.583	0.609	0.489	0.494	0.652	0.3433	0.4375	0.7713	0.35	0.061		0.91579	10.3839
20.8404	36.224	49.723	10.095	5.233	6.765	12.176	9.641	10.964	22.745	3.963	7.009	24.042	34.761	5.842	2.317	5.557	28.463	38.213	5.399	3.194	5.6823	4.61	25.3	0.669	0.013	0.39	0.34	0.4424	0.229	0.9293	0.609	0.537		0.921053	11.3149
20.9595	38.508	52.856	13.142	7.744	9.183	14.751	15.088	11.033	22.489	3.656	8.73	21.919	32.643	6.922	3.093	4.06	27.922	39.506	5.857	2.275	8.5945	4.069	25.108	0.714	0.441	0.39	0.39	0.4394	0.4443	0.2791	0.651	0.126		0.926317	11.9695
21.0786	49.222	52.626	13.868	9.778	11.822	13.644	19.24	11.144	27.754	2.73	12.573	20.289	32.441	7.807	3.487	6.194	32.604	43.175	5.809	3.126	9.937	4.696	24.968	0.339	0.228	0.555	0.333	0.6195	0.5544	0.4929	0.332	0.279		0.931581	13.2083
21.1976	51.791	48.071	15.814	14.271	12.41	19.633	27.41	14.455	26.452	3.096	16.109	17.848	33.267	8.702	3.885	7.445	42.903	42.375	7.509	3.92	11.4704	5.331	26.258	0.441	0.602	0.23	0.717	0.3409	0.2127	0.3943	0.486	0.163		0.93684	14.5004
21.3167	59.634	37.779	14.361	19.424	13.643	25.207	33.843	14.611	30.159	3.167	20.282	16.273	28.053	9.337	3.758	8.142	50.678	49.936	8.196	4.47	17.4603	6.819	26.537	0.707	0.288	0.63	0.383	0.391	0.5001	0.3384	0.171	0.279		0.942104	15.7955
21.4358	61.466	33.939	16.036	24.577	20.254	26.613	42.679	14.147	36.679	4.098	26.259	11.91	29.481	12.144	3.736	7.291	51.565	51.252	10.751	6.023	28.7271	8.313	25.928	0.405	0.443	1.036	0.062	0.1673	0.5573	0.2707	0.222	0.333		0.947367	17.4176
21.5549	62.225	27.763	17.613	25.994	21.438	20.448	51.166	15.573	37.748	3.783	27.706	7.857	26.361	14.901	4.309	9.792	56.369	54.38	10.782	9.576	41.9137	10.214	24.131	0.121	0.331	0.833	0.278	0.4353	0.1736	0.0567	0.274	0.718		0.952631	18.2895
21.674	61.623	21.704	18.487	29.486	16.138	15.093	54.388	18.853	45.472	5.169	27.344	6.999	23.071	14.326	4.56	12.783	47.722	46.802	14.364	11.879	63.5269	13.301	21.692	0.222	0.22	0.826	0.33	0.2883	0.5384	0.2132	0.114	0.116		0.957895	18.6766
21.7931	64.688	20.046	18.267	32.235	9.516	9.826	52.276	17.128	49.205	6.145	23.69	5.453	19.114	20.39	4.056	13.675	38.174	43.22	17.311	23.01	88.1393	13.652	23.523	0.329	0.224	0.403	0.228	0.3342	0.174	0.3324	0.324	0.057		0.963159	19.2233
21.9122	59.928	14.605	18.628	20.805	6.337	5.52	49.558	19.329	52.637	6.322	20.015	4.145	16.456	22.942	5.64	18.518	26.332	34.961	17.927	35.836	100.468	22.978	21.672	0.337	0.447	0.443	0.381	0.4412	0.1639	0.0728	0.121	0.11		0.968422	18.8774
22.0313	59.937	8.468	7.446	10.07	4.147	4.165	44.864	19.114	47.74	7.615	16.998	4.434	15.322	21.89	6.239	25.172	19.417	31.454	22.983	55.66	89.8803	32.327	16.374	0.393	0.443	0.549	0.387	0.282	0.1123	0.5506	0.165	0.326		0.973686	17.9664
22.1503	52.945	7.636	6.075	4.681	3.918	3.09	39.262	22.622	50.49	9.185	15.081	3.694	12.296	21.663	6.843	25.388	11.813	25.989	26.3	72.4	68.4041	42.205	10.769	0.502	0.666	0.724	0.281	0.4409	0.2249	0.2194	0.113	0.01		0.978945	17.0603
22.2694	52.812	5.076	5.247	3.455	3.117	2.97	28.969	24.492	53.155	13.401	11.669	2.41	9.597	23.63	8.711	31.007	6.407	25.292	27.922	86.34	54.4129	44.488	8.866	0.5	0.173	0.504	0.225	0.2225	0.3393	0.2229	0.385	0.164		0.984209	16.7557
22.3885	52.091	4.537	5.359	2.783	2.072	2.289	15.953	24.754	49.445	15.811	10.254	2.206	6.824	16.959	10.696	35.815	6.129	18.818	30.547	96.241	33.8868	50.91	8.154	0.327	0.392	0.393	0.166	0.333	0.4854	0.2193	0.171	0.056		0.989473	15.7836
22.5076	50.387	3.156	4.338	2.732	2.37	2.322	10.812	25.986	50.376	17.221	9.842	1.499	6	12.905	12.255	38.321	4.653	14.286	25.379	93.737	30.0521	50.721	7.923	0.061	0.386	0.546	0.331	0.2781	0.1715	0.0607	0.219	0.33		0.994736	14.9893
22.6267	36.227	2.449	2.823	1.944	1.739	1.117	8.326	25.951	55.044	16.391	7.964	1.327	5.378	6.819	18.801	36.63	4.232	12.783	21.236	82.167	22.4857	46.27	7.956	0.218	0.226	0.505	0.276	0.2189	0.0023	0.1642	0.224	0.166		1	13.3769

## Sheet: Image5
X0	Y0	Y1	Y2	Y3	Y4	Y5	Y6	Y7	Y8	Y9	Y10	Y11	Y12	Y13	Y14	Y15	Y16	Y17	Y18	Y19	Y20	Y21	Y22	Y23	Y24	Y25	Y26	Y27		Ap-basal	Avg int
0	30.838	29.12	33.061	48.718	30.67	22.728	21.138	28.381	37.185	32.704	35.524	38.517	32.092	22.0645	44.927	95.543	43.4293	30.9376	46.1155	35.3622	35.137	28.966	34.455	81.835	60.005	106.045	110.06	67.853		0	45.1218
0.1191	32.362	33.507	36.581	51.587	37.966	25.55	27.292	35.073	42.408	36.706	41.26	38.627	35.844	28.4542	63.859	108.527	50.1416	35.4017	58.7174	38.4304	44.802	35.43	29.309	85.104	63.008	113.391	125.872	95.258		0.00436726	51.8024
0.2382	31.037	35.497	48.315	63.847	43.123	30.164	26.86	36.301	45.611	42.423	51.197	44.961	36.465	40.7339	83.463	117.768	51.6187	35.7402	68.8589	40.2867	47.94	42.445	25.771	82.859	69.636	116.41	140.953	126.443		0.00873452	58.0974
0.3573	34.709	35.963	76.807	68.138	48.538	40.535	32.3	39.777	52.069	45.515	53.061	48.895	40.776	53.8567	90.037	121.582	57.6696	39.7743	78.9621	42.6485	55.433	55.603	25.211	83.638	73.197	116.481	125.021	142.804		0.0131018	63.5358
0.4764	37.365	40.818	113.488	69.462	61.609	53.807	36.714	50.462	55.41	49.749	60.414	52.289	45.053	59.5872	102.601	110.107	60.0848	42.0366	88.2513	44.7829	65.107	62.789	23.11	86.225	79.652	124.521	108.975	161.106		0.017469	69.4848
0.5954	40.517	44.372	145.077	78.973	67.937	74.041	42.512	52.464	60.056	49.971	64.287	56.29	50.635	65.5952	100.621	106.055	62.6118	46.9405	85.0453	49.9275	80.059	66.74	20.731	80.741	91.373	136.368	98.825	162.228		0.0218326	74.3212
0.7145	43.53	51.599	174.352	79.826	75.846	95.809	51.788	56.496	61.804	51.641	64.704	64.165	60.127	61.8253	96.33	97.266	67.5158	52.7302	86.306	56.4701	96.663	73.018	20.835	76.699	111.655	138.55	89.501	159.544		0.0261999	79.1641
0.8336	49.559	65.613	200.846	88.934	88.673	105.915	59.109	61.548	64.53	52.369	69.914	64.454	63.972	64.3548	91.494	85.404	65.5062	56.9548	86.2952	60.2178	116.077	69.389	23.032	72.878	120.886	141.83	79.495	160.221		0.0305672	83.1954
0.9527	58.55	89.188	213.274	86.918	94.474	110.732	69.677	74.336	63.056	52.232	70.825	67.193	70.074	60.6279	86.438	76.037	71.7497	58.8226	86.8764	64.9554	124.232	63.41	22.018	81.153	145.515	134.435	75.642	159.064		0.0349344	86.8395
1.0718	71.621	135.375	228.134	84.86	97.06	118.744	77.638	71.154	69.972	51.434	72.336	76.57	72.13	63.9028	74.786	69.743	73.5405	51.6628	81.8139	64.5595	137.962	62.962	25.582	82.681	166.972	128.162	69.293	151.1		0.0393017	90.4197
1.1909	82.828	172.231	240.435	87.408	108.464	116.655	86.993	78.216	67.35	54.753	83.327	77.129	73.013	57.8072	71.729	65.107	81.6725	56.6601	80.0304	66.0053	132.948	57.769	27.854	80.674	177.829	129.646	69.367	141.602		0.0436689	93.7679
1.31	91.584	209.023	237.69	83.591	112.005	104.57	96.237	87.652	69.745	56.342	91.64	77.606	77.544	59.2776	68.816	61.95	81.8359	47.9916	79.9745	73.4075	131.044	56.936	30.91	84.937	163.891	126.87	69.811	133.675		0.0480362	95.2341
1.4291	92.717	232.182	235.385	81.216	107.071	105.766	98.858	96.503	71.402	59.607	99.77	76.597	85.486	61.8242	65.214	59.209	84.0876	42.1565	72.6118	78.5722	121.991	52.323	31.001	94.75	164.743	123.465	65.481	125.833		0.0524035	95.9222
1.5481	110.276	240.986	231.483	82.139	113.717	105.807	98.425	97.559	76.659	64.704	98.203	85.413	82.725	60.3593	63.643	52.324	78.7176	42.4771	69.1133	82.1045	108.293	48.437	35.52	101.077	169.408	119.496	67.477	118.301		0.0567671	96.6016
1.6672	122.063	243.964	222.191	77.536	116.901	103.665	102.09	105.573	83.29	59.794	113.415	89.436	89.105	55.4732	56.337	54.619	82.3119	40.4974	66.5409	84.0835	98.785	45.921	37.206	106.054	165.367	114.894	60.277	105.4		0.0611343	96.5282
1.7863	129.691	239.992	199.618	85.446	120.376	103.795	111.071	115.731	79.269	58.257	123.314	103.849	87.328	61.7833	55.213	56.12	73.657	43.3948	64.4877	84.7577	87.772	43.231	49.865	115.157	172.53	105.586	64.813	94.784		0.0655016	97.5317
1.9054	150.229	234.042	153.386	87.346	128.964	102.445	108.808	113.79	83.428	59.387	124.532	118.495	92.834	59.4287	55.735	56.979	75.143	46.2997	62.0772	82.2531	75.048	45	58.051	119.177	160.516	105.824	67.205	84.354		0.0698688	96.8135
2.0245	166.358	210.752	115.821	94.997	126.327	99.748	116.093	111.294	81.013	61.367	135.096	132.918	97.575	61.9769	51.591	57.718	72.584	44.8258	59.5613	81.9117	59.944	43.963	65.066	112.079	147.9	100.651	64.19	77.573		0.0742361	94.6748
2.1436	175.025	192.073	81.646	106.665	131.507	102.957	117.445	112.459	74.071	59.65	138.147	133.352	101.23	62.6286	51.724	50.902	74.6514	43.6167	58.8611	77.2363	51.729	49.604	74.479	109.292	141.949	104.305	69.732	73.519		0.0786034	93.5877
2.2627	169.717	171.885	53.451	125.204	134.355	111.402	127.912	106.827	75.301	62.925	136.953	143.804	108.729	62.4739	53.247	54.034	69.2182	42.6287	55.8312	77.0559	48.178	49.952	85.201	102.03	134.906	102.486	77.047	68.786		0.0829706	93.2693
2.3818	163.094	153.427	35.416	135.928	147.376	112.138	132.391	98.493	74.476	65.994	134.562	144.564	112.03	60.0441	54.637	56.762	72.7625	51.0156	55.1092	73.6964	47.889	54.389	98.285	95.686	119.027	98.684	81.653	68.361		0.0873379	92.7818
2.5008	147.951	150.614	18.957	145.818	143.675	110.051	125.52	93.988	71.082	68.874	129.923	147.637	113.712	61.1176	52.773	56.676	59.1762	47.5786	54.5846	72.7654	44.871	58.657	109.918	89.999	117.983	104.537	95.193	66.915		0.0917015	91.4481
2.6199	116.938	147.25	16.283	151.6	138.62	109.771	129.427	89.288	75.834	68.227	119.519	151.393	115.696	64.6911	54.237	60.01	56.191	51.0809	55.9258	69.1618	45.134	62.397	118.655	95.215	112.737	103.827	98.765	59.937		0.0960687	90.6361
2.739	88.3	143.584	10.383	144.798	134.363	111.932	126.614	82.835	73.106	73.389	116.071	140.76	118.751	64.4003	52.663	68.388	56.038	48.5727	49.405	65.6221	39.137	66.41	128.264	93.846	108.818	104.995	105.886	55.961		0.100436	88.3319
2.8581	58.051	149.078	11.876	139.205	135.242	102.199	121.737	80.231	79.253	77.313	103.751	134.913	117.892	65.6673	52.175	72.297	50.4559	42.5499	46.8645	61.7013	38.225	76.299	118.591	90.689	106.518	94.448	110.133	56.977		0.104803	85.5119
2.9772	45.717	141.546	9.972	140.654	129.514	101.576	118.635	78.522	83.852	93.066	94.887	118.947	116.89	65.7088	56.416	78.096	46.5811	43.0212	42.524	56.3766	39.192	81.945	122.978	95.911	99.505	87.532	111.407	57.316		0.109171	84.2246
3.0963	34.389	130.162	8.396	127.403	120.718	90.985	115.253	78.767	79.282	104.882	81.142	120.124	112.702	69.7353	53.862	88.282	45.9646	36.6064	35.2742	56.8984	37.074	82.515	128.47	92.997	100.248	77.947	114.744	57.731		0.113538	81.5198
3.2154	31.915	118.008	6.89	115.112	114.029	84.726	116.42	73.285	79.53	123.64	70.738	120.037	107.518	66.029	53.909	95.617	43.1249	31.4933	28.2711	52.4765	36.706	91.802	132.234	93.116	105.687	69.952	113.61	52.98		0.117905	79.602
3.3345	31.247	104.276	6.69	97.788	98.831	78.19	117.864	74.022	81.011	137.42	59.345	117.954	108.604	60.021	49.754	107.932	34.4076	25.7884	23.8076	45.3548	39.753	93.239	138.207	94.83	104.416	71.92	113.197	56.32		0.122272	77.5782
3.4535	22.848	86.492	6.228	72.976	79.083	73.032	121.969	70.221	77.073	140.158	54.115	106.473	111.227	56.6195	45.724	108.521	29.1565	21.6146	17.0016	43.0867	39.756	96.963	148.656	96.618	104.144	70.522	120.665	54.711		0.126636	74.1305
3.5726	23.456	56.868	5.892	59.447	63.723	64.336	115.882	69.869	76.776	134.142	49.299	104.198	115.61	53.2934	43.918	110.374	25.2021	15.2705	11.6883	34.3679	38.972	97.644	140.193	89.767	93.987	70.899	120.822	50.61		0.131003	69.1609
3.6917	22.095	41.51	6.448	56.716	51.239	53.979	116.341	66.759	78.121	125.651	49.41	99.092	120.731	48.0429	35.144	108.904	21.3652	13.7389	11.0021	34.5841	38.982	91.662	143.769	91.295	94.056	78.375	114.792	50.535		0.13537	66.5835
3.8108	24.134	25.17	6.205	50.853	41.399	45.275	117.145	71.239	88.512	121.964	46.726	90.282	137.546	47.0001	28.234	105.217	21.8361	12.7208	8.1311	28.1575	41.28	91.834	136.107	89.278	84.975	77.503	123.045	55.139		0.139738	64.8896
3.9299	21.417	19.221	6.516	50.199	35.844	30.314	112.202	68.961	100.876	110.283	47.489	83.822	148.788	41.4589	19.817	91.564	17.063	10.2848	8.4462	27.0811	43.179	84.342	137.125	87.055	76.269	77.386	129.123	51.483		0.144105	62.0575
4.049	22.321	16.282	5.805	43.587	36.609	27.178	110.195	66.321	109.043	111.155	46.996	76.669	154.058	38.6264	20.259	64.296	19.0233	9.3328	7.2632	25.8981	43.808	80.883	148.256	80.856	70.501	69.451	129.913	53.719		0.148472	60.2966
4.1681	19.979	14.323	5.405	44.63	35.384	22.096	101.369	59.645	114.405	97.475	43.629	75.479	152.314	37.2919	16.591	43.945	19.3662	8.3616	6.119	25.8425	41.035	73.885	159.577	85.675	58.717	66.093	133.508	52.311		0.152839	57.659
4.2872	22.053	11.458	6.501	41.015	35.75	19.834	101.246	55.83	120.209	91.453	38.474	71.803	148.805	32.5968	13.665	33.375	18.0889	6.3791	6.803	25.6269	39.246	74.019	173.708	79.514	53.618	69.248	143.8	48.756		0.157207	56.5312
4.4063	20.281	11.093	5.703	40.597	32.574	17.182	95.218	57.724	120.436	82.642	40.628	68.381	145.37	28.8348	12.531	28.201	19.9809	6.7297	6.8206	21.4184	38.937	77.706	185.005	76.618	46.24	70.135	145.035	49.058		0.161574	55.3957
4.5253	22.69	8.829	5.822	40.374	25.462	15.435	97.049	53.535	124.803	63.934	44.087	69.66	127.662	29.2382	9.898	24.458	16.6092	6.683	5.7676	20.4419	34.168	77.718	184.458	71.51	43.282	68.99	148.978	49.009		0.165938	53.234
4.6444	19.962	6.66	6.756	37.09	24.555	14.339	90.056	49.95	116.29	51.312	39.232	69.412	114.019	25.3737	8.325	23.257	16.0716	6.0682	5.4658	21.3081	28.784	93.406	184.822	73.907	35.54	73.91	155.246	44.878		0.170305	51.2856
4.7635	21.261	7.015	6.382	32.934	23.082	14.045	86.532	46.653	110.692	42.568	38.963	62.583	98.791	24.3671	8.938	21.187	15.8199	5.3151	7.9652	21.2631	29.468	101.188	184.526	78.703	30.862	78.837	147.108	39.099		0.174672	49.5053
4.8826	19.537	6.375	6.844	34.926	19.061	12.366	76.663	46.599	102.274	28.964	35.234	69.613	80.934	22.7254	7.597	19.883	15.7582	5.9731	7.6754	18.7165	25.096	111.293	180.932	73.976	33.992	83.429	141.651	41.114		0.179039	47.4715
5.0017	21.684	5.823	9.803	32.409	16.763	12.663	68.075	46.099	81.568	23.137	37.447	71.11	67.787	21.3961	8.226	17.764	12.8144	5.8816	6.8278	16.7638	22.541	119.47	176.79	71.844	28.012	85.896	140.04	38.155		0.183407	45.2425
5.1208	20.922	6.056	10.195	30.578	17.766	12.455	61.304	40.12	78.279	19.103	32.022	70.663	51.756	18.211	9.157	17.074	12.9142	5.4219	5.4251	12.4461	19.428	115.299	176.545	71.629	30.089	87.566	124.822	36.465		0.187774	42.6325
5.2399	19.526	6.013	10.615	28.307	12.954	12.006	51.618	40.36	64.005	15.376	26.804	71.834	41.484	17.5681	8.057	16.081	13.2226	5.7631	6.5348	13.6349	16.16	100.019	164.473	68.794	23.834	89.606	122.092	33.363		0.192141	39.2894
5.359	21.543	5.571	11.498	28.049	14.532	11.897	43.75	31.188	56.428	16.573	24.808	74.905	33.47	15.3553	7.098	15.07	11.539	4.452	6.0083	12.0614	13.623	87.159	146.771	57.276	25.291	80.663	118.195	34.129		0.196508	36.0322
5.478	23.537	6.144	10.647	27.533	12.561	10.306	36.308	25.945	51.855	12.998	20.679	72.734	28.957	13.2539	7.548	15.669	11.3141	6.5054	6.2757	11.1997	10.035	74.089	127.942	48.189	21.861	67.219	113.004	35.56		0.200872	32.4953
5.5971	20.42	4.876	9.487	21.891	13.065	10.501	30.985	20.309	43.514	14.592	19.275	68.131	23.465	12.4014	7.792	13.843	10.8666	5.2631	5.998	10.6584	9.075	46.827	94.482	42.763	21.769	54.539	115.645	31.789		0.205239	28.0079
5.7162	21.259	5.599	9.133	25.535	14.039	10.651	25.828	14.939	42.019	12.476	16.652	71.379	19.602	12.8835	6.95	13.327	11.001	5.6005	6.3633	8.5858	11.538	32.657	77.029	31.09	17.31	37.937	119.921	32.17		0.209607	25.4812
5.8353	19.094	5.01	8.354	22.109	14.251	11.854	21.384	11.285	39.416	10.119	13.868	62.672	17.511	9.4432	6.603	12.668	9.4992	5.0263	7.5508	8.6742	11.136	20.657	64.026	25.07	14.669	23.462	116.197	31.091		0.213974	22.2393
5.9544	19.244	4.843	9.944	23.602	14.351	11.814	16.735	9.069	40.524	11.571	11.415	60.468	20.34	8.5287	8.026	12.548	10.6279	5.0626	6.4144	8.5216	10.027	15.447	52.001	19.36	12.897	17.47	113.696	30.284		0.218341	20.8868
6.0735	17.541	4.871	10.416	23.758	16.119	11.571	15.326	7.291	31.984	9.698	8.218	57.387	16.335	7.9093	6.327	13.663	11.7116	5.2622	6.7536	8.2144	9.628	9.973	44.621	14.497	9.908	12.549	113.808	33.922		0.222708	19.2594
6.1926	19.176	6.324	10.395	25.779	16.015	9.987	13.463	6.941	32.965	9.006	6.985	43.734	16.595	6.5881	6.334	12.04	10.4885	5.5063	6.554	7.4441	9.535	6.127	37.19	11.429	9.322	8.479	108.695	33.903		0.227076	17.75
6.3117	17.874	5.062	9.798	28.692	15.912	12.586	13.107	6.674	31.091	8.362	5.944	34.271	14.698	5.93	6.149	12.573	9.6744	5.6444	5.8705	6.3729	9.038	5.49	31.92	9.396	7.681	8.7	96.066	31.877		0.231443	16.3019
6.4307	19.105	5.344	8.791	27.908	13.463	11.392	14.056	7.648	27.364	6.863	5.038	26.978	13	5.9336	5.488	11.697	8.3233	5.1174	6.9915	6.1492	11.848	4.136	26.207	9.786	5.468	7.236	77.88	33.522		0.235806	14.7405
6.5498	18.266	5.341	7.398	24.374	14.122	9.014	15.457	7.265	27.567	7.542	4.491	21.949	12.214	5.4871	5.441	11.736	8.2243	4.1693	5.697	7.2417	11.553	4.094	27.081	11.901	7.254	7.428	67.897	32.945		0.240174	14.0411
6.6689	17.243	6.359	6.533	20.652	11.991	10.38	15.934	7.85	22.285	8.107	3.533	18.344	13.824	4.8938	5.295	11.032	9.2047	4.2439	6.8869	6.7212	13.38	3.999	23.23	14.082	4.854	7.448	55.966	36.537		0.244541	13.2432
6.788	14.304	6.312	6.454	16.772	11.699	12.225	14.534	7.402	21.75	7.901	4.216	15.521	14.384	5.5688	5.063	9.111	10.2972	4.5104	6.0513	6.3094	15.552	3.372	25.436	18.539	5.957	6.61	48.246	41.789		0.248908	13.0674
6.9071	17.539	4.534	6.519	16.581	12.953	14.056	16.876	6.906	20.798	5.914	4.503	14.42	13.168	5.1331	5.907	9.668	9.1944	5.6961	5.6132	5.5985	15.725	3.483	19.73	22.742	5.358	6.947	41.519	42.259		0.253275	12.8336
7.0262	16.125	4.969	8.147	16.016	12.753	16.683	14.114	10.96	17.573	6.972	4.796	12.846	15.057	4.7061	4.746	8.174	9.8423	5.5947	5.0399	5.0711	15.023	3.17	16.86	25.975	5.54	6.122	28.976	43.939		0.257643	12.3496
7.1453	18.879	6.167	5.699	16.894	11.763	16.561	15.986	9.959	15.651	6.225	5.022	12.243	14.639	4.2032	5.337	7.092	7.1445	5.441	4.6781	5.2452	16.221	2.815	14.656	29.961	4.743	5.867	21.921	44.949		0.26201	11.9986
7.2644	17.31	5.494	7.638	14.356	12.6	18.722	12.752	12.9	16.163	6.177	4.148	13.895	14.262	3.9068	5.238	7.147	7.1053	4.2272	5.4193	4.8264	15.549	3.242	12.989	35.458	5.102	6.655	22.385	48.494		0.266377	12.2915
7.3834	17.046	6.29	8.421	15.263	13.455	16.275	12.215	12.294	15.947	5.644	3.663	9.822	15.488	4.9696	4.502	7.797	7.0851	5.3344	4.5993	6.9435	12.632	3.038	11.663	37.415	4.491	6.539	18.1	47.791		0.270741	11.9544
7.5025	15.242	6.229	7.284	18.591	13.691	12.945	9.415	11.308	16.414	6.234	3.995	11.273	16.17	5.339	4.187	7.025	7.4526	4.2192	4.4478	5.1007	12.342	2.901	10.026	36.151	3.351	6.385	17.096	45.56		0.275108	11.4419
7.6216	16.906	7.598	7.233	19.494	14.343	9.94	9.632	13.525	17.537	6.314	3.247	10.662	13.055	4.9401	4.77	7.312	5.6307	5.3518	4.3849	4.3393	12.036	2.555	7.874	35.493	4.318	6.012	16.177	42.468		0.279475	11.1839
7.7407	18.086	7.352	9.641	18.319	12.395	7.402	9.105	11.111	18.733	5.209	3.772	10.969	14.247	4.2417	3.604	6.62	6.6122	4.4758	3.842	4.7219	13.932	3.08	6.629	34.244	4.34	6.08	12.789	44.269		0.283843	10.9222
7.8598	19.186	8.26	8.825	21.084	11.96	6.559	8.077	9.338	17.106	6.043	3.455	9.511	13.001	5.0919	5.424	8.431	5.9972	4.2337	3.6013	4.6838	13.707	2.988	7.013	35.297	4.14	6.054	12.219	39.25		0.28821	10.7334
7.9789	21.668	7.195	8.017	20.425	13.083	6.853	8.277	6.74	17.557	5.578	3.834	11.55	12.598	5.4553	4.708	6.351	4.3717	5.1245	4.4516	5.1402	13.086	2.966	6.857	32.335	3.66	5.691	12.441	37.185		0.292577	10.4714
8.098	18.244	6.868	8.485	21.808	13.257	7.949	8.102	5.207	18.748	6.696	3.701	10.221	11.526	4.5536	3.256	7.941	5.6705	5.2608	3.49	3.7427	15.403	3.844	4.991	32.157	2.717	5.266	11.774	37.344		0.296944	10.2937
8.2171	19.325	7.218	7.383	21.93	14.563	8.025	8.962	4.279	16.359	5.307	4.706	11.458	12.437	4.785	3.158	7.484	4.958	4.5061	3.4832	3.775	13.426	2.554	4.493	32.951	4.08	3.652	12.127	41.042		0.301312	10.3009
8.3362	18.892	7.216	6.957	22.216	15.696	7.601	11.351	4.744	19.218	5.871	3.911	11.487	14.077	4.8637	4.66	7.499	4.4288	6.0491	4.4467	3.9473	13.554	2.614	4.421	38.437	3.231	4.288	9.418	36.64		0.305679	10.6334
8.4552	22.498	6.415	6.089	21.804	15.077	7.805	10.518	6.194	18.489	6.1	3.86	11.268	13.72	4.1891	5.033	7.956	6.2561	6.3471	4.2697	6.0073	14.221	2.854	3.946	35.242	2.682	3.613	10.333	38.988		0.310042	10.7777
8.5743	22.852	7.165	7.157	20.813	14.64	5.829	10.736	3.797	18.212	6.136	3.898	11.25	13.639	5.1909	3.768	8.408	4.1103	6.48	3.7806	5.2407	15.826	3.303	4.037	34.788	3.964	3.521	10.68	38.919		0.31441	10.6479
8.6934	22.871	6.465	5.966	22.694	17.073	8.92	8.995	4.135	19.353	6.705	4.451	10.163	13.498	4.6559	4.382	10.111	5.0007	7.1144	4.0222	4.264	14.645	2.924	3.951	35.693	4.016	3.721	9.521	44.043		0.318777	11.0483
8.8125	26.864	6.882	5.655	20.853	19.661	7.121	9.426	5.223	17.263	5.872	4.284	10.508	14.071	4.6204	5.09	9.509	5.069	5.8532	3.9495	3.7651	15.384	3.025	3.619	34.887	3.45	2.837	9.51	40.167		0.323144	10.8721
8.9316	31.935	7.554	6.61	17.678	18.413	9.239	6.493	3.728	20.311	6.201	3.708	10.787	13.797	4.9589	6.284	10.652	4.753	6.4801	2.8614	3.7787	16.029	2.678	3.887	33.52	3.052	4.067	9.024	44.3		0.327512	11.1707
9.0507	31.461	6.261	6.834	17.928	20.337	7.298	7.924	6.607	20.951	6.511	3.683	12.189	13.655	6.2636	5.506	11.205	4.7386	6.1051	3.8797	4.0815	15.749	2.73	3.545	34.554	3.647	3.739	9.653	44.907		0.331879	11.4979
9.1698	34.246	7.016	6.838	23.357	18.416	8.14	7.737	5.527	22.054	5.231	4.337	10.812	13.377	5.5837	4.858	11.265	4.4239	5.9669	3.2191	2.9681	15.436	2.848	3.942	36.15	4.02	2.974	7.104	45.625		0.336246	11.5526
9.2889	31.164	5.891	7.606	21.542	19.756	9.606	6.485	5.257	20.546	5.476	3.872	12.669	14.015	5.8261	5.732	12.247	5.171	5.2174	2.3964	4.037	17.317	3.735	4.17	32.71	3.594	3.216	7.038	45.359		0.340613	11.4875
9.4079	27.61	4.912	6.518	22.62	16.382	9.724	6.363	4.014	20.873	6.231	3.626	9.237	12.653	5.2016	6.466	11.895	4.3474	4.6989	2.6029	3.064	16.694	2.7	4.816	32.427	3.447	2.751	6.181	41.414		0.344977	10.6953
9.527	27.511	5.892	5.129	18.505	16.174	10.567	6.686	4.074	21.552	5.658	4.635	9.225	10.809	4.8144	5.882	10.334	5.6967	6.1533	3.0128	3.1423	16.393	3.64	4.257	30.503	3.969	2.82	6.088	35.798		0.349344	10.3186
9.6461	24.823	4.556	6.99	21.394	16.131	10.965	7.595	5.206	23.227	4.937	3.532	9.637	9.879	4.553	6.246	9.721	5.1211	5.7747	2.4682	3.6279	18.369	2.336	4.267	32.024	3.901	2.554	5.616	32.356		0.353711	10.2788
9.7652	23.041	6.289	7.566	21.119	15.289	12.996	8.508	4.059	22.375	4.212	3.729	9.666	11.961	4.8799	6.069	8.942	5.7134	5.499	2.9494	3.4978	20.519	3.161	3.551	27.251	3.36	3.013	5.376	32.151		0.358079	10.2408
9.8843	24.761	5.759	5.871	20.945	16.95	10.812	7.921	5.731	21.641	4.83	4.49	9.19	12.345	4.4784	6.304	7.806	6.0329	5.9256	3.1925	2.4075	19.121	2.096	3.263	23.361	6.347	2.479	5.544	33.784		0.362446	10.121
10.0034	24.124	6.259	6.827	18.375	17.485	12.959	7.601	3.938	21.47	4.462	4.003	9.185	10.286	4.9343	6.768	7.76	4.765	6.3361	2.5608	2.2225	15.957	2.843	3.571	23.718	5.538	2.718	4.971	29.577		0.366813	9.6862
10.1225	24.599	6.864	5.073	16.991	21.483	10.992	7.08	4.896	22.36	4.583	3.686	9.737	9.665	4.0402	8.102	7.734	4.3615	4.8245	3.531	2.5855	18.465	3.362	3.698	22.607	8.175	3.332	4.892	35.982		0.37118	10.1322
10.2416	21.577	5.903	5.764	20.194	20.326	7.968	7.745	4.076	18.623	4.64	4.953	11.675	11.011	4.016	7.192	8.37	5.3355	5.6952	2.8235	2.6547	19.316	3.812	3.247	14.324	7.47	3.966	4.53	34.387		0.375548	9.69978
10.3606	22.075	5.875	5.242	21.543	21.035	7.821	7.5	4.191	20.046	4.626	4.222	10.251	12.709	4.5958	7.417	9.532	6.4852	7.4508	2.6465	2.611	17.433	4.172	4.623	14.919	9.963	3.099	5.091	35.044		0.379911	10.0792
10.4797	23.266	5.781	5.275	20.761	21.938	5.427	8.635	4.578	19.508	4.031	4.015	9.338	13.499	4.4422	7.988	8.106	7.9403	6.6885	3.3616	2.8879	16.63	4.519	3.628	15.561	8.755	1.948	4.789	29.368		0.384279	9.73802
10.5988	25.072	5.439	5.521	20.921	21.008	7.47	6.792	4.138	17.708	3.745	4.249	10.319	13.024	3.0261	8.473	10.396	7.9352	6.6189	1.7685	3.3144	16.085	4.94	2.885	13.335	10.855	3.287	3.87	25.038		0.388646	9.54404
10.7179	27.006	5.016	5.289	22.005	19.043	6.71	9.197	4.947	19.541	4.109	4.576	11.5	12.595	3.3013	7.587	8.179	8.5355	7.4946	2.395	3.0029	13.595	6.34	3.08	13.26	11.453	2.35	3.782	24.943		0.393013	9.67258
10.837	28.143	6.122	5.084	20.802	20.883	7.499	9.495	4.956	18.383	4.61	4.959	12.975	11.118	4.9244	5.634	8.488	9.3046	6.4294	1.8058	2.27	12.316	7.25	3.266	11.37	13.548	3.169	3.822	26.093		0.39738	9.8114
10.9561	27.708	5.773	5.474	19.389	22.506	8.513	9.901	4.961	16.413	4.134	3.806	15.521	11.594	4.376	5.164	7.276	8.3919	6.0805	2.1615	3.2058	10.316	6.235	3.272	10.662	15.391	2.165	3.435	23.187		0.401748	9.53613
11.0752	24.075	4.842	5.786	18.165	24.657	8.504	9.781	5.526	15.425	3.114	3.624	17.371	11.264	4.6897	4.676	7.558	9.7553	5.6573	1.7906	3.2631	9.951	7.896	3.598	8.916	18.899	2.848	3.919	21.859		0.406115	9.55036
11.1943	28.671	4.186	4.655	16.81	26.588	10.385	10.469	6.091	19.064	3.617	4.996	16.103	10.389	4.7088	5.146	6.544	7.2976	6.069	2.0761	2.9826	7.465	8.609	3.321	8.414	19.92	2.137	3.843	20.086		0.410482	9.66582
11.3133	28.672	4.467	5.071	16.614	29.207	10.258	11.482	6.712	16.91	3.254	4.569	13.391	10.791	5.1699	3.815	7.134	7.5726	6.5959	2.13	2.3318	5.859	8.293	3.516	7.211	22.399	2.57	3.366	18.385		0.414846	9.56236
11.4324	25.818	4.589	4.187	17.295	29.863	10.143	11.794	7.747	15.572	4.86	4.711	12.856	10.59	4.0039	4.383	8.025	6.5209	5.4445	1.4551	1.915	5.023	9.407	2.981	7.006	20.622	2.787	3.397	12.605		0.419213	9.12859
11.5515	21.93	5.17	4.176	19.14	33	8.21	12.77	8.952	16.595	4.721	4.673	10.517	10.643	5.3029	4.425	6.851	5.5579	5.803	1.6528	2.5627	5.04	10.713	2.929	6.468	21.757	2.116	3.315	10.047		0.42358	9.10848
11.6706	22.32	4.274	3.787	18.051	37.24	7.421	14.1	8.693	13.861	3.794	4.66	8.579	9.683	5.3262	4.211	7.036	6.6023	5.5495	1.9827	2.7658	4.326	12.538	3.756	5.869	22.066	2.641	2.373	8.242		0.427948	8.99098
11.7897	25.817	4.32	4.971	19.4	38.693	9.164	15.38	9.348	12.709	4.14	3.941	8.525	8.745	4.3758	4.399	5.836	6.8275	5.4662	2.4232	1.8142	3.65	12.974	3.246	5.844	24.897	1.99	3.435	7.106		0.432315	9.2656
11.9088	24.532	4.713	4.37	20.16	42.775	9.103	15.873	9.745	12.048	3.226	4.128	7.449	8.764	4.9498	5.533	4.74	4.7106	4.1212	1.9928	2.2306	3.958	13.008	2.9	4.841	23.671	2.548	3.24	5.012		0.436682	9.08364
12.0279	23.629	3.934	4.848	21.144	41.308	8.585	17.274	9.735	10.536	2.966	4.83	9.626	11.276	5.1139	5.194	5.608	4.1054	4.4392	2.2046	2.1657	4.883	10.939	3.042	4.599	22.53	2.496	3.725	5.355		0.441049	9.1461
12.147	26.554	4.102	5.404	20.564	43.07	7.94	13.895	12.765	11.31	3.831	4.118	8.999	9.527	5.0496	4.401	5.796	4.2581	6.4033	2.3196	3.0083	3.058	12.717	2.625	4.857	22.458	3.096	2.255	5.313		0.445417	9.27478
12.2661	25.386	3.506	5.074	21.957	45.516	6.503	12.413	12.996	11.515	4.199	4.189	8.669	10.153	4.2691	4.081	4.679	3.2763	4.74	1.8952	1.5927	2.933	11.383	2.817	4.268	23.453	2.878	2.995	4.635		0.449784	8.99897
12.3851	25.465	4.694	4.328	24.423	41.098	7	11.271	12.317	11.411	3.538	3.785	8.017	9.959	4.5817	4.298	5.477	4.1816	4.7012	1.9535	2.0122	4.483	10.079	2.46	4.675	24.833	2.529	2.54	5.431		0.454147	8.98361
12.5042	24.865	4.924	4.207	23.719	38.864	5.583	9.731	10.287	9.194	3.345	4.185	6.431	9.601	5.19	3.923	6.313	4.0423	5.7341	1.9833	1.9878	3.302	9.43	3.102	4.556	24.269	3.436	2.157	4.306		0.458515	8.52384
12.6233	26.365	5.522	4.989	25.378	34.912	6.297	8.378	11.38	12.933	3.2	4.4	7.93	10.348	5.4829	3.852	4.362	4.2969	5.8738	2.0477	2.2283	3.438	10.226	2.95	3.195	22.106	3.033	3.239	5.129		0.462882	8.69613
12.7424	27.892	4.49	3.9	23.82	38.111	5.689	7.782	12.919	11.745	3.422	4.513	7.872	7.762	5.0471	4.171	5.803	4.0828	5.7412	2.0851	2.7582	3.745	10.158	2.867	3.805	22.663	2.786	3.559	4.241		0.467249	8.69391
12.8615	26.545	4.372	4.733	23.895	36.458	5.349	8.668	15.73	10.201	4.051	4.286	6.452	8.354	4.8348	3.487	4.077	4.4331	4.7413	2.2191	1.5449	3.53	7.845	2.709	2.809	22.332	2.46	3.078	3.768		0.471616	8.32008
12.9806	27.32	5.078	3.804	20.173	31.901	5.288	8.763	14.185	10.686	3.565	3.901	7.265	8.132	6.0326	3.51	4.655	5.3044	5.3942	2.2637	1.9252	2.647	8.749	3.406	2.884	20.437	2.397	2.114	4.12		0.475984	8.06786
13.0997	27.695	5.314	4.709	18.828	32.118	3.723	10.252	13.544	9.105	3.604	3.819	7.503	8.453	5.3921	3.171	4.471	4.5941	5.1836	2.2419	2.2738	2.426	9.433	2.434	4.096	19.973	2.808	2.73	3.872		0.480351	7.99166
13.2188	25.166	4.449	4.834	19.221	31.264	4.856	10.175	14.463	10.179	3.601	3.743	6.9	7.911	6.0206	4.235	4.174	4.8283	4.3739	2.0653	1.8529	2.031	9.618	2.547	3.321	21.492	3.543	2.874	3.829		0.484718	7.98454
13.3378	27.084	4.908	4.579	18.09	27.431	4.724	10.336	13.71	9.178	3.572	3.306	7.46	6.799	6.293	3.036	3.508	4.1272	3.8999	2.8208	1.8076	2.778	7.676	2.706	3.603	20.353	2.431	2.239	4.352		0.489082	7.60027
13.4569	28.051	4.067	4.468	21.221	30.05	6.117	10.125	14.94	7.82	3.509	3.307	5.328	5.559	5.2684	4.091	3.816	4.7164	4.8816	2.2229	1.72	1.939	7.217	2.264	3.35	16.612	2.047	3.273	3.593		0.493449	7.55619
13.576	24.881	4.178	3.628	20.145	26.975	5.971	9.005	17.268	7.816	2.81	4.022	7.405	6.191	6.1408	3.723	4.174	3.4284	5.7316	2.2196	1.4396	2.131	6.943	3.077	3.658	14.853	2.482	1.902	3.339		0.497816	7.34061
13.6951	24.553	4.008	4.853	19.845	28.745	5.219	10.062	17.147	7.215	3.206	3.899	6.03	6.343	6.383	3.131	4.235	3.3696	5.301	1.8227	1.6686	1.646	7.922	3.155	3.54	12.642	2.673	2.271	3.919		0.502184	7.31442
13.8142	26.431	5.927	4.278	20.532	31.824	4.769	9.797	17.559	6.957	3.369	3.663	6.301	5.846	5.9621	3.854	3.816	3.2289	4.4504	1.7682	1.8889	2.518	8.128	2.195	3.651	13.512	3.038	3.336	4.057		0.506551	7.59488
13.9333	25.224	4.476	5.241	22.23	30.332	5.268	10.396	18.862	6.504	2.799	4.344	5.109	5.96	6.0464	3.152	3.491	3.2357	4.6044	1.7636	1.5781	1.866	9.629	2.904	2.302	12.442	2.464	2.702	3.482		0.510918	7.44311
14.0524	21.652	4.026	4.44	19.242	33.23	4.738	13.153	19.215	5.383	3.744	4.477	5.716	6.744	6.3205	4.634	2.554	4.1351	4.0712	1.6298	2.441	2.378	10.021	3.686	2.994	13.441	2.181	2.946	3.329		0.515285	7.59006
14.1715	21.968	5.009	3.328	16.92	34.883	5.383	14.773	15.942	5.993	3.165	4.604	6.315	4.749	5.3958	3.361	3.128	2.476	3.8535	1.9519	1.2289	1.82	8.981	2.979	3.56	13.109	3.491	2.639	2.942		0.519653	7.28386
14.2905	21.401	4.508	4.809	17.701	33.803	5.2	15.724	15.452	5.739	2.749	3.905	4.67	6.963	4.7403	2.573	2.967	3.5394	3.0024	2.0107	1.7581	2.305	10.606	2.814	3.37	15.883	2.11	3.169	3.092		0.524016	7.37728
14.4096	24.307	4.58	4.194	15.801	34.413	5.248	14.948	15.02	5.007	3.224	4.5	5.757	5.53	5.1424	3.19	2.626	3.4489	3.1623	1.856	2.4475	2.772	9.576	2.663	3.036	14.11	2.72	3.123	4.109		0.528384	7.3754
14.5287	23.979	4.369	3.276	15.469	29.46	4.945	13.261	15.196	4.957	2.943	3.891	4.615	4.709	4.4429	2.751	3.05	2.3654	2.8796	1.6654	1.489	1.704	7.842	2.095	3.506	12.547	1.784	2.523	3.046		0.532751	6.59858
14.6478	26.662	4.973	3.566	14.887	30.086	4.625	13.325	14.252	4.623	3.329	4.63	4.026	5.026	4.7602	2.197	3.281	2.5398	3.0638	1.3589	1.8	2.264	8.788	2.29	2.648	13.434	2.542	2.374	2.818		0.537118	6.79174
14.7669	24.104	4.586	3.921	14.2	28.691	4.623	10.583	13.605	4.556	3.337	4.031	4.263	5.034	4.4701	3.431	3.815	2.5793	2.5987	2.3594	1.5069	2.122	8.388	2.459	3.305	12.071	2.705	2.575	3.436		0.541485	6.54841
14.886	26.043	4.492	4.228	16.838	26.412	5.234	7.886	12.405	5.066	2.359	4.225	4.523	5.776	4.9455	3.035	3.584	2.0562	2.9294	2.266	1.4085	1.841	7.661	2.684	3.414	12.848	2.364	2.691	2.748		0.545853	6.49866
15.0051	23.973	3.794	4.169	13.134	24.687	4.757	6.517	15.417	4.251	2.634	3.463	4.631	4.091	4.229	2.813	3.318	2.6888	2.873	1.6849	1.8018	1.738	7.665	1.843	2.463	11.235	2.943	2.579	3.431		0.55022	6.02941
15.1242	26.323	5.473	4.251	14.321	25.561	4.209	5.603	14.668	4.512	3.095	3.597	4.154	4.516	3.4874	2.603	3.911	2.5151	2.4835	1.4932	1.3204	1.904	8.312	1.643	2.187	11.194	2.598	2.843	3.038		0.554587	6.13627
15.2432	25.385	4.749	3.923	14.43	28.84	5.656	7.59	14.57	4.712	3.32	3.854	4.276	5.373	3.441	2.692	3.429	2.3603	3.285	1.5118	1.4869	1.206	8.489	1.876	2.349	11.088	2.526	2.521	2.815		0.558951	6.34836
15.3623	25.106	4.152	4.25	14.402	26.075	5.128	7.448	16.511	4.599	3.154	3.961	4.421	4.819	3.8104	1.942	2.489	2.0351	2.9426	1.8266	2.4576	1.852	8.49	1.746	1.902	11.514	2.297	1.909	3.232		0.563318	6.23112
15.4814	25.17	4.17	3.433	12.493	28.412	5.547	7.541	14.648	4.771	2.458	4.587	4.382	4.745	3.664	2.799	2.816	2.4906	2.8369	1.4899	1.1789	1.245	8.151	1.715	2.31	10.8	2.495	1.813	3.047		0.567685	6.11458
15.6005	23.617	4.358	4.256	12.907	24.293	6.926	6.898	13.268	3.696	2.975	3.752	3.959	6.243	4.3847	2.481	2.572	2.0255	3.3969	1.7443	1.4309	1.5	6.508	2.406	3.348	10.023	1.835	2.281	1.785		0.572052	5.88819
15.7196	25.904	4.342	3.871	12.196	24.834	6.351	6.249	13.934	3.755	3.253	3.926	5.182	4.727	3.9496	2.484	2.5	2.2735	3.9574	1.6343	2.0589	1.273	8.536	2.144	1.573	10.588	2.407	1.791	2.444		0.57642	6.00492
15.8387	22.085	4.509	3.676	13.473	23.963	6.468	6.646	16.955	4.579	2.358	4.357	4.675	4.343	4.0425	2.878	3.131	2.0772	3.1119	1.5581	1.3697	1.454	7.45	1.676	2.482	9.621	2.029	1.517	2.445		0.580787	5.89034
15.9578	21.435	5.301	3.611	13.317	21.468	7.954	5.883	15.229	4.074	2.468	3.369	5.243	4.391	3.4551	1.873	3.234	2.821	2.8156	1.5201	1.2761	1.816	6.378	2.438	2.133	8.306	1.846	1.975	2.835		0.585154	5.65946
16.0769	21.496	3.909	4.358	12.17	20.837	6.748	7.879	13.238	3.028	2.65	3.38	4.288	4.838	3.3176	2.694	3.242	2.6649	2.483	1.6398	0.8834	1.392	6.131	1.967	2.226	9.181	2.324	2.087	2.782		0.589522	5.49406
16.196	19.916	5.237	3.283	13.01	20.225	7.28	7.071	12.088	3.075	2.821	4.214	5.679	5.265	2.9564	3.044	3.31	2.8557	2.4056	1.3201	1.5144	1.735	6.931	1.599	2.114	9.598	2.089	2.788	2.138		0.593889	5.55579
16.315	21.6	4.518	2.937	13.904	21.497	5.901	6.446	14.305	3.765	3.09	3.423	4.551	3.652	2.674	2.288	2.871	2.4984	2.6846	1.1462	0.8512	1.61	5.516	1.606	2.253	8.532	2.726	2.497	2.067		0.598252	5.40748
16.4341	23.936	4.716	3.592	12.418	20.966	6.454	6.386	13.281	3.967	3.204	4.006	4.901	4.331	3.8719	2.183	2.527	1.6325	2.469	2.0148	0.9263	1.481	5.494	2.323	2.294	9.49	2.208	1.876	1.892		0.60262	5.53002
16.5532	23.072	3.407	3.341	14.345	20.024	4.904	7.132	14.096	4.108	2.948	3.03	4.386	3.449	3.7859	2.955	2.304	1.8747	2.2203	1.5982	1.1487	1.574	5.126	2.42	2.325	7.912	3.553	2.601	3.282		0.606987	5.46149
16.6723	22.66	4.869	3.673	15.738	17.34	4.645	5.489	14.456	3.57	3.062	3.872	4.091	4.283	3.1003	1.897	2.04	2.1015	2.3948	1.8936	1.4533	1.443	5.471	1.47	2.282	9.509	2.495	1.975	1.978		0.611354	5.33041
16.7914	24.925	4.476	3.855	15.644	19.508	4.932	7.337	15.15	3.636	2.422	3.6	4.265	4.231	4.0333	2.456	2.263	2.2374	1.9067	1.4265	1.4681	1.559	6.035	2.495	2.468	9.386	2.366	0.902	1.182		0.615721	5.57732
16.9105	22.638	3.909	3.127	14.915	17.825	5.846	6.573	14.914	2.51	3.025	3.274	4.083	4.039	3.1981	2.062	1.752	1.9313	2.2788	1.3808	1.59	1.28	5.071	2.189	2.614	7.377	2.19	2.166	1.989		0.620089	5.20525
17.0296	21.28	3.668	2.883	13.713	19.294	6.117	7.86	13.7	3.098	1.984	3.295	3.301	4.166	3.5246	2.252	2.348	2.5824	2.0179	1.6188	1.6137	1.205	4.088	1.535	2.205	6.974	2.894	1.626	1.886		0.624456	5.09748
17.1487	19.387	5.138	3.729	14.566	22.033	5.538	7.189	14.983	2.916	2.28	2.601	3.673	4.046	3.7132	2.348	2.327	2.219	2.2924	1.6842	1.4604	1.445	3.587	1.558	1.943	6.448	2.355	2.102	1.599		0.628823	5.18429
17.2677	21.21	3.385	3.199	13.492	23.565	6.051	7.03	15.539	2.498	2.114	3.077	4.775	4.193	3.0674	2.478	1.605	2.0532	1.706	1.5966	1.3504	1.145	3.807	1.477	2.485	6.772	1.94	1.937	1.846		0.633187	5.19263
17.3868	21.954	4.624	3.542	12.339	26.194	5.414	7.396	16.177	2.522	2.196	3.267	3.749	2.706	4.4349	2.051	1.99	2.8279	2.1872	1.0574	1.0777	1.369	3.493	1.273	2.536	5.091	2.876	1.622	1.756		0.637554	5.27579
17.5059	21.347	3.372	2.926	14.556	28.297	4.821	7.748	16.187	1.617	2.045	3.206	3.611	3.049	3.5788	2.273	2.154	2.2163	1.9526	1.1172	0.9768	0.91	3.955	1.771	1.721	6.607	2.805	1.793	1.777		0.641921	5.29963
17.625	20.609	4.812	2.987	12.602	28.391	6.044	6.087	14.868	2.775	1.852	2.959	2.316	3.38	3.1128	2.063	1.827	1.8688	2.1135	1.378	1.2518	1.328	2.93	2.169	1.8	5.824	2.542	1.839	2.39		0.646289	5.1471
17.7441	25.115	4.315	3.937	12.881	27.877	7.385	7.774	18.013	2.643	1.921	2.357	3.589	4	2.9838	2.198	1.755	1.8924	1.8566	1.5015	1.5149	1.525	2.965	2.254	2.629	6.116	2.399	2.003	1.889		0.650656	5.61747
17.8632	24.453	3.883	2.991	11.934	24.894	6.302	6.515	18.582	3.718	1.991	2.898	2.747	2.78	3.2208	2.045	1.528	2.7373	2.1743	1.5493	1.5796	1.268	3.094	2.08	2.236	5.143	2.415	1.783	1.649		0.655023	5.29251
17.9823	23.413	3.59	2.556	12.332	23.987	4.765	6.794	15.251	3.046	2.257	2.985	2.288	3.042	2.7208	1.883	1.996	2.1601	2.0374	1.4942	0.932	1.647	3.172	1.854	1.957	5.815	1.905	1.849	1.738		0.65939	4.98095
18.1014	25.699	3.902	2.833	15.39	25.314	5.279	7.936	15.336	3.728	1.475	2.846	2.941	3.252	2.8279	1.824	1.914	1.9198	2.0623	1.2656	1.2843	1.161	3.157	1.739	2.258	5.329	2.296	1.761	1.505		0.663758	5.2941
18.2204	23.526	4.925	3.672	15.707	27.428	6.119	6.122	14.732	2.93	1.953	2.386	2.931	2.632	3.12	1.737	2.153	1.6923	2.1949	1.6073	1.3128	1.467	2.809	2.134	1.725	3.823	2.55	1.487	2.055		0.668121	5.24751
18.3395	23.662	4.4	3.815	15.521	27.69	5.915	6.404	15.229	2.632	2.416	2.079	2.461	2.893	2.3223	1.663	2.33	1.677	2.4058	1.0872	1.0167	0.907	3.327	2.156	1.859	5.684	1.48	1.677	2.073		0.672488	5.24221
18.4586	22.713	5.049	3.118	17.857	25.266	6.829	7.764	14.185	2.558	2.073	2.651	2.455	2.243	2.5323	2.279	1.63	1.3015	2.1692	1.089	1.1343	0.934	2.207	1.35	1.53	4.547	2.219	1.457	1.678		0.676856	5.10065
18.5777	23.085	3.114	3.148	18.682	26.375	6.263	7.263	14.551	2.917	2.337	2.881	2.429	2.4	2.4784	2.234	2.393	2.0179	1.8609	1.3418	0.4806	1.159	2.101	1.564	1.515	4.836	2.092	2.16	1.126		0.681223	5.17159
18.6968	20.539	3.652	3.475	18.378	28.923	6.093	6.906	12.734	2.595	1.964	2.27	3.028	2.002	3.1927	2.223	2.211	1.6902	1.9996	1.2007	0.7409	0.979	1.731	2.041	1.836	3.618	2.237	1.371	1.417		0.68559	5.0374
18.8159	22.358	3.18	3.067	17.365	26.563	7.02	6.627	14.505	3.14	2.057	2.847	2.861	1.613	2.6551	2.07	1.486	1.7473	1.7219	1.1589	1.1771	0.978	1.903	1.484	1.717	3.647	1.25	1.604	1.761		0.689958	4.9844
18.935	18.097	3.188	2.923	13.6	26.552	5.975	6.438	15.033	3.089	1.894	2.159	2.205	2.601	2.3251	1.915	2.139	0.9189	2.4476	1.2152	1.0565	0.969	2.537	1.721	1.76	3.033	1.851	1.344	1.551		0.694325	4.66205
19.0541	18.601	3.401	2.149	11.824	23.733	8.088	6.485	13.694	2.504	1.659	2.18	2.366	1.959	2.9588	1.084	1.78	1.2959	2.1489	1.1758	0.9794	1.508	1.457	2.169	2.09	3.789	1.431	1.449	1.164		0.698692	4.46867
19.1731	16.257	4.131	2.282	9.289	23.774	8.737	8.018	15.434	2.21	1.712	1.765	3.233	2.543	2.5022	2.155	1.221	1.8484	2.4901	0.7919	0.6486	1.028	1.953	1.673	1.251	3.259	1.698	1.116	1.768		0.703056	4.45672
19.2922	18.149	3.143	2.747	9.064	23.237	8.609	7.226	12.076	3.191	2.038	2.067	2.368	2.417	2.9869	1.285	1.235	0.9913	1.7191	1.1716	0.5818	1.201	1.72	2.162	1.758	3.526	1.661	1.146	0.881		0.707423	4.29849
19.4113	15.94	3.086	2.512	9.722	26.622	8.017	6.787	12.494	3.433	1.484	2.589	2.381	2.163	2.36	1.868	1.451	1.1993	1.4249	0.6363	1.3399	0.816	2.003	1.972	1.95	3.053	1.532	1.451	0.916		0.71179	4.32866
19.5304	18.334	4.185	2.989	9.293	24.92	8.39	7.972	12.706	2.502	2.127	2.155	2.359	2.258	3.1287	1.685	1.358	1.1897	1.5067	0.9207	1.2921	0.982	2.446	1.695	2.514	3.598	1.346	1.212	1.148		0.716157	4.50757
19.6495	14.91	3.541	2.931	8.51	27.65	7.359	9.787	14.581	2.778	1.386	2.488	2.686	2.512	3.2912	2.005	1.318	1.4314	1.5763	0.9937	1.1831	1.2	1.721	1.887	1.926	2.801	1.249	1.182	0.946		0.720525	4.49392
19.7686	15.525	2.979	2.651	9.409	25.531	7.545	8.366	12.913	2.634	1.536	2.164	2.311	2.848	3.1809	2.294	1.385	1.474	1.46	1.0825	0.9268	0.942	1.391	2.091	1.334	2.871	0.69	1.354	0.781		0.724892	4.2739
19.8877	17.024	3.302	3.274	9.251	26.216	7.138	8.886	11.66	2.894	2.03	1.699	2.53	2.652	2.2794	2.021	1.513	1.2824	1.8843	1.041	0.8798	0.919	1.551	2.189	2.011	2.644	0.992	0.814	1.62		0.729259	4.36417
20.0068	18.766	3.72	2.646	8.889	23.837	8.271	9.319	13.288	2.668	1.832	1.873	2.31	2.01	2.956	1.302	1.624	1.2352	1.9391	1.5173	0.9725	1.451	2.102	2.444	2.139	2.59	1.556	1.029	1.04		0.733626	4.47593
20.1259	16.006	3.513	2.588	9.3	23.702	7.653	10.283	13.754	2.161	1.82	1.535	1.757	1.43	2.9799	1.964	0.971	1.0044	1.5199	0.9835	0.8974	0.804	1.878	2.463	1.863	3.494	1.245	1.104	0.934		0.737994	4.27168
20.2449	17.45	2.912	2.375	8.62	24.903	7.755	11.245	13.639	2.89	1.197	1.956	2.045	1.703	2.9457	1.715	1.453	1.3013	2.2813	0.906	1.0647	1.019	1.625	2.718	2.195	2.343	1.486	0.83	1.194		0.742357	4.42025
20.364	19.296	4.171	2.73	8.423	23.449	10.027	9.248	13.102	2.798	1.593	1.67	2.016	1.714	2.5258	2.616	1.73	0.8844	2.7197	1.1496	1.0405	0.483	2.107	2.468	2.53	3.074	1.055	0.67	0.789		0.746725	4.50282
20.4831	19.098	4.091	2.665	9.102	22.234	8.569	9.17	14.136	3.2	1.831	2.22	2.105	1.379	2.261	1.828	1.355	0.8414	1.7052	1.1215	0.8383	0.914	1.412	3.039	2.662	2.515	0.983	0.966	0.569		0.751092	4.38609
20.6022	17.441	3.115	2.825	9.804	21.352	9.411	9.296	14.445	2.484	1.823	1.987	2.425	1.629	2.0671	1.765	1.449	1.4949	1.737	0.6862	0.7845	0.697	1.476	2.725	2.384	2.722	1.047	1.259	0.907		0.755459	4.32992
20.7213	15.621	3.269	3.959	7.611	21.443	10.92	7.541	15.076	3.018	1.913	2.392	1.994	1.928	2.6484	1.956	1.102	1.4571	1.4087	0.6627	0.8911	1.384	1.872	2.732	2.032	2.71	1.045	0.963	1.072		0.759826	4.30789
20.8404	14.403	2.574	2.744	8.609	20.405	8.063	8.881	14.22	2.842	1.931	1.929	1.581	1.61	2.3458	1.572	1.463	1.2327	1.8803	0.6597	1.4631	1.046	1.4	2.505	2.041	2.805	1.135	1.012	0.849		0.764194	4.04291
20.9595	14.125	3.957	2.748	8.525	18.732	9.208	9.057	14.471	3.213	1.751	1.74	1.266	1.537	1.5961	2.207	1.75	1.669	1.2782	1.1305	1.2698	0.638	2.252	2.812	2.566	2.715	1.429	1.166	1.664		0.768561	4.15974
21.0786	12.216	2.694	3.181	7.484	21.079	7.41	7.649	15.278	2.694	1.841	1.959	1.741	1.618	1.9793	1.52	0.872	1.5396	1.5756	1.1952	1.0278	0.94	2.077	2.448	2.365	2.363	1.096	0.725	0.989		0.772928	3.91273
21.1976	13.372	2.963	2.116	7.367	20.588	8.398	6.521	16.296	2.914	1.266	2.129	1.472	1.551	2.6249	1.69	1.493	1.1449	1.5485	0.6849	1.2202	1.14	1.742	2.397	2.166	2.639	1.141	1.435	1.179		0.777292	3.97137
21.3167	11.923	3.602	3.094	8.661	19.537	9.186	8.294	14.977	3.437	1.12	2.075	1.032	1.828	2.3869	1.583	0.764	1.1634	1.5704	1.1305	1.0495	1.268	1.721	2.278	2.136	2.238	0.828	0.69	0.74		0.781659	3.93974
21.4358	11.38	3.807	2.887	7.125	19.441	6.442	8.11	14.23	2.92	1.388	1.805	2.332	1.782	2.2863	1.797	1.363	1.2155	1.5315	1.1937	1.2476	1.042	1.749	2.25	1.526	1.364	0.63	0.612	0.904		0.786026	3.72716
21.5549	10.507	3.356	2.533	8.476	16.578	6.467	7.381	14.944	3.051	1.592	1.511	1.716	1.349	1.6053	1.817	1.171	1.038	1.3764	1.0915	1.1871	1.108	1.63	1.984	1.977	1.837	0.357	0.851	0.759		0.790393	3.54465
21.674	11.995	3.856	2.26	8.628	16.651	7.464	8.043	16.733	2.525	1.487	2.146	1.252	1.88	2.7227	2.199	1.319	1.4447	1.4064	0.9463	1.1395	1.756	1.83	2.393	1.759	1.449	0.558	0.563	1.119		0.794761	3.84016
21.7931	11.174	4.65	3.271	7.755	16.288	8.075	8.307	14.483	3.077	1.851	2.042	1.515	1.591	2.546	1.814	1.198	1.0112	1.6244	0.9622	0.9874	1.757	1.716	1.92	1.291	1.699	0.763	0.508	0.854		0.799128	3.74036
21.9122	11.515	4.543	3.093	8.102	17.031	8.235	9.655	13.848	2.82	1.174	2.019	1.725	1.429	1.828	1.402	1.459	1.3448	1.7041	1.0352	0.91	0.761	2.158	1.73	1.171	2.209	0.8	0.719	0.899		0.803495	3.7614
22.0313	11.72	4.942	3.478	8.087	14.986	8.593	9.093	13.419	3.189	1.764	1.759	1.876	1.755	2.2946	1.591	1.683	1.0763	1.3442	1.3268	1.0292	1.855	1.943	0.894	1.541	2.384	0.749	0.496	0.62		0.807863	3.76743
22.1503	9.934	4.122	2.889	9.496	15.862	7.043	9.095	14.753	2.962	1.18	2.125	1.374	1.486	1.7722	1.225	1.76	0.9349	1.1365	1.2943	0.7118	0.753	1.736	0.879	1.18	1.741	0.527	0.278	0.613		0.812226	3.53081
22.2694	9.464	4.757	2.173	7.598	16.612	6.645	7.157	13.956	2.874	1.781	2.081	1.814	1.381	1.7489	1.178	1.476	1.21	1.772	1.0345	0.811	1.224	1.03	1.032	1.694	1.599	0.276	0.59	0.368		0.816593	3.40487
22.3885	10.582	5.607	2.447	8.692	13.948	7.255	8	15.25	3.144	2.255	2.116	2.079	1.515	1.7327	2.283	1.326	1.4041	1.7171	1.1633	1.2883	1.714	0.812	1.196	0.776	1.745	0.439	0.81	0.267		0.820961	3.62727
22.5076	12.112	4.313	1.879	7.66	14.362	8.268	6.529	12.979	3.036	1.35	2.139	1.385	1.53	1.6505	1.167	1.416	1.4806	1.6168	1.1064	0.9952	0.931	1.393	0.499	0.915	1.42	0.446	0.738	0.567		0.825328	3.35298
22.6267	11.143	5.052	2.5	6.547	16.404	7.828	9.057	11.882	3.42	1.904	1.352	2.072	1.868	1.7835	1.381	1.536	1.1762	1.7765	0.8234	0.9911	0.846	1.285	0.901	1.019	1.038	0.432	0.226	0.549		0.829695	3.45688
22.7458	10.414	5.432	3.047	7.609	13.869	7.914	7.606	13.565	3.258	1.534	1.431	1.783	1.685	1.7385	1.496	1.199	1.8525	1.6076	0.9867	0.6426	1.043	1.267	0.552	1.156	1.229	0.32	0.796	0.442		0.834062	3.40982
22.8649	9.554	6.182	2.72	6.819	14.491	7.858	8.84	12.946	3.385	1.284	1.644	1.323	1.617	1.974	1.061	1.571	1.2674	1.3071	1.2069	1.1446	0.519	1.996	0.995	0.776	1.203	0.59	0.404	0.516		0.83843	3.39979
22.984	12.284	5.775	2.411	8.074	15.869	8.705	9.264	11.648	4.013	0.997	2.004	1.774	1.976	1.5761	1.61	1.45	1.9048	2.0549	1.2919	0.8701	0.825	1.667	0.912	1.098	1.331	0.231	0.802	0.415		0.842797	3.6726
23.103	7.661	6.091	2.455	7.093	14.709	8.413	8.2	14.648	3.321	1.431	1.74	2.072	1.626	1.4868	1.253	1.357	1.2953	1.5962	0.5512	0.7562	0.879	1.163	0.592	0.944	1.019	0.259	0.508	0.197		0.847161	3.33274
23.2221	9.372	6.441	2.895	7.763	15.028	8.497	7.965	12.05	2.728	1.498	2.142	2.052	1.817	1.3674	1.039	1.379	1.1313	1.142	0.7035	1.1896	1.208	1.675	0.208	0.717	0.88	0.333	0.593	0.638		0.851528	3.37328
23.3412	7.78	5.851	2.805	7.941	14.763	8.615	7.203	12.634	3.018	1.339	1.626	1.502	1.779	1.6266	1.056	0.994	0.9673	1.9746	0.8113	0.7686	1.168	1.512	0.688	0.679	1.501	0.375	0.529	0.342		0.855895	3.2803
23.4603	8.309	6.845	1.922	6.184	14.358	8.64	8.463	15.069	3.108	1.236	1.635	1.204	1.558	1.5446	1.286	0.949	1.0764	1.2426	0.6936	0.8368	1.103	1.586	0.586	0.738	0.365	0.361	0.278	0.259		0.860262	3.26557
23.5794	7.638	5.23	2.077	5.56	15.595	8.921	10.167	11.568	3.966	1.347	1.343	0.959	1.778	1.5294	1.029	1.015	1.4178	1.4499	0.658	0.875	1.141	1.38	0.242	0.518	0.652	0.51	0.279	0.332		0.86463	3.1849
23.6985	6.545	7.167	2.441	6.291	13.851	9.216	9.504	10.851	3.745	1.887	1.254	1.761	2.656	0.9035	0.85	1.07	1.8776	1.3039	0.5517	0.8181	0.903	1.554	0.39	0.406	0.96	0.277	0.44	0.46		0.868997	3.21192
23.8176	6.974	6.488	2.178	7.052	14.572	7.831	7.73	11.242	4.217	1.286	1.733	1.391	1.756	1.2759	0.889	1.359	1.4817	1.3369	0.6569	0.6965	1.022	1.428	0.788	0.624	0.975	0.121	0.21	0.421		0.873364	3.13339
23.9367	5.335	6.286	2.087	6.133	15.301	7.193	8.446	12.387	4.297	1.448	1.453	1.949	1.291	1.0934	0.365	1.204	2.2537	1.334	0.6277	0.9529	1.23	1.813	0.51	0.468	0.555	0.117	0.29	0.311		0.877731	3.09753
24.0558	4.836	6.141	2.109	6.453	16.296	7.818	7.307	11.51	4.853	1.56	1.443	1.608	1.389	1.0833	0.795	1.337	1.8458	2.0754	0.9313	1.1638	0.848	2.016	0.335	0.42	0.531	0.167	0.178	0.268		0.882099	3.11849
24.1748	5	5.788	2.235	7.036	16.965	7.96	7.601	11.836	3.967	1.368	0.968	2.023	1.097	0.9949	0.484	0.755	1.9211	1.4421	0.4809	0.6581	1.124	1.791	0.393	0.647	0.416	0.228	0.263	0.17		0.886462	3.05757
24.2939	4.455	5.783	2.289	5.921	18.254	7.089	9.272	13.63	5.914	1.983	1.214	1.617	1.181	0.7779	0.333	0.592	2.0923	1.7443	0.6826	0.7388	1.177	1.639	0.36	0.457	0.347	0.182	0.332	0.075		0.890829	3.219
24.413	3.438	6.218	1.699	6.362	18.637	7.639	10.321	15.288	5.161	1.835	1.279	1.329	1.544	0.9187	0.52	0.288	1.483	2.0432	0.938	0.892	1.044	1.149	0.083	0.435	0.75	0.075	0.047	0.102		0.895197	3.2685
24.5321	2.808	4.54	1.764	5.864	19.095	7.975	10.201	14.874	5.028	1.452	1.147	1.202	1.349	1.2124	0.578	0.788	1.9591	1.5725	0.7069	1.5433	1.054	1.267	0.209	0.555	0.437	0.266	0.098	0.203		0.899564	3.20529
24.6512	2.892	4.587	2.405	5.716	16.202	8.672	8.862	14.634	5.723	1.758	1.256	1.883	0.819	0.7383	0.672	0.527	1.5507	1.7477	0.3736	0.8726	1.146	1.649	0.308	0.421	0.208	0.189	0.126	0.331		0.903931	3.08103
24.7703	1.985	3.794	1.936	6.572	15.152	7.89	9.449	13.944	6.692	1.469	1.411	1.724	0.855	0.7326	0.489	0.373	1.7373	1.4751	0.5772	0.6755	0.521	1.399	0.299	0.217	0.395	0.111	0.166	0.187		0.908299	2.9367
24.8894	2.297	4.233	2.152	4.873	17.551	9.305	7.319	15.621	8.028	1.845	1.376	2.049	0.681	0.9325	0.33	0.595	1.3708	1.5718	0.8621	0.8337	0.821	1.568	0.289	0.371	0.508	0.35	0.216	0.184		0.912666	3.1476
25.0085	2.148	4.055	1.931	5.491	16.397	10.001	8.183	16.317	7.764	1.967	1.295	1.789	0.848	0.6408	0.435	0.33	1.8791	1.536	0.5932	0.6691	0.745	1.177	0.165	0.454	0.293	0.289	0.314	0.296		0.917033	3.14294
25.1275	1.242	3.413	2.01	5.31	20.195	10.644	9.09	17.48	9.87	1.972	1.566	1.781	0.751	0.4784	0.118	0.286	1.566	2.0386	0.407	1.2229	1.201	0.916	0.269	0.431	0.096	0.338	0.352	0.374		0.921397	3.40778
25.2466	1.844	3.231	1.957	6.027	18.87	10.001	8.02	18.625	8.079	1.466	1.312	1.441	0.727	0.4245	0.17	0.415	1.363	1.7422	0.6475	0.3013	0.926	0.857	0.125	0.185	0.416	0.14	0.231	0.423		0.925764	3.21309
25.3657	1.857	3.548	1.782	5.295	16.143	12.861	9.031	19.045	6.852	1.824	1.895	1.524	0.726	0.6507	0.124	0.575	0.6943	1.3857	0.5944	0.5366	0.665	0.671	0.148	0.324	0.087	0.055	0.338	0.458		0.930131	3.2032
25.4848	2.178	2.64	2.466	6.041	18.457	12.592	7.245	18.61	8.676	1.747	1.556	1.092	0.924	0.8049	0.428	0.286	1.1653	1.5219	0.4085	0.415	0.857	0.59	0.196	0.297	0.005	0	0.135	0.43		0.934498	3.27727
25.6039	1.285	2.114	2.468	5.224	17.671	13.982	8.69	21.328	9.88	1.731	2.018	1.207	0.743	0.5764	0.406	0.173	0.8085	1.3645	0.3066	0.3465	0.574	0.808	0.557	0.301	0.119	0.103	0.221	0.466		0.938866	3.4097
25.723	1.04	3.146	2.671	5.35	16.549	14.513	8.953	21.662	10.129	1.578	2.007	1.93	0.332	0.3557	0.188	0.315	0.702	1.2637	0.4923	0.7176	0.641	0.571	0.287	0.265	0.282	0.373	0.212	0.397		0.943233	3.46151
25.8421	1.299	3.024	2.785	5.318	15.761	16.232	8.616	20.699	10.721	1.645	0.783	1.159	0.283	0.6597	0.584	0.369	0.6591	1.3508	0.391	0.5048	0.842	1.208	0.049	0.271	0.255	0.188	0.079	0.321		0.9476	3.43059
25.9612	1.203	2.204	2.493	5.754	14.437	18.967	8.17	21.161	9.224	1.767	1.608	1.264	0.373	0.5525	0.168	0.486	0.5135	1.2816	0.4804	0.8027	0.327	0.707	0.104	0.123	0.28	0.217	0.21	0.021		0.951967	3.38924
26.0802	0.718	1.952	2.546	5.866	15.486	21.916	8.918	19.151	9.613	1.576	1.805	0.848	0.663	0.348	0.212	0.302	0.5705	0.9824	0.3384	0.553	0.397	0.937	0.217	0.101	0.114	0.008	0.075	0.121		0.956331	3.44051
26.1993	0.968	1.619	3.026	6.283	17.867	24.757	10.097	20.061	7.643	2.55	1.871	0.607	0.416	0.2386	0.309	0.121	0.7348	0.8595	0.4168	0.8868	0.519	0.948	0.259	0.118	0.164	0	0.106	0.119		0.960698	3.69873
26.3184	0.983	1.353	2.425	7.029	14.993	27.662	10.241	18.581	6.642	2.397	1.71	0.525	0.533	0.3923	0.311	0.057	0.4223	1.1058	0.3989	0.6172	0.69	0.617	0.134	0.0009011	0.224	0.006	0.052	0.267		0.965066	3.58462
26.4375	0.605	1.287	2.203	7.277	16.708	29.449	12.89	20.508	6.811	1.699	1.16	0.947	0.636	0.3297	0.135	0.311	0.2795	0.8901	0.2853	0.5428	0.413	0.867	0.158	0.108	0.368	0.105	0.005	0.323		0.969433	3.83216
26.5566	0.722	0.965	2.435	5.46	14.182	30.167	14.676	17.436	6.805	2.378	1.395	0.842	0.296	0.4425	0.168	0.255	0.5785	0.7942	0.3858	0.8025	0.465	0.415	0.107	0.212	0.08	0.055	0.056	0.268		0.9738	3.67298
26.6757	0.944	1.082	2.631	6.19	16.774	31.843	16.584	19.692	5.61	1.453	1.317	0.372	0.241	0.1686	0.218	0.214	0.3534	0.4991	0.3707	0.4195	0.255	0.488	0.137	0.156	0.316	0.048	0.153	0.295		0.978167	3.88658
26.7948	0.543	0.964	2.063	6.217	15.433	35.39	18.453	20.697	5.906	2.453	1.316	0.665	0.444	0.3772	0.282	0.108	0.4547	0.753	0.4587	0.3177	0.367	0.586	0.26	0.222	0.237	0.06	0.238	0.058		0.982535	4.11869
26.9139	0.655	0.62	2.472	5.462	16.101	36.519	21.09	18.678	4.951	1.885	1.088	0.806	0.383	0.2401	0.162	0.297	0.3906	0.7405	0.4588	0.4843	0.362	0.788	0.056	0.188	0.11	0.056	0.007	0.145		0.986902	4.11412
27.0329	0.685	0.778	2.285	5.522	14.962	37.731	21.253	19.539	6.184	2.65	0.799	0.621	0.244	0.3838	0.068	0.198	0.3929	0.5274	0.2507	0.7638	0.414	0.539	0.05	0.151	0.192	0.112	0	0.018		0.991265	4.18977
27.152	0.692	0.644	2.82	6.674	16.618	41.065	25.581	18.411	4.601	2.541	0.734	0.492	0.374	0.3831	0.199	0.122	0.2485	0.4484	0.7751	0.5706	0.531	0.639	0.062	0.367	0.136	0.002	0.094	0.051		0.995633	4.49556
[truncated: 1 more rows]

## Sheet: Image9
X0	Y0	Y1	Y2	Y3	Y4	Y5	Y6	Y7	Y8	Y9	Y10	Y11	Y12	Y13	Y14	Y15	Y16	Y17	Y18	Y19	Y20	Y21	Y22	Y23	Y24	Y25	Y26	Y27	Y28	Y29	Y30	Y31		Ap-basal	Avg int
[truncated: 256 more rows]

[truncated: 2 more sheets: Image8, Sheet1]
