# Supplementary material for: Crumbs organizes the transport machinery by regulating apical levels of PI(4,5)P2 in Drosophila
Source: eLife. 2019 Nov 7;8:e50900. doi: 10.7554/eLife.50900 (PMC6881148; doi:10.7554/eLife.50900)
Supplement: Figure 5—figure supplement 1—source data 5. [file elife-50900-fig5-figsupp1-data5.xlsx]

## Sheet: Image15 (2)
X0	Y0	Y1	Y2	Y3	Y4	Y5	Y6	Y7	Y8	Y9	Y10	Y11	Y12	Y13	Y14	Y15	Y16	Y17	Y18	Y19	Y20	Y21	Y22	Y23	Y24	Y25	Y26	Y27		Ap-basal	Avg int
0	16.1635	14.615	14.6548	18.5233	19.2458	19.6683	20.8599	10.2075	13.7182	12.5432	14.1807	10.4329	16.9037	12.4532	11.6077	10.3201	12.6923	10.9102	11.3284	14.3006	19.5025	13.5375	21.9527	31.7761	32.0801	30.7722	54.9723	73.128		0	20.109
0.1191	16.4972	14.0806	15.6198	18.4484	19.9243	21.1183	22.0467	10.2003	12.9298	15.1128	14.2392	12.3673	20.4099	12.426	11.9018	11.35	13.4618	11.3789	12.5199	16.0501	24.0999	12.4105	22.6745	34.1078	34.072	35.0387	55.0694	71.4295		0.00657666	21.1066
0.2383	17.1235	14.7812	14.0103	22.6717	23.4559	19.9331	26.386	11.3432	11.0154	15.1582	15.5215	14.8292	21.6497	15.7189	12.53	15.2968	14.711	11.9354	12.9059	18.056	23.4705	14.3465	26.118	40.6053	34.3111	39.6169	60.5222	62.5837		0.0131588	22.5217
0.3574	21.1519	15.3828	17.7697	23.1967	25.2104	21.7398	28.6658	12.3943	12.8073	16.5836	17.0839	19.4888	28.525	14.5042	13.6751	16.4246	13.7199	13.8273	14.1354	19.4851	27.7314	19.0666	27.8218	39.7285	34.2577	40.724	61.0012	62.064		0.0197355	24.2202
0.4766	24.1774	19.9031	21.7747	27.9919	28.1383	28.3138	29.0199	15.496	14.9208	18.5585	17.2484	22.6337	31.6433	16.3005	14.5226	14.3134	15.7334	14.7242	16.9743	22.1084	30.5874	18.0705	27.8504	46.1088	39.3616	38.6637	58.9508	54.9653		0.0263177	26.0377
0.5957	25.2182	26.9801	24.2108	27.5614	29.9041	28.5829	33.1379	16.9462	14.8725	22.404	22.2777	28.2102	33.6175	19.4366	14.9417	16.4719	15.6776	20.2366	18.4496	24.6344	34.2906	20.0081	32.3534	50.4351	42.2387	38.1722	59.4832	57.7015		0.0328943	28.5162
0.7148	28.4251	33.5009	27.2363	33.7879	31.2939	32.2736	34.8957	17.7979	16.998	22.9783	24.7537	29.4344	38.6274	20.8745	16.9844	16.5104	14.6474	20.8988	18.8339	26.3805	33.0167	23.4677	31.512	43.087	40.4658	37.7124	59.4732	60.9794		0.039471	29.8874
0.834	36.7028	39.8199	30.7561	36.0497	33.8701	33.7103	37.8245	20.1923	21.474	26.0356	28.6772	36.4177	38.2745	22.0975	18.686	18.1374	15.513	23.8359	23.1047	30.6526	32.2817	26.3264	32.4402	44.2145	40.7434	37.9609	58.3095	61.8487		0.0460532	32.3556
0.9531	48.1342	49.7634	33.881	37.4553	34.7696	35.7529	32.4597	27.8987	25.9529	27.1981	34.1236	36.4883	40.206	26.1527	20.4037	19.2229	15.884	25.4171	25.6159	31.2785	34.8744	28.8581	35.66	46.494	41.3626	39.8923	57.6419	59.3044		0.0526298	34.7195
1.0723	56.2596	56.2531	38.2189	35.8202	34.7757	39.3485	29.0178	27.3951	28.9335	31.5049	34.5819	43.6451	40.857	26.0886	20.2878	20.2529	16.8727	29.3139	27.2857	32.3136	39.0873	30.2288	38.6272	44.3724	41.6408	38.9805	56.4337	59.9704		0.059212	36.3703
1.1914	67.7818	60.1403	41.7347	36.5963	35.6647	38.0701	30.6392	30.2894	30.6211	33.4305	39.6311	44.1318	42.4735	26.2494	20.5037	18.347	19.0576	31.0479	29.1883	33.4587	34.661	32.1215	44.2538	48.1369	37.371	38.6848	60.4145	61.9808		0.0657887	38.0958
1.3106	67.9366	64.0506	46.5491	33.8897	33.1954	40.5997	24.9323	35.8349	33.3694	38.961	40.5404	46.2259	46.4286	31.3603	20.4922	18.111	18.1686	31.8248	31.1695	32.6308	32.9307	36.3885	42.0751	43.492	37.706	42.322	59.971	60.3141		0.0723709	38.9811
1.4297	71.4534	56.8637	44.4426	31.4248	32.492	34.0922	24.5688	36.2677	35.8095	40.7482	45.4504	43.7433	43.5218	30.29	20.937	18.9378	18.9657	29.9361	32.5407	35.3488	32.8379	37.2249	47.1915	39.9647	41.8157	39.9867	63.4495	58.6251		0.0789475	38.8904
1.5488	72.8172	54.7889	43.2898	30.7796	30.9027	35.7462	23.393	36.9514	37.859	42.104	44.0511	44.6077	44.1024	30.5837	20.4648	18.4555	21.2866	28.184	32.146	33.8916	30.1848	41.5418	44.2689	40.6891	35.5727	38.6129	62.8631	61.2303		0.0855242	38.6203
1.668	66.0772	42.7013	39.348	28.2251	31.3505	34.8426	18.976	32.1547	36.3651	44.1875	45.005	44.4144	40.7571	27.7365	21.0804	17.0925	24.8895	28.1289	31.3616	33.535	28.0915	39.5117	45.4423	37.39	36.1955	41.1023	64.1983	64.1763		0.0921064	37.2977
1.7871	53.8875	37.6785	37.8129	25.859	27.0786	27.8913	17.897	27.53	35.6011	47.3067	44.0145	46.7488	40.088	29.998	20.6913	17.57	22.0147	25.1141	29.8991	32.6495	25.0713	41.823	48.8213	36.027	34.9	45.7365	63.3943	63.2587		0.098683	35.9415
1.9063	44.5789	32.7938	32.0657	26.9224	24.0074	27.4029	15.4375	24.9303	31.807	42.1369	41.93	43.271	40.7404	31.4137	20.4691	16.106	22.5767	24.2391	26.6324	31.56	20.3156	43.1878	44.3917	33.6334	32.7752	45.2521	63.0203	61.9137		0.105265	33.7683
2.0254	38.1644	29.0178	23.723	24.8576	21.1722	20.8913	13.613	20.975	29.0455	42.0969	42.2539	43.9747	36.9334	29.5189	21.1947	16.6029	22.7133	20.4562	24.4554	26.6379	18.7489	40.5133	43.7829	32.5149	32.8404	45.9723	55.7663	58.6268		0.111842	31.3237
2.1445	31.6216	23.3962	18.0592	19.488	19.7665	19.1941	11.9173	17.3943	26.0811	44.8211	43.425	41.948	38.3686	29.8651	17.9865	16.419	24.2688	20.4533	23.0006	22.5077	17.3372	39.2061	39.3569	31.226	30.9289	42.6471	55.9084	52.6527		0.118419	29.2588
2.2637	27.5291	21.6816	13.8756	20.7033	17.2071	17.1161	11.022	15.3756	24.2221	42.8861	40.4559	42.3883	33.7252	28.6796	18.7979	18.3211	21.9224	18.2118	20.3105	20.9794	16.712	35.7358	37.6547	24.2918	28.7632	38.8028	50.6821	52.4566		0.125001	27.1611
2.3828	24.9756	17.9055	10.1655	15.7135	15.5441	14.5647	9.4357	12.549	20.2087	35.4015	36.6014	41.3055	34.3883	30.2702	18.628	17.5844	21.8296	16.0195	18.1522	19.9526	14.1901	33.3432	30.2541	26.0506	29.0954	38.4119	48.1202	49.4118		0.131577	25.0026
2.502	19.5844	15.4981	10.7804	12.5326	11.2605	13.0254	8.6046	12.8121	17.4002	32.6455	36.1518	36.245	31.2502	31.5015	17.0744	16.1582	20.8107	14.2682	16.9467	16.0306	13.527	31.7942	30.364	24.3962	25.8507	36.534	42.643	43.099		0.13816	22.8139
2.6211	17.9653	13.5519	10.2779	10.5321	10.6696	12.688	6.7479	12.6673	16.6529	31.1084	34.1968	35.0976	31.7585	28.8137	15.2787	18.3332	20.6333	10.3586	15.1891	16.3115	12.7566	27.6926	28.8459	18.0756	23.6934	32.5287	37.1823	42.3842		0.144736	21.1426
2.7402	15.9624	12.3565	7.716	10.2131	8.5602	10.5255	6.3453	11.3452	13.5748	26.0576	29.5289	32.0769	29.1792	25.5841	14.2594	16.2718	20.8382	10.1151	14.0302	13.2165	11.8524	22.9514	25.652	16.2119	23.3587	30.21	33.173	33.2435		0.151313	18.7289
2.8594	14.4641	10.3445	7.0349	8.9897	6.0819	10.3045	6.0796	9.9493	12.0839	25.3926	26.8366	31.418	29.3703	24.88	12.2948	17.1208	16.4281	8.017	13.6699	12.8953	10.7534	18.4087	20.1372	12.348	21.2609	28.8619	28.8794	29.7307		0.157895	16.9299
2.9785	12.6301	10.0851	7.4037	8.4507	4.6138	7.8348	5.4658	8.0714	9.3643	24.7478	27.7696	30.7607	27.6683	21.9351	11.9895	16.1751	16.3314	6.5881	12.9243	13.724	11.1021	15.6352	18.8345	8.8271	16.996	23.0687	22.0048	22.8033		0.164472	15.1359
3.0977	10.4043	8.8734	6.3326	7.1062	4.891	7.8066	4.9205	8.8052	9.3207	19.356	23.493	29.0459	25.2262	21.6831	9.7031	16.8947	14.7686	5.6507	12.1636	11.4377	10.9462	11.8665	14.4508	8.6647	15.8924	21.4339	19.2557	19.9165		0.171054	13.5825
3.2168	10.1743	6.8429	6.3923	5.9364	5.3935	5.4567	4.9323	7.6722	5.9058	17.4833	23.0541	24.7114	21.315	18.2785	9.567	17.1097	9.9438	4.5416	9.8539	11.0301	9.556	9.4304	11.6051	7.1264	14.3325	20.1474	17.6937	17.0854		0.177631	11.8776
3.336	8.6164	6.8544	6.7072	4.8899	3.3462	5.3821	4.2793	6.9482	5.9502	15.5273	23.1093	25.8789	20.2798	16.9109	8.835	16.778	8.8755	3.511	8.9114	11.0186	7.6586	6.7595	11.08	6.3811	12.68	18.0227	16.1342	13.0619		0.184213	10.871
3.4551	7.8871	5.7627	6.154	4.799	3.8889	4.5073	3.631	4.8714	5.3134	14.3855	20.7761	21.4839	19.143	13.9531	7.4205	18.3818	9.2876	3.5816	9.0661	9.4308	7.2273	4.552	9.4072	5.5527	9.8048	17.0656	13.8793	10.2755		0.190789	9.69604
3.5742	5.2143	4.9757	5.5634	4.475	2.9126	4.1356	3.4931	5.3682	4.9548	13.0738	20.8768	20.9301	15.8102	11.6218	6.241	17.5557	7.4522	3.3303	8.1541	8.9577	7.0849	4.4699	8.6035	3.7734	8.3879	14.6223	12.1528	9.2339		0.197366	8.69375
3.6934	5.0146	4.0844	5.159	4.9924	2.7969	4.053	4.0278	5.7973	3.4102	12.3024	18.796	17.9047	14.1622	8.043	5.1034	16.2531	6.5525	3.6177	6.9898	8.3538	5.6349	5.1031	7.8002	4.2349	6.6607	13.1496	11.6419	7.6328		0.203948	7.83115
3.8125	5.4034	4.4035	4.7477	4.3019	3.715	3.2554	3.6716	5.638	3.5143	13.8025	16.4539	16.6668	12.9782	7.7736	5.7274	17.6813	6.1514	3.2848	5.4341	7.4862	6.2127	4.2636	6.5988	3.3584	7.1241	11.5418	11.4146	6.5247		0.210525	7.46892
3.9317	4.053	4.9969	5.4949	3.987	2.91	3.7179	3.2061	5.5596	3.7033	11.4548	15.821	13.8753	9.1949	8.0624	5.6379	13.4411	6.1842	3.0125	4.7557	7.1544	4.8184	4.9714	6.5608	3.2141	5.7804	13.0406	12.2552	7.0352		0.217107	6.92496
4.0508	3.2105	3.9327	5.631	3.7334	3.6165	3.0866	2.8316	5.0357	3.9129	12.5017	16.4677	15.138	9.138	6.7953	5.3231	14.226	6.6141	2.5616	5.0463	6.6263	5.0211	4.2412	5.8296	3.6121	4.3777	8.6237	11.4608	5.8402		0.223684	6.58698
4.1699	3.0416	3.2722	5.1885	4.2205	2.8017	2.8297	3.3154	3.7399	3.2659	10.7612	15.9416	12.0076	6.0218	5.8295	4.3139	12.2007	6.5837	2.087	4.2852	6.0907	4.0006	4.3623	4.8223	4.1606	4.8794	9.5952	10.6184	6.9133		0.23026	5.96966
4.2891	3.2506	4.2626	4.8293	4.0355	2.5932	2.5476	3.3981	3.3974	3.1205	10.5391	16.2289	9.1458	5.7896	4.7633	4.592	9.9147	4.9614	3.3792	3.7833	5.0775	4.5801	3.9874	5.5497	3.0045	5.363	8.1558	9.7376	6.8591		0.236843	5.60167
4.4082	2.4936	2.984	5.8894	4.2941	2.6875	2.4269	2.2698	3.0051	3.2714	12.3229	13.8638	8.1605	4.2557	5.911	4.7576	8.6693	5.2356	2.9883	4.1266	4.999	4.6645	3.967	5.9068	2.4588	3.8555	7.8794	8.7859	4.1759		0.243419	5.22521
4.5274	2.962	3.2923	4.7175	3.2621	2.6506	2.677	2.8579	3.7662	3.7331	9.9077	10.7826	7.011	4.6819	5.3986	3.5822	6.5792	5.645	3.6815	3.4528	4.3991	3.215	3.6874	4.8569	3.627	3.3506	6.6925	9.817	4.874		0.250001	4.82717
4.6465	2.5862	2.5042	5.858	4.0879	2.3319	2.9276	2.5157	3.5014	3.6975	8.794	9.6332	5.4599	4.3056	5.7331	3.3187	5.6311	4.5752	3.1822	3.4482	4.2756	3.3709	3.774	6.2714	2.2432	3.3657	5.1567	8.4977	5.8901		0.256578	4.53346
4.7657	2.2686	2.1465	5.5262	4.0133	2.0548	2.5206	1.9167	3.0536	2.7015	8.029	8.6304	4.9777	3.8278	4.7722	3.8635	5.0644	3.6742	2.8391	3.9207	4.8588	3.2299	3.5162	5.0798	2.8799	3.8837	5.3165	9.7041	5.3392		0.26316	4.27175
4.8848	2.739	3.3962	4.7716	2.856	2.7954	2.4001	2.5149	2.2953	3.5042	6.603	6.8215	4.7962	3.1226	3.6294	3.9798	3.5728	3.7753	2.7704	2.6434	4.3011	3.5769	4.0926	4.226	3.0471	3.5423	5.0215	6.7244	5.7596		0.269737	3.90281
5.0039	2.7676	3.6866	5.1085	4.0164	2.0768	2.0915	2.8813	2.7181	4.1334	6.5411	6.3545	6.1555	3.5949	4.5996	5.3572	3.5846	4.3645	2.4181	2.6819	3.1059	3.1243	3.7506	4.9802	3.3762	2.5047	5.2936	7.2114	5.0352		0.276314	4.05408
5.1231	2.9459	3.7364	5.6715	3.686	1.9551	2.2606	2.5181	2.0931	3.5951	5.8554	5.4818	5.0246	3.1221	4.325	4.7262	3.9744	4.4367	2.363	2.7994	3.4566	2.4982	4.271	4.1519	3.4155	2.7249	4.2576	8.5491	5.3011		0.282896	3.89987
5.2422	1.9398	2.6615	5.667	3.1342	2.6718	2.2034	2.0085	2.5322	2.7724	5.988	5.921	6.4905	2.2525	4.278	4.3566	3.4255	3.1258	2.3607	3.0162	2.6534	2.1886	3.2686	4.9929	3.0724	2.7985	4.4466	6.814	5.0644		0.289472	3.64661
5.3614	2.1597	2.6646	4.8009	3.2052	2.2759	1.976	2.3929	2.0727	4.1176	6.6824	5.0125	5.6124	3.2604	4.6412	4.5322	2.5868	3.9049	2.7567	2.464	2.5934	2.9969	3.7	4.4598	3.407	2.5647	4.9693	7.304	4.9434		0.296055	3.71634
5.4805	2.7351	2.9914	4.9586	3.377	2.5471	2.2717	2.6495	2.6642	3.9244	6.0888	5.6162	4.3697	3.6595	4.698	3.7601	2.6758	3.1443	2.4156	2.4394	2.4919	2.8835	3.244	5.0408	4.2984	3.2614	3.8988	7.0013	5.6954		0.302631	3.74293
5.5996	2.0544	3.4802	5.4359	3.402	2.145	2.6218	2.1645	2.0979	4.3257	6.0839	5.3299	4.3803	2.5983	4.3326	4.2684	2.5877	3.4483	2.4541	2.0666	3.3889	2.482	3.9823	5.3124	2.9984	3.2415	5.8693	6.6112	5.0236		0.309208	3.72097
5.7188	2.2808	3.5442	5.1479	3.3679	2.4009	2.3177	2.6993	2.6946	3.4953	5.2334	4.0806	4.0593	3.184	3.9694	3.9399	2.9914	2.9487	1.9868	1.7525	2.3413	2.7283	4.4687	4.9579	3.5945	2.467	3.6011	7.6033	4.6419		0.31579	3.51781
5.8379	2.8028	2.8331	4.2582	3.0975	2.9899	2.2255	2.8364	2.701	4.4986	6.9559	3.3272	3.4889	2.8254	3.7181	4.0312	3.1176	2.7218	1.6317	1.6639	2.8672	2.3499	4.2035	4.903	3.5153	2.1378	2.8212	6.1687	4.3568		0.322367	3.39458
5.9571	2.1547	2.1799	4.526	2.8966	2.5624	1.9971	1.7827	2.2646	3.8298	6.3372	3.4966	3.2128	2.6383	4.4603	4.7822	2.8359	2.7254	2.0925	1.6054	2.7737	2.2842	4.7581	4.9527	3.5018	2.0956	4.1515	6.6708	4.9717		0.328949	3.37645
6.0762	2.1323	3.1614	5.3165	3.007	3.391	2.9278	2.8896	1.7212	4.1494	6.3632	3.0818	3.1533	2.9934	4.1069	4.2472	3.0188	3.0875	2.0881	1.8882	2.6656	2.9408	2.7938	4.272	3.9595	2.9777	3.0882	7.11	5.1228		0.335526	3.48768
6.1953	2.5788	3.3026	4.4656	2.6917	2.1864	2.411	1.754	2.6329	4.1116	5.9145	2.9048	2.8346	2.293	4.1267	3.9671	3.326	3.1564	2.4852	3.3119	3.123	3.3651	4.1591	4.3924	3.6274	2.74	3.8782	6.3857	4.143		0.342102	3.43817
6.3145	2.4109	3.2787	5.5981	2.9159	2.4264	2.2882	2.1575	2.356	4.4571	7.0108	2.2742	2.4245	2.3668	3.4377	4.6948	2.5725	3.0745	2.0982	3.1038	1.9607	1.9751	4.622	5.2624	3.1477	2.559	4.9146	5.2549	3.4487		0.348684	3.36042
6.4336	1.9862	3.2353	5.6657	3.2915	2.5037	1.7147	2.0711	2.0164	5.8704	5.9264	3.9649	2.0609	3.3089	3.1307	5.3778	3.5533	2.6182	2.304	2.1912	1.8536	3.1017	4.6832	4.9315	3.1941	3.1027	3.3831	7.6798	3.5655		0.355261	3.51023
6.5528	2.1051	3.0352	4.6953	3.2102	2.9551	2.3673	2.4127	3.1374	5.2636	7.0158	3.1302	3.2836	2.1122	4.0898	5.0146	3.4504	2.521	2.799	2.3176	2.1591	2.5302	4.1657	4.6942	3.606	2.8088	3.6685	6.0972	4.5137		0.361843	3.54141
6.6719	1.485	3.3918	5.6862	2.7014	2.3127	2.4257	2.8527	2.9258	6.6879	8.2068	2.6669	1.9598	2.492	3.5743	5.6432	2.9221	2.7194	1.9987	1.7346	2.1542	2.4219	3.7922	4.8496	2.9282	2.9276	4.6728	7.7789	3.7397		0.36842	3.559
6.7911	2.317	3.2821	7.1929	3.0604	2.7611	1.9061	2.9347	2.3635	5.4135	9.4241	2.8289	2.6435	3.1231	3.2844	5.4859	3.4305	2.4237	2.0062	1.7965	2.2835	2.5874	4.0473	5.1802	3.3883	2.4303	4.1495	8.4098	3.7652		0.375002	3.71141
6.9102	2.162	2.6094	7.2722	3.3048	3.1918	2.5825	2.1844	2.4682	7.239	11.8544	3.0978	2.2302	2.5561	3.8869	6.0276	3.5701	2.9542	1.8767	1.6816	2.2393	2.8765	3.5082	4.3143	3.9366	2.4306	3.9415	7.5466	3.8761		0.381579	3.83641
7.0293	3.089	2.8473	7.1362	3.4734	2.5003	3.1316	1.7836	2.2609	5.3626	13.9841	2.5411	1.9512	3.4026	3.3961	4.9708	4.1149	3.0673	1.7712	1.5856	1.8136	2.4746	3.3577	4.1865	3.5628	2.595	4.0127	7.2961	4.2304		0.388155	3.78211
7.1485	2.0525	3.9386	8.1267	3.3575	2.3804	3.0473	2.3052	2.637	6.8302	13.0741	3.0531	2.2378	2.8195	2.8949	5.352	3.9517	3.1714	1.6619	1.8541	2.035	2.29	3.8522	5.3454	3.9192	2.6861	3.796	7.612	4.1984		0.394738	3.94572
7.2676	2.2926	3.9764	10.3569	2.7647	2.5892	2.5005	2.4921	2.8291	8.3028	14.3939	2.894	2.6209	2.2432	3.6807	5.0051	4.1998	3.1775	2.1314	2.161	2.0674	2.015	3.864	4.3943	3.3603	2.7076	3.7668	7.7992	4.247		0.401314	4.10119
7.3868	1.9484	4.0998	10.1241	3.6195	3.0085	2.1973	2.6762	2.5636	9.0383	15.8368	2.5863	2.4525	2.1154	3.7787	5.724	4.0485	4.0177	2.4554	2.339	2.6535	2.2459	3.411	5.3296	3.5944	2.5051	4.296	9.3132	4.4181		0.407896	4.37131
7.5059	2.7966	3.8652	10.8139	3.5887	2.5633	2.26	2.3155	1.9248	8.4272	15.6231	2.9535	3.0133	2.3812	4.4349	5.4988	3.8618	3.1201	2.5394	2.3622	2.6096	2.5484	3.9206	4.8027	3.4891	3.3402	4.3315	8.5047	3.3961		0.414473	4.33166
7.625	1.8487	4.1107	13.0982	3.9962	3.421	2.2361	3.22	2.68	8.4946	14.3775	3.2095	2.7097	2.2077	3.7936	5.1071	3.9728	2.9887	1.6008	2.1096	2.222	1.6735	3.171	4.2151	3.0862	2.3559	3.3025	7.9306	4.0675		0.42105	4.18596
7.7442	2.4255	4.0856	14.1526	3.7462	2.8805	2.5719	2.5845	2.378	9.936	13.2672	2.8169	2.0719	2.554	3.4775	6.4095	4.1273	2.803	2.0806	1.7767	2.4313	3.1087	3.6169	5.3123	3.2862	2.4037	4.3871	9.3703	3.6208		0.427632	4.41724
7.8633	2.239	3.8695	15.8777	3.0172	2.5835	3.0169	2.9692	2.4279	11.7387	12.6714	2.2559	2.5827	2.5044	3.268	6.891	5.2323	2.7875	1.6075	1.969	2.7179	1.7094	3.0653	4.8376	3.3116	3.0293	5.2127	8.975	3.7657		0.434209	4.50478
7.9825	2.5124	3.3648	14.5168	3.7966	3.1534	2.5376	2.8624	2.7262	11.3217	11.4291	2.408	2.1838	2.3375	4.2455	6.8905	5.7003	2.7271	2.3032	1.9058	2.0803	2.2598	3.6638	7.0052	3.0814	2.8034	4.1364	8.3268	4.553		0.440791	4.52974
8.1016	2.1226	4.3975	16.3693	4.5487	2.8131	2.966	2.6099	2.1897	10.5599	13.1422	2.6436	2.2354	2.1917	4.3275	6.847	4.7949	2.9255	1.8741	2.1494	2.126	2.4916	3.8632	7.6115	2.861	2.5209	5.079	7.7567	4.7546		0.447367	4.67045
8.2207	2.5299	4.2654	16.6477	4.801	2.3537	3.5323	3.0559	3.1072	11.2651	12.5247	2.699	2.6505	2.472	5.5398	6.7413	4.6054	2.5315	1.7528	2.4081	2.1414	2.9697	4.6735	6.3643	2.8916	2.4308	6.2203	7.0229	3.1399		0.453944	4.76206
8.3399	2.5758	5.663	18.8003	4.5241	2.6402	2.8382	2.5368	2.1985	11.6992	13.308	2.7003	2.4212	2.3835	5.3787	5.3319	5.9366	2.5923	2.433	2.528	2.4392	3.0243	4.8779	6.692	2.8618	2.9172	6.0638	7.7789	3.42		0.460526	4.94874
8.459	2.837	4.4133	22.1019	4.3256	3.2349	3.1664	2.6051	2.9492	11.3509	14.3818	2.8316	1.9132	2.2347	5.2472	5.8336	6.6081	2.8282	2.3957	2.4144	2.427	3.0794	5.1811	7.4566	2.8302	2.8096	5.471	7.716	3.0954		0.467103	5.13354
8.5782	2.7736	4.7082	22.0627	5.7239	2.2558	3.1963	2.7201	2.6137	12.4096	16.2475	2.1226	1.7118	2.8772	4.0296	5.5324	6.083	2.1834	1.8387	2.0048	2.4683	2.8615	4.6755	8.1499	2.1418	2.9133	6.1528	8.4722	4.2032		0.473685	5.18334
8.6973	1.9388	3.8154	23.7709	3.9223	2.3958	2.5453	3.201	3.0135	11.0138	16.5765	2.7862	2.3504	2.7052	4.7245	6.3293	6.0969	2.3999	2.895	2.1208	2.3746	3.1163	5.0274	9.5739	2.6635	3.6849	7.4199	7.9704	3.9539		0.480262	5.37094
8.8165	2.6704	3.4998	25.0797	4.7569	3.218	3.1751	2.291	2.8243	10.8762	17.393	2.9257	2.5089	2.2315	4.1966	5.7339	6.27	2.8668	2.3861	2.702	1.9768	3.4538	4.5779	8.7127	2.5461	3.136	7.0666	8.8454	3.6574		0.486844	5.41352
8.9356	2.6661	4.7043	26.0839	5.1023	3.4349	2.7223	2.7807	3.221	11.0402	15.1827	2.609	2.7837	2.354	4.0591	5.5889	4.6628	2.4859	2.5138	2.6263	2.1306	3.1543	5.3457	8.415	3.3517	2.3606	8.2283	8.9957	4.4112		0.493421	5.46482
9.0547	3.2036	4.6964	24.2528	6.5119	3.2227	2.8329	2.7423	2.9747	9.7944	16.4166	2.4452	1.7069	2.1864	3.6903	5.6865	6.9552	3.3611	2.281	2.4842	2.6791	3.1001	5.659	10.543	2.51	2.9052	8.1368	8.8742	4.5585		0.499997	5.58611
9.1739	2.5254	4.1357	25.2566	5.7859	4.078	2.3936	2.5633	2.3742	10.8475	13.6437	2.7183	3.1045	2.8254	4.8761	5.2676	6.0836	2.9347	2.0554	1.9979	1.9525	3.1104	6.5561	10.9195	2.7515	2.1178	9.0106	8.3024	5.1549		0.506579	5.54797
9.293	2.6806	4.6862	22.7495	6.8262	4.2881	3.1769	2.3758	2.7474	9.8578	14.4348	3.2001	3.0025	3.0907	4.3107	5.1866	6.6564	2.7935	2.0132	2.9759	2.1103	2.556	5.8997	9.3808	3.5087	2.8536	7.7398	9.9769	5.0887		0.513156	5.57741
9.4122	2.4241	4.577	20.7279	6.5882	4.0228	3.2505	2.9964	2.6506	11.8825	13.3514	4.5586	2.4364	2.7429	4.6654	5.4849	5.9744	3.347	2.9771	2.4054	2.6807	2.4433	6.5793	9.7588	3.3312	3.0145	7.6482	10.6065	4.5383		0.519738	5.63087
9.5313	2.232	4.0635	16.01	7.8213	4.7468	2.7719	2.6004	3.6686	11.1575	11.6491	3.4246	2.6061	2.6723	3.9928	5.0862	7.8422	2.279	2.1333	2.0593	2.7378	3.7455	7.5151	8.9116	3.0784	3.2577	8.3786	11.1999	6.1409		0.526315	5.49223
9.6504	2.6233	4.6156	16.5218	6.3812	4.975	3.375	2.5556	3.3195	10.1866	11.5356	3.2752	2.4835	2.8463	4.5412	5.8779	6.9612	2.453	2.6572	2.222	2.6447	2.5869	7.9303	9.3065	3.2669	3.861	9.1309	11.0001	5.359		0.532892	5.51761
9.7696	2.2757	5.0891	15.558	6.8442	3.6684	3.1345	2.8825	2.5408	10.7051	11.4459	3.7171	2.6196	2.4537	5.3578	7.0164	8.3977	2.2996	2.9253	2.2023	1.6414	2.679	6.5176	9.858	2.7551	2.5688	7.6351	12.0597	7.1236		0.539474	5.499
9.8887	2.0557	5.2139	15.9128	5.155	4.3585	2.869	2.8976	3.5605	9.4371	12.3685	3.6182	2.6056	3.6132	5.2931	5.9485	6.5028	3.0298	2.2008	2.2498	3.0543	3.0176	8.6928	10.5923	3.1121	2.2318	7.428	11.2508	7.8355		0.54605	5.5752
10.0079	2.7041	4.5684	15.4003	5.874	4.2192	3.7079	3.6614	3.4304	9.1818	13.4869	3.8599	2.4117	2.8937	5.6903	5.8514	8.8974	3.5215	2.4787	2.3596	2.7385	3.3121	7.5249	10.0729	3.8247	2.9336	8.6857	12.9436	8.8517		0.552633	5.89594
10.127	2.6462	4.5848	15.8659	5.7489	4.1472	3.2779	3.3162	3.2436	10.0823	12.1648	4.436	2.6492	3.2393	5.9176	6.5765	7.7258	3.3459	2.312	2.5819	1.6319	4.1908	8.4822	10.6436	3.0409	2.3824	8.2394	12.6263	10.1978		0.559209	5.90347
10.2462	2.0856	4.9093	17.1878	5.2456	3.34	3.9803	3.4426	3.0536	8.3234	11.838	5.2736	3.2101	3.807	5.4349	5.645	8.2933	3.1378	2.1923	3.2634	2.3106	4.3808	10	10.0329	3.2558	3.0714	7.7406	13.0754	10.9515		0.565791	6.01724
10.3653	3.1262	5.7267	16.273	5.1106	3.6375	3.2394	3.2198	2.7087	8.9288	13.1474	5.0796	2.6899	4.3014	5.3132	5.7232	9.3304	3.6395	2.2859	2.4521	2.2889	3.4537	11.1718	8.9904	3.3914	3.619	7.3776	14.5172	8.079		0.572368	6.02937
10.4844	2.8416	5.6741	20.9407	5.6345	3.4495	2.9357	3.2366	3.1872	8.1538	13.6487	4.5886	3.1195	4.773	5.1748	5.809	9.1234	3.062	2.7593	3.0074	1.6855	4.4865	10.2798	8.5835	3.2886	3.7135	9.8323	14.6472	9.7141		0.578945	6.33394
10.6036	2.8797	5.2634	18.0316	5.4121	3.7637	3.4679	2.7599	2.8866	8.5984	13.2477	5.3789	2.3824	4.257	6.0983	5.6625	9.0859	3.4911	3.1684	2.7713	2.0197	3.9527	8.5542	8.2099	4.0665	4.476	10.381	14.8444	10.4414		0.585527	6.26974
10.7227	2.8908	6.7035	18.1095	6.0463	4.5319	3.5272	2.3458	2.6518	9.4522	16.1249	6.126	2.8888	5.2431	5.1041	5.9496	9.0983	3.8615	2.2471	2.1644	2.1526	4.2082	7.6375	10.0815	2.6718	4.2008	8.0112	15.1826	9.0859		0.592104	6.36782
10.8419	2.9457	5.9263	15.9022	5.2249	3.8125	3.4172	3.1808	3.5745	7.5829	13.4422	6.6263	2.8628	3.762	5.6077	4.7679	10.5818	3.1778	3.4004	3.2119	2.413	4.0678	6.6165	9.4164	3.7468	4.0888	10.345	15.2808	9.9159		0.598686	6.24639
10.961	2.8059	8.3799	13.9603	4.1392	3.366	3.1169	3.1599	3.2392	8.3879	13.7342	7.7656	2.3446	5.1365	5.1115	4.5787	10.4107	2.7578	3.1383	2.2826	2.4857	3.4597	6.9265	8.4553	4.2187	3.9852	8.6934	14.6126	12.5841		0.605262	6.18703
11.0801	3.0506	8.0694	15.3399	6.0221	3.4365	3.2371	3.406	3.4518	9.4585	15.8708	8.5279	4.1127	4.532	4.8203	5.1169	8.1914	3.0038	2.6986	4.051	1.8888	3.2846	7.0802	7.8375	3.2591	3.4957	9.6174	15.8703	14.6148		0.611839	6.54806
11.1993	3.1643	9.1804	15.5705	4.5397	3.7756	2.7155	3.3643	2.8765	8.5295	20.2481	7.2747	4.1618	5.0027	5.8654	5.7904	9.786	2.9004	2.9188	3.1439	2.5222	4.1048	5.7473	10.8586	3.7398	3.8992	9.2185	13.1325	16.2994		0.618421	6.79753
11.3184	2.9218	9.0004	14.7775	4.3903	4.0891	2.3409	3.0491	2.5421	8.8048	19.3831	8.5533	5.1095	7.2149	5.1067	5.3197	9.5704	3.3136	2.7554	2.6584	2.5341	5.0638	5.8449	8.7496	2.9071	4.0929	10.777	11.7226	15.1029		0.624998	6.70342
11.4376	3.1911	8.0264	13.0708	5.116	3.2383	3.5043	3.4806	3.6436	9.0667	18.3485	8.2371	5.658	6.2592	5.7021	4.8807	8.4277	3.5146	3.3355	3.6256	2.3943	4.4147	5.5589	8.0064	4.1333	3.4319	10.6004	11.2447	16.8225		0.63158	6.67621
11.5567	2.6791	8.4416	12.2211	4.6313	3.6977	2.5555	4.0475	4.2732	10.9836	19.8496	8.2001	5.5101	5.5492	4.2647	4.8202	7.9918	3.1375	3.496	2.8072	2.5981	4.4975	5.2445	9.1874	2.9533	3.6189	9.6402	13.4265	17.5895		0.638157	6.71117
11.6758	2.9529	6.6718	12.3276	4.6702	3.6582	2.4745	2.5872	2.9053	9.4468	20.7706	8.5704	6.7868	5.5797	5.5429	5.0658	8.0486	3.1308	3.428	3.6335	3.2422	4.4719	5.386	8.7067	3.2085	3.9758	13.2685	13.1934	17.1536		0.644733	6.81636
11.795	2.9481	6.5923	11.7753	5.7226	3.8552	3.0906	2.9369	3.3178	9.3849	19.7068	8.2208	6.0723	5.3416	5.6578	4.2367	10.2752	3.0702	3.6997	3.2732	3.4994	4.3603	5.7209	7.8355	4.0304	4.5371	12.0291	13.0733	19.8218		0.651316	6.93164
11.9141	2.9968	5.6044	10.7318	4.9257	4.5975	2.95	2.9907	4.0884	11.3138	21.454	7.497	5.2849	6.3066	4.8691	3.9194	9.374	2.7174	2.7308	2.9587	2.8361	5.4437	4.3575	8.3812	3.7724	3.84	14.9716	12.0754	20.3138		0.657892	6.90367
12.0333	3.1213	5.325	10.6794	5.4	4.2049	3.2999	3.7534	3.8556	8.676	20.753	7.2541	5.8136	5.779	5.7914	3.9488	11.458	2.9645	3.7315	3.2858	2.3148	5.069	5.3222	7.791	3.0921	3.6855	14.8521	11.6991	21.0888		0.664474	6.92892
12.1524	3.1666	5.3746	9.5173	4.415	4.4232	2.9753	2.829	3.5669	9.1418	18.1105	5.8026	4.9681	5.9671	4.9174	4.8286	11.0031	2.3696	3.5965	4.6263	3.1501	4.4205	6.3176	6.3524	3.6412	4.1231	15.1001	11.5654	20.2687		0.671051	6.66209
12.2716	3.0081	5.9546	11.7134	5.1136	4.2812	2.6773	3.7089	3.661	8.6076	21.1735	7.3926	4.0971	5.3562	4.9479	5.031	11.3298	2.7496	4.0185	3.33	2.9815	4.4172	6.4965	6.696	3.0403	4.3945	18.1167	10.864	19.504		0.677633	6.95224
12.3907	2.8071	6.004	10.9677	4.4403	4.6599	3.4976	3.7861	3.9266	9.6693	18.7362	7.6412	4.533	5.7245	5.6512	4.9855	12.0325	4.8875	3.5523	3.7242	2.747	4.1242	7.3438	8.0899	3.3222	5.1887	17.8334	10.9343	18.3825		0.68421	7.11403
12.5098	3.257	5.6859	12.628	4.63	4.6983	3.3177	3.3182	4.5292	9.5608	17.9551	7.9616	5.7407	5.4833	5.6417	5.4469	11.5642	3.7732	3.5171	3.9988	2.4371	4.5141	6.4258	6.472	4.266	4.3698	18.4063	11.4224	16.9934		0.690787	7.07195
12.629	3.1123	6.5369	11.4479	4.9829	3.4501	3.7793	3.2934	4.3517	9.9452	16.5219	7.2712	5.1482	6.318	6.0409	4.4639	11.5789	2.9281	3.0312	3.6462	2.904	4.1189	5.7396	8.9158	4.1824	4.9632	18.6223	10.5404	12.9324		0.697369	6.81311
12.7481	2.3734	6.13	12.1231	5.8547	3.459	3.9318	2.688	4.7382	11.1505	15.052	6.2918	5.4549	7.3103	5.3811	3.8993	11.1512	3.5898	4.1988	3.5245	3.2046	5.1048	6.3426	7.5302	3.6917	5.0124	19.0336	9.7752	14.4661		0.703945	6.8737
12.8673	4.0097	7.8879	11.9716	6.2852	4.2573	3.8156	3.2358	4.0234	9.9622	13.587	7.7981	6.3941	5.9847	4.6595	5.439	12.7839	3.9191	2.9777	2.6977	4.1667	5.0312	5.8235	8.1305	3.9781	5.515	21.3356	10.2928	15.3187		0.710528	7.18863
12.9864	2.8306	6.9392	13.1883	6.1181	4.3302	3.7475	3.6678	4.0203	9.6797	13.0999	7.6873	5.78	6.4649	5.0809	3.9137	13.1015	4.0571	3.7801	3.3459	3.2085	5.0706	6.1187	7.412	3.969	5.3127	21.4774	11.1144	13.057		0.717104	7.05619
13.1055	2.9524	7.5927	13.9107	5.8493	4.8797	4.1583	2.9844	4.8819	9.8663	13.4672	6.8926	7.4849	5.752	4.6746	4.6259	12.8207	4.1569	3.8743	4.5174	3.2115	5.4688	6.3538	6.9918	2.711	5.2328	23.2922	10.0053	13.045		0.723681	7.20194
13.2247	2.5144	6.5879	15.207	6.412	3.6342	3.4217	3.8531	3.661	9.5227	14.7496	7.7373	9.3648	6.3043	3.9574	5.4382	13.918	4.8063	3.4325	3.693	4.2899	4.4617	5.4482	8.0253	3.0942	5.1332	19.9736	11.9251	11.2052		0.730263	7.20614
13.3438	2.5264	6.4359	15.0398	7.1352	3.4041	3.9787	3.3653	4.925	9.7606	13.8883	8.2804	11.0623	6.7611	3.865	4.4491	14.4577	4.4122	4.0293	3.571	4.0683	6.2154	6.9553	6.4823	4.6217	4.5281	21.7324	12.4665	10.1054		0.73684	7.44724
13.463	3.1358	7.7959	14.6093	6.7246	3.7481	4.5126	3.9335	4.326	9.0675	14.037	9.408	11.353	5.5154	4.4843	4.7154	15.195	4.3261	3.2605	4.1435	3.4363	5.8589	6.28	7.1049	3.9598	4.081	21.0647	12.8613	9.0728		0.743422	7.42897
13.5821	3.0462	6.94	13.8219	6.5812	4.0656	3.6639	3.1064	4.7522	10.0286	16.1637	12.1789	11.5924	5.1764	3.6917	4.4133	14.7709	4.7115	3.8622	3.4654	3.2672	5.7662	5.4864	7.2258	3.0107	3.8454	19.3842	12.911	9.2307		0.749999	7.36286
13.7012	3.1689	9.89	14.9901	7.9875	3.4109	4.0055	3.0297	3.6637	11.4899	13.2966	12.3779	9.728	4.6445	5.0239	5.0418	15.8316	3.7296	3.8511	4.5685	3.6474	6.6507	5.6192	6.9914	3.9878	3.4872	20.2093	13.0701	9.7789		0.756575	7.61327
13.8204	2.9681	11.1014	14.8011	7.0395	4.1157	4.4572	3.4882	4.4393	13.8101	15.3716	15.9897	8.5234	5.5014	5.6491	5.1413	16.543	4.8699	2.9349	4.5199	3.8481	6.2208	5.5543	7.5817	3.8274	3.4039	18.9569	13.1018	9.5725		0.763157	7.97615
13.9395	2.9767	14.8926	16.6702	9.3047	3.6119	3.2016	3.8427	4.2812	10.957	14.1352	15.1313	7.9705	5.0635	5.4149	4.4441	14.8169	5.6024	4.0309	4.3113	4.1777	6.5727	6.1397	8.0457	4.2092	3.7397	17.6683	13.5914	9.4276		0.769734	8.00827
14.0587	2.8871	15.9488	16.5457	8.9206	3.6847	4.1437	4.1766	4.4587	11.4413	15.8323	17.8772	7.0338	5.0732	4.306	4.5297	16.1294	5.3742	2.9325	5.064	4.1019	7.5076	5.4005	8.0255	3.8524	3.8783	19.7615	14.0143	8.7247		0.776316	8.27236
14.1778	2.6378	16.2205	15.495	9.6354	3.1371	4.1523	3.1006	4.0745	11.0367	15.5998	18.2204	5.5038	4.7836	4.6418	5.0064	17.482	4.6682	3.3396	4.5057	3.5726	7.3511	6.5482	7.06	3.6687	4.1894	18.1276	13.8867	7.858		0.782893	8.0537
14.297	3.5476	16.866	16.0381	9.9006	4.2304	4.4245	3.5142	4.606	10.0816	18.5014	17.1167	5.1151	4.6101	4.2258	5.6251	17.9859	6.2571	3.4293	4.7122	3.7251	8.2781	5.8319	9.2178	4.3968	3.6405	18.7871	15.6071	7.8899		0.789475	8.50579
14.4161	3.7036	16.5065	17.6614	9.6642	3.8856	3.2422	3.7327	4.2111	9.2732	18.6693	16.7897	6.866	4.0725	3.5369	6.0387	17.4988	5.6083	3.6852	5.0132	4.0478	6.674	6.5756	8.6851	3.6261	3.9352	14.6192	14.4077	7.1482		0.796052	8.19207
14.5352	3.6849	17.1085	17.1811	11.6652	4.0554	4.5208	4.2313	4.1503	9.8448	20.6278	16.4227	6.3851	3.5095	4.9479	5.5031	20.0655	5.7995	4.3591	4.8629	4.312	9.8277	6.4339	8.1516	3.6705	3.6517	13.9121	16.3428	7.61		0.802628	8.67277
14.6544	3.1685	13.9091	17.8707	13.3767	4.2926	4.5674	3.7715	4.2664	10.5903	22.9437	16.2817	7.4092	4.1998	4.1353	5.6337	19.1545	5.7171	3.9385	5.0213	3.7385	9.4671	7.2939	8.8071	3.7488	3.4245	13.5972	16.0563	9.7757		0.809211	8.79132
14.7735	4.4908	15.2718	18.5929	12.4066	3.4068	4.2659	3.9269	3.7395	10.5726	24.0667	14.6124	8.2627	3.8856	3.8361	7.1306	20.8687	6.8739	4.6771	4.5825	4.2556	9.1842	6.5081	8.9093	4.5148	3.4341	11.2646	16.1329	8.3143		0.815787	8.85671
14.8927	4.1309	14.4876	18.6259	12.4119	4.8263	4.3927	4.1354	3.5021	10.0711	27.1702	12.3834	7.4054	5.0434	4.4838	6.7068	21.0179	6.9494	3.9274	5.4066	5.0245	9.8158	7.5337	10.416	3.7939	3.5512	12.2766	15.929	8.178		0.822369	9.05703
15.0118	2.8947	12.9998	20.0213	15.915	4.2609	5.5422	4.5483	4.1771	9.2271	29.2821	12.3109	5.9766	4.1878	4.8036	8.2321	21.7512	8.7765	4.4853	4.9481	5.7635	9.3589	7.4817	9.2317	3.8944	2.6588	10.0869	15.8758	9.8963		0.828946	9.23531
15.1309	2.888	13.6229	20.5758	15.6055	4.5444	4.6679	4.0444	5.4943	11.2238	34.1365	12.4272	6.4488	3.0265	3.7008	8.4375	22.7116	9.3596	4.9026	5.2583	6.6806	10.1079	7.4876	9.9253	4.0156	3.804	11.4122	16.1243	10.9658		0.835523	9.77142
15.2501	3.6856	12.452	21.2028	19.5529	4.6499	5.1915	3.6116	4.3621	10.6045	35.7182	14.5031	7.366	2.627	4.1121	8.1735	24.0496	12.1103	5.1232	5.577	5.699	9.4935	7.7129	9.6509	4.0364	3.3746	9.774	17.6985	11.596		0.842105	10.1325
15.3692	2.9347	14.2378	22.4227	21.9718	5.4974	5.411	4.3164	5.3388	12.5485	34.3022	14.4125	5.818	4.0102	4.7578	8.2773	24.0989	13.7705	5.1618	6.1995	7.9188	10.5309	8.8036	9.0456	4.2956	2.8152	9.364	19.4342	12.2772		0.848682	10.7133
15.4884	3.1926	17.7075	21.5762	21.9775	4.7478	5.1708	4.3406	5.2784	12.7336	29.2089	14.3865	5.1188	4.3237	4.8743	9.7293	23.3824	12.8938	5.7258	5.1523	7.518	11.8676	11.1612	10.4949	4.6965	3.164	9.4645	20.6823	14.951		0.855264	10.9115
15.6075	3.5991	16.9633	23.8342	21.7057	5.3924	4.1415	5.1345	6.8586	13.683	25.6626	14.9382	6.3718	4.6239	5.8913	9.6483	25.1733	15.9985	5.9096	5.5347	8.9766	12.6027	10.0696	10.8673	4.2452	2.5799	9.8497	20.3816	14.6519		0.86184	11.2603
15.7266	4.4062	22.9215	28.9381	21.8472	4.5055	5.3611	4.2655	5.8629	16.2791	20.3837	16.1886	5.0781	4.0034	6.1843	10.3379	25.5891	18.3947	5.364	6.9938	8.8854	16.3902	11.288	12.0295	4.4955	2.3028	10.1557	24.3704	17.8079		0.868417	12.1654
15.8458	4.7031	21.3331	29.9265	20.9637	6.4987	5.1599	7.0405	6.7365	18.0511	16.0886	15.7637	6.4563	4.9052	6.3132	13.3134	28.7443	19.9558	6.544	6.8071	10.456	17.4791	10.7667	13.6605	5.2571	3.2843	10.5573	25.5859	19.6502		0.874999	12.9286
15.9649	5.4997	26.6032	29.9796	24.0359	6.3983	5.9773	5.1489	7.0311	18.2038	12.5973	17.4275	6.1674	5.8289	6.0684	13.4972	32.1596	20.1008	6.7077	7.1186	9.2584	18.1569	10.3753	13.5096	3.7493	3.2401	9.6256	29.9818	21.7997		0.881576	13.4374
16.0841	5.4698	27.7688	24.6844	23.9539	7.361	7.178	4.9953	8.0031	19.8824	8.9196	19.2212	7.0562	6.5322	8.702	15.5231	33.967	22.2715	7.7584	7.3578	11.5009	19.4636	11.7154	16.4625	4.8571	3.446	9.4506	31.644	20.7252		0.888158	14.1382
16.2032	6.0385	32.4392	15.8292	22.8547	10.0678	6.1544	6.1562	8.8901	23.9885	9.5698	18.6153	7.3257	6.1782	8.0529	15.688	32.9124	25.8726	10.8145	9.1479	12.3874	19.6705	14.2856	18.2608	4.7119	2.4722	9.8155	32.9688	25.7098		0.894735	14.8885
16.3224	6.2107	37.7516	11.9127	22.8204	12.1059	7.0071	5.9495	10.1621	25.5406	6.2665	17.6139	6.8834	7.4472	11.4898	16.2983	34.4656	28.0236	12.3101	9.3866	11.2382	23.0749	14.7756	18.8762	4.3491	3.5644	10.289	37.6049	28.1614		0.901317	15.7707
16.4415	8.7628	39.8098	8.6276	22.6843	15.1289	8.0927	4.9633	9.0208	29.3638	4.8495	21.3123	8.1713	8.3601	11.8174	14.0475	33.6066	28.1789	14.396	9.3275	12.1733	24.6638	19.4676	21.4244	5.7917	3.9526	11.1316	42.74	34.3191		0.907894	17.0066
16.5606	10.7383	42.2831	7.5156	21.9975	16.1575	8.4865	6.8428	12.0518	30.6749	3.9331	23.8134	9.6862	8.4488	12.4977	12.8035	32.9337	28.9568	16.0227	8.2849	11.4922	27.518	20.647	22.2271	7.1974	3.0348	10.9223	49.949	39.795		0.91447	18.104
16.6798	13.3028	37.5443	6.2435	13.9252	20.9622	10.1017	9.538	13.6626	28.1822	2.6814	24.2497	10.4608	10.1786	13.6214	9.5485	33.0714	27.2211	15.6106	11.7569	12.7552	30.4197	24.9913	23.1649	7.0408	3.6458	11.2184	60.8505	44.6592		0.921052	18.9503
16.7989	15.6325	30.2461	4.4111	9.6595	21.793	9.9029	13.6795	16.559	25.612	2.3564	25.6093	11.5173	10.5382	14.9882	9.7733	31.5682	26.5431	19.5769	10.4784	15.5635	34.5168	30.4592	24.785	7.9157	4.0409	9.5941	63.8144	45.1267		0.927629	19.5093
16.9181	21.9825	21.3062	3.2423	8.3947	25.9354	10.627	15.4975	21.3771	20.5035	2.1439	27.5603	12.6641	11.7444	13.0424	6.7508	30.0125	21.5864	18.9455	12.5575	17.8054	35.8509	33.3523	28.3551	7.2647	3.5034	8.7283	71.4481	46.763		0.934211	19.9623
17.0372	25.6661	15.2523	2.9019	5.9767	26.1518	13.7185	18.0281	25.1185	13.725	2.3616	27.3735	13.8737	13.4434	12.7368	4.6392	25.3766	20.6124	16.8814	15.463	19.7763	42.8321	37.0119	30.7378	8.8323	3.4553	8.7192	79.4653	49.314		0.940788	20.6945
17.1563	26.0966	8.8556	1.7437	4.6744	23.2743	15.7352	21.6314	27.7134	8.773	1.6736	25.4115	14.9371	12.0566	10.7458	3.9291	20.9602	16.1367	16.1543	15.7877	17.2805	42.4726	39.2584	31.6155	8.2756	4.73	8.7779	81.3898	46.7643		0.947365	19.8877
17.2755	24.358	6.1327	1.2455	4.7477	20.5409	17.9005	22.9207	29.7227	9.0826	1.773	24.0834	18.4484	10.6453	8.4604	2.5384	20.2525	11.9648	18.7105	17.8285	22.1258	41.1533	42.4261	34.0163	11.1465	3.818	10.9469	77.7195	46.6828		0.953947	20.0497
17.3946	19.507	4.8147	1.3006	2.9714	17.466	19.2105	21.6261	33.5871	6.5261	1.5282	22.0302	16.9255	8.3776	6.0712	1.8644	15.2757	10.2466	14.2167	18.646	24.8462	49.9302	43.5102	37.3716	10.0673	3.6246	8.8924	74.7821	49.1209		0.960523	19.4406
17.5138	12.3618	4.2614	1.0071	2.1484	10.8564	16.8051	20.6485	33.2754	4.1936	1.2409	21.2397	23.1498	6.8705	4.538	1.9922	12.2822	8.2375	14.8917	21.1676	25.4046	51.466	43.7073	40.3427	11.988	4.249	9.6342	64.2744	53.7029		0.967106	18.7835
17.6329	7.9462	3.5302	0.9998	1.8869	8.1471	16.6808	16.8064	29.3957	3.4783	1.5579	16.1561	20.1868	5.3663	2.9881	1.3299	11.4984	5.2549	17.3847	21.6227	27.7957	52.7663	38.8336	38.362	13.7875	4.3223	7.9967	59.7195	53.2843		0.973682	17.4673
17.7521	4.6652	2.6201	0.6891	1.8281	4.6567	14.1828	11.4684	21.9309	3.002	1.0665	11.401	16.2622	4.0625	3.414	1.48	8.2404	4.7102	17.0971	21.1368	27.9265	48.0383	42.1678	36.4012	14.4327	6.2927	9.2061	47.1623	44.8399		0.980265	15.3708
17.8712	3.4702	1.6452	0.5584	1.726	4.3025	11.4621	8.4152	18.6647	2.323	0.6829	8.9984	11.3437	3.6688	2.4691	1.2901	5.2211	4.1665	13.9175	21.7389	29.6565	38.3536	39.1488	36.2022	17.0158	7.7872	6.8085	33.2135	38.9274		0.986841	13.3278
17.9903	2.6739	1.2675	0.6442	1.3527	4.0249	11.3173	6.2243	13.3854	2.5421	0.8803	6.8434	7.5253	3.7498	1.8551	0.8252	4.3076	3.5557	11.2455	19.8095	26.4551	31.0895	38.4667	35.3512	18.4743	8.7992	8.0035	22.9254	30.2589		0.993418	11.5662
18.1095	2.807	1.1316	0.5117	0.9247	3.641	6.9981	5.767	9.8633	2.4423	0.66	4.4249	5.0285	3.2857	1.9568	1.3801	3.2082	2.3539	8.21	19.3794	26.1791	25.3355	29.3411	30.9559	16.8777	9.2899	8.7991	14.7019	24.0102		1	9.62374

## Sheet: Image14 (3)
X0	Y0	Y1	Y2	Y3	Y4	Y5	Y6	Y7	Y8	Y9	Y10	Y11	Y12	Y13	Y14	Y15	Y16	Y17	Y18	Y19	Y20	Y21	Y22	Y23	Y24	Y25	Y26	Y27	Y28		Ap-basal	Avg int
0	15.994	20.696	29.196	28.55	35.56	13.967	25.245	28.5087	30.2368	18.9286	15.541	27.7733	16.0062	30.4674	23.8572	19.959	18.112	24.234	34.529	17.464	17.6548	8.9742	12.035	13.22	20.281	17.484	18.444	15.025	12.6437		0	21.0547
0.1191	16.758	24.955	30.319	32.179	36.388	17.692	26.277	29.7593	30.28	21.2567	13.876	31.7483	17.4545	31.8792	25.5354	21.082	17.794	30.331	36.699	19.48	20.5443	11.4835	14.025	14.335	20.773	20.875	19.176	16.712	13.2833		0.00609544	22.8604
0.2383	22.318	25.285	33.43	39.021	39.738	18.437	29.9372	32.0389	37.6357	21.1022	15.619	35.9278	20.1429	38.7907	29.1665	22.677	18.765	33.41	38.114	24.467	23.4292	13.8494	15.565	15.23	23.283	23.838	22.65	16.997	14.4755		0.012196	25.7014
0.3574	24.915	26.892	34.043	43.395	40.636	19.972	35.5208	35.7985	39.8	26.4541	19.894	45.7288	24.1374	44.4138	31.185	25.086	21.35	36.072	42.537	26.473	27.9015	13.4196	18.083	17.064	23.977	28.427	22.349	17.814	14.3525		0.0182914	28.5411
0.4766	32.702	31.26	38.712	51.482	46.628	22.054	41.1677	39.5824	47.3037	28.5713	20.162	47.043	30.1243	47.5163	33.5835	29.401	27.987	35.822	47.209	28.733	36.9402	16.9396	22.034	18.269	27.143	32.534	23.156	21.487	13.9182		0.024392	32.3954
0.5957	40.871	31.542	40.33	56.448	48.549	27.309	44.0697	44.2521	50.627	32.9456	23.018	50.5317	32.3301	52.6388	36.6411	32.197	32.497	39.937	51.169	33.478	41.9095	18.1413	21.329	23.295	30.476	49.273	27.688	24.826	16.3172		0.0304874	36.3668
0.7148	62.67	36.791	42.034	66.768	53.502	32.566	52.582	53.1293	56.0712	36.5524	26.993	58.1454	41.8389	57.6396	38.7745	30.181	36.318	40.379	54.461	40.365	52.1265	21.8191	24.722	29.653	33.255	61.241	29.184	38.559	16.9244		0.0365829	42.2498
0.834	75.327	34.316	49.638	71.681	58.32	35.156	61.315	61.0475	60.9939	42.1595	30.971	61.3764	45.9394	62.0686	40.5048	38.583	41.203	45.928	60.79	44.327	58.0215	25.0505	29.898	31.438	46.758	84.343	41.351	48.066	18.5392		0.0426834	48.4521
0.9531	94.408	37.327	54.213	80.163	65.653	43.578	70.9055	65.6849	64.9574	49.9866	35.182	64.5117	48.7518	68.265	49.252	38.357	46.404	56.049	61.854	49.454	68.1717	28.0029	32.477	40.236	64.075	106.956	54.148	61.453	21.1919		0.0487789	55.9196
1.0723	111.08	40.668	60.971	90.224	67.961	50.129	78.6586	75.9179	70.1252	55.227	40.232	70.3515	54.081	66.7681	54.1105	46.516	54.102	62.689	68.761	57.95	73.7212	30.7978	38.912	55.039	82.88	123.56	70.371	77.241	25.6053		0.0548794	63.9535
1.1914	122	49.847	69.226	97.716	72.559	61.495	84.679	78.8828	71.3178	60.2423	46.317	66.8744	62.3877	69.9579	60.6599	52.921	64.345	68.559	77.946	72.454	81.0966	34.7958	43.635	65.818	95.919	134.292	88.77	88.731	27.5895		0.0609749	71.415
1.3106	127.147	56.038	81.642	104.096	79.871	68.27	89.3799	87.6571	76.9724	67.3806	51.385	73.4625	69.2262	75.284	60.8354	62.771	73.01	76.919	80.916	78.72	84.762	42.7333	49.978	81.996	108.934	141.887	107.868	98.901	35.9502		0.0670754	79.1032
1.4297	124.855	66.969	91.366	109.52	86.185	78.28	88.6391	87.4323	81.5698	78.2576	55.478	74.4143	68.7535	75.9263	68.9813	70.224	83.885	85.725	86.454	88.906	94.1885	48.0679	54.509	97.511	120.697	135.315	123.162	106.024	39.6753		0.0731709	85.2059
1.5488	118.393	78.408	94.614	117.185	91.832	84.559	91.0443	93.0584	83.0131	86.6857	60.404	76.5658	78.6992	75.2894	72.4798	80.93	90.249	92.987	90.044	96.152	98.1543	55.2861	69.4	107.77	129.359	129.89	135.388	107.419	45.6055		0.0792663	90.7195
1.668	105.971	94.653	103.285	121.63	96.433	92.42	89.7867	93.6773	82.3339	89.4537	74.575	77.6492	77.4333	79.8395	79.7526	91.211	103.475	98.263	96.229	104.896	98.1146	63.9314	73.498	118.472	134.303	121.361	139.758	109.114	53.9965		0.0853669	95.3626
1.7871	90.51	102.569	107.897	128.08	97.798	102.348	81.3283	94.4264	88.3223	92.2507	84.467	81.0372	86.7105	80.8763	83.3313	98.132	100.79	100.543	99.351	104.35	100.74	67.5291	81.509	120.017	125.699	106.297	137.935	103.235	63.8563		0.0914623	96.9633
1.9063	74.299	111.766	114.84	129.24	105.415	108.594	81.0443	88.4896	83.771	86.2697	99.106	81.6714	85.7378	80.7027	86.9853	108.109	105.709	111.263	101.29	107.541	97.0845	78.7508	88.899	127.905	113.705	90.914	132.257	102.661	68.493		0.0975628	98.3625
2.0254	63.887	129.234	124.474	128.196	111.709	113.016	70.4308	88.2416	82.4707	85.2152	107.688	81.2036	84.3268	85.0774	90.3097	110.656	113.961	109.998	103.984	107.618	88.4809	81.3662	97.172	125.258	108.021	68.544	120.811	96.108	82.0095		0.103658	98.6023
2.1445	52.344	126.94	124.044	129.087	108.549	119.344	68.2285	84.4737	76.5048	77.6774	116.102	82.7683	85.8346	82.4622	92.2111	115.549	111.051	109.797	104.66	103.019	82.8694	80.8569	107.946	121.933	86.632	49.919	93.982	83.403	80.6771		0.109754	95.1333
2.2637	46.171	127.468	131.972	122.392	110.006	120.565	66.4317	76.9535	69.3043	76.2966	117.966	83.0816	77.182	86.3714	97.8693	111.598	104.474	109.202	97.394	93.238	69.4658	87.9662	114.57	114.762	68.166	32.812	69.974	74.288	93.9695		0.115854	91.4452
2.3828	42.976	120.722	130.632	120.322	114.13	112.851	57.9403	69.2648	60.0502	68.3168	109.894	84.1136	77.8674	85.1168	98.6488	109.286	98.984	109.701	96.687	84.127	61.1715	88.707	111.237	100.483	52.75	26.476	48.6	58.396	95.6144		0.12195	86.0367
2.502	38.355	101.907	131.629	110.881	115.146	111.457	53.1177	58.9677	52.2171	63.2578	109.759	82.4957	73.327	88.8106	96.5209	106.215	93.058	98.91	90.711	77.246	57.4328	86.8678	118.995	86.262	37.22	20.582	32.304	45.119	92.9129		0.12805	80.4029
2.6211	34.373	81.775	127.031	106.082	107.95	104.395	45.3357	55.1891	47.3357	59.7854	98.278	83.7394	69.6418	88.9474	93.6419	96.102	82.329	91.854	79.503	62.787	52.5404	87.8526	115.549	67.233	27.67	16.061	21.147	35.481	93.4171		0.134146	73.5526
2.7402	32.547	71.009	127.381	93.292	106.269	98.673	39.3331	46.8831	39.1248	51.086	91.095	83.7342	66.7955	90.9999	85.1826	90.584	68.712	77.658	68.644	54.142	44.7951	83.2459	112.262	52.745	20.074	13.931	15.02	29.844	91.3628		0.140241	67.1181
2.8594	27.29	56.701	123.64	79.79	103.697	93.031	31.7835	44.9996	34.6107	45.3762	76.197	79.2371	59.6452	89.6199	75.4606	84.149	61.54	62.562	52.29	45.503	40.4984	82.8961	102.938	37.593	14.51	11.377	11.764	22.532	86.5712		0.146342	59.9242
2.9785	28.418	43.878	105.694	69.542	97.419	77.787	25.0984	40.5949	29.9994	38.0864	63.624	77.2298	61.3953	94.024	74.654	72.557	55.166	48.806	42.89	42.325	39.6961	78.224	94.413	28.036	10.712	11.58	11.029	18.848	77.0828		0.152437	53.752
3.0977	21.362	37.512	95.818	59.267	88.774	59.657	18.9238	33.6835	28.184	37.0609	54.092	67.0613	64.2254	88.9039	65.3325	62.229	43.429	38.131	29.372	36.151	35.0256	75.8217	83.936	20.562	9.047	8.074	8.689	13.204	71.978		0.158538	46.7416
3.2168	22.09	28.357	82.875	50.716	82.332	48.478	18.2568	29.3826	20.2797	29.7684	38.874	58.9804	63.1535	85.843	53.6653	58.332	31.986	27.994	23.441	30.202	29.8285	67.6076	69.892	18.199	8.375	6.679	7.797	11.501	68.5014		0.164633	40.4616
3.336	19.219	21.03	66.772	41.973	64.242	39.257	15.2412	28.23	19.9612	29.4721	29.749	48.8898	63.8115	81.2758	44.9751	44.264	23.66	21.111	16.852	25.128	28.1357	61.9307	56.47	15.261	8.102	7.952	7.791	11.025	62.5681		0.170734	34.6327
3.4551	15.694	14.86	51.992	29.577	55.485	28.035	11.7102	22.2457	17.9661	22.701	21.462	38.0193	66.6954	81.214	33.275	39.299	16.431	16.317	12.908	20.278	24.3394	53.5446	40.22	13.988	5.932	7.094	6.075	9.291	52.0152		0.176829	28.5746
3.5742	14.501	13.395	37.38	23.839	48.023	20.741	10.1198	17.9744	16.0932	20.0575	18.046	30.7027	64.2728	76.7239	21.5801	32.532	15.262	12.807	9.97	16.129	20.0982	46.3948	34.802	13.006	4.738	6.882	5.451	7.306	44.3195		0.182925	24.2464
3.6934	13.062	11.017	32.98	18.096	37.067	17.067	8.1679	13.2394	14.8961	16.8542	12.938	19.4639	67.3095	72.9286	16.6749	29.481	12.674	10.86	8.449	12.278	18.0896	40.8931	23.386	12.518	4.826	5.549	5.123	7.376	35.9992		0.189025	20.6643
3.8125	13.202	8.875	24.478	13.573	29.375	13.937	6.6166	10.1405	13.1732	16.4572	10.441	17.7729	63.6119	72.0377	13.6369	21.096	10.507	8.151	7.972	8.839	15.5979	35.3152	17.266	10.519	3.738	5.326	4.366	6.109	31.3294		0.195121	17.7055
3.9317	10.152	8.957	18.155	12.24	23.316	13.41	4.9093	8.1593	11.7889	13.0304	9.004	15.8495	61.6975	66.2933	10.0959	16.733	9.711	7.718	8.088	7.4	12.24	30.3994	14.721	7.965	3.874	4.488	4.466	5.057	26.0103		0.201221	15.3769
4.0508	10.492	6.67	13.822	9.629	19.898	12.145	6.47	5.4984	9.0683	12.3792	7.907	14.0287	56.282	58.6898	8.9973	15.741	8.349	7.434	7.123	5.925	10.2789	24.256	13.598	8.393	3.485	5.494	4.037	4.277	23.268		0.207317	13.5736
4.1699	9.315	7.225	12.23	7.958	17.251	10.928	5.986	4.2208	8.1491	9.0766	7.22	12.4336	53.6361	49.6163	7.5546	13.824	7.358	7.498	7.041	6.12	8.5244	21.0114	10.064	7.471	3.336	4.598	4.386	4.065	22.4931		0.213412	12.0893
4.2891	9.062	6.818	11.796	6.855	14.39	8.393	5.4265	3.8601	7.2794	8.2887	8.792	10.0014	42.4216	38.923	7.6641	11.907	7.94	6.971	6.897	6.436	7.9117	14.9075	9.96	7.062	3.276	4.931	3.819	4.497	20.9753		0.219513	10.6021
4.4082	7.458	7.614	9.6	6.354	12.265	10.337	4.5434	4.2137	5.118	6.7164	8.896	7.9727	36.5016	29.6269	8.3827	9.394	5.588	7.521	5.946	5.337	6.4219	12.5058	9.762	5.523	2.481	5.272	3.803	3.745	17.6583		0.225608	9.19163
4.5274	6.883	6.961	9.73	4.925	10.684	8.945	5.5994	3.9885	5.2436	5.992	7.747	7.8538	29.0302	20.3123	6.3866	10.843	7.413	7.852	6.242	4.961	5.2735	11.056	9.874	6.381	3.137	4.952	3.268	3.765	16.0491		0.231709	8.32234
4.6465	6.652	7.688	9.475	4.9	9.002	8.368	5.2579	3.3341	5.6093	6.737	6.92	7.2592	17.8648	13.8528	6.7979	9.541	6.291	7.15	5.681	4.218	5.3616	8.593	8.399	5.711	2.573	4.103	3.565	3.379	13.7076		0.237804	7.17211
4.7657	5.534	8.468	7.458	3.409	7.985	7.557	5.7473	3.4241	3.6483	5.5343	7.696	7.1322	14.2736	9.5219	6.1163	9.272	5.786	6.383	5.465	4.235	4.8095	8.8974	6.951	5.86	2.785	2.901	3.128	3.615	12.8542		0.243905	6.42921
4.8848	5.036	8.847	6.896	4.534	7.334	7.411	5.8515	3.7037	4.5619	4.4406	7.391	6.5395	12.408	8.4762	6.7711	8.722	5.543	7.016	6.605	4.893	4.5206	8.761	7.271	4.53	2.024	2.766	2.847	3.527	11.1829		0.25	6.22103
5.0039	4.274	9.571	4.493	3.916	5.713	6.805	6.1226	2.9955	4.1096	3.9017	7.811	5.6917	11.1497	7.0544	5.6655	8.827	5.204	8.819	5.783	4.628	4.5545	7.5458	6.89	3.861	2.728	2.636	3.292	3.64	8.9372		0.256095	5.74549
5.1231	4.207	9.963	5.092	4.073	5.62	7.476	5.7277	3.1551	4.2681	4.5258	7.752	6.3506	9.1779	5.8119	6.2175	8.054	5.379	7.423	5.807	4.905	4.32	7.2702	7.053	5.274	2.748	2.159	3.689	3.877	8.4753		0.262196	5.719
5.2422	4.32	9.271	3.987	3.049	4.507	6.06	6.4237	3.3575	3.608	3.8966	6.786	5.8324	9.5366	5.9899	5.7124	8.404	5.782	6.919	5.01	5.219	4.5782	7.027	5.959	4.565	2.327	2.038	3.063	3.05	8.2291		0.268291	5.32784
5.3614	3.537	8.124	3.737	3.072	5.133	6.08	7.5211	3.2895	3.3792	4.7466	6.053	5.5475	9.656	4.8256	6.539	9.49	5.987	7.393	4.328	4.849	4.5068	5.5349	6.33	3.84	2.678	2.633	2.708	2.414	7.2771		0.274392	5.21411
5.4805	3.053	8.741	3.258	2.61	3.533	6.063	7.4319	3.7725	2.7214	4.2691	5.495	5.9877	9.446	5.1877	6.7087	8.721	5.531	6.282	4.838	5.313	3.9988	4.6126	5.606	5.029	2.863	2.123	2.652	2.839	5.5154		0.280487	4.97248
5.5996	3.989	8.4	3.054	2.875	3.871	4.643	6.3437	2.5518	3.6508	4.5775	5.772	5.3367	8.8426	4.8702	5.8955	9.059	5.511	8.044	3.701	4.395	3.8801	4.2566	7.083	3.84	2.261	2.272	2.333	2.549	5.7136		0.286583	4.8128
5.7188	4.025	8.794	3.501	2.944	3.037	5.691	7.632	2.9899	3.3857	3.8474	6.064	4.6066	9.1546	4.7634	5.5647	9.453	5.904	7.024	5.29	4.383	3.7379	4.7068	6.009	3.939	2.543	2.224	3.148	3.288	5.124		0.292683	4.92324
5.8379	3.791	9.767	3.487	3.059	2.958	4.299	6.814	2.9883	3.0439	3.4943	5.771	4.9051	7.1722	5.0751	5.6188	8.859	5.229	5.664	4.487	4.491	3.6829	4.1739	5.366	3.832	3.173	1.933	3.209	3.321	4.8999		0.298779	4.64015
5.9571	3.104	8.359	3.227	2.873	3.364	4.153	7.3901	3.7205	3.2168	4.9106	5.55	4.4632	7.1356	5.5443	5.6594	10.539	5.003	6.287	5.951	4.522	3.7036	3.6779	5.876	4.885	2.298	1.598	2.805	3.298	4.5065		0.304879	4.74553
6.0762	3.925	7.587	3.623	1.883	2.853	4.088	9.3341	2.9327	3.6438	3.7625	5.94	5.5733	6.2158	5.4007	5.7228	10.193	6.516	6.552	5.529	4.477	4.5246	3.9749	5.567	4.179	3.201	2.385	2.722	2.526	4.2294		0.310975	4.79519
6.1953	3.187	8.754	3.357	2.349	3.435	4.841	8.624	2.9994	3.2517	4.1444	6.111	4.557	5.3314	5.1132	5.079	10.625	6.512	7.213	6.444	4.072	3.4566	3.7203	5.75	4.735	2.251	1.844	2.621	2.474	4.1186		0.31707	4.72312
6.3145	3.827	9.347	3.365	2.272	3.551	4.151	8.3506	3.2156	3.6373	3.7922	5.907	5.5995	5.5255	4.3306	6.6013	10.679	5.793	8.438	4.851	5.054	4.7823	4.3818	7.264	4.249	2.565	2.093	3.766	3.059	3.8414		0.323171	4.97549
6.4336	3.198	7.907	2.772	2.967	2.27	4.479	8.8026	2.6399	3.6252	3.8216	4.977	4.3711	6.285	4.2923	6.1815	9.311	5.749	7.913	5.269	4.333	4.8494	4.0263	6.064	4.398	3.055	1.817	2.733	3.044	2.6647		0.329266	4.61433
6.5528	2.729	8.451	2.581	2.542	3.192	5.016	8.7897	3.3137	2.6721	3.9812	5.753	4.822	5.1068	3.6316	4.5061	8.806	5.982	7.746	4.325	4.487	3.9007	2.7166	5.852	4.575	2.869	2.428	2.232	2.578	4.7869		0.335367	4.49557
6.6719	2.413	7.626	3.478	3.079	2.361	4.953	7.5978	3.1713	3.9919	3.0644	5.618	5.6541	4.5265	4.5032	5.3053	8.874	6.468	7.218	4.351	6.288	2.9943	3.6795	7.441	5.759	2.696	2.343	2.507	2.594	3.44		0.341462	4.62053
6.7911	2.943	7.608	3.366	2.7	2.63	4.873	9.2265	3.029	2.7548	3.2896	5.287	4.6499	5.0263	4.1904	5.1386	7.87	6.702	7.701	5.059	5.568	3.7368	3.3412	7.353	5.108	3.112	2.101	3.64	2.787	3.957		0.347563	4.64649
6.9102	2.974	9.256	2.826	2.002	2.52	3.477	7.446	3.8706	3.4818	3.8903	5.196	4.7919	4.3081	3.54	5.5008	8.335	6.495	7.214	5.291	5.519	3.9456	2.7757	8.243	5.816	3.251	2.24	2.967	2.305	3.3954		0.353658	4.58183
7.0293	2.913	9.603	3.271	1.975	3.272	3.664	7.7376	2.9554	3.3712	4.6311	5.752	4.7609	5.9629	4.199	5.5856	9.538	6.071	7.195	5.239	5.676	3.8774	3.7887	7.866	6.875	3.387	1.923	3.192	2.056	2.7561		0.359754	4.79634
7.1485	2.605	9.904	3.195	3.136	2.53	3.652	8.0983	3.4045	3.3864	3.9983	5.59	5.6035	5.2292	3.7092	5.5878	9.506	7.713	7.472	5.996	6.488	4.3144	4.3903	8.789	6.505	2.366	1.74	2.682	2.614	3.1739		0.365854	4.9441
7.2676	2.393	10.978	3.519	2.352	2.97	4.164	6.6521	3.0422	3.3815	3.9737	5.838	5.6414	4.4012	3.6751	4.2858	10.137	8.541	6.892	5.645	7.061	4.3035	2.7053	8.732	6.689	2.767	2.164	2.595	2.259	3.4004		0.37195	4.86752
7.3868	1.956	13.6	3.172	2.683	2.86	3.369	7.254	2.5134	3.5858	4.3057	5.001	6.0769	5.9211	3.69	5.8606	10.265	10.043	6.983	5.237	8.54	4.4751	2.8851	7.933	8.652	3.346	2.546	2.301	1.908	3.743		0.37805	5.19675
7.5059	3.005	11.162	3.258	2.984	2.906	4.524	7.5908	3.1694	2.968	3.2887	5.192	6.591	4.5024	3.1172	5.6405	10.739	13.188	6.28	6.151	6.788	4.2876	3.1238	9.535	7.316	3.938	2.168	2.15	1.949	3.0376		0.384146	5.19138
7.625	2.653	12.838	3.155	2.893	2.842	4.641	7.016	4.2665	4.0646	4.5412	5.819	9.238	4.5505	3.119	5.3863	11.305	14.973	6.418	4.794	8.856	4.7533	3.4846	9.21	7.637	4.139	1.877	2.195	1.913	2.7774		0.390241	5.56398
7.7442	3.088	11.856	2.954	2.433	3.305	3.304	7.9752	3.5138	3.7675	3.6939	6.683	8.9433	4.3358	3.1626	4.7703	13.279	18.181	5.288	4.987	10.446	4.6774	3.4846	9.541	10.986	3.869	2.29	2.871	1.919	2.783		0.396342	5.80646
7.8633	2.566	11.959	3.798	2.879	2.781	3.449	6.6131	3.3462	3.3684	2.9032	7.081	10.3662	4.9805	3.4121	6.1083	13.925	18.81	5.542	6.916	11.4	4.7292	4.1482	8.506	11.873	5.575	1.866	2.381	2.823	3.1994		0.402437	6.11396
7.9825	2.279	13.891	3.353	2.566	3.461	4.864	7.0338	3.6026	3.6071	4.3154	6.546	10.8136	4.5445	3.3735	6.0897	14.379	18.944	6.38	6.411	11.45	5.0491	4.0313	7.286	10.749	4.296	2.139	2.247	2.356	3.0854		0.408538	6.17734
8.1016	2.532	13.195	3.513	2.555	2.484	3.61	5.9397	3.5038	3.3591	4.2898	7.199	11.6206	3.969	3.3762	7.7741	15.528	19.887	6.681	7.032	12.35	5.287	3.2939	7.09	12.665	5.37	2.221	2.113	1.673	2.829		0.414633	6.30828
8.2207	3.063	12.468	3.215	3.345	2.707	3.645	7.6269	4.6095	3.7015	3.6562	9.753	11.9282	4.1414	3.2859	8.8911	14.59	20.309	6.43	7.074	13.426	5.2614	3.907	8.39	13.686	4.634	2.111	2.195	2.297	3.098		0.420729	6.67052
8.3399	3.039	13.624	3.697	3.347	3.277	4.226	8.1157	4.4353	4.0147	4.1785	8.965	13.5584	4.3452	3.3661	10.5931	15.914	17.649	6.412	7.672	14.068	4.8015	4.0429	7.672	13.722	6.164	2.193	2.114	1.769	2.77		0.426829	6.88777
8.459	2.894	15.839	3.727	3.849	2.891	3.337	7.5005	4.047	3.5995	4.8457	13.205	14.0617	4.1244	3.0035	10.1552	14.097	16.336	7.519	7.632	16.082	4.7742	3.0956	5.873	16.4	6.17	2.726	2.021	1.89	2.4476		0.432925	7.03941
8.5782	3.283	18.418	3.318	2.68	3.366	4.431	6.0001	3.9597	4.2982	4.3257	13.548	15.3536	4.2536	3.2104	10.5537	15.883	16.205	9.029	7.887	15.414	4.8135	4.0592	6.443	19.837	8.466	1.949	2.502	2.83	3.3149		0.439025	7.5735
8.6973	3.293	21.41	2.6	3.118	2.627	3.388	6.9295	3.8472	3.9303	3.9514	17.078	14.5923	3.8511	3.5441	9.7319	18.722	16.318	10.776	7.455	16.55	4.8399	3.493	7.533	23.846	8.845	2.85	2.554	1.441	2.4532		0.445121	7.9851
8.8165	2.987	24.955	2.987	2.537	3.222	4.081	7.4461	4.0544	3.8688	4.4843	21.841	15.4039	3.7945	3.0784	8.7768	20.045	21.673	11.882	8.645	17.417	4.8231	2.9988	6.214	21.329	10.094	2.33	2.559	1.961	2.7228		0.451221	8.559
8.9356	3.048	27.38	2.701	3.017	3.716	4.449	6.9253	4.3231	3.113	4.2807	26.444	16.5528	4.2933	3.6999	7.5033	23.667	26.545	12.106	8.257	16.054	5.6981	3.1408	6.333	23.287	11.775	2.217	1.832	1.999	2.1835		0.457317	9.19106
9.0547	2.514	30.212	2.468	3.385	3.201	5.137	7.0541	4.9527	2.9128	4.4209	34.672	14.6723	4.5129	3.3248	9.1866	26.323	27.699	12.34	7.803	15.258	5.9944	3.3499	7.185	23.482	14.734	2.685	2.274	2.606	2.3532		0.463412	9.88664
9.1739	2.94	29.305	3.695	4.079	3.215	3.28	7.527	5.1467	3.0696	4.6846	41.284	17.8946	4.8943	3.7404	8.6877	25.179	31.442	12.839	8.634	14.164	5.3913	3.3967	7.708	20.923	15.528	2.453	2.641	2.081	2.5666		0.469513	10.2893
9.293	3.102	31.38	3.358	3.447	3.212	3.112	6.81	4.6134	3.4951	5.2484	47.433	19.1272	4.8265	4.3161	10.5281	28.405	34.443	12.376	9.816	14.78	5.1455	3.9058	5.959	21.362	14.436	2.092	2.023	1.878	2.5034		0.475608	10.7977
9.4122	2.723	35.409	3.199	3.092	2.683	3.635	9.3007	6.0408	4.2393	4.0114	52.036	18.9308	4.3929	3.0223	9.3715	27.705	41.324	15.418	10.338	14.288	5.7701	3.3979	6.477	21.346	13.492	2.443	2.275	2.112	2.7405		0.481709	11.4211
9.5313	2.488	30.753	3.021	2.9	2.996	4.4	8.4238	5.8372	3.824	5.4681	53.639	20.9752	4.3255	2.4655	9.5792	28.282	41.351	15.263	13.345	12.864	5.5265	2.8132	5.972	21.447	12.964	2.692	2.167	2.035	2.2427		0.487804	11.3814
9.6504	2.535	31.766	3.088	3.536	3.443	3.962	8.5176	5.9337	3.057	5.1447	54.367	21.6745	4.6899	3.3938	10.2881	28.558	41.062	18.027	13.725	14.281	5.4425	3.3601	5.395	20.804	9.058	2.87	1.935	2.359	2.1518		0.493899	11.5319
9.7696	2.943	28.59	2.801	3.552	3.052	4.153	8.9736	6.5726	4.2719	4.6697	55.674	26.1379	5.0143	3.1736	11.1378	31.681	34.893	20.059	13.799	15.269	6.2051	4.0478	7.524	18.882	7.644	2.851	2.433	1.985	2.5137		0.5	11.7415
9.8887	2.428	26.037	3.604	3.106	2.966	4.82	10.729	5.6041	3.5982	6.5196	57.142	32.5892	4.4096	3.5509	10.3742	27.739	27.581	22.273	15.532	14.817	5.1384	3.4192	5.227	18.778	5.713	3.22	2.185	2.394	2.3897		0.506095	11.5132
10.0079	2.598	25.508	3.653	3.25	2.792	4.24	8.8504	5.8484	3.6003	5.3665	56.507	31.0265	4.8487	3.2114	10.5372	27.084	23.044	21.225	14.957	13.522	5.5547	3.8703	5.97	18.409	6.334	3.43	2.537	2.174	2.2052		0.512196	11.1087
10.127	2.919	21.239	3.873	2.828	2.754	4.714	10.1264	6.2931	3.9307	4.9087	60.888	30.8821	4.8609	3.6361	11.5913	26.677	19.437	20.744	15.43	12.433	5.1457	3.7478	7	17.525	7.662	2.89	2.064	2.617	2.6014		0.518291	11.0834
10.2462	3.043	18.448	3.036	3.694	3.766	4.585	11.4086	6.3476	3.9892	5.1406	61.754	32.9582	4.1368	3.5534	8.9988	21.422	17.42	19.518	17.176	10.047	4.7548	4.0794	6.207	15.082	5.342	2.734	3.337	2.105	3.0087		0.524392	10.5894
10.3653	2.723	15.686	3.421	3.523	3.487	4.24	12.0083	6.9119	4.1095	6.2461	60.564	29.3819	5.4334	4.1482	6.6117	23.15	17.141	16.215	16.404	10.982	5.273	2.8651	5.952	16.424	6.095	2.763	2.016	1.821	2.7797		0.530487	10.2888
10.4844	3.845	18.322	4.002	3.847	3.414	3.924	11.6218	7.9656	2.8894	6.4719	60.391	26.0689	4.881	4.7881	7.228	23.874	15.846	16.895	16.672	11.485	4.558	3.3222	6.803	14.281	6.661	3.51	2.216	2.76	2.8828		0.536583	10.394
10.6036	3.412	16.634	3.058	2.916	3.622	3.994	10.603	7.874	4.7464	6.3902	59.465	25.228	5.5237	4.7899	6.7777	23.196	13.919	13.989	15.734	11.651	4.2672	3.1161	6.091	14.505	5.279	3.743	1.899	2.362	2.5232		0.542683	9.90719
10.7227	3.188	14.164	3.694	3.654	3.389	3.904	9.731	7.9203	4.6205	7.3201	61.195	23.2142	5.5557	4.1929	6.6905	20.559	14.445	15.676	16.005	10.667	5.094	4.0747	6.605	14.665	4.802	3.207	2.461	1.9	2.2887		0.548779	9.82354
10.8419	4.49	13.524	2.691	3.809	4.063	4.027	9.6703	9.1781	4.8822	7.7228	60.918	22.113	6.9269	4.2922	6.7411	24.235	14.834	16.629	19.587	11.674	3.5871	4.1018	6.217	16.636	4.715	3.918	3.066	2.547	2.1341		0.554879	10.3079
10.961	4.493	15.104	3.154	3.228	3.873	4.507	10.2838	9.4244	4.2324	9.2323	60.669	17.8478	7.1057	4.0035	5.0409	25.214	14.75	17.4	16.785	10.25	3.9522	4.2862	5.956	14.518	5.671	2.789	2.666	2.396	1.901		0.560975	10.0253
11.0801	5.321	14.757	3.9	3.518	3.035	4.398	9.6548	9.9027	4.5694	9.0457	59.08	17.0565	5.6897	4.9164	6.945	24.729	16.562	15.802	16.586	9.094	4.3943	3.784	6.481	16.098	4.977	3.649	2.391	3.366	3.3138		0.56707	10.104
11.1993	5.093	14.604	3.441	3.514	3.53	4.874	9.1891	9.2413	4.3603	10.3971	57.636	13.8122	5.7843	4.6911	7.599	25.299	17.94	13.372	15.862	9.902	4.6092	3.7213	6.694	13.136	5.733	3.399	2.898	2.744	2.5028		0.573171	9.84754
11.3184	3.735	13.355	3.454	4.152	4.277	4.727	10.2613	12.2755	4.0478	10.1944	48.154	11.249	6.5182	4.2595	7.403	26.338	18.238	14.031	15.38	10.184	5.4606	3.9227	6.127	14.964	5.961	4.486	2.147	2.301	3.225		0.579266	9.68372
11.4376	4.5	11.502	5.058	3.462	3.899	3.891	10.192	13.7557	4.556	10.3663	39.278	11.2839	4.9916	3.7356	6.2008	27.855	18.064	15.054	15.633	9.965	4.9965	3.4421	6.309	14.879	3.617	4.005	2.116	2.887	3.1512		0.585367	9.26364
11.5567	5.111	10.374	3.422	4.544	3.69	5.27	9.3469	15.9523	3.5181	12.0492	32.715	11.1293	6.953	3.8771	5.9613	27.44	19.258	14.145	16.41	11.113	4.2607	3.6003	6.537	14.602	5.298	4.868	2.5	2.014	2.9561		0.591462	9.27294
11.6758	5.285	9.69	3.76	3.203	4.336	4.63	9.4586	17.1449	4.1429	13.4167	24.048	9.8275	5.3211	3.9987	5.7138	26.905	17.218	15.088	15.654	11.017	3.5529	4.177	5.753	13.861	5.394	5.326	2.288	2.306	2.9017		0.597558	8.80751
11.795	5.533	8.541	3.346	2.908	4.362	5.228	8.9855	20.4823	4.5093	12.4231	19.772	8.9586	5.3784	3.7093	7.9771	28.224	17.105	15.428	17.051	10.529	4.1784	3.6706	5.218	14.753	6.098	4.395	2.938	2.296	3.0225		0.603658	8.86276
11.9141	6.755	8.165	3.741	3.652	3.377	3.922	9.2194	21.215	4.7297	12.0621	14.323	7.9603	5.8694	3.954	7.4586	29.712	15.345	17.922	16.074	9.578	3.7021	4.1208	5.358	13.859	6.309	4.693	2.791	2.426	3.4746		0.609754	8.68166
12.0333	7.07	7.977	3.834	3.551	3.379	4.287	9.5993	21.4155	4.7681	10.9695	9.477	8.0294	6.0009	4.655	8.9187	29.383	16.712	21.665	17.281	8.173	3.8292	3.6871	5.985	12.453	6.128	4.044	3.091	2.816	3.448		0.615854	8.71127
12.1524	6.058	7.474	4.664	3.239	4.302	3.423	9.4922	18.0614	5.7034	10.8761	11.067	6.4172	6.417	3.9171	10.2175	29.715	19.93	22.711	16.988	7.706	3.1748	3.2418	4.897	16.747	5.668	5.396	3.158	2.346	3.6046		0.62195	8.84869
12.2716	5.684	7.006	4.439	3.386	3.368	4.105	8.115	18.832	5.4483	10.0809	11.346	7.0673	6.5388	3.6741	9.6992	30.804	20.578	23.111	18.081	8.084	3.2433	3.593	4.778	15.724	5.108	5.163	1.922	2.111	2.1502		0.62805	8.73242
12.3907	7.059	8.497	4.215	3.246	3.419	3.586	6.3988	19.535	6.4627	10.2007	10.371	7.5515	6.3794	4.5319	11.5423	29.626	21.035	23.901	18.8	7.428	3.1668	4.0879	5.373	14.798	5.544	4.215	3.243	2.566	2.6014		0.634146	8.94415
12.5098	6.946	9.129	4.801	4.138	4.931	3.164	7.6568	17.8575	6.6755	9.6773	9.947	8.3497	6.0399	3.7429	10.5349	31.968	19.803	27.879	20.065	7.514	4.0528	3.4769	5.69	15.426	5.908	3.914	2.931	2.995	3.1081		0.640241	9.25246
12.629	7.487	7.362	4.031	3.356	3.569	3.714	6.493	18.0826	6.7246	10.0438	10.129	8.402	6.0243	4.1993	11.1886	37.527	20.726	26.691	15.934	8.803	4.0031	3.9768	5.459	13.987	6.911	5.068	3.622	2.842	3.4801		0.646342	9.3047
12.7481	8.944	7.755	3.327	4.733	3.495	3.662	5.3466	19.1275	6.7445	12.0423	11.398	8.6534	5.3519	4.8735	10.75	40.715	21.085	30.464	18.459	9.302	4.1224	4.3096	4.792	17.492	5.997	5.603	3.312	3.165	3.1299		0.652437	9.93626
12.8673	11.397	7.496	3.781	3.458	3.84	4.738	5.2358	18.474	6.0009	10.7783	11.217	8.7844	5.103	3.7599	10.2004	42.701	21.276	31.821	17.206	7.563	3.5311	4.5199	5.472	18.281	6.542	5.36	3.434	3.233	4.0765		0.658538	9.97518
12.9864	11.416	6.086	3.841	3.32	3.854	3.555	5.8605	14.9988	7.0793	11.2087	11.779	8.2435	6.2723	4.1683	10.5609	42.041	24.854	37.903	15.56	7.117	3.4235	5.0643	4.778	19.756	7.316	5.107	3.597	3.331	4.427		0.664633	10.2248
13.1055	12.686	6.553	5.368	4.512	4.408	4.358	5.5715	16.0026	7.3416	12.7775	12.129	9.1075	4.9395	3.7735	9.3	40.556	25.709	36.563	15.633	7.712	3.1168	5.1398	5.627	17.257	7.655	4.313	3.661	3.036	4.7464		0.670729	10.3294
13.2247	12.033	5.205	5.522	3.075	4.542	4.445	5.1598	14.8876	5.4352	12.8522	11.016	9.8549	5.832	4.0084	7.9177	40.331	25.413	38.909	14.894	8.2	3.3624	4.7862	4.994	15.822	9.237	4.851	3.667	3.227	4.6101		0.676829	10.141
13.3438	12.76	6.447	5.071	3.205	3.78	4.036	5.7367	13.878	6.9309	12.4716	10.765	9.5351	4.92	3.8288	8.1014	40.788	25.725	39.259	15.288	6.991	3.3981	4.1128	5.478	14.708	10.754	5.586	3.401	4.191	5.4443		0.682925	10.2273
13.463	14.269	7.171	5.608	3.887	4.112	4.339	4.9731	13.6676	6.6454	10.2032	11.137	11.1511	5.5038	3.6398	8.681	38.9	24.254	34.346	18.433	6.651	3.3312	4.7835	5.237	13.128	15.736	5.434	3.966	3.753	4.3695		0.689025	10.2521
13.5821	12.912	7.511	5.111	3.626	3.727	4.902	5.0747	14.3526	7.1648	11.729	12.513	10.6609	5.1196	4.0104	8.1145	41.726	22.73	30.19	20.013	7.191	3.87	4.7432	5.138	13.253	19.365	6.955	3.651	4.298	6.0222		0.695121	10.5405
13.7012	12.321	5.938	5.11	5.158	3.431	4.68	5.769	13.3281	7.8353	13.533	12.525	11.2351	5.0108	4.6144	7.518	42.045	20.135	29.892	22.863	6.348	3.2438	4.5563	5.113	11.488	23.075	7.777	5.21	5.62	7.0018		0.701216	10.7715
13.8204	15.757	6.043	5.356	5.586	3.839	4.72	5.9512	11.3007	8.1296	12.3835	11.73	10.6694	4.8897	4.8533	8.9408	42.471	21.283	31.601	24.908	6.686	3.6811	3.8447	5.564	12.144	25.679	8.536	6.027	6.731	7.9387		0.707317	11.2843
13.9395	14.566	7.724	6.559	4.24	4.34	4.433	5.2146	13.4749	7.536	11.6171	15.794	9.6312	5.4942	4.0866	9.5601	44.737	21.561	35.659	26.748	5.429	5.0615	3.6796	6.551	11.226	28.349	8.287	6.944	6.86	9.0521		0.713412	11.8764
14.0587	14.625	7.478	6.864	4.511	4.687	4.621	5.6645	13.428	9.4355	10.6211	17.168	9.4058	4.5135	4.9573	11.2822	47.26	18.703	35.268	28.554	6.418	4.0134	4.8072	6.123	10.398	25.151	10.766	7.117	9.469	12.2712		0.719513	12.2614
14.1778	14.752	7.867	5.686	4.304	4.93	5.087	4.7125	12.3103	9.5612	10.4427	15.78	9.1524	4.8502	6.0943	11.1336	45.478	19.898	39.253	30.117	5.857	3.0461	4.6086	5.29	10.421	23.73	11.443	7.638	11.421	14.0963		0.725608	12.3779
14.297	15.45	8.335	6.508	3.779	4.719	3.934	5.799	13.1554	9.5784	9.3732	13.356	10.1483	4.6835	5.7033	13.0788	43.278	24.887	42.437	26.337	5.741	3.5736	4.3497	5.277	11.85	22.475	12.501	9.978	12.921	16.904		0.731709	12.7624
14.4161	14.707	6.969	6.962	4.728	4.273	4.569	4.9653	12.271	10.8038	8.7136	14.028	10.0408	5.1055	6.3206	16.6085	40.565	26.189	47.994	25.258	5.603	3.7548	4.8554	6.087	9.167	21.934	12.138	11.489	16.216	22.3532		0.737804	13.2644
14.5352	13.927	6.218	6.866	5	4.332	4.897	4.4212	12.1098	10.4451	8.1996	16.114	11.7826	5.4088	6.6665	16.7524	41.189	30.058	51.644	28.317	7.093	3.8919	4.7625	5.872	10.855	22.579	13.836	10.605	18.387	25.4541		0.743899	14.0581
14.6544	14.76	7.287	7.186	6.067	5.463	5.201	4.8344	11.0822	10.9596	6.8907	14.755	10.9004	5.5012	6.4404	17.8183	48.12	34.234	55.02	24.816	5.941	3.7776	4.7118	6.279	11.054	22.646	13.075	12.015	21.042	28.2875		0.75	14.6953
14.7735	14.513	5.357	8.035	5.575	4.39	5.378	5.482	12.1377	11.101	6.053	12.578	13.0897	6.5495	8.01	18.0226	45.497	39.67	61.814	24.993	6.381	4.8977	4.1434	5.807	10.473	23.268	13.13	14.907	23.165	33.3321		0.756095	15.4396
14.8927	14.51	7.771	7.71	5.296	4.472	5.105	5.9633	12.1978	11.0863	6.6028	10.924	13.8639	7.008	10.0542	20.2761	47.248	44.146	65.561	22.657	6.496	4.5237	4.4564	7.75	11.354	23.042	12.52	16.358	27.145	38.6757		0.762196	16.3715
15.0118	14.089	7.842	8.217	5.883	4.535	5.445	5.2955	13.7478	12.7125	5.7998	11.724	14.9001	7.9749	9.5706	23.2962	48.794	46.629	68.226	26.37	6.957	4.1187	5.4241	8.094	11.791	22.11	13.94	17.208	31.053	46.9805		0.768291	17.5423
15.1309	14.769	7.963	6.564	5.97	5.65	5.519	5.2736	16.6415	11.8841	5.9573	10.684	16.8123	10.5031	9.6452	22.2237	51.662	48.446	71.597	24.691	6.89	4.8888	5.2493	10.136	11.76	25.429	11.573	22.327	34.04	48.2178		0.774387	18.3782
15.2501	16.537	8.16	7.663	7.749	4.862	5.616	5.6264	15.6283	11.7722	5.7558	7.87	15.2346	12.4897	8.6425	25.6513	55.484	52.688	72.07	25.259	8.518	4.2247	5.0819	10.359	11.239	20.883	10.196	22.137	35.058	52.1689		0.780487	18.7801
15.3692	15.534	7.957	7.195	8.954	5.373	4.682	5.3442	15.4254	13.1962	5.4694	8.144	19.2142	14.6299	9.6467	25.4484	60.547	60.299	77.767	27.486	7.483	5.5158	6.0509	10.182	14.539	23.332	11.661	22.99	34.068	47.9609		0.786583	19.8653
15.4884	14.637	8.058	8.204	8.194	5.073	5.855	5.9394	14.7844	12.891	5.448	8.192	17.0903	14.6309	9.5479	28.3938	70.626	61.349	85.764	26.798	6.054	5.1351	4.1337	12.476	18.62	22.506	10.452	22.4	36.423	44.3146		0.792683	20.4824
15.6075	18.555	7.832	8.523	8.936	5.447	6.473	5.7058	14.0568	12.7308	4.6823	8.4	15.0392	15.3186	9.2299	34.0091	69.184	68.804	85.361	29.484	7.71	5.092	5.7126	10.418	19.841	24.618	12.18	24.13	33.922	33.7989		0.798779	20.8688
15.7266	17.833	9.365	8.308	10.981	5.838	5.968	5.4315	13.3707	13.7326	4.7585	7.901	15.7511	16.8577	12.2619	36.7934	72.263	71.093	91.855	29.404	7.255	5.0368	5.4061	12.88	21.519	22.935	10.672	24.262	34.557	27.7895		0.804874	21.451
15.8458	19.669	9.58	8.342	12.61	6.849	6.24	5.4758	11.6924	12.3025	5.2173	8.576	15.5131	15.5567	9.0784	44.4943	74.579	71.496	93.277	33.5	8.273	6.5721	6.3838	13.191	26.501	25.864	11.713	25.69	31.404	21.2185		0.810975	22.0986
15.9649	19.474	10.777	9.026	14.308	6.372	6.293	6.7384	14.1309	14.0461	5.2396	7.455	15.713	14.1733	9.5679	50.7894	76.44	64.256	100.229	32.929	8.393	7.1928	6.2531	13.561	28.145	27.709	14.889	23.653	30.308	16.9656		0.81707	22.5871
16.0841	18.11	11.221	10.65	14.817	7.885	7.771	6.3072	13.657	13.543	5.8411	7.313	17.1937	14.6278	11.7009	54.0323	67.494	61.269	98.206	35.736	9.495	7.781	7.0545	16.674	37.979	32.685	14.833	24.132	29.168	12.2232		0.823171	23.0827
16.2032	18.466	11.02	9.651	16.35	7.818	9.073	7.91	13.7086	14.504	6.0113	8.582	19.4645	14.4892	11.8384	61.6421	66.393	55.34	101.728	36.174	10.348	9.0505	7.2387	15.955	45.143	32.716	16.54	24.75	26.52	10.5739		0.829266	23.7586
16.3224	21.926	12.148	9.058	18.093	7.865	9.211	8.701	13.5104	15.455	6.5758	8.514	17.8885	13.4655	12.1233	67.0863	54.703	44.527	97.449	37.621	11.919	13.4772	8.8437	16.884	46.272	38.445	19.127	23.145	25.256	8.5177		0.835367	23.7175
16.4415	24.053	12.758	10.753	20.421	10.112	10.667	8.9555	13.4216	14.1105	6.6211	7.466	17.5472	15.1914	13.704	75.0873	48.681	38.473	87.717	42.865	13.442	13.8796	8.6139	17.874	51.866	38.762	22.417	23.61	21.41	7.0662		0.841462	24.0533
16.5606	27.154	14.363	11.448	21.855	12.058	12.681	9.2215	14.8078	13.9566	6.5376	10.341	15.3529	17.4039	13.8729	79.9327	40.592	30.311	78.051	45.226	11.791	17.553	8.2029	21.402	50.309	38.021	25.195	23.868	17.837	7.0517		0.847558	24.0137
16.6798	28.29	13.212	10.812	26.703	13.419	16.082	9.4952	16.1035	15.9014	9.2161	11.652	15.0058	21.4842	14.9863	82.9685	32.019	24.8	68.723	47.471	16.597	22.088	9.3166	22.763	56.594	39.167	24.835	22.518	16.529	5.9562		0.853658	24.6451
16.7989	32.434	16.384	12.725	26.826	16.105	19.758	11.6042	16.8166	17.306	9.3549	12.668	17.3874	23.6175	11.9036	80.4704	26.511	20.443	59.757	53.97	16.907	26.716	9.5953	27.1	57.544	38.142	24.749	21.46	13.396	4.8037		0.859754	25.0502
16.9181	33.029	18.353	12.98	27.891	19.798	22.237	12.3572	17.3355	15.9449	10.5097	14.917	15.0294	27.3831	15.0089	75.2437	19.805	18.381	50.417	56.753	19.825	32.2289	10.6312	30.616	52.068	31.508	27.415	18.815	10.771	4.5205		0.865854	24.8887
17.0372	33.628	20.117	15.568	26.241	21.943	25.441	15.5881	18.9159	18.1043	12.8072	19.999	16.1566	26.433	16.0348	67.816	17.701	14.915	44.751	57.098	23.874	33.8193	10.9509	32.543	45.812	28.691	25.118	19.509	8.637	4.5225		0.87195	24.9219
17.1563	37.217	22.597	17.368	27.512	25.127	24.658	16.9407	17.0068	18.6925	18.0949	24.459	15.8705	27.9715	20.5281	55.6583	15.968	13.858	38.733	58.681	25.016	35.9912	13.815	35.387	38.505	25.066	20.97	17.77	7.871	3.4516		0.878045	24.8546
17.2755	37.544	28.116	19.903	26.015	28.827	23.109	18.1699	16.2829	20.532	22.0391	24.125	16.1149	25.6543	21.3333	40.3395	12.066	12.01	32.565	65.667	28.322	41.9352	15.9918	38.89	26.597	18.392	18.91	18.825	7.351	2.3196		0.884146	24.4119
17.3946	38.531	30.001	25.597	25.095	33.307	22.099	24.0995	17.0729	23.0288	26.82	25.876	17.6896	23.5374	24.0422	32.0957	13.135	10.801	26.561	61.499	34.882	47.6871	19.8671	35.795	16.773	12.96	15.05	16.33	6.671	2.4849		0.890241	24.4617
17.5138	39.246	35.887	30.059	26.221	34.396	18.357	29.3059	19.4913	25.8137	34.2732	26.872	18.7258	23.8172	23.1506	25.2766	10.893	9.223	21.754	65.223	36.319	46.8316	27.4903	34.561	13.627	9.435	15.797	14.833	5.974	2.3039		0.896342	25.0054
17.6329	41.931	45.514	30.678	28.292	36.226	17.405	35.8242	21.3295	30.9554	41.198	25.788	22.1536	27.7887	25.0023	19.1789	8.752	9.613	18.203	59.24	39.813	51.1756	28.418	34.614	10.908	8.116	14.405	13.905	6.114	2.4107		0.902437	26.0328
17.7521	44.273	52.51	28.354	29.222	38.462	16.052	46.1219	26.2181	36.6247	45.8169	27.632	26.7281	29.6728	23.3892	15.7563	7.892	6.33	13.557	50.969	47.12	51.8532	32.8342	29.546	8.584	7.788	11.14	12.351	4.752	2.0579		0.908538	26.6761
17.8712	45.009	56.656	30.656	28.255	39.364	12.177	52.0295	32.9808	41.2518	48.8339	24.643	31.1358	29.9659	26.0875	13.7902	6.738	4.725	11.009	45.823	45.847	57.4382	33.96	22.666	7.896	5.099	10.75	9.149	3.516	1.806		0.914633	26.871
17.9903	46.393	66.024	31.807	27.786	39.96	9.741	58.8479	31.8983	44.1587	54.5794	23.646	30.5464	28.1819	30.3247	12.2817	6.726	4.476	8.401	38.912	51.28	57.566	34.9153	19.215	6.065	5.137	7.964	8.332	3.725	1.6615		0.920729	27.2604
18.1095	52.158	63.624	32.468	25.443	34.808	7.913	57.7344	37.0603	43.4716	62.7774	17.342	30.0722	28.4165	30.3344	11.304	5.742	3.379	6.158	30.375	48.459	56.7975	33.8711	15.444	4.138	4.206	8.275	7.684	3.074	1.6178		0.926829	26.3499
18.2286	58.979	65.896	32.275	22.072	34.754	7.08	50.2918	44.8486	48.203	62.5988	16.712	24.4407	35.8437	34.647	10.781	4.767	2.885	4.21	25.083	47.992	51.4909	30.5973	9.272	3.609	3.436	7.474	6.748	2.611	1.4105		0.932925	25.8968
18.3478	63.024	64.916	26.959	17.099	27.511	5.614	41.7327	53.2039	52.7241	61.2085	15.13	20.3463	39.4352	37.3706	8.4234	3.911	2.509	3.764	18.054	40.174	44.0499	25.0447	7.581	3.069	2.484	5.444	5.689	2.616	0.8943		0.939025	24.1373
18.4669	69.013	57.85	24.74	14.266	23.301	4.689	28.5622	58.1975	53.0874	57.2377	11.642	15.657	50.9565	46.9378	8.2152	3.713	1.918	3.049	13.12	35.326	36.2759	23.0341	7.216	2.851	2.176	4.596	4.418	2.137	1.2023		0.945121	22.9443
18.586	81.603	48.259	20.884	10.015	20.656	5.041	19.7495	61.0943	49.0799	48.0286	8.528	11.2722	59.6663	57.3145	7.6709	3.626	1.386	2.44	9.039	27.933	24.7805	16.474	3.888	2.366	2.04	3.765	2.977	1.566	1.02		0.951216	21.1091
18.7052	93.822	41.251	17.244	8.137	14.708	4.314	12.6365	56.8198	42.5784	37.9596	9.124	8.6878	68.2034	65.2891	4.8426	2.468	2.208	2.421	6.949	19.674	15.1661	10.4062	2.982	1.577	1.778	3.084	2.879	1.501	0.8963		0.957317	19.2968
18.8243	103.844	27.204	13.939	5.743	10.106	3.975	9.6272	56.9444	31.8755	29.7518	6.386	7.1586	71.9081	69.8017	4.5645	2.962	1.845	2.036	5.937	14.185	10.9597	6.4806	2.093	0.843	1.362	2.595	2.772	1.242	1.2605		0.963412	17.5656
18.9435	109.376	21.394	12.563	5.471	9.593	3.034	7.5943	57.8067	23.8671	20.6441	5.442	5.4663	72.0385	69.2246	4.0956	1.937	1.424	1.795	4.774	9.317	7.3752	6.6777	2.329	0.837	1.557	2.546	1.621	1.458	0.7422		0.969513	16.2759
19.0626	99.512	14.299	10.108	5.563	6.579	2.227	5.48	52.3963	18.9408	14.9805	5.189	5.0868	69.4581	63.7188	4.0641	1.419	0.739	1.582	3.478	7.251	5.4902	3.4567	1.256	0.946	0.89	2.03	2.264	0.808	0.8832		0.975608	14.1412
19.1817	81.207	12.108	9.275	3.405	4.112	2.433	3.2902	41.0465	12.272	11.5859	3.34	4.0973	61.8758	49.6709	3.2957	1.342	1.166	1.155	3.628	6.696	3.8395	2.7001	1.303	0.636	1.08	1.684	1.871	0.759	0.7146		0.981703	11.4341
19.3009	56.866	8.742	6.546	3.556	4.796	1.748	2.2932	32.8663	8.4046	9.1373	3.473	3.5877	54.7973	36.1417	2.4878	2.096	1.148	1.776	2.125	4.355	2.7324	2.5121	0.816	0.693	1.076	1.573	1.353	1.035	0.604		0.987804	8.94267
19.42	34.168	6.705	6.557	3.746	3.362	1.938	2.0118	20.854	5.0426	6.5755	2.65	3.3031	37.7748	27.156	2.2274	1.818	0.88	1.177	1.917	5.011	2.3135	2.2559	1.196	0.402	0.594	1.002	1.094	0.59	0.5127		0.993899	6.3736
19.5392	20.322	6.198	5.632	2.611	3.086	1.508	2.0417	14.1449	3.8428	4.9024	1.847	2.2114	26.8679	24.1094	1.9922	1.208	0.747	0.909	1.817	3.818	2.1128	1.3088	0.694	0.666	0.976	1.41	0.911	0.761	0.2252		1	4.78898

## Sheet: Image13 (2)
X0	Y0	Y1	Y2	Y3	Y4	Y5	Y6	Y7	Y8	Y9	Y10	Y11	Y12	Y13	Y14	Y15	Y16	Y17	Y18	Y19	Y20	Y21	Y22	Y23	Y24		Ap-basal	Avg int
0	14.2009	20.03	10.499	10.4573	17.2539	10.4847	9.9418	15.3235	12.028	12.574	27.9462	33.0635	26.5623	27.9262	20.1313	17.2073	16.7075	12.2755	16.4343	22.0447	22.8694	15.8364	13.589	17.1419	24.4903		0	17.8808
0.1191	16.0266	21.895	12.619	9.2329	18.6355	11.6756	10.8629	14.5276	13.2617	13.9338	31.2331	36.1019	26.6434	30.5864	20.7538	18.2212	18.9691	13.3042	17.4594	23.7487	25.4349	17.4408	13.855	18.3985	25.735		0.00427202	19.2222
0.2383	19.9622	25.494	14.475	10.2421	22.6002	13.0333	12.2868	15.7603	13.811	13.707	34.5303	38.8612	27.5178	34.8835	23.1519	18.5225	22.2646	13.6932	18.8347	24.454	29.1097	18.1289	15.964	19.149	26.0115		0.00854762	21.0579
0.3574	21.2959	33.835	17.189	10.7415	27.4425	15.7825	13.4831	18.3148	16.5681	14.9508	34.5427	42.5687	29.2541	36.0655	24.0646	19.2174	27.0369	14.7237	19.3118	24.2928	30.9531	17.3289	16.993	20.8764	25.217		0.0128196	22.882
0.4766	23.0236	46.22	20.345	12.9116	31.2239	14.8198	13.3122	19.8847	17.1922	15.7123	35.8873	46.9606	30.7278	37.8221	28.1037	22.427	36.7436	15.4088	22.082	25.6593	32.0871	21.0038	18.84	23.2873	26.0988		0.0170952	25.5114
0.5957	24.4408	57.341	25.94	14.0803	36.5991	19.2115	16.4711	21.731	18.7756	15.6842	38.24	52.101	33.959	41.6472	32.0314	25.2018	44.1897	16.5443	24.485	26.3402	34.9698	23.5931	22.313	25.9228	28.1712		0.0213673	28.7994
0.7148	30.7033	68.285	35.244	16.5411	40.7121	19.5885	20.0529	26.6659	23.2219	18.9755	39.4622	52.3954	35.2893	47.9023	35.058	29.2209	52.6666	19.1649	28.1982	30.1589	39.3237	28.6119	27.507	31.6474	28.6083		0.0256393	33.0082
0.834	34.4496	81.193	45.559	18.1208	41.9853	20.7291	22.6484	33.3548	26.5386	20.1113	38.9251	51.0934	33.8843	53.599	37.4196	34.5416	62.082	20.8378	31.7688	30.6429	39.6709	33.3385	35.173	35.6738	29.6678		0.0299149	36.5203
0.9531	47.3299	93.747	62.094	19.4084	43.8956	27.0747	22.9765	38.199	29.3009	21.1509	38.0101	52.5401	37.4579	55.9958	41.2895	43.2465	72.3736	24.0852	33.4793	34.1103	40.3602	40.6166	41.781	38.2067	30.7453		0.0341869	41.179
1.0723	57.1575	106.481	79.01	23.404	50.2252	30.0713	27.7888	42.5077	35.3234	28.8427	40.4679	53.3798	38.922	55.7448	44.9427	49.36	79.8111	28.4736	37.3097	35.9999	42.4754	50.0573	53.671	49.1255	32.5899		0.0384625	46.9257
1.1914	68.5472	111.525	94.632	28.3998	54.4425	37.4279	33.9364	50.6066	43.8906	28.915	45.685	52.5322	39.6156	56.2676	46.6419	55.185	85.2759	35.6284	41.5493	36.7168	45.1636	55.3171	67.268	57.9483	35.5134		0.0427345	52.3452
1.3106	74.3764	115.693	106.523	34.7898	58.1964	42.1952	40.0357	59.5286	48.5298	36.4135	42.0751	49.7143	41.5765	60.6139	49.4539	60.1821	86.746	42.0136	41.8424	41.7614	46.0483	61.9386	76.257	63.2	38.1237		0.0470101	56.7131
1.4297	87.0299	116.885	106.672	38.3194	61.4456	49.025	47.0643	64.22	51.8439	45.4847	42.3492	46.6502	44.3071	62.8591	51.9645	65.6377	90.2596	47.3386	42.6541	45.0067	49.1301	69.1068	88.151	69.6236	39.5464		0.0512821	60.903
1.5488	93.6709	111.481	104.32	42.8782	64.1939	50.8588	54.8826	66.6233	57.4615	50.9003	42.5035	45.3789	45.3829	63.5535	56.6291	68.8474	87.312	52.9364	44.0284	46.387	51.411	71.4814	97.127	76.9139	40.1776		0.0555542	63.4936
1.668	94.2451	99.103	98.798	51.7194	65.5505	56.5037	58.9515	66.6353	59.5474	54.614	43.5279	44.8345	47.6174	62.3401	56.9256	72.0692	81.1805	56.1903	44.4118	50.9933	55.1674	72.2882	101.665	80.6487	45.7775		0.0598298	64.8522
1.7871	97.7525	82.54	88.451	61.7259	66.2895	62.3024	67.6259	65.0123	60.3984	59.816	45.0582	46.4319	45.6822	59.904	59.3159	72.9198	75.9208	60.2057	48.1339	49.989	58.4873	66.8685	103.23	76.0812	48.5124		0.0641018	65.1462
1.9063	93.7057	66.11	72.922	67.4037	65.9187	63.2143	73.622	66.0345	58.989	65.6958	44.4267	45.1434	49.478	58.303	61.4001	74.6831	67.458	63.2641	50.1295	50.9924	57.8249	68.9222	101.764	76.1751	50.2433		0.0683774	64.5529
2.0254	88.929	42.661	56.758	71.8418	64.3301	66.6609	75.4456	60.4051	59.0297	66.7638	43.7565	43.9411	51.2924	57.1488	61.9785	74.9055	58.9317	66.2317	51.4535	52.5305	60.5698	67.3788	95.319	71.5646	49.0983		0.0726494	62.357
2.1445	75.6483	28.106	42.578	72.43	60.0985	60.2449	74.3437	53.2948	55.8234	69.4381	44.9508	46.8053	51.1528	53.1011	64.7607	68.3788	48.9006	69.4744	53.1516	56.4355	62.1532	60.8348	81.214	64.5177	46.1127		0.0769214	58.558
2.2637	62.5955	20.775	32.158	71.9216	54.6187	61.5821	71.3095	46.8774	48.5262	68.4601	45.5312	44.5594	51.9669	51.1994	64.4811	68.1521	43.6892	68.1293	55.6308	55.6119	62.9144	55.9468	70.545	59.7578	49.0853		0.081197	55.441
2.3828	56.2006	15.41	22.778	70.3997	50.0179	62.0535	68.8415	39.2398	42.9631	68.5619	49.3232	40.2441	51.5851	49.4087	64.1432	64.1047	40.5213	64.9352	54.1793	61.0905	65.3276	55.818	57.75	54.0395	50.185		0.085469	52.7649
2.502	41.9412	12.101	19.003	61.5443	46.4448	61.2127	67.6824	29.79	33.7134	65.8148	51.0074	38.4062	52.0764	46.4644	63.3042	59.3898	35.0431	63.8189	55.385	65.2768	61.4967	52.9775	47.238	45.7158	48.6186		0.0897446	49.0187
2.6211	29.8631	11.234	16.713	57.7824	41.8667	59.3188	58.5633	20.8749	27.5897	63.7735	50.1851	38.7363	52.0951	42.1589	58.7173	52.3473	32.5203	58.859	53.7523	62.3004	63.2954	49.5613	39.545	39.7037	43.513		0.0940167	44.9948
2.7402	22.0103	9.57	14.102	53.732	39.4738	54.5251	50.3191	17.127	21.9475	57.1971	52.5949	36.7025	50.5567	37.1491	54.9476	48.4144	31.0793	56.0253	57.9615	60.0291	63.3837	48.5041	34.374	32.4084	44.0905		0.0982887	41.929
2.8594	14.9928	9.948	13.339	44.9082	34.5815	47.8419	42.8837	15.249	16.6742	48.4918	52.7385	36.1504	48.409	33.5889	55.0201	43.6858	25.9069	52.6938	59.1761	65.8921	64.158	46.2711	32.077	30.6736	45.0558		0.102564	39.2163
2.9785	12.7593	7.873	11.266	36.7982	27.1568	40.132	35.5752	12.8865	13.9302	39.2365	53.5826	37.4637	46.7312	31.3335	46.6301	36.9505	25.4289	53.1912	55.4187	66.4301	62.129	43.2292	29.463	27.9283	44.2515		0.106836	35.911
3.0977	11.4939	7.837	10.387	33.584	23.6994	35.4583	29.9478	10.0245	12.3596	31.3377	50.6032	37.9366	42.8476	27.0832	40.9287	32.908	25.0095	52.8878	52.1698	61.9586	61.953	38.8118	28.021	25.4023	38.6758		0.111112	32.933
3.2168	9.1724	7.599	8.883	30.8418	21.9641	27.1324	24.9169	10.119	11.7877	24.9979	51.6609	37.6987	41.8129	22.2796	35.9053	29.5306	23.0233	50.0237	53.6854	58.9732	59.8609	36.2717	25.217	20.7377	38.9901		0.115384	30.5234
3.336	8.1307	6.701	8.603	26.3414	20.9586	20.6573	22.5895	9.4851	8.4983	19.5946	49.6823	35.8292	40.3788	19.1462	30.8464	25.446	21.9592	47.2514	55.228	59.3274	58.1556	34.9092	24.06	22.0145	40.5167		0.11966	28.6524
3.4551	7.7326	6.642	7.409	24.2791	19.7748	16.8038	21.6788	7.9137	8.0669	16.1262	47.3873	35.8706	35.6627	15.1642	25.1241	23.5752	18.9578	43.2448	55.1774	56.6026	57.3899	37.7777	22.932	22.9748	37.2529		0.123932	26.8608
3.5742	6.5053	5.808	7.199	22.9431	20.9866	13.9181	21.714	7.1859	7.9112	13.4232	45.431	37.6071	36.152	12.4347	23.8393	23.1801	18.4522	40.1062	55.473	53.7215	58.2926	36.1402	21.364	20.738	34.6566		0.128204	25.8073
3.6934	6.4977	5.594	7.326	19.6764	20.5574	13.1326	20.9628	6.2235	7.5727	11.3457	44.7721	36.7648	35.008	10.3903	20.6852	18.6279	17.7557	38.6151	52.9189	50.9723	56.0868	33.775	19.063	20.7865	35.1156		0.132479	24.409
3.8125	6.0092	5.059	6.565	17.0939	17.9044	13.9005	18.8522	5.8847	6.8772	9.54	43.5369	35.3676	29.8279	9.6434	16.2663	15.3157	15.8349	33.9699	51.6964	47.7366	57.695	33.3441	19.421	20.4727	34.8926		0.136751	22.9083
3.9317	4.9567	4.053	5.8	16.4977	16.8304	14.6473	16.2422	5.579	5.6819	8.9967	39.9891	34.6955	27.4365	7.9666	16.6796	13.9025	14.4187	34.004	48.9835	41.1254	54.8938	33.1987	18.568	19.9483	29.4935		0.141027	21.3835
4.0508	4.9756	4.229	5.228	15.5208	13.4052	13.1027	14.9867	5.0662	4.2768	8.5758	37.9952	31.7144	26.7933	7.2758	14.2888	12.1222	13.9197	30.0546	46.6461	36.8451	54.0831	30.3503	20.147	20.4396	30.1662		0.145299	20.0883
4.1699	4.0826	4.168	5.505	12.7049	11.303	12.0717	12.7617	4.7093	3.8048	7.1599	36.8361	27.8426	26.6771	6.573	11.5334	10.3808	12.1825	30.4408	46.4672	31.1459	52.9466	31.6917	17.713	18.1101	29.6784		0.149571	18.7396
4.2891	4.8118	3.589	5.634	11.9282	10.076	11.9178	12.8512	4.7125	3.7373	6.6883	35.2645	29.7034	21.582	6.8032	9.7058	9.4448	11.7166	28.8985	45.7779	28.3989	50.3862	30.4922	16.573	18.5882	27.8676		0.153846	17.886
4.4082	4.3827	4.808	4.681	10.9365	7.2534	9.8167	12.6015	3.9961	3.9672	5.2105	30.8023	27.4767	22.5529	7.1312	9.1286	8.7093	11.7142	25.874	43.3207	21.9819	49.1138	31.059	16.524	20.3534	24.6627		0.158118	16.7223
4.5274	4.4627	3.461	4.897	10.2368	5.099	9.2273	10.6716	3.7192	3.6888	4.3194	28.0297	26.0513	21.6917	6.6729	8.8743	9.5505	10.7047	24.9822	44.7132	18.7437	46.7832	29.9094	16.536	19.0193	25.9563		0.162394	15.92
4.6465	3.8566	3.514	4.617	9.8056	4.1458	8.1749	10.192	3.9384	2.8041	3.8528	24.7907	23.93	18.7289	6.5678	6.8136	8.349	9.5041	24.375	44.5365	16.396	44.8501	28.9526	16.444	19.8993	23.5016		0.166666	14.9016
4.7657	3.3508	3.931	3.701	8.7234	4.1607	7.3277	8.7631	4.0565	2.8981	3.8733	22.6761	22.8846	18.0999	6.3003	6.7822	7.0259	10.3743	23.2836	41.9348	13.3295	41.3429	31.5103	17.225	20.0515	22.3661		0.170942	14.2389
4.8848	3.5328	3.864	3.388	8.3109	3.357	6.4739	9.9026	3.7789	3.1103	2.9044	20.0819	19.7642	14.6991	7.1604	6.2842	7.0277	9.7726	22.7374	41.0307	12.1819	38.9277	30.1184	16.268	20.6728	19.4974		0.175214	13.3939
5.0039	4.0151	3.811	3.553	8.81	3.924	6.3709	9.8327	3.6106	2.8623	3.8247	17.6731	18.7706	14.2135	6.8924	5.1726	6.5388	8.6672	20.1737	38.4849	10.8682	33.6007	29.8126	16.958	18.9453	18.0555		0.179486	12.6177
5.1231	3.0393	3.081	4.02	7.381	3.8243	5.8794	8.8042	3.5208	2.6656	3.375	17.3622	16.3256	13.3831	5.8336	4.6774	4.9207	7.1633	19.5611	38.2703	9.4649	32.665	30.2168	19.13	18.6925	16.8284		0.183761	12.0034
5.2422	3.045	2.994	3.26	7.5793	3.4185	5.4614	8.9308	2.8472	2.7334	3.2328	16.2028	15.8815	12.6385	5.0513	5.544	5.0797	6.4001	18.8068	37.5281	9.7591	29.7199	28.6244	19.474	17.8058	14.5656		0.188033	11.4634
5.3614	3.7268	3.111	3.39	7.3823	3.1469	5.3983	8.5034	2.7915	2.365	2.7107	15.8817	14.4442	10.4109	5.9842	5.2813	4.549	6.1894	18.8357	35.0515	8.6345	29.4282	25.4591	18.74	16.6742	12.2411		0.192309	10.8132
5.4805	3.3222	2.932	4.008	6.9142	3.5342	5.2538	8.2521	2.5114	1.7825	2.8012	14.0667	11.6957	8.8986	6.0271	3.1134	4.478	5.5451	18.4412	31.3726	8.7232	26.6863	23.5911	17.317	16.2454	10.747		0.196581	9.9304
5.5996	2.665	2.967	3.148	6.0935	3.5968	5.4324	7.2124	2.5544	2.2958	2.849	13.2108	12.3251	9.439	5.8629	2.845	4.3282	5.5051	17.495	27.5078	8.7022	20.9691	22.5805	17.004	15.4709	9.5897		0.200853	9.26598
5.7188	2.9682	4.002	2.98	7.1753	3.2919	4.8131	6.103	2.395	2.1207	2.3033	11.5548	8.9436	7.3315	5.7961	2.4238	3.3209	4.5364	14.8652	24.9465	8.6303	17.4895	22.0059	15.546	16.1848	8.3174		0.205129	8.40181
5.8379	3.0853	3.017	3.477	6.8159	3.7602	3.6327	6.552	2.6141	2.3019	2.065	10.9263	7.1354	6.4062	6.6573	3.2706	3.531	3.9345	16.125	19.3016	10.2269	14.5636	23.2772	16.233	16.7025	7.5735		0.209401	8.12743
5.9571	3.1382	3.303	3.395	6.1171	3.3058	4.2845	6.75	2.8129	1.9037	2.0652	9.7436	5.857	5.2846	6.838	3.3825	3.3593	3.6039	15.4123	17.0779	10.6015	11.4519	22.6268	16.56	15.3618	6.9278		0.213676	7.64657
6.0762	2.4799	3.323	3.326	5.9327	3.4149	4.4757	6.2831	2.9987	2.2495	2.472	8.8041	6.2307	4.9674	6.0773	3.276	2.9523	3.4185	13.6536	14.1767	9.0765	10.4428	19.3827	16.797	14.7561	6.8965		0.217948	7.11455
6.1953	2.5452	3.076	3.653	5.2458	3.4789	3.7058	5.8146	2.6176	2.3785	2.0841	8.1198	6.2997	5.1744	6.1116	2.6747	3.1475	3.1902	13.7736	10.7209	7.9449	9.7531	18.42	15.11	12.3683	6.7051		0.22222	6.56453
6.3145	2.5198	3.007	3.223	6.0985	3.3059	3.3602	5.4888	2.8269	1.8892	2.4189	8.1412	6.1038	4.6481	6.515	2.8249	3.2186	3.3523	13.4561	9.7382	8.9578	10.5922	16.5186	13.795	12.5291	5.5915		0.226496	6.40482
6.4336	3.0637	2.559	3.013	5.6042	3.5914	3.9025	7.283	2.1493	2.1078	2.4177	7.4145	6.0041	4.522	6.199	2.5381	3.0732	3.3247	12.1412	8.2612	9.5045	10.0065	14.5816	13.839	12.0584	5.3665		0.230768	6.18104
6.5528	2.6399	2.667	3.089	5.6773	3.3863	3.5737	5.7633	1.8464	1.7793	2.1227	7.9376	6.2154	4.1427	6.2451	2.9603	2.4429	2.5333	11.6358	7.7657	9.3361	10.2478	14.5836	12.776	11.2335	4.7518		0.235043	5.8941
6.6719	2.9746	2.401	3.744	5.4721	3.3852	2.8111	5.4775	2.4314	1.8113	2.2967	7.8981	5.9613	4.4054	6.0945	2.6674	2.6714	2.4977	9.9369	6.699	8.5367	8.8453	13.0246	13.196	9.5772	5.0586		0.239315	5.595
6.7911	2.4984	2.332	2.798	4.7375	3.4053	3.0918	6.2134	2.3399	2.2361	2.4912	7.3539	3.9451	3.6893	7.1395	2.9069	3.0615	2.1706	7.8462	6.2605	7.8214	7.6462	10.8765	12.017	8.7254	5.3381		0.243591	5.15767
6.9102	2.9002	2.53	3.38	4.9774	3.7802	2.9265	5.9209	2.2767	2.0378	2.6868	6.6916	4.154	2.9645	6.1367	2.173	2.523	2.3052	7.1242	6.5163	7.5464	7.0933	9.7055	11.787	7.4489	5.4034		0.247863	4.91958
7.0293	2.3908	2.247	2.637	4.8228	3.0653	3.1689	5.2996	1.7257	1.6966	1.837	7.821	3.249	3.2646	6.1006	2.8936	2.2796	2.7807	6.2719	6.4948	7.7297	7.1772	9.0081	10.939	6.588	5.3403		0.252135	4.67315
7.1485	2.7277	2.449	3.112	5.5749	3.041	2.6248	5.7391	2.1549	2.2824	2.4698	6.6675	2.8406	2.9609	5.5188	2.6707	2.5563	3.0065	5.9284	6.8745	7.6339	7.1362	7.2472	9.638	5.7767	4.2123		0.256411	4.51376
7.2676	3.2305	3.464	2.899	5.1168	3.3971	3.5058	6.4299	1.9206	1.4746	1.9722	6.597	3.2429	2.5646	5.3516	2.5186	2.5419	2.4455	5.3713	6.1517	7.4951	6.3216	6.4164	9.624	6.0023	4.9064		0.260683	4.43846
7.3868	3.0726	3.195	2.621	4.9421	3.0345	4.0878	7.1593	1.993	1.6039	1.6829	7.1269	2.7572	2.4986	5.9021	2.207	2.298	2.3313	4.9272	5.2002	8.1457	6.427	6.127	9.122	5.3498	6.0781		0.264958	4.39561
7.5059	2.6055	2.807	3.025	4.692	3.0101	3.0777	6.504	1.9497	1.8437	1.6508	5.5474	2.7207	2.1301	6.0933	2.2168	1.7911	2.0051	3.8833	5.0408	8.3622	6.6255	6.3285	8.954	4.68	5.7988		0.26923	4.13372
7.625	2.6765	2.882	2.54	4.5791	3.655	3.4308	5.3299	2.2553	2.286	1.9716	5.6417	2.5754	2.6848	5.3821	2.24	1.8287	1.7517	3.4488	5.8427	7.589	6.215	5.9764	7.478	5.1143	5.1952		0.273502	4.0228
7.7442	2.9162	2.573	2.692	4.311	3.5151	3.6649	5.4691	1.8869	2.1187	2.1251	6.3558	2.6818	2.5957	3.9755	2.4839	2.2554	1.7644	3.7437	5.5039	7.3616	5.0147	5.9311	8.228	5.8158	4.6892		0.277778	3.9869
7.8633	2.6539	3.334	2.765	4.539	3.426	3.4082	5.2155	2.3619	1.6173	1.6383	5.7647	3.0565	2.6801	5.0629	2.6081	2.3651	2.0501	3.0438	4.7967	8.1316	4.6265	5.123	7.486	5.1983	5.388		0.28205	3.93362
7.9825	2.6126	3.128	2.445	4.7568	4.0107	2.9367	5.1897	1.9854	1.6333	2.0884	5.3705	2.7338	2.4434	5.618	2.2139	2.0581	2.3797	2.9998	4.9383	7.5953	4.5452	5.2903	6.547	4.8179	5.1367		0.286326	3.81898
8.1016	2.2778	2.058	2.49	5.6091	3.5472	2.9706	5.3114	1.975	1.7095	1.9126	5.8111	2.2705	2.2655	5.8722	2.4967	2.2292	2.0298	4.128	4.598	7.8294	4.1229	4.6647	7.617	4.1684	4.9313		0.290598	3.79584
8.2207	2.3416	2.355	2.24	5.8404	4.0793	2.8928	5.6851	2.3695	1.7931	1.6735	4.9182	2.3695	2.0097	6.1443	2.1527	2.0589	2.1914	3.8391	4.4888	7.8636	4.2382	4.3685	7.136	4.2478	5.2383		0.29487	3.78141
8.3399	2.8815	2.344	2.622	4.7568	4.5038	3.4246	6.0289	2.0423	2.1352	1.6269	5.2336	2.9283	1.9735	6.8837	2.6524	2.1121	1.916	3.6661	5.0269	8.1296	3.6337	3.5892	6.285	3.8095	5.4491		0.299145	3.82619
8.459	2.9266	2.122	2.932	5.8213	5.0779	4.1045	6.968	1.9812	1.3448	2.1035	4.3458	2.1524	2.4829	6.4953	2.6228	1.7298	1.7689	2.89	4.8722	8.5532	2.4369	3.1683	5.742	3.8102	6.2824		0.303417	3.7894
8.5782	2.885	2.316	2.487	4.8646	6.4148	4.083	6.7803	1.9371	2.0127	2.1141	5.2312	2.4024	2.0356	5.2581	2.4743	1.6472	1.6859	3.1173	4.9208	9.0625	3.1529	2.9954	5.798	3.4873	4.7		0.307693	3.75454
8.6973	2.9571	2.401	2.411	5.8527	7.5547	3.4836	5.9745	1.7807	2.4335	2.2914	4.9544	1.9204	2.0169	5.025	2.5397	2.3732	1.8377	3.0474	4.9752	9.4098	3.853	2.9318	5.242	4.2492	5.0239		0.311965	3.86159
8.8165	2.1022	2.449	2.38	6.1747	6.1595	3.4895	6.4646	2.0296	1.4567	2.4448	4.598	2.2208	1.8262	6.1889	2.1671	1.9714	1.5307	2.7831	4.7857	11.0233	3.2093	2.5927	5.128	4.5078	4.857		0.31624	3.78162
8.9356	2.6199	2.847	2.456	4.8105	5.7001	3.2891	6.6749	2.1591	1.6226	1.7891	5.599	2.3786	2.1756	5.7069	2.2263	2.419	2.0893	2.5278	5.3125	10.8118	3.4487	2.4944	4.111	4.6027	4.5826		0.320512	3.77818
9.0547	2.3633	2.493	1.913	5.4504	5.0452	3.5767	7.1351	1.9628	2.546	0.9931	5.2734	2.3221	2.1925	5.3476	1.9859	2.1847	1.7348	2.7028	5.8027	10.8564	3.3056	2.6174	4.205	3.8868	5.4136		0.324785	3.7324
9.1739	2.532	2.81	1.921	4.8563	4.441	4.0968	7.4195	2.3068	2.4551	1.1136	5.6344	2.07	2.0012	5.2345	1.8763	2.5577	1.8342	2.5178	5.1037	11.353	3.2052	2.7606	4.163	3.8355	4.8105		0.32906	3.71639
9.293	2.495	3.036	2.403	5.3635	4.5883	3.0252	6.6235	2.0829	2.5283	2.1553	5.0968	2.4144	2.1632	5.399	2.2989	2.121	2.069	2.7924	6.4611	11.3401	2.8106	2.5181	4.09	3.1022	4.7539		0.333332	3.74927
9.4122	2.9033	2.651	2.475	5.8526	5.3942	3.7423	6.5553	2.1014	1.8408	2.1746	5.9054	2.7484	1.804	6.1064	2.6823	2.3024	1.9564	2.1147	5.6147	10.4313	2.878	2.8633	3.174	3.5392	5.055		0.337608	3.79464
9.5313	3.1794	2.113	2.68	6.4385	4.939	3.7176	7.6075	2.05	1.7213	2.3794	5.6466	2.4402	1.7741	6.3705	2.8669	2.4372	2.3246	2.1635	5.9371	10.7479	3.5827	2.5761	3.14	3.327	5.3624		0.34188	3.9009
9.6504	3.0408	2.477	2.428	5.7792	4.0179	3.3412	6.588	2.2131	1.5585	1.955	5.5959	2.4165	1.9638	6.612	2.8144	2.7256	2.2226	2.9364	5.7003	11.4257	3.2289	2.3755	2.599	3.6659	4.3397		0.346152	3.76084
9.7696	2.8251	2.432	2.384	6.2701	5.3705	3.5524	5.9279	1.9859	1.8981	1.9213	5.7788	2.8081	1.8802	6.4707	2.7331	2.5125	1.7037	2.2971	6.39	10.2546	2.8416	2.5439	2.653	3.5762	4.2981		0.350427	3.73236
9.8887	2.8418	3.161	2.377	6.9817	5.3683	3.486	6.1676	2.9963	1.5147	2.335	6.0496	3.0824	2.0671	5.6787	2.6538	2.3246	2.5223	1.8294	6.3784	9.9314	2.8836	2.604	3.76	3.3436	5.0436		0.354699	3.89528
10.0079	3.3794	2.731	2.345	8.1388	4.8024	4.2148	6.2601	2.6607	2.0382	2.1026	6.2966	3.2437	2.3278	7.0387	3.0968	2.4105	1.8985	2.0433	5.9816	10.4538	2.9612	2.1257	2.736	3.3429	4.4665		0.358975	3.96386
10.127	2.6009	3.059	2.244	7.3203	5.2645	4.8427	5.9571	2.1614	2.0696	1.793	6.3087	2.9993	2.6732	7.256	3.4598	2.192	1.8745	1.6681	6.3394	9.992	3.14	2.4871	2.45	3.5519	5.247		0.363247	3.95806
10.2462	2.858	2.335	2.844	6.3057	5.0608	4.0871	6.3663	2.0661	2.3222	1.8073	6.2609	3.4168	2.2791	7.0545	2.7289	2.4868	2.3284	2.7674	6.3544	9.2314	2.0778	2.7403	3.296	4.4297	3.8898		0.367523	3.89579
10.3653	2.8504	2.671	2.104	6.9883	5.4136	3.7238	6.1194	2.1049	1.9891	2.2155	6.3769	3.2444	2.3162	6.6956	2.5477	2.8906	1.7816	2.1666	6.2633	10.7542	2.685	2.7557	2.523	3.8171	4.275		0.371795	3.89092
10.4844	2.5921	2.954	1.918	5.3677	5.0181	3.131	7.2291	1.8612	1.9959	2.3452	7.1502	2.8923	1.7243	6.3159	3.2379	2.1055	1.72	2.0982	6.606	9.9596	3.0884	2.2316	3.209	3.9588	5.1241		0.376067	3.83336
10.6036	2.8032	2.66	2.527	6.5743	7.2115	4.2308	6.6858	1.7652	2.1181	1.5317	7.4435	3.8743	1.6167	7.1087	3.0952	2.698	1.538	2.5972	6.0808	10.1143	2.6627	1.7783	2.746	4.3144	4.3812		0.380342	4.00628
10.7227	2.7422	3.034	2.145	5.6658	6.8793	3.5514	7.6316	2.1573	2.0458	1.6657	6.2048	4.8216	2.2831	7.8001	3.116	2.4281	2.5809	2.3356	7.3298	10.1003	2.5555	1.7552	3.291	4.8224	4.0459		0.384614	4.11954
10.8419	2.9512	2.655	3.144	5.5832	6.4451	2.5551	8.9136	2.8181	2.4297	2.3359	5.3715	5.164	2.4562	8.8109	3.2115	2.954	1.8054	1.8266	7.5383	9.9391	2.5773	1.717	3.293	3.7943	4.72		0.38889	4.2004
10.961	3.2821	3.61	3.438	5.608	7.384	2.3725	9.6558	2.5463	1.8191	1.9347	6.3283	5.4883	1.6162	8.4107	2.8063	2.762	2.083	1.667	7.8788	11.6243	2.6684	1.4388	2.981	3.9758	4.8985		0.393162	4.33112
11.0801	3.7549	3.731	2.374	5.51	7.7587	2.5887	9.3648	2.1242	1.8492	2.1066	6.3419	5.9667	1.7291	8.7609	3.0661	2.7866	2.0945	2.1201	8.3927	9.4287	2.5129	2.1002	3.054	3.864	4.3591		0.397434	4.30958
11.1993	3.4499	3.284	2.726	5.6586	8.8824	2.6968	9.6775	1.9869	2.2246	2.1872	5.9199	6.6174	1.6473	9.8588	3.0027	2.6697	1.7485	2.0229	8.9493	9.327	3.0295	2.2739	2.901	3.8276	4.4858		0.40171	4.44221
11.3184	2.7908	3.121	3.022	7.3509	10.0675	2.1017	9.456	2.3906	1.9364	2.4619	5.9973	6.0843	1.9516	9.3796	3.5333	2.9137	1.8794	1.8616	10.264	10.4433	3.1045	2.3784	2.16	4.0631	4.286		0.405982	4.59996
11.4376	3.4033	3.669	3.014	7.811	10.2721	2.3691	11.5722	2.5481	2.0602	2.524	5.8279	6.1223	2.5239	11.8348	3.4312	2.6638	1.733	1.8423	9.023	9.8492	3.5404	2.5283	2.654	4.5998	3.7774		0.410257	4.84777
11.5567	3.0025	3.036	3.365	8.0934	11.3351	3.0958	10.4889	2.8939	2.0218	2.4058	5.5763	6.6987	3.1627	11.5492	3.2957	3.4024	1.7875	1.9024	9.1116	9.2335	3.9484	2.4072	2.396	3.5187	4.4811		0.414529	4.88838
11.6758	3.2527	3.293	3.305	9.0285	13.7788	2.6745	12.1947	2.5798	1.6928	1.9868	6.3641	7.1507	2.5289	11.1723	3.377	2.7098	1.9891	2.1345	9.1646	9.1201	3.1443	2.652	2.425	3.9934	5.0378		0.418801	5.07001
11.795	3.4215	3.279	3.05	7.2623	14.3004	2.6059	11.3569	2.7706	1.9698	2.4105	5.449	6.8045	3.1894	11.242	2.7579	3.1004	1.9001	2.417	8.6248	10.0609	3.1996	2.7268	2.465	4.4442	4.1391		0.423077	4.9979
11.9141	3.4937	3.339	3.139	8.5936	12.9294	2.8526	11.9745	2.5045	2.6303	2.7192	5.1412	7.6382	2.6078	10.2206	2.9261	2.4108	2.4904	2.0859	9.9409	9.8499	3.2877	2.0131	2.923	4.3332	4.575		0.427349	5.06478
12.0333	3.2434	3.279	4.126	9.0269	11.9586	2.9977	13.1388	2.9537	2.0513	2.3075	5.7157	7.1232	3.5807	10.558	3.1078	2.6969	2.3917	1.9088	10.4384	9.1715	3.4786	2.119	2.833	4.5339	3.832		0.431624	5.14288
12.1524	3.8255	2.898	4.185	11.2624	12.615	3.4777	13.6892	2.9461	2.7643	2.7881	5.5956	5.9729	3.5166	9.7518	2.8192	2.5221	2.2256	2.249	9.7455	9.9708	3.4633	2.0788	2.828	5.3738	4.8729		0.435896	5.33749
12.2716	3.2108	2.723	4.074	10.9277	12.6928	2.4736	12.4789	3.168	2.1983	2.484	5.1751	7.5246	4.3957	9.513	2.8106	2.5792	2.0917	2.7364	9.8844	9.5755	2.8987	2.4322	2.902	6.0114	5.1024		0.440172	5.28256
12.3907	4.1307	3.285	4.494	11.6838	11.7823	2.8966	12.7405	2.2719	1.9559	2.1747	5.5701	8.0738	3.6234	8.7519	3.0081	2.3517	2.3408	2.684	9.672	8.8585	3.5075	2.4063	2.782	5.9468	4.6869		0.444444	5.26717
12.5098	4.6216	3.776	4.501	12.3681	12.2017	2.8882	13.384	2.4391	2.2868	2.6529	6.5575	9.7372	3.6729	9.4114	3.6937	1.8338	2.0837	2.3506	9.6101	7.8748	3.3576	2.53	2.935	6.5187	6.2302		0.448716	5.58066
12.629	3.6997	3.274	4.105	11.6574	13.6662	3.027	14.1925	2.2851	2.0479	2.3108	5.5654	11.5193	3.6027	9.8578	3.0905	2.1355	2.4095	2.7893	10.3712	7.8937	2.9576	2.9805	2.431	4.9641	5.7576		0.452992	5.54365
12.7481	4.3579	3.938	4.139	11.7264	12.3551	3.3535	14.6599	2.8886	1.6971	2.192	4.6867	11.1672	4.1843	9.8974	2.9752	2.4151	1.8686	2.0051	11.198	7.8245	4.1957	2.2067	2.633	5.9897	6.1367		0.457264	5.62766
12.8673	4.2567	3.525	4.36	13.0766	11.4704	3.278	15.9284	3.0142	2.0634	2.3834	5.0519	13.4014	5.1209	10.8584	3.4994	2.7407	2.4567	2.6138	11.8143	8.3947	3.531	2.3126	2.788	6.3764	6.4798		0.461539	6.03184
12.9864	4.1062	3.956	3.702	13.0558	11.508	3.2652	18.0927	3.0546	2.0151	2.0286	5.7429	12.4552	5.2912	8.943	2.772	2.498	1.924	2.7668	14.2732	8.1862	2.6757	2.4088	3.069	6.2776	6.5132		0.465811	6.02324
13.1055	4.1201	3.746	4.335	13.2299	11.4349	3.6511	18.6787	3.2151	2.5371	2.5271	6.433	12.4277	5.4604	10.1267	2.8649	3.7914	2.4703	2.5076	13.1675	9.0647	3.8623	2.5769	2.657	6.3362	6.5993		0.470083	6.31284
13.2247	4.3085	4.178	4.331	12.6207	10.5362	4.1285	18.9996	2.937	2.4879	2.2476	5.7707	10.7372	4.9525	7.8471	2.9012	3.8265	2.3547	2.5473	12.8959	10.3834	3.4064	2.7345	2.756	8.0541	7.5309		0.474359	6.21894
13.3438	4.0943	3.721	4.572	13.1336	12.0631	4.7704	19.8587	3.0304	2.2432	2.3661	6.2523	10.2253	5.2651	8.4343	2.9296	2.949	2.3803	2.9293	14.2909	10.4155	3.713	2.2893	2.283	9.5453	7.0409		0.478631	6.43184
13.463	3.5818	4.149	4.03	14.3321	12.083	4.5165	21.0071	2.2534	2.1747	2.7384	6.1103	9.9552	6.2222	8.2589	3.3941	2.473	2.1912	2.5139	17.4468	10.694	4.2043	2.544	2.911	11.9299	6.6728		0.482907	6.7355
13.5821	3.4306	4.027	5.118	13.4349	10.353	4.3143	21.4431	3.0025	2.127	2.6018	5.6408	9.2032	5.9579	9.5068	2.9463	2.9223	2.1045	3.0262	19.0414	11.3861	3.5953	1.852	2.963	11.8856	6.9244		0.487179	6.75232
13.7012	3.4274	3.993	5.456	14.2701	8.8338	4.0048	23.1251	3.4869	2.1229	2.6414	6.4589	8.8141	6.6917	10.526	2.9551	2.5642	2.1002	2.6045	18.2699	10.103	4.0771	2.2427	3.666	14.4859	8.9607		0.491451	7.03526
13.8204	4.2045	4.338	4.884	14.3042	10.3359	4.5475	25.3456	3.7682	1.6746	2.6345	5.4098	8.5347	6.544	10.5648	3.0623	2.5875	2.4555	2.8098	20.6278	10.3269	5.6902	2.357	2.857	15.4522	8.8325		0.495726	7.36596
13.9395	4.4047	4.162	4.828	13.0558	9.8724	5.9777	23.9447	2.9288	2.1148	2.3371	5.2806	8.5629	7.8322	10.9837	3.4731	2.8237	2.3173	2.9799	21.4962	11.7034	6.8532	2.2588	2.983	19.34	10.1933		0.499998	7.70829
14.0587	4.5972	3.464	5.939	15.6352	8.8886	5.4037	21.0447	3.5993	2.7744	1.8426	5.7922	7.3988	8.2396	12.5623	3.752	2.2892	2.3086	4.4131	23.9976	11.6996	6.8333	2.4743	3.059	19.272	9.2488		0.504274	7.86116
14.1778	3.919	3.926	4.56	15.264	10.876	4.9083	20.5862	3.6996	1.7109	2.3992	5.5752	7.8107	8.6165	12.5809	2.9902	3.0961	2.6197	3.9132	25.4323	10.9237	6.3481	2.0984	2.819	21.6943	9.4861		0.508546	7.91414
14.297	5.2279	3.709	5.338	14.9561	9.277	5.7363	20.6389	3.7664	2.4596	2.5129	5.37	7.4662	8.0702	12.5801	3.0973	2.6307	2.4082	2.8227	29.1678	10.3881	5.5052	2.4293	2.92	23.5202	10.6134		0.512821	8.10446
14.4161	5.076	3.488	5.571	14.3073	9.6904	5.8072	21.5715	3.3502	2.2808	2.29	5.7667	8.0505	8.5367	13.1378	3.4308	2.6257	2.9299	4.2046	32.1268	10.0343	6.3173	1.9355	3.159	23.5617	11.2665		0.517093	8.42065
14.5352	4.8798	4.397	5.338	16.6318	10.8602	6.0199	19.3233	3.2277	2.5001	2.4053	4.9577	8.5592	8.4265	11.83	2.9923	2.6807	3.0147	4.6739	32.9119	9.6768	5.9274	2.2457	2.976	22.8578	11.7404		0.521365	8.44216
14.6544	3.8594	4.757	4.646	18.0429	10.5619	6.3847	19.7432	2.9972	2.5581	3.1996	5.481	8.6379	9.6829	11.1855	3.5853	2.7969	2.4624	3.9011	37.6664	10.6095	5.8892	2.3519	3.609	25.0901	11.8072		0.525641	8.86025
14.7735	3.6072	3.138	5.47	17.5484	12.5817	5.5489	18.5213	3.0064	1.9808	2.5712	5.3218	10.4198	10.0672	12.3531	3.112	3.1573	2.867	5.268	38.2619	9.4847	5.3352	2.2725	2.945	26.7477	12.1674		0.529913	8.95018
14.8927	3.4474	3.768	6.106	18.1037	11.9999	5.2091	17.3739	3.6943	2.0025	2.063	4.1416	11.2366	10.4414	10.4388	3.056	2.5737	3.0932	5.2643	35.7676	9.0265	5.121	2.2153	3.292	26.8847	12.2011		0.534189	8.74086
15.0118	3.894	4.218	5.921	19.1895	12.3729	5.2593	19.3451	3.5643	2.5299	2.4536	3.9191	10.8716	10.1787	9.9898	2.9398	3.338	3.0333	4.2294	39.5462	8.396	5.413	2.9985	2.661	30.504	10.8698		0.538461	9.10543
15.1309	3.8786	4.183	6.014	18.88	14.0292	4.9006	19.9212	3.4382	2.1488	3.2567	4.4054	13.1583	10.9127	9.0202	3.677	2.7948	3.343	6.0936	42.8323	8.8407	5.7139	2.6542	3.804	32.8277	10.3257		0.542733	9.64215
15.2501	4.6535	3.399	4.971	21.8596	15.4954	4.5622	17.4207	3.1081	2.0509	3.3423	5.4749	12.9129	11.3481	8.5347	3.3526	2.3377	3.5694	7.1615	41.1679	7.5189	5.1013	2.1381	3.244	34.7558	11.4748		0.547008	9.63821
15.3692	4.822	3.317	3.901	20.1984	14.0778	4.3553	15.8831	3.5128	2.7314	2.2807	4.9791	14.006	12.9107	8.6462	3.2042	3.0065	3.7919	7.9525	43.4605	7.8628	5.9522	2.6427	3.718	38.9675	13.5068		0.55128	9.98748
15.4884	3.9502	3.455	5.438	20.9085	13.4398	4.3618	16.3637	3.906	2.5815	1.3469	4.3175	15.0607	14.8292	8.1122	3.2241	3.0407	3.2038	8.067	42.4598	7.7415	5.3474	3.0058	3.508	45.1174	12.967		0.555556	10.2301
15.6075	4.0187	3.403	5.527	24.0399	14.231	3.8985	16.1086	4.0558	2.5872	1.7619	4.0973	14.755	14.7524	6.7116	3.5909	3.0824	3.0839	7.547	40.3065	7.3668	4.5982	3.0355	3.368	48.1109	12.6193		0.559828	10.2663
15.7266	3.6304	4.73	5.456	21.7372	12.3609	4.2605	16.1203	4.0457	2.1356	1.9091	3.5829	14.1421	15.3338	7.019	3.6464	3.3017	3.1164	7.7096	43.7501	6.4738	5.4609	2.4419	2.969	48.5014	14.2637		0.5641	10.3239
15.8458	3.446	4.298	5.354	20.0503	12.6228	4.2335	14.2278	4.374	2.3093	2.5843	3.6021	14.2375	17.6122	6.0057	4.324	2.9917	4.0267	8.6202	43.2854	8.4664	5.0919	2.964	3.337	49.9787	14.9021		0.568376	10.5178
15.9649	4.1935	4.346	5.693	22.0088	12.0422	4.4526	13.8978	3.2854	2.3642	2.3963	3.6798	14.0409	18.5692	5.139	3.9753	3.4731	3.9475	8.4245	45.4446	8.8594	3.4545	4.3734	2.813	45.529	13.9032		0.572648	10.4122
16.0841	3.7788	4.374	5.271	22.2927	11.9846	4.5967	13.8578	3.4092	2.1852	2.3621	3.6546	14.097	21.2694	5.7362	3.7482	3.3645	4.2171	8.8366	48.3581	9.5845	4.6363	3.6362	3.642	43.0882	12.1321		0.576923	10.5645
16.2032	3.5241	4.544	5.341	21.0178	12.7494	4.5193	12.3395	4.5191	2.2083	2.3968	3.798	12.7438	21.8049	5.9461	2.8637	3.8308	3.7193	11.0977	52.1211	11.0039	4.747	2.6215	3.996	42.694	13.3325		0.581195	10.7792
16.3224	3.7994	5.071	4.348	20.8493	13.3477	4.1356	13.3341	4.7807	1.9481	2.1393	3.9438	11.7348	23.9635	6.1542	3.5716	2.974	4.1205	12.4873	54.5127	8.9216	4.8821	2.6303	3.511	38.9654	13.6757		0.585471	10.7921
16.4415	3.8621	4.546	5.169	21.0772	13.9849	4.2779	15.2636	4.2071	2.0342	2.5695	3.698	11.9852	24.876	6.0916	4.3117	3.6962	3.7016	13.5527	58.0957	11.1178	4.4044	3.213	3.824	36.2688	14.8983		0.589743	11.2291
16.5606	3.847	4.424	5.246	20.7878	14.3942	4.2007	15.0086	4.7567	2.5712	2.2913	3.3526	11.7186	23.5733	5.8278	3.7459	3.2717	3.8256	14.2632	62.684	11.2205	4.4443	2.6069	4.583	34.5349	13.5931		0.594015	11.2309
16.6798	3.7881	5.025	5.248	18.2732	13.8578	5.03	14.6481	4.393	2.1146	2.7503	3.3072	12.1685	24.3047	6.2675	3.4657	3.1844	3.3252	14.2435	66.221	10.363	5.2046	2.6993	3.665	27.2785	14.2637		0.59829	11.0036
16.7989	3.5809	5.131	5.647	16.2452	14.6194	5.0975	14.5648	3.9222	2.817	2.2294	3.1886	12.365	25.5607	6.4513	3.7366	3.4406	3.8446	12.8264	68.7037	8.7576	5.8098	3.2722	3.916	25.8654	15.0724		0.602562	11.0666
16.9181	4.3625	4.456	5.445	14.5514	15.2297	4.7031	14.2204	3.8976	2.2539	2.5247	3.4934	13.1413	23.8789	5.9104	4.7338	3.7	4.173	12.1251	65.7949	8.5019	6.3564	3.7977	5.041	26.3368	12.5584		0.606838	10.8475
17.0372	5.0104	5.331	5.976	16.0182	15.0205	4.8914	14.7269	4.2562	3.0253	2.4002	4.3577	11.8627	25.471	5.4123	4.0386	3.068	4.2608	11.2188	63.1546	8.511	7.1447	3.9006	4.62	25.6982	11.6301		0.61111	10.8402
17.1563	3.9153	4.601	6.305	16.0465	17.4437	4.2927	14.7285	3.0541	2.6837	2.3965	4.6425	11.887	26.302	5.4662	3.8112	3.9586	3.9776	10.5434	60.6423	8.697	7.7294	4.4203	4.813	24.9556	12.2321		0.615382	10.7818
17.2755	4.3547	5.2	6.182	13.7807	18.0103	4.5395	14.5202	3.4456	2.8151	2.2703	3.9028	12.5669	24.107	5.1058	4.0246	3.7633	4.0596	9.949	60.5789	8.4384	9.2288	5.3537	4.532	26.0784	9.9451		0.619658	10.6701
17.3946	3.3407	5.051	6.415	14.2882	18.1675	3.9073	14.8502	3.1922	2.4548	2.076	3.1084	12.7568	23.0509	5.1523	3.8828	3.7287	4.55	10.2517	58.0992	9.5023	9.6506	5.8499	6.777	27.3063	8.8138		0.62393	10.6489
17.5138	4.1764	4.388	7.515	15.4035	19.6148	4.649	12.8465	3.1245	2.738	2.6386	2.9948	13.7507	22.2785	5.336	3.688	4.5592	4.8992	10.3593	57.2938	8.3851	9.2853	5.786	6.338	30.3295	8.4804		0.628205	10.8343
17.6329	3.7424	4.76	6.701	13.399	18.6098	4.6545	11.9655	3.8202	2.304	2.898	3.3925	14.2882	21.8139	5.6794	3.2037	4.3768	5.5106	11.5005	58.6876	9.5378	9.8694	6.6276	7.035	33.8594	7.1061		0.632477	11.0137
17.7521	3.2574	4.985	6.777	13.5915	19.272	4.4979	12.1758	4.6113	2.3906	3.0733	3.0921	15.0832	22.5331	6.2602	4.7604	4.6725	5.9327	13.5722	54.0614	10.4297	11.447	7.2426	9.065	38.6455	6.1394		0.636753	11.5028
17.8712	3.8171	5.263	6.783	15.8572	18.5529	5.2558	12.2215	3.8609	2.6477	2.1328	3.7825	16.08	19.0374	7.3266	4.4405	4.4082	5.9567	13.443	57.8829	9.5968	11.181	8.7459	9.52	40.8223	6.5198		0.641025	11.8054
17.9903	4.5532	6.633	8.258	17.3668	19.3286	4.919	10.9071	4.0982	2.4146	2.1484	3.4431	16.2076	16.7188	6.8115	3.5849	4.4654	6.33	17.3963	56.4617	10.8584	11.1492	8.5119	11.873	51.3237	5.7803		0.645297	12.4617
18.1095	4.5124	4.779	7.43	18.5462	21.5984	4.015	10.4645	4.3058	2.7486	2.3203	2.8654	19.386	16.5521	9.5256	2.9785	4.0009	4.9859	19.8155	55.7952	10.2611	11.6424	9.3274	12.935	53.912	5.7366		0.649573	12.8176
18.2286	3.528	5.209	8.978	20.2125	20.7184	4.6972	11.0751	4.3771	2.8487	2.8127	3.5221	20.3338	15.9367	9.3032	3.5761	3.8458	5.6369	21.1781	53.5483	11.5786	10.5517	10.3672	14.229	58.4621	6.597		0.653845	13.3249
18.3478	3.9272	4.943	9.782	21.161	19.1846	4.2339	10.3024	3.8524	2.7941	2.5828	3.8109	22.218	14.515	9.6067	4.4445	3.9662	6.0282	26.0683	50.7401	10.9256	10.8034	10.993	15.865	62.6191	6.4332		0.65812	13.672
18.4669	3.5102	5.104	8.912	21.6393	19.5628	4.3575	10.4662	3.9051	2.9065	3.113	3.0582	24.22	14.8866	8.8835	4.8666	4.7287	6.0321	28.0247	50.2521	9.1795	9.0595	12.1631	16.384	66.4528	6.8593		0.662392	13.9411
18.586	2.7531	4.924	9.857	21.7381	19.4502	4.1512	11.0693	4.7481	2.3008	3.0271	3.1156	24.3572	14.3062	9.8865	5.3268	4.9908	6.2505	30.9392	52.8561	8.5462	9.9272	13.1331	18.283	67.9023	7.2835		0.666664	14.4449
18.7052	3.0486	5.215	9.694	23.6859	18.4634	5.208	12.5671	4.7348	2.0704	2.871	3.2134	26.2278	13.726	9.2322	4.6165	4.5279	6.5688	34.0143	51.3734	8.9215	11.4003	14.4174	18.898	65.3035	7.4793		0.67094	14.6991
18.8243	3.6839	5.793	11.838	24.0914	19.116	5.1863	11.5922	5.0098	2.7879	2.9143	3.079	24.418	14.5529	10.0639	4.8136	4.6206	6.9759	40.9556	47.4634	9.2689	14.5382	12.9892	18.028	68.7292	8.0621		0.675212	15.2229
18.9435	4.2362	5.74	14.653	22.534	19.3166	5.1028	12.3896	4.2238	3.0991	2.4621	3.415	24.3752	11.7662	9.9708	4.5761	5.2302	7.3191	44.4826	41.8766	10.2201	14.7638	11.833	17.186	67.1182	9.2892		0.679488	15.0872
19.0626	3.1828	5.049	14.585	24.8492	16.9942	5.0606	13.3696	4.4703	2.7216	2.8754	3.5631	23.9431	12.6386	9.1706	4.7728	4.7122	7.5453	48.8184	40.053	11.3141	15.4597	11.1138	18.901	64.3291	9.5495		0.68376	15.1617
19.1817	3.5769	6.875	13.775	27.0116	18.6341	5.1085	15.0578	5.1462	2.6531	2.1021	3.4226	22.8103	12.7708	9.7307	6.0825	4.4832	6.7767	48.4309	36.5173	13.3516	18.0257	10.1307	17.152	60.2293	9.8349		0.688032	15.1876
19.3009	3.6532	6.167	14.134	29.7913	20.1726	6.504	16.2078	5.3265	3.4496	2.4422	4.1911	21.6667	14.0663	11.1426	6.5942	4.8938	7.3462	49.1262	32.6178	14.6939	20.8508	9.5685	16.311	59.9679	10.8801		0.692307	15.6706
19.42	3.7727	6.6	14.73	32.1007	19.7715	5.5462	16.7432	5.3909	3.1724	2.0304	3.5586	19.0036	15.7456	12.498	6.0338	5.1127	8.2819	50.9702	31.9735	16.9697	23.5514	9.3432	15.618	55.0129	11.2797		0.696579	15.7924
19.5392	4.0808	7.392	16.037	36.405	17.2089	5.5112	17.1925	5.8442	2.7801	2.7418	3.5717	16.558	16.7618	11.6264	6.8338	6.8021	7.7694	50.8001	31.0527	17.436	25.0485	8.4241	14.939	49.3966	10.9417		0.700855	15.7262
19.6583	3.0075	6.701	17.818	38.2282	19.4421	5.4357	18.5774	5.9198	3.1809	3.0437	4.2893	17.1241	16.4402	14.2397	6.8969	6.4052	8.5727	48.0216	30.2818	18.1555	27.5508	7.9319	13.698	46.8623	11.6742		0.705127	15.9799
19.7775	3.6382	7.143	18.408	39.7749	17.4218	6.3628	17.9227	6.1482	2.968	2.9556	4.0298	15.1894	17.6979	11.7611	7.0198	6.549	8.4467	49.8899	27.8704	20.351	25.9433	8.3697	14.925	43.9996	14.1198		0.709402	15.9562
19.8966	3.6514	7.2	19.436	44.8721	19.0589	6.1012	17.6435	7.1152	3.2917	2.6683	4.4402	15.7683	17.4918	13.0107	7.9965	5.9975	7.9003	48.9209	29.9402	20.5145	28.0477	7.6236	15.327	38.7557	16.8156		0.713674	16.3836
20.0157	3.3905	8.554	22.207	45.0646	19.9871	5.3939	16.8906	6.3328	3.3366	2.6621	3.7985	18.4197	18.6804	13.9244	8.3427	4.8867	7.933	45.8492	25.0828	22.1764	24.7965	7.2498	13.582	37.1345	18.6753		0.717946	16.174
20.1349	3.5197	8.153	22.456	46.8307	19.6552	5.5383	15.4631	6.6121	3.6839	2.82	3.9143	18.3481	19.8288	15.0508	9.0139	6.3975	8.8903	46.0057	25.2578	22.4917	26.1913	6.8274	14.256	34.4486	21.1622		0.722222	16.5127
20.254	3.3811	7.586	24.298	46.7206	17.6446	6.5641	14.7477	6.4622	3.9065	2.7809	3.4848	19.0788	18.4526	16.186	9.4069	6.8713	9.3849	43.3072	20.7631	21.2137	25.447	7.3391	14.063	32.2644	21.6394		0.726494	16.1198
20.3732	4.1971	8.189	27.337	48.634	17.8127	5.8501	14.4882	7.238	3.8798	3.0295	4.3068	18.3335	18.9513	18.8296	9.4653	7.4373	9.6703	41.2036	18.508	21.0686	26.1153	7.4242	15.219	33.598	21.2748		0.73077	16.4824
20.4923	3.8283	8.484	27.89	49.8701	14.5343	6.2596	12.5149	8.1418	3.684	3.4008	3.8275	19.2487	20.7912	18.8446	8.9107	6.9678	10.6878	42.311	17.9265	18.7541	24.9771	7.1009	14.268	34.1682	22.7152		0.735042	16.4043
20.6114	4.4674	9.408	27.127	46.3762	15.6045	7.8979	12.5074	8.5723	3.1702	2.9394	3.8065	18.5494	21.1416	19.7376	8.7102	7.7141	9.3332	41.7846	16.5777	20.1533	25.1186	7.6359	14.132	35.5266	21.918		0.739314	16.3964
20.7306	4.2554	10.468	25.21	47.0594	15.7024	6.9395	12.9484	9.0189	3.9893	2.954	3.7768	20.8571	19.7483	20.3208	9.2856	8.3823	10.6049	45.1708	15.9143	16.9508	24.3705	6.7544	15.791	34.1254	21.1694		0.743589	16.4707
20.8497	3.8702	9.316	24.732	47.1759	16.5101	7.5704	11.716	8.8767	5.1355	3.2359	4.5078	22.5426	22.4407	21.1712	9.1438	10.122	10.5687	46.9034	17.3134	17.5189	23.227	7.9025	14.702	30.4259	23.0597		0.747861	16.7875
20.9689	4.1162	11.107	26.42	47.0702	15.2583	8.0833	12.5623	9.2021	4.8913	3.4755	4.4041	21.4487	23.3228	20.8898	9.9371	8.934	11.2832	51.7273	19.8975	17.9864	23.8132	8.4833	15.634	28.0254	19.9057		0.752137	17.1151
21.088	4.4795	12.135	26.574	44.9564	17.5802	7.6886	12.0366	8.0922	5.4242	3.2815	4.894	23.2468	22.9202	22.33	10.2569	10.2947	11.4254	51.4678	20.1113	15.2579	25.8411	9.6489	17.289	26.1103	19.0824		0.756409	17.297
21.2071	4.9989	12.742	27.455	44.031	18.0725	8.5446	12.2059	9.3361	5.7952	3.7231	4.2092	21.0429	22.2759	22.0325	10.5698	11.4491	11.3709	57.9528	19.6256	16.692	27.1231	9.5878	17.013	25.184	20.2896		0.760681	17.7329
21.3263	4.7412	12.213	28.534	41.2938	16.637	8.0071	14.2636	9.2926	6.7332	4.2469	5.2466	19.9789	23.7777	23.2314	11.1463	11.5032	10.6547	57.3453	22.8963	16.9858	27.5443	10.7044	16.919	26.2715	20.8484		0.764957	18.0406
21.4454	4.4901	12.872	29.009	39.2882	16.4404	8.0723	12.8829	10.4151	8.0543	4.5184	6.5005	23.366	24.1937	24.3931	11.464	12.1489	11.6277	61.4888	23.3528	15.56	24.7728	10.1521	19.296	21.9066	20.0467		0.769229	18.2525
21.5646	4.8915	13.733	28.083	36.124	16.9451	8.5826	13.4753	11.1018	9.8536	4.5415	5.7546	20.8227	24.6972	26.5989	12.0219	12.8122	11.1596	62.6579	24.6415	17.0684	26.8546	11.5855	20.078	22.1445	19.2372		0.773504	18.6186
21.6837	5.0984	13.666	30.14	28.3021	17.4097	9.4066	14.0368	12.425	12.2825	5.7406	6.1369	20.8649	24.801	27.6929	13.2746	13.529	11.9988	64.9927	23.7802	18.4219	26.7836	13.705	19.48	21.4899	19.2409		0.777776	18.988
21.8029	4.8289	14.513	32.576	25.8733	16.8212	9.3199	14.2678	13.6583	14.1163	5.7806	7.5726	19.4435	26.347	28.4203	11.7777	15.5741	11.4648	70.1914	25.5639	18.6754	25.1425	14.4008	21.528	21.174	20.1452		0.782052	19.5671
21.922	5.1497	16.279	33.472	21.8731	19.8438	9.4531	16.0767	16.1149	18.4157	5.9174	8.3395	20.7532	25.1563	30.5742	11.8738	17.2625	12.0441	71.4353	24.4926	17.2745	27.3878	14.543	23.91	22.4907	20.3936		0.786324	20.4211
22.0411	6.7941	18.338	34.376	17.7549	20.0446	10.1919	18.2012	17.1884	19.6367	6.8885	8.6949	21.7522	23.6245	32.6743	13.2288	17.1419	11.6123	68.1957	23.4134	17.2342	30.0543	16.7734	27.985	23.289	21.9193		0.790596	21.0803
22.1603	6.0651	21.767	39.279	15.0522	21.6594	10.5547	15.9464	22.0771	24.2837	7.7054	10.3244	21.9647	23.8443	33.1944	12.8893	17.9792	12.8841	72.9674	24.7462	17.4046	29.9551	16.8808	29.871	22.9109	21.4596		0.794871	22.1466
22.2794	6.4245	20.721	45.301	13.764	21.249	8.6656	18.0655	25.9028	28.1172	7.6808	13.4916	21.2869	23.0853	32.2902	13.7018	19.0771	11.6411	76.4333	25.2599	17.4732	30.6088	18.7764	29.478	23.8776	22.5101		0.799143	22.9953
22.3986	5.7758	22.772	49.368	12.0612	22.1718	10.6905	18.6278	27.8081	31.2229	10.9973	14.1925	21.1652	24.409	31.0322	15.2466	18.0581	11.6627	75.8292	28.2272	17.5492	27.9569	21.0571	28.166	26.0682	25.0468		0.803419	23.8865
22.5177	8.6851	25.855	55.195	9.577	21.6739	9.796	18.6585	31.2227	34.4421	13.6461	14.9693	21.3169	26.4779	32.4473	15.372	18.3035	12.9121	80.6889	28.2046	20.2425	28.479	24.2172	30.665	25.6776	24.6199		0.807691	25.3338
22.6368	9.3978	26.211	59.116	8.5965	22.927	9.6657	19.0347	34.8462	38.394	16.3981	17.4269	19.7281	24.3267	30.3533	15.8559	19.9794	13.4396	80.3333	33.283	22.3314	28.3818	29.18	32.091	26.4897	21.6326		0.811963	26.3768
22.756	9.1894	27.007	59.821	7.5541	22.8456	11.2006	19.5297	33.5941	41.9504	18.8898	18.0656	20.0495	25.4509	29.839	16.8834	18.9058	14.1501	80.1945	36.5135	22.8084	30.4982	32.3308	35.007	27.0784	23.8922		0.816239	27.33
22.8751	10.9241	30.179	64.195	8.3419	22.087	12.213	20.7041	33.0194	41.7238	23.6507	18.7773	19.2687	25.7703	27.8226	16.3081	21.0619	15.983	80.282	39.5152	24.7523	32.4048	32.7414	36.013	28.6893	26.3786		0.820511	28.5123
22.9943	12.5904	30.264	62.269	7.0714	20.9576	13.1518	18.6665	33.6485	41.232	24.669	18.7955	18.3716	24.2718	28.1983	17.7373	19.9525	16.2856	77.6379	42.0052	27.3692	29.4761	39.3345	37.948	29.6101	26.7226		0.824786	28.7295
23.1134	14.1685	34.551	59.262	5.6031	20.1972	14.5548	21.2761	37.7176	39.1684	27.9841	18.838	17.9257	25.9541	25.7328	17.9988	21.4371	18.0299	79.7495	45.1082	29.011	27.5977	42.2545	40.493	32.9896	32.931		0.829058	30.0213
23.2325	15.3251	35.429	57.377	5.6176	17.2858	17.773	20.5741	34.4505	35.492	32.0867	20.1427	14.9475	24.3253	26.4026	17.4548	22.7635	19.1569	73.9325	44.1088	32.7543	28.4877	48.6489	41.862	36.5022	41.3413		0.83333	30.5697
23.3517	15.392	39.636	54.659	6.9786	16.4335	16.363	20.6489	32.1851	33.2784	32.7791	20.4828	15.7598	22.8835	21.4106	20.3245	25.6223	20.2611	73.7428	43.239	34.295	28.7475	53.6322	43.559	44.9618	44.7457		0.837606	31.2808
23.4708	17.133	39.131	54.679	6.7166	14.8117	15.8535	18.4937	30.7469	28.6326	34.3994	20.9143	13.63	22.6428	18.5524	21.2048	25.9831	22.5814	64.5169	42.1901	36.8114	32.0993	57.8537	46.31	45.9095	43.0916		0.841878	30.9955
23.59	18.2294	41.899	55.339	4.8675	13.025	17.7803	18.1328	26.5995	24.7592	36.3362	20.5371	12.2772	21.3394	14.7587	20.6717	29.8114	24.1479	59.94	43.4536	37.1056	33.3801	58.7449	50.226	50.0654	49.056		0.846154	31.2993
23.7091	21.0672	43.633	52.781	5.6221	11.6662	17.9922	19.0486	26.2747	23.6266	33.462	20.8724	10.9343	21.261	10.7382	20.7052	31.5226	24.2402	55.7751	44.0341	39.1458	34.4176	63.2321	50.461	50.5658	48.5056		0.850426	31.2634
23.8283	22.5167	47.539	48.04	4.1981	11.4468	19.5668	20.0363	24.0285	19.3621	32.4116	18.9947	10.1138	19.6275	8.7141	22.5948	32.1849	24.1731	47.7343	39.2651	42.7987	40.4443	67.7387	55.301	56.3301	48.8686		0.854701	31.3612
23.9474	25.3836	54.657	46.34	4.2297	10.5236	22.6738	18.052	19.3735	15.1373	28.9813	18.3629	9.3924	17.768	6.6731	23.4725	35.4851	26.1393	42.1062	40.7322	45.1505	42.3544	67.93	58.107	59.9588	49.6524		0.858973	31.5455
24.0665	29.0969	62.959	41.829	4.5691	9.2587	20.9961	16.1199	17.2215	12.7714	23.4222	16.5932	7.361	17.0551	5.1733	23.9279	36.953	26.9191	38.1821	41.9311	48.459	44.3313	66.6876	55.992	63.276	48.8446		0.863245	31.1972
24.1857	28.3526	63.493	34.698	4.312	8.1139	20.3301	13.8332	13.6733	9.839	17.5855	15.9377	8.0388	17.211	4.8899	22.9329	37.8409	28.4419	34.103	41.3254	45.5696	44.0862	65.2489	55.977	63.9963	49.3433		0.867521	29.9669
24.3048	29.7314	63.346	28.059	3.7866	7.5844	22.532	12.8058	12.4034	9.5077	15.3709	16.4995	7.1536	13.8501	4.5069	23.6577	38.1163	32.4501	30.4068	46.6324	43.3039	43.0579	65.0887	53.931	63.589	46.846		0.871793	29.3687
24.424	30.1268	67.001	22.943	3.7006	5.9038	22.0458	12.2067	9.1635	8.847	12.6372	16.6461	7.5048	12.6417	3.4799	21.2284	38.171	32.1119	27.0885	48.3087	41.1194	44.5386	61.1407	51.543	63.5452	43.7297		0.876068	28.2949
24.5431	34.4721	69.802	18.155	4.0248	5.9335	20.7253	9.9793	7.9985	7.7381	10.7002	14.8638	7.4959	10.8841	3.3576	19.642	37.2388	35.2122	23.3889	52.3709	40.499	44.1538	55.9579	50.056	59.9888	45.2494		0.88034	27.5955
24.6622	36.7028	74.213	12.397	2.6847	4.3968	20.169	9.0561	6.9977	7.1259	8.0449	14.1733	5.297	9.1284	3.1643	18.8006	37.3938	32.3413	23.1798	52.4159	35.6689	47.2561	48.9128	44.766	56.8366	45.1393		0.884612	26.2505
24.7814	39.4409	72.835	11.286	2.4452	4.262	20.4658	8.0102	6.3325	6.0891	6.2458	11.8043	5.8803	8.5032	2.0126	15.1119	36.0442	30.8136	21.2454	49.5788	33.245	46.45	45.8152	41.635	56.5321	42.565		0.888888	24.986
24.9005	42.6097	74.114	10.041	2.4984	3.6782	16.898	8.7019	6.3503	6.597	5.4255	10.3084	6.2068	6.6516	1.8906	14.9285	32.2585	30.9148	19.1427	50.7649	28.6644	38.3151	40.4607	40.752	52.1375	41.4207		0.89316	23.6692
25.0197	45.2531	65.374	8.369	2.2455	3.5451	14.74	6.2973	5.5753	5.5111	5.5938	8.4133	4.8066	5.7074	1.8187	13.0374	29.3687	30.4611	17.5575	49.3341	23.7247	37.6893	39.9301	39.633	45.4357	37.9991		0.897436	21.8968
25.1388	51.079	51.062	6.141	3.1219	3.5137	14.2184	5.6445	5.0826	4.3715	5.1308	6.5271	4.9713	4.6449	1.5821	10.06	30.241	31.7949	17.1664	46.602	17.0163	30.4324	34.547	35.836	42.011	28.9864		0.901708	19.6714
25.258	50.3253	36.156	5.524	1.9725	3.6659	10.3969	5.095	4.0631	4.3906	3.9277	5.6975	4.0869	3.8042	1.9509	8.581	27.2174	28.9699	17.6592	44.9222	13.0162	26.6366	33.8577	33.329	41.0817	24.6074		0.905983	17.6374
25.3771	54.4414	23.065	5.358	2.1693	3.6598	8.5434	3.7953	3.4672	4.2089	3.8656	4.5161	4.2465	3.5565	1.9195	7.6189	24.3854	29.0959	16.6668	42.5714	9.4962	22.9869	31.4516	32.24	35.801	17.3253		0.910255	15.8581
25.4962	54.2352	15.376	4.507	1.9611	2.3883	7.6029	3.3578	3.1588	3.5284	3.6213	4.7128	3.7818	3.0705	1.4007	7.261	20.3614	29.5116	16.6761	41.9286	8.2961	19.7497	27.5009	28.153	29.5509	12.8829		0.914527	14.183
25.6154	49.7619	11.571	3.54	1.5948	2.0256	6.3654	2.904	3.3708	2.7309	3.4675	3.7668	3.2355	2.6337	1.5689	6.8641	15.7622	29.8745	12.3392	36.4114	8.06	14.8349	26.591	30.095	24.9784	10.305		0.918803	12.5861
25.7345	41.0899	9.244	3.04	2.0221	1.9849	6.531	3.3964	2.0853	2.2199	2.774	3.5612	3.1174	2.2408	1.3113	5.1588	14.5492	29.6808	12.248	33.2251	8.4066	12.2159	22.4832	26.598	19.1459	7.3903		0.923075	11.0288
25.8537	31.4595	7.651	2.92	1.8714	2.1744	5.1762	2.4239	2.1487	2.0755	2.5401	3.362	2.9892	2.2166	1.5289	4.2962	11.9552	24.7638	10.9704	29.1742	6.594	10.3456	21.7422	22.986	14.7925	7.2431		0.927351	9.41602
25.9728	20.6033	5.782	2.369	1.6587	1.9821	3.8981	1.8048	2.0928	1.996	1.9267	2.9024	2.6054	1.8306	0.8786	4.2473	9.2149	21.3806	13.105	23.6707	4.8707	8.6109	19.1776	21.433	12.2628	7.1116		0.931623	7.89662
26.0919	13.5034	4.011	2.147	1.7977	1.4883	3.1133	2.0505	2.0506	2.1897	1.5915	2.3326	2.5903	2.6874	0.8842	4.0012	8.1286	19.408	12.747	19.0898	4.8049	8.0343	16.8787	18.834	9.6979	5.6011		0.935895	6.78652
26.2111	10.634	4.893	2.958	1.549	1.7123	2.8842	1.6464	1.4043	2.0848	1.7626	2.1001	1.7832	2.4	0.8697	3.2087	6.1934	13.4822	12.7046	15.3552	3.7358	6.2639	17.3218	15.702	7.992	5.0651		0.94017	5.82825
26.3302	8.6462	4.157	2.09	1.1004	1.4002	2.4583	1.6335	1.8777	1.546	1.8443	1.8494	1.1681	1.8573	0.7423	2.9338	5.7647	12.4116	11.1474	13.2031	3.3077	5.337	14.8825	17.358	6.4352	4.1338		0.944442	5.17142
26.4494	7.6487	3.557	2.075	0.9826	1.0887	1.9743	1.436	1.5691	2.0068	1.761	1.8131	2.0472	1.3486	0.6245	2.1611	4.614	9.9636	11.1839	12.1363	2.6878	4.2879	14.658	15.024	6.0646	3.6751		0.948718	4.65556
26.5685	6.862	2.499	1.831	1.0554	1.0476	1.4311	1.1194	1.5309	1.7936	1.6958	1.7148	1.6816	1.4974	0.7201	1.9079	3.3414	7.9222	9.9977	11.4166	2.2114	3.9604	12.1223	13.777	4.775	3.149		0.95299	4.04242
26.6876	7.5214	2.912	1.744	0.9529	0.9571	1.9262	1.4141	1.5211	1.2086	1.8674	1.2301	1.3695	1.0871	0.6945	2.2233	3.0766	7.3774	9.8544	10.7614	1.7752	3.5503	10.7894	12.602	4.4979	2.4914		0.957262	3.81621
26.8068	6.1677	2.575	1.492	1.1291	1.3248	1.5484	1.0374	0.967	1.2673	1.5886	1.0932	1.19	0.9772	0.7092	1.6955	3.0441	6.0911	7.9769	10.0612	2.0196	2.8122	10.1995	11.808	3.6237	2.6915		0.961537	3.40361
26.9259	5.0387	2.287	1.327	1.1609	1.0641	1.8804	0.9759	1.0086	1.4298	1.4024	1.3816	1.185	1.1463	0.7448	1.5928	2.4775	6.0062	8.6841	10.0393	2.1382	2.8055	9.5438	9.867	3.0396	1.9029		0.96581	3.20518
27.0451	4.3201	2.131	1.083	1.1127	0.6233	1.6924	1.0364	1.1277	1.0138	0.8831	1.1591	1.2096	1.143	0.3847	1.2429	2.482	5.5783	7.6051	9.6374	1.7259	2.3353	8.4659	9.849	2.3854	2.1232		0.970085	2.89401
27.1642	3.899	2.243	1.167	0.9198	0.7821	1.1681	1.1977	1.0171	0.7597	1.0673	1.5658	0.8679	0.8718	0.6939	1.3792	2.0378	4.254	8.5123	8.4299	1.4129	1.9433	7.9922	9.315	1.9666	1.9125		0.974357	2.69504
27.2834	3.1588	2.005	0.978	0.8915	0.5262	1.7577	0.9446	0.6941	1.2879	1.2555	0.9205	1.0905	1.2375	0.3716	1.4256	1.7681	5.2424	7.937	7.8585	1.3258	1.9301	8.0774	7.571	2.8969	1.7344		0.978633	2.59546
27.4025	3.0592	1.828	0.779	0.7913	0.9034	1.3496	0.9226	1.0303	1.1339	0.8183	0.8884	1.0139	0.8692	0.5607	1.0552	1.4922	4.2698	7.0911	7.3781	1.1983	1.3472	5.9671	6.531	2.3845	1.5311		0.982905	2.24774
27.5216	2.5832	1.502	1.061	0.4806	0.6525	1.1864	0.8272	0.8335	1.056	1.2609	0.6384	0.8352	0.7523	0.405	0.9305	1.6294	3.5286	6.6713	6.3216	1.1244	1.0505	5.2729	5.042	2.1091	1.1384		0.987177	1.95572
27.6408	2.085	1.467	1.429	0.4538	0.6543	1.3163	0.8753	0.7875	0.8198	0.9829	0.5377	0.4939	0.5466	0.4119	0.8487	1.4914	2.6603	6.1205	6.2234	1.4838	1.4517	5.3804	3.979	1.5135	1.1		0.991452	1.80455
27.7599	2.0485	0.982	0.964	0.3435	0.8485	0.9336	0.84	0.7963	1.2302	0.6089	0.5305	0.7299	0.6726	0.4396	0.9472	1.3038	2.2098	6.2467	4.7607	1.2523	0.9695	5.0847	3.25	1.7862	1.0159		0.995724	1.6318
27.8791	2.1155	1.391	0.479	0.4987	0.568	0.9445	0.9545	0.5577	0.6354	0.5791	0.4523	0.4691	0.8007	0.359	1.0521	1.2512	2.7653	6.1856	3.502	0.8281	1.311	5.0613	2.349	1.2335	1.1133		1	1.49828

## Sheet: Image12
X0	Y0	Y1	Y2	Y3	Y4	Y5	Y6	Y7	Y8	Y9	Y10	Y11	Y12	Y13	Y14	Y15	Y16	Y17	Y18	Y19	Y20		Ap-basal	Avg int
0	38.1924	19.5196	18.1475	20.0949	21.2172	21.5424	38.1821	35.8974	25.6815	20.2355	26.863	37.3162	26.6126	20.6045	27.7444	42.4082	39.4926	36.8137	25.7473	27.258	46.4048		0	29.3322
0.1191	42.0641	17.8777	21.3039	23.9707	23.7483	22.0749	39.1711	33.5423	27.5907	23.6648	27.6477	42.2033	31.9508	23.5565	27.8773	40.6931	41.3197	40.9784	26.3383	26.6268	48.7605		0.00537448	31.0934
0.2383	44.9427	18.3474	23.8815	28.2809	27.0067	24.3065	36.2787	34.261	26.5811	25.4865	30.7219	45.1293	35.3661	27.0409	26.7044	41.6917	42.2268	48.3107	28.6431	29.7505	54.8827		0.0107535	33.3258
0.3574	51.7091	19.7312	26.3244	35.9597	30.8933	26.8522	37.324	32.9767	30.9471	27.6952	31.2151	48.6474	42.4524	30.6074	26.569	43.2269	43.178	53.4101	29.5847	30.3928	53.3635		0.0161279	35.86
0.4766	56.0632	20.265	27.8084	45.2573	33.408	29.0037	39.6972	34.5535	32.1945	29.9929	30.358	53.8971	46.6208	33.338	31.1365	44.7614	46.473	62.2749	30.6656	30.5314	55.2943		0.0215069	38.7426
0.5957	57.436	23.2084	32.9567	50.972	35.2323	32.0474	38.356	34.0174	35.5865	30.256	32.0748	57.6639	55.1174	37.3626	32.9011	48.1166	47.7633	64.3944	30.9804	31.9165	60.5319		0.0268814	41.3758
0.7148	59.8667	27.3596	39.2626	55.0087	39.8164	38.955	37.4662	34.6396	41.4436	31.1942	32.5858	60.4719	63.025	43.2785	34.6007	46.0002	48.8007	63.2112	36.3935	33.5481	61.6293		0.0322559	44.217
0.834	59.4127	30.9292	45.4104	56.0311	41.4563	42.451	36.4392	34.6518	45.1254	32.179	34.4554	62.025	65.3572	47.4401	38.3781	47.7628	49.7211	60.7746	42.297	35.5159	62.3755		0.0376349	46.1995
0.9531	63.9257	34.2906	48.9784	58.3161	41.7862	46.8221	37.1697	34.3415	46.8674	33.925	37.2247	60.2244	72.0039	53.8371	39.877	49.9609	46.8906	61.0005	46.3881	37.2953	59.141		0.0430093	48.1079
1.0723	62.4009	40.3414	51.9033	59.4863	40.5337	50.3844	36.7907	38.3391	50.0187	33.5088	36.141	64.1673	70.9811	58.5894	40.7719	54.0345	47.7239	57.4644	54.6165	40.1916	59.1764		0.0483883	49.8841
1.1914	60.226	42.8433	52.3756	54.2363	43.3905	55.9708	39.05	42.7647	50.0407	34.97	38.507	60.0092	69.7263	65.8406	44.9896	50.7039	50.6796	51.8917	60.1061	41.9871	59.8794		0.0537628	50.9614
1.3106	60.6242	46.0907	49.1796	49.9003	46.6036	58.8363	40.6656	41.0717	50.3764	35.49	41.3733	59.8075	62.9858	64.5032	48.9222	53.6808	52.7463	45.7724	64.4865	44.1483	56.7121		0.0591418	51.1418
1.4297	57.9625	46.9939	45.2684	49.6428	45.5238	59.2406	40.8667	44.9156	53.6724	33.6437	42.5055	59.1625	54.149	65.2113	54.6934	54.5803	46.8631	40.0325	65.116	46.7385	59.1144		0.0645163	50.757
1.5488	57.4589	46.2903	47.6496	42.4854	45.2731	59.7658	41.0051	49.6109	54.7465	33.8326	43.8481	55.9809	43.596	64.2869	57.0958	53.0139	48.8058	36.4929	65.8364	49.6645	56.7824		0.0698908	50.1677
1.668	56.7542	48.2265	44.7218	38.8492	44.4913	55.4586	44.3839	52.7148	54.306	34.191	44.6375	56.2056	34.4135	60.0661	60.9802	54.2548	45.7026	35.4588	64.396	49.7806	59.172		0.0752697	49.484
1.7871	52.9739	45.7962	40.9549	38.262	42.8601	54.6167	49.4522	52.866	54.4785	34.9543	47.2278	55.0989	29.7355	54.6002	62.7094	53.2397	46.6004	29.8786	64.5109	54.6252	56.4336		0.0806442	48.6607
1.9063	50.0997	48.0179	38.28	34.8876	40.5812	52.6963	50.4241	57.3491	52.6055	34.1238	45.1536	54.7977	26.2331	47.1159	64.626	51.2569	45.6848	28.265	59.1003	56.6044	55.6864		0.0860232	47.3138
2.0254	47.4075	46.5398	34.7567	31.5132	37.7642	53.6692	55.1022	62.0463	52.2459	34.7615	48.4413	53.5303	23.1473	41.2728	64.2426	50.1577	45.7976	25.1447	53.674	55.8235	53.2241		0.0913977	46.203
2.1445	48.6747	43.646	35.0066	32.4436	37.3994	50.1204	57.1859	61.707	51.7565	35.6387	48.8765	50.6292	21.7654	32.5537	65.4778	48.743	43.5733	24.0673	45.8723	58.6321	53.5769		0.0967722	45.1117
2.2637	49.1523	45.4927	34.1005	32.5218	36.1992	52.1979	63.3489	67.0337	50.1967	34.6266	48.4852	48.6349	19.9487	31.3989	65.4546	47.0768	42.9027	20.7483	42.1362	56.4661	49.4168		0.102151	44.6447
2.3828	46.7142	45.1367	34.4648	29.1661	34.7287	48.952	66.1864	62.648	51.3548	36.0785	51.8418	46.1347	18.0361	28.0101	60.5077	42.2582	39.7804	20.6125	37.5607	50.6556	46.022		0.107526	42.7071
2.502	40.6271	41.979	32.4722	28.6497	32.7044	49.3462	73.5048	65.5734	52.1211	38.1633	56.4412	41.4387	18.3277	25.2662	54.8166	37.1795	36.2926	19.9267	34.2783	46.6687	48.442		0.112905	41.6295
2.6211	40.0674	42.8355	30.5779	28.1461	31.7458	50.4431	76.5833	69.1536	50.2556	37.2268	53.4687	38.3472	16.4515	22.6826	51.4824	34.9645	35.19	18.53	31.2645	44.254	44.1452		0.118279	40.3722
2.7402	40.0965	43.063	29.1947	28.7201	29.8862	50.2407	78.4963	68.0291	47.2414	38.0444	48.952	35.6776	16.5966	19.9374	48.5157	33.0997	33.4471	15.4327	27.5117	37.7865	43.6382		0.123654	38.7432
2.8594	36.9867	42.3311	32.837	27.2643	27.0588	50.2156	80.708	67.0833	47.8352	39.3745	45.8827	32.6683	16.3276	20.0059	41.9454	29.6686	29.0819	14.5764	27.2401	33.0744	42.6025		0.129033	37.3699
2.9785	33.0224	39.3926	31.2151	26.0959	26.6615	48.2765	79.6619	65.3813	46.5166	38.8677	45.41	29.9747	15.1411	17.149	34.6534	25.6197	27.9328	14.9875	24.2504	25.9998	41.4928		0.134407	35.1287
3.0977	30.1676	37.1218	30.7402	25.5761	26.7838	47.4637	79.4797	60.5596	45.9189	37.7015	43.8529	28.5474	13.1813	14.9381	30.5032	20.3828	24.9363	13.731	19.2413	22.7196	40.1844		0.139786	33.0348
3.2168	30.0828	38.638	28.2849	24.2592	25.3056	45.0794	75.1605	57.9399	44.6435	38.5838	40.8824	24.4989	14.0751	13.7457	24.0922	16.2151	20.839	12.1312	18.3609	21.2094	36.4666		0.14516	30.9759
3.336	27.5314	35.6928	27.4537	23.2615	25.0356	42.9628	70.8877	58.1674	43.9948	39.738	37.7013	24.056	14.1883	12.5966	22.2461	14.3396	19.4915	11.7884	15.7154	16.699	36.8252		0.150539	29.5416
3.4551	23.8145	32.4122	27.2712	25.0301	24.7583	41.8204	67.7054	54.5299	41.2589	40.0671	35.191	21.5328	13.7117	12.3831	19.2528	12.0177	17.0167	12.0961	13.807	14.6657	32.7691		0.155914	27.7672
3.5742	23.6732	30.8499	25.4979	23.6476	23.8175	40.3608	59.8435	51.3687	37.4555	39.9311	32.5496	21.0365	12.4017	11.8051	16.6876	10.8023	16.0918	11.7447	12.9928	12.6724	33.212		0.161288	26.1163
3.6934	22.7335	30.3753	25.5219	24.5947	23.0371	42.0325	52.9593	51.1782	37.1825	37.6906	30.1958	19.1785	11.7275	11.0333	14.2992	10.1679	13.8927	10.4825	12.2353	10.4657	31.1485		0.166667	24.8635
3.8125	21.0239	31.3325	23.3587	24.1758	22.9684	42.6365	49.143	49.0035	33.8691	36.7263	27.9947	15.7911	11.4562	10.4083	12.0284	8.4818	11.1751	10.4866	11.6689	9.7229	25.4048		0.172042	23.2789
3.9317	18.4849	27.8851	21.3644	22.997	23.6969	43.5988	42.8207	46.5369	33.6572	39.0866	25.0535	14.9947	11.5385	9.9372	8.9708	9.1072	9.831	8.9332	10.9751	6.9131	24.7681		0.177421	21.9596
4.0508	17.8188	27.4793	21.9605	22.0584	23.6726	42.6358	38.8014	42.5635	32.1214	38.6631	20.0224	11.6679	11.032	7.9162	7.1672	6.6913	8.8503	8.393	10.9608	6.5018	22.7848		0.182795	20.4649
4.1699	16.9931	28.9448	20.7635	21.4674	21.7651	43.5235	31.2394	41.9418	30.1479	37.211	17.2246	9.9957	9.1937	7.1429	5.9667	6.2964	7.8553	8.3699	9.8538	6.0388	21.9301		0.18817	19.2317
4.2891	14.3248	26.4801	19.4264	21.355	21.955	41.1887	24.7047	39.3231	26.5436	37.8251	14.4118	9.2241	9.9523	6.5776	5.2197	6.1212	6.7606	7.2042	8.6603	5.2684	19.9916		0.193549	17.739
4.4082	12.4912	23.5309	17.1653	18.956	21.6947	37.1814	19.8637	38.3833	25.0613	36.9242	11.2467	8.1226	8.2163	6.7168	4.1074	5.485	5.4503	7.1161	8.3136	4.6919	18.0294		0.198923	16.1309
4.5274	12.3498	25.0697	16.6327	18.94	21.9482	35.9158	16.3411	36.971	21.8147	35.4463	8.2212	7.2203	7.1602	6.0157	3.7509	4.4136	5.1157	5.8747	7.6917	3.2932	14.8338		0.204302	15.001
4.6465	10.5056	23.5096	16.184	19.7255	22.5095	35.0673	12.4037	35.7819	19.8856	33.1824	7.4928	5.4996	7.119	5.4538	3.7623	5.3141	4.5763	4.9763	7.113	3.2253	15.031		0.209677	14.2056
4.7657	10.5641	20.3011	16.2961	18.3012	23.5284	29.9523	11.5248	29.8561	14.6886	31.9652	6.3074	5.5851	6.2917	5.0537	3.6325	5.1203	3.4383	5.7952	6.2308	3.1978	14.5462		0.215056	12.9608
4.8848	9.3833	20.5876	14.8673	17.1737	22.736	28.289	10.1868	26.848	10.2699	30.5513	5.1511	4.5298	5.3458	4.3984	3.6276	5.6273	3.256	4.9484	6.1828	3.0255	12.5279		0.22043	11.8816
5.0039	8.1314	20.8703	14.125	17.0232	22.0889	26.3661	9.3029	26.516	7.684	27.9377	4.1736	4.1011	5.5223	4.5137	3.0109	5.665	2.8633	4.9596	4.8417	3.5648	11.7941		0.225805	11.1931
5.1231	7.2648	17.2176	13.9063	16.853	22.824	26.9472	8.2711	21.6208	6.3095	26.0323	5.2122	4.1377	5.4698	4.3033	2.9302	5.5851	3.317	4.5191	5.358	3.3576	11.347		0.231184	10.6087
5.2422	6.9603	15.7988	13.6648	16.6632	21.0848	24.4328	7.1249	20.5805	5.6784	23.7923	4.4565	3.1604	4.4367	3.6917	3.1432	5.2137	3.5681	4.3622	4.401	3.4438	10.0724		0.236558	9.79669
5.3614	6.4126	13.2345	11.5654	16.9516	22.3258	23.4911	6.1963	16.5367	5.0924	19.9555	3.7531	2.9282	4.0174	4.0194	2.5722	5.0065	3.1758	3.8509	4.6496	2.7931	10.0037		0.241937	8.9777
5.4805	5.2101	11.0896	10.7912	16.1584	21.1767	22.0317	6.1346	14.1736	4.786	15.7239	3.2496	2.3979	4.1813	3.073	2.7541	5.61	2.782	3.1495	4.5822	3.0996	8.5661		0.247312	8.12958
5.5996	5.5446	11.0299	9.1967	16.4938	19.9178	18.9291	5.3779	12.7184	4.8813	13.5427	3.7376	3.1146	4.1683	3.0736	2.2693	5.2248	2.781	3.4932	3.6485	3.6624	7.4686		0.252686	7.6321
5.7188	4.8115	9.375	8.5302	16.6506	19.2018	15.79	5.7067	10.865	3.9283	12.5157	3.856	3.5066	3.6727	2.3701	2.1855	4.504	2.4137	2.9413	2.8928	2.7755	9.4333		0.258065	7.04411
5.8379	4.5711	7.8593	6.9669	16.4075	20.0333	14.1158	5.5511	9.1187	3.1163	10.7125	3.5711	2.8445	3.5174	2.9525	2.3635	5.2992	2.8065	3.4614	3.6502	2.896	8.3676		0.26344	6.67535
5.9571	3.941	9.078	7.1165	16.9003	20.5371	11.8812	5.3161	7.6749	3.0451	9.1615	3.5019	2.5676	3.0506	3.0818	2.3466	4.8057	2.1973	3.2618	3.4258	2.8174	7.6073		0.268819	6.34836
6.0762	4.4876	7.9297	6.4429	16.7373	17.4757	11.4817	4.9429	5.7991	2.9539	7.8708	3.3239	2.2579	2.6502	2.7017	2.958	4.1253	2.4852	2.9518	3.5427	2.413	6.4832		0.274193	5.81021
6.1953	4.6481	5.9054	5.395	17.4946	16.1183	9.7833	5.4283	5.2059	2.5399	8.3332	3.4695	2.0489	2.3391	2.7444	3.327	3.7449	2.7721	3.1787	3.1421	2.7712	8.0658		0.279568	5.64075
6.3145	4.2286	6.167	5.1612	19.9601	14.1356	8.2437	4.8511	4.8885	2.7302	7.5696	3.8175	2.2959	2.5717	2.8091	3.0145	4.3765	2.1613	2.8129	2.4452	2.6222	6.6519		0.284947	5.40544
6.4336	4.0524	5.3926	5.3975	18.0192	14.4194	7.8461	4.9639	4.3877	3.3796	8.3334	3.1139	2.1595	3.2948	2.6925	2.3074	4.6184	2.2584	2.3544	3.0126	2.5492	6.192		0.290321	5.27357
6.5528	2.9618	4.7568	5.4082	17.3458	12.7876	7.3998	4.525	3.9526	2.9633	7.4871	2.9681	2.2894	2.8361	2.8474	2.655	5.654	2.1824	2.0685	2.8885	2.3267	6.3509		0.2957	4.98357
6.6719	2.8117	4.8511	5.1563	17.0831	9.902	6.0866	5.0543	3.3845	3.123	7.5367	3.5632	2.4973	3.0248	2.561	2.6041	5.2842	2.3901	1.8284	3.2584	2.0805	5.387		0.301074	4.73659
6.7911	3.2409	4.7665	4.9564	14.1231	9.4367	5.5016	3.7072	4.383	3.8712	5.732	3.2151	2.6583	2.3791	2.168	2.4371	5.8727	2.2648	2.4913	2.5991	1.9237	5.9745		0.306453	4.46201
6.9102	3.4443	4.0124	5.0745	12.9665	8.2574	6	4.1652	3.402	2.8262	5.7906	3.2818	2.7532	2.2511	2.691	2.5325	4.6072	2.8451	2.5841	2.4625	1.9964	5.4868		0.311828	4.25861
7.0293	3.3127	4.6623	4.9448	11.4013	8.0221	5.7211	4.1848	3.818	2.8591	5.6269	2.8194	2.5505	2.5314	2.0171	2.3947	4.7319	2.323	2.4227	2.3701	1.863	6.6769		0.317202	4.15494
7.1485	3.4017	4.4925	4.0843	9.2619	6.7859	5.7535	4.0553	3.883	2.6065	6.3716	3.2254	2.7502	2.2452	1.8896	2.188	4.866	1.9337	2.1012	2.4616	2.1489	5.7648		0.322581	3.91766
7.2676	2.7554	4.2009	3.6294	8.3665	5.3313	5.8361	4.3641	3.5205	3.5418	5.6467	2.8928	2.3746	1.7927	1.766	2.5275	4.7034	1.9168	2.4327	2.1908	2.385	5.4661		0.327956	3.6972
7.3868	3.3423	4.6193	3.1283	7.058	5.6689	5.8728	3.7101	3.4768	3.1167	5.4352	3.2534	2.5993	2.0524	1.7595	3.0976	5.2057	1.5987	2.6398	2.0421	2.2736	7.0571		0.333335	3.76227
7.5059	3.8402	3.6245	3.6548	5.4106	6.032	5.6037	3.8616	2.9833	2.5602	5.668	3.3107	2.7656	2.1179	2.109	2.6873	5.8622	2.0753	2.265	2.2202	2.1842	6.2201		0.338709	3.66935
7.625	3.5943	4.2062	3.3688	4.1447	4.9006	5.145	4.0125	3.4826	3.0122	5.1086	2.9154	2.167	2.0715	1.8116	2.3437	4.7138	2.3364	2.1699	1.5633	2.1026	5.8274		0.344084	3.38086
7.7442	3.8296	3.2105	3.6696	3.9908	4.5642	5.1001	4.2314	4.1566	3.0063	6.2756	2.8931	2.327	1.7846	1.675	2.5623	4.9319	1.7593	1.5742	1.7977	2.286	6.298		0.349463	3.42494
7.8633	3.4703	3.385	3.0135	3.3159	4.2052	5.6095	3.5019	3.2396	3.4991	6.1631	3.0363	2.1232	1.8255	1.6809	2.396	5.269	2.3939	1.7301	2.1051	1.9469	5.9613		0.354837	3.3272
7.9825	4.3174	3.0982	2.4811	3.6397	3.7287	5.0808	3.4897	3.2208	3.1774	5.7878	3.3717	2.2956	2.307	2.3637	2.2844	5.3515	2.1556	2.1602	2.005	1.9451	5.681		0.360216	3.33059
8.1016	3.2978	3.5049	2.159	3.6642	3.6343	5.9643	4.1911	2.9173	3.4911	5.2765	3.347	2.0518	2.0568	2.3981	2.2073	5.1098	1.7219	1.7892	2.7717	1.814	6.5399		0.365591	3.32895
8.2207	3.12	3.286	2.5677	3.0347	3.808	6.9593	3.8069	3.6448	3.1873	5.5248	3.8167	2.3363	3.0099	2.1325	2.6454	5.6326	1.4894	1.6629	2.286	1.8123	6.678		0.370965	3.4496
8.3399	3.8037	3.8089	2.4721	3.3366	4.2197	7.4411	3.0459	2.8702	3.8066	5.8625	2.7532	2.2498	2.0933	2.1738	2.7425	5.5082	2.2565	2.4462	2.1877	2.1343	7.0488		0.376344	3.53627
8.459	4.0526	3.4587	2.7161	3.2598	4.4378	7.3348	2.283	2.7867	3.733	6.7016	3.3673	1.8963	1.8127	2.6001	2.599	5.3256	1.8966	2.0031	2.0171	2.0725	6.078		0.381719	3.44916
8.5782	3.3151	3.7748	2.4661	3.202	3.665	6.2336	2.7028	2.9829	3.4959	6.9092	2.9147	1.7811	2.06	1.78	1.9909	5.9496	1.8431	2.0387	1.795	2.056	6.2047		0.387098	3.29339
8.6973	3.8088	3.5589	2.1667	3.2642	4.0535	6.4332	3.413	2.9201	3.535	6.4375	2.5849	1.4958	1.543	1.6879	2.5987	5.8213	2.2477	2.2064	1.47	2.3522	5.798		0.392472	3.30461
8.8165	3.5329	4.0169	2.721	3.766	3.9367	6.2871	3.1674	2.9993	3.1269	6.2342	3.432	1.9601	1.4577	1.6421	2.9039	6.1507	2.0733	1.986	1.7763	2.466	5.8699		0.397851	3.40507
8.9356	3.8587	4.2104	3.1812	2.7469	3.544	8.4197	3.2218	2.8126	3.3909	5.7333	3.5388	2.7109	1.8287	2.3725	2.8907	5.372	1.6031	1.9171	1.5658	2.7739	6.4991		0.403226	3.53296
9.0547	3.8402	3.6605	3.2768	2.8483	3.972	7.4591	2.9505	2.8528	3.496	4.7641	3.3641	2.5528	1.7844	2.2069	2.4788	5.6331	1.7549	2.1215	1.6916	2.2985	6.4457		0.4086	3.4025
9.1739	4.0457	3.2527	2.9448	2.9332	4.6488	5.7016	3.5246	3.3642	3.3859	5.0124	2.8514	2.6635	1.7908	2.153	1.7642	5.0561	2.057	1.9614	1.9616	1.527	5.5438		0.413979	3.24494
9.293	3.9841	3.6743	2.3513	3.2119	3.6115	7.9215	3.5408	3.1247	3.5512	5.9812	3.0518	2.4512	1.4488	2.056	2.0263	5.8605	2.0641	2.1084	2.0246	2.2172	5.8003		0.419354	3.43151
9.4122	4.2842	4.0825	2.3412	3.9221	3.6991	7.2547	2.7998	3.6413	3.6588	5.8802	3.2827	2.2402	2.1302	1.7826	2.1885	6.055	2.1004	2.1527	2.2121	2.0672	5.1597		0.424733	3.4731
9.5313	3.4674	3.8007	3.0464	3.6348	3.8906	8.0525	3.2401	3.342	3.1662	6.2135	3.3206	2.138	2.2631	2.047	1.6219	5.8841	2.3867	2.0117	2.0939	2.5408	5.1198		0.430107	3.48961
9.6504	4.0892	3.5027	2.784	3.866	3.8494	6.6959	4.194	3.1545	3.8119	6.3229	3.0478	2.7168	2.7193	1.6906	1.968	5.7823	2.2169	1.6274	1.928	2.3878	7.4006		0.435481	3.60743
9.7696	4.1603	3.0553	2.7207	3.8082	3.5377	7.3446	4.2931	3.4935	3.9036	5.4382	3.8296	2.4215	2.3933	2.1157	2.287	6.3435	2.2963	2.1104	2.2298	1.9355	6.8258		0.44086	3.64493
9.8887	3.7895	3.3356	3.0944	3.4761	4.2866	7.4965	3.9826	3.5983	3.959	5.6412	4.5948	1.7458	2.3021	2.0592	2.117	6.8333	2.1076	2.2263	1.9397	2.2118	6.5301		0.446235	3.68226
10.0079	5.3923	4.5613	2.877	3.3559	3.6068	8.4528	3.5519	3.6985	5.1231	5.9256	4.2567	2.0955	2.0278	2.0673	2.5965	6.8237	2.2715	1.826	2.0079	2.0207	5.905		0.451614	3.83066
10.127	6.5823	5.0424	2.6441	3.228	4.1427	8.001	4.2068	3.3275	5.7906	5.4601	4.7193	1.9168	1.8846	1.9595	2.1297	7.292	1.8924	1.825	2.1685	1.7338	6.7997		0.456988	3.94032
10.2462	5.5545	4.0781	3.105	3.5566	4.0946	8.4758	4.3992	3.0861	5.7388	5.2877	3.9702	3.0069	2.3821	1.9793	2.3178	7.2755	2.2712	1.9094	2.2177	2.5379	6.7526		0.462367	3.99986
10.3653	5.7952	4.769	2.9705	3.5113	3.5701	7.9083	4.5379	4.1846	5.986	4.7215	5.3361	2.7776	2.5664	1.4814	2.4334	6.4445	2.1753	2.5819	1.8025	2.5171	7.4951		0.467742	4.07456
10.4844	6.6154	4.2264	3.3421	3.4082	4.6187	7.5743	4.1606	3.9226	7.3561	5.2945	4.5103	2.4131	2.3439	1.966	1.9596	8.1025	2.346	1.8323	1.97	1.7224	8.0744		0.473116	4.17902
10.6036	5.5949	4.7751	2.8697	4.3655	4.3597	7.9663	3.4002	5.0082	8.7691	4.7331	4.3168	2.4541	2.6271	1.9734	2.5989	7.9864	2.4344	2.2289	2.0774	1.7251	7.4585		0.478495	4.27251
10.7227	5.8464	4.5937	2.8494	4.1178	4.2886	8.9054	4.2464	4.8147	8.4015	5.2993	5.1994	2.3347	2.2296	1.9017	2.7361	7.9047	2.6961	1.9383	2.6753	2.1599	7.6903		0.48387	4.42044
10.8419	5.6263	4.9671	3.5381	4.3354	4.1204	9.855	3.4441	4.5481	8.7491	4.646	5.8932	2.3361	2.6942	1.7813	2.3787	8.5843	2.7649	2.3401	2.7551	2.1321	8.2771		0.489249	4.56032
10.961	6.5854	5.0994	3.4342	5.0764	4.2398	9.2432	5.4557	4.3411	8.6599	5.0168	6.5189	2.3023	2.1107	2.1533	2.3511	8.5286	3.2702	2.6015	2.3798	2.5338	8.0464		0.494623	4.75945
11.0801	6.084	6.1664	4.2667	4.5683	4.4137	11.3718	5.0289	5.029	9.8255	5.7616	7.6022	2.8118	2.2305	2.1673	2.2472	9.0587	2.8624	2.4444	2.5826	2.1612	8.0227		0.499998	5.08128
11.1993	6.6746	4.9818	3.5736	4.0962	4.5281	10.9763	3.5115	3.7152	11.328	5.5714	8.7515	3.0969	2.7635	2.2283	2.5093	8.3882	3.08	2.4913	2.1533	2.2458	7.2841		0.505377	4.94995
11.3184	6.4828	6.2125	3.3579	3.5444	5.2946	10.9591	3.4062	4.3906	10.7009	5.5226	7.4921	3.1397	2.4006	2.074	2.5139	9.3628	3.1289	2.0469	2.5061	2.1556	7.369		0.510751	4.9553
11.4376	6.4356	6.775	3.3054	4.1309	5.2306	11.8374	4.4156	3.8037	10.9724	6.9003	6.9299	2.6903	2.1188	2.1766	3.2785	9.3939	3.0822	2.1469	2.1707	2.4681	6.4013		0.51613	5.07924
11.5567	5.852	6.0457	3.4592	4.7434	6.5001	11.745	5.6771	3.9998	11.4478	5.2371	6.6712	2.7958	2.3131	2.0286	3.278	9.4153	3.2447	2.1325	2.5626	2.7116	6.5878		0.521505	5.16421
11.6758	6.8225	6.8032	3.715	5.321	5.6258	11.9484	5.7056	3.6452	12.4227	6.0535	6.3296	2.5028	1.9712	2.4119	2.6695	9.4085	2.6492	2.2504	2.3853	1.9528	7.178		0.526879	5.22724
11.795	7.9575	6.0242	3.5653	4.6637	6.016	13.5328	5.3581	3.9309	14.3467	5.3749	5.8664	2.8214	2.0465	3.2153	2.5694	10.7095	2.4783	2.5052	2.5711	2.8268	6.3038		0.532258	5.46113
11.9141	8.0011	6.8754	3.1568	5.3707	6.7079	13.6547	5.2924	4.1452	14.6977	5.723	4.5483	3.3423	1.9092	2.6478	2.9224	10.5757	3.1285	1.9584	2.3513	2.4676	6.2224		0.537633	5.50947
12.0333	7.6561	8.1555	3.7913	5.2724	8.0131	14.0615	5.1018	3.7487	15.0594	5.6369	4.946	2.9511	1.9828	1.8647	2.377	12.5107	3.5475	2.5518	2.2166	2.4951	4.9878		0.543012	5.66323
12.1524	7.9941	8.1587	4.227	4.7549	7.678	13.1408	5.3555	3.7833	15.5307	6.4337	3.8631	2.8745	2.6435	2.974	3.1281	12.3963	3.3399	2.2735	1.9945	2.5272	3.8379		0.548386	5.66234
12.2716	8.2887	7.5219	4.236	5.6376	7.1592	14.5182	6.0434	4.0238	15.7135	6.8702	3.8003	2.9997	2.3052	2.3343	2.5092	14.1106	3.2315	2.2237	1.92	2.5332	4.3385		0.553765	5.8247
12.3907	9.0507	7.9786	4.2014	6.5128	7.8275	15.257	5.831	4.5508	15.3727	6.7791	3.985	3.036	2.2398	1.667	2.3819	13.4566	3.5176	2.758	2.2893	2.2327	3.28		0.55914	5.91455
12.5098	8.3904	8.9566	5.2168	5.3694	6.4098	15.0255	6.7318	4.1365	17.302	7.2636	4.4755	3.0555	2.2219	1.7642	1.9707	12.9881	4.5634	3.1583	1.9948	2.394	4.3523		0.564514	6.08291
12.629	9.8624	12.0431	4.6002	5.6283	5.4552	15.5123	6.3467	4.5837	16.8562	7.4447	4.5685	3.1229	2.6237	2.2733	2.5762	12.9688	4.642	2.3727	2.2936	2.9405	3.8879		0.569893	6.31442
12.7481	9.1958	12.3739	4.3561	6.0734	5.366	15.2815	5.7758	4.7564	16.015	7.3769	4.2627	3.304	2.74	2.2531	2.0602	12.4886	4.993	3.181	2.126	3.1775	3.6631		0.575267	6.22952
12.8673	8.459	14.2542	5.476	7.3196	5.6707	16.4995	6.7721	5.2841	16.6815	8.7511	4.8253	3.6641	2.0465	1.7556	2.0354	13.0956	4.6071	1.9653	2.4809	2.9913	4.1119		0.580646	6.60699
12.9864	7.7532	17.06	5.5976	8.4583	5.2475	15.2134	7.0545	5.5047	16.2622	7.4639	3.8183	3.6479	2.0025	1.9451	2.288	11.6415	4.3339	2.133	2.1689	2.6938	3.8926		0.586021	6.4848
13.1055	8.9115	19.5712	5.2896	7.2123	6.3784	15.5343	8.3022	6.7442	16.8563	7.785	3.7381	3.3664	2.5817	2.5006	2.7132	12.3984	5.0258	2.5893	1.8314	3.1275	3.8271		0.591395	6.96593
13.2247	9.016	22.9587	5.7124	7.9191	6.047	15.7862	10.0379	6.0498	17.1601	7.0951	3.4181	3.3795	2.5774	2.6534	2.8095	11.8703	5.544	2.4049	1.7529	2.5373	3.7848		0.596774	7.16735
13.3438	8.6468	22.959	6.2645	8.4393	5.415	13.3816	9.5954	5.7093	18.5212	6.4654	4.1422	3.1208	2.3141	2.0734	3.0608	10.937	5.4372	2.1511	1.974	2.0346	3.9575		0.602149	6.98096
13.463	8.9903	22.3828	6.1301	7.5376	6.9372	13.5327	9.7921	5.6386	17.3501	6.7499	4.059	3.3888	2.477	2.0743	2.5896	9.8145	6.5003	2.5067	2.1296	2.4583	3.3655		0.607528	6.97167
13.5821	9.1165	21.5684	5.9028	6.916	7.802	13.1299	11.6115	6.265	17.4885	5.8154	3.6583	2.7967	2.71	2.095	2.3771	11.4003	7.1378	2.4368	2.0942	3.1717	3.5621		0.612902	7.0979
13.7012	7.5614	20.0259	6.4983	7.2921	5.9115	14.531	10.8377	6.7957	17.3585	5.8664	2.8992	3.39	2.5854	2.0895	2.8254	10.2568	8.6812	2.6069	2.1511	2.6797	4.3431		0.618277	7.0089
13.8204	6.5269	17.6484	6.8613	6.1763	7.5737	14.3868	10.6906	6.2118	20.1838	6.1851	3.3789	3.5089	2.9124	2.1868	2.3197	9.111	9.5502	2.3634	2.685	3.0348	3.7741		0.623656	7.01285
13.9395	7.3421	18.7008	7.244	7.1725	7.0355	14.755	10.3356	7.2075	20.9756	6.5072	3.4773	2.9205	2.3611	1.9333	2.5615	8.7345	9.9419	2.346	2.0918	2.7476	4.0178		0.62903	7.16234
14.0587	6.9018	18.3407	7.486	7.7306	6.9724	14.1934	10.1088	7.1928	21.4808	5.5559	3.3502	3.154	2.3025	2.1642	2.5264	6.8811	12.7688	2.679	2.4797	2.6157	4.0947		0.634409	7.1895
14.1778	6.5965	17.4617	8.4772	8.2427	7.4765	13.8919	11.3898	7.8283	23.6403	6.322	3.2194	2.7261	2.1927	2.4661	2.5713	7.3788	15.3223	3.1138	1.9176	2.8563	3.8506		0.639784	7.56866
14.297	6.481	19.0962	10.8648	8.147	9.0575	15.0663	10.6923	8.1297	23.8368	6.688	3.0351	2.8349	2.1727	1.9809	3.1582	7.4617	17.1365	3.4431	2.0963	2.4844	4.108		0.645163	7.99864
14.4161	6.2163	19.6557	12.7013	8.0372	8.2617	13.887	9.6536	9.1105	24.298	5.6221	2.8287	3.0156	2.4535	2.348	3.3253	6.6477	18.5619	2.675	2.1499	2.4917	3.7263		0.650537	7.98414
14.5352	6.4454	24.0911	14.6093	9.9988	7.8118	12.8174	10.3796	8.2803	25.4248	4.9386	2.8868	3.0236	2.3139	2.2124	3.417	6.1049	21.6993	2.7911	2.7822	2.5237	3.793		0.655912	8.49262
14.6544	8.4668	24.9994	15.9872	10.4656	7.6877	11.1108	9.2032	10.7027	26.5647	5.3029	2.6614	2.7021	2.738	2.0214	3.1537	5.291	20.7321	2.5832	2.9856	2.4823	4.2257		0.661291	8.66988
14.7735	8.6093	23.6577	15.0892	10.5335	6.9436	12.0226	10.0434	11.7196	23.5467	4.9209	3.1302	2.3538	2.4613	1.9431	3.5914	4.6797	21.6192	3.1139	2.7307	2.8178	4.5259		0.666665	8.57398
14.8927	8.6621	23.9036	15.8849	11.3003	7.6832	11.8239	9.3458	11.995	23.1477	5.7771	3.7738	3.0804	2.3313	3.0994	2.9936	3.9554	21.208	3.2272	1.9901	2.3194	3.7322		0.672044	8.63021
15.0118	7.9778	20.6239	18.1291	12.6156	6.9876	9.4254	10.3076	13.4602	21.5725	5.3733	2.98	2.8548	2.9725	2.3913	3.1175	3.2928	19.3816	3.0262	2.4807	2.4828	3.3787		0.677419	8.32533
15.1309	7.6519	17.9005	16.8848	12.4525	7.126	9.7722	10.7554	14.0683	18.0391	5.6916	3.2872	3.4004	2.7808	2.3433	2.9819	3.3462	19.3518	1.8951	2.9098	2.615	3.9223		0.682793	8.056
15.2501	7.6402	18.2209	20.2734	13.3366	5.802	8.5372	11.717	16.5726	17.9943	5.699	3.1666	3.2028	2.7077	2.1369	2.5716	3.4814	19.6668	2.8368	2.557	2.5537	3.409		0.688172	8.28969
15.3692	7.1861	16.7756	20.8152	12.4456	6.5551	8.4963	13.11	17.0712	18.4844	6.5739	2.9807	2.6969	3.1236	2.1279	2.5953	3.5874	18.3646	3.4112	2.204	2.7354	3.0247		0.693547	8.3031
15.4884	7.5728	16.6443	20.929	12.8399	6.2839	9.6096	12.6213	19.1148	16.831	6.52	3.2491	3.0068	3.0245	2.5813	2.8744	3.7378	16.3165	3.6729	1.7983	2.3922	3.239		0.698926	8.32664
15.6075	7.0289	13.8859	21.7052	12.4866	5.5361	9.1996	15.1131	22.4575	16.6104	6.1359	4.0034	3.2663	3.5145	2.8848	2.5652	3.5797	15.3167	3.0757	2.2648	2.9129	3.7311		0.7043	8.44163
15.7266	7.3043	14.3263	23.6091	14.1517	6.4992	9.4537	16.901	23.0126	13.1983	6.7648	3.6826	2.3837	2.7662	3.3436	3.1967	2.7054	13.8962	3.0876	2.6537	3.0277	3.7319		0.709675	8.55697
15.8458	6.3883	13.7169	24.5571	12.5494	6.8313	9.6766	15.8573	24.6821	13.0425	6.4783	3.6369	2.7676	2.5631	2.9411	2.2634	2.5646	12.6608	4.0071	2.7448	3.1854	2.5809		0.715053	8.36645
15.9649	6.7153	13.8436	23.8103	12.7178	6.0815	8.8662	18.647	23.3919	12.2902	5.1424	3.6573	3.2969	3.1199	1.8583	3.3025	2.6966	10.4509	4.1727	2.5863	2.7993	3.0948		0.720428	8.21627
16.0841	6.478	16.0388	24.5554	12.8718	6.0843	9.1925	19.5732	25.4647	12.2424	4.6893	2.8457	3.5504	2.8589	2.486	2.5878	3.0506	11.6773	3.9977	2.6093	2.7042	3.2731		0.725807	8.51578
16.2032	6.2961	16.6081	20.5807	13.3054	6.6574	9.9965	22.0292	25.0623	10.3135	5.299	2.9143	3.1132	2.3569	2.5856	3.0011	2.8476	10.3734	3.5489	2.7026	2.7259	3.1797		0.731181	8.35702
16.3224	6.5677	18.4168	20.5677	10.5463	5.4017	10.1487	25.4825	25.603	10.5126	5.0148	2.7624	3.4425	2.2802	2.7489	2.9313	3.1883	10.6301	4.6255	2.7312	3.1282	3.0346		0.73656	8.56024
16.4415	7.3552	20.025	20.0227	10.4487	5.8957	11.816	27.2116	25.0511	10.1557	5.266	2.7577	3.733	2.4989	2.1107	2.9049	3.0058	9.8884	3.6294	3.4092	2.1764	3.0478		0.741935	8.68619
16.5606	7.5934	22.3502	19.6048	10.5323	5.5457	12.9792	32.2719	24.9465	10.4	5.3031	2.8377	2.8754	3.1394	1.451	2.5515	2.8581	9.6643	3.6224	2.7246	2.7084	3.0547		0.747309	9.0007
16.6798	7.5534	25.6553	17.3003	9.9325	4.7887	11.9889	33.0146	22.4323	11.3938	5.4078	3.188	2.837	2.8906	2.5928	2.5196	3.4389	9.0606	3.7596	2.6406	2.8145	3.2956		0.752688	8.97645
16.7989	10.0582	28.4945	15.2779	10.2778	5.4134	14.1626	37.7094	20.6187	10.3665	4.7536	2.7902	3.1859	2.4101	3.1982	2.6251	2.4956	9.5311	3.7633	3.0708	2.5785	2.83		0.758063	9.31483
16.9181	10.9209	32.4199	14.466	9.6146	5.0044	15.5259	38.5268	20.1562	11.1886	4.826	2.8137	3.4875	3.0029	2.8612	2.4618	2.3174	9.1656	3.6651	2.4296	2.8851	2.9256		0.763442	9.55547
17.0372	10.2134	36.1863	14.6157	9.2562	4.5496	15.2899	40.8731	19.7566	10.4197	5.1956	3.1046	2.8177	2.4065	2.22	2.5168	3.0791	8.3475	4.3228	2.849	2.5864	2.7183		0.768816	9.68213
17.1563	11.141	41.4529	13.3858	9.4537	5.1961	16.5215	42.1362	21.6041	9.5087	5.0116	2.7879	2.4048	2.8006	1.8973	2.8022	2.9022	9.1831	3.5987	3.2143	2.9486	2.7892		0.774191	10.1305
17.2755	12.1209	49.305	15.7271	7.6291	4.3966	16.9915	43.0238	19.4539	10.4234	4.839	3.1558	2.1871	2.5831	2.6027	3.5316	2.8068	9.7118	4.1075	2.5826	3.1798	2.6508		0.77957	10.6195
17.3946	13.3694	48.6439	16.7659	7.5248	4.8511	18.384	46.7353	19.4784	11.6216	4.599	3.5269	2.376	2.1594	2.8582	2.9366	2.8171	9.555	3.9458	2.5974	3.247	1.9183		0.784944	10.9481
17.5138	14.7038	49.5109	16.9087	5.7316	5.3388	20.913	44.3903	17.7673	11.967	3.5447	3.6844	2.7796	2.9039	2.205	2.7188	2.8561	9.2346	3.5225	2.8858	3.3244	2.2479		0.790323	10.9114
17.6329	16.302	57.0285	16.1475	5.9813	6.0101	22.3962	47.9073	16.8209	12.9076	4.7496	3.403	2.03	2.937	2.3039	2.946	3.5271	8.3954	3.5963	3.1652	3.3058	2.5609		0.795698	11.6391
17.7521	18.317	57.9844	15.7074	5.9367	6.4999	23.4664	43.4845	17.7057	15.2371	4.9009	3.4756	2.4248	2.6491	2.3686	2.6951	2.9138	8.9763	3.8672	3.3207	3.7872	2.5893		0.801077	11.8242
17.8712	17.9589	60.6001	14.7823	6.3787	6.1004	23.1242	41.0934	16.9356	16.0577	5.4153	3.2905	1.911	2.5171	2.8442	2.797	2.3118	9.7515	4.44	3.14	3.8228	2.7382		0.806451	11.81
17.9903	17.3681	63.2531	17.162	6.4142	6.2171	26.5769	41.1498	19.02	14.7421	5.9181	3.169	2.671	2.5436	2.5631	3.2953	3.1538	10.2614	3.4377	3.2675	3.3046	2.8363		0.811826	12.3012
18.1095	17.6279	63.2491	16.4506	6.2562	6.5896	26.9382	37.4104	20.9181	16.3851	5.5935	2.9042	2.5649	2.7145	1.8981	2.5921	3.0431	10.6041	3.0123	3.0885	3.5882	2.6808		0.817205	12.1957
18.2286	21.0131	66.2767	17.0967	7.1615	6.6678	29.0551	34.2003	21.7958	18.0547	5.8277	2.914	2.4828	2.5185	2.1755	2.2102	3.0278	9.0562	3.0952	3.2394	2.8185	2.5611		0.822579	12.5356
18.3478	22.3339	61.0509	19.0682	9.1144	7.5285	32.9256	31.0838	25.6044	20.0568	5.9404	3.1517	2.1531	2.5898	2.1633	2.6765	2.6688	8.8934	3.8906	2.9891	3.9615	2.8807		0.827958	12.9869
18.4669	25.1009	63.9432	23.4074	8.277	9.5331	37.3461	27.6557	29.2009	21.7367	6.8983	2.8042	2.3353	3.12	2.4098	2.52	2.4666	8.5148	4.2673	3.6644	3.87	3.7767		0.833333	13.9452
18.586	28.61	59.5756	26.2477	7.8413	10.2643	36.1303	25.0238	30.6487	24.0883	6.3665	3.05	2.2898	2.6838	2.779	1.8106	3.0984	9.9239	3.7868	3.7662	4.1446	2.4256		0.838707	14.0264
18.7052	30.9823	54.9674	26.6241	9.9617	10.1962	36.3621	22.4503	32.2407	22.2866	6.6439	3.8444	2.5649	2.9218	3.0382	2.5593	2.8963	7.7502	3.6791	3.1534	3.8287	3.0088		0.844086	13.9029
18.8243	34.9959	49.39	30.3635	10.9276	12.4641	38.4199	18.8517	32.8925	21.58	7.6853	3.7456	2.2805	2.6353	2.5575	2.7997	2.8815	7.7277	4.5993	3.5748	4.0282	3.1215		0.849461	14.1677
18.9435	37.7311	40.8712	38.3154	11.7934	14.8709	38.3552	16.7998	37.9011	23.352	7.9933	2.7966	1.9274	2.7137	3.1038	2.9395	3.0249	6.1701	4.0655	3.5333	4.3007	2.9684		0.85484	14.5489
19.0626	38.5348	38.3462	43.5591	12.1075	17.7217	36.2072	16.7493	34.2982	23.5475	6.8071	3.3668	1.896	2.3445	3.6493	2.6692	3.6404	6.572	4.6645	3.305	5.176	2.9444		0.860214	14.6717
19.1817	38.8226	38.7696	47.5433	13.9896	18.5408	34.1242	14.7547	32.0494	28.9418	7.1626	3.3961	2.7124	2.7591	2.5494	2.6626	3.7022	6.3453	5.243	3.089	5.9733	3.4764		0.865588	15.0765
19.3009	39.0819	37.9681	49.9264	15.4752	23.1023	31.1202	13.2705	33.7381	29.1848	8.3171	3.203	2.6854	3.1928	2.5543	3.0878	3.3521	6.027	6.1836	2.8809	6.8831	4.5924		0.870967	15.5156
19.42	38.693	39.3509	51.9658	18.0973	25.2553	30.5159	12.2853	29.4356	30.6328	7.3303	4.1235	2.5361	2.671	2.2654	3.1288	2.8138	6.1257	6.2826	3.78	8.3674	4.159		0.876342	15.7055
19.5392	38.1185	39.6995	53.0517	19.8999	30.0358	25.8985	11.573	26.0165	34.6805	8.3748	4.8705	2.6202	2.6481	2.4622	2.4859	3.3779	5.1882	6.811	4.3005	9.9519	3.805		0.881721	15.9938
19.6583	40.4034	41.4603	53.0562	24.5588	31.1733	27.2989	10.6259	24.7433	37.5116	8.0582	4.0726	2.4317	2.5798	2.9702	2.8314	3.9095	5.0124	7.3014	4.608	11.0259	3.4074		0.887095	16.621
19.7775	49.1971	42.9953	50.5657	26.9873	32.0643	23.9638	9.2546	22.3608	39.9364	7.9431	3.8987	2.9372	2.6444	2.5925	3.3345	4.2683	6.0749	9.6039	4.8655	12.6272	3.8198		0.892474	17.235
19.8966	50.845	41.2705	45.9329	32.9585	34.9374	21.3956	7.841	21.3599	44.1235	8.949	4.0086	2.7541	2.8229	2.5577	2.8398	4.3387	5.8235	10.2453	6.4029	16.5092	4.5415		0.897849	17.7361
20.0157	52.9051	38.9105	42.4883	35.0426	37.6669	19.4406	6.5289	18.1543	44.2793	8.5679	4.247	2.5307	3.043	2.9109	2.7217	4.2259	5.1379	13.0707	6.1075	23.6495	4.9704		0.903223	17.9333
20.1349	55.6894	38.1295	38.4756	38.9348	39.1662	17.4763	5.2897	16.5881	43.6656	8.6049	3.6799	2.5741	3.4407	3.009	3.1667	4.8388	6.3057	15.4793	6.4157	31.8431	6.5828		0.908602	18.5408
20.254	60.0863	37.7274	33.3768	42.2774	38.7529	13.9685	4.6427	14.4211	39.9512	9.0874	4.0463	3.3935	2.8997	2.1792	3.1449	5.5724	7.4251	21.2234	6.9194	33.8882	6.4502		0.913977	18.6397
20.3732	61.7875	34.1015	29.9672	43.2333	40.5394	11.4043	4.5503	11.6453	40.4268	9.0379	4.4874	3.4835	3.3927	2.8659	2.8074	6.2811	8.422	29.4305	7.6374	33.0747	6.0297		0.919356	18.7908
20.4923	65.8853	30.9493	24.9148	49.2023	37.2054	10.656	3.9582	10.2565	33.9783	8.7122	5.012	3.1443	3.416	3.1035	3.4088	8.2004	9.002	38.6088	8.5764	28.9824	7.5632		0.92473	18.797
20.6114	65.2251	29.18	22.7614	50.3664	32.4703	10.0502	2.9854	10.3325	31.962	9.7485	4.9819	3.4563	3.2341	3.4139	3.9658	8.3873	11.3036	46.6557	11.027	26.195	9.2231		0.930105	18.9012
20.7306	66.4129	29.0448	19.2322	49.6748	30.7768	8.2148	2.4483	8.1534	29.5647	10.0972	4.8294	4.1109	2.5344	3.6141	4.5053	9.2238	15.0728	48.8028	12.4971	20.3153	10.6515		0.935484	18.5608
20.8497	70.2943	25.3539	13.82	45.5928	31.2396	6.6315	2.0923	6.9339	27.0311	11.3349	5.0924	3.6871	2.6719	3.2569	4.748	11.5912	17.4112	48.5256	14.7714	17.1759	12.9911		0.940858	18.2022
20.9689	71.4496	23.9574	12.7527	43.5843	27.5805	5.2721	2.5581	5.6433	26.1012	12.5097	5.8969	3.1446	3.3065	3.1044	4.2807	15.4163	19.6419	40.8878	17.6204	12.9386	13.3414		0.946237	17.6661
21.088	70.4337	22.1368	12.8459	38.5609	25.189	4.3431	1.4125	4.309	22.2822	11.6813	6.1915	3.5037	2.7374	2.9901	5.1666	17.6919	19.7331	37.3493	17.7282	10.0651	15.5462		0.951612	16.757
21.2071	60.5927	19.013	11.3841	38.5861	21.5946	4.9584	1.4301	3.5244	20.384	11.5151	6.9687	3.6975	2.8564	2.9519	5.2757	21.2577	22.8231	29.5018	18.3634	6.8581	17.8254		0.956986	15.7792
21.3263	50.5288	19.492	11.7283	30.6407	19.3496	4.5148	1.6044	3.4068	17.016	14.0269	7.4506	4.6186	3.8951	4.563	6.6274	24.4159	22.7958	25.446	16.9726	6.0315	21.1598		0.962365	15.0612
21.4454	43.2341	17.0507	11.4413	31.0362	17.5932	3.4525	1.5251	2.8675	15.4917	17.046	9.1761	5.7528	3.787	4.434	7.7687	23.1245	26.9832	21.2439	15.6933	6.0243	20.2947		0.96774	14.5248
21.5646	33.9143	15.9011	10.6849	26.5444	12.0867	3.1713	0.9696	2.504	13.0728	19.316	11.3443	5.4082	3.7035	4.5829	11.1725	20.5109	29.8989	15.9675	14.8737	5.8791	22.8006		0.973119	13.5384
21.6837	26.8496	15.575	10.1517	22.3601	10.462	2.0063	0.9755	3.4541	10.8815	20.3589	14.2502	6.2363	3.4505	5.5204	16.822	15.2919	31.3606	13.4654	12.6546	4.636	23.1379		0.978493	12.8524
21.8029	22.1334	13.5241	10.8307	20.6803	9.3031	2.5821	0.8309	1.9381	9.5095	23.9528	12.6989	6.7576	3.5684	7.7472	23.177	9.3597	30.0231	13.3668	10.9053	3.7667	21.4522		0.983872	12.2909
21.922	19.3499	10.2652	10.8557	19.0294	6.4597	2.3632	0.9765	1.5311	8.0846	25.0699	16.0176	7.3434	3.8969	9.6893	31.1457	5.3133	25.62	11.8265	8.5449	3.3579	18.7386		0.989247	11.6895
22.0411	15.668	7.3184	9.5731	14.9852	5.4124	1.6278	1.0187	1.1124	6.3656	25.7219	18.7066	6.9827	3.615	12.9892	33.8393	3.8248	24.3665	10.3585	6.3699	2.7017	16.3577		0.994621	10.9007
22.1603	12.2179	6.142	9.7521	14.205	5.0654	1.0749	0.9324	1.4101	4.9726	26.4938	20.1672	6.9676	4.3726	17.7297	28.6881	2.9672	23.0811	9.4138	5.1484	2.4886	15.1792		1	10.4033

## Sheet: Image11
X0	Y0	Y1	Y2	Y3	Y4	Y5	Y6	Y7	Y8	Y9	Y10	Y11	Y12	Y13	Y14	Y15	Y16	Y17	Y18	Y19	Y20	Y21	Y22	Y23	Y24	Y25	Y26	Y27	Y28	Y29	Y30		Ap-basal	Avg int
0	8.4396	8.9876	9.4059	6.9949	4.6212	8.2197	10.0102	15.9671	16.6306	9.396	9.0435	10.9396	12.0877	10.2771	6.9937	21.8506	15.6299	15.1652	13.3701	9.8173	7.4784	12.4606	14.145	8.9451	7.0158	8.236	12.1168	6.0996	8.6489	24.5061	38.1566		0	11.9889
0.1191	10.4264	8.436	11.2708	9.0522	4.4928	9.0246	12.932	17.1358	17.6189	11.1542	14.3311	12.7304	16.0826	13.0156	7.6146	26.3273	17.6589	16.8265	14.6722	12.1001	7.8569	16.7023	17.9827	11.7429	6.6576	8.2075	14.009	7.2332	8.9361	26.9712	36.5338		0.00567984	13.7334
0.2383	12.4044	9.9226	13.2534	9.3061	6.3194	11.4972	15.1552	18.622	19.6634	13.1285	16.0518	16.4128	18.7891	12.3229	6.9763	31.871	24.3689	18.7363	16.1312	15.4873	7.9483	18.3458	19.9571	13.1804	7.8099	9.883	17.3953	7.1212	9.787	27.283	36.5613		0.0113644	15.5385
0.3574	13.1864	11.5445	15.4744	10.9383	8.0654	12.6285	15.1629	19.1744	25.8853	18.4811	21.5319	18.733	21.711	17.6993	9.1442	38.1567	26.8665	20.9701	21.1755	13.582	9.5952	19.3738	22.9639	14.5059	8.6756	11.5826	22.332	10.4732	10.7357	29.3996	40.1503		0.0170443	18.0613
0.4766	11.1173	13.878	18.9247	13.6876	9.7537	15.3162	16.8991	21.3403	24.0498	22.2731	27.5015	24.7412	24.3392	17.9748	12.5711	48.4733	31.7828	27.5229	26.0881	18.0431	12.5518	21.5796	27.9038	15.0073	8.9186	14.739	33.3533	11.5139	13.523	30.3255	44.3589		0.0227289	21.292
0.5957	16.0206	16.6257	20.1449	15.7604	10.8408	19.9496	19.5515	21.6841	28.8436	28.1185	38.4535	31.4865	27.7074	21.0425	13.2964	49.6515	38.9408	30.5685	30.9544	19.1605	13.225	25.9883	29.5455	19.6414	12.0437	17.224	35.8929	14.482	15.231	32.6515	47.1818		0.0284087	24.5777
0.7148	19.7034	18.9685	23.5378	19.6892	12.5329	21.5135	20.1116	24.9439	30.4009	35.29	49.1936	41.856	33.0201	24.4859	17.5341	53.5815	43.7831	35.7916	31.0931	22.3991	15.6222	27.5005	30.8958	18.5991	11.3775	19.6662	47.6991	19.7779	18.7009	32.0797	50.2456		0.0340886	28.1159
0.834	20.4474	23.8025	27.3416	23.0247	15.5141	22.3225	22.7181	25.3958	34.7337	41.0708	57.634	56.1563	35.2752	30.6237	21.6802	59.2752	49.0813	36.0711	36.1436	26.4788	17.8463	30.4169	33.7385	23.8112	13.9359	26.7802	53.8393	28.8101	21.2488	32.4599	62.0061		0.0397732	32.5704
0.9531	22.9545	26.3119	35.4494	25.5182	17.0066	25.8139	23.9278	27.2777	37.5099	51.6701	68.3056	59.8833	39.3032	33.1092	25.3795	59.2668	51.0777	44.1839	40.0672	31.2843	20.081	39.231	36.8026	23.5494	15.2007	28.1609	62.3438	38.5738	27.734	33.6307	65.6218		0.045453	36.6526
1.0723	27.203	28.2424	37.8775	28.9719	20.8601	25.705	24.105	32.2226	38.3454	58.9713	78.2517	68.8685	44.8881	38.0227	30.8263	61.8241	54.805	48.4503	45.8875	33.0945	20.6266	37.5197	41.666	27.1659	17.0815	38.4542	69.6592	46.6706	31.8146	34.3934	70.1651		0.0511376	40.7303
1.1914	33.0257	32.0678	40.0841	26.6749	21.1861	27.7976	23.9993	32.1055	41.9359	60.9763	80.3051	73.8933	47.2951	42.7377	35.1407	65.0683	57.5847	56.8786	47.3363	36.2483	27.5137	38.8131	42.6516	28.0819	19.0977	40.6644	72.1228	55.9459	39.4115	35.6711	69.6658		0.0568175	43.6123
1.3106	32.2071	40.0286	44.1864	28.5413	23.7878	25.5768	26.3033	34.8255	41.9813	65.7591	84.8787	74.7448	49.3194	47.4161	38.0946	61.2153	62.6253	56.2684	52.5699	39.8065	29.1431	45.5189	42.1185	33.0594	24.1043	46.5171	74.0035	63.3909	44.8944	38.5233	71.5379		0.0625021	46.5467
1.4297	37.1994	39.6534	44.2374	29.4078	25.216	24.8851	23.5425	36.3522	37.6115	66.2209	82.6962	74.0625	47.7613	46.7799	44.4912	60.3924	60.7554	58.4382	54.8821	45.1044	31.8387	51.7924	44.368	34.2436	25.2798	52.0736	63.0996	68.594	58.1476	38.6037	65.3618		0.0681819	47.5191
1.5488	39.8003	42.7913	47.2663	30.0146	23.7365	23.5072	24.7248	36.5498	43.9129	65.9355	82.1098	68.2011	50.2521	52.6467	51.4787	57.9909	60.4044	59.2825	52.9234	46.188	33.7157	54.7804	45.8521	39.6169	32.1191	55.0976	58.5629	72.3392	63.8239	45.4034	66.8317		0.0738618	49.2858
1.668	40.5419	46.2326	43.0535	32.2596	25.1274	23.9234	26.918	34.3034	38.474	64.2361	70.1131	62.0103	54.4645	53.1779	59.7527	55.3317	59.237	63.0832	58.868	52.2433	38.2123	53.8286	47.2282	44.423	36.4107	58.714	54.8716	78.2926	68.0106	53.3092	66.8501		0.0795464	50.4356
1.7871	39.2744	47.9742	37.2922	33.9589	23.9342	25.094	27.1757	34.6668	38.1172	54.7209	57.5129	58.6295	55.2652	57.0777	64.7655	52.9656	58.1866	59.9535	62.62	56.6056	43.0361	54.293	48.5146	44.9938	39.4734	53.2174	48.8468	80.4635	70.0489	56.2163	62.7412		0.0852262	49.9237
1.9063	43.1595	43.7237	31.3629	35.7328	24.2695	23.9252	27.2964	33.5395	38.0513	49.1612	45.5215	50.2624	55.4307	55.7888	64.6759	54.1475	56.8431	54.2747	69.5486	56.065	45.5472	53.4408	50.9075	51.1423	37.1498	56.7365	40.5859	73.789	75.515	67.735	55.7454		0.0909108	49.0669
2.0254	38.5327	37.275	24.2547	38.1616	23.2344	24.7166	28.5989	33.5254	35.7812	43.1719	38.2589	46.845	48.4362	49.186	63.1361	49.7065	51.4067	51.0032	69.006	56.4743	46.3281	52.1018	50.7912	52.5088	46.3506	48.837	31.1157	66.1905	74.8056	63.8266	43.8483		0.0965907	46.0457
2.1445	34.9182	31.3434	21.7742	37.8083	23.4569	25.2615	27.8719	31.7059	33.9679	34.9131	31.8952	36.3155	48.867	44.9649	68.0543	43.7552	50.6517	46.9747	64.4343	57.674	49.1816	50.7893	47.6221	48.8327	45.8222	46.2746	25.0626	55.0778	64.7061	53.0126	37.3871		0.102271	42.5928
2.2637	28.4628	24.3127	15.9422	35.1216	26.2445	24.685	25.9579	32.0573	32.8706	25.8497	24.6697	35.9781	46.5444	44.6913	64.9709	39.7714	45.5232	38.7049	58.2471	55.8855	46.8098	53.9898	46.0317	50.8497	47.5178	39.4381	17.9434	40.9697	57.6164	45.6953	27.2183		0.107955	38.7281
2.3828	25.706	20.4823	12.2772	31.7328	24.599	25.7535	27.185	34.209	31.4576	23.9269	21.3337	32.2538	38.0981	42.687	56.1118	35.8307	38.6657	37.4465	54.9327	53.514	52.7591	54.1776	46.514	45.1907	46.4804	34.8375	15.3578	29.6308	49.4466	33.2854	25.4888		0.113635	35.5281
2.502	19.7764	16.5432	10.4948	28.9159	25.7291	26.3723	27.8429	33.1744	33.3939	19.9709	19.5178	27.8254	34.2225	36.8313	50.3017	33.4789	30.5521	31.5451	56.8015	54.0454	57.1637	50.8609	41.6111	40.6992	47.1097	27.5669	14.733	23.3379	35.2654	26.9506	21.5064		0.11932	32.3916
2.6211	14.1054	15.704	9.4002	25.7216	24.4399	28.088	25.9034	27.6985	30.5316	17.3127	17.1137	23.8662	33.2224	34.5272	47.3636	30.0991	30.2205	27.9876	51.9264	53.9489	57.5748	45.2899	41.8885	37.8331	41.6142	24.9902	11.022	19.0903	26.8259	21.89	16.2521		0.124999	29.4662
2.7402	12.9898	10.6152	8.3834	19.2141	26.2331	27.4508	26.4545	30.4854	27.8062	14.0056	15.9802	20.6587	29.2625	30.5256	43.4338	26.5711	25.2796	25.1279	48.0894	46.5814	60.912	42.503	35.7669	33.7244	39.0197	21.4048	11.517	15.6343	20.1359	17.6197	14.7526		0.130679	26.7141
2.8594	9.3248	9.1404	7.6126	15.7006	27.8393	26.632	29.46	28.0722	23.8419	11.9876	13.4836	15.7153	28.5204	25.081	38.5639	22.8613	21.0643	21.1386	46.1734	47.9197	57.6907	41.8591	35.1443	31.784	36.9827	15.9021	8.6099	12.4544	14.6907	15.156	16.1432		0.136364	24.4048
2.9785	9.0007	9.2299	7.6355	12.8282	30.3163	28.2528	24.4555	27.33	22.6292	10.9833	10.5287	13.9592	25.6566	22.8868	35.6404	19.2896	20.4261	17.1804	47.1219	43.8397	56.8901	40.3835	32.2806	29.5548	35.8064	13.9284	7.9247	11.0898	14.0599	13.9861	13.4201		0.142044	22.8553
3.0977	7.7922	7.2897	5.6297	11.8138	27.7729	25.1201	25.6071	27.7493	22.35	10.0323	10.741	14.1158	26.0596	19.19	30.3391	19.6728	16.824	18.5129	38.9584	38.4487	56.3725	41.2328	26.9684	25.8241	33.3223	12.0041	6.5625	8.67	10.2419	10.6443	12.9276		0.147728	20.9287
3.2168	7.9436	6.7098	5.4476	9.745	26.4224	25.2984	22.4271	26.7105	19.4326	7.8974	8.4481	12.0739	26.9533	17.6609	27.7399	19.0487	19.1251	14.9511	35.3061	33.1291	48.8102	38.8847	27.2414	24.7729	30.9899	10.2633	6.5519	7.2006	8.5434	9.4776	13.4853		0.153408	19.3126
3.336	9.2167	5.8638	6.1027	7.823	27.1595	21.039	22.9224	25.0567	19.9085	7.844	8.3168	9.3056	26.628	15.5022	24.4041	16.6051	13.8604	13.7962	27.8154	31.2108	47.2999	35.4444	23.5599	24.0023	26.7504	10.3446	5.8477	5.5091	8.6848	8.5789	12.4354		0.159093	17.7045
3.4551	6.8393	5.8878	4.3377	8.2265	28.0404	21.0163	22.3819	25.1027	16.1253	8.0604	8.0829	9.7144	29.0445	13.123	24.0404	18.8058	14.1796	12.4622	27.3557	28.2752	40.8199	35.2951	23.9372	19.728	24.7769	9.7526	5.2645	5.3109	6.8293	6.9437	10.8071		0.164773	16.7925
3.5742	6.072	5.7634	5.695	6.4406	30.8856	17.4478	21.8577	23.62	14.1414	8.0509	7.1271	8.9594	28.6807	13.5579	20.9844	14.5448	14.002	12.3228	24.9216	26.4484	39.6892	30.0393	20.9171	19.9055	20.4795	8.4027	4.9436	4.8529	6.5887	6.376	10.1426		0.170452	15.6084
3.6934	6.2315	4.5498	4.6992	6.6668	25.7271	19.3818	22.5389	22.9281	12.0032	6.0174	7.4563	7.7814	28.7609	12.4254	19.5687	16.1868	12.9168	10.1699	22.8511	24.1962	36.9711	23.811	19.1984	18.7239	18.5555	7.6667	4.044	4.3971	6.3947	5.9268	9.6175		0.176137	14.4634
3.8125	5.173	5.045	3.9356	8.4228	23.3659	16.6165	20.7459	18.8537	11.0523	5.6309	6.1056	7.3923	29.3317	11.0076	17.3361	13.1078	13.9021	10.3604	22.9745	21.6971	35.9459	22.5418	17.0061	18.3484	15.9952	6.8018	3.4308	4.6133	4.9434	6.555	7.8058		0.181817	13.4208
3.9317	4.768	4.4874	3.9289	8.0498	22.113	15.4717	19.5882	17.817	9.8081	5.8914	4.4821	6.3727	29.4542	10.8391	14.387	12.2382	10.7415	10.6206	20.8288	19.3347	33.6253	21.9394	15.4733	18.2201	15.0856	7.9609	3.6555	4.3752	4.2904	5.9955	9.156		0.187501	12.6129
4.0508	5.4455	4.304	3.2138	6.1268	17.9887	16.3942	18.1998	13.7657	8.7006	4.9798	5.1507	5.8495	25.0592	11.5294	14.559	11.0474	12.5331	9.6875	19.7686	17.3361	29.3552	18.8995	14.1591	14.223	14.7054	5.5731	3.5251	4.0126	4.4722	5.5107	7.164		0.193181	11.3948
4.1699	3.5451	3.1116	3.9655	6.7979	17.5702	13.9319	17.7164	13.0884	8.6433	4.902	5.4252	6.5865	23.3088	8.4689	15.321	10.419	10.9173	10.4664	19.0772	17.2685	25.5855	17.1084	14.5878	14.2975	13.9572	5.3452	3.9467	3.3132	3.4759	4.8	7.8555		0.198861	10.8001
4.2891	4.2113	2.8049	4.05	6.1989	16.128	12.8595	14.7332	13.4163	8.1803	5.6506	5.3954	5.1787	21.7636	8.3491	12.5469	8.7536	11.6326	8.9416	17.3774	17.2041	25.6957	16.3051	11.5726	11.167	11.0283	4.5373	3.1449	3.4802	3.3127	4.7562	7.5733		0.204546	9.93385
4.4082	5.2677	3.417	4.3695	5.4003	13.7168	13.3074	15.461	9.8184	7.8449	4.8662	5.1853	4.491	22.2614	8.7702	11.6839	8.2989	10.9659	7.9299	15.0957	17.0355	21.9138	14.8789	11.36	10.2698	12.0951	4.0114	2.397	3.1406	3.9115	4.6023	6.5777		0.210226	9.36597
4.5274	3.8283	3.3589	3.8911	6.4837	15.3368	12.378	12.7969	8.9965	7.4089	4.5385	4.7964	5.0719	21.8747	8.7068	10.6622	8.6597	9.8995	9.2144	14.4499	14.187	21.2515	14.5321	12.2826	11.4109	10.5385	3.3069	2.7352	3.3016	2.8071	3.8098	7.2207		0.21591	9.02377
4.6465	3.4979	2.9549	3.1358	4.7185	12.7582	10.7301	11.5219	8.7604	8.1834	3.8908	3.8273	4.4705	21.2072	8.6915	9.1707	7.8231	9.7976	6.3362	13.8617	12.1061	19.3742	13.1596	11.1302	9.649	9.6026	4.4314	3.0178	3.279	3.5662	3.9098	6.7197		0.22159	8.23495
4.7657	2.7776	3.4639	3.5646	4.5673	12.7254	9.889	11.3181	8.7329	6.5412	4.5089	3.824	4.6303	18.8164	7.1379	11.7512	7.0856	8.0705	7.4186	12.6515	10.2769	18.6363	14.3149	11.9689	11.0723	9.962	3.4634	2.3984	2.6318	3.2168	4.0799	7.0299		0.227275	8.01698
4.8848	2.8557	2.2642	2.6379	5.0569	13.2192	10.0604	9.2129	7.3393	6.2401	3.8953	3.6937	4.7687	19.4572	6.3235	9.3567	7.0514	8.9054	7.2042	11.0744	10.7029	15.1011	13.3683	11.3765	7.8997	9.3456	3.1357	2.8112	3.0403	3.1467	3.1431	7.2838		0.232955	7.45071
5.0039	3.1062	2.904	2.586	3.8308	12.8353	10.0985	10.4909	7.2226	5.3744	4.3474	3.9797	4.1889	18.0353	6.379	9.9342	7.5484	8.2102	7.4975	10.8067	9.6156	15.1224	10.7185	9.9174	8.3605	8.8294	2.9821	3.2716	2.8935	2.9437	3.4784	7.4424		0.238634	7.2565
5.1231	2.6663	2.3677	2.7197	3.6069	12.505	8.3888	8.3172	7.6422	5.6005	4.1583	3.5213	4.1542	19.0089	6.0179	8.6235	6.9804	8.3255	6.951	10.7547	6.7321	14.6863	12.7516	9.1278	9.4886	6.934	2.7383	3.0883	2.9305	2.2217	3.0298	7.4514		0.244319	6.88679
5.2422	2.5586	2.34	2.4327	3.4999	10.6698	8.3431	7.2769	8.0869	5.837	4.0972	4.0929	3.9184	22.7681	6.4741	9.0544	7.0488	8.287	6.0398	12.2692	8.2089	12.5785	12.4191	7.928	7.5447	7.8324	2.9308	2.8165	2.2048	3.0786	2.7593	7.6513		0.249999	6.87251
5.3614	2.4397	2.6026	2.187	3.5058	11.0251	6.1847	6.7538	7.1738	6.4361	3.8661	3.7867	3.8124	21.9012	5.9772	6.152	7.3849	7.8822	5.3966	10.205	6.8987	12.2202	9.7202	7.4712	7.756	7.2374	3.0858	3.016	3.2093	2.3816	2.9135	8.3221		0.255683	6.41629
5.4805	2.5353	2.4182	1.9694	3.1655	9.3245	6.9895	7.2076	6.0458	5.0631	2.5611	2.9507	3.9106	24.1384	4.6772	8.2877	6.777	6.8776	4.4731	9.5107	7.1515	10.3617	10.9938	9.3539	7.2596	6.2222	3.3403	2.6822	2.8411	2.6826	2.571	8.7473		0.261363	6.22872
5.5996	2.3648	2.6345	2.6631	3.0625	8.3771	6.9627	5.2817	6.2458	5.5404	3.2081	2.9609	2.9641	24.4912	4.9751	6.8822	5.6356	6.2004	5.3521	9.2701	6.2196	10.6221	8.6645	6.2267	5.7286	5.8178	2.9351	2.0222	3.1028	2.0569	2.3936	8.0908		0.267043	5.77268
5.7188	1.7486	2.2969	1.8932	2.6106	7.0843	6.6042	5.3826	5.3749	5.6501	2.9799	3.0713	3.747	23.5544	4.9452	7.6661	6.5485	5.987	3.9667	9.4171	6.1963	8.3172	8.8491	6.9966	7.0922	5.561	2.336	2.095	2.4917	1.7507	2.969	8.2779		0.272728	5.59553
5.8379	2.1292	2.2138	2.1126	3.3286	7.5596	6.2734	5.0379	5.5636	4.676	2.8021	3.2308	2.5169	20.8088	5.2763	5.3563	5.1712	6.4235	3.837	7.8349	6.579	7.8694	9.022	6.9443	6.4367	6.2985	3.0323	2.323	2.8908	1.8277	3.2244	7.4108		0.278408	5.35521
5.9571	1.9747	1.6825	1.8774	2.3757	6.2863	5.8592	5.212	4.9764	6.0872	2.3063	2.6544	3.165	19.9129	4.6986	5.8141	5.0787	5.9582	4.8544	6.9762	5.6926	6.6594	6.893	6.2635	6.4733	5.5607	2.1902	1.7931	2.3307	1.8484	2.8415	8.3967		0.284092	4.99011
6.0762	1.7472	2.172	1.9529	2.5906	6.1906	4.8025	5.2661	3.9059	4.8331	2.5555	2.5044	2.6747	19.724	4.4493	5.286	4.4799	5.3921	4.6507	8.4352	6.5038	7.4288	6.4025	4.8679	7.4089	4.8555	2.3476	2.938	2.7019	2.2483	2.8057	7.6976		0.289772	4.89739
6.1953	2.1469	1.9151	2.1149	3.3318	6.7095	3.8974	5.8423	4.4777	4.9434	2.4788	2.125	2.9596	18.761	5.107	6.113	4.6183	4.6895	3.6704	7.8194	6.2173	6.9912	6.0508	5.3672	7.2259	4.7046	2.5503	2.4342	2.419	1.654	2.0386	6.559		0.295452	4.77204
6.3145	2.0147	2.1228	1.3708	2.9425	5.6725	3.6973	5.2659	3.8926	5.0628	2.368	2.4804	2.8068	17.362	4.7145	5.8766	5.2045	5.4669	4.3281	6.7411	6.1256	6.9726	5.7073	5.0955	8.0726	4.4351	3.0445	1.7543	1.8308	1.5778	2.2407	7.2431		0.301136	4.62873
6.4336	1.7031	1.8076	2.5048	2.9188	5.3903	2.6022	5.382	4.2869	4.6123	1.933	2.3385	2.4227	16.7699	3.4534	4.454	4.2787	4.5116	3.9247	6.5815	4.7635	6.6354	5.1403	4.0332	8.6479	3.9082	2.5414	2.6672	2.1711	1.989	3.0714	6.5233		0.306816	4.32155
6.5528	2.5539	1.534	2.1105	3.6509	6.2197	2.8729	4.8542	3.4442	4.0984	1.9496	3.7959	3.3127	16.8965	3.6685	4.9483	3.8406	5.0391	3.3161	5.7736	5.3042	5.7077	4.6337	4.2396	9.6711	3.9851	2.9629	2.3396	2.3396	1.9941	2.0242	7.5404		0.312501	4.40715
6.6719	1.8776	2.1787	1.1603	2.1531	5.8005	2.603	4.2483	3.7627	4.0915	2.8551	2.7626	3.2462	15.5537	3.5503	3.77	5.2121	3.2805	3.4527	5.7423	5.1996	5.6712	4.7813	4.1856	10.8348	4.0692	2.6101	1.8707	2.1589	2.9441	2.4597	4.86		0.318181	4.15956
6.7911	1.9487	1.594	1.7006	2.6489	5.636	3.1142	3.8923	4.3132	4.5935	2.658	2.5043	3.1322	15.1216	3.7942	3.6976	4.0853	4.0676	3.9237	6.0195	4.1609	5.748	3.7994	3.9392	11.2603	4.6917	2.6145	1.4723	1.9765	2.7643	2.3661	6.2982		0.323865	4.17861
6.9102	1.9807	1.1282	1.5475	2.7575	4.6667	1.5418	3.4332	3.0559	6.0017	2.1183	3.0326	2.2185	14.095	3.6819	4.7465	3.8379	3.2551	3.3858	5.0376	4.6546	4.9437	4.316	4.6347	13.5961	3.6491	2.4748	1.8559	1.6271	2.3777	1.7216	5.6115		0.329545	3.96726
7.0293	3.2091	1.6467	1.8034	2.0458	3.9937	2.0181	2.9442	3.6967	5.842	1.4744	2.9442	2.692	15.2567	3.1184	3.7283	3.9144	4.0077	3.2713	5.3673	4.4641	4.6724	4.5463	3.4581	12.0326	4.0642	2.0594	2.219	3.0652	2.1036	2.3182	6.0054		0.335225	3.99945
7.1485	3.433	1.6212	1.8381	2.0894	4.4731	2.8154	2.7084	3.8401	4.8457	2.6931	2.8212	2.0675	13.274	3.2001	3.9647	4.1201	3.6228	3.0691	6.4469	5.0555	4.9322	4.2906	3.7639	16.6334	3.8355	1.5886	1.8253	2.1269	2.9634	2.467	6.7876		0.34091	4.16819
7.2676	4.0463	1.4408	1.3573	2.1734	4.4527	2.9758	2.5266	3.0618	5.0487	2.5689	1.9947	2.6161	12.2538	4.4965	3.9511	4.3722	3.6207	2.3753	5.619	3.8556	4.271	5.0925	3.4933	16.8126	3.2622	2.1606	1.5713	2.3248	2.2386	2.3029	6.2252		0.346589	4.01814
7.3868	5.7507	1.8003	1.97	2.4614	4.3185	2.1698	3.0666	3.7487	5.2705	2.8678	2.1085	2.2735	13.726	3.9481	3.6952	4.6499	2.6298	1.8449	4.9865	5.1592	5.4407	4.7358	4.1625	19.1483	4.0484	2.1175	2.3656	1.768	2.111	1.9226	6.7498		0.352274	4.29084
7.5059	4.9683	1.7365	2.1062	2.6289	4.5649	1.8279	2.6499	4.2152	5.1501	2.4344	2.4643	2.7556	15.3651	3.4983	3.7198	3.6655	3.2668	2.7171	4.1172	4.8975	4.2791	4.2295	3.9501	19.1345	4.2345	2.4761	2.5369	2.3104	2.3068	2.1401	6.6718		0.357954	4.29095
7.625	6.1817	1.6959	1.8403	2.4242	4.5513	2.0368	2.3261	4.2442	5.2021	2.8262	1.7873	2.3544	15.8485	3.4263	3.2339	3.2267	2.555	3.0088	4.1107	5.1385	3.5914	3.7403	3.3371	20.2775	3.4174	2.2591	1.7801	2.0124	2.0064	2.5828	7.6138		0.363634	4.2141
7.7442	4.5274	1.3195	1.5755	2.17	4.2151	1.7118	2.7292	3.0423	6.4001	2.8488	2.342	2.4833	16.315	3.0895	3.2745	3.4376	3.3094	2.5234	4.6094	4.3401	3.7488	4.1901	4.0228	17.5624	2.7113	1.8122	1.9157	2.5506	1.8653	1.9582	7.5427		0.369318	4.06916
7.8633	3.6652	1.7094	1.6367	1.7128	4.6697	1.4805	2.1826	3.7594	6.0781	2.2312	3.2097	2.1882	14.1407	2.8591	3.9607	3.5422	3.4996	2.3554	3.758	4.6158	3.7713	3.3464	3.3026	19.7428	2.9713	2.5336	2.019	1.7982	2.3367	2.2665	7.6147		0.374998	4.03091
7.9825	3.4063	2.1892	1.3321	2.7773	3.625	2.3307	3.1494	3.4981	6.415	1.9625	2.5694	1.5488	16.7957	3.5426	3.6754	2.9022	2.1555	2.5144	4.1285	4.8069	4.3194	3.972	2.7884	17.5865	2.4605	2.1626	1.9027	2.289	1.933	1.8827	8.0595		0.380683	4.02198
8.1016	3.5007	2.3707	1.5853	2.685	4.2323	2.3129	2.0273	3.8367	7.1183	2.5637	1.925	1.7763	16.9087	2.5469	3.4421	3.0133	3.5951	2.6451	3.3133	5.5865	3.6155	4.1456	3.598	19.1771	2.827	2.0911	1.9755	2.1588	1.6436	2.423	8.5132		0.386363	4.16625
8.2207	2.9208	2.1121	1.8241	3.012	4.5661	2.145	1.6693	4.4583	5.7184	2.2077	2.4206	1.7097	20.5394	2.8299	2.8687	2.9574	2.7116	2.2575	4.6722	5.3932	3.6336	3.5525	3.2923	17.0547	2.9389	2.4685	2.1256	2.6685	2.3808	2.6791	9.3059		0.392043	4.22885
8.3399	2.4722	2.2957	1.3358	2.8462	4.3882	2.6464	3.3818	3.7834	7.571	2.9235	2.3784	2.6665	20.4835	2.704	2.8412	2.8761	3.485	2.2727	3.8713	5.3619	3.9086	3.2538	2.7156	17.0258	2.9256	2.6768	2.0618	2.3664	2.1301	2.3237	9.229		0.397727	4.29684
8.459	2.577	1.7942	1.6512	3.4645	4.6467	1.8509	3.093	3.861	7.77	2.2125	2.3385	2.2503	19.2933	1.81	2.3598	2.8568	2.8147	2.2275	3.5697	5.6678	3.2766	3.6266	3.1438	17.1038	2.8633	2.0561	1.7288	2.3263	2.0316	2.3948	9.5225		0.403407	4.13495
8.5782	2.6241	2.2662	1.5381	3.0211	5.5191	2.4052	2.3723	4.3236	7.8585	2.1965	2.2306	1.8291	19.0705	2.3165	3.121	2.3141	2.3841	2.3844	4.0228	5.086	3.0292	2.7658	2.9268	19.3934	2.8949	2.4009	2.1902	2.3723	1.6742	3.0603	11.9842		0.409092	4.3089
8.6973	2.3121	2.1071	1.3415	2.9504	5.1665	2.1477	2.5982	3.9283	7.7112	2.1204	2.1721	2.0557	20.8001	1.8158	2.8363	2.6431	2.7042	1.891	4.7771	5.7965	2.5673	2.3968	3.5795	21.1778	3.0709	2.0804	2.3138	2.5175	2.1329	1.6283	10.4374		0.414771	4.31542
8.8165	2.6498	1.3143	1.9014	3.009	4.876	2.4894	2.5187	4.3806	8.2458	2.0817	1.9152	2.0102	25.045	1.9582	1.9996	2.6623	2.359	2.356	4.742	6.2787	3.5865	3.344	2.6285	23.2656	2.9489	2.4249	1.8298	2.5217	1.7354	2.277	11.899		0.420456	4.6211
8.9356	2.3375	1.525	1.6365	2.6492	5.5853	1.6041	2.8031	4.9689	9.3216	2.4621	2.4071	2.2705	23.8148	1.9199	2.8905	2.6555	3.0863	2.0469	5.1164	5.1397	2.8261	2.7032	3.825	23.6287	2.8463	1.7971	1.9602	1.9726	2.2017	2.556	13.4932		0.426136	4.71132
9.0547	2.347	2.0788	1.4495	2.7791	6.3474	1.9559	2.4362	5.8888	10.5671	1.6835	2.0601	2.5329	23.6157	2.5294	2.8393	2.4662	2.2636	2.3024	4.534	5.9063	3.0865	3.0422	3.0034	27.8231	2.6108	2.6285	1.9853	2.3677	2.0937	2.4094	14.6951		0.431816	4.97835
9.1739	1.5969	2.1561	1.451	3.1296	5.952	2.3092	1.9626	5.8573	10.4295	2.4742	1.459	2.4156	24.8531	2.387	3.0814	3.0936	2.566	1.8635	5.4772	6.2702	2.7063	2.893	3.5904	25.2455	3.1076	1.6698	1.6685	2.3303	2.2258	2.3425	15.6606		0.4375	4.97501
9.293	1.9032	1.9684	2.089	3.2058	5.7351	2.7645	1.9401	6.7463	8.963	1.8245	2.3505	2.5372	22.6425	2.7003	2.21	2.7182	2.8108	2.1679	4.9562	6.5891	3.0776	2.859	3.2396	28.2291	2.4256	2.0111	2.455	1.8781	2.1502	1.6221	15.4784		0.44318	4.97575
9.4122	2.0377	2.0488	1.89	3.9115	6.2179	2.944	2.4267	7.6908	9.6125	1.683	2.4992	1.7558	20.8869	2.3784	2.2884	2.9554	2.4429	2.3242	4.9861	5.6252	2.1452	3.2546	3.687	28.3868	2.9252	2.0972	2.2517	1.8019	2.5073	1.8963	15.8353		0.448865	5.01271
9.5313	2.3581	1.6632	1.3754	3.0641	5.8506	2.0444	2.93	8.3585	8.9189	1.9488	1.9019	1.679	19.8049	2.0916	2.5612	2.4735	2.1919	2.9408	4.4717	6.1191	2.4048	2.8648	2.9059	28.507	2.6771	1.8195	1.8001	2.3618	2.1777	1.9155	17.9551		0.454545	4.90764
9.6504	1.9218	2.5186	1.9934	4.1399	7.7425	2.5719	3.2844	9.1736	9.7753	2.4294	2.2314	1.666	20.034	2.1011	2.3665	3.3397	2.5301	1.6702	5.7633	6.5333	2.7544	2.8339	3.3947	29.2157	2.4688	2.2323	2.4512	1.7597	1.9528	1.7226	15.578		0.460224	5.16615
9.7696	2.1907	1.792	1.5658	3.8051	7.7341	3.176	3.7676	9.9118	9.8424	1.5087	2.1006	2.2319	19.2547	2.0309	3.3153	3.5278	2.0586	2.0074	5.5019	6.0066	2.9127	3.262	3.1472	27.4383	2.322	2.5318	1.7213	2.4799	1.8611	2.3105	17.7407		0.465909	5.1954
9.8887	1.7564	1.3166	1.3045	3.8576	8.5562	3.6678	2.5649	12.2588	9.1071	1.2201	2.6237	2.1373	15.9083	2.0683	2.7064	2.2982	2.5671	1.8743	7.4346	6.2629	3.0702	2.8411	3.1465	29.1957	2.0491	2.4915	1.2156	2.3963	2.2871	3.0842	15.9482		0.471589	5.13602
10.0079	2.0322	2.6628	1.9026	3.9168	8.7475	3.8447	2.3229	13.1758	7.8433	1.3368	1.941	2.0119	17.3019	2.0508	2.1739	2.7178	3.4733	2.0695	8.0198	5.5578	1.9929	2.9155	3.7986	26.7408	2.1775	2.2415	1.3961	2.9228	2.6864	3.0086	16.116		0.477273	5.19677
10.127	2.0365	1.796	1.6637	3.4643	10.3871	2.6693	2.6843	15.229	7.7116	2.198	1.4598	2.0606	16.8756	2.6382	2.4191	2.3554	1.781	2.5944	7.6468	5.5065	3.068	2.7054	4.1722	25.8721	3.5248	2.2499	1.8554	2.0682	2.1805	1.8698	14.7712		0.482953	5.14564
10.2462	2.0354	1.4974	1.771	3.8626	12.0757	3.2503	2.8634	16.3166	7.3622	2.2523	1.6338	2.0962	14.2511	2.3048	3.172	2.996	2.325	3.285	7.7602	6.3184	2.9954	3.1778	3.7239	29.413	2.1065	2.1748	1.6795	1.6676	1.2461	2.4564	13.4694		0.488638	5.27548
10.3653	2.1954	1.8279	2.067	3.2238	11.7103	3.6839	2.8952	15.3764	5.543	2.0775	1.5489	2.3724	14.3127	2.313	2.6331	1.9517	2.0995	2.86	7.1927	5.6638	2.761	2.507	4.0597	24.8188	2.4385	2.6375	1.9858	1.851	2.1914	2.3578	14.8688		0.494318	5.03308
10.4844	1.6594	1.8727	1.5741	3.0049	12.3961	3.5955	2.4707	17.0863	5.0382	1.6432	1.7228	1.6038	13.3397	2.4068	2.6173	2.4871	2.1622	3.046	9.0342	6.8229	2.638	3.4641	3.2088	26.6488	2.0038	2.4976	1.684	2.1477	2.2035	2.0763	12.6949		0.499998	5.05972
10.6036	1.3594	1.7191	2.2461	3.7152	11.4838	3.4864	2.8095	18.4484	3.8625	2.0432	1.8425	2.6999	15.3456	2.4361	2.3744	2.6497	1.8012	4.0014	8.2468	5.5135	2.0221	1.7232	3.3474	25.8891	2.7869	1.6946	2.3254	1.9558	1.9717	2.3669	11.7159		0.505682	5.02851
10.7227	1.4113	2.1565	1.9274	3.227	13.5814	3.6784	3.1826	18.0833	4.1862	2.1883	2.4678	2.881	13.8757	2.8486	2.0238	2.4268	2.2839	3.4043	9.5466	5.687	2.3719	2.0682	3.695	25.6312	1.9153	2.128	1.8968	1.7781	2.8877	1.6478	10.901		0.511362	5.09642
10.8419	2.2368	1.6218	1.7333	2.6765	11.7521	3.2188	3.277	20.095	3.1591	1.7044	2.2297	2.084	16.7685	1.6865	2.218	1.7509	2.758	3.6365	12.1575	4.635	2.8291	2.1085	4.7392	23.8879	2.0738	2.0282	2.4535	2.2619	2.6235	1.8814	8.5462		0.517047	5.05912
10.961	1.4267	1.4906	2.4639	2.7646	13.3372	3.5693	4.3835	26.3509	2.7293	2.4991	2.4173	2.3926	16.2782	1.9114	2.4888	2.2689	3.0452	5.5119	12.6226	6.1516	2.6275	2.8572	4.3472	24.8363	2.283	2.062	2.0699	2.8898	1.836	1.5431	10.3974		0.522727	5.60816
11.0801	2.5594	2.4535	1.9687	2.403	14.1341	4.3931	4.103	31.2229	2.4938	1.7731	2.5218	2.2449	17.0123	2.0994	2.2191	2.051	2.7073	5.2397	14.546	5.4435	2.3995	2.474	5.1643	24.8054	2.7708	1.9925	2.0646	1.9738	2.0659	1.3541	8.5273		0.528406	5.78006
11.1993	1.2792	2.1199	1.6802	3.3958	14.1357	4.6455	4.6453	30.9464	2.5284	2.2651	1.883	1.9486	17.2451	2.0555	2.479	1.8332	2.9266	5.7429	14.4427	6.1192	2.7377	2.8321	5.5827	29.0031	2.219	2.2537	2.0545	2.5823	2.0281	1.4017	8.0118		0.534091	5.96852
11.3184	2.5317	1.5959	1.9057	2.8594	16.611	4.6611	4.3649	36.491	3.2415	1.5812	2.2604	2.5268	15.9939	2.8859	2.0447	2.0388	2.7612	7.3334	16.9113	7.2529	2.1944	3.8995	4.8962	26.4096	2.4009	2.6444	2.3973	2.4519	1.6364	1.5098	6.577		0.539771	6.28613
11.4376	2.0875	1.7748	1.6624	2.9359	14.0289	4.8855	4.2315	35.0599	2.4565	2.2658	1.6614	2.4991	14.2998	2.9323	2.209	2.2377	2.4992	9.9768	16.1371	5.6643	3.2366	2.5801	6.4535	26.5023	2.7667	1.6782	1.9383	1.8721	2.3845	1.6933	6.4556		0.545455	6.09892
11.5567	1.8163	1.5613	1.6057	3.4283	13.8194	4.5665	5.2407	38.0678	2.8326	2.539	2.2116	2.2844	16.2633	3.0161	1.9818	2.0555	3.188	8.7661	20.6227	7.72	2.0909	2.4991	5.8495	26.6349	2.6424	1.7121	3.0873	2.2356	1.9156	2.0359	7.7327		0.551135	6.51687
11.6758	1.5187	2.5622	2.4237	3.0023	12.3244	5.1833	5.9834	36.1496	2.3576	1.5786	2.3483	2.7381	15.6217	3.4671	1.8937	2.4436	2.9885	10.3614	21.9917	8.9122	2.5936	3.4008	7.4009	29.4166	2.2437	2.5477	1.9522	1.9221	2.0364	1.9606	7.2747		0.556815	6.72901
11.795	1.6179	1.8815	1.8937	3.9862	11.9032	4.6782	4.3892	33.2777	3.0694	1.4358	1.6175	1.9834	14.2122	3.3199	1.7228	2.0232	2.3319	12.1382	25.8191	10.0967	1.9495	3.3351	7.1399	31.6172	2.7607	2.1127	2.0368	1.7	1.7422	1.251	6.1868		0.5625	6.62031
11.9141	2.1479	2.3012	2.3768	3.6814	9.161	6.351	4.78	31.2062	2.0489	1.935	1.8839	2.1489	14.6949	3.9668	2.7199	2.1473	2.7635	15.776	31.5479	9.6376	3.398	2.6542	8.8583	31.3988	2.2839	2.0435	1.9593	1.5678	1.8327	2.0368	5.3259		0.56818	6.98824
12.0333	1.9417	2.5403	2.8633	4.2139	10.066	5.5299	5.1437	31.4962	2.2591	1.722	2.059	2.1924	12.949	3.6532	2.3509	3.6012	3.1781	15.8671	35.2517	12.2219	3.7934	2.751	8.1572	28.2164	2.5523	1.8847	1.7243	2.4018	2.2403	2.1772	4.8585		0.573864	7.1567
12.1524	1.8482	1.751	1.9609	4.3029	10.6606	4.738	5.0721	27.685	2.5031	2.0941	1.9654	2.5695	11.2225	3.7496	2.7479	2.4922	3.0484	16.8734	32.404	13.3242	3.3898	2.9408	8.2215	27.6625	2.4164	1.8609	1.8641	1.8175	2.7319	1.7551	4.958		0.579544	6.85908
12.2716	2.5224	2.0466	2.5387	4.6357	12.4249	4.1216	5.9583	27.7138	2.8584	1.9879	2.0501	2.2916	12.6137	4.7938	2.4224	2.5186	3.5625	17.0326	31.4772	17.082	4.4014	3.4779	9.4089	28.521	2.7273	2.0491	1.8846	1.883	2.3467	1.56	4.5159		0.585229	7.27189
12.3907	2.3509	2.2074	2.4586	5.5123	11.8684	3.8365	6.2509	22.9545	2.8475	2.1663	1.8792	2.3167	8.6346	4.3983	2.5237	1.877	2.8618	20.3307	30.6241	17.395	4.7312	3.1807	12.6549	30.3041	2.4099	1.9433	1.905	1.6424	2.2006	2.119	3.9974		0.590908	7.17364
12.5098	2.2262	1.9357	2.1728	4.9651	11.0611	4.4451	5.7485	24.4599	2.458	1.8167	1.8346	2.8033	8.3673	3.6688	2.6285	2.4199	3.4351	20.7559	28.3108	17.3255	4.6115	3.5727	16.4631	28.206	2.723	2.2553	1.9582	1.6316	2.308	2.1005	4.7604		0.596588	7.20739
12.629	1.7988	2.218	2.8614	5.1825	12.308	4.0815	6.4166	22.234	2.1349	1.8349	1.6605	2.3582	5.6083	4.619	3.4039	2.1771	3.5277	21.7696	25.7897	14.731	6.2662	4.4823	17.2976	29.4756	2.0443	2.4483	1.9572	2.1922	2.5337	1.7379	4.7907		0.602273	7.15941
12.7481	2.1155	1.8944	2.5962	5.4658	13.1368	4.1598	9.7617	19.4643	2.0755	1.864	1.7599	2.2099	6.1403	4.4182	3.0651	3.3418	3.9771	18.7642	22.9922	13.6	6.6732	4.6939	19.7012	31.8909	2.2598	1.7459	2.3564	1.5266	2.6366	2.2359	5.9593		0.607953	7.24137
12.8673	2.0987	2.2865	1.9615	5.3591	13.7178	4.9885	8.9067	15.0624	3.0041	2.1893	1.8564	2.09	5.6787	5.5794	3.4885	2.9826	4.6516	19.399	24.7266	15.2441	9.0999	4.1118	22.6187	32.7934	2.2599	2.3784	1.7826	1.8457	2.2696	2.4192	4.2739		0.613637	7.45563
12.9864	2.47	1.6879	2.415	5.6322	15.2159	5.0506	9.0893	11.6903	1.7349	2.3529	2.2525	2.0542	5.9302	5.4621	3.7551	3.0162	3.0565	18.3849	20.3339	14.5983	10.3078	5.2519	27.6565	33.1549	2.7136	2.0511	2.0289	1.7063	1.9488	2.7137	5.0697		0.619317	7.44471
13.1055	2.847	1.777	2.5619	5.0355	19.7214	6.3887	9.9444	9.7798	2.4921	1.9839	2.0988	1.9316	6.1783	5.0134	3.7259	2.7353	3.2705	15.511	21.8461	13.3541	12.9108	6.4889	31.3444	33.0639	2.5041	1.7263	2.2987	2.2243	2.1103	1.987	4.834		0.624997	7.73192
13.2247	2.6464	1.6128	2.6259	4.5711	22.1317	6.3123	10.2964	10.0811	2.5921	2.7261	2.3468	3.199	5.4544	7.6162	3.7459	3.5852	4.5957	13.7935	22.536	12.9967	14.8147	7.7087	34.9172	35.6585	2.8466	1.8142	1.8414	1.8828	2.6368	2.8442	5.5207		0.630682	8.321
13.3438	2.9567	2.4373	2.1646	4.0014	25.6496	6.5898	12.6148	7.0039	2.0799	1.5648	1.4107	2.1817	5.6156	7.3144	3.1946	2.9328	3.6732	13.9003	22.0959	13.7904	14.9241	6.707	38.8153	36.3389	2.5393	1.9223	2.259	2.0354	1.8372	1.8118	4.854		0.636361	8.29731
13.463	2.491	1.7483	3.5751	4.0801	28.1679	7.7663	12.8049	5.6059	2.2782	1.3264	2.1589	2.8116	5.7375	7.4979	3.6016	2.9077	3.6945	11.3922	20.0898	11.822	16.186	8.1425	40.4354	34.7239	2.6318	1.8517	2.0294	1.7524	1.7163	2.1314	5.1634		0.642046	8.33297
13.5821	2.9034	2.7919	2.9057	3.9568	28.8542	8.6351	13.9932	5.843	2.0363	2.0584	2.3882	2.4086	4.737	7.4664	3.4012	1.9283	4.9958	11.8756	18.5876	9.7576	16.3712	11.2045	38.8539	32.6796	2.3476	1.9277	1.747	2.0372	2.1193	2.6754	5.8006		0.647726	8.36414
13.7012	2.2787	2.3716	2.9141	3.9215	30.8905	9.6692	15.112	4.7831	2.0603	1.5458	1.5277	2.209	5.3934	6.8733	3.6594	2.5896	5.1747	10.1608	17.7147	9.0759	15.7779	11.5538	37.9443	30.0906	2.955	1.9115	2.3852	1.5226	2.1645	2.7831	5.558		0.653406	8.21199
13.8204	2.826	2.0749	3.2851	3.232	33.6203	10.0509	15.6602	4.1296	2.4034	1.9986	2.5566	2.3878	4.9687	8.3939	3.2787	3.7336	4.515	8.5029	15.9414	6.786	12.8542	11.9115	38.7443	31.7227	3.3648	1.838	2.0559	1.4385	2.3594	3.1377	6.087		0.65909	8.25354
13.9395	2.0537	2.3078	3.497	3.3006	33.4691	11.1504	18.5065	4.0795	2.5972	2.0404	2.3804	2.5783	5.4826	10.8216	3.662	3.4654	4.5368	7.4647	14.8406	6.6977	11.8678	12.4968	39.5936	29.9661	2.5777	2.0691	2.4192	2.0522	2.7573	2.4316	5.9036		0.66477	8.35701
14.0587	3.0866	2.3254	3.2627	3.2632	34.5855	11.9968	18.0651	3.7662	2.4722	1.8204	2.7354	1.8469	4.986	10.4978	2.9605	3.6651	5.3495	7.0487	13.8273	5.6576	11.5159	12.8525	40.0791	29.0305	3.2176	1.9015	2.9242	2.3934	2.2431	3.4429	7.1057		0.670455	8.38469
14.1778	3.2229	2.2879	2.9794	3.0313	36.272	12.1853	21.126	3.7409	2.2325	1.6746	2.0248	2.6106	6.4118	11.3238	3.6316	3.0036	5.4852	6.3514	13.6223	5.4481	12.8812	13.6303	38.5503	32.0983	3.0497	1.8961	2.2294	2.1108	2.7312	3.0289	8.1915		0.676135	8.67947
14.297	2.0295	2.1395	3.0312	2.7171	35.0772	14.1594	23.0959	3.5946	2.759	2.2443	2.1078	2.5745	5.4871	12.0108	3.5271	3.0599	4.4721	6.2068	11.5559	5.2993	13.2477	13.8717	36.3571	31.3939	2.6088	2.1804	2.3721	2.3885	2.3938	3.6662	6.0525		0.681819	8.50586
14.4161	2.0535	2.2813	3.2084	2.4644	30.7372	14.7599	23.0878	2.6587	2.4174	1.4089	1.7369	2.5207	5.1774	14.055	2.8353	2.9553	5.2925	5.4441	10.6414	4.9533	14.4159	15.2372	37.6154	28.4044	2.7793	1.8816	2.165	2.3749	2.6111	3.5805	7.4759		0.687499	8.36228
14.5352	2.6299	2.3622	3.3756	2.6776	26.2755	18.6528	27.2689	3.1311	2.2015	1.8763	1.4614	2.9775	5.7769	15.1544	3.5542	4.0183	5.7519	5.3601	12.732	5.535	14.3383	17.1723	34.0771	29.1946	2.8573	2.0275	2.5684	2.0111	2.7142	3.2926	6.4396		0.693179	8.69245
14.6544	3.4005	2.3019	3.2242	2.4852	25.4573	18.291	27.5108	2.8062	1.7207	1.5011	1.9089	2.6821	6.1893	17.1191	2.6851	3.2995	5.1109	5.6375	10.62	6.2077	17.9216	16.3008	32.5159	29.241	2.365	1.2665	1.8487	1.939	2.6374	3.5899	7.9862		0.698864	8.63777
14.7735	3.0352	2.0851	3.4697	2.4697	22.5623	18.1246	30.2556	3.0674	2.0541	2.0612	1.9251	2.0093	5.3406	17.691	3.3804	3.2809	5.0442	6.2853	12.0884	5.9775	14.7508	17.5988	31.3996	22.8798	2.402	1.7401	2.3526	2.0907	2.4063	4.0086	8.5078		0.704543	8.46273
14.8927	2.4757	3.3205	3.1026	2.254	23.243	21.212	29.3991	3.626	2.2116	1.8884	2.6934	2.1309	6.5335	19.4649	2.9243	3.4475	4.7496	3.969	12.4268	6.272	16.4713	16.0962	27.7353	21.3127	2.7412	2.1458	2.4104	2.03	2.6364	3.9875	8.0985		0.710228	8.4842
15.0118	3.215	2.0415	3.0727	3.117	21.165	21.5816	32.0923	3.2337	1.7975	2.7717	2.086	2.4342	7.0071	21.0018	3.1799	2.9204	4.3299	4.5532	10.1375	6.9269	15.8165	14.0594	25.1386	18.2431	2.4917	1.3529	2.4735	2.468	3.3674	4.3395	8.3912		0.715908	8.28409
15.1309	3.0069	2.7074	2.8097	2.6686	19.1627	27.3891	31.9053	3.0524	1.8801	2.1571	2.0238	2.7946	7.156	24.2169	3.4227	3.53	4.7683	4.7623	9.6223	7.6735	17.1429	17.2914	24.3664	18.7066	2.3342	2.3457	2.4013	2.1499	3.1069	4.1359	9.3902		0.721588	8.71229
15.2501	2.606	2.2966	2.806	2.4555	16.4277	26.859	30.7489	3.0217	1.946	1.7517	1.7479	2.7328	8.4559	22.4269	2.7301	2.9041	5.0822	5.199	10.876	8.5965	16.3385	15.6628	20.0897	19.763	2.7751	2.2543	2.2643	1.8955	2.5945	4.1205	9.5847		0.727272	8.35527
15.3692	3.6293	2.0328	3.0129	3.4431	16.2478	29.4884	31.2902	3.1689	2.2162	1.3547	2.4599	2.1782	8.2235	24.744	3.6146	3.2572	5.5829	4.7294	8.7629	7.1888	15.9594	12.373	20.2002	20.1751	3.3725	1.8923	2.2279	2.7377	2.6506	5.159	10.3285		0.732952	8.50651
15.4884	3.5851	2.8599	2.516	2.9435	15.6246	33.365	29.8483	3.1417	2.8439	1.6859	2.0416	2.9445	9.8267	24.4992	3.0837	3.2921	4.2145	5.0265	11.6328	7.2558	13.2991	14.5785	18.2245	16.0839	2.1266	2.0656	3.0062	2.0582	3.0632	4.9227	7.9452		0.738637	8.37435
15.6075	4.4802	3.0082	3.5325	3.6226	15.7285	34.6535	31.3192	2.7527	2.831	2.5829	2.7025	2.27	9.3679	23.8009	3.536	3.4626	4.9021	5.6298	11.6842	7.1085	13.6459	15.2864	19.7018	16.1192	3.2535	2.5949	2.2349	2.4902	3.2796	5.734	9.9366		0.744317	8.81461
15.7266	3.455	2.8137	3.4821	3.1772	18.8135	37.7595	32.2151	3.0801	2.043	1.9126	1.9008	2.6457	7.1737	29.2022	3.2012	3.3781	4.1304	5.3559	13.58	7.4528	13.0075	11.1972	15.9606	14.5406	2.8636	2.0667	2.4583	2.6781	2.5535	5.5853	10.6148		0.749996	8.71932
15.8458	2.8622	3.6567	2.8171	2.8103	16.0677	44.134	32.5448	2.7693	1.7649	1.6544	2.2316	2.4518	8.2305	28.0548	2.9474	3.4361	3.5981	5.09	13.5641	7.9875	8.4697	9.1009	16.1429	14.6353	2.6349	1.9906	2.6709	2.3641	3.2535	5.7437	11.9302		0.755681	8.63258
15.9649	3.2529	3.5501	3.7193	2.6658	16.4557	47.8584	33.6127	3.2346	2.0296	2.0153	2.1827	2.9168	8.4156	30.1667	2.9885	2.8847	3.7856	5.3988	12.1772	7.3385	7.9953	7.3513	16.5929	12.3994	2.8127	2.7267	3.206	2.1919	4.3162	6.9676	13.1161		0.761361	8.91373
16.0841	3.8822	3.8848	3.5479	2.9911	18.3568	46.5454	32.9098	2.5402	2.6571	2.4729	2.4064	2.3022	9.3418	33.7792	3.3888	3.7647	4.012	4.8527	11.5748	7.4219	6.0927	8.0618	17.4554	10.9805	2.7861	2.0652	4.5666	2.7173	3.7779	7.8791	13.4734		0.767045	9.11254
16.2032	3.4057	3.5245	2.7743	4.4801	14.0706	51.8321	34.3371	3.3117	2.1294	1.7453	2.1	1.9008	10.8057	36.15	2.8316	3.1796	3.0613	5.7209	10.4928	7.733	5.7139	7.0146	16.9587	12.967	2.8378	2.1092	4.0162	2.8057	4.1523	8.6086	17.4741		0.772725	9.36273
16.3224	4.0925	3.1496	3.2794	3.886	16.1655	51.4264	32.6746	3.2996	1.5932	2.0925	2.2985	2.3192	13.0126	37.1521	3.2611	3.171	3.8989	6.9866	10.4944	6.5567	4.8033	5.8455	16.8938	11.9666	3.1015	2.4722	5.3649	2.5224	3.6326	7.4235	22.7768		0.77841	9.60044
16.4415	4.0577	3.3936	3.2581	3.893	17.5236	55.6599	36.2955	4.6763	2.1316	1.6347	2.7997	2.4022	14.0266	43.4507	3.853	2.9056	4.4777	5.5938	10.848	6.9358	5.885	6.1759	18.386	10.2932	3.3309	2.8959	6.6857	2.888	4.9941	8.379	29.3933		0.78409	10.6169
16.5606	4.3817	4.7195	2.525	4.3732	16.7676	54.9181	36.2652	4.1764	2.6127	2.0283	1.9712	3.2612	15.2855	43.7258	3.6124	2.8624	3.3133	5.5442	12.5802	6.2042	5.4799	5.4629	20.0776	10.4106	3.7543	2.879	9.736	2.7927	4.9709	9.043	34.6907		0.78977	10.9815
16.6798	4.8191	4.4993	2.9704	4.5853	15.7809	54.7007	37.7611	3.9695	2.9301	1.938	2.5641	3.8785	15.6457	49.9601	3.1815	3.6198	3.3179	8.1027	10.582	7.133	5.3459	5.7574	20.4173	10.2237	3.6872	3.2733	14.0816	3.1026	6.6416	10.672	35.9728		0.795454	11.6489
16.7989	4.0201	3.2863	2.6421	5.6331	17.6545	55.4419	35.5745	5.4322	2.609	2.7382	2.4207	3.507	19.2519	57.278	3.7147	3.3425	4.2527	7.3322	12.5813	6.9331	4.8305	6.5402	20.1953	10.7856	4.6935	5.4223	15.0853	3.5473	6.8113	12.1691	36.5441		0.801134	12.3313
16.9181	4.7346	3.4899	3.6998	6.7832	18.8749	55.2335	41.6098	5.018	2.8015	2.174	2.8723	4.3803	19.5039	56.2073	3.5908	2.8194	4.0054	10.7388	12.528	6.6437	4.75	4.7441	20.1073	10.4387	5.3345	6.2296	17.129	4.6187	8.3528	14.3748	36.649		0.806819	12.9173
17.0372	4.5231	4.1026	3.4493	7.3945	21.5167	50.9565	43.187	4.8547	2.6342	3.1343	2.5472	2.8482	27.0621	61.5679	4.1958	3.5798	3.1797	10.1855	13.8651	7.8938	5.602	4.3875	19.1213	11.5271	5.4554	6.4676	18.4099	4.4236	9.9189	17.086	36.8771		0.812499	13.6114
17.1563	5.0658	4.5442	4.0741	7.4684	23.9685	52.9384	44.2738	6.9213	2.4623	2.5026	3.155	4.2442	32.2056	60.5812	4.9359	3.2107	2.7488	11.0369	14.7871	7.1257	6.0395	6.4899	20.1726	13.3053	6.976	7.2845	20.552	5.5381	10.2612	20.9961	36.2422		0.818178	14.5841
17.2755	4.8646	4.4206	4.3634	8.5531	26.9447	48.3053	42.9192	8.3545	2.481	2.8468	2.3486	4.4411	33.8267	62.7805	5.3948	3.173	2.7599	13.4047	17.0248	6.4818	5.0494	4.9451	20.6032	14.9447	9.1538	8.9725	18.4537	8.7646	11.8567	24.2472	38.5585		0.823863	15.2012
17.3946	5.5001	4.3307	3.8257	9.2795	28.6521	47.9128	41.9306	9.79	2.9897	2.3672	3.0573	3.6728	38.6963	59.8553	6.7717	3.7089	3.8927	12.1714	14.9944	6.789	5.9367	4.6301	24.526	16.6667	8.367	10.6766	17.7677	12.0699	13.9041	26.2761	34.1672		0.829543	15.6508
17.5138	5.7366	3.7131	3.5708	10.5532	32.3225	42.6123	40.0849	11.0939	3.307	2.7946	2.3004	4.6521	45.5688	59.5119	7.0331	3.2032	3.5466	13.3493	14.754	8.1149	5.7217	4.9764	21.4654	18.8503	9.9488	15.2609	15.7681	16.3388	14.909	29.2135	29.886		0.835227	16.1343
17.6329	5.6813	4.9102	5.0572	10.5727	33.2746	38.7658	33.9261	10.7606	3.3885	2.2474	2.8825	5.6735	47.664	57.46	8.203	3.7908	4.0456	15.162	14.6733	6.4642	5.9074	4.8311	20.0929	20.5534	15.7547	18.378	15.3739	19.8738	18.2447	33.8541	25.8534		0.840907	16.5587
17.7521	5.3094	4.5462	4.824	10.4875	33.1118	30.1374	32.7928	10.6859	2.5214	3.0191	2.8728	7.673	45.8341	60.3756	11.0804	4	4.0426	16.5081	11.5819	7.2221	4.8329	4.1891	19.3374	22.3431	16.721	21.2983	19.6728	25.8666	21.8257	37.0452	20.8933		0.846592	16.8597
17.8712	5.5838	4.7513	5.5285	13.6718	39.277	25.7003	29.8405	12.7434	2.9975	3.3843	3.4409	7.2629	43.0497	55.0741	13.1734	4.4817	3.6156	16.5816	10.8891	7.1901	5.3715	4.9632	16.7494	26.6323	18.9179	26.5792	20.6293	28.1258	20.9631	37.8875	12.7		0.852272	17.0244
17.9903	5.1245	3.881	6.6864	16.5818	39.4971	23.4743	23.5855	12.3311	3.3963	1.8919	3.0758	8.6421	43.5616	57.2051	17.0878	4.63	4.2268	17.0879	9.2704	6.7319	4.4307	5.7434	17.8661	29.9625	22.3607	29.6554	23.7066	30.8786	21.5969	38.6736	8.6996		0.857952	17.4691
18.1095	4.9939	4.9977	9.5431	15.728	40.7141	20.4811	23.4738	12.6685	3.7653	2.858	3.0503	10.7842	43.5608	59.519	18.719	5.6317	4.9175	15.7625	9.6343	6.7716	4.8651	4.9873	17.7333	37.5537	29.0949	35.6595	22.4586	28.1132	23.8215	33.2349	6.7695		0.863636	18.1247
18.2286	6.2556	5.5196	10.796	17.3561	41.0219	16.7069	19.233	13.5497	4.1791	2.9711	3.0316	13.6493	43.7958	53.6382	21.9285	5.2675	5.7923	20.1137	10.4805	5.3212	5.2694	6.1385	15.6448	45.2683	31.4171	35.7146	19.0735	27.7019	25.1721	29.8328	5.7487		0.869316	18.3093
18.3478	6.9609	4.8773	14.3906	18.4072	41.8398	15.0451	18.3396	13.0246	4.3848	3.1141	3.3672	16.1838	41.8771	56.5211	27.2315	7.0192	5.1316	18.056	9.723	5.643	6.3319	4.3653	14.5579	48.3615	37.6829	35.9146	16.6877	26.5635	29.4786	25.0229	4.3342		0.875001	18.7238
18.4669	6.1851	5.67	15.2846	19.6979	41.5949	13.4922	19.895	11.7266	5.728	3.1861	4.3718	21.758	46.0298	58.0919	27.313	9.5272	5.4715	21.9183	10.6536	5.15	5.2633	6.0212	11.053	52.2719	40.9395	32.086	13.1875	23.4845	29.1204	17.111	3.7304		0.88068	18.9359
18.586	5.869	5.6265	19.9677	21.664	39.0132	10.6298	18.1069	13.1434	6.1792	3.5303	4.4038	25.4035	42.1407	49.6264	32.9053	10.2066	5.1423	25.4142	9.3219	5.5299	3.9289	6.0336	11.5086	50.7989	38.9455	24.6968	12.6836	21.3323	32.2153	12.472	3.561		0.88636	18.4516
18.7052	6.6232	5.5567	21.1019	21.6654	35.5079	9.9787	21.1181	10.0822	8.2431	3.0885	6.276	29.1596	43.149	40.1013	32.1842	11.4655	7.2384	25.9441	7.4156	5.3641	4.9094	4.532	9.6545	52.0977	45.3547	18.5459	12.6241	18.9005	28.2368	9.4886	2.2818		0.892045	17.9964
18.8243	7.4852	5.8882	24.9949	18.7529	27.567	10.4542	23.3769	11.2849	9.8158	3.0567	6.3763	34.0246	38.1376	28.3936	37.9088	14.2654	8.0897	25.5779	7.4921	6.5401	4.5869	3.9646	8.2362	48.9459	49.3006	15.5181	12.3235	14.4363	24.9053	6.4156	2.4481		0.897725	17.4375
18.9435	8.5218	6.7234	25.7753	16.2608	27.8068	9.5738	24.1276	10.2337	9.5547	4.8628	8.7619	40.6067	33.3772	21.366	41.8002	18.3075	8.7218	18.1963	7.4316	5.8276	4.2382	4.0351	9.3144	40.9828	52.0497	12.9833	9.9944	12.7942	21.3703	6.5053	2.5398		0.903409	16.924
19.0626	9.5203	9.1167	26.382	16.4395	25.9534	8.6358	20.4585	12.516	11.7952	4.443	10.0778	45.1292	29.7738	16.0232	47.4125	19.8677	13.2649	13.9903	9.0396	6.1109	4.4811	3.493	8.0704	33.4305	50.4419	11.165	8.0634	10.6984	16.5024	4.2878	2.0589		0.909089	16.4078
19.1817	10.4267	9.702	24.016	15.6459	22.5058	8.4563	24.8469	14.2447	11.1826	5.0224	11.8523	49.266	24.068	10.6378	51.6961	29.0672	17.134	12.6392	8.1304	5.1947	4.1073	3.2483	10.8027	29.7274	47.5993	9.0893	6.2368	7.571	12.165	3.9643	1.9139		0.914769	16.1987
19.3009	12.2727	11.7843	26.4227	12.9161	20.7665	8.4553	21.995	17.8049	12.2677	6.4954	12.4229	48.9961	16.3182	10.4122	50.4951	33.9737	22.4449	12.6084	9.1475	4.856	3.7483	3.7897	11.3143	28.7991	35.6537	7.4128	6.8044	6.1352	7.9956	4.7014	1.6671		0.920454	15.8347
19.42	12.693	12.9025	25.2951	11.425	18.2406	5.958	21.9257	20.2349	13.9483	7.6514	14.7431	47.6214	11.7367	8.9129	45.7219	41.4082	29.5948	11.1541	8.9306	5.5966	3.7325	3.7524	10.5823	29.4523	28.2724	6.8316	7.4213	6.5202	7.1173	3.1531	1.3409		0.926133	15.6087
19.5392	15.5206	17.4192	23.0695	9.7575	15.8519	6.3894	21.6571	23.4553	13.8033	8.8544	17.566	44.3838	10.3634	8.5417	48.8376	47.0211	32.2378	12.1162	9.4701	5.9831	3.9139	4.3761	11.7695	31.1438	18.3601	6.5903	5.3114	5.3461	6.0336	2.9602	1.5007		0.931818	15.7937
19.6583	16.2296	16.6292	21.1429	8.9112	12.9512	7.0136	18.3632	22.7358	16.9065	10.0203	17.9817	43.877	7.3635	7.328	49.4837	50.6231	40.2978	11.5543	11.2364	5.224	4.9495	3.4401	12.3378	33.6106	13.7497	5.3931	5.0202	5.2782	4.1223	2.1381	1.2782		0.937498	15.7158
19.7775	20.0507	17.0174	17.0338	6.5903	10.5224	6.3006	16.5782	22.8575	25.0654	13.3414	22.3519	34.5075	7.3698	5.1825	53.968	47.2387	39.2625	12.2847	11.1127	4.4597	4.1105	3.2256	13.8341	35.2955	8.3368	4.5304	4.9523	4.5784	4.3515	2.1535	1.0707		0.943183	15.4689
19.8966	20.2273	16.1626	10.992	9.2494	9.982	6.3293	14.845	23.037	27.0221	17.5866	26.3419	29.2273	6.1329	5.1838	61.3556	46.3688	29.284	11.934	12.3569	5.4078	5.2852	3.1335	13.2136	34.4826	5.4112	4.3005	3.5928	3.7947	3.8798	2.3666	0.8566		0.948862	15.1401
20.0157	23.8476	18.0758	9.1878	6.8012	7.6081	5.8177	15.3885	19.8406	28.8796	20.0003	27.7366	27.0133	4.8496	5.4817	62.3331	43.3099	20.2045	13.9211	13.0637	5.4944	4.4896	3.5808	13.5412	35.1882	4.6433	3.6616	4.17	3.7183	4.0508	1.6896	1.1377		0.954542	14.7976
20.1349	24.2375	17.9544	7.0917	5.8422	8.2912	5.7718	11.5799	15.9821	28.3349	20.3248	25.1173	21.101	5.1008	4.6131	65.0797	43.6605	16.6895	16.3376	13.4202	7.1193	4.4463	5.0058	14.9884	33.0179	4.8263	3.4925	2.9743	3.1333	3.3416	1.7924	0.8954		0.960227	14.244
20.254	23.1524	19.4909	6.8397	5.8527	6.1297	4.2838	10.4726	13.5714	26.4755	22.1852	26.9383	17.3646	2.9693	4.4335	64.1861	42.8435	14.9946	18.8175	14.7613	6.8988	4.8632	3.6645	15.3885	28.1449	4.8965	2.9751	2.6581	3.7632	3.1611	1.4653	0.7359		0.965907	13.6896
20.3732	24.6164	19.6579	6.8024	4.793	6.8994	4.5037	9.7337	11.1531	21.31	20.1682	26.0541	13.6158	3.1026	3.7919	66.4204	41.6591	13.2722	17.2912	16.2447	9.403	7.7202	3.4833	15.1242	24.6769	4.2422	2.298	2.125	3.5663	2.6931	1.3865	1.0471		0.971591	13.1889
20.4923	19.7574	15.7694	7.1359	5.1218	5.5378	4.3768	9.3283	10.4188	17.4075	20.7728	24.8277	10.1504	2.8993	4.0161	59.4414	36.851	15.1734	20.6446	17.252	7.9823	7.222	5.0141	16.094	26.0752	3.916	2.4736	2.5149	2.86	2.025	1.3482	0.6251		0.977271	12.4204
20.6114	17.1435	11.3277	6.3814	4.5852	6.3011	3.9462	7.2972	9.5582	13.5513	21.2396	22.0714	9.1609	2.3581	2.9974	47.305	34.1006	22.6915	19.9909	20.278	8.4779	7.5849	6.4215	12.6334	27.0385	2.9404	2.5463	2.3844	2.383	1.533	1.2349	0.5234		0.982951	11.548
20.7306	13.8809	9.1224	5.9495	4.3296	4.6999	3.2813	6.4526	7.5671	12.5386	18.2173	20.6666	7.0322	2.019	2.9108	37.6069	31.2383	26.3636	24.6503	22.9336	11.3456	8.8377	5.5728	13.0607	26.5522	2.01	2.0793	1.9367	1.8877	1.7724	1.8806	0.9089		0.988636	10.9453
20.8497	11.9856	7.0221	6.9162	3.8598	4.1517	2.6234	5.9314	6.2625	11.5662	16.7695	17.8036	5.9618	2.1534	2.6256	29.1141	34.9822	28.4146	25.3887	27.8623	11.1943	9.8256	6.5513	14.15	25.4989	2.476	2.1715	1.9803	2.5965	1.4383	0.9539	0.6746		0.994315	10.6744
20.9689	8.5056	6.9996	6.4841	3.52	4.043	3.139	5.0037	6.139	10.0015	12.1416	14.137	4.6698	1.6318	2.7973	17.2766	38.6377	30.4259	26.0112	32.119	12.6188	9.6333	8.8858	12.5073	26.5247	2.5189	1.6933	1.519	2.0506	1.9078	0.8964	0.5606		1	10.1613

## Sheet: Image7
X0	Y0	Y1	Y2	Y3	Y4	Y5	Y6	Y7	Y8	Y9	Y10	Y11	Y12	Y13	Y14	Y15	Y16	Y17	Y18	Y19	Y20	Y21	Y22	Y23	Y24	Y25	Y26		Ap-basal	Avg int
0	135.402	148.794	120.372	80.744	91.747	108.549	88.212	86.982	82.025	48.888	24.958	21.006	23.533	15.517	21.709	39.889	28.896	39.6	6.548	8.979	10.394	37.399	25.7261	8.356	36.452	20.891	36.7293		0	51.7888
0.1191	140.823	152.981	131.9	81.018	105.814	119.844	98.456	93.674	83.675	51.983	30.924	24.275	23.092	16.793	23.307	46.359	29.373	46.278	7.713	10.59	10.49	39.802	24.6569	7.839	34.327	24.268	40.3089		0.00444489	55.5764
0.2382	141.43	166.838	139.739	84.404	117.855	127.383	106.181	93.149	83.858	57.644	39.445	26.722	27.667	17.535	26.774	44.161	30.353	59.333	11.558	13.614	13.287	39.211	26.5074	11.819	30.058	31.267	46.072		0.00888978	59.7728
0.3573	160.467	175.636	152.677	85.557	131.463	141.142	105.077	89.656	86.882	63.812	49.4	31.407	31.702	21.104	28.84	46.055	28.284	63.482	15.835	15.995	12.908	44.18	27.7855	13.187	31.092	38.067	49.1732		0.0133347	64.4765
0.4764	170.887	176.958	163.028	82.482	146.711	149.518	106.224	95.808	96.949	66.785	53.651	43.513	37.914	26.112	33.535	43.269	31.597	63.343	26.188	20.856	14.007	42.1	35.1805	16.164	35.48	46.032	55.2299		0.0177796	69.6119
0.5954	180.536	175.714	165.529	87.522	154.48	152.598	104.164	101.713	101.632	70.786	66.434	58.416	47.005	29.264	39.344	47.508	35.971	67.025	38.09	32.465	19.049	48.631	37.0005	21.775	48.421	56.259	54.2273		0.0222207	75.6133
0.7145	193.105	182.674	161.901	83.88	172.795	157.927	107.986	106.325	109.567	71.629	79.624	67.627	61.426	36.139	42.643	55.357	37.143	71.995	49.931	48.511	26.846	52.915	41.1488	26.838	75.386	72.845	57.6349		0.0266656	83.4
0.8336	201.335	186.545	167.476	86.64	174.528	146.198	120.255	111.242	110.968	75.613	96.686	80.388	74.764	49.469	48.228	60.965	40.21	80.712	68.382	64.052	40.405	61.461	43.2083	36.568	106.179	77.844	65.8361		0.0311105	91.7095
0.9527	199.143	186.652	163.646	87.113	171.624	150.716	127.39	113.722	109.174	79.948	104.09	95.927	85.584	60.232	61.188	66.776	47.921	81.991	94.325	93.092	54.639	69.86	51.3792	42.438	131.918	81.632	70.9201		0.0355554	99.3719
1.0718	199.514	183.514	153.272	94.025	179.972	147.856	130.727	126.756	109.101	80.137	102.971	116.334	96.69	76.064	78.409	75.261	55.302	87.254	121.279	119.505	72.863	78.339	51.0707	53.277	151.448	89.421	75.8213		0.0400003	107.636
1.1909	186.444	188.7	164.868	99.035	173.523	152.749	141.746	142.933	116.108	72.163	109.131	121.799	104.602	84.206	82.82	79.23	59.603	93.467	150.161	153.253	97.975	84.664	57.062	61.426	171.13	86.309	76.7695		0.0444452	115.255
1.31	183.152	183.614	159.674	102.315	175.564	150.644	158.927	160.69	124.912	77.307	115.862	124.625	112.143	97.001	88.533	82.417	66.692	96.564	173.478	182.369	119.154	93.453	65.7514	69.129	190.525	85.922	83.9486		0.0488901	123.125
1.4291	172.873	179.719	159.103	116.321	167.064	144.097	163.624	165.198	134.871	71.515	114.635	130.679	120.604	94.671	96.547	91.042	64.244	100.343	191.519	194.289	139.487	100.556	74.0973	80.496	204.268	93.475	85.0995		0.053335	127.794
1.5481	159.615	174.682	158.644	128.337	165.777	151.365	174.971	171.566	138.019	73.814	119.589	135.459	125.31	97.483	99.525	87.021	68.139	104.279	207.204	201.675	156.599	112.651	81.4031	84.219	218.678	91.714	90.6092		0.0577761	132.531
1.6672	153.244	167.22	150.343	133.137	155.381	156.203	178.446	189.523	146.542	66.141	118.519	137.546	135.382	99.951	102.892	83.198	75.114	106.619	199.574	194.35	162.753	118.099	85.9037	91.241	217.459	87.945	92.1277		0.062221	133.513
1.7863	144.962	157.823	148.595	132.683	153.479	154.98	187.14	196.232	144.498	60.173	113.95	132.828	137.318	100.556	106.993	77.887	79.434	118.863	191.235	187.294	160.737	117.561	87.4634	92.124	216.836	89.94	89.6534		0.0666659	132.638
1.9054	145.659	149.891	138.599	137.131	148.754	154.03	181.996	187.3	144.353	65.766	121.788	126.31	134.434	100.57	108.584	81.568	84.536	120.339	173.522	179.514	162.234	111.477	89.6488	103.322	189.649	91.94	90.7186		0.0711108	130.505
2.0245	153.279	156.995	124.476	141.657	147.924	146.056	171.766	189.421	142.505	69.346	122.611	120.045	132.585	102.012	110.489	83.828	99.488	112.203	148.99	169.421	159.578	110.946	95.4018	104.516	164.807	99.874	98.3308		0.0755557	128.835
2.1436	150.312	150.867	116.465	144.863	136.403	156.572	174.94	192.639	131.743	72.041	126.298	117.813	133.268	103.77	113.674	85.311	105.607	108.951	140.505	145.876	147.177	108.632	94.2147	104.049	140.798	102.475	88.3596		0.0800006	125.69
2.2627	152.962	146.754	110.56	146.028	131.259	143.753	164.284	176.3	139.472	81.129	128.639	116.903	133.945	112.371	111.907	86.341	109.462	109.87	116.235	117.657	130.518	98.157	91.7814	104.292	110.663	106.116	80.7771		0.0844455	120.672
2.3818	147.843	142.245	110.002	150.578	138.672	138.363	159.497	173.823	140.289	89.918	125.113	118.856	129.278	115.238	113.542	93.322	119.93	101.646	94.012	101.373	115.45	88.186	95.1782	102.427	90.461	107.513	71.1419		0.0888904	117.552
2.5008	146.122	138.292	97.466	143.305	136.612	129.083	149.968	160.496	147.23	95.105	128.476	119.881	134.883	118.562	111.093	99.713	126.653	93.768	83.136	83.491	103.198	80.783	95.2994	97.377	71.726	101.839	67.921		0.0933315	113.388
2.6199	139.348	138.006	97.685	147.761	133.85	126.258	137.778	153.204	151.948	106.877	126.998	111.57	121.461	120.293	114.444	103.12	135.821	90.754	69.189	67.326	88.446	72.857	95.7339	88.901	58.719	110.787	59.6217		0.0977764	109.954
2.739	137.593	128.416	100.041	146.183	131.064	130.831	123.257	144.449	153.956	118.262	126.753	108.441	109.212	119.068	116.059	108.07	143.821	85.812	62.386	59.739	69.321	62.291	98.1692	81.882	48.146	111.893	51.8731		0.102221	106.555
2.8581	135.041	124.635	101.223	139.35	128.476	131.504	116.635	138.645	152.842	128.887	119.595	99.217	102.526	116.928	112.94	106.786	143.041	73.94	58.497	52.978	59.047	59.712	94.3434	72.908	40.484	109.888	46.5976		0.106666	102.469
2.9772	126.099	118.96	105.779	137.229	130.121	135.348	117.584	139.98	150.892	144.315	116.86	89.935	94.482	114.872	112.06	104.301	147.907	70.031	53.266	39.944	44.72	53.536	94.8037	66.32	32.703	108.569	38.5064		0.111111	99.5972
3.0963	120.454	111.828	109.333	133.293	128.814	137.478	111.682	137.904	152.119	153.297	112.935	88.789	90.748	107.649	105.707	101.475	151.361	69.498	50.593	39.766	43.796	54.888	94.8639	60.89	30.151	102.107	30.7562		0.115556	97.488
3.2154	109.122	107.58	108.382	124.47	121.893	142.029	110.746	134.49	153.759	155.772	110.635	89.47	87.876	111.71	93.919	98.301	137.291	64.297	43.877	35.493	35.468	52.952	90.2355	57.049	28.033	89.76	23.6075		0.120001	93.2673
3.3345	99.97	114.825	103.25	117.319	121.528	139.304	107.124	139.631	153.973	164.004	103.646	89.573	84.58	104.923	100.023	94.35	124.686	52.013	40.953	33.07	33.28	48.051	87.1893	52.377	23.638	87.691	21.9324		0.124446	90.4779
3.4535	91.52	127.518	106.377	114.159	120.456	134.041	112.418	143.341	158.449	165.674	96.866	85.874	84.474	109.76	96.565	91.373	105.325	50.383	41.852	32.245	27.471	45.213	84.9896	50.853	23.496	78.504	17.2893		0.128887	88.7587
3.5726	87.113	125.074	98.045	116.561	131.11	132.785	100.353	144.788	157.828	164.653	92.165	85.245	78.963	105.721	100.991	88.046	92.69	44.841	36.557	30.602	26.341	44.397	78.2731	48.936	18.818	74.638	14.7471		0.133332	85.9363
3.6917	89.751	128.264	102.455	113.872	130.003	121.384	100.652	146.374	151.076	157.928	84.068	85.141	74.207	104.35	99.356	85.586	81.993	36.429	34.02	27.519	25.068	41.025	70.8891	45.079	16.438	67.23	12.2938		0.137777	82.6834
3.8108	88.297	118.289	95.846	110.051	134.216	118.859	101.733	150.482	149.41	154.93	70.385	83.929	77.108	97.735	99.284	89.093	65.751	27.774	28.854	24.922	21.161	38.118	61.2064	41.395	13.757	59.161	11.3895		0.142222	79.005
3.9299	85.944	115.8	89.986	109.903	131.865	127.127	103.83	144.613	136.786	144.729	55.394	85.403	77.343	96.715	107.64	85.572	56.537	28.09	28.272	24.423	20.915	33.996	51.3875	39.882	13.993	54.054	9.3833		0.146667	76.2808
4.049	89.744	107.923	86.449	114.388	130.912	136.722	100.818	139.861	122.824	129.049	47.867	83.933	72.11	94.088	103.696	85.952	46.739	24.076	22.992	19.372	20.252	32.625	40.7778	39.926	11.659	46.372	9.8425		0.151111	72.6285
4.1681	92.619	100.367	75.845	110.819	127.723	138.076	107.27	143.176	108.59	119.213	39.756	82.867	77.416	94.19	95.035	89.473	38.561	20.89	21.592	20.655	17.802	33.084	29.3367	34.007	10.991	42.97	8.5716		0.155556	69.6628
4.2872	92.609	84.192	69.28	107.015	120.931	134.905	106.981	140.745	96.571	101.035	34.09	80.866	75.77	90.101	100.48	87.853	29.768	18.436	17.78	17.372	15.077	29.384	23.3539	35.725	8.199	39.624	7.401		0.160001	65.3905
4.4063	84.297	71.585	66.242	106.997	112.781	131.184	105.623	136.808	79.986	88.053	25.599	71.962	79.427	86.73	104.097	85.759	26.582	13.269	17.794	18.047	16.62	27.737	19.6318	32.34	8.227	33.113	5.4573		0.164446	61.3314
4.5253	90.613	59.992	60.016	107.382	109.062	119.531	106.908	138.96	69.317	76.739	21.664	66.232	84.4	82.686	99.853	75.968	20.619	12.885	17.663	15.087	14.883	25.83	17.2093	30.128	6.859	29.676	5.8567		0.168887	58.0007
4.6444	77.785	45.229	58.618	109.818	97.954	105.379	104.273	134.743	58.892	60.556	17.442	56.006	84.732	85.749	93.815	61.821	20.005	10.253	14.898	15.82	15.389	24.983	15.4239	25.005	6.337	28.535	5.9969		0.173332	53.1651
4.7635	70.318	36.662	50.966	110.643	89.934	84.356	111.518	134.201	53.782	55.117	12.726	46.286	81.87	87.484	88.619	53.814	15.563	7.896	15.418	12.973	14.04	22.06	10.6176	22.784	5.4	24.14	4.9946		0.177777	49.0438
4.8826	67.406	28.733	44.906	114.296	89.97	75.587	107.504	129.17	49.186	46.89	11.339	36.041	80.331	80.727	71.888	39.773	15.973	7.294	11.449	12.058	14.047	22.81	11.3151	19.877	5.387	22.701	6.0907		0.182222	45.287
5.0017	61.104	22.514	40.679	116.232	77.927	65.209	109.164	127.002	44.802	40.24	8.572	23.72	71.195	71.139	67.33	29.027	15.877	6.515	12.107	11.378	13.111	21.589	8.6368	18.298	5.403	17.612	4.8211		0.186667	41.1557
5.1208	47.915	16.832	34.793	118.26	68.216	54.051	117.509	119.92	37.772	34.988	6.298	18.014	61.571	56.341	60.058	21.343	11.811	5.261	10.796	10.805	10.531	18.081	8.1365	15.092	6.421	15.851	4.8155		0.191112	36.7216
5.2399	42.545	15.103	32.405	119.652	59.704	43.4	113.026	121.817	29.982	28.945	6.754	13.922	45.233	42.183	48.6	13.74	11.608	4.432	8.933	10.626	9.19	16.802	8.4054	16.221	4.332	11.848	5.4309		0.195557	32.7718
5.359	36.07	12.546	31.624	115.755	51.856	32.022	107.127	112.832	26.59	21.345	4.994	14.658	34.579	33.31	40.551	12.218	12.073	4.924	9.394	8.474	10.237	14.953	7.8141	15.838	4.062	11.394	4.5754		0.200001	29.3265
5.478	28.828	12.449	29.107	113.799	41.094	24.142	105.885	100.741	20.507	22.124	5.542	11.431	27.971	25.688	33.586	10.118	13.144	4.799	8.145	8.313	8.93	14.785	5.2873	15.154	4.986	11.879	4.9349		0.204443	26.4211
5.5971	22.092	10.695	26.257	106.567	32.385	17.614	93.932	86.565	17.28	18.175	5.033	12.08	21.261	19.637	24.477	8.188	9.269	3.66	7.546	7.324	7.676	14.235	4.4402	12.058	4.067	10.025	4.9478		0.208888	22.4995
5.7162	19.949	8.994	26.86	87.311	22.742	14.286	78.983	76.218	15.402	17.028	6.709	9.594	18.14	19.538	21.936	7.805	10.32	3.132	7.097	6.787	8.101	11.773	4.0707	11.394	3.177	7.611	3.889		0.213332	19.5869
5.8353	14.993	7.693	21.914	78.494	16.37	13.96	62.737	60.045	13.583	17.784	5.318	9.281	12.552	14.658	21.041	5.766	9.474	4.012	7.359	7.285	8.045	9.447	4.0403	10.445	3.455	7.491	4.083		0.217777	16.7158
5.9544	14.678	7.427	16.302	70.628	13.159	15.702	43.811	47.096	12.329	18.257	6.401	9.534	9.864	14.007	16.493	5.711	10.873	3.964	5.998	5.95	6.01	8.138	4.1242	9.68	4.231	6.048	4.9451		0.222222	14.4948
6.0735	13.169	6.694	15.733	59.908	11.102	11.927	32.067	35.015	13.734	18.39	5.576	7.801	8.077	11.826	14.904	5.951	10.669	3.914	4.162	4.566	6.312	7.092	3.9301	7.417	4.665	5.612	4.6389		0.226667	12.4019
6.1926	14.631	6.902	15.978	58.317	8.063	9.374	23.981	28.096	13.292	17.279	5.003	8.923	6.916	9.902	14.231	6.466	9.939	2.721	4.368	4.989	7.067	6.138	4.0207	6.658	2.959	5.025	4.3337		0.231112	11.3175
6.3117	15.469	6.204	13.836	52.582	7.485	7.532	19.652	20.205	14.673	16.925	4.433	9.226	4.684	9.638	11.235	5.428	8.127	2.691	4.556	5.065	5.725	4.381	2.9176	6.553	3.822	4.989	4.7548		0.235557	10.1033
6.4307	17.891	6.458	12.43	52.579	6.801	6.742	14.725	15.499	16.711	18.838	4.424	8.295	4.101	8.863	8.948	6.357	10.551	3.088	4.379	4.532	4.924	4.525	3.7418	4.653	3.529	4.523	4.189		0.239998	9.7147
6.5498	12.894	7.077	11.775	53.457	6.479	7.322	13.426	14.327	17.091	18.788	4.007	8.783	4.025	7.773	8.945	5.824	11.234	2.57	3.768	3.94	5.486	3.751	3.2634	4.616	4.166	3.875	3.6713		0.244443	9.34569
6.6689	10.421	6.754	13.667	48.788	7.53	6.304	12.587	15.509	18.779	17.802	3.46	6.553	3.999	7.599	7.742	4.303	10.357	3.454	3.34	3.989	4.445	2.881	3.0962	4.699	3.217	3.715	4.0012		0.248888	8.85153
6.788	5.589	5.946	14.354	50.653	6.8	5.342	10.871	13.227	18.998	17.895	3.586	4.751	3.56	5.948	8.235	5.692	12.401	3.196	3.255	3.991	3.582	2.667	3.6691	3.016	3.295	3.026	4.3793		0.253333	8.44164
6.9071	4.252	5.1	13.462	54.285	6.276	6.217	9.912	11.123	19.129	18.901	3.467	2.934	3.602	4.851	6.556	5.998	13.642	2.77	3.018	3.737	3.185	2.741	3.2168	3.081	3.029	3.809	3.7766		0.257778	8.22483
7.0262	3.329	5.424	17.83	51.609	6.355	5.893	9.911	14.291	22.839	18.15	3.31	2.967	3.695	5.788	5.955	5.596	13.073	2.519	3.067	2.859	3.056	2.816	3.5964	3.367	2.454	2.903	3.5395		0.262223	8.37748
7.1453	3.017	5.701	20.235	42.974	5.165	6.151	11.212	12.864	22.769	20.581	3.671	2.791	2.701	4.777	5.471	5.722	15.701	2.766	3.046	2.832	2.783	3.392	3.5185	3.453	2.744	2.406	3.5027		0.266667	8.22023
7.2644	3.396	4.944	19.732	41.795	5.438	6.216	12.406	14.607	26.341	22.138	4.797	3.31	3.149	4.562	6.451	6.24	19.765	2.717	2.392	2.936	3.615	2.619	3.1621	3.387	2.77	2.711	3.0499		0.271112	8.69059
7.3834	2.927	6.77	23.289	40.388	6.155	6.072	9.893	15.626	21.96	20.012	4.874	2.906	4.105	4.73	6.422	5.56	22.196	3.229	3.339	2.828	3.312	2.059	3.6078	3.567	1.803	2.899	2.8564		0.275553	8.6439
7.5025	3.307	5.729	26.225	39.246	6.758	4.854	11.595	15.331	20.294	23.232	5.804	2.336	3.695	3.608	6.225	5.971	26.65	2.465	3.076	2.259	2.773	2.007	2.5493	1.908	1.888	2.893	3.2685		0.279998	8.73877
7.6216	3.104	6.018	26.368	35.349	5.805	5.01	12.427	15.165	20.226	24.855	5.433	2.566	4.415	4.265	5.853	5.484	28.225	2.764	1.994	3.305	2.717	2.524	3.1289	2.428	1.947	2.926	2.8051		0.284443	8.78174
7.7407	2.933	7.119	31.476	37.03	4.84	5.236	10.562	12.973	23.45	34.271	5.244	2.781	2.381	4.027	6.074	6.547	33.17	2.832	1.888	2.212	1.922	1.976	2.8093	2.152	1.766	3.392	2.8665		0.288888	9.40481
7.8598	3.391	7.865	32.569	31.257	6.303	5.187	13.24	14.058	22.83	43.918	4.242	2.592	2.661	4.115	5.486	7.59	35.684	3.469	1.55	2.44	1.717	1.876	3.6743	2.26	2.171	2.432	2.9564		0.293333	9.90866
7.9789	3.564	8.046	30.913	32.998	5.437	4.484	11.12	15.131	22.449	51.109	5.044	2.358	2.427	3.487	5.609	7.384	36.399	2.788	1.973	2.753	2.494	2.818	3.5091	1.646	1.81	2.985	2.5818		0.297778	10.1228
8.098	3.258	7.917	32.959	30.172	5.861	4.918	12.577	14.636	23.261	60.84	3.72	2.206	2.273	3.699	4.446	8.863	38.07	2.773	2.006	2.526	2.145	1.74	2.9205	1.979	1.677	2.591	2.9681		0.302223	10.4815
8.2171	3.429	8.459	32.961	31.697	5.515	5.43	12.367	14.625	21.055	64.918	4.439	2.836	2.684	4.105	4.706	11.31	36.74	3.312	1.907	2.435	1.772	1.683	3.3055	2.173	2.026	2.578	2.9689		0.306668	10.7939
8.3362	3.54	8.026	37.258	30.63	5.87	5.567	10.855	14.74	19.895	61.891	4.423	2.81	2.776	5.254	5.142	12.358	38.306	4.774	1.822	1.953	1.852	1.718	3.0438	1.833	1.837	2.393	2.7096		0.311113	10.8621
8.4552	3.851	8.824	39.707	29.143	4.803	5.161	12.932	14.34	19.305	72.011	4.812	3.176	2.242	4.38	4.631	12.461	36.763	3.982	1.8	1.686	1.661	1.353	3.5222	2.401	1.87	2.512	3.0026		0.315554	11.1975
8.5743	4.078	7.775	43.557	27.448	5.028	4.183	11.611	15.965	16.476	71.875	4.518	3.202	2.883	3.937	4.234	13.907	39.388	2.664	2.109	2.323	2.593	1.676	4.0686	2.075	1.792	2.709	4.3995		0.319999	11.3509
8.6934	4.617	7.412	53.847	26.688	5.551	4.41	11.503	14.127	19.034	78.225	5.347	3.315	2.778	3.643	4.952	15.516	40.362	4.272	2.037	1.385	1.86	1.937	3.2928	2.238	1.357	2.757	4.3625		0.324444	12.1046
8.8125	4.24	8.262	60.137	24.962	5.741	5.234	11.243	15.19	17.863	78.107	6.563	3.098	2.08	4.112	4.938	14.107	36.762	4.027	2.41	2.048	1.514	2.309	3.5565	2.045	1.414	2.06	4.5551		0.328888	12.1695
8.9316	3.383	6.376	66.539	23.503	5.165	4.135	11.476	13.503	18.022	80.194	5.773	3.267	2.618	3.938	5.623	14.693	41.055	3.748	2.386	2.176	2.035	1.529	5.1266	2.176	1.283	3.273	5.4138		0.333333	12.5337
9.0507	4.744	6.614	69.478	26.391	4.986	4.685	9.63	13.813	15.511	61.423	5.895	2.313	2.521	3.708	5.961	15.278	41.107	3.923	1.958	1.95	1.946	1.543	4.773	2.41	1.488	2.715	4.5856		0.337778	11.9018
9.1698	4.649	5.368	67.36	23.182	4.767	4.219	9.904	15.769	14.07	55.301	6.348	3.419	3.792	4.531	5.138	15.062	41.456	4.897	1.777	1.917	1.462	1.98	4.4132	1.768	1.595	3.38	5.229		0.342223	11.5835
9.2889	4.466	6.613	65.958	25.83	4.608	4.354	9.764	12.891	15.99	57.54	7.069	3.21	3.011	3.855	5.475	16.498	40.611	4.434	2.524	2.083	1.81	2.17	4.7009	1.81	1.161	2.636	4.3567		0.346668	11.6825
9.4079	4.172	6.644	62.834	24.357	5.292	4.591	9.527	16.968	14.631	64.825	7.532	3.228	3.118	3.86	6.375	19.389	41.478	5.142	1.85	2.125	1.766	1.877	3.8215	2.265	1.634	1.958	5.0247		0.351109	12.0846
9.527	5.503	6.313	56.22	24.993	4.729	3.375	9.68	14.916	14.297	64.967	7.166	2.998	2.788	4.622	7.211	21.374	41.192	5.315	1.578	1.781	2.174	1.129	3.4885	1.916	1.411	2.685	4.9086		0.355554	11.8048
9.6461	4.135	6.299	55.207	24.196	4.642	4.386	8.258	15.072	15.055	72.249	8.503	3.273	3.977	5.29	7.745	23.592	36.769	4.201	2.075	1.656	1.58	2.66	3.736	3.188	1.511	2.841	5.7103		0.359999	12.141
9.7652	3.872	6.947	50.587	27.229	4.123	4.507	8.613	13.784	13.174	67.062	7.436	3.317	3.703	4.263	8.542	22.718	35.095	5.044	2.379	1.873	2.125	2.169	4.6575	2.444	1.542	2.697	6.4647		0.364444	11.7173
9.8843	3.453	8.263	43.926	25.868	4.796	4.401	7.195	13.115	12.152	63.407	6.527	2.887	4.171	3.747	7.592	18.964	33.534	5.873	2.32	2.417	1.283	1.482	6.0256	2.731	1.584	2.826	6.7308		0.368889	11.01
10.0034	3.819	8.673	37.589	30.694	4.911	4.493	7.16	12.229	11.237	56.039	7.637	3.23	3.982	4.187	6.423	19.647	29.28	6.526	2.36	1.408	2.13	1.453	7.0931	3.033	1.728	3.538	6.6114		0.373334	10.6337
10.1225	3.911	8.155	32.141	29.705	4.298	5.61	7.31	11.424	10.386	56.292	6.06	3.596	5.322	4.047	8.277	18.614	26.273	6.12	2.307	1.941	2.259	1.783	6.5674	2.891	1.829	3.57	5.9104		0.377779	10.2444
10.2416	3.533	8.04	28.379	28.531	4.143	5.939	7.108	10.338	10.916	64.252	6.597	3.224	5.174	4.093	6.543	17.358	23.507	6.401	2.255	1.959	1.828	1.551	7.5635	2.844	1.507	3.616	5.8229		0.382223	10.1119
10.3606	4.129	7.694	26.748	29.044	3.657	5.638	5.898	10.969	8.203	68.788	6.389	3.087	5.048	5.146	6.056	15.027	23.302	7.188	2.011	1.705	1.279	1.39	5.1428	3.339	1.573	3.67	6.9138		0.386665	9.96424
10.4797	3.902	8.785	27.699	30.694	5.086	5.733	6.494	9.819	9.56	69.616	6.575	2.572	4.908	5.292	6.387	17.875	24.175	6.591	2.69	1.721	1.342	1.715	8.0487	3.23	1.555	3.995	7.5		0.391109	10.5022
10.5988	3.928	7.416	28.696	25.086	3.814	4.939	6.759	10.981	8.42	83.509	5.71	2.829	3.83	4.032	7.875	17.955	24.052	5.983	2.779	2.06	1.747	2.115	7.5693	3.147	1.361	3.814	8.3383		0.395554	10.6942
10.7179	4.276	7.85	33.008	25.457	4.646	4.406	6.39	9.026	8.769	90.701	5.666	2.318	4.513	4.725	7.835	18.797	26.128	5.166	2.163	2.785	1.963	1.537	7.6242	2.794	1.555	4.386	7.8039		0.399999	11.1959
10.837	4.439	7.948	38.511	22.833	4.727	5.919	5.934	8.017	8.384	89.117	4.839	2.225	4.79	4.276	10.583	21.332	30.488	4.479	2.45	2.341	2.434	2.19	7.9866	3.221	1.59	3.669	8.5482		0.404444	11.6026
10.9561	3.817	8.018	37.925	20.708	4.36	5.001	6.161	7.875	8.974	94.825	5.556	2.885	5.101	5.353	10.417	19.213	29.133	5.679	1.966	2.096	1.852	1.473	6.5675	4.511	2.454	5.046	10.1018		0.408889	11.7433
11.0752	4.636	8.525	40.342	19.019	4.424	5.7	6.837	7.288	7.369	95.883	4.649	2.8	4.576	4.84	11.743	19.541	28.263	4.791	2.904	1.715	2.164	2.011	6.0476	4.349	1.745	5.677	8.6151		0.413334	11.7205
11.1943	3.989	8.852	39.184	19.166	3.871	5.06	6.833	6.987	7.276	97.728	4.776	2.569	3.965	5.801	13.565	19.996	31.763	5.566	2.619	2.37	1.946	1.65	4.7741	4.104	1.378	4.447	8.7916		0.417779	11.8158
11.3133	4.9	8.886	39.639	17.045	3.886	4.939	6.579	8.098	7.844	100.565	4.74	3.412	3.971	5.603	13.155	18.973	31.817	4.941	2.814	2.388	1.476	1.659	5.6418	4.265	1.606	5.36	8.0782		0.42222	11.9363
11.4324	3.167	7.12	33.042	15.713	4.79	5.014	6.761	7.05	8.138	101.608	4.1	2.477	3.765	6.413	12.063	15.333	31.313	3.643	3	2.416	1.651	1.802	5.3148	4.838	1.456	4.878	10.0062		0.426665	11.3656
11.5515	4.192	5.683	34.336	13.195	4.783	5.798	6.789	7.658	7.935	95.607	4.29	2.64	4.116	5.406	11.278	11.236	29.482	3.46	2.856	1.83	2.462	1.409	5.2677	4.711	1.185	4.688	8.9245		0.43111	10.7858
11.6706	4.617	4.838	35.157	15.784	4.289	5.473	5.855	6.845	8.416	87.862	5.583	2.975	3.361	6.458	8.319	10.901	30.003	4.291	2.701	2.15	1.925	2.043	4.232	4.628	1.54	5.842	10.7		0.435555	10.6218
11.7897	3.973	5.094	42.655	14.925	3.958	4.343	5.992	9.107	8.752	79.753	4.224	3.307	2.764	6.788	9.549	10.511	26.327	3.538	2.955	1.547	1.259	1.905	3.6559	5.785	1.161	6.114	8.7557		0.44	10.3221
11.9088	4.648	5.504	39.681	15.067	4.288	4.627	6.034	7.899	9.15	73.152	5.748	2.678	2.576	5.936	6.66	10.997	25.898	3.275	2.907	1.818	1.855	2.392	3.4881	5.168	1.586	6.794	6.9521		0.444444	9.88067
12.0279	4.18	4.464	39.432	17.138	4.023	4.215	6.786	8.099	9.132	69.322	4.404	2.977	3.073	6.402	6.807	10.863	23.375	2.744	2.711	2.261	1.664	2.122	3.7902	4.841	1.632	6.46	7.0254		0.448889	9.6275
12.147	4.238	3.988	35.389	16.757	3.678	4.983	6.811	7.833	9.049	66.395	4.269	3.473	2.804	5.682	5.897	13.335	23.78	3.024	3.469	1.847	2.29	1.538	2.7605	5.654	1.283	6.274	6.7508		0.453334	9.37968
12.2661	4.434	3.527	28.748	15.109	3.588	4.699	6.592	7.172	8.554	63.218	5.491	3.837	2.959	5.4	5.596	17.004	25.515	2.224	2.527	2.015	1.742	1.564	2.9625	5.521	1.684	5.965	6.5697		0.457779	9.04508
12.3851	3.736	3.333	30.111	17.959	4.049	5.043	6.737	8.209	9.853	58.262	4.591	3.053	2.355	5.766	6.568	19.613	23.278	2.058	1.962	2.287	1.622	2.166	2.7919	4.801	1.745	6.751	5.4691		0.46222	9.0433
12.5042	4.558	4.305	25.772	17.745	3.759	4.402	6.171	7.47	11.144	50.47	4.98	2.459	2.504	6.279	7.206	15.479	22.679	1.898	2.368	2.279	1.816	1.731	2.8895	4.827	1.729	5.545	4.8444		0.466665	8.41885
12.6233	4.755	3.76	26.476	17.697	4.07	4.371	6.991	8.665	12.453	55.109	3.974	3.142	2.727	6.583	6.509	12.554	20.952	2.195	2.338	1.743	1.762	2.241	2.7103	5.456	1.507	6.064	3.8157		0.47111	8.54148
12.7424	3.679	4.393	29.65	17.04	4.39	4.19	7.047	9.099	13.368	50.658	5.092	3.583	2.558	6.616	6.442	12.671	21.764	2.323	2.605	2.045	1.512	1.397	2.6264	7.495	1.789	5.307	3.7587		0.475555	8.63326
12.8615	3.059	4.51	28.998	16.819	4.025	4.401	7.085	8.172	9.773	55.909	4.349	3.397	3.516	6.482	7.161	9.87	18.632	3.021	2.305	2.236	2.111	1.606	3.3722	7.061	2.02	4.307	4.4877		0.48	8.46981
12.9806	3.618	3.933	33.782	14.64	4.219	3.822	7.385	7.183	12.238	52.841	4.917	2.598	3.076	5.228	6.28	8.085	18.371	1.983	2.89	1.92	1.946	1.596	2.7674	6.344	1.525	5.128	3.3172		0.484445	8.20861
13.0997	4.316	3.872	35.56	14.461	3.839	3.778	7.04	6.895	10.334	46.814	4.493	2.861	2.36	4.73	7.375	5.971	16.211	2.597	2.456	2.401	1.768	1.411	3.7864	7.11	1.999	3.578	3.764		0.48889	7.84372
13.2188	3.275	3.846	35.2	12.367	3.379	4.16	5.571	7.468	9.212	45.167	5.585	2.783	2.579	3.328	7.976	5.418	15.746	1.945	2.414	2.007	1.345	1.033	2.4965	6.766	1.741	4.794	3.6237		0.493335	7.45279
13.3378	3.51	3.671	33.15	11.846	3.69	3.86	5.399	7.731	9.872	46.943	4.894	2.579	3.414	3.722	7.48	4.97	13.53	2.003	2.1	2.258	1.659	1.329	3.2407	6.605	1.493	4.087	3.7202		0.497776	7.36133
13.4569	3.387	3.611	30.603	11.859	2.795	3.806	5.871	7.038	10.68	45.902	4.555	2.845	3.496	3.557	6.469	4.482	15.366	1.905	1.397	1.979	1.354	1.627	2.534	6.279	1.271	4.18	4.5485		0.502221	7.16283
13.576	3.209	3.207	30.5	10.724	4.172	4.748	6.971	7.003	10.629	46.281	4.75	2.869	3.562	4.265	5.388	4.922	13.24	1.227	2.253	2.804	1.311	1.488	2.1868	6.507	1.241	4.016	4.9821		0.506665	7.20207
13.6951	3.283	3.283	28.663	9.713	4.497	5.25	5.169	7.206	9.793	44.982	4.889	2.974	2.44	3.06	5.436	4.858	10.721	1.659	1.856	2.179	1.794	1.791	2.6354	5.148	1.252	4.282	3.9202		0.51111	6.76791
13.8142	3.8	2.779	34.251	8.839	3.376	3.887	5.793	8.298	9.8	44.877	4.307	2.414	2.938	3.334	5.519	4.306	11.34	2.259	1.636	1.687	1.681	1.505	2.7987	6.206	1.105	3.537	4.4098		0.515555	6.91417
13.9333	3.693	3.003	33.538	7.921	3.662	3.02	5.794	7.993	8.033	49.22	6.017	2.37	2.729	3.405	5.717	3.932	12.786	1.401	2.012	1.783	1.749	1.957	1.6315	6.52	1.506	3.945	4.0406		0.52	7.014
14.0524	3.722	3.135	30.868	8.235	3.846	4.108	5.126	7.557	9.103	49.779	3.678	2.874	2.657	2.688	5.499	2.983	10.157	2.157	2.068	1.722	1.724	1.684	2.2752	5.379	1.375	4.095	4.3415		0.524445	6.77169
14.1715	3.926	3.709	30.511	7.343	3.676	3.737	6.164	8.622	9.555	49.383	4.782	2.014	1.952	3.741	4.367	4.113	12.687	1.607	2.141	1.914	1.99	1.097	2.6422	5.439	1.053	3.626	4.1389		0.52889	6.8863
14.2905	3.735	2.413	30.088	6.766	2.741	4.062	5.835	6.292	8.594	57.476	5.526	2.528	2.043	3.858	5.305	3.964	11.201	1.415	2.097	1.618	1.63	1.561	2.1525	6.897	0.994	4.094	4.1357		0.533331	7.00079
14.4096	2.95	4.283	27.887	7.082	3.638	3.731	5.164	7.351	9.223	57.7	4.009	2.777	2.041	3.34	4.007	3.171	10.368	1.639	3.268	1.818	1.607	1.597	2.1922	4.616	1.43	3.013	4.0835		0.537776	6.81429
14.5287	3.354	3.562	27.265	8.309	3.19	4.233	5.411	8.264	9.006	59.182	4.684	2.598	2.814	2.185	3.74	3.098	10.745	2.002	2.351	1.687	1.662	1.289	1.6711	4.241	1.425	3.482	4.1765		0.542221	6.87506
14.6478	3.854	3.681	28.701	7.543	2.937	3.476	4.828	6.387	8.23	58.126	5.238	2.74	1.848	3.051	3.246	2.873	10.446	1.314	1.708	1.04	1.499	1.684	1.8148	3.285	1.575	4.488	4.1715		0.546666	6.65868
14.7669	4.224	3.813	29.674	5.985	4.148	4.484	5.247	7.151	7.451	58.156	5.361	2.248	2.124	2.674	3.242	2.862	9.644	1.794	1.573	1.771	1.616	1.389	1.6188	3.603	1.224	3.508	2.778		0.551111	6.64307
14.886	4.071	3.523	32.005	7.483	3.976	4.429	4.608	6.44	9.03	51.494	5.524	2.167	1.881	2.537	3.697	2.384	9.688	2.24	1.672	1.928	1.88	1.388	1.6757	3.669	1.208	3.286	3.3524		0.555556	6.5643
15.0051	3.844	4.036	34.998	6.537	3.323	4.088	6.065	7.028	6.973	49.68	5.175	2.598	2.355	3.202	3.224	2.435	8.967	1.329	1.702	1.761	1.431	1.562	1.5252	3.847	1.755	3.008	3.4931		0.56	6.51634
15.1242	3.359	3.307	34.512	6.169	4.007	4.155	5.208	7.128	8.442	51.438	5.027	3.217	2.41	3.116	2.624	2.55	7.723	1.57	1.334	1.72	1.499	1.76	1.0927	3.321	1.357	2.804	3.2142		0.564445	6.44681
15.2432	3.435	3.025	31.261	5.049	3.874	4.042	4.812	6.194	6.446	45.113	4.146	2.952	2.659	2.122	2.306	2.285	7.591	1.422	1.659	1.546	1.706	1.616	1.0395	2.936	1.243	3.178	3.2295		0.568887	5.81063
15.3623	3.389	3.652	31.037	5.908	3.25	3.672	5.198	7.005	6.331	47.09	5.404	1.956	2.625	3.089	2.592	2.746	8.54	1.793	1.617	1.7	2.097	1.159	1.4701	3.494	1.829	3.23	3.3483		0.573331	6.11931
15.4814	3.053	2.916	30.044	4.166	3.252	3.17	4.263	6.404	6.766	44.678	5.499	2.848	2.241	2.948	2.045	2.183	8.6	1.55	2.236	1.901	1.348	1.523	1.3648	4.287	0.984	2.801	4.027		0.577776	5.81844
15.6005	3.272	4.023	30.985	3.695	3.514	4.463	5.403	6.956	7.709	46.372	5.374	3.416	2.814	2.265	2.112	2.553	7.549	1.601	2.43	2.361	1.771	1.932	0.9501	3.906	1.283	3.787	3.5487		0.582221	6.14981
15.7196	3.287	3.337	31.562	4.202	3.34	2.973	6.304	6.102	7.3	43.432	7.252	3.302	2.721	2.21	1.855	2.267	6.402	1.646	1.415	1.852	1.078	1.266	0.9687	3.316	1.646	3.426	2.6638		0.586666	5.81946
15.8387	3.273	3.91	32.412	4.762	3.903	3.318	4.557	6.431	7.428	43.754	6.237	3.623	1.297	2.207	2.254	2.334	5.876	2.012	1.555	1.662	1.48	1.392	1.7033	4.156	1.28	3.393	2.5486		0.591111	5.87992
15.9578	3.486	3.388	33.574	4.528	3.982	3.379	4.224	7.449	6.885	46.988	5.196	2.369	2.443	2.668	2.544	2.164	5.938	1.759	1.797	1.563	1.918	1.384	1.155	2.553	1.805	3.34	2.5752		0.595556	5.96497
16.0769	3.339	3.527	32.51	3.867	3.576	3.421	4.218	6.871	6.92	45.432	5.096	2.576	2.803	2.653	1.972	1.793	5.213	1.208	1.327	1.578	1.65	1.476	1.4076	2.262	1.375	2.479	2.255		0.600001	5.65943
16.196	3.405	3.27	28.354	5.091	3.211	2.979	3.836	7.533	6.35	44.295	6.253	3.095	2.759	2.631	2.162	2.247	6.069	1.714	0.969	1.144	1.636	1.298	2.0309	3.569	1.375	2.989	2.1294		0.604446	5.64423
16.315	3.048	4.032	28.062	4.847	3.098	3.64	3.796	6.512	7.565	46.701	6.138	2.572	2.318	2.603	2.061	1.821	7.56	1.655	0.94	1.47	1.125	1.716	1.098	4.042	1.134	3.287	2.6292		0.608887	5.75816
16.4341	3.14	3.981	26.515	4.181	3.149	3.659	4.699	7.626	7.149	45.602	7.55	2.97	2.781	2.258	2.144	1.891	5.584	2.014	1.444	1.808	1.472	0.933	1.3489	4.026	1.15	2.455	2.5374		0.613332	5.7062
16.5532	3.996	3.747	30.234	4.726	3.303	3.168	3.614	6.541	6.138	44.178	5.749	2.598	2.462	2.529	1.936	1.959	5.619	1.59	1.509	1.186	1.552	1.273	1.2174	4.336	1.348	2.311	2.5973		0.617777	5.60803
16.6723	4.134	4.787	27.137	4.182	3.234	3.148	3.393	8.423	7.04	42.032	6.68	2.435	1.747	1.944	1.992	1.737	5.618	1.11	1.666	1.242	1.256	1.084	1.3188	4.313	1.074	3.372	2.8498		0.622221	5.51661
16.7914	3.687	5.615	28.798	3.668	3.058	2.61	4.724	6.835	6.809	39.747	6.162	2.546	1.998	2.455	2.432	1.966	6.657	1.404	1.914	1.159	1.189	0.931	1.223	3.773	1.585	2.644	2.5867		0.626666	5.48799
16.9105	3.498	6.911	30.091	4.044	2.762	2.852	3.442	7.32	7.967	38.427	5.772	2.79	2.007	2.54	1.809	1.664	6.654	1.34	1.905	1.553	1.038	1.461	1.2069	3.511	1.367	2.391	2.4291		0.631111	5.50933
17.0296	3.866	5.489	30.417	3.24	3.138	2.774	3.86	6.978	5.915	38.491	7.542	2.11	2.136	1.652	2.037	2.247	6.317	1.392	1.164	1.425	1.387	1.188	1.2903	4.001	1.214	2.231	3.0985		0.635556	5.42962
17.1487	3.112	5.621	30.652	3.857	3.823	3.531	3.199	6.69	6.102	38.184	6.862	3.357	2.211	1.877	2.284	1.99	5.659	1.797	1.339	1.457	1.745	0.977	1.3781	4.417	1.097	1.971	2.6078		0.640001	5.47396
17.2677	3.388	5.909	29.511	3.57	3.459	3.122	3.961	6.202	6.4	37.367	6.795	3.058	2.625	1.877	2.271	2.028	6.827	1.573	1.061	1.387	2.044	1.161	0.9582	3.309	0.915	2.505	2.8593		0.644442	5.41269
17.3868	3.533	7.074	28.743	3.047	3.267	3.23	2.807	4.989	7.094	37.06	7.579	2.951	2.278	1.825	1.669	2.002	4.878	1.513	2.016	1.513	1.634	1.477	1.1459	3.697	1.3	2.272	2.1849		0.648887	5.2881
17.5059	3.256	5.939	27.736	3.405	3.217	3.646	3.97	5.654	5.509	33.122	8.154	2.22	2.03	2.355	1.192	2.253	4.399	1.377	1.481	1.386	1.075	0.732	1.2202	4.024	1.22	2.325	2.9177		0.653332	5.03018
17.625	3.626	6.972	28.614	4.137	2.909	3.003	3.678	4.944	7.312	32.84	6.891	2.69	2.387	2.04	1.958	2.336	5.389	1.29	0.949	1.075	0.881	0.707	0.9803	3.08	1.255	2.365	2.5254		0.657777	5.06791
17.7441	3.217	6.313	25.216	3.968	3.457	2.044	3.936	5.849	7.486	31.003	7.047	2.994	2.072	1.727	1.71	1.872	5.066	1.674	1.324	0.876	0.892	1.195	1.3976	3.555	1.339	2.221	1.9682		0.662222	4.86736
17.8632	3.249	7.306	28.658	4.212	3.232	2.56	3.187	6.099	7.096	33.206	7.449	3.198	2.211	2.172	2.325	2.193	4.685	1.753	1.344	1.497	1.403	1.405	1.2409	2.874	1.281	1.891	1.7494		0.666667	5.16579
17.9823	2.877	7.992	28.852	4.082	2.657	3.322	3.111	5.67	6.484	33.311	7.544	3.703	2.291	1.545	1.938	2.083	6.271	1.074	0.711	1.144	0.963	1.266	1.4455	2.564	1.289	1.458	2.9588		0.671112	5.13357
18.1014	2.774	8.117	29.982	3.766	3.013	3.937	2.638	5.779	7.524	32.653	7.427	2.754	1.407	2.156	1.846	3.162	4.943	1.593	1.089	1.115	1.378	1.006	1.2499	3.276	1.279	1.967	1.9524		0.675556	5.17716
18.2204	3.268	10.319	31.328	4.003	2.395	3.063	3.692	6.359	7.007	36.879	7.679	2.459	2.2	2.803	2.029	2.686	4.349	1.312	1.399	0.847	1.081	0.991	0.999	2.011	1.107	2.208	2.1924		0.679998	5.43205
18.3395	2.732	9.57	34.442	3.349	3.696	3.912	3.738	5.165	6.869	39.223	7.844	2.7	3.074	2.707	1.735	1.93	5.045	1.968	1.106	1.088	1.486	0.922	0.9905	2.309	1.488	1.722	2.3659		0.684443	5.6732
18.4586	3.456	10.504	35.918	3.303	3.43	3.639	3.116	5.705	6.292	38.273	9.128	3.356	1.87	2.235	1.807	1.982	5.486	1.412	1.458	1.117	1.283	1.329	1.1669	2.289	0.805	1.475	1.4581		0.688887	5.67752
18.5777	2.95	10.089	34.196	3.716	3.522	2.945	3.003	4.483	6.821	39.938	8.583	3.362	2.043	1.601	1.228	2.492	5.379	1.604	1.023	1.05	1.087	1.408	1.0738	2.749	1.556	1.652	2.4904		0.693332	5.63127
18.6968	3.206	13.699	34.363	3.35	2.966	4.061	3.578	4.176	6.245	40.355	8.504	3.079	1.904	2.492	1.63	1.87	4.083	1.857	1.44	0.882	1.189	1.083	1.1486	2.309	1.286	1.632	2.0942		0.697777	5.72155
18.8159	3.575	15.386	30.737	3.562	3.109	3.421	3.329	4.824	6.49	37.992	9.973	3.132	1.951	1.81	1.326	1.627	4.363	1.909	1.501	1.315	1.037	0.913	1.7138	2.886	1.063	0.985	2.1678		0.702222	5.63324
18.935	3.909	18.284	33.854	4.007	3.625	2.275	3.189	4.206	6.118	37.681	9.083	3.413	1.849	1.498	2.621	2.13	5.125	1.899	1.001	1.357	1.16	1.166	0.9882	2.162	1.49	1.479	1.8125		0.706667	5.82895
19.0541	2.307	21	31.513	2.81	3.536	2.721	3.812	4.111	6.505	37.548	9.881	2.96	1.389	1.844	2.23	2.25	4.341	1.689	1.646	0.77	1.142	1.1	0.9644	2.62	1.171	1.467	1.0028		0.711112	5.71593
19.1731	3.126	22.431	31.662	3.667	3.105	3.729	3.047	3.908	6.168	38.754	9.993	3.031	1.362	1.481	2.125	2.834	4.659	1.873	1.03	0.998	0.877	0.997	1.2727	1.446	1.394	1.183	1.4906		0.715553	5.83864
19.2922	2.591	22.325	35.274	3.663	4.506	2.764	3.082	3.661	5.61	40.394	8.908	2.665	2.143	1.908	1.634	2.274	4.809	1.719	1.25	1.322	1.094	1.067	0.6482	1.954	1.49	0.913	1.7013		0.719998	5.97665
19.4113	2.593	24.508	32.576	3.342	3.698	3.066	4.171	4.313	6.469	40.727	10.197	3.725	2.998	1.839	1.592	2.07	5.766	1.825	1.092	0.978	1.479	0.978	1.1215	1.593	1.277	1.253	1.302		0.724443	6.16846
19.5304	3.294	24.764	34.552	3.699	4.109	2.753	3.075	3.775	5.725	43.609	11.572	2.354	1.877	1.914	1.787	2.194	4.095	1.477	1.093	1.159	1.388	1.21	1.0777	2.21	1.234	1.361	1.8563		0.728888	6.26719
19.6495	3.231	29.12	35.348	4.734	4.022	3.162	2.664	4.212	4.349	45.482	9.908	2.94	2.174	1.924	1.864	2.165	4.935	1.594	0.842	1.144	1.359	0.783	1.0585	2.519	1.811	0.922	1.9282		0.733333	6.52573
19.7686	2.734	30.085	32.688	3.488	3.87	2.731	2.809	3.727	4.293	44.139	11.215	2.905	1.536	2.321	2.076	1.978	5.715	1.892	1.096	0.842	1.315	1.086	1.6189	1.893	1.183	0.959	1.8823		0.737777	6.37323
19.8877	2.891	28.396	32.74	3.432	3.424	2.77	3.47	3.957	4.71	47.895	11.589	3.248	1.846	1.834	1.32	1.83	4.557	2.195	1.32	1.117	1.391	0.803	0.7107	2.007	1.021	0.9	1.9823		0.742222	6.42059
20.0068	2.864	23.479	36.511	3.198	3.324	3.315	3.151	4.349	4.812	49.104	9.853	2.726	1.679	1.332	1.607	2.175	4.622	1.815	1.569	0.967	1.334	0.789	1.0148	2.179	1.031	1.165	1.9185		0.746667	6.36605
20.1259	3.251	22.072	37.469	3.492	2.937	3.498	3.371	4.081	4.191	46.066	9.827	2.256	1.945	1.947	0.93	1.573	4.987	1.328	1.204	1.572	0.977	0.854	0.8548	1.776	0.879	1.037	1.8323		0.751112	6.15582
20.2449	2.763	21.563	35.651	3.634	3.172	3.137	3.304	4.417	4.298	47.058	11.057	2.678	1.994	1.448	1.816	2.671	5.069	1.97	0.881	1.312	0.69	0.652	0.8263	2.037	1.015	1.477	1.5809		0.755553	6.22856
20.364	2.739	19.045	38.868	4.152	2.925	2.572	2.931	4.041	5.49	44.956	11.905	2.8	1.78	1.905	1.712	1.982	4.998	2.496	1.206	1.374	1.201	0.935	1.1523	2.244	1.043	1.148	1.4809		0.759998	6.26227
20.4831	3.464	18.876	38.501	3.313	3.318	3.897	2.495	4.22	4.065	43.576	12.306	2.606	2.072	1.753	2.123	2.01	4.844	2.533	1.416	1.33	1.286	1.906	0.4142	1.838	1.277	0.861	1.9723		0.764443	6.23231
20.6022	2.73	17.807	39.065	3.266	2.682	2.866	2.59	4.435	3.75	42.518	10.874	3.188	2.351	2.104	1.839	1.843	5.084	2.161	1.621	1.163	0.63	0.981	1.0102	1.983	1.541	0.904	1.4681		0.768888	6.01683
20.7213	3.519	21.169	35.095	3.93	3.447	3.511	3.377	4.213	5.333	40.749	12.393	3.37	1.407	2.011	1.516	1.915	4.854	1.737	1.247	1.183	1.436	0.913	0.7335	1.383	0.843	1.133	2.2006		0.773333	6.09697
20.8404	4.059	24.471	37.483	4.152	3.24	2.47	3.195	2.877	5.115	42.29	15.056	4.118	1.195	2.62	1.54	2.564	4.242	2.94	0.98	0.87	1.149	0.426	0.8313	1.353	0.555	1.111	1.8242		0.777778	6.39728
20.9595	4.224	21.42	38.974	3.632	4.009	4.707	2.679	3.697	4.788	36.106	16.176	2.852	1.668	2.098	1.434	1.429	5.297	2.711	0.871	0.787	1.445	0.548	1.0949	1.367	1.129	1.152	1.3889		0.782223	6.21051
21.0786	3.257	23.724	36.877	4.548	3.884	3.806	2.102	3.691	3.995	34.794	14.73	3.7	1.814	1.767	1.032	2.392	3.966	2.774	1.053	1.533	1.437	0.875	0.9035	1.467	1.329	1.028	1.1188		0.786668	6.05916
21.1976	4.441	21.214	40.888	4.387	3.045	4.646	2.829	3.848	5.885	34.992	15.933	3.506	1.266	2.045	1.438	2.059	4.334	2.709	1.978	1.068	1.048	1.218	0.8139	0.93	1.076	1.321	1.6198		0.791109	6.31621
21.3167	4.15	20.386	42.84	4.681	4.115	3.667	2.9	3.877	4.43	30.676	16.658	3.345	1.499	1.383	1.626	2.112	3.912	2.939	1.845	1.314	0.969	1.15	0.5782	1.129	0.81	0.7	1.386		0.795554	6.11397
21.4358	4.663	21.123	37.645	5.96	4.564	4.139	3.541	4.496	3.828	29.925	17.792	3.454	2.065	1.527	1.738	1.814	4.463	2.832	1.449	1.899	1.022	1.239	1.0828	1.425	1.188	0.584	1.015		0.799999	6.16566
21.5549	3.212	20.546	41.165	4.381	5.1	2.684	2.586	3.054	4.286	25.279	15.904	3.894	2.512	1.45	1.857	2.561	3.889	2.939	1.16	1.206	0.787	0.942	0.9552	1.162	0.939	1.255	1.3414		0.804443	5.81654
21.674	4.343	22.754	45.61	5.741	4.896	4	3.49	3.648	4.782	25.661	17.395	3.665	1.545	1.636	1.252	2.05	3.993	3.015	1.238	1.102	0.985	1.263	1.083	1.017	0.893	1.075	1.4138		0.808888	6.27947
21.7931	5.011	21.727	46.21	5.01	5.03	4.192	3.882	3.419	6.349	26.139	19.038	3.994	2.173	1.352	1.579	1.978	4.239	3.802	0.932	1.462	0.737	0.965	0.6469	0.978	1.134	1.492	1.4793		0.813333	6.47964
21.9122	5.078	21.116	46.942	4.722	5.341	5.136	3.974	3.723	7.009	20.973	22.045	4.806	2.35	1.962	1.862	1.927	3.762	3.612	1.365	1.336	1.251	0.961	0.8432	1.043	1.074	1.176	0.9178		0.817778	6.52989
22.0313	4.508	21.725	46.906	4.763	5.957	4.088	3.73	3.486	8.159	17.685	22.076	4.361	2.036	1.344	1.523	2.347	3.562	3.499	1.338	1.596	1.233	0.496	0.8751	0.965	1.344	1.617	1.4405		0.822223	6.3948
22.1503	5.226	20.964	45.157	5.123	7.092	5.775	4.18	3.391	10.415	14.522	21.207	4.64	1.875	1.604	1.35	2.26	3.627	3.519	1.509	1.039	0.948	0.849	1.0897	1.84	1.375	1.318	1.538		0.826664	6.42343
22.2694	4.55	19.714	44.469	5.229	9.052	6.908	5.496	4.541	10.144	12.485	19.865	5.07	2.783	1.117	1.132	2.297	3.72	3.73	1.54	1.629	1.402	1.34	0.9582	1.202	1.914	0.641	1.4727		0.831109	6.45929
22.3885	6.033	19.389	43.295	4.767	11.242	7.011	5.899	4.617	11.939	11.597	20.868	3.728	1.526	1.947	1.578	2.46	3.875	3.547	1.334	0.768	0.933	1.243	0.8652	1.355	1.595	1.052	1.2374		0.835554	6.50743
22.5076	6.317	17.772	44.17	6.388	10.826	7.498	4.679	4.398	9.731	10.66	19.576	4.9	1.752	1.367	1.498	2.364	3.05	4.194	0.97	1.243	1.414	0.913	1.223	1.245	1.221	0.72	1.5746		0.839999	6.35791
22.6267	6.469	18.874	43.22	6.862	8.207	8.261	5.221	5.166	9.637	11.017	17.756	4.204	2.078	1.423	1.435	2.213	2.848	3.725	1.028	1.289	1.118	1.111	0.8304	1.172	1.584	1.072	1.1362		0.844444	6.25765
22.7458	7.724	19.249	47.955	6.58	7.03	6.929	5.695	6.201	8.655	9.096	16.348	4.329	1.682	1.498	1.636	2.287	2.865	3.653	1.294	1.244	1.268	1.07	1.1457	1.382	1.277	1.039	0.7514		0.848889	6.29197
22.8649	7.242	21.476	51.768	7.609	7.188	6.362	7.524	6.108	7.21	9.389	16.459	4.751	1.646	1.696	1.548	2.58	3.36	3.869	1.509	1.052	1.176	1.422	1.4238	1.672	1.348	1.221	0.8381		0.853333	6.64618
22.984	8.734	19.875	50.607	8.225	8.325	5.958	5.749	6.329	5.443	7.156	17.608	5.839	1.711	1.591	1.547	2.272	3.377	3.863	1.546	1.406	0.869	0.84	1.1101	1.369	0.97	1.017	0.5663		0.857778	6.44083
23.103	8.708	23.235	53.43	11.461	9.526	7.155	4.848	9.714	5.95	7.345	15.675	6.351	1.799	1.29	1.923	2.593	2.923	3.193	1.301	1.204	1.037	1.409	0.8635	1.718	1.212	0.956	0.7971		0.86222	6.94876
23.2221	11.731	26.914	55.069	17.626	8.259	5.25	4.425	7.914	4.821	5.956	15.658	6.834	1.66	1.511	2.254	2.612	2.191	3.109	1.875	0.877	1.474	1.277	0.6838	1.063	1.699	1.444	0.687		0.866664	7.21755
23.3412	12.767	32.102	60.015	23.04	8.495	3.478	5.587	8.207	4.333	5.605	14.43	7.424	1.984	1.837	2.537	2.402	2.429	3.423	1.596	0.987	0.685	1.653	0.8197	0.942	1.735	1.154	0.7988		0.871109	7.79502
23.4603	17.12	36.967	65.267	26.14	5.328	2.879	4.074	8.006	3.761	5.022	13.829	7.37	2.079	1.787	1.956	2.21	2.394	3.399	2.166	0.933	1.106	1.798	1.2021	1.06	1.312	0.932	0.7735		0.875554	8.18039
23.5794	20.897	48.565	71.953	22.084	4.352	1.718	3.901	7.735	3.369	5.658	11.494	7.379	1.925	2.319	2.313	2.331	1.85	3.517	2.216	0.942	1.568	1.466	0.9836	1.43	1.65	1.285	0.6591		0.879999	8.72443
23.6985	30.09	53.588	74.393	17.583	3.045	1.405	4.489	8.001	3.036	3.933	10.943	7.602	2.218	1.407	1.79	2.44	2.031	3.495	2.389	1.286	1.235	1.519	1.3675	1.352	1.47	1.013	0.9866		0.884444	9.041
23.8176	37.292	57.783	70.432	14.168	1.86	2.06	4.38	7.98	2.99	3.527	9.99	6.909	2.153	1.91	1.883	1.973	1.613	2.638	2.008	1.148	1.611	1.361	1.0989	1.47	1.208	0.668	0.9832		0.888889	9.0036
23.9367	43.706	67.498	62.379	11.761	1.637	1.805	3.869	6.812	2.054	2.673	8.65	9.046	2.532	1.526	2.286	2.043	1.975	2.054	2.181	2.063	1.19	1.806	1.3463	1.315	1.364	1.219	0.8055		0.893334	9.17021
24.0558	50.496	69.841	54.381	10.469	1.359	1.014	3.572	4.918	1.544	3.077	7.393	9.265	2.167	1.812	1.93	1.903	1.66	2.448	2.34	1.555	0.93	1.862	1.2324	1.444	1.625	0.974	0.7293		0.897779	8.96077
24.1748	60.882	70.219	41.557	8.581	0.759	1.379	2.905	4.374	1.677	2.041	5.944	7.907	2.158	2.528	1.662	2.907	1.184	2.39	2.124	2.425	1.753	1.133	1.0223	1.375	1.212	0.869	0.786		0.90222	8.65753
24.2939	75.036	62.913	33.29	7.046	0.675	0.788	2.977	3.386	1.383	2.094	6.153	10.926	2.756	2.253	2.279	2.182	1.005	2.441	2.12	2.531	1.193	1.445	0.9829	0.991	1.123	1.829	1.0196		0.906665	8.62287
24.413	72.762	49.665	20.237	4.744	0.916	1.221	2.295	2.221	1.248	1.019	4.993	10.115	2.398	2.389	2.238	1.561	0.851	2.168	2.734	1.669	1.841	1.267	0.7231	1.264	1.434	0.959	0.7883		0.91111	7.2489
24.5321	72.77	37.821	10.733	3.512	1.031	0.856	2.563	2.781	1.096	0.958	4.213	9.073	2.788	2.472	2.449	1.991	1.028	2.408	2.735	2.074	1.975	1.577	0.6571	1.157	0.922	0.71	0.6951		0.915555	6.40908
24.6512	68.557	24.876	6.141	2.089	0.805	0.749	2.146	2.137	1.064	1.113	4.195	8.623	3.481	2.467	1.681	2.517	1.047	1.46	2.181	1.68	1.664	1.344	0.5671	1.817	0.927	1.005	0.8131		0.919999	5.44986
24.7703	51.462	18.603	2.787	1.406	0.366	0.619	1.424	2.118	0.822	0.879	3.349	9.432	2.962	2.271	3.199	2.324	1.106	1.29	2.626	2.349	1.775	1.384	0.5449	1.248	1.31	1.504	0.8728		0.924444	4.44566
24.8894	41.156	10.953	1.27	0.905	0.513	0.597	0.791	1.781	0.824	0.884	3.378	7.893	3.855	2.05	3.173	1.776	0.845	1.619	2.281	1.597	1.778	1.287	0.2686	1.244	1.191	0.57	0.6992		0.928889	3.52514
25.0085	31.778	7.55	1.217	1.112	0.209	0.483	1.207	1.783	0.847	0.514	3.573	6.786	3.71	2.26	2.473	2.218	0.715	0.943	2.451	1.82	2.13	1.2	0.3489	1.527	1.011	0.732	0.6576		0.933334	3.00946
25.1275	27.956	2.689	1.046	0.791	0.115	0.529	0.7	1.441	0.603	0.756	2.595	7.469	6.839	1.857	3.672	1.773	0.828	1.079	2.925	2.488	2.122	1.25	0.2595	1.656	1.417	1.05	0.6039		0.937775	2.83368
25.2466	23.483	1.907	0.796	0.593	0.407	0.372	0.641	1.541	0.573	0.52	1.977	5.856	7.122	2.462	4.113	2.13	0.726	1.086	3.025	1.936	1.705	1.325	0.2547	1.456	1.733	0.757	0.4699		0.94222	2.55432
25.3657	19.227	1.278	1.13	0.465	0.342	0.075	0.718	1.536	0.527	0.503	2.029	5.787	7.929	2.37	4.263	1.579	0.148	0.853	2.494	2.503	1.803	1.269	0.3509	1.724	1.085	0.964	0.81		0.946665	2.36155
25.4848	15.168	0.71	0.736	0.321	0.259	0.433	0.795	0.843	0.297	0.27	1.427	3.758	9.376	2.666	4.458	1.174	0.43	1.256	1.913	2.214	2.004	0.846	0.467	1.127	0.922	0.526	0.5671		0.95111	2.03567
25.6039	12.242	1.164	0.694	0.293	0.219	0.515	0.825	0.574	0.457	0.378	0.997	3.653	9.75	2.653	4.886	1.371	0.656	0.868	2.863	2.966	1.936	1.029	0.508	1.477	0.759	0.938	0.7218		0.955555	2.05159
25.723	7.716	0.873	0.448	0.614	0.286	0.199	0.554	0.816	0.429	0.263	1.081	3.622	8.028	2.912	4.577	0.986	0.412	0.655	1.712	2.944	2.214	0.794	0.3266	1.452	1.092	1.019	0.676		0.96	1.72965
25.8421	5.675	0.872	0.438	0.287	0.178	0.189	0.442	0.555	0.147	0.659	1.287	2.437	7.087	2.756	3.733	0.904	0.6	0.82	2.231	2.424	1.848	0.789	0.685	1.491	1.656	0.926	0.6901		0.964445	1.54837
25.9612	4.023	0.475	0.222	0.163	0.213	0.315	0.269	0.493	0.354	0.615	1.313	3.3	6.619	3.119	2.483	0.605	0.291	0.51	2.147	2.638	2.1	0.312	0.5627	1.71	1.167	0.872	0.0906		0.968889	1.36968
26.0802	2.734	0.479	0.43	0.323	0.121	0.096	0.443	0.631	0.051	0.166	0.655	1.579	5.301	3.95	2.403	0.542	0.276	0.68	1.442	1.587	1.634	0.713	0.7487	1.21	1.16	0.628	0.626		0.973331	1.13366
26.1993	2.412	0.374	0.557	0.295	0.157	0.166	0.492	0.324	0.351	0.326	0.862	1.231	2.892	3.32	1.511	0.319	0.28	0.31	1.645	1.304	1.504	0.576	0.3563	1.048	0.547	0.677	0.5239		0.977776	0.90223
26.3184	1.616	0.218	0.152	0.23	0.016	0.113	0.18	0.274	0.149	0.258	0.441	1.403	1.909	3.577	1.629	0.428	0.257	0.424	1.712	1.484	1.758	0.504	0.1933	0.997	1.673	0.922	0.3645		0.98222	0.847474
26.4375	1.477	0.15	0.194	0.208	0.094	0.227	0.294	0.286	0.18	0.651	0.584	1.315	1.804	2.722	1.368	0.491	0.196	0.295	1.761	1.235	1.754	0.663	0.4244	0.711	0.685	0.627	0.3326		0.986665	0.767741
26.5566	0.922	0.441	0.457	0.1	0.074	0.155	0.156	0.186	0.483	0.343	0.193	1.516	1.639	2.346	1.205	0.474	0.073	0.203	1.856	1.55	0.976	0.407	0.3495	1.023	0.669	0.643	0.4487		0.99111	0.699563
26.6757	0.364	0.649	0.387	0.182	0.257	0.122	0.286	0.168	0.279	0.284	0.183	0.775	1.484	1.806	0.774	0.29	0.159	0.737	1.69	1.416	1.075	0.685	0.37	0.977	1.11	0.906	0.2387		0.995555	0.653841
26.7948	0.633	0.339	0.427	0.32	0.014	0.006	0.41	0.102	0.154	0.291	0.617	0.901	1.398	1.845	1.074	0.384	0.291	0.396	1.15	1.017	0.718	0.645	0.2333	0.772	0.803	0.75	0.2612		1	0.590796

## Sheet: Image16
X0	Y0	Y1	Y2	Y3	Y4	Y5	Y6	Y7	Y8	Y9	Y10	Y11	Y12	Y13	Y14	Y15	Y16	Y17		Ap-basal	Avg int
0	13.69	9.643	24.027	29.946	53.554	53.666	56.925	39.288	25.912	36.416	27.738	37.925	47.632	36.061	37.381	25.826	33.574	49.964		0	35.5093
0.1191	13.131	12.655	27.492	33.201	68.671	66.814	67.596	50.231	29.606	46.752	32.683	40.162	59.63	40.679	40.135	26.441	38.161	58.523		0.00434827	41.8091
0.2382	20.798	12.9	42.651	34.97	71.567	72.673	78.332	52.11	35.957	53.59	37.55	47.266	69.432	48.243	51.616	31.126	39.651	64.735		0.00869654	48.0648
0.3573	30.737	14.364	58.409	41.495	84.589	75.658	80.64	65.818	39.334	68.936	38.057	52.142	76.677	62.281	61.115	37.634	44.964	71.323		0.0130448	55.7874
0.4764	51.099	19.196	87.448	45.337	91.604	82.189	91.487	75.046	42.645	83.784	46.666	56.99	85.533	82.325	75.284	44.727	51.754	83.277		0.0173931	66.4662
0.5954	87.255	26.299	112.644	52.878	107.645	86.615	92.314	86.551	61.205	108.715	51.18	87.707	98.236	103.432	102.612	60.155	54.469	82.374		0.0217377	81.2381
0.7145	133.61	37.337	149.609	60.21	114.505	97.614	95.937	104.049	72.592	144.813	58.561	110.194	109.932	123.688	127.832	85.386	68.793	90.125		0.026086	99.1548
0.8336	186.326	71.428	182.052	71.018	123.224	109.916	98.23	119.205	103.202	167.603	73.671	147.914	108.063	132.768	145.131	109.127	84.465	102.457		0.0304342	118.656
0.9527	229.763	119.69	198.416	85.083	136.281	125.45	106.044	134.025	132.639	199.845	98.977	197.185	119.348	154.855	182.795	141.76	100.096	113.703		0.0347825	143.109
1.0718	244.668	178.299	218.601	101.736	146.385	137.481	117.072	156.086	153.517	221.97	124.304	221.046	126.567	166.576	196.564	175.357	121.005	110.605		0.0391308	162.102
1.1909	252.592	219.2	212.865	114.533	167.659	142.641	140.189	178.457	187.095	232.816	160.544	238.252	128.334	172.642	212.806	199.874	144.544	120.751		0.0434791	179.211
1.31	251.692	243.491	209.757	129.226	187.534	158.993	161.415	203.384	210.049	243.002	209.857	237.818	129.513	184.726	227.587	220.181	172.34	127.139		0.0478273	194.872
1.4291	252.291	250.299	191.747	146.391	207.606	179.013	184.746	224.413	224.806	244.822	237.797	232.455	131.105	195.126	231.728	236.017	200.964	130.191		0.0521756	205.64
1.5481	245.067	249.719	170.425	160.78	218.577	197.658	198.545	240.529	235.713	244.135	250.015	203.147	146.474	203.21	230.567	241.436	220.882	124.921		0.0565202	210.1
1.6672	222.504	245.905	136.819	183.683	222.719	199.969	210.361	243.144	249.671	241.519	253.075	165.327	160.73	201.154	228.243	240.234	222.962	134.026		0.0608685	209.002
1.7863	174.355	237.271	121.897	202.702	222.804	205.45	230.824	236.475	250.307	233.473	250.814	121.488	170.252	197.767	213.035	232.225	223.9	132.131		0.0652168	203.176
1.9054	138.723	204.734	102.149	205.594	227.781	213.702	239.863	217.558	245.035	204.735	242.717	87.932	177.777	198.377	193.583	207.941	212.818	127.024		0.069565	191.558
2.0245	103.671	166.16	83.234	219.671	235.122	226.984	244.032	193.753	224.155	179.758	221.525	63.561	176.07	202.263	178.189	177.541	188.303	126.503		0.0739133	178.361
2.1436	84.768	123.259	65.773	227.795	240.097	227.051	242.949	163.838	211.806	163.042	188.933	48.416	192.078	192.664	155.513	149.569	139.554	112.905		0.0782616	162.778
2.2627	73.18	102.277	57.74	229.485	245.676	237.208	245.341	134.639	178.509	138.565	140.319	35.319	198.102	181.862	147.091	123.981	105.318	118.759		0.0826098	149.632
2.3818	62.272	76.949	43.693	228.168	251.457	239.198	241.783	115.277	161.36	112.698	109.108	25.692	203.092	167.731	135.091	112.255	81.354	115.293		0.0869581	137.915
2.5008	53.015	73.169	42.159	220.154	252.057	242.498	238.775	91.879	116.88	83.332	82.482	19.013	211.414	153.926	118.399	99.391	62.457	112.327		0.0913027	126.296
2.6199	50.122	61.752	35.146	212.921	252.302	243.458	233.409	69.949	86.48	67.704	58.682	14.489	208.721	139.53	100.227	79.626	44.389	103.966		0.095651	114.604
2.739	39.193	48.269	30.248	189.812	251.247	245.323	219.513	53.199	71.975	53.48	45.217	10.428	193.587	117.458	77.507	64.155	36.323	86.91		0.0999993	101.88
2.8581	38.374	43.096	28.159	162.968	243.67	247.63	194.293	36.4	54.903	43.338	41.481	7.847	182.885	100.565	65.717	45.923	28	65.048		0.104348	90.5721
2.9772	31.394	33.978	22.33	143.226	228.081	240.86	162.603	27.642	46.945	40.399	30.905	7.715	182.138	82.925	57.459	33.853	22.359	35.555		0.108696	79.4648
3.0963	29.301	31.85	22.988	131.387	199.126	239.286	128.968	20.218	34.799	34.113	25.064	6.053	176.314	67.4	44.314	22.922	18.851	24.756		0.113044	69.8728
3.2154	21.777	26.324	21.56	110.247	165.305	222.513	97.489	14.181	27.652	27.809	20.558	4.976	157.385	59.448	38.729	15.463	16.169	15.16		0.117392	59.0414
3.3345	20.549	24.793	18.238	86.033	126.221	195.505	74.543	14.567	24.67	22.005	16.533	4.958	150.032	51.043	31.033	13.301	13.266	12.706		0.121741	49.9998
3.4535	20.223	24.181	19.64	64.664	85.922	164.702	53.204	11.93	19.715	19.104	12.566	4.28	125.194	44.643	24.103	9.008	11.613	10.432		0.126085	40.2847
3.5726	15.89	22.229	13.965	50.369	55.339	128.573	37.889	10.587	17.921	15.372	12.988	4.139	103.13	38.177	18.843	7.421	8.567	10.45		0.130434	31.7694
3.6917	15.644	21.379	11.124	38.401	33.645	87.475	29.629	9.35	11.454	11.845	11.458	4.504	81.841	36.4	12.178	7.14	8.018	10.494		0.134782	24.5544
3.8108	12.994	17.006	10.696	29.907	25.419	62.001	22.293	10.809	11.21	11.546	9.526	4.3	61.898	31.689	11.29	5.772	7.929	10.335		0.13913	19.8122
3.9299	13.537	15.662	8.686	25.384	18.738	45.453	19.408	7.926	9.008	7.192	6.278	3.777	48.352	30.395	7.467	5.913	6.382	10.934		0.143478	16.1384
4.049	12.876	13.211	7.89	20.939	13.465	28.576	18.897	8.588	7.278	5.823	5.665	3.322	43.119	26.592	6.509	3.847	7.108	8.594		0.147827	13.4611
4.1681	12.118	11.138	7.086	18.271	12.318	19.611	17.951	7.467	7.359	5.223	5.267	2.861	33.739	21.337	6.569	5.068	5.326	9.123		0.152175	11.5462
4.2872	7.957	9.59	4.507	15.599	10.29	16.364	16.183	7.353	5.863	4.749	4.24	3.077	26.668	19.484	5.104	5.051	5.34	10.833		0.156523	9.90289
4.4063	7.27	9.348	6.763	15.312	8.792	10.998	16.069	7.084	5.696	4.212	5.518	4.639	20.246	16.789	4.254	5.154	5.707	8.566		0.160871	9.02317
4.5253	5.182	8.328	4.33	14.499	8.826	10.129	16.887	7.873	4.52	4.8	3.678	3.269	20.686	15.599	3.434	4.556	6.059	7.994		0.165216	8.36939
4.6444	4.774	8.577	5.404	16.059	8.886	10.125	16.177	6.82	5.412	3.521	3.376	2.569	18.198	14.766	3.63	5.038	5.7	10.796		0.169564	8.32378
4.7635	4.925	7.413	3.569	15.707	6.937	9.351	15.068	6.714	3.611	3.077	4.748	3.301	18.801	9.549	3.019	4.317	5.234	9.215		0.173913	7.47533
4.8826	4.539	6.317	4.985	14.294	7.325	8.387	14.138	7.381	4.172	3.232	4.479	3.25	14.436	10.87	2.977	4.286	3.918	11.157		0.178261	7.23017
5.0017	3.836	5.636	4.485	13.314	7.963	8.882	15.356	7.47	4.019	3.611	3.006	2.797	15.659	8.773	3.27	4.481	7.545	9.658		0.182609	7.20894
5.1208	3.016	3.619	5.59	14.841	6.682	8.151	14.247	5.536	3.308	3.278	3.426	4.079	13.813	6.701	3.857	4.801	6.502	9.225		0.186957	6.704
5.2399	3.318	3.343	3.703	16.835	7.728	7.071	16.539	6.486	3.585	2.936	3.122	2.405	10.746	5.251	2.736	2.95	7.141	7.992		0.191306	6.32706
5.359	2.36	2.688	5.632	13.195	6.892	6.741	15.812	7.039	4.085	2.832	3.268	2.408	12.168	4.911	2.893	4.944	4.843	9.651		0.195654	6.24233
5.478	2.825	2.794	6.025	13.085	5.545	6.552	15.187	6.245	3.256	2.273	3.451	3.405	10.967	4.439	2.602	3.623	6.589	9.005		0.199999	5.99267
5.5971	2.237	2.413	5.252	15.128	5.988	6.857	13.303	6.81	3.457	2.683	3.375	2.697	11.822	4.821	3.707	4.128	7.097	9.714		0.204347	6.19383
5.7162	2.862	2.211	6.881	12.885	6.867	6.925	13.699	6.89	2.849	2.333	3.595	3.885	10.736	3.731	2.858	6.294	6.119	9.541		0.208695	6.17561
5.8353	2.286	2.509	6.327	12.151	6.634	6.262	13.737	5.543	3.34	2.098	3.264	3.435	10.822	4.493	3.381	4.234	6.063	7.842		0.213043	5.80117
5.9544	3.208	2.713	7.305	15.161	5.932	6.205	13.656	5.811	3.617	1.877	2.859	3.887	7.836	3.141	3.484	3.681	6.611	9.493		0.217392	5.91539
6.0735	3.072	2.821	6.282	15.161	5.845	6.024	13.597	6.488	3.032	2.921	3.832	3.263	11.279	4.34	2.846	3.67	5.115	10.093		0.22174	6.09339
6.1926	2.313	3.135	7.119	14.573	6.378	6.762	13.302	6.476	3.476	2.763	2.763	2.557	11.976	3.643	3.769	5.304	6.963	10.162		0.226088	6.30189
6.3117	3.051	2.416	4.942	14.563	7.072	6.385	12.801	7.755	3.031	2.794	2.891	3.31	10.572	4.049	3.336	4.157	6.253	8.556		0.230436	5.99633
6.4307	1.815	2.758	6.611	14.713	4.908	6.851	14.824	7.49	2.661	2.695	2.784	3.117	11.076	3.176	2.552	2.877	6.43	10.323		0.234781	5.98117
6.5498	1.997	2.916	6.834	15.806	5.197	5.669	16.627	8.445	4.489	2.787	3.538	4.096	9.621	4.337	3.413	4.146	7.727	11.582		0.239129	6.62372
6.6689	2.577	1.955	7.459	15.486	5.086	6.144	14.466	7.082	3.707	2.334	2.461	3.697	10.321	3.879	2.452	3.741	6.705	8.729		0.243478	6.01561
6.788	2.389	2.396	5.382	16.759	5.723	6.4	16.467	8.647	3.56	2.513	3.398	4.55	10.108	3.914	4.02	4.388	7.899	10.072		0.247826	6.58806
6.9071	2.863	1.669	6.476	14.874	6.35	6.129	16.488	10.184	2.398	2.558	3.221	3.007	9.799	3.903	2.752	4.066	6.854	12.627		0.252174	6.45656
7.0262	2.716	2.358	7.153	18.196	7.022	6.529	16.27	9.901	3.153	2.39	2.367	3.218	10.347	3.904	2.844	3.851	6.714	13.078		0.256522	6.77839
7.1453	2.114	2.752	6.81	18.884	6.329	6.39	16.371	9.629	2.662	1.822	2.943	3.967	8.67	3.555	3.146	4.036	7.764	14.371		0.260871	6.78972
7.2644	1.905	3.211	7.68	20.023	7.389	6.494	16.94	11.833	3.241	3.025	2.971	3.691	8.183	4.243	3.423	5.473	7.114	17.056		0.265219	7.43861
7.3834	2.294	3.33	8.731	19.552	8.06	6.706	17.252	12.399	4.137	2.944	2.754	4.36	9.075	4.443	3.407	5.681	6.931	18.31		0.269564	7.79811
7.5025	2.691	2.138	7.096	19.753	8.187	8.169	21.465	16.884	2.963	2.09	3.507	4.006	9.958	3.151	2.351	5.545	6.171	17.649		0.273912	7.98744
7.6216	2.225	1.989	8.218	18.841	8.579	7.755	23.275	17.201	3.71	3.157	2.7	4.352	9.418	3.2	3.587	4.706	7.103	16.954		0.27826	8.165
7.7407	2.896	2.098	7.08	21.475	9.104	9.027	21.624	18.134	3.043	2.305	3.152	4.459	9.418	3.878	2.965	4.357	7.067	18.101		0.282608	8.3435
7.8598	2.84	2.947	7.502	20.228	12.24	9.207	25.617	18.233	3.464	3.339	3.336	4.306	7.686	3.577	2.977	3.863	7.207	15.072		0.286957	8.53561
7.9789	2.782	3.361	7.715	23.066	12.229	9.944	26.162	18.908	4.289	2.498	2.295	4.423	9.239	5.135	3.842	4.934	5.767	14.751		0.291305	8.96333
8.098	2.516	3.168	8.758	28.343	13.514	11.549	28.522	17.8	3.492	2.429	3.033	4.725	9.344	3.419	2.518	4.754	7.89	15.248		0.295653	9.50122
8.2171	2.915	2.804	8.375	32.754	13.6	10.805	32.121	20.881	3.155	2.593	2.308	4.037	11.575	3.123	3.053	4.699	6.398	15.297		0.300001	10.0274
8.3362	2.161	1.996	8.196	30.798	16.187	10.334	32.307	24.162	4.099	3.114	2.961	5.072	13.356	4.657	3.766	3.7	6.768	16.405		0.30435	10.5577
8.4552	2.26	2.772	8.401	35.081	17.853	9.267	31.817	22.375	3.483	3.471	2.918	5.288	12.125	3.065	4.099	5.158	5.66	18.289		0.308694	10.7434
8.5743	2.422	3.679	7.699	32.44	16.957	12.667	35.002	26.36	3.583	2.942	2.845	5.595	11.399	3.896	3.491	4.685	6.529	21.488		0.313043	11.3155
8.6934	2.61	3.113	8.329	32.997	21.392	12.176	43.89	26.548	3.875	2.874	2.928	6.435	12.659	5.083	4.064	4.708	8.242	21.272		0.317391	12.3997
8.8125	2.607	2.885	7.667	29.364	24.665	16.462	40.574	25.264	3.863	2.732	3.006	6.194	13.964	4.205	3.191	4.248	6.649	25.931		0.321739	12.4151
8.9316	2.362	3.024	7.255	28.989	26.253	17.29	36.925	25.054	5.37	2.272	2.285	5.672	14.762	4.074	3.3	3.572	5.91	28.284		0.326087	12.3696
9.0507	2.943	2.294	7.07	32.219	28.49	20.53	39.988	24.886	4.811	2.442	3.153	6.597	16.831	4.791	3.652	5.45	5.841	28.094		0.330436	13.3379
9.1698	2.885	2.525	6.889	34.971	28.529	24.168	36.198	26.164	4.1	3.069	2.43	5.485	20.133	4.464	3.493	3.645	5.546	37.078		0.334784	13.9873
9.2889	2.925	2.433	8.317	39.253	27.113	24.888	35.539	23.52	4.861	2.337	2.331	4.805	21.451	4.823	3.241	4.117	5.935	43.507		0.339132	14.522
9.4079	2.746	2.476	9.362	39.907	24.438	24.332	33.45	18.829	5.036	2.643	3.548	4.967	29.829	4.681	3.618	5.35	5.641	53.715		0.343477	15.2538
9.527	3.129	2.67	9.545	41.708	19.978	26.271	37.78	18.179	3.996	3.274	3.193	4.598	31.039	4.41	3.541	4.589	5.75	58.109		0.347825	15.6533
9.6461	2.169	2.227	11.081	38.522	16.142	22.876	34.157	13.331	5.44	2.645	2.203	3.749	31.349	5.444	3.397	3.729	7.706	58.202		0.352173	14.6872
9.7652	1.705	2.665	16.893	40.434	15.428	20.628	38.148	11.381	4.241	3.266	3.073	4.081	42.749	5.076	3.148	5.813	6.785	60.243		0.356522	15.8754
9.8843	2.397	2.509	16.647	37.708	14.552	20.255	39.013	9.019	4.495	2.749	2.646	4.823	49.138	5.434	3.132	4.508	4.541	52.421		0.36087	15.3326
10.0034	2.688	2.363	15.836	33.238	13.57	18.056	37.157	9.188	4.784	2.714	3.133	3.832	58.114	5.473	2.561	4.697	5.591	51.532		0.365218	15.2515
10.1225	2.211	2.466	17.824	35.383	14.453	16.948	37.028	7.723	4.231	3.812	2.621	3.663	64.662	4.612	3.828	5.166	5.39	48.807		0.369566	15.6016
10.2416	1.673	2.607	14.636	34.379	11.068	17.814	40.069	7.262	4.368	2.455	3.111	3.832	71.342	4.775	2.983	4.779	5.929	49.632		0.373915	15.7063
10.3606	3.042	2.659	13.582	32.274	12.878	16.675	41.369	8.508	4.21	2.848	2.505	4.713	77.273	5.028	3.184	3.287	4.884	49.091		0.378259	16.0006
10.4797	2.25	3.174	13.919	32.49	11.748	17.606	40.169	7.446	4.376	3.304	2.766	4.988	74.237	4.835	2.91	4.361	4.325	44.587		0.382608	15.5273
10.5988	2.171	3.66	11.385	30.291	11.141	15.544	38.285	7.701	4.982	2.977	2.728	4.209	70.465	4.416	3.535	5.373	3.587	52.067		0.386956	15.2509
10.7179	2.546	2.04	12.142	33.992	9.889	16.447	35.445	7.378	3.463	3.107	2.959	4.532	61.274	3.751	2.357	5.943	4.3	49.275		0.391304	14.4911
10.837	2.654	3.472	11.795	30.91	10.007	16.262	39.919	6.702	4.234	2.81	3.307	3.19	58.992	4.587	3.433	5.015	3.251	51.269		0.395652	14.5449
10.9561	3.771	2.92	12.216	33.195	9.693	15.989	36.542	6.009	3.223	3.017	3.124	3.375	51.177	4.121	2.837	3.744	3.583	46.668		0.400001	13.6224
11.0752	3.088	2.978	12.372	29.79	10.041	15.492	37.098	6.839	4.383	2.805	2.658	5.071	46.101	4.793	3.274	4.553	3.609	43.821		0.404349	13.2648
11.1943	3.079	2.547	12.272	30.215	11.199	11.7	36.408	6.361	3.812	3.294	2.305	4.129	41.302	4.037	3.192	5.249	3.862	41.653		0.408697	12.5898
11.3133	2.938	3.361	13.501	31.236	10.15	10.945	40.475	6.455	3.762	3.534	3.307	3.803	39.914	4.373	3.482	4.454	4.751	36.964		0.413042	12.6336
11.4324	1.995	3.054	14.328	33.457	10.966	10.201	42.608	7.927	3.566	3.208	3.126	4.027	35.164	5.003	4.671	4.019	4.743	36.774		0.41739	12.7132
11.5515	2.787	2.529	12.313	35.151	11.722	9.268	42.865	10.406	2.535	3.213	2.573	3.818	33.048	4.524	3.855	2.991	4.39	41.297		0.421738	12.7381
11.6706	2.134	3.59	16.049	33.741	10.753	8.736	44.025	12.876	3.448	3.063	2.664	3.761	28.544	4.409	3.75	5.159	4.426	40.191		0.426087	12.8511
11.7897	3.201	4.267	13.979	36.182	10.906	8.728	48.84	17.56	4.232	3.931	2.951	4.759	29.603	5.903	3.862	3.94	4.833	37.497		0.430435	13.6208
11.9088	3.635	3.305	14.203	32.245	11.186	8.447	52.237	18.338	3.396	3.929	2.877	4.55	27.54	5.614	3.46	4.51	4.853	36.682		0.434783	13.3893
12.0279	3.664	4.16	16.01	32.057	9.847	7.382	50.145	20.242	3.492	3.43	2.788	3.952	32.105	5.701	3.552	5.18	4.532	34.453		0.439132	13.4829
12.147	2.572	2.545	15.368	27.042	11.041	8.664	49.617	21.061	4.172	3.353	3.487	4.244	30.131	5.387	4.424	3.416	4.245	31.309		0.44348	12.8932
12.2661	2.903	4.065	16.994	23.986	10.367	8.633	47.653	18.338	4.047	2.743	2.749	3.903	28.546	5.936	3.877	4.218	3.564	28.972		0.447828	12.3052
12.3851	2.885	3.003	17.073	24.188	9.458	10.185	42.397	14.488	3.468	3.937	3.443	2.769	28.548	6.356	4.372	4.36	3.493	25.047		0.452173	11.6372
12.5042	3.141	3.261	13.694	24.097	9.435	8.165	40.271	12.195	3.562	3.275	2.764	4.121	30.749	6.309	4.873	3.961	3.664	23.276		0.456521	11.1563
12.6233	4.537	2.853	15.145	24.531	9.378	6.948	38.258	8.746	3.404	2.641	3.66	3.473	30.456	6.249	4.165	4.504	4.51	24.154		0.460869	10.9784
12.7424	2.071	3.566	14.421	24.266	9.184	6.362	39.629	7.487	3.186	3.689	2.194	4.105	28.734	6.46	3.681	4.4	4.857	24.959		0.465217	10.7362
12.8615	3.114	2.733	15.606	27.657	9.431	7.727	37.465	7.573	3.276	2.43	3.841	3.99	29.577	8.398	4.925	4.437	4.322	26.937		0.469566	11.3022
12.9806	2.901	3.068	15.037	29.863	9.695	9.821	39.539	7.011	3.882	2.91	2.386	3.212	33.406	7.293	3.632	4.98	3.854	24.631		0.473914	11.5067
13.0997	3	2.334	14.044	27.903	7.21	7.162	38.987	6.593	3.326	3.364	3.107	3.306	37.146	7.358	3.512	4.503	3.929	22.558		0.478262	11.0746
13.2188	2.256	3.592	16.224	31.417	8.137	7.501	39.161	7.052	4.061	3.761	2.973	4.1	40.256	6.963	4.398	3.923	3.212	22.799		0.482611	11.7659
13.3378	3.148	2.846	16.828	34.177	8.091	7.416	41.051	6.712	3.063	2.64	1.975	3.782	47.333	5.53	4.201	4.097	2.676	20.928		0.486955	12.0274
13.4569	3.089	3.562	14.907	34.758	9.375	8.267	48.815	5.634	2.882	3.468	2.493	3.344	43.22	5.402	4.452	4.538	3.415	18.265		0.491303	12.2159
13.576	3.086	3.115	13.844	36.74	7.74	7.543	48.824	5.445	3.689	2.754	3.032	3.987	43.266	4.951	4.606	4.125	3.652	19.723		0.495652	12.229
13.6951	2.17	3.988	15.449	36.356	7.902	6.946	51.721	4.943	3.595	3.459	3.084	3.82	40.964	5.388	4.884	5.425	3.901	21.055		0.5	12.5028
13.8142	2.789	3.663	13.921	35.831	8.784	6.864	47.516	5.404	3.31	3.491	2.554	4.199	38.923	5.929	4.769	4.007	3.573	20.225		0.504348	11.9862
13.9333	3.544	3.515	14.7	41.01	8.96	6.7	48.648	5.383	3.589	3.74	3.311	3.978	36.071	4.542	5.087	3.775	2.951	20.578		0.508697	12.2268
14.0524	2.802	3.301	17.085	36.637	7.644	7.618	51.73	6.023	4.019	3.534	3.615	3.477	34.951	4.601	5.072	4.314	3.966	18.937		0.513045	12.1848
14.1715	3.704	4.676	15.596	37.396	6.557	8.013	50.427	5.819	4.081	3.179	4.207	3.264	26.397	5.325	5.051	3.709	2.965	17.475		0.517393	11.5467
14.2905	2.695	3.664	16.11	36.074	8.887	7.219	45.609	5.984	3.865	2.92	3.201	3.826	25.995	4.222	5.937	4.655	3.157	17.977		0.521738	11.2221
14.4096	2.984	3.525	15.154	33.728	6.988	7.617	45.676	5.471	3.521	3.191	3.612	4.156	26.245	6.131	5.157	3.993	3.239	19.031		0.526086	11.0788
14.5287	3.044	2.791	14.731	32.354	6.409	6.889	44.228	6.066	3.67	3.222	3.259	4.035	26.432	3.615	4.353	4.66	5.219	14.961		0.530434	10.5521
14.6478	2.293	2.986	15.752	31.932	7.002	8.457	40.373	6.182	3.006	3.094	3.86	3.52	25.294	4.556	4.098	4.511	3.994	13.275		0.534783	10.2325
14.7669	2.178	2.854	17.197	31.081	6.271	8.244	40.023	5.632	3.665	3.056	3.254	3.795	24.481	4.46	4.917	4.535	4.575	15.156		0.539131	10.2986
14.886	2.641	3.57	14.892	29.807	6.871	8.273	46.443	5.634	4.309	3.841	3.595	3.149	24.451	4.724	4.251	4.54	4.277	14.917		0.543479	10.5658
15.0051	2.658	3.207	16.706	30.605	6.019	7.831	42.696	5.312	3.186	3.437	2.736	3.531	26.175	5.822	4.613	4.244	4.28	10.715		0.547827	10.2096
15.1242	3.317	2.829	18.168	31.152	6.135	7.384	43.252	5.714	4.177	3.685	3.489	2.542	28.002	5.382	4.102	5.176	3.945	13.503		0.552176	10.6641
15.2432	2.432	4.255	15.253	31.267	5.724	7.65	42.959	5.769	3.476	2.829	3.095	4.266	28.494	4.66	4.144	4.814	3.977	11.57		0.55652	10.3686
15.3623	3.165	3.509	15.766	33.445	4.958	7.85	41.609	6.809	4.309	2.673	4.052	3.48	31.486	5.246	4.521	4.878	4.833	11.872		0.560868	10.8034
15.4814	1.912	3.953	19.496	33.528	5.085	6.659	44.22	6.456	3.246	3.66	2.583	3.645	35.578	6.069	4.545	4.17	3.436	9.806		0.565217	11.0026
15.6005	2.752	3.794	20.327	33.952	5.831	6.338	42.733	5.519	4.196	2.917	2.826	4.281	36.676	6.407	4.772	4.159	4.961	10.205		0.569565	11.2581
15.7196	3.153	3.818	17.701	33.197	6.582	7.459	41.013	6.201	3.381	2.46	4.306	4.242	36.011	6.159	4.522	4.349	5.036	12.61		0.573913	11.2333
15.8387	3.169	3.84	17.772	35.878	5.185	6.898	37.416	5.461	4.232	3.421	3.357	3.769	38.929	5.826	4.027	4.016	3.971	9.677		0.578262	10.9358
15.9578	3.833	3.646	20.135	30.633	5.164	6.16	42.264	5.605	4.276	3.099	3.054	4.037	38.444	5.307	4.003	4.519	3.592	9.863		0.58261	10.9797
16.0769	2.353	2.3	20.667	28.948	5.04	7.354	37.738	5.545	4.263	2.996	3.79	2.972	41.943	5.63	3.476	3.174	3.803	8.031		0.586958	10.5568
16.196	3.098	3.242	18.373	27.556	5.625	7.137	41.841	5.996	4.515	2.972	3.803	3.217	43.733	5.857	3.972	4.554	4.992	7.671		0.591306	11.0086
16.315	2.891	4.102	17.862	27.25	5.737	8.04	40.132	5.883	4.105	3.343	3.027	3.538	49.024	7.166	4.319	4.47	3.443	7.201		0.595651	11.1963
16.4341	3.218	3.405	20.036	25.655	5.467	7.554	43.637	4.559	3.627	3.36	3.136	4.123	46.09	7.629	3.874	3.7	3.756	7.956		0.599999	11.1546
16.5532	2.598	3.536	20.976	23.148	4.903	7.498	45.213	4.772	4.318	4.479	3.84	3.675	48.199	6.562	4.329	3.52	4.016	5.68		0.604348	11.1812
16.6723	2.136	3.147	20.717	22.137	5.498	8.648	41.428	5.391	3.822	3.531	3.222	3.355	43.579	7.236	4.397	3.794	2.8	6.564		0.608696	10.6334
16.7914	3.425	3.313	20.112	24.415	4.787	7.643	40.414	5.777	4.58	3.984	2.799	3.616	44.419	6.356	3.946	3.486	4.09	7.474		0.613044	10.8131
16.9105	3.671	3.79	20.014	20.765	4.978	6.703	42.314	5.519	3.579	3.823	2.614	3.978	39.965	7.664	3.479	3.678	5.52	5.793		0.617392	10.4359
17.0296	3.355	3.914	21.699	17.405	6.219	8.233	45.909	4.849	3.254	3.381	3.614	3.654	39.007	7.346	4.406	3.033	3.471	6.613		0.621741	10.5201
17.1487	2.787	3.188	20.736	18.79	4.997	9.127	40.496	4.158	3.947	4.138	2.37	4.391	36.745	6.836	3.812	3.239	3.777	6.77		0.626089	10.0169
17.2677	3.077	3.755	20.165	18.423	3.955	8.18	42.804	5.217	3.56	3.49	3.099	3.67	35.387	5.046	4.132	4.101	4.612	5.943		0.630434	9.92311
17.3868	3.698	3.66	20.27	16.823	5.865	8.687	45.075	5.937	3.475	3.926	3.241	4.348	33.023	6.067	4.428	4.058	4.694	4.719		0.634782	10.1108
17.5059	2.879	2.809	21.505	17.377	6.522	7.403	40.518	5.234	4.365	4.951	4.341	3.617	37.466	5.419	4.522	4.584	2.942	5.318		0.63913	10.0984
17.625	2.902	4.374	24.398	16.94	3.978	7.638	43.999	6.07	4.218	3.754	3.894	3.059	34.144	5.733	4.032	3.551	3.508	6.097		0.643478	10.1272
17.7441	2.499	4.573	23.319	14.042	4.325	9.317	42.314	5.744	4.276	3.419	4.489	3.576	33.853	6.608	3.354	3.33	2.926	5.035		0.647827	9.83328
17.8632	3.015	3.175	23.801	13.896	4.263	7.081	44.669	6.02	4.081	3.976	3.495	4.211	33.831	6.174	4.786	3.795	2.923	5.311		0.652175	9.91683
17.9823	2.943	3.548	23.153	13.081	5.627	7.64	46.478	5.984	3.253	3.867	2.548	3.62	34.731	4.791	3.782	3.379	3.814	5.512		0.656523	9.87506
18.1014	2.881	4.533	22.473	13.004	6.304	8.956	41.568	6.269	4.521	4.096	3.049	3.31	35.974	4.868	4.146	3.716	4.452	4.619		0.660871	9.92994
18.2204	2.99	4.246	25.245	15.161	3.991	7.386	43.95	6.039	3.813	4.018	3.42	3.552	29.656	6.544	4.246	3.733	4.505	5.011		0.665216	9.86144
18.3395	2.922	3.222	26.158	14.519	5.836	9.334	46.727	6.455	3.95	2.951	3.516	4.225	30.604	5.016	4.391	4.418	4.618	4.891		0.669564	10.2085
18.4586	3.36	3.08	23.632	12.117	4.159	7.362	44.899	6.979	3.508	3.246	4.073	3.828	25.99	5.875	4.514	3.808	4.57	4.386		0.673913	9.41033
18.5777	3.139	3.246	26.809	12.456	4.881	9.07	49.926	5.763	3.713	4.549	2.797	3.903	26.19	5.229	4.211	4.224	3.738	4.863		0.678261	9.92817
18.6968	3.871	2.406	24.429	11.375	4.612	7.492	50.614	6.298	4.464	5.258	3.388	3.913	23.562	6.574	4.652	3.853	3.862	4.865		0.682609	9.74933
18.8159	2.941	3.048	24.723	11.552	4.782	7.879	49.802	7.135	3.882	4.199	3.773	3.967	26.698	6.501	3.994	4.197	3.227	5.066		0.686957	9.85367
18.935	2.578	4.25	26.831	12.297	5.788	6.924	54.699	5.108	3.389	4.129	3.97	4.418	29.469	5.511	4.811	3.408	3.57	4.563		0.691306	10.3174
19.0541	2.33	3.778	26.026	12.456	4.426	6.306	57.144	6.684	3.756	3.386	3.776	4.717	27.303	5.843	3.727	4.139	3.366	4.802		0.695654	10.2203
19.1731	2.346	3.573	28.885	13.064	5.499	7.033	57.753	6.694	3.255	4.265	3.639	5.128	25.407	5.595	4.2	4.349	3.841	4.623		0.699999	10.5083
19.2922	3.188	3.504	28.253	13.607	4.886	7.821	57.724	5.733	4.226	4.131	3.585	3.147	30.292	5.866	3.546	3.573	3.472	4.191		0.704347	10.5969
19.4113	2.725	3.47	28.722	12.659	5.068	7.021	62.82	6.462	2.966	3.987	4.867	4.404	24.521	5.123	4.323	4.711	3.638	4.163		0.708695	10.6472
19.5304	3.218	3.437	31.045	13.213	4.722	5.934	63.915	6.657	3.726	3.882	3.717	3.573	25.912	4.955	3.632	3.245	3.702	4.058		0.713043	10.6968
19.6495	4.212	3.004	27.462	10.356	4.455	6.7	62.965	6.053	4.188	3.788	3.418	3.473	25.32	4.459	4.856	4.803	4.255	3.72		0.717392	10.4159
19.7686	2.801	3.55	29.119	12.267	4.734	6.725	61.482	4.954	3.965	4.726	3.974	3.164	26.199	5.515	3.326	3.173	4.619	4.559		0.72174	10.4918
19.8877	2.599	4.126	29.503	9.685	5.972	6.901	58.827	5.596	4.168	4.407	3.254	3.521	29.061	6.787	3.888	4.737	3.184	3.575		0.726088	10.5439
20.0068	2.707	3.848	31.147	11.498	5.576	6.445	52.458	8.362	4.607	5.763	3.537	4.057	27.337	5.059	2.819	4.134	4.01	4.191		0.730436	10.4197
20.1259	2.167	3.703	27.556	11.479	5.127	6.757	56.688	5.072	5.039	4.089	3.475	3.949	27.552	4.445	3.353	4.17	3.716	3.177		0.734785	10.0841
20.2449	2.3	3.926	31.284	11.096	5.584	7.009	50.726	7.423	4.098	4.441	4.095	4.838	28.194	4.661	3.492	3.706	3.212	4.435		0.739129	10.2511
20.364	3.265	3.87	30.083	10.816	5.055	6.032	50.931	7.077	3.939	5.4	4.75	3.982	28.57	4.715	3.858	3.818	3.289	2.987		0.743478	10.1354
20.4831	2.845	3.809	32.269	11.707	5.433	6.83	48.918	7.282	3.571	4.558	4.378	5.573	26.138	4.813	3.404	3.512	3.227	3.596		0.747826	10.1035
20.6022	3.225	4.466	35.453	11.83	7.433	8.037	51.691	7.85	5.02	4.558	4.851	5.281	27.797	5.079	4.592	3.485	3.656	3.639		0.752174	10.9968
20.7213	3.473	4.331	32.999	9.698	6.532	7.795	50.748	5.891	4.126	4.102	4.795	6.002	25.456	4.564	3.639	3.405	3.966	4.705		0.756522	10.3459
20.8404	2.324	3.603	34.459	9.86	5.227	8.358	45.009	6.647	5.04	4.593	4.31	5.353	27.37	4.833	4.56	2.902	3.346	3.734		0.760871	10.0849
20.9595	3.118	3.646	31.772	13.168	5.181	7.443	46.416	6.737	5.81	4.952	4.507	6.209	28.964	6.03	4.593	3.098	2.884	3.686		0.765219	10.4563
21.0786	3.392	3.616	33.63	10.524	5.329	7.779	46.157	6.166	5.541	4.577	5.069	5.337	30.574	3.371	3.406	3.638	3.946	4.133		0.769567	10.3436
21.1976	2.537	3.682	34.441	13.408	5.623	8.362	48.551	6.658	5.634	5.595	4.487	5.603	30.209	3.952	2.925	4.377	3.211	3.668		0.773912	10.7179
21.3167	2.868	3.003	33.876	12.048	5.202	7.807	51.406	6.949	5.477	3.889	3.879	5.973	32.914	4.743	3.783	4.242	2.789	4.173		0.77826	10.8345
21.4358	2.128	4.098	39.613	10.842	6.66	6.45	57.967	6.802	4.815	5.315	4.353	5.926	29.999	4.289	3.906	4.081	3.868	4.087		0.782608	11.3999
21.5549	2.655	3.396	40.686	11.397	6.45	8.178	53.313	7.919	4.194	4.656	4.241	5.231	31.405	5.066	3.953	4.045	3.824	3.72		0.786957	11.3516
21.674	2.012	5.08	35.969	13.91	6.346	6.826	53.73	8.109	5.581	4.048	4.712	7.615	27.355	4.34	4.284	3.521	3.555	3.44		0.791305	11.1352
21.7931	2.215	3.706	38.541	13.016	8.421	7.406	55.696	6.603	4.855	4.478	5.378	8.009	33.508	4.6	4.616	4.043	4.95	4.581		0.795653	11.9234
21.9122	2.056	4.151	35.71	13.22	7.816	8.4	56.72	7.08	6.155	5.25	4.628	8.386	33.96	4.211	3.793	3.323	3.809	3.71		0.800001	11.7988
22.0313	2.922	4.915	38.112	14.929	6.9	9.883	59.727	8.144	5.194	5.993	3.972	9.053	32.624	4.73	3.522	5.707	3.381	3.207		0.80435	12.3842
22.1503	4.002	3.607	36.208	17.263	8.206	10.4	62.708	7.848	4.547	5.185	3.753	10.465	33.949	4.074	3.828	3.968	3.311	3.193		0.808694	12.5842
22.2694	3.395	3.59	38.347	20.664	9.724	12.13	69.896	9.795	5.388	6.295	6.07	11.556	32.736	5.144	4.113	4.755	3.245	4.257		0.813043	13.95
22.3885	3.929	5.125	38.214	23.348	9.672	13.829	76.053	10.033	5.815	4.703	4.431	11.68	31.515	4.954	2.764	3.152	3.662	3.829		0.817391	14.2616
22.5076	2.833	3.965	40.692	28.694	8.991	15.951	82.373	11.005	6.592	5.593	5.334	15.7	37.341	4.874	4.022	3.496	3.481	3.329		0.821739	15.7926
22.6267	2.856	4.169	43.13	38.02	10.23	18.555	86.69	10.29	7.776	4.93	4.86	19.787	31.586	5.481	3.088	4.312	3.361	2.392		0.826087	16.7507
22.7458	2.894	5.085	48.759	46.629	9.907	21.46	88.369	11.448	7.757	6.486	4.724	29.372	33.434	4.893	3.967	3.592	3.43	3.113		0.830436	18.6288
22.8649	2.924	3.809	52.937	50.953	11.109	22.113	92.502	13.184	10.233	5.255	4.762	33.035	34.152	5.97	4.717	3.326	3.363	3.978		0.834784	19.9068
22.984	3.69	3.646	55.752	66.683	10.378	24.665	93.289	13.766	12.312	7.8	5.802	38.892	30.375	6.792	4.714	5.022	2.767	3.743		0.839132	21.6716
23.103	3.415	5.573	62.174	70.739	13.585	30.703	94.141	16.013	13.319	8.928	6.185	49.166	29.265	7.243	4.071	4.083	3.387	4.791		0.843477	23.7101
23.2221	3.71	4.655	66.951	82.613	15.235	28.633	99.54	15.37	14.808	11.023	5.712	49.327	31.848	6.365	4.021	5.05	3.863	4.259		0.847825	25.1657
23.3412	4.101	6.039	73.611	75.615	18.585	36.638	105.217	17.198	17.321	12.643	5.274	56.333	32.933	7.032	4.312	3.843	3.603	3.308		0.852173	26.867
23.4603	4.282	4.553	75.343	76.505	25.062	44.487	112.61	19.259	20.027	16.424	7.484	60.777	34.468	6.767	3.888	5.097	3.736	5.006		0.856522	29.2097
23.5794	5.947	6.913	80.663	72.506	32.348	49.204	122.951	25.372	19.97	22.044	7.276	68.194	38.733	7.12	4.235	4.031	3.379	4.719		0.86087	31.9781
23.6985	6.877	6.855	84.876	76.199	41.418	59.596	127.422	29.694	27.785	29.831	8.06	74.407	37.068	7.301	3.23	3.514	4.272	4.206		0.865218	35.1451
23.8176	7.051	7.326	94.515	77.692	48.977	61.733	135.259	40.816	29.152	39.412	10.362	86.224	34.952	8.117	4.82	4.221	3.409	4.256		0.869566	38.7941
23.9367	9.161	6.455	106.229	86.028	61.552	63.164	145.843	54.737	42.467	43.777	13.37	101.466	38.835	7.738	3.677	4.357	3.728	4.194		0.873915	44.2654
24.0558	12.586	9.463	137.408	91.94	68.551	60.796	163.296	70.184	50.601	54.975	13.972	117.108	37.4	6.701	3.725	4.696	4.204	4.397		0.878263	50.6668
24.1748	17.961	10.832	152.255	104.93	77.887	59.061	180.579	84.379	67.306	62.349	17.073	122.143	41.797	8.324	4.411	3.786	4.061	4.524		0.882608	56.8699
24.2939	25.843	11.229	150.012	120.678	80.353	55.775	183.408	91.538	81.876	79.329	22.657	119.606	43.601	8.188	4.735	4.689	5.01	4.848		0.886956	60.7431
24.413	35.607	15.698	130.914	145.078	79.945	57.735	186.142	86.914	89.905	88.808	28.979	100.23	44.447	9.267	5.285	5.531	3.949	4.525		0.891304	62.1644
24.5321	47.583	19.049	84.672	162.64	81.188	61.366	160.562	87.372	100.996	109.656	33.215	78.854	52.322	13.25	5.072	4.746	3.13	4.755		0.895652	61.6904
24.6512	66.082	20.692	45.492	181.179	79.612	69.057	126.46	76.609	101.575	121.517	39.506	61.925	53.24	13.76	5.784	4.885	3.611	5.005		0.900001	59.7773
24.7703	81.628	24.958	22.411	171.805	85.893	78.238	76.713	54.107	117.92	135.067	52.769	51.237	55.496	12.417	5.318	4.974	4.411	4.719		0.904349	57.7823
24.8894	103.914	37.942	12.232	134.852	92.205	100.207	43.83	36.307	130.709	140.718	58.485	40.134	51.414	15.635	5.243	4.253	4.379	4.714		0.908697	56.5096
25.0085	114.581	45.885	10.552	90.867	101.779	105.696	20.911	21.394	134.101	145.588	64.495	30.89	52.863	21.682	6.476	4.997	4.624	6.716		0.913046	54.6721
25.1275	116.744	54.874	8.937	46.06	105.695	130.864	13.146	14.198	144.132	143.174	65.694	25.668	51.962	18.942	5.961	5.031	5.989	5.798		0.91739	53.4927
25.2466	105.488	74.267	5.435	22.537	83.336	139.988	7.482	10.76	141.282	130.892	62.681	18.329	52.972	23.686	6.124	5.796	6.724	6.468		0.921738	50.2359
25.3657	76.247	78.224	5.041	14.497	45.362	136.825	5.758	7.892	131.44	120.34	46.909	11.911	61.981	20.023	6.495	6.565	5.719	5.591		0.926087	43.7122
25.4848	42.144	68.47	3.237	8.541	23.578	115.041	4.461	5.361	107.436	104.734	37.455	9.191	70.048	18.288	5.835	6.84	7.275	6.006		0.930435	35.7745
25.6039	21.796	39.713	2.548	5.258	13.149	84.742	4.734	5.806	79.958	81.748	28.592	6.88	82.821	19.131	7.58	6.61	8.729	8.402		0.934783	28.2332
25.723	13.424	22.614	2.265	4.337	9.927	56.735	3.239	3.467	54.734	65.068	25.961	4.163	97.361	18.276	7.629	7.114	10.925	9.062		0.939132	23.1278
25.8421	10.049	12.842	1.563	4.369	8.059	28.815	3.532	3.032	40.308	52.911	23.298	3.625	111.4	22.158	8.634	7.382	14.456	8.338		0.94348	20.2651
25.9612	8.454	9.114	1.712	2.95	4.751	15.71	2.411	2.465	28.665	42.068	21.184	3.257	103.402	22.132	6.914	6.692	21.179	13.643		0.947828	17.5946
26.0802	6.205	7.44	1.333	2.34	4.915	9.903	1.992	2.6	20.884	33.675	16.892	2.906	109.783	25.358	7.954	7.244	25.993	19.073		0.952173	17.0272
26.1993	3.568	5.485	1.173	2.28	3.872	7.649	1.78	2.163	15.29	24.861	14.847	2.779	96.268	30.544	10.218	7.671	35.331	27.378		0.956521	16.2865
26.3184	3.053	2.916	1.276	1.942	2.707	6.003	1.764	1.67	12.414	17.335	12.435	2.444	87.025	33.702	10.822	11.008	49.063	44.259		0.960869	16.7688
26.4375	2.486	3.335	1.269	2.092	2.567	3.585	1.448	1.775	7.652	15.78	10.049	2.151	94.469	36.364	13.108	14.677	62.296	70.011		0.965217	19.173
26.5566	1.588	2.498	0.566	1.407	2.833	3.387	1.167	1.281	6.851	11.888	8.235	1.617	97.203	38.738	16.574	22.846	78.802	89.432		0.969566	21.4952
26.6757	2.038	1.729	1.537	1.112	1.71	2.496	1.175	1.44	4.959	9.262	5.907	1.554	94.665	43.312	24.677	33.461	88.528	107.716		0.973914	23.7377
26.7948	1.273	1.888	0.405	1.28	1.07	2.493	1.214	1.383	4.053	7.799	4.351	1.21	92.414	44.637	29.668	42.083	99.966	115.84		0.978262	25.1682
26.9139	1.393	1.608	0.657	0.992	0.996	2.12	0.994	0.951	2.65	6.934	4.157	1.123	91.462	50.516	38.443	48.808	106.148	114.878		0.982611	26.3794
27.0329	1.122	0.895	0.728	1.123	0.995	1.717	0.678	0.78	2.967	4.686	3.5	1.544	86.873	50.164	44.325	55.827	102.661	117.613		0.986955	26.5666
27.152	1.328	0.891	0.564	1.269	1.165	1.026	0.774	0.72	2.665	3.713	3.447	0.674	80.603	51.542	47.511	61.802	94.596	111.712		0.991303	25.889
27.2711	0.884	0.991	0.712	1.05	1.394	1.44	0.67	0.991	2.009	3.499	3.557	1.051	76.411	57.234	54.714	68.44	85.546	96.757		0.995652	25.4083
27.3902	0.664	0.734	0.608	1.054	0.778	1.208	0.601	0.348	2.004	2.298	2.844	0.721	65.992	59.981	64.954	73.72	65.477	81.285		1	23.6262

## Sheet: Image15
X0	Y0	Y1	Y2	Y3	Y4	Y5	Y6	Y7	Y8	Y9	Y10	Y11	Y12	Y13	Y14	Y15	Y16	Y17	Y18	Y19	Y20	Y21	Y22	Y23		Ap-basal	Avg int
0	4.854	3.818	8.299	5.632	6.718	8.385	13.223	32.454	18.901	9.963	6.918	17.425	24.258	17.555	18.419	23.627	20.577	28.293	8.995	14.6013	12.166	6.56	5.658	17.284		0	13.941
0.1191	6.091	4.61	10.208	5.668	8.206	9.765	14.986	34.799	22.807	11.436	7.562	22.089	29.108	21.707	18.149	25.349	20.899	32.309	11.877	17.0941	13.387	7.335	7.121	19.224		0.00465164	15.9078
0.2382	5.521	6.37	13.231	6.118	10.334	10.022	16.502	37.098	27.603	14.875	7.56	28.192	40.639	24.001	19.635	28.058	19.311	34.91	10.273	18.615	19.756	9.337	8.33	18.515		0.00930327	18.1169
0.3573	5.479	5.247	17.289	8.459	15.747	11.659	18.617	43.93	32.997	18.22	9.99	35.107	55.992	30.083	22.606	29.222	23.958	35.959	14.104	23.7718	24.279	10.001	10.664	21.152		0.0139549	21.8555
0.4764	6.751	5.62	20.352	8.33	22.929	13.108	26.151	41.392	38.197	26.041	14.539	50.782	82.124	36.37	25.792	31.212	25.743	42.745	15.668	29.9061	27.686	13.251	18.952	26.184		0.0186065	27.076
0.5954	7.578	5.87	24.807	13.542	31.142	15.479	33.763	43.427	50.868	30.336	20.567	72.363	113.281	44.648	34.223	31.125	30.966	45.824	18.455	34.8077	32.146	15.973	23.81	27.211		0.0232543	33.4255
0.7145	8.561	9.352	32.065	16.215	42.256	22.452	50.756	48.194	55.383	34.795	29.804	98.398	155.94	62.534	46.6	36.85	43.109	53.968	24.546	38.3072	38.654	21.314	38.087	32.23		0.0279059	43.3488
0.8336	12.325	13.454	40.278	27.229	58.932	26.642	63.703	59.461	58.735	46.714	45.314	128.227	185.88	85.1	66.132	42.767	61.764	55.719	32.259	46.1998	42.668	29.37	46.207	33.323		0.0325575	54.5168
0.9527	14.285	21.865	51.331	43.423	84.729	40.014	81.429	70.654	63.371	66.945	74.784	159.436	218.741	108.764	97.644	57.551	73.191	56.391	43.826	50.1286	47.151	46.311	53.936	45.749		0.0372092	69.6521
1.0718	23.939	31.935	57.879	64.675	124.16	49.032	103.169	92.067	74.846	78.112	121.42	180.239	237.248	134.338	144.865	71.5	81.592	57.964	59.75	59.18	54.905	70.536	60.449	57.218		0.0418608	87.1257
1.1909	40.132	43.087	77.161	99.829	152.047	66.773	122.159	105.432	78.216	98.647	148.303	198.451	247.86	160.965	180.028	90.47	88.12	59.127	69.538	65.458	72.534	100.959	68.092	66.164		0.0465124	104.148
1.31	62.479	58.232	91.147	132.396	178.836	87.378	138.572	114.167	90.179	115.655	181.849	207.912	251.47	184.694	217.049	107.242	96.133	58.301	79.385	79.649	92.074	122.858	76.412	82.555		0.0511641	121.109
1.4291	79.823	73.671	104.799	156.974	193.11	113.029	159.361	124.066	86.999	121.02	200.079	201.29	243.376	208.177	228.526	131.216	105.658	74.847	86.115	87.5675	109.014	149.949	93.212	103.279		0.0558157	134.798
1.5481	109.918	89.403	107.726	179.939	204.101	130.418	162.547	112.163	78.164	121.306	210.09	170.895	217.838	219.444	236.197	137.999	107.576	92.54	88.456	86.8974	122.231	154.039	113.088	110.508		0.0604634	140.145
1.6672	131.35	105.796	119.509	186.977	193.438	150.713	156.434	97.651	70.584	111.215	187.164	138.341	178.136	229.757	220.767	159.295	109.508	107.625	97.319	90.7144	129.768	157.862	128.626	118.689		0.0651151	140.718
1.7863	142.9	133.678	120.816	184.249	173.661	153.665	145.079	71.3	63.358	96.443	158.126	108.031	124.272	202.111	179.931	170.576	107.925	128.227	110.368	89.273	119.886	144.442	130.739	119.186		0.0697667	132.427
1.9054	154.753	146.115	121.525	167.526	149.391	148.175	130.787	57.365	51.913	81.74	121.936	72.867	85.429	156.554	139.434	166.032	91.942	134.68	102.264	83.6879	106.165	125.495	128.073	136.145		0.0744184	119.166
2.0245	155.585	162.169	128.36	143.734	126.668	139.269	116.107	47.02	43.067	62.941	86.306	50.869	50.484	114.933	87.369	160.789	76.11	130.67	92.613	76.0109	106.776	110.475	116.075	142.182		0.07907	105.274
2.1436	151.688	171.774	130.111	114.395	112.412	130.234	99.155	40.26	34.306	51.633	68.756	40.479	39.908	76.32	62.828	135.384	58.852	122.889	92.072	72.9551	97.503	91.867	102.036	145.479		0.0837216	93.4707
2.2627	158.799	178.845	132.322	102.828	102.223	109.649	77.33	32.176	30.722	44.85	56.03	29.514	31.888	53.375	44.502	109.796	51.209	107.48	91.238	59.178	83.598	78.688	93.758	132.417		0.0883733	83.0173
2.3818	155.108	173.965	138.346	82.885	83.471	93.312	58.002	30.917	25.469	38.673	41.923	23.08	27.192	44.663	36.651	85.391	49.919	90.475	84.437	56.8846	76.386	65.313	78.512	131.661		0.0930249	73.8598
2.5008	155.327	169.816	123.965	69.742	72.757	73.84	48.677	24.089	20.517	34.533	33.731	19.502	21.807	38.484	28.736	65.643	42.437	77.979	81.563	50.0692	61.741	52.777	66.999	116.018		0.0976726	64.6146
2.6199	160.22	155.105	122.149	53.37	49.643	56.361	35.785	23.023	17.431	31.212	27.95	16.038	20.599	27.261	22.566	57.978	37.285	70.67	77.319	49.0442	53.508	45.809	53.959	109.668		0.102324	57.248
2.739	140.335	139.339	107.833	42.957	35.484	47.553	28.401	21.138	17.159	29.3	23.151	11.196	16.182	21.786	18.863	44.53	33.5	56.323	69.457	46.171	43.881	42.544	45.405	104.053		0.106976	49.4392
2.8581	122.626	124.581	93.764	36.276	28.828	38.88	22.698	16.997	16.584	28.844	15.897	9.782	14.433	14.911	16.875	39.516	28.152	50.178	70.986	42.4996	37.557	36.29	37	95.986		0.111628	43.3392
2.9772	106.659	94.128	67.466	29.884	21.545	32.46	16.065	16.175	13.982	28.581	16.523	10.353	11.343	15.207	14.398	31.405	26.438	46.094	71.051	33.1624	29.47	28.232	38.572	80.572		0.116279	36.6569
3.0963	92.673	80.434	57.096	23.487	19.428	24.283	16.602	14.318	12.28	23.937	14.838	8.392	12.505	12.612	11.47	25.75	24.291	32.661	64.58	32.086	23.292	26.682	29.245	67.925		0.120931	31.2861
3.2154	81.949	67.89	52.107	20	15.101	22.839	12.206	14.977	13.355	24.4	12.116	9.197	8.689	10.305	7.665	21.082	22.102	30.14	64.047	27.1275	21.377	21.07	29.416	53.974		0.125582	27.6305
3.3345	70.013	58.319	51.791	14.798	12.571	15.974	14.017	14.7	11.934	22.449	13.186	6.168	7.601	11.664	8.441	21.051	21.793	24.5	59.399	20.0378	18.735	18.733	28.69	39.854		0.130234	24.4341
3.4535	62.373	49.49	45.023	15.771	10.597	14.375	12.785	11.471	13.047	22.988	15.069	7.471	8.897	9.665	7.072	15.93	25.199	25.105	45.444	21.4344	16.885	16.318	25.697	34.714		0.134882	22.2009
3.5726	52.462	47.605	38.376	11.948	9.335	12.937	10.781	10.584	13.351	18.66	14.491	4.94	6.53	9.38	7.437	14.143	25.427	25.894	41.495	19.0941	11.622	14.334	21.832	30.076		0.139533	19.6973
3.6917	48.181	41.639	32.531	9.334	11.067	10.669	11.828	11.05	10.391	18.933	10.901	6.661	6.768	8.838	7.717	10.771	25.406	23.546	37.784	17.8756	10.875	14.717	18.482	24.917		0.144185	17.9534
3.8108	41.51	41.813	28.803	11.029	7.965	9.169	8.586	8.874	12.653	15.69	12.929	5.346	6.983	8.565	7.202	10.681	28.787	24.331	32.571	17.3795	11.348	13.966	16.998	24.252		0.148837	16.9763
3.9299	35.265	32.72	26.961	9.809	6.371	9.368	9.746	7.555	8.181	14.127	11.593	6.378	5.077	7.666	5.746	10.029	30.973	21.137	32.081	18.0988	8.831	13.116	16.44	20.59		0.153488	15.3274
4.049	30.066	30.033	21.945	7.594	5.257	9.958	8.952	8.092	6.738	14.938	12.085	3.915	4.472	6.921	6.988	8.772	30.406	21.824	28.057	15.2741	9.23	10.048	15.877	17.392		0.15814	13.9514
4.1681	27.905	28.697	19.631	7.605	6.897	7.944	8.903	6.254	6.174	14.253	8.828	4.317	3.825	6.296	7.248	10.319	29.69	22.787	27.671	13.3791	8.908	9.186	12.544	14.934		0.162792	13.0915
4.2872	22.193	24.091	16.411	7.587	5.563	7.526	9.204	7.413	6.295	16.164	8.556	3.996	4.254	5.64	5.748	10.237	35.031	19.006	27.707	13.4166	7.442	9.504	13.738	15.548		0.167443	12.5946
4.4063	19.678	23.203	15.242	6.21	5.186	5.928	7.965	5.972	7.619	15.248	9.199	5.079	4.626	4.715	5.776	11.363	29.935	17.616	24.863	11.9403	7.563	8.031	10.413	13.326		0.172095	11.529
4.5253	15.806	19.009	15.47	6.192	3.978	5.792	8.775	6.552	6.075	14.154	9.157	4.185	3.739	5.825	4.923	9.516	30.554	17.542	25.407	13.2724	7.819	7.948	10.065	13.11		0.176743	11.0361
4.6444	13.189	16.678	13.63	5.286	3.394	6.446	9.153	7.259	5.492	13.793	9.314	4.566	3.385	4.402	4.427	12.013	35.085	14.503	22.077	10.2193	6.56	7.367	10.077	12.622		0.181394	10.4557
4.7635	10.028	13.988	13.897	5.713	4.118	4.488	8.862	6.823	5.028	12.009	8.168	4.963	3.663	5.322	4.25	9.769	31.668	11.405	23.199	9.3291	7.727	7.764	11.161	11.182		0.186046	9.77184
4.8826	10.185	14.031	11.26	4.271	5.024	5.931	7.495	5.719	6.009	11.129	9.648	2.678	3.399	4.351	4.4	10.335	28.586	10.895	23.907	7.5133	6.848	7.628	8.879	11.724		0.190698	9.24355
5.0017	9.875	9.22	15.393	4.349	3.685	4.775	7.857	7.934	5.242	11.215	10.343	3.698	2.759	2.757	4.264	8.381	25.856	10.967	23.574	9.0143	6.079	6.468	6.716	10.32		0.195349	8.78089
5.1208	7.428	10.652	13.92	3.618	3.842	4.647	8.595	8.471	3.698	9.432	9.278	4.87	3.407	3.178	3.751	7.141	25.51	11.4	21.199	7.1513	5.42	6.393	7.594	11.566		0.200001	8.42339
5.2399	5.403	7.989	13.881	4.532	3.119	3.482	9.227	6.902	4.236	10.086	7.595	4.339	3.638	2.136	4.456	6.435	23.828	9.56	19.122	8.0683	5.379	6.779	6.63	7.885		0.204652	7.69614
5.359	6.086	8.686	13.332	4.075	3.306	4.458	11.513	6.389	3.605	8.822	7.236	4.004	3.333	2.943	3.369	5.545	24.319	9.271	18.708	8.1339	5.702	5.897	7.734	9.368		0.209304	7.74312
5.478	5.35	8.588	13.8	3.365	3.023	4.295	8.453	8.283	3.697	9.996	7.432	4.401	3.428	2.444	3.425	6.218	26.352	7.599	20.527	7.9615	4.635	5.796	7.417	8.442		0.213952	7.70531
5.5971	5.767	6.022	15.003	3.816	3.812	3.97	7.11	7.731	4.191	10.276	7.336	2.995	3.576	3.312	3.772	6.654	24.501	9.259	15.368	9.272	4.892	5.717	6.23	8.757		0.218603	7.47246
5.7162	4.611	5.781	14.095	4.315	3.858	3.635	7.309	8.082	3.728	7.815	6.511	4.218	3.16	4.145	3.357	8.081	27.183	8.956	20.442	8.2546	4.978	5.739	7.718	7.084		0.223255	7.62732
5.8353	3.497	6.213	15.539	4.723	2.983	3.542	8.165	9.239	4.13	8.582	8.084	4.662	2.952	3.323	3.555	5.835	26.767	7.614	20.26	6.7715	4.982	3.77	6.956	6.214		0.227907	7.4316
5.9544	4.613	6.105	15.284	4.89	3.702	3.549	9.022	10.423	3.292	8.196	9.387	3.257	2.699	2.072	3.11	6.877	26.923	9.524	20.84	7.1676	4.789	4.172	6.768	6.286		0.232558	7.62282
6.0735	4.351	5.734	15.052	3.488	2.791	4.339	7.223	9.798	3.887	7.462	10.075	3.819	2.876	3.06	3.185	6.083	25.594	8.38	18.679	8.2683	3.97	3.878	3.932	4.814		0.23721	7.1141
6.1926	4.675	5.418	14.286	4.585	3.336	2.867	9.263	11.744	3.437	9.027	11.239	3.259	2.568	3.188	3.549	5.739	26.843	7.962	18.163	9.1646	4.122	3.412	5.191	4.973		0.241862	7.41711
6.3117	4.503	3.7	15.854	3.001	2.972	3.551	10.171	14.94	3.989	8.514	10.608	3.088	2.411	3.424	3.131	5.717	21.929	8.532	23.423	7.9892	4.06	3.471	4.495	4.871		0.246513	7.43101
6.4307	3.69	5.579	13.807	3.177	3.226	3.427	8.986	15.521	3.064	8.691	12.114	2.453	2.849	2.865	2.479	5.375	25.046	8.058	22.594	6.5112	3.787	4.366	4.325	3.658		0.251161	7.31867
6.5498	3.499	5.12	18.308	3.558	1.679	3.095	9.284	13.899	4.53	7.97	11.088	3.607	3.031	2.909	3.126	4.367	26.336	10.131	27.684	8.8177	4.556	2.671	3.64	4.561		0.255813	7.81111
6.6689	2.434	4.796	17.477	3.927	2.416	3.618	10.431	16.14	4.208	7.226	13.828	3.789	2.126	2.73	2.866	4.225	27.354	9.231	30.399	7.9443	4.317	2.874	3.659	3.915		0.260464	7.9971
6.788	3.671	5.385	17.613	3.1	3.1	4.083	11.773	14.738	3.199	7.272	14.286	4.028	2.499	2.497	2.534	5.024	31.978	11.393	27.609	7.3708	4.241	4.714	3.274	3.219		0.265116	8.27503
6.9071	3.524	5.757	16.01	2.848	2.309	3.628	11.605	14.132	4.106	9.404	15.019	3.11	2.128	2.582	2.647	5.691	34.337	9.916	23.893	6.6645	3.269	3.962	3.483	4.337		0.269767	8.0984
7.0262	3.597	4.931	16.639	3.228	2.624	4.198	10.571	15.72	2.376	7.9	13.152	4.36	2.442	2.276	3.071	5.27	34.724	7.875	21.981	7.6656	3.726	3.31	3.845	3.474		0.274419	7.87315
7.1453	3.401	5.488	19.582	4.873	2.892	3.295	10.613	15.314	3.874	8.345	12.413	3.039	2.843	2.048	2.973	4.618	33.53	10.709	18.108	9.6456	4.826	3.961	3.139	4.634		0.279071	8.09015
7.2644	3.291	6.199	17.172	2.546	1.835	3.006	12.502	13.907	3.592	9.604	13.214	3.373	2.829	2.197	3.39	4.162	33.715	8.357	19.908	7.5927	4.78	2.721	2.321	4.147		0.283722	7.76503
7.3834	3.746	6.168	20.66	4.068	2.469	2.898	12.959	13.534	3.265	10.024	14.176	3.584	2.812	2.782	3.541	4.119	30.71	8.479	20.159	7.7027	4.833	3.192	3.606	3.855		0.28837	8.0559
7.5025	3.761	4.887	21.563	3.787	2.55	2.914	10.492	12.825	4.605	10.588	16.982	3.598	2.186	2.351	2.818	3.514	25.681	10.978	18.929	7.6353	3.945	3.802	2.527	4.083		0.293022	7.79172
7.6216	2.429	6.44	20.78	3.802	2.588	3.111	13.054	13.407	3.918	10.15	17.422	3.763	2.573	2.215	3.012	4.049	26.02	9.367	19.956	7.6903	4.4	2.549	3.006	4.863		0.297673	7.94018
7.7407	3.066	5.723	23.088	3.415	2.684	3.683	10.518	14.659	5.473	10.084	17.069	3.691	2.779	2.088	2.566	4.298	22.825	9	23.755	8.8618	3.963	3.529	2.64	4.399		0.302325	8.07737
7.8598	3.347	7.107	22.595	2.664	2.375	2.745	10.943	16.195	3.844	8.911	15.976	2.268	2.999	3.126	2.912	3.796	20.29	8.355	24.823	8.4605	4.156	2.583	2.709	5.189		0.306977	7.84869
7.9789	2.014	7.123	23.134	3.068	2.293	2.771	10.522	20.064	4.216	10.782	17.674	3.136	2.619	2.111	2.921	3.83	18.204	7.486	25.225	10.0546	4.123	2.397	2.166	5.706		0.311628	8.06832
8.098	2.422	7.081	26.404	4.065	2.517	3.693	9.6	21.811	5.18	10.574	16.135	4.236	2.618	2.554	2.702	3.53	17.526	7.337	27.329	12.9959	5.16	3.362	2.907	7.455		0.31628	8.71641
8.2171	3.795	7.899	32.834	3.454	2.06	3.626	8.899	22.103	5.606	12.055	16.223	3.28	2.276	2.524	2.223	3.799	19.503	8.173	27.654	12.9487	5.545	3.993	2.947	6.256		0.320932	9.15315
8.3362	2.639	7.829	37.561	3.932	2.504	3.105	7.509	19.558	5.028	10.157	15.864	2.655	2.021	2.322	2.614	3.642	17.66	9.665	25.181	12.7149	4.225	4.118	3.007	6.19		0.325583	8.82087
8.4552	2.534	9.663	37.293	3.68	2.526	3.798	8.739	19.093	4.942	12.1	18.44	3.639	2.545	3.037	2.173	4.053	13.267	10.222	22.452	13.6446	4.163	3.329	2.394	6.71		0.330231	8.93486
8.5743	3.082	8.639	42.003	3.853	3.089	3.145	8.424	17.986	4.542	14.525	19.631	3.62	2.625	1.911	2.841	3.276	11.136	10.159	20.263	15.2362	5.104	3.089	3.078	6.802		0.334883	9.0858
8.6934	3.194	9.382	40.859	3.261	2.172	2.982	10.279	15.474	6.231	13.867	22.222	3.353	2.388	2.234	2.861	4.012	11.422	9.536	15.844	17.5187	5.004	3.493	2.386	8.016		0.339534	9.08295
8.8125	2.744	9.424	37.9	3.522	2.326	2.693	10.078	17.513	5.622	15.318	20.431	2.95	2.438	2.593	2.605	3.251	10.366	8.683	16.209	16.3275	5.367	2.873	2.699	7.013		0.344186	8.7894
8.9316	2.348	10.552	39.34	2.117	3.448	3.267	10.731	15.693	4.876	14.079	23.413	3.991	2.712	2.821	3.012	4.047	10.767	9.914	15.887	16.9771	5.338	3.145	3.234	7.017		0.348837	9.11359
9.0507	3.41	10.156	39.933	3.458	2.689	3.272	12.229	12.258	4.55	16.763	24.682	3.487	2.764	2.53	3.438	3.094	9.671	8.876	17.379	15.0117	4.352	3.89	2.682	5.168		0.353489	8.98928
9.1698	3.298	8.768	38.317	3.346	2.983	3.324	10.875	15.377	5.364	17.696	25.778	3.568	2.807	3.119	2.932	3.165	11.699	9.125	14.466	17.5917	5.535	3.609	3.289	5.814		0.358141	9.24357
9.2889	3.501	9.364	39.029	1.988	1.997	3.199	14.69	15.469	5.611	18.399	25.277	2.751	2.867	3.292	3.469	3.628	10.295	10.26	16.347	17.6645	5.261	2.571	3.519	5.995		0.362792	9.43515
9.4079	4.064	10.301	39.719	2.916	3.341	3.281	12.773	15.721	5.429	20.625	25.42	3.502	3.239	2.31	2.363	4.808	9.962	11.435	11.809	16.2048	6.133	2.827	2.522	6.567		0.36744	9.46966
9.527	3.036	11.84	40.002	2.693	2.997	3.208	14.076	15.21	7.145	19.792	27.55	3.576	2.002	2.797	3.077	3.149	9.412	12.719	13.534	14.0106	5.755	2.763	3.327	6.069		0.372092	9.57248
9.6461	3.325	9.034	34.339	2.844	2.54	2.847	13.112	16.143	8.13	19.723	25.469	4.687	2.738	2.769	2.668	3.107	9.84	15.781	17.76	12.4673	5.614	2.765	2.779	6.888		0.376743	9.47372
9.7652	2.822	11.749	34.746	2.693	2.91	3.898	13.739	14.851	8.129	20.353	27.879	3.796	2.777	3.784	2.735	3.307	8.871	14.906	22.235	13.6358	6.788	3.13	3.829	6.681		0.381395	10.0102
9.8843	3.301	12.717	38.2	3.599	2.392	3.648	14.036	15.018	7.676	19.383	25.169	3.667	3.036	2.833	2.86	2.997	10.682	16.05	20.079	14.7048	5.171	4.181	4.108	5.875		0.386047	10.0576
10.0034	4.215	11.344	38.911	3.355	2.462	2.602	15.85	12.819	7.524	19.789	27.962	3.062	2.654	3.25	3.444	2.635	9.071	14.684	24.944	11.7992	5.3	3.541	3.897	5.885		0.390698	10.0416
10.1225	3.86	13.886	40.528	3.626	2.46	3.35	16.114	12.518	9.328	20.117	27.504	3.726	2.198	3.815	3.152	2.709	9.092	15.814	24.592	12.1645	5.454	3.208	3.433	8.261		0.39535	10.4546
10.2416	4.35	11.369	41.122	3.585	3.095	3.827	18.39	11.975	8.425	20.555	27.126	3.383	2.916	2.543	3.684	3.819	6.074	13.997	25.054	12.8771	4.46	3.359	3.102	6.76		0.400002	10.2436
10.3606	5.444	11.427	45.487	3.751	2.6	3.293	18.35	10.371	8.191	20.183	26.647	3.534	3.281	3.156	3.723	3.01	8.767	12.906	27.969	13.7551	6.384	3.784	3.491	8.347		0.404649	10.7438
10.4797	4.031	11.118	45.733	3.032	2.078	3.203	18.122	13.403	9.061	22.995	23.317	4.632	3.136	2.824	3.734	2.79	8.215	13.637	24.259	14.947	5.461	3.881	4.053	9.827		0.409301	10.7287
10.5988	4.215	10.629	47.498	3.5	3.09	3.651	16.518	11.677	10.041	18.974	24.635	3.762	3.288	3.736	4.331	3.211	8.567	13.149	26.9	16.3824	6.729	4.128	3.741	9.093		0.413953	10.8936
10.7179	3.971	9.328	41.358	3.592	1.969	3.348	16.922	12.565	12.437	18.535	26.474	3.878	3.04	3.615	2.979	4.488	8.032	13.45	22.153	14.0948	6.301	4.803	3.889	10.252		0.418604	10.4781
10.837	4.516	7.794	35.837	2.767	2.737	2.865	14.843	13.315	12.397	17.486	25.668	3.615	3.158	3.128	3.156	3.558	7.897	15.213	20.284	12.566	5.032	3.423	3.659	8.103		0.423256	9.70904
10.9561	4.17	10.282	29.971	3.332	2.901	3.799	12.572	12.694	12.024	16.768	23.546	3.457	3.905	3.314	3.191	4.341	8.604	13.168	15.946	11.7173	5.096	3.869	3.995	8.35		0.427907	9.20885
11.0752	3.461	9.028	30.934	3.406	3.179	4.023	13.079	12.001	14.083	16.445	26.279	3.352	2.84	4.235	3.238	3.153	8.983	11.093	16.748	11.5607	6.847	4.015	4.28	9.679		0.432559	9.41424
11.1943	4.473	9.831	29.346	4.154	2.231	3.815	12.79	10.743	13.189	18.445	26.446	3.988	3.4	3.036	2.969	3.6	8.057	9.778	14.845	11.0605	5.146	3.792	4.538	8.187		0.437211	9.07748
11.3133	3.724	8.904	29.555	3.471	3.212	3.663	13.514	12.149	15.962	19.93	25.957	2.945	3.219	3.938	3.375	3.708	8.477	9.604	14.22	9.3649	5.869	4.273	4.983	9.063		0.441858	9.295
11.4324	3.538	8.657	27.409	3.222	2.177	3.172	12.633	11.981	16.091	21.004	24.269	3.283	4.059	3.125	3.583	3.454	8.021	9.916	15.132	10.2101	5.106	3.391	4.379	9.508		0.44651	9.055
11.5515	4.367	7.737	27.958	3.013	2.886	3.728	12.522	11.54	18.074	18.852	25.671	4.496	3.575	2.695	3.58	2.851	9.83	7.764	15.536	9.1544	4.214	5.563	4.053	10.06		0.451162	9.15498
11.6706	4.019	7.944	24.108	2.286	2.291	3.709	14.604	12.571	17.293	20.457	23.706	4.399	3.342	2.852	3.524	3.159	9.728	9.657	16.462	9.2672	4.19	3.467	4.466	8.62		0.455813	9.00505
11.7897	4.78	10.13	24.342	3.498	2.418	2.58	15.605	11.352	15.841	19.619	24.28	2.899	3.997	3.587	5.027	2.806	8.885	9.309	16.622	9.8639	4.626	4.327	3.825	9.557		0.460465	9.15733
11.9088	3.754	7.679	24.973	3.65	2.494	4.451	16.598	10.079	18.989	20.358	24.696	3.137	3.681	2.93	4.224	2.784	8.613	10.583	16.212	10.8378	4.504	3.752	5.262	8.341		0.465117	9.27424
12.0279	5.059	9.174	25.926	3.094	3.156	4.204	15.688	12.165	18.834	22.186	23.916	3.615	3.048	3.146	3.301	3.456	8.11	10.524	16.694	8.9389	5.427	4.455	4.388	7.981		0.469768	9.43691
12.147	4.6	9.989	27.103	3.564	2.446	4.024	17.919	13.293	18.538	22.171	27.376	3.085	3.578	3.525	3.256	3.188	8.642	7.039	16.147	10.2992	5.246	3.999	4.123	10.063		0.47442	9.71722
12.2661	3.994	8.22	31.014	4.195	2.784	3.529	16.531	12.013	15.478	22.73	24.614	3.303	2.93	3.466	3.35	3.841	8.787	8.269	19.317	8.525	4.326	3.26	4.077	9.436		0.479072	9.49954
12.3851	4.517	9.067	29.155	3.221	3.273	3.505	18.103	11.28	16.534	22.026	26.895	3.471	4.021	3.211	2.969	3.844	9.801	8.811	16.734	10.3111	4.632	4.039	4.723	8.058		0.483719	9.67505
12.5042	4.647	6.583	28.895	3.394	2.78	3.833	18.582	12.383	17.273	22.776	26.816	4.065	4.369	4.221	3.909	4.772	8.206	10.515	15.496	8.4722	3.616	4.56	4.367	9.568		0.488371	9.75409
12.6233	3.377	9.517	29.529	4.198	3.048	5.05	20.038	12.013	17.148	23.947	28.399	4.21	4.341	3.815	3.831	4.875	7.642	7.793	16.702	8.7176	4.951	3.243	4.346	9.063		0.493023	9.9914
12.7424	3.252	7.406	29.261	3.743	2.973	4.98	19.94	13.414	17.336	21.735	26.522	4.213	2.971	2.985	4.258	4.047	7.897	8.745	14.304	9.1218	5.702	3.624	4.242	10.535		0.497674	9.71695
12.8615	4.062	7.104	30.038	3.727	3.138	3.499	17.505	12.181	14.74	20.71	24.23	3.69	4.046	2.379	4.166	3.249	8.235	8.768	15.226	8.6177	4.059	3.513	4.091	13.086		0.502326	9.33582
12.9806	2.876	6.45	33.308	3.033	2.817	4.335	18.858	12.101	15.824	22.057	25.854	3.765	3.694	2.911	3.985	3.548	7.614	8.567	19.677	7.6339	4.399	4.576	4.356	13.535		0.506977	9.82391
13.0997	4.759	7.562	32.661	3.26	3.134	4.139	17.762	14.802	15.442	24.486	24.441	3.795	3.588	3.353	3.181	3.06	10.569	8.769	16.686	8.0606	5.277	4.363	5.127	14.359		0.511629	10.1098
13.2188	3.635	5.881	39.299	3.129	2.386	5.472	14.512	14.056	11.999	24.303	25.825	5.233	3.334	3.247	3.967	2.922	8.806	10.177	18.203	7.1427	5.896	3.903	4.966	15.991		0.516281	10.1785
13.3378	3.663	5.782	40.945	3.536	3.096	3.924	15.965	14.605	13.623	27.299	20.409	4.548	3.61	2.577	4.104	3.642	8.054	10.353	18.552	8.0325	4.767	5.157	5.221	16.201		0.520928	10.3194
13.4569	3.118	6.682	47.248	3.688	3.114	4.637	16.325	14.872	12.821	28.147	24.492	3.694	3.55	3.966	3.263	3.496	7.695	9.84	17.588	7.8705	5.427	4.832	4.771	19.008		0.52558	10.8394
13.576	3.34	5.876	44.589	3.417	3.216	4.066	13.549	12.791	12.368	25.877	26.623	5.839	3.676	3.261	3.405	3.54	7.845	10.638	15.083	7.6505	4.243	3.479	7.299	16.044		0.530232	10.3214
13.6951	3.796	6.748	45.602	3.445	2.579	4.349	13.967	15.702	15.015	27.292	24.288	4.914	3.536	2.961	3.411	2.609	6.127	12.567	16.478	7.8221	3.544	5.049	7.028	21.916		0.534883	10.8644
13.8142	3.484	7.649	42.538	4.135	2.275	5.141	13.255	14.698	13.899	28.05	23.587	5.248	2.814	3.746	3.682	3.324	7.495	12.421	19.059	7.8271	4.14	4.528	5.454	18.615		0.539535	10.711
13.9333	3.718	5.306	41.162	3.643	2.454	4.119	12.565	14.34	15.773	30.175	22.146	5.022	3.307	3.081	3.984	2.767	7.3	12.84	22.962	8.3847	5.192	5.179	6.982	17.347		0.544187	10.8229
14.0524	3.564	6.719	39.274	3.225	3.396	5.349	13.647	14.83	16.875	32.111	25.909	6.355	2.947	3.129	3.702	2.664	5.259	14.115	23.231	7.3588	5.02	4.626	7.167	18.61		0.548838	11.2118
14.1715	3.49	7.555	39.086	3.432	3.441	4.354	14.797	14.457	18.045	30.838	27.492	4.145	3.667	3.233	3.288	2.963	5.309	11.243	27.183	7.3243	4.148	4.477	7.162	20.496		0.55349	11.3177
14.2905	4.202	7.493	42.081	3.836	3.665	4.411	15.692	14.242	17.418	29.876	25.547	4.841	3.602	3.772	3.389	2.765	7.154	11.639	24.468	8.1398	4.891	4.699	6.758	20.547		0.558138	11.4637
14.4096	3.746	6.964	43.35	3.685	2.793	4.583	15.468	13.046	15.303	29.146	25.782	4.346	3.218	2.98	4.074	4.33	5.393	13.512	25.186	8.5652	4.314	4.394	9.697	22.023		0.562789	11.4958
14.5287	3.801	6.923	39.963	3.282	2.612	3.332	16.595	14.717	14.733	29.342	24.259	5.377	3.765	2.953	3.813	3.399	5.154	14.344	19.092	7.4854	3.867	4.636	8.917	24.206		0.567441	11.107
14.6478	2.788	6.384	39.971	3.378	2.5	4.986	16.477	14.557	14.522	29.243	28.129	5.202	3.452	3.081	2.887	3.663	5.252	14.517	19.422	7.0364	4.283	5.415	8.398	27.947		0.572093	11.3954
14.7669	4.223	7.123	34.086	3.991	3.481	4.333	15.315	11.897	15.422	29.944	27.111	4.671	3.3	3.084	2.631	2.849	6.122	13.49	20.605	7.3149	4.109	4.2	10.444	29.295		0.576744	11.21
14.886	3.083	6.67	32.931	4.27	2.28	4.452	12.879	13.722	14.949	31.456	26.082	4.475	3.762	2.955	2.948	4.005	5.29	15.658	20.837	8.2653	4.3	4.625	13.006	26.604		0.581396	11.2293
15.0051	4.677	5.115	32.059	3.38	3.765	4.378	16.482	15.36	16.373	33.455	25.672	5.035	3.179	3.72	4.185	3.644	5.182	15.689	20.251	6.4952	4.758	4.9	13.342	26.248		0.586047	11.556
15.1242	3.558	7.517	31.553	2.932	2.776	4.496	15.23	14.406	15.989	32.306	26.271	4.663	3.401	3.562	3.555	2.933	4.192	16.4	24.336	7.3651	4.433	5.105	13.707	21.001		0.590699	11.3203
15.2432	3.769	8.437	29.562	3.505	2.834	4.89	14.86	13.838	18.051	33.244	26.18	3.668	3.673	3.407	3.023	3.866	5.535	17.861	24.219	7.3736	4.447	4.216	13.306	23.21		0.595347	11.5406
15.3623	5.97	9.112	34.027	4.159	3.315	5.072	18.83	14.225	16.979	33.712	24.656	5.078	2.941	3.328	3.195	3.461	5.279	20.046	24.261	7.2722	4.101	4.718	13.293	17.08		0.599998	11.8379
15.4814	4.568	7.55	33.598	3.684	3.916	5.456	17.554	14.409	18.501	38.242	24.109	4.039	3.874	3.223	3.398	3.808	4.098	20.703	27.239	8.9154	5.14	5.568	14.385	17.156		0.60465	12.2139
15.6005	3.328	8.13	34.277	3.435	2.522	4.358	17.146	15.906	19.814	39.259	23.3	4.82	4.267	3.221	3.819	3.886	5.043	22.767	27.455	9.8522	4.67	5.404	14.458	16.157		0.609302	12.3873
15.7196	3.805	8.981	34.293	3.133	3.206	5.024	19.785	13.963	19.88	41.323	24.236	4.826	3.277	3.304	2.681	3.623	6.042	22.082	24.269	8.2915	5.271	5.238	17.099	16.153		0.613953	12.4911
15.8387	4.058	9.513	36.64	3.295	3.213	5.081	24.197	15.004	19.527	42.078	25.397	5.242	3.646	3.011	3.289	3.177	4.983	22.924	26.199	8.0003	5.227	6.633	17.485	13.822		0.618605	12.9851
15.9578	3.579	9.296	35.832	3.439	3.444	4.116	30.938	12.861	22.804	46.424	26.671	4.705	3.929	3.222	3.186	3.119	4.125	24.385	28.144	9.6558	4.247	6.264	20.874	14.566		0.623257	13.7427
16.0769	4.647	9.247	35.452	3.833	3.324	4.87	28.89	15.599	19.991	45.939	28.345	4.187	3.083	4.186	3.74	4.236	4.263	23.632	24.888	10.1918	5.484	5.134	16.292	18.732		0.627908	13.6744
16.196	3.411	6.913	35.072	3.99	3.061	5.691	27.401	14.195	23.097	48.256	30.303	4.781	3.527	3.374	3.257	2.748	4.535	24.17	26.242	9.5121	5.516	6.404	19.583	20.118		0.63256	13.9649
16.315	3.212	6.434	39.34	3.025	2.727	6.067	23.564	19.191	20.63	51.142	35.188	5.289	4.308	3.902	3.956	2.931	3.542	21.038	28.397	10.5291	6.104	6.474	22.205	23.397		0.637208	14.6913
16.4341	3.213	7.544	36.022	4.17	4.037	5.573	19.376	16.804	24.152	54.98	39.848	4.495	3.366	3.099	4.684	3.907	5.585	28.327	26.947	11.0173	6.741	7.676	25.782	22.925		0.641859	15.4279
16.5532	3.47	8.638	28.217	3.247	2.61	5.425	21.715	20.836	22.125	54.046	38.937	5.294	3.415	3.754	3.406	3.86	4.8	23.957	30.302	8.2722	5.787	7.267	28.242	21.194		0.646511	14.9507
16.6723	3.551	8.602	29.18	3.089	3.558	6.728	18.956	20.073	25.159	55.81	40.433	6.179	4.48	3.472	4.624	2.669	4.349	28.389	27.793	9.6079	8.287	7.917	28.945	16.282		0.651163	15.3389
16.7914	4.009	8.37	27.348	3.103	3.03	7.07	21.514	19.923	25.399	52.746	37.834	5.491	4.19	3.192	3.786	3.707	3.951	28.953	31.299	12.6228	6.466	8.242	30.77	14.108		0.655814	15.2968
16.9105	4.738	7.814	26.375	3.403	2.705	6.63	20.064	20.458	27.786	52.62	37.494	5.886	3.83	3.297	4.527	3.456	5.395	28.44	32.983	9.0931	6.214	8.351	32.298	12.445		0.660466	15.2626
17.0296	3.266	7.866	24.411	3.914	3.832	8.802	19.935	17.451	34.006	58.823	40.437	4.298	4.405	2.905	3.273	2.932	3.335	25.215	34.628	8.5514	7.173	8.446	30.754	9.62		0.665117	15.3449
17.1487	3.533	9.182	22.947	3.084	3.139	7.384	23.132	19.656	33.008	56.503	38.169	5.749	4.01	2.822	4.303	2.976	4.105	27.369	38.768	8.509	8.263	9.444	29.832	9.153		0.669769	15.6267
17.2677	3.682	7.009	23.667	4.14	3.88	6.847	29.452	20.033	33.424	65.111	43.415	6.775	4.683	2.617	3.844	3.291	3.761	26.466	41.85	9.1931	7.376	11.207	24.952	9.648		0.674417	16.5135
17.3868	3.63	6.935	25.369	5.795	3.022	7.496	25.666	21.627	41.364	64.447	46.336	5.815	4.705	3.478	3.531	3.167	4.142	26.724	51.263	7.0785	6.008	12.972	25.484	7.016		0.679068	17.2113
17.5059	3.967	8.042	25.822	4.446	3.404	8.419	26.873	22.864	45.405	78.947	51.083	6.602	4.826	3.751	3.563	3.055	3.689	27.488	52.878	7.2637	7.063	13.914	21.195	6.874		0.68372	18.3931
17.625	3.648	7.057	25.934	3.966	2.875	8.774	26.447	22.049	52.25	79.57	53.919	6.77	4.809	3.437	4.149	2.894	4.408	26.905	51.112	6.3253	8.832	13.596	20.814	5.847		0.688372	18.5995
17.7441	4.217	9.893	25.788	5.081	3.195	11.182	23.981	25.751	62.403	82.181	58.45	6.905	4.851	3.704	3.361	3.495	3.91	25.578	47.733	7.7267	8.523	18.101	18.184	4.96		0.693023	19.5481
17.8632	3.683	8.219	26.669	4.079	2.774	9.369	26.428	30.162	72.203	85.829	67.303	8.876	4.792	4.194	3.674	3.869	4.299	26.159	45.561	7.7519	9.441	17.32	17.055	5.683		0.697675	20.6414
17.9823	4.329	7.65	28.24	5.097	3.267	9.7	26.368	37.225	82.939	93.748	69.208	9.61	5.995	3.68	4.205	3.698	4.05	27.985	40.327	8.3448	8.292	21.867	15.311	4.806		0.702327	21.9142
18.1014	4.55	7.629	29.4	4.467	3.001	8.502	31.548	36.227	93.085	104.871	69.155	12.831	5.686	3.784	3.945	3.24	3.791	30.847	34.406	8.2435	9.222	23.504	13.929	4.812		0.706978	22.9448
18.2204	4.111	7.376	28.565	5.086	3.062	7.515	32.632	39.152	100.924	114.276	67.762	19.724	5.546	3.848	3.258	2.772	3.723	30.641	33.003	7.2619	12.851	29.127	16.24	4.905		0.711626	24.3067
18.3395	4.311	7.025	30.307	3.452	4.394	6.734	38.361	43.658	110.812	95.095	75.348	19.288	5.481	3.592	4.171	2.687	4.67	34.56	32.119	6.4321	11.745	32.069	13.187	4.469		0.716278	24.7486
18.4586	3.593	7.342	30.486	4.167	3.282	8.477	41.413	50	104.867	72.805	75.122	24.992	5.543	3.959	3.809	2.675	3.609	33.174	29.422	5.5432	11.034	38.645	14.543	4.048		0.720929	24.2729
18.5777	3.149	7.413	31.371	4.353	4.101	8.253	44.055	61.365	102.144	48.564	85.223	25.989	5.285	4.18	3.868	3.702	4.7	36.825	33.373	6.8309	10.829	38.398	12.806	4.039		0.725581	24.6173
18.6968	3.374	8.136	35.279	4.368	4.339	7.256	46.081	66.679	101.303	34.052	98.732	26.47	6.292	4.811	3.638	3.372	4.833	41.267	36.041	6.1799	10.795	40.426	12.943	3.442		0.730233	25.4212
18.8159	3.701	6.416	33.68	3.97	3.598	8.83	53.36	74.481	86.365	29.859	102.388	31.835	6.844	3.654	3.335	3.715	4.262	42.43	32.93	7.8206	15.538	38.268	11.386	3.389		0.734884	25.5023
18.935	3.779	8.015	37.619	5.68	5.068	12.399	51.289	71.747	70.278	22.517	108.348	33.591	6.672	4.473	4.432	3.95	5.206	45.518	35.567	7.0124	14.319	34.396	14.344	4.538		0.739536	25.4482
19.0541	2.898	6.92	39.035	4.807	4.459	11.467	48.91	60.62	54.094	18.202	109.54	41.769	8.303	4.207	4.398	4.646	5.392	47.256	33.456	6.4086	16.344	27.774	13.315	4.596		0.744187	24.1174
19.1731	3.123	7.284	42.574	5.363	5.503	17.533	49.286	39.596	40.296	17.763	102.405	50.401	8.276	4.055	3.619	3.876	4.082	50.6	38.158	9.2422	23.764	28.628	10.854	4.173		0.748835	23.7689
19.2922	3.334	8.845	50.085	5.297	7.484	20.914	52.479	25.597	33.46	16.26	86.483	57.744	10.731	3.994	4.037	4.262	5.348	49.103	36.084	8.5238	23.999	27.47	9.758	4.072		0.753487	23.1402
19.4113	3.487	7.026	44.639	7.842	8.649	26.965	49.596	20.535	30.823	13.063	70.305	74.064	12.248	4.464	3.954	2.972	4.995	52.773	39.118	8.1094	29.725	22.68	8.822	3.967		0.758138	22.9509
19.5304	3.615	8.715	45.794	7.331	11.666	31.935	49.974	19.171	26.511	11.134	54.36	85.454	12.999	3.257	4.026	3.742	6.722	51.565	33.878	8.2896	36.794	21.975	7.983	4.364		0.76279	22.9689
19.6495	3.977	8.808	47.277	7.433	14.534	42.259	48.556	15.027	19.459	11.548	44.1	86.777	18.401	5.897	3.949	3.579	5.972	51.475	35.112	8.0752	41.391	19.036	7.239	3.838		0.767442	23.0716
19.7686	2.914	7.991	38.4	10.467	16.661	46.02	38.939	12.279	17.886	7.591	37.813	79.935	18.828	3.736	3.543	3.638	5.924	51.493	30.417	9.1285	48.869	16.476	6.79	4.898		0.772093	21.6932
19.8877	4.596	9.103	35.303	11.117	21.189	51.619	33.665	11.956	15.749	7.009	31.528	68.384	25.207	5.099	4.553	3.438	6.611	51.079	29.581	9.833	51.276	15.224	6.093	4.846		0.776745	21.4191
20.0068	4.451	10.63	32.228	8.587	22.632	55.284	26.615	8.706	11.707	5.454	27.914	51.98	31.227	4.58	5.02	4.507	6.83	53.424	28.049	11.0028	50.393	14.407	6.165	4.144		0.781397	20.2474
20.1259	4.535	9.026	31.211	8.307	27.181	57.125	23.253	7.974	8.576	6.151	23.093	41.423	39.827	5.373	4.534	4.727	7.916	54.129	24.924	12.5688	54.856	14.011	5.79	4.789		0.786048	20.0542
20.2449	4.319	10.424	31.598	8.976	32.766	66.157	19.371	5.949	6.005	4.805	20.64	35.064	45.142	5.654	5.817	5.207	10.734	54.892	27.269	15.6871	55.261	14.472	5.463	3.861		0.790696	20.6472
20.364	4.752	8.337	30.864	10.685	31.6	60.015	16.061	7.263	5.628	3.908	20.153	28.77	43.306	6.939	5.959	7.025	12.901	57.678	23.504	19.9919	49.408	14.033	5.353	5.122		0.795348	19.969
20.4831	5.112	8.025	33.346	12.042	36.105	62.959	11.87	5.13	3.723	3.565	17.037	27.056	52.711	8.345	7.604	6.536	14.376	58.88	23.693	20.7492	45.67	11.862	5.561	4.6		0.799999	20.2732
20.6022	5.157	10.524	36.483	13.96	37.48	63.497	10.685	4.495	3.484	2.989	14.877	23.441	63.448	10.139	7.799	6.461	15.076	58.33	22.561	24.7171	42.232	11.313	5.742	5.034		0.804651	20.8302
20.7213	4.504	10.566	39.937	16.75	39.715	66.395	8.601	3.527	2.212	2.744	14.724	21.201	69.543	11.851	10.772	9.352	18.604	62.085	24.062	32.8668	37.863	12.731	4.238	4.428		0.809302	22.053
20.8404	4.908	9.581	46.299	17.955	45.202	51.945	9.589	2.354	2.339	2.805	11.575	15.875	69.603	15.683	12.628	7.97	19.205	63.965	22.574	35.7605	37.384	12.853	5.072	5.118		0.813954	22.0101
20.9595	3.92	12.909	52.511	21.081	49.073	43.434	6.318	3.152	2.118	2.188	10.629	17.296	65.207	21.253	14.042	8.473	19.293	59.919	23.02	48.6228	34.13	11.567	5.495	3.936		0.818606	22.4828
21.0786	4.909	13.452	69.69	24.841	48.446	34.722	6.08	1.873	2.089	1.987	7.737	15.423	62.647	25.417	19.453	9.473	23.357	58.201	26.361	57.5281	32.744	12.278	5.831	3.802		0.823257	23.6809
21.1976	4.385	13.327	84.467	27.885	40.662	27.198	4.951	2.545	1.415	2.306	5.582	12.396	49.94	42.423	25.656	10.748	24.707	54.848	32.301	63.1782	32.993	14.445	5.661	3.233		0.827905	24.4688
21.3167	5.937	11.601	95.355	31.829	29.496	23.624	4.356	2.342	1.082	1.504	5.305	9.716	41.356	54.022	31.608	10.599	27.163	62.283	33.235	64.6882	36.062	15.021	7.663	4.128		0.832557	25.4156
21.4358	5.072	13.962	94.764	35.452	29.373	19.394	3.143	1.845	1.779	1.249	5.406	9.602	33.588	74.177	39.712	11.403	27.437	61.805	40.13	73.7215	38.348	14.117	7.356	4.772		0.837208	26.9836
21.5549	5.052	14.974	93.139	29.561	23.098	14.845	2.618	2.349	1.391	1.526	4.304	8.559	29.933	86.501	50.417	13.282	28.653	64.67	39.86	70.4128	39.321	14.328	7.307	4.449		0.84186	27.1062
21.674	4.703	16.649	71.906	31.89	22.252	13.812	2.7	1.076	1.638	2.564	3.278	7.362	26.412	84.539	59.107	14.573	34.368	65.35	42.687	68.8241	39.845	15.267	6.771	4.103		0.846512	26.7365
21.7931	5.313	23.05	54.548	32.064	16.929	13.755	2.64	1.142	1.275	1.126	3.529	7.923	18.127	78.332	69.175	16.37	31.718	62.887	40.471	56.6842	42.282	16.647	7.616	4.553		0.851163	25.3398
21.9122	4.796	30.36	36.993	28.875	13.458	12.112	2.007	1.447	0.995	0.782	3.117	6.237	15.435	71.764	66.276	20.843	31.04	59.141	44.98	54.2855	42.982	19.111	8.017	4.869		0.855815	24.1634
22.0313	5.546	39.725	27.303	25.754	13.276	11.019	1.396	1.204	1.332	1.059	2.949	5.541	11.544	57.88	61.036	26.11	29.098	46.027	42.255	37.9943	51.937	24.595	6.343	5.477		0.860467	22.35
22.1503	5.451	42.779	17.671	20.02	13.091	10.3	1.549	0.771	1.099	0.993	2.253	3.694	11.153	43.961	53.557	33.788	29.152	39.118	40.482	31.9631	52.743	23.975	7.367	11.16		0.865114	20.7538
22.2694	6.239	45.522	13.598	17.445	10.197	8.908	1.243	0.902	1.269	1.114	2.501	5.12	6.77	28.558	40.941	35.987	31.404	29.16	32.656	24.2105	48.292	30.143	5.612	20.614		0.869766	18.6836
22.3885	6.814	48.602	12.008	15.135	9.242	8.727	1.512	0.235	0.731	0.684	1.485	4.056	5.635	20.614	34.648	44.005	33.587	27.862	25.387	19.0519	42.153	35.674	5.765	29.52		0.874418	18.0472
22.5076	5.767	55.866	11.295	11.516	8.196	8.245	1.322	0.643	0.62	0.722	1.543	3.485	4.417	14.41	26.248	39.739	26.86	20.609	20.708	14.5978	37.883	45.236	8.208	36.503		0.879069	16.86
22.6267	7.221	64.893	8.659	9.929	7.907	5.08	0.835	0.507	0.462	0.907	1.35	2.664	4.995	12.169	20.449	32.531	22.038	17.794	16.343	10.18	31.133	56.197	9.754	37.655		0.883721	15.9022
22.7458	7.817	77.068	5.751	6.604	6.042	5.439	0.893	0.547	0.666	0.665	0.95	2.493	4.087	9.341	17.557	28.7	19.463	14.408	11.844	8.9523	25.795	58.415	8.609	34.526		0.888372	14.8597
22.8649	8.99	78.026	4.764	7.144	6.591	3.322	1.004	0.254	0.39	0.774	1.066	2.36	3.523	7.66	14.811	26.055	18.578	15.012	10.996	8.2042	17.089	60.019	10.489	29.602		0.893024	14.0301
22.984	11.775	90.194	4.276	7.296	4.672	4.358	1.171	0.328	0.452	0.341	1.108	2.336	3.056	5.067	12.525	20.353	14.493	10.516	8.253	5.9505	15.658	62.477	15.533	26.006		0.897676	13.6748
23.103	17.47	85.251	4.138	4.475	4.49	3.54	0.909	0.324	0.504	0.883	1.703	2.168	2.309	3.402	9.216	18.004	11.174	11.294	7.02	4.6214	10.883	58.947	24.284	20.421		0.902323	12.8096
23.2221	23.035	78.819	3.341	5.826	4.835	3.613	1.158	0.285	0.88	0.837	1.131	1.077	2.375	2.934	7.387	13.885	10.217	9.572	4.249	4.0519	8.005	49.076	33.616	16.363		0.906975	11.9403
23.3412	35.249	61.335	3.108	4.758	3.892	2.663	0.563	0.481	0.83	0.56	0.73	1.445	1.732	3.994	4.735	13.293	9.998	7.621	5.239	2.4547	7.584	38.122	41.082	12.776		0.911627	11.0102
23.4603	42.753	49.451	3.81	3.928	2.514	2.688	0.445	0.287	0.442	0.722	0.712	1.172	1.511	2.37	4.439	9.811	8.409	7.208	3.909	2.3638	5.776	29.168	50.357	10.812		0.916278	10.2107
23.5794	48.013	38.179	3.173	3.706	3.279	1.691	0.441	0.321	0.502	0.228	0.844	1.591	1.663	2.502	3.571	7.928	8.201	5.864	2.738	3.092	4.973	21.122	53.891	7.996		0.92093	9.39621
23.6985	40.007	28.028	3.002	3.478	2.992	1.078	0.443	0.382	0.5	0.38	0.772	1.168	1.713	1.464	2.332	6.493	7.484	4.776	2.627	2.3375	4.86	18.413	48.236	7.706		0.925582	7.94465
23.8176	34.122	24.313	3.009	2.263	2.279	1.865	0.334	0.172	0.376	0.342	0.538	0.783	1.664	1.938	1.458	5.623	5.907	5.274	3.257	1.7474	3.156	13.101	44.739	7.017		0.930233	6.88656
23.9367	24.079	19.391	2.4	2.591	1.897	1.414	0.337	0.492	0.281	0.439	0.514	1.154	1.063	1.129	1.349	3.581	4.513	3.729	3.339	2.0331	2.986	9.509	33.848	6.861		0.934885	5.37205
24.0558	18.559	15.668	2.908	1.866	1.659	1.386	0.339	0.282	0.342	0.325	0.497	0.455	1.173	1.006	1.837	3.174	3.806	2.872	2.617	1.3479	2.613	8.837	24.78	4.5		0.939537	4.28537
24.1748	15.251	13.003	1.486	2.085	2.041	0.961	0.227	0.33	0.499	0.667	0.389	0.62	0.842	1.708	1.5	2.14	4.653	2.821	2.179	2.0858	2.83	6.999	18.624	4.806		0.944184	3.69778
24.2939	11.334	11.241	2.058	2.168	2.215	1.063	0.329	0.276	0.337	0.328	0.395	0.802	0.941	1.275	1.119	2.27	3.609	2.549	2.42	1.0783	1.681	5.662	10.903	4.245		0.948836	2.9291
24.413	10.011	7.846	1.767	1.464	1.522	0.776	0.06	0.064	0.272	0.501	0.391	0.737	1.544	1.395	1.173	1.622	3.125	2.442	1.995	1.058	1.723	5.479	10.088	3.296		0.953488	2.51462
24.5321	8.602	6.22	1.661	1.654	1.181	0.664	0.273	0.439	0.274	0.172	0.333	0.555	0.901	1.118	1.334	1.836	3.105	1.83	1.272	1.1064	1.616	3.454	8.392	3.445		0.958139	2.14323
24.6512	4.683	6.101	0.889	1.873	1.222	0.828	0.112	0.223	0.38	0.377	0.538	0.441	0.936	0.824	0.838	1.394	3.255	1.784	1.34	1.3232	1.936	4.473	5.694	3.748		0.962791	1.88384
24.7703	4.538	5.89	0.884	1.504	0.93	0.235	0.226	0.277	0.288	0.066	0.449	0.491	0.509	1.055	0.722	1.719	2.341	2.054	1.935	1.0623	1.337	2.409	4.752	2.576		0.967442	1.59372
24.8894	3.81	5.133	0.89	1.002	0.5	0.33	0.222	0.111	0.171	0.325	0.17	0.178	0.597	0.851	0.995	1.77	1.637	1.828	1.46	0.7918	1.121	2.669	5.013	3.411		0.972094	1.45774
25.0085	4.203	3.895	1.054	0.901	0.504	0.508	0.225	0.058	0.163	0.441	0.224	0.387	0.453	1.16	0.831	1.998	2.474	2.425	1	1.7103	1.16	2.261	3.462	1.949		0.976746	1.3936
25.1275	3.941	2.959	0.833	0.561	0.391	1.041	0.494	0.11	0.168	0.172	0.276	0.227	0.504	0.556	0.286	1.024	1.997	0.595	0.612	0.6099	1.439	1.737	2.778	2.323		0.981393	1.06808
25.2466	3.718	4.134	0.454	0.936	0.821	0.177	0.115	0.0009056	0.228	0.165	0.17	0.437	0.495	0.508	0.56	1.651	2.277	1.547	1.202	0.9871	1.061	1.556	2.824	2.692		0.986045	1.1965
25.3657	3.322	2.62	0.498	0.719	0.182	0.386	0.385	0.054	0.326	0.23	0.542	0.169	0.448	0.827	0.552	0.901	1.617	1.217	1.23	0.6215	0.881	1.348	2.725	1.901		0.990697	0.987563
25.4848	2.458	2.121	0.506	0.511	0.275	0.22	0.004	0.163	0.057	0.384	0.284	0.437	0.552	0.62	0.61	0.942	1.287	0.782	0.79	0.5637	0.512	1.775	2.234	2.055		0.995348	0.839279
25.6039	2.764	2.17	0.337	0.82	0.111	0.17	0.433	0.006	0	0.057	0.004	0.334	0.4	0.384	0.606	0.667	1.219	1.099	0.887	1.1087	0.776	1.882	2.697	1.393		1	0.846862

## Sheet: Image14 (2)
X0	Y0	Y1	Y2	Y3	Y4	Y5	Y6	Y7	Y8	Y9	Y10	Y11	Y12	Y13	Y14	Y15	Y16	Y17	Y18	Y19	Y20	Y21	Y22	Y23	Y24	Y25	Y26		Ap-basal	Avg int
0	5.201	5.708	9.689	15.317	11.1791	11.464	16.548	14.248	14.007	14.544	18.572	12.103	12.329	24.068	33.21	17.098	16.588	25.657	36.67	23.404	26.646	12.061	13.3573	29.577	18.333	12.5318	10.1151		0	17.0454
0.1191	7.07	6.752	9.193	19.087	15.027	16.026	18.096	18.341	16.309	13.964	19.733	13.758	12.861	26.776	35.816	18.41	17.455	28.726	39.488	27.131	31.208	13.461	13.4357	33.784	21.601	16.7146	13.4943		0.0046301	19.3969
0.2382	6.464	8.8	10.537	23.833	18.8775	16	23.944	19.649	20.097	15.815	29.826	16.863	13.691	25.937	39.969	21.321	20.175	29.534	44.731	27.546	35.521	15.231	15.9299	38.804	26.874	21.989	17.7396		0.0092602	22.4333
0.3573	9.122	11.255	11.476	30.294	24.4509	21.767	33.214	30.958	26.912	20.12	45.436	23.942	16.794	30.251	42.04	23.45	23.558	37.638	48.668	32.872	45.559	17.468	18.6174	47.139	30.371	29.8807	24.9604		0.0138903	28.082
0.4764	10.463	19.321	12.268	40.851	30.0187	24.084	47.789	46.098	36.483	28.841	69.713	34.205	19.702	33.61	51.532	23.422	29.176	41.271	53.307	40.113	58.134	27.721	26.4369	52.395	40.503	44.4098	30.2498		0.0185204	36.0043
0.5954	18.481	27.069	16.13	53.063	38.3332	32.329	60.343	64.585	48.349	45.234	101.778	46.528	23.24	39.982	62.906	28.61	40.112	55.744	59.96	48.617	69.439	39.682	31.2394	63.454	49.829	50.2725	45.7649		0.0231466	46.7064
0.7145	31.949	37.522	21.256	68.571	46.2046	47.547	82.446	86.594	63.676	68.039	134.876	76.86	30.882	59.881	67.575	38.868	51.858	68.932	69.018	53.201	80.135	56.484	41.0462	77.567	64.203	61.7051	56.2131		0.0277767	60.8559
0.8336	64.102	58.428	25.85	80.771	57.7669	62.6	110.073	107.16	79.089	90.803	155.962	112.254	37.093	91.991	82.338	52.242	67.956	83.809	78.204	59.393	88.758	74.218	53.6726	89.523	72.16	64.3396	66.1972		0.0324068	76.5464
0.9527	108.808	85.705	33.001	93.035	70.7148	85.121	137.739	128.007	110.002	125.308	164.112	152.248	48.089	126.995	101.754	67.103	94.013	103.101	95.484	64.738	99.477	94.406	68.9202	95.698	81.722	70.2432	76.6501		0.0370369	95.6368
1.0718	158.672	98.701	40.814	107.583	79.2395	106.252	157.324	147.8	131.801	149.725	159.26	182.24	62.671	173.605	128.418	95.922	118.297	125.75	111.46	72.096	101.584	109.089	70.1623	113.055	94.335	74.7391	76.1714		0.041667	112.843
1.1909	194.019	102.525	50.376	108.702	86.2645	126.855	175.114	162.378	153.828	164.435	150.129	199.099	85.859	212.674	158.304	120.021	124.674	139.461	129.562	79.176	102.065	112.292	78.5949	122.663	110.763	79.6655	77.2651		0.0462971	126.176
1.31	205.722	89.635	69.267	113.349	87.6576	143.645	171.206	167.362	169.212	179.738	143.277	194.44	103.476	210.511	194.805	146.876	123.969	138.009	152.756	100.555	102.916	121.914	81.1104	132.65	124.056	82.1195	75.5985		0.0509272	134.29
1.4291	190.79	73.873	89.078	103.415	90.795	162.565	150.527	160.252	159.918	177.368	130.91	169.895	133.708	201.129	205.848	165.562	114.028	145.84	155.024	120.096	104.718	115.376	86.5012	136.307	134.685	82.3155	66.5596		0.0555573	134.336
1.5481	145.566	56.747	115.388	99.277	79.9979	164.133	129.393	142.195	131.675	159.554	125.056	143.461	166.409	171.39	217.489	172.229	99.351	134.566	153.328	145.531	98.15	112.747	89.3011	132.073	139.058	90.245	60.4167		0.0601835	128.694
1.6672	97.869	50.857	131.592	90.806	79.2428	154.722	106.576	107.486	100.121	146.415	111.243	103.412	183.102	128.411	213.595	165.636	85.944	115.798	141.995	163.423	103.088	107.677	92.047	125.253	139.112	85.1445	58.8207		0.0648136	118.125
1.7863	61.703	45.325	145.755	83.284	71.4271	132.196	78.016	82.113	77.576	134.684	94.813	76.463	189.526	93.566	198.333	138.501	75.554	105.866	123.822	164.448	103.609	97.844	90.095	107.245	137.164	83.3186	50.6973		0.0694437	105.294
1.9054	38.77	34.765	132.872	68.473	65.8666	103.445	51.114	55.7	60.069	106.355	88.064	51.672	178.016	76.524	170.693	121.659	70.154	97.256	109.876	175.154	112.431	87.195	81.6517	84.97	131.361	82.3524	46.5321		0.0740738	91.9626
2.0245	31.7	31.963	104.813	52.8	58.669	69.855	38.671	42.157	44.467	81.179	71.161	39.033	145.288	54.203	131.651	105.302	68.266	89.675	84.659	161.401	108.167	88.485	74.1446	62.89	124.035	74.1998	44.6481		0.0787039	77.166
2.1436	26.695	31.143	85.363	41.418	50.2174	45.709	28.855	32.045	30.274	52.42	56.825	32.375	116.553	41.971	92.846	90.38	58.518	87.345	57.973	145.923	104.058	82.32	59.7792	48.172	111.921	75.3365	38.1449		0.083334	63.8733
2.2627	21.771	30.943	68.734	36.96	45.3093	30.949	25.646	27.291	24.837	38.277	41.838	25.754	86.078	28.677	63.274	77.174	47.467	83.076	36.898	114.288	100.209	71.998	53.1766	37.751	99.295	67.2276	34.92		0.0879641	52.5859
2.3818	19.313	28.273	54.492	31.538	37.1982	26.904	21.213	16.447	17.391	29.328	31.625	23.264	63.56	19.289	41.897	68.794	37.973	72.754	21.422	75.198	91.136	69.234	45.3549	30.969	83.178	67.5671	31.057		0.0925942	42.8285
2.5008	15.811	25.517	41.488	22.69	31.7311	21.321	16.297	12.407	10.45	22.262	27.664	17.494	41.517	14.495	30.344	62.062	30.188	59.385	16.052	46.664	90.549	61.205	38.9836	22.353	65.921	57.0535	32.041		0.0972204	34.5906
2.6199	13.865	24.766	31.346	18.095	27.2121	14.971	14.052	8.194	9.098	19.098	24.136	18.006	30.131	10.044	24.783	46.08	25.265	55.378	12.442	32.172	84.973	58.747	30.0463	20.127	52.023	53.6324	26.327		0.10185	29.0744
2.739	15.761	22.728	23.193	14.534	21.453	12.956	9.445	7.635	7.392	16.916	19.591	14.905	22.272	7.595	21.57	35.055	18.763	45.158	11.668	20.759	77.379	51.74	23.9644	15.462	44.293	43.7461	25.5831		0.106481	24.1302
2.8581	12.919	20.261	17.892	11.828	17.4577	9.428	9.17	6.096	6	13.363	16.467	11.55	14.614	6.852	17.802	25.257	17.401	35.685	11.443	15.101	63.922	52.041	21.8614	15.068	37.673	42.5184	24.1741		0.111111	20.5128
2.9772	10.503	20.828	14.092	9.632	13.8936	9.266	6.494	6.01	4.768	13.377	13.973	9.208	9.838	6.294	18.429	18.953	13.658	27.653	10.473	14.554	52.793	42.553	19.0781	14.091	29.075	38.5964	22.7635		0.115741	17.4388
3.0963	10.837	17.824	9.816	9.426	11.1255	7.676	6.519	4.249	3.928	15.794	11.974	9.35	9.217	6.646	16.645	13.028	13.386	21.614	9.081	13.816	39.167	41.911	16.0819	13.084	24.238	36.4831	19.6853		0.120371	15.2815
3.2154	9.526	19.044	7.927	8.399	10.2289	8.849	4.888	4.313	3.149	14.071	8.578	7.421	7.574	6.101	15.625	11.176	10.943	14.901	9.647	10.18	34.089	35.519	11.9691	13.782	17.21	35.4105	19.264		0.125001	13.3254
3.3345	9.377	18.249	7.815	8.578	8.047	7.162	3.984	3.858	4.146	14.203	8.168	6.015	6.754	5.585	18.585	9.657	10.957	11.349	10.572	10.255	23.427	30.761	10.1288	13.402	13.429	31.5262	15.6855		0.129631	11.9139
3.4535	8.164	18.144	9.244	10.428	8.4056	6.81	4.39	3.76	3.495	12.686	6.99	5.311	5.787	4.818	16.848	8.217	9.542	10.47	11.235	11.262	17.608	26.722	7.7929	12.989	11.233	29.198	17.9528		0.134257	11.0927
3.5726	7.178	18.502	7.893	8.946	7.8379	7.421	3.839	3.099	3.22	12.978	6.037	4.091	4.274	5.38	17.554	7.912	8.662	8.672	9.342	10.275	13.201	21.578	7.1806	11.88	7.785	27.3923	17.3538		0.138887	9.98087
3.6917	7.369	19.613	7.993	8.878	7.7447	7.953	2.559	2.632	2.559	11.92	5.7	4.8	4.664	5.723	18.15	8.994	6.211	8.945	9.834	9.972	9.203	15.819	5.9806	13.313	7.693	22.446	17.0959		0.143517	9.39867
3.8108	6.703	16.46	7.442	9.506	9.2138	6.997	3.605	2.606	2.335	11.587	6.277	4.031	4.496	4.509	14.229	6.878	6.683	9.575	10.41	9.303	7.336	13.476	4.5958	11.748	6.678	20.2165	14.6865		0.148148	8.57713
3.9299	6.968	15.78	7.147	8.916	9.874	5.067	3.319	2.296	3.392	13.32	4.996	3.032	3.743	6.585	17.175	6.984	6.655	9.647	9.467	10.153	5.823	12.961	5.1995	12.667	4.619	16.8498	16.283		0.152778	8.47846
4.049	6.018	15.932	7.94	6.211	10.2433	5.635	3.233	3.249	2.689	14.425	4.09	2.499	3.105	4.985	19.378	6.651	5.832	6.91	8.624	9.62	6.199	9.406	4.2142	14.106	4.602	14.1737	13.8537		0.157408	7.9194
4.1681	6.116	17.58	9.138	5.562	7.9529	3.843	2.931	3.09	2.279	14.208	3.933	3.1	3.373	5.266	17.671	8.06	5.301	7.195	9.319	10.103	6.113	8.154	4.4459	13.871	3.845	10.4766	13.7964		0.162038	7.6564
4.2872	4.618	17.53	8.179	6.05	9.5376	4.668	1.881	2.303	2.359	14.646	2.765	3.357	3.988	5.383	15.487	7.419	4.61	5.719	9.383	11.2	5.346	5.65	4.2348	15.049	3.363	9.2354	13.1866		0.166668	7.30176
4.4063	5.402	19.756	8.101	5.384	9.6893	4.347	1.967	2.78	2.469	13.17	3.405	3.313	4.284	6.161	17.763	7.045	3.802	7.136	8.538	10.637	5.663	4.373	4.4711	16.365	2.674	9.2063	12.712		0.171298	7.43014
4.5253	5.154	20.853	7.954	5.382	10.051	3.715	1.871	2.153	2.81	15.891	3.872	2.955	2.88	6.091	17.494	7.313	4.332	5.993	8.357	11.86	5.429	4.16	4.4347	14.814	3.791	6.58	13.5664		0.175924	7.39837
4.6444	4.443	21.694	8.447	4.978	8.1954	4.62	1.789	2.804	3.099	12.402	3.084	2.344	3.055	6.592	15.994	6.809	3.937	6.56	9.004	14.201	5.144	4.347	4.457	14.886	3.097	4.7876	11.8892		0.180554	7.13553
4.7635	4.346	21.579	7.349	5.21	10.1633	3.872	2.429	3.463	2.603	13.888	3.356	2.704	2.713	6.003	18.583	7.018	3.531	5.676	8.047	14.652	4.771	3.509	5.3476	12.905	2.668	3.8613	9.6991		0.185184	7.03505
4.8826	5.097	21.491	7.692	5.479	11.0329	4.926	2.414	2.308	2.668	14.321	3.517	2.287	2.702	6.287	18.695	6.59	4.54	5.573	8.11	13.159	4.721	3.198	3.6522	15.882	2.673	3.8439	9.2406		0.189815	7.1148
5.0017	4.781	21.858	7.607	4.533	11.4169	4.059	2.423	2.108	2.911	13.282	3.12	2.569	3.53	6.679	21.633	6.31	3.334	5.784	7.506	13.03	3.886	2.707	4.1382	17.987	2.819	3.2897	8.4226		0.194445	7.10087
5.1208	4.558	20.635	6.701	5.659	8.9979	3.638	2.401	1.927	2.796	13.511	3.065	2.837	2.817	7.034	19.715	6.285	3.225	6.483	8.873	11.961	4.144	2.377	3.8049	22.963	2.112	2.6589	6.6948		0.199075	6.95828
5.2399	4.668	19.322	7.319	5.12	10.7103	3.624	2.909	2.366	3.506	15.748	3.008	2.116	2.922	7.123	22.946	7.043	4.625	4.738	6.304	10.923	5.082	2.994	4.1792	22.708	3.125	2.7018	4.7217		0.203705	7.13156
5.359	4.439	16.166	6.865	4.961	10.1892	4.339	2.318	2.089	2.858	17.889	4.141	2.607	2.544	6.816	21.353	6.161	3.164	6.022	8.313	12.091	4.045	3.562	3.578	22.265	2.874	2.7316	5.3174		0.208335	7.02586
5.478	3.676	21.004	8.625	4.446	9.4901	4.101	2.401	2.734	2.27	21.136	3.662	2.777	3.269	7.641	21.422	6.082	3.829	5.405	8.709	13.043	3.221	2.947	3.7308	22.317	2.318	2.9479	4.8464		0.212961	7.33519
5.5971	3.613	17.899	8.655	4.82	10.2791	4.904	2.073	2.84	3.009	26.273	2.971	2.243	3.363	8.74	21.347	5.087	4.341	5.429	9.667	11.822	3.454	2.608	4.5023	20.068	3.276	2.9143	3.9693		0.217591	7.41359
5.7162	5.023	19.112	7.656	4.184	10.7006	4.084	1.924	2.981	2.406	24.049	3.506	2.582	2.93	8.818	22.409	6.852	2.799	5.12	10.797	11.661	3.585	2.808	3.9877	19.49	2.306	2.4724	4.6648		0.222221	7.36694
5.8353	4.475	16.38	7.465	4.334	9.0835	3.928	1.414	2.335	2.561	22.82	2.769	2.76	3.63	9.035	23.073	6.73	4.146	4.69	12.38	12.812	4.133	2.785	5.5143	23.219	3.502	2.2473	3.163		0.226851	7.45867
5.9544	4.908	16.639	8.447	5.205	11.2949	4.103	1.998	2.141	2.544	24.063	3.633	2.389	3.235	9.697	20.808	7.504	3.544	6.038	13.321	12.979	4.45	3.091	3.891	27.438	2.368	2.5564	3.0134		0.231482	7.82588
6.0735	4.694	15.963	8.904	5.241	11.072	3.685	2.502	2.392	3.666	21.318	3.246	2.293	3.514	8.906	19.865	5.943	3.504	4.816	10.938	13.711	3.862	2.962	3.655	27.061	2.313	1.9385	3.7579		0.236112	7.4712
6.1926	5.118	15.461	9.311	4.925	13.6135	4.175	2.244	2.317	3.012	22.917	2.972	2.874	2.856	9.252	19.168	7.343	4.119	5.267	11.414	16.391	3.759	2.184	3.9136	24.67	3.449	2.1143	2.6889		0.240742	7.68623
6.3117	6.257	12.965	10.719	5.576	12.5695	4.799	2.378	2.769	3.108	19.942	2.983	2.27	3.874	10.216	17.996	6.108	3.514	5.168	10.806	16.625	4	2.647	4.3947	27.494	2.572	2.6711	2.8283		0.245372	7.67591
6.4307	5.497	11.657	10.777	5.957	13.3499	4.209	2.373	2.981	2.97	21.863	3.799	2.366	3.844	10.338	20.185	6.292	3.683	4.312	12.953	18.248	3.812	2.999	4.47	30.823	2.759	2.7485	2.4009		0.249998	8.06171
6.5498	5.946	10.669	10.282	5.992	14.3415	4.799	2.057	2.585	3.406	21.476	3.079	2.495	2.733	11.882	22.997	6.396	4.586	4.757	13.166	19.148	4.383	2.727	3.915	37.477	2.666	2.9562	2.0532		0.254628	8.48037
6.6689	6.91	10.996	9.509	7.091	13.4066	3.359	1.941	2.511	3.874	21.546	3.464	2.602	3.663	11.715	25.482	5.622	4.749	5.831	12.513	19.957	3.957	2.516	3.9261	43.795	2.44	2.4918	2.2314		0.259258	8.81848
6.788	7.601	9.922	10.608	6.345	13.4501	3.938	2.166	2.127	4.092	22.206	3.191	3.053	2.629	10.8	28.067	6.997	3.894	5.112	12.914	22.684	4.086	2.259	3.4387	47.759	2.782	2.1897	2.0161		0.263888	9.12321
6.9071	7.674	11.257	10.95	5.984	13.5853	4.826	2.125	2.849	3.212	22.17	3.581	2.258	3.935	11.697	24.847	8.071	4.341	5.532	12.31	27.516	3.761	2.812	3.659	50.41	2.33	2.4909	2.5412		0.268518	9.50831
7.0262	9.673	12.723	11.662	6.64	14.8981	5.42	2.257	2.755	4.44	22.668	3.358	2.03	3.289	12.28	26.907	7.692	4.581	4.678	14.673	27.6	3.574	3.144	4.1379	48.187	2.352	2.4254	3.2477		0.273149	9.89971
7.1453	8.812	11.655	12.378	7.37	15.4377	4.769	2.402	2.94	4.125	22.066	3.244	2.347	2.815	12.046	26.689	7.521	5.044	5.202	12.947	35.271	4.577	3.052	3.9704	48.632	2.918	2.2663	2.6369		0.277779	10.116
7.2644	11.207	11.024	10.82	6.823	17.3339	4.791	1.863	2.234	3.82	20.651	3.844	1.628	2.823	11.236	25.895	9.705	4.388	4.713	16.865	40.422	3.969	3.149	4.4223	50.294	2.709	2.1964	2.4568		0.282409	10.4179
7.3834	12.66	10.127	12.747	7.484	16.0222	6.31	2.592	3.032	3.87	20.496	3.009	1.921	3.298	11.467	28.153	8.502	5.343	6.429	18.049	43.086	4.046	2.918	4.1823	49.631	2.653	2.6223	2.3893		0.287035	10.8533
7.5025	13.555	10.824	12.917	6.223	17.9518	6.934	2.303	2.676	3.334	19.338	2.892	2.853	3.852	11.379	29.144	6.57	4.551	6.43	17.521	41.399	3.693	3.264	5.1083	49.173	2.947	2.1935	2.2852		0.291665	10.7893
7.6216	14.887	11	14.323	7.154	18.6408	7.018	2.849	2.673	4.345	18.186	2.821	3.047	2.996	10.27	31.751	8.394	5.173	6.465	18.49	36.252	4.158	2.237	3.4452	44.283	2.321	2.1127	2.7856		0.296295	10.6695
7.7407	18.488	10.637	18.532	7.55	17.8284	6.693	2.532	3.455	3.78	19.078	2.049	2.264	3.427	11.307	35.772	10.004	4.665	6.627	18.535	31.68	4.318	2.299	4.0482	45.647	3.241	2.5767	2.1396		0.300925	11.0805
7.8598	18.974	14.99	25.211	9.245	18.8487	7.093	2.185	2.666	4.53	19.431	2.881	2.34	3.642	11.719	38.478	8.797	4.779	8.531	17.744	24.94	4.541	2.731	4.109	45.662	3.718	2.3246	2.5901		0.305555	11.5815
7.9789	23.278	13.983	28.996	8.681	17.3391	9.447	2.689	2.456	4.565	17.707	2.654	1.724	3.318	10.915	40.41	8.716	5.453	9.052	20.554	21.998	3.334	3.05	4.3052	39.045	2.644	1.8151	2.666		0.310185	11.5109
8.098	23.752	16.205	36.529	9.391	18.3886	7.939	2.376	3.406	4.382	20.179	2.818	3.197	3.1	10.031	45.947	8.798	5.232	9.095	20.524	18.365	3.418	2.315	4.1935	31.169	2.91	2.0077	2.4591		0.314816	11.7825
8.2171	24.589	15.622	42.743	8.944	18.7239	7.33	1.746	3.58	4.652	22.534	3.127	2.197	3.622	9.727	42.2	8.14	6.086	8.018	22.556	16.549	3.11	3.13	3.5761	27.663	2.517	2.3497	2.4316		0.319446	11.7579
8.3362	27.399	15.346	39.672	9.084	18.1181	6.817	2.714	2.919	5.373	20.246	3.649	2.077	3.729	7.96	43.788	9.66	4.872	9.342	27.995	16.034	3.758	3.485	3.8902	28.527	2.875	2.1497	2.1845		0.324076	11.9875
8.4552	30.597	21.118	33.136	7.699	21.5306	6.15	2.832	3.116	5.471	18.487	3.048	2.31	2.866	7.738	41.826	7.804	4.858	7.828	26.858	17.198	3.451	3.147	4.3791	26.228	2.681	2.4527	2.266		0.328702	11.7435
8.5743	30.248	21.673	28.337	10.427	26.434	6.572	2.305	3.037	4.97	16.018	1.899	2.692	2.529	7.406	37.792	8.058	5.164	8.287	28.088	19.546	3.473	3.271	4.1371	23.695	2.601	2.9249	2.5421		0.333332	11.6343
8.6934	30.398	23.742	22.133	9.22	25.3831	6.061	2.142	3.219	5.785	18.352	2.68	2.359	2.954	8.527	34.382	9.656	6.064	6.915	27.962	19.152	3.929	3.553	4.0999	24.592	3.034	2.255	2.978		0.337962	11.538
8.8125	31.276	21.539	18.921	9.541	25.9291	5.124	2.22	2.515	7.149	18.153	2.678	2.075	3.514	6.713	36.183	9.246	5.68	7.527	27.996	18.113	4.214	2.834	3.7091	25.088	2.515	2.0944	2.2254		0.342592	11.2879
8.9316	32.716	23.96	16.214	8.403	22.9174	6.094	2.78	2.547	7.205	16.181	2.739	1.985	2.968	7.017	30.241	8.837	5.101	7.301	23.301	18.549	3.131	2.721	4.2444	25.935	2.921	2.1213	2.4416		0.347222	10.7619
9.0507	35.003	24.385	17.213	10.012	23.6455	4.214	2.528	3.303	6.87	16.471	2.383	2.589	3.292	7.225	34.268	10.558	5.092	8.972	20.677	19.071	3.926	3.108	3.6725	30.198	3.247	2.3717	2.5197		0.351852	11.3635
9.1698	31.39	24.065	17.491	9.267	22.6939	5.742	3.446	3.384	6.307	15.038	3.071	2.786	2.972	6.866	32.367	10.093	5.313	7.102	21.576	20.24	4.29	3.005	3.7383	31.175	2.705	2.6901	2.3208		0.356483	11.1531
9.2889	28.463	21.944	16.204	9.472	16.2151	4.658	2.797	2.463	6.373	12.796	2.849	2.779	3.177	6.806	32.424	9.724	5.682	8.319	24.019	20.755	4.784	2.71	3.5805	28.119	2.568	2.7596	2.2707		0.361113	10.5448
9.4079	27.494	21.293	12.141	7.868	17.1032	4.322	3.021	3.33	6.999	14.363	3.088	2.603	2.919	5.29	32.181	9.341	5.283	9.597	23.416	17.832	3.741	2.859	3.1306	24.608	2.678	2.3086	2.2503		0.365739	10.0392
9.527	22.642	16.902	11.18	8.804	18.6223	4.555	2.513	3.608	6.364	15.057	3.076	1.908	2.782	5.112	32.01	9.033	5.614	8.861	26.54	18.117	4.038	2.157	4.781	25.68	2.62	2.0932	2.1767		0.370369	9.88319
9.6461	25.077	17.897	13.512	7.179	18.5703	4.949	3.313	3.078	5.842	15.613	3.846	2.485	3.465	5.286	31.93	9.875	6.046	8.067	26.092	17.143	3.778	2.859	3.9038	22.691	3.315	1.798	2.2007		0.374999	9.99299
9.7652	25.911	16.024	12.006	7.151	15.4062	5.301	2.679	3.189	7.519	14.274	3.625	1.813	3.35	5.992	32.955	9.882	4.915	6.992	29.019	21.302	3.071	3.139	3.4074	22.015	2.048	2.4967	2.0716		0.379629	9.9094
9.8843	27.497	14.956	12.14	8.189	15.6381	4.571	2.585	2.588	8.215	10.168	2.886	2.351	3.416	4.885	29.748	10.09	6.897	5.989	25.724	19.98	3.308	2.775	3.6781	21.063	2.607	2.3307	2.923		0.384259	9.52585
10.0034	31.061	13.653	12.359	6.812	15.7279	4.69	3.235	3.56	7.716	10.175	3.3	2.591	3.003	4.905	30.399	9.424	6.06	6.147	28.148	21.862	3.91	2.425	3.21	19.194	3.095	2.0767	2.1608		0.388889	9.66294
10.1225	32.466	13.202	11.177	6.479	15.0106	4.339	2.08	3.977	8.344	11.869	3.217	2.152	3.266	6.196	30.336	10.76	5.708	5.588	28.027	21.988	3.381	2.624	2.8765	18.494	2.165	2.1918	2.7244		0.393519	9.65327
10.2416	40.278	12.389	10.37	8.988	15.5478	4.659	2.134	2.865	8.818	10.452	2.774	2.366	3.233	5.277	26.82	10.234	5.975	6.27	26.099	23.896	3.164	3.091	3.2118	20.948	2.127	2.523	1.982		0.39815	9.87006
10.3606	35.792	13	10.763	7.669	16.7474	4.622	3.847	2.89	10.67	10.363	3.1	3.371	3.046	5.383	27.506	10.001	6.111	5.341	25.443	19.275	3.378	3.389	2.7032	20.272	2.273	2.4063	2.3024		0.402776	9.69127
10.4797	44.457	13.394	8.769	6.813	16.5402	5.003	3.14	3.485	11.08	9.101	3.022	2.562	2.871	5.277	28.296	9.259	5.143	4.863	23.029	20.661	3.5	2.547	3.0584	20.175	3.175	1.9671	2.5461		0.407406	9.76792
10.5988	37.937	13.639	9.646	6.432	18.156	4.2	3.561	3.634	11.613	10.449	3.906	2.557	2.569	5.009	26.401	9.042	5.003	5.227	19.614	21.529	3.528	2.282	3.4758	20.487	2.503	2.9233	2.8525		0.412036	9.56206
10.7179	40.263	13.91	8.231	8.126	15.7709	4.395	3.469	2.868	12.277	9.118	3.143	2.619	2.448	3.873	27.179	10.206	5.081	5.993	20.369	17.422	2.566	2.63	3.8165	20.048	2.601	2.8624	2.217		0.416666	9.38896
10.837	34.724	14.319	7.597	7.28	14.493	4.02	3.365	3.452	12.267	8.943	2.72	2.491	3.094	3.411	24.787	10.06	5.121	5.716	21.696	20.247	3.326	3.011	3.1789	20.692	2.487	2.6301	2.1884		0.421296	9.15987
10.9561	35.405	13.256	9.225	6.781	15.3741	4.232	3.503	3.568	14.96	7.416	3.281	2.558	3.565	4.226	25.561	11.218	6.629	5.175	20.009	20.227	3.456	3.554	3.0525	18.765	2.49	1.7351	1.194		0.425926	9.27466
11.0752	31.459	12.585	8.491	7.315	17.4466	5.341	2.629	3.262	15.177	6.743	3.395	3.255	3.282	4.105	26.185	10.646	6.397	4.644	19.311	24.233	3.465	3.244	3.1777	20.488	2.373	2.1567	1.4429		0.430556	9.34255
11.1943	34.468	14.23	8.667	6.136	16.1499	4.266	2.924	2.75	15	7.686	3.686	3.137	2.937	4.89	24.106	10.404	5.66	4.816	18.197	21.388	3.113	2.5	3.3564	20.191	2.656	2.4008	1.6382		0.435186	9.16123
11.3133	32.576	12.11	8.319	6.528	18.5917	4.825	3.907	3.005	15.744	7.805	3.152	2.34	2.343	3.682	24.821	11.719	5.589	5.57	18.002	20.243	3.7	3.394	2.9923	20.781	2.708	2.0995	2.5202		0.439813	9.22469
11.4324	36.646	12.249	7.98	5.792	18.0478	4.397	2.956	2.374	15.469	7.184	1.878	2.669	2.84	3.85	26.59	10.934	4.38	5.613	18.227	20.122	3.196	2.876	2.9883	19.517	2.576	3.2043	1.9804		0.444443	9.13096
11.5515	38.351	13.175	8.079	7.023	18.3643	4.592	2.737	3.303	17.676	6.386	2.6	3.018	2.579	3.385	25.472	12.613	4.395	5.975	19.425	20.043	3.735	2.593	2.6652	18.576	2.022	2.3764	2.0265		0.449073	9.37724
11.6706	45.894	12.136	8.211	5.333	18.6541	3.265	4.125	2.866	18.58	6.135	2.492	2.762	2.631	2.789	26.795	11.614	5.378	6.643	20.18	17.081	2.687	2.357	2.9754	20.015	1.949	2.2675	2.1342		0.453703	9.55367
11.7897	45.544	12.022	7.01	6.549	16.116	4.028	2.888	3.334	20.635	5.268	3.711	3.269	3.201	4.534	25.586	11.228	5.088	6.905	20.728	18.426	2.763	2.859	2.8273	20.908	2.336	1.6686	2.3074		0.458333	9.69405
11.9088	49.949	10.607	7.485	4.929	19.3852	3.414	3.449	3.858	24.224	5.048	3.598	2.842	2.904	2.78	26.233	9.968	4.02	6.709	20.299	16.816	2.898	3.282	3.3276	19.655	3.157	1.7856	2.4839		0.462963	9.81875
12.0279	54.845	10.815	7.467	6.562	20.0625	3.468	3.318	3.02	20.153	4.759	3.569	2.69	2.605	3.776	25.469	10.481	3.732	6.979	19.745	15.312	3.042	3.094	3.9272	20.815	2.593	3.1831	2.7544		0.467593	9.93467
12.147	57.716	11.68	6.541	6.393	19.7057	4.189	3.257	3.638	22.154	5.746	3.074	2.361	3	4.423	26.47	9.806	4.909	6.723	21.515	16.174	4.308	2.738	3.4092	20.76	2.448	3.5798	1.7391		0.472223	10.3132
12.2661	61.867	12.506	7.073	7.82	17.9804	3.85	3.329	3.037	21.151	4.943	2.717	2.807	2.743	3.952	24.812	10.521	3.978	6.234	21.413	15.845	3.618	2.47	3.1287	22.304	2.723	2.8412	2.0876		0.476853	10.2871
12.3851	62.108	12.084	7.066	5.649	19.7243	4.469	3.115	2.695	21.388	5.085	2.927	3.324	3.188	3.675	22.058	10.077	3.54	7.424	21.253	16.737	3.595	2.654	3.6328	19.652	3.131	2.3673	2.8271		0.48148	10.2017
12.5042	60.556	10.676	7.383	6.877	21.2549	4.235	3.555	3.078	22.545	5.143	2.945	3.945	2.871	2.81	22.645	9.277	3.789	6.881	20.629	16.553	3.573	3.362	3.9519	18.057	3.03	2.8076	2.166		0.48611	10.1702
12.6233	58.188	11.452	6.911	6.109	20.6628	4.113	2.911	2.664	20.946	5.393	2.912	2.953	2.605	3.71	24.266	9.534	4.45	7.006	22.124	17.567	3.134	3.412	3.2654	20.163	2.142	2.5939	2.5533		0.49074	10.1385
12.7424	58.859	11.832	8.203	5.742	21.7409	4.119	2.516	2.539	21.62	5.337	3.199	3.148	2.885	4.682	22.674	8.669	4.767	6.563	20.842	18.724	2.275	2.83	3.4001	18.189	2.112	2.28	2.4057		0.49537	10.0797
12.8615	54.214	9.614	7.92	5.659	25.7738	3.456	2.768	3.081	21.267	5.209	3.058	2.918	3.654	3.859	21.232	8.035	3.919	7.605	18.426	17.18	3.414	1.902	2.7612	17.954	2.922	2.2265	1.8632		0.5	9.69966
12.9806	56.359	9.402	7.879	6.311	25.4633	3.526	3.124	2.799	21.305	4.779	4.11	3.26	3.846	4.029	23.473	7.477	4.271	6.857	17.4	16.512	3.416	2.78	4.2023	18.627	2.554	2.6904	2.1097		0.50463	9.94673
13.0997	53.298	10.967	6.63	6.562	24.913	4.753	2.885	2.788	18.81	4.3	2.514	2.761	3.448	3.278	25.267	7.826	4.586	6.546	15.86	16.04	4.42	2.625	2.5226	20.589	3.446	2.3408	2.1592		0.50926	9.70869
13.2188	48.725	8.429	7.613	5.666	25.1733	3.657	3.058	3.758	22.734	4.169	2.81	3.51	3.145	3.442	23.374	7.496	3.71	7.082	15.481	15.771	3.383	2.259	3.0834	20.141	3.477	2.9624	2.3095		0.51389	9.49699
13.3378	40.131	7.091	7.347	5.371	25.6088	3.278	3.359	2.299	23.118	4.838	2.979	2.695	2.251	4.048	23.793	7.658	3.818	8.15	16.572	15.303	3.578	1.798	3.1979	21.42	3.239	3.3438	2.0323		0.518517	9.19692
13.4569	41.474	7.913	6.449	5.749	24.2978	4.373	3.27	2.118	20.055	4.67	4.002	2.78	2.862	4.356	21.412	8.107	4.949	6.857	16.374	14.516	3.921	3.017	4.2455	19.578	3.338	2.5683	2.5858		0.523147	9.10509
13.576	47.51	7.913	6.243	6.052	23.3795	4.184	2.883	3.091	22.75	5.251	2.935	2.803	3.211	2.953	22.865	9.444	3.99	6.31	14.095	14.252	3.024	3.356	4.3211	19.245	3.354	2.1407	2.9265		0.527777	9.2771
13.6951	49.86	8.444	6.885	5.725	23.113	3.697	3.318	2.411	23.844	4.666	2.658	3.083	2.764	3.395	23.421	7.298	4.423	6.214	15.465	16.784	3.177	3.286	3.1035	19.311	2.205	2.3106	2.3228		0.532407	9.37718
13.8142	50.948	7.666	6.273	6.269	20.5552	4.475	2.495	3.273	20.94	5.628	2.55	2.568	2.871	3.244	21.736	6.832	3.769	6.42	16.03	18.761	2.98	2.211	3.0807	20.572	2.588	2.2078	2.3013		0.537037	9.23126
13.9333	60.089	8.844	5.894	6.436	20.8556	3.638	3.282	3.163	23.505	4.607	2.512	3.537	3.463	2.937	23.797	7.346	3.632	5.856	13.853	20.573	3.293	2.629	2.8999	19.07	2.857	2.7665	2.3392		0.541667	9.76571
14.0524	59.941	7.593	7.65	6.536	19.2876	3.668	3.116	3.292	24.086	4.463	2.856	2.246	3.328	3.188	24.408	7.138	4.512	7.52	15.22	21.52	3.543	2.999	3.7105	20.429	3.279	2.2914	2.5406		0.546297	10.0134
14.1715	66.864	7.56	5.973	7.161	20.1998	3.666	3.033	3.078	20.757	3.368	2.881	2.813	3.049	3.352	26.103	7.292	4.477	7.525	13.126	22.578	2.97	2.483	3.3003	18.576	2.493	2.2156	2.209		0.550927	9.96677
14.2905	67.091	7.165	5.368	8.001	18.0014	3.901	2.352	2.776	20.893	4.524	3.338	2.351	3.219	3.131	24.308	6.854	5.153	6.952	13.689	24.991	2.861	2.551	3.1692	21.1	2.605	2.4247	2.2101		0.555553	10.0363
14.4096	71.508	7.05	6.606	7.481	19.4774	3.254	3.214	2.358	19.965	4.582	2.982	2.499	3.031	3.218	27.18	6.225	4.555	5.808	14.523	25.192	3.144	3.013	2.7121	17.991	2.683	1.9418	2.0774		0.560183	10.1582
14.5287	67.306	6.786	7.138	7.808	21.158	3.738	2.556	3.545	20.681	4.546	3.447	3.447	2.894	3.159	25.87	7.425	4.585	6.046	16.151	22.208	2.711	2.107	3.53	21.331	2.684	1.8552	2.4263		0.564814	10.2644
14.6478	64.625	7.649	6.558	7.692	20.3313	3.718	1.877	2.884	21.103	3.709	3.672	2.559	2.993	3.367	25.454	6.018	5.267	7.42	15.128	24.037	2.524	3.562	4.4003	19.504	2.242	2.3766	2.6621		0.569444	10.1234
14.7669	60.312	6.539	5.752	7.379	19.0057	3.552	2.418	3.06	20.928	4.009	4.009	2.463	2.827	3.2	24.821	5.694	4.016	6.58	16.645	25.684	2.883	1.658	3.0277	19.021	3.37	2.374	3.1646		0.574074	9.7923
14.886	53.324	6.898	8.673	7.025	23.4878	3.544	2.513	3.767	22.688	3.729	3.408	2.669	3.148	3.943	24.937	5.719	5.223	6.995	15.082	26.385	3.411	3.362	3.2906	20.605	3.71	2.2878	2.8102		0.578704	10.0976
15.0051	48.678	7.623	7.158	6.195	23.2269	3.25	3.21	2.627	25.498	3.756	3.253	2.896	2.84	3.557	23.908	6.091	4.744	7.238	17.469	26.73	2.947	3.668	3.4167	21.448	2.201	2.6284	3.1214		0.583334	9.97698
15.1242	48.092	6.567	8.515	8.027	24.016	3.644	3.342	3.209	27.781	4.429	2.754	2.427	3.151	3.419	24.947	5.551	4.591	6.227	17.469	28.718	3.674	3.043	3.449	23.444	2.034	2.2484	3.023		0.587964	10.2886
15.2432	45.787	8.37	9.246	8.524	23.951	3.78	3.171	3.992	24.499	5.166	2.213	2.234	3.603	3.153	25.791	5.664	4.408	7.48	19.827	32.122	3.374	3.438	4.2133	25.562	2.491	2.4259	2.6862		0.59259	10.636
15.3623	43.514	7.991	9.607	8.459	30.3147	3.674	2.897	3.024	26.384	4.366	2.662	2.818	2.934	3.23	25.982	6.103	3.596	7.341	19.462	32.889	3.119	2.827	3.0868	23.318	3.124	2.5392	2.1739		0.59722	10.6458
15.4814	39.735	6.915	9.009	8.087	30.2389	3.02	2.451	3.655	27.389	4.058	3.596	2.019	4.314	3.766	26.761	5.187	4.474	7.318	19.281	36.547	2.271	2.859	3.7266	25.289	3.18	2.8353	1.8243		0.60185	10.7336
15.6005	44.065	7.148	9.481	9.555	29.9869	4.444	2.709	3.549	29.046	3.859	3.388	3.506	3.168	2.635	26.134	5.265	4.374	7.068	18.984	38.255	3.076	2.723	4.064	25.701	2.309	3.221	2.6931		0.606481	11.1262
15.7196	40.663	7.163	8.903	7.263	24.9007	4.038	3.68	3.237	23.372	3.207	3.333	2.431	2.712	2.179	26.919	4.454	3.96	7.189	19.544	42.224	2.788	2.566	4.0384	26.156	3.127	2.3761	2.9431		0.611111	10.5691
15.8387	43.524	7.514	9.85	6.751	25.0564	2.99	3.234	3.383	25.069	3.466	4.033	3.126	2.906	2.814	29.04	5.124	4.665	8.302	19.376	37.727	2.857	2.709	4.0266	27.278	2.906	2.542	3.3214		0.615741	10.8737
15.9578	41.558	6.711	8.146	6.118	23.9373	3	3.014	3.127	27.249	3.748	3.472	2.782	3.196	3.739	30.374	4.851	4.354	8.37	19.084	38.373	3.401	2.541	3.5578	25.751	2.791	2.5921	3.0275		0.620371	10.6987
16.0769	41.66	8.351	7.999	6.921	23.4463	3.867	3.425	3.218	24.192	3.567	3.761	2.342	3.269	2.614	28.697	5.173	4.805	8.109	19.734	39.651	2.641	2.923	3.2685	25.239	2.579	2.3695	2.7896		0.625001	10.6152
16.196	36.392	7.843	7.531	6.634	25.4507	3.552	3.699	3.623	26.188	3.08	2.554	3.511	3.671	3.164	28.274	4.415	4.903	7.283	20.738	36.08	3.176	2.672	3.8903	25.959	2.39	2.1777	2.7753		0.629631	10.4306
16.315	35.396	6.792	7.894	7.637	24.5127	3.145	2.786	2.502	24.673	4.255	3.045	2.846	3.017	2.624	27.461	6.578	4.398	8.667	19.96	35.394	3.006	2.171	4.3426	23.241	2.907	2.926	2.8427		0.634257	10.1859
16.4341	35.681	7.562	7.155	7.547	25.1905	2.587	2.206	3.252	23.347	4.461	4.347	2.486	2.731	3.678	30.126	6	5.529	8.67	17.715	36.277	3.07	2.719	4.2026	22.749	3.457	2.6123	3.06		0.638887	10.3118
16.5532	33.051	6.421	8.938	7.609	24.2784	4.069	2.683	2.559	22.315	3.746	3.092	2.847	2.965	2.134	29.574	5.407	5.273	7.415	19.035	35.892	3.43	2.552	4.9672	19.773	2.537	2.6001	3.302		0.643517	9.94314
16.6723	34.902	6.536	7.51	8.192	26.8842	3.438	2.352	3.267	24.532	4.327	2.693	3.261	3.47	3.13	28.414	4.998	5.095	9.28	17.935	36.275	3.423	3.142	3.7912	19.863	2.77	2.3431	2.5732		0.648148	10.1628
16.7914	32.191	6.566	7.919	9.756	30.8136	4.53	3.022	3.484	26.597	3.844	2.548	3.097	3.767	3.089	31.935	4.642	5.141	9.33	18.864	39.291	3.062	2.856	4.3847	16.187	2.834	3.1686	2.699		0.652778	10.5784
16.9105	28.472	7.865	7.66	10.578	30.9531	3.473	3.221	3.073	25.595	4.274	3.286	3.166	3.36	3.207	29.304	4.75	4.437	9.764	17.636	37.149	2.569	3.326	4.1698	16.772	3.24	3.0458	1.9368		0.657408	10.2327
17.0296	28.881	6.729	8.178	11.498	29.1066	4.024	2.923	3.125	26.999	3.82	2.258	2.77	3.571	2.839	29.309	5.892	4.306	9.087	16.807	41.417	2.879	3.306	3.8864	17.23	3.134	2.5046	2.485		0.662038	10.332
17.1487	28.824	8.027	7.514	10.721	32.3722	3.656	3.261	3.307	26.473	3.812	2.988	3.342	2.365	2.563	29.537	5.178	4.767	7.869	15.278	34.93	1.93	2.828	3.4862	16.109	3.234	2.5529	3.0252		0.666668	9.99813
17.2677	26.986	8.99	8.303	10.197	31.551	4.053	3.017	3.674	28.874	4.262	3.301	2.844	3.606	3.292	30.687	4.898	5.242	9.206	16.161	39.742	3.022	2.601	4.0409	14.874	3.068	2.8374	2.9292		0.671294	10.454
17.3868	25.353	8.461	8.473	12.794	33.9713	5.58	4.275	4.14	31.238	4.813	3.562	3.422	3.067	3.809	31.119	5.064	4.54	8.728	13.998	39.141	2.561	3.062	4.1556	15.352	3.421	2.5833	1.8886		0.675924	10.6878
17.5059	23.664	9.474	7.587	14.267	33.3621	3.789	4.569	3.403	29.427	3.937	3.958	3.232	3.19	3.058	30.569	4.665	4.596	10.546	14.266	40.674	2.369	3.135	4.162	16.598	2.879	2.6502	2.7919		0.680554	10.6229
17.625	21.004	9.843	8.978	16.275	37.7295	4.446	3.202	3.002	31.293	4.987	2.699	3.745	3.305	3.648	34.47	5.354	5.412	7.998	16.377	40.225	3.621	2.666	4.7012	14.815	3.749	2.2028	3.0393		0.685184	11.0662
17.7441	21.366	10.172	7.854	18.312	34.1372	4.669	3.829	3.345	30.748	3.974	2.384	2.622	2.863	3.848	34.606	6.154	5.725	7.503	15.57	37.628	3.445	2.886	3.6113	13.701	2.985	2.931	2.4574		0.689815	10.7158
17.8632	19.947	11.548	8.255	21.917	36.8019	5.404	4.788	3.76	32.115	4.174	3.487	3.906	2.884	4.652	32.345	5.429	6.324	9.197	14.522	38.479	3.046	2.348	3.7487	14.13	2.4	2.5734	2.7812		0.694445	11.1467
17.9823	20.947	12.174	10.092	25.482	42.7692	5.322	3.909	4.547	31.927	5.147	3.234	3.353	3.059	3.43	35.163	5.538	6.119	8.215	15.966	38.945	2.589	2.895	4.128	14.828	3.01	2.5268	2.1417		0.699075	11.7577
18.1014	20.292	11.311	9.591	25.778	39.9864	7.514	4.572	3.967	35.781	6.955	3.355	4.116	3.527	4.184	33.431	4.835	5.668	9.102	18.948	36.93	2.677	2.927	4.5016	14.686	2.918	2.7148	2.2407		0.703705	11.9448
18.2204	18.504	14.502	11.556	31.265	41.5035	8.818	5.056	3.109	34.122	6.3	3.272	2.859	4.041	3.194	32.271	4.989	4.554	9.056	18.556	38.572	3.007	2.66	4.7599	16.473	2.403	2.3942	2.5026		0.708331	12.2333
18.3395	18.338	13.575	13.382	35.744	45.1149	9.493	4.552	4.265	35.769	6.106	3.111	2.579	3.487	3.643	32.252	4.432	5.611	9.573	20.839	40.527	3.709	2.452	4.0826	15.606	3.524	2.2568	2.3294		0.712961	12.8279
18.4586	21.249	13.932	14.168	40.575	46.6513	10.087	5.791	4.223	34.482	6.755	3.962	4.008	3.133	4.394	37.017	3.526	4.518	8.819	20.947	43.525	3.021	2.581	3.588	16.537	3.27	2.6166	2.8033		0.717591	13.5622
18.5777	19.816	18.274	18.067	42.345	46.1838	10.566	6.206	4.771	33.664	6.92	3.788	3.368	3.728	3.833	37	5.04	4.589	8.187	21.938	44.273	4.115	2.911	4.4663	17.581	3.604	2.4154	2.7567		0.722221	14.0891
18.6968	26.353	16.713	24.821	44.668	45.8546	13.223	6.147	3.887	34.993	10.346	3.846	3.841	2.964	3.585	39.761	4.848	5.492	8.164	21.814	45.701	3.336	2.949	4.4337	18.303	3.338	3.6604	2.2921		0.726851	15.0124
18.8159	31.367	19.69	25.027	48.199	44.7213	13.591	6.277	4.58	35.792	9.159	3.327	3.412	3.649	4.654	36.565	5.301	5.491	6.493	24.586	43.331	3.483	2.656	3.4592	16.6	3.261	3.0762	2.6087		0.731482	15.1984
18.935	33.067	23.451	30.056	44.786	44.8197	15.261	6.586	4.643	38.973	8.734	3.555	2.681	3.5	3.907	38.027	4.772	5.758	8.151	22.708	45.701	3.237	1.922	4.8774	18.734	2.98	2.6758	2.9742		0.736112	15.7977
19.0541	31.897	25.579	30.633	43.313	48.4525	18.735	8.061	4.957	43.584	8.806	2.515	3.072	3.722	3.785	37.643	5.465	5.457	8.103	24.706	45.694	3.615	2.255	4.6426	17.369	3.433	2.1322	3.0962		0.740742	16.3231
19.1731	29.186	32.175	30.432	45.141	49.6993	22.718	9.752	6.197	52.16	8.271	3.158	3.126	3.797	3.855	37.099	4.833	5.153	7.595	27.427	48.621	3.893	2.269	3.4474	18.842	3.259	2.1604	3.1161		0.745368	17.3105
19.2922	30.045	36.841	34.256	45.966	51.2802	25.999	10.24	5.692	53.781	9.506	2.876	3.492	3.187	4.088	38.936	6.534	6.489	8.455	24.496	47.571	4.339	1.769	3.2967	16.657	2.981	2.8868	2.197		0.749998	17.9206
19.4113	26.644	39.845	26.267	36.77	46.7078	28.085	11.77	6.392	50.605	11.622	3.595	2.893	3.616	6.224	40.257	4.674	5.961	8.452	27.116	52.885	5.027	2.814	3.28	16.465	2.982	2.4901	2.9275		0.754628	17.6432
19.5304	25.972	39.771	19.392	28.487	44.7347	30.724	15.898	6.345	47.676	13.733	3.573	3.817	3.593	5.296	44.943	5.154	6.211	7.739	27.057	56.657	4.556	2.577	2.9217	14.844	3.699	2.8831	2.629		0.759258	17.4401
19.6495	21.736	33.225	12.029	22.448	42.8558	27.762	19.196	7.544	49.658	15.584	3.217	3.754	3.482	6.169	46.336	5.497	5.488	8.517	27.494	63.898	4.449	3.197	3.9788	14.587	3.693	2.5989	2.5261		0.763888	17.0711
19.7686	18.16	26.79	7.845	17.138	38.9156	27.284	23.107	10.479	48.493	21.552	3.545	3.133	2.852	5.877	52.442	5.756	6.219	8.355	29.74	71.903	5.358	2.659	4.4178	17.595	3.581	3.0241	3.0333		0.768518	17.3798
19.8877	12.554	26.101	5.848	10.882	37.6065	22.719	24.329	12.18	51.987	28.107	2.886	3.585	3.551	8.412	60.197	7.173	6.393	8.36	29.373	78.399	4.911	2.996	3.8458	16.653	2.986	2.6345	3.4515		0.773149	17.7082
20.0068	10.326	17.425	5.438	9.261	34.6366	18.551	25.686	13.445	56.637	37.027	3.686	3.14	3.664	8.24	73.259	5.873	5.652	10.746	28.578	85.552	5.128	2.613	3.0241	16.832	2.933	1.9396	2.6207		0.777779	18.219
20.1259	6.377	11.319	3.872	7.65	29.0403	18.7	30.255	16.64	64.589	42.622	3.631	3.235	3.266	9.571	78.931	7.572	6.129	10.879	28.307	89.665	5.792	2.911	2.9528	17.091	3.047	2.2817	3.097		0.782409	18.8675
20.2449	5.138	9.36	3.23	5.666	22.2153	17.968	25.102	17.702	71.394	50.992	3.881	4.137	2.999	9.82	91.009	7.893	7.198	10.175	30.002	96.818	5.763	2.538	4.2475	16.503	3.596	2.694	3.9716		0.787035	19.7042
20.364	6.563	6.806	2.908	4.408	17.4703	15.622	23.059	26.346	82.854	57.158	4.136	3.649	2.913	12.092	90.883	8.441	6.69	11.28	28.772	96.61	6.108	2.771	4.0796	15.87	3.361	2.0978	2.7685		0.791665	20.2117
20.4831	4.925	5.823	2.047	3.654	15.1748	13.053	19.25	34.398	86.152	64.744	2.945	3.776	3.84	15.065	97.122	9.56	7.615	13.121	31.509	97.854	6.244	2.432	3.9939	16.685	2.823	3.0821	3.0476		0.796295	21.1087
20.6022	3.506	4.651	1.891	3.317	14.18	11.07	17.853	39.556	86.196	70.2	4.035	3.633	4.56	18.522	105.263	9.021	9.481	16.756	34.854	96.268	6.954	2.841	3.3097	16.707	2.744	2.3575	2.5104		0.800925	21.9347
20.7213	2.274	3.187	2.33	2.429	8.6145	12.271	16.666	47.355	80.365	68.783	5.041	3.117	4.892	23.996	109.751	9.4	11.339	18.289	32.666	100.063	6.745	2.91	4.5624	20.076	2.783	2.9254	2.7276		0.805555	22.4281
20.8404	2.244	2.267	1.858	2.533	7.439	8.31	14.209	41.988	70.514	70.695	6.127	3.915	4.075	31.872	101.403	10.236	12.933	19.027	37.41	98.346	6.323	4.499	5.1922	17.707	3.046	3.0447	2.2414		0.810185	21.8316
20.9595	2.035	1.872	1.264	1.856	5.5106	7.245	12.829	37.617	59.75	68.191	11.682	3.463	4.057	40.389	81.203	12.673	19.029	24.645	40.962	91.32	7.663	3.894	4.4381	18.128	2.559	2.7257	2.6293		0.814816	21.0974
21.0786	1.41	1.484	1.34	1.959	4.8906	5.332	13.083	37.03	53.654	61.013	19.062	3.782	4.555	47.462	46.59	16.518	19.571	31.318	47.182	85.326	9.14	4.319	4.2053	21.528	2.224	1.7519	2.4785		0.819446	20.304
21.1976	1.349	1.537	1.034	1.471	3.4916	4.78	12.609	34.798	43.847	47.471	29.461	4.063	5.249	54.272	24.862	18.868	26.454	38.412	53.812	76.322	9.593	4.401	5.6096	22.06	2.818	2.8574	2.1981		0.824072	19.7667
21.3167	1.121	1.011	1.086	1.394	2.9614	4.49	11.548	33.121	33.907	30.428	41.42	3.99	4.94	55.932	13.103	23.014	34.37	42.588	60.274	68.352	9.834	4.259	6.6672	23.702	2.388	3.1668	2.8143		0.828702	19.329
21.4358	1.337	0.843	1.064	1.189	3.1526	3.69	10.438	25.971	24.258	19.889	46.354	4.083	5.819	47.558	9.07	28.981	38.72	50.509	59.185	64.42	11.846	4.861	6.7101	23.599	2.465	2.746	2.7457		0.833332	18.5742
21.5549	0.803	0.793	0.83	0.699	2.4208	2.942	8.873	18.569	15.7	14.443	44.565	4.424	6.546	39.526	6.592	31.837	40.086	54.841	52.755	52.081	14.003	4.807	7.5259	24.454	1.861	3.1297	2.8971		0.837962	16.9631
21.674	0.611	0.781	0.767	0.818	2.3386	3.115	8.854	15.798	12.519	10.769	43.683	6.625	7.126	29.678	5.532	42.153	35.636	53.802	48.184	33.939	16.799	4.768	8.1616	27.082	2.077	3.1552	1.9943		0.842592	15.8061
21.7931	1.105	0.941	0.708	0.615	1.8341	2.342	7.363	13.616	10.687	8.183	40.273	4.728	8.38	23.766	3.647	36.209	44.853	48.262	34.582	29.286	22.838	6.204	11.097	25.657	3.184	3.0503	2.4426		0.847222	14.6612
21.9122	0.562	0.674	0.432	0.73	2.366	2.14	7.712	11.408	8.361	6.791	45.218	6.52	9.004	17.871	3.064	28.151	48.299	32.277	25.219	19.606	26.414	5.756	8.5733	29.621	2.887	1.6569	2.5083		0.851852	13.1045
22.0313	0.612	0.894	0.576	0.573	1.6115	1.33	6.132	7.816	6.507	5.608	49.336	5.889	14.072	11.251	2.718	13.49	36.459	18.374	17.54	17.774	30.793	7.171	8.8001	27.657	2.784	2.3436	3.1333		0.856483	11.1572
22.1503	0.389	0.37	0.645	0.685	0.9278	1.358	4.748	6.024	4.281	4.253	62.847	8.011	18.071	9.993	1.635	7.9	17.891	11.522	10.968	12.774	31.307	6.418	9.75	29.133	3.05	2.5029	2.3375		0.861109	9.99227
22.2694	0.506	0.483	0.218	0.767	0.8691	1.004	5.19	4.991	5.034	3.096	62.067	13.881	24.802	7.133	1.662	6.005	9.543	7.682	9.015	9.903	29.631	7.048	10.0768	28.336	3.362	3.2801	2.7904		0.865739	9.56946
22.3885	0.687	0.6	0.261	0.414	1.014	1.559	3.984	5.118	3.006	2.719	57.731	18.845	32.055	6.739	1.776	5.247	9.081	7.071	8.48	6.797	34.452	7.546	11.5069	27.767	4.046	2.7739	2.6046		0.870369	9.77335
22.5076	0.293	0.479	0.418	0.621	0.8896	1.356	3.459	4.699	3.641	2.241	50.507	23.042	38.812	4.028	1.188	3.192	6.87	4.627	6.222	5.402	33.625	7.887	11.4889	36.515	3.652	2.798	2.4192		0.874999	9.6434
22.6267	0.472	0.461	0.614	0.433	0.5995	0.883	2.829	3.358	2.473	1.985	40	32.048	47.418	4.078	0.931	2.951	5.183	3.549	4.406	5.254	38.947	6.254	11.2686	38.013	3.385	3.4121	2.7215		0.879629	9.77506
22.7458	0.317	0.228	0.309	0.431	0.7102	1.071	2.912	2.821	3.216	1.764	28.429	32.425	45.578	2.995	0.829	2.506	3.464	2.131	3.179	4.238	37.817	8.871	11.3474	42.444	3.757	2.9982	2.7657		0.884259	9.24272
22.8649	0.112	0.484	0.424	0.449	0.444	1.075	1.949	1.998	2.77	1.766	15.488	37.026	33.053	2.372	0.948	2.682	2.817	2.568	2.865	3.149	33.608	9.197	10.8827	47.715	4.209	3.4578	2.3753		0.888889	8.36607
22.984	0.275	0.307	0.21	0.553	0.5511	0.678	2.037	1.831	2.249	1.391	11.434	39.786	21.776	1.981	1.303	1.497	1.821	1.923	2.753	1.757	27.137	9.903	12.1794	54.69	2.812	2.8673	2.5995		0.893519	7.71486
23.103	0.268	0.259	0.185	0.2	0.4399	0.503	1.795	1.365	1.894	1.279	11.377	46.993	13.119	1.939	0.577	1.261	1.631	1.372	2.027	1.578	18.892	9.367	12.136	60.445	3.021	2.7568	1.8323		0.898146	7.3523
23.2221	0.32	0.156	0.255	0.551	0.4844	0.448	1.773	1.385	1.508	1.678	7.429	54.037	8.316	1.81	0.331	2.017	1.272	1.347	1.713	1.725	12.751	9.851	16.1076	57.516	2.705	2.2621	2.2455		0.902776	7.11087
23.3412	0.292	0.227	0.021	0.394	0.3403	0.562	1.036	1.303	1.297	1.046	5.815	56.152	5.744	1.163	0.804	1.278	1.413	1.265	1.086	1.355	7.918	11.499	19.6822	66.743	3.571	2.5458	2.3146		0.907406	7.29137
23.4603	0.166	0.295	0.006	0.3	0.2669	0.556	0.56	1.29	0.864	0.869	3.505	56.544	6.468	0.933	0.718	0.83	1.045	0.956	1.205	1.219	6.503	13.25	21.0883	72.887	4.039	2.6364	2.0877		0.912036	7.44768
23.5794	0.012	0.247	0.158	0.344	0.2315	0.384	1.417	1.344	1.535	0.838	2.553	42.286	4.816	0.883	0.474	0.427	1.155	0.828	1.539	1.473	5.981	12.512	24.8522	74.442	3.742	3.0107	2.1489		0.916666	7.02346
23.6985	0.093	0.002	0.109	0.063	0.5327	0.189	0.797	0.923	1.574	0.905	3.127	23.181	2.68	0.648	0.394	0.553	0.753	0.791	1.257	1.137	5.545	15.449	27.5167	68.677	5.101	2.5619	2.4462		0.921296	6.18539
23.8176	0.168	0.152	0.089	0.121	0.1851	0.146	0.657	0.826	0.726	0.76	1.158	13.1	2.596	0.78	0.29	0.606	0.611	0.784	0.599	0.692	3.739	19.107	32.4506	53.647	4.411	2.4968	2.1701		0.925926	5.2988
23.9367	0.057	0.318	0.183	0.142	0.2289	0.354	0.454	0.766	0.66	0.603	1.422	8.456	2.041	0.509	0.543	0.412	0.555	0.732	0.527	0.988	2.853	21.547	39.448	30.959	5.291	2.5342	2.0282		0.930556	4.61523
24.0558	0.109	0.279	0.166	0.212	0.5785	0.206	1.018	0.738	0.455	0.664	1.135	8.653	1.953	0.219	0.39	0.34	0.544	1.377	0.614	0.555	1.871	22.232	47.4911	20.796	5.588	3.3055	2.5192		0.935186	4.5929
24.1748	0.053	0.154	0.111	0.115	0.2424	0.324	0.439	0.523	0.379	0.592	1.393	6.417	1.847	0.774	0.377	0.257	0.694	0.547	0.474	1.026	1.944	31.056	46.2433	14.764	5.542	2.6851	2.1063		0.939813	4.48441
24.2939	0.325	0.112	0.176	0.133	0.2879	0.279	0.556	0.663	0.633	0.959	0.771	4.427	1.435	0.347	0.246	0.485	0.452	0.685	0.469	0.523	2.198	38.891	43.8685	9.916	7.746	3.3886	2.8089		0.944443	4.54744
24.413	0.209	0.231	0.222	0.164	0.213	0.338	0.372	0.366	0.496	0.467	0.645	3.717	1.232	0.7	0.495	0.348	0.445	0.529	0.532	0.427	1.604	36.398	35.3886	8.014	8.484	3.9298	2.8579		0.949073	4.03053
24.5321	0.02	0.171	0.104	0.314	0.3207	0.185	0.436	0.389	0.536	0.504	0.751	2.181	1.481	0.626	0.204	0.42	0.163	0.182	0.403	0.85	1.252	18.747	23.6813	4.519	11.031	3.8126	3.1409		0.953703	2.83054
24.6512	0.055	0.201	0.118	0.066	0.1795	0.338	0.458	0.28	0.376	0.414	1.153	1.926	0.842	0.496	0.149	0.308	0.269	0.525	0.161	0.525	1.137	10.992	17.5374	4.262	13.867	4.8496	2.7236		0.958333	2.37808
24.7703	0.103	0.07	0.061	0.109	0.1091	0.057	0.235	0.454	0.423	0.384	0.751	1.521	0.644	0.231	0.227	0.217	0.322	0.338	0.516	0.444	0.965	9.296	10.283	2.37	18.258	5.2864	3.6705		0.962963	2.12389
24.8894	0.01	0.13	0.01	0.106	0.0135	0.063	0.39	0.375	0.254	0.141	0.617	1.335	0.842	0.16	0.069	0.37	0.196	0.332	0.303	0.859	0.703	7.448	7.0748	2.144	23.631	5.0309	3.3524		0.967593	2.07258
25.0085	0.017	0.0001082	0.006	0.008	0.0534	0.0001082	0.333	0.319	0.279	0.379	0.689	1.345	0.935	0.09	0.056	0.217	0.375	0.406	0.382	0.785	0.598	6.86	5.2949	1.667	29.667	5.2021	3.074		0.972223	2.18658
25.1275	0.212	0	0.161	0.05	0.1601	0	0.489	0.241	0.228	0.308	0.625	0.599	0.777	0.311	0.111	0.121	0.394	0.254	0.339	0.296	0.989	5.699	4.1717	1.158	29.619	6.7763	3.976		0.97685	2.15056
25.2466	0.101	0.057	0	0.063	0.0715	0.26	0.209	0.276	0.12	0.146	0.431	1.035	0.649	0.176	0.153	0.166	0.265	0.172	0.173	0.421	0.699	2.981	2.9546	1.124	33.646	6.6025	3.5401		0.98148	2.09229
25.3657	0.156	0.063	0.006	0.23	0.1944	0.129	0.109	0.257	0.189	0.206	0.346	0.899	0.358	0.007	0.065	0.011	0.026	0.086	0.047	0.258	0.627	1.976	2.6224	1.095	30.386	7.2979	5.2359		0.98611	1.95861
25.4848	0.187	0.156	0.049	0.43	0.0247	0.146	0.105	0.022	0.418	0.126	0.198	0.887	0.149	0.158	0.279	0.158	0.05	0.302	0.339	0.374	0.398	2.2	2.5144	0.55	23.022	10.1133	4.4997		0.99074	1.77241
25.6039	0.061	0.004	0	0.227	0.2561	0.136	0.014	0.103	0.36	0.195	0.335	0.679	0.745	0.17	0.176	0.158	0.149	0.157	0.118	0.248	0.669	2.273	1.659	0.54	17.078	13.0282	5.4039		0.99537	1.66453
25.723	0.052	0	0.049	0.152	0.1399	0.12	0.211	0.203	0.027	0.087	0.497	0.612	0.803	0.176	0.142	0.178	0.314	0.187	0.253	0.106	0.247	1.631	1.4178	0.894	13.055	17.7436	5.0435		1	1.64225

## Sheet: Image3
X0	Y0	Y1	Y2	Y3	Y4	Y5	Y6	Y7	Y8	Y9	Y10	Y11	Y12	Y13	Y14	Y15	Y16	Y17	Y18	Y19	Y20	Y21	Y22	Y23	Y24	Y25	Y26	Y27	Y28		Ap-basal	Avg int
0	19.7156	7.5825	12.9452	13.44	29.881	13.0288	11.359	26.002	27.464	16.468	18.82	30.275	45.994	63.8486	12.6015	14.976	18.247	49.479	16.45	21.5928	22.516	22.277	16.993	27.539	32.756	11.731	10.383	11.445	19.542		0	22.2535
0.1191	23.538	10.1561	17.7269	15.559	37.463	14.525	11.019	31.953	32.447	17.098	21.136	30.816	48.096	65.4695	18.7115	17.706	22.597	60.543	19.342	24.6771	25.013	20.664	18.398	24.92	29.803	10.727	10.183	14.792	19.287		0.00480818	24.6333
0.2382	26.5543	10.2067	27.3951	18.165	43.057	17.0842	13.253	39.097	37.501	20.22	23.242	31.332	53.345	63.4333	25.2866	21.211	24.987	70.425	23.029	29.6857	26.827	21.555	17.613	22.825	29.564	13.701	12.229	16.874	20.457		0.00961636	27.5915
0.3573	28.5587	12.5418	35.6755	23.86	51.675	23.9525	11.582	43.121	47.031	22.155	25.087	31.971	52.869	62.2505	37.3444	22.662	31.783	80.341	26.87	38.735	31.22	23.24	18.602	19.486	33.04	13.089	14.161	21.291	23.885		0.0144245	31.3131
0.4764	33.5115	20.5596	44.6503	30.235	59.491	30.5033	15.721	45.649	57.993	24.723	25.122	28.101	54.373	56.4898	55.3407	26.443	40.152	81.586	32.077	49.0892	36.613	23.135	19.028	20.89	39.396	14.985	13.917	27.894	27.406		0.0192327	35.6922
0.5954	37.0658	32.6426	47.2143	30.389	67.144	37.7847	19.127	45.052	76.872	33.867	28.329	30.088	54.589	54.8924	72.4578	30.152	48.894	72.603	36.655	58.7545	42.195	23.432	22.116	18.399	49.933	17.443	17.224	38.525	31.303		0.0240369	40.5222
0.7145	40.5318	48.0272	52.3611	31.13	70.37	45.2366	23.876	45.151	95.287	47.465	32.084	32.021	55.917	56.4113	82.192	30.271	57.593	61.488	41.215	70.6165	55.785	28.161	28.572	17.87	63.377	20.876	22.255	53.736	42.685		0.028845	46.6401
0.8336	46.3306	62.3259	58.1935	34.58	79.844	48.1364	31.361	46.132	119.35	68.178	41.142	34.976	59.612	56.7343	83.7214	31.922	59.627	53.406	43.052	79.5679	65.776	34.132	34.284	18.08	80.103	27.918	30.943	76.03	54.325		0.0336532	53.7856
0.9527	51.329	76.651	59.7748	34.503	86.592	56.0447	38.918	51.402	138.397	92.438	51.905	36.141	65.159	59.1606	73.3731	31.539	58.624	46.705	46.723	85.3691	71.586	42.099	45.949	19.124	96.123	36.524	43.48	98.076	61.424		0.0384614	60.5218
1.0718	54.3506	86.2565	58.8286	36.814	87.797	64.2978	47.425	51.923	153.019	118.713	65.302	41.907	82.105	62.2311	66.5366	31.26	51.884	40.671	45.343	91.691	84.456	56.897	59.136	18.283	106.232	49.454	58.28	123.525	77.151		0.0432696	67.992
1.1909	59.3279	87.2099	59.8357	33.237	86.866	65.2919	56.026	57.122	150.729	139.87	80.942	48.915	93.336	65.65	62.1769	31.729	48.008	37.077	47.263	91.4281	91.998	66.09	73.33	21.494	108.531	68.152	75.741	142.053	90.013		0.0480777	73.7739
1.31	68.0287	85.9716	58.1935	34.483	84.697	70.8163	61.307	63.137	151.28	148.619	94.666	57.314	106.705	70.0982	57.2931	31.744	45.421	33.66	46.519	93.9616	97.474	73.711	86.177	28.093	107.962	89.636	91.804	146.138	100.399		0.0528859	78.8038
1.4291	76.6211	76.6592	55.9846	39.065	78.42	73.3191	68.137	75.116	148.396	149.958	117.071	71.044	125.292	77.8597	57.1961	32.523	40.885	33.709	44.358	93.2965	101.457	88.487	95.621	33.241	107.296	112.552	107.115	135.052	112.236		0.0576941	83.723
1.5481	82.7302	69.3726	53.4913	43.687	76.656	73.3996	70.919	85.732	135.889	150.426	135.631	90.971	147.464	73.8207	54.7154	33.353	36.271	32.756	46.911	93.159	104.35	98.191	105.897	47.308	107.43	131.439	110.371	117.312	121.943		0.0624982	87.2964
1.6672	89.5958	64.3632	53.0978	47.986	82.779	74.6991	70.957	93.686	128.152	147.773	146.016	118.295	173.341	69.9708	51.5357	33.352	33.928	33.582	48.244	89.5485	93.164	108.352	106.992	70.889	105.337	137.673	110.317	93.966	120.281		0.0673064	89.5818
1.7863	92.4448	53.7681	50.3727	50.983	86.608	71.4598	69.006	99.504	122.527	141.907	161.453	150.263	199.29	66.545	51.4841	31.991	33.538	32.531	47.229	89.2961	88.931	122.075	99.087	102.58	94.885	136.967	109.756	80.347	113.787		0.0721146	91.4005
1.9054	91.3343	45.2902	44.6826	54.909	87.763	62.3608	71.166	107.128	109.891	126.524	163.333	184.19	224.052	64.0357	46.4135	32.952	34.742	34.444	48.301	84.7735	78.412	134.586	88.942	130.9	90.708	134.145	109.304	74.394	102.82		0.0769228	91.8102
2.0245	84.4628	41.1134	45.1677	55.303	89.489	59.956	72.86	115.973	99.571	113.245	163.462	213.936	233.59	62.7491	42.2774	33.662	31.993	35.09	48.857	80.8184	66.157	130.622	81.592	151.836	80.974	125.856	102.821	70.449	97.234		0.0817309	90.7282
2.1436	74.763	41.8004	44.5429	59.656	94.833	62.0575	73.811	127.097	88.597	100.954	151.91	230.444	228.025	63.2328	40.3902	39.941	33.418	38.992	53.164	71.947	62.265	120.379	72.953	157.935	67.546	118.563	99.402	64.583	92.894		0.0865391	88.8309
2.2627	62.5449	38.284	43.3311	56.132	96.146	61.7889	70.385	147.118	79.791	92.098	140.015	223.39	217.328	65.0943	37.7499	40.653	36.505	39.296	55.87	63.653	53.498	108.507	69.803	144.102	58.912	104.146	93.49	60.168	90.546		0.0913473	84.4947
2.3818	55.889	33.7213	43.7521	55.668	96.758	60.7812	69.588	156.412	70.211	82.706	130.208	201.513	201.064	63.8598	34.4923	46.664	36.702	46.251	58.48	55.9616	46.189	82.825	63.192	129.393	51.548	94.994	85.41	54.173	82.464		0.0961555	78.9955
2.5008	48.9351	31.8858	41.7278	58.265	94.281	58.9415	69.231	161.699	63.074	72.268	120.823	173.164	172.401	65.4318	31.3747	49.989	38.01	54.701	66.464	49.8094	41.92	62.387	54.752	108.89	46.123	84.695	77.953	50.761	75.513		0.10096	73.2921
2.6199	45.6312	29.0587	39.8833	62.865	96.292	57.1125	69.186	165.045	59.825	70.489	108.995	141.9	149.639	73.2987	29.4875	53.233	44.857	63.22	71.7	45.4181	37.35	51.435	45.71	93.168	42.813	72.159	76.29	46.923	72.431		0.105768	69.4971
2.739	42.8722	27.9179	40.4294	66.16	95.437	48.9836	69.539	164.615	56.372	61.436	99.001	124.381	116.034	70.7331	26.0773	61.567	46.576	69.912	76.444	40.4434	36.022	42.526	38.661	69.401	35.65	66.741	65.746	41.309	66.906		0.110576	64.4101
2.8581	46.5597	24.9098	36.8913	70.139	94.4	47.7118	74.376	171.623	53.58	53.351	93.625	103.891	86.795	77.8265	26.5957	66.505	50.919	80.359	85.028	34.7449	32.086	41.73	31.763	60.498	34.911	60.56	58.568	41.306	59.995		0.115384	62.112
2.9772	43.604	24.2483	37.0175	66.08	99.974	45.2571	70.846	165.212	54.406	47.925	87.566	85.885	61.482	80.5508	25.9614	68.371	58.567	84.131	96.944	28.877	30.201	40.019	27.285	47.772	33.403	54.644	53.013	40.278	57.385		0.120192	59.2036
3.0963	45.6577	23.4312	37.9801	67.035	102.381	44.5128	66.429	160.187	50.909	45.339	82.082	66.41	46.247	72.5445	24.3477	74.738	61.965	86.354	101.2	23.693	29.834	36.655	24.322	38.572	29.392	49.067	49.638	38.632	55.379		0.125001	56.377
3.2154	47.8677	22.7698	34.8732	70.053	97.605	42.6132	66.205	157.396	50.358	40.932	80.074	56.966	36.271	54.0372	22.4779	78.456	65.379	81.208	113.649	20.507	26.109	31.429	23.011	30.397	26.743	43.816	48.986	38.204	46.259		0.129809	53.6087
3.3345	52.1061	22.344	34.9486	73.872	105.024	43.4039	67.474	146.796	49.364	41.433	77.319	46.935	30.894	39.5691	23.2407	85.748	65.822	81.542	128.698	16.1598	21.969	25.499	18.806	27.143	22.466	40.361	46.13	34.401	42.472		0.134617	52.1359
3.4535	54.8322	21.8622	35.5424	79.167	100.96	42.0849	64.697	143.369	43.694	39.353	74.076	39.646	27.264	26.9291	21.7541	97.609	73.59	84.43	133.138	13.5315	20.21	23.4	16.119	20.707	19.604	40.527	42.048	33.097	36.565		0.139421	50.683
3.5726	59.6961	19.9012	29.4801	81.571	98.532	42.7432	60.7	137.66	43.059	35.018	65.843	29.552	22.887	16.2495	19.0513	104.134	77.908	90.688	136.648	11.024	21.171	20.041	12.956	17.717	17.314	37.528	36.128	32.006	30.084		0.144229	48.5273
3.6917	63.0729	19.9104	29.7234	83.559	96.26	46.5633	60.756	130.401	43.845	33.98	63.7	26.933	20.511	11.1419	18.4797	108.654	78.86	89.764	135.019	10.0656	20.099	18.83	9.5	15.772	14.629	35.276	32.285	28.681	28.146		0.149037	47.3937
3.8108	68.2558	19.5918	29.17	85.332	94.908	47.1389	59.334	123.551	44.464	32.064	57.025	24.982	19.913	11.3333	16.4477	124.902	81.761	92.603	132.464	8.459	19.976	17.474	7.927	14.259	11.337	32.088	32.4	25.875	22.429		0.153846	46.8091
3.9299	72.5211	20.8544	29.9799	88.965	93.557	47.9715	60.901	116.735	42.69	32.103	51.729	22.182	17.246	8.966	17.7605	130.92	88.876	99.244	115.479	8.3391	18.71	15.882	6.599	11.043	9.095	31.507	31.215	24.192	17.578		0.158654	45.96
4.049	73.3947	23.3737	31.1672	94.208	86.214	47.9749	61.751	114.55	38	29.437	39.701	18.499	15.891	8.6585	15.3554	134.031	90.639	100.591	100.907	7.6629	15.132	13.451	6.19	9.587	7.663	30.384	29.176	20.791	15.85		0.163462	44.1459
4.1681	72.1944	20.9963	33.2202	99.697	84.236	50.2176	65.621	106.938	36.906	28.704	36.355	17.623	15.955	8.273	13.7269	138.684	92.458	104.154	78.236	7.8645	14.353	13.605	5.062	8.086	6.799	23.725	28.459	17.45	12.268		0.16827	42.823
4.2872	70.3527	20.3335	31.7331	105.406	87.231	52.5572	67.202	96.629	40.75	27.968	28.299	11.866	16.151	7.7605	13.6419	147.118	98.822	101.217	57.602	7.0741	14.277	12.573	4.841	7.803	5.443	19.303	25.429	14.947	9.298		0.173078	41.5044
4.4063	70.5289	21.6735	33.5935	107.056	81.945	51.3394	68.782	93.845	41.247	26.992	27.272	12.589	15.81	7.0815	12.8158	154.93	107.839	102.547	37.105	5.8377	12.155	10.694	4.058	7.004	6.052	16.6	22.402	13.48	7.983		0.177886	40.733
4.5253	68.0882	21.7928	34.3665	109.231	78.356	48.7428	65.137	81.408	39.746	25.423	23.537	12.31	15.972	5.8703	12.1576	157.033	112.192	92.389	26.613	6.0662	12.011	9.761	4.303	7.111	5.495	11.919	20.528	10.524	6.505		0.182691	38.7789
4.6444	72.5646	22.3407	32.7713	108.365	70.813	51.0439	64.606	78.47	37.902	25.776	18.985	9.682	16.304	6.1153	11.6274	148.182	115.187	76.739	20.968	5.7352	11.229	9.728	3.704	6.099	4.382	9.618	18.938	9.996	5.274		0.187499	37.005
4.7635	72.3795	24.255	34.1157	103.496	66.466	51.8099	61.026	76.324	38.318	23.944	15.397	9.111	15.45	5.3742	10.1996	131.378	125.548	59.737	16.549	5.0274	9.276	9.751	4.045	5.724	5.265	8.032	18.344	9.48	4.964		0.192307	35.1995
4.8826	79.3401	24.0991	33.3078	93.784	67.34	53.8208	58.351	68.662	38.395	23.453	11.054	10.052	16.463	4.5186	9.3157	113.806	131.713	49.833	14.017	4.5433	8.766	8.494	4.084	6.915	4.923	6.686	13.981	8.446	5.251		0.197115	33.566
5.0017	74.8741	24.6234	34.6085	87.169	68.224	51.7385	57.778	68.796	35.478	23.909	9.391	11.058	17.423	4.3173	9.4366	88.26	130.133	43.327	12.692	4.4709	7.54	6.527	3.408	5.421	5.193	5.916	11.358	6.474	4.624		0.201923	31.523
5.1208	69.1507	24.9291	37.5165	83.522	62.148	55.8151	58.195	59.067	33.956	23.77	8.29	10.388	16.372	3.7483	7.4243	65.955	123.681	37.122	10.002	4.5904	7.531	5.835	3.493	4.001	5.387	6.074	10.08	5.781	5.179		0.206731	29.276
5.2399	64.4504	27.876	38.2942	75.227	61.722	57.607	57.262	54.456	30.368	21.522	7.341	9.71	16.812	4.2654	7.5791	42.547	118.414	33.218	9.957	3.5503	6.811	6.386	3.244	4.388	5.136	5.3	7.111	5.873	5.534		0.21154	27.309
5.359	59.0941	32.8657	40.7898	72.677	56.161	55.9293	56.394	50.819	26.007	19.437	7.154	10.238	16.764	4.262	7.2649	30.992	122.49	31.831	9.284	3.2375	5.338	6.001	4.4	4.672	5.827	4.937	6.272	5.266	4.431		0.216348	26.2357
5.478	50.7141	34.4031	41.7686	68.695	49.167	60.6273	57.494	45.129	22.936	19.325	6.221	9.671	16.728	3.755	6.1821	23.14	126.857	29.49	9.822	3.1045	4.605	4.92	3.862	4.606	6.038	4.199	5.654	4.721	4.372		0.221152	25.1106
5.5971	40.8913	33.6825	41.8867	66.7	42.058	62.1907	57.357	39.228	18.911	16.763	6.339	11.333	16.594	3.1416	6.2768	20.302	116.89	27.636	8.314	2.9757	5.28	4.708	3.369	4.652	6.334	3.761	5.705	4.174	4.415		0.22596	23.5127
5.7162	36.7134	34.4196	41.8931	56.567	31.134	62.8418	55.705	33.914	15.11	15.196	5.926	10.452	18.437	4.0111	6.0375	19.149	103.258	26.684	8.19	3.3809	4.829	4.959	3.412	4.21	6.24	4.472	4.594	3.653	3.996		0.230768	21.7029
5.8353	29.0522	31.5559	44.3278	49.788	21.369	63.2119	59.17	30.738	14.479	15.423	5.303	11.699	19.69	3.3489	4.1229	15.083	91.976	25.237	6.793	2.3006	5.075	4.41	3.036	3.895	6.897	5.281	4.447	3.69	4.494		0.235576	20.2032
5.9544	23.046	33.3262	45.4698	44.923	14.986	62.1896	58.982	29.215	12.668	14.074	5.976	9.791	17.901	3.4864	4.2471	12.811	71.126	22.24	6.465	2.4772	4.106	5.091	3.016	4.25	6.324	3.977	3.996	3.243	4.723		0.240385	18.4181
6.0735	19.3278	33.8862	45.9733	37.5	10.855	59.3686	54.086	26.686	11.521	10.459	4.87	9.639	18.54	3.5322	4.3979	12.685	56.465	21.255	7.256	2.5997	3.144	4.197	2.94	3.605	6.887	3.331	3.55	3.344	4.394		0.245193	16.7688
6.1926	16.4637	32.6794	43.6787	34.478	7.653	54.7234	49.227	26.341	9.975	9.26	5.08	10.407	17.98	3.9707	3.9718	11.903	41.207	22.291	6.038	2.8848	3.05	3.245	2.828	3.731	6.665	3.659	4.085	3.569	4.297		0.250001	15.3566
6.3117	16.9128	31.7736	43.0492	30.016	6.637	54.7438	48.046	26.408	9.281	9.285	4.178	10.899	20.206	3.2768	4.0779	10.415	31.295	22.931	6.921	2.9166	2.486	3.229	2.353	3.939	7.595	3.704	4.105	3.939	4.622		0.254809	14.8014
6.4307	16.4546	32.9859	43.7753	27.076	6.361	54.5945	44.429	22.357	7.735	8.586	4.315	11.409	22.967	3.9706	3.2136	9.246	26.071	20.322	6.118	3.4764	2.687	2.787	1.862	4.234	10.105	3.455	3.374	3.42	4.508		0.259613	14.2033
6.5498	15.3898	34.3481	41.3238	22.383	6.381	53.1473	42.831	23.14	6.349	8.101	5.39	11.61	23.088	3.5511	3.4169	7.504	20.984	23.066	6.15	3.3441	2.948	3.677	2.601	5.219	9.752	3.253	2.971	2.991	4.098		0.264422	13.7589
6.6689	14.7239	31.185	37.9112	16.86	5.69	55.285	39.225	20.209	5.28	6.935	5.519	10.864	24.048	4.0686	3.398	7.132	18.357	27.472	6.365	3.1885	3.048	3.663	2.785	3.997	10.377	3.804	2.523	3.595	4.363		0.26923	13.168
6.788	11.6703	33.0174	30.8012	17.33	5.352	53.9204	38.881	21.388	5.863	6.599	5.388	10.774	27.721	3.7704	3.9847	5.73	14.764	28.989	7.16	2.7237	3.73	2.953	2.551	3.992	11.084	3.072	2.972	3.338	4.932		0.274038	12.9121
6.9071	10.1555	31.1706	29.0004	15.447	6.485	56.5219	37.162	19.207	5.271	7.822	5.126	10.134	30.755	3.3317	3.4608	4.912	13.596	28.196	6.587	3.0036	2.896	2.481	2.75	4.968	12.327	3.185	2.75	2.483	4.46		0.278846	12.6084
7.0262	9.1574	26.0295	24.7583	12.488	5.203	50.5515	38.392	19.236	4.862	6.157	4.808	10.513	27.516	4.2298	2.904	4.944	12.265	25.692	6.144	3.1222	2.599	2.694	3.025	4.722	12.054	2.909	2.871	2.821	4.448		0.283654	11.6247
7.1453	9.2974	24.0058	20.9764	13.304	4.614	45.2463	39.361	18.965	5.459	4.603	5.478	8.543	24.724	4.0182	3.401	4.949	11.245	25.551	6.035	3.3008	2.735	2.961	2.505	4.347	11.911	3.341	3.211	2.983	4.733		0.288462	11.0967
7.2644	8.4186	21.438	19.7262	12.855	5.334	37.6404	40.083	15.186	5.147	4.64	4.484	10.778	23.548	3.8734	2.3793	5.255	9.74	23.876	6.899	3.6133	2.579	2.008	3.109	4.686	12.902	3.346	3.175	4.144	5.381		0.293271	10.5601
7.3834	6.9024	18.2643	17.8594	13.201	5.075	30.6316	39.915	13.841	5.044	3.875	5.12	11.62	25.939	4.4363	2.8531	4.511	8.581	26.865	8.427	3.7739	2.985	2.127	2.559	5.492	12.125	3.187	2.329	3.432	4.549		0.298075	10.1903
7.5025	6.3817	17.2726	15.7406	12.91	4.553	24.1004	38.812	14.194	4.495	4.501	4.63	11.411	32.044	5.0564	2.4152	4.067	7.48	30.703	7.588	2.9424	2.649	2.316	2.784	5.669	14.228	2.733	2.178	3.23	4.986		0.302883	10.0714
7.6216	7.0852	13.6548	13.4918	14.657	5.447	16.8245	35.394	13.439	4.352	3.729	4.308	10.258	34.765	5.6401	3.0825	4.235	8.196	35.407	7.42	3.4715	2.522	2.875	2.371	5.11	12.024	2.882	2.742	3.057	4.118		0.307691	9.74339
7.7407	7.8669	11.4883	11.0411	14.42	5.576	12.3627	28.727	14.039	5.1	3.466	4.71	9.797	35.273	4.4709	3.5232	3.726	9.073	39.264	6.641	3.1646	2.091	2.375	2.213	4.757	13.215	2.759	2.543	3.167	4.063		0.312499	9.34182
7.8598	6.139	10.9648	9.9	14.042	5.773	8.827	24.766	11.968	5.029	3.97	5.703	9.842	39.044	5.1424	3.7765	3.893	8.852	45.505	7.37	2.9242	2.169	2.382	2.706	5.283	14.327	2.905	2.397	3.483	4.425		0.317307	9.43131
7.9789	6.1716	10.1079	6.8645	16.142	6.219	6.2919	21.687	12.593	5.324	3.745	5.878	10.443	47.298	6.6455	2.9207	3.363	7.528	49.283	7.157	2.8438	2.567	2.516	2.776	5.325	16.526	3.68	2.413	3.956	4.275		0.322116	9.74276
8.098	4.9857	9.3465	6.9358	15.813	5.828	5.4928	16.484	12.327	5.185	4.501	5.595	10.112	54.614	6.2798	2.6088	3.509	8.121	53.29	8.403	3.8312	2.745	2.221	3.03	5.692	18.729	3.379	2.806	3.257	4.375		0.326924	9.98264
8.2171	4.7612	8.8372	5.8663	14.919	5.171	5.6248	12.881	13.204	5.303	4.119	5.584	10.637	61.598	5.8939	2.7833	3.34	9.217	58.255	8.488	3.1207	1.74	2.321	2.815	5.226	20.345	3.851	3.176	2.945	4.449		0.331732	10.2232
8.3362	4.7747	7.9416	4.9838	14.117	5.522	5.7115	10.386	13.676	6.066	4.004	5.125	10.065	72.389	5.5544	3.2646	3.482	8.508	57.548	8.834	3.2515	2.158	1.949	2.467	6.505	23.73	3.079	3.084	3.436	4.859		0.33654	10.568
8.4552	4.3421	7.2538	4.8535	14.088	6.723	5.0622	8.407	10.862	5.622	3.971	5.127	9.562	80.077	5.4228	2.9484	3.505	7.727	58.04	7.408	2.751	2.443	2.044	2.342	5.858	26.99	2.773	2.739	4.502	4.94		0.341344	10.6339
8.5743	4.9198	6.4295	3.8551	15.964	6.762	4.8002	7.532	10.571	5.238	3.825	4.881	11.139	87.179	4.2484	2.783	3.978	8.978	56.723	6.852	3.0278	2.574	2.106	3.085	5.713	28.04	2.368	2.935	3.906	5.3		0.346152	10.8866
8.6934	5.2332	5.7265	4.0581	13.664	7.666	5.3876	7.313	11.433	5.937	4.167	5.267	10.301	87.266	5.1016	2.8186	4.256	8.909	55.435	8.339	3.0512	2.578	2.861	2.598	5.647	24.86	3.018	2.88	2.979	4.239		0.350961	10.7928
8.8125	5.2298	4.5994	3.9434	13.892	8.648	5.2439	7.017	10.713	5.287	3.987	5.588	8.835	77.21	4.8856	3.1989	4.057	7.407	55.03	9.119	2.8819	2.31	2.458	2.559	5.65	28.206	3.385	2.999	2.746	4.19		0.355769	10.3888
8.9316	5.0665	4.5713	3.4436	12.759	10.054	4.8615	7.503	9.009	5.528	3.845	5.326	9.763	63.549	4.461	2.7348	3.708	6.484	63.866	9.985	3.0039	2.125	1.954	2.592	7.384	25.62	3.037	3.45	3.26	4.778		0.360577	10.1283
9.0507	4.7022	4.2404	3.6494	12.777	12.076	5.2703	7.635	9.23	5.582	3.687	5.13	9.576	53.488	4.8805	2.764	4.042	8.455	70.894	8.885	2.47	2.702	2.116	2.828	8.895	24.392	3.081	2.179	3.63	4.326		0.365385	10.1235
9.1698	4.8328	3.9286	4.659	14.295	11.487	4.8535	7.612	9.997	4.226	4.338	5.298	8.859	44.623	4.6876	3.0322	4.75	9.883	70.477	9.153	2.9475	2.413	2.094	2.405	9.269	25.125	2.967	2.413	3.525	3.901		0.370193	9.9328
9.2889	5.0614	4.7673	4.6774	13.367	15.362	4.7368	8.696	9.431	4.966	4.113	5.692	8.921	38.245	4.7623	2.9185	4.447	9.231	67.484	10.374	2.5017	2.254	2.32	3.047	8.16	26.386	3.262	2.486	2.998	4.435		0.375002	9.83112
9.4079	5.2879	4.8978	2.7843	14.377	14.625	5.1458	9.899	9.191	4.399	3.238	5.275	7.42	36.77	4.0766	2.5203	3.868	11.311	60.785	11.435	3.6437	2.097	2.618	2.294	8.873	26.39	3.942	2.935	3.161	3.901		0.379806	9.55726
9.527	6.66	5.0017	3.4357	15.489	17.841	4.972	13.923	7.729	4.074	4.383	5.274	7.38	31.348	4.181	3.425	3.705	12.359	50.753	12.212	4.026	2.541	2.253	2.613	8.133	26.021	3.699	3.294	3.709	3.838		0.384614	9.45767
9.6461	6.8303	4.6479	3.4396	16.876	17.529	6.0684	21.79	8.234	4.338	4.065	4.908	6.977	31.234	4.3559	2.6305	4.145	10.711	47.006	10.671	2.6051	2.895	1.98	2.917	8.314	27.527	3.221	3.609	3.568	3.646		0.389422	9.54271
9.7652	5.4453	5.0672	4.0456	18.442	17.146	5.6736	25.747	7.417	4.461	3.334	5.049	6.978	31.804	4.597	2.883	3.923	9.752	42.703	12.265	3.5331	2.551	2.223	2.46	10.761	28.496	3.296	3.088	3.548	3.323		0.39423	9.65558
9.8843	5.7394	4.4555	4.3147	18.196	18.758	4.756	26.467	7.072	5.79	4.459	5.032	7.143	27.339	4.4959	2.7738	3.972	7.834	38.873	12.25	2.6003	3.127	2.177	1.971	10.215	27.253	4.021	2.939	3.548	4.597		0.399038	9.38512
10.0034	5.2593	5.3459	4.0791	16.934	18.968	5.6337	27.281	6.106	4.88	4.671	5.939	7.368	26.758	4.8628	2.3461	3.693	7.471	40.155	12.012	2.576	2.646	2.644	2.756	11.621	23.496	3.384	3.168	4.152	5.118		0.403847	9.356
10.1225	6.0037	4.5256	4.1998	17.781	19.094	5.3674	37.115	6.097	4.116	4.15	5.734	7.8	25.94	5.2027	2.7338	2.906	6.875	38.858	12.668	3.6485	2.839	2.668	2.649	12.605	22.283	3.167	2.33	3.623	4.562		0.408655	9.5704
10.2416	6.23	4.5265	3.8844	19.001	21.011	6.4421	44.977	6.489	4.413	3.722	5.337	7.28	25.966	4.8342	2.8901	3.164	7.331	38.78	14.013	3.9197	3.215	2.698	3.007	12.387	20.093	3.684	2.977	3.523	4.461		0.413463	10.0088
10.3606	5.2792	4.6038	3.9777	18.489	19.178	7.0819	61.802	6.157	4.579	3.698	5.145	8.104	25.62	5.7212	3.0715	4.004	6.381	38.377	14.176	3.8927	2.969	2.375	2.723	12.735	18.993	3.534	2.933	3.435	3.941		0.418267	10.4474
10.4797	5.1949	5.4275	4.3735	21.466	20.278	8.0001	70.935	6.154	5.502	4.329	4.899	7.822	26.249	3.9716	2.3941	4.305	6.761	36.048	10.752	3.4274	2.978	2.35	2.821	17.136	15.327	3.03	2.617	3.091	4.222		0.423075	10.7538
10.5988	5.8761	4.2335	5.0477	20.255	23.225	8.2924	79.602	5.465	5.412	5.02	5.182	6.609	26.583	4.7292	2.4622	3.353	7.31	33.489	10.881	3.5477	2.645	2.519	2.835	17.643	14.13	3.843	2.594	2.734	3.573		0.427883	11.0031
10.7179	6.4906	4.585	5.6762	21.737	22.266	8.645	90.165	5.624	4.782	4.808	5.515	5.717	27.615	5.4355	2.6714	4.041	8.577	32.96	11.069	3.5267	2.883	2.514	2.876	17.943	14.041	3.566	2.894	3.073	3.452		0.432692	11.5568
10.837	6.2968	4.3452	5.4014	24.696	22.055	10.6226	100.443	5.135	5.267	4.94	4.998	5.388	29.697	4.6338	2.798	4.302	7.242	29.487	12.243	3.8692	3.326	2.631	2.896	17.104	15.525	3.593	2.799	2.908	3.178		0.4375	11.9938
10.9561	6.4278	5.3042	6.0296	29.645	24.162	11.7975	101.418	5.902	4.545	5.126	6.148	6.373	27.959	5.4613	2.7662	4.676	6.645	24.033	13.476	3.6283	3.206	2.908	2.147	16.781	15.737	2.926	3.806	3.233	3.968		0.442308	12.284
11.0752	6.3807	5.6117	6.6611	30.309	25.01	15.4384	105.784	5.256	4.296	4.85	5.054	6.066	26.522	6.099	2.3455	3.898	6.743	19.012	14.98	3.0993	3.106	3.126	2.513	18.261	17.638	2.98	3.295	3.333	4.1		0.447116	12.4747
11.1943	6.9757	6.2344	5.7168	30.749	26.518	18.0653	106.212	5.479	4.386	4.877	6.697	6.939	23.881	5.6555	2.8277	4.447	7.028	21.045	15.066	3.2544	3.46	2.318	3.07	16.15	16.755	2.786	2.709	2.871	4.198		0.451924	12.6335
11.3133	7.0375	5.7502	6.7554	28.855	29.249	23.2839	95.501	5.311	3.984	5.013	4.657	6.462	20.69	6.4482	3.3755	4.721	6.092	22.046	15.707	2.6587	3.916	2.958	2.68	14.975	19.031	2.555	3.166	2.753	3.503		0.456728	12.3839
11.4324	6.1658	5.3105	7.4135	28.265	31.139	31.367	83.672	5.514	5.202	4.989	5.549	5.41	21.956	6.1899	2.8579	4.017	5.807	22.931	16.947	2.873	2.824	2.553	3.001	13.011	18.593	3.109	3.974	3.306	3.595		0.461537	12.329
11.5515	5.4902	5.978	8.435	24.062	33.465	42.5236	67.008	4.814	4.717	5.025	5.015	5.815	21.691	5.2682	3.634	3.92	6.565	22.661	15.574	2.5929	2.993	2.425	2.52	12.853	18.908	2.601	2.6	2.963	3.44		0.466345	11.9158
11.6706	5.6166	6.0265	8.3727	23.803	34.095	52.9538	55.775	5.22	4.972	4.767	5.6	5.118	22.816	6.0218	2.4745	3.894	5.382	23.529	14.889	2.7124	3.663	2.201	2.443	12.985	16.644	2.893	3.488	3.34	3.538		0.471153	11.9046
11.7897	5.7988	4.6672	9.1707	24.987	38.044	64.2895	46.067	5.697	5.159	5.518	5.596	5.28	22.483	5.9861	2.9167	4.067	5.666	24.083	14.44	2.5992	2.61	2.679	2.486	11.813	16.485	3.261	3.901	3.201	3.353		0.475961	12.1484
11.9088	5.1954	6.1487	8.6238	25.644	43.307	78.8567	40.88	6.034	4.863	5.19	4.986	4.708	21.164	6.9057	3.0458	3.853	4.214	22.663	14.054	2.6368	2.619	2.331	2.349	9.762	15.048	2.662	3.417	2.688	3.179		0.480769	12.3113
12.0279	5.8687	6.5235	8.8162	27.418	49.053	88.3147	37.284	5.459	5.424	5.604	5.673	5.736	21.524	7.0192	2.9233	4.093	4.344	19.952	14.022	3.0443	3.416	3.057	2.065	9.58	14.204	2.849	2.904	3.019	3.202		0.485577	12.8411
12.147	6.0323	6.3703	8.7758	28.533	54.945	92.7425	33.706	5.136	6.045	4.974	5.611	5.649	21.33	7.1608	2.9108	3.919	4.755	18.606	15.077	3.1144	3.38	2.8	2.973	10.339	14.962	2.626	3.398	3.89	3.456		0.490386	13.2144
12.2661	6.2257	6.1803	8.3114	28.658	63.659	90.4423	26.295	5.477	5.624	4.912	4.899	4.928	17.879	6.7867	3.2108	3.874	5.678	17.148	16.577	3.3105	3.122	3.205	2.407	10.337	15.423	3.134	2.945	3.307	3.324		0.495194	13.0096
12.3851	5.4051	7.1219	10.6812	31.022	67.599	85.044	21.804	4.83	5.947	4.271	4.476	5.434	17.84	6.9664	3.4095	4.408	5.381	15.8	19.582	3.7166	2.471	2.989	2.465	10.17	16.311	2.979	2.96	3.062	3.158		0.499998	13.0105
12.5042	6.7402	8.1407	10.8913	30.856	66.349	72.9573	18.144	4.387	5.239	3.934	3.799	5.113	14.994	7.5819	2.916	3.787	4.309	14.438	19.473	3.4563	2.824	2.753	2.036	10.036	15.538	2.01	3.459	3.041	3.347		0.504806	12.1569
12.6233	5.5948	6.2685	12.0495	31.642	63.08	61.2273	16.257	4.492	6.164	4.929	5.528	4.951	15.612	9.5237	2.728	3.785	4.274	13.387	21.037	3.596	3.147	3.559	2.517	10.019	15.004	2.315	2.762	2.95	3.87		0.509614	11.8024
12.7424	5.0585	6.6062	10.6209	32.165	61.392	49.8812	13.043	4.582	4.079	4.921	4.489	4.285	13.611	10.4183	3.4835	3.771	4.141	12.241	21.242	2.7574	2.871	3.334	2.936	10.302	15.529	2.912	2.777	3.336	3.875		0.514423	11.0572
12.8615	5.7978	7.1799	11.9608	33.675	56.597	48.2236	12.326	4.911	3.831	4.499	4.783	4.467	13.752	10.8854	3.2081	3.716	4.204	13.119	22.156	3.3203	2.919	2.594	2.744	9.958	14.426	3.46	1.906	3.149	3.416		0.519231	10.9374
12.9806	4.9815	8.1675	12.9086	35.546	53.762	44.812	12.936	4.751	4.21	4.114	5.057	4.913	12.65	10.3915	3.2745	3.208	4.047	11.597	20.565	2.805	2.856	2.445	2.475	9.79	12.401	3.27	2.278	3.6	4.033		0.524039	10.6153
13.0997	6.0963	8.1467	9.1553	37.601	50.737	40.7668	12.592	4.416	4.601	4.445	4.335	4.925	14.249	11.2095	3.5689	3.295	4.728	11.086	21.161	3.2545	3.275	2.621	2.801	9.53	12.608	3.147	3.063	2.983	3.023		0.528847	10.4628
13.2188	6.5545	7.9708	10.5994	35.595	51.016	41.253	12.327	5.167	5.188	4.225	4.5	4.75	12.657	12.3047	3.1927	3.373	5.175	10.054	21.964	3.9358	3.409	2.216	2.399	8.3	14.408	2.671	2.565	3.177	3.689		0.533655	10.5047
13.3378	6.1235	8.3049	11.2501	34.466	50.291	40.8895	11.749	5.058	5.12	4.374	4.328	4.586	12.906	13.7725	3.2792	2.749	4.551	9.774	18.996	3.7648	2.507	2.444	2.402	8.066	16.45	2.366	2.749	3.078	2.757		0.538459	10.3156
13.4569	6.4279	8.4625	11.2849	30.29	54.033	39.2357	11.978	4.723	5.382	4.349	4.668	4.316	12.443	14.2338	3.1228	2.681	4.431	10.572	18.319	3.8574	2.55	2.985	2.633	7.551	19.922	1.865	2.599	2.697	2.942		0.543268	10.3639
13.576	5.2809	7.9411	11.0647	26.424	54.31	45.1153	8.979	5.36	4.284	3.773	4.702	4.168	13.01	14.6521	2.9391	3.323	4.704	11.728	17.085	4.1907	2.291	2.806	2.801	7.572	24.669	2.371	2.154	3.124	4.052		0.548076	10.5129
13.6951	6.7115	8.845	9.4285	22.041	54.687	46.1837	10.356	4.703	4.148	5.38	3.383	4.704	14.798	15.7283	2.9751	2.985	4.11	11.856	17.162	4.0767	3.074	2.831	2.57	9.125	26.208	2.479	3.208	2.926	3.133		0.552884	10.6833
13.8142	4.3907	7.5473	9.413	18.783	54.984	46.256	8.473	5.127	4.204	4.287	4.29	4.06	12.791	15.5074	3.0219	2.831	3.979	10.495	18.332	4.1358	3.238	2.772	2.481	9.575	23.393	2.827	3.105	2.871	3.196		0.557692	10.2195
13.9333	4.9368	6.2962	10.3933	15.26	47.613	51.3328	9.137	4.896	4.614	4.802	4.216	3.939	12.009	18.069	2.5341	2.771	3.807	12.447	19.934	4.5632	2.949	2.866	2.26	9.938	21.443	2.903	2.809	2.568	2.78		0.5625	10.1409
14.0524	5.4939	5.6427	8.8787	15.059	54.668	48.8068	7.929	5.232	5.051	4.548	4.567	4.903	10.952	17.5531	3.1497	2.971	3.739	13.127	22.759	4.3131	2.979	2.725	1.981	11.091	16.869	3.544	2.652	3.044	2.936		0.567308	10.247
14.1715	5.4402	6.5873	9.1317	14.777	57.43	42.8763	9.496	4.098	4.765	4.502	4.577	4.712	11.482	16.6775	2.9989	2.751	4.002	12.677	20.717	4.3559	2.788	2.353	3.289	10.72	14.209	2.659	3.108	2.747	3.602		0.572117	9.98375
14.2905	6.4896	6.7743	7.1832	13.794	59.839	40.2947	12.284	4.259	4.913	5.127	3.849	4.334	11.962	16.483	3.2996	2.406	3.801	12.362	24.556	3.6741	2.71	2.422	3.467	10.111	11.638	2.258	2.836	2.919	2.816		0.576921	9.96074
14.4096	5.7236	5.5287	7.1513	12.833	66.719	36.9884	12.003	4.637	4.337	4.904	4.532	4.416	12.022	15.4221	2.7277	3.256	4.078	10.859	23.656	3.7303	2.535	2.85	2.434	8.966	12.261	3.057	3.359	2.321	3.29		0.581729	9.88266
14.5287	5.9657	5.7815	6.5309	13.054	76.817	32.8326	14.287	3.832	5.336	4.239	5.423	4.066	10.048	14.6469	3.1971	2.802	2.809	10.493	23.042	4.2318	2.972	2.841	3.011	9.236	10.4	3.1	2.401	2.712	3.094		0.586537	9.97247
14.6478	5.3196	5.039	7.5506	12.331	82.965	32.4038	14.362	4.659	5.155	4.838	4.604	4.097	9.958	15.9639	2.8217	2.637	3.183	8.7	27.146	3.8308	2.365	2.555	2.33	7.564	9.637	3.07	2.419	2.649	2.99		0.591345	10.1084
14.7669	5.1571	5.1593	6.8287	11.981	91.417	32.3024	11.843	4.278	5.19	4.868	4.236	4.098	8.684	16.4777	2.6458	3.172	3.248	8.291	29.775	3.8375	2.326	3.146	2.251	7.141	11.023	3.353	3.11	2.669	2.85		0.596153	10.3917
14.886	6.2504	5.8722	6.7106	11.233	85.025	31.7366	12.144	4.469	5.365	5.32	4.465	4.542	9.678	17.9714	2.4381	2.612	3.852	7.042	26.767	3.8704	2.827	2.623	2.322	5.689	10.672	2.248	2.974	2.842	3.085		0.600962	10.0912
15.0051	5.8681	6.1435	6.7301	12.708	79.212	31.9994	11.58	5.031	5.453	4.641	4.181	4.067	9.76	19.8177	3.0622	2.559	3.099	6.398	22.599	3.8956	2.663	2.847	3.018	5.41	10.295	2.168	3.004	2.341	3.557		0.60577	9.79681
15.1242	6.383	5.6712	7.2246	12.752	76.932	29.4456	9.447	5.751	5.485	3.88	3.784	3.362	9.49	21.2062	3.0845	2.925	3.509	7.361	21.006	3.9047	2.941	2.175	2.619	4.742	12.286	2.862	2.343	3.122	3.72		0.610578	9.63496
15.2432	6.2654	6.5736	6.2744	14.112	76.897	30.055	7.147	4.738	4.94	4.326	3.928	4.502	10.152	21.2525	3.4836	2.914	3.358	8.019	21.078	4.1216	2.866	2.08	3.15	5.395	12.308	3.282	2.712	3.538	3.202		0.615382	9.74724
15.3623	5.9659	6.9291	5.7872	10.816	71.78	30.1632	6.584	3.902	4.681	3.996	4.01	4.052	8.626	21.2694	3.1895	2.817	3.482	8.599	19.284	3.747	2.876	2.551	2.21	5.422	13.444	2.875	2.457	2.54	3.764		0.62019	9.23515
15.4814	5.4127	6.5588	6.5682	8.594	68.458	28.8439	6.194	3.85	4.111	4.756	3.477	3.69	9.082	21.8636	2.4101	2.675	3.6	8.359	17.604	3.9522	2.409	2.564	3.144	4.692	16.612	2.725	1.65	2.892	3.324		0.624998	8.96798
15.6005	5.712	6.1794	7.0162	9.765	65.874	31.6149	6.968	4.678	4.152	4.023	4.012	3.522	9.39	23.3106	2.5842	2.31	3.895	7.399	17.258	3.5907	2.995	1.96	2.41	4.022	17.835	3.294	2.007	2.576	3.257		0.629807	9.09
15.7196	6.5941	4.4576	5.8448	9.484	63.239	28.2613	8.604	4.822	4.884	4.048	3.455	3.058	8.983	24.4643	3.3836	2.738	3.7	6.907	17.711	3.38	3.286	2.446	2.469	3.991	18.024	3.551	2.244	2.374	3.636		0.634615	8.96689
15.8387	5.5587	3.9004	6.0306	8.165	63.752	27.7266	5.842	4.318	5.322	4.232	4.661	4.025	8.62	28.0143	3.5705	2.627	3.026	8.402	19.189	3.7059	2.385	2.491	2.816	4.751	18.191	3.227	2.244	2.848	4.106		0.639423	9.09472
15.9578	5.9743	5.1544	5.8226	8.05	60.193	27.7756	6.733	3.928	5.797	4.148	4.385	4.525	8.78	29.6529	3.2201	2.858	3.496	7.883	18.895	4.4107	2.955	3.195	2.989	4.049	17.153	2.905	2.956	3.272	4.158		0.644231	9.14874
16.0769	5.854	6.0936	5.084	8.105	59.554	26.9384	6.523	5.493	5.258	3.979	4.733	5.012	10.848	30.5474	3.7702	2.28	3.02	8.209	18.641	4.4252	2.498	2.342	2.706	4.172	15.701	2.569	2.727	3.108	3.622		0.649039	9.09699
16.196	5.6904	4.4542	6.174	8.558	59.478	23.9111	7.347	5.685	4.254	4.078	4.682	4.8	11.24	33.7557	3.3499	2.548	3.201	7.401	17.346	4.3449	2.588	2.351	3.219	3.87	14.561	2.465	2.605	3.044	3.209		0.653848	8.97277
16.315	5.1579	4.0241	5.3205	7.726	57.984	21.0447	7.018	4.817	5.263	4.09	4.103	4.301	11.587	28.9989	3.0083	3.162	2.908	8.902	15.998	2.8378	2.985	2.84	2.746	4.297	14.758	3.458	2.688	3.125	3.413		0.658652	8.57108
16.4341	5.0966	4.2925	5.8518	9.615	57.424	17.9487	6.494	4.675	4.735	4.178	5.112	4.787	11.586	30.4589	3.0874	3.074	3.166	8.909	14.743	4.8281	3.469	1.976	2.814	4.796	14.413	3.242	2.501	2.584	3.407		0.66346	8.59531
16.5532	6.0969	5.0064	4.6162	8.526	61.42	15.7893	5.707	3.432	4.89	4.242	4.955	5.068	10.406	27.7079	2.4521	2.542	3.066	9.324	15.293	4.5853	2.447	2.638	2.252	4.824	15.713	3.301	2.215	3.669	3.029		0.668268	8.45562
16.6723	5.8237	5.1198	4.6511	9.271	61.706	15.3307	5.697	4.2	4.747	4.501	4.416	4.335	13.029	24.0505	2.1733	2.655	2.701	7.586	17.892	4.7021	2.689	2.559	2.271	4.979	16.332	2.492	2.507	3.182	3.592		0.673076	8.45483
16.7914	5.8538	5.1944	4.8711	9.938	65.798	15.5652	5.563	4.117	4.897	4.14	4.514	4.251	11.489	23.6007	2.5379	2.687	2.335	7.449	17.354	4.9878	2.927	2.414	2.487	4.709	16.944	2.759	1.95	3.596	4.239		0.677884	8.592
16.9105	6.2835	4.5626	4.1392	8.946	64.22	16.5407	6.775	3.592	4.19	5.927	5.178	4.087	10.521	22.5762	2.8365	2.679	3.752	7.565	18.676	5.2826	2.452	2.26	2.196	6.6	17.726	2.725	1.827	3.906	4.052		0.682693	8.69218
17.0296	4.738	4.4211	4.4368	9.561	66.568	16.8991	6.728	4.117	4.896	5.631	4.63	4.64	12.169	23.6246	2.5908	2.655	2.548	6.943	18.743	5.8909	2.515	2.429	2.117	6.066	16.48	2.799	2.164	3.334	4.062		0.687501	8.77229
17.1487	4.9072	4.6067	5.2022	12.743	65.859	15.4442	5.511	4.804	5.482	3.874	5.049	3.938	11.941	22.2617	2.5582	2.544	3.535	6.141	17.029	4.8411	2.763	1.957	2.297	5.787	15.787	2.741	1.745	3.359	4.253		0.692309	8.58484
17.2677	4.9411	5.7883	4.1787	18.694	66.521	16.3891	6.071	4.285	4.141	4.324	4.514	4.664	14.396	21.0803	2.3772	2.867	3.49	5.647	18.726	4.1777	2.847	2.669	2.941	6.145	16.299	2.958	1.882	3.973	4.33		0.697113	9.01091
17.3868	5.0208	4.9322	4.0008	28.545	66.625	14.8782	7.526	3.791	5.104	3.707	3.508	4.052	14.958	19.7384	2.8773	2.403	2.902	5.24	17.673	5.2163	2.52	2.016	2.938	6.745	14.577	1.836	2.075	4.185	4.397		0.701921	9.103
17.5059	4.8529	5.037	4.0914	36.4	67.505	16.1064	8.341	3.726	4.739	4.968	4.433	4.163	17.573	21.134	2.8638	2.493	2.616	5.71	19.411	5.9091	2.394	2.101	2.427	6.939	15.407	2.683	2.517	4.997	3.813		0.706729	9.83968
17.625	3.6728	5.1302	3.7938	40.221	60.795	14.7301	7.876	3.443	5.199	4.405	3.892	4.112	17.607	22.1746	2.8605	3.216	2.747	6.423	19.794	5.675	3.125	2.377	2.549	5.807	16.274	2.874	2.034	6.024	3.17		0.711538	9.72417
17.7441	4.5066	4.4416	4.2671	39.29	60.278	17.0148	6.498	4.468	3.599	4.517	4.352	3.522	20.22	23.7448	3.022	2.907	2.853	4.394	21.73	5.6314	2.73	2.425	2.703	6.958	16.864	3.166	2.94	4.573	4.713		0.716346	9.94236
17.8632	4.1218	4.0983	4.2886	37.734	66.533	18.0868	5.534	4.664	3.835	4.195	4.539	4.144	23.064	22.132	2.7341	2.797	2.218	4.407	21.622	4.9116	2.626	2.284	2.31	7.013	18.598	4.165	2.91	5.032	4.291		0.721154	10.1686
17.9823	4.4036	5.373	4.2784	37.98	67.055	17.7808	5.057	5.026	4.331	4.517	5.421	4.165	20.73	21.193	2.9237	2.848	2.914	4.326	22.095	4.6072	3.478	2.292	2.61	7.55	20.574	4.55	3.025	6.294	5.798		0.725962	10.455
18.1014	4.8016	5.8828	4.6202	40.013	71.074	18.1149	4.945	4.593	4.121	4.709	5.077	4.328	22.513	24.5664	3.4157	2.257	2.952	4.273	23.429	5.4292	3.41	2.23	2.167	8.668	19.44	4.247	3.714	5.842	5.332		0.73077	10.9022
18.2204	5.1196	4.6062	4.5778	37.215	76.366	17.371	6.109	3.968	3.262	4.866	5.182	4.853	23.98	21.1092	2.8435	3.193	2.151	5.309	25.825	5.1482	3.07	1.718	2.538	9.602	22.086	5.047	4.354	6.488	6.262		0.735574	11.18
18.3395	5.1317	5.0287	4.4884	34.651	73.797	16.3277	6.368	4.941	3.134	4.21	4.762	4.884	26.385	21.0661	3.0443	3.033	2.617	3.889	25.384	4.9877	2.579	1.579	2.226	10.254	19.977	5.744	2.666	7.657	7.748		0.740383	10.9848
18.4586	4.525	4.7578	5.2654	34.387	75.11	14.5608	5.969	4.505	4.602	4.376	5.381	5.428	31.966	23.6168	2.956	3.21	2.489	3.538	22.731	4.641	3.532	2.031	2.869	9.747	17.064	6.506	2.871	8.241	7.581		0.745191	11.1882
18.5777	3.9674	4.2504	5.4186	39.434	75.756	17.0678	5.155	5.266	5.297	4.976	4.795	4.837	37.481	23.8002	3.4149	2.953	2.992	4.486	23.658	4.6781	3.35	1.9	2.953	9.378	17.278	7.286	2.513	8.182	7.503		0.749999	11.725
18.6968	4.3341	3.954	3.651	31.884	79.028	15.3244	6.096	4.21	4.634	4.783	4.459	4.734	41.785	24.4554	3.2725	3.257	3.317	4.619	21.558	4.8326	3.129	2.174	2.727	10.014	14.627	7.566	3.559	7.929	9.519		0.754807	11.5666
18.8159	4.2052	4.5766	4.1326	22.69	79.306	15.995	4.852	4.271	4.318	4.623	5.517	5.44	46.753	23.836	3.3433	2.576	2.559	4.131	22.01	5.3059	2.523	2.089	4.559	8.013	11.563	7.763	4.306	8.463	10.41		0.759615	11.3838
18.935	5.5657	4.9454	4.0363	17.514	77.58	14.5015	5.765	4.93	4.084	4.121	4.122	5.535	50.592	27.1505	3.6243	2.148	2.86	5.246	23.673	5.3182	3.27	1.65	4.33	8.353	8.955	8.119	4.837	9.137	9.622		0.764424	11.434
19.0541	4.0917	4.5425	5.3582	13.178	71.849	16.5899	6.405	4.235	4.319	4.184	5.715	7.012	51.976	26.3418	3.4363	2.513	2.45	4.805	24.671	6.0515	3.002	2.288	4.32	6.333	7.558	9.759	4.291	8.762	10.751		0.769232	11.2685
19.1731	4.925	4.0284	4.2437	14.618	67.429	16.7452	5.73	4.767	4.73	4.295	5.352	9.564	54.177	24.7906	3.1025	2.739	2.766	5.077	24.316	6.6734	3.373	2.015	3.407	4.647	6.92	9.635	5.106	10.334	10.552		0.774036	11.2434
19.2922	5.055	4.1362	4.8975	14.669	71.58	13.7075	6.95	5.946	4.599	4.259	5.505	12.716	55.712	26.7148	3.2854	3.309	3.132	3.975	24.166	7.3368	3.249	1.985	3.577	3.284	5.251	11.304	6.985	10.855	9.008		0.778844	11.6258
19.4113	3.8941	4.261	4.6095	14.675	71.289	13.7393	7.25	5.262	4.825	5.419	4.324	13.877	60.822	28.5263	3.1892	3.187	2.887	3.805	23.87	7.349	4.543	2.083	3.512	3.493	3.724	13.239	8.822	10.731	7.773		0.783652	11.8959
19.5304	4.2042	4.3436	4.6158	12.666	73.454	13.2743	5.879	4.606	5.985	4.934	6.127	17.34	61.684	26.7516	3.2378	3.321	3.62	3.603	24.189	8.0802	4.874	2.874	3.731	2.511	3.65	16.277	6.664	9.818	6.336		0.78846	12.0224
19.6495	4.2186	3.813	5.3275	12.567	72.408	15.8916	6.87	5.889	6.039	3.801	6.637	18.912	65.739	25.6953	4.1126	3.098	3.703	4.017	26.131	7.2985	5.631	3.138	3.506	2.109	3.053	13.748	7.032	11.202	6.994		0.793269	12.3649
19.7686	3.7615	4.4481	4.7975	11.729	73.88	15.4387	6.333	6.102	6.336	4.59	8.941	22.085	63.822	24.4317	2.9911	3.283	2.709	4.29	29.57	7.055	7.322	4.092	3.752	1.629	2.493	13.352	6.407	8.272	5.991		0.798077	12.4105
19.8877	4.6334	4.6225	4.87	9.785	72.55	16.1229	5.79	5.72	7.196	3.899	8.577	24.258	63.952	21.3214	3.4571	2.339	2.399	3.676	31.909	6.0207	7.084	3.969	2.417	1.531	2.37	12.786	6.602	7.179	4.801		0.802885	12.1323
20.0068	4.468	4.5215	3.9461	10.519	77.627	17.1419	6.352	5.46	7.302	3.842	8.712	25.938	61.33	19.4415	4.4676	2.558	2.72	4.088	30.695	5.9558	9.253	4.636	1.807	1.568	1.889	9.744	6.718	5.703	4.092		0.807693	12.155
20.1259	3.8343	4.1366	4.7165	10.563	76.175	19.4384	5.942	6.524	7.169	4.661	6.829	28.866	63.884	22.188	4.5387	2.871	2.354	3.89	27.038	4.8618	9.061	5.373	1.909	1.21	1.481	7.078	5.416	5.971	2.354		0.812501	12.0805
20.2449	3.7764	3.4438	4.5556	10.664	70.057	18.9338	5.648	6.914	8.909	4.614	7.413	29.532	70.675	19.8753	4.3042	3.172	2.372	4.624	23.922	4.7049	11.799	4.425	1.471	0.691	1.243	5.89	6.421	4.239	2.2		0.817305	11.9479
20.364	3.7306	3.7684	5.0484	10.088	71.217	21.8299	5.801	9.664	8.689	4.64	6.722	36.195	70.414	21.2415	3.397	2.764	3.502	8.013	23.478	5.4558	13.262	5.531	1.211	0.485	1.424	5.247	5.079	3.674	1.943		0.822114	12.535
20.4831	3.6977	4.4378	5.2281	11.315	71.379	22.6802	6.008	9.395	10.961	5.176	7.502	41.696	69.884	23.1645	4.2758	2.855	3.517	7.058	22.955	5.6943	10.714	5.63	1.107	0.461	0.915	4.383	4.547	2.86	1.558		0.826922	12.795
20.6022	4.174	3.8694	4.6942	10.941	70.065	23.1413	6.771	11.485	15.008	5.972	9.769	44.343	63.717	23.7717	4.6838	3.728	3.624	8.871	20.992	5.7065	10.337	5.81	0.927	0.749	0.843	3.545	4.526	1.808	1.659		0.83173	12.9493
20.7213	3.5621	3.5508	4.2178	9.927	73.227	27.5142	7.275	15.035	19.718	6.106	11.996	46.143	47.726	24.5911	4.7303	3.688	3.717	8.717	20.991	4.2983	10.071	4.675	1.207	0.807	0.719	1.742	2.905	1.802	1.872		0.836538	12.8459
20.8404	3.8735	3.5955	4.3785	10.689	68.154	25.9952	5.972	18.369	25.518	7.401	14.76	41.498	37.095	24.1981	4.5359	3.403	2.606	9.814	18.688	3.721	7.582	4.337	0.897	0.502	0.561	1.988	3.382	1.171	0.81		0.841346	12.2584
[truncated: 33 more rows]

[truncated: 3 more sheets: Image14, Image13, Sheet1]
