# Supplementary material for: Crumbs organizes the transport machinery by regulating apical levels of PI(4,5)P2 in Drosophila
Source: eLife. 2019 Nov 7;8:e50900. doi: 10.7554/eLife.50900 (PMC6881148; doi:10.7554/eLife.50900)
Supplement: Figure 5—figure supplement 1—source data 6. [file elife-50900-fig5-figsupp1-data6.xlsx]

## Sheet: Image18
X0	Y0	Y1	Y2	Y3	Y4	Y5	Y6	Y7	Y8	Y9	Y10	Y11	Y12	Y13	Y14	Y15	Y16	Y17	Y18	Y19	Y20	Y21	Y22	Y23	Y24	Y25	Y26		Ap-basal	Avg int
0	63.889	65.955	70.87	75.726	59.937	39.764	51.923	55.225	44.672	52.708	49.294	62.244	45.1958	45.539	43.6955	59.1651	55.1494	33.9242	49.412	61.709	72.811	58.8127	55.7528	44.3569	39.0134	32.5463	41.5628		0	52.9946
0.1191	66.358	70.833	74.089	75.692	65.614	43.458	62.531	60.78	49.908	60.063	54.246	64.33	52.3722	51.43	42.5218	65.3706	59.7846	36.2579	53.189	68.92	68.882	56.8326	58.1948	48.0089	40.2573	37.8825	40.5048		0.00581194	56.6041
0.2383	71.213	72.872	75.601	78.53	64.459	48.785	70.78	68.177	50.645	63.555	59.133	62.302	54.6626	57.631	42.9214	69.8828	64.6035	39.8178	56.093	77.677	69.582	60.2632	69.6758	52.0994	41.0822	42.4842	40.8473		0.0116288	60.1991
0.3574	75.415	80.698	78.342	84.035	63.702	54.657	78.252	66.476	52.31	66.606	62	64.129	60.9567	67.366	43.3583	70.3514	67.2382	42.4779	58.376	90.341	69.252	62.8908	71.7422	58.7914	41.7011	47.7426	43.1701		0.0174407	63.7918
0.4766	75.634	83.62	75.676	87.671	64.82	57.316	89.819	68.069	57.647	76.877	67.536	64.729	65.0832	75.447	42.7334	73.3202	70.6754	43.6558	61.34	97.642	71.713	63.1664	70.4251	66.4284	45.0551	51.7297	46.5881		0.0232575	67.2006
0.5957	74.404	85.901	81.458	92.121	70.805	59.496	94.544	75.339	66.823	86.809	74.55	67.319	65.7891	86.135	44.4022	76.106	71.2706	48.4613	65.189	104.971	73.799	64.8873	68.8569	74.3733	46.0211	56.431	54.5332		0.0290695	71.5109
0.7148	79.606	88.013	84.024	97.393	75.613	62.643	103.243	80.92	73.062	91.501	76.555	70.374	70.7204	91.602	47.8824	69.142	75.0202	51.9196	68.721	111.258	77.007	69.3104	70.0095	80.0373	49.8951	61.4136	62.1853		0.0348814	75.5211
0.834	78.091	91.999	84.222	101.466	79.385	69.701	109.043	90.563	82.024	99.298	87.067	68.009	75.2795	99.896	52.9765	63.0384	74.2793	54.1894	73.388	113.963	78.56	72.0028	71.6389	79.6467	50.0583	69.3499	70.8943		0.0406982	79.2603
0.9531	82.332	96.47	89.805	106.347	84.406	71.361	113.382	94.336	90.882	106.431	92.378	69.546	81.008	112.796	58.9164	62.2021	70.356	60.5092	76.63	117.602	84.494	74.2434	74.8918	84.0564	53.8638	79.1621	75.6884		0.0465102	83.8554
1.0723	86.411	100.5	96.939	110.919	90.262	76.266	117.455	92.418	102.979	109.431	96.507	75.767	86.6182	121.567	67.1431	62.2485	67.4482	62.3044	80.915	116.997	87.771	73.075	70.8868	86.8783	55.7341	87.7525	81.2625		0.052327	87.5724
1.1914	87.529	105.226	99.45	110.044	96.553	79.256	122.108	98.61	113.041	117.953	102.521	77.476	89.2339	121.85	75.9673	57.4681	63.8537	65.8439	85.441	111.925	89.416	75.5705	71.2406	85.124	58.5578	91.6451	83.6215		0.0581389	90.2417
1.3106	94.216	106.7	103.298	112.396	97.513	82.309	124.451	100.602	116.902	120.687	106.335	78.396	89.6825	129.554	87.2949	51.8282	54.7328	64.8278	91.383	104.444	91.346	75.5852	69.9011	82.6176	61.922	93.2669	82.7407		0.0639557	91.6641
1.4297	99.097	115.577	103.546	117.481	104.297	91.225	125.082	103.612	119.107	120.278	107.114	78.743	92.2962	128.883	94.4074	50.425	51.3148	65.2162	93.304	99.852	98.32	78.2578	69.5222	82.8432	67.0283	91.2266	79.6301		0.0697677	93.618
1.5488	99.104	121.461	107.506	123.076	106.067	98.092	126.941	108.774	121.834	124.685	115.857	80.543	94.5043	122.761	90.9682	46.3369	51.2657	64.6615	95.522	86.669	106.474	83.215	67.0914	82.3	68.9165	93.7284	77.2998		0.0755796	95.0242
1.668	101.814	120.239	106.85	123.856	113.04	103.289	128.338	110.383	126.175	125.068	114.746	86.945	92.1077	118.063	90.9247	46.4781	47.1981	65.1405	98.985	76.203	109.669	85.8869	66.4306	85.2947	75.8459	95.4895	71.7869		0.0813964	95.7869
1.7871	107.606	125.837	104.91	121.281	112.511	102.316	125.644	116.221	126.496	120.792	116.823	88.186	94.6544	106.927	93.1326	48.1999	43.8238	68.6421	102.375	71.279	111.289	89.5584	67.7246	86.2554	78.7194	92.0837	67.1248		0.0872084	95.9412
1.9063	105.127	123.165	111.877	119.998	113.142	103.574	123.928	115.052	128.624	128.944	114.309	91.72	94.6478	101.181	93.4691	44.8309	43.3541	67.6941	102.844	69.803	109.482	91.8341	65.8775	81.0422	80.1132	85.9662	63.0524		0.0930252	95.3575
2.0254	105.941	122.037	113.648	117.337	111.49	104.018	123.356	115.115	131.365	131.466	111.946	90.355	87.7327	88.113	96.6573	39.349	43.0697	68.2464	108.747	67.499	111.961	90.4808	64.4474	78.3549	76.8526	81.8026	58.0219		0.0988371	94.0522
2.1445	107.007	124.078	114.148	111.306	110.843	105.278	121.525	115.506	129.718	130.987	109.053	94.581	85.2946	79.303	90.5098	37.828	40.8739	67.5394	106.721	60.446	107.603	87.72	60.6336	79.3036	79.6651	75.3504	53.6424		0.104649	92.0913
2.2637	109.189	116.346	115.86	103.566	107.442	103.387	117.791	113.854	129.16	132.201	98.963	99.753	83.671	70.766	85.276	37.2819	41.4661	66.2155	108.02	54.451	103.942	91.0009	59.1872	80.1	75.0775	71.6897	52.5163		0.110466	89.9323
2.3828	103.365	111.031	116.489	97.091	110.103	102.948	120.253	113.006	125.811	131.392	90.656	101.505	76.5704	62.695	86.2381	36.5489	37.8627	63.8175	110.069	55.058	97.172	92.8049	62.6848	79.1197	75.6002	70.828	52.9551		0.116278	88.2842
2.502	96.976	98.655	112.461	92.629	111.775	106.699	121.068	115.015	124.52	128.828	88.069	104.812	70.5466	56.009	81.9355	34.8975	39.324	64.1547	113.353	55.864	89.651	90.2772	59.2606	72.0337	76.621	65.3552	48.7074		0.122095	85.9073
2.6211	86.863	89.045	110.4	80.952	110.246	108.292	117.741	116.553	122.772	126.036	85.869	108.407	67.948	51.67	80.2177	35.4234	39.1068	60.6181	111.829	55.193	80.367	90.8577	57.8035	73.8753	76.5122	61.9265	46.3775		0.127907	83.4408
2.7402	77.167	83.127	111.075	74.692	107.508	107.953	113.474	118.3	113.536	120.714	76.892	107.888	64.9876	48.89	75.9113	34.3104	36.4173	59.0387	112.576	52.721	71.641	89.0387	58.1519	71.7872	78.2797	58.5723	43.8555		0.133719	80.315
2.8594	70.086	75.398	107.893	62.875	102.554	113.001	108.387	114.294	106.389	113.662	74.181	105.342	60.5403	46.123	69.5453	34.6385	35.5557	56.7626	110.548	53.556	63.088	88.5574	59.3246	70.1442	78.4801	58.1885	41.8083		0.139535	77.0712
2.9785	67.694	72.155	103.601	56.46	92.975	113.367	110.389	113.932	103.011	109.432	76.298	110.558	58.0933	43.74	66.7707	36.4624	35.361	57.5588	107.169	49.311	59.846	86.954	56.9673	69.4729	73.7803	52.2788	41.8036		0.145347	75.0163
3.0977	63.509	65.556	97.246	48.828	91.162	115.749	109.484	111.245	102.249	105.382	70.364	105.871	55.0462	38.768	63.8139	34.368	36.6074	55.434	101.13	51.293	55.339	87.2147	58.0031	68.5983	77.6813	48.7325	40.7006		0.151164	72.5694
3.2168	56.535	60.739	101.217	43.628	82.681	115.961	103.938	103.9	97.284	97.629	70.501	104.342	49.5038	35.793	61.7508	33.9276	37.3375	53.7119	95.495	46.47	50.782	89.8558	57.7118	68.9183	73.1231	46.3859	36.3251		0.156976	69.461
3.336	54.141	61.973	96.171	39.346	72.106	114.732	103.512	99.855	95.313	95.771	68.758	101.668	42.3092	32.433	58.2538	35.778	34.2637	52.0521	87.929	43.854	45.774	85.7025	55.8655	68.1777	73.5461	40.0257	32.9054		0.162793	66.3784
3.4551	51.377	61.832	96.593	33.201	65.137	115.722	98.03	97.102	86.793	86.142	70.239	96.391	37.9758	32.038	57.1327	37.3831	35.512	49.7193	83.748	38.156	44.5	86.058	56.3511	64.9789	69.5817	37.9606	32.2933		0.168605	63.7758
3.5742	48.524	62.428	86.657	29.07	57.353	118.674	98.898	94.788	86.584	79.42	68.875	89.986	37.1284	27.714	55.5464	35.266	35.6227	47.7428	79.702	34.948	44.176	82.3682	55.6774	64.8221	67.0608	36.4233	31.3077		0.174417	61.3616
3.6934	49.62	58.213	76.915	24.347	50.6	124.684	94.577	94.174	83.835	75.133	67.701	81.876	34.4057	24.282	50.5157	36.7481	35.7692	44.8848	72.648	32.069	39.597	77.2777	56.7	62.6295	64.7978	32.2931	29.8189		0.180234	58.3745
3.8125	46.033	58.506	73.163	19.999	43.287	124.607	83.49	88.443	81.941	66.212	66.221	76.114	33.5498	21.577	50.7978	36.2478	34.34	45.6387	68.015	25.898	40.188	71.4004	55.8011	62.813	55.8526	28.9721	25.2645		0.186045	54.9767
3.9317	44.449	55.495	67.866	16.446	34.582	124.959	76.888	81.562	83.151	58.197	63.744	66.631	32.433	20.355	48.5882	36.5314	36.8139	40.2599	63.525	25.309	38.347	65.409	53.9673	57.2456	53.6347	25.0644	24.5488		0.191862	51.7038
4.0508	42.073	58.214	56.623	14.14	29.864	119.82	76.766	78.562	79.66	56.42	59.496	61.317	32.4653	19.142	44.227	34.7409	33.5104	42.2997	58.131	17.332	33.606	60.5182	55.9407	53.1661	45.6342	23.0774	21.0997		0.197674	48.4387
4.1699	40.492	58.031	45.739	11.517	25.075	115.52	69.302	71.575	72.452	49.183	55.568	52.429	29.3374	18.328	43.6592	32.7744	31.4455	40.215	52.056	14.272	32.145	52.3361	54.8003	51.0641	34.6763	21.3128	18.3875		0.203486	44.2108
4.2891	39.139	54.763	39.25	8.512	21.692	106.827	63.017	69.277	71.848	44.348	54.39	44.577	27.8342	16.181	41.4182	34.9875	32.928	37.4132	46.758	12.711	30.605	44.0839	49.6106	43.8052	28.5044	19.4525	16.13		0.209303	40.7431
4.4082	36.993	54.947	29.668	7.331	17.796	96.528	59.422	61.094	64.023	39.436	48.903	40.414	25.0651	16.345	38.4354	36.1274	35.009	32.2599	45.219	11.251	27.334	31.7152	50.0374	37.4944	24.3928	15.5887	15.3086		0.215115	36.9681
4.5274	35.637	54.536	22.542	6.087	14.297	88.336	54.699	57.303	55.385	36.249	46.101	32.852	22.2537	13.427	33.9189	33.8524	30.7514	28.2765	41.224	8.327	24.025	24.0564	46.4534	31.6385	21.2781	14.1657	12.3232		0.220932	32.9628
4.6465	32.113	54.941	16.559	4.977	11.385	69.659	45.689	49.854	49.774	31.007	43.424	29.853	19.7157	11.455	33.06	32.1625	29.7604	29.0581	36.204	7.851	22.319	16.212	46.5911	22.8505	20.0343	11.089	10.2836		0.226744	29.1808
4.7657	32.442	56.712	11.679	4.646	9.578	52.798	40.94	46.324	41.378	27.716	37.164	26.59	16.3424	10.448	29.5475	32.3937	31.994	25.2795	33.358	7.253	20.292	11.3615	42.837	19.208	17.0215	9.433	8.8612		0.232561	26.0592
4.8848	30.905	53.514	10.388	3.646	8.39	41.195	35.011	40.307	35.465	21.579	31.336	22.79	15.4829	8.576	22.6488	29.2522	32.0498	24.1849	26.553	5.801	17.076	10.1476	41.1266	15.8778	14.0823	10.2318	8.6361		0.238372	22.8242
5.0039	28.559	52.377	9.434	4.61	7.981	33.704	29.778	33.006	29.368	18.777	25.957	20.411	14.889	7.092	19.1655	30.0294	29.5352	20.694	23.705	5.381	15.414	7.7355	33.8403	13.4035	12.5474	7.9021	7.2283		0.244184	20.0935
5.1231	25.352	47.759	8.231	4.112	7.009	25.455	22.476	26.791	24.526	15.365	18.81	17.271	12.485	5.641	17.1968	29.0222	25.2901	20.6569	19.196	4.787	11.906	6.3204	31.4036	11.7053	11.9048	6.2932	6.5964		0.250001	17.169
5.2422	24.792	46.567	7.007	3.645	5.982	19.835	19.158	25.178	22.356	13.752	14.772	16.594	11.0817	5.688	15.4573	26.8429	25.8497	19.8907	17.292	4.984	11.093	7.3325	29.7476	10.0812	11.5819	5.0757	5.3506		0.255813	15.8143
5.3614	22.225	40.852	6.071	3.265	5.029	17.253	16.943	21.228	20.621	12.498	12.903	14.171	9.5122	5.975	14.1651	26.4921	23.4314	17.2051	16.928	4.582	9.044	6.0301	26.8483	8.2836	8.6265	4.3692	5.4432		0.26163	14.0739
5.4805	20.487	34.459	5.919	3.218	4.771	15.835	13.768	22.137	19.05	12.195	10.186	13.331	8.3112	5.122	12.5813	26.6111	22.7065	16.1086	13.573	3.919	7.948	5.4826	21.9173	6.673	9.2284	3.7976	4.1815		0.267442	12.7229
5.5996	16.791	27.245	6.772	3.345	4.027	14.518	11.175	19.536	17.691	12.753	9.338	13.499	7.5923	5.334	13.1895	26.4392	21.6523	12.8629	14.111	3.572	7.483	5.7028	18.5124	5.201	9.8737	3.3878	3.5101		0.273254	11.6709
5.7188	13.113	23.097	5.708	3.138	3.384	12.313	9.006	17.579	14.014	11.829	10.013	10.519	7.2905	4.098	11.472	24.0513	21.7934	13.0127	12.132	3.519	6.29	5.6776	15.2272	4.2645	8.1676	3.6014	3.6384		0.279071	10.2944
5.8379	8.707	18.498	4.74	3.018	3.57	12.508	7.462	15.91	12.873	10.937	8.532	11.043	6.9122	3.245	9.7609	22.8459	20.9124	10.7395	9.675	3.601	4.967	5.0844	11.8973	4.3211	9.0773	2.9554	3.2963		0.284883	9.15143
5.9571	8.432	14.268	4.725	2.712	3.45	12.191	7.372	14.888	11.054	9.048	7.592	8.584	6.6112	3.511	8.989	21.8047	19.8447	9.5169	10.444	3.61	4.985	5.3575	11.6852	4.6066	8.3304	3.0825	3.0937		0.290699	8.51068
6.0762	8.315	13.104	4.016	2.475	3.569	11.351	5.379	12.312	11.063	9.533	8.682	8.273	6.9782	4.183	9.096	21.0356	18.7428	8.3034	9.543	3.804	5.002	4.8488	10.5302	3.9431	8.2293	2.0914	3.3154		0.296511	8.06364
6.1953	7.494	13.561	4.677	2.637	3.123	10.761	5.187	11.64	11.601	8.53	8.219	7.674	5.8758	3.139	7.9433	20.3159	18.19	7.8561	8.029	3.495	4.422	5.0264	8.6915	3.7633	7.003	2.5817	2.5209		0.302323	7.55396
6.3145	7.07	12.086	4.228	2.575	3.427	9.896	3.714	10.381	10.416	7.793	7.841	8.457	5.894	3.599	7.1128	18.4235	17.4379	6.5844	8.063	3.955	5.281	4.4151	8.5955	3.1938	7.6634	3.5917	2.3448		0.30814	7.18663
6.4336	5.631	10.519	4.309	2.207	3.621	9.544	3.856	8.678	9.538	7.666	7.141	7.795	4.9043	2.673	6.8065	18.8032	15.9755	6.8738	9.283	3.05	3.954	4.6789	7.4865	3.2796	7.2832	2.313	2.2497		0.313952	6.67108
6.5528	6.015	11.403	3.823	2.752	3.426	8.609	3.609	8.502	9.426	6.075	7.213	6.642	5.3726	2.036	6.0537	16.3825	12.4523	5.2116	8.542	3.478	3.481	3.9729	6.5164	4.0522	6.342	2.6945	2.3702		0.319769	6.16492
6.6719	6.352	9.808	3.86	2.651	3.085	8.936	4.211	8.019	7.563	6.305	6.799	7.211	4.803	2.645	4.4738	14.2793	11.4061	4.6504	9.378	2.653	4.26	4.788	5.3319	3.8361	5.5169	2.308	2.9864		0.325581	5.85614
6.7911	8.274	9.702	3.195	2.645	2.896	7.742	3.216	7.852	8.396	6.173	7.408	7.44	5.3732	3.007	5.6194	14.067	9.6514	4.7184	9.327	2.9	4.538	4.696	5.964	4.0133	5.6874	2.7009	2.7228		0.331398	5.92314
6.9102	11.426	8.021	3.233	3.042	3.536	6.603	2.918	7.037	8.122	5.666	7.046	6.563	5.5663	2.616	5.3811	11.8613	9.4133	4.343	9.311	3.783	3.462	4.5054	6.6527	4.1422	5.9638	2.695	2.0724		0.33721	5.74006
7.0293	12.539	7.814	3.246	2.43	3.232	5.645	3.221	6.411	8.133	5.155	7.627	6.581	5.3725	2.519	5.0068	11.3536	7.6913	3.8461	9.612	2.866	3.1	4.2305	5.9549	3.1862	5.2583	3.2074	2.2352		0.343022	5.46199
7.1485	16.834	7.736	3.563	2.493	3.64	5.207	2.486	6.203	7.127	5.324	7.338	7.32	6.4024	2.502	4.5477	10.5444	6.9066	3.9253	8.341	3.185	3.57	4.716	5.8654	3.6379	4.4508	2.0664	2.5554		0.348838	5.49953
7.2676	19.286	6.015	3.297	2.209	3.791	5.341	2.895	6.278	6.962	5.282	8.23	6.209	5.8776	2.631	4.6877	10.1964	6.1314	3.6623	7.569	2.327	3.429	3.5021	5.5568	3.6226	5.3419	2.566	2.4509		0.35465	5.38321
7.3868	19.351	6.242	2.479	1.784	3.526	5.061	3.183	6.046	8.544	5.193	7.615	5.233	6.2573	2.963	4.4029	8.2657	5.2662	3.6577	7.052	2.488	3.248	3.9501	5.1115	3.6675	5.5718	2.3852	2.2592		0.360467	5.21493
7.5059	19.271	5.617	2.47	2.15	3.882	5.543	3.173	5.827	7.123	5.055	7.121	6.221	6.8522	2.791	4.0948	8.881	4.761	3.3032	7.369	2.916	2.694	4.213	4.9531	3.8132	5.502	2.9284	2.3843		0.366279	5.21886
7.625	18.926	5.525	3.246	2.393	4.513	4.157	3.02	6.271	6.893	4.966	5.868	5.189	6.3758	3.059	3.7769	7.4535	4.4821	3.9633	8.82	3.577	3.083	4.5713	5.4161	3.3181	6.0146	3.2746	2.4602		0.372091	5.20787
7.7442	18.457	5.549	3.092	2.756	4.443	4.645	2.544	6.155	6.831	4.963	5.189	6.056	7.1423	2.009	3.6208	7.4183	3.949	3.5883	7.536	3.414	2.892	4.1125	5.1302	4.161	5.9368	2.7027	2.8455		0.377908	5.0792
7.8633	18.249	5.1	3.394	2.945	4.727	4.634	2.219	6.036	6.822	4.641	5.092	6.595	6.1198	2.046	3.4872	7.5891	3.2369	3.1027	7.352	3.03	2.587	4.5947	5.7497	4.7235	5.9188	2.2237	2.6676		0.38372	4.99566
7.9825	19.222	5.168	2.841	2.46	4.913	4.478	2.118	5.59	6.57	4.816	4.47	5.401	7.0424	2.198	3.2202	7.7336	3.6091	3.0865	7.106	3.049	2.368	4.0864	5.6278	4.024	5.9947	2.5811	3.0586		0.389537	4.91972
8.1016	14.9	4.905	3.139	2.818	4.785	4.402	2.93	5.404	6.996	4.544	5.116	5.499	6.0956	2.078	3.2733	7.3551	3.8165	3.0732	6.814	3.102	2.679	3.7576	5.034	4.1727	6.4609	2.033	3.5943		0.395348	4.76953
8.2207	13.955	4.171	2.577	2.074	4.53	4.179	2.176	4.768	7.08	5.278	4.197	5.537	6.4591	2.122	3.3325	8.2429	3.7114	2.7455	6.893	3.19	2.806	3.8068	5.0081	4.0284	7.406	2.2334	3.2883		0.40116	4.65909
8.3399	15.151	3.751	2.97	2.382	4.556	3.64	2.791	5.454	7.272	4.737	3.647	5.357	6.7109	2.124	3.4242	7.2655	2.9883	3.6587	8.277	3.748	2.614	5.1088	5.8633	4.5855	6.7342	2.3673	2.9892		0.406977	4.821
8.459	13.636	4.465	2.39	2.309	4.691	3.625	2.014	5.026	7.304	4.525	4.394	5.129	6.8563	2.389	2.9351	6.9126	2.9698	3.2217	8.171	3.199	2.458	5.4383	6.0125	4.3451	7.6657	2.1264	3.2311		0.412789	4.71999
8.5782	12.496	4.637	3.074	2.625	5.17	3.272	1.891	5.287	8.016	5.211	5.017	5.317	6.9981	2.542	2.757	6.4248	2.9276	2.7646	8.039	3.211	2.362	5.45	5.8135	5.2664	8.0945	2.4927	2.7443		0.418606	4.81113
8.6973	11.73	4.493	2.425	2.471	5.616	3.364	2.205	5.13	6.555	4.594	4.58	5.147	5.7649	2.49	3.1742	6.6193	3.7816	2.5688	8.962	3.265	2.492	4.9537	6.9551	5.0862	7.5465	2.6688	3.4526		0.424418	4.7441
8.8165	11.444	4.213	3.102	2.886	6.178	3.189	2.264	5.532	5.713	5.54	4.412	4.946	5.5344	3.009	2.8256	7.6395	3.0569	2.9227	9.039	3.586	3.29	5.5778	7.0661	5.0357	7.6685	2.5905	2.6797		0.430235	4.84964
8.9356	11.762	3.84	3.237	2.629	5.579	2.625	2.92	6.204	7.188	5.074	5.364	4.555	5.8468	3.053	3.2987	7.5188	3.5523	3.148	10.08	3.945	2.917	5.89	7.2685	5.3593	7.7092	2.7772	3.0151		0.436047	5.05022
9.0547	10.853	4.521	3.037	2.683	5.452	3.604	2.581	5.287	7.155	5.27	4.854	5.002	6.4832	2.46	2.8774	8.1722	2.9864	3.1421	12.023	3.394	3.007	4.6877	6.6798	5.739	7.0295	2.8039	2.9795		0.441859	4.99125
9.1739	10.191	5.276	3.709	2.449	5.49	3.679	2.498	6.192	7.028	4.864	5.087	5.311	6.6732	2.406	3.0434	8.3707	2.7405	2.6995	10.959	4.353	2.201	4.8942	7.8634	6.4965	8.2133	2.5291	3.5334		0.447675	5.1389
9.293	9.851	4.805	2.988	3.25	5.259	3.558	2.834	5.894	6.854	5.181	5.6	5.363	7.3188	2.304	2.4582	6.5974	3.3236	2.8204	10.323	4.525	2.675	3.6561	6.118	6.1968	7.9856	1.9962	3.817		0.453487	4.94637
9.4122	9.196	4.406	2.671	2.577	5.844	3.773	2.488	5.4	6.45	5.233	5.389	5.161	7.9951	2.32	3.4371	7.1591	3.2447	3.0476	10.496	3.585	2.919	3.8117	5.8579	7.9619	7.0877	2.4723	3.6345		0.459304	4.9488
9.5313	9.369	5.133	2.928	3.35	6.131	3.802	2.209	6.3	6.788	4.807	5.65	4.652	8.4565	2.42	3.0899	6.5283	2.9079	2.7079	10.966	4.465	3.021	4.2765	6.289	7.5111	8.8494	2.6816	3.5727		0.465116	5.14303
9.6504	10.65	5.196	2.709	2.914	5.917	2.783	2.168	6.143	7.068	4.486	5.2	5.049	8.3423	2.711	3.3052	7.461	2.9253	2.7091	11.288	4.512	3.191	3.891	5.5772	8.0416	9.1292	3.6934	3.8412		0.470928	5.21857
9.7696	9.822	5.261	2.742	3.052	6.464	3.742	2.403	5.13	7.9	4.162	4.276	6.021	8.0065	2.89	3.0726	6.0071	3.3566	2.6452	10.678	4.408	2.542	4.6723	6.4482	7.8766	8.7869	3.1094	3.9347		0.476745	5.1633
9.8887	9.692	4.905	2.759	2.71	6.313	2.794	2.479	5.725	8.203	4.111	4.895	5.66	9.5754	3.412	2.6184	6.8686	4.0961	2.8782	9.174	4.16	2.561	5.3746	6.9194	7.6995	9.0816	2.4416	3.6501		0.482557	5.2132
10.0079	8.845	5.116	2.398	2.544	5.877	2.608	2.475	6.986	7.07	3.539	4.898	4.905	9.4434	3.237	3.1179	6.195	3.19	2.7605	8.979	4.055	2.388	5.307	6.87	6.6679	8.6945	2.2907	4.3228		0.488374	4.99184
10.127	8.783	4.338	2.429	3.141	5.333	3.101	2.084	6.385	6.661	3.659	4.737	4.601	8.9617	3.016	3.1811	6.1731	3.0238	3.4148	9.156	3.128	2.443	4.8543	6.7789	8.4961	9.0407	2.7579	4.2724		0.494186	4.9611
10.2462	8.535	4.973	3.293	3.08	6.93	3.294	2.192	6.218	5.799	3.832	4.65	4.988	10.8012	3.231	2.4643	6.2186	4.1508	2.846	9.177	4.219	2.586	6.4424	6.8169	8.5657	7.5652	2.5196	4.0562		0.500002	5.16459
10.3653	9.205	5.041	2.579	2.665	7.337	3.07	2.356	5.592	5.634	3.705	4.457	5.684	8.6764	3.464	3.0952	5.932	4.1165	3.1804	7.837	4.326	2.732	7.7853	6.6611	8.8906	7.6199	2.6567	3.9496		0.505814	5.12029
10.4844	10.755	6.088	2.67	2.848	6.404	3.01	2.082	5.788	6.046	3.914	4.201	6.047	9.4782	3.373	2.8562	5.7116	3.9052	2.8266	8.493	4.662	2.766	8.7795	6.3166	8.4624	8.9143	2.8736	3.7751		0.511626	5.29801
10.6036	10.391	5.375	2.525	2.542	6.742	2.546	2.258	5.064	5.638	4.039	4.467	6.367	9.8643	3.651	3.7042	6.1177	3.778	3.0137	7.792	4.63	3.457	9.2418	7.0771	9.7084	9.5243	3.0187	4.1564		0.517443	5.43291
10.7227	12.528	4.068	2.875	2.421	6.691	2.9	2.893	4.859	6.804	4.092	4.458	5.652	9.7952	3.404	3.2657	5.9261	5.0543	2.5226	7.567	4.231	2.983	9.5892	6.9542	10.4663	8.648	2.7696	4.3949		0.523255	5.47452
10.8419	12.693	4.634	2.52	3.188	5.787	3.086	2.787	4.612	5.686	3.478	4.824	5.535	11.9553	3.628	2.9247	7.4828	4.3974	2.7995	7.68	5.004	2.437	8.7098	7.6415	8.9775	8.853	2.3211	3.8382		0.529072	5.46221
10.961	13.194	5.041	2.735	2.728	6.172	3.542	3.364	6.16	5.994	3.736	4.72	5.553	12.0073	4.226	3.1813	7.1766	5.1567	2.5269	8.409	5.2	2.19	8.8931	7.7984	9.7018	8.1965	2.9054	5.0741		0.534884	5.7623
11.0801	11.946	3.977	2.642	3.767	5.779	3.811	3.06	5.44	6.057	3.911	4.561	5.428	13.7468	4.276	3.6083	6.7659	4.9885	3.2024	8.748	5.013	2.312	8.2921	9.2768	10.8863	8.5091	3.2443	4.6527		0.540696	5.84819
11.1993	11.666	4.035	2.422	3.642	5.293	3.409	2.244	5.206	6.249	3.641	4.864	6.27	15.0791	5.132	3.5286	7.8076	5.1379	3.5555	9.02	4.39	2.303	8.6126	9.2478	10.6447	8.3872	2.6446	4.365		0.546513	5.88136
11.3184	11.204	3.291	2.239	3.41	5.647	3.454	2.723	5.854	6.385	3.598	5.825	6.567	15.719	6.229	3.4531	6.3763	4.4721	3.3661	9.744	4.586	2.457	9.3121	10.575	12.0439	8.7402	2.8896	4.9477		0.552325	6.11511
11.4376	10.541	3.426	2.278	3.461	7.078	3.617	2.919	6.033	7.56	2.963	4.925	6.535	18.3709	5.109	3.0622	6.5819	4.0478	3.4241	9.226	5.212	2.441	9.5446	12.9744	12.1723	8.8147	2.7982	4.3076		0.558141	6.27491
11.5567	8.526	3.186	3.082	3.847	5.484	3.999	2.62	6.6	7.184	3.167	5.042	6.86	20.764	6.039	3.5739	5.3679	3.5565	3.3103	9.415	5.154	2.615	9.9102	13.0219	12.6675	9.7553	2.9229	3.8943		0.563953	6.35425
11.6758	7.888	3.539	2.807	3.285	6.141	3.653	3.309	6.159	8.405	3.382	5.392	7.138	22.5626	6.073	2.8146	5.857	3.4399	3.0287	11.371	4.334	2.664	11.6056	12.7708	12.9258	9.9974	2.7192	3.8169		0.569765	6.55846
11.795	6.84	3.338	2.306	3.773	5.562	3.879	3.176	6.793	8.022	3.358	5.83	7.423	23.3452	5.334	3.4362	5.9502	3.1795	2.9726	10.156	4.908	2.937	9.2314	11.8682	13.5103	10.8592	2.7835	4.1137		0.575582	6.47722
11.9141	6.808	2.462	2.358	4.137	7.233	3.5	2.888	6.233	8.6	4.79	5.232	8.414	27.3496	5.654	3.25	5.4898	3.6956	3.1118	10.159	4.669	3.06	8.4359	10.2835	11.581	11.8522	2.7508	4.4057		0.581394	6.60751
12.0333	5.203	2.404	2.239	3.609	6.786	4.082	2.955	6.128	8.049	2.947	5.298	10.895	29.1818	6.719	3.7401	4.8885	3.7539	3.649	11.856	5.37	2.909	9.0095	10.7919	13.2613	9.8879	2.8839	4.587		0.587211	6.78088
12.1524	5.431	2.636	2.654	3.842	7.247	3.39	2.919	6.79	8.7	3.815	6.019	12.554	30.1137	6.084	3.0485	4.4884	4.0476	4.1072	11.963	4.886	2.807	10.5972	10.9935	13.7915	11.089	3.0317	5.2374		0.593023	7.12158
12.2716	5.12	2.78	2.579	3.892	7.858	3.068	3.345	6.333	9.499	3.288	5.404	13.874	31.4387	5.82	3.3289	5.8213	5.0184	4.3718	13.467	5.969	2.993	8.3254	10.8632	14.2741	10.8285	2.344	5.3216		0.59884	7.30463
12.3907	4.778	3.059	2.67	4.11	8.621	3.742	3.384	7.43	9.386	3.687	4.924	16.899	33.4073	6.532	3.568	5.9808	4.8616	4.2552	13.886	6.427	2.851	8.7797	9.7364	14.8905	10.322	2.3998	5.409		0.604652	7.62949
12.5098	5.401	2.724	2.355	4.403	9.945	3.491	2.972	7.091	10.819	4.306	4.76	17.136	32.6257	6.22	3.0126	7.137	4.1323	3.5308	13.307	6.566	3.045	6.8483	9.9958	14.4631	10.8768	2.6017	3.9942		0.610463	7.54664
12.629	4.69	3.793	2.667	5.039	10.765	4.098	3.231	7.846	12.301	3.237	5.07	15.86	32.1023	7.642	3.0196	6.0939	5.4314	4.4155	12.781	5.733	2.868	6.9562	8.3095	13.0941	11.1477	2.5028	4.1102		0.61628	7.58534
12.7481	4.409	3.028	2.5	4.127	9.543	4.577	2.637	7.346	12.252	3.344	5.667	15.478	31.1034	7.221	3.214	6.8865	5.8535	4.0454	12.767	5.131	3.533	7.0351	8.3276	14.2493	11.6072	2.5073	4.8157		0.622092	7.52611
12.8673	4.504	2.43	2.496	4.194	10.958	4.403	2.91	6.306	13.309	4.149	5.653	14.012	31.3478	7.011	2.9752	8.2215	7.3624	3.7806	13.169	5.198	3.277	7.3893	9.0135	14.8594	11.4068	2.5865	5.2503		0.627909	7.71009
12.9864	4.645	2.552	2.449	3.402	12.027	4.283	3.197	7.059	13.768	3.252	6.093	13.469	31.0086	7.148	3.2164	7.4048	7.9712	4.3228	13.161	7.164	2.898	7.4348	9.1081	14.1137	10.6775	2.9613	5.0482		0.633721	7.77164
13.1055	3.961	3.097	2.334	4.508	15.166	3.794	3.099	7.868	15.405	3.518	5.762	13.531	33.4097	6.131	3.2081	7.7532	9.9551	4.8281	13.879	6.619	3.104	7.4569	8.6082	15.4559	10.1123	2.9558	4.6388		0.639533	8.154
13.2247	3.902	2.971	2.542	4.238	15.81	3.714	3.004	7.075	16.266	3.761	5.921	14.168	31.7278	6.046	2.7899	8.4239	11.3809	4.4005	13.783	6.907	3.246	7.8693	9.5693	15.0395	11.3486	3.167	4.4436		0.64535	8.27831
13.3438	3.995	2.995	2.664	4.299	16.788	4.122	2.662	9.3	16.582	4.61	6.641	15.21	32.575	5.474	3.3304	7.1957	10.344	4.9429	14.27	7.349	3.23	6.9854	9.7469	15.3271	9.3967	2.8688	4.1967		0.651162	8.41113
13.463	4.02	2.084	2.509	4.88	19.371	4.598	2.897	8.013	19.055	3.579	6.292	16.186	35.2068	6.399	3.5619	9.123	10.9383	5.8633	13.135	7.69	3.533	7.5565	8.8888	15.8342	9.4724	2.9063	4.1591		0.656978	8.80561
13.5821	4.077	2.872	2.764	3.696	20.415	4.629	2.954	9.277	19.347	3.437	8.556	16.61	35.4501	5.638	3.3724	11.2595	12.0054	5.4052	14.385	7.577	3.609	7.491	9.1898	17.4671	9.453	2.0297	4.6157		0.66279	9.1697
13.7012	4.393	2.365	2.376	3.593	18.574	4.753	2.698	8.369	19.605	3.695	7.95	16.076	34.5722	5.738	3.3853	10.5977	10.0507	5.7796	13.121	8.239	3.571	8.3058	10.2904	16.7314	11.3595	2.2601	4.2709		0.668602	8.98961
13.8204	4.04	2.52	2.198	4.285	17.656	4.437	3.949	7.854	18.749	4.139	8.597	16.914	37.707	6.262	3.6996	9.9839	8.6902	6.3096	14.872	7.915	3.248	7.6171	9.5595	17.9362	11.0977	2.6896	3.8289		0.674419	9.13905
13.9395	3.689	3.22	2.782	5.126	16.712	4.074	3.173	8.021	18.39	3.548	8.545	16.567	36.8418	6.614	3.0381	9.849	8.186	6.5574	14.115	8.125	3.129	7.6074	8.7311	18.3141	13.2065	2.5237	4.0834		0.680231	9.0655
14.0587	3.606	3.23	2.633	5.527	15.847	4.197	2.089	7.939	18.794	4.004	6.572	16.313	37.8193	6.963	2.4056	11.5398	8.783	5.0508	14.746	8.634	3.796	8.0149	7.6643	20.4428	13.0351	2.9614	3.8417		0.686048	9.12773
14.1778	3.615	2.445	2.349	5.765	17.146	4.865	3.655	7.524	18.999	4.328	7.767	16.054	39.1521	9.258	3.022	11.0803	9.6714	5.7378	13.285	8.996	4.368	8.1756	8.4822	21.2233	13.8326	3.024	3.9276		0.69186	9.54622
14.297	2.755	2.707	2.58	5.919	15.579	3.928	2.584	8.061	22.579	3.759	7.474	16.56	37.5753	10.041	3.355	10.8643	9.0948	6.6495	13.789	9.708	3.766	6.5209	8.6949	22.5989	14.5474	2.7619	4.7675		0.697677	9.60072
14.4161	2.911	2.898	3.114	5.368	13.485	3.581	2.719	8.388	22.635	4.569	7.817	16.477	37.8821	8.021	3.4473	11.1734	9.3091	6.7992	13.65	9.881	4.263	7.5566	9.561	22.8116	14.8302	3.8167	4.0911		0.703489	9.66871
14.5352	3.198	2.96	2.776	5.506	14.496	5.66	2.938	8.217	24.474	4.623	8.306	15.266	37.674	6.911	3.7082	9.2534	9.7994	5.5669	12.42	8.816	4.363	7.8559	9.7597	24.3732	16.166	3.4107	4.433		0.709301	9.73816
14.6544	2.871	2.72	2.341	6.268	14.464	5.772	3.196	7.471	28.488	4.857	7.967	14.702	39.4436	7.108	2.5703	8.2336	11.401	6.0651	12.977	8.07	3.948	8.4321	10.3204	22.4237	17.0358	3.7013	4.5389		0.715117	9.90318
14.7735	3.025	2.199	2.388	6.515	14.471	5.644	3.336	7.249	29.327	4.342	7.864	12.953	40.9557	7.481	2.6458	9.3588	13.4902	6.335	15.362	8.221	4.071	8.7264	10.6589	23.7769	16.364	3.7464	3.2815		0.720929	10.1403
14.8927	3.298	2.164	2.928	6.007	13.484	4.914	2.878	7.172	31.814	4.519	7.024	11.582	36.4146	5.868	2.8942	7.4204	13.9576	6.7233	14.475	8.547	3.55	8.2848	9.7298	23.5307	17.1393	3.8189	3.3763		0.726746	9.75977
15.0118	3.39	2.172	2.754	5.436	12.148	4.232	2.785	6.818	35.243	3.885	8.22	14.336	38.0457	6.198	3.1714	7.869	14.2096	7.9658	13.19	8.687	3.547	7.2832	8.7232	22.7522	16.9761	3.3145	3.5804		0.732558	9.88637
15.1309	2.803	2.944	2.654	5.251	10.112	4.241	3.241	6.592	33.26	4.936	7.814	13.511	40.5172	7.329	3.286	7.3654	14.8403	8.1382	14.027	8.218	3.861	7.9497	8.1414	23.2357	17.6769	4.1212	3.5087		0.73837	9.98425
15.2501	3.118	2.644	3.216	7.701	10.61	4.658	3.575	6.87	32.866	4.087	7.271	11.882	41.0156	6.244	3.3758	7.0081	15.7064	7.7239	14.002	7.834	3.692	7.9836	7.0814	22.5481	16.9902	3.4794	3.0865		0.744187	9.86181
15.3692	3.143	3.2	2.747	8.701	9.818	4.692	3.08	7.741	30.488	3.677	6.969	13.414	44.7935	7.141	2.8222	8.5133	15.7073	7.8219	15.127	8.489	3.511	6.7098	6.7047	22.7462	15.7054	3.7739	2.9146		0.749999	10.0056
15.4884	3.1	3.197	3.532	8.696	9.304	4.119	2.828	8.589	29.953	4.877	7.243	12.562	45.6713	7.039	3.0504	7.5148	16.3615	7.882	12.31	10.361	3.912	8.888	7.3301	24.7068	15.988	3.1874	3.0265		0.755816	10.1937
15.6075	3.09	2.23	3.105	7.881	8.593	4.021	2.827	9.025	30.301	4.706	7.402	8.938	47.2841	5.842	2.5612	7.6283	16.0274	7.7502	11.62	8.877	5.007	7.4572	7.0481	25.4508	16.8319	3.3493	2.7503		0.761628	9.91125
15.7266	3.599	2.743	3.112	8.8	7.632	4.245	2.752	9.627	29.76	4.431	6.821	8.776	45.1707	6.029	2.86	8.0189	15.5912	8.7997	11.22	8.612	4.516	8.3792	5.8704	22.8805	16.018	3.5067	3.0054		0.767439	9.73243
15.8458	3.57	2.726	2.526	9.475	8.361	4.078	2.849	8.622	25.961	4.796	7.015	8.032	46.4775	6.596	3.6251	9.2636	16.6683	8.1136	10.103	8.542	3.787	6.9591	6.6071	21.6181	14.4882	3.1645	3.7592		0.773256	9.54753
15.9649	3.587	2.502	3.205	9.164	10.202	4.848	3.09	8.508	26.723	4.467	5.917	8.45	46.12	6.442	3.3279	10.2747	16.4482	8.5957	9.516	9.802	4.316	6.8631	5.8951	22.6551	15.6738	3.1101	3.6745		0.779068	9.75471
16.0841	3.854	2.196	3.175	7.786	9.199	4.641	3.352	8.564	26.702	4.98	5.546	10.475	46.9901	5.717	2.8881	9.5273	16.3774	10.2635	10.576	9.329	4.591	6.5366	6.6772	21.928	15.9437	2.8829	3.2858		0.784885	9.77717
16.2032	3.484	2.701	3.018	7.289	9.344	5.407	3.063	8.22	26.828	4.947	6.48	10.519	41.8359	6.901	2.6714	9.5802	17.7843	10.3828	10.22	8.893	3.548	7.6337	7.2843	20.222	15.4341	3.356	3.114		0.790697	9.63558
16.3224	3.66	2.619	3.088	6.685	8.788	5.408	2.622	6.8	24.606	4.325	5.573	9.541	43.5302	6.488	2.4771	9.1568	17.0861	10.9506	10.706	9.95	2.822	7.544	7.781	18.2831	16.5967	3.4115	3.0639		0.796514	9.39119
16.4415	2.394	2.274	2.864	7.941	8.403	5.885	2.827	7.747	21.481	4.881	6.095	9.212	41.8927	7.403	3.6262	10.5234	19.2292	11.248	9.006	9.365	3.913	6.9757	8.7648	17.1321	17.2877	3.0756	3.3503		0.802326	9.43691
16.5606	2.459	2.229	3.246	6.946	7.105	4.987	2.608	8.379	20.36	4.271	7.196	10.241	42.6726	7.002	4.3869	9.879	19.1353	10.3119	9.85	9.615	3.451	6.8539	7.899	15.8021	17.0833	3.1443	3.7227		0.808138	9.29022
16.6798	2.369	2.957	3.168	7.519	6.961	4.697	2.549	7.788	19.962	5.602	6.542	8.785	43.9902	7.471	3.6623	10.9593	20.7492	12.0888	8.9	10.269	3.699	6.6587	7.1611	15.6571	18.9433	3.9742	2.8401		0.813955	9.4786
16.7989	2.762	3.455	2.955	7.542	6.335	4.869	2.122	7.993	17.156	5.183	6.403	9.504	41.9557	6.753	3.2709	10.6963	21.2154	10.6202	10.854	9.841	3.851	6.6889	8.0463	16.1616	18.9175	4.4103	3.221		0.819766	9.3623
16.9181	2.379	3.528	2.048	7.956	7.09	5.155	2.477	8.581	15.258	4.999	6.112	10.049	43.7803	7.315	3.3509	9.7019	22.2026	9.5433	10.404	9.156	3.404	7.4795	8.307	15.4811	18.4351	4.0267	3.3819		0.825583	9.31857
17.0372	2.992	3.154	3.542	8.477	7.874	4.266	3.134	6.963	13.27	5.481	5.62	8.583	45.2554	8.281	3.1862	9.8744	20.6859	9.8818	11.739	9.456	3.759	6.7976	8.5659	17.1768	19.5853	3.8645	3.3758		0.831395	9.43854
17.1563	2.813	2.642	3.161	8.222	6.831	4.638	3.075	7.273	11.932	5.263	7.029	8.456	43.4325	9.31	3.1559	8.8361	20.632	9.938	11.605	11.199	3.242	7.3027	8.4186	17.6729	20.7963	3.7936	3.7171		0.837207	9.42173
17.2755	3.412	2.707	3.599	8.855	7.384	3.784	2.689	7.554	11.556	5.196	5.112	8.073	41.4195	8.606	3.0611	10.1858	22.1665	9.7219	10.618	10.3	4.258	7.414	9.029	16.902	21.8073	4.2241	3.3233		0.843024	9.3688
17.3946	3.571	3.426	2.901	8.23	6.961	4.594	2.403	7.509	10.831	5.101	4.719	7.005	41.4776	7.693	3.5014	10.715	22.3418	8.7369	10.799	11.664	4.42	8.4239	9.1874	17.0681	22.454	4.3613	3.0157		0.848836	9.37445
17.5138	2.649	3.434	3.05	9.068	7.066	5.131	2.625	7.053	9.716	4.834	5.742	7.654	39.3101	8.19	2.9872	8.8245	19.9162	9.7158	11.556	12.858	3.874	8.7384	8.6618	16.5535	24.2851	4.7908	3.3001		0.854653	9.31791
17.6329	3.031	3.153	2.647	8.848	6.517	4.816	2.556	6.509	9.552	5.069	4.957	6.489	34.6417	7.465	3.1907	7.4254	17.8905	9.7814	12.972	10.574	3.686	8.1468	8.9401	15.1076	27.1498	5.2667	3.3131		0.860465	8.87759
17.7521	3.302	3.207	3.092	7.715	7.418	4.922	2.739	7.703	9.487	5.193	4.926	6.62	32.8766	8.643	3.2817	9.1259	17.7644	7.6333	13.767	10.058	3.671	8.0739	9.87	16.8775	28.7385	4.6922	3.6395		0.866281	9.07543
17.8712	2.985	3.659	3.653	7.448	6.378	4.968	2.615	6.549	10.827	5.342	4.716	5.515	30.4991	7.567	2.7994	9.5308	17.7801	7.4324	13.241	8.787	3.838	7.5368	9.1919	18.8052	30.4261	4.9183	4.324		0.872093	8.93823
17.9903	3.496	3.636	3.27	8.699	6.808	2.941	2.237	5.07	12.391	5.546	4.86	5.949	30.573	7.416	2.4535	8.9726	16.3313	7.0962	11.534	9.783	4.046	7.4797	10.3323	19.8843	32.705	5.6587	3.9244		0.877905	9.00344
18.1095	3.544	3.127	3.509	8.465	8.098	3.692	2.189	5.089	12.625	5.877	5.65	6.708	29.8231	8.642	2.761	7.9663	17.8922	8.459	12.049	8.508	3.958	7.3325	10.2094	23.1804	35.5204	6.2692	4.6384		0.883722	9.4734
18.2286	3.259	3.592	3.713	7.575	7.274	4.56	2.792	5.103	12.297	5.629	4.89	6.565	28.3369	8.855	2.7003	7.8384	16.0588	6.9943	13.564	7.791	4.272	6.9814	11.9748	26.0648	32.2146	8.1537	4.5546		0.889534	9.39273
18.3478	4.205	3.064	3.326	7.311	7.793	4.42	3.224	6.526	14.035	6.667	5.256	5.803	26.9799	8.834	3.3296	9.1426	14.388	7.6327	14.02	8.039	4.092	6.2155	13.9716	30.0599	29.4146	8.4724	4.9207		0.895351	9.67194
18.4669	3.701	4.256	4.852	7.267	8.103	4.64	3.062	5.935	13.579	6.816	5.406	6.852	26.0527	8.038	3.4543	8.3405	17.507	7.539	13.207	8.65	4.128	6.9765	14.4779	30.991	26.8118	10.531	7.3676		0.901163	9.94597
18.586	3.799	5.209	5.037	6.817	8.91	5.207	2.336	6.199	15.479	6.022	5.211	8.031	24.2058	8.415	3.5715	7.9594	16.7464	7.244	14.946	7.359	4.131	5.7234	15.3702	32.2381	23.0398	11.8151	8.6105		0.906975	9.98638
18.7052	4.935	5.094	5.045	7.929	9.807	3.756	2.842	6.517	14.665	6.298	4.745	8.693	26.8368	8.322	3.0111	7.9051	16.0403	8.1172	16.283	6.657	3.549	6.297	16.0537	30.6899	16.8486	14.6689	9.6062		0.912792	10.0449
18.8243	4.721	5.995	5.298	8.116	9.394	3.683	2.817	5.993	14.41	5.689	5.241	8.629	27.1954	9.651	3.219	7.4836	18.0155	7.7682	17.12	5.623	3.702	5.2673	17.1969	26.9975	10.5765	18.9234	11.3124		0.918604	10.0014
18.9435	4.999	5.885	7.025	10.109	10.089	4.23	2.634	5.735	16.047	5.789	4.983	9.216	25.6821	10.344	3.4328	7.4117	17.4411	8.2094	22.11	6.344	3.942	5.9359	16.4561	22.9764	8.4421	20.6361	14.988		0.92442	10.4108
19.0626	5.834	6.303	6.632	12.349	12.254	4.214	2.54	7.197	15.869	7.002	4.018	8.543	27.0009	9.677	3.339	8.048	16.0751	7.6134	24.914	6.73	3.829	6.032	15.8814	22.6643	6.7087	21.5459	18.6223		0.930232	10.7939
19.1817	6.747	8.806	9.118	14.439	11.821	4.333	2.697	6.735	16.518	6.555	4.226	8.152	26.4135	9.801	3.4465	7.9387	16.3954	8.2087	28.367	6.196	3.915	7.0818	17.9426	21.5541	4.7745	22.6643	19.1529		0.936044	11.2592
19.3009	8.401	9.702	13.236	16.276	12.254	5.524	2.336	5.859	16.086	6.97	5.137	9.158	26.1513	8.939	3.1024	9.4266	15.2007	8.8098	33.034	7.529	4.205	7.7801	17.4231	19.8992	3.4571	20.6776	20.841		0.941861	11.7561
19.42	10.857	10.809	17.058	20.23	13.493	4.939	3.238	6.686	17.082	7.652	4.213	8.647	25.2236	10.032	3.4273	10.1758	15.7009	8.8487	36.711	8.138	4.449	7.5275	18.3584	17.4038	2.7007	17.6035	19.8191		0.947673	12.2601
19.5392	12.871	14.284	26.267	22.648	15.051	3.951	3.349	6.491	19.217	7.881	4.17	7.968	24.1855	8.948	3.1302	8.1827	16.0549	8.8436	38.93	7.926	3.925	8.1757	18.4871	14.576	2.1207	13.5269	18.9112		0.95349	12.5952
19.6583	14.306	17.606	34.914	26.903	14.828	3.901	2.895	6.165	20.441	7.897	4.634	8.006	24.1979	8.942	3.3661	9.2871	17.5094	8.7477	46.238	9.078	4.283	9.7194	21.7859	13.7384	2.4629	10.5079	17.7302		0.959302	13.707
19.7775	15.701	22.122	41.48	32.864	15.89	4.869	2.886	5.947	22.621	9.307	4.682	7.488	25.7182	9.999	3.3068	8.7306	16.664	8.4976	49.645	9.414	4.743	11.1014	20.1821	13.0903	1.7625	7.5608	14.1682		0.965119	14.4608
19.8966	18.771	24.778	49.291	40.527	16.459	4.936	2.615	6.022	23.657	11.142	4.324	8.318	27.2546	10.579	3.3224	10.5833	17.3026	9.1414	53.187	10.176	4.755	13.8376	22.4263	11.6179	1.5708	6.1822	13.1593		0.970931	15.7754
20.0157	20.919	23.172	53.143	46.631	19.736	5.2	3.27	6.468	24.072	12.75	5.277	7.833	29.3673	11.635	3.3665	11.435	17.7843	8.7008	56.624	11.454	5.048	14.6405	24.0278	9.4146	1.4236	4.6044	12.766		0.976742	16.6949
20.1349	21.461	23.02	52.292	49.356	22.161	5.562	2.629	5.494	23.647	12.686	5.422	7.887	30.3462	11.974	3.3739	12.1302	16.6713	9.1194	53.393	14.246	5.211	15.6479	26.0152	8.4052	0.8412	3.9925	10.0358		0.982559	16.7785
20.254	21.549	19.545	43.732	47.642	24.472	5.934	2.93	6.121	27.179	13.166	4.762	8.402	30.7387	11.402	3.3282	12.532	16.4294	10.2466	46.78	17.111	6.012	16.1452	25.5719	6.7609	1.0393	3.111	10.2449		0.988371	16.4032
20.3732	18.604	17.647	34.792	44.433	25.504	6.301	3.417	6.544	26.773	15.73	5.545	8.155	32.9866	11.849	4.1148	12.1789	14.7395	10.3143	36.444	19.025	8.319	17.16	24.4198	5.2534	1.1625	3.5172	10.2545		0.994188	15.7475
20.4923	16.167	14.199	25.875	38.674	25.78	7.642	3.57	6.413	28.969	18.262	5.417	9.842	35.1785	12.115	3.9916	12.0828	13.6949	10.7624	27.837	22.259	9.458	16.1189	21.483	4.5351	1.1966	2.2626	11.9905		1	15.0287

## Sheet: Image17
X0	Y0	Y1	Y2	Y3	Y4	Y5	Y6	Y7	Y8	Y9	Y10	Y11	Y12	Y13	Y14	Y15	Y16	Y17	Y18	Y19	Y20	Y21	Y22	Y23	Y24	Y25	Y26	Y27		Ap-basal	Avg int
0	37.6925	16.6654	10.7218	10.7277	36.4825	29.8736	69.551	91.6198	66.5696	34.1743	22.796	44.9847	57.0955	50.6671	101.203	50.2584	24.6131	72.3658	67.4115	35.4624	39.1398	63.4588	41.2378	66.154	24.0418	39.7134	30.8456	24.5227		0	45.0018
0.1191	42.6379	18.9436	13.5829	13.4392	34.1158	36.1022	69.6501	97.518	76.3989	35.1888	24.3699	46.1262	67.8363	50.005	91.341	55.8551	30.0425	71.2498	71.3078	42.4718	46.4897	69.8949	49.676	70.7517	30.7827	45.926	31.3668	21.4238		0.00689416	48.3748
0.2383	49.6075	23.1824	14.8301	15.4611	31.5753	34.0639	69.7443	92.0213	77.736	34.135	28.8963	48.8022	72.0606	51.6886	90.995	58.2794	30.1952	72.0224	70.0822	41.8929	54.9283	75.5263	58.1898	76.0622	35.1339	56.1847	34.6843	19.9247		0.0137941	50.6395
0.3574	60.896	28.7702	14.6283	14.8571	28.5433	33.5197	71.3368	91.9391	83.6623	35.862	36.5719	59.8107	78.5215	51.0964	82.3993	59.923	28.6492	72.9029	78.2335	44.2596	59.7364	70.646	61.7491	88.4867	44.6324	61.2083	34.8036	18.4494		0.0206883	53.432
0.4766	70.4376	35.5472	15.4995	21.7074	26.9276	36.1922	71.6403	85.1711	86.0551	38.2988	40.1227	66.9124	81.1202	49.6114	74.3003	60.4347	30.1099	72.7192	80.1815	43.8716	59.9011	70.6172	61.6192	84.6355	48.8754	67.311	38.5921	20.5749		0.0275882	54.9638
0.5957	72.2128	46.7644	22.1115	25.2303	27.7483	33.7219	75.2918	83.7674	87.6355	40.9839	46.0676	77.4633	84.0823	47.6421	69.3896	59.5173	29.3772	72.2547	85.0415	50.4812	56.0984	66.784	57.6227	85.7823	58.2125	76.6571	43.0779	18.8963		0.0344824	57.1399
0.7148	78.555	56.6659	22.3004	31.2401	30.6217	35.9215	74.4025	76.8176	89.7708	42.6883	53.905	73.3391	79.7908	45.2193	60.9459	62.5481	37.1869	73.1602	78.9993	50.4076	53.3431	66.1951	58.3796	80.5324	66.1166	78.1234	47.3805	22.602		0.0413765	58.1128
0.834	77.6639	67.5154	26.9177	42.4412	33.874	34.903	72.6889	71.2551	84.9971	49.7227	59.6153	76.2753	78.893	45.0491	56.0118	57.126	35.9463	77.7443	69.9026	48.8482	50.5468	60.82	57.2524	81.7518	68.4078	84.8107	55.7383	24.6436		0.0482765	58.9772
0.9531	79.6488	68.13	34.9475	50.7142	42.9336	35.9164	69.3119	66.8466	80.4825	45.9089	62.234	70.502	77.5462	40.9577	52.7825	54.3479	37.9323	74.376	77.9519	51.978	48.7008	62.382	55.7824	80.196	68.3777	83.8368	57.8863	26.7758		0.0551706	59.2638
1.0723	75.6404	72.0628	45.4345	61.507	54.4984	39.3954	72.3682	66.2549	82.4062	46.3454	72.3345	65.5283	73.3289	40.7187	49.1587	54.1329	40.0762	75.9823	77.9231	54.6051	40.4869	61.2348	51.0861	72.1465	69.6658	86.2065	69.8823	33.1583		0.0620706	60.8418
1.1914	74.5748	63.1478	56.623	69.991	67.0857	38.8005	71.9527	66.8358	83.531	44.4095	75.403	67.9926	72.0037	42.2851	42.3614	48.8633	42.2586	82.0966	73.3397	55.9201	42.7584	62.7563	52.4017	73.0603	74.0994	84.4538	78.8236	42.1004		0.0689647	62.4975
1.3106	74.5858	59.5903	62.9286	68.4671	78.5369	40.9905	70.976	56.3341	83.2185	44.1548	76.5011	69.7798	69.9754	41.0481	41.6745	47.2006	46.1113	85.0019	80.7963	60.351	40.3111	61.4148	51.3104	72.0421	75.274	87.8289	83.3668	53.0624		0.0758647	63.6726
1.4297	75.9437	52.7345	72.2067	81.5406	89.4132	37.4994	68.114	57.748	80.9748	47.0807	73.0975	70.363	68.2208	43.5858	40.5584	47.0821	48.9636	80.2768	76.1044	59.6128	41.2541	60.6768	50.8457	67.6075	73.0223	85.8378	83.1626	69.9372		0.0827588	64.4095
1.5488	70.7399	48.7171	72.975	84.5682	90.5067	38.8228	76.012	55.5062	81.1865	45.4797	62.1412	66.3169	68.2429	41.2988	36.0807	44.6729	49.8183	82.1371	69.4476	64.4228	36.2502	59.17	48.5225	67.2082	73.3013	74.266	84.6908	78.1382		0.089653	63.2372
1.668	69.7506	48.637	76.6934	85.4948	93.9626	41.1941	72.3975	57.9531	76.2682	49.8052	50.4916	65.6647	70.9706	45.7859	36.4089	46.3602	52.4639	81.9179	67.0884	59.7808	38.9712	59.098	50.1057	65.035	78.1256	70.1314	88.0883	93.3709		0.0965529	64.0006
1.7871	70.8855	47.7827	70.8642	85.3176	95.2647	45.6011	73.6916	57.1774	70.7992	48.3077	41.891	73.0414	71.4907	43.4415	37.0453	42.2553	57.2495	80.7013	63.5285	55.8687	36.1216	54.173	51.0113	61.1824	79.3976	68.379	91.483	97.7773		0.103447	63.2761
1.9063	74.7014	49.6007	67.2172	80.1839	79.4425	49.1596	67.9228	63.1348	67.4822	50.5846	35.2846	71.4141	66.3089	47.3167	32.0196	41.4622	63.5728	82.4176	63.2385	47.499	35.7896	55.5386	50.9621	56.7298	74.9501	65.8332	97.7371	92.5768		0.110347	61.7886
2.0254	72.6485	50.3693	56.4175	75.9324	71.0698	55.1979	62.2975	58.1401	61.0345	49.0697	25.9818	72.3072	61.7039	51.356	32.2852	38.3748	64.2801	76.9664	64.6093	40.443	36.9613	52.3933	51.637	56.503	78.8724	65.259	93.7981	79.0854		0.117241	59.1069
2.1445	66.4727	48.7353	49.9996	64.8039	62.1922	65.4351	59.651	54.8182	64.0435	48.4916	19.5191	70.2531	58.5991	50.7999	29.954	40.6014	66.331	76.0594	65.2066	30.7913	35.8732	51.7824	49.8468	60.5223	82.5646	69.029	94.3146	66.4037		0.124135	57.2534
2.2637	71.2003	54.4242	40.1462	50.8979	48.614	79.8179	52.5235	55.2934	62.4928	54.6924	16.1242	66.5912	57.6446	51.3902	29.2486	35.1795	68.9485	78.1648	56.489	24.5584	37.3777	59.5504	50.9753	58.5182	82.1215	59.6653	93.8713	48.8882		0.131035	55.1932
2.3828	67.3504	52.3713	32.8527	38.6735	44.0998	85.7742	47.7573	49.3517	59.9334	54.6323	12.7178	64.3675	58.9451	58.3963	27.0808	35.9832	71.0309	68.954	58.1414	19.9039	35.7797	56.2506	48.6889	61.9993	89.116	61.7515	88.9195	39.5553		0.137929	53.2278
2.502	65.0476	54.6717	25.7964	33.096	40.728	92.4259	49.3843	50.2355	60.2049	55.0913	12.3655	63.852	55.6775	61.0521	28.5895	34.6343	72.7129	67.7161	57.1699	14.8385	36.5249	59.5265	49.217	61.1465	81.1888	62.5654	86.383	30.0117		0.144829	52.2091
2.6211	70.4854	56.1647	18.3432	28.5206	35.8251	92.3192	48.8265	49.8068	59.853	57.7305	9.1186	57.6094	51.3122	61.8704	26.6327	40.9859	66.1302	68.4337	59.0413	15.4682	34.5138	58.7499	51.1514	60.2178	79.9916	65.3002	84.1921	23.2057		0.151724	51.1357
2.7402	64.7257	59.1127	13.8618	25.5597	30.379	87.0982	44.9292	46.4247	59.1968	62.6932	8.8847	48.2406	54.3706	66.3227	27.6863	40.6633	69.162	66.6738	55.4437	14.7654	33.4108	60.5896	45.878	56.2783	82.4125	63.4	86.4633	17.5372		0.158618	49.7201
2.8594	63.871	63.6831	13.5497	22.3919	25.1512	77.6444	43.3651	46.177	56.7714	65.0695	7.6966	45.0609	55.8258	60.5194	28.1608	41.4773	63.0431	63.2987	55.1537	13.8956	34.9554	62.1506	54.3952	59.1239	80.5877	60.0451	84.5975	11.261		0.165518	48.5329
2.9785	58.4049	70.3222	10.5723	16.5115	18.6457	66.6658	39.4249	44.5081	56.7471	70.1376	6.693	43.1792	61.0068	61.5396	27.1279	41.4606	56.8167	59.0395	54.8937	14.3046	32.3933	62.3656	51.8645	55.7858	77.3856	55.2119	78.5864	10.8362		0.172412	46.5154
3.0977	57.5808	71.3779	8.7489	13.3135	16.4592	51.4793	39.0313	38.7482	53.7662	65.3027	7.1525	40.2537	62.0315	53.2562	34.4104	42.1034	45.6183	53.4788	49.7869	13.2452	31.2045	65.2378	47.2019	59.3715	75.7453	55.8352	71.1604	9.939		0.179312	44.03
3.2168	56.1507	73.0618	7.8216	11.672	13.6261	42.1467	40.9233	40.7318	52.6027	61.2208	6.9334	33.8522	60.7783	51.6627	31.3549	42.8817	39.0464	49.3982	49.8933	12.0507	32.5562	63.467	51.1739	57.8191	78.3508	54.5539	70.7789	6.9731		0.186206	42.6244
3.336	56.2517	72.1185	6.7363	8.448	10.519	29.3017	41.842	39.5149	51.4994	54.4351	5.7879	29.8753	62.1808	46.2543	31.6552	41.076	34.3997	43.4873	45.4367	11.4083	28.606	66.9821	47.7079	58.6814	71.9301	53.4894	66.9891	8.2854		0.193106	40.175
3.4551	54.7623	71.0141	6.4793	7.1972	6.313	22.4721	43.3965	39.9446	55.5421	51.7007	6.0174	26.439	56.7498	43.46	31.5921	43.8219	28.7668	38.8817	38.5739	9.8358	28.8395	65.6111	40.7527	60.7769	76.6018	55.8256	60.8667	6.4796		0.2	38.5255
3.5742	59.9806	63.4373	5.1372	5.745	4.9553	19.2639	42.3153	39.0042	57.7134	44.3074	4.5551	26.4924	59.4169	37.4636	31.3841	42.0633	23.1217	30.973	39.1448	10.198	25.4436	64.5434	37.2997	63.0587	74.5726	54.3311	61.6878	6.8112		0.206894	36.9436
3.6934	62.7514	54.8595	5.6134	5.2609	4.7951	15.1344	49.2543	38.3696	61.8302	40.8454	4.3466	22.0227	56.8461	33.1726	31.9413	38.1527	23.0925	32.5292	34.4673	10.3554	23.5258	62.6176	37.8916	62.1447	75.1637	51.0019	54.1371	5.7514		0.213794	35.6384
3.8125	58.637	47.5462	4.7034	4.2291	4.7193	13.2219	52.9084	37.415	61.3725	36.9082	3.7954	21.866	56.1594	29.1632	34.5084	38.8265	20.7117	28.5459	30.3921	7.7313	22.4287	66.044	33.103	63.726	71.9168	43.5912	48.4109	6.1328		0.220688	33.8827
3.9317	53.8512	36.2329	4.184	4.3407	3.6931	12.4564	54.9603	38.1234	62.1668	30.8055	3.8899	17.108	61.0863	26.8038	34.2708	36.7089	18.8614	28.8077	27.4288	7.8598	18.1898	63.4135	29.2642	63.0178	69.9572	34.4087	41.4659	5.484		0.227588	31.7443
4.0508	49.7224	30.0816	5.6808	2.9101	3.5681	12.681	57.0655	38.6426	69.6185	24.8117	4.7834	16.1632	55.8117	23.4039	36.7841	33	15.7494	26.6619	25.0783	8.6929	18.6954	66.2618	27.9126	65.9112	69.6554	29.2644	38.7656	5.1805		0.234482	30.8056
4.1699	41.5168	24.1998	4.224	2.5115	3.6468	13.4155	59.1596	39.9282	74.2669	22.9027	2.9765	13.5858	59.4191	20.2802	33.8874	34.2846	13.6506	23.6616	21.8288	9.3411	16.5015	65.1294	27.3569	62.0098	65.8041	22.4147	38.1826	4.537		0.241377	29.308
4.2891	33.2648	20.1255	3.6224	3.036	3.7331	13.6978	55.1281	43.3165	72.2666	17.273	4.2792	12.7041	59.4065	19.9122	37.5965	30.3309	15.0468	21.7615	21.4849	6.6417	15.9254	68.6789	25.4086	58.0306	67.8607	19.471	33.0674	4.2041		0.248276	28.117
4.4082	26.1089	16.0747	4.5211	2.9102	4.3857	11.3148	52.4925	45.7966	73.1318	17.0566	4.3849	12.2117	59.7101	16.5281	33.3353	28.3535	14.9265	22.1499	23.4113	7.6821	14.4425	63.2202	24.6038	55.6312	60.4391	18.6657	32.1841	3.6049		0.255171	26.7599
4.5274	20.011	13.5549	4.9053	3.5087	3.8218	11.0588	49.7167	50.4594	70.7328	14.4629	3.5085	7.6039	58.2356	14.9404	28.2379	26.9651	13.8567	19.3522	20.4159	8.2942	13.88	61.6485	22.3946	54.3578	56.435	17.3602	28.4542	4.5249		0.262071	25.0964
4.6465	14.579	12.1373	3.7876	2.6751	3.913	10.0829	45.6828	52.4079	70.4191	11.8618	2.9834	7.0958	57.445	14.8184	27.1324	24.116	11.7111	18.7088	21.6699	6.8279	12.7105	63.9235	22.2087	53.9579	46.3166	14.8284	22.9406	3.5754		0.268965	23.5899
4.7657	10.5552	9.8849	3.0952	2.9696	4.2408	9.2269	38.6852	53.1662	68.2086	11.7259	3.4502	5.7944	55.6379	13.1136	24.7655	25.4316	14.6806	16.8995	21.577	7.855	10.4571	61.3634	21.2859	50.1185	42.2368	13.7403	21.1214	3.4196		0.275865	22.311
4.8848	8.3193	10.1772	4.7314	2.9519	5.0897	9.6031	31.6286	55.0815	70.5738	11.4467	3.1345	5.4069	55.9835	13.4881	21.6349	22.9086	12.2576	15.7638	20.8538	7.4081	9.4685	64.5523	19.9734	50.7643	36.2878	12.1182	15.5202	3.5304		0.282759	21.4521
5.0039	8.9739	9.8665	4.4216	2.6093	4.0915	8.7874	21.2639	52.0425	64.0706	11.4753	3.2623	4.4483	54.857	13.1167	20.2714	20.9889	12.0906	15.9657	18.4818	7.5156	9.7704	65.7216	17.9382	44.7941	28.9868	8.9134	11.9774	2.7351		0.289653	19.6228
5.1231	7.0778	9.17	3.7285	2.3621	4.1151	8.9935	17.9215	56.5737	56.8576	11.4284	3.1435	3.906	54.4284	12.5945	17.4986	19.6819	12.7889	13.8522	17.7916	6.6775	8.0321	63.567	17.4842	42.4559	26.4331	7.1942	11.1848	3.5866		0.296553	18.5903
5.2422	7.1318	6.674	4.7016	2.4209	3.8235	8.5988	13.1686	51.9353	53.0625	12.7517	3.8964	3.9434	50.644	12.2721	17.7886	19.4615	13.1963	13.2642	17.7159	5.7346	9.5738	60.1281	17.6055	43.0064	20.5288	7.2685	9.982	2.539		0.303447	17.6006
5.3614	9.1758	7.4149	3.8218	2.6364	3.8498	6.463	11.4659	48.4724	48.3994	12.3841	2.5426	3.1723	53.5989	11.5225	14.2182	19.7604	14.8164	14.0137	15.2086	6.165	10.0906	59.2814	15.44	41.592	19.2266	5.6757	8.8742	3.1244		0.310347	16.8717
5.4805	8.6766	6.6297	3.7886	2.9774	4.582	6.9991	12.3281	43.0272	45.1856	11.3031	3.2658	3.5372	48.4953	12.352	14.099	19.3165	15.1324	11.5641	12.4473	6.052	8.7112	60.0262	12.1133	38.3912	17.7983	7.2891	8.0736	3.0007		0.317241	15.9701
5.5996	9.469	6.0034	4.5908	2.1571	4.1849	6.4132	10.3857	39.3463	40.6752	12.1105	4.1846	3.0566	45.3589	10.2362	12.4741	20.1337	12.902	11.4334	11.5908	6.449	9.3491	55.8579	10.821	38.7838	15.6833	6.5489	7.2194	2.4715		0.324135	14.9961
5.7188	9.798	5.7063	3.5169	2.8915	4.98	7.5565	9.758	31.2574	32.4607	12.1888	2.8973	3.0579	46.2217	9.0484	10.4249	19.498	13.5862	9.9395	9.104	7.0833	8.6085	53.0706	8.3463	40.8273	16.5056	5.0695	5.8788	3.1387		0.331035	14.015
5.8379	7.5063	6.6741	4.1792	2.3094	4.0411	8.447	9.3419	22.1444	27.2971	13.5074	3.3286	3.5024	46.863	9.8129	8.3416	16.8377	13.0833	8.9962	9.241	6.3962	10.5942	49.0932	7.5722	39.0081	13.2008	5.4503	5.6924	2.8463		0.337929	13.0467
5.9571	8.2545	5.7895	3.674	2.8453	4.5844	7.6941	7.8593	15.4065	22.1782	13.993	2.5294	2.8891	37.425	8.4704	7.8517	17.075	11.4554	8.5442	8.0097	6.0054	9.0736	45.863	6.4995	37.1024	14.0484	5.5232	5.013	3.394		0.344829	11.7518
6.0762	6.5819	6.3154	2.4992	2.1747	4.983	8.1287	6.9788	10.2075	18.7185	15.2817	3.0152	2.3849	34.8878	8.8274	9.3034	15.8462	11.1201	8.7994	6.086	5.9434	9.8268	46.0603	6.5012	34.8809	9.8886	5.5506	5.7246	3.2481		0.351724	11.063
6.1953	8.1438	6.3143	3.7803	1.9647	5.93	6.4923	6.8998	8.2143	15.5237	13.4953	2.4421	2.8273	35.3268	8.1148	9.0433	13.8612	10.2644	7.5133	5.6157	6.9102	9.8974	39.1015	5.6312	32.272	9.1812	5.0308	5.1978	2.5718		0.358618	10.27
6.3145	6.4058	5.2466	3.1233	3.0733	5.1256	8.163	6.3136	6.9258	13.416	14.5256	3.4035	2.9263	29.4227	7.96	6.6595	12.4457	10.7001	7.1257	5.7992	8.1654	9.0332	35.0263	6.3856	28.6967	8.9981	6.0713	4.0006	3.6958		0.365518	9.60122
6.4336	6.0431	4.8208	3.3516	2.5508	5.036	8.3472	6.5155	5.8319	13.1036	12.7507	2.7824	2.9522	25.3192	7.406	7.1248	9.2197	7.8068	6.4924	4.87	6.3883	10.5738	31.3626	5.5768	24.1355	9.273	5.4578	4.5631	2.7623		0.372412	8.65778
6.5528	5.2399	6.0187	4.0943	2.5647	6.4256	6.2813	5.607	6.4024	11.9438	15.3131	3.4462	2.8843	20.3926	7.117	7.4707	9.4785	10.9114	5.4048	4.6966	7.3882	9.1954	26.8533	5.7825	22.325	8.9981	6.2158	4.2697	2.7288		0.379312	8.40892
6.6719	4.2327	5.3796	3.783	2.1807	6.4031	6.2045	5.1213	5.6202	9.0943	14.5844	3.5005	2.9796	17.5758	6.7358	6.8806	8.7252	8.7836	4.2147	4.7693	7.935	10.3836	27.8875	4.9681	16.2607	10.0882	5.6616	4.9046	2.5473		0.386206	7.76448
6.7911	2.8193	5.587	3.5401	2.3904	7.6753	7.0638	5.0956	4.7268	8.7295	14.3793	3.1462	2.6451	15.4919	7.7123	8.0416	8.5973	9.2621	4.9802	3.4963	8.3826	10.4297	26.9695	5.135	14.4228	10.4211	5.0951	3.4405	3.089		0.393106	7.59876
6.9102	2.6468	5.5094	4.4105	2.6343	6.6648	5.7471	4.2879	4.9043	8.2541	14.157	3.4116	3.0505	11.8494	7.2797	6.8695	7.979	9.6998	5.1225	3.9119	9.2012	12.4852	21.1702	3.3662	12.8585	9.5588	6.1877	3.4193	2.26		0.4	7.10347
7.0293	2.5704	4.2005	3.5199	2.708	7.0055	6.6008	3.9042	4.7968	7.0835	16.2474	2.4053	2.0252	9.9204	6.9836	7.0943	8.9489	9.98	4.3066	3.9273	9.0006	16.3307	18.3348	3.825	11.5892	11.1651	5.883	3.1745	2.5597		0.406894	7.00326
7.1485	2.7741	4.5526	2.9701	2.1387	6.586	6.4842	4.0264	4.8094	8.1291	17.8205	2.559	2.4433	7.9102	7.0191	5.8583	7.0867	9.0901	4.6693	3.9727	12.5347	16.2823	13.9135	3.6878	9.8173	10.257	4.7053	4.25	2.178		0.413794	6.73306
7.2676	3.0978	5.5742	4.4223	3.4699	8.36	7.7664	4.7387	4.737	7.9217	18.1114	2.868	3.2962	11.6072	9.034	5.9548	7.0971	8.5345	4.7707	4.2876	12.5935	16.5465	12.9552	4.3476	9.4832	11.7802	4.8765	2.9898	1.9825		0.420688	7.2573
7.3868	2.3832	5.4239	3.8723	2.8457	8.157	9.8577	4.448	4.406	8.5382	16.2118	3.1428	2.1525	9.5242	6.9439	5.9322	7.6778	8.126	3.3657	3.328	13.9983	15.4495	9.9714	3.3646	9.2577	13.931	4.8704	3.9139	1.8706		0.427588	6.89158
7.5059	2.6967	5.5041	4.2454	3.2268	10.0868	11.947	4.8271	4.0143	10.8777	15.0936	4.2076	2.2338	9.5874	6.35	5.4567	7.8801	9.6318	4.4533	3.5363	17.3678	14.8974	9.0304	3.1742	7.608	14.6107	5.6143	3.3617	2.7166		0.434482	7.2942
7.625	2.8355	5.196	3.769	3.0213	9.8035	9.8954	3.4262	4.5007	11.0064	16.0837	2.5989	2.4778	9.8588	8.0986	5.6107	8.2335	9.1392	3.4328	3.5003	20.6049	16.5609	8.0532	3.3072	6.7464	14.5631	5.965	3.407	2.3509		0.441377	7.28739
7.7442	2.4848	6.5372	3.9873	2.8979	9.9235	11.0547	3.4855	4.0305	10.3149	15.9524	4.3326	2.3147	12.6173	9.3883	5.5992	7.3072	7.5657	4.2784	3.0643	18.7297	17.3483	6.455	3.1262	6.4621	18.3649	4.7062	2.847	2.2847		0.448276	7.4093
7.8633	2.3434	6.659	4.2692	2.6408	8.807	13.4771	2.7457	4.9251	13.0095	15.0433	2.7826	2.1293	12.2134	7.34	6.8186	6.552	9.4643	3.0785	4.0499	18.6114	14.9824	5.2624	4.0149	8.2803	18.2912	4.1528	3.3104	2.8288		0.455171	7.43155
7.9825	2.2502	7.7594	3.83	2.973	9.4652	13.3694	3.2399	3.9623	13.6965	16.174	3.2066	3.0456	13.6227	7.7495	6.5259	8.3852	10.3669	4.7885	3.4771	13.0131	17.4832	4.9982	3.4065	6.4124	14.1198	5.278	2.9578	3.2209		0.462071	7.45635
8.1016	2.299	7.219	4.3464	3.6948	7.5521	13.7096	3.0479	4.6101	13.8622	16.1784	3.4727	2.7359	11.943	8.6828	7.5549	8.1359	9.7559	3.8044	4.2778	11.3994	16.7696	3.9035	2.482	7.0994	16.799	6.5938	3.3749	2.8517		0.468965	7.43415
8.2207	2.404	8.8519	3.922	3.6559	10.3341	15.1974	3.6208	5.1058	14.7824	18.86	3.1759	2.6614	14.4706	7.6195	6.5854	7.4828	8.8397	2.8798	3.2582	10.2658	17.9197	4.7974	2.7459	6.9067	13.5915	5.4392	3.5885	3.1255		0.475859	7.57456
8.3399	2.1397	8.3445	4.1622	3.3575	8.5731	17.0304	3.2772	3.9701	15.0948	17.0233	3.2622	2.1131	12.1241	8.8308	6.1857	7.3264	8.08	3.8286	3.2626	10.3914	18.9581	5.1144	3.7176	6.2443	14.4635	5.3491	3.3446	3.0206		0.482759	7.44964
8.459	3.3626	9.266	3.4574	3.7374	12.183	15.403	3.5929	4.8913	19.1218	18.64	3.3108	2.8213	12.7416	8.3842	6.5801	7.9245	8.3918	3.9918	4.1058	9.8861	20.5106	5.8127	3.6061	6.6553	15.4715	8.3102	3.4567	3.4669		0.489653	8.18155
8.5782	2.7427	9.9042	3.8535	3.1441	14.2201	14.0892	2.6229	3.5579	21.5054	19.4226	3.1789	2.5825	13.3854	8.6015	7.382	6.9051	8.5241	3.0431	3.7141	9.1869	19.6016	5.2121	3.4973	8.1998	16.3509	7.9032	3.4802	3.0027		0.496553	8.17193
8.6973	3.3327	11.4376	3.5993	2.8601	16.0028	15.4269	3.1186	4.0305	22.5874	19.1971	3.8081	2.3422	11.4014	8.2609	6.6957	6.9479	8.8974	3.3711	3.825	8.987	17.987	6.5604	3.3236	7.5467	18.6556	8.3238	4.1078	2.5445		0.503447	8.39925
8.8165	2.7494	11.0859	4.087	2.8711	18.219	13.9083	3.3273	4.2425	21.7323	19.7975	2.1921	2.3033	9.2387	7.9517	7.2367	8.4853	9.8895	3.6657	3.5015	7.8488	20.047	4.5127	2.9857	7.4761	16.8718	10.2386	2.5871	2.6755		0.510347	8.276
8.9356	2.6721	10.8191	2.8296	2.7569	16.3789	13.1747	3.54	3.5282	22.8268	22.4401	2.8908	2.5534	10.8626	8.1733	7.1391	7.4138	9.4093	3.922	2.8	7.281	20.0612	6.9292	2.6601	8.2486	17.3751	10.5029	3.0412	2.6477		0.517241	8.38849
9.0547	2.8112	11.4018	3.1791	2.9786	16.8063	14.2369	2.6722	3.6186	28.0764	20.7454	4.401	2.9983	8.3978	9.1063	7.0471	7.9599	10.7225	3.8269	3.4625	8.114	20.7901	5.0803	3.31	9.9363	19.3018	9.5248	3.9572	2.8219		0.524135	8.83161
9.1739	2.9249	11.4531	2.7884	3.2657	17.8612	13.7459	3.1701	3.6436	29.1667	22.1087	3.7815	2.2838	9.9566	8.8336	6.8987	7.2938	8.8006	3.3736	3.7071	7.3054	20.6399	4.7057	3.817	11.1575	19.119	8.362	3.3336	2.9579		0.531035	8.80199
9.293	3.2521	11.2403	3.3462	3.5098	15.6677	11.4783	3.1617	4.2103	29.8292	23.1422	4.6242	2.22	11.4985	9.9382	7.0317	7.3357	11.3296	4.1718	3.1968	6.9116	21.7506	5.446	3.7864	10.896	20.2798	7.9423	3.2422	2.9309		0.537929	9.04893
9.4122	3.2295	11.6624	2.965	4.1003	16.5611	13.0464	2.957	4.6953	27.7948	23.0216	5.3601	2.9536	11.9843	10.355	7.2228	8.2242	13.7707	3.4347	3.1274	7.1449	26.6177	6.6226	4.14	13.3287	18.1447	7.6316	2.1827	2.4488		0.544829	9.45457
9.5313	3.2474	11.9644	3.0653	3.7543	16.3831	11.3058	3.7001	3.6544	29.0411	22.3585	4.9323	2.471	13.9559	10.6816	7.8042	8.8546	18.8392	3.6406	2.9424	5.7327	30.0704	5.768	4.0895	14.2528	19.1303	6.4197	3.4007	3.3428		0.551724	9.8144
9.6504	3.1929	11.7345	3.5216	2.7924	15.2761	12.5449	4.1112	3.6426	29.5852	24.242	4.0611	1.9036	14.98	11.2089	7.95	8.7182	20.6332	4.3485	3.396	6.7426	26.3357	5.7708	2.6028	16.3031	19.8529	7.4573	3.4839	3.1003		0.558618	9.98187
9.7696	3.707	12.3884	3.4666	2.6287	15.3952	11.5177	3.1202	3.6037	30.9078	24.3267	4.4011	2.2978	15.8584	12.5747	8.5016	9.4771	18.6798	4.242	2.9261	5.9426	26.7513	6.7834	3.4735	18.5444	18.4296	8.2881	3.2562	3.3048		0.565518	10.1712
9.8887	3.7786	12.0698	2.8186	3.2159	15.2942	11.154	3.8847	4.9334	37.2763	26.7999	3.8402	2.7717	14.7811	15.3886	7.0829	9.7454	20.7171	4.5216	3.3576	6.9444	28.0547	6.8929	2.7853	25.6902	21.7431	7.0125	3.1893	4.5827		0.572412	11.0831
10.0079	4.6595	12.3765	2.8157	2.9083	16.4537	10.643	3.5513	5.4671	42.2417	27.6795	3.2105	2.6255	16.4217	16.3474	7.7088	9.4378	19.1167	3.6782	3.7749	5.5553	19.8589	8.5362	3.933	27.177	22.2086	9.1385	2.662	3.3121		0.579312	11.1964
10.127	5.8094	13.8702	3.4194	3.2584	14.0529	12.3858	4.8201	5.565	48.3904	29.6421	4.7761	2.3672	14.8322	17.7065	7.7723	9.8867	17.1371	3.9698	2.6151	5.9628	18.4344	7.8614	3.1679	33.8549	25.3727	7.3778	3.9959	3.8106		0.586206	11.8613
10.2462	6.6128	12.4713	2.88	3.4525	14.4144	11.7559	4.3284	4.8837	46.0822	33.8978	3.9816	2.792	14.4828	15.6862	8.1442	9.721	15.8373	3.5536	3.225	6.4844	17.2653	8.7929	3.2289	33.4516	31.3311	6.9584	3.1035	3.3311		0.593106	11.8625
10.3653	7.893	14.2042	3.8882	3.1212	12.2702	15.2552	3.679	5.286	42.0755	34.7707	4.6057	2.9201	12.2303	16.2593	6.9347	9.8445	16.2638	3.9197	4.2153	6.2791	14.9374	9.5143	3.31	34.3183	36.506	9.2282	2.8135	3.3063		0.6	12.1375
10.4844	8.6534	11.6676	2.8239	3.4078	12.3101	17.8925	4.4856	6.3121	32.6647	34.635	5.0518	2.646	10.3014	15.4226	7.9507	11.8277	14.6257	4.5533	3.6092	6.5849	15.6863	6.9837	3.7969	36.4729	36.7577	8.448	3.1625	2.2123		0.606894	11.8195
10.6036	10.2541	11.6966	2.8224	3.4845	13.2615	21.5034	4.0489	6.4072	27.6447	33.4295	3.8604	2.7987	8.7439	18.2846	6.8099	11.0732	14.3204	5.191	3.9197	4.8857	13.009	6.851	3.3237	35.6761	45.1445	7.3659	2.9945	2.8822		0.613794	11.846
10.7227	11.2672	11.4629	2.7724	3.1347	10.6708	26.7015	4.383	5.7739	24.3105	31.602	3.5806	2.7309	9.3615	18.9561	7.4958	11.4074	12.2074	3.6474	3.4635	5.4368	13.1224	6.6858	3.7723	37.5985	41.4966	7.1497	3.1843	2.2023		0.620688	11.6278
10.8419	12.8523	9.1402	2.8607	3.3915	13.8605	34.9721	3.5215	6.8525	21.0726	32.9185	4.2433	2.5101	9.0843	24.7796	7.1433	12.611	13.2769	4.5276	4.0635	4.7657	14.9697	8.0995	3.7591	34.8738	42.2922	6.6209	3.1599	2.7017		0.627588	12.3187
10.961	15.6727	10.0933	2.3732	3.681	14.0726	34.8994	4.2832	5.1607	18.6627	35.8016	4.0557	2.8779	8.6085	26.1482	6.7554	12.8444	12.0345	3.5424	3.0736	5.0168	14.3077	7.8146	3.8587	33.9315	41.8967	7.982	3.2877	2.8331		0.634482	12.3418
11.0801	16.8687	8.3193	2.4661	2.9306	14.9164	40.6117	4.2875	4.4453	20.9626	37.6678	4.9245	2.9735	8.7854	25.7386	8.7323	13.8028	10.043	3.6262	3.3507	5.9409	13.3119	7.5706	3.3401	34.1676	37.8098	8.3161	3.1199	2.5766		0.641377	12.5574
11.1993	19.013	9.1417	2.7118	3.5542	16.2771	43.7974	3.9756	5.7738	19.9481	36.075	3.6014	3.2308	8.0985	25.8885	7.084	15.2485	9.6745	4.1514	2.8832	5.7913	16.4707	7.7531	4.4541	36.2088	33.7029	6.6918	2.718	2.7002		0.648276	12.7364
11.3184	22.7368	8.123	2.3709	4.164	17.1447	46.079	3.3546	5.0309	22.714	34.1248	4.4892	2.9292	7.7965	25.2493	7.6915	18.0869	10.0265	4.2176	3.7424	4.7516	16.0668	9.3965	4.2124	40.501	32.6659	7.4368	3.3259	3.0337		0.655171	13.2665
11.4376	25.3621	6.7463	2.7441	3.114	15.3406	45.2835	3.5906	4.7329	24.6012	34.1618	5.0348	2.6387	7.703	26.2427	8.2533	16.2957	9.8353	3.4414	3.9676	5.1576	18.1027	8.5614	3.7493	41.1274	27.8873	7.2279	3.4628	3.0544		0.662071	13.1222
11.5567	29.5349	7.7272	2.7137	3.6953	14.197	40.8622	3.779	4.529	26.9332	30.2514	3.7281	3.7271	7.5596	23.3712	6.547	20.7659	10.0636	3.6907	4.4593	5.2911	18.3111	9.1285	3.1956	39.7812	25.2454	10.0257	3.5221	3.1441		0.668965	13.0636
11.6758	29.1477	7.3729	2.9671	4.1446	13.6928	38.3052	2.8632	4.4527	25.34	30.9975	4.0878	3.6567	7.3246	24.791	7.2794	19.8383	10.4686	4.5357	3.4622	6.4339	18.1923	6.3291	3.6049	41.819	28.0253	8.5077	3.1642	2.6608		0.675859	12.9809
11.795	28.7936	5.5571	2.6529	3.6367	11.9324	30.6124	3.1855	5.7307	23.6645	28.8136	4.9451	2.9406	8.0277	24.3915	7.757	21.3657	9.3953	3.8966	3.8106	5.0436	19.1524	9.2381	4.2339	40.8095	29.5118	6.9668	2.895	3.4392		0.682759	12.5857
11.9141	28.7705	5.3547	3.3167	3.7314	11.202	26.8768	3.4123	4.4908	26.4148	27.7608	4.5495	2.4283	7.6877	23.7122	9.0424	23.2633	11.9615	3.8398	3.2032	5.3163	17.2472	8.0185	4.2932	33.1097	27.7625	7.125	2.657	3.3195		0.689653	12.1381
12.0333	27.8354	4.2784	2.4016	3.0636	11.7744	21.4742	3.994	5.082	22.1337	30.4523	4.3821	2.9131	7.3607	21.5121	6.445	22.4134	10.4062	3.6115	2.7514	4.9263	17.705	7.8354	4.3707	30.2472	29.9038	7.586	2.6581	3.4002		0.696553	11.5328
12.1524	23.7664	4.8268	2.7558	3.8778	11.17	16.8679	4.0249	5.4946	22.4477	35.5456	4.7824	3.0209	9.0013	22.2901	8.6908	24.8857	10.5616	4.4076	3.2736	4.4638	17.2573	8.3481	4.179	22.685	35.1141	7.882	3.0953	2.9514		0.703447	11.7024
12.2716	20.9132	4.0376	3.2884	3.4718	10.2315	12.5388	4.5626	6.3383	21.4768	35.5492	5.247	3.5839	8.4719	20.9701	7.6821	24.9289	9.8416	3.6392	3.2403	5.7261	18.1777	8.0457	3.3042	20.0115	38.8201	6.8636	3.3574	2.9322		0.710347	11.3304
12.3907	19.9932	4.4579	3.195	4.3605	10.6503	11.7428	5.373	6.6404	20.1547	35.5234	4.7916	3.199	7.2098	20.517	8.5869	25.299	9.2785	2.9651	3.6597	6.0637	16.4296	7.6836	3.7831	18.349	41.7076	6.7631	3.9589	3.2133		0.717241	11.2696
12.5098	19.8572	4.0779	3.4205	3.7282	8.5759	10.936	4.7849	4.8217	20.0468	32.2156	4.0811	3.3999	8.8236	21.2525	7.5112	23.3222	9.5821	3.4429	3.2571	5.7054	15.6672	7.747	4.0392	17.7257	43.7378	7.3769	3.722	2.6658		0.724135	10.9116
12.629	19.2628	4.1481	3.5566	3.7516	9.5964	10.1965	5.1037	6.378	20.5252	29.2542	4.5401	3.1906	9.4926	17.6756	8.2708	22.8911	10.418	3.8185	2.5357	5.5333	14.5991	8.5217	4.511	15.2886	42.1233	7.1534	3.3471	3.9879		0.731035	10.7026
12.7481	17.4672	3.6756	3.1015	3.4244	9.8406	9.2818	4.4635	5.7866	20.7586	26.8482	5.0897	3.9335	8.7316	14.8907	7.5265	21.7474	11.3047	3.8303	2.4543	6.3057	12.4317	8.1425	4.0472	13.3562	48.4034	7.8748	3.3179	2.8581		0.737929	10.3891
12.8673	15.3771	2.7621	3.8726	3.6569	8.8853	10.3869	5.939	7.152	19.8756	24.0469	4.5523	3.895	8.9717	16.2221	8.8212	21.7614	10.4118	3.6856	3.381	5.7918	12.6714	7.3849	4.8956	10.9903	51.2961	8.4629	3.3304	3.2954		0.744829	10.4205
12.9864	17.17	3.5534	4.3571	2.947	7.3533	10.8036	3.672	7.5711	19.0029	21.0511	3.8732	3.6109	9.8262	15.6329	8.6612	17.7983	11.0733	3.412	4.0266	5.9696	13.8968	7.4741	4.4564	9.7407	58.832	7.6434	3.1083	3.7264		0.751724	10.3659
13.1055	14.5261	2.8323	4.395	4.0422	7.1089	11.298	5.3243	6.8278	17.9567	20.9345	4.1482	4.178	9.6523	13.2569	9.5771	20.1698	11.3956	3.5782	2.8453	6.8611	12.888	7.5723	4.6767	9.1389	72.7976	9.7517	2.9476	3.9807		0.758618	10.8808
13.2247	15.419	3.7594	5.4388	3.7813	6.6396	13.9132	4.3645	8.3553	19.7759	18.8036	4.9458	4.3771	9.763	10.7449	11.5196	18.2805	11.6233	3.3541	2.8921	6.1859	13.843	7.7795	5.1917	9.1383	72.956	7.8898	3.3247	2.6327		0.765518	10.9533
13.3438	13.5093	3.0405	3.8953	4.4578	6.2431	17.9475	5.6535	9.2179	15.2077	17.5703	3.5755	5.3071	11.725	10.525	8.3647	17.6723	11.7265	3.3823	3.1961	6.1213	12.1302	7.5529	5.715	8.2109	86.1258	6.9159	3.0947	3.4669		0.772412	11.1268
13.463	11.5175	3.6808	3.7454	3.3919	6.4644	22.0949	4.6434	7.7943	17.2927	19.8254	4.5328	4.8934	12.8399	9.9573	9.9257	18.6992	9.86	3.4515	3.6201	5.7761	12.6763	7.4838	4.6295	8.3141	87.1359	7.2297	2.9093	3.6149		0.779312	11.3571
13.5821	13.0741	2.9373	4.7804	5.4099	5.471	24.2238	5.8559	8.6224	15.936	19.4098	3.8514	4.5648	13.4907	9.0903	8.8496	18.8033	12.229	3.5994	3.22	4.7973	9.4491	7.3527	4.7112	7.7474	91.1537	8.0144	3.3308	4.1458		0.786206	11.5758
13.7012	11.635	2.4951	5.5596	6.1214	6.499	34.0003	6.0573	8.0863	17.0099	20.4425	5.6442	5.3406	13.5837	9.3343	10.3028	19.625	10.2053	3.847	3.191	4.9084	9.6406	8.0529	5.2758	9.0638	91.944	7.2541	2.8398	3.1561		0.7931	12.1827
13.8204	11.4324	2.9465	5.7911	5.5823	7.1776	33.7996	7.1106	8.9459	20.3089	22.0093	4.1342	5.1918	13.087	9.0303	11.4246	19.7366	9.3182	3.6609	3.5218	5.0959	9.5576	7.7273	5.1843	8.3763	94.3554	6.2702	3.4367	3.6774		0.8	12.4247
13.9395	10.6947	3.1454	5.4027	4.6073	7.345	34.6309	7.6909	8.1021	18.3972	23.523	5.5965	5.3214	15.788	9.7449	9.03	19.1826	10.8828	3.5074	3.3219	5.1561	9.7894	7.4282	5.8027	6.658	95.815	6.1292	4.0684	4.0945		0.806894	12.5306
14.0587	11.4	3.5076	6.3316	5.8213	6.4721	34.6536	9.6738	8.3843	23.0326	23.7547	5.5381	5.9251	14.1615	9.112	10.5411	19.0755	11.0967	3.8849	2.5475	5.2755	10.7492	7.6671	6.2989	7.0638	95.2735	6.1517	3.7648	4.3467		0.813794	12.9109
14.1778	8.9251	3.6834	5.5915	7.3827	8.3093	26.5514	9.6566	8.0529	25.2764	22.4689	4.723	6.5325	11.8137	8.4546	12.9294	19.6151	11.7466	2.8099	3.1545	5.1893	10.2897	8.7047	5.017	6.6453	98.0552	5.7556	3.3668	3.5418		0.820688	12.6515
14.297	7.7891	2.4743	7.24	8.7532	9.4016	27.9629	10.7092	8.1133	25.3645	23.812	7.6175	6.5349	11.4026	8.712	13.725	20.2818	12.6469	3.6628	2.8846	4.2473	11.1566	8.1728	5.7895	6.0285	94.0489	5.959	3.1858	2.9254		0.827588	12.8786
14.4161	8.5679	2.5359	6.7545	9.4646	9.2457	26.1309	12.6122	7.1952	26.199	22.876	7.1689	6.946	11.854	8.2962	12.6382	20.0005	15.3563	3.2553	3.2534	4.6529	13.5367	8.1492	7.0562	8.8706	86.1398	6.3274	3.219	4.4236		0.834482	12.9545
14.5352	7.0215	3.5616	8.2141	10.7421	10.5318	25.0786	14.1959	7.1819	28.3067	25.4662	8.3283	6.6134	11.9354	7.085	12.2085	19.0743	13.1328	4.5867	3.4968	4.5689	16.9847	7.3117	7.2323	6.2851	84.9111	6.696	3.095	3.7047		0.841377	13.1268
14.6544	6.9109	3.2122	6.7867	12.7903	11.4204	24.829	18.9961	6.8422	31.8832	25.1498	9.1295	8.301	12.5876	10.3301	14.0302	23.1757	15.1349	2.835	2.7371	3.8793	15.2102	7.2623	7.4631	6.8005	76.802	8.0564	3.9534	4.5352		0.848276	13.6087
14.7735	6.6074	3.4662	5.4368	14.5496	10.3735	24.0936	21.4503	5.7754	28.1355	21.5031	10.9918	7.9379	11.9954	7.738	15.1472	21.9272	14.0107	3.4011	3.4636	5.2996	14.1212	8.5823	6.6893	5.8056	67.5443	9.7745	3.8309	4.2817		0.855171	12.9976
14.8927	5.2966	3.2776	4.2981	12.8043	11.9577	26.2771	22.4538	6.6879	32.0545	21.4095	10.9248	8.3658	13.7908	9.5808	12.7635	23.4882	11.3123	4.0279	3.0545	4.3429	13.2714	8.1019	8.3872	6.4272	65.6643	10.5489	3.9295	4.1049		0.862071	13.1644
15.0118	4.9455	2.5375	3.4682	10.4827	13.8635	28.0185	28.3453	6.5947	30.5522	20.4353	13.1844	9.1594	12.7847	9.8693	13.9818	22.7642	13.7687	3.6807	3.5789	5.8069	12.2191	9.8976	7.901	6.5924	62.7731	11.497	3.7452	5.5071		0.868965	13.4984
15.1309	4.8491	3.2238	3.2594	9.1419	14.903	29.9132	31.8967	6.9596	32.6458	20.9155	15.4085	7.6467	12.5652	10.5459	16.9189	24.2682	12.7641	3.6597	3.2695	4.4282	11.6973	10.4294	9.2262	6.7433	54.6907	15.7981	2.9836	6.153		0.875859	13.818
15.2501	3.7532	3.7359	3.1477	7.081	13.683	33.5221	33.8825	7.2581	30.3085	15.2638	14.0192	8.968	14.1988	8.1098	16.7817	20.902	12.3168	3.3653	3.7741	4.0561	8.7786	9.6947	10.5168	6.9223	50.5279	17.7901	3.5045	5.3298		0.882759	13.2569
15.3692	4.5195	3.1576	3.4313	6.5766	11.1377	33.4383	39.978	7.253	31.2223	17.0953	15.6208	9.8031	13.0391	8.4117	15.1088	21.331	12.7365	3.5139	3.4083	5.209	7.3316	9.5109	11.5293	5.9775	46.4618	20.7014	2.9258	4.9007		0.889653	13.4047
15.4884	2.8797	3.015	2.3627	5.0245	13.7982	34.7079	38.9846	6.6727	30.8901	13.4963	17.3907	10.3622	15.3732	9.3545	16.3241	19.1029	11.0971	3.5093	2.2908	4.0785	6.2599	11.2648	12.4114	6.3207	40.1429	21.4482	3.2793	5.9646		0.896553	13.136
15.6075	2.4261	2.6083	2.7338	3.956	14.7214	34.8976	42.9381	5.609	30.4034	14.6511	18.991	10.4116	13.9283	9.7599	18.2408	22.3251	9.5203	3.6132	3.0194	4.5362	8.2432	10.0939	13.8236	4.9143	37.7948	24.5403	3.389	6.3862		0.903447	13.517
15.7266	2.9469	2.8561	1.6011	3.2812	9.9097	37.7785	41.5487	7.9234	28.6004	12.4551	18.5289	10.48	15.4884	9.5566	19.0954	18.544	10.4977	2.5088	3.7542	4.1301	7.8149	13.4591	14.6212	5.483	30.7744	23.1306	3.2586	6.8454		0.910341	13.1026
15.8458	2.3247	2.5472	1.6051	2.6329	6.9641	36.5481	43.4166	7.0927	27.1279	11.9775	20.254	10.7907	16.6619	8.704	18.7003	17.6718	10.7752	3.5242	3.8418	5.0409	6.6797	11.2004	16.2194	6.0771	26.0245	25.4407	3.5782	9.5257		0.917241	12.9624
15.9649	2.5604	2.17	1.2718	2.3043	5.1689	35.5956	47.7575	8.8546	26.3234	13.1906	22.0804	11.0982	17.1026	8.5346	22.3837	19.1634	9.3355	2.4053	3.6418	4.7355	7.7157	13.9071	16.1191	5.5072	24.7041	23.0696	3.5083	10.2083		0.924135	13.2292
16.0841	1.4596	1.7817	1.5017	2.0757	4.2097	32.3909	50.8318	9.3869	29.8554	14.2051	21.9816	14.6661	18.6029	9.9352	22.6763	18.1468	9.048	4.2883	4.1508	6.2228	7.6024	13.5195	16.7658	5.2922	19.4338	23.2858	3.6104	14.6476		0.931035	13.6277
16.2032	1.4855	1.4489	1.7861	1.6332	3.4597	29.5491	52.3872	9.073	28.6222	14.3999	22.1273	17.9086	21.2363	11.5239	24.5949	18.4431	10.5912	3.773	3.3326	6.0428	7.517	13.8947	18.5496	4.9239	19.2115	23.5941	4.411	20.3886		0.937929	14.1396
16.3224	1.2755	1.133	0.9192	0.8156	4.4782	18.9257	53.359	10.4727	29.1336	15.3532	20.976	19.1107	22.5745	11.4184	26.7352	16.9411	10.1147	3.7837	3.7767	4.9793	7.5224	13.0368	18.8469	5.2283	15.5614	28.6855	4.2931	25.1906		0.944829	14.0943
16.4415	0.8457	1.2714	0.9922	1.1201	3.4271	11.8832	59.4592	12.1845	25.8919	16.6353	19.8724	19.2839	24.725	13.1399	25.3516	16.7859	8.4514	3.4463	3.3446	6.7809	7.7257	13.1498	20.1703	3.9905	11.9106	26.5474	4.8831	33.7768		0.951724	14.1802
16.5606	1.2125	1.2644	0.9452	1.0583	2.6613	6.2994	71.0073	14.2378	24.0719	16.1157	21.8194	25.3457	26.0359	13.3134	24.8005	16.2702	8.4867	3.6212	3.7266	6.3931	8.5352	17.4921	20.2187	4.205	11.9123	30.3966	3.3317	41.697		0.958618	15.2313
16.6798	1.0202	1.3224	1.0331	1.5192	1.3933	4.9453	75.3162	15.3984	24.706	17.4409	20.5625	30.5433	29.2326	14.0433	25.761	18.7668	8.4339	2.8136	4.6232	6.2989	9.8063	17.3759	20.1991	5.9184	10.5746	31.4714	3.7795	43.9126		0.965518	16.0076
16.7989	1.3175	1.4955	0.4019	0.4769	1.6543	4.2955	79.2404	16.557	23.7653	20.0024	21.6051	29.6755	31.6861	16.0707	28.9232	20.3876	7.8592	4.2184	4.3448	8.2408	11.5073	18.4274	19.8941	5.0764	10.3326	33.5195	4.7009	33.4027		0.972412	16.3957
16.9181	1.2089	0.6728	1.0369	0.974	0.8329	2.9664	69.8462	20.7653	22.1897	20.4161	16.8741	28.4102	34.2897	15.1856	28.3352	19.4401	9.3303	2.9359	3.1235	8.1131	10.9858	21.6181	19.6176	5.4239	10.8753	39.1774	4.1091	22.2953		0.979312	15.7518
17.0372	0.5674	0.3488	0.7944	0.4655	0.7885	2.5476	59.5627	26.1588	22.6804	21.0097	18.2437	29.271	34.885	16.5785	29.6801	22.4907	8.0188	4.4989	3.3326	10.2616	10.7062	21.9969	21.3311	5.7907	9.4088	38.6353	5.5745	11.7247		0.986206	15.6197
17.1563	0.9395	0.763	0.3954	0.6056	1.1125	1.5079	46.9883	27.1279	24.4387	22.9408	21.7702	25.6881	37.7536	18.9253	28.6994	22.8224	8.1598	4.1788	2.9666	11.1617	12.2965	26.3281	22.9139	5.3242	9.327	45.8431	6.0634	6.6379		0.9931	15.8457
17.2755	0.7191	0.3887	0.4416	0.4506	0.8423	1.7209	33.9418	30.623	22.5893	23.9772	19.9229	22.3619	34.2908	18.5548	26.3006	24.3223	9.4323	4.5295	3.5241	16.177	14.2256	25.2441	22.6095	5.5006	10.2221	54.5749	5.8707	4.1154		1	15.6241

## Sheet: Image16
X0	Y0	Y1	Y2	Y3	Y4	Y5	Y6	Y7	Y8	Y9	Y10	Y11	Y12	Y13	Y14	Y15	Y16	Y17	Y18	Y19	Y20	Y21	Y22		Ap-basal	Avg int
0	81.105	90.3623	68.0798	71.064	51.452	78.186	71.226	65.579	89.781	50.347	39.476	76.647	87.841	37.9798	26.4292	56.304	58.4076	32.1019	32.4375	73.256	86.937	57.025	73.8295		0	63.298
0.1191	78.722	89.7148	68.1918	66.723	51.251	86.245	74.127	73.959	86.112	56.49	42.632	80.916	81.674	39.0373	31.1665	56.931	62.6211	32.1717	32.3842	72.666	90.794	64.1262	71.9018		0.00680035	64.8068
0.2383	80.945	93.0648	69.7714	64.276	52.129	91.477	76.535	79.526	79.749	63.548	52.1	93.649	83.055	42.3213	33.0937	62.746	68.5862	35.7315	33.0534	72.044	88.235	70.0336	71.7277		0.0136064	67.7129
0.3574	86.362	91.6356	70.9807	59.675	54.808	102.826	79.781	79.757	76.856	71.268	65.185	98.874	81.391	47.7898	38.138	66.163	70.8677	35.2382	35.4992	69.399	91.651	71.5799	71.9751		0.0204068	70.3348
0.4766	94.963	87.5626	68.6858	61.449	60.392	109.278	84.681	81.981	73.652	78.62	80.134	109.899	81.469	50.3638	41.1686	65.405	73.7827	35.1212	38.2666	68.413	93.595	72.789	72.4569		0.0272128	73.223
0.5957	107.056	84.4548	67.3599	66.571	70.125	121.098	85.32	88.349	75.698	82.792	97.798	122.891	82.665	50.0875	42.2275	64.751	75.8087	37.0971	42.8458	73.267	95.294	73.3043	73.1198		0.0340132	77.3905
0.7148	114.354	82.8478	65.5555	75.663	77.881	121.229	85.559	96.559	80.827	92.496	115.505	128.696	83.056	53.8829	44.8944	65.991	75.3835	36.355	46.8238	84.518	99.658	75.8943	70.8376		0.0408135	81.4986
0.834	115.83	79.4393	67.4951	86.124	89.058	123.205	87.428	101.042	84.715	100.45	134.978	136.965	81.744	51.9141	50.8521	67.661	78.6577	38.6872	52.1728	90.515	102.869	74.1483	68.8618		0.0476196	85.4266
0.9531	117.259	78.503	67.8143	93.776	96.615	120.009	91.619	105.857	85.439	112.642	149.974	137.019	82.56	53.8704	54.2852	68.611	75.0251	40.1742	55.9544	98.602	111.014	78.3071	68.586		0.0544199	88.8485
1.0723	117.597	76.7925	68.592	101.655	103.548	113.052	100.104	109.756	91.593	122.675	157.544	143.931	82.132	53.8312	58.4044	68.744	73.5767	42.3096	57.3921	99.742	111.287	76.9205	68.9801		0.061226	91.3113
1.1914	121.082	73.576	72.7245	105.987	110.545	108.45	102.45	115.481	93.782	127.494	169.381	153.835	83.371	53.195	66.6102	73.286	70.3406	44.2962	58.7188	103.629	112.919	77.9638	69.2545		0.0680264	94.277
1.3106	118.46	74.2191	77.4203	110.024	119.661	104.623	105.398	110.747	98.152	136.178	173.761	155.1	79.922	56.6831	67.4872	75.954	70.5558	45.2637	64.2997	104.176	110.044	73.8626	70.6506		0.0748324	95.767
1.4297	115.816	68.4359	82.9089	113.69	120.187	100.531	103.606	116.133	101.37	146.935	173.492	153.697	81.573	55.7541	72.06	79.55	69.0803	46.9902	65.971	106.028	112.713	74.3553	73.6238		0.0816328	97.1522
1.5488	113.658	66.4191	85.6247	117.1	117.541	97.098	110.118	121.747	101.46	153.636	177.729	158.633	84.926	56.9211	77.1137	82.076	72.0739	47.7798	66.367	108.826	116.131	71.5407	70.021		0.0884331	98.893
1.668	116.688	66.8496	88.2727	112.864	115.065	97.961	116.972	119.784	102.753	147.846	177.165	163.846	86.917	58.2368	80.3882	83.915	70.7146	51.8595	70.1121	109.628	110.974	71.0205	68.9239		0.0952392	99.5111
1.7871	120.958	67.5732	93.5944	112.532	113.596	97.483	119.651	123.623	106.102	143.635	178.843	163.596	86.482	59.8225	83.6591	87.493	69.5582	56.0813	69.0645	108.632	112.952	71.9908	68.1436		0.10204	100.655
1.9063	121.877	71.2763	96.3911	109.777	104.038	95.99	121.235	121.662	105.355	137.888	174.889	163.086	93.868	60.4817	88.3592	89.022	71.6749	56.1422	75.032	109.289	113.491	75.8101	68.6905		0.108846	101.101
2.0254	123.501	77.1491	92.5111	105.251	96.208	94.165	122.389	122.962	107.388	122.568	161.574	166.08	94.361	64.8213	84.102	88.072	75.1349	58.2568	79.5845	105.962	106.402	78.8698	67.4475		0.115646	99.7722
2.1445	123.737	80.245	93.8148	98.181	86.896	96.531	116.968	123.374	111.704	110.969	150.374	169.725	90.609	64.7539	83.2785	91.473	79.1773	58.2894	82.9029	108.646	105.92	75.9716	70.3224		0.122446	98.8636
2.2637	128.906	82.2935	93.3445	90.042	73.56	89.585	117.457	121.769	116.59	97.935	135.325	165.611	95.793	65.3754	85.9488	97.946	81.0451	62.3755	78.2584	108.93	99.199	77.3656	75.1037		0.129252	97.3808
2.3828	126.098	81.3695	89.7141	79.799	65.027	88.489	120.277	119.122	120.468	80.008	112.615	157.192	97.662	65.4218	80.7943	104.171	80.7173	59.2078	77.6756	109.85	94.384	77.8104	73.0503		0.136053	93.9532
2.502	123.341	81.0049	84.4136	69.166	56.993	89.31	113.203	114.177	120.714	72.63	94.963	152.139	101.973	67.8045	81.7998	107.961	89.628	59.788	77.5433	108.708	99.611	78.5027	73.7419		0.142859	92.1355
2.6211	121.701	80.6191	78.2121	64.926	50.974	84.553	109.947	113.318	120.346	64.398	74.743	135.135	106.006	64.7253	77.8895	112.373	91.4545	58.6375	77.1957	109.307	101.227	76.0716	76.6305		0.149659	89.1474
2.7402	122.943	72.6458	70.3237	58.602	47.787	85.401	102.302	106.989	115.143	54.842	64.841	114.76	103.885	61.2664	73.9185	112.77	91.6587	54.2783	74.0868	107.585	99.049	74.0959	79.6787		0.156459	84.7327
2.8594	116.545	62.1378	67.2686	55.465	44.837	85.193	97.219	104.512	106.48	48.353	47.657	101.318	106.13	62.8948	74.344	117.888	90.9012	52.9722	71.8814	107.573	99.607	71.8651	74.6121		0.163266	81.2024
2.9785	113.812	58.7287	61.8997	48.794	44.419	83.961	81.15	103.34	96.536	42.775	36.576	90.122	104.954	60.6132	71.3683	115.153	90.416	48.7075	70.1166	103.78	103.77	72.5903	75.2816		0.170066	77.3419
3.0977	107.09	51.9243	51.9178	42.897	40.842	84.49	70.443	101.422	82.216	33.589	33.598	77.978	106.251	57.1465	63.1877	113.421	92.7	43.0769	64.0907	96.632	101.951	65.2213	72.3207		0.176872	71.9307
3.2168	98.503	44.062	46.6549	34.933	39.567	83.455	59.865	100.709	70.452	28.433	27.287	67.918	104.998	60.0889	57.5408	113.829	91.0046	39.7087	59.6547	100.268	103.794	65.9739	66.6102		0.183672	68.0569
3.336	91.461	39.6583	40.2302	29.477	39.776	81.146	46.735	101.339	64.088	26.101	25.272	56	101.518	55.712	53.3574	110.489	88.7442	37.1424	53.9882	93.126	106.071	64.3269	62.7679		0.190478	63.849
3.4551	84.965	35.3967	33.9332	23.814	37.34	77.018	35.799	97.696	60.047	23.328	22.103	43.902	95.09	52.9763	50.7593	110.713	86.9241	32.0906	48.6263	91.256	106.888	64.2976	58.6673		0.197279	59.7231
3.5742	77.287	36.1596	30.7067	21.47	33.462	73.035	31.159	92.133	50.701	18.429	18.82	37.187	89.108	52.6686	47.7706	107.116	86.1007	27.2598	44.7075	90.703	99.672	61.3965	55.9711		0.204079	55.7836
3.6934	68.393	32.8026	30.5995	18.808	30.387	65.767	22.292	89.547	38.866	13.332	14.868	29.355	85.996	48.4268	38.8112	96.59	81.3567	26.5494	38.0241	88.132	98.846	60.7708	53.9875		0.210885	50.9786
3.8125	63.307	31.3949	26.9981	14.678	26.282	62.783	16.174	77.295	31.381	11.602	15.276	25.736	78.485	43.5621	33.0856	80.828	78.9485	23.6649	35.174	89.391	96.719	56.9151	52.9347		0.217685	46.6354
3.9317	60.939	30.1686	26.038	12.251	26.231	60.705	12.479	67.52	26.882	7.702	13.856	22.796	64.684	42.1915	28.8887	71.252	78.0231	18.5624	32.3023	85.423	91.917	52.9162	56.0296		0.224492	43.0329
4.0508	57.276	30.6773	22.2108	10.625	25.006	55.049	11.177	53.378	21.028	6.01	12.345	20.299	54.702	36.9413	27.5681	64.989	74.8775	16.6947	28.9039	83.447	85.941	51.7271	53.1646		0.231292	39.306
4.1699	49.205	28.0377	20.998	9.354	20.522	46.065	7.842	41.39	18.662	4.659	10.953	18.123	48.208	30.813	22.999	56.812	72.0256	14.0505	25.3103	82.68	85.708	49.5715	51.4401		0.238092	35.4534
4.2891	47.503	27.2623	19.8315	8.165	16.021	39.204	6.359	28.47	17.358	4.278	9.813	15.042	42.338	26.5888	20.9644	51.439	66.5945	11.3976	21.4353	80.226	74.597	46.7375	48.9182		0.244898	31.7627
4.4082	43.528	25.7517	17.4569	8.621	14.803	33.431	4.969	20.249	14.445	4.597	8.687	14.006	39.488	23.4581	16.4134	45.057	62.5718	10.797	18.276	76.333	66.217	45.4335	47.1239		0.251699	28.7701
4.5274	40.386	23.8604	16.7149	6.892	12.755	23.989	5.41	16.007	14.304	3.475	7.247	12.24	34.801	22.7562	14.0656	40.55	58.8667	9.5571	15.6941	70.834	62.891	41.2504	45.8469		0.258505	26.1041
4.6465	34.905	22.7844	15.6592	7.101	11.064	20.477	4.924	13.311	14.671	3.783	6.549	10.307	35.856	21.2395	11.5151	34.233	58.1551	8.36	11.9771	61.871	57.917	38.6605	47.7187		0.265305	24.0452
4.7657	33.588	22.4688	14.8669	6.286	10.08	19.855	4.3	12.004	12.263	3.33	6.463	9.418	33.541	19.6449	13.3164	28.558	54.7109	7.1971	9.2737	54.402	52.722	33.9561	43.4798		0.272111	21.988
4.8848	33.069	18.7924	12.4892	6.526	9.958	16.705	5.18	9.744	12.374	3.314	6.314	9.197	35.616	21.2498	10.8285	23.424	49.7353	6.7251	9.7952	46.749	47.069	29.3623	38.4		0.278911	20.1138
5.0039	26.83	18.7994	9.7467	6.503	9.29	14.611	4.494	10.228	12.764	3.311	4.956	9.595	34.71	22.0321	10.8776	21.184	44.2628	6.7792	8.0223	40.875	41.076	28.905	33.0193		0.285712	18.3857
5.1231	24.37	18.4625	9.2081	6.042	9.249	12.88	4.955	8.645	10.66	4.145	4.789	9.521	33.552	18.9517	10.5239	19.953	42.1334	6.8713	5.9445	35.942	34.422	27.0797	31.3111		0.292518	16.9396
5.2422	20.816	17.2533	7.972	5.258	9.831	10.726	4.739	7.791	11.023	3.674	4.5	10.146	33.341	17.316	10.5721	20.287	35.8089	5.6021	5.476	29.547	29.452	24.508	25.8486		0.299318	15.2821
5.3614	17.88	15.6711	7.8781	4.62	9.381	11.253	4.557	7.499	10.367	3.808	4.392	11.101	31.946	15.5727	11.7678	20.272	34.9483	6.2248	4.6608	23.952	27.696	20.7747	24.3809		0.306124	14.3741
5.4805	18.391	14.3472	6.5484	5.342	9.886	10.114	5.145	6.31	8.96	3.524	6.208	9.691	31.453	15.6583	11.1713	21.16	32.3404	6.2013	4.3129	17.328	22.417	22.3636	19.5149		0.312925	13.4081
5.5996	18.344	14.8123	5.8329	4.92	10.423	10.282	4.444	5.009	10.288	2.595	5.44	10.875	32.68	15.8985	11.1379	24.648	28.22	5.9596	3.9237	14.421	17.139	21.2914	17.1798		0.319725	12.8593
5.7188	14.579	14.0585	5.7607	4.839	9.741	8.513	4.442	4.592	10.182	2.603	3.964	10.261	30.003	14.5447	12.4672	25.369	26.1564	6.0968	3.4089	11.38	13.394	19.2386	14.3084		0.326531	11.7349
5.8379	15.062	11.0873	5.3676	5.555	8.621	8.224	3.996	5.117	8.321	2.835	3.725	10.882	29.773	14.1501	11.7282	24.131	21.0075	7.1841	3.6063	9.337	11.747	17.153	12.622		0.333331	10.9231
5.9571	15.373	9.6932	5.5601	5.339	8.609	7.527	3.576	4.302	9.699	2.93	4.054	9.991	29.081	14.59	11.4487	20.734	17.0946	5.9508	3.2084	7.919	10.269	17.6712	11.7353		0.340137	10.2763
6.0762	14.139	8.4037	4.7768	5.467	7.776	7.245	3.149	4.992	8.638	2.362	4.358	9.385	27.67	14.4514	10.4431	17.84	14.5798	6.273	2.7389	6.928	9.435	17.6606	10.9448		0.346938	9.55027
6.1953	12.554	8.2276	4.7444	5.976	7.381	5.759	3.207	4.985	10.211	3.151	3.779	9.65	26.966	13.9391	8.88	14.836	12.0296	7.7416	2.0614	5.714	8.296	17.7717	9.2309		0.353738	9.00397
6.3145	11.666	8.1572	5.12	5.044	5.187	5.098	3.489	3.639	9.144	2.531	3.762	9.556	27.309	13.7555	8.9388	14.408	9.8933	6.058	2.7565	4.673	6.904	15.7302	8.3669		0.360544	8.31245
6.4336	11.868	6.484	6.2565	4.768	5.33	5.728	3.148	3.381	8.977	2.448	4.668	8.933	24.403	12.4721	8.2687	13.064	9.1424	6.0246	2.7852	3.791	6.382	14.7823	7.4212		0.367345	7.84896
6.5528	13.091	6.5982	5.54	4.613	5.53	4.838	2.824	3.755	9.46	2.535	4.986	9.305	25.236	12.2219	8.0018	10.313	8.9705	7.0309	2.3272	4.202	6.501	13.3577	7.6296		0.374151	7.77682
6.6719	13.321	5.0682	5.8967	4.115	4.797	4.791	2.64	4.062	9.077	2.69	3.858	9.943	23.894	9.9611	7.7718	10.955	8.8617	6.6303	2.4511	3.954	5.91	12.0447	5.9998		0.380951	7.33445
6.7911	10.974	5.5428	5.0953	3.197	5.225	4.215	2.454	3.813	8.61	2.286	4.292	9.71	24.55	10.0004	8.153	8.732	9.4495	5.9753	2.2056	3.991	5.461	10.6861	6.4175		0.387757	7.00154
6.9102	10.951	4.9723	4.3912	3.133	5.278	4.199	3.031	3.355	7.364	2.705	4.319	8.501	25.167	11.2227	7.8933	8.633	9.854	7.0286	2.4475	3.303	4.28	9.8227	6.458		0.394557	6.88301
7.0293	10.203	4.1685	4.1689	3.005	6.136	4.769	2.937	3.86	8.017	2.964	4.036	7.847	24.24	10.3026	8.1242	7.861	10.0691	7.4236	2.8621	2.863	4.889	9.1646	5.8907		0.401358	6.77397
7.1485	9.585	4.1937	3.8327	3.415	6.841	4.073	2.627	3.666	7.602	2.946	3.972	8.514	24.51	9.1897	6.999	8.166	11.2381	6.2534	2.7436	2.773	4.805	9.2688	5.1531		0.408164	6.62466
7.2676	10.77	4.007	3.5666	3.469	6.419	4.069	2.508	3.064	8.007	2.56	4.081	8.764	24.819	9.7462	6.8188	9.242	11.687	6.409	2.7098	2.843	3.7	8.8615	5.6914		0.414964	6.68749
7.3868	10.467	3.9462	3.7934	3.262	5.708	4.067	2.601	3.424	7.695	2.547	3.68	10.061	23.252	9.2737	8.3313	7.684	11.8261	7.2399	2.9009	2.717	4.099	8.4503	4.5568		0.42177	6.59055
7.5059	9.573	3.1592	2.933	3.088	7.31	4.889	2.34	3.759	8.514	3.102	3.69	9.924	23.541	9.2414	7.8379	8.703	12.6931	7.2133	2.6734	2.859	3.467	7.5954	4.6437		0.428571	6.64128
7.625	8.136	3.3353	2.7779	3.28	8.21	4.009	2.412	3.748	8.213	2.682	3.846	9.766	22.025	8.6479	7.2085	7.365	13.0622	6.6916	2.1972	2.782	2.978	7.6153	5.4309		0.435371	6.36603
7.7442	7.646	3.2578	2.9032	3.213	6.868	4.184	2.174	4.717	7.629	3.645	4.633	10.239	23.397	8.544	6.6952	7.047	11.8543	5.6849	2.719	2.742	3.756	8.0509	5.3136		0.442177	6.38752
7.8633	8.432	3.3758	2.4804	3.132	7.016	3.761	2.82	4.076	7.787	2.444	4.905	9.689	23.85	8.4827	5.9194	7.061	10.5751	6.7364	3.1976	2.434	3.584	7.5878	5.8847		0.448977	6.31439
7.9825	7.98	3.5442	2.7697	2.855	6.98	3.743	2.494	3.843	7.821	2.336	5.158	9.087	23.216	8.5122	6.0268	6.994	11.3426	6.2307	3.0193	2.511	2.874	9.1318	5.4929		0.455783	6.25923
8.1016	8.39	4.2358	2.801	1.898	8.144	3.798	2.658	4.093	6.954	2.989	4.206	10.216	23.328	9.4544	6.5115	6.385	9.0171	7.2751	3.304	2.478	3.341	9.6371	5.3002		0.462584	6.36583
8.2207	7.604	2.9965	2.7925	2.882	6.852	3.457	3.092	3.758	7.563	2.946	3.822	8.959	25.461	7.097	6.1103	6.842	9.5089	7.5256	2.3775	2.643	3.028	9.6059	5.608		0.469384	6.19701
8.3399	7.222	3.6	2.5387	3.019	6.962	3.277	2.585	4.722	6.819	3.548	3.708	9.985	23.964	6.7074	5.211	6.791	9.4737	6.9043	2.4356	2.184	2.389	10.4289	6.564		0.47619	6.13211
8.459	6.313	3.7469	3.1019	2.31	7.211	3.228	2.906	3.728	7.646	2.953	5.47	9.477	25.603	7.2533	5.5876	7.831	9.9874	6.6392	2.2898	2.221	2.298	10.8956	7.0241		0.482991	6.33569
8.5782	6.52	3.174	3.3499	2.883	7.517	3.391	3.302	4.055	7.129	3.423	4.725	10.97	25.554	7.2663	5.3331	8.369	8.8964	6.9619	2.784	3.096	2.264	10.6757	6.3364		0.489797	6.43373
8.6973	5.487	3.7177	2.7921	2.934	8.315	3.082	3.496	4.42	7.778	3.246	3.861	13.806	27.797	7.099	6.0798	8.123	9.0127	7.003	2.3435	2.74	2.501	10.6218	6.9005		0.496597	6.65896
8.8165	5.215	4.236	2.619	3.037	9.27	3.515	2.817	4.327	6.735	2.975	4.363	14.541	29.115	7.2527	5.1512	8.528	8.6581	6.4837	2.8119	2.515	2.903	10.1888	7.7199		0.503403	6.73814
8.9356	5.455	3.8979	2.8046	3.344	8.348	3.019	2.437	4.788	6.673	2.694	4.697	18.883	31.137	6.9899	4.3452	8.818	8.3495	6.8915	2.871	2.418	3.159	9.9796	7.5698		0.510203	6.93778
9.0547	5.654	3.613	2.9526	2.871	8.112	3.59	2.903	4.806	7.147	2.212	4.534	21.309	30.67	7.1881	3.9656	6.764	8.5693	7.7357	3.2045	2.156	2.653	10.5008	7.0848		0.517004	6.96502
9.1739	5.281	3.3357	3.1291	2.741	7.217	3.464	2.666	4.868	6.134	3.225	4.613	24.775	30.945	7.0973	4.7574	5.787	9.238	7.0769	2.6142	1.791	2.414	9.8728	8.6911		0.52381	7.03189
9.293	5.305	2.8267	2.9876	2.393	8.129	3.512	3.438	5.719	6.585	3.095	4.805	30.14	33.046	6.6714	4.159	4.045	8.9899	8.4261	2.6881	2.182	3.014	10.6558	11.1304		0.53061	7.56274
9.4122	4.988	2.7457	3.2562	3.081	7.961	3.598	3.348	6.168	7.575	2.565	5.136	34.17	33.743	7.2401	4.1463	3.624	10.2446	8.1917	2.9912	2.53	2.269	10.8412	12.0427		0.537416	7.93286
9.5313	5.479	3.3604	3.4691	2.411	8.177	3.448	3.669	5.483	7.707	3.291	4.647	35.353	34.523	6.1901	3.6503	3.276	8.4727	8.1046	2.7875	2.53	2.728	9.9276	13.9148		0.544217	7.93909
9.6504	5.263	3.0715	3.7675	2.638	7.874	3.372	3.738	6.082	8.756	3.214	6.48	34.544	30.834	5.2306	3.9617	3.163	8.392	7.3778	3.466	2.159	2.61	10.3412	14.3855		0.551017	7.85743
9.7696	5.546	2.7908	3.3767	2.601	7.94	3.431	3.06	7.329	9.734	3.059	6.836	32.518	30.862	5.1999	3.8487	3.264	6.4461	8.2453	3.0346	2.363	2.799	9.8104	16.3673		0.557823	7.84617
9.8887	5.148	2.8639	3.2942	2.77	8.818	4.349	4.166	7.97	9.932	2.991	6.933	33.198	30.156	7.0136	4.3495	3.38	4.0927	6.3789	3.9436	2.049	2.276	10.0204	16.3744		0.564623	7.93336
10.0079	4.819	2.8737	4.0919	2.59	9.626	3.772	4.348	8.53	9.691	3.324	7.322	39.558	29.024	6.3958	4.0545	4.486	2.8872	7.7832	4.0057	2.247	2.754	9.7638	16.2283		0.571429	8.26848
10.127	4.432	2.4595	3.5632	3.347	10.881	3.98	4.398	9.611	9.686	3.43	6.372	42.349	27.862	5.6479	4.1919	3.194	2.7977	7.5634	4.3245	2.506	2.748	9.9826	17.6739		0.57823	8.39133
10.2462	4.171	3.184	3.9603	3.809	11.3	4.12	4.03	11.069	8.993	3.092	7.412	49.103	26.877	5.5818	4.5632	3.345	3.3677	7.2792	3.8759	2.687	2.855	10.043	17.4038		0.585036	8.78791
10.3653	3.307	2.718	3.8613	3.11	11.277	4.162	4.291	11.182	9.037	2.585	8.169	48.704	27.639	5.8922	4.7697	4.557	3.9148	7.4074	4.6994	2.876	2.227	9.5266	18.0059		0.591836	8.86601
10.4844	2.851	2.9376	3.9704	3	13.173	3.687	4.074	13.944	8.714	2.965	8.178	47.464	28.7	6.1793	4.4598	4.911	3.5937	7.4228	5.8008	3.157	3.021	9.0577	18.0981		0.598637	9.10257
10.6036	3	3.1783	4.335	3.402	13.093	3.667	4.867	16.382	6.725	3.613	8.994	41.247	33.313	6.0574	4.9337	4.904	3.9414	7.305	5.5481	2.548	2.889	9.7261	21.0774		0.605443	9.3368
10.7227	3.657	3.2131	4.1533	4.401	13.744	3.455	4.52	18.801	6.75	3.889	10.104	38.099	34.037	5.9792	4.7693	5.049	3.6761	7.9109	5.9323	2.994	2.848	10.3778	22.5322		0.612243	9.60401
10.8419	2.88	3.5361	4.788	4.622	15.463	4.165	5.013	21.494	5.34	3.613	9.11	30.177	35.875	5.8208	4.5148	5.159	3.6169	7.6555	6.062	3.139	3.304	10.718	25.313		0.619049	9.62518
10.961	3.059	3.5891	5.2939	5.372	18.317	3.807	5.02	23.755	4.861	3.711	9.588	24.467	35.926	5.4456	4.7289	4.919	3.6934	8.5501	6.3905	2.634	3.057	8.8305	24.9198		0.625849	9.56238
11.0801	2.646	4.7335	4.8701	5.472	20.477	3.54	4.837	27.369	4.791	3.433	9.752	23.16	37.345	5.7443	5.3084	5.082	4.651	7.5596	6.5873	2.728	3.317	8.7674	24.2622		0.63265	9.8449
11.1993	2.901	3.4435	4.8756	5.15	24.841	3.879	4.864	26.337	4.686	2.704	8.485	20.996	36.377	5.2238	5.1107	5.094	4.8817	8.0222	8.8821	2.826	3.528	9.909	26.4634		0.639456	9.97739
11.3184	3.319	4.4	4.6839	6.267	25.997	4.432	4.648	26.705	4.548	2.677	10.492	20.397	34.335	4.7952	5.9591	5.795	3.9635	9.1073	9.9925	3.084	2.053	8.0648	26.2051		0.646256	10.0835
11.4376	3.664	4.65	4.3424	5.956	26.526	4.427	5.167	28.94	3.88	3.173	9.968	20.411	31.654	4.8401	5.3364	5.58	4.4492	11.5859	10.311	3.354	2.321	8.0537	24.6015		0.653062	10.1387
11.5567	3.738	4.3849	4.0196	5.921	25.873	4.15	5.612	30.233	3.187	3.003	10.079	19.603	28.597	5.1316	5.8784	4.738	5.3196	12.2831	11.1652	2.551	2.589	9.1843	26.4773		0.659863	10.1617
11.6758	3.287	5.1975	4.7766	5.79	22.992	3.559	5.173	29.511	3.699	2.9	10.011	21.319	27.871	5.9042	6.5216	4.841	5.5405	11.2586	13.7631	2.744	2.88	7.5437	27.2046		0.666663	10.1864
11.795	3.319	5.1479	4.7641	6.834	21.808	4.032	5.622	27.014	3.691	2.34	9.442	20.512	23.406	5.7918	5.587	5.071	5.2022	9.3881	14.0289	3.445	2.943	7.4561	30.748		0.673469	9.89535
11.9141	3.342	5.8272	5.0961	6.455	18.889	3.817	5.422	28.191	3.441	2.848	7.905	21.605	23.12	5.3788	5.5821	6.147	6.9964	9.8086	13.4248	2.515	2.523	7.579	32.5071		0.680269	9.93131
12.0333	3.772	6.133	5.8157	6.356	17.229	3.949	5.717	30.762	3.325	2.655	5.779	22.036	23.826	5.6571	5.4149	5.294	8.043	10.6433	14.6559	2.693	2.433	8.4179	34.5302		0.687075	10.2233
12.1524	4.427	6.4631	5.3927	5.237	18.354	4.425	6.289	25.884	3.63	2.587	7.653	20.254	23.174	5.8072	5.274	5.548	9.2003	10.261	15.0472	2.555	1.966	7.6604	37.9713		0.693876	10.22
12.2716	4.55	6.2491	5.5498	5.428	16.404	4.78	6.624	25.417	3.801	3.012	7.246	21.072	23.71	6.0056	5.3569	6.064	10.3466	11.0083	14.9096	2.072	2.12	7.0659	38.9038		0.700682	10.3346
12.3907	4.829	4.9955	5.5997	5.318	16.245	4.321	6.824	24.365	3.066	3.35	7.157	20.926	24.847	6.799	5.4729	6.302	12.2782	12.6654	15.3861	2.78	2.528	6.298	44.7902		0.707482	10.7453
12.5098	4.358	5.8329	4.8976	5.351	12.998	4.589	6.515	24.864	3.266	2.409	7.237	22.066	26.748	8.8268	7.1895	6.496	12.7247	12.8693	13.1214	2.821	2.844	5.2775	43.7576		0.714282	10.7417
12.629	5.447	5.4164	3.9109	5.362	14.472	4.11	5.749	21.249	3.553	2.664	6.784	21.92	26.145	9.7319	6.2257	6.364	13.5516	11.7263	11.51	2.888	2.613	5.7155	40.9773		0.721089	10.3515
12.7481	5.215	5.6239	4.4557	5.867	13.563	4.3	5.942	22.966	2.899	2.528	7.385	24.603	28.981	10.3689	6.7758	5.875	15.6088	12.7276	11.469	2.363	2.234	5.8821	41.2999		0.727889	10.8232
12.8673	4.878	4.548	4.2266	6.798	10.789	4.343	5.981	21.651	2.867	2.676	6.866	22.436	32.164	10.6957	7.9191	5.909	16.3775	12.8305	11.8318	3.797	2.362	5.553	42.0474		0.734695	10.8499
12.9864	5.385	3.9225	4.74	7.361	10.091	4.238	6.303	19.78	2.682	2.305	5.751	23.546	34.479	12.1744	7.0562	7.373	14.7508	13.6753	12.0002	2.97	2.927	4.6902	40.9677		0.741495	10.8334
13.1055	5.024	3.8117	4.4562	7.728	8.949	4.434	6.892	18.383	2.481	2.427	5.865	23.434	32.79	13.71	7.54	7.244	16.3811	14.0769	12.0247	2.984	2.414	4.3241	43.4647		0.748296	10.906
13.2247	5.193	3.9634	5.145	6.86	7.534	4.905	6.635	18.072	2.908	2.584	5.51	24.989	27.692	15.1807	8.262	7.756	16.2894	14.0105	13.4804	3.102	2.491	4.402	43.5076		0.755102	10.8901
13.3438	5.656	4.0095	5.3147	7.509	7.234	4.679	6.276	18.031	2.728	2.194	5.086	23.245	23.733	16.3137	8.2521	8.443	15.7645	15.7753	12.525	2.772	2.547	4.2715	43.7128		0.761902	10.6988
13.463	6.103	4.0234	5.4157	8.189	5.937	4.7	4.602	17.637	2.754	2.915	5.126	25.129	21.354	18.3918	8.7154	8.173	13.959	16.8734	12.3485	2.91	2.522	4.1292	45.0636		0.768708	10.7379
13.5821	5.177	4.1967	5.6702	10.057	6.14	5.829	5.612	18.044	3.128	2.07	4.63	24.471	21.04	16.7756	9.711	8.591	14.7406	16.8485	13.5296	2.699	2.302	4.311	42.3553		0.775508	10.7795
13.7012	5.736	3.8476	5.5958	6.827	7.044	4.265	5.023	17.21	2.716	2.659	4.474	24.673	19.676	19.8232	9.2826	9.847	12.6421	18.9226	14.3708	3.341	2.233	3.2803	38.6802		0.782309	10.5291
13.8204	6.787	4.1716	4.8989	7.019	7.074	4.571	5.263	18.895	2.907	2.109	4.516	24.791	18.12	18.5322	8.7272	9.971	12.9158	20.3909	14.2645	3.225	2.139	3.0401	34.8559		0.789115	10.3993
13.9395	7.196	4.7994	4.7741	7.182	6.033	4.666	5.352	20.475	2.939	1.932	3.897	25.786	15.925	18.8929	9.3728	10.684	13.7736	21.961	16.0913	3.007	2.051	3.3621	33.2532		0.795915	10.5828
14.0587	6.92	4.7952	5.4456	7.195	6.249	4.583	5.345	18.456	3.211	2.375	3.868	24.548	16.56	21.4363	10.0868	10.451	12.6861	21.1452	15.0639	2.957	2.467	3.646	31.6638		0.802721	10.485
14.1778	7.186	5.6902	4.8899	6.9	5.973	4.638	5.37	16.467	3.019	2.647	4.212	25.442	17.746	21.5357	9.1884	11.134	11.7305	21.1391	15.6334	3.837	2.613	3.753	27.6332		0.809522	10.3642
14.297	6.361	4.7266	6.2142	7.501	5.755	4.524	5.312	15.142	3.216	2.807	4.192	21.842	18.267	22.0996	9.5342	10.987	11.4903	21.9059	15.476	3.165	1.924	3.4379	25.8521		0.816328	10.0753
14.4161	5.394	4.689	6.008	8.119	6.186	5.136	5.455	14.482	2.364	3.148	3.457	19.895	15.705	23.4536	9.7706	11.765	11.8164	20.9443	16.4894	2.674	2.104	3.3249	26.3415		0.823128	9.94442
14.5352	6.171	4.6235	5.3454	7.491	5.227	4.599	4.691	15.548	2.62	3.228	4.212	18.375	17.608	24.4343	8.1903	10.933	12.0202	19.0461	19.8427	3.317	1.69	3.8962	28.6092		0.829928	10.0747
14.6544	5.898	3.7692	5.7485	7.742	4.647	5.047	5.434	16.071	2.837	2.721	4.097	18.563	15.017	24.7569	9.2533	10.212	10.1108	19.8477	18.6411	2.949	2.057	3.351	30.7325		0.836734	9.97839
14.7735	5.753	4.2727	6.0238	6.93	4.355	4.458	5.491	16.132	2.535	2.428	4.057	19.131	14.845	24.402	9.3823	10.293	10.5245	21.1373	21.0212	2.879	2.553	3.7581	33.4826		0.843535	10.2541
14.8927	4.353	4.3929	6.3635	9.386	4.975	3.916	4.867	15.206	2.662	2.191	3.685	20.801	13.384	22.6611	10.5516	10.961	10.7873	20.9563	20.2851	3.323	2.174	3.8793	33.0348		0.850341	10.2085
15.0118	4.22	4.3167	6.1265	10.17	3.854	3.93	4.717	16.548	2.584	2.209	3.798	20.936	12.62	22.0447	10.0235	10.788	10.9848	20.1131	20.1577	2.714	1.934	3.2069	32.8083		0.857141	10.035
15.1309	3.851	4.4057	6.4406	10.601	4.186	3.58	5.358	14.634	2.536	2.457	3.865	21.629	10.658	22.1833	9.3333	10.104	12.7493	20.0073	20.0815	3.327	2.262	3.0543	33.5242		0.863942	10.036
15.2501	4.741	3.6504	7.8753	12.87	4.209	3.605	4.731	14.796	2.55	2.451	3.51	22.895	10.699	23.5175	10.5269	11.599	11.5889	20.3772	18.2055	3.665	2.361	3.5035	33.4878		0.870748	10.3224
15.3692	3.873	3.8105	9.2683	12.93	4.06	2.307	5.184	14.911	2.306	2.686	4.194	22.267	9.68	22.465	9.2892	11.936	10.8178	20.5845	16.454	4.116	2.198	3.24	33.8284		0.877548	10.1046
15.4884	3.743	3.575	8.5088	14.415	4.763	2.36	6.313	14.502	2.308	3.125	4.164	24.346	9.666	23.5897	8.305	10.782	11.7521	23.418	15.0424	3.332	2.048	1.9379	33.2257		0.884354	10.227
15.6075	3.651	4.5709	9.5361	14.152	3.734	2.786	5.54	13.455	1.998	3.134	4.116	27.559	9.901	23.1479	8.9455	9.507	11.3636	22.8644	14.0588	2.938	1.955	2.7022	33.3059		0.891154	10.214
15.7266	3.473	4.6437	11.8359	12.643	4.181	2.905	6.201	14.575	2.393	2.397	4.007	26.606	9.629	23.3155	9.5762	11.123	11.9421	24.0769	12.6193	3.273	1.936	3.1118	31.8845		0.897955	10.363
15.8458	3.79	5.6366	13.399	12.27	4.079	2.293	6.533	13.618	2.609	2.93	3.414	24.767	9.155	22.1743	10.1733	11.106	12.3661	26.3437	12.3234	2.83	1.919	3.2456	29.5527		0.904761	10.2838
15.9649	3.981	6.3799	15.0968	11.078	3.251	2.352	6.68	14.038	2.614	3.162	4.402	23.351	9.461	24.3281	8.5083	11.302	13.4623	26.0355	14.0923	3.081	2.356	3.2672	27.9544		0.911561	10.4449
16.0841	5.232	7.3889	13.7971	10.301	3.479	2.537	6.597	13.33	2.493	3.512	4.064	24.399	8.311	25.9518	9.2947	11.112	13.0245	28.4348	13.4068	2.77	2.247	2.5228	26.5438		0.918367	10.4674
16.2032	4.846	7.7917	15.6768	10.059	3.731	3.077	8.515	13.151	2.406	3.713	4.439	22.707	9.325	25.8441	8.1348	11.944	13.1187	28.2592	14.2104	3.031	2.04	2.8546	25.321		0.925168	10.6172
16.3224	5.219	8.9359	15.1335	8.355	3.532	2.989	8.071	12.276	2.91	2.834	3.575	21.591	8.35	26.0216	8.5863	10.685	12.3607	30.4492	16.1427	3.392	1.999	2.7874	24.7451		0.931974	10.4757
16.4415	4.375	9.9334	14.0362	7.727	3.531	3.299	8.974	12.486	3.416	2.903	3.985	21.841	8.588	26.7185	11.1303	12.929	12.9835	33.8757	16.0008	3.321	2.135	2.4383	21.1915		0.938774	10.7747
16.5606	5.092	9.0036	10.0648	6.377	3.125	3.961	8.237	14.24	2.887	3.08	3.793	21.465	7.044	29.4631	10.7452	12.079	13.2718	33.3295	16.3295	3.279	2.056	2.7214	18.7336		0.945574	10.4512
16.6798	4.394	9.6729	8.713	6.569	3.669	3.986	8.67	14.755	2.675	3.452	3.612	22.796	6.929	31.4346	12.4556	12.079	14.7131	34.8261	15.5165	2.964	2.241	2.6947	18.7999		0.95238	10.766
16.7989	5.327	9.9495	7.8774	6.72	3.853	3.798	7.662	14.208	2.745	4.485	3.541	22.148	6.616	30.5652	13.305	13.213	16.0882	33.6421	17.0269	3.19	2.232	2.8974	17.9488		0.959181	10.8278
16.9181	5.069	10.3142	6.4308	6.776	4.556	4.74	8.931	14.178	3.353	3.765	3.345	21.324	6.287	29.2028	15.9184	12.111	14.0879	31.4566	14.5209	3.119	2.009	2.5171	17.3484		0.965987	10.4939
17.0372	4.741	9.75	6.3421	6.426	4.074	3.851	9.885	15.287	2.515	5.08	4.067	20.45	6.271	29.5684	18.2458	13.29	15.1515	33.101	11.9199	2.526	1.985	2.5156	17.0024		0.972787	10.6106
17.1563	3.968	8.8985	5.615	6.266	5.188	4.145	11.543	15.673	2.838	4.339	5.106	19.756	8.117	27.1741	23.9436	12.851	13.4938	32.0937	10.8939	2.614	1.715	2.3375	17.1846		0.979588	10.6849
17.2755	4.257	8.3891	5.6874	6.975	5.495	4.232	11.034	14.99	2.632	4.925	4.58	21.381	6.825	28.1994	28.0715	13.589	12.7952	31.3157	9.3278	3.525	1.474	2.4419	14.8906		0.986394	10.7405
17.3946	4.867	6.9787	5.8611	5.846	5.992	6.036	13.637	14.523	2.702	6.552	5.012	20.32	6.035	27.6342	34.0537	13.732	14.8464	33.0336	7.8364	3.321	2.13	2.402	16.2856		0.993194	11.2886
17.5138	3.897	6.2629	5.2089	6.637	6.49	6.426	15.46	14.828	3.148	7.69	4.524	19.622	7.569	27.658	37.4865	14.034	13.0804	34.0803	6.5864	2.427	1.846	2.4586	17.7427		1	11.5288

## Sheet: Image6 (2)
X0	Y0	Y1	Y2	Y3	Y4	Y5	Y6	Y7	Y8	Y9	Y10	Y11	Y12	Y13	Y14	Y15	Y16	Y17	Y18	Y19	Y20	Y21	Y22	Y23	Y24	Y25	Y26	Y27	Y28	Y29	Y30	Y31		Ap-basal	Avg int
0	193.887	182.838	101.11	99.867	73.161	97.103	106.03	89.819	102.073	101.574	101.915	78.944	29.711	48.91	34.217	31.066	57.873	39.361	22.7	24.725	19.81	18.667	13.468	19.314	24.551	29.111	36.88	35.903	51.245	37.066	38.367	55.557		0	62.4007
0.1191	221.064	195.008	103.127	102.439	79.048	105.175	103.671	92.195	111.458	109.459	104.298	89.235	33.018	53.719	32.898	34.285	72.101	37.904	24.299	26.041	21.074	22.449	13.155	22.845	25.634	35.859	37.982	48.071	55.987	40.854	46.684	61.173		0.00448476	67.569
0.2382	234.817	221.433	106.184	102.2	78.341	108.519	110.425	95.899	123.836	108.138	108.551	103.242	33.289	59.013	40.176	37.976	85.961	47.773	23.843	32.423	24.893	26.249	18.673	26.15	26.154	43.09	43.586	51.594	59.116	42.518	48.5	64.815		0.00896952	73.043
0.3573	242.492	225.399	108.967	105.512	84.425	106.983	121.391	97.055	128.012	110.069	111.08	117.808	35.512	70.366	38.479	43.901	103.896	54.176	25.755	35.193	25.912	26.402	19.523	29.778	33.156	44.594	44.746	59.635	67.592	50.849	56.105	68.498		0.0134543	77.9144
0.4764	249.845	243.612	116.822	109.028	94.037	112.956	139.449	107.449	138.931	113.484	116.19	131.601	42.22	74.029	47.167	51.906	115.351	55.802	28.224	42.68	27.855	36.873	21.102	36.38	37.588	49.654	53.579	68.7	78.131	60.367	62.455	82.675		0.017939	85.8169
0.5954	254.193	245.464	132.629	114.671	95.308	110.864	153.381	108.119	147.9	126.045	121.383	145.257	49.463	81.555	46.972	59.778	124.839	66.088	32.344	49.628	30.677	40.339	26.485	50.163	55.987	55.647	58.467	85.962	88.607	73.395	75.225	102.708		0.02242	94.0482
0.7145	254.833	251.763	146.658	122.01	109.488	106.929	163.196	122.212	159.096	125.815	125.478	146.953	60.148	85.011	52.338	74.92	131.865	72.585	34.74	51.253	35.552	61.134	34.794	53.451	57.719	66.225	65.385	97.161	106.615	85.919	87.334	124.365		0.0269048	102.28
0.8336	254.003	253.217	151.661	129.712	115.803	107.185	168.564	126.705	173.884	121.678	137.154	153.083	65.472	92.005	62.891	78.708	145.066	75.346	41.378	64.535	42.629	80.689	44.612	63.364	76.984	74.461	69.314	108.543	118.465	104.705	101.092	138.438		0.0313896	110.667
0.9527	254.75	253.343	170.429	143.172	129.177	105.926	179.433	128.989	177.258	129.231	146.961	155.478	72.408	97.418	66.248	93.851	162.521	84.9	59.308	63.974	50.574	114.206	52.322	68.299	76.429	80.498	73.062	128.545	135.783	134.394	122.142	162.695		0.0358743	121.054
1.0718	253.256	253.478	183.043	151.682	135.885	104.973	187.298	139.727	184.519	132.56	165.603	159.58	84.518	104.823	75.447	105.008	172.94	97.742	66.956	70.393	61.353	159.191	67.364	76.085	78.841	93.386	79.279	137.23	151.265	159.517	142.846	173.96		0.0403591	131.555
1.1909	253.263	249.971	194.903	163.605	145.032	115.124	200.554	157.91	179.303	131.432	176.732	156.444	94.932	115.674	79.237	118.983	177.846	111.382	76.503	86.546	78.821	194.481	79.099	77.3	81.676	102.373	81.921	148.331	167.28	185.147	163.714	199.878		0.0448438	142.044
1.31	253.545	248.736	196.208	172.275	139.786	110.639	199.323	174.845	184.711	131.561	184.615	158.844	102.609	122.927	87.408	139.382	187.51	116.908	91.058	98.57	91.655	211.865	89.556	86.346	88.242	110.472	95.204	148.314	186.266	206.359	174.105	217.204		0.0493286	150.22
1.4291	252.033	238.029	183.894	169.029	128.52	112.387	197.509	187.102	187.515	135.077	204.277	160.761	107.811	121.838	100.438	159.224	204.801	132.567	103.235	110.489	122.905	227.722	99.473	94.851	90.71	126.528	99.5	149.29	191.933	227.517	190.471	226.57		0.0538134	157.625
1.5481	250.14	238.635	161.648	164.396	112.071	117.246	205.246	191.518	194.933	143.576	211.401	162.867	120.208	120.938	106.634	170.547	217.852	147.5	123.716	131.422	165.285	241.133	119.554	97.92	98.012	141.182	111.6	148.011	202.419	231.306	203.375	222.937		0.0582944	164.851
1.6672	249.099	228.158	147.881	151.183	93.188	116.862	199.712	198.23	201.149	143.503	220.402	167.434	132.1	128.714	110.512	188.464	231.071	166.277	128.744	153.746	192.565	247.907	138.073	103.585	99.22	146.449	114.827	154.254	210.884	237.036	210.252	234.123		0.0627791	170.175
1.7863	246.798	234.68	128.739	131.159	81.575	125.342	193.892	217.104	206.041	158.672	226.032	161.973	143.525	134.795	111.352	201.833	236.167	176.714	141.512	165.59	223.594	249.636	152.24	108.819	113.814	153.345	131.348	154.447	224.245	242.513	217.662	240.977		0.0672639	176.129
1.9054	250.904	238.926	111.235	114.202	67.442	123.109	199.172	223.076	212.337	178.22	228.607	160.539	141.311	143.783	119.782	203.605	244.945	183.283	154.661	188.161	234.933	248.803	165.582	119.067	122.038	154.5	137.33	166.316	233.833	246.252	222.154	239.375		0.0717486	180.546
2.0245	250.617	241.472	96	98.593	50.848	123.831	197.823	223.235	228.055	192.266	240.112	169.07	154.878	143.004	127.278	210.25	245.727	200.083	158.901	199.631	242.516	249.509	184.273	130.391	125.481	158.744	140.211	173.653	239.624	252.303	225.37	243.268		0.0762334	184.907
2.1436	253.404	246.447	88.447	85.836	49.332	125.607	205.5	225.142	231.244	207.855	240.517	169.652	157.628	152.749	136.36	210.357	244.411	202.821	170.418	209.107	240.372	240.232	192.634	144.369	142.28	155.758	152.842	173.937	243.915	249.783	231.479	240.572		0.0807182	188.156
2.2627	253.6	248.917	78.798	76.75	43.517	124.941	197.128	227.608	239.935	220.265	243.863	175.237	167.771	149.671	128.657	206.098	246.507	215.112	182.734	212.866	246.668	234.403	197.337	153.272	149.264	160.403	160.736	176.711	250.756	246.997	232.859	243.559		0.0852029	190.404
2.3818	254.154	248.513	71.918	68.281	38.328	119.273	205.554	231.788	241.421	224.102	246.497	181.483	156.039	155.651	140.617	208.547	249.157	213.939	189.897	215.061	237.707	222.661	207.013	160.254	155.902	153.459	166.099	184.559	249.912	250.373	238.401	240.622		0.0896877	191.474
2.5008	254.386	245.916	65.227	61.349	32.694	128.153	200.767	227.184	244.996	232.831	245.948	191.172	149.801	147.637	140.67	215.182	248.124	219.58	200.037	212.889	234.769	217.148	210.408	170.041	161.547	162.988	156.934	181.934	252.085	240.952	232.451	224.423		0.0941687	190.944
2.6199	253.28	245.916	62.132	56.704	31.836	127.466	213.769	235.734	247.692	235.713	248.55	194.653	151.744	147.798	151.921	200.563	241.069	217.704	195.624	211.949	217.228	202.388	208.557	166.767	166.762	147.174	153.605	201.256	251.788	231.176	209.383	202.615		0.0986534	188.454
2.739	252.377	231.792	56.804	55.196	29.604	140.781	206.492	234.789	244.067	245.378	248.047	209.717	149.382	147.559	163.812	193.235	233.887	206.949	200.52	198.444	213.448	193.213	199.182	161.816	163.774	133.928	141.624	211.83	247.585	214.176	171.401	172.109		0.103138	183.529
2.8581	247.807	198.428	56.991	54.139	27.524	157.927	204.293	228.295	248.879	246.67	245.625	214.511	140.717	155.375	155.075	192.372	225.958	208.505	204.282	188.017	191.507	171.9	188.294	153.988	160.979	114.116	131.82	227.746	242.099	212.04	124.527	149.024		0.107623	177.17
2.9772	213.785	155.912	55.102	48.951	24.514	168.568	219.726	223.28	248.342	248.691	242.843	222.186	137.102	152.307	168.073	173.947	213.288	203.922	206.333	185.506	175.186	156.651	173.357	137.843	154.368	93.827	119.281	220.744	241.909	202.673	88.427	130.668		0.112108	168.978
3.0963	170.456	120.339	49.266	42.047	24.865	172.607	215.793	230.127	241.136	249.897	249.116	224.094	133.955	149.193	174.657	159.13	200.53	197.695	192.005	160.9	159.882	134.783	167.516	123.526	146.971	67.674	108.659	219.557	233.44	193.62	64.717	115.566		0.116592	159.179
3.2154	124.056	91.409	46.404	43.476	26.212	182.236	223.921	230.805	241.233	249.38	242.177	223.521	120.558	137.546	172.56	156.082	186.823	178.412	181.053	140.543	142.297	120.756	152.778	106.596	144.597	56.5	96.811	224.933	226.749	183.708	55.811	98.053		0.121077	150.25
3.3345	100.146	81.309	44.919	36.579	23.416	187.982	224.651	221.459	239.577	243.317	246.778	216.887	113.472	133.25	168.095	151.323	168.521	163.944	158.681	118.294	118.6	102.638	146.48	96.556	139.902	46.308	82.748	226.479	223.096	161.917	47.824	78.168		0.125562	141.041
3.4535	89.974	70.632	41.039	36.118	22.672	191.898	228.651	211.664	229.001	241.438	243.785	210.006	97.192	122.62	168.362	145.177	155.152	152.217	137.935	104.245	97.184	87.884	130.035	82.298	127.385	44.382	69.589	226.05	202.402	156.373	35.346	68.008		0.130043	132.085
3.5726	77.083	66.017	37.469	30.955	20.227	194.137	235.118	217.574	221.65	231.395	236.605	191.517	78.469	115.509	158.218	127.583	141.071	137.431	122.218	92.297	75.359	76.044	123.884	70.204	115.849	39.542	64.089	214.462	199.336	131.237	32.065	53.326		0.134528	122.748
3.6917	64.063	59.933	33.772	27.712	17.146	199.032	239.175	209.983	212.713	215.37	233.473	179.284	61.399	103.083	158.372	123.101	132.978	121.172	98.35	75.568	60.822	60.632	111.558	68.785	106.127	36.223	51.62	196.223	181.908	113.778	29.06	43.251		0.139013	113.302
3.8108	56.364	53.28	34.585	25.895	16.357	200.588	242.396	206.289	184.77	195.585	217.856	165.545	49.73	84.264	145.847	113.543	125.485	105.201	81.415	65.448	51.738	52	104.845	59.366	84.552	33.026	48.507	179.949	174.651	89.482	26.254	38.027		0.143497	103.526
3.9299	48.776	47.614	32.673	25.461	16.612	204.696	244.995	200.109	168.016	188.525	214.037	154.606	35.133	58.115	134.479	97.385	115.113	90.077	64.747	51.991	44.703	39.218	95.768	56.816	74.972	30.809	39.288	164.011	151.646	64.919	27.747	27.212		0.147982	94.0709
4.049	45.477	36.93	29.077	23.427	17.295	208.281	246.265	185.027	137.465	183.746	210.004	148.485	25.346	40.188	120.385	88.17	103.613	78.054	53.031	44.625	40.778	24.608	83.861	50.331	56.154	31.379	37.161	148.765	117.036	50.978	24.848	20.392		0.152467	84.7244
4.1681	44.984	32.528	27.018	21.589	16.191	212.777	245.635	161.199	103.649	160.364	193.991	138.448	23.167	22.122	97.547	76.669	91.474	65.486	42.09	37.715	38.067	24.712	73.251	50.774	41.531	30.633	33.624	132.952	91.99	42.179	22.504	12.154		0.156952	75.2817
4.2872	37.714	27.767	25.498	20.592	18.537	214.611	245.831	154.885	70.077	141.708	196.977	121.303	21.576	18.053	82.672	66.759	78.302	55.081	41.504	29.623	30.689	22.855	65.192	50.418	33.645	25.161	28.36	123.257	68.099	37.891	21.774	8.514		0.161436	68.2789
4.4063	35.944	29.527	25.358	19.253	16.758	216.014	243.667	145.07	48.248	127.634	194.275	108.955	16.652	15.84	66.1	60.336	72.078	48.072	33.392	25.656	27	20.361	60.27	45.179	26.273	23.739	22.579	116.915	56.453	32.953	22.527	7.083		0.165921	62.8175
4.5253	32.563	25.743	21.109	19.782	15.437	220.698	244.371	132.612	37.007	115.693	195.66	106.211	14.359	15.495	48.502	54.312	61.828	46.567	28.336	23.216	20.572	19.194	50.259	41.678	19.822	19.664	22.181	106.833	42.289	29.45	18.409	5.595		0.170402	57.9827
4.6444	27.304	21.59	20.988	16.646	16.207	220.165	246.333	120.215	30.662	98.455	199.239	94.77	14.397	12.517	34.451	48.125	54.369	36.963	20.975	20.431	15.595	16.873	44.369	41.108	17.184	17.195	17.239	91.093	34.708	26.981	16.768	5.267		0.174887	53.0994
4.7635	28.716	22.779	21.764	16.28	15.774	220.497	246.275	115.531	29.063	87.934	192.244	91.232	12.229	11.847	27.897	44.071	45.436	33.513	22.656	21.229	14.762	17.548	35.753	42.484	12.977	14.592	15.973	84.39	29.513	20.035	12.298	5.178		0.179372	50.3897
4.8826	25.154	20.262	21.222	15.115	17.925	222.592	238.764	103.814	21.544	78.748	187.204	84.373	14.351	10.792	22.265	40.209	41.262	31.678	19.182	17.71	11.927	14.627	33.987	34.932	12.782	13.613	14.448	74.331	25.911	18.869	13.622	4.684		0.183856	47.1218
5.0017	23.219	19.401	21.187	14.215	17.137	225.307	243.867	93.348	16.618	63.424	176.258	80.303	12.862	8.438	19.374	39.207	33.601	28.538	18.674	15.541	11.882	15.294	29.64	32.68	12.878	13.158	13.994	59.814	18.972	14.483	13.193	5.306		0.188341	44.1192
5.1208	20.842	17.029	19.353	12.367	16.681	224.187	243.825	74.551	17.474	48.677	174.334	69.055	12.487	7.421	15.083	33.462	28.681	26.272	15.861	14.871	10.043	13.385	25.701	31.695	11.242	10.733	13.526	46.072	15.738	10.854	11.971	4.649		0.192826	40.5663
5.2399	16.999	14.966	18.67	12.444	14.772	229.188	238.287	56.434	14.74	39.85	167.985	68.966	11.108	8.341	13.596	31.509	24.832	26.211	13.253	13.506	10.312	13.532	23.608	28.389	8.841	10.77	10.489	37.974	13.388	11.147	12.556	4.929		0.197311	38.1747
5.359	18.783	14.954	18.943	14.32	13.388	224.284	234.725	47.119	12.321	34.976	161.612	65.266	11.261	7.262	11.322	27.034	26.37	22.263	13.542	11.067	8.267	12.147	22.317	25.502	9.255	12.291	12.476	29.068	11.953	8.618	11.429	4.576		0.201795	36.2097
5.478	16.042	13.571	16.83	11.987	13.395	228.619	237.751	37.855	10.092	30.227	155.519	63.544	12.561	6.781	9.523	22.828	25.062	21.417	15.934	10.896	7.186	12.608	21.423	23.939	10.147	10.362	11.39	20.161	11.489	8.368	12.173	4.212		0.206276	34.8091
5.5971	12.684	12.28	17.917	12.784	12.661	219.303	231.645	29.367	13.173	26.885	146.434	70.18	12.236	5.289	9.933	19.533	23.504	17.606	14.507	13.272	7.85	10.373	18.099	23.924	9.4	9.186	8.955	18.342	9.288	7.849	11.644	4.924		0.210761	33.1571
5.7162	12.746	11.512	18.902	11.78	12.373	214.208	228.606	27.568	12.65	24.447	137.375	69.053	12.227	6.056	8.145	18.218	21.03	14.863	14.521	10.269	6.112	9.02	18.016	19.113	7.845	10.521	8.354	15.912	7.109	6.901	13.589	3.973		0.215246	31.6567
5.8353	10.877	11.609	16.578	12.243	13.002	213.779	226.635	21.221	10.928	17.87	131.584	67.132	12.3	5.243	7.318	16.754	16.678	13.664	14.827	11.238	5.657	9.288	17.043	16.254	9.172	8.244	8.676	14.332	6.156	8.019	12.948	3.631		0.219731	30.3406
5.9544	12.734	10.371	18.62	12.853	10.652	212.354	224.168	19.239	10.135	17.337	125.634	60.693	10.743	4.964	7.209	14.224	13.952	14.327	16.401	8.325	3.871	8.954	15.896	15.468	9.016	10.39	8.995	9.175	5.018	6.352	11.557	5.041		0.224215	29.2084
6.0735	10.428	9.666	15.052	11.571	12.09	212.188	212.341	19.458	11.201	18.278	125.141	54.891	11.162	5.558	8.021	11.143	14.186	12.697	15.998	8.875	5.628	7.638	19.591	15.777	7.335	10.413	8.203	9.097	6.269	6.954	12.671	4.997		0.2287	28.5787
6.1926	10.556	8.891	14.213	11.178	12.771	209.692	208.788	16.879	9.234	16.02	108.523	49.791	11.832	6.014	6.734	12.648	11.461	12.806	17.246	9.59	4.445	8.542	17.091	13.584	8.196	7.525	8.786	8.381	5.257	6.201	12.654	4.485		0.233185	27.1879
6.3117	12.392	8.924	16.462	12.41	11.837	202.042	195.945	15.435	9.242	15.458	94.745	43.56	12.679	4.65	6.848	10.943	12.216	11.988	15.946	8.706	4.061	7.644	18.976	12.575	6.373	7.569	6.821	6.621	4.04	5.219	13.076	4.661		0.23767	25.627
6.4307	9.861	9.839	15.299	12.038	11.608	199.183	192.993	17.165	8.866	14.154	83.274	43.118	11.216	4.635	5.271	11.666	10.191	11.202	15.37	10.85	4.574	5.235	17.105	11.405	6.168	7.609	6.584	5.559	3.655	5.192	12.219	4.195		0.242151	24.6031
6.5498	8.251	8.584	15.459	13.07	12.056	189.641	180.591	16.959	7.983	13.511	72.219	39.819	10.421	4.866	6.807	9.801	9.963	9.625	15.938	11.864	3.676	6.622	18.579	8.852	6.635	8.269	7.269	6.326	4.096	5.923	10.952	3.884		0.246635	23.391
6.6689	8.223	7.862	14.792	12.636	13.311	186.615	180.761	14.313	7.307	13.175	60.51	37.727	13.213	5.308	5.316	8.688	9.376	11.234	17.528	12.551	3.76	4.574	18.612	7.3	6.783	6.45	7.106	7.836	4.622	6.041	13.902	5.347		0.25112	22.8993
6.788	7.574	8.078	14.221	13.422	10.916	183.789	172.378	13.822	7.709	12.24	49.351	30.015	11.702	5.375	5.788	7.46	9.324	11.373	17.631	10.696	3.75	4.533	17.195	7.271	5.955	7.158	8.926	7.171	3.639	5.708	13.129	4.65		0.255605	21.6234
6.9071	8.612	8.044	13.294	14.17	12.872	169.864	157.817	12.866	7.864	12.429	41.306	26.297	13.27	4.009	6.934	7.79	8.292	10.468	15.977	11.385	4.402	5.344	17.143	7.884	6.404	7.113	5.848	7.637	3.6	6.076	12.614	4.808		0.26009	20.3885
7.0262	7.794	7.421	16.091	13.871	11.227	164.622	137.047	13.157	8.764	13.292	30.24	21.387	13.303	4.622	6.989	7.135	7.408	10.146	15.775	9.389	3.555	5.428	17.485	5.887	5.931	5.761	7.962	6.678	3.301	5.283	13.099	5.472		0.264575	18.9226
7.1453	7.53	8.323	16.775	12.926	10.57	146.346	115.198	13.91	7.557	14.434	22.988	18.653	15.436	3.982	6.137	6.767	6.009	10.077	18.915	8.717	3.116	4.574	17.842	5.569	5.095	8.154	6.662	6.732	3.47	5.076	14.904	5.098		0.269059	17.4232
7.2644	6.546	8.164	14.551	11.381	12.543	126.988	91.057	13.069	8.395	11.393	12.645	14.155	14.061	5.637	6.874	6.831	5.719	10.639	15.865	7.712	2.847	4.131	14.997	6.516	4.57	6.793	6.525	7.09	3.262	5.015	18.105	4.564		0.273544	15.27
7.3834	7.623	7.935	16.173	11.873	13.205	109.925	78.127	12.506	6.998	12.898	10.397	12.021	12.716	3.85	6.669	6.436	5.76	11.086	18.557	5.91	3.05	4.236	14.934	5.018	4.516	7.559	7.362	7.505	3.889	5.295	15.643	4.579		0.278025	14.1953
7.5025	7.299	7.098	15.389	9.949	10.162	91.085	71.327	10.991	7.963	12.053	8.635	9.688	13.695	4.577	6.796	6.544	6.684	10.537	19.691	7.369	4.147	4.9	14.304	4.993	4.087	7.048	8.768	8.681	3.342	5.603	18.839	5.918		0.28251	13.3801
7.6216	7.375	7.132	15.982	10.756	11.071	74.484	64.205	11.386	7.706	11.449	7.53	9.247	14.315	3.973	6.365	6.954	6.53	10.161	19.209	5.797	3.69	5.137	11.834	5.458	3.905	9.23	6.315	9.75	3.659	5.103	21.656	4.943		0.286995	12.5721
7.7407	7.755	6.71	15.406	9.526	11.542	59.622	58.723	10.572	8.467	13.56	5.745	8.101	13.155	4.925	6.847	6.446	6.349	9.89	20.687	6.018	3.188	5.179	11.374	3.977	4.651	6.944	6.217	9.158	2.807	4.932	19.677	4.55		0.291479	11.6469
7.8598	7.632	7.835	16.262	11.176	11.76	46.578	47.186	9.215	7.835	12.228	5.538	8.27	16.059	3.816	6.102	6.798	6.952	12.056	22.626	4.738	4.251	4.201	10.1	3.94	4.633	8.255	6.549	9.854	3.776	6.235	20.682	4.679		0.295964	11.1818
7.9789	7.033	6.905	14.555	10.977	10.184	31.77	39.572	10.084	7.14	12.946	5.047	6.552	13.298	3.86	5.74	7.012	5.71	13.625	21.439	5.471	3.612	4.549	10.11	4.507	4.255	7.327	6.379	11.089	3.364	4.386	18.063	5.3		0.300449	10.0582
8.098	7.315	8.131	18.544	9.267	10.129	18.732	33.692	9.8	7.38	12.898	6.696	5.728	14.312	4.524	5.793	6.15	8.449	11.812	22.808	6.13	3.894	5.255	7.867	4.105	3.757	6.766	6.424	11.523	4.176	5.464	20.44	4.088		0.304934	9.75153
8.2171	5.896	7.997	19.759	10.932	11.422	12.599	22.647	9.829	8.009	14.22	5.47	6.812	17.4	4.391	5.832	6.349	8.335	14.825	25.746	5.134	3.439	5.642	7.454	4.829	3.519	8.182	6.141	10.15	3.099	5.171	17.642	5.074		0.309418	9.49831
8.3362	6.362	8.546	22.793	9.704	7.959	8.884	20.933	9.112	8.234	11.937	5.257	7.502	15.498	3.543	4.867	7.369	7.518	14.343	23.577	4.701	2.942	4.908	8.634	4.947	3.229	8.08	6.628	10.907	3.863	6.28	21.495	5.172		0.313903	9.24137
8.4552	5.862	7.836	21.103	10.263	9.898	8.745	17.578	10.284	7.887	14.137	5.547	6.327	16.682	4.399	5.5	6.741	7.744	18.094	25.225	4.529	3.948	4.642	8.078	3.977	3.851	7.292	6.908	13.439	3.27	5.402	20.995	5.884		0.318384	9.43959
8.5743	5.977	6.323	19.972	11.028	12.033	6.945	15.357	10.901	7.419	14.847	4.333	6.111	17.517	4.082	6.351	5.976	7.6	19.717	25.609	4.496	2.943	4.818	7.504	4.22	3.93	9.868	6.468	15.911	3.575	5.379	25.378	5.064		0.322869	9.61412
8.6934	6.19	6.418	21.834	10.728	11.396	8.329	12.024	8.606	9.509	16.865	5.007	6.899	17.314	3.737	5.431	6.036	8.817	19.828	26.836	4.497	3.706	4.931	8.792	3.549	3.521	8.117	6.037	12.724	4.413	6.327	25.335	5.794		0.327354	9.67334
8.8125	6.969	7.075	23.69	11.338	12.101	6.824	12.152	9.138	7.8	15.869	5.666	6.771	16.537	3.877	6.01	6.169	8.994	20.975	26.672	5.114	3.072	4.987	8.744	4.376	4.64	8.387	5.857	14.012	4.035	5.156	26.869	5.779		0.331838	9.86422
8.9316	6.198	6.245	19.437	11.039	15.48	7.28	12.164	7.872	9.848	13.258	5.46	6.685	21.182	4.433	5.605	5.972	9.837	22.08	25.956	5.022	4.389	5.131	9.794	4.359	5.089	9.88	6.549	11.878	4.653	6.074	30.26	6.535		0.336323	10.1764
9.0507	6.977	6.834	20.429	10.593	12.888	6.731	12.902	8.724	8.762	14.122	5.45	6.5	21.665	3.334	4.833	7.219	11.432	23.48	25.345	4.156	3.112	5.067	10.415	4.206	3.98	11.281	6.982	13.06	3.158	6.037	37.936	6.953		0.340808	10.4551
9.1698	5.877	7.449	18.735	11.517	15.818	8.51	11.648	8.625	11.318	13.38	5.195	8.052	19.487	3.819	6.227	6.343	13.432	26.637	26.852	3.977	3.125	5.842	9.927	3.359	5.369	13.416	9.133	12.003	3.644	4.495	36.936	5.952		0.345293	10.8156
9.2889	5.156	6.726	16.714	11.321	17.551	8.03	9.648	7.861	13.725	13.958	5.401	8.598	21.789	4.02	6.439	6.622	15.341	22.202	24.015	3.401	4.213	6.005	8.845	3.308	4.829	13.872	9.999	12.89	3.775	5.441	41.613	6.579		0.349777	10.934
9.4079	4.969	6.787	16.576	13.088	18.065	8.052	14.102	9.909	17.338	13.075	5.795	8.476	20.594	4.095	4.566	6.653	18.11	20.81	24.165	3.634	4.436	4.401	9.674	4.114	5.524	21.043	11.604	13.894	4.001	6.403	44.399	7.668		0.354258	11.7506
9.527	5.097	4.938	16.405	13.431	20.759	9.183	9.907	8.516	20.416	13.274	4.679	8.251	21.749	4.684	6.047	6.251	18.024	22.795	19.391	4.74	3.438	5.669	11.254	4.272	6.378	21.762	14.952	11.266	4.554	5.845	47.392	8.876		0.358743	12.0061
9.6461	4.909	6.552	17.29	13.389	18.981	8.531	11.237	8.868	20.099	9.392	4.875	8.833	21.815	4.105	6.774	6.301	17.478	22.567	21.453	4.327	3.935	6.099	11.248	4.537	5.472	27.847	16.354	12.424	2.872	4.417	47.023	7.279		0.363228	12.1026
9.7652	4.279	4.966	18.404	14.36	19.786	8.196	9.974	8.295	21.985	10.619	4.044	10.335	23.326	3.435	5.717	6.808	17.156	23.044	19.396	4.941	3.835	6.201	11.317	3.764	5.165	34.055	20.517	11.345	2.836	4.239	50.733	6.771		0.367713	12.4951
9.8843	5.031	6.093	19.661	18.038	19.413	8.7	10.086	7.854	21.947	11.996	6.459	13.708	23.403	3.83	5.487	6.953	17.351	22.597	17.445	3.377	3.566	5.222	11.179	4.203	6.38	42.619	20.58	13.591	3.158	5.515	46.378	8.554		0.372197	13.1367
10.0034	4.231	6.128	23.711	17.598	20.264	7.062	8.833	8.161	21.328	12.061	5.252	16.556	25.326	3.98	7.614	6.504	18.103	24.713	15.234	3.762	3.358	5.009	11.553	5.913	5.174	47.939	23.232	17.471	4.391	6.036	45.533	8.717		0.376682	13.7733
10.1225	5.103	5.688	27.775	20.461	20.473	8.651	10.782	8.957	21.65	11.785	5.024	16.742	26.244	3.747	7.29	6.657	18.678	23.492	10.797	2.651	4.555	5.384	11.121	3.861	5.025	51.957	25	19.589	3.161	6.134	48.961	8.736		0.381167	14.2541
10.2416	4.757	5.189	27.861	20.959	20.546	9.609	8.418	9.38	20.894	9.977	5.26	17.157	27.299	4.166	9.324	6.706	21.655	27.401	10.724	4.858	4.258	5.599	11.503	3.979	5.471	58.419	27.641	18.863	3.747	7.114	44.213	8.508		0.385652	14.733
10.3606	4.181	4.418	31.757	20.968	18.685	11.025	9.747	7.496	23.926	10.063	5.641	14.784	29.311	3.976	10.438	8.012	17.851	27.252	10.11	4.923	4.15	6.044	10.958	5.354	5.194	61.64	28.805	20.016	3.869	7.882	46.786	9.17		0.390133	15.1385
10.4797	4.096	4.175	33.257	22.575	17.243	10.989	11.167	7.773	24.64	9.392	5.409	13.577	31.622	3.817	10.97	7.543	20.72	28.118	9.939	3.852	3.353	6.258	14.415	5.028	5.321	69.84	33.87	21.479	3.663	7.354	43.565	9.71		0.394618	15.7728
10.5988	4.488	4.383	30.86	21.034	17.847	11.911	11.661	7.423	26.651	9.361	5.045	14.154	31.832	4.686	12.329	7.288	19.405	30.922	8.708	4.18	4.951	7.773	14.886	6.579	5.414	73.163	34.412	23.318	4.489	8.488	43.034	8.743		0.399102	16.2318
10.7179	4.285	4.456	34.082	23.195	19.468	11.196	10.106	7.566	27.882	11.167	5.895	12.176	37.944	3.929	9.669	8.141	26.15	30.811	8.346	4.261	5.482	5.632	13.201	6.75	6.363	82.156	39.633	22.109	4.129	8.821	40.362	9.527		0.403587	17.0278
10.837	3.065	5.556	36.976	24.891	22.358	11.791	11.999	6.333	28.343	11.217	5.547	11.446	38.242	3.584	10.762	6.776	26.737	38.361	7.199	5.408	4.504	7.241	12.994	6.53	6.194	73.903	42.064	22.846	3.904	7.873	38.664	10.72		0.408072	17.3134
10.9561	4.275	4.747	38.269	23.597	26.979	9.932	13.709	8.789	27.007	9.998	5.853	10.568	37.411	4.773	11.61	7.603	30.153	36.573	7.042	5.131	4.658	6.622	12.875	7.544	5.409	79.16	46.727	23.342	4.343	8.392	38.376	7.356		0.412557	17.7757
11.0752	4.21	4.452	43.871	23.897	33.119	11.171	13.515	6.965	29.783	8.91	6.829	10.465	39.649	3.392	9.89	6.783	32.302	42.322	7.22	4.53	4.624	7.336	11.247	7.877	5.543	76.552	49.146	21.31	3.919	7.713	34.416	7.632		0.417041	18.1434
11.1943	3.631	4.307	52.413	23.399	35.586	13.332	10.637	6.976	34.32	11.39	5.184	10.176	39.149	4.381	10.317	7.191	37.983	44.377	6.914	3.442	3.906	10.27	10.749	7.84	6.593	79.657	57.26	23.613	3.503	6.893	36.386	7.954		0.421526	19.3665
11.3133	4.023	4.459	60.209	24.243	31.969	12.495	11.845	8.438	34.449	10.789	6.004	8.513	40.495	4.237	9.833	6.611	39.875	44.951	6.931	4.136	5.006	9.96	10.363	11.463	5.737	64.793	60.226	24.885	4.01	6.794	35.772	7.065		0.426007	19.3931
11.4324	3.968	4.118	64.733	20.68	33.691	13.761	10.95	8.515	36.834	9.583	5.424	10.526	38.551	3.791	8.384	6.999	38.17	47.832	6.319	5.188	4.576	12.602	9.509	9.781	5.586	68.293	58.324	24.476	4.579	7.256	30.469	8.463		0.430492	19.4353
11.5515	3.94	4.855	60.508	21.102	37.599	16.39	13.245	8.942	39.104	10.073	4.342	9.166	38.479	4.533	9.663	9.321	37.842	44.012	5.613	4.171	4.771	14.214	9.367	11.274	6.249	62.216	55.261	24.741	3.62	6.296	31.906	6.239		0.434977	19.3454
11.6706	3.418	4.132	64.458	22.783	38.275	15.61	12.486	7.362	40.188	9.886	4.874	10.767	37.478	4.297	10.851	6.945	37.835	41.931	5.57	3.389	4.143	19.443	8.655	12.499	6.912	50.714	56.838	22.535	4.041	6.789	31.818	5.618		0.439461	19.1419
11.7897	4.423	5.286	60.43	25.621	40.097	15.594	14.321	7.144	40.47	10.194	4.613	8.959	42.144	5.171	11.913	6.855	36.661	40.242	6.813	5.022	4.326	20.393	8.43	12.398	6.849	50.349	56.366	22.338	4.156	5.798	32.818	6.097		0.443946	19.4466
11.9088	3.836	5.174	56.58	26.782	42.965	17.337	17.187	7.951	35.94	9.856	5.516	9.642	39.316	4.575	11.789	8.337	39.111	36.334	4.718	2.882	4.271	30.243	7.209	14.777	7.711	48.661	56.323	19.954	3.327	5.417	30.61	7.671		0.448431	19.4376
12.0279	4.06	5.378	55.15	24.882	45.474	14.234	20.13	7.839	37.344	8.718	4.831	9.564	37.246	6.174	13.073	7.14	34.461	31.777	6.469	3.333	4.592	39.416	7.484	15.55	7.42	41.575	49.906	19.26	5.314	4.64	27.235	6.038		0.452916	18.9283
12.147	3.509	5.251	56.944	26.527	44.029	17.942	18.692	9.61	37.088	10.113	5.68	9.264	37.698	5.281	12.975	8.717	32.27	25.36	5.024	4.717	4.885	48.251	7.907	14.977	6.53	41.287	46.222	14.249	3.786	4.895	28.686	6.598		0.4574	18.9051
12.2661	3.2	5.039	57.2	33.92	49.52	16.873	19.701	8.981	35.112	10.478	3.389	7.227	39.258	4.359	13.465	8.663	32.187	24.589	4.793	4.9	4.394	67.698	7.561	12.646	6.96	39.955	38.497	12.41	3.461	5.903	28.6	6.425		0.461885	19.2926
12.3851	4.074	4.655	61.257	43.393	57.124	18.161	21.744	10.873	38.088	9.831	5.714	9.873	38.735	4.136	12.958	8.751	29.962	24.8	5.702	3.735	4.898	77.957	6.558	12.469	5.413	43.947	35.222	12.985	5.065	6.808	30.287	5.967		0.466366	20.6607
12.5042	3.524	6.136	60.987	48.099	61.924	20.055	20.397	10.59	46.917	9.909	5.618	7.181	35.021	4.407	12.334	9.131	29.439	19.668	4.098	3.856	4.792	91.2	7.523	11.154	6.469	40.883	26.443	11.213	4.98	5.795	25.818	5.295		0.470851	20.6517
12.6233	3.037	6.22	57.984	45.139	68.585	21.085	22.253	11.587	56.363	9.739	4.04	7.957	30.266	4.744	10.594	10.464	28.121	18.56	4.346	4.089	4.3	100.942	7.406	10.11	6.299	42.376	21.309	9.944	4.5	7.307	29.115	7.022		0.475336	21.1188
12.7424	3.65	4.914	57.305	44.055	66.883	20.158	27.514	12.065	71.56	8.899	5.089	7.024	31.005	4.247	12.196	9.628	26.766	15.497	4.513	3.183	5.769	105.766	7.363	10.849	6.307	42.112	21.478	8.778	5.585	5.839	31.236	6.431		0.47982	21.677
12.8615	3.614	6.374	60.784	42.689	69.063	21.107	28.666	12.101	80.337	9.069	3.82	7.491	26.229	3.051	11.193	11.407	30.405	14.367	4.508	3.837	4.705	117.037	6.581	9.755	5.488	36.806	21.678	10.658	5.079	5.871	36.878	5.37		0.484305	22.3756
12.9806	3.439	6.325	60.021	43.349	71.768	23.445	32.99	13.032	94.968	7.926	5.027	7.969	21.966	4.006	10.83	13.574	33.001	13.637	4.778	4.831	5.755	114.027	6.807	7.271	6.692	39.604	25.082	10.543	3.579	7.048	34.332	6.158		0.48879	23.2431
13.0997	3.458	8.2	55.481	47.917	64.573	27.975	35.067	10.574	105.653	8.32	4.122	6.962	19.266	3.813	10.423	15.045	34.214	12.508	4.07	3.116	5.034	118.694	7.064	6.755	6.303	31.99	25.196	12.183	4.034	5.772	36.772	5.388		0.493275	23.3107
13.2188	3.72	8.383	51.928	48.315	66.007	28.154	36.27	11.501	107.566	8.478	4.475	7.935	18.81	4.746	10.699	16.013	44.782	10.328	4.824	3.733	5.711	115.046	7.53	6.464	5.135	31.429	26.398	11.482	3.822	5.57	37.481	5.909		0.49776	23.7076
13.3378	3.86	8.418	45.832	47.712	57.332	32.435	36.398	9.261	105.955	8.175	4.511	8.278	16.328	4.516	11.46	17.355	48.875	9.354	4.448	3.172	5.234	124.387	8.877	7.986	5.241	28.831	24.873	14.231	3.23	6.613	34.191	4.34		0.50224	23.4909
13.4569	3.562	7.676	42.084	49.799	53.097	31.673	37.611	9.07	97.441	7.697	4.638	6.923	17.326	4.739	13.308	17.026	54.647	10.068	3.475	4.244	5.871	124.739	7.407	6.163	6.248	30.302	24.407	14.43	4.605	6.481	33.306	4.151		0.506725	23.2567
13.576	4.014	8.906	40.278	49.463	44.939	30.053	33.845	8.162	95.012	7.925	4.395	7.496	15.108	3.329	14.631	18.425	60.124	8.854	4.749	3.995	6.214	124.118	7.502	7.247	6.536	28.002	21.896	12.078	4.516	6.264	30.998	5.036		0.51121	22.6284
13.6951	4.383	10.16	34.747	49.81	41.982	31.182	31.845	8.186	91.382	8.482	3.179	6.657	14.705	3.843	14.548	23.331	69.357	9.251	3.892	2.939	4.876	115.306	5.661	6.888	6.41	25.898	20.659	14.114	5.311	6.53	29.803	6.066		0.515695	22.2307
13.8142	3.393	10.628	34.044	53.399	37.186	31.713	29.307	7.662	82.776	7.078	4.583	7.687	14.598	4.237	11.861	22.55	74.354	9.228	3.368	3.775	7.125	110.702	6.22	7.083	5.122	28.951	15.808	13.937	4.973	4.894	26.423	6.065		0.52018	21.5853
13.9333	3.482	10.515	33.256	53.131	33.252	30.098	34.268	7.512	72.583	7.193	4.279	6.314	14.827	3.811	12.999	26.513	75.469	6.483	3.363	4.126	6.647	102.95	6.037	6.605	5.007	28.614	14.345	13.701	4.533	5.406	24.606	5.253		0.524664	20.8493
14.0524	3.381	11.498	32.77	47.374	27.835	24.295	31.535	6.267	72.655	7.105	4.193	7.072	13.083	4.05	15.232	23.742	77.517	6.922	4.359	4.134	7.356	86.706	7.231	6.417	5.002	29.503	10.976	11.465	5.964	5.395	26.7	4.446		0.529149	19.7556
14.1715	3.47	13.704	30.7	46.891	25.839	25.097	31.829	7.38	60.045	6.982	4.356	6.768	14.602	3.452	16.557	24.45	79.627	6.941	3.978	3.805	7.34	79.483	6.767	5.454	3.967	28.777	9.907	12.259	4.313	4.851	30.282	4.98		0.533634	19.2142
14.2905	3.408	13.546	27.325	44.516	26.468	23.904	31.2	6.15	58.755	7.45	3.434	8.655	13.804	3.973	17.199	25.547	78.624	6.897	4.658	4.444	8.016	69.18	6.128	5.659	5.071	33.016	9.78	11.559	4.432	5.686	31.177	5.104		0.538115	18.8989
14.4096	4.288	17.385	30.272	48.539	26.991	28.974	31.635	6.153	57.81	7.047	4.232	6.879	13.128	3.929	19.525	23.899	82.241	5.848	4.065	4.455	8.653	57.66	8.64	6.324	5.448	36.098	9.519	8.071	4.228	5.724	28.418	4.394		0.5426	19.0772
14.5287	3.472	17.451	26.682	44.443	24.741	31.253	29.508	5.707	52.796	7.955	4.566	7.605	12.172	4.077	18.171	27.271	81.895	5.08	2.676	3.708	8.459	55.537	8.867	4.515	5.994	35.004	8.536	10.271	3.726	5.394	29.781	5.423		0.547084	18.523
14.6478	4.972	16.742	29.419	43.284	25.6	32.305	25.108	7.616	49.719	7.244	3.536	9.408	13.382	3.817	20.37	27.702	81.833	5.896	3.484	4.693	8.124	48.561	11.066	4.598	5.31	34.728	10.141	8.405	5.062	5.031	28.633	5.334		0.551569	18.4726
14.7669	4.402	19.477	25.278	45.233	30.228	38.846	24.487	6.372	45.075	8.119	4.13	7.789	11.801	4.673	21.818	28.335	81.966	4.908	3.983	4.622	8.781	45.473	10.304	4.188	5.001	34.864	7.36	8.838	3.499	6.095	26.697	5.573		0.556054	18.3817
14.886	4.761	16.741	27.435	51.157	30.704	43.831	24.09	4.818	42.003	6.789	3.754	8.791	12.23	4.129	19.219	30.389	75.6	5.879	3.144	5.459	8.371	39.791	11.057	4.177	5.199	32.06	8.301	5.902	4.51	5.932	27.058	5.256		0.560539	18.0793
15.0051	5.089	19.605	28.873	52.562	31.339	45.218	23.19	5.72	40.675	6.111	3.914	7.926	8.405	3.471	20.752	32.775	75.453	4.37	3.508	4.948	9.974	36.752	12.207	4.477	6.197	32.98	6.739	7.921	4.454	4.803	22.636	4.844		0.565023	18.059
15.1242	4.583	19.687	26.838	54.625	29.415	48.592	20.214	6.768	35.838	6.832	4.085	6.827	9.527	4.161	20.278	34.968	73.655	4.18	3.813	4.325	9.837	27.532	12.153	4.366	6.605	27.875	7.194	5.022	4.073	4.785	21.241	4.891		0.569508	17.337
15.2432	5.892	22.982	29.352	57.045	31.256	53.404	23.226	9.2	37.518	6.235	3.402	6.359	8.729	3.707	22.155	37.188	68.352	5.344	4.043	5.039	11.219	27.385	8.955	3.82	7.025	27.312	6.957	5.242	5.008	5.274	22.474	6.302		0.573989	18.0438
15.3623	4.763	23.145	33.593	55.808	37.53	48.143	18.504	10.3	36.618	5.522	3.384	8.505	8.633	3.323	22.808	39.651	63.552	3.685	3.881	4.444	10.125	23.983	9.689	4.003	6.416	25.589	5.69	5.152	4.484	5.558	22.042	6.736		0.578474	17.6643
15.4814	3.292	22.973	35.768	51.873	41.622	52.37	17.006	9.96	39.345	5.638	4.319	6.782	7.996	3.355	24.134	41.743	57.453	3.803	2.79	4.061	12.55	19.309	8.006	4.007	7.788	27.116	6.317	6.597	5.166	5.836	23.522	4.621		0.582959	17.7224
15.6005	5.864	25.869	38.597	45.382	45.599	46.448	16.225	11.531	35.411	4.467	3.88	7.737	8.392	3.613	25.282	42.871	54.417	4.001	4.034	4.521	11.557	20.257	6.582	3.88	6.911	23.656	5.762	6.067	4.8	5.306	25.106	4.648		0.587443	17.4585
15.7196	5.425	26.926	44.272	44.12	52.779	38.005	13.852	7.889	34.021	6.494	3.875	7.145	6.705	4.459	23.628	42.336	51.422	2.934	4.221	5.05	12.166	17.147	6.679	2.897	7.381	23.577	5.817	6.139	5.189	4.237	28.857	5.455		0.591928	17.2218
15.8387	5.7	26.665	40.826	35.85	52.608	32.103	12.692	7.608	33.148	5.584	3.137	7.398	6.016	4.401	25.111	44.83	44.265	3.943	4.137	5.93	12.712	17.722	6.229	3.503	7.626	22.511	5.532	6.404	4.624	4.491	28.247	5.069		0.596413	16.4569
15.9578	5.085	28.695	38.063	30.632	53.357	28.457	12.611	5.647	31.835	5.645	3.579	7.375	6.692	4.013	22.112	43.551	40.793	4.35	4.107	5.632	11.923	17.245	4.805	3.787	8.255	21.58	6.159	6.001	4.463	5.287	26.362	4.379		0.600898	15.7024
16.0769	6.854	32.423	38.191	25.256	46.457	29.698	12.74	4.723	30.429	6.646	3.669	7.1	7.255	4.013	20.284	45.723	38.815	3.749	4.449	5.887	14.679	16.428	6.456	3.919	6.649	21.929	5.314	4.713	4.137	4.953	29.271	4.393		0.605382	15.5376
16.196	5.86	33.114	28.583	22.41	44.936	25.976	10.487	4.805	32.811	5.919	4.837	8.412	6.257	4.457	22.951	52.239	29.816	3.327	3.844	4.853	10.386	16.071	6.211	3.24	7.241	19.522	5.07	5.488	3.642	5.472	22.765	4.916		0.609867	14.5599
16.315	6.794	36.426	26.707	20.217	41.444	27.025	13.607	5.228	27.57	5.938	3.072	9.032	6.967	3.055	22.787	54.884	27.546	3.713	5.491	5.095	13.91	17.049	5.875	3.814	7.613	17.091	4.305	4.604	3.786	4.173	24.805	5.163		0.614348	14.5246
16.4341	6.78	33.727	20.41	19.836	37.35	23.482	11.198	4.893	28.499	4.816	4	9.007	6.352	4.297	21.756	59.817	24.986	4.105	4.283	6.611	12.143	18.085	6.045	3.774	8.763	16.694	4.508	6.451	4.625	4.398	25.33	5.301		0.618833	14.1351
16.5532	5.779	37.416	15.581	17.808	39.28	22.659	9.886	6.716	28.389	5.396	4.157	8.172	5.226	3.499	21.209	59.748	22.947	3.611	3.555	6.392	13.867	18.918	5.364	4.03	9.49	13.723	5.384	4.259	3.315	5.893	23.166	4.825		0.623318	13.7394
16.6723	5.852	42.171	12.995	18.165	41.612	23.283	8.726	4.186	28.983	6.063	5.115	8.912	5.81	4.527	21.797	63.757	21.148	4.352	4.159	5.429	12.992	13.978	4.873	3.682	9.777	11.635	4.802	4.695	4.656	4.46	22.213	4.917		0.627803	13.7413
16.7914	7.102	49.363	13.144	16.554	39.367	21.605	8.254	5.184	29.589	5.266	4.527	9.332	6.479	3.623	25.521	64.132	19.104	4.445	4.485	5.8	13.466	12.31	6.343	3.674	11.333	11.35	4.998	5.332	4.202	5.438	27.344	5.849		0.632287	14.2036
16.9105	6.912	54.286	10.298	16.826	45.243	20.364	10.172	4.36	31.168	4.889	4.681	10.305	4.607	3.326	29.89	58.655	14.575	3.409	3.994	5.509	11.673	12.065	4.558	3.478	12.118	8.434	4.538	5.778	4.444	4.347	27.59	4.692		0.636772	13.9745
17.0296	6.311	60.345	9.423	19.731	44.224	21.399	9.116	5.961	30.039	5.395	3.704	12.183	5.427	4.462	34.534	60.382	14.456	3.706	4.762	5.983	10.622	10.48	4.223	4.139	15.48	10.554	4.243	5.159	4.502	5.344	24.883	5.502		0.641257	14.5836
17.1487	7.143	62.061	9.521	16.338	45.556	27.671	8.064	5.039	27.592	6.594	4.852	11.843	6.205	3.284	41.427	57.242	12.183	4.861	4.607	5.754	10.705	9.58	4.46	2.81	16.681	7.482	4.136	4.765	4.19	5.142	26.926	5.578		0.645742	14.6966
17.2677	8.714	67.218	9.858	15.608	46.418	31.921	7.387	5.783	29.287	5.282	5.054	12.781	5.106	4.534	48.037	56.921	10.796	4.654	3.684	6.378	10.245	9.065	4.965	3.654	17.673	8.251	4.834	6.442	5.147	5.223	25.341	4.769		0.650223	15.3447
17.3868	8.489	69.125	9.231	19.3	50.06	33.911	7.709	5.474	30.397	4.259	4.989	11.916	5.221	3.535	46.533	53.735	10.336	3.787	4.416	6.504	9.198	9.668	4.427	3.183	21.84	7.644	4.098	5.614	5.436	6.643	24.649	5.436		0.654707	15.5238
17.5059	7.218	63.853	8.398	16.206	49.379	39.654	7.633	4.686	29.466	5.825	4.701	14.24	5.047	4.104	50.446	52.494	9.516	4.14	5.119	7.616	11.052	7.314	4.112	3.68	26.532	7.592	4.892	6.026	4.471	6.788	24.505	5.069		0.659192	15.6804
17.625	8.299	61.27	8.878	14.763	51.033	37.634	6.651	6.201	32.099	5.392	4.886	18.57	5.846	4.527	48.823	56.19	8.75	5.345	3.86	5.751	12.352	6.974	4.422	3.727	34.228	7.761	4.265	6.511	5.351	6.519	21.557	5.918		0.663677	16.0735
17.7441	6.327	58.983	9.334	14.579	51.23	33.189	6.919	5.816	30.094	4.064	4.51	21.121	4.846	5.036	45.961	59	10.174	4.573	5.055	7.846	12.785	7.273	4.849	2.87	38.108	6.76	4.44	8.387	4.544	6.222	20.275	4.946		0.668162	15.9411
17.8632	7.089	54.118	8.629	13.462	44.78	32.153	7.705	6.832	33.383	5.335	4.421	25.958	5.209	4.348	40.748	60.259	9.421	3.86	5.326	9.138	15.257	6.979	3.92	2.969	43.147	6.357	4.047	8.456	4.649	6.683	22.226	6.425		0.672646	16.0403
17.9823	8.756	51.647	12.519	15.858	41.95	32.436	6.425	6.019	31.418	4.37	4.511	27.571	5.103	4.446	38.738	63.777	8.717	4.645	5.569	9.398	15.026	6.975	3.715	4.034	52.9	7.452	4.274	8.809	5.117	8.027	18.158	5.476		0.677131	16.3699
18.1014	8.943	42.029	13.273	15.64	40.447	35.103	6.511	8.146	34.174	4.86	4.12	28.083	5.094	5.676	31.775	63.752	8.1	4.295	3.29	9.977	15.917	7.023	4.675	3.839	54.807	7.128	3.993	11.445	6.231	6.919	20.015	6.35		0.681616	16.3009
18.2204	7.478	39.63	14.597	14.272	35.961	35.637	7.275	7.074	31.315	5.368	4.912	25.076	4.184	3.755	25.064	64.753	7.381	4.297	4.295	10.486	14.181	6.353	4.828	3.321	61.589	7.053	3.173	11.362	6.66	7.511	18.344	6.101		0.686097	15.7277
18.3395	7.911	37.085	11.537	14.388	33.367	34.797	6.41	5.976	34.711	5.551	4.045	27.145	4.524	4.305	25.283	63.618	7.167	5.196	6.027	9.381	18.825	5.98	4.107	3.501	57.959	8.372	4.271	15.047	5.941	7.463	17.854	5.414		0.690582	15.7237
18.4586	7.401	33.186	14.605	12.568	30.114	38.137	5.541	6.781	36.131	3.612	3.877	30.867	5.528	5.125	21.007	65.146	7.986	4.805	5.764	8.535	18.101	5.698	4.441	4.094	62.204	8.658	4.212	14.123	6.287	9.321	18.988	5.971		0.695066	15.9004
18.5777	6.83	29.323	13.886	14.557	30.358	35.321	5.706	5.892	35.029	4.412	4.607	30.61	6.002	4.589	22.005	64.304	6.576	5.118	7.831	7.163	17.984	5.981	4.649	3.736	59.741	7.638	3.729	16.107	5.143	11.603	15.657	8.219		0.699551	15.6346
18.6968	8.624	27.113	12.019	14.801	29.565	37.918	5.772	7.024	41.344	4.4	4.533	35.11	4.399	4.177	22.438	59.465	6.681	4.176	6.967	7.696	24.053	4.828	3.876	4.081	62.273	8.145	4.105	14.574	8.125	12.202	15.183	6.315		0.704036	15.9994
18.8159	7.793	26.833	12.074	13.405	31.152	30.18	6.637	7.242	36.918	5.222	5.097	37.806	5.009	4.404	26.244	58.447	6.591	4.907	7.474	7.48	24.01	4.814	3.134	2.937	58.817	7.738	4.11	20.068	6.87	11.134	13.47	6.884		0.708521	15.7782
18.935	8.796	25.915	10.738	13.338	30.361	28.849	5.162	6.631	37.489	5.357	5.281	33.778	5.084	5.051	25.581	48.943	6.091	4.779	7.594	6.388	24.37	6.131	4.481	3.143	54.17	8.772	5.617	18.886	6.171	12.773	13.73	7.057		0.713005	15.2033
19.0541	8.691	27.451	9.622	14.593	30.027	23.386	5.097	7.604	33.697	5.659	5.312	32.712	3.988	3.384	25.307	47.813	7.24	4.638	8.219	7.085	25.865	6.174	3.655	4.189	52.777	7.452	3.143	17.512	7.556	14.653	11.611	6.806		0.71749	14.7787
19.1731	7.286	28.832	10.807	12.872	31.053	19.008	5.503	8.926	31.09	5.682	4.744	29.512	5.232	4.076	23.458	47.524	6.965	5.359	8.194	6.9	27.534	5.009	3.933	3.54	46.505	7.66	4.662	19.798	9.073	16.318	11.709	8.014		0.721971	14.5868
19.2922	6.504	29.478	8.883	12.405	30.539	20.674	5.61	7.812	35.903	4.997	3.964	28.442	5.394	3.868	28.282	41.925	7.076	5.226	10.858	7.467	28.166	5.052	3.365	4.327	39.916	8.987	5.086	20.699	7.474	18.246	11.31	6.132		0.726456	14.5021
19.4113	6.444	34.992	8.293	15.19	32.231	16.983	5.041	9.438	30.764	4.435	4.952	26.535	4.808	3.733	30.75	41.774	6.639	4.535	9.368	7.697	26.751	5.491	3.404	6.85	44.796	8.992	4.832	19.482	8.463	19.17	10.814	7.458		0.730941	14.722
19.5304	8.431	34.073	8.721	13.75	32.978	15.791	5.148	9.781	30.282	4.753	4.35	29.567	5.62	4.351	31.739	47.555	6.397	5.196	12.57	9.36	22.599	6.428	3.459	8.328	43.603	8.664	4.677	21.897	9.478	23.805	10.531	5.419		0.735425	15.2907
19.6495	8.834	30.341	9.515	14.2	34.659	17.194	6.063	8.593	29.537	4.662	5.362	31.607	4.501	5.474	38.618	43.3	7.737	5.051	11.515	10.207	23.006	4.094	3.495	8.75	40.482	8.849	5.593	19.176	10.366	25.573	10.939	7.034		0.73991	15.4477
19.7686	9.632	28.355	9.637	14.612	32.337	15.305	5.631	8.96	34.058	4.621	5.757	32.987	5.097	4.124	41.348	48.155	5.653	6.254	11.889	9.472	21.487	5.762	3.109	11.954	39.388	9.611	3.987	20.513	12.602	30.402	10.123	7.323		0.744395	15.942
19.8877	10.567	30.811	9.975	15.517	34.37	15.707	5.387	9.852	35.901	5.383	6.002	36.507	5.418	4.593	44.391	43.622	6.016	6.37	15.621	10.575	17.959	5.096	3.04	18.595	43.011	9.189	5.852	21.062	14.069	37.378	10.113	6.158		0.74888	17.0033
20.0068	12.059	22.129	10.7	16.962	39.377	15.226	4.566	10.265	42.277	4.213	5.417	34.723	5.108	4.497	50.727	44.16	7.292	7.265	17.909	12.019	16.183	4.825	3.742	25.22	41.138	10.876	5.044	18.249	18.441	44.006	9.914	7.031		0.753365	17.8612
20.1259	12.174	22.664	10.557	16.192	41.075	15.413	4.689	10.497	41.657	4.911	4.393	37.823	4.581	4.603	54.538	32.743	5.885	9.069	20.849	13.59	15.488	4.13	3.128	39.185	37.652	10.908	4.904	21.047	19.443	52.403	11.94	6.643		0.757849	18.5867
20.2449	13.968	22.489	7.888	17.505	43.07	13.753	5.351	10.352	44.311	5.186	5.148	33.5	5.096	5.389	60.655	30.517	7.585	9.469	23.059	13.898	14.365	4.528	3.147	44.648	38.382	13.455	5.704	25.342	22.864	55.199	12.057	7.592		0.76233	19.546
20.364	14.431	20.424	8.533	18.784	47.911	13.777	5.736	11	42.062	6.009	5.439	33.726	4.661	5.394	63.138	26.528	6.549	12.643	29.915	15.763	12.811	4.412	2.834	49.352	34.428	13.636	6.982	35.666	30.324	63.075	12.809	7.877		0.766815	20.8322
20.4831	14.213	24.008	11.104	19.665	55.433	12.342	5.387	12.056	39.571	5.749	6.579	35.145	6.645	5.307	69.031	24.726	7.943	14.847	31.992	17.962	11.709	5.134	4.271	57.933	32.134	16.15	8.348	40.776	41.749	76.273	12.965	9.039		0.7713	23.0058
20.6022	14.762	22.834	9.322	23.875	56.697	12.15	5.902	12.946	41.016	5.226	5.309	35.719	6.603	5.77	72.6	20.926	7.968	15.757	36.515	19.688	12.591	4.513	3.996	59.237	32.311	16.618	8.028	47.159	51.799	88.965	16.731	7.809		0.775785	24.4169
20.7213	15.573	23.662	11.177	23.019	59.282	11.095	4.58	13.1	36.191	6.462	7.791	35.116	6.06	6.508	78.545	23.837	8.658	20.215	37.255	23.334	10.334	4.144	3.531	65.584	29.902	18.114	13.208	51.141	60.914	98.541	17.948	8.578		0.780269	26.0437
20.8404	16.214	22.906	8.788	29.321	62.208	11.969	5.964	16.009	36.261	6.26	6.121	39.18	5.995	5.57	82.635	21.388	11.702	23.754	46.117	24.861	11.094	3.684	5.179	66.409	26.639	21.6	16.493	49.221	71.82	100.632	16.788	8.679		0.784754	27.5457
20.9595	17.089	19.784	8.355	32.717	70.779	10.235	5.337	14.844	32.469	6.707	9.515	37.657	7.937	7.186	80.963	24.685	12.145	29.411	47.93	32.258	11.595	4.443	3.978	74.075	25.86	21.953	26.152	46.413	82.61	103.729	18.614	10.403		0.789239	29.3071
21.0786	17.075	15.994	9.334	33.932	75.98	9.724	5.179	12.83	30.662	5.783	8.992	46.473	10.156	9.024	87.772	25.199	16.786	34.769	49.686	38.932	12.475	4.938	4.347	89.164	26.791	29.584	33.422	43.864	92.558	105.722	20.13	9.453		0.793724	31.7728
21.1976	21.786	13.653	11.627	40.967	77.43	9.191	5.524	15.586	29.611	7.566	9.347	55.695	13.121	8.612	89.869	29.038	19.091	42.509	52.974	40.934	10.542	4.595	4.216	92.145	25.953	33.415	42.189	47.44	95.506	98.685	20.263	10.915		0.798205	33.7498
21.3167	21.803	14.043	9.479	40.276	75.353	8.917	5.598	14.073	25.16	6.963	14.073	62.748	13.034	12.163	94.269	33.63	22.773	47.559	53.337	40.234	10.834	5.326	3.961	96.239	29.018	38.937	52.265	50.853	95.575	90.105	19.555	11.697		0.802689	34.9953
21.4358	21.889	9.967	10.038	46.429	74.856	8.526	6.183	15.668	25.148	8.266	16.858	81.006	18.737	15.403	93.656	37.523	32.003	56.502	52.102	39.668	9.284	4.696	4.336	97.587	27.859	44.649	63.453	60.997	87.688	79.41	21.433	12.104		0.807174	36.9976
21.5549	24.396	9.192	12.181	51.981	72.619	8.691	5.957	13.825	23.919	10.58	21.197	88.532	26.991	21.786	102.593	43.834	44.801	66.875	53.473	43.318	8.856	4.989	3.48	95.837	31.298	52.546	72.327	62.308	77.788	70.268	19.653	14.388		0.811659	39.39
21.674	24.414	10.266	10.352	55.696	72.733	8.243	6.84	15.221	26.062	13.732	31.455	97.198	33.371	24.607	107.132	45.259	52.613	69.864	50.324	45.546	10.236	5.442	4.074	88.293	34.761	52.319	84.332	69.113	62.565	63.217	17.554	18.062		0.816144	40.9655
21.7931	28.606	9.367	10.507	59.648	74.798	8.782	6.738	17.95	26.529	14.695	36.755	93.492	45.26	31.895	106.397	45.475	67.52	65.813	50.962	44.548	7.539	4.987	5.443	85.536	33.824	62.093	92.952	75.839	49.118	51.73	17.918	22.574		0.820628	42.3528
21.9122	31.039	7.82	11.539	63.272	73.36	7.686	7.761	17.872	29.017	19.151	47.094	83.127	55.822	40.07	100.732	46.776	78.832	68.3	52.917	40.263	8.968	4.677	4.929	77.355	34.99	64.301	98.029	81.892	32.674	48.103	19.285	25		0.825113	43.2079
22.0313	31.193	8.083	11.853	68.171	64.376	7.902	6.864	17.129	28.636	27.317	64.603	71.751	56.763	49.005	95.143	47.161	85.529	60.096	55.011	35.781	9.703	4.557	5.286	73.375	35.703	71.788	100.508	88.04	21.386	40.453	20.43	27.351		0.829598	43.4671
22.1503	33.153	8.168	12.005	68.298	68.554	6.958	7.856	19.27	31.866	33.784	70.814	48.246	54.653	49.518	81.49	47.618	87.484	60.076	59.228	36.052	11.041	4.459	7.146	65.404	33.276	80.91	108.201	78.191	14.897	37.212	19.859	28.861		0.834079	42.9546
22.2694	37.089	6.959	10.735	70.376	66.397	7.086	6.618	17.856	41.774	43.403	79.794	34.403	48.646	56.041	61.889	58.26	92.718	50.96	67.216	30.702	11.583	5.7	6.365	60.994	33.328	82.577	105.356	73.31	10.993	35.721	28.076	30.553		0.838564	42.9212
22.3885	37.921	6.982	13.068	74.576	62.564	7.979	9.256	20.623	46.833	47.29	78.52	20.013	38.455	56.164	48.676	63.942	92.948	48.248	65.116	30.148	12.822	5.748	7.713	51.25	32.381	82.599	94.978	61.658	8.374	37.088	32.617	30.816		0.843048	41.4802
22.5076	41.386	6.741	11.97	74.743	58.935	10.671	10.091	23.093	47.35	52.059	68.236	12.542	25.468	48.319	43.382	71.504	100.879	40.751	62.018	30.469	14.011	5.408	6.826	42.144	29.918	78.488	77.303	56.643	5.503	38.554	37.99	34.971		0.847533	39.6364
22.6267	41.463	6.623	11.42	77.601	52.007	9.67	9.624	27.737	55.397	56.524	51.584	8.155	17.167	35.773	37.829	67.897	96.547	33.094	66.204	33.425	17.235	5.446	9.751	36.559	24.664	85.297	66.485	50.543	4.223	40.924	42.472	35.237		0.852018	37.9555
22.7458	41.79	6.227	13.69	80.514	48.34	10.074	11.351	29.348	59.699	57.816	40.109	7.111	10.72	25.483	27.502	61.947	84.231	28.621	61.086	35.429	18.312	5.972	11.887	31.781	21.247	79.232	54.447	37.138	3.502	34.175	48.673	38.062		0.856503	35.1724
22.8649	46.101	5.237	16.105	77.125	48.579	13.822	11.349	30.437	62.25	52.468	26.237	4.822	7.464	13.08	22.844	51.033	68.342	21.155	50.458	36.746	16.768	6.252	13.611	28.549	21.087	74.224	42.717	28.58	2.397	34.773	51.72	38.759		0.860987	32.0341
22.984	44.861	5.324	15.943	78.892	51.207	17.282	13.952	35.801	71.007	44.278	15.763	4.361	5.052	6.684	15.905	45.904	56.848	16.356	47.93	37.018	14.069	7.185	16.435	25.061	20.062	69.967	33.394	18.06	2.529	29.133	54.16	38.416		0.865472	29.9637
23.103	40.489	5.192	15.227	79.502	45.085	21.338	14.682	39.782	74.865	34.368	11.347	4.818	3.37	4.72	11.234	33.74	41.195	10.141	41.472	35.809	14.797	6.168	19.455	22.303	16.901	63.328	24.124	13.458	1.93	30.828	54.794	49.762		0.869953	27.6945
23.2221	37.714	7.234	14.77	86.706	43.688	27.81	19.105	42.622	75.497	24.659	5.85	3.669	2.334	2.763	8.444	28.38	28.87	8.371	35.409	31.943	16.72	6.255	22.534	18.219	17.429	55.02	17.813	9.49	1.417	24.515	49.888	53.278		0.874438	25.888
23.3412	31.817	5.179	15.404	81.08	37.599	34.493	19.536	45.625	71.391	17.449	5.269	2.092	2.763	2.978	5.62	19.076	19.275	6.596	27.525	34.695	16.192	6.581	25.324	15.385	18.123	49.432	11.406	6.026	1.467	20.168	50.881	56.683		0.878923	23.8478
23.4603	29.721	4.444	14.212	82.457	37.35	43.36	21.205	40.291	61.28	12.07	4.549	1.786	1.831	1.875	4.045	13.983	13.688	4.537	25.49	33.255	15.848	9.629	25.401	11.912	16.835	36.447	7.633	4.282	1.096	17.384	49.421	57.484		0.883408	22.025
23.5794	29.699	4.128	15.574	75.915	32.345	51.669	24.913	39.211	46.594	9.852	2.801	2.35	1.944	1.302	3.591	11.7	10.041	3.941	19.102	29.448	13.255	9.654	26.807	12.405	15.349	25.175	4.321	2.764	1.051	15.231	55.291	51.758		0.887892	20.2869
23.6985	30.452	5.466	18.017	63.929	39.972	71.485	27.486	33.153	33.375	7.073	2.717	1.145	2.108	1.433	3.078	6.338	6.385	3.535	16.894	27.453	13.766	12.317	26.863	10.757	13.326	16.294	3.322	2.23	0.407	17.085	60.555	46.528		0.892377	19.5295
23.8176	29.768	6.632	21.164	52.598	44.329	83.973	28.831	27.105	23.956	4.609	2.461	1.17	1.844	1.407	2.659	5.843	4.986	3.29	14.473	26.069	13.116	12.608	27.684	9.597	10.966	11.456	2.141	1.405	0.545	15.208	63.973	37.184		0.896862	18.5328
23.9367	26.635	6.635	25.767	43.635	47.258	93.041	34.264	19.808	18.944	5.303	1.912	1.242	1.166	1.445	2.093	4.28	4.771	3.284	11.973	19.923	14.338	14.829	30.465	7.275	10.688	7.362	1.746	0.803	0.771	15.846	68.86	33.991		0.901347	18.136
24.0558	27.256	7.35	30.16	42.918	49.907	103.526	31.543	17.178	15.2	4.582	2.487	0.857	1.18	1.407	1.735	3.77	4.574	2.713	11.828	17.708	12.785	15.345	34.072	5.359	7.992	4.199	1.453	0.768	0.471	14.4	62.459	26.211		0.905831	17.606
24.1748	31.394	6.743	36.626	32	44.962	106.353	40.113	13.91	12.591	3.563	1.691	0.506	1.305	1.108	1.562	3.678	3.508	1.874	10.652	14.836	13.362	14.555	33.941	3.189	7.334	3.062	1.01	0.661	0.556	13.974	54.65	21.819		0.910312	16.784
24.2939	37.3	6.676	47.381	28.996	40.337	103.526	41.909	10.804	12.663	2.764	1.556	0.779	1.467	1.131	1.662	3.648	3.282	1.399	8.9	12.088	15.556	15.58	39.201	3.472	4.78	2.754	1.364	0.657	0.433	12.249	49.799	18.746		0.914797	16.6518
24.413	42.973	7.853	46.018	21.746	34.495	100.775	35.182	10.17	9.897	2.337	1.464	0.883	1.341	0.749	1.282	2.833	2.876	1.486	6.553	7.073	14.458	18.812	39.418	2.945	3.002	3.322	0.528	0.343	0.389	9.199	40.373	16.454		0.919282	15.2259
24.5321	52.44	7.705	46.847	17.929	31.863	84.604	30.194	10.192	7.011	2.445	1.688	1.091	0.949	0.892	1.383	2.883	2.834	1.801	5.767	5.906	12.184	21.461	41.805	2.269	2.54	2.393	0.718	0.541	0.065	9.587	36.895	12.708		0.923767	14.3622
24.6512	55.75	9.722	45.056	13.441	26.182	66.277	23.847	8.151	7.206	1.93	1.502	0.723	0.74	0.934	1.508	2.224	3.115	1.166	5	5.829	13.096	24.743	44.711	2.245	2.246	1.629	0.575	0.235	0.064	7.819	36.18	7.665		0.928251	13.1722
24.7703	65.205	7.893	43.636	10.658	20.596	40.512	15.385	6.731	4.816	2.169	1.064	0.399	1.25	0.972	1.719	2.318	2.444	1.535	4.406	5.158	13.583	27.605	50.419	1.16	1.544	1.598	0.597	0.133	0.325	6.62	29.964	5.407		0.932736	11.8069
24.8894	69.778	8.093	49.873	8.038	17.934	22.235	10.988	4.391	4.083	1.891	1.059	0.412	0.74	1.316	1.229	1.766	2.326	0.975	4.428	5.118	13.132	30.961	50.06	1.496	1.288	1.576	0.492	0.545	0.075	5.018	24.022	3.254		0.937221	10.8935
25.0085	80.394	8.18	45.044	8.13	12.376	21.647	9.052	4.344	2.984	2.152	1.392	0.817	0.852	1.171	1.185	1.723	2.684	1.101	3.103	4.206	13.941	34.129	49.028	0.591	1.395	1.322	0.715	0.158	0.216	6.111	19.233	2.328		0.941706	10.6782
25.1275	77.014	7.468	47.013	6.452	11.302	12.672	9.575	4.357	3.647	1.846	1.173	0.336	0.521	0.813	1.273	1.553	1.644	1.372	3.716	4.198	12.892	35.823	49.261	0.697	1.792	0.939	0.56	0.062	0.357	5.29	11.701	1.483		0.946187	9.96256
25.2466	80.054	8.978	31.883	4.405	9.782	10.707	8.681	3.114	2.176	1.017	0.82	0.38	0.481	0.599	0.674	1.597	1.528	1.515	2.258	4.399	12.61	35.436	45.52	0.451	1.267	0.804	0.289	0.052	0.294	4.083	7.676	0.964		0.950671	8.89044
25.3657	77.32	10.421	24.419	4.787	6.89	9.323	6.042	2.86	1.765	1.334	1.337	0.281	0.776	0.75	0.935	1.158	1.368	1.318	1.973	3.161	8.504	38.495	38.13	0.756	1.08	0.759	0.594	0.112	0.337	4.095	5.555	0.82		0.955156	8.04547
25.4848	68.013	15.766	13.724	3.215	6.8	8.391	5.004	1.822	1.119	1.016	1.06	0.336	0.686	1.287	1.051	1.329	1.609	0.834	2.165	2.226	8.425	35.573	34.345	0.654	1.198	0.48	0.276	0.38	0.277	4.211	2.62	0.849		0.959641	7.08566
25.6039	50.058	18.622	8.773	3.362	6.534	5.787	5.24	2.439	1.274	0.942	0.576	0.229	0.771	0.906	0.677	1.12	1.4	0.654	1.432	2.204	6.245	30.404	26.521	0.236	1.045	0.655	0.115	0.014	0.316	3.286	1.676	0.632		0.964126	5.75453
25.723	36.811	28.394	6.541	3.923	4.543	6.038	4.565	1.646	1.418	1.788	0.937	0.274	0.621	0.345	0.721	1.16	1.169	0.835	2.227	1.759	6.131	31.384	18.545	0.365	0.458	0.587	0.165	0.16	0.172	2.97	1.126	0.603		0.96861	5.26191
25.8421	23.598	33.906	4.399	3.178	4.419	4.946	4.188	1.616	1.247	0.64	0.449	0.283	0.651	0.43	0.674	1.37	1.487	0.886	1.769	0.652	6.074	26.856	15.416	0.129	0.595	0.186	0.334	0.113	0.122	2.219	0.562	0.663		0.973095	4.50178
25.9612	17.388	39.08	3.408	1.983	3.103	3.761	3.909	1.071	1.212	0.38	0.288	0.385	0.816	0.617	1.036	0.526	0.904	0.892	1.399	0.884	4.143	20.711	11.594	0.336	0.658	0.265	0.289	0.062	0.328	1.548	0.443	0.406		0.97758	3.86953
26.0802	12.325	43.367	2.679	2.225	2.491	3.539	3.446	1.218	0.838	0.621	0.481	0.432	0.529	0.551	0.798	0.833	0.794	0.841	1.176	0.889	4.94	13.952	9.128	0.124	0.509	0.284	0.219	0.215	0.108	1.512	0.291	0.172		0.982061	3.48522
26.1993	9.139	46.652	2.497	1.918	2.065	3.266	2.907	0.905	0.29	0.559	0.344	0.177	0.598	0.228	0.873	0.613	1.273	0.508	1.322	0.714	3.92	12.04	6.912	0.379	0.503	0.169	0.263	0.11	0.159	0.975	0.325	0.268		0.986546	3.21472
26.3184	8.395	44.041	2.356	2.034	2.64	2.557	2.208	1.191	0.614	0.553	0.438	0.165	0.604	0.655	0.209	0.513	1.368	0.928	0.858	0.887	2.917	8.173	5.924	0.33	0.276	0.276	0.113	0.063	0.168	0.837	0.113	0.112		0.99103	2.89113
26.4375	6.314	38.841	2.03	1.132	1.796	1.875	1.617	0.517	0.449	0.567	0.221	0.397	0.461	0.62	1.024	0.802	0.736	0.459	1.143	0.569	3.124	6.92	5.949	0.173	0.276	0.228	0.065	0.164	0.065	0.249	0.115	0.375		0.995515	2.47728
26.5566	5.67	27.608	1.37	1.326	2.054	2.846	2.305	1.205	0.398	0.396	0.477	0.921	0.384	0.719	0.661	0.422	0.943	0.974	0.531	0.716	2.154	3.94	3.272	0.279	0.119	0.242	0.108	0.156	0.108	0.313	0.333	0.179		1	1.97278

## Sheet: Image27
X0	Y0	Y1	Y2	Y3	Y4	Y5	Y6	Y7	Y8	Y9	Y10	Y11	Y12	Y13	Y14	Y15	Y16	Y17	Y18	Y19	Y20	Y21	Y22	Y23	Y24	Y25	Y26	Y27	Y28	Y29	Y30	Y31		Ap-basal	Avg int
0	176.409	62.953	122.26	75.277	55.989	101.107	92.889	88.72	142.386	142.779	88.418	97.683	89.103	135.339	181.767	152.684	116.336	124.53	156.297	125.693	109.002	126.297	128.352	108.31	96.346	98.431	92.42	83.878	80.594	86.474	94.667	60.853		0	109.195
0.1191	169.399	63.001	126.936	84.62	63.571	100.574	92.82	80.471	149.476	143.944	96.498	102.357	84.338	142.908	175.594	160.549	119.036	130.822	157.5	122.29	121.087	141.061	141.808	107.558	98.817	103.742	105.787	103.927	89.67	92.991	107.426	68.048		0.00520886	114.02
0.2382	163.48	66.716	132.948	92.692	70.648	99.83	95.515	88.561	149.658	144.966	103.005	104.178	93.198	154.805	191.044	181.587	127.096	136.365	163.975	124.543	126.018	151.478	158.491	109.852	105.241	106.052	109.155	111.082	102.331	102.338	122.933	73.91		0.0104177	120.74
0.3573	163.316	74.108	133.056	100.537	82.663	100.944	101.116	93.343	154.877	134.367	102.619	109.771	94.392	154.684	199.007	179.593	133.342	137.432	173.343	128.819	141.845	158.383	173.434	123.592	114.327	115.709	125.606	121.03	107.255	120.128	139.386	82		0.0156266	127.313
0.4764	168.795	80.874	137.521	119.466	91.112	97.727	105.157	95.607	144.408	124.188	101.098	114.096	101.697	158.896	211.899	180.381	143.224	143.42	181.24	132.82	147.61	166.464	177.482	134.474	127.295	125.227	139.536	139.824	120.126	135.97	154.059	96.248		0.0208354	134.311
0.5954	165.205	89.726	148.566	138.197	101.725	105.912	118.733	91.948	143.296	118.849	102.289	126.458	102.731	159.54	219.128	185.38	150.41	154.698	191.683	136.513	161.909	173.52	183.171	158.589	131.126	130.269	152.816	158.52	147.062	154.887	171.262	111.138		0.0260399	143.289
0.7145	165.675	93.938	154.073	150.983	113.229	101.289	124.424	98.493	147.619	116.796	103.363	131.416	107.389	166.384	227.422	191.635	157.282	165.186	198.127	137.671	173.93	176.765	193.171	169.926	145.118	145.391	157.38	170.956	172.856	173.723	187.608	128.554		0.0312488	151.493
0.8336	161.877	100.22	159.763	157.976	117.707	110.789	138.659	99.67	150.028	116.716	113.698	127.986	106.888	175.1	229.186	192.992	171.878	181.769	204.893	140.855	191.171	186.552	200.993	189.277	154.645	156.101	177.051	194.939	186.792	185.792	192.965	141.431		0.0364576	159.886
0.9527	166.397	105.603	164.93	173.231	122.264	120.18	146.87	102.521	143.591	115.404	105.717	137.307	107.119	170.358	231.046	190.36	177.351	196.105	209.588	147.614	206.604	191.59	199.655	204.472	156.737	169.617	189.634	202.746	206.768	203.874	194.258	149.695		0.0416665	165.913
1.0718	159.313	111.687	180.064	173.244	125.451	127.365	159.543	109.052	144.254	114.676	110.214	142.079	110.982	183.086	219.987	190.039	185.737	205.308	220.611	156.618	216.549	199.161	202.662	214.141	178.661	179.028	194.343	216.588	215.219	217.733	203.158	169.499		0.0468753	173.002
1.1909	161.391	119.446	181.152	181.145	128.488	127.707	169.014	117.888	134.699	116.775	108.727	129.705	112.775	193.646	207.172	192.727	191.521	215.43	224.909	165.523	228.54	200.21	207.806	217.04	191.262	193.109	200.569	227	219.067	220.637	196.878	176.969		0.0520842	176.841
1.31	163.987	121.579	191.837	175.914	129.908	143.112	167.703	120.23	131.858	115.012	109.299	137.669	119.313	206.615	201.866	196.92	198.632	218.293	226.211	171.783	235.861	198.747	215.78	221.154	197.083	205.628	200.165	227.57	228.035	222.855	188.469	182.382		0.0572931	180.358
1.4291	170.699	125.692	194.08	175.507	120.959	142.744	174.286	131.657	132.675	111.656	108.468	127.079	115.867	217.154	190.796	186.223	207.041	218.64	234.588	171.869	239.839	190.568	204.964	225.745	195.815	214.423	195.116	226.42	230.311	227.918	185.09	176.032		0.0625019	180.31
1.5481	178.517	139.281	198.02	180.178	119.389	151.139	181.293	143.897	131.951	113.626	113.968	125.61	117.342	223.881	181.85	173.874	203.815	222.139	229.169	182.528	246.113	191.331	206.978	216.784	201.684	208.342	190.434	217.665	224.782	231.313	178.737	166.714		0.0677064	181.011
1.6672	182.726	139.145	202.897	168.672	127.686	159.35	183.908	150.72	124.753	116.508	119.97	117.296	115.377	231.586	169.41	169.556	210.651	219.817	234.017	190.658	247.623	193.08	205.268	210.789	190.957	212.357	169.15	215.341	223.871	228.15	167.071	158.277		0.0729153	179.895
1.7863	181.46	147.225	204.835	172.045	124.659	165.7	174.809	158.849	116.731	119.846	120.215	112.348	110.297	240.81	155.211	154.321	203.346	209.734	231.96	201.017	244.489	193.93	199.618	208.871	193.766	198.703	162.088	198.147	216.627	222.147	150.422	141.076		0.0781241	176.103
1.9054	190.695	158.085	206.834	170.295	124.093	168.701	173.133	160.699	108.032	118.704	121.362	102.172	103.22	235.701	147.721	143.105	197.631	203.018	234.492	204.719	244.735	197.201	193.986	206.474	192.192	191.352	141.833	185.536	207.259	209.624	141.78	123.478		0.083333	172.121
2.0245	183.993	164.951	197.513	160.489	117.848	163.205	174.113	167.307	101.856	113.997	131.501	98.104	99.121	236.963	144.4	132.132	199.129	199.882	228.665	215.478	236.743	197.842	175.645	195.932	184.734	175.527	129.295	171.435	193.413	204.215	131.856	112.924		0.0885418	166.882
2.1436	183.735	174.479	188.567	161.6	126.986	161.88	182.155	172.891	89.756	113.946	134.814	99.123	93.207	230.624	140.92	123.582	194.567	197.389	216.227	219.389	231.447	191.157	169.969	183.752	186.443	157.247	107.236	159.141	182.507	186.011	124.505	100.141		0.0937507	162.044
2.2627	184.048	180.589	169.058	154.832	126.155	158.695	190.156	180.807	74.153	116.409	135.092	90.205	89.066	227.13	141.678	110.938	185.281	195.921	212.319	218.198	212.595	191.065	162.843	176.156	177.288	137.754	78.687	135.836	164.459	160.709	117.067	98.375		0.0989595	154.799
2.3818	177.303	192.587	144.552	149.266	129.636	157.19	187.473	186.024	71.915	113.364	137.226	86.511	74.155	221.172	135.694	94.4	175.406	196.843	201.889	210.762	194.45	181.427	150.985	164.3	171.626	121.966	59.849	116.198	140.155	148.506	112.756	94.147		0.104168	146.867
2.5008	179.787	183.27	134.422	135.732	125.772	156.48	201.043	189.733	60.908	111.342	142.116	85.877	66.555	219.954	133.262	80.206	165.297	189.949	191.41	222.366	175.502	178.884	139.045	142.898	168.885	105.298	53.718	96.046	120.718	122.313	105.441	93.223		0.109373	139.92
2.6199	175.585	196.069	123.348	118.725	130.631	151.546	199.85	192.443	60.58	110.256	142.525	82.049	54.713	206.041	123.26	70.51	148.346	185.301	179.966	212.616	149.281	170.538	139.361	127.238	153.113	91.403	47.959	75.497	102.466	112.933	95.691	82.462		0.114582	131.634
2.739	177.145	193.111	108.134	100.974	117.99	154.792	198.981	190.616	58.194	111.21	139.7	75.775	47.044	199.183	127.238	65.503	129.068	179.137	176.881	197.262	138.475	171.454	130.714	111.214	151.17	76.648	43.531	57.986	82.513	94.154	79.166	73.742		0.119791	123.71
2.8581	178.262	186.856	95.134	84.65	112.685	153.021	188.359	191.058	59.769	109.899	151.83	74.863	40.092	192.837	123.07	55.681	118.801	168.251	173.428	189.004	123.851	163.368	124.952	105.526	138.458	68.277	36.423	46.899	67.996	78.614	66.796	65.386		0.124999	116.691
2.9772	176.64	191.817	86.433	79.358	101.099	153.866	187.542	184.592	60.079	108.772	150.6	70.701	30.697	187.674	123.161	43.099	111.606	168.63	173.937	179.027	106.808	159.785	126.586	97.895	127.053	58.856	34.078	43.446	61.01	69.055	52.221	53.634		0.130208	111.242
3.0963	168.479	192.159	72.468	69.326	89.965	149.941	181.085	176.265	58.733	116.624	163.559	69.873	29.408	187.767	122.82	41.672	105.619	172.06	167.304	154.526	93.084	143.928	114.31	88.521	119.991	46.324	29.23	45.215	51.062	66.176	37.398	39.96		0.135417	105.152
3.2154	168.244	191.799	61.691	72.528	71.982	151.055	181.396	172.912	59.289	117.383	167.726	60.569	27.431	182.474	111.323	34.124	96.389	170.261	158.051	130.321	83.664	134.574	107.318	86.334	106.335	41.374	29.915	41.598	48.043	55.565	33.947	33.42		0.140626	99.6573
3.3345	167.574	187.78	58.327	67.122	61.532	156.179	185.611	158.496	61.783	113.802	168.151	60.058	24.428	187.848	108.871	31.822	81.725	165.378	151.87	118.432	77.402	118.224	103.27	84.898	98.141	29.499	30.184	35.616	43.664	50.956	33.574	28.119		0.145835	95.323
3.4535	170.751	183.987	51.751	62.761	55.652	156.654	180.891	158.656	59.666	114.948	163.044	62.545	25.37	193.034	111.155	30.143	72.196	160.722	141.853	109.155	74.331	108.17	88.654	82.095	89.587	22.007	25.63	35.698	40.258	40.771	32.012	30.404		0.151039	91.7047
3.5726	169.914	193.443	49.354	62.1	57.545	165.604	183.923	156.795	56.994	117.902	165.876	57.781	22.499	195.668	113.35	27.563	63.206	157.152	137.093	98.747	72.318	97.002	90.473	74.11	85.718	18.033	24.311	33.146	36.755	38.99	30.332	26.503		0.156248	90.0063
3.6917	172.282	193.292	43.686	54.438	56.187	163.496	186.314	158.18	50.488	111.915	181.497	58.881	17.809	200.301	110.153	28.598	54.945	154.993	131.353	92.205	65.638	87.302	76.672	70.788	75.608	17.099	25.174	30.371	32.772	34.711	30.299	28.529		0.161457	87.3743
3.8108	180.794	181.586	43.52	49.035	53.014	167.498	183.019	161.673	50.875	109.877	179.218	66.518	19.379	197.543	95.66	29.881	50.517	149.481	127.401	82.964	58.421	81.78	74.353	69.444	67.783	16.29	22.051	28.542	30.963	33.449	29.951	30.99		0.166666	85.1084
3.9299	185.479	172.079	42.852	40.673	46.627	160.643	188.139	163.315	48.398	116.121	175.774	66.069	18.936	188.494	89.095	25.566	44.457	149.174	122.663	78.133	59.989	71.967	70.891	70.796	59.529	13.914	23.175	25.85	26.976	29.119	29.75	29.665		0.171875	82.3221
4.049	182.08	175.218	39.048	36.064	47.765	161.841	193.726	157.561	44.121	107.435	186.793	70.451	19.598	176.684	79.706	22.014	35.54	144.658	119.195	78.182	55.354	58.626	69.954	67.624	49.375	11.333	20.786	24.395	26.577	27.477	23.792	31.632		0.177084	79.5189
4.1681	186.86	168.937	39.888	31.601	42.063	160.381	188.109	150.407	44.273	113.476	193.726	71.248	17.103	167.838	73.114	19.007	37.659	144.163	114.429	65.383	54.921	54.296	64.498	66.378	43.027	12.758	19.169	20.46	23.636	22.377	20.602	27.787		0.182293	76.8617
4.2872	193.334	164.067	38.295	23.626	41.028	154.841	185.986	149.15	41.683	118.06	198.086	77.504	16.413	164.181	75.927	21.036	32.879	146.562	110.849	64.339	48.225	50.107	64.905	65.984	32.142	11.49	20.031	24.187	21.491	19.608	20.71	30.498		0.187501	75.8507
4.4063	198.635	160.281	38.463	20.427	38.758	150.078	180.552	144.631	39.586	122.519	202.047	81.792	15.547	163.744	72.639	21.813	33.338	152.408	108.686	60.88	41.807	45.005	62.486	65.691	25.282	9.417	15.991	22.337	17.588	17.407	19.478	23.632		0.19271	74.1545
4.5253	202.119	158.709	35.955	17.226	39.996	146.71	169.532	135.185	33.386	126.458	205.109	84.836	14.425	157.147	73.957	16.741	28.265	154.569	106.788	54.336	35.155	37.782	59.054	64.586	19.764	9.847	16.752	19.299	16.792	12.095	17.185	20.263		0.197915	71.5632
4.6444	210.365	152.537	33.045	17.268	36.979	139.473	162.82	123.968	35.489	124.785	213.63	83.763	15.567	149.861	74.023	17.626	25.588	161.07	101.329	47.493	32.625	34.951	55.281	55.897	16.314	9.353	14.495	17.201	16.172	13.666	16.257	18.608		0.203124	69.6093
4.7635	220.753	151.782	35.233	16.884	33.119	137.529	151.033	93.136	35.251	132.116	215.099	89.374	15.998	151.895	70.944	16.882	22.12	154.782	99.166	44.499	35.11	28.67	54.436	56.326	13.065	8.09	15.407	20.231	16.077	13.191	15.018	16.677		0.208332	68.1217
4.8826	227.637	146.693	33.053	15.481	27.504	137.951	143.933	83.169	27.727	136.083	215.149	91.382	15.321	157.892	63.478	17.316	21.076	156.636	88.908	39.16	29.439	29.677	49.32	53.28	11.188	10.063	16.805	19.4	15.139	11.978	14.035	14.121		0.213541	66.2498
5.0017	233.66	142.708	29.674	17.798	26.772	135.371	129.061	59.683	26.498	136.486	211.98	88.264	16.88	146.139	58.625	15.81	18.501	154.121	84.85	33.467	25.924	28.417	41.986	47.892	9.395	8.888	15.119	19.288	14.271	13.382	16.055	14.441		0.21875	63.1689
5.1208	237.301	127.502	30.741	19.237	23.066	128.412	115.64	36.417	27.898	136.492	215.779	96.287	13.393	139.604	48.577	15.227	16.656	156.167	80.064	30.816	21.943	32.506	37.463	40.311	10.095	9.527	14.576	21.934	14.299	11.593	14.56	13.041		0.223959	60.5351
5.2399	244.475	111.474	26.186	17.581	22.82	128.739	102.016	25.353	23.656	133.265	216.164	101.242	15.304	132.022	42.453	14.967	14.582	140.867	71.735	25.909	18.85	35.894	30.882	36.222	8.63	9.01	15.669	20.978	12.751	9.501	15.808	13.045		0.229168	57.4391
5.359	243.637	100.208	26.433	18.583	17.766	117.41	96.567	16.708	23.157	127.556	214.231	100.618	14.132	117.649	36.313	15.639	14.23	133.797	55.839	22.787	19.287	40.786	26.065	27.873	8.914	8.475	15.039	20.78	11.663	11.81	18.028	12.659		0.234377	54.2075
5.478	245.951	93.727	27.091	17.766	15.827	111.53	85.951	11.269	20.678	131.743	221.742	101.979	13.131	98.325	31.437	15.203	12.604	117.41	43.446	18.776	19.507	40.025	23.589	22.376	8.155	7.717	14.567	16.236	11.215	10.399	18.62	13.789		0.239581	51.3057
5.5971	253.21	83.906	25.461	17.896	14.12	99.082	69.925	9.172	19.538	125.676	217.72	98.013	14.557	81.18	25.636	14.963	11.786	94.509	38.087	14.238	18.942	39.487	20.804	18.035	7.663	6.113	17.224	17.87	11.553	10.457	16.92	12.514		0.24479	47.6955
5.7162	251.938	75.221	25.075	18.399	14.26	87.503	64.211	7.728	19.601	126.208	218.854	91.094	11.112	53.656	23.893	15.552	8.405	68.357	31.987	13.065	17.382	36.96	15.775	13.006	7.466	5.023	17.287	17.043	10.117	11.281	16.899	11.458		0.249999	43.9317
5.8353	250.026	64.217	24.183	17.367	11.517	79.078	54.201	5.54	15.352	129.824	217.823	85.885	12.111	32.495	21.657	14.317	8.291	40.593	26.06	10.627	17.443	37.922	13.355	11.248	6.308	3.67	16.29	14.99	9.62	9.395	15.097	10.166		0.255208	40.2084
5.9544	249.374	57.656	21.698	17.969	10.561	70.743	46.563	5.35	15.558	123.385	208.376	78.797	10.327	17.726	21.994	12.566	6.605	18.281	17.272	10.689	15.471	34.633	12.737	10.659	5.728	4.655	15.226	12.628	9.679	9.08	17.648	10.608		0.260417	36.8826
6.0735	249.793	49.394	18.181	24.353	10.924	55.726	40.033	5.172	15.699	125.527	196.979	64.846	11.071	17.02	21.426	12.854	6.402	10.453	14.075	9.354	15.623	34.213	11.997	9.384	6.619	3.974	14.911	13.866	11.262	10.785	18.837	10.991		0.265625	35.0545
6.1926	250.218	44.604	16.324	25.183	9.009	46.064	37.609	6.478	15.784	130.068	191.997	54.739	12.085	16.098	23.581	12.204	5.064	8.593	9.632	8.335	18.221	36.82	10.505	8.969	6.028	3.705	14.866	13.001	10.027	9.698	15.989	9.905		0.270834	33.7938
6.3117	251.025	39.407	15.303	26.497	8.668	39.8	37.349	5.879	16.736	121.832	172.556	47.685	13.516	14.282	24.982	10.546	6.03	6.677	8.404	9.869	16.07	35.058	10.9	8.262	6.213	4.668	17.138	14.844	9.75	11.134	18.871	7.809		0.276043	32.43
6.4307	244.387	29.23	14.161	24.422	8.548	36.026	32.16	4.898	14.745	117.588	161.607	42.728	14.66	13.192	29.75	13.086	4.735	7.29	6.372	8.041	16.164	31.307	10.364	7.858	5.849	3.861	17.381	13.939	9.01	11.615	20.968	7.23		0.281248	30.7241
6.5498	236.589	25.35	12.732	23.236	7.712	30.497	26.425	5.327	14.8	105.219	146.779	36.634	11.823	11.963	28.87	12.692	5.17	7.235	6.937	9.527	15.828	31.224	10.595	5.132	4.294	4.09	17.92	14.472	9.528	12.996	22.843	9.177		0.286457	28.863
6.6689	235.768	19.798	12.845	23.41	6.742	27.095	20.423	6.292	14.197	95.122	125.069	31.905	10.809	11.404	32.681	12.547	5.151	5.831	6.212	8.813	15.614	25.453	11.366	6.182	4.689	4.065	17.596	16.215	7.612	14.086	23.35	8.94		0.291665	27.1026
6.788	226.371	18.081	13.507	20.93	6.954	21.192	15.67	5.462	14.34	90.571	99.876	25.272	11.907	10.87	38.78	13.172	5.368	5.318	5.961	8.581	17.807	22.992	11.827	5.615	4.606	3.76	18.297	16.508	9.971	13.323	26.622	7.502		0.296874	25.5317
6.9071	208.952	16.03	13.678	21.225	6.756	16.939	14.374	5.193	14.833	76.64	85.283	17.916	12.474	10.033	38.877	15.312	5.127	5.401	5.101	8.261	17.983	20.86	8.042	4.568	4.114	3.71	18.84	17.018	9.498	14.686	29.036	8.049		0.302083	23.5878
7.0262	194.847	15.252	16.412	18.516	6.252	15.5	12.627	5.795	14.304	67.609	66.063	14.349	10.682	9.71	36.751	17.572	5.225	4.927	5.61	9.718	17.825	17.895	10.819	4.638	3.266	3.611	19.165	21.761	11.458	15.212	29.204	8.55		0.307292	22.2227
7.1453	174.901	16.366	17.868	20.635	5.677	10.458	11.719	4.9	13.765	50.603	46.902	13.8	13.343	8.584	35.46	18.88	4.01	4.763	5.224	9.064	19.892	17.685	9.042	5.542	3.267	4.916	20.391	22.678	10.999	14.71	26.639	8.925		0.312501	20.3628
7.2644	156.877	15.623	22.319	17.976	5.774	9.644	13.552	4.372	12.961	36.587	35.003	15.164	13.339	9.423	29.603	20.546	4.737	3.247	6.029	9.257	19.679	18.859	10.651	5.427	3.844	4.625	20.123	22.338	10.408	13.631	23.402	9.258		0.31771	18.8837
7.3834	135.374	15.959	23.935	14.775	4.384	8.946	14.221	5.879	14.443	25.612	20.328	14.518	14.751	9.72	30.728	23.094	4.969	4.11	5.851	10.112	20.624	17.334	10.113	5.637	4.072	3.424	21.567	27.338	11.273	17.009	25.049	9.571		0.322914	17.96
7.5025	108.284	17.07	29.533	15.517	5.631	6.617	15.161	4.442	16.337	19.978	14.707	13.372	13.916	8.427	34.782	19.93	5.35	3.735	6.73	10.269	19.229	20.083	10.933	4.963	4.432	4.849	20.684	27.696	11.365	15.128	21.101	9.69		0.328123	16.8732
7.6216	87.659	19.708	34.526	18.937	6.817	8.683	13.307	4.808	13.926	15.543	9.917	13.779	13.979	8.101	39.472	21.741	4.679	4.314	6.483	10.851	20.894	22.864	8.696	4.74	3.618	4.21	22.685	27.027	13.442	16.558	21.165	8.604		0.333332	16.6167
7.7407	71.276	19.329	37.388	18.611	5.855	5.457	15.082	3.954	16.578	15.169	6.68	13.941	13.367	8.01	47.866	18.128	5.263	4.49	5.377	9.248	20.759	23.424	9.034	5.271	4.443	4.762	23.625	24.361	14.07	16.99	19.823	8.954		0.338541	16.1433
7.8598	50.437	22.488	40.037	19.789	5.104	5.59	15.105	3.917	18.221	13.141	5.448	13.499	12.257	6.58	57.823	17.059	5.85	5.272	5.301	9.59	22.737	25.728	8.995	5.188	3.149	4.055	25.155	26.312	14.563	16.982	22.887	9.848		0.34375	16.1908
7.9789	38.373	21.008	44.658	21.053	4.873	5.606	13.247	4.371	18.316	12.824	5.523	12.372	14.801	7.908	63.732	17.365	5.487	4.722	6.038	9.821	23.215	26.074	8.126	4.337	3.675	3.816	26.613	32.338	16.25	16.312	19.013	9.93		0.348958	16.3062
8.098	31.953	22.679	40.165	24.434	5.378	3.488	15.922	4.18	19.595	10.827	4.823	13.173	14.848	7.524	70.733	18.504	5.09	4.025	5.393	9.07	24.412	25.568	7.552	4.143	3.653	3.575	30.52	32.098	16.335	16.722	20.047	7.578		0.354167	16.3752
8.2171	29.507	25.862	40.94	23.737	4.755	4.036	17.06	4.222	20.513	14.145	4.924	11.532	13.964	7.119	74.945	16.773	5.24	4.065	6.063	8.836	25.587	22.842	8.136	4.816	4.106	4.099	32.735	31.795	16.887	16.457	17.459	8.775		0.359376	16.6229
8.3362	28.01	28.45	40.878	27.691	4.836	3.64	15.755	4.667	20.954	12.708	4.356	9.412	15.65	8.253	70.826	14.953	5.191	3.719	6.043	10.412	28.488	22.01	8.449	3.79	3.621	3.82	37.912	30.524	15.622	19.837	17.592	8.697		0.364585	16.7739
8.4552	19.181	30.626	39.112	28.808	5.318	3.79	14.957	5.07	20.203	11.107	3.416	7.079	15.017	7.749	75.471	12.469	4.132	4.877	5.914	10.429	31.155	21.919	9.402	4.921	3.831	3.987	35.808	33.985	18.468	18.996	16.68	8.06		0.36979	16.623
8.5743	15.054	28.976	37.441	28.395	5.29	4.382	17.437	4.972	19.586	8.056	3.699	6.248	16.392	8.046	70.25	11.408	4.979	3.797	6.315	9.523	31.56	26.215	8.671	4.231	4.206	4.339	36.339	34.06	16.343	22.757	15.719	7.718		0.374998	16.3251
8.6934	15.057	29.184	37.995	23.923	5.393	4.897	16.507	4.678	20.151	6.721	4.677	7.055	19.412	7.269	64.64	11.732	3.752	3.361	5.192	10.53	33.362	25.292	8.289	4.206	4.395	3.548	36.013	33.154	19.744	26.32	16.008	6.936		0.380207	16.231
8.8125	13.811	28.481	36.779	22.117	6.078	5.481	15.577	4.792	19.721	5.896	3.823	5.095	20.589	8.841	56.549	10.311	5.308	3.856	5.713	11.412	33.853	24.246	8.315	4.772	3.601	3.867	35.253	28.607	21.762	26.308	18.033	6.884		0.385416	15.8041
8.9316	13.824	27.803	39.457	22.402	5.027	5.332	14.518	4.324	21.311	5.016	2.592	5.415	24.666	7.644	50.404	13.387	4.93	3.535	4.898	10.45	37.213	29.188	9.886	4.324	3.624	4.819	38.601	31.84	21.759	26.656	17.118	7.595		0.390625	16.2362
9.0507	15.77	27.174	45.408	21.571	4.794	5.938	15.598	3.629	21.027	4.633	3.764	5.438	26.925	7.912	45.261	17.052	5.446	4.389	6.582	11.508	41.344	27.72	10.011	3.317	3.585	4.251	36.038	31.129	23.196	30.2	15.027	6.77		0.395834	16.6377
9.1698	16.317	28.537	46.713	17.074	4.773	5.857	14.378	4.021	23.743	4.669	3.618	5.069	29.399	10.31	42.569	20.793	4.157	3.382	4.149	11.028	43.235	29.757	12.212	4.712	3.492	3.541	35.888	30.388	21.919	31.027	16.93	7.527		0.401043	16.912
9.2889	20.879	27.093	44.724	18.689	5.767	6.266	16.144	3.492	23.471	5.126	3.597	5.52	31.256	9.927	42.333	24.958	5.255	4.744	4.937	11.402	48.786	34.154	13.644	4.123	3.424	2.569	32.83	29.201	22.124	32.399	15.903	7.512		0.406252	17.5703
9.4079	23.377	27.667	44.465	19.432	6.195	5.72	13.941	4.409	20.784	4.59	3.158	4.657	31.006	10.485	39.565	29.214	4.879	4.426	5.619	12.131	52.449	30.728	13.903	3.598	4.211	3.931	32.13	27.69	20.677	33.928	13.738	7.416		0.411456	17.5037
9.527	25.999	24.29	48.279	19.47	5.349	6.494	13.505	4.128	20.319	4.384	4.321	5.568	33.91	8.744	37.064	29.797	4.447	4.414	5.93	13.492	54.33	32.078	13.852	4.188	3.767	3.998	32.124	28.073	25.155	35.248	13.75	7.388		0.416665	17.933
9.6461	28.918	23.739	50.187	19.153	5.028	6.083	12.602	4.423	19.59	4.543	4.233	5.072	34.868	10.994	38.2	30.448	5.417	5.398	5.205	11.188	57.308	30.967	12.263	3.445	3.153	3.341	30.146	28.229	25.08	38.157	10.46	6.527		0.421874	17.9489
9.7652	29.807	22.091	49.965	18.053	5.107	7.513	10.082	4.73	19.987	3.521	3.261	5.943	37.736	10.104	42.396	29.012	4.749	4.647	6.118	11.239	64.384	30.528	11.568	3.984	3.144	3.015	28.044	27.537	24.77	38.269	10.575	7.355		0.427083	18.1011
9.8843	28.826	20.863	52.451	16.273	7.016	7.503	11.014	3.641	22.458	4.04	4.202	5.638	41.283	10.31	43.553	28.644	4.932	5.164	6.954	13.21	76.105	30.754	12.024	3.344	3.139	3.457	27.373	27.765	25.264	44.42	10.383	7.375		0.432291	19.0431
10.0034	31.456	21.529	53.459	15.288	6.381	8.048	8.989	4.97	21.824	3.772	4.022	4.855	40.217	11.805	45.952	26.854	4.814	4.491	6.574	12.347	71.538	24.259	11.723	3.382	3.693	3.931	28.249	27.139	27.381	41.716	9.516	6.622		0.4375	18.6499
10.1225	31.128	23.523	58.235	14.677	5.115	8.047	10.459	4.231	27.756	3.648	2.801	4.853	40.732	11.574	47.005	18.966	4.798	4.717	4.654	12.656	75.566	21.225	12.742	3.196	3.071	3.887	31.342	24.171	24.803	42.421	9.34	5.909		0.442709	18.664
10.2416	34.37	22.471	52.349	15.508	5.586	7.797	9.603	5.149	29.309	3.735	3.309	5.534	41.479	10.78	52.155	16.478	4.941	5.179	5.698	12.738	73.859	21.087	15.407	3.991	3.617	3.468	31.05	24.534	25.572	42.572	9.783	7.02		0.447918	18.9415
10.3606	35.358	22.564	51.038	13.561	6.887	6.993	8.704	4.548	32.03	3.677	2.987	4.573	40.574	13.769	55.766	16.036	5.24	4.373	4.933	13.605	72.297	21.534	16.237	4.609	3.395	3.228	31.58	22.82	24.952	36.206	8.172	7.322		0.453122	18.7365
10.4797	33.8	19.029	47.4	12.971	5.4	6.575	10.359	5.587	29.618	2.954	2.919	5.403	39.978	13.248	62.305	13.262	5.313	5.069	5.442	12.344	70.19	24.806	16.218	3.199	3.438	2.915	31.042	22.966	21.351	40.928	9.499	7.594		0.458331	18.5351
10.5988	36.481	22.74	45.801	10.877	6.391	7.947	12.668	4.944	31.133	3.121	4.269	4.96	40.913	13.018	62.775	10.736	4.423	4.956	5.018	15.993	70.262	24.779	17.843	4.174	2.668	3.759	27.788	19.417	20.216	43.587	9.513	6.26		0.46354	18.7322
10.7179	36.685	22.4	46.003	10.546	6.934	6.582	15.486	5.121	35.092	3.623	3.722	4.904	47.086	12.787	67.754	11.84	5.427	4.684	4.643	15.735	64.963	25.924	16.517	4.199	4.067	3.684	23.775	20.147	19.198	42.834	8.647	5.965		0.468749	18.9679
10.837	35.396	22.75	46.25	10.863	5.332	6.263	17.128	3.852	34.24	3.145	3.297	5.115	56.184	14.465	68.906	13.456	4.515	4.61	5.632	17.022	64.658	27.436	16.866	3.45	3.749	4.195	23.416	20.111	18.802	40.753	8.136	6.725		0.473958	19.2724
10.9561	36.888	23.625	45.374	11.337	4.998	5.431	18.885	4.978	36.69	3.374	4.235	5.182	63.971	14.746	68.886	10.228	4.366	4.42	4.415	16.959	62.715	24.547	16.903	3.829	3.485	3.458	23.215	20.817	18.889	40.092	8.446	6.55		0.479167	19.4354
11.0752	40.933	25.987	43.102	10.926	5.112	5.24	21.514	4.848	37.735	3.708	4.339	4.315	69.661	12.709	61.83	10.373	4.237	3.351	5.115	15.195	67.284	24.154	13.98	3.235	2.999	4.32	26.06	21.688	19.412	42.576	7.576	4.563		0.484376	19.6274
11.1943	40.301	26.957	40.093	11.769	4.116	4.41	21.2	4.796	38.004	3.341	4.487	5.003	75.271	13.202	59.263	11.062	5.593	5.683	4.665	17.505	60.528	26.845	14.813	3.614	2.745	3.197	22.569	17.654	23.523	40.926	8.595	4.516		0.489584	19.5702
11.3133	40.61	30.079	38.016	9.766	4.73	3.858	23.065	4.648	37.182	4.248	2.894	5.1	80.712	13.281	56.503	11.364	4.547	4.548	4.245	16.339	57.675	28.891	11.229	3.639	3.314	3.23	24.841	18.242	23.353	39.58	7.407	5.043		0.494789	19.4431
11.4324	44.731	31.415	31.476	9.978	5.435	5.644	18.899	5.356	35.581	2.976	3.763	4.329	81.111	11.255	48.004	12.146	5.612	4.483	5.31	16.913	58.235	28.374	11.668	3.01	4.27	2.861	25.401	15.894	27.208	35.054	7.734	5.089		0.499998	19.038
11.5515	48.676	31.632	30.401	7.45	4.564	3.881	16.749	4.446	37.985	2.998	3.98	5.785	74.039	12.107	45.228	13.156	5.4	4.661	4.57	16.602	57.833	27.767	9.508	2.423	3.309	3.019	27.516	19.611	25.595	35.105	8.209	4.325		0.505207	18.7041
11.6706	50.309	34.69	29.382	6.174	3.571	4.631	14.683	4.328	40.189	3.571	3.184	4.893	70.621	12.696	39.775	12.904	5.948	5.078	4.327	14.821	56.973	27.471	9.123	2.867	4.213	2.701	25.031	19.938	26.2	32.85	6.935	4.329		0.510416	18.2627
11.7897	55.439	34.67	25.616	5.544	3.626	3.928	13.957	4.348	38.531	3.861	4.619	4.242	76.4	11.669	40.965	13.786	5.82	4.603	5.233	15.89	56.887	28.384	7.305	3.873	3.808	4.178	27.591	19.947	26.351	31.884	7.577	4.305		0.515624	18.5887
11.9088	52.239	38.552	24.474	6.339	3.509	5.464	13.921	4.388	41.606	2.761	3.233	4.064	65.172	12.26	43.721	14.084	5.713	4.275	4.383	15.813	56.217	26.015	7.561	4.155	2.579	3.082	24.819	19.51	25.689	29.627	6.117	4.012		0.520833	17.9798
12.0279	59.913	39.983	20.55	5.918	4.199	5.244	12.913	4.05	39.27	4.093	3.385	4.526	65.46	12.61	47.391	13.18	5.827	4.707	4.924	17.242	57.95	24.383	7.233	3.652	2.545	2.905	29.4	20.166	25.104	27.42	5.339	4.155		0.526042	18.3012
12.147	57.772	41.437	16.182	6.619	4.981	4.939	14.543	4.179	42.747	3.031	3.243	4.375	56.536	12.816	54.275	14.784	5.086	4.376	3.803	17.575	64.874	25.426	6.331	3.295	3.673	2.951	28.626	18.228	24.754	23.832	7.927	5.239		0.531251	18.3892
12.2661	60.09	45.098	17.854	5.565	5.23	5.261	13.642	4.156	42.015	3.319	3.298	4.699	54.376	14.47	56.819	12.976	4.125	4.059	5.651	15.434	72.945	25.585	7.303	4.442	2.927	3.221	30.543	20.407	23.775	22.147	7.573	3.885		0.53646	18.8403
12.3851	64.529	47.847	15.769	5.313	3.608	5.598	12.136	4.888	40.448	3.879	3.545	3.883	41.879	12.478	57.062	12.654	4.455	4.414	5.887	14.315	73.593	24.472	6.443	4.109	3.397	2.642	34.39	20.718	23.025	22.001	6.773	3.254		0.541664	18.4189
12.5042	54.841	50.723	14.267	4.827	3.65	5.705	13.349	4.257	38.384	3.734	2.371	4.39	31.443	11.355	59.179	9.88	4.955	3.737	4.702	14.88	81.275	28.985	4.996	4.397	2.971	2.786	34.599	20.101	27.564	18.292	4.595	4.041		0.546873	17.976
12.6233	49.183	54.767	14.05	5.9	4.851	6.136	13.599	4.471	43.655	3.959	3.256	4.485	30.535	12.45	56.963	9.287	4.494	4.341	5.738	13.473	79.071	28.328	6.525	4.169	3.217	3.524	39.653	21.471	30.138	19.808	6.737	3.624		0.552082	18.4956
12.7424	46.635	58.186	12.929	6.486	3.834	6.843	14.349	3.886	45.847	3.204	3.145	4.786	27.906	11.574	55.062	8.833	3.603	4.085	3.483	12.57	82.899	28.763	6.07	4.296	3.055	3.348	41.063	21.295	32.545	15.534	6.414	3.418		0.557291	18.3108
12.8615	48.541	64.189	11.123	4.806	3.621	6.732	16.588	5.245	48.632	2.909	3.598	4.909	22.72	12.292	55.812	8.142	4.337	3.819	3.711	10.327	88.591	30.679	6.222	3.951	2.347	3.189	46.064	21.302	34.509	14.363	5.875	3.981		0.5625	18.8477
12.9806	47.408	61.656	11.087	4.762	3.841	7.799	15.261	3.679	47.03	3.529	3.142	4.695	22.028	13.888	56.213	6.671	4.91	3.292	4.42	9.692	102.127	28.725	4.713	3.195	3.5	2.923	38.243	22.557	33.994	12.704	5.504	4.45		0.567709	18.6762
13.0997	49.827	59.099	9.269	5.941	4.215	8.254	19.96	3.666	47.646	3.698	3.517	3.829	20.311	14.569	53.464	8.136	5.04	3.349	3.792	8.143	103.083	29.794	4.937	3.831	3.928	3.302	42.405	22.939	33.127	15.45	6.22	4.326		0.572917	19.0333
13.2188	57.336	60.581	9.357	5.323	3.73	7.901	20.863	4.351	42.861	3.365	3.469	4.582	19.479	14.59	54.626	6.753	3.894	3.363	4.234	6.947	112.726	26.908	5.503	3.034	3.454	2.545	43.77	25.037	32.845	13.517	5.628	4.156		0.578126	19.2728
13.3378	63.414	54.469	8.472	5.922	3.696	6.778	25.255	3.833	45.777	3.107	3.237	3.104	17.326	13.335	56.256	5.969	4.089	4.046	5.109	6.352	109.044	27.689	5.257	3.027	3.626	3.263	43.517	26.094	37.232	11.457	5.725	3.955		0.583331	19.3573
13.4569	66.583	49.254	8.793	4.903	4.929	7.456	24.468	5.765	42.396	3.927	2.806	3.775	18.781	12.91	59.497	6.62	3.649	3.396	3.809	7.749	106.739	25.372	6.207	3.436	3.232	3.089	44.455	22.448	41.787	10.584	5.414	4.416		0.58854	19.3327
13.576	73.69	47.086	9.101	5.095	4.94	6.169	25.787	4.722	39.091	3.646	2.951	4.028	18.524	13.691	62.987	6.482	4.472	3.984	4.466	6.814	102.111	24.442	5.33	3.276	2.686	3.688	45.367	21.797	45.292	9.014	5.003	3.467		0.593748	19.35
13.6951	74.886	43.202	7.431	4.81	4.871	7.508	28.979	4.643	35.277	2.98	3.133	4.598	14.947	13.736	62.404	7.308	3.972	3.16	3.94	6.78	101.806	19.748	5.93	3.374	4.024	3.45	42.817	22.284	48.462	10.003	4.955	4.032		0.598957	19.0453
13.8142	68.65	39.02	8.216	4.116	3.786	8.285	31.289	3.903	35.545	2.641	3.659	4.51	17.294	12.373	61.309	6.075	4.523	3.694	3.822	4.83	95.469	19.668	5.318	3.692	3.275	3.134	37.729	20.46	46.062	10.517	4.601	3.423		0.604166	18.1528
13.9333	71.787	38.868	7.348	4.466	4.355	8.223	31.594	3.58	32.491	2.818	3.709	4.237	16.083	13.487	67.602	6.692	4.911	3.489	4.246	4.935	87.79	22.422	4.423	2.81	2.691	3.305	40.001	20.29	46.483	8.681	4.707	4.09		0.609375	18.2067
14.0524	69.041	40.319	8.587	5.049	4.073	6.278	28.608	4.141	30.676	4.115	2.803	4.126	12.736	14.335	59.181	7.246	4.533	3.961	3.744	6.234	85.689	20.032	4.425	3.503	3.625	3.189	42.884	17.152	42.893	8.713	4.639	3.92		0.614584	17.5141
14.1715	65.976	38.672	7.574	4.241	4.084	6.629	27.417	4.001	28.475	3.576	3.915	3.679	12.44	14.894	60.475	5.768	4.551	3.502	3.873	6.28	84.077	21.927	4.827	3.41	3.116	2.825	46.022	16.191	46.046	8.66	4.602	3.162		0.619793	17.3402
14.2905	64.864	39.243	9.148	4.436	4.501	8.578	24.09	4.12	27.885	4.412	3.112	3.804	12.851	14.628	57.958	6.146	4.063	3.17	3.967	5.151	76.784	25.091	5.678	3.084	3.055	2.987	40.153	16.12	43.6	8.078	4.956	3.51		0.624997	16.8507
14.4096	67.219	37.312	9.175	5.206	5.362	6.787	24.941	3.644	27.955	3.394	2.58	4.07	12.546	15.811	57.216	5.241	4.039	3.524	3.7	5.319	76.272	24.536	4.501	3.372	3.125	4.074	40.357	14.782	48.962	7.774	4.56	2.904		0.630206	16.8831
14.5287	63.568	37.77	8.816	4.501	4.163	7.268	20.707	4.532	25.113	3.928	2.8	4.322	12.696	20.089	52.73	5.625	4.427	2.714	3.12	5.152	78.851	21.64	3.629	3.133	2.788	3.768	40.867	14.826	53.21	8.075	4.639	3.324		0.635415	16.6497
14.6478	61.325	36.227	8.263	3.248	4.126	7.239	18.978	4.947	28.148	2.888	2.93	3.566	12.205	22.323	50.836	5.862	4.213	3.39	3.249	5.225	70.855	22.651	3.86	3.021	2.736	3.304	38.797	13.616	54.146	6.57	4.824	4.148		0.640624	16.1786
14.7669	64.18	30.388	8.985	4.017	4.646	6.767	17.731	5.198	27.273	2.799	3.241	4.719	11.523	22.411	54.403	5.185	3.702	3.236	3.831	4.421	65.221	22.847	4.797	3.632	3.119	3.481	39.723	13.354	58.424	6.491	4.533	3.282		0.645833	16.1738
14.886	67.87	28.796	8.884	3.37	4.489	5.222	12.951	4.623	26.863	3.42	3.489	4.381	9.621	22.476	49.412	4.399	3.749	3.18	4.435	5.908	64.012	22.621	3.883	3.507	3.227	4.014	41.607	13.733	57.63	5.827	4.176	3.844		0.651042	15.8006
15.0051	62.823	29.08	8.008	4.426	4.371	5.7	9.849	4.513	28.153	2.752	3.849	4.209	10.609	28.709	52.044	3.943	2.837	4.11	4.656	5.593	61.172	24.722	3.431	3.8	2.922	4.045	40.92	12.954	56.911	6.095	4.752	3.511		0.65625	15.7959
15.1242	67.522	27.735	9.831	4.694	4.207	6.128	8.407	4.456	30.534	3.297	2.983	4.63	11.07	25.881	52.952	4.604	4.247	3.1	4.524	5.669	59.145	24.778	3.561	3.465	3.94	3.959	38.408	12.067	55.832	5.708	3.923	3.479		0.661459	15.773
15.2432	66.857	25.159	10.116	3.362	3.84	5.252	7.438	4.471	30.342	3.119	2.365	4.489	10.948	25.112	48.72	5.206	4.314	2.532	3.583	4.976	52.556	25.798	3.845	4.026	3.964	3.2	39.386	11.884	56.732	6.099	4.443	2.897		0.666664	15.2197
15.3623	67.032	25.62	10.547	3.36	3.967	4.743	7.51	4.68	29.813	3.143	3.459	4.782	8.422	24.501	50.241	5.111	4.339	2.577	3.369	5.738	49.481	25.911	3.616	3.112	2.798	3.26	40.97	12.905	53.42	6.994	4.177	2.992		0.671873	15.0809
15.4814	70.781	27.942	9.946	3.316	4.699	4.545	6.932	5.002	30.747	2.943	3.304	3.574	8.445	25.654	49.11	5.412	3.878	3.162	3.856	6.018	47.716	26.235	4.245	3.966	3.112	3.549	39.457	13.111	50.62	5.543	3.829	3.583		0.677081	15.1323
15.6005	67.678	25.436	10.047	4.571	4.827	6.182	6.686	4.198	33.592	3.553	3.217	3.638	9.898	24.978	51.525	5.432	3.36	3.038	3.38	5.503	44.393	29.78	4.959	3.247	2.455	3.425	43.14	11.916	46.448	6.922	3.027	2.484		0.68229	15.0917
15.7196	64.765	22.875	8.501	4.543	4.379	6.462	6.938	4.983	34.565	3.416	2.965	3.699	8.928	22.956	55.783	4.375	3.241	2.956	2.84	5.22	41.288	29.662	4.026	4.359	2.9	3.682	44.046	13.687	45.5	6.141	3.718	3.051		0.687499	14.8891
15.8387	61.247	21.158	8.401	3.875	4.589	6.431	5.267	3.966	33.329	3.828	2.13	2.938	9.674	21.502	54.207	4.978	3.315	2.911	2.308	4.922	38.069	31.926	3.683	4.126	2.495	3.435	46.158	12.723	39.429	5.316	4.49	4.233		0.692708	14.2831
15.9578	59.191	20.844	6.465	3.693	3.481	6.658	6.874	4.645	33.173	3.256	2.059	4.008	8.216	22.183	53.28	4.9	3.558	2.595	2.312	6.337	36.215	36.045	3.745	3.853	3.385	2.735	43.824	13.581	37.494	6.11	4.243	3.562		0.697917	14.1413
16.0769	56.649	20.419	7.918	4.611	4.461	6.637	6.558	4.573	34.454	3.037	3.099	3.029	9.576	19.712	52.654	4.886	4.963	2.79	3.298	4.6	33.84	40.008	3.247	3.877	3.039	4.291	41.39	12.856	37.775	5.302	4.081	4.534		0.703126	14.1301
16.196	55.725	19.248	7.558	4.667	3.633	7.055	6.171	5.306	34.531	2.591	2.927	3.74	9.3	19.902	51.202	4.381	4.284	2.236	3.488	3.97	32.365	39.164	3.82	3.588	3.012	4.437	42.478	12.759	40.212	5.1	4.547	3.667		0.708335	13.9708
16.315	54.729	19.079	5.817	5.314	3.774	6.477	6.54	4.1	36.165	3.265	2.431	3.795	9.228	20.646	51.414	4.757	3.443	2.783	3.65	3.724	27.648	38.302	3.727	4.371	2.972	3.878	38.627	15.78	41.195	5.715	3.661	3.909		0.713539	13.7786
16.4341	53.577	20.641	6.234	4.758	4.2	7.044	5.206	4.013	32.638	3.9	2.981	3.434	9.302	23.596	48.483	4.577	3.423	2.881	2.831	4.793	26.286	38.861	4.22	3.433	2.95	3.692	34.048	14.525	39.662	5.251	3.609	3.578		0.718748	13.3946
16.5532	56.286	20.41	6.189	4.034	4.044	6.091	6.984	4.582	33.394	3.103	2.736	3.586	8.788	24.347	47.078	4.541	3.275	2.22	3.435	4.874	25.389	38.684	4.506	3.589	3.132	4.503	38.12	14.239	37.764	5.617	4.26	4.469		0.723957	13.5709
16.6723	51.556	19.944	6.92	4.435	3.835	6.485	7.827	4.33	33.917	2.989	2.761	4.409	7.959	22.343	50.889	5.077	3.793	2.97	4.017	5.411	24.535	43.548	3.706	3.315	3.042	5.225	33.66	15.094	39.025	4.446	4.077	3.828		0.729166	13.6052
16.7914	49.38	19.68	5.381	5.702	3.691	5.684	6.944	3.513	32.005	2.824	2.719	3.631	7.801	21.759	47.817	4.576	3.667	3.265	2.958	5.9	25.253	41.698	4.431	2.883	3.12	5.021	33.389	15.542	38.837	5.288	4.004	2.816		0.734375	13.1618
16.9105	46.87	21.276	6.007	4.44	4.691	5.747	6.419	4.01	30.513	2.587	3.408	3.299	7.478	20.845	44.841	3.03	2.954	3.603	3.58	4.175	23.243	39.876	4.97	4.818	2.585	5.697	31.676	15.572	45.047	5.227	3.791	3.38		0.739583	12.9892
17.0296	46.272	23.862	4.785	3.851	3.957	5.917	4.524	3.656	29.852	4.015	2.314	3.684	8.133	22.161	46.188	3.267	3.692	3.543	3.396	4.061	27.972	36.3	4.734	4.003	3.29	6.016	28.364	14.649	38.714	4.9	3.794	2.919		0.744792	12.712
17.1487	44.355	24.913	6.699	4.11	3.718	5.243	6.889	3.367	29.169	2.765	2.97	4.028	7.767	23.462	47.766	3.286	2.993	3.695	3.191	4.616	28.54	37.456	4.345	4.631	3.084	4.659	24.939	12.478	37.876	4.819	3.612	3.161		0.750001	12.6438
17.2677	39.345	22.157	4.731	4.394	4.464	6.197	4.912	4.539	31.234	2.662	3.644	4.779	7.596	22.733	47.384	3.048	3.648	2.987	3.069	4.54	30.42	40.266	4.447	4.224	2.944	6.021	26.485	15.579	40.988	4.166	3.81	2.629		0.755206	12.8138
17.3868	37.262	23.599	5.123	4.486	4.678	5.12	5.527	4.145	27.544	3.272	2.764	3.977	6.754	22.334	48.92	3.636	3.169	3.209	4.026	4.205	35.502	38.2	4.171	4.098	2.936	5.652	24.65	15.035	39.014	4.634	2.982	2.658		0.760414	12.6026
17.5059	35.643	23.479	4.446	5.452	4.459	6.654	6.014	4	26.967	2.932	3.054	2.946	6.552	24.022	47.625	4.065	3.668	3.464	3.541	3.921	38.49	36.687	4.852	4.779	3.09	6.997	21.933	14.93	40.495	4.794	3.451	3.228		0.765623	12.7072
17.625	30.287	20.16	4.624	5.617	4.539	5.577	4.771	4.321	30.307	2.454	3.091	4.412	7.372	24.549	49.813	4.161	3.83	2.685	2.743	3.733	41.188	40.776	5.015	3.62	3.505	7.1	20.565	13.841	39.128	4.67	4.775	3.349		0.770832	12.7056
17.7441	29.952	22.095	4.393	4.915	4.474	5.406	5.226	3.476	31.158	3.241	2.908	3.914	5.405	25.106	52.303	3.789	2.941	3.066	2.504	4.036	43.862	47.561	4.498	4.103	3.271	8.2	17.938	16.267	37.299	4.485	4.858	3.251		0.776041	12.9969
17.8632	26.289	19.705	5.459	4.789	4.331	4.566	4.732	4.034	28.542	2.676	3.491	3.865	6.151	23.756	52.119	3.415	3.255	2.92	3.569	3.541	47.149	43.641	5.524	3.799	2.889	8.522	16.546	14.865	33.882	4.788	4.537	3.432		0.78125	12.5243
17.9823	28.227	18.286	5.666	4.26	4.054	5.3	5.084	4.145	31.211	3.625	3.738	2.714	5.599	23.836	54.211	3.741	3.423	2.374	3.191	3.793	47.878	41.708	4.77	5.519	3.24	9.83	17.048	17.127	34.991	4.664	4.489	2.809		0.786459	12.8297
18.1014	26.55	19.204	6.568	4.715	5.267	4.583	6.268	4.191	32.239	3.537	3.125	4.259	5.866	22.054	57.189	5.094	3.491	3.028	3.109	3.573	46.788	39.833	4.787	4.938	3.473	11.157	14.439	14.222	31.749	4.626	3.659	3.123		0.791668	12.7095
18.2204	25.58	20.09	6.369	4.423	4.271	5.159	6.658	4.817	31.295	3.471	3.355	3.263	5.181	21.776	55.916	3.899	3.677	3.287	2.279	3.391	48.296	42.797	5.362	4.563	3.824	12.659	12.962	17.364	29.38	4.058	3.077	3.565		0.796872	12.6895
18.3395	24.167	21.117	4.713	5.594	4.15	6.08	4.858	4.201	30.076	3.03	3.442	3.499	5.184	23.053	56.522	3.239	3.216	2.283	3.454	4.035	47.508	50.664	5.673	6.344	4.753	13.911	11.941	14.919	24.623	3.854	3.043	3.083		0.802081	12.6947
18.4586	22.718	20.863	5.496	4.946	5.012	5.163	5.814	3.751	32.565	2.774	3.175	4.029	4.391	22.957	57.527	3.561	4.781	3.004	3.149	3.483	47.945	54.408	5.081	5.769	4.46	15.47	12.104	15.384	27.378	4.392	2.623	3.66		0.80729	13.0573
18.5777	20.614	20.051	5.077	3.804	3.916	5.586	6.13	4.943	33.78	3.083	3.308	3.619	4.526	24.819	59.367	4.069	3.416	3.038	2.949	4.313	50.551	59.541	5.084	6.773	4.7	19.199	10.724	16.004	24.433	3.605	3.937	2.725		0.812499	13.3651
18.6968	19.411	17.328	4.273	4.328	4.583	5.182	6.206	4.243	32.247	2.436	2.386	3.385	5.041	24.569	54.542	4.103	3.234	3.349	3.2	3.597	47.374	69.747	7.071	8.578	5.231	17.527	10.726	14.066	25.47	4.604	4.038	3.581		0.817707	13.3018
18.8159	19.924	19.597	6.049	3.843	4.411	5.822	4.86	4.13	32.872	3.073	2.889	3.031	4.815	24.121	51.025	3.622	3.699	2.451	3.492	3.182	46.374	79.124	7.64	9.142	5.374	20.427	8.672	17.125	23.172	3.592	2.927	3.621		0.822916	13.5656
18.935	17.829	22.793	5.596	4.088	3.338	5.356	4.7	3.68	33.487	3.292	3.562	3.092	4.732	24.868	49.576	3.095	3.304	2.658	2.687	3.781	44.308	84.569	7.529	10.235	5.28	24.43	9.859	16.881	23.985	3.462	3.84	4.07		0.828125	13.8738
19.0541	17.067	19.737	6.524	5.083	4.099	6.933	5.615	3.888	29.213	2.91	3.259	3.591	5.745	22.601	48.703	2.978	4.043	2.997	3.829	4	39.382	87.042	6.007	8.859	4.755	28.134	8.78	16.759	24.025	4.742	3.188	3.386		0.833334	13.6836
19.1731	15.221	21.78	6.778	4.848	4.391	5.13	5.553	4.391	23.43	2.447	3.541	3.509	4.493	23.364	48.079	3.997	3.237	3.94	2.957	3.066	43.728	85.041	7.649	13.394	4.603	29.943	8.783	18.422	22.343	4.378	3.695	3.784		0.838539	13.7473
19.2922	15.866	23.873	5.309	5.36	4.148	4.705	5.027	4.127	26.302	3.348	3.575	3.549	4.964	23.123	45.284	3.689	3.536	2.427	3.664	2.981	41.056	86.508	8.229	17.095	5.183	33.574	10.631	19.475	21.284	4.263	4.011	3.42		0.843747	14.0496
19.4113	16.871	26.853	6.006	4.04	4.875	5.17	6.175	4.116	27.035	2.902	1.906	3.235	4.162	23.298	46.679	3.88	3.085	3.561	3.82	3.631	42.161	90.403	9.334	18.564	5.401	39.208	11.56	20.702	20.771	3.856	3.074	3.857		0.848956	14.6935
19.5304	16.798	28.64	6.254	4.282	5.442	4.678	6.226	4.781	25.818	4.319	3.493	4.414	4.611	25.736	45.124	4.467	3.372	3.341	3.615	3.464	38.805	87.566	11.826	23.279	6.09	39.17	9.219	19.869	16.11	4.44	4.299	4.676		0.854165	14.8195
19.6495	14.751	32.791	7.287	5.726	5.418	5.824	5.049	4.186	29.522	3.965	3.277	3.928	5.691	25.221	48.462	4.033	3.091	3.089	3.929	3.565	35.524	87.877	13.708	29.133	6.169	41.726	7.836	18.751	16.382	4.048	4.133	3.14		0.859374	15.226
19.7686	16.769	32.573	7.593	4.476	5.616	5.732	5.132	4.348	29.6	3.286	4.063	4.109	4.669	29.184	46.953	5.461	3.407	3.614	3.761	2.98	37.712	87.812	17.261	30.805	6.915	38.184	9.653	18.758	15.164	3.708	3.934	2.859		0.864583	15.5028
19.8877	16.362	36.361	8.353	4.929	5.475	6.065	6.117	5.354	29.717	3.754	3.445	3.604	5.558	30.366	47.639	4.202	3.599	3.646	4.085	3.033	35.097	81.035	18.381	32.464	6.674	34.208	9.239	16.871	12.817	3.29	3.636	3.286		0.869792	15.2707
20.0068	17.974	37.72	7.734	4.68	5.224	4.815	5.523	4.449	31.12	3.582	3.945	4.549	4.535	31.035	45.877	4.853	3.696	3.839	3.983	3.435	34.846	82.857	21.009	37.305	6.756	30.836	10.411	17.145	12.973	4.363	4.437	2.933		0.875001	15.5762
20.1259	19.67	42.238	8.891	4.417	5.783	5.256	6.335	4.995	33.8	3.797	3.748	4.071	5.33	34.992	46.765	5.472	3.605	3.042	3.34	3.814	36.23	70.468	22.464	44.248	7.979	32.909	8.394	19.148	10.527	3.624	3.306	3.225		0.880209	15.9963
20.2449	21.234	46.836	8.723	5.298	6.569	5.891	7.113	4.509	34.791	3.322	2.695	3.845	5.09	32.389	46.605	4.481	3.697	3.113	4.037	3.163	36.147	56.459	25.923	46.994	10.27	31.92	8.805	17.814	8.568	3.189	3.946	3.284		0.885414	15.835
20.364	23.996	54.782	10.985	4.186	6.944	6.869	6.532	5.165	32.986	3.788	3.375	5.237	5.379	26.387	45.456	4.709	3.75	2.742	4.033	3.996	35.4	42.782	22.882	42.139	10.83	25.85	8.79	21.089	8.069	5.172	3.563	3.005		0.890623	15.3396
20.4831	27.042	58.708	13.633	4.501	6.85	6.901	8.142	5.059	32.675	3.378	3.003	4.117	5.033	31.076	46.161	4.955	3.92	3.396	4.983	4.323	33.301	42.012	23.87	38.397	10.857	20.454	10.514	20.53	7.195	4.752	3.45	3.284		0.895832	15.5147
20.6022	35.71	63.499	15.355	4.909	7.546	5.129	8.08	6.065	29.08	3.78	3.552	4.063	4.697	35.557	43.826	4.391	4.214	3.51	6.683	4.375	31.082	30.785	23.994	38.71	13.075	18.682	11.18	19.656	7.19	4.198	4.028	3.753		0.90104	15.6361
20.7213	44.83	70.851	20.612	5.526	7.347	5.02	7.094	5.608	28.676	4.41	4.658	3.899	4.883	34.903	43.081	5.993	3.013	4.734	5.569	4.253	31.582	28.926	24.636	32.269	19.992	19.143	10.045	22.818	7.074	3.32	3.961	3.723		0.906249	16.3265
20.8404	51.801	70.928	23.948	6.228	8.474	5.261	7.778	5.455	29.006	4.277	3.571	3.885	5.373	40.17	46.282	5.464	4.079	4.376	6.48	3.811	28.89	24.371	19.21	25.911	21.836	16.64	9.893	22.042	6.48	4.624	4.082	2.838		0.911458	16.3582
20.9595	60.001	69.469	30.579	6.441	8.393	6.318	6.777	5.025	28.333	3.908	4.71	4.3	5.378	46.023	47.727	5.175	3.721	3.83	8.158	3.976	24.728	21.981	16.555	25.496	24.335	15.458	10.406	26.023	6.427	3.725	4.012	2.414		0.916667	16.8688
21.0786	59.204	66.391	38.429	8.495	8.794	6.009	7.024	5.412	27.248	4.918	4.406	4.513	5.337	49.091	51.822	4.667	3.47	3.628	9.073	3.949	23.608	18.516	13.314	20.404	30.986	12.507	10.699	30.109	6.807	3.934	4.083	3.864		0.921876	17.2097
21.1976	52.604	62.144	45.005	9.892	8.432	5.472	7.185	5.143	28.406	5.089	5.02	4.552	6.155	53.207	50.513	6.739	3.309	4.438	9.903	5.405	19.15	16.88	10.77	18.02	36.577	13.36	11.299	30.367	6.945	3.846	3.403	3.181		0.92708	17.2628
21.3167	41.983	53.711	48.591	13.182	10.881	6.311	8.04	5.507	28.692	4.213	5.482	4.508	4.587	70.482	56.335	6.102	3.594	4.824	10.51	6.002	15.156	14.188	8.402	14.868	42.204	12.008	10.47	32.06	6.03	3.543	3.81	3.56		0.932289	17.4949
21.4358	31.767	43.216	53.829	14.005	10.428	5.617	7.782	5.235	29.136	3.957	6.776	5.048	6.011	90.401	62.666	6.519	3.523	4.724	12.763	8.11	12.009	11.366	6.197	11.954	40.591	11.805	11.824	35.386	5.639	3.888	3.725	3.761		0.937498	17.8018
21.5549	19.887	32.225	57.828	18.258	13.578	6.981	10.098	7.177	27.651	4.156	7.16	6.249	6.408	101.089	67.441	7.693	3.128	5.66	16.995	8.696	7.972	8.649	5.049	9.372	41.137	12.952	12.731	35.683	5.28	4.057	5.369	4.159		0.942707	18.149
21.674	15.871	25.506	61.587	20.27	14.848	7.867	10.655	7.868	24.96	4.455	10.974	5.856	6.859	104.375	65.168	7.245	3.18	5.004	19.378	12.417	5.667	7.899	3.912	8.723	43.533	12.613	12.907	34.772	5.836	5.32	4.716	3.375		0.947916	18.238
21.7931	12.135	23.206	54.296	28.911	14.794	8.604	12.962	10.323	23.006	4.622	14.19	7.461	5.265	104.793	67.707	7.575	3.623	4.337	23.283	17.458	3.979	5.061	2.939	6.564	44.429	12.5	14.06	35.027	4.438	4.286	4.49	3.178		0.953125	18.4219
21.9122	8.915	20.789	50.556	35.753	15.217	9.691	15.419	13.421	23.781	5.067	16.984	8.917	5.759	103.201	63.871	7.717	4.18	3.981	28.905	17.345	3.173	4.898	2.259	4.093	47.926	10.535	12.666	33.322	4.721	3.768	5.358	2.946		0.958334	18.5979
22.0313	7.118	17.455	50.239	46.007	17.122	11.315	16.324	14.641	24.311	6.821	21.237	9.803	6.605	95.497	59.406	10.144	4.305	6.144	33.378	22.401	2.356	3.306	2.294	3.092	44.28	10.804	13.429	31.754	5.123	4.409	4.615	3.341		0.963542	19.0336
22.1503	4.852	15.892	35.939	48.021	16.938	13.072	19.201	15.044	22.016	8.336	24.469	12.146	7.233	83.292	53.148	9.74	4.458	5.475	35.789	24.361	2.136	2.532	1.475	2.91	44.556	11.593	13.992	25.772	4.952	5.524	4.382	3.099		0.968747	18.1983
22.2694	3.749	12.182	23.656	54.001	18.174	15.974	21.953	17.815	23.241	7.363	33.815	12.487	6.268	72.892	45.735	10.32	5.212	6.835	30.834	22.804	1.348	3.105	1.771	1.814	39.629	10.556	13.222	27.329	4.898	4.096	3.344	3.161		0.973956	17.487
22.3885	3.738	9.893	14.958	56.334	16.611	16.482	26.741	21.564	20.882	10.659	38.519	15.458	7.347	62.02	31.856	11.863	6.735	8.522	33.891	21.571	1.088	2.483	0.917	2.096	36.021	10.363	14.505	27.419	5.153	5.036	3.081	3.491		0.979165	17.103
22.5076	2.548	7.438	10.213	55.241	20.25	19.808	29.679	24.935	22.74	14.165	47.752	16.066	8.556	55.931	21.677	14.173	8.66	9.02	29.074	19.501	1.459	2.097	1.166	1.93	30.91	9.92	14.481	27.085	5.224	4.068	4.33	4.002		0.984373	17.0031
22.6267	2.061	4.349	6.882	60.357	26.902	21.389	33.835	30.603	22.942	16.939	53.645	14.476	8.699	45.724	12.516	18.007	9.147	9.942	26.832	16.246	1.42	1.451	1.128	1.283	30.615	9.082	16.35	28.213	5.878	5.171	3.925	4.598		0.989582	17.2065
22.7458	1.855	3.954	6.606	59.783	27.332	18.859	38.594	47.577	28.364	18.292	56.103	13.057	10.824	34.366	7.335	17.633	12.667	9.74	20.489	10.268	0.975	1.63	1.02	1.807	27.064	9.46	16.545	28.403	5.962	5.937	4.134	3.535		0.994791	17.1928
22.8649	1.587	4.325	4.793	51.766	30.325	20.473	41.927	58.735	28.519	17.307	49.976	9.029	11.001	27.701	4.78	20.165	14.563	10.055	16.934	8.63	0.889	1.66	0.733	1.697	23.109	8.957	15.996	27.958	5.893	6.271	4.757	3.91		1	16.7007

## Sheet: Image26
X0	Y0	Y1	Y2	Y3	Y4	Y5	Y6	Y7	Y8	Y9	Y10	Y11	Y12	Y13	Y14	Y15	Y16	Y17	Y18	Y19	Y20	Y21	Y22	Y23	Y24	Y25	Y26	Y27	Y28	Y29		Ap-basal	Avg int
0	19.833	16.389	48.667	45.278	22.944	17.444	27.111	24.833	20.111	19.778	31.111	36.611	54.667	21	26.5	26.2778	26.222	22.167	19.444	19.333	26.944	26.722	19.5	22.389	19.944	24.056	15.167	18.722	31.167	31.556		0	26.0629
0.1191	24.389	19.111	58.833	53.944	24.667	17.389	29.389	25.056	25	24.444	34.667	42.833	57.778	19.722	30.556	25.3889	26.167	24.611	20.333	25.389	29.5	29.278	22.556	25.444	24.444	32.056	16.056	19.556	34.889	38.889		0.00448476	29.4112
0.2382	29.778	20.111	70.889	59.056	26.944	20.889	32.778	26.278	25.667	24.5	39.944	46.889	65.056	23.444	30.889	32.7222	32	29.778	20.611	26.333	35.667	31.722	22.389	28.833	33.278	48.556	14.889	23.278	38.222	45.667		0.00896952	33.5686
0.3573	35.222	22.444	70.944	64.833	27.222	26.222	33.722	28.278	31.444	25.444	42.389	54.222	72.444	23.556	29.333	37.2778	35.556	39.833	23.167	27.778	40.056	37.056	28.222	34.222	39.167	73.333	18.444	30.667	46.611	49.5		0.0134543	38.287
0.4764	42.667	30.222	70.833	80	31.111	27.611	39.222	38.833	41.722	30.778	49.444	55.611	76.333	27.278	38.944	38.2778	42.556	46.556	25.889	32.444	50.056	41.444	35.389	43.111	49.778	91.167	23.222	33.5	53.944	64		0.017939	45.0648
0.5954	61.778	37	79.5	89.389	39	32.333	46.778	42.333	50.222	33.611	53.5	62.556	87.222	28.444	42.667	43.2778	51.611	60.722	29.056	45.222	56.667	43.611	42.056	55.278	61.167	115.556	26.389	39.944	63.833	81.556		0.02242	53.4093
0.7145	81.111	48.778	74.5	107.056	42.389	39.611	58.389	48.889	64.611	39.444	62.389	68.889	97.667	35	56.889	44.9444	63.278	75.667	33.278	50.556	69.333	51.111	51.222	75.444	73.222	124.722	32.833	52	78.667	95.556		0.0269048	63.2482
0.8336	94.5	63.056	69.444	109.889	50.167	51.944	67.333	51.833	85.389	44.944	76.278	76.444	121.722	45.167	71.389	50.3889	71.444	89.778	35.278	63.889	88	59	57.833	100.667	86.056	150.222	48.722	66.278	89.444	114.722		0.0313896	75.0407
0.9527	136.056	76.389	74.444	122.444	59	73.167	75.5	66.611	96.611	52.722	75.722	80.778	130.667	60.222	89.167	64.6111	84.5	109.944	41	92	100.111	66.444	81.5	136.611	92.944	156.833	70.111	81.722	99.889	125.833		0.0358743	89.1184
1.0718	159.111	107.111	82.389	123.944	71.5	87	86.556	85.111	112.333	62.167	89.611	91.944	152	76.056	116.056	62.7778	88.833	122.111	44.611	114.333	128.5	74.278	96.833	165.389	107	162.611	93.556	106.389	109.333	126.333		0.0403591	103.526
1.1909	202.167	135.222	88.889	133.222	78.667	108.556	104.833	108.944	113.556	79.389	103.389	98.389	164.556	101.889	149	70	98.722	139.667	56.389	138.944	148.111	101.889	132.944	197.167	113.778	166.778	113.722	119	116.778	124.611		0.0448438	120.306
1.31	219.944	177.889	104.889	124.5	82.833	127.667	118.222	144.111	115.722	100.5	114.889	108.5	171	124.111	164.556	78.6111	96.944	146.944	60.167	151.222	174.167	114.556	157.056	221.667	129.222	173.889	129.833	137.556	114.111	122.556		0.0493286	133.594
1.4291	230.556	206.278	116.278	124.778	97.333	129.611	130.333	172.889	94.222	119.222	118.222	115.111	167.944	148.167	173.056	80.1111	102.556	160.722	73.778	168.667	173.833	136.611	179.444	232	135.278	185.167	147.056	158.667	104.278	108.667		0.0538134	143.028
1.5481	235.389	227.389	136.444	119.333	104.111	134.222	145.278	209	88.222	136.722	120.111	113	159.611	167.833	187.722	74.2222	99.5	165.389	92.333	175.889	187.111	153.944	210	233.722	147.889	182.333	164.111	173.278	89.778	89.611		0.0582944	150.783
1.6672	223.167	239.944	182.5	112.611	113.5	129.944	145.389	212.778	67.667	143.222	110.556	119.667	136.278	189.056	189.333	74.8889	92.778	162.5	106.5	166.778	185.444	177.667	223.833	225.611	161.722	178.056	177.278	170	71.722	76.389		0.0627791	152.226
1.7863	204.278	237	193.333	106.167	116.333	111.389	146.5	214.278	46.944	135.222	86.778	114.722	105.278	197.611	179.389	78.1111	81.278	169.278	119.167	152.056	177	173.556	216.333	217.667	169.167	183.722	177.5	176.889	55.556	60.111		0.0672639	146.754
1.9054	162.278	235.222	202.611	107.111	118.056	100.167	140.5	225.111	31.667	98.389	59.778	109.5	82.111	204.889	184.389	73.3889	77.722	145.833	125.778	124.5	155.556	164.056	205.556	221.611	185.722	174.278	182.056	171.056	45.556	48.611		0.0717486	138.769
2.0245	118.889	224.556	200.389	113.333	120.167	90.833	134.889	212.389	27.278	75.111	36.611	100.167	56.667	202.389	169.722	63.1111	65.056	145.778	131.889	86.167	123.667	138.5	176.611	205.722	184.556	176.278	180.611	159.222	33.111	41.056		0.0762334	126.491
2.1436	89.889	188.944	188.722	125.111	110.111	78.556	111.056	182.778	23.278	66.167	28.278	84.889	43.833	195.444	156.167	54.6667	57.111	126.722	135.278	57.5	101.056	112.556	140.833	181.111	196.389	176.944	179.444	127.722	32.056	29.056		0.0807182	112.722
2.2627	76.167	138.111	171.889	147.778	108.056	78.222	87.333	159.222	18.556	51.278	22.278	63.944	29.722	187.944	121.778	46.6667	53.167	116.778	132.111	34.833	80.389	92.278	101.056	148.611	197.222	168.667	170.389	120.5	25.5	27.333		0.0852029	99.2593
2.3818	60.667	101.611	156.278	163.722	105.5	72.333	64.889	127.056	14.556	43.167	20.278	44.833	22.222	180.778	90.333	41.6667	43.778	103.222	123.278	29.556	58.778	66.833	76.611	109.722	200.667	165.667	170.056	100.944	23.611	24.667		0.0896877	86.9093
2.5008	49.444	79.667	143.944	164.611	100.444	64.222	43.111	91.556	12.333	44.778	19.722	31.556	17.778	160.389	66.056	36.8889	38.389	86.722	118.889	23.5	45.222	51.556	54.056	68.667	188.611	153.167	161.056	93.833	18.056	20.111		0.0941687	74.9445
2.6199	37.889	71	131.111	175.444	90.667	64.556	29.333	78.722	11.889	45.278	18.333	25.111	15.333	135.389	52.111	31.0556	31.333	73.167	103.5	22.167	36.167	38.944	41.222	52.667	174.667	151.333	140.389	78.444	18.278	22.167		0.0986534	66.5889
2.739	32.111	61.222	96.944	181.056	72.889	59.778	20.889	52.222	10.444	41.167	17.333	19.333	12.056	107.167	33.667	25.1667	24.056	58.389	81	16.389	27.389	26.833	34.722	41.833	140.222	129.611	125.444	76.444	15.167	15.056		0.103138	55.2
2.8581	30.111	49.556	75.278	169.444	59.833	51.278	16.444	42.111	9.333	42.611	14.444	19.889	11.556	80.833	23.722	21.2222	17.611	49.167	61.111	14.889	26.556	19.778	29.167	35.111	110.444	121.167	103.167	68.111	13.722	16.278		0.107623	46.7981
2.9772	22.444	48.278	57.278	166.722	48.167	47.167	15.667	31.333	6.611	44.278	13	15.222	10.278	60.778	21.111	20.6667	13.333	36.444	45.944	14.778	24.556	15.333	25.167	23.222	86.778	110.611	87.5	59.278	11.278	15.278		0.112108	39.95
3.0963	20.722	34.167	49.056	145	34.056	36.5	13.333	21.389	7.444	49.389	13.611	13.056	10.778	40.833	16.222	23.1111	13.611	27.944	39.5	12.944	20.222	13	17.389	15.778	72.389	98.111	70.889	63.444	11.167	11.222		0.116592	33.8759
3.2154	20.222	34.611	42.222	120.389	26.111	29.889	11.944	16.222	6.611	48.889	15.778	11.889	9.611	33.889	12.889	19.5556	9.222	21.167	34.778	12.444	17.111	13.222	13.833	13.944	59.556	81.333	59.667	53.389	11.389	10.944		0.121077	29.0907
3.3345	16.833	24.278	36.5	99.778	19.667	25.111	10.167	13.778	5.944	48.778	14.667	10.444	10.222	20.111	10.611	20.2222	7.111	16.333	28.667	10.444	11.944	11.833	12.667	12	56.167	74.333	44.444	46.556	9.889	9.556		0.125562	24.6352
3.4535	13.167	24	33.389	83.556	15.778	19.778	8.5	9.889	6.111	48.722	14.833	12.833	9.056	17.889	9.611	17.7222	7.778	11.333	23.833	7.222	13.167	10.333	10.333	10.222	45.556	62.222	41.833	40.556	6.778	10.5		0.130043	21.55
3.5726	12.667	22.444	28.278	67.333	12.056	20.667	11.556	8.278	5.278	47.667	13.611	10.056	8.389	12.5	8.333	18.7778	5.389	11.056	20.778	6.278	8.833	10.889	10.444	7.667	40.167	55.167	35.111	37.278	8.278	6.833		0.134528	19.0686
3.6917	10.556	18.333	27.167	46.722	10.833	22.389	10	7.833	4.333	37.5	12.444	11.833	8.611	9.389	6.667	14.9444	6.333	8.889	15.444	7	8.944	10.333	9.889	7.667	33.833	43.889	27.389	35.056	5.389	6.222		0.139013	16.1944
3.8108	9.778	16	25	36.778	11.5	22.222	8.278	6.167	4.278	29.889	12.722	14.722	7.056	8.778	6.444	13.3333	5.444	7.389	17.611	5.444	7.278	10	8.5	6	26.111	38.5	19.167	35.778	8.056	5.167		0.143497	14.4463
3.9299	9.444	12.778	18.722	25.444	8.833	22.833	11.889	5.389	4.611	24.889	13.722	13.444	7.778	7.889	6.389	14.7222	5.444	6.111	17	5.944	6.333	10.333	8.556	5	28.778	34.333	15.167	30.5	6.222	4.833		0.147982	13.111
4.049	6.389	10.556	16.778	19.278	8.722	21.667	10.444	4.667	5.611	23.5	12.278	10.389	8.278	6.5	6.056	14.2222	4.333	6.167	13.667	6.278	6.556	11.611	9.944	5.5	23.389	30.944	10.5	31.833	8.056	5.389		0.152467	11.9834
4.1681	6.556	9.167	16.889	13.833	7.944	23.278	10	4.778	3.889	21.722	13.056	13.944	8.444	5.944	7	15.1111	5.5	6.222	15.667	5.556	6.222	9.833	9.056	5.278	21.778	26.5	10.389	28.667	6.167	4.667		0.156952	11.4352
4.2872	6.667	8.167	15.833	13.444	6.667	23.111	10.222	4.222	4.056	22.111	13.056	14.556	9.444	5.722	5.333	13.2778	5.056	5.944	14.833	4.889	5.222	11.778	7.167	4.5	16.611	21.389	7.722	28.556	8.833	3.944		0.161436	10.7444
4.4063	6.222	6.889	14.222	11.778	6.889	19.889	7.222	3.667	3.556	15.833	13.667	16.889	10.444	5.889	6.167	13.0556	4.389	5.389	14.556	4	5.556	12.944	8.389	4.278	14.167	21.667	7.833	24.667	6.611	5.389		0.165921	10.0705
4.5253	6.333	7.667	13.556	9.5	7.111	20.5	9.667	4.889	4.556	15.722	13.444	16.889	8	7.056	4.944	12.8333	3.333	5.056	15.556	5.222	5.556	12.111	8.333	4.778	11.778	19.444	7.778	23.889	6.944	5.722		0.170402	9.93891
4.6444	5.278	7.167	15	11.444	6	22.5	8.611	5.278	5.167	15.611	14.889	17.222	9.222	5.778	4.889	11.7222	3.833	4.333	14.222	4.222	5	14	8.444	4.444	8	17.778	7.889	20.944	7.111	3.722		0.174887	9.65734
4.7635	5.889	5.167	11.5	10.556	6.056	22.389	9.056	3.944	3.833	17.5	12.722	18.389	9.278	5.444	4.778	13.1667	4.389	4.333	15.389	4.111	5.167	13.278	8.444	3.778	9.444	14.5	6.944	21.611	8.389	4.444		0.179372	9.46296
4.8826	5.611	5.889	13.444	10.833	5.778	22.389	9.944	4.278	3.5	16.167	11.722	18.889	9.167	5.667	6.278	11.8889	4.5	4.833	15.056	5.333	5.056	13.167	7.556	5.278	8	15.444	6.056	22.722	8.111	5.278		0.183856	9.5945
5.0017	5.889	6.722	15.5	10.389	5.889	24.167	9.278	5.111	4.278	15.444	15.833	20	7.389	4.222	4.722	11.8889	5.778	5.278	13.333	4.833	6	10.056	7.056	3.5	7.389	18.444	6.833	24.111	9.333	3.611		0.188341	9.74256
5.1208	5.278	6	12.611	9.778	5.611	20.611	9.889	5.833	3.611	16.111	13.056	19.5	6.833	4	4.611	13.1667	4.556	4.944	15.944	4.056	5.833	10.167	7.444	4.778	8.722	15.111	5.833	20.111	7.611	2.944		0.192826	9.15179
5.2399	4.556	6.778	13.722	9.333	5.444	20.611	9.111	3.611	3.556	12.889	12.5	20.778	9.167	4.833	4.167	12.7222	4.611	3.944	15.167	4.111	5.778	10.778	7.167	3.667	9.5	13.833	6.111	19.667	7.5	3.5		0.197311	8.97041
5.359	4.333	6.167	14.889	9.167	5.722	19.222	8.889	4.444	3.389	13.611	12.778	20.222	8.778	4.889	4.889	15.6111	3.611	4	16.111	5.889	6.778	10.833	6.056	3.889	8.722	14.222	6.444	19.333	7.222	3.778		0.201795	9.1296
5.478	5.667	5.778	15.111	8.056	4.611	17.278	9	4.833	4.056	9.667	11.444	20.444	7.889	5	4.056	16.3333	3.111	4.278	14.5	5.278	5.944	8.889	6.778	4.333	8.056	13.278	6.167	17.722	7.556	4		0.206276	8.63711
5.5971	4	6.278	16.778	9.556	5.056	17.556	10.778	4.056	3.667	9	12.611	22.833	7.722	5.389	5.556	16.6667	3.389	4.389	9.722	4.722	5.389	11.111	6.278	3.444	7.833	14.944	5.611	18.556	7.778	3.611		0.210761	8.80932
5.7162	4.667	5.667	15.278	7.333	5.5	17.444	10.556	4.611	2.944	10.444	12.389	18.056	7.889	3.889	5.611	16.8333	3.889	3.778	14.556	3.444	5.5	10.778	6.111	3.222	8.278	14.056	7.389	18.556	6.111	3.167		0.215246	8.59821
5.8353	5.667	6.833	16.889	8	5.222	15	13.444	4.167	3.889	8.778	11.778	14.889	5.444	3.667	5.944	17.4444	3.556	4.944	15.056	4.778	6.5	10.389	8.556	3.444	6.278	13.444	5.833	17.944	6	2.833		0.219731	8.55368
5.9544	5.056	6.833	21	9.056	5.667	16.444	13.778	3.5	3.889	10.167	13.833	18.056	5.611	4.111	4.389	16.7778	3.889	3.778	12.889	4.444	6.778	9.667	8.556	4.056	6.278	12.111	6.944	21.222	4.889	3.444		0.224215	8.90376
6.0735	4.5	6.611	19.278	8.944	5.333	18	12.944	3.667	2.889	8.222	11.5	18.444	5.444	3.278	5.889	15.0556	3.833	3.667	14.667	4.778	6.611	14.056	8.444	4.167	6.611	12.889	6.056	21.278	5.111	3.111		0.2287	8.84259
6.1926	4.889	6.222	17.556	6.5	5.833	18	14.222	4.944	3.278	8.278	15.722	16.722	5.444	4.167	4.556	16.1667	4	4.444	15.333	4.389	5.889	16.222	9.278	3.167	6.722	10.667	6.444	22.556	4.5	3.056		0.233185	8.97222
6.3117	5.722	7.167	16.889	7.556	4.722	15.389	11.5	3.722	3.444	8.278	12.056	17.278	5.722	3.556	4.722	16.3889	2.944	3.611	14.611	4.389	7.333	15.5	9.778	3.778	7.278	9.5	6	22.222	4.667	2.944		0.23767	8.62223
6.4307	5.5	7.056	16.167	7.833	4.833	16.5	12.944	4.833	3	8.333	12	17.722	5.667	3.5	4.889	16	4.778	4.278	16.167	5	6.889	14.167	7.944	4.111	7.889	11.722	5.722	18.278	5.056	2.722		0.242151	8.71667
6.5498	4.389	6.333	17.111	7.944	5.111	15.167	13.778	3.778	2.833	7.944	14.444	18.556	5.722	3	5.611	16.2222	4.444	4	18.5	5	5.389	18.111	8.389	5.333	8.389	9.222	5.278	19.111	5.722	3.389		0.246635	8.94067
6.6689	4.778	7.444	16.889	8	6.167	15.556	14.111	3.611	3.111	8.611	10.111	21.444	4.444	3.333	6	18.0556	2.722	4.5	17.5	5.444	6.167	17.444	6.167	4.389	8.222	12.167	5.444	18.611	5.667	3		0.25112	8.97032
6.788	5.111	4.222	15.167	6.389	5.222	14.611	14.333	3.444	3.222	6.722	9.944	20.056	5.611	3.556	5.333	16.3333	4.222	3.667	15.333	4.889	5.5	18.944	8.167	4.5	9.889	11.889	4.722	17.056	4.722	2.222		0.255605	8.49994
6.9071	6.167	6.167	12.667	7.5	5.667	13.667	14.611	3.333	2.833	10.389	12.111	18.056	5.056	3.889	4.111	15.1667	4.056	4.111	16.389	5.389	7.389	20.833	7.556	5.611	9.222	9.944	5.167	14.778	3.889	4.222		0.26009	8.66489
7.0262	4.111	6.833	12.389	6.833	4.389	14.111	12.389	3.611	2.944	8.833	11.5	19.944	5.222	4.556	5.778	17.2222	2.833	3.722	17.944	4.444	6.556	21.167	7.556	4.389	8.667	12.5	6.056	12.444	5.278	3.556		0.264575	8.59257
7.1453	5.333	5.5	13.056	5.833	4.889	14.444	14.333	3.944	3	8.944	9.333	17.556	4.167	2.944	4.889	17.1667	3.667	3.944	16.389	5.611	4.944	21.667	6.611	4	10	13.889	5.444	12.111	4.556	3.444		0.269059	8.38696
7.2644	5.056	6.667	13.278	6.889	4.5	13.167	12.278	3.111	2.556	7.278	9.833	15.222	4.722	3.944	5.278	15	3.389	3.167	18.889	4.556	6	22	10.111	5.5	11.389	14.333	5.444	11.333	5.444	3.278		0.273544	8.45373
7.3834	4.889	7	11.167	7.833	5.056	11.556	13.944	2.778	2.611	8	11.278	16	3.778	3.556	4.222	17.3889	3.722	3.944	20.278	5	6.722	20	8	4.5	10.833	12.667	5.444	11.444	6.167	2.944		0.278025	8.42406
7.5025	5.5	7.444	9.944	6.222	6.111	10.778	12.167	2.667	3.056	7.889	10.556	17.833	4.889	3.056	4.389	15.7222	3.667	3.667	18.444	5.278	5.833	22.278	8.778	4.611	11.556	14.5	5.333	8.889	6.167	2.889		0.28251	8.33711
7.6216	5.5	6.944	12.111	8.222	6.056	11.778	13.333	4	3.444	7.667	10.222	16.778	4	3.556	5.778	15.7222	3.778	4.944	19.833	5.167	6.889	23.5	9.167	4.944	9.722	12.333	5.611	9.333	7.444	2.333		0.286995	8.67031
7.7407	5.556	7.833	12.722	7.444	4.778	10.278	15.667	2.778	2.389	9.389	9.389	21.556	4.333	2.722	4.5	14.2778	3.278	3.278	18.778	5.611	6.167	20.722	9.333	6.389	12.167	10.667	5.833	7.833	8.444	3.111		0.291479	8.57409
7.8598	6.833	8.833	11.833	7.278	4.722	9.667	15.944	3.111	3.667	7	10.778	20.444	4.5	3.389	4.444	13.7778	3.389	4.389	19	4.667	5.5	19.278	10.389	5.222	11.222	13.778	5.278	8.333	8.333	4.778		0.295964	8.65923
7.9789	6.444	8.611	12.667	6.722	4.778	9.5	11.833	3	3.222	8.222	13.111	17.611	3.778	3.222	3.667	13.7778	3.333	4	16.5	5.611	5.889	18.556	10.278	6.333	9.778	12.389	5.056	8.444	7.556	3		0.300449	8.22963
8.098	7.167	9.833	11.667	8.167	3.889	9.111	13.222	2.667	2.611	8.944	12.056	21.556	5.722	2.833	5.556	15	4.056	4.444	14.111	4.278	5.333	16.722	11.167	4.944	11.722	11.389	5.056	6.833	8	2.889		0.304934	8.36483
8.2171	6.667	9.278	9.722	7.278	4.056	8.722	14.167	3.556	3.333	9.833	13.444	19.111	5.889	2.722	5.222	15.3333	3.944	3.722	16.167	3.722	7.111	16.722	9.944	5.611	12.5	11.389	6.222	6.5	8.889	3.167		0.309418	8.46478
8.3362	7.778	11.667	12.944	7.389	4.444	8.333	14.111	3.611	4	9.389	13.778	21.833	4.389	3.222	4	16.3889	2.667	2.944	16.833	3.444	4.722	17.667	8.944	6	10.833	10.778	5	5.722	9.389	2.833		0.313903	8.50176
8.4552	5.333	9.778	11.389	8.389	3.778	8.667	13.444	3.889	2.389	9.722	14.833	21.278	4.222	3.611	4.444	10.9444	3.611	4.222	16.778	3.833	4.722	20.222	8.556	5	12.111	10.056	5.444	5.333	8.833	2.778		0.318384	8.25365
8.5743	6.222	12.389	11.778	6.667	4.722	7.833	12	2.667	3	9.944	16.556	21.944	3.5	2.667	5.889	13.0556	2.944	4.389	17.833	3.5	4.722	22.556	8.944	5.722	11.222	12.167	6.389	5.389	11.5	3.389		0.322869	8.71665
8.6934	7.222	10.056	11.5	7.833	5.611	8.556	12.167	3.611	2.611	9.389	19.611	20.278	5.222	3.556	4.556	12.4444	3.944	4.167	14	4.556	5.667	17.444	9.111	5.944	10.778	11.111	4.778	6.5	11.333	2.611		0.327354	8.53891
8.8125	7.611	10.444	13.722	7.056	5.278	7.611	13.444	2.944	3.833	10.444	21.944	20.389	4.389	2.278	4	11.8889	2.944	4.056	20.222	3.778	5	20.278	8.167	5.167	9.389	9.833	5.056	6	9.889	3.556		0.331838	8.68703
8.9316	5.278	10.778	12.389	7.167	4.444	8	13.222	3.111	2.944	8.556	19.778	19.444	4.278	2.556	3.556	13.2778	3.278	4.056	19.944	3.944	5	16.944	7.556	4.778	10.611	10.167	4.889	4.889	9.389	3.444		0.336323	8.25559
9.0507	7.611	11.444	15.167	7.167	5.611	7.333	13.111	2.889	2.333	9.444	21.722	21.444	4.778	3	4.056	12.9444	3.333	5.278	17.222	5.056	5.389	21.222	6.944	5.278	9.611	10.667	3.667	5.778	10.778	3		0.340808	8.77591
9.1698	6.556	10.444	12.167	7.444	4.389	6.722	14.389	3.778	2.778	10.944	25.667	19.167	3.444	2.722	4.333	14.5	2.722	3.833	20	4.056	4.667	24.278	8.944	6.167	10.056	12.833	4.667	5.222	11	3.333		0.345293	9.04073
9.2889	5.778	10.278	12.556	7.111	3.778	5.5	14.722	3	2.944	12.111	27.556	17.667	4.556	2.778	4.056	14.1111	2.556	4.611	18.5	4.556	5.278	25.778	6.389	5.889	10.667	11.222	3.944	5.389	10.111	3.444		0.349777	8.89454
9.4079	5.167	11	13.167	7.944	4.278	7.444	14.333	3.222	2.833	10.889	29.889	18.167	4	2.778	3.944	12.7778	3.722	4.222	17.778	3.611	4.5	24.167	7.556	5.944	11.5	13.111	4.611	6	9.5	4.056		0.354258	9.07036
9.527	5.889	8.333	12.444	6.722	3.722	7.389	15.556	3.389	2.111	9	29.611	16.667	4.5	2.944	3.778	13.6667	3.389	4.778	19.333	3.778	4.667	28.778	7.278	6.5	9.667	10	3.778	5.611	11.167	3.389		0.358743	8.92782
9.6461	6.667	8.167	12.611	6.722	5.056	7.444	12.667	4.222	2.167	10.778	33.889	15.667	3.944	2.611	3.722	13.4444	3.111	5.111	16.389	4.778	5.222	27.722	7.5	5.611	10.5	13.556	3.667	5.556	12.111	2.833		0.363228	9.11485
9.7652	5.5	7.778	11.944	6.389	5.944	5.944	13	3.611	3.667	10.889	31.833	15.222	3.333	3	4.833	16.5556	1.833	3.889	17.889	5	5.833	31.278	6.389	4.889	10.889	10.333	4.5	5.167	13.667	2.611		0.367713	9.12032
9.8843	4.889	7.167	11.389	6.667	5.611	6.444	12.167	3.722	3.611	9.778	36.944	15.611	3.278	2.389	3.778	12.7778	2.111	4.056	16.333	4.222	5.333	35.167	7.944	5.778	10.667	10.556	4.667	4.889	13.5	2.889		0.372197	9.14449
10.0034	5.611	7.944	12.056	5.611	6.722	7.056	14.556	3.778	1.944	10.278	39.667	14.111	3.556	2.389	4.444	11.8333	3.278	4	17.444	5.444	4.389	36.444	7.222	6.556	12.333	9.611	4.778	4.389	15.611	3.556		0.376682	9.55371
10.1225	4.944	7.944	10.556	6.556	6.722	5.556	11.944	4.056	2.444	10.278	38.611	16	4.056	2.222	3.778	14.8333	3.111	4.111	16.722	5.667	5.667	43.278	6.778	5.611	10.667	13.389	4.167	4.333	15.333	3.944		0.381167	9.77594
10.2416	4.556	7.444	10.833	6.333	6	6.944	12.833	5	2.278	8.944	39.056	15.389	3.056	3.667	3.722	12.0556	2.889	5.056	16.222	5.444	5.111	44	7.778	4.278	11.056	11.722	6.167	5.444	12.111	2.833		0.385652	9.60739
10.3606	5.278	8	10.611	6.667	6.278	5.833	12.944	5.611	2.833	10.722	41.611	17.167	5	3.556	4.278	12.6667	2.667	4.278	15.444	5.222	5.444	51.333	8.722	5.111	9.556	10.722	5.111	5.5	14.167	3.278		0.390133	10.187
10.4797	4.667	7.056	11.167	8.444	7.167	5.167	12.611	3.611	2.889	10.444	38.667	14.444	4.222	3.167	4.111	14.3889	2.778	3.722	17.222	4.611	3.556	58.556	7.778	5.5	10.944	10.389	4.444	4.5	12.722	3.833		0.394618	10.0926
10.5988	5.5	7.667	10.667	7.667	5.722	7	10.611	6.222	3	10.778	37.556	13.167	4.056	3.5	4.667	12.7222	3.333	3.833	19.667	4.444	3.889	59.167	6.667	4.944	9.778	9.833	4.778	5.444	11.278	3.833		0.399102	10.0463
10.7179	5.222	6.611	9.944	7.5	6.667	5.167	12.722	5.167	2.944	10.278	38.722	14.889	4.278	3.5	4.722	13.8889	2.833	4.056	15.889	5.444	5.111	59.778	8.722	4.889	9.778	10.444	5.667	5.278	11.833	3.556		0.403587	10.1833
10.837	5.611	6.944	10	6.444	5.944	6.444	12.278	4.722	2.944	9.444	34.667	15.889	3.278	3.278	4.667	14.2778	2.556	3.222	18.389	4.278	3.667	61.889	7.389	5.556	8.278	10	4.944	4.556	12.889	3.111		0.408072	9.91853
10.9561	5.278	6.833	10.611	8.333	6.611	6.389	12.278	4.722	3.111	10.444	32.111	12.278	4.111	2.944	3.944	14.6111	3.333	3.278	18.889	4.778	4.167	59.389	7.722	4.833	8.667	9.5	5.056	4.944	11.389	3.722		0.412557	9.8092
11.0752	5.278	6.667	13.833	7.722	7.278	5.667	11.444	4.889	2.944	10.389	28.444	14.333	3.889	3.556	4.167	15.7222	2.722	4.056	18.444	5.056	4.389	66.222	9.556	5.833	10.222	11.167	4.667	5.611	13.5	3.333		0.417041	10.3667
11.1943	5	6.444	14.111	8.111	6.889	6.222	14.278	5.389	4	10.889	27.444	11.5	3.556	2.944	4.167	11.1667	2.722	4.833	20.611	4.889	4.556	65.444	9.611	7.889	9.889	11.167	5.278	4.556	15.444	2.944		0.421526	10.3981
11.3133	5.889	5.444	13.5	7.611	6.833	6	14.611	5.278	3.167	9.444	23.056	11.611	4.111	2.611	3.389	12.5556	2.833	4.667	19.611	4.833	4.5	67.833	8.111	7.833	9.889	10.611	4.889	4.833	12.278	2.833		0.426007	10.0222
11.4324	4.889	6.167	12.056	7.5	6.833	6.5	12.667	6.111	3.611	10.222	25.056	13.333	3.889	2.444	3.5	13.6111	1.722	4.778	17.667	5.111	4.778	65.389	10.111	7	10.611	10	4.444	5.389	12.556	2.778		0.430492	10.0241
11.5515	5.278	7.111	12.333	8.111	6.667	5.667	13.333	6.444	3.722	10.333	23.556	12.556	3.833	2.833	4.167	13.6667	4.444	3.5	14.722	4.667	4.056	64.556	8.5	6.278	8.611	11.444	5.389	5.333	12.278	2.889		0.434977	9.87592
11.6706	5.778	5.611	13.333	8.722	7.556	6.389	11.667	6.722	3.667	10.889	21.389	11.278	3.611	3.444	3.556	14.5	3.611	3.278	16.944	4.889	5.778	56.5	8.667	4.944	10.278	9.611	5.889	4.889	12.611	2.889		0.439461	9.62967
11.7897	5.833	6.556	12.167	8.444	7.944	5.667	11	5.944	2.833	9.611	21.111	10.778	3.611	2.389	4.111	13.7222	3.167	4.167	14.722	5.167	4.722	51.889	8.611	6.333	12.222	10.5	5.389	4.667	13.167	4.278		0.443946	9.35741
11.9088	5.167	7.167	12.778	8.556	6.944	6	9.889	7.222	3.222	11.444	21.167	14.444	3.778	3.056	4.556	13.7778	3.111	4.722	12.333	4.333	5	49.778	7.167	5.111	10	11.222	5.889	4.167	15.167	3.389		0.448431	9.35189
12.0279	5.278	6.333	12.611	8	8.056	5.889	11.111	6.667	3.111	12.056	20.167	12.056	3.833	2.778	4.5	12.2222	3.444	5.333	14.5	4.667	4.667	41.722	8.5	6.722	12	11.278	4.667	5.056	13.111	4.056		0.452916	9.14637
12.147	6	5.5	13.333	9.833	8	5.611	11.278	6.889	4	10.833	20.444	12.278	4.056	3	4	12.7222	3.056	5.444	13.333	4.944	5.167	42.5	8.611	5.833	12.389	10.5	5.278	3.889	13.5	3.611		0.4574	9.19441
12.2661	4.944	6	11.889	7.778	7.222	5.444	10.222	6.444	1.944	10.611	20.667	13.111	4.556	4.167	4.5	13.3333	2.5	3.944	15.444	4.944	5.167	39.611	7.944	5.167	10.5	10.167	5.444	5.222	15.056	4.167		0.461885	8.93698
12.3851	6.667	5.889	12	7.778	7.167	6.556	10.444	5.778	2.944	11.167	18.5	13.556	3.667	2.889	4.556	11.1667	2.833	4.278	14.111	4	6	31.167	8.222	6.222	12.389	11.444	4.5	5.056	14.167	4.611		0.466366	8.65749
12.5042	5.556	5.389	10.944	8.833	5.111	8.444	9.444	6.667	3.111	12	21.333	11.111	3.944	2.389	4.722	11.5556	2.833	6.333	12.944	5.056	5.556	28.611	8.056	4.833	11.833	10.5	5.278	5.333	12.889	3.389		0.470851	8.46659
12.6233	4.944	5.389	12.167	8.722	7.167	4.556	11.5	6.778	2.5	14.889	19.5	12.778	4.556	2.722	5.167	11.1111	2.722	4.222	12.389	4.778	5.778	29.5	7.5	4.833	9.778	11.944	6.222	6	16.111	4.278		0.475336	8.68337
12.7424	6.167	5.5	13.667	8.667	6.556	5.667	10.278	8.889	3.167	11.111	20.889	12.889	2.889	2.611	5.389	9.7222	3.222	4.889	14.167	4.5	6.278	24.889	7.556	6.778	12.889	12.222	5.278	5.556	14.5	4.333		0.47982	8.70384
12.8615	5.222	5.778	14.389	8.889	7.389	5.722	10.944	7.833	4.278	11.889	20.111	11.444	3.944	2.667	5.333	11.1667	3	4.333	14	4.333	5.5	26.111	8.056	4.833	14.944	12.444	5.222	5.778	14.222	3.278		0.484305	8.76842
12.9806	6.833	4.944	13.167	8.5	5.611	5.333	10.944	7.389	2.722	11.778	21.722	11.167	3.667	2.722	5.722	11.7778	3	4.778	14.111	4.833	5	24.222	7.944	6.444	13	10.556	6.389	6.333	13.889	3.167		0.48879	8.58883
13.0997	5.778	7.167	14.667	7.889	5.722	6.222	8.444	6.333	3.389	11.944	20.722	10.556	3.167	3.333	4.5	10.6667	3.833	3.444	12.778	4.333	6.611	24.722	9.111	5.722	10.889	13.222	5.667	5.833	14.056	3.944		0.493275	8.48882
13.2188	4.722	6.056	17.5	7.056	7.5	5.389	9.389	7.278	3.056	11.222	21.722	10.556	4.667	3.667	5.667	12	2.944	4.056	12.556	3.556	5.667	20	9.222	7.833	14.778	13.111	5.556	5.667	16.278	4		0.49776	8.7557
13.3378	6.278	5.944	17.389	8.278	6.778	5	11.278	10.667	3.222	12.278	20.667	10.222	4.056	3.056	5.667	12.2778	2.333	5	13.722	5.056	6.667	21.722	9.667	7.278	12.611	12.167	6.278	5.667	13.833	4.056		0.50224	8.97049
13.4569	5.278	5.722	17.667	7.167	4.889	4.889	9.722	7.722	3.611	14.278	22.556	12.222	3.056	2.667	4.056	12.5	2.944	4.056	13.111	4.722	6.556	22.333	9.389	7.611	11.722	11.389	6.278	5.444	14.833	4.111		0.506725	8.75003
13.576	6	5.389	17.111	8.056	4.778	6.5	9.944	8.944	3.167	12.333	19.278	10.167	3.444	2.5	4.611	10.6111	3.444	5.833	14.556	3.667	5.556	21	8.333	7.5	14.222	10.056	6.611	5.611	15.778	4.222		0.51121	8.64074
13.6951	5.833	6.667	19.444	5.944	4.889	5	9.722	9.167	2.667	14.611	20.778	11.444	5.5	3.056	4.778	10.0556	3.722	5.056	12.889	4.5	4.889	17.667	9.5	6.667	14.444	9.944	7.333	4.944	13.056	3.389		0.515695	8.58519
13.8142	5.889	5	17.278	7.944	5.556	4.833	10.611	8.056	4.444	14.111	23.5	11.278	3.667	2.667	5.167	10.3333	4.167	4.556	14.556	4.556	7.667	18.667	7.722	8.722	10.889	9.611	7.5	4.556	17.778	3.889		0.52018	8.83901
13.9333	5.667	5.389	17.944	8.833	5.056	5.889	9.722	7.444	3.944	15.167	21.333	9.389	4.5	3.611	5.611	9.9444	3.833	5.278	13.444	3.778	6	18.778	8.667	7.056	12.333	10.722	6.5	4.722	17.333	3.778		0.524664	8.72218
14.0524	4.444	5.944	18.389	7.111	4.889	5.722	9.222	8.278	3.611	15	24.111	9.667	3.556	2.5	6.333	7.8333	2.667	6.056	14.167	4.444	6.833	17.111	9.778	8.389	13.222	10.389	6.611	4.556	19.389	3.667		0.529149	8.79631
14.1715	5	5.667	18.556	7.333	6.444	5.389	9.722	8.111	3.5	15.167	22.444	9.444	5.167	4.167	6.611	10.3333	3	4.944	13.556	4.667	6	18.778	9.278	8.333	11.5	9.833	5.333	5.389	17.5	4.667		0.533634	8.86111
14.2905	4.611	4.667	18.5	7	4.778	5.278	10.833	8.389	4.111	15.556	19.389	9.833	4.111	2.611	6.944	8.7222	2.056	4.556	13.889	3.667	6.389	18.167	9.667	7.778	12	12.056	4.778	5.389	17.278	3.722		0.538115	8.55751
14.4096	4.167	5.833	18.111	6.944	4.389	4.722	10.278	9.167	3.722	15.111	21.944	12.056	3.556	2.889	5.833	5.5	3.167	5	13.222	4.722	5.833	18.444	8.278	7.111	12.333	11.611	6.167	4.5	19.222	4.556		0.5426	8.61293
14.5287	5.167	5.611	16.389	7.722	5.111	5.056	10.333	10	2.944	14.333	23.278	11.222	3.556	2.611	6.333	7.8889	2.833	6	13.5	5.722	6.333	15.556	10.389	8.722	11.556	12.556	5.722	5.944	18.333	4.389		0.547084	8.837
14.6478	4.389	6	15.944	7.5	4.778	5.722	10.222	9.167	2.278	16.444	20.389	9.944	3	2.5	7.667	7	2.5	6.111	16.5	3.389	6.111	16.889	8	9.167	12.111	9.444	6.222	5	17.778	3.389		0.551569	8.5185
14.7669	4.444	5.5	15.5	8.778	5.333	5.056	10.722	10.222	3.667	15.722	25.5	10.111	3.389	2.389	7.056	6.5	2.889	4.778	14.778	4.222	7.667	18.056	8.667	9.833	11.889	12.278	7.389	5.611	17.111	3.5		0.556054	8.9519
14.886	4.611	5.167	16.278	7.778	4.722	6.167	10.944	8.556	3.056	14.444	22.444	9.944	3.889	2.667	7.333	6.1111	3.222	6.111	16.833	4.222	6.667	15.944	8.389	10	10	10.278	6.556	4.944	16.556	3.444		0.560539	8.5759
15.0051	4.5	7.722	15.833	8.111	4	5.5	9.667	9.167	2.778	15.333	19.389	10.5	3.611	2.611	7.722	6.6667	4.056	5.222	12.667	4.5	7.167	17.389	11.278	10.278	9.833	12.611	6.556	5.111	17.222	3.444		0.565023	8.68149
15.1242	5.167	7.111	14.778	9.722	5.056	4.556	9.056	10.333	3.444	16	21.833	12.556	3.056	2.889	6.556	6.2778	3.111	4.444	13	4.778	6.111	17.111	10.222	10.556	12.278	13.222	5.5	4.722	16.5	5.444		0.569508	8.84633
15.2432	5.444	6.667	15.667	8.167	4.889	5.667	11.333	10.278	3.056	16.167	19.778	10.667	4.167	2.444	7.944	6	4.278	3.889	15.389	4.111	6	17.333	11.722	11.056	10.389	13.389	6.5	5.889	16.667	5.222		0.573989	9.00563
15.3623	5.056	5.5	14.944	8.611	4.944	5.222	9.167	11.056	3.611	15.944	19.333	10.667	3.722	2.5	6.889	6	2.889	4.833	14.278	4.222	6.167	19.278	11.333	11.889	11	11.889	5.167	4.333	16.111	4.333		0.578474	8.69627
15.4814	4.444	6.389	16.833	8.778	5.944	4.778	7.889	11.444	3.389	18.444	16.444	9	4.333	2.833	7.444	4.6667	4.333	4.444	15.444	4.056	6.556	15.444	13.278	11.333	11.667	12.278	5.889	3.556	20.333	3.889		0.582959	8.85176
15.6005	3.5	6.333	15.333	9.167	4.5	4.5	9.944	10	3.889	19.889	18.278	7.278	2.278	3.722	7.778	5.6111	3.556	4.111	13.5	5.111	8	18.389	11.333	12.722	8.944	12.056	6	4.778	17.667	5		0.587443	8.77224
15.7196	4.444	6.722	17.333	7.889	4.5	4.111	7.278	9.389	3.722	18.556	16.389	8.667	3.222	3.111	7.611	6.1111	3.056	3.889	13.667	4.556	6.111	19.722	12.167	11.222	10.111	11.611	7.611	4.556	18.056	4.389		0.591928	8.6593
15.8387	4.5	6.833	16.944	9.222	4.667	4.556	8.389	12.111	4.611	18.056	16.111	10.611	3.778	3.222	9.5	6.9444	2.833	5.389	12.944	5.611	6.333	23.111	12.222	13.167	9.889	12.5	5.833	5.167	16.222	4.444		0.596413	9.19068
15.9578	5.278	6.389	17.5	9.056	4.778	4.722	9.611	9.278	3.389	21.167	14.778	9.167	3.833	3.056	9.444	4.1667	2.556	3.667	13.889	4.611	6.167	17.778	13.444	15.222	10.556	9.444	7.056	4.389	18	4.222		0.600898	8.88712
16.0769	3.944	5.5	16.222	10.333	4.556	5.611	6.889	11.389	4.611	21	16.167	9.056	4.611	3.333	8.944	5.0556	3.611	3.944	14	3.944	5.889	20.611	10.833	13.556	9.278	9.278	5.944	4.222	17.111	5.667		0.605382	8.83699
16.196	4.611	6.667	15.5	9.111	4.5	4	8.5	9.167	3.889	17.889	15.944	8.111	2.833	3.167	8.722	5.1667	2.5	5.056	16.111	5.167	6.944	20.944	9.5	14.056	11.167	11.5	6.222	5	17.278	4		0.609867	8.77409
16.315	5.222	6.333	16.778	10	4.833	4.778	8.056	9.944	4.556	17.278	15.222	7.778	4.278	2.778	9.333	4.9444	3.389	3.389	14.278	4.5	7.333	17.667	10.056	12.444	10.278	10.333	5.556	6.167	16.722	5.444		0.614348	8.65558
16.4341	3.556	7.444	15.611	8.833	4.278	4.111	7.556	9.444	4.444	18.389	15.833	9.667	2.944	4.111	10.722	5.7778	2.778	4.389	14.111	5.5	7.5	20.889	10.444	14.167	10.222	9.889	6.389	5.389	16.778	4.278		0.618833	8.84813
16.5532	4.944	5.111	14.5	9.167	4.333	4.833	8.556	10.722	4.944	19.667	13.278	10.944	4.444	3.556	13.167	4.8333	3.111	4.111	15.222	4.667	6.833	21.056	9.722	11.944	11.556	11.833	6.778	4.833	18.389	4.778		0.623318	9.06108
16.6723	4.833	6.056	16.611	9.833	4.167	4.333	9.056	11.944	3.722	19.333	15.444	8.333	3.111	2.667	11.5	5.2778	2.944	4.444	17.833	5.389	7.778	21.111	8.056	16.722	10.056	11.111	5.556	5.556	17.556	4.056		0.627803	9.14629
16.7914	4.667	5.611	16	11.5	4.444	5.056	7.667	11	4	21	16.389	8.5	3.444	2.833	13.389	5	3.722	5	17.278	5.556	6.556	20.667	10.056	15.722	9.556	11.444	5.889	4.556	17.333	4.556		0.632287	9.2797
16.9105	4.556	5.389	13.556	9.889	4.389	4.389	7.556	10.5	4.722	17.5	15.111	5.889	4.333	3.222	13.278	4.2222	4.222	4.556	14.5	5.5	6.944	23.111	8.722	16.444	9.944	12	5.111	4.556	15.5	3.889		0.636772	8.78334
17.0296	4.389	5.889	15.667	12.278	4.889	6.111	8.167	11.722	4.611	23.056	14.778	8.278	4.167	2.556	15.556	5.5	3.833	3.222	13.389	5.333	7.667	20.667	8.167	15.667	10.444	12	6.167	6	17.222	4.278		0.641257	9.389
17.1487	3.778	6.667	15.056	13.167	4.944	4.056	7	9.944	4.111	20.889	16.556	7.722	3.611	4	16.778	4.1667	2.833	3.889	15.333	5.111	5.333	19.778	8.611	14.611	11.556	13.111	5.944	4.889	20.111	4.056		0.645742	9.25372
17.2677	3.944	4.444	17.556	11.889	4.333	5.278	7.444	10.944	3.667	22.111	16.833	7.111	4.333	2.667	14.056	3.2778	2.889	3.944	14.222	4.889	6.5	19.722	9	16.833	11.222	11.5	6.111	5.444	17.778	4.111		0.650223	9.13509
17.3868	5.444	5.444	16.556	12.389	4.222	4.778	7.5	9.611	3.944	23.056	14.778	7.667	3.222	3.667	16.111	4.9444	4	3.667	14.556	7.056	6.167	20.389	11.278	16.333	12.222	12.111	7.167	4.722	16.222	4.389		0.654707	9.45375
17.5059	2.889	5.778	17.889	14	4.833	3.944	6.778	10.333	4.611	23.167	14.944	7.444	3.889	2.944	16.722	3.7222	3.778	4.111	14.833	4.833	5.889	21.833	11.056	14.778	13.611	13.389	8.778	5	16.111	5.667		0.659192	9.58514
17.625	3.056	5.444	17.389	11.833	4.444	4.944	9.167	12.111	5.333	21.5	15.444	6.778	3.944	2.389	17.556	4.6111	2.833	4.389	14.833	4.778	6.833	23.278	9.444	13.056	13.944	12.944	7.278	5.389	17.222	4.278		0.663677	9.54807
17.7441	3.889	3.944	15.667	10.556	4.278	5.944	7.222	10.111	4.667	20.722	14.833	7.611	3.278	3.056	17.222	2.6111	3.167	5	15.222	4.611	6.389	21.056	11	13.667	14.167	13.389	7.167	5.833	16.389	3.667		0.668162	9.21117
17.8632	3.611	5.056	17.556	11.722	5.167	5.389	9.111	10.611	5.056	21.5	15.056	8.444	4	3.222	21.389	4.2222	3.222	4.278	14.667	4.5	5.889	23.778	10.389	12.722	13.333	10.944	6.056	5.444	14.667	5.056		0.672646	9.53524
17.9823	4.056	3.944	16.333	9.833	4.833	4.833	9.5	9.889	4.278	18.889	14.167	7	3.556	3.389	18.944	3.8333	3.167	5.556	16.556	5	5.944	22.611	9.944	11.833	13.5	11.167	5.889	5.722	17	4.056		0.677131	9.17408
18.1014	3.611	4.444	16.111	11.111	4.167	5.056	6.111	12.389	4.167	19.278	16.556	7	3.667	3.167	18.222	3.7222	3.167	3.667	15.778	5.333	6.667	23.722	10.222	12.778	14	12.389	5.611	5.889	14.5	4		0.681616	9.21674
18.2204	3.889	4.444	16.944	9.278	4.333	3.944	9.889	9.667	5.111	20.056	16.778	6.833	3.889	2.889	19.833	3.6667	2.667	4.222	16.889	4.778	5.944	24.111	12.278	13.667	15.944	11.833	6.5	4.722	15.056	4.5		0.686097	9.48516
18.3395	3.333	5.056	17	12.611	5.833	5.556	8	9.611	4.778	18.889	16.722	6.556	4.278	3.556	19.5	3.8889	3.111	4.556	17.611	4.333	5.444	21.167	13.167	10.778	13.944	12.778	7.222	5.444	17.056	4.278		0.690582	9.53523
18.4586	3.389	4.722	15.667	11.833	5.611	5.667	9.333	10.056	5.111	17.5	14.222	6.278	4.056	2.444	18.722	4.1111	3.222	3.722	15.944	4.111	5.389	25.667	11.944	11.222	14.778	11.056	5.167	4.222	16.389	3.722		0.695066	9.1759
18.5777	4.389	4.278	16.889	13.722	4.889	6.278	8.056	11.167	4.889	17.722	13.389	6.778	4.167	4.278	19.056	4.3889	3.667	4.111	14.944	5.556	6.167	27.889	14.333	12.833	17.333	12.611	6.056	5.389	15.5	4.944		0.699551	9.85563
18.6968	3.333	4.833	14.722	13.556	5.667	5.167	8.667	11.722	6.278	19.5	14.333	7.444	3.667	2.778	17.611	4.0556	3.333	4.778	15.389	4.667	4.778	26.167	14.556	12	18.722	13.556	7.111	4.833	13.889	4.778		0.704036	9.72969
18.8159	3.5	4.056	15.611	12.944	6.111	6.167	9	12	5.889	18.833	12.889	5.889	3.667	2.444	18.833	3.3333	3.056	4.333	14.5	5.389	5.5	24	14.056	14.833	17.056	13.056	6.278	4.889	16.167	3.833		0.708521	9.60374
18.935	3.278	3.889	13.278	10.722	6.833	4.167	11.778	11.056	4.722	19.056	15.833	7.944	3.056	3.333	20.5	4	3.111	4.833	16.722	4.556	4.889	26.222	15.611	13.444	16.389	12.722	5.5	5	18.222	4.444		0.713005	9.837
19.0541	2.889	4.056	12.056	12.833	7.167	4.722	10.556	11.389	5.389	20.167	16	7.5	3	2.722	18.333	3	3.167	4.778	13.167	5	5.5	26.444	15.833	11.833	15.389	14.556	6.167	4.833	14.667	4.111		0.71749	9.57413
19.1731	4.444	4.278	12.833	12.167	6.5	5.667	9.944	12.222	6.278	19.111	13.389	7	3.389	3.444	20.278	4.2778	2.722	4.611	13.444	4.333	5.389	25.944	15.833	13.556	16.889	13.556	7.722	3.556	17.389	5.056		0.721971	9.84073
19.2922	3.5	3.833	13.722	12.5	6.5	5.556	12.444	13.556	6.778	18.111	15	7.889	3.222	3.556	19.722	4	3.556	4.944	12.056	4.056	7.167	27.944	17.167	13.278	17.222	15.333	6.833	4.944	16.389	4.556		0.726456	10.1778
19.4113	3.556	4.556	17.111	11.333	5.167	5.889	13.222	11.944	7.611	19.389	14	6.111	3.778	3.056	20.667	3.8889	4.056	4.222	15.722	5.889	6.278	26.611	17.5	14.111	19.056	16.667	5.778	3.889	16.444	3.889		0.730941	10.3797
19.5304	3.389	5.167	16	12.556	5.167	7.556	11.556	12.278	7.611	20.278	15.611	7.556	3.389	3.556	20.222	3.5556	2.556	3.944	11.778	5.778	6.944	26.333	19.333	13.278	16.667	16.444	6.556	4.667	20.056	5.167		0.735425	10.4983
19.6495	3.611	4.389	13.778	11.167	6.389	5.667	15.833	12.389	9.167	22.222	15.722	7.389	3.5	3.278	18.889	3.6111	2.611	4.278	13.778	6.333	6.389	27.167	18	13.167	17.611	18.111	6.333	4.167	16.222	4.111		0.73991	10.5093
19.7686	3.222	5.556	14.222	11.944	6.389	5.722	13	12.722	7.5	21.778	16	7.278	3.222	3.722	18.444	2.7778	3.833	4	14.111	5.889	6.333	29.111	17.889	14.111	17.389	16.056	6.889	4	17.278	5.722		0.744395	10.537
19.8877	3.389	4.5	15.722	12.944	7	5.833	14.556	13.333	9.056	20.833	16.167	8.5	4.167	2.667	22.167	3.8333	3.222	3.833	14.556	5	6.111	29.833	18.722	15.667	20.556	19	5.667	6.778	16	5		0.74888	11.1537
20.0068	3.667	4.833	15.333	11.778	5.833	6.5	15.389	10.556	9.444	22.389	19.222	8.056	3.278	2.778	20.333	3.5	3.278	3.833	16.278	5.111	7	28.389	16.611	14.889	17.833	17.778	5.889	5.722	19.667	4.167		0.753365	10.9778
20.1259	3.5	5.111	14.611	12.611	7.333	8.5	15.556	10.778	10.667	22.278	18.722	6.778	4.389	3.444	18.833	3.9444	3.389	5.056	16.222	7.222	5.667	28.667	18.611	13.889	19.778	19	7.833	4.444	18.778	4.167		0.757849	11.3259
20.2449	2.667	5.167	14.611	12.333	7.833	8	16.167	12.111	11.333	21	17.222	7.833	3.667	4.333	21.278	3.1111	3.278	4.889	17.278	5.944	6.222	29.222	20.5	14.444	17.444	19.167	6.167	6.333	15.944	3.889		0.76233	11.3129
20.364	4.167	4.278	14.889	13.111	8.667	7.333	18.556	13.167	11.222	24.722	18.111	9.222	5.778	3.056	23.111	3.6667	3.611	3.722	16	6.389	5.778	30.778	20.444	14.222	18.222	18.833	5.889	6	17.389	4.5		0.766815	11.8278
20.4831	3.722	3.667	13.889	11.333	8	8.889	20.278	12.444	12.556	26.889	17.5	9.667	4.778	3	22.944	3.2778	3	5.278	16.111	6.889	8	30.278	24.944	17.278	20.889	20.556	6.333	5	18.111	4.333		0.7713	12.3278
20.6022	2.556	4.222	17.111	11.444	9.833	7.333	20.722	13	13.722	27.611	19.5	8.167	5.889	2.722	22.111	3.6667	2.556	3.889	16.667	7	6.222	33.278	24.056	18.556	20.389	24.444	7.111	4.389	21.5	3.944		0.775785	12.787
20.7213	2.556	4.222	14.556	12.056	9.667	7.722	19.167	12.333	15.278	27.556	17.833	9.389	5.556	3.389	23.556	4.7222	2.944	4	18.611	5.389	6.722	33.889	25.722	18.778	20.222	25.333	7.444	4.889	21.944	5.722		0.780269	13.0389
20.8404	3.5	4.111	16.333	12	9.333	10.722	19.5	13.278	16.444	31.611	21.056	11.333	4.889	4.5	21.833	2.8333	2.889	5.389	18.778	5.722	7.056	39.056	24.444	22.056	20.167	22.778	7.556	5.278	18.333	4.778		0.784754	13.5852
20.9595	2.778	4.5	17.389	12.611	10.556	9.833	22.556	12.722	19.722	33.889	22.222	10.167	4.444	3.833	23.444	4.5	2.889	4.333	18.889	6.889	7.611	41.056	24.278	26.667	22.833	24	7.944	5.444	18.944	6.056		0.789239	14.4333
21.0786	3.667	3.833	16.444	12.333	10.389	12.167	24.333	14.611	22.167	35.611	20.667	10.444	4.833	5.056	21.833	3.5	3.444	4.278	19.556	4.944	7.111	44	24.278	26.333	26.333	21.444	8.389	6.778	24	4.667		0.793724	14.9148
21.1976	4.167	4.167	16.333	10.278	12.222	13.5	24.556	16	25.556	37.778	21.111	12.278	7.167	3.444	22.222	3.8333	2.944	6.056	19	7.944	7.222	46.167	26.944	32.889	27.167	21.778	8.389	6.833	24.444	4.833		0.798205	15.9074
21.3167	3.278	4.556	15.167	14.444	14.944	16.278	26.667	13.278	28.167	43.222	22.889	11.278	6.167	6.167	24.278	4.5556	3	4.111	20.278	5.333	6.778	50.389	30.222	34.278	28.556	25.833	7.889	6.389	23.556	5.444		0.802689	16.9131
21.4358	4.389	5.889	17.167	11.889	14.889	15.833	29	16.111	32.278	50.389	25.444	10.167	6.778	5.778	25.111	4.5	2.722	5.944	20.833	8.556	6.833	45.722	30.444	45.944	30.167	22.778	6.944	6.611	28.111	5.389		0.807174	18.087
21.5549	4.333	3.889	15.611	11	15.5	16.944	29.722	16.389	35.222	51.278	26.444	13.333	8.167	5	24.278	4.6667	3.611	6.389	20.944	7.333	7.111	44.5	30.611	41.056	31.333	24.556	6.833	8.056	29.944	4.667		0.811659	18.2907
21.674	4.222	4.444	14.778	12.556	15.944	19.389	29.722	15.944	33.5	64.944	27.778	11.889	10	4.833	26.611	3.7222	3.556	4.444	20.833	7.278	9.722	43.222	33.667	47.833	29.833	21.667	7.778	7.833	31.833	6.389		0.816144	19.2055
21.7931	3.944	5.278	15.833	11.5	16.444	22.722	29.333	15.167	30.944	64.667	29.556	14.944	9.833	5.944	24.5	5	3.444	7.944	19.667	7.222	8.444	45.722	32.778	48.611	32.944	28.111	7.778	12.333	38.056	6.389		0.820628	20.1684
21.9122	5.333	5.722	14.722	10.944	20.444	24.556	33.222	20.278	31.556	63.111	36.667	14.667	10.722	6.889	25.389	5.3333	4.944	6.778	22.278	8.5	9.667	40.611	35.611	47.944	40.889	29.111	6.333	12.944	39.722	7.778		0.825113	21.4222
22.0313	6.278	4.444	11.889	10.556	20.722	32.111	33.944	22.389	29.778	54.333	42.444	14.444	13.667	4.833	24.278	6	4.556	7.056	22.222	8.611	9.944	46.056	33.111	50.722	41.611	31.722	8	14.5	43.611	9.5		0.829598	22.1111
22.1503	5.833	4.056	14.944	11.333	20.667	35.778	38.333	26.056	22.722	36.056	48.444	16.278	14.056	7.333	25.111	6.1111	4.611	7.278	22.944	9.278	12.167	45.833	33.5	49.333	46.611	34	9	21.278	46.5	10.278		0.834079	22.8574
22.2694	5.556	4.556	14.722	14.778	24.333	38.556	43.889	27.389	19.111	22.889	63.778	15.778	15.889	8.056	25.222	5.2222	3.333	7.444	23.778	9.222	11.389	42.611	30.222	45.667	45.056	37.278	11.167	20.278	43.667	14.778		0.838564	23.1871
22.3885	7.111	4.556	15.278	13.5	24.722	48.167	47	29.722	15.611	15.556	68.667	22.222	20.944	7.889	24.5	7.0556	4.889	8.444	26.778	9.389	13.667	44.333	29.333	41.111	50.722	38.056	10.278	23.5	49.833	19.333		0.843048	24.7389
22.5076	8.167	5.778	15.667	12.389	25.5	55.5	44.667	30.667	10.5	15.5	76.667	25.111	22.778	8.333	25.889	7.5556	5	8.278	23.778	11.111	13.556	44.167	26.611	35.944	52.389	45.611	13.556	28.278	53.833	24.389		0.847533	25.9057
22.6267	8.5	5.5	14.5	15.222	29	62.5	45.278	29.167	7.111	12.222	58.833	28.222	28.389	10.722	25.833	8.7222	5.222	8.778	32.056	13.5	17.056	43	24.222	32.278	57.333	40.333	19.333	28.111	54.722	26.778		0.852018	26.4148
22.7458	8	6.222	14.611	16.667	31.833	72.333	46.111	27.333	8.278	9.722	53.667	30.111	29.389	10.667	27.5	8.7222	4.333	10.167	35.444	15.833	19.222	38.5	24.722	26.278	59.278	43.333	19.389	39.889	60.222	32.667		0.856503	27.6814
22.8649	8.5	6.333	13.611	13	36.222	73.222	47.556	21.167	5.889	9.778	39.556	31.333	34.222	12.722	26.611	13.4444	5.556	10.167	32.944	19.722	21.556	39.222	23.944	23.333	62.833	43.833	28.111	47.944	67.944	36.833		0.860987	28.5703
22.984	9.944	6.722	14.444	15.611	34.278	66.111	44.222	22	7.278	6.667	32.611	34.389	38.278	13	27.944	14.7222	7.222	9.111	36.278	25.111	30.333	38.278	22.278	17.389	53.889	40.444	35.722	67.056	71.444	38.611		0.865472	29.3796
23.103	9.278	6.944	16.278	13.889	43.5	56.278	44.278	21.444	6.5	6.222	21.278	35.889	35.833	16.389	32.778	16.7778	7.222	13.722	37.111	28.944	35	31.889	21.667	15.222	41.222	40.278	45.111	85.944	61.722	39.056		0.869953	29.5889
23.2221	11.611	8.167	17.222	14.389	48.389	41.722	35.278	20.444	5.556	6.611	12.444	37.611	30.5	14.222	33.556	19.1667	9.889	15.222	38.833	39.833	44.167	32.278	15.111	10.778	32.278	47.944	53.667	102.111	52.444	31.222		0.874438	29.4222
23.3412	10.5	9.5	17.611	13.778	54.444	33.111	30.167	17.444	5.778	6	12.444	33.722	27.722	17.222	39.056	25.6111	11.056	12.889	40.389	39.778	46.611	28.222	12.5	9.056	25.444	52.556	57	105.5	36.167	25.222		0.878923	28.55
23.4603	10.778	11.778	17.278	16.333	72.222	20.222	30.833	14.333	4.667	5.056	8.222	34.556	18.222	20.056	43.389	31.8889	13.889	15.833	40.389	50.667	47.333	23.333	8.111	7.278	16.5	45.056	59.333	92	22.389	18.056		0.883408	27.3334
23.5794	10.944	12.389	15.333	16.222	77.333	15.167	22.833	13.611	4	3.722	5.556	27.444	12.778	24.778	42.667	36.3889	15.389	19.167	41.278	57.833	44.778	15.556	7.556	5.111	14	27.222	63.222	67.389	16	10.056		0.887892	24.8574
23.6985	12.167	11.389	17.889	17.667	80.889	14.5	20.667	12.222	4.778	2.778	4.833	21.667	10	27.667	43.056	37.6667	17.778	21.111	44.556	55.833	38.222	15.111	5.333	4.333	8.667	16.611	62.278	37.167	9.667	6		0.892377	22.7501
23.8176	11.5	15.056	15.778	16.5	70.056	9.889	16	10.722	4.222	3.056	4.778	17.944	7.611	39.444	44.944	37.6667	19.222	20.833	45.889	56.5	34.111	12.611	4.833	3.833	6.611	12.444	44	19.444	7.444	6.167		0.896862	20.637
23.9367	14.111	19.333	18.556	22.722	63.889	7.333	12.944	10.111	4.444	2.667	3.278	17.667	8.611	35.667	47.111	37	21.5	25.389	46.111	43.889	24.556	8.611	4.222	3.333	5.111	8.944	28.111	12.833	4.222	4.222		0.901347	18.8833
24.0558	11.667	23.167	20.444	31.778	54.833	4.944	13.389	9.056	4.389	2.222	4.111	11.889	5.611	39.611	43.111	29.6667	22.389	27.667	48.833	27.722	12.444	6.222	4.111	2.667	4.389	6.944	14.389	7.5	3.222	4.222		0.905831	16.7537
24.1748	15	30.111	21.111	33.333	35.167	4.722	10.944	10.889	2.944	2.222	4.444	6.889	6.278	43.056	38.611	22	29.056	31.833	43.111	11.778	10.556	6.444	3.944	2.833	4.111	5	7.944	5	3.222	3.556		0.910312	15.2036
24.2939	14.889	30.722	20.222	41.889	24.389	2.556	5.778	8.889	2.556	1.833	2.556	5.444	4.833	39.778	34.167	16.1667	32.278	33.333	37.222	8.611	9.333	4.444	2.944	2.167	2.722	4	6.222	3.278	2	1.944		0.914797	13.5722
24.413	13.722	35.5	23.222	48.833	16.722	3.167	5.944	6.833	3	1.889	2.5	5.667	4.389	40.278	31.389	9.8333	27.833	34.833	38.056	7.444	9.833	4.222	2.056	1.778	2.333	3.389	4.389	3.056	1.444	3		0.919282	13.2185
24.5321	12.722	36.833	23.833	52.778	12.833	2.889	5.889	6.167	2.222	2.5	2.333	4.667	3.667	33	24.556	10.3333	28.111	36.944	33.333	5.556	6.389	3.278	2.389	1.889	2.111	2.333	4.5	2.5	1.167	1.889		0.923767	12.3204
24.6512	13.389	37	24.833	65	9.056	2	4.389	6.444	3.111	2.278	1.167	4.056	4.056	30.889	19.333	8.3333	22.889	32.444	24.278	4.611	4.389	2.278	1.389	1.778	1.722	2.167	3.389	2.111	1.278	1.111		0.928251	11.3723
24.7703	15.722	36.167	20.389	66.167	6.611	2.389	2.722	6.111	2.722	1.611	1.889	4.389	2.444	22.167	19.556	7.3333	24	32.667	14.111	3.389	3.778	2.389	2.167	1.444	2.167	1.389	1.833	0.944	1.056	1.556		0.932736	10.376
24.8894	10.222	34.056	17.278	61.944	4.278	2.222	3.111	4.889	3.111	0.944	1.389	3.889	2.333	17.778	15.556	6.1667	21.111	32.389	8.778	3.333	2.667	2.556	1.278	1.056	1.333	1.722	2.056	1.611	0.611	0.833		0.937221	9.01669
25.0085	8.278	27.056	15.444	58.278	4.5	1.389	2.444	4.167	1.722	1.167	1.222	2.111	1.278	14.944	11.667	6.2778	15.667	23.833	8.833	3.389	2.778	1.611	1.333	1.056	1.111	1.278	1.778	0.889	0.944	0.944		0.941706	7.57963
25.1275	8.222	23.333	11.111	54.056	2.944	1.389	1.278	4.667	2.167	1.5	1.778	1.167	1.444	12.556	10.389	5.6667	10	22.722	7.556	2	2.111	1.111	1.5	1.167	0.944	1.278	1.056	0.556	0.722	1		0.946187	6.57969
25.2466	6.889	17.278	10.444	48.056	3.5	1.278	1.556	2.5	1	0.944	1.333	1.5	0.722	11.5	8.389	5.1667	12.444	21.111	5.833	2.167	1.556	1.222	1	0.722	0.722	0.889	0.889	1.389	0.611	0.611		0.950671	5.77406
25.3657	8.5	11.833	8.389	39.722	2.056	1.056	2.111	2.056	1.722	1.056	1.556	1.778	0.722	5.833	6.389	3.6667	8.444	15.778	4.722	1.833	1.333	1.056	0.778	0.444	0.667	1.5	0.778	0.833	0.167	0.778		0.955156	4.58522
25.4848	7.556	10.778	7.278	31.222	2.167	1.056	2.556	1.778	1	1.611	0.944	0.833	1.056	8.722	5.556	4.6667	8.111	13.056	3.5	1.889	1.167	0.667	0.444	0.611	1.167	0.833	0.667	0.556	0.333	0.389		0.959641	4.07232
25.6039	6.556	11.444	6.167	26.556	1.833	0.778	1.167	1.667	0.667	0.5	0.333	1.056	1.056	5.722	4.889	5.3333	7.556	9.833	4.222	1.333	0.944	0.833	0.833	0.722	0.944	0.5	0.278	0.722	0.333	0.167		0.964126	3.49814
25.723	7.222	8.611	7.278	19.389	2	0.444	1.333	1.056	1	0.778	1.167	0.778	1	6.111	4.111	4.5	5.833	7.222	3.222	1.722	1.333	0.667	0.333	0.444	0.389	0.667	0.611	0.389	0.556	0.389		0.96861	3.0185
25.8421	6.222	7.889	4.722	12.167	1.5	0.611	1.111	1.833	1.444	0.5	0.667	1.167	0.389	5.611	4.833	4	6.111	7.833	2.056	1.222	0.944	0.333	0.889	0.5	0.444	1.278	0.278	0.722	0.333	0.611		0.973095	2.60733
25.9612	5.778	6.111	5.278	9.444	1.278	0.667	0.944	1.222	0.556	0.556	0.722	0.389	0.778	3.111	3.444	4.1667	4.667	8	2.722	1.444	0.944	0.389	0.667	0.611	0.444	0.778	0.111	0.389	0.444	0.333		0.97758	2.21292
26.0802	5.056	6.556	5.556	9.111	0.667	0.5	1.167	0.778	0.778	0.444	0.667	0.889	1.333	3.556	3.278	3	3.667	6.056	1.556	1.667	0.389	0.444	0.778	0.667	0.722	0.722	0.333	0.056	0.389	0.111		0.982061	2.02977
26.1993	4.889	6.167	4.222	7.778	1	0.667	0.5	1.111	0.5	0.389	0.556	0.722	0.778	3.111	2.222	2.5	3.333	5.111	2.167	0.833	0.778	0.278	0.389	0.611	1.222	0.611	0.722	0.389	0.444	0.611		0.986546	1.82037
26.3184	4.167	4.333	3.389	7.833	0.722	0.611	0.722	0.944	0.5	0.111	0.278	0.389	0.5	2.111	2.667	2.5556	3.833	3.278	2.111	1.389	0.611	0.444	0.444	0.056	0.111	0.111	0.5	0.389	0.222	0.667		0.99103	1.53329
26.4375	3.611	4.778	2.833	5.611	0.889	0.556	0.389	0.833	0.389	0.278	0.389	0.389	0.556	1.889	2.222	2.1667	3.389	4.389	1.222	0.667	0.611	0.389	0.389	0.222	0.667	0.389	0.444	0.278	0.278	0.111		0.995515	1.37412
26.5566	3.056	4.278	3.167	5.278	0.778	0.444	0.389	0.889	0.333	0.278	0.111	0.278	0.5	2.111	1.389	1.5556	3.611	4.444	1.389	0.667	0.222	0.333	0.056	0.222	0.111	0.278	0.167	0.333	0.056	0.333		1	1.23522

## Sheet: Image7
X0	Y0	Y1	Y2	Y3	Y4	Y5	Y6	Y7	Y8	Y9	Y10	Y11	Y12	Y13	Y14	Y15	Y16	Y17	Y18	Y19	Y20	Y21		Ap-basal	Avg int
0	10.325	11.021	19.102	10.6501	24.672	19.291	14.697	23.3853	26.746	29.942	44.593	42.298	43.216	27.383	25.126	20.273	46.863	50.026	44.405	24.678	12.459	11.732		0	26.4947
0.1191	12.624	12.642	23.162	11.9919	25.146	23.693	15.621	23.4383	33.817	30.0666	48.304	45.494	48.351	29.638	27.809	21.876	56.851	55.131	42.628	26.282	12.644	10.484		0.00406546	28.9861
0.2382	18.833	16.311	27.916	14.163	25.266	26.017	15.233	21.3491	37.35	31.2708	46.962	44.934	57.108	32.98	25.835	23.597	69.124	59.244	44.907	25.195	13.773	11.276		0.00813091	31.302
0.3573	27.705	17.324	30.416	15.4074	25.855	33.02	15.252	24.3422	43.565	33.7959	49.781	44.903	65.806	37.342	28.702	28.117	84.897	58.42	46.475	27.064	16.484	13.241		0.0121964	34.9052
0.4764	43.02	20.486	33.55	17.9093	27.068	37.449	15.861	28.4302	44.538	34.0833	49.717	44.669	77.776	39.352	33.674	34.233	100.534	61.116	44.881	28.378	18.287	18.763		0.0162618	38.8079
0.5954	65.357	26.513	39.115	21.9337	27.661	45.717	17.251	34.2437	51.277	36.375	47.938	43.39	88.531	42.837	37.781	38.392	112.611	64.372	44.202	28.037	25.93	23.786		0.0203239	43.7841
0.7145	91.229	31.737	45.232	27.0907	28.033	48.212	21.178	39.37	50.671	47.9157	50.465	44.807	100.189	47.693	43.823	47.982	144.775	71.104	47.013	29.265	32.366	28.888		0.0243893	50.8654
0.8336	125.126	38.992	56.303	33.8342	35.378	52.752	26.092	44.291	50.329	57.26	52.607	47.171	118.599	54.895	48.301	49.138	170.503	77.453	47.958	31.045	41.454	37.337		0.0284548	58.9463
0.9527	145.623	44.733	60.663	38.4841	36.443	59.105	31.112	52.8256	56.464	65.5264	54.692	47.744	139.594	61.454	61.296	57.578	188.077	80.77	56.416	33.747	47.79	41.26		0.0325202	66.4271
1.0718	164.83	47.949	68.622	46.3131	42.323	74.643	35.94	60.9003	52.919	75.6133	56.506	50.949	167.428	67.642	74.377	63.598	201.074	82.983	64.436	42.197	59.398	47.049		0.0365857	74.895
1.1909	167.905	54.382	76.814	57.8139	48.817	90.295	47.258	66.1636	51.676	77.6475	56.564	49.572	175.237	80.454	92.446	76.427	209.574	91.064	67.013	48.408	69.348	50.756		0.0406512	82.0743
1.31	153.99	59.767	87.565	63.2022	58.836	111.731	57.33	79.7151	50.594	87.6572	54.903	51.543	186.668	91.095	95.184	83.064	215.197	98.784	74.596	57.87	75.578	50.184		0.0447166	88.4115
1.4291	130.768	62.827	98.688	71.7374	72.902	132.674	75.638	86.661	43.729	82.0279	55.837	55.038	186.285	100.91	92.359	89.915	221.997	107.795	86.955	74.867	86.008	49.428		0.0487821	93.8657
1.5481	110.672	66.777	109.272	71.6934	87.948	155.795	97.327	92.5711	39.464	76.1801	60.768	52.422	193.485	113.485	84.916	88.698	221.458	121.839	99.249	89.601	101.613	45.411		0.0528441	99.1202
1.6672	90.702	69.69	117.493	73.9818	107.208	166.093	125.455	92.4652	36.635	74.2558	62.72	59.364	201.697	123.209	71.903	86.03	225.535	133.578	113.639	101.27	113.161	45.121		0.0569096	104.146
1.7863	70.491	71.667	119.028	70.3582	120.762	159.183	148.4	81.4261	36.157	70.529	67.981	66.25	208.272	135.966	66.529	79.986	221.303	133.166	125.43	110.201	126.052	49.597		0.060975	106.306
1.9054	59.106	83.45	120.148	70.5783	134.067	149.165	160.948	76.4156	36.277	70.3793	78.735	71.795	211.846	149.59	59.335	75.881	221.356	139.45	132.061	121.037	134.823	49.223		0.0650405	109.348
2.0245	49.823	94.594	124.2	74.5784	136.038	128.455	165.413	68.546	35.578	61.5498	90.272	83.323	214.645	155.639	51.796	70.777	226.999	144.087	133.845	125.78	142.707	56.69		0.0691059	110.697
2.1436	42.747	105.549	128.824	76.4842	127.411	102.642	152.729	60.2164	38.154	63.6594	105.252	95.481	209.247	161.146	45.477	66.916	227.444	140.847	129.148	120.914	139.894	64.411		0.0731714	109.3
2.2627	36.831	108.741	131.281	70.6351	103.594	83.329	130.158	52.5484	39.239	62.7308	122.068	107.117	206.157	159.558	39.873	58.836	229.024	140.701	123.635	112.499	136.933	69.62		0.0772369	105.687
2.3818	32.408	117.189	137.291	66.5406	80.836	71.184	105.154	44.0272	40.373	61.2901	138.519	122.548	195.133	168.73	36.914	55.131	231.758	138.043	121	94.735	132.733	75.227		0.0813023	103.035
2.5008	28.933	117.873	140.802	59.6502	68.825	53.121	86.373	40.5535	38.661	56.8391	148.931	142.07	180.131	173.261	37.264	50.084	236.224	143.917	120.197	85.352	121.778	82.716		0.0853644	100.616
2.6199	26.229	119.487	136.468	52.7882	58.108	45.784	69.512	31.9431	40.566	53.3714	146.69	148.189	164.569	176.89	36.424	47.26	239.506	153.419	110.265	72.717	116.5	90.981		0.0894298	97.1667
2.739	24.54	122.759	129.667	41.6874	50.194	37.957	62.723	29.8945	41.892	55.043	132.615	150.893	148.575	181.449	35.301	43.735	237.841	154.043	103.458	63.714	107.669	100.073		0.0934953	93.442
2.8581	21.401	125.435	124.231	33.7003	41.629	30.098	55.66	29.3232	44.162	56.3866	118.795	141.279	128.72	189.428	36.344	41.09	234.779	156.282	97.042	47.762	97.656	111.975		0.0975607	89.2354
2.9772	18.793	120.451	113.459	29.3545	32.595	24.769	52.171	27.0369	45.664	51.6464	101.445	136.432	114.219	192.776	36.2	41.272	237.061	152.661	91.604	39.861	92.291	125.98		0.101626	85.3519
3.0963	15.771	119.651	96.983	22.9913	30.173	21.187	49.395	24.3634	50.049	49.4239	86.972	125.808	95.622	192.643	35.19	34.953	238.644	151.056	82.514	32.177	84.993	147.792		0.105692	81.2887
3.2154	14.912	111.782	81.899	20.2451	30.522	18.87	46.042	25.7868	53.51	47.7198	74.963	106.462	79.431	191.472	38.683	38.277	237.585	147.418	76.766	23.603	75.272	157.603		0.109757	77.2193
3.3345	13.609	104.532	65.303	19.2407	27.175	17.797	50.611	25.3339	55.251	49.2332	63.28	88.704	76.312	181.925	44.333	41.556	236.038	144.122	65.883	18.636	69.324	152.861		0.113823	73.23
3.4535	11.718	98.78	57.812	17.2707	24.44	16.051	51.042	23.2762	57.354	42.325	52.992	77.21	68.979	185.097	45.83	39.938	230.15	141	62.117	16.243	64.072	152.598		0.117885	69.8316
3.5726	9.405	86.925	47.654	16.6276	25.493	13.366	49.912	25.5933	69.511	36.6453	46.028	65.892	64.649	180.625	50.468	40.856	224.771	132.135	56.097	14.402	53.991	137.616		0.12195	65.8483
3.6917	9.89	78.015	42.547	16.8159	23.079	12.546	50.268	21.8804	82.35	33.8069	42.348	54.316	62.449	179.196	56.53	41.05	209.905	114.388	49.98	13.151	43.591	116.276		0.126016	61.5626
3.8108	10.204	74.208	34.053	12.9083	24.302	12.042	46.248	21.3875	90.738	31.5308	35.604	50.22	53.902	172.527	63.653	37.334	195.19	98.308	50.609	12.636	35.465	102.247		0.130081	57.5144
3.9299	8.501	63.921	30.113	12.9927	22.509	11.132	38.213	21.5606	101.631	29.7183	32.432	43.507	44.171	159.429	65.105	32.598	184.093	85.93	50.395	11.848	30.497	85.832		0.134146	53.0058
4.049	8.448	56.161	25.779	12.0533	17.851	11.047	33.633	22.848	117.107	29.1485	31.155	36.842	40.799	139.361	73.596	27.957	176.684	70.725	53.565	11.03	24.04	75.625		0.138212	49.7934
4.1681	9.09	50.622	20.949	10.9859	16.268	10.711	30.07	22.0242	132.94	27.6771	29.078	32.949	36.491	122.356	77.238	23.739	169.285	59.332	53.452	9.923	20.65	66.04		0.142277	46.9032
4.2872	9.048	45.849	17.401	10.0004	16.762	10.633	28.407	21.0756	151.356	26.8216	25.101	30.259	34.21	97.537	77.109	18.857	162.584	52.25	53.953	10.714	19.129	58.827		0.146343	44.4493
4.4063	7.54	39.065	15.762	11.1962	16.041	9.909	24.389	17.9631	162.059	24.5583	23.249	28.783	31.802	82.868	78.823	16.04	148.543	45.909	55.043	11.517	14.796	48.928		0.150408	41.5811
4.5253	6.931	35.009	14.098	11.4826	13.516	8.797	20.846	19.5346	170.613	27.7984	22.73	26.317	29.414	73.34	83.123	12.989	126.837	38.47	56.887	11.07	12.922	43.556		0.15447	39.3764
4.6444	7.51	33.858	13.352	9.3978	12.195	8.081	20.186	19.1055	186.202	28.207	21.427	22.46	29.004	58.801	84.041	10.472	103.935	34.181	53.423	11.102	9.78	34.93		0.158536	36.8932
4.7635	6.732	30.689	12.972	10.8831	11.385	6.756	16.835	21.5279	196.367	26.9278	21.769	18.647	26.66	47.48	85.157	9.892	79.41	28.612	58.239	10.328	8.785	28.651		0.162601	34.7593
4.8826	6.067	26.607	11.981	10.0004	9.355	6.962	17.742	19.5372	216.288	28.8373	18.316	16.269	25.485	35.692	83.444	10.397	64.753	23.302	55.574	11.471	7.458	24.639		0.166667	33.1899
5.0017	6.602	20.943	13.803	9.911	9.635	6.802	16.754	19.0343	224.525	26.3255	20.562	17.922	25.11	26.614	79.434	8.604	55.463	17.207	57.828	12.579	6.271	21.447		0.170732	31.9716
5.1208	6.895	18.487	12.536	9.9985	8.332	7.083	17.77	19.3037	226.144	24.937	19.86	15.703	24.255	23.548	74.537	8.608	42.858	15.77	54.993	13.867	6.205	18.873		0.174798	30.4801
5.2399	6.053	17.882	11.863	9.7048	7.948	6.438	16.953	18.5968	235.588	27.0139	19.322	15.572	27.042	21.153	76.37	9.464	34.288	14.197	49.91	15.289	5.702	17.091		0.178863	30.1564
5.359	4.965	20.021	12.663	10.5968	6.61	5.712	16.015	19.1621	239.144	26.9307	19.123	15.018	26.618	18.843	76.187	10.499	30.403	12.779	51.74	17.243	4.955	15.97		0.182928	30.0544
5.478	5.674	20.281	12.619	10.8234	6.404	5.589	16.452	18.2722	239.148	26.1605	17.856	14.416	26.173	16.717	80.246	13.051	26.787	11.247	49.78	20.055	4.264	14.286		0.186991	29.8319
5.5971	5.734	16.139	15.223	10.8118	6.202	5.451	16.968	17.0718	236.649	25.9226	16.687	14.191	25.637	14.388	83.42	15.902	22.847	10.286	50.32	21.169	4.536	14.281		0.191056	29.538
5.7162	6.16	16.174	14.267	11.6239	6.368	5.38	16.724	15.8382	237.783	26.7458	18.808	12.581	24.635	14.802	86.318	19.819	19.583	10.131	51.699	22.159	4.848	13.4		0.195121	29.8112
5.8353	5.02	17.25	16.804	10.9819	5.499	5.1	14.632	14.3646	239.273	24.7275	17.795	14.222	23.955	13.414	85.386	23.574	19.137	10.658	48.642	22.218	4.441	11.169		0.199187	29.4665
5.9544	4.051	15.496	16.328	13.3129	3.862	4.819	17.762	12.0731	241.751	25.4343	17.978	14.631	22.181	13.856	87.261	27.57	18.021	10.202	48.382	22.798	4.245	9.854		0.203252	29.6304
6.0735	4.648	14.145	14.855	13.9835	3.869	5.073	19.196	11.8472	244.717	21.8724	18.417	15.196	21.202	13.638	84.106	33.887	16.561	10.29	53.845	25.934	3.743	9.302		0.207318	30.0149
6.1926	5.011	14.595	14.687	13.5966	4.099	5.645	19.442	11.8657	246.135	22.313	18.336	13.838	19.479	14.236	80.339	39.049	16.069	9.328	53.308	25.534	3.782	10.054		0.211383	30.0337
6.3117	5.538	14.403	15.184	15.1644	5.006	5.025	23.237	9.6038	245.587	20.5431	16.459	12.719	20.452	12.8	83.251	42.212	13.761	8.738	56.008	26.614	3.72	7.458		0.215449	30.1583
6.4307	5.562	11.372	15.679	17.1906	4.249	5.323	28.132	8.6078	245.141	19.1336	15.353	12.097	20.947	12.497	84.757	48.03	12.117	8.968	54.609	27.469	3.829	7.39		0.219511	30.3842
6.5498	4.351	13.061	15.32	18.8147	3.686	4.001	29.975	8.4467	246.816	17.4205	12.929	11.397	17.651	13.98	87.443	53.146	12.903	8.433	55.347	27.891	3.909	6.071		0.223576	30.5905
6.6689	4.451	13.591	13.152	19.0731	3.532	3.073	28.914	8.063	243.148	13.7765	10.445	8.96	14.667	12.807	86.029	56.559	11.496	9.126	52.213	25.545	3.759	6.283		0.227642	29.4847
6.788	4.783	15.194	14.652	16.2348	3.528	4.022	34.331	6.7992	240.639	11.0213	8.875	9.75	16.385	13.225	79.747	67.691	11.617	8.144	55.16	25.7	3.119	5.246		0.231707	29.812
6.9071	4.316	12.9	11.825	18.6986	4.006	3.812	34.083	6.9491	238.987	11.3469	6.778	7.699	16.704	13.048	78.905	70.457	10.625	9.626	55.95	24.749	3.52	5.772		0.235773	29.5798
7.0262	4.904	13.387	12.956	16.4836	3.704	4.289	30.562	7.0768	245.279	11.8368	7.244	7.357	16.873	13.746	83.477	77.842	9.952	9.471	56.326	23.257	3.346	5.565		0.239838	30.2243
7.1453	4.069	13.766	12.762	15.6416	3.823	2.686	28.726	7.4722	242.701	11.0822	7.012	6.718	14.547	12.477	83.772	79.177	9.501	8.897	52.529	19.892	3.5	5.627		0.243904	29.3808
7.2644	4.066	13.429	11.777	18.25	3.747	3.525	26.856	6.6535	232.737	10.9302	6.79	6.124	14.477	14.339	80.477	86.83	7.997	10.747	48.83	18.132	3.31	4.718		0.247969	28.8519
7.3834	3.902	12.618	11.607	17.7242	3.077	3.184	26.163	6.2987	220.292	11.8208	5.682	6.48	16.65	15.362	81.081	92.079	7.63	9.737	49.374	16.066	3.059	4.295		0.252031	28.3719
7.5025	4.113	11.717	9.583	15.845	2.639	3.088	26.086	7.7136	199.826	10.6772	5.153	5.829	15.161	16.207	86.052	89.842	8.079	10.373	43.918	14.146	3.694	3.977		0.256096	26.9872
7.6216	4.109	13.05	9.16	16.2788	2.98	3.061	25.499	7.2482	170.565	10.3777	5.487	4.295	14.754	16.485	92.112	97.083	8.032	12.115	41.015	12.962	3.078	4.033		0.260162	26.0809
7.7407	4.092	11.381	9.813	14.6527	3.068	3.478	24.18	6.6284	133.856	9.6205	5.388	4.043	15.157	17.38	97.626	107.192	8.215	12.48	35.274	11.321	3.63	3.439		0.264227	24.6325
7.8598	4.824	12.735	9.436	16.1731	3.424	3.665	26.478	4.9231	89.968	9.7273	5.735	4.327	13.942	16.99	105.558	105.574	8.571	14.971	32.427	11.408	3.136	4.152		0.268293	23.0975
7.9789	4.653	15.177	8.263	15.0205	2.814	3.549	31.287	5.4239	54.14	9.9128	5.91	4.999	13.142	16.966	116.07	107.163	7.368	15.504	29.475	13.118	3.554	4.391		0.272358	22.1773
8.098	4.61	13.541	8.377	13.3153	2.92	3.246	31.836	5.0548	24.872	9.756	5.615	4.426	15.052	19.702	122.712	102.222	6.925	17.132	27.391	13.754	3.849	3.516		0.276424	20.9011
8.2171	4.773	12.846	9.073	13.2641	3.336	3.577	41.055	5.5964	12.443	8.2038	5.242	5.384	13.412	19.364	137.608	106.565	8.193	15.964	26.391	17.152	3.223	3.498		0.280489	21.6438
8.3362	4.645	11.8	8.774	12.4571	3.056	3.503	43.925	5.6413	7.751	8.625	4.714	4.909	13.042	17.681	140.801	114.812	7.785	16.106	24.131	23.143	3.934	3.779		0.284555	22.0461
8.4552	3.988	12.514	8.495	14.6415	2.895	3.889	43.008	6.1476	5.598	8.2733	5.181	4.507	14.994	17.215	147.201	112.357	8.907	17.474	22.952	25.073	3.07	3.745		0.288617	22.3693
8.5743	3.7	9.099	8.794	14.2466	3.21	3.26	42.942	6.3049	4.749	8.4009	5.07	3.878	14.928	18.823	148.843	106.176	9.097	16.389	21.899	28.034	3.243	3.065		0.292682	22.0069
8.6934	3.847	10.324	8.148	13.8973	3.429	3.986	40.626	6.4689	3.803	8.0347	4.709	3.624	14.883	17.539	136.346	105.034	9.307	18.342	19.411	31.196	3.461	3.874		0.296748	21.3768
8.8125	4.159	10.685	8.066	14.9383	3.341	4.337	37.841	5.8612	3.912	8.4828	4.946	3.992	16.157	17.322	128.545	100.181	10.304	16.53	18.905	35.042	4.146	3.519		0.300813	20.9642
8.9316	3.751	10.526	9.342	15.5975	3.523	4.248	35.265	5.5818	3.775	7.4051	4.294	3.586	19.452	15.288	103.634	91.79	10.966	15.825	17.429	40.917	3.662	3.156		0.304879	19.5006
9.0507	3.518	10.839	10.609	13.6107	2.861	4.345	34.591	5.9044	4.654	8.8514	3.856	3.236	22.244	17.138	88.079	82.188	8.469	15.761	17.484	45.036	2.963	2.512		0.308944	18.5795
9.1698	3.936	9.998	9.996	14.3779	3.132	4.05	30.865	6.2648	3.988	8.2132	3.586	3.616	21.49	14.43	72.028	71.51	9.165	13.74	17.987	47.476	3.063	3.303		0.313009	17.1007
9.2889	3.567	10.721	9.721	14.0276	3.364	4.514	29.029	5.0449	4.323	8.4002	4.071	3.392	22.62	14.409	45.157	63.255	8.825	14.975	17.592	49.596	3.377	3.292		0.317075	15.6033
9.4079	3.281	11.4	10.61	13.0719	2.755	3.887	27.683	4.7057	3.795	8.9219	4.344	3.524	26.09	13.784	25.759	47.994	10.199	14.129	16.437	51.021	3.267	3.122		0.321137	14.0809
9.527	3.82	10.125	12.673	13.2749	3.669	5.525	27.188	4.6298	3.833	9.5453	3.983	3.61	30.419	14.111	15.846	37.161	12.377	12.548	16.897	53.827	3.424	3.505		0.325202	13.7269
9.6461	4.23	10.587	13.038	14.3663	3.17	4.974	26.553	5.0686	4.324	9.5959	4.423	3.799	33.157	15.023	8.968	30.253	12.18	14.095	15.361	57.002	3.592	3.432		0.329268	13.5087
9.7652	3.585	11.371	13.108	13.8626	3.175	4.568	23.85	4.5897	3.559	10.1036	4.344	3.442	37.494	15.853	5.056	22.453	10.013	15.81	15.349	55.183	3.258	2.532		0.333333	12.8436
9.8843	2.931	12.231	14.078	14.6391	3.087	4.4	22.647	4.2772	3.793	11.33	4.237	3.882	39.039	14.423	4.802	16.678	11.357	13.964	15.488	51.527	2.974	3.111		0.337399	12.4952
10.0034	3.751	12.283	14.546	14.8452	3.154	4.054	22.582	4.4549	4.082	12.3236	3.852	4.111	39.646	15.987	3.622	11.849	13.416	14.553	15.675	49.757	2.458	3.1		0.341464	12.4592
10.1225	3.196	13.017	15.33	13.9032	3.5	3.774	22.718	4.4542	4.352	14.2988	3.895	3.332	38.171	16.534	3.107	8.835	14.837	17.31	13.854	45.345	3.264	3.335		0.34553	12.2892
10.2416	3.149	14.369	17.78	12.88	3.174	4.663	22.993	5.0364	3.68	15.626	3.855	3.208	35.873	18.613	4.377	6.255	14.765	18.761	14.269	44.678	3.583	3.058		0.349595	12.4839
10.3606	3.099	12.943	15.903	11.5766	2.97	4.683	21.389	5.5947	3.806	18.803	3.997	3.425	34.198	19.433	3.115	5.247	16.331	16.351	12.68	40.936	3.268	2.939		0.353657	11.9403
10.4797	3.234	12.496	18.751	12.1584	3.199	4.746	20.834	4.7453	4.071	18.2959	3.232	3.018	31.305	21.989	2.817	3.93	17.378	16.008	12.958	40.371	3.66	3.245		0.357723	11.9292
10.5988	3.093	13.048	21.975	14.0948	3.267	5.106	20.76	5.7349	4.315	19.3646	3.328	3.068	27.678	22.085	2.998	2.662	18.694	17.078	12.228	40.889	3.443	3.401		0.361788	12.1959
10.7179	3.27	11.582	23.187	16.7562	3.224	5.027	19.834	5.706	3.731	22.7586	3.587	3.699	22.536	23.097	2.852	2.478	18.75	20.206	14.441	41.293	3.498	3.389		0.365854	12.4955
10.837	3.544	12.133	26.249	17.0081	3.495	4.553	20.596	5.8007	3.273	21.1843	3.499	3.488	19.567	20.888	2.771	2.678	18.953	19.675	14.809	41.762	3.672	3.454		0.369919	12.4115
10.9561	3.43	12.889	32.292	15.7714	2.762	4.398	20.744	5.3677	4.06	19.5888	3.736	3.892	18.183	22.001	2.909	2.535	17.961	20.773	15.148	40.888	3.938	3.718		0.373984	12.5902
11.0752	3.367	11.568	32.653	14.9302	3.694	4.621	22.474	6.0031	4.252	20.3516	3.425	3.325	16.395	23.309	3.176	2.442	19.429	22.134	14.99	41.059	4.127	3.287		0.37805	12.7733
11.1943	3.432	12.338	31.488	13.8109	3.189	4.409	24.175	5.0869	4.234	22.5358	3.717	3.317	15.209	23.031	2.85	2.842	20.817	20.68	18.094	41.286	3.555	3.851		0.382115	12.9067
11.3133	3.116	14.218	36.266	11.6075	3.116	4.844	22.817	4.8814	3.753	21.4273	3.828	3.211	15.908	24.237	2.635	2.378	22.118	19.321	18.002	41.571	3.702	3.28		0.386177	13.0108
11.4324	3.208	12.74	37.758	7.3763	3.367	5.306	21.999	5.0737	3.517	22.5836	3.99	3.606	15.879	26.685	2.597	2.368	21.751	18.55	18.11	40.224	3.297	3.418		0.390243	12.882
11.5515	3.488	14.181	41.223	6.3821	3.31	4.889	19.416	4.968	3.587	19.5114	3.767	4.137	15.809	28.036	2.719	2.303	22.205	17.858	19.347	43.556	3.3	3.545		0.394308	13.0699
11.6706	3.316	12.602	39.857	5.8437	3.335	4.904	18.841	5.5945	3.742	18.7456	3.733	3.144	19.308	29.612	2.707	2.602	22.675	17.003	18.919	45.579	3.383	3.519		0.398374	13.1348
11.7897	3.81	12.74	42.37	6.2519	3.602	5.318	18.659	5.9567	3.711	18.3991	3.702	2.73	18.261	30.749	2.101	2.612	21.257	17.617	18.857	48.558	4.573	3.568		0.402439	13.4274
11.9088	3.596	12.273	46.572	6.1184	3.925	5.077	18.845	6.7038	3.418	19.7949	3.099	2.71	19.189	30.19	3.083	2.915	25.21	17.876	18.042	48.388	4.326	3.694		0.406505	13.8657
12.0279	3.452	11.042	48.716	5.48	3.843	5.564	18.384	6.7203	3.956	20.094	3.176	3.139	19.422	31.015	3.008	2.382	26.478	21.215	19.734	49.528	3.738	4.117		0.41057	14.282
12.147	4.036	12.156	53.767	6.0466	3.474	5.708	15.229	5.7215	3.746	20.7928	3.403	3.255	18.368	31.386	1.92	1.978	28.633	21.944	20.542	52.632	3.4	3.88		0.414636	14.6372
12.2661	4.07	11.793	52.953	5.5738	3.124	5.128	14.226	5.2703	3.7	20.9501	3.946	3.106	17.873	30.228	2.362	2.433	30.809	22.205	20.592	52.506	4.121	4.093		0.418701	14.5937
12.3851	3.963	11.034	61.286	4.3633	4.144	5.379	14.992	5.3193	3.805	22.5181	3.468	3.29	18.834	27.956	2.376	2.55	31.396	24.283	22.119	53.671	4.624	3.276		0.422763	15.2112
12.5042	3.786	11.503	68.972	6.3192	3.36	6.289	13.078	6.4453	3.828	24.749	3.513	3.039	16.417	28.609	2.871	2.268	29.989	22.878	22.794	55.421	4.348	3.68		0.426829	15.6435
12.6233	3.92	11.354	80.736	5.204	3.125	5.975	12.345	5.1515	3.072	25.1394	3.384	2.924	12.755	28.087	2.699	2.607	32.25	26.195	21.656	50.076	4.46	3.369		0.430894	15.7493
12.7424	4.006	10.853	86.841	5.6638	3.82	5.346	12.954	5.8707	3.141	26.1613	3.462	2.799	11.662	30.389	2.505	2.111	29.594	25.947	22.263	51.995	5.254	3.509		0.43496	16.1885
12.8615	3.949	12.507	86.819	5.2239	3.672	5.196	14.531	5.8293	4.598	31.4742	3.815	2.697	9.461	30.453	2.511	2.565	26.037	23.212	20.657	50.208	4.749	3.613		0.439025	16.0808
12.9806	3.499	11.364	94.352	6.3123	4.074	5.588	12.724	5.2847	4.315	34.4777	4.043	2.88	8.372	30.601	2.683	3.249	23.807	22.509	20.647	52.521	5.102	3.909		0.44309	16.4688
13.0997	3.809	10.726	100.404	5.9228	4.481	6.525	13.364	6.5676	3.558	38.4465	3.313	2.728	7.509	30.939	2.742	2.732	21.302	26.307	17.46	54.176	4.679	3.842		0.447156	16.8879
13.2188	2.829	10.112	102.006	5.5754	3.463	6.968	12.963	8.569	4.518	46.0559	2.981	3.443	8.156	30.151	2.991	2.343	18.878	28.007	18.258	49.324	5.22	4.372		0.451221	17.1447
13.3378	3.178	10.334	101.514	5.2467	3.451	5.789	14.105	7.1534	3.998	44.888	3.464	3.097	7.656	30.316	2.809	2.31	17.935	30.295	16.397	48.25	4.34	3.135		0.455283	16.8028
13.4569	3.438	10.407	105.33	6.3171	3.65	5.806	15.33	5.7198	3.263	50.5004	3.222	3.071	6.879	33.606	3.146	2.893	17.672	31.732	16.427	46.523	5.723	3.935		0.459349	17.4814
13.576	4.203	10.692	103.922	5.4822	2.859	6.484	13.24	6.1288	3.86	52.0397	4.286	2.475	6.089	34.93	2.888	2.485	16.602	32.521	18.672	43.685	5.663	3.347		0.463414	17.3888
13.6951	2.94	10.256	100.345	5.5173	3.154	6.545	13.194	5.9146	4.719	50.2175	4.274	2.677	6.998	37.785	3.649	3.178	14.023	34.682	18.535	43.298	6.582	3.691		0.46748	17.3716
13.8142	2.948	11.936	99.31	4.8259	4.369	7.215	12.077	5.6972	4.554	47.5206	4.089	3.465	6.201	35.406	2.99	3.519	16.029	35.523	16.073	40.213	7.271	3.337		0.471545	17.0259
13.9333	2.702	12.258	102.148	5.8222	3.757	5.509	13.899	6.1844	3.805	42.9454	4.182	3.503	5.396	38.436	2.862	3.522	13.196	34.857	14.959	38.263	6.999	3.51		0.475611	16.7598
14.0524	2.829	12.718	111.583	5.252	4.125	5.963	13.973	5.5583	3.621	39.028	3.444	2.824	4.775	41.655	2.897	3.447	13.177	36.031	14.773	37.308	7.164	3.936		0.479676	17.0946
14.1715	4.066	13.105	117.776	5.2507	3.841	7.558	15.451	6.2446	3.738	33.2851	3.39	4.072	5.416	44.099	3.908	3.027	11.394	35.941	16.203	39.584	8.033	3.92		0.483742	17.6956
14.2905	4.101	12.364	113.69	5.5654	3.524	7.493	14.32	5.9946	4.184	29.3679	3.824	4.19	4.572	52.275	3.22	3.786	11.332	38.226	16.594	40.626	6.965	3.905		0.487804	17.7327
14.4096	3.695	12.609	108.659	4.7947	3.124	6.388	15.419	6.4075	4.273	27.5388	3.862	3.925	5.195	55.936	3.491	4.224	11.034	40.07	18.284	40.489	7.876	3.979		0.491869	17.7851
14.5287	3.588	10.727	106.238	4.6481	4.341	6.331	13.12	5.2844	4.55	27.6865	3.604	3.832	5.422	58.093	3.433	3.255	9.481	44.335	18.332	45.843	6.835	3.872		0.495935	17.8569
14.6478	3.612	10.954	100.032	5.446	3.68	5.778	12.238	5.5781	4.167	29.0017	3.95	3.383	4.852	57.7	4.259	3.396	9.168	44.381	17.245	48.96	7.812	3.845		0.5	17.7017
14.7669	3.463	10.894	94.084	4.6037	3.483	5.86	13.132	4.7581	4.125	28.2538	3.757	4.018	5.193	52.154	3.713	3.643	9.355	42.585	15.546	50.491	8.024	3.647		0.504065	17.0356
14.886	3.475	12.182	83.156	5.5781	4.208	6.758	12.056	5.3285	3.446	29.7181	3.681	3.647	3.841	47.802	4.128	3.89	9.46	39.159	17.193	49.73	7.974	4.369		0.508131	16.3991
15.0051	3.111	12.286	80.225	5.1612	3.726	7.544	11.637	6.0225	3.492	30.6918	3.355	3.392	3.892	43.809	3.673	3.355	9.282	38.274	18.749	52.616	9.136	3.208		0.512196	16.2108
15.1242	4.137	10.765	72.39	4.0811	3.675	6.074	12.253	5.2507	4.256	29.1323	4.503	3.605	4.059	40.841	2.976	3.012	9.782	34.269	19.318	52.896	7.683	3.017		0.516262	15.3625
15.2432	4.287	10.862	62.949	4.6484	3.327	6.115	12.668	5.6076	4.611	31.3344	3.23	3.094	3.386	38.724	3.729	2.151	10.422	30.888	21.242	48.407	7.382	3.901		0.520324	14.6802
15.3623	3.387	10.411	53.277	4.2275	3.276	6.729	12.256	5.0829	4.501	35.2503	2.963	3.104	3.933	36.049	3.743	3.115	9.053	33.263	25.215	47.054	7.916	4.673		0.524389	14.4763
15.4814	3.66	11.697	44.667	4.2104	3.621	6.212	11.688	5.1628	3.7	32.1519	3.724	3.896	3.384	36.511	3.568	3.999	7.73	30.059	25.424	40.593	9.491	4.349		0.528455	13.6135
15.6005	4.061	11.56	38.433	4.7251	3.026	7.791	12.293	5.3447	4.801	31.8204	3.661	3.376	4.368	40.67	3.627	3.068	7.695	30.586	27.113	42.554	10.311	3.312		0.53252	13.8271
15.7196	4.936	11.433	37.06	5.1715	3.171	7.44	12.317	5.1788	4.269	31.8084	2.902	3.388	4.932	38.754	4.05	2.777	7.872	29.192	25.257	36.584	9.881	3.975		0.536586	13.2886
15.8387	4.079	12.618	34.299	4.4936	3.327	7.354	11.646	5.3542	4.066	32.7143	3.579	3.961	3.85	39.391	3.057	3.352	6.664	30.28	25.241	33.799	10.832	3.354		0.540651	13.0596
15.9578	4.129	15.048	31.993	4.3057	3.314	9.474	11.845	6.0959	3.811	34.3315	3.643	3.801	4.588	41.51	3.264	3.255	7.54	29.891	22.425	32.785	12.408	3.678		0.544717	13.3243
16.0769	3.674	15.013	32.144	4.0959	3.56	9.465	11.629	5.096	4.707	30.3727	3.147	3.695	4.315	41.07	4.194	2.857	6.902	30.196	21.63	31.177	13.318	4.41		0.548782	13.0303
16.196	4.229	16.066	26.557	3.6515	3.263	8.642	10.113	4.945	4.5	30.9224	3.521	3.478	4.788	43.974	3.315	2.842	7.501	30.741	21.357	27.94	12.754	3.49		0.552848	12.6632
16.315	3.857	17.827	28.515	4.0768	3.579	10.181	10.889	4.8218	4.774	32.3432	3.209	4.184	5.156	43.173	3.473	3.109	7.384	28.706	20.087	29.385	14.139	3.352		0.55691	13.01
16.4341	4.487	18.336	23.872	4.3227	3.616	9.997	11.042	5.5112	4.322	29.1112	3.084	4.149	4.768	43.545	3.893	3.283	7.869	26.33	18.269	30.54	17.662	3.519		0.560975	12.7967
16.5532	4.651	21.208	23.808	3.8061	3.041	9.744	12.271	5.3943	4.562	30.7425	3.544	3.841	4.423	46.128	3.525	2.956	6.252	27.247	19.078	26.821	16.82	3.504		0.56504	12.8803
16.6723	3.942	22.416	23.863	3.9874	2.52	10.792	11.938	4.3347	5.526	30.3204	4.694	4.461	4.609	50.907	3.659	2.931	6.976	24.771	20.636	25.841	17.234	3.398		0.569106	13.1707
16.7914	4.864	25.076	19.246	4.594	3.133	11.767	12.327	5.0296	4.571	28.5522	4.061	4.472	4.126	50.011	4.35	2.448	7.554	24.371	21.818	23.083	19.341	3.658		0.573171	13.1115
16.9105	4.695	23.705	20.72	3.9381	4.214	11.001	12.6	4.5584	4.154	29.5509	4.321	4	5.052	50.197	4.869	2.597	7.992	20.3	22.854	22.048	20.159	3.756		0.577237	13.0582
17.0296	4.372	23.208	17.583	3.914	3.264	10.932	10.998	4.9381	4.786	31.6443	4.011	3.105	4.217	51.521	4.546	2.88	8.561	21.735	22.321	22.177	23.064	3.356		0.581302	13.0515
17.1487	4.242	25.632	13.816	4.138	3.288	14.606	10.661	5.4614	5.374	30.2539	4.647	3.072	4.721	49.097	4.895	3.354	6.11	20.702	22.158	21.555	21.408	4.333		0.585368	12.8875
17.2677	4.345	23.968	12.489	3.4226	3.277	12.661	10.78	5.1182	4.488	28.6186	3.472	3.45	4.087	47.347	4.655	2.962	5.944	18.708	24.41	19.056	23.326	3.397		0.58943	12.2719
17.3868	3.837	24.722	11.234	3.9236	3.748	12.944	11.715	5.5223	4.024	31.5528	4.082	3.373	4.118	42.873	4.575	2.667	6.921	17.362	27.512	17.922	28.17	3.496		0.593495	12.5588
17.5059	3.506	27.204	11.223	3.84	3.615	12.349	11.559	5.0389	3.459	31.3483	3.563	3.786	4.133	43.843	4.6	2.827	6.088	19.259	29.839	17.901	29.54	4.013		0.597561	12.8425
17.625	3.755	28.701	10.387	3.9879	3.809	14.094	10.276	5.2897	4.249	33.6922	3.878	4.425	4.158	44.677	4.963	2.97	4.626	18.941	29.703	17.197	33.461	3.389		0.601626	13.2104
17.7441	4.145	28.455	10.287	4.0945	3.47	14.298	9.758	5.271	5.297	33.7801	4.189	4.486	5.023	42.902	4.985	2.932	5.648	19.582	33.728	17.497	35.168	3.905		0.605692	13.5864
17.8632	4.354	31.012	9.151	4.298	3.1	13.521	8.952	4.7152	4.691	33.641	4.198	4.478	4.737	43.781	4.893	3.311	4.913	19.359	34.096	15.488	33.901	4.879		0.609757	13.4304
17.9823	4.442	33.345	10.231	3.1993	4.053	15.594	9.505	4.9222	5.176	33.5234	3.696	3.962	4.001	41.979	5.197	3.418	4.861	22.205	34.274	15.377	36.595	4.042		0.613823	13.7999
18.1014	4.544	31.118	9.654	3.4775	4.139	14.17	11.365	6.4437	4.681	33.9784	4.016	3.69	4.589	43.839	5.642	2.982	5.235	21.094	37.714	16.21	35.535	4.2		0.617888	14.0144
18.2204	5.306	27.806	9.17	3.7153	3.709	11.741	10.627	6.0256	4.574	29.9306	4.007	3.876	5.273	44.817	4.854	3.083	5.259	17.378	36.193	15.667	37.735	4.114		0.62195	13.4027
18.3395	5.439	28.025	7.779	3.8553	2.937	10.917	11.401	5.2338	4.229	29.5841	3.423	3.992	4.282	42.021	5.262	3.492	5.332	17.494	36.388	15.751	38.965	4.601		0.626016	13.2001
18.4586	4.682	28.304	8.263	2.9129	3.286	12.819	10.288	5.1921	4.016	27.2091	3.595	3.494	4.529	42.75	5.678	3.407	5.63	18.233	38.229	16.187	39.757	3.93		0.630081	13.2905
18.5777	4.881	24.655	7.734	3.1115	3.15	10.341	9.88	5.5348	4.463	27.6345	3.423	3.36	4.033	40.785	5.473	2.804	4.665	15.754	38.421	17.12	39.807	4.343		0.634146	12.7897
18.6968	4.195	28.956	7.658	3.6924	3.201	11.754	11.407	4.7051	4.814	29.4724	4.484	3.674	4.519	39.191	4.941	3.63	3.632	18.256	37.725	16.507	42.425	3.864		0.638212	13.3047
18.8159	4.24	28.013	7.729	4.2529	3.199	11.652	11.515	5.0956	4.644	30.306	4.372	2.924	4.336	35.996	4.698	4.156	4.865	18.944	36.494	15.194	43.341	3.488		0.642277	13.157
18.935	4.029	28.012	8.05	3.4586	3.168	11.325	8.702	5.1974	5.551	30.7694	4.74	2.905	3.775	37.129	4.646	3.172	4.798	15.582	38.161	14.222	49.433	3.378		0.646343	13.1911
19.0541	4.626	28.864	7.261	3.9608	3.476	10.393	9.251	5.3781	5.208	31.4353	4.565	3.308	4.687	33.913	5.573	3.382	5.146	13.822	37.873	16.884	50.383	4.28		0.650408	13.3486
19.1731	4.545	27.669	6.511	3.7938	4.313	11.31	10.21	4.6808	4.933	30.1961	4.365	3.347	4.43	36.765	6.355	3.147	3.512	14.898	42.159	17.208	49.025	3.859		0.65447	13.5105
19.2922	4.862	28.224	6.01	3.8449	4.469	10.785	10.115	4.2775	4.639	29.829	3.401	3.388	3.862	35.61	5.987	3.759	4.211	14.404	42.329	16.219	53.096	4.842		0.658536	13.5529
19.4113	4.365	27.559	6.214	4.0954	4.584	11.421	9.491	4.3962	4.389	30.3819	3.502	2.992	3.917	35.732	5.705	4.178	3.892	14.443	44.217	17.735	55.687	4.973		0.662601	13.8123
19.5304	4.598	28.09	5.233	3.3388	3.955	12.383	10.336	4.2203	4.585	29.8218	3.609	3.245	3.721	36.472	6.463	2.677	3.863	12.797	43.258	18.612	59.125	4.581		0.666667	13.8629
19.6495	3.934	29.849	5.687	3.5304	3.807	12.001	11.602	4.6544	4.671	32.172	3.805	3.675	3.867	36.566	6.828	2.299	4.542	13.548	46.054	18.691	56.605	5.065		0.670732	14.2479
19.7686	4.349	31.136	6.097	3.6325	3.972	13.094	9.948	4.1498	4.888	30.3742	3.509	3.295	3.583	35.379	7.017	3.266	4.329	13.712	46.688	22.134	62.64	4.236		0.674798	14.6104
19.8877	5.626	31.091	5.293	3.7985	3.744	13.717	9.573	4.7386	4.753	29.1968	3.269	3.252	3.381	37.851	7.047	3.811	4.309	13.115	50.158	24.271	63.759	5.155		0.678863	15.0413
20.0068	4.585	31.664	5.613	3.0947	4.742	13.984	9.983	5.692	5.46	31.466	3.803	3.421	3.703	41.933	8.041	3.294	3.822	11.893	51.615	25.49	67.223	5.082		0.682928	15.7093
20.1259	5.126	34.359	5.784	4.0021	4.562	12.135	10.844	5.1745	4.448	32.2369	3.583	4.177	4.071	41.267	9.26	3.707	5.2	12.804	50.568	27.734	64.534	5.315		0.686994	15.9496
20.2449	4.454	33.299	6.189	3.1184	3.519	12.055	10.987	4.3316	4.858	32.2424	3.102	3.592	3.865	40.497	10.431	3.241	5.462	11.657	50.124	33.394	66.932	5.644		0.691056	16.0452
20.364	4.476	33.411	5.792	2.8511	4.391	12.033	12.78	4.5277	5.65	31.5765	3.301	3.741	3.929	42.664	10.022	2.605	4.114	11.939	45.938	37.272	65.934	5.601		0.695121	16.1158
20.4831	4.305	32.241	4.333	3.3386	4.046	11.81	10.868	5.6208	4.581	34.2013	3.634	3.2	2.995	46.72	10.08	2.455	3.538	10.147	47.58	38.676	69.356	4.712		0.699187	16.2926
20.6022	3.597	31.66	4.461	3.4733	5.232	10.122	11.95	6.4018	4.668	33.5179	3.834	3.973	2.854	46.265	11.376	4.065	3.731	11.673	46.117	39.958	65.429	4.73		0.703252	16.3222
20.7213	4.857	29.423	5.964	3.9395	5.234	12.138	11.314	5.4763	4.471	31.6228	3.723	2.957	3.074	44.789	11.783	3.98	3.281	11.135	43.878	39.929	63.329	4.552		0.707318	15.9477
20.8404	4.236	28.871	4.803	3.7431	5.087	12.546	11.713	5.0511	4.345	33.7233	3.585	3.021	3.866	42.471	12.196	4.352	3.706	11.334	41.591	45.597	63.353	4.46		0.711383	16.075
20.9595	4.084	31.778	5.281	4.2194	4.993	11.334	11.347	5.8777	4.445	34.2006	4.408	2.856	3.099	40.583	14.47	4.385	4.144	10.599	43.158	42.357	65.158	5.202		0.715449	16.2718
21.0786	5.068	32.319	6.28	3.751	4.251	10.029	11.446	5.579	5.143	34.627	4.655	3.323	2.907	42.808	13.364	4.143	3.077	10.423	42.431	42.746	62.954	5.203		0.719514	16.2058
21.1976	5.233	34.426	6.534	3.8258	4.339	12.025	11.794	5.3742	5.569	30.5719	3.815	3.562	3.351	39.342	16.139	2.855	3.173	10.931	45.125	44.212	62.421	5.341		0.723576	16.3618
21.3167	4.183	31.346	6.798	3.8157	4.919	12.399	11.033	5.3986	4.568	33.2882	4.278	3.403	3.995	36.494	17.593	2.901	3.57	10.502	50.185	38.192	61.746	5.799		0.727642	16.2003
21.4358	4.451	32.405	6.341	4.0914	4.08	13.003	13.25	6.4486	5.493	34.3184	4.275	3.979	3.475	36.951	19.811	3.901	3.842	10.611	49.93	33.932	60.389	5.726		0.731707	16.3956
21.5549	4.9	33.111	5.49	4.2106	4.529	15.416	12.782	6.0926	5.61	35.5543	4.11	3.734	3.182	35.621	24.082	3.833	4.523	9.47	51.59	30.55	57.498	5.984		0.735773	16.4488
21.674	5.011	33.363	5.866	3.8883	4.515	13.99	13.253	5.5094	5.606	34.4508	3.9	3.572	3.435	35.527	27.281	3.599	4.03	8.783	53.036	29.939	56.538	6.531		0.739838	16.4374
21.7931	5.391	32.682	5.47	4.0252	4.546	13.569	14.001	6.5652	5.702	34.2246	4.09	3.504	2.845	34.793	28.17	3.671	3.601	9.949	57.506	28.475	60.731	7.291		0.743904	16.8546
21.9122	4.051	34.139	5.626	3.7129	4.385	14.615	13.998	6.2926	4.87	34.5556	4.142	2.621	3.029	35.557	32.358	3.91	4.015	9.324	57.014	29.46	63.346	7.61		0.747969	17.2105
22.0313	4.538	30.846	5.55	3.9547	5.379	14.044	15.695	5.1612	5.775	32.8816	4.032	3.013	3.294	32.888	30.011	4.271	4.762	9.16	59.659	27.699	62.09	8.009		0.752034	16.9415
22.1503	4.533	32.003	5.769	3.8339	4.496	13.467	16.574	6.0271	6.559	34.78	3.712	3.579	3.497	32.735	31.885	3.989	4.577	8.504	62.715	27.515	60.324	8.765		0.756096	17.2654
22.2694	4.373	29.005	5.855	3.5846	4.371	14.226	18.308	4.7628	5.632	35.1319	3.384	3.474	3.553	33.9	35.87	3.908	4.125	8.958	67.587	30.525	61.19	9.514		0.760162	17.7835
22.3885	4.44	29.926	5.123	4.5728	4.694	15.58	20.017	6.3143	6.531	34.8615	3.8	4.384	3.176	36.595	39.927	4.165	3.543	7.087	65.016	29.829	61.845	13.271		0.764227	18.3953
22.5076	5.234	28.008	4.963	5.4438	4.613	13.873	17.913	6.2202	6.24	37.1615	4.047	3.379	2.951	36.622	42.906	3.992	3.939	7.428	70.434	30.142	65.517	18.647		0.768293	19.0761
22.6267	5.361	28.821	6.448	3.9268	4.406	16.826	22.913	6.4847	6.121	37.7607	3.982	3.329	2.865	35.003	42.54	3.832	3.657	9.095	69.914	32.053	60.013	22.976		0.772358	19.4694
22.7458	5.517	30.025	5.676	3.4904	4.895	14.875	24.02	6.4101	6.386	39.3265	4.232	3.687	3.958	36.3	46.098	4.487	4.09	8.726	68.068	31.796	58.408	29.001		0.776424	19.976
22.8649	6.03	30.429	5.998	4.0065	4.787	15.639	25.973	6.5193	6.86	38.5364	4.262	4.439	3.579	40.785	50.36	4.713	3.72	11.235	67.998	35.656	57.911	36.039		0.780489	21.158
22.984	5.103	27.749	5.419	3.7885	5.001	15.202	29.754	6.9172	6.789	39.1241	4.12	3.165	3.658	44.249	53.807	4.374	3.949	10.205	71.599	36.039	56.307	38.323		0.784555	21.5746
23.103	5.087	28.179	4.907	4.351	5.245	14.928	29.771	6.2691	8.194	39.8825	4.57	3.177	3	47.171	57.537	4.905	3.495	10.845	73.121	39.334	54.161	45.2		0.788617	22.4241
23.2221	4.652	28.419	5.459	3.7816	6.027	14.214	27.632	5.7598	9.242	39.4074	4.221	4.114	3.683	45.413	59.964	6.667	3.316	13.588	77.136	43.518	58.963	45.23		0.792682	23.2003
23.3412	6.561	26.863	5.733	4.0594	5.956	13.737	30.319	5.864	9.776	37.7479	3.528	3.727	3.829	46.995	58.33	7.133	4.231	12.865	78.573	50.516	56.273	47.881		0.796748	23.659
23.4603	6.038	26.48	6.112	4.4467	5.713	16.047	31.132	6.7436	7.619	37.5242	4.029	3.37	3.946	44.372	62.53	7.484	4.843	11.751	77.153	59.216	53.154	52.692		0.800813	24.1998
23.5794	5.028	29.089	5.926	4.7457	4.815	15.857	34.454	7.9539	10.117	40.4377	4.053	3.869	3.395	43.582	63.062	9.569	4.372	12.982	82.159	65.231	49.952	49.873		0.804879	25.0237
23.6985	6.274	31.561	5.535	4.4023	5.802	17.66	37.82	8.4406	10.722	38.5787	4.056	3.146	4.09	44.999	65.489	13.505	4.167	12.856	77.897	70.545	40.779	39.731		0.808944	24.9116
23.8176	7.017	34.009	6.181	3.9577	6.208	17.265	40.471	8.3618	10.75	39.4956	5.417	3.108	3.53	47.764	64.241	17.492	3.999	12.236	72.128	64.055	32.796	26.868		0.813009	23.9705
23.9367	6.616	31.753	5.311	4.6607	6.871	18.905	46.103	9.0133	12.631	42.4549	6.904	3.84	3.359	48.061	54.984	24.917	4.154	11.987	63.976	60.632	23.933	17.683		0.817075	23.125
24.0558	5.946	31.48	5.548	4.6341	7.252	17.949	48.04	8.981	14.095	40.4133	5.6	3.653	4.393	48.354	39.995	29.178	4.01	11.423	57.537	50.317	17.784	16.091		0.82114	21.4852
24.1748	7.327	32.484	6.574	4.5657	7.438	18.508	55.372	8.4575	18.878	34.9065	6.942	4.502	3.903	50.025	22.129	37.349	3.799	10.985	44.972	36.944	11.694	11.893		0.825202	19.984
24.2939	7.558	33.169	6.06	4.7921	7.953	20.857	66.614	8.2856	21.964	35.613	8.01	3.554	3.149	50.447	12.85	44.213	4.25	10.737	35.914	26.548	9.262	10.65		0.829268	19.6568
24.413	7.967	31.041	5.859	4.9361	7.83	22.696	75.572	9.7789	26.949	36.3387	8.695	3.967	3.458	51.508	7.085	49.077	4.119	8.483	31.052	16.725	5.747	8.119		0.833333	19.4092
24.5321	7.729	30.079	6.49	4.8685	6.417	25.13	83.544	12.0554	34.343	38.0463	12.2	3.595	3.613	52.991	5.57	52.319	5.403	10.038	24.321	10.579	5.26	6.156		0.837399	20.034
24.6512	6.89	36.609	6.566	4.0231	6.97	27.474	89.784	12.7664	41.865	37.9788	16.079	3.968	4.659	48.516	4.883	46.979	5.124	10.061	19.365	8.104	4.041	5.559		0.841464	20.3757
24.7703	7.456	37.774	7.211	3.6086	7.082	31.65	94.132	17.827	48.753	40.7187	18.602	4.109	4.12	50.462	3.659	36.477	5.116	9.93	16.282	7.724	3.712	4.186		0.84553	20.936
24.8894	7.607	38.612	7.118	4.6374	7.492	36.4	94.759	22.109	53.493	37.9859	25.891	4.455	3.509	49.422	3.13	29.016	4.446	9.264	11.455	5.371	3.008	3.06		0.849595	21.0109
25.0085	9.605	41.334	7.689	4.6966	7.085	38.145	82.39	26.7432	57.98	37.5905	32.051	5.798	4.796	45.787	2.071	20.455	4.953	10.896	8.726	3.924	3.309	2.307		0.853661	20.8332
25.1275	8.522	41.604	8.967	5.8931	8.006	43.348	77.106	35.8763	61.689	38.0768	35.744	6.093	4.832	46.181	2.186	10.37	5.11	12.362	6.28	3.339	2.176	2.145		0.857723	21.1776
25.2466	8.924	45.754	8.703	5.8372	7.808	47	64.656	45.807	67.128	43.9878	35.359	7.931	5.4	44.578	1.862	6.426	6.302	13.644	5.494	2.368	2.116	2.035		0.861788	21.7782
25.3657	11.307	50.084	8.855	7.0592	7.305	50.128	56.09	51.0695	70.871	48.3783	37.571	11.604	4.46	43.309	1.42	4.674	6.205	17.737	4.942	2.492	1.968	1.91		0.865854	22.7018
25.4848	10.652	50.752	7.864	5.4042	9.981	54.119	43.348	53.2617	74.473	53.0502	44.332	15.693	6.521	41.979	2.137	3.58	6.686	21.828	3.601	2.24	2.07	1.456		0.869919	23.4104
25.6039	9.124	57.992	7.882	4.8597	9.807	47.946	29.46	53.5265	79.811	61.4255	49.223	20.393	7.512	42.584	1.279	4.479	7.167	23.801	2.85	1.649	1.318	1.092		0.873984	23.8718
25.723	11.074	55.951	8.803	5.5418	10.393	44.132	20.22	56.8203	86.559	63.9813	44.926	28.97	8.375	42.897	0.998	2.933	8.47	26.209	2.566	1.516	1.402	0.783		0.87805	24.2509
25.8421	14.24	59.577	8.036	5.7289	11.347	37.575	13.542	42.4978	92.407	66.7504	40.469	40.221	10.694	45.092	1.243	2.056	9.913	27.403	2.249	1.693	0.723	0.699		0.882115	24.2798
25.9612	14.959	59.761	10.028	6.5099	11.048	36.485	8.018	30.2962	104.599	66.8667	35.234	41.851	11.162	44.528	0.827	1.828	7.798	26.625	1.952	1.798	0.967	0.852		0.886181	23.8179
26.0802	15.536	60.17	10.426	5.9921	11.76	32.685	5.786	16.7498	113.13	56.8032	26.314	44.145	12.576	46.432	0.734	1.468	8.048	22.883	2.006	1.477	0.928	0.816		0.890243	22.5848
26.1993	20.363	65.184	9.706	5.744	14.525	24.814	4.492	10.5564	115.924	46.0702	18.508	46.876	16.079	46.423	1.048	1.475	9.382	19.362	1.393	1.248	1.177	0.928		0.894308	21.8763
26.3184	24.281	64.717	11.178	6.6057	15.162	20.782	4.33	6.8059	111.732	34.5203	12.363	49.866	20.56	52.143	0.665	1.584	11.102	15	1.594	0.878	0.62	0.68		0.898374	21.235
26.4375	28.147	61.453	12.717	6.8875	17.88	17.349	3.525	5.478	89.888	23.0249	9.964	47.447	22.907	55.512	0.738	1.499	12.89	13.105	1.25	0.726	0.509	0.591		0.902439	19.704
26.5566	36.56	65.519	12.009	6.5006	22.934	14.826	3.398	5.4905	57.756	13.5708	8.352	37.976	27.461	56.995	0.766	1.178	16.023	10.724	1.082	0.739	0.556	0.447		0.906505	18.221
26.6757	38.933	67.06	13.799	5.4018	26.563	8.893	1.937	4.3419	32.312	9.4357	5.728	25.988	31.158	54.742	0.842	1.04	22.71	8.909	1.14	0.943	0.456	0.472		0.91057	16.4911
26.7948	41.767	61.993	16.652	6.5224	37.054	5.638	2.132	3.7876	15.357	7.7227	5.161	16.316	30.734	60.353	0.419	0.923	28.804	7.556	0.875	0.852	0.415	0.64		0.914636	15.9852
26.9139	44.363	62.441	17.66	7.3807	44.533	3.889	1.952	2.6329	8.457	7.2217	4.42	9.863	31.609	56.877	0.444	0.856	36.27	5.201	0.974	0.598	0.575	0.461		0.918701	15.849
27.0329	49.189	57.579	20.953	7.8878	44.085	3.306	2.143	2.3868	6.137	6.6198	3.494	7.95	28.919	53.019	0.391	0.687	45.881	4.505	0.577	0.685	0.555	0.408		0.922763	15.789
27.152	46.99	43.977	28.824	8.0894	37.7	2.124	1.55	2.0065	4.732	5.5371	2.922	7.951	21.257	49.793	0.323	0.643	50.049	4.943	0.629	0.608	0.372	0.399		0.926829	14.61
27.2711	44.496	38.77	32.538	7.1609	22.621	2.156	1.104	1.8318	3.204	5.5424	2.424	5.518	15.282	46.961	0.47	0.833	55.213	3.305	0.484	0.679	0.427	0.28		0.930894	13.2409
27.3902	38.434	35.163	34.86	7.5343	12.613	1.549	1.065	1.5998	3.254	4.2217	1.992	4.335	9.568	43.917	0.416	0.79	52.858	2.953	0.491	0.567	0.488	0.318		0.93496	11.7721
27.5093	33.343	28.603	35.06	9.3403	6.926	1.34	1.243	1.1614	2.534	4.1418	2.059	3.245	6.879	36.21	0.481	1.192	51.396	2.281	0.676	0.454	0.597	0.274		0.939025	10.4289
27.6284	28.469	26.423	39.032	11.2382	4.875	0.905	1.012	1.0038	1.776	2.6936	1.684	2.431	5.29	27.616	0.407	0.593	42.842	2.37	0.449	0.578	0.267	0.474		0.94309	9.2013
27.7475	17.388	22.288	44.671	12.7486	4.444	1.296	0.447	0.761	1.783	2.7815	1.518	2.779	5.416	22.543	0.336	0.455	37.394	2.712	0.713	0.602	0.202	0.293		0.947156	8.34414
27.8666	10.472	15.764	42.905	14.9738	4.649	1.332	0.784	0.7164	2.002	2.219	1.449	1.834	3.651	18.851	0.322	0.528	30.664	2.516	0.6	0.382	0.434	0.429		0.951221	7.15805
27.9857	7.74	13.023	49.519	21.5635	3.573	1.029	0.926	0.88	1.045	1.7077	1.27	1.463	3.311	12.619	0.273	0.698	25.533	1.84	0.462	0.276	0.619	0.249		0.955287	6.80087
28.1047	5.419	11.133	49.465	26.8538	2.483	0.54	0.82	0.7727	1.009	1.4275	1.109	1.788	2.691	9.98	0.272	0.396	19.764	1.653	0.444	0.205	0.294	0.114		0.959349	6.3015
28.2238	4.929	7.912	46.901	31.4738	1.833	0.474	0.672	0.4751	1.015	1.4941	0.726	1.833	2.355	8.446	0.167	0.338	15.218	1.594	0.581	0.183	0.131	0.167		0.963414	5.85991
28.3429	3.692	6.348	46.974	36.2694	2.433	0.832	0.33	0.4664	0.956	1.2584	0.698	1.626	1.856	6.516	0.259	0.384	12.081	1.188	0.26	0.299	0.292	0.23		0.96748	5.6931
28.462	2.785	4.661	48.85	40.5486	2.238	0.874	0.43	0.5128	1.233	0.9921	0.673	1.319	1.938	5.454	0.073	0.522	9.613	1.524	0.196	0.2	0.246	0.19		0.971545	5.68511
28.5811	2.146	3.251	44.087	42.5623	1.257	0.72	0.529	0.3882	0.794	1.2077	0.839	0.501	1.761	4.532	0.192	0.621	7.881	1.118	0.119	0.542	0.091	0.35		0.975611	5.24951
28.7002	1.429	2.691	36.327	34.2944	1.071	0.639	0.325	0.3846	0.421	1.0653	0.893	0.86	1.512	3.763	0.196	0.419	6.797	1.058	0.274	0.181	0.055	0.119		0.979676	4.30792
28.8193	1.605	3.157	28.84	19.9113	0.823	0.445	0.311	0.3639	0.269	0.8322	0.7	0.618	1.121	3.309	0.163	0.22	5.621	0.718	0.268	0.109	0.038	0.003		0.983742	3.15661
28.9384	2.129	2.439	24.002	8.8796	0.765	0.583	0.436	0.3928	0.731	0.6726	0.473	0.734	1.156	2.834	0.143	0.227	4.186	0.444	0.146	0.35	0.285	0.052		0.987807	2.36636
29.0574	1.265	2.423	16.699	6.0641	0.758	0.397	0.318	0.2115	0.532	1.0183	0.422	0.64	0.995	2.265	0.174	0.187	3.753	0.781	0.171	0.165	0.057	0.103		0.991869	1.79086
29.1765	1.073	1.367	10.36	5.3732	0.862	0.66	0.273	0.1745	0.398	1.1621	0.284	0.622	0.636	1.884	0.204	0.166	3.426	0.831	0.144	0.075	0.094	0.148		0.995935	1.37349
29.2956	0.939	1.525	6.944	5.2411	0.674	0.176	0.332	0.0717	0.368	0.6789	0.252	0.58	0.645	1.589	0.058	0.105	2.597	0.622	0.105	0.209	0.098	0.075		1	1.08567

## Sheet: Image6
X0	Y0	Y1	Y2	Y3	Y4	Y5	Y6	Y7	Y8	Y9	Y10	Y11	Y12	Y13	Y14	Y15	Y16	Y17	Y18	Y19	Y20	Y21		Ap-basal	Avg int
0	16.258	22.2131	17.0179	28.863	18.736	16.8577	13.631	14.904	21.6877	28.969	18.6653	36.547	91.408	38.592	37.4216	14.0124	35.1271	55.0036	31.3486	26.4052	39.3125	39.2562		0	30.1017
0.1191	21.6867	25.3808	17.1236	31.401	17.463	17.5042	13.786	17.695	24.6769	30.937	21.0262	37.826	102.032	39.324	40.7693	14.2094	34.6632	53.7555	30.6614	31.3698	44.0585	40.3171		0.00448476	32.1667
0.2382	26.6558	28.3267	16.3928	32.946	19.859	19.0446	15.02	21.578	28.4288	36.722	21.5706	36.612	107.645	39.271	42.3735	17.4067	38.0176	49.616	29.9279	37.1562	48.2447	42.7258		0.00896952	34.3428
0.3573	35.94	30.5827	19.4891	31.914	21.865	20.7302	16.409	26.084	31.7837	39.719	23.3197	36.798	114.287	40.24	45.0699	20.7496	38.5154	50.3278	28.1459	39.0878	52.063	42.7652		0.0134543	36.6312
0.4764	38.776	31.4007	21.0163	32.308	21.803	25.0255	17.358	33.151	32.9365	46.294	25.7409	40.922	121.395	47.445	44.3084	24.977	38.8398	54.2072	25.6761	42.8991	52.6235	49.0863		0.017939	39.4631
0.5954	45.0447	33.1409	21.6336	30.251	20.548	27.4706	24.964	40.56	39.1452	51.669	28.1246	44.165	128.567	53.284	38.1271	26.9227	38.8864	56.3042	26.9852	42.1787	55.127	53.5894		0.02242	42.1222
0.7145	52.4114	37.3903	20.4221	30.462	18.363	30.4376	28.203	49.729	44.7722	55.167	30.1959	50.357	137.914	55.524	35.6433	34.4279	41.3317	54.7887	26.0085	43.7001	56.8275	57.3095		0.0269048	45.063
0.8336	60.2933	41.8891	19.9851	28.714	15.684	32.2411	32.794	52.252	51.4574	58.413	32.7486	48.743	137.852	61.394	33.0044	41.8159	42.1852	54.1768	23.795	40.961	53.8178	58.8715		0.0313896	46.504
0.9527	63.767	43.5585	20.837	26.421	16.435	33.1256	41.081	53.083	64.1083	58.764	36.0751	49.512	139.004	66.679	32.6018	43.0853	39.6294	53.2512	25.485	41.2223	53.885	60.5434		0.0358743	48.2797
1.0718	67.1578	49.3017	23.762	26.33	19.481	35.6766	42.946	45.776	71.9137	52.604	39.4438	55	134.265	69.467	32.6687	42.1863	41.6841	52.9826	25.5501	40.5101	51.2934	56.5377		0.0403591	48.9335
1.1909	71.304	52.2438	22.8837	26.273	19.202	38.8308	45.718	41.771	76.2106	49.583	43.4538	54.866	129.524	69.968	34.4289	44.9733	43.8315	52.518	24.9944	43.6698	48.512	57.6069		0.0448438	49.653
1.31	70.3799	54.2662	29.7932	27.662	18.611	38.2375	47.807	34.769	79.4048	49.567	47.0306	57.169	126.425	72.288	33.1022	49.1989	44.1916	54.1347	27.0196	44.2817	50.7951	59.8989		0.0493286	50.7288
1.4291	66.3772	51.0939	29.623	28.882	18.257	39.0482	51.789	34.072	80.5357	53.493	49.5164	57.536	128.566	73.033	31.0798	53.0642	47.7158	52.1407	28.6073	44.9657	56.4778	60.6476		0.0538134	51.6601
1.5481	62.5845	50.7529	30.2968	27.827	17.969	37.5037	48.995	30.961	80.6743	59.408	50.8683	60.897	135.177	69.868	31.594	51.8139	48.9703	49.3183	26.9037	47.5044	59.1701	58.9946		0.0582944	51.7296
1.6672	61.0269	50.9144	33.8069	26.525	20.303	36.6209	50.467	26.613	86.6261	60.25	53.8026	58.201	135.568	74.591	33.8455	51.625	47.5009	47.6043	27.5835	48.5628	62.3845	60.9352		0.0627791	52.5162
1.7863	60.3163	52.2753	34.6976	27.238	22.242	35.6881	50.147	24.691	81.7451	62.598	58.8157	62.459	142.164	70.028	32.3617	51.9609	57.7584	50.6602	24.5475	52.4782	67.2813	59.7589		0.0672639	53.7233
1.9054	51.9029	50.0664	35.7464	25.949	24.111	36.1012	42.33	21.623	81.5861	66.684	60.9537	63.24	136.51	70.69	31.4719	49.9451	59.4696	49.7095	27.2346	50.826	67.9302	57.9557		0.0717486	52.8198
2.0245	52.7923	52.3483	38.3817	28.298	29.053	35.3501	38.242	20.984	75.8194	68.241	63.0699	62.158	139.031	67.065	30.3619	50.8091	59.3378	48.3014	26.0947	52.536	66.6997	62.5855		0.0762334	53.0709
2.1436	50.3549	54.7938	35.278	29.559	33.255	38.3561	30.8	20.701	71.6023	68.677	67.1413	58.613	130.643	70.007	31.7556	47.5501	59.3309	48.6946	26.3995	52.6461	66.7385	62.5635		0.0807182	52.5209
2.2627	49.2016	58.0528	36.0011	29.448	33.962	43.1565	25.521	18.153	69.3967	70.296	73.206	53.507	121.083	70.592	32.7974	46.4304	62.8355	48.2645	27.5316	53.4691	64.6125	64.254		0.0852029	52.3533
2.3818	50.1415	59.7479	37.6417	28.554	42.733	43.9087	24.478	18.685	61.9676	70.229	73.5964	55.657	115.375	77.358	28.7586	45.2404	65.9749	49.7788	31.3166	53.4612	60.2417	60.7192		0.0896877	52.5256
2.5008	47.146	64.0607	36.153	31.911	58.803	44.7014	24.326	17.374	61.0979	73.628	70.6781	59.388	114.599	78.951	25.9656	45.7582	68.0899	44.0839	27.7981	54.1771	53.9954	61.7985		0.0941687	52.9311
2.6199	44.7756	63.2011	38.846	37.845	74.449	43.1861	21.737	18.555	57.9094	75.532	65.7471	61.472	116.136	76.228	27.5553	43.1532	65.4611	44.7241	27.8265	52.4078	50.3199	59.2075		0.0986534	53.0125
2.739	42.9444	62.5671	41.2993	41.684	93.148	47.4048	20.048	14.448	51.6224	81.306	66.4878	61.255	113.545	70.899	24.5689	44.1133	67.4733	45.4947	26.8404	57.2919	48.0655	58.5094		0.103138	53.6826
2.8581	39.5579	62.3083	38.5488	50.448	103.247	47.9381	21.137	15.437	50.0066	88.158	65.4911	58.979	111.623	72.081	26.3658	40.4577	73.3051	44.3523	30.1874	53.027	45.6469	53.937		0.107623	54.1927
2.9772	34.8944	63.6597	41.4532	57.86	100.995	48.6751	20.939	15.607	51.6267	95.08	63.4701	59.959	109.599	69.174	24.5186	40.5308	72.8716	42.1277	28.6405	54.0966	42.1348	55.2535		0.112108	54.2348
3.0963	31.797	60.6216	47.1837	74.083	88.929	49.907	16.068	15.999	53.76	97.111	69.1021	55.355	104.639	68.011	22.8135	40.3279	77.897	43.6656	27.8559	53.3866	36.253	57.7567		0.116592	54.2056
3.2154	30.4486	59.8222	52.2572	86.687	68.087	49.9214	15.787	15.304	52.0633	103.944	74.6655	56.288	103.547	67.65	21.7508	39.6528	80.7621	43.8196	29.6108	55.0719	36.6957	54.6124		0.121077	54.4749
3.3345	27.264	59.9381	56.0731	90.847	51.147	56.261	15.789	17.159	53.3826	111.038	74.7412	54.925	97.227	69.507	21.3974	38.2938	85.6039	44.9251	31.5327	56.227	35.7937	53.9636		0.125562	54.6835
3.4535	26.8147	60.9309	58.2342	99.569	37.184	61.1964	16.177	17.341	51.716	116.139	75.3232	54.668	99.254	70.285	19.6721	37.1532	84.5199	47.1522	31.1482	57.2909	34.0274	55.897		0.130043	55.077
3.5726	23.4825	62.2686	61.9226	106.866	29.921	59.5318	14.698	18.326	52.9327	117.966	72.7456	56.445	98.518	70.008	19.5481	38.5546	85.1918	49.7277	35.5205	57.0019	31.0199	55.4861		0.134528	55.3492
3.6917	24.7788	57.6474	60.9437	102.755	24.014	58.4727	14.589	20.857	52.3696	115.021	70.7966	57.147	99.774	67.374	21.4016	39.5697	89.2387	48.1632	32.0696	55.078	34.5643	56.3825		0.139013	54.6822
3.8108	23.7078	57.8803	64.2402	88.227	24.212	58.9516	15.934	23.047	51.8833	108.108	72.9971	64.153	96.549	66.447	18.996	41.3904	84.4029	52.4873	31.7424	58.243	31.3959	57.4428		0.143497	54.2017
3.9299	22.4448	56.6144	64.242	59.426	24.874	62.2666	15.213	22.093	52.6061	102.749	77.394	64.424	97.712	67.484	17.7267	39.2455	79.2609	50.9464	34.2463	62.9086	29.2209	58.1194		0.147982	52.7826
4.049	23.14	55.543	67.8995	40.803	23.899	62.9882	16.984	21.846	55.727	98.629	77.9228	67.793	99.119	66.323	19.8397	39.3436	74.0643	49.0935	35.3053	59.956	26.233	59.3491		0.152467	51.9
4.1681	21.9328	53.57	67.0693	29.923	22.074	64.1124	17.728	20.883	53.8275	95.057	77.8754	76.685	101.446	57.889	20.2735	41.6606	71.0045	48.805	36.8254	59.9035	28.0377	57.7172		0.156952	51.1045
4.2872	20.2954	52.1245	70.9981	26.496	25.289	68.6216	16.85	24.831	49.8714	85.826	84.0958	82.125	106.219	58.085	18.3081	39.7062	70.4008	51.4902	38.0576	61.6843	25.4485	59.1538		0.161436	51.6353
4.4063	17.842	50.8953	66.1629	25.015	26.707	73.3156	18.742	24.539	43.7938	85.349	83.212	85.66	101.964	57.604	18.74	41.2546	68.4166	59.5042	40.9089	60.566	24.4103	57.3046		0.165921	51.4503
4.5253	15.4521	49.1218	61.3704	23.224	29.158	73.5864	18.578	26.043	43.5202	84.892	82.8036	87.43	97.161	53.615	19.3127	40.3146	66.1532	62.1806	43.2762	60.3058	22.8386	53.9263		0.170402	50.6483
4.6444	15.8429	48.9479	61.5101	27.055	28.929	77.8716	21.378	28.191	42.634	88.265	80.5988	93.35	96.498	52.573	20.9107	43.0939	65.7688	66.697	44.8535	60.58	24.4398	50.6301		0.174887	51.8463
4.7635	15.788	45.7601	60.4512	25.909	30.523	85.4269	21.559	28.82	47.2427	97.587	74.1541	98.978	96.517	50.758	19.7293	43.816	65.4952	71.0581	47.5764	56.1134	24.5951	50.2653		0.179372	52.6419
4.8826	15.5028	45.3251	60.9065	23.809	33.526	86.3193	26.462	32.349	50.4004	106.939	64.1529	95.366	102.847	49.87	19.8808	48.4746	63.9874	73.7688	50.2328	56.4229	23.106	46.7577		0.183856	53.473
5.0017	15.24	46.6573	54.6854	22.269	37.366	87.6649	31.008	35.817	55.9368	106.131	55.7188	93.227	102.98	50.724	18.8727	46.9652	61.5764	74.3523	49.7737	53.4031	20.5029	45.997		0.188341	53.0395
5.1208	15.1713	46.3192	54.4321	24.892	39.298	85.3279	31.58	35.986	65.9719	103.351	45.584	91.387	106.593	54.512	20.0154	50.6513	60.6153	71.5649	50.2605	53.6129	22.3385	44.4914		0.192826	53.3616
5.2399	14.5677	46.628	48.4859	28.426	46.434	85.0924	33.159	39.878	74.374	97.48	39.8237	91.41	102.837	51.449	19.3484	52.8448	60.5148	72.119	53.9566	53.3288	21.5867	38.8098		0.197311	53.2979
5.359	14.155	43.2796	50.0209	29.102	50.165	81.5483	37.455	47.269	77.201	91.965	36.3544	89.763	102.186	52.888	21.0781	54.4464	57.9384	76.0184	51.4203	52.1839	17.3267	36.5131		0.201795	53.1944
5.478	11.5757	38.8822	51.3147	30.528	54.919	78.9899	48.486	55.321	76.5799	81.874	34.2793	95.405	99.104	56.855	19.8247	57.1098	55.5182	76.6051	52.0834	49.9396	14.4714	34.1983		0.206276	53.3575
5.5971	12.7482	36.4193	52.0316	34.617	56.517	73.9729	59.879	74.192	83.1357	71.855	31.3219	98.267	97.175	61.365	19.0037	60.3065	54.0655	80.379	55.121	49.1102	13.1911	31.5274		0.210761	54.8273
5.7162	13.4762	35.7362	53.0194	34.658	66.288	72.8436	69.616	89.8	84.8481	66.412	30.1575	99.098	101.111	65.854	20.6132	64.4593	55.305	80.5191	52.2693	45.5219	9.6595	25.3201		0.215246	56.2084
5.8353	12.0039	36.3064	51.4954	36.648	69.644	68.0627	83.493	106.48	80.5513	54.281	30.8146	99.148	101.787	69.729	20.9796	66.8582	57.3367	72.4333	52.2363	43.6178	7.3434	20.6793		0.219731	56.4513
5.9544	13.0959	36.0608	51.5455	40.201	76.722	65.6919	99.03	126.503	79.9164	44.642	30.3899	98.162	101.311	70.516	24.151	63.3638	56.2937	74.4879	52.1997	41.3276	6.9945	19.4859		0.224215	57.8223
6.0735	14.3084	33.6441	55.253	44.633	81.438	65.5674	117.574	132.028	81.5158	41.055	29.4356	103.545	100.281	73.984	27.474	65.3409	59.4923	69.9316	53.8258	38.7348	4.9276	15.6079		0.2287	59.5271
6.1926	11.5675	32.357	57.9509	44.441	88.977	62.505	124.716	134.497	82.6235	36.484	29.7728	104.731	97.436	83.811	27.5553	65.1161	55.3381	70.1005	53.3017	36.7101	4.498	13.8254		0.233185	59.9234
6.3117	13.0391	32.037	61.6638	45.643	90.543	62.1646	123.394	139.153	90.6659	35.651	29.8204	100.597	97.296	89.853	26.7143	69.8117	55.4286	67.6119	53.9591	34.0321	4.5069	12.6521		0.23767	60.7381
6.4307	12.8449	31.991	70.2561	48.486	97.868	65.7726	123.3	137.778	82.3661	33.502	28.9061	103.587	100.502	88.301	27.2167	74.1801	52.1741	66.6527	53.5635	32.4763	4.5632	10.728		0.242151	61.228
6.5498	12.4897	30.7408	74.8432	50.887	100.943	70.4686	127.398	138.32	82.8373	33.074	27.9556	107.276	105.758	94.605	32.6462	73.7497	48.2773	68.1393	51.7436	30.587	2.9851	9.728		0.246635	62.5206
6.6689	12.3977	29.247	77.3504	52.144	107.954	77.607	123.822	138.403	76.094	31.518	23.5753	109.567	108.42	99.159	32.4714	70.1772	47.9182	64.873	54.5795	27.3365	2.6823	8.1855		0.25112	62.5219
6.788	12.9869	26.4967	80.7291	57.381	107.649	81.1584	125.019	141.687	73.8436	27.3	20.2504	113.26	110.017	108.777	35.5598	73.5384	46.1828	62.6745	54.2853	24.2955	3.3067	6.7989		0.255605	63.3271
6.9071	12.0445	23.0378	76.4849	62.791	110.078	86.9925	123.837	138.156	72.9304	26.054	17.3517	107.746	112.923	113.35	36.7838	66.7072	39.5148	59.6462	50.4894	21.5976	3.3385	6.1737		0.26009	62.1831
7.0262	9.9432	21.8164	70.232	62.525	104.133	92.1733	118.936	145.744	70.0586	21.508	14.3125	109.443	118.72	114.418	39.0995	71.1571	35.5715	52.8059	51.2236	19.6054	3.5262	6.4286		0.264575	61.5173
7.1453	10.8626	19.8877	61.7903	63.879	105.23	96.4093	122.784	147.411	60.5945	21.327	13.4027	110.678	122.368	117.867	39.8738	65.8521	33.3265	46.6923	53.1041	16.3422	2.8376	4.8432		0.269059	60.7892
7.2644	12.0367	16.8556	52.8831	66.416	109.209	89.393	121.286	157.489	53.5753	18.519	12.4872	106.292	130.907	126.815	40.9444	63.4508	33.9008	39.6529	53.5235	14.4217	3.1113	5.4957		0.273544	60.3939
7.3834	9.743	16.6169	45.1763	68.844	109.99	88.651	114.562	159.642	45.7077	16.498	12.6542	106.052	132.213	126.798	46.3245	67.2073	33.4562	31.8415	54.0631	11.3454	3.2242	5.2544		0.278025	59.3575
7.5025	10.1753	16.0241	36.6757	66.422	115.842	81.3737	110.255	151.129	39.4601	15.957	11.2241	102.047	131.709	127.273	50.7333	66.1311	32.1634	25.6994	55.3658	10.1503	2.741	6.9478		0.28251	57.5227
7.6216	8.5991	17.3466	31.6774	68.011	117.079	79.1391	102.397	149.396	31.6198	14.522	11.1958	98.629	133.93	121.719	56.5335	70.9961	29.0189	17.9129	55.3667	8.4072	2.7791	7.4261		0.286995	56.0773
7.7407	7.3242	16.8072	27.508	68	131.072	72.7961	97.68	144.971	23.5033	13.643	11.8951	97.777	136.446	121.993	56.4472	73.1655	24.5402	14.4922	52.8781	7.7795	3.1547	6.6758		0.291479	55.025
7.8598	6.9313	16.4061	23.0068	75.155	134.665	67.4251	96.445	137.583	20.4071	12.224	14.6182	96.474	141.107	116.987	54.4761	75.4693	22.2134	12.4855	55.1997	6.9957	2.7284	6.1223		0.295964	54.3239
7.9789	8.0485	16.2897	22.4618	77.281	132.52	67.1209	96.607	132.15	15.0931	11.549	16.507	82.383	152.486	124.761	57.6657	72.9276	16.9472	10.0801	58.0507	5.9201	3.222	6.4339		0.300449	53.9321
8.098	8.6214	15.0253	20.9752	74.613	124.042	63.0135	101.248	113.881	11.9737	11.632	14.9215	79.186	159.824	129.102	56.885	75.9908	15.0637	10.1503	55.0561	4.6276	2.9411	7.1637		0.304934	52.5426
8.2171	8.6506	13.5903	17.9016	76.688	120.487	56.6447	102.295	104.396	10.7726	14.612	15.6509	73.827	151.706	124.499	63.2745	78.8034	12.7843	10.1494	55.2189	4.7092	3.0212	7.1987		0.309418	51.2218
8.3362	7.6252	14.3595	18.8391	77.198	117.358	47.3943	102.896	91.591	9.3757	14.518	15.4853	59.704	152.258	121.73	63.9531	78.3199	11.0522	9.8272	53.9248	4.6127	2.9931	6.4245		0.313903	49.1563
8.4552	8.5393	14.6631	19.0052	79.984	106.361	40.8167	97.377	85.98	9.5139	15.194	17.5153	45.774	146.04	119.805	68.994	75.0668	8.917	9.6516	50.8558	5.073	3.1643	6.3979		0.318384	47.0313
8.5743	7.6311	16.2659	16.9248	79.263	98.972	30.8958	92.917	76.088	9.2249	13.144	21.0275	36.054	142.15	120.186	74.6224	76.7936	6.9957	9.1255	46.1488	6.7732	3.0508	8.5494		0.322869	45.1274
8.6934	8.9582	14.0247	15.6299	84.567	101.018	22.9295	84.902	70.857	8.4647	13.303	20.6961	26.931	136.745	118.186	74.964	75.3962	6.0655	7.8549	41.1184	4.9202	3.6153	9.6473		0.327354	43.2179
8.8125	8.3219	12.9353	16.9548	81.25	99.958	17.4122	75.832	63.659	9.594	14.763	25.5804	21.046	121.793	122.747	78.0735	77.0131	6.4301	8.1111	33.8394	5.4204	3.4686	8.1488		0.331838	41.4705
8.9316	8.8916	14.1623	19.285	77.967	101.412	14.0227	66.991	56.197	10.2535	14.022	30.3371	16.393	104.025	117.264	76.9705	71.9787	6.2611	9.2237	28.1051	5.4815	3.4566	8.9856		0.336323	39.1675
9.0507	7.4467	13.1526	18.9174	77.778	98.606	8.1042	55.724	50.067	9.0917	15.263	30.002	12.17	83.752	114.991	79.8528	74.7741	6.0487	7.2987	25.6814	6.442	4.7827	9.1387		0.340808	36.7766
9.1698	7.4684	11.9519	22.7579	74.113	95.481	6.7681	45.323	42.581	7.9699	17.304	28.2367	11.604	70.099	112.858	78.3768	70.5955	4.8121	6.9622	22.2891	6.2603	4.6829	9.5978		0.345293	34.4588
9.2889	6.7025	14.2464	22.8598	70.759	100.359	4.7993	40.838	37.338	7.3792	15.834	30.2273	10.571	58.595	114.496	77.4316	72.1322	4.8554	6.6637	19.6644	6.1215	5.3919	9.6535		0.349777	33.4963
9.4079	7.2298	13.3324	24.0332	65.003	95.976	4.4915	35.323	34.548	7.0962	14.693	26.9498	10.724	44.457	114.951	77.2567	73.4958	5.0633	7.332	17.7883	5.1312	5.6883	9.9319		0.354258	31.8407
9.527	6.506	11.0734	21.2671	61.691	91.644	3.486	31.464	33.121	6.4765	13.352	27.5404	11.614	33.538	117.625	76.2535	79.6693	4.6142	6.9798	16.2853	5.5723	5.6461	10.19		0.358743	30.7095
9.6461	6.4757	10.6793	19.9312	56.711	91.275	2.6431	24.993	29.987	6.2573	15.197	28.2661	11.831	24.945	114.326	76.6906	75.2282	4.1867	8.0846	15.6411	5.178	6.648	11.1581		0.363228	29.3788
9.7652	5.7369	9.7263	19.1788	50.319	79.709	3.8839	21.964	28.722	5.8361	14.695	29.5879	13.47	17.677	102.623	71.097	74.9578	4.4163	8.789	14.6371	4.6879	7.52	10.1877		0.367713	27.2464
9.8843	6.2922	10.0586	17.409	47.442	66.149	2.9349	20.352	27.198	5.6337	13.695	26.8168	14.2	10.713	98.007	72.8471	74.7383	4.8543	8.3624	12.748	5.0168	6.9944	12.4651		0.372197	25.6785
10.0034	6.4573	9.6627	19.0419	46.992	55.462	2.5122	17.352	22.249	4.7404	13.472	28.088	17.562	7.171	87.199	69.5452	74.6282	4.3688	9.1722	13.4617	5.4862	8.3421	13.2726		0.376682	24.3745
10.1225	5.7365	9.5756	18.9517	44.221	44.885	2.3824	15.086	18.591	4.1048	13.93	25.1087	21.006	4.782	83.372	72.395	74.3643	4.2028	8.2056	12.5497	5.8058	8.3259	14.1319		0.381167	23.2597
10.2416	5.5426	8.207	22.4463	38.247	38.063	2.5976	12.864	18.306	3.6378	14.412	24.3058	22.312	4.584	80.242	71.9804	72.4482	3.9777	9.9512	13.7172	5.5994	7.6432	14.8302		0.385652	22.5416
10.3606	5.4426	8.2345	22.8528	33.399	32.645	2.244	12.113	15.786	3.7387	13.949	21.4779	25.161	3.957	71.948	74.4165	64.0358	3.9102	11.5717	14.0604	4.4496	6.4822	14.9047		0.390133	21.2173
10.4797	5.5823	9.1728	24.3797	30.888	28.152	2.3811	11.023	13.858	3.396	11.995	19.6161	23.663	3.44	72.468	72.2465	61.1843	4.0911	12.6489	15.9427	4.2236	6.9993	14.9317		0.394618	20.5583
10.5988	5.633	7.686	25.4692	27.594	25.696	1.7957	11.038	13.651	3.6266	11.269	17.9889	23.385	3.251	69.508	76.6569	55.5789	4.9737	12.1709	16.8643	4.7783	6.5441	13.6998		0.399102	19.9481
10.7179	6.2983	7.2168	24.9533	21.819	20.408	2.1037	10.648	14.177	3.4419	11.076	19.5564	23.987	3.705	61.615	79.8672	47.3578	3.8188	12.1626	20.708	3.9621	6.7421	13.3854		0.403587	19.0459
10.837	5.8474	7.7362	27.241	21.927	18.037	2.1301	10.773	11.11	3.63	10.523	16.2484	25.32	3.488	55.197	78.0865	42.2134	3.5316	13.0971	22.6621	4.4852	6.4923	12.2676		0.408072	18.2747
10.9561	5.7975	9.2065	28.4358	19.301	16.539	2.0616	9.839	11.425	3.7181	10.456	18.1803	25.461	3.982	46.259	77.7816	30.3739	3.4695	14.2647	24.3769	5.1226	5.9386	11.6293		0.412557	17.4372
11.0752	5.483	8.4334	29.1341	16.011	15.613	2.4148	10.253	12.4	3.5832	8.574	14.3705	25.954	3.505	40.851	75.4519	27.5178	3.3157	14.4865	23.7174	5.0465	5.4353	9.7057		0.417041	16.4208
11.1943	4.479	7.6246	31.1032	15.593	12.664	2.4806	10.094	14.367	3.4829	7.192	12.0556	29.755	4.246	36.951	71.5022	20.9274	3.4104	15.4627	22.3831	4.6178	4.6497	9.1802		0.421526	15.6464
11.3133	4.366	8.8414	32.0149	11.566	11.367	2.2768	8.94	14.609	4.7579	7.679	12.3942	28.268	3.96	28.587	67.1395	15.1214	3.5133	15.8239	19.3853	5.2474	2.9482	9.1994		0.426007	14.4548
11.4324	5.1532	10.3059	32.6957	9.857	10.134	2.2437	8.522	15.831	4.7163	9.208	10.8847	26.694	3.231	22.451	61.3352	12.6474	2.9698	15.9069	18.0623	5.0132	2.7504	10.067		0.430492	13.6673
11.5515	5.3529	10.0221	32.7228	8.778	8.454	2.6949	9.204	17.605	5.3251	7.577	11.2677	27.276	2.739	18.799	52.5596	8.8241	2.6344	18.1349	17.8537	4.1816	2.7352	11.3164		0.434977	13.0026
11.6706	4.8923	12.6685	33.3374	8.14	8.527	2.1189	9.606	18.26	4.9389	6.729	8.5188	27.471	3.295	17.439	44.5599	7.5359	3.2615	20.4764	17.0567	4.3372	3.4876	11.3106		0.439461	12.6349
11.7897	5.4345	16.657	33.6152	7.472	8.355	2.138	7.541	19.94	4.4565	7.299	7.1609	26.166	3.201	15.733	36.796	6.0655	2.8919	23.684	15.2428	4.0389	3.062	11.7948		0.443946	12.2157
11.9088	5.9213	20.9539	28.8976	6.064	6.409	2.1661	6.41	21.994	5.4749	6.684	7.7921	23.868	2.771	14.342	26.4552	5.852	3.0036	21.9795	17.7823	4.0376	3.8104	11.8813		0.448431	11.5704
12.0279	4.5078	23.4482	27.5324	4.951	6.123	1.8881	5.314	23.237	5.7481	6.351	7.6369	24.437	3.433	13.899	19.0897	6.4953	2.9008	23.7218	17.2816	3.4161	4.0652	13.2889		0.452916	11.3075
12.147	4.4685	23.4089	26.3041	4.341	5.119	1.8065	4.855	24.737	7.0639	7.132	7.2013	20.782	2.539	14.271	13.6671	5.4391	2.6711	22.8078	17.4037	3.5036	3.2198	13.1174		0.4574	10.7209
12.2661	4.746	24.2997	21.1507	3.548	4.927	1.8809	5.909	24.777	7.8409	7.658	8.7236	17.032	2.54	12.572	10.4143	4.2699	2.6621	21.4808	18.0238	3.5633	2.9866	11.5061		0.461885	10.1142
12.3851	5.2309	23.5573	18.2805	2.997	4.559	2.3061	5.244	26.25	8.9378	8.026	10.1745	16.345	3.244	15.479	10.7934	4.4545	2.8042	22.4442	18.8452	2.52	3.5875	12.2817		0.466366	10.3801
12.5042	4.1842	22.4901	16.2024	2.885	3.144	2.1897	4.86	31.585	8.2494	8.641	12.118	15.249	2.857	12.596	8.9486	4.1577	2.8158	21.1292	21.4838	2.6532	3.9642	14.2271		0.470851	10.3014
12.6233	3.623	22.2834	16.7004	2.47	2.94	1.9823	5.262	31.623	9.6695	9.042	12.1486	14.529	3.765	12.003	7.9407	3.1304	2.6594	25.1506	23.5015	3.1259	3.6602	13.8459		0.475336	10.5025
12.7424	3.9757	22.2751	13.7183	2.756	3.428	2.0634	3.606	30.48	10.4257	8.19	12.1629	15.245	2.991	12.233	8.487	3.4498	2.574	29.2187	27.2616	2.5038	3.5702	13.6562		0.47982	10.6487
12.8615	3.9255	20.6211	11.8564	2.329	3.328	1.7023	3.905	30.731	9.7616	8.629	13.5378	12.939	2.672	12.289	6.4684	4.0424	3.2192	35.1949	29.6357	2.4084	3.6724	11.9263		0.484305	10.6725
12.9806	4.3256	17.8359	10.3679	1.921	2.701	1.5152	3.795	27.036	9.1579	9.683	14.1855	14.244	3.271	13.539	5.2934	3.7968	3.1719	40.9689	32.842	2.4924	4.7773	9.1598		0.48879	10.7309
13.0997	4.0993	16.9164	10.3029	1.865	1.999	1.9578	4.448	26.507	8.4463	10.194	14.1675	12.977	3.338	15.74	6.2831	3.6694	2.5664	42.2829	34.1318	2.2583	4.1389	10.9065		0.493275	10.8725
13.2188	4.4166	15.0645	10.4536	2.053	2.099	2.6468	4.396	20.697	7.5812	11.042	12.4961	14.643	4.47	12.821	6.8043	3.847	2.7151	46.2269	33.6231	2.5596	3.6069	10.1686		0.49776	10.656
13.3378	3.9391	13.1848	8.178	1.974	2.081	2.1849	3.914	18.865	6.8958	9.884	12.4537	13.638	3.467	12.643	5.4251	3.6519	2.945	45.0984	32.2404	2.8841	3.6034	9.2608		0.50224	9.92779
13.4569	4.4726	11.175	7.4191	1.979	2.474	2.4232	4.08	18.799	7.288	10.57	10.9817	15.446	2.872	11.587	5.1003	3.8171	3.0778	46.0568	34.2546	2.3083	3.6716	9.8909		0.506725	9.98836
13.576	5.9306	10.3704	6.7825	1.711	2.039	2.2196	4.804	20.751	7.2267	10.979	9.7901	15.927	3.051	12.133	5.1864	3.423	3.5649	46.3156	32.2902	2.3316	4.8948	8.5685		0.51121	10.0132
13.6951	5.7782	9.984	5.4949	1.786	1.544	1.8973	3.819	20.324	7.9728	9.741	8.2427	17.325	3.593	11.883	5.0441	3.6562	3.7241	40.6886	29.282	2.4796	3.9439	7.5563		0.515695	9.35271
13.8142	5.5983	10.3825	5.841	1.582	1.449	2.4146	4.171	20.939	7.3328	10.079	7.602	17.75	3.635	10.841	6.6374	4.0714	2.9665	33.5691	30.7301	2.2779	3.5941	8.0209		0.52018	9.15839
13.9333	5.8846	11.5934	4.773	1.984	1.755	2.2862	4.135	22.369	7.379	10.584	7.6846	18.366	3.428	10.296	5.9187	3.0673	3.1974	30.7014	32.0147	2.4431	3.6634	7.8158		0.524664	9.1518
14.0524	6.7536	12.9854	4.8543	2.182	1.809	2.5442	4.038	19.558	7.3321	9.884	7.836	22.037	3.755	9.842	5.3469	3.1479	2.7233	24.9506	32.8156	2.3482	3.1677	8.464		0.529149	9.01704
14.1715	7.6263	14.3004	4.2085	1.975	1.188	2.3783	4.038	21.472	7.8899	10.308	8.1907	22.46	4.269	10.332	4.8355	2.8886	3.1802	22.2573	35.7768	2.1856	4.0058	6.9999		0.533634	9.21663
14.2905	7.2748	17.076	3.6047	1.433	1.589	1.9819	3.534	18.811	10.1439	8.698	8.6691	22.257	4.558	8.124	5.7341	2.9817	4.9615	20.4363	42.8418	2.0912	3.1769	6.6771		0.538115	9.39341
14.4096	6.3914	17.4406	3.6058	2.207	1.821	1.9436	3.774	21.661	8.8594	9.546	7.4108	23.714	3.595	8.096	4.1407	2.6577	4.6475	19.2824	41.1122	2.0204	3.9066	6.3564		0.5426	9.28134
14.5287	8.161	18.1118	3.6304	1.844	1.656	2.2561	3.497	22.648	9.4816	9.336	7.0709	23.081	3.248	9.147	4.6359	2.847	4.8377	17.0509	45.2681	2.2172	3.7272	6.3337		0.547084	9.54939
14.6478	8.9937	18.6527	3.1543	1.524	2.032	1.5126	4.058	23.858	9.747	8.75	7.6496	22.134	3.488	8.562	5.2997	2.4194	6.314	17.9678	46.2975	2.1405	4.5297	5.3029		0.551569	9.74488
14.7669	8.7592	19.7397	2.6434	1.329	1.953	1.972	3.272	19.074	8.7791	8	8.001	20.773	3.205	8.843	5.1759	2.5478	6.0221	17.1294	49.0534	3.1226	4.3769	5.836		0.556054	9.52761
14.886	8.8585	19.0773	2.3732	1.783	1.625	1.9898	3.543	21.608	9.4451	8.115	6.9999	22.045	3.092	9.396	5.5296	3.0574	7.0818	19.1139	53.2591	2.9758	4.1899	6.0392		0.560539	10.0544
15.0051	8.8869	16.6898	2.8547	1.811	1.723	1.9135	4.504	19.048	9.8661	7.017	8.7675	24.682	4.641	9.289	4.3048	3.2862	8.5679	18.5686	53.4663	2.1358	4.4021	5.8372		0.565023	10.1028
15.1242	8.7855	15.0732	2.926	2.002	1.894	1.4204	3.75	18.532	9.5027	7.632	8.5026	23.385	3.793	10.997	4.5315	3.2349	7.7909	16.8692	52.2235	2.2825	4.479	5.9565		0.569508	9.79834
15.2432	7.8991	14.3266	2.0952	2.074	1.943	1.9687	3.711	18.293	10.6092	8.415	8.0669	26.015	3.551	11.003	5.805	3.1376	9.0478	15.974	48.2287	2.5446	3.91	7.0641		0.573989	9.80375
15.3623	8.8548	12.1826	2.3577	1.849	1.611	2.0608	4.196	16.784	10.8122	7.615	7.2835	27.439	4.908	13.201	5.4678	3.562	11.6729	15.7025	44.715	2.1156	3.2564	7.7734		0.578474	9.79183
15.4814	8.7561	12.7555	2.4283	1.894	1.578	1.5029	3.764	17.121	9.7718	7.054	6.4694	25.571	5.364	14.445	5.3677	4.326	13.4765	14.1136	43.804	2.0274	3.4685	9.7566		0.582959	9.76433
15.6005	10.3954	11.0707	2.3457	2.34	1.634	1.3923	3.356	15.576	10.6835	7.421	6.2674	24.698	5.683	12.595	4.684	3.4932	15.4071	14.2886	43.5971	2.7285	4.4021	9.7509		0.587443	9.71861
15.7196	9.6339	10.2867	2.3443	2.148	1.982	1.7127	3.734	15.636	10.9339	7.493	6.3295	23.363	6.136	13.321	4.7877	3.1878	22.3144	11.3221	41.4177	2.461	3.3657	8.3019		0.591928	9.64601
15.8387	8.7089	11.9023	2.6054	1.871	1.326	2.7954	3.604	14.472	9.5376	8.15	5.9446	21.448	5.868	15.842	5.5325	4.1516	24.2932	10.4448	37.011	2.2923	4.1685	7.2248		0.596413	9.50881
15.9578	8.2999	10.967	2.086	2.09	1.458	2.4634	4.033	14.161	9.1503	7.986	6.3689	22.447	6.107	18.153	5.8028	4.3749	28.3186	11.3952	37.1904	2.7714	4.4218	8.1905		0.600898	9.91982
16.0769	9.0539	9.7324	2.511	1.836	1.785	2.2855	4.904	14.567	8.4697	6.443	5.2261	21.861	5.458	18.706	4.7602	4.7177	26.8897	10.6408	37.5564	2.6277	3.6379	8.0787		0.605382	9.6249
16.196	7.848	10.6211	2.1761	2.124	1.533	2.1634	4.791	15.901	6.3687	6.565	5.1006	19.695	5.146	21.156	5.1121	4.7784	24.0148	11.3568	35.9984	2.5231	4.1742	7.433		0.609867	9.38999
16.315	8.4156	10.103	2.3855	2.028	1.189	1.8266	5.162	14.681	6.0739	6.08	5.1943	17.735	7.304	22.18	5.8291	4.7973	22.24	10.0624	32.6464	2.4328	3.0763	6.895		0.614348	9.01533
16.4341	9.3148	11.2869	2.7359	2.163	2.062	1.7383	5.397	14.435	5.8522	5.57	5.8414	17.83	7.825	23.527	5.2266	5.4734	18.4702	10.9899	34.4584	2.091	4.0395	7.9716		0.618833	9.28632
16.5532	8.9805	12.1352	3.1027	2.405	2.38	2.1878	5.178	13.077	5.5207	5.537	5.7658	16.988	8.274	23.936	5.6294	5.5839	14.9399	10.42	34.0878	2.6447	3.4547	8.5719		0.623318	9.12727
16.6723	7.8797	12.2363	2.9257	2.057	1.645	2.1949	5.858	14.02	4.5457	5.783	4.5283	16.802	9.557	24.79	6.7583	6.8917	10.914	10.8188	32.6083	2.5445	2.9287	8.1923		0.627803	8.93087
16.7914	8.16	12.2859	2.6155	2.044	1.668	2.1225	4.807	13.59	4.1455	5.065	4.8022	14.206	9.491	26.226	7.5552	8.4966	9.3198	9.3519	32.5376	2.4932	3.6636	8.4031		0.632287	8.77498
16.9105	7.284	10.8097	2.007	2.631	1.903	2.0605	4.134	13.161	4.303	4.984	5.6154	14.38	9.431	23.413	8.2732	10.882	7.7285	9.9092	35.0156	2.0044	4.0991	8.1172		0.636772	8.7339
17.0296	5.7713	11.8638	2.3604	3.338	1.625	2.2954	4.838	13.754	4.6039	5.746	4.8442	14.391	10.411	25.915	9.4631	14.6402	7.1627	10.3171	34.4154	2.1905	4.1512	7.6877		0.641257	9.17204
17.1487	6.6543	10.7621	2.7547	2.949	1.652	1.7767	5.565	14.231	4.1338	5.025	4.4472	11.558	10.503	23.464	12.4033	16.1176	7.9405	10.2008	38.2833	2.3514	3.9456	8.8932		0.645742	9.34598
17.2677	6.4547	11.416	2.6548	3.613	1.863	1.8356	6.453	15.838	3.8981	4.198	3.7164	11.672	11.794	27.034	14.3495	16.9834	7.65	9.7636	37.9462	1.9909	4.1722	9.1781		0.650223	9.74884
17.3868	6.0128	10.5502	2.4594	3.396	2.159	1.861	6.347	14.851	4.5154	5.133	3.5623	10.247	12.49	27.885	14.0036	19.0757	8.0952	9.9329	35.012	2.0607	4.4523	10.0453		0.654707	9.73395
17.5059	5.4844	11.0809	2.5058	2.578	1.709	2.4568	6.993	13.715	4.4641	4.85	5.1674	8.797	11.988	29.82	16.1778	18.6217	7.757	10.1581	37.6968	2.3651	4.292	10.0782		0.659192	9.94346
17.625	6.1713	12.5854	3.0966	2.647	1.642	2.2541	6.342	12.763	4.0438	4.902	4.6731	7.514	12.987	30.218	15.4808	19.6783	7.8309	10.4128	37.7273	2.4024	4.8683	10.8981		0.663677	10.0517
17.7441	5.8911	14.5728	2.2909	2.862	1.84	2.5475	5.428	13.148	4.8336	4.864	4.7392	6.345	14.927	34	17.7788	20.3677	7.8247	9.9994	38.4291	2.8703	4.4245	10.8667		0.668162	10.4932
17.8632	5.8767	13.9027	2.1082	3.393	1.987	2.3725	6.196	12.032	4.7782	4.76	4.0773	6.31	13.556	34.188	18.8666	21.2731	7.9196	10.0229	35.1965	2.5988	4.8211	10.5247		0.672646	10.3073
17.9823	6.2194	13.8984	2.2497	4.168	1.93	2.3282	5.34	11.674	4.1452	4.804	4.3828	5.982	16.363	36.218	20.7168	23.1406	8.3973	8.2906	38.4495	2.2917	6.2477	9.6422		0.677131	10.7672
18.1014	6.5814	13.5306	2.2448	3.25	2.285	2.5014	6.377	11.771	4.1017	4.796	4.4351	6.418	16.188	39.982	21.7796	23.3825	9.9816	9.4086	38.9315	2.156	5.556	12.7349		0.681616	11.2906
18.2204	6.6152	12.9931	2.882	3.288	2.263	3.1469	5.492	12.357	3.6546	4.405	4.4998	6.98	16.944	39.015	22.9707	21.5539	12.1496	9.1785	39.3629	1.8525	6.1111	13.2394		0.686097	11.407
18.3395	6.3807	12.6824	2.2666	4.661	2.304	3.2431	5.663	13.815	3.9097	4.483	3.6633	6.368	17.56	40.214	22.2464	18.4548	12.3122	7.9954	38.7896	2.4461	6.7009	11.6155		0.690582	11.2625
18.4586	6.249	13.7983	2.785	4.933	2.055	2.6289	5.817	12.178	3.7644	4.449	3.6631	5.059	17.481	39.321	20.8076	13.4642	9.7379	8.5165	40.8966	2.1415	6.5016	13.3804		0.695066	10.8922
18.5777	5.5483	13.1206	2.7222	4.062	2.012	4.0285	5.889	11.63	4.0051	4.763	4.2265	5.549	16.061	34.166	23.6345	9.7834	10.5488	9.8057	40.7033	2.015	6.3788	11.3788		0.699551	10.5469
18.6968	5.6351	15.9175	2.0066	4.322	1.919	3.5652	6.001	11.035	4.4161	4.97	4.1565	4.78	14.621	31.118	21.7183	9.1333	10.2473	9.5446	42.5815	2.2243	7.5388	11.5314		0.704036	10.4083
18.8159	6.3139	13.8389	2.2098	4.909	1.912	2.9057	7.115	12.516	4.2884	4.913	3.6618	4.732	14.25	30.148	20.4568	7.9773	10.2884	10.2155	45.8438	2.5552	8.9975	11.2648		0.708521	10.5142
18.935	6.1024	13.4042	2.5568	5.266	2.249	3.0809	6.058	12.922	4.327	4.406	3.7913	4.625	15.142	31.543	21.4787	7.5485	9.7002	8.9247	48.2202	2.3568	8.8047	11.2482		0.713005	10.6253
19.0541	6.3055	14.6664	2.6085	5.734	2.652	3.279	6.423	12.103	5.3371	4.098	3.5259	5.153	18.53	31.084	21.7478	8.3594	9.154	9.5321	48.9107	2.5211	7.978	11.3117		0.71749	10.9552
19.1731	5.6717	16.1547	3.0276	6.388	2.269	4.2938	5.8	11.369	4.5939	5.154	3.3337	5.111	16.623	31.124	20.3792	8.9603	8.9969	8.912	50.5732	2.4895	7.6009	14.0232		0.721971	11.0386
19.2922	5.968	14.8877	2.6534	6.563	3.305	4.1113	7.158	11.468	4.1133	3.776	3.35	5.199	15.769	36.107	16.3838	8.498	9.1458	10.0153	48.5617	2.1408	8.4683	13.4798		0.726456	10.9601
19.4113	5.6108	13.8846	2.0146	7.516	3.805	4.8058	6.873	10.265	3.888	4.745	4.3185	4.322	16.495	34.015	17.5028	8.6816	8.3156	8.8518	50.722	2.1488	8.4664	12.5669		0.730941	10.9006
19.5304	5.6079	12.812	2.0155	7.707	3.655	4.2145	8.378	11.428	3.1594	4.059	3.5252	4.594	15.458	34.207	13.9874	8.2183	8.7524	8.4858	50.8699	2.3703	7.9734	15.1649		0.735425	10.7565
19.6495	6.351	12.8967	2.7136	7.989	4.24	4.8817	7.824	11.118	4.1589	4.318	4.0174	5.052	14.89	37.684	13.3115	11.4253	8.5062	10.0672	49.8577	2.3707	7.4199	15.4089		0.73991	11.2046
19.7686	7.3159	12.4318	2.8586	8.214	4.741	5.7382	8.763	10.517	3.577	3.839	3.4353	4.855	14.518	36.201	11.4225	10.2066	8.4563	9.4406	45.1717	2.8099	7.5988	14.0283		0.744395	10.7336
19.8877	6.9566	12.4006	2.6687	9.048	5.653	7.0415	9.79	10.555	3.505	3.55	3.1577	4.143	12.109	34.339	8.7138	12.2822	8.6966	8.0508	45.4118	2.4096	7.8305	15.4478		0.74888	10.6255
20.0068	6.7418	12.8644	2.1174	10.28	7.608	8.2308	9.405	9.903	3.5507	4.182	2.7121	4.883	12.455	31.99	6.3871	14.7332	6.9336	9.0838	42.9168	2.614	8.0966	16.7643		0.753365	10.6569
20.1259	5.8079	13.6641	2.7521	11.975	7.398	8.8762	10.269	10.147	3.8284	3.609	3.0861	5.019	15.274	29.506	5.7089	13.709	5.2555	9.388	42.3055	3.6497	8.4394	19.1403		0.757849	10.8549
20.2449	5.9306	13.5632	3.1482	12.138	7.86	10.0928	10.505	9.809	4.2442	2.486	2.6629	3.939	13.394	28.589	4.9499	13.6041	4.1583	10.03	42.8416	3.2804	8.6322	17.3065		0.76233	10.5984
20.364	7.0496	13.4262	3.4415	15.574	10.304	13.3036	10.899	9.53	3.6491	3.268	2.4469	3.901	12.135	25.698	4.5755	12.206	4.7704	9.3611	38.7692	2.8095	8.5163	17.4292		0.766815	10.5938
20.4831	5.2247	15.1663	2.5871	19.475	11.712	15.7258	13.018	9.298	4.1902	3.464	2.6242	3.76	13.08	20.371	4.9498	12.9951	4.9119	8.8561	40.4727	2.6029	8.5522	18.4841		0.7713	10.9782
20.6022	5.2205	15.582	3.2014	25.47	12.456	17.2625	14.04	9.176	3.5074	2.509	2.6016	3.374	13.106	18.334	4.8891	13.2311	5.7394	8.5135	38.5245	2.4351	9.703	19.7952		0.775785	11.3032
20.7213	6.0961	15.5282	3.4895	31.304	15.468	20.9287	12.522	9.699	3.332	2.603	3.1533	3.776	12.992	16.387	4.8861	12.2114	7.6441	9.5085	35.2895	2.8776	10.2183	19.361		0.780269	11.7852
20.8404	5.4189	18.8782	3.7295	34.981	17.62	23.8987	11.653	8.442	3.34	3.062	2.4301	3.463	11.559	17.508	5.6312	9.4721	7.1865	9.7849	36.321	2.5769	11.0825	19.0002		0.784754	12.1381
20.9595	5.0773	17.8871	2.506	35.241	17.451	25.8126	12.561	8.538	3.5438	3.171	2.9462	4.3	10.795	18.657	5.7771	10.2899	7.3548	9.6177	35.5108	3.3349	11.4049	20.1269		0.789239	12.3593
21.0786	5.0027	17.854	3.7664	36.037	16.505	25.4245	15.353	8.037	3.8068	4.047	2.3623	3.595	11.499	17.363	6.1566	10.5904	6.6006	9.9447	39.9504	3.039	10.5344	17.5988		0.793724	12.5031
21.1976	5.7984	17.1388	3.116	33.712	13.913	25.1833	15.781	8.482	4.3986	2.783	2.3392	3.405	11.984	17.301	6.773	11.0634	6.2226	10.1307	42.0008	2.8721	11.6325	18.4377		0.798205	12.4758
21.3167	6.1334	17.512	3.5377	29.766	11.363	27.2746	16.196	7.474	3.3123	2.405	2.9427	3.607	11.464	16.279	8.1136	11.1464	6.9257	11.5672	43.0569	2.6728	12.6251	19.2996		0.802689	12.4852
21.4358	6.2631	18.7649	3.8783	21.488	8.724	23.2888	18.581	9.125	2.8366	2.343	2.8711	3.063	8.631	17.858	8.5785	12.3278	6.2903	10.2086	49.4715	2.8437	13.2472	18.216		0.807174	12.2227
21.5549	6.8276	18.9097	4.4525	14.764	5.804	18.9303	20.681	9.058	3.5741	2.358	2.9061	3.566	9.742	20.833	7.3989	15.4918	7.269	11.3706	52.0799	3.0757	14.3876	16.8778		0.811659	12.289
21.674	6.9923	17.5133	5.5015	11.899	4.499	16.1902	19.973	9.954	4.058	2.214	2.6569	3.021	10.768	23.75	9.1725	22.9399	7.5813	11.872	53.447	2.9645	14.5237	17.668		0.816144	12.689
21.7931	6.1077	20.4563	5.7339	8.293	3.259	12.4481	21.468	8.507	3.3582	2.5	3.0904	2.869	8.965	25.252	12.2222	29.122	7.8858	10.4834	56.179	2.4384	15.3471	16.9673		0.820628	12.8615
21.9122	7.1447	21.6117	6.3332	5.945	2.153	11.3102	22.802	7.451	4.2725	2.666	3.1894	3.257	8.255	25.221	11.9918	27.6473	6.6094	9.6384	57.7265	2.3948	14.3327	16.9649		0.825113	12.6781
22.0313	7.9728	24.8378	6.4783	3.588	2.485	11.1459	21.15	7.147	3.5219	2.654	3.3451	2.852	8.406	25.329	11.9888	23.527	7.1946	9.296	63.9759	3.027	15.9854	17.5959		0.829598	12.8865
22.1503	8.3018	25.6773	6.44	2.52	2.11	9.0106	21.817	8.833	4.2393	2.49	2.6208	3.411	8.01	26.101	11.5026	18.0801	8.5374	7.7132	64.6185	3.3554	17.8248	15.2927		0.834079	12.6594
22.2694	8.6147	23.4796	8.4641	2.399	1.819	7.644	22.146	9.469	4.2344	2.948	2.5354	3.142	7.406	22.762	13.0053	14.0629	6.7491	9.2707	66.452	3.4405	17.7001	14.1314		0.838564	12.358
22.3885	10.219	23.5222	9.4918	2.62	1.694	6.802	22.517	9.016	4.7178	3.608	3.4073	3.264	7.805	23.382	14.3882	11.2476	4.9969	9.8889	70.3065	3.3562	19.1307	15.2539		0.843048	12.7561
22.5076	11.1733	27.3151	9.6388	1.947	1.495	5.6053	22.964	10.168	5.6128	4.278	3.5443	3.438	8.695	22.633	14.5299	9.898	5.66	10.1372	72.9587	2.9078	18.6259	13.8855		0.847533	13.0505
22.6267	13.7574	30.5759	10.1085	2.282	1.11	5.0242	24.742	10.697	5.6619	3.814	3.2135	3.093	8.231	21.297	14.0793	9.4679	5.8582	8.6361	69.6449	3.0752	18.055	13.5271		0.852018	12.9978
22.7458	14.679	31.94	12.0761	2.025	1.36	4.4175	25.354	11.314	7.1226	3.576	3.1605	3.029	9.39	20.009	11.7656	9.2506	5.5114	9.6189	73.5878	3.6316	19.9065	15.0589		0.856503	13.5356
22.8649	17.3225	34.7601	12.5998	1.763	1.04	4.1356	25.188	13.685	11.1945	4.136	4.6589	2.939	8.555	18.054	12.9744	8.3601	5.0826	9.78	75.9113	3.4757	22.8428	14.4471		0.860987	14.223
22.984	21.7891	37.6255	15.6114	1.676	1.349	4.2437	23.364	15.802	12.2763	4.002	4.8998	2.645	10.038	19.592	14.8066	8.7012	5.6595	10.2584	74.88	3.6634	28.032	13.2688		0.865472	15.1902
23.103	24.1236	34.2535	15.7874	1.419	1.155	2.4463	22.429	17.927	15.6403	4.675	5.6578	2.828	10.12	18.349	16.2536	7.2898	4.9601	8.8866	70.9787	3.8592	28.7957	13.0727		0.869953	15.0412
23.2221	28.1475	38.0609	18.6334	1.077	1.136	2.0848	20.605	17.457	20.5414	5.823	7.5084	3.145	9.76	17.873	15.4974	7.5472	5.0459	8.4011	63.648	4.4289	30.7638	11.0955		0.874438	15.3764
23.3412	28.9652	41.0765	24.3269	1.135	0.892	2.7119	19.802	18.944	23.5949	7.428	8.7438	3.374	9.381	18.55	15.0774	7.1634	4.6961	8.5428	58.6773	3.7034	34.6571	10.7261		0.878923	16.0077
23.4603	30.6789	40.9137	27.4533	1.582	0.646	2.2351	16.778	21.65	23.6921	10.22	10.7826	3.779	9.814	20.358	12.6004	8.5992	4.0826	8.0526	49.9245	2.6381	34.7279	9.6846		0.883408	15.9497
23.5794	30.8405	48.2905	32.9172	1.222	0.511	2.1196	15.113	23.21	23.5193	16.354	12.5271	4.456	10.455	21.507	12.0187	7.4101	4.3809	7.8841	43.8956	4.1205	39.2776	8.428		0.887892	16.839
23.6985	34.6512	49.739	37.0023	0.931	0.649	1.8271	12.324	18.465	20.8886	22.551	13.2809	4.599	11.664	23.626	11.4787	6.5177	5.6393	8.4213	41.5316	4.6331	36.7058	8.6468		0.892377	17.0806
23.8176	38.9398	57.6307	39.4237	0.945	1.028	2.1211	10.402	17.782	17.9663	30.69	15.0548	5.448	14.597	22.16	11.7658	7.7634	5.1317	9.2527	35.6247	4.9905	37.9577	9.592		0.896862	18.0121
23.9367	41.7807	62.7662	39.9955	0.673	0.545	1.0488	10.647	15.882	13.689	32.597	20.811	6.68	18.584	22.646	10.758	6.4608	6.3981	8.9969	32.7635	4.4733	35.9453	7.6962		0.901347	18.2653
24.0558	47.9335	64.9964	40.7208	1.201	0.437	1.424	7.546	11.389	11.1877	30.364	23.8963	8.511	25.531	24.338	12.1938	6.2057	7.2703	7.0971	33.7999	4.9465	35.2584	6.988		0.905831	18.7834
24.1748	44.405	65.9243	32.0172	1.101	0.754	1.7279	6.576	9.618	9.1284	25.415	22.2295	9.321	34.982	24.142	11.5143	5.14	7.1517	6.8775	31.7868	4.3852	38.3014	8.0212		0.910312	18.2054
24.2939	45.2465	62.8748	24.8587	1.364	0.736	1.2399	5.733	7.756	6.3831	24.474	19.9382	13.164	41.084	25.321	11.3206	6.0306	8.8424	7.1913	33.5856	4.7255	43.3383	7.1839		0.914797	18.2905
24.413	39.2602	61.5563	18.72	1.316	0.538	0.9645	5.052	6.792	5.9865	16.331	13.6643	17.75	51.192	25.662	10.6745	6.0112	7.9084	8.0382	29.0273	5.0128	44.3511	8.0301		0.919282	17.4472
24.5321	30.0088	50.2428	15.2287	0.756	0.473	1.0184	3.464	5.416	4.3329	11.568	8.1678	22.813	52.08	27.445	10.8752	5.9236	6.9055	8.3669	28.1975	5.1505	42.6612	6.7708		0.923767	15.8121
24.6512	23.0478	38.8179	10.7334	0.787	0.445	1.1931	3.831	4.632	4.0575	8.92	6.4292	30.801	48.281	27.047	11.5567	6.3702	6.1763	10.3938	31.1045	4.6817	43.6302	7.1767		0.928251	15.0051
24.7703	16.8663	26.9605	8.0623	0.736	0.414	0.5264	3.5	5.008	3.6039	7.369	4.6987	37.807	35.23	28.167	11.6564	5.6422	4.9293	10.809	29.4486	5.2406	43.0392	6.1299		0.932736	13.4475
24.8894	13.591	20.2061	6.6152	0.618	0.211	0.5059	3.502	4.165	2.7154	6.467	3.4361	42.772	29.863	30.181	10.6643	5.2678	5.1456	9.6426	29.1985	6.8702	43.7477	6.3635		0.937221	12.8068
25.0085	10.0997	14.7887	5.3418	0.63	0.522	0.8841	2.974	3.84	2.041	5.495	2.8607	40.956	23.707	31.794	11.053	4.2942	5.7382	11.811	31.8167	6.671	44.5185	6.1599		0.941706	12.1817
25.1275	7.2888	9.7901	3.9262	0.648	0.44	0.7749	2.726	2.916	1.7723	4.967	2.3574	31.002	18.338	30.177	11.2657	5.2062	6.2952	13.4211	30.3742	6.6265	44.8003	5.5845		0.946187	10.9408
25.2466	5.3958	7.5785	4.0621	0.388	0.253	0.6822	2.328	3.2	1.8583	3.853	1.9593	22.839	13.968	30.957	8.7363	4.8231	6.8266	14.7355	30.4535	8.294	42.2133	5.7154		0.950671	10.0509
25.3657	4.5633	5.9528	2.3672	0.24	0.267	0.5772	2.166	3.058	2.0932	2.819	2.0788	14.799	9.91	32.081	8.1038	4.6857	5.8577	15.2212	32.0957	9.6663	39.6107	5.7836		0.955156	9.2726
25.4848	4.6328	4.7315	2.5124	0.446	0.378	0.2508	2.46	2.478	2.129	2.122	1.4926	8.88	8.617	32.126	8.6264	5.0515	6.3847	17.3773	34.7651	10.1152	41.0461	5.1896		0.959641	9.17327
25.6039	3.9232	3.7584	1.9514	0.513	0.287	0.5319	2.01	3.06	1.625	1.869	1.0115	7.841	6.239	31.06	8.3631	5.3306	8.1396	18.8231	36.6388	11.3364	36.917	5.3199		0.964126	8.93404
25.723	3.5896	3.2805	1.4607	0.371	0.191	0.2058	1.923	2.17	1.5874	2.01	1.4401	6.168	6.279	34.824	9.149	4.4875	9.474	20.3445	42.1851	13.2869	34.6014	5.9504		0.96861	9.31722
25.8421	2.9313	3.0765	1.7284	0.283	0.389	0.1827	1.767	1.432	1.5834	1.309	1.1366	5.473	4.619	36.015	9.0853	6.1017	9.5044	22.6495	49.2121	16.7571	33.2102	5.7656		0.973095	9.7369
25.9612	2.5221	2.3154	1.5072	0.153	0.26	0.1319	1.457	1.277	1.8902	1.012	1.3131	5.047	3.13	33.353	7.528	6.0513	9.8851	26.9607	57.0431	18.5308	27.1248	5.0841		0.97758	9.70804
26.0802	2.6886	2.4963	1.3767	0.186	0.192	0.224	1.448	1.258	1.8671	0.803	0.9794	3.335	3.051	35.35	7.5905	4.9922	10.5475	28.6334	57.2045	21.5127	27.6643	4.9916		0.982061	9.9269
26.1993	2.3604	1.7651	1.8588	0.32	0.26	0.3106	0.977	1.69	1.4906	1.023	0.9892	2.495	2.527	36.589	8.6963	4.479	12.1491	31.3976	68.9756	25.3562	29.4135	5.517		0.986546	10.9382
26.3184	1.7473	1.7065	1.2084	0.234	0.369	0.1104	1.172	1.516	1.312	1.02	1.4035	2.167	2.295	33.657	8.2982	4.9792	12.9218	32.4894	73.1918	30.5576	27.6303	5.174		0.99103	11.1437
26.4375	1.42	1.397	1.085	0.23	0.394	0.3196	1.542	1.601	0.8414	0.9	1.1178	2.009	1.598	32.535	8.8828	4.7517	12.6167	34.3542	82.6256	33.184	24.012	5.3156		0.995515	11.4878
26.5566	1.308	0.8437	1.7042	0.114	0.28	0.1927	0.832	0.977	0.6974	0.971	0.9016	1.537	1.094	37.045	9.8637	3.5757	13.2273	31.8711	89.6698	36.5755	26.2207	4.8028		1	12.0138

## Sheet: Image5
X0	Y0	Y1	Y2	Y3	Y4	Y5	Y6	Y7	Y8	Y9	Y10	Y11	Y12	Y13	Y14	Y15	Y16	Y17	Y18	Y19	Y20	Y21	Y22	Y23	Y24	Y25	Y26	Y27	Y28	Y29	Y30	Y31	Y32		Ap-basal	Avg int
0	20.729	61.965	14.081	38.319	16.415	21.759	26.765	8.331	21.626	15.176	24.111	18.71	30.625	42.633	29.833	18.648	33.571	20.327	21.439	21.718	43.761	37.808	39.917	35.093	25.202	32.874	22.387	44.822	37.906	22.954	59.76	107.749	79.829		0	33.2377
0.1191	25.018	82.104	15.582	45.81	19.232	22.196	31.011	9.616	27.058	19.414	29.809	22.622	34.673	45.52	32.172	19.064	33.545	19.431	25.531	24.228	57.986	45.713	43.703	35.311	25.358	32.639	25.631	52.468	41.417	25.174	68.649	103.197	105.904		0.00502563	37.7814
0.2382	25.948	93.552	20.04	49.382	24.034	29.577	34.702	12.255	33.613	26.002	31.825	25.637	39.032	45.994	40.336	19.783	37.292	23.093	28.621	25.796	57.264	56.149	49.95	37.851	27.298	33.26	23.468	63.976	50.935	25.983	71.481	97.844	130.289		0.0100513	42.1898
0.3573	29.681	105.649	20.721	55.692	30	31.188	40.424	15.149	42.361	27.501	38.918	30.113	43.488	44.99	51.143	22.1	42.911	25.675	32.318	30.736	66.426	67.931	47.592	39.242	32.229	36.283	28.974	73.467	60.134	28.102	78.856	90.142	153.404		0.0150769	47.38
0.4764	32.203	118.042	28.06	66.683	33.227	36.578	49.054	17.467	53.307	35.603	42.122	36.267	49.049	47.327	60.811	29.023	52.162	27.327	38.148	36.411	75.265	80.081	56.274	41.812	42.206	38.045	31.328	80.641	73.464	31.626	79.426	102.62	164.298		0.0201025	54.1199
0.5954	32.176	128.959	36.452	78.132	38.963	41.202	61.226	21.768	73.153	53.525	46.061	40.842	54.884	47.685	74.761	35.146	72.805	36.508	42.907	41.476	88.062	90.926	56.624	46.863	50.983	41.417	42.89	90.139	84.59	35.035	93.814	116.692	168.684		0.025124	62.5864
0.7145	38.071	145.578	43.732	85.747	48.894	52.8	70.043	27.568	80.527	82.195	55.82	50.431	64.868	48.685	81.042	45.359	91.483	47.387	45.342	51.169	99.007	97.666	53.6	49.17	69.105	45.753	57.016	99.499	102.25	41.727	101.912	132.733	167.383		0.0301496	71.9261
0.8336	38.341	158.106	56.461	96.949	56.414	62.635	87.316	31.343	96.837	119.183	59.966	58.979	79.982	54.365	100.323	50.696	112.767	62.127	48.937	60.357	130.146	97.829	54.998	56.851	72.545	53.599	79.3	101.923	115.179	53.783	117.391	152.651	166.863		0.0351752	83.1861
0.9527	45.913	168.907	72.388	111.891	69.444	78.867	102.476	40.093	104.775	154.092	71.729	73.951	95.606	62.858	119.915	65.823	137.665	95.53	55.072	77.16	146.485	103.542	56.121	60.706	79.201	56.696	92.653	114.397	127.881	62.351	139.842	167.812	166.11		0.0402009	96.3016
1.0718	51.941	175.838	89.926	129.145	81.713	99.557	129.821	48.134	111.489	186.064	89.336	85.457	110.784	64.803	140.733	86.285	159.447	143.878	67.464	91.934	163.058	105.747	59.308	65.206	90.631	62.952	113.676	117.596	127.696	71.717	159.603	171.918	154.487		0.0452265	109.313
1.1909	60.519	181.659	115.241	145.922	92.94	124.612	160.614	65.478	129.11	204.72	123.477	102.331	128.532	74.56	173.039	95.121	180.994	177.737	86.982	106.289	177.035	99.777	62.21	77.839	97.551	69.6	130.172	122.715	131.354	82.28	178.137	181.785	143.154		0.0502521	123.742
1.31	69.477	187.934	149.138	175.605	102.592	156.252	192.168	82.477	142.256	218.839	155.354	114.753	143.642	86.683	197.453	112.357	199.31	202.425	109.689	125.342	186.511	106.092	67.654	93.19	107.263	83.821	144.258	122.85	135.831	88.224	190.781	186.422	134.892		0.0552778	138.531
1.4291	81.025	190.583	164.423	204.628	118.101	179.758	214.671	94.986	149.29	224.786	176.372	121.561	176.702	99.729	216.851	127.698	202.438	217.389	139.399	136.573	193.482	107.644	71.321	104.767	123.26	95.442	163.265	127.66	133.807	90.125	200.952	193.246	123.028		0.0603034	150.453
1.5481	101.244	194.056	190.677	224.831	127.95	202.067	238.799	110.549	160.138	214.749	196.206	128.905	189.4	106.062	232.568	140.875	209.402	231.57	154.756	153.005	188.971	111.716	81.195	124.579	142.247	116.394	167.725	127.923	133.944	87.096	201.634	193.235	107.716		0.0653248	160.369
1.6672	111.158	197.025	205.616	239.564	141.507	214.961	236.497	127.181	165.723	198.907	206.605	142.612	198.932	122.623	232.415	157.33	210.113	241.06	170.712	168.447	184.051	104.692	82.151	137.995	148.299	142.862	158.075	129.641	135.526	89.033	195.553	196.222	100.65		0.0703504	166.477
1.7863	133.942	199.804	222.215	243.075	146.307	227.157	238.171	146.436	176.821	175.66	216.679	159.793	200.988	126.789	233.906	166.612	202.667	243.629	189.832	168.049	173.07	94.792	91.248	143.214	164.043	165.799	144.726	125.349	140.379	86.523	194.995	187.651	92.181		0.0753761	170.379
1.9054	146.887	211.989	223.796	243.784	163.596	224.141	221.21	162.196	191.142	140.731	218.828	177.243	192.536	140.984	229.218	179.579	182.168	247.453	197.159	175.07	154.988	94.71	99.052	143.528	175.26	188.802	129.023	128.055	146.398	79.213	191.176	184.002	82.07		0.0804017	171.697
2.0245	153.698	217.158	228.57	237.714	185.456	216.288	192.131	163.184	193.308	110.444	214.145	196.857	174.595	157.06	203.879	194.532	158.954	243.111	189.296	169.776	137.011	88.454	106.746	137.371	183.519	204.756	110.145	136.688	145.273	77.448	187.262	174.325	74.349		0.0854273	168.591
2.1436	166.644	223.997	234.253	224.512	208.164	184.278	161.368	173.205	193.442	90.349	207.303	214.717	159.752	169.44	159.477	201.846	142.147	237.708	169.444	154.621	113.664	80.407	105.766	128.138	189.64	217.099	95.36	140.83	154.024	87.595	179.242	158.065	63.096		0.090453	163.321
2.2627	171.171	236.223	241.577	206.888	232.195	153.606	135.921	167.355	184.541	84.28	198.92	215.097	133.671	180.876	115.312	213.455	116.342	214.98	145.274	144.434	90.702	79.665	107.204	110.902	177.944	223.004	70.593	148.358	148.383	89.69	167.387	134.379	48.747		0.0954786	154.214
2.3818	189.065	238.673	245.529	186.539	240.852	126.898	117.465	156.928	163.395	72.743	176.64	219.959	103.88	189.626	72.5	223.393	96.56	198.115	128.006	121.867	59.725	75.316	94.915	96	174.881	208.204	52.195	149.67	138.783	95.955	157.423	113.168	39.265		0.100504	143.156
2.5008	189.608	236.708	245.141	152.629	240.834	103.889	104.376	151.683	145.595	67.835	160.196	206.322	77.324	195.668	52.613	228.52	81.249	158.203	103.104	87.293	41.399	75.038	98.256	73.379	173.285	176.515	40.138	148.797	138.173	101.566	139.533	82.168	28.264		0.105526	130.464
2.6199	191.766	226.35	240.26	134.231	235.66	85.821	92.381	146.798	121.503	61.849	131.67	203.586	59.064	189.191	41.161	226.611	58.861	117.644	81.726	65.657	29.805	66.988	99.375	59.939	158.153	143.429	36.013	131.545	131.254	119.349	113.643	66.135	23.115		0.110551	117.895
2.739	185.5	202.366	238.083	111.589	224.65	81.487	90.92	140.539	95.351	51.502	102.855	172.22	44.054	170.789	30.109	218.617	44.55	84.653	60.298	50.614	22.724	73.674	98.083	51.25	151.913	109.599	26.429	118.33	123.784	112.663	85.912	47.132	15.49		0.115577	104.174
2.8581	181.809	170.716	225.6	89.686	210.078	71.304	92.239	132.173	77.127	48.218	74.443	137.792	35.719	144.429	25.331	208.099	34.895	58.875	42.906	39.409	17.406	71.726	95.19	42.727	136.061	84.016	28.58	99.948	105.18	109.329	68.994	32.255	11.534		0.120603	91.0241
2.9772	169.921	122.495	203.576	74.606	194.09	68.34	87.288	125.017	61.271	43.353	52.013	96.794	29.808	123.642	19.616	176.006	30.061	43.227	32.51	31.341	15.547	76.974	98.916	36.799	105.437	54.005	26.7	80.86	93.543	109.44	46.071	22.234	7.656		0.125628	77.5502
3.0963	147.492	88.264	174.199	60.112	171.357	64.585	87.901	125.776	49.494	36.478	37.274	62.19	26.122	93.854	18.088	143.66	24.32	32.372	23.157	24.279	13.542	81.387	97.829	29.446	81.266	35.614	21.918	64.389	78.515	102.92	36.477	14.616	6.698		0.130654	65.3209
3.2154	111.709	63.282	148.074	56.357	159.599	69.013	90.871	119.799	39.994	30.618	25.457	39.364	22.652	78.333	15.576	107.153	18.443	21.464	19.835	18.134	14.967	89.485	95.805	24.249	52.062	21.733	20.283	51.927	62.904	95.857	27.536	11.783	5.739		0.135679	55.4563
3.3345	89.742	47.131	118.83	47.428	146.108	65.227	86.473	118.922	32.462	29.69	21.069	29.648	21.062	70.218	12.654	88.424	14.109	19.069	18.079	16.068	15.08	101.233	88.951	18.996	30.481	14.839	16.315	33.381	48.188	91.858	19.823	9.035	4.605		0.140705	48.0363
3.4535	74.044	30.919	85.594	44.48	130.104	60.398	85.255	115.752	29.749	26.095	17.321	21.171	16.168	57.924	11.865	73.631	11.006	15.71	13.488	18.366	11.695	100.998	84.508	15.492	18.627	9.765	13.808	26.528	41.808	78.036	19.185	8.466	3.125		0.145727	41.5479
3.5726	55.953	27.457	59.36	41.332	119.611	60.983	83.406	115.625	23.173	24.631	16.419	19.078	16.141	50.196	9.647	61.925	9.195	11.943	11.862	17.996	12.422	106.15	68.501	13.109	10.699	6.801	12.309	22.047	33.268	65.051	14.784	6.195	4.385		0.150752	36.7168
3.6917	49.539	21.745	42.324	40.258	99.268	60.085	79.502	117.676	20.656	25.145	15.276	15.819	15.467	44.863	9.674	54.299	7.384	9.94	10.153	17.529	8.475	110.985	56.143	13.813	8.831	4.233	12.384	20.246	30.135	57.765	12.247	7.803	2.725		0.155778	33.4057
3.8108	45.55	18.906	28.633	35.627	83.505	54.429	75.843	117.965	21.723	24.018	15.97	11.132	16.781	43.986	8.647	45.654	6.115	7.126	9.783	16.714	9.33	110.829	43.148	13.037	7.332	3.86	11.554	17.237	26.551	42.748	10.828	5.384	2.6		0.160803	30.0771
3.9299	43.409	17.403	21.435	31.992	66.866	52.218	72.753	122.008	16.99	19.801	20.542	9.276	14.329	41.678	6.955	34.844	6.045	7.041	8.768	13.223	8.688	104.534	26.136	13.293	5.788	4.161	11.485	17.357	21.728	34.211	9.326	4.862	2.231		0.165829	27.0114
4.049	34.463	15.987	16.913	31.744	53.89	49.06	66.652	122.805	15.246	19.265	20.462	8.368	11.261	43.226	6.06	24.198	5.57	5.111	7.196	12.702	6.787	95.63	19.121	11.707	4.265	3.187	11.062	14.292	18.543	23.014	9.314	6.213	2.83		0.170855	24.1256
4.1681	33.659	15.35	13.052	32.727	45.017	49.012	64.844	116.292	13.778	15.79	18.221	7.497	12.537	42.759	7.424	22.422	5.58	5.018	7.233	11.904	5.948	85.287	13.758	12.19	4.353	3.335	10.245	13.397	17.083	21.641	9.063	5.67	2.635		0.17588	22.5673
4.2872	33.614	14.975	11.761	27.977	40.146	46.796	60.365	117.223	11.836	11.747	22.847	5.764	12.596	41.564	6.347	18.963	4.43	5.219	7.459	11.156	5.78	71.807	12.781	9.909	4.343	3.446	9.4	11.88	13.547	22.199	9.143	5.433	2.907		0.180906	21.0715
4.4063	31.643	13.973	8.8	25.203	33.172	39.707	58.759	114.518	14.654	12.035	18.814	5.153	13.197	42.722	5.234	14.728	5.862	4.694	5.627	12.288	6.157	55.173	12.019	9.829	3.624	2.972	7.618	14.1	13.78	21.31	10.061	5.42	2.205		0.185932	19.547
4.5253	30.698	10.647	7.19	23.007	29.559	39.884	54.237	110.876	13.691	10.615	19.184	5.05	12.718	38.841	4.214	13.468	4.702	4.117	4.595	11.479	5.644	40.692	12.226	7.957	3.925	2.771	7.371	11.992	10.784	18.529	9.819	5.221	2.928		0.190953	17.8373
4.6444	25.98	7.883	6.58	22.583	26.323	34.878	45.861	102.892	13.992	9.165	18.43	5.904	11.509	36.217	3.94	9.755	4.175	3.763	4.58	11.572	6.686	33.708	12.56	8.339	4.173	2.248	6.33	11.826	10.436	17.298	9.971	4.613	2.706		0.195979	16.269
4.7635	25.663	7.608	6.129	19.956	24.301	32.166	38.882	99.305	16.518	10.758	15.006	4.1	11.092	29.01	3.285	8.268	4.975	2.734	5.388	11.823	5.806	26.249	10.605	7.671	4.178	2.436	6.118	11.217	7.696	16.337	10.501	4.384	2.403		0.201004	14.9263
4.8826	25.393	6.497	5.796	18.9	26.69	28.071	34.96	100.14	16.903	10.949	11.958	4.451	9.271	26.981	3.001	7.595	4.737	3.245	5.596	14.022	5.739	21.872	11.546	8.252	3.755	1.79	6.948	10.41	6.561	15.532	8.714	3.894	3.07		0.20603	14.3406
5.0017	23.736	6.984	6.034	17.029	23.064	23.991	30.21	93.597	15.439	10.605	12.563	4.847	10.669	28.757	3.915	6.332	4.592	3.254	4.629	11.821	4.521	21.933	9.957	6.604	3.76	2.484	5.95	8.616	7.913	13.054	10.599	4.055	2.441		0.211056	13.4532
5.1208	22.809	6.627	4.922	16.396	23.32	19.659	27.269	83.964	14.068	8.671	11.415	3.957	12.324	25.541	3.496	7.599	4.609	3.041	4.098	11.293	5.872	20.032	8.43	7.392	4.017	2.399	6.828	7.997	7.281	11.782	11.228	4.037	2.058		0.216081	12.5585
5.2399	20.609	7.729	4.816	17.189	19.414	17.003	23.199	73.548	15.65	9.404	10.963	4.352	9.693	22.787	3.024	6.5	5.011	2.923	3.327	11.463	6.209	15.24	8.163	7.03	3.239	2.15	7.342	7.583	8.59	9.113	9.44	3.507	2.306		0.221107	11.4702
5.359	16.367	7.497	4.734	16.575	18.769	14.833	18.439	65.495	13.45	9.632	8.914	3.374	10.265	23.097	2.628	6.367	4.781	2.017	3.592	10.893	5.647	12.24	6.447	6.26	2.807	2.159	6.798	6.533	9.998	8.527	9.344	4.204	2.1		0.226132	10.448
5.478	16.501	8.592	4.12	16.008	16.894	11.698	18.126	54.094	10.758	10.853	7.671	3.57	11.447	23.623	2.652	7.386	3.783	2.849	3.181	9.867	5.609	11.481	6.224	5.512	3.082	2.452	5.151	6.7	8.125	7.677	9.049	4.118	1.74		0.231154	9.71494
5.5971	15.747	12.182	4.284	17.846	16.027	9.738	19.12	55.379	13.533	9.511	7.037	4.292	11.509	19.854	3.528	5.885	3.266	2.756	3.634	9.728	4.707	11.134	5.498	5.477	3.443	2.359	4.777	7.081	8.526	6.749	7.679	4.088	3.023		0.23618	9.6787
5.7162	17.297	13.853	4.15	17.053	15.125	8.577	18.184	43.553	12.027	10.022	6.304	4.121	12.994	18.461	3.584	5.559	4.041	2.623	4.435	9.81	6.322	8.533	5.79	6.691	2.984	2.29	5.138	5.363	8.123	5.459	8.36	3.779	3.112		0.241205	9.20355
5.8353	16.85	11.726	3.465	18.087	11.942	7.595	18.332	38.941	11.184	11.638	5.557	3.394	14.124	15.106	3.357	5.636	4.23	2.101	3.398	11.577	5.155	10.6	4.295	7.287	2.215	1.5	4.356	5.348	7.471	5.281	7.995	3.191	3.148		0.246231	8.66915
5.9544	14.075	10.994	4.298	15.201	9.149	7.644	16.849	32.713	11.774	10.458	5.995	3.938	14.232	13.884	2.567	4.932	4.274	2.025	3.329	11.838	4.538	8.96	4.969	6.129	2.919	2.107	4.257	5.324	9.99	6.13	6.724	3.652	2.298		0.251256	8.12624
6.0735	13.768	11.95	4.556	16.432	7.766	7.299	14.346	29.368	12.553	9.802	6.738	4.097	13.485	14.451	2.785	4.936	4.409	2.159	4.135	11.799	5.146	8.242	5.969	6.725	2.843	1.835	4.165	5.443	10.454	4.935	6.448	3.458	3.231		0.256282	8.05236
6.1926	13.867	12.574	4.335	17.13	8.346	6.519	14.855	23.285	13.526	10.094	6.848	3.477	16.025	12.868	2.39	5.418	5.583	1.655	3.928	12.427	5.602	7.069	4.953	6.203	2.729	2.857	4.095	7.113	8.958	4.66	5.66	4.072	2.585		0.261308	7.93048
6.3117	11.305	9.263	3.919	15.683	6.727	6.786	15.565	18.464	12.378	10.895	7.029	3.282	16.473	9.872	2.443	5.554	5.558	2.003	3.487	10.092	6.317	7.651	4.869	6.904	2.728	2.853	3.581	7.404	9.003	3.094	5.682	4.239	3.123		0.266333	7.40079
6.4307	11.403	10.18	3.342	18.156	7.188	6.781	14.241	14.564	15.737	12.16	7.353	2.766	17.605	10.815	2.768	4.501	6.383	2.579	3.588	11.81	7.066	7.782	5.047	6.564	3.779	2.754	3.9	9.05	7.463	3.31	6.684	4.264	3.418		0.271355	7.7273
6.5498	11.263	10.451	3.944	18.795	5.113	6.838	15.342	14	14.256	13.299	7.591	3.107	16.762	8.871	2.908	5.415	6.943	1.72	4.283	11.586	5.433	6.862	4.833	5.676	2.861	1.772	3.73	10.632	6.559	3.687	5.801	4.127	4.082		0.27638	7.53158
6.6689	8.572	8.9	3.726	19.098	5.998	5.987	13.745	9.738	16.332	12.455	8.326	3.318	14.631	8.744	3.025	4.813	6.099	1.721	4.509	10.648	5.213	7.556	6.114	5.16	2.495	1.863	3.489	10.681	7.16	3.322	5.4	4.465	4.768		0.281406	7.21427
6.788	8.702	10.26	3.73	19.863	5.947	5.525	14.581	7.835	15.113	12.115	8.266	3.58	15.29	8.549	2.842	3.682	5.847	1.943	4.257	11.627	5.808	7.227	5.702	5.033	2.445	1.636	3.591	12.225	6.275	3.145	5.943	3.803	4.1		0.286432	7.16627
6.9071	9.789	9.956	4.081	19.283	4.655	6.604	13.212	10.238	14.497	14.693	7.937	2.951	14.797	6.967	2.649	4.649	6.447	1.629	4.916	11.548	6.129	7.385	5.788	6.879	2.156	1.558	5.102	11.135	6.301	3.108	5.455	3.488	4.141		0.291457	7.27645
7.0262	10.56	10.327	3.988	19.69	5.109	5.662	10.318	8.49	14.158	14.443	7.425	4.173	14.575	7.126	2.703	3.923	6.307	2.031	4.263	11.006	7.139	7.075	6.111	6.698	1.926	1.958	4.314	14.281	6.959	2.532	4.869	3.771	4.474		0.296483	7.22376
7.1453	9.372	10.037	3.58	19.08	5.526	5.399	13.055	8.2	12.801	15.188	8.505	3.416	16.316	7.211	2.672	4.426	6.003	2.298	5.075	9.616	6.306	6.998	7.172	6.387	2.145	2.09	3.033	15.402	6.974	3.027	6.434	3.903	5.179		0.301509	7.35836
7.2644	8.679	9.739	4.011	22.513	5.167	6.387	13.201	8.968	12.071	14.722	8.284	3.457	16.786	7.444	2.826	4.327	6.22	1.719	4.546	9.336	5.952	7.107	8.254	5.829	1.621	1.701	3.017	17.374	6.419	2	5.727	3.497	4.739		0.306534	7.38303
7.3834	10.205	8.746	3.674	21.764	4.708	5.922	16.19	8.709	12.291	14.914	9.039	3.356	13.173	7.65	3.225	5.033	6.563	1.945	3.99	8.04	5.55	6.686	8.686	5.742	2.203	1.938	3.428	21.931	6.261	2.652	4.94	3.671	4.122		0.311556	7.48324
7.5025	7.42	9.816	3.882	22.14	5.349	6.973	15.541	7.521	11.152	15.467	8.634	3.118	15.695	6.078	2.432	5.359	5.838	1.574	5.629	7.824	5.667	7.97	8.621	4.796	2.183	2.158	3.742	20.652	6.174	3.159	4.655	3.327	4.561		0.316581	7.42748
7.6216	8.215	9.223	4.872	21.399	5.28	6.434	16.187	8.903	13.169	14.286	10.078	3.037	15.115	5.496	2.292	5.284	5.826	1.914	4.775	8.96	5.39	8.031	9.736	4.875	1.987	1.987	2.494	21.367	6.58	3.068	5.092	3.172	4.977		0.321607	7.56064
7.7407	7.836	9.62	3.655	21.97	4.891	4.767	15.626	10.338	10.703	14.618	9.427	2.886	14.288	7.236	2.043	4.989	5.399	1.722	5.021	9.06	6.11	7.905	10.928	6.142	1.958	1.859	3.449	21.674	7.246	2.565	4.8	3.754	4.284		0.326632	7.53845
7.8598	8.041	10.214	4.206	20.184	5.317	5.661	14.227	7.34	10.507	14.089	10.241	2.951	15.7	6.237	1.993	4.815	5.24	2.092	4.581	9.363	7.522	8.924	11.062	5.079	2.015	2.04	3.676	19.978	6.417	2.513	4.601	3.479	4.163		0.331658	7.40812
7.9789	7.752	8.747	3.847	20.951	5.34	6.471	17.294	8.222	10.675	17.229	12.647	2.963	15.07	6.099	3.544	4.554	4.546	1.818	5.529	8.442	6.375	8.839	8.562	4.564	2.237	2.173	3.164	17.013	5.527	2.273	4.392	3.272	4.09		0.336684	7.40064
8.098	8.728	8.543	3.388	19.697	5.188	6.79	16.036	8.753	13.264	16.08	14.378	3.111	13.659	5.217	2.576	4.193	5.76	1.963	5.055	8.815	6.74	8.624	11.318	4.585	2.266	2.614	3.541	17.127	5.245	2.907	5.099	3.068	3.57		0.341709	7.51206
8.2171	7.554	8.558	3.719	18.254	6.643	7.534	19.305	7.185	12.956	17.637	14.17	3.379	15.169	4.707	2.752	5.263	6.337	2.064	5.053	10.36	4.905	8.049	10.489	4.001	2.511	2.771	3.651	18.551	4.291	1.989	3.355	2.839	4.975		0.346735	7.60533
8.3362	7.971	9.063	4.388	19.942	6.993	7.012	19.663	7.017	12.392	17.603	12.801	3.049	15.445	6.269	2.291	3.968	7.099	2.136	5.661	10.217	4.828	9.184	8.781	3.682	2.167	2.612	3.541	18.021	3.367	2.175	3.606	3.127	3.871		0.351761	7.574
8.4552	6.233	11.314	2.97	17.982	7.651	7.176	18.882	6.736	13.546	19.465	12.464	3.043	13.818	6.028	2.401	4.005	6.458	1.869	4.483	9.212	4.573	8.762	8.294	3.882	2.238	2.085	3.116	16.569	4.009	2.026	2.949	3.565	3.14		0.356782	7.30133
8.5743	6.995	12.276	3.811	16.511	6.835	8.067	23.202	6.805	14.326	18.66	10.981	2.853	14.049	4.568	2.414	3.704	7.476	2.069	4.101	8.409	4.743	9.303	7.58	4.319	2.327	1.549	2.836	16.002	3.482	2.265	4.215	3.213	3.993		0.361808	7.39209
8.6934	5.546	13.016	4.016	15.468	6.465	9.048	20.491	5.889	11.325	20.104	11.129	3.253	13.395	4.047	2.517	4.034	7.681	1.753	3.588	9.642	3.463	8.953	7.19	4.271	2.569	1.741	3.235	15.598	3.372	2.361	4.324	3.438	3.058		0.366833	7.15091
8.8125	6.204	13.523	4.4	16.663	7.586	8.492	21.731	8.391	13.134	21.085	9.942	3.46	11.951	4.321	1.97	4.211	6.247	1.889	3.641	9.003	4.489	8.398	7.523	4.367	2.911	1.867	3.011	13.846	4.006	2.197	3.895	2.639	2.301		0.371859	7.25133
8.9316	6.271	13.739	4.191	15.564	9.737	9.022	20.851	7.811	11.049	21.37	7.03	3.016	14.505	3.051	2.695	4.417	6.389	2.131	5.023	6.332	3.767	9.037	6.552	3.515	2.268	1.739	3.029	13.112	2.967	2.206	3.414	3.183	2.961		0.376885	7.02861
9.0507	4.943	13.353	3.559	15.436	9.878	10.153	20.618	7.958	11.416	19.996	7.601	3.133	14.942	4.296	2.509	3.836	8.843	2.095	4.582	7.679	3.178	7.79	7.143	4.063	1.697	1.663	3.101	11.23	2.816	2.249	3.889	2.486	2.372		0.38191	6.98494
9.1698	6.288	14.145	2.952	14.817	9.083	10.582	21.496	6.291	11.436	20.52	8.892	3.166	13.558	4.181	2.091	3.431	8.354	2.171	4.459	7.752	3.214	7.451	7.353	4.562	1.788	2.524	3.029	11.068	3.158	2.027	3.14	3.755	2.343		0.386936	7.00233
9.2889	5.523	12.456	2.896	12.674	9.599	13.53	19.637	7.412	10.858	19.903	7.667	3.295	13.929	3.998	2.282	4.068	7.954	1.96	4.032	9.356	2.893	5.98	6.933	3.871	2.974	1.903	3.129	9.611	2.397	2.194	3.742	3.462	2.715		0.391962	6.81312
9.4079	5.316	14.088	3.405	14.279	11.94	15.337	19.096	6.941	11.687	23.6	9.225	4.06	15.005	3.67	2.095	3.727	7.227	1.982	5.308	9.721	3.305	6.637	7.105	4.011	2.699	2.05	3.679	8.454	2.568	2.323	2.705	2.56	2.383		0.396983	7.21782
9.527	5.707	13.604	4.128	13.939	13.073	14.71	22.972	6.889	10.462	23.559	7.991	3.5	15.438	3.505	2.052	3.591	7.648	1.854	5.711	7.582	3.11	7.519	7.288	3.635	2.435	1.641	2.384	8.68	2.483	1.788	2.97	2.026	2.916		0.402009	7.17545
9.6461	4.742	16.087	4.629	14.273	13.438	13.407	21.305	7.162	9.506	23.625	8.254	4.305	15.374	3.794	2.895	3.302	8.171	1.359	5.976	8.04	2.414	8.576	8.498	3.951	2.166	2.237	2.946	6.709	2.01	1.309	2.715	3.792	1.919		0.407034	7.23897
9.7652	5.585	17.227	4.21	15.105	17.05	12.231	19.616	6.243	10.219	24.537	9.329	3.82	15.646	2.496	3.14	3.836	7.725	2.18	5.089	7.572	2.208	7.934	9.073	3.129	1.996	2.033	1.999	6.348	1.918	1.929	2.013	2.942	3.069		0.41206	7.25597
9.8843	5.16	16.542	4.274	13.559	16.646	10.688	19.858	7.018	10.308	25.349	9.11	4.261	17.402	4.04	2.716	3.662	8.977	2.029	4.79	9.346	2.365	7.641	9.375	3.725	2.344	1.729	2.14	7.281	2.192	1.879	2.501	2.047	3.443		0.417085	7.40597
10.0034	5.45	16.518	3.824	13.191	17.581	9.599	18.46	6.283	10.353	25.962	9.544	3.739	17.632	3.48	2.308	3.707	7.93	1.982	5.1	9.553	2.639	8.429	7.91	3.362	2.118	1.527	2.478	7.271	1.819	1.866	2.383	1.974	2.955		0.422111	7.24021
10.1225	5.523	16.571	3.469	11.225	18.556	8.942	20.183	5.905	10.054	26.031	10.018	4.745	16.642	3.713	3.086	4.777	8.489	1.437	4.041	9.513	2.025	8.727	6.996	3.088	2.547	1.907	1.892	9.346	1.99	2.101	2.425	2.204	2.651		0.427137	7.29755
10.2416	5.068	17.148	3.51	10.066	17.757	9.715	17.89	6.69	10.825	27.796	8.363	4.485	19.874	3.71	2.701	3.487	7.995	1.451	4.461	8.882	2.394	7.626	8.552	3.151	1.623	1.694	3.107	9.381	1.969	1.748	2.954	1.87	3.252		0.432162	7.30894
10.3606	5.07	18.715	3.885	8.48	17.114	10.452	18.246	6.93	11.231	27.201	10.479	4.498	21.172	3.709	2.389	3.402	8.681	1.807	4.026	8.831	2.299	9.149	9.243	2.576	1.607	1.936	2.401	8.687	1.599	1.97	2.221	2.414	3.062		0.437184	7.43885
10.4797	4.866	20.034	3.844	9.84	20.142	11.617	20.541	6.592	11.186	26.003	9.701	3.745	23.328	3.862	2.918	3.263	9.361	1.48	4.079	7.863	3.158	9.827	8.239	2.381	1.683	2.889	1.952	7.972	1.978	1.878	2.877	2.529	3.117		0.442209	7.71955
10.5988	5.591	20.997	4.165	9.626	15.093	12.436	20.659	6.829	11.882	24.524	8.782	3.974	23.095	4.091	2.637	3.357	8.727	1.865	5.337	7.731	2.561	10.283	10.758	2.956	1.915	2.177	2.128	7.293	1.778	2.116	2.76	2.681	2.719		0.447235	7.68252
10.7179	4.158	22.397	3.805	8.779	14.007	13.374	22.597	7.407	12.054	23.672	8.756	3.002	22.076	3.772	3.393	4.146	8.354	2.154	4.166	7.792	2.283	11.719	11.781	2.649	1.82	2.512	2.519	9.131	2.044	1.91	2.858	2.614	2.55		0.452261	7.76518
10.837	4.746	25.874	3.344	9.76	15.024	12.749	20.849	7.384	11.759	23.49	9.866	4.256	22.679	2.729	2.318	4.061	9.664	1.559	5.349	7.062	2.199	10.945	12.106	3.307	1.394	1.296	1.784	10.989	1.942	2.182	1.985	2.554	2.89		0.457286	7.88167
10.9561	4.553	26.397	4.868	8.873	15.028	16.425	21.798	8.323	10.684	18.323	10.733	4.925	23.301	3.173	2.911	3.576	8.677	1.58	5.179	8.212	2.159	11.23	11.552	2.771	2.009	1.883	1.714	11.656	1.285	1.417	1.916	1.911	3.866		0.462312	7.96691
11.0752	5.153	26.814	3.791	10.763	15.456	15.284	20.353	7.042	12.014	17.19	8.859	4.256	21.934	3.3	2.487	3.058	8.12	1.969	5.875	7.097	1.993	10.124	9.241	2.823	2.259	1.604	2.47	10.334	1.099	1.509	2.274	2.059	3.633		0.467338	7.64355
11.1943	5.091	27.608	4.266	6.8	16.739	15.378	21.226	6.806	11.445	15.236	9.962	4.373	22.955	2.566	2.573	3.696	8.245	1.929	5.06	6.695	3.224	9.811	11.421	2.269	1.702	1.192	2.082	10.873	1.562	1.508	2.575	2.031	3.613		0.472363	7.65188
11.3133	4.408	29.266	4.436	6.182	18.913	15.557	21.808	6.849	12.897	14.678	9.31	5.185	23.863	3.318	2.626	3.419	6.857	2.424	4.772	5.541	2.276	10.112	11.705	2.669	1.582	1.785	2.078	12.478	1.454	1.052	2.576	1.776	3.188		0.477385	7.78909
11.4324	3.78	30.888	4.6	7.008	19.948	17.553	22.433	7.442	11.341	12.741	9.977	4.47	21.131	2.703	2.881	3.541	7.228	1.963	5.627	5.864	1.899	10.439	11.617	2.797	1.625	1.257	2.289	10.063	1.603	1.496	2.357	2.2	3.647		0.48241	7.76994
11.5515	4.832	29.185	3.768	7.835	23.775	16.545	21.706	7.5	13.097	12.908	11.553	5.28	22.854	3.165	1.976	3.768	7.44	1.848	6.108	5.449	2.248	8.728	11.317	2.805	1.784	1.482	2.339	10.728	1.693	1.512	2.254	2.21	3.862		0.487436	7.98648
11.6706	4.098	30.147	3.747	6.651	28.863	20.129	20.583	6.982	11.281	10.881	12.896	5.296	22.289	3.144	2.24	3.266	7.692	2.057	4.817	5.371	2.2	7.74	12.204	2.468	2.063	1.15	2.142	8.831	1.522	1.468	2.272	1.452	3.831		0.492462	7.93252
11.7897	4.889	29.956	3.99	7.195	29.607	20.039	20.464	6.336	9.93	12.215	12.255	4.675	21.305	3.07	3.297	4	7.41	1.597	4.811	5.139	1.935	6.282	11.989	2.901	1.929	1.853	1.976	8.527	1.834	1.098	2.454	1.708	3.434		0.497487	7.88182
11.9088	5.353	29.782	5.006	6.216	32.559	21.203	19.245	7.416	10.12	12.295	14.016	4.774	21.964	2.854	2.85	3.119	6.287	1.659	5.234	5.049	1.794	5.683	10.491	2.726	1.347	1.177	1.677	8.029	1.697	1.027	2.687	1.8	3.589		0.502513	7.90076
12.0279	5.931	27.948	3.661	6.299	34.124	21.234	20.27	7.867	10.624	10.984	11.938	5.098	19.777	2.844	2.699	3.191	7.471	1.443	5.247	5.727	1.499	5.926	10.644	2.649	1.271	1.965	2.475	7.385	1.21	1.038	2.708	1.795	4.617		0.507538	7.86542
12.147	5.345	28.662	3.808	5.714	33.176	23.922	19.753	7.971	10.952	9.885	11.343	3.805	18.027	3.078	1.858	4.166	7.44	1.777	5.658	4.366	1.792	4.772	11.541	2.388	1.424	1.721	2.351	6.43	1.845	1.154	2.579	1.653	3.879		0.512564	7.70409
12.2661	4.285	32.223	4.011	5.922	32.143	24.126	20.38	7.289	12.195	10.771	12.119	4.462	19.139	3.202	2.092	3.387	7.014	2.105	6.024	4.436	2.472	3.655	8.331	2.464	1.245	1.671	2.08	4.767	1.279	1.668	1.947	2.171	3.533		0.51759	7.71539
12.3851	3.733	32.893	4.285	6.054	31.292	21.218	19.063	7.509	11.693	10.074	12.976	4.323	19.015	2.674	2.184	3.578	6.844	1.632	5.164	5	2.139	3.369	8.655	3.75	1.213	1.458	1.267	5.113	0.945	1.749	2.171	1.442	3.051		0.522611	7.50079
12.5042	4.827	33.404	4.698	5.923	31.212	22.199	18.632	8.14	12.304	9.567	12.684	4.28	20.864	2.686	2.884	3.313	7.552	2.137	5.018	4.353	1.504	3.338	7.952	2.689	1.351	1.809	1.663	4.237	1.191	1.037	1.044	1.582	3.146		0.527637	7.55212
12.6233	4.075	32.714	4.54	5.298	32.388	19.718	17.467	8.356	10.873	9.264	14.486	4.621	19.222	2.793	1.891	3.412	6.559	2.425	6.116	4.181	1.408	3.31	8.533	2.588	1.826	1.292	1.917	3.457	1.052	1.368	1.38	2.117	2.45		0.532662	7.36658
12.7424	3.712	30.735	4.209	5.489	29.538	17.361	17.188	9.128	13.474	9.68	13.05	4.904	20.741	3.069	2.071	3.537	7.202	1.291	5.594	4.259	1.441	2.448	6.447	2.145	1.611	1.278	1.764	4.115	1.305	1.585	1.741	1.426	2.306		0.537688	7.14679
12.8615	4.018	27.913	4.32	5.678	30.654	16.641	15.967	9.481	12.554	8.985	13.601	4.334	19.109	2.837	2.001	3.702	7.164	1.985	4.978	4.316	1.406	3.132	6.229	2.754	1.415	1.642	1.505	3.322	0.92	1.308	2.003	1.387	2.127		0.542714	6.95115
12.9806	4.546	28.758	4.639	4.692	30.349	16.78	16.114	10.345	13.942	9.581	12.752	3.729	18.952	3.282	2.117	4.019	8.323	1.743	4.912	3.852	1.459	2.447	5.573	2.153	1.279	1.645	1.94	3.182	1.309	1.228	1.889	1.478	1.515		0.547739	6.98558
13.0997	4.466	29.528	4.835	4.728	28.328	17.016	15.273	10.137	13.889	9.095	13.483	3.936	19.847	3.123	2.332	3.347	9.24	1.921	5.482	3.979	1.412	2.139	5.561	2.182	1.578	1.031	1.667	3.447	1.65	1.358	2.14	1.932	1.771		0.552765	7.02585
13.2188	4.962	30.798	5.474	4.547	29.727	17.971	14.412	10.897	12.277	9.655	14.224	4.846	17.612	2.918	2.122	3.447	8.024	1.752	5.713	3.925	1.903	2.275	5.232	1.958	1.218	1.45	1.538	2.518	0.881	0.994	1.826	1.707	1.938		0.557791	6.99215
13.3378	3.82	28.13	4.088	4.397	31.669	21.275	15.498	9.604	12.028	10.816	14.255	4.056	16.946	2.678	2.303	3.591	7.083	2.029	6.345	3.365	2.244	2.599	5.729	2.116	1.239	1.306	1.3	2.562	1.008	1.322	1.878	2.162	0.805		0.562812	6.97715
13.4569	4.688	26.938	4.255	4.904	31.422	24.145	15.146	11.406	12.517	9.482	15.856	3.95	18.31	2.885	2.123	3.65	7.277	2.277	5.238	3.942	1.625	2.021	5.343	2.198	1.312	0.893	1.614	2.46	1.107	1.494	1.433	2.155	1.242		0.567838	7.13055
13.576	3.947	27.943	5.288	4.944	34.044	24.626	14.432	8.338	12.941	11.27	14.402	4.664	18.126	2.939	2.694	3.368	8.335	1.598	6.66	3.821	1.53	2.713	4.777	2.187	1.098	1.396	1.394	2.286	1.257	1.219	2.068	2.358	1.581		0.572863	7.28012
13.6951	5.527	27.863	4.721	4.078	36.525	29.753	14.166	9.172	11.105	11.387	13.289	4.005	16.763	2.639	2.235	4.065	9.325	1.25	5.934	3.594	1.421	2.432	4.802	1.979	1.154	1.293	1.033	2.33	0.531	1.091	1.753	1.851	1.135		0.577889	7.27882
13.8142	4.657	25.292	5.184	4.294	33.469	30.817	15.993	7.484	12.09	11.101	14.503	4.072	16.269	2.572	1.899	3.961	8.429	1.747	5.088	3.415	1.934	2.587	5.736	2.051	1.208	1.91	0.884	2.285	0.904	0.863	1.786	1.491	1.388		0.582915	7.19282
13.9333	4.838	26.537	4.412	4.443	33.844	31.502	14.63	7.567	12.139	12.845	12.961	3.479	17.58	3.561	2.588	3.539	9.221	1.861	4.489	4.222	1.555	2.094	5.337	1.331	1.598	1.271	0.657	1.768	0.748	1.119	1.291	1.798	1.706		0.58794	7.22821
14.0524	4.523	24.875	4.445	4.157	29.68	31.852	15.205	9.213	11.197	12.248	15.612	3.841	15.82	2.606	2.506	2.971	9.086	1.75	3.657	4.74	1.763	1.992	4.293	1.949	0.852	1.076	1.14	1.484	0.897	0.958	1.769	1.315	0.915		0.592966	6.98142
14.1715	5.594	29.639	6.465	4.507	30.183	26.676	16.792	7.107	10.835	10.642	15.691	5.247	16.503	3.498	2.588	2.495	9.037	1.922	3.438	2.926	0.993	1.698	5.263	1.434	0.902	1.33	1.25	2.287	0.732	1.317	1.746	1.622	1.007		0.597991	7.0717
14.2905	5.2	27.666	4.594	4.255	28.672	27.907	15.007	7.245	12.526	12.123	16.113	5.162	15.522	3.027	2.303	3.456	8.262	2.185	5.594	3.829	1.59	2.554	3.882	1.535	0.76	1.082	1.026	2.429	0.975	0.813	1.607	2.194	0.859		0.603013	7.02891
14.4096	5.507	28.797	5.037	4.63	26.36	28.846	15.975	7.446	11.67	15.263	16.598	4.747	16.655	2.969	2.249	3.657	8.585	1.65	4.472	4.149	1.652	2.385	4.838	1.356	1.144	1.004	0.901	1.224	0.957	0.775	1.321	2.048	0.864		0.608038	7.14336
14.5287	5.803	26.835	4.512	4.717	25.23	30.281	15.657	8.475	11.428	13.767	15.804	4.073	15.153	2.404	2.269	3.988	9.462	1.561	4.937	3.43	1.455	1.716	4.364	2.067	1.375	1.303	1.193	1.75	1.021	1.166	1.542	1.88	1.204		0.613064	7.02491
14.6478	5.236	26.233	5.331	3.414	22.193	32.605	16.532	9.137	11.508	14.932	17.532	4.015	15.435	2.898	2.574	3.109	8.253	1.768	4.945	3.514	1.441	1.751	3.77	1.748	0.87	1.373	0.865	1.687	1.155	1.115	1.289	1.674	1.191		0.61809	7.00282
14.7669	5.045	27.209	4.02	3.684	25.135	35.209	16.562	6.61	11.983	12.317	19.116	4.991	14.969	3.092	2.37	3.166	8.053	1.555	4.576	3.658	1.829	2.002	4.821	1.819	1.347	0.832	1.364	1.467	1.383	1.256	1.511	1.678	0.982		0.623115	7.13973
14.886	5.174	26.74	4.296	3.888	21.893	41.57	15.645	8.764	13.251	11.937	18.279	4.468	13.686	3.174	2.435	3.366	7.431	1.634	4.778	3.5	1.294	1.358	4.762	1.274	1.15	1.057	0.94	1.503	0.854	1.557	1.135	1.382	0.904		0.628141	7.12361
15.0051	5.161	25.19	5.253	4.069	20.922	44.377	13.167	8.821	12.505	11.951	19.196	4.236	13.649	3.191	2.336	3.99	8.268	1.822	4.246	3.495	1.922	1.749	3.793	1.419	1.556	0.909	0.716	1.937	0.747	1.015	1.397	2.458	0.971		0.633167	7.16467
15.1242	5.808	25.186	4.426	3.897	21.727	45.421	13.111	8.864	10.14	11.205	19.843	3.892	13.783	3.376	2.055	3.08	8.434	1.554	5.165	3.476	1.406	1.65	3.963	1.624	1.312	1.078	1.194	1.747	0.93	0.688	1.231	1.566	0.842		0.638192	7.08103
15.2432	4.753	24.612	4.466	3.531	21.733	49.548	14.257	8.73	9.595	12.119	21.899	3.353	13.142	3.32	1.784	3.755	9.682	1.495	4.432	2.725	1.572	1.817	3.46	1.259	1.469	1.237	1.286	2.083	0.793	0.874	1.357	1.549	0.623		0.643214	7.22152
15.3623	4.997	23.061	4.944	3.99	22.338	47.832	13.822	8.571	12.355	9.312	23.223	4.991	12.692	2.867	1.878	3.191	8.821	2.388	4.999	3.299	1.617	2.169	3.205	1.103	1.042	1.452	0.974	1.705	1.038	1.076	1.23	1.62	0.826		0.648239	7.23115
15.4814	4.653	24.445	5.305	4.239	20.508	48.061	13.906	11.754	11.02	9.487	22.612	5.659	12.437	2.586	2.395	3.053	8.786	2.781	3.694	2.343	1.688	2.089	3.152	1.298	1.215	1.277	0.8	1.51	1.206	0.939	1.088	1.21	0.805		0.653265	7.21215
15.6005	4.477	25.649	5.077	3.526	18.889	48.819	13.602	11.212	11.955	8.9	21.941	4.929	11.611	3.06	1.99	3.788	8.312	1.996	4.89	2.511	1.061	1.464	3.556	1.308	1.356	0.882	0.769	1.442	1.153	0.736	1.303	1.072	0.801		0.658291	7.09203
15.7196	4.323	26.288	4.022	3.604	18.197	48.796	12.696	13.948	10.343	8.722	23.533	4.588	10.524	2.731	2.139	3.421	8.644	2.105	4.079	2.616	1.298	1.998	3.461	1.204	1.101	0.87	0.875	1.691	0.837	0.864	1.166	1.064	0.948		0.663316	7.05139
15.8387	5.032	21.718	4.643	3.043	18.85	50.347	12.666	11.487	11.399	7.732	23.926	5.246	10.174	3.77	1.83	4.499	9.028	1.702	4.662	2.628	1.337	1.566	3.225	1.099	1.053	1.147	1.029	1.331	0.624	1.095	0.783	1.387	0.682		0.668342	6.99212
15.9578	5.525	22.329	4.893	3.252	18.207	46.39	13.207	9.783	9.762	7.424	27.976	5.984	10.358	2.565	2.53	3.597	9.215	1.565	4.447	2.928	1.31	2.073	2.592	0.944	0.879	1.244	0.744	1.222	0.856	0.449	1.041	0.938	0.818		0.673368	6.88021
16.0769	4.397	20.994	5.895	2.42	17.084	44.76	12.002	9.546	10.397	8.326	24.845	5.839	10.816	3.035	2.594	3.999	9.943	2.051	4.479	2.867	1.147	1.504	3.576	1.298	1.073	1.037	1.273	1.298	0.678	0.533	1.156	0.834	0.421		0.678393	6.73082
16.196	4.772	20.503	5.979	3.483	18.161	42.961	12.573	8.988	10.672	7.437	28.326	4.395	10.201	3.902	2.463	2.953	8.831	1.86	4.859	2.151	0.947	1.336	2.84	0.637	0.889	1.044	0.786	1.499	0.65	0.822	1.149	0.979	0.331		0.683419	6.64785
16.315	5.11	21.155	6.007	3.233	16.264	41.991	12.295	8.579	12.459	8.483	27.636	4.021	9.515	3.308	2.116	3.951	9.044	1.981	4.356	2.966	0.85	1.959	3.296	0.895	0.735	0.805	0.555	0.862	1.179	0.877	0.986	1.021	0.46		0.68844	6.63485
16.4341	5.575	19.517	5.715	3.812	16.225	42.181	13.195	7.578	12.643	7.97	27.064	3.924	8.377	3.418	3.06	4.107	10.2	1.878	4.652	2.986	1.111	1.433	2.929	1.252	0.882	0.715	0.916	1.253	0.614	1.056	0.749	0.841	0.578		0.693466	6.61836
16.5532	6.538	18.106	6.079	3.771	16.61	38.95	12.877	7.443	10.458	8.011	26.709	3.486	8.966	2.966	2.506	3.914	9.974	2.545	4.589	3.327	1.497	1.484	2.34	1.014	0.735	0.951	0.669	1.642	0.562	0.608	1.123	0.85	0.285		0.698491	6.41167
16.6723	5.906	14.981	5.441	3.99	15.539	36.04	14.624	7.187	10.681	8.006	27.403	4.431	9.613	3.17	2.52	3.603	9.634	2.494	5.003	2.444	1.787	1.855	2.699	1.043	0.97	0.916	0.569	1.13	1.085	0.791	0.979	0.997	0.562		0.703517	6.30585
16.7914	5.787	14.095	6.947	4.004	13.351	35.971	13.382	6.983	11.535	8.15	27.207	4.268	8.615	4.052	2.557	3.911	10.719	2.186	3.961	2.742	1.088	1.138	2.506	0.792	0.783	0.55	0.677	0.962	0.745	0.956	0.834	1.626	0.639		0.708543	6.1733
16.9105	5.74	15.861	5.482	3.024	13.237	35.376	13.664	7.173	12.04	7.128	25.855	4.691	7.752	4.085	3.203	3.832	9.843	1.875	5.012	2.524	1.235	1.547	2.945	1.384	0.804	0.846	0.551	0.982	0.877	0.897	0.676	0.659	0.821		0.713568	6.10973
17.0296	6.259	13.542	6.092	3.36	11.173	34.647	12.791	7.073	11.962	7.428	23.451	4.601	8.587	4.843	2.64	3.517	9.953	1.539	6.583	2.293	1.53	1.898	2.518	1.351	0.875	0.948	0.287	0.932	0.852	0.923	0.843	0.9	0.821		0.718594	5.97006
17.1487	6.425	12.904	6.886	3.243	11.896	32.125	12.564	8.322	14.725	6.718	23.863	4.606	7.895	3.878	3.233	4.281	9.778	2.176	4.802	2.416	1.324	1.54	3.278	1	1.102	0.719	1.002	0.955	0.665	1.02	1.045	1.36	0.758		0.72362	6.01527
17.2677	6.291	12.231	5.614	4.685	11.612	35.412	14.395	8.181	12.572	7.066	20.256	4.924	8.591	5.4	2.706	3.189	7.985	2.293	4.102	2.208	1.235	1.62	3.115	1.037	0.971	0.909	0.796	1.219	0.614	0.828	0.602	1.202	0.687		0.728641	5.89539
17.3868	6.746	11.469	6.085	3.262	9.392	37.503	13.225	8.993	13.404	6.695	21.265	5.362	10.677	5.36	3.077	4.145	8.539	1.666	4.989	2.379	1.355	1.637	1.781	1.501	0.837	0.989	0.66	1.522	0.396	0.413	0.634	0.912	0.429		0.733667	5.97876
17.5059	7.464	14.132	9.021	3.037	10.425	39.765	13.728	9.293	12.952	6.435	22.766	6.046	8.306	6.798	3.604	3.964	8.117	1.567	5.496	2.593	0.695	1.513	2.452	1.143	0.994	0.589	0.37	1.427	0.694	0.77	0.59	0.917	0.701		0.738692	6.31406
17.625	7.557	12.589	8.857	4.021	9.68	39.82	13.609	8.597	13.686	5.208	21.872	4.585	9.297	7.146	2.795	4.625	8.958	2.028	5.246	3.215	0.949	1.334	2.517	1.843	0.939	0.474	0.447	1.216	0.391	0.763	0.541	1.507	0.925		0.743718	6.27991
17.7441	8.286	14.516	8.837	3.57	8.875	38.348	15.097	8.843	14.352	5.547	22.978	4.683	8.497	9.794	3.31	4.845	9.716	2.127	4.661	2.765	1.077	1.085	1.879	0.802	1.196	1.088	0.72	1.016	0.517	0.828	0.711	0.946	0.562		0.748744	6.42648
17.8632	8.324	12.865	8.017	4.201	9.301	38.756	15.495	9.225	15.065	5.33	22.48	4.574	8.707	10.175	3.107	3.823	10.583	1.892	6.511	2.155	1.427	0.857	2.858	0.709	1.237	1.134	0.556	0.733	0.683	0.657	0.456	0.736	0.456		0.753769	6.45712
17.9823	8.293	11.309	8.715	3.798	8.856	39.602	14.242	8.816	16.576	5.562	23.551	5.302	8.538	12.219	4.162	5.59	10.838	1.813	5.443	2.947	1.573	0.899	2.246	0.847	0.757	0.605	0.468	1.138	0.341	1.018	0.565	0.766	1.143		0.758795	6.62236
18.1014	7.365	12.213	8.479	4.426	8.153	42.709	15.641	9.44	14.454	6.175	23.906	5.569	9.765	12.887	4.056	5.505	10.721	1.657	6.068	3.136	1.491	1.855	1.978	0.87	0.746	0.856	0.577	0.955	0.458	0.916	0.614	1.082	0.879		0.76382	6.83642
18.2204	8.613	11.844	11.333	4.267	7.895	42.939	17.848	8.04	12.104	6.319	23.44	6.292	9.13	13.369	4.84	4.793	10.523	2.348	5.538	2.598	1.547	1.578	2.567	0.596	0.951	0.685	0.671	1.152	0.315	0.854	0.392	0.731	0.913		0.768842	6.87955
18.3395	6.436	9.394	12.102	3.518	7.878	45.939	15.858	8.711	10.434	4.872	22.72	5.163	9.241	14.563	6.053	7.522	10.37	2.466	5.818	2.442	1.231	1.493	2.253	1.247	0.925	0.83	0.345	1.341	0.612	0.279	0.39	1.159	1.23		0.773868	6.81318
18.4586	6.902	10.447	14.798	3.989	7.317	48.513	17.517	8.719	14.224	6.368	22.707	6.595	9.269	15.38	6.973	7.765	12.064	2.437	6.992	2.492	1.331	1.201	2.58	0.976	1.003	1.065	0.128	0.801	0.734	0.643	0.622	0.965	0.866		0.778893	7.40555
18.5777	6.584	10.294	15.339	3.639	6.854	54.565	18.34	8.253	12.687	7.683	23.583	7.178	8.079	17.563	8.075	9.061	12.227	2.846	6.656	3.206	1.627	1.5	2.347	1.327	0.878	1.008	0.295	1.088	0.574	0.507	0.534	0.517	0.937		0.783919	7.75306
18.6968	8.435	9.435	16.749	3.632	6.828	54.368	19.92	11.211	11.911	8.19	28.105	6.518	9.505	16.916	8.765	8.505	11.971	2.591	7.152	2.44	1.926	0.89	2.521	1.359	1.408	0.432	0.357	0.638	0.507	0.513	0.556	0.905	0.79		0.788944	8.05906
18.8159	9.482	9.939	20.769	3.582	5.489	58.479	20.895	10.925	12.909	6.64	24.199	6.404	9.685	18.297	10.155	10.31	13.416	2.148	7.573	2.666	1.4	1.239	2.759	0.89	0.795	0.691	0.315	0.851	0.845	0.437	0.517	0.848	0.666		0.79397	8.37015
18.935	8.828	9.795	22.818	4.426	5.272	62.235	21.759	10.073	13.108	7.169	24.077	7.479	9.808	18.255	10.712	11.74	14.038	2.848	8.277	3.248	1.491	1.48	2.212	1.175	0.682	0.825	0.335	0.982	0.693	0.824	0.518	0.801	1.001		0.798996	8.75709
19.0541	7.455	8.177	23.384	4.206	6.261	61.78	23.577	12.018	13.224	7.706	22.809	7.779	9.96	18.796	8.356	13.322	16.683	3.598	7.925	2.823	2.18	2.079	2.065	1.111	0.87	0.498	0.413	0.933	0.589	1.094	0.581	0.546	0.785		0.804021	8.89645
19.1731	8.668	6.864	24.046	3.809	6.376	71.855	27.074	13.263	14.149	7.818	26.201	7.269	9.783	21.355	8.49	14.449	20.304	3.47	8.694	3.624	1.521	1.818	1.678	1.379	0.638	0.395	0.352	0.429	0.92	0.495	0.328	0.431	0.635		0.809043	9.65394
19.2922	8.462	7.613	26.056	4.633	5.626	71.332	30.281	13.714	15.027	8.646	27.469	9.079	11.977	24.651	9.233	15.606	21.406	2.993	8.167	3.841	2.214	1.997	1.735	1.069	0.882	0.505	0.175	1.015	0.536	0.498	0.263	0.499	0.745		0.814068	10.2408
19.4113	9.183	9.061	29.138	4.587	5.768	80.824	33.127	13.374	14.115	9.059	25.242	8.287	13.018	27.111	12.023	16.582	27.718	3.839	7.806	3.271	1.994	1.458	2.542	0.799	0.533	0.496	0.52	0.818	0.531	0.785	0.201	0.414	0.637		0.819094	11.0564
19.5304	8.939	8.638	28.624	4.263	5.144	84.431	38.948	13.882	13.657	9.425	27.777	8.081	11.411	30.126	15.29	15.312	27.904	4.268	9.033	3.107	2.06	1.079	1.854	1.199	0.766	0.804	0.794	1.037	0.449	0.584	0.121	0.771	0.456		0.82412	11.5222
19.6495	8.518	8.251	27.783	4.145	5.284	82.505	38.345	16.229	13.055	11.004	24.701	9.378	14.257	31.876	21.148	16.224	32.031	4.836	10.548	2.974	2.932	1.165	2.372	0.971	1.014	0.405	0.579	0.824	0.411	0.444	0.276	0.492	0.323		0.829145	11.9788
19.7686	10.304	7.872	27.753	3.7	6.226	87.132	48.089	16.909	14.217	12.019	22.518	9.107	13.127	33.619	23.819	19.238	31.324	5.564	12.93	3.278	2.73	1.133	1.708	0.788	0.93	0.823	0.31	0.433	0.579	0.606	0.161	0.286	0.496		0.834171	12.719
19.8877	12.646	8.079	26.824	4.137	5.196	80.299	49.527	18.256	15.656	12.826	23.533	9.156	15.129	32.091	23.784	20.459	27.589	9.041	12.411	4.038	2.648	1.416	2.072	1.043	0.586	0.265	0.572	0.836	0.509	0.429	0.147	0.28	0.59		0.839197	12.79
20.0068	10.832	7.103	27.47	4.489	5.578	83.481	51.795	21.373	14.269	13.042	25.779	9.669	15.707	29.253	21.289	20.966	25.471	14.232	15.792	3.73	3.314	1.454	2.754	1.234	0.315	0.479	0.316	0.97	0.548	0.769	0.252	0.411	0.305		0.844222	13.1649
20.1259	11.155	7.348	26.583	4.522	5.394	81.628	51.552	21.8	14.732	12.419	24.112	10.169	18.369	26.58	17.207	18.446	15.504	19.398	16.639	4.204	3.67	1.781	2.354	1.432	1.111	0.68	0.427	0.911	0.766	0.727	0.48	0.487	0.212		0.849248	12.8121
20.2449	13.119	7.517	28.572	4.481	4.577	78.779	48.669	21.788	16.226	14.065	22.998	12.116	20.512	21.665	13.535	17.578	9.08	24.126	20.295	4.412	3.568	1.867	2.756	1.073	0.926	0.286	0.89	1.108	0.726	0.442	0.145	0.344	0.143		0.854269	12.6783
20.364	14.146	9.082	27.06	4.563	4.844	80.372	50.298	25.253	15.49	13.931	23.162	15.007	22.695	18.634	14.223	15.203	6.001	26.821	22.678	3.77	3.882	1.955	2.775	1.62	0.676	0.424	0.871	0.902	0.597	0.417	0.275	0.227	0.156		0.859295	12.97
20.4831	13.378	9.103	28.252	4.084	5.334	70.482	49.617	23.166	16.718	16.545	24.726	17.687	20.73	19.623	8.529	11.915	5.17	28.18	26.503	4.177	4.028	2.605	2.484	1.359	1.041	0.39	0.356	0.377	0.718	0.493	0.063	0.289	0.156		0.864321	12.6751
20.6022	15.884	8.475	32.795	4.538	5.16	70.609	53.505	26.906	15.747	19.432	25.31	19.111	24.33	15.333	7.42	8.047	4.603	30.195	31.182	5.331	2.919	1.945	2.215	1.14	0.837	0.593	0.448	0.689	0.558	0.375	0.164	0.282	0.255		0.869346	13.2222
20.7213	17.659	8.466	31.371	5.214	6.481	61.685	49.414	26.703	15.181	21.104	28.407	19.495	22.933	13.937	5.835	6.14	2.988	30.152	34.887	6.446	2.908	2.082	2.202	0.858	0.603	0.414	0.469	0.664	0.861	0.292	0.219	0.446	0.099		0.874372	12.9277
20.8404	19.476	9.97	35.767	5.462	7.368	41.715	43.402	33.05	16.495	24.215	32.024	20.996	23.987	9.497	5.193	3.657	2.917	29.339	35.886	7.451	1.948	2.295	1.631	0.946	0.636	0.626	0.329	1.059	0.615	0.452	0.299	0.181	0.227		0.879397	12.7003
20.9595	16.974	11.201	38.091	5.796	6.649	28.968	33.136	34.571	18.404	24.125	39.562	20.821	18.572	8.283	3.511	4.448	2.139	30.624	35.089	6.093	1.392	2.153	2.387	0.733	0.791	0.555	0.252	0.69	0.673	0.384	0.16	0.136	0.158		0.884423	12.0461
21.0786	18.472	12.782	40.526	6.942	8.319	22.399	26.658	34.472	15.461	30.306	42.183	20.72	14.915	7.828	4.21	3.674	2.416	29.244	28.003	4.532	1.291	2.187	1.973	0.703	0.568	0.533	0.214	0.547	0.416	0.23	0.049	0.112	0.043		0.889449	11.6039
21.1976	17.052	13.056	42.805	8.18	8.867	17.9	21.349	36.163	16.752	32.711	48.414	21.804	12.387	7.175	3.335	3.325	2.124	20.424	16.29	3.098	1.139	2.204	2.204	1.002	0.521	0.255	0.277	0.713	0.65	0.22	0.094	0.146	0.229		0.89447	10.9959
21.3167	19.718	16.021	44.979	10.309	11.04	11.669	11.22	35.077	15.147	34.775	46.651	24.864	9.075	4.863	2.1	2.469	1.275	13.503	11.208	2.381	0.747	2.222	1.945	0.823	0.396	0.24	0.185	0.487	0.634	0.217	0.225	0.337	0.387		0.899496	10.2178
21.4358	25.575	17.822	47.022	11.214	15.385	9.061	8.372	34.684	15.652	35.283	51.45	24.216	6.208	3.666	2.321	2.346	2.079	7.459	5.425	1.535	0.909	2.36	1.779	0.761	0.631	0.176	0.099	0.551	0.535	0.06	0.051	0.077	0.209		0.904521	10.1507
21.5549	27.588	19.375	45.648	9.757	19.379	6.564	5.111	37.147	17.371	39.179	48.186	22.338	7.446	4.582	1.898	1.806	1.118	4.586	3.798	1.263	0.442	2.222	1.507	0.603	0.593	0.598	0.327	0.478	0.586	0.223	0.024	0.367	0.135		0.909547	10.068
21.674	35.373	21.825	43.026	10.257	22.231	5.586	3.929	40.56	17.934	43.046	51.28	20.634	6.218	3.89	1.762	2.318	1.274	4.939	3.701	1.134	0.325	3.215	1.551	0.451	0.575	0.383	0.127	0.288	0.426	0.254	0.105	0.123	0.11		0.914573	10.5712
21.7931	39.325	25.792	44.857	10.618	24.123	4.249	3.09	43.249	16.578	55.307	53.669	22.902	3.503	2.599	1.547	1.977	1.418	4.521	3.476	0.755	0.456	3.214	1.618	0.714	0.447	0.496	0.313	0.398	0.158	0.121	0.132	0.076	0.279		0.919598	11.272
21.9122	40.723	27.429	44.349	11.381	23.949	3.083	2.504	47.066	19.495	60.658	53.981	21.921	3.161	2.401	1.089	1.507	0.842	3.801	2.024	0.727	0.717	2.621	1.078	0.607	0.814	0.677	0.308	0.098	0.269	0.019	0.206	0.115	0.255		0.924624	11.5114
22.0313	36.875	27.535	41.842	11.314	25.979	2.512	2.328	50.956	20.513	57.797	49.241	22.816	2.841	1.836	1.249	1.258	1.002	2.074	1.443	0.586	0.679	1.829	1.226	0.444	0.576	0.497	0.152	0.134	0.19	0.061	0.028	0.013	0.062		0.92965	11.1481
22.1503	33.353	23.249	36.461	8.311	20.897	2.418	2.398	52.59	21.63	51.786	36.874	19.997	2.647	2.373	1.332	1.573	0.78	2.564	1.658	0.483	0.447	1.498	0.792	0.373	0.514	0.434	0.087	0.073	0.412	0.117	0.053	0.142	0.052		0.934671	9.95055
22.2694	29.166	22.617	38.514	8.293	17.183	2.022	1.694	48.938	23.532	40.641	27.344	17.46	2.191	1.912	0.913	1.053	0.52	1.702	1.774	0.423	0.344	1.33	0.673	0.385	0.454	0.312	0.061	0.24	0.341	0.027	0.09	0.186	0.099		0.939697	8.86164
22.3885	25.223	21.767	35.508	7.792	15.791	1.846	1.434	47.382	26.928	33.002	15.462	11.051	1.579	1.213	0.767	0.716	0.273	1.503	1.038	0.432	0.391	1.106	0.669	0.462	0.472	0.163	0.053	0.294	0.28	0.088	0.063	0.097	0.132		0.944722	7.72658
22.5076	22.454	21.857	33.806	5.479	11.348	1.188	1.555	54.341	31.749	20.789	8.881	9.742	1.695	1.497	1.42	0.759	0.458	1.14	0.769	0.419	0.415	1.249	0.586	0.389	0.527	0.357	0.235	0.138	0.096	0.014	0.018	0.113	0.195		0.949748	7.14176
22.6267	15.901	19.001	33.854	5.077	9.333	0.943	1.194	54.276	38.355	12.313	5.053	6.632	1.737	1.005	1.178	0.872	0.57	0.921	0.546	0.308	0.445	0.63	0.82	0.412	0.133	0.284	0.15	0.04	0.178	0.096	0.133	0.016	0.029		0.954774	6.43742
22.7458	12.169	17.181	30.475	4.257	9.247	1.356	1.251	44.217	46.626	6.559	3.431	5.252	1.439	1.088	0.884	0.786	0.605	0.771	0.691	0.625	0.541	0.537	0.626	0.216	0.42	0.387	0.12	0.244	0.209	0.126	0.151	0.11	0.05		0.959799	5.83779
22.8649	9.518	17.037	29.87	4.066	7.326	0.99	0.782	29.895	49.226	4.52	3.077	4.227	1.544	0.959	0.995	0.678	0.622	0.998	0.766	0.465	0.264	0.721	0.814	0.219	0.324	0.169	0.333	0.283	0.049	0.005	0.1	0.084	0.095		0.964825	5.18245
22.984	8.414	11.44	23.538	4.315	5.162	0.523	0.86	15.475	54.004	4.158	2.858	3.412	0.815	0.935	0.557	0.857	0.455	0.972	0.678	0.667	0.317	1.059	0.349	0.314	0.173	0.319	0.145	0.214	0.165	0.103	0.107	0.016	0.247		0.96985	4.35221
23.103	7.648	10.449	18.585	3.084	3.577	0.879	0.936	8.833	57.82	3.074	2.092	2.837	0.799	1.144	0.519	0.561	0.468	0.971	0.658	0.281	0.454	1.128	0.426	0.383	0.271	0.24	0.007	0.199	0.115	0.197	0.059	0	0.12		0.974872	3.90345
23.2221	5.979	7.912	11.499	2.556	3.814	1.097	0.815	6.042	47.476	2.014	1.956	1.866	0.931	0.844	0.895	0.271	0.333	0.851	0.416	0.404	0.594	0.488	0.453	0.127	0.504	0.382	0.104	0.16	0.149	0.103	0.039	0.003	0.137		0.979897	3.06709
23.3412	4.809	6.119	8.78	2.611	3.439	0.9	0.719	5.357	30.084	1.705	1.772	1.552	0.584	0.808	0.545	0.574	0.384	0.946	0.66	0.403	0.301	0.573	0.34	0.15	0.505	0.443	0.111	0.081	0.17	0.037	0.017	0.091	0.007		0.984923	2.29021
23.4603	3.738	4.836	6.3	1.922	2.7	0.659	0.211	4.516	18.105	1.942	1.326	1.886	0.268	0.699	0.347	0.4	0.123	0.91	0.548	0.29	0.179	0.683	0.355	0.083	0.385	0.317	0.057	0	0.216	0.099	0.04	0.071	0		0.989949	1.64276
23.5794	3.036	3.819	5.917	1.295	2.699	0.32	0.638	3.381	9.678	1.321	1.034	0.767	0.472	0.375	0.475	0.301	0.388	0.791	0.517	0.133	0.121	0.678	0.216	0.26	0.51	0.263	0.074	0.13	0.174	0.235	0.015	0.002	0		0.994974	1.21318
23.6985	2.548	4.265	4.782	1.118	1.74	0.379	0.531	2.618	7.372	0.975	1.289	1.042	0.31	0.591	0.241	0.242	0.272	0.674	0.394	0.363	0.236	0.553	0.276	0.128	0.289	0.276	0.155	0.037	0.081	0.182	0	0	0.057		1	1.03079

## Sheet: Image4
X0	Y0	Y1	Y2	Y3	Y4	Y5	Y6	Y7	Y8	Y9	Y10	Y11	Y12	Y13	Y14	Y15	Y16	Y17	Y18	Y19	Y20	Y21	Y22	Y23	Y24	Y25	Y26	Y27	Y28	Y29	Y30	Y31	Y32		Ap-basal	Avg int
0	17.628	15.812	8.389	11.911	11.659	5.166	6.3991	8.775	8.67	9.475	11.906	10.7395	9.248	14.5607	8.0258	8.9264	6.4826	8.3434	7.125	8.3377	5.488	8.825	6.818	5.2081	5.604	7.4049	4.8113	6.0801	9.064	12.807	10.522	8.29	9.2		0	9.02126
0.1191	21.189	21.952	10.598	13.407	13.28	5.821	10.5434	9.628	9.479	12.887	13.561	10.792	11.407	15.3232	9.9131	11.6296	6.5551	9.1586	8.0709	9.6524	7.274	11.819	6.679	5.1837	5.807	7.3738	6.2363	6.8528	9.127	14.24	11.449	11.119	10.021		0.00549506	10.5463
0.2382	30.017	33.414	14.338	16.293	16.263	7.247	11.3312	12.001	10.369	16.926	16.351	14.0954	14.383	16.9181	12.7402	14.9234	7.8391	9.0967	8.2844	10.8317	7.78	15.929	7.718	5.9086	8.001	8.1119	5.9914	9.2416	10.538	16.513	15.879	14.346	13.486		0.0109901	13.1244
0.3573	40.891	43.965	18.973	18.078	22.515	9.117	18.5038	16.226	10.027	23.759	20.701	14.4598	18.669	21.0771	15.5777	20.0377	6.9421	12.7133	10.7283	11.5504	9.442	18.385	9.658	6.8403	7.55	8.9407	6.1635	11.2552	11.973	22.977	21.503	19.518	15.429		0.0164852	16.4893
0.4764	52.365	69.137	21.547	19.724	35.186	13.595	29.7661	19.217	13.695	23.525	18.238	14.5897	17.553	26.6956	18.7939	35.182	7.6754	15.0495	13.6046	17.1469	9.146	24.292	13.34	8.5115	8.296	16.1386	10.3837	13.8598	14.642	32.941	25.76	32.299	17.389		0.0219803	21.4935
0.5954	68.039	98.903	28.115	24.688	56.973	20.284	35.4047	25.988	15.515	30.473	20.948	20.7819	24.492	30.6762	24.7982	48.5505	8.7712	16.7031	20.3442	22.2913	13.041	25.779	16.005	10.7965	10.671	16.4809	16.6618	19.0813	13.549	45.216	40.037	45.286	27.302		0.0274707	28.565
0.7145	82.292	124.037	41.009	30.953	78.046	35.918	56.4751	37.997	17.61	30.531	23.882	19.1309	33.336	34.1697	32.2988	60.4675	10.222	17.3838	30.2869	29.1167	19.239	29.851	22.62	14.7805	12.081	18.1124	24.5538	24.771	17.109	45.57	52.438	59.977	36.756		0.0329658	36.4552
0.8336	105.616	133.798	49.054	38.459	113.887	58.115	70.0772	53.426	21.932	39.247	29.894	21.2014	42.289	43.5996	34.5064	75.5224	14.4493	22.675	41.8418	39.7021	19.038	38.653	36.22	18.6584	15.09	24.7898	37.1355	30.4705	20.637	47.318	65.166	86.834	47.292		0.0384608	46.5635
0.9527	121.136	134.373	59.465	46.093	133.518	83.826	84.6818	77.83	26.622	41.883	38.154	24.0296	51.997	42.2346	41.9764	73.4763	15.4483	26.7949	49.1658	46.3511	26.412	56.773	56.86	20.7018	25.854	29.5558	50.5197	39.9813	25.493	53.421	84.671	96.488	69.773		0.0439559	56.2291
1.0718	136.652	119.33	71.891	57.334	158.289	112.031	95.4953	96.079	35.586	46.274	43.818	30.6584	66.656	47.2	49.1147	67.1954	17.6361	32.9669	60.6305	59.8167	37.345	79.037	83.417	25.0702	31.801	35.4145	59.6729	49.1	26.023	57.17	103.67	118.661	102.868		0.049451	67.088
1.1909	148.51	100.533	90.263	71.567	170.068	117.677	95.6025	105.599	45.287	52.479	48.596	35.4927	81.876	48.8761	59.0792	58.286	19.5631	35.8181	66.3489	66.4946	57.709	111.604	109.14	28.5859	47.259	38.0212	64.5117	53.2946	31.358	65.613	109.409	115.508	133.723		0.054946	75.2652
1.31	151.545	77.417	101.09	88.322	173.659	117.368	88.8179	105.562	66.794	57.653	63.7	46.0378	100.492	50.9711	65.944	52.1064	22.0121	43.6537	61.8006	65.4065	68.54	145.222	130.699	36.255	65.205	46.7686	65.7228	59.8317	42.344	76.336	99.205	114.669	149.695		0.0604411	81.8438
1.4291	151.617	63.111	107.722	116.262	158.589	90.903	84.0894	97.196	81.116	64.256	77.01	57.3236	116.031	50.6967	63.1045	51.4711	21.8801	42.5959	65.1708	65.3163	94.2	165.473	133.321	43.3741	90.332	48.4654	62.0757	63.1735	46.765	83.171	75.488	107.629	142.469		0.0659361	84.2848
1.5481	146.323	53.444	112.799	131.949	132.075	73.461	76.7043	92.66	99.882	67.005	93.861	62.6156	130.904	50.351	52.6068	49.6197	24.0949	41.386	70.8543	60.4385	114.731	175.658	120.882	52.1404	98.474	47.4585	60.3212	61.6881	56.864	84.441	61.931	89.367	124.004		0.0714266	83.9695
1.6672	132.397	41.154	112.79	153.548	92.771	64.064	71.0201	85.482	116.842	71.742	110.892	67.8769	133.397	48.3797	46.6564	42.5156	22.4651	36.754	64.4648	67.8646	134.349	165.237	103.542	60.664	106.912	51.1569	58.6876	58.4679	69.304	95.293	51.484	74.506	95.62		0.0769217	82.0697
1.7863	112.508	35.922	111.022	170.656	56.849	52.363	64.4751	73.989	124.257	75.412	108.004	68.5888	143.189	47.9212	37.8714	40.1997	25.3778	35.2515	60.728	71.8144	147.59	151.303	86.75	71.5256	101.251	58.6865	46.8422	57.2402	73.548	101.877	42.813	59.619	79.841		0.0824167	78.645
1.9054	88.264	31.029	101.692	183.468	37.408	48.52	58.7372	63.699	120.234	89.961	106.529	60.1786	138.411	47.7725	33.0269	36.9433	25.7259	31.7539	55.8942	72.6043	154.646	132.3	83.103	74.9855	94.066	68.0737	48.3379	51.5662	79.201	99.785	38.114	51.798	65.382		0.0879118	74.9458
2.0245	63.154	27.589	93.968	192.614	23.994	39.736	51.6031	50.906	106.082	94.818	92.57	51.7972	137.071	52.2249	28.6175	37.8063	27.1074	30.7886	48.6703	66.0017	155.886	111.401	80.693	74.9747	81.886	71.46	47.3977	43.5004	87.258	105.015	32.134	38.372	52.191		0.0934068	69.6754
2.1436	44.595	24.729	78.468	188.954	14.977	39.094	40.6862	37.617	97.268	98.609	89.806	44.5329	145.301	52.4629	25.7144	33.2921	28.0859	24.955	41.8865	61.1938	151.415	99.192	67.596	63.0463	69.492	70.5846	43.0942	37.8698	103.974	104.841	27.276	35.351	44.549		0.0989019	64.5609
2.2627	31.4	29.193	72.91	182.687	13.108	35.616	32.5584	32.42	91.422	114.862	78.346	39.9838	129.491	54.8313	22.3396	28.7301	29.2839	29.3795	36.8986	54.486	146.656	84.032	66.37	51.6738	58.5	61.8101	45.1818	37.1792	110.776	110.71	18.603	27.092	38.006		0.104397	60.5011
2.3818	23.327	27.521	59.193	148.42	10.485	27.421	29.2277	28.139	93.162	119.052	71.415	34.5588	131.6	56.2502	20.5822	27.1475	30.556	26.4052	31.7039	47.7241	133.138	65.544	59.418	44.7118	52.385	49.5648	38.953	28.8087	119.668	114.577	14.619	26.261	32.664		0.109892	55.2789
2.5008	17.723	32.304	47.154	120.107	8.41	23.526	24.1059	24.42	86.477	129.622	58.474	29.4645	117.355	58.1042	21.9421	30.7768	31.469	22.0588	29.5288	48.3488	115.38	53.423	52.684	38.4281	45.004	43.1577	35.1576	27.641	120.802	111.874	13.964	24.937	32.72		0.115382	50.8043
2.6199	14.056	34.811	36.073	84.123	9.006	22.186	22.103	21.293	87.582	138.679	49.648	23.2831	108.309	52.4116	21.8469	27.4154	33.2291	20.5173	28.8909	42.7749	99.918	42.284	38.504	34.7088	40.912	37.3086	30.205	22.216	122.554	106.131	11.402	22.267	23.086		0.120878	45.7495
2.739	12.564	29.627	25.512	57.918	6.722	19.852	20.5201	20.944	89.028	155.684	37.888	17.2992	100.387	43.172	17.8707	27.9287	34.1435	19.3202	24.186	37.1692	82.873	35.653	28.527	26.5198	33.273	28.9494	30.353	23.3852	129.45	103.282	9.028	20.924	20.689		0.126373	41.5346
2.8581	9.009	31.441	16.748	39.558	6.272	18.652	19.2439	19.355	81.275	159.992	29.334	12.9664	100.356	31.5472	17.2577	25.0083	31.9401	21.4657	21.1065	37.2006	67.153	23.513	26.294	24.0436	27.569	20.2296	27.2578	22.6752	128.595	98.489	7.946	18.02	14.408		0.131868	37.4522
2.9772	6.414	27.559	11.969	26.332	5.978	14.593	16.1448	17.878	79.432	169.817	26.542	8.7931	94.562	23.8224	17.3543	22.0074	32.0149	23.5234	22.1487	33.2003	52.668	21.259	23.059	18.0401	25.387	18.7712	25.9861	20.1243	123.079	91.015	7.59	20.034	14.923		0.137363	34.6067
3.0963	5.13	28.926	9.664	16.632	4.874	15.176	14.5676	19.702	72.809	177.644	22.498	7.3191	75.693	14.6931	15.837	19.8708	32.2226	25.8602	18.6518	30.1922	44.994	15.929	20.805	17.4938	19.847	14.8053	24.6556	20.8953	119.55	78.73	7.654	19.322	12.759		0.142858	31.6789
3.2154	4.595	28.735	8.296	9.921	5.194	12.797	14.442	18.683	65.003	186.233	21.942	5.2611	61.923	9.9402	17.049	19.0867	31.9996	26.0152	15.2769	26.0333	37.125	14.252	17.815	11.9821	14.358	13.8843	24.3747	19.266	105.968	69.862	6.137	19.625	12.087		0.148353	28.9443
3.3345	3.288	30.007	7.897	8.369	3.405	13.905	15.6654	15.846	59.053	195.206	20.375	5.7389	38.866	6.3063	14.5742	21.5948	27.1789	28.2318	14.0463	21.4539	29.755	10.534	18.17	12.9893	10.658	9.155	21.4688	20.7987	98.479	58.646	7.413	20.919	9.809		0.153848	26.6607
3.4535	3.867	28.45	7.224	6.97	4.361	10.507	14.8156	13.683	50.307	193.753	17.289	3.6736	19.518	4.5095	12.9467	19.2734	32.3652	28.4599	12.3069	16.8032	26.616	8.613	17.261	9.1275	9.64	7.2362	22.4326	19.4784	84.124	52.316	7.173	22.565	9.429		0.159338	24.1544
3.5726	3.742	24.844	7.291	5.623	3.529	10.124	13.2476	12.568	42.832	185.166	16.589	4.0746	8.084	4.3399	15.7566	18.6701	27.4891	32.6911	9.9587	15.8141	21.51	7.614	13.772	6.6805	7.103	6.9281	17.7586	20.3193	63.688	45.17	6.419	22.707	8.3		0.164833	21.5274
3.6917	2.622	25.305	7.021	4.362	3.512	9.221	12.4997	12.067	43.243	176.236	17.346	4.0435	4.496	3.4279	13.9138	19.1315	30.1242	32.0888	9.6358	13.7012	17.589	7.665	14.47	6.8579	6.807	4.7827	18.7677	22.0834	41.539	37.22	6.208	25.297	8.852		0.170329	20.0647
3.8108	3.492	27.443	7.455	3.976	2.967	12.07	12.9171	12.055	37.976	161.784	16.382	3.7785	3.499	3.1177	12.536	16.7319	35.0618	34.5695	9.7378	12.2914	14.89	6.526	13.636	5.3824	5.3	4.1205	18.8584	19.4769	27.289	31.28	5.852	25.607	8.031		0.175824	18.6694
3.9299	3.758	29.503	8.697	4.103	3.553	11.736	11.9507	10.888	33.696	148.515	14.058	3.1194	3.578	3.9086	14.543	16.9323	37.5195	33.7152	8.1	10.3581	12.788	6.554	15.751	5.4067	5.123	4.1605	16.5766	19.1789	16.559	22.13	6.179	27.936	8.053		0.181319	17.5342
4.049	3.083	27.06	8.841	3.968	3.254	11.649	12.4431	11.893	30.455	133.162	13.65	4.5629	2.934	2.8863	13.5525	13.2984	40.1891	31.4333	7.928	10.3218	9.663	6.128	12.946	4.3124	5.658	4.1492	17.0202	22.3053	8.586	15.962	5.433	32.487	5.533		0.186814	16.2651
4.1681	3.762	25.642	8.838	3.791	3.253	12.738	15.3814	12.863	29.149	115.149	10.453	4.6373	2.171	2.9215	16.0276	12.5098	43.0623	33.3274	7.1228	8.5556	7.196	4.959	11.959	3.9947	5.076	3.1934	18.098	18.7248	5.783	8.971	4.427	29.423	5.74		0.192309	15.1182
4.2872	3.03	21.796	12.196	2.924	3.324	12.258	17.9063	10.332	25.8	104.557	12.688	3.0656	2.002	2.8644	14.7999	11.5924	39.0131	31.5393	6.2619	10.6625	5.907	4.476	13.108	4.0636	3.36	2.882	16.369	18.1551	5.372	6.796	4.582	31.729	5.444		0.197804	14.2684
4.4063	4.109	15.037	9.938	4.563	2.567	13.307	19.1681	10.322	21.615	89.868	10.923	3.8222	2.564	2.2883	16.7083	10.8624	32.2381	31.2259	4.8655	9.1468	5.751	4.452	13.075	4.0799	2.95	2.3221	16.3879	17.5506	3.994	4.215	4.495	32.724	6.122		0.203299	13.129
4.5253	3.409	11.642	10.022	3.336	4.069	13.085	22.3835	11.632	19.194	72.463	11.553	3.5376	2.132	2.1676	19.3205	11.4094	31.1598	27.0131	4.4166	8.4465	3.994	4.638	11.17	3.8504	2.621	2.0184	17.067	18.442	4.483	4.306	4.194	35.557	6.326		0.208789	12.4563
4.6444	3.512	10.089	10.82	3.65	4.141	14.214	24.0449	12.962	17.77	56.902	12.343	3.6633	2.422	2.6387	19.2127	9.3414	27.8862	23.5008	5.0572	9.3906	4.31	5.303	8.964	3.9592	2.061	2.7783	15.905	18.2077	2.996	3.567	3.702	42.046	7.446		0.214284	11.9638
4.7635	2.594	9.169	10.663	3.597	3.202	13.849	28.0216	11.394	16.677	48.174	9.653	4.4232	2.575	2.7722	18.7234	9.9382	23.4895	20.9356	3.2967	8.8444	4.073	5.503	9.495	4.7067	2.297	2.667	14.0309	17.3316	4.661	3.793	3.569	43.667	6.885		0.219779	11.3537
4.8826	3.245	8.301	11.289	3.884	2.997	12.872	34.3882	10.349	15.666	41.131	10.546	5.842	2.085	3.771	16.4675	10.5163	20.0735	23.166	4.0414	8.4925	3.149	4.007	8.098	2.6429	2.352	2.4287	14.8686	18.5079	3.278	3.667	4.246	48.032	6.568		0.225275	11.2415
5.0017	3.455	7.341	10.549	3.581	2.34	12.825	38.3692	9.718	14.636	35.742	11.815	4.5252	2.582	2.0761	16.0755	10.4678	17.7932	20.3606	4.5108	8.6673	3.074	4.459	7.929	3.2445	1.848	2.1704	14.9874	16.5302	3.054	3.84	3.754	44.995	5.809		0.23077	10.7007
5.1208	4.124	8.249	9.591	3.595	3.095	10.899	45.4258	10.635	12.221	30.793	10.843	4.7626	1.929	2.4576	16.2846	9.046	14.8876	18.5022	3.2263	9.609	3.039	3.959	8.55	3.514	1.79	2.3133	13.7752	17.6045	1.968	2.534	3.605	40.184	5.899		0.236265	10.27
5.2399	3.851	6.487	8.683	3.136	3.51	12.226	51.6812	11.6	12.782	27.87	10.753	4.4693	1.855	2.0937	17.1311	8.181	14.593	14.9377	4.071	11.9907	3.7	4.751	7.972	3.0943	1.99	3.0296	13.7328	17.2318	2.371	2.708	3.124	41.808	7.542		0.24176	10.4532
5.359	2.573	6.129	9.284	2.854	3.635	12.458	56.1848	12.2	11.486	21.066	10.668	4.6502	2.395	1.9257	16.7558	9.1924	10.9439	14.5645	3.6847	11.9996	4.128	4.877	7.572	3.5099	1.877	2.3679	14.9546	19.3569	2.181	2.006	3.469	42.367	6.587		0.247255	10.3001
5.478	3.415	7.184	9.889	3.149	3.208	11.39	57.4957	13.062	9.834	20.71	11.161	4.8331	2.056	1.9069	18.1932	7.5918	10.4699	13.7692	3.1452	12.8767	2.592	3.58	7.128	2.5341	2.067	1.9561	15.7564	16.4839	2.41	2.473	3.046	42.564	6.676		0.252745	10.1396
5.5971	4.117	7.662	9.65	4.132	2.774	11.003	60.531	14.845	8.237	14.89	10.752	4.9764	3.044	2.3027	16.446	9.5842	9.7945	10.985	3.3955	12.6424	2.946	4.751	7.26	3.7604	2.039	2.8484	15.1693	17.0138	2.195	2.218	2.991	41.748	6.249		0.25824	10.0895
5.7162	4.396	7.537	8.387	3.744	3.441	11.659	64.4623	14.934	7.241	11.119	11.978	4.9991	2.483	2.1007	15.1871	9.2744	11.7335	7.5997	3.506	13.354	2.46	4.588	7.595	4.3283	1.794	2.4405	13.5035	16.618	1.683	1.988	3.165	42.456	5.967		0.263735	9.93097
5.8353	4.237	6.86	10.971	3.667	3.851	12.652	63.8949	19.418	7.019	9.494	13.323	4.5388	2.614	2.2653	14.7036	9.7168	8.7818	6.685	2.7104	13.5291	2.893	4.051	6.787	3.5754	2.107	2.6251	18.4701	16.258	2.2	2.367	2.74	40.884	6.117		0.26923	10.0608
5.9544	3.439	5.918	11.16	4.998	4.053	13.023	68.1195	22.316	7.192	7.376	15.377	5.4073	2.833	1.972	14.5354	8.4082	7.4977	5.2767	3.7742	12.8744	3.317	3.441	7.664	3.6021	2.592	2.2448	15.1678	16.7673	2.309	1.979	3.007	37.242	7.467		0.274725	10.0712
6.0735	2.988	6.546	11.456	4.911	3.533	14.292	69.8145	18.136	7.079	6.226	13.372	4.4677	2.311	2.3407	13.5171	9.5221	6.438	4.2444	2.4286	13.3478	3.459	3.613	6.111	3.4644	1.445	2.3083	14.5297	14.545	1.983	1.606	2.946	31.934	7.969		0.280221	9.48134
6.1926	3.63	6.465	12.102	6.299	3.606	15.839	68.9375	16.884	5.316	5.561	12.665	5.1835	2.919	2.2342	11.5577	8.9305	4.9122	3.477	3.3634	18.0526	3.079	3.498	7.84	3.8587	1.779	2.1397	17.0226	14.1534	1.641	1.679	2.215	29.567	8.214		0.285716	9.53397
6.3117	3.942	7.194	14.082	5.109	3.564	13.881	64.9114	14.06	5.965	4.398	12.443	4.3787	2.725	2.1347	11.4512	11.022	4.8031	3.5962	3.0879	18.9299	2.206	3.25	7.644	4.0448	1.981	2.4505	16.5282	13.4203	2.152	1.79	2.349	26.768	9.589		0.291211	9.26821
6.4307	3.841	7.496	14.863	6.553	3.351	15.106	65.6345	14.35	5.42	4.047	14.859	5.4286	2.112	2.3881	10.9979	9.3716	3.9005	2.9484	3.0399	20.5744	3.523	3.345	6.469	3.5506	1.777	2.6766	18.7207	14.3874	2.393	2.435	3.101	24.283	11.477		0.296701	9.52788
6.5498	5.51	7.393	16.681	5.497	3.31	14.889	67.8948	13.269	5.163	4.148	14.614	5.2545	2.572	2.6383	10.3617	9.072	3.3633	2.7003	3.2862	25.9442	2.66	3.287	5.882	4.0401	2.707	2.9405	18.1943	13.9356	2.279	2.07	2.955	20.075	12.856		0.302196	9.61948
6.6689	5.116	6.461	18.119	5.462	5.369	14.712	66.7742	14.316	4.956	3.584	15.592	6.4216	2.095	2.245	9.6005	9.6439	3.6194	2.9685	3.1148	23.6884	2.259	3.428	6.23	4.323	2.093	3.0665	18.3021	12.7357	2.028	2.05	2.966	19.893	11.75		0.307691	9.54493
6.788	4.028	5.278	20.075	5.668	3.044	16.503	61.9407	14.976	6.134	3.425	14.251	6.7508	2.202	1.9518	10.0748	10.8368	3.2291	2.6977	2.8864	27.2187	3.279	2.983	6.398	4.6148	2.299	2.37	16.8179	13.0183	2.041	1.723	2.469	17.063	11.654		0.313186	9.39093
6.9071	4.404	6.595	21.307	6.338	3.164	15.172	64.3382	13.671	5.36	4.177	14.895	6.28	2.097	2.2895	10.1351	11.0922	3.1204	2.1656	2.6564	31.3081	2.777	2.994	6.169	5.6014	1.277	2.6276	18.9801	11.9633	1.691	2.468	2.647	14.823	11.04		0.318681	9.56436
7.0262	4.663	5.257	20.237	6.123	3.846	15.981	62.7445	16.279	5.956	3.672	14.979	5.1278	1.855	3.0654	9.6555	12.7559	2.7197	1.7959	2.7693	31.9126	2.53	2.591	4.8	6.3766	1.884	2.3595	18.479	12.6486	1.952	2.209	2.379	13.759	11.94		0.324176	9.55462
7.1453	5.452	5.557	21.799	6.275	3.761	16.305	61.5704	13.894	5.741	3.541	14.639	5.6803	2.515	2.5848	7.38	12.5814	2.7487	2.2285	2.755	33.6187	2.088	3.122	4.953	4.7236	2.492	2.6166	16.4414	12.4768	3.114	1.965	1.531	13.785	12.91		0.329671	9.48016
7.2644	5.603	5.984	22.189	6.808	3.586	17.699	56.2503	14.244	6.263	4.613	15.919	5.9687	2.011	2.7407	8.0422	12.829	3.3284	1.897	1.8336	37.9498	2.791	2.868	6.241	6.5469	1.776	2.751	15.839	12.3306	2.684	2.09	2.355	15.04	14.853		0.335167	9.81588
7.3834	4.353	5.969	22.467	6.195	4.505	17.269	55.2739	14.305	6.37	3.357	17.107	6.6524	2.279	1.9363	8.5467	16.8361	2.7374	2.1656	3.1123	42.8607	2.079	2.862	4.813	4.9409	2.26	2.6064	21.4245	10.1495	2.806	2.611	1.986	12.577	14.14		0.340657	9.98645
7.5025	4.148	7.419	22.817	6.031	3.837	18.466	46.5088	15.307	6.836	3.726	18.478	6.5805	2.917	2.8083	7.1955	15.3021	2.8708	2.0538	2.1488	43.5376	3.248	2.557	5.697	5.5889	2.308	2.5582	21.9695	9.4573	2.942	2.667	2.546	11.364	16.249		0.346152	9.94364
7.6216	4.624	5.459	20.996	5.193	4.614	16.917	41.2158	18.206	7.538	4.238	18.609	6.9944	2.315	2.4826	6.6509	16.149	2.6472	2.674	2.6593	42.444	2.022	2.44	4.859	5.5342	2.066	2.5559	23.8636	11.5569	2.488	2.961	2.512	11.556	21.606		0.351647	9.95899
7.7407	4.459	5.149	18.274	8.204	5.304	15.523	38.1164	22.927	6.618	3.37	22.717	6.2311	2.14	1.8045	7.9593	14.7957	2.6177	2.2781	2.463	41.1414	2.161	2.381	4.984	4.7463	2.417	2.934	22.1904	10.7035	2.34	2.122	2.964	9.973	22.841		0.357142	9.84392
7.8598	3.654	6.212	16.792	7.671	4.874	15.347	40.285	27.35	6.413	3.198	21.17	5.1231	2.659	2.3482	9.0237	17.0427	2.2518	2.2953	2.3661	39.3586	2.692	2.713	4.836	4.5165	2.278	2.4274	21.0352	10.2238	1.527	2.786	2.557	9.763	25.72		0.362637	9.95483
7.9789	3.79	5.756	15.376	7.036	4.089	14.419	36.5974	31.482	7.545	4.117	18.16	6.1077	2.418	1.8032	7.216	16.059	2.1769	2.1025	1.9106	38.781	2.354	3.036	5.019	5.2109	2.356	2.4261	21.2109	9.986	1.98	2.027	2.795	11.141	24.982		0.368132	9.7414
8.098	4.255	5.71	14.68	5.811	4.92	14.855	39.5614	40.986	7.456	3.721	18.317	6.1577	2.769	1.8095	7.7012	18.5393	2.4116	2.1008	3.0693	34.7409	2.587	2.415	4.129	5.8147	2.477	2.6078	22.2863	9.5035	1.529	2.182	2.369	8.249	25.145		0.373627	10.0262
8.2171	4.302	6.072	15.516	7.773	3.824	12.435	39.1305	39.716	7.498	4.3	18.937	5.4203	1.906	2.692	9.0427	18.6912	2.9898	2.2562	1.9154	33.4997	2.467	2.698	4.801	5.4783	2.588	2.6985	22.4064	8.6306	2.264	2.17	2.118	6.93	25.353		0.379122	9.95514
8.3362	4.738	5.745	16.296	8.076	2.867	10.611	40.1052	40.939	7.1	4.269	20.772	5.5506	2.901	1.9262	7.2703	16.9074	2.4675	2.3275	2.5012	34.2151	2.67	2.683	4.041	4.5805	2.386	2.652	25.4718	8.4055	2.239	2.323	3.012	8.393	25.921		0.384618	10.0716
8.4552	3.413	6.334	14.942	6.881	3.412	11.33	35.5961	37.405	8.098	5.449	19.396	4.3144	2.101	2.8953	6.9628	18.7342	2.3405	2.3693	2.4729	26.5588	3.387	2.777	5.254	5.018	2.089	3.0568	26.3246	7.456	2.639	2.676	1.68	6.76	25.752		0.390108	9.57196
8.5743	3.332	4.677	14.511	7.139	3.576	9.698	33.6634	35.107	7.009	5.097	23.813	4.9694	2.077	1.3699	7.2708	21.5089	1.7999	2.1442	2.6631	27.4639	2.05	2.849	4.986	5.1432	2.162	2.4287	21.2478	8.8591	1.967	2.869	2.753	6.617	29.741		0.395603	9.47158
8.6934	3.589	4.108	18.533	7.355	5.111	12.636	29.7538	30.451	7.434	4.125	22.225	4.6297	2.9	2.2713	7.1466	19.6808	2.0737	2.3904	2.282	24.3308	3.143	2.232	4.761	6.4045	2.772	2.8749	21.261	6.5333	2.486	2.548	2.371	5.331	29.568		0.401098	9.25187
8.8125	4.181	5.105	17.39	6.065	4.451	11.173	32.4862	25.047	6.79	4.59	22.064	3.6778	2.106	2.1576	7.4236	18.9743	2.7099	2.1957	2.9049	22.1984	3.394	2.381	4.789	4.6579	1.787	2.4145	22.9941	7.1315	3.177	2.742	3.182	4.919	27.418		0.406593	8.92962
8.9316	2.927	4.916	19.535	7.808	4.603	9.436	35.3074	19.479	6.671	5.447	23.755	4.5919	2.369	2.0494	6.4348	20.1858	3.3621	2.554	2.0638	21.4378	3.43	2.581	3.544	6.0873	2.344	2.4605	21.9132	7.5759	1.964	2.141	2.685	4.904	24.244		0.412088	8.81233
9.0507	3.628	5.108	19.249	6.827	4.155	10.364	32.7232	16.663	6.188	5.623	21.062	4.3609	2.157	2.8184	8.0836	17.2918	2.7846	1.7767	2.4504	22.2659	3.295	3.176	3.619	6.6767	2.495	2.1688	25.3092	7.3562	1.826	1.69	2.905	4.445	25.821		0.417583	8.67765
9.1698	3.36	5.7	16.462	6.73	4.947	11.342	32.3234	16.518	6.96	5.603	21.175	4.4273	3.344	2.3299	8.2973	18.5466	2.3333	2.6688	2.7325	24.2064	2.856	3.102	2.898	8.6774	2.279	2.2891	21.6493	6.6448	1.959	1.56	3.028	4.285	29.297		0.423078	8.80397
9.2889	3.848	5.668	14.169	6.721	4.417	10.162	33.7654	16.241	7.119	5.7	19.539	4.3054	3.109	1.7603	6.7227	19.3569	2.0908	2.6914	2.2133	24.6278	2.944	2.747	4.397	8.1039	2.25	2.8191	22.8906	5.688	2.002	1.844	2.241	5.241	26.184		0.428573	8.59329
9.4079	3.733	5.214	15.045	6.221	3.52	10.702	32.7935	15.276	7.052	6.217	23.36	4.7524	3.508	2.661	7.3117	18.6773	2.4449	2.1617	2.3268	24.2893	2.663	3.266	4.518	6.2676	2.411	2.3538	24.3417	5.2741	2.125	2.836	2.997	5.01	26.064		0.434064	8.7089
9.527	3.918	4.998	15.633	5.744	3.525	10.105	36.1682	14.341	8.767	6.599	23.377	4.2489	3.12	3.2288	6.9806	17.0337	1.9476	2.3953	2.0782	25.8606	2.999	3.014	4.883	6.6249	2.402	3.44	22.676	5.5973	2.039	1.685	2.918	4.72	24.693		0.439559	8.72
9.6461	3.083	5.3	16.162	5.807	3.582	9.496	35.1283	16.463	8.455	7.095	28.069	3.976	2.558	2.8658	5.9479	19.009	2.1305	2.4158	1.9511	24.8963	2.988	2.647	3.582	6.0164	2.834	2.1214	22.2718	5.4605	2.251	1.93	2.19	4.432	25.425		0.445054	8.74363
9.7652	3.057	5.433	17.547	4.97	3.434	9.315	36.2286	16.285	9.004	6.203	31.941	4.5799	2.389	2.3565	6.3513	16.2369	2.5901	1.3637	3.0265	28.1094	3.822	2.548	4.224	7.1438	2.311	2.2717	19.4136	4.6736	2.637	2.124	3.014	4.437	24.668		0.450549	8.90026
9.8843	3.813	5.177	17.655	6.166	4.188	9.912	36.8201	19.079	9.009	6.876	33.443	4.7534	2.559	2.6614	4.5173	17.6867	2.9326	2.1875	1.8474	27.503	3.024	2.794	4.98	8.4132	2.504	2.249	19.2077	6.2628	1.847	2.433	2.657	4.494	23.78		0.456044	9.19491
[truncated: 99 more rows]

[truncated: 4 more sheets: Image3, Image15, Image14, Sheet1]
