# Supplementary material for: Crumbs organizes the transport machinery by regulating apical levels of PI(4,5)P2 in Drosophila
Source: eLife. 2019 Nov 7;8:e50900. doi: 10.7554/eLife.50900 (PMC6881148; doi:10.7554/eLife.50900)
Supplement: Figure 5—figure supplement 1—source data 7. [file elife-50900-fig5-figsupp1-data7.xlsx]

## Sheet: Image28
X0	Y0	Y1	Y2	Y3	Y4	Y5	Y6	Y7	Y8	Y9	Y10	Y11	Y12	Y13	Y14	Y15	Y16	Y17	Y18	Y19	Y20	Y21	Y22	Y23	Y24	Y25	Y26		Ap-Basal	Avg intensity
0	48.801	35.233	39.864	26.042	23.7497	22.51	22.5532	21.9539	21.4042	26.7932	26.3199	27.303	27.269	29.071	49.295	36.6226	28.559	26.503	34.476	19.514	25.166	36.604	47.715	50.095	40.53	42.189	40.382		0	32.4636
0.1191	50.58	47.968	41.122	26.492	25.9397	24.092	21.8863	19.8391	20.5849	26.9219	24.7005	29.242	29.037	32.627	56.0034	46.3685	35.022	27.162	33.904	21.623	26.688	38.736	50.536	58.348	45.914	43.398	42.583		0.00487855	35.0859
0.2382	57.001	53.288	50.69	29.836	27.4348	24.91	21.9383	26.84	26.5427	31.2152	29.5568	30.434	28.977	34.824	66.3155	44.7933	35.912	32.278	32.868	22.109	24.741	40.57	56.275	64.037	49.961	48.81	45.745		0.0097571	38.4408
0.3573	71.927	60.465	55.696	37.429	30.9526	32.928	25.6955	23.7379	28.9341	32.6362	28.7476	33.687	29.105	30.434	63.8695	46.8156	31.689	32.132	34.255	24.939	30.142	47.062	62.981	79.715	52.517	52.768	54.759		0.0146356	42.0748
0.4764	80.56	69.927	59.841	38.678	40.3249	32.869	23.6581	25.3702	27.1612	34.0003	30.4695	33.806	32.282	36.923	65.0595	54.5245	32.163	38.348	37.238	26.401	35.062	48.935	72.288	87.699	57.238	58.053	63.603		0.0195142	46.0179
0.5954	99.425	81.566	71.487	41.67	39.5979	34.125	29.9433	29.918	30.4934	40.303	30.9565	39.18	37	40.264	73.7461	55.4187	40.82	41.709	43.313	28.527	32.979	58.798	82.788	96.102	54.695	65.056	65.35		0.0243886	51.3048
0.7145	134.661	95.289	73.87	48.589	49.5635	44.821	29.9481	30.7455	35.442	40.7715	39.6576	40.083	38.97	44.177	86.7178	61.9504	43.79	49.372	41.512	30.589	34.78	57.362	84.739	106.372	64.023	73.282	78.242		0.0292672	57.7526
0.8336	140.261	101.294	75.487	50.61	54.2255	54.153	38.4111	37.1564	31.0458	48.8824	39.3152	43.903	40.199	50.442	85.411	65.4597	50.843	56.039	43.762	36.415	40.359	68.615	93.634	106.027	67.834	79.86	89.277		0.0341457	62.5526
0.9527	158.171	110.1	85.677	55.84	68.7994	60.174	40.9205	37.0515	41.4284	49.1219	46.2582	49.706	47.23	49.723	84.5456	69.3574	49.021	64.744	54.032	37.491	46.039	68.648	98.303	111.344	73.223	87.055	97.283		0.0390243	68.1958
1.0718	163.205	119.791	97.547	56.392	76.1746	80.08	49.5021	43.4363	38.3576	59.9337	50.2859	52.698	53.218	61.81	87.8995	76.2757	57.534	82.741	55.658	41.117	52.668	77.822	101.806	110.09	85.201	95.612	104.5		0.0439028	75.2354
1.1909	183.987	124.586	108.443	66.906	80.8718	86.547	60.8876	43.8495	43.1103	61.6639	54.3043	56.579	54.664	69.505	89.652	76.7906	68.546	104.637	70.669	46.084	62.04	82.365	105.601	124.377	84.942	111.57	118.498		0.0487814	83.025
1.31	168.745	133.685	111.276	74.84	85.4999	93.312	66.6471	51.9002	39.9496	61.0517	57.1263	66.475	58.052	71.42	94.4819	83.0485	76.271	121.128	81.433	53.836	66.214	92.848	111.739	118.018	99.49	116.198	136.146		0.0536599	88.5493
1.4291	157.803	126.73	121.902	81.737	96.4538	98.035	77.9974	59.0701	45.9879	70.2247	61.9117	67.622	61.118	83.371	83.8151	86.1963	87.916	129.2	103.667	63.507	77.499	109.56	112.398	121.894	102.701	123.915	154.669		0.0585385	95.0704
1.5481	130.228	123.899	118.054	83.8	100.581	109.277	87.8415	57.9538	49.866	70.076	70.1703	76.492	63.834	83.437	83.3885	81.5367	101.105	145.046	127.011	78.091	83.482	101.597	114.586	125.648	104.923	129.721	161.723		0.0634129	98.6433
1.6672	108.455	109.012	121.06	89.978	98.1075	107.38	88.7707	74.0566	55.1359	76.0877	77.0556	87.551	75.426	92.868	82.1788	81.7776	113.192	157.315	136.952	85.223	91.319	117.344	120.013	126.184	109.59	135.695	173.859		0.0682915	103.392
1.7863	81.503	94.605	119.423	87.908	83.5139	96.471	88.5964	76.7232	54.0856	71.8008	85.956	88.968	86.575	96.53	82.3806	83.5831	114.014	163.388	159.584	87.917	104.055	117.407	121.326	124.444	126.638	150.377	178.773		0.07317	104.687
1.9054	72.868	87.291	106.642	89.141	77.0016	90.686	87.2105	86.6122	55.5386	84.1521	88.6173	97.502	83.691	102.994	81.052	84.5159	126.555	158.898	164.607	99.207	120.744	113.067	122.723	119.155	132.342	155.484	181.933		0.0780486	106.305
2.0245	60.791	83.353	102.835	97.173	74.6895	75.498	87.2063	87.237	60.5315	91.461	86.2635	110.232	92.582	102.836	85.7217	90.6086	131.483	156.959	171.46	113.544	127.116	127.266	127.394	108.789	128.833	160.138	192.64		0.0829271	108.69
2.1436	53.637	76.707	90.887	95.855	63.2882	71.542	77.7313	92.718	62.1967	89.3356	90.9325	112.544	101.651	110.844	77.1288	92.5601	132.421	148.394	168.086	121.932	135.41	125.954	122.018	110.56	137.252	169.19	194.139		0.0878057	108.33
2.2627	45.295	58.113	82.156	91.66	62.1242	56.828	72.286	97.9005	71.786	89.5653	93.5089	106.888	99.149	106.122	84.466	102.708	131.862	140.959	168.161	124.928	139.074	138.651	124.968	111.041	141.038	166.958	195.332		0.0926842	107.538
2.3818	39.707	52.893	76.813	86.829	48.8059	55.332	71.3856	86.5175	80.6754	81.1014	88.6319	114.501	106.26	97.015	92.2484	95.2043	124.92	116.754	154.516	130.667	137.195	132.648	126.991	105.695	139.409	166.498	193.38		0.0975628	103.8
2.5008	32.06	49.573	69.401	79.486	40.6492	47.375	62.8282	88.4553	87.689	86.6695	85.8229	113.721	114.393	92.933	86.1927	84.5986	116.16	111.601	144.637	130.111	148.388	132.11	121.765	100.77	135.853	167.626	170.197		0.102437	100.039
2.6199	25.618	41.639	60.39	59.97	37.2132	41.348	54.2518	83.0672	81.5409	78.5245	85.3328	114.953	101.795	105.862	71.4905	95.3788	115.274	92.953	127.228	136.303	148.418	128.799	119.088	89.024	149.606	174.765	160.624		0.107316	95.5725
2.739	24.992	32.72	56.419	54.601	34.2429	35.579	50.8879	77.5422	91.9087	77.3146	86.8552	116.563	109.485	90.727	68.7992	93.163	107.82	81.48	107.239	144.879	148.83	135.638	122.58	84.096	136.988	163.565	150.141		0.112194	92.0391
2.8581	19.45	29.747	41.416	48.443	29.3695	30.945	47.5036	68.1147	102.284	69.9561	86.0382	106.03	99.635	85.992	66.0536	89.7073	91.606	66.921	96.91	153.193	133.022	123.728	111.505	86.587	131.864	149.907	123.748		0.117073	84.8028
2.9772	17.618	23.263	38.879	47.255	29.3254	32.257	42.07	65.5091	92.3665	66.0011	77.2063	90.932	100.346	88.358	53.4868	90.3981	79.723	58.14	81.201	155.072	134.468	118.2	109.712	79.835	117.964	141.51	97.416		0.121951	78.8338
3.0963	16.576	21.01	26.59	36.214	23.3909	30.858	37.5509	52.8987	89.4852	61.4821	72.5206	84.194	94.565	78.777	54.3224	86.3721	63.772	49.249	71.562	155.68	124.243	105.304	98.404	71.598	118.173	124.587	94.101		0.12683	71.9807
3.2154	14.016	17.636	25.103	31.964	23.3154	20.347	30.241	52.7291	92.8034	52.2572	70.0974	73.158	81.687	79.921	45.9305	76.7125	55.391	42.795	57.37	150.047	114.839	97.925	89.961	69.04	100.097	105.289	73.714		0.131709	64.6069
3.3345	12.386	16.466	21.319	28.176	19.7301	18.939	24.1552	44.0184	84.5767	43.7733	56.4415	60.834	82.595	71.197	42.6758	70.2966	48.593	38.895	48.754	150.716	96.968	82.352	86.147	64.601	95.622	90.616	68.653		0.136587	58.1295
3.4535	12.614	13.017	15.53	26.443	14.9273	15.447	21.9084	37.6284	79.7199	40.8206	56.721	52.197	67.953	67.604	35.2297	65.889	43.225	32.774	43.359	130.701	86.785	68.163	71.175	58.722	76.029	68.059	52.114		0.141462	50.1761
3.5726	11.813	12.157	16.726	23.604	14.56	14.242	20.0666	31.9137	69.5934	32.0679	44.5994	46.482	58.083	59.601	29.197	52.4646	37.887	25.928	37.138	116.062	82.013	52.885	66.598	48.692	68.154	63.778	43.139		0.14634	43.6831
3.6917	13.148	9.623	17.268	20.982	13.1099	12.754	16.4151	33.9591	51.8682	26.0798	37.7816	36.982	54.039	51.644	32.0131	44.089	31.093	25.761	32.893	91.441	68.178	42.311	59.579	44.805	58.829	47.088	33.666		0.151219	37.3111
3.8108	8.973	9.199	12.652	17.328	10.7661	11.787	13.2121	27.368	41.2965	22.2584	30.3566	29.802	44.88	41.332	30.4325	39.2655	28.509	20.063	29.505	80.579	66.203	39.73	49.539	43.571	54.103	37.584	29.4		0.156097	32.2109
3.9299	8.27	8.627	8.978	17.953	13.1306	10.928	11.1961	23.0825	36.5876	23.0919	24.2054	30.432	34.956	33.779	30.7736	31.6666	25.147	20.969	24.588	60.424	58.725	34.991	39.218	35.877	45.717	30.621	26.335		0.160976	27.7878
4.049	7.061	8.852	9.475	17.548	10.254	9.414	11.091	18.3092	29.4399	19.1637	19.9115	31.996	23.749	29.058	20.7274	25.6561	19.445	16.517	22.786	52.589	54.445	28.969	31.535	31.333	37.794	29.846	25.539		0.165854	23.7964
4.1681	9.443	7.357	9.862	14.164	11.133	8.809	8.3168	14.786	21.6505	18.0279	15.9547	34.665	16.341	23.603	21.528	23.1173	22.583	13.292	19.553	44.126	56.043	28.77	28.306	29.952	32.365	21.722	22.281		0.170733	21.3982
4.2872	8.699	7.685	10.526	17.062	9.1901	7.127	8.1819	11.7625	18.4321	17.1909	14.2396	31.333	14.7	18.761	15.9924	17.5039	18.192	11.651	16.008	36.324	45.694	22.697	21.49	26.305	31.301	22.817	21.025		0.175611	18.5885
4.4063	8.511	8.005	9.671	15.085	11.1555	6.825	8.1528	12.4281	14.2505	14.0184	16.4379	28.601	14.117	17.803	15.4346	17.8032	14.355	11.64	13.63	28.436	40.465	20.587	23.346	23.762	30.239	16.248	23.148		0.18049	17.1909
4.5253	6.577	7.057	8.143	16.666	7.6866	7.426	7.2352	11.1012	12.6646	11.8812	11.0228	23.937	11.993	14.479	14.176	16.806	14.741	12.371	13.057	27.322	37.655	17.104	18.758	18.94	28.778	15.544	19.297		0.185364	15.2748
4.6444	8.001	7.521	8.897	17.966	8.119	7.961	7.6885	8.5045	11.7019	12.0378	10.4941	20.472	9.281	14.669	12.6134	14.9335	13.872	10.722	12.726	23.395	33.092	14.673	16.614	19.42	25.8	15.989	16.366		0.190243	14.2048
4.7635	7.554	7.831	9.938	16.105	9.4647	6.564	7.9048	9.9928	10.3506	10.2832	12.2724	17.796	11.696	13.546	11.354	14.5624	14.252	8.911	15.307	17.601	31.29	14.64	11.83	21.278	24.519	13.681	18.611		0.195121	13.6717
4.8826	5.651	6.103	9.332	13.651	9.4514	6.674	6.6247	7.3773	11.2291	10.1982	10.9608	12.835	8.889	11.794	7.9125	13.3422	10.793	13.606	14.307	18.036	29.948	15.059	11.833	19.746	21.655	15.809	15.02		0.2	12.5125
5.0017	5.969	7.347	8.369	17.632	7.0405	6.786	8.4186	6.6245	9.5112	9.3443	11.2399	15.138	9.254	11.454	11.091	12.1329	9.886	11.44	10.147	15.631	26.644	7.98	10.129	15.214	18.063	13.584	14.764		0.204879	11.5124
5.1208	6.726	5.735	7.908	14.203	10.3753	6.291	6.3484	7.724	10.5581	14.98	9.7285	12.904	9.286	10.45	9.2844	10.1666	12.902	9.158	8.409	15.777	17.57	11.407	12.55	15.76	16.76	12.683	16.118		0.209757	11.1764
5.2399	8.177	8.123	7.901	14.956	7.0424	5.838	5.8739	6.8596	10.6428	7.8459	10.319	11.341	8.666	10.306	10.1552	8.69	8.069	9.417	11.512	9.978	17.851	9.126	11.622	13.166	17.488	12.918	16.553		0.214636	10.3865
5.359	6.228	5.316	6.76	13.912	8.4942	7.482	6.0212	8.3744	9.3476	11.3173	7.7221	10.516	7.654	7.851	8.3015	8.4367	9.138	10.033	9.272	11.324	14.672	8.348	10.096	13.034	12.431	13.557	12.461		0.219514	9.55926
5.478	6.578	7.211	8.736	11.314	6.1277	7.978	5.9028	7.2527	9.1033	9.4987	10.1118	11.161	7.841	8.949	7.8166	8.6092	8.127	6.8	8.651	9.053	15.433	8.856	9.709	9.291	12.727	11.301	12.252		0.224389	9.12559
5.5971	5.95	5.475	8.236	12.534	6.097	7.113	5.7066	5.9281	10.7092	11.5555	12.0303	10.084	8.309	6.632	8.3146	9.7088	8.53	8.061	9.318	10.456	11.185	9.137	9.495	9.709	10.658	11.739	11.47		0.229267	9.04226
5.7162	8.289	5.987	6.566	11.705	8.0042	4.885	5.8992	7.3637	9.7677	11.233	10.2081	7.522	5.061	8.727	9.776	9.357	9.31	7.584	9.788	8.562	11.83	7.433	7.732	9.545	8.643	10.524	9.239		0.234146	8.53855
5.8353	6.023	7.187	7.609	10.575	6.8947	7.256	5.0876	8.382	8.9257	10.4501	10.4097	7.62	5.963	7.88	9.1117	8.86	6.269	9.436	9.67	7.884	12.47	5.957	7.446	8.283	9.834	9.015	11.137		0.239024	8.35687
5.9544	7.338	5.866	7.809	11.03	8.2914	6.174	7.1731	6.2072	10.2772	8.7795	10.5434	6.307	6.24	7.482	9.231	7.5831	7.577	7.49	6.856	9.16	11.116	7.309	7.926	7.817	9.065	9.804	7.801		0.243903	8.08344
6.0735	5.761	6.98	8.442	10.764	6.2718	7.385	6.9079	7.5759	8.6105	11.355	12.6645	7.601	6.882	7.675	9.6458	8.8933	6.583	4.646	7.051	5.928	11.563	7.219	6.811	7.974	9.157	8.325	8.476		0.248781	8.04251
6.1926	8.278	7.572	6.581	12.556	6.6473	7.417	4.7947	6.1833	9.7172	9.1709	13.2469	6.451	7.178	7.458	9.5396	8.7473	6.464	5.566	8.76	4.348	7.187	7.63	6.016	9.314	7.8	7.763	7.742		0.25366	7.78253
6.3117	6.066	6.037	6.744	9.918	6.7649	5.879	5.0933	5.3565	9.2265	9.2774	13.2787	8.733	4.564	7.678	10.6069	8.2847	4.775	6.651	6.362	5.331	8.194	6.928	6.925	7.208	8.541	6.962	10.507		0.258538	7.47748
6.4307	6.803	5.638	6.962	11.235	8.0064	6.271	6.6541	5.4292	7.966	10.7709	15.6639	7.858	5.445	7.42	7.5121	7.9188	6.131	4.192	7.215	4.971	7.902	5.752	6.531	5.993	6.72	7.177	10.312		0.263413	7.42405
6.5498	6.759	5.447	5.904	11.337	5.841	6.34	5.6022	7.7514	8.4532	9.6116	13.5217	7.905	7.998	5.299	8.9959	8.3733	6.474	5.846	6.435	7.555	7.003	6.223	6.735	6.13	7.351	9.097	10.178		0.268291	7.56171
6.6689	5.551	5.591	6.208	12.02	7.6199	6.505	4.9457	7.043	9.261	10.0982	13.0703	7.431	4.864	7.799	9.0489	8.2493	6.194	5.782	5.911	5.559	8.234	6.056	6.165	6.547	6.692	7.568	8.887		0.27317	7.36668
6.788	7.191	5.62	5.991	11.264	7.6458	5.358	6.0196	4.2883	9.8141	10.1914	12.8532	7.369	5.841	5.553	9.033	8.0035	6.119	5.321	5.294	5.812	8.366	5.422	5.172	5.54	6.189	9.5	8.652		0.278049	7.16381
6.9071	9.27	4.148	6.622	9.113	6.915	5.018	5.2718	7.2359	9.4743	14.2306	15.312	6.902	6.398	6.102	8.434	7.7573	4.986	5.52	5.582	4.505	7.754	5.099	3.813	4.044	7.588	5.546	9.232		0.282927	7.1064
7.0262	8.08	6.176	6.809	10.492	6.4454	7.145	3.8611	6.0709	7.6521	11.2763	18.5107	7.256	4.834	7.203	9.4046	8.8212	5.729	6.813	6.839	5.016	5.044	4.502	5.349	6.771	7.854	8.328	7.624		0.287806	7.40394
7.1453	7.503	4.532	8.018	11.319	7.2244	5.531	4.4422	6.7577	5.6978	11.7479	19.7289	8.747	3.449	5.567	8.1238	7.3664	5.02	5.905	5.768	4.831	6.052	4.098	4.607	4.124	7.069	6.16	8.107		0.292684	6.9443
7.2644	7.573	6.735	7.426	11.672	6.945	5.233	5.3615	5.5035	8.2059	11.3655	16.9692	11.008	5.601	6.073	9.5663	7.006	7.4	4.611	6.123	6.695	6.916	6.408	4.773	5.541	6.935	6.934	7.365		0.297563	7.47944
7.3834	7.075	6.814	6.4	10.719	6.3632	5.451	5.0014	4.8248	5.4899	10.9006	19.622	8.752	6.672	4.415	9.1534	7.0695	4.494	5.875	3.997	5.011	6.425	8.844	4.658	6.029	8.194	6.883	8.07		0.302437	7.15566
7.5025	7.908	5.863	6.095	8.815	5.1425	5.884	5.6305	6.1124	5.7567	13.7953	20.8399	9.112	6.118	5.815	9.4478	6.5862	4.978	4.054	5.488	4.77	7.138	5.425	5.031	5.999	6.506	5.859	7.994		0.307316	7.11716
7.6216	6.354	5.381	5.878	9.325	5.6702	6.05	5.0633	7.5035	8.5835	13.3998	19.1844	7.817	5.761	6.456	9.0526	7.5032	5.486	4.073	4.738	5.018	7.337	7.73	4.889	2.791	5.047	5.695	8.034		0.312194	7.03039
7.7407	5.56	7.615	6.183	13.118	7.3774	5.012	4.4677	5.521	6.8664	13.4126	18.8658	8.702	5.641	5.479	9.8297	8.676	5.282	5.829	4.674	4.876	7.579	4.865	5.787	6.146	7.095	7.43	7.472		0.317073	7.38376
7.8598	7.575	7.451	6.174	13.1	7.3444	4.559	3.1922	6.0294	5.6816	14.4729	19.4544	9.076	6.65	7.392	11.4092	5.6544	5.935	4.79	4.633	4.057	6.411	5.266	4.739	5.151	7.371	6.79	7.577		0.321951	7.33094
7.9789	7.364	6.454	5.909	12.281	8.6286	4.341	3.3607	6.7332	7.3948	12.0047	20.162	7.702	4.93	4.357	11.5715	9.1398	4.584	5.259	3.85	5.206	5.091	5.969	4.025	3.988	5.645	4.281	6.694		0.32683	6.92316
8.098	7.343	6.008	5.738	11.881	5.9972	4.632	4.5279	5.26	8.0843	10.3086	19.4311	9.211	3.485	5.471	11.2304	7.3432	5.097	5.493	4.747	4.889	7.254	7.231	4.902	5.113	6.001	5.516	6.829		0.331709	7.00088
8.2171	6.153	6.832	8.112	13.156	5.543	6.953	5.2635	5.4547	6.9407	12.4445	20.0337	7.547	6.409	5.206	10.2974	8.4151	5.699	5.594	5.157	3.99	6.206	6.231	5.425	4.286	4.706	6.944	7.822		0.336587	7.28965
8.3362	6.984	5.047	6.506	12.847	7.2847	4.124	4.3526	5.4505	6.2737	13.197	24.3847	8.557	6.378	4.549	11.3017	6.7773	6.377	5.038	4.933	6.069	5.046	7.164	5.504	4.262	5.805	6.858	7.957		0.341466	7.37138
8.4552	5.883	6.4	6.708	14.863	5.907	5.219	3.1896	4.3797	7.6819	10.9671	19.5729	9.524	5.074	6.77	12.3261	7.1538	4.151	4.261	4.282	5.59	6.388	6.504	4.198	3.632	5.608	7.016	7.339		0.34634	7.05882
8.5743	7.588	5.913	4.845	12.738	7.8338	5.396	4.3483	5.8677	6.3205	13.6555	18.7986	9.749	5.212	5.779	10.7755	6.9266	5.396	5.722	3.729	4.676	7.514	7.267	5.207	4.449	4.597	6.524	6.057		0.351219	7.14387
8.6934	7.158	7.566	7.032	13.014	7.1941	5.289	4.9569	3.4139	7.4406	11.9964	23.599	8.946	7.33	4.198	10.2568	7.1579	5.923	5.018	4.772	5.904	6.379	8.321	4.856	5.411	6.928	5.904	6.567		0.356097	7.50117
8.8125	6.843	7.38	8.765	15.435	7.1741	5.499	5.7946	4.9697	9.4769	16.1925	19.6045	12.791	6.981	5.734	11.988	7.8865	5.33	5.138	3.899	5.049	6.237	6.843	5.365	4.389	7.118	5.345	7.334		0.360976	7.94673
8.9316	6.708	7.477	6.204	14.97	6.813	6.156	4.892	4.6136	6.251	12.6243	19.8598	12.306	7.136	6.408	12.5271	6.6509	5.202	4.791	3.404	3.742	4.645	7.167	6.142	4.467	6.496	7.984	6.379		0.365854	7.48206
9.0507	7.932	4.962	7.789	15.266	7.5446	6.062	4.2024	4.7307	7.0209	12.3815	23.1286	12.201	5.416	5.938	15.1354	6.816	4.396	5.002	3.927	4.529	5.885	5.874	5.246	5.093	6.579	6.736	6.165		0.370733	7.62808
9.1698	7.12	8.274	7.412	13.954	6.5703	6.678	6.2199	3.4971	6.6335	14.1473	21.5535	12.499	5.203	4.899	10.5872	6.5011	5.793	4.955	4.077	3.93	7.071	6.657	4.849	5.175	5.713	6.302	7.322		0.375611	7.54048
9.2889	6.46	7.015	7.046	13.322	7.38	6.281	5.0649	4.6169	7.9169	13.6983	26.4856	12.056	7.085	4.823	12.8475	6.9596	5.204	5.129	3.871	4.82	7.216	6.03	4.151	5.661	5.751	6.254	8.259		0.38049	7.82977
9.4079	8.11	6.741	7.478	15.755	7.3612	5.664	5.3817	5.2552	8.6211	13.0633	20.272	12.244	6.949	4.006	12.4879	6.6073	6.201	4.695	5.266	4.666	6.541	6.902	5.568	4.961	4.741	4.995	6.404		0.385364	7.66432
9.527	8.237	6.373	8.429	17.953	4.5592	5.865	3.8659	3.9231	7.0682	16.4577	21.3694	11.988	6.048	4.143	12.2409	8.7316	5.398	5.063	4.608	3.549	6.407	5.979	4.65	5.392	6.378	6.099	7.647		0.390243	7.71933
9.6461	7.421	6.452	6.179	16.905	7.6873	6.38	3.0334	5.1429	6.3698	16.5612	23.9737	11.566	7.973	6.175	13.2247	6.7573	7.41	4.424	4.132	5.623	5.687	8.215	5.696	4.897	5.394	6.609	7.354		0.395121	8.04601
9.7652	8.889	6.42	7.523	16.283	8.6832	6.013	4.6973	4.5052	6.1012	15.9824	20.0517	12.697	5.663	5.698	12.4719	6.9022	6.183	4.082	4.895	4.46	7.957	7.702	6.435	4.805	4.567	6.275	7.013		0.4	7.88723
9.8843	7.487	7.325	7.615	16.471	7.2688	4.862	5.2764	3.2731	5.397	15.9021	23.5249	10.168	7.652	5.967	12.9746	10.3046	5.289	4.677	4.448	4.158	8.925	7.138	4.969	6.095	5.421	6.615	6.884		0.404879	8.00324
10.0034	7.322	6.626	7.678	18.701	6.0553	5.337	4.6177	5.7933	7.1176	14.9482	20.941	9.771	5.856	5.149	12.9594	8.6386	6.655	5.104	3.295	6.978	7.159	7.532	6.366	3.81	5.511	6.543	8.213		0.409757	7.951
10.1225	8.83	8.21	7.957	16.608	6.715	5.707	4.2365	3.8076	7.2731	13.0579	21.863	10.332	7.019	6.082	12.4919	8.1278	5.28	5.562	3.174	5.897	7.033	9.455	6.009	4.035	6.064	6.94	6.482		0.414636	7.93514
10.2416	8.329	6.455	7.566	21.36	7.1486	6.851	5.4288	4.4196	5.4705	15.4184	24.9415	10.695	6.564	5.63	15.4742	8.893	5.734	5.753	4.339	5.355	9.358	8.301	5.348	4.553	6.2	6.958	6.99		0.419514	8.50124
10.3606	8.415	6.884	7.113	17.456	7.8716	6.162	4.3643	4.7758	5.801	12.2221	18.6741	8.565	7.717	6.211	17.5261	8.6427	4.394	5.143	4.046	4.142	7.86	8.975	7.475	4.312	6.428	8.9	9.709		0.424389	8.14017
10.4797	8.313	5.323	7.856	20.268	7.027	7.311	5.1187	4.0561	7.0262	16.8577	20.7593	9.758	7.916	4.451	15.8367	7.7391	4.835	4.536	3.44	5.253	9.335	10.433	8.856	4.376	9.016	6.776	8.93		0.429267	8.57047
10.5988	8.749	6.393	6.496	20.077	7.571	8.321	4.2793	3.8858	6.8601	15.6423	21.4783	10.019	8.035	5.74	17.6761	7.4713	4.841	5.03	4.354	4.414	6.983	8.803	6.863	6.038	5.011	7.46	10.109		0.434146	8.46667
10.7179	8.504	7.684	8.77	25.471	7.1698	7.354	5.1421	5.8102	6.7934	15.7597	20.1874	11.894	6.645	4.76	19.9699	9.4711	4.181	4.773	3.951	4.906	10.115	10.116	7.297	6.006	7.833	5.703	8.672		0.439024	9.0718
10.837	7.233	7.876	6.084	25.026	6.8138	7.326	6.1927	6.025	4.7374	15.1305	23.3585	9.355	8.897	5.889	18.918	7.3672	5.612	5.016	5.478	5.613	9.698	10.679	7.114	5.234	8.571	6.526	10.79		0.443903	9.13186
10.9561	7.175	6.533	8.093	24.067	6.7385	6.236	4.7185	4.8922	4.7152	14.319	27.0863	13.088	7.653	5.239	23.639	9.8336	5.057	5.668	4.913	6.539	8.83	10.581	6.767	4.711	6.244	7.637	12.021		0.448781	9.37016
11.0752	9.991	8.165	7.117	26.774	8.4473	7.786	5.3058	6.8583	6.6736	11.9036	25.4859	11.908	10.922	6.199	27.0131	6.9102	6.155	3.797	3.707	4.868	9.851	10.714	7.455	5.431	5.45	10.039	10.677		0.45366	9.83718
11.1943	7.696	7.188	8.002	24.009	6.8071	7.178	5.2492	4.452	6.0046	11.8648	24.6246	11.603	8.509	7.992	28.1199	8.8077	4.944	5.533	4.244	7.779	10.892	11.704	6.131	6.053	5.754	7.258	10.668		0.458538	9.59507
11.3133	8.767	7.775	8.05	29.396	7.7844	7.122	6.4479	5.2004	5.8502	12.7163	23.9188	13.165	11.857	7.741	27.5257	9.7347	4.891	4.173	5.381	9.147	10.748	10.891	6.899	5.81	6.673	7.75	12.379		0.463413	10.2886
11.4324	7.016	6.92	8.963	26.334	7.0755	4.801	6.4526	4.8931	5.635	12.9321	24.55	13.761	11.13	8.328	27.8611	7.37	3.808	4.586	4.3	6.763	8.054	11.481	6.489	4.792	8.531	8.028	13.475		0.468291	9.78998
11.5515	8.429	7.422	7.347	30.916	7.4377	5.745	5.3517	5.878	5.609	12.6696	22.7353	14.354	10.115	9.182	27.6384	7.932	6.32	3.909	4.228	7.033	10.083	10.73	6.823	7.406	9.1	10.975	13.009		0.47317	10.3103
11.6706	8.085	6.227	7.752	27.543	8.6041	5.097	5.7072	4.8628	5.205	11.6419	24.6807	14.275	8.952	8.299	25.5056	10.7623	5.305	6.881	5.495	6.992	10.729	8.246	6.156	7.005	7.849	9.882	15.24		0.478049	10.1104
11.7897	8.112	6.604	7.113	26.219	6.9924	6.399	5.9994	6.9598	6.6103	11.7395	23.8415	14.349	7.696	6.981	24.8486	6.7767	3.938	4.968	4.932	7.393	8.035	9.063	7.723	5.846	6.329	14.832	15.701		0.482927	9.8519
11.9088	8.011	6.582	8.217	25.991	6.6859	5.736	5.3278	5.7971	6.5603	10.269	23.8158	12.602	8.831	9.514	23.9224	8.2303	6.949	5.201	3.569	7.442	11.594	12.392	7.659	6.356	7.376	12.339	14.832		0.487806	10.0667
12.0279	8.417	8.783	10.982	24.97	9.5178	7.002	5.2851	6.8449	7.0007	14.0946	22.7316	13.16	10.841	9.945	21.1786	9.351	5.762	6.56	4.575	6.158	10.592	13.419	7.679	7.308	10.2	13.901	16.124		0.492684	10.829
12.147	7.04	5.471	7.884	27.74	8.9955	7.071	6.5448	7.873	9.0019	14.0688	21.6918	14.788	12.006	8.066	24.8682	11.8767	4.966	5.614	5.698	7.374	14.141	12.317	8.469	7.665	10.752	12.214	22.072		0.497563	11.3433
12.2661	6.558	9.709	7.936	30.275	7.6529	8.163	6.7161	6.9223	8.2278	13.1233	17.8737	10.594	7.684	8.569	22.4604	8.6013	5.678	4.661	6.357	6.801	12.791	13.645	7.233	5.19	10.874	15.937	17.917		0.502441	10.6722
12.3851	7.261	8.765	7.316	29.427	6.895	7.246	6.2334	6.379	8.2895	11.9382	20.3124	13.104	9.114	10.794	21.9946	9.2601	5.135	5.418	4.538	6.768	12.326	14.511	7.329	8.609	9.56	15.53	21.014		0.507316	10.9284
12.5042	10.208	7.073	8.378	31.626	7.3388	6.163	6.2702	5.0293	10.4469	14.77	19.7217	12.702	11.262	10.412	17.1334	11.3428	4.915	4.689	5.092	8.292	13.214	15.764	9.215	7.058	9.726	14.297	20.513		0.512194	11.2093
12.6233	6.705	6.579	7.635	23.718	8.5133	7.577	7.2503	7.7817	6.773	11.3556	18.9768	12.968	9.194	11.307	18.6604	10.0831	6.105	4.939	3.753	8.603	12.436	15.664	9.275	8.962	10.931	15.54	20.523		0.517073	10.8077
12.7424	10.159	8.657	7.252	25.779	11.3928	7.287	6.7304	8.2617	8.0422	14.391	18.9594	12.944	10.642	13.013	18.0416	8.3195	5.257	5.302	4.815	8.549	17.563	13.605	10.443	7.131	9.145	15.871	19.629		0.521951	11.3771
12.8615	8.715	7.798	7.618	24.037	7.2164	8.672	5.9576	8.2009	7.7974	14.3783	19.3292	11.14	8.847	13.021	17.8356	7.6088	5.928	5.441	4.498	10.177	16.063	15.796	11.159	7.656	7.915	15.756	24.193		0.52683	11.2131
12.9806	7.373	8.61	6.056	23.501	9.2601	8.864	6.0319	6.2648	8.0997	10.8755	20.1233	11.683	9.849	16.842	17.6263	7.3155	5.078	4.967	4.573	9.479	15.158	15.555	10.726	7.658	8.563	15.693	24.252		0.531709	11.114
13.0997	6.594	9.937	7.97	22.614	6.4182	6.553	7.1056	8.0852	8.843	8.9925	21.5841	16.563	10.208	19.185	17.1487	8.421	4.212	5.406	6.187	6.937	16.479	17.539	10.073	8.982	9.148	12.449	29.41		0.536587	11.5942
13.2188	6.884	9.142	7.211	20.297	7.0618	8.343	7.2105	7.3213	7.6297	12.2756	25.5111	10.104	11.938	18.786	16.625	7.3178	5.478	4.554	5.467	8.997	15.25	19.032	9.616	7.686	7.68	12.711	28.352		0.541466	11.4252
13.3378	8.02	9.152	7.811	22.579	8.8774	7.995	5.7191	7.9389	9.2184	13.6349	23.1497	13.1	9.064	21.84	13.7764	9.0183	6.019	4.62	4.427	8.662	16.956	13.033	6.377	7.75	7.823	11.129	29.302		0.54634	11.3701
13.4569	8.78	10.157	7.504	22.994	6.1928	6.933	6.6406	7.7758	6.5702	12.4746	25.2913	13.694	11.032	23.314	17.0723	5.7369	4.252	4.057	5.027	7.851	17.66	15.055	12.574	7.051	7.055	12.859	27.599		0.551219	11.6001
13.576	8.408	8.239	7.462	23.442	7.8921	6.88	6.3387	6.3428	7.0897	13.2298	25.7188	17.547	9.963	21.265	15.7289	6.8148	5.692	4.092	6.109	6.971	15.897	16.977	9.352	6.841	9.33	8.463	30.407		0.556097	11.5738
13.6951	7.501	8.164	9.381	26.135	9.0352	6.794	6.0384	7.3872	8.9877	13.2138	21.2427	18.473	12.338	25.408	11.2588	6.5199	5.579	5.303	6.292	7.092	16.41	16.481	10.568	9.989	9.334	10.508	33.286		0.560976	12.1748
13.8142	7.931	8.374	8.112	23.72	9.2883	7.676	8.099	6.4267	8.7844	13.7133	24.6165	23.919	11.944	21.178	14.1255	7.5836	5.621	4.285	5.55	5.993	12.407	15.854	8.276	8.073	7.481	11.107	33.437		0.565854	11.9843
13.9333	7.729	8.365	10.458	25.683	8.4588	7.564	7.1951	6.0986	7.7665	12.3724	20.0122	23.651	12.654	24.978	12.1832	7.8318	3.996	3.33	6.522	7.386	15.75	15.228	8.188	6.063	9.168	8.169	29.308		0.570733	11.7077
14.0524	8.992	9.373	8.337	22.489	8.4306	7.989	6.8463	7.8181	9.2408	13.3776	18.7379	26.014	15.106	25.359	8.8898	6.9983	6.079	4.592	4.489	5.251	14.848	13.232	8.207	6.619	6.606	7.791	34.216		0.575611	11.7011
14.1715	8.669	7.748	9.155	24.757	11.3216	6.468	7.3204	6.0992	7.846	12.3867	20.3978	25.952	13.96	26.495	8.8333	5.7496	6.035	4.947	5.786	7.248	15.303	14.865	8.938	5.196	7.766	7.046	28.113		0.58049	11.6445
14.2905	9.525	8.581	8.245	24.362	8.9452	5.765	6.0066	7.7314	9.4242	11.7278	16.7746	24.791	12.142	27.944	11.127	6.3175	6.526	3.815	4.872	7.348	15.342	14.381	10.628	5.873	8.981	7.267	28.084		0.585364	11.575
14.4096	9.068	9.522	9.139	22.711	8.8468	5.735	5.8819	6.8977	8.5485	11.8857	19.1261	26.284	12.981	25.042	9.4144	5.5734	6.046	5.552	5.731	9.289	13.722	14.694	10.865	8.238	10.599	8.446	27.284		0.590243	11.7453
14.5287	8.433	8.881	7.813	22.928	9.2354	6.615	6.2623	9.5183	9.7061	9.7385	18.423	25.154	11.708	31.231	9.0153	7.1489	5.076	5.451	4.303	7.901	13.511	14.474	9.919	7.322	9.21	7.81	28.558		0.595121	11.6795
14.6478	10.429	11.497	10.194	23.457	11.6529	6.647	5.0447	8.6386	6.601	13.0602	16.4437	30.101	10.935	27.91	10.9543	7.1225	4.187	5.814	5.225	6.838	12.884	15.752	9.146	6.321	9.055	8.415	25.964		0.6	11.8626
14.7669	10.315	10.221	7.344	21.186	10.5488	6.633	6.0448	7.239	8.3812	11.5069	13.7178	31.287	10.778	27.872	10.3937	6.211	6.261	3.444	4.649	6.45	13.003	17.687	9.469	6.823	11.916	9.425	18.147		0.604879	11.3686
14.886	9.519	8.806	9.207	19.361	11.8495	7.338	6.9829	7.8519	9.2059	9.9151	17.6467	31.153	11.514	31.949	10.4868	6.1907	6.338	3.532	4.875	5.139	14.447	18.39	6.363	6.363	10.274	8.684	21.04		0.609757	11.6452
15.0051	9.248	13.824	8.693	19.217	9.3494	5.759	5.1521	8.8853	7.1039	12.1103	11.8469	34.182	11.689	29.149	10.4775	4.9404	4.785	5.283	5.356	7.761	14.354	16.521	8.202	7.255	8.705	8.504	18.285		0.614636	11.357
15.1242	10.744	12.642	6.619	21.571	12.8184	6.691	7.5853	9.5314	8.676	11.1753	14.7295	41.432	11.121	28.657	10.2492	5.0336	5.438	5.57	4.787	7.903	14.066	12.377	6.968	6.742	7.991	9.796	19.412		0.619514	11.8639
15.2432	9.727	11.726	8.378	18.432	11.9048	6.672	7.5523	7.5938	8.2317	13.1053	11.325	37.283	9.473	29.013	10.4727	6.4059	5.873	4.672	4.911	9.233	13.249	16.018	9.368	6.493	9.396	7.166	16.56		0.624389	11.4902
15.3623	8.86	12.625	7.054	17.148	14.9552	5.485	6.4542	9.6596	7.4998	13.6136	13.8698	40.125	10.51	28.023	9.1156	6.4387	5.753	5.491	4.538	8.717	14.374	16.078	8.321	8.191	10.79	9.356	16.558		0.629267	11.8372
15.4814	10.729	11.878	6.839	16.036	15.5052	6.262	5.7673	7.95	7.8521	13.7564	12.4284	39.873	11.194	27.671	8.8805	5.7165	7.294	7.322	6.11	8.527	14.745	12.657	6.995	8.33	7.893	11.309	16.548		0.634146	11.7062
15.6005	10.895	8.593	8.041	19.628	18.2979	9.575	6.4138	7.3531	8.8184	13.4502	13.652	40.534	10.195	26.562	6.95	5.2331	5.624	5.981	7.375	5.485	14.479	11.771	6.576	7.733	9.656	8.967	14.907		0.639024	11.5832
15.7196	8.83	10.524	8.924	19.317	17.8135	7.168	6.8701	7.4204	7.8376	11.188	12.6578	42.843	13.175	29.223	8.7519	6.4198	4.791	5.249	3.672	7.926	17.148	10.393	7.298	7.566	10.252	8.473	14.198		0.643903	11.7011
15.8387	10.493	8.275	8.756	19.882	18.8571	6.82	8.2122	9.018	6.1616	11.452	12.8125	41.685	11.588	29.564	7.0366	6.645	4.144	4.108	5.078	8.701	16.633	10.96	7.289	7.746	9.619	8.529	14.651		0.648781	11.6561
15.9578	10.203	10.983	7.7	17.476	18.9817	8.388	8.4945	7.2254	8.2984	12.8485	13.6377	47.635	13.135	33.293	6.7202	5.8256	4.99	6.418	5.508	7.721	13.342	10.616	6.317	7.253	9.088	8.478	11.871		0.65366	11.9425
16.0769	7.192	11.146	6.079	18.55	22.6612	9.806	6.9207	7.6733	6.645	13.1262	10.6889	50.865	14.85	32.465	9.9365	5.1425	4.712	6.273	4.404	7.439	14.595	11.996	6.867	9.272	10.57	8.626	14.054		0.658538	12.3169
16.196	10.028	11.844	5.636	18.391	21.7663	11.048	6.6652	8.4581	5.9866	13.736	11.9987	51.826	15.135	32.17	10.6448	6.7861	6.22	5.937	3.924	8.196	14.256	11.854	6.161	6.182	7.918	9.866	14.213		0.663417	12.4758
16.315	8.926	10.93	7.978	15.847	23.3842	8.465	7.0282	10.1085	5.752	13.7598	12.4424	44.928	13.051	33.036	7.7572	5.3864	6.131	7.809	4.402	8.33	15.745	14.226	5.981	5.732	9.995	8.791	14.984		0.668291	12.2558
16.4341	9.798	13.116	8.14	16.277	25.8935	8	7.3567	8.685	7.5514	14.5991	14.895	53.366	14.468	32.631	8.1627	5.6549	4.933	6.032	4.884	10.055	14.903	11.887	6.331	7.15	7.751	10.51	13.012		0.67317	12.8164
16.5532	10.489	11.12	8.298	13.797	27.1854	8.54	7.8682	8.0275	6.4121	13.7893	16.6137	52.464	13.982	34.067	9.0421	5.2253	7.311	4.771	6.767	10.343	13.842	11.763	6.234	7.121	10.643	10.385	15.409		0.678049	13.0189
16.6723	9.925	12.952	7.327	16.463	29.7212	9.836	8.9478	8.4814	5.9971	11.3102	12.4762	46.64	14.648	35.036	8.3639	6.6778	7.307	6.266	5.508	9.475	16.653	9.77	7.089	7.415	10.676	9.759	17.193		0.682927	13.0338
16.7914	9.782	11.642	7.38	14.406	29.0042	8.594	6.8426	8.4234	8.4898	13.162	14.2666	45.412	15.546	33.457	8.0316	5.3224	4.93	6.291	5.671	9.51	15.047	11.254	7.665	6.549	8.723	10.796	16.572		0.687806	12.6952
16.9105	10.095	11.519	8.252	13.759	27.0293	7.888	6.2708	7.5152	6.9901	10.3919	16.8489	45.008	14.938	33.043	7.9668	5.6127	5.482	5.807	5.864	7.145	13.741	11.846	7.999	6.199	8.453	11.287	20.205		0.692684	12.4872
17.0296	12.752	10.161	7.456	14.622	28.6216	10.02	7.4014	8.7908	6.4389	15.756	18.9707	43.937	15.784	38.809	8.467	7.2296	5.055	4.718	5.594	8.986	15.006	10.747	7.422	7.236	10.341	8.585	16.799		0.697563	13.1743
17.1487	7.422	11.716	7.256	14.445	31.1933	8.066	7.9031	8.2266	7.5929	10.5344	16.376	40.545	19.677	37.21	7.5114	5.7488	4.833	5.902	5.312	8.128	16.272	11.028	7.49	8.051	9.833	8.71	17.692		0.702441	12.7657
17.2677	9.663	9.798	6.816	12.995	29.9375	10.467	8.3724	7.076	8.1139	14.1336	17.1359	40.734	18.843	38.299	9.122	4.9975	7.198	7.195	6.31	8.628	17.92	10.306	7.352	7.537	8.151	9.404	12.583		0.707316	12.9292
17.3868	10.918	10.946	7.371	13.398	28.0044	11.43	7.8927	7.6487	8.3072	11.8195	17.8032	34.473	22.871	41.301	8.3898	6.0376	5.899	6.084	5.415	8.191	17.707	12.706	8.307	6.437	8.13	8.936	14.774		0.712194	13.0073
17.5059	12.929	10.041	6.999	14.061	29.3784	10.46	8.2134	7.5017	7.9227	14.1202	14.654	24.623	20.862	37.779	8.4972	6.402	5.894	6.609	4.488	10.133	21.419	10.885	7.691	6.484	8.638	9.551	14.63		0.717073	12.6247
17.625	11.883	9.824	7.738	13.208	29.4219	9.753	8.0351	8.8759	8.1086	15.2147	13.9705	32.18	22.719	33.978	9.1122	5.1519	5.384	7.091	7.293	9.129	24.358	11.651	7.166	6.662	8.669	11.998	12.476		0.721951	13.0019
17.7441	12.363	9.372	6.356	12.469	30.6001	13.405	7.9609	9.3185	6.7717	14.5165	18.2649	32.738	25.973	37.411	10.018	4.2562	7.924	6.281	7.293	7.493	24.563	10.245	7.338	6.066	10.015	9.129	12.386		0.72683	13.3528
17.8632	7.6	8.413	7.885	13.591	29.2627	9.387	9.299	8.5064	8.591	13.391	16.6506	27.044	29.572	33.109	7.2842	6.1558	6.498	4.271	6.473	6.759	24.359	10.628	7.949	5.653	8.109	10.546	12.111		0.731709	12.5592
17.9823	10.214	9.116	6.449	12.147	29.2127	13.955	7.5675	10.6573	7.5787	15.0737	16.7483	33.528	31.982	34.637	7.5911	5.8343	7.234	5.852	6.995	7.339	28.611	10.216	8.836	6.05	8.291	8.101	14.031		0.736587	13.4758
18.1014	12.65	8.632	6.405	13.216	28.2552	12.567	11.0958	7.8977	7.7301	13.0516	16.7254	39.042	33.268	37.379	7.8054	5.4568	6.531	4.239	7.587	8.555	29.07	12.491	6.706	6.707	10.43	11.442	13.562		0.741466	14.0184
18.2204	10.385	8.773	6.099	13.375	28.3332	14.132	8.525	8.3627	8.1439	17.3995	16.1905	41.135	37.038	30.909	6.6346	6.3327	6.046	7.432	7.81	9.496	34.246	13.686	7.627	5.226	9.732	8.402	13.573		0.74634	14.2609
18.3395	11.916	10.372	6.499	15.085	31.024	15.89	9.6933	8.7386	6.5178	16.7106	17.2442	39.293	43.689	28.871	6.7234	5.8057	5.162	6.98	6.541	7.26	34.896	13.122	7.08	7.134	9.632	10.681	13.481		0.751219	14.6682
18.4586	13.276	8.228	6.097	15.614	31.5275	15.585	9.6442	8.2771	9.7746	13.0833	20.9547	43.265	47.226	33.043	9.302	4.3331	6.317	6.523	7.231	7.85	35.405	12.846	6.999	6.451	11.955	9.009	14.881		0.756097	15.3592
18.5777	11.77	6.853	5.637	13.107	28.8928	14.145	8.4131	8.5317	10.3526	15.1591	17.8844	46.028	50.494	26.257	7.188	6.0277	6.948	5.914	7.949	8.27	36.352	15.036	6.845	8.018	8.781	9.688	12.476		0.760976	14.9266
18.6968	10.411	9.069	7.063	13.305	29.1235	12.3	9.6238	8.4833	8.1827	15.1149	21.0695	46.638	52.66	27.18	7.4139	5.172	6.59	6.562	7.986	7.61	32.504	14.223	7.04	6.856	9.962	11.353	14.472		0.765854	15.1099
18.8159	11.829	7.26	8.921	14.202	32.946	13.957	9.2371	9.677	7.7897	13.9836	21.9152	48.843	60.64	30.065	7.8606	7.3072	5.741	6.799	7.349	7.804	38.073	15.181	6.321	5.893	9.226	11.247	13.706		0.770733	16.0657
18.935	9.281	8.589	5.891	11.534	39.398	12.884	8.6837	8.6245	8.9678	15.8285	19.7719	48.362	63.604	31.273	7.3158	6.2785	7.219	7.63	6.837	11.49	41.832	16.983	7.253	8.264	8.763	9.532	15.193		0.775611	16.566
19.0541	11.884	8.192	6.155	13.057	33.3305	14.052	9.3535	9.9738	9.286	16.3583	23.2577	52.041	65.303	32.384	8.3428	5.6602	6.154	5.184	9.856	7.646	40.742	17.811	7.435	7.879	10.331	11.395	15.52		0.78049	16.9846
19.1731	10.624	7.138	6.558	10.244	33.9829	16.49	9.8733	8.6117	9.5772	16.2567	24.0814	52.744	71.153	32.771	10.0029	4.9203	7.962	6.138	7.406	9.106	41.381	16.426	8.762	8.032	6.924	11.489	16.821		0.785364	17.2398
19.2922	11.02	9.13	8.642	11.731	35.1002	13.158	9.725	9.0782	10.0848	17.6273	34.2895	59.314	75.027	33.552	9.5806	8.7231	6.557	6.071	8.541	6.197	43.484	18.55	8.475	6.004	7.388	10.763	15.884		0.790243	18.2851
19.4113	10.522	8.255	8.224	11.477	37.8841	15.186	8.96	12.4976	9.0894	18.0072	31.5384	62.234	81.61	30.196	10.0082	6.7521	7.372	8.723	8.751	8.516	39.27	20.999	7.61	7.753	9.931	12.473	15.075		0.795121	18.8487
19.5304	9.235	9.692	6.741	13.125	28.6285	15.926	10.7531	9.8385	10.9739	17.7969	38.6737	63.812	81.526	29.54	11.6361	8.6483	6.59	7.936	7.441	8.338	48.465	21.78	7.793	6.921	8.529	11.141	15.981		0.8	19.1652
19.6495	8.958	9.393	8.42	14.109	38.2888	16.526	11.807	8.7925	8.6203	19.1552	45.9877	66.485	81.26	32.934	13.9202	6.951	7.094	7.2	6.392	9.853	48.905	21.673	10.017	6.692	7.825	11.159	17.222		0.804879	20.2089
19.7686	8.533	9.713	8.56	12.138	34.3885	19.354	10.9061	12.5575	10.7325	20.228	45.0153	68.126	76.495	34.972	14.9503	8.5484	7.703	6.186	7.503	10.594	46.122	29.58	8.585	6.743	9.127	9.053	16.364		0.809757	20.4732
19.8877	9.256	8.045	8.539	13.712	38.8501	20.526	12.0355	11.2977	9.8976	23.113	53.1905	69.432	85.645	26.877	16.6764	9.2834	7.286	7.28	8.642	8.533	41.125	25.71	9.569	7.209	11.513	11.653	18.742		0.814636	21.2459
20.0068	9.632	8.713	8.546	15.599	38.8644	18.556	13.1623	10.4635	12.9549	21.5009	53.2943	68.723	83.519	31.451	15.2264	9.1096	6.072	7.639	7.491	9.848	43.642	30.445	8.569	8.389	10.211	9.384	18.284		0.819514	21.4552
20.1259	7.587	6.866	8.877	12.646	39.2435	21.557	13.4094	12.6467	12.3117	22.1829	51.8331	69.48	84.906	30.587	19.8163	8.2678	8.015	7.887	6.91	11.882	45.963	33.379	5.745	7.913	10.636	11.381	18.433		0.824393	21.8652
20.2449	10.402	7.757	10.949	16.368	44.5826	24.84	11.9061	13.408	13.4655	29.5811	53.6916	56.075	90.032	30.652	24.5898	9.4548	9.218	7.862	9.308	11.486	44.982	34.915	8.757	7.916	10.699	8.869	17.781		0.829267	22.9462
20.364	10.425	7.863	11.296	19.675	42.0832	25.526	13.8233	11.4585	16.7362	33.35	56.6852	60.459	84.996	29.764	31.1933	11.7097	10.415	9.152	7.195	10.598	43.162	43.122	10.127	8.811	8.267	11.08	17.403		0.834146	23.9398
20.4831	10.62	9.066	11.307	21.767	43.4674	26.139	17.7313	15.2958	16.0705	37.0425	56.7674	60.95	94.098	34.999	36.0289	11.8442	9.361	9.903	8.724	14.561	51.669	43.427	8.418	6.881	11.171	9.762	16.184		0.839024	25.6761
20.6022	9.857	7.572	11.569	23.06	49.6882	23.875	17.7658	16.5125	15.082	46.1432	63.9982	56.753	90.418	32.61	42.2046	11.4714	11.527	9.516	9.408	13.072	51.295	46.223	8.741	7.126	11.214	10.846	17.337		0.843903	26.4772
20.7213	9.715	8.223	11.718	25.754	47.4664	26.855	23.1963	18.5579	22.0542	44.8086	74.1372	52.437	96.018	34.995	38.3268	12.6802	11.559	8.098	9.037	14.448	45.237	43.833	10.616	7.109	10.708	9.913	19.258		0.848781	27.2874
20.8404	12.037	10.189	14.5	27.198	55.892	27.436	24.8735	15.8485	20.775	47.8117	73.8132	44.734	87.561	41.687	52.6144	14.8692	10.764	10.399	9.296	16.453	42.553	50.298	8.259	9.504	12.934	10.427	19.975		0.85366	28.6186
20.9595	11.312	10.393	13.486	27.353	57.2313	31.386	25.2958	20.3308	21.9116	54.466	64.0863	40.958	83.115	52.093	48.1066	19.0522	9.732	11.647	13.601	17.238	49.57	49.496	9.935	9.397	12.072	12.268	22.089		0.858538	29.5415
21.0786	11.054	11.566	14.666	34.114	55.423	26.491	30.3787	18.3713	28.0815	60.372	70.9571	40.843	74.079	56.075	59.924	17.6263	13.937	12.248	13.121	20.909	53.335	50.942	13.183	9.329	14.023	11.878	20.271		0.863417	31.2296
21.1976	12.425	9.772	14.46	31.204	60.2792	36.563	34.3422	20.0262	22.8861	60.6908	66.5874	36.706	74.201	57.157	55.774	19.6911	15.92	13.227	12.279	26.083	48.981	51.944	12.141	10.053	10.65	14.716	20.533		0.868291	31.4553
21.3167	12.482	12.35	18.213	35.418	66.5978	41.137	36.6323	22.5236	32.7595	64.9211	64.2186	31.771	69.367	69.093	58.9264	26.4008	13.655	17.042	13.483	29.501	49.184	46.874	13.472	10.6	13.675	15.508	19.903		0.87317	33.5447
21.4358	11.238	15.265	14.732	35.999	67.2003	42.967	45.1277	25.5176	34.8686	65.725	61.3251	31.097	69.033	66.27	62.3442	27.2483	18.014	18.337	14.287	34.113	56.255	52.752	15.309	10.201	16.053	13.006	22.939		0.878049	35.0824
21.5549	10.627	14.024	16.326	42.768	67.0325	46.401	36.9737	28.4513	39.6747	66.7418	61.3814	27.123	60.34	65.465	70.4484	31.3584	18.087	18.454	18.302	41.586	58.53	59.27	14.704	9.938	15.616	14.404	21.428		0.882927	36.128
21.674	12.626	16.557	17.608	47.48	71.0917	48.133	39.2084	28.2115	43.1383	70.8705	52.7163	26.495	54.315	70.163	65.3352	36.7494	24.458	22.059	18.842	49.338	60.603	56.748	18.875	13.782	18.713	15.074	22.432		0.887806	37.8379
21.7931	13.821	17.477	17.76	46.219	74.7967	54.615	41.7845	29.2801	46.5532	67.5005	48.6249	23.359	44.643	67.319	64.1007	42.5915	27.416	22	20.79	56.761	66.736	65.304	24.132	10.637	20.728	14.23	20.881		0.892684	38.8911
21.9122	14.329	20.329	18.846	52.522	80.8288	53.173	42.5585	31.1441	49.8815	67.1518	43.8823	22.606	41.193	68.582	68.6629	47.9244	26.943	25.093	20.418	51.42	69.138	65.694	26.477	11.581	20.113	17.915	26.473		0.897563	40.1807
22.0313	14.616	23.556	19.469	60.889	76.8599	55.745	53.6152	35.941	50.9247	59.1836	36.853	23.988	35.284	65.765	58.0467	51.7461	30.701	26.367	24.931	51.411	73.353	70.285	29.155	11.433	25.939	19.711	26.276		0.902441	41.1868
22.1503	14.481	26.533	23.758	69.574	79.7057	52.251	55.7713	43.3319	53.9537	64.6097	32.1565	22.524	27.255	67.317	57.8507	55.0321	32.488	32.97	28.176	57.615	70.415	75.048	37.011	15.168	25.182	21.025	22.387		0.907316	43.0959
22.2694	18.243	27.063	28.748	67.653	86.9266	52.196	53.719	47.7058	57.3058	57.1679	31.2205	20.443	23.979	55.551	49.9017	59.6882	34.541	37.199	26.328	56.648	65.97	77.96	38.016	13.495	27.301	23.717	25.804		0.912194	43.1293
22.3885	17.676	34.34	31.688	80.331	89.3675	54.344	57.2041	57.4722	59.3717	50.3248	31.7104	19.554	24.411	52.282	47.4342	63.2618	36.282	40.626	29.408	61.286	60.193	81.302	37.537	12.996	33.732	21.542	28.22		0.917073	44.9591
22.5076	23.655	45.522	34.951	93.348	91.9618	54.052	57.0734	62.9288	59.3542	38.0914	27.3948	20.808	20.605	44.081	45.3365	59.3861	42.78	43.397	31.562	58.439	54.746	79.066	44.778	15.666	37.545	23.406	31.438		0.921951	45.9767
22.6267	27.819	52.023	44.41	101.257	102.019	49.364	59.6992	65.8952	57.8883	39.6716	22.9206	20.631	22.38	37.169	39.9748	63.1213	40.877	48.641	31.33	63.778	46.828	79.509	56.447	15.991	40.08	24.238	30.638		0.92683	47.5778
22.7458	30.03	62.08	47.735	101.332	94.9078	51.842	62.839	73.0987	57.1551	34.6656	19.0552	20.207	17.932	32.394	38.1241	62.7215	47.6	47.356	28.491	60.663	45.454	77.45	59.746	21.355	47.291	26.815	33.623		0.931709	48.2209
22.8649	38.089	64.727	60.885	105.048	98.882	50.263	60.8753	72.6796	57.4323	31.29	18.1564	17.968	16.394	29.918	32.5427	55.9943	44.91	49.346	32.988	58.205	44.09	77.882	58.43	22.472	51.923	29.765	37.844		0.936587	48.8518
22.984	50.648	77.682	72.83	119.729	86.5933	48.359	61.6528	76.8187	55.1861	24.1138	17.2063	17.155	21.168	23.275	29.7756	54.26	44.989	55.521	33.963	50.498	38.301	63.413	65.643	26.117	47.611	33.372	40.222		0.941466	49.4853
23.103	59.389	92.987	85.051	126.763	83.0952	44.091	54.0458	63.3795	51.0039	25.0109	16.9936	15.239	16.765	22.598	27.2462	45.6105	39.465	50.925	39.538	50.009	38.467	67.717	64.564	31.361	53.887	32.804	48.901		0.94634	49.8854
23.2221	81.72	100.158	90.659	131.652	79.7675	46.326	61.9622	63.383	45.7482	21.8279	15.2856	15.481	17.437	22.098	29.8733	46.4318	39.437	46.403	36.946	51.146	31.732	65.668	65.986	30.362	59.047	37.265	51.517		0.951219	51.3081
23.3412	96.373	117.226	101.978	132.791	70.1166	51.955	64.7396	58.0443	38.3032	19.0222	15.688	14.817	19.388	20.089	21.4874	44.1772	34.445	45.471	38.056	45.753	30.546	58.993	73.409	39.949	61.126	38.022	55.941		0.956097	52.1447
23.4603	116.134	133.353	108.533	127.759	73.1327	43.856	69.4981	50.9118	31.0087	20.5341	15.0056	12.458	14.484	19.351	17.8095	32.9288	32.376	44.526	41.935	46.003	27.352	47.155	80.628	39.206	64.544	47.907	65.506		0.960976	52.7369
23.5794	130.008	145.914	119.88	120.853	66.8524	46.12	84.9379	56.8125	28.954	17.6614	13.9672	12.108	17.108	18.912	17.2256	32.9821	31.091	41.64	42.106	44.354	24.585	50.677	79.898	40.951	65.921	46.814	66.952		0.965854	54.2698
23.6985	131.095	139.371	125.287	115.916	60.4215	49.751	85.1242	50.1476	27.1728	15.7897	13.1219	10.683	15.938	14.646	17.6763	30.5454	28.492	37.372	42.25	36.359	21.667	41.792	86.47	48.397	69.526	47.054	76.294		0.970733	53.2726
23.8176	137.423	136.119	116.156	94.995	50.3481	49.615	75.1537	48.2132	23.9014	16.8359	12.5256	10.684	13.911	13.322	12.5186	23.6423	28.319	35.089	45	43.547	22.204	32.073	82.439	59.875	70.528	50.337	75.719		0.975611	51.1294
23.9367	130.257	119.153	104.322	82.654	46.0398	39.108	66.7656	38.1955	22.3386	14.772	10.4363	10.219	14.685	13.425	11.5474	27.0472	29.803	32.17	50.248	36.883	19.078	28.998	84.865	60.154	64.928	54.803	77.002		0.98049	47.774
24.0558	105.948	115.001	85.843	70.545	34.9661	37.495	52.4038	33.3181	18.3256	13.6001	10.5658	7.944	13.276	11.506	10.2108	23.5384	31.5	32.226	43.446	37.428	22.008	25.762	77.671	69.5	71.985	59.501	78.112		0.985368	44.2084
24.1748	62.562	92.689	57.071	48.042	25.2409	35.411	39.8783	30.1279	18.354	9.9294	9.6994	8.249	9.743	11.477	6.5077	19.5468	28.381	28.045	43.857	31.018	17.722	29.089	72.503	75.143	78.734	64.631	89.083		0.990243	38.6198
24.2939	31.65	57.265	36.576	28.851	17.7423	30.222	29.4985	22.1848	17.2934	9.9229	9.6946	7.737	10.035	8.825	8.9249	20.4372	21.951	24.507	47.047	29.371	15.025	21.745	65.114	77.54	76.714	62.78	84.056		0.995121	32.3226
24.413	19.265	30.049	22.065	23.152	10.4692	25.758	24.9103	18.6757	12.7985	10.997	7.7835	8.637	8.347	9.08	8.9739	18.6709	21.448	24.859	44.257	21.943	13.257	16.405	59.964	85.244	71.329	58.856	80.35		1	28.0572

## Sheet: Image27
X0	Y0	Y1	Y2	Y3	Y4	Y5	Y6	Y7	Y8	Y9	Y10	Y11	Y12	Y13	Y14	Y15	Y16	Y17	Y18	Y19	Y20	Y21	Y22	Y23	Y24	Y25	Y26	Y27	Y28	Y29	Y30	Y31	Y32		Ap-Basal	Avg intensity
0	39.808	36.9369	31.2833	43.9759	58.423	31.072	52.63	36.357	35.557	50.084	32.135	38.883	46.496	52.633	32.187	31.15	41.429	55.946	61.603	56.409	30.417	37.45	20.929	12.3249	20.584	10.743	10.208	10.4941	15.7493	22.716	17.67	21.143	24.099		0	33.925
0.1191	40.2835	49.2059	38.9244	45.5293	63.726	37.726	59.282	39.823	40.554	51.823	38.554	44.696	58.866	61.458	44.803	29.836	50.111	68.31	74.502	63.614	41.304	43.779	24.787	15.7019	25.1284	12.695	13.498	8.1871	17.9545	26.153	20.273	21.672	26.201		0.00602471	39.3625
0.2382	44.9749	56.5326	46.6138	53.775	76.83	43.21	62.185	48.159	36.391	65.233	39.065	51.774	68.939	67.83	59.136	38.904	56.469	70.569	84.449	73.603	43.394	50.183	28.558	19.4004	30.0474	19.25	16.78	12.8382	17.7604	32.678	24.371	30.817	33.865		0.0120494	45.5935
0.3573	50.65	68.8048	51.8785	59.1965	81.895	42.605	70.258	57.362	44.935	70.756	45.178	60.322	81.489	93.824	62.037	55.627	75.776	82.53	88.422	77.914	53.717	55.785	35.663	22.8431	38.877	30.508	22.826	17.9804	25.1554	34.582	36.586	31.089	43.468		0.0180741	53.6527
0.4764	49.0956	73.3122	60.2057	64.9588	84.97	44.808	75.663	73.55	54.91	83.496	49.977	68.99	94.597	105.276	77.071	72.804	79.125	89.654	103.673	89.804	66.527	61.169	41.559	26.8435	49.2426	38.379	23.379	17.1872	28.9948	39.191	31.623	36.83	47.356		0.0240988	60.734
0.5954	52.8774	83.8126	74.1923	71.6195	90.13	40.301	83.533	97.841	62.837	98.587	61.846	81.037	122.215	129.711	94.604	91.041	95.172	99.025	104.806	110.985	83.412	74.502	46.408	29.5009	50.7849	55.419	32.02	22.13	41.8218	45.798	41.154	40.82	51.887		0.0301185	71.5706
0.7145	49.2846	93.4557	79.2454	80.4346	101.987	41.771	95.642	115.46	73.567	101.671	66.288	97.554	143.021	151.677	111.395	111.725	114.511	103.243	114.446	116.662	102.302	79.302	56.996	30.2142	65.3844	71.269	44.25	30.0545	50.342	53.657	50.624	46.391	57.311		0.0361432	81.8526
0.8336	51.5169	97.7767	82.5177	78.2993	100.479	43.177	97.903	127.824	93.713	114.349	103.373	112.122	172.761	164.9	133.333	128.13	119.304	115.439	132.974	119.185	117.67	87.08	64.294	40.4182	68.7707	79.357	53.048	33.9734	63.6746	51.886	56.868	56.316	63.786		0.0421679	91.7036
0.9527	51.1925	102.379	83.2068	86.849	116.035	52.905	105.23	143.428	98.851	124.865	118.599	140.379	187.765	186.356	155.929	136.557	126.439	125.089	117.893	128.437	127.746	104.411	71.521	44.6351	81.1871	96.956	58.964	34.6457	73.361	69.767	64.962	68.523	69.162		0.0481926	101.643
1.0718	53.5452	93.9054	82.7852	80.1452	112.146	54.75	100.126	139.72	118.038	140.298	135.339	144.743	190.951	188.989	163.419	129.106	121.027	122.58	132.332	127.625	146.732	112.367	87.888	55.3858	91.5609	111.313	70.522	40.5745	87.5006	78.254	79.117	72.861	86.861		0.0542173	107.652
1.1909	53.2098	90.421	80.2185	73.4095	97.905	65.731	100.288	139.504	133.517	147.85	151.929	162.143	194.019	194.595	172.579	117.901	108.929	116.443	127.757	140.072	149.992	114.941	100.156	64.5105	93.6296	115.487	87.157	42.0879	98.7805	91.407	86.313	85.237	97.126		0.060242	111.977
1.31	44.1231	82.4312	74.1519	64.311	92.407	87.726	80.902	115.225	150.092	164.908	167.058	169.224	179.516	205.617	173.709	84.71	88.302	107.89	129.125	131.856	147.453	112.363	107.683	69.6262	95.3532	118.226	84.365	49.2802	95.5511	98.458	105.003	96.977	111.415		0.0662667	111.668
1.4291	39.7687	70.437	63.8092	50.7043	84.159	99.258	64.223	86.353	139.451	166.697	174.328	177.948	164.303	196.428	161.367	68.559	66.294	95.511	120.004	121.11	147.279	92.977	102.366	75.5233	94.9188	126.629	91.182	51.9649	87.5176	115.688	106.189	106.094	117.614		0.0722914	106.868
1.5481	35.4926	56.935	56.5798	44.1554	67.294	118.099	38.938	63.436	126.674	185.338	178.27	170.821	146.875	191.156	147.608	47.481	53.962	77.476	109.388	104.813	129.795	85.211	100.328	88.7294	89.0688	139.235	94.167	49.5592	87.177	118.186	117.775	96.805	129.127		0.0783111	101.393
1.6672	37.1811	48.846	48.4473	35.9261	64.246	133.688	28.466	47.28	104.002	201.87	195.364	145.343	127.934	173.766	107.789	37.588	35.276	62.995	86.498	94.427	106.181	59.53	73.268	90.6116	78.769	138.573	101.614	53.9171	76.9638	117.532	113.329	102.43	129.472		0.0843358	92.7007
1.7863	32.2435	35.6986	39.7652	32.5772	49.942	133.716	17.399	33.187	76.781	207.524	184.851	132.098	111.488	156.244	70.572	27.755	23.138	53.077	81.769	74.74	82.566	44.004	49.989	94.1782	68.6857	135.521	117.379	54.6828	77.9626	114.465	105.04	102.171	126.882		0.0903605	83.2755
1.9054	36.2285	31.0236	28.022	35.3543	41.593	108.518	12.33	30.267	59.379	203.355	173.512	103.529	97.405	125.942	48.882	21.117	19.731	35.458	58.175	53.414	67.461	24.531	42.226	87.7544	59.4636	129.238	110.791	52.1598	73.0079	97.894	101.982	95.093	116.943		0.0963852	72.1752
2.0245	27.7153	25.8422	24.1835	23.4711	30.278	77.608	9.729	26.809	41.649	194.651	156.643	66.919	85.507	96.381	31.446	21.016	15.181	25.486	45.944	37.739	43.575	17.251	25.161	76.0366	52.6114	116.383	98.894	49.6246	72.389	90.471	83.386	89.272	90.279		0.10241	59.6828
2.1436	23.7167	23.829	17.2736	21.3015	22.518	61.311	10.405	22.344	23.908	188.236	144.528	39.484	79.754	85.225	20.274	17.784	9.886	17.601	32.367	22.413	29.283	11.205	18.57	58.6106	42.8864	106.187	100.453	47.9591	76.6004	83.77	76.111	80.361	75.425		0.108435	51.26
2.2627	23.3074	18.2691	19.0453	20.1428	14.389	41.732	7.846	21.592	17.998	169.076	131.241	26.124	69.971	74.802	17.327	18.662	11.495	12.744	21.144	20.677	22.59	9.043	18.689	39.4476	36.2108	84.519	86.98	52.984	65.3013	65.63	70.191	61.607	56.387		0.114459	43.2474
2.3818	23.3419	17.3933	16.5435	19.9805	11.538	28.682	8.549	19.262	13.991	151.198	98.085	21.644	62.79	66.317	17.494	16.471	10.89	10.535	18.212	17.606	22.049	9.641	18.589	27.5324	31.6722	73.276	72.719	45.4178	62.7921	43.595	46.911	48.203	49.189		0.120484	36.4276
2.5008	20.6456	15.5459	15.6551	18.2034	12.292	24.276	8.571	15.332	12.656	119.139	93.28	18.218	48.523	58.05	12.761	16.976	9.28	8.115	17.651	13.29	19.831	7.173	16.962	21.1234	26.0799	60.536	63.811	46.3385	53.192	26.177	40.128	40.253	37.552		0.126504	30.8369
2.6199	16.9128	13.2193	12.3524	15.9855	8.919	17.968	7.064	18.43	10.904	93.955	70.72	18.042	40.863	50.799	11.054	17.831	9.566	9.404	14.25	12.328	18.425	7.78	15.644	16.2212	22.044	49.382	50.806	35.4898	47.0718	22.027	32.881	30.254	30.865		0.132528	25.7411
2.739	15.362	12.2979	12.9942	15.2911	10.278	10.983	5.958	17.575	7.152	71.873	48.446	14.274	37.94	50.657	11.906	17.952	8.459	9.3	10.641	13.355	17.886	9.271	17.689	11.4114	17.1072	36.73	49.919	32.6609	40.4457	17.027	25.088	29.344	25.099		0.138553	22.1931
2.8581	16.3386	11.4542	10.2072	19.0351	8.953	11.117	7.584	15.043	8.57	47.688	28.551	12.846	30.017	41.511	10.542	18.626	9.013	6.494	7.977	14.698	14.48	7.071	18.685	10.4484	14.5475	24.961	36.816	26.7571	36.9408	14.214	23.563	24.639	18.395		0.144578	18.4177
2.9772	12.1954	13.0899	11.6537	14.1797	7.828	10.632	5.797	16.821	10.289	31.836	19.851	15.027	29.382	40.381	11.505	21.725	10.13	6.665	8.048	15.019	14.006	7.546	18.852	10.3762	13.6662	22.067	28.65	20.2255	30.6823	8.873	20.23	24.034	17.357		0.150602	16.6248
3.0963	15.1246	11.9545	9.8761	15.6161	8.24	7.33	6.378	13.384	7.389	18.472	13.227	13.195	25.28	28.235	10.161	17.59	8.008	6.372	8.359	11.091	14.689	7.88	15.636	8.5127	9.4098	19.018	22.087	18.8921	21.9634	10.688	18.947	20.795	17.934		0.156627	13.9919
3.2154	11.6263	13.0021	11.274	12.0543	9.246	8.147	6.037	13.326	8.346	15.073	13.852	13.836	18.088	21.225	10.745	19.827	8.201	6.087	7.394	12.063	14.722	7.054	15.745	9.2496	8.3525	13.068	15.78	15.0741	21.3577	8.681	15.583	15.57	13.659		0.162652	12.5256
3.3345	10.5541	11.3601	10.0497	14.9848	10.747	7.36	7.336	13.777	6.04	12.996	10.772	12.538	19.087	17.245	9.576	20.713	8.436	6.174	8.623	12.82	15.779	7.1	15.703	6.9675	6.0802	10.405	15.589	15.6298	19.2624	6.644	14.218	17.967	15.223		0.168677	12.0532
3.4535	9.1341	8.0323	10.5343	11.8263	11.319	6.893	6.417	12.279	7.045	8.334	9.834	11.349	19.485	13.642	7.571	18.258	7.231	6.241	8.8	10.917	14.402	6.603	13.916	6.8902	5.3653	10.17	11.421	9.5964	15.9529	7.324	15.697	17.104	13.205		0.174696	10.6906
3.5726	7.4741	8.7592	9.7302	13.6523	8.976	7.017	5.604	15.498	6.692	10.543	9.117	12.196	19.138	11.383	7.981	19.654	8.051	7.317	7.022	12.874	13.969	5.996	15.745	7.7008	6.665	7.414	8.259	8.1666	13.8611	8.411	12.816	15.726	13.112		0.180721	10.5006
3.6917	7.3391	8.4929	9.408	16.9239	8.375	7.802	5.178	14.942	8.506	8.118	8.483	10.221	18.454	11.909	7.327	21.937	7.421	3.937	6.578	11.307	13.706	7.327	17.926	7.5998	4.6103	6.604	6.771	6.8475	16.6455	5.632	13.719	18.705	12.855		0.186746	10.3517
3.8108	6.602	8.256	8.4987	16.5276	8.076	8.347	5.518	13.107	7.702	6.163	8.389	11.334	17.927	11.209	7.72	20.427	5.999	6.063	7.968	11.926	12.908	6.076	16.169	7.891	3.6982	5.777	8.072	8.0692	15.8235	6.454	12.161	15.241	11.27		0.19277	9.92028
3.9299	6.9096	8.0239	7.9062	15.9171	6.654	5.155	6.652	15.164	6.777	7.046	7.247	9.095	17.157	9.758	5.96	20.274	7.149	5.361	6.623	15.609	14.225	5.29	16.603	8.6308	4.2087	6.016	5.666	8.0329	14.2838	5.988	9.177	15.798	9.593		0.198795	9.51364
4.049	7.2807	9.0398	10.964	17.4613	6.492	5.635	5.937	16.238	6.97	6.908	7.811	10.684	17.226	9.245	6.673	20.485	6.328	4.829	8.368	14.932	15.25	6.586	15.752	6.2925	3.8628	5.269	5.68	9.5179	14.6251	6.236	12.683	13.69	8.497		0.20482	9.80146
4.1681	7.493	10.3895	9.5764	18.4418	7.287	6.059	5.982	15.363	6.647	4.872	6.797	9.443	16.042	7.841	9.256	18.721	7.191	5.34	7.629	14.937	16.043	5.884	18.22	8.4016	3.512	5.709	6.424	6.2291	15.5127	6.036	11.174	13.125	7.143		0.210844	9.65822
4.2872	6.52	7.3555	10.4457	16.1437	6.873	4.79	5.589	16.673	5.788	5.745	6.12	9.742	20.027	7.532	8.783	21.046	9.705	5.343	7.966	16.729	13.839	5.751	15.97	7.797	3.908	5.044	3.836	8.4208	14.8369	4.824	11.563	15.378	9.423		0.216869	9.68202
4.4063	6.7353	9.3507	10.8186	17.0962	6.659	6.243	5.903	21.381	7.021	4.955	5.713	11.43	19.184	7.133	8.092	19.898	6.78	5.554	8.262	15.274	16.557	5.364	14.778	6.4093	2.9573	4.424	4.616	7.2719	15.4166	6.838	12.154	15.815	6.408		0.222894	9.77248
4.5253	7.3544	8.6476	8.6621	16.7012	7.398	4.415	5.108	18.962	7.843	5.998	6.844	10.445	20.37	8.338	7.477	22.367	5.688	5.071	8.139	16.729	16.754	5.755	13.774	8.8245	3.2316	4.604	4.296	7.5641	12.0922	5.732	10.567	16.236	7.426		0.228914	9.6792
4.6444	7.8811	10.195	7.6948	17.6854	7.71	5.833	7.364	18.734	5.413	4.803	7.1	9.733	18.379	7.28	6.529	19.064	7.837	3.769	8.099	17.734	14.964	5.688	14.805	6.2917	3.9683	5.108	3.694	6.7814	13.5246	5.202	8.518	19.874	6.414		0.234938	9.50516
4.7635	9.7062	7.5156	12.6184	14.6757	7.251	5.151	8.517	19.939	8.338	4.867	5.094	9.696	18.341	8.683	8.179	18.876	7.7	6.084	7.428	15.913	13.409	5.301	16.409	6.2196	3.8935	4.214	3.084	5.7223	13.2475	6.322	11.05	17.957	6.598		0.240963	9.63636
4.8826	6.6603	9.1127	11.1753	18.3582	8.355	5.698	9.162	20.553	6.016	6.902	5.838	11.819	18.003	7.903	7.413	20.618	6	3.565	8.061	14.436	12.497	6.209	17.132	5.5208	3.6354	2.858	3.314	6.0289	13.3867	6.105	10.76	18.656	7.674		0.246988	9.67955
5.0017	6.8285	8.7916	9.6234	15.0615	7.059	5.766	8.849	19.285	6.018	3.582	6.393	11.098	21.02	7.338	8.276	19.239	9.365	4.653	8.943	12.769	13.566	4.307	15.53	5.5241	2.8557	3.592	4.126	10.1333	17.2572	5.818	12.038	17.738	8.13		0.253012	9.71434
5.1208	7.7538	9.7965	10.1632	20.3126	9.202	4.217	7.281	21.906	7.715	4.865	5.224	10.759	20.527	7.886	7.213	19.368	6.908	5.105	8.658	14.831	10.599	5.751	16.478	7.2647	4.7049	3.345	3.94	7.7093	16.6629	7.834	9.428	23.035	5.549		0.259037	10.0604
5.2399	5.3496	7.5821	9.4947	20.6867	8.099	5.505	7.238	23.425	6.813	4.936	5.425	11.004	22.339	8.371	5.467	21.624	7.741	4.973	6.867	15.749	16.842	7.656	17.086	6.4194	3.2544	3.236	3.077	7.3842	16.8582	6.35	9.488	15.226	9.318		0.265062	10.0268
5.359	6.2021	8.5164	9.1641	15.4661	7.435	6.304	8.204	23.912	6.295	5.651	5.942	9.244	19.585	8.967	6.684	22.619	7.335	3.708	7.11	16.137	16.662	8.792	20.756	7.5581	3.5765	2.825	3.025	8.6248	15.6707	4.564	9.46	17.76	5.745		0.271086	9.98484
5.478	4.5556	6.543	7.7368	21.6674	6.192	4.772	6.324	25.58	6.889	3.756	7.413	9.716	18.106	8.78	7.798	24.458	8.087	5.038	8.55	16.55	17.764	6.71	19.513	6.4914	3.0282	3.437	3.351	9.7666	21.0857	7.317	11.854	17.408	7.607		0.277106	10.4195
5.5971	6.6578	6.7656	8.8141	16.0687	7.832	5.113	6.085	25.437	7.776	5.373	5.201	10.775	21.002	9.72	8.91	23.553	7.655	4.846	6.789	14.079	16.838	7.248	17.885	7.0808	2.5527	3.497	3.304	8.0515	17.222	6.196	12.189	16.416	6.41		0.283131	10.1013
5.7162	4.2096	7.5498	9.5495	17.6503	9.362	4.501	7.658	20.812	7	5.566	6.526	12.44	20.272	9.413	8.228	26.674	6.599	6.606	9.221	17.287	16.725	6.219	17.987	8.0561	4.2377	4.122	2.798	7.8607	17.3984	6.468	10.973	14.896	6.821		0.289156	10.3541
5.8353	5.4666	5.0908	9.3864	16.3361	8.116	5.506	8.659	24.605	10.098	4.844	7.107	10.197	18.814	8.317	8.688	24.99	4.703	4.484	6.675	14.238	18.337	6.052	22.015	7.3778	4.0276	4.288	3.644	6.2245	15.7857	5.462	11.723	17.092	5.426		0.29518	10.1144
5.9544	5.5154	6.5795	8.5256	17.4412	7.933	6.19	8.686	23.142	7.468	4.42	7.856	12.935	17.385	8.541	5.476	29.193	6.081	4.536	8.162	16.782	16.526	7.721	22.7	8.0535	4.3372	2.973	4.151	8.684	13.279	6.462	11.786	18.445	6.651		0.301205	10.4429
6.0735	3.7319	7.2111	9.1126	19.5937	7.832	5.214	5.765	26.221	7.601	6.613	8.566	13.659	19.183	10.118	7.147	28.553	6.299	4.973	9.202	16.631	21.685	8.259	22.268	8.9413	4.9033	3.421	3.954	8.5707	16.6023	6.228	16.485	16.573	7.43		0.30723	11.1681
6.1926	5.7658	6.0412	10.0211	21.2602	9.329	8.669	7.918	26.407	7.212	4.578	8.775	13.266	19.034	6.439	6.428	31.013	5.114	4.862	10.542	19.817	20.559	8.638	25.265	7.5875	4.3519	3.626	2.942	7.0552	14.7009	5.443	16.143	16.692	8.635		0.313254	11.3373
6.3117	3.9266	6.6656	10.4152	17.2519	8.548	5.936	5.516	24.748	11.127	5.412	9.3	17.493	22.583	7.963	8.762	29.935	6.35	4.253	9.077	15.28	19.836	6.785	24.401	8.2228	3.3379	3.861	4.446	7.0543	13.5966	7.384	17.743	16.498	8.724		0.319279	11.2858
6.4307	4.01	5.044	11.0154	21.284	10.607	6.644	7.438	25.746	9.482	6.972	9.017	17.122	17.525	7.27	7.753	27.978	4.625	5.265	9.766	14.648	21.05	8.228	24.688	9.4107	4.165	2.539	3.152	7.5699	13.2132	7.152	17.955	15.065	7.397		0.325299	11.2362
6.5498	4.1522	5.186	7.6707	20.6465	11.352	8.12	5.865	27.092	8.043	5.809	9.357	20.833	18.064	7.587	5.636	28.039	7.107	5.498	7.446	14.029	20.046	7.106	23.791	7.6627	6.0522	3.207	4.854	8.1017	15.2196	6.706	17.054	15.97	7.665		0.331323	11.2414
6.6689	4.9775	5.8826	8.1912	22.5326	11.509	10.731	6.51	26.73	5.704	5.714	8.001	23.767	19.039	7.279	5.689	28.321	6.539	3.895	8.341	19.552	26.156	6.49	25.397	7.5598	3.8542	3.249	4.163	7.689	15.8249	6.26	20.962	13.275	7.796		0.337348	11.7449
6.788	5.2943	5.7457	9.9945	19.8249	11.289	11.118	6.993	30.061	7.685	9.373	10.929	18.761	18.424	8.086	6.914	30.486	6.528	5.241	8.354	20.259	26.238	7.383	27.094	10.036	5.6083	4.069	5.925	9.3272	15.9167	5.729	20.849	15.431	8.837		0.343373	12.5395
6.9071	4.8799	4.7977	7.0442	21.6144	11.716	10.657	4.794	32.821	7.717	6.516	9.666	18.527	14.851	7.94	5.92	29.159	8.38	5.604	9.32	17.261	22.946	8.174	26.277	6.6684	4.5068	3.516	3.648	7.8832	12.9286	8.994	21.525	13.103	9.048		0.349398	11.7698
7.0262	4.4688	4.3024	9.3501	19.9804	9.511	7.123	6.499	28.134	7.922	6.327	7.683	16.831	18.917	7.429	6.529	25.415	6.093	5.546	8.763	16.115	22.935	8.409	28.257	5.9474	4.9014	3.165	4.035	9.1322	16.2118	7.82	18.639	11.441	9.676		0.355422	11.3184
7.1453	4.8513	5.3301	9.0868	20.5493	10.941	8.577	6.788	25.247	7.826	8.628	8.324	16.906	16.149	6.269	7.114	29.212	6.434	5.1	8.263	18.162	23.515	7.702	25.989	7.0045	3.6849	3.738	3.246	8.457	15.2759	8.172	20.396	12.793	9.321		0.361447	11.4864
7.2644	5.7181	6.4665	8.0869	17.1337	12.2	8.217	7.628	25.391	6.826	6.167	9.956	16.37	17.109	8.088	5.963	28.016	6.492	5.083	7.574	16.929	27.165	6.906	25.619	7.6699	4.8051	3.107	3.444	10.938	13.7335	6.81	21.312	12.218	10.877		0.367472	11.5157
7.3834	3.2069	6.9698	7.6216	18.9908	11.798	6.638	5.339	29.707	6.684	8.356	8.373	15.138	14.812	7.081	5.711	28.047	7.991	5.462	8.016	15.496	23.686	5.556	26.35	5.7296	5.2811	3.56	3.815	7.6483	15.3527	7.462	25.132	12.306	9.722		0.373491	11.3042
7.5025	3.9071	4.8201	8.4558	18.4189	14.379	6.896	8.227	26.669	5.767	7.131	9.003	13.515	17.944	7.768	7.575	33.303	7.116	6.63	8.112	17.783	22.984	6.762	23.673	7.7092	3.9587	4.585	3.687	9.3728	12.6592	5.232	24.58	11.128	9.647		0.379516	11.4969
7.6216	5.2421	4.6404	7.1166	17.1292	12.392	8.416	5.736	29.997	7.21	6.413	8.473	17.429	18.178	7.888	7.024	27.771	6.935	4.935	7.366	20.815	19.702	7.016	20.83	6.9949	3.0007	3.589	4.397	6.6528	14.0793	8.871	24.296	11.329	8.947		0.385541	11.2367
7.7407	4.7086	4.2328	7.5591	18.7898	13.417	7.895	6.402	25.551	7.765	8.083	8.671	16.38	18.601	7.287	5.909	30.33	5.939	5.372	9.003	18.714	21.719	7.84	18.333	6.9265	5.285	5.026	4.154	8.5466	13.2003	7.857	24.669	16.157	12.329		0.391565	11.5955
7.8598	3.7812	4.9294	6.5772	15.0011	13.863	9.864	6.222	26.815	7.525	7.681	8.999	16.218	14.638	8.566	6.769	27.027	5.319	4.95	8.026	19.851	20.856	8.943	22.075	7.3275	4.5305	4.913	5.626	9.8723	14.9748	6.667	25.843	12.541	9.962		0.39759	11.4168
7.9789	3.6497	4.4241	6.5858	16.2836	9.567	9.255	5.425	26.42	7.01	6.851	7.994	16.218	16.176	8.639	6.403	31.099	6.603	4.115	8.741	19.561	20.344	5.96	19.759	6.4984	5.5556	4.523	4.341	7.7244	16.8677	7.849	25.483	10.587	9.649		0.403615	11.0958
8.098	3.9842	4.5124	7.8962	17.1114	9.263	9.946	5.983	26.138	8.169	6.389	9.408	17.921	15.958	8.039	5.518	31.349	7.661	5.199	8.519	23.358	20.441	7.495	21.212	6.0034	5.7575	4.794	4.927	8.6304	15.4906	8.126	23.828	10.156	10.605		0.40964	11.5087
8.2171	2.8637	4.2133	7.3884	15.6764	10.241	10.189	6.251	27.94	6.511	6.527	8.657	16.149	15.955	6.277	6.671	29.221	8.384	5.677	9.77	25.011	19.311	6.984	19.167	7.2008	5.0312	4.288	4.164	6.1492	14.2143	7.88	24.732	12.939	9.231		0.415664	11.2383
8.3362	3.3284	4.4518	7.1773	17.6449	10.52	6.982	6.08	29.761	7.355	6.046	8.743	15.566	14.125	6.31	7.973	28.886	8.401	5.295	8.684	27.213	18.409	9.263	21.451	6.9202	3.8441	5.471	5.347	8.3915	15.2385	9.3	27.678	10.418	7.851		0.421689	11.5189
8.4552	4.1148	3.9351	8.0854	20.0246	10.035	8.608	5.894	29.814	6.101	6.762	9.71	15.913	12.484	8.828	7.111	26.043	8.902	4.885	7.74	25.633	20.886	9.305	20.495	6.1566	4.8352	5.108	4.691	10.3579	11.1084	7.872	27.459	8.018	8.516		0.427709	11.3767
8.5743	4.3537	4.1994	6.7523	17.9377	8.11	7.379	7.491	24.915	5.945	5.651	8.646	14.689	13.21	5.959	6.312	23.512	7.003	4.684	8.404	22.955	20.843	7.497	22.058	5.7981	5.2479	6.012	4.311	8.1187	13.5572	9.109	29.505	13.304	6.45		0.433733	10.9066
8.6934	4.1626	4.7033	6.2695	21.7029	10.192	8.411	5.748	28.054	4.494	7.124	9.782	12.948	14.329	7.01	5.197	25.818	9.304	5.651	9.202	25.021	20.485	7.096	23.39	5.8645	4.3956	3.33	4.778	7.0601	14.7216	8.794	26.308	11.09	8.039		0.439758	11.2265
8.8125	4.426	5.0107	6.5034	17.0556	11.222	7.706	6.594	26.232	5.982	5.427	9.111	15.595	14.542	6.966	5.754	26.88	9.381	5.153	8.974	26.259	22.986	5.696	22.96	7.5558	5.1569	3.738	3.544	7.9486	11.5125	8.763	25.557	12.069	9.163		0.445783	11.2553
8.9316	4.3196	4.8945	8.8934	16.8049	11.691	6.99	5.246	23.092	6.174	5.335	7.15	14.544	12.362	7.452	5.181	31.4	7.893	4.947	8.663	25.672	22.744	7.484	23.227	7.1441	4.071	4.748	5.909	9.5462	11.5053	7.655	27.393	12.655	8.406		0.451807	11.2482
9.0507	3.956	5.0318	6.7539	16.9945	9.876	8.773	4.713	29.269	4.746	6.021	9.015	13.828	15.136	7.937	5.929	35.388	6.724	5.138	7.956	21.333	20.186	6.403	22.991	7.4826	3.7688	3.37	4.155	8.65	15.2518	8.131	28.947	12.642	7.821		0.457832	11.343
9.1698	5.802	5.3935	8.0671	15.5698	11.369	6.475	5.393	27.58	7.033	6.201	7.234	14.596	11.631	7.828	7.697	35.332	6.239	5.04	8.271	20.114	26	6.991	20.433	6.698	5.7596	3.841	3.696	11.0922	13.1865	9.651	30.574	9.858	7.546		0.463857	11.4604
9.2889	5.2431	4.1504	5.8643	18.4631	10.955	5.883	6.95	27.292	5.813	5.641	8.401	15.765	15.622	7.488	4.938	37.278	6.285	4.201	5.991	21.367	25.628	7.158	21.973	7.5901	4.8194	4.78	4.116	9.7595	13.8279	8.095	32.234	11.703	8.116		0.469882	11.6179
9.4079	4.5106	4.5198	7.1963	15.2851	10.162	8.666	6.004	31.229	5.39	3.886	9.217	17.648	14.397	7.984	5.256	40.823	6.776	5.279	7.38	20.373	24.406	10.795	21.881	7.7845	3.9871	5.152	6.072	9.1604	13.4223	8.665	30.816	10.464	9.41		0.475901	11.9393
9.527	5.9967	3.7268	6.1911	16.7415	10.976	6.106	6.812	29.785	7.081	6.32	9.405	17.677	13.216	7.096	4.069	37.401	7.721	6.295	8.851	20.558	24.378	8.293	20.733	8.2919	4.8818	3.621	3.439	8.7832	12.731	7.58	30.652	9.334	8.396		0.481926	11.6103
9.6461	6.4937	5.4044	6.7813	15.2327	12.096	6.312	4.876	32.185	6.449	4.768	9.372	17.003	10.919	8.377	5.114	35.435	6.837	5.959	6.895	18.57	21.301	8.044	22.827	7.0383	5.5076	4.927	4.361	9.7173	13.3489	7.95	32.107	5.871	7.425		0.487951	11.3789
9.7652	5.1405	6.6544	6.9292	15.0214	13.943	6.099	5.4	29.133	8.19	6.389	9.765	19.14	11.702	6.847	5.075	38.133	6.842	5.013	7.886	18.035	24.553	9.095	21.74	7.3855	5.2727	3.141	5.742	11.1187	11.5721	8.315	35.611	10.218	9.785		0.493975	11.9663
9.8843	5.1366	4.3211	7.8047	16.4854	13.825	6.031	3.891	30.91	6.263	7.252	8.886	17.712	13.188	5.155	5.713	31.471	6.736	6.289	9.27	18.016	20.127	7.924	19.011	5.8846	3.5255	4.442	5.975	10.0609	14.4575	7.133	32.348	9.265	8.687		0.5	11.309
10.0034	5.1754	2.7261	7.2979	16.3306	14.271	8.585	5.65	31.776	6.971	7.636	8.812	18.879	13.308	7.371	5.673	28.526	8.166	6.584	8.873	16.057	21.857	8.301	23.048	6.5684	4.7259	5.147	4.346	9.5057	15.7527	9.205	37.171	10.246	9.393		0.506025	11.9374
10.1225	4.4256	4.8881	6.8038	13.3288	13.291	7.661	8.282	27.18	5.905	5.351	8.027	20.525	12.912	7.42	5.473	28.572	7.307	6.106	8.137	19.468	20.784	7.589	22.826	7.7853	4.9819	6.022	7.338	8.7008	13.0217	8.464	32.797	9.633	7.534		0.512049	11.4709
10.2416	4.5317	4.9504	6.3614	13.3696	12.783	6.647	5.899	29.711	6.828	5.732	10.065	23.17	14.271	5.571	5.777	27.237	9.262	5.585	7.918	18.329	21.729	9.841	25.079	5.9198	4.056	4.035	5.195	8.3138	13.0013	8.945	34.515	9.805	7.127		0.518074	11.5624
10.3606	5.3854	4.9817	7.209	11.5673	13.546	7.633	5.385	26.922	5.136	6.19	10.059	24.435	13.699	7.799	6.935	28.012	6.891	4.496	7.839	19.003	19.202	8.385	24.445	6.3685	4.6913	5.431	3.87	7.5912	12.9637	9.608	32.081	7.605	6.247		0.524094	11.261
10.4797	6.7797	4.3314	5.8084	13.3213	11.029	6.063	5.95	27.803	5.876	4.544	9.916	21.354	15.082	6.817	5.237	24.971	6.727	5.891	7.031	18.181	20.073	9.769	22.694	6.1839	4.8631	5.661	4.994	6.6393	15.3856	9.732	34.333	8.557	7.666		0.530118	11.1898
10.5988	5.3522	4.5431	6.9463	12.7639	17.532	6.291	5.142	25.83	6.56	4.989	9.832	22.504	14.18	7.465	6.186	28.031	5.88	4.736	5.865	21.356	17.332	9.577	23.027	6.7295	4.6273	4.689	5.602	10.2729	16.5363	9.123	35.34	7.476	9.057		0.536143	11.5568
10.7179	6.7309	3.6627	7.7099	12.3568	16.767	7.169	3.93	26.642	7.144	5.865	10.187	19.964	16.207	5.479	4.814	24.555	6.123	5.124	7.991	21.048	21.838	9.56	21.828	6.5074	3.603	4.821	6.023	8.3151	15.0243	10.039	31.985	8.049	8.349		0.542168	11.3761
10.837	5.2001	5.5254	6.994	13.2509	15.667	5.9	5.992	26.704	6.2	5.09	9.18	19.916	15.454	6.897	6.087	32.29	7.869	6.061	8.17	24.448	18.403	9.604	24.757	6.5047	4.5744	4.149	5.349	7.9009	16.1568	9.296	34.728	8.81	8.132		0.548193	11.8564
10.9561	5.2516	4.2476	7.0668	11.6479	13.716	5.042	8.091	23.476	5.306	6.402	11.439	21.72	15.834	7.091	5.546	26.257	6.142	5.689	7.02	20.366	22.59	9.964	22.753	7.1703	4.201	4.157	3.809	7.8264	16.7732	10.981	38.343	7.725	7.49		0.554217	11.5495
11.0752	5.5712	4.7316	6.3119	9.0287	13.536	6.327	5.597	26.308	5.734	7.672	13.504	26.667	15.282	6.838	5.358	28.447	5.073	6.426	7.555	21.533	23.618	9.439	22.328	7.1556	5.0119	4.26	3.967	8.6405	17.7363	8.784	32.097	8.763	8.357		0.560242	11.7472
11.1943	6.9404	5.4689	6.1723	12.1502	15.091	5.056	4.398	27.802	6.488	5.777	12.318	20.662	13.311	8.384	6.074	28.464	7.197	7.089	8.628	21.892	24.619	10.378	20.433	6.2314	5.2172	5.114	6.095	8.9191	19.4888	9.66	32.491	7.593	8.769		0.566267	11.9506
11.3133	3.8846	4.7744	6.0848	9.1641	16.065	6.662	4.958	27.224	6.571	5.105	11.484	18.26	15.259	6.687	5.15	32.683	6.458	5.424	8.038	20.877	23.278	9.168	19.201	7.2606	5.7297	4.331	5.631	8.9713	19.7482	9.547	35.094	7.613	8.827		0.572286	11.6731
11.4324	6.9151	5.3931	5.6639	10.247	16.798	6.437	5.938	22.721	5.234	6.191	10.491	17.079	17.649	8.044	4.912	33.647	6.933	6.42	9.524	21.865	21.998	10.919	24.878	5.0243	5.956	4.245	5.303	8.3136	22.0679	11.753	32.906	7.128	9.021		0.578311	12.0489
11.5515	6.1878	3.5362	5.2281	8.0697	15.058	5.683	5.847	27.231	7.652	5.558	12.496	21.709	15.717	7.314	6.016	32.95	6.243	6.128	7.976	22.975	21.906	12.101	18.916	6.875	3.6352	4.362	4.155	9.1359	17.1016	10.661	35.061	6.506	7.738		0.584336	11.7493
11.6706	4.6633	4.6844	5.9068	11.1751	13.753	6.978	5.199	30.587	6.395	5.917	11.929	23.095	17.531	7.091	6.147	35.525	7.889	5.213	8.203	21.379	19.816	10.794	23.077	6.9389	3.5755	3.901	6.762	7.3725	17.5385	13.168	33.096	7.696	9.408		0.59036	12.1941
11.7897	5.4058	3.8163	4.8652	9.2633	18.926	5.649	5.621	25.311	6.796	7.171	14.013	21.674	17.224	6.784	6.912	30.472	6.19	3.952	7.33	21.21	21.162	9.39	21.942	5.879	4.4006	3.866	5.534	7.1021	19.2129	13.357	29.367	6.909	6.782		0.596385	11.6209
11.9088	4.3977	5.9191	5.3129	8.1452	16.25	5.773	5.262	21.855	6.333	4.544	11.974	20.779	14.295	7.781	5.787	30.944	7.808	5.108	7.499	21.723	21.211	12.404	21.888	5.6396	5.6598	4.408	5.232	8.4455	19.2246	13.732	30.985	6.427	6.179		0.60241	11.4826
12.0279	4.9315	4.3775	4.4328	8.0081	16.437	7.777	6.764	21.112	8.028	5.262	13.064	28.142	13.284	5.838	6.119	29.4	6.989	5.564	7.055	23.035	20.524	10.89	21.521	4.1704	4.4916	4.783	5.77	8.5441	19.1219	15.217	22.624	7.124	9.443		0.608435	11.5104
12.147	6.3142	4.1572	5.116	8.7437	22.125	7.941	6.116	19.491	6.497	5.891	10.794	22.454	17.038	5.459	4.897	28.613	6.804	4.64	8.539	23.818	20.206	9.04	22.461	5.4111	3.7626	4.421	3.261	9.5668	18.3477	13.981	24.379	8.132	9.144		0.614459	11.4413
12.2661	4.4372	3.6682	5.138	10.1598	19.321	6.439	5.998	18.281	9.839	7.036	10.996	22.831	15.116	6.387	6.145	31.441	7.854	5.982	7.185	23.654	21.696	11.526	22.613	7.3684	3.4535	4.757	5.201	8.4671	17.8733	13.671	24.512	7.456	6.597		0.620484	11.6091
12.3851	4.6991	3.4749	4.1971	7.574	19.923	8.361	5.951	20.097	7.839	6.326	13.122	21.033	13.163	5.97	6.661	28.96	6.895	6.286	7.442	26.274	21.343	12.521	24.852	7.4423	7.6223	5.179	4.173	8.9252	20.2175	15.325	23.275	5.57	8.731		0.626504	11.8007
12.5042	5.0865	3.0266	6.71	6.9564	23.612	8.448	6.01	16.455	6.803	5.405	13.981	27.663	12.371	6.647	4.566	27.308	7.01	5.878	7.848	23.627	22.534	12.19	19.986	5.9983	5.7768	4.719	5.017	9.3342	20.4299	18.838	23.705	7.356	6.988		0.632528	11.7662
12.6233	4.4308	4.5811	4.7292	7.6534	21.776	7.146	5.2	17.351	8.181	5.993	12.406	26.938	11.304	8.458	4.795	31.017	7.118	7.002	9.061	19.594	22.472	12.075	26.925	6.4669	5.5409	5.052	5.214	12.9288	16.9557	14.657	21.754	7.868	7.448		0.638553	11.821
12.7424	5.1104	3.7846	4.319	6.8486	19.867	6.872	3.791	15.503	7.382	6.236	14.222	28.108	12.533	6.736	5.244	27.656	6.268	5.32	7.277	20.394	22.63	10.626	19.474	6.5855	4.6728	4.942	4.742	8.3734	17.0192	16.201	21.895	6.934	5.799		0.644578	11.0111
12.8615	4.944	4.0384	4.8012	8.1714	21.95	6.55	5.128	13.235	8.039	5.659	13.343	31.207	11.303	6.672	5.749	26.394	6.715	5.402	11.595	19.539	20.154	11.933	23.231	6.5243	4.7094	4.225	4.963	9.0738	18.7647	13.79	17.364	6.97	7.229		0.650602	11.1929
12.9806	5.5396	3.1681	5.9937	6.5023	21.713	7.202	5.04	15.456	11.282	6.765	11.891	27.801	10.855	6.054	6.03	24.344	7.151	5.481	7.57	20.845	21.33	9.573	19.273	5.944	5.3787	3.682	5.464	11.254	19.4338	17.604	18.986	7.148	6.739		0.656627	11.1665
13.0997	4.1049	4.595	5.1695	6.7775	20.283	8.008	5.49	11.603	9.836	6.755	13.541	27.264	10.555	5.887	6.5	25.477	6.75	5.44	7.687	23.468	21.938	12.038	21.532	7.4413	5.6179	3.943	5.698	11.6635	20.3652	14.191	18.971	8.437	7.81		0.662652	11.3587
13.2188	5.0058	3.4482	5.1511	6.6492	19.171	8.806	6.374	13.64	10.655	5.792	13.505	33.119	11.685	6.93	4.539	30.628	7.046	6.209	10.971	20.113	18.978	10.193	19.251	7.3506	5.6704	6.32	6.572	9.3334	17.1725	16.435	20.678	7.954	9.012		0.668677	11.6472
13.3378	6.0044	4.6953	3.6196	6.3849	23.695	5.428	5.181	12.171	12.355	7.065	10.378	33.027	11.959	5.41	4.729	24.097	6.536	5.807	9.267	21.191	19.985	12.504	20.987	7.9027	7.2501	4.028	5.046	11.0824	19.358	20.455	21.132	6.867	7.878		0.674696	11.6205
13.4569	5.0614	4.7667	6.0036	8.6003	21.26	6.708	5.169	13.407	12.599	6.227	12.77	37.58	11.524	7.15	5.983	29.372	6.522	5.596	7.662	19.073	18.794	11.588	20.889	6.2004	3.954	5.456	5.671	11.6928	22.3267	19.308	22.98	9.146	10.984		0.680721	12.1825
13.576	4.704	4.9828	4.3885	5.6115	21.168	8.095	5.196	13.178	12.675	9.077	14.344	39.557	11.307	5.664	5.278	28.271	7.401	6.088	8.042	19.714	18.025	10.718	19.637	5.3825	5.0193	6.249	4.692	9.9903	18.456	17.739	24.453	8.515	8.689		0.686746	11.8881
13.6951	4.0697	3.8921	6.0499	7.1385	18.467	5.253	6.608	13.875	13.286	6.629	14.658	47.608	13.29	6.775	6.166	32.692	6.881	8.321	10.92	18.921	20.72	12.7	24.359	6.4044	4.2491	5.476	5.565	11.0368	20.9453	18.505	22.468	6.289	8.603		0.69277	12.6915
13.8142	4.7075	4.6117	6.7218	7.625	20.276	6.285	5.44	13.22	15.423	6.029	15.059	43.971	9.238	6.644	4.501	30.468	7.674	5.62	8.121	20.317	18.019	12.442	21.144	5.2311	5.41	5.204	5.553	9.678	18.3623	19.972	20.357	5.661	9.683		0.698795	12.0809
13.9333	6.6825	5.0613	5.4708	8.2346	16.539	7.029	5.172	16.701	14.881	7.11	16.498	42.264	9.567	7.317	5.606	30.192	7.221	5.655	8.096	19.757	18.247	12.162	23.056	6.4632	6.045	5.189	4.488	9.7444	21.4369	21.988	21.154	8.512	7.728		0.70482	12.4627
14.0524	4.3649	4.5273	4.3545	8.5444	21.385	8.936	6.028	10.076	13.485	6.556	14.476	43.72	13.498	8.006	6.35	29.226	8.033	6.05	10.412	20.501	17.047	15.45	20.551	7.3097	6.6654	5.152	5.298	10.6307	23.223	22.65	17.296	7.18	8.439		0.710844	12.5885
14.1715	4.0748	4.0843	6.2604	7.1041	16.579	8.688	4.442	10.748	15.144	6.241	17.567	37.415	12.479	8.839	5.555	27.995	7.756	4.657	7.13	22.561	19.563	13.297	19.482	6.3808	5.219	5.562	5.382	9.5284	25.2067	21.179	20.57	6.416	9.032		0.716869	12.186
14.2905	7.0234	4.394	5.4385	7.2724	21.577	8.831	5.454	12.799	14.577	7.256	18.24	32.928	10.914	8.822	6.797	31.164	6.313	4.484	7.672	21.082	18.972	16.672	21.907	3.6149	4.8873	5.4	6.766	11.3727	20.5611	24.837	17.64	9.48	11.211		0.722889	12.6169
14.4096	4.8272	2.7786	7.1373	8.2599	20.57	8.937	5.79	11.549	16.94	6.817	18.421	29.862	11.703	7.27	6.654	33.395	6.932	5.454	6.538	20.918	16.365	15.841	17.736	8.5997	5.1587	4.524	6.403	11.4554	23.0767	23.221	16.024	7.358	8.525		0.728914	12.274
14.5287	5.0311	5.8446	5.474	6.7514	19.748	8.228	4.785	12.028	15.848	8.27	18.148	27.261	11.431	7.656	4.997	28.772	6.046	7.813	9.311	22.446	20.63	14.509	23.183	7.3017	6.6156	4.147	4.726	10.3639	23.589	22.784	16.371	7.994	7.285		0.734938	12.2845
14.6478	6.9491	5.9513	3.9189	9.3382	21.339	10.163	4.772	9.523	16.667	7.838	19.038	25.732	11.676	6.755	6.087	34.293	7.561	6.668	7.669	23.207	19.11	15.544	21.42	6.663	3.7292	5.456	6.127	13.8856	26.9433	23.23	18.481	7.125	9.887		0.740963	12.8105
14.7669	4.0735	5.7653	4.6129	5.9554	20.522	9.592	5.071	9.539	19.765	8.232	17.182	20.956	10.999	10.525	5.97	30.1	7.131	6.226	9.821	23.441	17.966	19.326	20.596	6.8176	4.9151	4.317	4.818	14.0094	23.8434	26.078	23.693	7.981	10.269		0.746988	12.7306
14.886	6.6278	2.9362	5.1621	7.4737	21.292	9.438	4.873	11.39	18.59	7.747	19.134	24.289	9.657	10.205	4.615	31.853	7.409	5.578	9.477	24.947	19.109	15.296	20.872	6.9978	4.7926	5.786	6.311	13.0581	23.8824	28.132	20.156	8.687	10.253		0.753012	12.9099
15.0051	5.4612	4.3891	5.3521	6.2707	21.108	10.306	6.081	9.292	21.753	6.548	20.845	27.825	10.753	7.931	6.472	30.754	7.827	6.896	8.161	21.317	20.08	18.831	20.18	6.1091	4.2237	6.344	6.339	17.5813	21.2061	30.253	21.049	10.217	9.523		0.759037	13.2509
15.1242	5.3468	5.4512	4.7309	6.7972	21.784	9.42	5.024	9.495	18.242	8.056	20.349	22.578	12.075	7.475	5.941	37.247	6.801	5.351	9.654	25.629	19.376	16.947	26.386	6.6883	4.2535	4.727	6.442	15.4203	25.5831	33.825	16.029	8.612	13.225		0.765062	13.4837
15.2432	6.6912	3.7901	5.1728	5.6035	20.96	9.164	6.402	10.941	23.86	8.165	19.722	21.449	10.533	9.5	5.898	32.297	7.602	7.304	9.044	25.936	18.525	18.229	23.245	6.9392	5.2091	5.511	4.565	19.6746	23.3627	35.091	23.099	10.056	11.869		0.771081	13.8003
15.3623	5.7116	4.4244	3.7244	5.9857	19.507	8.989	5.159	9.411	20.473	8.723	21.901	21.305	10.933	8.453	6.175	31.273	6.674	6.015	11.791	26.787	20.847	18.787	22.561	8.6224	5.7382	4.535	5.931	21.3578	24.0466	41.999	20.091	8.866	12.294		0.777106	13.9119
15.4814	6.7299	4.0955	6.4451	5.08	19.774	9.414	6.712	8.954	22.716	10.011	22.42	23.642	11.787	8.542	6.956	35.557	8.571	6.6	9.51	25.052	22.498	20.855	27.043	7.9215	6.2298	7.275	6.675	23.6391	29.6013	47.844	22.623	13.227	13.447		0.783131	15.3772
15.6005	7.9666	4.0952	5.6244	6.9045	23.099	13.752	7.334	7.579	26.029	9.53	21.357	27.447	11.501	8.045	6.288	37.086	6.394	5.272	10.148	27.755	19.964	21.993	26.907	9.0294	6.231	6.198	7.6	22.848	24.4374	48.245	22.956	11.005	12.563		0.789156	15.551
15.7196	6.7028	4.4414	5.569	5.9564	22.43	10.392	5.332	8.087	24.487	8.767	22.026	29.316	14.199	9.602	5.752	34.324	6.984	6.905	12.519	27.985	18.595	25.455	27.755	12.0751	5.9405	6.976	8.047	23.4676	26.9188	55.47	28.054	13.212	12.298		0.79518	16.2437
15.8387	6.8774	3.707	5.8802	7.733	20.861	11.503	6.658	8.968	26.931	8.829	23.73	26.802	11.585	9.704	7.153	32.036	9.343	6.759	10.724	27.655	20.056	26.67	34.625	9.5411	5.3794	6.223	6.128	22.6911	31.1545	63.375	32.606	17.59	14.755		0.801205	17.098
15.9578	7.663	4.383	7.0894	6.2562	23.378	12.273	7.011	9.134	27.738	9.158	24.329	25.698	11.808	7.952	5.341	37.149	8.067	6.586	10.289	31.593	23.857	28.498	37.504	12.2869	7.4279	5.947	8.236	23.621	32.8847	65.954	33.968	20.907	17.143		0.80723	18.2161
16.0769	6.4075	5.3214	5.6749	5.8905	22.841	11.386	7.07	7.62	33.943	10.002	23.376	24.317	9.757	10.007	7.871	39.293	6.203	7.608	8.664	31.51	23.447	34.116	40.839	14.7042	8.3634	6.353	7.6	20.5854	33.3564	65.776	42.39	29.423	22.533		0.813254	19.2197
16.196	8.4459	4.0831	5.9079	8.0754	23.579	12.501	6.37	6.689	32.391	8.625	23.661	25.7	13.995	7.262	7.799	35.695	6.508	5.444	10.56	32.784	23.348	36.078	51.59	19.9224	7.0543	9.347	8.027	24.6106	35.1621	69.726	48.49	29.61	25.911		0.819279	20.4531
16.315	8.3345	5.1008	6.4801	6.5317	22.394	11.396	5.62	7.591	30.756	10.467	21.186	24.494	11.856	8.374	7.31	35.596	8.015	7.487	10.484	32.395	21.362	39.907	48.366	24.0581	7.7122	9.289	11.193	25.8639	33.6954	71.468	54.764	31.069	28.731		0.825299	20.8893
16.4341	9.5348	4.732	5.0173	7.3411	19.599	11.398	5.719	8.668	30.477	8.972	24.24	26.187	12.218	12.252	7.4	37.129	6.477	8.688	12.164	33.599	20.115	44.187	52.026	28.1036	9.815	9.387	13.429	28.5262	38.3202	70.415	71.518	48.2	36.589		0.831323	23.1043
16.5532	10.3685	7.2249	7.2225	5.6759	17.945	14.48	5.938	8.255	27.904	7.494	23.722	22.758	10.449	7.505	7.04	32.05	6.468	7.824	11.96	34.435	19.172	52.965	54.399	35.7275	11.1404	8.966	13.858	30.4996	43.2116	74.935	79.534	51.747	39.658		0.837348	24.0161
16.6723	11.8213	5.7738	7.4272	7.1696	19.068	16.221	6.5	9.707	33.599	10.686	22.831	25.388	11.817	10.402	8.767	37.945	7.509	8.921	11.031	37.757	18.524	57.171	54.527	48.1311	13.1573	11.719	15.601	37.9344	37.9093	74.278	89.293	61.448	45.815		0.843373	26.5409
16.7914	10.8919	6.9195	7.3354	7.4531	20.055	16.653	6.188	8.073	34.376	10.154	25.916	25.37	12.214	7.968	6.951	36.741	7.871	9.164	13.177	35.459	25.025	54.475	39.969	51.5622	16.0349	11.449	15.932	39.7598	43.3733	73.022	100.122	77.253	48.509		0.849398	27.4369
16.9105	13.8519	6.9335	7.2664	6.2422	15.815	15.348	6.727	8.433	31.98	11.517	23.826	29.838	9.187	9.833	10.537	35.303	7.821	7.837	14.636	43.234	27.554	52.903	45.988	56.395	17.3778	11.882	15.836	43.8416	42.0718	62.326	102.629	85.824	52.391		0.855422	28.2783
17.0296	17.5475	6.6285	6.029	8.4538	16.445	19.816	7.271	11.221	30.702	11.434	26.769	24.274	12.64	9.425	11.225	36.969	9.063	6.914	14.911	44.404	30.591	47.288	42.275	51.601	18.9106	13.901	21.239	46.9118	44.8546	59.302	96.714	93.44	52.963		0.861447	28.8525
17.1487	18.5881	7.6159	7.0496	7.8508	13.451	19.035	6.747	8.223	32.183	10.291	30.93	21.849	9.383	10.238	10.496	37.232	8.151	10.352	15.617	51.535	33.374	51.679	37.569	48.2723	21.2838	17.274	23.989	55.4526	40.5401	45.807	88.47	93.876	50.774		0.867472	28.6418
17.2677	21.8092	5.1462	6.6276	8.1869	18.237	19.341	5.824	8.617	29.096	8.96	26.574	22.534	10.107	11	10.071	38.195	9.491	8.296	14.963	51.795	35.814	49.102	29.739	40.3228	25.8719	17.245	28.194	62.0724	38.6598	44.982	88.39	89.005	51.063		0.873491	28.3434
17.3868	23.3642	8.3701	11.4658	8.0486	14.395	24.817	7.449	9.434	33.397	11.642	28.958	24.167	11.827	10.109	11.411	36.586	13.042	10.217	14.183	58.874	39.483	48.228	22.271	35.0222	27.0639	16.459	33.105	65.5237	34.123	39.418	74.223	75.423	49.725		0.879516	28.2371
17.5059	27.3646	7.5852	8.9044	10.372	14.23	21.625	8.067	9.149	33.368	11.66	31.286	24.423	11.619	11.747	13.778	40.976	11.211	9.742	19.711	63.91	35.043	34.437	16.501	29.736	26.4952	24.744	33.75	68.2213	34.0433	33.446	64.034	65.245	45.128		0.885541	27.3198
17.625	25.324	6.8802	9.634	9.6387	12.711	25.091	9.251	9.513	36.142	12.988	32.697	24.044	11.507	11.518	12.708	34.664	11.809	13.031	22.895	69.196	41.791	30.494	14.044	22.5552	25.8209	31.289	41.465	75.5945	32.9727	25.629	39.595	42.243	42.063		0.891565	26.2666
17.7441	27.9499	8.4153	9.1696	10.1658	14.648	34.563	8.467	10.672	36.763	12.157	32.271	24.034	11.363	11.246	16.375	35.981	11.413	12.71	23.841	70.875	42.645	21.532	12.508	16.0477	23.7867	26.64	55.281	66.5149	22.8292	17.865	28.787	27.597	38.743		0.89759	24.9653
17.8632	25.8303	7.8182	10.6308	11.7101	16.924	34.337	9.722	13.836	36.323	11.351	29.619	24.235	10.179	11.295	14.232	38.458	11.436	15.253	28.339	70.026	45.859	16.84	11.47	12.7225	17.7638	32.509	57.099	57.0563	20.0838	17.5	23.553	21.968	31.194		0.903615	24.1568
17.9823	25.5397	8.0685	11.9952	12.9676	18.09	36.443	8.758	10.55	36.478	12.223	27.19	26.934	11.828	11.57	15.034	40.551	12.906	20.308	31.806	73.163	46.031	15.994	10.146	11.5404	11.5587	24.5	64.064	48.2235	13.1139	13.64	22.677	22.417	15.001		0.90964	23.373
18.1014	26.1992	11.1869	10.7305	12.303	21.309	33.586	7.52	11.039	35.883	11.507	24.56	26.457	10.319	10.596	16.735	43.517	16.469	17.941	40.349	69.322	42.699	14.132	8.179	6.9701	10.5634	27.094	58.408	33.0871	12.5109	13.574	15.781	19.161	15.059		0.915664	22.2651
18.2204	23.9648	13.648	10.7075	14.3036	17.826	39.098	9.683	12.321	34.059	11.169	23.421	27.361	9.444	9.819	15.935	42.293	18.411	26.114	44.649	61.282	29.703	11.712	6.777	8.9922	6.6572	24.797	60.025	20.5469	8.2074	11.141	14.213	14.237	15.348		0.921684	21.1474
18.3395	20.8756	10.5802	11.9221	14.0188	20.381	37.655	9.983	13.608	33.667	12.631	25.336	31.728	14.016	12.187	13.204	42.699	18.868	26.406	54.157	61.27	23.678	9.446	5.141	6.5018	8.5597	20.561	55.13	16.6373	8.0878	10.368	12.838	12.51	14.555		0.927709	20.885
18.4586	23.1382	18.4183	14.4487	16.1359	16.648	38.883	10.734	16.081	38.792	12.417	25.726	32.343	11.785	10.036	20.112	44.975	24.553	33.242	64.829	50.456	20.933	8.753	5.562	5.9467	7.2672	22.577	47.014	13.7293	8.7534	8.156	7.17	7.127	9.63		0.933733	21.1022
18.5777	17.9234	18.2255	15.4847	14.7619	16.659	38.224	13.12	19.817	39.481	14.239	20.414	34.197	13.79	14.142	16.428	48.603	34.704	41.984	75.125	46.196	17.849	8.822	4.268	4.8029	6.0017	17.703	27.772	10.8663	7.7448	7.106	6.1	7.357	7.766		0.939758	20.8387
18.6968	15.121	20.9929	19.6949	15.1291	18.711	39.662	15.935	21.539	46.412	15.46	26.816	30.155	11.358	14.496	18.108	55.958	36.587	44.677	86.627	30.41	14.547	5.917	3.492	4.3103	7.2327	9.14	15.94	9.4951	8.3575	4.838	6.392	4.59	5.979		0.945783	20.7297
18.8159	13.567	18.3459	25.8258	15.8196	16.511	40.9	18.768	28.692	40.428	11.334	26.234	32.151	11.551	14.984	18.851	52.927	40.85	47.418	89.526	21.367	12.644	4.182	3.741	3.5153	4.2985	7.365	11.372	8.8921	5.4523	4.553	4.92	3.468	5.791		0.951807	20.1892
18.935	9.2494	18.4032	22.3201	19.2591	15.732	42.422	18.788	32.241	42.033	12.047	26.635	29.612	13.803	11.403	23.146	52.514	59	56.84	77.154	18.543	11.639	4.75	2.414	5.1222	4.0847	7.142	11.471	6.9917	4.9133	4.271	4.275	3.163	3.417		0.957832	20.4484
19.0541	9.2269	13.6769	28.017	23.3703	16.212	42.398	22.36	31.813	43.921	16.8	26.434	32.764	12.931	16.502	21.976	60.704	66.915	64.104	65.814	14.873	8.049	3.5	2.599	3.2756	5.4508	7.707	10.347	5.0458	3.7068	5.768	3.498	2.927	3.645		0.963857	21.1009
19.1731	7.2262	10.4326	26.7669	23.5563	15.008	44.36	24.947	37.749	37.25	17.123	25.259	33.022	12.818	17.837	27.57	62.247	67.39	69.124	46.596	10.001	9.016	3.205	2.544	2.6546	3.7894	8.108	10.107	4.8517	3.6581	4.025	3.235	2.853	3.176		0.969876	20.5305
19.2922	5.6921	6.2402	20.0795	24.5957	17.651	42.392	28.949	39.776	37.158	14.669	25.748	36.057	14.157	22.316	29.387	67.194	70.469	73.928	26.955	9.522	4.986	3.148	2.243	3.8641	3.3859	6.413	7.751	2.5991	4.1278	1.994	2.934	2.283	3.363		0.975901	20.0614
19.4113	4.2541	6.6021	13.7099	23.8303	18.457	51.137	32.871	36.711	35.145	14.857	27.145	38.625	14.337	18.59	37.972	70.613	77.241	70.912	18.567	7.96	5.076	2.261	1.344	2.6087	3.1157	5.511	6.342	2.2357	3.6711	3.142	2.636	1.937	2.956		0.981926	20.0719
19.5304	3.3198	5.021	10.7922	19.6798	21.142	47.468	37.019	38.2	34.452	15.424	27.199	39.888	19.245	26.836	45.554	71.827	78.436	53.614	10.126	8.523	5.465	1.23	1.279	2.9222	3.1495	4.184	5.343	3.2893	3.1642	1.867	2.814	1.543	2.075		0.987951	19.7603
19.6495	4.2187	4.4062	7.704	17.5467	21.892	46.065	46.345	44.241	31.005	16.137	28.42	39.679	18.505	32.748	47.607	80.563	81.034	32.134	8.704	8.357	4.432	1.872	0.558	1.7533	2.1166	4.609	5.106	3.6356	2.4755	2.472	1.733	1.093	2.912		0.993975	19.76
19.7686	3.5527	5.0037	6.9977	15.4648	24.31	46.573	54.397	43.302	31.63	19.287	26.674	39.722	17.625	38.554	60.753	80.09	66.456	20.966	7.697	6.037	3.139	1.379	0.675	2.3696	2.6556	3.688	4.045	2.6117	2.6422	2.278	2.228	1.663	1.782		1	19.5833

## Sheet: Image8
X0	Y0	Y1	Y2	Y3	Y4	Y5	Y6	Y7	Y8	Y9	Y10	Y11	Y12	Y13	Y14	Y15	Y16	Y17	Y18	Y19	Y20	Y21	Y22	Y23	Y24	Y25	Y26	Y27	Y28		Ap-Ba	Avg int
0	74.212	57.255	46.164	41.0823	29.6969	23.509	26.536	27.827	38.8556	31.6328	39.777	25.1099	39.3408	48.85	53.059	47.1827	27.2031	28.697	41.7112	49.3069	55.2881	47.798	60.297	53.811	68.472	119.247	101.478	66.551	51.415		0	49.0126
0.1191	87.048	62.728	49.36	44.2823	29.171	23.976	34.3209	29.1563	39.8431	30.8432	44.33	28.5946	38.4106	50.756	56.3282	48.8016	29.7609	26.7187	39.3427	53.2349	53.6587	57.2684	66.547	60.499	70.528	119.321	109.917	77.034	73.01		0.0053769	52.9238
0.2382	90.516	72.457	60.905	54.6493	33.5935	28.095	40.7316	28.0007	43.4761	41.3113	47.714	32.4408	46.0611	50.45	52.7408	55.9591	33.2301	30.7331	36.6517	45.2953	53.9818	55.5366	69.994	67.667	65.877	111.42	124.669	89.616	81.455		0.0107538	56.732
0.3573	84.88	86.42	71.876	56.5783	38.14	30.735	36.4226	35.2527	44.9576	49.7088	55.625	37.2378	44.8404	62.115	54.654	55.9678	37.9375	37.358	41.6765	53.9832	60.5754	56.9421	77.843	66.963	72.453	109.445	124.135	98.412	92.527		0.0161307	61.2297
0.4764	81.799	86.992	68.448	68.6384	41.1915	29.866	41.9439	39.7636	54.4857	52.2084	68.31	44.4754	48.4937	64.293	69.6669	54.9481	45.916	34.9103	41.4042	52.1931	56.7664	48.5563	83.226	78.547	83.438	114.344	124.764	98.103	108.545		0.0215076	65.0427
0.5954	84.409	89.538	85.933	70.3278	46.0554	29.372	47.0246	45.4566	63.1538	58.1115	79.12	55.8206	45.364	63.159	75.0844	58.4865	57.2007	40.6191	46.6208	50.8563	58.0696	56.0713	83.352	76.517	83.899	113.585	125.946	115.561	128.536		0.02688	70.1121
0.7145	80.868	101.798	89.464	79.794	44.3884	34.247	57.5547	49.6259	65.8277	57.7501	85.098	52.8382	47.3934	59.831	71.1232	64.2207	60.2271	51.8607	53.9469	52.8983	59.3627	51.094	100.781	97.338	90.412	114.179	117.091	128.498	136.053		0.0322569	74.3298
0.8336	83.827	109.873	99.622	85.3753	54.9624	41.676	55.5988	52.3811	77.6452	58.7524	98.261	63.2087	52.0117	60.924	64.3299	71.4258	66.3997	61.7083	64.4599	57.1051	59.4902	53.2525	104.787	102.794	89.508	112.989	116.819	126.943	141.938		0.0376338	78.8989
0.9527	85.649	99.042	102.1	88.6553	61.3151	43.483	62.8984	57.9675	84.2437	58.0208	107.375	56.7355	59.7909	61.865	72.0831	73.0324	74.2051	63.501	67.8897	57.0992	62.0773	59.1984	99.9	97.269	94.105	123.568	113.351	130.613	134.135		0.0430107	81.0748
1.0718	82.283	94.073	98.091	86.9252	69.1944	56.433	68.8024	62.568	87.084	59.7421	103.721	62.7364	57.4892	69.154	75.0011	75.8008	81.6934	68.2765	76.8972	59.8217	60.4967	54.5675	99.116	93.142	97.727	121.883	117.661	124.749	130.927		0.0483876	82.6226
1.1909	83.811	96.635	108.463	89.45	76.9971	67.821	71.6138	61.8857	82.9818	62.6044	96.294	66.8515	59.5734	68.966	69.4717	74.9027	83.7582	79.069	77.2561	64.9509	63.952	50.6939	92.41	91.106	103.138	124.422	114.479	114.131	117.904		0.0537645	83.2963
1.31	83.628	107.915	112.53	79.966	84.2055	73.829	74.8932	64.6129	78.38	66.3279	94.583	62.9807	67.952	79.259	68.8621	69.3131	85.0748	83.8269	76.16	70.4773	66.5876	50.1989	97.905	93.469	98.184	136	122.387	99.371	109.845		0.0591414	84.7836
1.4291	80.701	100.112	103.436	88.9463	78.8965	79.148	85.4088	72.7291	80.8386	68.0668	82.304	57.9935	64.8417	88.41	76.8059	64.4818	87.2452	82.145	70.1552	69.0502	68.8017	51.8988	87.331	100.189	92.483	142.013	111.431	84.444	85.867		0.0645183	82.9715
1.5481	83.22	103.253	106.354	84.4262	88.1664	87.219	95.1325	74.3221	68.2098	63.5916	73.573	58.8605	72.8662	85.847	76.7815	69.0609	75.6555	78.3637	68.3371	76.1103	75.3914	53.3874	93.758	93.806	102.758	134.591	110.173	72.506	68.905		0.0698907	82.5733
1.6672	75.515	98.714	111.166	87.5984	93.7306	96.764	89.4617	74.5816	62.015	58.3019	66.287	66.2816	75.9975	88.914	84.3645	68.6146	73.2941	74.2967	66.0354	78.816	77.9064	48.1896	82.592	99.779	111.453	122.453	102.08	62.509	66.718		0.0752676	81.5321
1.7863	70.012	103.566	96.325	85.8496	80.4125	99.548	81.2068	72.4389	59.1802	64.0021	57.598	66.9081	69.3569	101.724	90.4506	68.594	65.6726	66.8281	65.9564	70.3585	75.3451	46.4477	79.081	94.663	117.474	114.712	102.919	51.271	55.124		0.0806445	78.3802
1.9054	79.874	88.72	96.294	81.3603	82.4456	107.88	91.0509	76.423	56.594	68.1644	54.979	62.9135	78.22	102.242	93.8421	61.9696	59.6676	62.2964	64.4673	74.0202	71.5938	35.6437	91.267	93.177	112.178	109.118	95.575	51.022	49.667		0.0860214	77.6781
2.0245	77.157	93.291	94.398	74.4275	84.9266	115.428	92.0524	67.1887	57.7912	64.7685	46.996	54.5019	77.0871	92.382	91.6086	63.1218	59.4965	65.7398	58.1614	73.2435	69.3473	29.4235	83.78	96.32	122.542	94.038	88.63	47.408	49.194		0.0913983	75.3259
2.1436	73.479	97.833	94.34	68.0823	88.9968	113.008	83.7786	63.8964	56.7835	61.1652	47.794	60.0196	75.1425	81.823	96.3345	56.2169	48.6308	57.0987	59.5807	75.5727	62.8338	26.6032	70.453	101.222	118.819	92.421	84.986	43.134	39.932		0.0967752	72.4131
2.2627	75.736	95.979	92.793	69.0401	80.7425	114.852	90.3492	63.0524	43.6371	58.5215	41.143	55.4915	74.191	72.295	100.293	57.7026	43.7743	49.5864	56.4357	67.5011	54.886	24.4546	73.192	90.275	122.82	86.123	82.046	35.931	30.782		0.102152	69.0906
2.3818	78.617	96.524	86.629	57.1441	79.4563	114.755	89.8987	63.5126	39.7778	46.9533	28.579	61.702	73.3879	68.845	97.1505	48.2287	44.5717	46.6078	53.7772	65.5911	48.3307	22.8419	67.747	90.638	125.101	86.551	90.558	29.942	31.678		0.107529	66.7275
2.5008	80.904	93.391	87.042	55.4387	75.1127	102.287	88.2295	56.8396	37.6696	38.0601	25.737	58.8733	77.9735	60.805	91.7792	46.8363	39.3009	38.716	47.6376	56.8865	45.2289	28.2953	70.393	84.781	121.967	81.53	88.966	33.441	29.509		0.112901	63.5735
2.6199	83.491	94.705	82.966	51.8907	61.8828	99.693	95.8642	57.6577	42.5738	36.9393	25.685	56.4682	72.8582	54.161	87.3986	41.0062	32.839	38.1935	42.4266	55.0326	36.9997	21.2215	68.817	94.755	114.815	79.616	89.992	28.874	22.189		0.118278	61.0694
2.739	86.059	85.531	84.854	46.3778	59.1302	109.509	80.9449	54.3642	39.5998	42.4918	28.381	60.805	63.7142	43.473	76.1234	33.6385	33.4133	37.9267	41.5016	55.8709	32.0415	17.1238	61.686	91.673	120.495	79.986	87.402	30.844	23.69		0.123655	58.919
2.8581	89.12	82.041	79.578	48.8494	51.7917	112.955	77.8623	48.6136	38.2552	37.4433	25.634	59.544	65.5695	35.042	77.9356	27.2121	26.4317	32.9088	34.793	54.1853	28.1775	19.6391	56.981	96.606	115.573	74.044	95.826	23.923	19.821		0.129032	56.4261
2.9772	96.853	96.46	76.625	46.8391	41.8552	104.374	73.7064	48.0824	33.6002	35.1578	25.199	58.2947	61.6445	22.549	61.4981	21.4634	28.0319	28.8948	39.8095	44.2997	23.9989	17.583	48.737	101.775	104.667	75.393	89.028	23.526	18.335		0.134409	53.389
3.0963	98.871	91.436	68.66	39.7354	43.7361	93.327	72.3531	58.1467	34.8894	33.7628	23.799	51.8655	54.1222	25.106	48.2857	18.7474	25.1922	32.5289	42.7369	47.7955	21.4283	14.0746	43.949	100.238	100.896	75.866	85.628	24.678	17.056		0.139786	51.3417
3.2154	102.644	86.672	66.802	47.1652	41.2049	78.707	73.3555	51.6828	31.4617	33.2437	24.837	48.9198	47.9536	20.905	37.5447	16.1189	21.5701	26.355	32.8914	41.0432	19.4657	14.3584	41.718	101.428	102.736	69.457	80.129	23.276	16.49		0.145163	48.2805
3.3345	97.519	81.876	65.619	39.8654	36.6248	68.187	58.5978	47.5619	25.4966	32.9664	25.837	51.9909	38.6115	17.585	35.4423	12.2663	23.7611	20.81	36.5248	34.5303	16.7009	16.0981	42.478	89.027	90.361	68.27	83.118	21.445	14.762		0.15054	44.6184
3.4535	94.754	74.47	60.577	36.1818	37.9848	57.202	58.986	54.9951	27.5766	28.6898	27.611	53.0881	29.7864	20.176	29.2504	13.5253	26.403	25.4584	36.8957	37.9047	14.5636	17.3666	41.723	90.93	76.98	77.267	84.683	18.166	13.72		0.155912	43.6867
3.5726	86.655	76.442	51.69	36.9153	32.8598	50.874	59.9155	53.2087	30.2506	30.7808	27.293	55.0194	23.143	21.3	21.5541	14.5594	23.1477	28.5093	36.4061	32.0265	14.0866	13.7955	35.966	97.947	82.691	81.117	82.922	17.783	13.866		0.161289	42.5077
3.6917	89.531	65.898	47.722	34.2464	33.0875	47.086	55.649	46.7929	31.4937	28.9703	27.733	50.729	19.7438	20.449	24.5506	11.0486	18.9549	28.1203	31.9226	26.019	12.7703	9.6626	30.976	86.252	76.445	80.001	76.886	16.26	12.906		0.166666	39.3761
3.8108	82.602	58.763	53.372	31.4523	36.0926	36.132	54.5434	40.7405	31.1887	27.8794	27.116	49.9267	19.7399	16.771	19.0306	10.6414	15.5804	23.6877	28.4508	25.96	15.6908	11.6891	23.407	77.69	75.125	75.941	74.882	17.685	10.724		0.172043	36.9829
3.9299	70.403	45.672	47.401	27.1866	29.5108	35.52	59.6394	35.6589	27.0791	25.6935	21.956	51.1221	16.4574	16.758	16.3102	8.2579	13.0422	19.4714	30.4834	25.7303	13.4475	10.1653	23.812	76.798	80.815	77.628	69.416	15.784	12.017		0.17742	34.5943
4.049	65.191	38.764	40.134	21.9598	24.5746	30.063	48.5484	26.7225	26.3728	26.6256	21.036	49.6607	19.0232	15.821	16.7877	7.9415	15.8098	16.636	27.0645	20.2714	14.136	11.4181	18.094	73.611	74.538	80.134	64.507	11.284	10.521		0.182797	31.6293
4.1681	50.42	30.842	32.237	21.4052	24.9302	23.454	40.2285	32.1693	25.3438	24.0325	23.615	57.6466	14.5522	17.518	19.5543	6.5917	15.3741	15.0956	25.7704	15.9011	12.6515	9.6844	16.59	65.791	67.761	72.916	60.821	14.715	10.303		0.188174	29.2384
4.2872	38.233	20.032	25.517	20.5939	23.5487	23.227	36.2961	25.4338	23.6441	20.1457	22.46	50.7107	15.917	16.443	19.8176	6.2602	13.8683	10.9139	23.4541	15.4646	10.3346	9.8396	15.808	57.687	68.237	83.649	53.706	14.358	8.668		0.19355	26.6989
4.4063	23.686	15.043	21.503	19.9826	21.1952	16.77	39.8349	27.8562	18.2357	21.6156	18.17	47.0153	15.2926	12.979	16.9969	6.4261	9.5979	14.5832	22.3205	17.9062	11.1785	10.8134	13.409	41.93	58.688	75.209	50.306	9.779	10.512		0.198927	23.7529
4.5253	19.31	14.51	16.696	15.8731	17.0298	18.714	31.5243	23.5456	12.0111	26.5421	19.136	47.6286	12.4651	17.34	20.0034	4.1259	9.6835	14.713	21.6197	14.8873	9.5324	11.8166	11.907	40.381	53.226	79.497	47.007	8.029	8.745		0.2043	22.3276
4.6444	17.714	11.38	12.473	13.6351	18.2964	17.686	26.309	17.1769	11.7532	26.2071	18.824	42.8967	14.704	18.486	19.6617	5.8313	11.2045	16.5809	20.7915	15.3389	8.5344	10.7207	11.334	32.76	51.722	72.211	44.305	11.795	8.562		0.209677	20.9964
4.7635	13.46	12.012	12.97	17.1044	17.715	16.476	19.6906	16.1632	11.3912	19.4702	20.241	34.4761	14.1615	15.724	22.8743	8.1989	9.8501	13.3439	26.5567	16.0292	8.7518	11.1271	11.499	31.451	46.575	76.897	44.943	10.607	6.654		0.215054	20.2211
4.8826	13.089	9.501	10.973	12.8197	16.8357	15.397	14.3648	15.5894	10.6998	16.0396	19.201	28.7523	12.7453	16.583	21.5754	7.197	13.0763	14.883	17.7365	14.3263	8.6452	10.8451	13.146	30.297	39.228	84.721	38.708	10.489	5.472		0.22043	18.7219
5.0017	12.422	10.954	9.058	9.7774	11.8606	16.031	15.703	13.9961	11.0301	15.8523	16.968	27.9388	10.1947	15.781	21.2605	6.0404	12.1768	12.1588	16.7416	12.2385	8.6329	13.3781	13.289	25.346	36.072	86.126	36.495	11.172	8.741		0.225807	17.8426
5.1208	11.07	7.392	5.702	9.6554	13.9297	15.154	14.3354	12.231	10.3399	18.7381	13.535	20.5924	13.3523	15.847	22.381	6.6261	9.5765	15.7755	15.664	10.3874	13.9441	10.5744	12.685	19.854	37.701	68.365	35.765	12.442	8.039		0.231184	16.6088
5.2399	12.466	6.205	7.752	7.7432	10.9802	12.1	11.164	9.3417	10.5773	17.3394	15.136	19.3211	12.7476	16.887	22.086	4.2775	7.8309	14.5584	16.7493	8.7526	11.0834	11.5268	10.918	17.53	39.133	74.855	40.004	13.094	6.558		0.236561	16.1627
5.359	11.052	6.767	7.238	7.6164	10.9764	13.335	10.91	10.8431	7.6382	13.5124	15.74	19.3393	11.3113	17.8	22.793	4.0651	4.9569	10.4017	16.0818	10.9513	10.7117	12.7847	10.204	18.137	37.74	81.185	37.133	10.915	4.537		0.241938	15.7475
5.478	10.096	5.919	8.002	5.9599	11.7571	13.567	12.2106	9.4814	6.8511	6.9456	13.223	16.5883	13.4422	17.911	22.4111	4.6548	6.8676	8.6011	14.8753	10.2977	10.3441	12.7651	7.847	19.322	31.609	80.532	31.639	10.025	3.683		0.24731	14.7389
5.5971	8.738	6.492	7.196	6.4852	11.0545	14.98	10.2996	7.5386	7.54	8.3192	12.012	14.8528	14.6327	13.733	17.5588	5.3027	5.994	8.3846	13.0995	7.9088	11.956	18.0519	7.071	16.389	35.831	88.662	30.942	11.112	6.078		0.252687	14.766
5.7162	10.009	4.744	5.28	4.5149	6.469	18.22	10.3726	8.3882	6.3746	6.0891	14.473	14.1691	13.2698	15.118	21.3313	5.8827	6.2664	8.5186	11.7086	9.1235	13.0162	14.5307	9.088	17.773	34.502	81.606	31.997	8.733	4.167		0.258064	14.3357
5.8353	10.098	5.496	6.222	3.8484	8.9332	18.119	9.8753	6.9805	4.2237	8.4642	10.628	12.4975	12.0475	16.556	17.2248	6.6607	6.7582	9.3138	11.3855	10.2213	11.6056	21.6352	8.69	16.244	35.392	77.997	33.189	9.182	5.007		0.263441	14.2929
5.9544	9.778	5.411	4.285	3.6452	12.3096	17.869	10.8513	6.2536	5.5606	7.0305	9.665	12.1002	9.2102	20.558	13.8715	3.2354	8.3086	7.3225	14.1128	9.7181	11.9232	21.2644	9.762	10.933	25.786	86.565	29.721	12.221	5.091		0.268818	13.9435
6.0735	10.983	5.874	4.762	4.2877	9.1925	18.8	9.7049	4.2826	5.4068	6.243	7.45	10.058	11.7737	21.923	10.6445	4.5648	6.0936	4.093	13.8176	9.5829	7.7914	22.1957	9.717	11.136	26.291	80.963	29.332	12.021	2.977		0.274195	13.1711
6.1926	10.752	7.33	3.258	4.6733	9.8872	19.786	8.2792	5.14	6.3817	5.574	7.68	12.2912	12.3223	21.757	13.0356	4.6953	4.9981	7.0894	10.2388	8.404	9.8054	19.7425	8.998	9.159	24.397	75.232	25.988	9.796	3.365		0.279572	12.7606
6.3117	9.536	5.438	3.372	5.9706	8.1198	22.847	7.6431	5.1382	4.4748	6.6312	8.542	12.2482	11.0798	23.163	13.9363	2.3457	5.4451	10.0295	8.2132	7.126	9.953	21.9998	8.69	13.603	22.887	67.829	29.423	9.921	4.186		0.284949	12.7514
6.4307	9.322	5.448	4.963	3.835	8.6526	18.092	8.1657	6.0063	4.8178	9.204	8.734	10.7367	11.1637	24.437	9.855	5.1911	5.2789	10.6443	8.0375	9.3811	10.031	19.1142	13.766	15.228	21.654	57.847	30.036	10.894	3.431		0.290321	12.5506
6.5498	9.689	6.705	4.562	5.7025	8.7771	21.99	8.4433	6.7812	5.163	7.505	7.013	12.9856	13.8776	26.638	10.3693	5.8848	5.0386	11.1659	6.4186	7.4004	11.5676	20.3568	12.324	13.531	19.386	50.145	21.57	11.304	6.031		0.295698	12.356
6.6689	9.901	6.603	4.65	3.9062	9.4644	28.086	6.9925	3.8939	3.2146	7.4138	5.639	12.7566	14.8087	23.806	10.8033	5.1716	3.4158	7.8282	6.6652	7.2237	10.3986	23.423	10.418	12.813	14.89	55.189	21.929	8.676	6.358		0.301075	11.9427
6.788	7.268	6.653	5.1	3.0654	8.0086	23.608	8.2505	5.6371	4.3411	6.8972	6.307	10.0128	15.0615	25.157	11.5625	3.9676	5.1036	5.9088	5.6056	6.6623	10.2538	28.956	11.477	11.759	16.517	44.948	23.182	7.787	2.965		0.306452	11.449
6.9071	11.454	5.753	5.348	2.896	8.3071	19.078	6.7578	6.457	5.3571	3.1843	8.647	7.8807	17.9067	25.382	11.3074	3.9681	4.5339	8.0597	5.6669	6.9688	10.8574	24.2644	13.418	11.777	17.249	40.074	24.093	8.385	7.04		0.311829	11.4507
7.0262	11.519	6.217	3.342	4.3584	6.0616	15.325	7.1491	4.6477	3.624	3.1041	5.453	7.2271	22.2479	25.642	10.5134	2.951	4.342	6.5701	6.4352	7.1314	14.186	22.9939	14.04	15.443	17.005	34.054	18.45	9.089	6.843		0.317206	10.8953
7.1453	8.321	5.151	2.885	3.2556	6.2741	20.322	4.663	4.8912	3.8786	2.8181	7.593	5.5727	19.1214	29.999	14.5681	4.2271	2.6831	6.1623	5.514	7.8289	13.2567	24.9813	16.226	15.569	15.582	34.494	17.551	7.53	7.029		0.322583	10.9637
7.2644	11.414	7.053	2.926	2.2907	5.9417	21.657	4.8486	5.5254	2.3653	3.7984	4.428	9.6024	18.7272	28.498	15.1474	5.6579	3.9315	5.4375	6.0645	8.0443	15.1589	22.7157	15.002	20.01	11.902	29.427	19.001	7.037	5.465		0.327959	11.0027
7.3834	13.469	6.065	2.958	4.1877	6.6076	24.021	5.1318	6.3511	2.3926	5.0065	4.535	11.0152	20.8179	33.06	13.9125	3.8218	5.4341	6.5651	5.4428	7.7399	16.1717	20.2125	14.823	18.594	11.866	30.19	20.401	5.653	5.984		0.333332	11.4631
7.5025	17.299	4.29	3.261	3.8229	7.8044	28.931	5.4372	5.1004	4.3603	4.2525	5.351	10.4201	24.3104	36.513	11.4438	3.981	6.3608	6.3012	7.6435	10.5267	14.3128	26.3	15.84	16.836	9.591	26.796	22.07	8.352	5.712		0.338709	12.18
7.6216	19.302	5.828	4.564	2.7204	5.3308	32.947	2.9268	5.8835	3.6402	3.423	7.294	12.0809	27.6645	34.952	15.5329	3.9665	5.2564	2.8357	7.4003	8.1038	14.9939	35.5385	13.649	15.156	10.743	21.902	24.107	7.47	5.557		0.344086	12.4403
7.7407	19.51	5.778	4.756	3.5382	4.8022	37.861	5.2953	5.8258	6.7743	3.7197	5.944	10.7015	31.3046	39.445	13.9754	5.072	5.5312	3.4949	4.2613	7.852	15.3664	30.8189	12.316	17.032	13.536	19.316	27.241	7.097	5.091		0.349463	12.8709
7.8598	19.076	5.995	7.159	5.4382	5.1835	36.3	5.887	6.4594	4.9548	6.4822	7.03	9.9266	35.9176	38.444	14.5793	3.327	6.1224	4.907	5.6507	7.6858	14.2422	29.6795	12.194	17.739	9.561	20.509	32.74	6.813	3.808		0.354839	13.2349
7.9789	17.395	6.836	5.481	3.7431	6.2675	37.357	5.8973	3.8802	4.8078	5.1036	7.913	12.8538	31.636	38.939	13.4983	4.5137	4.356	7.6205	6.7127	9.1173	11.227	23.5143	17.404	18.93	10.042	14.626	38.37	8.537	4.781		0.360216	13.1503
8.098	17.068	6.687	4.279	3.0604	4.9842	45.054	6.0981	3.5395	3.0747	4.4064	6.891	14.5153	36.2001	41.696	15.8287	4.5241	2.797	5.1112	6.4021	9.0842	14.355	24.2473	18.705	15.791	10.997	14.116	37.435	7.218	6.96		0.365593	13.4871
8.2171	14.526	7.985	5.888	2.5412	5.4551	42.499	6.7297	3.304	3.383	3.3932	8.724	14.2695	39.0815	37.482	13.3662	3.9944	3.0382	4.9393	6.274	9.5063	12.6603	26.6519	19.522	13.352	8.078	13.409	37.239	5.818	5.594		0.37097	13.0588
8.3362	13.777	7.654	5.717	2.7723	5.5392	41.632	7.3871	5.0129	4.1541	5.1823	9.48	14.5336	35.378	30.78	11.8981	3.3885	4.7061	2.7141	5.8496	7.977	10.5665	23.8743	19.008	11.076	7.25	8.386	37.786	6.492	3.333		0.376347	12.1829
8.4552	11.668	6.417	4.832	3.3339	5.0889	57.345	4.6586	6.6596	4.8693	5.282	9.721	13.0422	33.2095	31.967	8.8655	5.4103	4.4493	4.6932	5.4286	8.1789	11.9555	21.9713	21.748	11.152	8.196	9.666	37.89	6.762	4.122		0.381719	12.7097
8.5743	9.265	6.204	5.229	3.4317	6.5761	57.503	4.831	3.7254	4.5056	3.0148	10.913	14.6465	31.6993	40.34	9.3108	4.2375	4.5127	5.8101	7.3373	8.3662	12.5396	20.2889	20.716	10.225	7.582	7.844	33.684	6.511	5.543		0.387096	12.6342
8.6934	9.635	6.966	5.035	3.4577	5.5282	53.718	5.1068	6.6371	1.5825	3.9745	9.768	12.6099	33.3818	41.038	12.8764	4.6642	4.4896	4.7827	5.99	8.5449	17.0204	19.4634	24.623	11.049	10.309	7.641	33.723	6.613	5.642		0.392473	12.961
8.8125	8.604	5.394	4.65	4.2362	7.1897	58.496	5.6207	3.869	5.2744	3.1934	8.861	11.3052	26.5351	47.579	9.7968	3.1777	2.3558	4.2413	8.213	8.2215	12.8328	22.8601	28.064	10.838	6.873	5.882	32.989	4.576	3.895		0.39785	12.6077
8.9316	5.969	5.39	2.809	2.6612	6.7214	46.944	6.7975	3.2867	4.0106	4.3279	12.584	9.5278	32.0235	53.252	7.9446	3.6828	3.9378	6.5667	4.9654	10.1852	14.0157	21.5537	25.458	8.576	7.308	7.424	34.207	5.204	6.152		0.403227	12.534
9.0507	6.836	4.946	4.309	3.5002	6.4326	38.281	4.6503	3.6803	3.6481	4.0466	12.145	12.3986	31.4229	45.429	7.3983	3.2743	3.1971	6.005	5.4633	9.7132	14.7424	19.2344	27.166	8.746	9.131	7.259	33.073	5.632	4.204		0.408604	11.9298
9.1698	6.702	5.258	2.649	4.1753	4.1152	30.854	4.3019	5.013	2.3079	3.585	8.494	12.5931	31.9859	33.827	7.4016	4.7214	2.1123	5.9977	7.3202	10.0059	14.328	19.148	26.426	11.396	9.917	5.367	32.409	5.216	4.561		0.413981	11.1099
9.2889	7.494	6.347	4.09	4.3451	4.9302	35.467	5.0735	4.8547	3.5949	5.5416	8.289	14.4314	33.519	40.581	5.0312	5.9505	2.8106	3.2784	6.9478	12.8465	13.3984	17.8455	18.828	9.101	10.356	6.821	32.519	6.104	3.79		0.419358	11.5237
9.4079	6.831	4.539	4.272	5.5466	6.2956	30.586	3.9894	4.1221	6.2589	6.1873	10.254	13.9806	35.2352	33.703	6.4505	5.7099	3.8504	2.9706	9.5528	10.7022	15.3872	18.2042	17.555	9.693	6.222	8.208	30.373	6.138	3.335		0.42473	11.2466
9.527	3.55	4.599	4.907	4.1221	5.9748	32.091	5.9432	3.0714	6.6816	3.6652	8.621	13.6139	39.0838	25.524	7.2889	6.5785	4.1115	3.9729	6.5327	11.9385	13.7582	18.109	15.021	9.646	5.628	9.132	30.227	6.138	5.46		0.430107	10.8617
9.6461	4.319	3.422	4.463	3.1901	4.3712	29.119	5.0021	4.692	4.7309	5.5025	8.369	12.6698	36.1851	22.704	5.7157	5.2784	4.0245	3.1389	6.323	10.8514	12.9955	18.8311	17.282	9.058	7.083	5.858	32.494	5.99	4.504		0.435484	10.2816
9.7652	4.526	3.983	3.474	3.778	5.1514	26.641	3.642	5.402	4.111	3.6287	9.189	10.9076	40.0258	27.392	4.064	4.6664	4.0822	4.6526	7.6589	9.633	13.4825	14.6031	16.347	8.122	5.707	6.585	25.168	5.565	4.845		0.440861	9.8977
9.8843	5.4	3.875	2.515	4.6429	5.9061	23.167	5.2754	3.0393	3.4993	4.0479	8.285	14.4265	42.6261	25.991	5.1565	3.2139	4.7189	4.1696	8.5147	10.0153	13.7578	12.8892	16.32	8.802	5.108	6.737	27.701	5.793	4.265		0.446238	9.99512
10.0034	5.597	2.85	3.126	4.8194	4.5604	21.547	5.6253	4.1715	4.2845	5.961	7.835	15.7958	49.0092	27.369	2.9311	5.5266	2.7223	4.5146	7.055	7.0462	15.4122	14.0696	14.115	8.097	5.807	6.821	28.83	7.105	3.678		0.451615	10.2166
10.1225	7.298	4.615	3.269	3.7313	5.1539	19.48	4.214	4.6392	3.6244	6.8673	9.416	15.793	52.0512	28.587	3.6299	3.6637	3.5538	3.8666	6.6283	8.3332	17.1419	15.0344	19.004	7.307	7.548	5.871	22.009	9.636	2.469		0.456992	10.4978
10.2416	7.992	5.663	4.05	3.6345	4.6235	23.385	5.7153	5.2464	3.2286	3.3749	6.791	13.2577	46.0739	19.883	3.585	3.0884	5.3248	4.1896	6.7441	15.7123	18.2274	12.9694	17.631	9.756	6.582	4.802	23.21	7.818	4.191		0.462368	10.2328
10.3606	6.681	4.427	2.746	5.0321	5.7151	17.982	4.5892	5.5477	3.326	3.4535	7.919	10.7446	46.2549	19.145	1.8457	3.45	4.1003	4.7461	6.9293	16.1542	17.2566	10.7501	10.651	9.16	6.216	7.408	26.751	6.59	3.872		0.467741	9.63598
10.4797	4.599	3.043	2.005	4.593	5.0527	15.442	3.3633	6.3242	3.6077	5.637	5.125	14.1209	48.1217	21.602	4.6778	3.112	2.655	4.4671	8.8152	15.2416	16.9164	9.4511	11.782	8.462	5.366	3.269	23.468	6.298	6.122		0.473118	9.40482
10.5988	6.24	3.005	3.653	6.3141	5.4672	13.492	3.0894	4.0639	3.1941	5.3822	5.912	13.0539	47.9662	16.145	2.3315	4.5585	4.0611	2.9637	7.5743	15.1343	15.5154	14.6356	12	8.53	6.179	7.728	20.532	4.539	4.216		0.478495	9.22332
10.7179	4.854	4.712	5.081	1.8626	5.5876	15.107	3.5007	3.7397	3.0467	5.2275	5.63	17.3647	51.7174	15.337	4.1253	2.4354	3.2101	3.3691	7.2665	15.1688	12.6749	12.9721	14.513	6.069	5.943	6.06	20.686	4.486	3.521		0.483872	9.14718
10.837	4.855	3.969	5.584	1.9274	7.5418	15.732	4.0262	2.6318	4.906	5.4317	6.95	18.7074	44.4586	16.704	4.2123	5.1151	2.2295	4.0438	5.6469	19.067	17.8086	10.1651	10.375	8.654	4.217	5.853	31.377	8.727	3.262		0.489248	9.79925
10.9561	4.316	4.102	3.936	3.1501	8.4283	15.824	3.8394	5.4257	2.1466	4.0117	5.618	10.8825	45.1973	14.715	3.1616	3.5839	2.8257	2.8232	6.2081	23.5742	24.5358	8.348	11.995	9.232	4.924	6.873	26.852	5.767	5.991		0.494625	9.59611
11.0752	4.642	4.083	3.619	3.1516	6.5007	16.933	3.7075	4.7633	2.7485	3.8429	8.031	13.6826	47.1162	11.092	2.8908	2.7111	5.0606	4.0546	6.8706	25.4071	19.8335	8.283	12.464	8.538	5.151	5.944	29.992	7.108	7.195		0.500002	9.84195
11.1943	3.561	4.502	5.966	4.0519	6.2042	14.261	4.484	5.2424	2.2018	4.9701	9.556	16.4567	41.8826	10.008	2.8335	4.2028	3.2084	4.1644	8.9264	29.7026	20.1106	10.0005	13.246	5.045	5.77	3.219	30.006	7.514	4.593		0.505379	9.85827
11.3133	4.328	4.418	4.437	4.7539	6.9263	15.2	2.7991	3.9981	2.177	5.4767	7.668	14.9217	41.3367	8.659	3.7243	4.5683	2.4943	3.6653	10.9963	18.4407	24.3621	8.8718	11.695	6.014	4.617	3.804	27.139	3.798	4.533		0.510752	9.1663
11.4324	5.745	4.715	4.134	4.7343	6.2309	13.893	4.8666	4.5543	4.9235	4.4851	9.262	16.0263	36.6972	6.636	6.1072	2.4995	4.907	2.5675	13.1892	22.306	21.7152	8.4977	10.041	5.982	4.711	3.369	24.044	5.491	5.073		0.516128	9.22081
11.5515	7.011	2.14	4.786	4.7487	7.3825	15.863	2.6348	2.5582	3.7534	4.1932	12.159	15.195	33.6952	6.6	3.9735	2.4025	5.7896	2.8982	10.2316	25.6317	23.1211	8.2645	8.48	5.299	3.87	4.52	27.632	3.58	3.269		0.521505	9.02354
11.6706	7.68	3.463	3.979	3.9666	6.6859	17.269	3.8016	2.578	4.3442	4.371	9.752	15.383	34.4529	7.879	3.478	4.644	5.2801	4.2565	11.0461	21.6009	16.8448	6.4485	7.731	7.302	4.858	6.305	19.653	6.151	5.978		0.526882	8.86835
11.7897	5.047	3.427	3.38	4.3488	5.8803	21.972	5.3692	3.4666	3.648	3.7363	8.208	12.0516	29.686	5.911	3.4009	3.5043	6.3384	2.3827	8.1186	18.2677	25.4767	9.9424	8.689	3.886	2.594	9.263	24.382	7.051	6.759		0.532259	8.83405
11.9088	4.225	4.844	2.466	4.5768	6.1645	21.145	5.0212	4.0296	2.6028	4.2756	7.18	14.5354	24.2552	5.255	3.5565	2.4339	4.0039	3.0211	8.242	14.1939	25.0354	7.2207	7.023	6.759	4.743	5.99	17.619	6.144	6.19		0.537636	8.02591
12.0279	6.22	4.59	3.613	5.0125	9.2316	14.985	2.1602	5.9939	5.187	4.1165	10.962	12.1888	24.4627	4.432	4.0669	2.2095	6.6798	3.8421	9.081	12.2289	26.6066	8.688	7.512	6.599	3.835	8.135	13.949	5.628	4.721		0.543013	8.17024
12.147	4.308	3.762	3.377	3.0958	6.3074	14.801	3.9672	4.0946	4.4205	3.015	10.927	13.7391	20.0383	5.654	4.9821	2.3197	4.7835	3.1618	12.4454	13.3814	22.674	7.6324	8.901	6.458	4.827	7.667	12.563	7.405	5.128		0.54839	7.78746
12.2661	3.002	3.814	4.917	4.8135	7.8779	15.931	3.3657	3.8624	3.6649	4.4064	9.816	15.0824	23.3886	7.231	3.38	3.2142	3.713	2.6867	11.6429	17.0596	24.608	7.5728	10.42	5.457	6.187	4.641	12.249	7.973	6.065		0.553767	8.20834
12.3851	3.389	3.087	4.067	4.2837	5.7048	12.722	5.7828	3.5624	4.2333	4.4857	6.156	18.1153	22.5941	5.005	3.8266	3.901	1.9416	3.4021	11.7737	16.798	24.7555	7.2569	10.447	4.254	7.745	7.408	15.466	5.101	5.916		0.559139	8.04071
12.5042	4.935	3.142	3.999	2.8771	8.6177	14.326	6.6726	4.4547	3.3751	3.589	9.791	16.1774	20.2233	4.473	4.132	4.3645	2.8515	4.1555	9.3325	14.5624	23.6205	4.9571	9.845	4.513	2.701	6.328	10.453	5.717	5.437		0.564516	7.5732
12.6233	5.006	3.628	3.007	4.3606	6.0223	15.233	4.5985	5.8007	4.306	3.7596	7.614	17.1186	21.5272	6.297	4.2237	3.5197	3.751	3.8192	12.9741	10.543	26.7268	3.8065	8.912	3.671	5.568	9.075	10.276	4.23	7.513		0.569893	7.82371
12.7424	5.121	3.397	4.338	3.9014	5.8852	11.022	3.724	5.7464	4.2334	6.212	11.748	13.6181	26.0482	5.389	3.0544	2.6278	3.3801	4.1149	15.8107	17.7226	25.9876	5.2836	6.806	4.824	4.619	11.705	8.786	5.563	4.86		0.57527	8.12167
12.8615	4.84	2.954	2.697	3.5292	5.9845	12.642	2.3813	3.2036	6.9202	3.062	9.564	13.7194	24.8011	5.494	4.0685	3.1362	3.19	3.9685	12.1602	17.699	18.1414	5.7732	7.842	4.825	6.265	11.126	8.465	6.311	5.067		0.580647	7.58036
12.9806	4.15	4.095	3.906	3.3568	8.3686	14.667	2.513	4.4468	4.0753	4.7378	8.848	20.5918	26.1841	3.252	5.0675	3.0122	3.7859	3.5359	8.7162	18.5249	22.215	5.7348	7.518	5.593	4.378	12.23	8.314	6.119	4.548		0.586024	8.01671
13.0997	5.595	3.039	2.92	3.4613	6.6881	16.174	2.701	6.0608	3.0744	5.0187	7.803	22.7772	26.149	6.536	2.2141	5.4569	3.6206	5.472	9.901	16.487	25.3511	6.2681	8.499	6.509	6.652	17.861	6.369	5.242	4.093		0.591401	8.55149
13.2188	5.135	2.533	4.054	3.8247	5.8945	11.069	3.2232	2.9616	2.7688	3.5747	9.914	17.6896	28.7664	5.083	3.4817	3.9215	2.8333	5.4029	11.8065	18.366	25.1643	7.6357	9.676	3.961	7.317	13.634	5.066	6.532	5.039		0.596777	8.14926
13.3378	5.393	3.878	2.855	2.6228	6.0971	16.55	1.4844	2.2391	4.8415	5.0312	8.156	16.1288	28.0946	2.346	2.668	2.9441	3.3601	4.5562	8.8473	19.4897	24.3544	4.6976	9.047	3.043	4.359	18.648	7.947	5.317	4.852		0.60215	7.92579
13.4569	3.706	3.205	2.677	4.4303	3.8796	13.107	3.189	3.2763	3.8278	4.1602	6.687	15.7484	29.2659	3.771	2.4056	3.2986	4.5518	4.1881	8.2483	23.9774	24.3803	4.309	7.325	4.237	6.003	21.195	7.737	5.759	3.927		0.607527	8.0163
13.576	4.196	2.006	2.289	4.0745	6.133	11.361	3.2702	1.5739	3.8349	3.9311	8.145	21.2539	25.739	5.697	3.9314	3.3533	5.0296	5.6122	9.1129	22.3293	22.7234	6.7517	9.16	4.638	6.251	24.987	7.992	6.765	4.316		0.612904	8.49853
13.6951	3.677	2.014	2.875	3.4005	5.9351	11.469	3.2004	3.0399	2.0933	4.021	9.443	23.0363	25.8374	3.843	5.4149	3.4135	3.452	5.4877	10.2787	19.412	23.7164	4.5042	6.455	7.691	4.18	23.644	6.682	4.571	3.657		0.618281	8.15325
13.8142	3.137	2.16	2.343	3.1534	6.5224	10.193	3.5253	3.6809	3.086	4.6577	9.812	23.2457	30.1442	2.358	4.5094	4.3977	2.6824	6.279	8.2994	19.8377	19.1379	4.4783	8.46	4.502	4.788	22.105	6.306	4.289	6.192		0.623657	8.0787
13.9333	2.086	3.976	5.712	2.4159	4.717	11.402	3.0535	3.3641	3.2862	3.3386	7.048	22.5447	30.0127	5.108	3.5294	6.1596	2.5911	3.0327	8.6377	19.584	17.1005	4.6008	6.343	5.085	3.948	26.203	6.396	4.712	4.084		0.629034	7.9335
14.0524	2.389	3.17	3.741	3.9283	5.2206	12.843	2.7727	4.2643	3.6463	3.1396	9.117	23.8083	25.7834	2.484	6.4469	1.8774	3.8091	6.2239	5.2191	20.2081	17.7703	4.6815	6.031	4.327	5.543	27.046	5.366	3.813	6.975		0.634411	7.98775
14.1715	2.843	3.627	2.563	3.254	5.5608	13.792	3.9071	5.2061	5.8503	5.3649	7.007	23.3911	27.6537	4.584	5.6001	2.6008	6.3111	5.2492	11.3229	17.6085	16.2284	4.5003	7.436	5.279	5.171	27.185	8.549	4.621	4.472		0.639788	8.50822
14.2905	2.348	2.962	2.474	2.8277	7.9164	11.677	5.0105	4.2004	3.763	4.3677	6.714	26.1422	26.2662	3.241	4.1709	3.6565	6.8965	4.7759	10.8266	16.0602	13.7973	3.2797	5.949	4.644	3.638	31.575	6.764	4.087	4.127		0.645161	8.0744
14.4096	4.427	2.502	2.691	4.921	10.6951	11.431	4.2709	2.2151	3.8641	2.76	9.644	24.7554	27.2062	2.345	4.5639	4.613	5.5939	5.5775	9.2802	22.0572	13.1677	3.6262	9.22	3.374	4.58	31.985	5.501	6.264	6.247		0.650537	8.59926
14.5287	4.362	5.937	6.423	3.693	4.8965	10.498	2.8867	3.5349	5.8083	2.2556	9.852	23.7862	27.4136	1.988	3.9089	4.1883	3.1925	7.9894	11.6705	20.1155	11.0543	4.4472	6.207	5.182	6.478	29.352	5.338	3.269	6.427		0.655914	8.35015
14.6478	2.587	5.688	3.428	3.4001	8.8486	13.102	3.8715	4.9167	3.6115	3.2471	4.898	25.9246	22.2703	2.279	3.0566	4.4875	3.3767	7.1419	12.0006	19.9806	13.114	6.4339	5.265	5.989	7.302	29.431	8.002	5	6.213		0.661291	8.44366
14.7669	2.15	2.324	4.331	5.2743	6.393	11.471	2.0654	2.9553	3.7257	4.7303	5.555	22.9577	21.4623	3.263	3.4644	4.884	5.4863	7.5669	11.5958	20.1811	13.3111	7.3463	4.555	4.936	6.861	29.542	6.769	5.638	6		0.666668	8.16534
14.886	4.506	2.232	3.694	1.4978	7.7281	10.122	4.4888	3.4314	5.0067	4.4141	7.575	22.5777	21.3596	4.968	3.6695	1.9163	4.5174	5.7316	13.9507	20.8443	13.6917	4.0693	5.663	3.618	4.694	43.538	5.755	3.23	7.5		0.672045	8.48241
15.0051	6.355	4.838	5.345	2.1915	4.717	11.182	2.8599	4.4356	3.0403	3.2939	9.814	22.425	25.7271	8.186	3.0649	2.9082	4.0309	6.8927	13.1084	24.7793	13.8425	7.8895	6.827	3.544	7.568	46.934	7.886	3.432	6.249		0.677422	9.42644
15.1242	3.63	4.062	3.943	3.3791	8.1197	9.96	3.7357	3.1173	4.5301	3.9596	6.922	24.1238	27.9801	4.959	2.9161	5.2092	5.7515	3.1998	11.0259	26.7897	9.1276	6.1871	6.87	5.904	4.768	45.287	5.668	4.362	4.424		0.682799	8.96246
15.2432	2.262	3.727	5.845	4.5946	6.7224	8.885	4.689	2.8886	3.6844	6.3564	5.56	26.9716	22.6029	5.667	4.1449	5.9558	3.1352	7.4856	9.3641	24.0597	11.3565	6.3195	6.445	6.123	2.734	50.762	6.345	4.356	7.128		0.688171	9.17828
15.3623	4.578	1.509	2.257	3.0628	6.7429	8.403	3.7837	3.4914	4.0577	3.0524	6.385	20.7604	26.7312	3.019	3.7711	2.0632	2.9693	6.2364	9.7662	24.4348	15.7531	4.9448	8.644	4.382	5.477	48.989	3.854	4.524	8.03		0.693548	8.67836
15.4814	3.199	1.944	3.301	3.0323	6.6068	10.697	4.1982	1.793	3.6981	3.7005	7.38	19.8435	24.3167	4.955	3.1681	2.9984	3.1762	6.9567	11.4881	24.4484	13.31	5.9496	7.6	5.203	4.909	38.721	6.572	5.329	5.14		0.698925	8.40119
15.6005	2.98	3.214	3.56	3.1639	7.8571	7.238	3.0762	3.419	3.4449	3.4775	7.937	22.5606	19.2198	4.304	3.4319	3.0176	2.3268	7.5978	10.8581	25.6156	11.3639	6.6296	9.864	4.353	2.914	44.525	5.317	4.264	3.765		0.704302	8.32053
15.7196	2.554	4.519	3.769	3.3158	5.0794	8.37	3.2294	3.695	4.3739	3.8271	9.176	18.2115	21.5286	1.499	3.5356	5.1078	2.1195	4.9462	8.3919	25.1243	10.2251	5.4323	7.913	3.753	5.567	46.021	4.783	5.45	4.74		0.709679	8.14681
15.8387	3.074	3.561	2.657	4.8963	6.2383	9.544	2.5672	2.5728	3.8361	3.689	6.941	23.0858	16.0834	2.798	4.4214	4.8393	4.038	4.6411	10.236	27.9875	10.6933	4.5738	6	3.733	5.029	34.625	5.561	5.508	4.147		0.715056	7.84749
15.9578	5.493	2.63	2.82	3.5205	10.2026	10.658	4.848	3.1235	2.7811	4.4322	9.456	26.2115	20.7961	4.684	5.1691	3.1248	3.3966	3.2016	8.4919	27.7846	12.7608	4.0024	3.947	4.956	4.622	36.059	5.732	3.571	4.855		0.720433	8.3907
16.0769	4.624	3.356	4.651	5.2905	8.9313	13.093	4.9385	3.2461	3.2224	3.9071	9.472	24.1334	18.9496	5.766	2.6456	4.5465	5.0748	6.0368	9.042	25.2655	13.1861	3.9276	6.963	5.032	4.382	34.971	8.054	4.41	4.637		0.72581	8.6812
16.196	2.81	4.253	5.662	3.2701	5.1047	11.943	4.4006	2.1671	4.5766	3.9676	8.112	22.0487	17.0909	5.308	3.5121	7.5567	5.3626	5.0546	12.9736	25.1147	10.7484	6.4617	6.372	3.253	3.586	27.702	6.734	3.903	5.529		0.731186	8.08889
16.315	5.869	2.732	3.327	5.2473	6.7344	13.922	3.8004	3.4478	4.6376	4.7934	4.992	23.0351	18.6529	4.462	3.074	5.2283	4.5264	4.442	10.8845	27.2775	9.1881	3.922	5.09	3.616	5.987	27.037	6.915	3.158	7.534		0.736559	8.05285
16.4341	3.69	4.828	3.097	3.8458	8.6857	13.071	5.1378	3.041	3.1433	4.4209	5.369	25.5289	20.361	3.117	2.7066	5.7011	2.233	3.3677	7.3358	31.7052	11.8463	6.1749	3.649	3.635	3.877	28.483	6.061	5.136	4.39		0.741936	8.05648
16.5532	3.928	3.757	3.178	4.4495	9.3598	15.153	3.9832	5.0572	3.3578	4.0255	6.67	28.1187	17.1854	2.262	2.3519	4.4742	4.2136	5.2989	11.233	31.2532	7.3404	5.4255	5.692	3.2	2.7	26.816	7.784	6.475	4.199		0.747313	8.23937
16.6723	5.035	4.113	4.273	3.8842	10.1834	14.597	3.7435	3.249	3.8762	3.6758	7.038	28.2703	14.5907	2.892	2.9751	3.5224	5.2556	3.7993	9.4503	30.0937	9.3191	3.2982	6.715	3.85	4.786	26.205	7.34	4.724	6.153		0.75269	8.16923
16.7914	3.028	3.665	3.754	6.0789	6.6335	11.869	4.1579	2.0814	3.6558	6.0221	5.872	21.3004	14.6827	4.527	3.1423	5.4177	2.941	5.4384	7.3824	34.5965	9.1759	4.678	6.076	4.227	4.199	24.167	7.411	4.955	6.432		0.758066	7.84713
16.9105	4.05	3.544	4.562	2.7293	6.9761	18.972	4.593	3.6776	2.3897	4.2229	6.506	26.1346	12.5811	5.279	4.1402	3.8561	3.2724	6.0713	10.8758	31.0793	8.097	5.6082	5.725	3.26	4.056	21.274	5.443	4.622	5.889		0.763443	7.91333
17.0296	5.272	4.452	6.063	1.9322	8.9528	16.853	4.9463	4.1787	2.9382	4.5009	7.58	27.5603	13.1859	2.133	5.6674	2.3015	4.018	2.6664	8.8191	29.7607	10.4665	5.8371	3.118	4.601	4.878	23.772	6.08	4.815	4.715		0.76882	8.00221
17.1487	3.13	3.375	5.442	4.6736	7.2389	12.517	1.7691	4.6064	3.2451	4.9207	6.16	26.1272	11.6951	4.94	2.667	3.3276	3.7983	5.1115	11.6308	32.8053	11.1142	6.8253	4.723	2.404	7.127	27.495	4.908	4.195	5.249		0.774197	8.04211
17.2677	3.526	4.041	3.333	3.7132	12.2882	11.238	3.0146	4.4633	3.6709	3.8672	11.079	26.268	8.7776	2.216	3.9433	5.6192	3.2057	7.1532	10.1406	27.6461	7.497	5.7929	6.151	5.03	6.135	25.015	7.112	5.291	4.518		0.77957	7.99124
17.3868	4.353	3.315	5.75	4.01	8.9662	12.323	4.5282	3.2045	2.203	4.4558	8.488	24.7621	10.3949	3.644	4.4765	3.8751	5.3733	6.4091	7.6046	28.362	7.4145	8.3454	8.039	6.102	5.398	27.325	5.956	5.801	4.501		0.784946	8.11656
17.5059	6.323	5.449	3.214	3.7135	10.2815	15.032	5.4555	4.6465	2.0826	3.9041	6.147	24.7303	8.3784	4.397	4.3787	3.2989	4.0491	4.9245	10.8033	27.4693	8.4697	7.7005	5.635	4.019	5.705	23.346	5.201	6.935	5.265		0.790323	7.96394
17.625	3.464	3.188	5.199	3.8987	8.2268	15.308	4.8644	3.4149	1.3683	2.7532	11.695	24.5438	10.3335	3.018	4.0472	4.6225	4.9555	5.0015	9.8152	28.4008	8.9446	6.2479	9.395	3.501	7.657	24.426	3.529	5.511	5.716		0.7957	8.03606
17.7441	3.994	5.258	4.99	3.7075	7.9572	12.656	4.3528	3.0394	2.0795	3.2678	8.965	23.4531	9.3668	3.004	3.8276	5.5123	4.7324	2.7072	9.5853	28.1848	8.4705	4.5287	6.661	3.226	4.772	22.78	7.038	6.226	4.851		0.801077	7.55841
17.8632	4.464	3.72	3.04	5.3486	9.7874	12.417	2.8037	3.0239	2.145	4.0282	9.918	24.0365	12.6244	7.702	4.9571	6.3092	4.7246	4.6878	10.0583	28.2829	7.2897	4.6453	6.748	6.32	7.925	22.838	6.487	5.838	4.616		0.806454	8.16502
17.9823	5.817	4.767	3.778	4.2633	9.3315	11.832	5.6427	4.9799	3.8413	7.3856	7.994	24.1178	11.4411	4.959	2.9717	6.0868	3.1391	4.488	12.0092	33.4568	8.4342	5.9574	5.529	4.181	4.636	22.982	7.544	5.929	6.436		0.811831	8.41139
18.1014	6.699	4.071	5.927	4.2404	10.623	14.97	4.6196	4.2451	4.1894	4.2057	7.144	25.6178	11.3845	5.055	6.0895	7.109	3.9186	6.6823	9.0215	26.8879	8.5903	4.4554	5.8	4.696	5.139	18.62	5.706	4.639	4.007		0.817208	8.08114
18.2204	7.899	5.761	4.282	4.936	10.441	15.436	3.976	4.2158	3.3059	4.2749	8.829	26.7876	15.1678	5.585	4.0024	6.8847	3.1594	6.1504	10.725	30.1769	9.8694	7.3851	5.318	5.002	4.994	20.895	4.113	5.866	4.678		0.82258	8.6247
18.3395	7.506	4.048	5.467	4.0146	9.4138	17.46	5.8101	2.2088	5.0668	4.1472	8.615	31.0525	13.4433	5.96	4.2921	5.1916	1.9514	5.6248	12.2856	35.6267	10.9782	6.9111	5.085	5.843	7.356	20.587	4.22	5.927	5.348		0.827957	9.01519
18.4586	11.266	4.975	4.225	3.0906	11.3696	16.847	2.6707	2.7464	3.484	3.1956	6.145	27.8274	15.6319	4.303	3.3728	3.7796	5.144	2.8185	13.5002	30.3659	10.0266	7.8509	4.408	3.558	6.128	25.217	2.896	5.201	6.061		0.833334	8.55533
18.5777	14.26	5.143	6.231	7.8379	15.9813	17.107	4.256	5.3747	3.5751	4.9989	7.844	27.5024	15.5364	8.542	2.3343	6.2012	5.5681	3.9962	9.4572	27.3896	9.2421	5.5618	3.604	2.572	6.808	23.245	6.037	7.379	4.695		0.838711	9.25104
18.6968	13.644	6.822	7.972	2.7948	12.4676	20.248	4.1924	5.9955	2.2461	3.5732	8.061	23.0273	11.4203	5.991	7.9244	5.2863	4.4574	6.5596	8.3345	27.6675	8.795	6.9803	7.014	5.499	5.688	21.472	6.208	7.477	3.18		0.844088	8.99994
18.8159	10.637	3.697	5.532	4.383	15.4191	24.033	6.2063	4.3899	4.771	4.1123	8.163	27.6665	14.8971	5.616	5.2915	6.2806	4.1631	4.2909	9.9812	27.0573	10.3642	7.4504	5.518	4.889	4.96	19.093	5.411	4.509	5.774		0.849465	9.12263
18.935	13.164	3.731	6.254	4.1582	14.41	29.905	7.9943	3.4769	5.0206	4.8857	10.96	30.0187	16.7214	7.306	5.6253	5.5837	4.6899	5.24	11.0588	28.5616	9.632	11.1217	6.179	5.251	5.461	25.257	7.876	3.577	6.209		0.854842	10.3217
19.0541	13.79	6.567	6.349	3.9866	18.0304	30.907	7.1888	3.4558	6.2648	5.6659	10.016	28.1499	17.1494	9.976	4.7868	6.3864	4.1855	6.4894	9.4288	25.5338	11.2423	7.528	4.455	2.853	6.058	25.313	5.571	4.343	5.135		0.860219	10.2347
19.1731	15.621	5.349	4.588	5.0889	19.3399	29.628	9.5739	3.7497	4.1454	4.8903	10.816	33.2253	17.588	11.05	6.8375	9.6428	7.0444	5.382	9.3201	25.9943	13.423	9.2637	8.156	2.974	6.84	20.294	5.915	5.382	5.891		0.865591	10.9315
19.2922	14.188	6.675	5.28	6.0393	22.4009	32.009	11.3521	3.4128	3.5513	4.9648	10.522	28.9956	19.5249	14.219	8.4881	10.532	3.9272	6.2433	13.5176	18.8852	11.7004	14.3045	7.034	4.603	6.705	22.162	3.997	6.953	5.299		0.870968	11.2926
19.4113	23.058	7.433	5.796	5.2269	24.4502	33.001	9.0208	3.538	3.2472	3.1282	11.831	26.0888	23.448	16.57	6.4601	9.7203	5.2659	5.2372	14.6392	25.8149	9.8528	9.4825	6.552	4.392	6.252	25.442	3.735	5.38	7.199		0.876345	11.7677
19.5304	24.045	8.529	6.647	4.4947	23.1898	36.398	10.9672	5.1712	3.7642	4.5995	14.511	29.7083	24.8289	22.18	8.2813	8.8664	4.7908	7.9955	11.6987	28.6201	11.1918	10.7832	9.345	5.514	5.036	24.851	4.256	5.014	8.286		0.881722	12.8815
19.6495	26.976	5.849	7.229	5.5026	25.1521	37.663	13.2894	4.6292	4.9835	4.4951	15.863	34.3443	23.8729	28.321	9.7064	10.6026	5.675	5.7357	13.2056	26.3433	16.0031	9.4084	9.171	4.7	5.45	22.407	4.372	8.742	4.889		0.887099	13.6062
19.7686	26.703	9.26	9.28	3.7649	22.7096	36.618	16.3411	4.6869	6.5293	3.8589	11.552	30.3965	21.1537	27.211	9.3863	16.6173	5.7887	6.5411	8.9768	23.8489	13.6067	10.668	7.575	5.884	6.94	26.799	6.029	6.886	5.797		0.892475	13.4969
19.8877	24.028	7.736	7.855	5.2661	26.8476	43.601	16.8581	5.9234	5.9227	4.9757	12.516	30.798	34.041	25.235	10.8426	21.7839	5.7713	5.5128	9.2853	28.8863	17.3464	15.1524	7.201	5.793	6.259	23.459	5.104	6.365	7.574		0.897852	14.7565
20.0068	31.894	9.983	11.024	5.5614	27.1575	47.301	24.2791	6.051	5.183	5.5471	15.529	38.0038	27.8913	28.349	15.8303	21.8788	4.988	8.5143	13.2639	23.855	22.173	14.2783	7.655	4.64	5.92	20.983	6.186	5.169	7.011		0.903229	16.0724
20.1259	29.051	10.65	13.385	8.3603	28.8755	41.283	29.5437	7.1985	3.9708	5.5497	11.556	43.3641	29.0736	33.873	15.7876	23.4045	9.1903	5.2146	14.7583	28.0112	22.1081	16.8348	10.582	4.996	8.992	27.169	4.724	5.491	4.365		0.908606	17.1504
20.2449	38.186	15.556	13.049	9.1667	33.3447	32.27	35.1772	8.8167	5.1667	4.9497	18.982	36.2218	31.4895	27.764	25.5894	25.5631	10.2581	5.7183	13.6646	29.9469	19.6751	18.7402	6.853	4.822	7.032	24.671	5.351	5.471	7.755		0.913979	17.9742
20.364	38.673	18.364	17.937	11.0273	34.8585	21.369	44.4708	8.5365	4.2532	4.797	14.19	37.4496	39.9041	21.093	25.7	22.3936	9.8767	4.9255	11.5157	24.3679	23.8629	18.4762	8.651	4.024	6.37	22.994	7.199	8.205	8.606		0.919355	18.0721
20.4831	38.242	21.496	22.02	9.1456	37.0693	16.005	49.0081	9.593	5.3399	4.6535	13.863	39.9056	32.9512	18.599	26.1095	16.4833	9.8123	7.2455	13.0739	25.2845	23.107	25.3065	7.636	6.056	6.451	23.508	6.64	7.432	8.593		0.924732	18.2976
20.6022	42.401	22.433	24.355	9.2268	41.7271	10.561	49.109	13.5368	6.5673	6.3067	12.562	45.0532	29.5766	13.284	23.7299	17.6474	9.766	7.7352	10.9671	33.0128	25.4295	22.9013	10.037	6.963	9.2	25.141	6.361	8.882	9.157		0.930109	19.0907
20.7213	47.872	36.547	24.729	10.8978	41.0281	10.315	42.8389	18.5984	9.77	8.691	16.919	41.0435	28.4877	9.848	21.2916	11.1007	11.4039	7.6077	9.8212	30.0286	31.3954	28.8674	10.059	4.786	9.719	25.931	6.697	7.309	7.442		0.935486	19.6912
20.8404	50.744	38.822	37.85	15.364	39.9726	6.855	40.3849	25.4537	9.8776	5.9053	19.541	42.113	16.7586	9.048	17.7847	6.5851	10.6905	8.0367	9.3226	31.8127	27.4312	30.0653	9.82	5.9	6.859	25.076	8.6	7.524	8.326		0.940863	19.7422
20.9595	50.799	47.284	35.769	16.2006	37.9986	4.778	26.2867	30.4019	11.615	5.1071	22.092	45.9418	12.5839	7.381	14.2662	3.4838	14.2508	9.0057	13.3785	36.4534	29.24	27.3345	10.456	6.338	7.866	26.532	9.051	7.207	8.396		0.94624	19.9137
21.0786	49.831	48.525	41.623	18.117	38.5926	5.094	16.9465	37.7269	12.4479	4.8411	21.44	39.9	8.9631	7.452	10.7174	6.7218	14.5235	7.5669	11.4245	42.4168	34.4362	30.2377	10.443	3.61	9.26	31.716	10.804	9.429	8.474		0.951617	20.458
21.1976	46.098	47.874	39.903	27.8057	35.9407	2.67	16.4575	38.7274	13.7758	7.3033	17.537	41.6814	7.2142	4.501	10.5378	4.8027	22.9448	11.9258	14.8426	34.4963	37.0456	33.6985	12.762	4.402	11.046	30.021	9.465	11.652	7.017		0.956989	20.8327
21.3167	35.653	39.192	46.425	31.3812	31.3836	4.032	14.8523	40.5371	17.5572	6.0201	22.461	43.7553	8.3864	3.646	6.283	3.6148	21.6664	9.9425	17.6145	33.7432	37.2522	28.2817	13.888	7.856	9.985	30.431	7.142	12.429	9.916		0.962366	20.5285
21.4358	18.468	30.139	37.64	25.397	20.5215	3.131	12.2308	48.2104	24.4261	9.7344	24.4	45.508	5.9518	3.159	3.9615	1.8784	24.5358	8.4588	12.9428	28.9665	32.4983	21.7778	16.016	6.004	11.306	35.355	7.795	14.335	11.603		0.967743	18.8397
21.5549	15.621	21.267	35.575	29.0391	19.8564	3.857	6.1777	56.4344	30.6949	11.7355	22.733	49.6788	3.3641	3.538	4.1807	1.3339	27.452	7.6478	15.3404	29.2383	27.5484	17.7765	17.895	5.294	8.874	26.224	9.532	14.508	12.497		0.97312	18.4453
21.674	11.294	19.35	37.929	29.5491	17.3289	3.404	5.6385	64.2328	38.0934	13.2643	23.087	43.5413	2.2836	2.173	3.8621	1.2773	35.8784	7.3213	17.0924	30.3896	20.1782	13.9004	20.137	5.451	11.425	30.995	16.739	17.583	12.697		0.978497	19.1757
21.7931	11.124	15.324	28.852	22.0158	9.5096	2.21	3.5752	60.4903	37.9697	16.0807	25.472	53.3152	4.1101	2.952	2.038	2.3762	29.5611	10.6354	16.1167	35.6449	16.6758	13.2068	19.619	5.293	10.876	33.027	16.222	19.923	21.217		0.983874	18.808
21.9122	7.498	13.496	23.398	17.7968	9.3693	3.283	5.1122	50.4657	46.0025	18.471	31.637	50.3474	4.112	1.306	2.0679	1.4874	26.1905	14.7853	16.9257	36.7028	9.9012	10.254	19.348	4.51	8.363	31.038	17.956	28.953	22.557		0.989251	18.3909
22.0313	9.167	13.865	18.624	17.9048	9.8745	1.354	4.1558	47.6859	46.8866	18.9484	33.165	53.659	2.5767	2.289	0.8714	0.584	21.7555	14.31	22.0469	38.5076	8.4614	6.1752	21.788	6.398	10.018	33.823	24.56	36.272	23.739		0.994628	18.9471
22.1503	5.154	12.151	16.855	13.2863	8.4197	1.028	5.387	40.9871	44.3649	29.9739	41.652	46.3565	1.2872	0.621	2.8704	1.5657	16.0216	18.7981	26.5542	40.8672	6.5532	9.1055	29.088	5.358	11.416	27.69	31.712	40.611	32.72		1	19.6019

## Sheet: Image7
X0	Y0	Y1	Y2	Y3	Y4	Y5	Y6	Y7	Y8	Y9	Y10	Y11	Y12	Y13	Y14	Y15	Y16	Y17	Y18	Y19	Y20	Y21	Y22	Y23	Y24	Y25	Y26	Y27	Y28	Y29		Ap-Ba	Avg int
0	24.7951	26.944	33.021	19.6113	37.3107	47.255	29.161	15.891	20.813	17.511	28.585	25.026	22.939	14.892	14.712	11.0018	15.892	14.061	20.604	17.321	17.692	17.457	15.684	16.286	9.566	13.722	20.161	12.975	17.858	20.267		0	20.6338
0.1191	30.0428	34.5895	27.4336	29.8647	33.402	50.302	44.432	21.84	24.295	28.981	36.304	37.433	28.95	19.167	12.794	13.2914	11.308	16.725	17.692	20.673	21.137	17.773	19.848	18.318	9.897	17.142	20.753	14.386	16.857	24.702		0.00526369	24.0111
0.2382	25.1538	32.1806	33.5549	35.7405	47.115	47.461	47.239	23.161	29.562	22.522	47.499	37.718	36.034	20.867	18.616	13.9506	16.478	14.143	21.903	26.137	19.485	15.397	17.551	29.983	12.369	22.312	23.616	22.366	26.532	26.471		0.0105274	27.1039
0.3573	34.8905	35.7839	45.2025	37.4788	43.3646	41.841	58.698	29.246	30.846	30.563	41.009	40.639	37.838	23.025	22.264	18.1841	15.793	18.918	26.069	20.078	25.087	21.529	24.721	20.833	14.003	25.136	29.04	25	24.254	26.21		0.0157911	29.5848
0.4764	42.2284	50.3631	41.799	51.386	42.4966	48.86	63.874	29.738	31.499	32.317	49.309	42.251	42.945	33.288	25.707	26.2916	21.12	20.276	29.926	34.845	33.223	28.09	27.412	26.463	17.112	44.128	44.543	31.632	23.603	28.491		0.0210548	35.5072
0.5954	45.546	47.957	43.6675	60.7038	65.4782	44.417	64.812	41.386	48.628	35.876	52.433	53.207	59.353	32.618	34.748	24.8684	24.681	29.365	37.833	36.68	43.55	29.311	36.552	27.2	21.898	38.434	48.647	38.827	21.479	30.637		0.026314	40.6931
0.7145	38.986	40.5317	49.9827	65.5919	60.1982	56.386	60.394	52.211	61.639	49.715	64.004	52.066	71.137	37.773	32.648	31.5308	35.063	34.899	36.487	53.22	52.269	36.451	49.246	38.543	19.638	46.133	61.546	40.487	40.53	32.676		0.0315777	46.7327
0.8336	47.7055	52.3711	55.7976	73.3911	61.5639	56.278	71.839	69.557	73.529	51.144	66.743	57.383	61.29	48.482	52.713	50.3528	49.301	37.237	39.21	62.991	62.749	45.351	53.002	39.147	21.018	47.117	80.945	36.072	42.16	35.787		0.0368414	53.4076
0.9527	47.8694	55.7667	60.5246	83.6173	65.5895	68.023	67.72	72.921	70.636	62.928	73.43	73.382	73.71	42.039	71.534	39.8712	51.443	41.271	45.191	71.674	67.63	59.701	74.933	47.423	29.192	60.477	94.523	43.711	47.948	36.591		0.0421051	60.0423
1.0718	48.5562	59.8703	62.0052	96.169	70.4988	73.292	69.325	90.712	85.569	67.477	96.505	81.266	79.489	53.328	71.245	63.4208	61.109	47.574	53.037	89.205	84.459	66.205	88.367	65.71	28.72	71.006	116.182	53.789	58.882	48.565		0.0473688	70.0513
1.1909	62.7347	62.3688	70.0933	100.1	76.0596	80.776	81.35	86.986	84.345	63.416	100.466	82.232	96.337	70.528	79.914	72.1572	80.699	63.431	67.452	107.07	85.303	95.71	105.656	79.482	42.184	78.342	120.342	63.341	66.518	54.55		0.0526325	79.3315
1.31	59.4304	62.8944	72.799	92.0027	78.6628	94.401	88.019	94.186	103.744	81.855	101.054	91.801	97.289	85.277	95.197	76.7134	108.62	85.099	72.21	103.394	93.855	109.388	113.319	85.623	54.102	94.037	130.498	76.197	70.217	76.832		0.0578962	88.2906
1.4291	59.5666	64.8104	67.3772	83.7886	82.8382	97.254	85.931	98.564	114.429	76.309	107.18	101.694	96.438	87.131	101.601	95.4005	110.392	84.614	81.731	122.977	106.846	116.147	128.853	99.201	68.221	97.663	130.053	102.551	90.933	79.142		0.0631599	94.6546
1.5481	62.9958	64.1566	77.8786	90.0536	72.0618	97.928	88.767	110.862	97.082	66.32	116.158	117.56	105.847	96.597	106.018	89.163	103.179	85.755	90.38	136.951	112.323	109.546	114	97.938	73.628	94.612	144.863	109.319	100.012	90.106		0.0684192	97.402
1.6672	80.1242	73.3194	80.3348	76.3504	86.6615	98.596	101.021	96.369	94.739	79.343	108.061	102.372	109.264	112.463	90.071	93.6592	117.714	107.092	91.631	124.789	127.773	101.951	109.593	104.084	89.831	126.905	142.375	118.289	99.734	112.638		0.0736829	101.905
1.7863	66.82	58.1437	84.2195	76.9539	73.9349	110.003	106.344	94.326	83.686	83.082	114.314	109.101	116.985	108.539	96.249	95.7802	117.215	123.364	102.612	119.054	119.014	112.065	86.502	103.73	106.517	124.834	140.267	126.518	121.255	113.48		0.0789466	103.164
1.9054	58.1145	52.1867	69.7556	62.5685	73.3205	108.905	101.703	102.903	78.472	98.445	112.821	108.605	113.694	112.339	79.145	71.1567	107.884	118.034	102.461	114.766	97.552	91.171	80.772	100.183	105.044	119.113	125.849	146.781	109.467	118.265		0.0842102	98.0492
2.0245	51.7286	65.9586	67.7524	66.4794	82.6546	110.159	87.401	80.111	76.952	104.062	111.677	119.688	114.859	102.122	86.29	67.6661	92.243	98.013	98.1	106.155	89.283	80.451	62.735	98.383	127.105	114.774	104.18	143.917	109.831	109.38		0.0894739	94.337
2.1436	52.9732	66.7689	53.5148	54.3988	64.6345	93.949	101.794	66.527	68.866	89.313	104.073	97.682	106.157	105.725	70.43	52.4218	73.687	83.407	95.062	88.794	73.685	58.568	52.258	96.441	134.549	112.739	98.485	147.279	91.925	120.724		0.0947376	85.8944
2.2627	58.0042	56.1208	45.0647	48.7947	63.1372	107.189	94.437	52.69	61.896	100.785	86.753	104.661	94.669	97.232	53.173	55.9076	58.103	73.637	78.037	60.827	57.038	51.231	39.707	85.494	126.719	87.747	80.526	140.516	87.054	106.987		0.100001	77.1379
2.3818	57.0631	66.2158	40.0385	34.0002	60.4203	92.113	94.493	49.141	52.875	83.401	80.878	110.323	74.358	82.503	41.496	49.7085	42.194	50.36	45.884	54.895	47.048	41.641	32.867	67.959	123.625	68.827	59.293	127.726	94.988	101.614		0.105265	67.5983
2.5008	53.3314	55.1318	31.6787	32.9061	54.9136	83.018	82.452	38.566	48.439	73.003	78.684	109.118	73.387	63.581	33.423	39.0136	42.564	29.698	35.788	48.249	30.226	33.035	28.094	64.539	111.711	63.479	52.04	118.474	85.674	81.036		0.110524	59.1751
2.6199	53.7938	54.6949	27.7495	24.9711	60.3071	76.296	87.005	35.41	41.792	62.72	58.148	109.141	62.041	47.763	32.304	42.7575	30.413	25.229	24.412	30.267	25.614	21.456	22.012	53.925	94.155	51.87	43.427	98.066	67.019	58.349		0.115788	50.7703
2.739	42.4594	40.0713	20.3607	17.7077	58.9356	69.249	76.337	30.312	29.507	47.481	50.745	109.284	44.851	45.416	22.762	31.1229	24.772	18.771	14.233	26.273	21.748	17.24	23.204	42.379	74.546	43.804	40.107	81.049	59.181	56.245		0.121052	42.6718
2.8581	40.6656	37.3398	17.38	17.5682	52.1867	59.038	76.35	28.43	26.624	29.644	44.734	104.727	35.246	29.377	20.024	35.0497	18.63	12.792	10.25	17.307	23.413	13.239	12.557	40.245	65.946	33.007	27.529	72.81	42.143	41.282		0.126315	36.1845
2.9772	37.4387	28.9509	15.4707	17.7424	39.0651	52.219	70.098	29.398	25.643	31.884	39.604	88.716	34.642	27.305	17.55	35.55	19.9	9.456	13.266	22.235	17.727	13.336	13.979	31.641	54.529	30.666	24.329	58.04	30.425	31.374		0.131579	32.0727
3.0963	38.1084	37.0112	15.6278	12.8762	44.5899	47.011	63.037	32.965	18.386	23.091	36.574	73.237	29.081	23.559	21.673	31.2288	22.299	8.55	9.034	17.611	21.126	10.446	5.723	28.072	51.844	28.027	21.694	45.674	21.123	28.109		0.136843	28.9129
3.2154	30.2596	20.8842	11.4227	18.2019	39.1545	39.182	50.438	30.745	16.274	14.237	32.736	64.749	26.569	16.261	12.715	30.8534	22.06	8.898	7.95	18.429	13.026	4.207	10.38	26.496	40.887	24.127	17.623	35.757	23.402	21.409		0.142106	24.3111
3.3345	29.7076	17.3303	12.9607	14.8243	35.6385	37.783	50.144	22.805	13.927	12.347	24.93	56.207	16.818	15.243	11.345	22.6804	20.601	7.501	8.679	17.551	12.635	6.818	4.812	20.073	37.128	22.707	16.064	32.568	18.177	20.224		0.14737	21.341
3.4535	30.3424	19.8792	12.0047	14.8475	31.9795	35.99	48.549	19.121	8.14	10.289	23.239	47.889	15.466	11.665	9.849	22.9633	18.516	6.11	8.25	16.454	13.366	5.65	4.569	14.109	38.421	20.056	14.842	25.829	12.491	14.955		0.152629	19.1944
3.5726	28.1269	11.2292	13.1812	7.5122	31.9589	35.224	45.015	22.679	9.408	10.518	17.179	42.743	11.763	12.383	11.561	24.7818	16.904	7.483	9.89	10.357	13.197	7.841	6.575	15.551	46.469	26.945	13.447	26.492	10.506	12.858		0.157893	18.6593
3.6917	24.0819	19.7447	12.6517	10.3679	23.9328	33.659	40.875	20.758	9.176	9.919	16.157	34.798	12.633	15.912	9.045	16.1287	19.918	6.717	6.203	8.408	13.067	4.984	6.181	8.963	36.116	19.907	7.959	22.486	10.439	7.276		0.163157	16.2821
3.8108	19.0199	15.5395	12.7742	8.549	24.7433	23.234	36.01	20.463	9.349	9.518	17.627	28.495	14.305	10.045	15.609	16.2813	13.388	7.481	4.832	5.568	13.471	5.836	3.109	8.508	32.708	14.188	11.457	16.362	9.884	8.276		0.16842	14.5543
3.9299	19.6391	14.4085	10.6242	8.6446	21.7853	29.885	32.452	19.432	10.366	4.079	21.423	21.566	6.94	11.266	12.152	11.6469	11.806	6.076	8.62	7.826	17.97	6.303	3.052	11.804	34.386	17.237	9.189	12.541	5.368	8.147		0.173684	13.8878
4.049	10.6474	17.1974	11.8949	6.6736	18.5417	23.869	26.563	16.78	8.828	4.701	17.527	16.287	8.521	9.61	15.125	10.8009	10.466	8.759	3.617	7.992	14.565	6.84	5.036	9.182	29.478	11.566	6.437	13.516	7.328	8.12		0.178948	12.2156
4.1681	16.7737	13.2895	12.6868	8.3067	27.1255	21.635	25.442	15.883	6.379	6.083	10.696	14.965	11.746	9.921	10.407	8.6418	11.381	5.961	8.562	9.498	11.221	7.664	4.413	10.442	31.484	5.531	7.92	14.354	5.043	8.612		0.184212	12.0689
4.2872	13.9594	12.6578	14.6082	5.7664	17.6275	18.417	16.362	15.211	6.562	7.911	9.605	11.484	8.21	7.114	15.175	9.6843	6.236	4.057	3.765	6.926	13.894	5.733	3.959	6.166	31.063	4.581	5.517	10.593	7.394	6.781		0.189475	10.234
4.4063	15.2984	11.6511	13.7366	5.5209	14.2882	22.896	22.763	17.109	4.625	6.583	5.328	9.702	6.87	10.558	13.708	10.0087	8.06	7.409	8.597	10.013	10.627	7.708	4.088	4.997	35.259	4.521	6.158	7.585	9.853	6.155		0.194739	10.7225
4.5253	11.7074	11.4614	9.9187	3.8443	15.1136	15.452	25.966	15.323	5.564	3.463	4.709	11.015	8.738	11.086	15.671	8.5018	7.947	3.995	7.744	6.173	9.702	3.43	3.426	4.511	35.101	3.779	3.338	11.502	5.549	5.151		0.199998	9.62941
4.6444	10.1518	14.1068	13.1027	3.0802	10.7771	14.566	13.957	14.302	5.266	5.45	4.851	7.814	9.494	8.753	18.77	11.7979	8.302	6.339	5.115	5.107	9.071	4.461	3.582	6.046	21.842	2.736	6.648	8.62	4.81	8.854		0.205262	8.92575
4.7635	6.9098	17.0525	12.5057	3.4869	12.1977	11.526	10.997	8.638	7.341	5.463	5.012	8.52	6.905	9.637	13.776	8.921	6.049	5.335	6.561	4.418	6.275	5.947	1.709	4.367	19.137	3.311	3.527	7.752	4.111	7.37		0.210526	7.82525
4.8826	7.5736	11.8528	11.8428	5.6009	13.7695	5.927	11.899	11.926	4.879	4.727	5.272	7.662	7.301	7.628	12.852	11.063	5.764	8.832	7.978	6.447	9.319	7.838	3.527	4.372	16.527	3.649	6.987	7.909	6.338	8.978		0.215789	8.20802
5.0017	5.7806	10.3657	14.9307	4.9856	12.6694	4.036	11.731	11.765	3.69	4.615	3.845	6.639	10.369	8.189	15.522	7.5209	2.782	5.935	6.967	6.464	9.795	6.533	2.231	2.041	8.47	3.378	3.202	8.192	8.09	8.82		0.221053	7.31846
5.1208	4.0353	7.6059	9.9944	3.4873	8.9808	4.884	11.046	13.277	4.311	5.145	4.824	7.997	6.62	9.214	15.203	14.7028	5.166	9.162	9.095	6.568	10.004	3.704	4.808	1.912	9.829	4.217	4.095	7.868	4.64	7.598		0.226317	7.33312
5.2399	5.2697	10.1231	11.5847	4.5328	9.3224	3.203	8.749	14.312	3.219	3.294	4.126	6.706	4.104	8.244	11.371	12.5896	7.78	8.538	7.214	6.014	13.635	3.04	2.194	3.142	13.756	5.057	3.815	4.494	6.247	8.199		0.23158	7.12918
5.359	7.0761	9.2313	9.3794	6.5644	8.4635	5.699	7.703	15.733	3.293	4.087	3.682	5.779	4.581	11.019	12.269	9.9985	6.723	5.848	9.005	6.951	11.696	7.213	3.366	4.52	7.084	2.131	4.552	5.645	7.882	9.569		0.236844	7.22477
5.478	4.9982	8.137	13.0882	4.6945	9.0536	5.539	8.157	13.808	2.966	7.047	3.363	5.821	5.425	9.333	9.989	11.5898	6.886	8.218	9.2	6.111	14.391	6.457	2.572	2.638	7.908	2.88	2.611	5.828	5.674	7.905		0.242103	7.07628
5.5971	4.6564	6.8935	9.7314	4.6471	6.6161	5.353	5.857	15.554	4.502	1.933	2.578	4.046	2.95	10.834	8.678	12.0288	7.046	7.687	8.638	7.882	15.245	8.28	4.626	2.207	6.306	2.8	4.489	3.878	3.193	8.551		0.247367	6.58954
5.7162	4.0626	6.8402	13.7292	5.2303	4.8214	2.068	11.675	12.127	3.955	4.439	3.6	3.385	4.232	11.78	9.239	11.1164	7.841	8.896	6.301	5.078	14.966	13.839	4.915	4.56	6.662	2.354	2.946	2.303	4.286	10.626		0.252631	6.9291
5.8353	6.6242	6.3534	16.3826	4.9033	4.951	3.401	6.731	12.617	6.782	6.11	4.02	2.181	2.366	11.376	10.526	9.6982	11.247	10.723	11.186	3.865	14.009	8.092	2.914	3.422	7.153	2.531	3.384	4.87	6.544	8.429		0.257894	7.11306
5.9544	7.2765	7.7989	14.5909	6.0907	3.2833	3.419	9.047	12.311	2.111	2.285	4.101	3.904	2.207	13.111	7.151	13.7129	11.555	15.469	16.115	9.101	18.929	9.664	2.966	3.595	9.729	3.122	3.117	4.11	4.793	10.504		0.263158	7.83897
6.0735	4.5799	6.9207	14.9578	5.0894	6.6711	2.851	8.598	11.034	5.444	3.173	2.467	1.643	5.77	14.695	7.666	17.5762	5.906	19.207	10.098	6.026	25.119	10.246	2.188	2.29	6.829	2.359	3.444	3.672	4.84	11.768		0.268422	7.77094
6.1926	3.0154	6.699	17.5087	5.3052	5.2186	2.918	6.451	13.635	4.698	4.204	2.779	4.024	3.889	15.797	5.295	14.8125	6.883	17.817	14.888	10.982	19.795	9.07	2.451	1.868	4.651	3.736	3.495	2.233	4.269	16.926		0.273686	7.84378
6.3117	4.541	8.524	15.9986	5.3788	3.2656	3.323	10.876	13.727	4.664	2.308	4.299	1.815	4.989	18.511	6.269	17.0317	9.518	21.562	15.921	7.82	23.283	10.137	3.547	3.182	5.096	4.434	2.687	4.156	4.072	18.007		0.278949	8.63142
6.4307	3.6408	6.874	17.3891	7.743	6.5408	3.351	4.957	13.573	4.242	2.082	4.72	3.419	6.681	11.731	7.304	17.8065	9.772	24.299	12.08	7.186	21.184	7.876	2.516	2.538	5.949	1.737	2.778	2.974	3.67	15.324		0.284208	8.06457
6.5498	5.0887	6.8428	21.9235	7.2332	4.4014	3.371	9.572	14.653	4.318	4.083	3.061	3.159	6.268	17.608	8.91	12.6819	12.133	26.07	12.345	5.759	22.281	8.835	4.668	3.49	4.246	2.346	4.993	3.937	5.319	22.424		0.289472	9.06735
6.6689	4.0115	6.2904	22.7444	5.6407	4.6281	3.645	6.87	15.109	3.546	2.66	4.569	5.453	4.646	18.344	7.199	15.3797	13.571	21.095	24.541	7.843	19.665	11.631	1.923	1.959	3.615	1.476	4.499	2.094	7.461	21.282		0.294736	9.11303
6.788	5.1599	6.1628	23.19	6.1357	2.3593	4.565	5.628	18.445	4.384	4.464	2.106	4.36	4.093	17.799	8.499	14.6034	15.683	18	26.594	7.699	30.355	9.506	4.457	3.13	2.256	3.123	1.118	3.583	4.162	22.67		0.3	9.47634
6.9071	2.8839	5.9593	26.2483	6.5959	4.3508	2.211	10.489	18.007	5.438	5.142	5.166	4.1	4.421	21.355	10.535	14.1347	13.352	20.685	39.723	7.721	27.861	11.537	2.867	7.146	4.493	2.355	4.922	3.673	5.653	25.063		0.305263	10.8029
7.0262	3.3778	5.6354	29.1208	4.6955	2.4098	3.051	7.966	26.369	4.305	2.05	2.821	4.066	5.173	20.28	7.713	12.0462	17.204	20.404	30.639	8.168	29.554	9.616	2.587	2.852	3.71	3.38	3.928	2.723	5.281	20.407		0.310527	10.0511
7.1453	3.8914	10.6591	30.4303	5.7164	3.2656	1.066	9.594	24.698	4.078	2.362	2.321	2.026	1.292	18.24	7.673	13.6751	16.133	21.658	32.438	7.453	35.323	8.439	5.364	3.77	1.719	3.222	1.996	3.239	2.098	24.488		0.315791	10.2776
7.2644	3.1337	7.1256	40.9305	4.6471	2.3455	1.88	6.923	24.99	4.31	3.472	2.68	2.509	3.275	18.299	10.375	8.5366	17.297	19.535	27.613	12.486	28.597	10.376	3.192	3.644	0.977	2.832	2.265	3.211	5.23	21.173		0.321054	10.1287
7.3834	3.4944	6.3017	41.3844	5.076	2.807	4.344	12.887	26.417	3.527	3.071	1.818	3.573	2.522	14.812	10.524	10.0277	16.681	17.96	23.588	8.437	32.544	9.762	4.334	3.665	1.05	2.699	0.709	3.516	5.721	25.582		0.326314	10.2945
7.5025	3.5666	6.6595	41.1125	3.1957	2.9741	2.159	7.686	29.637	5.255	1.721	4.272	3.4	3.672	14.119	11.047	13.0742	16.629	17.25	23.134	13.857	25.337	11.483	5.073	2.997	1.765	3.27	2.638	4.756	11.7	27.152		0.331577	10.6864
7.6216	2.0996	6.1981	46.8923	5.6906	3.9656	3.271	6.842	25.623	7.564	3.961	3.981	2.614	2.902	14.661	16.959	13.3999	21.521	15.905	21.272	11.689	30.698	9.911	5.694	1.834	0.284	1.385	3.846	2.895	4.315	22.968		0.336841	10.6947
7.7407	3.1886	6.7669	35.1709	4.4408	4.1835	1.878	6.345	21.5	3.555	3.207	0.917	2.946	2.991	12.773	25.232	15.4078	14.203	19.423	22.712	8.776	23.761	13.072	4.279	2.011	1.995	2.475	2.89	4.136	6.156	16.783		0.342105	9.77248
7.8598	3.2609	7.153	28.6238	3.5276	1.7974	1.494	8.473	22.585	3.951	2.616	3.67	3.213	3.469	9.483	24.395	12.877	12.524	23.568	23.11	16.049	15.176	10.261	3.966	1.518	1.801	1.712	3.515	3.793	7.697	22.562		0.347368	9.59469
7.9789	3.8034	6.9785	22.0701	6.1712	2.8428	1.832	6.969	17.463	4.124	1.911	4.313	3.647	4.266	14.745	32.127	11.7089	12.014	27.722	20.931	14.503	23.581	11.284	2.886	4.454	4.949	2.998	3.612	4.205	6.463	25.466		0.352632	10.3347
8.098	3.3894	8.8204	18.8136	4.045	3.1672	2.763	10.807	14.504	5.123	3.35	3.205	3.624	0.83	11.808	24.132	9.9983	15.221	23.639	15.444	11.376	18.554	6.702	3.317	1.843	2.402	2.377	4.136	2.336	7.343	20.56		0.357896	8.78766
8.2171	3.1954	9.3926	16.6916	4.7837	4.0929	2.592	3.58	19.882	4	4.564	2.17	2.754	2.056	8.888	30.819	17.8052	11.194	25.08	21.504	16.969	15.409	10.366	4.008	4.458	3.365	2.273	3.089	4.907	7.619	19.695		0.363159	9.57341
8.3362	3.8834	9.6361	14.5556	3.5706	4.1009	1.577	8.21	19.425	5.777	3.53	3.638	1.83	2.949	9.318	26.222	20.5246	9.63	21.526	23.584	12.382	18.861	10.568	3.887	2.755	2.541	2.778	2.815	3.233	7.211	13.02		0.368423	9.11794
8.4552	1.9487	7.4815	8.3365	4.4219	3.2676	2.976	6.452	16.71	3.816	4.663	4.153	1.431	3.45	10.168	30.617	19.3399	8.758	19.791	26.867	14.614	17.776	9.552	1.439	2.701	4.413	2.41	2.199	2.935	9.388	18.793		0.373682	9.02894
8.5743	4.9864	6.1353	10.0849	3.6997	1.4674	2.625	4.779	18.492	4.341	4.58	3.787	2.877	2.856	9.584	30.767	18.5015	11.732	17.584	37.562	13.635	17.033	7.669	3.224	2.285	4.071	3.282	3.248	3.526	10.225	12.944		0.378946	9.25277
8.6934	2.3616	8.7715	9.5723	3.3762	1.2696	2.194	8.252	21.758	4.129	3.814	3.525	3.669	4.427	7.501	26.883	17.84	9.583	20.664	37.074	14.766	14.997	9.746	2.127	5.8	3.135	4.09	2.551	3.039	8.795	10.322		0.38421	9.20107
8.8125	2.1223	7.6788	9.3319	2.6953	1.3013	2.801	4.268	22.294	4.767	1.659	5.251	4.125	3.432	9.444	31.853	11.5833	9.715	11.517	35.945	12.482	16.968	7.065	1.646	2.991	2.169	5.342	2.729	4.119	12.028	13.425		0.389473	8.75826
8.9316	3.4386	7.4312	9.2363	4.0609	1.3735	1.889	5.977	20.763	5.262	4.157	2.758	2.139	2.402	5.517	23.38	13.672	10.733	14.746	32.731	11.502	16.072	4.76	2.762	2.388	4.281	1.906	2.442	1.875	7.237	9.874		0.394737	7.89218
9.0507	3.2626	9.7152	9.1228	3.0261	1.8662	1.888	6.37	24.5	4.854	2.682	3.282	2.515	0.993	4.461	24.838	14.274	7.222	9.83	27.088	14.853	18.328	9.979	2.447	3.616	3.469	2.955	4.54	2.671	9.248	10.186		0.400001	8.13606
9.1698	3.4218	5.4727	8.9088	2.8353	4.6649	2.18	9.571	20.79	2.316	4.953	1.2	1.091	2.371	3.256	18.366	14.9403	9.425	9.094	18.921	14.85	9.446	6.552	2.687	3.181	0.961	2.878	3.704	2.012	11.596	7.302		0.405265	6.96489
9.2889	3.7662	11.0389	9.0349	2.4821	4.2422	1.988	7.266	23.247	6.974	4.775	2.682	4.102	4.681	6.163	20.429	11.6679	8.511	6.063	18.312	17.244	15.687	7.064	3.265	6.001	1.809	1.857	3.527	2.576	10.725	9.737		0.410528	7.89724
9.4079	4.1063	8.0843	5.6046	5.6106	2.7171	2.193	5.27	23.468	3.24	4.31	3.203	1.944	3.386	3.109	23.855	8.5216	10.377	7.876	13.329	20.657	13.38	4.994	2.88	3.499	3.414	1.092	2.177	3.137	13.63	8.172		0.415788	7.24122
9.527	3.6536	9.1583	6.4433	2.653	4.4643	1.852	5.524	21.254	6.386	2.845	2.398	3.333	1.844	3.513	20.849	10.2852	8.026	7.415	13.43	15.152	10.598	6.948	3.938	4.033	2.328	2.024	5.601	3.532	10.841	6.092		0.421051	6.88046
9.6461	5.5164	8.8983	8.3173	3.7396	4.1855	2.498	8.689	22.265	4.606	3.1	4.053	4.192	2.512	3.72	18.409	10.3875	8.066	7.545	16.055	16.746	11.957	6.717	4.13	2.507	2.726	3.379	3.949	2.242	8.522	8.541		0.426315	7.27235
9.7652	4.4734	9.1557	9.5179	4.3299	1.3779	2.766	5.73	15.623	3.17	3.028	3.401	1.694	2.049	3.222	17.124	11.352	7.255	10.185	12.059	14.062	9.285	8.278	4.236	3.221	4.252	3.332	3.064	3.004	10.819	5.551		0.431579	6.55389
9.8843	3.7214	10.5448	8.9143	2.1938	3.3279	1.218	3.265	13.661	5.306	2.138	3.616	4.15	4.035	3.122	15.683	12.8183	9.385	7.326	10.802	9.948	11.309	7.162	2.455	3.221	2.596	2.66	1.763	1.423	10.304	8.766		0.436842	6.22782
10.0034	2.7862	11.4787	3.4204	3.6891	3.6191	1.753	3.022	15.509	3.957	2.76	4.606	4.037	3.225	4.072	9.502	12.839	7.695	7.828	12.438	14.689	11.815	6.469	3.487	3.366	2.158	1.881	4.383	3.831	11.469	5.001		0.442106	6.22618
10.1225	3.9635	9.4914	6.1171	3.1671	3.2874	1.973	2.921	17.584	5.1	3.014	4.584	3.171	2.943	4.822	9.4	13.8046	6.11	10.822	10.635	10.26	9.914	6.547	5.157	3.263	1.649	2.297	2.17	3.618	8.485	4.275		0.44737	6.01817
10.2416	3.3867	13.6471	5.7858	2.3822	3.1296	4.368	5.97	14.129	6.903	3.073	2.251	3.075	3.666	2.941	7.736	15.8841	6.245	11.133	10.59	14.276	9.294	8.063	4.676	2.929	3.431	2.365	1.229	4.96	12.143	6.218		0.452633	6.52932
10.3606	7.6979	9.9293	3.5568	1.6258	0.351	1.618	5.825	10.515	6.148	4.515	3.885	3.451	2.565	5.846	8.11	10.8684	7.357	10.703	15.963	9.212	8.365	6.205	1.9	3.774	4.695	3.542	3.105	2.685	14.433	4.253		0.457893	6.08997
10.4797	3.4064	8.4223	5.2487	2.7391	3.0773	4.426	5.443	13.504	3.868	2.765	1.495	2.026	4.232	2.675	8.525	13.2022	6.683	7.891	13.65	14.79	11.725	5.168	2.182	4.73	2.956	3.516	2.363	3.85	10.367	3.752		0.463156	5.95593
10.5988	3.3789	8.7921	7.8999	2.338	4.2268	3.855	3.937	12.079	5.088	2.475	2.003	2.088	2.244	3.545	6.613	17.144	6.023	10.818	6.136	9.338	11.365	6.229	2.856	2.16	2.766	2.41	5.246	2.116	13.448	3.957		0.46842	5.75249
10.7179	3.645	9.2012	5.5702	2.9354	2.2061	2.84	6.923	13.627	3.262	4.801	2.453	1.796	3.335	3.555	5.841	17.1832	7.725	11.422	10.292	8.672	11.103	5.013	3.817	5.444	2.972	2.188	3.391	4.017	17.245	5.109		0.473684	6.2528
10.837	3.51	9.7784	8.0297	0.8498	3.7219	3.316	6.125	14.49	4.442	1.348	4.923	3.162	1.955	1.511	5.464	20.8785	4.949	8.178	9.733	8.33	10.085	9.865	4.119	3.056	3.848	4.82	2.021	3.404	13.422	4.609		0.478947	6.13144
10.9561	4.9891	10.5655	4.954	2.9753	2.196	4.576	8.339	13.009	3.574	2.513	1.262	3.205	4.082	2.243	8.234	18.6508	6.456	11.907	6.33	8.806	12.74	4.413	2.748	2.91	2.971	2.706	2.178	3.248	15.993	5.402		0.484211	6.13919
11.0752	4.4648	9.2351	5.2564	1.3653	1.5697	3.568	6.494	15.075	4.336	2.057	3.42	6.007	2.924	3.055	4.838	19.7503	5.14	10.52	4.981	9.411	11.469	6.789	4.707	5.327	1.26	2.66	2.727	3.436	18.007	7.601		0.489475	6.24835
11.1943	4.0451	10.9381	4.3445	2.025	3.6949	2.445	9.477	10.26	3.682	3.537	2.72	2.317	2.435	2.864	4.145	22.1971	4.561	8.981	6.284	8.432	9.655	6.685	4.35	2.05	2.984	3.325	3.187	4.85	22.424	5.436		0.494739	6.14436
11.3133	5.141	11.5939	3.7116	2.6782	1.1097	1.156	9.679	15.761	4.786	2.366	1.7	1.381	2.858	3.541	4.597	17.5079	5.092	6.483	4.01	8.026	11.327	5.477	4.003	4.207	3.306	1.778	4.693	2.549	12.915	5.613		0.499998	5.63488
11.4324	6.5456	10.7074	6.2785	2.8303	1.8307	1.177	9.686	15.641	3.302	4.276	4.962	4.335	2.695	4.835	3.338	22.1833	4.802	6.845	7.149	10.06	10.587	5.948	3.773	4.895	3.335	2.596	4.903	3.67	11.174	4.91		0.505261	6.30899
11.5515	3.5629	8.7875	4.0285	2.0925	4.0812	3.612	11.482	16.894	4.953	4.297	3.825	3.116	2.597	1.993	3.844	21.9027	7.279	7.782	6.008	6.372	15.412	3.43	2.755	4.205	2.466	1.565	3.905	4.279	13.153	3.267		0.510525	6.09821
11.6706	3.5923	9.2029	6.1916	3.3292	3.3956	2.918	10.302	10.71	3.407	1.666	3.468	4.447	2.506	1.835	4.978	19.3192	5.111	9.03	5.41	8.704	9.639	6.009	2.286	1.628	2.963	3.613	3.984	3.081	15.931	4.038		0.515789	5.75649
11.7897	5.5013	7.3005	6.9292	3.4775	1.719	2.517	11.25	16.032	2.741	2.915	1.843	5.01	3.498	1.748	4.399	17.1029	5.026	5.681	9.956	6.849	11.94	3.367	1.201	4.911	2.445	3.484	2.074	2.22	18.318	5.629		0.521053	5.90281
11.9088	5.4884	9.9986	4.8557	0.9402	2.1095	2.375	11.034	14.921	4.757	1.901	4.649	1.407	1.933	3.953	2.486	19.416	6.852	7.283	6.601	7.52	10.114	4.487	2.519	3.088	1.25	2.484	3.999	2.524	15.762	4.72		0.526316	5.71425
12.0279	6.2364	8.9811	9.0273	0.2976	1.5755	3.329	13.953	11.732	3.049	2.448	1.329	3.432	2.442	6.163	3.057	18.2315	4.092	7.178	11.435	7.617	11.913	2.099	2.938	3.808	4.032	2.554	2.868	2.861	14.079	3.514		0.53158	5.87571
12.147	7.1307	9.8281	9.9152	2.6744	1.1681	2.022	15.883	15.52	4.537	2.173	2.441	3.113	3.93	3.516	2.078	19.4805	8.896	7.425	4.606	8.064	13.747	3.177	2.521	3.272	1.286	1.536	2.461	2.497	15.73	5.041		0.536844	6.18897
12.2661	4.8494	8.9663	9.0627	2.6684	4.3131	3.2	16.191	9.199	3.221	3.647	2.285	2.536	1.485	4.34	2.784	18.8616	8.781	6.836	4.219	7.084	12.559	4.517	1.742	3.743	2.053	3.136	3.823	3.767	12.26	3.388		0.542107	5.85058
12.3851	4.826	10.5299	4.5436	2.8626	2.964	3.863	17.14	11.152	2.862	2.174	2.737	1.209	2.907	2.922	5.68	20.4594	6.838	8.314	7.126	7.02	10.61	2.271	3.39	1.515	2.938	3.524	2.238	2.129	19.707	1.83		0.547367	5.94272
12.5042	3.964	9.6207	6.3801	2.5382	3.0375	1.552	13.729	12.245	3.149	4.221	3.629	2.802	4.952	3.398	3.079	16.6368	7.473	6.148	6.256	6.484	11.116	4.773	3.113	3.038	2.686	4.573	1.995	5.221	16.186	2.598		0.55263	5.88644
12.6233	5.2535	10.3082	7.7302	3.1348	2.3756	1.546	14.423	7.985	2.236	3.323	2.829	3.049	2.226	2.536	6.604	17.3565	9.096	4.575	5.472	5.851	7.825	2.531	3.034	2.187	3.306	2.579	4.55	4.723	16.751	4.505		0.557894	5.66336
12.7424	3.1912	10.2421	6.5871	4.3763	1.463	3.815	11.514	7.621	3.057	2.068	2.072	1.617	2.01	1.749	5.321	14.956	8.713	5.956	6.305	4.714	7.189	3.417	2.738	4.44	3.015	3.141	3.042	7.191	16.139	5.04		0.563158	5.42332
12.8615	3.1458	8.3806	6.053	2.6997	1.6225	1.46	8.809	8.168	2.939	2.352	1.047	1.354	1.903	3.229	3.892	19.8804	10.759	3.153	7.015	6.989	7.196	2.766	3.689	2.344	1.394	3.316	3.853	4.327	14.828	4.568		0.568421	5.1044
12.9806	2.0826	9.8944	6.093	3.2171	2.458	4.332	10.888	8.221	3.064	0.7	4.467	2.658	4.215	2.377	2.406	14.9324	9.713	6.927	3.113	6.331	5.643	2.857	3.272	2.6	3.095	3.511	0.908	2.076	17.096	3.433		0.573685	5.08602
13.0997	2.7359	11.4693	7.8129	1.3712	2.1419	3.379	13.356	5.259	1.948	3.42	2.46	3.003	3.036	4.386	3.703	21.0808	10.29	7.998	4.386	7.353	6.337	4.198	2.122	2.814	2.051	2.47	1.674	6.304	19.968	3.781		0.578949	5.7436
13.2188	2.3264	14.1236	8.6142	1.6286	3.6941	1.671	8.51	5.628	4.367	2.245	1.79	2.896	1.978	4.008	4.532	13.6297	9.459	6.917	3.092	5.469	6.981	5.139	1.245	4.064	1.729	2.522	5.549	3.417	16.683	5.348		0.584212	5.30852
13.3378	4.1882	7.9	6.3383	3.533	2.812	2.879	15.209	7.028	4.365	2.718	1.741	1.788	4.377	3.235	3.175	15.925	7.28	7.073	3.003	5.186	5.693	1.857	2.342	2.333	4.405	1.86	4.092	2.449	15.229	3.537		0.589472	5.11835
13.4569	5.4103	8.2741	5.0102	4.1589	3.446	5.029	11.25	5.131	5.172	2.448	1.491	1.244	2.27	2.796	2.592	13.6675	9.156	7.496	5.302	7.411	12.426	2.999	4.122	1.856	1.069	1.722	2.719	3.434	10.928	3.866		0.594735	5.12987
13.576	4.1627	10.8742	7.4692	4.2039	1.9398	3.657	10.155	4.391	2.856	2.237	3.546	1.755	3.428	2.094	2.897	15.4277	9.638	4.214	7.24	5.561	8.048	3.244	1.189	4.332	2.446	1.506	4.619	3.889	17.355	2.166		0.599999	5.21802
13.6951	2.9742	7.3804	8.568	2.4294	1.0177	4.567	8.259	6.856	4.467	1.891	3.302	1.249	1.853	2.182	3.31	14.4806	6.442	4.517	4.465	5.34	9.041	4.679	1.97	4.665	2.424	2.283	3.282	6.191	15.425	2.724		0.605263	4.94114
13.8142	3.9108	6.1417	5.6108	2.7644	1.6618	2.799	7.802	6.497	5.169	2.306	4.39	1.634	3.4	2.023	2.877	13.0878	7.151	3.873	5.34	5.833	6.468	3.334	2.409	1.534	1.896	1.684	4.426	8.032	17.262	3.553		0.610527	4.82898
13.9333	3.0815	6.8282	5.6803	2.6319	3.6577	2.035	8.506	6.284	1.987	0.904	3.53	1.371	3.172	3.229	3.794	13.6193	12.074	5.111	3.661	6.221	6.766	4.383	1.19	3.112	1.645	1.976	2.431	4.815	21.347	4.773		0.61579	4.99386
14.0524	3.9058	9.9859	7.1673	4.2325	4.8956	1.632	11.917	5.249	3.771	2.377	2.159	3.356	3.591	2.862	3.6	11.9908	8.184	3.061	5.846	7.215	7.821	4.283	0.806	3.035	2.816	2.297	3.027	3.662	17.975	3.493		0.621054	5.2071
14.1715	3.8157	7.3723	4.149	4.0366	1.4095	3.354	9.725	4.363	3.218	3.437	2.827	3.321	4.896	2.201	3.31	10.2149	5.338	4.618	6.323	9.509	5.379	4.425	2.464	3.515	2.201	1.607	4.635	6.579	15.998	2.926		0.626318	4.90557
14.2905	3.0777	6.8257	7.7363	1.9957	1.7828	2.346	11.336	5.188	2.898	1.876	3.908	1.613	3.39	2.105	4.717	15.2193	9.407	5.706	5.284	6.141	6.119	1.797	2.085	2.779	2.859	2.271	4.271	4.808	15.772	4.767		0.631577	5.00268
14.4096	2.5846	7.3319	4.7283	2.0288	2.2326	2.267	10.255	4.059	3.108	2.432	2.873	4.454	1.764	1.873	2.675	7.6288	4.408	5.385	3.609	3.374	7.367	4.046	2.877	3.875	1.372	1.333	3.169	5.818	17.923	3.154		0.636841	4.3335
14.5287	4.2154	11.1799	6.2408	3.6193	4.3031	2.109	10.289	6.463	2.207	3.061	2.482	2.712	1.57	1.434	5.491	13.3276	5.666	6.704	6.243	6.469	6.119	3.129	1.886	2.117	1.19	3.345	1.04	8.608	15.637	3.755		0.642104	5.08707
14.6478	3.6024	8.1372	5.8573	2.4942	1.574	2.029	8.973	5.314	2.135	2.788	3.161	1.952	1.93	2.195	4.935	10.3366	9.423	5.254	6.279	6.515	3.766	2.959	3.513	3.872	2.554	2.128	5.052	4.011	14.744	3.773		0.647368	4.70856
14.7669	2.4945	7.587	5.4374	2.9743	1.1091	3.814	11.563	4.726	3.196	3.251	2.236	1.516	3.231	4.287	5.55	6.429	6.716	4.703	3.818	3.575	4.724	3.639	2.314	2.18	3.528	1.893	3.873	3.201	14.245	1.358		0.652632	4.30561
14.886	2.9816	6.3692	6.8647	2.1713	3.04	4.553	12.674	4.538	1.791	2.068	3.016	3.615	1.613	2.202	3.546	11.8742	7.592	5.766	5.479	3.73	5.107	4.124	2.744	2.476	1.895	2.663	2.575	3.157	12.589	2.339		0.657895	4.5051
15.0051	3.6423	6.6319	8.6957	3.4182	1.6206	6.027	13.137	5.61	1.555	3.229	2.408	1.742	1.268	2.162	5.72	10.2422	6.918	8.159	6.558	8.178	6.403	3.179	1.662	3.156	0.914	2.894	7.031	6.891	15.722	7.937		0.663159	5.4237
15.1242	2.9325	5.7662	8.6684	2.7005	1.5703	7.01	11.152	6.872	2.353	5.377	1.556	3.258	4.656	2.565	3.548	9.2452	8.86	7.916	7.034	6.581	4.987	2.046	1.641	2.473	2	1.734	3.731	5.762	12.218	3.465		0.668423	4.98927
15.2432	2.5533	7.2706	7.4858	1.512	3.7701	7.547	10.215	2.714	2.088	3.506	1.802	1.841	2.246	2.459	4.562	9.9556	8.217	6.028	5.063	4.984	5.159	3.584	4.015	0.88	1.981	3.51	4.026	4.725	13.825	3.219		0.673682	4.69145
15.3623	1.1999	6.4625	9.8081	3.2676	1.8238	3.344	10.086	4.384	3.878	2.911	2.848	1.425	3.28	4.276	4.796	9.3909	6.024	4.88	6.928	3.178	5.322	2.608	1.302	2.881	3.668	3.988	2.974	4.17	14.958	1.888		0.678946	4.59833
15.4814	1.7728	5.7957	8.1421	3.1569	1.797	8.992	10.594	5.924	2.482	2.897	2.772	1.917	3.211	1.738	3.665	7.0089	5.242	4.925	5.527	8.008	5.451	2.103	3.267	1.806	4.264	3.695	1.502	5.585	19.43	2.075		0.684209	4.82485
15.6005	3.6729	7.0086	5.7732	3.0419	3.1847	7.423	16.781	3.073	1.347	1.493	6.432	0.742	2.174	2.386	3.134	8.5581	4.56	5.15	5.425	8.122	4.574	5.868	2.684	2.597	1.295	2.846	1.959	7.089	15.392	4.597		0.689473	4.94608
15.7196	2.465	6.2191	6.8532	2.4162	2.2787	10.241	6.477	3.184	3.062	3.073	2.993	2.669	1.276	1.678	3.049	6.8567	5.819	7.01	4.067	8.375	4.742	4.023	1.278	1.34	3.189	2.323	2.471	6.462	14.79	3.194		0.694737	4.46246
15.8387	2.1797	4.8898	12.5147	1.9599	1.6191	9.514	8.554	3.25	2.066	4.358	1.852	2.41	1.448	1.847	3.144	5.7699	5.952	8.139	5.237	6.886	4.499	5.078	2.172	3.429	2.104	2.84	2.847	7.533	15.155	3.798		0.7	4.76817
15.9578	3.3282	6.3744	9.3957	3.3492	1.4101	7.95	9.366	3.141	1.806	3.009	1.557	3.145	2.201	2.135	4.46	11.3549	4.716	5.36	6.333	9.445	6.062	2.662	4.488	3.138	2.74	1.388	1.039	6.339	12.542	4.968		0.705264	4.84008
16.0769	4.3931	5.6164	8.0422	0.7606	1.5013	7.381	7.965	5.66	2.845	4.128	2.113	2.881	5.102	3.216	2.072	9.9591	6.973	5.644	7.237	7.64	6.279	4.329	3.63	5.689	2.057	2.752	4.172	7.738	11.789	4.291		0.710528	5.12852
16.196	1.7126	4.9419	9.4105	3.0961	3.5069	7.328	9.112	3.763	2.568	2.295	3.625	3.658	2.115	5.176	4.477	8.878	10.953	6.238	7.421	8.819	6.541	6.145	1.958	1.663	3.135	4.165	3.899	8.767	13.49	4.788		0.715792	5.45483
16.315	2.227	4.4777	9.4513	4.5342	2.2644	6.785	8.661	4.325	1.957	2.914	2.253	3.045	1.296	3.054	5.1	7.1631	7.873	4.88	5.98	8.697	8.047	6.174	1.188	1.259	4.033	5.243	6.08	10.647	14.408	3.858		0.721051	5.26249
16.4341	2.877	4.7566	9.5542	2.043	2.8728	6.842	5.995	1.866	2.799	4.296	1.495	4.247	2.268	3.445	4.55	9.7691	6.103	5.96	5.188	8.615	5.894	4.213	2.741	3.886	2.03	4.052	2.462	6.294	15.083	2.153		0.726314	4.81166
16.5532	2.1611	5.6913	8.1422	2.8044	1.9114	9.453	6.519	3.377	3.831	2.266	2.475	1.417	2.348	2.164	4.132	7.422	7.365	6.908	5.233	8.566	6.552	3.315	2.369	4.901	2.62	2.745	4.054	8.319	14.633	2.672		0.731578	4.87888
16.6723	3.9213	5.0141	9.5345	4.0963	2.6052	11.503	9.896	2.232	2.834	1.961	4.035	4.128	5.31	2.018	4.743	7.2133	5.846	7.265	5.955	8.88	6.284	4.745	1.644	4.747	4.631	2.698	5.063	9.919	9.347	1.708		0.736842	5.32589
16.7914	4.3215	8.553	7.3747	2.5513	3.1178	7.365	5.578	3.562	4.382	3.869	4.225	3.217	3.093	1.709	5.585	8.6656	6.458	8.287	6.504	6.308	5.847	5.267	4.094	4.29	2.66	4.82	3.781	11.152	12.436	3.023		0.742106	5.4032
16.9105	4.0999	5.9882	9.2717	1.898	3.0193	8.411	8.479	1.727	5.813	2.33	4.111	4.966	3.453	3.515	8.75	8.3891	6.971	5.286	5.527	6.51	6.851	4.065	2.424	2.726	3.177	3.396	6.497	13.098	15.211	4.31		0.747369	5.67567
17.0296	2.7553	6.091	8.0641	1.932	3.8536	10.987	8.894	3.988	6.107	2.479	4.09	4.836	2.697	2.552	4.653	8.7588	9.892	4.069	8.625	11.773	7.919	4.927	3.123	4.993	4.783	7.122	8.226	11.637	9.781	3.287		0.752633	6.09649
17.1487	3.0846	4.654	9.3497	2.5878	2.8084	8.878	5.793	4.422	2.235	3.221	4.927	1.255	5.139	3.746	5.993	8.3909	13.448	8.405	8.868	9.945	11.54	2.694	2.296	3.973	4.46	7.262	12.894	12.97	10.216	4.923		0.757897	6.34595
17.2677	2.4685	3.1998	8.0341	2.9065	4.1834	10.331	9.478	3.322	5.096	5.481	3.873	5.114	5.885	3.726	10.491	7.1875	8.955	6.712	9.487	7.865	8.615	6.879	3.949	3.159	2.349	5.871	11.5	18.239	9.596	4.392		0.763156	6.61149
17.3868	2.0005	5.7069	7.2584	2.4338	2.4748	8.162	7.779	4.717	5.869	2.818	3.23	4.739	4.555	3.643	7.225	7.0966	14.698	9.864	8.871	10.961	13.373	6.016	5.086	3.162	4.845	7.373	12.709	12.442	9.394	2.699		0.76842	6.7067
17.5059	2.4901	6.2358	8.9869	4.7761	4.0923	10.744	6.843	3.722	3.144	6.746	5.049	5.424	3.897	4.794	5.194	8.8345	10.928	11.827	11.143	11.593	10.052	5.537	5.163	4.116	4.681	9.559	10.091	14.968	9.592	4.387		0.773683	7.15366
17.625	3.4765	5.4365	6.0107	5.4633	4.2784	7.735	13.788	2.968	4.455	9.137	5.219	7.788	6.781	7.05	6.4	6.5491	10.988	7.597	7.81	9.663	11.04	5.928	4.182	3.873	3.766	7.695	12.418	15.781	11.579	3.146		0.778947	7.26672
17.7441	2.8256	7.0738	10.7808	5.8951	6.0284	6.858	10.745	4.134	6.075	6.029	4.87	4.914	4.831	4.763	9.346	12.5993	10.336	7.11	10.301	10.178	12.25	11.833	4.627	3.363	4.801	9.988	10.719	16.493	11.977	4.114		0.784211	7.86193
17.8632	0.5984	6.4432	7.6921	4.451	5.4282	10.53	12.216	4.961	6.607	10.068	6.418	5.67	5.419	2.832	9.992	10.0346	10.132	9.544	11.706	10.352	13.033	6.963	6.733	5.265	3.765	12.913	9.811	15.985	11.045	5.753		0.789474	8.07868
17.9823	1.4262	5.7201	11.7647	2.8859	4.0246	10.48	8.181	5.705	5.915	8.082	4.944	10.679	5.148	6.562	9.395	8.7038	11.683	6.402	8.505	12.787	9.472	4.642	4.446	6.363	5.214	15.216	11.272	12.376	12.209	5.667		0.794738	7.86234
18.1014	1.9527	9.4048	9.2242	2.1295	5.5029	13.075	10.07	4.978	6.017	8.633	3.959	5.717	6.815	6.035	7.354	9.4935	13.019	7.659	11.122	8.505	11.836	8.133	7.143	5.364	5.66	15.322	13.447	14.613	11.657	3.846		0.800002	8.25622
18.2204	4.5857	6.1648	12.1961	5.7537	4.7793	11.177	9.262	5.116	5.437	11.638	4.301	10.453	7.335	11.294	8.098	9.5496	11.99	7.294	6.919	9.993	14.888	7.191	9.723	5.122	5.565	18.103	14.755	12.907	12.716	4.459		0.805261	8.95884
18.3395	2.1229	4.9606	11.9133	2.3768	6.2056	11.058	8.511	6.852	7.356	13.901	4.088	11.997	7.679	10.134	8.285	10.3664	12.971	7.663	10.847	7.7	14.08	5.225	8.158	8.419	6.335	18.054	12.333	15.672	11.573	6.944		0.810525	9.12602
18.4586	2.2078	7.2682	12.6473	5.9191	5.6569	10.279	10.326	6.289	7.113	11.295	5.57	15.831	9.626	9.007	6.375	9.3303	13.991	6.653	7.668	8.414	11.693	7.215	11.569	8.728	14.765	18.348	11.235	13.494	9.667	6.493		0.815788	9.48912
18.5777	3.4887	5.612	9.9898	7.6669	5.2006	7.673	12.584	7.78	6.875	15.696	7.177	14.115	7.324	12.547	8.783	10.6206	13.198	7.869	7.06	7.927	11.677	8.343	9.837	11.705	12.034	13.238	7.202	19.142	7.376	7.777		0.821052	9.58392
18.6968	2.4063	8.7851	8.5295	5.1314	5.9969	5.715	7.881	10.963	7.415	10.741	5.478	8.893	9.71	10.283	8.712	5.6134	7.884	7.043	10.929	12.377	8.463	9.593	9.878	15.905	9.882	13.478	9.252	14.556	12.552	9.837		0.826316	9.12942
18.8159	3.8257	5.4796	13.2219	7.7102	5.4759	4.913	13.839	9.34	8.018	12.104	6.831	12.077	8.933	9.484	8.532	8.2507	9.603	9.585	5.093	7.775	11.806	9.7	13.956	14.334	15.721	12.89	7.037	12.923	8.396	8.2		0.83158	9.5018
18.935	3.3794	7.5679	10.3348	7.9252	8.2689	4.162	16.254	7.524	10.63	15.408	4.811	8.596	10.041	10.656	12.154	8.6986	7.541	4.935	7.25	6.116	13.793	6.56	14.558	12.858	18.724	9.204	8.42	16.936	6.65	9.437		0.836843	9.64643
19.0541	3.813	6.9135	10.9462	6.1352	7.6599	1.98	8.777	5.657	11.867	14.298	6.15	10.452	10.709	11.5	10.391	7.232	7.422	6.731	5.448	7.278	10.923	6.776	15.258	16.282	17.76	6.232	3.922	11.67	6.823	7.606		0.842107	8.82039
19.1731	2.2426	9.2385	11.3725	5.1231	6.3052	3.661	9.617	7.661	11.009	12.78	6.36	8.316	7.458	10.798	10.295	7.6358	6.604	6.204	5.419	7.293	13.183	5.236	13.087	21.489	18.718	6.988	4.631	13.965	8.978	8.025		0.847366	8.98976
19.2922	4.5022	5.0763	10.384	3.9003	11.0621	3.747	11.31	11.555	9.509	11.007	6.783	10.204	8.152	11.525	9.142	5.559	3.666	5.141	3.152	4.844	4.592	5.286	8.895	15.788	20.694	3.972	1.766	11.226	6.681	9.958		0.85263	7.9693
19.4113	4.6221	5.7493	8.8399	4.6218	8.1003	5.439	12.82	8.721	5.466	11.989	5.043	10.949	5.536	13.104	9.269	4.3589	3.086	3.294	2.127	3.314	6.162	4.501	9.519	14.676	19.079	4.353	3.841	12.975	3.603	7.462		0.857894	7.42068
19.5304	3.7649	3.442	10.0363	8.5578	7.5149	2.435	14.075	9.68	10.772	7.716	3.221	8.5	5.862	9.786	7.134	4.2675	1.902	1.962	1.915	4.494	3.91	5.07	4.099	16.79	16.49	5.722	2.607	7.131	4.417	6.959		0.863157	6.67441
19.6495	4.1067	4.9191	9.7407	5.2589	9.0586	3.799	11.45	10.443	9.568	8.227	3.239	6.789	1.971	6.57	5.547	2.7299	2.239	2.594	2.754	2.698	3.225	5.87	6.789	12.224	14.875	3.868	2.031	7.294	4.673	5.093		0.868421	5.98813
19.7686	2.8256	4.9874	8.0823	5.4399	8.6719	1.786	8.651	11.764	10.523	7.371	2.201	6.486	2.165	7.154	4.657	2.8878	2.769	0.884	1.702	1.394	3.802	3.03	6.7	6.666	10.843	2.357	2.959	7.036	1.271	4.704		0.873685	5.059
19.8877	3.3791	5.3811	10.1708	9.0541	7.9639	4.835	9.178	5.929	7.418	5.76	2.13	4.447	1.324	5.64	5.639	3.6294	1.641	1.939	3.061	2.539	2.895	3.141	3.243	8.011	10.483	1.79	1.586	6.906	1.206	2.68		0.878948	4.76665
20.0068	2.9074	7.0143	7.9098	4.5253	8.2072	1.91	10.529	9.329	10.106	7.254	0.702	4.359	0.952	7.093	4.468	4.9916	2.13	2.699	2.325	1.273	2.237	4.059	2.016	3.997	7.995	1.224	3.55	4.489	1.562	3.626		0.884212	4.51465
20.1259	4.8566	4.7059	7.1591	7.0227	8.7254	2.927	3.957	5.241	5.071	3.534	1.603	3.54	0.803	6.703	3.535	1.9033	2.789	1.987	0.837	0.984	2.725	1.999	6.419	5.7	3.446	1.601	1.857	3.594	1.069	2.809		0.889476	3.63677
20.2449	5.5411	6.3683	10.7671	7.9915	7.1331	1.791	5.358	5.666	6.028	4.204	1.528	6.183	1.975	7.825	2.689	1.4426	1.741	2.555	0.648	2.68	1.519	3.554	1.951	4.497	3.522	1.716	1.838	6.717	2.179	3.455		0.894735	4.03542
20.364	3.1497	3.1943	7.2111	11.5681	8.9446	1.422	4.22	5.442	4.37	2.418	0.713	1.656	2.866	7.393	1.293	2.1083	1.284	1.161	1.259	1.357	0.65	1.818	3.337	3.666	5.987	1.999	1.143	4.236	2.298	2.386		0.899999	3.35167
20.4831	2.5455	5.6706	8.5133	5.3932	6.291	0.668	5.988	6.37	3.626	0.816	1.971	6.48	0.769	7.149	1.309	1.0061	1.192	0.768	0.595	1.553	0.748	1.156	2.718	1.777	3.283	1.185	2.203	3.072	2	4.747		0.905262	3.05209
20.6022	4.846	8.509	6.4106	5.7819	8.1754	1.314	3.787	3.201	3.318	2.333	0.11	2.211	1.924	6.2	1.404	2.7853	1.146	2.125	1.115	1.118	1.424	1.419	2.88	2.311	1.528	1.046	1.002	2.62	3.293	1.553		0.910526	2.89634
20.7213	4.8596	6.1405	8.6586	9.0754	5.142	0.246	3.573	3.355	0.397	2.728	0.681	2.185	0.703	3.295	1.72	0.5005	0.872	1.222	0.48	1.321	0.497	2.698	3.311	1.633	4.867	0.396	2.283	1.614	2.274	2.676		0.91579	2.64679
20.8404	4.0054	9.622	7.9381	7.1712	6.1567	1.032	4.641	1.727	2.548	0.868	0.107	1.564	0.573	2.903	0.738	0.2337	0.692	1.028	0.076	1.117	0.773	0.768	1.919	1.944	1.401	0.221	0.861	4.001	1.138	1.182		0.921053	2.2983
20.9595	6.1114	6.3562	9.1194	8.0381	5.8856	0.721	2.332	2.339	3.204	2.332	0.695	1.727	0.048	1.695	1.21	0.5146	0.685	1.927	1.038	1.408	1.25	1.918	1.348	2.766	1.215	0.21	0.282	1.803	2.21	1.096		0.926317	2.38281
21.0786	6.0763	7.0396	11.6693	8.2027	4.9831	0.05	2.816	2.02	1.508	0.486	0.905	2.265	1.777	1.052	2.606	1.9729	0.022	0.641	0.333	1.458	1.315	1.329	1.064	1.805	1.889	0.367	0.028	1.772	0.698	2.723		0.931581	2.36243
21.1976	7.4842	5.3434	11.0594	4.8049	4.8883	2.526	1.564	3.476	0.518	0.712	0.888	1.15	0.364	3.599	1.194	1.1251	0.869	0.446	0.473	0.709	0.134	1.464	1.08	1.923	1.354	0.169	0.32	2.695	1.773	2.562		0.93684	2.22224
21.3167	5.4494	5.0687	8.6322	8.9922	3.1849	1.424	0.868	1.336	0.779	0.358	1.126	0.543	1.009	1.194	0.225	0.764	0.704	0.504	1.012	0.903	0.155	0.568	1.029	1.131	0.461	0.588	0.556	0.608	0.699	2.335		0.942104	1.74021
21.4358	9.2076	9.5493	7.8628	4.8381	2.523	0.232	0.39	1.877	0.672	0.603	0.939	1.743	0.87	0.788	0.43	0.7386	1.052	0.213	0.947	0.593	1.06	1.178	0.097	0.813	1.062	0.162	0.406	1.563	0.798	2.586		0.947367	1.85978
21.5549	6.1928	7.6744	6.3699	6.3897	3.8343	0.007	1.075	1.292	1.587	2.001	0.026	0.479	0.47	0.993	1.083	0.2637	0.4	0.121	0.247	0.111	0.547	0.557	1.178	0.297	0.547	0.649	0.333	0.684	0.968	0.704		0.952631	1.56936
21.674	5.8952	4.577	10.7562	8.1214	4.2751	0.649	0.84	0.686	0.814	1.336	0.314	0.823	0.493	1.037	0.492	0.1633	1.322	0.615	0.368	0.271	0.012	0.228	1.065	1.387	1.337	0.803	0.807	2.205	0.503	0.034		0.957895	1.74097
21.7931	8.9057	8.4609	6.1414	7.6031	2.6616	0.595	1.771	0.667	1.18	1.455	0.238	1.12	0.18	0.863	1.201	1.7648	0.002	0.654	0.031	0.026	0.586	0.713	1.876	1.631	1.446	0.954	0.688	0.441	0.487	0.876		0.963159	1.84062
21.9122	6.4689	7.1736	7.8493	5.6519	2.0896	0.519	0.161	0.101	1.189	0.678	0.337	0.152	0.021	2.253	0.673	0.8973	0.22	0.487	0	0.374	0.224	0.071	0.821	0.801	0.615	0.797	0	0.513	0.016	0.801		0.968422	1.39849
22.0313	7.2765	6.3337	7.9822	7.1393	1.8796	0.047	1.177	0.511	0.357	0.671	1.343	0.05	0.11	2.635	0.612	0.6519	0.267	0.055	0.411	0.055	0.605	1.433	0.769	0.074	0.054	0.026	0.007	0.733	0.6	0.551		0.973686	1.48054
22.1503	6.4647	5.784	6.3494	7.1251	1.7745	0.0001957	0.993	0.053	0.201	1.289	0.91	0.509	0.415	0.781	0.015	0.4591	0.606	0.472	0.183	0.048	0.27	0.065	0.018	1.261	0.522	0.24	0.127	0.479	0.226	0.936		0.978945	1.28587
22.2694	7.7939	5.7676	6.4596	4.8174	0.725	0.002	1.073	0.287	0.328	0.912	0.011	1.306	1.303	0.712	0.1	0.1597	0.174	0.009	0.014	0.338	0.052	0.268	0.689	0.279	0.469	1.234	0.274	0.421	0.017	0.79		0.984209	1.22617
22.3885	6.7349	7.521	7.4544	5.3158	2.3732	0	0.033	1.287	0.17	0.021	0.544	0.455	1.116	1.298	0.243	0.5859	0.384	0	0	7.368e-05	0.033	0.016	0.245	0.661	0.789	0.026	0.93	0.412	0.759	0.022		0.989473	1.31431
22.5076	4.9677	4.9695	3.6682	4.2168	1.6371	0	0.403	0.414	1.163	0.454	0.47	0.025	0.596	0.314	0.263	0.969	0.02	0	0	0	1.177	0.605	0.685	0	0.238	0	0.162	0	0.007	0.237		0.994736	0.922043
22.6267	6.3826	5.0238	3.5256	3.3275	1.0632	0.005	0.711	1.167	0.575	0.501	0.144	0.322	0.849	0.514	0.212	0.0631	0.116	0.277	0.215	0	0.124	0.16	0.144	0.006	0.26	0.251	0	0	0.161	0.478		1	0.885927

## Sheet: Image6
X0	Y0	Y1	Y2	Y3	Y4	Y5	Y6	Y7	Y8	Y9	Y10	Y11	Y12	Y13	Y14	Y15	Y16	Y17	Y18	Y19	Y20	Y21	Y22	Y23		Ap-Ba	Avg int
0	73.173	66.251	48.12	64.075	91.476	82.29	29.442	41.2	66.115	71.704	52.188	41.9	51.62	47.093	53.389	33.123	36.1289	45.711	41.877	30.514	72.834	71.358	44.292	64.347		0	55.0092
0.1191	72.274	71.697	54.936	67.064	92.318	85.414	27.703	44.256	77.842	75.576	53.173	48.271	52.808	46.894	49.823	38.285	35.783	53.261	37.367	26.076	77.376	85.086	41.966	74.869		0.00471747	57.9216
0.2382	75.86	78.27	55.778	68.759	85.43	88.557	32.344	54.068	78.919	80.799	54.886	47.96	54.609	54.99	53.122	45.306	40.0696	55.6	40.995	28.309	87.434	80.813	59.017	84.329		0.00943493	61.926
0.3573	73.189	83.179	61.331	84.607	85.056	102.541	36.862	57.712	80.237	88.754	67.273	60.483	54.824	54.359	69.96	52.395	46.7169	70.777	41.566	35.845	94.013	95.067	67.491	91.454		0.0141524	68.9872
0.4764	85.565	91.523	59.149	89.94	91.172	114.034	46.903	58.544	88.988	90.848	76.739	67.473	59.479	46.32	80.405	56.937	55.3138	79.263	62.061	39.291	90.734	105.2	76.007	105.902		0.0188699	75.7413
0.5954	88.584	88.113	70.74	102.745	79.588	126.114	47.9	61.652	97.391	97.47	81.472	78.773	58.977	53.457	87.284	59.595	66.8656	92.095	80.343	62.145	87.302	113.814	86.228	106.751		0.0235834	82.3083
0.7145	88.394	99.517	68.668	104.79	92.872	127.02	63.836	77.949	100.861	101.359	83.305	89.692	66.757	58.588	104.47	57.074	74.45	108.311	90.515	72.255	95.08	121.832	102.081	113.635		0.0283008	90.138
0.8336	95.347	105.208	85.069	117.47	86.635	134.446	80.819	95.214	126.458	109.045	99.016	95.548	74.991	63.845	115.763	65.697	78.3684	120.726	116.418	81.115	89.427	118.32	110.57	113.216		0.0330183	99.1138
0.9527	101.257	111.553	91.491	120.38	78.475	126.09	86.985	108.275	128.58	116.416	100.949	104.797	97.957	75.972	131.563	79.257	93.5933	101.253	123.527	102.481	102.526	117.328	125.276	111.958		0.0377358	105.747
1.0718	109.621	107.209	92.263	131.974	95.059	134.88	104.954	118.159	130.788	124.059	104.685	110.642	104.123	87.737	147.822	68.814	87.8535	105.952	111.198	106.249	100.05	126.357	127.815	112.184		0.0424532	110.435
1.1909	106.262	120.077	109.516	136.534	90.764	129.237	110.942	137.355	148.637	134.312	123.249	119.94	105.061	109.251	154.731	73.188	91.2337	102.596	122.181	120.237	108.392	119.245	132.793	113.741		0.0471707	117.478
1.31	113.634	119.21	107.964	140.29	96.017	139.01	130.745	143.59	149.422	127.554	123.118	125.763	124.923	119.264	157.962	85.283	84.8168	94.646	105.02	119.551	106.126	120.127	137.062	114.187		0.0518882	120.22
1.4291	122.848	112.511	117.658	136.959	95.331	143.439	137.288	156.778	161.498	142.278	137.624	138.511	136.638	124.144	179.203	87.72	80.8497	93.093	94.317	124.838	103.982	121.033	130.875	123.166		0.0566056	125.108
1.5481	119.502	111.828	115.037	146.546	98.865	137.221	137.235	158.48	160.906	160.309	147.877	123.368	148.326	147.245	183.44	95.15	74.0157	82.049	92.17	136.539	101.626	119.633	135.3	118.537		0.0613191	127.134
1.6672	114.044	115.427	117.574	147.833	110.386	155.349	140.812	158.411	168.593	168.329	149.013	132.946	161.707	156.637	205.164	105.12	80.5193	85.307	88.459	134.211	110.337	123.776	137.516	116.535		0.0660366	132.667
1.7863	109.949	110.237	129.017	136.961	99.219	141.521	147.744	173.758	173.839	165.175	163.17	140.164	155.545	157.885	199.239	120.708	83.5726	81.755	86.643	135.793	106.149	124.293	134.055	107.285		0.0707541	132.653
1.9054	112.163	95.142	123.775	130.774	90.983	138.02	156.824	173.113	185.216	161.591	153.818	163.938	162.201	165.003	204.538	120.883	82.9586	75.739	81.143	125.69	105.815	109.558	122.417	117.843		0.0754715	131.631
2.0245	108.537	95.25	116.453	131.586	104.942	137.542	142.646	178.151	175.018	162.63	159.112	172.527	172.33	178.621	198.443	108.074	82.8619	77.708	81.763	114.432	110.63	111.969	118.238	115.818		0.080189	131.47
2.1436	104.725	89.691	118.192	122.247	99.559	128.483	161.961	180.805	178.025	181.902	156.457	170.942	173.172	195.135	197.541	118.513	84.535	70.252	69.838	109.333	115.152	108.172	112.578	106.422		0.0849065	131.401
2.2627	107.354	85.15	108.853	114.427	104.639	115.702	152.164	188.378	176.795	166.603	156.736	170.328	160.898	183.915	193.539	137.021	72.5071	59.774	73.237	108.45	117.726	105.557	107.652	112.126		0.0896239	128.314
2.3818	96.395	88.361	89.325	110.807	103.94	126.359	153.765	178.159	181.908	170.518	148.187	182.158	179.529	191.288	190.187	140.609	80.7251	58.052	66.85	106.499	125.063	112.878	107.741	117.489		0.0943414	129.45
2.5008	92.63	74.483	84.541	96.736	108.772	118.652	148.579	164.607	171.951	162.571	154.621	174.382	180.756	179.728	186.868	146.474	81.4039	57.523	56.579	93.933	127.794	107.719	102.682	119.124		0.0990549	124.713
2.6199	90.251	72.255	80.07	87.493	110.597	118.143	137.365	148.835	167.582	170.562	152.772	181.281	170.92	173.82	181.13	144.053	74.6642	51.266	58.439	85.811	114.879	114.594	105.408	113.911		0.103772	121.088
2.739	80.06	72.46	68.288	79.084	107.158	97.491	149.775	149.937	162.711	160.807	155.28	187.818	173.233	180.218	177.316	145.629	82.2767	52.333	52.195	75.16	119.513	105.976	110.733	122.084		0.10849	119.481
2.8581	75.009	73.668	57.694	71.527	106.289	102.973	140.343	138.554	152.577	163.845	145.942	185.38	168.45	168.63	171.699	155.608	75.2628	47.634	40.96	85.516	119.133	102.948	97.388	127.229		0.113207	115.594
2.9772	65.826	61.611	56.175	71.788	107.401	98.483	123.278	111.855	136.747	162.518	153.249	184.147	160.185	173.855	158.946	155.141	75.7339	45.943	42.851	72.562	134.513	111.715	85.143	132.299		0.117925	111.749
3.0963	68.396	55.782	48.462	65.118	101.645	99.479	125.8	101.503	119.322	145.515	157.681	183.167	144.244	178.669	155.862	158.016	75.1481	45.939	37.908	65.5	128.748	111.575	85.925	119.614		0.122642	107.459
3.2154	60.047	55.71	51.944	62.424	101.884	95.282	126.892	94.018	111.602	143.514	149.37	172.104	164.782	169.199	152.872	146.68	77.5462	42.424	32.998	69.109	124.137	111.149	84.691	123.247		0.12736	105.151
3.3345	59.515	54.946	44.216	56.37	94.448	102.151	124.958	84.346	92.678	130.92	141.361	169.892	154.207	161.249	141.669	151.998	71.8635	40.641	32.187	58.692	141.259	113.519	91.397	114.597		0.132077	101.212
3.4535	52.428	55.339	39.861	47.977	84.291	92.773	123.768	76.309	74.743	105.555	125.881	177.072	151.908	162.723	135.868	148.91	73.0362	42.797	34.137	55.454	136.808	114.188	80.155	109.635		0.136791	95.9007
3.5726	45.152	49.218	43.295	38.48	79.459	88.457	119.245	70.668	65.647	85.846	118.531	172.432	169.165	156.33	119.555	147.814	73.2134	39.038	32.324	62.178	141.411	115.268	83.453	107.476		0.141508	92.6523
3.6917	48.85	39.93	40.43	41.845	66.815	81.112	113.177	66.222	55.182	69.181	112.946	159.736	162.529	159.695	117.575	144.035	66.4883	40.588	33.487	52.91	141.988	103.005	79.044	116.346		0.146226	88.0465
3.8108	46.458	38.064	34.692	34.726	64.018	75.885	106.684	65.711	46.498	53.057	108.293	161.125	161.596	146.021	100.055	138.092	69.8221	36.887	34.073	50.263	140.088	112.799	83.875	100.369		0.150943	83.7146
3.9299	42.639	41.584	36.237	28.955	54.766	75.671	96.381	53.957	42.725	40.084	98.542	156.718	154.001	143.015	87.813	120.547	66.1661	36.275	29.44	53.705	145.787	99.827	70.543	99.113		0.155661	78.1038
4.049	37.087	42.272	31.659	33.125	39.235	69.218	96.979	45.93	28.932	30.527	82.19	157.084	153.836	137.825	88.339	115.806	62.3943	34.954	28.217	46.654	147.417	113.105	71.436	92.64		0.160378	74.4526
4.1681	31.326	36.829	35.299	30.713	29.969	61.868	96.663	47.095	32.282	31.108	73.118	149.344	141.524	136.672	70.504	86.251	57.6809	26.831	27.42	43.322	146.015	108.344	67.292	88.223		0.165095	68.9872
4.2872	28.3	37.212	35.707	21.665	24.404	61.466	93.617	44.246	26.947	27.15	62.347	148.182	141.266	149.531	54.854	82.911	59.6289	29.256	26.195	33.359	141.877	106.446	67.731	87.003		0.169813	66.3042
4.4063	26.2	29.686	35.948	28.066	26.405	50.884	83.13	37.273	25.719	25.667	52.947	146.733	145.545	130.73	45.806	67.001	51.9375	24.01	25.725	36.885	132.583	91.393	69.921	85.427		0.17453	61.4842
4.5253	20.153	29.237	29.306	23.5	26.456	40.288	83.894	33.916	23.704	21.681	36.653	143.266	127.823	108.262	40.716	47.571	43.6618	25.48	26.655	32.258	117.097	92.5	65.346	80.858		0.179244	55.0117
4.6444	23.23	31.096	24.885	23.095	19.51	40.102	75.124	30.506	18.439	20.894	33.458	147.027	133.219	116.168	31.432	41.637	45.6627	23.675	24.401	31.336	132.295	84.927	64.558	88.189		0.183961	54.3694
4.7635	20.961	30.038	26.757	22.563	20.289	34.358	63.479	26.323	15.273	18.782	27.627	144.027	115.8	96.079	32.466	36.185	42.8742	23.833	21.991	22.702	119.297	81.536	71.927	77.538		0.188679	49.696
4.8826	22.36	26.055	27.236	21.507	21.597	29.938	66.511	23.042	13.416	19.956	19.684	135.332	122.007	95.636	21.918	32.975	39.544	19.747	26.885	21.499	113.896	80.872	67.471	74.19		0.193396	47.6364
5.0017	19.695	21.389	24.016	13.698	23.463	24.804	61.797	18.853	14.155	19.07	24.481	133.488	112.706	69.55	21.002	29.461	34.9437	23.997	23.104	22.501	98.131	76.153	67.802	74.096		0.198114	43.8482
5.1208	13.598	17.67	22.694	13.372	19.998	18.894	52.346	19.892	12.672	18.291	23.845	122.098	108.641	58.315	20.837	27.587	40.5077	19.81	21.421	20.42	81.968	75.58	63.371	64.792		0.202831	39.9425
5.2399	15.532	17.226	25.559	10.629	19.182	17.304	47.326	13.8	10.082	16.392	21.852	102.802	93.779	49.958	19.258	24.109	28.4949	21.056	20.098	20.262	79.459	71.078	55.37	65.475		0.207549	36.0868
5.359	15.49	13.314	24.907	12.011	16.472	18.029	44.67	13.347	10.071	19.35	22.083	81.942	88.304	46.042	17.098	26.836	25.8034	21.184	18.596	15.798	65.556	64.876	56.271	50.568		0.212266	32.8591
5.478	11.215	13.548	20.405	12.093	19.257	15.665	42.203	11.848	11.576	21.583	17.811	64.755	75.424	41.478	14.352	24.17	27.0147	17.636	14.535	16.292	56.711	60.764	45.144	57.934		0.21698	29.7256
5.5971	11.103	13.023	16.705	8.932	15.963	13.594	30.713	9.439	5.732	19.296	18.993	42.893	67.114	32.812	16.941	22.693	20.8221	16.371	16.543	16.763	47.076	50.719	46.55	51.838		0.221697	25.5262
5.7162	11.596	14.168	14.737	9.272	16.199	13.59	33.889	7.36	8.025	18.64	19.972	26.234	57.098	31.646	15.458	23.018	19.2793	18.621	20.314	19.962	43.857	54.65	48.803	42.489		0.226415	24.5366
5.8353	8.081	11.16	12.85	6.668	13.263	11.826	32.715	9.372	10.999	18.039	16.473	24.402	49.787	29.23	16.278	24.035	23.3558	18.323	17.638	18.451	39.509	37.629	48.541	34.34		0.231132	22.2069
5.9544	9.216	7.27	12.4	8.011	14.561	13.678	26.226	6.895	7.248	19.203	16.041	20.914	44.985	27.343	13.289	23.274	19.9517	20.036	15.978	14.103	37.314	33.856	43.893	37.388		0.23585	20.5447
6.0735	7.606	8.905	11.4	6.056	16.866	13.642	23.557	8.938	6.998	19.856	15.492	18.906	37.811	25.48	12.298	15.994	17.3145	20.869	18.086	13.158	31.366	27.323	44.328	32.66		0.240567	18.9546
6.1926	6.884	8.329	8.617	5.613	14.196	8.231	18.402	5.865	5.814	17.895	15.478	17.256	30.399	26.371	14.003	17.893	15.9992	19.706	17.078	11.306	30.307	25.452	43.118	32.802		0.245285	17.3756
6.3117	7.956	8.554	10.149	7.173	11.548	13.442	13.029	6.153	5.975	17.215	11.891	13.081	33.227	23.974	13.48	19.922	14.4136	17.88	13.327	12.704	27.35	21.281	42.133	30.348		0.250002	16.5086
6.4307	6.987	7.978	6.233	6.993	14.431	8.415	15.371	5.83	6.535	18.602	11.109	16.365	29.214	21.799	15.326	17.168	15.1934	15.472	14.398	11.428	23.91	20.982	43.644	28.248		0.254715	15.9013
6.5498	4.618	6.305	6.75	5.635	14.934	11.352	11.595	6.251	5.925	16.191	15.137	15.824	22.462	22.468	11.139	17.408	15.3635	13.868	11.279	12.109	23.611	18.738	39.434	23.637		0.259433	14.6681
6.6689	7.547	6.977	6.803	7.238	13.407	10.063	8.911	7.521	4.914	15.965	13.143	11.795	25.602	17.608	14.357	16.516	13.1486	13.568	14.137	10.781	22.988	17.989	37.99	26.324		0.26415	14.3872
6.788	7.332	8.307	8.181	5.334	15.848	10.375	7.078	4.8	6.612	14.79	10.517	12.02	20.911	22.946	10.951	15.262	16.9297	10.351	11.58	13.122	25.288	17.989	36.424	22.89		0.268868	13.9932
6.9071	7.081	6.718	7.442	6.645	11.523	6.55	7.987	6.587	7.501	13.007	13.065	10.162	22.043	17.242	8.616	14.614	16.0344	11.978	16.63	10.146	26.056	20.284	37.124	21.28		0.273585	13.5965
7.0262	9.054	5.279	7.473	7.195	11.177	8.596	8.091	5.26	5.195	12.192	11.029	13.247	23.489	19.243	13.737	10.403	16.5454	9.06	9.752	12.104	24.397	17.008	32.193	18.123		0.278303	12.9101
7.1453	4.848	6.459	6.446	6.816	12.271	8.182	7.881	5.666	5.202	10.582	8.435	11.511	19.119	16.848	12.057	12.117	14.3042	13.047	6.798	9.466	24.497	15.073	30.642	20.332		0.28302	12.025
7.2644	6.194	7.845	6.023	5.838	11.851	8.875	7.281	4.234	4.569	12.71	9.577	12.315	18.357	15.839	12.413	11.467	13.246	14.238	6.288	10.667	22.759	13.839	25.686	24.315		0.287738	11.9344
7.3834	5.926	7.154	7.855	4.134	15.125	9.445	6.18	5.999	5.257	12.404	10.795	9.638	18.096	15.632	12.435	10.588	12.0097	10.413	8.991	13.502	23.234	16.635	27.416	18.949		0.292451	11.9922
7.5025	6.668	5.942	6.926	6.817	12.794	10.468	4.609	5.574	5.815	11.122	10.669	9.588	13.433	15.432	11.397	11.244	10.3083	13.181	7.997	8.524	21.404	12.441	26.734	20.607		0.297169	11.2373
7.6216	6.734	5.803	5.995	5.184	12.095	7.79	6.911	5.396	7.272	10.085	10.827	8.806	16.322	13.449	10.236	12.991	11.3218	9.959	7.114	9.704	22.901	14.578	22.291	19.326		0.301886	10.9621
7.7407	5.457	6.138	6.419	4.569	12.158	9.234	9.691	4.475	4.674	9.822	9.851	10.081	12.236	13.329	9.351	10.552	10.0229	11.529	9.355	10.536	17.239	19.053	19.614	18.351		0.306604	10.5724
7.8598	6.579	7.345	4.492	5.23	13.84	9.329	7.618	5.535	4.947	9.721	9.002	11.72	12.996	16.201	11.527	8.853	10.9976	10.936	5.943	10.854	20.145	11.855	21.98	15.26		0.311321	10.5377
7.9789	6.365	6.685	6.506	7.202	12.141	8.483	4.405	6.088	7.966	11.09	11.443	7.72	14.66	10.623	9.38	9.402	10.5984	9.298	6.833	10.027	21.692	11.975	20.215	15.61		0.316039	10.267
8.098	7.016	5.683	6.255	6.162	12.722	7.521	8.508	4.888	6.178	10.134	9.109	9.674	12.563	15.45	11.157	11.847	9.303	9.623	6.163	13.793	17.952	11.092	21.787	15.538		0.320756	10.4216
8.2171	8.073	5.378	4.832	3.927	13.76	7.879	5.35	3.069	5.353	11.002	11.129	9.971	12.485	19.561	13.834	10.078	9.6649	9.025	7.112	11.241	16.022	13.523	19.394	12.051		0.325474	10.1547
8.3362	6.632	6.655	4.325	4.695	10.914	7.497	5.7	4.8	6.862	7.251	10.865	10.312	14.283	17.132	9.494	8.823	9.8272	8.123	6.458	12.007	14.877	11.742	21.811	8.885		0.330191	9.58209
8.4552	4.409	5.72	3.214	6.737	8.626	9.029	3.626	4.709	9.264	7.716	10.893	7.526	13.028	16.288	12.611	9.079	12.0856	10.043	5.218	10.428	16.269	14.34	26.223	11.403		0.334905	9.93686
8.5743	5.571	5.792	6.851	7.068	11.697	7.835	4.604	7.37	7.153	10.242	14.982	9.306	13.023	17.014	9.406	11.925	11.824	8.261	6.815	14.152	16.684	8.215	25.035	10.609		0.339622	10.4764
8.6934	6.581	6.901	5.075	7.609	11.104	9.214	4.964	3.701	6.771	8.601	11.911	9.075	10.766	16.905	12.683	10.811	10.0309	6.477	8.571	11.121	14.222	12.589	24.019	12.252		0.344339	10.0814
8.8125	7.27	8.47	4.566	5.032	14.885	6.953	3.747	5.226	6.707	6.787	14.306	6.354	9.916	14.89	10.374	10.229	11.1067	9.183	7.271	11.562	14.372	8.584	29.362	11.343		0.349057	9.93732
8.9316	5.866	5.494	4.788	5.098	13.979	6.771	5.367	6.003	8.475	9.595	14.741	7.972	10.945	17.284	11.916	13.089	12.5671	12.474	4.264	14.199	13.601	10.292	27.978	11.391		0.353774	10.5895
9.0507	8.488	6.887	3.665	3.776	14.736	7.697	3.372	4.405	6.176	8.203	15.318	9.777	8.612	19.457	10.818	9.345	14.6421	12.801	5.317	14.355	12.754	11.012	30.117	8.942		0.358492	10.4447
9.1698	4.591	6.557	6.405	6.281	20.371	7.083	5.567	5.841	6.744	10.106	17.042	10.9	9.381	17.404	14.828	12.403	14.3866	9.611	7.151	13.712	15.563	10.665	27.657	10.285		0.363209	11.2723
9.2889	6.763	6.377	5.197	4.329	16.49	9.717	5.345	4.091	6.804	9.692	17.52	9.685	9.483	15.814	11.309	12.148	13.9789	12.69	4.627	13.799	14.694	6.848	20.401	12.77		0.367927	10.4405
9.4079	5.475	3.541	5.151	4.296	18.99	7.351	5.502	4.494	6.111	10.449	16.725	10.158	9.739	15.376	13.099	10.236	15.0225	10.518	7.651	10.909	15.596	7.846	23.647	11.79		0.37264	10.403
9.527	6.529	5.441	4.353	5.295	18.298	7.534	3.704	6.232	6.479	10.088	16.591	9.731	11.297	15.636	13.906	10.609	11.4604	9.426	10.714	14.365	15.843	9.288	23.935	11.761		0.377358	10.7715
9.6461	6.157	4.92	6.036	5.528	15.748	7.368	4.041	4.646	5.534	10.155	17.551	9.615	9.955	17.147	14.048	9.579	11.9428	8.746	9.46	14.077	14.966	10.173	31.194	10.715		0.382075	10.8042
9.7652	7.55	5.82	5.135	4.787	20.274	9.347	4.458	4.253	6.207	12.827	16.658	9.981	8.977	21.642	14.549	12.923	10.5866	14.458	5.5	11.353	17.108	13.099	26.152	13.91		0.386793	11.5648
9.8843	7.62	6.168	3.887	7.48	18.049	6.655	5.668	5.126	8.334	7.947	14.816	7.316	8.561	19.664	19.237	9.622	13.0783	10.578	7.847	15.491	17.248	10.246	26.067	13.121		0.39151	11.2428
10.0034	8.834	5.427	4.453	5.827	21.252	7.731	6.722	3.991	6.37	9.742	17.152	9.63	9.764	14.287	20.587	10.659	18.8271	13.073	8.235	21.207	20.158	13.834	33.683	14.781		0.396228	12.7594
10.1225	8.246	4.521	6.113	6.724	19.96	8.05	5.293	4.633	6.014	11.561	21.38	9.627	10.085	17.213	21.341	10.261	17.7077	13.715	9.407	18.432	21.087	14.973	30.677	13.555		0.400945	12.9407
10.2416	6.213	4.815	7.277	5.201	23.656	6.199	3.951	4.931	6.778	9.869	17.126	8.181	10.805	16.509	16.731	10.76	13.3584	15.675	8.712	16.471	14.739	15.853	33.854	12.512		0.405663	12.0907
10.3606	7.057	8.821	4.169	5.694	21.988	8.247	5.186	4.625	6.382	7.478	20.59	8.977	12.881	17.204	15.705	10.282	14.2804	13.332	10.744	18.036	19.978	17.876	34.147	10.28		0.410376	12.665
10.4797	7.723	7.396	5.074	6.726	24.862	7.623	3.772	4.128	10.151	9.448	22.765	10.264	11.45	18.651	17.227	10.527	12.7752	20.416	9.182	21.622	19.011	15.595	30.563	10.798		0.415094	13.2396
10.5988	8.796	4.907	5.261	5.494	28.528	10.018	4.982	5.515	5.884	9.897	26.091	12.906	12.901	19.738	16.569	10.819	16.9977	14.537	9.252	22.364	25.073	16.573	28.32	8.926		0.419811	13.7645
10.7179	8.111	6.643	5.257	7.319	25.366	6.121	4.863	4.92	8.031	8.396	21.364	8.585	11.779	19.374	21.051	11.488	17.5809	15.277	8.851	18.667	30.464	20.437	32.086	8.402		0.424528	13.768
10.837	7.665	6.628	5.821	7.995	24.504	8.571	3.355	4.371	5.5	11.579	22.266	8.441	12.388	16.522	21.312	12.082	15.4161	18.669	8.276	24.636	25.481	21.378	25.04	12.08		0.429246	13.749
10.9561	9.3	8.524	3.88	8.004	26.233	8.513	5.941	5.323	4.51	9.963	27.477	8.004	15.193	19.6	23.784	15.304	17.9524	15.312	6.664	27.354	27.613	22.399	27.479	11.619		0.433963	14.8311
11.0752	8.463	10.324	5.989	7.878	27.338	8.259	5.301	6.429	5.546	9.549	25.884	8.339	11.86	18.411	27.663	14.69	17.708	19.272	10.163	20.824	25.925	16.452	26.917	8.906		0.438681	14.5038
11.1943	12.093	8.469	6.218	7.383	24.094	10.124	4.792	4.331	7.088	9.728	30.398	11.301	11.982	19.318	29.839	14.374	15.5036	24.371	11.232	20.988	27.824	16.929	30.611	10.684		0.443398	15.4031
11.3133	13.07	9.383	5.781	6.308	23.056	8.636	6.341	3.584	6.824	10.212	30.648	11.459	10.45	28.284	30.597	11.162	15.3207	30.783	11.976	21.287	22.355	17.916	25.344	11.513		0.448112	15.5121
11.4324	11.308	8.131	6.935	6.373	25.022	11.687	4.868	3.82	6.565	8.09	27.549	11.074	13.005	21.286	28.116	12.877	15.2836	39.657	10.659	22.944	25.391	18.913	29.993	9.222		0.452829	15.782
11.5515	13.693	8.686	9.034	6.064	23.06	8.818	6.463	3.102	7.086	7.974	31.37	10.516	16.589	26.932	35.215	12.669	18.9697	45.074	8.064	20.604	23.096	16.777	31.932	9.056		0.457547	16.7018
11.6706	13.164	8.225	6.891	6.814	23.373	9.418	4.633	5.889	5.329	10.593	34.635	11.501	9.253	29.135	29.903	9.258	14.9372	48.106	12.947	23.459	26.6	17.615	37.123	13.785		0.462264	17.1911
11.7897	11.053	7.709	8.683	8.073	32.167	11.343	4.713	3.283	4.984	7.427	34.504	10.772	13.945	21.658	28.148	9.636	16.1878	52.324	12.465	18.693	27.364	19.347	31.979	12.155		0.466982	17.0255
11.9088	15.477	10.468	10.156	8.132	33.708	9.847	4.052	4.029	5.975	7.494	28.332	10.224	11.879	30.405	28.74	9.45	17.2599	54.035	12.263	21.524	26.2	16.459	38.63	11.703		0.471699	17.7684
12.0279	16.394	7.49	10.052	9.454	42.918	10.162	4.409	5.701	8.041	4.92	32.389	10.816	14.19	26.041	23.935	10.967	17.0654	54.215	15.364	21.416	25.779	14.994	36.739	15.911		0.476417	18.3068
12.147	20.704	9.758	8.514	9.038	41.952	9.396	5.449	5.038	5.282	4.485	30.611	7.81	12.692	23.692	22.45	8.928	18.7715	45.124	16.141	22.604	27.282	13.735	31.457	14.057		0.481134	17.2904
12.2661	23.103	9.692	6.73	11.879	44.999	9.098	6.421	5.595	7.163	5.491	34.715	9.511	14.112	17.92	22.246	9.062	15.5944	36.485	16.248	22.504	21.572	12.358	34.398	14.697		0.485852	17.1497
12.3851	23.615	13.708	8.761	11.304	41.853	9.555	6.112	4.742	5.821	7.254	41.582	12.543	13.294	19.205	19.59	8.075	14.0287	34.472	19.658	15.292	25.87	11.104	33.526	13.788		0.490565	17.2814
12.5042	24.69	21.083	10.701	14.015	40.918	10.128	6.42	3.626	5.579	8.275	36.919	9.96	15.552	18.78	23.427	9.094	11.5128	28.336	23.231	18.419	28.407	9.085	30.581	13.474		0.495283	17.5922
12.6233	30.203	19.99	7.915	19.507	37.005	10.024	6.384	5.387	4.504	8.095	34.655	11.658	16.582	18.732	24.048	8.38	10.9415	22.091	24.421	18.2	24.156	11.206	29.697	15.101		0.5	17.4534
12.7424	27.429	20.683	9.926	20.932	34.322	11.601	3.807	4.713	6.392	8.756	34.182	13.509	16.344	15.871	22.974	8.105	9.7605	15.58	25.756	15.074	22.813	10.652	27.717	15.72		0.504717	16.7758
12.8615	25.574	25.187	10.339	31.915	32.931	12.145	6.73	6.07	4.212	7.196	31.416	13.989	17.944	18.787	26.242	7.476	8.2227	13.941	27.841	16.399	24.039	11.649	27.055	17.086		0.509435	17.6827
12.9806	25.176	25.089	11.914	25.825	33.837	9.561	5.184	4.558	7.411	7.399	30.581	13.902	16.18	17.74	27.802	6.615	10.2542	10.877	31.042	18.611	23.655	10.756	24.576	18.213		0.514152	17.3649
13.0997	20.199	23.711	10.788	27.573	31.728	10.942	5.39	4.812	6.552	6.462	30.103	15.673	18.307	13.718	26.173	7.999	6.5236	11.506	25.739	17.947	20.255	11.106	18.462	14.128		0.51887	16.0749
13.2188	20.576	19.426	13.384	27.644	33.074	10.776	4.342	6.164	6.07	6.68	28.895	21.1	18.374	15.843	34.287	9.39	5.3312	9.242	27.118	17.446	20.129	10.779	13.44	18.658		0.523587	16.5903
13.3378	21.332	21.479	11.187	27.708	33.164	12.942	5.551	4.904	6.384	7.214	28.55	16.574	16.185	13.098	35.342	8.203	7.5092	9.907	28.845	16.549	20.264	8.288	16.753	19.01		0.528301	16.5393
13.4569	18.453	22.914	12.934	20.943	32.466	11.565	8.068	6.612	4.627	8.682	29.578	22.916	16.053	16.189	27.555	8.008	6.5413	8.063	28.201	16.553	17.104	5.791	9.728	18.082		0.533018	15.7344
13.576	16.517	26.166	13.263	20.731	38.13	10.059	6.744	6.257	5.63	7.079	24.392	23.261	13.619	16.218	27.803	6.39	8.7638	9.44	27.424	17.287	21.617	9.23	15.038	18.938		0.537736	16.2499
13.6951	17.385	26.292	14.716	21.297	35.992	8.9	4.164	6.618	5.409	7.549	25.126	23.921	15.814	16.634	25.199	7.1	6.4256	9.845	30.461	16.614	15.94	8.381	9.421	19.372		0.542453	15.774
13.8142	17.684	23.755	17.892	17.42	40.156	10.694	5.485	4.253	5.828	7.781	19.117	22.375	15.895	14.969	24.129	7.572	6.2091	9.11	24.07	20.737	16.736	8.439	12.799	19.556		0.547171	15.5275
13.9333	20.99	23.787	19.74	21.595	40.737	11.838	5.292	3.472	4.559	5.37	22.835	19.307	12.438	19.903	25.26	8.851	6.0969	7.429	22.586	22.461	15.667	9.241	10.591	19.202		0.551888	15.802
14.0524	23.45	25.21	15.84	18.825	45.947	12.673	5.724	7.693	6.219	5.293	21.348	14.164	14.252	16.944	23.636	9.33	6.688	6.792	21.887	23.651	15.279	9.187	10.059	22.469		0.556606	15.94
14.1715	24.301	21.872	13.812	16.439	43.607	12.315	4.582	6.936	3.955	6.378	20.693	15.003	11.573	16.872	18.091	8.72	5.8666	7.168	25.224	20.025	15.141	5.456	10.324	24.439		0.561323	14.9497
14.2905	32.214	21.068	13.206	12.703	43.606	14.416	4.117	6.624	4.793	5.952	18.305	18.688	11.986	16.642	20.032	12.104	6.5803	7.234	25.61	20.264	17.045	6.845	11.954	21.113		0.566037	15.5459
14.4096	31.443	20.363	17.128	12.255	37.505	11.587	5.484	4.075	5.681	5.919	16.209	12.651	11.504	17.63	21.961	10.721	4.6994	6.14	22.197	22.347	16.58	8.166	9.727	24.204		0.570754	14.8407
14.5287	31.633	19.338	10.804	12.603	36.568	14.448	5.328	5.814	6.467	4.827	18.927	12.203	12.529	14.004	23.65	10.489	5.9959	8.321	25.538	22.161	16.672	8.927	7.738	22.552		0.575472	14.8974
14.6478	38.525	17.003	15.633	15.38	39.155	10.799	4.316	4.729	5.178	7.858	19.428	15.251	12.93	17.041	20.183	9.705	6.5434	6.677	29.768	21.685	17.349	9.391	6.5	22.976		0.580189	15.5835
14.7669	38.112	16.282	14.808	16.864	42.159	12.432	7.088	5.644	4.856	5.913	17.691	11.102	11.047	15.371	22.736	11.74	5.4649	6.352	30.857	19.292	14.182	7.056	6.647	22.563		0.584906	15.2608
14.886	34.19	12.38	15.355	15.054	44.051	15.86	5.94	5.963	5.349	7.56	18.888	15.681	11.814	15.975	22.459	11.175	5.1279	5.842	24.769	20.272	15.205	6.15	6.837	22.224		0.589624	15.1717
15.0051	41.17	13.848	13.881	15.594	44.047	12.383	5.327	4.166	4.418	5.012	14.147	15.163	6.974	23.228	23.775	8.63	3.6335	6.871	23.934	22.849	12.984	6.627	5.94	20.235		0.594341	14.7849
15.1242	35.574	9.467	13.466	16.435	41.984	12.377	5.512	3.419	3.795	7.079	14.111	15.299	13.13	18.956	19.262	9.776	5.2616	5.642	24.858	26.03	11.616	8.639	7.877	25.649		0.599059	14.8006
15.2432	44.785	7.138	12.413	15.28	45.066	13.048	5.07	4.457	4.529	5.877	14.649	16.36	14.887	17.659	23.629	11.119	6.5322	8.313	28.27	25.889	9.337	6.772	6.993	20.275		0.603772	15.3478
15.3623	36.878	10.944	8.668	15.578	40.321	13.499	5.503	3.39	4.589	4.305	14.232	20.475	11.249	17.589	23.057	11.197	4.7932	6.287	27.251	29.956	12.337	6.585	7.587	22.592		0.60849	14.9526
15.4814	33.741	7.835	10.295	13.94	35.853	13.142	5.316	5.574	7.191	6.129	13.583	17.212	16.713	18.775	21.809	12.285	5.2704	5.825	24.834	24.984	14.582	6.451	5.807	25.754		0.613207	14.7042
15.6005	33.022	9.121	11.896	10.188	34.92	12.6	7.437	4.692	5.804	6.648	13.339	20.856	15.439	15.448	15.806	11.39	6.667	4.4	24.82	26.581	11.899	8.18	6.591	22.426		0.617925	14.1738
15.7196	28.652	9.298	9.41	11.321	40.876	13.236	4.684	4.497	4.81	5.948	13.407	24.085	12.383	20.606	16.659	11.68	8.156	7.468	20.535	26.85	10.937	5.984	6.386	27.256		0.622642	14.3802
15.8387	33.126	6.619	7.198	9.873	36.096	13.676	5.34	5.506	5.276	6.441	12.826	26.171	17.621	16.428	20.501	9.412	7.7928	5.515	17.252	24.878	9.169	5.294	6.421	24.265		0.62736	13.8624
15.9578	32.167	7.98	11.076	13.165	32.855	11.796	3.697	4.661	5.868	5.313	13.144	27.986	19.579	18.422	23.167	10.236	7.8544	7.599	22.628	27.198	11.448	6.368	6.317	22.11		0.632077	14.6931
16.0769	30.501	7.062	9.851	11.118	32.587	10.915	4.383	3.879	3.46	4.048	14.675	30.648	13.232	18.759	16.752	9.029	7.4846	3.909	21.929	25.089	7.926	5.249	6.423	21.873		0.636795	13.3659
16.196	30.009	6.942	5.578	12.554	35.768	12.59	4.788	4.125	5.212	4.91	10.397	26.158	16.63	21.183	17.587	8.902	4.2293	5.404	21.499	31.567	11.497	6.062	5.586	18.902		0.641512	13.67
16.315	27.628	5.135	6.97	9.337	35.07	12.047	5.507	3.547	3.973	6.689	12.748	24.61	19.259	18.696	15.677	8.055	6.8518	5.898	20.49	29.97	12.747	7.85	6.134	23.804		0.646226	13.6955
16.4341	26.801	4.775	6.447	12.87	32.756	13.278	5.98	4.027	3.545	4.87	14.03	28.071	15.365	21.65	15.87	11.769	6.4621	5.161	22.006	30.147	10.204	6.914	7.094	24.266		0.650943	13.9316
16.5532	34.234	8.604	7.569	11.807	33.205	12.272	5.939	5.739	4.884	5.919	11.341	36.966	18.361	23.033	17.567	11.367	5.7729	6.114	22.624	34.878	12.13	5.768	7.049	23.518		0.655661	15.2775
16.6723	30.63	5.712	6.124	10.251	33.082	12.185	6.363	6.086	4.07	4.779	10.781	34.032	18.602	24.024	14.562	9.969	4.8971	5.488	23.599	35.913	8.772	3.539	5.325	25.483		0.660378	14.3445
16.7914	33.283	6.761	6.361	12.691	32.445	12.524	4.172	7.12	5.293	8.427	10.745	40.055	23.284	26.511	17.96	10.594	6.1565	7.336	22.732	34.847	7.215	5.227	6.003	26.432		0.665095	15.5906
16.9105	30.002	6.052	7.067	11.479	31.648	13.73	4.021	4.412	5.497	5.683	9.229	41.68	17.017	22.886	18.448	12.017	5.296	5.921	20.111	36.598	8.782	5.58	5.748	30.185		0.669813	14.962
17.0296	31.831	6.507	7.92	14.309	28.982	13.715	5.556	4.328	4.656	5.95	8.866	46.516	21.698	23.827	18.009	11.969	4.4906	4.659	22.59	31.579	7.943	4.745	5.267	24.87		0.67453	15.0326
17.1487	26.466	5	5.757	13.225	28.646	13.936	5.363	4.233	5.598	6.553	10.671	48.415	20.414	26.629	19.911	12.728	3.5135	4.275	22.725	39.784	7.258	5.065	3.136	23.082		0.679248	15.0993
17.2677	37.89	5.804	6.641	12.629	28.81	13.656	3.719	5.185	5.263	8.183	8.834	42.826	24.773	31.244	18.37	9.478	6.6187	6.935	17.881	29.202	8.669	3.94	5.491	23.523		0.683961	15.2319
17.3868	39.719	6.016	6.18	14.566	39.149	13.518	5.138	4.5	6.262	5.767	9.652	49.2	18.123	31.953	14.415	9.639	5.3702	3.533	18.307	24.657	6.708	5.149	5.108	25.39		0.688679	15.3341
17.5059	33.207	6.159	8.432	13.231	27.666	16.291	4.979	3.873	4.346	4.885	8.33	49.352	21.815	30.709	20.077	9.822	5.4567	6.005	17.405	28.542	7.236	3.04	5.38	22.399		0.693396	14.9432
17.625	44.381	4.479	9.147	14.273	33.898	15.759	6.376	3.741	4.335	6.03	8.436	52.145	14.505	30.087	20.577	9.231	3.7718	6.659	19.072	25.099	9.516	5.348	5.525	25.483		0.698114	15.7447
17.7441	40.174	4.869	6.076	13.172	30.277	14.554	4.581	4.186	5.876	4.018	9.887	49.962	15.431	32.356	17.743	9.519	5.2584	7.545	18.05	31.067	7.381	4.58	4.156	24.026		0.702831	15.1977
17.8632	36.633	5.864	5.81	14.923	34.918	10.933	5.536	4.864	4.497	4.855	9.067	55.363	12.267	31.812	18.857	11.065	7.7079	5.461	14.004	31.079	6.787	6.494	4.338	21.067		0.707549	15.1751
17.9823	41.885	5.177	5.273	11.527	34.112	14.968	5.185	4.433	5.771	6.839	7.824	56.741	14.597	33.296	17.496	12.277	5.3305	6.222	13.843	29.172	8.329	5.855	5.595	22.645		0.712266	15.5997
18.1014	44.635	4.979	4.561	12.738	31.3	13.823	5.814	4.673	6.208	5.812	6.166	59.462	15.702	34.994	18.179	11.811	7.0427	5.98	15.845	27.817	5.6	5.837	5.737	23.85		0.716984	15.7736
18.2204	43.066	6.858	5.583	15.963	34.981	15.978	7.034	5.754	5.119	4.588	9.149	58.907	14.261	34.837	16.987	10.079	5.704	5.951	14.122	28.11	6.283	5.292	6.194	23.972		0.721697	16.0322
18.3395	40.35	5.23	4.933	15.887	31.953	15.095	4.767	5.192	5.11	5.49	6.541	53.793	11.7	32.424	19.694	11.594	5.7294	5.052	13.709	28.089	4.99	5.715	7.529	23.738		0.726415	15.1794
18.4586	43.607	5.026	6.81	12.455	28.592	14.922	6.3	4.627	5.381	5.297	8.948	58.344	13.767	32.932	17.849	10.363	4.9086	6.085	14.363	31.037	6.952	6.086	5.875	26.23		0.731132	15.6982
18.5777	44.318	5.472	8.338	13.17	27.656	12.884	6.065	4.509	5.606	5.87	7.465	55.953	13.814	26.423	17.094	10.889	7.5847	4.406	12.994	29.71	7.05	6.432	5.17	24.05		0.73585	15.1218
18.6968	40.188	7.579	6.459	14.506	26.886	15.092	4.583	5.026	5.175	6.998	9.377	57.047	15.678	32.58	19.585	13.677	5.4972	6.629	11.848	34.291	7.298	4.125	5.306	18.265		0.740567	15.5706
18.8159	43.348	4.992	5.243	14.245	25.369	13.577	4.687	4.608	4.748	5.72	7.411	48.912	15.96	33.549	15.58	11.064	5.3224	4.339	13.862	28.865	7.549	5.602	4.374	25.301		0.745285	14.7595
18.935	53.367	5.922	5.384	13.562	25.009	12.926	4.993	4.712	5.192	6.341	8.418	52.06	15.52	34.303	19.064	11.981	6.016	5.596	14.917	31.824	8.572	4.941	4.868	23.701		0.750002	15.7995
19.0541	52.237	6.313	5.166	15.504	28.761	18.252	5.486	4.682	4.836	6.84	8.105	51.529	14.315	30	19.901	13.069	6.4723	4.706	12.104	32.451	5.922	4.725	4.614	24.097		0.754719	15.837
19.1731	51.85	6.304	6.752	15.044	22.723	14.136	5.802	4.544	5.067	4.899	6.727	53.057	13.572	35.247	15.787	11.198	6.1617	5.836	16.223	40.718	4.996	3.524	5.152	24.967		0.759433	15.8453
19.2922	52.129	6.425	7.552	13.531	26.784	16.497	5.001	5.141	5.641	4.824	7.025	57.345	11.904	27.576	20.894	9.635	6.6544	4.637	13.318	39.303	7.257	4.746	2.233	24.917		0.76415	15.8737
19.4113	56.821	7.972	8.826	11.697	31.7	15.886	5.285	5.212	2.895	4.685	7.317	62.457	12.986	33.189	19.034	9.215	6.2096	5.649	10.134	35.675	6.461	7.588	5.322	22.094		0.768868	16.4296
19.5304	50.743	8.073	5.72	15.128	29.494	12.524	4.632	4.15	5.39	5.126	9.363	54.22	16.908	31.216	16.543	11.695	6.5976	5.583	10.097	36.199	6.859	5.672	5.889	25.251		0.773585	15.9614
19.6495	52.484	8.671	4.476	14.796	30.914	15.514	4.373	7.051	4.456	4.92	11.393	57.788	13.854	33.165	23.035	12.066	4.9906	4.521	10.411	33.23	6.822	4.176	4.504	27.51		0.778303	16.4634
19.7686	48.508	10.773	7.934	13.471	26.627	16.612	5.334	4.797	4.251	4.644	7.866	55.733	14.327	36.179	23.978	10.98	6.2292	6.324	11.114	27.595	6.386	5.038	3.354	26.212		0.78302	16.0111
19.8877	49.691	7.412	6.917	15.615	27.382	10.86	3.611	4.038	6.539	6.879	8.354	59.652	13.895	36.136	23.11	11.218	6.3979	5.773	12.32	24.994	5.297	5.47	5.032	21.577		0.787738	15.7571
20.0068	48.859	9.292	8.008	14.277	33.394	13.881	3.032	6.371	6.656	6.189	6.595	56.27	13.92	34.879	23.808	9.288	7.2658	4.865	12.64	31.794	7.622	6.722	5.659	23.186		0.792455	16.4364
20.1259	50.74	8.541	7.533	11.85	28.446	15.291	4.029	5.69	5.637	4.436	8.39	56.098	13.404	38.04	24.462	6.503	10.0289	4.933	11.037	22.822	8.018	4.389	4.477	22.298		0.797173	15.7122
20.2449	52.443	10.189	6.337	13.666	31.563	11.82	4.979	4.762	4.91	4.161	8.433	53.415	16.595	35.362	25.585	9.737	7.5198	6.113	11.445	23.643	7.542	5.051	3.855	20.081		0.801886	15.8003
20.364	46.167	9.512	8.183	15.956	32.602	15.287	5.579	5.07	4.865	6.01	8.153	51.832	11.818	36.656	25.091	7.877	6.1701	6.509	11.891	27.512	8.477	6.065	7.158	20.125		0.806604	16.0235
20.4831	44.991	10.223	7.828	20.27	37.629	13.235	4.299	5.283	4.686	6.527	8.125	60.568	11.733	36.142	27.318	9.252	5.9822	3.195	8.57	30.1	6.13	7.118	4.591	18.383		0.811321	16.3408
20.6022	46.43	10.015	7.262	17.321	41.002	10.501	3.024	6.094	7.275	7.834	9.123	59.307	13.384	43.034	25.135	10.166	6.6508	4.401	11.546	23.61	7.558	5.726	5.085	19.678		0.816039	16.7151
20.7213	47.438	14.279	6.741	13.101	39.93	13.762	3.933	4.966	5.022	8.345	8.608	56.956	13.48	42.245	22.307	8.603	5.4572	5.21	12.74	21.125	10.354	6.227	4.532	20.69		0.820756	16.5021
20.8404	49.099	16.412	8.543	17.846	41.716	16.599	3.903	4.968	3.024	10.364	9.773	60.147	14.241	41.245	24.311	8.447	7.1803	5.341	12.035	20.576	7.719	4.012	4.526	22.075		0.825474	17.2543
20.9595	47.634	12.354	8.016	18.969	50.452	20.904	4.526	6.024	5.497	9.923	9.39	50.422	20.121	38.898	24.181	9.21	4.1706	6.742	10.91	23.757	7.321	4.955	3.057	21.001		0.830191	17.4348
21.0786	46.502	15.948	8.956	16.096	47.463	18.27	6.813	5.044	8.95	7.45	10.923	52.366	21.023	41.149	24	8.544	6.11	6.786	13.264	31.948	6.598	5.467	5.302	22.725		0.834908	18.2374
21.1976	49.203	15.408	8.775	17.303	46.04	15.726	6.308	8.507	6.511	8.406	8.251	57.375	18.855	42.761	26.943	9.892	6.2219	5.576	14.679	26.856	6.045	5.581	6.271	20.77		0.839622	18.261
21.3167	54.771	11.942	7.646	16.065	53.256	23.177	6.954	4.198	8.349	9.217	8.063	59.289	25.323	42.46	24.91	7.908	4.901	5.667	14.959	27.578	8.662	5.552	6.341	18.067		0.844339	18.969
21.4358	48.366	15.207	9.634	17.473	55.678	22.483	4.369	3.345	6.162	11.631	8.436	50.306	24.626	48.2	27.221	9.998	7.7196	6.285	14.344	28.076	7.772	4.15	2.862	20.9		0.849057	18.9685
21.5549	48.019	19.092	10.578	19.15	66.179	27.853	5.326	6.668	8.958	11.263	9.963	50.196	18.811	48.162	28.752	9.116	6.4413	6.374	15.031	26.062	6.513	4.79	4.731	17.038		0.853774	19.7944
21.674	51.98	18.286	8.489	19.365	63.696	28.003	6.212	7.067	8.051	12.452	9.257	51.728	21.878	49.802	25.549	6.746	3.5516	5.747	12.554	26.696	7.797	2.975	3.755	21.394		0.858492	19.7096
21.7931	44.301	22.541	9.076	19.772	66.128	33.725	7.209	7.047	11.583	13.718	13.439	53.651	25.138	52.329	26.697	6.701	5.4693	7.721	12.946	24.899	8.238	5.241	4.218	15.696		0.863209	20.7285
21.9122	49.473	20.678	8.654	18.934	65.79	30.362	6.247	6.475	15.618	12.369	13.277	55.405	20.643	46.618	30.372	6.626	4.4029	6.676	16.748	26.393	8.042	4.75	5.973	20.469		0.867927	20.8748
22.0313	54.625	20.966	9.422	22.289	59.818	36.322	6.681	7.047	15.979	16.822	21.744	57.568	22.648	57.802	28.229	8.621	4.8268	8.04	12.775	27.682	7.309	3.721	5.088	16.984		0.872644	22.2087
22.1503	45.739	21.682	10.595	23.197	51.051	36.866	6.828	7.522	18.224	18.283	22.181	57.869	22.896	58.146	26.537	8.175	6.4129	5.399	15.236	31.872	9.047	5.12	6.071	20.403		0.877358	22.3063
22.2694	49.704	24.895	15.609	26.935	41.992	37.917	7.368	8.449	22.056	18.827	28.055	62.004	24.487	61.432	29.783	7.989	6.1638	5.932	15.887	30.967	6.851	4.001	5.493	23.151		0.882075	23.5812
22.3885	47.183	26.744	13.563	27.973	35.457	39.329	6.483	8.209	21.076	24.133	32.108	64.711	30.832	71.839	21.242	9.861	5.6014	4.986	16.144	32.81	8.034	3.743	5.828	18.263		0.886793	24.0064
22.5076	55.114	25.32	15.586	27.336	28.614	30.542	8.308	9.801	28.605	26.98	35.981	62.626	23.147	66.502	27.044	9.105	5.6084	5.972	15.117	37.611	7.007	6.697	4.027	17.91		0.89151	24.19
22.6267	48.555	22.789	14.423	36.147	19.481	29.369	8.133	10.085	28.904	26.288	41.527	65.315	28.459	63.096	27.185	10.645	6.335	6.192	18.428	38.71	8.415	5.163	5.949	18.254		0.896228	24.4936
22.7458	61.417	29.57	17.177	34.757	10.865	22.239	9.539	13.391	33.255	35.228	52.177	66.037	35.337	71.99	23.638	7.298	6.6345	7.438	16.391	39.983	8.467	4.025	4.785	17.158		0.900945	26.1999
22.8649	60.333	28.329	16.528	41.379	10.286	24.82	9.02	18.006	38.115	29.668	51.604	62.076	40.326	66.834	29.405	9.3	6.4995	7.378	16.828	43.893	8.743	4.832	5.822	20.238		0.905663	27.0943
22.984	52.776	28.255	16.307	38.339	12.55	18.45	7.765	21.617	30.052	32.927	48.025	73.77	42.056	68.896	27.093	12.682	5.3758	6.866	13.742	43.681	6.978	4.041	6.101	18.982		0.91038	26.5553
23.103	58.18	29.455	16.813	38.247	6.459	18.65	9.995	24.903	27.401	25.676	52.869	61.599	42.463	71.779	32.528	11.953	6.6119	5.387	12.751	43.853	7.289	5.604	5.116	19.518		0.915094	26.4625
23.2221	55.443	27.777	23.088	40.462	7.556	13.528	8.764	31.391	23.449	23.175	44.329	71.769	46.966	68.374	33.735	16.467	7.3842	6.48	15.453	48.888	10.093	6.65	2.999	25.118		0.919811	27.4724
23.3412	51.828	30.843	20.225	49.819	6.091	11.599	12.287	31.421	22.506	15.857	44.606	70.065	48.708	56.616	43.426	15.216	7.5323	6.547	12.9	44.341	7.671	4.337	5.371	18.133		0.924528	26.5811
23.4603	43.522	32.096	22.218	47.852	4.898	10.94	12.365	32.286	17.559	11.866	35.561	73.989	40.346	46.773	43.415	14.596	9.1541	7.689	12.807	46.017	7.748	4.899	5.48	15.911		0.929246	24.9995
23.5794	43.983	31.927	25.796	48.059	5.314	10.267	18.329	34.618	14.342	10.369	34.155	81.9	40.184	51.089	49.5	19.342	5.812	7.106	12.688	49.968	6.034	4.063	6.467	19.183		0.933963	26.2706
23.6985	37.368	35.745	25.729	43.205	4.453	7.666	16.162	27.878	12.91	6.586	27.585	84.579	42.857	47.299	50.28	17.74	8.6554	7.911	15.953	49.342	8.988	5.078	7.847	18.447		0.938681	25.4276
23.8176	33.279	32.736	27.993	50.959	4.922	8.843	16.182	28.328	6.894	5.602	28.804	81.538	36.593	48.78	53.492	21.251	8.2418	6.819	14.608	51.149	9.69	6.846	4.573	21.866		0.943398	25.4162
23.9367	28.227	39.975	37.487	43.839	3.113	4.816	13.395	23.905	9.358	5.404	23.007	64.356	36.32	50.532	56.56	27.039	9.2316	7.645	12.708	51.173	8.782	4.67	6.523	22.402		0.948116	24.6028
24.0558	23.749	42.083	35.065	42.93	2.903	7.048	13.133	21.762	4.001	4.353	14.945	54.544	39.16	41.925	66.774	25.885	11.5088	7.395	13.156	52.199	10.482	4.343	7.342	25.409		0.952833	23.8373
24.1748	22.085	38.806	37.615	39.106	2.318	7.057	12.357	20.583	3.952	2.981	10.838	55.364	32.899	41.539	57.316	32.24	16.2017	9.741	19.416	48.637	10.577	7.796	6.137	26.205		0.957547	23.4069
24.2939	14.526	36.359	47.879	45.002	2.174	3.695	11.141	15.962	3.968	3.085	6.807	38.057	30.507	37.586	50.814	50.856	21.8721	11.85	16.598	41.481	14.408	8.124	5.443	31.251		0.962264	22.8935
24.413	11.359	38.88	45.937	34.209	1.914	3.951	13.493	8.816	3.845	2.181	6.439	35.898	29.537	34.427	41.613	50.572	26.3358	10.09	18.538	45.85	14.666	6.532	5.671	31.212		0.966982	21.7486
24.5321	5.481	32.12	44.545	29.858	2.498	2.615	11.001	5.837	2.445	0.687	3.859	25.924	23.627	31.02	37.673	49.138	35.1301	17.235	18.786	42.656	18.056	7.388	9.452	36.341		0.971699	20.5572
24.6512	7.379	30.135	44.448	21.689	1.182	3.132	12.09	7.932	2.851	2.768	2.83	22.863	19.978	29.165	34.345	53.202	39.6144	17.32	18.099	38.585	19.947	7.025	6.881	32.79		0.976417	19.8438
24.7703	4.978	24.279	48.736	19.768	2.491	3.954	9.387	9.412	2.68	1.84	3.224	20.752	11.899	23.598	23.344	45.002	43.1007	15.345	17.719	39.544	23.766	9.417	6.043	33.909		0.981134	18.5078
24.8894	4.784	29.95	47.075	17.296	1.965	2.198	9.075	7.269	2.836	1.473	3.425	14.913	12.294	20.726	21.255	34.314	49.773	18.449	17.983	39.222	26.868	13.763	9.397	37.345		0.985852	18.4853
25.0085	3.954	26.273	44.684	12.413	2.107	2.78	6.849	7.916	2.823	1.729	1.845	14.193	11.732	18.586	18.417	26.255	44.5082	18.166	19.82	32.367	27.372	12.875	11.142	41.369		0.990569	17.0906
25.1275	3.01	25.55	43.01	9.595	1.183	1.671	7.251	6.479	1.978	2.486	1.598	11.317	10.323	15.64	15.245	24.547	38.4405	20.361	22.973	23.331	31.764	13.222	10.223	37.63		0.995283	15.7845
25.2466	3.187	18.708	40.901	11.612	1.159	1.463	5.982	4.421	2.475	0.792	2.001	13.213	8.809	15.942	14.728	19.815	43.2918	21.418	21.549	19.011	32.145	19.197	14.416	36.721		1	15.5399

## Sheet: Image5
X0	Y0	Y1	Y2	Y3	Y4	Y5	Y6	Y7	Y8	Y9	Y10	Y11	Y12	Y13	Y14	Y15	Y16	Y17	Y18	Y19	Y20	Y21	Y22	Y23		Ap-Ba	Avg int
0	30.7398	23.325	18.743	32.311	57.7403	54.31	48.439	27.072	13.299	20.068	17.862	21.848	43.2915	25.329	27.4522	18.7307	16.3353	31.9319	20.9534	20.6036	35.665	39.4149	22.0867	18.7087		0	28.5942
0.1191	33.7448	36.577	16.152	30.993	67.5525	57.055	51.52	38.497	18.648	24.049	15.783	26.256	48.2023	31.981	27.9728	22.9941	17.9441	40.2544	20.979	26.0655	26.9023	52.1551	25.242	17.262		0.00518187	32.2826
0.2382	33.0738	43.486	14.827	32.18	66.258	60.462	55.414	42.359	19.87	22.05	18.216	23.386	48.3251	32.293	37.1707	28.4609	21.5196	34.7049	25.2693	26.9427	36.4088	52.2984	26.0642	21.3551		0.0103637	34.2664
0.3573	40.9445	49.335	19.898	34.2	69.5445	67.005	73.08	45.413	30.909	27.29	20.803	26.686	45.7739	37.915	32.2022	32.3674	28.0029	42.4259	30.5326	27.5125	39.3079	60.4595	31.8759	27.0082		0.0155456	39.1872
0.4764	48.2717	68.125	28.288	33.659	72.8363	71.324	66.382	65.733	36.918	30.241	22.225	32.724	54.2799	42.88	37.3775	35.6821	23.1454	45.1382	32.7933	35.512	55.8701	63.7371	33.5393	27.0161		0.0207275	44.3207
0.5954	52.2264	77.02	35.934	40.519	74.8232	85.006	73.659	68.24	41.697	34.448	20.882	33.236	49.3006	47.336	40.0471	40.5817	24.7231	46.0238	32.518	35.528	55.6873	67.351	44.67	22.7174		0.025905	47.6739
0.7145	65.5864	92.51	40.495	48.205	70.9692	87.816	84.943	82.035	55.167	41.279	20.683	31.264	54.0562	46.057	39.2393	43.2486	28.1262	46.0316	39.9837	44.9542	63.1691	76.2735	56.7327	30.6737		0.0310868	53.7291
0.8336	72.4624	95.404	48.326	50.083	83.5043	103.197	91.302	81.763	68.627	46.068	29.404	34.996	56.7969	49.005	50.0944	49.2087	32.604	44.2788	41.8531	47.524	66.5277	76.2776	59.558	37.7084		0.0362687	59.0239
0.9527	77.5783	109.58	60.122	58.151	83.1032	105.038	107.594	83.378	79.353	48.956	30.199	33.752	57.1482	56.693	50.6446	47.1139	38.586	49.5473	44.367	39.2461	69.3265	80.9119	72.9332	43.7367		0.0414506	63.6275
1.0718	81.8695	107.565	75.424	61.429	78.2597	106.497	108.76	92.305	98.815	53.568	36.663	40.096	63.1666	65.559	65.8219	45.9621	39.0537	50.1422	46.035	42.6581	64.274	93.3393	84.6747	52.9192		0.0466324	68.9524
1.1909	86.0837	112.858	87.743	68.555	86.8842	94.258	120.58	94.17	113.012	70.773	50.03	42.936	63.0046	65.209	65.2589	46.1283	46.775	55.9897	57.7717	53.7722	66.6462	89.2099	86.2216	52.2502		0.0518143	74.005
1.31	85.1316	111.002	89.99	72.989	83.7975	109.388	127.34	100.33	126.085	77.596	46.44	51.272	72.2787	73.17	71.9978	53.3651	47.9115	57.6021	62.2484	58.9084	66.6257	87.1192	89.1077	57.5301		0.0569962	78.3011
1.4291	100.131	100.017	106.127	70.054	88.6504	113.039	134.348	104.71	143.27	97.105	54.515	57.675	71.2473	69.563	64.1395	53.5677	52.9141	56.6091	57.452	58.3277	62.7799	77.1221	85.6974	62.8357		0.062178	80.9124
1.5481	97.3973	95.648	106.245	79.575	79.7413	99.035	122.802	108.696	138.022	105.21	69.348	64.017	82.263	66.456	71.7208	58.9405	49.6941	52.5301	63.0984	52.7723	57.5341	68.1282	90.4908	68.4755		0.0673556	81.16
1.6672	91.0679	85.816	107.526	88.097	92.54	107.177	134.198	104.32	161.612	123.995	74.897	66.784	82.9512	69.447	80.6036	58.8644	53.7864	50.0507	68.8895	58.0268	53.08	71.8739	85.3311	63.2064		0.0725374	84.7559
1.7863	96.749	76.254	100.029	93.171	90.8191	95.528	132.942	107.857	156.684	119.604	92.688	81.351	83.8007	66.364	88.9504	64.0245	62.6436	46.5594	68.5753	63.1221	56.4799	62.5504	80.4676	65.7765		0.0777193	85.5413
1.9054	87.1003	61.757	104.743	101.889	85.9769	90.229	144.297	111.089	152.453	127.266	100.113	89.886	83.7918	74.95	92.1773	58.5415	50.6393	34.7786	76.4712	75.0686	56.2552	56.7451	74.452	56.267		0.0829011	85.289
2.0245	79.2419	75.819	105.037	105.526	93.4373	80.617	129.45	103.918	134.833	137.068	107.17	101.269	84.1819	74.867	83.1438	58.8489	51.8196	27.1322	70.0331	72.237	55.9627	56.929	62.6516	53.9658		0.088083	83.5483
2.1436	86.7074	65.948	107.085	119.222	85.2463	80.542	128.122	104.211	114.803	136.878	119.81	113.013	88.4126	85.474	92.1191	65.8224	41.4391	22.5369	66.6818	69.2402	55.2725	48.2588	45.2687	49.3396		0.0932649	82.9772
2.2627	76.5418	56.523	93.122	120.741	91.273	80.134	116.733	106.922	115.697	134.561	125.459	112.916	96.0551	87.962	90.4594	67.6018	37.1994	19.3479	60.027	68.5345	50.824	46.8609	45.9847	39.9363		0.0984467	80.8923
2.3818	69.178	58.278	86.422	119.397	99.7224	67.225	128.897	116.096	101.703	125.628	132.933	113.706	87.8432	87.535	86.8711	69.3677	32.9227	18.5648	53.9157	70.72	50.1609	49.8701	32.0927	28.4945		0.103629	78.6477
2.5008	69.6718	57.048	88.162	127.824	97.5585	59.971	113.321	92.885	90.85	84.068	138.584	111.456	82.3213	87.917	90.9549	64.0137	23.3473	16.1918	51.6954	70.571	53.6462	44.2487	26.4252	26.189		0.108806	73.705
2.6199	56.7963	52.382	74.221	112.959	92.9038	63.153	115.116	80.388	78.326	80.027	128.561	109.694	81.8652	91.648	83.5222	65.5216	22.7521	12.2925	47.5296	63.2481	58.5444	42.056	25.4908	19.8339		0.113988	69.118
2.739	50.2543	46.515	72.165	111.216	90.5588	65.64	104.625	80.632	71.021	67.332	127.229	101.478	85.743	96.271	84.7253	67.7229	19.68	13.3165	34.1764	68.8917	53.4597	30.3476	21.7575	19.0318		0.11917	65.9912
2.8581	45.5301	45.364	68.475	106.901	89.8275	57.922	98.891	64.995	69.137	61.376	113.52	97.859	84.9011	93.402	82.0637	74.126	17.1433	13.1628	29.2836	60.2954	52.8323	35.2307	15.7351	17.3356		0.124352	62.3046
2.9772	40.6542	47.186	68.388	90.747	82.892	56.562	95.966	66.019	55.229	50.111	103.674	88.036	85.33	91.612	78.4904	65.4252	13.0883	11.9062	27.1131	58.5927	58.2835	32.1142	14.2741	18.1466		0.129534	58.3267
3.0963	32.1517	41.794	58.842	91.239	79.796	44.55	81.435	55.881	56.765	43.994	83.499	78.969	75.4286	102.024	83.1771	65.383	16.3642	8.8844	25.9012	59.4416	58.5624	31.1453	16.9139	12.461		0.134715	54.3584
3.2154	26.2078	44.775	52.709	79.628	64.8331	34.277	75.7	54.867	51.841	43.76	73.423	70.59	79.3204	94.475	86.875	55.5629	12.4386	9.5506	14.7658	51.3257	57.005	28.7861	15.9981	13.8973		0.139897	49.6921
3.3345	20.1456	38.43	51.309	69.427	66.7195	33.868	73.383	49.294	38.559	38.962	61.149	61.242	72.6169	104.409	82.6573	51.0681	9.8509	11.1754	16.0918	45.2918	63.1034	29.7	18.069	14.3171		0.145079	46.7016
3.4535	16.8425	32.197	49.367	60.782	52.5743	29.407	63.17	51.244	48.394	34.497	47.075	53.684	64.902	97.906	81.9904	55.8356	10.4119	8.6516	18.3989	43.0397	67.314	25.2836	12.2155	11.5991		0.150257	43.1993
3.5726	15.4653	30.954	47.198	52.359	52.2087	26.195	52.479	50.936	40.854	34.776	44.248	53.21	69.1053	101.149	87.87	51.9331	9.1761	9.2866	14.9432	37.5583	64.7185	24.6223	18.332	11.6842		0.155439	41.7192
3.6917	14.7233	28.593	45.048	53.968	41.2333	21.213	53.545	43.966	39.756	28.738	36.76	43.335	64.8553	101.464	72.9429	42.1294	8.7284	7.0761	13.5951	35.7042	65.8698	19.3244	16.4568	13.6385		0.16062	38.0276
3.8108	8.6744	24.728	45.344	47.899	34.2408	21.004	41.563	44.245	37.563	28.727	30.891	37.56	53.8457	97.908	73.8321	37.4226	7.9444	6.7944	10.5736	23.9853	68.8771	24.0788	16.6614	11.3242		0.165802	34.8203
3.9299	12.5908	18.863	42.511	46.601	32.4061	26.811	42.773	39.172	32.988	27.222	29.788	30.548	46.6124	84.089	62.143	40.4261	6.2322	6.6231	11.4004	28.978	71.0183	21.0274	13.2413	10.9797		0.170984	32.7102
4.049	10.9551	18.537	43.163	38.895	33.945	19.543	47.663	41.86	30.915	23.09	30.272	31.217	44.4458	87.502	61.708	31.2808	10.7272	6.3052	9.8971	26.3231	58.8085	26.4847	14.2508	9.6693		0.176166	31.5607
4.1681	7.9696	16.233	32.715	34.187	35.2975	22.061	37.296	36.373	26.899	27.334	22.699	27.51	35.9139	90.976	62.2007	31.9879	9.8007	8.6687	11.092	22.4177	65.3623	19.9986	13.5091	12.4362		0.181348	29.6224
4.2872	7.6004	14.695	31.525	33.498	30.3864	24.763	31.536	39.63	24.093	28.008	22.413	24.369	30.5468	76.303	54.4568	27.1688	8.3885	7.848	7.2034	17.816	71.4084	25.4303	14.6533	9.7375		0.18653	27.6449
4.4063	8.6935	12.892	26.839	27.819	30.9627	23.13	31.962	38.325	25.393	23.564	19.748	25.111	31.8881	74.699	53.4102	27.119	8.5814	6.3613	7.6483	21.2066	71.0911	25.9935	10.9505	7.7696		0.191712	26.7149
4.5253	10.8748	10.756	23.391	26.73	30.1683	23.734	26.443	34.411	21.086	21.781	18.055	22.22	24.8718	53.83	48.6286	23.8559	7.797	3.8041	6.6976	16.4086	66.9337	24.275	13.5411	9.3892		0.196889	23.7368
4.6444	10.1947	9.321	26.617	27.073	25.4437	25.967	24.535	28.144	21.438	24.655	17.227	24.033	22.6425	66.993	39.6162	21.1721	10.5487	4.1723	8.611	12.0109	64.0439	23.7325	11.2832	9.8363		0.202071	23.3046
4.7635	6.5077	11.421	21.31	23.594	24.9315	20.415	23.129	29.768	21.142	18.894	13.22	20.155	18.1996	64.534	40.6264	16.4288	9.8847	5.1283	7.8097	14.9853	73.7441	31.9988	13.8935	10.0912		0.207253	22.5755
4.8826	7.9844	8.99	22.692	24.864	25.1715	22.596	21.315	28.179	20.305	20.247	16.096	14.619	15.1174	48.659	31.1805	22.8151	8.9512	5.7638	5.148	13.1239	67.0901	28.7018	13.3174	7.9121		0.212435	20.8683
5.0017	8.4478	6.381	15.434	18.289	24.051	20.414	20.648	21.905	22.775	18.11	11.197	18.612	14.9109	44.441	36.1363	15.3937	10.0501	6.2354	6.7827	14.6276	67.1902	28.754	10.7895	8.0441		0.217617	19.5675
5.1208	7.8265	9.297	15.023	20.73	24.2224	17.918	26.043	17.886	20.638	19.275	14.471	18.647	10.2044	46.297	28.6424	14.8288	7.7734	5.5337	7.4985	9.4954	60.0195	27.9471	11.2182	9.1605		0.222798	18.7748
5.2399	9.1179	5.591	13.484	20.314	20.6241	13.795	19.034	16.109	16.345	17.763	12.316	12.758	11.2123	38.682	22.2974	16.6408	8.7972	5.2931	6.4712	12.6411	62.4259	26.5823	11.1798	8.9859		0.22798	17.0192
5.359	6.6746	7.684	13.432	17.761	19.674	11.829	19.145	14.515	15.588	18.505	12.873	15.332	11.1054	35.37	19.5357	14.0527	6.0786	2.5653	6.6973	10.0991	60.1953	30.7054	9.6369	6.3468		0.233162	16.0584
5.478	8.4123	6.724	13.368	15.756	17.99	12.59	15.595	15.141	17.223	20.282	13.669	17.931	11.5934	29.681	18.1378	14.9837	6.8174	4.1755	5.6043	10.6487	58.9213	31.0416	11.8528	7.0308		0.23834	16.0487
5.5971	4.0472	6.557	12.053	13.749	16.0485	7.437	21.558	14.846	17.658	18.267	11.145	17.951	11.3934	19.251	12.646	10.0113	7.8858	4.5096	6.0889	10.3608	52.5206	30.4648	8.1094	8.6613		0.243522	14.3008
5.7162	6.2664	5.463	10.773	14.028	13.8691	9.544	17.727	14.034	19.823	16.18	11.344	13.393	11.5132	19.376	20.3795	10.9228	6.5725	4.5822	5.4149	10.1418	48.196	32.4859	9.3896	7.2381		0.248703	14.1107
5.8353	7.3429	7.382	10.994	14.863	11.9299	5.355	18.553	13.595	17.67	14.353	12.476	12.845	9.3907	12.538	16.4892	13.6563	10.1788	3.6098	5.2453	8.8081	45.6439	33.3785	8.0974	3.8576		0.253885	13.2605
5.9544	6.1793	6.634	11.816	10.982	10.0095	7.358	18.716	12.707	15.047	14.727	10.222	15.739	8.5663	16.363	17.3547	9.3207	7.2203	6.8908	7.222	8.6926	44.0715	33.1368	9.3257	6.3083		0.259067	13.1087
6.0735	3.561	6.322	12.131	11.421	10.1792	5.98	20.296	10.375	14.855	12.649	8.794	16.368	5.3424	13.621	14.6052	10.4795	8.6716	3.8288	5.7397	8.2599	37.6618	37.6018	10.7759	7.3123		0.264249	12.368
6.1926	5.047	3.454	13.602	12.21	11.3181	6.024	15.629	10.933	13.218	12.376	7.929	13.926	9.266	13.767	16.9564	7.5412	9.9558	6.6718	4.371	6.7094	30.7509	31.6058	9.8964	6.0697		0.269431	11.6345
6.3117	7.6814	6.484	11.366	9.995	13.4641	9.004	16.001	9.349	13.373	9.045	7.165	9.993	5.8479	9.547	12.7285	10.3988	9.7482	3.3073	5.5873	7.7922	27.6941	35.6659	8.5408	5.1918		0.274613	11.0404
6.4307	4.8187	5.791	14.607	9.455	12.0057	5.243	18.143	12.091	11.957	9.409	8.003	12.638	7.3054	13.062	12.6252	8.9442	9.1441	2.9336	5.199	6.119	24.6176	35.5131	9.3652	4.7299		0.27979	10.9883
6.5498	5.9736	4.75	7.048	8.815	11.3898	5.765	14.304	8.908	11.992	9.817	6.407	12.716	7.2683	11.748	10.417	7.9817	9.1995	3.5277	5.2364	6.6573	19.5503	35.871	8.6962	6.3568		0.284972	10.0165
6.6689	5.7142	7.088	12.276	10.168	9.423	6.089	13.166	10.707	15.246	9.264	7.821	11.874	6.6975	8.628	10.1975	8.2729	9.9604	4.5918	4.229	7.3532	19.2761	39.8649	8.675	3.603		0.290154	10.4244
6.788	6.652	5.322	11.276	10.796	11.033	6.463	13.039	10.574	8.882	7.932	6.201	13.492	8.0655	6.891	10.0774	12.3579	10.8382	3.2747	3.2767	4.9828	20.9872	36.8691	10.0797	3.9122		0.295336	10.1364
6.9071	3.0799	4.51	10.413	8.66	10.7219	6.34	14.695	6.736	11.517	7.47	4.997	14.154	7.0886	8.152	9.9156	11.9258	10.3258	4.1495	5.2295	5.7129	23.4147	34.022	11.1585	5.1648		0.300518	9.9814
7.0262	6.3097	5.612	7.497	9.556	11.4252	5.612	13.998	7.258	12.179	7.393	6.627	8.936	6.8721	6.96	8.9382	10.2908	13.3771	4.352	2.1692	2.8077	15.9153	31.2131	10.4407	4.4778		0.3057	9.1757
7.1453	5.5053	4.069	7.69	9.982	9.3525	5.152	10.459	7.343	11.812	5.784	7.202	11.325	6.4054	8.849	7.4034	10.1698	11.1924	3.3103	2.1921	4.5444	14.8023	36.2245	11.0969	4.4114		0.310881	9.01157
7.2644	6.7973	3.349	6.967	7.035	9.9327	6.453	13.506	7.531	9.564	6.34	5.431	11.953	8.2708	5.845	7.7227	11.3014	12.1219	5.3505	5.1451	5.4597	11.0035	32.0113	9.9377	4.0376		0.316063	8.87776
7.3834	5.5385	5.376	5.077	7.065	9.3838	5.13	16.118	6.665	6.696	5.895	6.73	11.392	8.0841	7.631	7.6774	11.4007	13.7594	4.8141	3.0996	4.4319	11.3607	29.3553	11.3676	4.6765		0.321241	8.69686
7.5025	7.0133	3.025	4.31	6.645	8.5935	5.315	14.091	5.681	10.889	4.656	7.085	15.867	5.3431	4.66	6.1728	10.8054	13.411	3.54	4.4457	3.1865	10.7729	22.4258	10.0066	2.717		0.326423	7.94407
7.6216	5.6734	5.423	4.766	6.776	9.4282	5.916	13.809	6.345	6.586	5.476	5.996	15.434	5.749	5.896	6.5054	12.8102	15.1962	5.3691	4.6311	3.7452	11.7673	22.1058	7.7143	3.639		0.331605	8.19822
7.7407	6.2638	3.23	4.657	6.889	11.0502	6.963	20.127	6.471	8.88	6.139	6.391	16.611	6.2611	6.327	4.8498	13.6116	15.7962	4.3095	5.1354	5.2492	9.3469	18.8621	13.2325	3.335		0.336786	8.74951
7.8598	5.3261	4.329	5.914	9.017	10.3224	5.306	18.645	7.384	4.877	4.318	4.727	15.074	8.2031	7.452	5.4305	10.2434	15.1633	3.9044	5.0297	6.266	4.8672	23.1828	11.6976	4.5548		0.341968	8.38476
7.9789	5.4144	3.842	4.684	8.541	11.2212	6.306	16.884	5.233	7.163	4.085	6.37	19.152	5.7041	7.646	6.1137	9.7449	16.4366	4.4675	4.9045	5.0002	6.2984	16.56	10.5495	3.7453		0.34715	8.16943
8.098	6.1541	4.459	4.658	9.598	15.2589	7.392	24.159	6.378	5.349	3.354	3.644	17.288	6.9212	4.411	4.0593	12.5274	17.2105	5.984	3.7027	3.296	9.4433	15.868	8.1993	3.9922		0.352332	8.47112
8.2171	6.7358	4.054	3.141	6.887	11.3996	5.679	15.605	3.926	5.097	3.566	6.063	22.063	7.85	5.958	5.8475	15.7586	15.2199	5.4171	3.5294	5.4642	8.5482	21.2287	10.9285	3.0674		0.357514	8.45975
8.3362	5.6847	4.726	4.116	7.48	11.0004	8.039	20.661	3.59	5.995	3.487	4.044	19.227	7.1292	5.893	7.594	15.758	19.572	4.612	3.051	3.7034	5.8097	20.0188	8.6682	3.865		0.362696	8.48852
8.4552	5.9969	6.029	3.607	9.308	11.0831	5.277	18.471	4.075	3.745	3.141	4.572	20.461	9.1594	6.475	7.103	17.5555	18.7689	5.3414	3.6878	2.7852	3.615	16.8942	8.9015	3.5491		0.367873	8.31675
8.5743	5.1132	4.495	3.977	8.864	14.0102	6.283	23.71	6.22	5.699	3.133	4.165	23.035	8.3886	7.16	4.8087	16.5879	18.676	4.085	3.8881	3.8514	6.3036	16.0314	6.8405	3.1671		0.373055	8.6872
8.6934	6.5599	3.902	4.759	7.671	11.2894	10.019	19.76	6.354	3.427	3.642	6.577	20.564	6.3484	5.296	9.2949	10.8094	20.9356	4.1524	4.1087	2.6241	4.7578	15.5326	8.2973	3.7664		0.378237	8.352
8.8125	5.4021	3.936	5.7	13.32	14.3557	8.023	20.812	6.698	4.949	3.141	5.827	19.133	8.7233	5.848	4.5244	13.5138	24.5279	6.9561	4.7141	4.8819	5.9183	17.0557	11.3944	2.6708		0.383419	9.25106
8.9316	6.3865	5.187	4.87	8.864	7.6936	7.579	19.106	7.442	4.833	2.871	6.631	18.07	7.3545	4.393	6.2627	18.4728	22.4332	3.9977	3.7785	3.6106	3.7531	17.0028	8.908	3.5845		0.388601	8.46185
9.0507	4.7925	1.194	4.382	11.075	11.2226	7.911	25.473	7.249	3.264	4.752	4.667	18.104	8.9212	4.997	5.5944	15.0239	27.8085	5.1081	2.4864	2.6506	3.2909	22.2949	10.1507	3.9863		0.393783	9.01662
9.1698	6.6494	4.791	1.723	9.94	12.0393	7.655	23.059	8.561	4.281	4.231	5.108	21.35	10.1265	2.752	6.0041	10.8314	30.5469	6.9821	3.003	5.0534	4.5348	18.1936	6.8309	3.4161		0.398964	9.06927
9.2889	5.9338	4.488	3.299	10.186	9.126	7.773	24.514	7.205	3.868	3.057	7.735	20.613	10.0688	4.551	5.0221	15.4014	28.8427	4.6156	4.8465	5.538	3.7933	16.0826	6.801	2.5075		0.404146	8.99451
9.4079	5.554	3.584	4.712	11.732	9.3057	9.342	23.059	7.106	3.356	2.938	4.903	27.735	8.5285	5.501	4.5226	19.2154	29.9634	4.5841	3.3671	3.2308	4.8026	11.7913	6.2872	3.2657		0.409324	9.09943
9.527	6.4953	4.553	5.154	14.648	11.0041	10.887	23.603	6.555	5.773	4.163	5.983	32.971	8.4424	7.222	5.9504	12.6868	34.2964	3.8386	3.8112	3.6259	4.9658	11.039	7.6736	2.7543		0.414506	9.92066
9.6461	6.636	3.61	3.035	16.709	11.4447	8.409	22.632	6.826	3.47	3.155	4.472	34.983	5.9835	5.823	7.125	14.1568	29.2996	3.2652	3.5901	3.7708	5.284	12.6277	6.128	3.6669		0.419688	9.42093
9.7652	4.3296	3.871	3.614	22.393	16.6282	9.497	22.831	5.947	3.18	3.415	4.349	41.58	9.8607	5.56	7.575	14.7139	29.8693	4.328	4.2183	4.7567	4.9523	8.9845	7.5989	3.6018		0.424869	10.3189
9.8843	5.7722	2.906	5.449	22.187	15.8727	8.292	23.502	7.991	4.98	3.506	5.01	49.552	10.1255	4.981	5.5358	11.9805	32.1728	2.7275	3.2514	3.4155	4.0124	11.39	4.5655	1.6908		0.430051	10.4529
10.0034	6.4865	3.614	4.679	26.243	14.0399	8.25	25.502	6.462	4.55	4.349	6.766	53.294	11.1471	5.521	4.0586	13.9219	26.6071	2.3729	3.3726	3.6226	2.745	8.2592	4.9837	2.7711		0.435233	10.5674
10.1225	7.33	7.126	4.92	23.917	17.0247	7.463	24.875	4.32	3.944	3.618	4.747	52.687	8.8948	7.318	7.8002	13.9043	25.1001	4.5426	3.1407	2.3731	2.6915	8.3521	7.1457	2.2345		0.440415	10.6446
10.2416	5.3987	5.358	5.313	27.021	17.3676	10.26	25.759	6.931	3.753	4.182	5.663	49.594	10.9364	8.373	7.0433	10.7625	20.9959	3.5829	4.0348	3.6513	2.3386	7.7417	5.2079	3.2313		0.445597	10.6042
10.3606	4.8564	4.304	5.065	30.13	25.9576	11.23	28.715	7.687	4.566	3.126	1.941	51.717	11.4618	6.467	6.055	14.6758	29.8429	4.6086	3.8661	3.6138	4.6211	7.8931	5.2334	4.2605		0.450774	11.7456
10.4797	5.5708	5.773	5.499	28.916	23.4906	9.895	29.687	10.048	5.239	4.056	4.385	57.053	11.1501	6.783	6.9538	13.4561	19.6433	3.7242	2.6117	3.6155	2.7365	7.5648	6.7631	3.9644		0.455956	11.6075
10.5988	6.5849	3.701	4.534	33.988	30.8687	9.41	32.638	6.569	2.444	3.737	6.585	51.543	11.9606	4.76	7.1735	14.6722	20.9741	3.3174	5.077	2.1326	3.868	5.6217	3.6548	2.4913		0.461138	11.5961
10.7179	6.7013	3.374	5.666	26.864	27.4473	10.514	34.09	6.103	3.231	3.553	4.407	46.276	15.6302	5.898	5.5734	9.0023	16.3339	3.9115	2.4923	3.019	4.2409	6.38	6.3967	3.8862		0.46632	10.8746
10.837	5.4326	4.755	4.77	29.882	23.5741	10.894	34.09	8.883	5.161	3.854	4.34	43.736	14.0503	6.099	7.3651	11.9815	17.5919	3.4564	3.5713	5.5734	4.995	5.2531	7.4805	3.8011		0.471502	11.2746
10.9561	6.5891	4.721	6.287	25.324	21.4036	12.64	32.579	6.577	5.711	4.607	4.914	43.949	13.7093	5.634	6.6081	12.7247	16.9387	4.2975	2.3901	3.5044	3.3976	5.7757	6.5513	1.8256		0.476684	10.7774
11.0752	6.3339	4.937	8.301	23.776	21.7177	9.975	35.021	6.286	3.359	3.914	4.524	39.496	14.8034	6.595	5.6138	13.5998	23.1153	5.6814	5.3969	3.7436	3.4082	7.9452	6.4112	3.3887		0.481866	11.1393
11.1943	4.0141	4.142	7.628	21.307	22.5828	9.175	38.858	5.232	4.48	2.692	5.117	33.761	12.4672	8.593	4.6892	12.1231	19.0598	4.3832	3.6315	3.8617	4.0321	7.6976	7.5825	4.0206		0.487048	10.4638
11.3133	7.1157	4.98	5.68	18.631	23.5946	11.596	31.736	6.517	3.357	5.309	4.43	38.076	12.8353	7.634	5.2797	15.6205	23.2184	3.5347	4.2333	4.0156	4.4012	6.497	6.4314	3.5824		0.492225	10.7627
11.4324	5.4593	5.478	7.978	13.366	19.3159	12.362	28.49	7.359	3.532	3.917	4.102	28.551	10.8737	8.908	7.8784	14.6075	21.0841	5.7908	4.1082	3.119	4.8789	5.5833	7.7672	3.0083		0.497407	9.89657
11.5515	5.5925	4.66	7.676	15.034	23.9327	15.211	30.368	6.589	3.87	5.465	3.856	27.341	13.3994	7.166	7.1716	15.8863	18.8028	3.0291	3.5377	2.9575	5.5076	6.3749	9.0664	5.2798		0.502589	10.3239
11.6706	8.0813	4.342	6.385	14.612	23.0234	16.819	25.23	5.561	5.361	4.832	4.365	29.604	11.8989	7.805	5.6802	15.8882	18.9844	5.2467	4.0933	5.735	3.9446	6.1743	9.2582	4.7588		0.507771	10.3201
11.7897	6.0302	4.682	5.039	14.041	25.2653	16.379	24.198	4.08	4.63	5.852	3.478	31.146	15.9189	8.888	6.9524	22.202	17.8772	3.3278	4.6976	4.2568	4.2573	6.3649	10.069	4.6337		0.512952	10.5944
11.9088	5.7568	4.758	6.77	11.43	32.4663	20.96	22.788	7.079	5.607	5.763	3.444	31.168	9.672	9.461	10.243	18.5209	17.1311	3.8581	3.4385	3.7487	3.8691	5.2337	12.8162	5.1282		0.518134	10.8796
12.0279	6.5995	3.901	5.016	13.811	29.9424	23.061	22.181	7.362	3.642	5.109	6.94	40.611	10.6487	6.919	7.7025	15.3468	18.0707	4.3303	4.1729	4.7251	4.8032	3.8619	11.5127	5.4198		0.523316	11.0704
12.147	6.5004	5.973	7.754	9.366	26.9995	25.53	20.429	6.223	4.679	4.397	6.019	34.528	11	7.224	6.4172	21.3106	17.9823	3.2171	3.0767	3.2131	2.2339	7.7081	13.5142	5.1106		0.528498	10.8502
12.2661	3.9419	3.111	8.062	8.275	31.2095	25.185	24.106	7.203	2.513	5.92	4.14	35.286	11.4489	9.016	6.5203	20.5673	16.8194	3.6099	4.148	3.9438	2.6859	4.8084	18.9502	3.4378		0.53368	11.0378
12.3851	4.1804	5.398	6.723	8.556	34.27	28.335	17.765	6.983	4.768	2.409	3.78	36.665	14.7392	8.231	4.1605	16.8966	16.9895	4.4252	3.3465	4.539	2.6329	7.2795	16.3013	6.5767		0.538857	11.0813
12.5042	3.8389	4.495	7.26	8.131	34.5396	27.475	15.003	6.055	3.182	3.334	3.961	31.927	17.9133	8.003	7.2357	20.4124	16.5385	3.9026	3.7276	5.3679	4.6099	3.722	22.9267	7.1644		0.544039	11.2802
12.6233	3.9286	5.175	6.391	9.569	35.9319	40.073	20.021	7.462	4.079	5.603	4.266	32.526	17.2022	6.508	4.5288	22.3563	13.7859	3.6185	4.1317	4.0493	3.8279	4.5825	23.8964	8.9402		0.549221	12.1856
12.7424	3.8479	8.424	8.1	8.57	32.2111	38.675	17.006	5.418	3.825	3.484	3.925	23.705	21.2499	8.413	4.732	20.4968	18.2254	3.0455	4.3623	5.0603	2.6344	5.642	21.1395	10.2027		0.554403	11.7665
12.8615	5.5071	4.187	7.587	11.495	36.5838	43.777	15.746	6.936	5.214	3.619	4.833	24.894	18.2468	7.686	7.687	18.2408	19.7825	5.16	2.5312	3.6567	3.3904	3.0018	18.2332	15.4553		0.559585	12.2271
12.9806	6.2826	3.83	4.744	10.811	31.0121	39.761	12.992	5.142	5.694	4.657	5.793	22.028	18.167	6.083	4.9663	18.404	21.2684	4.0979	5.1388	3.318	2.9746	3.2885	14.9967	15.8587		0.564767	11.3045
13.0997	4.5544	6.949	8.173	11.945	29.315	48.225	13.356	5.614	5.57	4.585	4.551	17.515	19.4811	8.534	8.4417	18.6572	20.2701	5.0898	5.3822	4.0579	2.9077	3.88	14.9172	17.4759		0.569949	12.0603
13.2188	5.942	6.867	7.513	7.185	26.7686	47.798	14.269	6.422	3.575	3.372	4.409	18.732	19.0234	7.779	5.7672	13.7464	20.091	4.5333	3.0247	3.7717	3.3546	4.365	14.2097	26.5516		0.575131	11.6279
13.3378	6.2545	3.789	5.296	8.704	37.7777	56.117	15.487	5.958	5.341	5.918	4.953	18.211	15.1854	9.88	7.4221	14.2232	21.2296	4.8727	3.0897	3.0434	3.8565	4.6558	13.3907	28.1343		0.580308	12.6162
13.4569	3.6027	4.524	5.953	9.154	37.1938	50.175	11.883	4.317	4.312	3.621	7.433	15.886	19.5914	7.589	5.6946	12.2151	21.8413	7.7391	4.3024	2.5341	3.5918	2.4241	12.902	28.1303		0.58549	11.9421
13.576	5.6086	6.699	6.574	7.693	41.5918	55.049	12.704	6.741	3.126	2.95	4.449	17.93	18.2399	7.942	5.4457	14.5315	22.7282	4.1643	3.0369	4.1869	3.1165	2.0949	15.2925	28.0883		0.590672	12.4993
13.6951	5.3103	4.798	6.803	9.694	34.8425	57.044	14.521	5.768	3.536	2.648	6.428	16.59	19.5715	9.209	5.8544	11.6301	22.5659	4.3574	4.2837	2.9567	3.8005	3.0791	10.4967	36.9636		0.595854	12.6146
13.8142	3.6846	2.881	6.891	7.702	44.8642	60.398	10.743	6.389	4.288	6.717	3.925	12.729	18.7394	7.339	4.6925	7.9587	21.7643	6.5358	3.3786	5.4879	2.462	3.8603	9.2771	36.2811		0.601036	12.4579
13.9333	5.1283	4.096	6.723	8.265	38.0151	64.277	13.312	5.677	5.193	5.221	5.472	15.587	18.2684	6.854	8.557	8.469	21.5863	5.8661	3.4163	2.6551	2.8453	3.6046	9.8681	31.6638		0.606217	12.5259
14.0524	7.1573	3.361	6.752	8.471	49.5121	64.122	11.279	6.437	2.627	3.166	7.333	12.192	18.3163	5.989	3.9226	10.3889	24.0236	4.2385	4.1707	3.9825	3.1657	5.7694	10.0541	29.5347		0.611399	12.7486
14.1715	4.5637	6.021	4.99	7.238	41.666	70.252	12.2	4.747	5.254	3.06	6.709	14.542	20.3639	6.331	6.6505	10.2593	17.0157	4.807	4.5663	1.9811	4.0205	4.2784	6.0317	39.0431		0.616581	12.7746
14.2905	4.1429	3.822	7.137	9.897	34.0836	66.275	9.725	3.497	5.209	3.618	4.445	19.966	19.6034	6.372	4.6219	8.6119	19.7843	5.2898	2.0468	3.1605	2.4548	3.0733	6.094	37.0996		0.621759	12.0846
14.4096	3.9371	4.549	7.412	7.587	36.7383	74.555	10.725	5.176	3.63	4.188	5.204	15.19	19.1359	7.455	6.4128	9.1411	20.5589	6.3715	4.7835	4.392	3.158	3.3073	7.6531	35.5511		0.62694	12.7838
14.5287	3.1795	5.22	5.277	6.698	28.1466	72.69	8.633	5.705	4.549	4.182	4.361	19.732	17.8421	5.025	7.2397	8.6285	22.3916	3.9235	4.2938	2.2725	2.6034	2.4855	5.4541	30.5052		0.632122	11.7099
14.6478	5.1762	4.689	6.22	8.504	23.0108	72.978	8.655	6.618	5.561	3.487	4.279	14.009	22.5193	9.009	5.8728	7.9046	20.331	5.9299	3.6489	4.3656	4.3484	2.9683	5.2953	26.6029		0.637304	11.7493
14.7669	5.5165	4.471	5.524	7.909	19.3829	80.106	7.351	5.491	4.711	4.209	4.534	14.155	19.6147	4.811	4.8054	8.2589	22.9011	6.9644	3.4521	2.8232	3.5539	2.4576	7.2836	25.977		0.642486	11.511
14.886	2.8102	5.534	7.098	6.726	18.6998	85.599	7.441	5.976	5.688	4.662	5.55	14.436	18.0547	5.964	7.1365	7.9063	16.15	3.5122	4.0435	4.1815	4.9286	4.9917	5.6024	25.149		0.647668	11.5767
15.0051	4.9867	5.618	5.148	7.712	19.6842	82.192	10.287	4.504	5.273	5.046	5.482	15.942	21.0534	6.21	5.544	9.8684	22.4975	5.3257	3.3429	5.8678	3.6715	3.7805	4.638	21.6986		0.65285	11.8905
15.1242	4.7603	4.563	5.856	5.916	15.9517	84.771	8.86	4.497	5.854	4.139	3.73	15.322	19.5658	4.68	5.712	6.6057	25.0243	4.4975	3.6238	3.7847	2.2102	3.8593	7.2621	15.7625		0.658032	11.117
15.2432	3.7397	6.085	3.378	8.414	11.9261	88.919	7.846	5.519	4.288	4.496	3.812	14.606	16.7953	8.408	5.2287	7.5993	25.2703	5.1199	2.339	2.4546	3.3601	1.9091	5.1968	13.3762		0.663209	10.8369
15.3623	5.2779	5.147	5.196	7.117	14.1465	89.675	9.094	3.471	5.229	4.626	5.226	21.269	19.4466	7.869	4.9236	10.867	25.8966	6.918	3.6811	3.2153	3.9739	2.8302	4.8154	15.0266		0.668391	11.8724
15.4814	3.8539	4.247	5.257	8.11	9.9219	85.336	7.731	5.924	5.29	3.829	5.397	19.718	14.4545	6.217	5.3122	7.9803	25.4856	6.6671	2.8145	3.3546	4.415	2.0676	2.3917	14.7842		0.673573	10.8566
15.6005	3.2051	3.881	6.779	5.028	9.8344	83.411	9.096	5.712	5.147	4.761	5.694	15.692	14.905	7.957	8.3015	8.7724	27.7665	6.1219	5.0526	3.176	3.307	3.9303	4.3762	11.8891		0.678755	10.9915
15.7196	6.3772	4.24	7.473	6.19	12.4746	74.945	8.129	4.978	4.659	3.294	4.029	21.032	14.3691	8.16	4.6822	8.154	23.4694	6.543	4.1528	3.7053	4.2761	2.8274	4.3849	12.4522		0.683937	10.6249
15.8387	5.7146	4.384	4.866	7.19	12.336	78.647	7.763	4.63	3.606	2.927	4.12	19.665	15.1168	8.414	3.7599	5.9739	25.8167	5.4356	4.7838	3.2948	2.8402	4.1221	6.5995	9.6597		0.689119	10.4861
15.9578	5.1077	5.675	5.838	6.031	9.3701	78.969	8.024	4.104	4.672	4.532	4.565	20.015	13.4327	8.733	4.7326	7.8459	23.3559	5.6914	3.7323	2.6658	4.5692	3.8313	2.9356	8.3055		0.6943	10.2806
16.0769	5.3497	5.967	5.279	6.247	9.851	75.698	9.415	6.435	5.825	3.864	7.675	22.973	13.654	8.324	8.0655	9.3317	20.7855	7.47	3.8861	3.6286	4.0605	3.2411	5.6256	11.1939		0.699482	10.9935
16.196	3.835	4.689	4.376	6.395	11.0449	73.184	11.221	6.506	4.697	4.689	3.871	20.733	12.4311	6.747	7.2626	9.0355	24.5879	9.6798	4.1222	3.7777	4.0416	5.0462	3.1601	11.8934		0.704664	10.7094
16.315	5.3729	5.557	6.87	7.356	13.2453	68.104	11.923	5.326	3.38	4.519	2.905	21.019	14.7608	8.001	7.2576	10.5769	21.2696	8.0204	5.4811	4.0349	4.1759	2.534	3.0473	8.684		0.709842	10.5592
16.4341	3.4219	2.891	7.323	3.348	10.7244	68.083	13.785	4.961	5.022	4.199	5.1	24.096	9.7757	8.041	6.9198	7.6264	22.6463	8.388	3.0273	2.698	2.5378	1.9951	3.5224	4.3461		0.715023	9.76993
16.5532	5.4137	5.635	4.98	6.129	8.7811	51.79	12.435	4.192	4.966	4.761	4.341	26.983	15.9093	8.003	6.6586	9.1429	20.4832	8.8206	5.0116	4.3018	3.6332	2.985	4.954	5.4764		0.720205	9.82443
16.6723	6.3471	6.92	6.243	3.957	12.0005	56.36	13.04	5.143	3.316	4.554	4.418	23.165	14.7348	7.7	6.3281	7.4588	16.614	9.1211	4.036	4.6864	4.3716	3.0535	4.9233	6.811		0.725387	9.80426
16.7914	5.1448	5.455	6.129	7.747	11.5856	50.33	17.839	3.592	5.85	5.518	5.38	23.777	14.6086	6.331	5.3513	8.0333	20.3222	8.1373	4.1094	3.3327	3.8514	1.5439	3.1527	6.9934		0.730569	9.75478
16.9105	6.2926	4.181	6.601	5.851	14.3409	50.235	17.587	3.397	5.168	5.369	5.087	25.975	14.6759	6.735	6.0176	10.7056	21.7738	8.6244	2.9925	3.0097	3.4581	4.0541	3.7427	5.9665		0.735751	10.0767
17.0296	5.2512	6.962	4.511	8.397	16.341	52.287	22.599	2.922	3.734	4.168	5.711	31.006	13.2171	4.714	5.1593	11.4839	24.4141	13.0916	3.1258	3.3789	1.9972	2.0112	4.2634	5.4263		0.740933	10.6738
17.1487	5.1782	5.457	5.472	7.235	14.7647	47.098	21.337	4.517	3.022	5.254	5.021	27.884	14.674	8.218	4.5169	12.497	25.2425	11.7413	2.9278	2.1135	4.703	3.2388	3.6122	6.5425		0.746115	10.5111
17.2677	5.8845	3.869	4.596	5.066	17.4245	37.737	31.516	4.092	3.774	3.879	4.855	32.236	13.4982	6.092	6.1219	10.2353	19.2427	9.3081	5.2536	4.9798	4.9592	3.7864	3.7946	4.6616		0.751292	10.2859
17.3868	4.3094	3.523	5.717	5.381	18.4013	43.405	32.947	6.892	4.462	4.596	4.857	28.73	15.4045	5.301	4.4657	13.9362	21.6648	12.9019	2.2993	3.0739	4.1932	4.8026	3.4655	4.3841		0.756474	10.7964
17.5059	7.3404	4.169	5.263	6.476	19.9749	42.517	33.924	3.53	4.313	5.456	3.055	38.222	15.6515	8.158	6.506	16.3682	21.8127	12.1321	4.4055	2.8844	4.2126	2.7372	3.0251	5.9591		0.761656	11.5872
17.625	7.2449	4.428	4.634	6.544	27.0629	38.017	32.686	3.578	4.853	4.464	5.919	42.208	15.464	5.672	7.3183	25.1487	23.4934	19.2862	4.811	2.4736	2.9846	2.8125	4.3026	5.1227		0.766838	12.522
17.7441	6.0859	5.609	5.872	5.856	28.5927	39.354	32.968	4.063	5.291	5.375	6.65	48.314	19.7491	8.979	5.6756	29.3011	23.8814	19.7418	7.203	2.7661	4.0424	4.226	4.1855	5.273		0.77202	13.7106
17.8632	5.3012	4.77	5.458	6.39	31.2582	35.577	30.658	4.826	3.235	6.122	8.667	54.903	16.6213	5.705	7.4846	29.2832	24.9893	16.4079	6.0351	3.2146	2.9145	2.3191	4.231	3.8559		0.777202	13.3428
17.9823	3.2598	5.63	4.305	5.73	34.8662	39.697	39.364	5.646	5.869	5.185	6.593	55.639	23.2589	6.511	6.2224	38.1443	29.0942	24.2369	4.1048	4.6755	5.0185	3.8616	4.0376	4.6936		0.782383	15.2351
18.1014	4.7333	5.559	4.228	6.187	38.7878	39.645	35.048	7.555	3.612	5.589	6.062	68.059	23.6299	5.264	6.8475	41.6956	30.3829	27.7698	4.7229	3.3158	4.2026	4.924	2.8065	5.6903		0.787565	16.0965
18.2204	5.4358	5.178	3.641	5.161	42.1058	41.608	27.664	7.365	5.54	8.064	6.3	65.432	24.4292	6.868	8.8986	35.4167	31.295	27.0387	4.2704	2.6357	3.1714	3.0489	2.3261	6.237		0.792743	15.7971
18.3395	4.2029	4.542	5.502	8.358	39.2538	38.993	28.75	7.341	5.466	6.461	8.046	67.36	27.4306	7.116	7.57	42.1378	26.648	26.2381	7.0281	4.001	2.9823	2.7647	3.03	7.2755		0.797925	16.1874
18.4586	7.0573	4.778	3.538	7.495	36.6671	32.687	27.535	7.45	5.922	4.954	7.907	71.207	25.442	4.581	9.2436	35.7085	15.2395	29.5769	7.4074	5.2459	2.2221	3.8301	3.4713	6.1068		0.803107	15.2197
18.5777	5.9745	4.188	3.95	8.005	34.2731	30.629	20.774	7.503	6.509	7.199	10.508	61.082	16.9649	7.006	7.9942	34.8591	12.4401	26.8118	10.9402	5.4141	4.0122	3.3696	2.6362	4.2401		0.808288	14.0535
18.6968	3.5798	4.559	3.574	9.862	27.9574	32.762	17.003	9.589	4.302	6.89	9.874	57.271	24.1439	6.504	12.4896	30.0839	7.3914	19.515	8.185	5.7143	2.6683	3.1618	4.1225	4.3484		0.81347	13.148
18.8159	6.383	5.344	5.287	8.288	21.5775	25.788	13.058	17.65	7.223	7.898	12.651	50.709	18.1557	8.871	11.354	21.3435	6.143	14.8604	12.1325	5.1943	4.7007	3.4018	4.1413	4.997		0.818652	12.3813
18.935	7.5839	4.933	3.838	11.133	18.564	23.136	12.039	26.154	5.225	7.628	11.008	39.883	15.9772	5.979	12.2648	16.0386	5.1146	12.6863	9.7012	4.701	3.8442	3.2548	4.123	4.1976		0.823834	11.2086
19.0541	7.485	7.322	3.295	9.065	17.1762	19.479	15.23	34.653	6.986	8.16	8.526	35.135	12.2524	7.242	12.7004	11.3586	3.3946	6.8244	10.0052	6.1308	4.5226	2.9799	4.8703	5.4393		0.829016	10.843
19.1731	4.4343	5.124	4.243	11.177	16.2907	16.206	9.717	37.84	6.227	6.503	14.334	23.347	10.8001	9.823	10.4571	9.2885	3.7148	9.0711	11.2599	8.5758	3.2598	4.5472	4.2426	4.1238		0.834193	10.1919
19.2922	5.7505	7.163	7.047	13.076	11.2442	13.554	7.177	45.749	7.404	9.688	15.028	16.979	11.2141	11.297	11.774	5.6717	4.1134	6.4877	8.1964	8.7634	4.4106	4.2631	4.9711	5.3156		0.839375	10.2641
19.4113	6.4164	4.877	4.72	14.434	9.1432	11.032	8.224	44.917	11.997	7.465	17.33	14.579	8.4496	8.647	10.5959	4.473	3.4069	5.2484	10.2985	7.3199	3.6969	4.8549	3.1771	5.6304		0.844557	9.62221
19.5304	7.8188	6.676	4.538	15.299	9.7061	9.369	6.578	35.196	14.621	8.694	23.973	10.376	8.3003	12.742	9.7178	7.1624	1.4222	5.941	6.0917	8.6848	3.9011	4.0162	3.2776	3.6408		0.849739	9.48928
19.6495	6.7865	6.225	4.503	18.392	8.4449	8.735	6.483	26.16	16.792	14.678	31.437	10.691	7.709	12.672	5.6001	5.2147	2.8367	4.8959	7.3889	10.8995	2.6656	4.0255	2.6744	6.1841		0.854921	9.67058
19.7686	7.3936	5.25	4.767	19.02	4.9298	5.746	6.061	16.734	26.416	13.437	38.573	6.165	7.1229	12.703	6.809	4.9096	2.5088	3.9172	8.4348	11.1025	3.0402	5.6291	2.9511	4.8906		0.860103	9.5213
19.8877	9.6456	4.007	5.643	23.551	3.7433	4.748	5.983	14.435	33.194	20.466	52.629	7.961	4.6429	12.788	3.8038	3.4729	2.7311	2.2155	6.7213	12.2985	3.642	7.9323	2.256	4.7609		0.865285	10.553
20.0068	10.3513	6.07	6.858	28.707	3.284	4.419	3.32	11.404	38.826	26.874	64.983	7.444	4.073	12.215	5.7455	3.874	1.48	2.2591	7.1687	12.1501	4.6186	5.6301	3.4747	5.0257		0.870466	11.6773
20.1259	10.2726	7.365	6.349	28.268	2.9864	4.61	3.477	9.458	45.502	34.145	73.712	2.781	2.3092	5.367	5.69	2.9705	1.8985	1.2741	7.9796	11.573	4.6289	6.5239	1.724	5.101		0.875648	11.9152
20.2449	14.1122	6.737	6.191	27.697	2.6423	4.411	1.967	8.58	50.987	40.18	80.742	4.678	2.9301	4.801	3.6012	2.0519	0.8747	2.6776	5.7006	9.0162	5.2445	7.4919	2.2513	4.0173		0.880826	12.4826
20.364	12.9992	7.052	6.271	33.555	2.083	3.514	2.388	6.429	50.078	48.729	75.597	5.067	1.9396	6.561	4.3243	1.2613	1.5453	2.6572	6.1387	11.4539	4.6195	8.2528	2.3919	4.2877		0.886008	12.8831
20.4831	19.1278	8.048	6.78	30.357	1.2308	2.891	3.533	6.608	46.08	39.994	71.315	2.686	3.1288	6.847	2.9449	1.6947	1.3185	1.7819	4.8415	11.2213	5.5778	7.8584	4.4901	5.5104		0.89119	12.3277
20.6022	27.2933	8.646	7.861	33.07	1.7098	3.855	3.193	5.855	39.914	30.684	64.342	2.045	0.9772	4.947	2.6101	2.037	1.1088	1.3078	5.0809	9.6415	7.1871	6.6548	5.7333	6.2438		0.896371	11.7499
20.7213	33.6807	8.23	8.85	25.721	1.5689	2.876	2.448	5.735	37.298	30.548	54.144	1.913	2.0063	4.687	2.1658	0.8398	0.4021	1.2828	3.9525	7.4866	6.5265	8.9574	3.5804	5.981		0.901553	10.87
20.8404	34.3442	10.195	9.106	25.606	1.0296	0.943	2.033	4.27	33.24	28.548	44.576	1.425	2.7051	4.912	2.3345	0.8901	0.9281	1.5069	2.8062	6.7103	5.9453	9.3812	3.3436	4.7728		0.906735	10.0647
20.9595	38.1688	10.055	8.927	17.528	0.705	2.418	2.404	3.875	28.848	23.786	27.023	1.763	1.2577	3.793	2.2586	0.8286	1.3268	0.6264	3.3975	6.6711	10.5458	8.6035	2.893	5.2345		0.911917	8.87239
21.0786	36.0176	14.619	15.78	13.105	1.0398	1.543	1.004	3.332	18.747	20.726	19.88	0.867	0.8886	2.59	1.7344	0.6179	1.2626	1.0557	1.3424	4.674	8.8471	10.4304	4.1172	6.2225		0.917099	7.93513
21.1976	44.4893	15.487	15.989	9.477	1.2955	0.609	1.263	1.682	21.476	17.669	12.615	1.088	1.229	2.364	1.0118	1.0169	0.4113	2.0789	0.471	3.5089	10.5687	13.5675	3.8131	8.0696		0.922276	7.96877
21.3167	38.1247	16.964	18.25	5.62	1.228	1.701	1.703	2.986	12.336	14.247	11.367	0.743	0.9001	2.621	2.0835	1.3356	1.434	1.1354	1.3163	2.3657	12.7207	14.1124	5.6176	6.46		0.927458	7.3905
21.4358	29.9354	19.047	23.06	3.562	0.8533	0.808	0.589	2.546	15.511	15.868	8.529	2.029	0.8385	2.913	2.3722	0.2451	0.2373	0.8139	0.805	4.2693	13.1236	18.1851	3.1374	8.0145		0.93264	7.38719
21.5549	25.2486	31.221	33.566	5.085	0.9165	0.464	1.162	2.757	12.581	13.573	5.871	0.559	0.5052	1.085	0.9311	1.3642	1.0491	0.3991	1.0013	2.8361	15.0229	18.947	6.0059	5.518		0.937822	7.81954
21.674	21.4903	32.485	40.227	2.493	0.2312	1.046	1.58	1.781	8.123	8.274	3.783	0.873	0.674	0.528	1.1105	0.5641	1.1558	0.5073	1.0053	1.2153	14.5652	15.9052	4.5449	6.2227		0.943004	7.09937
21.7931	15.22	38.413	39.751	1.396	0.6092	0.888	0.56	1.743	9.014	7.762	4.766	1.036	0.5121	1.041	0.4905	0.076	0.5538	0.3286	0.8189	2.779	9.8198	18.5913	6.1938	8.274		0.948186	7.10987
21.9122	9.2598	52.67	41.463	1.492	0.113	0.287	1.285	2.626	8.953	6.012	4.676	1.909	1.4211	0.443	0.6665	0.9309	0.8885	0.4355	0.7275	2.0344	8.5668	18.4894	4.3975	5.8019		0.953368	7.31453
22.0313	8.4561	51.458	44.418	0.844	0.437	0.501	0.35	1.129	5.181	5.366	3.599	0.76	0.7103	0.279	0.8321	0.0012	0.5269	0.7271	0.8875	1.6598	6.8988	16.9581	5.2814	7.5024		0.958549	6.86515
22.1503	5.3007	50.116	39.665	0.777	0.3868	0.661	0.333	1.809	4.961	4.241	2.839	0.927	0.774	1.138	0.2337	0.3324	0.4421	0.6246	0.6283	1.0892	6.4116	14.4828	8.4027	9.058		0.963727	6.48475
22.2694	6.198	46.565	34.463	0.739	0.284	0.284	0.267	0.971	6.614	6.9	3.182	0.505	0.3354	0.142	0.7683	0.4011	0.7648	1.2642	0.6544	1.693	3.7883	10.4689	9.4388	7.863		0.968909	6.02309
22.3885	4.1268	35.338	36.088	0.233	0.0581	0.284	0.656	1.369	4.815	3.987	2.41	0.719	0.0079	0.599	0.6613	0.6013	0.7949	0.6704	0.6906	1.1169	2.1607	11.7131	9.1348	9.0205		0.974091	5.3023
22.5076	2.7116	20.834	23.277	1.365	0.1829	0.431	0.445	0.889	2.936	3.237	3.028	0.113	0.3287	0.283	0.8362	0.8237	0.6811	0.3858	0.1475	0.4563	4.3443	10.0518	9.8774	8.823		0.979273	4.02035
22.6267	4.5603	13.769	19.072	0.349	1.8553	0.166	0.08	2.639	4.292	3.322	1.581	0.006	0.0068	0.394	0.8957	0.5618	1.0858	0.2408	0.5428	0.8734	3.1439	6.9004	11.9249	9.2269		0.984454	3.64537
22.7458	2.2012	8.484	12.794	0.876	0.0172	0.006	0.445	1.282	5.043	4.884	2.705	0.55	0.2136	0.384	0.1668	0.499	0.7155	0.4292	0.7238	0.275	3.0492	7.2752	12.046	8.6879		0.989636	3.07302
22.8649	0.9676	5.772	9.986	0.889	0.7074	0.158	0.437	1.088	2.552	2.349	1.484	0.329	0.2817	0.449	0.17	0.0716	0.2783	1.194	0.2736	0.2827	1.0874	5.094	11.9218	9.3326		0.994818	2.38149
22.984	2.8555	4.905	11.112	0.632	0.2329	0.018	0.218	0.334	4.281	1.955	1.612	0.224	0.1753	0.289	0.3963	0.6543	0.0677	0.4631	0.3928	0.386	1.3739	2.9348	10.7112	6.9364		1	2.21501

## Sheet: Sheet1
Image5				Image6			Image7				Image8				Image27				Image28							Distance	Image5	Image6	Image7	Image8	Image27	Image28
Ap-Ba	Avg int			Ap-Ba	Avg int		Ap-Ba	Avg int			Ap-Ba	Avg int			Ap-Basal	Avg intensity			Ap-Basal	Avg intensity						0	28.5942	55.0092	20.6338	49.0126	33.925	32.4636
0	28.5942			0	55.0092		0	20.6338			0	49.0126			0	33.925			0	32.4636						0.05	54.1245	87.0855	44.2818	68.6614	68.7689	56.7249
0.00518187	32.2826			0.00471747	57.9216		0.00526369	24.0111			0.0053769	52.9238			0.00602471	39.3625			0.00487855	35.0859						0.1	81.7429	128.693	93.426	78.3054	92.4675	103.65
0.0103637	34.2664			0.00943493	61.926		0.0105274	27.1039			0.0107538	56.732			0.0120494	45.5935			0.0097571	38.4408						0.15	54.6012	102.096	38.2232	56.0383	30.5936	67.7136
0.0155456	39.1872			0.0141524	68.9872		0.0157911	29.5848			0.0161307	61.2297			0.0180741	53.6527			0.0146356	42.0748						0.2	29.0718	58.1669	12.718	33.0795	11.0388	19.6636
0.0207275	44.3207			0.0188699	75.7413		0.0210548	35.5072			0.0215076	65.0427			0.0240988	60.734			0.0195142	46.0179						0.25	16.3118	23.6569	7.29264	17.3118	9.66592	9.23694
0.025905	47.6739			0.0235834	82.3083		0.026314	40.6931			0.02688	70.1121			0.0301185	71.5706			0.0243886	51.3048						0.3	10.6406	12.7706	8.57224	13.1227	10.188	7.30835
0.0310868	53.7291			0.0283008	90.138		0.0315777	46.7327			0.0322569	74.3298			0.0361432	81.8526			0.0292672	57.7526						0.35	8.4963	10.2325	10.2039	11.7951	11.5157	7.165
0.0362687	59.0239			0.0330183	99.1138		0.0368414	53.4076			0.0376338	78.8989			0.0421679	91.7036			0.0341457	62.5526						0.4	8.77372	11.2644	8.67132	12.814	11.3935	7.72452
0.0414506	63.6275			0.0377358	105.747		0.0421051	60.0423			0.0430107	81.0748			0.0481926	101.643			0.0390243	68.1958						0.45	10.587	14.119	6.69366	10.7848	11.2849	8.63445
0.0466324	68.9524			0.0424532	110.435		0.0473688	70.0513			0.0483876	82.6226			0.0542173	107.652	68.7689		0.0439028	75.2354						0.5	10.7429	17.3761	6.06667	9.70879	11.5781	10.2857
0.0518143	74.005	54.1245		0.0471707	117.478		0.0526325	79.3315	44.2818		0.0537645	83.2963	68.6614		0.060242	111.977			0.0487814	83.025						0.55	11.2973	16.3742	5.88975	8.71633	11.5289	11.2639
0.0569962	78.3011			0.0518882	120.22	87.0855	0.0578962	88.2906			0.0591414	84.7836			0.0662667	111.668			0.0536599	88.5493	56.7249					0.6	12.1832	15.193	5.27366	7.97588	11.8083	11.7649
0.062178	80.9124			0.0566056	125.108		0.0631599	94.6546			0.0645183	82.9715			0.0722914	106.868			0.0585385	95.0704						0.65	11.9946	14.1429	4.81921	8.20555	11.5191	11.6501
0.0673556	81.16			0.0613191	127.134		0.0684192	97.402			0.0698907	82.5733			0.0783111	101.393			0.0634129	98.6433						0.7	10.8211	15.1598	4.80495	8.64088	11.8998	12.704
0.0725374	84.7559			0.0660366	132.667		0.0736829	101.905			0.0752676	81.5321			0.0843358	92.7007			0.0682915	103.392						0.75	10.1664	15.4709	5.33752	8.18589	12.5501	13.3898
0.0777193	85.5413			0.0707541	132.653		0.0789466	103.164			0.0806445	78.3802			0.0903605	83.2755			0.07317	104.687						0.8	14.3752	16.0116	7.51025	7.94122	14.8396	16.8551
0.0829011	85.289			0.0754715	131.631		0.0842102	98.0492			0.0860214	77.6781			0.0963852	72.1752			0.0780486	106.305						0.85	10.634	17.6819	9.13957	8.85481	23.1283	23.654
0.088083	83.5483			0.080189	131.47		0.0894739	94.337			0.0913983	75.3259			0.10241	59.6828	92.4675		0.0829271	108.69						0.9	11.6137	22.8299	4.84995	12.7822	27.0979	35.5078
0.0932649	82.9772			0.0849065	131.401		0.0947376	85.8944			0.0967752	72.4131			0.108435	51.26			0.0878057	108.33						0.95	7.57625	25.8836	2.21981	18.9322	21.3163	47.249
0.0984467	80.8923			0.0896239	128.314		0.100001	77.1379	93.426		0.102152	69.0906	78.3054		0.114459	43.2474			0.0926842	107.538						1	4.14317	19.3858	1.34388	19.2855	20.1646	45.4535
0.103629	78.6477	81.7429		0.0943414	129.45		0.105265	67.5983			0.107529	66.7275			0.120484	36.4276			0.0975628	103.8
0.108806	73.705			0.0990549	124.713		0.110524	59.1751			0.112901	63.5735			0.126504	30.8369			0.102437	100.039	103.65
0.113988	69.118			0.103772	121.088	128.693	0.115788	50.7703			0.118278	61.0694			0.132528	25.7411			0.107316	95.5725
0.11917	65.9912			0.10849	119.481		0.121052	42.6718			0.123655	58.919			0.138553	22.1931			0.112194	92.0391
0.124352	62.3046			0.113207	115.594		0.126315	36.1845			0.129032	56.4261			0.144578	18.4177			0.117073	84.8028
0.129534	58.3267			0.117925	111.749		0.131579	32.0727			0.134409	53.389			0.150602	16.6248	30.5936		0.121951	78.8338
0.134715	54.3584			0.122642	107.459		0.136843	28.9129			0.139786	51.3417			0.156627	13.9919			0.12683	71.9807
0.139897	49.6921			0.12736	105.151		0.142106	24.3111			0.145163	48.2805			0.162652	12.5256			0.131709	64.6069
0.145079	46.7016			0.132077	101.212		0.14737	21.341			0.15054	44.6184	56.0383		0.168677	12.0532			0.136587	58.1295
0.150257	43.1993	54.6012		0.136791	95.9007		0.152629	19.1944	38.2232		0.155912	43.6867			0.174696	10.6906			0.141462	50.1761
0.155439	41.7192			0.141508	92.6523		0.157893	18.6593			0.161289	42.5077			0.180721	10.5006			0.14634	43.6831
0.16062	38.0276			0.146226	88.0465		0.163157	16.2821			0.166666	39.3761			0.186746	10.3517			0.151219	37.3111	67.7136
0.165802	34.8203			0.150943	83.7146	102.096	0.16842	14.5543			0.172043	36.9829			0.19277	9.92028			0.156097	32.2109
0.170984	32.7102			0.155661	78.1038		0.173684	13.8878			0.17742	34.5943			0.198795	9.51364			0.160976	27.7878
0.176166	31.5607			0.160378	74.4526		0.178948	12.2156			0.182797	31.6293			0.20482	9.80146	11.0388		0.165854	23.7964
0.181348	29.6224			0.165095	68.9872		0.184212	12.0689			0.188174	29.2384			0.210844	9.65822			0.170733	21.3982
0.18653	27.6449			0.169813	66.3042		0.189475	10.234			0.19355	26.6989			0.216869	9.68202			0.175611	18.5885
0.191712	26.7149			0.17453	61.4842		0.194739	10.7225			0.198927	23.7529			0.222894	9.77248			0.18049	17.1909
0.196889	23.7368			0.179244	55.0117		0.199998	9.62941			0.2043	22.3276	33.0795		0.228914	9.6792			0.185364	15.2748
0.202071	23.3046	29.0718		0.183961	54.3694		0.205262	8.92575	12.718		0.209677	20.9964			0.234938	9.50516			0.190243	14.2048
0.207253	22.5755			0.188679	49.696		0.210526	7.82525			0.215054	20.2211			0.240963	9.63636			0.195121	13.6717
0.212435	20.8683			0.193396	47.6364		0.215789	8.20802			0.22043	18.7219			0.246988	9.67955			0.2	12.5125	19.6636
0.217617	19.5675			0.198114	43.8482		0.221053	7.31846			0.225807	17.8426			0.253012	9.71434	9.66592		0.204879	11.5124
0.222798	18.7748			0.202831	39.9425	58.1669	0.226317	7.33312			0.231184	16.6088			0.259037	10.0604			0.209757	11.1764
0.22798	17.0192			0.207549	36.0868		0.23158	7.12918			0.236561	16.1627			0.265062	10.0268			0.214636	10.3865
0.233162	16.0584			0.212266	32.8591		0.236844	7.22477			0.241938	15.7475			0.271086	9.98484			0.219514	9.55926
0.23834	16.0487			0.21698	29.7256		0.242103	7.07628			0.24731	14.7389			0.277106	10.4195			0.224389	9.12559
0.243522	14.3008			0.221697	25.5262		0.247367	6.58954			0.252687	14.766	17.3118		0.283131	10.1013			0.229267	9.04226
0.248703	14.1107			0.226415	24.5366		0.252631	6.9291	7.29264		0.258064	14.3357			0.289156	10.3541			0.234146	8.53855
0.253885	13.2605	16.3118		0.231132	22.2069		0.257894	7.11306			0.263441	14.2929			0.29518	10.1144			0.239024	8.35687
0.259067	13.1087			0.23585	20.5447		0.263158	7.83897			0.268818	13.9435			0.301205	10.4429	10.188		0.243903	8.08344
0.264249	12.368			0.240567	18.9546		0.268422	7.77094			0.274195	13.1711			0.30723	11.1681			0.248781	8.04251
0.269431	11.6345			0.245285	17.3756		0.273686	7.84378			0.279572	12.7606			0.313254	11.3373			0.25366	7.78253	9.23694
0.274613	11.0404			0.250002	16.5086		0.278949	8.63142			0.284949	12.7514			0.319279	11.2858			0.258538	7.47748
0.27979	10.9883			0.254715	15.9013	23.6569	0.284208	8.06457			0.290321	12.5506			0.325299	11.2362			0.263413	7.42405
0.284972	10.0165			0.259433	14.6681		0.289472	9.06735			0.295698	12.356			0.331323	11.2414			0.268291	7.56171
0.290154	10.4244			0.26415	14.3872		0.294736	9.11303			0.301075	11.9427	13.1227		0.337348	11.7449			0.27317	7.36668
0.295336	10.1364			0.268868	13.9932		0.3	9.47634			0.306452	11.449			0.343373	12.5395			0.278049	7.16381
0.300518	9.9814	10.6406		0.273585	13.5965		0.305263	10.8029	8.57224		0.311829	11.4507			0.349398	11.7698			0.282927	7.1064
0.3057	9.1757			0.278303	12.9101		0.310527	10.0511			0.317206	10.8953			0.355422	11.3184	11.5157		0.287806	7.40394
0.310881	9.01157			0.28302	12.025		0.315791	10.2776			0.322583	10.9637			0.361447	11.4864			0.292684	6.9443
0.316063	8.87776			0.287738	11.9344		0.321054	10.1287			0.327959	11.0027			0.367472	11.5157			0.297563	7.47944
0.321241	8.69686			0.292451	11.9922		0.326314	10.2945			0.333332	11.4631			0.373491	11.3042			0.302437	7.15566	7.30835
0.326423	7.94407			0.297169	11.2373		0.331577	10.6864			0.338709	12.18			0.379516	11.4969			0.307316	7.11716
0.331605	8.19822			0.301886	10.9621	12.7706	0.336841	10.6947			0.344086	12.4403			0.385541	11.2367			0.312194	7.03039
0.336786	8.74951			0.306604	10.5724		0.342105	9.77248			0.349463	12.8709			0.391565	11.5955			0.317073	7.38376
0.341968	8.38476			0.311321	10.5377		0.347368	9.59469			0.354839	13.2349	11.7951		0.39759	11.4168			0.321951	7.33094
0.34715	8.16943			0.316039	10.267		0.352632	10.3347	10.2039		0.360216	13.1503			0.403615	11.0958	11.3935		0.32683	6.92316
0.352332	8.47112	8.4963		0.320756	10.4216		0.357896	8.78766			0.365593	13.4871			0.40964	11.5087			0.331709	7.00088
0.357514	8.45975			0.325474	10.1547		0.363159	9.57341			0.37097	13.0588			0.415664	11.2383			0.336587	7.28965
0.362696	8.48852			0.330191	9.58209		0.368423	9.11794			0.376347	12.1829			0.421689	11.5189			0.341466	7.37138
0.367873	8.31675			0.334905	9.93686		0.373682	9.02894			0.381719	12.7097			0.427709	11.3767			0.34634	7.05882
0.373055	8.6872			0.339622	10.4764		0.378946	9.25277			0.387096	12.6342			0.433733	10.9066			0.351219	7.14387	7.165
0.378237	8.352			0.344339	10.0814		0.38421	9.20107			0.392473	12.961			0.439758	11.2265			0.356097	7.50117
0.383419	9.25106			0.349057	9.93732		0.389473	8.75826			0.39785	12.6077			0.445783	11.2553			0.360976	7.94673
0.388601	8.46185			0.353774	10.5895	10.2325	0.394737	7.89218			0.403227	12.534	12.814		0.451807	11.2482	11.2849		0.365854	7.48206
0.393783	9.01662			0.358492	10.4447		0.400001	8.13606			0.408604	11.9298			0.457832	11.343			0.370733	7.62808
0.398964	9.06927			0.363209	11.2723		0.405265	6.96489	8.67132		0.413981	11.1099			0.463857	11.4604			0.375611	7.54048
0.404146	8.99451	8.77372		0.367927	10.4405		0.410528	7.89724			0.419358	11.5237			0.469882	11.6179			0.38049	7.82977
0.409324	9.09943			0.37264	10.403		0.415788	7.24122			0.42473	11.2466			0.475901	11.9393			0.385364	7.66432
0.414506	9.92066			0.377358	10.7715		0.421051	6.88046			0.430107	10.8617			0.481926	11.6103			0.390243	7.71933
0.419688	9.42093			0.382075	10.8042		0.426315	7.27235			0.435484	10.2816			0.487951	11.3789			0.395121	8.04601
0.424869	10.3189			0.386793	11.5648		0.431579	6.55389			0.440861	9.8977			0.493975	11.9663			0.4	7.88723	7.72452
0.430051	10.4529			0.39151	11.2428		0.436842	6.22782			0.446238	9.99512			0.5	11.309	11.5781		0.404879	8.00324
0.435233	10.5674			0.396228	12.7594		0.442106	6.22618			0.451615	10.2166	10.7848		0.506025	11.9374			0.409757	7.951
0.440415	10.6446			0.400945	12.9407	11.2644	0.44737	6.01817			0.456992	10.4978			0.512049	11.4709			0.414636	7.93514
0.445597	10.6042			0.405663	12.0907		0.452633	6.52932			0.462368	10.2328			0.518074	11.5624			0.419514	8.50124
0.450774	11.7456	10.587		0.410376	12.665		0.457893	6.08997	6.69366		0.467741	9.63598			0.524094	11.261			0.424389	8.14017
0.455956	11.6075			0.415094	13.2396		0.463156	5.95593			0.473118	9.40482			0.530118	11.1898			0.429267	8.57047
0.461138	11.5961			0.419811	13.7645		0.46842	5.75249			0.478495	9.22332			0.536143	11.5568			0.434146	8.46667
0.46632	10.8746			0.424528	13.768		0.473684	6.2528			0.483872	9.14718			0.542168	11.3761			0.439024	9.0718
0.471502	11.2746			0.429246	13.749		0.478947	6.13144			0.489248	9.79925			0.548193	11.8564			0.443903	9.13186
0.476684	10.7774			0.433963	14.8311		0.484211	6.13919			0.494625	9.59611			0.554217	11.5495	11.5289		0.448781	9.37016
0.481866	11.1393			0.438681	14.5038		0.489475	6.24835			0.500002	9.84195	9.70879		0.560242	11.7472			0.45366	9.83718	8.63445
0.487048	10.4638			0.443398	15.4031		0.494739	6.14436			0.505379	9.85827			0.566267	11.9506			0.458538	9.59507
0.492225	10.7627			0.448112	15.5121		0.499998	5.63488			0.510752	9.1663			0.572286	11.6731			0.463413	10.2886
0.497407	9.89657			0.452829	15.782	14.119	0.505261	6.30899			0.516128	9.22081			0.578311	12.0489			0.468291	9.78998
0.502589	10.3239	10.7429		0.457547	16.7018		0.510525	6.09821	6.06666		0.521505	9.02354			0.584336	11.7493			0.47317	10.3103
0.507771	10.3201			0.462264	17.1911		0.515789	5.75649			0.526882	8.86835			0.59036	12.1941			0.478049	10.1104
0.512952	10.5944			0.466982	17.0255		0.521053	5.90281			0.532259	8.83405			0.596385	11.6209			0.482927	9.8519
0.518134	10.8796			0.471699	17.7684		0.526316	5.71425			0.537636	8.02591			0.60241	11.4826	11.8083		0.487806	10.0667
0.523316	11.0704			0.476417	18.3068		0.53158	5.87571			0.543013	8.17024			0.608435	11.5104			0.492684	10.829
0.528498	10.8502			0.481134	17.2904		0.536844	6.18897			0.54839	7.78746			0.614459	11.4413			0.497563	11.3433
0.53368	11.0378			0.485852	17.1497		0.542107	5.85058			0.553767	8.20834	8.71633		0.620484	11.6091			0.502441	10.6722	10.2857
0.538857	11.0813			0.490565	17.2814		0.547367	5.94272			0.559139	8.04071			0.626504	11.8007			0.507316	10.9284
0.544039	11.2802			0.495283	17.5922		0.55263	5.88644	5.88975		0.564516	7.5732			0.632528	11.7662			0.512194	11.2093
0.549221	12.1856			0.5	17.4534	17.3761	0.557894	5.66336			0.569893	7.82371			0.638553	11.821			0.517073	10.8077
0.554403	11.7665	11.2973		0.504717	16.7758		0.563158	5.42332			0.57527	8.12167			0.644578	11.0111			0.521951	11.3771
0.559585	12.2271			0.509435	17.6827		0.568421	5.1044			0.580647	7.58036			0.650602	11.1929	11.5191		0.52683	11.2131
0.564767	11.3045			0.514152	17.3649		0.573685	5.08602			0.586024	8.01671			0.656627	11.1665			0.531709	11.114
0.569949	12.0603			0.51887	16.0749		0.578949	5.7436			0.591401	8.55149			0.662652	11.3587			0.536587	11.5942
0.575131	11.6279			0.523587	16.5903		0.584212	5.30852			0.596777	8.14926			0.668677	11.6472			0.541466	11.4252
0.580308	12.6162			0.528301	16.5393		0.589472	5.11835			0.60215	7.92579	7.97588		0.674696	11.6205			0.54634	11.3701
0.58549	11.9421			0.533018	15.7344		0.594735	5.12987			0.607527	8.0163			0.680721	12.1825			0.551219	11.6001	11.2639
0.590672	12.4993			0.537736	16.2499		0.599999	5.21802			0.612904	8.49853			0.686746	11.8881			0.556097	11.5738
0.595854	12.6146			0.542453	15.774		0.605263	4.94114	5.27366		0.618281	8.15325			0.69277	12.6915			0.560976	12.1748
0.601036	12.4579	12.1832		0.547171	15.5275		0.610527	4.82898			0.623657	8.0787			0.698795	12.0809			0.565854	11.9843
0.606217	12.5259			0.551888	15.802	16.3742	0.61579	4.99386			0.629034	7.9335			0.70482	12.4627	11.8998		0.570733	11.7077
0.611399	12.7486			0.556606	15.94		0.621054	5.2071			0.634411	7.98775			0.710844	12.5885			0.575611	11.7011
0.616581	12.7746			0.561323	14.9497		0.626318	4.90557			0.639788	8.50822			0.716869	12.186			0.58049	11.6445
0.621759	12.0846			0.566037	15.5459		0.631577	5.00268			0.645161	8.0744			0.722889	12.6169			0.585364	11.575
0.62694	12.7838			0.570754	14.8407		0.636841	4.3335			0.650537	8.59926	8.20555		0.728914	12.274			0.590243	11.7453
0.632122	11.7099			0.575472	14.8974		0.642104	5.08707			0.655914	8.35015			0.734938	12.2845			0.595121	11.6795
0.637304	11.7493			0.580189	15.5835		0.647368	4.70856			0.661291	8.44366			0.740963	12.8105			0.6	11.8626	11.7649
0.642486	11.511			0.584906	15.2608		0.652632	4.30561	4.81921		0.666668	8.16534			0.746988	12.7306			0.604879	11.3686
0.647668	11.5767			0.589624	15.1717		0.657895	4.5051			0.672045	8.48241			0.753012	12.9099	12.5501		0.609757	11.6452
0.65285	11.8905	11.9946		0.594341	14.7849		0.663159	5.4237			0.677422	9.42644			0.759037	13.2509			0.614636	11.357
0.658032	11.117			0.599059	14.8006		0.668423	4.98927			0.682799	8.96246			0.765062	13.4837			0.619514	11.8639
0.663209	10.8369			0.603772	15.3478	15.193	0.673682	4.69145			0.688171	9.17828			0.771081	13.8003			0.624389	11.4902
0.668391	11.8724			0.60849	14.9526		0.678946	4.59833			0.693548	8.67836			0.777106	13.9119			0.629267	11.8372
0.673573	10.8566			0.613207	14.7042		0.684209	4.82485			0.698925	8.40119			0.783131	15.3772			0.634146	11.7062
0.678755	10.9915			0.617925	14.1738		0.689473	4.94608			0.704302	8.32053	8.64088		0.789156	15.551			0.639024	11.5832
0.683937	10.6249			0.622642	14.3802		0.694737	4.46246			0.709679	8.14681			0.79518	16.2437			0.643903	11.7011
0.689119	10.4861			0.62736	13.8624		0.7	4.76817			0.715056	7.84749			0.801205	17.098	14.8396		0.648781	11.6561
0.6943	10.2806			0.632077	14.6931		0.705264	4.84008	4.80495		0.720433	8.3907			0.80723	18.2161			0.65366	11.9425	11.6501
0.699482	10.9935			0.636795	13.3659		0.710528	5.12852			0.72581	8.6812			0.813254	19.2197			0.658538	12.3169
0.704664	10.7094	10.8211		0.641512	13.67		0.715792	5.45483			0.731186	8.08889			0.819279	20.4531			0.663417	12.4758
0.709842	10.5592			0.646226	13.6955		0.721051	5.26249			0.736559	8.05285			0.825299	20.8893			0.668291	12.2558
0.715023	9.76993			0.650943	13.9316	14.1429	0.726314	4.81166			0.741936	8.05648			0.831323	23.1043			0.67317	12.8164
0.720205	9.82443			0.655661	15.2775		0.731578	4.87888			0.747313	8.23937			0.837348	24.0161			0.678049	13.0189
0.725387	9.80426			0.660378	14.3445		0.736842	5.32589			0.75269	8.16923	8.18589		0.843373	26.5409			0.682927	13.0338
0.730569	9.75478			0.665095	15.5906		0.742106	5.4032			0.758066	7.84713			0.849398	27.4369			0.687806	12.6952
0.735751	10.0767			0.669813	14.962		0.747369	5.67567			0.763443	7.91333			0.855422	28.2783	23.1283		0.692684	12.4872
0.740933	10.6738			0.67453	15.0326		0.752633	6.09649	5.33752		0.76882	8.00221			0.861447	28.8525			0.697563	13.1743
0.746115	10.5111			0.679248	15.0993		0.757897	6.34595			0.774197	8.04211			0.867472	28.6418			0.702441	12.7657	12.704
0.751292	10.2859	10.1664		0.683961	15.2319		0.763156	6.61149			0.77957	7.99124			0.873491	28.3434			0.707316	12.9292
0.756474	10.7964			0.688679	15.3341		0.76842	6.7067			0.784946	8.11656			0.879516	28.2371			0.712194	13.0073
0.761656	11.5872			0.693396	14.9432		0.773683	7.15366			0.790323	7.96394			0.885541	27.3198			0.717073	12.6247
0.766838	12.522			0.698114	15.7447		0.778947	7.26672			0.7957	8.03606			0.891565	26.2666			0.721951	13.0019
0.77202	13.7106			0.702831	15.1977	15.1598	0.784211	7.86193			0.801077	7.55841	7.94122		0.89759	24.9653			0.72683	13.3528
0.777202	13.3428			0.707549	15.1751		0.789474	8.07868			0.806454	8.16502			0.903615	24.1568	27.0979		0.731709	12.5592
0.782383	15.2351			0.712266	15.5997		0.794738	7.86234			0.811831	8.41139			0.90964	23.373			0.736587	13.4758
0.787565	16.0965			0.716984	15.7736		0.800002	8.25622			0.817208	8.08114			0.915664	22.2651			0.741466	14.0184
0.792743	15.7971			0.721697	16.0322		0.805261	8.95884	7.51025		0.82258	8.6247			0.921684	21.1474			0.74634	14.2609
0.797925	16.1874			0.726415	15.1794		0.810525	9.12602			0.827957	9.01519			0.927709	20.885			0.751219	14.6682	13.3898
0.803107	15.2197	14.3752		0.731132	15.6982		0.815788	9.48912			0.833334	8.55533			0.933733	21.1022			0.756097	15.3592
0.808288	14.0535			0.73585	15.1218		0.821052	9.58392			0.838711	9.25104			0.939758	20.8387			0.760976	14.9266
0.81347	13.148			0.740567	15.5706		0.826316	9.12942			0.844088	8.99994			0.945783	20.7297			0.765854	15.1099
0.818652	12.3813			0.745285	14.7595		0.83158	9.5018			0.849465	9.12263			0.951807	20.1892	21.3163		0.770733	16.0657
0.823834	11.2086			0.750002	15.7995	15.4709	0.836843	9.64643			0.854842	10.3217	8.85481		0.957832	20.4484			0.775611	16.566
0.829016	10.843			0.754719	15.837		0.842107	8.82039			0.860219	10.2347			0.963857	21.1009			0.78049	16.9846
0.834193	10.1919			0.759433	15.8453		0.847366	8.98976			0.865591	10.9315			0.969876	20.5305			0.785364	17.2398
0.839375	10.2641			0.76415	15.8737		0.85263	7.9693	9.13957		0.870968	11.2926			0.975901	20.0614			0.790243	18.2851
0.844557	9.62221			0.768868	16.4296		0.857894	7.42068			0.876345	11.7677			0.981926	20.0719			0.795121	18.8487
0.849739	9.48928			0.773585	15.9614		0.863157	6.67441			0.881722	12.8815			0.987951	19.7603			0.8	19.1652	16.8551
0.854921	9.67058	10.634		0.778303	16.4634		0.868421	5.98813			0.887099	13.6062			0.993975	19.76			0.804879	20.2089
0.860103	9.5213			0.78302	16.0111		0.873685	5.059			0.892475	13.4969			1	19.5833	20.1646		0.809757	20.4732
0.865285	10.553			0.787738	15.7571		0.878948	4.76665			0.897852	14.7565							0.814636	21.2459
0.870466	11.6773			0.792455	16.4364		0.884212	4.51465			0.903229	16.0724	12.7822						0.819514	21.4552
0.875648	11.9152			0.797173	15.7122		0.889476	3.63677			0.908606	17.1504							0.824393	21.8652
0.880826	12.4826			0.801886	15.8003	16.0116	0.894735	4.03542			0.913979	17.9742							0.829267	22.9462
0.886008	12.8831			0.806604	16.0235		0.899999	3.35167			0.919355	18.0721							0.834146	23.9398
0.89119	12.3277			0.811321	16.3408		0.905262	3.05209	4.84995		0.924732	18.2976							0.839024	25.6761
0.896371	11.7499			0.816039	16.7151		0.910526	2.89634			0.930109	19.0907							0.843903	26.4772
0.901553	10.87	11.6137		0.820756	16.5021		0.91579	2.64679			0.935486	19.6912							0.848781	27.2874
0.906735	10.0647			0.825474	17.2543		0.921053	2.2983			0.940863	19.7422							0.85366	28.6186	23.654
0.911917	8.87239			0.830191	17.4348		0.926317	2.38281			0.94624	19.9137							0.858538	29.5415
0.917099	7.93513			0.834908	18.2374		0.931581	2.36243			0.951617	20.458	18.9322						0.863417	31.2296
0.922276	7.96877			0.839622	18.261		0.93684	2.22224			0.956989	20.8327							0.868291	31.4553
0.927458	7.3905			0.844339	18.969		0.942104	1.74021			0.962366	20.5285							0.87317	33.5447
0.93264	7.38719			0.849057	18.9685		0.947367	1.85978			0.967743	18.8397							0.878049	35.0824
0.937822	7.81954			0.853774	19.7944	17.6819	0.952631	1.56936	2.21981		0.97312	18.4453							0.882927	36.128
0.943004	7.09937			0.858492	19.7096		0.957895	1.74097			0.978497	19.1757							0.887806	37.8379
0.948186	7.10987			0.863209	20.7285		0.963159	1.84062			0.983874	18.808							0.892684	38.8911
0.953368	7.31453	7.57625		0.867927	20.8748		0.968422	1.39849			0.989251	18.3909							0.897563	40.1807
0.958549	6.86515			0.872644	22.2087		0.973686	1.48054			0.994628	18.9471							0.902441	41.1868	35.5078
0.963727	6.48475			0.877358	22.3063		0.978945	1.28587			1	19.6019	19.2855						0.907316	43.0959
0.968909	6.02309			0.882075	23.5812		0.984209	1.22617											0.912194	43.1293
0.974091	5.3023			0.886793	24.0064		0.989473	1.31431											0.917073	44.9591
0.979273	4.02035			0.89151	24.19		0.994736	0.922043											0.921951	45.9767
0.984454	3.64537			0.896228	24.4936		1	0.885927	1.34388										0.92683	47.5778
0.989636	3.07302			0.900945	26.1999	22.8299													0.931709	48.2209
0.994818	2.38149			0.905663	27.0943														0.936587	48.8518
1	2.21501	4.14317		0.91038	26.5553														0.941466	49.4853
				0.915094	26.4625														0.94634	49.8854
				0.919811	27.4724														0.951219	51.3081	47.249
				0.924528	26.5811														0.956097	52.1447
				0.929246	24.9995														0.960976	52.7369
				0.933963	26.2706														0.965854	54.2698
				0.938681	25.4276														0.970733	53.2726
				0.943398	25.4162														0.975611	51.1294
				0.948116	24.6028														0.98049	47.774
				0.952833	23.8373	25.8836													0.985368	44.2084
				0.957547	23.4069														0.990243	38.6198
				0.962264	22.8935														0.995121	32.3226
				0.966982	21.7486														1	28.0572	45.4535
				0.971699	20.5572
				0.976417	19.8438
				0.981134	18.5078
				0.985852	18.4853
				0.990569	17.0906
				0.995283	15.7845
				1	15.5399	19.3858
