# Supplementary material for: Crumbs organizes the transport machinery by regulating apical levels of PI(4,5)P2 in Drosophila
Source: eLife. 2019 Nov 7;8:e50900. doi: 10.7554/eLife.50900 (PMC6881148; doi:10.7554/eLife.50900)
Supplement: Figure 5—figure supplement 1—source data 8. [file elife-50900-fig5-figsupp1-data8.xlsx]

## Sheet: Image22
X0	Y0	Y1	Y2	Y3	Y4	Y5	Y6	Y7	Y8	Y9	Y10	Y11	Y12	Y13	Y14	Y15	Y16	Y17	Y18	Y19	Y20		Ap-Ba	Avg int
0	136.823	136.576	125.241	68.176	99.156	115.077	104.337	69.441	106.447	140.319	78.456	100.442	128.914	124.659	142.397	125.952	131.685	116.046	82.213	47.55	71.0097		0	107.187
0.1191	136.308	139.705	124.866	73.52	98.141	122.489	111.641	74.326	106.875	135.666	84.629	101.568	138.375	130.801	141.377	137.588	125.538	105.652	83.496	51.385	74.096		0.00628994	109.431
0.2382	137.212	147.233	130.126	81.067	110.243	137.624	116.605	77.419	106.213	131.682	94.454	107.643	148.468	141.303	145.578	163.069	118.352	108.329	85.106	53.677	76.0935		0.0125799	115.119
0.3573	131.915	156.666	133.974	97.677	121.267	143.663	124.101	83.078	108.088	124.668	97.403	123.514	162.087	149.879	153.81	161.513	120.194	111.322	78.402	61.233	75.2569		0.0188698	119.986
0.4764	130.257	160.909	140.637	106.605	113.655	142.481	135.685	85.422	111.719	118.982	112.764	138.665	180.431	153.286	164.715	162.242	114.926	110.298	75.323	62.152	72.6835		0.0251598	123.516
0.5954	122.599	166.69	151.313	119.049	111.122	150.654	133.891	95.774	105.785	121.336	121.659	144.389	197.716	164.561	171.215	160.458	115.834	108.899	76.748	72.319	73.5965		0.0314444	127.886
0.7145	135.408	176.504	150.204	121.489	117.484	159.325	142.586	100.163	112.35	118.89	125.937	155.868	208.081	173.902	180.212	165.287	122.966	117.986	82.933	82.475	67.7018		0.0377344	134.179
0.8336	138.386	182.853	161.181	132.698	111.212	159.837	151.864	109.36	122.842	123.47	133.897	155.867	207.773	185.038	182.681	167.126	128.7	113.739	91.256	86.668	67.9209		0.0440243	138.779
0.9527	141.103	182.991	164.552	144.517	114.244	166.595	146.342	107.71	125.777	122.918	139.106	169.235	216.057	190.654	182.816	164.319	136.589	112.134	93.584	103.195	64.2423		0.0503142	142.318
1.0718	145.724	181.455	171.241	143.615	111.758	160.245	154.242	118.257	130.451	129.508	144.436	163.744	214.403	199.707	181.889	166.007	135.893	106.218	95.76	112.39	63.934		0.0566042	144.327
1.1909	149.515	176.391	173.848	148.807	126.761	158.759	161.169	121.352	134.34	132.891	142.7	159.301	209.87	214.691	179.996	162.661	143.771	105.779	104.746	121.465	60.8398		0.0628941	147.126
1.31	152.556	178.737	178.943	146.61	139.511	168.871	158.556	119.344	131.615	132.951	148.152	162.669	201.655	215.854	188.295	159.841	150.637	113.606	106.656	126.848	56.6395		0.0691841	149.455
1.4291	161.404	178.082	158.802	146.789	143.172	162.972	150.632	119.282	129.756	127.297	144.891	162.635	201.465	213.074	204.906	154.644	148.941	114.156	122.789	128.798	53.792		0.075474	148.966
1.5481	149.963	170.73	161.919	138.666	155.642	164.774	155.451	119.867	128.158	128.134	139.558	160.896	193.857	211.975	216.422	156.855	154.312	122.124	125.432	129.257	55.6556		0.0817586	149.507
1.6672	153.859	165.186	153.252	139.28	165.245	174.125	154.551	119.271	127.817	134.538	138.793	167.83	192.704	204.402	213.399	159.583	165.294	128.073	132.059	123.768	50.8879		0.0880486	150.663
1.7863	144.739	162.457	152.771	139.814	158.784	168.485	148.414	117.592	122.164	132.383	135.761	168.261	188	190.078	218.277	161.665	168.032	140.678	131.732	128.602	55.6405		0.0943385	149.254
1.9054	149.817	160.702	162.945	143.738	163.205	155.354	146.501	115.273	128.504	131.463	139.697	168.965	188.181	180.639	212.651	171.266	178.09	137.516	131.601	118.119	55.8922		0.100628	149.529
2.0245	147.176	161.593	157.699	140.254	161.729	150.865	153.742	117.58	119.264	125.299	140.181	165.12	189.85	171.58	215.5	186.481	173.14	133.619	126.709	115.066	56.5942		0.106918	148.05
2.1436	130.787	158.508	151.206	138.944	160.831	152.559	150.319	120.705	108.401	126.458	142.028	165.256	188.947	171.996	206.092	189.572	155.072	127.52	121.38	106.864	53.5659		0.113208	144.143
2.2627	132.372	157.261	150.415	139.637	153.148	136.943	146.447	113.95	98.473	125.34	135.476	162.649	185.239	165.697	190.206	192.996	152.704	127.114	118.821	103.224	49.1458		0.119498	139.869
2.3818	125.128	157.185	142.009	139.415	149.079	125.574	145.591	97.162	84.629	119.928	137.478	151.537	174.828	149.692	176.948	187.674	147.773	129.61	113.644	103.363	53.3449		0.125788	133.885
2.5008	117.984	150.283	138.34	139.64	147.028	121.616	134.644	92.581	75.995	116.303	145.28	141.59	166.571	142.12	156.55	183.965	137.995	123.12	98.54	99.155	58.9813		0.132073	128.013
2.6199	115.675	132.852	133.912	139.719	152.659	116.814	124.338	89.126	63.839	109.832	135.408	131.851	146.914	123.096	130.432	172.726	137.111	127.894	94.299	92.534	54.6429		0.138363	120.27
2.739	105.325	120.615	127.36	127.623	141.398	123.724	107.652	77.023	53.854	99.635	132.816	119.968	148.979	109.703	114.254	168.587	141.523	119.168	90.538	89.416	55.7093		0.144653	113.089
2.8581	102.129	106.2	121.577	120.907	143.685	117.067	99.888	63.93	44.873	89.889	131.655	111.389	143.372	90.405	99.963	178.873	140.107	122.188	78.844	93.9	56.9457		0.150943	107.514
2.9772	96.108	96.597	117.094	115.399	131.685	107.676	94.824	56.746	38.581	78.326	114.05	96.66	132.764	78.164	89.209	181.995	140.475	120.781	77.642	84.557	53.4289		0.157233	100.132
3.0963	93.426	97.354	108.192	105.722	133.59	104.564	82.321	49.909	33.631	68.134	103.488	83.491	127.645	64.621	69.977	179.396	147.284	116.637	77.343	80.147	58.7446		0.163523	94.5532
3.2154	89.76	86.905	107.158	98.537	126.883	96.329	82.18	43.753	30.61	59	84.662	82.033	126.248	53.738	62.199	180.783	152.102	107.608	69.624	83.669	56.9574		0.169813	89.559
3.3345	86.314	81.86	98.902	88.788	118.049	86.451	77.537	37.33	30.218	54.536	72.304	81.894	123.184	47.135	55.563	180.079	150.747	104.531	63.672	76.055	63.9413		0.176102	84.7186
3.4535	82.557	75.541	88.911	80.282	109.966	86.596	66.244	36.908	29.551	46.538	66.978	85.71	114.878	42.307	50.024	177.195	163.247	95.21	56.73	76.801	61.2913		0.182387	80.6412
3.5726	75.373	72.857	79.678	75.967	102.377	85.555	61.954	32.12	26.566	38.418	45.814	83.527	109.496	34.508	46.204	173.223	161.553	87.689	53.261	75.355	62.0043		0.188677	75.4047
3.6917	69.428	69.061	70.693	66.83	95.101	78.681	60.779	31.979	27.034	35.061	42.831	85.765	101.796	25.711	46.307	168.543	170.356	81.082	49.772	75.365	65.9401		0.194967	72.2912
3.8108	63.691	66.04	59.165	66.175	87.136	71.153	50.177	27.634	22.251	29.036	36.558	81.483	95.852	22.748	51.933	166.505	171.08	76.688	43.475	74.449	67.4113		0.201257	68.1257
3.9299	63.645	62.946	48.94	64.311	82.577	67.828	45.311	28.829	17.125	29.869	35.099	73.609	88.491	25.645	53.059	173.047	172.443	64.923	41.434	77.056	64.203		0.207547	65.7329
4.049	58.295	49.352	42.672	55.558	75.152	64.053	42.229	28.305	17.418	24.493	33.156	68.729	74.019	27.429	49.128	179.914	179.75	57.577	42.76	74.108	69.7073		0.213837	62.5621
4.1681	51.029	45.343	38.323	55.738	75.293	60.284	36.577	23.635	14.388	18.171	29.114	62.106	71.085	29.44	47.047	179.768	173.082	50.657	37.563	70.783	67.3795		0.220127	58.8955
4.2872	48.402	40.895	33.901	55.046	75.075	60.046	34.432	24.452	13.614	14.916	24.795	57.446	70.418	27.103	40.54	179.537	179.122	44.774	33.211	73.174	66.4253		0.226417	57.0154
4.4063	42.166	40.45	29.68	56.986	65.538	60.526	30.916	20.25	12.082	15.991	22.026	52.326	59.411	27.265	34.862	180.608	183.663	39.345	28.644	69.413	67.8319		0.232707	54.2848
4.5253	38.6	35.667	26.83	50.345	63.61	57.618	31.514	16.36	11.834	13.586	23.174	53.974	51.859	28.784	37.848	181.786	195.06	37.726	28.762	75.478	65.8515		0.238991	53.6317
4.6444	32.793	33.069	22.496	44.785	65.32	55.566	28.206	15.495	11.478	12.605	21.995	46.209	48.075	25.805	36.758	179.245	188.059	34.576	29.25	78.075	65.2271		0.245281	51.1946
4.7635	32.91	29.361	23.009	39.441	62.899	52.711	26.484	17.423	10.426	12.392	21.224	41.542	44.371	26.307	33.694	177.612	184.83	30.546	29.803	75.966	63.7244		0.251571	49.3655
4.8826	28.245	29.922	18.922	40.179	55.402	55.295	24.621	14.599	8.302	11.402	18.73	39.342	41.293	27.477	31.502	173.255	192.514	29.668	26.226	79.366	64.3072		0.257861	48.1223
5.0017	25.164	25.688	14.751	37.592	52.256	58.33	26.287	12.953	9.369	10.473	17.241	33.727	34.404	28.94	27.857	166.546	187.865	27.041	27.689	86.517	68.3646		0.264151	46.6216
5.1208	25.942	25.179	14.385	34.379	54.586	58.414	24.195	12.734	10.191	7.901	17.248	34.209	31.007	32.682	23.891	166.068	172.802	30.973	24.644	84.227	63.6402		0.270441	45.2046
5.2399	21.073	22.937	15.123	29.211	58.104	53.854	24.309	14.845	7.586	9.924	16.344	31.737	25.988	32.847	18.097	165.004	161.572	33.819	24.995	85.337	63.3366		0.276731	43.6211
5.359	20.797	19.706	15.159	25.189	54.695	57.602	24.187	11.298	9.204	8.37	17.15	29.455	19.708	35.006	18.801	149.83	144.955	36.577	22.249	80.023	65.5845		0.283021	41.2165
5.478	19.757	17.833	12.441	24.708	60.53	54.51	23.066	9.617	8.001	9.287	13.78	28.694	17.912	33.689	18.104	143.757	126.136	45.216	22.959	86.962	58.9172		0.289306	39.8036
5.5971	15.089	16.944	11.9	23.953	66.711	56.499	21.691	12.024	8.156	8.068	14.104	24.472	17.676	42.132	16.973	137.089	119.772	59.051	26.061	85.724	56.1201		0.295595	40.01
5.7162	15.846	14.529	13.106	27.494	67.843	59.52	20.7	11.728	7.013	9.887	14.064	26.626	16.46	43.393	14.486	133.697	93.241	64.552	22.778	85.036	58.9926		0.301885	39.0948
5.8353	14.585	12.426	12.57	25.684	69.016	62.49	18.741	11.838	7.899	8.814	14.497	23.486	18.798	47.958	13.907	119.32	80.425	61.575	23.585	80.982	60.5309		0.308175	37.5775
5.9544	14.938	11.821	13.435	28.78	67.183	59.172	18.821	10.672	7.047	8.047	13.077	22.568	18.962	50.467	13.379	104.599	71.035	67.883	22.679	81.584	61.815		0.314465	36.5697
6.0735	11.685	10.376	11.573	26.167	66.755	61.243	16.315	11.885	5.54	10.75	14.409	20.129	17.9	47.787	17.222	97.246	64.623	67.112	22.463	80.459	62.3703		0.320755	35.429
6.1926	11.694	10.877	13.597	27.66	66.441	59.914	17.582	12.298	7.545	8.798	13.1	18.833	18.917	47.324	16.756	82.702	55.954	61.872	22.966	81.048	61.4597		0.327045	34.1589
6.3117	12.264	10.801	12.131	29.482	69.085	61.561	17.737	9.939	6.509	8.546	15.077	19.241	19.737	46.376	15.847	69.447	50.819	57.822	22.101	85.353	50.7651		0.333335	32.8876
6.4307	10.785	10.725	12.924	27.944	76.092	60.676	16.989	10.987	8.186	9.016	16.304	19.116	18.757	44.55	16.973	59.019	46.93	54.707	20.063	80.898	54.8619		0.33962	32.2144
6.5498	11.061	10.848	14.34	29.977	75.177	68.143	17.255	9.772	8.449	9.963	14.113	18.335	18.541	49.501	16.642	40.56	43.856	52.397	17.191	73.458	52.3804		0.34591	31.0457
6.6689	10.393	8.844	13.604	32.692	79.554	76.997	19.206	9.193	7.038	9.397	14.637	19.17	21.166	47.901	16.768	32.077	33.911	58.372	20.549	61.537	49.1486		0.3522	30.5788
6.788	8.94	9.747	15.742	32.107	79.175	81.254	17.953	8.002	7.105	8.226	15.579	19.17	20.764	44.36	17.088	28.163	28.362	55.831	19.528	61.841	43.5336		0.35849	29.6415
6.9071	10.048	10.61	15.965	32.087	76.751	76.696	18.256	8.085	7.042	7.712	12.574	20.021	19.986	38.809	15.722	25.136	22.875	53.343	17.551	51.415	40.4138		0.36478	27.6713
7.0262	9.816	10.414	13.786	30.724	83.149	76.51	16.084	9.421	6.283	9.902	13.521	21.094	22.245	45.123	17.257	20.636	20.324	55.814	19.086	46.36	36.1726		0.371069	27.7963
7.1453	11.006	9.28	13.346	28.278	82.479	77.669	17.221	8.825	5.905	9.675	12.103	20.972	23.391	43.655	14.733	18.937	19.556	62.042	18.703	40.571	30.4692		0.377359	27.0865
7.2644	9.71	10.571	13.368	27.007	81.269	73.202	19.131	7.224	6.226	7.285	12.878	19.721	21.51	39.161	15.092	15.922	14.668	68.664	19.167	33.561	28.47		0.383649	25.8956
7.3834	9.574	10.476	17.109	26.335	81.35	77.215	18.364	8.196	6.551	8.618	12.559	20.2	20.257	39.649	14.102	14.074	13.899	69.459	19.302	31.973	27.0886		0.389934	26.0167
7.5025	8.856	10.519	16.479	24.75	84.487	79.096	18.759	9.581	6.452	9.209	13.604	21.106	23.714	42.519	14.54	11.73	12.343	67.13	19.896	26.747	22.9696		0.396224	25.9279
7.6216	10.303	10.037	19.895	25.035	82.684	79.69	18.453	7.944	6.442	8.425	12.974	21.614	23.907	39.986	16.252	12.196	14.063	65.029	20.806	25.414	20.2404		0.402514	25.7804
7.7407	9.354	7.872	16.601	26.478	76.426	73.891	18.494	8.646	7.151	7.372	13.987	19.654	24.918	39.275	16.671	10.699	13.67	62.729	21.416	20.289	19.8364		0.408804	24.5443
7.8598	9.242	10.154	21.914	28.114	76.468	66.684	19.284	8.978	7.067	7.641	14.37	20.973	22.946	37.935	13.202	10.498	10.84	55.996	25.677	19.321	18.5585		0.415094	24.0887
7.9789	9.353	11.366	19.513	27.249	77.881	58.836	21.128	9.9	7.975	6.594	15.311	18.424	25.42	31.906	13.205	9.731	14.078	50.876	26.29	14.034	17.1609		0.421384	23.1539
8.098	9.968	9.772	20.954	32.981	71.773	53.33	20.663	9.085	6.671	7.365	13.569	21.959	24.694	32.937	13.586	8.596	12.709	49.575	29.285	14.045	15.0773		0.427674	22.7902
8.2171	9.719	12.013	20.788	30.943	66.984	47.262	23.393	9.048	7.723	7.003	10.964	20.939	24.054	31.992	13.659	8.805	12.901	43.953	30.187	13.975	16.4037		0.433964	22.0337
8.3362	11.107	13.278	23.745	32.68	59.166	44.798	24.237	10.092	6.894	7.477	12.509	18.895	21.923	32.414	13.155	9.602	14.738	36.545	29.457	11.805	15.1279		0.440253	21.4117
8.4552	12.348	12.77	20.6	30.595	51.778	41.948	23.009	9.359	6.249	7.462	12.122	23.667	24.176	33.484	10.836	10.392	13.147	33.775	27.725	12.454	13.3575		0.446538	20.5359
8.5743	10.456	15.625	23.195	32.822	49.184	33.354	23.219	9.665	8.302	8.169	14.172	20.908	28.184	34.511	12.544	9.869	11.743	33.398	31.729	13.083	13.9451		0.452828	20.8608
8.6934	10.566	16.353	25.161	33.544	45.548	32.737	26.032	8.621	6.943	8.429	12.538	20.098	27.333	33.479	11.653	11.578	12.974	31.952	30.239	13.103	11.6875		0.459118	20.5033
8.8125	10.183	16.987	23.284	28.412	47.036	31.135	28.614	9.984	6.376	7.943	12.379	21.443	28.01	34.127	10.603	11.396	13.737	36.501	26.059	12.434	11.0134		0.465408	20.3646
8.9316	11.394	16.855	21.011	29.701	48.09	30.76	33.176	10.833	7.672	7.836	12.524	27.761	28.513	37.659	9.618	10.514	14.255	34.559	24.971	11.102	8.7474		0.471698	20.8358
9.0507	14.985	16.925	20.195	30.422	45.754	31.868	28.389	9.2	7.928	6.161	13.338	25.785	29.363	36.356	11.753	10.411	13.223	35.247	23.615	10.466	8.1105		0.477988	20.4521
9.1698	12.657	16.151	24.387	30.707	40.139	28.152	30.145	9.375	6.448	7.103	12.919	25.179	32.216	40.992	10.41	7.382	15.124	34.792	21.929	9.935	9.1548		0.484278	20.2522
9.2889	14.261	14.659	22.591	33.43	32.436	25.623	33.465	9.012	6.402	7.449	12.61	24.359	32.791	38.369	10.163	8.797	17.425	34.81	21.671	10.662	10.2896		0.490568	20.0607
9.4079	15.675	15.357	22.909	31.965	27.423	26.062	32.584	8.902	7.422	6.355	12.764	24.165	33.894	39.458	9.791	8.918	18.006	33.041	17.422	8.989	9.9014		0.496852	19.5716
9.527	16.817	15.658	23.721	34.951	25.74	22.692	33.428	8.018	6.915	7.025	11.666	19.16	34.142	39.123	10.429	8.83	18.464	36.654	16.823	9.155	10.2926		0.503142	19.5097
9.6461	17.922	16.184	21.956	35.458	24.107	21.808	30.471	8.958	7.822	7.45	11.426	19.159	35.599	40.265	11.385	10.793	19.591	33.716	14.56	9.16	9.0026		0.509432	19.3711
9.7652	19.054	22.796	22.208	40.487	21.773	17.448	32.021	8.266	7.271	7.626	10.606	17.485	33.547	39.634	8.94	8.947	17.183	30.636	15.544	8.009	10.1292		0.515722	19.0291
9.8843	17.834	21.653	21.669	39.484	22.222	16.274	30.99	9.012	7.458	8.155	10.879	19.246	36.536	42.196	10.444	7.862	16.404	27.05	14.075	7.809	8.4112		0.522012	18.8411
10.0034	22.536	21.335	22.026	38.735	22.818	19.82	31.802	8.561	7.522	6.065	11.235	18.943	34.864	40.637	8.813	8.128	16.144	24.884	17.824	9.512	8.7402		0.528302	19.0926
10.1225	21.365	19.265	23.945	38.697	22.861	17.45	31.59	8.316	7.645	6.226	11.679	18.355	33.943	41.401	9.109	8.026	13.281	22.813	17.831	8.398	9.7823		0.534592	18.6656
10.2416	23.666	25.355	20.896	39.04	22.02	17.759	32.937	8.528	7.307	5.724	9.266	15.573	36.452	40.517	9.223	9.03	18.199	24.778	15.73	8.66	10.609		0.540882	19.108
10.3606	24.895	23.441	24.45	41.47	20.052	20.397	30.456	7.628	7.621	5.697	8.767	14.801	35.057	37.913	9.494	8.158	16.17	25.432	15.041	8.152	7.8343		0.547167	18.7108
10.4797	26.465	24.267	23.959	39.635	20.474	18.345	32.794	7.449	6.479	6.681	7.714	15.352	37.41	37.953	8.537	9.225	13.828	24.108	16.137	8.254	7.5286		0.553457	18.695
10.5988	30.333	26.801	21.626	34.392	17.09	16.788	33.998	7.898	6.551	6.929	8.8	12.809	38.899	37.893	8.489	10.028	15.48	21.314	15.733	7.741	8.2702		0.559747	18.4696
10.7179	29.712	23.973	24.769	32.355	17.258	17.547	33.5	9.101	5.435	6.125	9.244	15.27	34.606	37.259	8.85	9.023	16.534	22.903	15.843	8.046	6.5924		0.566036	18.2831
10.837	27.652	26.137	24.943	32.492	17.785	14.898	31.958	8.034	6.27	6.665	9.058	14.561	34.556	33.09	7.645	8.305	15.415	18.924	14.959	7.372	5.8064		0.572326	17.4536
10.9561	23.944	23.017	26.265	33.139	16.016	14.503	34.115	9.452	5.596	7.156	9.496	13.203	34.966	33.548	8.529	8.345	13.917	21.503	15.042	7.636	7.3482		0.578616	17.4636
11.0752	25.872	24.554	26.012	32.299	17.93	14.38	35.526	7.626	6.31	7.512	7.569	13.158	34.635	33.808	8.002	8.904	13.199	23.113	14.222	7.036	7.8989		0.584906	17.5984
11.1943	25.546	28.954	29.45	30.442	16.603	11.63	33.775	8.697	7.174	6.639	9.204	12.56	38.222	29.395	10.61	9.495	16.343	21.576	12.742	7.162	7.2907		0.591196	17.7862
11.3133	24.881	24.37	31.008	27.303	15.816	10.973	34.638	8.037	6.538	7.343	8.349	11.487	41.384	29.076	10.218	9.353	15.328	22.828	10.761	6.612	8.809		0.597481	17.3863
11.4324	23.838	21.227	33.612	27.799	13.819	12.285	33.091	7.917	7.339	7.455	8.215	11.333	39.659	29.75	9.548	7.891	13.933	20.751	10.702	6.804	8.2649		0.603771	16.9159
11.5515	24.369	22.732	28.684	28.307	12.709	12.769	30.264	6.352	5.699	5.565	8.479	10.866	38.101	27.546	9.678	7.981	13.528	22.651	10.43	8.164	8.3017		0.610061	16.3417
11.6706	24.853	22.258	24.253	24.915	12.857	15.706	31.765	6.342	7.084	6.459	11.258	11.152	32.602	25.101	9.218	10.07	15.085	19.473	11.273	6.205	7.6252		0.616351	15.9788
11.7897	22.988	19.72	24.762	25.93	13.816	14.344	31.894	8.875	7.002	6.204	8.941	10.013	31.834	26.902	8.203	9.308	16.525	18.103	11.293	7.13	8.5944		0.622641	15.8277
11.9088	23.605	22.09	24.485	25.971	12.78	11.457	29.794	8.01	5.809	5.475	7.642	10.209	30.268	22.984	8.188	9.878	18.803	17.924	9.676	6.412	6.8191		0.628931	15.1561
12.0279	23.759	20.561	24.109	23.833	14.318	11.029	26.763	7.19	6.988	5.549	8.454	9.113	26.571	22.28	8.584	10.231	14.63	18.187	11.514	7.15	6.7578		0.63522	14.6462
12.147	27.2	19.295	26.003	26.979	13.379	10.605	26.183	8.181	7.355	4.866	6.583	8.59	29.004	18.743	11.849	10.109	14.838	17.595	10.686	6.697	7.3844		0.64151	14.8631
12.2661	27.21	19.367	26.326	26.766	11.575	10.251	26.473	9.599	6.458	6.541	7.479	7.279	24.46	21.623	9.987	10.156	15.047	16.98	8.563	6.454	6.6594		0.6478	14.5359
12.3851	29.315	19.87	27.867	24.484	10.664	10.505	23.106	7.971	6.396	5.516	6.714	8.435	24.501	20.006	9.367	9.6	17.417	17.738	9.18	5.685	7.5668		0.654085	14.3764
12.5042	28.473	18.969	24.831	24.176	10.471	10.143	22.971	6.501	6.127	5.496	6.94	7.315	23.201	18.738	10.127	9.209	16.081	19.3	11.108	5.704	7.7554		0.660375	13.9827
12.6233	27.439	18.362	25.019	22.661	11.96	9.028	23.728	8.283	5.057	5.573	6.03	8.428	22.544	18.13	9.782	9.359	17.041	16.578	9.676	5.809	7.8705		0.666665	13.7313
12.7424	26.715	24.464	24.625	20.576	11.482	9.668	20.931	8.11	5.915	4.871	5.116	10.115	24.342	17.134	9.65	8.889	15.817	15.382	8.515	5.103	6.3397		0.672955	13.5124
12.8615	25.484	23.093	23.753	19.627	12.192	8.67	18.728	8.259	5.804	5.884	5.145	8.374	22.14	17.23	8.967	10.197	17.945	18.415	9.562	5.855	6.2628		0.679245	13.4089
12.9806	25.596	22.111	25.261	17.693	13.505	7.711	19.048	9.858	5.55	5.895	5.043	7.142	19.222	16.925	9.866	9.818	18.561	16.218	7.819	5.006	6.6944		0.685535	13.0734
13.0997	23.983	21.807	23.198	16.861	12.889	8.614	18.171	7.891	5.478	3.981	6.363	7.523	17.461	15.743	10.637	8.769	16.383	17.227	8.194	5.288	6.5448		0.691825	12.5241
13.2188	22.835	24.146	21.356	19.049	11.533	8.503	18.131	8.761	6.808	4.965	6.486	7.451	18.17	16.012	9.248	8.432	16.035	17.924	8.143	4.565	7.5883		0.698115	12.6734
13.3378	21.679	24.946	21.866	15.647	12.025	8.414	19.339	9.919	5.809	5.626	6.291	7.066	17.385	18.04	8.581	9.059	15.316	16.229	9.317	4.914	6.8788		0.704399	12.5879
13.4569	21.728	26.876	21.605	19.1	12.085	6.862	16.644	10.682	5.896	5.337	6.585	7.203	19.593	17.326	9.905	8.565	13.693	16.54	9.272	6.025	6.5832		0.710689	12.7669
13.576	23.672	25.968	25.489	17.716	11.969	7.278	15.564	8.64	5.467	5.05	5.715	6.283	18.782	19.557	9.736	9.609	13.819	14.435	7.44	4.777	5.1135		0.716979	12.48
13.6951	22.511	25.237	25.851	18.122	11.236	6.583	14.062	11.013	4.987	5.638	5.175	6.327	16.682	19.007	8.2	8.477	11.377	15.408	8.061	5.403	5.8687		0.723269	12.1536
13.8142	22.87	23.529	28.594	15.649	12.191	7.802	12.847	12.566	5.282	7.429	4.383	6.095	15.398	18.912	9.529	9.315	12.467	13.674	10.022	5.211	5.8508		0.729559	12.3627
13.9333	22.244	22.868	26.408	14.877	10.949	7.78	13.315	12.457	5.951	6.471	4.712	6.018	14.959	20.034	9.509	9.403	11.811	15.073	8.395	4.86	4.4591		0.735849	12.0263
14.0524	21.351	21.755	26.748	15.907	10.941	6.695	12.958	11.723	5.398	5.63	6.683	6.745	14.405	22.831	11.639	9.271	11.815	13.797	8.641	5.541	4.6966		0.742139	12.151
14.1715	20.062	20.876	24.981	14.179	11.296	6.508	13.364	9.463	5.074	5.665	6.048	4.553	14.143	25.888	10.83	9.714	9.03	10.846	6.053	4.178	3.9546		0.748429	11.2717
14.2905	16.471	22.322	22.811	15.727	9.996	7.245	13.378	9.266	5.658	5.549	5.589	4.677	14.621	24.866	11.075	9.489	10.928	13.288	7.376	4.453	5.5537		0.754713	11.4447
14.4096	15.942	21.933	25.207	16.413	11.227	7.139	11.793	11.061	5.618	4.495	6.735	3.973	11.011	23.904	11.592	8.536	13.004	15.784	7.7	5.041	5.3861		0.761003	11.595
14.5287	15.065	17.872	27.229	18.077	11.053	6.704	11.808	11.252	7.036	5.897	6.279	5.052	11.349	25.954	10.084	9.493	11.717	12.395	7.903	5.533	5.0445		0.767293	11.5617
14.6478	14.943	16.84	27.583	17.499	10.158	5.715	10.197	12	5.094	4.474	5.238	4.458	11.054	27.362	11.76	9.08	14.431	12.123	7.631	4.663	5.2357		0.773583	11.3114
14.7669	14.374	17.962	25.976	16.052	11.263	7.371	11.387	10.606	5.212	6.347	3.463	4.447	11.342	29.358	10.788	8.6	12.827	12.92	6.402	2.904	4.4828		0.779873	11.1468
14.886	14.247	20.001	25.817	18.038	8.56	6.803	11.724	11.892	6.327	5.467	5.154	4.166	11.745	27.802	13.068	7.819	13.273	14.829	6.956	4.547	4.3319		0.786163	11.5508
15.0051	16.553	20.064	26.845	16.014	10.417	6.555	11.744	13.403	5.472	4.907	5.708	4.715	10.373	29.096	14.876	9.158	14.691	13.876	6.218	3.959	4.3526		0.792453	11.857
15.1242	14.621	19.849	26.01	13.324	10.598	5.836	10.985	13.081	4.382	6.36	5.668	5.384	9.808	28.949	13.829	8.889	14.828	13.15	7.998	3.449	3.6004		0.798743	11.4571
15.2432	12.141	17.139	24.211	16.749	9.997	5.18	12.728	12.291	4.726	8.318	5.262	4.529	8.381	31.313	11.545	8.308	12.907	14.7	6.09	3.459	4.0598		0.805028	11.1445
15.3623	13.575	19.206	24.205	16.143	12.355	5.879	12.382	15.784	5.307	8.106	3.339	4.294	8.859	28.128	13.396	10.025	13.388	14.74	5.07	4.611	4.2221		0.811318	11.5721
15.4814	11.904	17.47	22.186	12.994	11.161	6.718	12.54	14.811	7.151	5.759	4.852	6.297	9.015	28.867	14.877	8.904	12.163	14.372	5.308	4.788	4.3476		0.817608	11.2612
15.6005	11.843	15.666	18.823	14.753	9.493	6.187	11.102	13.769	7.715	4.538	4.518	5.596	8.711	34.158	13.906	9.453	11.694	14.558	5.466	3.122	4.2577		0.823898	10.9204
15.7196	11.942	17.851	22.205	13.74	10.556	4.816	10.101	13.915	7.805	5.43	5.04	3.961	7.875	30.073	12.527	7.704	10.893	12.7	6.112	3.778	5.032		0.830187	10.6693
15.8387	10.585	15.427	25.679	14.733	10.28	5.655	10.664	14.02	6.069	5.252	5.136	5.149	8.943	28.981	13.086	8.953	11.448	13.02	7.038	4.291	3.2242		0.836477	10.8397
15.9578	9.846	16.24	23.031	13.068	10.487	7.549	9.483	13.938	6.275	5.869	5.899	4.935	7.47	25.602	11.621	8.517	11.069	11.783	6.475	5.332	2.5496		0.842767	10.3352
16.0769	12.042	14.818	26.412	13.72	10.502	7.428	10.078	16.002	7.453	6.306	4.9	5.104	8.154	20.11	10.727	9.326	9.99	13.001	7.166	4.38	4.2497		0.849057	10.5652
16.196	10.681	12.825	24.337	16.068	10.431	7.239	10.519	16.89	7.312	5.658	4.669	5.502	9.562	24.845	11.487	8.738	9.047	13.771	6.21	3.996	4.1115		0.855347	10.6618
16.315	12.449	13.209	23.805	13.788	12.469	6.003	9.087	14.863	9.597	4.809	4.226	6.844	9.714	20.867	9.349	9.528	8.569	12.715	5.867	3.396	3.3758		0.861632	10.2157
16.4341	10.203	13.791	24.305	13.546	10.975	8.447	8.424	17.732	9.216	4.685	5.415	6.706	9.262	19.104	12.026	7.487	8.743	11.672	6.519	3.852	3.7381		0.867922	10.2785
16.5532	11.418	16.18	24.316	14.061	9.94	8.363	10.04	17.789	8.526	5.305	5.044	8.25	8.711	18.239	9.865	6.474	6.506	11.439	6.228	3.818	5.1245		0.874212	10.2684
16.6723	11.57	13.232	22.473	13.278	9.885	9.89	9.033	16.432	7.777	5.531	5.686	5.933	10.543	14.768	10.599	7.72	6.753	11.335	5.739	5.381	5.2179		0.880502	9.94171
16.7914	11.112	14.24	26.368	13.927	9.589	9.544	8.333	17.681	7.864	4.913	6.238	7.005	8.731	15.238	11.471	7.247	7.712	11.019	5.241	6.345	4.8634		0.886792	10.2229
16.9105	10.09	12.886	26.056	15.77	10.779	7.86	7.805	16.007	6.517	4.473	6.489	6.786	10.342	12.555	9.43	7.963	7.001	10.804	7.023	6.713	4.7567		0.893082	9.9098
17.0296	10.874	12.905	25.631	14.317	10.071	9.027	9.018	15.694	6.14	4.253	5.341	6.338	10.058	13.274	11.01	7.383	7.088	11.638	6.562	6.888	3.4925		0.899372	9.85726
17.1487	11.57	17.149	25.651	16.35	10.66	9.208	8.134	16.127	6.532	5.243	4.529	6.254	9.748	10.442	11.026	7.887	6.741	11.193	6.667	5.477	4.0895		0.905661	10.0323
17.2677	13.615	13.173	26.462	15.452	10.672	10.074	6.903	15.639	8.058	5.996	4.272	7.888	9.289	9.579	10.668	8.187	6.19	10.208	8.532	6.073	4.9149		0.911946	10.0879
17.3868	9.875	13.523	23.581	12.918	8.796	9.099	7.272	14.733	8.254	4.519	5.101	7.679	9.332	9.958	11.291	6.909	5.62	9.994	9.01	6.627	5.5391		0.918236	9.5062
17.5059	12.879	14.148	22.186	12.182	13.164	7.335	5.561	13.205	7.111	4.341	6.284	6.768	9.602	8.647	11.857	5.752	3.842	10.747	9.33	6.881	5.1289		0.924526	9.37861
17.625	12.776	10.983	24.237	12.354	11.288	6.798	6.303	12.096	6.411	5.066	6.635	8.317	8.833	6.582	8.949	6.704	4.46	9.757	9.991	7.96	5.0991		0.930816	9.12377
17.7441	16.5	12.421	25.007	12.99	10.474	6.992	6.314	12.303	7.34	5.632	5.994	7.288	10.19	5.343	8.102	4.494	4.441	10.489	10.78	6.345	6.4313		0.937106	9.32716
17.8632	16.13	14.091	23.656	12.549	11.166	6.653	4.186	12.183	7.712	5.48	6.641	7.197	8.333	5.246	8.761	3.679	5.059	11.498	13.579	8.31	5.3953		0.943396	9.40497
17.9823	17.097	13.587	29.035	12.348	10.303	6.417	4.463	11.397	10.296	7.142	5.745	6.814	7.132	4.119	6.225	4.265	4.29	12.467	15.704	9.411	5.4507		0.949686	9.70037
18.1014	16.66	11.874	30.345	12.65	12.05	5.729	4.438	10.045	9.754	5.55	7.021	5.855	6.37	3.848	5.632	4.235	3.423	11.147	14.552	9.363	5.7264		0.955976	9.34607
18.2204	15.532	12.88	30.857	14.445	10.537	6.925	5.11	9.539	10.56	6.171	5.276	6.703	6.474	3.37	6.364	4.552	2.84	10.049	12.882	10.368	5.8674		0.96226	9.3953
18.3395	16.996	13.068	29.662	14.115	12.156	7.205	5.141	8.967	12.656	5.998	3.631	5.078	4.846	2.328	5.298	3.303	3.336	8.518	14.364	11.416	6.0398		0.96855	9.2439
18.4586	16.147	14.027	28.492	13.484	12.765	6.399	5.089	8.759	11.833	6.857	4.63	5.249	3.725	3.042	4.959	3.166	3.958	8.104	14.001	11.12	7.0944		0.97484	9.18573
18.5777	15.797	13.633	30.729	12.608	11.232	8.326	5.773	7.319	14.15	7.217	5.107	4.221	3.572	2.199	4.25	2.774	2.931	8.83	14.059	10.523	5.5		0.98113	9.08333
18.6968	14.396	13.903	27.447	15.608	11.169	8.84	4.382	7.336	16.744	6.555	3.963	4.558	2.98	2.317	3.383	2.331	2.776	7.281	13.905	11.582	5.0179		0.98742	8.87971
18.8159	13.417	13.926	23.336	16.61	13.3	9.614	5.713	7.715	14.421	5.32	4.826	3.928	3.025	1.818	2.999	2.083	2.631	6.921	11.866	9.191	5.8384		0.99371	8.49992
18.935	12.616	11.207	24.749	16.838	12.088	9.171	6.315	5.682	13.652	7.703	3.828	2.963	2.124	1.513	2.524	2.069	3.23	5.921	11.429	11.196	6.3378		1	8.24551

## Sheet: Image21
X0	Y0	Y1	Y2	Y3	Y4	Y5	Y6	Y7	Y8	Y9	Y10	Y11	Y12	Y13	Y14	Y15	Y16	Y17	Y18	Y19	Y20	Y21	Y22	Y23	Y24	Y25	Y26	Y27	Y28	Y29	Y30		Ap-Ba	Avg int
0	12.568	8.723	11.978	10.498	49.736	42.933	28.168	24.914	48.38	41.863	21.242	15.706	15.837	21.15	27.2309	34.189	22.339	36.369	18.906	22.114	24.402	25.503	30.0275	12.6995	16.78	13.846	21.612	21.8174	31.804	69.053	57.79		0	27.1025
0.1191	16.075	7.273	12.25	10.616	58.094	47.541	40.156	33.167	46.791	47.434	22.618	16.05	15.549	20.6	28.9012	35.37	28.094	34.736	17.324	25.563	27.927	27.115	28.5896	13.5739	23.164	17.348	25.469	24.5267	33.84	77.158	68.366		0.00680342	30.0413
0.2382	16.132	8.004	14.716	11.83	70.925	53.264	41.646	38.443	50.69	44.645	25.249	21.358	15.215	21.779	28.4803	39.307	40.43	36.982	20.944	25.262	30.498	26.325	32.1349	16.6904	36.421	20.532	32.221	26.7305	34.346	77.042	81.374		0.0136068	33.536
0.3573	24.586	10.74	19.55	13.824	77.592	60.621	41.281	44.356	53.437	52.711	28.793	23.068	14.511	20.904	31.8343	42.363	46.189	42.876	22.252	28.233	28.474	28.16	35.4589	24.1029	47.17	29.012	38.112	34.371	38.961	81.295	92.274		0.0204103	37.9714
0.4764	26.59	13.251	24.904	16.838	90.195	67.852	49.11	50.539	62.026	55.882	32.761	31.104	13.751	21.446	37.7216	44.205	67.554	48.787	28.316	31.432	35.702	28.367	36.3014	32.6647	59.203	36.697	41.642	35.7408	38.987	89.404	100.002		0.0272137	43.5153
0.5954	39.512	13.791	27.302	21.917	97.17	71.633	59.773	53.3	67.133	57.173	35.198	44.924	15.215	30.29	41.2744	48.402	74.938	46.022	39.76	35.958	43.867	29.779	42.8347	38.6778	66.037	40.852	48.135	34.3953	43.173	92.525	112.434		0.0340114	48.8192
0.7145	49.545	12.27	31.369	22.945	98.212	79.778	71.026	58.956	75.746	63.042	44.757	74.445	16.337	43.767	40.9269	48.212	82.992	51.415	48.068	39.254	52.753	28.825	42.5834	45.2277	73.743	52.821	55.408	34.7534	41.868	108.972	121.496		0.0408148	55.2101
0.8336	69.373	17.399	41.666	24.928	114.204	92.887	79.257	67.186	85.162	70.527	49.894	111.399	18.614	62.334	44.2904	47.317	97.747	55.018	59.093	47.097	59.356	33.988	51.0769	50.8955	84.313	64.585	65.924	38.7539	46.072	111.671	134.859		0.0476182	64.4157
0.9527	90.48	21.393	45.555	33.188	125.354	109.273	91.626	68.381	93	80.629	52.737	141.876	27.196	88.918	51.1368	57.125	101.553	61.944	70.049	52.035	69.796	41.106	59.7615	60.7757	101.818	76.685	88.895	40.8272	52.38	115.698	134.195		0.0544217	74.3673
1.0718	121.874	26.218	53.243	40.887	135.956	127.857	106.003	72.124	105.052	87.51	59.22	174.941	39.017	108.019	54.2474	58.862	112.54	85.356	80.915	62.303	79.719	47.873	71.0933	69.2258	122.342	90.055	114.414	43.819	54.902	119.525	147.264		0.0612251	86.2057
1.1909	158.724	32.028	57.873	48.269	148.055	149.176	125.802	68.475	112.917	92.266	61.702	211.008	60.992	125.859	62.9989	68.08	119.545	102.242	94.731	75.615	91.442	53.011	78.8918	74.1161	137.596	97.718	122.536	45.3038	62.233	122.147	157.126		0.0680285	97.3703
1.31	186.846	42.893	68.962	64.994	169.095	168.473	135.285	69.54	120.745	98.216	69.707	225.187	93.966	139.613	74.051	79.319	122.9	103.701	108.822	79.364	94.704	66.154	85.7253	79.514	144.393	103.79	119.583	50.0063	69.77	122.56	163.224		0.0748319	107.132
1.4291	199.508	52.257	85.015	78.378	180.504	188.547	145.901	75.309	138.489	107.655	74.664	232.053	133.116	148.975	88.0954	88.042	132.673	120.567	115.168	83.617	103.402	72.141	92.2529	80.404	150.126	109.777	121.295	62.1996	84.89	129.227	156.46		0.0816353	117.12
1.5481	219.596	67.109	98.321	91.956	178.586	195.784	156.799	76.515	147.827	124.908	84.383	236.579	168.589	147.947	93.1139	92.255	140.437	124.081	116.128	85.145	97.541	75.365	91.7524	71.9761	163.349	114.594	116.152	68.019	95.85	133.367	153.129		0.088433	123.457
1.6672	231.384	71.591	111.375	108.028	161.268	197.325	165.23	72.552	153.624	147.026	102.512	230.698	190.411	145.527	92.1724	95.627	137.571	124.92	120.574	79.525	87.398	79.776	90.8132	72.1658	165.835	107.38	113.916	70.7725	103.237	146.063	163.415		0.0952365	127.087
1.7863	231.222	81.659	123.261	132.078	152.804	188.92	174.178	73.108	156.509	163.297	113.627	223.052	197.153	137.549	79.0447	93.437	147.072	123.937	115.144	78.186	83.44	77.653	91.9069	75.4199	171.644	106.988	114.274	78.49	115.657	151.107	165.168		0.10204	129.58
1.9054	236.428	83.624	129.713	160.619	144.31	179.399	177.347	83.892	157.196	169.806	124.342	202.376	207.721	120.43	63.2581	95.817	155.059	120.877	104.317	83.745	72.244	77.533	86.671	85.6623	179.65	116.407	112.556	87.6051	118.186	157.686	158.208		0.108843	130.732
2.0245	234.512	86.645	129.746	182.187	115.799	164.785	171.316	97.297	152.628	173.458	130.484	174.866	186.391	108.518	59.0577	103.503	160.056	106.476	92.774	85.256	74.643	75.322	79.8718	93.8099	188.696	121.919	102.24	88.0722	126.204	171.37	153.449		0.115647	128.753
2.1436	236.463	93.655	128.279	209.006	99.445	154.315	147.185	102.064	146.419	176.93	131.927	152.537	177.175	102.776	52.899	102.136	155.017	98.494	81.859	82.42	82.09	65.352	76.617	90.7993	180.576	128.964	99.797	90.4072	130.367	169.244	148.552		0.12245	125.605
2.2627	235.66	101.588	125.715	214.714	78.324	132.385	138.024	103.292	138.67	175.85	130.778	140.918	158.633	94.503	46.2604	101.522	156.848	96.861	79.491	79.548	91.251	63.602	77.6401	87.9031	166.875	133.295	100.403	91.2276	127.411	176.149	144.804		0.129254	122.263
2.3818	228.027	113.432	129.923	221.746	65.543	110.448	122.938	100.721	125.242	183.719	131.258	120.084	126.099	82.983	43.5606	99.646	149.015	98.317	69.418	73.008	84.786	56.955	69.3499	93.0523	170.293	145.153	107.846	87.2708	128.275	175.688	139.15		0.136057	117.837
2.5008	220.184	108.589	132.049	207.504	54.213	95.603	110.187	103.139	119.945	175.75	132.065	107.833	116.236	75.952	37.5898	90.997	151.14	93.931	60.243	70.245	82.662	52.677	63.2873	93.7995	158.065	154.725	107.298	88.2636	121.396	182.204	131.89		0.142855	112.892
2.6199	201.997	115.958	119.469	187.586	49.126	82.742	94.825	112.442	107.902	177.298	132.485	90.067	102.314	70.318	33.9283	79.389	148.309	90.7	55.698	68.571	87.387	51.795	57.7221	92.4278	148.195	163.537	112.908	86.3814	107.735	183.938	132.867		0.149658	107.936
2.739	190.397	119.012	113.899	163.652	44.103	74.355	75.164	119.399	93.014	175.879	138.892	81.893	92.333	68.354	31.3461	74.036	135.931	76.848	50.197	74.102	86.565	55.015	56.4147	87.1103	146.458	162.936	101.061	84.139	97.229	184.452	127.184		0.156462	102.625
2.8581	179.345	128.118	111.288	136.78	40.655	59.936	70.245	124.62	90.261	164.875	137.475	68.583	79.774	62.107	27.1743	61.682	120.801	70.755	46.865	74.782	93.321	62.9	52.9503	85.8022	127.176	182.912	100.063	74.6429	93.371	177.679	127.196		0.163265	97.8753
2.9772	164.954	125.78	102.434	110.382	36.682	52.516	64.277	138.962	85.286	164.307	135.719	59.743	69.76	52.348	24.3961	50.72	104.237	61.689	47.111	77.922	89.191	71.501	53.1802	82.127	113.305	172.162	99.205	70.3275	89.409	171.484	135.97		0.170068	92.8093
3.0963	160.276	111.204	81.041	88.259	34.703	47.696	57.549	147.636	83.367	165.065	119.962	57.09	63.553	51.738	19.9989	46.605	101.335	49.712	42.417	78.471	77.83	86.265	52.9027	73.3919	105.483	165.004	107.737	68.7534	92.472	181.225	132.018		0.176872	88.7342
3.2154	147.635	105.331	68.547	75.692	33.013	42.889	52.048	145.356	83.956	153.88	110.592	52.349	63.09	52.724	19.8105	40.643	95.328	42.448	39.495	75.292	75.118	90.926	54.4947	62.9958	92.571	156.031	108.041	62.9144	95.261	188.164	129.664		0.183675	84.3968
3.3345	141.908	95.637	65.687	60.105	33.134	41.286	50.36	143.665	91.239	135.682	99.16	46.61	57.553	45.969	19.4499	39.289	80.05	33.678	37.546	79.766	67.025	85.265	58.5746	61.7181	84.937	153.703	116.204	62.0113	93.144	180.546	119.188		0.190479	80.0029
3.4535	135.701	87.524	57.155	49.789	30.947	40.627	44.138	143.229	90.499	125.995	82.452	41.733	59.341	50.147	18.0011	33.183	74.332	29.28	37.639	83.979	53.334	77.289	63.0199	49.8101	82.052	149.022	115.991	55.0986	88.469	170.397	119.425		0.197276	75.4709
3.5726	128.501	80.202	48.371	43.658	28.229	36.636	38.673	137.841	91.033	105.811	72.035	40.184	54.503	54.286	17.4035	33.04	68.834	24.169	35.87	83.529	49.502	74.088	70.2413	47.0488	79.109	140.235	98.617	50.2943	83.192	160.222	119.444		0.20408	70.8001
3.6917	125.399	73.095	42.987	39.943	21.629	38.037	37.577	127.312	91.423	99.504	72.344	40.733	51.09	49.28	16.0694	31.506	55.603	21.921	35.032	85.434	54.601	70.897	70.6487	45.6184	77.254	128.818	87.955	48.9137	73.815	163.637	127.696		0.210883	67.9281
3.8108	116.866	70.741	47.57	37.001	21.257	33.621	32.339	114.027	86.105	92.434	64.931	39.025	48.937	51.117	16.1114	29.033	46.387	16.905	41.141	88.28	61.012	70.338	70.5221	46.3556	73.984	116.417	83.259	45.7973	69.721	158.707	132.649		0.217687	65.2449
3.9299	115.58	65.562	48.042	29.998	21.527	29.862	29.413	103.284	85.087	78.895	61.483	35.162	47.822	46.078	16.6929	27.002	43.98	16.041	38.438	88.75	57.203	67.713	61.7551	37.1277	75.237	114.134	77.059	44.4594	67.413	171.964	131.32		0.22449	62.3898
4.049	96.302	57.16	49.357	29.161	19.125	25.543	27.762	95.65	85.566	72.859	59.239	30.55	44.711	41.651	12.9337	27.972	39.922	16.798	39.151	85.984	48.906	67.344	60.0228	32.157	69.413	106.039	73.88	43.0734	59.93	169.291	122.5		0.231293	58.3856
4.1681	90.384	46.793	53.386	28.282	16.313	24.977	24.22	85.071	75.874	62.297	54.295	31.215	42.19	39.317	14.3592	27.568	37.051	15.448	40.258	92.703	44.948	69.34	62.3168	28.7462	65.73	103.016	68.394	39.4094	57.29	175.933	110.953		0.238097	55.7444
4.2872	90.37	44.46	50.45	28.578	15.611	22.944	24.319	71.374	63.023	59.13	53.344	28.847	37.485	36.366	15.7284	27.669	31.322	16.63	46.539	89.096	39.388	66.187	66.2743	30.5355	57.73	95.485	64.039	37.167	50.996	172.548	95.659		0.2449	52.5579
4.4063	79.933	41.148	48.42	28.17	15.127	20.615	20.196	63.664	57.174	53.226	50.747	26.785	39.848	33.848	13.289	29.284	28.804	15.699	56.158	79.14	34.292	65.365	68.7525	27.3562	49.341	86.874	59.275	41.3342	54.486	164.804	79.157		0.251704	49.4294
4.5253	79.21	38.477	47.112	26.096	14.297	20.623	17.18	59.39	44.812	48.756	46.282	24.492	34.29	36.69	11.1677	27.356	28.256	15.615	70.873	80.485	35.751	62.353	68.9602	24.7528	43.018	76.947	57.146	37.1822	47.705	150.761	67.925		0.258501	46.5794
4.6444	68.898	36.744	48.465	26.029	14.218	20.077	17.233	48.748	42.844	45.807	42.384	25.475	32.046	33.078	13.5876	26.027	26.703	13.934	76.789	80.341	33.16	66.434	74.7151	27.1451	37.143	70.098	58.139	38.8809	43.275	125.759	67.355		0.265305	44.5655
4.7635	65.224	32.532	47.065	18.383	13.397	17.725	17.505	50.398	37.263	40.396	43.326	24.268	30.67	33.507	11.9851	22.936	22.141	13.292	79.498	74.572	31.555	75.851	81.972	26.8596	35.624	66.794	52.523	39.3294	41.83	99.637	63.621		0.272108	42.3122
4.8826	60.587	30.852	50.512	15.317	12.034	17.506	17.506	45.563	34.381	36.915	39.249	25.316	30.73	33.973	10.4438	23.2	20.362	13.666	81.23	73.58	31.909	81.22	87.3039	24.3329	31.991	57.082	47.55	39.0107	42.049	84.262	60.596		0.278912	40.6526
5.0017	55.715	31.274	53.835	19.372	12.308	15.726	16.062	44.269	30.051	32.254	39.699	22.489	29.484	39.573	12.5205	21.985	17.132	12.246	79.975	72.109	29.502	82.163	93.0869	21.1887	34.808	55.61	49.53	36.7079	39.668	65.715	59.363		0.285715	39.5297
5.1208	53.675	30.523	51.66	16.65	11.133	13.193	15.89	39.541	24.125	31.543	34.426	21.437	29.504	47.032	9.7221	19.177	18.973	12.1	80.376	67.515	29.832	75.571	98.0228	19.6711	31.916	45.93	44.447	35.8488	37.714	58.459	55.181		0.292519	37.4448
5.2399	53.666	26.827	56.228	15.165	11.734	12.807	15.444	34.849	23.23	29.705	38.209	20.623	28.118	54.186	10.0652	16.073	13.721	12.338	72.013	65.784	29.755	76.731	89.3551	18.0795	29.201	46.004	43.229	36.1188	36.146	54.161	51.655		0.299322	36.1684
5.359	50.464	22.719	53.824	13.04	9.102	9.948	12.583	32.794	18.272	26.507	33.565	18.262	23.294	55.102	11.3189	17.942	14.736	12.224	58.937	65.348	27.193	78.291	80.6155	18.4978	29.123	37.955	41.87	32.7226	36.877	53.193	51.29		0.306125	33.7939
5.478	50.8	22.414	54.358	14.098	10.665	9.69	13.079	31.932	14.446	23.646	35.273	18.522	18.239	54.621	13.0687	16.911	12.407	11.35	46.186	62.058	24.645	80.08	79.7195	18.048	29.15	38.829	45.115	35.1606	36.578	51.594	47.638		0.312923	32.9136
5.5971	43.582	20.539	53.359	13.826	11.787	9.9	15.44	29.048	14.04	22.687	35.033	18.907	16.201	58.387	13.16	12.536	12.302	12.794	38.843	60.479	23.144	84.151	66.9608	16.712	27.193	37.969	40.953	36.6475	35.77	47.547	38.068		0.319726	31.2247
5.7162	40.281	16.205	53.465	13.146	8.43	7.859	16.514	26.909	15.376	21.684	34.949	13.267	12.157	58.633	12.1148	13.61	11.406	14.789	37.883	59.617	21.344	92.084	62.9217	15.3299	25.953	37.875	30.238	32.1833	32.616	44.393	36.489		0.32653	29.6684
5.8353	30.276	14.775	56.709	15.364	9.218	10.702	15.447	27.231	15.261	20.208	36.64	14.089	9.694	55.333	11.4074	10.428	10.369	15.041	35.156	55.418	19.746	96.12	54.6285	15.4553	23.966	37.207	26.52	30.5921	30.479	42.102	34.446		0.333333	28.388
5.9544	24.705	15.301	55.244	14.242	8.584	11.174	13.569	24.066	14.703	19.327	34.753	16.071	10.33	56.589	13.8645	9.642	11.357	14.779	33.035	46.973	18.707	97.904	55.0212	15.7421	22.683	32.026	20.294	28.4607	35.333	40.712	35.443		0.340137	27.4398
6.0735	21.384	15.568	49.455	13.134	8.456	10.409	12.706	22.78	13.464	21.447	34.757	13.845	9.105	50.494	11.1042	8.194	9.433	15.278	29.502	41.934	16.714	103.967	47.6071	14.1639	20.754	27.954	21.996	30.4482	29.58	39.405	34.05		0.34694	25.777
6.1926	18.543	14.67	47.958	12.069	8.815	9.889	13.273	25.441	13.971	21.521	34.704	12.43	8.884	51.186	10.7408	6.741	10.673	17.352	30.421	37.987	16.161	108.159	44.2113	14.2715	18.247	30.47	20.526	30.0111	29.075	39.1	28.307		0.353744	25.3486
6.3117	16.075	15.839	46.505	12.602	8.656	11.137	14.053	23.533	13.139	21.045	35.47	12.495	9.795	50.694	10.8772	7.362	10.515	24.377	37.404	37.129	18.345	106.33	44.7901	14.9683	16.8	29.546	18.603	25.4925	26.751	40.322	26.938		0.360547	25.4061
6.4307	16.566	13.122	47.16	13.011	8.323	9.688	11.624	26.757	13.06	20.813	28.693	11.953	9.019	49.743	10.3953	8.145	8.135	29.115	40.559	38.609	17.049	110.775	49.5454	14.4128	15.331	27.378	18.324	26.7319	26.311	35.507	25.15		0.367345	25.1937
6.5498	13.687	13.402	49.999	11.824	8.719	7.798	11.504	32.982	10.818	18.276	28.429	10.803	10.07	45.244	10.8234	8.826	7.65	35.49	50.806	42.644	14.78	115.615	42.5195	13.9416	15.001	26.541	18.342	26.3356	28.028	36.508	25.001		0.374148	25.5615
6.6689	13.898	14.774	55.097	10.215	9.186	9.445	10.3	36.196	11.24	16.164	29.198	10.886	9.587	41.752	12.7639	8.322	8.861	45.385	59.577	45.439	15.164	110.039	40.4164	14.4643	12.528	24.106	19.068	24.3979	27.332	30.629	21.148		0.380952	25.7283
6.788	11.91	14.321	54.016	13.506	9.866	8.779	12.01	36.954	12.571	18.108	25.011	11.535	8.531	43.705	11.8709	7.559	8.385	48.635	63.253	51.474	16.276	109.805	36.1261	13.7394	13.962	22.245	16.381	24.1809	25.276	31.655	22.101		0.387755	25.9273
6.9071	12.323	14.974	62.518	12.086	9.44	7.573	12.345	41.86	10.485	18.364	24.839	10.676	8.584	45.942	12.4515	6.362	8.346	50.899	63.463	57.958	16.035	104.481	30.4078	12.2086	16.816	19.853	15.04	21.4806	26.853	32.156	19.721		0.394558	26.0174
7.0262	13.332	13.825	67.097	12.737	8.871	8.338	11.684	41.829	9.037	17.662	22.332	10.574	10.437	51.523	14.0458	6.062	8.601	52.939	64.785	59.123	18.978	92.751	24.7028	12.9418	13.674	18.423	13.969	24.5794	28.277	33.472	20.763		0.401362	26.044
7.1453	13.678	15.468	71.331	13.329	9.172	8.192	9.891	42.073	9.11	17.569	21.677	9	8.065	55.416	13.0646	6.299	8.247	55.869	69.659	66.076	17.969	84.804	21.1246	12.2428	14.131	19.611	13.299	24.606	29.76	29.499	21.351		0.408165	26.1801
7.2644	14.878	13.567	73.247	12.315	9.358	7.692	11.085	50.665	13.299	16.485	24.413	8.105	8.154	55.812	12.1354	5.001	6.659	55.158	76.613	68.797	18.756	79.898	22.1692	10.0324	12.713	17.904	13.106	26.3221	30.707	30.543	16.403		0.414969	26.5159
7.3834	14.125	16.067	71.322	11.886	9.188	7.859	12.748	52.122	11.956	17.474	23.753	9.663	7.436	58.469	11.069	6.028	7.078	56.946	66.793	75.449	17.051	77.422	19.5615	12.48	10.593	13.994	14.168	27.3193	28.006	32.093	16.018		0.421766	26.327
7.5025	12.152	16.351	66.482	10.578	10.488	8.676	10.027	54.927	10.907	23.179	25.842	10.049	7.548	55.049	15.6903	7.053	6.457	55.168	56.908	79.469	19.066	81.707	19.1273	10.2794	10.003	13.242	16.035	28.3944	30.137	26.62	16.16		0.42857	26.2507
7.6216	12.528	14.752	62.984	11.847	8.112	8.857	9.095	59.62	10.715	27.858	22.302	10.495	6.791	50.374	13.4473	6.168	6.957	52.416	57.204	77.5	21.606	86.719	18.9298	11.1629	10.572	13.271	15.727	30.2939	29.542	25.324	15.383		0.435373	26.0824
7.7407	12.03	13.286	57.282	11.726	8.638	8.167	9.412	59.345	13.802	28.526	21.772	9.841	4.659	41.2	15.2135	8.515	7.59	55.574	59.233	85.217	23.035	80.669	22.4315	12.1832	10.8	12.788	14.012	32.3307	30.75	28.788	15.157		0.442177	26.2572
7.8598	9.924	16.009	60.37	12.289	9.049	7.225	9.893	53.952	12.991	29.938	22.777	8.161	6.681	28.796	17.0263	8.159	7.853	64.262	60.233	85.032	23.303	83.621	21.4485	13.0726	8.407	14.841	12.326	32.8718	35.88	29.561	12.334		0.44898	26.3963
7.9789	9.853	16.533	61.663	11.991	6.787	7.564	7.602	53.511	10.134	29.106	19.239	8.086	7.158	31.08	19.4025	6.818	8.254	72.981	54.156	87.868	26.685	94.057	19.2433	13.7193	9.108	13.588	13.522	39.0861	35.654	23.91	13.305		0.455783	26.8279
8.098	9.111	14.178	58.05	11.62	8.361	7.975	9.152	50.955	11.799	29.721	15.829	7.276	7.867	34.457	17.1173	6.535	10.005	72.977	50.31	92.352	33.347	96.306	18.428	18.4275	8.92	12.123	12.496	47.6305	42.448	19.613	12.312		0.462587	27.3451
8.2171	11.471	12.483	53.549	11.79	8.707	8.485	9.571	57.9	13.681	35.291	13.837	7.61	7.635	34.523	17.5438	9.199	10.355	76.442	56.526	106.398	45.427	97.01	17.7045	18.7027	9.211	11.679	13.283	56.8025	41.372	19.832	13.012		0.46939	29.2591
8.3362	10.389	11.94	55.107	12.315	9.644	8.764	7.08	57.783	13.884	40.814	14.412	7.404	8.371	31.655	15.2916	10.105	10.369	70.704	58.712	113.043	57.775	95.282	16.7224	27.0817	8.23	11.723	12.708	70.6963	46.907	21.326	15.78		0.476194	30.7103
8.4552	8.842	11.884	53.24	12.6	8.3	7.933	7.5	57.306	13.874	45.458	14.621	6.641	6.608	33.53	16.4444	10.087	10.067	62.893	64.439	117.23	68.537	105.045	19.8237	30.3864	8.591	11.042	13.206	89.0575	47.189	19.859	13.763		0.482991	32.1289
8.5743	8.414	11.924	52.214	11.444	7.651	7.36	9.433	55.353	16.609	50.23	13.477	8.108	5.227	31.463	16.0671	8.12	11.957	54.464	72.135	130.244	75.028	111.788	19.7852	33.4914	9.324	13.067	12.983	103.664	45.397	19.852	15.155		0.489795	33.5945
8.6934	7.588	13.03	52.063	13.502	10.208	7.496	10.055	60.742	17.31	53.902	14.001	8.505	5.837	24.839	14.0022	8.607	12.002	50.902	72.064	140.657	89.654	116.105	18.3778	46.857	11.012	12.326	14.457	101.886	40.766	23.814	13.961		0.496598	35.0493
8.8125	9.008	12.867	52.466	11.804	8.935	7.151	8.211	64.404	17.594	55.762	13.55	8.618	6.886	28.717	16.2868	8.548	13.992	41.407	73.286	147.004	99.567	113.864	19.2132	56.8822	10.64	10.387	15.529	97.0061	40.773	21.783	13.85		0.503402	35.6771
8.9316	9.195	14.328	55.617	10.197	9.255	6.616	7.286	78.323	20.623	60.599	15.303	6.571	6.593	30.091	16.7877	7.354	13.58	34.053	76.895	158.37	113.674	101.491	22.4713	71.7146	9.729	9.84	15.337	87.2441	35.702	23.572	13.211		0.510205	36.8265
9.0507	8.21	13.793	49.867	9.55	9.15	9.15	8.446	84.416	24.289	70.651	16.091	6.528	5.864	25.085	19.0455	6.652	13.199	31.069	81.767	167.046	124.253	96.729	18.446	77.4102	10.682	9.695	15.344	78.7766	36.15	22.117	14.505		0.517009	37.5476
9.1698	7.834	14.95	47.748	11.059	9.228	8.979	7.389	81.484	24.007	69.379	15.443	6.703	6.384	26.875	21.2153	8.096	13.873	26.424	83.986	186.293	141.737	87.771	21.5308	77.2555	10.5	11.259	17.31	76.3513	29.337	21.633	13.226		0.523812	38.2342
9.2889	9.311	14.093	49.039	9.634	9.185	9.209	8.389	77.908	24.981	79.19	14.966	7.619	6.748	27.532	20.4208	8.427	15.318	22.995	74.623	204.827	157.373	76.242	22.1861	72.9081	10.132	10.27	19.933	66.3072	27.259	26.366	12.843		0.530615	38.5882
9.4079	7.528	13.427	40.889	8.199	9.3	7.893	9.437	72.533	25.553	77.62	14.874	8.917	6.95	25.469	23.0153	7.617	13.088	21.561	65.02	219.639	183.858	68.619	20.4989	65.5942	9.727	11.59	17.421	60.9481	28.397	30.795	15.823		0.537413	38.4452
9.527	8.9	15.875	38.368	8.747	8.233	7.616	8.767	69.176	28.833	71.404	13.826	6.922	5.462	26.068	26.5053	8.885	15.57	16.34	56.717	232.757	212.535	58.237	19.877	66.8659	8.044	12.643	19.288	53.6474	28.037	38.086	15.124		0.544217	38.947
9.6461	8.712	15.136	32.636	9.886	7.369	7.616	9.075	64.429	31.564	60.723	12.199	6.934	6.265	22.241	27.116	9.762	17.816	16.125	50.884	240.1	226.752	51.711	18.7996	67.9527	8.424	11.659	17.923	50.776	22.186	50.643	17.483		0.55102	38.7386
9.7652	7.25	17.021	29.434	10.545	7.642	7.693	8.665	59.415	33.632	55.441	12.621	8.377	6.975	24.394	26.9322	10.176	18.446	14.159	49.145	239.098	218.097	40.538	17.1147	65.0117	9.229	10.52	16.57	47.9608	24.983	55.986	18.109		0.557823	37.78
9.8843	6.502	16.537	25.939	10.594	8.644	6.911	6.399	51.302	33.194	41.985	12.772	5.898	6.631	25.989	25.1658	9.508	18.198	12.509	49.286	232.038	202.031	39.158	15.5376	63.0454	9.544	11.971	16.977	47.1551	21.077	65.467	21.921		0.564627	36.1254
10.0034	8.325	15.789	25.035	7.817	8.869	7.3	7.291	48.978	32.576	42.037	10.919	6.226	6.348	23.999	26.174	10.364	18.9	11.458	47.133	224.556	161.24	37.342	13.2508	60.5364	7.958	10.578	17.891	44.6277	21.647	66.323	26.768		0.57143	34.1373
10.1225	8.674	16.138	19.832	7.766	7.244	7.027	8.839	42.618	35.016	41.458	9.382	7.506	5.749	20.75	28.7594	8.232	20.938	12.09	42.81	195.507	111.921	33.038	11.3791	54.5814	7.046	10.926	15.808	49.9573	21.448	59.885	28.706		0.578234	30.6784
10.2416	11.101	16.004	18.243	8.193	8.001	7.206	8.253	38.989	37.187	38.901	9.544	7.535	5.887	16.08	25.8901	8.364	25.818	13.431	45.514	152.063	85.875	28.477	9.9066	53.2287	9.54	8.931	18.594	49.4427	19.791	60.333	28.376		0.585037	28.2161
10.3606	9.923	18.155	16.943	8.366	8.352	6.661	8.321	37.044	40.121	43.955	10.622	6.981	6.241	17.47	29.4053	8.481	26.319	10.47	40.744	113.881	60.678	29.615	8.4948	60.3642	10.091	12.31	14.545	52.4162	23.18	55.523	31.139		0.591835	26.6713
10.4797	9.491	15.887	15.278	8.13	8.531	7.734	9.444	33.402	36.417	51.884	9.31	7.149	6.015	15.04	32.227	6.69	27.716	10.191	41.152	91.472	47.27	27.476	7.5536	62.9443	10.824	12.407	16.71	46.6356	20.634	52.865	36.504		0.598638	25.322
10.5988	9.172	16.906	14.025	8.254	6.618	9.217	7.036	34.411	38.983	50.126	9.257	5.123	6.352	13.929	30.305	8.051	32.966	8.665	36.59	73.381	37.816	22.799	6.557	59.1063	10.291	11.039	16.13	43.8647	19.636	52.061	37.144		0.605442	23.7358
10.7179	10.26	19.245	12.772	9.584	6.631	9.302	5.85	34.213	43.953	50.815	6.832	7.646	5.458	14.138	31.9027	10	38.367	8.294	34.116	55.449	27.631	18.841	6.7476	70.6688	10.846	11.456	16.59	38.4289	17.454	45.026	37.626		0.612245	23.1014
10.837	9.391	21.578	13.897	9.89	8.451	8.997	7.641	34.543	51.02	44.137	9.144	8.354	6.248	15.186	33.886	9.25	42.225	9.913	28.467	45.176	24.053	13.522	7.8746	70.6439	11.199	12.251	17.949	33.3146	18.635	43.692	37.38		0.619048	22.8357
10.9561	9.549	25.964	13.33	8.397	7.352	9.132	7.819	30.891	50.893	40.917	7.658	8.288	6.507	14.986	38.5306	8.782	40.914	8.177	26.33	32.146	21.98	10.53	6.4245	71.9346	12.065	11.726	20.281	34.4957	16.622	41.894	39.291		0.625852	22.0583
11.0752	8.737	28.152	11.536	8.76	7.383	9.787	8.037	31.64	49.275	37.225	5.599	7.127	6.552	13.701	40.8906	9.346	39.178	8.481	21.624	29.155	16.699	9.521	7.0547	73.6239	14.098	12.38	21.511	31.7841	14.837	40.429	37.943		0.632655	21.357
11.1943	9.69	28.31	11.711	9.687	9.376	10.343	8.932	32.045	50.717	33.129	7.509	6.162	6.774	16.599	40.3846	8.168	37.58	8.808	17.307	21.477	15.922	8.178	6.6113	67.6894	16.814	9.828	21.431	33.4352	12.844	34.048	35.76		0.639459	20.5571
11.3133	9.921	34.974	12.228	9.499	8.366	8.45	7.144	31.851	48.775	25.984	9.089	7.797	6.115	17.477	42.4538	8.184	38.818	8.458	11.575	16.654	14.938	8.457	6.9165	65.9395	19.358	10.672	22.881	34.1373	11.125	32.581	37.075		0.646256	20.2546
11.4324	9.006	40.656	10.967	10.385	8.449	8.311	8.652	27.19	48.654	22.609	8.031	7.103	6.935	13.34	45.2002	8.875	39.985	8.081	8.879	13.081	13.2	8.213	7.5554	60.7824	21.465	12.017	24.331	31.7494	10.985	34.616	42.159		0.65306	20.0472
11.5515	9.33	43.146	11.062	9.132	7.897	8.209	6.222	27.766	48.43	19.541	8.33	6.18	7.344	13.399	42.5721	9.89	40.243	8.584	8.802	11.381	10.52	7.009	7.7733	53.9913	20.196	13.725	26.654	30.3472	10.596	39.326	46.531		0.659863	19.8106
11.6706	9.786	43.799	10.444	9.691	7.623	10.315	5.709	26.521	52.146	17.672	7.727	6.938	8.295	14.948	38.7863	9.146	41.58	7.326	8.586	10.09	9.102	7.224	6.9114	45.8099	17.137	13.03	26.882	29.5273	10.121	42.153	44.227		0.666667	19.3307
11.7897	11.015	40.354	10.594	9.963	8.441	7.507	8.99	27.341	52.183	17.089	7.675	7.052	8.075	13.932	36.6357	8.727	41.576	5.597	5.994	10.426	7.998	8.386	6.5653	46.0246	19.083	14.631	29.563	29.9417	10.368	43.956	47.33		0.67347	19.452
11.9088	11.569	40.895	11.109	10.265	9.585	7.717	7.998	23.063	48.563	15.817	8.55	8.122	8.268	13.989	36.8964	9.534	41.9	6.32	7.232	8.11	8.862	8.521	6.9417	43.182	20.9	14.005	30.327	30.41	10.451	41.577	41.147		0.680274	19.0912
12.0279	12.46	45.476	10.865	9.936	10.112	7.206	9.188	19.857	47.361	16.322	8.545	7.981	6.441	12.744	35.5475	10.732	42.087	6.554	7.325	8.729	9.823	7.59	7.5528	41.1424	22.333	13.487	35.22	26.1203	9.276	39.587	45.905		0.687077	19.1453
12.147	12.114	44.201	10.34	8.182	8.091	8.201	7.249	20.168	52.319	15.279	7.31	7.294	7.586	11.731	35.3761	10.178	38.873	7.595	5.95	7.926	6.62	7.257	7.6844	38.174	22.758	14.945	35.981	22.9187	9.217	38.862	43.984		0.69388	18.5279
12.2661	11.953	49.14	11.059	9.955	7.202	8.326	7.206	21.549	55.766	15.528	7.593	7.437	6.605	12.02	36.0644	12.634	39.183	7.219	6.066	7.356	6.138	7.025	7.282	38.1594	23.827	15.08	41.004	20.5666	8.503	36.081	45.824		0.700684	19.0113
12.3851	14.265	46.09	13.56	11.343	10.763	7.646	7.345	21.669	54.52	12.89	7.745	7.341	9.123	11.56	32.1284	11.136	37.789	5.79	6.805	6.279	5.66	6.898	6.9055	38.5417	26.632	13.544	39.227	16.554	8.658	35.578	49.006		0.707481	18.8062
12.5042	12.693	51.845	10.931	9.472	10.885	9.69	8.346	20.799	52.705	13.166	6.431	5.837	6.459	11.962	34.2681	14.14	42.833	5.249	7.058	8.05	7.126	5.653	7.5437	39.9538	23.321	14.054	41.326	14.4667	9.282	34.57	46.296		0.714285	18.9165
12.6233	13.197	51.657	12.061	9.963	9.451	9.959	8.975	21.626	51.844	12.959	8.26	7.345	7.398	12.423	37.2445	10.821	40.817	5.467	6.379	7.378	6.921	6.89	8.1469	39.9002	26.563	16.219	43.06	14.0532	7.599	32.839	42.126		0.721088	19.0175
12.7424	12.266	51.903	10.712	9.155	9.005	11.273	9.859	20.887	52.525	11.481	8.947	7.825	6.796	9.731	35.7248	12.551	44.809	5.817	6.045	7.932	7.561	8.398	7.2271	40.5434	31.446	17.252	43.077	14.7555	8.678	32.025	36.473		0.727892	19.1187
12.8615	13.46	55.789	12.065	9.65	9.395	10.366	9.409	21.22	40.647	10.475	7.356	6.557	6.754	9.31	34.0267	14.049	44.697	7.991	5.022	6.288	8.956	8.52	7.4713	38.8724	33.87	18.768	40.818	11.9731	8.816	29.259	34.162		0.734695	18.581
12.9806	12.607	50.118	13.546	9.868	11.146	9.935	10.059	23.645	34.485	9.554	7.677	8.053	7.805	9.898	35.5214	13.773	44.726	7.639	6.893	6.37	7.265	8.372	6.9804	32.7676	32.903	15.611	43.476	12.1008	8.806	29.088	35.628		0.741499	18.2683
13.0997	11.492	53.559	13.948	9.932	10.128	9.7	10.425	30.622	28.003	9.42	6.556	7.198	5.758	10.367	33.4857	17.025	43.781	7.305	6.192	6.562	7.191	7.723	7.3301	32.3684	40.516	17.248	45.423	11.208	8.153	30.137	34.389		0.748302	18.4886
13.2188	14.41	60.244	16.238	10.624	9.909	9.012	13.462	35.629	22.873	10.824	8.433	6.446	6.291	10.376	36.6149	18.742	43.312	6.492	7.202	5.733	7.986	7.421	5.6886	26.3696	37.186	19.059	41.973	9.4706	9.031	28.435	34.763		0.755105	18.7177
13.3378	14.461	58.847	15.242	9.855	11.352	9.56	11.429	40.255	23.461	8.925	7.509	6.485	7.721	10.551	42.9531	17.949	43.313	7.905	6.99	6.595	8.927	6.415	6.446	21.3273	37.423	19.699	41.323	9.5946	9.907	26.328	35.819		0.761903	18.857
13.4569	14.668	59.147	14.669	10.34	11.945	10.097	13.625	48.139	21.843	7.984	8.443	6.85	8.414	8.754	36.7507	20.637	41.705	6.388	7.286	6.359	6.75	7.273	7.3844	21.3233	43.947	18.197	43.934	11.6034	9.377	22.506	31.303		0.768707	18.9562
13.576	14.516	60.839	15.405	10.26	13.544	10.95	13.324	54.123	20.044	10.216	8.295	8.918	7.242	9.215	42.1207	23.624	39.935	5.785	7.179	7.28	7.636	10.259	5.8338	22.6802	47.029	18.074	41.094	10.3451	7.993	17.263	32.827		0.77551	19.479
13.6951	18.267	59.965	18.926	9.595	12.068	8.889	13.29	59.396	17.534	9.571	7.936	7.108	5.911	10.295	37.5022	25.173	42.126	6.421	7.415	7.833	7.036	8.965	6.4994	21.8293	52.585	19.686	41.856	8.1478	7.669	14.796	30.141		0.782313	19.4978
13.8142	17.917	57.98	17.937	11.731	15.283	10.21	16.82	62.096	14.779	8.191	7.65	7.126	6.393	9.094	41.5066	32.089	41.581	7.066	8.191	8.036	8.539	7.124	7.8146	19.6819	50.936	19.446	40.292	9.0676	7.652	14.345	29.878		0.789117	19.8856
13.9333	17.861	59.856	22.099	13.529	15.304	11.612	17.111	57.951	16.18	9.224	9.562	6.42	7.003	9.92	39.695	41.757	35.723	7.553	8.072	8.367	9.17	8.879	8.3056	18.7073	58.897	18.985	45.41	9.6554	8.461	13.747	27.317		0.79592	20.7204
14.0524	17.768	59.804	25.792	13.491	19.083	12.393	17.734	59.744	16.13	9.728	6.755	6.864	7.534	9.234	41.738	41.236	32.063	5.99	7.602	8.3	9.356	9.589	7.5113	19.7578	65.678	19.501	44.587	7.9886	9.243	13.016	30.456		0.802724	21.1505
14.1715	18.041	65.89	27.384	13.16	21.1	13.132	20.374	69.357	15.681	8.727	6.932	6.327	6.048	9.833	47.4784	44.914	33.533	6.187	6.416	8.303	8.791	9.822	7.7996	19.6269	73.88	19.837	43.311	7.7233	9.558	12.515	32.381		0.809527	22.3891
14.2905	20.373	64.498	31.535	15.921	19.864	17.104	23.467	71.654	14.673	8.759	8.405	8.295	6.73	8.945	50.3439	53.051	28.861	4.514	5.881	9.371	9.674	10.414	8.5532	19.075	79.021	22.704	47.022	7.3704	8.526	10.984	25.048		0.816325	23.2463
14.4096	21.513	67.131	42.725	19.512	21.265	17.318	29.411	73.608	12.05	9.685	8.37	8.286	8.87	9.102	55.5386	56.221	24.456	4.81	7.266	9.993	10.796	8.086	10.4385	18.8984	83.041	23.29	43.518	9.0331	7.984	11.231	24.9		0.823128	24.4628
14.5287	21.765	69.113	52.958	20.757	22.745	20.72	38.069	74.947	11.081	8.884	8.38	7.255	7.356	9.992	53.3976	64.847	19.133	5.482	6.949	10.603	11.696	9.114	9.7646	16.787	84.101	23.547	38.634	10.3183	7.297	9.343	20.551		0.829932	25.0189
14.6478	26.738	75.087	62.392	23.897	28.83	27.315	44.607	80.22	11.606	8.56	7.967	7.147	7.301	10.472	45.5231	66.309	17.457	6.956	7.214	11.593	13.325	10.588	9.6875	17.3764	79.498	23.365	39.76	9.2828	6.938	12.693	21.643		0.836735	26.4951
14.7669	30.663	76.589	65.643	29.536	39.519	34.303	51.505	80.336	10.879	9.685	9.142	7.006	5.557	11.879	43.345	66.266	15.285	7.831	8.848	12.271	13.352	10.778	10.7029	17.6164	83.533	24.307	35.51	9.4767	8.306	9.502	19.569		0.843538	27.7013
14.886	37.364	80.247	72.321	36.911	50.237	48.754	58.936	84.904	12.188	9.98	10.325	9.819	6.883	13.04	40.7195	75.978	16.203	8.244	7.916	12.581	15.3	12.643	11.7315	19.3103	86.973	25.966	36.43	8.3288	7.083	8.934	18.721		0.850342	30.4829
15.0051	39.219	85.661	80.55	44.855	63.61	57.557	66.683	87.173	12.189	9.413	9.131	10.416	7.132	10.915	38.9889	78.026	14.075	6.549	8.739	12.836	22.123	16.037	14.9336	17.6257	88.069	28.165	39.007	9.4039	8.433	9.429	18.526		0.857145	32.7571
15.1242	39.522	95.35	78.507	57.677	70.202	68.846	76.16	87.827	13.821	8.972	11.703	10.213	8.478	11.68	39.6727	84.825	13.096	8.66	10.056	13.966	25.813	20.194	14.545	16.3772	87.33	29.436	40.1	9.871	9.544	12.679	17.178		0.863949	35.2355
15.2432	45.783	98.853	80.234	76.206	66.003	80.59	87.466	93.683	17.906	9.7	12.029	11.641	7.026	13.11	45.2203	90.059	11.445	7.954	10.586	16.808	28.777	25.146	16.8662	15.4112	94.886	31.088	38.206	9.8396	8.417	9.589	16.292		0.870746	37.9619
15.3623	58.556	105.968	72.667	101.919	56.984	88.66	92.502	100.969	20.348	10.827	14.539	14.159	8.495	16.205	48.337	87.971	13.692	8.991	12.173	23.269	32.677	34.042	22.3328	14.7168	98.878	39.378	38.767	9.1141	8.843	7.816	16.576		0.87755	41.3023
15.4814	64.412	107.924	62.255	108.564	42.139	93.054	93.585	106.115	24.304	11.858	15.434	15.75	8.274	19.142	52.1834	88.79	13.02	9.916	15.571	27.943	37.436	41.058	26.3908	14.5927	105.37	38.705	47.705	8.9991	10.381	8.329	14.038		0.884353	43.0077
15.6005	75.864	116.615	47.027	96.948	32.534	89.501	94.054	103.531	29.092	11.859	23.063	20.991	10.066	22.316	62.3746	84.3	12.204	9.21	14.152	39.316	42.353	45.995	28.388	15.7154	116.403	42.723	48.644	11.0314	9.878	9.572	13.005		0.891157	44.475
15.7196	92.39	116.241	35.022	78.079	27.307	78.172	76.38	96.172	32.464	11.78	27.277	21.786	11.263	25.724	72.3275	90.5	11.886	8.912	25.431	53.055	40.497	54.708	32.0743	14.0123	127.585	48.305	48.021	10.2851	8.278	9.52	11.671		0.89796	45.0686
15.8387	101.907	110.387	28.167	53.003	23.356	63.23	55.765	78.785	37.104	13.106	25.91	25.569	11.677	38.241	75.0372	91.947	13.499	9.194	30.304	58.179	42.875	62.955	34.0823	13.1876	123.523	56.648	47.31	11.1584	9.894	9.29	9.927		0.904764	44.0393
15.9578	95.418	99.467	20.453	44.124	21.732	49.637	41.466	60.914	42.024	16.909	28.008	32.096	13.707	53.11	71.2036	92.238	12.723	14.786	40.54	54.033	41.137	71.344	35.5504	17.1523	116.408	66.384	43.107	13.6863	9.539	9.564	10.926		0.911567	43.206
16.0769	85.894	93.202	18.519	37.068	21.492	41.872	33.116	49.129	48.468	16.591	24.741	31.082	16.408	59.548	68.3507	100.26	14.492	19.031	50.878	53.373	37.326	71.35	42.4089	15.7	108.8	70.383	37.321	14.5832	9.306	8.913	9.614		0.91837	42.2329
16.196	77.538	77.803	17.32	30.068	18.14	32.671	28.384	36.897	56.529	21.201	26.153	30.825	20.737	57.571	56.5624	117.182	15.828	23.199	55.117	48.472	31.928	67.899	50.535	15.2313	105.624	70.989	38.854	18.5389	8.16	8.3	9.703		0.925174	41.0955
16.315	66.99	73.365	18.422	23.147	15.696	26.182	26.072	27.263	60.798	23.622	26.348	31.085	29.137	57.608	58.7806	111.455	15.502	33.842	68.934	41.654	29.244	56.102	57.5349	15.8576	99.705	71.658	38.371	21.4425	9.6	9.431	8.804		0.931972	40.4404
16.4341	52.495	64.179	14.693	20.518	16.815	21.766	24.096	20.055	52.816	24.115	30.413	29.518	36.396	46.572	62.1631	116.751	16.47	48.7	63.397	32.074	24.917	44.492	59.6723	15.586	99.703	74.44	41.492	25.8465	10.063	9.384	9.283		0.938775	38.9962
16.5532	47.451	53.398	12.594	22.093	16.314	17.537	21.292	16.597	35.2	25.019	33.052	28.76	43.045	38.571	53.368	122.905	19.316	59.489	58.715	24.022	19.333	34.182	57.7579	15.2959	103.36	75.198	45.271	31.6185	10.433	9.381	10.463		0.945578	37.4526
16.6723	40.468	45.341	11.891	19.727	12.687	17.092	17.144	15.222	32.672	25.943	32.563	28.062	38.446	33.221	48.0409	112.251	21.252	66.253	48.985	21.691	15.68	27.932	46.6776	17.4103	106.251	72.374	42.014	39.6172	12.849	8.471	10.082		0.952382	35.1068
16.7914	32.823	38.238	12.191	17.688	10.538	13.424	15.099	14.37	25.138	27.705	26.409	22.707	37.362	28.656	37.9535	95.487	26.112	70.708	40.202	19.874	14.495	21.283	41.5002	17.5359	112.164	68.636	37.184	43.2047	11.834	8.774	8.849		0.959185	32.1982
16.9105	29.542	34.349	10.244	13.996	9.041	13.205	14.11	14.405	19.814	25.341	20.28	22.828	39.741	28.548	33.5888	79.309	33.919	67.548	26.828	13.443	11.168	17.579	36.154	20.2724	111.6	61.693	35.3	50.7848	11.308	10.677	10.8		0.965989	29.9166
17.0296	27.188	26.565	8.968	15.875	7.544	10.799	11.371	14.821	17.271	24.761	14.688	19.776	39.31	22.232	27.7121	70.714	40.443	57.079	21.705	14.285	9.958	14.857	32.0639	22.31	99.87	54.67	33.656	59.5654	13.566	11.46	10.911		0.972792	27.6127
17.1487	21.919	22.958	9.834	15.95	7.662	11.439	10.903	14.847	16.605	22.677	12.878	18.462	38.981	17.996	25.2381	62.714	44.048	50.24	22.398	15.053	10.838	13.592	24.6351	22.3059	102.938	50.169	35.024	65.8759	15.438	10.643	11.608		0.979595	26.6409
17.2677	21.471	21.693	7.223	10.013	6.405	9.428	8.309	13.781	12.752	17.661	14.252	15.904	33.681	14.74	19.5567	53.485	38.988	38.88	17.462	8.731	11.374	13.078	18.9668	26.0137	100.747	48.509	36.669	68.0677	19.66	9.983	8.395		0.986393	24.0606
17.3868	17.368	18.776	5.738	8.272	4.251	6.369	7.828	11.212	11.4	14.42	10.76	12.944	27.766	13.337	15.911	45.634	37.837	35.266	15.483	7.615	9.685	10.622	15.438	24.2465	92.472	43.838	34.765	60.3504	19.898	10.448	10.762		0.993197	21.3133
17.5059	17.072	14.195	4.445	10.319	3.141	6.29	5.886	9.248	10.909	11.345	9.38	12.241	24.903	12.076	15.8582	37.139	39.325	27.885	16.532	10.154	7.848	9.681	9.6626	27.7346	93.109	46.037	46.057	63.2929	27.222	11.096	11.264		1	21.0112

## Sheet: Image13
X0	Y0	Y1	Y2	Y3	Y4	Y5	Y6	Y7	Y8	Y9	Y10	Y11	Y12	Y13	Y14	Y15	Y16	Y17	Y18	Y19	Y20		Ap-Ba	Avg int
0	51.649	52.249	56.601	37.518	40.637	36.263	47.912	51.56	56.818	33.094	52.019	32.02	67.556	30.933	46.066	48.92	49.294	34.464	31.964	68.209	36.836		0	45.8372
0.1191	55.94	51.188	49.317	43.116	51.536	41.508	49.732	57.003	59.069	41.043	56.209	41.49	75.072	32.197	48.731	45.405	46.167	34.523	30.204	75.715	44.052		0.0040004	49.0103
0.2382	56.093	54.333	57.137	42.506	57.748	50.748	58.517	56.712	60.013	52.524	64.787	51.376	86.424	44.539	47.444	57.067	51.565	45.403	32.767	78.283	50.272		0.00800081	55.0599
0.3573	60.312	45.469	62.458	39.186	61.774	62.881	75.964	66.42	61.925	60.03	66.256	56.08	89.063	50.347	55.764	63.423	54.414	45.418	38.926	84.139	51.061		0.0120012	59.5862
0.4764	67.753	45.396	68.15	39	60.576	70.389	84.258	62.122	66.509	65.977	63.126	60.805	96.758	49.829	61.944	63.84	53.15	66.249	44.11	90.254	61.349		0.0160016	63.883
0.5954	73.068	48.579	64.605	46.914	76.957	80.248	94.615	73.25	71.763	71.341	80.385	64.079	104.923	65.658	66.525	64.85	61.731	69.296	53.974	84.44	75.998		0.0199987	71.1047
0.7145	84.042	50.292	68.58	50.816	95.342	86.08	105.491	93.268	75.647	73.114	87.269	73.473	114.856	82.933	76.006	70.741	69.786	74.436	59.747	88.296	93.935		0.0239991	79.7214
0.8336	86.079	72.656	73.377	54.357	129.206	113.177	131.887	103.066	81.077	83.365	104.521	74.78	112.668	84.745	80.188	72.177	80.223	91.881	63.23	92.179	106.036		0.0279995	90.0417
0.9527	93.068	76.422	81.962	66.841	157.809	126.249	143.902	115.207	96.758	96.947	102.138	92.768	139.076	100.586	96.771	77.072	91.343	106.604	73.025	113.359	115.082		0.0319999	102.999
1.0718	101.178	68.388	80.122	84.831	182.494	170.229	150.086	135.028	119.136	109.296	122.718	101.004	159.796	108.673	104.643	91.375	91.57	130.916	74.948	125.291	116.613		0.0360003	115.635
1.1909	107.728	79.37	84.964	90.535	203.69	200.769	160.411	174.897	139.196	134.701	144.842	104.692	170.001	132.031	107.671	89.443	108.418	143.674	89.804	130.065	108.634		0.0400007	128.835
1.31	121.827	96.535	96.664	99.429	219.973	215.372	181.992	205.323	159.28	155.753	152.101	125.246	179.48	145.664	123.833	104.791	104.684	141.354	89.503	142.172	125.068		0.0440011	142.193
1.4291	127.34	94.161	88.147	114.322	227.296	232.557	193.675	224.452	170.677	185.588	166.094	131.58	194.003	163.612	145.628	122.393	113.956	154.481	79.674	140.976	127.306		0.0480015	152.282
1.5481	134.559	110.644	96.485	133.442	229.97	242.384	209.471	231.623	186.934	205.702	169.437	138.33	190.305	183.216	162.577	136.98	126.932	164.197	96.124	143.73	123.643		0.0519985	162.699
1.6672	143.213	117.851	111.822	142.561	227.722	247.586	222.947	231.971	223.374	222.029	187.961	157.338	201.089	194.505	167.16	154.184	132.306	166.787	114.561	141.303	124.803		0.0559989	173.003
1.7863	153.137	135.249	127.353	159.568	231.358	247.431	234.255	240.869	232.359	237.628	194.24	170.979	207.177	201.575	181.649	159.473	149.334	167.199	132.54	153.999	125.084		0.0599993	182.974
1.9054	156.159	147.128	134.118	170.11	218.49	241.008	233.727	240.435	239.237	242.02	202.646	191.369	194.139	205.126	196.551	167.629	162.269	181.913	139.507	149.885	118.304		0.0639997	187.227
2.0245	170.146	145.665	137.449	177.688	207.677	231.374	240.178	226.307	244.468	239.512	207.737	197.721	177.003	210.317	209.137	173.937	155.432	189.068	157.95	172.442	110.524		0.0680001	189.606
2.1436	179.245	148.471	140.177	192.468	198.23	221.154	236.566	188.441	247.294	237.02	224.594	209.13	162.681	221.593	209.692	178.92	162.826	192.671	165.607	175.482	119.135		0.0720005	191.019
2.2627	173.325	140.168	148.98	203.119	174.983	219.361	219.129	154.064	250.049	236.628	221.248	220.154	147.046	229.048	208.049	183.923	177.096	196.936	165.529	173.859	107.378		0.0760009	188.099
2.3818	187.565	153.326	162.617	219.075	159.267	203.013	213.488	110.085	249.548	229.091	221.229	210.548	140.082	221.893	208.738	183.328	182.51	193.563	161.743	168.703	95.347		0.0800013	184.512
2.5008	199.265	151.382	180.808	220.512	125.519	186.483	187.206	83.991	236.32	211.805	222.762	214.372	128.311	210.254	213.396	167.888	177.716	189.035	157.164	173.523	99.784		0.0839984	177.976
2.6199	200.447	155.201	197.787	218.349	105.186	163.841	181.481	55.107	226.242	176.901	217.72	204.14	118.435	198.67	216.287	158.685	187.758	193.165	150.729	173.757	96.835		0.0879988	171.273
2.739	202.271	175.34	189.131	219.565	76.922	131.323	165.84	54.601	206.903	140.964	225.531	190.042	118.507	183.018	226.465	153.813	171.498	189.059	147.801	160.98	96.026		0.0919992	163.124
2.8581	203.195	167.17	186.868	212.638	65.331	114.848	148.62	50.629	183.631	113.081	223.091	184.235	115.556	157.547	227.899	144.715	166.292	181.997	137.801	161.917	99.326		0.0959996	154.59
2.9772	215.652	168.533	201.857	204.688	50.795	81.358	107.201	43.016	164.503	91.853	225.494	191.548	113.815	150.526	225.392	132.352	151.758	179.585	119.903	149.645	98.518		0.1	146.095
3.0963	209.736	155.63	200.937	195.683	47.989	70.917	89.065	44.983	138.32	66.541	227.944	188.71	108.308	143.244	219.175	123.523	136.436	170.626	106.432	130.465	95.468		0.104	136.673
3.2154	202.354	156.043	199.013	180.551	51.378	59.032	68.004	37.43	119.705	55.8	230.504	191.026	116.343	134.795	221.134	104.716	114.47	169.648	100.709	121.688	90.53		0.108001	129.756
3.3345	202.671	146.986	182.992	161.302	45.404	47.497	54.725	32.481	104.433	48.114	233.693	171.118	116.304	119.824	220.129	92.935	97.282	168.023	101.675	114.058	84.913		0.112001	121.265
3.4535	197.347	137.204	176.313	161.502	35.774	43.275	44.982	29.688	104.948	41.854	227.148	167.318	102.856	107.963	202.063	77.255	76.095	173.859	94.935	101.48	77.287		0.115998	113.388
3.5726	181.531	127.146	173.22	143.359	35.52	44.368	35.785	29.467	98.411	37.137	233.015	162.982	104.304	91.618	187.705	73.44	74.933	157.368	94.876	88.718	76.268		0.119999	107.199
3.6917	177.462	118.863	156.344	126.513	31.743	33.38	30.349	28.061	93.627	35.935	231.323	156.648	91.336	85.467	176.03	69.956	66.662	162.903	96.33	76.951	85.539		0.123999	101.496
3.8108	176.953	123.803	140.798	118.897	29.156	37.628	27.669	26.743	82.055	31.187	235.029	148.515	91.918	76.652	153.968	72.26	64.988	146.206	85.651	70.925	82.752		0.127999	96.3692
3.9299	156.301	124.696	124.562	101.118	30.032	33.605	25.865	26.391	79.356	25.32	225.145	152.921	92.407	73.229	141.643	57.828	62.898	141.519	78.943	59.894	80.772		0.132	90.2117
4.049	144.804	125.701	126.698	85.297	35.138	33.178	25.885	21.539	66.537	24.362	231.833	162.362	75.869	65.049	129.155	50.418	54.391	111.159	73.73	52.279	70.464		0.136	84.088
4.1681	122.505	117.373	116.152	70.694	30.402	35.77	26.021	21.265	57.936	26.669	230.042	166.492	72.25	70.346	117.606	42.844	51.297	104.528	69.06	48.619	72.187		0.140001	79.5266
4.2872	99.913	89.79	104.059	53.37	36.679	31.984	24.302	24.939	53.849	27.984	228.541	155.809	68.972	65.822	99.486	33.027	42.904	87.598	50.509	43.603	62.777		0.144001	70.758
4.4063	88.678	81.425	107.426	41.976	28.567	32.758	23.608	23.218	53.332	22.991	225.503	165.367	63.727	73.065	88.097	39.536	46.99	75.742	35.787	34.763	60.556		0.148001	67.291
4.5253	82.436	70.785	100.212	22.454	33.365	41.429	19.281	18.001	53.474	21.417	227.72	155.326	63.483	59.242	72.85	30.288	37.281	62.951	27.282	35.603	61.168		0.151999	61.7166
4.6444	69.491	67.875	87.315	20.508	33.723	42.14	22.231	18.646	47.788	23.634	218.867	150.068	50.631	51.105	69.011	27.654	35.807	48.627	29.304	34.551	49.675		0.155999	57.0786
4.7635	53.083	62.235	81.967	19.187	35.746	42.531	16.046	18.511	40.325	22.247	226.207	134.988	49.936	58.172	64.778	22.609	31.688	39.716	24.792	35.481	49.339		0.159999	53.7897
4.8826	55.214	63.176	79.691	15.302	38.03	39.711	15.838	18.855	47.97	19.793	224.905	137.694	47.527	62.89	48.9	17.239	27.409	38.388	21.439	31.597	46.821		0.164	52.3042
5.0017	61.974	56.035	71.143	14.064	35.193	37.257	17.574	17.647	42.444	18.195	230.278	128.154	48.2	46.754	44.908	20.543	23.759	37.652	18.947	28.274	43.944		0.168	49.6638
5.1208	53.31	50.383	62.399	16.24	26.667	31.589	19.126	18.142	44.093	18.368	226.825	123.013	45.748	46.016	40.487	17.067	22.698	36.359	21.102	25.469	41.487		0.172001	46.9804
5.2399	46.268	53.393	51.864	16.704	32.267	36.627	17.307	13.465	46.445	18.951	229.749	121.665	45.921	45.006	30.256	22.831	21.463	28.139	21.055	23.76	36.734		0.176001	45.7081
5.359	40.723	49.713	44.765	17.02	39.061	35.996	19.241	13.697	48.008	21.972	216.923	107.506	44.912	44.144	25.042	28.169	21.448	28.145	22.128	22.133	37.448		0.180001	44.1997
5.478	44.644	47.965	39.991	15.927	33.923	42.277	17.673	14.634	44.349	15.622	215.289	100.787	45.077	35.502	25.059	18.484	16.527	30.305	18.466	17.633	34.869		0.183998	41.6668
5.5971	39.713	45.974	33.603	16.87	38.388	41.701	20.573	14.355	43.929	17.439	206.672	88.934	48.891	38.08	25.872	19.228	16.061	27.539	19.621	22.254	32.849		0.187999	40.8831
5.7162	43.178	46.198	25.717	15.2	37.53	35.479	17.599	18.29	49.952	19.087	194.671	85.432	51.502	29.797	22.123	27.836	18.431	32.871	18.711	18.709	30.685		0.191999	39.9523
5.8353	50.827	37.315	17.812	12.01	45.334	25.027	19.144	13.613	50.587	19.588	183.202	86.661	49.9	32.997	22.572	20.182	20.078	30.554	14.898	17.665	25.395		0.196	37.8743
5.9544	53.149	35.952	16.83	11.134	39.195	27.68	18.075	16.058	50.759	17.475	171.593	87.749	45.795	36.175	21.333	19.922	18.869	30.859	15.155	17.64	31.652		0.2	37.288
6.0735	63.483	28.619	14.871	12.825	39.99	29.376	20.99	18.755	56.57	22.745	166.503	89.737	47.935	30.927	22.856	17.774	16.294	33.574	19.072	19.394	36.058		0.204	38.4928
6.1926	81.47	34.293	15.298	15.848	34.855	27.697	21.497	19.587	64.878	26.58	146.753	84.608	46.16	32.744	23.374	21.778	19.317	32.576	17.691	19.531	34.583		0.208001	39.1009
6.3117	77.959	36.422	18.341	16.566	36.02	29.887	16.914	19.662	66.905	21.759	114.875	85.541	51.044	24.079	20.404	20.519	21.281	36.768	17.614	16.806	30.731		0.212001	37.1475
6.4307	85.66	34.279	12.932	20.921	32.354	29.259	19.766	25.457	71.093	25.502	88.87	84.175	47.553	29.43	21.265	22.329	16.006	33.98	13.784	14.82	34.589		0.215998	36.3821
6.5498	67.909	31.835	15.84	18.377	32.238	27.765	18.666	28.315	75.559	22.399	68.909	72.465	41.933	30.658	23.293	24.933	17.992	34.809	13.159	14.599	29.583		0.219999	33.8684
6.6689	73.842	26.132	15.383	20.847	36.033	25.926	16.092	28.203	86.339	24.774	42.874	66.601	47.828	27.857	24.53	23.463	18.824	42.106	16.28	17.187	31.267		0.223999	33.9232
6.788	78.644	25.218	17.681	19.066	46.181	27.579	23.46	26.319	87.672	19.484	35.109	61.135	47.435	29.068	29.56	24.401	18.936	38.498	13.078	16.402	29.144		0.227999	34.0033
6.9071	97.193	25.75	16.099	19.946	51.179	21.486	21.704	33.6	97.133	22.846	27.774	59.01	45.841	36.095	30.133	28.646	20.616	35.006	14.887	11.719	24.142		0.232	35.2764
7.0262	84.93	32.257	14.96	21.035	50.33	28.073	21.142	37.835	100.542	25.799	16.794	54.417	43.175	34.903	26.381	24.649	17.502	44.429	11.528	12.734	23.694		0.236	34.6242
7.1453	86.286	33.04	15.286	21.526	43.978	29.129	23.202	45.881	104.099	23.225	11.822	47.674	48.912	33.999	24.625	25.627	19.044	46.843	14.91	12.449	26.731		0.240001	35.1566
7.2644	93.604	28.818	12.542	29.129	47.333	31.077	27.195	43.67	116.937	19.677	12.311	38.746	48.171	34.991	29.532	23.324	20.312	49.205	15.699	14.025	27.202		0.244001	36.3571
7.3834	96.747	26.305	13.092	30.934	47.91	29.782	29.231	54.321	122.874	20.13	12.773	36.558	42.968	29.815	31.37	23.277	21.606	46.328	12.229	10.445	21.964		0.247998	36.2219
7.5025	81.899	25.201	15.763	25.345	47.843	30.817	35.64	59.338	124.651	19.27	10.408	36.126	49.48	32.248	23.994	19.625	24.813	62.125	13.585	12.44	25.377		0.251999	36.9518
7.6216	91.28	23.549	11.204	32.147	50.029	30.086	30.189	58.808	138.895	18.749	12.949	27.103	53.469	39.35	22.33	23.101	24.944	59.077	17.433	8.968	27.626		0.255999	38.1565
7.7407	85.91	18.268	11.973	33.232	42.906	32.75	33.855	52.856	134.934	19.039	13.554	20.563	55.879	32.128	22.611	26.33	29.869	64.615	12.3	11.79	24.658		0.259999	37.1438
7.8598	74.651	19.152	14.121	29.184	46.197	32.797	36.738	53.981	133.32	19.482	10.809	14.464	47.556	32.58	23.229	19.342	30.519	67.934	12.589	11.676	21.205		0.264	35.787
7.9789	73.525	24.923	15.957	33.453	43.81	39.822	34.917	55.464	129.573	19.738	9.387	14.861	45.639	33.763	24.141	19.409	29.327	65.503	10.768	12.123	22.665		0.268	36.1318
8.098	69.826	20.893	15.996	32.611	41.191	31.48	26.772	56.92	115.885	20.678	12.874	11.09	48.207	33.291	18.698	20.069	28.077	69.922	12.224	13.908	24.7		0.272001	34.5387
8.2171	64.807	19.897	14.434	28.082	42.013	33.19	25.441	63.088	121.13	17.715	11.949	10.251	45.505	31.473	15.146	18.401	27.703	82.606	16.63	14.716	22.685		0.276001	34.6125
8.3362	58.667	20.879	16.344	33.779	39.773	34.145	23.779	57.296	108.795	14.564	10.909	12.149	43.917	31.954	20.423	15.776	29.252	76.197	14.698	12.067	18.673		0.280001	33.0493
8.4552	60.329	19.575	13.396	39.927	41.562	30.368	26.334	61.899	104.064	14.045	12.89	14.551	47.497	36.798	21.808	16.784	27.692	85.213	14.47	9.76	14.85		0.283998	33.991
8.5743	51.561	16.471	17.038	45.826	41.693	29.28	21.121	52.093	88.446	18.183	11.981	15.586	39.85	39.347	21.5	17.579	30.512	88.747	15.684	12.72	15.776		0.287999	32.9045
8.6934	41.708	17.619	17.535	56.244	40.053	29.995	23.182	47.011	84.869	17.704	9.003	12.431	39.871	46.845	22.746	18.503	29.601	89.553	15.532	11.163	16.66		0.291999	32.7537
8.8125	38.877	17.22	11.987	51.913	44.947	27.728	24.047	38.328	75.879	15.734	9.525	8.962	42.054	49.018	20.026	18.662	26.782	93.86	9.878	10.282	19.476		0.296	31.1993
8.9316	36.809	18.195	16.576	51.065	41.621	26.883	23.402	43.34	69.949	14.128	12.303	7.516	41.342	44.285	22.573	18.412	26.139	99.749	13.798	16.235	20.957		0.3	31.6799
9.0507	36.654	16.251	12.3	46.264	40.701	21.709	30.874	46.604	62.733	13.01	9.172	10.259	36.318	41.661	19.031	18.011	24.63	96.665	17.459	9.951	17.18		0.304	29.878
9.1698	33.479	15.879	17.508	48.427	33.116	23.813	35.68	47.85	57.415	14.71	9.717	10.403	34.442	39.732	21.415	19.46	26.472	108.781	17.889	12.038	13.723		0.308001	30.569
9.2889	35.152	17.293	20.22	41.08	36.329	20.317	34.493	52.145	54.289	11.146	8.438	9.557	36.96	43.834	21.948	14.852	26.913	93.448	15.83	15.479	18.657		0.312001	29.9229
9.4079	33.145	17.038	17.591	44.829	34.423	21.011	35.494	58.985	53.028	14.225	9.073	13.511	31.605	41.566	17.659	19	29.033	88.504	17.62	11.021	18.741		0.315998	29.862
9.527	31.158	14.569	19.689	48.358	33.661	16.584	31.862	63.162	44.332	14.822	10.614	10.403	25.928	45.341	20.932	18.38	28.865	81.375	15.19	12.384	19.025		0.319999	28.8873
9.6461	30.242	18.123	17.713	42.067	33.111	22.101	34.582	53.191	45.084	15.715	10.503	11.792	28.608	49.749	20.844	20.37	30.92	72.434	10.688	12.902	14.512		0.323999	28.3453
9.7652	29.667	13.798	17.5	39.508	35.343	19.557	28.75	66.257	36.144	17.128	11.071	12.971	28.908	45.901	27.424	22.002	29.076	68.299	12.042	11.825	13.624		0.327999	27.9426
9.8843	22.453	18.061	16.161	41.192	31.069	17.958	29.106	64.594	48.26	20.151	10.365	14.931	23.628	48.205	21.282	20.398	34.13	64.928	12.912	10.779	13.035		0.332	27.7904
10.0034	25.826	16.91	18.021	48.418	27.033	22.842	32.041	60.081	49.194	15.034	9.137	10.477	20.986	51.969	22.147	15.971	29.787	70.634	14.357	12.695	16.297		0.336	28.0884
10.1225	25.758	15.703	18.579	43.17	33.582	19.149	27.41	69.56	43.281	15.482	11.803	14.35	24.159	45.063	20.596	17.549	31.716	81.757	16.125	7.426	16.487		0.340001	28.5098
10.2416	20.934	15.074	17.46	43.77	39.183	23.423	29.277	62.267	41.996	18.824	11.367	14.383	24.071	49.259	19.413	18.023	29.425	79.949	11.607	12.035	11.991		0.344001	28.2729
10.3606	19.332	14.98	17.983	45.666	38.58	23.402	31.537	64.818	39.376	14.252	12.222	11.045	19.204	55.416	19.731	17.437	29.086	82.659	16.772	10.781	13.511		0.347998	28.4662
10.4797	18.022	13.62	15.699	49.241	38.852	22.867	36.253	61.128	40.183	11.538	9.093	10.666	20.469	46.478	19.905	18.633	33.122	91.701	16.921	9.411	15.263		0.351999	28.5269
10.5988	19.148	15.692	19.06	47.407	33.547	24.778	32.935	59.031	34.62	13.241	11.305	9.628	20.052	46.341	18.575	15.628	30.524	93.395	13.757	11.304	14.604		0.355999	27.8368
10.7179	18.194	14.082	17.713	44.135	39.48	20.644	32.836	71.482	41.257	15.583	12.566	10.908	16.684	42.839	17.524	17.561	21.887	90.526	15.247	11.314	11.571		0.359999	27.8111
10.837	17.655	13.915	14.753	43	32.656	26.281	27.412	72.721	41.407	15.646	12.854	11.554	20.393	42.477	20.164	16.962	27.357	87.309	16.761	9.892	12.803		0.364	27.8082
10.9561	16.334	14.042	19.804	46.046	33.525	23.852	38.024	68.909	42.735	15.061	12.168	10.329	23.625	50.77	18.985	15.809	21.476	85.333	14.365	9.477	15.359		0.368	28.3823
11.0752	16.036	13.437	23.217	48.548	29.429	29.268	39.81	77.114	35.794	15.615	12.023	10.1	16.463	39.509	19.537	16.492	15.625	95.064	18.992	8.596	15.523		0.372001	28.3901
11.1943	14.735	14.485	19.524	47.651	32.794	29.083	42.501	67.797	37.918	17.567	7.769	11.811	18.872	42.746	16.444	15.26	15.363	92.353	18.096	10.43	17.505		0.376001	28.1288
11.3133	20.017	16.05	19.759	52.622	31.568	29.099	33.773	71.356	33.317	15.436	9.392	11.094	20.202	42.348	18.084	17.894	12.679	94.197	18.735	6.609	13.576		0.379998	27.9908
11.4324	21.274	17.276	19.716	53.033	29.442	36.199	37.856	77.522	32.988	15.331	9.602	13.698	21.657	36.362	18.56	18.705	17.128	94.91	16.947	11.682	9.998		0.383998	29.0422
11.5515	20.351	15.879	17.53	47.586	27.551	29.555	35.72	82.738	33.871	10.714	10.858	11.578	21.485	42.013	17.722	18.176	16.179	101.167	20.751	8.892	10.842		0.387999	28.6266
11.6706	19.285	13.063	22.054	41.001	34.572	27.891	40.836	83.765	33.795	13.329	11.641	10.915	21.691	41.985	16.33	16.498	15.172	87.825	13.984	8.319	11.31		0.391999	27.8696
11.7897	17.004	13.981	20.606	45.846	35.836	37.027	41.57	92.66	26.909	14.215	15.343	12.415	24.93	42.211	24.649	17.339	16.289	99.348	16.027	9.414	12.841		0.396	30.3076
11.9088	14.299	9.573	21.182	41.171	31.93	35.946	48.147	83.995	30.447	13.647	14.89	12.445	23.548	44.698	20.103	16.215	14.332	95.784	14.645	9.571	11.711		0.4	28.9657
12.0279	15.135	12.186	20.475	45.645	34.81	25.9	39.642	84.807	24.793	14.772	12.314	11.64	17.691	53.531	19.759	20.871	18.244	82.475	13.318	8.772	12.427		0.404	28.0575
12.147	18.126	11.199	24.517	42.238	40.227	33.076	47.221	88.615	22.879	12.397	12.685	10.09	22.359	53.86	18.478	15.727	14.82	81.542	14.984	9.079	12.349		0.408001	28.8794
12.2661	13.404	14.56	25.204	44.537	36.946	32.72	51.807	91.581	23.327	15.343	14.948	10.282	22.914	47.575	16.85	19.471	15.852	89.911	15.285	10.175	11.935		0.412001	29.7441
12.3851	13.614	13.238	28.594	41.335	33.831	30.579	57.263	81.491	28.233	15.92	12.955	11.891	28.995	49.648	19.122	13.185	14.159	79.332	15.373	10.519	12.475		0.415998	29.131
12.5042	16.578	12.825	29.325	45.488	40.482	31.108	46.143	78.604	28.452	9.349	13.554	12.774	22.263	45.986	18.687	15.035	17.092	67.887	21.121	10.944	11.246		0.419999	28.3306
12.6233	16.175	11.79	25.001	44.998	33.684	29.968	48.782	71.13	21.641	11.732	15.593	14.965	20.726	51.226	20.947	20.173	18.284	73.671	16.069	13.187	10.547		0.423999	28.109
12.7424	14.121	12.443	24.159	53.284	31.548	32.278	48.602	63.993	23.357	15.522	10.799	8.903	26.391	50.159	20.516	14.847	19.055	84.525	18.353	12.528	11.44		0.427999	28.4201
12.8615	14.289	9.304	31.718	55.561	31.27	36.834	53.018	61.753	20.654	12.188	11.5	9.933	25.798	54.724	18.758	13.379	20.883	78.778	17.947	11.403	12.321		0.432	28.6673
12.9806	14.599	11.898	27.026	58.401	36.376	34.049	48.179	66.257	17.952	13.435	13.406	8.825	25.332	50.234	22.242	13.613	18.281	68.858	15.522	12.493	13.289		0.436	28.108
13.0997	13.111	13.761	32.606	62.682	35.867	27.107	58.417	58.431	20	14.806	15.743	11.25	25.993	50.307	18.85	16.161	24.579	75.28	16.153	9.941	12.575		0.440001	29.22
13.2188	12.633	9.859	28.85	78.837	33.209	32.13	62.148	59.984	20.944	17.216	13.988	10.194	26.806	47.39	20.49	13.999	19.987	84.551	13.23	10.553	9.961		0.444001	29.8552
13.3378	22.004	12.585	25.204	63.086	33.655	32.025	58.002	58.891	21.418	13.911	10.514	12.284	27.687	52.355	17.114	15.759	16.024	78.604	13.89	9.322	12.284		0.447998	28.8866
13.4569	18.469	11.659	28.824	64.684	35.044	29.215	61.969	57.08	22.368	16.429	12.803	13.749	38.878	51.425	17.785	20.027	16.898	77.595	13.049	14.367	11.579		0.451999	30.1855
13.576	15.631	13.163	32.678	75.35	36.482	31.716	65.63	48.627	19.986	14.709	16.841	12.35	26.7	59.767	15.384	25.911	15.084	68.367	17.32	12.322	12.138		0.455999	30.2931
13.6951	13.362	12.829	27.692	73.976	34.924	37.772	70.427	45.05	16.092	12.798	15.392	11.982	28.705	58.311	14.748	14.275	16.8	61.627	16.55	15.048	11.498		0.459999	29.0409
13.8142	15.234	14.248	29.693	77.82	37.684	31.974	65.796	45.852	18.698	16.66	14.95	11.366	26.744	53.502	20.609	12.601	19.862	68.678	14.775	16.079	8.954		0.464	29.6085
13.9333	14.785	12.701	31.733	60.088	39.68	37.526	65.777	40.895	22.686	17.913	16.954	9.761	32.989	48.7	18.23	14.782	17.141	60.158	16.599	11.805	9.112		0.468	28.5721
14.0524	12.955	12.911	30.851	58.841	29.597	32.847	63.813	41.463	19.911	15.333	15.566	14.874	34.251	47.573	16.312	21.069	17.112	54.71	21.738	8.333	10.104		0.472001	27.6269
14.1715	16.151	13.787	36.569	72.994	39.909	42.149	62.313	36.373	17.778	14.725	14.275	14.42	28.435	55.548	19.015	14.558	19.606	56.699	18.979	11.915	9.216		0.476001	29.3054
14.2905	18.167	18.411	31.712	63.315	37.788	49.882	64.439	36.532	15.05	14.454	12.538	13.67	23.579	52.205	16.261	16.802	14.685	59.853	14.356	12.529	11.759		0.479998	28.4756
14.4096	16.755	14.752	32.034	56.842	33.196	48.35	73.43	37.47	18.574	15.287	12.801	14.784	27.935	52.173	22.311	15.774	18.568	54.677	15.652	10.677	9.726		0.483998	28.6556
14.5287	13.166	16.635	32.362	58.66	35.739	53.658	64.552	34.415	21.206	13.467	13.601	14.245	25.827	51.523	19.485	18.226	19.641	53.938	18.576	14.176	14.357		0.487999	28.9264
14.6478	12.749	16.211	29.358	53.348	39.754	53.237	72.289	31.919	19.565	14.58	13.548	13.247	23.435	56.318	21.362	16.069	17.748	57.107	17.511	14.254	12.36		0.491999	28.8557
14.7669	13.822	18.779	37.17	55.407	41.593	49.64	70.227	31.802	21.866	15.433	15.277	11.114	31.592	50.488	16.108	20.146	16.043	61.798	19.734	12.178	10.391		0.496	29.5528
14.886	13.767	16.567	39.507	52.611	38.871	49.7	70.566	33.353	18.033	18.981	12.401	13.701	33.932	50.212	18.727	20.285	16.508	59.899	19.57	11.62	12.657		0.5	29.5937
15.0051	16.19	18.74	35.21	49.371	42.825	55.897	85.682	27.479	19.671	20.529	12.286	12.986	26.192	51.214	21.114	15.388	17.899	61.405	17.548	11.528	12.15		0.504	30.0621
15.1242	13.612	14.266	38.018	57.48	48.707	56.547	77.76	25.491	21.473	16.251	16.319	12.124	30.553	48.924	16.429	20.745	18.158	61.679	13.676	11.668	11.883		0.508001	30.084
15.2432	11.185	17.484	33.019	55.609	46.174	58.184	73.704	28.511	18.49	17.527	18.067	14.864	33.879	52.382	15.784	17.445	14.541	62.155	16.697	12.344	15.264		0.511998	30.1576
15.3623	15.497	19.889	27.924	51.928	41.898	56.941	74.84	33.584	16.878	21.971	13.54	14.139	28.731	48.794	21.217	16.601	14.773	56.182	21.855	12.457	9.674		0.515998	29.4911
15.4814	13.667	16.751	34.864	50.722	44.949	70.959	67.987	29.823	16.1	20.548	13.651	12.565	30.016	45.269	16.494	22.013	19.292	55.912	22.047	11.022	9.296		0.519999	29.7118
15.6005	13.729	19.081	40.999	51.083	47.673	79.785	67.063	29.558	21.478	18.977	18.128	10.955	27.574	46.881	17.87	16.95	17.171	52.52	18.614	9.87	10.825		0.523999	30.323
15.7196	12.636	15.974	34.451	44.609	53.256	72.83	63.545	27.423	19.878	17.582	15.256	11.585	34.654	49.849	22.07	18.965	15	53.736	23.08	10.53	9.156		0.527999	29.8126
15.8387	10.732	22.948	39.901	44.868	55.205	82.822	53.766	27.918	22.4	17.936	16.682	11.051	38.146	48.256	20.403	13.224	16.87	50.797	17.18	12.28	11.74		0.532	30.244
15.9578	11.651	17.885	42.437	46.045	55.179	81.191	54.745	22.994	19.788	17.59	10.25	12.918	33.145	44.599	19.601	14.983	18.889	47.829	18.506	12.224	10.795		0.536	29.2021
16.0769	13.723	16.056	36.468	49.868	61.739	90.363	57.387	26.932	20.229	17.608	9.413	13.227	38.241	43.941	19.164	15.871	18.659	52.839	17.635	12.53	10.401		0.540001	30.5854
16.196	15.957	20.36	38.926	47.288	65.258	75.828	48.647	28.507	17.683	17.197	12.698	15.554	32.987	48.902	17.001	17.102	23.645	56.258	20.628	10.058	10.827		0.544001	30.5386
16.315	14.137	18.396	35.103	50.738	65.321	73.744	53.545	24.067	22.465	15.306	15.787	15.499	30.12	50.884	21.231	15.104	17.779	61.339	22.239	10.868	8.91		0.547998	30.5991
16.4341	12.183	17.468	43.104	45.922	70.438	78.179	55.079	26.137	21.942	19.454	12.988	13.021	30.565	51.309	20.321	13.44	18.386	47.477	23.036	11.927	13.772		0.551999	30.769
16.5532	10.48	17.064	38.16	41.11	68.948	72.846	61.477	26.543	19.097	17.862	12.693	15.656	31.608	52.809	15.634	15.575	18.598	51.176	28.04	11.533	14.024		0.555999	30.5206
16.6723	15.147	18.886	40.643	50.371	66.703	72.372	52.674	24.433	23.385	20.316	12.432	13.582	33.635	47.596	16.574	17.529	18.575	43.965	26.711	10.82	10.568		0.559999	30.3294
16.7914	12.946	17.828	40.633	44.795	71.638	69.594	48.352	26.203	22.363	22.739	11.851	13.203	33.365	48.572	15.331	22	18.997	38.796	34.027	13.408	13.871		0.564	30.5006
16.9105	12.949	19.018	40.694	50.145	72.944	77.021	54.361	23.182	23.134	24.575	15.812	13.948	34.315	55.492	20.29	14.32	15.902	42.776	38.929	10.722	12.612		0.568	32.0543
17.0296	14.749	18.956	38.425	45.89	65.286	83.914	60.898	25.091	22.705	20.409	18.151	13.212	32.164	60.742	22.363	13.995	19.968	35.697	43.092	11.517	10.867		0.572001	32.29
17.1487	18.403	22.298	44.509	41.494	70.235	85.249	55.655	26.68	23.843	23.9	17.644	16.182	30.442	56.392	18.945	13.875	22.98	36.664	46.38	10.822	12.833		0.576001	33.1155
17.2677	19.723	15.895	42.769	39.412	69.288	83.272	54.053	25.837	26.806	18.543	16.286	16.552	38.494	52.382	17.197	15.535	18.744	41.095	50.807	13.303	10.583		0.579998	32.6941
17.3868	16.506	21.107	40.917	43.209	62.91	72.434	52.855	25.736	25.213	18.979	15.043	14.151	31.172	48.442	18.17	14.979	16.317	37.582	66.175	14.93	9.338		0.583998	31.7221
17.5059	15.969	24.101	45.877	41.761	57.526	82.039	50.058	28.055	23.858	21.888	15.355	14.339	36.628	41.519	19.339	14.551	20.119	37.429	69.87	13.125	8.96		0.587999	32.4936
17.625	18.223	24.524	42.296	44.162	61.676	75.463	51.239	28.948	22.869	25.166	19.022	17.69	37.578	48.198	17.063	15.673	15.462	35.373	74.374	13.474	11.638		0.591999	33.3386
17.7441	15.743	24.498	41.488	43.171	71.235	80.573	48.04	26.237	20.985	26.554	19.043	15.355	37.786	47.47	14.783	19.362	15.688	36.005	67.193	13.106	10.943		0.596	33.1075
17.8632	15.898	20.874	46.245	47.167	61.817	81.461	50.582	27.077	24.093	25.414	20.8	15.365	36.23	44.939	15.401	17.512	18.14	35.491	54.33	11.701	13.183		0.6	32.5581
17.9823	18.613	20.156	41.953	44.38	62.69	82.213	51.601	23.815	25.192	21.599	18.294	17.199	34.989	56.77	15.763	17.902	20.585	30.338	54.433	15.448	11.763		0.604	32.6522
18.1014	14.208	22.382	44.321	43.416	68.342	94.34	47.193	27.478	23.157	25.448	23.663	16.178	34.108	60.06	17.165	15.128	22.54	30.606	58.99	12.484	11.399		0.608001	33.9336
18.2204	14.973	17.315	44.183	44.386	65.758	109.603	54.193	28.809	25.051	23.866	24.172	16.336	35.369	58.899	18.833	19.952	15.251	41.522	57.383	9.133	10.62		0.611998	35.0289
18.3395	17.174	19.95	37.29	45.137	67.147	100.754	49.418	26.247	25.164	23.811	21.089	21.386	37.624	63.958	15.974	17.274	17.253	35.291	51.781	14.74	10.58		0.615998	34.2401
18.4586	13.336	22.739	38.92	45.083	83.783	110.791	54.415	23.085	33.717	24.531	20.606	18.151	37.801	62.445	15.481	17.04	15.834	34.998	45.279	11.982	9.072		0.619999	35.1947
18.5777	16.335	20.692	35.737	42.98	84.046	104.198	45.808	22.388	28.171	21.754	24.466	13.363	32.686	65.904	18.151	19.581	23.052	34.722	50.915	10.637	9.874		0.623999	34.5457
18.6968	17.088	19.683	39.525	46.209	97.599	101.678	51.635	26.338	23.577	28.057	22.571	16.242	33.155	62.482	18.961	19.44	21.154	38.64	50.795	13.667	6.831		0.627999	35.968
18.8159	16.438	19.367	42.836	48.911	94.986	107.607	56.353	33.332	22.071	21.883	27.273	22.011	30.673	51.214	14.638	17.244	23.803	38.035	49.975	13.973	10.102		0.632	36.3202
18.935	16.26	23.301	54.348	42.436	99.397	88.877	52.742	26.394	24.43	19.444	24.01	20.09	27.683	50.048	15.202	19.423	23.28	32.691	41.514	16.622	8.435		0.636	34.6013
19.0541	14.673	19.187	47.422	44.93	106.969	82.881	48.299	27.994	20.366	22.01	26.871	20.97	33.379	54.512	16.372	22.472	20.417	32.867	49.3	15.55	9.171		0.640001	35.0768
19.1731	18.365	17.683	39.693	40.558	101.453	83.787	53.879	25.004	28.548	23.235	28.143	19.871	37.92	55.111	15.633	22.54	19.27	31.209	48.074	13.141	11.137		0.643998	34.9645
19.2922	22.534	17.973	44.116	45.495	99.957	80.878	46.755	30.517	27.322	27.489	25.394	20.513	40.588	54.756	17.032	22.724	16.611	32.569	49.717	14.502	8.527		0.647998	35.5223
19.4113	19.645	17.085	39.714	44.013	90.316	90.609	50.327	28.407	20.408	22.334	25.117	19.545	47.963	56.023	18.909	21.374	20.081	40.522	47.712	18.784	12.514		0.651999	35.781
19.5304	18.453	19.968	41.585	46.354	96.792	81.934	55.819	24.383	20.762	20.165	25.378	24.518	39.923	56.265	17.258	20.458	21.647	36.556	46.099	17.704	11.536		0.655999	35.4075
19.6495	19.33	24.798	40.712	43.669	94.488	82.622	52.301	25.801	22.059	23.097	27.201	27.882	40.262	61.335	20.97	21.284	21.786	43.256	52.606	18.23	11.349		0.659999	36.9066
19.7686	20.885	25.907	42.557	46.133	90.843	82.911	58.026	23.871	23.491	23.456	27.709	33.712	44.942	60.273	14.669	21.252	20.713	45.169	51.416	15.746	14.716		0.664	37.5427
19.8877	25.884	25.839	45.045	50.425	97.844	82.336	64.625	24.819	21.452	24.316	26.031	27.71	47.494	56.539	13.821	19.84	19.747	56.371	54.522	17.032	12.816		0.668	38.7861
20.0068	18.839	26.386	50.386	55.534	93.053	92.11	56.91	29.964	23.728	20.464	24.947	29	45.964	58.667	14.886	16.986	22.268	56.341	49.373	18.959	9.058		0.672001	38.7535
20.1259	19.013	31.089	50.645	57.301	85.94	88.252	50.404	29.05	24.674	21.701	23.225	29.383	49.428	57.034	16.944	17.569	21.676	63.965	52.721	15.162	14.395		0.676001	39.0272
20.2449	18.218	24.81	47.44	60.564	80.319	98.031	57.073	24.413	19.27	29.074	22.386	24.891	43.884	54.42	20.491	15.986	19.809	71.608	59.38	14.216	11.457		0.679998	38.94
20.364	20.103	24.107	50.726	50.692	93.22	90.8	53.615	29.85	20.624	22.774	24.586	30.601	43.237	59.781	20.409	17.378	19.3	68.682	68.27	19.694	9.141		0.683998	39.8852
20.4831	18.219	22.875	53.673	57.809	89.238	107.497	50.306	28.6	24.67	22.367	27.479	33.307	42.594	57.827	17.266	18.092	19.68	63.176	68.412	17.436	12.236		0.687999	40.6076
20.6022	16.997	26.952	47.71	61.08	97.587	95.625	53.782	34.808	20.573	16.761	30.968	26.683	43.546	57.99	20.116	18.234	19.19	64.163	71.042	20.397	10.639		0.691999	40.7068
20.7213	23.905	31.018	52.532	64.105	104.743	109.86	54.86	28.904	24.682	18.888	23.706	33.928	48.777	53.625	20.147	20.703	22.671	59.316	66.367	17.253	9.455		0.696	42.3545
20.8404	23.473	28.423	49.595	70.998	99.887	113.273	55.262	26.94	21.173	22.381	22.238	29.772	45.342	52.899	14.264	20.974	22.912	54.115	86.605	18.183	10.054		0.7	42.322
20.9595	25.091	28.074	47.15	69.51	98.508	124.694	51.085	25.617	17.404	25.021	22.609	31.378	40.585	57.752	17.305	22.026	21.12	50.875	91.085	15.576	12.091		0.704	42.5979
21.0786	25.084	26.226	48.679	69.106	96.309	121.25	52.305	29.408	19.56	19.626	16.55	35.63	43.894	51.417	20.38	23.145	20.98	53.39	89.639	18.44	9.085		0.708001	42.3859
21.1976	20.295	27.022	48.104	66.026	94.734	106.798	47.615	29.963	20.819	25.96	23.452	32.831	50.973	51.666	22.895	17.772	15.46	53.057	82.116	17.765	8.911		0.711998	41.154
21.3167	17.536	23.251	43.992	60.2	97.387	109.638	49.488	25.94	21.867	20.785	28.751	31.504	50.043	53.031	21.308	18.748	18.481	55.951	88.248	19.623	11.569		0.715998	41.302
21.4358	21.492	25.826	44.505	65.464	99.314	108.88	45.046	24.442	19.062	17.424	26.021	33.932	43.877	59.728	19.063	19.567	17.164	57.473	104.531	20.006	14.487		0.719999	42.2526
21.5549	20.083	24.695	45.055	71.625	98.807	102.794	47.761	24.858	21.845	16.718	23.977	33.438	44.543	63.451	21.961	16.512	22.268	56.157	96.898	18.936	14.592		0.723999	42.2369
21.674	22.136	26.234	45.066	72.742	97.471	111.063	56.55	22.213	19.352	19.374	23.861	30.684	44.656	60.556	21.854	21.215	22.845	63.253	87.98	21.766	11.462		0.727999	42.9682
21.7931	24.419	24.268	45.173	75.41	93.712	113.275	50.149	24.636	19.268	21.872	23.338	36.045	45.951	63.21	20.389	19.599	25.11	68.442	76.374	25.599	12.503		0.732	43.2734
21.9122	23.191	32.671	50.109	74.53	106.08	112.976	47.66	27.164	16.887	19.501	23.972	38.529	44.814	67.211	22.337	17.239	23.562	72.981	69.695	28.253	10.738		0.736	44.2905
22.0313	23.033	27.411	47.016	74.277	104.041	121.887	53.061	28.051	25.362	17.136	24.453	32.621	52.126	69.349	26.428	15.65	25.663	92.848	67.344	26.337	12.74		0.740001	46.0397
22.1503	22.021	26.81	38.767	73.901	97.136	113.349	46.097	32.979	20.187	20.736	20.096	32.628	52.634	71.537	23.064	20.402	26.317	86.276	61.811	32.477	16.15		0.743998	44.5417
22.2694	23.954	28.041	48.995	74.582	90.278	111.084	48.914	31.65	25.555	17.905	21.007	33.639	55.666	56.052	20.555	22.13	21.072	102.015	71.502	32.898	18.3		0.747998	45.514
22.3885	22.103	30.608	48.672	81.868	93.579	114.59	48.771	22.592	19.171	22.531	19.868	27.879	50.35	55.921	22.876	19.386	27.15	100.814	75.295	34.97	18.416		0.751999	45.591
22.5076	15.982	24.693	50.599	71.34	94.759	109.164	47.611	24.075	23.695	20.388	19.677	30.208	53.194	59.765	26.307	15.996	30.909	106.266	71.168	52.097	17.253		0.755999	45.9593
22.6267	20.746	32.508	58.017	74.653	99.816	108.387	49.634	35.807	24.359	21.771	17.109	34.862	49.147	51.625	22.443	20.657	30.924	106.442	83.099	61.882	20.338		0.759999	48.7727
22.7458	19.917	26.254	59.877	83.613	113.915	102	55.609	36.939	24.7	21.694	18.985	31.39	55.001	59.077	21.643	18.523	24.086	114.063	110.382	70.409	22.466		0.764	51.9306
22.8649	25.325	34.223	62.574	88.873	128.504	105.953	56.818	36.865	24.434	17.443	21.57	30.344	53.641	61.836	16.957	17.459	35.889	115.69	127.382	80.844	27.063		0.768	55.6994
22.984	28.019	38.133	59.354	84.602	142.711	98.845	55.348	37.682	24.058	20.095	19.958	28.874	60.998	60.09	14.942	21.597	35.013	111.089	130.426	98.491	28.538		0.772001	57.0887
23.103	23.003	31.184	69.595	87.713	129.208	104.548	60.386	40.99	25.106	16.54	20.643	28.216	67.555	63.457	19.572	23.453	36.528	104.143	133.244	104.362	33.233		0.775998	58.2228
23.2221	23.536	28.641	64.502	91.738	138.561	109.745	64.44	45.666	24.691	21.163	24.411	28.196	73.343	70.981	20.354	19.177	45.312	115.849	123.289	116.022	38.626		0.779998	61.3449
23.3412	27.086	30.731	77.485	98.417	130.257	112.978	63.257	34.89	28.239	23.81	21.176	26.373	65.383	68.802	13.397	20.186	42.813	117.906	117.23	117.286	40.312		0.783998	60.8578
23.4603	27.884	30.679	92.651	106.161	128.441	112.711	58.978	44.448	30.314	22.473	16.425	26.928	70.919	71.236	15.666	21.336	49.913	116.829	106.608	116.992	45.665		0.787999	62.536
23.5794	29.509	29.16	96.965	98.566	131.83	118.122	64.103	46.383	32.654	23.009	15.438	24.333	65.972	70.955	18.965	22.052	61.392	117.434	116.845	113.263	54.86		0.791999	64.3719
23.6985	34.034	34.821	96.992	98.397	131.456	116.842	64.28	47.366	36.264	25.249	19.587	24.64	61.033	61.293	18.629	25.632	62.765	111.259	116.225	118.618	54.9		0.796	64.7753
23.8176	30.792	31.845	82.544	94.856	143.813	122.382	63.325	45.415	40.818	21.05	22.227	25.238	60.309	60.822	18.412	25.987	69.815	113.506	118.043	115.88	59.129		0.8	65.0575
23.9367	24.797	35.058	96.033	97.961	152.413	116.397	62.214	47.834	34.828	25.756	17.036	24.211	70.109	60.633	17.952	31.719	73.365	116.062	129.7	115.843	68.386		0.804	67.5384
24.0558	34.89	33.503	98.821	110.738	168.351	128.959	60.942	48.142	34.16	24.301	17.145	25.262	61.739	68.45	20.44	29.389	83.61	120.896	125.571	106.99	76.398		0.808001	70.4141
24.1748	27.817	35.038	99.873	109.188	167.944	128.434	63.631	50.005	28.185	24.151	18.892	21.854	66.785	70.262	19.004	33.391	69.271	133.389	115.242	99.685	71.99		0.811998	69.2396
24.2939	34.178	31.827	112.95	119.87	168.584	119.383	71.159	54.898	36.173	24.55	20.276	21.244	51.509	71.688	21.174	38.458	71.343	132.78	111.76	81.48	75.901		0.815998	70.0564
24.413	39.078	37.963	108.704	126.553	157.394	108.358	77.548	61.113	34.271	22.853	19.474	24.265	46.354	81.508	20.609	36.332	77.593	136.063	86.902	72.574	78.463		0.819999	69.2368
24.5321	37.238	41.347	104.075	125.948	137.524	100.159	76.874	60.17	33.858	23.968	18.618	29.944	40.993	93.38	16.547	38.508	76.861	138.435	72.049	63.761	97.718		0.823999	67.9988
24.6512	37.68	42.61	119.786	140.175	123.999	99.167	79.423	60.822	38.074	24.407	21.378	25.498	38.712	88.964	18.53	46.273	71.548	128.549	68.786	52.217	98.719		0.827999	67.8722
24.7703	37.589	46.076	135.633	130.386	110.576	85.139	85.428	64.123	43.03	24.235	25.194	23.087	46.647	95.475	20.25	46.552	79.218	119.382	48.993	39.473	97.832		0.832	66.8723
24.8894	41.137	47.177	130.345	122.618	77.469	78.775	89.844	68.494	38.21	26.333	33.159	31.067	41.757	88.873	28.51	51.357	86.522	99.66	37.67	31.077	93.453		0.836	63.9765
25.0085	35.261	50.025	147.182	115.828	66.569	59.965	82.088	62.423	44.687	28.093	32.471	31.577	40.666	95.91	24.805	62.752	90.962	85.288	31.365	24.322	86.117		0.840001	61.8265
25.1275	29.914	57.027	148.147	112.446	47.791	49.986	74.952	74.218	43.449	24.743	31.782	30.156	37.549	91.52	24.079	53.201	93.975	76.887	19.746	20.908	74.235		0.843998	57.9386
25.2466	36.913	54.989	147.93	122.282	29.508	42.915	64.063	69.92	47.65	28.461	30.953	34.283	39.779	85.608	28.748	60.263	95.8	65.085	13.933	15.409	64.468		0.847998	56.141
25.3657	43.064	65.051	151.266	111.652	24.681	37.831	58.208	73.302	47.241	28.547	33.744	33.007	36.814	98.909	22.423	65.768	91.842	52.173	9.588	8.271	57.648		0.851999	54.811
25.4848	51.133	70.217	141.916	105.046	21.197	27.364	44.247	79.3	49.514	37.064	44.896	32.392	40.512	95.213	23.723	76.842	92.153	37.906	8.603	7.328	49.68		0.855999	54.107
25.6039	43.325	76.522	138.139	81.732	19.027	20.81	42.174	83.36	46.543	41.858	42.979	28.257	41.15	86.886	28.414	77.694	91.305	26.79	6.689	6.984	40.431		0.859999	51.0033
25.723	43.303	89.151	147.303	67.784	11.806	17.733	40.639	72.399	41.011	42.455	53.142	34.239	38.709	84.874	32.635	88.094	81.111	19.037	5.36	5.527	32.839		0.864	49.9596
25.8421	54.772	93.296	131.203	56.194	8.646	12.466	43.456	68.422	42.132	45.645	54.403	31.178	40.896	94.293	29.803	96.637	71.161	10.214	4.154	2.743	23.415		0.868	48.3395
25.9612	53.943	93.741	128.876	51.045	8.084	7.231	43.474	56.897	40.898	49.973	61.822	33.131	44.716	91.024	35.81	100.281	68.202	6.877	3.842	4.802	18.082		0.872001	47.75
26.0802	47.359	100.131	133.518	43.906	5.227	5.72	40.783	57.24	45.811	45.236	59.008	33.983	43.436	93.062	39.523	91.2	61.153	3.403	2.678	2.53	13.039		0.875998	46.0927
26.1993	46.977	104.416	126.27	43.168	3.712	3.803	34.551	58.54	43.886	50.655	53.359	31.424	38.218	102.996	40.605	94.943	54.554	2.308	1.226	1.806	10.075		0.879998	45.1187
26.3184	38.186	98.144	125.424	29.908	1.684	2.731	28.628	52.887	46.056	52.112	57.456	32.23	43.577	108.336	45.861	94.557	54.096	3.624	2.007	1.54	8.191		0.883998	44.154
26.4375	44.92	89.174	112.231	29.782	1.603	3.975	35.534	49.074	45.553	50.613	68.812	36.378	38.87	123.695	45.293	92.089	48.055	2.676	2.367	1.42	7.301		0.887999	44.2579
26.5566	47.07	93.905	108.769	27.783	0.832	2.167	26.158	42.369	38.889	48.978	68.722	31.059	41.991	138.539	43.195	104.266	39.825	0.8	1.524	1.395	6.44		0.891999	43.556
26.6757	57.985	96.224	104.697	20.412	0.14	1.085	23.033	50.199	31.861	51.624	63.428	38.601	44.618	148.901	45.623	103.972	32.118	0.904	2.216	0.929	3.147		0.896	43.8913
26.7948	50.943	114.665	94.988	18.592	0.083	2.436	16.924	50.588	40.48	50.153	72.579	37.106	45.406	147.292	51.895	99.685	24.984	1.219	2.011	1.727	5.599		0.9	44.255
26.9139	56.03	102.723	97.273	19.234	0.054	0.369	9.264	44.859	42.151	53.652	79.484	38.148	47.868	133.762	52.556	100.864	15.775	0.62	1.65	1.992	3.735		0.904	42.9554
27.0329	55.515	113.661	93.183	12.726	0.001	0.144	6.807	35.279	52.526	56.797	83.538	40.845	47.857	142.109	53.525	89.761	9.617	1.398	0.609	1.154	1.659		0.907997	42.7958
27.152	51.178	115.115	87.402	12.127	0	0.549	8.827	29.489	53.237	60.906	88.263	45.754	54.919	153.826	55.826	71.906	5.488	1.463	0.699	2.587	2.451		0.911998	42.953
27.2711	63.908	117.51	81.524	14.393	0	0	8.183	32.944	55.082	64.074	95.604	45.01	56.381	147.414	61.875	63.676	2.984	0.71	0.583	1.191	3.354		0.915998	43.6381
27.3902	71.677	113.622	75.157	9.71	0	0	5.561	28.621	55.155	71.061	85.128	58.388	52.789	142.441	64.637	47.13	1.074	0.618	0.682	0.485	3.612		0.919999	42.2642
27.5093	78.278	107.005	70.265	9.847	0	0.029	5.986	22.695	54.918	81.649	77.16	67.184	50.716	138.843	56.929	33.877	1.681	1.116	0.129	0.383	1.253		0.923999	40.9497
27.6284	90.753	97.432	58.121	6.612	0	0.416	3.915	21.886	46.143	78.652	68.932	76.3	48.713	146.304	57.484	25.101	0.951	0.565	0.054	0.648	1.124		0.927999	39.5289
27.7475	97.839	90.903	52.738	5.081	0	0	2.555	15.642	37.651	74.077	63.056	82.546	46.28	154.479	62.452	19.969	0.959	0.251	0.415	0.288	2.384		0.932	38.5507
27.8666	96.15	99.014	52.174	3.814	0	0	1.633	14.266	38.183	60.455	61.675	76.396	48.909	153.708	58.738	16.046	0.804	0.406	1.235	1.024	2.162		0.936	37.4663
27.9857	89.615	83.633	44.693	4.281	0	0	2.376	13.455	40.015	52.758	54.914	77.008	50.417	151.755	61.463	10.818	0.401	0.183	0.223	0.954	1.9		0.940001	35.2791
28.1047	90.171	62.23	37.344	1.326	0	0	0.423	10.283	33.344	55.635	45.923	69.361	54.904	161.826	74.681	6.087	0.013	0.396	0	0.756	1.032		0.943998	33.6064
28.2238	78.883	58.676	29.301	1.617	0	0.026	0.491	7.895	33.758	53.563	40.61	64.659	46.734	153.857	67.873	2.316	0.108	0.443	0.642	0.19	1.52		0.947998	30.6268
28.3429	77.426	47.99	23.005	0.932	0	0.163	0	15.103	33.668	53.537	40.046	53.359	51.038	153.499	74.557	1.405	0.112	0.677	0.768	0.467	1.465		0.951999	29.9627
28.462	68.032	47.559	23.609	1.415	0	0	0.009	10.628	31.192	47.166	35.284	48.632	52.014	159.094	78.614	1.803	0.373	0.522	0.147	1.692	1.603		0.955999	29.0185
28.5811	60.335	41.424	15.038	0.462	0	0	0.058	8.484	26.147	47.111	32.561	44.085	55.193	159.256	84.863	0.544	1.337	0.381	0.383	0.548	2.441		0.959999	27.65
28.7002	51.819	37.953	15.1	0.019	0.152	0.556	0	4.915	21.29	50.637	33.187	39.543	59.603	170.136	75.03	0.631	0.583	0.576	0.169	0.507	1.266		0.964	26.8415
28.8193	47.971	32.481	12.339	0.371	0.014	0.111	0	4.872	25.039	47.164	28.35	36.477	63.177	170.277	72.717	0.5	0.041	0.259	0.002	0.727	0.941		0.968	25.8967
28.9384	39.149	30.464	11.094	0.018	0	0	0.01	3.368	27.706	47.298	29.295	40.599	60.901	157.545	71.754	0.471	0	0.019	0	0.705	1.352		0.972001	24.8451
29.0574	31.901	24.76	8.073	0	0	0	0.268	5.196	20.583	42.36	24.333	32.928	53.628	130.181	67.114	0.261	0	0.531	0.106	1.232	0.431		0.975998	21.1374
29.1765	31.109	19.662	6.756	0	0	0	0	4.174	19.051	36.991	23.823	34.87	55.193	110.581	59.986	0.079	0.126	0.295	0.211	1.33	0.918		0.979998	19.2931
29.2956	26.482	17.829	5.205	0	0.093	0.015	0	1.237	16.649	38.226	19.891	30.445	42.296	94.244	49.622	0.049	0.269	0.208	0.016	0.361	0.467		0.983998	16.3621
29.4147	20.157	14.167	4.952	0	0.018	0.11	0	1.413	13.039	30.239	19.073	33.552	52.387	81.775	44.201	0.561	0.265	0	0	1.189	0.707		0.987999	15.1336
29.5338	22.973	14.58	3.016	0.005	0	0	0	0.934	11.355	30.029	12.792	24.647	48.306	68.161	32.106	0.243	0.291	0	0.047	2.064	0.2		0.991999	12.9404
29.6529	18.534	10.155	1.947	0.273	0	4.731e-05	0.433	0.84	13.234	29	16.392	22.877	41.592	54.965	21.14	0.638	0.105	0	0.57	1.107	0.794		0.996	11.1712
29.772	11.084	8.429	1.857	3.185e-05	0	0.109	0.289	1.495	13.133	27.528	13.58	19.813	33.545	46.137	16.263	0.3	0	0	0	0.218	0.474		1	9.25019

## Sheet: Image12
X0	Y0	Y1	Y2	Y3	Y4	Y5	Y6	Y7	Y8	Y9	Y10	Y11	Y12	Y13	Y14	Y15	Y16	Y17	Y18	Y19	Y20	Y21	Y22		Ap-Ba	Avg int
0	62.533	25.213	42.935	22.744	17.33	23.774	26.857	45.219	37.572	34.502	26.605	17.265	30.77	69.417	36.745	22.678	15.848	12.807	21.372	38.489	59.858	46.425	23.122		0	33.047
0.1191	57.803	34.911	37.197	25.288	13.234	20.557	37.225	51.399	47.919	37.131	29.643	24.144	39.983	62.028	47.612	29.161	13.997	21.071	26.33	44.021	75.455	56.084	34.318		0.00595298	37.6744
0.2382	63.968	35.227	46.378	27.566	17.226	18.875	41.126	43.113	51.032	52.547	29.41	26.542	36.738	63.015	51.292	30.902	16.901	18.679	27.55	46.097	74.939	67.024	37.726		0.011906	40.1684
0.3573	71.346	39.436	42.321	38.835	15.473	17.351	30.811	49.352	55.358	48.331	29.141	23.126	46.636	67.977	56.894	43.693	16.91	18.733	25.339	57.72	80.599	70.887	42.891		0.0178589	43.007
0.4764	72.088	37.155	47.953	48.119	19.041	22.377	36.826	48.217	62.092	56.597	36.861	30.466	60.395	65.634	64.514	52.203	12.858	20.008	26.769	59.66	99.933	70.353	53.979		0.0238119	48.0043
0.5954	72.571	51.834	52.604	58.657	19.901	27.709	43.298	60.786	74.447	59.878	39.644	37.218	54.921	81.378	72.709	59.47	19.282	26.397	42.956	64.23	118.057	73.947	73.047		0.0297599	55.867
0.7145	88.399	53.686	70.156	69.015	35.55	33.61	61.713	53.482	82.6	76.719	51.125	54.473	67.365	84.868	79.109	80.815	21.441	50.255	53.075	74.055	123.273	85.612	79.708		0.0357129	66.5263
0.8336	88.425	54.798	76.671	79.159	36.923	41.27	80.764	60.547	91.807	83.365	59.239	58.403	85.07	92.91	85.393	111.214	28.642	64.693	52.05	95.52	136.653	86.687	89.776		0.0416658	75.6513
0.9527	102.258	60.361	82.52	91.645	51.308	48.915	101.629	57.337	89.273	120.377	84.358	76.967	109.189	111.023	111.924	123.89	42.678	85.722	73.698	94.236	154.633	81.256	109.597		0.0476188	89.7737
1.0718	104.337	74.02	99.619	109.599	67.241	68.495	119.663	63.471	98.338	134.829	117.687	100.75	141.721	134.713	119.531	151.417	65.916	112.961	101.572	111.421	151.782	89.62	131.913		0.0535718	107.418
1.1909	103.96	102.636	117.341	125.172	76.963	98.926	145.144	72.29	118.578	157.084	164.142	106.923	167.655	153.469	130.429	144.226	102.181	142.889	133.92	112.64	160.199	101.189	141.041		0.0595248	125.174
1.31	131.517	120.028	136.777	120.897	97.11	121.687	152.284	75.916	129.399	175.971	180.687	131.759	191.313	166.691	158.801	155.333	155.364	158.117	153.551	128.983	170.934	95.463	154.273		0.0654777	141.863
1.4291	119.322	129.157	156.72	124.402	107.374	144.918	170.655	89.256	135.509	177.641	201.297	150.341	204.458	186.164	170.774	155.635	169.312	181.195	156.727	138.987	175.777	99.302	162.361		0.0714307	152.491
1.5481	133.429	157.545	176.104	141.339	133.384	163.916	165.747	102.485	157.839	194.201	206.138	177.235	197.707	187.319	170.17	140.503	186.153	185.478	172.608	130.582	167.567	96.305	175.66		0.0773787	161.714
1.6672	143.592	160.906	188.537	135.571	148.337	167.244	164.896	122.659	148.883	191.244	204.788	191.076	185.283	178.275	195.522	124.906	189.025	193.429	167.234	128.924	159.413	106.943	167.028		0.0833317	163.64
1.7863	160.468	178.016	185.688	144.844	155.919	172.527	153.563	121.432	141.87	188.364	201.9	195.289	192.885	152.532	169.295	111.965	186.912	171.097	145.494	133.34	144.178	113.386	160.522		0.0892846	160.065
1.9054	173.141	184.141	205.102	125.205	157.004	174.712	146.694	130.768	137.691	196.322	223.679	193.842	191.677	136.816	145.764	109.723	180.766	168.663	130.803	118.98	147.662	104.668	147.886		0.0952376	157.9
2.0245	172.403	188.269	199.686	116.649	165.044	180.759	133.397	122.899	112.435	169.958	213.516	188.482	158.401	94.808	130.3	85.668	166.653	162.951	103.197	98.262	133.581	111.437	133.435		0.101191	145.313
2.1436	173.539	175.857	196.74	106.337	152.035	185.25	103.959	103.588	102.101	156.515	206.944	175.565	148.931	86.233	93.986	80.919	137.164	149.883	75.891	88.91	132.327	121.605	116.56		0.107144	133.515
2.2627	171.621	168.503	185.008	96.491	157.944	170.167	107.564	84.899	94.061	131.376	205.941	163.188	122.302	61.725	80.756	65.925	123.602	114.872	49.296	68.364	119.49	132.014	92.764		0.113097	120.342
2.3818	170.121	170.343	139.679	93.165	146.695	164.696	83.329	65.391	70.546	111.88	197.079	144.311	89.06	54.578	57.804	44.22	84.222	89.609	41.704	64.602	109.166	130.052	86.814		0.11905	104.742
2.5008	153.189	136.909	116.458	81.831	126.09	156.094	54.854	45.882	67.779	95.163	177.234	109.515	80.892	39.672	53.325	43.056	75.156	74.17	33.339	55.983	107.962	134.939	72.944		0.124998	90.9755
2.6199	125.713	121.389	104.648	56.28	104.776	138.127	45.877	40.376	68.008	83.505	160.476	92.526	75.129	31.694	41.987	34.952	62.293	53.573	25.75	56.78	97.944	131.186	63.695		0.13095	78.9863
2.739	113.562	112.331	73.87	46.629	87.476	106.203	46.398	34.054	54.267	69.963	140.136	79.235	58.942	23.703	35.019	32.326	46.824	42.946	29.781	48.229	80.804	126.582	56.815		0.136903	67.2215
2.8581	115.026	97.764	73.513	45.499	72.04	94.272	36.895	25.085	50.932	48.899	120.832	86.019	52.624	24.559	27.205	30.355	37.712	32.993	24.323	43.679	71.205	124.921	46.668		0.142856	60.1313
2.9772	98.805	90.621	62.206	44.503	54.037	64.551	31.181	24.235	45.957	44.833	96.76	79.661	39.05	25.951	27.657	34.161	26.773	31.663	20.085	40.591	60.999	119.111	45.358		0.148809	52.5543
3.0963	87.997	85.963	51.149	32.554	45.816	69.465	36.045	23.316	39.04	37.347	85.887	63.736	41.346	21.551	28.224	24.298	22.086	18.893	17.041	41.422	46.805	94.856	39.667		0.154762	45.848
3.2154	68.335	75.756	32.831	28.232	41.661	50.067	29.134	22.606	37.222	22.82	68.676	47.553	41.904	19.482	23.806	25.055	24.392	18.328	18.52	31.573	41.439	74.209	40.363		0.160715	38.4332
3.3345	58.319	64.402	33.594	29.147	33.956	39.141	22.517	20.467	31.278	24.876	56.149	51.16	40.101	14.619	23.926	34.479	16.347	19.51	20.189	34.071	37.731	73.423	34.898		0.166668	35.4043
3.4535	44.793	59.765	26.109	32.71	29.424	33.037	20.149	20.707	31.18	23.055	53.961	40.392	35.299	14.011	16.621	26.971	15.246	13.99	14.466	31.813	32.076	52.63	29.212		0.172616	30.3312
3.5726	40.651	52.765	29.795	19.954	24.004	28.25	21.041	17.799	36.54	20.152	41.024	34.003	28.624	11.112	14.51	26.461	13.975	14.044	15.919	29.117	28.903	53.885	23.968		0.178569	27.239
3.6917	34.047	49.345	31.896	23.227	24.796	19.588	16.466	18.267	26.12	18.33	39.274	26.334	27.221	16.23	21.547	20.961	20.59	16.443	11.239	26.57	23.27	30.585	20.371		0.184522	24.466
3.8108	29.341	47.702	25.858	18.921	17.838	17.937	16.824	18.198	24.718	15.856	31.541	29.49	26.767	11.443	15.382	17.342	17.954	8.228	13.253	31.226	25.678	21.247	20.345		0.190475	21.8734
3.9299	20.678	46.626	21.069	17.134	21.866	17.625	17.294	15.73	24.449	14.289	22.777	25.176	22.395	13.985	14.075	24.919	14.825	12.244	10.972	25.741	22.094	16.175	20.958		0.196428	20.1346
4.049	21.178	34.285	18.715	15.012	14.273	15.866	14.154	14.802	29.987	11.721	21.637	23.304	30.408	12.613	15.61	25.381	13.771	13.539	9.325	17.583	20.293	12.845	12.061		0.202381	18.1897
4.1681	20.924	32.068	13.351	17.788	20.416	12.827	14.23	19.1	26.752	15.278	21.242	26.975	25.107	9.335	9.862	18.497	12.336	10.593	5.053	19.06	16.594	10.755	10.127		0.208334	16.8813
4.2872	16.885	33.777	16.708	15.089	15.188	14.781	12.193	13.912	19.814	10.648	13.748	16.461	16.923	9.921	11.909	22.272	13.957	9.333	7.074	20.554	18.962	8.431	10.447		0.214287	15.1733
4.4063	17.987	25.072	15.518	11.027	13.05	13.527	10.503	12.053	22.678	11.677	17.874	20.682	19.216	13.857	9.761	18.42	14.5	8.939	7.432	20.407	18.525	12.201	7.994		0.22024	14.9087
4.5253	14.66	24.992	13.363	8.778	10.504	7.673	7.731	14.378	21.168	11.887	15.937	17.339	18.532	12.642	10.511	22.904	12.236	10.814	4.739	16.611	14.408	7.45	10.526		0.226188	13.4688
4.6444	20.152	27.94	15.952	14.578	9.587	8.931	9.19	11.144	25.621	10.602	12.874	16.433	16.199	9.492	9.548	20.486	10.039	5.533	6.752	18.215	11.27	8.914	11.225		0.232141	13.5077
4.7635	12.993	23.095	18.444	8.269	9.599	7.184	8.708	11.735	26.707	7.258	10.882	13.967	15.921	14.674	7.147	20.374	7.809	5.667	5.362	16.088	11.972	6.428	6.381		0.238094	12.0289
4.8826	13.095	31.358	20.779	6.784	10.092	9.038	12.442	10.045	26.496	11.65	14.578	12.463	13.112	15.044	7.473	19.269	6.676	5.507	3.408	17.519	6.529	10.452	7.946		0.244047	12.685
5.0017	9.308	21.69	16.172	7.498	6.526	6.667	15.614	10.892	20.068	8.093	11.571	15.538	15.214	15.937	6.504	17.593	7.106	6.96	5.06	12.562	7.36	6.845	7.133		0.25	11.2135
5.1208	10.087	25.66	22.283	6.838	7.716	5.55	14.125	12.803	23.909	5.678	6.63	14.527	14.968	12.448	5.265	17.981	9.13	4.809	5.73	14.814	8.298	5.383	10.276		0.255953	11.5177
5.2399	13.93	20.258	30.172	6.478	6.023	7.046	11.637	11.073	23.742	6.697	9.506	9.816	13.68	9.634	8.374	22.771	9.472	6.305	5.755	13.223	8.469	7.46	4.442		0.261906	11.5636
5.359	8.642	20.113	24.746	8.48	3.648	4.054	9.934	16.577	27.77	8.754	8.511	12.184	18.471	6.053	9.983	21.79	6.934	5.641	8.04	14.812	11.277	6.646	9.236		0.267859	11.839
5.478	10.99	19.851	40.814	5.322	6.135	4.376	15.128	13.49	25.832	8.411	7.719	11.18	17.019	6.463	8.474	20.986	11.748	6.818	5.734	17.739	10.912	6.111	9.791		0.273807	12.654
5.5971	11.846	18.367	37.695	7.95	4.23	3.855	12.214	14.744	31.571	6.399	6.813	7.846	20.063	7.816	8.119	16.952	9.53	6.734	5.864	18.081	7.714	6.168	10.145		0.27976	12.205
5.7162	13.372	19.659	34.247	8.637	7.012	6.633	10.164	16.435	27.676	4.675	7.29	7.372	17.593	8.743	10.177	18.301	7.487	4.868	3.558	16.771	12.508	5.592	9.496		0.285713	12.0985
5.8353	9.505	22.739	38.064	7.356	5.934	7.419	9.173	18.687	21.547	5.104	3.898	6.829	15.429	5.089	7.342	19.761	7.085	5.348	7.802	13.926	15.554	5.248	12.166		0.291666	11.7828
5.9544	9.157	27.382	37.358	9.011	3.676	6.422	14.27	17.908	23.744	6.607	4.723	6.036	16.588	3.546	8.353	33.617	10.472	4.046	9.528	15.991	12.794	5.434	9.825		0.297619	12.8908
6.0735	7.416	27.133	31.996	6.982	5.39	5.014	10.399	14.687	32.945	3.495	5.887	6.448	17.051	9.436	6.745	28.58	9.286	6.627	5.72	10.026	12.885	8.672	10.719		0.303572	12.3278
6.1926	11.455	23.583	34.825	9.073	5.385	6.499	12.628	15.771	34.916	6.886	4.492	9.195	15.543	8.482	5.78	26.526	12.65	5.747	4.311	10.854	12.318	4.976	11.224		0.309525	12.7443
6.3117	12.908	23.499	34.405	5.656	6.041	4.98	10.612	19.037	32.028	7.248	6.143	9.263	17.036	6.236	4.96	34.925	12.031	5.866	4.177	8.004	15.791	4.45	19.638		0.315478	13.258
6.4307	10.813	17.244	30.161	5.385	5.582	3.293	10.469	15.403	30.967	8.372	6.581	6.01	20.388	7.134	3.637	43.641	8.805	7.053	5.976	11.423	18.423	2.996	17.361		0.321426	12.9181
6.5498	8.351	17.242	25.03	5.887	5.765	3.993	9.553	14.461	35.797	6.627	6.184	5.86	20.699	6.819	3.499	46.416	10.609	6.855	4.517	11.97	18.938	5.374	20.041		0.327379	13.0647
6.6689	9.664	12.599	17.349	6.177	5.259	3.122	11.049	19.095	32.895	3.704	4.009	6.531	18.864	6.692	4.751	44.656	10.016	5.684	5.658	12.95	18.925	4.058	13.913		0.333332	12.0704
6.788	12.718	11.914	10.131	8.661	5.425	5.32	15.087	23.495	39.034	4.736	4.407	3.667	23.484	7.635	6.319	37.644	12.267	5.319	7.146	13.957	18.65	3.985	17.838		0.339285	12.993
6.9071	12.129	14.769	9.103	9.893	4.699	6.485	12.222	25.645	29.981	6.719	6.907	4.67	22.078	5.858	3.917	30.179	15.779	4.644	5.428	8.554	24.427	3.378	16.316		0.345238	12.3383
7.0262	12.074	12.372	7.995	9.03	3.572	5.404	12.995	26.07	28.088	6.593	6.259	5.092	20.238	6.396	6.828	21.307	14.768	6.475	5.321	8.85	19.801	3.528	24.583		0.351191	11.8973
7.1453	17.498	12.37	10.237	12.792	5.407	4.64	12.78	21.126	25.206	8.98	5.941	4.75	18.261	7.248	3.543	18.906	16.936	5.855	4.604	8.32	18.823	5.32	21.249		0.357144	11.7736
7.2644	22.622	12.287	8.146	11.3	2.674	5.273	19.233	19.462	23.674	5.204	4.278	6.945	22.491	9.185	5.654	14.793	24.537	4.385	3.722	9.11	20.569	5.371	20.75		0.363097	12.2463
7.3834	23.888	11.925	5.105	7.588	4.866	3.378	15.136	22.774	25.335	4.577	5.907	5.788	24.547	6.584	4.904	11.023	22.601	8.634	3.691	9.613	19.964	3.374	19.253		0.369045	11.7589
7.5025	20.423	11.467	6.207	10.86	3.51	5.653	16.312	28.703	24.522	5.905	3.144	7.985	23.822	9.243	6.069	10.779	21.763	4.893	6.994	11.963	24.265	4.957	18.575		0.374998	12.5223
7.6216	23.877	12.83	6.262	9.281	4.821	3.93	12.734	28.037	20.268	7.899	4.309	5.266	20.508	8.777	4.209	10.698	23.489	6.366	6.336	8.229	24.195	5.188	19.682		0.38095	12.0518
7.7407	22.555	10.369	7.659	11.114	4.709	5.92	12.579	33.275	16.12	7.19	5.193	3.103	22.839	7.187	4.628	9.498	23.633	5.146	7.554	9.783	19.891	2.897	19.552		0.386903	11.8432
7.8598	30.895	17.676	6.151	8.106	5.612	4.42	15.876	33.764	19.362	5.512	4.095	6.658	26.998	4.575	5.831	11.63	22.358	7.162	8.355	9.544	25.914	6.124	17.804		0.392856	13.2357
7.9789	22.557	10.585	5.792	10.102	3.882	3.879	12.993	38.214	22.049	6.075	5.695	7.107	22.754	5.246	7.642	11.247	19.259	6.746	6.242	11.392	25.148	2.952	17.437		0.398809	12.3911
8.098	24.062	9.969	7.681	8.837	5.179	2.697	15.244	34.126	19.147	5.706	7.242	8.432	22.486	6.722	5.269	11.757	21.376	9.633	5.483	9.211	25.95	3.354	18.462		0.404762	12.5228
8.2171	26.379	11.789	7.193	6.828	6.379	5.796	13.883	34.74	16.871	6.288	6.01	7.811	23.374	6.063	6.315	12.726	24.774	8.158	7.681	9.732	23.987	4.444	15.773		0.410715	12.7389
8.3362	26.016	13.643	4.28	12.113	5.687	3.931	11.708	37.342	11.476	6.804	7.271	7.444	22.421	5.665	5.141	8.293	19.535	6.961	5.448	10.082	25.774	5.407	17.506		0.416668	12.1717
8.4552	22.307	12.415	5.403	10.316	3.686	4.131	9.926	46.519	16.492	6.288	6.211	5.595	28.401	4.321	5.395	11.704	21.528	7.915	6.836	8.031	26.896	3.961	23.059		0.422616	12.9277
8.5743	20.655	10.591	6.618	13.854	2.971	3.788	12.369	45.308	13.83	6.925	4.235	7.519	25.956	6.229	5.047	9.201	24.31	7.887	3.783	5.53	23.407	4.999	21.854		0.428569	12.4724
8.6934	16.147	8.545	4.127	11.872	4.475	4.754	8.931	47.103	12.753	6.435	4.849	7.754	23.031	4.965	4.663	8.584	18.623	5.708	5.157	6.383	25.049	6.303	21.316		0.434522	11.6316
8.8125	12.12	8.32	4.202	14.022	5.224	5.743	9.704	44.606	13.188	7.168	3.146	3.747	20.507	5.164	3.317	8.565	21.849	6.213	7.242	13.264	21.356	6.038	19.439		0.440475	11.4845
8.9316	17.555	12.984	3.194	10.653	4.789	3.764	11.508	56.939	12.479	6.139	3.534	7.793	20.613	4.233	4.172	10.282	26.543	7.666	6.047	8.318	24.092	4.009	23.932		0.446428	12.6625
9.0507	14.128	10.021	6.26	12.978	5.008	2.228	14.25	50.478	6.023	7.583	5.021	6.012	22.123	6.784	6.318	6.409	21.427	8.582	8.36	6.721	32.406	6.486	22.235		0.452381	12.5148
9.1698	10.423	10.04	4.885	13.473	3.882	4.395	17.691	53.219	9.927	3.857	6.402	6.845	16.06	6.299	4.566	7.637	19.723	6.473	9.416	7.859	32.706	4.171	28		0.458334	12.5195
9.2889	12.29	8.881	7.672	14.592	2.885	6.236	12.513	40.383	12.133	4.036	5.812	7.546	19.751	5.782	5.899	8.22	21.804	8.992	6.536	8.123	27.144	5.68	21.487		0.464287	11.9303
9.4079	13.255	9.373	5.649	13.652	2.695	6.286	12.976	40.255	10.219	7.41	3.404	6.063	21.912	8.6	5.701	5.544	22.584	7.105	9.252	5.188	29.434	6.963	20.361		0.470235	11.9079
9.527	13.196	8.912	6.655	15.08	3.974	5.9	10.664	49.223	9.922	6.793	4.774	5.9	16.257	8.829	4.211	6.335	21.145	5.996	7.677	6.398	24.137	4.513	20.524		0.476188	11.6093
9.6461	6.693	11.598	8.519	13.482	5.043	4.384	11.026	46.185	10.487	5.519	2.335	5.96	19.011	10.775	5.251	7.163	26.7	9.835	7.65	8.024	29.755	4.96	17.394		0.482141	12.076
9.7652	11.542	12.265	7.61	11.678	5.476	3.939	10.932	37.487	9.663	8.427	4.603	4.756	26.544	8.469	3.218	6.457	26.296	8.67	7.301	5.53	31.133	5.119	19.945		0.488094	12.0461
9.8843	12.263	9.499	4.332	15.625	5.902	5.69	13.777	41.456	11.682	3.729	6.798	8.715	29.889	8.445	7.305	7.176	21.339	10.799	5.333	7.205	27.163	4.873	19.502		0.494047	12.5433
10.0034	11.867	8.18	4.862	16.821	5.956	8.193	13.866	43.741	7.564	5.308	8.384	9.038	29.665	7.198	4.55	5.772	26.785	13.197	10.489	7.423	31.999	5.382	22.308		0.5	13.4151
10.1225	7.814	9.194	8.03	10.316	5.028	6.519	9.342	47.928	8.737	7.103	5.695	8.742	27.586	6.615	5.402	7.273	22.329	13.781	8.187	10.217	26.007	2.809	23.196		0.505953	12.5152
10.2416	7.528	8.311	4.757	11.549	5.611	5.07	11.959	44.706	10.246	4.321	5.958	5.556	26.85	8.677	3.39	8.568	24.1	16.438	7.312	6.728	30.983	5.88	21.137		0.511906	12.4189
10.3606	7.136	11.693	5.666	12.399	7.728	7.902	8.441	41.122	7.929	3.667	6.908	8.655	23.722	6.49	4.832	4.586	15.436	14.153	5.222	8.722	28.672	4.289	17.309		0.517854	11.4208
10.4797	9.474	8.146	5.353	14.551	5.458	5.613	10.576	43.908	7.899	3.566	6.374	9.832	27.33	5.964	4.986	5.32	20.565	13.983	6.263	11.39	25.313	4.313	18.457		0.523807	11.9406
10.5988	7.535	8.388	5.338	16.641	5.355	6.762	9.304	40.851	8.386	3.518	5.727	7.207	37.18	5.436	4.823	8.556	23.489	14.714	7.713	8.594	27.32	3.168	28.833		0.52976	12.819
10.7179	10.388	7.839	5.278	16.131	4.667	8.524	7.646	43.614	7.303	5.584	4.813	8.596	24.37	8.462	4.726	9.046	19.759	19.619	5.263	7.037	24.441	4.784	17.706		0.535713	11.9824
10.837	8.007	8.916	5.608	15.849	4.186	6.997	9.473	41.268	10.596	8.735	7.945	5.853	30.179	5.762	3.376	8.094	18.638	19.236	6.709	9.226	24.008	5.853	17.559		0.541666	12.264
10.9561	8.203	7.718	4.619	17.538	6.078	5.03	8.916	34.41	7.986	8.559	6.59	6.483	23.461	7.617	4.744	4.824	23.382	17.282	9.204	6.896	25.113	5.349	17.185		0.547619	11.6168
11.0752	11.721	6.791	5.285	19.712	4.77	6.432	6.961	33.463	9.173	5.95	5.194	6.814	21.644	6.03	5.782	5.48	16.788	19.914	7.375	10.939	28.207	4.866	17.866		0.553572	11.6155
11.1943	9.044	7.948	3.679	19.003	5.415	7.169	7.878	41.068	8.69	7.302	6.584	8.018	26.148	8.022	4.425	5.59	22.433	20.897	5.375	7.826	27.33	3.551	18.481		0.559525	12.2555
11.3133	6.867	7.23	7.101	16.277	6.015	6.382	5.586	34.328	7.719	6.115	7.614	6.794	23.399	8.369	5.85	4.75	18.61	16.61	8.268	6.731	24.946	6.182	16.533		0.565473	11.2294
11.4324	9.371	8.976	4.243	19.776	4.899	8.188	8.094	40.214	6.662	7.231	4.849	7.188	22.183	8.192	4.835	5.175	18.466	22.921	10.259	10.151	27.698	5.078	22.528		0.571426	12.486
11.5515	8.093	5.892	7.223	17.964	7.673	7.809	7.097	35.969	4.444	5.923	7.419	5.799	25.689	7.802	6.19	5.574	15.499	23.087	10.989	9.135	27.447	4.778	17.397		0.577379	11.9518
11.6706	9.888	8.601	6.301	19.075	5.957	4.965	7.902	38.776	6.206	7.657	7.547	8.025	18.564	10.337	6.108	5.014	19.139	27.458	10.292	9.503	27.986	6.767	21.98		0.583332	12.7847
11.7897	5.371	7.131	5.345	15.578	5.15	6.865	8.034	41.12	4.922	7.667	7.219	5.636	26.89	5.571	2.673	4.163	17.395	23.984	13.6	4.549	23.568	2.911	20.869		0.589285	11.5744
11.9088	7.648	9.344	6.372	21.123	7.179	6.542	7.346	38.045	5.943	6.084	6.374	8.248	25.574	12.489	4.665	4.457	14.089	21.789	12.439	10.818	31.558	5.576	12.806		0.595238	12.4569
12.0279	4.797	9.319	5.84	24.206	7.579	6.145	7.277	31.291	8.263	5.133	5.417	5.549	25.23	5.886	4.9	3.248	11.589	24.111	11.042	8.802	19.227	5.903	11.757		0.601191	10.9787
12.147	5.777	11.452	4.376	19.3	7.063	7.798	10.301	36.432	7.966	6.761	4.058	5.52	28.037	8.556	5.8	7.367	10.673	27.197	14.228	9.415	27.146	9.114	10.445		0.607144	12.3818
12.2661	8.325	6.561	3.59	20.109	6.46	5.56	9.398	38.423	7.613	6.597	9.22	6.31	20.452	9.437	2.927	4.323	9.289	33.935	14.704	9.253	21.218	7.63	14.608		0.613097	11.9975
12.3851	9.338	10.003	3.145	27.284	5.018	3.898	7.053	32.093	6.401	8.131	6.617	5.986	22.661	10.57	6.099	4.676	9.411	26.866	15.747	6.944	23.019	5.15	8.189		0.619045	11.4913
12.5042	9.836	6.681	3.928	23.447	4.504	6.293	8.486	33.325	7.422	5.318	6.1	6.365	19.517	6.544	6.138	4.847	10.765	26.151	14.062	8.415	25.399	4.398	8.977		0.624998	11.1703
12.6233	7.023	8.04	3.205	22.523	6.775	5.368	7.062	34.19	5.743	4.347	5.849	9.203	22.552	7.048	5.555	7.031	11.21	30.717	14.62	5.449	12.635	9.891	9.462		0.63095	11.1086
12.7424	7.893	8.544	5.18	23.113	7.778	6.748	8.974	26.468	5.378	4.586	4.999	8.864	20.906	10.387	4.75	5.068	8.054	28.471	15.444	8.583	18.634	4.837	8.207		0.636903	10.9507
12.8615	6.187	9.42	5.432	16.283	5.014	4.465	8.655	35.216	6.449	5.913	5.824	8.209	18.721	12.625	4.526	3.846	9.666	25.874	13.303	9.688	21.864	6.717	10.57		0.642856	11.0638
12.9806	7.513	6.991	4.965	17.243	4.548	5.204	7.191	29.674	5.246	4.551	5.306	6.016	17.764	10.198	2.165	5.742	7.814	30.44	14.049	9.504	17.031	5.497	6.212		0.648809	10.0376
13.0997	7.67	6.517	3.16	20.623	6.645	3.73	7.136	35.136	4.737	6.832	4.446	8.966	19.598	7.696	3.014	2.682	6.59	26.516	17.519	7.128	19.447	5.836	6.797		0.654762	10.3661
13.2188	7.354	6.289	4.924	20.659	5.299	4.04	8.029	27.664	5.436	7.295	5.333	8.221	12.993	8.178	3.549	2.611	4.241	31.872	18.439	8.085	14.834	5.963	5.368		0.660715	9.85548
13.3378	7.192	3.734	6.029	23.345	9.255	5.964	12.109	32.618	7.777	4.889	6.361	7.103	20.166	11.746	4.28	4.187	6.144	25.892	15.393	8.627	15.698	5.007	4.777		0.666663	10.7953
13.4569	9.364	6.339	4.308	25.271	4.266	6.609	9.986	34.839	6.291	5.169	5.145	6.106	19.038	8.61	4.937	6.087	6.699	30.517	17.725	9.28	14.285	4.246	6.237		0.672616	10.9284
13.576	9.665	6.897	5.394	22.789	6.826	3.857	9.074	34.02	6.74	7.686	3.379	8.781	18.673	11.106	4.907	3.403	7.906	23.131	20.661	6.583	14.894	6.663	7.613		0.678569	10.8977
13.6951	8.243	5.795	4.877	24.162	5.886	4.715	9.05	37.588	4.672	4.4	5.873	6.33	15.798	12.25	5.913	2.393	5.72	21.778	19.462	9.557	15.031	6.48	6.426		0.684522	10.5391
13.8142	5.331	5.561	6.99	26.857	6.64	4.537	6.365	36.325	8.041	5.084	6.195	8.664	17.955	7.716	7.15	5.649	6.702	22.582	17.874	9.57	14.396	5.045	6.439		0.690475	10.7682
13.9333	8.42	4.686	5.765	23.294	5.198	4.15	7.744	40.103	6.432	6.763	6.675	8.05	21.158	8.282	3.575	3.344	6.417	24.877	19.921	8.538	14.18	6.18	8.742		0.696428	10.978
14.0524	6.83	4.646	3.927	23.962	6.124	5.289	5.533	48.663	5.432	6.076	6.133	7.343	18.583	12.226	4.239	5.564	3.687	23.107	23.868	12.216	9.502	8.206	5.552		0.702381	11.1612
14.1715	4.227	5.977	2.782	22.583	6.462	4.062	7.117	40.636	4.53	5.194	3.958	7.685	21.046	17.242	4.468	5.106	4.954	19.681	22.866	13.499	11.901	4.187	3.992		0.708334	10.6154
14.2905	6.339	8.166	3.006	23.459	2.027	5.667	5.167	47.052	4.233	8.203	8.411	6.21	15.263	14.001	3.484	4.647	7.206	18.977	20.853	15.262	11.499	6.254	3.354		0.714282	10.8148
14.4096	6.691	3.644	4.059	22.21	4.963	3.237	6.693	37.495	6.854	6.945	7.874	7.207	15.803	7.489	3.645	5.166	3.904	19.525	20.184	11.282	14.024	5.517	4.32		0.720235	9.94483
14.5287	7.332	4.5	4.097	23.285	4.289	2.984	11.347	39.918	6.506	7.61	5.58	7.488	17.11	11.267	4.181	3.068	4.617	16.69	20.669	11.749	10.117	4.333	3.808		0.726188	10.1107
14.6478	9.339	3.716	4.96	21.64	5.552	3.719	8.262	40.929	5.967	8.077	5.337	7.938	14.528	12.399	5.198	3.147	4.65	16.318	21.63	15.143	12.161	6.5	5.188		0.732141	10.5347
14.7669	5.441	5.379	8.128	23.249	8.195	6.455	3.571	36.614	5.017	4.161	8.267	6.216	16.802	10.242	5.078	7.013	7.548	16.066	23.842	11.64	15.655	4.85	6.109		0.738094	10.6756
14.886	7.747	7.922	4.475	22.66	7.386	1.594	7.189	34.715	6.536	5.779	5.33	6.419	21.005	11.176	6.833	5.337	6.394	17.412	20.43	10.399	14.837	5.326	5.43		0.744047	10.5361
15.0051	7.551	4.695	2.62	22.593	5.419	6.741	7.449	38.416	5.95	4.774	3.976	5.486	14.569	9.606	5.379	3.328	5.57	14.895	28.309	12.348	16.563	6.792	4.463		0.75	10.3257
15.1242	5.462	2.782	3.449	23.902	4.984	5.656	5.683	35.134	4.411	4.768	6.01	5.82	17.616	15.435	3.871	3.559	6.344	17.199	32.111	11.986	10.084	4.615	3.657		0.755953	10.1973
15.2432	7.396	6.116	5.112	18.999	3.939	4.095	12.876	29.664	6.394	4.846	5.183	7.412	21.649	13.546	4.639	5.962	3.823	14.2	32.903	17.191	10.37	7.661	7.275		0.761901	10.924
15.3623	6.305	4.994	4.682	23.046	7.765	2.436	7.965	29.643	5.878	7.912	5.192	6.091	15.72	15.56	4.742	5.128	7.928	13.581	33.097	13.84	15.699	5.116	4.127		0.767854	10.7151
15.4814	5.861	4.69	4.632	24.787	8.402	5.279	8.66	36.62	4.6	5.907	7.127	6.013	16.943	16.031	6.001	4.339	5.572	10.622	29.854	13.562	12.895	8.1	5.292		0.773807	10.9473
15.6005	5.436	7.429	5.814	22.109	6.913	5.994	8.535	23.104	5.351	4.247	5.609	6.751	15.723	14.026	7.637	4.152	4.939	10.991	35.498	16.296	19.282	6.066	4.597		0.77976	10.7173
15.7196	4.429	4.164	5.625	23.146	5.5	7.746	5.998	30.025	8.295	7.929	6.574	5.592	17.424	16.822	4.366	2.492	3.013	11.6	37.179	22.297	12.062	8.268	5.831		0.785713	11.1468
15.8387	6.309	4.849	3.823	24.861	6.986	4.246	7.013	31.262	5.337	4.62	7.403	3.268	18.152	15.064	5.497	2.444	4.097	9.864	32.241	17.494	11.706	8.45	5.584		0.791666	10.4596
15.9578	4.95	5.942	4.926	25.299	7.135	5.736	8.505	30.834	7.969	3.876	4.844	4.064	15.653	17.146	4.95	3.492	3.61	7.74	35.93	24.09	12.292	6.618	3.818		0.797619	10.8443
16.0769	5.452	4.768	3.857	21.835	5.14	5.141	6.119	31.888	5.254	7.445	4.718	6.658	17.767	20.748	5.16	5.489	4.109	7.594	29.137	21.952	13.859	9.041	6.078		0.803572	10.8352
16.196	5.448	6.234	5.032	27.495	7.943	3.083	5.733	30.03	10.715	5.104	8.261	6.577	19.122	13.296	3.495	7.661	3.549	3.45	22.812	19.003	15.901	5.744	5.317		0.809525	10.4785
16.315	5.568	7.715	4.125	24.287	5.669	2.579	5.836	23.602	9.872	3.983	5.503	6.304	20.509	21.379	4.249	4.647	5.529	9.936	21.555	24.67	12.838	7.397	7.251		0.815473	10.6523
16.4341	5.01	5.498	3.944	27.524	8.767	4.887	6.088	23.164	8.766	9.411	8.323	5.101	14.33	20.559	2.93	5.021	4.36	10.928	21.985	25.67	16.686	8.216	4.56		0.821426	10.9447
16.5532	5.682	5.49	3.672	29.492	5.721	5.669	6.835	24.787	6.045	5.669	3.869	5.489	17.688	22.45	5.808	3.045	5.183	8.213	24.849	24.888	15.17	10.365	2.903		0.827379	10.8253
16.6723	4.872	5.781	2.907	25.949	7.429	3.982	3.731	29.448	6.893	6.656	5.916	4.206	19.319	18.208	2.641	4.505	3.315	7.517	20.858	32.28	15.367	9.222	4.659		0.833332	10.6809
16.7914	6.588	5.117	3.436	24.373	7.637	3.471	6.246	27.33	6.17	5.782	4.822	4.998	16.494	23.483	5.098	4.792	6.468	10.587	22.537	35.77	17.584	6.154	4.913		0.839285	11.2978
16.9105	6.592	5.647	5.526	23.888	8.307	3.467	6.576	32.024	4.857	5.329	6.229	3.027	21.628	19.786	2.878	2.915	4.029	9.87	18.193	25.782	11.37	5.42	4.066		0.845238	10.322
17.0296	4.161	4.039	4.559	25.491	5.004	4.379	8.215	24.018	7.064	5.444	6.484	3.912	17.533	24.158	3.28	3.346	3.586	7.244	17.276	27.534	19.031	8.376	5.008		0.851191	10.3975
17.1487	7.364	5.556	3.91	25.966	4.828	5.209	6.861	23.89	7.807	4.361	6.052	5.795	20.025	27.602	3.913	3.982	4.114	6.342	15.734	27.667	17.517	9.513	5.142		0.857144	10.8326
17.2677	11.021	8.664	4.179	30.651	4.632	5.178	5.082	23.695	6.673	7.116	5.968	6.018	21.848	18.298	4.592	4.597	4.394	5.658	15.607	29.74	18.147	13.603	7.983		0.863092	11.4497
17.3868	7.497	8.584	5.09	34.515	7.325	3.115	5.536	26.726	8.35	7.69	6.065	4.904	16.442	21.433	6.041	3.408	3.497	5.018	17.288	39.875	16.575	8.239	4.662		0.869045	11.6467
17.5059	7.591	5.509	7.444	25.45	5.633	4.157	8.868	24.431	9.856	3.098	3.873	5.579	16.537	26.169	5.347	5.006	4.372	3.575	16.27	35.6	18.045	13.058	5.014		0.874998	11.3253
17.625	9.309	5.23	11.691	33.681	6.968	5.072	7.709	25.065	9.297	7.805	6.483	6.648	12.973	20.491	6.028	4.928	3.522	9.098	12.419	32.423	16.898	10.151	5.199		0.88095	11.6995
17.7441	11.471	8.973	10.679	38.612	3.968	4.267	8.119	23.661	9.75	5.461	5.551	4.187	13.674	28.654	4.307	3.969	3.104	7.751	19.118	38.386	16.624	15.028	6.163		0.886903	12.6729
17.8632	13.358	7.325	9.444	24.887	2.421	4.259	10.261	30.187	8.726	5.192	7.653	5.754	16.214	29.187	6.274	1.89	3.518	4.187	18.193	32.756	13.953	20.389	8.066		0.892856	12.3519
17.9823	11.446	6.805	10.799	30.042	5.637	4.221	10.34	28.1	9.209	5.257	5.686	9.479	16.074	28.727	8.156	3.878	4.483	5.606	23.054	31.152	16.451	17.62	4.549		0.898809	12.9031
18.1014	10.03	7.575	20.965	27.882	3.621	4.278	10.255	28.407	11.248	3.599	3.416	9.228	23.357	28.912	4.81	4.835	4.16	3.736	15.786	39.939	20.24	17.534	4.032		0.904762	13.3846
18.2204	15.726	8.49	19.05	29.115	7.685	4.45	8.533	26.589	9.75	4.974	7.331	6.083	27.397	32.843	6.9	2.931	3.188	6.882	14.499	33.996	20.711	20.018	5.555		0.91071	14.0303
18.3395	12.004	13.285	20.284	32.016	6.537	5.376	11.664	30.982	11.132	5.674	7.981	7.091	33.317	29.747	9.2	4.676	2.215	6.787	14.814	36.299	15.518	21.02	5.474		0.916663	14.9171
18.4586	13.754	11.679	22.698	37.441	8.913	3.457	6.798	34.417	15.124	5.969	7.577	8.792	40.696	39.869	8.219	4.828	5.637	6.626	11.053	36.071	19.558	22.499	4.916		0.922616	16.3735
18.5777	14.716	15.315	16.602	32.909	8.281	7.77	10.903	39.718	12.339	5.363	8.854	6.512	47.524	42.309	10.226	3.399	4.621	5.014	17.233	31.939	25.122	24.084	5.418		0.928569	17.2248
18.6968	9.013	16.07	19.537	38.044	5.774	5.233	8.911	41.423	17.659	6.725	7.83	15.526	43.382	40.983	11.587	2.933	1.111	4.966	14.715	35.1	24.914	27.489	4.332		0.934522	17.5329
18.8159	12.316	19.784	18.512	43.712	8.328	7.459	10.815	39.708	21.103	11.175	7.742	12.928	40.99	42.811	13.735	4.121	3.536	5.74	17.115	29.018	26.443	33.614	4.237		0.940475	18.9105
18.935	11.313	11.54	11.755	43.343	8.033	3.796	12.645	39.163	24.847	7.706	7.083	10.813	43.571	58.816	14.961	4.428	3.417	6.971	13.731	36.969	28.779	34.174	4.588		0.946428	19.2366
19.0541	8.93	18.075	10.328	49.949	8.463	10.435	11.687	36.137	30.681	10.406	10.923	13.457	32.018	68.332	13.333	4.443	4.236	7.623	16.752	37.694	44.709	31.163	4.143		0.952381	21.0399
19.1731	10.188	21.718	11.601	45.448	8.327	7.704	11.886	35.641	26.248	11.821	10.027	12.283	30.932	50.769	19.371	6.615	2.874	6.224	21.527	38.929	32.96	35.941	7.361		0.958329	20.278
19.2922	12.091	19.465	6.968	44.605	12.666	7.709	15.228	36.667	25.371	11.758	9.522	16.398	19.529	46.033	17.973	6.964	3.194	7.032	17.796	41.121	49.103	29.363	5.476		0.964282	20.0883
19.4113	10.272	22.354	8.374	45.408	11.118	8.453	17.462	42.68	27.14	18.06	10.261	26.131	11.33	31.092	15.516	5.866	5.72	6.504	19.792	38.696	50.204	27.073	6.307		0.970235	20.2527
19.5304	9.124	14.03	7.277	48.562	11.787	9.959	24.461	51.144	26.931	23.239	10.841	26.18	7.733	19.062	14.323	8.154	3.929	10.554	23.161	42.307	45.895	27.899	5.778		0.976188	20.5361
19.6495	7.194	11.249	5.829	40.936	16.311	10.554	18.395	62.239	36.591	26.066	12.411	24.683	10.606	17.505	17.588	10.941	3.762	11.172	20.452	41.968	46.599	30.807	7.762		0.982141	21.3748
19.7686	5.334	11.165	7.837	37.754	11.882	16.317	21.977	67.618	35.871	25.29	19.635	27.733	10.255	11.356	16.149	16.256	6.556	13.67	20.658	34.558	52.163	34.021	4.291		0.988094	22.102
19.8877	5.87	13.093	5.052	28.071	18.199	24.399	22.953	69.442	30.374	26.355	20.664	25.989	7.898	9.674	8.671	21.933	7.862	17.162	22.791	28.275	64.601	36.738	4.488		0.994047	22.6328
20.0068	3.862	9.382	4.107	30.437	18.575	23.125	30.16	68.02	27.265	21.138	19.698	13.915	7.724	10.738	8.678	21.026	8.131	19.109	17.628	19.232	61.751	32.591	4.557		1	20.9065

## Sheet: Image11
X0	Y0	Y1	Y2	Y3	Y4	Y5	Y6	Y7	Y8	Y9	Y10	Y11	Y12	Y13	Y14	Y15	Y16	Y17	Y18	Y19	Y20	Y21	Y22	Y23	Y24		Ap-Ba	Avg int
0	20.606	45.702	28.689	27.03	31.707	26.523	20.691	15.457	32.93	20.457	8.8999	17.833	12.808	8.761	23.275	40.243	39.008	16.092	9.003	9.088	8.923	8.82	12.667	10.408	37.9452		0	21.3426
0.1191	26.555	44.481	37.23	20.567	30.239	27.049	18.459	15.877	38.692	25.353	10.1007	19.884	10.296	8.801	28.752	41.444	34.685	17.937	12.627	6.838	14.58	7.159	18.119	14.189	38.0976		0.00465164	22.7205
0.2382	26.898	45.692	42.299	31.667	34.412	31.997	17.761	19.71	46.115	35.159	14.7363	23.114	15.656	8.189	28.517	51.822	44.007	20.276	13.274	14.436	9.778	7.896	16.936	11.575	51.8913		0.00930327	26.5525
0.3573	25.929	52.891	47.251	35.3	34.232	29.059	18.069	20.951	40.924	37.401	16.0907	26.974	20.745	14.671	27.35	57.218	45.223	15.492	18.133	17.355	8.787	8.205	25.87	15.351	52.6073		0.0139549	28.4832
0.4764	32.426	49.64	50.115	39.528	44.773	32.641	23.376	26.414	48.097	44.236	25.8233	25.99	22.052	15.866	32.436	63.473	41.522	27.864	23.303	25.214	14.619	10.216	29.435	14.488	51.3663		0.0186065	32.5965
0.5954	30.849	53.171	65.896	47.574	58.623	35.526	25.283	33.945	51.948	50.859	38.1046	26.53	29.921	21.138	38.54	61.834	48.489	31.569	34.069	31.134	20.625	14.559	29.874	23.981	48.7021		0.0232543	38.1097
0.7145	34.197	59.726	75.644	67.675	80.835	32.57	38.558	34.041	63.208	58.988	49.9221	27.567	36.83	23.718	45.687	64.409	61.957	34.698	36.777	47.417	25.386	14.674	35.524	31.042	55.0656		0.0279059	45.4446
0.8336	42.005	80.322	69.937	76.529	77.844	42.583	46.382	49.267	58.903	56.561	56.949	37.249	41.282	27.829	56.428	75.306	59.695	41.606	57.602	72.225	35.495	21.834	48.955	38.806	77.1859		0.0325575	53.9512
0.9527	49.96	77.107	84.919	97.518	103.636	45.727	56.106	57.739	63.974	58.093	60.2556	40.568	55.024	46.282	69.313	87.871	61.086	56.676	63.926	103.94	47.569	30.457	56.5	45.181	82.4337		0.0372092	64.0745
1.0718	44.511	93.268	95.824	114.094	120.097	56.28	80.727	66.942	77.062	70.802	65.1153	51.521	72.095	43.966	75.903	91.643	91.206	69.933	80.278	115.874	62.332	45.645	82.891	53.202	88.1377		0.0418608	76.374
1.1909	62.926	95.224	103.686	129.161	122.384	64.265	99.575	76.637	76.722	81.77	66.7617	71.759	78.251	70.204	94.548	95.392	88.536	73.105	97.646	130.874	78.962	60.669	94.785	73.223	94.8593		0.0465124	87.277
1.31	74.723	105.441	103.39	134.515	128.728	85.807	112.448	92.009	86.221	89.912	65.8353	79.776	90.901	87.129	109.278	105.854	107.988	95.52	101.718	150.384	103.463	84.883	106.005	78.747	90.0505		0.0511641	98.829
1.4291	88.401	98.612	101.404	126.418	131.692	103.328	117.803	101.087	90.316	83.122	58.3216	80.721	112.957	95.615	125.933	112.359	118.107	117.118	117.555	143.559	120.523	116.823	110.276	96.582	94.4477		0.0558157	106.523
1.5481	102.534	92.131	87.761	137.254	137.874	110.473	121.952	109.097	91.896	110.226	60.1054	99.399	107.624	107.625	119.257	118.344	137.239	112.746	110.141	134.257	141.027	120.069	94.971	103.841	87.6085		0.0604634	110.218
1.6672	121.709	94.751	71.819	127.937	145.067	123.905	126.141	118.875	97.575	112.097	64.2132	117.907	110.217	114.612	121.507	112.452	136.649	134.243	117.047	133.32	160.137	132.319	99.604	111.641	86.4943		0.0651151	115.69
1.7863	123.265	101.975	65.364	104.784	133.619	150.376	128.8	135.958	107.049	113.184	60.5819	98.678	100.666	110.568	100.984	100.749	145.966	147.956	114.678	131.706	148.84	124.835	77.661	108.59	84.4424		0.0697667	112.851
1.9054	137.862	100.945	49.073	86.883	132.364	123.395	139.272	130.623	98.255	117.231	60.8037	99.799	86.715	108.153	73.257	89.627	133.455	142.599	103.713	124.856	141.019	123.853	75.479	90.083	55.0103		0.0744184	104.973
2.0245	132.79	95.021	44.368	76.377	127.071	95.083	129.91	131.709	106.439	117.911	65.8847	85.407	67.248	95.269	56.508	74.435	123.441	130.576	97.017	103.409	133.238	115.84	64.176	89.669	53.1941		0.07907	96.4796
2.1436	131.343	77.725	26.711	75.553	111.183	78.91	123.521	112.798	117.31	127.879	58.239	69.512	45.565	69.021	39.966	60.874	98.438	131.287	77.3	89.911	100.897	100.838	58.207	84.926	42.913		0.0837216	84.4331
2.2627	120.794	68.533	26.524	60.903	91.506	62.174	119.769	102.058	120.452	117.314	67.8371	71.18	39.453	68.353	31.962	47.434	91.388	114.031	68.88	80.483	74.829	85.71	47.851	69.116	29.8429		0.0883733	75.1351
2.3818	104.943	60.749	25.826	47.588	70.778	49.737	110.05	92.378	106.701	121.572	68.3177	58.535	34.332	45.275	34.316	43.749	84.116	93.629	65.01	68.611	73.309	61.056	40.818	53.91	32.6239		0.0930249	65.9172
2.5008	97.333	52.735	19.548	34.4	63.003	43.62	97.696	88.364	92.055	104.172	74.3338	47.379	23.375	35.451	25.643	29.642	71.308	85.698	64.181	57.624	54.197	43.632	32.615	54.823	28.0025		0.0976726	56.8332
2.6199	88.381	47.787	17.127	34.914	56.403	43.917	97.037	78.541	74.184	110.563	83.5169	44.065	22.828	28.971	20.589	34.349	49.698	72.553	61.634	46.191	40.958	28.225	32.84	47.379	21.9449		0.102324	51.3838
2.739	69.312	48.564	12.834	28.949	46.231	39.262	89.588	61.081	66.78	94.714	101.622	39.121	20.6	15.863	18.091	32.649	40.611	56.829	54.458	41.782	26.948	28.138	29.277	38.444	21.6731		0.106976	44.9369
2.8581	49.503	37.628	17.433	22.635	34.944	35.677	68.817	50.375	60.794	94.199	95.732	40.155	18.016	17.852	19.128	30.362	37.612	44.488	47.298	32.296	24.793	24.047	29.466	35.004	14.6615		0.111628	39.3166
2.9772	40.152	38.885	17.433	16.749	40.36	32.751	56.479	33.893	47.273	90.114	96.9874	43.337	17.051	13.679	14.057	25.815	18.28	37.144	58.765	18.835	22.478	19.886	25.867	33.029	16.8355		0.116279	35.0454
3.0963	38.792	25.234	9.857	16.23	30.226	32.93	56.19	26.575	47.018	105.442	105.733	26.296	12.435	14.854	15.355	23.062	21.498	32.406	52.049	19.288	22.396	17.054	28.429	28.239	12.087		0.120931	32.787
3.2154	28.813	32.924	9.405	15.78	29.683	33.929	48.98	21.823	36.473	90.096	96.4306	28.291	11.954	13.042	12.505	21.19	20.415	26.344	55.094	17.875	16.853	18.408	29.549	25.21	10.5797		0.125582	30.0659
3.3345	28.652	24.276	14.51	13.107	19.213	35.243	41.97	21.969	34.939	77.148	99.7629	28.917	9.573	9.269	10.52	16.665	22.528	28.734	56.093	17.287	13.624	17.675	20.47	21.394	12.8712		0.130234	27.8564
3.4535	20.217	28.166	14.339	13.317	18.184	21.6	34.117	16.101	25.601	61.427	93.9958	27.167	12.196	10.021	9.323	14.282	17.477	20.08	41.746	13.18	10.492	13.816	20.993	20.762	9.5754		0.134882	23.527
3.5726	17.984	23.431	11.009	9.333	17.343	23.04	29.881	14.737	24.529	65.853	98.3155	27.591	14.324	12.043	8.296	18.245	18.039	16.634	41.717	11.024	13.027	13.956	27.405	15.531	10.5286		0.139533	23.3526
3.6917	12.992	17.936	10.083	8.506	12.257	26.105	25.109	14.452	23.055	58.193	91.1748	21.883	9.094	9.47	5.507	16.95	13.928	18.559	46.364	14.204	9.979	14.806	23.356	16.366	10.4015		0.144185	21.2292
3.8108	13.751	23.836	11.751	8.121	11.5	16.394	17.675	9.269	20.543	45.482	82.7155	19.859	8.607	9.889	7.674	20.838	15.506	18.428	31.559	10.676	13.041	15.388	20.002	11.512	6.9913		0.148837	18.8403
3.9299	14.156	22.263	13.049	7.465	11.121	16.724	13.212	6.87	19.47	45.789	65.773	22.875	9.918	8.307	6.883	20.381	8.971	21.446	30.297	16.953	9.575	9.903	20.873	10.728	7.8465		0.153488	17.6339
4.049	16.398	20.34	9.924	8.03	10.765	20.396	10.006	8.264	18.824	40.259	63.4007	25.023	10.908	8.088	5.417	14.838	17.821	12.058	44.873	8.759	10.532	11.524	27.57	13.784	6.3053		0.15814	17.7643
4.1681	12.492	22.926	8.028	10.061	7.662	19.73	11.743	8.587	18.799	30.171	60.4591	22.012	8.892	5.541	5.62	14.215	14.886	16.334	30.385	5.295	8.831	11.574	20.794	9.46	5.5184		0.162792	15.6006
4.2872	14.306	23.857	7.346	6.556	8.165	21.894	7.874	8.866	21.101	37.314	59.1269	24.299	7.119	5.249	9.009	15.118	10.106	14.248	33.939	10.962	7.285	12.138	21.698	6.652	4.7277		0.167443	15.9582
4.4063	13.046	22.387	5.982	7.949	6.6	19.489	8.141	6.752	16.35	29.368	52.1509	25.862	5.491	6.873	4.716	19.573	15.943	18.869	35.558	8.788	7.022	9.026	17.254	9.448	5.8703		0.172095	15.1403
4.5253	9.559	23.944	6.662	6.242	8.237	15.421	6.836	6.768	14.898	23.598	40.4118	23.528	6.999	6.854	6.787	18.742	10.191	15.642	36.97	10.271	9.52	9.854	24.509	9.37	7.7212		0.176743	14.3814
4.6444	6.703	27.563	5.598	8.374	6.278	19.285	7.098	6.442	15.278	19.548	35.8592	22.366	5.422	4.47	6.467	17.844	13.874	15.558	32.762	8.969	8.011	10.278	21.416	7.867	6.6572		0.181394	13.5995
4.7635	5.928	30.491	8.163	7.125	3.562	18.434	8.714	5.912	11.627	23.673	35.8125	20.768	8.042	4.091	6.227	22.962	11.615	11.85	33.371	8.211	5.576	6.739	16.072	7.666	6.3761		0.186046	13.1603
4.8826	8.309	30.556	7.225	3.483	3.923	16.353	5.335	5.506	11.972	26.961	30.1522	23.555	5.066	6.97	5.922	21.734	11.64	10.895	30.663	7.62	6.253	4.989	17.044	9.401	7.166		0.190698	12.7477
5.0017	9.359	37.556	5.971	4.324	4.321	21.241	5.929	5.677	11.152	16.409	25.2069	18.888	6.708	4.206	6.401	15.137	8.626	18.529	30.541	8.053	7.704	5.481	17.778	8.241	6.01		0.195349	12.378
5.1208	7.548	37.445	3.962	6.063	5.743	19.435	6.129	5.17	12.488	13.189	27.5942	19.06	5.621	5.054	7.424	15.562	9.268	15.573	32.252	6.716	8.341	8.295	15.049	7.64	5.829		0.200001	12.258
5.2399	7.561	35.036	4.695	4.481	3.683	18.254	4.409	4.427	14.485	9.98	25.3608	17.831	5.462	2.804	8.636	15.962	9.434	11.736	29.801	8.437	4.816	9.202	24.738	6.729	6.0682		0.204652	11.7611
5.359	4.74	39.817	4.42	5.915	3.929	16.495	4.097	2.56	14.007	13.503	18.8157	18.932	4.469	3.996	4.233	18.958	8.688	11.221	19.922	5.002	3.448	6.967	25.059	9.975	4.5604		0.209304	10.9492
5.478	6.59	34.554	4.658	2.591	7.165	19.588	3.406	4.84	12.815	9.752	20.4358	14.46	3.689	5.165	2.837	20.754	7.651	5.636	25.032	4.781	3.978	5.257	22.538	7.831	3.7384		0.213952	10.3897
5.5971	6.988	25.348	3.913	3.031	3.316	16.147	5.363	2.57	15.599	11.484	15.8666	16.07	8.455	4.317	5.196	17.792	7.207	10.389	24.029	4.427	4.886	5.934	21.883	6.757	4.2332		0.218603	10.048
5.7162	4.49	26.029	2.828	5.515	7.304	21.43	3.826	3.835	14.017	11.665	17.3394	14.633	6.747	5.419	3.921	21.171	8.333	5.98	22.457	5.419	5.183	7.31	21.733	6.997	3.7404		0.223255	10.2929
5.8353	7.217	23.345	1.267	3.961	6.317	16.396	4.934	5.691	13.017	8.868	14.8484	14.165	7.194	5.067	5.645	20.987	10.157	12.53	21.768	7.475	5.455	4.557	15.058	7.615	3.7362		0.227907	9.89082
5.9544	4.904	23.97	2.723	5.094	5.104	14.346	4.637	2.792	17.057	8.643	14.5986	15.927	6.483	2.438	6.328	21.874	7.81	9.614	22.687	5.02	6.231	2.822	21.639	7.509	3.2042		0.232558	9.73819
6.0735	4.007	25.804	3.146	3.334	4.602	18.357	3.554	6.407	21.322	12.054	13.3871	18.888	6.338	4.02	5.611	24.038	9.622	8.5	22.565	5.129	3.748	5.401	25.662	11.709	7.6221		0.23721	10.9931
6.1926	5.876	25.343	4.364	3.037	4.345	16.764	2.046	3.548	18.552	8.865	17.8303	15.774	6.214	4.166	7.406	28.274	11.013	6.068	22.867	6.792	2.755	4.851	22.45	10.627	5.9339		0.241862	10.6304
6.3117	5.64	28.064	1.433	4.676	3.819	16.714	4.836	5.255	20.492	9.902	14.5874	16.563	5.155	4.608	6.447	24.084	10.765	8.873	24.44	6.675	4.971	6.267	25.7	10.272	4.9883		0.246513	11.0091
6.4307	3.354	33.993	1.617	3.745	6.579	15.881	3.16	5.42	15.496	11.136	13.502	14.194	5	5.64	7.764	30.819	11.356	7.603	23.168	7.245	3.325	3.116	29.154	6.538	3.0277		0.251161	10.8733
6.5498	4.283	30.743	4.922	3.972	6.511	17.508	3.548	4.097	17.15	16.431	7.665	16.465	5.684	2.6	4.129	24.032	15.83	8.942	30.937	5.015	3.581	4.92	27.245	6.725	4.313		0.255813	11.0899
6.6689	4.674	36.832	5.437	2.923	5.247	18.604	3.327	4.39	19.191	10.931	13.3057	17.223	5.09	3.359	5.044	23.533	15.059	8.614	20.414	5.882	4.042	4.825	22.348	6.788	6.6893		0.260464	10.9509
6.788	3.091	33.469	2.081	2.371	3.239	17.015	4.315	4.833	20.531	13.255	12.871	21.247	2.625	3.628	3.67	27.037	16.73	8.481	23.394	3.277	3.546	5.835	29.019	7.925	6.3672		0.265116	11.1941
6.9071	5.24	34.312	5.826	3.158	6.51	14.667	4.371	4.341	25.568	10.28	10.4685	16.79	3.85	1.603	4.928	21.97	15.581	8.484	23.175	3.823	4.84	2.409	32.154	4.752	4.9143		0.269767	10.9606
7.0262	6.941	33.982	3.235	3.701	4.077	16.636	2.698	7.515	28.485	14.072	12.3918	21.028	4.464	2.845	7.04	21.295	18.986	11.446	24.555	4.917	5.188	4.309	22.894	4.956	7.5018		0.274419	11.8063
7.1453	5.551	34.842	3.868	4.311	4.938	13.627	2.332	6.592	26.688	15.496	9.4521	22.906	5.006	1.547	5.307	18.146	22.707	13.375	23.884	3.844	3.753	3.894	27.933	4.338	4.624		0.279071	11.5584
7.2644	5.106	27.571	5.852	3.927	8.276	9.339	4.685	4.717	27.68	15.987	9.4613	15.415	3.966	1.973	4.072	20.975	18.306	12.138	28.636	4.367	6.063	3.437	23.512	5.365	7.4498		0.283722	11.131
7.3834	5.447	21.903	4.752	3.211	5.76	9.801	3.201	3.935	23.144	13.853	8.418	16.625	3.634	4.583	7.698	20.162	17.508	11.691	28.26	3.269	5.158	3.341	20.971	3.162	3.3154		0.28837	10.1121
7.5025	5.131	17.394	3.178	3.557	4.987	8.641	5.111	4.062	25.584	13.965	6.1047	16.95	3.624	3.133	6.256	24.459	11.724	12.485	23.881	2.626	2.978	1.653	20.313	3.328	6.7162		0.293022	9.51364
7.6216	7.568	15.257	4.295	2.851	8.261	9.577	3.975	5.853	28.128	16.181	7.3447	22.996	4.954	5.459	6.414	24.06	11.647	10.877	25.49	3.447	4.764	6.551	22.287	6.306	6.9073		0.297673	10.858
7.7407	8.955	14.127	4.245	3.382	9.126	13.267	1.581	2.59	27.706	21.153	9.173	24.258	3.611	2.834	4.369	22.992	12.744	13.175	27.122	5.983	3.844	5.385	21.486	4.33	6.6305		0.302325	10.9627
7.8598	5.758	17.511	2.729	3.548	7.729	12.683	2.795	4.657	27.104	24.691	8.4917	21.013	4.023	2.555	5.007	18.245	13.518	14.318	25.792	5.125	3.442	2.944	17.343	4.184	5.7909		0.306977	10.4399
7.9789	6.484	14.389	3.366	2.909	9.081	8.055	1.986	6.63	33.764	28.568	8.1081	25.66	2.138	3.84	6.085	24.395	12.067	16.469	21.506	6.48	2.481	3.387	20.135	4.926	4.2766		0.311628	11.0874
8.098	10.844	16.152	4.059	2.282	8.185	8.722	3.022	2.859	30.138	28.566	9.8762	25.94	3.336	4.577	6.391	30.545	14.046	13.313	17.369	3.868	3.252	3.653	22.522	8.621	2.9477		0.31628	11.4034
8.2171	8.174	16.436	2.913	2.61	9.108	10.339	3.732	2.62	27.751	35.881	10.0039	30.834	2.495	3.443	3.063	36.262	13.556	14.367	20.919	2.775	3.941	5.292	22.297	9.504	3.7491		0.320932	12.0826
8.3362	7.742	17.312	2.82	3.238	9.003	7.407	3.011	4.029	31.9	38.457	9.134	38.187	4.762	3.812	3.485	42.021	18.817	13.609	24.033	5.477	2.86	4.443	13.709	8.118	3.9796		0.325583	12.8546
8.4552	9.316	9.652	3.538	3.077	10.221	7.263	2.041	6.727	27.145	41.735	7.2865	41.199	3.115	2.21	5.528	45.907	17.088	11.447	22.979	5.199	4.532	3.684	21.065	4.893	2.9922		0.330231	12.7936
8.5743	7.574	10.873	4.274	2.92	14.964	6.67	4.772	6.392	25.507	39.555	8.6483	31.419	2.506	4.452	7.07	43.285	18.094	10.055	19.039	4.202	3.606	3.086	20.536	7.005	6.1172		0.334883	12.5049
8.6934	6.511	9.726	4.413	2.415	11.734	7.19	3.203	2.589	27.523	43.848	7.6282	37.881	5.467	2.53	7.918	56.463	14.896	9.507	22.01	4.631	2.954	4.128	18.993	5.416	2.3928		0.339534	12.8787
8.8125	5.171	11.265	3.174	2.176	13.014	11.437	2.858	4.258	27.878	44.665	9.0135	44.178	4.08	4.554	5.224	56.109	14.148	8.121	17.669	3.679	3.868	4.529	20.081	6.496	3.0913		0.344186	13.2295
8.9316	8.143	8.348	3.294	2.4	12.057	4.041	4.041	2.471	25.801	50.476	6.7923	44.995	3.4	3.495	6.295	46.741	14.875	9.395	20.217	4.798	2.59	3.694	24.713	5.502	6.142		0.348837	12.9887
9.0507	4.506	8.43	4.505	3.518	11.382	6.075	4.032	5.089	19.857	53.091	6.7556	38.585	5.83	2.428	6.168	55.496	16.906	7.202	21.711	4.32	2.662	2.694	18.574	6.939	4.772		0.353489	12.8611
9.1698	6.966	8.642	4.276	3.06	12.76	9.606	4.645	3.342	19.507	46.655	8.3528	38.499	6.09	2.085	6.834	56.29	16.461	8.494	17.259	3.859	3.016	5.297	15.241	6.038	6.8012		0.358141	12.803
9.2889	8.991	5.343	2.608	4.521	16.098	4.705	2.546	2.893	15.609	44.028	9.3576	35.923	5.53	3.054	5.46	56.894	14.302	9.833	21.85	2.478	3.885	4.629	20.94	5.642	6.8099		0.362792	12.5572
9.4079	7.741	7.67	5.296	4.191	19.33	7.83	3.883	3.133	14.408	49.887	11.0849	32.989	4.82	3.63	5.071	43.359	18.758	8.225	22.425	3.082	4.658	3.273	16.156	3.817	8.3176		0.36744	12.5214
9.527	9.033	7.043	2.468	3.525	22.031	6.135	2.007	4.578	14.695	50.38	10.3975	31.198	2.906	2.1	4.734	56.999	20.058	8.958	24.321	3.962	1.32	4.687	13.829	7.466	6.8416		0.372092	12.8669
9.6461	7.165	8.232	2.656	3.324	23.453	7.493	3.536	3.173	17.726	45.202	11.7229	24.6	2.44	2.48	6.379	40.313	23.704	7.114	18.833	4.217	2.4	4.026	22.073	5.48	6.04		0.376743	12.1513
9.7652	6.112	5.184	3.468	1.83	23.726	6.332	2.13	5.544	15.603	49.59	13.6601	24.425	2.661	4.058	8.386	47.332	26.67	6.442	18.976	4.564	5.094	2.702	14.054	6.449	4.9921		0.381395	12.3994
9.8843	7.974	5.557	4.113	2.744	25.9	5.012	2.139	3.965	16.912	39.603	14.245	19.568	4.743	4.094	4.562	42.271	32.415	8.751	19.942	3.331	3.918	2.801	18.049	6.827	5.767		0.386047	12.2081
10.0034	7.226	4.935	2.572	2.399	22.219	7.452	2.798	3.706	16.369	41.238	14.1089	19.005	3.271	4.332	3.976	41.772	29.603	8.959	18.893	4.792	2.413	3.977	14.684	8.273	8.0091		0.390698	11.8793
10.1225	6.926	5.426	1.829	1.722	23.426	6.925	4.236	3.514	15.71	33.468	17.4623	22.744	2.302	3.296	4.945	35.087	35.504	9.171	22.233	4.325	2.738	3.168	17.228	7.976	8.0063		0.39535	11.9747
10.2416	7.266	3.065	3.294	4.006	25.435	4.21	1.322	2.172	17.161	31.573	22.4579	21.147	3.87	4.864	5.516	38.549	34.081	7.134	17.884	3.605	4.805	1.639	21.65	8.828	5.8282		0.400002	12.0545
10.3606	8.706	3.898	3.516	4.084	21.17	4.815	3.017	1.714	21.578	27.046	24.3602	20.238	2.452	4.207	3.886	30.293	26.841	6.366	18.633	2.792	3.062	5.289	18.924	6.628	9.5242		0.404649	11.3216
10.4797	8.053	1.127	1.95	3.075	22.624	5.383	3.014	2.052	14.361	28.901	15.1311	19.922	3.082	4.348	3.402	35.021	29.592	11.122	24.226	6.143	3.206	2.868	21.03	7.912	6.6041		0.409301	11.366
10.5988	7.781	4.264	1.63	4.196	19.139	4.452	2.824	3.668	17.76	25.637	21.0451	14.694	1.605	2.285	2.734	35.541	33.527	10.616	19.88	4.698	1.782	5.416	15.646	6.309	5.4713		0.413953	10.904
10.7179	8.84	4.502	2.66	3.459	24.734	2.955	2.786	2.529	18.213	28.13	17.0062	15.434	2.067	3.772	3.584	26.377	26.17	10.092	16.765	4.515	2.789	5.496	19.835	7.291	5.4778		0.418604	10.6192
10.837	8.904	2.596	3.318	2.868	26.108	6.558	3.142	4.351	18.138	29.422	19.3306	10.844	4.708	4.689	3.493	27.658	22.356	7.116	22.452	4.486	2.788	2.115	16.733	7.723	7.6278		0.423256	10.781
10.9561	7.396	4.658	1.851	2.191	31.683	5.1	3.982	2.929	16.17	23.055	16.0021	12.341	2.288	2.538	3.703	26.839	23.898	12.237	21.398	4.111	3.509	3.928	15.131	10.047	8.913		0.427907	10.6359
11.0752	9.963	4.642	3.69	3.483	30.275	3.53	3.191	1.792	17.641	23.243	17.1174	8.703	3.443	4.844	5.328	27.108	21.406	7.703	18.34	4.393	3.59	4.115	16.403	10.505	8.0179		0.432559	10.4987
11.1943	13.249	4.14	2.744	1.802	23.268	3.741	3.27	3.58	17.422	20.173	13.3337	9.538	2.915	2.726	5.214	21.048	20.892	11.427	14.457	2.569	3.124	3.288	18.954	7.796	6.7653		0.437211	9.49744
11.3133	13.449	3.887	2.49	4.646	25.885	4.728	5.952	3.607	15.862	18.596	18.419	10.435	4.388	3.502	3.179	28.131	16.965	7.479	17.6	2.654	4.48	4.644	17.073	7.703	10.4989		0.441858	10.2501
11.4324	13.086	3.139	3.03	2.078	32.925	4.354	3.935	4.254	14.223	19.934	25.2992	11.91	2.457	1.871	6.142	26.905	29.411	10.106	12.981	2.863	3.432	1.664	22.905	9.448	8.7764		0.44651	11.0851
11.5515	17.136	2.481	4.826	2.697	32.332	3.954	2.642	2.986	14.521	17.386	23.1861	8.945	1.301	3.997	4.944	29.47	21.443	7.958	19.236	4.235	3.688	2.804	20.008	7.792	11.0631		0.451162	10.8412
11.6706	16.931	4.275	5.38	1.738	32.329	5.398	2.192	2.03	15.007	18.538	21.6918	9.568	2.341	4.038	2.276	35.536	21.079	12.299	19.225	4.346	1.688	1.764	19.493	6.757	11.254		0.455813	11.087
11.7897	15.803	3.172	6.857	3.936	30.918	6.185	3.765	5.106	14.985	16.915	23.8663	6.869	4.834	3.676	5.961	33.055	19.26	7.176	20.017	3.143	3.618	2.028	21.636	7.85	14.3161		0.460465	11.3979
11.9088	19.895	2.722	5.383	2.475	29.582	5.342	3.601	3.078	18.245	17.364	25.9993	4.295	2.973	2.613	4.326	28.966	20.547	9.235	16.662	2.712	2.587	3.712	19.734	5.107	8.6497		0.465117	10.6322
12.0279	19.302	6.179	4.324	3.746	34.18	8.788	3.81	3.509	17.393	14.164	27.1947	4.987	2.335	0.897	4.387	24.675	20.076	5.051	19.101	4.494	2.963	5.509	21.814	6.753	10.825		0.469768	11.0583
12.147	19.859	5.044	2.99	2.757	38.26	5.499	3.156	2.841	19.157	11.806	23.7021	6.37	1.785	3.953	6.035	22.646	19.218	8.308	20.879	5.281	1.815	3.821	14.897	8.67	10.666		0.47442	10.7766
12.2661	18.288	4.519	3.078	1.699	29.66	4.48	2.05	2.911	16.84	14.781	28.7552	6.174	2.528	3.323	3.308	23.127	21.56	5.604	20.07	2.447	3.662	3.597	13.217	8.198	10.7367		0.479072	10.1845
12.3851	30.391	4.474	4.437	3.492	27.634	4.84	2.88	3.794	11.614	14.232	25.4224	6.161	4.24	3.444	2.72	25.854	16.629	5.13	19.569	5.588	3.418	3.654	17.253	6.263	8.2521		0.483719	10.4554
12.5042	25.941	4.36	2.945	3.362	25.182	2.684	2.937	3.966	15.474	14.409	25.4021	4.617	3.214	4.886	4.374	20.966	13.15	6.858	18.177	3.144	2.963	4.112	17.007	5.53	9.8712		0.488371	9.82125
12.6233	21.189	2.278	2.847	3.979	25.014	5.251	3.641	3.291	18.753	15.757	28.9022	8.277	3.851	4.05	4.348	21.6	11.006	10.842	16.759	2.403	3.797	2.946	14.268	6.668	8.7224		0.493023	10.0176
12.7424	21.257	4.231	4.72	4.856	27.149	4.886	2.721	3.453	16.794	10.5	29.4423	8.345	2.429	3.771	6.051	28.119	8.605	6.384	17.582	4.076	3.002	4.576	12.4	7.846	10.9075		0.497674	10.1641
12.8615	22.919	7.365	2.381	2.673	21.521	4.634	3.492	4.387	18.525	11.544	30.421	8.575	3.779	2.558	3.043	24.026	9.664	7.692	17.369	4.271	3.829	5.29	12.304	9.99	11.0277		0.502326	10.1312
12.9806	26.624	4.18	3.827	3.798	23.343	3.102	3.079	3.193	16.855	15.874	25.3171	6.02	2.904	4.751	1.889	24.121	13.16	8.157	19.573	2.833	4.284	4.164	14.357	6.724	9.3953		0.506977	10.061
13.0997	25.7	5.271	3.968	2.072	19.54	4.565	3.167	3.154	15.821	16.019	28.734	3.339	2.899	4.225	2.836	22.309	12.625	8.758	21.016	3.607	5.618	4.127	13.784	7.547	8.8955		0.511629	9.98386
13.2188	31.763	5.139	1.683	1.761	24.792	4.714	4.588	3.33	17.142	11.532	23.2534	4.794	5.25	2.505	4.121	25.476	9.45	7.084	19.681	6.987	5.283	2.756	10.896	11.66	12.9455		0.516281	10.3434
13.3378	30.786	5.724	3.751	5.441	25.129	4.065	6.025	3.344	15.663	13.732	30.343	4.972	5.824	2.348	2.244	23.005	8.761	7.604	19.54	5.14	6.245	2.661	12.02	6.988	9.6696		0.520928	10.441
13.4569	24.812	3.429	6.976	3.363	23.212	4.629	4.656	3.014	19.204	8.306	28.6809	5.493	3.151	2.247	5.722	20.341	7.898	8.31	15.701	2.235	4.821	3.494	6.817	9.635	11.8133		0.52558	9.51841
13.576	25.09	7.668	3.459	5.567	30.53	4.093	2.422	3.016	19.223	10.466	34.3017	4.721	4.745	4.939	8.145	21.183	11.154	6.714	21.793	3.866	4.529	3.739	12.251	10.215	7.6517		0.530232	10.8593
13.6951	23.405	4.999	4.277	4.757	20.861	6.33	4.647	5.06	18.954	11.294	35.7385	6.506	4.847	3.213	4.221	22.854	10.584	5.13	24.98	4.715	5.482	5.351	8.381	9.64	8.3917		0.534883	10.5847
13.8142	22.006	2.98	2.822	4.209	20.455	3.141	6.955	4.444	24.03	10.191	30.9363	4.729	2.828	4.577	3.922	21.238	8.999	6.566	24.393	2.795	4.466	6.438	10.111	8.213	10.3365		0.539535	10.0712
13.9333	21.771	4.786	2.584	3.381	23.584	4.391	4.387	4.509	20.277	9.158	35.765	7.702	4.868	4.583	1.618	17.867	9.289	6.278	23.998	3.837	3.127	3.413	11.01	13.976	10.7234		0.544187	10.2753
14.0524	25.56	5.651	4.16	4.187	21.476	2.451	6.279	3.738	22.294	9.324	26.8789	7.126	5.485	4.237	5.333	23.744	10.618	6.32	18.834	5.4	5.055	5.437	6.057	12.318	10.2757		0.548838	10.3295
14.1715	30.026	4.773	5.153	4.614	26.001	4.814	3.594	2.99	19.244	7.348	31.8955	4.873	3.433	3.719	4.529	19.077	11.187	7.946	19.892	4.602	4.068	4.407	9.22	14.126	8.6068		0.55349	10.4055
14.2905	28.591	2.906	3.908	2.222	23.726	6.359	3.278	3.137	20.291	9.631	34.1464	6.222	2.367	4.232	3.785	19.705	9.261	11.341	19.693	4.592	3.999	4.247	6.447	10.342	9.6		0.558138	10.1611
14.4096	31.294	3.917	2.565	5.095	24.181	4.642	2.966	4.548	22.533	10.335	25.1525	6.406	3.547	4.497	3.749	17.333	11.479	7.74	24.741	4.728	6.175	3.176	9.193	10.205	9.5525		0.562789	10.39
14.5287	31.732	5.84	5.039	6.961	20.837	5.03	4.513	3.908	22.48	7.498	22.3933	4.913	3.891	5.668	6.502	20.769	9.074	6.041	19.019	4.476	3.688	4.048	8.097	12.985	7.5763		0.567441	10.1191
14.6478	27.346	2.57	5.472	3.269	22.797	1.292	5.505	3.244	22.353	7.525	29.3516	6.808	4.613	3.872	4.037	26.054	11.734	6.408	22.411	3.425	2.966	5.147	10.687	12.427	10.3005		0.572093	10.4646
14.7669	21.803	6.075	5.273	1.749	22.957	4.411	4.343	5.427	22.05	8.726	33.756	7.584	5.823	3.426	3.853	21.786	9.736	8.831	19.569	5.608	3.584	6.081	7.254	9.733	8.4271		0.576744	10.3146
14.886	23.834	5.018	3.991	4.224	25.726	5.192	3.022	4.344	14.471	9.67	32.5773	3.754	5.173	1.782	3.034	20.982	9.484	6.99	23.213	6.862	5.375	5.109	7.236	14.057	11.9572		0.581396	10.2831
15.0051	24.575	2.264	5.673	7.082	22.196	8.121	4.692	3.725	19.731	8.895	29.5364	6.252	4.962	3.952	3.899	20.718	7.031	8.294	23.874	7.821	5.652	4.201	5.964	11.864	11.692		0.586047	10.5067
15.1242	25.721	5.836	3.685	4.511	22.348	4.769	3.241	4.501	19.673	8.939	30.972	5.556	5.621	4.629	5.51	23.11	8.864	7.391	20.759	5.971	3.356	3.448	7.615	13.844	7.9024		0.590699	10.3109
15.2432	24.304	7.171	4.672	4.306	20.341	4.55	3.167	2.649	23.186	9.235	33.6436	3.975	2.324	3.725	4.444	18.364	8.106	6.271	20.411	6.539	4.732	4.182	4.634	14.513	10.3748		0.595347	9.99278
15.3623	28.823	2.976	7.328	3.942	24.394	3.562	6.994	4.419	17.435	7.277	38.3214	4.385	1.652	4.635	4.596	20.236	8.597	6.743	21.216	7.035	4.598	3.272	6.891	14.342	8.0722		0.599998	10.4697
15.4814	25.081	4.156	3.646	4.886	21.237	4.862	4.689	4.212	19.925	5.963	34.0591	3.506	3.368	4.023	2.475	13.856	6.423	8.659	19.852	5.988	4.796	5.761	8.067	13.194	8.6496		0.60465	9.65335
15.6005	28.863	5.046	3.51	5.408	20.938	4.589	2.613	4.331	21.074	6.89	32.7638	6.75	5.483	2.545	5.843	16.369	9.483	7.551	21.107	3.692	3.931	4.452	3.546	11.894	8.4296		0.609302	9.88406
15.7196	31.686	3.022	3.716	3.631	29.612	5.042	2.121	5.971	25.072	9.431	34.3692	7.985	4.047	3.93	7.72	16.161	10.41	6.211	20.812	4.592	2.846	3.955	7.609	13.246	10.2799		0.613953	10.9391
15.8387	33.406	4.287	6.396	6.937	23.959	4.235	3.061	3.077	16.558	11.361	31.2356	5.459	2.902	3.529	3.178	16.465	8.663	4.832	25.803	3.748	5.501	6.338	8.673	13.374	12.3035		0.618605	10.6112
15.9578	27.323	3.298	3.509	5.617	18.752	7.157	1.398	4.265	17.128	7.24	34.1255	7.72	5.55	2.949	3.98	15.132	7.701	4.777	22.508	2.972	4.055	5.206	4.085	12.369	14.634		0.623257	9.73802
16.0769	27.744	4.176	4.219	5.892	18.707	5.668	3.735	4.224	20.876	9.338	26.634	5.18	4.268	6.006	5.869	19.75	11.479	7.702	18.816	4.612	2.603	5.085	6.326	15.479	13.5078		0.627908	10.3158
16.196	25.854	2.322	3.507	4.451	19.099	3.605	2.371	3.618	26.452	9.014	31.7453	6.532	3.773	3.42	7.739	12.7	12.335	7.694	20.087	4.834	3.072	5.031	5.552	14.632	10.8384		0.63256	10.0111
16.315	20.812	5.179	4.641	4.592	17.889	2.447	5.939	3.779	20.946	7.876	37.7112	4.704	5.935	1.91	5.28	17.396	9.092	4.311	21.781	6.307	4.521	5.684	7.857	16.909	12.2084		0.637208	10.2283
16.4341	22.597	1.406	3.943	4.434	18.143	5.367	4.031	2.914	19.478	8.329	31.6959	3.734	5.151	3.816	3.728	10.691	8.727	6.515	18.535	6.316	3.885	3.758	7.047	21.601	9.0457		0.641859	9.3955
16.5532	21.944	4.789	1.316	5.047	17.194	3.561	3.448	6.508	24.27	5.836	30.1666	3.63	4.153	3.783	6.463	9.92	9.756	7.574	18.145	5.76	4.173	4.687	4.635	22.653	10.4323		0.646511	9.59376
16.6723	26.957	3.729	3.688	5.836	14.624	3.886	2.698	4.449	21.367	8.14	36.9997	4.386	5.262	2.869	4.128	13.333	8.906	6.301	19.652	3.548	6.676	4.22	5.166	16.748	11.3387		0.651163	9.7963
16.7914	23.114	5.495	4.645	6.301	13.731	4.099	4	4.962	17.807	7.497	32.1636	5.779	3.793	3.929	7.723	19.319	6.297	8.417	18.469	7.563	3.46	1.324	7.476	16.825	12.6319		0.655814	9.87282
16.9105	23.001	3.737	3.623	5.042	11.974	4.643	3.641	3.926	18.663	4.41	25.3255	5.447	1.94	2.929	6.287	10.873	8.882	5.139	20.573	4.36	3.813	4.091	4.958	20.094	13.8003		0.660466	8.84687
17.0296	21.343	4.718	2.457	6.351	11.106	3.127	1.49	6.326	23.885	4.037	28.8108	5.916	5.617	3.65	4.207	13.299	10.148	5.002	21.587	4.981	5.116	4.442	4.708	20.896	12.1459		0.665117	9.41463
17.1487	24.695	5.634	2.574	5.089	7.153	4.731	2.539	5.634	15.15	5.195	29.2875	5.483	2.857	3.054	5.156	12.309	7.188	6.734	19.534	4.007	6.765	5.708	6.902	18.807	9.4286		0.669769	8.86456
17.2677	19.525	3.497	4.688	5.296	6.512	6.49	3.403	3.729	20.587	3.349	21.9336	5.823	4.389	4.731	5.934	14.549	9.62	7.263	17.615	4.692	4.65	6.562	3.039	20.346	9.6824		0.674417	8.7162
17.3868	16.719	1.697	4.286	3.655	9.041	4.212	3.069	3.354	15.097	6.531	27.7874	3.69	5.633	1.775	4.417	13.177	10.548	7.049	19.324	4.172	8.095	3.877	4.022	20.37	9.0783		0.679068	8.42703
17.5059	11.57	2.842	3.821	5.254	7.917	1.335	4.922	4.678	23.04	4.917	26.1168	4.704	5.486	3.023	4.132	9.974	10.121	6.325	25.175	2.912	6.505	3.161	4.576	18.371	12.2295		0.68372	8.52429
17.625	14.324	4.219	3.486	3.938	8.401	2.194	4.888	3.892	20.319	5.328	21.1802	4.044	3.88	3.771	3.936	14.33	7.24	7.027	20.954	5.644	3.755	7.438	8.098	16.821	10.3189		0.688372	8.37704
17.7441	15.259	4.199	3.537	4.55	6.035	5	7.382	2.871	20.345	6.46	21.2537	4.894	1.731	4.385	5.136	13.088	9.673	7.989	22.302	6.451	5.137	6.03	6.672	20.536	11.7295		0.693023	8.90581
17.8632	11.151	5.285	3.935	7.609	11.039	7.019	4.127	5.404	21.704	6.317	20.0979	3.425	3.43	3.815	3.035	12.665	8.573	8.011	23.233	6.114	6.349	6.728	4.875	22.491	13.1873		0.697675	9.18477
17.9823	12.844	2.256	4.458	6.391	7.774	5.435	5.027	4.719	23.889	3.979	17.5247	5.46	4.393	2.335	4.581	10.975	10.084	7.531	24.453	5.521	5.35	5.876	5.892	24.232	18.9229		0.702327	9.1961
18.1014	10.988	3.139	2.346	3.309	8.041	5.109	3.208	4.674	22.277	9.172	22.0923	4.369	4.003	5.345	3.454	12.789	12.15	9.782	28.253	5.021	3.075	4.782	5.644	23.022	12.4588		0.706978	9.14012
18.2204	10.604	2.471	6.413	4.851	7.549	3.646	5.857	3.055	27.66	3.962	22.3105	3.32	5.755	2.19	3.355	6.604	14.143	8.338	19.262	4.639	5.26	2.376	6.476	24.267	13.448		0.711626	8.71246
18.3395	9.705	5.154	4.648	4.418	6.365	3.618	5.069	7.302	27.443	3.537	22.5186	6.979	3.879	5.302	3.288	10.32	10.82	7.867	26.238	7.504	6.757	3.861	4.957	20.678	11.161		0.716278	9.17554
18.4586	6.385	2.877	5.631	5	6.038	7.227	2.79	4.246	24.603	5.411	26.6929	5.977	3.381	3.997	3.07	10.93	8.205	4.892	32.256	4.989	7.686	3.692	6.146	18.847	16.6273		0.720929	9.10385
18.5777	8.187	5.204	3.892	5.316	8.317	4.254	1.833	4.721	25.733	4.664	20.488	5.298	3.672	4.081	6.177	8.437	12.693	6.831	22.48	4.358	4.675	3.282	7.119	19.1	19.048		0.725581	8.7944
18.6968	7.862	5.039	3.869	4.754	9.39	4.317	3.407	4.764	25.223	7.093	26.1636	4.332	3.815	4.264	2.774	9.425	13.906	6.507	26.784	5.436	3.942	2.041	4.578	26.024	19.3723		0.730233	9.40328
18.8159	5.182	3.56	4.147	8.525	5.589	2.347	3.881	4.303	23.216	3.594	25.8403	5.962	4.259	3.902	4.193	11.503	9.119	5.545	28.348	4.36	5.354	4.212	5.605	21.624	22.5525		0.734884	9.06891
18.935	4.187	3.795	3.868	6.451	6.718	4.892	4.39	3.468	25.978	5.633	18.8521	6.114	7.292	6.023	6.378	6.016	10.723	6.009	25.47	5.485	7.674	4.011	2.415	25.755	19.7374		0.739536	9.09338
19.0541	6.967	3.7	3.401	8.404	7.168	4.97	4.288	4.442	21.891	4.577	27.6932	4.081	5.236	4.516	5.086	8.669	9.178	5.334	29.441	5.555	4.249	5.536	4.208	29.415	25.1834		0.744187	9.72754
19.1731	5.908	3.254	4.623	6.198	7.141	5.753	3.829	3.33	27.265	6.262	15.5838	4.672	4.408	4.193	4.502	10.96	13.915	8.529	27.154	4.308	3.365	4.866	6.609	21.556	19.0557		0.748835	9.08958
19.2922	4.875	2.858	2.93	6.736	7.211	3.013	3.356	4.939	32.539	3.612	19.8979	8.625	4.327	3.836	6.234	9.667	15.548	9.077	28.155	8.228	5.489	5.03	3.487	27.333	21.4058		0.753487	9.93635
19.4113	8.249	3.665	2.924	7.383	5.797	3.137	3.372	4.435	29.299	3.185	17.7774	2.888	3.955	5.496	5.54	10.779	15.971	4.476	30.212	4.923	4.626	3.91	5.707	30.107	20.2745		0.758138	9.52352
19.5304	5.541	4.821	5.353	10.958	4.92	4.223	3.951	4.383	30.922	3.745	22.7455	4.035	3.015	4.179	4.729	8.47	18.215	7.719	33.84	3.287	4.163	4.8	3.82	30.588	24.4529		0.76279	10.275
19.6495	3.311	4.471	3.023	9.363	4.785	3.619	3.856	5.93	38.297	4.897	20.4042	6.938	4.826	4.166	4.473	9.446	12.706	9.083	30.846	4.934	3.907	3.234	4.74	29.492	21.7517		0.767442	10.1
19.7686	7.674	3.38	3.083	12.327	5.19	3.827	3.772	5.997	38.863	3.426	21.6449	6.599	6.466	4.951	6.691	10.975	15.485	7.843	36.065	8.894	8.208	6.233	4.987	32.5	26.5867		0.772093	11.6667
19.8877	3.059	4.213	3.344	15.357	5.184	3.56	3.226	5.861	34.674	4.284	23.4509	3.235	5.787	3.329	5.863	7.858	20.132	4.966	33.935	6.02	4.688	3.913	7.426	32.52	25.7833		0.776745	10.8667
20.0068	6.065	5.847	3.137	14.017	8.59	2.653	2.967	5.288	34.755	6.259	21.126	3.325	5.368	3.43	4.581	8.897	21.654	8.105	33.206	4.181	3.344	6.06	5.766	31.27	24.544		0.781397	10.9774
20.1259	5.494	3.858	1.307	15.409	5.186	3.549	4.369	5.416	27.958	8.227	17.4454	5.949	3.527	4.289	5.425	11.157	20.443	4.084	29.08	7.882	4.299	4.424	8.321	29.925	23.2703		0.786048	10.4117
20.2449	3.995	2.026	3.947	15.682	6.98	3.056	4.589	3.022	24.088	10.047	24.3581	5.105	3.935	4.72	3.646	8.081	20.971	5.174	33.4	6.008	5.083	4.358	7.872	36.706	24.5309		0.790696	10.8552
20.364	3.162	4.946	3.981	15.499	6.085	3.613	4.29	7.356	19.641	18.137	24.1944	4.816	4.253	4.962	4.49	12.795	20.122	5.315	30.364	6.568	5.379	3.875	4.522	36.753	17.0867		0.795348	10.8882
20.4831	3.665	4.77	5.628	18.191	5.085	2.219	3.347	4.352	22.082	20.476	21.0676	3.848	2.856	5.707	6.2	9.469	16.647	7.258	32.945	5.874	6.678	7.33	4.675	36.298	14.1659		0.799999	10.8333
20.6022	5.257	3.338	2.886	20.97	5.757	5.251	3.01	4.672	23.163	36.174	21.2238	4.574	7.126	6.043	4.554	6.675	21.996	5.142	26.777	5.955	6.259	4.457	6.496	33.243	23.0249		0.804651	11.7609
20.7213	4.622	4.843	2.71	20.492	4.914	4.274	2.336	3.826	21.496	39.736	20.2901	5.652	3.621	2.647	8.34	7.643	23.952	8.736	30.104	8.358	4.679	5.327	7.345	27.294	25.5038		0.809302	11.9496
20.8404	4.076	3.896	3.846	22.724	7.046	4.958	3.522	8.034	26.825	46.417	19.0555	6.069	3.609	5.393	5.64	13.977	27.666	6.014	23.722	5.446	6.259	1.715	7.103	38.717	21.9411		0.813954	12.9468
20.9595	5.248	3.466	5.04	23.693	4.984	4.967	5.309	4.951	27.833	53.658	17.8224	4.004	3.752	5.627	4.808	12.167	24.772	10.051	28.248	5.856	5.135	5.265	8.708	39.72	19.4297		0.818606	13.3806
21.0786	4.341	4.891	4.753	24.619	4.744	3.533	4.557	6.575	30.745	49.815	18.9581	5.033	4.082	5.233	4.933	14.969	23.295	6.61	33.112	6.515	5.637	5.987	6.192	32.289	21.9433		0.823257	13.3345
21.1976	4.271	4.301	3.612	24.116	4.781	2.817	3.833	5.592	33.497	53.085	18.1918	6.25	4.396	3.007	4.442	14.374	20.03	6.86	24.842	6.885	6.15	3.966	6.532	34.494	25.9022		0.827905	13.0491
21.3167	3.931	4.186	5.919	21.598	5.081	3.59	3.929	7.323	30.238	58.243	19.649	6.833	5.265	2.543	5.793	20.237	19.688	8.716	23.958	6.816	4.191	5.035	7.072	31.571	24.9964		0.832557	13.4561
21.4358	3.303	3.49	4.867	23.664	7.247	5.668	4.897	6.576	34.039	43.521	20.7775	4.312	4.012	3.517	7.059	18.839	26.2	8.241	22.356	9.923	6.384	4.987	6.71	37.404	18.4708		0.837208	13.4586
21.5549	3.751	3.922	4.764	23.379	7.463	4	2.176	8.942	28.83	38.737	17.4766	4.565	6.704	6.995	11.961	27.512	32.123	9.102	29.587	14.419	5.887	3.494	6.343	35.486	26.3095		0.84186	14.5571
21.674	5.104	4.275	4.299	22.043	5.027	4.696	3.861	7.279	30.636	34.944	20.5534	2.952	5.308	3.825	9.996	26.063	25.881	18.36	24.92	16.494	5.839	5.545	8.964	39.462	24.1001		0.846512	14.4171
21.7931	3.667	5.866	5.498	22.377	7.7	4.659	2.302	6.61	29.084	26.542	20.801	5.166	4.937	2.956	8.108	25.857	22.818	16.587	28.223	19.291	4.309	5.407	7.418	39.781	23.3714		0.851163	13.9734
21.9122	6.245	4.218	6.496	24.886	3.93	3.514	5.152	4.932	30.704	20.163	17.264	3.162	3.673	5.097	11.11	22.566	22.366	14.051	21.459	23.018	3.262	5.659	7.874	39.888	31.0301		0.855815	13.6688
22.0313	4.429	5.348	7.182	25.695	3.079	3.67	5.94	8.673	32.376	21.847	15.8081	8.451	4.254	4.985	18.511	24.792	26.283	16.063	18.453	22.394	6.657	7.817	11.424	38.994	27.5125		0.860467	14.8255
22.1503	5.566	3.538	7.765	20.196	5.256	4.838	4.521	9.967	32.108	18.259	20.8955	8.777	5.476	7.116	19.854	30.079	32.193	16.901	19.448	26.155	8.061	5.556	17.87	38.641	34.7554		0.865114	16.1517
22.2694	8.743	3.027	6.557	20.002	5.732	3.131	2.051	12.706	29.926	19.042	27.3464	7.372	5.3	4.614	19.118	21.989	27.587	14.107	14.661	28.216	7.131	6.11	20.805	44.199	29.7553		0.869766	15.5691
22.3885	4.573	2.279	5.714	23.922	4.796	3.357	5.548	10.451	33.394	16.789	22.9997	4.803	3.33	5.221	28.061	23.025	28.146	12.004	14.753	27.184	8.727	8.265	24.876	43.64	28.0762		0.874418	15.7574
22.5076	6.407	5.597	9.707	18.778	6.027	3.222	2.254	11.368	32.878	19.059	21.28	4.138	5.859	5.383	36.159	18.127	25.126	10.124	17.323	37.615	16.213	11.445	26.969	40.494	30.0924		0.879069	16.8658
22.6267	5.25	7.002	9.137	21.348	8.593	5.377	6.102	7.215	33.002	21.028	22.9355	7.266	6.169	7.824	40.826	18.237	23.988	13.165	18.207	34.443	15.752	12.67	31.233	42.069	28.4525		0.883721	17.8916
22.7458	5.375	6.648	10.585	25.153	6.553	4.371	4.558	11.417	31.635	26.886	26.7613	4.442	6.696	8.368	48.564	18.238	23.91	15.922	16.749	34.796	17.774	14.155	39.363	42.379	28.8312		0.888372	19.2052
22.8649	6.507	7.4	12.25	22.126	6.271	4.162	6.644	20.917	31.62	25.404	22.7539	8.915	4.417	7.963	49.145	12.564	15.736	11.787	15.911	27.933	23.851	16.639	37.312	32.506	26.4768		0.893024	18.2884
22.984	7.723	8.512	16.401	27.035	7.242	5.719	6.47	17.851	27.848	21.425	25.1004	8.487	4.923	8.58	50.98	10.555	15.433	9.468	13.53	34.592	37.115	23.997	31.948	40.565	25.0292		0.897676	19.4611
23.103	8.931	8.606	19.244	27.25	8.515	4.479	6.366	25.238	25.488	24.158	24.3205	6.948	7.372	7.389	42.018	9.421	12.97	9.86	9.805	32.457	39.895	22.916	25.461	36.308	22.3284		0.902323	18.7098
23.2221	5.336	11.143	23.249	24.581	8.687	6.761	10.804	24.904	18.899	24.36	27.8101	11.629	9.135	15.078	33.508	7.148	9.203	11.942	12.395	30.769	40.823	26.653	26.775	37.248	22.1623		0.906975	19.2401
23.3412	5.382	8.585	21.821	28.735	6.867	6.748	11.582	25.814	14.224	22.543	26.9617	8.438	9.294	16.472	27.589	9.165	11.242	12.159	10.071	28.468	48.693	33.499	15.238	46.764	21.7175		0.911627	19.1229
23.4603	5.325	14.309	26.534	33.368	10.574	7.132	15.268	31.438	13.342	18.007	27.9649	8.545	11.561	17.123	15.699	5.907	7.206	6.901	5.579	23.727	38.803	37.892	11.989	39.283	18.1394		0.916278	18.0647
23.5794	7.839	16.331	27.475	38.84	11.908	9.793	15.152	26.479	16.202	17.131	30.9016	8.451	9.606	24.202	15.289	4.646	4.093	6.487	6.601	18.403	32.209	26.723	8.707	34.525	16.5311		0.92093	17.381
23.6985	13.688	16.506	25.251	40.305	12.534	9.937	13.283	31.826	15.257	18.629	28.1329	9.123	14.577	27.164	12.322	3.593	3.328	4.98	3.213	23.396	26.529	32.538	11.106	31.4	13.1649		0.925582	17.6713
23.8176	21.405	20.23	23.546	48.011	18.639	11.387	16.819	32.768	12.636	22.407	35.2326	12.897	26.787	29.501	14.155	3.607	3.139	7.441	2.445	14.255	19.994	23.35	6.946	27.581	10.8281		0.930233	18.6403
23.9367	22.739	19.065	35.171	61.464	18.655	17.374	23.346	39.381	13.565	18.365	31.8159	18.211	29.635	27.536	12.941	1.941	3.051	4.518	2.592	11.521	17.835	17.031	8.886	25.038	10.6241		0.934885	19.692
24.0558	22.619	19.778	39.535	63.065	31.046	19.922	23.409	36.531	10.518	18.529	35.5556	21.787	41.17	31.929	7.675	1.517	2.582	3.226	2.909	12.973	15.11	13.404	7.343	23.88	8.4748		0.939537	20.5795
24.1748	21.342	22.723	46.925	65.985	34.593	28.608	29.057	33.61	12.29	24.13	33.0634	23.982	44.523	34.319	10.744	1.767	2.653	5.129	0.985	10.202	11.415	13.407	3.652	16.903	7.8184		0.944184	21.593
24.2939	23.523	21.474	30.668	70.772	34.66	39.39	40.465	22.072	11.722	14.877	36.683	24.651	40.514	22.965	8.573	1.679	1.327	3.114	1.675	9	7.829	9.632	3.615	12.465	6.1494		0.948836	19.9798
24.413	18.639	24.67	21.091	66.663	30.272	42.774	46.098	24.65	10.153	8.82	40.5924	20.451	40.501	18.016	5.296	1.119	1.653	2.011	1.007	6.432	10.869	8.574	3.303	10.941	3.7986		0.953488	18.7358
24.5321	22.727	25.397	19.899	48.511	26.759	46.449	41.201	28.599	9.999	11.098	34.8581	18.805	28.454	13.705	5.88	1.143	0.959	1.398	0.861	6.66	5.813	7.931	2.766	6.622	4.3733		0.958139	16.8347
24.6512	23.013	28.159	17.122	32.68	25.591	42.833	45.137	18.462	6.353	10.651	42.9981	12.197	19.267	11.822	2.275	0.565	2.096	1.614	0.763	7.317	5.699	5.384	0.876	6.383	3.3468		0.962791	14.9042
24.7703	22.389	28.921	13.075	25.02	21.317	39.664	40.416	15.421	9.429	10.088	32.6463	10.247	11.305	11.831	4.954	0.854	0.569	1.906	1.525	3.92	2.961	4.477	1.781	5.768	2.1532		0.967442	12.9055
24.8894	23.424	21.673	13.357	17.832	19.809	35.76	25.79	15.064	6.469	6.421	45.0326	8.13	10.669	8.726	1.722	1.596	0.919	3.526	0.887	5.754	2.792	6.718	2.513	4.224	2.502		0.972094	11.6524
25.0085	22.726	19.805	12.791	17.363	20.078	18.95	21.086	10.335	4.872	5.394	41.8202	5.862	9.195	10.176	3.561	1.322	0.533	2.255	0.167	3.691	4.541	4.196	1.12	5.457	1.3877		0.976746	9.94736
25.1275	21.748	16.065	7.127	13.237	16.551	13.039	15.142	15.393	8.1	6.047	48.9156	5.193	6.652	5.698	2.249	0.892	2.057	3.016	0.406	3.84	2.284	2.887	0.71	4.221	1.8985		0.981393	8.93472
25.2466	25.565	12.561	10.117	9.881	13.209	10.506	13.881	13.134	5.093	9.236	40.5094	8.172	7.849	3.652	1.339	0.599	0.163	0.802	0.83	2.362	3.621	3.355	2.347	3.063	1.5951		0.986045	8.13766
25.3657	23.604	9.734	8.331	12.733	5.195	10.438	10.514	13.486	3.872	6.419	48.0518	4.019	4.271	4.298	1.794	0.475	2.449	1.386	0.808	3.238	4.972	2.939	1.778	1.515	2.071		0.990697	7.53563
25.4848	22.939	7.537	6.24	4.461	6.929	7.478	10.036	6.863	3.871	4.402	38.5844	6.457	6.126	3.705	1.56	0.16	1.334	0.452	0.114	3.821	2.726	4.828	0.701	1.482	1.5915		0.995348	6.17592
25.6039	17.025	6.654	4.401	3.008	5.093	7.811	8.384	6.642	3.622	6.362	27.9339	4.877	6.179	1.957	1.261	0.448	1.043	0.525	0.105	2.372	2.693	1.01	0.425	1.922	3.1644		1	4.99669

## Sheet: Image5
X0	Y0	Y1	Y2	Y3	Y4	Y5	Y6	Y7	Y8	Y9	Y10	Y11	Y12	Y13	Y14	Y15	Y16	Y17	Y18	Y19	Y20	Y21	Y22	Y23	Y24	Y25	Y26	Y27	Y28	Y29	Y30	Y31	Y32	Y33	Y34	Y35	Y36		Ap-Ba	Avg int
0	35.013	33.792	26.356	22.909	12.393	11.394	13.1084	31.702	31.602	18.755	23.554	14.91	47.719	58.969	41.056	93.8378	79.783	71.178	67.1606	54.811	57.389	17.3889	45.8333	52.667	38.6667	24.5	17.833	25.4444	35.1667	30.444	36.278	19.056	43.389	28.0556	46.778	48.167	16.5		0	37.1232
0.1191	27.38	39.324	31.459	22.907	14.049	12.749	12.3501	37.455	29.481	31.79	29.245	15.691	57.17	70.087	51.675	87.8185	74.618	75.648	62.4737	48.294	54.167	23	46.3889	60.833	39.5	27.2778	16.833	25.1667	32.3333	34.944	27.778	18.056	34.611	29.8889	48.5	41.167	16.7778		0.00518187	38.078
0.2382	30.679	46.798	36.349	31.575	16.943	12.979	13.3076	36.069	35.08	30.923	29.556	15.842	55.324	61.661	60.594	89.8663	76.002	72.865	62.9274	42.627	53.944	24.8333	48.3889	62.222	47.1111	26.8333	18.556	28.6111	38.5556	37.667	36.444	18.389	39	30.6111	43.444	34.833	20.5		0.0103637	39.6733
0.3573	33.912	59.327	40.327	40.914	22.136	14.447	18.1692	36.503	32.055	39.998	31.956	16.907	58.561	72.667	63.194	87.1961	86.668	69.772	72.8243	39.623	56.389	25.3889	64.5556	76.833	49.6111	26.1667	20.778	36.6667	48.9444	34.278	37.056	20.167	43.944	34.3333	45.944	33.611	25.2778		0.0155456	43.7054
0.4764	35.824	70.059	43.15	53.267	21.572	16.082	15.2759	35.266	34.315	49.579	33.363	17.202	73.697	77.016	90.034	84.5947	85.725	75.495	74.8846	40.93	48.667	29.2778	60.7222	75.389	51.1111	26.9444	20	29.6667	46.8333	40.222	41.778	24	47.556	43.0556	42.389	25.333	20.6111		0.0207275	45.9699
0.5954	33.423	79.54	50.036	62.857	29.353	19.803	18.6609	35.558	44.377	58.681	36.1	18.358	80.093	82.062	97.56	85.896	84.477	73.134	74.8494	40.945	49.056	36.8333	65.2778	90.5	47.2778	29.4444	19.833	41.3333	65.6111	40.167	49.722	33.389	41.944	46.3333	43.222	29.389	24.3333		0.025905	50.2549
0.7145	43.385	101.246	64.417	76.422	37.247	24.09	25.7098	36.728	50.917	63.601	41.311	23.929	76.583	86.533	104.953	80.6055	95.015	81.469	73.6462	37.881	47.722	39	66.3333	87.167	62.2222	29.1667	23.278	46.5	63.8889	39.944	52.389	47.778	43.944	40.2778	38.722	28.333	34.6667		0.0310868	54.5141
0.8336	40.999	106.996	73.743	83.305	41.531	28.68	24.4693	39.442	53.899	79.303	46.538	21.578	85.637	91.47	119.915	75.7363	102.881	69.294	70.1365	38.973	63.889	46.8333	68.1111	107.333	64.1667	29.4444	27.389	48.1667	70.2222	50.778	55.333	56.056	48.833	49.8333	42.833	23.722	35.2778		0.0362687	58.9932
0.9527	43.946	127.535	84.676	94.108	51.548	37.316	30.9674	48.466	62.58	82.625	56.406	27.485	93.636	95.484	119.264	78.4353	101.385	77.728	68.1838	35.992	71	43.9444	71.2222	98.111	65.1667	26.8333	28.778	57.5	74.7222	46.833	62.222	63.333	40.056	46.8889	38.167	23.889	43.1667		0.0414506	62.6919
1.0718	46	152.991	102.064	97.449	64.061	48.004	36.5178	49.836	80.708	81.635	62.578	28.637	100.248	96.4	125.987	77.1652	95.155	86.408	67.9433	42.702	74	45.1111	67.8333	92.944	69.1667	28.9444	31.889	58.2222	84.7222	50.5	67.111	74.056	53.389	51.6111	39.278	19.722	51.6111		0.0466324	67.6378
1.1909	53.648	174.012	120.877	106.823	76.567	52.913	42.6723	50.608	85.82	89.393	74.281	35.306	103.898	100.905	124.103	73.2067	107.745	78.085	64.0688	49.371	93.833	52.4444	74.2778	93.5	76.2222	33.6667	37.5	61.2778	86	53.722	72.222	80.611	54.167	48.6667	36.556	20.389	56.5		0.0518143	72.861
1.31	53.211	190.045	131.877	123.535	78.701	57.306	42.4134	61.214	104.265	99.947	96.092	43.381	116.079	108.509	131.003	73.9613	107.556	81.005	67.6626	57.52	75.667	54.7778	68.3333	89.111	85.1667	39.6111	41.833	58.0556	88.5	50.5	82.444	102.556	55.389	53.8333	41.556	21.056	53.0556		0.0569962	78.0197
1.4291	67.72	197.786	156.901	131.298	95.845	71.624	46.1004	71.256	110.602	105.11	117.012	61.113	103.893	117.342	126.509	75.7815	119.849	84.516	66.9758	60.355	79.667	52.5	71.1667	75.833	77.6667	46.8889	46.278	65.5556	91.9444	53.167	107.389	100.333	55.611	60.1667	39.222	18.111	55.3333		0.062178	83.3628
1.5481	84.715	209.121	182.884	128.351	104.521	77.981	51.4937	74.134	109.86	107.384	134.463	87.676	109.579	130.866	125.908	79.8416	119.793	85.007	66.8363	74.976	84.667	58.7778	63.1667	72.5	77.5	45.5	53.111	60.1667	91.5	61.833	114.444	102.722	61.167	61.8333	41	21.5	52.0556		0.0673556	88.3469
1.6672	104.345	211.931	202.951	143.981	111.884	97.441	57.6427	72.77	100.652	113.971	147.261	115.01	111.161	128.735	127.023	82.2172	127.096	89.361	55.3832	80.108	87.722	62.4444	68.1667	72.056	73.7222	57.9444	54.111	58.9444	90.9444	60.889	121	107.111	70.667	62.1111	46.778	17.056	38.7778		0.0725374	92.7397
1.7863	122.554	203.938	197.282	137.863	108.151	98.511	66.7321	75.541	92.921	119.162	161.1	141.322	112.876	140.277	129.682	68.0644	123.18	88.033	57.8504	76.218	74.333	72.0556	70.9444	57.889	82.5	55.3333	50.889	56.9444	89.8333	58.389	127.611	111.944	64.889	64.1111	48.111	14.722	40.8333		0.0777193	93.5835
1.9054	139.203	202.319	211.502	134.645	104.398	100.489	61.6539	88.345	90.856	137.195	166.87	163.828	116.069	151.975	129.514	66.1634	135.26	81.436	68.4757	89.374	68.889	67.7778	69.0556	59.167	74.5	57.1111	59.778	52.3333	89.3333	63.833	144.167	116.944	83.778	65.9444	45	18.5	40.4444		0.0829011	97.7332
2.0245	157.47	192.696	216.386	144.559	106.853	110.51	69.957	97.015	108.225	134.419	163.088	173.118	104.71	160.398	132.242	63.2841	143.152	85.217	65.7569	98.817	50.778	63.9444	69.0556	44.944	74.4444	67.0556	56.389	61.6667	84.6667	54.444	139.889	115.111	82.444	71	45.944	14.556	34.8889		0.088083	98.8944
2.1436	168.719	177.703	205.787	141.791	114.702	104.511	61.9217	91.149	104.612	129.714	150.755	184.321	108.952	177.605	130.169	50.5802	131.959	91.052	66.0608	104.435	53.889	68.2222	70.5556	49	65.0556	75	59.889	46.4444	88.3333	53.833	137.333	133.5	82.778	74.4444	42.333	21.389	35.0556		0.0932649	98.7447
2.2627	174.924	150.857	196.329	137.007	117.049	111.722	72.7568	90.315	92.294	137.468	128.858	195.998	110.342	180.161	134.473	50.1434	149.421	88.657	68.6871	106.534	53.056	60.8333	65.1111	47.444	63	76.2222	67.889	48.7222	83.7778	59.222	139.833	128.778	77.278	78.0556	52.167	22.333	36.1667		0.0984467	98.7537
2.3818	188.048	128.227	185.131	133.355	113.13	107.321	77.105	83.306	87.154	136.618	119.779	170.322	115.832	199.209	136.488	50.688	135.426	92.849	70.0275	116.911	56.389	61.4444	70.5556	46.222	62.5	75.5556	74.778	49.6667	79.4444	56.111	142.722	142.222	85.889	82.2222	44.833	18.333	35.9444		0.103629	98.1556
2.5008	171.205	103.896	166.583	139.341	119.259	98.642	72.7419	78.141	81.647	124.211	104.556	141.253	114.652	193.114	148.708	49.4482	141.624	96.398	71.6932	117.084	66.611	70.1111	69.6667	55.778	52.7778	77	86.333	53.1111	89.3889	58.056	109.889	137.056	88.222	76.3333	46.389	25.056	32.8889		0.108806	95.3747
2.6199	172.868	92.348	140.912	135.873	128.55	103.07	63.6614	69.14	80.612	112.129	92.38	108.871	106.302	204.043	150.629	46.4731	126.039	94.561	79.9779	120.967	63.722	76.7778	72	47.667	46.8333	83.3889	85.611	50.1111	88.4444	63.222	114.333	133.778	78.333	72.1111	51.333	19.833	29.1111		0.113988	92.0545
2.739	161.119	72.9	115.68	138.148	121.3	94.505	69.6285	71.428	74.023	104.028	75.472	75.906	99.504	212.385	157.533	41.919	136.634	95.026	88.8908	111.069	68.778	75.8333	76.6111	49.611	53.0556	76.2778	84.167	46.8889	86.9444	66.778	109.111	143.667	80.667	83.3333	45.667	20.444	31.1111		0.11917	89.6228
2.8581	156.915	62.847	83.011	139.048	113.628	86.359	63.8173	68.049	81.521	97.509	65.385	59.953	94.247	192.874	154.532	39.5423	125.416	103.207	88.2845	112.127	68.333	87.8333	77.3889	50.556	45.3333	80.8333	85.944	41.5556	87.1667	71	88.833	147.333	84.778	77.3333	46.222	17.889	35.7222		0.124352	86.0088
2.9772	141.114	55.02	74.913	136.201	95.783	77.997	65.3218	65.451	77.632	92.935	56.407	43.71	79.11	195.605	174.333	38.1065	115.975	108.362	89.5628	115.184	76.889	77.3889	77.8889	55.778	50.1667	68.7222	101.278	36.3333	92.2222	81.556	84.389	141.611	84.722	72.3333	50.278	19.833	25		0.129534	83.6517
3.0963	137.668	51.202	72.406	134.266	91.575	76.167	53.5746	65.873	78.743	79.415	48.949	50.103	76.831	182.194	177.337	36.7987	124.968	111.865	82.3009	118.401	76.611	79.8889	77.5556	52.778	46.3889	71.2778	102.833	36.6667	94.3889	78.444	76.444	145.889	87.278	78.5	45.778	23.667	24.6667		0.134715	82.4241
3.2154	132.154	45.493	55.926	140.453	80.939	68.775	55.747	69.551	73.956	69.019	43.032	38.073	63.851	167.377	164.674	41.126	116.556	108.807	88.7823	117.111	94.889	77.0556	74.5	51.944	46.3889	69.1667	99.111	37.4444	98.4444	74.278	79.722	129.667	83	70.6667	47	24.278	28.4444		0.139897	79.119
3.3345	129.983	41.65	47.447	138.116	65.244	48.067	49.722	77.734	72.486	64.82	39.575	41.976	59.448	151.559	183.509	38.4854	117.873	114.897	82.5609	120.99	83.222	78.0556	80	57.389	44.8889	67.2222	100.222	27.2222	93.1111	80.444	71.944	130.778	91.278	73.0556	45.333	24.611	28.8333		0.145079	77.3987
3.4535	134.521	44.923	46.378	132.836	67.773	39.094	43.4103	87.549	74.39	50.535	31.67	38.098	51.492	148.143	172.985	38.1609	124.61	118.286	86.2447	118.008	92.111	81.3889	76.7778	64.111	36.7778	65.8333	93.556	31	96.2222	79.444	62.389	129.833	87	64.5556	48.389	27.611	24.2778		0.150257	75.9563
3.5726	136.285	38.215	42.06	117.855	61.573	33.204	40.705	90.343	70.951	50.43	36.199	35.993	52.922	119.761	176.139	44.5468	137.84	110.268	77.6868	111.431	102.056	72.2778	67.5	59.444	41.8889	61.6111	85.5	30.5	93.2778	77.722	64.167	103.667	96.5	67.8333	50.056	28.167	29.3333		0.155439	73.4029
3.6917	141.535	33.822	37.876	105.807	53.5	28.957	37.389	92.949	79.033	46.155	31.27	33.709	46.038	99.65	176.309	44.884	150.353	111.356	84.0372	115.157	94.389	60.7222	66.7778	55.167	44	61.5556	77.778	28.3889	91.8889	70.722	59.111	85.5	100.222	63.0556	53.333	34.722	27.1667		0.16062	70.9266
3.8108	130.872	35.854	33.818	93.25	52.965	25.11	32.8561	99.864	77.237	39.885	25.471	31.88	44.8	83.642	184.542	46.2427	173.897	105.168	75.4467	120.889	97.167	71.9444	64.7778	58.722	44.1667	61.8333	71	26.3889	86.8333	74	67.778	81.444	101.833	72.1111	53.944	39.667	22		0.165802	70.5216
3.9299	141.139	38.02	28.645	82.935	47.56	21.203	28.1593	100.441	77.951	39.211	23.893	32.429	44.137	62.633	186.347	39.4746	172.955	97.431	80.4362	117.304	101.111	54.2778	53.3889	49.833	40.1667	48.1111	56.667	22.1111	81.1111	72	59.222	71.444	101.389	66.8889	59.222	43.444	25.3333		0.170984	66.7034
4.049	128.696	36.204	23.875	59.886	43.388	18.83	29.8366	116.889	88.762	34.375	20.008	29.112	41.299	57.629	192.097	36.4874	182.469	91.337	74.5412	127.532	93.167	52.5	42.4444	39.278	39	47.7778	49.222	19.7778	83.2778	72.111	51.333	62.611	103.389	56.1667	74.444	47.444	24.0556		0.176166	64.6284
4.1681	139.133	32.761	23.168	54.26	48.556	19.79	29.4013	108.008	80.725	35.196	22.614	22.971	43.357	49.777	188.344	39.6112	194.08	85.539	72.8201	124.826	89.389	49.7222	41.6111	39.389	38.3889	44.7778	38.111	24.1111	79.7222	80	45.556	51	105.944	52.7222	58.167	42.722	18.6111		0.181348	62.5644
4.2872	136.705	35.122	22.586	43.693	45.954	16.603	25.1852	122.18	89.902	34.273	22.225	22.802	37.755	45.258	186.087	46.9848	189.848	68.172	57.6995	133.972	94.611	43.9444	43.2222	35.944	41.1111	43.2778	25.5	20.5	78.7222	68.444	53.556	45.944	119.5	60.6111	67.389	60.167	20.0556		0.18653	62.311
4.4063	144.664	31.711	20.94	41.323	44.78	15.767	22.5234	126.584	93.038	31.406	17.052	21.583	35.127	37.633	194.627	39.3095	192.576	71.621	56.1081	124.972	82.611	36.2778	27.6111	34.167	42.7778	40.4444	22.556	18.1111	69.7222	68.389	63.056	42.778	114.556	53.4444	68.333	73.222	20.2778		0.191712	60.5859
4.5253	142.65	28.584	21.026	31.452	43.88	14.678	22.6754	146.705	86.213	32.782	16.665	21.661	38.554	27.357	187.786	44.444	185.058	51.298	45.4438	124.919	70.889	30.8333	27	35.278	45.2778	32.4444	15.611	18.8333	68.1667	71.444	47.778	37.889	117.222	50.7778	83.556	70.944	21.3333		0.196889	58.3543
4.6444	133.478	24.947	20.178	30.027	42.064	15.349	21.0578	138.354	93.106	29.677	17.865	18.896	36.834	20.44	196.822	33.627	185.527	41.967	43.533	124.223	70.333	20.7222	24.6667	36	40	30.2778	17.278	12.6667	69.9444	63.167	49.444	42.333	115.833	53.0556	74.778	74.722	24.1111		0.202071	56.4136
4.7635	140.188	22.769	16.723	27.277	44.176	14.138	22.7716	146.989	99.427	33.573	11.464	19.557	40.901	25.214	197.904	30.1251	176.113	39.68	39.5912	124.118	62.556	21.8333	22	37.5	45.6111	28.1667	19.889	13.2222	67.1667	75.444	45.722	38.944	118.778	54.7222	83.167	79	19.6667		0.207253	56.9213
4.8826	132.248	25.205	12.743	21.48	44.328	12.105	19.8335	164.968	90.323	26.161	14.06	21.547	32.003	22.079	198.92	28.1827	165.7	38.318	37.463	127.498	54.833	15.1111	23.3333	38.833	50.8889	22.7778	18.278	12.4444	68.8889	71.556	48.778	28.056	123.278	47.2778	83	88.833	20.7778		0.212435	55.4624
5.0017	121.088	23.64	11.292	17.322	39.8	11.199	22.2822	168.713	91.498	27.09	15.197	19.198	37.17	20.477	194.936	28.1272	145.374	34.104	37.5839	132.745	50.667	16.2778	18.6667	46.444	50.7778	21.2778	20.833	11.2778	68.2778	71.278	46.167	32.056	123.667	47.9444	89	90.278	20.3889		0.217617	54.7058
5.1208	112.032	22.662	9.994	17.198	37.462	11.354	23.2353	183.207	101.66	25.88	14.531	23.468	34.79	19.577	196.648	26.633	134.015	35.544	33.2763	135.435	41.556	15.8333	15.9444	41.333	44.7778	19.6667	17.5	11.1667	74.2778	77.111	43.056	29.167	121.778	57.2778	78.556	92.556	20.3333		0.222798	54.0674
5.2399	100.804	27.22	9.129	19.325	43.034	10.933	21.2253	182.725	99.241	27.169	12.542	18.458	34.854	19.697	198.955	22.6907	105.226	29.578	40.8603	128.294	40.444	13.7778	15.2222	41.222	45	13.8333	17.167	11.1111	77.8889	94.222	41.778	26.222	98.722	50.5	78.889	101.389	20.4444		0.22798	52.4268
5.359	102.399	20.032	8.193	15.463	38.383	11.757	21.9915	186.764	102.046	24.188	14.538	21.076	33.674	18.351	191.297	23.077	100.345	34.6	32.2475	134.225	25.222	12.2778	19.6667	41.667	48.7222	15	16	9.3333	70.3889	84.722	45.778	19.833	98.889	49	74.389	101	16.1111		0.233162	50.8824
5.478	89.636	25.549	5.543	15.923	35.062	8.866	23.6005	184.25	103.731	25.915	11.764	21.28	29.495	18.748	189.761	19.4803	81.644	20.373	30.9645	134.351	24.833	10.7778	21.5556	36.333	37.2222	10.5	16.278	8.5	64.8333	89.333	49.222	21.889	91.944	50.7778	67.333	102.5	23.2222		0.23834	48.7295
5.5971	74.216	30.077	5.052	17.571	33.69	8.743	29.3795	201.497	99.864	23.866	11.797	22.258	31.794	17.216	171.827	21.0501	65.114	22.321	32.2525	136.367	18.611	12	13.3889	35.056	37.3889	8.7222	15.389	12	64.2778	101.389	42.667	22.556	91.444	52	67.222	103.611	17.3889		0.243522	47.8666
5.7162	71.79	25.273	6.632	12.495	40.042	7.142	32.5213	208.832	94.212	32.001	12.534	22.908	30.835	15.023	171.255	23.1248	43.53	19.038	29.4406	145.047	17.667	12.2778	14.5556	32.222	53.0556	11.5556	19.278	8.8889	60.2778	102.056	47.5	19.611	79.111	57.8889	64	112	20.2222		0.248703	47.9958
5.8353	48.37	29.768	7.378	11.942	41.583	8.375	31.8628	202.606	98.843	30.211	15.454	21.365	28.157	15.8	146.373	20.4708	48.519	15.321	29.7956	145.19	17.833	15	13.6111	30.389	44.1111	11.4444	18.111	9.1111	64.3333	115.333	39.722	19.333	80.389	57.8889	55.167	84.222	18.0556		0.253885	45.7146
5.9544	42.691	28.595	5.171	9.236	40.145	9.299	35.2794	208.436	109.833	24.971	14.291	23.622	37.706	13.254	125.893	19.2748	42.493	11.664	29.2122	157.95	15.833	10.5	14.3333	28.722	47.5	10.6111	15.778	8.9444	67.6667	128.389	37.444	16.944	74.778	54.7222	59.833	78.611	17.6111		0.259067	45.3307
6.0735	38.114	34.208	5.098	7.293	40.746	9.949	31.1424	200.856	102.176	27.07	15.826	27.182	29.683	16.462	105.924	15.3868	36.966	13.716	29.0377	149.288	9.778	9.9444	10.9444	29.611	49	9.6667	24.056	7	54.5	135.556	36.167	19.944	61.111	53.8889	62.056	76.222	23.3889		0.264249	43.4854
6.1926	34.23	37.114	4.255	7.709	38.545	6.629	33.9583	222.976	108.929	30.72	12.243	25.243	32.293	11.359	87.833	12.1815	35.849	9.609	28.3606	144.007	7.778	9.2222	13.1111	24.056	43.5	9.0556	18.278	6.3889	58.5556	164	31.722	17.556	63.778	63.3333	50.278	80.333	18		0.269431	43.324
6.3117	27.938	42.099	5.093	6.507	42.313	9.276	34.4921	230.257	106.266	24.124	12.704	37.578	28.741	13.164	67.015	12.3618	23.639	8.224	29.2513	142.999	8.833	7.7222	12.3889	15.778	48.9444	8.7222	21.833	7.7778	57.5	151.5	36.389	15.611	47.667	62.5	47.778	68.389	19.8333		0.274613	41.7084
6.4307	33.965	42.101	5.895	7.079	37.884	7.549	35.6771	223.495	96.948	22.179	12.657	37.357	32.233	13.241	63.91	14.3463	19.804	8.672	29.1257	145.047	6.222	8.7222	13.6111	16.611	57.5556	6.9444	23.667	7	57.8333	152.722	35.389	17.944	51.167	60.5	53.611	66.056	28.3889		0.27979	41.9759
6.5498	28.339	44.44	4.732	7.086	39.872	9.005	35.7797	232.551	93.542	26.334	12.034	32.246	30.598	12.67	55.541	12.3353	18.618	10.703	30.2339	131.192	6.722	10.0556	12.9444	12.278	61.1111	7.1667	20.111	6.0556	56.9444	152.167	22.333	12.222	47.389	62.2778	45.833	64.056	29.5556		0.284972	40.4615
6.6689	29.797	47.102	6.509	6.924	40.704	8.099	38.5453	228.674	94.312	29.098	9.788	34.46	29.377	13.431	49.907	12.4983	13.358	9.552	28.9664	131.151	4.5	9.8889	14.7778	11.722	54.4444	8.1111	22.389	6.2778	52.2778	151.444	18.889	17.278	50.722	66.1111	50	67.389	26.3333		0.290154	40.4002
6.788	31.202	44.168	5.758	7.672	36.955	8.471	44.2006	232.32	87.042	30.654	10.342	29.771	39.629	9.92	37.756	12.8617	12.599	10.635	33.3758	126.995	6.611	10.5	12.9444	10.889	56.8889	5.2778	19.278	5.1667	41.1667	136.722	28.444	15.778	35.5	69.2778	47.444	61.056	26.4444		0.295336	38.9653
6.9071	22.059	49.556	4.588	6.649	37.903	12.01	43.4799	226.636	80.751	27.531	8.236	31.22	30.427	11.751	33.669	13.3563	11.098	8.653	32.6642	116.429	6.833	8.3333	12.7222	9.722	56.3333	9.6667	19	4.3889	38.3889	109.889	22	12.944	35.444	65.5	48.667	62.278	28.3889		0.300518	36.7342
7.0262	24.367	42.201	6.485	5.514	46.598	9.25	56.1809	220.608	70.093	31.578	8.382	27.229	36.759	9.489	34.106	8.9311	9.341	11.076	32.321	114.941	4.889	7.1667	11.5556	9	50.5	7.8333	18.444	7.4444	34.8333	104	20.722	15.333	35	63.7222	47.278	57.778	29.7778		0.3057	35.9656
7.1453	23.536	36.913	4.807	5.981	57.176	9.885	55.7852	214.926	63.875	24.023	8.101	27.856	40.443	12.409	26.51	9.9112	7.076	13.355	29.5599	103.414	5.667	12.3889	15.7778	10.444	52.6667	7.1111	17.611	4.1111	27.3333	89.389	19.444	15.167	26.444	58.0556	45.444	60.556	34.4444		0.310881	34.5297
7.2644	21.338	40.025	6.043	6.918	57.569	11.983	58.7082	205.924	65.522	22.025	8.739	27.025	40.49	13.023	20.626	11.2513	7.579	10.722	31.1029	93.561	6.833	8.8889	11.0556	8.667	48.7222	7.4444	16.056	5.6111	18.4444	74.833	17.556	11.833	28.722	56.1111	51.889	56.667	44.8333		0.316063	33.3606
7.3834	20.44	35.054	7.038	4.347	55.886	11.514	51.8851	179.399	51.754	21.045	10.966	25.608	39.957	11.911	19.469	8.0694	6.919	7.845	32.1187	87.661	5.889	8.6667	12.6111	6.222	56.7778	5.5556	19.111	4.3889	15.1111	57.333	19.444	13.222	31.278	67.2222	47.833	58.556	36.7778		0.321241	31.2131
7.5025	20.661	39.553	5.531	4.301	57.864	11.392	50.6206	146.204	44.008	20.333	8.139	23.527	46.405	9.134	15.499	10.6644	7.366	9.575	30.9104	74.86	5.389	7.5556	11.6667	7.167	46.1667	6.1667	15.278	4.1111	12.4444	36.833	20	11.556	26.167	56.2778	51.167	50.833	44.6111		0.326423	28.3767
7.6216	19.912	35.242	6.121	4.479	47.077	14.285	61.8753	128.238	31.453	18.433	8.839	28.685	41.233	7.693	19.049	9.3793	6.466	8.097	31.7227	61.681	7.333	6.3889	13.5556	7.944	35.1667	6.8889	16.111	5.2778	9.0556	24.444	17.389	8	23.889	53.9444	53.056	51.5	40.2222		0.331605	26.2196
7.7407	15.815	36.4	6.057	4.004	43.882	15.636	52.3228	88.927	33.29	14.906	10.186	31.335	46.794	8.541	14.75	7.8702	7.859	7.881	31.7139	62.29	3.056	6.3889	17.1667	9.944	29.5	7.1667	16.5	3.8889	9.3333	20.889	20.833	9.333	23.333	61.3333	48.444	47.667	49		0.336786	24.9794
7.8598	16.623	37.298	5.628	4.027	36.88	20.081	43.5611	67.363	29.435	17.299	7.697	32.936	45.275	11.086	15.697	9.5534	6.662	8.031	33.4585	46.88	3.778	5.0556	13	6.056	25.9444	7	21.667	4.4444	7.6667	15.056	15.167	11.889	18.722	58.2222	45.778	55.056	46.2222		0.341968	23.1404
7.9789	16.873	39.194	6.541	4.45	28.596	18.153	46.0767	53.137	27.925	13.416	9.038	31.277	44.759	8.091	15.309	9.5861	4.702	8.721	31.6464	38.359	5.556	6.4444	16.2222	7.556	24.8333	6.1111	17.833	4.8889	7.6111	13.722	20.778	10.389	17.056	62.3333	51.278	53.333	50.6667		0.34715	22.499
8.098	17.082	35.559	7.041	5.818	31.801	16.933	42.025	37.426	26.365	12.659	8.94	35.242	44.355	11.073	13.984	8.0564	5.19	7.26	34.8214	35.723	3.889	7.5556	14.9444	8.667	22.8889	6.0556	19.333	4.3889	10.2222	15	16.167	8.444	20.944	66.8889	54.667	48.278	45.8333		0.352332	21.933
8.2171	20.572	33.859	5.806	4.033	27.441	22.275	44.271	30.244	26.385	10.245	8.745	40.159	40.214	9.491	9.486	8.8971	4.683	8.837	39.6981	27.878	5.5	4.7222	17.2222	9.389	20.3889	4.2222	24.111	3.3333	5.3333	8.556	20.778	11.333	18.167	64.3333	47.389	56.444	44.2778		0.357514	21.3167
8.3362	20.104	37.687	7.31	5.584	27.77	21.827	46.0069	28.387	20.986	10.349	9.586	45.147	34.631	10.933	10.614	10.1064	5.415	7.766	36.9627	21.855	5.111	6.4444	16	7.889	18.1111	6.8889	23.278	3.8333	4.7222	7.5	21.167	9.722	20.389	60.8889	43.222	49.889	46.3333		0.362696	20.8221
8.4552	17.664	35.608	8.576	5.644	22.428	22.032	35.7154	19.113	25.21	9.043	10.37	39.535	40.424	9.005	8.692	10.9597	4.802	7.801	42.7061	17.844	4.833	7.2222	14	8.056	15.9444	7.6111	25.722	7.2222	3.3333	5.444	21.667	8.111	14.667	69.8889	44.667	51.333	46.7222		0.367873	20.2599
8.5743	22.823	32.691	6.32	5.272	22.454	21.907	37.7174	16.813	17.616	9.058	9.167	39.131	40.692	8.6	8.807	8.5883	6.277	7.524	36.5017	14.468	4.944	5.1667	15.1111	12.222	14.8333	9.0556	26.333	4.4444	3.3333	6	26.056	9.778	14.833	62.5556	44.833	49.722	51.5		0.373055	19.8148
8.6934	24.051	39.013	6.544	4.493	22.34	25.97	42.8967	16.021	18.477	9.672	11.626	36.429	38.649	9.968	7.488	9.762	4.219	8.636	42.1633	18.568	4.5	6.3889	16.5556	8.444	13.9444	11	20.389	5.1111	2.8889	4.222	25.5	5.056	14.222	62.6111	53.556	57.778	50.8333		0.378237	20.5402
8.8125	24.846	38.873	7.385	5.127	21.061	25.111	42.5531	13.331	13.358	10.172	9.024	33.934	43.813	7.306	12.051	11.5574	4.956	6.439	39.7934	15.567	3.611	10.2222	14.9444	11.611	13.3889	6.5556	22.778	6.5	3	3.611	25.556	6.5	16.778	60.5	54.222	65.056	51.5556		0.383419	20.6121
8.9316	30.413	36.631	6.779	5.624	18.934	21.815	37.2576	12.083	10.861	9.375	10.155	36.196	42.87	6.985	9.597	9.5507	6.151	5.761	38.0088	15.01	3.278	7.6667	17.2222	11.056	16.6111	7.6111	26.667	3.7222	5.0556	6.333	25.333	6.167	12.611	58.7778	56.222	55.389	52.1667		0.388601	20.0526
9.0507	34.383	37.186	7.92	5.594	20.687	22.614	36.4958	8.767	11.051	5.95	11.241	43.418	37.999	7.258	9.576	7.4315	4.822	8.923	34.3066	16.195	3.278	7.6667	18.9444	13	13.8333	7	22.5	4	4.0556	3.222	24.222	8.944	14.944	59.0556	62.889	60.5	49.8333		0.393783	20.2623
9.1698	29.136	35.402	9.421	5.049	17.69	23.805	29.3902	7.018	9.103	6.847	11.51	45.59	38.047	7.669	8.361	10.6149	4.619	7.787	32.2712	20.893	4.278	8.6111	16.1111	10.944	13.0556	11.7222	21.056	4.4444	3.2778	3.944	28.222	8.722	15.556	59.0556	54.389	68.333	49.7778		0.398964	20.0466
9.2889	30.372	31.545	9.515	5.08	16.923	27.344	24.9051	6.91	8.479	8.678	8.362	42.203	36.886	6.669	8.895	12.0876	6.685	8.635	33.7762	16.532	4.944	5.6667	21.1111	10	16.1111	8.8889	24.778	3.6667	3.8333	3.444	25.722	8.222	18.556	59.3333	63.389	61.556	52.2778		0.404146	20.0536
9.4079	26.773	34.631	6.295	6.107	14.944	27.394	25.4703	6.1	9.239	10.37	11.945	49.293	32.805	6.239	8.383	9.7708	5.674	5.994	32.1189	22.415	3.944	5.6111	16.7222	11.722	16.2222	7.6111	33.167	3.8889	4.4444	4.778	29.167	7.5	17.278	58.6111	69.667	75.667	45.1667		0.409324	20.6251
9.527	27.705	32.091	10.902	5.516	11.813	26.662	23.7736	6.176	7.277	7.044	11.204	47.849	27.751	7.399	6.709	7.9958	5.778	8.388	33.5999	21.054	4.944	7.0556	19.1111	14.056	16.6111	6.1667	33.722	5.3333	4.6667	4.111	27.278	5	13.444	62.9444	65.667	69.5	47.5		0.414506	20.1027
9.6461	22.381	32.802	7.649	5.404	13.459	27.363	22.9465	6.094	7.005	6.918	13.211	44.42	36.984	7.441	7.001	7.8465	3.801	7.783	27.8126	26.704	7.722	6.5556	16.5	15.833	12.8333	8.1667	37.278	4.5556	3.2778	4.667	25.167	6.333	17	69.8333	68.222	71.556	47		0.419688	20.4737
9.7652	25.385	28.101	8.851	4.642	12.706	29.542	18.7973	6.446	7.42	6.685	10.817	45.951	29.076	6.187	6.918	7.0987	3.653	9.455	31.1617	27.96	4.167	4.6111	18.3889	14.722	12.4444	7.8333	43.5	4.0556	3.5556	3.444	23	5.278	19.389	61.3889	72	72	45.5		0.424869	20.0576
9.8843	25.128	24.001	6.904	5.224	12.477	27.973	16.9029	5.719	6.64	6.397	14.442	47.745	23.481	5.731	7.18	10.6175	2.84	6.076	28.4993	27.39	3	5.3333	21.0556	23.444	14.8889	7.5	43.056	4.6667	6.5	4.222	18.333	7	28.5	67.6667	74.389	71.222	47.2222		0.430051	20.5234
10.0034	23.01	21.66	7.146	3.253	8.845	32.065	18.7176	6.996	3.668	5.712	15.342	48.883	24.202	7.946	7.816	9.0445	4.211	6.239	33.4282	27.525	3.611	4.1667	21.6667	26.333	14.6667	6.6667	40.444	4.6667	3	4.944	21.667	7.444	23.5	64.4444	68.167	80.167	41.3333		0.435233	20.3405
10.1225	20.98	19.696	8.209	4.807	8.711	29.708	21.3729	7.567	5.762	6.738	14.351	46.105	23.792	6.283	5.485	9.5598	3.908	6.681	34.801	31.089	3.167	5.7222	20.9444	31.722	13.9444	9.0556	36.389	4.9444	4.8889	4.167	19.722	6.167	25.833	62.1111	86.389	69.889	36.3889		0.440415	20.4608
10.2416	19.118	20.45	7.949	4.013	9.662	33.613	20.5113	8.676	3.811	4.294	16.95	48.327	19.843	6.044	6.41	10.0133	4.879	7.223	34.3768	35.539	2.611	6.2778	25.6667	38.111	10.3333	9.3333	41.556	5.7778	3.3333	5	23.167	4.944	33.5	57.0556	86.722	89.778	39.7222		0.445597	21.7457
10.3606	20.817	18.689	7.318	4.475	9.186	34.109	19.7225	5.578	3.925	6.278	17.201	46.029	17.113	6.097	7.405	8.7356	5.936	5.096	34.4183	26.72	3.111	5.9444	29.3889	37.222	15.2222	11.2778	34.889	4.5	3	6.611	17.833	4.333	31.778	54.3333	85.222	94.722	38.4444		0.450774	21.1535
10.4797	20.831	21.507	5.085	6.562	9.848	31.527	18.7395	6.797	5.113	6.474	20.373	46.211	24.596	6.206	5.614	6.0081	3.718	6.536	33.6058	30.444	4.889	9.6667	30.6111	38.444	13.7778	9.6667	27.444	4.5556	6.7222	3.778	25.056	5.333	29.056	43.9444	96.722	95.556	32		0.455956	21.4329
10.5988	20.509	17.949	5.07	4.919	8.344	36.106	20.3511	6.242	2.842	4.134	22.818	48.014	24.91	7.723	5.794	8.6131	4.714	6.812	31.9941	32.146	3.722	6.0556	37.1667	35.389	16.9444	11.9444	24.056	4.8333	4.6667	4.889	25.722	5	30.333	50.1111	98.389	89.889	40.4444		0.461138	21.88
10.7179	20.741	16.375	5.008	3.826	11.554	35.326	18.6894	5.811	4.661	4.647	27.82	48.035	22.183	6.689	7.155	8.663	4.366	6.53	33.392	33.863	3.556	6.3889	37.2778	38.611	14	10.1667	25.5	2.7222	3.6111	5	27.5	5.056	25.667	42.1111	99.889	101	36.8889		0.46632	21.8995
10.837	19.717	17.071	5.625	4.938	8.607	35.87	17.7251	3.605	4.059	6.233	28.518	37.105	23.051	6.195	6.883	8.1646	5.695	4.726	30.9091	34.256	1.778	7.5	36.6667	34.222	19.4444	9.4444	20.722	3.4444	4.1111	3.556	25.556	5.278	27.222	45.1111	104.778	103.111	33.8889		0.471502	21.4807
10.9561	17.536	19.457	6.791	4.417	7.362	38.767	13.5479	4.186	5.647	6.152	28.759	38.627	18.447	6.165	7.087	6.1631	5.638	6.095	28.3549	26.55	4.278	8.5556	42.5	36.278	19.3889	10.3889	21.444	5.2222	3.7222	4.778	31	8.389	23.056	48.2778	123.222	121.944	32.5		0.476684	22.7214
11.0752	17.775	21.556	6.143	3.762	9.191	35.204	18.8648	5.018	3.729	4.551	32.658	39.061	22.685	6.557	6.458	8.2659	5.439	5.949	27.1961	29.793	3.611	4.7778	40.1667	24.944	23.7222	10.6667	20.611	4.3889	4.7222	4.111	29.722	5.111	26.5	47.7778	132.056	118.889	36.3889		0.481866	22.9195
11.1943	16.932	19.142	5.024	5.905	10.425	35.491	15.6241	4.133	5.564	6.091	34.084	36.664	20.892	6.533	5.209	7.8889	4.014	5.489	27.5973	29.056	4.833	6.3889	36.3889	24.444	24.3333	12.3333	15.333	3.3333	2.1111	5.333	28	5.222	22.5	52.9444	147	118.111	31		0.487048	22.7397
11.3133	20.316	22.835	6.584	7.671	8.542	35.606	14.7526	4.997	4.346	6.835	31.63	32.234	24.914	6.566	7.817	9.0783	5.898	6.109	27.6668	30.002	4.278	6.1111	40.2222	22.333	23.7222	9.8333	18.833	4.5556	3.3889	4.278	26.722	5.278	24.056	54.0556	149.722	119.722	27.0556		0.492225	23.2045
11.4324	17.434	21.516	6.605	4.996	9.324	40.258	15.7815	6.111	5.622	5.144	29.186	24.881	23.649	7.607	6.586	8.476	5.703	6.03	26.4164	30.571	2.333	6.5	37	22.5	22.6111	7.4444	13.667	4.7778	3.2222	3.222	30.111	5.222	20.333	58.8333	159.889	133.944	23.3889		0.497407	23.1593
11.5515	17.932	22.39	6.781	3.263	8.635	34.383	13.529	5.292	6.139	4.182	31.05	28.697	24.507	6.528	7.499	8.8714	4.922	6.717	28.3069	32.527	3	9.0556	43.7778	21.444	19.7222	12.1111	14.056	3.3889	2.8889	4.889	25.333	6.056	26.333	61.2778	160.667	135.722	21.9444		0.502589	23.6167
11.6706	13.848	20.425	6.954	6.287	8.58	38.281	12.0638	4.181	4.477	5.006	30.903	26.13	25.077	6.702	7.309	9.8274	5.614	6.519	23.9418	29.404	4.111	7.3889	37.4444	20.556	20.2222	10	17.278	2.3889	4.6667	3.889	30.222	6.556	18	55.5556	158.056	133.833	23.2222		0.507771	22.8357
11.7897	13.203	16.644	6.564	6.123	8.386	38.344	11.2372	6.01	4.422	4.729	30.82	25.55	20.749	6.843	5.907	8.0899	4.954	6.319	27.5555	30.68	3.611	6.6111	41.7222	24.889	19.2222	11.0556	18.833	2.8333	4.4444	3.722	27.722	5.778	21.167	55.4444	140.389	141.5	21		0.512952	22.5155
11.9088	13.356	19.142	5.089	5.157	5.309	34.288	14.6628	3.862	4.69	4.179	30.83	23.111	23.311	8.413	3.46	8.2606	7.869	7.043	25.5868	29.985	4.611	5.9444	39.3889	21.667	18.5556	8.0556	14.111	3.0556	3.0556	6.778	32.944	6.833	21.389	48.7222	127.944	135.333	14.6111		0.518134	21.3677
12.0279	13.118	16.369	8.409	3.93	9.255	41.119	14.628	5.4	5.128	3.23	30.368	23.114	22.707	7.699	5.846	7.331	5.509	5.759	25.1899	28.128	3.222	6.6111	35.9444	19.444	19.5	8.1111	16.278	4.2778	6.0556	7.556	30.278	4.944	20.889	55.3333	112.278	135.444	11.4444		0.523316	21.077
12.147	17.121	20.999	6.242	5.027	6.084	42.708	12.6236	4.295	6.239	3.885	27.859	22.008	24.423	8.056	7.434	8.202	5.34	5.978	21.6456	29.831	2.444	4.2778	39.6111	19.778	19.1667	4.8333	15.5	3.9444	4.2778	5.111	32.056	5.722	23.944	43.7778	96.056	118.611	13.2222		0.528498	19.955
12.2661	14.819	22.339	6.757	5.061	8.196	40.191	8.8494	4.98	5.347	4.272	28.882	23.643	27.26	6.901	6.393	9.3831	4.705	7.543	21.8078	29.083	3.889	6.1667	38.0556	19	18.4444	7.7222	16.778	4.5	4	4.167	28.667	4.111	23.278	43.8889	80.667	120.778	11.5		0.53368	19.5142
12.3851	15.165	19.464	6.277	4.837	7.744	43.394	9.1783	4.488	4.468	4.4	32.154	18.355	22.358	6.078	5.471	8.5953	7.118	6.191	27.661	28.579	3.611	4.0556	33.8333	15.389	16.5	7.2222	15.889	2.9444	3.0556	5.667	25.944	5.444	25.444	36.2222	63.778	132.556	11.8333		0.538857	18.6855
12.5042	17.913	18.61	5.716	6.539	5.815	41.685	12.7027	6.8	5.747	4.734	29.03	20.09	21.551	6.131	4.965	8.5163	5.784	5.742	25.6473	33.966	1.889	5.6111	27	19.278	16.2778	7.2778	14.167	2.7222	3.0556	5.278	24.611	7.111	28.667	41.0556	52.722	114.111	10.5556		0.544039	18.0831
12.6233	15.377	21.241	6.824	4.883	7.904	47.246	9.3861	5.298	5.982	6.163	27.66	17.479	23.934	9.026	7.111	7.5837	7.356	6.432	35.442	29.142	3.111	4.9444	34	18.278	15.1111	6.7222	16.333	3.2222	3.4444	3.833	28.5	4.889	30.778	36.1667	40.722	100.444	9.2778		0.549221	17.8715
12.7424	9.566	21.655	6.713	4.673	6.128	47.584	10.2156	6.093	4.938	5.57	28.56	20.709	24.202	6.926	6.189	5.4918	5.514	6.89	32.3794	27.204	4.444	4.7222	27.1111	20.167	15.1667	6.9444	12.667	3.2222	3.1667	6.222	25.278	5.556	30.111	41.9444	35.167	99.556	11.2778		0.554403	17.2953
12.8615	11.863	19.874	7.09	3.915	5.584	46.421	8.106	6.384	2.865	5.855	32.793	20.265	20.497	6.381	6.399	6.5511	6.633	8.308	37.2084	26.391	3.556	3.2222	28.8889	16.833	12.8333	8.2778	14.667	4.5	3.8333	5.944	22.667	4.5	30.667	36.8889	25.944	96.056	12.9444		0.559585	16.8002
12.9806	13.126	23.133	7.305	4.58	7.617	44.706	10.7044	6.33	6.846	5.245	34.029	16.921	25.041	8.083	6.203	7.742	3.888	7.442	37.0914	25.462	4.667	4.8889	25.1111	21.167	10.5556	7.6111	11.722	4.6111	4.1111	6.444	29.167	4.5	33.222	39.1667	26.556	58.111	10.1111		0.564767	16.3032
13.0997	16.169	19.273	7.906	6.454	9.364	48.925	10.3312	4.93	4.334	6.701	31.882	19.465	27.675	8.476	6.228	8.1905	3.34	8.497	46.9916	22.285	3	4.5556	21.6667	21.444	10.8889	8.2778	10.667	6.4444	4.6111	4.611	21.833	5.556	32.944	36.3333	21.278	45.556	8.2222		0.569949	15.8191
13.2188	11.662	18.463	7.061	5.297	8.382	53.645	8.5502	5.802	4.745	5.196	25.558	19.317	20.921	7.258	6.59	9.1254	4.235	7.155	41.9134	22.526	4.556	4.5556	25.5	19	9.4444	7.9444	16.111	4.3333	4.1667	2.722	21.056	4.889	35.778	36.0556	21.778	36.889	10.7778		0.575131	15.107
13.3378	15.688	20.056	6.562	5.919	6.959	47.429	11.6698	5.627	4.751	7.452	33.381	18.42	21.531	5.618	7.382	6.8551	5.699	10.999	48.1863	23.265	6.167	5.6111	28.7222	22.333	9.3889	7.2222	14.278	3.2222	5	5.833	18.167	4.278	42.222	35.8333	13.333	21.889	7.8333		0.580308	15.2644
13.4569	13.858	17.774	10.244	4.904	6.127	47.049	11.9615	7.445	3.914	4.216	27.717	16.397	23.833	8.207	5.271	8.2121	5.59	7.018	43.177	20.496	4.722	4.4444	27.3889	21.5	8.7778	7.6667	10.167	6	4.8333	4.667	20	6.722	35.556	35.8889	16.111	18.111	7.1667		0.58549	14.409
13.576	14.008	17.767	7.568	4.822	6.057	55.365	11.0133	6.363	4.615	4.615	32.47	15.159	22.096	6.284	5.61	6.5404	7.582	6.206	50.3975	19.661	3.111	4.2778	23.6667	20.611	8.1111	6.1111	15	3.6111	3.5	6.111	21.111	5.389	35.056	39.2222	10.833	12.389	8.6667		0.590672	14.3507
13.6951	13.383	18.846	8.42	5.007	6.527	46.643	10.1159	5.531	4.785	7.238	29.997	11.824	25.433	7.375	5.674	5.8547	4.973	6.457	47.0841	16.918	3.444	4.3889	29.8889	16.278	9.6667	7.6667	10.667	3.9444	4.3889	4.778	22.722	6.444	32.056	37.1667	13.167	9.833	11.1667		0.595854	13.9393
13.8142	18.665	17.08	7.27	5.409	8.095	53.686	11.2046	4.974	4.431	5.176	32.367	13.19	25.328	6.601	6.431	6.8235	6.442	6.124	50.9955	18.283	3.667	4.1111	26.8333	19.944	5.7222	7.0556	11.889	3.6111	3.2222	6.167	23.611	3.833	32.556	39.5556	9.944	11.667	10.4444		0.601036	14.3894
13.9333	21.853	14.409	6.286	4.88	8.091	46.869	14.1137	5.115	4.816	5.671	26.554	12.588	23.052	8.954	8.43	7.481	4.707	6.994	48.81	16.134	4.111	4.5	26.3333	18.167	7.6667	9.5556	8.833	4.8333	3.4444	3.167	19.278	5.056	28.944	29.9444	9.944	7.111	9.6111		0.606217	13.4137
14.0524	17.913	12.898	7.378	5.558	5.654	47.25	12.0525	6.45	5.517	7.414	29.243	13.364	23.581	6.263	6.811	8.1602	5.434	6.79	53.5951	18.093	4.111	3.5	25.8333	22.667	6.6667	8.2222	15.278	4.4444	2.8889	6.944	21.056	6.833	25.556	38.9444	9.889	9.056	9.9444		0.611399	14.0879
14.1715	17.681	16.028	8.91	4.274	5.7	47.096	10.4264	6.77	3.582	6.204	29.1	14.102	22.276	6.954	6.147	6.4811	4.251	6.688	49.2401	14.7	2.833	5.7222	25.5556	21.056	6.2778	10.2222	15.611	4.8889	3.8889	4.444	24.056	4.556	24	33.6111	9.222	8.167	8.5556		0.616581	13.494
14.2905	21.433	12.459	7.105	7.503	4.712	57.059	10.1428	6.987	7.302	3.931	30.132	13.092	22.635	7.311	4.988	7.4901	4.597	6.621	50.7128	15.579	2.944	4.2778	21.4444	18.833	4.0556	9.5556	15	5.1111	3.0556	4.778	17.444	4.056	28.111	34.7778	12.222	8.333	9.4444		0.621759	13.655
14.4096	29.211	12.739	6.677	4.904	8.271	49.472	13.5437	5.134	5.235	4.23	29.806	16.163	25.765	7.822	4.499	6.5497	5.319	7.211	52.8137	13.638	4.167	6.2222	22.4444	18.778	5.0556	10.9444	17.056	3.8333	3.1667	5.667	18.278	9.056	24.944	37.2222	9.722	6.556	9.6111		0.62694	14.1007
14.5287	28.746	11.901	6.003	5.315	8.314	52.336	7.6667	6.068	6.919	4.833	36.301	13.346	26.151	6.615	7.112	9.1321	4.608	6.648	45.0049	16.463	3.167	5.5	24.2778	16.222	5.6667	11.6111	18.444	3.2222	4.7778	5.389	17.5	6.167	26.889	36.5	8	9.278	7.7222		0.632122	14.0491
14.6478	31.819	13.797	6.688	5.922	9.917	53.424	11.1727	5.506	6.399	5.974	36.839	11.402	23.966	7.52	7.795	7.2929	4.857	6.538	45.0481	12.675	4.167	4.6111	20.8889	12.111	3.3333	9.8333	19.556	3.2778	3.8333	5.167	18.611	5.056	24.056	40.0556	8.778	8.167	7.7222		0.637304	13.8858
14.7669	30.686	9.734	7.038	6	5.46	65.534	5.5613	6.998	5.204	5.802	45.078	11.959	20.532	8.283	6.631	7.352	5.053	6.664	49.1832	12.397	6.222	5.5	19.6111	13.778	6.2222	9.2222	18.167	3.6111	3.7222	5.056	19.778	6.722	23.722	37.4444	12.722	6.778	8		0.642486	14.2548
14.886	40.715	10.101	7.571	7.469	5.518	69.477	8.8285	8.408	4.7	5.101	46.184	16.801	23.214	8.539	6.568	7.9179	3.588	6.04	54.0631	11.934	4.5	3.5	20.3889	17.667	5.6111	9.6111	19.278	4	3.5	5	18.889	5.5	18.778	34.9444	11.722	5.778	10.3333		0.647668	14.9118
15.0051	41.098	11.773	6.277	5.618	9.816	63.535	8.4462	8.402	5.699	5.31	47.462	14.117	20.529	8.035	6.69	7.0369	5.775	4.708	48.4318	13.725	4.278	5.2222	20	12.167	6.1667	10.2778	19.056	4.2778	2.7778	5.056	17.444	5.722	16.889	34	9.278	5.167	6.6111		0.65285	14.2398
15.1242	43.78	14.908	6.889	5.79	7.51	62.64	10.2576	9.118	4.522	9.158	53.554	12.986	23.096	8.003	7.315	7.1083	6.727	6.508	52.1146	11.523	5	5.6111	18.2778	14.333	3.1667	8.5556	20.444	3.7778	4.3333	2.611	19.278	5.556	21.5	36	10.667	7.389	9.1111		0.658032	15.1113
15.2432	39.116	12.253	8.516	5.94	4.965	65.855	9.1959	7.344	5.32	4.975	47.213	12.43	25.979	11.337	6.726	8.5517	4.292	6.289	51.8546	10.03	4.111	5.9444	17.7778	13.111	5.3333	9.1111	21.444	5.5556	3.6667	4.556	18.889	3.722	18.167	35.8889	12.333	8.111	9.0556		0.663209	14.7286
15.3623	36.61	12.868	8.664	4.899	5.953	64.243	9.6865	12.418	4.856	6.754	49.704	12.053	24.598	9.542	6.4	7.8025	5.196	6.575	54.079	8.604	4.222	4.1111	18.8333	12.222	6.3889	7.6667	19.722	4.9444	2.5	3.833	19.5	7.278	26.333	37.7778	9.667	6.167	9.5556		0.668391	14.925
15.4814	33.398	11.272	8.163	6.784	5.876	66.153	11.0701	10.502	6	7.863	55.327	12.932	22.868	10.818	5.615	8.5901	5.574	6.824	57.1613	13.491	5.278	4.1111	18.0556	11.667	3.9444	7.3889	20.833	3	3.3889	3.778	20.111	6.278	24.833	39.8333	10.056	7.278	10.6111		0.673573	15.3169
15.6005	31.485	12.533	9.202	6.629	7.995	59.315	9.7605	12.417	6.843	5.453	41.11	11.405	22.817	9.944	6.143	9.5844	5.849	7.049	55.4478	10.202	4.167	5.1111	15.9444	12.667	5.8889	5.5	17.667	7	3.8333	4.722	22.444	5.056	30.167	37.7222	10.889	6.944	9.6111		0.678755	14.7707
15.7196	28.421	13.681	8.974	6.361	8.922	58.126	13.3491	15.112	5.872	5.802	47.407	14.617	22.264	10.4	7.648	6.6963	5.518	6.645	53.6606	8.632	4.889	2.4444	13.6111	12.111	5.5	5	18.111	4.6667	2.5	3.944	18.222	7.167	33.167	32.8333	9.722	5.722	10.1667		0.683937	14.5374
15.8387	29.245	15.246	8.288	4.597	5.432	69.18	11.0715	19.271	8.638	7.237	46.254	15.72	21.774	10.667	7.294	7.9126	4.568	6.507	51.4504	8.866	3.556	6.1667	15.4444	9.444	5.8889	5.1667	22.611	3	3.4444	4.111	21.556	6.611	35.667	36.2222	10.611	8.111	7.5		0.689119	15.2522
15.9578	27.033	14.484	9.226	5.521	5.161	72.838	12.3873	22.887	7.746	6.843	48.414	15.657	20.857	10.548	6.81	7.3067	6.13	4.689	46.5528	8.391	4.167	4.8333	14.0556	10.611	5.2778	4.5	19	3.7222	3.4444	3.833	16.389	6.333	36.444	37.2222	12.389	7.444	11.3889		0.6943	15.1496
16.0769	26.986	16.262	11.135	7.154	5.765	70.008	15.5719	30.913	9.12	7.91	39.8	17.274	23.392	9.361	5.382	7.8805	5.684	5.945	42.2775	8.642	3.722	5.1111	13.8333	11.333	5.7778	5.4444	20.611	3.7778	2.1667	3.111	22.333	5.167	36.222	34.5556	13.833	6.611	11.0556		0.699482	15.4359
16.196	36.696	20.479	12.122	4.695	6.171	83.156	13.763	34.396	10.626	8.034	39.587	18.477	27.45	9.303	6.023	8.0527	5.297	4.59	42.5257	9.221	4.778	5.6111	14.8333	8.556	4.3889	4.7778	20.778	5.5556	4.2222	3.167	18.222	7.333	34	37.5	13.889	4.556	9.5		0.704664	16.2793
16.315	47.793	22.935	10.161	4.806	7.819	87.571	11.5803	48.524	11.752	7.4	43.216	15.659	24.151	13.651	8.033	9.0722	4.924	6.645	41.6555	9.393	4.944	6.1667	16.5556	10	4.1667	4.3333	22.111	5.2778	2.8333	4.111	20.056	4.944	32.667	34.6667	9.667	7.167	8.9444		0.709842	17.1717
16.4341	46.602	30.591	14.325	9.32	6.474	93.238	15.7919	67.891	14.775	7.001	40.523	15.572	34.346	10.915	8.025	7.6873	4.162	8.664	43.459	8.699	4.444	4	15.1111	8.722	2.8889	4.6111	24	4.7778	3.1667	3.333	19.167	6.278	25.833	37.1111	12.556	6.222	10.1111		0.715023	18.389
16.5532	42.043	37.468	14.54	8.186	6.528	91.324	14.7938	74.57	17.132	8.699	36.862	16.684	34.183	9.762	7.888	6.152	5.902	4.535	44.1832	8.919	4.389	5.6667	14.6111	11.444	3.8889	3.3333	27.889	6.3333	4.6111	3.222	16	4.111	23.722	38.2222	12.278	5.722	7.9444		0.720205	18.4795
16.6723	46.456	36.11	16.78	7.063	7.67	101.946	11.8534	71.941	22.319	7.018	32.976	17.763	28.903	10.838	7.004	9.0999	4.417	5.865	46.1354	7.875	4.167	5.2778	16.6667	9.833	4.4444	5	22.778	4.2778	4.3333	2.944	19.056	6.389	31.722	35.2778	13.222	6.167	10.0556		0.725387	18.9634
16.7914	40.868	36.379	21.93	7.793	7.417	95.079	18.8329	63.632	23.774	8.969	38.635	16.293	26.45	9.369	5.04	8.061	5.671	8.8	45.0043	6.695	4.056	4.1111	14.6667	9.278	3.6111	3.7778	28.167	4.7778	3.5556	2.444	16.444	5.611	28.056	34.6667	10.556	6.556	8.7778		0.730569	18.4812
16.9105	31.948	38.712	28.834	6.259	6.928	88.684	22.2662	54.852	22.993	8.281	39.032	20.27	24.844	9.277	5.975	7.35	5.042	6.696	45.5511	10.649	4.889	5.1111	17.8889	5.611	5.6111	7.3333	25.722	4.7222	4.4444	2.667	22.167	5.278	28.944	34.5	12.5	4.556	7.8889		0.735751	18.494
17.0296	25.249	44.668	36.036	7.165	8.333	82.474	25.4173	43.36	32.598	8.744	37.774	19.755	26.825	9.991	8.22	9.3033	5.925	6.403	44.9963	10.207	5.333	4.6667	15.3333	6.778	8.4444	3.9444	28.222	5.3333	3.8333	3.444	23.333	7.333	27.833	31.8333	11.556	9.278	8.2222		0.740933	18.8693
17.1487	19.332	32.198	41.882	7.628	4.836	70.501	28.0518	36.695	36.677	10.21	37.109	25.674	25.6	10.828	7.236	10.6042	6.242	5.913	48.1721	9.151	6.278	7.6667	16.7778	10.167	5.3889	6.7222	28.111	4.7778	3.5556	4.667	19	7.444	28.056	33.7778	10.778	6.722	7.2778		0.746115	18.4245
17.2677	15.813	28.29	39.058	11.504	9.417	67.557	34.0594	30.768	39.541	10.877	43.056	25.21	30.836	8.026	7.954	11.6674	6.636	6.894	50.1325	9.986	5.111	4.3333	17.5	10.944	4.6667	5.1111	28.833	6.0556	3.0556	4.222	19.611	5.722	24.944	39.6667	14.556	8.444	8.3333		0.751292	18.8754
17.3868	13.648	19.757	42.935	12.399	9.42	73.919	36.7645	19.774	40.183	13.041	46.273	26.266	26.556	10.718	8.474	7.9956	6.167	7.16	48.3284	10.052	2.833	7.2222	12.4444	11.5	4.1111	5.6111	25.5	5.5	4.5556	5.611	14	7.667	23.778	35.1667	18.333	5.889	5.0556		0.756474	18.2327
17.5059	9.983	13.985	35.635	12.383	6.352	68.501	39.7089	15.489	31.541	12.164	46.26	31.633	22.824	9.345	7.015	10.1016	6.336	8.337	49.5007	10.484	4.333	4.1111	12.5556	11	4.4444	2.7222	33.5	7.4444	4.5556	4.611	18.167	5.667	28	33.0556	13.444	8.167	5.2222		0.761656	17.5291
17.625	6.351	13.604	26.828	13.282	9.153	60.285	49.3595	12.12	32.221	16.229	40.776	32.088	23.121	8.802	7.26	8.6683	6.6	9.283	43.9989	12.856	3.444	5.7778	17	6.278	3.2778	4.4444	30.278	9.8333	3.5556	3.278	15.5	6.056	26.833	27.1667	12.444	6.556	7.6111		0.766838	16.8167
17.7441	8.316	10.464	20.336	15.948	8.92	62.253	52.3722	12.951	28.53	18.238	38.03	27.862	23.07	8.844	8.173	7.8676	6.366	6.033	46.9422	13.941	4.444	3.5556	18.3333	6.389	6.5	5.1667	27.222	11.3333	4.6667	3.5	18.278	6.167	31.722	32.4444	13.778	7.944	7.6667		0.77202	17.1505
17.8632	6.329	5.64	18.288	18.879	9.568	70.146	61.619	11.364	28.961	20.48	47.64	32.102	26.352	9.948	5.968	9.5294	5.89	5.742	35.3302	11.771	3.333	4.7778	15.7778	8.556	4.1111	6.7222	21.5	11.0556	2.3889	4.778	14.056	7	22.444	34.0556	14.611	6.944	6.5		0.777202	17.0313
17.9823	4.616	6.115	16.414	20.477	9.107	72.889	55.6244	9.251	21.503	20.775	44.828	29.832	26.55	8.734	6.156	10.4104	6.197	7.741	41.6682	13.747	6.278	5.6111	14.5	10.5	4.7222	5.3333	21.722	8.5	2.2222	4.5	22.833	6.444	25	30.4444	13.5	7.833	6.6111		0.782383	17.0051
18.1014	6.263	5.344	10.333	22.288	11.531	69.202	53.0157	6.805	20.09	21.363	44.271	31.049	26.784	7.193	6.036	10.2491	5.467	7.232	38.391	18.821	5.889	6.0556	13.3889	11.833	3.3333	6.7778	19.111	10.8333	3.8333	3.889	16.778	5.278	25.944	24.6111	14.722	8.278	7.5556		0.787565	16.4821
18.2204	3.439	3.083	9.545	23.454	10.712	68.884	45.8864	6.946	16.368	29.174	48.086	37.912	22.469	7.712	6.198	9.9492	5.004	5.884	37.545	18.598	5.611	4.5556	13.5556	11.5	3.3333	7	16.222	14.7222	2.6111	4.056	15.333	5.444	21.5	20.3889	15.5	9.611	5.6667		0.792743	16.0394
18.3395	1.119	4.797	8.382	29.109	9.391	65.378	37.0804	6.595	15.329	36.189	49.007	36.351	28.3	9.282	8.033	9.2499	5.689	7.572	31.8207	19.078	9.333	6.0556	16.8889	10.389	4.2222	8	16.056	15.2778	5.3333	5	12.333	7.889	19.222	33.4444	17.444	9.278	7.0556		0.797925	16.7831
18.4586	1.62	3.408	7.707	37.788	10.806	74.064	30.5354	4.32	16.432	42.883	47.172	43.724	27.572	9.473	6.981	7.6553	4.91	7.515	31.2295	23.626	8.111	5.2778	13.6111	9.278	6.1111	10	15.278	13.6667	5.2778	3.611	14.778	7.389	20.111	24.7222	17.111	9.667	8.5		0.803107	17.079
18.5777	1.557	2.542	5.118	45.503	13.092	61.818	22.8938	4.991	17.912	43.77	47.543	44.986	30.792	10.382	6.313	9.0291	6.122	7.802	26.3619	22.797	10.944	5.3889	14.4444	11	7.2222	13.1111	17.056	11.8333	4.5	4.667	20.222	7.222	19.278	29.3333	18.833	7.333	9		0.808288	17.3706
18.6968	1.271	1.395	6.001	46.842	13.618	53.174	15.625	4.692	12.945	48.049	53.638	47.754	37.605	10.448	5.935	9.8653	5.812	8.626	22.599	22.403	10.444	4.8333	18.4444	10.5	5.1111	14.1111	20.667	20.2778	5.3889	5.167	12	6.389	21.778	28.8889	19.444	8.778	6.0556		0.81347	17.475
18.8159	0.663	2.181	3.815	61.155	16.217	37.094	15.7094	4.027	10.282	41.881	57.437	60.561	46.106	11.143	5.738	11.4975	5.907	6.698	24.2042	21.743	12.222	6	10.8889	8.722	5.7222	15.1111	18.833	18.3333	3.2222	6.389	16.333	5.722	20.667	25.3333	20.222	8.667	9.5		0.818652	17.7283
18.935	0.783	0.948	2.941	57.032	23.06	30.649	14.1861	3.293	11.179	31.323	59.578	66.871	54.739	10.269	8.15	11.7402	7.265	5.252	21.723	18.032	10.667	6.6111	17.4444	8	5.2222	19.2778	26.333	15.6667	5.0556	5.611	17	6.889	21.222	29.3889	19.889	8.333	9.3333		0.823834	18.134
19.0541	0.492	0.636	2.167	70.121	25.966	25.678	12.1677	2.861	6.316	35.355	66.421	65.119	62.142	12.734	6.28	9.2769	4.535	7.075	25.0388	15.123	12.611	9.1111	13.5556	10.333	5.2778	20.6667	24.722	20.2778	4.3333	4.111	16.5	7	19.167	28.5556	16.667	10.278	7		0.829016	18.5317
19.1731	0.743	1.201	2.748	59.587	39.673	17.996	7.8065	2.26	6.186	29.688	65.59	54.371	64.35	13.163	6.839	12.0457	5.75	7.71	20.2758	15.773	12.389	6	13.1111	10.944	4.5	26.0556	34.333	19.5556	5.7222	4.444	16	5.556	17.056	28.7222	21.222	7.278	7.7222		0.834193	18.2261
19.2922	0.75	0.869	1.788	57.493	51.209	11.967	8.1121	2.628	8.482	28.64	81.708	47.193	65.911	10.531	8.667	9.337	6.461	6.283	20.6161	20.24	20.833	7.2778	17.9444	11.889	6.1667	36.5	31.556	24.3333	5.1667	5.5	13.944	6.889	20.222	24.7778	21.944	7.778	6.6111		0.839375	19.4113
19.4113	0.506	0.56	2.318	55.424	60.123	11.962	8.4708	3.492	6.43	20.196	79.317	49.869	56.614	13.098	6.756	12.6023	5.297	5.845	20.5301	18.421	25.056	7.6667	14.3333	9.944	5.0556	40.4444	40.944	25.3333	4.5556	5.111	15.389	6.722	17.056	27.1111	27.333	9.667	7.8889		0.844557	19.6606
19.5304	0.088	0.877	2.117	51.168	66.132	9.54	9.2323	1.951	6.511	17.993	81.675	44.137	54.367	13.531	7.317	11.3574	4.877	6.332	22.1481	19.559	25.389	12.0556	14.2778	11.444	4.8333	48.2778	41.833	22.7778	4.2222	5.222	15.944	6.667	14.333	26.1111	31.556	8.056	4.8333		0.849739	19.6957
19.6495	0.333	1.005	1.397	48.406	65.29	6.871	2.9601	2.044	3.916	16.516	79.497	35.011	55.765	14.481	6.703	14.2329	8.464	6.581	19.9993	17.438	24	13.5556	13.7778	9.222	5	51.2778	43.278	16.7222	5.5556	5.444	20.056	9.056	14.667	19.6667	36.333	8.611	6.8889		0.854921	19.1898
19.7686	0.355	0.891	1.842	34.954	55.968	6.794	6.6769	2.444	3.331	17.464	69.068	24.96	61.001	13.731	7.998	10.9025	7.991	6.069	22.9299	20.279	32.556	11.6667	14.8333	11.167	3.7778	51.4444	46.056	25.5556	5.8333	7.222	14.389	7.278	13.778	24.3889	38.667	9.056	7.1111		0.860103	18.9305
19.8877	0.192	0.44	1.072	28.419	49.946	2.785	5.7571	1.707	3.998	15.556	58.306	24.367	55.911	12.811	7.354	13.6725	7.52	3.999	24.201	17.426	36.778	18.4444	13.3333	9.5	6.9444	44.5556	45.333	32.6667	8.3333	6.444	17.444	6.667	19.222	20.6111	35.056	6.889	7.8333		0.865285	18.1485
20.0068	0.101	0.726	1.098	23.678	44.002	4.959	4.2012	0.721	4.263	11.949	54.308	22.152	53.939	21.508	9.024	15.4348	7.307	8.574	23.8125	17.331	42.056	27.2778	14.3333	13.389	5.0556	39.6667	50.444	32.6667	6.9444	4.889	17.944	9.778	15.833	19.7222	39.333	9.056	9.8333		0.870466	18.576
20.1259	1.639	1.17	0.575	16.96	29.334	5.014	3.6479	1.924	3.189	9.917	44.184	17.45	49.583	24.703	8.673	18.0968	5.456	6.102	24.9586	16.292	34.833	24.9444	16.6111	14.111	6.2222	37.1111	50.667	34.0556	11.6667	8.889	17.889	8.444	14.611	24.9444	36.556	11	5.0556		0.875648	17.4724
20.2449	0.367	0.239	1.123	15.779	30.596	3.371	3.8539	1.243	2.349	15.26	36.413	16.017	46.06	24.153	8.763	18.0487	7.188	5.694	21.8879	18.757	42.556	31.5556	19.3889	10.611	5	25.7222	41.222	37.3333	9.9444	9.389	20.167	9.278	11.278	33.9444	45.222	12.556	5.1667		0.880826	17.4999
20.364	0.372	0.589	0.28	14.959	25.828	3.491	3.0091	0.854	2.336	9.649	32.986	15.235	35.736	31.11	8.856	16.8442	9.526	6.472	23.6765	20.106	32.556	28.1111	15.8889	11.944	8.6667	15.0556	35.333	38.1667	11.7778	10.667	16.778	9.389	13.556	28.7778	42.722	12.556	5.7778		0.886008	16.2064
20.4831	0.101	0.633	0.643	16.187	16.544	3.491	2.2122	0.884	2.793	10.117	27.217	11.022	30.001	26.596	8.479	17.6085	6.381	7.324	22.1642	16.133	32.278	35.5	20.6111	12.222	7	13.3333	31.444	44.2222	14.1111	13.167	16.111	9.5	10.833	32.5556	53.611	10.333	7.2222		0.89119	15.9618
20.6022	0.645	0.735	0.746	11.37	12.3	3.009	1.7201	2.026	2.276	9.822	23.098	7.668	24.909	33.138	11.038	17.1498	6.909	6.955	27.6451	16.472	27.833	32.8889	19.2222	17.611	5.0556	8.6667	24.667	46.2778	16.8889	13.111	16.111	8.278	10.333	44.7778	44.222	14.667	8.1667		0.896371	15.6327
20.7213	0.122	0.923	1.085	9.099	9.807	2.08	1.4785	0.765	2.894	9.312	19.801	10.169	23.552	43.373	11.655	23.7143	5.063	6.977	30.7878	19.259	24.167	38.3333	23.0556	13	4.5	6.9444	18.278	46.1667	23.6111	20.333	19.611	8.167	12.444	45.4444	58.778	16	11.3889		0.901553	16.8146
20.8404	0.283	0.451	1.335	8.895	7.23	1.704	2.7407	1.091	2.098	11.38	16.37	9.982	16.248	50.525	10.473	22.9648	4.989	9.456	23.7316	16.759	21.167	35.0556	30.1111	17.778	5	7.3333	19.111	39.8333	30	22.111	17.278	7.056	9.444	49.6111	55.778	20.889	9.7222		0.906735	16.6482
20.9595	0.109	0.332	1.503	6.037	5.483	1.648	2.3832	0.62	2.037	7.59	14.139	6.991	12.599	63.275	11.422	23.3051	6.645	8.258	27.8219	18.285	19.222	30.1111	28.5	13.5	5.5	4.8889	10.944	32.3333	31.0556	29.111	21.333	8.333	8.778	48.4444	68.944	23.833	9.2778		0.911917	16.6106
21.0786	0.104	0.097	0.693	3.083	4.776	1.674	2.4183	0.275	2.238	7.315	12.127	6.908	9.776	75.306	11.031	25.0661	9.38	4.874	23.9006	17.367	16.722	32.8889	26.9444	18.5	5.3333	3.1111	7.778	24.2778	32.0556	35.111	18.722	10.444	11.611	48	63.778	32.778	12.7778		0.917099	16.7363
21.1976	0.118	0.811	0.379	3.532	3.376	0.958	0.4453	0.645	1.505	7.06	8.568	7.553	11.784	87.027	14.398	29.5432	7.396	5.405	26.5955	16.089	13.889	27	33.7778	14.778	6.2778	4	5.278	15.4444	30	37.944	17.778	9.556	12.667	51.7778	71.056	34.611	12.7222		0.922276	17.0742
21.3167	0.29	0.292	0.309	4.368	4.404	1.881	1.525	0.845	0.702	5.488	9.076	6.451	10.105	92.017	12.85	33.208	8.754	7.676	28.3268	19.25	9.556	23.9444	28.2778	15.056	6.6111	3.3333	4.889	10.7222	42.5	40.944	24.722	7.278	9.556	50	69.944	52.389	17.7778		0.927458	17.9816
21.4358	0.376	0.866	0.756	3.524	4.039	0.487	0.9563	0.826	1.795	4.206	12.313	4.854	7.556	93.167	16.142	35.2714	7.323	6.546	28.128	19.903	10.611	20.5	24.1667	18.667	8.0556	2.1667	3.667	11.3889	27.6667	41.889	21.056	8.778	10.222	46.3889	73.611	51.722	23.4444		0.93264	17.6496
21.5549	0.64	0.009	0.377	3.576	3.863	0.985	0.9096	0.378	0.682	3.392	8.639	5.815	9.067	79.605	15.811	36.0696	9.078	8.991	22.3713	19.984	8.5	21.7778	36.3333	24.278	6.3889	1.9444	3.333	6.7778	28.1667	45	24.556	9	9	50.1111	71.722	73.722	29.7222		0.937822	18.3939
21.674	0.194	0.053	0.549	3.311	3.063	0.383	1.7468	0.24	1.192	4.711	8.639	3.433	5.927	71.511	21.883	40.0609	7.777	7.206	27.2245	17.347	8.278	19	33.1111	22.944	6.1667	1.2222	2.611	5	19.9444	46.056	23.222	10.167	11.222	49.3333	82.944	71.611	31.4444		0.943004	18.1278
21.7931	0.254	0.107	0.798	2.474	3.893	1.078	1.2085	0.256	0.879	3.098	9.03	2.136	5.785	58.22	21.051	41.0724	10.174	9.576	24.1018	23.225	4.444	18.6667	31.4444	25.278	8.1667	3.3889	1.778	4.6667	20.3889	34.944	24	8.111	10.556	41	75.889	71.111	37.8333		0.948186	17.2995
21.9122	0	0.252	0.398	1.649	2.481	0.493	0.3992	0.087	0.437	3.418	6.974	4.667	5.159	52.667	22.562	48.1636	6.878	11.658	23.8384	21.003	5.278	9.7778	29.2222	27.556	4.9444	1.3333	1.667	1.2778	12.0556	30.056	27.333	7.056	9.278	46.6667	84.333	75.611	46.2222		0.953368	17.1041
22.0313	0.328	0.341	0.255	2.307	2.278	0.492	1.1055	0.545	0.862	3.355	4.913	4.052	5.341	39.093	24.517	43.506	9.118	10.757	20.009	18.231	3.5	10.1667	26.5	33.722	10.3333	0.6111	1.5	2.7778	7.1667	27.611	31.278	10	8.611	37.0556	77.889	71.667	47.0556		0.958549	16.1851
22.1503	0.125	0	0.455	1.161	1.408	1.3	0.7169	0.391	1.258	3.659	5.904	3.888	5.235	36.488	27.658	53.4545	18.796	12.789	23.9414	21.951	3.833	8.1111	20.7222	32.111	6.5556	1.1111	1.333	1.2222	8.1667	18.222	29.167	11.778	8.111	36.3333	71	65.778	56.5		0.963727	16.2334
22.2694	0.109	0.213	0.336	0.304	3.399	1.237	0.4647	0.933	0.611	2.082	5.633	2.122	3.43	31.538	29.261	63.2834	18.178	11.937	23.1057	21.485	3.444	5.8333	15.3333	30.5	9.3889	1.2222	2.611	3.2778	4.7222	13.5	32.389	12.5	8.167	33.8333	64.389	72.056	55		0.968909	15.8873
22.3885	0.004	0.254	0.009	1.265	2.088	1.038	0.3598	0.747	1.072	2.265	3.799	2.569	3.269	24.264	31.703	56.9001	18.668	11.946	22.8437	22.517	2.722	6.0556	14.1111	38.222	10.8333	0.5	1.056	2.5556	4.9444	8.833	40.444	11.444	7.722	38.7222	48.222	73.833	49.5556		0.974091	15.334
22.5076	0.057	0.12	0.212	0.464	1.211	0.2	0.5617	0.039	0.675	2.99	4.224	2.483	5.18	21.217	28.888	60.1246	25.835	13.093	21.0522	20.057	3.278	5.8889	12.6111	37.611	13.2222	0.5	1.167	1.8889	4.1111	8.5	33.111	9.333	7.111	38.3889	48.444	66.833	42		0.979273	14.6671
22.6267	0.062	0.301	0.533	0.267	0.99	0.955	0.9732	0.232	0.414	3.329	4.128	3.641	3.05	14.173	26.802	72.9444	28.949	13.435	25.0167	24.983	4.056	4.3889	8.6111	40.556	14.8889	0.7778	1.111	1.0556	2.8333	6.389	37.722	10.444	6.889	41.7778	42.444	60.278	44.4444		0.984454	14.9688
22.7458	0.305	0.211	0.405	0.64	2.298	0.686	1.0592	0.614	0.205	2.08	1.68	2.488	1.996	14.207	23.565	70.3651	28.515	15.229	30.4149	24.093	2.278	3.5	7.5556	34	17.6111	1	0.333	0.7222	3.7222	5.833	42.722	10.167	10.222	37.4444	39.111	53.833	40.1111		0.989636	14.3573
22.8649	0.035	0.079	0.327	0.349	0.475	0.164	1.0484	0.622	0.612	1.88	2.617	1.513	2.91	12.864	21.293	78.7052	43.735	15.932	32.3932	23.47	1.889	3.4444	5.3333	49.667	25.8333	0.0556	0.167	0.7222	2.0556	3.611	47.667	9.5	8.111	36.8333	34.889	48.444	36.5556		0.994818	15.0217
22.984	0.16	0.315	0.034	1.359	1.232	0.492	0.1756	0.459	0.377	2.11	2.61	1.931	2.321	10.547	16.553	79.4436	42.483	21.761	37.7295	23.491	2	3.3889	7	42.556	27.0556	0.6667	0.667	1.7778	2.2778	3.333	49.056	11	8.889	32	35.278	33.833	31.3333		1	14.5323

## Sheet: Image4
X0	Y0	Y1	Y2	Y3	Y4	Y5	Y6	Y7	Y8	Y9	Y10	Y11	Y12	Y13	Y14	Y15	Y16	Y17	Y18	Y19	Y20	Y21	Y22	Y23	Y24	Y25	Y26		Ap-Ba	Avg int
0	50.753	49.5571	54.712	19.582	19.727	30.2539	91.4653	100.23	46.895	51.876	43.4778	25.666	31.725	73.657	59.979	18.012	20.717	36.772	57.825	26.245	25.856	36.435	41.072	46.262	49.069	41.068	41.574		0	44.0912
0.1191	45.595	42.401	53.442	21.224	18.967	34.4295	100.227	99.1405	47.305	52.125	40.6391	24.1457	32.559	68.941	65.514	22.191	26.972	35.818	61.531	35.602	23.739	38.355	50.098	59.479	45.732	50.321	41.704		0.00495099	45.8591
0.2382	49.841	42.156	56.632	21.503	24.705	30.7022	102.609	85.529	44.694	47.328	38.324	30.0932	37.295	63.76	74.244	30.729	27.162	40.96	57.567	41.839	23.529	49.757	57.894	69.903	50.986	61.044	48.454		0.00990198	48.4903
0.3573	50.94	40.468	57.097	28.134	21.545	36.2064	93.3774	77.5536	48.598	57.919	36.0618	29.8196	31.664	63.049	83.71	41.76	32.244	41.07	70.451	45.585	24.824	41.953	68.653	72.905	44.816	59.333	46.601		0.014853	49.8644
0.4764	50.646	43.0641	65.018	35.605	23.237	29.5279	88.8341	71.1512	58.436	56.643	38.7971	36.8543	35.044	60.706	91.41	64.53	33.64	42.599	70.195	55.59	24.397	48.091	71.167	77.024	52.489	54.079	52.291		0.019804	53.0024
0.5954	53.511	42.6416	76.662	37.042	35.007	34.8791	84.8737	61.1442	55.748	62.481	36.1126	40.7166	24.93	48.393	102.222	83.773	39.4	47.232	71.174	65.335	26.165	55.675	67.093	93.791	44.321	59.165	50.21		0.0247508	55.5444
0.7145	61.363	46.1473	90.771	45.884	46.797	33.401	75.1614	54.1486	45.109	65.621	39.4276	45.6454	30.526	45.94	104.417	100.982	39.327	38.084	75.731	69.437	30.843	49.847	79.629	94.627	56.554	56.387	45.011		0.0297018	58.0303
0.8336	61.503	51.8161	95.699	49.496	49.375	35.5116	82.1281	44.5608	54.903	62.196	37.7633	41.2766	31.329	41.891	95.024	107.366	50.109	57.148	86.515	93.414	37.656	49.563	85.672	97.874	64.368	54.896	38.503		0.0346528	61.391
0.9527	68	55.0841	109.42	71.093	51.967	31.4522	71.1529	45.2712	52.815	68.475	44.1485	57.3374	30.275	36.911	100.701	116.385	54.795	58.463	99.852	105.176	35.049	57.971	83.612	105.266	70.82	57.16	34.531		0.0396038	65.6735
1.0718	59.549	58.8885	111.627	79.46	62.634	40.9385	70.8714	45.8485	54.812	65.618	43.8829	62.6875	27.475	36.248	97.062	114.121	61.67	62.615	117.65	107.628	49.867	69.126	94.497	98.57	65.47	50.995	33.131		0.0445547	68.2571
1.1909	56.562	57.7617	107.18	95.641	56.938	47.5428	65.0373	50.2239	47.402	65.849	49.1118	70.4237	29.725	32.22	95.261	90.955	64.747	69.92	116.052	105.093	57.962	61.901	102.579	107.145	65.632	52.149	31.876		0.0495057	68.6256
1.31	57.305	61.0968	107.139	90.944	58.426	60.3745	65.8972	50.0739	45.056	67.314	43.3133	75.8241	31.016	42.99	80.429	81.711	67.381	75.647	123.517	111.243	70.17	65.783	90.37	107.811	79.009	51.377	27.554		0.0544567	69.9545
1.4291	52.825	60.4237	115.813	95.343	68.922	59.6225	69.5551	46.7606	43.064	68.479	50.6978	77.0194	27.974	48.716	69.704	77.623	63.186	86.174	128.675	115.411	81.117	66.344	87.843	108.409	72.732	56.433	25.613		0.0594077	71.277
1.5481	52.697	56.9028	112.986	96.545	74.27	65.9226	64.7548	51.5668	43.138	62.536	56.3228	75.7559	30.771	52.886	61.386	66.452	69.858	97.944	122.784	116.109	90.416	60.475	96.63	105.536	71.014	63.328	27.315		0.0643545	72.0852
1.6672	54.056	60.0338	98.549	112.034	86.66	77.5805	64.9494	60.4844	46.252	68.559	55.6087	61.432	31.328	66.687	62.198	67.321	65.186	106.965	113.447	112.107	97.109	64.266	101.779	112.964	73.493	64.612	25.913		0.0693055	74.5027
1.7863	53.425	68.7415	102.243	97.087	95.338	78.1443	59.621	59.5591	38.293	64.799	60.6895	67.1695	30.942	85.544	60.063	62.137	67.28	115.737	119.204	120.436	112.609	54.151	81.864	117.09	76.477	68.018	31.15		0.0742565	75.8449
1.9054	51.565	70.6901	97.884	97.663	107.441	83.2796	58.4372	65.3529	41.131	65.272	66.5176	67.9914	30.069	98.609	65.924	49.859	70.047	116.909	127.044	116.982	118.451	56.985	70.921	130.17	78.34	70.262	35.25		0.0792075	78.1128
2.0245	48.867	76.9367	89.745	95.905	100.172	71.8447	58.6024	63.7651	43.643	73.756	73.1904	65.4712	31.367	100.307	59.899	53.704	85.59	138.767	140.318	114.222	117.266	54.608	69.325	130.957	83.889	67.564	38.475		0.0841585	79.5614
2.1436	53.239	72.3185	101.332	91.807	116.186	70.4779	56.6074	71.2224	50.098	76.477	73.2132	64.8608	33.729	109.178	55.074	45.26	91.285	128.689	140.999	116.607	121.826	63.108	58.907	127.999	81.394	81.392	36.608		0.0891095	81.1072
2.2627	59.68	78.3734	95.6	89.397	116.548	66.4463	46.7857	77.6267	49.065	76.67	65.5192	54.6961	29.624	116.492	60.876	46.665	93.179	123.141	145.904	110.991	108.565	65.651	51.842	119.008	88.559	84.963	47.17		0.0940605	80.3347
2.3818	64.894	74.8724	98.31	87.92	121.496	71.7684	46.2708	78.9885	50.183	76.408	74.0948	53.955	34.741	120.194	62.965	44.697	106.493	110.768	156.76	110.33	108.28	74.651	45.891	118.556	103.211	97.289	45.058		0.0990115	82.9276
2.5008	66.957	73.9345	99.442	91.337	122.97	71.1547	57.9475	76.75	54.695	81.256	64.53	51.2077	34.758	121.6	60.757	39.763	101.808	96.281	152.201	110.322	106.971	83.915	40.661	119.067	116.101	111.917	54.525		0.103958	83.8085
2.6199	70.393	67.3525	97.29	90.699	118.199	68.0344	54.6515	75.9466	51.333	79.869	64.1404	49.3446	40.736	122.084	66.502	42.858	113.328	83.537	150.538	107.007	102.063	85.568	35.223	121.55	149.857	118.756	57.636		0.108909	84.611
2.739	83.177	64.8027	96.231	80.005	114.915	62.7833	49.1459	72.858	57.494	95.368	63.5648	55.4383	38.24	105.773	71.361	47.352	123.266	70.394	152.642	99.334	97.786	94.177	30.465	106.217	149.333	125.58	71.476		0.11386	84.414
2.8581	84.316	65.7246	99.188	71.569	108.852	59.6889	51.3723	75.8877	64.973	82.966	57.0258	53.5044	43.02	102.014	85.945	54.51	127.173	59.563	138.63	96.196	100.934	103.661	27.211	105.267	166.73	126.095	71.094		0.118811	84.5597
2.9772	94.34	81.3116	96.759	72.028	95.017	54.6493	52.3514	74.698	65.612	86.158	58.6801	44.6953	36.243	90.867	87.158	66.488	128.373	47.526	126.373	99.493	108.336	107.701	26.848	96.273	159.939	115.086	73.07		0.123762	83.1879
3.0963	97.592	71.9481	108.935	75.496	77.652	59.4202	58.0839	68.9677	68.753	78.117	59.7885	46.8694	33.4	74.077	88.912	63.141	135.311	39.69	99.075	90.367	108.821	115.988	30.458	81.202	150.115	115.107	92		0.128713	81.0847
3.2154	95.813	70.2874	107.971	76.744	65.734	51.8522	48.7692	63.7863	71.152	74.29	57.8498	43.8759	40.244	67.023	103.207	66.062	144.278	33.64	100.93	83.642	107.201	130.655	25.793	67.473	156.824	108.39	100.481		0.133664	80.147
3.3345	92.429	63.8615	117.014	73.481	54.606	50.2178	58.9686	52.9922	82.89	71.789	50.6951	40.9389	43.962	46.258	100.087	68.031	155.772	28.451	81.863	87.909	111.592	127.296	27.543	56.348	151.795	107.984	95.661		0.138615	77.7939
3.4535	89.439	66.5199	115.991	84.839	45.287	51.5666	60.0625	44.9391	84.06	62.577	53.5894	33.8859	44.423	36.507	103.277	64.559	152.667	21.999	69.172	89.168	122.852	144.859	20.268	41.733	146.009	106.192	101.928		0.143562	76.2359
3.5726	97.31	60.1949	111.547	82.984	34.494	44.4411	62.818	39.3289	81.574	66.965	57.671	40.7078	56.533	29.707	109.619	73.707	153.256	22.027	51.234	80.744	120.489	151.887	21.28	31.767	135.581	107.932	127.885		0.148513	76.0624
3.6917	107.141	63.5723	130.195	91.011	33.843	43.234	66.8813	41.205	73.437	65.143	49.5519	37.5246	62.669	22.203	109.504	68.52	153.54	23.688	46.443	63.588	115.186	147.877	22.174	25.062	140.402	107.321	112.46		0.153464	74.9399
3.8108	102.246	58.2181	126.355	89.981	30.662	37.1399	57.4138	41.1161	77.435	65.733	50.9558	38.7329	60.353	23.239	122.948	81.395	140.955	18.212	42.072	60.38	127.753	146.685	22.693	17.743	155.834	116.784	124.978		0.158415	75.4819
3.9299	98.927	59.1931	129.392	89.678	26.334	27.5598	66.9782	36.4547	79.549	66.553	56.534	43.6073	71.052	16.812	119.643	92.031	148.874	19.843	36.657	57.071	126.807	147.671	20.963	18.308	152.635	123.303	116.201		0.163366	75.8752
4.049	98.229	63.9548	138.753	86.503	25.737	30.0124	73.6423	35.4587	74.156	74.814	43.5199	41.0458	68.151	19.04	122.272	109.379	147.365	20.043	32.973	51.178	108.415	152.956	21.444	21.096	159.205	135.409	123.683		0.168317	76.9791
4.1681	114.913	60.4885	142.873	84.646	21.874	28.4177	64.3867	26.8118	74.451	75.906	50.4101	44.589	66.389	19.163	114.349	101.784	136.478	17.228	28.903	54.227	116.929	157.061	21.044	19.676	163.413	165.712	121.988		0.173268	77.5597
4.2872	100.887	60.967	148.449	80.239	23.501	25.9209	65.8319	28.1546	81.752	75.278	52.5636	36.7961	66.281	18.565	117.123	111.788	138.31	12.71	23.564	42.463	108.411	149.334	22.653	17.737	176.589	159.06	130.449		0.178219	76.8658
4.4063	97.087	57.2121	150.816	64.905	27.724	28.3926	52.7226	28.1479	83.066	74.993	42.5473	43.3278	65.266	14.257	111.511	112.715	127.592	14.157	21.088	39.145	110.622	140.762	24.663	15.091	181.841	153.357	128.121		0.18317	74.4863
4.5253	92.935	62.4071	135.008	65.479	24.855	22.3577	62.0351	26.659	85.768	79.909	47.3496	36.7454	57.224	14.952	116.154	128.143	106.459	12.372	14.843	29.32	109.083	135.799	21.446	14.98	164.111	174.529	141.888		0.188117	73.4374
4.6444	80.454	67.5013	116.617	54.135	26.189	24.509	50.7404	30.1558	85.289	82.521	46.5354	50.4793	59.504	13.332	112.846	126.757	123.953	17.375	12.508	35.507	101.842	124.675	23.848	16.924	162.973	170.944	146.339		0.193068	72.7575
4.7635	90.285	64.2257	104.894	42.836	21.814	23.2785	55.9526	26.0413	103.922	105.152	52.5266	52.7769	54.777	13.979	107.75	112.313	123.734	17.247	13.641	23.648	106.568	107.067	21.411	13.586	166.501	174.758	144.275		0.198019	72.0355
4.8826	77.398	63.5943	88.81	39.156	21.143	23.0083	57.5703	27.671	102.249	97.559	45.7091	52.306	41.564	12.911	113.789	116.876	131.13	14.174	16.212	24.336	95.705	103.189	22.537	15.477	158.564	187.904	159.455		0.20297	70.7406
5.0017	66.226	59.2007	64.853	38.869	22.268	20.8398	43.3818	27.3027	109.324	109.689	46.5908	65.1883	36.053	15.972	113.521	105.457	123.228	15.281	10.71	18.655	86.149	99.763	20.027	13.043	163.276	188.342	161.396		0.207921	68.3187
5.1208	62.373	60.2376	61.252	33.774	19.408	20.0616	44.4587	22.9487	120.329	120.51	49.8562	68.6912	28.774	12.53	97.476	97.843	121.508	8.505	14.002	18.936	87.97	90.495	23.468	13.256	155.546	183.893	159.859		0.212872	66.5911
5.2399	60.205	54.4242	54.313	34.139	20.116	20.4491	36.3851	23.1165	118.885	109.984	58.5457	57.2842	24.476	14.719	108.111	101.541	131.18	9.35	11.1	19.653	72.792	77.596	23.437	13.874	156.62	196.354	152.217		0.217823	65.2173
5.359	48.095	52.4685	46.637	30.514	20.651	16.0931	42.6693	21.2615	133.264	114.277	56.9821	57.7819	16.59	12.308	111.121	88.609	120.29	8.603	12.087	18.515	67.475	73.443	24.955	13.351	150.49	207.777	156.352		0.222774	63.8022
5.478	48.844	48.7567	42.371	41.965	21.541	17.3559	44.1969	21.0728	132.292	111.316	46.7589	63.8716	14.613	12.935	109.979	93.441	116.485	7.271	12.785	16.251	55.207	69.963	23.49	11.354	147.884	207.053	150.963		0.227721	62.5932
5.5971	43.16	43.7845	45.099	33.352	24.034	16.5839	36.3822	21.7298	137.434	114.46	52.3069	53.2588	13.394	19.218	111.903	93.422	111.072	7.483	13.657	15.745	48.455	67.341	25.128	10.02	148.838	207.416	150.391		0.232672	61.6692
5.7162	32.414	40.2803	33.819	33.722	21.528	17.0565	36.8852	27.5692	124.908	120.851	52.0456	48.7194	10.747	16.247	129.509	92.793	105.69	9.151	15.697	10.382	36.538	54.413	21.965	10.148	127.073	197.039	135.149		0.237623	57.8644
5.8353	31.037	37.204	40.327	35.654	20.361	17.8773	43.5867	29.2868	141.339	127.032	58.5652	51.837	9.735	17.074	134.378	110.386	95.541	8.148	12.844	10.876	31.883	51.131	22.397	10.492	111.28	194.52	122.47		0.242574	58.4171
5.9544	24.278	31.5717	39.339	33.233	19.396	15.8566	38.4644	25.5306	146.322	119.893	51.6558	44.0165	11.519	20.203	146.181	110.773	81.866	6.504	14.734	10.775	30.947	39.683	19.676	10.11	81.748	188.042	119.507		0.247525	54.8824
6.0735	19.014	32.1281	29.632	37.749	16.853	15.9972	38.3715	26.8508	142.521	142.558	45.6529	31.9784	12.36	22.421	143.196	120.051	71.534	6.986	10.679	8.302	21.713	33.435	20.638	10.255	67.493	171.547	114.472		0.252475	52.3847
6.1926	19.552	30.7585	26.598	30.209	16.162	17.1552	35.3613	28.8584	126.413	141.898	41.5536	26.815	12.466	24.413	139.259	135.023	67.794	7.563	12.849	9.025	21.471	28.27	21.095	9.781	60.213	139.924	91.414		0.257426	48.959
6.3117	16.396	30.4057	31.958	32.724	13.726	13.405	34.6879	27.2619	138.21	144.317	44.6572	17.3768	10.334	24.631	134.143	133.538	59.818	10.512	17.515	5.371	17.853	22.338	27.138	11.902	40.573	122.04	84.947		0.262377	46.9548
6.4307	14.472	26.1425	33.139	37.598	17.117	12.7441	33.3915	28.9158	129.563	144.002	38.9102	10.1304	10.321	27.797	134.403	150.528	50.194	10.161	14.409	6.265	13.298	24.53	28.105	14.504	26.923	83.875	70.743		0.267324	44.1549
6.5498	14.899	25.6401	33.687	39.018	15.551	13.3122	34.0921	26.2136	136.702	145.042	33.9575	10.7882	10.442	26.67	119.51	163.785	47.583	12.105	22.268	5.478	11.28	19.167	27.52	10.94	20.009	67.034	64.893		0.272275	42.8736
6.6689	16.797	24.76	25.316	33.079	16.264	13.5594	29.3944	25.7488	151.842	145.774	25.9759	10.9567	9.185	29.781	106.131	158.14	39.857	10.213	16.526	3.684	9.066	15.906	24.611	12.464	15.013	56.184	56.898		0.277226	40.1158
6.788	12.3	26.492	29.353	33.025	17.817	12.3296	31.3062	25.6261	159.997	142.935	27.4304	8.3352	12.44	32.839	94.247	173.178	29.726	10.481	22.101	4.045	10.984	13.209	28.175	10.083	13.228	44.25	39.58		0.282177	39.4634
6.9071	12.723	22.153	25.596	30.42	13.399	12.591	29.7567	27.8339	161.424	137.995	24.3795	6.3225	12.582	38.872	81.137	179.506	25.201	12.536	23.741	3.935	11.801	12.24	21.734	12.694	11.676	35.741	36.489		0.287128	37.9437
7.0262	11.901	21.5042	26.629	24.166	10.751	14.3439	31.1147	29.7677	165.046	123.273	25.059	10.5165	11.416	39.948	65.988	183.387	15.412	10.246	26.962	4.981	12.37	8.976	22.273	18.894	8.664	30.193	24.856		0.292079	36.2459
7.1453	12.688	20.8643	18.655	31.771	12.164	9.976	23.6018	28.4799	160.969	101.204	19.661	8.2443	12.549	39.022	64.28	164.736	14.218	10.027	28.398	3.811	7.519	7.455	22.507	18.683	7.605	22.643	19.846		0.29703	33.0214
7.2644	13.923	17.9782	22.513	28.659	11.237	10.5305	25.4934	32.3678	152.7	93.972	18.5024	8.8056	15.417	40.305	44.699	162.835	13.289	7.259	33.689	2.945	6.79	6.056	12.782	19.298	10.459	19.575	18.319		0.301981	31.4963
7.3834	12.205	18.6826	21.607	27.405	10.583	9.3857	25.9347	28.803	149.359	70.482	18.882	6.8983	14.656	42.711	40.044	135.297	14.348	7.749	32.123	3.424	5.696	4.569	12.331	18.771	7.806	15.587	13.741		0.306928	28.4845
7.5025	10.933	20.3021	19.776	21.384	12.916	11.1376	17.9471	30.9402	151.483	61.522	15.5086	8.0136	13.671	38.215	32.705	132.624	16.481	8.324	31.149	1.528	4.911	4.845	10.788	24.176	9.317	11.974	13.344		0.311879	27.2561
7.6216	7.229	18.7756	21.958	21.887	9.379	10.2309	21.3772	28.9281	133.949	48.514	15.1352	7.1564	12.069	34.487	25.034	109.547	10.655	8.993	36.917	2.232	4.68	4.666	12.767	24.266	7.85	12.119	10.587		0.31683	24.4959
7.7407	10.31	18.2543	20.598	23.904	10.48	9.3808	19.9177	31.8815	138.546	35.579	10.9852	6.2041	11.621	30.261	16.266	90.77	6.092	6.092	36.171	3.761	5.623	3.356	11.435	27.145	6.008	10.475	11.914		0.321781	22.7048
7.8598	8.272	18.2153	19.848	21.565	9.062	10.9347	21.0146	26.4489	135.514	26.282	9.926	8.9509	9.741	29.972	13.301	75.673	4.38	9.609	44.104	3.731	3.791	3.053	10.003	23.184	5.554	10.246	8.036		0.326732	21.1263
7.9789	9.854	17.1627	19.616	20.001	10.972	11.5271	20.4504	27.4537	115.84	22.321	8.1363	6.5964	11.295	26.745	14.068	68.208	6.535	7.942	42.128	4.417	3.128	5.171	9.631	25.646	5.501	7.976	6.682		0.331683	19.8149
8.098	8.667	15.7045	15.535	17.185	8.652	12.1086	14.8543	23.3701	109.178	20.1	7.2865	7.5741	12.865	26.439	8.06	47.007	6.338	8.715	51.467	4.575	2.173	5.083	9.228	26.784	8.401	6.084	6.519		0.336634	18.1464
8.2171	12.023	17.9792	15.885	20.278	9.217	10.2184	18.8078	26.6873	86.266	12.207	4.968	5.1489	13.844	29.617	7.998	44.577	7.13	9.295	48.746	4.349	2.809	4.496	6.568	27.452	5.727	5.523	6.608		0.341585	17.2009
8.3362	6.418	18.6163	16.147	20.82	9.395	10.8672	20.48	33.1849	68.797	14.422	6.9219	9.4737	16.103	26.967	7.009	32.565	5.645	10.76	53.153	3.548	2.52	4.987	7.62	27.731	4.928	6.155	6.287		0.346536	16.723
8.4552	8.171	15.4036	13.603	15.478	7.527	9.8054	16.5295	29.9484	65.857	12.64	5.6322	8.7871	18.598	24.098	6.68	32.557	6.91	11.042	46.121	3.886	5.943	3.213	7.179	27.829	3.817	5.569	5.323		0.351483	15.4869
8.5743	9.328	17.0282	13.287	14.312	8.109	8.6551	16.9272	32.2811	54.575	9.979	4.2777	7.4557	15.525	30.639	5.171	19.965	5.088	10.784	54.303	3.791	3.038	2.548	5.486	33.318	5.939	5.475	6.332		0.356434	14.9488
8.6934	11.285	12.9223	13.05	15.447	7.128	8.217	20.1794	28.1358	45.013	9.447	2.7863	7.1707	20.868	20.571	5.345	20.076	6.572	12.49	58.493	4.886	3.929	3.412	5.891	32.136	6.235	5.767	5.555		0.361385	14.5558
8.8125	7.902	19.0435	12.53	15.872	5.339	6.8997	20.1931	32.5181	36.94	7.147	3.9774	5.7335	19.039	19.39	5.654	18.864	7.55	10.215	63.173	2.53	4.616	3.848	5.2	29.774	5.095	4.258	5.937		0.366336	14.0459
8.9316	8.205	16.2796	10.697	13.404	5.662	7.9934	18.1904	26.5041	28.591	8.373	4.0005	6.0705	23.889	18.914	7.263	16.834	7.463	11.921	63.707	5.075	5.245	3.627	6.454	30.852	4.05	3.257	6.823		0.371287	13.6794
9.0507	9.343	15.1576	12.657	11.831	6.957	9.6232	18.3335	24.6008	28.1	7.515	4.8801	5.6702	29.438	13.483	3.803	11.055	4.599	10.523	73.569	4.064	4.708	4.736	3.938	37.453	5.343	3.329	6.939		0.376238	13.7648
9.1698	7.175	17.2401	7.235	8.736	6.246	10.1118	18.4108	23.4894	23.853	8.597	1.9473	5.8739	30.084	16.865	4.675	10.598	4.743	12.024	77.316	3.853	4.351	3.412	4.787	37.258	4.76	5.095	5.448		0.381189	13.4883
9.2889	8.15	16.7369	9.287	10.862	7.303	6.6713	16.3276	26.4577	17.826	7.988	4.3657	7.6502	37.119	11.939	5.382	6.805	7.853	12.683	79.293	4.005	3.56	4.386	7.807	35.058	5.779	4.809	5.828		0.38614	13.7752
9.4079	10.716	20.9656	7.784	11.192	6.987	7.8363	16.2075	28.4588	20.853	6.362	4.7391	6.9161	33.643	13.575	6.032	6.496	5.458	9.578	78.577	5.435	6.155	4.142	4.31	43.788	5.206	5.652	3.906		0.391087	14.11
9.527	6.994	23.8927	9.858	12.257	8.662	8.4881	14.0531	30.7337	19.531	7.042	4.8978	5.4451	29.36	13.317	4.277	5.856	4.738	8.755	77.686	4.2	5.071	2.415	3.797	41.827	5.68	5.045	5.22		0.396038	13.6703
9.6461	9.037	18.305	10.567	12.444	6.024	8.5794	12.8122	35.0287	17.873	8.783	4.1085	10.2919	33.697	15.042	6.545	3.106	4.466	7.35	72.316	3.493	3.905	4.69	4.116	48.212	6.726	4.933	5.129		0.400989	13.9844
9.7652	9.125	20.6872	8.387	7.772	6.869	7.4939	11.525	32.438	12.618	9.27	5.1503	11.0402	35.122	14.397	7.019	3.933	4.568	6.972	68.071	3.799	3.337	3.814	4.512	41.615	6.974	3.441	3.412		0.40594	13.0875
9.8843	8.75	27.5716	8.422	9.308	5.527	8.505	13.0328	36.0189	12.042	9.703	3.4136	10.7324	35.311	12.405	7.143	4.472	4.535	6.021	62.324	3.812	5.756	3.016	4.189	40.145	6.664	4.896	4.594		0.410891	13.2707
10.0034	9.952	22.2665	4.63	7.43	5.494	6.8263	12.2413	34.4163	12.485	13.033	4.0531	7.7469	33.084	14.317	4.912	3.994	4.818	5.276	52.085	6.074	4.331	2.978	3.484	41.507	7.461	3.962	4.438		0.415842	12.3443
10.1225	9.356	26.7529	4.826	9.451	6.589	6.3707	11.0546	35.2221	13.079	11.103	3.2966	9.4512	27.612	13.259	5.706	3.137	4.469	7.601	51.833	4.758	4.786	3.591	4.185	37.119	4.602	4.029	4.617		0.420792	12.1428
10.2416	8.508	27.2477	7.643	8.086	6.695	6.6138	12.7405	34.9358	17.662	16.34	3.996	9.7756	32.443	15.016	3.699	5.285	6.1	6.918	50.526	5.119	5.152	5.811	4.439	41.127	7.337	3.676	3.29		0.425743	13.1919
10.3606	9.706	23.232	5.748	9.93	3.859	7.6627	11.4927	40.5352	15.064	14.787	4.9678	9.1743	29.385	14.271	4.422	4.051	4.436	6.841	42.278	6.195	3.312	3.632	4.849	40.732	6.395	2.806	3.794		0.43069	12.354
10.4797	9.632	34.7779	5.017	9.675	6.721	8.8111	13.9129	31.1056	18.397	21.736	4.2866	8.2927	29.601	16.254	5.14	4.166	4.687	7.077	39.251	5.488	4.032	4.997	5.546	34.043	7.327	4.223	5.344		0.435641	12.946
10.5988	11.93	30.5341	4.563	6.537	3.983	10.2075	15.2775	32.4972	22.314	21.687	6.5667	9.3068	23.313	17.315	5.264	2.965	3.815	8.11	43.381	5.573	3.726	3.42	4.525	35.913	7.552	2.838	5.755		0.440592	12.9211
10.7179	14.026	32.1252	6.564	6.252	4.628	6.9268	11.2942	36.5657	18.469	23.8	5.8782	9.1766	24.333	16.309	5.348	4.964	5.518	8.46	37.848	5.506	4.492	4.097	6.031	38.432	5.285	3.488	4.78		0.445543	12.9851
10.837	14.136	36.6986	4.868	5.449	5.177	10.1293	16.9997	39.2541	21.564	27.628	5.3131	8.9429	24.225	16.576	5.626	5.145	4.424	7.727	40.994	6.957	3.085	2.578	4.907	38.538	4.555	4.727	5.579		0.450494	13.7705
10.9561	14.533	38.2632	5.912	7.75	5.814	8.0388	17.1467	44.1693	19.722	27.374	5.9628	8.0626	24.46	17.22	4.609	4.209	3.383	6.849	37.553	7.036	3.594	4.226	4.306	37.059	6.121	3.952	4.967		0.455445	13.7886
11.0752	15.035	47.5024	5.125	4.958	5.585	11.602	16.5106	47.2872	21.424	28.912	6.6516	10.6635	23.119	18.099	5.025	3.439	4.127	6.233	51.018	7.005	4.191	3.993	6.252	36.018	6.389	4.185	4.588		0.460396	14.9977
11.1943	17.352	49.0808	4.856	3.956	5.928	10.0815	17.5414	51.8877	22.987	30.648	7.8272	9.0379	25.319	15.516	5.415	3.973	4.117	5.081	48.605	6.931	5.229	3.296	4.775	36.094	5.995	5.946	4.328		0.465347	15.252
11.3133	16.86	41.0204	6.31	6.36	6.085	8.8587	18.359	53.0221	24.819	31.121	7.1513	10.9961	23.017	20.323	3.934	3.649	5.017	6.785	49.534	5.313	3.648	4.156	4.593	35.616	6.385	4.504	4.075		0.470294	15.2412
11.4324	16.175	48.6437	7.363	6.505	8.108	10.4963	20.8036	48.5877	25.501	29.464	6.804	11.2669	30.739	16.29	4.231	5.35	5.584	7.162	46.306	7.023	3.643	2.856	3.639	39.963	7.647	5.76	3.336		0.475245	15.898
11.5515	17.094	48.5134	6.239	6.622	7.564	11.8796	25.0498	50.5254	22.147	29.155	7.2737	8.3928	31.357	19.356	5.907	4.928	3.664	6.123	42.793	6.63	2.578	4.931	3.986	43.956	9.464	4.268	6.277		0.480196	16.1731
11.6706	17.699	45.2739	7.144	4.727	4.001	15.2869	23.8655	50.2317	23.384	28.165	6.2434	7.7901	29.031	19.329	5.64	4.895	4.98	6.362	37.037	6.447	6.06	4.066	4.831	36.377	6.185	4.838	7.114		0.485147	15.4446
11.7897	18.633	49.101	6.87	3.762	4.678	13.4516	27.6567	46.9483	15.715	26.816	6.367	9.6536	22.965	16.839	6.092	3.199	3.726	8.558	33.293	6.621	3.412	4.018	6.83	42.811	6.881	4.697	4.521		0.490098	14.9672
11.9088	17.694	42.3219	7.358	6.847	6.451	14.9035	36.9115	37.3382	20.013	23.924	7.0166	9.2087	19.635	12.926	4.4	4.462	4.094	6.368	32.717	9.104	3.042	4.31	3.716	40.54	6.573	6.117	3.866		0.495049	14.5132
12.0279	17.389	48.6057	5.176	5.735	5.035	13.9143	35.5846	36.7333	17.166	27.489	9.0282	8.5937	21.443	13.825	4.1	4.194	6.063	9.457	29.775	5.741	4.059	4.428	4.796	40.592	6.877	5.129	4.547		0.5	14.6473
12.147	16.967	44.445	6.999	6.296	4.633	12.025	37.7578	31.6555	17.044	26.139	9.0639	8.8067	20.563	16.148	4.993	4.499	4.865	7.978	23.701	5.84	4.534	3.923	5.169	41.336	7.049	5.505	4.893		0.504951	14.1788
12.2661	16.743	44.8708	6.195	3.56	6.035	12.7699	37.4017	25.1786	15.98	25.606	8.8464	10.1794	19.196	14.196	3.986	2.398	3.872	5.938	25.075	7.716	6.004	4.047	7.316	31.984	10.387	6.014	5.606		0.509902	13.5963
12.3851	18.387	36.9973	6.679	5.916	5.086	16.3588	32.8332	29.8423	22.169	25.85	8.5334	9.6109	18.318	13.878	4.368	3.818	5.916	5.308	29.92	6.626	2.9	4.294	4.222	38.493	8.231	4.252	5.232		0.514849	13.8533
12.5042	23.038	37.6288	6.324	6.058	7.074	18.1026	38.6703	23.7727	21.241	25.155	8.5764	10.3619	14.855	16.676	3.231	4.682	4.754	4.792	28.936	5.58	3.378	5.534	4.584	37.388	6.731	5.77	5.387		0.5198	14.0104
12.6233	19.742	42.4012	6.226	4.738	6.551	16.9384	34.8116	29.5791	27.535	29.935	8.9284	9.2131	19.907	13.03	3.245	4.483	5.103	6.212	24.662	4.739	2.742	3.027	3.424	38.918	4.491	5.922	4.284		0.524751	14.1033
12.7424	22.746	42.0671	5.146	5.318	5.808	12.2204	34.8456	31.3349	41.312	26.926	7.563	8.0347	19.259	12.989	4.582	2.822	5.482	6.573	26.938	5.811	3.334	3.842	4.062	32.228	6.72	6.094	4.795		0.529702	14.402
12.8615	18.944	35.0357	6.631	4.309	6.31	15.3486	24.3498	23.1766	43.408	24.643	9.1864	8.2609	21.337	12.98	5.377	3.971	3.22	5.433	26.016	5.536	5.839	5.152	3.85	34.76	7.18	5.795	3.897		0.534653	13.7017
12.9806	17.78	35.1725	7.575	5.498	8.241	11.354	24.2402	25.921	48.769	29.408	9.2757	9.3351	24.341	13.885	4.675	3.656	5.151	6.407	28.34	5.932	3.371	3.316	4.05	28.058	6.703	6.656	4.616		0.539604	14.138
13.0997	17.496	33.6121	7.316	5.666	3.947	13.1326	21.7194	21.6094	52.411	34.34	10.2911	10.2698	23.263	11.548	5.027	3.352	3.772	6.226	27.128	5.451	4.845	5.582	2.918	29.55	7.437	7.214	5.366		0.544555	14.0922
13.2188	24.782	36.7841	7.184	5.105	4.358	13.2185	23.0703	20.3829	60.527	33.776	11.098	9.8903	19.915	10.342	5.011	4.109	4.798	5.02	23.919	5.592	4.854	4.889	3.913	25.709	7.73	5.501	6.322		0.549506	14.363
13.3378	19.6	36.6019	8.769	3.83	7.128	13.5704	22.3994	22.4513	60.04	36.305	10.5541	9.1307	26.577	13.618	6.12	3.954	5.544	6.485	20.706	5.561	4.625	3.469	3.366	26.091	6.538	3.982	5.169		0.554453	14.5254
13.4569	16.061	36.4989	7.345	5.147	6.266	15.4059	18.3149	17.0595	72.424	34.414	14.1273	7.3297	28.309	12.003	4.869	4.255	4.671	7.012	21.917	5.077	3.983	4.861	5.296	26.699	7.775	4.802	3.811		0.559404	14.6568
13.576	20.773	37.0764	6.658	5.085	5.597	17.2823	20.5858	21.0507	65.529	32.256	12.4976	8.0365	21.171	10.874	5.461	5.543	5.457	4.879	17.801	4.882	4.349	4.297	4.197	25.065	9.037	5.261	7.242		0.564355	14.3683
13.6951	22.218	40.7299	8.445	6.523	4.274	12.7022	21.7045	17.2907	56.105	30.455	11.566	7.7642	22.903	12.129	5.874	4.927	4.674	8.031	20.834	3.927	4.709	5.365	3.434	22.928	9.313	5.196	6.153		0.569306	14.0805
13.8142	20.263	40.6047	5.644	3.77	5.801	12.3053	25.6055	18.4469	54.603	25.032	13.1389	10.4521	24.292	11.27	5.469	5.937	3.956	4.267	24.49	6.435	4.462	4.037	3.06	24.521	10.492	5.07	5.008		0.574257	14.016
13.9333	22.544	41.9761	11.541	4.84	4.391	16.3353	23.9053	25.6571	52.347	19.532	15.3418	10.0202	24.846	10.465	5.498	5.045	4.12	5.555	26.009	5.403	4.731	4.049	5.875	27.664	10.774	4.603	4.97		0.579208	14.7421
14.0524	20.399	45.3321	7.392	5.469	6.174	15.0485	24.397	24.3269	56.498	19.747	13.6443	10.364	25.258	11.097	2.999	3.574	2.906	5.806	24.161	7.808	4.219	4.108	3.948	23.596	7.179	5.62	5.928		0.584158	14.3333
14.1715	21.8	42.8927	7.168	4.617	6.567	13.7346	27.3914	18.936	55.163	19.773	15.3684	10.6926	28.243	14.474	3.475	4.505	2.891	5.316	21.694	4.009	5.967	4.541	4.305	23.926	8.678	4.138	4.793		0.589109	14.2614
14.2905	17.202	42.766	8.537	4.451	5.521	12.8861	28.484	18.5025	50.879	17.108	14.8273	11.3526	28.94	11.517	3.851	3.332	4.851	5.556	18.939	4.785	4.236	4.282	5.675	19.513	9.847	4.937	4.753		0.594056	13.6122
14.4096	19.015	45.5847	9.068	3.165	6.339	14.9846	27.4982	16.288	50.781	20.877	15.0636	11.1431	32.037	12.516	4.744	4.166	6.618	6.841	21.093	4.348	4.997	4.757	3.88	18.097	5.941	5.719	3.492		0.599007	14.039
14.5287	15.968	41.0171	10.598	6.16	5.924	15.5517	35.0958	19.1405	38.487	18.298	18.5789	9.9179	30.644	11.002	5.194	3.682	3.005	6.978	19.186	6.745	5.679	3.747	5.761	20.303	6.531	5.945	4.418		0.603958	13.8354
14.6478	12.543	43.7352	9.974	4.189	7.986	14.7148	29.1615	19.522	37.153	18.343	14.7662	11.7048	33.285	10.426	3.918	3.158	4.455	6.649	23.777	6.979	7.047	4.972	3.738	19.415	8.388	5.905	5.672		0.608909	13.7621
14.7669	13.227	42.3539	8.058	5.96	5.87	17.107	29.748	17.2283	32.443	23.746	20.4508	13.1143	32.559	12.449	3.867	4.351	2.768	8.04	22.147	6.333	5.243	4.03	3.583	16.623	9.471	4.501	6.233		0.61386	13.7594
14.886	13.158	42.0251	11.076	2.964	8.81	12.4748	31.4124	20.1419	32.239	24.904	18.0005	13.2749	31.619	14.579	4.765	2.978	5.801	7.368	22.513	6.094	5.928	3.858	4.9	14.56	10.797	4.553	3.894		0.618811	13.8773
15.0051	11.023	50.4776	9.175	5.558	7.058	15.5097	27.2797	18.0779	34.03	21.126	21.1192	11.5105	32.37	13.261	4.283	5.295	4.572	8.871	20.683	5.491	3.869	4.236	3.653	16.577	12.098	5.686	5.438		0.623762	14.0121
15.1242	11.688	51.7958	10.23	5.537	5.931	13.0427	29.2395	16.6339	25.335	25.407	17.8847	12.247	33.556	11.366	3.517	5.21	4.981	6.372	23.103	4.778	5.04	7.172	3.548	15.891	10.583	6.509	6.499		0.628713	13.8184
15.2432	13.427	53.3248	9.446	3.248	5.753	12.8772	33.436	17.0736	27.135	26.005	18.5445	13.5134	28.139	12.782	5.902	4.211	3.053	8.068	25.927	6.121	3.414	3.96	3.925	14.413	12.763	5.469	7.063		0.63366	14.0368
15.3623	13.918	53.8385	9.598	5.888	5.477	14.9923	27.8116	14.4394	27.854	23.236	16.532	10.4234	32.699	10.676	4.672	4.736	4.647	7.247	27.032	5.332	4.863	5.89	4.182	17.074	13.857	5.792	5.924		0.638611	14.0234
15.4814	12.225	44.2751	6.424	5.853	5.691	12.8269	26.1362	15.9604	23.641	29.02	18.5626	14.5419	33.274	16.106	3.021	4.913	5.443	7.124	22.69	5.106	5.174	6.044	5.632	16.614	14.909	7.345	6.545		0.643562	13.8925
15.6005	12.04	54.9317	9.489	4.628	7.135	19.3318	19.1563	12.6735	23.13	27.646	15.8869	13.8866	34.521	12.893	4.211	5.633	4.959	8.775	22.591	5.481	4.737	4.15	5.261	16.459	12.247	6.188	4.581		0.648513	13.8008
15.7196	12.944	52.7107	8.627	6.508	6.769	15.246	21.5038	19.7331	26.363	30.684	17.9526	13.2852	40.654	12.942	5.659	4.717	6.737	7.988	22.008	4.761	4.42	5.793	5.468	13.687	13.48	6.63	6.149		0.653464	14.5711
15.8387	9.937	46.4117	6.68	6.104	6.145	15.7065	21.2748	13.8488	27.783	29.523	18.749	17.2702	40.132	13.596	4.915	4.738	6.03	8.009	24.124	6.779	3.536	4.791	5.055	14.34	12.767	5.613	6.312		0.658415	14.0804
15.9578	13.627	52.1246	9.162	4.844	6.92	13.5005	25.2305	13.901	25.022	30.83	17.6795	17.5504	38.233	18.763	4.725	6.301	5.174	9.697	26.518	6.449	6.931	4.778	5.081	13.885	16.818	6.382	6.041		0.663366	15.0432
16.0769	12.291	47.8239	8.558	6.718	4.979	12.3581	20.2954	13.7359	22.881	29.918	15.6625	18.7117	43.359	19.29	5.265	6.526	4.792	7.442	29.836	5.888	6.302	4.111	3.89	17.33	13.935	6.688	5.257		0.668317	14.5868
16.196	11.645	50.6851	7.374	4.904	8.361	12.9029	19.7302	16.91	23.933	36.683	18.5506	19.2517	39.826	18.509	4.643	4.334	5.597	9.601	24.445	7.266	6.276	6.345	4.787	11.806	15.69	6.457	5.38		0.673268	14.8849
16.315	8.345	48.2862	6.021	6.401	5.606	11.1279	18.8635	15.8906	25.008	32.122	17.8633	20.0965	37.22	19.731	5.118	5.553	3.158	10.381	27.668	4.821	3.844	5.317	3.162	11.278	14.086	7.108	4.225		0.678215	14.0111
16.4341	8.192	54.1937	8.515	6.411	5.448	10.4048	17.6337	15.2601	20.232	32.543	16.7176	24.7616	42.373	15.062	5.61	4.639	4.426	13.025	30.117	3.78	3.762	5.566	7.461	13.852	13.781	4.018	6.441		0.683166	14.6009
16.5532	11.267	54.1992	7.451	5.691	6.167	9.5526	17.6578	17.2878	21.79	29.458	18.9971	21.2576	30.734	17.074	3.722	4.616	6.103	17.651	25.436	3.924	6.291	7.313	5.618	12.828	14.59	5.247	5.957		0.688117	14.3659
16.6723	8.293	51.2739	5.784	5.394	8.146	13.6496	14.4079	16.4381	18.262	32.022	14.9851	25.0464	32.241	22.901	5.566	4.99	4.985	18.434	29.933	6.808	5.68	5.525	4.607	15.718	16.543	6.875	8.97		0.693068	14.9436
16.7914	10.983	54.6142	6.831	5.381	6.458	12.7705	18.4506	15.7249	22.49	30.492	15.9143	25.7848	32.854	18.009	3.486	4.072	4.95	26.825	32.313	6.708	5.168	7.788	6.174	16.029	13.734	6.202	6.708		0.698019	15.4413
16.9105	10.061	48.6072	9.637	6.101	4.147	11.2123	16.2527	12.292	22.312	31.638	16.7143	25.291	34.45	23.976	5.699	4.67	5.099	26.513	34.257	7.173	4.265	7.196	6.337	16.661	12.936	7.587	7.053		0.70297	15.4866
17.0296	8.477	47.9578	7.445	5.8	6.708	12.733	16.4753	16.7905	27.34	34.441	17.5997	25.7718	34.195	22.111	4.843	4.785	6.589	29.697	31.619	7.464	5.652	8.839	4.481	14.709	14.689	7.816	6.117		0.707921	15.9683
17.1487	8.821	48.5065	5.954	5.701	5.81	9.6286	18.4499	13.6945	27.291	37.213	18.3595	31.2667	32.779	21.247	4.787	4.362	5.846	28.462	35.017	7.514	5.406	8.344	6.053	15.498	19.978	8.923	6.277		0.712872	16.3403
17.2677	8.597	46.1664	6.307	5.936	7.715	8.2496	18.7836	16.7222	27.321	30.194	15.8244	26.9016	29.647	20.175	6.533	4.113	6.928	31.713	35.186	7.007	6.726	10.839	8.149	14.807	14.363	7.495	8.18		0.717819	15.9474
17.3868	13.983	43.0455	6.46	4.839	6.383	10.7705	20.5608	14.3925	22.777	37.691	16.5491	26.6462	31.908	20.51	5.338	4.481	6.772	32.183	30.97	6.366	6.728	8.813	9.333	18.148	16.977	9.944	5.579		0.72277	16.2277
17.5059	10.661	48.4099	5.2	6.78	8.015	9.7357	24.1988	17.8988	26.642	38.921	18.1279	30.6672	36.101	27.378	6.319	4.948	5.318	38.688	41.466	7.625	4.191	9.121	7.32	13.764	18.323	8.358	5.142		0.727721	17.7526
17.625	8.424	45.6289	6.421	5.93	7.848	12.7831	21.9266	17.3812	22.081	37.665	17.1195	32.7866	33.071	27.438	4.7	5.133	8.956	47.89	42.683	9.068	5.953	11.437	8.197	12.521	20.601	8.914	6.168		0.732672	18.1009
17.7441	8.525	49.757	8.546	6.706	4.995	11.6422	21.628	18.4525	25.653	35.374	19.9427	29.3879	37.662	25.369	5.994	4.049	8.002	50.884	43.906	9.55	5.407	11.918	10.166	14.6	22.031	9.384	6.065		0.737623	18.7258
17.8632	7.851	42.7303	5.242	6.3	6.401	9.0851	20.5248	18.0338	23.365	34.677	22.0365	26.1689	38.335	24.75	4.835	4.548	9.633	54.874	51.913	8.528	5.973	12.555	8.296	18.355	20.902	8.645	8.504		0.742574	18.6319
17.9823	6.894	40.693	4.366	6.078	7.229	11.9178	25.2345	20.3834	22.31	32.755	23.9879	32.9403	35.733	30.763	6.06	6.466	10.321	52.748	55.383	9.881	6.733	14.524	9.076	14.19	22.13	9.977	6.289		0.747525	19.4468
18.1014	9.345	38.133	6.866	7.128	7.832	10.5589	22.7583	18.5079	22.197	36.014	25.3667	27.6213	36.054	27.266	4.526	7.308	9.712	58.495	65.041	9.697	12.513	17.753	14.937	14.872	28.34	12.741	7.802		0.752475	20.718
18.2204	6.525	42.4648	9.68	5.056	7.406	12.1836	21.1235	16.7287	25.121	30.93	25.1088	43.958	42.724	34.139	6.561	6.557	12.284	54.533	81.048	9.581	12.297	21.57	15.906	19.347	26.963	11.975	6.815		0.757422	22.5402
18.3395	7.551	42.3591	6.79	7.698	6.934	10.7996	22.347	17.093	23.17	25.643	25.1364	34.5159	45.38	33.109	7.833	6.43	11.639	48.219	85.465	9.657	11.853	24.442	21.513	13.907	28.511	13.759	10.385		0.762373	22.3014
18.4586	6.37	45.1016	6.424	6.349	7.037	12.4761	21.9815	16.8956	24.029	32.524	25.0229	27.7657	38.806	38.338	7.733	5.943	14.268	36.776	101.474	13.899	15.601	30.891	22.829	22.817	28.383	14.68	10.207		0.767324	23.5045
18.5777	8.425	39.4503	6.744	6.145	5.974	10.1051	21.3388	20.5434	20.531	28.262	30.4952	34.4225	47.641	46.35	7.283	5.998	13.643	35.283	103.363	14.34	22.749	32.008	29.181	22.243	33.713	14.576	11.386		0.772275	24.896
18.6968	8.072	38.0171	6.507	6.153	4.143	11.2757	18.5	18.0827	25.924	25.186	29.3821	29.314	47.158	50.987	8.316	5.996	10.665	25.597	104.37	19.567	19.271	46.088	36.006	27.995	37.13	15.984	12.044		0.777226	25.4715
18.8159	10.092	39.3759	7.731	4.625	6.288	10.6356	19.9205	16.337	22.525	24.167	36.1762	31.6801	52.152	49.826	10.263	6.533	19.155	27.038	90.086	22.34	25.513	42.619	37.278	33.578	41.021	17.643	14.274		0.782177	26.6249
18.935	6.79	34.7856	6.134	5.379	6.864	9.9967	21.2059	21.3911	19.731	26.159	34.7887	35.872	49.807	61.851	9.174	5.069	22.618	24.889	87.179	28.771	29.462	51.199	49.943	38.634	41.629	21.531	21.84		0.787128	28.6183
19.0541	8.272	40.5626	7.962	6.268	7.241	9.692	22.8816	18.702	20.719	26.682	43.8776	35.7182	65.984	71.354	12.266	6.126	27.222	19.04	76.492	28.377	36.047	55.031	53.559	37.098	41.242	26.862	22.553		0.792079	30.6604
19.1731	10.372	40.6222	7.883	5.127	6.09	10.3818	18.0025	20.0061	17.473	28.323	43.7598	28.6866	70.965	68.398	14.076	7.818	33.011	18.614	61.15	42.043	33.001	65.355	66.286	41.788	50.488	30.507	28.624		0.797026	32.1797
19.2922	10.011	35.8368	7.194	7.51	7.911	10.7843	17.1315	18.008	25.418	27.993	45.7437	36.1061	62.144	70.108	16.542	8.185	34.195	14.807	47.694	46.639	41.155	70.793	55.582	42.85	49.74	34.621	31.346		0.801977	32.4462
19.4113	7.218	40.2245	9.784	5.646	6.801	11.4306	20.2629	16.7578	22.632	30.707	45.1756	37.0465	79.892	77.935	21.166	8.2	39.654	12.081	38.126	54.156	47.053	64.691	62.879	42.535	56.692	34.488	36.976		0.806928	34.4522
19.5304	7.404	45.3338	7.874	4.646	7.621	11.6929	20.3015	20.22	19.534	29.99	51.9278	41.8826	89.462	69.33	24.429	7.779	43.425	10.104	35.384	71.314	49.117	57.003	59.605	46.679	63.888	35.41	38.042		0.811879	35.9037
19.6495	8.687	39.4312	7.889	6.549	7.042	8.6886	20.3887	15.3602	26.192	33.574	51.6997	48.0463	94.478	78.974	35.571	6.839	40.495	8.519	26.115	77.798	54.793	46.604	50.271	46.113	74.268	39.23	45.095		0.81683	36.9893
19.7686	11.288	40.2945	7.497	7.247	9.13	10.5757	23.005	19.627	32.268	39.922	58.804	47.6818	96.599	66.083	34.837	14.293	30.504	7.806	16.867	84.491	64.61	39.148	56.907	39.863	89.326	43.496	47.904		0.821781	38.5213
19.8877	7.203	35.7194	9.519	6.253	6.625	8.5618	19.9646	19.9689	29.882	37.422	54.3612	55.3886	102.477	63.043	40.098	18.591	26.927	7.9	15.667	81.587	62.743	22.479	45.318	35.127	100.701	48.178	53.814		0.826732	37.6118
20.0068	8.456	34.7602	9.638	4.837	5.911	13.0516	17.5842	16.2838	27.129	44.625	50.3095	56.8712	96.143	56.074	51.068	24.82	23.386	6.424	16.399	77.228	58.352	22.422	45.923	24.958	116.44	50.185	63.661		0.831683	37.8866
20.1259	10.448	38.9217	9.941	5.947	6.062	12.229	19.8855	16.556	28.926	45.36	47.4089	61.0339	94.448	47.649	57.197	38.02	22.005	7.069	13.18	70.259	59.625	20.266	39.611	20.954	127.806	61.823	54.597		0.836634	38.4159
20.2449	10.45	43.7823	7.143	4.299	5.696	13.0628	23.0315	21.7305	30.774	41.049	44.5814	60.3112	75.652	37.128	62.575	47	14.553	5.526	13.627	49.386	57.226	12.092	32.778	21.009	134.467	73.741	62.535		0.841581	37.2298
20.364	11.04	38.1659	10.484	5.15	5.176	15.7592	18.6352	19.7992	32.854	46.887	42.8033	59.3329	57.779	31.389	62.697	53.03	12.872	4.502	6.867	38.462	52.244	11.047	24.77	15.837	142.631	86.044	57.364		0.846532	35.6897
20.4831	12.092	35.5553	9.22	5.635	6.828	16.799	22.9584	16.6395	30.661	46.35	45.4878	59.1635	56.316	33.09	64.749	49.875	13.629	5.753	5.786	28.209	47.839	10.8	22.61	11.709	120.706	94.577	48.248		0.851483	34.1217
20.6022	14.306	35.7459	12.983	5.736	7.725	24.4917	21.7763	19.9852	34.016	46.62	41.8286	53.8425	42.067	26.571	62.703	55.504	11.535	3.894	8.119	22.924	44.128	10.842	18.542	11.56	104.132	96.997	45.926		0.856434	32.7593
20.7213	12.551	38.3635	10.851	6.921	6.041	34.6886	27.5344	22.415	37.788	44.915	49.16	51.5952	39.69	17.528	59.896	56.74	8.534	3.823	7.464	19.317	41.687	6.457	15.089	9.554	80.614	117.76	38.954		0.861385	32.0715
20.8404	11.313	40.4511	9.583	3.3	5.908	37.7623	28.5746	26.813	37.114	45.898	61.5261	60.1741	36.234	16.801	49.188	55.308	6.781	2.771	5.775	15.864	34.099	5.037	12.252	6.026	59.276	117.355	34.129		0.866336	30.5672
20.9595	14.503	35.7876	11.363	5.271	6.219	45.843	36.6421	28.3808	40.673	46.284	73.293	52.2863	23.21	18.36	44.894	52.79	6.739	2.282	4.255	16.189	25.357	4.865	10.49	6.609	34.829	124.267	30.677		0.871287	29.717
21.0786	16.456	39.3741	12.163	4.471	6.893	56.0607	45.116	28.9081	39.164	53.19	76.6408	55.1068	26.712	15.27	38.058	40.656	7.284	2.165	3.456	7.812	20.694	4.955	7.09	3.942	27.334	120.713	28.451		0.876238	29.1902
21.1976	15.297	40.4929	18.624	4.171	9.838	59.5814	49.5858	35.314	41.368	52.562	76.4159	63.4867	18.956	11.718	32.708	37.045	3.323	2.517	4.07	8.247	15.098	4.582	6.499	4.379	19.259	103.29	24.168		0.881185	28.2443
21.3167	18.295	44.2739	20.662	6.912	9.648	61.8915	51.4125	42.1221	49.227	59.805	81.3498	63.5671	15.747	9.809	22.253	29.034	4.369	0.806	3.145	6.964	10.448	4.148	5.489	3.01	14.381	86.943	22.134		0.886136	27.698
21.4358	16.803	50.0027	19.686	5.67	17.219	69.9958	60.2047	50.2219	42.622	59.716	84.027	65.0849	14.347	6.896	20.596	17.526	3.549	1.726	2.55	6.284	8.234	4.339	4.717	2.711	13.008	64.443	14.495		0.891087	26.9139
21.5549	19.233	47.4757	22.649	6.763	15.858	67.5009	65.2229	53.1783	46.243	55.382	79.8983	61.2964	14.981	6.707	13.943	15.775	2.841	1.309	1.963	6.107	7.453	2.586	3.504	3.258	8.997	49.005	10.442		0.896038	25.5397
21.674	21.149	53.9189	17.826	6.431	22.005	64.5726	81.275	54.5635	41.859	54.948	69.3587	60.6964	11.223	6.952	11.864	15.944	2.332	1.181	1.215	4.473	6.57	2.44	3.825	3.276	10.36	38.238	9.372		0.900989	25.1062
21.7931	21.176	51.0482	27.729	9.204	21.521	65.5494	84.9976	51.1798	40.723	47.787	58.0248	52.3017	8.859	6.986	10.96	10.485	4.233	2.104	0.932	3.611	8.136	2.107	2.388	1.441	6.412	31.092	8.794		0.90594	23.6956
21.9122	20.376	55.7893	29.656	7.945	29.989	73.4587	91.5586	46.3385	32.614	44.123	56.2054	49.8525	5.445	4.573	7.068	8.549	1.54	1.5	1.787	1.787	3.366	1.716	1.822	2.816	4.439	19.795	4.908		0.910891	22.5562
22.0313	22.117	50.0097	31.825	9.897	32.939	79.5098	74.264	46.0327	35.313	33.198	49.6703	49.2338	6.322	3.897	6.316	10.252	1.801	0.545	1.068	2.73	3.431	1.468	1.326	2.015	3.614	13.581	5.137		0.915842	21.3893
22.1503	24.745	51.2284	36.91	8.302	44.11	64.6409	53.1685	42.2867	30.517	31.445	41.499	44.8076	6.746	3.683	5.721	8.836	2.452	1.363	0.685	2.95	3.4	3.137	1.884	1.018	3.82	8.703	4.646		0.920788	19.7298
22.2694	26.502	54.8656	42.333	11.158	49.785	61.9821	40.2016	38.5859	21.176	26.129	35.5258	43.2712	6.181	3.303	3.975	7.831	2.44	1.121	0.949	1.758	3.493	2.099	2.474	1.883	2.499	5.216	3.183		0.925739	18.5156
22.3885	24.693	54.4482	47.171	10.013	46.028	65.1139	27.683	36.0995	18.756	23.953	33.4656	34.5133	4.258	3.329	4.874	7.914	1.763	0.493	0.567	1.709	1.397	1.193	2.057	1.565	2.635	3.618	3.569		0.93069	17.1436
22.5076	23.973	53.1806	54.37	13.508	42.423	52.1061	23.1305	30.2187	19.268	23.769	31.0539	39.8429	3.634	2.846	5.267	8.466	1.825	0.364	0.896	1.92	2.191	1.112	1.948	1.525	3.73	3.975	2.188		0.935641	16.6197
22.6267	25.401	56.2135	58.836	13.652	40.996	37.2116	17.1693	28.75	19.118	22.191	29.1472	28.4931	3.269	2.647	4.312	5.148	1.679	0.648	0.888	1.762	2.347	0.813	1.606	1.106	1.675	2.616	2.08		0.940592	15.1768
22.7458	23.118	53.891	62.427	16.666	37.413	30.7588	19.1889	25.6245	11.321	16.147	21.4065	22.4779	2.202	1.632	2.992	3.936	2.158	0.803	0.602	0.665	1.761	0.936	1.191	0.697	2.315	2.432	2.289		0.945543	13.5945
22.8649	19.513	61.8059	65.525	19.847	33.371	27.079	20.4249	21.5633	9.227	11.06	17.5023	21.4894	2.627	1.973	3.061	2.653	1.935	0.495	0.644	2.126	1.517	0.738	1.413	1.353	1.142	2.743	3.247		0.950494	13.188
22.984	19.466	58.8093	64.621	25.549	27.381	18.3824	14.4614	19.1477	9.525	11.376	15.0207	19.6102	2.013	1.633	1.675	3.566	1.111	0.209	1.131	1.228	1.694	1.217	1.683	1.48	2.453	2.22	1.954		0.955445	12.171
23.103	13.047	57.7952	62.03	31.194	25.002	13.4739	11.5136	15.3208	10.078	9.556	11.7787	16.9184	1.674	1.564	3.866	4	2.378	1.001	0.294	0.932	1.186	0.18	0.871	0.805	0.714	0.692	2.138		0.960392	11.1112
23.2221	18.033	61.1078	55.432	37.874	29.049	9.2904	5.8699	13.6937	7.751	9.662	10.5503	14.968	1.597	1.046	2.546	2.685	0.537	0.532	0.337	1.623	0.414	0.399	0.591	0.509	1.792	3.468	2.393		0.965343	10.8796
23.3412	12.542	63.7337	59.836	49.585	24.791	8.7161	7.9439	13.2368	4.971	9.105	8.4715	13.2355	1.713	0.926	1.119	2.582	1.525	0.754	0.319	0.566	0.939	0.806	0.595	0.778	0.85	1.587	1.833		0.970294	10.8541
23.4603	10.58	51.1058	52.026	56.452	20.338	5.6246	9.7574	11.3822	4.529	7.641	9.1947	12.0378	1.22	1.254	2.046	1.791	1.025	0.133	0.136	0.652	1.139	0.408	0.983	0.706	0.847	1.447	1.337		0.975245	9.84417
23.5794	11.924	45.4709	47.309	54.569	17.907	3.929	7.1321	7.981	3.443	4.714	7.3186	13.0914	1.281	1.048	1.067	1.557	0.642	0.466	0.355	1.471	0.272	1.735	0.855	0.783	0.497	1.414	1.247		0.980196	8.86959
23.6985	11.198	40.1031	40.197	51.432	18.334	4.1697	6.7399	8.0777	4.052	5.582	5.5739	8.9045	1.332	1.157	0.999	2.079	0.755	0.341	0.054	0.757	0.275	2.026	0.488	1.686	0.711	1.123	0.692		0.985147	8.10514
23.8176	11.003	47.1093	44.368	48.46	11.38	3.8976	4.3126	8.616	3.627	6.22	5.5201	6.308	1.55	0.677	0.953	3.246	1.007	0.725	0.667	0.728	0.417	0.174	0.605	0.197	1.269	1.76	0.811		0.990098	7.98547
23.9367	10.98	38.3036	41.069	37.442	14.281	2.3759	7.7431	5.5661	2.827	4.538	3.96	5.6838	1.983	0.145	1.351	1.93	0.632	0.406	0.581	0.221	0.139	0.083	0.764	0.832	1.483	1.239	0.913		0.995049	6.94339
24.0558	11.858	35.0513	32.125	38.907	11.009	3.8185	4.8834	5.1078	3.21	3.979	4.0307	3.9072	0.462	0.118	1.363	2.025	0.682	0.161	0.114	0.06	0.391	0.969	0.174	0.269	0.454	0.141	0.483		1	6.139

## Sheet: Sheet1
Image4				Image5				Image11				Image12				Image13				Image21				Image22					Distance	Image4	Image5	Image11	Image12	Image13	Image21	Image22
Ap-Ba	Avg int			Ap-Ba	Avg int			Ap-Ba	Avg int			Ap-Ba	Avg int			Ap-Ba	Avg int			Ap-Ba	Avg int			Ap-Ba	Avg int				0	44.0912	37.1232	21.3426	33.047	45.8372	27.1025	107.187
0	44.0912			0	37.1232			0	21.3426			0	33.047			0	45.8372			0	27.1025			0	107.187				0.05	57.3986	55.6727	49.6463	59.7137	94.2063	46.1088	124.267
0.00495099	45.8591			0.00518187	38.078			0.00465164	22.7205			0.00595298	37.6744			0.0040004	49.0103			0.00680342	30.0413			0.00628994	109.431				0.1	77.9562	94.5689	89.1306	151.02	172.782	112.565	148.603
0.00990198	48.4903			0.0103637	39.6733			0.00930327	26.5525			0.011906	40.1684			0.00800081	55.0599			0.0136068	33.536			0.0125799	115.119				0.15	80.3036	82.1821	28.5992	83.8129	93.5887	118.58	129.354
0.014853	49.8644			0.0155456	43.7054			0.0139549	28.4832			0.0178589	43.007			0.0120012	59.5862			0.0204103	37.9714			0.0188698	119.986				0.2	74.6219	62.9931	14.2988	27.0089	45.0678	84.2985	83.1781
0.019804	53.0024			0.0207275	45.9699			0.0186065	32.5965			0.0238119	48.0043			0.0160016	63.883			0.0272137	43.5153			0.0251598	123.516				0.25	61.174	50.3182	10.5978	13.7334	35.7511	58.8114	56.5853
0.0247508	55.5444			0.025905	50.2549			0.0232543	38.1097			0.0297599	55.867			0.0199987	71.1047			0.0340114	48.8192			0.0314444	127.886				0.3	40.1229	40.3356	10.9216	12.0977	34.329	40.1308	42.9618
0.0297018	58.0303			0.0310868	54.5141			0.0279059	45.4446			0.0357129	66.5263			0.0239991	79.7214			0.0408148	55.2101			0.0377344	134.179				0.35	21.144	26.7568	12.284	12.6605	28.8509	28.68	33.8077
0.0346528	61.391			0.0362687	58.9932			0.0325575	53.9512			0.0416658	75.6513			0.0279995	90.0417			0.0476182	64.4157			0.0440243	138.779				0.4	14.0023	20.3089	12.3416	12.2606	28.43	25.6969	26.977
0.0396038	65.6735			0.0414506	62.6919			0.0372092	64.0745			0.0476188	89.7737			0.0319999	102.999			0.0544217	74.3673	46.1088		0.0503142	142.318	124.267			0.45	12.9014	20.699	10.7091	12.3255	28.8919	26.3547	22.4274
0.0445547	68.2571			0.0466324	67.6378			0.0418608	76.374			0.0535718	107.418	59.7137		0.0360003	115.635			0.0612251	86.2057			0.0566042	144.327				0.5	15.0923	22.6457	10.5205	12.256	29.0422	31.9663	20.1937
0.0495057	68.6256			0.0518143	72.861	55.6727		0.0465124	87.277			0.0595248	125.174			0.0400007	128.835			0.0680285	97.3703			0.0628941	147.126				0.55	14.0877	19.3165	10.2612	12.0659	30.1216	38.1896	18.9392
0.0544567	69.9545	57.3986		0.0569962	78.0197			0.0511641	98.829	49.6463		0.0654777	141.863			0.0440011	142.193			0.0748319	107.132			0.0691841	149.455				0.6	14.1945	14.7773	10.2424	11.9647	32.1059	30.3333	17.6696
0.0594077	71.277			0.062178	83.3628			0.0558157	106.523			0.0714307	152.491			0.0480015	152.282			0.0816353	117.12			0.075474	148.966				0.65	13.9554	14.179	10.0513	11.1742	35.0981	21.4588	15.2157
0.0643545	72.0852			0.0673556	88.3469			0.0604634	110.218			0.0773787	161.714			0.0519985	162.699	94.2063		0.088433	123.457			0.0817586	149.507				0.7	14.7445	15.3567	8.9391	10.7404	39.526	19.1956	13.1868
0.0693055	74.5027			0.0725374	92.7397			0.0651151	115.69			0.0833317	163.64			0.0559989	173.003			0.0952365	127.087			0.0880486	150.663				0.75	17.786	18.5788	9.20413	10.4447	43.4625	18.7393	12.0821
0.0742565	75.8449			0.0777193	93.5835			0.0697667	112.851			0.0892846	160.065			0.0599993	182.974			0.10204	129.58	112.565		0.0943385	149.254				0.8	26.9243	16.9287	10.7417	10.7541	58.0514	19.7924	11.453
0.0792075	78.1128			0.0829011	97.7332			0.0744184	104.973			0.0952376	157.9			0.0639997	187.227			0.108843	130.732			0.100628	149.529	148.603			0.85	36.6822	18.6983	13.2985	10.6999	64.9171	25.6852	10.8531
0.0841585	79.5614			0.088083	98.8944			0.07907	96.4796			0.101191	145.313	151.02		0.0680001	189.606			0.115647	128.753			0.106918	148.05				0.9	28.7807	16.9956	16.9449	12.0296	46.8737	40.4809	10.0908
0.0891095	81.1072			0.0932649	98.7447			0.0837216	84.4331			0.107144	133.515			0.0720005	191.019			0.12245	125.605			0.113208	144.143				0.95	18.1609	17.3163	19.1546	17.4082	38.5059	39.79	9.48437
0.0940605	80.3347			0.0984467	98.7537			0.0883733	75.1351			0.113097	120.342			0.0760009	188.099			0.129254	122.263			0.119498	139.869				1	9.29026	15.1252	10.2025	21.0214	19.9617	26.1077	8.93334
0.0990115	82.9276			0.103629	98.1556	94.5689		0.0930249	65.9172			0.11905	104.742			0.0800013	184.512			0.136057	117.837			0.125788	133.885
0.103958	83.8085	77.9562		0.108806	95.3747			0.0976726	56.8332			0.124998	90.9755			0.0839984	177.976			0.142855	112.892			0.132073	128.013
0.108909	84.611			0.113988	92.0545			0.102324	51.3838	89.1306		0.13095	78.9863			0.0879988	171.273			0.149658	107.936			0.138363	120.27
0.11386	84.414			0.11917	89.6228			0.106976	44.9369			0.136903	67.2215			0.0919992	163.124			0.156462	102.625	118.58		0.144653	113.089
0.118811	84.5597			0.124352	86.0088			0.111628	39.3166			0.142856	60.1313			0.0959996	154.59			0.163265	97.8753			0.150943	107.514	129.354
0.123762	83.1879			0.129534	83.6517			0.116279	35.0454			0.148809	52.5543			0.1	146.095			0.170068	92.8093			0.157233	100.132
0.128713	81.0847			0.134715	82.4241			0.120931	32.787			0.154762	45.848	83.8129		0.104	136.673	172.782		0.176872	88.7342			0.163523	94.5532
0.133664	80.147			0.139897	79.119			0.125582	30.0659			0.160715	38.4332			0.108001	129.756			0.183675	84.3968			0.169813	89.559
0.138615	77.7939			0.145079	77.3987			0.130234	27.8564			0.166668	35.4043			0.112001	121.265			0.190479	80.0029			0.176102	84.7186
0.143562	76.2359			0.150257	75.9563	82.1821		0.134882	23.527			0.172616	30.3312			0.115998	113.388			0.197276	75.4709			0.182387	80.6412
0.148513	76.0624			0.155439	73.4029			0.139533	23.3526			0.178569	27.239			0.119999	107.199			0.20408	70.8001	84.2985		0.188677	75.4047
0.153464	74.9399	80.3036		0.16062	70.9266			0.144185	21.2292			0.184522	24.466			0.123999	101.496			0.210883	67.9281			0.194967	72.2912
0.158415	75.4819			0.165802	70.5216			0.148837	18.8403			0.190475	21.8734			0.127999	96.3692			0.217687	65.2449			0.201257	68.1257	83.1781
0.163366	75.8752			0.170984	66.7034			0.153488	17.6339	28.5992		0.196428	20.1346			0.132	90.2117			0.22449	62.3898			0.207547	65.7329
0.168317	76.9791			0.176166	64.6284			0.15814	17.7643			0.202381	18.1897	27.0089		0.136	84.088			0.231293	58.3856			0.213837	62.5621
0.173268	77.5597			0.181348	62.5644			0.162792	15.6006			0.208334	16.8813			0.140001	79.5266			0.238097	55.7444			0.220127	58.8955
0.178219	76.8658			0.18653	62.311			0.167443	15.9582			0.214287	15.1733			0.144001	70.758			0.2449	52.5579			0.226417	57.0154
0.18317	74.4863			0.191712	60.5859			0.172095	15.1403			0.22024	14.9087			0.148001	67.291			0.251704	49.4294	58.8114		0.232707	54.2848
0.188117	73.4374			0.196889	58.3543			0.176743	14.3814			0.226188	13.4688			0.151999	61.7166	93.5887		0.258501	46.5794			0.238991	53.6317
0.193068	72.7575			0.202071	56.4136	62.9931		0.181394	13.5995			0.232141	13.5077			0.155999	57.0786			0.265305	44.5655			0.245281	51.1946
0.198019	72.0355			0.207253	56.9213			0.186046	13.1603			0.238094	12.0289			0.159999	53.7897			0.272108	42.3122			0.251571	49.3655	56.5853
0.20297	70.7406	74.6219		0.212435	55.4624			0.190698	12.7477			0.244047	12.685			0.164	52.3042			0.278912	40.6526			0.257861	48.1223
0.207921	68.3187			0.217617	54.7058			0.195349	12.378			0.25	11.2135	13.7334		0.168	49.6638			0.285715	39.5297			0.264151	46.6216
0.212872	66.5911			0.222798	54.0674			0.200001	12.258	14.2988		0.255953	11.5177			0.172001	46.9804			0.292519	37.4448			0.270441	45.2046
0.217823	65.2173			0.22798	52.4268			0.204652	11.7611			0.261906	11.5636			0.176001	45.7081			0.299322	36.1684			0.276731	43.6211
0.222774	63.8022			0.233162	50.8824			0.209304	10.9492			0.267859	11.839			0.180001	44.1997			0.306125	33.7939	40.1308		0.283021	41.2165
0.227721	62.5932			0.23834	48.7295			0.213952	10.3897			0.273807	12.654			0.183998	41.6668			0.312923	32.9136			0.289306	39.8036
0.232672	61.6692			0.243522	47.8666			0.218603	10.048			0.27976	12.205			0.187999	40.8831			0.319726	31.2247			0.295595	40.01
0.237623	57.8644			0.248703	47.9958			0.223255	10.2929			0.285713	12.0985			0.191999	39.9523			0.32653	29.6684			0.301885	39.0948	42.9618
0.242574	58.4171			0.253885	45.7146	50.3182		0.227907	9.89082			0.291666	11.7828			0.196	37.8743			0.333333	28.388			0.308175	37.5775
0.247525	54.8824			0.259067	45.3307			0.232558	9.73819			0.297619	12.8908			0.2	37.288			0.340137	27.4398			0.314465	36.5697
0.252475	52.3847	61.174		0.264249	43.4854			0.23721	10.9931			0.303572	12.3278	12.0977		0.204	38.4928	45.0678		0.34694	25.777			0.320755	35.429
0.257426	48.959			0.269431	43.324			0.241862	10.6304			0.309525	12.7443			0.208001	39.1009			0.353744	25.3486	28.68		0.327045	34.1589
0.262377	46.9548			0.274613	41.7084			0.246513	11.0091			0.315478	13.258			0.212001	37.1475			0.360547	25.4061			0.333335	32.8876
0.267324	44.1549			0.27979	41.9759			0.251161	10.8733	10.5978		0.321426	12.9181			0.215998	36.3821			0.367345	25.1937			0.33962	32.2144
0.272275	42.8736			0.284972	40.4615			0.255813	11.0899			0.327379	13.0647			0.219999	33.8684			0.374148	25.5615			0.34591	31.0457
0.277226	40.1158			0.290154	40.4002			0.260464	10.9509			0.333332	12.0704			0.223999	33.9232			0.380952	25.7283			0.3522	30.5788	33.8077
0.282177	39.4634			0.295336	38.9653			0.265116	11.1941			0.339285	12.993			0.227999	34.0033			0.387755	25.9273			0.35849	29.6415
0.287128	37.9437			0.300518	36.7342	40.3356		0.269767	10.9606			0.345238	12.3383			0.232	35.2764			0.394558	26.0174			0.36478	27.6713
0.292079	36.2459			0.3057	35.9656			0.274419	11.8063			0.351191	11.8973	12.6605		0.236	34.6242			0.401362	26.044	25.6969		0.371069	27.7963
0.29703	33.0214			0.310881	34.5297			0.279071	11.5584			0.357144	11.7736			0.240001	35.1566			0.408165	26.1801			0.377359	27.0865
0.301981	31.4963	40.1229		0.316063	33.3606			0.283722	11.131			0.363097	12.2463			0.244001	36.3571			0.414969	26.5159			0.383649	25.8956
0.306928	28.4845			0.321241	31.2131			0.28837	10.1121			0.369045	11.7589			0.247998	36.2219			0.421766	26.327			0.389934	26.0167
0.311879	27.2561			0.326423	28.3767			0.293022	9.51364			0.374998	12.5223			0.251999	36.9518	35.7511		0.42857	26.2507			0.396224	25.9279
0.31683	24.4959			0.331605	26.2196			0.297673	10.858			0.38095	12.0518			0.255999	38.1565			0.435373	26.0824			0.402514	25.7804	26.977
0.321781	22.7048			0.336786	24.9794			0.302325	10.9627	10.9216		0.386903	11.8432			0.259999	37.1438			0.442177	26.2572			0.408804	24.5443
0.326732	21.1263			0.341968	23.1404			0.306977	10.4399			0.392856	13.2357			0.264	35.787			0.44898	26.3963			0.415094	24.0887
0.331683	19.8149			0.34715	22.499			0.311628	11.0874			0.398809	12.3911			0.268	36.1318			0.455783	26.8279	26.3547		0.421384	23.1539
0.336634	18.1464			0.352332	21.933	26.7568		0.31628	11.4034			0.404762	12.5228	12.2606		0.272001	34.5387			0.462587	27.3451			0.427674	22.7902
0.341585	17.2009			0.357514	21.3167			0.320932	12.0826			0.410715	12.7389			0.276001	34.6125			0.46939	29.2591			0.433964	22.0337
0.346536	16.723			0.362696	20.8221			0.325583	12.8546			0.416668	12.1717			0.280001	33.0493			0.476194	30.7103			0.440253	21.4117
0.351483	15.4869	21.144		0.367873	20.2599			0.330231	12.7936			0.422616	12.9277			0.283998	33.991			0.482991	32.1289			0.446538	20.5359
0.356434	14.9488			0.373055	19.8148			0.334883	12.5049			0.428569	12.4724			0.287999	32.9045			0.489795	33.5945			0.452828	20.8608	22.4274
0.361385	14.5558			0.378237	20.5402			0.339534	12.8787			0.434522	11.6316			0.291999	32.7537			0.496598	35.0493			0.459118	20.5033
0.366336	14.0459			0.383419	20.6121			0.344186	13.2295			0.440475	11.4845			0.296	31.1993			0.503402	35.6771	31.9663		0.465408	20.3646
0.371287	13.6794			0.388601	20.0526			0.348837	12.9887			0.446428	12.6625			0.3	31.6799	34.329		0.510205	36.8265			0.471698	20.8358
0.376238	13.7648			0.393783	20.2623			0.353489	12.8611	12.284		0.452381	12.5148	12.3255		0.304	29.878			0.517009	37.5476			0.477988	20.4521
0.381189	13.4883			0.398964	20.0466			0.358141	12.803			0.458334	12.5195			0.308001	30.569			0.523812	38.2342			0.484278	20.2522
0.38614	13.7752			0.404146	20.0536	20.3089		0.362792	12.5572			0.464287	11.9303			0.312001	29.9229			0.530615	38.5882			0.490568	20.0607
0.391087	14.11			0.409324	20.6251			0.36744	12.5214			0.470235	11.9079			0.315998	29.862			0.537413	38.4452			0.496852	19.5716
0.396038	13.6703			0.414506	20.1027			0.372092	12.8669			0.476188	11.6093			0.319999	28.8873			0.544217	38.947			0.503142	19.5097	20.1937
0.400989	13.9844	14.0023		0.419688	20.4737			0.376743	12.1513			0.482141	12.076			0.323999	28.3453			0.55102	38.7386	38.1896		0.509432	19.3711
0.40594	13.0875			0.424869	20.0576			0.381395	12.3994			0.488094	12.0461			0.327999	27.9426			0.557823	37.78			0.515722	19.0291
0.410891	13.2707			0.430051	20.5234			0.386047	12.2081			0.494047	12.5433			0.332	27.7904			0.564627	36.1254			0.522012	18.8411
0.415842	12.3443			0.435233	20.3405			0.390698	11.8793			0.5	13.4151	12.256		0.336	28.0884			0.57143	34.1373			0.528302	19.0926
0.420792	12.1428			0.440415	20.4608			0.39535	11.9747			0.505953	12.5152			0.340001	28.5098			0.578234	30.6784			0.534592	18.6656
0.425743	13.1919			0.445597	21.7457			0.400002	12.0545	12.3416		0.511906	12.4189			0.344001	28.2729			0.585037	28.2161			0.540882	19.108
0.43069	12.354			0.450774	21.1535	20.699		0.404649	11.3216			0.517854	11.4208			0.347998	28.4662			0.591835	26.6713			0.547167	18.7108
0.435641	12.946			0.455956	21.4329			0.409301	11.366			0.523807	11.9406			0.351999	28.5269	28.8509		0.598638	25.322			0.553457	18.695	18.9392
0.440592	12.9211			0.461138	21.88			0.413953	10.904			0.52976	12.819			0.355999	27.8368			0.605442	23.7358	30.3333		0.559747	18.4696
0.445543	12.9851			0.46632	21.8995			0.418604	10.6192			0.535713	11.9824			0.359999	27.8111			0.612245	23.1014			0.566036	18.2831
0.450494	13.7705	12.9014		0.471502	21.4807			0.423256	10.781			0.541666	12.264			0.364	27.8082			0.619048	22.8357			0.572326	17.4536
0.455445	13.7886			0.476684	22.7214			0.427907	10.6359			0.547619	11.6168			0.368	28.3823			0.625852	22.0583			0.578616	17.4636
0.460396	14.9977			0.481866	22.9195			0.432559	10.4987			0.553572	11.6155	12.0659		0.372001	28.3901			0.632655	21.357			0.584906	17.5984
0.465347	15.252			0.487048	22.7397			0.437211	9.49744			0.559525	12.2555			0.376001	28.1288			0.639459	20.5571			0.591196	17.7862
0.470294	15.2412			0.492225	23.2045			0.441858	10.2501			0.565473	11.2294			0.379998	27.9908			0.646256	20.2546			0.597481	17.3863
0.475245	15.898			0.497407	23.1593			0.44651	11.0851			0.571426	12.486			0.383998	29.0422			0.65306	20.0472	21.4588		0.603771	16.9159	17.6696
0.480196	16.1731			0.502589	23.6167	22.6457		0.451162	10.8412	10.7091		0.577379	11.9518			0.387999	28.6266			0.659863	19.8106			0.610061	16.3417
0.485147	15.4446			0.507771	22.8357			0.455813	11.087			0.583332	12.7847			0.391999	27.8696			0.666667	19.3307			0.616351	15.9788
0.490098	14.9672			0.512952	22.5155			0.460465	11.3979			0.589285	11.5744			0.396	30.3076			0.67347	19.452			0.622641	15.8277
0.495049	14.5132			0.518134	21.3677			0.465117	10.6322			0.595238	12.4569			0.4	28.9657	28.43		0.680274	19.0912			0.628931	15.1561
0.5	14.6473	15.0923		0.523316	21.077			0.469768	11.0583			0.601191	10.9787	11.9647		0.404	28.0575			0.687077	19.1453			0.63522	14.6462
0.504951	14.1788			0.528498	19.955			0.47442	10.7766			0.607144	12.3818			0.408001	28.8794			0.69388	18.5279			0.64151	14.8631
0.509902	13.5963			0.53368	19.5142			0.479072	10.1845			0.613097	11.9975			0.412001	29.7441			0.700684	19.0113	19.1956		0.6478	14.5359
0.514849	13.8533			0.538857	18.6855			0.483719	10.4554			0.619045	11.4913			0.415998	29.131			0.707481	18.8062			0.654085	14.3764	15.2157
0.5198	14.0104			0.544039	18.0831			0.488371	9.82125			0.624998	11.1703			0.419999	28.3306			0.714285	18.9165			0.660375	13.9827
0.524751	14.1033			0.549221	17.8715			0.493023	10.0176			0.63095	11.1086			0.423999	28.109			0.721088	19.0175			0.666665	13.7313
0.529702	14.402			0.554403	17.2953	19.3165		0.497674	10.1641			0.636903	10.9507			0.427999	28.4201			0.727892	19.1187			0.672955	13.5124
0.534653	13.7017			0.559585	16.8002			0.502326	10.1312	10.5205		0.642856	11.0638			0.432	28.6673			0.734695	18.581			0.679245	13.4089
0.539604	14.138			0.564767	16.3032			0.506977	10.061			0.648809	10.0376			0.436	28.108			0.741499	18.2683			0.685535	13.0734
0.544555	14.0922			0.569949	15.8191			0.511629	9.98386			0.654762	10.3661	11.1742		0.440001	29.22			0.748302	18.4886			0.691825	12.5241
0.549506	14.363			0.575131	15.107			0.516281	10.3434			0.660715	9.85548			0.444001	29.8552			0.755105	18.7177	18.7393		0.698115	12.6734
0.554453	14.5254	14.0877		0.580308	15.2644			0.520928	10.441			0.666663	10.7953			0.447998	28.8866			0.761903	18.857			0.704399	12.5879	13.1868
0.559404	14.6568			0.58549	14.409			0.52558	9.51841			0.672616	10.9284			0.451999	30.1855	28.8919		0.768707	18.9562			0.710689	12.7669
0.564355	14.3683			0.590672	14.3507			0.530232	10.8593			0.678569	10.8977			0.455999	30.2931			0.77551	19.479			0.716979	12.48
0.569306	14.0805			0.595854	13.9393			0.534883	10.5847			0.684522	10.5391			0.459999	29.0409			0.782313	19.4978			0.723269	12.1536
0.574257	14.016			0.601036	14.3894	14.7773		0.539535	10.0712			0.690475	10.7682			0.464	29.6085			0.789117	19.8856			0.729559	12.3627
0.579208	14.7421			0.606217	13.4137			0.544187	10.2753			0.696428	10.978			0.468	28.5721			0.79592	20.7204			0.735849	12.0263
0.584158	14.3333			0.611399	14.0879			0.548838	10.3295			0.702381	11.1612	10.7404		0.472001	27.6269			0.802724	21.1505	19.7924		0.742139	12.151
0.589109	14.2614			0.616581	13.494			0.55349	10.4055	10.2612		0.708334	10.6154			0.476001	29.3054			0.809527	22.3891			0.748429	11.2717
0.594056	13.6122			0.621759	13.655			0.558138	10.1611			0.714282	10.8148			0.479998	28.4756			0.816325	23.2463			0.754713	11.4447	12.0821
0.599007	14.039			0.62694	14.1007			0.562789	10.39			0.720235	9.94483			0.483998	28.6556			0.823128	24.4628			0.761003	11.595
0.603958	13.8354	14.1945		0.632122	14.0491			0.567441	10.1191			0.726188	10.1107			0.487999	28.9264			0.829932	25.0189			0.767293	11.5617
0.608909	13.7621			0.637304	13.8858			0.572093	10.4646			0.732141	10.5347			0.491999	28.8557			0.836735	26.4951			0.773583	11.3114
0.61386	13.7594			0.642486	14.2548			0.576744	10.3146			0.738094	10.6756			0.496	29.5528			0.843538	27.7013			0.779873	11.1468
0.618811	13.8773			0.647668	14.9118			0.581396	10.2831			0.744047	10.5361			0.5	29.5937	29.0422		0.850342	30.4829	25.6852		0.786163	11.5508
0.623762	14.0121			0.65285	14.2398	14.179		0.586047	10.5067			0.75	10.3257	10.4447		0.504	30.0621			0.857145	32.7571			0.792453	11.857
0.628713	13.8184			0.658032	15.1113			0.590699	10.3109			0.755953	10.1973			0.508001	30.084			0.863949	35.2355			0.798743	11.4571
0.63366	14.0368			0.663209	14.7286			0.595347	9.99278			0.761901	10.924			0.511998	30.1576			0.870746	37.9619			0.805028	11.1445	11.453
0.638611	14.0234			0.668391	14.925			0.599998	10.4697			0.767854	10.7151			0.515998	29.4911			0.87755	41.3023			0.811318	11.5721
0.643562	13.8925			0.673573	15.3169			0.60465	9.65335	10.2424		0.773807	10.9473			0.519999	29.7118			0.884353	43.0077			0.817608	11.2612
0.648513	13.8008			0.678755	14.7707			0.609302	9.88406			0.77976	10.7173			0.523999	30.323			0.891157	44.475			0.823898	10.9204
0.653464	14.5711	13.9554		0.683937	14.5374			0.613953	10.9391			0.785713	11.1468			0.527999	29.8126			0.89796	45.0686			0.830187	10.6693
0.658415	14.0804			0.689119	15.2522			0.618605	10.6112			0.791666	10.4596			0.532	30.244			0.904764	44.0393	40.4809		0.836477	10.8397
0.663366	15.0432			0.6943	15.1496			0.623257	9.73802			0.797619	10.8443			0.536	29.2021			0.911567	43.206			0.842767	10.3352
0.668317	14.5868			0.699482	15.4359			0.627908	10.3158			0.803572	10.8352	10.7541		0.540001	30.5854			0.91837	42.2329			0.849057	10.5652
0.673268	14.8849			0.704664	16.2793	15.3567		0.63256	10.0111			0.809525	10.4785			0.544001	30.5386			0.925174	41.0955			0.855347	10.6618	10.8531
0.678215	14.0111			0.709842	17.1717			0.637208	10.2283			0.815473	10.6523			0.547998	30.5991			0.931972	40.4404			0.861632	10.2157
0.683166	14.6009			0.715023	18.389			0.641859	9.3955			0.821426	10.9447			0.551999	30.769	30.1216		0.938775	38.9962			0.867922	10.2785
0.688117	14.3659			0.720205	18.4795			0.646511	9.59376			0.827379	10.8253			0.555999	30.5206			0.945578	37.4526			0.874212	10.2684
0.693068	14.9436			0.725387	18.9634			0.651163	9.7963	10.0513		0.833332	10.6809			0.559999	30.3294			0.952382	35.1068	39.79		0.880502	9.94171
0.698019	15.4413			0.730569	18.4812			0.655814	9.87282			0.839285	11.2978			0.564	30.5006			0.959185	32.1982			0.886792	10.2229
0.70297	15.4866	14.7445		0.735751	18.494			0.660466	8.84687			0.845238	10.322			0.568	32.0543			0.965989	29.9166			0.893082	9.9098
0.707921	15.9683			0.740933	18.8693			0.665117	9.41463			0.851191	10.3975	10.6999		0.572001	32.29			0.972792	27.6127			0.899372	9.85726
0.712872	16.3403			0.746115	18.4245			0.669769	8.86456			0.857144	10.8326			0.576001	33.1155			0.979595	26.6409			0.905661	10.0323	10.0908
0.717819	15.9474			0.751292	18.8754	18.5788		0.674417	8.7162			0.863092	11.4497			0.579998	32.6941			0.986393	24.0606			0.911946	10.0879
0.72277	16.2277			0.756474	18.2327			0.679068	8.42703			0.869045	11.6467			0.583998	31.7221			0.993197	21.3133			0.918236	9.5062
0.727721	17.7526			0.761656	17.5291			0.68372	8.52429			0.874998	11.3253			0.587999	32.4936			1	21.0112	26.1077		0.924526	9.37861
0.732672	18.1009			0.766838	16.8167			0.688372	8.37704			0.88095	11.6995			0.591999	33.3386							0.930816	9.12377
0.737623	18.7258			0.77202	17.1505			0.693023	8.90581			0.886903	12.6729			0.596	33.1075							0.937106	9.32716
0.742574	18.6319			0.777202	17.0313			0.697675	9.18477			0.892856	12.3519			0.6	32.5581							0.943396	9.40497
0.747525	19.4468			0.782383	17.0051			0.702327	9.1961	8.9391		0.898809	12.9031			0.604	32.6522	32.1059						0.949686	9.70037
0.752475	20.718	17.786		0.787565	16.4821			0.706978	9.14012			0.904762	13.3846	12.0296		0.608001	33.9336							0.955976	9.34607	9.48437
0.757422	22.5402			0.792743	16.0394			0.711626	8.71246			0.91071	14.0303			0.611998	35.0289							0.96226	9.3953
0.762373	22.3014			0.797925	16.7831			0.716278	9.17554			0.916663	14.9171			0.615998	34.2401							0.96855	9.2439
0.767324	23.5045			0.803107	17.079	16.9287		0.720929	9.10385			0.922616	16.3735			0.619999	35.1947							0.97484	9.18573
0.772275	24.896			0.808288	17.3706			0.725581	8.7944			0.928569	17.2248			0.623999	34.5457							0.98113	9.08333
0.777226	25.4715			0.81347	17.475			0.730233	9.40328			0.934522	17.5329			0.627999	35.968							0.98742	8.87971
0.782177	26.6249			0.818652	17.7283			0.734884	9.06891			0.940475	18.9105			0.632	36.3202							0.99371	8.49992
0.787128	28.6183			0.823834	18.134			0.739536	9.09338			0.946428	19.2366			0.636	34.6013							1	8.24551	8.93334
0.792079	30.6604			0.829016	18.5317			0.744187	9.72754			0.952381	21.0399	17.4082		0.640001	35.0768
0.797026	32.1797			0.834193	18.2261			0.748835	9.08958			0.958329	20.278			0.643998	34.9645
0.801977	32.4462	26.9243		0.839375	19.4113			0.753487	9.93635	9.20413		0.964282	20.0883			0.647998	35.5223
0.806928	34.4522			0.844557	19.6606			0.758138	9.52352			0.970235	20.2527			0.651999	35.781	35.0981
0.811879	35.9037			0.849739	19.6957			0.76279	10.275			0.976188	20.5361			0.655999	35.4075
0.81683	36.9893			0.854921	19.1898	18.6983		0.767442	10.1			0.982141	21.3748			0.659999	36.9066
0.821781	38.5213			0.860103	18.9305			0.772093	11.6667			0.988094	22.102			0.664	37.5427
0.826732	37.6118			0.865285	18.1485			0.776745	10.8667			0.994047	22.6328			0.668	38.7861
0.831683	37.8866			0.870466	18.576			0.781397	10.9774			1	20.9065	21.0214		0.672001	38.7535
0.836634	38.4159			0.875648	17.4724			0.786048	10.4117							0.676001	39.0272
0.841581	37.2298			0.880826	17.4999			0.790696	10.8552							0.679998	38.94
0.846532	35.6897			0.886008	16.2064			0.795348	10.8882							0.683998	39.8852
0.851483	34.1217	36.6822		0.89119	15.9618			0.799999	10.8333							0.687999	40.6076
0.856434	32.7593			0.896371	15.6327			0.804651	11.7609	10.7417						0.691999	40.7068
0.861385	32.0715			0.901553	16.8146	16.9956		0.809302	11.9496							0.696	42.3545
0.866336	30.5672			0.906735	16.6482			0.813954	12.9468							0.7	42.322
0.871287	29.717			0.911917	16.6106			0.818606	13.3806							0.704	42.5979	39.526
0.876238	29.1902			0.917099	16.7363			0.823257	13.3345							0.708001	42.3859
0.881185	28.2443			0.922276	17.0742			0.827905	13.0491							0.711998	41.154
0.886136	27.698			0.927458	17.9816			0.832557	13.4561							0.715998	41.302
0.891087	26.9139			0.93264	17.6496			0.837208	13.4586							0.719999	42.2526
0.896038	25.5397			0.937822	18.3939			0.84186	14.5571							0.723999	42.2369
0.900989	25.1062	28.7807		0.943004	18.1278			0.846512	14.4171							0.727999	42.9682
0.90594	23.6956			0.948186	17.2995			0.851163	13.9734	13.2985						0.732	43.2734
0.910891	22.5562			0.953368	17.1041	17.3163		0.855815	13.6688							0.736	44.2905
0.915842	21.3893			0.958549	16.1851			0.860467	14.8255							0.740001	46.0397
0.920788	19.7298			0.963727	16.2334			0.865114	16.1517							0.743998	44.5417
0.925739	18.5156			0.968909	15.8873			0.869766	15.5691							0.747998	45.514
0.93069	17.1436			0.974091	15.334			0.874418	15.7574							0.751999	45.591	43.4625
0.935641	16.6197			0.979273	14.6671			0.879069	16.8658							0.755999	45.9593
0.940592	15.1768			0.984454	14.9688			0.883721	17.8916							0.759999	48.7727
0.945543	13.5945			0.989636	14.3573			0.888372	19.2052							0.764	51.9306
0.950494	13.188	18.1609		0.994818	15.0217			0.893024	18.2884							0.768	55.6994
0.955445	12.171			1	14.5323	15.1252		0.897676	19.4611							0.772001	57.0887
0.960392	11.1112							0.902323	18.7098	16.9449						0.775998	58.2228
0.965343	10.8796							0.906975	19.2401							0.779998	61.3449
0.970294	10.8541							0.911627	19.1229							0.783998	60.8578
0.975245	9.84417							0.916278	18.0647							0.787999	62.536
0.980196	8.86959							0.92093	17.381							0.791999	64.3719
0.985147	8.10514							0.925582	17.6713							0.796	64.7753
0.990098	7.98547							0.930233	18.6403							0.8	65.0575	58.0514
0.995049	6.94339							0.934885	19.692							0.804	67.5384
1	6.139	9.29026						0.939537	20.5795							0.808001	70.4141
								0.944184	21.593							0.811998	69.2396
								0.948836	19.9798							0.815998	70.0564
								0.953488	18.7358	19.1546						0.819999	69.2368
								0.958139	16.8347							0.823999	67.9988
								0.962791	14.9042							0.827999	67.8722
								0.967442	12.9055							0.832	66.8723
								0.972094	11.6524							0.836	63.9765
								0.976746	9.94736							0.840001	61.8265
								0.981393	8.93472							0.843998	57.9386
								0.986045	8.13766							0.847998	56.141
								0.990697	7.53563							0.851999	54.811	64.9171
								0.995348	6.17592							0.855999	54.107
								1	4.99669	10.2025						0.859999	51.0033
																0.864	49.9596
																0.868	48.3395
																0.872001	47.75
																0.875998	46.0927
																0.879998	45.1187
																0.883998	44.154
																0.887999	44.2579
																0.891999	43.556
																0.896	43.8913
																0.9	44.255	46.8737
																0.904	42.9554
																0.907997	42.7958
																0.911998	42.953
																0.915998	43.6381
																0.919999	42.2642
																0.923999	40.9497
																0.927999	39.5289
																0.932	38.5507
																0.936	37.4663
																0.940001	35.2791
																0.943998	33.6064
																0.947998	30.6268
																0.951999	29.9627	38.5059
																0.955999	29.0185
																0.959999	27.65
																0.964	26.8415
																0.968	25.8967
																0.972001	24.8451
																0.975998	21.1374
																0.979998	19.2931
																0.983998	16.3621
																0.987999	15.1336
																0.991999	12.9404
																0.996	11.1712
																1	9.25019	19.9617
