# Supplementary material for: Crumbs organizes the transport machinery by regulating apical levels of PI(4,5)P2 in Drosophila
Source: eLife. 2019 Nov 7;8:e50900. doi: 10.7554/eLife.50900 (PMC6881148; doi:10.7554/eLife.50900)
Supplement: Figure 5—figure supplement 1—source data 9. [file elife-50900-fig5-figsupp1-data9.xlsx]

## Sheet: Image35
X0	Y0	Y1	Y2	Y3	Y4	Y5	Y6	Y7	Y8	Y9	Y10	Y11	Y12	Y13	Y14	Y15	Y16	Y17	Y18	Y19	Y20	Y21	Y22	Y23	Y24	Y25	Y26	Y27	Y28	Y29	Y30	Y31		Ap-Ba	Avg int
0	27.6589	20.6561	17.6129	18.873	19.092	17.731	37.772	31.7736	17.5378	41.6044	23.3342	9.822	16.3315	16.1213	21.7371	17.1008	10.2239	15.8869	17.8338	15.0104	15.6052	30.8777	14.2874	14.0947	27.9267	24.8167	26.103	20.1408	14.8795	16.1879	21.789	18.0755		0	20.5781
0.1191	21.3755	21.8551	20.1627	22.961	20.4877	25.0931	42.9331	34.395	20.4393	39.5197	24.6988	12.2923	15.5975	12.2905	16.3743	19.0988	11.4069	19.029	19.5974	20.1915	22.4037	38.0017	14.1504	15.7541	29.2643	28.3166	25.252	18.1976	20.9223	21.1995	23.0672	17.7182		0.00520886	22.314
0.2382	29.0764	18.4474	24.1915	28.82	23.6562	24.5931	36.8241	30.2582	22.0115	43.7078	31.5406	13.3001	19.0116	12.0271	16.8586	17.79	16.3439	21.3028	20.3006	21.5912	24.2591	41.1671	17.5846	16.7183	30.9941	27.3479	31.5205	20.6302	16.3264	24.995	19.9858	16.5185		0.0104177	23.7406
0.3573	29.643	19.5349	26.2807	33.911	27.0858	27.1167	36.8647	33.2736	21.6334	46.8792	34.3146	14.4941	20.5593	13.4061	18.192	15.692	14.8316	20.0075	20.6911	24.0512	27.616	39.82	20.1255	16.0022	31.4592	31.8857	28.9079	25.1966	17.9979	29.7677	24.0141	17.8479		0.0156266	25.2845
0.4764	32.6278	22.3887	28.2223	34.786	28.0609	25.3984	38.2696	33.266	19.7494	43.5679	40.3216	19.8231	18.7821	12.8345	22.0565	17.7888	20.0079	25.6806	19.2901	30.6884	29.2703	48.2871	18.2726	16.6388	34.0328	34.4737	34.5146	24.8147	21.0832	32.0908	25.5878	14.7299		0.0208354	27.1065
0.5954	26.4122	19.7275	28.8491	38.53	31.2902	27.956	33.2632	31.9173	24.9351	41.4579	44.1575	20.9084	31.8033	17.9898	22.3392	18.1726	22.909	26.8506	20.9343	36.6165	34.9158	54.26	20.991	23.5074	34.2434	40.8084	39.0802	23.489	23.4102	32.5349	27.2712	16.0397		0.0260399	29.2991
0.7145	29.7973	24.7956	33.5892	45.226	33.938	40.2914	44.0082	34.3895	29.3101	45.1563	51.1012	26.511	36.7527	25.2121	21.7061	25.104	27.8387	23.0988	25.6797	43.2805	37.4702	59.3042	20.46	23.2571	29.7921	39.8855	38.5123	24.2281	24.2119	43.3694	35.5387	23.8519		0.0312488	33.3334
0.8336	29.5009	30.6752	39.1585	48.654	33.2393	39.236	38.3253	35.4122	32.7247	46.2216	48.3237	26.9723	38.5596	33.6099	25.1625	36.5153	28.2132	28.8485	30.8138	44.6308	44.1261	64.0301	18.4182	23.4437	28.9477	41.1684	39.4441	32.1243	22.3545	47.63	37.5027	24.028		0.0364576	35.563
0.9527	37.4597	35.9515	51.7117	45.44	39.3224	42.1421	38.0312	41.4753	40.393	44.028	58.5454	27.5172	51.3173	38.1286	38.5346	48.5054	33.3523	34.9688	33.4601	52.9135	51.4838	65.5863	19.1782	28.1285	31.5015	42.492	53.6631	36.6651	23.4972	49.2319	42.9822	24.29		0.0416665	40.6843
1.0718	39.3985	37.9976	55.3069	53.848	39.8059	48.3321	40.2435	40.9984	43.5948	43.0624	71.2354	28.5816	61.6389	54.563	43.3888	54.7755	38.8579	38.4758	37.1712	65.9456	49.3244	67.9384	24.4549	29.2548	30.644	43.9496	42.4382	36.7781	27.3828	45.1908	35.6815	25.7406		0.0468753	43.625
1.1909	53.8975	58.3252	64.4933	57.414	47.0292	53.259	48.7039	36.0635	58.7692	54.6021	73.09	36.249	71.0865	62.4519	50.0896	56.2766	41.8962	35.1756	46.3386	72.9944	48.3717	73.4759	30.6847	25.7621	35.8502	47.173	45.2496	35.013	32.4718	35.6237	36.9478	30.7125		0.0520842	48.6107
1.31	58.5454	71.6557	76.2051	58.649	52.9632	51.5668	45.5439	34.9076	66.9998	59.5919	69.5343	49.6718	85.8015	73.5807	59.0223	64.937	47.243	43.0641	52.4459	67.4194	53.99	72.4594	33.4348	23.5237	39.6775	46.2034	47.5279	37.4377	36.5268	35.6474	33.8194	33.7996		0.0572931	52.6061
1.4291	67.3497	84.768	61.7469	61.418	62.7832	54.0712	48.1828	36.9773	85.2652	72.2225	74.8785	52.2485	84.5833	90.5525	78.0157	68.6106	52.8734	43.3527	58.5242	68.8588	52.3078	74.4912	34.1964	26.7409	44.0869	42.241	45.1931	45.0788	40.7222	36.9966	29.6263	33.404		0.0625019	56.6365
1.5481	59.1324	88.489	52.6794	64.211	60.8549	56.3528	48.1414	44.3706	98.9133	76.2697	73.0377	59.3521	82.6354	80.1888	85.7431	70.5308	48.2158	46.992	63.8002	60.8724	52.549	60.9194	34.0962	32.1235	45.007	39.0011	51.1949	44.4759	39.3984	33.3628	23.8267	32.4532		0.0677064	56.5372
1.6672	51.6518	97.3675	52.0499	67.866	65.6646	65.1464	47.6476	45.3149	86.7818	77.6894	68.7191	64.6348	75.2203	76.4908	86.2144	61.2286	44.0654	50.5975	60.5471	53.5891	44.0041	56.7977	34.8669	29.8091	43.6215	42.2373	51.8781	49.9599	40.8156	30.5044	24.2868	39.7556		0.0729153	55.8445
1.7863	49.0875	90.9957	55.6168	70.005	62.5684	60.1628	62.3046	48.4109	83.2905	76.8432	56.7456	70.6482	73.3106	64.3162	81.3706	57.6425	51.2404	53.6728	55.2589	47.1965	32.9546	49.2573	36.9752	27.5452	45.369	35.7057	54.2232	48.5746	36.8544	35.5935	24.9449	38.8821		0.0781241	54.299
1.9054	50.0897	83.5198	49.0341	77.388	60.4898	64.3354	65.3236	54.1341	80.2616	69.0289	46.2719	70.2597	74.7894	57.9183	63.8239	50.4394	50.6119	41.2564	53.7919	30.8536	26.9029	41.4095	39.8256	23.0875	44.4691	33.2021	52.9187	48.6578	40.2856	39.3796	22.2522	45.8383		0.083333	51.6203
2.0245	41.2579	78.6422	59.7157	78.657	63.2103	69.0336	64.8993	57.4676	62.982	59.8682	45.3262	63.2707	63.2531	57.5929	55.9362	43.6081	50.4617	35.6695	47.0659	30.2864	14.2729	34.9313	38.1468	24.6034	37.6765	29.8575	48.8485	46.4949	34.9659	35.7807	19.0902	44.4975		0.0885418	48.0428
2.1436	38.1079	68.6334	57.145	75.158	68.696	58.0148	69.1976	63.3318	43.7088	50.8775	44.2091	62.2836	45.7481	59.6932	53.472	41.659	41.993	32.583	37.4444	18.6007	13.3215	28.9742	33.3959	21.0078	30.715	27.2033	45.2347	43.3831	35.1571	34.1956	20.2583	44.7952		0.0937507	44.0062
2.2627	33.1384	62.2283	52.7121	67.757	65.6631	53.4917	69.9019	63.3333	38.382	41.2939	39.3859	69.2963	45.6814	51.9309	48.1598	35.8243	43.5706	31.6008	33.0122	16.3228	12.0194	19.6674	35.3574	23.8568	23.7771	24.891	49.0865	44.8066	33.2281	32.1894	21.4388	43.4557		0.0989595	41.4519
2.3818	27.5043	61.2808	58.3307	73.295	71.8808	46.7281	66.0127	54.7439	35.1578	37.7435	42.1331	70.054	42.8568	47.9398	38.7617	33.1745	36.512	23.7406	25.4936	18.2748	7.9272	16.7926	37.0634	23.7728	14.3947	21.7485	47.551	37.5413	30.0913	32.0743	20.4645	46.1321		0.104168	38.9741
2.5008	30.3298	49.721	57.5848	70.793	78.9711	36.4173	67.7919	43.3987	35.5834	31.4618	44.626	54.8882	37.6	40.8598	34.7486	30.2753	33.4273	15.7591	16.7196	12.1607	6.3854	12.8141	37.1735	27.9045	13.7654	19.7314	40.4161	32.8111	31.6946	31.3871	19.7264	50.9906		0.109373	35.8724
2.6199	29.1208	50.9921	62.6897	73.066	83.6426	34.3791	69.5172	38.1627	33.0239	26.9566	48.9459	50.1845	32.7225	24.2892	33.359	27.2017	33.1242	12.3025	14.0105	10.5831	7.8264	12.5647	36.0957	24.9174	15.3855	16.0544	39.3855	32.7202	34.8529	33.8157	22.1291	54.1734		0.114582	34.9436
2.739	20.9592	49.31	67.2156	87.16	97.265	33.4727	67.3197	31.6916	27.2584	25.234	51.969	47.6709	35.2236	18.8227	25.8433	28.1782	28.0783	9.5149	12.4395	10.8165	7.4676	9.86	35.2363	25.4226	12.6726	15.1299	36.0069	27.3917	25.9907	33.428	19.3773	47.8856		0.119791	33.4785
2.8581	22.0314	42.9319	69.2089	87.734	92.9719	32.6432	63.3633	34.9012	22.6797	23.8116	60.2591	40.1108	28.9222	17.3606	21.3356	23.4152	24.9647	8.8639	10.8528	10.0754	6.7751	11.0221	38.5604	29.0117	12.4459	15.051	34.1793	27.6508	31.4021	27.5487	19.0417	50.6354		0.124999	32.5551
2.9772	21.9661	37.1255	70.6733	102.755	82.8935	32.0733	50.5473	35.1895	21.4239	23.2466	60.1097	38.6779	24.2696	16.4375	16.1121	22.6258	18.4756	6.4912	8.1237	6.7362	7.3863	10.7625	35.7447	28.1026	9.0284	12.0812	32.936	29.7053	32.3443	34.9177	18.9452	53.2308		0.130208	31.2856
3.0963	22.9754	31.3138	68.5103	97.17	78.6186	33.3014	49.6266	29.3652	22.0768	23.8825	62.7153	42.7622	20.9325	14.7285	21.0173	20.3793	18.7562	6.0904	8.8593	7.3149	5.032	7.011	40.6133	31.3282	6.8714	11.3124	37.8816	23.7764	36.8621	38.1358	18.4827	60.5114		0.135417	31.1942
3.2154	20.3246	26.81	66.7795	95.961	67.8222	30.9124	48.0376	23.771	26.48	28.2985	68.4443	41.5084	17.1563	11.3617	19.5614	20.8107	18.4787	4.9518	8.9451	4.3818	5.2122	8.0318	35.2837	31.0393	6.2167	9.0368	36.1662	27.2744	36.9377	32.2249	22.8002	52.3939		0.140626	29.7942
3.3345	19.3641	26.5828	69.1713	102.258	59.3317	22.5325	38.78	22.824	26.6358	25.0327	71.0317	37.4208	12.6878	14.4302	12.8974	22.3733	18.3068	6.0716	4.989	4.4295	6.4009	7.8328	33.6884	28.0205	4.4918	10.1438	28.8855	28.2169	42.0703	33.9522	22.0247	58.635		0.145835	28.7973
3.4535	19.0907	26.2599	66.7374	115.585	51.3091	24.7082	34.4217	25.1138	24.085	20.1519	64.9865	38.8271	13.6942	13.6416	16.031	18.8932	13.2204	6.4555	4.7651	6.1236	7.4949	8.2592	29.8417	30.909	6.2701	8.1599	32.5265	25.4006	38.2399	33.9411	16.2828	53.8772		0.151039	27.9782
3.5726	20.5328	25.8579	64.561	120.454	45.9926	21.7258	29.4311	20.4937	18.6138	25.1802	75.4524	45.3498	10.5566	12.4797	16.6611	17.5991	19.8101	7.2109	5.8507	4.065	7.6487	6.3146	27.6736	33.1494	7.3661	10.0095	29.3495	25.0038	41.1016	33.5342	17.4976	55.1462		0.156248	28.1773
3.6917	23.335	30.8067	77.0447	117.321	44.8473	16.7739	28.7912	17.4435	16.3766	23.3434	82.8631	57.2859	11.0425	10.7412	14.4	15.4661	18.3984	9.1788	6.9395	3.2322	8.9207	5.2235	32.9784	29.2223	10.6703	10.892	26.1838	21.3894	39.4041	34.8558	17.0808	56.1723		0.161457	28.707
3.8108	19.3106	25.9174	82.6582	110.425	38.8869	18.8772	30.1221	16.8534	20.8303	22.5167	77.9333	64.132	10.3224	12.5655	12.4462	18.5984	15.7376	9.8355	6.5097	5.0643	6.2303	8.4391	27.0927	29.355	11.2858	8.7631	27.6527	26.4103	46.3307	36.2443	18.1035	57.7946		0.166666	28.8514
3.9299	15.5983	26.6707	79.0268	108.325	35.3122	18.1649	25.7768	17.2703	16.828	20.8345	73.352	60.8117	8.8115	14.8231	12.1862	16.6443	17.3676	6.2531	8.8772	8.4644	5.8363	6.8231	29.071	29.1033	10.3892	7.9197	22.6817	24.0566	45.6667	32.8307	19.6988	53.6752		0.171875	27.4735
4.049	14.4108	27.7174	70.7089	112.95	28.4652	15.6145	19.5188	17.2888	15.4966	19.1334	72.5174	53.8755	6.4978	12.4605	11.9051	16.0201	13.3878	8.6245	6.0361	7.5222	5.7342	5.9866	25.4192	34.3352	13.54	7.7239	15.6488	23.3948	48.1821	33.002	21.8175	52.4953		0.177084	26.1697
4.1681	13.5754	22.6891	66.1512	106.622	26.7469	15.9425	26.2731	16.5802	14.8072	18.162	75.5049	66.041	7.3168	13.5256	12.3319	13.1802	13.1447	10.6611	5.1356	7.6329	5.3094	3.9824	27.5155	36.2089	12.7672	8.8923	13.7818	21.5688	48.4606	32.7503	18.0369	48.9538		0.182293	25.9454
4.2872	11.8856	17.813	63.1631	102.885	28.6017	17.7889	16.7661	14.1385	17.1537	20.7829	69.3607	67.5078	7.6964	15.6346	14.2043	12.9759	14.2085	11.4205	4.6015	6.8075	7.9583	4.3069	26.2694	32.1832	13.4382	8.107	16.2527	19.4617	49.3711	32.4038	16.667	45.2155		0.187501	25.2197
4.4063	11.9112	15.7291	53.0098	104.549	24.1239	21.2771	18.946	15.3713	16.0214	20.4746	76.5065	67.154	7.2561	11.7509	11.2316	13.0402	10.2199	10.6029	5.7996	4.3169	8.4999	3.4173	24.998	33.5228	20.4201	8.3648	14.5615	21.6696	45.1726	25.6419	19.7471	44.8809		0.19271	24.6934
4.5253	10.9536	16.0547	44.8093	90.807	25.5177	24.2208	16.6896	17.636	12.4167	18.1849	77.0139	66.4735	4.4069	11.9235	10.3049	13.1203	9.6883	10.4187	7.3028	5.7888	7.7437	5.5487	27.071	29.8911	19.3098	7.2819	19.494	23.6973	43.4902	28.5154	16.2158	44.3987		0.197915	23.9497
4.6444	11.4366	16.2638	38.9845	82.501	23.2233	21.5332	18.8355	17.5137	12.9805	15.5166	68.7452	61.6696	5.922	15.2368	12.3086	14.706	8.034	11.5818	7.7245	6.9325	6.9323	7.7798	20.4668	31.5966	21.9782	5.309	17.9743	21.096	41.6194	28.554	17.0933	44.363		0.203124	23.0129
4.7635	10.0721	13.085	28.5012	71.512	21.7568	23.6213	22.1765	18.2862	15.7412	15.1299	73.4251	52.9718	8.4988	13.64	11.479	16.5718	8.5332	12.6145	5.1037	7.0785	7.7741	4.4406	21.0575	37.7444	22.4399	5.7508	14.3695	19.4308	38.7993	21.0909	13.4509	44.7189		0.208332	21.9021
4.8826	11.0982	12.9848	27.0738	67.388	13.5472	26.1606	22.9855	15.667	13.5108	10.9937	73.9759	54.5202	6.936	17.0385	6.7412	17.7742	8.2696	14.1758	3.2671	7.0597	9.0495	5.2575	22.4445	38.7161	24.1517	8.0361	15.0674	16.2772	39.9853	18.2289	10.0675	44.0139		0.213541	21.327
5.0017	9.567	15.9468	24.3212	55.228	14.8292	28.5596	16.6096	11.8024	12.6137	12.2067	64.6921	52.8925	7.5904	16.517	9.7927	15.1761	8.8443	10.3654	5.1872	6.1954	5.2697	5.0756	22.199	36.9145	27.446	4.8595	13.6954	13.5506	35.0227	16.5596	10.6296	30.3825		0.21875	19.3919
5.1208	11.1101	15.2105	25.9688	44.331	11.2565	20.7105	17.6666	13.8726	13.2601	12.2893	59.8064	48.5852	4.9675	19.7343	9.6881	13.684	8.944	10.4666	5.8954	7.2088	7.2396	4.9966	13.405	39.9251	24.3454	6.6519	12.605	14.2702	34.972	8.8532	10.6848	29.2717		0.223959	18.1837
5.2399	9.5949	12.6339	26.2874	47.163	15.7559	22.6451	18.1515	11.225	11.3775	11.0832	60.5805	57.546	4.729	21.8947	7.8498	13.7329	8.5405	18.3099	5.9583	6.4807	6.2571	3.8062	15.996	34.4412	26.986	4.7572	10.9504	15.0835	31.0286	9.8266	8.4116	28.6054		0.229168	18.3653
5.359	12.6812	12.1326	22.2267	41.892	14.7965	22.0102	20.1662	13.6366	10.2983	12.5796	46.4549	59.5986	7.0897	21.2552	9.5408	17.8236	10.1181	16.1074	8.585	8.0948	7.568	4.2406	12.0775	29.1547	26.9438	4.7494	9.2706	14.3549	21.0279	11.6484	7.0294	23.6688		0.234377	17.4632
5.478	13.2469	10.3602	20.6739	36.216	12.0712	20.023	16.0591	11.1719	12.208	8.3743	38.2973	54.5519	3.9877	25.4919	7.9655	13.2695	8.4894	13.2822	7.7969	8.6704	9.1163	7.3938	14.8198	28.3927	26.1826	4.6426	10.0764	9.1658	21.4607	12.9274	9.1685	23.0856		0.239581	16.2075
5.5971	13.4332	13.7992	24.415	30.992	10.5241	20.9962	16.5261	9.7418	12.2539	5.8245	41.6577	51.4602	5.002	30.1295	8.4146	11.6234	4.501	15.7333	8.5998	7.8837	10.9639	7.0531	12.9802	31.6167	28.8089	6.0147	12.0294	10.6634	21.0773	8.2995	9.139	22.0932		0.24479	16.3828
5.7162	11.1868	10.6139	19.8966	22.786	10.6856	23.0426	15.7655	9.0923	11.801	9.9996	41.6187	43.4357	6.2209	25.4467	13.3793	13.1754	6.4116	15.823	6.8506	7.7855	9.7037	6.2747	14.0262	35.9743	27.6872	5.3724	11.4555	8.5388	14.2125	8.268	7.1964	15.1123		0.249999	15.2762
5.8353	12.3979	9.7016	19.6828	19.727	12.0053	20.2405	11.8209	10.0412	14.957	9.0455	40.3241	40.0439	5.2432	26.9258	9.7805	13.365	5.6572	17.5823	8.8727	8.1146	9.2933	5.5684	12.3666	38.2413	24.3413	6.4415	8.7414	12.7571	13.1442	6.6385	6.9053	10.5847		0.255208	14.7048
5.9544	17.2692	15.4843	17.9467	18.734	11.6236	21.4016	8.7841	8.5313	12.134	6.3734	36.7083	31.7373	6.1452	29.5535	10.2319	13.9982	8.2298	15.2011	8.6673	9.0186	10.0123	5.7874	8.4836	27.5403	26.7173	5.3494	9.3237	8.8375	14.5103	9.5306	6.0492	10.6487		0.260417	14.0801
6.0735	18.2796	17.4155	17.9177	19.134	13.0604	19.068	12.4539	9.7772	11.1893	6.9603	42.8432	24.3983	6.4137	28.5639	9.6631	12.3303	7.3635	15.5713	8.6206	10.5238	10.7205	5.6221	8.8842	29.2352	25.9581	7.2022	9.7586	7.5122	10.1416	10.6753	5.954	9.4143		0.265625	14.1446
6.1926	21.7968	18.6619	13.8994	20.17	11.4991	24.3986	12.5705	8.0713	11.0405	7.8575	39.3502	18.2721	4.0179	31.0987	10.47	12.6053	6.4945	16.4121	8.3442	10.7678	11.0064	4.8915	9.0814	31.1464	25.8392	7.6689	10.2943	8.4777	9.5744	9.6743	8.3719	10.546		0.270834	14.1991
6.3117	22.3699	14.3942	15.204	16.981	10.5611	30.3256	12.4571	7.2849	11.2738	9.3032	32.4228	14.5546	4.1202	34.3153	8.2498	10.6746	6.3396	15.9179	7.9704	8.6048	15.0515	5.2729	11.0455	28.127	21.9386	5.5097	6.7102	5.8775	9.474	6.2597	7.6062	9.9383		0.276043	13.3167
6.4307	21.5653	13.1279	13.1834	15.861	13.5706	26.2182	9.2038	11.6093	14.6544	10.0279	22.986	12.7156	6.2396	27.5012	9.0053	10.1575	7.6139	15.8488	8.7081	14.5501	19.3017	7.0522	7.3927	29.5225	19.448	4.9884	8.2593	6.5498	6.9747	7.4856	8.056	7.4328		0.281248	13.0254
6.5498	19.6971	13.0211	13.8766	11.875	12.3743	25.0701	11.0078	12.0118	14.6762	7.6626	20.4603	10.2706	4.061	29.985	11.128	8.9356	5.5113	16.3172	11.9942	13.1049	24.6062	9.7619	7.4475	26.1013	21.9179	5.5586	10.4409	6.6327	4.3211	4.9042	8.6307	7.4479		0.286457	12.8379
6.6689	23.2131	10.7041	11.8559	11.549	11.3705	22.9436	12.3285	9.0896	16.6153	6.2043	17.9319	6.295	1.9913	29.4371	13.8086	8.7601	6.5616	16.216	13.5947	10.572	21.0498	6.0835	7.9552	19.368	22.1518	6.2378	9.9576	6.2558	4.0959	4.6809	8.0674	5.4932		0.291665	11.9512
6.788	27.9662	14.0065	8.2436	10.597	10.7063	24.6666	11.2677	9.6611	13.1216	9.073	15.0465	4.6102	4.8099	28.3801	9.5152	8.4943	6.3428	15.2599	16.9217	13.3241	18.7426	7.6286	8.039	19.5804	22.6975	8.0541	8.0344	6.5054	5.0968	5.132	8.2145	4.9827		0.296874	12.0226
6.9071	24.2565	16.8982	10.3806	8.679	13.374	20.9932	10.794	10.5525	13.9158	7.1444	11.1845	5.6974	3.5159	29.933	11.2182	10.0531	5.7922	9.3614	19.4334	12.5264	22.9055	6.5035	5.6086	20.2575	20.0941	7.7894	10.7055	5.1231	3.7079	6.5622	11.6679	5.3063		0.302083	11.9355
7.0262	19.3525	13.0646	9.693	8.141	13.2503	19.7436	13.4161	11.0894	16.2647	8.2897	10.472	4.2397	4.8321	32.3324	10.0302	9.2023	7.1269	8.7695	16.6191	13.582	20.4963	7.1483	7.0887	20.2065	23.9937	6.6608	10.6611	6.443	4.1119	6.2407	10.4834	5.1666		0.307292	11.8191
7.1453	18.8855	8.4262	8.9928	10.752	10.5368	22.7394	16.7804	11.9852	21.2144	8.4676	10.4412	4.7022	4.0471	31.5914	11.3929	9.9833	4.3271	9.0781	16.6333	16.3745	23.7953	4.9569	7.4583	17.8585	19.9106	5.0305	8.9008	4.9632	6.8658	4.9796	11.2225	5.6311		0.312501	11.8414
7.2644	19.5969	15.0163	7.9883	6.532	11.8202	22.3914	15.6937	11.9621	24.3625	7.5733	7.5043	2.8886	4.4862	32.0651	12.556	6.9492	2.8436	7.4895	22.4712	14.4997	23.193	7.0619	4.3164	15.6628	19.3345	6.797	8.4621	5.1997	7.633	5.7541	9.1208	5.9757		0.31771	11.725
7.3834	17.5942	13.0103	8.1851	7.538	14.146	19.7723	15.3051	14.1574	21.008	9.8552	5.6876	3.4698	3.7356	29.7989	15.0342	10.666	6.2615	9.7282	25.163	15.443	20.3577	6.0809	5.4089	16.1078	15.7446	4.4783	11.1148	4.0512	6.1575	7.603	9.0395	4.8179		0.322914	11.7663
7.5025	18.6253	12.869	7.6069	6.492	12.8672	20.2613	17.4058	12.3147	19.8872	9.4641	7.0079	2.5808	3.1769	26.184	13.0187	9.9953	5.2514	8.8023	21.3496	15.317	28.332	6.1983	3.9324	15.8227	12.6766	4.737	8.9344	5.4011	5.4458	7.1905	13.176	7.7431		0.328123	11.5646
7.6216	15.3737	13.0315	6.9879	7.862	9.3881	18.6853	21.8818	16.9753	22.7046	7.6415	7.8022	2.6789	3.5097	30.2472	14.102	9.4203	4.6314	7.4071	27.2413	16.8543	28.4695	8.2086	3.415	15.7576	11.8285	6.3825	6.3803	4.1937	6.5635	6.6405	11.8278	4.3808		0.333332	11.8273
7.7407	13.292	10.8869	7.9851	9.664	9.468	23.5943	25.7555	14.9092	20.2031	7.1949	4.0626	4.5462	2.1442	29.7234	12.4261	7.3166	6.845	6.5962	22.6106	16.8304	25.1558	8.4657	3.9036	11.5914	11.6301	5.9865	8.1435	3.9631	6.2669	5.1048	10.5703	3.7497		0.338541	11.2683
7.8598	14.0029	12.9175	7.7769	7.246	9.6452	21.8778	20.4999	15.93	19.5181	8.2336	2.6672	5.1804	4.3086	24.8501	16.8859	5.9854	3.3689	5.4188	28.8896	18.1558	30.665	6.8467	2.9714	10.0842	10.7564	6.8176	9.6748	6.3849	4.4109	5.3262	12.8675	4.9438		0.34375	11.4096
7.9789	17.4014	13.8152	7.3291	6.176	11.1498	27.9623	18.7538	15.4053	19.8879	8.6556	3.5577	4.6167	3.7622	26.0009	16.6109	8.8259	4.7089	3.7675	27.7392	21.0689	30.5808	5.6803	3.4275	12.2115	13.5231	5.9158	12.1097	4.0277	4.2888	3.9768	14.4626	3.3211		0.348958	11.8975
8.098	20.1295	13.4275	7.3255	6.049	13.3982	23.9565	17.5214	14.0342	21.1767	6.7296	4.3399	3.4099	4.1567	19.0134	19.3705	3.7516	2.59	2.9764	21.0467	18.1507	23.3342	6.9692	4.9762	11.0627	7.192	6.916	12.9708	4.1574	3.3151	5.1754	17.3207	2.293		0.354167	10.8824
8.2171	23.5242	10.3239	7.6906	5.561	12.7431	24.6302	19.8436	13.518	20.5127	9.9015	3.0514	3.0885	4.7176	17.0375	17.7365	6.0288	4.6808	4.5712	23.2829	14.9861	20.2928	5.1238	4.7845	9.4976	6.2851	6.8165	13.196	5.6705	4.2255	6.6724	13.0143	4.5538		0.359376	10.8613
8.3362	24.679	14.2273	4.8688	4.955	12.6093	23.1685	20.3173	11.7122	21.1266	6.322	3.6147	5.2348	4.0186	14.3102	17.2381	6.787	5.3196	4.9444	24.19	17.0782	23.2322	5.7615	3.7093	9.0543	7.0275	6.3625	12.6389	3.311	4.0841	6.6806	14.3513	3.7272		0.364585	10.8332
8.4552	27.9872	11.1802	7.7227	5.144	13.3453	25.7881	21.615	15.2721	20.4651	6.9958	5.3283	2.7949	4.7768	16.8433	20.4224	6.3116	4.8405	2.8043	25.608	14.5693	17.4667	3.5112	3.4639	5.0732	5.5482	7.3313	14.6037	4.6738	3.0095	7.4639	14.8588	5.3847		0.36979	11.0064
8.5743	25.7575	10.9897	8.4949	4.815	12.9361	19.1022	23.4572	12.0591	20.8753	7.2072	3.8733	2.2291	4.264	11.2867	22.4271	5.7552	6.55	4.2014	23.5784	15.7721	18.203	4.9361	4.4628	4.4276	5.2722	5.1988	15.0542	5.0846	2.0327	6.7176	14.3583	2.2737		0.374998	10.4267
8.6934	29.0809	11.1262	6.8597	5.181	13.4479	24.2404	23.1883	12.7617	20.9128	6.9209	2.577	2.6963	5.074	12.3546	21.325	4.5539	6.7586	3.1108	21.6905	14.0196	18.9756	4.1406	4.1883	4.5547	5.6048	5.7412	14.478	4.6984	3.3712	6.3982	13.7042	2.9568		0.380207	10.5216
8.8125	24.7597	11.4697	8.4595	4.621	12.3114	21.8928	24.0536	16.8335	25.9298	6.3471	4.4946	2.8122	2.1815	9.1316	22.9123	6.5823	5.4968	4.3619	21.6528	21.1121	16.2686	4.8292	5.7023	3.7784	4.0326	6.1065	17.5974	2.9123	4.7469	5.0773	14.3458	4.4158		0.385416	10.8509
8.9316	25.6261	10.6079	5.3812	7.491	13.4874	17.321	22.9664	14.9178	24.7162	8.0152	2.3449	3.6492	4.4289	8.6006	28.9415	6.0694	4.8277	4.3707	15.5392	23.9447	15.1843	4.552	4.9241	3.8978	6.637	6.0517	19.8843	2.7792	2.2011	7.6477	13.4219	4.3599		0.390625	10.7746
9.0507	23.9964	12.9749	4.6481	4.939	7.4607	22.117	25.4757	12.8925	22.5658	6.6514	3.8054	3.4501	3.1798	7.3428	26.489	8.4213	6.0646	5.7611	14.1371	26.5269	14.5202	4.9414	4.228	3.2828	5.187	6.1552	24.0305	4.2967	3.9846	7.0013	11.5942	4.1799		0.395834	10.6969
9.1698	23.5372	10.3038	5.5904	5.098	7.8278	15.553	36.932	15.3939	21.6902	6.1171	4.7129	4.6415	2.4679	5.8554	24.2772	7.1982	2.9414	6.5249	13.3011	24.8363	18.4872	6.1626	5.4289	4.216	6.5585	4.3622	30.6684	6.4711	3.0957	5.4938	13.4842	4.8734		0.401043	11.0657
9.2889	17.3397	11.4633	5.1852	6.291	4.8167	14.7606	29.0906	15.438	24.2189	6.2378	6.6908	2.5066	2.6003	4.6914	24.8005	5.7856	4.74	4.8339	10.7723	31.663	12.6169	6.8941	5.5659	6.0564	3.5559	5.882	29.0343	5.0782	3.6469	7.0403	13.6595	4.7478		0.406252	10.5533
9.4079	14.7206	12.24	6.2314	7.045	7.51	17.2269	33.3845	16.0843	27.8532	5.7621	4.7956	2.5025	2.9447	4.2823	21.6819	6.3297	5.2254	5.2581	7.7427	29.9402	14.0215	3.9668	2.905	5.0219	5.0611	4.764	25.0429	5.9777	3.807	5.659	11.8075	4.8398		0.411456	10.3636
9.527	17.0284	13.4518	6.1108	5.015	6.9676	17.8201	32.9727	12.32	29.3816	7.4801	5.7502	4.9632	4.3828	2.7392	27.1396	4.6275	3.3052	2.6491	8.9993	35.3974	18.2448	5.2522	3.2008	4.6468	4.1571	5.3746	28.3609	6.3243	3.856	3.8306	13.6274	2.6223		0.416665	10.875
9.6461	12.9819	9.553	7.5087	6.562	8.0251	21.7619	31.8058	12.0269	29.8575	8.7531	5.3502	3.489	3.3031	4.778	28.3663	4.2724	1.9311	2.7829	5.0047	43.4419	17.0737	7.1289	5.1277	3.2269	4.9298	6.0109	24.7486	4.3532	3.5837	7.3818	14.7303	3.4729		0.421874	11.0414
9.7652	13.6494	8.3474	5.9724	5.568	7.2268	17.1134	31.3215	16.0246	22.4005	6.5814	4.3726	2.6008	2.789	4.6951	28.4248	5.9584	3.393	2.8353	6.9159	47.7767	18.0118	4.7909	5.4823	3.6752	4.6193	6.6506	16.0337	6.9224	4.0171	5.5615	14.439	3.3606		0.427083	10.5479
9.8843	15.9847	12.645	5.6019	8.829	6.7713	19.004	33.7885	16.5167	21.5123	6.8728	4.9194	3.34	3.9001	3.5685	25.5694	6.0504	1.9761	4.6133	6.9622	40.2313	18.1089	2.7246	3.8903	3.2582	4.5622	5.4576	18.2592	6.5195	3.4876	5.2612	13.8772	5.3109		0.432291	10.6054
10.0034	13.4508	9.7925	4.3563	6.904	5.5837	22.5809	29.5936	18.4412	22.5752	7.026	4.367	6.2855	3.6127	4.7109	28.284	5.3197	2.5854	5.2943	6.1129	32.4875	14.0066	4.0245	6.4367	3.2386	3.6243	5.9538	15.4366	4.3057	4.9599	5.6924	13.7999	4.4061		0.4375	10.164
10.1225	11.4694	9.449	5.6068	4.042	8.9251	23.309	23.7389	21.1188	25.157	5.3159	3.2711	3.8335	5.2409	5.1158	31.0025	4.2547	3.3442	4.7014	6.1307	34.7837	17.664	4.8583	4.6052	4.5668	5.0493	5.1914	16.2621	3.9013	3.8825	3.1233	15.6536	5.2035		0.442709	10.3054
10.2416	13.2184	9.0221	6.4707	4.493	6.0378	19.0696	26.606	18.365	23.5273	6.6249	3.4001	3.8085	2.6435	3.0468	24.7505	4.4448	3.1906	4.3304	7.2208	31.9915	18.7653	4.9141	4.3454	3.322	5.2422	6.4683	18.4916	5.0533	4.2836	4.4931	15.6003	4.7599		0.447918	9.93754
10.3606	16.5396	8.6719	7.9834	4.366	7.419	25.1966	26.5077	14.9721	20.7927	6.9187	4.9599	3.888	4.0526	4.5878	19.5106	6.2777	5.4018	5.0283	5.2373	37.5707	18.2496	4.7403	2.8719	2.1965	2.7191	6.6599	13.9018	6.3834	4.3729	5.4012	15.3481	3.9417		0.453122	10.0834
10.4797	15.0325	10.9215	6.4553	4.735	7.408	25.4668	30.9422	13.9693	19.2911	7.5832	3.1712	4.5684	2.7436	2.0995	29.4776	4.6303	5.6775	4.3366	5.0395	37.0989	14.5028	3.4696	3.7771	3.0529	4.4223	5.6967	17.5984	6.2357	4.9198	5.4227	16.062	7.3274		0.458331	10.4105
10.5988	12.8034	10.0272	6.3616	6.217	6.0599	24.3365	21.7013	17.0354	19.2979	6.5019	4.6072	5.1243	2.8609	3.267	33.4628	5.9599	4.9741	4.4928	5.7324	31.1386	18.3861	5.08	3.9759	5.4013	4.95	7.8756	16.637	6.7232	6.444	6.44	13.9676	8.3396		0.46354	10.5057
10.7179	8.6466	8.6551	6.2625	6.31	6.2294	21.8371	17.9396	25.3773	21.6535	7.2459	3.8401	3.567	3.5904	3.931	28.6172	4.0445	5.5907	3.435	6.3116	30.3934	16.4232	4.0366	3.9227	3.1067	2.7893	7.8521	17.8765	5.0532	5.8234	4.4379	14.1674	6.0982		0.468749	9.84578
10.837	14.1664	6.9628	4.7192	5.118	5.986	21.8667	18.89	27.0266	24.8388	6.3607	5.172	3.503	2.7421	3.9767	28.5049	4.0838	3.3205	5.192	4.3174	30.9415	17.2355	4.3038	4.8905	3.9777	1.9238	6.4975	16.4914	4.8958	4.6145	3.8587	16.6573	5.6319		0.473958	9.95836
10.9561	8.7722	8.6013	5.3324	5.442	5.4981	26.0825	18.494	27.468	21.4121	9.4891	3.4309	3.843	3.4467	3.7399	26.8392	4.9568	4.2829	5.5266	2.9431	28.9889	18.6578	3.7901	3.9523	4.0024	3.4221	7.4319	17.1031	6.2341	3.6721	5.7077	13.42	6.417		0.479167	9.95001
11.0752	9.6114	7.9318	5.5015	5.237	6.5878	27.4309	17.4267	25.864	22.7792	7.7037	5.1848	5.1832	2.9608	3.301	26.0015	5.5916	4.3968	3.9307	3.8153	29.3181	16.2991	3.5477	3.5382	3.6969	3.2542	4.7961	19.8053	4.0201	5.0261	6.0205	14.0557	5.7317		0.484376	9.86092
11.1943	6.9407	7.9074	5.056	5.486	5.9006	21.5655	15.7327	22.0148	19.392	8.2596	4.8684	2.0987	5.2721	2.6839	29.9342	6.22	2.7815	4.9245	6.0076	20.9724	22.1165	3.931	3.178	1.6323	6.0688	5.9432	24.3401	7.6551	4.9209	6.0076	13.3657	8.5891		0.489584	9.74272
11.3133	11.0637	7.4813	5.9325	6.581	7.4328	22.5444	19.76	24.8281	21.7123	7.0912	4.6843	3.5672	3.743	2.019	25.1837	7.5498	4.6627	4.8636	5.2522	17.0155	19.2351	3.7832	3.4955	4.975	3.9483	5.5096	24.191	6.2219	7.309	4.3277	15.5155	9.4772		0.494789	10.0299
11.4324	9.9765	8.7384	4.8087	6.856	7.4228	21.6056	18.0474	23.0291	21.8701	5.7129	3.2497	4.7668	3.1906	1.6816	19.9875	6.441	3.3394	4.2807	2.9149	22.6775	17.0533	4.508	5.3074	4.6726	3.6216	5.4768	22.0391	6.6402	4.6191	7.3876	11.3941	6.934		0.499998	9.38284
11.5515	7.4695	10.4263	7.7016	4.617	5.966	27.7679	20.8199	25.9188	24.4553	5.686	5.672	4.5968	2.853	2.1323	19.1814	6.6892	5.5993	2.3539	4.6177	17.5347	19.3496	4.4214	2.6338	2.8387	2.6636	5.8692	25.897	7.0998	4.0805	6.4607	10.2243	9.523		0.505207	9.78501
11.6706	8.9296	11.8341	6.7488	4.73	6.7876	26.1591	20.5618	26.1313	26.5484	7.3416	5.7742	2.7781	2.1501	3.4115	21.9189	8.5725	5.1708	2.9976	3.7537	17.0169	18.1942	3.7338	4.482	5.412	2.3295	6.9099	27.6468	6.9328	3.572	4.6618	10.535	11.6991		0.510416	10.1695
11.7897	9.8057	10.1683	6.7447	5.441	8.0343	25.5288	23.5872	21.494	23.2202	6.9294	3.0373	3.5488	3.0698	3.4653	17.0216	8.4826	4.856	6.2574	4.6214	14.2258	20.4196	3.0166	2.9478	3.5072	4.4376	4.9597	29.2272	5.3472	3.6866	4.764	9.0546	10.6291		0.515624	9.73552
11.9088	6.4475	9.1773	5.2161	3.701	6.5408	23.9267	23.0928	24.9563	24.8116	9.4856	4.6002	4.7023	4.9725	6.1429	18.5293	10.6916	3.2095	1.8557	4.1622	13.0202	22.0285	3.6709	3.8017	4.538	3.6202	3.5804	22.0132	4.9655	2.6738	6.2315	11.9161	10.8348		0.520833	9.6599
12.0279	6.0165	12.0238	4.2859	3.644	6.4887	24.8965	19.3892	23.6867	23.9843	6.787	6.7198	2.227	3.6883	5.3182	15.663	10.9998	4.2396	5.593	5.2468	11.6139	25.3164	4.5691	2.2817	3.6501	4.0195	3.6867	18.92	5.9848	2.8975	2.7989	10.4684	10.8228		0.526042	9.31025
12.147	8.9883	10.2231	5.1086	5.124	4.9933	23.4268	18.8056	22.4655	22.9827	5.4198	4.8959	2.8557	3.4595	3.9014	15.6703	9.1243	3.5958	5.4626	4.417	10.574	30.1227	2.2662	4.0638	3.7948	2.7948	5.9086	23.7585	4.9746	4.1167	3.3087	7.3223	10.0676		0.531251	9.1873
12.2661	5.192	13.7106	3.7974	6.242	5.0012	24.8523	21.1182	25.0914	17.986	6.3625	4.197	3.6537	3.483	3.5044	12.6966	9.6105	5.6435	5.112	4.2403	7.3212	29.3565	5.6734	4.5723	2.7567	3.9066	7.5531	24.1898	6.7546	5.0121	2.9656	10.6835	15.9292		0.53646	9.63029
12.3851	5.4362	13.4128	7.2733	5.312	5.6717	23.8232	22.9715	25.6195	23.6543	5.6816	3.5971	2.0408	2.5854	3.2168	15.1204	13.8605	4.3109	4.9301	4.3107	7.3658	33.3168	3.2957	3.6284	3.4352	3.9696	5.9293	18.07	10.9369	5.2516	4.1621	7.3648	15.2816		0.541664	9.83864
12.5042	4.8251	11.638	7.6763	4.464	4.7164	24.6424	18.6991	26.7609	25.926	2.9761	3.4969	2.628	3.5339	2.0555	13.8002	12.9052	4.5297	2.5956	3.1477	8.2845	30.7697	3.3117	3.896	3.7606	5.4652	6.4171	22.8064	8.0005	3.8796	4.9605	8.2034	17.0782		0.546873	9.62032
12.6233	4.7571	12.7338	6.752	2.85	6.0964	29.9135	21.1455	26.507	28.4382	3.8833	2.9384	5.007	3.0816	2.4741	14.7767	14.481	4.4154	3.7539	6.239	6.7704	30.2659	3.3407	3.6517	2.9241	4.3133	5.0865	20.0306	7.9089	3.4375	6.7451	7.077	18.0137		0.552082	9.99404
12.7424	6.0777	13.5866	7.0534	3.52	7.3408	31.0641	16.7796	27.6884	27.0693	7.9424	1.1653	5.7575	3.3068	2.9995	13.0674	14.715	4.5585	5.091	4.9063	5.5085	37.1129	5.4563	5.4982	1.6469	3.2256	4.8104	18.9522	7.4156	3.9762	4.8145	6.0189	16.3068		0.557291	10.1385
12.8615	5.8689	21.8278	6.1336	2.795	8.4934	26.7138	22.645	28.2865	28.2384	5.3753	3.1514	2.6521	3.4025	2.2988	13.8857	12.8023	3.5035	6.3665	5.0171	8.0968	37.7357	4.0645	5.5285	3.2457	4.1469	6.6086	18.4634	7.2584	4.4006	5.4186	5.7157	14.4262		0.5625	10.4552
12.9806	4.8292	22.7681	5.6236	4.743	3.9783	25.364	20.8661	41.0966	31.0165	4.6606	6.1661	3.7908	2.7849	1.9224	15.0639	18.3901	5.1034	4.8988	4.8428	6.2826	37.2025	4.0701	3.8098	4.1517	6.8634	5.5459	17.9383	6.3141	5.2498	4.228	6.3112	11.22		0.567709	10.8468
13.0997	2.3881	19.0821	6.9516	6.09	6.0219	31.7057	22.6541	38.3491	23.4654	5.2138	5.8395	4.8685	4.3456	3.7136	14.849	18.177	3.3695	2.8511	5.9126	5.0078	36.3057	3.1953	4.1314	4.4908	3.3846	4.8199	19.8213	7.703	5.3552	5.9387	6.0725	14.8787		0.572917	10.8423
13.2188	2.0132	15.6634	6.8456	6.294	9.3075	25.6183	20.7318	36.4737	22.8721	6.87	3.8719	4.8077	5.2123	4.3093	10.9016	15.4205	4.1491	2.4263	4.1522	5.4428	44.3671	4.409	3.842	4.3742	4.3608	3.4457	17.3337	7.1889	3.7245	2.351	6.8796	12.1774		0.578126	10.2449
13.3378	3.2101	18.7742	8.5944	4.916	8.4678	28.6471	20.2494	32.4033	23.9485	5.1558	4.5245	5.2647	5.4631	2.8097	9.0536	17.8849	6.3088	2.3986	2.4674	5.7098	47.1041	4.8046	3.4039	3.9721	3.515	5.1121	15.5157	9.8007	3.5459	4.0123	4.3576	11.8194		0.583331	10.413
13.4569	3.5073	22.078	5.8539	6.12	5.0225	21.9414	16.8161	30.5866	22.7403	5.0777	4.2378	5.3419	3.8292	1.8712	10.3131	21.85	7.4276	4.4113	3.6798	4.016	50.4406	4.6028	3.9823	3.2264	5.2274	6.3213	17.3893	6.4083	5.6228	3.2492	4.1584	14.9842		0.58854	10.3855
13.576	4.5239	24.1166	6.6969	7.907	4.8904	22.3778	17.5178	31.1628	26.0049	7.1111	4.8594	3.5891	4.5247	4.0484	8.4505	19.8214	4.9057	3.582	4.1819	4.7363	46.8955	6.4229	5.2467	3.4023	4.046	4.9272	17.567	7.8887	3.86	2.9435	5.4073	12.333		0.593748	10.4984
13.6951	3.4713	19.5911	4.5921	5.388	8.0074	21.8014	20.0694	27.4029	24.7463	4.9463	5.3252	2.6233	5.3273	2.077	6.7303	21.7822	3.3024	3.7594	3.3369	5.8679	43.2987	3.8875	5.1733	3.5553	5.3941	3.7453	19.1404	8.5633	4.0421	5.2313	5.7986	13.4577		0.598957	10.0449
13.8142	3.1929	23.6146	4.1651	6.705	7.526	25.2761	19.9095	29.4009	25.4598	6.2048	4.4474	2.9907	5.0605	3.1952	8.2972	21.1104	3.854	4.9672	4.0335	4.4301	43.2496	4.584	5.0395	3.5403	6.0764	4.0795	14.8033	9.0807	3.5493	5.3269	5.5084	14.7112		0.604166	10.4184
13.9333	2.9593	19.4845	6.0117	4.182	7.9564	20.8097	21.7946	27.0349	25.3694	5.1737	4.2076	4.4585	5.9178	3.3071	8.3683	25.2328	6.2837	5.861	4.6833	3.204	47.2655	5.8308	4.8111	3.9245	2.0477	4.0502	15.4443	12.3715	6.58	3.721	4.2857	14.5186		0.609375	10.536
14.0524	3.8896	21.3116	7.5062	4.8	10.1415	20.5175	18.7594	23.4244	24.7221	7.0032	5.8519	4.6763	3.4583	3.386	7.0719	19.8765	3.9581	3.7236	3.118	3.728	47.6254	4.5581	3.7625	2.6959	4.6387	4.7747	18.1443	8.3593	6.5769	7.905	4.7696	14.4545		0.614584	10.2872
14.1715	3.3321	25.4788	6.5104	4.898	10.8769	20.8689	16.7513	22.0275	27.4603	5.88	4.7521	4.0215	4.4694	3.2205	8.8717	20.0725	4.1226	2.4492	3.7699	3.9561	43.5201	3.5855	2.2101	3.6119	4.7341	4.1999	14.0493	10.5768	5.8462	4.151	5.6006	15.1491		0.619793	10.032
14.2905	3.9535	21.6056	6.4845	5.626	9.3274	20.7355	14.6874	20.1707	29.8677	7.4909	3.0857	3.5077	3.7967	2.9688	8.1195	24.3962	5.0606	4.2247	6.2138	3.6401	47.5807	8.7065	3.2554	3.9809	4.051	3.1688	17.4651	10.4913	5.4553	4.5588	5.0824	17.2795		0.624997	10.5012
14.4096	3.9866	26.8669	9.2719	6.968	7.4944	22.4175	15.9624	16.931	27.0745	7.9068	5.2914	2.4933	4.296	2.4443	7.6542	24.275	4.2586	5.8357	7.0642	3.5205	44.4526	6.3436	4.6035	3.5299	4.2746	4.0593	15.582	12.1915	9.2992	5.4077	4.4243	15.1936		0.630206	10.668
14.5287	3.4898	27.4726	8.2941	4.503	8.6827	21.9544	18.5484	17.8218	25.9396	7.0317	7.073	5.5667	5.4787	5.8057	6.7132	21.1105	4.524	4.2598	4.2488	3.2898	51.1303	6.471	4.9285	3.4878	3.0762	2.5098	15.7923	11.3056	3.2882	4.5502	4.7791	11.0069		0.635415	10.4417
14.6478	3.7775	24.2941	11.2543	5.277	8.3726	21.775	16.7505	14.2744	35.1903	6.1483	4.732	5.3381	2.8461	4.2456	7.2706	20.2178	2.9018	4.1536	3.7999	4.1952	40.6442	4.4485	2.9757	2.1291	3.6077	5.0881	20.0948	12.7113	4.7744	4.1868	3.8968	13.6559		0.640624	10.1571
14.7669	6.0977	24.1566	11.4587	7.155	9.9534	17.0379	12.3288	15.7107	27.973	6.5001	4.9051	4.1209	3.6964	3.6256	5.932	23.9863	3.1927	4.1007	3.0185	4.2859	36.0456	5.1301	3.0855	3.3867	4.2753	5.3054	17.1065	12.4597	8.8332	3.6417	4.1296	9.439		0.645833	9.75232
14.886	4.5803	24.7967	12.0352	7.825	11.1107	17.202	14.9415	14.0123	29.2914	6.88	4.7568	2.0093	3.7095	2.7493	5.9792	25.2963	6.7997	3.516	3.7368	4.4085	28.1357	5.4519	3.2751	4.0326	4.1347	5.0175	14.5894	15.4863	7.1049	6.0613	3.9145	9.9027		0.651042	9.77322
15.0051	3.0668	27.1468	11.6213	7.321	9.9218	16.4451	14.5753	12.924	28.4383	6.0765	5.8092	4.6933	4.0266	3.7252	8.0636	17.6034	6.0979	3.1798	4.7114	4.2444	26.3341	5.9035	3.1187	3.0718	2.8161	5.2845	13.9574	12.378	4.0459	4.945	5.1049	9.2885		0.65625	9.24813
15.1242	4.6994	28.6227	12.0797	8.156	12.9733	15.14	14.8076	13.1154	27.8267	8.249	3.9734	5.3331	3.2436	3.0973	7.2161	23.3262	5.6574	3.4899	3.5003	3.4449	18.6083	6.1544	2.2432	4.5645	3.3694	5.0207	14.1291	12.4399	8.1606	5.0737	4.7455	8.4058		0.661459	9.4021
15.2432	3.7621	24.248	14.0584	8.557	16.1991	15.2099	15.7887	14.0178	28.7953	11.2344	4.7984	3.0906	4.1075	4.2302	6.8552	20.2779	3.433	4.0061	4.5198	2.2464	20.1605	7.1594	4.3849	4.7667	5.1241	3.4491	14.3092	13.6834	5.0015	5.8778	3.8575	6.7911		0.666664	9.50003
15.3623	5.1446	17.6115	12.3883	6.666	17.5724	14.8099	12.5479	12.7329	27.6006	9.6794	5.4088	2.3924	4.9768	3.2373	5.8376	20.4246	5.2583	2.8409	4.89	4.3522	15.0753	7.3356	2.6659	2.1981	4.4691	4.2215	12.4842	14.7503	6.8099	6.1369	4.1663	6.3631		0.671873	8.84527
15.4814	2.9223	21.5208	11.5486	7.577	15.9038	15.0241	13.1853	13.1846	30.3575	11.1771	5.4982	1.9304	4.2956	3.1915	8.5797	21.3317	3.8011	3.7365	5.6443	5.1699	17.2968	4.9523	2.6335	4.7841	3.8469	3.2133	14.6065	16.3456	6.7644	6.9132	3.1846	6.3924		0.677081	9.26605
15.6005	4.1959	21.6439	13.9971	6.938	22.4617	14.0127	11.0197	13.5678	30.3731	7.6875	3.869	3.5321	3.8514	4.4825	9.1608	24.923	5.2404	6.4055	4.99	3.03	10.8462	5.5739	3.7459	4.1602	3.657	2.6385	13.977	13.3878	7.7489	3.9313	3.0948	5.286		0.68229	9.16968
15.7196	4.241	19.9054	17.9159	7.883	20.5574	10.3547	15.1348	10.7729	26.6896	7.5013	4.3674	3.8027	3.9329	4.3299	10.6787	22.7373	6.1234	3.6759	4.0807	4.3593	15.3818	7.3281	3.3213	3.0497	2.2843	3.2799	13.5179	18.4377	7.0613	6.2403	3.8465	5.9454		0.687499	9.33558
15.8387	7.3771	20.5441	15.6827	9.766	23.0756	8.6775	13.5739	10.8871	29.0347	10.3396	3.7305	3.4443	3.6523	3.3217	10.8187	23.5605	5.1419	4.8089	2.9086	5.287	13.9677	6.0981	3.3227	4.2295	3.1658	4.5636	12.7755	22.6595	6.1323	6.651	3.5353	5.0913		0.692708	9.61953
15.9578	7.4427	17.8162	21.2134	6.881	22.9247	10.8196	11.1345	9.2358	30.5173	12.1201	3.3696	4.9005	4.0078	4.854	8.8022	30.343	5.3081	6.2144	3.952	6.9398	11.2591	7.5456	5.0763	4.7308	3.3696	4.4677	8.414	25.7175	8.3542	7.1558	3.4235	4.7749		0.697917	10.0964
16.0769	10.1716	17.494	23.6886	12.999	23.6666	10.8264	11.6037	13.5672	27.7598	11.7588	7.4063	4.3125	4.355	4.4623	6.8307	27.4244	7.0989	4.0239	4.0334	2.2777	9.4018	6.1976	4.8242	2.7331	4.1253	3.6122	7.1422	25.0649	7.3193	6.6976	3.965	7.2205		0.703126	10.127
16.196	14.3067	18.4392	25.275	8.564	23.8542	14.4809	11.2059	12.4616	27.2669	13.6394	5.7319	3.8509	5.6773	5.102	8.0912	23.7641	5.8245	4.121	3.8689	3.946	8.5411	8.0088	4.6792	2.758	4.9956	4.9136	6.5874	27.3711	5.4373	5.9988	4.6552	5.6569		0.708335	10.2836
16.315	14.1328	18.6188	29.6234	6.978	18.9267	10.9233	12.3163	12.7097	30.3506	12.5663	3.833	4.7315	6.22	7.6182	11.251	24.1572	5.5715	4.5965	5.6913	3.2858	9.9453	9.7423	4.3476	4.4853	4.5478	3.8653	8.0626	27.0367	6.056	6.2487	4.6605	6.493		0.713539	10.6123
16.4341	18.4164	19.546	32.6965	11.712	29.1738	13.1674	12.7478	12.941	35.7736	12.5892	5.7445	4.989	7.484	10.0695	9.6873	28.7501	6.3563	4.0225	6.2464	3.1553	8.1259	7.5505	3.4529	3.9663	2.2063	3.9631	5.9032	30.9402	5.7775	6.6307	3.0201	6.661		0.718748	11.6708
16.5532	27.4445	19.7288	36.1106	13.476	30.9193	18.3129	10.8014	14.8741	33.069	11.3248	5.001	4.5232	5.2372	11.6324	11.5258	22.0028	7.5708	5.0261	7.6621	3.3659	8.9426	9.2442	4.2184	2.8851	5.3875	6.0164	4.714	24.473	5.7965	4.9351	4.3566	5.7549		0.723957	12.0729
16.6723	33.9366	20.8668	34.1908	17.204	34.5546	13.5298	14.6067	16.161	29.2716	14.5997	3.5444	6.0631	4.1998	12.7805	11.5723	23.7351	5.2613	3.7418	6.6222	3.6898	9.0247	9.3441	4.7273	1.7441	4.5586	4.8077	5.1103	26.8986	8.1437	7.3546	3.1836	5.2484		0.729166	12.5087
16.7914	40.8909	20.2751	39.6536	14.822	36.8711	15.3978	16.6196	17.921	27.6183	21.187	5.3267	6.1074	6.1693	12.9316	15.4822	21.0555	5.8202	4.6654	5.6232	4.7104	6.109	11.6769	4.3519	3.8439	5.5328	2.2617	5.8491	34.931	7.8197	7.6013	3.2532	4.2412		0.734375	13.6444
16.9105	35.441	21.4057	40.905	14.642	37.7033	16.2638	14.8288	17.7573	24.6389	21.0139	6.5358	5.8918	5.7911	13.5169	11.7344	17.0656	7.6692	5.9736	4.911	2.853	7.204	12.7934	2.5229	4.2861	4.8857	3.4014	6.3871	27.7385	10.1062	4.9569	4.3744	5.3703		0.739583	13.1428
17.0296	28.0248	17.4997	51.1017	21.966	36.9784	18.7583	12.3632	16.4103	26.3426	17.3784	6.5991	7.8966	4.6112	15.5177	13.6741	19.0051	6.1262	5.3289	9.3594	6.4793	7.8638	10.6706	2.5934	3.8187	3.8636	3.1731	6.2869	22.1727	8.2426	7.3223	4.5242	4.6385		0.744792	13.331
17.1487	24.8746	19.1792	47.4716	31.083	37.518	18.4987	15.8669	23.7584	26.3592	19.979	8.6681	4.6489	7.1304	16.2013	13.6213	27.9035	7.7433	6.6357	9.584	10.3843	8.9416	14.7441	5.1089	4.6	3.2871	2.094	6.2038	20.5607	7.1993	6.3849	3.4216	4.7535		0.750001	14.5128
17.2677	18.659	16.6623	52.486	26.84	42.4085	14.9633	17.5049	22.2364	26.4931	17.2429	9.4746	2.0053	7.4624	16.631	12.4189	19.0458	6.9389	9.4991	9.5455	13.3384	9.7959	14.0068	6.262	4.3402	4.7167	2.6068	5.0483	23.1921	8.834	5.4458	4.747	3.3319		0.755206	14.1932
17.3868	16.5888	18.1704	48.8047	33.474	40.0777	15.7825	19.3659	23.0854	25.3139	26.8291	8.9584	4.9398	9.3449	20.8987	14.172	21.2237	9.4077	9.4305	9.7099	12.6592	7.1442	11.383	5.6819	4.8033	2.5246	5.6339	5.2906	19.4556	11.1502	5.9061	7.8736	3.8908		0.760414	14.968
17.5059	11.6343	12.7426	50.7374	41.492	39.9036	16.588	22.0697	19.3322	23.2003	28.2192	11.0992	5.1599	7.2523	23.1032	16.2355	20.6412	8.1698	12.7936	12.7872	9.1175	7.9532	14.0487	6.6347	3.9509	3.5034	3.0674	6.0151	14.2803	14.4124	6.7147	4.8816	3.7056		0.765623	15.0452
17.625	11.1115	12.9699	48.0204	42.332	37.6513	15.0287	21.3568	19.4894	23.6556	27.6813	8.9463	5.7564	10.2393	24.1388	17.4179	17.5811	14.9309	11.0987	14.399	9.5169	9.0139	14.1305	6.2577	3.4449	3.1275	2.0597	2.9052	15.5337	10.5823	6.2144	3.815	4.0976		0.770832	14.8283
17.7441	12.4593	11.4063	49.6599	50.634	32.5925	9.8977	17.551	21.3196	22.091	34.3658	10.4569	6.3303	8.6408	25.7843	17.4767	13.7267	13.54	19.3736	13.0714	20.0052	9.4553	18.44	6.7135	3.1717	6.0034	5.4775	4.4714	10.9654	14.863	5.8302	6.0915	6.4758		0.776041	15.8857
17.8632	7.8704	9.8999	42.2033	54.008	21.4287	8.8194	16.9759	21.9553	28.5348	35.0074	11.8387	6.6166	12.0083	22.5802	20.3495	23.734	16.8968	20.6307	17.9797	14.5816	11.5884	17.5942	7.8902	3.161	3.2116	6.0422	5.7237	14.7112	15.2036	8.3088	6.5596	4.5409		0.78125	16.2017
17.9823	5.829	5.6227	34.5455	55.518	23.6241	10.3652	21.1303	14.7005	25.2325	44.4519	13.8554	5.6638	14.1641	27.566	22.8316	21.5695	17.2581	26.8538	17.8033	11.1721	13.1869	18.0161	9.5782	4.2709	2.7949	3.5756	6.2228	10.6377	16.7336	5.8107	5.3579	5.7975		0.786459	16.3044
18.1014	4.8437	3.3698	31.3091	50.875	25.1146	10.6431	18.2532	12.596	22.164	43.2253	14.0915	6.2924	20.9564	37.4001	27.4243	15.8524	25.4811	32.2305	15.969	14.6263	12.6017	23.2708	7.9963	4.027	3.9244	5.4973	6.3057	9.7376	21.7779	6.6593	7.3556	6.0044		0.791668	17.1211
18.2204	4.2401	4.4449	28.6817	40.555	21.003	5.3855	13.7853	11.4143	19.6562	42.4259	19.7184	9.9567	26.4305	40.3723	23.1896	22.025	30.8398	22.7077	18.3735	24.2556	15.9155	25.5029	9.8547	1.9679	4.5291	3.2787	4.9198	9.2439	20.5469	9.6284	7.9842	3.7534		0.796872	17.0808
18.3395	2.8767	6.7824	15.0168	41.7	17.7318	6.7521	13.2424	9.1152	16.1236	45.8212	18.8522	8.9895	37.7246	42.9423	29.5517	26.2741	32.6022	25.1512	17.8538	16.2112	18.8121	22.3833	9.9313	7.4095	3.7107	4.8708	4.4394	10.2852	21.559	10.4523	5.9735	4.8917		0.802081	17.3761
18.4586	4.0184	5.5039	10.8512	24.731	15.9803	6.1001	10.4408	9.042	16.3862	47.5489	23.4306	10.6513	47.0728	51.0978	28.0742	30.644	27.269	24.4526	18.7799	16.5651	23.2103	24.256	12.9578	4.9879	3.1785	6.5898	3.8797	8.0066	22.9766	12.5075	7.6934	6.6567		0.80729	17.6732
18.5777	1.7236	4.3716	9.6155	12.74	10.4532	5.6482	7.862	7.2912	12.2078	50.8615	21.2049	13.647	48.7652	59.5776	35.6089	36.8647	23.0656	20.8566	21.7671	10.8433	24.822	27.6158	10.6367	3.5093	2.5415	4.6968	2.8853	9.7987	23.2176	15.3987	9.5485	6.5142		0.812499	17.38
18.6968	1.0474	2.8308	5.3185	8.805	11.9413	5.6326	4.1542	4.4017	10.4656	42.9854	30.6112	19.1514	52.4315	57.8836	43.4157	37.9342	23.8378	17.0031	17.3205	8.5938	27.0919	35.6364	9.9809	3.3561	6.4354	2.223	5.2873	7.0828	25.0081	14.4425	11.4891	6.8532		0.817707	17.5204
18.8159	1.0772	3.2312	4.1996	6.055	6.437	3.3973	4.9836	6.3838	9.0273	37.5771	28.3229	19.384	57.9299	61.2684	45.3459	39.2632	16.3215	13.6138	13.9615	5.6411	32.188	33.9696	10.6788	4.0729	3.9541	3.9779	4.0865	8.7186	20.4118	15.2939	9.7099	7.1776		0.822916	16.8019
18.935	1.2119	4.3951	3.8611	5.512	6.521	2.5022	6.7371	3.4337	8.3311	33.9147	30.5735	19.5511	59.7367	69.6197	55.5437	37.2932	10.9612	8.7284	11.8546	4.4865	24.8681	36.737	11.5696	5.2491	4.0322	5.7374	4.1238	6.5267	18.6071	19.7001	8.0796	8.1402		0.828125	16.8169
19.0541	1.9013	3.7803	2.9381	2.954	5.9277	2.4453	3.0353	3.3972	4.5988	28.64	31.8924	31.4157	42.7216	74.3951	61.6917	33.7942	12.9509	8.7059	9.2735	3.8246	26.2944	45.0462	13.9908	4.9196	3.3228	5.6886	4.4222	6.3822	24.3082	22.7666	8.1047	5.6849		0.833334	16.913
19.1731	0.4126	3.2135	1.5735	3.882	5.5835	1.5012	3.435	3.6583	4.1637	21.3494	23.766	29.4269	37.8957	64.9572	66.4448	23.3467	10.0389	11.4386	8.1359	4.4926	18.3187	45.2447	12.899	8.2708	4.319	8.6163	3.0805	7.6534	24.0033	31.7055	11.2866	6.9578		0.838539	15.971
19.2922	0.0674	1.4744	1.7923	3.148	5.1915	1.5281	4.1419	3.3368	7.0899	15.0337	21.3332	30.6535	31.306	60.07	64.8437	17.1701	8.4789	6.9904	6.771	2.8286	12.5373	51.8567	15.7073	5.0757	3.8995	5.3876	4.317	8.3134	26.6999	38.5546	12.4082	7.7505		0.843747	15.1799
19.4113	1.5652	1.1942	1.5717	3.039	4.7287	0.8993	2.3066	2.6133	3.1986	10.8167	21.3735	32.7039	23.9875	59.7781	64.2722	12.174	6.704	5.6395	5.3144	3.8127	8.8438	51.2811	20.7715	7.1992	4.8961	5.4107	4.2605	9.3321	24.0898	33.7319	15.8405	6.3969		0.848956	14.3671
19.5304	1.2973	1.457	1.7447	5.055	6.1267	0.743	3.0357	0.9186	2.7469	8.0087	14.4033	28.8466	10.9955	49.4425	59.2257	6.7326	6.1658	5.4951	4.3473	2.8484	7.792	50.7704	21.3951	8.892	3.0898	5.2618	5.8597	8.796	19.863	34.3834	14.5701	7.3374		0.854165	12.739
19.6495	0.5288	1.4441	0.9803	2.991	5.4373	1.4169	1.6011	2.0474	2.1775	11.2083	12.1749	27.4777	7.0203	34.8901	49.2889	6.9404	4.5013	5.6596	3.4796	1.2274	8.1567	53.9897	21.842	10.3521	3.4615	7.0554	5.8358	7.9673	13.8082	28.9229	19.4289	9.2455		0.859374	11.6425
19.7686	1.1729	1.5127	2.4451	1.646	3.4919	1.1905	0.8266	2.7632	2.7115	9.0921	7.1929	19.4314	4.3685	30.5793	41.1305	4.9715	3.1057	4.1563	1.091	0.8508	4.8737	65.457	26.5885	11.4009	2.5015	6.6857	7.0329	6.022	15.3314	30.6059	23.2328	10.3653		0.864583	11.0571
19.8877	0.2896	1.2622	1.9648	2.28	4.9066	0.3319	1.8725	1.7829	1.3144	6.3147	5.771	14.6576	6.2394	19.3764	26.9806	3.8046	2.8463	3.3663	2.7637	2.955	4.7674	59.0418	23.8384	10.6597	4.9564	5.2874	6.3388	4.5724	13.9234	27.9304	23.5495	8.6332		0.869792	9.5181
20.0068	0.7001	1.1096	0.9872	0.44	3.5592	0.5062	2.7173	2.6525	1.7407	3.9281	4.435	11.1032	6.0006	10.0976	17.0722	4.4731	4.9767	3.3518	2.1188	1.3258	3.3619	41.7772	35.0436	18.2047	5.0535	7.2844	6.7545	7.3492	12.0106	28.2913	27.2364	12.7881		0.875001	9.0141
20.1259	0.6613	1.2147	0.584	2.113	2.5159	0.7958	1.2882	2.2408	2.3468	2.9403	1.7997	10.0571	3.4033	5.5913	13.5352	2.5639	4.4371	3.2951	2.2909	0.3097	2.7714	36.1232	35.3249	13.68	5.7493	8.5745	8.2493	5.8777	15.1402	20.8366	20.0069	10.2991		0.880209	7.70679
20.2449	0.5005	1.3455	1.4634	1.608	3.0689	0.6843	2.9499	0.7017	2.0726	3.5442	2.4123	7.5335	1.4624	6.1737	8.3072	2.1356	1.4752	3.5202	1.4008	1.1317	1.4018	28.327	37.0418	18.6296	6.6065	10.24	6.1205	3.3783	13.3909	20.7591	22.1438	13.9183		0.885414	7.35779
20.364	0.4503	0.9994	1.0779	0.715	3.176	0.9837	2.624	0.1835	0.8686	2.3451	1.9921	4.075	1.2398	4.2816	6.0938	2.0209	1.6156	1.5913	1.5741	1.1542	1.8063	15.4115	47.7479	20.5379	8.1518	9.9337	10.5867	8.9809	17.0429	17.7757	21.0181	12.0756		0.890623	7.19159
20.4831	0.472	1.6977	0.5188	0.866	1.6298	1.1549	1.5658	1.3691	0.7817	2.6544	2.6403	3.5909	0.8654	6.3034	4.2328	1.4418	1.6954	1.775	1.259	0.4689	1.115	9.4666	59.0801	23.1172	11.2135	15.0364	11.2721	9.6616	20.5966	14.4135	16.2034	14.2092		0.895832	7.57401
20.6022	0.0044	0.6718	1.0693	0.84	0.9191	0.2116	0.7356	0.7482	0.8984	0.7352	1.731	2.94	0.7747	5.7052	1.4665	0.2166	1.8943	1.3205	0.7711	0.5746	0.3144	7.0276	56.8004	30.1429	8.0339	16.1089	15.7885	10.3532	20.6266	10.6741	17.1736	14.1503		0.90104	7.23195
20.7213	0.6823	0.7068	0.1921	2.595	1.2781	0.1427	1.2341	1.5391	0.9023	2.2975	0.7861	2.9787	0.2523	2.6725	3.7877	0.9218	1.9671	0.7589	1.0305	0.621	0.5803	8.0906	44.0994	35.7607	9.4688	17.5473	17.5955	9.6161	19.3235	10.9507	16.3717	9.7513		0.906249	7.0782
20.8404	1.395	0.8995	0.1557	0.89	1.5615	0.1929	2.0188	0.5853	1.2319	0.6773	1.0985	2.8783	1.3319	2.3225	3.4211	0.2337	0.9981	0.295	1.4414	0.8525	1.1192	5.7265	42.8307	40.7464	11.1353	19.3545	18.7519	12.0418	16.7004	10.5037	14.5588	11.2721		0.911458	7.16319
20.9595	0.3947	0.3003	0.0374	0.86	1.459	0.5903	0.5526	0	1.6592	0.4395	2.4666	2.1838	1.0549	0.6391	1.3576	1.0889	0.9248	0.7243	0.4074	0.6155	0.6312	4.3971	35.5062	39.4902	14.3462	20.9145	29.692	12.622	26.5164	9.1706	14.7259	7.8568		0.916667	7.30078
21.0786	0.6425	0.3471	0.9111	0.816	1.5558	0.2884	0.2805	0.0388	0.7451	0.7726	2.3802	2.0928	0.8747	1.3834	0.1747	1.017	0.6033	1.1724	0.703	0.1408	0.1446	2.219	29.4621	37.3093	17.1803	21.4082	27.2835	17.3508	26.9712	9.924	10.0435	5.3751		0.921876	6.92537
21.1976	0.2828	0.6364	1.0073	0.838	0.8175	0.1863	0.4838	0.0235	0.345	1.252	1.3329	0.7156	1.8014	1.3778	0.8249	0.5685	0.8133	0.2685	0.9441	0.1375	0.6853	2.2291	12.9287	36.9221	22.0101	26.0533	30.7349	20.1505	24.3757	9.7861	8.0611	3.6524		0.92708	6.6327
21.3167	1.0296	0.4532	2.1091	0.661	0.8032	0.128	0.4477	0.6571	1.0261	0.8062	1.2711	1.4944	1.1293	1.5746	0.5318	0.617	0.9773	0	0.7396	0.2921	0.6502	2.967	6.1446	30.7174	25.2081	24.3047	34.937	28.0356	21.8976	4.7784	5.4624	2.8419		0.932289	6.39667
21.4358	0.1637	0.1448	1.8778	0.875	0.4685	0.9995	0.1897	0.515	0.5228	0.6199	0.2821	0.6393	0.4643	1.1419	0.4585	1.1169	1.0179	0.3153	0.3999	0.3851	0.0235	3.8779	3.6841	18.8873	33.221	25.6379	30.6766	26.5897	22.8777	3.4727	5.8343	2.812		0.937498	5.94352
21.5549	0	0.1003	0.0319	1.403	0.1029	0.6546	0.7102	0.7547	0.3097	1.0258	0.6831	1.2161	1.178	0.9746	0.8257	0.8917	0.4773	0.1289	0.4763	0.4071	3.459e-05	1.7098	1.6986	10.7192	35.9972	31.013	28.4904	28.9995	13.6347	2.1884	3.9744	3.0582		0.942707	5.43235
21.674	0.3166	0.1726	0	1.584	0.4541	0.5458	0.1147	0.6145	0.1575	0.8623	0.4624	1.4137	1.7979	1.1709	1.771	0.3467	1.9292	0	0.6386	0.4969	0.0991	1.5097	2.5165	6.0002	35.0177	37.4559	31.9176	24.0045	8.5757	3.9796	2.7114	2.1312		0.947916	5.33652
21.7931	0.4914	0.3174	0	1.219	0.1652	0.0558	0.0429	0.3687	0.3181	0.0842	0.4555	0.7156	0.3511	0.7723	0.803	0.3512	1.3602	0	0.7146	0.0713	0.3489	1.2842	2.7358	5.5817	28.787	37.4334	21.94	15.0657	5.4729	2.4684	1.8316	2.662		0.953125	4.19591
21.9122	0.0809	0.3588	0.0711	0.067	0.099	0.5719	0.3945	0.3442	0.0552	0.3671	0.5349	0.5929	0.1398	0.3768	1.1781	1.4542	1.1093	0.0407	0.1608	0.2272	0.3863	1.4441	1.5268	1.9367	20.401	46.0949	20.0254	6.0398	2.7648	1.6578	3.8553	2.6804		0.958334	3.65743
22.0313	0	0.0856	0.1772	0.631	0.2299	0.1597	0.285	0.5312	0.3952	0.0119	0.3066	0.6386	1.7136	0.8497	2.3213	0.2599	0.5009	0.4639	0.0614	0.2729	0.5582	2.3158	0.6644	1.3476	12.8461	54.2658	18.5349	3.7055	4.2668	1.9855	1.7127	1.1963		0.963542	3.54047
22.1503	0	0	0.3454	0.166	0.1711	0.0054	0	0.2934	0.2178	0.5755	0.6027	0.3301	1.0241	0.1868	1.0882	0.0563	0.4041	0.6483	0.5589	0.2889	0.1359	0.8163	0.855	1.4626	5.8859	48.6804	16.0974	5.3115	3.8088	2.5177	1.3799	1.0072		0.968747	2.9663
22.2694	0.0501	0.2788	0.2044	0.299	0.15	0.6073	0.1636	0.4896	0.2345	1.345	0.7372	0.5807	0.3014	0.113	0.2261	0.0898	0.302	0.8063	0.7526	0.4026	0.2597	0.6008	0.3206	1.5592	2.8649	54.2305	15.2849	3.1471	2.9244	1.6208	1.0187	0.5833		0.973956	2.89215
22.3885	0.0055	0.2213	0.2179	0.09	0.213	0.3977	0.0788	0.0571	0.2304	0.1346	0.4953	0.9068	0.0423	0.601	0.0055	0.4795	0.416	0.2107	0.5144	0.5325	0.5067	0.5421	0.6909	1.3613	1.3345	51.1548	13.3668	2.3551	2.6577	1.3425	2.3626	1.4424		0.979165	2.65524
22.5076	0	0.2868	0.1612	0.378	0.0983	0.1936	0	0.008	0.0886	0.0607	0.1494	0.4638	0.9226	0.4626	0	0.308	0.2239	0	0.3889	0.4654	1.0978	0.7423	1.8754	1.0532	0.2433	41.135	10.7035	1.4423	2.6967	2.702	0.9003	1.517		0.984373	2.21152
22.6267	0	0.2299	0.0098	0.329	0.235	0.0795	0.4558	0.3285	0	0.381	0.1839	0.3298	0.403	0.7146	0	0.4812	0.2792	0	0.6456	1.1476	0.5851	0.9207	1.0407	1.0789	0.8349	31.5735	8.5742	0.5279	2.0913	1.1957	0.8236	0.8923		0.989582	1.76163
22.7458	0	0.3671	0	0.274	0	0.2736	0.0442	0.0525	0	0.0856	0	0	0.1319	1.1692	0.1246	0.6146	0.0732	0.1476	0.0331	0.4115	1.0859	0.1171	0.3997	0.7969	0.2602	24.3426	11.0785	2.7326	1.6708	0.7094	1.0943	0.467		0.994791	1.51743
22.8649	0	0.4519	0.102	0.213	0.3386	0.0709	0	0	0	0.028	0.5282	0.2779	0.2224	0.1497	0.042	0.106	0.3251	0.4683	0.1064	0.6194	0.8127	0.57	0.418	0.0334	0.0233	7.6237	7.5234	1.9126	1.409	0.8964	1.1582	0.2605		1	0.834094

## Sheet: Image33
X0	Y0	Y1	Y2	Y3	Y4	Y5	Y6	Y7	Y8	Y9	Y10	Y11	Y12	Y13	Y14	Y15	Y16	Y17	Y18	Y19	Y20	Y21	Y22	Y23	Y24	Y25	Y26	Y27	Y28		Ap-Ba	Avg int
0	15.216	16.4984	18.8034	31.8282	26.2407	31.2931	37.2858	41.9402	18.3694	11.0074	10.023	21.2864	14.2035	15.7813	25.0351	15.2135	12.7451	27.2049	27.8505	13.6029	18.4479	24.0053	22.6757	20.2383	27.9211	41.0488	48.0326	18.0996	23.6169		0	23.2936
0.1191	24.5377	19.8941	21.2947	41.7123	24.4027	24.9879	31.3748	48.3102	20.5539	11.7246	10.5176	27.139	19.195	14.4804	17.3765	12.5293	13.3779	20.9375	32.1205	16.7623	23.1526	26.2185	36.2058	27.7391	30.6492	43.6727	68.0375	27.2531	26.2707		0.00598863	26.2906
0.2382	27.9277	16.95	26.576	35.6348	26.3042	27.4018	27.4094	47.9416	21.3097	14.5724	16.7047	31.1606	17.9368	26.4211	23.0863	14.0098	14.6165	30.8899	34.5373	24.3736	29.1152	31.2825	38.3357	27.9513	34.4959	50.4614	67.3054	26.0257	28.1796		0.0119773	28.9282
0.3573	32.0942	21.8158	31.628	46.1688	23.4712	28.9311	25.2933	47.5773	23.0952	15.301	20.426	35.2887	18.1622	26.3101	22.6549	16.6661	16.564	26.5857	35.1893	23.9595	24.2561	30.8712	40.9148	30.0395	34.9002	45.3025	74.5551	31.4407	33.8291		0.0179659	30.4583
0.4764	34.7123	27.9545	35.1198	47.2461	34.2091	29.7351	30.7389	39.497	27.5621	14.7048	23.2275	40.5981	24.7601	33.9059	24.5814	19.5514	20.1831	30.9174	36.4066	28.885	34.1608	45.2112	43.1845	35.1919	39.5971	57.9199	72.2709	35.0289	30.4079		0.0239545	34.3955
0.5954	43.3104	32.4545	45.727	37.2128	42.5256	36.1401	29.0774	40.7881	24.4444	13.764	27.5757	42.6265	27.5621	27.9959	26.7396	21.3853	19.6367	29.2677	40.1246	34.0165	39.2259	51.4341	50.221	43.44	40.9181	50.1804	68.4725	43.7348	26.981		0.0299381	36.4477
0.7145	43.6028	45.4731	43.5999	41.8484	39.7245	35.0156	27.6151	44.3715	29.0876	18.0532	31.8259	44.4375	34.1	33.2698	32.4804	23.2902	18.0768	34.3017	45.1358	42.1922	53.7477	47.1909	59.2055	49.5193	43.4529	62.216	59.3791	53.552	30.4153		0.0359267	40.2131
0.8336	48.6664	51.938	50.1558	48.8988	54.0984	46.7766	25.6817	40.3126	32.7374	30.3669	40.9857	51.186	38.4208	34.0426	32.2499	31.3185	15.1483	37.0564	52.3853	44.8613	49.7492	47.2752	51.1563	58.7245	45.2961	52.5461	50.4649	63.913	30.7859		0.0419154	43.3517
0.9527	52.5381	56.5014	51.2935	47.1449	70.4762	48.3277	27.5699	45.0855	32.3431	31.7381	45.3221	60.4686	43.224	39.4733	34.7791	36.3916	22.0388	38.1089	44.1976	49.0216	51.3165	56.7484	45.4118	57.0807	39.4593	47.8917	48.9142	74.5494	26.015		0.047904	45.6356
1.0718	78.1381	63.5876	61.622	54.2745	67.2312	47.7908	31.091	45.5407	36.1992	40.7049	48.861	61.401	54.36	44.4947	35.5272	33.0767	22.6101	44.6731	52.9782	50.6038	51.8713	53.1553	39.6172	64.0119	49.3979	58.1909	46.2113	59.0781	34.6749		0.0538926	49.344
1.1909	88.7645	60.6523	56.9901	56.0194	66.2154	47.1918	31.5549	47.1761	34.6893	43.6488	51.4191	61.5693	57.2521	43.7538	32.9949	38.6058	28.2626	42.8012	54.1919	50.1587	66.6681	49.3984	36.8663	59.0419	56.9324	58.5443	42.598	60.4985	35.3033		0.0598812	50.3367
1.31	79.5975	56.9814	58.3853	56.0594	50.2344	42.3879	30.5035	42.4661	35.3333	51.7263	54.4698	62.6372	45.9296	48.1067	36.1105	44.338	36.2384	43.4353	49.8244	57.1531	58.4012	58.2896	36.8619	56.2896	61.468	51.3009	41.5385	46.9856	38.8581		0.0658699	49.3763
1.4291	73.1463	61.4596	57.6299	48.1478	42.7124	42.0131	35.4648	52.4806	35.342	43.22	49.2896	63.7185	51.7195	52.7855	33.2646	40.742	34.3744	46.7967	47.797	63.475	61.439	59.6296	37.3946	55.422	54.7982	63.1671	35.9808	35.877	36.5234		0.0718585	48.8211
1.5481	60.4587	53.0125	44.9685	52.9064	30.1799	36.4837	37.02	51.3591	36.3319	42.0336	45.8399	62.4231	58.3669	43.6366	39.9162	40.7763	35.7897	43.6454	49.8358	53.1998	65.2392	55.3874	41.9254	53.8621	60.3858	53.9001	40.2703	33.1689	38.0809		0.0778421	46.9105
1.6672	50.2006	58.3131	46.28	36.5367	29.5049	32.1242	37.0906	62.034	38.2332	48.065	43.7275	48.5894	48.6466	40.2758	30.7076	50.318	40.2573	45.244	50.1762	49.1494	58.7959	56.7963	42.896	48.0172	60.9876	54.2375	36.646	25.8056	44.3959		0.0838307	45.3121
1.7863	38.8165	49.7105	36.8811	38.9736	23.8949	27.2145	36.7153	60.8018	34.706	59.0792	39.1902	48.1671	42.2888	39.6144	30.6037	48.8104	42.6285	42.2308	52.2376	55.8971	58.2685	49.9883	41.2839	43.2302	68.4813	52.8248	36.6392	24.2526	47.3639		0.0898193	43.8205
1.9054	34.7118	48.1125	36.0861	32.874	18.434	23.6387	39.4432	55.2201	31.3159	57.8501	43.4058	37.8346	46.2411	42.0788	27.0814	46.605	48.9449	43.3244	47.4409	46.2831	58.0163	50.0064	42.8195	42.0762	65.1891	60.003	35.6718	18.7707	50.8901		0.095808	42.4265
2.0245	25.8804	46.6336	33.0434	34.5	21.3626	20.2063	41.834	47.1833	32.0291	50.7715	42.2891	29.8911	44.5175	42.859	30.9548	41.0879	39.3675	35.1116	45.2736	54.7483	53.9626	59.4785	43.0674	37.8785	66.3735	65.2412	35.7476	22.4812	62.2371		0.101797	41.5866
2.1436	27.724	40.5198	30.3999	44.8788	20.781	19.0946	33.7895	52.9877	31.5044	49.2175	45.1874	32.025	39.6494	35.5818	28.1928	38.9333	38.4347	35.9004	43.5103	52.6026	47.9632	49.2363	50.3665	32.9727	62.2416	58.3398	32.5547	17.9953	61.6118		0.107785	39.7999
2.2627	22.4718	43.998	28.3312	31.5348	13.4069	15.2006	35.3177	48.0317	38.294	47.7625	38.5921	36.7447	37.2232	29.7763	24.4655	32.2067	37.5398	26.7647	48.5306	61.5553	46.1745	52.5611	49.6571	31.311	79.0748	70.1595	34.7426	18.1261	68.8137		0.113774	39.5989
2.3818	18.8204	30.3886	19.7494	28.7845	13.9746	13.6501	28.8134	39.6997	33.2302	41.2642	38.3918	24.3899	33.4453	22.5852	21.8759	29.9916	29.6729	22.4009	48.6409	55.8428	48.9655	54.5199	68.9933	30.7829	68.0086	53.8733	40.2017	14.7229	59.9632		0.119762	35.7118
2.5008	15.9985	22.5006	23.8521	24.3982	14.9341	15.8583	27.3009	37.157	39.6661	46.9204	37.1716	23.9678	25.0144	26.1554	26.2485	21.4736	28.4493	18.5744	51.6573	55.5384	35.2931	53.9896	72.0741	27.3985	70.479	62.8346	39.986	19.0234	65.1194		0.125746	35.484
2.6199	11.1163	22.9489	22.544	26.082	8.4039	14.554	28.4692	34.7658	41.2541	38.3716	28.8936	25.4674	19.2502	28.9551	27.9743	15.4155	24.2727	17.2457	44.7161	55.7459	26.2714	52.0554	68.6783	26.8478	58.3991	69.7413	38.4282	18.4684	64.345		0.131735	33.0925
2.739	12.4226	16.5173	23.4625	19.1317	10.0343	8.4916	27.9108	29.3543	36.0054	32.3206	25.1139	18.9857	19.8115	24.0349	27.6926	16.2865	20.843	21.5559	40.4628	59.2106	20.9447	56.8415	75.7627	28.8373	50.3281	65.139	38.8554	20.2586	58.613		0.137723	31.2148
2.8581	8.4722	15.9826	23.1509	22.5605	10.8776	10.6161	27.1533	28.5879	28.1339	34.8735	25.6786	20.751	14.3841	23.2274	29.9656	20.518	16.81	16.9124	40.4041	50.5619	25.1759	60.2947	70.6984	32.4253	45.6645	66.8135	43.8193	17.34	54.0599		0.143712	30.5487
2.9772	9.3859	13.9333	20.5242	16.7194	8.9091	9.0725	28.4017	30.2572	30.8829	32.0446	25.5056	17.208	11.7378	19.9216	25.4139	15.5773	19.1752	13.0663	39.4294	46.8446	22.2399	57.4369	72.9812	31.5335	46.951	71.6563	40.321	19.8701	54.4721		0.149701	29.3611
3.0963	11.5045	11.3149	18.3485	15.8337	6.8417	11.5581	28.4284	27.765	24.9538	31.839	22.5457	15.362	8.0063	21.883	32.3302	14.0604	17.8165	12.7955	32.8357	43.9824	20.0829	69.8235	74.2462	34.6385	49.7545	80.8661	47.5909	28.7999	53.0303		0.155689	29.9599
3.2154	10.0132	11.6317	12.5389	17.0397	6.7186	10.1652	26.8527	19.239	23.9074	25.8509	23.1245	15.1053	8.2468	17.8702	31.9141	14.1226	15.2706	12.8444	32.7894	41.5292	18.7645	68.2134	86.3513	41.7143	45.7285	82.0073	45.2727	25.4197	48.4513		0.161678	28.9206
3.3345	8.2667	10.1145	10.9675	15.1626	7.6949	8.1841	25.6378	22.968	27.1135	25.9175	17.5225	13.4582	11.9777	22.653	32.2214	13.9976	13.4155	11.0284	27.3566	30.8269	14.1731	60.2629	73.8692	35.4465	51.4428	76.7511	48.9583	28.2924	49.2134		0.167666	27.4102
3.4535	9.5369	7.5961	13.0408	16.4173	7.7863	7.3522	28.2921	20.312	16.7532	27.1438	13.8799	10.1565	8.709	22.1333	39.4518	10.9417	12.0203	9.2144	26.459	24.8587	18.5909	64.7207	81.4741	36.7339	41.7972	74.2467	50.7161	30.7888	47.6183		0.17365	26.8532
3.5726	9.4187	7.7283	10.0057	17.5015	4.0377	5.0999	21.9058	22.5776	16.6946	21.5617	14.4255	13.5071	10.2354	21.3929	38.0064	7.9201	12.215	9.9771	27.3247	22.8759	13.5172	62.3702	88.1133	25.8507	48.1493	79.0801	50.451	28.4216	41.8409		0.179639	25.9381
3.6917	6.5436	7.3877	9.6702	14.2373	5.7171	6.8745	26.3051	20.8007	21.0053	20.0219	10.5756	9.4195	10.5869	18.2411	31.0938	8.5898	10.1166	8.9311	25.7242	24.4451	15.4841	66.57	81.373	28.6369	51.4532	76.1404	50.4855	41.1052	34.3108		0.185627	25.5809
3.8108	9.2253	6.3962	9.8123	16.8576	6.1788	7.1178	22.5043	19.2027	14.2873	20.2845	7.717	8.42	9.4968	19.6429	36.4688	9.1034	12.552	5.5738	21.1586	24.0561	13.4381	63.2785	79.5971	30.4132	41.0828	64.6965	49.5116	46.4286	37.6406		0.191616	24.5567
3.9299	8.4616	6.9412	8.8861	19.0599	4.2762	6.3165	22.9948	14.8691	15.4378	21.0291	7.8936	9.8462	10.9712	18.2162	46.131	7.8512	5.2539	8.3122	26.1787	27.1923	10.8339	70.3065	90.8576	26.8977	32.1779	65.0493	48.8471	52.3426	39.5262		0.197605	25.2744
4.049	6.2638	6.5952	4.7428	13.92	6.0133	7.3766	22.2737	17.8418	16.4265	21.0374	6.919	8.6893	8.6953	19.1183	38.5571	8.819	7.4738	7.4616	18.8126	26.2368	11.4279	67.2949	93.8258	28.9697	31.7419	54.364	57.3278	61.1116	34.2263		0.203593	24.6056
4.1681	8.1679	6.9583	6.5283	15.1678	4.6464	5.374	19.9461	13.3779	12.2211	15.7646	6.1579	12.5674	11.8899	11.8895	34.6356	7.6915	8.0035	7.0523	20.9413	23.6641	12.6818	68.9044	91.521	18.5202	23.7399	41.6716	55.8431	57.4967	25.4549		0.209582	22.3613
4.2872	7.0869	7.5115	5.8628	16.4071	5.7248	6.4071	16.6285	14.2803	15.1775	12.2888	7.5562	12.9222	9.8215	10.845	39.047	6.4348	8.8841	12.3048	18.504	17.1864	8.4838	70.7307	97.2567	19.5366	23.7112	28.143	51.7766	68.4888	18.7118		0.21557	21.9904
4.4063	4.6161	5.0314	6.6267	19.0061	3.9776	5.208	15.5132	13.0263	15.3824	14.9617	6.4635	14.4528	7.2396	13.4364	41.6538	5.2983	7.4771	10.9742	21.2123	23.3462	7.3431	62.8959	99.5364	18.1898	29.7315	23.7205	54.4009	83.2023	17.3705		0.221559	22.4584
4.5253	6.7077	3.1305	2.6905	16.9836	6.2085	2.4701	14.4168	12.7203	17.4388	12.5198	6.3067	11.7284	10.5402	13.3534	34.1882	6.3671	7.6914	7.2965	16.5714	24.6244	7.0943	72.3795	96.6685	15.0007	21.0971	25.2332	56.433	83.9257	14.2325		0.227543	21.5869
4.6444	6.4635	4.3803	5.0825	15.3335	5.3324	3.2137	16.1322	10.8358	13.5352	13.8412	6.6985	14.0379	10.8306	13.4717	39.0059	8.775	7.62	6.7006	21.2258	23.946	8.4597	65.4652	91.2754	12.6518	23.1128	18.6722	48.5451	68.9434	19.0942		0.233531	20.7821
4.7635	6.8695	4.5619	6.2776	15.9787	6.6574	3.0321	13.7487	8.8541	16.8612	11.7119	12.8973	9.4104	12.3532	10.9049	39.2594	8.1682	8.0537	9.8024	20.3192	20.7652	8.8689	67.6587	91.2623	12.8856	21.9855	21.3496	52.8594	74.9809	11.3715		0.23952	21.0245
4.8826	6.8181	5.3581	5.5328	18.3371	3.4053	2.2479	16.0078	11.3457	15.4265	12.7053	9.4805	10.0203	11.0568	11.0282	34.44	5.2129	5.4348	7.4324	18.806	19.3586	7.2113	72.3334	100.235	12.0615	19.9425	15.8255	58.945	73.3932	11.5326		0.245509	20.7219
5.0017	7.3347	6.0661	6.2858	16.256	4.6027	3.2343	13.1149	9.1611	23.1862	13.698	7.5714	13.489	12.9375	8.8286	31.4744	7.5897	4.0495	6.6649	20.7051	12.3257	6.2988	66.4638	85.755	8.846	23.3128	15.2542	46.0426	80.2187	11.1837		0.251497	19.7225
5.1208	7.3815	5.5801	3.0402	15.9123	5.6008	3.3166	11.7885	7.641	15.5764	14.5733	8.4333	12.5434	13.3435	7.5106	30.6241	6.2605	6.9903	8.5574	14.3703	16.113	6.0526	54.1397	72.742	7.7492	19.5087	16.9927	38.9114	81.0275	8.4851		0.257486	17.9574
5.2399	6.0809	3.1119	5.1021	16.745	3.8546	4.0007	13.0748	7.1157	16.4848	16.8858	10.7471	12.1326	12.4431	6.2181	31.1274	4.7676	6.1204	9.5965	11.6917	16.4412	6.3343	52.7542	64.9516	7.5766	22.3685	11.8984	30.4604	82.3397	5.9876		0.263474	17.1867
5.359	6.3055	2.3569	4.9655	19.2019	4.6279	4.3422	11.9076	6.3453	18.4681	13.8772	12.526	13.4748	17.4753	5.4708	27.5815	4.5311	5.4245	7.5339	9.297	17.376	6.1686	55.1339	63.7261	7.6756	14.6882	12.7168	26.4743	80.3747	5.2883		0.269463	16.7357
5.478	5.428	1.7685	4.0658	21.5654	5.4059	3.9292	14.5231	13.2344	15.1505	14.017	10.3882	16.5001	18.629	6.1383	25.4192	4.4359	5.2515	9.5115	13.4448	14.9404	6.2221	51.6827	61.7868	5.7683	14.5514	12.9948	19.0729	81.0371	7.7429		0.275447	16.7105
5.5971	2.8269	3.1883	5.313	23.3788	3.6168	3.6027	13.2076	10.6862	18.445	14.0759	11.8292	11.8613	15.9943	3.5506	19.3582	5.4135	5.4412	9.1487	10.9073	16.6953	6.8786	48.5867	44.0023	7.2734	13.0003	13.232	13.8715	75.715	6.6851		0.281435	15.0961
5.7162	2.6223	3.4029	4.2716	24.1159	5.8204	3.9279	16.4001	9.3272	20.3097	15.6471	16.0997	15.1648	15.9129	4.6587	19.387	5.9891	5.0113	11.1	11.0546	11.1873	9.5793	36.8382	44.8233	8.2731	12.2356	14.0732	17.8895	64.3415	8.9645		0.287424	15.1182
5.8353	3.3063	3.5751	4.2644	18.6062	2.5385	3.2332	13.7486	8.7598	20.3459	17.628	15.8445	15.3975	16.9798	2.5863	16.738	4.8769	7.1585	11.0564	9.1555	13.0212	8.6688	45.5439	35.2622	5.439	8.7012	13.6426	14.7687	61.0572	9.2895		0.293413	14.1791
5.9544	6.0009	3.9447	3.3163	26.4673	3.4003	2.14	11.8236	13.0368	20.6998	18.5458	17.6761	18.0431	16.1136	2.6832	12.8271	5.2536	6.0378	12.1319	11.0677	11.2692	8.867	34.6616	22.0809	5.4282	11.2922	14.1497	12.6348	66.6203	5.2561		0.299401	13.9127
6.0735	5.7385	2.7764	6.5438	33.8985	2.9022	2.9378	7.5168	10.5362	24.9205	15.2894	16.4674	24.7449	16.4786	2.3803	11.188	5.6164	2.5454	10.6225	13.1622	17.6319	8.5081	27.264	14.4035	5.2158	9.3244	16.4041	10.1228	57.6479	7.3001		0.30539	13.4513
6.1926	5.3007	3.4802	5.4464	31.4013	3.1327	3.0149	9.027	10.7288	24.3838	17.3638	17.7096	23.8984	15.3198	2.3211	9.5	6.0796	4.7346	10.4883	12.2998	15.0699	8.1812	20.6862	9.7803	3.2526	8.6564	17.4365	9.9045	46.678	7.5887		0.311378	12.5126
6.3117	5.8416	3.7056	5.6875	29.6721	3.2699	2.1439	5.2502	9.1622	25.9092	13.9926	20.2776	24.8445	17.549	5.5642	8.0881	5.4469	3.8364	14.1047	10.0955	16.6702	8.8966	21.5929	7.9954	3.9002	11.6248	21.6267	8.2525	39.1476	6.6685		0.317367	12.442
6.4307	5.8996	4.7544	3.2256	30.9346	3.7414	2.1516	7.8175	8.8115	23.3389	15.4149	16.0755	26.7772	13.8594	4.6669	4.6916	5.5433	4.6133	11.9755	12.7712	15.1061	8.5649	15.3384	6.0929	4.2838	7.0571	18.3371	8.2854	31.9396	6.931		0.323351	11.3448
6.5498	6.1816	5.0284	3.455	34.0434	4.2571	3.3174	5.3781	11.7527	24.2401	14.4009	14.3582	25.2104	14.692	2.268	2.7519	3.66	4.2831	14.0264	14.2683	17.8483	11.2453	11.3888	5.4115	3.9106	6.4157	17.9163	7.9206	25.1653	6.7729		0.329339	11.0886
6.6689	4.4255	4.9751	4.5484	34.8312	3.0889	0.6828	2.5476	8.9082	28.1253	15.7378	19.6748	26.2516	10.857	3.0184	6.1726	3.4061	6.5349	11.1451	11.0089	17.8721	13.3617	7.0506	5.9244	3.9816	8.8776	20.1787	9.5989	18.8444	5.5952		0.335328	10.9388
6.788	5.171	3.7727	4.1219	29.0528	5.6724	2.5395	5.5166	8.9871	27.1713	13.5323	15.3765	22.501	13.8102	3.782	3.2326	3.4266	4.2544	16.5265	14.7132	12.9699	13.2418	7.2002	4.5346	3.5408	9.4077	18.0586	6.6251	12.6495	6.4305		0.341316	10.2696
6.9071	7.7129	2.8183	4.2374	30.922	4.8724	2.8503	6.2853	8.1408	30.5758	13.9524	17.9342	31.4183	10.0382	1.9334	4.2078	3.5597	1.8885	20.9561	14.5698	19.0336	13.2845	5.2992	4.779	6.8219	6.942	19.0736	7.441	8.6769	10.4634		0.347305	11.0582
7.0262	4.5878	4.6361	3.2193	24.6968	4.1969	3.0847	2.567	8.4037	29.4732	15.9709	16.6948	25.7553	10.6369	2.0254	2.0026	3.1513	3.9948	14.121	15.4318	18.7085	11.3209	4.1824	2.8609	2.6624	8.698	18.463	9.2472	8.9813	5.7543		0.353294	9.84583
7.1453	6.171	3.4313	3.9011	26.379	3.8133	2.4519	2.7177	7.086	31.187	14.4333	14.3781	27.0254	8.3021	2.6111	2.6587	2.6166	5.2636	12.3167	13.38	16.8713	18.986	6.439	4.6682	6.2585	8.2775	14.2335	7.1148	6.1129	8.9987		0.359282	9.93394
7.2644	6.9489	6.9345	2.3756	26.354	3.875	1.8112	3.3897	6.3483	28.6903	13.1787	22.2733	26.7259	10.1023	4.1239	2.3464	2.5658	6.2565	13.9331	17.0384	15.2734	17.4788	5.0277	3.1751	3.6594	11.4052	24.7822	6.4944	5.162	9.5806		0.365271	10.5969
7.3834	6.1276	3.7955	2.4552	22.8898	5.677	1.9655	4.4557	7.9344	25.8857	13.6505	16.2649	32.2725	10.3352	5.0522	2.7008	2.5177	3.0055	15.4646	13.1905	18.9633	11.2441	4.1276	3.9038	3.3025	9.3506	24.3795	5.5984	4.3034	9.8463		0.371255	10.0228
7.5025	3.5842	3.99	5.079	24.8657	4.3445	1.6553	7.6086	6.9088	28.9853	13.8137	12.4613	26.9478	11.7654	2.1654	2.176	2.4027	4.2068	12.8563	17.88	16.8003	12.1508	4.5971	3.6482	2.5246	11.1804	23.8113	6.5257	4.5039	6.2608		0.377243	9.85172
7.6216	4.9681	5.2351	3.1264	24.4949	3.0826	4.9365	4.0812	6.7902	23.8281	13.0329	13.3532	33.4366	9.6491	2.0611	2.4312	3.8079	3.6362	11.0383	19.6538	18.0609	12.7	4.7845	4.6308	4.8055	6.1322	21.9234	9.2333	3.9115	6.7716		0.383232	9.84818
7.7407	5.6871	4.2589	1.9776	22.7101	4.5835	3.7556	2.8833	5.26	22.7573	16.9236	15.936	37.6504	10.9701	2.5284	3.3947	4.5472	4.5244	11.8189	23.6297	22.6892	10.4295	4.0224	3.0811	4.4218	7.214	26.7902	7.2766	6.6606	6.2733		0.38922	10.5054
7.8598	5.4594	4.9675	2.8982	24.2865	2.6799	4.1277	2.5968	4.488	19.375	17.6938	20.1001	42.5863	11.7589	2.5053	2.7831	2.7379	3.5877	8.6877	24.6396	22.0041	8.415	5.9862	4.6167	2.5251	7.2159	23.5307	7.4367	4.2463	10.4795		0.395209	10.4971
7.9789	8.0071	4.7051	3.8623	26.651	3.7627	2.717	2.8032	8.7174	25.5526	21.7209	18.6085	33.0105	11.0827	3.4041	3.4904	3.3619	3.6886	7.3515	20.9723	27.5106	8.4867	5.3827	2.6292	3.3464	8.4008	24.5462	5.2155	5.6773	9.7353		0.401198	10.8414
8.098	6.6437	3.8487	2.6525	29.2801	3.1518	1.9248	2.9799	10.4751	25.5158	19.6844	21.0339	40.555	8.5439	4.1232	3.6332	2.3724	3.5449	9.2364	24.4227	31.2634	7.3084	7.0042	3.6459	5.1751	7.5431	24.9462	4.0389	4.6837	11.1353		0.407186	11.392
8.2171	6.8209	4.1806	3.45	31.1785	4.8807	2.4108	4.4308	10.5193	23.1436	18.5235	21.1239	40.8633	10.8567	3.039	1.4873	2.83	3.3937	6.5953	21.4812	21.9879	5.5549	5.4702	3.8304	4.1693	8.6514	27.701	3.65	4.8264	7.879		0.413175	10.8596
8.3362	3.864	3.6478	4.5763	34.5051	5.1037	3.1268	3.6987	7.7045	28.9888	17.2198	16.6044	38.3289	11.5667	3.8025	1.4234	2.704	4.7242	10.0486	19.2762	29.7303	5.7918	5.3211	4.194	3.4041	7.0077	28.2049	7.3416	4.5263	6.4082		0.419164	11.1326
8.4552	2.5303	5.6966	2.9926	30.9082	2.6934	5.1203	4.4463	8.482	26.8537	17.4586	16.731	36.4329	9.4933	2.4544	3.0495	4.3211	4.6231	7.1093	22.2084	30.3537	6.0623	6.6351	3.752	4.7971	9.0301	27.8234	8.4239	1.9969	8.0661		0.425147	11.0533
8.5743	5.1628	5.3281	4.9877	30.1833	4.4942	2.228	4.3575	8.2828	32.9327	17.2992	20.7392	38.8541	7.7066	4.7581	2.8858	4.1116	2.3931	6.556	28.7067	31.3551	6.1915	4.2987	4.3258	4.1772	9.9929	31.7948	5.1881	2.4346	7.2791		0.431136	11.6898
8.6934	7.198	5.467	3.7053	28.4866	4.6413	4.3732	3.8819	8.9872	29.104	21.0535	19.634	42.6708	9.4806	4.8943	3.1868	3.6539	5.6862	9.0652	27.7985	29.1719	6.6471	1.9134	3.1703	2.617	9.4202	26.6897	4.7168	2.989	6.753		0.437124	11.6226
8.8125	5.4809	3.9679	2.9213	25.058	4.3876	4.6638	8.4553	8.8569	32.399	18.6301	17.9023	37.7532	10.2599	1.8628	3.7674	4.765	3.6087	6.1758	25.845	30.6165	6.4249	4.6024	2.6768	3.9087	8.8832	29.5856	2.9666	4.869	7.2383		0.443113	11.3287
8.9316	5.8731	3.7851	2.1352	25.8455	3.0627	3.5828	7.1665	6.872	26.6226	14.5765	14.8521	34.0521	9.334	2.5299	3.6941	4.6416	3.4094	5.6547	26.7833	23.0105	8.2659	5.3523	3.6463	3.6258	8.4434	27.2419	4.5584	6.017	6.0062		0.449102	10.3669
9.0507	8.5692	3.4843	3.4188	22.9187	2.5191	3.2526	3.3558	5.6234	27.0844	16.0173	17.3667	37.9697	8.3771	3.9497	3.2564	2.5869	2.1146	6.0733	25.5676	19.1266	5.1519	3.6892	4.1259	4.7974	12.7868	34.9301	7.3261	5.5121	9.8066		0.45509	10.7158
9.1698	6.4829	2.1332	4.6818	20.3681	5.8948	4.4031	3.0595	7.2496	24.1861	19.6028	17.594	25.8012	9.7664	2.1879	2.5153	2.9961	3.8386	6.1038	23.9278	18.8989	7.1493	3.9329	3.9447	2.7687	12.6863	33.3787	5.383	3.8674	7.2147		0.461079	10.0696
9.2889	4.12	3.8257	2.4742	17.8146	3.4082	2.6808	3.3489	6.9363	28.7338	20.9191	15.2197	28.0805	9.8526	3.8221	3.7001	3.1953	3.8186	6.6051	21.0249	22.357	8.3561	3.0536	2.7643	3.5898	14.1438	33.9795	7.9874	2.6586	7.9772		0.467068	10.2223
9.4079	8.6673	4.74	3.1954	16.0847	5.0614	3.6951	3.5239	6.4107	29.4756	23.2821	14.2452	27.3517	9.14	2.6788	3.363	4.6883	4.1987	4.745	31.7072	16.1232	7.5222	3.7956	3.5746	2.9035	10.7462	41.2638	6.838	3.2471	6.4665		0.473051	10.646
9.527	9.6259	4.5186	3.6205	14.0452	1.839	3.2241	3.3033	8.0418	29.2725	22.982	13.1478	32.1399	8.0564	2.0333	2.8265	4.3413	4.4197	4.0223	28.8936	26.1713	8.4777	3.8901	3.5164	2.4945	7.6174	40.3261	4.3112	4.0364	8.8187		0.47904	10.6901
9.6461	6.9988	5.2102	2.4049	12.8117	2.3976	3.8071	3.4478	6.1474	30.3939	22.1401	15.4565	33.5518	10.8504	4.6812	2.4119	4.4339	3.3577	7.2151	30.6571	27.4784	7.0317	3.3761	4.8073	4.7257	9.6938	36.6505	5.0809	1.9856	7.2001		0.485028	10.9105
9.7652	4.5911	3.3247	2.2218	12.2168	6.2355	4.0471	5.1985	6.0156	33.3506	23.1307	11.5352	36.374	10.7177	3.4967	2.4146	3.1259	4.3029	7.0376	31.3487	21.5368	6.1424	3.6181	3.1456	5.8427	8.8633	34.5258	4.9551	4.2915	6.7685		0.491017	10.7026
9.8843	6.5985	3.7781	2.1034	10.0239	4.08	3.7924	4.7306	5.045	28.0373	25.2684	11.7108	32.8268	6.1046	3.4004	4.1833	3.1142	4.9571	6.5492	30.7252	20.1205	6.4928	3.0539	4.2632	3.142	6.5724	24.9678	6.126	4.4919	6.2425		0.497006	9.74146
10.0034	5.753	4.2394	3.8402	12.6984	3.1519	3.3959	3.0809	5.115	20.837	30.7268	15.4531	42.2194	7.7439	2.6367	3.8997	5.2356	5.154	5.1084	28.7152	24.2127	5.1546	2.7906	3.6126	2.6803	5.4111	20.9722	4.1539	3.6118	5.5548		0.502994	9.90204
10.1225	6.0291	5.0951	4.3956	11.7982	5.0529	5.3785	4.4243	4.0502	26.0562	28.5557	13.3114	37.6394	6.0718	2.7599	2.166	2.5694	3.7618	4.2509	25.325	22.9773	6.17	2.7371	2.9484	2.8389	8.6057	20.9119	4.0379	3.3714	6.1648		0.508983	9.63637
10.2416	5.4823	4.6	5.331	9.0561	4.2233	3.8268	3.2037	5.2529	22.9329	35.2556	17.8031	33.6381	5.8915	3.2123	3.2641	1.9474	3.732	5.719	28.6638	29.146	3.3909	3.1327	3.8076	4.0782	6.8755	22.7379	4.2768	2.9889	8.279		0.514972	10.0603
10.3606	6.9327	2.1341	6.2978	7.1508	5.9271	2.8873	4.0887	4.3822	17.4368	38.4307	13.9108	41.2737	8.795	2.8021	3.3299	3.7457	2.4872	4.3904	31.3053	26.5693	4.321	2.8694	3.7637	3.1531	5.6072	23.4625	4.2458	1.9662	5.1055		0.520955	9.95766
10.4797	5.2568	5.4161	3.379	7.4637	3.6202	4.3415	3.232	4.7822	16.4949	37.5081	14.4858	41.3477	4.7474	2.3571	3.2017	4.3394	2.6082	4.5484	27.3497	31.6728	4.5919	2.5501	1.9045	4.5756	5.027	20.9587	3.3608	2.906	5.8888		0.526944	9.65228
10.5988	5.7807	3.5214	3.4574	9.7727	3.2227	2.9024	4.2221	4.0196	12.7534	32.9619	16.276	36.0675	5.9826	4.2238	1.8434	2.8475	3.6058	5.9938	27.5471	26.0666	4.7343	3.9967	3.7912	2.7201	5.0895	20.9972	5.341	3.6971	7.0568		0.532932	9.32732
10.7179	5.5702	4.4076	3.2172	10.3625	4.4469	3.8013	3.1071	4.8564	9.7103	36.0202	21.9591	33.3272	4.3569	3.8904	1.4195	3.0193	3.4234	5.6841	31.1218	22.7102	3.9494	3.5876	4.9764	2.5909	6.1387	20.1162	6.2904	3.6203	6.9157		0.538921	9.46887
10.837	5.8596	3.1821	4.4597	9.2594	7.2651	3.8093	3.9802	4.7855	10.8275	29.6962	22.4194	28.0673	6.0707	2.2789	0.9621	2.9314	4.5551	4.8968	25.9576	21.8808	4.7736	3.0679	4.6815	4.453	8.5736	18.1007	5.2067	3.7101	7.4808		0.54491	9.07561
10.9561	6.5552	5.2361	5.0728	8.8764	6.0396	4.286	6.0494	3.9866	10.4505	35.666	23.4551	30.7976	8.1646	2.4311	2.93	4.0143	4.1388	4.1417	26.3234	22.5707	6.1021	3.309	4.1652	4.2731	5.9255	19.0204	4.1154	4.4931	5.2147		0.550898	9.57946
11.0752	7.4922	4.8702	7.1666	10.1696	7.4405	3.275	3.6307	4.3002	10.7597	30.8666	24.2206	27.4496	5.6702	5.7564	1.721	2.9896	4.2632	5.3594	26.7442	23.9537	5.6934	3.1435	4.1512	3.7647	5.8172	20.3735	5.9976	3.083	5.1282		0.556887	9.49143
11.1943	4.4133	7.3103	3.4499	7.8632	5.9211	1.9643	2.6029	5.2269	8.7449	29.485	26.0321	29.225	5.6306	5.3241	2.0594	3.6644	4.4413	4.2737	33.3041	20.3207	5.7419	2.8694	4.0862	4.09	4.4872	22.9617	3.9278	5.6079	8.1287		0.562876	9.41924
11.3133	4.9372	5.7677	4.9225	12.2232	6.7938	2.6899	4.7654	5.2188	11.0874	30.4649	23.9902	30.9875	4.9817	2.5056	2.0439	2.944	3.2715	3.4917	28.7052	19.0265	5.6536	4.6584	3.6306	2.7384	4.1627	22.1375	4.0368	3.21	7.6447		0.568859	9.26522
11.4324	3.4541	2.9259	3.9005	11.6904	5.4075	5.282	3.2856	3.861	9.6483	30.2172	25.0431	29.1897	5.3947	2.7503	3.2609	2.3402	2.1906	3.7815	26.9678	20.7049	4.1447	3.1644	3.4974	3.5932	4.2093	19.0424	6.3104	2.6503	9.0795		0.574848	8.86165
11.5515	6.6805	5.2298	5.6029	14.2426	7.8806	2.9729	3.4503	3.9384	8.311	27.0074	21.484	24.9638	5.8904	2.8984	3.0693	4.1955	3.5291	2.6213	34.1405	16.8326	6.6005	2.7108	3.0411	2.1636	5.8114	24.0008	3.8727	7.2901	10.5412		0.580836	9.34391
11.6706	6.2601	3.8143	4.9803	21.7253	7.0302	2.6483	3.4471	4.7418	7.4734	29.626	26.4998	28.9512	5.8124	2.9981	1.9764	3.2694	3.3193	3.6158	34.7833	13.0334	3.5831	3.4487	3.9145	3.9528	5.9021	24.8652	5.7456	2.664	8.92		0.586825	9.62076
11.7897	6.3052	4.506	4.3268	22.9623	5.6296	4.1861	4.597	5.9526	6.4276	31.3996	25.4714	30.6202	6.1142	2.1457	3.6704	2.8628	2.6725	5.1008	34.4541	12.3752	3.3784	2.1749	3.218	5.306	4.371	19.6138	6.9271	4.7865	8.0481		0.592814	9.64151
11.9088	8.4124	4.744	5.5457	29.9064	5.6014	3.6055	2.3279	6.3221	7.1858	25.3413	21.5773	31.6695	4.8384	2.9055	1.0743	1.9515	4.1565	5.2768	32.7094	14.999	3.8476	4.2381	3.1852	4.6359	5.7862	21.8143	3.5537	3.3335	8.1467		0.598802	9.61007
12.0279	6.8478	4.3978	2.8061	29.2416	8.1644	2.8363	3.3265	3.0501	8.3755	27.9447	25.6626	31.6909	6.4466	3.1545	2.3741	3.2488	3.0795	3.0678	29.6859	14.2675	3.3688	3.5868	3.7549	4.4	5.9035	21.9554	2.8913	3.822	7.3096		0.604791	9.54004
12.147	6.2992	4.8967	6.0443	26.6868	8.5199	3.6965	2.6246	3.2103	6.2274	21.0993	26.0027	25.2611	5.1903	4.1676	2.1702	4.0756	3.2264	2.5218	27.5439	12.9942	4.7686	2.4487	3.1222	4.6856	6.3861	18.659	5.5478	2.8823	8.4767		0.61078	8.94606
12.2661	8.0409	4.3816	6.3622	23.0016	7.0791	2.4008	3.5968	4.3211	5.8805	17.7669	32.6164	27.3513	7.3148	2.9617	2.9518	4.2063	3.2905	2.9433	29.8765	16.1217	4.8825	2.6779	4.3855	4.3461	5.6247	14.6971	5.7187	2.8743	12.0802		0.616768	9.30182
12.3851	6.7286	4.0571	6.7838	25.5288	5.1049	4.252	3.2946	4.6676	7.2424	16.5334	29.9151	25.0769	7.8349	2.5375	1.3604	4.0882	4.534	4.3481	33.6131	16.0155	5.6488	2.7744	6.1334	3.6184	4.3498	15.1201	3.331	3.4023	9.5177		0.622752	9.22113
12.5042	7.1882	4.3287	6.6026	24.4703	7.0524	2.2444	3.4332	4.8904	6.4998	19.3503	37.3993	20.9609	5.4345	3.8294	1.0781	2.8927	4.0702	5.3575	30.5326	11.3497	3.4891	3.3214	4.7101	2.2458	6.588	17.4971	5.6982	2.2415	6.0823		0.62874	8.99444
12.6233	5.4813	4.8383	5.1732	27.8773	5.6497	4.254	3.4641	3.8743	6.7521	20.7461	33.0565	22.9426	5.1001	3.2495	2.9746	2.4454	2.8078	5.3777	27.9119	9.4555	6.6286	3.3868	3.7682	3.3738	4.317	15.8852	4.205	2.9236	6.8219		0.634729	8.78421
12.7424	5.7744	6.323	6.8613	26.1262	4.1547	3.6587	3.9986	4.146	5.9418	18.1041	38.629	23.0931	7.2803	1.8818	2.8608	1.8684	2.4395	4.0739	22.0138	12.6939	5.6508	5.0316	2.7742	2.4836	4.0803	19.4166	3.1347	2.0754	7.4889		0.640718	8.76067
12.8615	5.9717	4.8318	5.38	23.418	5.0067	2.8717	2.0258	2.8652	4.8471	15.4565	35.4061	24.6374	9.1249	5.0717	2.5672	2.4027	2.2477	4.4783	17.7624	11.1709	4.0232	4.095	3.1193	2.7362	4.0425	18.0213	2.678	3.1902	9.9735		0.646706	8.25597
12.9806	5.621	3.9411	3.5125	21.1066	4.9966	2.9498	2.4457	2.9551	7.0106	14.7108	42.7175	24.3048	6.5474	2.9586	0.6281	3.7978	3.6081	3.7352	15.2315	11.9818	4.6957	3.3993	3.3013	3.6043	3.5854	17.606	5.6173	5.0878	6.6939		0.652695	8.21902
13.0997	7.3777	3.2178	5.4941	22.9116	3.3265	2.9812	3.9052	4.691	5.6806	19.1408	48.6995	27.3018	6.1706	3.312	2.1592	2.6496	4.4703	5.1756	16.5067	8.2143	4.7064	3.6245	2.7813	5.0623	3.3855	20.1393	4.5047	3.964	6.1517		0.658684	8.88641
13.2188	9.1911	4.9155	6.3525	21.0492	3.5477	3.2819	3.7589	6.3062	5.9241	18.6291	47.7104	34.8636	5.6075	2.9009	2.3275	4.0355	1.8768	3.8316	19.7752	12.4732	3.0514	3.3236	3.9891	4.2248	4.1306	17.6812	5.3221	3.6807	8.0233		0.664672	9.3719
13.3378	9.898	6.239	4.8665	22.5262	4.3733	4.4886	3.3075	4.4078	6.8345	17.6961	41.3518	31.4162	5.9001	2.7248	4.7037	5.6652	3.9066	5.423	19.0678	10.6604	5.2221	3.6974	4.435	3.5009	4.1104	14.5408	2.987	4.0799	9.9341		0.670656	9.24016
13.4569	8.707	6.4755	4.3843	25.1067	5.3897	3.8177	3.253	6.6923	5.0404	12.6397	44.1999	31.1979	6.8728	3.3936	4.5756	3.3747	2.2879	1.8723	19.6994	12.2205	6.1241	3.6822	3.3388	3.7188	5.4586	16.7233	3.1738	3.7724	9.5533		0.676644	9.19814
13.576	5.6379	5.711	3.3183	22.2458	4.1539	5.7735	4.7409	2.6398	4.1658	15.2224	40.4541	27.4214	6.6855	3.7551	4.0607	2.7663	2.8729	1.4611	15.0627	10.8417	3.4181	5.3241	3.8288	2.0303	4.4648	16.8996	2.6818	4.0371	9.5926		0.682633	8.31959
13.6951	5.6869	4.7901	2.1782	22.6355	2.9978	3.3731	3.5271	4.1594	5.952	13.6435	36.3801	23.7264	9.6947	3.4635	3.1008	4.1735	3.1476	2.5185	13.2424	14.2719	4.738	4.6132	3.1376	4.7565	4.8852	12.7956	3.3656	4.6833	10.4022		0.688622	8.13932
13.8142	6.8094	5.2656	4.8697	23.8168	3.0153	2.5966	1.3724	4.927	5.6462	10.8449	35.2784	26.7026	7.9223	4.7972	2.0947	2.3835	4.2654	2.4776	11.3352	13.3447	5.8467	2.3849	3.9193	4.3866	6.4939	10.3784	4.6273	4.798	6.6247		0.69461	7.90432
13.9333	5.9067	6.7378	8.1338	23.0921	1.6542	6.1226	3.7824	6.2095	5.9436	12.2304	37.3062	24.8438	7.5981	7.2072	4.0701	2.3896	5.9304	3.5946	9.4282	15.3491	5.0569	2.3911	4.1247	2.3074	4.7919	13.2577	3.2968	3.1157	7.91		0.700599	8.4063
14.0524	7.8703	5.679	6.0801	22.3613	3.1063	3.3688	3.8657	4.8434	5.026	10.7227	28.8947	20.4235	7.6048	3.6146	5.104	3.7794	3.6999	5.3802	9.5371	16.8739	4.3771	3.7912	3.7104	4.7758	5.3851	13.5142	4.8753	3.0943	11.6663		0.706587	8.03536
14.1715	4.8325	5.3956	6.0351	19.1577	4.5747	2.9879	3.7834	4.4975	5.2015	10.4884	28.2932	22.8228	5.3908	4.1007	2.778	2.9994	2.5394	3.4255	6.6541	15.6454	5.0185	2.7562	3.2854	7.006	5.6228	9.4395	4.8321	4.6642	7.7417		0.712576	7.30931
14.2905	4.9882	5.3092	6.2532	18.3966	1.9575	4.0337	4.1464	6.7652	4.5912	8.9028	28.5246	28.884	8.3462	3.0233	3.2102	2.9663	2.8385	4.5635	5.9504	18.1771	5.513	3.0056	3.1031	3.3889	4.5291	11.7518	7.0872	3.3239	4.9354		0.71856	7.53331
14.4096	3.2438	5.1778	5.7473	23.4804	4.1806	3.488	3.4646	5.8275	4.5181	12.729	28.6849	24.3143	6.5145	2.1814	2.9081	2.1119	4.2641	2.1621	6.0669	18.1482	4.1004	4.115	4.7227	2.7818	3.3098	14.3711	5.4719	3.6514	7.6897		0.724548	7.56646
14.5287	5.1754	5.2624	3.6466	21.8015	5.9056	3.0665	4.7549	3.2599	5.7967	11.1802	24.3612	25.1557	7.3392	3.6371	2.394	1.9823	3.7302	3.6397	6.8561	21.8553	3.588	3.206	4.0342	4.1992	3.6725	11.1414	6.021	3.3058	6.2653		0.730537	7.45634
14.6478	5.8136	5.4067	4.6206	24.1099	2.7658	3.4149	4.9265	3.2951	5.0948	9.6697	20.5773	26.9748	9.0681	4.5413	2.918	1.8453	3.7302	4.2766	6.7034	17.0557	3.7528	4.0758	2.036	2.3091	3.7216	13.681	4.7373	4.5137	9.3689		0.736526	7.41395
14.7669	4.2182	5.2525	4.1741	26.7006	4.528	3.9639	4.1814	3.662	4.1703	7.9092	20.7764	29.6412	10.5575	5.2398	4.2788	3.3876	3.1845	1.7602	5.6628	20.86	3.4622	4.2421	2.5033	3.3094	5.2104	15.9021	9.4764	5.4666	7.7054		0.742514	7.97886
14.886	5.311	4.804	4.8822	29.78	3.5759	5.754	2.378	2.2588	2.384	5.7663	24.1647	26.2643	8.1408	2.7514	5.6809	2.2721	3.2868	2.6954	7.4561	21.8099	4.1963	3.4508	3.8928	4.7826	3.2848	17.017	7.3299	2.8681	7.5171		0.748503	7.78469
15.0051	7.165	1.6657	6.6952	26.7846	4.3447	3.1114	3.3911	2.5604	2.3277	5.2398	22.8948	30.2296	8.1441	3.6469	3.4453	2.61	2.1888	4.888	5.8431	23.2365	3.4379	2.9698	3.2264	4.3562	4.3335	11.9284	8.0494	4.045	8.0525		0.754491	7.6142
15.1242	4.378	5.1194	7.4901	26.5518	4.4521	2.8279	4.9642	3.8	3.9795	4.1063	24.125	29.8479	6.4556	1.9977	4.7365	3.0114	2.4528	4.1221	3.8833	26.6035	3.0608	2.9047	3.24	3.6378	3.7314	13.5291	7.2389	4.8733	10.6265		0.76048	7.85337
15.2432	6.0087	4.3497	3.694	30.147	4.3115	5.8669	4.086	4.0496	5.5938	4.1705	24.9162	40.2292	8.566	5.2496	3.2633	2.5915	1.778	4.3483	5.7901	22.8379	2.9672	4.2148	3.1019	1.7628	5.0811	12.4109	5.2831	2.1268	6.455		0.766464	8.11212
15.3623	5.6322	5.9983	5.9784	28.8709	4.0002	3.0532	2.8393	3.9322	4.7281	3.8869	21.024	37.2198	5.6922	3.7127	3.7317	3.1514	1.4751	3.1936	6.1469	31.6787	5.5865	2.554	2.8958	3.5036	5.4396	12.7982	9.5559	3.8996	7.0196		0.772452	8.24823
15.4814	5.6747	6.481	5.5065	24.6075	4.5446	3.8503	2.9838	3.5483	2.6502	4.7113	18.9614	39.1317	8.4347	4.1894	2.8394	3.3216	1.8068	3.6992	3.7057	23.5432	3.4845	2.8992	2.713	3.4294	4.7533	11.3475	10.1808	3.9441	6.3897		0.778441	7.70113
15.6005	5.1289	6.917	5.129	27.9638	3.7617	3.7832	4.004	2.9336	4.5798	5.858	16.0722	43.2803	9.0879	6.5151	3.6308	4.0139	0.9154	1.5927	5.1279	20.975	2.9854	1.359	4.9257	4.7489	4.1022	12.2239	11.3452	3.0306	5.3561		0.78443	7.97749
15.7196	4.7028	5.372	5.6328	31.0241	6.3527	2.9119	2.9698	2.8049	3.0482	5.0223	13.5422	38.7065	6.9919	2.2863	2.4213	3.8427	3.4632	2.8438	7.1555	18.7455	4.0721	3.453	3.6528	4.0743	4.5122	11.3031	11.2889	3.1259	4.089		0.790418	7.56592
15.8387	4.1332	3.9951	3.7188	22.7849	5.6833	2.996	3.8701	3.8712	4.2775	4.7666	15.3175	30.8266	7.8039	3.4554	6.3478	5.8514	2.7848	4.4998	6.054	20.1872	4.815	4.1889	4.1682	4.6149	3.634	11.5329	8.8122	1.6854	6.0738		0.796407	7.33622
15.9578	4.7895	5.0691	4.373	23.7799	5.5151	1.7297	2.5313	3.0674	3.4118	4.7771	15.9525	37.7761	7.9066	3.1304	4.0722	4.1122	4.0134	3.9461	5.3058	17.7584	2.8031	4.249	3.6468	4.3995	5.9341	7.9114	13.7842	5.9333	5.3638		0.802395	7.48423
16.0769	4.9097	5.8362	3.6557	22.9579	4.0091	2.4615	2.6242	3.6083	2.3516	4.5382	14.1806	35.3151	6.2278	2.5798	2.7142	1.2096	2.8025	3.0476	5.5713	18.992	4.5973	4.1577	4.3643	4.0366	4.0678	10.6016	12.1624	3.4001	4.3053		0.808384	6.9409
16.196	5.4386	4.5834	3.7803	20.2018	2.6889	4.28	4.139	2.9306	4.7243	4.3367	11.0501	35.9368	6.25	4.3541	3.2012	3.9262	3.7443	3.0899	7.6055	18.8573	7.5824	3.6682	4.5848	4.083	3.9634	9.7886	10.3944	3.3467	7.4615		0.814373	7.2411
16.315	6.2556	4.8702	6.1581	19.5094	3.679	2.915	3.6181	1.526	4.6202	6.7498	10.0053	32.222	7.9534	3.9062	4.428	2.3622	4.4956	2.2651	5.8971	15.6684	3.4659	4.448	3.1425	4.1992	4.1664	13.3269	8.1437	5.3954	6.7362		0.820356	6.96996
16.4341	4.8919	6.5613	3.8105	22.8734	4.6064	4.0981	4.7943	4.0682	2.8365	4.2749	11.9482	34.0735	7.9984	2.3866	2.2201	2.0166	4.4883	3.0652	7.9082	19.4952	5.1129	4.2025	5.2628	4.7193	4.6718	9.0021	11.6097	4.652	6.2394		0.826345	7.37546
16.5532	7.9681	5.588	6.3249	18.9391	4.353	3.0433	6.6734	2.8352	2.8173	5.9144	10.6376	33.8008	6.735	2.8502	5.6208	4.0125	3.4909	2.9652	7.3669	17.2324	5.1811	3.772	3.4399	5.9872	4.4534	8.8129	10.8223	2.7892	4.2018		0.832334	7.1941
16.6723	5.4147	4.8191	5.3416	20.5526	6.0856	2.8497	6.1983	3.9042	4.7152	5.7125	11.5632	36.7973	9.5042	4.0784	3.1625	2.351	2.2638	3.8429	4.6739	16.8291	2.9764	3.0787	4.4745	5.0421	6.6796	9.7654	8.074	4.0393	3.6916		0.838322	7.18901
16.7914	6.958	6.4179	3.7584	21.9219	6.1496	3.091	2.9407	2.5072	3.1783	4.3436	14.2649	34.8696	13.8061	3.9188	2.6478	4.7976	5.1253	4.5543	4.6592	18.4907	2.3851	3.3067	3.2831	5.3722	6.3457	11.4185	17.2931	3.0178	4.1336		0.844311	7.75713
16.9105	4.4098	4.4673	3.6721	21.4901	4.8051	3.8409	2.7212	2.255	3.0018	4.2169	9.9391	37.4689	12.5304	2.8324	2.0645	4.8361	3.8745	4.7382	3.3211	18.352	4.3146	4.3823	2.1092	5.0416	2.5447	8.3534	14.4864	3.2851	6.4094		0.850299	7.09531
17.0296	6.4807	2.7737	4.1513	21.5175	5.6176	3.5827	2.9213	2.536	2.8525	4.2791	12.2605	32.1929	11.9947	3.5281	3.1537	4.9767	3.1089	4.5208	6.0101	17.7831	4.7491	4.2726	3.7256	2.6509	4.2717	7.6681	13.8611	4.3934	6.1899		0.856288	7.17325
17.1487	6.4296	4.5288	3.977	17.8792	5.5095	5.2135	4.784	2.2111	3.7612	5.1725	11.8071	36.6472	12.9445	6.0706	4.0698	2.5788	3.9544	4.1384	4.2603	17.8895	4.3144	4.5076	4.0505	5.6176	4.8889	4.9396	9.6082	4.2346	9.5831		0.862277	7.4335
17.2677	8.2386	4.8112	5.6993	17.3166	9.0058	4.0442	3.7647	3.9199	2.7559	5.9587	13.058	41.321	15.4123	6.9626	2.7873	3.2264	4.1934	4.1378	5.7537	18.9564	7.0767	3.5823	4.2758	2.5327	3.1661	6.4094	11.0217	4.4784	6.1198		0.86826	7.93058
17.3868	7.1267	7.5056	5.8341	18.8868	13.6677	4.766	3.6014	4.5999	3.7309	4.6437	13.875	37.4475	11.044	5.3882	3.1465	5.2305	4.8336	5.6949	5.8674	22.8779	3.8835	4.5869	3.2277	3.3806	4.0965	8.0181	12.7301	5.448	5.9993		0.874249	8.31514
17.5059	9.1063	7.6484	4.2924	17.7095	15.7427	3.9945	5.0515	4.1496	1.4893	6.9449	13.2117	47.2227	17.8796	5.2747	3.7657	4.1245	6.5034	3.6496	3.825	24.2006	6.5054	3.4957	2.8896	2.9917	8.5098	9.6721	8.1959	4.4418	5.3703		0.880238	8.89169
17.625	7.954	6.5662	5.5217	18.4621	20.435	5.7685	3.5494	2.1344	3.1229	5.0131	11.4758	46.2789	16.1018	3.7624	1.8812	3.1262	4.7338	4.4299	4.4656	25.9486	6.5407	3.9507	4.91	3.0464	5.255	8.3024	9.4674	3.8109	5.4228		0.886226	8.67027
17.7441	8.1499	6.6674	5.0262	17.9046	19.7472	4.0417	4.2904	2.1512	4.1677	5.8904	13.4806	44.9625	17.6721	4.6117	4.3059	2.1696	4.7988	4.6493	5.0406	26.4647	7.0833	3.0951	4.5595	4.7274	4.0208	7.1156	16.1723	4.5973	6.0493		0.892215	9.09011
17.8632	10.5983	9.0567	5.5075	16.3785	21.3122	4.915	2.8551	4.8673	4.064	5.4673	15.9569	40.0656	18.856	6.4803	4.0849	3.0563	6.0894	4.6681	6.2292	28.2209	8.9461	1.8757	4.4019	5.4373	3.3925	9.2786	12.3504	4.4231	4.8568		0.898203	9.43765
17.9823	11.3138	8.2956	7.3923	18.2632	18.5194	5.396	4.0073	5.3227	4.0035	4.4794	16.8084	40.3076	17.8501	4.499	4.2253	3.1825	3.7263	7.0699	3.9468	32.1736	9.3947	3.5923	6.5167	5.5041	4.4125	10.455	11.6344	4.7684	6.7235		0.904192	9.78567
18.1014	14.0754	12.5456	4.3726	19.1443	20.615	4.491	4.0525	5.2291	5.1477	7.914	13.6008	42.3252	29.1679	4.8165	6.3125	5.1155	4.6433	6.1011	4.6653	28.8343	9.0352	1.8134	5.2437	2.3769	6.1544	10.9504	11.6525	4.9139	5.9718		0.910181	10.389
18.2204	16.1571	14.5442	5.9312	19.5252	22.7459	7.376	3.3	4.6119	4.3296	9.7464	15.9482	47.8892	30.3056	4.5812	3.1723	5.5787	4.5571	9.489	4.6063	27.7533	12.2969	3.2428	4.2759	4.4705	4.7312	10.2179	12.5007	2.9542	5.6232		0.916164	11.1194
18.3395	18.0972	13.2488	7.155	17.6317	24.4696	6.9481	2.1457	2.7854	3.7952	11.099	16.6238	54.8627	33.6302	6.8469	1.1069	4.8705	6.7236	10.8867	6.3082	29.0219	9.4603	2.6009	3.842	3.9513	4.9198	8.4363	14.9706	5.9742	6.7891		0.922153	11.6966
18.4586	20.6498	12.3922	9.2285	17.6391	25.3291	6.885	3.4231	7.0719	4.317	13.027	23.2582	44.5311	38.7246	7.3306	3.6814	2.5669	4.9999	17.583	5.2968	31.2508	11.4046	3.1482	4.8522	4.5309	4.7316	9.1023	13.8445	5.29	5.6504		0.928142	12.4738
18.5777	23.441	18.1802	8.9496	18.9198	23.573	8.3974	3.8199	5.739	4.7653	13.584	19.2138	47.6133	39.2994	7.7213	4.3052	4.6115	4.2232	15.76	6.0462	31.4421	12.5797	4.0031	2.8433	4.1145	6.2587	11.0852	11.6677	6.4011	5.301		0.93413	12.8917
18.6968	21.6792	15.9168	8.4645	20.4224	26.1849	8.2607	5.3513	6.0834	3.4471	16.9988	18.9751	52.611	35.0336	12.4393	4.9893	4.3064	3.46	16.5973	7.2386	22.1554	15.0757	3.3839	4.2544	5.2106	3.7392	8.1484	18.8478	7.4419	4.6709		0.940119	13.1513
18.8159	23.7307	22.1259	13.4846	18.932	30.8912	15.1352	5.3757	6.4266	4.8352	19.0341	18.7391	38.6874	39.3365	12.3076	2.9378	4.3797	3.5267	21.4083	10.6745	25.1815	17.1585	2.1547	3.922	2.998	3.6023	11.1862	15.7174	7.9946	4.8021		0.946107	14.0237
18.935	16.6788	30.0289	10.8469	21.4365	29.2608	13.2893	4.0914	6.0544	5.4386	22.9263	13.2816	41.4683	46.5808	10.6411	3.6037	3.5806	3.774	24.9453	10.9083	27.9408	14.2316	4.3338	3.9007	3.11	4.1956	12.0135	15.0808	3.4309	4.8085		0.952096	14.2028
19.0541	13.51	29.6685	12.9614	24.6828	29.5875	15.2997	3.3459	8.5112	4.7016	19.0536	15.2625	43.0783	39.9059	10.7884	3.1652	5.4224	4.1919	23.3006	11.5721	28.8312	14.7496	4.6531	4.9056	3.4561	4.0986	12.6976	13.6299	2.2218	4.7286		0.958085	14.2063
19.1731	8.0449	31.6063	16.6289	27.6005	25.0343	21.9658	8.7794	10.979	6.162	19.927	15.8805	39.8262	39.879	16.1566	3.301	5.0036	4.981	23.8137	12.7927	25.7437	16.4987	4.2852	4.8345	3.6902	5.8492	9.8997	14.274	3.2684	5.7444		0.964068	14.9121
19.2922	7.1422	20.8923	18.9224	27.1973	27.2729	24.3014	8.4758	9.7967	7.8244	20.1601	10.9613	34.4084	36.9241	16.1986	3.0738	3.3837	4.382	22.7582	22.2332	26.0856	19.0681	3.2886	6.5385	4.1908	5.0356	11.0296	12.2721	3.7164	6.098		0.970057	14.608
19.4113	8.7351	16.5417	21.2097	30.4772	30.043	16.9067	10.112	13.2076	9.0053	18.8884	7.0164	21.2211	36.997	21.4699	4.0781	8.043	3.384	20.4611	23.7943	27.784	23.3559	5.5339	3.3302	5.3343	6.4957	11.586	12.241	3.2719	6.5195		0.976045	14.7257
19.5304	9.0833	12.4115	19.0677	21.5415	30.9001	18.4979	10.7811	22.6376	10.7351	20.844	5.9582	16.2037	19.3023	20.0094	2.8934	5.0779	5.1959	25.6611	29.1614	25.6238	20.9043	5.3272	6.474	4.3568	6.0714	11.8427	16.7635	5.6932	2.9398		0.982034	14.2055
19.6495	6.6449	10.4794	24.676	25.9812	30.1097	18.1579	10.6644	24.078	9.4494	16.1282	7.3883	10.5371	13.0339	26.7428	3.692	6.8576	3.4504	27.0436	31.6932	26.4921	17.706	3.7979	5.9224	4.3141	5.6345	9.4759	16.7316	4.5837	5.1641		0.988023	14.0217
19.7686	4.2978	8.9451	22.6369	18.7288	33.3958	18.324	11.5918	25.6773	10.4857	16.9205	7.1371	7.9647	11.4043	25.6886	3.6577	6.1191	5.0724	24.9629	27.2253	25.5654	19.5222	6.5217	7.5481	3.9431	4.639	10.2628	12.8423	3.5463	5.6987		0.994011	13.4595
19.8877	3.1308	7.2989	20.3074	20.7797	33.023	16.7031	11.5699	26.0148	20.2995	8.4823	4.9773	8.3255	10.178	25.6064	5.5576	6.8849	10.6385	20.1688	24.3761	28.6918	19.9218	9.7053	7.4287	6.1105	6.889	7.0511	16.9183	4.0247	8.7768		1	13.7876

## Sheet: Image32
X0	Y0	Y1	Y2	Y3	Y4	Y5	Y6	Y7	Y8	Y9	Y10	Y11	Y12	Y13	Y14	Y15	Y16	Y17	Y18	Y19	Y20	Y21	Y22	Y23	Y24	Y25	Y26	Y27	Y28	Y29	Y30		Ap-Ba	Avg int
0	15.5689	13.6447	10.0447	12.104	17.3992	13.582	8.049	15.0056	13.834	18.282	18.642	16.231	13.802	19.239	9.425	14.123	13.611	12.324	18.126	27.234	17.185	21.215	32.6373	17.4818	36.4939	65.128	19.0286	37.9335	27.0066	28.4988	27.3933		0	20.3314
0.1191	19.5543	11.7828	15.4512	15.247	20.6509	17.63	12.883	19.1888	15.426	17.092	21.219	20.456	15.348	20.403	11.545	18.077	18.082	10.6523	19.193	41.007	18.924	32.447	33.4413	20.7271	32.1546	67.1848	24.0084	47.1498	29.2106	29.6185	32.6034		0.00502563	23.4954
0.2382	23.6224	13.7386	18.2595	17.201	19.819	24.228	15.979	21.045	16.946	27.939	19.341	26.504	23.208	24.9	12.705	20.066	23.584	13.2826	31.151	45.886	30.454	36.629	45.3239	21.9927	38.001	73.3757	35.3022	46.766	28.5001	34.9356	26.203		0.0100513	27.6416
0.3573	29.1712	20.2437	18.1829	19.874	24.046	23.097	13.677	32.0213	22.785	33.058	23.933	23.019	25.392	28.072	17.353	16.641	25.67	19.2451	43.271	49.156	40.863	48.316	54.6283	24.5805	45.4064	72.5776	33.749	55.8925	30.3769	39.401	30.5613		0.0150769	31.7503
0.4764	37.3178	25.7878	19.9417	26.736	25.8861	27.651	25.55	31.9943	28.181	37.739	29.414	35.403	32.468	36.116	22.464	28.341	33.312	23.5532	41.563	57.731	48.93	61.144	47.611	32.3132	60.9462	69.8766	33.9218	63.6672	39.7067	33.9487	29.3685		0.0201025	37.0511
0.5954	44.8572	35.9535	20.5466	30.128	37.3798	32.336	21.57	41.4985	37.196	45.7	39.557	41.074	50.864	48.049	31.678	48.986	45.796	33.8531	65.171	87.791	59.683	67.995	47.2443	41.364	60.5005	86.9901	34.6588	56.7538	40.7579	33.219	30.1262		0.025124	45.138
0.7145	52.6263	35.2117	29.1526	34.72	32.9419	39.023	28.728	47.6654	43.838	67.541	49.611	54.967	62.159	61.339	43.583	59.023	50.719	48.1429	80.192	98.22	71.737	89.885	57.7383	47.6492	59.8368	85.6582	43.7193	56.9952	42.6087	38.4866	30.8202		0.0301496	53.0496
0.8336	58.1758	43.9469	33.6698	42.449	50.4039	35.966	37.506	58.7938	70.08	95.753	61.77	87.997	79.605	68.649	65.257	66.529	68.821	63.2809	89.846	104.043	91.82	107.061	64.2948	55.689	58.8378	94.4084	44.2844	68.6696	35.0739	34.1768	29.7793		0.0351752	63.4399
0.9527	71.8208	50.7961	45.7456	44.751	46.9387	49.844	41.932	73.7788	88.623	113.319	67.3	131.657	109.214	94.754	69.623	81.728	84.804	67.3643	99.687	95.385	104.46	113.312	67.266	71.6723	63.2471	92.4435	56.6208	68.9403	34.4941	37.2507	36.7914		0.0402009	73.4053
1.0718	74.188	60.8189	51.5927	61.978	58.3141	56.231	47.721	78.8505	95.126	121.724	84.589	153.615	108.837	94.949	90.836	105.283	92.872	83.2927	119.658	93.894	110.091	108.844	66.3091	79.9902	74.3111	88.2934	59.3947	66.3453	45.1871	35.1726	27.8449		0.0452265	80.5211
1.1909	73.1274	83.1577	73.9278	66.768	60.2701	49.397	67.077	98.5756	102.302	124.793	93.913	170.85	110.325	102.831	97.534	99.85	82.182	87.8211	123.899	94.674	119.193	131.417	63.7374	95.1559	72.7884	89.0765	60.2867	78.4803	37.7734	46.1676	35.9567		0.0502521	86.8809
1.31	87.6877	92.5676	70.0965	72.541	55.1775	64.431	58.077	96.0205	114.711	113.873	100.945	161.85	89.6	90.824	101.865	109.267	101.857	70.4916	107.828	81.99	125.948	124.911	71.4567	87.9508	74.4759	81.7042	63.1955	76.2571	32.8384	36.9092	35.4722		0.0552778	85.5748
1.4291	87.7645	101.275	83.5316	88.954	64.0685	62.563	67.809	95.7942	102.067	82.828	96.35	151.846	42.515	75.26	113.237	119.555	84.844	54.193	102.135	68.921	113.084	113.896	77.6489	98.1638	70.0585	70.286	76.2711	84.7424	37.3407	43.8741	35.1435		0.0603034	82.7748
1.5481	91.9406	97.6336	94.2259	100.309	62.6776	66.655	79.076	86.7005	94.521	48.097	94.404	136.6	45.632	47.352	110.104	114.875	79.697	51.169	93.5	60.365	95.91	105.583	64.2409	78.8033	66.3281	72.5395	88.9887	96.9235	37.0078	57.071	33.4089		0.0653248	79.1077
1.6672	97.1149	94.7396	92.2721	102.655	74.1636	76.82	81.742	83.1264	70.885	31.516	94.548	105.678	32.77	44.077	101.212	108.734	70.173	36.0742	60.52	49.051	76.503	82.068	57.0352	63.7469	55.4428	47.655	88.8612	91.2971	45.3823	45.8982	45.3628		0.0703504	71.1976
1.7863	93.4192	97.3013	91.8096	97.281	69.9587	76.564	89.132	65.6101	55.056	26.242	76.57	90.341	23.682	32.324	89.811	104.635	66.741	28.7473	53.845	36.32	56.429	68.188	51.3515	51.003	46.9009	42.8977	86.6411	96.3942	37.1963	45.9436	37.8403		0.0753761	64.0702
1.9054	82.6603	75.1674	96.0174	95.299	85.0459	93.362	108.512	55.026	42.709	23.619	76.394	62.927	22.475	25.647	68.642	77.708	66.846	30.6262	48	32.627	52.407	49.26	51.1595	35.5485	47.9568	38.6862	97.8938	87.5553	43.8177	56.3782	40.6917		0.0804017	60.344
2.0245	80.0119	72.8768	76.7794	98.575	88.1587	97.276	97.562	41.3187	33.985	14.947	54.959	39.986	17.774	19.334	44.423	74.579	60.135	21.4821	45.118	29.282	35.73	29.555	48.0353	24.0875	26.6573	26.2843	93.4995	85.0169	38.8674	54.3789	48.6887		0.0854273	52.2375
2.1436	65.835	73.2505	78.5138	82.742	88.7356	88.569	97.672	36.5607	31.745	17.001	42.807	44.296	18.387	16.001	44.714	56.817	44.003	26.4104	32.879	27.726	30.073	31.154	35.9807	22.1776	25.7497	20.1202	83.8789	86.7738	34.8426	49.4303	53.7829		0.090453	48.0203
2.2627	63.0685	52.8987	69.6836	58.687	86.4823	114.325	102.961	22.5744	22.469	14.465	24.166	38.142	10.886	12.181	37.359	50.661	37.585	22.3486	19.349	20.528	30.971	29.651	31.2562	19.1379	19.939	18.4594	64.9927	78.1073	31.5023	46.6357	49.3652		0.0954786	41.9625
2.3818	49.5397	47.005	64.2421	66.249	88.8692	92.42	94.729	24.5742	21.659	16.004	20.632	28.075	15.51	12.789	30.956	45.492	45.01	16.1662	19.518	17.363	19.995	19.603	28.8605	21.8098	21.0629	7.2436	71.5727	71.7699	36.4334	50.8701	52.249		0.100504	39.2991
2.5008	37.2754	37.5209	51.3546	69.604	79.1323	90.835	89.348	18.6343	19.954	7.914	16.253	25.227	12.256	9.478	27.222	43.818	31.457	15.991	21.543	12.801	22.828	14.288	33.18	20.8421	18.8474	5.6714	51.8605	64.7182	22.3764	52.6589	51.1152		0.105526	34.7098
2.6199	29.4777	42.9108	44.0201	52.256	93.3266	92.848	65.584	21.8891	14.761	4.26	11.425	23.2	17.85	12.826	22.92	35.313	31.353	15.2151	18.925	14.336	16.864	16.55	26.2649	19.1999	14.3078	11.0617	38.3997	49.7108	32.25	39.5801	52.0172		0.110551	31.642
2.739	24.3723	27.1884	41.9566	51.776	88.716	107.73	66.368	15.481	10.576	5.511	8.25	20.724	8.045	12.62	20.854	35.458	23.28	11.932	17.063	14.49	15.929	15.237	17.3576	14.9551	13.5696	7.5175	30.4935	35.2795	22.2414	40.8068	50.6611		0.115577	28.2722
2.8581	19.3664	20.3829	37.0536	45.921	86.9401	89.998	53.826	21.6806	8.681	5.827	10.328	22.778	12.257	11.396	21.321	26.96	17.03	13.81	12.366	12.866	11.538	18.25	15.6643	21.4283	11.7253	6.2187	20.4951	29.9162	19.2137	39.0939	42.4556		0.120603	25.3802
2.9772	14.7456	20.6908	33.9137	45.934	79.6496	91.245	39.416	12.5256	8.298	4.944	7.147	15.848	6.038	7.219	16.878	24.386	14.316	16.5247	10.496	10.415	9.753	14.167	8.7115	15.7694	16.1963	7.246	17.2496	22.1055	22.3101	32.2354	41.7554		0.125628	22.1977
3.0963	12.2403	20.6221	27.5209	49.031	76.556	86.706	31.619	11.7517	6.678	3.071	5.505	17.641	6.277	6.648	12.496	15.797	14.361	13.1992	12.095	4.093	10.691	16.697	10.7963	12.841	13.4155	8.6696	11.4707	26.776	13.9996	29.025	37.7512		0.130654	20.1949
3.2154	8.7058	17.5072	27.6483	37.4	66.4255	82.063	30.538	14.1449	5.306	5.687	5.811	20.233	5.276	5.278	16.387	16.178	22.011	13.341	7.845	6.4	7.731	10.311	14.5683	9.7598	16.5498	5.1841	11.1583	27.4774	15.6427	30.1555	41.9805		0.135679	19.5066
3.3345	8.1562	19.6426	25.7169	33.335	61.327	64.149	20.065	9.3415	8.58	3.361	6.395	19.277	6.081	7.098	16.206	15.654	19.629	15.8234	9.28	8.589	7.033	9.643	11.1511	11.3329	10.0799	6.4281	9.302	19.7837	19.6601	24.3355	42.5672		0.140705	17.7104
3.4535	10.6307	9.8857	18.4776	26.176	51.4268	56.308	20.578	9.6117	4.171	2.648	4.005	20.677	4.734	3.256	12.247	13.73	20.279	16.683	9.472	3.772	10.48	7.923	11.2076	10.4775	12.5033	5.6073	4.5253	22.828	13.9045	22.6445	30.8012		0.145727	15.2152
3.5726	6.4294	13.0237	13.6877	21.118	47.4773	46.093	25.408	9.9746	4.239	1.974	5.25	26.735	8.021	2.094	6.936	9.46	13.405	15.7569	8.282	6.726	5.238	12.823	8.3395	14.1606	14.757	6.0081	7.7502	22.0929	11.1227	23.2878	30.2877		0.150752	14.4503
3.6917	9.6192	12.8154	14.8129	25.546	53.4785	38.988	15.339	11.4732	6.924	6.236	4.1	17.57	4.418	2.791	6.796	6.681	11.249	17.2279	6.678	7.041	6.96	11.569	10.1925	13.2197	10.1762	4.1126	8.2339	21.9981	10.8503	18.747	26.9437		0.155778	13.6383
3.8108	11.1554	10.1932	18.8228	19.326	40.8843	28.962	22.176	10.5216	5.429	3.517	5.743	18.484	5.37	4.2	9.048	9.253	12.925	21.7686	6.867	3.878	5.822	9.678	15.2687	13.8982	13.242	2.7951	8.0359	14.5944	10.6961	18.191	25.4636		0.160803	13.1035
3.9299	8.4452	9.0534	18.3193	14.959	35.9246	19.759	14.991	11.3606	3.448	2.452	2.83	16.885	5.347	3.69	8.175	6.525	9.587	23.2353	7.632	2.853	6.523	10.867	10.3432	11.2031	13.811	3.7935	9.5995	17.9495	10.5951	15.4264	13.9732		0.165829	11.276
4.049	5.7987	13.979	14.5154	12.382	29.0639	24.841	12.317	10.1427	6.302	5.488	3.533	18.784	6.765	3.015	6.413	5.823	12.865	26.3871	7.046	3.631	7.25	10.486	8.875	17.3848	15.3474	5.1404	5.998	21.5663	8.5709	16.9027	15.4836		0.170855	11.6805
4.1681	5.107	7.4408	13.8596	11.759	21.5508	18.691	18.734	14.3807	7.353	5.171	2.006	15.266	4.65	4.657	8.046	5.633	8.673	21.9137	7.448	4.453	3.728	10.134	6.954	14.3172	11.9985	4.3438	6.1535	19.1663	7.3825	13.2968	12.9012		0.17588	10.2312
4.2872	5.4752	8.3721	14.3377	11.331	16.6561	17.02	11.677	9.4303	5.148	2.066	2.944	15.538	6.92	2.243	3.701	3.788	8.553	19.1208	4.494	5.287	5.088	10.075	10.3669	10.1402	14.6267	6.039	3.3259	20.4116	7.3569	13.8031	11.0093		0.180906	9.23693
4.4063	6.4014	13.222	13.0159	8.979	17.6345	10.683	17.57	11.975	3.775	4.786	1.487	12.21	5.786	3.691	5.645	5.807	10.593	24.5823	7.005	5.246	6.463	11.791	13.3087	10.1651	11.4663	2.9218	2.8493	23.2254	11.7064	10.058	12.7412		0.185932	9.89646
4.5253	5.6567	9.4286	13.0468	6.599	17.5242	15.381	12.898	10.7105	3.973	2.165	2.79	11.992	5.451	2.07	3.2	2.456	10.646	27.0155	5.217	5.654	7.912	11.84	16.9182	8.5763	13.1981	4.5799	3.0801	21.7173	7.7229	10.2325	10.7345		0.190953	9.36729
4.6444	5.2525	12.7116	9.6457	8.331	17.0585	14.007	14.277	18.5804	4.701	3.363	4.536	16.494	5.599	2.113	5.433	4.459	8.617	25.0569	6.721	5.445	4.044	7.261	16.3667	6.813	15.6604	6.6541	4.5041	19.2985	8.1589	10.6873	9.5807		0.195979	9.72356
4.7635	4.079	8.5017	9.7069	5.974	10.1111	8.845	15.433	13.6679	4.906	3.286	3.402	18.503	6.514	4.366	1.32	4.257	8.927	24.5473	6.812	5.254	6.981	8.847	13.2662	5.7888	20.7175	3.2616	4.1175	20.2802	7.7911	8.894	10.4815		0.201004	8.99482
4.8826	5.3004	10.1118	10.5151	5.454	16.2709	7.879	15.393	17.5049	6.604	5.069	3.782	11.252	7.953	4.741	1.637	3.534	5.309	17.4184	7.021	2.023	5.725	8.844	12.2731	8.0915	19.0338	4.6712	5.0385	19.7704	9.2297	7.8025	7.5343		0.20603	8.79956
5.0017	4.0448	10.6228	10.0615	7.162	11.4546	5.039	14.115	17.1201	2.594	1.479	3.824	9.738	9.414	5.821	2.462	3.253	6.709	14.7469	5.487	3.511	4.818	10.325	10.8296	8.9484	17.5333	1.7065	6.0529	18.9595	8.9079	8.1006	5.2366		0.211056	8.067
5.1208	3.0594	8.381	9.4916	4.45	13.3989	6.208	14.399	21.508	1.978	2.555	3.585	14.115	6.251	3.769	3.078	2.326	8.706	11.9003	7.229	1.868	4.976	5.635	13.5656	9.5937	14.2614	5.751	6.4983	18.9739	7.107	7.7973	7.2852		0.216081	8.05486
5.2399	4.9823	12.6107	15.895	7.052	4.8671	10.368	20.905	18.2864	4.139	3.417	3.513	13.575	9.153	1.549	1.382	4.714	6.013	15.5852	8.719	5.317	6.163	11.167	14.0732	9.1939	20.4486	3.2022	1.5846	18.7847	7.9828	7.9687	6.981		0.221107	9.01911
5.359	3.8964	8.975	11.8137	6.525	9.5951	3.551	15.305	28.126	6.203	1.218	3.477	9.38	9.107	1.095	3.139	2.983	8.251	9.7586	5.721	2.426	5.972	9.423	13.6924	10.4291	18.3479	4.4993	3.9316	15.861	9.0251	8.5568	6.2423		0.226132	8.27504
5.478	3.828	14.0752	10.6896	4.874	6.5074	5.803	14.465	22.1526	4.864	3.155	5.246	7.264	7.339	3.915	1.646	2.969	7.217	8.9497	2.093	3.437	6.106	9.979	17.8301	6.2487	20.8412	3.5906	4.1085	17.0055	8.4973	6.1007	4.4811		0.231154	7.9122
5.5971	4.7783	6.7039	8.6914	4.398	5.6869	5.946	14.787	23.9385	5.782	2.915	5.15	7.232	7.624	2.405	3.086	2.912	7.696	8.8846	6.724	5.697	3.445	10.637	18.4066	4.7649	18.6973	3.4327	4.0754	22.2725	18.0248	5.8342	4.9341		0.23618	8.24394
5.7162	6.5066	6.4431	16.0976	3.926	5.8245	3.821	14.057	23.6436	5.136	3.652	2.941	10.4	14.518	6.584	1.551	2.573	8.861	10.4618	7.283	5.061	3.511	8.183	17.5631	8.182	16.2245	3.7588	1.7136	21.5702	22.1004	3.7321	8.5611		0.241205	8.85294
5.8353	4.9639	8.5995	13.2714	5.283	6.4422	5.028	16.771	23.469	2.099	3.777	1.35	5.973	9.61	4.957	2.379	3.497	4.759	9.7988	10.607	1.974	4.788	10.588	15.8349	6.5051	21.2678	4.0127	1.7469	26.4478	21.4519	7.2222	5.133		0.246231	8.697
5.9544	3.7333	9.7183	13.1974	9.023	2.6659	5.908	19.088	21.7094	4.314	3.563	4.612	5.952	10.351	2.741	4.674	2.92	7.296	10.1876	12.475	4.014	3.776	11.653	23.3975	5.393	22.3	5.3431	3.113	22.3568	23.4315	7.843	7.5654		0.251256	9.49404
6.0735	3.7454	11.5544	13.7501	6.045	4.5367	9.131	19.203	18.1265	3.526	3.304	3.812	8.186	17.19	3.571	1.6	1.628	7.555	6.5221	10.752	5.739	5.794	15.352	21.4769	5.458	16.0651	2.9629	3.6148	17.6561	26.6585	7.0668	5.0687		0.256282	9.24681
6.1926	2.2322	8.9947	16.3994	5.164	4.7221	6.165	18.59	17.0655	1.968	1.092	3.668	4.14	13.634	2.827	1.218	3.469	4.005	5.9015	14.533	2.767	2.982	11.831	17.751	9.6308	19.2615	5.4442	2.4832	19.2783	29.8604	4.3821	3.4081		0.261308	8.54413
6.3117	4.7806	6.6838	18.5295	5.038	3.8182	3.951	14.612	17.7956	2.622	2.8	2.154	6.149	20.748	4.162	2.08	3.088	6.029	3.8851	16.221	4.785	3.833	11.421	22.1833	10.3892	21.5909	2.9204	6.9739	11.7198	36.1165	5.2488	3.8116		0.266333	9.23033
6.4307	4.0509	11.4124	22.0311	5.686	4.4098	3.759	14.601	17.1877	4.151	3.368	3.296	6.61	11.542	3.9	2.245	2.482	7.758	6.3074	15.236	2.127	3.001	10.256	17.1891	13.9834	23.0207	2.3634	2.668	14.9177	33.7424	6.0707	6.7773		0.271355	9.23065
6.5498	5.3743	10.6532	19.6086	2.137	5.5287	4.024	9.293	13.4347	5.703	4.659	3.559	4.053	12.886	3.173	2.35	3.725	2.762	5.3866	14.158	2.849	4.273	7.301	26.1418	14.5565	19.9667	2.3816	3.5663	10.704	32.1459	5.265	6.7614		0.27638	8.65743
6.6689	3.6885	10.711	27.9612	3.728	5.9981	4.446	7.168	14.9441	4.2	1.86	1.548	4.583	15.124	3.734	1.625	3.312	4.621	6.9066	17.766	3.75	4.729	9.362	21.5537	13.6436	20.1614	3.4715	4.1672	9.2634	39.182	6.5332	9.2436		0.281406	9.3221
6.788	3.7356	11.8122	31.9222	1.554	4.4373	5.71	12.238	11.6149	7.055	2.754	3.068	3.85	15.474	5.132	2.412	3.527	6.991	4.5754	14.06	1.395	1.884	9.176	22.2924	10.3093	24.6993	6.0978	2.7203	5.1537	34.2307	6.4829	5.5659		0.286432	9.09451
6.9071	3.7426	10.9813	34.9582	4.44	5.8101	4.553	11.796	12.3384	4.111	2.208	3.55	8.248	9.335	3.824	2.454	3.399	6.428	2.3375	15.249	4.204	3.519	7.424	21.8592	12.2155	25.4825	3.6467	2.6127	6.83	27.0861	3.8361	6.3525		0.291457	8.86553
7.0262	5.1661	8.9393	29.2361	4.932	3.909	4.225	10.259	17.2561	5.58	2.398	3.868	4.526	12.886	3.778	2.546	1.778	3.392	6.7177	23.202	5.248	3.467	7.061	23.4373	10.355	32.1827	5.6215	2.8322	5.4826	29.2289	4.5281	6.2325		0.296483	9.36358
7.1453	5.6567	9.6376	28.977	4.076	5.7636	2.716	12.182	13.8333	2.441	1.699	3.134	3.443	10.02	3.076	2.002	3.476	6.339	5.3718	23.378	3.153	4.022	5.536	18.9834	13.5894	35.7999	4.9022	1.9829	4.8342	30.9918	4.1566	6.7236		0.301509	9.09345
7.2644	4.7517	11.3668	33.9661	5.412	4.9915	4.469	7.97	11.9148	4.237	1.463	4.85	2.52	14.574	4.518	2.925	1.833	5.209	5.5988	20.414	2.638	1.318	5.958	15.7491	13.8458	30.2059	3.1695	3.5138	10.233	34.7654	3.623	4.8656		0.306534	9.1248
7.3834	4.3934	4.092	33.084	4.865	3.5681	5.564	10.843	9.7073	3.736	3.822	4.584	2.355	15.799	1.665	3.158	1.505	4.654	4.1919	20.211	3.49	2.487	7.327	22.202	14.0695	25.73	1.296	1.7483	3.9024	27.7602	6.3903	5.1007		0.311556	8.49358
7.5025	8.7279	8.1229	37.4927	2.246	1.3458	5.766	8.471	13.7717	5.388	2.232	2.867	2.552	13.82	4.618	4.808	2.113	5.124	5.4387	22.246	2.851	3.574	3.581	17.3307	15.0326	31.8799	4.3301	1.6766	2.9067	26.9451	5.1103	3.1343		0.316581	8.88719
7.6216	6.9638	5.6413	39.003	3.658	3.1545	4.583	12.516	10.7516	4.096	3.231	2.675	4.291	10.792	2.601	1.441	2.455	3.581	3.7239	17.715	5.024	2.719	5.975	15.698	15.3276	28.262	5.7304	3.0567	2.3157	27.6615	3.7002	6.6376		0.321607	8.54777
7.7407	6.4484	4.8428	35.3412	2.999	5.9987	2.968	7.883	16.1464	5.366	1.197	3.099	3.446	17.158	2.861	1.971	2.269	4.667	4.3034	22.46	5.672	1.02	3.504	18.9838	13.441	38.1775	3.6088	2.4795	3.615	21.2163	8.2769	3.5841		0.326632	8.87109
7.8598	5.2608	8.2478	38.0099	4.175	5.0718	5.569	11.103	12.4419	4.095	0.571	4.036	3.435	16.613	3.785	1.407	2.667	2.022	3.6084	18.447	8.229	2.305	5.209	18.3075	20.5326	29.7295	3.4521	3.1316	3.1566	22.9637	7.2002	3.8477		0.331658	8.98807
7.9789	3.4469	7.1333	35.5844	5.627	6.7845	6.344	12.826	10.8263	4.959	2.2	1.805	4.284	9.053	3.276	1.794	2.42	4.777	2.3605	17.597	3.731	3.478	4.263	14.6509	19.4412	43.0114	3.9913	1.4235	4.4972	21.6469	5.3085	4.0496		0.336684	8.79324
8.098	2.1315	6.455	36.2642	5.994	4.1933	3.529	7.117	14.3697	2.453	3.076	1.992	3.844	16.02	3.5	2.173	3.183	4.309	2.1115	17.869	2.73	1.005	2.935	13.5092	20.1767	37.9078	3.5273	0.8041	3.2226	20.5021	5.504	3.7614		0.341709	8.26353
8.2171	4.338	7.9222	24.6701	5.969	5.3242	4.838	14.681	13.5997	4.781	2.857	2.958	3.417	11.377	5.386	2.737	1.748	2.759	6.5649	16.165	3.355	4.227	4.444	16.459	19.1817	30.9116	2.7629	1.9763	3.1768	18.0089	5.6167	3.4412		0.346735	8.24688
8.3362	4.8925	6.9904	27.4676	4.796	4.7193	6.676	10.92	12.5754	5.023	2.459	5.557	5.039	16.436	3.66	3.612	2.169	5.082	5.235	21.153	2.655	4.814	7.427	10.2733	19.4248	24.4618	3.8693	2.0527	2.8498	20.5551	6.7651	5.5722		0.351761	8.55427
8.4552	3.1436	7.0801	34.7081	4.593	5.4251	8.065	14.358	14.7439	3.203	2.645	3.052	2.943	14.872	2.092	3.955	4.913	3.226	4.1203	21.712	2.849	1.178	4.987	13.2253	25.5847	32.4199	3.2009	2.1277	4.1678	16.4217	11.2668	5.1771		0.356782	9.07923
8.5743	3.5774	8.5428	28.7046	4.281	7.615	7.818	13.777	16.0491	5.182	2.71	2.006	4.725	13.41	4.626	2.881	1.397	3.097	5.0905	25.217	4.389	2.277	6.53	15.9784	23.5311	22.3829	4.3503	3.1715	3.4773	19.7939	9.3244	4.6867		0.361808	9.05158
8.6934	3.7901	8.1315	16.1923	3.944	5.486	9.939	12.508	17.6857	3.533	3.234	2.46	3.667	11.638	3.87	4.305	2.114	3.082	4.1407	23.03	5.801	2.342	3.882	8.4947	26.082	24.7956	3.2116	2.996	1.9266	11.7805	9.2807	3.5314		0.366833	7.96369
8.8125	3.2032	10.2538	18.1608	4.441	6.2013	7.267	9.229	13.5868	4.582	3.189	3.064	1.816	9.938	4.999	2.118	2.905	2.702	5.4093	25.967	4.428	2.751	4.385	11.5784	26.3476	29.1795	3.9892	3.3204	4.1683	10.6973	15.5987	6.6577		0.371859	8.45591
8.9316	4.6028	8.416	22.7407	4.292	6.4454	8.956	10.861	13.4385	4.69	3.625	2.416	3.873	9.73	2.154	1.21	0.221	3.289	5.6077	20.104	4.693	1.732	4.258	7.6157	25.5414	31.4326	4.1853	3.0645	1.923	14.0077	13.3674	5.4276		0.376885	8.19098
9.0507	4.7068	7.9924	9.6944	3.621	7.7028	6.141	14.145	13.0519	3.052	3.032	3.024	5.072	14.146	5.972	0.354	5.492	3.359	2.2368	16.654	2.787	2.862	6.941	8.8756	28.5105	25.8645	4.2373	1.288	1.4645	10.2447	12.9364	6.6569		0.38191	7.81024
9.1698	3.9614	10.9064	11.3617	8.719	10.9624	4.872	11.711	11.2623	6.472	3.04	1.535	2.356	13.437	3.377	1.586	1.939	2.171	4.094	21.912	3.476	2.692	6.044	9.9825	26.7198	21.923	4.8279	4.2751	2.8791	7.7145	15.0634	6.4493		0.386936	7.99103
9.2889	3.1806	9.1439	14.041	4.235	4.7166	10.663	10.07	11.2758	2.793	2.367	3.714	1.958	12.9	3.035	3.443	2.324	4.24	2.4763	20.205	3.209	1.562	3.681	5.6698	33.0398	22.5671	6.3832	3.929	3.1387	10.4731	12.5162	5.3488		0.391962	7.68706
9.4079	3.3229	11.5928	8.0846	4.984	6.5053	7.02	11.49	11.4917	3.172	1.549	2.457	3.928	13.285	2.629	1.488	3.422	3.138	2.9174	10.51	2.378	3.408	2.65	4.6251	37.7666	26.1212	3.0163	2.9417	4.5954	7.7104	11.8513	10.7971		0.396983	7.4467
9.527	4.1381	7.2909	10.7796	5.055	7.6865	11.351	8.163	14.0635	4.551	3.686	1.959	2.559	13.801	3.584	5.154	2.699	2.597	4.3803	12.898	2.273	3.438	4.717	6.2153	36.3733	30.0531	2.838	1.526	0.9315	8.9463	19.9182	6.2343		0.402009	8.06
9.6461	3.6916	7.1342	10.375	6.093	8.271	8.939	7.405	13.7808	6.515	3.664	1.066	3.089	9.603	3.656	2.36	3.932	2.593	3.1844	16.536	5.086	4.472	5.481	10.8929	29.7308	25.1608	6.3665	1.4312	3.7682	8.0679	14.7375	8.0606		0.407034	7.90785
9.7652	3.4603	9.9806	7.4724	5.836	8.0806	6.142	8.387	18.4847	5.032	2.413	2.164	2.969	9.977	4.657	3.172	4.591	2.36	4.457	8.551	2.541	3.732	4.273	8.3522	34.1442	31.3296	3.8924	2.5725	2.8513	5.0527	14.7376	6.2519		0.41206	7.67474
9.8843	5.4401	6.1861	9.2673	6.93	4.7215	9.764	6.078	9.0901	4.198	3.568	2.856	3.141	10.422	4.112	1.359	2.267	2.704	2.9849	11.563	3.499	2.416	4.588	4.5592	33.657	28.8041	6.3134	4.0473	1.6299	7.8214	16.1504	7.8537		0.417085	7.35456
10.0034	1.2624	7.6005	8.7465	4.431	6.3943	6.897	5.737	17.0861	3.862	1.929	1.867	1.848	10.943	3.33	0.819	1.527	3.351	3.7468	9.331	3.596	2.864	2.617	4.3713	29.5328	30.4399	2.3866	2.614	3.3238	5.6239	16.0552	8.6902		0.422111	6.86527
10.1225	4.9537	8.9214	9.2358	6.453	9.0608	5.611	8.891	13.8872	5.034	2.317	4.472	3.436	11.895	3.058	2.432	3.026	2.614	4.0798	5.946	4.894	2.871	3.674	5.3492	24.082	39.633	3.9696	4.0317	1.9682	4.5861	14.786	8.7555		0.427137	7.54594
10.2416	4.7928	6.8771	9.3309	6.738	6.1315	8.44	6.047	12.0467	5.617	3.803	4.024	4.514	11.585	2.806	1.817	3.349	1.26	4.0092	3.316	4.492	3.866	2.208	6.1043	19.3303	33.4014	4.7024	3.0177	1.7616	7.9568	17.0129	7.0952		0.432162	7.01461
10.3606	2.7409	6.8698	10.6471	4.858	5.9234	7.342	7.635	9.3007	3.428	0.863	5.767	1.818	7.027	3.753	3.23	3.153	1.759	2.6176	6.686	4.432	3.939	3.312	7.462	21.3469	29.2129	5.0254	4.1655	1.3584	6.8939	19.2763	9.0036		0.437184	6.8015
10.4797	1.9856	4.8775	8.9517	4.723	5.7794	4.754	6.329	13.1475	2.792	3.429	1.313	2.972	9.453	3.579	4.286	4.864	3.835	3.1783	4.641	4.607	2.081	3.028	7.6965	14.7179	31.9322	4.6581	2.6909	3.8561	5.4171	20.6916	10.775		0.442209	6.67875
10.5988	2.6498	5.43	12.6469	5.491	7.4395	4.356	7.91	14.0046	4.256	3.902	1.016	3.649	7.353	1.647	2.515	3.2	1.388	2.1096	5.43	3.318	1.214	4.603	6.8363	16.4445	30.7842	3.9655	2.231	4.023	4.7931	17.1904	8.1369		0.447235	6.44946
10.7179	1.9729	8.0383	6.994	3.674	4.8401	8.412	4.997	7.0423	3.891	2.065	3.883	4.462	8.797	1.696	1.975	2.673	3.041	2.3136	5.05	4.598	1.465	5.071	8.2197	14.2404	28.7453	3.505	3.1088	3.0948	4.6716	18.3435	14.7089		0.452261	6.30933
10.837	3.0106	6.8078	9.1317	6.187	5.0735	6.42	8.478	11.634	6.019	2.735	2.219	1.584	9.368	2.096	0.713	2.061	1.618	2.3033	3.37	3.785	3.656	3.555	3.2892	14.3761	20.4929	4.6464	2.059	3.2954	5.2164	16.3075	6.1432		0.457286	5.73068
10.9561	2.1102	4.9767	9.0378	5.736	8.8179	6.066	6.809	10.4645	2.644	2.084	2.204	2.779	10.122	5.442	2.088	1.228	1.909	4.3129	3.304	3.839	2.628	3.752	11.5265	10.9648	25.8489	5.2917	2.6583	2.6313	4.0818	21.039	9.4948		0.462312	6.31907
11.0752	3.0673	5.0188	8.2612	6.682	6.8291	6.611	7.27	13.8932	3.183	2.743	1.691	2.361	6.73	3.656	2.658	1.739	2.754	2.1865	4.513	6.275	1.364	4.383	5.3959	12.7011	28.7907	5.9706	2.0564	2.8971	3.6423	27.544	9.6474		0.467338	6.53273
11.1943	2.2001	8.2765	13.8254	4.474	5.8315	5.781	7.508	11.7945	4.63	2.55	2.348	1.187	7.69	3.598	1.638	2.725	3.163	1.4799	3.943	4.534	2.399	5.682	6.6988	8.5391	21.1765	6.1334	2.3777	2.7804	3.0185	23.2826	9.4009		0.472363	6.15051
11.3133	2.7205	8.5755	8.6053	7.983	5.0898	5.197	8.223	13.078	3.368	2.431	3.843	3.046	5.664	5.467	1.292	1.997	1.938	1.4787	2.219	6.905	2.88	1.137	6.7052	8.6796	22.4059	4.7773	4.1679	1.8023	6.2248	18.0976	7.0493		0.477385	5.90476
11.4324	2.8815	6.2727	8.6255	8.213	3.9009	6.169	9.865	8.3124	4.124	3.723	1.887	2.864	6.803	5.052	2.506	3.982	1.565	1.5956	3.467	7.132	3.766	4.2	3.7545	12.9708	24.1212	6.2164	3.7968	5.0745	4.0682	19.011	9.0969		0.48241	6.29087
11.5515	3.0016	5.7525	11.8198	4.286	6.3733	6.051	3.224	9.3075	4.203	3.401	2.446	2.494	6.156	3.579	0.881	2.789	3.535	1.894	5.059	7.508	3.87	4.93	3.8438	9.001	30.6654	4.012	1.4289	3.6296	2.8822	20.8359	4.4543		0.487436	5.91335
11.6706	2.9602	6.5202	12.0463	3.572	4.5173	3.819	4.264	10.2761	2.484	2.091	2.383	2.028	4.929	4.034	2.172	3.844	1.349	1.7851	3.875	7.587	4.395	4.836	5.531	11.5817	33.0269	6.2184	2.7622	3.3795	2.1337	22.2541	6.9888		0.492462	6.11753
11.7897	3.28	9.0523	9.9143	6.51	4.8771	4.327	9.613	7.5864	8.291	4.252	3.969	2.393	8.502	3.974	2.267	3.01	1.267	1.4176	4.189	5.659	4.342	1.583	3.5146	9.5423	38.0578	4.9434	2.5041	2.6066	3.8462	13.7201	7.7927		0.497487	6.3485
11.9088	3.6661	7.1299	8.8848	5.121	8.4394	6.981	3.038	6.0606	4.258	1.247	3.026	4.604	5.549	7.064	3.861	1.248	2.176	1.6078	3.586	12.499	2.806	1.905	4.5918	6.1581	35.4742	7.4544	4.2386	4.8835	5.7473	17.8051	11.4119		0.502513	6.53298
12.0279	2.8867	10.0508	11.9244	5.708	6.5102	6.79	5.355	12.5436	3.856	3.036	2.939	3.903	6.674	5.023	3.032	1.389	1.55	3.0924	2.962	15.098	2.051	3.406	4.4218	7.4922	36.6839	7.504	2.539	4.4731	2.4522	19.9963	10.2524		0.507538	6.95468
12.147	3.3361	5.9581	10.6792	8.175	5.0875	6.028	3.867	8.017	3.67	3.203	1.771	2.263	4.141	6.748	2.132	2.399	2.228	2.6298	3.68	12.733	3.911	1.355	3.0538	9.1453	31.1544	4.2213	2.1726	4.7285	4.6806	17.9743	9.7413		0.512564	6.15754
12.2661	2.6803	7.8446	12.6665	6.491	6.1773	5.255	3.731	6.2298	1.875	4.106	2.004	1.922	1.738	6.033	1.195	2.462	2.687	2.8461	2.905	10.208	2.873	1.912	5.3298	7.4049	30.7929	3.5264	1.2018	2.7582	2.5184	12.8339	11.1875		0.51759	5.5934
12.3851	2.5007	5.7874	12.3438	5.645	4.8403	6.353	5.465	7.3849	4.784	2.514	1.742	2.035	5.191	3.848	1.124	2.045	3.208	2.5846	4.046	14.525	2.672	2.449	3.9556	6.7062	26.495	6.8482	2.7403	3.3717	3.4696	12.4922	10.639		0.522611	5.80018
12.5042	2.3917	3.8277	8.6785	6.04	7.2794	3.78	5.093	4.7777	3.852	0.639	1.276	2.32	5.652	2.783	3.775	2.253	4.09	2.8936	5.867	9.351	2.93	2.755	5.0771	7.3904	29.5615	4.1309	3.5521	3.6865	4.9624	17.7032	13.6552		0.527637	5.87174
12.6233	4.1557	4.6523	8.429	4.764	5.6742	5.031	3.798	8.9166	5.084	2.481	1.489	1.581	2.108	3.604	1.631	1.87	4.566	1.0176	3.45	10.035	4.39	2.57	5.1481	11.0804	25.2105	5.9978	3.7613	2.4327	3.4106	16.7792	14.1084		0.532662	5.7815
12.7424	3.403	5.9832	9.0011	5.4	5.18	4.595	2.598	8.832	4.705	2.019	2.148	1.482	5.272	4.484	1.11	1.435	1.402	2.0068	2.471	12.773	4.412	1.619	4.1976	8.5626	24.5003	6.2695	3.3189	3.7215	5.4907	12.5862	13.3985		0.537688	5.62506
12.8615	2.8627	8.0554	11.5123	5.429	5.0204	5.457	3.938	6.5179	2.126	3.723	1.525	1.682	3.396	4.594	3.542	1.991	3.759	1.0764	4.171	11.161	2.615	3.441	5.0821	9.3141	31.517	5.9031	4.3534	3.4394	3.448	13.5537	13.2653		0.542714	6.04746
12.9806	2.5593	4.5257	12.203	6.106	5.5443	3.378	5.324	3.7664	5.326	1.274	0.638	3.01	2.92	5.681	1.394	2.174	2.028	1.8114	2.965	11.747	2.783	2.193	3.1403	5.9151	35.7071	4.9417	3.3205	3.1444	2.5826	12.4106	17.1693		0.547739	5.7317
13.0997	3.4162	6.3986	14.9913	6.388	9.1758	5.424	2.989	5.8481	3.331	1.678	1.262	1.651	5.069	7.761	1.69	2.642	1.284	2.7428	2.958	10.425	2.77	3.285	2.1001	6.5258	29.5642	4.1388	2.7614	2.3677	1.2409	10.7715	19.625		0.552765	5.87985
13.2188	2.0905	8.7489	12.9177	5.493	5.1546	5.493	4.35	6.2091	3.934	2.147	1.53	1.952	2.039	6.381	2.301	3.283	1.213	1.9305	2.646	9.343	1.475	1.585	4.813	5.6955	23.1424	3.5052	5.9224	3.0367	2.3468	13.5923	25.2294		0.557791	5.79032
13.3378	4.1163	4.9733	17.0854	6.748	7.4496	2.876	4.749	6.3549	4.376	2.034	1.445	3.099	2.836	4.2	2.806	3.709	1.508	3.6279	4.102	9.322	3.985	2.47	3.7179	7.8096	23.0664	4.6338	4.2575	3.5623	4.6805	9.9752	17.9278		0.562812	5.91946
13.4569	1.5517	6.4656	15.9184	5.484	6.4733	4.677	3.066	6.0272	3.308	3.413	1.966	1.884	4.135	5.306	1.901	2.626	0.703	2.1674	2.137	11.521	1.217	2.929	3.7787	7.1822	25.0886	6.8263	2.3468	2.8309	3.4775	8.1689	21.4587		0.567838	5.67855
13.576	3.4024	6.3199	11.9015	5.111	4.7822	8.234	4.155	4.3827	4.126	1.807	2.301	2.466	4.322	4.26	4.443	2.543	3.151	3.7612	2.688	7.712	2.035	3.069	3.2367	4.4904	25.2476	5.8119	4.9272	2.3231	5.6462	5.6561	19.5963		0.572863	5.60995
13.6951	4.099	7.9974	12.0426	7.16	5.1893	6.415	4.532	6.4756	4.951	1.78	3.121	1.661	3.659	6.417	2.652	3.237	1.41	2.0556	1.392	10.599	1.738	1.135	3.6336	5.1112	20.3592	5.7051	2.4407	2.5795	4.1051	8.3262	22.7966		0.577889	5.63793
13.8142	3.5672	5.6245	13.7519	6.18	4.6427	4.731	3.413	4.1499	6.055	1.8	0.649	2.456	4.053	8.498	2.26	3.506	1.272	2.171	2.667	8.627	3.159	4.239	4.267	8.2678	21.1154	4.0539	3.0795	3.6439	2.857	10.5835	35.0027		0.582915	6.14009
13.9333	2.1656	7.3615	17.3164	5.867	3.3768	3.305	3.937	4.3895	5.642	2.477	1.868	3.436	3.45	6.567	1.011	2.008	1.242	1.471	1.351	6.985	2.828	0.815	4.7159	6.5143	25.369	5.0789	2.4689	3.0006	4.362	5.8336	30.5379		0.58794	5.70164
14.0524	1.9488	4.4454	15.1207	5.35	5.0747	3.647	3.487	4.7718	4.303	1.19	1.143	1.13	2.257	7.177	2.87	0.356	3.001	3.1194	2.527	7.185	2.207	3.141	3.8443	4.5428	24.7203	5.289	3.3401	1.0589	5.0689	4.6175	27.5749		0.592966	5.33898
14.1715	2.4986	4.2144	13.2784	4.04	5.9767	5.259	2.796	6.9487	3.717	3.129	2.431	2.785	2.351	7.297	2.554	1.385	3.619	1.2743	2.565	6.78	3.53	2.09	4.4745	6.106	21.6096	6.3642	3.9918	1.6907	2.7929	6.5819	33.8741		0.597991	5.74209
14.2905	2.5699	6.5642	15.4332	6.821	6.0141	6.906	4.303	5.8483	3.865	3.306	1.413	2.382	1.791	8.72	1.497	2.611	2.468	2.0815	1.894	4.899	1.592	5.027	4.9966	5.4443	15.4141	6.2682	2.249	3.9076	3.5327	5.4066	24.1253		0.603013	5.46292
14.4096	1.8068	5.8457	14.4688	2.47	2.6795	4.731	3.381	4.0401	5.335	1.764	2.479	2.413	2.291	7.779	2.43	1.436	3.207	1.9388	1.429	4.7	3.031	3.096	3.5463	3.9814	16.7148	5.9562	2.188	2.0955	1.7415	4.5405	23.2838		0.608038	4.73547
14.5287	3.3795	6.5132	16.4429	4.52	4.7613	4.502	3.476	1.6875	4.06	3.124	1.916	1.224	2.797	9.449	2.905	0.85	1.62	1.353	3.084	6.647	3.723	1.948	4.1481	5.1787	15.6481	5.4948	4.792	3.3552	2.0967	4.54	24.9434		0.613064	5.16708
14.6478	3.4061	5.9397	10.8447	5.994	4.963	4.454	4.119	4.9682	6.638	1.511	0.726	2.334	2.768	7.988	3.584	2.22	2.827	1.0596	1.337	5.178	4.541	1.261	4.7491	4.9373	19.6774	7.232	2.202	3.2682	4.0277	3.5388	26.6107		0.61809	5.3195
14.7669	2.7979	5.8735	12.3743	2.87	3.3019	3.944	4.694	4.8877	5.213	2.499	2.536	3.137	3.93	6.167	1.775	1.913	3.397	2.0872	2.724	3.161	4.508	2.675	3.9846	4.5709	13.3678	8.0439	3.9539	3.6705	2.5778	3.1007	19.6836		0.623115	4.81997
14.886	2.2594	7.0435	15.9722	2.957	6.394	3.089	4.866	4.3007	4.245	4.501	1.791	2.114	2.642	6.976	2.704	1.677	1.174	1.6447	3.022	3.676	2.915	3.373	1.8245	3.8504	10.5072	9.1463	4.1959	3.4157	3.5267	7.2239	22.3336		0.628141	5.01164
15.0051	5.6333	8.3106	14.8367	5.892	4.8628	4.666	4.187	4.2276	4.899	1.046	3.314	1.541	3.173	7.267	2.607	1.328	1.551	3.0535	1.134	2.904	3.678	2.475	2.1586	5.0682	14.1325	6.7803	2.2258	0.5954	3.1606	3.0763	22.6973		0.633167	4.91876
15.1242	4.0533	4.4103	19.202	3.969	3.9896	5.114	1.405	4.5747	5.444	3.591	1.088	2.172	2.42	5.746	5.34	0.249	0.73	3.0532	2.866	3.965	4.435	2.24	2.296	4.2331	11.332	6.1051	3.7457	1.7507	3.6743	2.6006	18.9781		0.638192	4.67009
15.2432	2.5979	9.1915	16.6969	4.893	5.2208	2.747	1.403	6.1179	5.085	2.389	1.83	1.956	1.675	7.643	3.068	4.194	0.912	1.0071	1.197	4.852	3.467	4.098	2.9755	3.1085	15.9249	12.6998	2.419	1.7884	2.546	3.8126	19.6376		0.643214	5.06946
15.3623	1.8928	2.324	16.8388	1.747	5.3005	4.24	3.695	3.7201	6.451	2.158	2.266	1.974	2.747	7.626	2.31	2.252	1.893	2.8384	2.351	6.257	2.762	3.098	2.3839	3.6963	13.4902	7.4448	2.3822	2.6196	1.3509	3.1419	26.3206		0.648239	4.8249
15.4814	2.743	5.8194	13.0389	3.546	6.0661	4.286	4.693	3.708	6.774	2.283	2.317	2.122	0.99	6.115	2.252	2.891	3.347	3.0404	1.362	3.149	2.618	1.518	2.5716	2.7501	10.9662	8.5273	4.0584	2.5125	2.6827	3.5038	16.148		0.653265	4.4645
15.6005	2.6074	8.5788	18.3045	4.851	4.8364	5.948	3.021	3.7548	5.961	3.276	0.562	1.46	1.561	8.708	3.693	1.928	1.971	2.5991	1.552	5.235	3.417	3.274	2.2205	3.6547	11.4046	10.4981	3.9887	3.0791	4.489	3.7743	18.8876		0.658291	5.13212
15.7196	1.0789	3.9226	14.4845	6.719	5.8448	2.757	3.884	1.6647	4.537	1.843	3.805	1.617	2.523	4.962	2.432	4.554	2.324	1.546	3.037	1.429	4.045	3.404	1.2669	3.537	12.5022	6.7623	3.1868	2.2086	2.3764	4.8414	16.0151		0.663316	4.35839
15.8387	1.4187	5.6827	16.1673	4.534	5.6434	3.987	3.366	5.2966	4.387	1.559	3.282	1.553	0.932	6.356	1.652	1.376	0.778	3.7536	1.319	4.08	1.839	0.598	1.0597	2.1679	7.5154	9.8831	5.8918	3.5232	1.0259	5.3657	22.9321		0.668342	4.48145
15.9578	4.1576	5.9235	12.6494	4.806	5.3805	3.992	3.195	4.7766	4.69	1.182	2.04	2.588	1.362	8.353	2.105	2.137	0.285	1.8262	1.517	4.668	3.394	3.867	2.7486	4.1175	7.1233	13.4334	3.5322	1.9008	1.9219	3.4364	25.9862		0.673368	4.80952
16.0769	1.6655	5.3465	14.2866	3.155	4.8339	5.263	3.268	5.9917	3.781	2.191	0.762	0.388	2.925	5.351	1.927	1.94	0.459	2.6358	1.904	1.801	4.006	2.385	3.4778	3.227	10.2178	12.9323	3.695	2.4916	3.4536	2.379	22.198		0.678393	4.52704
16.196	1.5296	5.0237	14.0232	2.424	5.5654	4.998	1.339	3.8609	4.7	2.539	0.914	1.475	2.179	5.484	1.252	1.11	2.401	1.0253	1.72	3.304	6.461	3.969	3.0652	2.7768	8.5943	9.7668	3.1879	3.2538	3.3841	5.3651	21.2642		0.683419	4.45017
16.315	1.6481	5.9562	11.1634	3.726	5.5654	4.572	2.442	3.8058	7.256	1.475	1.299	1.468	0.72	6.657	2.872	0.795	1.281	4.1645	1.646	3.485	3.813	2.205	2.1389	4.8669	9.3454	13.0642	3.0914	2.4041	3.3361	3.3959	18.3148		0.68844	4.45075
16.4341	2.3914	6.4646	11.4448	5.492	5.3653	6.92	4.504	5.6723	4.175	2.644	0.408	1.077	0.959	5.085	3.084	2.208	0.513	2.5098	1.503	1.658	5.428	2.049	2.8173	3.371	9.5502	13.551	3.27	3.0929	3.7448	2.9461	17.8247		0.693466	4.57172
16.5532	1.5999	4.2231	14.2369	7.874	5.3762	6.675	3.456	2.1338	4.703	3.739	0.879	1.219	2.781	3.518	1.273	1.909	0.742	0.9315	3.064	4.682	5.269	1.54	3.7532	6.3406	9.0833	12.1691	3.9311	1.9142	5.0354	2.8349	16.9786		0.698491	4.6408
16.6723	1.5753	5.5401	9.8324	3.942	4.3581	3.21	3.395	4.2684	8.963	0.556	0.776	0.632	2.845	3.254	3.233	0.839	1.512	2.3139	0.981	2.658	4.416	1.112	1.9806	2.7668	9.1498	13.6142	2.27	3.0407	1.0181	2.5966	13.3681		0.703517	3.87152
16.7914	1.158	4.8178	8.3806	4.425	5.019	5.338	5.327	2.4563	2.941	3.296	0.549	1.547	0.535	2.217	2.216	2.041	3.982	2.6613	2.178	3.115	3.381	1.888	1.976	1.8622	7.6573	19.4201	3.3291	3.1686	4.1147	4.691	16.8775		0.708543	4.27631
16.9105	2.9641	6.7118	8.1601	5.13	8.6686	2.898	2.743	2.2111	3.605	0.791	0.982	1.437	1.664	5.985	4.152	2.778	0.678	1.4862	2.214	1.983	4.629	1.979	2.5997	3.2269	9.3871	19.5862	4.4301	2.7413	3.4201	2.5872	19.7447		0.713568	4.56688
17.0296	1.8774	6.3082	12.4947	2.456	5.1764	3.456	3.362	0.6464	3.051	0.82	1.284	0.728	2.612	3.224	1.826	2.05	1.667	2.9503	3.009	3.156	2.728	3.125	2.0841	2.5199	7.7438	18.0787	3.1532	4.671	3.7112	3.3922	15.9331		0.718594	4.17079
17.1487	1.1897	3.7876	8.9268	4.778	5.7728	4.076	2.092	3.6284	4.295	2.698	1.991	1.943	1.66	2.828	4.405	2.727	1.919	1.7723	1.507	2.396	5.666	2.093	2.6531	2.6676	6.4645	16.1473	3.0194	1.4579	6.122	2.4443	16.9576		0.72362	4.1963
17.2677	2.6795	6.4859	10.315	5.09	4.4392	4.907	2.481	2.539	5.434	2.544	0.756	2.239	1.147	2.666	2.012	0.777	2.539	1.6201	1.707	3.652	7.511	2.92	1.851	4.6892	9.7799	20.2693	2.2336	2.6081	5.388	2.8161	19.7807		0.728641	4.7057
17.3868	3.0467	5.1704	11.3241	5.441	3.9097	4.462	2.908	1.6879	6.005	2.264	1.159	1.433	1.693	3.652	3.973	2.693	1.494	0.4817	2.034	2.439	7.199	2.817	3.8343	3.6438	6.6499	22.3494	2.2264	3.2132	2.0568	3.0506	19.2775		0.733667	4.63188
17.5059	1.9292	4.0819	12.6552	5.152	4.2086	5.024	1.442	2.7123	4.778	2.015	1.212	1.853	1.906	1.992	3.231	1.423	2.003	3.1286	2.004	1.945	6.219	3.433	1.8906	4.6681	6.155	22.1888	1.5911	4.4103	2.4823	3.8067	12.374		0.738692	4.31983
17.625	3.125	4.2875	13.9494	4.946	3.988	4.517	0.505	4.5408	2.236	0.87	2.343	0.757	0.913	2.516	2.983	2.285	1.883	1.5926	1.378	1.28	7.112	2.801	0.714	4.2635	5.1582	22.1872	3.5057	3.3675	3.5245	3.3352	15.931		0.743718	4.28371
17.7441	2.9005	3.2788	12.7026	4.669	2.9012	1.734	3.415	5.0236	2.756	2.28	0.745	0.837	0.645	2.188	3.081	0.425	2.166	0.8896	2.483	1.613	3.426	1.989	2.8022	1.8221	4.5362	28.208	5.4324	3.3299	3.1071	7.5151	12.8795		0.748744	4.25099
17.8632	3.2621	3.461	12.7907	5.614	3.7443	2.311	2.298	4.8943	3.381	1.83	0.482	0.668	1.152	3.078	3.446	1.858	1.279	0.7446	3.586	3.084	4.107	5.081	2.0726	1.6058	6.5433	22.8502	2.6022	2.5199	2.4765	4.6705	17.076		0.753769	4.34094
17.9823	1.5845	3.8862	12.9924	4.829	7.6541	3.54	3.805	3.3289	3.878	1.33	0.647	1.521	1.656	0.777	2.529	0.437	1.757	2.5243	0.802	2.885	8.645	2.259	2.3095	1.7026	10.3119	29.5212	3.6865	2.1315	2.1824	2.8589	15.3445		0.758795	4.62311
18.1014	1.0607	6.8986	10.4146	2.922	6.1361	1.866	1.821	3.7889	1.049	0.868	0.683	2.898	1.304	2.738	4.499	2.508	0.641	2.5465	1.352	2.203	5.285	1.663	1.3497	1.7166	4.105	26.7985	5.1371	1.9468	4.3485	3.7185	17.9686		0.76382	4.26564
18.2204	2.4643	4.4241	10.4255	2.716	4.0826	2.775	2.163	3.8842	3.311	2.139	0.715	0.964	1.962	2.864	3.339	1.282	1.945	0.9911	3.985	0.713	4.68	4.648	2.719	3.4553	4.4815	36.4391	3.6768	2.5421	5.4037	3.5375	12.5951		0.768842	4.5588
18.3395	3.2702	2.5704	11.1526	3.465	2.1908	3.874	3.489	2.2674	2.126	1.852	0.011	1.319	1.924	1.947	3.535	2.001	1.274	0.6706	0.68	2.032	5.58	0.759	0.979	2.9775	5.7683	34.024	3.5898	3.5725	1.2917	2.9384	11.147		0.773868	4.00897
18.4586	1.2855	5.711	11.0021	4.454	1.2694	3.68	3.394	2.7881	2.991	1.797	1.195	2.458	0.589	3.043	3.637	2.21	1.899	2.1557	1.034	2.952	6.262	2.072	2.1757	1.7977	9.8695	26.2566	5.4006	4.4393	3.866	2.6202	17.1674		0.778893	4.56361
18.5777	3.0707	5.6249	9.0061	3.026	3.9049	3.625	2.564	2.8042	2.374	2.297	1.321	1.296	1.623	1.536	2.655	0.819	0.938	1.3062	1.501	1.779	6.143	2.252	1.8094	1.2007	6.5481	32.9475	3.1158	2.3962	3.2799	1.5379	15.3621		0.783919	4.1827
18.6968	1.7287	3.2989	12.9984	5.156	5.454	3.858	2.144	2.1291	3.838	1.481	1.967	1.454	1.805	2.783	3.349	0.562	0.528	1.1392	1.969	1.745	9.412	0.969	1.6658	1.7625	4.4856	26.3838	2.9307	2.2373	3.8134	2.1736	16.1794		0.788944	4.23872
18.8159	3.1795	6.5172	15.1145	4.896	3.5543	3.361	2.081	4.0889	2.62	1.544	1.704	1.985	0.653	1.538	3.707	1.177	0.663	1.6815	3.146	1.06	3.964	3.432	2.5104	2.3317	4.7224	33.0225	2.933	4.7669	2.882	2.3526	14.3566		0.79397	4.56597
18.935	3.483	4.7235	10.6551	4.825	1.9166	1.505	1.768	1.7688	4.477	1.645	0.925	2.584	0.037	0.773	4.075	1.484	0.66	1.9108	1.267	2.013	5.206	3.353	2.7463	1.4422	5.1509	25.181	3.9068	5.0447	2.5185	2.7918	14.2469		0.798996	4.00271
19.0541	2.1103	7.5171	11.457	5.556	4.405	3.674	1.206	4.4712	5.567	1.914	0.408	2.593	0.545	0.192	4.787	1.339	1.004	1.8172	1.632	3.309	5.866	3.062	2.2813	2.5862	3.783	33.4179	5.9693	3.8464	3.54	4.159	18.0314		0.804021	4.90472
19.1731	0.968	6.1819	7.8556	3.596	4.6739	2.925	2.031	2.5287	6.677	1.194	2.523	1.32	1.705	1.886	3.794	2.358	1.035	1.385	2.487	1.791	6.642	1.952	1.9283	1.8072	4.3948	29.3407	4.231	2.1678	2.5624	4.3506	17.2444		0.809043	4.37214
19.2922	3.9426	7.5704	12.9912	3.412	5.793	3.286	3.685	4.6696	4.176	0.542	1.288	1.699	2.111	2.442	4.427	1.551	1.95	0.8554	0.863	2.228	6.526	2.087	2.4757	2.1301	4.08	24.8354	5.5399	3.1576	4.3518	4.7645	11.4643		0.814068	4.54498
19.4113	1.5588	6.4512	7.6431	3.163	1.4555	1.354	4.529	4.1108	5.182	1.314	2.436	3.13	0.897	2.703	4.633	1.823	2.051	0.6739	2.374	1.78	6.03	5.374	2.5366	1.4202	3.6111	27.6737	2.5093	5.0481	3.0579	4.883	11.1011		0.819094	4.27443
19.5304	1.881	5.1671	6.1014	4.736	4.3601	1.155	1.618	3.5541	5.766	2.482	0.54	3.57	2.789	1.635	4.214	1.453	2.171	2.2917	2.397	1.755	4.907	3.618	0.8216	3.1605	2.7892	23.4746	4.9214	1.0073	2.7828	3.3637	15.1306		0.82412	4.05204
19.6495	1.8148	6.8448	6.2752	6.665	1.7932	2.073	2.109	1.9641	6.747	1.033	1.431	2.758	1.806	0.827	3.068	3.078	1.903	1.0275	2.709	3.121	4.106	4.564	1.0105	5.1605	4.4257	23.1133	3.6091	2.1342	4.351	5.4499	15.4587		0.829145	4.27195
19.7686	2.3642	6.2958	6.9952	4.904	3.0489	4.298	2.21	2.8831	3.272	3.344	1.149	1.26	1.173	0.657	2.217	0.987	3.055	1.457	2.013	1.767	4.917	1.309	2.5042	2.7034	0.8416	19.9579	5.1155	4.0915	7.3524	2.5757	12.3304		0.834171	3.84028
19.8877	2.8407	3.6441	6.1955	4.331	2.8651	2.174	0.678	3.4109	5.004	1.949	1.103	2.522	2.113	2.799	2.19	2.089	1.366	1.281	2.531	1.424	4.124	3.01	1.1579	3.6435	2.6938	21.2375	4.0504	3.3313	5.3924	2.7834	18.2961		0.839197	3.94292
20.0068	1.7338	4.7078	11.3649	4.47	5.6307	3.66	2.44	2.7277	4.063	1.585	0.636	0.546	1.099	1.957	1.405	1.443	1.588	1.5242	2.223	2.212	5.898	2.498	1.9846	2.6993	3.5548	17.7517	5.3927	4.4258	4.7047	5.1423	12.5625		0.844222	3.98808
20.1259	2.25	4.6443	6.7022	3.028	4.6507	0.643	2.469	1.601	4.754	1.02	0.286	1.791	1.192	0.442	2.09	1.18	0.781	0.9287	1.799	1.464	2.312	2.762	3.1231	2.6968	3.3064	16.8259	4.5186	3.0705	5.074	3.1888	13.0911		0.849248	3.34468
20.2449	2.7233	5.7463	6.6302	6.427	7.7431	1.501	1.214	3.9791	0.762	1.834	0.951	2.165	0.209	0.2	2.958	1.434	1.98	1.1117	1.272	2.354	3.076	1.91	2.9091	0.7621	3.5408	15.0014	5.2408	5.5123	4.8324	5.5699	13.3933		0.854269	3.70783
20.364	1.9196	3.7303	9.331	3.345	4.8872	3.909	2.714	3.1301	2.346	3.788	1.205	0.58	1.48	1.915	5.16	1.627	0.52	1.9152	2.53	2.137	3.217	2.177	2.8088	1.115	3.4748	18.9616	7.825	3.7015	3.2973	7.6904	14.3373		0.859295	4.08952
20.4831	3.7386	3.6924	5.3084	4.259	2.228	3.326	2.659	3.4134	4.232	1.996	1.751	1.098	2.19	3.741	1.708	1.002	1.874	0.9548	2.172	3.615	3.395	2.038	3.341	0.924	4.6956	15.6243	10.7619	4.7289	6.2113	5.4462	13.4361		0.864321	4.05035
20.6022	3.0987	5.6448	6.0354	2.471	5.8948	5.18	0.96	3.6759	5.072	1.252	2.386	1.006	1.094	0.571	2.599	2.736	2.093	1.4152	3.122	2.3	3.31	2.977	3.4163	2.4905	3.0648	14.2406	5.6471	5.5168	4.5684	2.7085	14.0681		0.869346	3.8908
20.7213	2.0031	6.5669	6.2665	4.775	4.2358	4.947	2.703	2.8937	3.366	1.194	1.054	0.564	0.916	0.852	0.799	2.695	0.992	1.1677	1.06	2.521	3.785	1.892	4.6771	1.1888	1.6963	12.8941	9.2749	4.4732	5.7345	6.7488	16.1655		0.874372	3.87425
20.8404	3.5178	3.9144	5.4924	3.663	3.0198	2.114	1.638	2.6394	3.017	1.059	0.767	0.969	2.056	0.413	2.448	1.893	1.023	0.7743	1.006	0.358	3.165	5.826	2.2169	1.2428	3.3956	15.824	8.8796	2.8215	6.1453	2.9241	12.8841		0.879397	3.45506
20.9595	1.39	3.711	9.0715	4.81	7.3036	3.61	2.108	2.6011	3.825	1.448	0.716	0.047	2.283	1.065	1.426	2.075	1.679	1.3171	1.751	1.819	2.245	3.817	2.5578	5.4056	2.7208	10.4106	5.8532	3.424	4.382	3.1367	19.5278		0.884423	3.79151
21.0786	4.0558	3.1591	7.7375	4.195	4.3536	2.676	1.574	1.654	0.838	2.017	0.836	1.117	2.461	0.867	3.053	1.307	0.454	0.5282	0.431	2.202	3.371	1.453	3.0022	4.3098	2.6082	11.2965	11.1979	3.8024	4.9611	3.5339	12.7215		0.889449	3.47657
21.1976	3.6531	7.1041	4.8182	2.359	4.5098	2.198	1.814	1.3976	2.563	0.018	0.849	2.036	1.68	0.162	1.176	1.612	1.784	1.0819	1.937	0.88	2.808	4.699	2.7553	4.2697	2.733	10.1803	7.3709	5.3871	5.4075	5.3694	12.2576		0.89447	3.44744
21.3167	2.1622	6.7193	6.6686	3.869	6.7751	2.517	2.652	1.4906	2.168	0.489	1.331	1.863	2.631	0.572	3.11	1.758	1.525	2.4316	0.553	1.677	3.01	4.764	2.4491	2.9889	2.7714	6.997	9.6006	5.7175	2.3922	5.1341	13.5909		0.899496	3.6251
21.4358	4.1014	6.3425	9.088	2.079	7.9952	2.171	3.56	2.5624	2.723	1.159	1.283	0.306	0.186	2.2	2.448	2.23	0.935	1.079	1.297	0.733	2.817	1.89	1.5031	3.275	8.1148	7.2289	9.6026	2.0365	5.1832	4.6646	12.3444		0.904521	3.64963
21.5549	2.6469	4.9652	6.6589	3.748	7.6757	2.931	1.441	2.6525	2.816	1.303	1.868	0.994	1.022	0.836	2.232	1.266	0.408	0.4951	0.548	0.349	0.991	3.68	0.4022	3.4426	4.8533	4.3409	10.3983	4.6777	6.5679	4.4207	16.6506		0.909547	3.46069
21.674	3.4677	2.9973	6.4037	3.038	4.9269	2.02	1.068	1.519	3.618	1.827	1.151	0.571	1.549	0.913	2.596	1.569	0.209	1.9458	1.631	2.225	3.233	1.298	1.0763	4.2251	6.7216	6.7421	15.3523	4.3534	3.3182	6.4218	16.5114		0.914573	3.6935
21.7931	2.2379	3.6344	6.1602	4.117	2.9276	2.203	1.522	3.3397	3.083	1.159	1.018	1.501	0.552	0.582	0.78	1.811	1.908	0.9715	0.672	1.758	3.116	1.916	1.1512	5.5738	4.2381	7.5648	18.0984	2.7399	6.1637	6.7109	10.9105		0.919598	3.55228
21.9122	3.301	5.4736	3.7545	5.324	2.609	1.345	2.382	3.8251	1.191	1.104	2.322	0.288	1.228	0.752	0.557	0.992	1.566	0.5126	0.904	2.246	2.279	0.581	2.8061	3.4301	4.3105	9.399	14.3495	3.745	4.1623	5.1958	11.7285		0.924624	3.34399
22.0313	1.9601	8.1922	7.225	4.499	4.462	2.17	0.446	0.7036	2.288	0.879	2.049	0.342	1.379	0.496	2.495	1.882	1.545	1.4501	1.151	2.567	1.348	0.672	3.0398	4.9228	3.4583	4.3763	13.994	1.6656	5.4746	5.0027	13.9437		0.92965	3.4219
22.1503	5.2727	6.9249	9.1123	2.632	4.1973	1.65	1.137	1.9979	2.707	1.798	0.075	0.029	1.133	0.08	2.14	0.889	2.177	0.7756	0.663	3.927	0.425	1.598	3.3033	2.5825	5.6365	5.6181	19.6067	3.8309	4.6013	2.7395	9.6692		0.934671	3.51383
22.2694	5.1229	6.9245	9.9532	2.29	4.9968	2.189	1.83	0.9845	3.407	1.805	0.006	0.16	1.05	1.136	1.613	1.125	1.818	1.8729	0.659	2.767	2.083	0.516	2.7798	1.4331	8.7565	5.284	15.1242	3.0589	3.8278	5.0031	12.9985		0.939697	3.63144
22.3885	4.9145	6.9539	7.1061	1.531	4.1206	2.111	1.948	2.4484	2.135	0.123	1.022	0.008	0.479	1.036	0.623	1.225	1.167	1.1103	0.725	1.729	2.094	0.83	2.5538	1.544	7.0946	7.5595	20.1081	5.8483	4.4816	6.8868	12.6854		0.944722	3.68393
22.5076	2.1575	5.8912	9.3974	6.355	3.7446	4.395	1.781	1.6415	2.633	0.463	1.922	1.883	0.604	0.038	1.486	0.953	0.74	0.3144	1.633	0.31	1.823	0.597	0.884	2.0337	7.433	6.13	13.5594	4.6253	5.4482	5.872	9.7643		0.949748	3.43589
22.6267	6.2859	8.6443	6.2383	4.35	7.5696	2.159	1.338	3.1698	0.953	0.935	0.769	0.795	0.557	0.607	1.738	0.756	2.092	1.3664	1.849	1.92	1.664	0.617	3.0497	2.5011	6.3107	8.0585	18.3797	3.4127	4.9847	5.8404	13.189		0.954774	3.9387
22.7458	5.6042	7.3034	6.1706	7.295	5.3358	4.19	2.374	1.1891	3.016	0.779	0.447	0.85	0.754	0.505	1.045	0.602	0.821	0.3834	0.296	0.976	0.469	1.175	3.2242	1.7566	5.0236	4.5168	11.1656	5.4508	4.3849	6.0253	11.0785		0.959799	3.36151
22.8649	2.7816	8.1296	7.2431	8.105	6.2122	2.693	4.468	3.6773	2.362	1.036	0.338	0.714	0.596	0.72	0.513	0.404	0.134	0.5813	1.446	1.852	1.126	0.477	1.5582	3.7453	6.061	5.4314	19.9916	7.0125	8.185	5.8415	8.9603		0.964825	3.94825
22.984	6.8722	9.0532	4.0577	7.082	3.5483	3.376	1.243	1.434	3.483	0.285	1.606	0.727	0.608	1.045	1.244	1.16	1.213	0.996	1.421	1.646	3.072	2.738	1.8092	1.9735	4.5774	4.2074	13.7471	7.8854	4.4247	7.1343	11.0288		0.96985	3.69994
23.103	6.2015	7.9444	7.2862	4.622	7.7787	4.072	1.276	2.0102	1.181	0.994	0.878	0.757	0.11	0.011	0.881	1.265	1.053	2.5821	0.91	0.864	0.767	2.645	2.0938	1.4316	2.8856	3.5647	21.2554	8.9501	4.9203	7.7747	9.5872		0.974872	3.82427
23.2221	8.5583	8.4893	3.7038	6.29	7.9492	2.939	3.108	1.04	0.841	0.717	0.008	1.079	0.553	1.035	0.768	0.244	0.022	2.1935	0.523	0.938	2.047	1.4	0.9748	1.5489	3.9078	4.0825	13.7725	7.7854	5.6168	6.058	8.3795		0.979897	3.43782
23.3412	9.5139	6.4728	4.2705	8.332	4.4278	3.908	1.046	1.8603	1.041	0.514	0.019	0.116	0.129	0.855	1.197	1.157	0.774	1.1671	0.981	0.896	2.326	2.242	1.1438	1.9425	2.3334	5.9507	15.8233	9.4976	4.9787	4.6775	9.7045		0.984923	3.52572
23.4603	7.6408	5.7548	4.2722	7.04	4.4483	4.426	1.446	1.192	1.044	2.733	0.75	1.24	0.442	0.119	0.39	0.562	1.042	1.2032	0.504	1.604	0.343	1.012	1.9661	0.3949	1.764	8.2807	17.8518	7.9018	3.8999	6.0495	7.2998		0.989949	3.37474
23.5794	11.6682	4.0899	4.6364	5.783	5.4407	4.722	2.067	1.5647	0.828	0.366	0.012	0.031	0.984	1.035	1.815	0.493	0.505	0.7475	1.044	0.663	2.621	1.16	1.2788	0.1722	1.7602	6.1226	15.5414	10.0553	2.6341	6.4645	7.3713		0.994974	3.34441
23.6985	6.3301	2.6227	3.0664	5.283	6.3483	3.121	1.307	2.1917	2.277	0.733	0.108	0.437	0.185	0.399	0.456	0.605	1.473	0.8203	1.113	1.05	2.086	0.613	1.7827	0.3488	0.3507	7.7259	12.0125	13.2223	4.4585	7.8213	5.8532		1	3.10327

## Sheet: Image20
X0	Y0	Y1	Y2	Y3	Y4	Y5	Y6	Y7	Y8	Y9	Y10	Y11	Y12	Y13	Y14	Y15	Y16	Y17	Y18	Y19	Y20	Y21	Y22	Y23	Y24	Y25	Y26	Y27	Y28		Ap-Ba	Avg int
0	67.358	46.896	50.497	49.471	74.777	71.3872	70.8554	69.244	75.948	49.407	41.151	52.993	73.826	50.157	24.122	24.213	23.165	23.151	42.249	76.361	50.873	52.948	39.521	46.541	42.321	72.454	61.637	79.094	101.981		0	55.331
0.1191	80.319	55.194	53.961	50.638	74.893	73.2173	65.5213	66.376	77.128	50.729	46.547	52.698	81.655	51.938	24.505	31.347	23.927	26.177	46.593	78.638	58.837	59.722	50.943	57.646	47.036	74.919	64.792	71.598	107.371		0.00505102	58.7885
0.2382	80.904	51.719	58.365	52.509	78.069	77.3775	64.634	64.095	77.149	49.78	49.895	67.407	76.72	47.138	31.876	34.345	33.72	28	46.232	80.952	62.724	66.223	61.765	66.671	46.937	78.09	60.73	73.408	108.275		0.010102	61.2314
0.3573	89.523	50.098	55.698	53.431	78.564	75.6481	73.0996	74.114	90.751	57.481	53.433	76.293	83.525	59.207	33.793	43.61	41.001	36.781	51.054	93.74	69.034	71.701	72.388	71.628	58.119	77.892	64.516	67.381	102.029		0.0151531	66.3977
0.4764	99.337	66.843	68.92	55.711	74.702	74.6403	74.5895	83.466	100.191	67.756	59.339	82.034	90.519	68.435	43.701	54.725	49.847	47.934	55.22	94.15	79.902	88.64	92.796	84.695	63.299	74.635	75.41	81.284	96.472		0.0202041	74.1101
0.5954	102.735	67.931	72.259	63.974	78.587	76.9053	73.4393	86.937	106.405	77.408	66.369	92.679	100.582	74.505	56.822	74.006	71.477	56.202	60.464	105.343	81.166	112.658	115.356	102.143	65.51	75.573	86.11	77.219	84.014		0.0252509	81.5441
0.7145	109.019	81.426	74.653	69.927	85.748	74.0506	70.6277	89.714	98.217	97.304	73.56	103.811	103.217	79.848	74.692	96.455	98.499	73.879	71.477	102.583	94.932	130.071	133.526	116.307	71.451	79.129	84.677	80.805	83.116		0.0303019	89.749
0.8336	104.532	88.543	89.001	79.003	95.463	73.6374	69.1542	85.642	110.591	114.817	89.024	116.784	96.145	83.655	89.872	134.671	104.135	84.388	74.492	129.195	112.715	142.301	156.979	134.664	78.135	84.765	86.418	81.941	79.817		0.0353529	98.9821
0.9527	112.025	99.745	100.593	90.115	97.412	76.3955	76.4777	83.928	104.514	147.311	103.572	115.368	100.273	97.513	100.02	146.241	119.607	98.216	90.66	137.127	124.486	155.017	172.84	154.085	74.392	85.415	82.194	79.188	83.854		0.0404039	107.193
1.0718	107.183	107.937	106.824	95.117	96.94	85.5526	80.7961	90.018	113.098	162.337	120.308	116.462	105.006	100.695	118.212	160.699	145.674	112.767	111.087	153.315	146.854	180.631	186.609	176.751	85.706	94.106	90.265	80.862	77.989		0.0454549	117.579
1.1909	98.156	115.36	103.706	105.887	107.342	93.1482	82.5207	101.262	126.083	175.776	133.492	124.324	99.358	100.709	133.52	165.525	157.626	123.385	124.04	168.087	163.817	182.313	189.253	176.193	94.194	102.341	91.962	83.889	75.627		0.050506	124.1
1.31	100.031	118.314	107.34	99.446	108.73	93.1899	88.586	108.737	131.339	184.888	147.756	119.258	103.235	108.864	139.701	174.277	168.869	132.523	145.326	182.486	186.758	175.789	200.262	197.631	104.658	102.163	93.557	85.572	77.698		0.055557	130.586
1.4291	87.838	127.133	102.726	114.144	113.305	98.9901	93.3119	107.272	130.582	181.454	157.244	123.064	99.075	109.637	142.698	175.022	165.4	143.793	160.958	190.066	194.975	169.418	188.864	194.996	119.074	107.086	101.825	90.359	78.515		0.060608	133.408
1.5481	76.557	125.711	99.148	109.791	117.223	90.2273	95.5429	103.078	136.133	178.17	157.586	119.929	108.675	108.771	148.568	160.815	156.124	156.432	163.738	188.899	205.198	172.887	185.663	187.029	130.922	127.488	103.977	98.462	77.957		0.0656548	134.162
1.6672	71.206	110.583	99.8	113.846	121.071	89.9587	97.9448	109.456	140.475	164.826	148.183	114.168	105.789	105.38	140.597	151.396	148.012	155.653	162.703	185.264	208.237	162.817	181.877	179.504	137.64	121.293	119.222	98.473	81.636		0.0707058	131.966
1.7863	69.852	104.989	89.046	108.856	112.389	94.8197	88.5568	105.65	138.517	148.667	148.276	98.831	104.413	107.943	130.429	123.066	133.389	160.372	164.529	180.265	200.057	156.781	167.398	169.252	138.556	123.635	116.154	100.117	75.989		0.0757568	126.234
1.9054	59.856	99.35	84.281	107.711	110.531	90.1681	82.416	109.655	142.875	142.999	136.574	92.8	95.196	107.745	125.592	95.524	111.499	144.099	149.471	157.123	198.472	148.079	154.744	162.767	148.089	126.174	113.491	97.982	80.548		0.0808078	119.856
2.0245	52.076	82.704	72.052	96.682	98.788	92.1506	81.9076	102.192	143.17	118.455	115.721	81.658	83.54	108.843	107.749	85.51	99.222	141.516	124.483	134.444	168.523	131.323	146.894	131.693	149.942	126.732	116.405	96.707	80.426		0.0858588	109.362
2.1436	50.264	76.156	66.63	89.412	96.976	81.101	76.3408	80.664	139.326	97.593	94.146	72.123	71.591	100.551	82.013	70.058	93.055	111.951	98.097	104.94	150.612	122.197	129.712	114.934	150.502	115.788	112.164	98.626	80.469		0.0909099	97.517
2.2627	41.311	61.317	58.802	82.679	78.626	81.0639	61.3763	71.054	127.691	82.205	88.928	64.395	58.578	89.108	77.111	58.702	88.033	93.094	86.324	77.303	136.288	119.295	108.517	88.292	148.309	110.178	109.066	96.076	74.147		0.0959609	86.8231
2.3818	33.846	53.195	48.892	74.442	76.18	76.8555	50.677	66.947	117.059	69.105	73.265	55.327	54.038	83.727	60.911	45.79	76.547	83.8	77.824	56.634	107.94	110.977	88.513	73.202	137.149	91.536	107.854	101.198	83.902		0.101012	77.1494
2.5008	30.08	48.518	39.702	64.081	62.09	68.4329	41.6562	55.309	101.693	63.542	57.017	49.755	42.219	66.309	49.942	45.919	67.445	75.973	69.959	42.433	89.204	97.575	73.167	62.175	123.488	74.957	114.575	93.646	82.749		0.106059	67.3659
2.6199	31.682	45.846	36.781	49.96	55.295	55.6577	33.9577	45.828	82.295	52.236	52.107	41.113	36.498	51.394	46.068	42.058	57.889	63.204	61.532	32.991	73.246	84.1	62.878	58.071	110.775	66.081	106.485	87.102	82.592		0.11111	58.818
2.739	29.441	43.861	35.643	44.973	45.512	47.2691	30.0054	43.594	76.593	45.086	44.937	36.421	29.828	49.698	39.401	31.113	57.61	59.507	52.233	26.171	75.832	74.139	58.944	47.359	93.885	60.025	105.203	87.305	77.892		0.116161	53.4304
2.8581	27.374	36.547	32.728	34.783	41.441	33.9394	27.6944	39.279	65.675	41.187	35.576	30.938	23.558	42.868	34.065	32.536	51.865	60.069	43.843	23.671	67.583	70.675	46.627	41.591	81.832	50.911	96.817	77.294	76.06		0.121212	47.2078
2.9772	25.295	33.806	30.049	32.208	37.461	29.4039	26.7053	36.534	63.166	30.084	29.349	30.953	22.3	36.72	30.066	27.593	43.319	50.489	42.36	22.287	59.062	65.122	35.938	35.753	71.266	49.218	94.216	74.301	74.664		0.126263	42.7479
3.0963	22.557	29.002	26.342	25.676	36.225	24.8045	22.4109	35.842	47.185	28.447	24.152	27.304	23.045	29.389	22.425	21.907	37.5	42.76	39.874	21.023	53.087	55.411	29.331	29.419	63.206	47.755	83.062	68.426	71.007		0.131314	37.537
3.2154	22.666	25.91	28.037	25.349	30.811	26.4009	19.673	32.014	37.156	21.957	19.559	27.707	17.23	27.737	22.183	18.204	35.024	36.452	36.424	15.469	44.368	50.523	26.777	21.802	53.317	39.105	76.221	70.338	71.744		0.136365	33.7985
3.3345	16.971	23.76	26.197	24.631	24.761	25.6327	19.0173	30.349	36.533	16.247	15.167	25.095	15.448	26.673	17.871	17.098	30.919	33.512	30.842	11.238	41.084	51.354	26.246	20.226	45.05	35.647	70.25	64.009	67.913		0.141416	30.6807
3.4535	19.708	20.078	23.202	21.305	24.868	24.5796	20.5014	21.235	33.341	14.077	16.52	21.596	12.113	18.264	14.277	16.247	23.471	23.624	29.88	11.602	38.927	41.672	24.599	18.506	41.254	29.445	61.405	59.155	62.31		0.146463	27.1642
3.5726	19.544	16.155	21.136	18.421	22.488	21.1623	19.7688	16.555	27.602	12.464	16.66	21.025	11.212	17.756	14.142	13.915	22.163	21.121	27.403	11.048	33.32	35.191	19.079	17.199	37.745	29.111	54.348	54.89	62.011		0.151514	24.6426
3.6917	15.755	16.833	20.901	16.199	23.247	15.6425	19.7208	15.482	21.584	13.811	12.866	16.35	11.295	13.653	14.584	13.06	17.979	20.03	21.672	9.698	21.858	31.75	17.299	16.82	31.325	28.389	46.174	48.28	58.209		0.156565	21.7402
3.8108	13.379	16.12	16.889	14.494	17.845	15.8837	14.4487	16.067	20.126	13.369	11.58	17.547	10.653	11.006	12.252	14.455	16.094	18.179	22.92	9.105	20.338	24.31	15.348	12.888	25.688	27.605	43.542	44.091	55.105		0.161616	19.7009
3.9299	12.798	14.849	17.117	15.722	17.593	13.3967	15.0376	17.37	16.399	10.024	10.458	12.596	10.662	11.868	9.02	14.188	14.055	17.608	17.27	9.756	16.09	25.879	14.75	10.976	21.074	22.497	43.24	42.336	51.81		0.166667	18.1531
4.049	12.295	12.455	13.834	11.617	19.94	11.1682	15.5027	18.667	13.993	9.024	9.29	13.749	9.677	9.633	8.232	8.285	10.752	15.925	18.836	10.604	15.651	26.232	14.578	11.766	20.042	19.456	34.183	41.827	52.241		0.171718	16.8778
4.1681	13.539	10.289	12.849	13.723	18.257	11.2193	15.1542	15.516	13.179	8.182	7.882	16.284	9.277	10.588	8.941	7.004	12.064	16.225	17.211	7.968	14.26	25.193	13.177	11.327	22.481	20.388	27.297	37.99	46.425		0.176769	15.9962
4.2872	8.167	9.133	14.847	14.987	13.785	12.817	12.9994	15.724	15.283	8.009	8.095	15.113	8.489	9.975	10.331	9.942	10.659	15.081	16.697	6.505	11.883	18.809	12.453	8.664	16.705	19.483	25.33	31.463	45.128		0.18182	14.7088
4.4063	6.611	8.2	17.25	14.183	13.833	10.7735	12.0267	14.696	13.591	8.233	6.272	12.033	7.104	9.267	10.706	7.88	7.407	11.361	14.191	8.903	10.716	18.663	12.165	8.508	15.087	16.064	24.076	29.764	40.213		0.186871	13.4406
4.5253	8.957	8.966	16.948	11.995	10.191	11.5911	11.741	16.649	11.513	6.883	6.399	12.114	6.099	8.796	9.169	6.68	7.829	10.737	11.692	8.725	11.6	16.736	9.307	9.135	11.864	13.7	25.547	24.824	34.591		0.191918	12.4475
4.6444	7.136	6.982	16.219	13.225	10.704	10.4102	7.3601	15.828	11.036	7.061	6.133	10.443	5.794	8.923	7.497	6.902	6.503	9.703	12.477	7.36	8.828	14.891	8.591	6.443	10.58	16.76	21.199	24.667	34.839		0.196969	11.5343
4.7635	4.884	7.103	13.915	11.836	10.251	8.7037	8.4537	13.555	10.706	6.633	7.556	14.509	6.54	9	7.462	6.144	5.992	8.996	11.723	6.071	7.994	13.373	8.358	5.448	12.635	13.809	21.642	22.372	30.391		0.20202	10.8985
4.8826	6.348	6.775	11.777	7.786	7.42	8.1766	10.4216	14.076	11.488	6.574	5.93	13.674	7.396	7.052	5.632	8.51	6.149	7.452	9.226	6.837	9.676	11.423	6.942	5.919	9.062	12.779	18.556	20.46	29.702		0.207071	10.111
5.0017	5.415	7.54	13.541	7.567	7.735	6.9989	10.2491	13.276	8.417	6.798	6.513	11.325	6.844	8.882	5.987	6.424	7.538	8.607	10.085	5.733	7.763	12.254	6.706	7.404	7.228	14.402	15.531	15.802	25.082		0.212122	9.57403
5.1208	5.739	6.284	14.023	7.567	8.334	6.8421	9.4837	12.433	7.209	6.607	5.51	13.891	4.994	6.532	6.232	6.547	7.101	8.363	10.015	4.561	6.534	9.285	7.1	7.551	6.152	12.061	16.271	13.746	21.244		0.217173	8.90386
5.2399	5.554	4.828	12.514	6.322	7.544	5.6524	8.0123	15.872	7.717	5.118	7.534	11.841	5.227	8.213	6.894	4.695	7.515	7.89	9.483	5.62	7.98	10.845	6.419	6.743	7.17	14.411	15.156	12.204	19.779		0.222224	8.78458
5.359	5.581	5.659	10.921	7.396	6.245	7.501	7.957	12.251	6.753	3.539	6.278	9.809	5.166	8.305	6.008	5.043	5.565	7.947	9.162	7.122	7.386	10.51	6.579	6.599	8.42	14.565	12.333	11.096	16.225		0.227275	8.20417
5.478	6.302	6.664	12.034	7.23	5.691	7.0833	6.3292	9.339	7.778	4.642	4.734	13.124	4.696	7.582	5.823	5.982	4.023	6.275	8.397	5.141	6.368	8.021	6.207	7.021	5.858	14.528	12.967	11.039	17.755		0.232321	7.88391
5.5971	6.635	5.402	9.858	7.046	5.288	6.5934	9.5394	8.873	5.565	5.491	5.168	12.49	4.084	6.862	6.079	5.218	6.814	5.101	8.594	5.024	7.37	8.557	5.14	5.02	5.698	10.252	11.565	11.387	16.775		0.237372	7.49961
5.7162	5.182	5.355	11.27	5.174	5.537	5.4388	8.3577	8.247	4.441	4.115	5.007	12.763	7.38	6.923	5.458	5.75	4.601	5.343	8.912	5.684	5.474	7.989	6.574	4.909	4.554	12.389	9.957	11.497	13.851		0.242423	7.17698
5.8353	6.408	6.654	12.326	4.609	4.904	6.5309	7.5065	9.055	6.658	4.717	5.007	10.669	6.364	7.841	6.317	5.695	5.814	5.958	8.395	7.595	6.346	10.51	5.284	5.33	4.29	11.962	12.912	11.03	14.446		0.247474	7.62529
5.9544	6.31	5.428	13.85	5.349	4.889	5.7419	8.1026	8.228	4.976	4.246	4.192	12.31	5.518	8.512	5.81	6.113	4.933	7.208	8.908	7.15	5.941	7.592	4.854	4.401	5.557	12.161	11.132	10.563	13.79		0.252526	7.37122
6.0735	5.091	4.892	13.194	6.333	5.607	7.1648	7.4932	7.316	5.044	5.025	3.821	11.777	4.945	8.493	4.546	5.043	6.692	6.823	9.146	6.854	3.893	8.446	4.722	4.792	6.481	10.279	8.477	11.278	11.396		0.257577	7.07117
6.1926	3.739	5.374	11.808	5.966	5.432	8.4401	7.3756	8.722	5.582	4.994	6.255	15.269	4.486	9.324	4.592	4.42	5.918	6.24	8.502	6.929	4.981	9.453	4.398	3.891	6.296	10.374	6.404	9.513	9.91		0.262628	7.05475
6.3117	4.752	5.113	9.654	6.008	5.932	3.9044	6.6347	7.161	6.952	5.019	5.568	11.833	3.91	8.875	6.752	4.011	4.139	5.086	7.76	6.013	4.983	10.84	4.055	5.437	5.693	10.643	8.618	8.447	10.539		0.267679	6.70111
6.4307	6.173	5.658	11.064	6.285	3.761	4.0855	8.4547	6.072	5.359	6.127	4.993	14.649	4.837	8.052	7.85	4.681	5.606	6.866	7.012	7.012	4.225	9.174	5.036	4.843	5.667	10.404	7.086	9.005	9.147		0.272725	6.86842
6.5498	3.89	4.873	12.076	4.351	4.426	4.2572	8.4749	5.858	5.47	4.843	2.948	15.215	5.595	6.418	4.971	3.784	4.986	6.072	9.832	8.754	4.252	10.017	4.258	3.341	3.918	11.769	5.778	5.473	8.944		0.277776	6.37393
6.6689	4.426	4.946	14.923	5.227	4.779	4.2243	6.849	7.56	4.663	3.292	5.208	16.877	5.328	8.292	4.239	3.581	5.424	6.048	7.249	6.883	4.451	8.234	5.15	3.472	5.189	9.911	5.429	5.605	6.585		0.282827	6.34636
6.788	4.592	3.657	12.117	5.389	4.39	5.7821	6.2169	8.68	4.601	4.201	5.923	21.013	4.169	7.998	4.955	3.515	5.088	7.685	7.158	4.647	4.519	7.276	4.338	2.332	3.368	10.659	5.61	7.05	7.541		0.287878	6.36103
6.9071	5.067	3.538	14.49	5.696	4.614	4.1471	7.2639	9.217	4.712	3.417	4.585	19.508	3.638	6.408	5.523	3.664	4.818	7.674	7.288	4.585	4.154	7.51	4.93	4.153	4.537	10.909	5.904	5.605	7.009		0.292929	6.36428
7.0262	5.028	3.341	15.043	5.37	5.005	5.0113	7.1802	7.072	6.42	2.962	3.955	23.613	5.966	8.066	5.885	3.508	4.525	6.956	6.108	5.93	4.02	9.348	4.62	2.828	3.565	12.313	4.978	4.432	7.032		0.29798	6.5545
7.1453	4.845	4.477	18.331	4	5.469	5.7826	8.1762	6.635	6.013	4.093	3.187	20.767	6.698	9.55	4.591	5.092	5.017	7.07	6.363	7.94	4.148	11.121	4.361	3.834	3.858	12.052	5.29	7.703	7.447		0.303031	7.03141
7.2644	3.931	3.732	13.392	4.898	3.422	5.9326	8.74	9.308	6.32	4.591	3.988	20.813	4.916	9.771	3.713	2.698	5.118	10.014	7.259	8.299	4.793	11.407	4.363	4.729	5.257	10.912	4.602	8.67	5.935		0.308082	6.94909
7.3834	3.41	5.049	15.994	5.239	2.778	5.0845	7.7741	8.766	5.831	4.864	3.985	20.642	3.737	8.926	4.356	3.494	5.236	9.812	6.435	6.057	3.511	9.842	2.538	4.738	5.055	13.292	5.07	6.171	6.053		0.313129	6.68068
7.5025	3.384	5.024	18.095	4.784	4.162	5.6644	8.5619	8.073	5.012	3.868	4.39	23.361	4.674	6.449	4.855	3.736	4.743	11.213	6.001	7.903	3.606	10.733	3.372	4.571	3.662	13.461	5.112	7.964	4.822		0.31818	6.93987
7.6216	2.936	4.091	17.425	6.557	5.077	4.9553	8.3372	8.238	6.335	4.294	3.216	21.019	6.473	10.144	6.411	3.703	4.701	10.438	7.627	7.945	4.701	10.315	3.574	3.874	4.197	14.102	5.116	7.037	4.766		0.323231	7.15878
7.7407	3.207	4.365	14.634	4.808	3.632	5.5193	8.1596	8.777	3.857	4.915	3.918	22.245	3.737	10.045	6.846	4.464	4.859	10.831	9.036	5.42	4.666	11.506	4.655	3.855	5.692	11.366	3.462	6.71	4.337		0.328282	6.88013
7.8598	4.126	4.19	16.486	4.163	3.095	5.1801	8.4685	11.119	4.172	3.728	4.811	24.646	4.409	10.007	6.736	4.035	6.291	13.536	9.168	7.829	3.143	12.151	3.727	3.42	5.062	13.691	4.528	6.346	5.302		0.333333	7.36433
7.9789	4.934	4.689	19.153	4.997	4.209	4.018	8.1192	9.331	4.153	3.7	6.258	23.499	4.576	10.545	6.007	3.469	4.164	12.92	8.564	7.346	3.944	14.326	4.441	3.611	4.933	12.553	4.646	5.169	4.685		0.338384	7.34342
8.098	1.877	4.031	23.958	5.017	4.772	4.5053	7.2653	10.049	4.838	3.152	5.174	23.896	4.518	11.45	5.599	4.164	3.865	13.698	10.134	6.552	4.82	13.221	2.498	4.745	4.215	12.836	4.732	5.381	4.388		0.343435	7.42588
8.2171	3.12	4.254	21.711	4.436	5.241	4.8195	7.0172	12.084	4.997	3.836	3.783	23.485	5.371	10.457	5.301	3.482	4.303	12.835	10.576	8.007	5.177	13.851	3.503	4.748	3.87	13.523	2.953	6.036	4.707		0.348486	7.49944
8.3362	3.414	4.583	21.462	4.713	5.307	4.6309	7.0894	12.457	2.89	3.002	4.812	23.32	6.524	11.024	5.413	4.044	3.647	11.323	10.317	7.805	4.925	14.692	2.975	4.55	4.062	13.166	3.568	8.313	4.537		0.353537	7.53673
8.4552	3.568	4.803	24.901	4.577	3.794	3.695	6.858	14.806	3.463	3.563	5.313	25.01	4.884	11.816	8.088	3.985	4.462	11.478	11.443	7.954	3.476	14.323	3.882	4.455	4.832	12.838	4.491	6.927	5.544		0.358584	7.90445
8.5743	3.523	4.914	27.415	4.504	3.811	5.3348	6.1189	16.428	4.294	3.099	3.937	25.699	5.73	9.614	8.763	3.238	3.739	13.282	10.844	6.586	4.155	15.013	2.796	4.672	5.414	11.269	4.751	6.823	6.441		0.363635	8.00716
8.6934	3.732	3.824	32.066	5.155	4.032	5.0303	5.5956	18.262	4.376	3.538	4.183	27.125	5.31	11.589	8.092	4.733	5.098	13.999	8.995	10.579	4.74	14.03	3.055	4.208	7.11	13.567	4.602	6.962	5.936		0.368686	8.60427
8.8125	3.246	3.598	32.906	4.844	4.991	3.6496	6.3475	21.717	4.775	3.254	4.402	27.272	5.549	10.526	7.875	5.198	4.679	13.841	7.28	10.542	5.113	12.603	4.599	4.282	4.871	16.822	4.082	6.842	5.64		0.373737	8.66711
8.9316	3.942	3.717	33.944	3.297	4.274	5.1692	4.6975	21.039	4.369	5.684	4.832	27.935	5.943	10.248	6.149	4.323	5.969	13.978	9.419	10.367	5.411	11.834	4.625	4.333	4.884	13.071	5.703	5.672	4.957		0.378788	8.6133
9.0507	2.614	4.629	35.013	3.514	2.401	5.1284	5.3948	23.924	3.799	4.812	5.013	26.919	8.216	12.586	10.644	4.362	5.797	13.466	9.299	12.42	3.295	11.806	4.52	2.764	4.683	14.682	5.127	5.851	4.656		0.383839	8.87363
9.1698	3.447	4.997	38.664	5.476	3.657	4.737	5.9745	24.114	3.857	3.32	3.032	28.954	9.629	10.854	9.222	3.923	4.1	11.322	9.298	14.196	3.893	11.749	4.667	3.405	4.464	19.242	4.072	5.676	3.945		0.38889	9.09953
9.2889	3.571	5.468	32.743	4.03	3.592	3.5508	5.3422	21.773	3.954	4.036	3.279	28.634	6.795	8.927	9.599	3.599	4.82	10.837	11.395	15.148	3.149	12.932	3.862	3.642	5.094	19.548	4.452	6.799	5.169		0.393941	8.81862
9.4079	3.419	4.809	33.821	4.595	4.326	4.8397	4.2376	19.085	5.322	3.562	2.943	27.041	6.737	9.39	8.718	3.739	5.88	9.575	9.906	15.381	4.312	15.68	5.111	4.861	5.674	21.54	4.065	6.99	5.168		0.398988	8.9906
9.527	2.842	4.329	43.972	6.028	3.75	5.593	4.2767	22.778	5.053	3.406	3.594	28.62	7.963	10.786	6.992	3.721	4.741	8.285	11.102	13.691	4.611	15.038	4.755	3.993	4.566	19.892	5.804	4.577	4.453		0.404039	9.28316
9.6461	3.296	4.279	44.322	4.713	4	3.291	4.559	23.891	4.126	4.263	3.776	27.869	9.642	13.019	8.809	4.085	4.27	8.636	9.866	15.632	5.721	17.116	6.385	4.119	6.76	21.984	3.761	6.86	4.464		0.40909	9.77634
9.7652	3.005	4.569	41.7	4.15	4.058	3.8104	5.7792	22.869	2.935	4.677	4.844	26.391	9.92	12.349	11.414	3.9	4.714	10.289	9.923	16.482	4.565	19.463	6.059	5.262	5.483	25.819	4.322	7.891	3.856		0.414141	10.0172
9.8843	3.398	5.524	43.624	4.725	4.03	3.5498	5.6165	20.853	3.756	3.261	4.938	22.006	7.807	13.261	9.668	4.076	3.622	11.185	10.811	16.762	4.04	25.403	6.068	4.908	5.767	24.909	5.033	7.794	5.434		0.419192	10.0631
10.0034	2.995	4.16	44.922	5.594	3.465	3.1238	3.8636	23.694	3.065	3.388	3.479	22.64	10.211	14.564	8.958	6.061	3.688	10.795	9.808	12.796	4.683	27.35	5.225	5.508	5.569	27.443	4.544	6.959	6.134		0.424243	10.1616
10.1225	3.445	4.188	39.822	3.815	3.944	4.3272	5.1214	23.417	3.871	3.225	3.282	21.182	13.753	16.288	7.886	4.358	5.673	10.665	10.979	15.767	5.216	32.282	5.216	4.351	4.953	34.072	5.111	7.701	5.759		0.429294	10.6783
10.2416	3.372	4.857	37.154	4.632	4.231	3.3995	5.3836	22.087	2.772	2.643	3.689	14.907	13.821	18.009	8.26	4.482	5.487	10.627	14.118	15.192	5.423	36.29	4.375	4.272	5.995	35.637	5.452	6.812	6.013		0.434345	10.6687
10.3606	3.256	4.84	38.224	5.034	4.843	2.8923	4.9455	19.339	3.786	2.89	4.257	13.112	14.858	15.204	9.107	5.43	5.86	8.937	13.807	15.248	5.609	40.869	5.71	4.879	5.747	35.677	6.154	5.244	5.066		0.439392	10.7181
10.4797	4.06	5.709	33.446	4.808	4.55	3.5045	5.9722	21.593	4.213	3.433	4.091	14.394	16.706	13.97	10.24	5.121	3.914	8.109	14.354	17.798	4.863	38.263	7.276	4.924	6.216	33.176	7.29	5.42	5.593		0.444443	10.7933
10.5988	3.451	5.666	30.622	4.522	2.459	3.2647	6.172	19.617	3.935	2.932	4.303	9.185	16.771	15.658	10.161	5.319	5.097	7.055	13.107	16.187	4.573	35.832	6.839	4.218	5.571	28.254	6.411	4.194	8.097		0.449494	9.98182
10.7179	2.841	5.211	31.371	4.188	3.279	4.3397	5.224	20.464	3.469	3.175	4.708	10.151	19.705	17.02	9.85	3.967	4.868	11.303	13.356	16.387	5.016	37.631	8.215	5.147	6.563	24.032	8.008	4.061	7.454		0.454545	10.3794
10.837	2.45	4.876	27.974	4.342	3.88	2.8847	4.6152	19.934	3.386	4.463	3.553	9.165	24.72	14.381	10.924	3.842	4.063	9.017	15.733	17.027	4.753	39.645	6.048	4.671	5.293	21.883	9.192	5.626	5.578		0.459596	10.1351
10.9561	2.583	5.272	26.759	4.058	4.046	3.4545	4.9634	20.5	4.2	3.082	4.45	9.292	25.285	15.98	9.797	4.202	3.737	8.477	14.208	17.737	7.58	33.728	6.028	5.454	4.933	20.056	8.08	5.023	6.311		0.464647	9.97503
11.0752	3.409	4.879	23.651	5.851	3.977	3.3097	5.6622	19.651	4.126	2.192	3.839	11.212	24.038	14.946	9.459	3.74	4.07	6.577	16.74	18.451	5.567	32.678	7.404	6.171	5.046	14.749	14.627	3.775	7.957		0.469698	9.92255
11.1943	3.106	5.638	22.801	4.742	3.824	3.4211	5.3797	23.081	3.172	2.568	2.87	10.571	26.568	15.756	7.86	4.851	3.394	8.085	18.312	19.373	7.248	31.355	7.035	6.009	6.079	13.991	16.111	4.309	6.673		0.474749	10.1442
11.3133	2.22	4.787	23.944	4.847	2.649	3.0094	4.6011	18.666	4.597	3.238	3.687	7.752	27.147	17.414	7.505	5.478	3.263	6.842	18.069	17.13	8.454	28.15	6.793	4.674	4.372	14.935	18.34	3.525	6.975		0.479796	9.76081
11.4324	4.524	5.003	22.981	4.95	2.549	3.7435	4.8467	15.919	4.202	2.667	3.567	7.871	27.671	17.85	6.43	5.377	3.061	7.432	16.591	18.552	12.189	28.09	5.163	5.452	6.72	13.365	17.078	3.713	6.61		0.484847	9.79887
11.5515	4.761	5.571	19.598	4.959	2.713	3.9833	5.219	15.939	4.574	3.801	4.651	7.542	31.928	18.87	8.672	4.487	3.516	6.5	16.965	19.272	10.332	29.427	4.839	5.088	7.302	10.445	17.753	4.37	5.187		0.489898	9.94015
11.6706	3.941	4.896	20.284	6.554	2.119	4.8738	5.2912	13.607	4.728	2.66	4.512	8.251	37.127	21.402	8.089	5.268	4.121	5.02	18.331	17.582	11.217	24.485	6.544	6.703	6.901	9.026	16.729	4.157	5.171		0.494949	9.98586
11.7897	3.41	5.194	16.604	5.125	2.479	5.1081	5.3555	13.127	3.317	2.171	3.963	7.966	34.728	21.255	7.186	6.149	4.828	6.348	18.132	15.392	9.655	24.767	5.542	5.438	6.134	9.131	16.001	4.509	5.174		0.5	9.45478
11.9088	3.714	4.904	15.997	4.33	3.516	3.9041	5.9972	12.43	2.781	2.8	4.533	6.643	36.986	23.037	8.558	5.318	4.262	6.003	17.873	15.754	8.869	24.851	6.896	4.519	5.139	10.177	12.189	3.897	6.062		0.505051	9.37722
12.0279	4.54	5.486	19.84	3.925	3.579	3.2181	5.1298	12.64	4.196	3.043	3.39	6.861	35.449	22.621	7.558	3.941	3.573	7.023	15.189	15.683	10.033	21.636	6.23	4.371	6.421	8.151	12.741	3.813	4.847		0.510102	9.14234
12.147	6.584	4.803	18.459	3.946	3.566	3.6237	4.7846	12.588	3.51	3.495	3.286	5.722	39.064	24.556	8.738	5.506	4.531	6.896	15.071	14.064	11.342	23.597	5.822	4.376	3.682	7.679	11.647	3.46	4.861		0.515153	9.2848
12.2661	4.187	6.985	16.041	4.688	2.885	3.7889	7.172	12.026	3.126	3.461	2.636	6.976	39.839	24.416	8.392	5.37	3.695	8.095	13.954	14.878	11.055	18.35	5.714	4.231	3.336	6.841	11.112	3.368	4.71		0.520204	9.01131
12.3851	3.18	6.825	18.109	5.2	3.409	4.3779	6.8934	10.533	3.429	2.971	4.121	7.138	43.701	22.489	7.708	5.458	4.69	6.635	11.311	14.695	8.454	21.181	6.221	4.325	3.699	7.217	9.857	3.485	4.192		0.525251	9.01739
12.5042	3.66	5.433	17.897	3.68	3.138	3.4892	4.8437	10.366	3.401	2.89	4.388	4.914	39.688	22.068	8.823	5.738	5.121	6.637	12.261	11.32	10.217	19.886	6.853	5.301	3.672	6.446	10.67	4.651	3.741		0.530302	8.66182
12.6233	4.309	5.917	16.212	4.094	3.822	3.7381	5.6225	8.643	2.198	4.104	2.866	5.769	39.031	20.258	8.211	6.174	3.578	6.57	14.725	13.933	11.46	20.086	5.994	4.891	3.813	5.832	8.344	2.667	5.056		0.535353	8.54888
12.7424	3.045	5.997	13.632	6.027	4.229	3.7946	4.7263	6.931	2.452	3.768	2.685	6.577	36.222	19.686	6.817	5.887	4.987	5.681	14.033	13.949	12.611	14.594	4.726	3.714	4.094	6.929	8.016	4.145	6.919		0.540404	8.16807
12.8615	3.881	5.404	12.361	4.48	2.955	3.5974	4.3696	8.011	2.558	1.916	3.732	5.673	34.691	16.338	7.872	3.83	3.718	5.987	13.727	14.379	11.545	14.641	5.755	3.582	3.455	6.784	9.573	2.914	6.572		0.545455	7.73452
12.9806	4.231	4.51	13.821	3.816	4.175	3.4751	5.0941	9.696	1.976	2.986	3.432	5.241	32.726	13.602	8.241	4.923	5.448	5.166	12.065	13.45	11.533	14.218	7.848	3.862	4.742	5.388	9.254	2.751	6.856		0.550506	7.74228
13.0997	4.598	6.226	14.225	3.817	2.945	2.3937	5.3267	8.504	2.822	2.82	2.314	6.278	33.791	16.714	8.283	3.124	4.033	4.224	9.813	11.542	11.639	12.736	6.522	3.759	5.406	4.963	7.237	2.946	5.321		0.555557	7.39043
13.2188	2.926	5.072	15.958	3.551	4.449	3.3739	6.2318	8.209	3.449	2.655	2.776	7.143	31.446	16.867	7.054	6.356	3.564	5.74	12.255	12.86	11.87	10.704	4.946	3.872	4.22	6.039	8.558	4.558	4.918		0.560608	7.64209
13.3378	3.411	6.692	13.281	3.602	3.15	3.0862	7.0118	8.084	2.841	3.363	3.183	5.392	33.983	14.902	5.286	7.025	2.927	5.06	10.303	12.843	11.887	10.114	4.173	3.967	3.611	5.509	8.845	5.235	5.202		0.565655	7.37824
13.4569	4.307	6.194	11.738	4.743	2.786	3.6741	6.8556	7.413	3.535	2.919	3.25	4.549	35.624	14.096	3.745	5.599	4.766	5.362	10.318	11.493	11.684	9.64	6.221	4.132	4.627	6.405	9.158	3.803	3.941		0.570706	7.33027
13.576	3.727	6.457	9.391	3.296	4.035	2.9648	5.7735	6.953	4.487	2.318	3.174	5.772	31.856	15.925	4.674	3.771	4.272	4.418	10.152	12.707	13.111	9.552	5.501	4.254	3.295	6.699	9.855	5.104	3.584		0.575757	7.14063
13.6951	4.194	7.192	9.868	3.712	3.54	3.6587	5.2944	6.889	2.7	3.488	2.588	5.512	32.724	16.784	5.019	3.942	4.528	4.442	11.047	11.826	14.521	9.182	5.555	4.502	3.431	5.864	8.196	4.93	3.773		0.580808	7.20352
13.8142	3.145	6.238	10.768	5.227	2.9	2.7415	5.3996	5.992	2.161	2.946	4.581	5.054	33.061	13.541	5.001	2.907	3.343	6.986	7.984	11.666	13.512	8.926	4.731	2.903	4.02	4.212	6.543	4.389	6.899		0.585859	6.8199
13.9333	3.851	7.162	11.871	3.741	3.406	3.9684	3.1292	7.422	2.268	2.582	3.955	4.524	33.512	10.922	5.265	5.347	4.208	5.163	6.723	10.31	12.866	7.437	4.225	3.351	4.831	4.901	5.504	4.234	6.838		0.59091	6.67299
14.0524	3.646	6.599	11.658	3.39	3.469	3.3745	4.4626	6.484	3.487	3.005	2.819	5.435	36.61	12.156	4.877	3.314	2.873	5.813	8.616	10.353	12.577	7.067	4.447	4.314	3.361	4.307	7.227	4.051	6.052		0.595961	6.75324
14.1715	4.246	7.4	8.464	2.676	4.236	3.0626	5.994	6.241	2.943	3.054	1.95	3.52	38.075	12.99	3.701	3.592	3.493	3.728	9.981	11.363	12.997	7.087	5.003	4.253	2.726	4.545	6.272	4.201	6.365		0.601012	6.69512
14.2905	4.033	6.357	8.767	1.976	4.23	4.7927	3.2386	6.584	2.628	3.395	2.626	3.474	35.317	13.166	4.772	3.355	3.277	4.685	9.294	9.647	11.359	6.296	2.876	2.782	2.836	3.635	6.468	4.949	4.491		0.606059	6.25194
14.4096	4.068	6.872	8.416	2.386	3.24	5.219	4.5689	5.48	2.62	2.135	2.765	3.726	32.695	12.803	5.509	5.314	3.767	5.436	8.072	9.227	10.907	5.897	3.146	4.046	3.046	2.882	6.289	4.262	5.082		0.61111	6.20262
14.5287	3.794	6.281	7.529	2.272	3.582	3.4055	3.7661	6.652	1.762	1.328	2.745	2.805	31.771	13.833	4.661	4.316	4.455	3.823	7.176	7.929	11.674	4.936	4.373	3.197	3.471	3.849	5.274	3.745	4.901		0.616161	5.83812
14.6478	4.242	7.057	8.624	3.069	3.035	3.3374	2.7862	6.111	2.537	2.293	2.383	4.296	30.533	13.753	4.3	4.185	4.453	4.414	7.202	7.226	11.864	5.186	3.838	2.778	3.101	3.681	4.421	4.114	5.305		0.621212	5.86637
14.7669	4.861	6.538	8.462	2.855	4.045	3.3212	3.3425	6.51	3.213	3.191	3.195	4.544	32.862	13.935	3.524	2.397	3.902	4.481	8.204	5.07	10.389	5.699	2.968	2.533	3.304	3.547	4.073	3.79	6.068		0.626263	5.89047
14.886	2.784	5.409	7.023	4.309	2.361	3.1086	4.9432	7.078	2.644	2.814	2.17	5.226	31.325	12.677	3.506	4.689	2.983	4.984	9.806	5.74	11.826	7.241	2.704	3.341	3.475	3.29	4.176	3.827	5.156		0.631314	5.8833
15.0051	2.826	8.947	7.63	3.206	1.804	3.3617	4.014	5.51	3.587	2.607	3.045	3.724	25.868	13.332	4.047	3.094	3.083	4.974	7.403	4.524	13.807	5.56	3.666	3.569	3.221	3.372	4.372	3.614	3.859		0.636365	5.57333
15.1242	3.663	6.875	6.987	3.295	2.394	3.3654	3.6129	4.409	2.581	1.82	1.882	3.294	25.526	15.849	4.94	2.021	3.808	4.534	7.124	6.046	11.73	4.421	4.357	3.304	2.322	2.649	5.038	2.927	3.468		0.641416	5.3187
15.2432	3.773	7.386	7.361	2.576	2.29	3.358	3.1928	5.234	1.974	2.259	2.482	4.135	24.403	15.398	5.455	2.438	3.113	3.735	6.799	6.641	13.38	5.007	2.801	2.712	2.824	3.465	4.26	4.186	3.2		0.646463	5.37372
15.3623	3.972	6.209	7.668	4.25	3.564	2.9154	4.0289	6.233	3.176	3.453	3.204	3.711	23.143	12.206	3.949	2.069	3.219	3.517	8.401	6.948	13.213	5.978	3.168	4.734	2.958	3.734	4.792	4.402	2.962		0.651514	5.57853
15.4814	3.507	5.472	8.643	3.649	3.162	3.269	5.3867	6.104	1.812	3.606	2.729	3.655	22.076	11.873	2.919	2.542	4.637	6.152	6.988	6.403	12.304	6.569	4.747	2.937	2.424	2.715	3.937	4.381	3.839		0.656565	5.46337
15.6005	3.593	8.442	6.86	3.65	3.035	4.3311	3.8626	6.262	2.003	3.161	3.539	4.483	22.85	9.303	3.763	3.292	2.985	4.771	8.19	4.27	11.139	5.58	3.716	2.76	3.558	3.739	5.872	3.106	4.122		0.661616	5.38751
15.7196	4.936	7.712	6.496	2.814	2.502	4.0397	3.8301	4.983	2.924	3.045	2.999	3.895	20.929	8.553	4.374	4.964	3.361	5.682	7.482	5.132	8.903	5.908	4.333	3.139	3.043	4.263	3.752	4.314	3.476		0.666667	5.23392
15.8387	4.398	6.608	5.13	3.683	2.821	2.3429	3.5673	5.461	2.157	2.509	2.559	2.673	20.792	9.543	4.226	4.483	3.151	4.573	7.475	3.612	9.661	4.646	3.59	1.756	1.614	2.315	4.232	2.622	2.762		0.671718	4.65387
15.9578	3.801	8.021	5.185	3.303	3.405	2.5624	3.3056	5.526	3.451	4.081	2.203	2.871	19.173	9.36	2.445	4.277	3.438	4.378	6.954	5.696	11.177	4.567	4.056	2.748	1.884	2.155	3.191	2.964	3.034		0.676769	4.80041
16.0769	4.109	6.772	6.413	3.229	2.68	3.5067	3.0362	4.622	3.759	3.056	2.643	2.812	21.863	8.55	3.299	2.816	3.022	5.017	7.767	3.64	9.119	3.852	3.911	3.351	2.581	2.344	4.104	2.737	3.291		0.68182	4.75524
16.196	3.557	6.581	6.098	3.265	2.478	4.3426	3.9319	5.283	3.112	2.56	1.836	3.798	21.875	8.731	3.471	2.169	3.655	5.661	6.308	5.3	11.347	4.899	3.863	2.262	1.983	3.957	3.779	2.703	3.45		0.686871	4.90536
16.315	4.085	8.673	5.981	3.629	3.548	2.2083	4.0081	5.38	2.26	2.59	2.301	4.396	24.164	6.67	3.989	3.185	4.418	2.894	5.173	4.27	9.742	6.997	3.578	2.575	2.76	3.497	2.737	3.768	3.441		0.691918	4.92819
16.4341	3.647	7.569	5.754	3.903	3.04	2.4329	5.1907	4.564	3.428	5.198	2.996	3.77	21.319	10.775	2.395	2.452	3.506	4.362	6.286	5.15	6.648	4.578	3.416	3.088	3.459	2.662	2.6	3.197	3.011		0.696969	4.84126
16.5532	4.199	9.606	5.634	3.867	1.924	2.0497	3.9076	6.859	3.145	3.616	2.253	2.991	22.696	8.873	2.646	1.973	3.217	4.466	5.656	4.689	7.821	4.996	4.026	3.032	2.403	2.595	3.564	2.963	5.186		0.70202	4.85701
16.6723	3.737	10.399	4.21	4.475	3.411	2.524	3.9667	5.086	2.676	3.263	1.782	4.063	23.315	7.794	3.112	3.274	3.616	3.531	5.404	3.439	7.402	4.936	4.478	2.716	3.074	2.787	3.1	3.73	3.524		0.707071	4.78706
16.7914	3.399	9.51	5.063	3.454	3.057	3.5976	4.561	5.398	2.475	2.797	1.611	3.621	21.147	8.71	3.081	3.981	2.907	4.521	5.142	3.482	6.235	4.609	4.228	2.765	3.324	3.455	3.467	3.208	3.05		0.712122	4.68468
16.9105	3.673	9.431	7.259	3.541	2.234	2.1845	3.7055	5.452	2.233	2.486	2.186	5.33	17.574	9.569	3.95	3.389	4.344	3.771	7.019	4.779	7.252	4.786	4.324	1.932	1.55	3.372	4.48	2.964	3.191		0.717173	4.75728
17.0296	3.905	7.01	5.278	4.029	2.309	2.8393	3.671	5.007	2.74	2.112	2.1	4.109	16.685	9.597	2.607	3.148	3.233	4.457	4.899	4.527	7.151	4.054	6.359	2.772	2.61	1.921	3.477	3.193	2.465		0.722224	4.42291
17.1487	4.295	7.701	6.156	3.691	3.652	2.7497	3.651	6.384	3.045	2.777	2.997	3.604	19.737	7.662	2.6	2.618	3.547	3.364	4.381	5.12	7.95	5.315	4.195	2.733	1.96	2.496	3.197	2.214	2.336		0.727275	4.55613
17.2677	4.483	7.983	4.222	2.989	3.189	2.576	4.3127	5.401	2.489	3.645	2.834	3.594	20.191	8.983	2.429	2.72	2.746	3.727	3.575	3.288	8.878	3.879	4.697	3.974	2.094	1.634	3.207	3.071	2.373		0.732321	4.45461
17.3868	4.374	11.397	4.96	3.742	3.18	3.6315	4.8566	6.782	2.787	4.2	3.541	4.209	20.64	7.393	2.527	3.041	3.326	4.859	3.675	4.821	7.126	5.231	4.851	3.75	2.734	1.823	2.933	2.969	2.273		0.737372	4.88387
17.5059	3.741	8.939	4.759	3.779	2.444	2.4837	3.0259	6.408	3.212	2.689	2.855	2.474	18.908	8.522	2.091	3.294	3.65	5.896	4.398	3.314	5.864	4.971	3.932	4.241	2.561	2.189	2.919	3.637	1.431		0.742423	4.43543
17.625	3.177	7.958	3.788	4.157	2.057	1.564	4.0309	6.657	2.339	3.298	3.732	2.476	15.162	7.877	2.408	2.86	3.313	3.745	4.698	3.347	6.293	4.125	2.836	3.747	2.425	2.444	3.306	4.013	1.547		0.747474	4.11655
17.7441	3.61	7.592	4.235	2.769	2.15	1.7561	5.2675	5.009	2.784	3.133	2.616	3.841	18.1	8.24	2.835	2.991	2.77	3.378	5.068	5.148	6.743	2.591	1.938	2.796	2.433	1.72	2.829	2.395	1.473		0.752526	4.07623
17.8632	4.023	7.501	3.634	3.405	2.413	1.8628	4.0854	7.219	2.13	2.475	2.278	3.229	16.582	8.18	1.487	2.485	2.804	3.529	4.787	3.905	8.98	3.811	3.678	2.205	2.58	2.334	1.929	2.083	1.56		0.757577	4.04049
17.9823	3.956	8.269	5.097	4.177	3.014	1.8712	3.0506	6.405	2.696	2.251	2.038	3.337	16.937	6.911	1.977	2.525	2.154	3.517	5.927	4.288	7.231	4.785	3.881	2.278	2.661	2.768	2.179	2.412	2.961		0.762628	4.19151
18.1014	3.558	9.043	4.763	2.822	2.415	1.4108	3.286	6.98	2.396	2.937	3.489	4.15	16.112	7.485	2.034	3.723	3.02	3.252	5.081	3.907	5.646	3.64	2.485	3.306	2.648	1.368	2.636	3.049	2.246		0.767679	4.09958
18.2204	3.801	7.625	3.824	2.349	2.88	1.7267	3.4079	7.103	1.999	2.953	2.656	3.535	17.104	7.711	3.653	2.802	1.438	3.43	4.792	4.56	7.035	2.564	2.868	2.962	3.111	2.047	3.04	1.921	1.976		0.772725	4.03012
18.3395	3.349	6.717	4.107	2.359	2.54	2.5523	3.7165	5.677	2.62	2.293	2.504	3.513	16.705	7.974	1.934	1.7	3.422	3.123	5.298	4.311	6.146	1.851	3.436	1.835	2.443	2.362	2.971	2.374	1.666		0.777776	3.84479
18.4586	4.175	7.768	4.54	3.267	3.228	1.9963	3.6958	4.475	2.188	2.172	3.282	3.604	16.22	8.984	1.89	2.691	3.555	2.834	5.127	3.306	5.549	3.276	3.458	2.272	2.711	1.649	2.688	2.365	1.739		0.782827	3.95535
18.5777	4.851	7.694	5.799	4.223	2.709	2.3059	3.1627	5.292	2.318	2.929	2.763	4.552	20.848	7.331	2.625	4.806	4.045	3.177	4.336	5.328	7.283	2.908	3.539	2.644	2.544	1.679	1.968	1.94	1.06		0.787878	4.36757
18.6968	5.178	8.16	5.761	3.269	2.82	2.1806	1.996	4.376	1.884	3.285	3.174	4.136	15.414	6.01	2.948	2.188	2.581	2.418	3.795	3.776	7.38	3.949	2.798	2.656	3.617	1.486	3.816	1.928	1.533		0.792929	3.94871
18.8159	4.162	9.143	5.126	2.211	2.957	1.0774	3.5264	5.002	1.784	2.418	2.811	4.048	14.996	6.2	4.264	3.389	2.997	3.54	6.024	3.097	9.457	2.95	2.888	2.244	2.447	1.633	2.555	2.651	3.094		0.79798	4.09282
18.935	3.795	7.529	6.653	2.785	2.379	1.8399	4.706	5.221	1.883	2.075	2.414	4.052	18.458	6.976	4.598	2.816	3.272	2.998	6.486	5.416	8.922	2.6	4.288	1.05	2.119	2.379	3.682	1.929	1.077		0.803031	4.28958
19.0541	3.304	10.461	4.85	1.794	2.529	2.334	3.3843	3.84	1.933	2.276	2.279	3.829	16.561	9.009	4.227	3.186	2.041	2.21	5.34	5.838	10.066	2.823	3.207	1.16	2.424	2.304	5.154	1.934	2.126		0.808082	4.22149
19.1731	3.382	7.693	4.156	2.266	2.98	2.5262	2.6191	3.818	2.252	3.014	2.148	5.814	13.774	7.497	4.636	2.971	1.655	4	5.931	4.923	7.473	3.651	2.998	1	3.364	1.746	3.799	2.499	0.937		0.813129	3.98353
19.2922	2.856	7.392	3.11	3.741	3.411	1.6981	2.7172	2.743	2.622	3.373	2.344	5.165	12.33	6.909	5.051	3.161	2.418	1.837	5.826	5.706	7.308	3.79	2.509	2.263	2.141	2.386	2.235	2.265	0.518		0.81818	3.78708
19.4113	4.176	9.48	4.641	3.992	2.358	1.9878	4.2395	3.891	2.187	1.889	2.03	4.523	11.79	7.775	4.972	3.281	2.468	1.574	6.505	5.441	6.737	3.353	3.445	2.083	2.115	2.016	3.129	1.264	1.729		0.823231	3.96798
19.5304	4.124	9.506	4.596	2.342	2.557	2.021	4.4972	4.794	2.529	1.537	2.289	5.103	14.532	10.072	4.121	2.374	2.249	1.847	8.008	5.16	5.751	2.286	3.221	1.584	3.323	2.437	2.596	1.279	1.703		0.828282	4.08408
19.6495	3.09	8.17	3.629	2.446	2.245	2.4433	2.3142	2.916	2.084	1.695	3.333	3.905	14.227	11.065	5.286	3.194	1.951	2.284	7.628	6.928	5.47	2.71	2.76	2.523	2.544	2.177	3.377	1.443	1.365		0.833333	3.9725
19.7686	3.311	7.121	2.27	3.475	2.103	1.6577	2.9656	4.788	2.361	2.141	2.935	4.428	10.19	9.043	5.433	2.208	2.323	3.127	6.023	6.218	4.923	3.385	2.645	2.763	2.307	1.811	1.888	0.821	1.777		0.838384	3.67039
19.8877	3.67	10.279	3.231	3.218	2.243	1.3006	2.5526	4.111	2.005	4.017	2.949	3.859	10.171	10.682	5.983	3.024	1.688	2.436	7.288	7.31	4.428	2.962	1.684	1.49	1.057	2.11	2.582	1.299	1.787		0.843435	3.84194
20.0068	4.329	9.54	3.495	2.442	2.725	1.5919	4.3283	4.813	1.716	4.101	2.726	4.606	8.977	11.033	7.87	1.934	2.063	3.39	7.9	5.866	3.827	3.294	2.225	2.452	1.429	2.2	1.663	1.56	0.986		0.848486	3.96835
20.1259	4.415	8.193	3.954	2.853	3.373	1.2091	3.701	3.94	1.978	3.624	2.316	5.6	7.772	9.266	7.222	4.59	2.558	3.624	9.208	4.488	5.625	3.7	1.384	2.851	1.887	2.818	1.464	1.44	1.471		0.853537	4.01807
20.2449	3.204	7.672	3.984	3.297	2.835	1.8873	3.5083	3.126	2.795	2.479	2.63	5.168	7.051	9.668	8.428	5.382	3.479	3.053	6.642	4.088	5.139	3.303	1.959	2.916	2.387	1.529	2.113	1.709	1.999		0.858584	3.9114
20.364	3.862	9.304	4.243	2.938	1.585	0.6322	3.1671	1.803	3.345	1.644	2.354	6.077	7.882	9.772	7.318	5.079	2.554	3.029	6.541	4.954	4.706	3.808	1.683	3.993	3.129	2.468	2.884	1.814	1.257		0.863635	3.92501
20.4831	6.069	7.723	3.31	2.593	3.192	1.3237	2.8459	3.41	3.998	3.772	3.148	6.018	6.729	9.278	7.69	5.791	2.583	2.513	7.132	4.527	5.053	2.818	1.424	2.928	2.146	2.916	2.727	2.175	2.104		0.868686	4.06678
20.6022	6.072	9.478	2.506	3.313	2.464	1.9221	1.8666	4.427	1.83	3.209	2.908	3.52	5.867	7.953	9.227	7.789	4.634	3.151	6.503	4.928	3.181	2.429	2.141	3.162	3.029	2.016	2.594	1.701	1.817		0.873737	3.98751
20.7213	5.517	8.697	3.447	2.465	2.551	3.039	1.5358	4.525	2.181	2.803	1.765	4.137	5.32	5.416	9.06	7.644	4.526	4.367	6.533	4.299	3.587	3.901	2.714	3.347	3	1.312	2.315	1.552	1.499		0.878788	3.89844
20.8404	5.194	6.825	2.498	3.247	3.048	2.3565	1.9156	1.81	2.293	2.617	1.138	4.058	4.95	5.776	8.254	6.197	3.865	3.473	8.571	4.356	3.167	2.656	1.941	2.853	4.176	1.804	2.335	1.264	0.881		0.883839	3.56962
20.9595	5.847	6.471	2.438	3.327	3.695	1.6685	1.9504	2.303	1.426	2.058	2.776	3.251	4.438	6.838	9.508	9.372	6.636	3.537	5.832	2.483	2.659	3.12	2.402	3.163	3.057	1.671	2.451	1.956	0.501		0.88889	3.68396
21.0786	6.545	5.38	2.219	3.349	3.025	1.9466	1.7892	1.776	2.653	3.595	2.68	3.873	4.063	5.31	9.433	9.538	5.907	4.42	4.723	2.795	3.348	3.057	2.924	3.849	3.141	1.021	1.836	1.181	1.165		0.893941	3.67386
21.1976	5.97	8.744	4.4	2.141	2.716	2.2264	1.7596	2.329	1.428	2.68	2.284	4.385	4.011	5.367	10.542	11.695	4.711	3.573	5.25	3.423	2.487	2.3	2.98	2.421	1.789	1.373	2.568	1.22	1.859		0.898988	3.74593
21.3167	5.438	10.179	3.381	3.226	2.132	1.5187	2.3248	2.323	1.907	2.27	1.137	2.33	2.132	5.345	9.592	10.988	4.471	3.887	3.791	2.43	2.12	3.418	1.974	2.714	2.136	1.466	1.883	1.066	0.938		0.904039	3.39716
21.4358	8.188	6.899	1.928	2.958	2.455	1.9503	1.5427	2.381	2.154	3.286	1.409	2.22	2.709	3.841	10.262	11.298	3.915	6.141	3.304	2.11	2.278	2.248	2.23	2.16	3.158	1.63	2.289	1.597	0.713		0.90909	3.42255
21.5549	7.702	5.905	3.365	2.138	2.407	1.6957	3.0439	2.754	2.557	1.986	2.268	2.069	2.099	2.398	9.333	9.208	4.179	4.334	2.446	2.818	1.333	1.604	2.587	2.815	4.538	3.233	2.398	0.995	1.025		0.914141	3.28392
21.674	6.283	5.04	4.548	2.878	2.173	2.2971	2.0335	1.336	1.612	3.057	2.682	2.291	2.089	2.443	7.246	8.926	4.859	5.729	3.755	2.33	2.395	3.141	2.75	1.628	2.479	2.463	2.03	0.614	1.733		0.919192	3.2014
21.7931	7.327	4.264	2.516	1.918	1.496	1.797	1.4245	1.104	1.817	3.034	1.169	2.191	1.989	3.755	6.763	10.177	4.781	5.466	3.346	2.293	1.229	1.998	1.604	1.911	3.16	2.139	0.792	1.087	0.581		0.924243	2.8665
21.9122	9.726	4.229	3.56	1.688	1.81	2.4418	1.0157	2.013	2.245	2.369	1.589	1.619	1.944	2.623	4.579	8.705	6.486	4.632	1.731	1.546	0.974	1.434	1.978	2.06	2.3	2.012	1.504	1.502	0.559		0.929294	2.78878
22.0313	10.938	6.309	1.912	1.22	2.126	2.9548	1.6944	1.436	0.983	1.966	1.681	1.646	1.141	1.832	4.182	8.695	5.379	5.634	3.05	1.951	1.218	1.655	1.856	2.194	2.454	2.028	1.296	1.063	2.382		0.934345	2.8578
22.1503	9.248	4.435	2.51	1.919	3.075	1.6613	1.5835	2.088	1.767	1.813	1.941	1.857	2.245	2.014	4.879	7.025	4.639	6.061	2.13	1.551	1.153	1.808	2.046	1.078	1.669	2.024	1.647	2.082	1.332		0.939392	2.73382
22.2694	5.766	4.882	2.388	1.913	1.95	1.9548	2.6512	1.495	1.618	1.139	1.128	1.315	0.863	1.89	2.799	5.776	4.93	4.596	2.019	0.932	0.696	1.133	1.978	1.371	2.228	2.432	2.421	1.398	1.036		0.944443	2.29993
22.3885	5.697	4.411	3.159	1.213	1.434	3.5437	2.5276	0.859	1.688	1.858	1.492	1.613	0.711	2.003	2.185	6.703	5.315	4.283	2.096	1.154	1.128	0.788	1.301	2.806	2.291	1.743	1.281	1.093	1.838		0.949494	2.35222
22.5076	7.637	3.418	3.387	1.946	2.759	2.4494	1.3931	0.539	1.456	1.693	1.371	0.722	0.827	1.502	2.847	5.638	4.611	4.81	1.986	1.051	0.834	1.808	2.003	1.402	2.021	1.28	0.968	1.072	1.601		0.954545	2.24247
22.6267	8.542	3.122	2.654	2.132	1.693	2.0349	0.9811	0.855	1.91	2.569	1.294	0.3	1.601	1.835	2.887	4.641	2.639	2.929	1.405	1.2	0.706	1.892	2.21	1.244	2.411	1.511	1.255	1.293	0.497		0.959596	2.07734
22.7458	6.218	3.892	2.268	2.534	1.71	2.6454	1.0462	0.661	0.518	1.776	1.594	0.938	0.644	1.357	3.325	2.429	4.105	2.207	2.071	1.476	0.484	1.128	1.483	2.912	2.38	1.634	1.703	0.81	1.151		0.964647	1.96895
22.8649	3.844	2.921	2.757	2.435	1.756	1.9169	2.2574	1.207	0.851	1.896	1.677	1.516	1.164	1.213	1.97	3.204	2.896	3.229	2.582	1.053	1.333	1.195	0.83	1.586	2.416	1.698	1.007	1.025	1.449		0.969698	1.89256
22.984	4.085	2.452	1.37	2.63	1.267	1.9358	1.3351	1.645	0.477	2.15	1.238	1.063	0.469	0.843	1.885	2.06	2.803	1.883	1.453	2.156	0.922	0.608	1.35	0.753	1.376	1.897	1.675	0.644	1.025		0.974749	1.56724
23.103	4.892	2.436	2.062	2.852	1.028	2.3727	1.2274	1.047	0.74	1.909	0.6	0.724	1.396	0.681	1.257	2.207	3.755	2.054	0.88	0.708	1.303	0.81	0.846	1.49	1.646	1.366	1.354	0.781	1.29		0.979796	1.57635
23.2221	4.591	2.896	2.157	2.132	0.988	1.6691	0.6062	0.926	0.787	2.666	1.098	0.561	0.965	0.429	1.529	1.855	3.006	1.528	1.099	1.184	0.774	1.231	1.484	1.331	0.43	1.8	0.838	1.244	0.955		0.984847	1.47446
23.3412	5.852	3.234	1.917	1.922	0.957	0.5286	1.211	1.707	1.538	1.302	1.526	1.206	1.013	0.731	1.572	1.089	2.681	2.734	0.656	0.999	1.106	0.707	1.071	1.191	1.623	1.348	1.242	0.956	1.339		0.989898	1.5503
23.4603	3.093	3.651	2.285	1.3	1.645	1.0093	0.9579	0.934	1.186	1.864	0.827	1.172	0.447	0.946	1.073	1.263	3.443	2.72	1.079	1.1	0.533	1.313	1.169	0.63	1.736	1.56	0.599	0.705	0.821		0.994949	1.4159
23.5794	4.043	3.011	1.827	1.859	1.435	1.4431	0.5702	0.472	1.456	1.817	1.04	0.727	0.602	0.883	0.833	1.127	1.545	1.608	1.148	1.311	0.561	1.198	0.926	0.427	1.563	0.632	0.703	0.855	1.137		1	1.26756

## Sheet: Image19 (2)
X0	Y0	Y1	Y2	Y3	Y4	Y5	Y6	Y7	Y8	Y9	Y10	Y11	Y12	Y13	Y14	Y15	Y16	Y17	Y18	Y19	Y20	Y21	Y22	Y23	Y24	Y25		Ap-Ba	Avg int
0	38.401	38.434	58.0913	76.628	61.474	36.485	43.897	35.604	40.539	55.257	96.618	105.135	69.324	71.4585	56.32	45.865	31.5128	94.566	54.216	56.886	64.21	72.384	51.43	71.284	84.761	65.17		0	60.6135
0.1191	42.563	55.859	72.1889	75.729	68.954	39.351	48.88	40.307	43.908	57.643	113.567	117.745	69.908	75.264	67.225	53.728	36.9563	102.094	68.532	62.692	75.517	79.873	57.338	75.078	81.4	71.156		0.00485486	67.4406
0.2382	46.523	65.76	77.2387	78.314	64.273	42.8	53.339	40.178	61.176	57.098	119.657	140.355	84.106	76.049	79.914	64.384	40.6752	113.164	83.415	76.288	85.413	105.185	62.246	90.866	85.99	82.503		0.00970973	76.035
0.3573	54.574	85.645	80.4031	83.801	70.41	50.224	59.977	47.115	65.001	67.472	120.799	161.599	87.259	81.0918	86.804	71.743	46.7529	120.141	103.071	99.746	95.476	123.505	57.197	93.082	96.595	99.286		0.0145646	84.9527
0.4764	56	100.81	86.8332	88.088	82.646	55.5	73.611	59.442	78.833	77.673	138.427	161.991	93.577	81.1856	91.333	81.948	52.9451	134.569	121.567	113.679	102.415	133.368	65.737	86.214	84.253	111.438		0.0194195	92.8493
0.5954	61.304	112.977	87.7849	73.107	98.955	60.062	94.166	76.318	89.894	81.425	144.805	163.48	87.27	80.4365	93.342	88.246	55.2646	145.446	134.286	128.925	127.218	154.292	72.255	89.505	98.872	131.553		0.0242702	101.2
0.7145	72.783	120.985	89.9581	81.33	109.329	69.892	108.928	107.882	99.846	89.711	164.798	169.17	83.379	74.7561	100.68	95.784	59.9858	152.149	153.256	162.86	143.351	161.694	81.276	102.545	95.208	141.551		0.0291251	111.273
0.8336	70.191	133.277	96.4076	85.531	123.724	78.624	120.342	114.166	111.476	101.91	169.349	164.63	103.418	73.7741	103.788	104.365	54.2394	161.07	161.07	175.174	160.532	170.249	81.584	107.393	107.18	139.273		0.03398	118.182
0.9527	74.863	127.358	94.8206	91.037	117.374	90.217	134.065	130.119	123.358	107.982	174.457	165.047	99.778	68.9095	111.366	95.365	64.6966	173.34	188.911	185.122	169.414	186.302	90.11	119.747	103.601	134.595		0.0388348	123.921
1.0718	86.17	119.938	94.743	103.331	124.534	114.7	135.44	145.003	127.118	112.726	171.838	165.631	101.521	68.0136	105.782	91.503	72.2299	167.309	188.019	201.607	179.082	189.472	93.407	124.494	112.724	132.301		0.0436897	128.024
1.1909	99.09	126.292	92.0583	106.439	131.791	125.268	134.192	158.155	129.512	123.442	173.968	146.685	104.092	65.3586	88.542	86.869	74.0713	175.665	187.016	203.349	183.122	187.287	95.069	131.714	120.032	117.466		0.0485446	129.483
1.31	108.481	122.373	101.59	106.844	136.905	139.207	129.351	161.654	129.735	131.435	160.379	149.133	98.136	61.6034	85.111	78.549	76.5857	171.762	179.87	205.812	186.498	180.605	110.246	140.204	130.68	111.392		0.0533994	130.544
1.4291	107.952	115.13	97.118	108.423	132.396	140.572	121.395	159.279	130.473	135.17	147.097	142.839	100.645	60.9037	79.3	80.46	82.1109	178.029	158.831	198.407	179.539	185.624	116.555	143.288	136.352	109.869		0.0582543	128.76
1.5481	106.424	114.169	96.3591	109.098	127.821	147.259	113.528	145.751	145.203	143.546	140.65	137.033	103.525	55.3428	77.464	74.48	85.0263	172.675	138.39	177.97	165.612	181.54	119.842	140.153	126.616	110.868		0.0631051	125.244
1.6672	97.308	98.698	93.0412	114.519	119.297	143.68	85.344	129.344	134.405	135.314	135.789	129.598	109.886	51.3981	64.858	71.844	81.8631	181.283	130.8	160.544	158.938	182.883	112.757	146.422	142.794	109.185		0.0679599	120.069
1.7863	95.882	81.855	91.8821	112.614	106.014	135.35	73.281	113.589	125.22	134.432	130.565	126.16	109.777	50.6101	57.305	67.922	86.9635	187.509	119.504	135.641	150.7	178.532	117.419	146.88	147.794	107.565		0.0728148	115.037
1.9054	86.661	67.348	89.3976	106.945	99.532	130.559	70.533	89.154	113.405	134.847	133.217	123.808	116.829	48.3661	52.117	66.656	75.0433	192.235	113.711	126.638	140.988	177.332	134.873	151.143	149.095	96.944		0.0776697	111.053
2.0245	75.206	62.169	82.9837	104.416	101.846	113.365	62.99	82.089	103.985	137.679	127.039	115.741	106.455	42.7069	47	69.495	72.2589	189.948	108.73	112.318	136.41	175.508	136.426	156.385	147.3	98.831		0.0825245	106.511
2.1436	65.914	54.534	88.1668	97.916	94.254	93.753	56.418	68.206	78.068	140.311	126.55	115.445	111.514	41.8205	50.821	61.142	70.8006	194.738	98.626	108.715	131.371	169.277	148.319	143.194	145.542	101.73		0.0873794	102.198
2.2627	61.916	50.385	82.9427	88.86	89.716	84.064	48.099	59.447	75.587	134.175	113.965	108.914	121.156	43.9542	49.361	58.701	58.9422	196.461	89.824	97.99	106.341	175.948	139.007	140.694	139.237	88.847		0.0922343	96.3282
2.3818	56.708	44.303	67.7259	88.297	91.239	84.748	42.311	51.216	64.409	131.153	118.73	108.773	123.669	43.3681	47.103	52.562	55.5293	195.058	92.157	93.744	104.975	182.964	133.474	137.354	140.922	86.631		0.0970891	93.8124
2.5008	49.071	41.535	66.026	90.974	81.443	81.555	35.978	41.273	49.535	134.637	127.004	112.782	135.67	42.6942	44.134	53.428	53.973	180.703	79.179	91.209	99.807	173.508	131.484	144.51	123.528	78.972		0.10194	90.1774
2.6199	42.076	39.154	58.6581	86.144	78.507	73.644	36.06	32.243	48.801	127.732	117.406	106.796	133.311	41.7941	40.631	49.653	54.0541	175.435	78.738	91.04	94.675	171.653	124.724	126.564	107.456	83.132		0.106795	85.3877
2.739	44.68	37.553	60.9105	79.287	73.216	71.404	31.915	32.494	41.165	123.9	122.316	101.532	136.745	45.2093	44.501	53.909	57.2306	165.375	73.199	81.577	90.17	164.111	125.687	119.495	100.756	86.987		0.11165	83.2817
2.8581	43.951	36.609	58.52	74.483	60.581	58.147	30.209	28.929	42.544	124.269	119.076	105.088	124.796	41.3071	47.089	58.188	54.2084	149.595	71.896	80.125	92.452	165.308	115.192	97.161	88.327	77.7		0.116504	78.6827
2.9772	41.183	35.543	48.2158	73.304	50.388	58.316	27.756	26.96	39.273	110.55	124.305	108.198	139.038	45.8038	41.541	58.843	53.8202	156.738	66.488	75.319	97.359	150.184	108.207	94.69	77.137	75.911		0.121359	76.3489
3.0963	37.752	32.72	46.3555	70.232	42.703	52.806	25.218	25.065	40.009	91.53	114.044	101.772	131.808	46.4822	44.948	56.404	51.3016	153.162	66.619	66.935	102.33	146.287	100.722	82.937	67.716	78.542		0.126214	72.1692
3.2154	33.647	31.878	44.6496	72.847	31.786	51.283	19.604	24.425	31.235	86.294	112.746	96.913	121.668	47.1265	46.281	55.847	52.215	157.959	64.016	61.184	99.156	150.269	97.817	72.458	54.866	91.482		0.131069	69.602
3.3345	34.543	30.333	42.893	63.91	33.846	43.637	20.295	22.709	32.445	85.355	100.342	94.003	120.874	40.2939	43.62	61.027	50.308	141.635	63.93	56.81	101.307	137.303	95.282	68.321	49.845	86.915		0.135924	66.2224
3.4535	33.803	27.328	44.2336	66.448	27.068	47.532	16.33	22.513	36.263	75.555	94.405	92.885	119.856	40.7838	51.521	52.54	48.6625	140.206	57.582	52.041	108.877	134.714	92.35	60.474	48.434	83.788		0.140775	64.469
3.5726	33.724	28.345	40.4704	53.278	27.98	42.68	15.806	20.949	33.709	65.11	100.253	86.284	113.841	38.8309	50.273	50.991	49.1477	130.09	57.403	51.26	105.111	139.19	81.026	54.569	35.843	76.36		0.14563	60.8663
3.6917	33.156	30.017	44.6425	52.463	21.286	42.794	14.658	16.936	31.116	56.252	92.423	87.476	108.21	40.9636	42.59	54.028	52.9021	125.833	57.919	49.709	102.397	132.822	71.078	50.357	36.212	77.196		0.150484	58.6706
3.8108	30.115	27.812	43.4555	52.805	25.406	34.05	14.346	15.206	23.914	48.655	88.244	73.19	103.127	43.7549	39.971	50.161	50.9952	122.778	53.683	46.191	94.501	137.346	67.823	42.749	27.576	71.045		0.155339	54.9577
3.9299	25.915	30.432	44.8318	48.949	23.505	27.613	11.974	16.051	24.075	38.393	80.504	67.926	101.274	49.3771	44.3	59.949	55.6322	118.21	52.955	45.645	101.64	134.773	57.038	42.01	27.738	68.44		0.160194	53.8135
4.049	25.471	27.5	46.912	38.931	20.283	28.545	13.39	16.272	20.263	30.677	72.843	69.089	91.92	49.4214	43.279	48.437	56.3324	127.634	52.64	42.017	96.684	133.015	60.442	40.424	20.914	69.466		0.165049	51.6462
4.1681	22.471	28.889	44.6058	36.716	16.919	20.722	9.577	16.447	25.637	26.423	66.348	64.875	88.491	51.4383	47.335	46.75	55.5197	123.234	49.239	37.342	89.992	120.163	54.382	33.125	21.007	65.662		0.169904	48.5888
4.2872	24.269	30.489	40.1817	28.411	19.023	19.281	9.854	13.857	22.584	24.703	67.157	59.7	90.017	54.1128	44.653	45.757	54.8973	120.668	50.05	37.463	89.422	129.29	45.796	26.924	19.042	66.195		0.174759	47.4537
4.4063	21.203	23.129	40.2497	27.201	16.466	16.039	10.284	12.051	16.999	22.976	58.687	57.036	83.582	59.8721	43.038	46.45	58.3141	107.101	47.332	35.414	84.755	136.768	35.678	27.443	18.169	62.731		0.179614	44.9603
4.5253	24.309	20.626	41.4218	21.809	13.298	13.833	12.212	13.103	14.932	20.573	54.696	55.099	80.354	57.4916	43.741	53.023	56.3154	100.816	44.49	38.018	78.848	121.692	33.829	26.047	14.581	62.731		0.184464	42.9957
4.6444	14.336	23.715	42.6765	17.262	12.581	12.54	8.556	11.142	13.672	22.742	55.499	55.59	72.032	61.3585	42.703	48.088	52.7816	95.905	40.549	31.74	78.534	116.816	32.02	26.226	12.703	58.024		0.189319	40.7612
4.7635	18.392	21.367	38.874	17.396	14.023	14.943	8.859	12.401	13.341	22.305	50.035	52.473	69.879	58.621	42.359	44.176	51.4064	84.741	39.15	31.584	70.573	115.775	33.827	22.248	10.826	53.831		0.194174	38.9771
4.8826	18.011	16.525	31.7967	13.825	15.509	10.943	6.074	14.389	11.875	21.791	48.005	48.863	60.854	56.9383	45.699	48.006	49.2735	73.959	37.212	30.498	69.478	99.811	26.395	15.491	10.3	56.886		0.199029	36.0926
5.0017	15.537	17.787	27.0625	14.076	11.834	8.041	7.081	10.634	11.594	20.926	44.59	43.158	57.668	57.887	45.048	49.811	57.8485	58.621	37.165	24.33	65.307	102.817	26.318	15.647	9.589	52.333		0.203884	34.335
5.1208	13.151	17.722	19.9753	14.477	12.627	10.632	6.863	10.646	12.195	19.995	40.958	43.206	52.495	57.604	46.673	48.949	54.5839	46.171	31.197	30.621	58.109	91.662	25.449	11.929	10.351	58.009		0.208739	32.5481
5.2399	13.715	14.872	19.1578	12.625	10.147	8.209	6.994	8.844	9.841	19.242	40.004	38.704	52.64	56.4139	47.07	51.581	58.0984	39.291	35.704	31.734	50.665	82.228	24.234	12.817	11.274	56.872		0.213594	31.2683
5.359	10.136	11.85	15.0058	9.416	11.623	6.172	5.769	7.729	8.449	18.572	32.707	30.994	52.416	57.6542	43.21	49.325	56.8084	31.39	31.885	28.373	54.58	79.893	20.242	11.155	8.687	56.688		0.218448	28.8742
5.478	9.806	10.678	12.2467	9.533	9.886	6.439	6.289	8.119	10.014	15.886	33.576	31.667	45.156	49.971	50.254	45.98	47.7163	27.548	34.565	24.937	46.652	66.801	19.431	9.517	8.128	61.165		0.223299	26.9985
5.5971	9.843	13.926	10.2772	8.978	11.38	8.921	6.513	8.209	9.362	15.699	25.498	29.557	36.36	43.0651	45.32	45.251	54.6657	24.66	35.117	21.962	49.983	62.247	16.556	8.573	8.054	56.549		0.228154	25.6356
5.7162	7.017	9.434	11.234	8.188	11.839	4.579	3.95	5.982	10.08	14.228	23.635	24.775	39.892	41.1592	42.18	46.546	48.1257	24.382	30.811	26.624	47.952	53.633	13.584	6.318	7.19	51.457		0.233009	23.646
5.8353	8.152	9.045	13.5247	8.344	10.209	6.412	6.757	5.215	8.995	12.127	21.223	20.557	38.108	31.1251	40.072	49.516	53.5374	22.055	24.623	22.09	47.115	46.003	13.026	5.934	7.885	49.423		0.237864	22.349
5.9544	6.725	10.186	9.5855	8.886	9.413	7.614	6.433	7.534	9.381	15.391	21.817	25.653	31.992	24.2565	38.583	48.481	55.1929	26.33	27.134	20.821	46.82	39.769	12.364	7.725	7.375	50.295		0.242719	22.1445
6.0735	6.794	6.203	9.0789	6.255	10.766	5.429	6.066	6.619	7.428	13.479	18.777	24.115	28.217	18.9798	39.47	48.762	46.8929	24.153	26.586	17.554	45.357	35.17	10.802	8.152	7.655	48.094		0.247574	20.2636
6.1926	5.391	7.063	11.6096	5.438	11.04	7.107	5.668	6.245	9.621	10.302	14.764	22.314	25.004	18.2769	38.577	50.912	38.0682	20.994	24.252	22.899	42.096	32.089	12.109	7.198	9.06	43.877		0.252428	19.3067
6.3117	5.424	6.939	9.0221	5.429	11.076	9.658	5.862	5.731	8.97	11.498	15.531	20.225	21.405	16.4172	37.397	44.737	40.1683	21.846	23.777	23.03	35.688	29.165	12.879	7.086	8.148	47.29		0.257283	18.6307
6.4307	6.053	5.882	6.9635	5.883	8.073	6.905	5.22	3.854	6.864	11.18	11.334	20.808	15.943	18.3126	35.123	43.291	35.3286	16.933	18.495	20.107	35.534	29.76	11.715	6.343	9.93	43.488		0.262134	16.897
6.5498	7.103	6.836	8.8425	6.612	9.606	6.43	4.535	5.176	7.772	12.912	11.737	20.729	12.431	16.4923	33.825	43.641	29.7566	18.704	20.518	21.231	39.107	26.648	12.348	8.132	8.593	43.487		0.266989	17.0463
6.6689	6.344	5.331	6.2244	6.505	11.819	5.851	4.264	6.228	6.507	12.051	16.34	19.463	12.673	16.851	34.513	38.574	27.3686	17.696	21.121	17.49	32.403	30.741	13.372	7.42	8.206	43.938		0.271844	16.5113
6.788	6.084	6.881	5.9109	5.968	8.865	5.495	4.611	6.088	8.069	11.541	13.327	18.046	8.644	18.1685	34.694	37.033	25.3093	15.877	17.167	17.192	32.008	25.584	12.408	7.447	8.117	37.475		0.276699	15.3081
6.9071	6.58	6.014	7.0525	6.204	7.597	6.597	4.399	5.779	7.126	10.952	14.138	14.4	9.326	14.0971	30.66	36.087	17.7601	14.984	16.553	15.889	27.86	21.478	10.774	7.651	8.058	30.746		0.281554	13.7985
7.0262	7.819	4.84	6.146	4.031	12.071	5.158	4.521	4.469	6.837	12.194	14.183	14.953	8.819	14.9046	25.838	37.787	15.9738	15.706	16.129	15.165	30.425	20.914	12.581	9.271	10.303	31.91		0.286408	13.9596
7.1453	5.602	5.612	6.5643	3.752	10.758	6.108	4.137	4.758	6.07	11.833	12.79	12.656	7.678	14.9926	18.292	38.159	14.5759	15.702	12.344	13.057	28.257	20.958	15.794	5.79	9.257	27.718		0.291263	12.816
7.2644	6.176	4.618	5.7972	5.756	10.95	6.701	6.477	4.248	7.056	9.015	9.376	9.608	9.369	16.972	15.558	30.897	15.2546	15.192	14.335	14.095	30.723	22.444	14.616	9.122	10.763	24.304		0.296118	12.6701
7.3834	5.738	3.851	5.9901	6.976	9.813	6.161	6.113	4.077	7.799	11.1	10.448	9.667	9.104	14.2409	14.016	22.123	10.573	20.221	11.536	13.114	31.253	23.342	14.658	11.087	12.486	20.479		0.300969	12.1525
7.5025	6.559	4.36	4.9147	5.2	11.23	5.982	4.176	4.64	7.018	11.575	10.883	10.693	7.325	17.3571	8.225	21.444	10.9574	17.317	12.227	12.85	25.013	19.397	15.84	10.066	10.588	17.544		0.305824	11.2839
7.6216	8.315	6.077	4.0338	4.627	8.768	6.191	5.029	3.876	6.397	13.465	9.078	9.639	7.602	18.9428	8.114	21.907	10.0716	16.588	9.75	13.151	26.307	16.398	16.701	9.56	9.057	17.438		0.310679	11.0417
7.7407	7.71	6.852	5.2907	5.65	10.764	6.885	4.55	4.131	6.857	13.624	12.244	7.185	6.615	24.3904	8.312	16.523	9.2904	13.695	8.992	9.242	22.793	16.18	15.901	10.14	9.851	19.156		0.315534	10.8778
7.8598	8.528	6.69	5.8405	6.09	12.151	6.259	4.965	4.895	7.414	12.536	11.201	7.073	7.597	19.386	9.483	16.221	11.1675	15.664	8.781	8.78	20.113	16.526	18.526	11.834	10.641	17.533		0.320388	10.996
7.9789	8.553	8.037	4.3731	6.624	11.691	7.339	5.717	4.497	6.917	13.352	12.473	8.726	8.642	16.4976	8.841	13.3	8.8718	23.591	7.484	8.963	16.898	13.267	19.254	11.802	11.248	14.518		0.325243	10.826
8.098	5.88	4.685	3.3059	6.611	12.156	6.687	5.195	4.146	5.237	12.791	11.923	5.989	6.832	18.46	9.098	9.893	10.4572	17.879	8.421	7.551	19.487	14.537	17.374	10.073	12.949	13.447		0.330098	10.0409
8.2171	7.551	3.673	4.4103	4.814	11.143	6.876	4.584	4.066	5.846	12.553	14.976	7.541	6.64	15.8678	10.445	7.88	7.7086	17.715	8.129	6.387	15.899	16.083	23.811	11.849	10.481	14.313		0.334953	10.0478
8.3362	7.341	4.684	4.3675	7.059	11.67	6.295	5.403	4.343	5.444	12.436	13.585	7.138	8.22	15.1981	10.221	9.332	8.7959	20.514	8.802	6.139	11.542	15.548	20.926	11.674	11.428	13.113		0.339808	10.0469
8.4552	8.583	5.559	6.1266	6.328	12.461	7.669	5.001	2.857	6.065	16.336	13.976	7.53	7.76	15.7264	7.863	9.734	6.1012	18.799	6.544	6.207	12.682	14	22.672	13.242	11.851	13.325		0.344659	10.1922
8.5743	9.059	5.373	4.7628	5.971	13.613	7.972	4.092	3.312	5.953	13.041	11.521	7.586	8.081	14.6343	8.121	8.445	8.9865	18.837	7.525	6.057	10.378	15.755	31.393	13.83	11.339	11.768		0.349513	10.2848
8.6934	8.125	4.329	5.2424	6.656	17.285	7.415	4.407	4.072	6.839	12.402	9.715	6.641	6.122	14.1977	6.94	9.189	9.8354	18.218	6.428	6.347	10.243	14.766	29.609	14.045	12.183	13.041		0.354368	10.1651
8.8125	9.54	4.801	4.9188	5.595	13.272	8.581	4.277	4.399	6.601	12.067	10.538	8.419	6.24	15.818	6.727	6.766	6.7482	23.925	6.854	4.738	7.265	15.399	29.841	16.396	12.124	10.929		0.359223	10.1069
8.9316	9.024	4.42	5.4352	5.046	12.384	9.092	5.403	4.075	5.922	13.004	10.439	7.659	7.522	11.927	7.142	7.786	6.7118	24.033	5.873	5.086	8.06	18.749	28.407	19.989	15.703	11.255		0.364078	10.3903
9.0507	8.071	6.38	5.1004	5.944	12.765	9.495	4.356	2.927	5.858	9.754	12.174	6.68	5.93	14.1819	7.002	7.768	7.1178	26.529	5.703	4.203	8.51	19.762	31.687	17.4	17.357	14.042		0.368933	10.6422
9.1698	9.392	4.276	5.8606	5.701	16.813	8.203	4.626	3.297	5.615	11.042	11.478	6.228	6.606	11.1275	6.635	5.744	5.3593	25.459	7.725	5.737	8.65	17.171	32.09	18.58	18.481	10.085		0.373788	10.4608
9.2889	8.857	5.737	7.0117	5.115	15.95	10.137	4.803	4.557	5.405	9.818	12.032	6.753	5.058	11.8705	7.161	6.539	4.9888	24.076	7.294	4.693	8.939	19.429	34.186	24.999	16.188	9.168		0.378643	10.7987
9.4079	8.244	5.989	6.2484	5.827	12.187	10.33	5.031	4.917	5.571	12.046	9.462	6.676	7.379	12.0568	9.287	8.485	7.7294	26.398	7.057	5.565	8.028	19.133	37.656	21.12	16.26	9.398		0.383493	11.08
9.527	9.156	5.921	5.5012	5.075	14.86	7.188	5.184	4.213	3.852	12.221	9.108	6.129	5.929	12.28	10.419	7.885	6.5808	29.223	6.4	5.807	7.81	20.958	35.489	19.102	15.686	7.081		0.388348	10.733
9.6461	13.191	6.551	4.5459	5.916	16.09	7.691	4.818	3.978	6.314	15.781	12.15	5.711	7.085	15.2013	8.067	5.739	7.1987	32.447	5.821	5.496	6.124	17.034	37.855	22.885	17.064	7.508		0.393203	11.4716
9.7652	14.164	5.305	4.463	6.042	11.26	8.884	4.707	4.932	6.824	15.234	9.691	8.201	8.168	14.4906	9.653	7.274	9.2825	32.914	5.382	4.291	5.326	17.294	43.343	19.085	15.124	6.595		0.398058	11.4588
9.8843	14.616	8.241	4.3506	6.419	14.922	7.797	5.322	5.195	8.626	17.421	11.468	8.413	6.958	17.7248	9.446	7.288	8.8406	36.155	7.792	4.757	4.505	20.399	38.831	20.124	16.098	5.863		0.402913	12.2143
10.0034	15.914	7.27	5.4767	7.033	17.029	10.729	5.262	5.089	5.945	14.452	10.466	5.937	6.628	17.4866	9.436	6.756	6.9831	38.84	6.521	6.132	7.205	21.699	49.744	19.57	19.173	6.12		0.407768	12.8037
10.1225	15.418	6.862	5.6566	6.648	18.788	10.589	5.791	4.001	6.24	12.482	9.076	6.503	6.394	20.5167	12.399	4.431	8.6813	43.248	8.221	4.325	5.763	20.082	47.346	17.466	20.982	5.31		0.412623	12.8161
10.2416	14.565	8.191	6.8649	6.808	17.914	12.464	5.996	6.444	8.424	19.091	11.976	7.051	7.742	21.0004	10.589	6.209	7.3136	46.969	8.217	5.691	5.174	19.876	53.822	18.515	24.529	7.91		0.417478	14.2056
10.3606	16.63	8.681	5.6741	5.766	16.608	11.792	6.008	5.55	8.066	18.877	13.065	6.01	7.688	22.0913	11.851	7.07	7.1931	47.271	6.538	6.481	6.161	21.134	55.572	16.34	22.196	6.757		0.422328	14.1181
10.4797	15.555	8.279	6.7846	6.94	16.263	11.438	4.447	7.138	7.89	18.082	11.339	6.197	6.878	22.195	15.561	7.534	6.54	49.58	8.298	4.924	5.515	22.73	58.603	20.859	23.285	9.32		0.427183	14.699
10.5988	18.717	7.629	7.2911	5.999	17.645	14.194	5.222	5.876	4.657	18.91	10.856	6.768	6.951	26.8853	16.09	5.127	6.5343	50.081	9.099	5.55	5.22	21.23	60.039	17.191	22.178	5.928		0.432038	14.6872
10.7179	20.149	8.601	4.9734	5.233	18.344	13.202	5.844	4.569	7.055	21.325	13.937	7.453	7.667	31.0191	12.805	5.872	7.2169	47.588	10.233	6.02	5.276	20.769	58.409	15.706	27.063	5.971		0.436893	15.0885
10.837	14.817	10.757	5.8635	6.369	15.373	14.353	5.269	6.716	10.501	22.858	11.992	7.146	7.397	28.7138	14.362	6.967	8.1771	51.325	9.102	5.311	5.126	20.583	57.546	17.205	23.417	5.734		0.441748	15.1146
10.9561	16.833	11.134	5.4737	9.345	14.202	18.314	4.996	5.228	10.397	22.253	11.917	8.721	6.319	35.3797	13.879	6.778	8.9616	48.257	8.399	3.822	5.811	20.437	56.712	17.463	23.358	4.119		0.446603	15.3273
11.0752	19.077	7.66	3.317	7.974	14.296	23.912	4.355	4.404	7.082	28.325	14.02	7.821	7.458	37.4043	13.064	6.5	7.2351	47.232	6.38	5.569	6.039	19.982	55.368	16.773	29.094	4.737		0.451457	15.5799
11.1943	20.979	7.953	4.7113	6.847	14.394	22.956	3.733	4.452	8.623	30.45	14.546	10.708	7.624	35.2874	12.125	4.665	5.4242	44.218	6.776	5.436	7.162	18.995	54.917	14.687	28.038	5.137		0.456312	15.4171
11.3133	20.258	8.502	4.0161	7.821	14.612	23.074	4.135	5.521	8.949	35.483	14.657	10.348	8.405	38.1548	14.705	7.793	7.7959	40.282	8.581	5.514	6.763	17.069	56.055	16.883	30.166	5.559		0.461163	16.1962
11.4324	21.638	9.497	2.5638	7.283	10.903	25.689	3.755	3.825	9.03	41.331	14.168	9.431	7.793	36.5201	21.14	6.655	7.5566	45.067	8.068	6.951	6.42	15.986	55.398	15.337	25.79	6.188		0.466018	16.3071
11.5515	22.931	8.647	4.9201	8.769	10.683	18.632	4.694	3.006	7.888	46.558	12.957	7.869	7.544	36.4873	19.858	7.52	7.7484	40.818	6.89	5.058	7.809	16.581	61.032	17.644	25.966	5.826		0.470873	16.3206
11.6706	23.222	5.641	6.0983	7.265	11.994	18.858	6.51	5.564	8.089	46.079	14.56	8.85	7.703	38.1362	19.892	6.396	8.6738	44.592	8.166	4.609	4.687	18.337	59.651	14.5	30.872	6.662		0.475728	16.7541
11.7897	23.139	6.477	5.9308	4.156	10.968	17.967	5.434	5.409	9.165	46.302	15.363	9.892	7.314	37.9386	18.668	8.31	9.1987	35.942	7.54	4.457	5.971	15.994	59.936	17.213	27.991	5.809		0.480583	16.2494
11.9088	20.542	5.749	5.9268	5.459	10.425	18.066	5.092	6.045	8.135	49.934	14.275	8.837	8.208	37.8491	19.879	10.35	8.4591	38.294	9.171	4.973	6.567	17.714	58.322	18.202	30.544	4.944		0.485437	16.6139
12.0279	19.045	5.112	4.0309	6.32	9.933	17.276	5.86	6.249	10.349	43.96	16.285	5.918	8.217	34.5538	23.296	7.884	9.9853	32.799	8.817	6.509	7.737	16.772	62.22	20.194	32.57	6.004		0.490292	16.4575
12.147	18.035	7.553	5.0687	7.519	8.17	18.596	5.613	6.366	10.19	40.133	16.745	6.332	5.291	34.787	25.999	10.047	10.5102	34.75	6.669	5.69	5.104	18.657	52.535	19.701	30.616	5.98		0.495147	16.0253
12.2661	17.985	6.265	5.1151	6.434	9.426	17.145	4.895	6.472	11.489	37.648	13.9	9.293	7.531	31.3836	29.383	10.116	8.1211	33.571	8.112	5.053	5.972	19.819	52.992	22.381	32.75	5.926		0.500002	16.1222
12.3851	20.18	9.354	5.2558	6.903	8.827	17.965	3.946	6.177	12.3	36.084	15.097	8.931	9.366	30.8837	31.616	11.852	10.9749	34.556	8.623	4.744	7.484	17.406	51.119	23.391	32.797	5.641		0.504853	16.5951
12.5042	19.944	7.566	4.3364	6.751	8.194	18.512	5.239	6.981	13.053	36.235	12.306	8.132	7.633	28.0746	30.826	14.073	12.0707	36.444	5.785	7.501	6.035	16.44	45.82	20.029	38.095	5.026		0.509708	16.1962
12.6233	21.504	6.141	5.9842	6.237	7.138	19.122	4.586	6.801	12.27	30.936	10.686	8.813	6.595	25.26	26.731	14.31	14.4923	36.289	6.924	5.757	6.774	16.058	49.866	20.724	34.812	6.792		0.514563	15.8309
12.7424	22.173	8.585	6.5138	5.363	9.189	16.141	6.236	7.711	14.101	34.567	11.551	6.854	8.577	25.3764	35.781	15.767	13.4427	35.808	8.481	3.893	7.271	15.322	53.959	21.104	30.387	3.966		0.519417	16.4661
12.8615	22.385	7.346	5.1891	6.209	9.196	12.325	7.173	6.175	14.959	29.295	12.781	9.902	7.539	24.172	39.788	15.837	14.1933	39.339	8.834	4.179	7.445	13.616	50.12	20.799	30.771	5.523		0.524272	16.3496
12.9806	17.999	9.853	5.922	5.95	10.349	12.673	4.31	7.295	14.345	29.355	13.437	8.425	8.3	23.1892	39.85	15.735	15.5949	42.532	7.976	6.07	6.414	14.583	46.851	17.527	30.893	5.858		0.529127	16.2033
13.0997	17.167	11.569	7.2448	5.437	9.24	13.691	5.123	7.9	9.481	27.007	16.718	9.16	7.813	21.0946	44.405	15.376	15.58	49.361	10.456	6.233	6.392	14.095	43.086	16.45	30.86	6.193		0.533982	16.4282
13.2188	13.033	12.453	6.1222	7.149	10.967	13.898	4.367	7.573	10.774	24.115	16.319	9.094	6.154	18.2198	51.522	17.485	16.7178	54.003	9.922	6.107	7.145	11.386	42.37	16.389	32.838	6.243		0.538837	16.6295
13.3378	11.571	13.725	5.9424	6.641	8.571	15.998	5.734	6.612	9.465	21.329	14.286	7.633	7.578	19.1448	46.033	15.333	17.982	59.517	10.775	5.971	6.722	11.794	38.658	18.16	30.73	7.733		0.543688	16.2938
13.4569	14.122	12.984	5.0864	6.244	8.931	13.871	4.266	6.288	12.393	21.91	16.533	8.278	9.403	17.2054	41.241	19.135	19.1708	62.253	8.702	6.329	8.726	13.189	39.011	17.269	34.004	7.201		0.548543	16.6825
13.576	14.74	12.322	6.3664	5	9.187	15.405	5.114	5.2	11.688	25.465	15.242	7.544	8.398	18.6628	45.259	25.214	18.2685	76.29	7.319	6.819	6.131	12.955	42.524	11.605	32.946	7.484		0.553397	17.4288
13.6951	13.934	13.434	5.0857	3.875	8.555	16.828	5.681	5.76	12.747	23.759	13.57	7.416	7.355	16.7733	48.522	23.074	20.6576	85.219	10.605	5.354	5.465	11.538	38.934	14.074	35.304	7.519		0.558252	17.7323
13.8142	16.244	11.369	6.0485	6.495	8.871	12.857	4.95	6.493	10.685	19.973	13.507	8.779	9.969	13.9619	48.051	23.368	19.3597	83.823	9.459	5.237	7.202	13.976	41.8	17.68	34.655	9.072		0.563107	17.8417
13.9333	13.799	14.141	6.0175	4.718	7.025	16.026	5.25	5.933	13.469	20.956	13.09	9.117	9.33	12.1124	52.129	25.956	19.4491	78.229	8.879	5.965	8.709	12.335	43.236	17.436	31.141	5.507		0.567962	17.6906
14.0524	16.143	14.003	5.382	6.341	7.545	19.691	6.43	6.915	10.203	23.197	15.648	9.945	8.788	12.9605	58.153	26.251	20.4054	76.706	9.305	8.345	6.695	9.142	41.703	15.55	30.782	5.837		0.572817	18.1564
14.1715	15.643	14.16	5.6045	5.01	9.748	20.031	5.442	5.669	12.029	22.846	17.724	10.78	8.461	11.4935	61.594	28.224	24.4672	73.611	10.67	8.117	6.655	9.686	39.782	17.435	33.42	7.793		0.577672	18.696
14.2905	12.122	11.658	6.7161	7.243	7.163	17.058	5.484	6.68	12.246	23.309	16.325	8.355	10.151	9.1372	59.911	24.924	26.8183	63.961	10.425	6.422	6.815	7.359	31.865	17.864	33.522	7.742		0.582522	17.3568
14.4096	16.109	14.119	6.2484	6.486	6.71	18.745	6.912	9.745	11.541	24.194	17.592	7.455	7.4	10.6008	64.13	20.926	23.9247	58.786	14.492	7.674	7.672	9.412	37.442	17.362	33.753	6.877		0.587377	17.9349
14.5287	12.83	14.131	4.441	4.971	6.6	17.768	6.645	6.873	13.428	25.66	19.229	7.433	7.748	7.965	68.078	22.776	28.1186	49.147	12.416	6.236	6.232	9.138	31.274	15.055	30.532	6.73		0.592232	16.979
14.6478	13.327	13.343	4.4551	5.261	6.258	18.906	4.395	8.473	12.714	23.03	18.628	8.099	7.108	6.6146	66.619	21.844	25.6124	40.041	10.192	7.719	8.619	10.22	31.101	13.899	35.499	7.648		0.597087	16.524
14.7669	16.086	11.439	5.2529	6.563	7.649	14.383	5.162	8.158	12.86	23.851	16.047	9.343	5.097	9.7919	64.643	18.509	24.0976	38.123	10.502	8.644	6.513	9.876	30.482	16.515	31.99	6.686		0.601942	16.0871
14.886	15.679	12.21	4.8296	5.819	8.149	15.237	5.573	8.541	12.004	24.327	15.137	6.607	6.181	8.2081	61.655	18.317	22.0767	35.382	11.435	7.984	8.508	9.29	34.118	16.32	28.275	5.906		0.606797	15.6834
15.0051	13.292	15.345	5.1658	4.493	6.465	15.015	6.696	6.496	11.864	23.329	17.965	6.889	8.385	7.0971	58.476	20.459	22.3158	34.86	10.34	5.217	7.547	9.821	29.687	14.924	35.465	6.896		0.611652	15.5579
15.1242	14.715	12.44	4.8632	4.762	6.37	14.851	5.884	6.229	13.201	25.582	16.657	8.853	8.587	9.1722	57.668	20.969	18.8302	40.714	10.635	6.993	8.005	10.614	33.663	16.669	29.905	6.801		0.616507	15.9089
15.2432	13.094	14.912	6.2176	5.03	5.707	16.142	5.503	6.148	12.587	28.441	11.392	6.183	6.921	8.7262	58.093	18.527	18.1684	35.315	10.745	6.013	10.098	10.41	30.316	16.356	30.949	6.732		0.621357	15.3356
15.3623	14.398	13.043	6.3754	5.939	4.307	18.351	4.955	6.773	11.632	29.326	11.3	6.578	5.025	6.8549	45.943	20.417	19.1222	35.227	10.656	6.56	8.582	6.051	31.153	21.468	31.614	5.038		0.626212	14.8726
15.4814	14.382	14.149	6.5003	7.6	6.367	20.725	5.44	7.56	10.06	24.947	10.362	7.522	6.977	6.9837	48.079	19.883	16.4454	35.46	10.418	5.62	6.773	6.939	30.921	18.52	29.452	6.577		0.631067	14.7947
15.6005	14.882	14.839	4.7151	7.337	8.775	20.762	6.344	7.342	11.341	25.684	9.971	7.711	5.695	7.1156	48.721	23.648	12.8966	32.852	10.387	6.773	8.596	8.594	28.551	17.223	32.384	4.836		0.635922	14.9221
15.7196	15.619	13.522	5.2713	5.387	6.964	23.351	9.392	7.941	11.682	25.108	12.798	7.506	6.73	8.0702	38.249	27.17	15.611	37.444	8.636	6.221	6.447	8.459	32.488	18.946	30.348	4.971		0.640777	15.1666
15.8387	14.454	15.1	4.9378	6.158	6.035	22.922	7.66	7.939	10.864	26.913	10.63	7.509	6.809	6.8069	36.984	25.9	15.0261	45.519	10.529	7.1	6.409	10.39	31.954	22.583	39.232	6.394		0.645632	15.8753
15.9578	15.794	14.66	5.7846	4.903	7.358	24.725	6.329	7.907	11.44	31.13	10.574	7.015	7.148	7.0602	36.097	25.129	15.1231	49.126	8.319	5.216	7.478	9.038	28.074	21.406	37.902	8.421		0.650487	15.8907
16.0769	16.772	14.687	4.8127	5.762	7.017	22.525	6.595	7.613	11.651	31.26	11.236	7.464	8.91	6.2935	34.026	35.352	17.2324	56.911	9.924	6.562	8.257	9.609	24.429	23.154	32.809	5.805		0.655341	16.4103
16.196	17.45	10.984	6.1114	6.242	6.447	24.079	5.791	7.648	12.809	35.491	13.264	8.776	7.346	5.6723	34.494	31.651	20.6227	71.167	11.484	7.446	7.237	9.533	26.463	23.012	31.437	6.846		0.660196	17.2886
16.315	18.13	14.334	7.789	6.149	7.504	28.871	7.627	7.284	12.111	36.142	14.384	7.58	6.246	6.6317	29.355	34.518	21.6498	81.271	11.482	5.432	8.969	7.852	24.69	24.675	34.573	8.583		0.665047	18.2243
16.4341	16.495	14.564	6.1634	5.817	6.122	29.079	7.616	9.021	13.244	33.042	10.689	8.341	6.232	5.9534	28.762	37.007	17.0665	80.53	11.501	7.114	9.81	8.842	20.747	31.099	38.411	5.088		0.669902	18.0137
16.5532	17.205	12.07	5.91	5.635	7.411	31.876	8.434	8.882	11.04	34.336	11.163	6.841	6.535	7.4359	24.036	44.81	17.9715	77.761	8.849	8.865	6.635	8.282	12.965	33.582	35.659	6.204		0.674757	17.7074
16.6723	17.303	13.437	4.0838	3.286	8.646	34.472	8.388	8.448	11.888	35.212	13.034	5.788	6.816	7.0799	26.191	47.695	15.3721	75.456	11.838	6.98	7.48	7.226	11.702	34.894	35.507	9.358		0.679612	17.9839
16.7914	16.256	13.266	4.7645	4.661	7.443	36.397	8.413	8.763	15.535	30.075	12.439	7.363	6.424	8.5234	23.668	48.822	17.0778	74.601	12.018	8.931	6.177	7.397	11.571	41.686	34.397	5.714		0.684466	18.1686
16.9105	21.496	13.66	5.9002	6.811	6.368	39.036	6.887	11.052	16.296	28.683	11.063	6.605	5.691	6.8843	18.57	42.148	17.502	79.095	10.479	7.356	7.086	7.057	11.289	47.885	37.797	5.569		0.689321	18.3948
17.0296	18.269	12.174	6.3376	5.341	8.36	38.16	7.145	9.598	13.758	26.951	12.103	6.459	5.575	8.2724	21.85	48.502	14.7391	69.104	9.228	7.528	7.848	9.613	6.615	52.072	36.282	4.315		0.694176	17.9307
17.1487	17.653	14.04	5.3465	4.94	7.813	40.627	8.708	10.068	15.241	28.354	11.875	7.264	6.138	5.5111	14.659	42.229	15.7598	66.141	9.87	6.992	7.039	8.445	5.521	55.886	45.017	4.387		0.699031	17.9048
17.2677	19.237	14.199	6.1211	5.861	7.3	41.982	8.602	9.251	15.932	28.865	10.608	7.146	7.786	5.7792	18.169	37.412	21.2615	67.463	9.879	5.914	6.229	5.283	8.057	59.193	42.132	6.727		0.703882	18.3226
17.3868	17.131	14.799	5.7674	5.201	7.392	41.046	8.532	12.953	13.257	26.149	9.656	8.705	6.107	6.9512	18.132	27.625	19.7869	69.308	10.748	6.76	6.428	6.815	10.331	55.045	55.2	6.67		0.708737	18.3268
17.5059	16.517	11.168	4.388	6.059	7.905	37.17	9.026	8.569	16.033	24.493	8.474	8.654	6.535	7.4539	15.927	26.097	22.1358	63.81	8.088	6.182	5.474	6.703	8.108	51.486	52.843	6.981		0.713592	17.1646
17.625	17.141	11.7	4.336	5.977	8.687	43.521	8.256	10.905	15.257	22.693	8.939	6.835	5.673	6.6446	13.388	26.513	21.4907	70.237	7.533	6.88	6.152	7.93	10.114	53.555	50.488	5.71		0.718446	17.5598
17.7441	18.722	14.595	4.8353	5.607	8.061	40.064	9.59	11.562	16.491	21.205	11.562	7.75	5.714	6.097	12.968	25.952	20.5475	65.051	9.79	5.639	6.104	9.534	7.486	45.202	57.667	6.403		0.723301	17.4692
17.8632	20.214	15.046	6.3956	6.18	6.629	42.876	9.803	12.239	15.479	21.176	9.899	5.98	6.705	5.6038	16.847	24.996	20.2718	66.942	10.258	6.917	5.287	8.906	9.045	44.649	61.372	7.107		0.728156	17.9547
17.9823	19.406	12.242	4.7584	5.126	5.611	45.277	9.168	11.252	14.846	20.112	10.276	6.54	5.98	7.365	13.042	27.719	19.5464	63.755	9.116	5.735	6.306	6.872	8.94	36.068	70.07	5.258		0.733011	17.3226
18.1014	19.647	10.653	5.0295	5.785	7.847	49.359	8.867	11.312	19.18	17.853	13.72	7.949	5.258	6.5908	15.217	34.76	19.8297	67.367	9.984	4.456	8.216	6.273	9.301	29.285	81.149	5.521		0.737866	18.4773
18.2204	20.957	12.261	4.8725	5.781	7.4	47.617	8.153	13.505	22.379	16.481	9.884	8.471	7.44	6.1913	13.731	43.614	20.4456	70.786	10.139	5.773	6.474	6.908	10.729	27.634	91.793	3.843		0.742717	19.3562
18.3395	20.793	12.191	5.4904	6.894	6.281	45.462	9.796	13.979	24.644	19.203	10.555	6.608	8.462	6.6349	13.205	45.97	23.7547	67.703	8.926	6.897	8.56	7.342	8.881	22.532	92.061	4.672		0.747572	19.5191
18.4586	18.159	15.401	7.2614	8.604	8.895	43.577	9.26	10.638	21.372	19.721	10.636	6.688	7.636	7.7053	10.571	48.301	19.4348	72.148	7.053	8.004	8.102	6.341	7.355	21.939	106.638	6.148		0.752426	19.9073
18.5777	18.444	14.578	6.9891	7.284	8.702	43.158	10.461	12.792	25.85	19.833	14.102	7.31	6.093	7.6905	12.708	46.467	20.0643	67.932	6.842	7.444	7.122	9.478	8.212	16.181	129.13	4.779		0.757281	20.7556
18.6968	19.773	16.884	6.3337	5.198	10.225	41.516	11.31	10.76	25.42	21.717	13.777	8.045	7.596	6.1901	12.978	46.391	25.6001	74.682	7.306	5.894	6.585	7.046	8.924	16.75	133.46	4.703		0.762136	21.3486
18.8159	20.786	17.888	5.7709	4.376	7.951	44.221	12.047	12.789	22.791	22.202	11.828	7.685	6.74	5.9892	15.106	44.169	21.987	71.533	9.571	7.498	7.567	6.569	7.641	15.179	134.231	4.818		0.766991	21.1128
18.935	20.315	16.709	7.1196	4.397	11.142	44.758	12.451	14.846	25.576	21.436	9.695	10.039	11.56	6.8421	13.055	39.493	24.0007	72.51	8.081	4.624	5.82	6.955	10.583	17.221	140.297	6.371		0.771846	21.7652
19.0541	23.241	15.317	6.2217	5.599	8.972	46.192	12.613	15.51	23.784	24.319	9.15	6.648	9.081	7.3971	10.036	42.669	22.7615	73.305	7.852	7.148	7.168	8.786	8.496	20.322	139.608	5.722		0.776701	21.843
19.1731	23.394	16.361	6.3935	5.133	9.685	50.249	10.744	15.475	21.37	24.116	10.055	9.321	8.519	10.4186	13.071	41.638	22.6309	71.797	10.387	6.755	7.276	6.797	11.849	24.763	144.161	5.115		0.781552	22.5952
19.2922	26.154	18.9	7.2582	6.861	13.224	43.049	12.786	12.452	23.553	22.786	11.138	7.828	6.232	7.0484	13.465	45.199	21.0169	65.018	10.547	6.983	6.175	8.123	13.292	26.958	148.023	6.839		0.786406	22.7273
19.4113	21.957	20.323	6.7659	6.477	14.131	44.149	16.426	15.853	24.573	25.431	11.859	7.829	7.703	5.8837	12.477	42.904	22.9173	68.62	9.487	6.677	6.339	8.324	15.3	30.559	138.474	7.058		0.791261	23.0191
19.5304	23.729	15.811	5.4541	7.151	12.142	40.677	15.777	17.093	25.273	24.73	10.845	9.258	10.137	6.8401	14.228	47.699	21.312	65.098	8.857	6.835	7.036	7.216	21.14	36.924	147.119	6.082		0.796116	23.6332
19.6495	26.648	18.907	5.4728	7.754	15.493	43.03	13.98	17.679	24.244	22.413	11.327	9.621	11.548	6.3707	14.26	40.523	22.6062	60.443	9.11	6.666	6.378	8.622	25.325	40.384	132.833	7.042		0.800971	23.4108
19.7686	25.351	23.521	7.8915	5.917	18.443	49.202	15.394	21.714	31.546	20.739	8.306	9.047	10.059	8.0163	9.642	43.453	22.92	60.354	9.154	7.671	5.735	6.808	32.981	52.773	111.415	5.859		0.805826	23.9966
19.8877	29.815	22.047	7.5477	6.417	18.45	51.041	19.927	25.409	35.922	26.512	9.752	9.843	8.41	5.6706	10.964	44.012	21.6414	64.12	10.635	6.74	7.511	8.115	41.469	68.961	93.817	6.243		0.810681	25.4228
20.0068	29.707	20.429	7.5153	7.677	24.874	46.738	23.691	23.83	39.667	23.383	8.666	8.387	10.27	7.2282	11.63	46.58	20.323	61.153	8.741	5.937	7.857	8.406	50.935	80.549	79.92	4.706		0.815536	25.7231
20.1259	30.403	17.671	6.1006	8.234	29.866	50.987	26.958	24.623	41.507	23.028	10.724	8.741	10.765	8.0914	10.571	52.964	22.7852	64.302	9.609	8.161	7.997	8.669	57.969	91.676	69.73	3.439		0.82039	27.1374
20.2449	36.833	17.179	8.1242	7.709	38.179	46.724	26.614	23.218	39.1	27.519	9.404	7.206	9.678	8.9964	14.57	55.72	23.897	58.138	8.552	5.552	5.859	12.125	76.574	97.721	51.247	3.279		0.825241	27.6814
20.364	37.547	22.052	8.0868	10.369	44.404	44.74	29.543	24.044	39.172	25.527	9.522	8.716	13.256	10.6955	12.217	56.463	24.7742	63.663	7.344	6.888	8.608	15.12	87.241	84.595	37.748	6.186		0.830096	28.4047
20.4831	35.072	20.959	6.5409	10.327	52.597	48.333	32.667	23.177	40.015	23.357	9.125	6.504	13.978	10.0919	12.784	57.262	22.8749	67.064	9.857	6.232	7.958	13.535	86.795	67.112	32.682	5.964		0.834951	27.8025
20.6022	42.86	21.672	7.3951	9.827	61.226	50.56	38.217	24.685	36.024	23.29	10.253	9.485	16.049	10.8653	12.816	55.112	27.579	65.789	13.125	5.595	7.562	20.471	83.145	50.84	24.821	6.283		0.839806	28.2902
20.7213	54.34	20.107	7.4162	8.615	76.348	47.903	38.306	24.349	36.281	24.619	9.528	10.302	17.469	12.0615	9.723	53.085	32.7623	69.998	11.587	7.174	7.531	23.479	69.857	42.415	16.369	4.673		0.844661	28.3192
20.8404	56.589	20.847	5.5951	7.714	77.821	52.021	40.295	27.097	41.875	23.373	7.852	9.11	19.619	14.3503	12.801	65.148	29.1257	67.833	11.015	6.291	6.15	29.998	62.072	30.626	13.238	5.491		0.849516	28.6134
20.9595	61.193	26.041	7.3136	11.151	80.271	61.02	41.05	30.119	43.117	24.497	9.317	7.788	19.877	15.4454	13.014	66.519	26.294	71.401	11.117	7.246	7.48	34.741	53.801	25.793	9.567	7.055		0.85437	29.7011
21.0786	64.04	27.715	9.9165	13.408	79.657	56.767	48.59	27.384	42.972	23.395	10.067	9.65	30.616	21.3278	11.073	62.421	32.6573	82.181	12.754	8.44	7.26	40.194	47.012	18.693	10.213	6.132		0.859225	30.9437
21.1976	67.354	27.414	11.7357	14.298	74.985	63.195	49.307	35.613	41.796	27.356	8.869	9.878	35.525	19.2331	12.943	58.668	34.1657	83.435	13.174	8.106	8.649	44.599	41.071	14.933	9.158	4.688		0.864076	31.5442
21.3167	70.611	33.751	11.3535	15.138	68.836	64.859	51.192	33.525	40.989	29.737	9.428	11.722	33.915	23.0777	11.184	59.934	36.8023	92.51	13.688	8.427	8.351	50.655	37.385	11.757	7.756	8.561		0.868931	32.5056
21.4358	84.68	30.813	10.9048	19.227	54.157	73.138	45.597	33.812	44.673	28.479	8.128	14.412	38.033	27.4741	12.653	66.866	40.6388	91.283	13.438	8.843	10.542	62.714	31.163	10.489	7.246	6.869		0.873786	33.7028
21.5549	76.028	25.072	11.6014	24.708	40.916	78.168	49.397	33.233	40.375	33.234	9.646	15.907	46.223	31.8859	15.094	67.451	41.5481	94.035	16.348	8.382	8.685	67.569	30.031	9.261	6.206	6.551		0.878641	34.1367
21.674	73.777	26.119	11.7934	31.747	27.658	77.219	58.281	42.42	36.548	39.018	10.77	16.207	50.753	34.5522	16.372	64.357	39.2417	105.344	16.321	6.246	9.659	75.613	26.525	9.645	6.267	9.098		0.883496	35.4443
21.7931	70.841	27.721	13.2474	42.42	22.161	76.597	60.342	40.065	44.125	42.527	11.989	17.208	56.802	35.3574	18.294	64.894	33.4327	108.19	16.673	7.702	11.549	79.702	21.674	5.832	5.292	9.002		0.88835	36.2938
21.9122	59.774	31.203	12.2015	43.817	15.125	84.79	66.308	47.347	48.723	51.995	12.272	16.817	61.824	45.1481	17.022	62.805	40.7567	106.655	19.841	8.039	9.483	72.386	21.803	6.676	3.771	9.783		0.893205	37.5525
22.0313	47.538	36.252	16.8258	63.94	11.78	85.583	75.351	44.342	53.051	67.478	13.413	26.843	59.843	46.6566	17.885	55.069	38.6764	115.152	23.264	8.603	10.8	67.129	20.377	6.29	4.138	12.031		0.89806	39.5504
22.1503	35.557	33.983	13.839	71.723	10.622	76.725	82.216	43.435	52.402	74.829	15.484	33.667	59.561	48.1397	21.329	66.644	38.7499	122.065	27.899	12.061	12.935	61.83	19.106	5.771	5.308	9.463		0.902911	40.5901
22.2694	30.696	38.957	13.0257	87.182	6.923	73.113	89.469	44.952	62.401	99.662	19.59	39.007	40.619	52.102	20.245	59.932	38.7111	131.743	30.835	12.14	15.55	66.967	17.098	4.29	3.694	9.597		0.907766	42.6346
22.3885	24.986	36.806	20.737	93.843	6.043	72.786	96.972	50.372	66.822	109.951	24.129	48.927	35.193	54.0862	25.284	66.748	36.814	136.26	40.643	13.376	19.987	64.515	16.325	4.376	3.372	11.911		0.912621	45.4332
22.5076	24.707	43.713	23.9029	93.574	2.838	57.01	97.495	51.341	63.64	122.588	30.243	67.934	26.443	42.625	31.747	76.214	48.5416	141.775	54.577	16.014	21.914	55.568	15.616	3.492	3.437	12.454		0.917475	47.2847
22.6267	20.594	51.168	27.3906	84.957	3.394	45.828	101.197	56.533	63.787	139.292	29.508	73.67	20.992	28.2943	28.419	79.871	48.9835	140.687	58.399	18.235	25.513	51.201	14.483	3.028	2.571	9.967		0.92233	47.2293
22.7458	16.135	54.628	30.6649	75.726	4.659	31.957	97.991	55.839	69.582	144.206	35.736	77.823	19.562	22.3632	31.886	81.375	53.6996	135.103	59.173	26.74	32.197	46.71	11.332	3.752	2.674	11.578		0.927185	47.4266
22.8649	11.946	60.034	33.7193	54.086	3.046	26.094	90.922	62.237	79.701	139.355	40.914	69.009	15.578	16.2075	37.776	88.042	55.083	124.477	63.426	31.49	35.162	42.503	10.671	2.765	2.032	13.904		0.93204	46.5454
22.984	11.456	66.508	40.543	40.515	2.59	21.255	88	65.084	89.501	124.027	41.874	60.798	12.711	12.0927	37.411	95.316	59.5181	104.772	73.072	40.663	40.733	36.37	9.674	1.725	1.572	11.202		0.936895	45.7301
23.103	9.247	73.527	46.6847	30.316	1.834	17.085	76.388	63.422	101.74	112.734	45.91	55.321	10.059	9.1655	40.439	96.013	61.3159	106.377	74.887	54.313	47.211	35.099	7.218	2.046	1.456	10.577		0.941746	45.784
23.2221	7.222	79.796	52.2342	22.768	1.511	17.052	62.948	74.381	104.465	112.316	43.882	49.613	8.646	8.6936	41.926	99.904	64.6415	81.254	90.139	56.414	45.841	31.547	5.597	1.799	1.407	14.688		0.946601	45.411
23.3412	6.284	84.814	58.6386	17.895	1.912	11.237	58.696	87.164	114.139	93.172	43.46	48.375	6.661	7.8599	46.497	103.738	74.1736	59	95.011	60.252	44.585	26.595	4.917	1.54	0.896	17.031		0.951455	45.1747
23.4603	5.356	76.929	61.6348	18.212	1.697	11.406	51.444	95.619	115.735	83.426	47.368	54.591	6.746	5.9123	55.188	106.388	74.8821	47.207	98.576	71.201	43.27	20.255	2.828	2.397	0.542	20.798		0.95631	45.3695
23.5794	3.898	73.585	53.1053	16.334	1.2	8.714	43.045	95.573	115.873	59.491	39.534	41.7	5.274	3.9186	47.143	110.729	77.0167	39.891	94.155	81.096	38.701	20.236	3.415	1.615	0.347	31.876		0.961165	42.5948
23.6985	3.626	68.666	53.4492	11.5	1.832	10.408	36.688	107.486	104.336	51.412	35.382	34.386	3.369	4.668	43.698	112.327	74.6687	26.578	87.755	69.373	34.249	17.678	3.028	1.158	0.283	39.708		0.96602	39.912
23.8176	4.46	58.696	48.2205	12.525	1.873	8.933	29.746	109.884	90.915	39.598	32.75	30.198	3.321	1.9241	33.444	114.813	69.0742	18.653	72.926	57.754	35.661	13.276	2.613	0.738	0.511	48.232		0.970875	36.1823
23.9367	2.764	55.195	44.6816	9.331	1.303	6.229	27.507	96.101	81.925	25.383	28.37	28.395	3.833	2.8155	23.166	108.425	56.0048	12.812	60.803	40.596	28.281	8.547	1.776	0.661	0.087	49.422		0.97573	30.939
24.0558	2.784	49.777	43.8696	8.317	0.919	7.256	23.551	82.893	60.551	20.009	29.07	24.733	1.504	2.7561	13.74	103.056	45.4307	8.679	45.055	28.506	27.701	10.109	1.196	0.567	0.68	58.357		0.980585	26.9641
24.1748	2.228	36.482	32.8467	8.553	1.015	5.306	17.757	71.925	43.089	12.824	26.614	19.231	1.902	2.2074	10.286	87.351	32.6483	7.333	30.418	19.159	25.139	6.433	0.467	0.413	0.833	64.002		0.985435	21.787
24.2939	1.921	29.574	27.0679	7.018	1.072	4.459	12.536	59.081	28.95	11.609	24.132	17.229	1.828	1.7205	11.167	81.795	24.4136	7.546	19.703	14.044	23.05	5.244	0.562	0.318	0.538	60.228		0.99029	18.3387
24.413	1.769	28.448	24.0565	5.602	1.054	5.139	11.645	49.66	20.509	9.377	19.854	12.699	1.464	1.6041	7.315	79.046	16.3372	6.083	12.419	10.605	23.531	5.258	0.266	0.485	0.588	60.739		0.995145	15.9828
24.5321	1.225	21.883	23.7012	4.216	1.1	2.521	11.389	39.545	17.636	8.219	18.217	9.628	1.728	1.4549	5.833	62.246	15.6135	4.409	9.926	9.978	17.492	4.68	0.554	0.22	0.347	61.021		1	13.6455

## Sheet: Image18
X0	Y0	Y1	Y2	Y3	Y4	Y5	Y6	Y7	Y8	Y9	Y10	Y11	Y12	Y13	Y14	Y15	Y16	Y17	Y18	Y19	Y20	Y21	Y22	Y23	Y24	Y25	Y26	Y27	Y28		Ap-Ba	Avg int
0	94.439	66.009	91.719	90.268	95.597	124.13	113.841	115.551	95.333	123.503	103.063	78.566	59.09	120.245	79.25	63.591	75.341	125.119	86.044	123.592	175.482	118.821	98.546	59.721	82.68	81.702	62.716	75.323	72.356		0	94.8841
0.1191	113.998	70.859	82.301	101.759	104.106	128.471	136.84	117.606	94.19	113.542	115.534	94.508	77.37	126.456	76.993	69.477	86.62	151.708	96.501	137.456	195.014	125.76	90.603	62.284	76.268	83.785	64.151	79.714	78.721		0.00561856	101.814
0.2382	106.833	83.129	87.243	112.038	105.012	140.913	148.061	114.58	99.72	128.192	119.536	99.18	85.303	137.815	81.861	82.57	86.533	158.911	110.432	145.092	204.334	134.624	102.829	54.586	86.728	110.719	66.472	94.967	80.735		0.0112371	109.274
0.3573	112.921	90.92	88.569	128.277	109.972	160.303	140.788	119.731	110.615	136.057	125.731	124.344	103.349	152.382	99.83	99.311	91.651	158.069	117.199	158.428	211.783	150.241	95.589	61.689	94.976	134.657	68.266	88.925	103.188		0.0168557	118.543
0.4764	133.369	91.189	93.132	143.525	130.232	167.114	136.05	130.148	119.343	150.247	135.586	150.279	122.168	166.466	105.007	120.807	95.676	161.475	125.963	170.481	213.214	154.725	94.758	64.133	100.06	158.868	78.038	108.561	106.775		0.0224742	128.531
0.5954	149.556	99.157	116.245	167.095	147.781	189.175	145.744	123.845	121.731	144.357	142.847	174.553	138.586	188.094	117.95	120.76	104.924	177.332	131.548	169.17	225.419	164.411	93.163	79.633	98.726	178.508	83.084	125.261	128.517		0.0280881	139.558
0.7145	139.765	108.496	118.751	173.886	160.156	201.87	136.776	124.928	131.375	175.252	155.836	189.058	157.781	197.185	134.838	131.743	110.339	171.078	129.189	187.137	219.794	167.923	93.552	84.025	99.327	198.631	86.552	123.157	152.365		0.0337066	146.923
0.8336	160.714	117.934	145.138	192.04	162.505	211.658	128.396	126.12	143.45	175.481	159.897	202.999	166.775	205.915	162.91	151.122	113.902	161.737	130.811	198.467	205.758	175.663	92.555	84.975	119.842	209.611	98.938	128.54	170.758		0.0393252	155.331
0.9527	182.734	137.15	156.997	197.038	160.375	212.216	126.253	133.403	146.748	185.429	160.552	199.474	175.45	222.599	160.542	163.173	130.572	154.784	134.617	205.549	226.867	177.975	85.592	86.131	136.592	214.574	107.962	133.662	172.713		0.0449438	161.646
1.0718	194.652	144.807	168.3	204.358	171.116	207.107	137.952	135.455	157.915	184.802	182.812	200.865	190.476	219.764	190.1	175.946	137.401	147.3	140.541	200.968	220.058	171.025	96.435	96.631	143.091	206.233	115.442	151.612	181.287		0.0505623	168.085
1.1909	201.461	160.004	173.232	207.432	179.142	198.438	143.839	156.355	181.869	187.318	177.005	195.869	204.449	223.551	194.063	187.152	125.923	135.478	139.108	204.332	228.455	168.814	95.967	104.205	134.692	209.807	122.417	151.403	184.538		0.0561809	171.597
1.31	217.908	171.445	189.31	217.154	191.838	209.757	157.179	166.487	182.358	191.786	187.386	188.044	215.87	221.747	182.635	201.169	127.847	144.392	143.055	201.03	226.929	172.201	103.685	110.534	139.794	221.494	131.182	159.171	176.663		0.0617994	177.588
1.4291	218.149	182.985	182.072	214.763	185.289	212.291	163.825	166.384	188.282	188.565	182.762	194.769	217.137	215.91	198.408	190.008	134.041	135.059	152.01	192.286	224.917	172.051	108.126	103.467	132.534	202.154	135.813	152.098	167.257		0.067418	176.325
1.5481	214.6	194.397	188.736	217.221	196.011	196.331	166.26	158.907	167.953	183.219	192.499	181.707	220.264	213.415	187.946	170.76	132.236	132.632	142.362	209.259	223.182	169.351	107.441	115.824	127.986	195.151	142.601	150.98	141.157		0.0730319	173.806
1.6672	224.815	201.324	188.998	199.164	188.512	183.333	163.585	148.902	163.772	185.448	189.485	166.225	218.66	208.276	173.256	157.33	133.363	126.894	127.667	200.956	219.714	169.942	115.455	96.593	115.507	185.712	147.259	149.461	128.673		0.0786504	168.217
1.7863	220.654	205.411	172.506	207.362	190.003	171.21	144.262	119.554	147.008	172.462	173.94	154.337	224.238	201.82	144.407	146.146	148.144	124.064	147.049	207.08	223.693	180.513	113.801	90.263	103.19	163.927	159.47	139.888	108.043		0.084269	162.222
1.9054	220.269	205.794	152.45	191.32	184.459	156.699	142.743	100.563	125.855	149.42	182.342	131.034	213.031	186.138	126.092	104.973	149.37	137.701	160.678	187.075	214.238	179.332	111.576	83.926	101.157	140.365	156.419	138.88	108.218		0.0898875	153.176
2.0245	214.073	185.532	139.363	176.608	175.729	134.913	135.966	76.884	96.914	131.159	164.01	118.781	200.459	178.634	96.705	76.425	155.734	125.316	163.961	189.474	217.547	188.197	108.286	80.06	86.938	135.064	150.926	120.327	97.801		0.0955061	142.131
2.1436	211.03	168.546	99.811	149.951	169.459	123.785	98.588	54.231	64.552	104.693	150.098	94.621	187.264	143.746	57.04	57.894	153.145	122.697	157.296	184.142	228.407	190.533	105.769	68.415	74.585	112.916	154.719	116.19	90.392		0.101125	127.397
2.2627	209.827	140.131	69.735	125.018	142.002	102.238	84.89	36.085	40.715	83.998	121.663	67.737	192.44	127.712	36.682	42.957	159.69	122.415	170.817	164.661	220.928	177.494	98.759	60.374	65.529	110.589	142.576	112.15	86.17		0.106743	114.344
2.3818	183.193	105.985	55.145	96.179	113.365	81.768	49.729	28.349	31.488	55.974	94.181	56.101	175.319	93.036	31.811	36.907	167.317	116.055	162.88	146.263	220.034	184.627	95.198	55.857	63.623	102.234	154.427	109.333	63.146		0.112362	101.018
2.5008	164.802	76.434	41.98	66.341	87.708	66.1	42.371	29.611	25.655	35.46	68.041	39.266	146.559	74.659	22.839	26.981	156.507	110.523	152.862	122.233	207.867	175.436	86.461	56.521	54.638	86.671	140.64	106.835	68.445		0.117976	87.6016
2.6199	135.034	54.227	35.944	49.526	60.969	48.235	20.835	25.943	22.771	28.877	52.283	30.097	131.166	60.932	23.58	25.215	138.026	107.885	165.384	93.938	207.335	161.177	75.479	47.739	51.715	79.809	143.743	93.616	58.091		0.123594	76.8818
2.739	107.802	35.784	27.627	49.448	44.278	36.079	19.768	27.919	23.557	24.756	38.967	26.827	115.227	39.276	22.572	19.015	118.551	110.055	147.575	71.683	191.232	146.667	77.368	41.357	50.039	82.176	135.408	89.652	55.2		0.129213	68.1333
2.8581	77.22	26.657	27.487	37.253	33.872	27.069	27.114	23.28	23.227	26.384	24.724	22.77	87.123	29.835	18.262	16.144	99.888	97.644	136.613	46.41	164.625	125.182	69.344	36.573	44.255	72.402	134.008	87.267	52.345		0.134831	58.4475
2.9772	52.316	19.355	24.592	32.119	26.415	25.852	25.298	22.378	23.295	29.283	18.789	17.613	67.364	23.179	17.671	12.545	79.746	96.617	113.778	39.576	144.503	94.935	73.415	35.298	41.934	66.112	132.938	82.862	47.46		0.14045	51.2841
3.0963	39.68	15.645	22.326	32.129	23.958	26.253	25.287	21.109	21.55	23.675	20.554	13.961	39.171	19.937	13.613	11.824	62.31	84.476	107.136	29.521	108.133	66.98	70.387	33.875	34.192	62.41	120.485	74.875	39.648		0.146068	43.6241
3.2154	32.488	16.588	18.55	27.269	18.336	22.616	22.338	22.646	20.141	24.433	17.604	11.349	24.688	15.839	9.667	14.626	50.384	69.111	85.52	21.952	83.121	56.051	68.806	28.859	34.088	53.542	117.629	62.86	42.537		0.151687	37.7117
3.3345	26.815	13.96	17.909	20.649	15.127	16.758	24.997	18.878	23.144	22.69	16.921	11.429	21.551	18.569	11.326	13.292	44.996	66.349	73.292	18.509	64.447	44.571	56.282	26.388	32.018	53.191	106.238	62.404	40.009		0.157306	33.8865
3.4535	25.923	11.07	18.533	18.495	19.585	17.648	20.958	17.053	23.55	24.715	14.426	11.796	17.881	18.061	10.556	13.841	33.79	55.483	57.683	15.541	60.769	49.095	55.914	26.93	29.666	48.316	100.279	58.66	39.832		0.162919	31.5879
3.5726	23.752	11.369	16.381	19.036	16.654	16.503	18.298	12.948	26.423	20.769	13.23	9.007	15.181	16.295	9.811	8.16	27.332	49.033	46.552	15.03	42.975	36.995	50.128	25.971	33.122	50.071	92.581	60.098	32.684		0.168538	28.1513
3.6917	20.179	11.239	21.893	13.127	18.1	16.915	17	16.061	24.81	18.717	13.491	11.246	14.245	15.404	8.391	10.383	21.883	38.478	27.591	12.92	29.609	31.008	51.169	27.467	30.624	39.209	74.713	57.11	31.923		0.174157	24.9967
3.8108	18.39	14.014	18.88	11.3	13.758	17.959	14.832	14.784	24.337	19.683	12.796	11.293	10.236	12.801	8.383	9.572	21.441	32.932	25.912	12.643	24.705	28.421	47.917	26.655	28.208	40.535	78.848	55.192	32.49		0.179775	23.7558
3.9299	21.411	10.097	16.381	10.833	12.924	17.358	15.23	15.533	26.109	16.294	13.953	9.786	12.084	9.067	10.394	9.321	18.698	25.416	17.469	11.754	24.067	24.759	45.231	31.612	32.089	45.864	70.084	51.507	30.136		0.185394	22.6021
4.049	20.632	10.151	20.618	13.451	14.37	14.402	14.748	14.788	27.756	16.804	13.765	9.574	10.917	6.527	6.256	7.668	13.014	25.396	18.837	11.195	21.084	25.421	38.152	29.739	27.877	43.625	69.048	52.808	30.415		0.191012	21.691
4.1681	15.361	10.809	19.022	15.688	15.908	12.613	13.07	14.869	24.379	13.727	15.082	10.072	15.507	8.475	8.048	5.386	12.433	23.884	14.525	15.01	22.419	16.69	34.967	26.263	23.351	41.336	63.421	46.231	26.036		0.196631	20.158
4.2872	11.225	9.423	16.452	17.7	15.162	14.663	20.079	14.551	24.112	15.528	14.349	8.405	8.679	9.735	9.744	10.483	15.087	22.203	15.769	14.978	17.828	18.904	25.465	24.47	24.114	36.173	59.439	43.301	28.588		0.202249	19.5382
4.4063	14.005	11.245	18.19	11.209	14.414	10.035	14.651	12.016	23.747	12.935	16.584	8.428	11.349	6.9	6.229	10.448	13.124	21.656	13.924	11.95	18.952	16.183	28.035	19.894	21.093	32.469	50.904	39.633	20.577		0.207868	17.6131
4.5253	10.11	9.87	16.103	12.492	14.754	13.756	14.887	14.229	20.855	12.907	13.266	9.953	7.138	7.924	9.55	8.672	11.673	23.09	13.462	13.88	17.591	18.884	24.016	23.017	23.855	34.137	53.204	34.044	22.883		0.213482	17.5932
4.6444	10.362	7.574	18.487	12.15	12.972	14.353	13.937	16.066	21.677	17.371	12.051	10.623	6.486	7.688	7.865	11.865	13.71	20.802	10.626	12.961	15.444	18.417	15.97	21.573	21.398	30.04	44.569	42.723	21.968		0.2191	16.9561
4.7635	6.864	8.812	18.022	12.771	14.061	13.64	16.846	15.682	23.387	13.115	12.977	10.347	8.511	7.412	8.905	10.548	13.841	22.76	11.179	9.903	19.485	15.768	16.597	15.992	28.723	33.291	41.257	34.325	19.872		0.224719	16.7204
4.8826	6.219	9.915	15.381	14.01	13.873	13.348	19.886	13.795	22.188	11.985	14.78	11.563	7.311	6.098	9.059	8	13.102	24.017	12.341	10.987	20.051	18.153	11.91	18.489	23.948	26.293	44.457	33.943	17.623		0.230337	16.3009
5.0017	5.988	9.376	18.152	14.321	13.621	11.772	14.913	13.474	19.513	16.033	17.134	13.006	7.28	5.974	7.216	10.299	11.194	20.698	9.983	9.315	25.257	18.976	11.822	17.708	25.402	28.467	35.206	33.103	15.342		0.235956	15.8809
5.1208	8.05	7.201	15.579	13.264	14.728	13.522	15.318	17.515	20.631	15.39	18.69	12	8.742	4.706	7.128	7.227	12.527	19.715	9.42	11.662	20.652	16.49	10.689	15.33	24.8	25.573	30.655	34.391	14.928		0.241575	15.3973
5.2399	8.461	8.805	14.369	14.238	11.843	11.846	16.116	14.344	19.996	16.212	18.397	11.635	9.879	4.979	8.167	9.071	12.371	17.441	10.925	12.027	24.427	16.353	12.26	15.594	20.703	22.937	33.228	31.639	17.687		0.247193	15.3776
5.359	6.739	6.513	17.875	13.223	14.348	9.892	11.624	14.559	18.545	14.004	20.034	13.236	8.646	5.355	7.072	6.587	10.827	15.66	11.123	8.939	21.139	18.739	9.937	16.219	24.398	25.671	36.015	26.144	18.213		0.252812	14.8716
5.478	8.136	7.549	14.156	12.904	15.44	11.079	14.821	13.295	25.055	15.186	21.822	8.408	7.762	7.103	6.877	8.898	10.802	15.847	12.62	12.121	18.827	15.461	9.387	9.743	18.568	21.344	28.593	26.06	18.146		0.258425	14.3452
5.5971	4.622	6.76	15.098	14.629	13.159	11.115	13.878	13.674	23.043	14.543	21.164	9.888	6.959	4.956	9.049	11.681	11.175	14.964	11.82	13.659	21.616	18.143	12.232	11.355	17.405	22.383	36.618	26.579	16.579		0.264044	14.7843
5.7162	5.794	8.185	15.994	14.874	10.526	10.607	17.434	12.819	18.363	13.6	19.548	14.588	5.857	3.332	7.298	10.88	10.108	16.485	10.414	12.734	18.643	19.926	11.216	9.231	15.812	19.142	28.765	26.859	11.203		0.269663	13.8013
5.8353	5.962	8.511	15.97	12.838	13.534	8.303	18.395	13.026	16.92	13.666	25.455	11.119	7.257	7.131	7.733	11.252	11.874	18.101	7.87	15.979	19.548	21.841	10.626	9.429	15.634	22.772	28.832	27.841	13.332		0.275281	14.5087
5.9544	7.585	5.601	17.493	14.127	16.685	14.622	16.42	12.01	18.642	16.231	23.005	9.219	7.094	6.142	8.814	12.127	10.172	15.649	11.124	17.648	12.582	26.256	9.552	8.534	16.034	18.187	30.467	22.893	12.824		0.2809	14.4048
6.0735	4.593	7.115	17.819	16.468	14.43	9.617	11.437	14.451	18.104	15.631	24.862	14.065	9.427	5.579	10.555	15.323	12.481	19.133	10.079	23.628	13.308	18.647	8.579	7.962	12.619	19.606	33.188	19.406	13.429		0.286518	14.5359
6.1926	4.753	8.864	15.643	15.43	14.595	10.113	13.421	12.72	17.786	14.691	27.777	14.377	8.216	3.982	9.004	15.346	13.2	16.012	10.832	19.601	11.769	23.617	9.586	8.5	10.082	15.673	30.02	19.751	8.318		0.292137	13.92
6.3117	4.805	8.351	14.883	17.815	16.162	9.322	16.164	12.737	16.705	16.633	20.87	13.792	9.867	4.287	10.089	13.055	11.692	13.716	8.684	22.32	13.381	20.683	11.872	6.441	10.963	19.595	29.852	19.493	14.766		0.297755	14.1033
6.4307	5.357	7.54	15.394	16.241	12.126	10.502	18.785	10.558	18.245	15.24	24.496	14.056	6.667	6.103	7.731	15.471	15.274	13.485	11.359	27.024	13.172	18.41	9.014	5.727	10.26	13.696	31.912	24.858	13.088		0.303369	14.1997
6.5498	5.937	6.177	15.527	12.431	12.046	11.38	19.048	12.915	19.621	14.64	25.245	12.618	6.91	8.085	9.696	18.33	13.483	14.672	10.337	29.458	9.642	17.01	8.743	6.284	9.42	17.659	27.422	22.236	12.315		0.308988	14.1133
6.6689	5.045	5.89	17.291	13.259	11.514	11.358	15.311	11.439	19.549	17.083	31.991	9.751	6.937	4.648	7.761	17.762	12.566	13.228	9.11	35.637	15.004	21.39	9.083	7.219	8.127	12.767	30.05	23.287	13.442		0.314606	14.3965
6.788	6.335	6.694	16.461	13.045	13.829	15.074	17.91	14.898	20.191	20.462	30.175	11.011	5.584	6.917	10.563	17.204	16.937	14.798	7.814	29.936	12.954	19.949	8.641	5.723	8.277	15.48	28.82	22.146	12.846		0.320225	14.8508
6.9071	5.557	6.07	17.661	15.119	13.956	13.203	17.549	14.229	20.978	18.395	28.981	12.87	9.346	6.563	13.748	23.127	17.436	11.05	11.747	25.804	10.626	18.613	10.108	6.149	7.324	9.924	28.829	18.474	11.847		0.325843	14.6649
7.0262	4.89	7.454	16.53	13.81	17.712	13.337	16.73	12.217	25.152	21.573	35.11	15.53	8.326	6.592	14.149	19.006	19.506	10.134	12.005	22.068	10.493	18.795	9.186	7.498	4.892	9.353	28.143	17.197	9.821		0.331462	14.7313
7.1453	4.069	7.762	16.572	15.05	18.469	12.541	16.134	17.699	21.877	26.524	37.295	12.817	8.385	4.858	10.399	24.212	20.84	11.233	10.292	18.931	8.729	16.541	10.729	7.753	5.392	8.873	28.145	14.499	12.082		0.337081	14.7828
7.2644	7.029	6.537	23.239	15.568	17.66	12.685	14.856	15.054	20.39	20.39	35.877	10.434	7.099	5.654	15.879	24.984	21.211	12.854	10.769	19.688	9.579	16.497	13.18	7.956	5.511	8.659	28.616	16.585	11.436		0.342699	15.0302
7.3834	8.252	7.254	28.408	19.752	16.629	11.968	14.783	17.758	19.625	24.753	37.152	14.459	6.252	4.586	11.547	28.898	21.677	9.67	12.704	19.261	9.928	18.28	10.205	7.91	5.86	8.983	28.753	15.911	9.483		0.348313	15.5414
7.5025	5.853	6.989	29.259	16.052	16.79	12.206	18.641	19.64	21.104	24.259	35.528	11.88	8.525	5.44	14.977	24.427	29.514	11.012	10.976	17.54	8.468	20.77	11.504	6.968	7.702	8.047	26.554	14.798	8.005		0.353932	15.6354
7.6216	5.987	7.857	30.067	16.257	14.273	13.246	18.787	19.389	23.515	19.724	34.818	12.903	5.623	6.4	12.957	25.037	35.128	10.911	14.697	14.52	11.579	18.155	9.641	8.744	6.317	8.706	26.765	15.874	7.228		0.35955	15.6933
7.7407	5.69	6.109	29.337	17.198	15.578	15.954	21.165	17.792	28.011	25.575	31.078	9.715	6.726	4.62	12.032	22.747	42.496	9.579	11.654	15.372	11.401	17.732	10.489	6.796	6.94	5.444	19.108	11.395	7.553		0.365169	15.3547
7.8598	5.992	6.935	32.041	18.188	16.82	20.62	18.136	15.747	23.085	24.639	33.48	11.741	9.279	5.624	11.194	22.464	49.695	10.862	16.973	12.112	9.704	22.646	12.732	8.882	6.036	7.945	21.231	13.117	8.569		0.370787	16.4307
7.9789	5.554	9.521	30.348	17.876	18.393	17.829	16.745	15.991	31.21	26.816	30.428	15.659	8.897	4.257	13.77	21.469	52.074	9.863	13.544	11.256	9.48	23.406	10.414	6.885	4.023	10.055	22.794	13.378	8.298		0.376406	16.5598
8.098	7.51	6.545	28.648	15.958	21.583	16.839	18.609	18.319	31.806	27.022	26.559	11.059	6.287	5.735	13.787	17.953	58.116	10.968	19.638	11.064	9.393	24.663	14.496	7.998	6.66	8.551	19.724	13.52	5.798		0.382024	16.7175
8.2171	5.644	6.383	27.118	16.417	19.02	21.27	18.957	19.504	35.976	34.239	26.97	10.332	8.691	5.869	11.434	16.386	55.133	7.485	22.825	13.476	8.882	30.283	13	7.457	4.276	8.946	21.397	11.898	8.293		0.387643	17.1573
8.3362	5.624	7.82	29.541	19.828	19.256	20.708	24.298	20.071	33.867	40.587	29.521	10.81	7.363	6.113	10.42	19.573	61.795	12.543	23.435	11.401	11.038	33.636	9.83	10.49	5.24	9.087	17.701	10.269	6.054		0.393262	18.2041
8.4552	6.013	8.4	27.842	18.557	28.236	22.047	27.626	18.403	38.34	46.01	23.72	12.853	7.207	5.291	9.804	20.271	56.942	12.659	21.851	7.321	10.819	31.259	12.096	7.538	7.773	13.599	11.234	9.845	6.101		0.398875	18.264
8.5743	5.39	7.932	37.216	22.266	23.308	22.761	23.219	15.797	42.223	44.113	21.964	11.153	10.308	5.143	9.885	21.736	53.533	9.92	27.061	9.23	6.895	31.504	14.221	8.257	6.924	12.924	13.163	8.022	5.796		0.404494	18.3401
8.6934	6.907	7.263	33.82	19.927	21.23	19.455	24.631	19.027	45.69	48.501	28.472	10.044	8.896	7.529	10.526	19.848	50.885	10.669	28.832	7.184	8.165	32.295	11.755	10.026	6.005	12.675	12.368	8.315	6.07		0.410112	18.5176
8.8125	5.385	8.752	36.795	21.04	29.413	22.235	25.168	18.793	40.807	45.895	18.554	11.396	6.047	6.285	10.288	18.417	48.355	11.341	23.94	9.563	8.967	36.667	14.499	8.527	4.373	18.717	13.59	6.207	6.029		0.415731	18.4843
8.9316	5.296	9.167	47.032	20.012	28.29	20.645	27.089	21.454	39.874	48.15	21.444	7.452	7.832	6.963	10.387	23.589	39.71	13.635	23.931	8.448	11.578	40.895	17.59	9.102	5.513	15.708	13.9	7.634	4.679		0.42135	19.2069
9.0507	5.975	5.95	57.452	25.2	25.287	22.552	27.974	22.796	36.685	53.883	23.4	8.512	7.049	6.966	11.425	17.418	39.927	12.541	29.99	7.598	9.865	40.916	15.71	11.544	7.794	23.331	13.288	6.025	5.338		0.426968	20.0824
9.1698	5.251	9.347	51.912	21.615	24.375	21.669	26.129	28.799	38.108	44.115	16.491	9.81	8.094	6.357	9.875	20.475	44.358	17.525	24.691	9.828	6.78	37.399	13.787	7.353	7.058	25.886	9.916	5.129	7.313		0.432587	19.2912
9.2889	5.105	10.751	58.846	22.718	31.843	26.629	29.114	25.222	44.651	47.652	14.13	9.404	8.397	7.227	11.687	20.475	38.811	16.489	28.931	7.643	7.556	33.578	14.388	9.34	6.843	23.81	9.959	5.447	5.216		0.438205	20.0642
9.4079	4.383	9.999	67.176	24.706	32.829	27.745	24.996	27.91	45.017	48.6	17.82	9.323	7.601	6.646	10.311	17.212	39.371	18.41	31.299	6.78	8.096	38.627	14.423	7.856	7.254	27.052	9.11	5.642	5.383		0.443819	20.744
9.527	5.942	10.797	65.279	22.927	28.566	24.694	24.758	30.199	48.128	50.395	18.541	9.794	7.948	5.907	12.76	13.759	35.45	19.864	27.273	6.348	10.394	34.191	12.038	9.412	4.866	33.446	7.488	5.574	4.982		0.449438	20.4041
9.6461	5.2	8.565	62.339	26.554	33.736	22.72	21.38	24.231	44.45	46.882	14.051	9.354	9.138	6.053	12.302	19.297	45.119	26.231	23.961	7.34	6.114	43.221	17.451	7.896	7.448	40.087	7.563	5.635	5.094		0.455056	21.0142
9.7652	7.143	9.598	66.488	29.5	35.071	26.801	26.158	34.367	48.08	48.719	14.548	9.459	5.577	7.42	11.646	15.856	44.666	23.025	20.289	5.892	11.818	42.928	14.486	8.348	7.722	41.621	6.536	8.319	5.779		0.460675	21.9952
9.8843	5.595	8.263	61.746	32.077	32	23.409	22.377	41.533	46.916	52.305	19.128	8.42	8.009	7.43	12.142	14.547	48.688	21.124	18.696	4.543	8.125	42.196	16.436	9.818	8.014	46.16	7.75	6.529	6.808		0.466293	22.096
10.0034	5.327	9.414	53.269	28.465	37.204	26.067	25.171	51.13	38.267	52.686	13.11	10.585	7.662	5.455	11.127	16.806	38.317	20.15	19.613	6.335	7.344	57.423	17.078	9.016	5.405	50.736	6.868	5.881	6.981		0.471912	22.1687
10.1225	6.475	10.734	49.466	32.348	39.745	30.237	27.73	51.606	37.192	61.41	14.362	8.956	6.017	7.211	13.902	15.712	40.218	25.717	18.371	7.552	9.266	48.13	12.852	7.871	6.728	52.888	8.771	5.961	6.698		0.47753	22.9009
10.2416	6.526	11.533	48.281	30.622	29.628	30.089	26.064	47.221	39.081	63.595	15.633	10.757	6.423	8.453	12.721	17.206	48.593	26.824	16.885	6.17	8.948	50.421	16.635	10.76	6.232	51.287	8.145	5.549	5.963		0.483149	22.974
10.3606	7.248	7.739	52.723	34.394	27.137	36.729	28.011	56.566	38.945	75.815	12.185	8.651	7.268	5.905	12.99	13.284	43.533	27.654	18.047	6.24	6.936	57.658	17.304	8.88	5.373	51.544	6.935	6.894	4.897		0.488763	23.7064
10.4797	6.338	7.983	52.62	42.018	26.886	34.225	30.962	47.432	38.936	76.264	13.397	8.468	5.987	6.609	12.511	14.137	40.861	37.802	16.055	8.805	5.122	56.221	18.854	9.699	7.918	50.018	8.369	6.551	5.598		0.494381	24.0223
10.5988	6.077	7.402	42.831	37.102	26.971	31.717	29.996	48.406	39.77	72.162	15.413	7.812	7.477	8.271	11.006	13.614	44.457	33.376	16.584	5.865	8.959	53.976	15.399	9.943	8.701	44.933	7.07	6.942	5.51		0.5	23.0256
10.7179	6.491	9.453	37.578	48.679	23.458	37.998	30.094	38.166	42.424	75.187	13.311	8.76	7.295	6.447	9.45	12.545	50.992	31.583	13.885	6.652	8.224	56.938	16.322	11.008	7.519	44.845	8.575	7.318	6.18		0.505619	23.3578
10.837	7.057	7.278	33.525	51.717	24.243	35.588	31.473	36.191	41.028	79.873	13.473	8.619	7.492	6.06	9.787	12.417	51.292	37.926	12.613	5.894	6.547	49.98	21.425	7.824	7.65	44.256	6.711	5.937	5.146		0.511237	23.0697
10.9561	6.528	9.07	31.065	62.058	26.16	35.195	34.425	33.284	39.948	82.229	11.773	9.223	8.622	7.986	8.31	12.836	47.343	37.811	9.253	5.677	8.352	41.452	17.271	10.564	5.711	47.818	5.818	5.187	5.661		0.516856	22.9872
11.0752	5.301	8.933	26.09	70.138	19.068	32.503	36.755	39.031	39.528	76.745	14.903	13.963	7.661	7.194	7.985	14.972	46.76	36.38	12.165	5.165	9.705	44.474	22.209	13.431	5.967	49.23	6.705	6.916	5.33		0.522474	23.6278
11.1943	6.74	6.835	21.396	68.145	19.382	34.139	33.531	36.882	37.488	76.405	12.672	8.35	7.233	5.953	10.413	11.12	48.906	43.916	14.412	8.528	9.006	42.726	17.999	8.995	6.368	48.454	7.73	6.474	5.547		0.528093	22.9567
11.3133	3.51	9.987	16.932	76.182	19.664	25.775	37.445	39.325	37.511	88.107	15.751	7.877	8.467	5.415	11.599	13.514	50.901	38.291	17.567	6.7	7.455	42.495	22.853	8.475	8.285	47.788	4.044	4.963	6.496		0.533707	23.5646
11.4324	8.964	8.183	16.226	75.832	14.378	27.833	32.694	40.342	42.286	86.033	12.464	7.963	6.484	5.371	7.584	14.493	56.777	35.459	15.941	6.826	13.643	37.724	19.686	11.68	8.207	45.727	8.728	8.075	5.337		0.539325	23.4807
11.5515	5.928	7.545	16.63	68.035	16.441	24.563	36	43.159	30.062	77.448	12.924	8.801	7.087	6.413	8.731	15.34	54.879	32.137	11.371	3.149	15.629	44.149	15.686	11.358	8.184	47.143	8.636	7.369	5.822		0.544944	22.4351
11.6706	7.072	7.046	13.8	66.111	15.517	24.069	32.404	43.584	26.383	80.473	11.633	7.243	5.863	6.623	9.058	12.47	50.919	35.436	13.148	4.205	16.589	43.393	18.926	8.357	9.611	50.705	4.221	6.131	5.981		0.550562	21.9645
11.7897	8.256	8.61	14.385	67.561	20.131	25.131	29.486	44.048	30.137	94.552	14.492	7.296	8.362	6.081	8.365	13.021	53.016	29.125	10.555	5.188	17.9	49.983	21.446	8.643	11.28	54.625	6.143	7.735	3.997		0.556181	23.4328
11.9088	5.663	8.085	11.102	69.503	14.859	21.79	22.931	56.739	25.103	96.249	12.168	7.932	5.032	5.351	9.04	11.434	53.292	26.955	10.078	4.353	12.466	50.822	18.253	8.451	7.412	45.635	7.295	6.918	7.511		0.561799	22.1525
12.0279	4.977	7.51	9.804	67.551	16.614	19.506	25.425	57.234	22.939	99.65	15.393	7.655	6.259	7.931	9.862	15.202	52.71	25.94	12.187	3.74	19.227	58.495	17.469	10.753	10.703	47.992	6.558	7.126	6.432		0.567418	23.2015
12.147	6.463	8.43	8.476	65.341	17.693	19.487	22.832	58.85	23.606	97.98	14.804	8.579	8.52	5.766	7.053	11.457	62.038	28.811	7.567	5.959	17.242	59.639	16.384	12.65	7.689	49.762	8.98	6.736	5.999		0.573037	23.2687
12.2661	6.667	7.632	10.676	63.717	17.531	22.491	23.662	51.278	27.119	97.157	13.678	7.133	7.12	9.889	6.8	12.199	54.74	27	7.996	6.335	14.797	52.925	13.859	9.895	11.675	46.085	7.31	8.578	6.392		0.578655	22.4943
12.3851	8.257	9.367	10.126	65.424	18.45	18.763	25.529	53.635	27.767	102.208	13.016	7.897	7.113	5.203	6.577	14.599	50.692	23.256	9.958	6.391	14.55	59.429	18.271	11.013	7.687	43.632	6.966	6.909	6.022		0.584269	22.714
12.5042	8.692	8.404	11.845	60.166	20.513	23.157	22.8	62.944	29.052	100.879	9.649	7.823	9.471	6.227	5.92	14.127	47.907	25.247	7.118	5.311	11.72	60.43	14.696	11.02	9.352	36.222	9.402	7.967	5.999		0.589888	22.5538
12.6233	5.614	10.226	7.648	52.989	19.933	20.429	25.471	56.184	31.72	96.283	14.681	6.823	8.516	7.131	7.754	13.317	62.179	27.18	7.277	5.749	10.349	69.085	12.648	9.847	8.951	37.775	8.239	7.431	8.617		0.595506	22.7602
12.7424	7.073	7.749	12.783	49.409	21.147	18.701	22.894	49.221	33.198	94.891	15.401	7.215	7.494	6.068	8.057	14.489	59.486	30.611	6.395	6.082	9.949	64.494	13.869	9.432	11.213	35.076	9.04	7.604	6.383		0.601125	22.256
12.8615	7.886	7.587	10.12	40.828	20.674	17.874	24.293	44.425	35.097	100.95	12.191	5.909	7.871	6.25	7.917	14.234	60.147	30.034	8.897	3.795	9.917	62.019	13.911	11.201	11.329	34.579	7.678	6.193	6.781		0.606743	21.7444
12.9806	9.201	6.282	7.927	34.45	22.219	20.503	25.104	49.838	33.981	100.096	10.84	9.607	7.594	7.596	7.526	11.328	51.268	27.433	9.267	6.382	11.033	59.548	13.317	12.469	15.242	34.329	8.815	6.922	7.223		0.612362	21.6324
13.0997	7.882	6.887	7.751	31.539	22.08	24.041	22.919	45.276	33.428	107.357	8.847	8.484	7.061	7.392	7.996	10.656	47.805	28.688	6.248	5.456	12.08	52.935	13.943	9.117	15.966	27.021	8.827	6.872	7.895		0.61798	20.7741
13.2188	7.423	9.215	8.791	26.578	24.056	19.024	22.715	41.462	36.527	99.049	12.683	7.277	6.184	5.003	7.764	11.647	43.963	31.888	7.119	5.28	11.814	60.958	11.856	8.619	13.032	35.051	6.883	5.998	5.605		0.623599	20.4643
13.3378	8.917	8.147	9.166	24.135	29.383	19.709	25.525	36.881	41.699	94.002	9.812	8.277	7.018	2.862	8.409	15.661	40.075	37.057	8.427	7.392	8.493	57.466	11.991	9.573	13.634	33.165	9.401	7.274	6.018		0.629213	20.6748
13.4569	8.483	7.246	10.722	22.968	30.701	20.705	28.608	36.381	46.388	96.069	10.503	8.451	7.332	5.433	6.728	16.196	31.721	30.818	9.235	5.763	10.953	62.101	13.765	8.023	12.689	32.575	8.949	6.823	8.486		0.634831	20.8557
13.576	8.525	5.105	10.51	21.444	28.685	21.943	21.085	39.237	45.893	97.769	10.378	8.039	5.856	6.512	7.531	13.303	34.945	34.255	6.364	4.418	10.928	62.626	12.056	7.233	17.158	37.882	9.61	8.071	6.697		0.64045	20.8296
13.6951	10.014	7.726	8.522	20.532	31.109	19.812	21.577	31.386	51.767	93.006	11.368	6.615	9.08	5.931	7.768	13.886	24.663	33.988	7.712	7.685	12.435	50.994	13.379	7.542	14.631	37.538	10.784	7.96	7.525		0.646068	20.2391
13.8142	7.867	7.728	9.571	18.933	32.66	15.925	21.232	29.925	48.936	89.728	11.753	6.911	7.532	4.155	8.703	16.234	26.855	31.996	8.789	5.484	13.125	44.757	12.294	9.275	11.619	39.079	10.124	9.312	5.866		0.651687	19.5299
13.9333	7.692	7.548	5.946	18.795	30.864	16.337	21.141	28.201	43.486	93.833	10.448	9.149	7.769	3.936	7.129	13.034	30.012	31.539	9.108	6.941	14.741	43.032	14.409	6.116	12.862	42.328	6.871	12.519	6.913		0.657306	19.4034
14.0524	9.314	9.155	10.941	21.689	33.885	18.87	17.258	29.522	53.494	90.462	11.563	6.938	9.437	7.661	7.774	12.877	27.121	31.914	10.83	4.954	19.024	30.777	12.846	6.574	14.008	46.824	9.527	9.33	8.706		0.662924	20.1129
14.1715	5.721	8.052	8.035	22.019	41.321	17.498	15.827	28.911	50.775	84.558	8.879	7.753	7.087	7.646	5.864	12.244	29.138	30.239	9.756	4.764	15.835	27.542	9.753	7.355	16.718	51.637	11.502	8.448	8.576		0.668543	19.4294
14.2905	10.756	8.078	8.368	15.411	39	18.544	20.853	25.72	59.186	85.024	9.469	8.52	5.526	7.667	5.754	10.133	26.363	24.941	8.85	5.442	23.831	23.957	11.003	8.951	13.942	51.967	12.328	5.708	9.032		0.674157	19.4594
14.4096	5.508	7.855	7.141	15.528	45.132	20.164	21.649	24.859	68.148	76.073	13.254	8.615	7.313	5.174	5.33	12.234	27.334	23.059	8.839	7.647	20.741	22.068	12.265	9.463	16.331	52.07	12.012	7.383	8.606		0.679775	19.7171
14.5287	6.753	7.777	8.767	15.579	46.873	24.627	18.262	20.014	76.886	71.239	14.078	7.824	6.181	4.87	8.6	9.961	23.034	23.906	9.623	6.917	19.928	21.121	10.455	11.61	15.863	45.516	10.648	5.595	5.52		0.685394	19.2423
14.6478	6.138	8.32	9.452	17.47	48.031	23.07	17.693	23.677	93.297	62.882	11.594	8.01	7.575	6.803	6.122	10.252	25.644	19.929	11.551	4.982	27.108	19.922	13.496	10.848	19.365	44.701	8.388	6.631	7.71		0.691012	20.0228
14.7669	9.923	7.008	5.991	17.481	49.852	27.121	12.914	21.429	95.365	62.518	11.9	8.031	7.326	6.697	10.025	12.36	22.814	27.079	10.059	7.861	24.045	19.001	12.719	11.158	22.94	43.723	10.211	10.98	7.764		0.696631	20.5619
14.886	6.736	7.501	7.549	17.971	48.718	28.297	22.415	24.739	102.056	51.823	10.598	6.419	6.797	7.318	4.966	11.685	26.067	22.283	9.617	6.673	25.743	18.461	11.293	7.648	23.964	47.321	13.281	8.526	5.48		0.702249	20.4119
15.0051	6.54	7.059	10.157	16.789	53.71	28.189	21.376	28.968	95.685	41.201	9.409	9.152	7.267	5.77	9.696	12.33	28.045	22.937	8.719	5.708	22.219	22.351	14.583	8.153	22.113	48.678	12.088	8.881	7.008		0.707868	20.5097
15.1242	7.103	6.626	7.961	15.462	48.573	25.411	19.293	20.562	105.262	28.494	12.958	6.809	9.448	8.241	6.484	12.207	29.744	20.038	9.497	5.512	23.223	19.213	12.34	8.897	24.85	52.252	10.471	7.952	8.045		0.713486	19.7561
15.2432	6.046	7.663	9.356	15.123	56.275	29.242	23.864	23.983	115.9	25.801	10.037	9.122	4.67	7.127	4.923	10.33	25.729	19.715	7.296	7.752	22.868	21.791	15.068	9.057	23.648	47.105	12.582	7.069	9.658		0.7191	20.3034
15.3623	6.898	7.696	8.277	15.652	56.852	25.337	25.895	22.301	121.033	24.209	12.01	8.645	7.6	5.997	8.352	9.863	27.759	22.767	11.334	5.693	24.821	17.904	11.377	11.343	25.395	52.734	15.664	7.128	6.727		0.724719	20.9401
15.4814	5.2	8.652	9.553	15.872	60.018	26.361	21.236	24.991	126.4	21.539	9.848	8.323	7.656	4.841	6.31	9.842	28.556	20.031	8.907	5.608	24.84	20.338	13.236	9.035	30.935	50.471	14.716	7.787	6.273		0.730337	20.944
15.6005	8.627	9.402	10.316	13.247	67.357	20.74	22.551	24.509	124.814	21.327	11.493	9.047	7.431	5.752	8.45	9.813	33.838	22.004	8.847	8.119	24.307	18.658	14.055	10.708	26.236	56.379	13.691	9.482	9.135		0.735956	21.7357
15.7196	10.263	5.19	11.246	15.249	63.354	23.456	21.462	26.458	116.634	21.132	11.613	9.29	6.75	7.418	5.087	9.903	33.052	18.498	7.348	9.083	24.296	21.854	19.214	10.4	23.46	57.538	16.773	8.008	9.074		0.741575	21.4863
15.8387	9.811	7.611	13.263	15.928	58.368	22.812	18.579	29.977	108.334	16.969	12.082	7.221	8.067	5.587	7.859	11.703	31.671	19.756	10.623	10.377	23	20.847	15.97	13.2	27.978	56.374	15.031	10.229	8.309		0.747193	21.2943
15.9578	7.485	7.73	13.827	17.014	71.989	24.357	19.897	27.066	90.089	19.077	8.408	8.004	8.626	7.303	6.35	10.576	35.372	19.603	9.228	11.001	26.657	21.258	17.289	13.21	23.864	61.269	17.343	10.143	8.004		0.752812	21.4496
16.0769	8.61	6.255	9.753	17.276	61.133	17.685	22.883	30.691	76.188	16.47	12.299	8.314	6.32	7.307	7.714	9.22	38.45	17.227	7.055	13.11	29.725	21.553	17.143	15.356	26.522	59.447	21.099	7.701	11.508		0.75843	20.8281
16.196	6.272	6.973	9.941	18.048	66.486	19.427	24.932	32.416	65.579	19.188	13.359	9.656	4.599	4.693	6.852	11.156	28.417	15.114	6.837	11.171	31.192	27.851	17.405	16.144	26.191	63.994	21.238	8.107	11.449		0.764049	20.8513
16.315	6.031	7.418	7.975	17.986	62.666	21.071	26.479	39.736	60.795	19.694	9.355	8.977	6.161	7.041	7.37	10.94	35.597	10.284	7.699	12.795	26.562	32.081	18.648	21.184	21.818	69.253	25.632	7.804	15.105		0.769663	21.5227
16.4341	7.56	6.613	8.028	17.589	61.983	17.836	32.117	36.869	51.72	17.368	9.641	8.046	7.174	7.058	6.217	10.896	33.783	8.852	7.452	18.55	29.206	30.372	18.244	22.692	30.152	70.186	33.875	11.557	13.064		0.775281	21.8862
16.5532	4.883	7.786	11.005	19.012	60.155	17.324	34.93	44.26	51.814	13.388	10.882	10.104	7.767	7.145	5.388	12.472	37.02	11.655	7.456	21.763	32.052	34.149	19.204	28.633	31.958	77.266	27.406	11.887	22.051		0.7809	23.4764
16.6723	6.116	6.501	11.505	21.116	66.025	17.362	42.035	46.772	48.981	15.399	9.858	10.903	6.786	7.559	5.454	11.37	35.699	11.454	6.32	24.407	33.443	34.5	18.632	26.395	36.412	87.104	28.615	15.835	18.808		0.786518	24.5299
16.7914	6.199	8.276	8.665	18.412	68.611	22.536	42.771	48.506	36.968	15.81	14.625	11.447	8.299	6.356	8.214	13.596	34.728	10.122	5.187	22.35	33.816	35.865	23.022	33.208	42.94	86.515	31.263	21.491	22.206		0.792137	25.5863
16.9105	8.163	6.969	12.312	21.812	68.759	20.588	37.281	53.533	31.311	14.77	13.603	10.08	9.87	9.807	6.158	11.81	32.313	11.46	6.588	18.487	38.589	38.508	26.804	35.931	53.773	81.011	33.415	25.135	26.008		0.797755	26.3741
17.0296	9.992	6.998	10.781	20.83	70.115	18.888	59.761	58.653	30.682	15.009	13.732	9.688	8.049	6.056	7.947	11.673	30.672	10.307	7.766	21.916	34.962	34.783	31.191	34.835	56.612	87.637	40.676	33.012	39.42		0.803374	28.367
17.1487	10.168	7.46	11.457	20.246	69.896	22.793	64.522	69.78	29.69	15.382	15.266	10.82	7.962	5.83	6.88	11.97	37.795	11.553	9.214	22.302	33.167	36.049	41.034	41.408	64.143	84.371	39.115	37.77	50.894		0.808993	30.653
17.2677	8.983	9.765	10.42	19.031	67.348	23.678	72.685	79.585	27.603	16.844	15.382	7.19	9.063	5.957	7.935	14.418	36.31	10.894	6.105	22.677	39.521	42.252	44.29	39.478	69.36	79.48	44.095	36.326	48.705		0.814606	31.5648
17.3868	7.812	9.758	13.373	15.937	64.635	28.699	67.792	87.568	29.369	14.651	17.075	12.733	6.883	9.335	9.751	13.195	39.297	10.992	8.86	22.588	47.79	45.537	50.763	38.757	79.607	82.925	46.09	41.22	41.695		0.820225	33.2651
17.5059	6.991	13.718	9.035	19.56	62.386	31.941	75.936	82.962	24.641	17.688	15.786	10.849	6.029	8.426	8.352	18.034	37.32	11.262	6.496	29.883	54.595	46.75	51.602	29.732	60.908	71.071	39.127	50.164	43.097		0.825843	32.5635
17.625	9.177	10.018	13.239	22.873	59.766	34.176	82.091	80.083	28.335	19.879	19.74	13.333	5.667	9.608	6.872	22.066	36.54	13.804	8.692	25.361	48.703	45.971	59.799	25.03	40.627	51.017	41.21	46.284	41.366		0.831462	31.7699
17.7441	11.62	10.537	13.709	19.247	57.461	46.495	85.972	80.98	28.516	20.439	21.816	18.067	6.861	10.79	8.18	18.23	34.138	14.906	10.229	29.602	50.59	55.756	55.913	22.706	23.709	36.527	28.983	52.748	28.042		0.837081	31.13
17.8632	16.379	11.091	15.081	19.247	59.943	49.233	94.743	85.622	36.614	24.817	23.628	20.785	8.459	10.95	12.265	21.23	43.983	11.677	13.48	30.501	52.734	48.233	47.443	17.332	13.729	34.902	24.449	47.187	22.52		0.842699	31.664
17.9823	13.257	13.294	14.189	27.461	73.003	66.304	100.71	85.689	37.232	29.609	26.882	23.232	7.2	14.997	15.881	29.589	41.657	13.816	20.559	28.514	51.058	47.685	35.109	14.194	12.726	20.686	22.298	44.633	15.983		0.848318	32.6706
18.1014	14.327	14.293	18.988	27.029	78.686	78.313	97.621	90.33	37.656	38.317	28.828	33.676	11.846	13.658	15.497	31.608	48.714	17.532	18.525	27.647	37.559	40.771	25.853	12.315	9.112	17.145	17.199	38.174	14.766		0.853936	32.965
18.2204	14.62	16.536	21.242	24.676	84.148	84.909	107.186	100.01	44.323	49.361	29.621	42.582	10.446	17.416	18.171	31.521	52.007	11.447	28.996	27.979	36.498	37.601	22.513	8.233	7.823	10.406	13.106	33.603	7.722		0.85955	34.3001
18.3395	16.662	20.164	22.85	31.853	87.626	90.425	107.649	83.236	39.942	54.165	38.383	54.832	12.269	20.116	19.748	34.502	50.817	14.774	41.272	24.51	31.202	32.537	19.674	5.828	6.226	7.065	10.048	24.387	8.982		0.865169	34.8877
18.4586	20.411	21.438	32.141	34.913	84.341	98.379	105.136	91.2	60.79	62.939	48.584	54.849	19.09	25.195	25.264	41.864	58.398	16.909	45.929	19.311	24.121	28.919	17.287	5.915	4.541	4.168	10.136	16.397	6.861		0.870787	37.4285
18.5777	22.695	27.365	31.986	38.615	89.477	89.086	102.947	93.551	66.805	57.299	54.303	60.847	21.61	30.836	35.705	57.905	58.908	19.533	54.463	20.971	23.907	21.276	17.1	6.34	3.506	3.134	6.074	16.364	8.071		0.876406	39.3338
18.6968	22.644	40.629	35.976	38.007	85.204	82.946	73.022	80.898	65.809	50.246	63.282	59.099	23.764	38.882	39.081	65.066	64.486	16.706	60.762	14.871	20.862	18.184	9.75	3.39	2.468	2.953	5.314	13.567	3.784		0.882024	37.988
18.8159	32.855	40.853	47.828	45.423	89.486	83.177	75.088	75.46	57.472	45.379	52.075	47.866	35.898	41.909	51.009	52.397	69.994	17.74	56.661	15.733	22.616	15.718	8.697	1.935	2.007	2.22	5.611	10.239	2.448		0.887643	38.1308
18.935	28.338	44.555	51.556	51.817	90.74	80.282	62.621	67.478	55.21	39.128	45.389	37.301	43.642	51.305	50.722	44.912	71.756	23.184	54.574	14.261	18.179	12.681	7.897	2.815	3.283	2.011	4.635	10.893	1.704		0.893262	36.9955
19.0541	31.216	52.438	55.896	52.71	94.663	61.284	54.288	53.695	37.556	29.625	31.929	22.67	56.124	52.411	51.064	31.24	71.139	22.089	41.767	10.76	15.723	15.355	5.168	2.834	2.203	0.952	2.612	8.127	2.949		0.89888	33.4651
19.1731	41.854	57.591	58.744	62.446	95.312	50.413	36.424	38.939	28.354	16.735	19.556	16.493	69.416	53.398	51.871	23.633	73.27	23.484	40.222	10.077	16.565	9.799	4.836	1.744	1.458	1.562	3.149	6.357	2.691		0.904494	31.5998
19.2922	46.991	51.69	60.511	79.163	96.351	46.761	31.53	29.819	19.419	14.787	18.379	18.42	70.889	62.674	43.833	17.747	74.731	25.421	31.025	7.931	15.424	11.154	4	1.412	2.525	1.342	2.955	4.222	2.651		0.910112	30.8192
19.4113	55.259	66.462	52.369	85.856	73.93	34.747	28.102	19.967	13.594	10.296	12.386	14.463	82.241	65.284	33.213	12.997	72.447	23.363	28.611	9.093	10.061	7.977	3.227	1.24	1.798	1.067	2.32	4.233	2.672		0.915731	28.5957
19.5304	65.519	60.208	59.889	94.499	70.275	27.351	17.679	16.201	13.852	8.204	12.517	8.353	73.059	63.101	22.619	12.702	68.536	21.266	22.514	7.867	6.789	4.79	2.986	1.858	0.952	0.685	1.523	4.273	1.71		0.92135	26.613
19.6495	75.39	65.493	61.154	107.309	50.653	18.284	10.857	13.17	13.81	5.843	8.791	7.203	56.312	51.042	18.301	11.319	61.695	21.553	21.066	10.171	9.845	5.995	1.851	0.832	1.006	0.558	1.507	2.598	0.934		0.926968	24.6394
19.7686	70.275	64.829	55.871	107.096	43.165	12.646	8.499	10.803	10.914	4.946	8.041	5.41	44.954	37.298	11.14	8.606	62.601	21.587	21.25	5.862	6.388	3.223	2.147	1.197	0.634	0.682	1.427	3.209	0.779		0.932587	21.9131
19.8877	76.156	57.891	41.635	92.327	35.867	10.922	8.228	11.016	5.971	4.68	2.855	4.925	35.616	27.72	13.493	5.216	58.282	21.581	16.542	6.183	6.475	3.042	1.945	0.595	0.233	0.56	1.306	4.804	0.562		0.938205	19.1941
20.0068	76.857	46.428	24.45	63.382	19.959	6.051	7.085	6.491	4.855	3.766	2.854	2.358	25.789	20.91	11.364	5.115	44.277	16.152	12.55	3.742	5.818	3.764	1.213	0.642	0.059	1.136	0.776	2.071	1.739		0.943824	14.5398
20.1259	49.63	31.613	18.721	43.361	14.608	5.229	5.455	4.068	5.02	3.01	2.62	1.798	21.339	14.875	7.993	5.106	31.448	15.229	12.08	3.151	5.163	3.004	1.532	0.526	0.157	0.666	0.915	2.049	1.464		0.949442	10.7528
20.2449	34.793	17.088	8.632	26.567	10.56	3.642	4.557	3.09	1.978	1.985	2.104	1.141	20.66	15.189	5.758	3.847	25.962	11.542	12.576	2.077	4.063	1.257	1.651	0.39	0.122	0.455	1.67	0.998	1.684		0.955056	7.79441
20.364	22.126	12.805	6.208	13.686	7.898	3.43	2.867	3.049	1.574	1.384	1.448	1.891	13.383	11.377	4.7	2.071	23.868	13.564	10.518	1.56	2.829	0.995	1.82	0.608	0.43	0.897	1.824	1.406	1.656		0.960675	5.92662
20.4831	14.183	10.674	3.38	10.728	5.971	2.624	1.614	2.316	1.447	1.406	1.975	1.093	9.765	11.089	3.322	1.638	16.088	11.141	9.883	1.002	1.82	0.641	1.461	0.134	0.646	0.564	0.527	0.683	0.712		0.966293	4.43197
20.6022	11.561	7.218	6.021	5.255	4.382	2.788	1.147	1.447	1.107	1.13	0.972	0.83	6.427	5.361	2.069	2.036	10.514	9.367	10.658	0.792	1.381	1.086	0.559	0.884	0.269	0.631	0.041	1.363	0.844		0.971912	3.38414
20.7213	12.092	6.046	2.758	7.076	4.158	1.139	1.493	0.823	1.319	0.753	1.256	1.411	5.328	4.679	1.585	1.095	7.335	7.184	6.25	0.468	2.209	0.336	0.226	1.136	0.536	0.093	1.411	0.692	1.14		0.97753	2.82852
20.8404	10.257	3.202	3.251	4.05	2.845	1.309	2.075	0.571	0.565	0.394	0.937	1.275	2.698	1.849	1.969	0.194	6.534	7.614	6.233	1.086	1.064	1.163	0.441	0.432	0.181	0.376	1.061	0.292	1.334		0.983149	2.25007
20.9595	4.638	4.026	1.73	4.574	2.024	1.6	0.422	0.868	1.241	0.914	0.301	0.537	1.434	1.79	1.648	0.485	6.162	7.261	5.875	0.708	0.136	0.336	0.968	0.36	0.079	0.058	0.872	1.475	0.616		0.988768	1.83234
21.0786	5.876	2.768	1.889	2.186	1.476	0.557	0.515	0.835	0.635	0.638	0.449	0.026	2.266	2.226	1.112	0.974	4.784	4.685	4.327	1.139	1.104	0.338	0.212	1.345	0.448	0.573	0.87	0.4	0.981		0.994386	1.57359
21.1976	4.208	2.72	1.692	2.802	1.735	0.236	0.278	0.79	0.733	0.459	0.504	0.263	1.205	1.582	0.445	1.263	2.959	3.204	3.039	0.441	0.137	0.542	1.067	1.167	0.573	0.316	0.306	0.537	1.158		1	1.25383

## Sheet: Image14
X0	Y0	Y1	Y2	Y3	Y4	Y5	Y6	Y7	Y8	Y9	Y10	Y11	Y12	Y13	Y14	Y15	Y16	Y17	Y18	Y19		Ap-Ba	Avg int
0	15.4746	10.9366	9.7215	12.7048	15.9789	15.4863	21.3991	15.8795	18.1864	16.0387	25.8683	24.1777	19.2418	22.2883	28.353	46.125	21.818	24.0823	45.068	50.3946		0	22.9612
0.1191	18.5688	13.6448	8.0997	9.3298	19.1393	16.8293	24.0652	20.3884	18.1106	14.0215	27.2682	28.5896	22.7189	23.1661	40.8243	53.8374	20.796	25.0335	54.5727	58.1997		0.00588296	25.8602
0.2382	20.2376	13.7001	7.9523	12.553	28.5578	19.319	27.9084	16.0852	16.9988	18.3016	29.6992	35.0015	26.3129	20.6408	35.8512	55.0403	26.5934	30.3615	67.5206	70.098		0.0117659	28.9367
0.3573	21.0586	13.0371	12.9446	12.8423	32.8568	22.5763	28.8524	17.9208	21.7195	16.1729	31.7625	38.2633	24.8889	23.3038	48.0905	54.622	32.2617	36.2687	65.3416	76.2273		0.0176489	31.5506
0.4764	29.8552	13.5026	12.2491	13.88	37.6832	30.7916	29.6183	24.841	22.2762	19.6504	32.7224	41.576	27.7088	29.3991	40.5927	51.3837	29.5221	39.8635	67.4597	78.3429		0.0235319	33.6459
0.5954	32.9262	12.6697	15.2129	14.6555	36.3319	31.2012	32.9072	24.886	24.1177	25.7556	37.5727	44.8708	30.226	30.0933	47.3914	60.685	34.0794	51.7733	73.3204	82.1534		0.0294099	37.1415
0.7145	30.017	14.8089	15.3439	12.1229	48.9974	44.9255	34.2056	24.5754	27.7561	21.5191	41.6284	43.0955	25.2859	31.9595	54.3761	52.9946	27.8976	49.7222	65.9563	81.8316		0.0352928	37.451
0.8336	37.1028	22.4275	21.1617	14.583	46.0552	49.7024	42.3016	31.3446	26.7793	22.6124	35.7055	46.501	30.3276	32.8668	56.4273	59.3738	26.9306	53.5929	64.8438	89.7037		0.0411758	40.5172
0.9527	42.7089	24.9252	29.3286	23.4783	47.4802	54.2271	43.7489	32.5093	32.1196	22.7374	40.3397	50.1271	40.6326	36.6194	63.1584	78.193	31.0728	60.4155	65.9577	91.0526		0.0470588	45.5416
1.0718	36.12	29.594	33.7394	24.163	53.5728	52.0304	49.117	35.3359	31.5568	31.9891	40.9022	53.3594	37.6856	42.247	57.6623	95.8783	30.1071	58.2888	59.8692	94.6705		0.0529417	47.3944
1.1909	32.6645	29.4853	32.8876	31.1341	52.0931	54.1437	49.7625	31.9732	37.3905	25.4101	40.4431	45.7556	40.9343	38.9988	52.9256	95.2552	39.4505	54.9801	53.8144	93.3084		0.0588247	46.6405
1.31	34.806	32.1317	41.8079	29.2357	40.194	47.8812	53.4319	41.174	37.7177	26.183	33.5228	47.6363	33.6416	41.9352	53.8095	94.6561	42.2345	55.5594	48.1567	80.8621		0.0647077	45.8289
1.4291	40.6556	46.705	41.7487	34.5464	38.197	46.5592	48.8215	46.0493	38.4639	35.1061	30.7293	43.3003	40.4989	32.1033	59.648	83.3128	43.7592	51.395	45.3366	81.0927		0.0705906	46.4014
1.5481	44.6766	41.4507	46.8171	34.3245	40.3402	39.3047	49.7759	50.5988	39.0115	40.332	26.9174	42.9006	43.3717	37.157	53.5287	77.5173	47.122	52.0193	37.9108	69.3892		0.0764686	45.7233
1.6672	52.5864	39.8585	41.7257	33.9275	36.8805	35.8918	38.9528	49.3906	43.8031	33.3027	28.3328	40.6174	39.762	41.9105	50.137	76.4664	44.5677	44.7939	36.9043	60.909		0.0823516	43.536
1.7863	51.429	42.0756	40.474	36.0526	31.7193	29.6096	37.8801	57.9807	36.952	33.2207	33.5376	45.4505	45.0652	33.2716	49.519	70.3833	51.8927	39.3877	35.7635	59.0677		0.0882346	43.0366
1.9054	46.6641	35.6857	33.5865	26.2636	30.7478	27.5708	40.485	57.1459	41.4398	54.2027	31.3322	36.3354	36.5024	40.7012	51.0076	73.028	55.2434	33.0321	22.9383	52.9835		0.0941175	41.3448
2.0245	38.9882	36.7919	29.8006	25.378	27.8219	23.1229	38.1876	53.9688	39.7247	47.9816	32.7687	32.6934	38.74	45.6945	43.8237	67.8612	59.7149	34.0101	22.0822	42.9704		0.1	39.1063
2.1436	30.9608	23.4958	23.8592	20.258	29.9259	18.0629	35.4	48.8968	35.9568	44.584	30.8168	29.7899	40.1658	39.31	49.9268	64.5482	68.5534	23.7159	21.853	37.819		0.105883	35.8949
2.2627	26.481	17.6177	16.9753	15.0959	25.1171	14.3248	35.455	43.0803	30.2442	44.8518	24.8414	35.044	35.813	39.9009	44.5176	55.866	74.0495	22.2817	17.2203	34.348		0.111766	32.6563
2.3818	19.1357	15.5033	14.3431	11.0222	20.4901	14.745	33.663	45.2592	19.3696	40.208	31.2378	32.2886	31.4924	33.4316	49.789	54.8828	78.0565	15.153	15.2189	27.5829		0.117649	30.1436
2.5008	18.9315	11.2775	11.3831	9.9974	19.626	13.3249	30.6158	48.7076	19.4514	38.4667	28.8906	29.0256	28.1665	30.776	48.9662	48.934	80.7414	11.6827	13.7855	23.4378		0.123527	28.3094
2.6199	16.0823	9.6478	8.7499	9.8256	24.6444	12.3198	26.6074	54.3336	18.0998	37.1014	26.9406	29.4867	26.6748	25.5692	37.6727	48.4276	77.2177	12.868	11.7357	23.4678		0.12941	26.8736
2.739	13.9421	7.906	10.171	7.0456	15.76	16.064	26.9734	41.7688	16.1358	31.4461	29.7787	30.7397	21.9647	17.9119	39.9704	49.6947	67.9277	15.5347	12.1264	20.7554		0.135293	24.6809
2.8581	11.3114	6.1409	12.927	6.7771	15.5904	12.6373	18.2139	38.0961	10.2599	26.8167	24.2242	26.9939	18.2281	15.2516	36.5421	52.9594	69.3815	10.6042	7.6826	21.4059		0.141176	22.1022
2.9772	12.258	6.8955	9.8224	4.599	15.107	12.3941	18.0198	29.2114	13.948	26.3149	21.8882	24.1296	17.2666	10.3042	38.4603	51.5311	60.1268	12.1309	10.3947	17.8937		0.147059	20.6348
3.0963	11.0002	7.7329	8.9179	3.1047	11.1644	9.8357	17.4813	25.2079	11.5246	27.2437	24.5252	20.5941	13.5808	8.2471	37.9043	50.5983	52.1114	8.7368	11.4422	11.5874		0.152942	18.627
3.2154	9.199	9.036	10.6351	3.8803	10.8362	11.6336	11.9549	24.3644	8.9786	23.8516	17.6068	19.0009	14.2184	7.0786	29.3332	55.5381	41.9943	7.6189	6.3959	13.6655		0.158825	16.841
3.3345	10.157	5.9681	10.373	4.3854	10.6286	10.9222	13.2072	20.6223	8.7928	22.3423	24.4864	23.7137	11.1347	9.3475	27.6517	51.163	32.2884	9.3451	5.3646	11.7177		0.164708	16.1806
3.4535	6.9302	5.1661	6.8437	2.7469	7.9577	7.0044	11.2921	18.2976	7.283	18.1858	22.0649	16.0355	12.2524	8.3797	28.4741	47.2242	27.8049	10.3586	7.1105	11.1057		0.170586	14.1259
3.5726	6.617	4.4883	7.462	2.0258	9.1678	7.0247	10.1753	11.9583	7.4702	17.4051	23.9787	11.943	10.1472	7.3683	27.4352	53.5297	25.3227	10.2871	6.8293	9.9514		0.176469	13.5294
3.6917	4.9643	4.2517	8.3221	1.5426	8.7545	10.516	11.2041	11.0203	6.3948	18.589	21.0248	12.8971	8.598	7.9497	29.7449	45.9244	22.2758	7.6316	4.6944	7.5904		0.182352	12.6945
3.8108	5.0362	4.5681	5.7415	4.6049	4.7025	9.2036	9.2082	9.0948	6.2106	18.1841	19.0803	9.8323	8.2139	8.036	32.4829	47.0925	16.9811	5.6304	5.8322	9.6555		0.188235	11.9696
3.9299	9.2054	4.8419	7.2436	4.1546	7.0185	6.9656	10.1276	11.9774	5.8437	15.3325	14.0139	10.4652	8.009	4.7718	27.9667	43.8199	15.5082	3.9521	4.9946	7.5446		0.194118	11.1878
4.049	9.6957	4.8498	8.1467	4.0517	6.9713	8.6811	7.3588	12.488	3.7925	17.2101	13.0582	6.3508	7.1272	9.6493	29.9994	43.4969	16.181	4.5166	4.2443	7.4684		0.200001	11.2669
4.1681	9.3202	3.9828	3.4612	3.837	6.3474	9.4682	6.9525	11.6609	4.1534	10.447	14.3883	8.4341	8.3083	7.8193	25.0768	52.2175	11.9812	3.1727	4.5628	7.9072		0.205884	10.6749
4.2872	8.0705	3.6778	4.3601	2.1465	8.7605	8.8698	8.6145	9.6485	3.8129	11.5389	11.3042	8.3705	5.9698	8.7607	26.7796	52.0836	12.2397	3.9702	4.727	6.8742		0.211767	10.529
4.4063	7.0221	3.4229	5.557	1.5305	6.8499	8.3693	5.3687	7.4235	3.9784	13.9788	9.1272	6.7509	6.7328	8.4819	19.0723	50.4145	13.4451	4.6592	2.1461	4.8742		0.21765	9.46026
4.5253	6.7029	3.7518	5.1885	1.1531	8.1744	7.9538	4.6961	6.9116	6.406	13.6689	9.4028	4.9273	6.4351	4.4765	18.2717	50.6171	9.6859	4.0169	2.7696	7.9982		0.223528	9.16041
4.6444	6.3005	4.5059	2.2528	2.7453	5.6648	8.389	2.4944	5.755	2.5034	10.5958	9.2272	3.6438	7.2954	4.3616	16.6489	50.2186	6.8506	2.998	2.092	4.113		0.229411	7.9328
4.7635	8.0936	3.77	3.9615	3.4686	4.6641	10.8008	3.1076	5.497	3.1681	11.0745	9.0135	7.2313	9.5267	5.0965	16.7977	57.5781	9.4707	4.2598	2.4337	3.9697		0.235294	9.14918
4.8826	7.6526	3.8662	1.8971	2.0978	3.4958	9.0313	2.0708	7.2213	5.8457	9.4682	7.8913	5.7456	9.5523	4.3989	15.2603	49.5932	8.2517	4.15	0.8778	5.0661		0.241177	8.1717
5.0017	3.7392	1.0618	2.8539	4.1393	4.1271	12.4844	2.7368	4.715	4.4648	7.958	5.7505	6.3991	5.2596	4.9296	14.9469	41.5685	6.1256	4.2318	1.293	4.4695		0.24706	7.16272
5.1208	7.9463	2.3128	1.9718	2.4547	4.339	10.1878	3.4955	5.6642	5.5513	5.3604	8.3771	7.4299	8.2643	3.4574	11.8078	42.9728	10.7028	2.7251	3.0431	6.0009		0.252943	7.70325
5.2399	8.0723	3.7692	2.8327	1.1849	3.8856	12.7624	2.9619	8.8679	3.359	8.8393	6.556	4.5209	6.8639	4.5574	10.6028	42.3622	10.8182	4.7707	3.3569	4.4833		0.258826	7.77138
5.359	8.0691	2.101	3.2811	1.7523	6.3075	13.0968	3.777	4.8612	3.3686	6.883	5.8368	4.2545	4.101	4.7834	5.4784	33.5122	6.3721	6.8431	2.0357	1.5962		0.264709	6.41555
5.478	6.6238	2.4563	1.7016	1.1048	3.9298	13.9461	2.7528	7.4212	4.3202	5.5876	6.4133	4.4112	6.164	4.5347	8.5408	28.3688	3.4953	4.5149	2.2681	1.625		0.270587	6.00902
5.5971	8.3591	2.6847	2.1659	3.1488	2.9473	13.9517	1.7491	10.0112	5.1762	5.1437	5.1792	4.9355	9.4759	5.3262	4.9201	22.4727	7.9501	3.6851	2.5157	2.3875		0.27647	6.20929
5.7162	8.4848	3.7579	2.4046	1.3284	3.2522	12.6275	2.9407	5.9163	2.3563	5.1954	4.0761	6.6597	5.828	3.5045	6.1967	20.7494	7.3597	4.141	2.6955	2.7023		0.282353	5.60885
5.8353	8.3176	1.9934	1.911	2.3836	4.2167	13.5167	2.9783	4.0827	3.386	4.4179	3.6929	4.6695	8.4415	3.4987	5.4002	17.4648	7.5829	7.0985	4.2621	3.1002		0.288236	5.62076
5.9544	5.4455	2.3957	1.3787	1.7267	2.7222	10.4497	1.9807	7.5782	2.8852	4.1175	4.2656	3.8854	7.8723	3.8491	7.1503	13.8816	5.2094	5.959	2.576	2.4763		0.294119	4.89025
6.0735	4.6353	3.8816	2.0411	1.4814	3.5119	9.7607	3.0649	4.415	3.1742	5.3342	5.414	6.1628	8.5137	3.3944	3.8741	12.2548	6.6332	8.3356	3.4575	2.9228		0.300001	5.11316
6.1926	6.604	1.8179	1.8559	1.7218	2.298	10.8756	3.7139	7.1451	3.6503	4.9318	4.1043	5.5025	6.312	2.7978	6.1959	8.5619	8.5356	5.3783	2.9306	2.8261		0.305884	4.88796
6.3117	5.4117	3.1202	3.8865	2.0191	3.6439	8.5966	2.3488	6.6218	1.746	4.3266	3.914	2.667	7.2842	3.4803	6.791	8.9575	6.9594	6.526	1.9597	3.6517		0.311767	4.6956
6.4307	6.9573	3.4456	1.4655	1.6039	6.1676	9.5761	1.5066	5.8667	2.5872	5.116	5.0999	2.6387	7.3629	3.4052	5.1253	8.4508	5.9939	6.4396	2.7764	2.5331		0.317645	4.70592
6.5498	9.7225	2.2697	1.8789	3.6424	6.0841	10.4718	2.1517	4.4548	2.0018	5.6384	1.8523	3.6941	7.0223	4.5307	4.7094	11.6076	5.4068	6.9272	1.9917	2.8928		0.323528	4.94755
6.6689	11.3248	2.1624	1.2254	2.3076	5.2559	9.4868	2.7705	4.8596	3.6369	6.5511	1.9207	3.2556	10.5904	3.9754	3.9274	7.4481	5.1864	6.3808	2.21	3.1998		0.329411	4.88378
6.788	7.718	2.4732	1.9077	2.2167	4.4125	11.7676	2.5264	2.3389	2.1453	6.0198	2.0914	3.4486	10.78	3.9356	1.4084	6.2507	5.7739	6.4235	3.3964	2.1176		0.335294	4.45761
6.9071	8.364	2.6365	1.0832	1.6079	5.9275	7.9608	3.9999	2.0913	3.7659	3.8119	1.5887	3.5261	8.538	4.5262	3.763	5.6794	4.0121	8.6961	3.5351	1.7478		0.341177	4.34307
7.0262	7.1376	2.5494	0.7313	1.4634	4.2427	7.6204	3.0089	3.2879	5.4168	5.3947	3.9125	2.1056	8.7421	5.0599	5.4587	5.9544	5.2549	5.401	3.5646	2.6272		0.34706	4.4467
7.1453	8.8394	2.831	1.5209	1.3574	5.935	8.2712	1.9158	3.3407	2.5889	8.0081	3.1146	2.9419	9.7192	4.4819	4.0047	4.9122	8.0351	4.6541	2.6577	3.1905		0.352943	4.61601
7.2644	9.0744	2.2155	1.7977	1.8862	5.8701	6.6848	2.2295	3.7416	1.866	4.8137	2.9778	3.4539	6.8508	5.7463	2.4749	5.3189	5.9228	7.6017	2.0698	2.8451		0.358826	4.27207
7.3834	8.5757	2.265	1.198	2.2061	7.8505	5.7858	1.4512	2.7155	3.0285	4.8594	3.5445	3.6761	7.7265	4.2722	2.9299	5.6389	3.5256	5.8891	2.3388	2.6926		0.364704	4.1085
7.5025	13.7305	2.2431	2.8932	2.2889	5.4616	8.7749	2.6264	1.8316	2.2848	3.4785	2.1488	5.247	9.5071	5.3038	2.0793	3.5987	5.256	5.3315	1.7915	1.6954		0.370587	4.37863
7.6216	10.6911	2.7214	2.4703	1.1105	5.9254	6.8569	2.2348	1.9008	2.0137	3.4459	3.0347	5.81	7.6041	4.9177	3.0541	5.3528	5.0877	6.315	4.7047	2.8144		0.37647	4.4033
7.7407	15.0983	1.6512	1.5932	1.8507	7.1436	9.6668	4.051	2.4624	3.0671	5.1978	3.0319	3.7098	8.1433	5.7166	3.6539	6.5189	5.915	6.6878	2.725	2.0608		0.382353	4.99726
7.8598	9.2703	2.5058	1.5017	2.7878	6.8575	9.9546	2.1892	2.5927	3.1297	6.3603	3.2807	4.438	6.9691	4.9365	2.5134	5.7497	6.6268	6.8017	2.9422	1.8123		0.388236	4.661
7.9789	7.9019	2.4629	1.2105	1.6491	5.6603	7.7135	2.7272	2.6245	3.2809	5.5621	2.6416	4.2712	6.7746	6.7047	2.3468	2.2294	3.1558	6.5471	3.8795	1.6048		0.394119	4.04742
8.098	9.76	2.9524	1.3149	1.573	6.8687	5.702	3.3587	2.7561	1.4329	7.539	3.8591	4.2608	10.8599	4.8416	1.7152	3.9877	4.7106	5.5152	3.0026	2.1944		0.400002	4.41024
8.2171	8.2027	1.6519	1.6694	2.5742	5.9162	7.9136	1.4107	2.471	2.6834	7.9999	3.0884	3.1306	8.8826	5.7585	1.4171	5.8478	6.9109	5.7274	2.9959	2.1861		0.405885	4.42192
8.3362	8.2707	1.7673	1.9085	0.2857	5.6983	5.2724	1.467	2.4012	2.7495	7.1354	3.4152	1.8909	8.7952	6.6654	2.4176	3.4643	5.9338	5.0921	3.564	2.4852		0.411768	4.03399
8.4552	8.8733	3.4711	0.9806	3.2932	5.1598	5.6032	3.5003	2.7963	3.0843	5.0744	1.9067	4.3306	8.689	6.8296	1.5941	5.1747	6.9169	4.0417	2.6431	2.3611		0.417646	4.3162
8.5743	9.3337	3.5067	2.1651	3.1861	6.2978	5.3529	2.0001	2.1151	2.6666	5.9785	2.1392	2.5767	10.0706	5.5208	2.5502	3.7999	7.7884	5.5454	2.726	3.0569		0.423529	4.41883
8.6934	8.0363	2.721	1.8089	2.8853	4.6144	3.6421	2.7054	2.2444	3.9593	6.8174	4.4227	4.3025	10.559	8.4041	4.2659	3.4483	9.9365	6.3666	3.6828	4.1334		0.429412	4.94782
8.8125	7.958	3.6245	2.0242	2.6488	5.9571	3.7851	2.9112	2.8116	4.1105	4.9253	3.8514	4.4504	11.5283	7.3673	3.4627	5.445	6.9065	6.0184	2.1692	2.6863		0.435295	4.73209
8.9316	10.4917	2.4065	1.3025	2.282	6.0174	3.9867	1.9691	1.7834	4.1528	7.2787	2.5751	3.6913	9.8655	5.1876	2.8607	3.4469	9.3347	4.9891	1.9172	2.5338		0.441178	4.40363
9.0507	11.2625	2.9777	3.4033	1.0179	5.4053	3.5649	1.7389	1.8126	4.3698	8.0285	2.3258	2.8324	13.7937	7.9534	2.9625	2.6934	8.4438	5.2131	2.7166	1.5823		0.447061	4.70492
9.1698	9.7354	2.4891	2.2022	1.1797	7.0521	4.2456	2.4655	0.9892	4.4124	7.426	2.0616	3.0911	10.8116	5.5211	2.8698	1.4562	6.858	3.9162	2.2138	1.3326		0.452944	4.11646
9.2889	9.701	4.1746	0.9344	2.0533	7.6183	4.6746	2.1896	0.8365	3.0611	10.7347	2.7032	3.3933	13.8599	6.2626	2.3065	1.8954	7.4451	4.6582	2.212	0.8871		0.458827	4.58007
9.4079	10.0822	2.1668	1.5561	3.9809	5.6504	2.0147	2.6675	1.67	2.592	13.4315	2.2977	4.5105	13.8611	7.7863	2.9108	3.235	7.9454	5.6716	2.8269	1.8422		0.464705	4.93498
9.527	9.5779	0.2227	1.51	4.1528	5.7739	3.7741	2.6586	1.697	2.2589	9.2725	3.7512	4.4209	12.1959	5.9264	3.6586	4.7632	7.5186	8.9174	5.3621	1.9998		0.470588	4.97062
9.6461	8.6526	1.1949	2.3986	1.1079	7.7976	4.1269	3.0458	2.6269	2.2869	11.9978	4.0143	4.8598	11.2033	6.2821	4.6918	6.9053	9.8628	8.6494	3.3442	1.8357		0.476471	5.34423
9.7652	10.1914	1.2973	2.4302	2.173	7.5158	2.4465	2.1022	1.84	2.6671	10.8768	3.5604	4.4269	9.5948	5.896	2.4875	6.278	10.2041	6.7231	2.2342	1.5014		0.482354	4.82234
9.8843	10.5098	0.5595	1.7675	1.6104	9.4426	4.0862	1.3041	1.6939	2.392	7.7474	1.705	3.8014	9.917	9.8113	4.992	4.0775	9.2174	7.0258	1.2441	2.2862		0.488237	4.75956
10.0034	9.0391	1.0295	1.1675	1.4031	8.5172	1.5154	1.4212	0.9863	2.8867	8.088	3.1572	2.6592	13.0876	6.6659	3.9242	5.7068	7.2392	4.7184	1.9773	1.9064		0.49412	4.35481
10.1225	9.0986	1.5245	2.3085	2.0705	12.0692	2.3905	1.5198	1.4993	2.5885	8.4122	2.7904	2.9457	10.4894	7.2875	2.9303	4.1747	7.4888	4.2126	0.9255	2.621		0.500002	4.46737
10.2416	8.7504	2.8747	4.7013	2.4129	14.405	3.4862	0.979	1.1177	4.6873	7.8839	3.5591	3.2361	9.9522	6.2364	1.7971	3.9002	10.7332	5.1431	2.4934	1.6764		0.505885	5.00128
10.3606	10.1937	2.3264	0.8734	1.7072	9.1341	2.0018	1.695	1.3392	3.0284	6.5711	2.3774	2.7821	11.2162	4.2875	4.9937	4.992	8.7639	6.9884	2.1296	1.4031		0.511763	4.44021
10.4797	7.9299	1.4842	1.5756	1.8732	9.3937	3.3621	2.1124	1.7881	2.1223	7.9577	2.6328	3.6134	12.7158	4.0936	5.3694	4.8453	5.8838	6.0194	1.4961	2.3702		0.517646	4.43195
10.5988	6.2759	1.6097	1.4343	2.176	12.5241	3.9123	1.405	2.8036	1.3561	5.669	1.9267	2.8545	14.2604	8.4643	3.6876	5.7252	5.5149	5.8817	2.9462	1.5821		0.523529	4.60048
10.7179	4.7251	2.5599	1.0177	2.2871	10.5564	2.2518	1.8437	1.6564	1.9731	7.3958	3.1649	1.8737	11.4044	6.7761	7.0666	3.4191	6.919	5.5114	3.235	1.4992		0.529412	4.35682
10.837	5.5729	3.6816	1.4463	1.7648	9.378	2.3448	1.7759	1.2071	2.1777	8.86	3.6222	2.0487	10.105	4.6287	4.2194	6.3141	5.2245	3.9328	1.685	1.4455		0.535295	4.07175
10.9561	6.5803	2.5378	1.553	2.7136	11.4848	3.0949	2.6142	2.1453	1.5236	7.1054	6.0651	3.1673	11.6982	4.7615	3.065	6.0726	3.5973	6.2393	2.513	2.11		0.541178	4.53211
11.0752	11.7948	1.0572	1.8166	1.5894	11.544	2.3713	2.0376	2.6518	1.7319	7.5369	5.033	2.0222	9.1878	4.6761	5.454	4.3771	3.0882	2.8106	0.9783	1.0316		0.547061	4.13952
11.1943	8.7425	0.9237	1.8891	2.0625	8.7533	3.2321	3.6859	2.4255	2.2727	9.3073	4.1742	3.0691	10.877	2.9135	7.1621	5.9042	4.8218	3.6383	1.393	1.005		0.552944	4.41264
11.3133	9.2971	2.3903	0.8395	1.728	9.7108	2.8896	2.5281	1.4672	1.8122	9.1455	4.5873	3.6043	8.6018	5.6349	7.4901	5.8807	3.563	4.0475	2.6122	1.1737		0.558822	4.45019
11.4324	8.9977	1.7047	1.1568	1.9564	7.8569	2.8848	0.7454	1.8122	1.7173	8.7796	3.655	2.3008	12.1558	3.4067	6.6543	5.7656	5.9901	5.525	1.3983	2.062		0.564705	4.32627
11.5515	10.212	2.8201	1.4391	2.1135	5.6783	2.0843	2.588	1.0553	1.9357	6.7665	3.361	2.2646	9.2825	3.1271	6.1455	5.4046	4.1846	4.7446	0.6424	0.7901		0.570588	3.83199
11.6706	8.3362	2.9668	2.2645	2.4404	7.8912	2.8643	1.3238	2.0858	2.1999	6.5444	3.5058	3.1048	8.0145	5.9306	6.4961	4.6397	3.3165	4.5429	0.8736	2.4991		0.576471	4.09205
11.7897	7.7064	1.9873	1.9894	3.1719	6.2059	1.9469	2.5877	3.3386	1.3609	6.4354	4.5539	2.3619	8.9269	4.5193	5.4218	8.0278	4.5796	3.3393	1.0292	2.1963		0.582354	4.08432
11.9088	10.5632	2.2451	2.1272	3.6613	4.9424	1.6526	1.4533	1.1252	1.7058	4.1301	2.3637	3.1156	10.4603	2.8579	7.0089	7.0748	5.0709	3.2859	1.261	1.7828		0.588237	3.8944
12.0279	7.9852	2.8172	1.2644	3.1866	3.4316	3.5926	1.1352	1.671	0.9267	3.9661	4.3732	3.9806	8.8766	4.2824	7.2884	9.2011	3.3197	4.0483	4.2214	2.0297		0.59412	4.0799
12.147	6.0633	1.8916	2.2292	2.6543	5.1346	2.178	1.2277	1.6333	2.2362	5.2153	4.2006	3.1729	9.1263	3.2023	7.9963	9.7592	3.8199	4.1611	3.7727	2.5927		0.600003	4.11337
12.2661	5.8584	2.0484	1.9985	3.2597	4.4609	1.8453	1.031	0.9341	2.6308	3.0018	3.947	2.8542	8.8087	2.7903	6.1793	9.979	2.7664	4.3957	1.1577	0.8855		0.605886	3.54164
12.3851	6.8302	1.7324	2.019	3.579	3.6844	1.9364	0.3945	0.9879	2.2316	2.233	4.9679	4.572	10.3615	3.1338	6.0882	8.6165	3.7066	4.2165	0.5609	0.5346		0.611764	3.61935
12.5042	4.7406	3.486	1.7705	1.9669	4.3669	1.7644	0.8508	1.4048	2.1892	3.3796	4.3218	4.9344	10.5045	3.75	5.8976	4.6215	5.0428	4.6653	2.8429	1.1893		0.617647	3.68449
12.6233	8.8631	1.942	1.6234	3.4924	3.9434	2.0524	2.1421	1.9534	2.0854	1.6821	5.5529	3.7007	6.21	3.0562	3.7812	7.1514	5.001	4.1424	2.0147	1.9616		0.62353	3.61759
12.7424	7.8733	0.8721	1.7375	5.0514	4.2916	2.0731	2.9553	1.568	1.6451	3.7856	5.0458	3.6909	5.3824	3.8094	4.1395	5.4352	3.3589	6.3397	3.4182	1.7332		0.629413	3.71031
12.8615	8.0004	0.5999	1.0857	3.216	2.2809	2.2154	1.6629	1.5094	3.3954	3.6575	8.6783	3.6108	6.2837	3.7221	5.8632	3.6858	2.5886	4.0201	1.4557	0.8241		0.635296	3.41779
12.9806	5.3365	1.3009	1.4385	3.8368	2.0131	1.3736	2.379	1.1103	0.8594	3.914	5.015	3.406	5.7209	2.4517	7.4267	4.6718	3.7298	7.2297	1.7823	2.6373		0.641179	3.38167
13.0997	3.8198	3.1788	1.169	2.2675	4.1535	1.354	1.8396	1.3966	1.2865	2.2563	4.4022	4.9361	5.361	1.1917	6.3581	4.6172	4.5767	6.5462	1.5126	0.9607		0.647062	3.1592
13.2188	4.6084	2.7522	0.586	3.3867	1.5613	1.4217	1.1596	1.7019	2.2648	2.21	4.4825	5.9366	8.1049	2.0953	7.3672	2.593	4.6007	5.4047	2.9982	0.7251		0.652945	3.29804
13.3378	6.7718	1.9147	1.496	5.3953	3.1426	1.3789	1.912	1.3253	2.0775	3.8784	7.7263	4.7838	6.6477	4.3684	2.9966	1.6539	2.9797	7.6426	1.4597	1.5309		0.658823	3.5541
13.4569	7.1061	3.2105	1.9918	4.5625	2.8582	1.2141	2.1661	2.1424	2.322	5.3779	9.1298	10.1322	7.2322	2.5149	5.5315	2.595	3.7706	5.4547	1.6613	1.7597		0.664706	4.13667
13.576	5.5574	1.7674	2.2883	4.6475	3.2738	2.5789	2.4851	1.8378	0.739	4.6848	8.6839	7.0197	4.9557	2.0367	5.9746	2.0972	3.6622	4.8682	2.8268	2.4849		0.670589	3.7235
13.6951	5.0535	1.0008	1.0923	5.6498	3.5901	1.6047	2.461	0.9736	2.8593	3.9646	10.4926	7.258	5.7939	2.4156	4.6988	2.7321	2.4461	6.082	2.0183	2.602		0.676472	3.73945
13.8142	3.1777	1.5329	1.6061	3.4273	1.6961	3.0618	0.5885	0.8175	2.5481	4.8656	5.8158	9.1392	6.4326	1.6473	3.7478	2.8046	3.3595	3.7492	2.0809	2.3111		0.682355	3.22048
13.9333	5.3397	1.6112	1.3198	3.8777	2.8732	1.5889	1.7171	1.2007	1.4119	4.2113	7.1664	8.5438	4.7587	2.012	3.4155	5.1425	2.9548	3.9656	1.0563	1.4426		0.688238	3.28048
14.0524	4.4942	2.8428	1.8176	4.1545	2.6722	2.1477	1.3312	2.7011	0.8425	1.3999	6.0101	6.1419	6.0026	2.9594	6.9341	3.9798	2.2577	3.9381	1.2809	1.3751		0.69412	3.26417
14.1715	4.286	1.7607	2.4199	5.2844	3.5427	1.7132	1.9793	1.5815	1.8979	2.4346	5.5006	3.8053	6.3021	3.0182	5.7834	2.8197	4.7027	4.1599	2.2811	1.5296		0.700003	3.34014
14.2905	2.9882	1.8854	1.7056	5.8263	2.7772	2.3079	1.9036	1.6034	0.9199	2.8771	6.8157	4.976	5.8658	1.5979	5.0812	2.2148	3.4231	5.513	2.4196	2.5779		0.705881	3.26398
14.4096	4.5242	0.6594	2.3758	7.0145	1.7464	2.2337	1.7583	0.8778	1.5843	4.4742	5.854	7.5667	5.1449	2.1988	4.7442	2.1551	5.3227	3.7138	2.9521	2.261		0.711764	3.45809
14.5287	3.8704	1.5692	2.7025	3.0187	1.4747	2.2188	1.1609	0.6936	2.9974	1.7841	5.956	8.6294	4.7327	2.3418	6.1432	2.5307	4.6208	3.5077	1.4722	1.601		0.717647	3.15129
14.6478	5.2138	0.9199	3.5164	3.7992	1.4979	2.6679	2.6682	1.4458	1.423	2.2811	7.6564	9.5441	3.3124	2.057	3.1366	2.4748	2.408	4.5162	1.1313	4.6738		0.72353	3.31719
14.7669	3.9539	1.9566	1.2654	6.2089	2.5946	3.4836	1.9671	1.0354	0.6943	2.3993	8.1198	10.7365	5.6261	0.672	2.454	2.8392	2.685	4.3339	1.9604	2.396		0.729413	3.3691
14.886	3.4646	1.8593	1.4533	4.8254	2.5827	2.7414	1.2972	1.0666	2.3155	2.7927	7.3118	9.0751	3.3831	2.5734	3.4847	2.0064	3.6205	3.0164	2.4423	1.3127		0.735296	3.13125
15.0051	3.4663	1.629	3.778	5.0661	1.0556	3.1438	1.8052	1.2813	1.6832	2.4999	6.7498	10.477	4.8091	1.8549	5.6471	2.3282	4.5292	3.1221	1.8981	4.0052		0.741179	3.54146
15.1242	3.0903	1.7531	1.8302	7.011	1.6918	1.9607	1.5047	0.9843	1.9074	2.2252	6.1381	8.9363	2.862	2.349	5.3003	4.24	2.9397	2.2507	1.0393	2.8394		0.747062	3.14268
15.2432	2.7141	1.6729	2.6193	5.0977	2.2849	0.5444	2.1877	1.7667	1.6241	2.2673	3.7137	8.4959	2.5414	0.7583	3.847	2.8153	3.5151	2.5725	0.242	2.5524		0.75294	2.69163
15.3623	3.99	3.2882	3.6116	5.1583	1.3231	2.3133	2.4314	0.1952	1.66	2.315	4.7378	7.4978	2.8389	2.1107	3.8135	2.464	2.9928	1.7667	2.2906	1.4627		0.758823	2.91308
15.4814	4.4614	2.5781	1.8106	6.6976	2.7701	2.4661	2.4749	1.4469	1.5219	2.5301	4.4295	7.8395	1.9538	2.514	3.4501	2.7314	3.7392	2.9674	1.6271	1.4085		0.764706	3.07091
15.6005	2.956	2.2502	2.4979	5.4996	3.9006	1.0447	2.8125	2.9574	3.1503	3.0947	4.7137	6.5063	2.3442	1.7746	2.3759	2.4266	4.9781	3.6798	1.9221	1.2807		0.770589	3.1083
15.7196	2.3253	1.1776	2.3214	5.7139	1.1428	2.1828	1.7091	2.9354	3.8569	2.6348	4.8052	5.8097	1.2162	1.8459	1.8518	5.1503	2.2813	3.3282	3.403	1.3924		0.776472	2.8542
15.8387	3.2605	1.908	2.6031	6.3469	0.3844	2.2479	1.8043	1.375	4.0599	1.169	2.7733	6.9683	2.0149	1.752	2.0585	5.084	2.6883	1.3151	2.4242	1.4387		0.782355	2.68382
15.9578	3.9247	2.8463	2.2113	6.0525	2.5841	1.598	1.2113	1.2706	2.1403	1.36	2.0316	7.1946	3.38	2.9635	3.4534	3.9712	3.1329	2.9394	1.2434	3.2769		0.788238	2.9393
16.0769	4.6861	2.3079	1.5643	6.7687	2.3688	1.6856	0.9548	1.8458	1.7764	1.6687	1.4535	6.725	2.3865	2.5991	4.3888	3.6171	2.2757	2.2852	2.6073	1.1603		0.794121	2.75628
16.196	3.7274	2.1734	1.5687	5.9984	1.567	1.6311	1.6123	2.0588	0.9121	2.0276	1.8581	5.3839	2.8842	3.1759	2.9005	5.576	2.577	2.9961	2.6571	1.0232		0.800004	2.71544
16.315	3.8384	1.9877	2.7186	5.1561	1.0597	1.4187	1.5774	1.9224	3.7802	0.965	3.108	9.1096	3.0488	1.5269	2.546	4.5358	2.4502	2.6727	2.0469	0.9192		0.805882	2.81942
16.4341	2.0086	2.1706	2.4946	4.2802	1.5682	1.6378	1.422	1.2789	3.1289	0.9362	2.4284	6.1978	1.5356	1.9916	3.0218	3.9329	4.1673	3.5058	2.6403	0.7695		0.811765	2.55585
16.5532	2.9454	2.5044	3.7865	3.354	1.7759	1.6127	1.5408	0.5862	1.6535	0.7017	1.9234	6.6925	1.0524	2.7731	5.2981	2.9881	3.4788	3.766	1.026	0.756		0.817648	2.51078
16.6723	2.5965	2.4474	3.9743	3.5994	3.1431	1.4048	1.3287	1.9766	1.0837	1.941	1.6551	5.7168	2.85	1.6901	3.7455	4.1635	3.0283	2.6236	1.287	0.7325		0.823531	2.5494
16.7914	2.9821	2.8611	2.0451	3.4441	2.4679	1.3405	1.2977	1.9255	1.493	2.3311	1.8479	4.3914	2.3902	1.3553	3.4005	3.7253	2.4448	2.2519	0.9983	1.5666		0.829414	2.32801
16.9105	2.9794	1.7989	2.2289	3.6629	2.4366	0.2878	2.9497	3.7059	2.3411	1.4975	2.8379	3.4048	1.1854	0.5259	4.5378	2.3579	1.5204	1.7295	2.2225	1.8214		0.835297	2.30161
17.0296	2.6941	2.456	3.3844	2.3993	2.485	1.0707	1.7425	2.5137	0.8965	0.8052	2.1451	5.4527	0.8919	1.2064	2.6423	2.1676	1.5393	2.1206	2.8891	1.9239		0.84118	2.17131
17.1487	2.2782	1.5842	4.4393	2.3388	3.3068	0.7017	1.7679	2.3611	0.0622	0.8231	2.1788	4.3596	1.5596	2.0228	2.7624	3.7124	3.7089	1.5465	2.7416	1.0085		0.847063	2.26322
17.2677	3.5481	3.547	3.7829	2.979	2.2622	1.2815	1.3633	0.8496	0.7493	1.7834	2.9067	4.2951	1.1945	1.1131	4.5446	3.551	2.4429	1.6638	2.4247	1.6162		0.852941	2.39495
17.3868	2.1311	1.9308	4.7053	3.7884	1.6016	2.3567	0.7427	1.9771	0.6571	0.7585	1.4378	2.8702	1.2395	0.6903	3.8128	1.7141	2.2396	2.2576	2.6097	0.9097		0.858824	2.02153
17.5059	2.4503	1.6	3.3786	3.5521	2.263	1.2369	1.4382	3.2969	0.4206	1.0096	1.2777	5.3804	1.2554	1.632	3.7092	2.3494	2.2104	2.137	2.7721	1.0205		0.864707	2.21952
17.625	1.6354	1.7332	3.193	1.9812	3.7552	1.108	1.1814	3.4248	0.8674	1.4615	4.1051	3.6663	1.9983	0.7407	1.93	4.5817	1.7452	1.9108	0.929	1.6428		0.87059	2.17955
17.7441	2.7556	3.0932	3.4483	2.8279	4.1685	1.2418	1.6544	2.5761	0.7291	1.0138	4.033	2.5846	1.3806	0.4758	2.9106	4.335	2.8508	1.6144	2.0849	0.6337		0.876473	2.32061
17.8632	3.0867	3.5119	3.342	2.7751	3.4327	0.9718	2.4965	2.7902	0.4814	0.6883	3.2358	3.5779	1.2203	1.4519	1.8807	2.7549	3.1363	1.4156	1.4422	3.3169		0.882356	2.35045
17.9823	2.4017	3.4327	2.0958	3.1766	5.1305	2.0982	1.2679	1.9196	0.4123	0.3743	1.2167	2.2037	0.2006	0.7126	2.7821	3.1029	2.1461	1.4824	0.6712	1.6862		0.888239	1.9257
18.1014	2.9349	4.2238	1.997	2.1596	2.8158	1.6915	1.6657	2.6828	0.3081	1.4519	1.5664	2.3579	1.128	1.0495	1.9767	3.1599	1.6146	1.8088	0.8979	0.1348		0.894121	1.88128
18.2204	2.6964	2.7969	1.3492	2.3039	2.2729	1.6847	1.6356	2.2652	0.7192	2.0377	1.9791	2.8091	0.2892	0.4387	1.7891	2.965	1.7582	1.9104	2.7002	0.5974		0.9	1.84991
18.3395	4.2555	2.4759	1.9114	2.9217	1.5718	1.5746	2.6668	2.4185	0.6913	1.2737	1.3797	2.2943	0.8161	0.159	2.1418	2.3419	2.0084	2.4145	1.6286	0.4177		0.905882	1.86816
18.4586	3.008	3.3364	1.1693	2.4643	1.3796	1.8617	3.6755	1.0737	0.4794	1.8214	0.8096	1.8905	0.4353	0.3535	1.8343	2.0715	2.4102	0.9619	0.9378	0.6103		0.911765	1.62921
18.5777	0.94	4.8738	2.1496	3.7563	1.8005	0.8078	3.0602	2.3221	0.1337	0.4974	1.6913	1.4224	0.7543	0.2105	1.509	2.1639	2.6475	1.4692	3.2467	1.8653		0.917648	1.86607
18.6968	0.8649	2.5758	3.3536	3.498	2.2454	1.467	1.9813	3.0385	0.384	1.706	1.8398	1.2443	1.2136	0.5917	1.3986	1.6415	1.7148	1.3026	2.191	1.6424		0.923531	1.79474
18.8159	2.0247	1.4319	2.7986	2.5256	2.3334	1.3398	1.8898	1.7353	0.5595	1.0262	2.2106	1.0565	0.5481	0.0892	2.1962	3.4646	1.7464	1.441	1.2893	0.7812		0.929414	1.6244
18.935	1.9916	3.4563	1.9079	3.6367	1.9009	0.9724	3.5003	1.1723	0	0.3581	3.3273	1.9442	0.2984	1.527	3.5799	2.0487	1.2255	1.7224	2.3286	0.6451		0.935297	1.87718
19.0541	2.2212	2.8844	1.6165	3.4394	2.6392	2.0208	0.9215	1.1746	0.549	0.2145	1.0945	0.5476	0.348	0.0616	1.4532	1.4083	1.7458	0.3612	2.3782	0.4855		0.94118	1.37825
19.1731	2.6901	2.5364	2.9403	2.4558	1.7531	1.4272	1.4746	0.9723	0.2948	0.4079	0.8564	0.4364	2.0504	0	0.8622	1.9697	1.2243	0.1275	3.4079	1.9726		0.947058	1.493
19.2922	2.9273	1.1938	2.6945	1.7154	0.4827	2.9394	1.5614	1.0224	0.3527	0.9881	1.5506	0.63	0.6286	0.2933	1.1259	1.4804	0.9386	0.7867	2.2878	0.7228		0.952941	1.31612
19.4113	1.7679	3.1327	2.4722	2.2003	1.2058	0.7793	2.1415	1.7021	0.9259	0.3075	0.669	0.9997	0.7261	0.9456	0.3998	0.8312	1.3142	1.2063	2.6142	0.9866		0.958824	1.36639
19.5304	1.4263	2.0677	3.0501	3.3261	0.6625	0.8494	0.938	0.5956	0.1082	0.2993	1.1203	1.7955	0.6207	0.3554	0.2879	2.4353	1.4523	1.2121	2.9097	1.0607		0.964707	1.32865
19.6495	0.99	3.8069	2.1457	3.7426	1.0112	0.3923	0.8523	0.2791	0.993	1.1703	0.8885	0.3578	1.0074	0	0.3617	2.4496	1.0899	0.3793	1.3027	2.0905		0.97059	1.26554
19.7686	1.4657	2.6272	1.2463	2.4499	1.2816	1.3151	1.3899	0.8368	1.49	1.3388	0.2497	1.2869	0.7909	0.0576	0.7642	0.9804	0.5287	0.7706	2.0626	0.418		0.976473	1.16755
19.8877	1.1621	2.9631	1.8192	3.0497	1.1519	1.1484	0.7202	0.7231	0.3166	0.8027	0.4645	0.9169	0	0.7048	1.2976	2.4877	1.1245	0.821	2.2974	1.1068		0.982356	1.25391
20.0068	1.1743	2.447	0.8605	1.3961	0.6145	2.1157	0.8448	0.5105	0.7142	0.2116	0.5476	1.3265	0.1901	0.6032	1.2581	1.3955	1.3319	0.4265	1.949	1.2041		0.988239	1.05608
20.1259	2.2014	2.1388	0.8897	2.5523	1.7549	0.3509	1.2003	0.132	0.0035	0	0.3875	1.2892	0.7721	0.0787	0.9912	1.1425	0.9689	0.052	1.8194	0.8173		0.994122	0.97713
20.2449	1.7735	1.3004	1.9026	1.5624	1.0773	0.1499	0.738	0.77	0.1668	0	0.6361	0.1937	0.542	0	0.9845	1.8323	1.0725	1.0641	1.2436	1.0019		1	0.90058

## Sheet: Image12
X0	Y0	Y1	Y2	Y3	Y4	Y5	Y6	Y7	Y8	Y9	Y10	Y11	Y12	Y13	Y14	Y15	Y16	Y17	Y18	Y19	Y20	Y21	Y22	Y23	Y24		Ap-Ba	Avg int
0	19.6435	24.4636	18.8632	40.453	54.1278	45.306	37.223	33.066	36.8249	21.7	24.3093	22.4714	22.136	22.4325	11.0759	11.2508	8.9035	16.8181	27.324	38.6899	43.456	16.1207	14.6231	25.268	31.7021		0	26.7301
0.1191	15.408	30.6421	27.0003	44.209	49.3383	48.778	31.393	32.168	41.3181	21.2596	25.8432	27.8745	27.863	17.8093	12.6004	11.7107	12.8685	16.2555	29.175	41.3055	49.758	23.412	10.8398	31.375	30.2766		0.00502563	28.4193
0.2382	20.9337	37.3353	31.4149	47.422	54.292	58.746	35.039	34.87	49.8357	31.3054	35.6433	26.9585	22.291	19.5202	16.9118	13.6516	7.874	16.505	32.294	43.5659	56.076	26.2313	10.5934	35.863	35.5043		0.0100513	32.0271
0.3573	26.7892	35.4211	30.4183	43.288	52.2993	57.257	43.479	36.18	54.6922	30.3971	31.3511	30.8766	32.381	24.7118	18.3661	13.06	11.5717	29.2938	37.205	35.9226	51.495	35.6862	14.4435	33.58	42.0051		0.0150769	34.0868
0.4764	30.9702	51.5469	40.4329	49.869	58.0121	54.65	55.489	40.536	56.6944	31.6927	39.4371	40.7111	34.404	33.7303	21.0273	13.6911	11.0183	28.9387	41.677	40.1103	50.042	32.9253	15.7795	38.974	47.5193		0.0201025	38.3951
0.5954	35.5603	44.0871	50.3322	54.569	51.9017	63.296	62.497	44.623	64.6679	51.8822	49.0637	51.4831	39.278	40.2017	28.5795	18.6841	13.2001	37.6806	56.416	44.0513	63.002	40.9946	20.4716	42.104	57.7389		0.025124	45.0546
0.7145	47.2592	48.538	56.4188	56.349	62.3284	63.716	64.973	47.886	57.7825	56.553	54.6105	60.9573	46.241	47.4996	35.322	25.9678	18.3923	48.3126	64.261	43.4369	68.189	53.1299	21.1858	42.752	68.7729		0.0301496	50.4334
0.8336	48.586	60.2495	85.7695	55.831	58.1753	70.746	73.484	51.834	58.3298	69.6513	70.2075	59.4886	51.927	56.9539	47.6079	35.2802	23.0272	53.3592	71.362	53.3636	63.821	65.9313	23.5329	43.809	70.133		0.0351752	56.8984
0.9527	61.7776	63.1963	82.2589	79.509	64.2374	70.105	81.987	59.11	69.7125	68.9278	86.6026	77.9534	51.298	78.7411	59.7177	46.4818	25.7339	67.1313	91.342	55.8598	59.969	76.6517	34.3579	37.151	77.9313		0.0402009	65.1098
1.0718	61.2424	75.3822	87.2268	78.767	61.9845	83.128	95.744	63.593	69.0279	81.9446	85.6395	74.3786	62.031	79.5625	71.9364	59.1458	45.6968	57.8015	112.88	56.8959	68.032	81.671	46.4321	51.467	80.991		0.0452265	71.7041
1.1909	64.0748	62.593	91.0945	86.297	65.9431	94.836	104.718	74.718	64.8133	87.3046	91.9566	77.6558	68.653	85.4744	78.4754	65.136	64.712	72.7668	107.107	71.2178	76.269	73.4506	60.007	60.554	81.568		0.0502521	77.2558
1.31	62.2585	66.6539	92.962	90.75	63.8481	96.314	103.596	82.202	73.5681	94.526	85.1114	88.9077	83.182	83.6643	84.3375	81.0018	67.2095	81.0798	93.52	75.2399	72.283	88.3616	86.656	63.07	82.0412		0.0552778	81.6938
1.4291	61.0011	59.4545	83.9687	98.947	69.9418	88.153	115.056	93.53	78.1737	89.9083	89.7158	92.4551	90.848	80.3437	82.8174	72.3387	67.7757	76.5214	87.156	75.4741	73.401	81.1984	97.7704	63.919	76.8553		0.0603034	81.869
1.5481	49.6586	58.7768	73.3254	102.954	69.9325	94.077	124.058	92.995	74.6589	81.6673	81.0474	81.7367	110.676	84.2145	82.3267	78.5324	75.5677	76.0665	70.466	68.2099	70.575	80.8505	102.54	70.229	63.9182		0.0653248	80.7624
1.6672	49.4397	43.1822	64.6887	106.685	67.8628	98.353	123.765	90.343	66.223	85.5857	82.4692	86.1124	105.935	70.5733	80.4284	60.5778	78.7427	78.9411	62.08	67.5737	76.334	71.9509	97.3425	76.638	61.8478		0.0703504	78.147
1.7863	42.8412	36.044	65.112	68.639	57.7538	108.182	109.837	106.664	73.1616	82.3106	74.9214	56.5676	116.023	64.1924	75.8798	46.0363	79.6108	74.5797	52.22	73.8513	72.299	71.1595	84.8831	84.146	57.6179		0.0753761	73.3813
1.9054	42.6717	37.6093	61.4267	86.924	76.2002	98.413	97.672	96.12	68.2525	67.9419	63.4785	58.7238	109.411	55.1732	67.7638	53.4237	92.0762	73.5966	47.142	63.5624	78.927	66.2764	79.6439	96.62	50.0884		0.0804017	71.5655
2.0245	47.4027	32.7289	63.4687	70.852	71.9121	87.654	78.969	94.998	77.875	63.7863	64.7143	48.4636	113.999	58.5596	42.776	45.9639	88.6577	48.4361	43.887	64.8039	81.279	68.1637	79.0486	104.481	49.7641		0.0854273	67.7058
2.1436	44.4473	35.4245	55.3193	52.686	74.5515	103.577	75.896	92.205	67.487	58.2867	52.4428	43.1239	96.656	37.6518	49.5022	36.2945	69.6478	52.809	48.892	61.1343	89.335	70.0285	70.8009	101.853	37.0635		0.090453	63.0846
2.2627	36.6078	28.2454	51.9245	47.361	73.139	107.302	65.013	84.973	57.6346	62.3045	50.9951	34.0243	89.024	38.8146	43.5906	39.0626	67.6709	46.8825	42.926	53.1415	88.901	67.7744	69.7273	105.214	40.4769		0.0954786	59.7092
2.3818	42.0051	29.1662	39.7359	40.824	73.8617	98.329	63.935	95.141	51.9691	53.3738	48.4915	22.8464	73.46	36.6417	34.8191	44.7892	60.1951	41.1865	29.806	46.2509	92.371	60.8399	61.1938	92.259	44.0701		0.100504	55.1024
2.5008	30.7567	27.9215	46.194	38.27	85.2865	91.004	52.735	79.944	55.9315	49.7418	31.8314	25.4624	54.288	33.6923	31.0679	29.8071	50.8148	34.3116	32.726	49.9866	104.048	61.7683	53.7617	104.055	50.4666		0.105526	52.2349
2.6199	29.292	26.2452	37.8437	35.995	80.7714	81.418	41.709	82.159	44.3461	44.6816	31.8266	25.1711	38.608	38.7604	33.8276	24.8811	40.4823	34.2528	26.678	42.4288	95.404	52.2095	47.1133	99.335	46.0282		0.110551	47.2587
2.739	29.9541	28.4193	32.7334	36.113	79.8144	76.689	35.484	63.662	41.0826	40.8633	26.901	21.9869	31.643	29.8655	29.8033	32.7142	45.0254	26.3272	23.114	34.4774	80.602	47.5693	49.0044	103.931	49.8282		0.115577	43.9043
2.8581	29.2923	23.7975	34.1235	33.034	70.8698	61.996	29.098	55.855	30.0904	40.3823	24.7712	19.4466	34.093	23.447	31.8882	24.782	33.3065	27.6347	24.527	29.8111	89.987	49.3414	51.2738	97.121	41.4083		0.120603	40.4551
2.9772	29.7073	24.4919	36.5618	36.198	73.2693	51.098	28.94	43.111	26.9849	29.1325	22.441	19.0858	29.984	21.8112	22.9174	21.5234	29.5076	25.3545	23.053	21.6235	78.231	44.7026	57.7786	97.675	47.3672		0.125628	37.702
3.0963	29.052	29.6978	31.4981	27.551	72.9298	39.231	20.829	40.578	19.8432	29.7354	22.5915	17.2489	23.489	20.4512	18.3297	20.9999	31.505	21.7939	17.815	19.1807	81.428	36.6108	52.0912	101.925	40.7051		0.130654	34.6844
3.2154	31.6174	31.1365	26.6765	26.622	72.4378	29.27	18.227	28.82	17.7691	26.7599	19.7904	10.4816	21.878	20.453	23.0762	17.6211	29.9925	22.4174	14.073	19.4249	62.583	32.6157	51.3149	93.096	43.4887		0.135679	31.6657
3.3345	25.8837	29.4693	25.6379	29.739	82.7389	30.374	10.606	23.418	18.0616	25.312	18.1636	9.9017	25.703	16.7104	19.9933	16.1659	16.1716	18.6568	14.154	13.3508	59.03	30.3829	47.3231	81.988	45.2495		0.140705	29.3674
3.4535	25.4779	23.2898	27.4297	35.409	78.8282	22.434	12.686	22.394	15.3	22.4446	14.3177	10.7595	19.489	15.6769	19.5145	12.6562	20.9957	17.5664	10.627	15.5103	52.928	30.9034	44.6677	73.315	43.9031		0.145727	27.5409
3.5726	24.371	21.9535	22.5856	42.201	69.1776	20.685	8.03	18.398	14.8471	18.3165	17.2564	8.1306	14.099	16.2923	13.9735	14.6013	18.243	13.0493	7.887	12.9645	45.722	25.5811	47.3142	68.831	48.0547		0.150752	25.3026
3.6917	24.2124	26.9478	25.7758	38.411	71.4824	20.356	8.136	22.131	15.2886	16.8049	10.5253	9.7036	16.221	13.5977	12.6944	12.9662	17.0728	11.4216	6.599	9.5192	34.977	24.9715	48.1182	68.606	55.2631		0.155778	24.8721
3.8108	25.6272	27.3517	29.3795	38.215	81.7338	14.965	5.768	13.604	15.7138	12.556	8.4698	9.1694	10.125	17.598	11.1322	11.4617	15.0856	17.8349	7.39	11.5645	32.065	22.3595	31.4851	58.863	53.2057		0.160803	23.3089
3.9299	26.3792	23.8289	35.4806	40.473	75.6294	13.66	5.325	12.141	12.2059	13.8527	7.3719	7.1498	9.692	15.0082	12.6522	10.1506	13.9011	12.6152	6.535	9.5908	33.037	16.7606	34.1165	52.491	54.7511		0.165829	22.1919
4.049	25.475	25.4351	30.8123	45.384	79.5166	14.155	6.418	13.861	16.7252	13.7314	8.5748	5.4225	9.517	14.8495	7.2459	13.4658	15.1801	12.9076	6.076	9.5907	27.501	19.1196	30.8997	57.102	51.1935		0.170855	22.4064
4.1681	19.5427	21.4228	31.4918	44.069	89.5534	13.976	8.961	11.224	10.6115	10.3701	8.1879	3.9894	8.304	14.9956	6.4697	10.0182	13.0916	9.4452	4.092	8.7334	21.042	15.6322	32.0906	44.728	49.8178		0.17588	20.4744
4.2872	27.6484	27.745	34.7636	41.955	85.7707	16.235	5.756	10.416	11.9294	10.1047	5.5226	5.2113	3.957	13.1915	8.6599	10.144	10.6486	9.0888	5.843	6.1337	24.569	15.3294	35.7784	42.661	58.72		0.180906	21.1113
4.4063	26.8804	25.9662	26.6276	49.937	69.1786	11.599	5.104	5.45	11.5033	10.1896	7.7898	5.0162	6.341	16.8596	6.8815	8.9713	9.1521	9.2112	3.784	5.9665	17.289	11.6202	31.7659	42.424	56.6005		0.185932	19.2843
4.5253	27.9388	27.39	30.3803	48.404	61.835	12.847	9.964	9.883	11.6984	8.6584	8.6909	4.8654	8.111	18.8838	4.8288	10.2772	11.1871	9.4221	6.879	7.6139	16.766	10.5676	28.9566	48.561	65.3881		0.190953	20.3999
4.6444	26.4225	26.8871	30.5667	53.763	55.234	11.228	10.436	6.138	12.8367	10.9575	4.6353	5.9281	7.206	17.7363	5.9934	9.3401	10.2283	6.3867	5.622	7.7412	16.64	12.1337	26.916	43.862	59.1275		0.195979	19.3586
4.7635	28.0038	24.7572	35.3463	42.605	42.2279	10.824	3.921	8.756	11.1315	12.6167	5.7103	5.3452	6.998	20.2207	5.9897	8.6759	6.6147	5.3401	5.002	7.9742	12.753	12.12	24.3138	36.449	52.782		0.201004	17.4591
4.8826	29.5118	30.686	29.3078	52.025	35.3183	10.122	5.089	9.04	13.4487	11.1054	6.2513	4.881	6.775	16.549	5.8495	8.1693	4.7232	4.8915	6.984	6.0434	12.271	11.2827	19.9859	36.431	53.4329		0.20603	17.207
5.0017	28.2121	34.8162	31.4801	47.994	25.3541	10.938	5.905	9.863	13.0651	11.8082	5.0998	3.0554	8.537	16.1923	4.6181	6.3513	7.9187	4.0506	2.045	5.8666	12.607	10.9732	17.2853	29.625	63.6441		0.211056	16.6922
5.1208	25.0155	36.4482	27.5592	55.304	24.3281	9.472	6.062	4.946	12.2537	10.44	7.5729	3.7048	4.708	13.9281	5.6904	5.2105	4.3549	5.5979	3.383	7.4744	19.215	11.101	22.4377	35.233	65.7317		0.216081	17.0869
5.2399	24.5991	35.2923	29.2797	46.01	24.4443	7.96	4.771	7.582	13.7262	13.7658	7.6202	5.4	6.507	21.1761	5.1947	6.6463	4.6996	4.0281	4.28	5.7161	13.216	7.4468	16.9802	30.013	57.3556		0.221107	16.1484
5.359	27.9583	35.8608	27.6687	43.821	24.6876	9.28	3.616	9.246	9.8698	11.5679	4.0525	4.498	4.218	17.951	6.1033	7.8406	6.164	3.4189	3.337	7.639	11.248	10.0018	19.0465	31.832	56.3125		0.226132	15.8896
5.478	33.949	34.9088	28.5539	34.545	23.967	9.426	7.053	5.879	11.2973	11.1739	4.8791	4.3524	6.233	12.5871	6.1384	5.7939	3.5656	5.5113	4.441	7.4741	13.263	7.425	16.8217	29.822	49.2491		0.231154	15.1324
5.5971	32.3497	29.189	30.8993	36.384	13.13	4.159	3.633	4.628	9.266	8.7947	4.0666	4.7304	5.277	14.7075	5.5132	4.4854	4.8605	2.9235	6.738	7.2301	15.871	5.586	13.9941	27.088	64.4011		0.23618	14.3962
5.7162	32.4788	34.6824	31.3098	26.572	13.9387	7.163	4.135	5.685	11.1639	10.3896	2.5457	4.4223	3.747	15.5661	7.1586	5.8971	5.8473	2.58	3.586	7.116	13.812	11.1142	14.4744	21.401	57.3425		0.241205	14.1651
5.8353	32.6625	36.3791	27.348	19.732	12.3423	6.329	5.996	5.362	9.5101	8.348	4.4529	1.9287	3.885	25.4741	7.125	4.862	7.4158	4.2409	5.583	7.5467	11.608	7.776	16.4332	13.312	51.4163		0.246231	13.4827
5.9544	31.8424	27.6695	22.146	14.604	12.245	5.827	6.455	5.896	10.5958	7.9585	2.8153	3.393	5.752	24.7949	3.4191	5.35	2.9665	3.9569	3.29	5.3937	8.906	8.9741	18.0585	20.592	58.0616		0.251256	12.8385
6.0735	35.5501	25.8659	24.5962	13.792	10.3616	9.005	2.993	6.753	12.2473	7.482	6.1688	3.8746	4.737	20.7176	4.6557	6.5319	5.3385	2.3864	5.089	8.2096	12.703	8.1852	15.0997	12.97	50.8402		0.256282	12.6461
6.1926	35.1811	26.885	16.0688	12.698	13.3914	6.775	3.927	5.728	10.0274	6.4979	3.8997	3.8056	5.645	23.9095	3.9642	6.3825	3.0532	3.3564	4.359	7.5453	13.66	8.1122	12.7871	10.71	54.7766		0.261308	12.1258
6.3117	33.7768	29.9276	19.06	8.288	9.2399	6.954	5.133	6.194	15.4611	4.4221	3.1041	6.503	3.845	19.1133	3.736	3.4131	6.3149	2.5594	5.059	8.9472	12.907	7.9753	17.979	13.749	51.7689		0.266333	12.2172
6.4307	30.2125	29.8992	20.0844	6.734	9.5984	6.206	4.168	7.262	15.1256	3.9619	4.9724	5.9076	5.047	19.989	4.9072	4.0427	2.0738	2.3156	5.532	6.0319	16.456	7.2943	13.9832	10.599	41.872		0.271355	11.371
6.5498	38.8971	23.4084	21.4625	8.281	7.6177	6.939	6.302	5.778	19.9127	6.1451	3.5881	4.6084	4.42	28.2866	6.3115	5.3134	3.4095	3.414	3.65	7.162	14.497	7.3226	16.4832	11.771	39.3877		0.27638	12.1747
6.6689	37.0822	23.1511	13.3522	7.659	7.8817	9.115	3.948	4.349	12.3446	5.4392	3.7081	4.5419	3.916	32.6372	3.6709	3.712	3.0724	4.201	6.057	6.5201	11.096	5.4424	14.2929	11.073	42.3318		0.281406	11.2238
6.788	36.1572	19.864	13.845	6.241	9.362	10.498	5.277	4.16	10.9299	7.4443	2.5114	4.1443	6.816	31.6998	4.3356	4.4177	3.9237	4.0553	5.953	6.6797	15.658	8.4695	15.1317	10.057	39.5672		0.286432	11.4879
6.9071	32.8885	17.8445	10.9355	6.882	8.3402	12.815	4.347	6.472	14.6975	9.5081	6.1049	2.3228	4.664	37.506	4.1703	3.558	4.019	4.6937	3.601	3.8485	12.626	8.5088	16.4572	11.094	43.2575		0.291457	11.6465
7.0262	32.8741	14.8879	13.4626	7.317	6.9798	14.699	6.709	6.565	14.88	10.9059	5.7292	5.1079	5.656	37.4812	2.9513	3.5236	4.5723	4.5383	5.307	10.5399	14.588	9.7677	14.9153	10.885	38.1125		0.296483	12.1182
7.1453	26.8291	10.4589	13.1468	7.087	8.5709	15.962	4.879	6.884	13.8122	10.7392	4.4056	4.0687	4.742	39.1123	5.4916	2.468	3.9772	4.7422	4.201	7.7938	10.37	7.1354	16.9024	9.787	36.1531		0.301509	11.1888
7.2644	27.6267	13.6249	6.884	8.544	8.2579	14.912	4.535	5.015	14.6145	8.7771	2.739	5.3079	3.727	40.8737	4.4299	2.1866	5.1428	3.0935	5.247	5.1475	16.902	7.9974	19.3425	10.448	36.9072		0.306534	11.2913
7.3834	22.6475	10.5998	11.961	5.837	8.8627	13.6	3.668	4.703	18.6605	6.3928	3.5925	3.7248	2.929	45.6731	5.1515	2.8386	2.4946	4.7764	4.701	6.5152	16.072	10.9425	18.1223	10.186	21.9644		0.311556	10.6646
7.5025	15.5384	10.4754	11.3371	5.539	7.719	14.852	6.218	5.98	12.7829	7.9603	3.9963	5.47	4.563	47.0646	3.1101	1.2997	1.6687	2.5769	4.749	4.8405	15.698	8.0455	16.8263	11.457	24.4057		0.316581	10.1669
7.6216	10.3718	8.3382	9.9795	5.195	10.1848	16.28	4.772	4.888	18.0653	12.0485	2.7739	3.9867	7.362	48.4501	5.3796	2.6638	2.9877	4.2873	3.805	9.1633	19.98	8.9215	23.8803	10.231	27.4642		0.321607	11.2584
7.7407	12.3543	9.5606	9.3877	7.408	12.2444	14.536	5.025	4.418	24.0898	6.3845	4.6203	4.9639	4.056	47.3444	5.7164	2.4634	2.9114	3.8475	4.556	6.892	11.103	8.2499	21.0206	10.332	29.3571		0.326632	10.9137
7.8598	15.9562	6.8149	10.8147	9.083	10.5073	16.232	4.661	5.365	21.8334	8.8043	4.5879	2.1287	4.507	43.0442	5.1867	2.2414	3.0385	5.6412	4.917	6.7614	13.774	7.9187	20.4636	10.869	23.0531		0.331658	10.7282
7.9789	14.1364	8.4291	8.0246	9.171	9.5589	15.912	7.163	5.751	18.7992	10.6206	4.919	4.6084	3.625	46.8944	6.7062	1.8669	2.5061	5.3721	3.821	7.8288	14.19	10.0367	16.4782	9.163	16.7101		0.336684	10.4917
8.098	12.0409	4.1899	7.7714	4.953	12.0702	15.78	4.746	5.9	15.9781	10.8675	3.6972	6.0318	3.506	39.7054	4.8926	2.5697	3.2726	4.0935	3.859	4.4283	13.358	9.4845	17.5803	7.336	17.064		0.341709	9.40704
8.2171	14.6158	8.1017	11.3213	6.366	12.0212	24.954	6.015	4.644	16.6349	11.4241	3.4317	3.1815	4.008	33.368	6.9217	2.622	3.5823	6.8173	7.471	5.1187	20.525	8.19	15.7283	6.645	24.5797		0.346735	10.7315
8.3362	7.8437	3.689	8.1962	5.921	11.6588	25.494	4.083	3.183	16.8897	10.1388	4.9731	4.0135	2.516	27.7562	5.7268	4.1524	2.913	3.3121	4.839	7.1354	16.778	10.7157	18.7533	7.451	18.4761		0.351761	9.46435
8.4552	9.7851	5.5145	6.8805	7.677	12.3922	19.594	4.498	4.838	15.6896	10.534	4.8165	4.0954	5.204	34.998	5.5024	1.9063	2.1416	3.8499	5.251	7.8555	16.926	11.0376	17.5455	6.567	15.3969		0.356782	9.61986
8.5743	5.8884	5.2309	8.7003	6.803	9.1194	26.311	5.442	5.436	21.3442	10.0279	4.1449	4.655	5.076	36.4003	4.6051	4.2539	4.2128	4.5812	3.825	5.1816	18.467	7.6906	16.8027	10.316	13.9231		0.361808	9.93753
8.6934	4.7344	3.6629	7.7426	6.216	11.8093	21.824	4.796	3.552	19.5182	13.7509	2.8972	4.5358	2.74	26.0999	3.7732	3.7	3.6702	5.2035	4.229	6.7548	18.921	9.3758	19.3049	9.668	16.1895		0.366833	9.38676
8.8125	5.88	5.1116	7.2967	5.691	7.9397	25.357	7.502	4.257	16.103	12.9345	4.0606	3.1534	3.467	22.4666	6.9711	4.0479	4.1424	3.5144	3.41	7.3464	16.678	11.566	17.5242	10.126	11.3754		0.371859	9.11688
8.9316	6.8927	4.9591	5.6249	7.038	11.8625	27	6.479	5.89	15.0078	14.1814	4.8117	4.437	3.414	19.4847	5.9348	1.8656	5.3656	3.9452	4.584	7.9701	18.983	14.28	17.8432	9.618	11.8172		0.376885	9.57158
9.0507	4.1956	5.8335	8.2036	6.035	7.218	24.694	6.546	6.556	12.578	13.684	1.4905	3.0649	4.163	21.4208	5.5785	2.674	4.1895	2.6429	4.053	7.4221	17.103	11.3662	17.2366	8.797	11.4435		0.38191	8.72757
9.1698	5.9708	3.1979	7.3667	5.338	10.2671	25.163	6.274	4.77	15.6881	15.1397	1.8709	5.6304	5.236	24.8971	7.3679	3.6515	3.6296	5.9839	7.978	7.1651	16.496	8.7385	17.6415	10.877	11.9761		0.386936	9.53259
9.2889	4.5767	2.7858	6.3249	4.66	9.7851	25.373	5.487	5.437	18.7827	17.3864	5.6228	3.8956	5.245	20.9565	7.3185	1.5613	5.2258	2.5773	4.238	6.1237	23.567	10.9712	17.7364	8.638	10.6279		0.391962	9.39614
9.4079	3.2648	3.8234	5.8936	6.543	9.464	27.896	4.294	6.313	15.8231	17.9425	6.24	2.6955	5.38	19.2223	5.6845	2.2906	2.5385	5.1967	6.346	5.716	24.309	9.3926	22.1321	8.38	7.8904		0.396983	9.38686
9.527	2.6389	4.365	4.3663	3.923	8.1978	24.337	9.311	5.26	21.2177	18.9711	5.5885	3.3604	2.105	19.5728	7.0899	4.592	3.6542	3.9383	6.366	7.753	26.849	12.8271	15.2798	9.1	8.8428		0.402009	9.58026
9.6461	5.9478	7.8452	5.6112	5.711	8.3523	29.452	5.777	7.176	22.4957	18.009	4.5581	4.2308	5.242	17.0281	7.6454	1.7147	3.5029	4.9813	5.202	7.6581	26.395	9.7775	20.5804	9.903	7.1386		0.407034	10.0774
9.7652	5.1314	2.6145	5.721	5.6	9.108	29.495	5.463	5.662	21.5872	18.8304	4.594	3.245	4.418	16.0092	7.8119	3.5362	2.8258	3.7457	4.744	6.0031	30.652	10.2816	22.7728	8.072	7.958		0.41206	9.83527
9.8843	4.5244	2.1484	5.2741	4.159	6.6579	23.153	4.091	4.932	20.5387	17.739	2.6864	4.1217	3.805	18.4686	6.8326	2.0842	3.0546	2.157	5.538	6.6216	36.419	13.5674	23.4255	8.117	6.5714		0.417085	9.4675
10.0034	4.3851	3.4653	4.3363	4.556	7.7041	26.833	6.622	4.775	21.2109	16.3759	3.6869	6.0394	4.652	19.0442	8.3329	3.7258	4.4789	5.697	4.747	6.0084	32.544	13.7036	23.3694	12.384	6.9106		0.422111	10.2235
10.1225	4.789	2.9506	4.6683	5.187	9.1386	29.634	6.092	3.037	24.3107	20.5211	4.5612	4.9514	4.213	23.6017	5.5268	4.1668	4.3083	6.1292	4.684	10.2901	40.088	12.7329	25.0003	11.159	4.9256		0.427137	11.0667
10.2416	4.6066	3.9246	5.5469	5.146	12.1996	25.289	8.462	2.943	23.7694	17.796	4.86	3.7386	5.526	21.6113	6.3781	4.5647	2.2511	3.5531	3.667	5.5602	28.84	11.5981	21.5201	10.95	8		0.432162	10.0921
10.3606	5.4342	5.263	3.4446	6.436	11.0695	28.769	8.059	7.817	21.0374	15.4712	5.173	5.8056	3.536	21.4552	6.7681	3.4435	3.5285	3.9879	4.629	3.5641	28.483	9.7827	27.54	11.44	4.9352		0.437184	10.2749
10.4797	2.3111	3.9635	4.0146	3.446	13.1374	31.722	11.768	6.301	21.1651	18.1227	3.349	5.4482	3.998	26.1289	5.0771	5.302	3.5013	2.8176	5.944	7.6039	22.664	10.6424	30.6702	10.68	4.5746		0.442209	10.5741
10.5988	3.2953	5.5534	5.4357	5.019	15.5582	28.719	8.961	5.611	13.0672	22.4201	6.8395	4.7506	5.062	24.3502	10.0355	5.0956	4.3558	4.4257	4.563	5.9086	24.246	11.4946	28.7138	10.483	4.6499		0.447235	10.7445
10.7179	4.0218	6.9272	6.8022	6.581	16.9194	25.03	7.637	3.924	15.2764	22.5328	5.5383	2.6176	4.273	25.3386	10.2924	4.4654	7.7038	6.2154	4.859	6.5175	13.972	9.4315	30.3682	10.714	4.0255		0.452261	10.4794
10.837	7.9307	4.2024	6.5277	4.65	14.2537	25.829	9.151	3.685	18.6215	23.9044	8.4683	2.5047	3.789	24.8309	8.0987	2.3767	4.2454	3.0365	5.944	7.4314	15.674	15.5618	26.5669	8.855	3.8794		0.457286	10.4007
10.9561	6.0401	4.2787	4.8322	6.07	13.429	23.388	7.774	4.258	17.0273	25.5488	7.4207	3.9111	4.752	25.6036	5.5145	2.8336	5.2088	2.8539	4.388	7.2592	17.28	16.0185	24.1263	12.969	7.8488		0.462312	10.4254
11.0752	4.6033	4.2725	6.1999	3.699	13.4804	21.333	9.192	5.929	19.5655	24.7247	7.9322	4.3844	6.855	30.7	3.665	2.8674	2.3255	2.7535	5.385	7.3961	16.653	12.8426	28.0764	12.815	6.5687		0.467338	10.5688
11.1943	8.9098	6.8163	7.9844	5.293	13.6974	28.619	8.997	3.524	17.547	17.3708	9.6326	5.0736	2.861	22.0651	5.6065	4.8674	2.3344	4.1783	2.172	5.878	18.511	13.7552	33.6506	11.42	4.4087		0.472363	10.6069
11.3133	8.1984	8.6421	7.0454	4.475	14.4022	35.012	7.858	2.062	13.675	23.7771	10.308	3.2404	3.431	20.7405	9.8499	3.9052	3.7458	2.4575	4.998	5.1401	23.318	13.7112	29.9302	12.143	5.9909		0.477385	11.1223
11.4324	5.1063	3.832	7.2537	4.919	14.0392	34.876	8.637	5.679	16.856	21.8635	4.2351	4.8899	6.28	17.1591	10.2486	4.2115	3.7522	4.5824	3.44	6.7496	21.765	13.0253	35.8402	8.61	3.8736		0.48241	10.869
11.5515	5.1553	5.1109	5.2946	3.197	12.5328	27.56	11.46	5.049	10.0718	23.9378	7.5139	5.9821	3.665	20.6448	11.1372	4.7923	5.7087	3.8842	4.471	3.6228	28.592	14.7635	37.8338	12.145	5.5765		0.487436	11.1881
11.6706	4.2141	6.1756	7.434	4.801	13.9533	31.792	13.126	4.783	10.4476	25.9957	9.177	4.4117	4.449	15.5765	7.7372	4.4305	5.0913	6.9651	4.123	2.0728	22.659	16.7541	27.0144	14.073	6.4168		0.492462	10.9469
11.7897	7.903	5.6759	7.5213	6.07	12.8417	27.698	8.68	4.165	13.3235	35.0422	8.0281	4.3654	2.88	18.6171	7.1813	6.8729	5.0185	4.6068	4.406	3.9325	17.532	19.4084	29.7055	17.185	5.4853		0.497487	11.3658
11.9088	4.4426	5.6312	12.231	6.852	15.8919	27.615	16.258	7.774	8.5178	25.9472	7.9055	6.2547	5.006	20.3498	3.8688	4.4597	2.9741	5.1386	3.079	6.1766	22.247	24.1252	32.2162	14.181	6.1688		0.502513	11.8125
12.0279	5.8313	5.6249	9.5416	7.268	15.9983	21.762	12.951	3.671	11.0974	30.5649	6.8826	7.4073	5.726	17.7622	5.3998	7.3481	6.1852	3.3866	5.189	5.2451	12.477	23.2338	26.9176	17.467	5.7084		0.507538	11.2258
12.147	4.233	6.7382	10.086	8.378	11.1332	11.648	15.421	5.1	7.5686	30.0409	8.9568	6.2314	2.859	14.4888	4.8444	4.342	4.8148	4.4865	6.138	3.8973	15.517	21.4202	29.5077	22.41	8.6866		0.512564	10.7579
12.2661	4.3226	7.9788	13.291	9.421	13.0654	14.844	14.964	5.336	11.4115	30.3176	9.7655	4.4052	2.608	14.3951	8.5108	4.0886	3.8635	5.9447	5.625	4.1566	15.108	22.0013	27.3657	20.641	4.3081		0.51759	11.1096
12.3851	6.4919	9.3853	9.6134	10.824	10.2182	16.682	14.65	3.39	8.9475	34.9096	8.2788	2.7719	3.785	15.6106	8.1846	5.775	4.9777	5.2573	2.916	5.7976	17.984	29.0985	24.3396	18.378	7.4105		0.522611	11.4271
12.5042	9.0687	8.3802	13.5054	9.085	10.8736	11.221	19.349	5.626	4.822	36.6994	12.2042	5.854	4.365	16.8439	8.8799	4.9307	3.5516	2.836	2.463	4.1894	16.614	30.5653	29.1467	21.243	7.704		0.527637	12.0008
12.6233	10.0036	10.0967	12.2884	8.6	13.294	10.648	24.499	6.699	6.5477	29.8174	9.6742	5.1914	4.194	16.3019	5.3827	5.4715	6.0523	3.4589	5.966	5.1452	18.23	32.4859	22.5499	18.657	10.6101		0.532662	12.0746
12.7424	7.9868	12.9194	10.3622	8.379	13.3473	10.952	22.183	6.033	9.0316	31.6111	10.4177	5.3815	6.179	21.1129	5.7745	5.5048	4.4021	3.164	5.439	4.4847	14.505	38.6701	22.6527	14.83	9.8255		0.537688	12.206
12.8615	5.1964	13.6186	12.3622	10.925	13.8028	13.064	26.156	5.273	7.608	28.3709	6.3149	4.8937	3.428	18.0947	8.0695	3.7973	3.7332	4.2236	5.548	6.3993	11.859	29.0718	22.9875	13.582	10.9907		0.542714	11.5748
12.9806	7.2058	7.4117	10.0817	7.939	14.0177	15.719	30.012	4.921	9.1828	29.9284	9.8521	6.3523	1.372	16.1364	7.7139	5.5411	3.5762	2.1988	3.603	4.0384	12.837	33.0845	21.832	10.415	9.771		0.547739	11.3897
13.0997	7.206	8.4369	9.8469	13.561	13.3883	13.114	28.959	5.166	5.781	26.3018	9.3444	5.0676	4.061	13.6254	9.6963	4.1392	3.1263	4.7868	4.722	5.3305	13.246	28.0298	13.5713	10.567	12.8389		0.552765	10.9565
13.2188	6.2493	9.0427	10.7365	11.559	12.1196	14.169	28.319	7.288	9.4275	21.192	14.1772	4.5368	5.517	15.6004	12.5579	4.6127	3.9458	5.4112	5.036	4.7906	13.144	26.1679	10.6938	13.308	17.502		0.557791	11.4842
13.3378	10.8069	7.7135	10.4891	9.792	11.3283	12.735	22.813	8.361	9.4294	15.4206	9.2245	3.7671	5.004	14.6648	11.6316	7.4298	4.7467	6.5556	5.491	4.4335	14.303	23.982	12.461	10.828	11.0715		0.562812	10.5793
13.4569	6.2256	7.8248	8.4807	9.004	12.2103	17.669	17.787	6.659	6.458	16.3888	12.4395	4.5996	4.324	18.068	13.2621	6.5574	5.0832	4.2313	3.688	4.3272	11.129	25.6183	15.3826	14.733	15.6577		0.567838	10.7123
13.576	6.1878	8.2825	8.5197	6.378	11.4077	14.137	18.692	6.556	7.9929	22.4884	11.6055	2.3864	4.359	17.2808	7.1369	5.4618	3.5551	5.4316	3.309	5.2003	11.732	27.4062	14.4247	11.802	18.0381		0.572863	10.3909
13.6951	9.0596	10.0935	6.7863	9.851	8.7972	9.478	20.801	7.348	7.2042	12.6398	12.8467	4.2568	3.315	18.7592	8.7218	3.9476	4.0866	4.5128	3.136	4.3687	15.682	26.855	16.5078	11.682	18.6915		0.577889	10.3771
13.8142	9.5658	6.8987	8.0981	9.004	10.5206	11.722	18.957	6.675	8.7896	21.2552	9.4364	1.8589	4.81	12.5705	6.4105	6.114	4.8755	4.4632	5.29	3.001	11.983	32.296	12.4356	11.812	23.5645		0.582915	10.4963
13.9333	7.7383	11.6468	6.9072	6.875	7.492	10.841	22.425	6.258	5.839	20.9209	8.5861	4.7076	4.558	15.2296	7.4917	4.3402	3.8516	3.8682	6.16	5.1152	9.885	27.4696	12.9938	8.286	24.2781		0.58794	10.1506
14.0524	7.6056	10.7038	6.4405	6.798	13.8524	8.371	19.166	6.302	5.9848	25.9464	7.6531	5.3176	1.555	20.1601	6.1254	5.5706	4.7252	5.1899	4.887	4.8274	11.049	32.4519	13.4519	5.209	21.8092		0.592966	10.4461
14.1715	8.2497	11.5541	11.3948	8.75	9.9883	11.856	20.001	6.485	4.3358	20.6113	14.9523	5.5891	6.552	17.5173	9.6529	7.7426	5.2389	3.2114	3.689	3.9934	11.9	32.9419	12.9709	4.541	21.376		0.597991	11.0038
14.2905	6.2622	9.5323	9.9166	7.602	13.3237	7.558	19.991	9.811	5.3789	20.5838	13.7144	4.6892	6.564	13.5611	5.7729	6.2694	5.2452	4.252	4.706	5.5387	12.11	34.863	13.6344	7.159	25.3422		0.603013	10.9352
14.4096	5.3903	9.1887	8.7073	8.347	12.0303	12.697	21.453	6.921	6.1232	22.26	9.7254	4.6397	3.35	11.7133	7.7571	5.8608	5.0019	6.6838	2.468	6.299	6.746	34.6214	14.5274	7.49	29.1132		0.608038	10.7646
14.5287	6.2703	9.2034	8.5698	10.796	8.0446	10.008	24.497	4.595	7.0453	22.5618	14.9862	3.1942	3.45	14.354	8.6975	3.9402	3.1135	6.5471	4.731	3.0171	9.381	30.2922	9.5139	5.411	31.9541		0.613064	10.567
14.6478	5.3286	8.0376	8.6123	12.361	9.7012	8.94	30.778	10.111	6.5113	29.3083	11.8982	5.3099	3.389	17.457	8.3718	4.1773	5.5882	4.4724	5.063	3.0693	12.721	29.6739	12.4569	6.594	30.6638		0.61809	11.6238
14.7669	8.9881	8.4728	6.2375	8.646	9.4856	8.564	26.977	9.057	5.683	21.519	13.7835	3.3398	4.046	11.672	8.3553	5.068	4.5416	6.0666	4.125	4.4488	9.76	33.4162	11.4036	10.721	23.7071		0.623115	10.7234
14.886	7.8585	9.9718	6.9487	10.343	7.9834	10.587	30.789	7.909	4.9431	24.6189	14.4961	2.5065	3.499	13.251	8.4824	4.1559	4.4842	4.2957	3.843	4.3526	9.577	34.8484	10.1383	11.477	29.1046		0.628141	11.2186
15.0051	9.3781	9.5814	5.1652	7.408	7.9629	9.985	31.723	8.111	7.0573	22.574	16.3169	3.5129	5.723	13.8817	11.1179	5.825	3.2113	6.73	3.768	7.3065	9.213	34.3519	11.8171	7.534	24.0258		0.633167	11.3312
15.1242	8.185	8.739	8.6754	10.47	6.3892	11.816	27.29	7.567	6.38	22.1017	13.6769	5.5343	5.101	14.1133	7.4981	4.3319	4.9517	6.1865	3.541	5.7112	7.559	37.1053	11.7386	7.576	17.1398		0.638192	10.7751
15.2432	12.1529	9.0376	7.7575	10.459	10.1004	10.454	31.312	6.937	8.1188	18.5052	7.9214	5.9204	3.086	16.2427	6.7334	2.8218	3.7005	5.303	4.091	5.9179	5.51	32.7906	10.1117	5.819	16.8262		0.643214	10.3052
15.3623	8.8967	7.5248	6.9358	7.685	9.8496	9.675	28.707	10.103	7.1301	21.1577	12.6549	5.244	3.853	16.7839	7.553	5.5925	5.2495	3.914	5.191	3.8285	12.209	32.553	12.8301	5.588	19.0004		0.648239	10.7884
15.4814	11.4203	8.0538	9.6241	7.899	12.2109	8.82	25.665	8.003	4.7425	22.2009	11.2333	4.1161	4.204	14.7969	7.9649	4.1821	3.5767	5.8622	5.021	6.0631	10.26	40.9364	11.3208	6.848	22.4361		0.653265	11.0984
15.6005	9.7855	12.4662	10.7923	9.405	11.7761	8.62	25.268	9.151	6.9637	21.8801	12.6511	4.2766	5.026	17.4341	8.4467	5.8512	5.4339	7.1226	7.395	5.4122	14.626	37.599	12.826	7.004	24.1052		0.658291	12.0527
15.7196	8.9559	11.511	10.1762	9.018	12.7494	11.034	22.485	10.812	5.9055	18.1427	12.3586	2.9401	2.951	14.8584	8.5111	6.1007	4.1257	4.1948	5.057	4.6041	7.724	41.9058	15.471	4.597	20.5611		0.663316	11.07
15.8387	9.2011	9.4239	10.7681	6.338	12.4579	8.5	26.982	8.764	5.9807	16.8659	12.7692	3.7577	3.9	16.6198	8.3757	4.4594	6.0047	6.6942	6.709	5.242	7.266	43.939	14.4702	8.292	18.9184		0.668342	11.308
15.9578	6.6642	9.6853	11.3233	8.458	9.4471	12.107	23.51	9.492	6.0687	18.0537	12.5551	3.5723	4.463	12.7843	8.2644	3.8868	4.3961	6.5083	4.87	7.6458	9.404	37.4311	15.3482	8.642	22.7615		0.673368	11.0937
16.0769	8.2173	8.606	8.7907	5.457	12.437	12.435	22.793	9.052	8.0803	18.4964	16.273	5.4558	4.005	14.8853	7.3524	3.8963	6.1426	5.8384	7.365	5.062	12.329	41.8019	13.4545	8.72	16.2794		0.678393	11.329
16.196	10.5012	9.1351	10.1381	6.745	10.8212	10.779	25.139	9.224	9.8802	20.6341	10.5362	5.0646	4.537	14.6124	8.9798	5.4109	3.8339	10.6467	6.11	6.8403	11.07	35.0768	11.0783	5.41	18.2987		0.683419	11.2201
16.315	8.8502	9.4241	7.4125	7.36	11.6075	13.202	25.93	10.782	4.8574	23.5973	14.803	6.3052	7.558	16.9778	9.3921	2.4962	7.3345	9.4761	7.469	5.2507	9.652	40.3758	14.6922	7.411	16.0191		0.68844	11.9294
16.4341	7.4337	6.6493	9.4672	8.7	9.7017	9.469	24.252	7.906	8.424	24.0221	13.6747	5.6905	3.422	19.2085	9.4985	4.8918	10.5635	9.2847	10.397	6.1794	7.019	41.1429	13.5848	8.464	17.5055		0.693466	11.8621
16.5532	7.0503	7.0928	11.4473	4.537	10.9344	11.962	22.395	10.718	6.2682	16.3479	13.9463	5.075	3.969	14.282	9.5512	6.0578	5.0836	11.8744	11.514	5.3368	8.988	30.4334	12.7289	6.106	16.9573		0.698491	10.8263
16.6723	8.3627	4.558	8.2584	6.901	9.2804	10.785	21.643	9.361	7.6005	18.0276	9.2643	4.3454	5.593	18.1791	9.0444	5.488	4.7271	10.923	16.473	7.6665	8.933	28.0347	15.1573	6.232	14.1152		0.703517	10.7581
16.7914	11.7116	5.2475	7.5736	7.049	6.3581	14.221	22.165	9.516	7.8065	18.1405	13.5193	5.1819	5.651	12.4169	10.6288	5.3117	7.8137	15.2004	14.485	9.9622	9.331	24.9797	10.5865	5.609	17.0707		0.708543	11.1015
16.9105	6.4055	8.8766	12.3361	5.244	10.7967	14.196	23.511	9.358	6.5913	15.1332	10.9914	6.7649	6.01	13.966	9.6856	5.2354	10.9486	12.0819	17.861	8.0298	5.601	31.0181	12.145	6.688	15.1692		0.713568	11.3858
17.0296	9.0959	10.7092	7.6464	6.598	10.3818	13.441	27.49	10.511	9.029	15.6183	18.2839	6.0373	2.583	17.0848	13.0115	5.9188	10.3242	17.2168	21.071	9.6442	6.389	34.3473	17.9874	5.511	13.858		0.718594	12.7916
17.1487	9.2656	10.3204	11.4948	6.543	8.3232	8.493	21.743	9.828	9.4706	16.3433	10.6984	6.3579	5.206	17.7379	12.2254	7.299	9.3339	24.8157	29.961	12.5004	7.299	38.2835	11.7178	7.172	13.908		0.72362	13.0536
17.2677	10.2008	9.7474	9.4075	4.574	8.4148	14.853	32.297	10.959	8.7711	22.8051	9.6815	5.8614	6.245	19.8522	12.5799	8.3099	14.2724	32.2467	27.203	14.8028	8.549	38.7471	12.3809	9.239	15.5224		0.728641	14.7009
17.3868	7.6744	10.0683	9.8903	7.617	13.1668	15.928	29.03	11.313	5.8385	15.9772	11.1233	4.682	5.452	18.6839	10.2929	5.082	14.7215	23.6983	30.655	16.5873	6.718	30.5604	13.7315	5.89	15.3688		0.733667	13.59
17.5059	12.4437	6.1784	7.713	7.239	7.5034	13.488	26.646	10.137	7.9147	14.9027	11.0165	5.145	4.873	22.4009	11.8098	7.9527	16.3339	28.4952	27.647	19.1823	6.711	35.1377	12.1812	9.017	15.943		0.738692	13.9205
17.625	8.774	5.3794	6.7622	9.151	8.3874	19.114	25.492	9.599	10.8215	16.0307	11.2894	6.603	6.133	21.3736	13.6742	10.1172	22.8616	36.9974	27.19	25.651	7.65	34.3235	12.7007	5.666	11.4105		0.743718	14.9261
17.7441	12.5467	7.4505	12.1516	9.637	8.5622	15.292	27.494	8.002	5.4016	21.7502	11.2888	6.0994	6.275	25.2526	13.645	10.5508	25.1217	28.7078	20.154	23.3177	4.41	40.6976	10.6189	4.522	11.1694		0.748744	14.8047
17.8632	11.9236	8.4197	9.5033	7.342	9.218	20.738	34.5	9.654	8.2696	21.8421	13.5021	4.9971	7.95	27.8524	12.8782	10.4499	23.387	28.8047	19.183	27.0555	6.167	33.4589	7.8089	4.114	12.0098		0.753769	15.2412
17.9823	13.7487	7.2663	10.4779	8.606	7.3977	18.542	38.896	10.012	7.7179	21.1877	11.9501	7.0076	8.615	24.3682	14.2598	19.8749	31.0976	31.0528	18.877	28.6038	7.717	37.9844	9.4349	7.42	12.8855		0.758795	16.6
18.1014	10.1026	8.2015	10.1856	9.791	7.0666	17.097	32.872	18.991	9.3495	18.9488	11.4314	3.1712	8.207	33.1602	18.0031	15.9528	41.0582	22.7848	13.085	31.7748	8.664	36.5146	10.7604	5.552	13.2185		0.76382	16.6377
18.2204	13.6339	9.0035	9.3616	7.455	8.3166	21.367	34.49	16.3	10.4131	18.4028	14.8615	5.4715	7.731	29.2723	19.711	20.297	40.08	16.374	8.044	31.8612	9.031	40.5962	7.8446	8.317	19.2783		0.768842	17.1006
18.3395	12.0805	9.0427	9.8666	7.387	10.6522	22.11	38.879	17.036	14.098	24.0081	19.4279	5.5018	10.327	34.0089	26.765	28.9808	47.4093	12.9604	7.811	30.6034	8.851	36.6805	11.469	5.846	11.9091		0.773868	18.5484
18.4586	15.0213	11.9108	12.3543	8.771	11.2838	20.557	42.289	23.13	13.2051	20.8679	18.5962	8.139	12.372	40.4543	23.8602	27.9566	48.0317	10.9952	8.309	24.4478	8.384	43.5271	11.1706	2.285	17.0294		0.778893	19.3979
18.5777	10.8729	10.0379	9.629	8.122	12.1303	22.011	38.528	23.751	14.4268	23.3238	13.7828	5.5633	10.215	37.6485	28.4185	32.2594	36.4147	10.2025	5.153	23.9558	7.087	40.6347	11.3073	3.76	12.2493		0.783919	18.0594
18.6968	14.1367	7.5128	14.0986	9.709	11.9905	23.583	49.972	26.819	17.0868	18.4488	23.0163	10.5369	16.316	38.205	28.0364	31.9702	40.807	10.732	4.915	21.2095	8.405	37.423	13.5827	4.727	11.4973		0.788944	19.7895
18.8159	12.263	7.6921	11.029	8.326	9.0332	23.239	57.308	34.482	14.5723	20.1028	16.6645	6.4889	18.482	45.389	33.3585	37.7099	33.5515	6.2132	5.164	15.4604	10.432	33.8835	13.6403	5.558	11.104		0.79397	19.6459
18.935	11.4779	10.1311	13.6201	8.036	9.9858	22.851	58.899	32.467	18.7328	25.1068	13.7513	8.0063	22.918	41.8175	37.1851	35.9667	28.9168	6.4137	3.965	10.7541	9.251	32.0441	11.0474	3.69	15.4676		0.798996	19.7001
19.0541	8.4411	11.989	10.8791	9.057	9.5859	29.974	53.575	30.112	21.1079	26.4878	17.4073	9.0668	31.847	45.0468	35.6755	25.1643	23.4578	7.2703	2.625	10.4368	13.467	36.0437	8.9048	3.769	12.1471		0.804021	19.7415
19.1731	11.4531	12.4655	11.9308	7.326	11.569	25.615	55.374	29.707	22.686	26.3088	21.0643	12.2587	36.589	38.2827	37.6057	23.8362	15.7795	3.7918	1.505	9.3049	14.221	38.8377	10.9523	2.734	11.3531		0.809043	19.702
19.2922	12.8607	11.7681	13.3964	10.145	17.6586	33.687	59.511	38.731	24.5223	21.5856	16.4569	15.9605	35.959	36.2325	34.4102	23.3594	14.2291	2.9136	2.487	6.2016	17.863	33.2831	13.4372	4.583	11.3004		0.814068	20.5017
19.4113	12.5499	14.9435	18.4037	9.775	17.7047	38.114	64.26	36.313	32.8203	22.9572	20.3518	17.6857	45.101	33.9377	35.913	16.1666	12.5441	3.2117	0.733	3.9154	26.035	32.4751	13.8474	3.775	10.8366		0.819094	21.7748
19.5304	12.6411	12.7511	17.0615	15.808	15.1882	44.591	53.738	27.337	37.5216	22.3407	21.4555	22.941	44.155	37.0738	26.8435	10.8477	7.2536	5.8705	1.425	5.1989	30.089	33.2316	18.7859	5.223	12.7594		0.82412	21.6853
19.6495	12.022	15.2408	20.0105	12.934	15.6767	46.409	41.966	29.454	36.8176	27.6809	23.1351	21.685	43.371	38.1559	36.9451	11.6944	8.5462	2.1046	1.013	3.0588	30.742	31.6314	18.4475	4.31	16.0817		0.829145	21.9653
19.7686	11.6024	16.2029	18.8658	16.47	15.2499	42.08	35.76	40.158	33.4655	25.2128	28.7871	26.0381	44.327	30.8184	31.2775	7.8256	7.0576	2.2302	1.166	3.8539	38.179	38.2291	18.0828	6.084	13.2479		0.834171	22.0909
19.8877	15.6658	17.1061	25.3679	20.981	17.831	36.732	26.553	24.889	35.958	29.1381	31.2023	24.7366	45.784	32.6805	25.3298	8.6054	6.06	2.0686	2.483	1.7106	41.794	38.1166	22.0928	5.46	10.4621		0.839197	21.9523
20.0068	17.7709	13.071	23.4017	16.627	17.7783	29.263	21.931	20.866	37.3245	34.4304	30.5462	37.5294	42.038	24.3062	20.4234	6.0961	5.047	1.5269	2.255	1.6917	39.932	37.9101	25.9836	4.087	11.6583		0.844222	20.9398
20.1259	12.8179	18.1101	22.6603	19.528	23.1414	19.039	14.633	20.467	31.3199	33.6761	36.847	41.3016	35.302	20.3488	15.1313	6.1829	3.0374	1.2472	1.162	2.8287	38.646	43.1667	28.4911	5.372	9.7109		0.849248	20.1667
20.2449	11.979	19.2225	30.4433	23.664	22.3167	17.509	13.761	10.443	28.5851	33.6733	45.2746	40.1525	35.458	16.463	11.9407	3.7488	2.1012	0.8153	0.929	2.9566	44.666	49.443	31.8768	4.658	7.4735		0.854269	20.3822
20.364	18.2422	17.8658	33.8227	19.619	22.8376	14.219	9.73	9.351	26.5083	37.4936	41.3856	43.1054	30.374	17.8777	8.7933	3.3913	2.4286	1.2262	0.116	0.9311	37.596	47.5463	30.7885	5.347	7.738		0.859295	19.5334
20.4831	17.2733	21.4092	30.4511	21.548	30.0338	8.5	8.13	9.11	21.7917	32.6723	48.7848	46.8928	20.203	14.6551	8.7021	2.9752	1.6682	2.3191	2.032	0.709	28.89	45.8611	33.063	6.282	9.0513		0.864321	18.9203
20.6022	17.5989	22.7683	39.5824	22.483	27.2195	4.324	6.548	5.444	16.7179	42.7696	59.1225	40.6125	14.469	11.8856	5.0118	2.5057	1.7336	1.316	0.135	0.4472	26.497	38.665	36.5588	6.922	7.578		0.869346	18.3566
20.7213	16.8373	23.5062	38.495	23.941	31.7318	4.393	3.874	6.379	11.3274	42.0002	51.0736	42.9371	12.199	6.7145	2.4022	3.0632	1.0721	0.6738	0.415	0.7073	21.139	47.6282	38.1139	8.119	8.9544		0.874372	17.9079
20.8404	11.8145	28.349	35.5568	25.161	36.7729	2.679	4.547	2.318	9.5269	44.1766	61.6279	36.6089	10.231	5.7335	5.2178	1.1555	1.499	1.1632	1.252	0.2542	13.832	48.0945	40.7055	8.09	6.9108		0.879397	17.7311
20.9595	17.2358	29.8715	41.8752	30.709	38.8454	2.294	2.152	2.745	7.6343	33.4951	59.2118	34.7437	8.617	6.039	2.2324	1.0354	0.7832	0.8288	0.908	0.1838	14.137	49.3492	46.6485	12.49	8.8968		0.884423	18.1185
21.0786	17.935	27.4109	35.9383	32.157	41.5513	2.279	2.604	2.211	6.4418	36.0073	54.5411	25.9298	6.53	3.495	3.94	0.7139	0.4847	0.1415	0.406	0.2989	10.481	46.2755	46.4609	13.515	7.6185		0.889449	17.0147
21.1976	21.3386	29.6281	32.1622	35.959	47.139	2.129	1.362	1.68	3.4452	38.4721	46.7892	18.3176	6.366	3.5452	1.9545	1.0657	0.8123	0.3394	0.173	0.232	8.015	45.0733	56.6154	16.923	7.2457		0.89447	17.0713
21.3167	27.3871	25.238	41.4774	47.189	55.282	1.862	1.564	2.323	5.8913	28.9048	37.0054	14.8363	4.427	3.4624	2.3828	0.9763	1.8086	0.3589	0.068	0.5579	7.373	41.4685	54.2444	19.872	8.5853		0.899496	17.3818
21.4358	26.9346	27.1937	43.8668	47.372	45.2432	0.242	2.384	2.503	3.7592	28.771	27.8357	8.7055	3.36	2.5634	2.0378	1.1963	1.1151	0.0269	0.432	0.4577	6.466	54.7321	61.9294	19.179	7.3395		0.904521	17.0258
21.5549	27.2358	31.6247	51.9401	50.738	32.558	0.582	1.383	1.098	7.5855	24.1067	23.167	6.6393	3.155	1.3072	1.8063	1.7539	0.1611	0.4211	0.591	0.9118	6.545	46.3571	60.7373	21.752	10.9676		0.909547	16.605
21.674	31.8478	34.7569	61.52	53.007	23.4646	1.407	1.788	0.74	3.542	17.6739	20.1757	7.8648	1.752	1.7289	1.1877	1.1223	0.4512	0.2558	0.409	1.1286	7.572	44.9977	53.9182	25.41	6.8524		0.914573	16.1829
21.7931	39.6236	36.5401	54.2321	61.718	16.2743	1.107	2.023	0.987	1.3739	10.8343	16.4243	7.5366	2.077	1.4605	0.3572	0.7093	0.9541	0.0097	0.018	0.1839	3.441	34.5653	57.3222	24.573	13.3979		0.919598	15.5097
21.9122	33.9687	39.7712	57.82	53.71	12.6631	0.346	0.717	1.866	1.1855	7.1008	11.9182	5.2472	3.319	0.8989	0.1089	0.6233	0.48	0.0543	0.138	0.7299	3.622	30.0523	57.6054	26.897	14.6335		0.924624	14.619
22.0313	38.9131	55.9677	46.1869	53.463	10.4986	1.039	1.511	1.231	2.8266	5.7073	8.3319	3.3247	1.264	1.6694	0.9824	0.1688	0.0233	0.0013	0.24	0.1153	3.826	16.4139	53.0115	30.334	15.1382		0.92965	14.0876
22.1503	44.5473	68.9451	31.2314	36.987	8.2959	1.725	1.727	0.904	1.3263	5.2485	6.0378	3.8205	2.512	0.1523	0.2729	0.2087	0.227	0.0384	0	0.0387	4.041	16.8387	42.6461	30.052	16.7568		0.934671	12.9832
22.2694	46.1228	68.1711	22.9453	24.295	6.8083	0.508	1.017	1.176	1.8421	4.7939	5.7092	3.8876	0.4	0.1727	0.6097	0.4959	0.6049	0.5568	0	0.4432	3.38	16.121	33.1823	31.082	15.6818		0.939697	11.6003
22.3885	43.8258	68.2121	17.1383	13.522	2.5318	1.259	0.797	0.487	1.0127	4.9522	4.4344	1.7723	1.596	0.9715	0.8557	0.8851	0.4408	0.3053	0.068	0.5529	1.713	16.1635	36.3969	25.899	24.3561		0.944722	10.8059
22.5076	52.1725	57.8171	10.1353	9.964	3.5679	0.476	0.26	1.637	0.9834	2.3485	4.5024	1.0853	1.563	0.5302	0.1473	0.239	0.0637	0.4286	0.876	0.7091	1.353	8.6983	24.7788	22.639	22.4692		0.949748	9.17778
22.6267	46.4048	41.4918	8.7391	7.249	2.3708	0	1.102	0.727	1.3331	2.8953	2.0353	0.5362	0.137	0.8586	0.3602	0.2951	0.0731	1.4455	0	0.149	0.972	7.5142	28.2528	19.746	23.6535		0.954774	7.93366
22.7458	46.7501	31.0379	7.7828	7.658	1.3522	0.425	0.333	0.278	0.6719	3.8526	2.4095	1.9255	0.267	0.4701	0.3264	0.5896	0	0	0	0.1299	2.047	7.0807	23.1882	18.526	24.6392		0.959799	7.26962
22.8649	39.5867	30.1857	3.3948	7.381	1.7737	0.485	0.261	0.19	1.9366	2.1346	2.9856	0.7312	0.09	1.7582	0.8555	0.0709	0	0	0	0.0024	0.239	6.6208	17.2813	12.598	39.0582		0.964825	6.78481
22.984	45.9397	16.4255	3.0756	3.703	1.3037	0.208	0.087	1.218	1.2834	3.2597	1.4437	1.3629	0.544	1.0598	0.0828	0.5267	0.4267	0.0047	0	0	0.178	5.5813	13.0994	8.748	32.9741		0.96985	5.70143
23.103	30.8352	15.3792	0.59	1.568	0.6261	0.139	0.366	0.59	1.3651	0.8022	1.8974	0.3694	0.189	0.0603	0.8794	0.1843	0.7956	0.0237	0	0.2439	0.516	5.6673	9.358	11.321	30.511		0.974872	4.57108
23.2221	31.6219	11.6025	1.9664	2.126	0.7623	0.006	0.569	1.203	0.8829	2.1782	1.8595	0.0605	0.005	0.0333	0.392	0.0113	0.4894	0.2132	0	0.1178	1.19	3.853	7.2472	8.552	33.2878		0.979897	4.40921
23.3412	24.3939	10.5914	1.849	1.401	1.41	0.009	0.558	0.471	0.0851	1.7938	1.7319	0.4939	0	0.3554	1.2401	0.3817	0.0663	0.0091	0.053	0.8353	0.835	2.2745	5.7517	6.562	31.666		0.984923	3.79272
23.4603	20.6922	3.8043	1.4293	0.731	1.1705	0.421	0.101	0.381	0.863	0.2599	0.7648	0.0683	0.406	8.919e-05	0.2859	0.5426	0.4783	0.0012	0.002	0.3904	0.132	1.3928	7.3771	6.274	27.9758		0.989949	3.03778
23.5794	18.926	5.7278	1.0162	0.55	1.5947	0.041	0.692	0.259	0.2373	1.7888	0.6653	0.7605	0.48	0	0.0424	0.0202	0.1271	0.0137	0	0.0007	0.89	2.4804	5.6985	6.082	22.077		0.994974	2.80682
23.6985	16.008	5.1398	1.8099	0.902	0.7988	0.759	0.003	0.291	0.9753	1.6315	3.6098	0.3554	0.967	0	0.3066	0.0078	0.4856	0.1011	0.002	0.1056	0.749	2.802	3.8191	6.431	19.1586		1	2.68876

## Sheet: Image19
X0	Y0	Y1	Y2	Y3	Y4	Y5	Y6	Y7	Y8	Y9	Y10	Y11	Y12	Y13	Y14	Y15	Y16	Y17	Y18	Y19	Y20	Y21	Y22	Y23	Y24	Y25	Y26	Y27		Ap-Ba	Avg int
0	9.5307	13.9416	8.0102	8.6788	13.725	5.6454	13.0541	11.8214	14.572	3.6498	4.7285	7.5683	12.7619	11.2634	10.333	10.1673	10.8749	10.86	6.2165	5.3645	13.4626	8.3013	6.2076	8.4563	8.7687	15.237	16.165	12.5133		0	10.0671
0.1191	14.8349	18.039	8.4474	8.6107	16.0062	5.5144	9.7004	15.265	12.9985	6.6482	5.3262	7.6367	13.2253	13.42	12.8964	11.3775	16.3186	12.0483	6.8163	8.0043	13.1814	12.7512	8.9405	8.1019	11.5223	15.6359	19.0597	17.2194		0.00709292	11.7695
0.2382	16.7643	16.8717	11.4262	12.217	17.321	7.4072	15.5404	19.7429	18.1982	7.7576	4.8859	7.0306	19.3975	13.5958	16.6962	13.8634	16.1365	12.4027	6.8495	6.0567	15.5013	11.895	11.0099	11.2216	12.8095	18.091	25.3845	10.9256		0.0141858	13.4643
0.3573	20.2885	22.2249	15.1122	16.2807	16.9438	8.4959	15.2747	23.3899	21.5857	10.1644	8.8063	7.4556	18.8659	16.2201	16.6176	14.5482	12.2474	16.6342	8.6788	9.8054	18.512	16.1571	10.4607	19.35	17.7471	16.5736	30.5185	23.6612		0.0212787	16.165
0.4764	26.014	30.3845	19.9095	22.5916	23.2707	8.4102	16.6009	28.4183	23.4201	17.4827	11.7096	10.9468	23.2958	15.9715	17.503	16.2561	21.4802	19.6164	11.5138	10.3035	17.0148	18.7962	17.6171	17.9628	18.4294	27.9303	33.4491	31.4085		0.0283717	19.9181
0.5954	31.0975	33.7277	23.6607	27.5654	34.0853	8.7964	16.533	29.6628	28.9986	21.0055	15.828	10.781	27.0342	18.5151	22.1952	14.597	24.9637	23.4363	11.5968	9.0359	20.8291	22.8187	17.3449	22.4169	25.8319	32.5912	41.548	43.7059		0.0354586	23.5787
0.7145	33.5444	39.1362	38.4484	37.6321	33.4704	9.0397	18.358	35.7351	32.0061	26.1309	16.1633	15.9799	28.538	18.0078	30.4583	17.9468	30.3936	26.9641	16.2618	11.5789	23.4516	29.5816	23.8251	31.3144	33.919	39.2696	50.0669	52.6274		0.0425515	28.566
0.8336	47.7314	37.6409	50.586	42.0297	33.7505	12.2936	27.4387	41.8172	27.7148	28.6102	27.198	23.7321	25.0003	23.2771	28.8212	25.9753	41.0908	33.6595	21.5519	18.8767	27.5543	35.4179	21.9244	31.534	42.0433	47.4256	65.1871	63.0111		0.0496445	34.0319
0.9527	61.3649	38.812	44.0014	45.326	35.1143	14.3814	28.0595	41.605	29.9802	37.967	37.1081	22.77	33.4562	21.5976	30.8836	31.0935	48.4921	32.1098	26.2985	24.0544	27.7662	51.105	31.5143	38.3114	51.5071	57.8215	62.8374	67.064		0.0567374	38.3001
1.0718	61.3907	44.037	52.2361	38.1288	33.167	15.7388	30.8676	42.3877	34.759	50.858	54.2029	37.4193	37.0381	26.0691	32.2357	47.3807	57.8552	40.7682	34.0572	24.3835	35.9522	52.378	38.291	43.9426	65.3133	69.6918	64.7647	66.1106		0.0638303	43.9795
1.1909	65.5814	44.4626	36.0432	33.764	44.1386	20.3661	41.8075	52.5016	34.5154	56.2606	52.4618	46.1227	44.3923	33.052	38.2206	56.7107	64.2219	44.1992	33.0458	33.6789	46.1988	67.5944	45.0693	48.7244	76.3066	83.5298	70.9837	63.7418		0.0709232	49.2034
1.31	57.7135	43.6004	33.467	31.1755	50.9046	19.4269	52.2702	53.3534	31.6296	60.2962	57.9191	53.9719	48.456	31.4219	41.0381	57.6707	62.7206	50.9315	34.3703	37.0434	57.4907	67.9217	39.4852	43.768	64.7638	84.0098	67.7822	64.3075		0.0780161	49.9611
1.4291	54.4159	32.9708	29.3383	28.0184	49.7448	30.7628	53.9707	53.7158	34.0326	58.2808	57.055	58.9517	44.2846	35.7369	47.6815	58.381	61.7804	37.2528	30.092	39.3683	73.4324	75.5257	41.2798	41.6373	50.0395	93.8669	70.9829	67.2893		0.085109	50.3532
1.5481	38.4525	32.0191	24.1388	36.7485	51.4156	38.8069	56.0423	61.9422	29.996	50.1116	45.4235	48.9748	42.6099	27.6344	44.9097	55.1826	52.7976	43.2536	27.3176	48.4896	74.7055	70.3438	37.3904	40.7861	38.1796	82.4574	65.6766	66.6802		0.092196	47.5888
1.6672	27.6561	23.4327	25.4499	33.1753	46.512	38.687	54.1597	55.6158	28.8765	40.9953	39.4917	36.5936	36.5468	28.6098	39.4534	48.7764	40.0079	36.9952	31.6431	50.4212	69.0943	57.0165	35.7805	41.3525	36.7667	62.4138	60.6141	59.6325		0.0992889	42.3489
1.7863	21.8949	19.4834	25.582	42.7146	47.0775	44.0662	51.7751	53.5792	21.954	40.6852	32.7622	34.9418	29.8785	24.2342	34.4374	40.9924	34.0488	33.0485	29.9983	48.6738	62.8612	53.3558	34.3265	36.1409	31.3095	54.2785	59.0622	56.0954		0.106382	39.2592
1.9054	13.9496	17.3726	31.5111	43.5047	37.4058	40.5627	40.3251	40.4387	21.775	30.0081	27.1248	30.0623	23.5818	23.3835	27.0666	28.2806	22.2996	23.7903	30.2779	48.2282	53.2211	37.7161	40.7306	39.17	34.3562	45.6099	60.2795	51.7625		0.113475	34.4212
2.0245	15.224	16.991	33.3951	42.64	27.5523	38.5956	40.5574	37.2901	13.9924	30.9799	19.7268	29.9238	25.938	20.4196	27.4823	20.7712	19.5305	19.1686	21.4427	41.1771	37.201	29.2393	38.4165	30.715	31.0632	31.4021	51.057	46.9962		0.120568	29.9603
2.1436	10.8313	14.2259	39.0835	48.0103	26.1173	37.0776	26.0148	34.634	15.375	27.6196	23.2438	30.9968	17.564	20.6928	17.9863	17.3784	17.868	18.1973	23.7667	38.0605	26.7596	24.7614	31.9178	31.8975	25.9123	30.7512	55.2577	37.8804		0.127661	27.4958
2.2627	9.458	16.632	37.8977	39.0911	24.9092	34.4236	26.1907	23.3326	7.3957	23.4279	14.9827	27.4327	13.4211	15.779	14.0776	12.7451	12.9326	11.6875	17.1575	27.4595	20.8694	18.7879	27.9118	29.271	21.3248	28.0775	40.2432	35.0868		0.134754	22.5717
2.3818	6.9565	12.4954	33.0587	40.1903	17.4917	28.1075	22.3377	18.4138	10.6395	20.262	21.1832	20.0156	17.0224	15.3446	9.3911	9.6057	10.7883	14.2798	20.3863	25.2099	15.8931	16.5534	33.1707	27.2505	23.7132	32.3294	30.0847	39.4905		0.141846	21.1309
2.5008	5.1787	13.0619	33.8039	37.3997	20.7019	22.6709	16.8067	14.8274	7.702	19.0595	12.0389	20.6487	13.9588	14.4659	9.054	7.9817	7.1606	11.5884	16.4436	18.5721	8.2048	16.3587	33.7515	22.4586	26.9252	23.5994	29.4107	30.7285		0.148933	18.3772
2.6199	5.4353	12.7103	28.7357	31.3252	16.1663	16.2197	15.1086	11.7214	6.602	19.797	14.8609	17.2983	12.3722	16.5506	9.6757	3.6595	7.4071	10.1663	14.0512	14.9294	12.4821	14.7559	28.9805	21.4458	29.3194	21.1035	31.5176	27.6375		0.156026	16.8584
2.739	3.0388	14.1914	27.1456	25.6112	14.442	14.3285	11.7575	9.0063	5.6755	22.5244	14.1159	17.3016	7.669	13.7923	4.7254	6.0921	5.1275	9.2968	11.5953	14.9895	8.6492	15.1966	23.3893	15.7219	26.1474	16.8422	22.7695	20.6036		0.163119	14.3481
2.8581	6.3836	13.8571	21.267	25.8092	15.0777	10.0024	8.3103	6.4731	7.2229	18.8987	10.9063	18.7047	7.7657	16.032	5.4421	4.5539	4.3367	7.5904	16.4985	9.9527	7.2344	13.6822	20.0889	16.3391	27.8822	19.2594	19.5178	20.966		0.170212	13.5734
2.9772	5.349	14.0685	17.31	21.5412	16.0477	7.8364	8.1551	4.5114	4.5555	18.6182	9.897	13.0637	6.3635	14.4114	3.934	3.0571	4.4907	6.3671	19.8394	10.2555	8.2334	13.1731	21.7977	20.0878	28.697	18.7753	17.0822	25.9273		0.177305	12.9802
3.0963	5.0649	13.5101	13.1131	14.7902	12.2242	6.154	7.1419	5.0399	4.3397	17.2248	9.7108	9.0911	4.7402	16.6808	5.4399	3.3601	2.9699	5.4612	19.7111	10.3155	7.1336	15.3404	19.1398	17.2344	27.6611	11.7276	12.1188	17.6224		0.184398	11.2165
3.2154	4.0236	17.6074	13.6817	16.1402	13.1463	6.5398	3.438	3.181	4.9415	14.0003	10.7158	9.7671	5.5671	14.8248	3.7122	2.9052	3.1416	5.8645	19.7011	9.4853	5.0824	11.7475	18.3254	16.219	23.8573	12.3707	12.2666	17.6471		0.191491	10.7107
3.3345	3.9889	15.8524	12.6882	11.8143	15.8625	3.419	3.7865	2.5929	3.5553	12.4072	7.4474	7.2162	3.6239	12.6342	3.0188	2.0178	2.23	5.3288	20.7664	7.1432	6.1762	10.5139	16.6579	18.6494	25.0147	9.7424	13.9141	23.4211		0.198584	10.053
3.4535	5.7153	14.3412	11.0284	6.3692	12.0947	4.392	2.2094	3.4598	3.4191	13.3645	8.5342	7.0333	4.6783	14.3407	3.5154	3.0415	2.7732	3.6154	19.1158	6.1711	6.3851	9.6029	15.4156	12.9126	23.3664	8.9438	12.0815	19.6784		0.205671	9.19996
3.5726	5.0545	13.8277	8.9091	10.0009	12.2499	4.0146	3.3322	3.5577	1.9006	14.5044	8.7424	6.0393	5.4101	15.0819	2.8462	3.3621	2.8442	5.8757	20.4132	6.9525	5.8335	6.5295	14.5276	13.6051	23.322	9.0682	9.1404	14.4027		0.212764	8.97672
3.6917	4.6844	16.7208	7.9359	6.1599	13.708	3.4157	2.511	2.6286	3.259	11.8217	7.5123	5.8718	4.0339	12.0337	2.9299	4.0968	3.9771	4.5835	25.8161	6.852	6.5478	9.0139	15.0959	10.8285	27.6986	8.1995	8.3161	14.7396		0.219857	8.964
3.8108	5.264	13.8759	8.9217	6.2195	12.5467	4.6259	2.8	2.6369	3.2219	12.4572	8.2212	4.5202	3.4535	14.4426	4.0418	2.0196	3.2137	5.7224	21.9877	8.2482	6.2131	10.177	11.5524	11.6833	23.3496	9.5216	8.7854	13.4277		0.22695	8.68395
3.9299	4.7911	17.2165	7.4064	5.5671	12.4186	2.8574	1.7874	2.9621	3.3626	13.6953	9.7888	6.0544	3.5248	16.2997	5.6283	3.4012	3.1566	4.8652	20.4675	8.228	4.3332	7.5603	12.6384	12.2855	18.5548	8.7568	5.9996	15.3627		0.234042	8.53465
4.049	3.907	14.0167	10.1447	9.1286	10.4721	3.2719	3.4608	5.1315	4.0565	12.9676	8.4884	4.8449	3.8854	14.7222	5.1482	3.7551	1.8306	3.8062	17.4113	6.6768	5.3422	8.6647	14.8352	12.3375	15.8071	8.9113	7.8649	12.4757		0.241135	8.33447
4.1681	3.5973	13.7738	8.742	5.4578	12.9754	3.0635	0.8679	4.1632	2.5739	9.5026	9.6255	4.6557	4.8251	18.2848	6.2961	2.3073	3.3838	3.2581	19.2436	7.4125	8.8249	7.0294	11.6001	10.8069	16.1581	6.1805	7.6969	10.7549		0.248228	7.96649
4.2872	3.328	14.009	7.4388	2.6936	14.0163	3.8727	2.6186	2.474	3.2604	8.2608	12.3961	5.4262	2.6413	17.187	3.2865	2.097	3.6422	3.2366	16.01	11.2784	5.876	8.6359	11.1722	14.5979	16.4712	7.28	6.2736	13.6665		0.255321	7.96953
4.4063	5.0515	12.8357	4.9143	3.5195	11.8726	2.7593	2.6444	2.7078	1.9072	7.4696	10.2056	4.6626	4.7152	15.0292	3.5893	3.5926	4.0409	3.1663	15.53	6.5097	5.5844	6.1507	11.1024	13.3865	17.0186	6.6005	4.3838	15.4832		0.262414	7.37262
4.5253	4.3814	11.6496	6.461	6.6688	14.792	5.1339	3.6305	3.7407	3.3513	7.8567	12.0362	4.8596	4.5305	14.6254	4.062	2.0861	3.4884	4.3996	11.4824	7.9455	6.3416	4.7506	10.6695	11.5088	18.3749	7.9394	4.695	13.3118		0.269501	7.67047
4.6444	4.2215	17.0489	4.4908	5.499	14.5491	2.8004	3.1478	3.6881	3.4976	9.4017	9.2649	5.188	4.7139	16.1911	4.407	2.5877	2.1666	4.6977	13.0051	8.5088	3.351	6.3157	13.0031	12.794	17.8985	4.1766	5.6286	10.504		0.276594	7.59811
4.7635	4.43	14.8892	6.8044	2.5388	15.0246	4.901	3.8974	2.0689	3.8153	7.3343	9.513	4.8769	4.724	17.3419	4.6059	3.3197	2.9786	3.953	10.8282	9.8158	6.6612	5.5741	14.755	10.6622	19.5264	6.4995	4.3023	10.3154		0.283687	7.71275
4.8826	4.4243	14.7123	5.7031	4.1559	16.617	5.1788	3.128	4.3184	2.6858	6.5499	10.6214	5.2954	4.2004	12.9919	4.5922	2.6808	3.3197	3.9187	11.7886	12.2653	4.6507	5.4049	10.3421	12.7991	19.7099	6.3184	5.6739	8.8303		0.29078	7.60276
5.0017	7.3793	14.8906	3.2776	5.054	15.4946	3.783	1.5114	2.6985	4.118	5.7713	12.5386	4.546	4.3758	17.4707	3.5991	3.0628	2.87	2.9499	13.0661	13.821	5.2002	4.6496	8.4322	11.1516	19.631	5.2551	6.4519	9.1826		0.297873	7.57973
5.1208	4.1373	12.6615	5.9169	2.9365	17.2028	4.2447	2.368	3.03	2.9604	7.0013	12.4034	4.5564	5.0582	16.5502	5.846	1.6877	3.3475	5.2903	13.194	14.2887	6.5755	5.2741	10.289	12.8568	18.5993	7.6571	4.7369	10.2572		0.304966	7.89028
5.2399	4.3066	13.9718	6.275	2.2417	15.1316	3.2995	2.2841	4.4376	3.0823	4.5745	13.5581	5.9883	3.4058	17.4026	5.3892	2.7597	2.9871	2.2415	9.0196	18.2159	5.8419	4.6908	10.0524	16.6354	18.6399	4.6024	6.0642	6.7521		0.312059	7.63756
5.359	5.6106	14.6148	4.801	5.2545	15.1819	3.0798	3.5371	2.4297	2.8223	4.4519	9.6289	4.1091	4.8905	11.8346	5.1267	2.2988	4.0793	3.6692	5.9103	18.3704	7.3488	5.7627	8.2981	12.4609	15.889	4.6788	5.4677	8.3317		0.319151	7.14068
5.478	5.1957	16.2128	6.1855	5.389	12.3876	3.0582	1.739	1.9067	4.3136	6.3264	13.8435	3.715	4.816	12.8509	5.2082	1.0831	3.5628	4.0692	7.6013	17.9439	7.042	6.3182	8.9583	14.2249	19.3692	5.9539	3.2517	7.7603		0.326238	7.51025
5.5971	5.9433	11.8859	3.1986	4.6405	11.8929	3.0059	2.4873	3.7932	3.2169	6.9353	13.9119	4.751	2.7316	15.0891	5.0205	1.9987	5.4174	3.2142	4.4618	20.3476	5.6199	6.1457	8.8681	14.1834	18.2278	7.9342	4.4732	4.8249		0.333331	7.2936
5.7162	6.0294	12.8974	5.586	3.5737	14.8091	2.6431	2.5955	2.3362	2.1024	5.2965	11.2757	4.8718	3.6712	10.1117	5.3722	1.5297	3.096	3.5675	6.8475	21.97	6.5881	5.2556	9.2324	11.8952	17.5385	6.0542	5.1881	5.3816		0.340424	7.04701
5.8353	5.085	10.8435	6.5957	5.3426	13.3346	4.9299	4.2689	1.2272	3.468	6.5672	13.6543	4.98	3.4354	18.0674	6.8439	2.8703	2.6036	4.2311	4.8139	21.6132	4.6871	4.1982	11.5428	11.7386	19.4322	6.2327	5.5273	8.5034		0.347517	7.73707
5.9544	5.1927	9.8469	4.807	4.2738	14.0583	5.3274	3.8987	3.3189	4.2402	5.7903	14.9169	4.7901	3.3988	12.4234	9.291	2.2102	2.9982	3.9744	7.0233	23.1123	4.5834	4.9019	8.6895	12.314	21.3252	5.0514	3.5097	4.479		0.35461	7.49096
6.0735	5.6137	16.8656	5.3306	2.3205	15.0187	2.3426	1.9044	1.8699	3.9443	4.8404	18.5651	6.2785	5.3269	10.6797	5.9715	4.6246	3.6727	4.4756	4.4251	20.8823	5.4297	7.4773	9.1204	12.4567	21.4337	4.7595	4.4097	6.0069		0.361703	7.71595
6.1926	4.8592	11.6728	4.7903	4.376	12.9222	4.2066	3.1259	3.2231	3.0605	3.8804	24.788	5.2255	4.011	11.8257	6.4845	2.2734	1.9658	4.7934	5.6649	21.8251	3.8227	5.5569	7.7815	11.4168	17.3227	7.1291	3.9994	6.7998		0.368796	7.45726
6.3117	6.4295	11.2196	8.0481	3.5041	11.0331	4.1074	1.9504	2.7265	2.1746	4.7864	17.0768	5.6412	7.921	13.261	7.3313	3.1776	3.7464	4.9012	4.4071	22.1906	6.0885	5.3446	6.6857	13.6857	20.0072	6.5049	2.0719	6.3399		0.375889	7.58437
6.4307	7.6908	15.535	7.8716	5.0379	14.1019	3.8119	2.2955	2.6127	1.506	4.6548	14.0053	5.4268	4.6955	11.69	6.9612	2.2615	5.0014	3.2933	5.5121	22.0097	6.479	3.4088	9.0047	10.8116	20.4286	6.7159	3.581	9.0222		0.382976	7.69381
6.5498	7.3957	10.5084	5.4909	4.331	13.7621	2.6372	3.3081	4.08	2.3604	6.0799	18.8352	3.0507	4.956	13.8571	9.3408	2.6376	3.6118	3.9056	3.5738	22.0547	5.583	4.7065	5.2985	13.1971	18.7164	5.8046	3.4664	6.5552		0.390069	7.46803
6.6689	6.5155	8.6275	6.3264	3.0461	15.8584	3.0507	5.4751	1.3701	3.1944	4.1187	15.2723	5.3485	5.2853	14.9171	6.395	2.265	4.6997	4.2848	4.8092	20.9393	6.5278	2.9925	5.942	14.3212	18.0736	8.8499	3.243	5.1028		0.397162	7.38757
6.788	5.3476	12.2887	8.1669	4.3767	15.5646	3.6386	1.8271	2.9221	3.5036	5.5971	14.8924	8.0194	6.1226	10.3673	6.907	2.7082	3.5764	3.8647	5.1354	26.0578	5.7524	4.4757	7.174	11.4494	18.8854	7.6586	3.7683	6.4801		0.404255	7.73315
6.9071	7.3098	13.0667	7.7632	6.0024	14.7779	2.5835	4.0083	2.5093	2.5239	5.1151	20.0658	6.855	7.407	15.4904	9.544	3.4712	4.8363	3.4731	5.3639	17.1596	8.0796	2.8046	8.9527	10.653	22.0932	9.0793	5.5858	5.9474		0.411347	8.30436
7.0262	6.9882	14.7489	10.0944	4.0138	14.7216	3.5517	3.5499	2.0474	3.7045	4.1233	14.3527	5.8744	6.7651	11.5281	9.424	5.5926	3.837	3.0711	3.6238	19.3747	5.182	6.4065	5.9207	15.2723	19.4802	11.5883	4.6906	3.9941		0.41844	7.98292
7.1453	8.9444	10.657	9.8514	6.4035	16.8529	3.9927	3.1466	3.4813	1.748	4.2444	18.2329	6.0315	5.3633	12.7448	9.1869	3.2863	3.8103	3.5361	3.6819	19.9213	7.7395	3.8643	5.8832	8.7602	21.9253	9.9777	4.9473	5.5434		0.425533	7.99137
7.2644	5.8603	11.3635	11.5992	4.1126	15.4139	3.2227	2.9514	2.4575	3.686	7.0635	17.8486	6.2761	6.8097	13.7455	10.5976	3.3123	3.0766	2.5695	5.3083	16.1068	9.2937	3.4432	6.6916	10.3318	20.3129	12.6723	5.0473	6.1084		0.432626	8.11724
7.3834	7.1114	12.9427	7.3681	4.7643	14.099	3.3928	2.7621	2.5537	3.3603	3.7557	17.7705	6.5732	5.5521	10.1526	9.0874	3.5055	2.9905	3.9542	4.5823	19.1226	10.2516	5.2016	5.2845	10.1638	22.1458	13.1831	3.8954	4.6464		0.439713	7.86333
7.5025	9.2909	11.6206	6.7276	5.6909	14.2138	3.1299	2.5314	3.9492	3.2239	8.1836	16.7298	6.3955	6.3866	10.9084	11.0472	3.6158	2.9437	4.435	5.3508	19.7282	10.7079	4.4324	4.6802	11.6221	18.8338	14.3191	2.8305	3.1265		0.446806	8.09483
7.6216	6.9777	12.1555	9.5939	5.0829	15.3023	6.0678	3.837	1.5064	3.2444	4.8118	17.8871	7.8622	4.6584	12.6505	13.5044	4.936	3.7206	3.5632	4.9472	17.3604	8.0789	5.7333	8.0382	9.6929	20.3266	16.9703	3.1452	5.3647		0.453899	8.46499
7.7407	6.3666	10.7451	7.8249	4.211	15.2669	2.4055	2.8857	3.4972	2.0831	5.5116	19.9327	9.4427	5.0806	14.8624	11.4099	4.7073	3.685	4.665	3.4908	14.7113	10.3318	3.6549	5.3824	10.8821	18.2826	16.6759	3.9686	4.6752		0.460992	8.09424
7.8598	7.5451	14.6746	6.8006	4.9231	16.4486	2.4248	3.237	2.3402	2.0924	3.6902	19.4931	11.2517	5.2841	15.4805	12.1661	2.8897	3.0952	4.904	5.1844	13.1603	11.7268	3.8026	5.1857	7.3356	18.2833	20.299	5.1138	4.4714		0.468085	8.33228
7.9789	5.892	13.3917	8.2864	3.9743	14.0359	4.0183	3.1751	3.3396	1.836	3.2959	17.8993	10.3643	8.0908	8.9595	13.0044	4.2668	3.5573	2.7298	4.0536	12.4005	10.8416	3.706	7.362	7.5625	17.3716	22.6322	4.7443	5.0227		0.475178	8.0648
8.098	7.4571	14.2662	9.0367	4.8554	15.8376	2.8939	3.5519	2.5535	2.3367	4.4927	15.7766	8.9103	6.5903	11.2504	13.4106	3.288	2.9124	3.5569	4.7924	11.0022	11.8793	3.2542	6.4616	10.3676	18.765	24.2431	5.5763	3.1192		0.482271	8.30136
8.2171	11.4565	10.0296	9.8049	6.387	16.1729	3.0436	3.5996	2.9848	2.7209	2.8968	14.7904	9.9262	6.355	10.9253	8.4026	3.9991	4.53	3.4937	4.7555	9.1375	18.1354	5.606	4.8037	8.4722	15.3425	25.1837	4.9035	4.9959		0.489364	8.31624
8.3362	7.604	14.2089	7.3114	6.0802	16.7031	5.4674	2.1756	2.9064	1.6015	3.9168	17.7077	11.9681	7.9117	14.5587	12.5648	5.0536	3.8179	3.9498	5.2461	8.044	19.2159	4.1292	5.6828	7.9278	16.9647	30.524	5.2785	2.5165		0.496457	8.96561
8.4552	6.8235	16.4483	8.5297	5.2873	14.4173	2.0403	1.9455	2.691	2.2407	4.8696	17.4781	10.8858	9.0708	10.456	13.9536	5.3868	4.8335	2.8762	3.4541	4.8972	17.5274	3.4628	7.3493	9.6386	15.2718	31.7913	5.1162	4.4201		0.503543	8.68439
8.5743	6.8464	11.4333	7.3028	5.6177	15.165	4.7715	4.3652	3.4481	3.3727	3.8477	15.5752	8.6076	6.6514	12.199	13.1822	3.3755	5.519	4.0072	4.8884	7.8835	19.2959	5.0688	5.559	10.6547	14.4216	28.8537	4.7489	3.1259		0.510636	8.56385
8.6934	6.9435	12.5042	6.8007	6.9867	19.4277	3.1619	2.5867	3.8257	1.3289	3.9223	14.2249	10.501	5.3489	11.4932	13.2916	4.0303	4.843	5.5831	4.9539	8.5389	19.2832	5.0295	5.8942	12.0749	16.5187	32.3013	2.8663	4.1251		0.517729	8.87108
8.8125	6.9144	14.4224	8.0025	7.2299	18.5921	4.1805	3.092	3.3143	3.039	2.706	13.5327	12.2516	7.6608	12.31	14.8774	3.4393	5.9827	3.4795	3.4696	7.5678	16.9298	5.2772	7.1017	11.4508	14.1062	34.6671	5.2922	4.0181		0.524822	9.10384
8.9316	6.7686	11.5356	8.267	7.0743	14.2441	2.8065	2.2066	2.7649	3.0755	2.2893	13.8923	14.728	7.1308	9.1659	15.8759	4.7019	2.3224	3.6201	5.121	7.8407	21.11	6.1434	6.3669	9.0414	13.313	32.2397	4.4471	5.3292		0.531915	8.69365
9.0507	7.7582	9.4603	8.8169	8.2883	19.4617	3.916	2.4469	3.0347	3.1557	2.464	14.0345	16.1786	9.6544	10.3097	13.3829	3.8497	2.8104	4.6143	5.122	5.7908	20.4292	5.2877	5.4909	11.3477	12.9329	36.2651	3.414	4.4061		0.539008	9.07584
9.1698	8.9702	11.7918	8.0372	8.6618	15.573	3.8099	2.9829	2.5642	2.791	2.2309	16.7917	15.6067	9.6421	12.9311	14.1632	5.4561	3.7631	2.9211	3.7402	7.0673	24.7249	3.6565	3.9822	7.8493	13.2248	37.4121	2.7163	4.8499		0.546101	9.21112
9.2889	6.9286	12.5277	8.1367	7.9699	13.4854	3.2953	3.7733	2.3644	2.9845	2.3905	10.4646	16.6786	8.4663	13.4305	17.9927	4.2572	3.0856	3.8012	4.0796	6.8235	23.0993	3.4643	6.9081	10.2756	9.7311	37.9423	4.8691	4.9036		0.553194	9.07605
9.4079	4.614	11.2231	8.3602	8.2152	13.1923	4.8555	3.7733	3.0876	4.1319	3.7768	11.2564	14.4656	9.5984	14.2875	19	3.4438	4.9502	4.2897	4.1882	6.9949	22.3893	3.447	5.2062	8.9153	10.3184	36.9989	4.5744	2.6861		0.560281	9.00858
9.527	7.2295	10.6427	8.9302	8.4575	15.765	3.3728	3.8402	2.4567	3.0441	2.5197	10.6742	19.4667	9.0067	16.3239	14.6936	3.7984	5.3546	5.0764	3.2678	5.4211	23.728	3.8602	3.5068	8.4005	10.7785	34.6331	5.6299	5.0298		0.567374	9.10388
9.6461	6.6509	14.1296	11.1611	6.3387	14.0161	3.4247	5.6324	3.553	2.4846	3.2724	13.2448	20.6883	10.707	20.1026	17.4458	5.969	4.915	3.0838	4.4169	7.0984	18.0926	5.2266	4.2883	8.044	12.3603	39.0599	7.0529	5.9004		0.574467	9.94143
9.7652	5.4875	13.1156	8.7513	6.5789	14.0085	5.4889	4.4279	3.5443	2.476	3.8793	10.6254	21.0144	8.4427	15.0207	17.1338	3.9115	3.6312	3.9312	5.4852	6.3644	23.0717	4.5526	6.3411	12.0254	10.7824	37.9593	7.9509	3.8359		0.58156	9.63707
9.8843	6.0457	12.6671	10.3833	9.6744	17.1245	3.261	5.9137	2.6057	3.8068	2.6464	10.797	20.5358	14.3324	19.3977	13.7323	4.3734	4.6503	3.8001	5.0841	7.3527	20.874	4.2963	4.8845	8.8902	9.7507	35.8603	4.7584	4.8796		0.588653	9.7278
10.0034	7.74	12.5917	11.4621	8.3204	15.2495	4.5553	4.0788	3.4451	2.4213	2.6614	11.84	21.5166	15.598	13.5884	18.1935	4.2379	4.4495	3.6677	4.1675	6.426	20.3339	4.794	7.2583	11.4061	12.7355	34.9345	6.9997	2.3943		0.595745	9.89525
10.1225	6.0941	14.5147	10.054	8.3073	11.2091	4.3748	3.0244	3.9082	3.4075	3.7567	9.4633	23.8034	14.2662	15.9412	18.4761	6.7651	2.4531	2.221	3.3493	3.9591	19.6443	6.0084	6.603	8.3772	11.8325	34.509	7.2762	2.9915		0.602838	9.5211
10.2416	4.2202	7.5712	12.2954	8.5507	16.7373	3.8417	3.2592	2.7357	2.5244	3.6586	11.1639	26.9445	14.2719	12.8367	23.5791	5.3182	4.9987	2.2202	4.4981	5.3856	19.7989	6.8985	4.9521	9.463	12.7038	28.997	10.0613	4.3218		0.609931	9.77885
10.3606	3.6628	11.9327	14.1449	7.7859	19.0833	3.8564	2.2058	4.5301	3.2938	1.4187	10.6957	26.4567	13.9699	15.2997	23.8655	5.9149	5.1027	5.7277	3.9063	4.365	17.6419	6.1488	6.0723	7.1818	11.4686	25.602	8.0296	4.302		0.617018	9.77377
10.4797	6.4847	10.968	9.5401	8.3791	20.0376	4.9548	2.1628	3.4961	4.2834	2.7359	5.574	27.7914	13.0969	15.2892	21.7594	7.3473	5.158	4.1484	4.1576	5.3663	18.0097	5.5462	5.451	9.5473	11.772	22.6316	11.4671	6.3011		0.624111	9.76632
10.5988	5.0061	11.9635	13.2768	7.5038	19.9477	6.6711	3.0635	3.0403	3.2656	1.9868	7.5462	29.1426	13.1926	12.6472	24.4513	7.9313	5.2179	4.3407	4.7787	5.941	15.2216	4.8667	6.1785	7.2867	7.658	18.725	8.9518	4.487		0.631204	9.43893
10.7179	4.2419	10.5234	12.238	7.9584	16.4212	2.7588	4.3638	2.6292	2.6911	4.804	9.4123	27.6046	14.3097	13.7378	20.8835	8.5777	4.3921	3.8051	3.0697	4.8105	11.3589	9.4099	7.72	9.1823	8.3212	20.3062	16.1175	2.5968		0.638297	9.43734
10.837	3.9075	13.5605	11.8756	10.2077	15.3301	3.7191	3.9429	2.8849	3.8783	4.1335	7.6488	31.9834	13.2981	14.9351	27.1569	9.4154	4.5706	4.0814	5.9993	6.9078	11.9562	10.2674	6.898	7.0202	10.1564	16.9845	14.6254	4.5581		0.64539	10.068
10.9561	4.7963	9.4772	12.1635	5.729	19.485	2.9246	2.7651	3.9042	3.4438	3.7093	7.5462	35.1993	13.2438	13.2516	26.3231	9.3123	5.4962	6.3165	4.7858	4.413	8.4738	11.1877	6.8371	8.0722	10.5715	18.1843	17.882	5.003		0.652483	10.0178
11.0752	4.5959	9.6159	12.1858	9.2745	19.5325	3.7848	4.8576	2.7967	3.7859	3.7735	6.3367	36.8035	12.0446	13.6589	28.5757	10.1442	5.3496	5.5241	5.8979	9.5259	10.5156	13.8253	6.4534	9.0426	13.1984	16.5222	16.9983	7.5436		0.659576	10.7916
11.1943	5.7883	10.6717	12.8756	10.2993	16.3173	4.6152	4.6271	4.5867	3.2016	2.7132	5.3173	34.2882	12.9645	12.5009	27.0187	11.8223	5.1057	4.8855	7.1127	6.8581	7.5558	12.5799	7.9507	9.0744	11.8142	16.5517	19.6943	3.5161		0.666669	10.4395
11.3133	4.5186	11.8367	14.0363	9.0014	15.4272	3.6058	5.4554	5.0969	3.9674	3.9329	7.11	32.6029	14.3766	17.2985	35.3091	15.2642	5.1865	6.2851	4.1696	4.7026	8.4528	18.1967	7.6555	7.9677	11.5311	16.8603	23.052	4.9172		0.673756	11.3506
11.4324	4.5233	13.2204	14.7065	10.6272	14.7951	3.3491	4.5115	4.3714	3.5948	4.0425	6.9658	41.4268	19.5575	14.8768	32.2401	15.7985	5.7395	5.5045	5.615	4.9645	9.0498	15.9481	6.878	8.4212	8.9061	14.463	26.0774	4.0432		0.680849	11.5792
11.5515	5.6643	12.8939	12.8065	11.4063	16.3005	4.5762	3.6548	4.536	3.3933	4.9726	8.2477	39.1026	20.7085	14.8047	27.8009	18.7388	7.5971	6.7458	3.0733	5.9312	8.6837	22.4979	8.5171	6.167	11.5408	12.7089	22.8098	4.6615		0.687941	11.8051
11.6706	6.1549	11.8679	13.1883	14.2521	15.7237	4.5015	3.1769	6.0691	6.0286	5.7527	6.9255	36.6362	16.8281	17.1977	35.4812	19.8035	9.19	6.3073	4.7747	7.2183	8.7404	26.5481	6.1187	8.7149	12.198	15.1852	26.6304	4.7266		0.695034	12.7122
11.7897	4.8362	10.4953	18.9957	16.9853	20.9143	4.2409	5.5207	6.0687	3.0451	5.1156	8.9769	36.3658	20.2019	15.8388	36.8608	26.5476	8.6281	8.7479	6.3196	7.7208	9.1297	26.6391	8.2867	8.7533	10.684	16.4873	26.5644	4.1825		0.702127	13.684
11.9088	7.45	10.4696	16.1934	13.2369	22.2098	5.2072	3.6206	8.5589	9.9475	7.2519	9.4087	39.5056	17.4171	20.2373	31.9663	27.5059	11.0455	6.7806	4.0277	8.4716	11.1606	25.6611	7.1151	10.0111	14.1966	13.7753	29.0505	5.6418		0.70922	14.183
12.0279	6.001	11.5201	16.1278	13.8052	23.1429	4.5587	4.356	7.8047	10.1357	5.6948	12.8199	29.9769	14.7106	22.6464	41.4315	28.9002	13.0117	6.8869	7.2112	7.2141	12.3209	24.1554	10.7696	8.9856	12.6049	14.5899	28.5928	3.5474		0.716313	14.4115
12.147	7.8039	8.9852	19.3859	13.6912	20.252	6.2457	5.9129	8.4319	8.7143	10.1068	10.8206	41.1158	14.2638	22.2644	43.043	31.8277	12.6675	7.147	6.3825	8.3108	11.9499	30.2633	11.4775	7.5794	11.466	14.5358	27.3051	5.1512		0.723406	15.2536
12.2661	4.5518	8.6525	24.8738	11.3957	24.1809	4.5477	5.3033	11.2557	12.2452	9.9188	10.1867	36.3367	15.7161	21.2983	44.3492	21.6929	13.7897	8.1001	7.8521	8.4681	9.7608	28.786	13.3666	11.6377	14.0565	12.8916	28.8087	6.7357		0.730499	15.3842
12.3851	5.5437	12.6211	22.5818	14.6918	21.9213	5.683	6.874	12.9852	15.2411	9.1488	15.9448	37.7037	15.5519	26.8345	40.9156	18.6088	10.1364	8.4902	6.3591	7.6254	9.3213	32.24	14.057	8.6492	13.5371	16.8478	26.1302	6.1865		0.737586	15.8011
12.5042	4.8827	10.8504	20.7788	10.7754	25.9094	5.0548	8.8193	15.4494	19.2273	12.4804	15.3226	42.2491	19.2503	24.3197	45.8404	17.9527	9.0586	11.2464	7.7205	10.9285	11.5403	31.2125	13.9044	8.2548	11.1067	13.732	36.9598	7.1957		0.744679	16.858
12.6233	7.9713	8.5804	21.5025	12.4399	27.6206	7.6529	10.2903	15.9578	23.6728	17.9522	16.7357	43.2621	17.2481	24.944	35.0294	18.9471	12.0244	6.1665	7.422	11.0689	11.9601	34.2913	21.1304	11.2991	13.2082	17.7025	34.3251	6.5375		0.751772	17.748
12.7424	6.2882	10.082	29.2936	14.5932	25.5489	9.1035	15.4985	18.6974	29.4413	20.9478	18.644	38.99	15.2365	26.5987	35.1292	25.2042	14.4047	7.942	8.0315	10.0893	9.535	28.701	20.8095	11.6027	14.1103	15.2312	34.5666	4.9961		0.758865	18.547
12.8615	7.1474	13.6252	33.9779	13.8048	27.2142	10.6899	18.3962	22.7649	35.624	19.9222	19.7951	42.6714	17.1675	28.4041	31.1478	21.7132	12.1019	8.0885	6.3101	16.2234	7.4713	22.1766	26.9633	16.5074	15.2195	18.9561	30.6062	6.1256		0.765958	19.672
12.9806	6.578	11.5908	28.1462	15.2165	31.8976	10.2601	26.9067	25.3177	34.5341	26.2643	22.246	40.7126	18.6153	30.1305	30.5421	16.3989	9.4231	7.4044	8.949	11.0939	9.2169	25.8135	23.3649	13.7691	14.9205	17.8977	38.9035	6.3003		0.77305	20.0862
13.0997	7.028	10.158	37.7783	13.4791	30.7159	12.5889	20.54	20.4878	38.2102	31.3112	20.8778	35.9213	19.6282	22.187	32.9985	13.6576	9.362	5.7003	8.1386	10.5997	6.112	20.8525	28.451	16.6816	17.2663	18.2318	34.1327	4.7662		0.780143	19.5665
13.2188	9.1424	10.0745	36.6922	16.8136	32.2326	12.098	24.1324	21.4996	39.6203	34.7779	26.5292	39.1367	15.8725	20.5873	29.6784	12.9311	6.961	4.233	6.7205	11.31	7.7454	23.2314	36.3426	18.5624	20.4807	13.6422	42.4779	8.7039		0.787236	20.7939
13.3378	8.6751	10.4356	35.7365	19.329	32.0413	14.8075	28.5469	22.8759	36.223	37.3022	32.5393	38.5861	12.3181	19.8829	31.426	11.0494	7.6507	4.4832	5.502	10.3264	6.1647	19.0123	36.151	19.0818	24.7611	14.5087	36.1287	6.533		0.794323	20.7885
13.4569	9.449	11.2144	33.6769	18.1803	37.3748	17.1256	27.8303	21.6811	27.3736	34.308	30.2374	40.1415	18.7651	20.5644	18.5442	9.2853	7.221	5.3229	5.6024	9.6901	3.7391	14.8369	39.1629	22.2448	19.7277	17.468	37.3908	8.5636		0.801416	20.2401
13.576	16.6043	14.8009	30.3885	20.8251	32.4614	19.3185	18.8502	15.0287	23.3666	40.2281	34.9382	43.838	19.4214	18.6454	14.8046	7.4182	5.7277	4.5757	6.0229	5.607	2.6401	12.3011	35.3769	23.8845	21.6613	18.8548	37.5013	8.7856		0.808509	19.7813
13.6951	18.972	14.5598	32.9421	24.0692	37.926	21.0741	13.4826	14.698	15.5005	32.5017	33.1365	34.7187	20.4393	21.8148	15.0967	5.8949	4.3738	1.8697	6.3254	6.9831	3.2899	8.7527	33.8691	25.9406	22.346	16.4118	43.5876	12.3487		0.815602	19.3902
13.8142	21.6296	14.0327	23.2967	23.669	39.2254	16.8388	12.1933	10.4371	10.2451	30.8081	26.2676	31.8359	16.5035	20.5587	12.3254	4.3211	3.2524	4.0935	3.8417	5.6821	3.5051	6.1565	20.6144	29.6132	30.3999	16.1316	41.4064	11.1822		0.822695	17.5024
13.9333	26.4393	16.6821	27.4516	21.6634	40.5926	24.6034	7.2371	6.996	7.9921	32.6194	18.2804	26.6366	15.1967	16.3564	10.3822	5.0643	4.0128	4.351	4.2322	4.1198	3.9635	5.2159	16.8184	32.4821	28.6009	21.6119	35.279	9.989		0.829788	16.9596
14.0524	31.7343	19.7761	28.6907	26.6035	38.2033	24.9817	3.6965	6.4115	6.1038	25.8477	12.3579	17.7542	14.5931	18.3279	6.3453	5.7547	1.8964	2.3256	3.1127	4.179	2.0306	4.8011	8.9385	25.7253	31.8129	22.6876	39.4322	10.56		0.836881	15.8816
14.1715	41.5535	21.9048	32.3202	27.8773	43.2822	17.6022	2.4451	5.6504	4.308	19.4283	10.4514	12.8052	10.366	12.5752	6.2119	5.2018	2.6246	1.3744	3.1259	3.6065	1.8616	3.053	7.7488	23.9272	31.2267	32.2955	37.3511	13.8709		0.843974	15.5732
14.2905	43.7341	26.6283	29.8621	24.2289	45.4023	12.3177	2.8521	3.3387	2.3415	15.3188	7.1075	9.9552	6.5746	10.0527	4.0235	3.6558	2.3862	1.1877	3.7265	2.4731	1.4515	2.3973	7.5453	17.236	30.2372	31.7198	40.8115	16.0906		0.851061	14.452
14.4096	58.2855	28.863	33.1312	29.1553	39.5144	7.5519	2.1646	3.3079	3.4528	12.4624	5.7765	8.6624	8.6023	7.5872	3.8104	3.8625	1.714	2.0369	1.9492	2.0048	1.4266	3.797	5.0798	14.2632	27.271	31.8367	39.5383	19.797		0.858154	14.5323
14.5287	63.4442	33.9758	35.8832	32.6198	24.071	6.3209	1.7001	3.6572	4.4351	9.8505	5.3129	5.8784	5.679	6.5484	3.11	1.8395	2.1991	2.2471	1.135	1.4205	1.7219	2.0716	4.2336	9.4565	33.8772	33.6364	41.4468	24.3328		0.865246	14.3609
14.6478	62.3886	30.7994	32.1327	36.2694	21.3874	4.6971	2.9922	3.0828	2.3865	8.7163	2.7784	5.6554	5.6426	2.6475	3.8728	2.2717	2.4592	1.8359	2.3807	1.9781	1.184	3.1473	4.3902	7.8511	32.2691	34.4064	42.8935	23.3186		0.872339	13.7798
14.7669	53.078	40.0997	30.373	29.6039	14.4433	4.5599	1.9061	2.2207	1.916	6.7425	3.5976	4.6065	2.8798	4.5063	3.3432	2.6578	1.7544	1.5236	1.339	0.9388	2.0971	1.5844	2.106	4.5183	18.9545	38.5097	43.3224	17.119		0.879432	12.1536
14.886	27.319	44.8484	37.9426	26.9606	10.4449	4.2214	1.7172	1.0037	1.5772	3.4385	2.7319	2.5459	3.8496	2.5104	2.9945	1.038	2.3452	1.176	1.327	1.7767	1.4215	1.552	1.8804	4.4805	17.393	39.5119	43.0056	17.8891		0.886525	11.0322
15.0051	22.844	42.3688	38.9815	19.1048	6.4842	4.3172	0.6508	1.608	1.1183	3.6217	1.9188	2.8279	2.9724	3.8185	1.7051	1.1656	1.6802	2.214	2.3375	1.265	1.5136	1.0921	1.735	3.8068	11.205	42.885	49.6236	17.2186		0.893618	10.4316
15.1242	14.7465	39.6125	34.4748	14.0269	6.7714	3.2325	1.7589	0.5882	1.7119	3.6094	2.3114	2.5549	2.4097	2.0727	1.9053	0.7771	1.0594	1.0119	1.5072	0.4256	1.1386	1.5682	1.0226	4.3547	7.2982	44.363	52.3023	19.2195		0.900711	9.56555
15.2432	9.022	25.34	26.9466	10.1139	6.3763	2.3509	0.8412	1.8467	0.5652	1.6107	1.4858	2.3953	2.4379	3.1177	0.9109	1.6133	0.8059	0.4868	1.0252	1.6316	2.0415	0.901	1.1458	3.1129	5.5673	26.8449	45.4981	19.2604		0.907798	7.33199
15.3623	7.662	19.147	17.5245	6.3255	5.5627	2.0502	0.5875	1.3105	0.7097	2.2229	1.3232	1.6154	1.7142	1.3702	1.6574	1.8349	0.7304	1.4126	0.9365	0.7164	0.6067	1.4382	2.1465	1.9792	6.437	18.6639	55.0422	20.6479		0.914891	6.54912
15.4814	5.0808	10.1353	11.5515	6.7783	2.5598	1.7773	0.5225	0.7279	0.2087	1.3239	1.7907	1.0401	1.8569	2.5337	1.316	1.3752	0.547	1.4608	1.0295	1.3803	0.6453	1.1028	1.858	3.7458	4.8829	11.0038	59.4202	23.6967		0.921984	5.76256
15.6005	5.8391	9.8786	7.1371	6.0542	3.3176	1.7628	0.6123	0.5047	0.9247	0.9535	0.7	1.7902	1.3056	1.7518	1.1134	0.652	0.5581	0.5927	1.3099	0.2159	0.4616	0.8787	1.0889	3.1992	3.2903	8.5815	49.9008	27.4628		0.929077	5.06564
15.7196	3.9655	7.8807	4.9262	3.5312	3.7769	0.507	0.4816	0.292	0.6766	0.6749	0.6694	1.6744	1.0127	1.823	1.6573	1.5451	0.6112	2.0175	0.6967	0.0956	1.747	0.6335	1.4892	1.8898	4.7878	5.7293	45.0186	28.643		0.93617	4.58763
15.8387	3.6742	6.6892	7.5476	3.6646	2.2174	1.1528	0.6731	0.4965	0.6502	1.137	0.6593	1.1182	1.8703	1.3404	0.9668	1.1469	1.1211	0.1922	1.1767	1.6243	0.8178	1.3209	0.6995	1.0335	1.7982	6.6345	30.5109	35.4489		0.943263	4.19225
15.9578	2.1789	5.1591	5.1164	2.6412	2.1019	0.36	1.0129	0.5816	1.3463	1.3112	0.7921	0.6858	0.9819	1.6341	0.3516	0.7343	0.9982	0.8787	2.2384	1.0224	0.611	0.823	1.4451	2.5342	2.064	4.9063	24.5979	43.4298		0.950356	4.01922
16.0769	1.3924	2.7363	3.8693	1.6728	2.1132	0.256	0.3355	1.3718	0.1519	0.3708	0.3906	0.6646	0.3677	0.4539	1.192	1.1017	0.4503	0.4428	1.2795	1.1547	0.5534	0.8838	1.3426	1.7038	1.5702	2.0309	17.4647	43.3959		0.957448	3.23975
16.196	1.6086	2.673	1.4202	1.1748	1.5126	1.036	0.7699	0.9272	0.2762	0.2979	0.2362	0.6258	0.4982	1.5103	0.5808	0.3855	0.7306	0.6794	0.6143	0.4502	0.2362	0.6617	0.7776	2.5973	2.2196	2.7416	10.3635	52.5865		0.964541	3.22113
16.315	2.1095	2.091	2.3702	0.6981	0.3537	0.5378	0.3552	0.6017	0.5183	0.7538	0.4835	1.2504	0.5527	1.1946	1.0293	0.6546	1.0297	0.8678	0.5759	0.4408	0.9302	1.2524	3.1106	1.0011	2.3387	1.3566	6.0184	55.4605		0.971628	3.21204
16.4341	1.1964	1.8501	2.0741	2.0622	0.7659	0.5061	1.014	0.3982	0.5998	0.1232	0.5515	0.5572	0.2213	0.356	0.2302	0.1471	0.1584	0.5606	1.103	0.7911	0.4785	0.9664	1.1614	1.7126	1.4393	3.09	3.2986	69.5531		0.978721	3.46308
16.5532	1.1879	1.7811	2.9848	1.37	0.5631	1.2581	0.1927	0.2185	0.223	0.2744	0.353	0.9043	0.1119	0.9197	1.2308	1.7801	1.5789	0.3373	0.9135	0.7628	0.8555	0.4996	1.6431	0.9289	1.1047	3.3894	5.859	77.3014		0.985814	3.94741
16.6723	0.082	1.3938	3.2484	1.4188	0.9768	0.4674	0.1127	0.2729	0.4945	0.7982	0.211	0.5154	0.3414	0.6187	0.5047	0.2598	0.4468	0.826	1.1345	0.0057	0.3609	0.2947	0.9646	1.1862	1.5593	1.4781	6.4059	71.7031		0.992907	3.50294
16.7914	0.4277	1.4514	1.5313	0.7222	0.3635	0.3919	0.1095	0.827	0.0101	1.7504	0.1885	0.6984	0.8554	0.5254	0.5138	0.5077	0.5077	0.7309	0.709	0.1137	0.7778	0.8686	1.6506	0.4432	0.6694	2.4474	1.8083	62.1053		1	2.9895

## Sheet: Sheet1
Image19				Image12				Image14				Image18				Image19 (2)				Image20				Image32				Image33				Image35				Distance	Image19	Image12	Image14	Image18	Image19 (2)	Image20	Image32	Image33	Image35
Ap-Ba	Avg int			Ap-Ba	Avg int			Ap-Ba	Avg int			Ap-Ba	Avg int			Ap-Ba	Avg int			Ap-Ba	Avg int			Ap-Ba	Avg int			Ap-Ba	Avg int			Ap-Ba	Avg int			0	10.0671	26.7301	22.9612	94.8841	60.6135	55.331	20.3314	23.2936	20.5781
0	10.0671			0	26.7301			0	22.9612			0	94.8841			0	60.6135			0	55.331			0	20.3314			0	23.2936			0	20.5781			0.05	21.7623	47.8286	35.1	132.459	102.043	85.0005	49.3368	35.8358	31.8308
0.00709292	11.7695			0.00502563	28.4193			0.00588296	25.8602			0.00561856	101.814			0.00485486	67.4406			0.00505102	58.7885			0.00502563	23.4954			0.00598863	26.2906			0.00520886	22.314			0.1	46.0992	71.3021	43.9522	161.384	108.919	114.706	62.4589	46.0738	50.0019
0.0141858	13.4643			0.0100513	32.0271			0.0117659	28.9367			0.0112371	109.274			0.00970973	76.035			0.010102	61.2314			0.0100513	27.6416			0.0119773	28.9282			0.0104177	23.7406			0.15	24.4022	37.0116	26.6581	71.0051	71.5701	42.3393	22.9279	33.8635	31.7666
0.0212787	16.165			0.0150769	34.0868			0.0176489	31.5506			0.0168557	118.543			0.0145646	84.9527			0.0151531	66.3977			0.0150769	31.7503			0.0179659	30.4583			0.0156266	25.2845			0.2	11.726	21.0867	13.4745	25.152	44.962	15.5498	10.7149	26.1425	26.22
0.0283717	19.9181			0.0201025	38.3951			0.0235319	33.6459			0.0224742	128.531			0.0194195	92.8493			0.0202041	74.1101			0.0201025	37.0511			0.0239545	34.3955			0.0208354	27.1065			0.25	8.48997	15.3039	8.88269	16.3012	25.3035	8.31347	8.54157	21.331	18.2777
0.0354586	23.5787			0.025124	45.0546			0.0294099	37.1415			0.0280881	139.558			0.0242702	101.2			0.0252509	81.5441			0.025124	45.138			0.0299381	36.4477			0.0260399	29.2991			0.3	7.63239	11.82	5.95478	14.2892	14.979	6.6727	9.06485	15.5942	13.2218
0.0425515	28.566			0.0301496	50.4334			0.0352928	37.451			0.0337066	146.923			0.0291251	111.273			0.0303019	89.749			0.0301496	53.0496			0.0359267	40.2131			0.0312488	33.3334			0.35	7.40816	10.5118	4.66491	14.8608	10.5276	7.17784	8.67704	11.1876	11.6002
0.0496445	34.0319			0.0351752	56.8984			0.0411758	40.5172			0.0393252	155.331			0.03398	118.182			0.0353529	98.9821			0.0351752	63.4399			0.0419154	43.3517			0.0364576	35.563			0.4	7.57716	9.4256	4.4098	16.969	10.9357	8.68618	8.17364	10.2622	10.7819
0.0567374	38.3001	21.7623		0.0402009	65.1098			0.0470588	45.5416			0.0449438	161.646			0.0388348	123.921			0.0404039	107.193			0.0402009	73.4053			0.047904	45.6356			0.0416665	40.6843			0.45	8.11701	10.2835	4.4551	19.7566	14.444	10.3238	7.0602	11.129	10.4477
0.0638303	43.9795			0.0452265	71.7041			0.0529417	47.3944	35.1		0.0505623	168.085	132.459		0.0436897	128.024			0.0454549	117.579			0.0452265	80.5211			0.0538926	49.344	35.8358		0.0468753	43.625			0.5	8.39413	10.9306	4.77925	22.8611	16.2463	9.90194	6.1841	10.3606	9.96519
0.0709232	49.2034			0.0502521	77.2558	47.8286		0.0588247	46.6405			0.0561809	171.597			0.0485446	129.483			0.050506	124.1	85.0005		0.0502521	86.8809	49.3368		0.0598812	50.3367			0.0520842	48.6107	31.8308		0.55	8.94221	11.4723	4.44297	23.0494	16.464	8.66886	5.94431	9.59474	9.69308
0.0780161	49.9611			0.0552778	81.6938			0.0647077	45.8289			0.0617994	177.588			0.0533994	130.544	102.043		0.055557	130.586			0.0552778	85.5748			0.0658699	49.3763			0.0572931	52.6061			0.6	9.54787	10.6576	4.10906	22.7593	17.4999	7.10264	5.70219	9.42154	10.4288
0.085109	50.3532			0.0603034	81.869			0.0705906	46.4014			0.067418	176.325			0.0582543	128.76			0.060608	133.408			0.0603034	82.7748			0.0718585	48.8211			0.0625019	56.6365			0.65	9.75442	10.9196	3.49223	20.7494	15.4008	5.77771	4.90014	8.81041	10.2387
0.092196	47.5888			0.0653248	80.7624			0.0764686	45.7233			0.0730319	173.806			0.0631051	125.244			0.0656548	134.162			0.0653248	79.1077			0.0778421	46.9105			0.0677064	56.5372			0.7	11.766	11.3449	3.53238	19.8179	17.85	4.98261	4.52935	8.68327	9.46098
0.0992889	42.3489			0.0703504	78.147			0.0823516	43.536			0.0786504	168.217			0.0679599	120.069			0.0707058	131.966			0.0703504	71.1976			0.0838307	45.3121			0.0729153	55.8445			0.75	15.6628	13.5516	3.22963	20.9355	18.3058	4.51747	4.37433	7.6325	12.5972
0.106382	39.2592	46.0992		0.0753761	73.3813			0.0882346	43.0366			0.084269	162.222			0.0728148	115.037			0.0757568	126.234			0.0753761	64.0702			0.0898193	43.8205			0.0781241	54.299			0.8	19.9563	18.5221	2.88016	23.7135	22.2211	4.08605	4.39149	7.78484	16.0901
0.113475	34.4212			0.0804017	71.5655			0.0941175	41.3448			0.0898875	153.176			0.0776697	111.053			0.0808078	119.856			0.0804017	60.344			0.095808	42.4265			0.083333	51.6203			0.85	17.0772	21.1161	2.43273	32.0273	27.372	3.95154	4.03393	7.22037	16.1362
0.120568	29.9603			0.0854273	67.7058			0.1	39.1063	43.9522		0.0955061	142.131			0.0825245	106.511			0.0858588	109.362			0.0854273	52.2375			0.101797	41.5866	46.0738		0.0885418	48.0428			0.9	12.2651	17.9061	2.09357	36.0144	35.2264	3.78597	3.73502	8.52532	8.69932
0.127661	27.4958			0.090453	63.0846			0.105883	35.8949			0.101125	127.397	161.384		0.0873794	102.198			0.0909099	97.517			0.090453	48.0203			0.107785	39.7999			0.0937507	44.0062			0.95	5.35835	12.9505	1.64968	20.5401	45.8654	2.80494	3.56762	12.4935	6.24052
0.134754	22.5717			0.0954786	59.7092			0.111766	32.6563			0.106743	114.344			0.0922343	96.3282			0.0959609	86.8231			0.0954786	41.9625			0.113774	39.5989			0.0989595	41.4519			1	3.36798	4.56247	1.16448	2.93513	29.1716	1.64341	3.51333	14.2408	2.44847
0.141846	21.1309			0.100504	55.1024	71.3021		0.117649	30.1436			0.112362	101.018			0.0970891	93.8124			0.101012	77.1494	114.706		0.100504	39.2991	62.4589		0.119762	35.7118			0.104168	38.9741	50.0019
0.148933	18.3772			0.105526	52.2349			0.123527	28.3094			0.117976	87.6016			0.10194	90.1774	108.919		0.106059	67.3659			0.105526	34.7098			0.125746	35.484			0.109373	35.8724
0.156026	16.8584	24.4022		0.110551	47.2587			0.12941	26.8736			0.123594	76.8818			0.106795	85.3877			0.11111	58.818			0.110551	31.642			0.131735	33.0925			0.114582	34.9436
0.163119	14.3481			0.115577	43.9043			0.135293	24.6809			0.129213	68.1333			0.11165	83.2817			0.116161	53.4304			0.115577	28.2722			0.137723	31.2148			0.119791	33.4785
0.170212	13.5734			0.120603	40.4551			0.141176	22.1022			0.134831	58.4475			0.116504	78.6827			0.121212	47.2078			0.120603	25.3802			0.143712	30.5487			0.124999	32.5551
0.177305	12.9802			0.125628	37.702			0.147059	20.6348			0.14045	51.2841			0.121359	76.3489			0.126263	42.7479			0.125628	22.1977			0.149701	29.3611			0.130208	31.2856
0.184398	11.2165			0.130654	34.6844			0.152942	18.627	26.6581		0.146068	43.6241			0.126214	72.1692			0.131314	37.537			0.130654	20.1949			0.155689	29.9599	33.8635		0.135417	31.1942
0.191491	10.7107			0.135679	31.6657			0.158825	16.841			0.151687	37.7117	71.0051		0.131069	69.602			0.136365	33.7985			0.135679	19.5066			0.161678	28.9206			0.140626	29.7942
0.198584	10.053			0.140705	29.3674			0.164708	16.1806			0.157306	33.8865			0.135924	66.2224			0.141416	30.6807			0.140705	17.7104			0.167666	27.4102			0.145835	28.7973
0.205671	9.19996	11.726		0.145727	27.5409			0.170586	14.1259			0.162919	31.5879			0.140775	64.469			0.146463	27.1642			0.145727	15.2152			0.17365	26.8532			0.151039	27.9782	31.7666
0.212764	8.97672			0.150752	25.3026	37.0116		0.176469	13.5294			0.168538	28.1513			0.14563	60.8663			0.151514	24.6426	42.3393		0.150752	14.4503	22.9279		0.179639	25.9381			0.156248	28.1773
0.219857	8.964			0.155778	24.8721			0.182352	12.6945			0.174157	24.9967			0.150484	58.6706	71.5701		0.156565	21.7402			0.155778	13.6383			0.185627	25.5809			0.161457	28.707
0.22695	8.68395			0.160803	23.3089			0.188235	11.9696			0.179775	23.7558			0.155339	54.9577			0.161616	19.7009			0.160803	13.1035			0.191616	24.5567			0.166666	28.8514
0.234042	8.53465			0.165829	22.1919			0.194118	11.1878			0.185394	22.6021			0.160194	53.8135			0.166667	18.1531			0.165829	11.276			0.197605	25.2744			0.171875	27.4735
0.241135	8.33447			0.170855	22.4064			0.200001	11.2669	13.4745		0.191012	21.691			0.165049	51.6462			0.171718	16.8778			0.170855	11.6805			0.203593	24.6056	26.1425		0.177084	26.1697
0.248228	7.96649			0.17588	20.4744			0.205884	10.6749			0.196631	20.158			0.169904	48.5888			0.176769	15.9962			0.17588	10.2312			0.209582	22.3613			0.182293	25.9454
0.255321	7.96953	8.48997		0.180906	21.1113			0.211767	10.529			0.202249	19.5382	25.152		0.174759	47.4537			0.18182	14.7088			0.180906	9.23693			0.21557	21.9904			0.187501	25.2197
0.262414	7.37262			0.185932	19.2843			0.21765	9.46026			0.207868	17.6131			0.179614	44.9603			0.186871	13.4406			0.185932	9.89646			0.221559	22.4584			0.19271	24.6934
0.269501	7.67047			0.190953	20.3999			0.223528	9.16041			0.213482	17.5932			0.184464	42.9957			0.191918	12.4475			0.190953	9.36729			0.227543	21.5869			0.197915	23.9497
0.276594	7.59811			0.195979	19.3586			0.229411	7.9328			0.2191	16.9561			0.189319	40.7612			0.196969	11.5343			0.195979	9.72356			0.233531	20.7821			0.203124	23.0129	26.22
0.283687	7.71275			0.201004	17.4591	21.0867		0.235294	9.14918			0.224719	16.7204			0.194174	38.9771			0.20202	10.8985	15.5498		0.201004	8.99482	10.7149		0.23952	21.0245			0.208332	21.9021
0.29078	7.60276			0.20603	17.207			0.241177	8.1717			0.230337	16.3009			0.199029	36.0926			0.207071	10.111			0.20603	8.79956			0.245509	20.7219			0.213541	21.327
0.297873	7.57973			0.211056	16.6922			0.24706	7.16272			0.235956	15.8809			0.203884	34.335	44.962		0.212122	9.57403			0.211056	8.067			0.251497	19.7225	21.331		0.21875	19.3919
0.304966	7.89028	7.63239		0.216081	17.0869			0.252943	7.70325	8.88269		0.241575	15.3973			0.208739	32.5481			0.217173	8.90386			0.216081	8.05486			0.257486	17.9574			0.223959	18.1837
0.312059	7.63756			0.221107	16.1484			0.258826	7.77138			0.247193	15.3776			0.213594	31.2683			0.222224	8.78458			0.221107	9.01911			0.263474	17.1867			0.229168	18.3653
0.319151	7.14068			0.226132	15.8896			0.264709	6.41555			0.252812	14.8716	16.3012		0.218448	28.8742			0.227275	8.20417			0.226132	8.27504			0.269463	16.7357			0.234377	17.4632
0.326238	7.51025			0.231154	15.1324			0.270587	6.00902			0.258425	14.3452			0.223299	26.9985			0.232321	7.88391			0.231154	7.9122			0.275447	16.7105			0.239581	16.2075
0.333331	7.2936			0.23618	14.3962			0.27647	6.20929			0.264044	14.7843			0.228154	25.6356			0.237372	7.49961			0.23618	8.24394			0.281435	15.0961			0.24479	16.3828
0.340424	7.04701			0.241205	14.1651			0.282353	5.60885			0.269663	13.8013			0.233009	23.646			0.242423	7.17698			0.241205	8.85294			0.287424	15.1182			0.249999	15.2762	18.2777
0.347517	7.73707			0.246231	13.4827			0.288236	5.62076			0.275281	14.5087			0.237864	22.349			0.247474	7.62529			0.246231	8.697			0.293413	14.1791			0.255208	14.7048
0.35461	7.49096	7.40816		0.251256	12.8385	15.3039		0.294119	4.89025			0.2809	14.4048			0.242719	22.1445			0.252526	7.37122	8.31347		0.251256	9.49404	8.54157		0.299401	13.9127			0.260417	14.0801
0.361703	7.71595			0.256282	12.6461			0.300001	5.11316	5.95478		0.286518	14.5359			0.247574	20.2636			0.257577	7.07117			0.256282	9.24681			0.30539	13.4513	15.5942		0.265625	14.1446
0.368796	7.45726			0.261308	12.1258			0.305884	4.88796			0.292137	13.92			0.252428	19.3067	25.3035		0.262628	7.05475			0.261308	8.54413			0.311378	12.5126			0.270834	14.1991
0.375889	7.58437			0.266333	12.2172			0.311767	4.6956			0.297755	14.1033			0.257283	18.6307			0.267679	6.70111			0.266333	9.23033			0.317367	12.442			0.276043	13.3167
0.382976	7.69381			0.271355	11.371			0.317645	4.70592			0.303369	14.1997	14.2892		0.262134	16.897			0.272725	6.86842			0.271355	9.23065			0.323351	11.3448			0.281248	13.0254
0.390069	7.46803			0.27638	12.1747			0.323528	4.94755			0.308988	14.1133			0.266989	17.0463			0.277776	6.37393			0.27638	8.65743			0.329339	11.0886			0.286457	12.8379
0.397162	7.38757			0.281406	11.2238			0.329411	4.88378			0.314606	14.3965			0.271844	16.5113			0.282827	6.34636			0.281406	9.3221			0.335328	10.9388			0.291665	11.9512
0.404255	7.73315	7.57716		0.286432	11.4879			0.335294	4.45761			0.320225	14.8508			0.276699	15.3081			0.287878	6.36103			0.286432	9.09451			0.341316	10.2696			0.296874	12.0226
0.411347	8.30436			0.291457	11.6465			0.341177	4.34307			0.325843	14.6649			0.281554	13.7985			0.292929	6.36428			0.291457	8.86553			0.347305	11.0582			0.302083	11.9355	13.2218
0.41844	7.98292			0.296483	12.1182			0.34706	4.4467			0.331462	14.7313			0.286408	13.9596			0.29798	6.5545			0.296483	9.36358			0.353294	9.84583	11.1876		0.307292	11.8191
0.425533	7.99137			0.301509	11.1888	11.82		0.352943	4.61601	4.66491		0.337081	14.7828			0.291263	12.816			0.303031	7.03141	6.6727		0.301509	9.09345	9.06485		0.359282	9.93394			0.312501	11.8414
0.432626	8.11724			0.306534	11.2913			0.358826	4.27207			0.342699	15.0302			0.296118	12.6701			0.308082	6.94909			0.306534	9.1248			0.365271	10.5969			0.31771	11.725
0.439713	7.86333			0.311556	10.6646			0.364704	4.1085			0.348313	15.5414			0.300969	12.1525	14.979		0.313129	6.68068			0.311556	8.49358			0.371255	10.0228			0.322914	11.7663
0.446806	8.09483			0.316581	10.1669			0.370587	4.37863			0.353932	15.6354	14.8608		0.305824	11.2839			0.31818	6.93987			0.316581	8.88719			0.377243	9.85172			0.328123	11.5646
0.453899	8.46499	8.11701		0.321607	11.2584			0.37647	4.4033			0.35955	15.6933			0.310679	11.0417			0.323231	7.15878			0.321607	8.54777			0.383232	9.84818			0.333332	11.8273
0.460992	8.09424			0.326632	10.9137			0.382353	4.99726			0.365169	15.3547			0.315534	10.8778			0.328282	6.88013			0.326632	8.87109			0.38922	10.5054			0.338541	11.2683
0.468085	8.33228			0.331658	10.7282			0.388236	4.661			0.370787	16.4307			0.320388	10.996			0.333333	7.36433			0.331658	8.98807			0.395209	10.4971			0.34375	11.4096
0.475178	8.0648			0.336684	10.4917			0.394119	4.04742			0.376406	16.5598			0.325243	10.826			0.338384	7.34342			0.336684	8.79324			0.401198	10.8414	10.2622		0.348958	11.8975
0.482271	8.30136			0.341709	9.40704			0.400002	4.41024	4.4098		0.382024	16.7175			0.330098	10.0409			0.343435	7.42588			0.341709	8.26353			0.407186	11.392			0.354167	10.8824	11.6002
0.489364	8.31624			0.346735	10.7315			0.405885	4.42192			0.387643	17.1573			0.334953	10.0478			0.348486	7.49944			0.346735	8.24688			0.413175	10.8596			0.359376	10.8613
0.496457	8.96561			0.351761	9.46435	10.5118		0.411768	4.03399			0.393262	18.2041			0.339808	10.0469			0.353537	7.53673	7.17784		0.351761	8.55427	8.67704		0.419164	11.1326			0.364585	10.8332
0.503543	8.68439	8.39413		0.356782	9.61986			0.417646	4.3162			0.398875	18.264			0.344659	10.1922			0.358584	7.90445			0.356782	9.07923			0.425147	11.0533			0.36979	11.0064
0.510636	8.56385			0.361808	9.93753			0.423529	4.41883			0.404494	18.3401	16.969		0.349513	10.2848			0.363635	8.00716			0.361808	9.05158			0.431136	11.6898			0.374998	10.4267
0.517729	8.87108			0.366833	9.38676			0.429412	4.94782			0.410112	18.5176			0.354368	10.1651	10.5276		0.368686	8.60427			0.366833	7.96369			0.437124	11.6226			0.380207	10.5216
0.524822	9.10384			0.371859	9.11688			0.435295	4.73209			0.415731	18.4843			0.359223	10.1069			0.373737	8.66711			0.371859	8.45591			0.443113	11.3287			0.385416	10.8509
0.531915	8.69365			0.376885	9.57158			0.441178	4.40363			0.42135	19.2069			0.364078	10.3903			0.378788	8.6133			0.376885	8.19098			0.449102	10.3669			0.390625	10.7746
0.539008	9.07584			0.38191	8.72757			0.447061	4.70492			0.426968	20.0824			0.368933	10.6422			0.383839	8.87363			0.38191	7.81024			0.45509	10.7158	11.129		0.395834	10.6969
0.546101	9.21112			0.386936	9.53259			0.452944	4.11646	4.4551		0.432587	19.2912			0.373788	10.4608			0.38889	9.09953			0.386936	7.99103			0.461079	10.0696			0.401043	11.0657	10.7819
0.553194	9.07605	8.94221		0.391962	9.39614			0.458827	4.58007			0.438205	20.0642			0.378643	10.7987			0.393941	8.81862			0.391962	7.68706			0.467068	10.2223			0.406252	10.5533
0.560281	9.00858			0.396983	9.38686			0.464705	4.93498			0.443819	20.744			0.383493	11.08			0.398988	8.9906			0.396983	7.4467			0.473051	10.646			0.411456	10.3636
0.567374	9.10388			0.402009	9.58026	9.4256		0.470588	4.97062			0.449438	20.4041			0.388348	10.733			0.404039	9.28316	8.68618		0.402009	8.06	8.17364		0.47904	10.6901			0.416665	10.875
0.574467	9.94143			0.407034	10.0774			0.476471	5.34423			0.455056	21.0142	19.7566		0.393203	11.4716			0.40909	9.77634			0.407034	7.90785			0.485028	10.9105			0.421874	11.0414
0.58156	9.63707			0.41206	9.83527			0.482354	4.82234			0.460675	21.9952			0.398058	11.4588			0.414141	10.0172			0.41206	7.67474			0.491017	10.7026			0.427083	10.5479
0.588653	9.7278			0.417085	9.4675			0.488237	4.75956			0.466293	22.096			0.402913	12.2143	10.9357		0.419192	10.0631			0.417085	7.35456			0.497006	9.74146			0.432291	10.6054
0.595745	9.89525			0.422111	10.2235			0.49412	4.35481			0.471912	22.1687			0.407768	12.8037			0.424243	10.1616			0.422111	6.86527			0.502994	9.90204	10.3606		0.4375	10.164
0.602838	9.5211	9.54787		0.427137	11.0667			0.500002	4.46737	4.77925		0.47753	22.9009			0.412623	12.8161			0.429294	10.6783			0.427137	7.54594			0.508983	9.63637			0.442709	10.3054
0.609931	9.77885			0.432162	10.0921			0.505885	5.00128			0.483149	22.974			0.417478	14.2056			0.434345	10.6687			0.432162	7.01461			0.514972	10.0603			0.447918	9.93754
0.617018	9.77377			0.437184	10.2749			0.511763	4.44021			0.488763	23.7064			0.422328	14.1181			0.439392	10.7181			0.437184	6.8015			0.520955	9.95766			0.453122	10.0834	10.4477
0.624111	9.76632			0.442209	10.5741			0.517646	4.43195			0.494381	24.0223			0.427183	14.699			0.444443	10.7933			0.442209	6.67875			0.526944	9.65228			0.458331	10.4105
0.631204	9.43893			0.447235	10.7445			0.523529	4.60048			0.5	23.0256	22.8611		0.432038	14.6872			0.449494	9.98182			0.447235	6.44946			0.532932	9.32732			0.46354	10.5057
0.638297	9.43734			0.452261	10.4794	10.2835		0.529412	4.35682			0.505619	23.3578			0.436893	15.0885			0.454545	10.3794	10.3238		0.452261	6.30933	7.0602		0.538921	9.46887			0.468749	9.84578
0.64539	10.068			0.457286	10.4007			0.535295	4.07175			0.511237	23.0697			0.441748	15.1146			0.459596	10.1351			0.457286	5.73068			0.54491	9.07561			0.473958	9.95836
0.652483	10.0178	9.75442		0.462312	10.4254			0.541178	4.53211			0.516856	22.9872			0.446603	15.3273			0.464647	9.97503			0.462312	6.31907			0.550898	9.57946	9.59474		0.479167	9.95001
0.659576	10.7916			0.467338	10.5688			0.547061	4.13952			0.522474	23.6278			0.451457	15.5799	14.444		0.469698	9.92255			0.467338	6.53273			0.556887	9.49143			0.484376	9.86092
0.666669	10.4395			0.472363	10.6069			0.552944	4.41264	4.44297		0.528093	22.9567			0.456312	15.4171			0.474749	10.1442			0.472363	6.15051			0.562876	9.41924			0.489584	9.74272
0.673756	11.3506			0.477385	11.1223			0.558822	4.45019			0.533707	23.5646			0.461163	16.1962			0.479796	9.76081			0.477385	5.90476			0.568859	9.26522			0.494789	10.0299
0.680849	11.5792			0.48241	10.869			0.564705	4.32627			0.539325	23.4807			0.466018	16.3071			0.484847	9.79887			0.48241	6.29087			0.574848	8.86165			0.499998	9.38284	9.96519
0.687941	11.8051			0.487436	11.1881			0.570588	3.83199			0.544944	22.4351			0.470873	16.3206			0.489898	9.94015			0.487436	5.91335			0.580836	9.34391			0.505207	9.78501
0.695034	12.7122			0.492462	10.9469			0.576471	4.09205			0.550562	21.9645	23.0494		0.475728	16.7541			0.494949	9.98586			0.492462	6.11753			0.586825	9.62076			0.510416	10.1695
0.702127	13.684	11.766		0.497487	11.3658			0.582354	4.08432			0.556181	23.4328			0.480583	16.2494			0.5	9.45478	9.90194		0.497487	6.3485			0.592814	9.64151			0.515624	9.73552
0.70922	14.183			0.502513	11.8125	10.9306		0.588237	3.8944			0.561799	22.1525			0.485437	16.6139			0.505051	9.37722			0.502513	6.53298	6.1841		0.598802	9.61007			0.520833	9.6599
0.716313	14.4115			0.507538	11.2258			0.59412	4.0799			0.567418	23.2015			0.490292	16.4575			0.510102	9.14234			0.507538	6.95468			0.604791	9.54004	9.42154		0.526042	9.31025
0.723406	15.2536			0.512564	10.7579			0.600003	4.11337	4.10906		0.573037	23.2687			0.495147	16.0253			0.515153	9.2848			0.512564	6.15754			0.61078	8.94606			0.531251	9.1873
0.730499	15.3842			0.51759	11.1096			0.605886	3.54164			0.578655	22.4943			0.500002	16.1222	16.2463		0.520204	9.01131			0.51759	5.5934			0.616768	9.30182			0.53646	9.63029
0.737586	15.8011			0.522611	11.4271			0.611764	3.61935			0.584269	22.714			0.504853	16.5951			0.525251	9.01739			0.522611	5.80018			0.622752	9.22113			0.541664	9.83864
0.744679	16.858			0.527637	12.0008			0.617647	3.68449			0.589888	22.5538			0.509708	16.1962			0.530302	8.66182			0.527637	5.87174			0.62874	8.99444			0.546873	9.62032
0.751772	17.748	15.6628		0.532662	12.0746			0.62353	3.61759			0.595506	22.7602			0.514563	15.8309			0.535353	8.54888			0.532662	5.7815			0.634729	8.78421			0.552082	9.99404	9.69308
0.758865	18.547			0.537688	12.206			0.629413	3.71031			0.601125	22.256	22.7593		0.519417	16.4661			0.540404	8.16807			0.537688	5.62506			0.640718	8.76067			0.557291	10.1385
0.765958	19.672			0.542714	11.5748			0.635296	3.41779			0.606743	21.7444			0.524272	16.3496			0.545455	7.73452			0.542714	6.04746			0.646706	8.25597			0.5625	10.4552
0.77305	20.0862			0.547739	11.3897			0.641179	3.38167			0.612362	21.6324			0.529127	16.2033			0.550506	7.74228	8.66886		0.547739	5.7317			0.652695	8.21902	8.81041		0.567709	10.8468
0.780143	19.5665			0.552765	10.9565	11.4723		0.647062	3.1592			0.61798	20.7741			0.533982	16.4282			0.555557	7.39043			0.552765	5.87985	5.94431		0.658684	8.88641			0.572917	10.8423
0.787236	20.7939			0.557791	11.4842			0.652945	3.29804	3.49223		0.623599	20.4643			0.538837	16.6295			0.560608	7.64209			0.557791	5.79032			0.664672	9.3719			0.578126	10.2449
0.794323	20.7885			0.562812	10.5793			0.658823	3.5541			0.629213	20.6748			0.543688	16.2938			0.565655	7.37824			0.562812	5.91946			0.670656	9.24016			0.583331	10.413
0.801416	20.2401	19.9563		0.567838	10.7123			0.664706	4.13667			0.634831	20.8557			0.548543	16.6825			0.570706	7.33027			0.567838	5.67855			0.676644	9.19814			0.58854	10.3855
0.808509	19.7813			0.572863	10.3909			0.670589	3.7235			0.64045	20.8296			0.553397	17.4288	16.464		0.575757	7.14063			0.572863	5.60995			0.682633	8.31959			0.593748	10.4984
0.815602	19.3902			0.577889	10.3771			0.676472	3.73945			0.646068	20.2391			0.558252	17.7323			0.580808	7.20352			0.577889	5.63793			0.688622	8.13932			0.598957	10.0449
0.822695	17.5024			0.582915	10.4963			0.682355	3.22048			0.651687	19.5299	20.7494		0.563107	17.8417			0.585859	6.8199			0.582915	6.14009			0.69461	7.90432			0.604166	10.4184	10.4288
0.829788	16.9596			0.58794	10.1506			0.688238	3.28048			0.657306	19.4034			0.567962	17.6906			0.59091	6.67299			0.58794	5.70164			0.700599	8.4063	8.68327		0.609375	10.536
0.836881	15.8816			0.592966	10.4461			0.69412	3.26417			0.662924	20.1129			0.572817	18.1564			0.595961	6.75324			0.592966	5.33898			0.706587	8.03536			0.614584	10.2872
0.843974	15.5732			0.597991	11.0038			0.700003	3.34014	3.53238		0.668543	19.4294			0.577672	18.696			0.601012	6.69512	7.10264		0.597991	5.74209			0.712576	7.30931			0.619793	10.032
0.851061	14.452	17.0772		0.603013	10.9352	10.6576		0.705881	3.26398			0.674157	19.4594			0.582522	17.3568			0.606059	6.25194			0.603013	5.46292	5.70219		0.71856	7.53331			0.624997	10.5012
0.858154	14.5323			0.608038	10.7646			0.711764	3.45809			0.679775	19.7171			0.587377	17.9349			0.61111	6.20262			0.608038	4.73547			0.724548	7.56646			0.630206	10.668
0.865246	14.3609			0.613064	10.567			0.717647	3.15129			0.685394	19.2423			0.592232	16.979			0.616161	5.83812			0.613064	5.16708			0.730537	7.45634			0.635415	10.4417
0.872339	13.7798			0.61809	11.6238			0.72353	3.31719			0.691012	20.0228			0.597087	16.524			0.621212	5.86637			0.61809	5.3195			0.736526	7.41395			0.640624	10.1571
0.879432	12.1536			0.623115	10.7234			0.729413	3.3691			0.696631	20.5619			0.601942	16.0871	17.4999		0.626263	5.89047			0.623115	4.81997			0.742514	7.97886			0.645833	9.75232
0.886525	11.0322			0.628141	11.2186			0.735296	3.13125			0.702249	20.4119	19.8179		0.606797	15.6834			0.631314	5.8833			0.628141	5.01164			0.748503	7.78469			0.651042	9.77322	10.2387
0.893618	10.4316			0.633167	11.3312			0.741179	3.54146			0.707868	20.5097			0.611652	15.5579			0.636365	5.57333			0.633167	4.91876			0.754491	7.6142	7.6325		0.65625	9.24813
0.900711	9.56555	12.2651		0.638192	10.7751			0.747062	3.14268			0.713486	19.7561			0.616507	15.9089			0.641416	5.3187			0.638192	4.67009			0.76048	7.85337			0.661459	9.4021
0.907798	7.33199			0.643214	10.3052			0.75294	2.69163	3.22963		0.7191	20.3034			0.621357	15.3356			0.646463	5.37372			0.643214	5.06946			0.766464	8.11212			0.666664	9.50003
0.914891	6.54912			0.648239	10.7884			0.758823	2.91308			0.724719	20.9401			0.626212	14.8726			0.651514	5.57853	5.77771		0.648239	4.8249			0.772452	8.24823			0.671873	8.84527
0.921984	5.76256			0.653265	11.0984	10.9196		0.764706	3.07091			0.730337	20.944			0.631067	14.7947			0.656565	5.46337			0.653265	4.4645	4.90014		0.778441	7.70113			0.677081	9.26605
0.929077	5.06564			0.658291	12.0527			0.770589	3.1083			0.735956	21.7357			0.635922	14.9221			0.661616	5.38751			0.658291	5.13212			0.78443	7.97749			0.68229	9.16968
0.93617	4.58763			0.663316	11.07			0.776472	2.8542			0.741575	21.4863			0.640777	15.1666			0.666667	5.23392			0.663316	4.35839			0.790418	7.56592			0.687499	9.33558
0.943263	4.19225			0.668342	11.308			0.782355	2.68382			0.747193	21.2943			0.645632	15.8753			0.671718	4.65387			0.668342	4.48145			0.796407	7.33622			0.692708	9.61953
0.950356	4.01922	5.35835		0.673368	11.0937			0.788238	2.9393			0.752812	21.4496	20.9355		0.650487	15.8907	15.4008		0.676769	4.80041			0.673368	4.80952			0.802395	7.48423	7.78484		0.697917	10.0964
0.957448	3.23975			0.678393	11.329			0.794121	2.75628			0.75843	20.8281			0.655341	16.4103			0.68182	4.75524			0.678393	4.52704			0.808384	6.9409			0.703126	10.127	9.46098
0.964541	3.22113			0.683419	11.2201			0.800004	2.71544	2.88017		0.764049	20.8513			0.660196	17.2886			0.686871	4.90536			0.683419	4.45017			0.814373	7.2411			0.708335	10.2836
0.971628	3.21204			0.68844	11.9294			0.805882	2.81942			0.769663	21.5227			0.665047	18.2243			0.691918	4.92819			0.68844	4.45075			0.820356	6.96996			0.713539	10.6123
0.978721	3.46308			0.693466	11.8621			0.811765	2.55585			0.775281	21.8862			0.669902	18.0137			0.696969	4.84126			0.693466	4.57172			0.826345	7.37546			0.718748	11.6708
0.985814	3.94741			0.698491	10.8263			0.817648	2.51078			0.7809	23.4764			0.674757	17.7074			0.70202	4.85701	4.98261		0.698491	4.6408			0.832334	7.1941			0.723957	12.0729
0.992907	3.50294			0.703517	10.7581	11.3449		0.823531	2.5494			0.786518	24.5299			0.679612	17.9839			0.707071	4.78706			0.703517	3.87152	4.52935		0.838322	7.18901			0.729166	12.5087
1	2.9895	3.36798		0.708543	11.1015			0.829414	2.32801			0.792137	25.5863			0.684466	18.1686			0.712122	4.68468			0.708543	4.27631			0.844311	7.75713			0.734375	13.6444
				0.713568	11.3858			0.835297	2.30161			0.797755	26.3741			0.689321	18.3948			0.717173	4.75728			0.713568	4.56688			0.850299	7.09531	7.22037		0.739583	13.1428
				0.718594	12.7916			0.84118	2.17131			0.803374	28.367	23.7135		0.694176	17.9307			0.722224	4.42291			0.718594	4.17079			0.856288	7.17325			0.744792	13.331
				0.72362	13.0536			0.847063	2.26322			0.808993	30.653			0.699031	17.9048			0.727275	4.55613			0.72362	4.1963			0.862277	7.4335			0.750001	14.5128
				0.728641	14.7009			0.852941	2.39495	2.43273		0.814606	31.5648			0.703882	18.3226	17.85		0.732321	4.45461			0.728641	4.7057			0.86826	7.93058			0.755206	14.1932	12.5972
				0.733667	13.59			0.858824	2.02153			0.820225	33.2651			0.708737	18.3268			0.737372	4.88387			0.733667	4.63188			0.874249	8.31514			0.760414	14.968
				0.738692	13.9205			0.864707	2.21952			0.825843	32.5635			0.713592	17.1646			0.742423	4.43543			0.738692	4.31983			0.880238	8.89169			0.765623	15.0452
				0.743718	14.9261			0.87059	2.17955			0.831462	31.7699			0.718446	17.5598			0.747474	4.11655			0.743718	4.28371			0.886226	8.67027			0.770832	14.8283
				0.748744	14.8047			0.876473	2.32061			0.837081	31.13			0.723301	17.4692			0.752526	4.07623	4.51747		0.748744	4.25099			0.892215	9.09011			0.776041	15.8857
				0.753769	15.2412	13.5516		0.882356	2.35045			0.842699	31.664			0.728156	17.9547			0.757577	4.04049			0.753769	4.34094	4.37433		0.898203	9.43765			0.78125	16.2017
				0.758795	16.6			0.888239	1.9257			0.848318	32.6706			0.733011	17.3226			0.762628	4.19151			0.758795	4.62311			0.904192	9.78567	8.52532		0.786459	16.3044
				0.76382	16.6377			0.894121	1.88128			0.853936	32.965	32.0273		0.737866	18.4773			0.767679	4.09958			0.76382	4.26564			0.910181	10.389			0.791668	17.1211
				0.768842	17.1006			0.9	1.84991	2.09357		0.85955	34.3001			0.742717	19.3562			0.772725	4.03012			0.768842	4.5588			0.916164	11.1194			0.796872	17.0808
				0.773868	18.5484			0.905882	1.86816			0.865169	34.8877			0.747572	19.5191			0.777776	3.84479			0.773868	4.00897			0.922153	11.6966			0.802081	17.3761	16.0901
				0.778893	19.3979			0.911765	1.62921			0.870787	37.4285			0.752426	19.9073	18.3058		0.782827	3.95535			0.778893	4.56361			0.928142	12.4738			0.80729	17.6732
				0.783919	18.0594			0.917648	1.86607			0.876406	39.3338			0.757281	20.7556			0.787878	4.36757			0.783919	4.1827			0.93413	12.8917			0.812499	17.38
				0.788944	19.7895			0.923531	1.79474			0.882024	37.988			0.762136	21.3486			0.792929	3.94871			0.788944	4.23872			0.940119	13.1513			0.817707	17.5204
				0.79397	19.6459			0.929414	1.6244			0.887643	38.1308			0.766991	21.1128			0.79798	4.09282			0.79397	4.56597			0.946107	14.0237			0.822916	16.8019
				0.798996	19.7001			0.935297	1.87718			0.893262	36.9955			0.771846	21.7652			0.803031	4.28958	4.08605		0.798996	4.00271			0.952096	14.2028	12.4935		0.828125	16.8169
				0.804021	19.7415	18.5221		0.94118	1.37825			0.89888	33.4651			0.776701	21.843			0.808082	4.22149			0.804021	4.90472	4.39149		0.958085	14.2063			0.833334	16.913
				0.809043	19.702			0.947058	1.493			0.904494	31.5998	36.0144		0.781552	22.5952			0.813129	3.98353			0.809043	4.37214			0.964068	14.9121			0.838539	15.971
				0.814068	20.5017			0.952941	1.31612	1.64968		0.910112	30.8192			0.786406	22.7273			0.81818	3.78708			0.814068	4.54498			0.970057	14.608			0.843747	15.1799
				0.819094	21.7748			0.958824	1.36639			0.915731	28.5957			0.791261	23.0191			0.823231	3.96798			0.819094	4.27443			0.976045	14.7257			0.848956	14.3671
				0.82412	21.6853			0.964707	1.32865			0.92135	26.613			0.796116	23.6332			0.828282	4.08408			0.82412	4.05204			0.982034	14.2055			0.854165	12.739	16.1362
				0.829145	21.9653			0.97059	1.26554			0.926968	24.6394			0.800971	23.4108	22.2211		0.833333	3.9725			0.829145	4.27195			0.988023	14.0217			0.859374	11.6425
				0.834171	22.0909			0.976473	1.16755			0.932587	21.9131			0.805826	23.9966			0.838384	3.67039			0.834171	3.84028			0.994011	13.4595			0.864583	11.0571
				0.839197	21.9523			0.982356	1.25391			0.938205	19.1941			0.810681	25.4228			0.843435	3.84194			0.839197	3.94292			1	13.7876	14.2408		0.869792	9.5181
				0.844222	20.9398			0.988239	1.05608			0.943824	14.5398			0.815536	25.7231			0.848486	3.96835			0.844222	3.98808							0.875001	9.0141
				0.849248	20.1667			0.994122	0.97713			0.949442	10.7528			0.82039	27.1374			0.853537	4.01807	3.95154		0.849248	3.34468							0.880209	7.70679
				0.854269	20.3822	21.1161		1	0.90058	1.16448		0.955056	7.79441	20.5401		0.825241	27.6814			0.858584	3.9114			0.854269	3.70783	4.03393						0.885414	7.35779
				0.859295	19.5334							0.960675	5.92662			0.830096	28.4047			0.863635	3.92501			0.859295	4.08952							0.890623	7.19159
				0.864321	18.9203							0.966293	4.43197			0.834951	27.8025			0.868686	4.06678			0.864321	4.05035							0.895832	7.57401
				0.869346	18.3566							0.971912	3.38414			0.839806	28.2902			0.873737	3.98751			0.869346	3.8908							0.90104	7.23195	8.69932
				0.874372	17.9079							0.97753	2.82852			0.844661	28.3192			0.878788	3.89844			0.874372	3.87425							0.906249	7.0782
				0.879397	17.7311							0.983149	2.25007			0.849516	28.6134			0.883839	3.56962			0.879397	3.45506							0.911458	7.16319
				0.884423	18.1185							0.988768	1.83234			0.85437	29.7011	27.372		0.88889	3.68396			0.884423	3.79151							0.916667	7.30078
				0.889449	17.0147							0.994386	1.57359			0.859225	30.9437			0.893941	3.67386			0.889449	3.47657							0.921876	6.92537
				0.89447	17.0713							1	1.25383	2.93513		0.864076	31.5442			0.898988	3.74593			0.89447	3.44744							0.92708	6.6327
				0.899496	17.3818											0.868931	32.5056			0.904039	3.39716	3.78597		0.899496	3.6251							0.932289	6.39667
				0.904521	17.0258	17.9061										0.873786	33.7028			0.90909	3.42255			0.904521	3.64963	3.73502						0.937498	5.94352
				0.909547	16.605											0.878641	34.1367			0.914141	3.28392			0.909547	3.46069							0.942707	5.43235
				0.914573	16.1829											0.883496	35.4443			0.919192	3.2014			0.914573	3.6935							0.947916	5.33652
				0.919598	15.5097											0.88835	36.2938			0.924243	2.8665			0.919598	3.55228							0.953125	4.19591	6.24052
				0.924624	14.619											0.893205	37.5525			0.929294	2.78878			0.924624	3.34399							0.958334	3.65743
				0.92965	14.0876											0.89806	39.5504			0.934345	2.8578			0.92965	3.4219							0.963542	3.54047
				0.934671	12.9832											0.902911	40.5901	35.2264		0.939392	2.73382			0.934671	3.51383							0.968747	2.9663
				0.939697	11.6003											0.907766	42.6346			0.944443	2.29993			0.939697	3.63144							0.973956	2.89215
				0.944722	10.8059											0.912621	45.4332			0.949494	2.35222			0.944722	3.68393							0.979165	2.65524
				0.949748	9.17778											0.917475	47.2847			0.954545	2.24247	2.80494		0.949748	3.43589							0.984373	2.21152
				0.954774	7.93366	12.9505										0.92233	47.2293			0.959596	2.07734			0.954774	3.9387	3.56762						0.989582	1.76163
				0.959799	7.26962											0.927185	47.4266			0.964647	1.96895			0.959799	3.36151							0.994791	1.51743
				0.964825	6.78481											0.93204	46.5454			0.969698	1.89256			0.964825	3.94825							1	0.834094	2.44847
				0.96985	5.70143											0.936895	45.7301			0.974749	1.56724			0.96985	3.69994
				0.974872	4.57108											0.941746	45.784			0.979796	1.57635			0.974872	3.82427
				0.979897	4.40921											0.946601	45.411			0.984847	1.47446			0.979897	3.43782
				0.984923	3.79272											0.951455	45.1747	45.8654		0.989898	1.5503			0.984923	3.52572
[truncated: 10 more rows]
