# Supplementary material for: Crumbs organizes the transport machinery by regulating apical levels of PI(4,5)P2 in Drosophila
Source: eLife. 2019 Nov 7;8:e50900. doi: 10.7554/eLife.50900 (PMC6881148; doi:10.7554/eLife.50900)
Supplement: Figure 5—figure supplement 1—source data 10. [file elife-50900-fig5-figsupp1-data10.xlsx]

## Sheet: Image38
X0	Y0	Y1	Y2	Y3	Y4	Y5	Y6	Y7	Y8	Y9	Y10	Y11	Y12	Y13	Y14	Y15	Y16	Y17	Y18	Y19	Y20	Y21	Y22	Y23	Y24	Y25	Y26	Y27	Y28	Y29	Y30		Ap-Ba	Avg intensity
0	12.4408	12.2965	14.1543	20.3053	19.3325	22.1128	14.2532	17.9645	16.6482	9.6654	7.5829	13.6816	17.6423	12.6129	14.6023	11.659	18.5315	21.9982	15.2228	12.2056	11.4338	9.3657	19.024	14.4721	23.6687	16.9932	14.535	18.557	24.5267	43.5588	21.3539		0	16.8517
0.1191	12.9562	14.4139	13.7451	27.3568	21.5225	22.7941	12.6617	20.9539	18.4769	11.4094	13.0925	13.7825	15.4637	10.9793	16.6734	14.3679	26.5348	21.6495	19.2677	16.9334	12.0785	14.0342	19.8139	19.2186	28.1686	17.3571	13.346	22.885	24.7273	46.3733	22.489		0.00492662	18.888
0.2382	10.1948	14.9018	15.4808	23.9574	19.6694	26.46	15.029	18.4517	16.1863	15.3155	11.1773	15.7275	19.892	12.4813	18.4892	18.7746	22.8192	20.3111	22.2246	12.3219	13.2333	14.7977	23.9112	21.1988	31.6079	15.7766	15.007	27.096	27.515	40.089	21.3599		0.00985324	19.4019
0.3573	10.2002	16.1225	18.9132	24.442	26.461	24.83	20.8876	16.1748	21.2941	13.794	9.7786	12.437	18.0353	17.937	23.8434	20.2845	16.6308	18.1101	22.3331	16.8255	16.0926	12.4346	27.8679	20.6032	28.9952	24.4672	14.023	30.884	25.7498	46.4534	20.496		0.0147799	20.5613
0.4764	14.0044	16.9314	18.4391	29.5358	29.736	28.5727	25.2515	23.1315	21.2036	10.2456	15.5187	14.7998	22.3396	13.4807	22.1668	19.6041	20.4214	23.6839	25.5274	22.5426	14.1294	22.9089	31.6133	25.1481	35.1453	26.6981	13.475	23.487	28.7722	58.505	26.8075		0.0197065	23.3492
0.5954	16.9079	19.1257	17.6371	28.2023	26.5453	26.0491	30.1968	24.7187	21.5087	13.613	11.2924	14.5236	26.6288	15.8616	21.7172	22.7166	22.0037	17.7362	25.6786	24.8748	20.899	18.7949	24.3413	26.2573	30.909	30.8879	21.32	32.245	29.2374	55.3634	16.221		0.024629	23.6779
0.7145	16.5531	19.7564	18.2753	23.7636	23.9678	27.0637	24.4949	22.1601	23.0632	14.462	13.9322	16.2611	31.0687	21.5072	18.3814	20.2009	20.3917	27.992	28.8411	32.3489	26.4374	25.4566	26.2044	33.4826	32.0997	42.7504	23.969	36.453	31.5991	50.4527	20.18		0.0295556	25.599
0.8336	17.4411	25.2702	26.8472	32.5425	31.1224	27.0538	32.7184	20.287	25.5303	16.662	14.2411	16.2967	25.9555	20.342	25.4669	20.3718	27.2586	26.8689	26.4038	31.0797	37.0114	31.6219	27.2614	31.4252	36.2786	52.0878	32.337	31.541	30.9297	53.0052	28.6291		0.0344822	28.448
0.9527	26.1803	37.5421	24.7505	35.1743	29.5602	31.5105	30.5102	26.8354	30.5988	15.8543	15.2183	19.8267	27.9637	25.5612	22.2947	23.6902	25.6783	30.4358	22.6883	31.5772	39.1192	45.4152	37.2218	35.6228	34.3917	47.2947	30.606	40.598	30.1638	57.5739	21.6855		0.0394088	30.7466
1.0718	23.0619	37.9342	25.7315	35.4115	30.0216	28.9717	28.5682	29.3508	34.8403	24.6708	22.7586	20.6302	34.5708	34.4414	25.3197	29.9972	36.4175	28.3728	29.2841	40.4247	39.5768	51.0287	39.9731	47.3241	47.1818	56.4641	44.453	43.973	36.918	52.7869	26.1215		0.0443354	35.051
1.1909	24.4302	38.0251	28.4563	45.929	31.6238	35.7287	29.2782	30.6487	36.8375	27.6445	29.4725	27.2665	32.5293	34.1677	28.829	31.9233	39.0906	23.9161	31.7243	37.4027	45.5449	63.9769	43.6516	45.5075	43.3236	59.3916	60.856	51.854	45.4498	53.3028	29.5481		0.049262	38.301
1.31	29.8414	37.6138	30.476	47.2127	42.4543	34.1002	44.9618	37.4873	37.9306	30.3634	29.0155	30.7956	40.7729	39.8485	39.8292	33.0281	38.9898	30.3692	35.5008	50.5364	59.8912	67.1003	51.2638	53.7346	57.0708	61.4259	65.644	65.424	45.0251	52.4376	36.4612		0.0541887	43.7615
1.4291	27.8917	45.6713	26.4332	52.179	49.4985	38.7828	37.4129	44.5092	47.3611	47.2897	40.3759	36.8488	50.943	49.8472	40.2772	34.571	35.8559	27.5487	36.3013	49.2968	65.442	72.8224	54.0899	52.9884	67.6972	66.6537	85.464	85.632	45.4147	48.4863	34.9241		0.0591153	48.339
1.5481	28.0274	36.2187	29.5746	42.5278	53.7843	34.0584	35.6489	41.8968	47.9537	48.1322	40.8341	43.1232	60.387	45.726	43.768	38.3796	34.5016	29.5878	45.9584	48.1347	71.4091	81.4852	65.2462	64.1522	58.279	67.9737	94.718	89.724	48.3146	51.449	40.9423		0.0640378	50.3844
1.6672	29.7762	33.8508	37.6719	37.5263	48.8243	42.4521	37.1886	50.8604	51.6087	48.2999	49.0773	48.4158	55.4258	52.7881	45.5203	31.1302	35.9612	35.0426	33.6294	54.4929	77.643	73.998	68.8675	63.4247	53.3583	64.1776	94.106	94.375	55.0957	58.9021	43.9503		0.0689644	51.8529
1.7863	26.2568	26.8806	35.7043	46.9681	59.0705	40.6108	37.5112	48.1889	49.9638	48.3191	34.0874	53.1292	51.0888	53.1599	42.6472	39.6665	28.0709	30.1376	43.8517	72.8521	75.4469	66.8674	54.2956	52.9664	63.6538	62.0712	100.598	100.975	59.4563	60.9205	42.3152		0.073891	51.8623
1.9054	27.0969	24.3154	33.7109	37.6076	52.2554	39.7574	32.0354	46.2559	46.1487	47.3354	32.424	51.9885	49.6623	52.4391	40.8208	34.835	26.3416	26.3435	49.5312	81.2161	76.5771	64.2437	50.8106	50.6666	57.6782	58.4303	96.842	103.129	62.589	62.6694	55.7242		0.0788176	50.6929
2.0245	24.9991	23.5591	30.5963	30.6707	46.6368	44.2773	31.396	43.5645	43.1185	43.7017	33.7875	54.9082	44.0849	50.5457	40.2476	33.2157	17.8625	29.2333	48.1886	87.9286	91.5973	60.7102	56.0476	43.9518	42.144	60.5016	79.032	88.337	60.2632	60.6062	61.1268		0.0837442	48.6078
2.1436	21.1008	18.8991	27.6408	24.7989	52.6682	44.9366	31.9227	34.1578	37.0582	47.6547	27.9797	56.2177	37.7567	46.1047	29.9261	21.3111	17.8926	25.7024	50.5788	83.7156	88.0315	55.3141	39.6116	38.7193	45.6711	55.8831	68.21	80.751	64.9014	65.2775	74.1189		0.0886708	45.6294
2.2627	27.0283	15.8497	26.5623	16.7431	35.7121	37.2148	32.7713	32.0416	28.718	44.8264	22.4832	55.7949	32.3593	46.9113	27.0987	18.4043	16.3228	22.4725	48.2697	87.5262	86.5318	44.8279	24.7286	32.4936	40.6656	44.712	53.676	75.942	55.6541	55.5322	78.6021		0.0935975	40.9186
2.3818	24.8773	16.7714	20.0488	13.4889	27.9987	44.0372	33.5246	28.4494	22.0117	40.383	23.7934	53.2846	32.229	42.0753	17.069	16.373	8.2307	19.2365	48.4724	80.9778	75.4329	34.6391	19.9931	22.6031	30.1291	31.333	43.161	57.317	57.4661	51.2944	87.178		0.0985241	36.2542
2.5008	19.5269	10.9483	14.2856	14.8114	28.111	38.9076	32.5413	27.7771	14.9235	27.7387	24.4047	53.1497	25.7383	27.0085	13.3511	13.3499	7.7222	17.2717	45.9314	91.1761	82.7015	24.5087	19.3756	19.7556	25.2528	24.6914	35.393	50.213	65.176	46.7289	91.5122		0.103447	33.3543
2.6199	12.2347	11.9143	13.7936	11.7297	25.2483	36.2694	26.8161	19.6789	11.0783	22.2642	20.4835	55.4723	20.7351	30.2843	11.5892	12.118	6.7739	13.8027	37.6926	79.6838	71.1554	18.4248	13.8873	17.129	23.4702	16.9455	27.192	39.933	63.7597	40.7233	85.8251		0.108373	28.9712
2.739	15.5173	9.275	13.1441	6.5123	19.8291	35.7316	29.1533	18.0947	10.3563	22.6621	23.9447	46.2424	15.3151	18.9856	6.4386	7.6787	8.3575	13.1799	28.6307	76.7674	71.2076	15.2481	7.404	15.8106	20.5645	14.9239	26.815	29.654	55.092	40.3144	84.6541		0.1133	26.0485
2.8581	10.7588	7.2912	14.1442	9.32	9.6969	34.1841	37.4365	12.9719	8.7967	17.4832	18.3402	46.5362	10.4851	11.3253	5.5644	9.9845	4.7092	12.6094	27.3437	57.5539	57.2742	12.0374	12.7464	11.9361	18.9887	10.9142	20.762	26.95	66.3386	25.8705	88.3377		0.118226	23.1836
2.9772	9.2823	4.8289	13.871	6.3893	4.8018	28.6564	35.5107	12.4962	10.1808	14.9435	21.3899	42.1595	7.4681	11.5594	8.0514	6.6574	5.3928	8.781	21.7389	49.8817	47.8862	11.3033	7.2786	7.6802	17.3752	9.8526	16.844	20.803	47.8361	31.3424	81.8656		0.123153	20.1325
3.0963	10.9822	6.6105	10.2008	6.5039	8.3194	21.8289	35.4388	14.2532	5.6632	11.347	20.1085	32.5205	9.713	10.0126	8.6631	5.1203	5.5044	6.9273	17.0822	46.1925	36.5342	12.4644	5.1766	8.6718	13.6976	8.9219	14.375	25.801	44.6946	33.1398	69.965		0.12808	18.2721
3.2154	8.9034	3.5732	9.0187	7.1058	10.2001	15.6928	33.1211	10.7171	6.4745	11.5061	15.9087	37.29	9.7445	8.106	6.4673	4.0882	5.2168	3.9818	16.877	42.03	32.4475	9.8518	6.763	4.7179	11.9222	9.5377	11.106	19.185	38.1031	27.5926	73.099		0.133006	16.4629
3.3345	6.318	6.3938	6.428	6.1552	5.9331	10.2038	36.684	10.7032	6.415	7.6377	18.0872	28.1358	7.4699	6.058	4.7984	4.1203	4.0219	6.2156	13.221	30.0452	21.4927	7.0895	8.6019	7.4838	7.7402	5.4138	8.44	11.665	34.8807	38.6881	73.0286		0.137933	14.5022
3.4535	7.2246	5.7114	5.1706	5.6705	7.0715	9.3304	34.324	7.296	2.9673	8.2783	16.9863	23.2128	7.7183	5.2137	8.407	5.8012	1.6528	4.0781	14.2132	23.0864	21.0226	6.5604	7.5847	5.1278	6.6251	5.2269	5.055	9.474	29.2928	37.2294	60.0913		0.142855	12.7969
3.5726	6.8457	2.8594	4.374	5.0621	4.3852	10.9568	34.9977	9.0215	3.8962	8.3468	24.2545	24.8619	9.398	1.8472	5.8661	2.2148	3.6099	8.8936	9.9355	18.7442	11.7829	6.3892	6.3467	4.1876	4.0107	5.3856	5.391	12.589	25.7277	23.8721	55.3754		0.147782	11.659
3.6917	4.7666	3.0332	6.0953	6.5088	3.737	13.0666	31.2732	6.9607	4.8485	7.4052	21.319	19.3895	8.4604	4.5137	8.0363	3.6671	6.0906	5.0186	10.8974	15.3816	12.0544	4.8537	3.3766	4.972	4.1835	4.6374	6.547	7.449	25.7767	25.0073	49.3243		0.152709	10.9242
3.8108	4.0553	2.7028	7.6163	4.4775	6.1148	8.6806	28.7098	7.0921	5.7674	5.6331	17.9828	16.9881	8.7899	4.8576	4.8094	3.298	1.7669	3.9538	8.9583	10.984	20.2927	4.9843	5.8358	5.2302	3.8047	5.2386	4.916	7.452	20.2501	23.6532	39.2426		0.157635	9.81093
3.9299	2.9355	3.2839	5.1353	5.9781	4.9036	10.2783	28.6079	5.328	3.5924	5.0112	17.0676	14.9041	8.5177	5.5648	7.4149	4.679	3.6741	3.2367	7.7408	14.9232	13.677	6.898	5.163	5.7279	2.2099	3.4978	5.963	6.046	18.1424	22.3078	27.8351		0.162562	9.04016
4.049	5.0908	1.8406	3.0311	4.4118	4.6338	7.4466	19.4679	7.391	3.0513	6.3217	17.3482	12.5125	6.7837	4.8507	7.7614	3.8939	1.6277	4.6432	7.3401	11.0454	12.4385	3.9936	6.4592	10.2316	4.0392	2.3203	5.43	6.319	13.2826	18.9751	24.1445		0.167488	8.0041
4.1681	4.3016	4.2262	3.2832	6.4409	3.7865	9.8114	18.4851	5.4669	3.9481	5.804	18.6001	13.7989	5.9642	2.6019	7.0571	5.0451	2.2572	4.1021	8.0287	7.4924	14.7601	4.7246	2.678	6.9466	2.5401	2.8058	3.935	4.314	13.7423	14.3361	20.4284		0.172415	7.4746
4.2872	3.8866	1.9735	3.7181	6.029	4.1611	6.0486	13.2849	5.8664	3.1419	3.5039	16.7871	14.5375	7.9871	5.3441	6.4998	3.748	3.1785	5.2015	9.4181	6.0196	10.1962	6.7979	5.2524	4.9332	2.2588	4.151	3.109	7.941	11.532	19.7222	18.7881		0.177342	7.25862
4.4063	3.7411	1.729	2.6929	6.8478	4.421	3.0114	11.5904	4.6621	3.911	7.9145	14.3937	12.4316	4.1252	3.3583	5.6446	6.3569	3.1062	4.3371	9.5945	10.413	8.7677	3.8196	5.8897	3.1395	3.2727	3.7692	3.324	5.107	13.3561	18.613	16.0123		0.182268	6.75333
4.5253	3.1106	3.1646	3.3827	6.11	6.6137	3.0606	8.981	6.3375	2.0709	5.625	13.2744	12.8439	5.6055	5.946	6.1694	4.8933	1.3414	2.8092	6.6967	7.9223	5.4947	4.6139	6.0754	4.0513	2.7641	3.2673	2.54	4.587	11.7736	17.2416	14.1956		0.187191	6.21172
4.6444	5.179	2.1268	4.6909	3.9113	3.5955	5.8035	8.2656	8.6005	2.8273	4.2201	12.0119	8.7665	4.7952	3.2172	5.5818	4.3945	2.6877	3.9864	4.186	5.3551	6.5263	4.579	4.5004	4.1778	1.6255	2.1359	3.905	5.143	7.6717	16.091	10.5747		0.192117	5.52042
4.7635	5.1605	1.7462	2.6847	10.0347	5.6448	4.8468	8.4593	4.7885	2.4436	4.2393	9.7654	9.9549	7.2615	3.2474	4.643	5.0526	1.9383	3.1978	8.358	4.3722	8.1546	6.0337	7.6314	7.0602	1.585	3.2976	3.605	6.11	10.9873	13.9305	8.9292		0.197044	5.97303
4.8826	2.1648	2.9847	4.7866	6.9194	3.5404	4.9002	5.9066	7.4349	1.6338	2.7749	5.463	7.1747	5.3227	3.673	5.1364	3.9531	3.0713	3.5848	5.3901	5.3092	7.9319	5.8986	3.9109	7.6099	4.0705	4.1709	3.149	6.965	9.8064	10.1084	9.2118		0.201971	5.28896
5.0017	3.9965	2.1546	3.1404	6.2542	7.0042	4.6334	3.5881	3.4015	1.605	2.6755	6.7995	7.8673	7.2744	1.9663	5.0089	4.1827	1.3256	1.2779	7.5245	4.9973	4.8635	3.3769	3.845	6.6582	3.788	2.5755	3.709	6.792	9.1882	12.5109	7.9144		0.206897	4.89998
5.1208	2.9512	4.7548	2.6844	5.0358	5.4749	3.4495	3.8402	3.6856	2.6204	1.8094	4.0955	10.322	4.739	3.1054	5.8361	3.5768	1.8582	2.9865	6.1482	3.0109	3.0797	3.5866	4.4899	4.6137	4.0838	3.1513	3.699	5.168	4.5661	10.1757	7.0876		0.211824	4.37697
5.2399	1.9547	3.8595	3.7732	5.4739	3.282	4.9453	5.0762	4.9246	1.1078	3.3746	3.9259	7.5619	6.3369	2.7961	2.0645	5.1523	2.9214	5.2312	3.9817	3.4326	3.2035	4.9832	4.9686	4.6927	3.0415	2.7477	3.449	5.893	6.3828	7.3208	8.0637		0.216751	4.38461
5.359	3.4147	2.2318	4.131	8.2924	4.5076	3.688	5.0886	7.5474	1.3061	2.2147	4.587	6.4463	3.9631	3.1654	1.9171	4.2296	2.7649	3.2279	4.1182	3.4415	4.4445	6.1235	4.9461	6.529	3.1208	2.026	3.353	4.871	6.4705	12.4545	7.7698		0.221677	4.59329
5.478	3.3699	2.0487	2.4757	3.96	4.2271	3.7033	4.7843	4.2932	1.162	2.5183	6.3886	8.2313	5.7859	1.7028	2.6693	4.982	2.1809	1.597	6.4024	5.456	8.4788	6.0812	4.7353	6.0867	3.1541	2.8385	3.575	6.699	8.34	10.9135	4.2843		0.2266	4.61694
5.5971	4.3758	1.8362	2.7969	7.0332	3.3252	4.3167	2.6315	4.9373	2.215	3.3644	3.0001	5.8645	5.9057	2.1294	4.0119	6.4119	2.716	3.8723	4.2147	5.792	2.8496	5.0433	3.914	5.8552	3.0267	3.9518	3.287	5.953	8.9766	8.6003	4.4606		0.231526	4.40867
5.7162	2.2177	3.008	3.1528	7.1789	6.0188	3.6543	6.1642	5.557	1.613	2.4336	3.3031	8.2486	4.269	1.7339	5.736	7.3894	2.3059	3.949	5.566	3.276	4.8721	5.0434	5.6592	6.7166	4.0213	2.6547	5.605	5.719	5.8159	8.9576	6.1763		0.236453	4.77472
5.8353	3.924	1.6479	4.1916	6.4421	6.7465	2.7097	4.5013	5.884	1.4155	2.84	3.2872	5.7316	5.4854	1.9737	3.5969	3.9589	2.7608	3.2843	4.8174	5.4859	2.5736	5.2333	6.2088	6.6163	1.7499	2.3922	3.623	7.776	4.4109	12.3509	5.2465		0.241379	4.47955
5.9544	3.1396	1.8275	3.524	10.4836	5.5502	4.3263	7.2872	10.1547	0.5217	1.7921	4.7492	6.4229	3.8903	2.2005	5.9287	5.6949	2.1242	3.4573	6.9751	5.3134	4.7362	3.6263	4.9831	2.7345	2.1115	2.305	3.532	8.047	5.053	12.5371	4.3926		0.246306	4.82005
6.0735	4.7173	4.2427	2.5526	6.1947	7.8062	3.519	3.4848	8.7019	2.5723	1.3006	2.2024	5.6605	6.5529	2.1333	4.9698	5.4271	2.3812	3.7235	6.2114	2.7555	4.4043	5.0708	6.32	3.3864	3.0275	2.1018	2.434	8.228	8.0591	8.5625	6.6012		0.251233	4.68727
6.1926	5.719	3.4363	2.9442	7.8596	8.1815	1.7561	3.4917	9.6816	1.134	2.3477	2.8089	7.4099	4.6271	2.7612	4.5775	5.1172	1.9152	5.5164	4.3482	2.7495	2.6367	3.5917	5.424	4.0001	2.7985	1.7779	2.04	7.964	4.4389	7.5662	4.8629		0.256159	4.37044
6.3117	4.4745	1.9617	3.1563	10.9005	5.6451	4.0532	4.487	6.6378	0.7826	2.568	2.3776	5.0196	6.1791	2.0965	4.3369	3.9231	2.9922	3.764	4.7337	3.1188	3.9597	4.0115	8.6886	5.5068	2.9861	3.5298	4.348	7.374	6.929	10.1076	5.5437		0.261086	4.7159
6.4307	3.0671	2.9034	2.3912	8.3997	11.9049	3.3215	3.7935	6.3785	0.8045	1.8908	2.3282	7.2081	3.577	2.679	6.7831	4.5753	2.8627	5.637	4.7127	3.8209	3.4547	4.4484	6.4326	6.1393	2.3084	2.2543	4.787	5.766	7.8843	10.7353	6.6769		0.266008	4.83633
6.5498	2.298	2.0285	1.4915	8.6954	10.3945	3.8108	3.0395	7.4091	1.3548	1.5252	2.9321	6.6037	7.0345	2.5543	4.4518	3.9087	0.9266	3.5056	6.5972	3.9769	3.513	2.7256	6.59	5.4928	1.8525	1.6244	4.487	5.608	8.4153	11.4999	5.3058		0.270935	4.56945
6.6689	3.6934	1.7425	2.3429	8.5809	9.9355	4.8846	5.212	5.6614	1.0324	2.4426	2.3905	8.1178	4.961	2.4329	4.9859	3.442	1.2281	2.6772	5.7609	2.2429	4.7589	3.9315	5.0046	7.7952	2.1647	0.6658	3.364	8.383	8.1138	8.5891	6.6183		0.275862	4.61795
6.788	3.4398	1.2848	1.4051	6.7406	6.4146	2.0097	4.7857	9.1907	1.7937	1.1062	1.7615	7.3187	6.4894	3.2728	6.3081	2.1374	1.0868	3.0424	4.469	3.9067	6.3378	3.2793	5.3814	4.1869	2.9277	1.3256	2.777	6.816	6.8628	9.5122	8.7713		0.280788	4.39167
6.9071	4.9207	1.8633	0.9509	11.2596	5.5737	3.7238	4.888	9.0431	1.463	2.6129	2.6517	9.2285	6.37	2.0813	7.1042	2.3705	1.3048	1.6886	7.2712	4.9213	7.3406	4.046	6.8881	5.1266	3.1871	1.9109	4.57	7.994	10.1205	12.5616	7.0479		0.285715	5.22853
7.0262	5.0676	1.7867	2.0325	8.6078	5.7131	4.5087	5.6552	6.3255	2.0356	1.6398	2.706	6.2697	5.7315	3.7698	6.3534	3.9752	0.704	3.0555	3.5563	3.2904	6.1773	5.2949	7.3205	4.9041	3.7524	2.2565	2.976	5.2	11.1404	10.8565	7.8337		0.290641	4.85473
7.1453	3.2015	3.0558	2.9568	10.3178	5.7787	1.1649	3.1212	7.6799	1.5149	0.7934	2.1355	8.2753	5.8038	1.9101	7.0526	4.3074	1.039	5.2524	4.6399	2.5569	4.4182	3.6509	7.8707	4.6527	2.8574	3.0109	4.976	5.071	8.517	10.3467	9.706		0.295568	4.76243
7.2644	4.2898	1.1427	1.759	7.7657	5.1521	3.5813	4.0254	6.3687	0.6621	2.3783	1.9058	5.6015	5.4657	2.605	6.5485	2.6084	0.8317	4.8725	5.6334	4.1851	5.1907	2.3619	9.6306	3.6468	3.6389	2.6511	5.784	4.649	3.0693	11.9528	12.2133		0.300495	4.58616
7.3834	5.5643	3.0983	1.151	10.7613	6.2244	5.3743	4.0947	8.176	1.7921	2.466	2.4053	5.7082	5.6748	1.4293	10.1226	3.6547	2.5837	4.5449	6.2458	2.5966	3.1896	3.0749	9.1323	2.7671	3.9473	2.1027	7.164	9.929	8.1202	12.9807	11.9351		0.305417	5.41972
7.5025	3.0829	2.1433	0.3953	10.9321	6.8591	4.2609	6.0019	6.0206	2.4797	1.1274	2.151	7.3113	4.9152	2.8762	7.653	2.4882	1.7274	3.6758	4.9031	4.3671	3.1322	5.2632	8.5387	2.1498	2.7609	1.5664	3.461	7.005	7.9477	12.265	7.3947		0.310344	4.73729
7.6216	2.5449	1.1744	3.1099	10.2858	7.4056	2.5115	4.1092	6.5694	2.1105	1.3366	2.8513	6.8471	5.1246	5.3336	7.7106	1.4468	2.1481	1.6295	5.5592	1.3486	6.2912	4.0211	10.3412	4.2124	2.4785	1.5904	4.211	4.405	8.1812	9.8392	13.0685		0.31527	4.83216
7.7407	2.9012	2.0464	1.1341	8.1267	7.7291	3.51	6.3875	5.4279	2.434	2.6679	2.571	7.706	6.7316	4.3618	9.1292	3.0428	0.9578	1.9723	5.3035	3.0963	7.6007	3.0633	8.1892	3.2886	2.2466	3.481	3.596	5.971	8.1569	10.156	10.4825		0.320197	4.95061
7.8598	3.1089	0.6271	1.7062	7.0548	3.7821	7.4985	4.0108	4.5257	3.0484	2.9008	2.0937	4.3772	6.8603	3.4389	7.8025	1.745	1.459	1.9867	6.7005	3.7587	6.6269	3.2773	9.7614	2.2614	2.1054	3.2117	4.009	7.503	7.0399	10.9784	10.6926		0.325124	4.70815
7.9789	3.6505	0.3604	1.236	5.978	5.0268	4.5097	4.9097	6.7017	0.7825	1.7129	1.3317	6.7483	7.6294	3.5792	6.1243	2.8094	1.438	3.9153	5.4151	7.1337	5.1432	2.9384	7.9178	4.568	3.4548	2.4247	3.315	8.046	7.8259	5.916	7.6405		0.33005	4.52203
8.098	2.5292	1.9022	0.7467	6.9303	4.4965	4.6001	2.7374	6.0865	0.7409	3.862	3.6988	6.0279	7.4029	2.1416	5.4804	2.6109	1.6975	4.5859	3.8265	3.3697	4.8876	2.9447	5.9427	3.6154	3.253	1.4641	4.186	6.776	7.8893	10.0871	6.9049		0.334977	4.30402
8.2171	4.099	2.8632	2.8812	7.3431	5.8874	3.1777	2.5776	3.2319	1.9955	1.9162	2.0075	4.6282	5.6884	3.0515	4.8868	2.1506	0.8689	4.2154	3.5597	4.0434	4.5888	2.7797	5.2721	2.8149	2.7597	1.0281	2.545	8.894	9.8554	9.9175	8.5994		0.339904	4.19767
8.3362	3.9245	0.8809	1.0003	8.4967	6.6011	6.3757	2.9798	3.794	2.4484	1.6327	2.8228	4.3276	9.3564	3.4486	4.3881	1.6414	1.0207	2.117	4.5232	3.7318	4.5693	6.1034	4.9358	2.8768	1.6975	1.6401	3.57	5.593	8.6977	10.9816	7.4625		0.34483	4.31095
8.4552	1.7129	1.3547	0.9256	6.9484	4.7619	5.5763	3.9353	4.7584	1.6326	1.5059	2.678	4.1638	8.2006	3.0094	4.3378	2.9842	0.8697	1.3548	4.8202	2.1051	5.6482	2.9172	6.68	3.7964	3.218	4.0433	3.833	10.412	5.3778	10.8327	6.5008		0.349753	4.22242
8.5743	3.7364	2.1773	1.9624	6.02	8.1408	4.5899	5.9253	4.7923	1.9782	2.9004	3.0843	4.2181	6.9669	3.9434	4.2079	2.1848	1.2671	4.104	2.9887	2.1485	4.6052	3.1051	6.9456	2.3644	2.1215	2.4122	3.48	6.663	4.5271	10.9657	12.2849		0.354679	4.41327
8.6934	1.9624	2.0317	1.0615	6.6699	4.7389	6.8922	3.324	1.7034	1.0869	1.9339	3.6974	3.4534	6.7115	4.46	5.215	1.4527	0.5648	3.9288	6.3554	2.9595	5.0376	4.3552	6.5656	2.7614	1.5089	3.3222	2.679	10.674	4.8759	8.4287	10.684		0.359606	4.2289
8.8125	2.3743	1.8128	0.2907	6.5846	3.3881	4.4951	3.7803	2.7652	1.5839	0.4726	2.8581	3.9632	6.0451	3.9213	2.4624	2.5031	2.883	1.1846	5.9403	4.2807	5.3463	3.4482	7.2821	1.4207	1.0632	2.479	1.089	7.075	6.4168	10.5665	9.2106		0.364532	3.83828
8.9316	3.6271	1.8862	1.6247	8.2072	5.0109	3.6011	3.7268	1.5378	1.0089	1.8827	2.014	3.5164	5.0926	5.2248	4.094	2.8275	1.5754	3.0294	3.1623	4.5785	3.3333	2.5726	8.5272	2.2661	0.9835	1.865	2.773	8.483	7.4359	14.8539	10.248		0.369459	4.21193
9.0507	3.0156	2.0949	1.4453	7.4281	4.9861	4.9546	6.63	3.1785	2.2146	1.7973	5.3791	3.667	4.7976	3.0241	3.9628	2.3913	3.0257	3.4694	4.22	4.0132	4.0583	2.9497	8.0245	2.169	3.6451	3.6676	2.038	6.707	4.9325	11.0427	10.5814		0.374386	4.37132
9.1698	1.6691	1.8382	1.7239	4.848	4.107	4.9881	4.3472	2.2005	2.7762	2.3747	2.7869	5.2142	6.1872	3.9384	4.6289	1.5114	2.525	2.1943	6.617	2.8358	6.1748	3.2088	10.4531	1.96	2.482	3.5893	2.869	7.943	8.4008	12.6971	8.3837		0.379312	4.43463
9.2889	1.4806	0.4389	2.8175	4.3295	5.4375	4.4128	3.001	3.4697	1.4741	2.9557	4.4925	3.0919	5.3488	5.7482	4.9336	1.5234	1.1732	3.3022	5.0363	3.1197	2.9531	2.1253	6.185	2.1598	1.6923	1.5324	3.446	5.185	9.8728	16.6026	9.4894		0.384239	4.15583
9.4079	2.0117	0.6924	2.751	6.3627	4.1924	5.6935	2.1193	3.1397	1.7198	1.5997	4.0027	3.4652	3.6725	3.1713	5.8537	2.2636	1.0078	3.7813	3.0396	3.9938	4.3298	2.8388	4.6782	3.5629	1.9315	1.7265	2.166	7.004	8.8232	16.6574	8.7523		0.389161	4.09691
9.527	4.1975	2.1426	1.3347	5.1101	5.6539	8.4298	5.138	2.3602	0.4997	1.3365	2.7015	5.3927	7.1699	5.8722	4.9891	1.7039	1.8213	1.6438	3.4837	2.6091	3.8623	2.5521	6.0458	2.0992	3.0615	3.1812	3.064	5.75	9.4951	10.9812	9.8895		0.394088	4.30878
9.6461	1.3036	0.8666	0.9214	3.8812	4.5315	8.2555	2.602	3.374	1.9002	1.6771	2.5045	3.9133	4.1724	3.7098	4.4243	1.9081	2.4614	3.8383	2.7112	3.4919	4.3528	2.7956	3.9796	2.2703	3.3489	2.6691	3.74	6.528	8.5987	11.4834	7.1439		0.399015	3.85028
9.7652	1.3704	1.1862	2.492	5.2619	2.2245	4.137	5.6523	1.9355	1.6795	2.9313	3.0004	2.413	5.2666	3.4026	6.3637	0.6473	3.3821	2.826	5.8233	3.3447	3.9948	2.3704	7.402	1.648	0.938	0.9918	1.848	8.623	11.2234	8.6049	13.1743		0.403941	4.06964
9.8843	2.0866	3.1978	1.5559	5.1611	5.1905	3.8469	7.2619	1.7037	2.2215	1.4748	3.6366	2.8812	4.7378	3.2832	5.0758	3.2777	2.5226	2.4295	4.9255	2.9014	4.7666	2.7187	5.4091	0.6797	2.1279	0.892	0.772	6.738	11.1123	11.5323	8.954		0.408868	4.03466
10.0034	1.5186	0.9577	2.8564	3.007	7.0406	6.7875	4.1276	3.1339	2.4473	0.9211	4.2813	6.1463	3.4281	3.7382	4.0984	2.3145	1.8768	3.5681	5.0337	3.812	3.7604	4.132	3.7688	3.6595	1.4126	1.0562	2.919	6.028	7.0401	14.1662	6.3967		0.413795	4.04628
10.1225	3.3785	0.4188	1.0142	6.1438	7.169	7.8603	5.0632	1.252	0.6513	2.3056	4.6892	5.8433	3.0371	3.0167	3.0801	3.1226	2.1069	2.9214	4.9896	4.4099	4.1911	2.2014	6.2799	2.1092	2.6525	1.3598	2.183	6.006	8.7126	15.5551	6.431		0.418721	4.19855
10.2416	2.4746	0.8153	2.8413	4.1683	3.7885	5.4433	6.5944	2.2449	1.582	2.5037	4.126	5.4147	3.3348	2.777	3.4935	2.8198	1.3162	1.4209	3.4873	4.0297	3.5884	4.2913	5.1271	1.435	1.1258	1.4032	1.389	4.165	7.9592	14.2177	4.4796		0.423648	3.67282
10.3606	1.9984	1.6223	1.6006	4.0955	3.1651	2.9392	5.5892	3.5803	1.0834	0.8143	3.9924	3.9491	4.3725	3.3416	4.8182	3.2672	1.0138	2.9412	4.3992	2.9108	2.4569	3.7065	3.4855	1.5566	0.8255	2.8488	2.933	6.954	7.4633	12.3409	8.1316		0.42857	3.68377
10.4797	2.691	0.9264	1.8355	2.9321	5.0618	3.742	8.2421	2.0412	0.4606	0.7679	3.1118	5.1094	3.485	3.1697	3.912	3.2706	0.9969	2.3667	4.6044	2.9859	3.6453	4.1567	3.8654	2.2539	0.818	0.8679	1.968	6.628	8.5065	12.2475	6.2552		0.433497	3.64275
10.5988	2.4148	2.9111	0.7552	3.6294	3.5931	4.6904	6.4736	1.5826	0.8128	0.7681	1.9281	2.2883	5.3074	6.9043	4.3543	1.398	3.0265	2.9554	6.7899	4.1729	5.2602	2.2561	3.1828	2.7571	0.7791	1.9204	2.236	6.584	5.3486	12.0027	5.1835		0.438423	3.68602
10.7179	1.5843	1.7039	2.4184	5.5698	4.3125	4.7996	6.5298	1.2185	0.6684	1.0661	2.02	1.6321	5.7173	1.9074	4.0645	1.7925	1.5411	3.1098	4.9609	4.6802	2.2885	2.8879	3.5086	3.0328	2.2575	1.2641	1.516	7.813	6.794	13.3919	11.1944		0.44335	3.78212
10.837	1.3873	2.2154	1.1245	3.3899	3.5224	5.6851	5.4983	1.9229	0.9207	1.1283	3.0404	2.7912	3.8558	0.7843	4.0771	2.6413	1.4519	5.325	4.4032	2.9068	3.3434	4.4844	3.4268	2.4433	2.2761	0.5237	2.232	6.072	7.6339	16.6414	6.345		0.448277	3.66109
10.9561	0.7505	0.9543	0.9273	2.3777	3.8419	3.9115	4.9668	2.9665	2.1276	2.4635	2.8233	3.2505	8.663	2.3126	3.2197	1.5958	1.0794	2.6613	3.7601	3.8519	3.0028	4.4676	2.6169	1.1874	1.0986	2.0625	1.346	5.647	7.4683	10.8022	6.0119		0.453203	3.36182
11.0752	2.6911	0.3344	2.4493	3.2146	4.1552	6.1933	8.1364	0.8552	1.9899	1.6629	2.3993	4.5571	5.2527	2.3177	2.2077	3.7162	3.4559	2.1571	3.2956	2.2972	1.9158	3.3961	2.7192	0.5143	0.8699	1.5137	4.059	7.655	9.3818	15.8143	5.0504		0.45813	3.7493
11.1943	3.4744	2.0527	2.7316	3.1214	2.7146	4.2031	6.4939	1.1494	1.1539	1.0006	2.8542	3.5369	4.6624	2.4858	1.7201	1.4798	1.3623	3.9503	3.8299	2.0868	2.6318	3.6833	3.7251	1.5516	0.4734	1.4608	2.461	6.019	8.6201	13.4989	3.2222		0.463057	3.33585
11.3133	4.6545	1.7087	0.2904	2.133	3.031	4.4781	4.177	2.0427	1.7651	0.7386	2.8029	3.3234	2.5267	1.7253	3.4997	1.842	1.901	4.5184	2.7905	2.3084	1.6567	3.197	2.9598	1.6217	1.2272	1.9286	2.217	5.472	11.6823	17.3621	7.2754		0.467979	3.51152
11.4324	2.0226	1.5397	0.8075	2.4706	3.7792	4.8505	6.5032	1.8013	1.0027	0.5487	3.8574	2.1184	3.7198	2.7406	2.3498	3.6551	1.9478	1.7465	3.0081	2.524	2.889	3.7337	3.8425	3.2758	0.5115	1.0101	1.735	4.91	11.3032	10.5762	6.5736		0.472906	3.334
11.5515	2.3114	1.564	0.2182	3.4608	3.0938	5.8227	9.4384	1.223	1.3095	2.3634	1.5764	2.685	5.7821	2.9835	3.7636	2.4599	1.7874	2.5618	3.3114	2.5698	3.8397	3.4609	1.521	2.0692	0.3373	3.0033	2.211	5.914	12.7748	11.5504	7.2887		0.477832	3.68569
11.6706	3.7332	1.6665	1.8019	1.3132	4.2555	4.8621	7.0173	1.6158	0.6068	2.5685	2.3299	4.8759	2.738	1.6744	2.779	0.5411	2.767	2.7735	3.1514	2.006	3.3931	1.0284	1.7452	0.4527	1.5131	2.8293	3.665	5.762	12.4215	17.2443	6.0121		0.482759	3.58528
11.7897	2.5364	2.5194	0.7561	1.7518	4.574	5.3887	9.1143	1.3834	1.4184	1.3561	1.7931	2.891	1.6657	1.543	2.4164	0.6218	1.8522	3.6072	3.0002	1.4978	2.0202	4.0564	2.549	2.2708	1.5216	1.4781	3.011	4.414	9.3663	20.179	4.1237		0.487686	3.4412
11.9088	1.0124	0.5903	0.8616	3.0914	3.0883	5.6695	7.3744	1.0541	2.9818	0.2112	3.0508	2.3065	2.8905	2.6449	0.9957	1.6366	0.8828	2.7731	2.9235	0.7776	4.3354	3.4936	2.1733	1.7372	1.2417	2.1502	2.547	5.16	8.5532	17.022	8.1034		0.492612	3.33335
12.0279	1.367	0.9755	0.6403	3.5832	1.6802	5.3166	8.8808	2.6934	1.5546	0.3217	3.7742	2.7732	3.0034	3.5421	1.9023	1.6755	1.9993	1.3954	3.0278	1.6969	2.3944	5.3003	2.0074	2.0035	1.5495	0.8162	2.509	5.206	7.5188	18.3949	6.4335		0.497539	3.41732
12.147	3.4526	2.4934	0.7023	3.6884	1.4965	2.4445	7.1246	1.5467	2.0958	0.6916	4.201	4.3021	2.8082	3.3125	2.3206	1.8038	2.0872	2.5733	3.4768	2.0031	2.7365	1.5027	3.7059	1.7421	1.3946	1.5683	1.655	6.012	8.0189	17.6743	3.8263		0.502465	3.36973
12.2661	2.7475	1.5929	1.579	2.4565	4.0736	5.4912	10.0006	2.3444	1.2928	1.687	2.6932	2.9698	3.2899	2.4589	2.0688	0.9999	1.0877	1.651	4.2502	2.7688	4.5487	5.8694	3.5495	0.9184	1.5036	1.226	2.449	5.023	7.8308	14.1832	4.9505		0.507392	3.53406
12.3851	1.857	1.0016	0.6338	1.6066	3.0196	3.517	11.113	2.4774	1.0506	1.4017	2.6393	3.6123	2.0145	4.3699	2.1233	1.038	0.4487	0.8844	3.0487	2.3442	2.2639	6.785	1.3093	2.0539	1.6014	2.3527	3.115	3.457	7.5761	14.5176	3.7484		0.512314	3.19296
12.5042	1.5323	2.4077	1.2132	1.8084	6.6213	3.7347	9.188	2.102	1.8051	1.8276	4.931	2.8208	1.4062	1.4689	2.9457	1.3385	0.4218	2.6291	2.534	2.1569	4.4011	5.8142	1.9981	2.1665	2.5734	3.7737	1.494	6.367	9.8154	14.6503	4.1565		0.517241	3.61624
12.6233	2.7151	2.2516	0.667	2.0242	4.7105	2.8175	7.868	2.2174	0.451	1.6088	4.2588	1.8947	2.131	4.0834	1.3709	0.4799	1.3036	3.1599	3.0329	1.4589	3.0482	5.1487	2.6652	1.8517	0.929	2.5163	2.866	5.296	9.8614	9.7061	4.3474		0.522168	3.1852
12.7424	1.62	1.733	1.986	1.3751	5.5689	2.2146	6.2814	1.2165	1.3515	0.2355	2.994	2.1148	3.197	3.0288	1.5971	0.7878	0.6489	1.9337	2.5635	2.0875	2.5025	7.399	1.564	0.7144	0.1379	1.8984	2.304	3.617	16.9923	13.8612	6.7198		0.527094	3.29826
12.8615	1.9838	1.1602	0.9273	2.341	3.9896	4.0423	8.0461	2.3108	0.2367	0.2724	1.0196	3.0063	3.9827	2.9738	1.3421	2.2603	0.9785	1.9957	2.7642	3.0457	3.5122	4.7428	1.7322	1.9444	1.8185	1.0812	0.828	6.555	11.599	14.861	5.6484		0.532021	3.32264
12.9806	2.4281	0.4539	0.8043	1.9346	3.0919	3.8676	8.0758	1.2137	0.8179	2.5785	2.7183	2.5825	2.6757	3.5566	1.34	2.4604	2.523	1.6445	2.3239	3.1887	2.6727	7.4909	1.1866	1.6503	0.9743	1.2145	1.969	4.35	13.5069	11.889	6.4902		0.536948	3.34433
13.0997	2.9498	2.0291	0.1715	1.4366	6.363	3.6548	7.6111	2.0596	0.8037	1.5466	4.2914	1.6811	2.9525	3.5419	1.6099	1.2726	1.053	1.4758	4.1174	2.3558	2.9978	4.3876	2.3519	0.5997	2.3661	0.7809	3.467	5.777	12.0193	13.3078	6.2112		0.541874	3.45947
13.2188	2.2494	0.7379	1.2782	2.2551	5.2577	2.4657	8.5461	2.1106	0.2295	1.4999	2.1544	2.6231	2.5261	2.5367	1.438	0.519	0.5538	2.0501	2.7108	2.1756	1.8834	6.41	1.3001	0.5123	1.6462	1.3569	1.803	4.843	9.4439	14.6802	5.6255		0.546801	3.07814
13.3378	1.5233	3.1315	0.5365	0.9079	7.2144	3.9265	10.2404	1.0641	1.6591	0.5783	3.9064	1.4581	1.486	1.9579	0.9682	1.0167	1.5031	4.5298	1.7585	2.7064	2.4745	4.8778	1.8557	1.484	1.9155	0.3373	1.125	4.738	9.4822	12.5956	4.7637		0.551723	3.15234
13.4569	3.3804	1.7452	2.0305	0.7334	4.3051	2.7145	9.0764	1.3014	0.2752	1.6427	2.4999	2.8195	1.2264	1.622	2.0672	1.8337	1.4013	1.7696	2.3907	2.8843	4.0138	5.2901	1.9599	0.6664	1.6058	0.3839	1.146	4.739	7.9499	16.6529	6.3322		0.55665	3.17611
13.576	3.3863	0.6484	0.6132	1.6821	3.7327	3.2892	5.6534	3.6334	2.018	0.7685	2.0066	2.928	2.6322	1.2377	1.1942	1.7243	2.2189	2.8543	2.7375	1.0048	2.5042	5.8895	2.2315	0.2185	0.8333	2.1412	1.869	2.006	10.8762	15.1659	6.3154		0.561577	3.09724
13.6951	1.9481	0.3322	0.1773	0.913	3.5916	2.5336	6.2461	0.5407	1.105	1.1296	1.5119	2.7344	1.4694	3.9166	3.4834	0.7531	2.4981	2.5498	3.6259	1.6325	2.2731	6.0225	1.4645	1.4893	0.4002	2.6545	2.629	4.494	7.9096	14.175	4.6614		0.566503	2.93114
13.8142	0.4613	1.6575	0.7041	1.5132	2.6637	2.0005	3.6696	1.5067	1.7899	0.7888	2.1184	3.354	1.6581	2.8102	0.8811	0.5171	0.7014	3.9746	4.4431	1.0818	2.3957	5.3351	0.7615	1.6392	0.3825	1.8599	3.472	3.288	5.2419	14.0752	4.7706		0.57143	2.62957
13.9333	2.5963	0.983	1.2681	1.583	3.0941	4.1101	3.3751	1.6456	1.4747	0.6306	2.2297	1.6399	2.9787	0.8039	0.8059	1.2714	1.7096	2.1277	1.3412	2.6731	1.926	6.0642	1.1381	1.0517	2.4023	0.9992	3.105	3.869	7.953	12.3724	3.2448		0.576356	2.66024
14.0524	2.795	2.2728	0.4749	1.7131	3.8934	2.5957	5.4476	0.6745	0.5767	1.2929	1.528	2.9183	3.1685	2.977	0.579	0.6652	0.9917	2.2414	2.0995	1.4951	2.5157	4.3999	1.719	1.447	1.1096	2.0292	2.983	3.055	10.5777	13.3941	5.4323		0.581283	2.87299
14.1715	2.5091	2.6891	1.0972	1.3881	2.687	1.6487	6.1089	1.4254	0.7949	1.3556	1.1422	2.2329	2.5008	3.1443	1.0221	2.1345	1.2797	1.7838	3.6997	0.6795	2.1687	6.7355	1.2174	1.0426	0.8838	2.203	1.31	6.119	10.7598	8.4833	5.7679		0.58621	2.83918
14.2905	2.7121	0.8549	0.6594	1.066	3.8454	2.6322	4.5232	2.1438	0.904	1.6075	2.1415	1.3469	1.7474	3.7158	0.6902	0.7046	1.2904	1.3143	2.1873	2.4755	1.3621	4.1221	3.3878	1.6572	2.3789	1.952	1.17	6.637	9.3043	12.5528	4.1285		0.591132	2.81339
14.4096	3.126	0.5771	0.7118	1.1657	4.0237	2.7421	3.3437	1.6843	0.7741	2.1852	1.9122	3.2643	1.0143	4.1556	1.0668	1.4503	1.6389	2.169	1.3629	2.2296	1.4782	3.6749	1.2116	2.6675	1.0635	1.8809	2.194	3.563	8.3916	8.1766	6.3091		0.596059	2.61963
14.5287	2.4232	0.9909	0.6888	1.2454	2.8458	1.786	3.6902	0.9188	0.3157	0.6381	1.2532	3.1274	3.1517	3.1589	0.6736	0.8572	0.9592	3.6856	2.6659	1.9245	3.0852	2.4541	1.5818	0.7052	1.1498	0.2025	2.363	2.833	5.7152	11.4013	6.4328		0.600985	2.4169
14.6478	2.9962	0.9118	1.173	0.8244	6.7539	2.3625	3.4524	1.7237	0.5798	2.7571	3.1892	0.9645	2.9909	2.2723	0.9734	0.2257	0.6325	1.8306	2.7378	0.5213	3.1194	4.3752	1.6756	2.8833	1.0553	1.3357	1.627	5.452	8.9953	8.6932	7.1313		0.605912	2.78117
14.7669	2.7031	0.2731	1.9349	1.7691	2.7228	0.9425	3.5791	1.1851	0.1969	1.2265	2.2226	0.8056	1.1646	3.5392	0.3865	0.0466	0.554	3.1306	2.185	1.401	2.2015	5.0545	1.9436	1.6867	1.4921	1.0317	1.628	4.343	11.0773	14.7055	8.1403		0.610839	2.75074
14.886	1.6034	0.726	1.6324	1.2517	2.0911	2.0178	1.6519	1.9786	0.9036	0.668	0.953	2.0327	2.7522	3.315	1.0434	0.6546	1.1545	2.3547	1.0372	1.4086	2.1112	5.7154	2.9524	0.7865	1.466	1.3901	2.842	5.699	11.0955	12.9482	7.2619		0.615765	2.75802
15.0051	1.6173	1.6082	0.2667	2.2226	2.2944	5.017	4.5291	0.6312	0.9336	2.7722	0.209	3.3783	2.4266	3.4538	0.9009	0.9006	1.1506	2.37	2.3814	1.7082	2.8969	4.2866	1.4601	1.2258	0.9584	1.0299	2.041	7.434	10.8536	9.6548	5.4982		0.620692	2.84229
15.1242	3.9914	0.3622	2.0404	1.0107	2.6281	3.0971	3.0144	1.8019	1.6576	1.7851	1.6717	2.5868	2.0427	2.6775	0.9412	0.6884	1.2398	2.6722	2.4357	2.7613	2.6506	4.8648	2.1516	1.3947	1.4114	3.2006	0.794	4.653	9.0667	10.357	7.382		0.625618	2.87202
15.2432	1.3782	1.534	0.3859	0.5182	0.8721	4.0729	6.1055	0.7082	2.7752	1.5826	2.0975	2.0281	3.5332	3.8026	0.8746	1.4419	0.8397	0.6638	1.8519	2.0405	1.6229	3.578	2.406	1.6989	1.4015	2.2638	1.199	5.126	10.6175	13.364	4.4125		0.630541	2.79989
15.3623	2.2503	1.0304	1.6989	0.7169	1.5338	4.6035	3.2164	1.2669	3.2557	1.3154	1.5907	2.1463	2.2005	4.0929	1.7423	1.2328	1.4401	1.7679	2.6461	2.2425	1.9464	8.6774	3.3487	2.0098	1.2174	1.0128	1.985	2.542	12.547	16.8384	5.1686		0.635468	3.2027
15.4814	3.6753	0.1637	1.465	0.9228	5.7173	3.637	2.5213	0.4829	2.0359	0.4298	1.6623	2.7459	3.5808	1.3556	1.4725	0.3474	1.1767	1.9683	2.3195	0.8557	2.5978	6.7569	1.4457	0.3784	0.4049	1.0501	1.252	3.488	11.3661	14.9567	7.5747		0.640394	2.897
15.6005	2.5814	0.536	0.6712	1.3259	3.6266	2.6773	1.583	1.0117	1.1738	1.0319	2.5627	2.7809	2.6469	2.7803	1.2254	1.2226	1.7989	3.1214	2.3001	0.7089	1.8209	3.7413	0.9881	1.0955	0.75	1.6963	2.346	4.637	11.5447	15.0547	6.7182		0.645321	2.83095
15.7196	3.1057	2.0672	0.6283	1.1004	2.232	3.0773	2.4091	0.5742	0.8593	0.4625	2.0612	2.639	2.5928	2.7947	2.9841	1.1745	1.5976	1.3555	1.1682	1.2661	0.7363	5.3844	0.3492	0.5162	1.4537	1.9353	1.505	5.844	10.1948	17.2093	7.4716		0.650247	2.86289
15.8387	2.6829	0.8056	0.4732	0.9519	3.0543	3.2276	1.1026	0.1155	0.7045	1.3414	3.1108	1.2656	1.7012	0.8077	1.2404	2.0707	0.5901	2.5298	2.0771	3.8887	2.039	2.6027	2.0648	0.3112	3.0432	1.0174	3.388	4.827	7.0919	15.7336	13.5087		0.655174	2.88287
15.9578	1.8261	0.2585	0.6002	1.7219	1.7874	4.9073	1.9902	0.785	1.2704	1.5273	1.4119	2.2359	1.4294	1.0443	0.6366	1.7326	0.5614	1.4959	4.7145	2.3985	2.1335	3.0059	1.8986	0.6945	0.8812	1.3413	2.704	4.174	9.9422	15.7549	7.9754		0.660101	2.7368
16.0769	3.068	1.0537	2.2959	1.4525	2.4773	2.2197	2.407	0.7298	1.1401	0.9431	2.583	1.1263	1.2714	0.7436	0.997	0.4315	0.6492	0.1514	1.4332	1.0315	2.4621	2.615	1.5696	0.7653	1.277	1.1426	3.318	5.45	12.7939	18.306	11.5229		0.665027	2.88476
16.196	2.6626	1.2032	1.5029	1.0767	2.4406	1.9592	1.7111	1.9951	1.5692	1.1382	0.7789	3.4472	0.978	1.155	1.3065	0.9704	1.4588	0.9295	1.8466	1.757	3.9328	4.8427	1.9614	1.5113	0.7043	0.4521	1.934	8.569	10.6313	12.6664	8.4278		0.669954	2.82322
16.315	1.5556	0.6143	0.7861	0.8201	2.3558	1.8601	2.4595	0.8092	0.3537	0.7303	0.9738	2.7632	1.0493	1.9918	0.2565	1.0178	0.4951	2.5071	3.4809	2.5976	2.1757	3.1275	1.0669	1.2783	1.099	1.7833	3.688	4.886	11.7224	11.23	12.1366		0.674876	2.69908
16.4341	2.4913	0.4357	0.4684	1.7633	3.8887	3.279	1.8918	1.0292	0.8295	1.8251	2.074	2.3523	0.9722	1.9132	0.4914	0.844	0.6834	2.5964	1.8112	1.6259	3.6818	2.47	0.4394	0.9509	1.3433	1.0429	3.314	5.571	13.3197	11.6453	9.0631		0.679803	2.77766
16.5532	3.008	1.1758	1.229	1.0293	1.9754	1.1031	3.8253	1.2316	1.7856	0.7653	2.6507	1.5813	1.5842	1.5161	0.9523	0.6629	0.6654	0.4044	1.256	1.9674	3.0491	4.8333	3.4986	1.1426	1.5675	1.1465	1.354	4.853	11.5899	16.2846	11.4405		0.68473	2.93964
16.6723	2.7712	0.6488	1.2978	1.9586	0.8783	2.3306	1.596	1.5473	1.7439	1.6586	1.8476	2.4323	1.8186	0.5367	1.268	0.3486	0.6402	2.2019	2.5085	1.7004	2.202	2.9963	0.7099	1.6842	1.5986	1.2536	1.694	5.148	16.7744	20.2207	10.4501		0.689656	3.1118
16.7914	3.6542	0.102	0.9951	1.4111	1.732	2.7494	2.0383	0.5313	0.7716	0.8707	2.1327	1.7729	2.0947	2.8487	0.612	1.1147	0.6417	0.958	2.4489	2.2989	1.4616	2.2133	0.7378	0.7801	1.4673	0.3027	2.381	4.596	14.7042	17.1949	11.0363		0.694583	2.85981
16.9105	2.0113	0.9219	0.3473	1.919	1.1483	1.7071	2.0288	0.6069	0.6402	0.8121	1.3969	2.8446	1.1421	1.9051	0.468	0.6879	0.9292	1.5244	1.5662	1.1736	2.2811	1.9047	0.961	1.0836	1.8457	3.8216	3.263	3.749	11.7728	16.7821	14.063		0.699509	2.8164
17.0296	1.2659	1.265	0.903	1.6834	2.3671	3.7634	1.6541	2.0085	1.3373	1.0637	2.6248	1.557	2.9541	2.6539	1.4466	1.7102	0.8197	2.4442	1.7118	1.1771	2.884	3.0156	1.3892	0.5276	0.4838	1.7348	2.425	6.399	13.5019	16.8519	9.86		0.704436	3.08012
17.1487	0.7496	0.5553	0.9493	0.5704	3.8237	2.9319	2.3837	0.9602	3.5266	0.4901	3.54	1.6549	1.7578	1.6646	1.1607	0.6702	0.9235	2.3848	0.9876	0.9703	2.3429	1.6672	1.3304	2.0404	0.2555	0.9012	2.358	6.904	17.9406	23.9839	13.9731		0.709363	3.43072
17.2677	1.5359	2.169	1.4379	0.3575	1.9102	1.8162	2.2301	1.5971	1.4092	1.9012	1.9309	1.6173	1.1319	0.9555	0.7151	0.12	0.9171	1.7671	2.109	1.0036	1.3794	3.0323	1.1356	0.5527	1.0613	0.5769	0.453	5.283	10.5172	20.9712	12.6911		0.714285	2.7834
17.3868	2.1907	0.2571	1.275	0.4984	1.6142	1.3824	1.0351	1.2171	1.007	1.7801	0.9071	2.6685	1.7774	0.2852	1.194	0.7369	2.0982	0.7111	1.4102	2.41	1.6567	3.179	2.2744	0.9571	1.7163	2.0947	2.901	6.721	16.246	21.6198	14.8296		0.719212	3.24682
17.5059	3.3909	0.7128	1.1736	0.223	2.7241	1.7165	1.9878	0.5222	1.0806	1.4979	1.1827	1.0475	2.3143	0.654	1.7182	0.8054	0.7727	0.1606	0.6465	1.8758	2.515	2.9325	1.6911	1.2097	1.7924	1.8659	1.283	7.666	12.0397	24.1743	16.1637		0.724138	3.21098
17.625	1.4533	0.7787	0.6568	1.121	2.4263	1.5977	0.8551	1.5688	0.9827	1.546	1.0391	0.7578	1.5021	1.145	0.7899	0.8469	1.9532	1.4427	0.8146	2.6678	3.8611	3.2514	0.9243	0.3048	1.1009	2.026	1.314	5.868	10.9614	23.7511	16.526		0.729065	3.09144
17.7441	0.9571	1.0495	0.1646	2.1177	4.9372	2.0275	0.3259	0.7989	0.8037	0.2201	1.8611	3.5177	1.4976	1.194	1.7856	1.979	0.6088	2.2407	1.2314	1.179	2.3698	3.1617	1.0696	0.3151	1.6348	2.1416	2.735	7.636	11.0885	27.5555	18.447		0.733992	3.50489
17.8632	2.2026	0.2174	0.3236	1.2187	2.9562	1.1612	1.6444	1.5605	0.3298	0.6576	2.291	2.3926	2.3554	0.4428	1.2769	0.6869	0.3521	1.8649	1.5267	2.0057	1.7328	1.409	2.3232	0.3743	3.0773	1.4623	1.364	5.724	9.9834	27.068	19.0028		0.738918	3.25768
17.9823	1.2015	1.1568	0.016	1.1326	3.273	1.8375	2.2764	1.0926	0.0053	0.8702	1.434	2.5713	1.5003	1.5488	0.6807	0.6616	0.9122	1.8621	2.4517	3.2149	3.0568	2.3257	0.9445	1.5511	0.1408	1.3012	0.961	6.643	13.021	26.559	18.91		0.743845	3.39076
18.1014	2.8049	1.4959	1.6599	0.8648	3.9675	1.0891	1.6448	0.6355	0.8821	0.4999	1.9356	0.9133	0.6406	1.5982	0.6243	1.2646	1.36	1.2733	0.9321	3.7685	5.0277	1.8887	0.571	1.3646	0.5787	1.5018	3.604	10.443	15.8578	26.0539	27.7348		0.748771	4.01551
18.2204	1.8495	0.8405	0.3116	1.1958	1.7773	1.4056	1.8454	1.0128	0.8332	0.6646	0.5942	1.9201	0.7999	0.7471	0.3444	0.7167	0.4673	0.3432	2.099	2.3075	2.4848	1.8863	2.3501	1.0052	1.3488	0.821	2.333	7.871	15.3024	21.1556	21.2262		0.753694	3.22129
18.3395	1.7424	0.6195	0.7255	0.9606	1.9225	1.926	1.2817	1.3497	0.321	0.6715	2.3142	3.3526	3.275	0.964	1.042	0.4723	0.307	0.6454	2.0117	1.3452	4.1394	3.5834	1.1771	1.1983	1.3732	1.1969	2.192	5.562	13.4565	16.3757	26.4098		0.758621	3.35207
18.4586	3.5625	1.3647	0.5277	1.8282	2.7936	1.6957	0.6637	1.2807	0.5181	1.7597	1.4253	1.5118	2.4303	0.1474	0.5339	0.2431	0.4412	0.5246	0.5234	2.1421	1.8652	3.2117	0.8409	1.414	1.8537	0.0421	2.544	5.545	11.205	11.371	33.3986		0.763547	3.20029
18.5777	2.7285	1.206	0.529	1.4909	2.1993	0.6895	1.5589	2.5238	0.389	0.0974	1.3879	1.0158	2.3772	0.3048	0.6705	0.5836	1.1377	0.8017	2.6483	1.8317	4.1605	3.8927	1.4015	1.0427	1.4935	0.8628	2.065	5.133	10.757	5.8073	27.1168		0.768474	2.90014
18.6968	2.8216	0.6303	1.9671	1.7359	0.791	1.4992	1.2984	1.1451	0.2061	0.6381	1.9406	1.0657	3.5552	0.0639	0.1015	0.4024	1.1713	0.8537	1.3408	2.2151	3.6207	2.3051	0.6934	0.8019	2.1275	1.4224	3.692	7.803	6.4512	6.6878	24.2556		0.7734	2.75173
18.8159	3.0044	0.4894	0.9557	1.2374	0.999	0.6593	0.5511	2.3519	0.7225	1.4643	1.6926	2.3686	3.4391	0.469	1.6535	0.548	0.29	1.8222	1.9837	1.7481	3.0198	2.3778	1.6649	0.8304	2.9563	1.7729	2.817	6.198	6.8894	5.1228	22.4727		0.778327	2.72812
18.935	1.8072	1.0049	0.8052	3.5869	2.0716	1.2639	1.0341	1.737	0.0842	0.3848	2.4932	1.6031	3.1952	0.5023	0.2356	0.1503	0.3357	1.1252	1.1015	1.7778	3.2527	2.73	2.0056	0.9228	1.2782	2.9633	2.615	7.591	5.4246	5.2465	18.3376		0.783254	2.53765
19.0541	1.4733	1.3478	0.5896	3.1444	2.6894	0.2939	1.2903	1.7095	1.7224	0.7717	1.461	2.0795	1.2726	1.4988	0.7497	0.8437	1.6737	1.5996	3.6756	1.5023	1.9436	0.7093	3.1847	0.4508	0.2879	1.8121	2.526	6.835	5.0331	2.4874	17.2948		0.78818	2.3856
19.1731	0.9478	1.4606	0.7131	2.5775	0.9118	0.3208	0.6069	1.142	1.0551	1.0029	1.6074	1.7772	1.1926	1.3971	1.5809	0.2305	0.4441	1.1216	1.3387	1.6892	2.7347	1.4912	3.6678	0.6964	1.3719	1.7687	2.725	4.522	4.4353	2.6497	16.3653		0.793103	2.11438
19.2922	2.355	1.2815	0.3575	1.7244	2.719	0.8268	0.7899	1.6615	0.9406	1.3556	2.088	1.9968	1.9752	0.6966	2.0874	0.3617	0.5943	2.8044	0.5817	1.5144	1.4269	2.5018	1.9811	0.4788	1.2821	3.0032	4.012	5.501	6.7626	1.7237	13.7317		0.798029	2.2941
19.4113	1.308	1.9354	0.4596	1.2901	1.2401	1.7243	2.3359	0.2925	0.4077	0.3026	1.7392	0.5239	2.8778	0.788	0.6061	0.2292	1.0203	1.8957	1.077	1.8176	4.3938	1.3625	3.6287	0.8224	0.9284	1.5832	3.19	2.608	4.0984	3.0213	9.1821		0.802956	1.89322
19.5304	0.9972	1.0135	1.5335	2.9738	0.5653	1.0302	2.2478	2.0915	1.1323	1.1416	0.9152	1.2614	1.2647	0.6121	0.2002	1.7736	0.2677	0.76	1.3123	3.0869	2.7753	1.8526	1.8004	1.1997	1.9372	1.8178	2.789	3.018	3.5036	2.6988	8.4421		0.807883	1.87146
19.6495	1.206	0.4226	0.4896	2.0182	0.5252	0.3223	1.4239	1.8781	2.3883	1.224	1.569	1.1524	2.8562	0.7979	1.8244	0.4868	1.5265	1.7351	2.4823	3.8877	2.93	1.2167	1.0063	1.7831	2.7233	1.8152	1.994	2.657	2.6605	0.7972	5.9163		0.812809	1.79729
19.7686	3.3128	0.9805	0.5383	3.3835	0.6338	0.2483	1.2833	1.1911	1.3747	1.5047	1.6881	1.059	0.5289	1.408	3.0743	0.3353	0.5622	0.7424	1.4865	2.5395	1.3285	0.962	1.2257	1.5134	1.3219	0.7633	1.697	1.557	2.3007	2.2261	3.8412		0.817736	1.50361
19.8877	1.3182	0.7485	1.2693	1.6492	0.8392	0.6439	0.9895	1.2613	1.2527	1.7421	1.4383	1.2991	0.4869	1.8344	0.3548	1.9865	2.1527	0.1757	1.1201	1.2556	3.0595	1.4024	0.4939	0.4316	1.1083	3.0619	1.962	1.178	1.8486	1.1043	2.7296		0.822662	1.36123
20.0068	1.2618	0.7869	1.9411	1.6287	1.1719	1.559	1.2155	0.7676	0.3814	0.5094	0.7666	1.1553	1.6998	0.7732	0.7341	0.827	1.2215	1.5525	0.6981	3.1217	2.9865	0.6925	2.0436	0.3395	1.3685	2.26	1.375	0.944	1.8365	1.233	2.8989		0.827589	1.34681
20.1259	1.0959	1.4083	1.23	0.7449	1.8204	1.3403	1.9003	0.6443	0.5466	0.3185	2.2972	1.5165	0.7873	0.1034	0.4379	0.1717	1.6723	0.6596	1.8573	2.7924	0.7166	0.8285	1.2616	0.3723	1.5168	2.0874	2.112	0.423	2.3869	1.0338	2.8276		0.832516	1.25521
20.2449	0.847	1.4909	1.7804	0.8299	0.1129	1.2054	2.2235	1.3317	1.3135	0.3188	1.1608	1.7373	0.6384	0.6668	0.196	0.5151	0.7253	2.1736	0.3827	1.729	2.9047	1.5433	1.1945	1.0866	0.798	1.9131	2.81	1.168	1.9709	2.1204	2.1074		0.837438	1.32245
20.364	3.0552	0.9011	1.4696	1.6035	0.7614	1.3287	3.086	1.1287	0.9973	0.826	4.2458	1.443	1.4356	0.5099	0.4492	0.3696	1.2239	2.5797	1.0845	2.12	1.5774	1.4757	1.2734	0.5015	0.5535	1.9161	2.06	1.929	0.8196	1.3227	4.1302		0.842365	1.55412
20.4831	1.6874	2.1719	2.0311	1.4111	1.753	0.9976	2.5179	1.021	1.8152	1.498	0.872	2.0374	1.3781	0.3872	1.7712	1.0718	0.3783	0.8555	1.8301	1.2263	0.576	0.5935	0.4121	0.7659	1.0783	1.8346	1.49	0.332	1.7279	1.2217	1.7354		0.847291	1.30579
20.6022	3.3395	0.8674	2.9408	2.1396	1.0249	0.0932	0.7392	0.9351	1.0949	0.7332	0.3251	2.5011	0.9968	0.4109	0.2126	0.3814	0.6261	1.6429	1.1303	1.4106	0.9498	1.5115	0.4862	2.6853	0.2977	0.358	1.499	1.101	1.2894	2.5189	0.9799		0.852218	1.20072
20.7213	0.8222	1.5151	1.1592	1.9186	0.5055	0.5628	2.0521	1.8661	0.3251	1.5512	1.2966	2.3672	0.7609	0.7563	0.4243	0.8775	1.2449	1.7452	0.0723	0.8362	0.7023	1.4302	0.7773	1.2926	0.7825	1.6175	2.532	0.769	0.8231	0.6818	2.1789		0.857145	1.16924
20.8404	1.0389	2.429	0.083	1.0137	0.2563	0.9561	0.9788	1.8267	1.3135	0.1714	1.8721	1.9696	0.5621	0.0826	0.1296	0.5765	0.6654	0.7714	0.6085	0.8457	0.8086	1.3245	0.3041	1.1472	1.3528	1.2423	0.93	0.789	0.6797	2.3939	1.2612		0.862071	0.980135
20.9595	1.246	2.1038	0.7963	1.2839	1.6589	0.7269	2.3303	1.3154	1.8419	0.7607	0.9561	1.6443	1.0018	0.4541	0.466	0.8054	0.6621	1.228	0.4109	1.4351	0.7041	0.262	0.1462	0.7804	1.6077	0.9711	0.082	0.952	1.289	0.7126	0.9109		0.866998	1.01761
21.0786	1.9668	1.9656	0.635	2.322	2.1753	0.6132	1.2042	1.5946	1.2191	0.8278	0.5963	1.7243	1.1181	0.4831	0.3653	0.619	1.935	1.3518	0.95	1.7669	0.2709	0.4058	0.2114	0.4314	1.3267	0.4659	0.558	0.945	0.2933	0.3584	1.6063		0.871924	1.04215
21.1976	1.851	2.0693	1.339	0.7746	0.3443	2.4381	0.8016	1.5561	0.4323	0.8453	2.003	2.4708	0.4073	0.8605	0.5533	0.1933	0.2415	1.4344	0.8926	0.6899	0.1007	0.4459	0.0761	0.1582	0.9286	0.4351	1.274	1.011	0.3078	1.2448	1.448		0.876847	0.955755
21.3167	2.1808	0.9912	1.166	3.3333	0.66	1.1139	1.1219	0.7723	0.7685	0.5107	1.6189	1.8952	0.622	0.924	0.4213	0.7901	0.7146	0.6916	0.6789	1.884	0.6292	0.3504	0.0004	0.2478	0.0754	0.303	0.974	0.15	1.2347	0.6162	1.2215		0.881774	0.924574
21.4358	1.3495	1.2387	0.9985	2.3475	0.5631	0.6528	1.0304	0.1233	1.267	0.7321	0.3896	2.2253	0.499	1.4393	0.6805	0.6845	0.6128	0.686	0.8496	0.7876	0.7168	0.3123	0.0549	0.0958	0.9251	1.2274	0.346	0.088	0.6159	0.0574	1.5891		0.8867	0.812445
21.5549	2.3545	0.9294	1.5729	2.5406	1.8649	0.6296	0.7578	0.4546	1.6024	1.1423	2.7406	1.0398	0.9929	0.4551	0.4691	0.3482	0.6093	0.5129	0.602	1.127	0.852	0.5149	0.984	0.4826	0.7408	0.4907	0.866	0.371	0.0267	0.9498	1.596		0.891627	0.987755
21.674	3.5282	0.3243	0.978	1.089	1.0899	0.7179	1.2435	0.2601	0.336	1.0674	2.5516	0.244	1.0937	0.7268	0.6654	0.5562	0.4147	0.4241	0.861	0.3177	1.3057	0.8495	0.3332	0.1105	0.2119	0.8218	0.988	0.075	0.1169	0.2773	1.3399		0.896553	0.803845
21.7931	1.3788	0.7669	0.6099	3.916	0.8025	2.2786	0.9251	1.0124	0.9796	1.0309	1.3465	0.0034	1.4252	0.3622	0.3688	0.1856	0.9087	0.685	0.8178	1.421	0.5905	0.1478	0.2716	0.1746	0.218	0.8954	0.412	0.44	0.1629	0.2054	0.8167		0.90148	0.82451
21.9122	1.8301	0.7325	0.8912	2.3927	0.499	1.4638	0.7595	0.8036	0.213	0.7142	1.7154	0.9344	0.2984	0.4886	0.1927	0.5107	0.4537	0.1782	0.6122	1.5181	0.4675	0.4722	1.1424	0.4798	1.0002	0.2559	0	0.269	1.0487	0.6366	0.8195		0.906407	0.767542
22.0313	2.0114	1.8612	2.5296	2.6305	0.123	0.8734	0.7815	0.7131	0.6952	0.1858	0.5215	0.2657	0.0297	0.5856	0.033	0.2896	0.5972	0.8847	0.7641	0.4803	0.0079	0.0723	0.5375	0.5134	0.9308	1.4552	0.497	0.493	0.5917	0.621	0.112		0.911333	0.731868
22.1503	0.965	2.6707	2.0659	3.1268	1.4986	1.5037	0.5601	0.5253	0.4419	0.4271	1.5942	0.3711	0.7539	0.35	0.4571	0.3417	0.0618	0.9146	0.1877	0.2682	0.0163	0.5898	0.0092	0.0101	0.5055	0.181	0.973	0.298	0.554	0.6755	0		0.916256	0.738639
22.2694	1.3348	0.428	1.3061	0.489	1.2231	0.1469	1.0685	0.5942	0.0193	0.5084	1.5324	0.413	0.2752	0.6115	0.176	1.8386	1.1406	0.3726	0.3647	0.0424	0.4745	0.8341	0.6281	0.2745	1.0851	0.2855	0.171	0.541	0.1297	0.1391	0.6256		0.921182	0.615274
22.3885	1.6051	1.011	0.838	1.2296	1.3635	0.977	0.7784	0.6503	0.2962	1.3658	1.4714	0.4679	0.074	0.6448	0.7136	0.7693	0.6527	1.4785	0.0641	0.3429	0.1193	0.3373	0.61	0.9037	0.5608	0.1796	0.344	0.182	0.8443	0.1932	0.2633		0.926109	0.688116
22.5076	1.3116	0.6324	0.5999	0.5239	0.6155	0.3385	0.6926	1.913	0.5659	0.5595	4.4836	0.4919	0.5053	0.2789	0.1997	0.9173	0.5242	0.1748	0.1192	0.7524	0.1999	0.1693	0.3006	0.4094	0.5288	0.7407	0.016	0.078	0.2941	0	0.2527		0.931036	0.619019
22.6267	1.0069	0.5928	1.1441	1.1007	0.9198	0.3493	0.8197	0.5322	0.2776	0.9751	0.9682	0.0621	0.1121	0.0911	0.4155	1.0801	0.6049	0.1187	0.8965	0.1644	0.6577	0.0529	0.2474	0.6566	0.1189	0.1637	0.081	0.031	0.3243	0.3963	1.2115		0.935962	0.521713
22.7458	1.4802	1.1181	1.9584	0.9035	1.4254	1.1619	0.7576	0.3294	0.0142	0.2762	0.0535	0.4715	0.6624	0.9519	0.9103	0.8259	0.0068	0.2376	0.2606	0	0.0544	0	0.0474	0.431	0.0861	0.2706	0.197	0	0.0336	0.912	0.5482		0.940889	0.528571
22.8649	0.9255	0.1346	1.337	1.5293	1.002	0.0478	0.2143	0.0498	0.3393	0.6538	0.2685	0.209	0.5644	0.1516	1.4277	0.5581	0.0097	0.0314	0.2771	0.4512	0.2104	0.2871	0.4813	0.2728	0.2522	0.8905	0.231	0	0.0258	0.6149	0.3525		0.945815	0.445181
22.984	0.0664	0.7264	1.2902	1.0236	0.9538	0.1105	0.9924	0.7505	0.4611	0.9391	0.0223	1.3491	0.1046	1.0878	0.5277	0.1629	0.2076	0	0.153	0.1044	0.1299	1.0372	0.1299	0.3621	0.0235	0.1722	0.053	0	0.1477	0.1912	0.8626		0.950742	0.456216
23.103	0.8608	0.0694	1.1575	1.5598	0.3827	0.6909	0.4118	1.0401	1.4405	1.1014	0.4894	0.4417	0.5185	0.8208	0.728	0.1928	0.0474	0.0944	0.4015	0.576	0.4502	0.1487	0	0.0346	0	0.6091	0.065	0.156	0.0222	0.4281	0		0.955665	0.481913
23.2221	0.632	1.2322	1.5247	0.7094	0.4363	1.3274	1.8997	0.1018	0.273	0.1983	0.1797	0.0919	0.3661	0.2799	0.0684	0.2422	0.0131	0.0388	0.4174	0.1513	0.0498	0.0079	0	0	0	0.4465	0.429	0.011	1.1747	0.9165	0.1807		0.960591	0.432248
23.3412	0.4812	0.9189	0.9275	0.5	0.2801	0.6636	1.4643	0.3389	0.5548	0.2221	0.0851	0.2205	0	0.4005	0.2036	1.101	0.2793	0.1491	0.0212	1.104	0	0.7673	0.2347	0.5986	0.2259	0.2302	0	0	0.7881	0.3527	0.2278		0.965518	0.430355
23.4603	0.499	0.1645	0.4531	0.9288	0.1022	0.379	0.829	0.2627	1.4142	1.165	0.0793	0.2217	0	0.0534	0.2712	0.131	0.3254	0.6084	0.2123	0.1782	0	0.1766	0.0986	0.8854	0.871	0.0928	0	0	0.0372	0.4422	0.036		0.970444	0.3522
23.5794	0.3069	0.5238	1.0829	1.2263	0.2574	0.8397	0.9011	0.0002	0.4757	0.7833	0.5239	0.575	0	0	0.3617	0.7099	0.3397	0.3482	0.0675	0.2989	0.0548	0.2812	0.1521	0.0518	0.1253	0	0	0	0.2975	0.3016	0.0208		0.975371	0.351845
23.6985	0.3295	0.4761	0.9685	0.4926	0.424	0.3502	0.2621	0.0466	0.0103	0.3463	0.5153	0.5753	0.5487	0	0.1214	0.3451	0.0159	0.2718	0.1645	0.054	0.2064	0.0448	0.0364	0	0	0.0015	0.017	0	0.5098	0	0.257		0.980298	0.238423
23.8176	0.8868	0.0928	0.0089	1.7047	0.358	0.2064	0.1072	0.01	0.2599	0.5558	0.4401	0.5627	0.6879	0	0.1079	0.0953	0.6526	0.0447	0.6268	0	0.0721	0	0.5893	0	0.0994	0.007	0.316	0.296	0.2657	0	0		0.985224	0.292065
23.9367	0.3607	0.8982	0.0549	0.6282	0.2596	0.9679	1.1958	0.0046	0.5966	0.5293	0.4082	0.8918	0.1566	0	0	0.2087	0.0537	0	0.0956	0	0.0128	0.0933	0.4321	0	0.0673	0	0.019	0.724	0.3569	0	0		0.990151	0.290832
24.0558	0.1912	0.3473	0.2163	0.1363	0.1178	0.2928	1.7352	0.1894	0.3595	0.766	0.0857	0.2339	0	0	0.5696	0.1062	0.002	0	0.0075	0	0.4872	0.0178	0.6607	0	0	0	0.203	0.24	0.2408	0.4939	0		0.995078	0.24839
24.1748	0.3795	0.4521	0.436	0.7408	0.9524	0.14	0.8687	0.0795	0.0062	7.488e-06	0.3478	0.352	0	0	0.2568	0.2855	0.2059	0	0.6435	0.5201	2.529e-06	0	0.0739	0.5552	0.0246	0	0	0.102	0.0246	0.0616	0.0171		1	0.242768

## Sheet: Image37
X0	Y0	Y1	Y2	Y3	Y4	Y5	Y6	Y7	Y8	Y9	Y10	Y11	Y12	Y13	Y14	Y15	Y16	Y17	Y18	Y19	Y20	Y21	Y22	Y23	Y24	Y25	Y26	Y27	Y28	Y29		Ap-Ba	Avg intensity
0	30.111	37.056	34.667	27.944	20.056	35.5	40.722	43	32	38.222	53.056	48.167	75.889	107.889	82.056	53.222	47.389	59	50.056	68.556	66.778	75.778	96.278	61.389	69	42.889	26.722	34.611	47.667	37.222		0	51.4297
0.1191	32.611	40.833	48.944	36.722	23.778	38.111	35.5	34.556	35.778	50	49.167	51.833	70.056	105.889	83.556	54.5	55.278	59	60.556	75.778	72.611	69.167	114.389	70.833	66.278	53	31.333	40.556	45	42.167		0.00431078	54.926
0.2382	34.444	53.556	43.389	45.111	29.222	43.333	45.167	38.333	43	45.778	40.389	58.556	92.278	91.5	95.611	69.833	67	69.944	74.333	77.278	60.833	85.944	134.167	81.722	79.778	54.222	30.722	33.833	44.111	43.556		0.00862156	60.2314
0.3573	36.056	54.222	52.333	41.222	29.333	46	49.167	39	56.833	42.611	52.889	64.222	80.111	112.833	108.778	82.222	73.778	74.111	81.278	81.667	79	80.111	149.167	82.278	75.389	64.722	38.889	42.389	49.222	37.167		0.0129323	65.2333
0.4764	42.722	60.278	66.611	41.611	35.944	51.889	50.111	35.667	60.722	49.056	58.444	73.444	87.611	112.222	111.944	89.278	69.722	75.778	98.778	90	82.333	88.111	164.389	78.167	98.833	82.611	37.889	43.056	50.778	43.444		0.0172431	71.0481
0.5954	44.444	68.556	84.611	46.222	34.111	61.333	55.389	42.333	73.389	45.667	61.889	70.222	97.389	122	124.667	91.278	66.722	86.111	103.722	88.556	92.444	81.278	174.111	81.833	100.722	85.389	45.944	63.5	54.056	44.722		0.0215503	76.4203
0.7145	58.167	71.167	80.389	49.611	57.111	77.333	63.222	58.556	80.167	46.667	87	87.556	91.778	110.222	141.111	116.667	67.111	95.667	107.611	83.889	95.333	103.389	178.667	99.944	112.222	112.278	64.667	64.167	68.444	49		0.0258611	85.9704
0.8336	64.333	81.889	96.889	50.611	59.833	70.667	72.333	61.278	87	49.722	100.167	96.722	80.667	127	149.833	125.389	99.5	98.722	117.5	106.333	104.5	103.333	173	106.556	131.611	118.722	72.556	80.611	73.944	56.222		0.0301719	93.9148
0.9527	57.611	100.333	111.389	67.556	72.5	103.278	73.167	63.611	80.667	65.889	104.278	108.222	94.056	118.056	160.778	149.167	91.944	115.722	148.833	136.278	107.222	122.444	189.722	118.889	137.056	153.167	94.444	103.333	72.111	59.667		0.0344826	106.046
1.0718	80.278	87.611	118.278	70.111	83	108.111	80.556	88.111	93.611	71.111	124	121.222	106.278	118.444	168.944	155.056	103.333	131.778	146.611	129.944	111.944	143.722	177.333	130.889	137.167	157.278	105.944	95.444	74.444	56.778		0.0387934	112.578
1.1909	90.167	97.667	136.556	91.333	101.222	110	87	93.944	96.778	88.556	125.889	142.722	112.444	133.889	169	171.222	124.722	141.5	154.333	153.333	127	152.667	178.5	145.611	150.389	178.389	125.333	115.444	85.778	70.778		0.0431042	125.072
1.31	103.167	116	128.667	93.333	102.222	131.944	86.889	107.444	120.778	106.722	150.389	133.5	109.944	147.889	178.889	159.556	146.222	155.611	174	161.333	131.611	155.944	176.167	148.278	167	177	148.778	131.056	88.222	82.833		0.047415	134.046
1.4291	121.889	125.333	157.167	125.889	122.056	138.444	96.556	110.167	125.611	121.833	129.611	147	123.111	146.389	180.278	188.167	143.5	160.333	183.889	173	159.389	162.556	180.333	159.111	172.889	181.111	160.444	152.444	121.333	83.667		0.0517258	145.117
1.5481	127.722	128.222	154.722	131.556	127.556	130.833	109.056	115.611	130.056	131.389	134.889	178.667	141.778	159.722	178.389	167.556	153.722	168.944	171.778	177.944	150.167	174	176.222	163.556	159.389	182.444	176.722	160.667	124.556	96.389		0.0560329	149.474
1.6672	148.611	153.389	153.278	130	131.056	127.333	112.778	130.333	156.722	139.556	138.667	184.722	138.778	152.556	183.667	165.333	169.944	170.667	184.944	181.889	155.333	182.556	179.833	146.278	162.222	173	161.444	152.722	128.389	110.389		0.0603437	153.546
1.7863	155.167	134.389	150.556	128.222	118.444	124.167	120.111	123.056	154.722	148.778	136.5	171.333	146.778	179.889	171.389	165.556	157.556	167.611	162.722	185.389	176	167.5	161.444	170.222	162.389	173.389	171.833	166.111	153.556	137.778		0.0646545	154.752
1.9054	138.444	147.333	143.667	133.222	94.778	134.5	131.167	127.333	153.722	156.778	135	166.833	148.611	159.389	161.944	149.944	139.333	157.611	153.111	156.667	164.389	171.611	158.222	178.111	155.056	159.389	169.5	176.167	157.222	166.167		0.0689653	151.507
2.0245	135.556	149.333	153.278	124.389	103.333	113.889	126.111	128.722	188.667	160.444	132.056	169.833	164.222	164.5	160.444	148.556	135.056	138.556	136.944	158.722	157.056	148.667	142.722	167.444	157.333	133.389	173.722	158.111	177.556	183.167		0.073276	149.726
2.1436	130.611	150.778	128.333	105.556	91.833	110.222	126	130.722	169.667	172.944	127.111	164.222	161.889	167.833	127.944	130	131.833	114.167	108.444	145.944	151.444	133	135.833	159.556	160.611	129.778	158.611	153.444	174.556	179.722		0.0775868	141.087
2.2627	125.778	126.833	136.278	78.722	67.944	89.333	119.556	121	171.778	156.889	120.722	149.056	162.333	146.722	123.667	98.889	108.111	81.444	77.222	128.667	148.944	121.611	96.111	157.778	134.722	116.889	130.5	139.722	169.667	184.944		0.0818976	126.394
2.3818	106	119.722	106.056	53.944	57.167	69.833	126.944	116.444	158.611	148.056	136.944	141.667	155.389	140.167	101.278	93.722	68	77.056	55.444	103.111	127.444	103.167	76.556	174.389	114.167	84.167	102.444	102.278	150.444	178.444		0.0862084	111.635
2.5008	100.722	92.778	115.611	44.222	53.167	66.444	126.778	109.444	150.833	127.167	119.389	122.889	141	110.444	80.056	73.222	46.389	56.611	43.611	82.444	106.556	85	60.222	163.389	115.333	79.5	79.333	65.5	152.333	189.333		0.0905156	98.6573
2.6199	86.889	79.111	108.5	33.333	41.111	65.389	129.167	98.778	142.944	117.722	98.611	116.222	110.222	100.167	65.278	61.444	28.778	45.889	35.444	68.056	84.5	75	54.167	161.444	90.333	50.833	65.333	57.167	141.5	176.722		0.0948263	86.3351
2.739	76.667	87.389	106.667	29.167	30.5	55.278	102.111	77.667	124.556	98.389	72.944	89.889	95.222	82.5	53.556	47.333	31.667	42.889	36.056	53.5	65.333	64.444	27.722	142.444	83.944	37.5	42.667	41.778	136.167	155.333		0.0991371	73.0426
2.8581	65.333	75.556	91.389	16.278	32.556	44	96.611	59.5	107	75.222	66.778	74.722	68.944	55.111	35.5	36.444	14.778	37.833	29.444	44.778	52.556	43	17.5	136.944	69	19.722	32.667	27.722	114.444	155.722		0.103448	59.9018
2.9772	54.222	61.944	85	17.5	22.333	35.778	80.167	43.222	92.111	61.778	56.556	58.389	61.944	39.778	31.222	35.667	16.611	31.444	29.444	43.778	34.611	51	20.111	123.444	63.5	15.722	24.278	23.222	80.278	122.833		0.107759	50.5962
3.0963	45.778	60.5	66.778	17.556	18.111	38.667	59.056	28.889	75.444	54.611	40.444	53.444	40.389	26.778	25.556	28.778	14.278	25.722	29.833	30.889	24.556	33.611	13.556	102.333	63	18.722	19.056	24.444	58.278	96.833		0.112069	41.1963
3.2154	48	47	66.167	16.778	10.833	26.833	35.444	24.333	57.944	42.333	25.056	39.278	35.611	19.056	21	20.556	9	29.222	23.556	29.5	20.333	29.444	13.222	91.333	56.111	20.167	16.667	18.333	36	79.278		0.11638	33.6129
3.3345	38.833	46.444	52.667	10.111	11.389	23.222	30.167	20.556	54.5	34.444	24.944	30.444	33.056	16.556	16.944	17.556	6.444	23.833	27.556	25.278	12.111	29.5	12.667	70.722	43.167	16.222	9.278	19.889	28.611	69.667		0.120691	28.5593
3.4535	37.611	47.611	60.722	8	12.833	20.111	33.333	15.833	48.389	21.444	19.056	30.889	25	13.556	12.167	18.167	4.444	22.444	22.778	18.444	10.778	25.944	14.667	49	50.5	16.778	7.056	17.778	25.333	55.778		0.124998	25.5481
3.5726	29.833	45.056	41.167	10.667	6.889	17.556	27	14.667	42.389	20.722	18.389	18.833	29.111	11.056	8.889	11.278	12.278	17.444	29.167	24.222	15.222	18.5	13.611	31.056	34.778	18.778	11.167	11.111	17.111	57.167		0.129309	22.1705
3.6917	34.167	37.667	41.833	8.944	10.778	11.722	25.722	12.222	43.556	24.944	12.056	23.167	20.556	10.444	10.333	8.5	6.833	9.333	25.5	17.722	17.167	17.222	14.111	28.222	28	11	7.778	12.111	15.889	43.889		0.13362	19.7129
3.8108	25.722	34.889	31.889	5.889	10	10.556	18.056	7.722	31.111	18.444	9.611	19.778	23.5	11.556	8.222	8.778	10	9.778	21.111	22.5	14.833	13.667	8	20.5	29.556	13.611	8.278	10	17.056	44.889		0.137931	17.3167
3.9299	22.889	31	28.556	6.167	7.111	10.556	21.556	5.333	23.611	15.778	10.278	14.111	17.833	10.556	6.722	7.778	7.111	12.833	22.278	21.667	11.556	14.611	8.278	17.722	22.222	13.167	8.222	13.389	16	40		0.142241	15.6297
4.049	20.611	32.222	22.611	7.278	7.667	13.111	13.778	7.5	30.778	11.667	10.111	13.944	17.222	12.722	5.833	8.611	6.222	12.167	16.222	21.333	15.667	14.667	7.944	17.444	23.444	12.333	8.833	13.722	12.944	32.278		0.146552	15.0295
4.1681	19.278	29.722	18.944	4.5	9.5	11.444	13.667	4.889	20.111	9.889	10.111	13.444	12.944	11.111	10.333	6.167	5.833	10.5	22.556	23.833	10.167	7.944	9.5	19.778	21.833	9.167	5.667	10	14.944	31.222		0.150863	13.6333
4.2872	12.167	23.056	15.5	4.333	5.944	6.556	12.667	7.611	22.722	12.556	8.778	9.556	17.111	14.611	3.778	5.556	7	4.278	18.722	21.389	11.667	7.944	10.056	16.278	20.611	8	5.667	13.389	12	27.167		0.155174	12.2223
4.4063	12	25.611	12.889	3.278	8.444	12.611	14.389	6.333	18.778	11.444	7.944	9.389	11.333	11.889	5.389	6.833	5	8.667	19.389	17.667	11.556	10.444	9.167	16.944	19	10.556	4.833	8.333	9.944	25.167		0.159484	11.8407
4.5253	18.278	17.444	11.389	4.444	4.167	11.222	6.611	8.722	23.667	12.667	9.056	12.444	17.611	12.778	9.5	5.389	6.778	3.333	21.111	15.444	9.944	10.667	8.611	19.833	12.889	8.944	8.778	6.167	9.667	23.778		0.163792	11.7111
4.6444	12.444	19.889	12.167	5.167	7.944	9.333	10.389	5.333	16.778	13.889	6.667	8.389	11.778	17.833	6.889	6.167	6.222	7.333	12.333	17.833	11.056	8.389	8.611	25.333	17.333	9	8.778	5.333	10.222	16.722		0.168102	11.1851
4.7635	9.222	20.333	8.056	6.333	4.556	11.444	11.5	6.722	14.944	11.556	11.667	7.833	13.111	13.5	4.556	3.833	6.389	2.333	10.778	14.889	9.056	8.944	7.167	20.222	13.889	8.111	7.444	5.056	6.833	17.778		0.172413	9.93517
4.8826	7.5	17.833	12.167	4.611	4.167	12.778	9.889	9.556	20.444	14.611	5.444	9	16.556	17.944	6.778	3.222	3.722	5.333	13.111	11.889	9.278	7.444	6.444	14.5	9.944	8.389	5.889	6.222	9.111	19.056		0.176724	10.0944
5.0017	8.056	14.944	9.667	4.889	5.222	12.333	10.667	4.667	21.278	10.167	8.778	9.889	12.278	22.556	7.889	2.222	2.722	5.5	11.444	15.5	8.722	6.389	7.611	14.111	11.778	6.056	8.5	6.056	9.333	21		0.181035	10.0075
5.1208	6.167	13.167	7.333	3.611	6.833	8.278	9.722	5.333	21.222	7.722	8.722	3.111	16.222	21.722	6.5	5.056	3.667	6.722	11.222	12.722	8.056	7.611	6.833	13.056	13.778	7.278	6.556	7.5	10.833	14.444		0.185346	9.36663
5.2399	5.444	11.167	5.722	2.722	6.667	10.444	11.778	8.389	13.722	12.5	10.278	6.889	19.5	28.111	5.167	3.833	1.444	6.056	12.222	10.5	5.5	10	5.278	13.389	12.278	7.833	8.389	8.333	7.611	18.556		0.189656	9.6574
5.359	4.222	12.5	6.389	3.111	7.556	10.111	11.278	6.556	22.5	12.056	8.778	5.222	18.778	33.111	6.389	3.056	2.333	5.111	12.056	8.611	8.944	6.444	6.5	8.889	11.722	7.5	6.167	9.444	8.556	14.111		0.193967	9.60003
5.478	5.5	14.222	6.222	2.611	4.667	11.611	7.333	5.667	18.278	14.056	6.333	6.556	16.111	27.111	4.778	2.611	3.778	3.556	8.611	11.889	10.778	6.389	4.889	10.944	15.444	10.222	8.278	8.444	13	16.889		0.198274	9.55927
5.5971	8.389	12.389	5.5	5	3.722	10.278	10.444	5.444	24.889	10.222	6.333	5.389	16.056	34.944	7.444	3	4.556	3.111	8.944	9.5	6.944	8.167	4.167	10	12.833	12	12.056	4.778	9.944	12.667		0.202585	9.637
5.7162	4.278	9.5	5.778	3.278	4.889	9.778	9.333	6.778	19.722	12.111	5.556	3.833	13.889	36.5	8.222	4.222	3.667	5.944	7.556	12.667	8.333	8.333	5.5	8.389	10.944	5.167	8.611	7.278	8.944	15.056		0.206896	9.1352
5.8353	8.778	9.333	5.111	4.056	3.222	13.556	8.722	8.444	19.167	19.278	6.333	7.389	17.111	34	8.333	3.222	5.278	1.722	5.667	11.944	10	8.278	3.278	11.056	12.667	6.722	8.056	5.944	8	17.278		0.211207	9.7315
5.9544	5.444	10.222	4.333	7	4.5	16	8.611	5.611	20.278	12	5.333	8.222	16.667	28.778	6.556	5.667	3.333	2.389	5.5	10.056	6.333	8.944	4.667	11.944	15.889	5.222	8.389	7.944	9.5	13.444		0.215517	9.29253
6.0735	6.889	7.667	4.333	1.944	4.667	8.444	9.611	4.778	20.333	12.167	7.722	4	15.556	38.056	8.667	4.833	3.5	4.5	4.222	12.833	2.611	6.278	3.111	12.611	11.333	12.111	5.333	6.5	6.5	16.611		0.219828	8.92403
6.1926	3.444	9.444	5.611	3.333	2.944	9.056	8.111	4.333	19.444	12.5	5.056	2.611	10.222	33.333	10.167	3.167	4.778	4.278	5.5	12.056	3.667	9.111	3.5	9.278	9.778	7.278	5.722	6.556	9.444	12.611		0.224139	8.2111
6.3117	5.444	10.833	4.111	3.278	4.667	8.056	6.611	7.389	19.444	11.722	8.389	4.944	12.389	26	12.278	2.667	4.444	4.056	5.389	13.056	5.5	4.278	4.056	10.833	12.556	10.167	6.833	4.778	8.667	13.222		0.22845	8.53523
6.4307	7.056	12.389	5.111	4.056	8.778	10.167	5.889	4.278	14.056	11.056	7.944	5.278	11.056	31.444	10.111	4.667	4.556	3.611	3.833	19.222	4.5	6.944	8.056	8.444	12.278	13	7	6.389	9.556	13.5		0.232757	9.14083
6.5498	7.278	10.389	5.444	2.333	2.333	7.833	6.889	2.278	19.833	12.556	7.889	4.667	16.833	30.611	9.444	4.944	2.944	4.722	7.722	13.722	6.222	4.389	6.833	6.389	12.222	8.389	5.389	10	10.944	14.111		0.237068	8.85173
6.6689	4.611	14.167	3.5	4.667	4.167	9.778	9.111	8.167	18.722	11	5	2.833	8.556	32.5	4.944	6.833	5.167	3.944	4.556	16.444	8.222	4.5	2.222	8.778	15.778	9.778	7.333	11.222	8.222	18.611		0.241378	9.1111
6.788	5.833	9	6.389	2.611	3.444	11.278	7	5.111	18.5	8.944	7.222	4.889	10.389	25.556	8.389	5.722	3.278	5.889	1.833	23.333	5.333	5.389	3.722	7.444	16.611	7.944	8.778	8.833	11.611	19		0.245689	8.97583
6.9071	8.278	8.667	6.111	1.944	4.667	11.833	5.722	6.222	18.056	13.722	4.389	4.778	8.944	30.278	3.389	6.5	3.5	3.5	7.278	20.944	8.333	4.889	6	6.722	16.889	9.222	6.389	9.944	10.722	20.056		0.25	9.26293
7.0262	7.611	8.778	8.111	3	4.444	9.389	8.556	6.5	16.611	12.889	2.333	4.167	7.944	32.333	6.611	4.778	4.444	2.444	5.778	21.444	4.167	4.667	7	8.889	14.611	5.944	8.889	7.667	13.889	18.278		0.254311	9.0722
7.1453	9.611	11.333	4	3.944	4.889	9.611	4.444	5.611	17.833	11.722	7.833	4.778	7.5	31.889	7.278	4.944	4.278	5.333	6.778	19.389	3.778	6.389	7.111	7.667	15.333	11.722	8	7.611	8.889	17.278		0.258622	9.22587
7.2644	7.722	13.944	3.333	4.444	4	6.944	4.222	3.889	17.889	12.389	9.889	4.889	7.278	32.444	8.111	3.833	4.667	4.722	6.944	21.667	7.722	6.5	4.167	9.444	14.444	8.667	5.722	10.611	11.833	21.389		0.262932	9.4573
7.3834	7.556	9.556	3.889	2.611	4.5	6.611	8.5	4.111	16.5	7.389	5.5	3.389	5.056	24.444	10.444	7.167	4.389	3.167	7.722	23.5	6.389	4.333	3.056	8.722	18.111	13.056	5.778	8.833	15.611	17.778		0.26724	8.92227
7.5025	10.056	14.611	2.722	3.611	4.611	10.944	6.944	6.5	17.611	10.278	2.778	6	6.556	24.444	8.944	2.889	4.778	2.944	6	24.167	7	6.667	4.611	9.222	18.167	12.667	11.389	6.389	20	19.611		0.27155	9.77037
7.6216	9.444	11.389	2.833	2.722	2.444	8.167	6.389	5	14.556	7.722	6.056	8.389	11.111	34.889	5.5	3.222	3.056	6.556	6.556	22.722	9.389	5.444	6.5	11.278	24.722	8.333	8.778	9.111	22.444	21.056		0.275861	10.1926
7.7407	9.222	13.778	3.222	3.278	4.333	7.222	5.889	5.778	20	10.944	6	3.833	7.833	35	6.278	4.889	5	3.444	4.333	24.889	7.833	10.389	3.944	9.167	22.444	8.944	9.389	12.778	17.889	19.778		0.280172	10.2573
7.8598	11.5	11.833	2.722	2.778	4.889	13.611	6.333	3.778	18.889	12.722	5.944	4.167	7	34.444	4.944	5.944	4	3.556	4.722	30	8.056	4.611	5.444	12.056	20.278	11.167	10.5	5.667	15.722	15.556		0.284483	10.0944
7.9789	8.722	11.722	4	2.222	5.278	8.889	6.167	6.556	18.611	9.778	6.111	4.056	5.389	29.222	8	4.056	2.167	4.056	4.278	32.833	5.333	7.167	3.333	12.833	20.833	9.778	18.111	7.722	16.611	21.056		0.288793	10.163
8.098	7.222	11.944	3	1.056	4.611	8.778	5	8.389	16.222	12.278	4.444	5.389	3.889	32.889	9.944	1.778	4.167	3.833	7.333	33.278	8.333	6.444	4	11.444	18.778	7.611	10.5	8.389	15.111	21.889		0.293104	9.93143
8.2171	10.389	13.778	2.389	5.944	3.944	9.667	3.611	6.389	21.833	10.833	5.944	5.611	6.444	29.667	8.722	5.056	3.389	4.5	5.556	30.556	6.889	7.111	3.556	11.722	19.611	9.833	9.722	11.111	20.556	20.222		0.297415	10.4852
8.3362	9.722	11.111	4.611	2.833	5.611	17.222	6.778	10	24.833	7.833	6.444	4.944	10.056	36.222	8.056	5.056	4.111	4.778	4	18.944	6.556	6.889	4.5	12.222	16.944	4.5	8.056	9.611	19.5	23.611		0.301726	10.5185
8.4552	8.667	12.889	2.556	4.833	5.833	10.5	7.667	11.778	23.611	7.389	3.778	5	4.667	36	7.5	3.056	2.389	5.111	5.556	25.778	2.222	5.389	5.833	14.222	23.167	6.889	8.667	8.833	18.556	26.333		0.306033	10.489
8.5743	13.111	14.111	2.611	3.222	3.056	12.5	4.667	7.667	29.278	9.278	6.056	4.222	5.667	43.722	10.222	3	5.167	3.056	5.556	26.056	6.278	7.611	4.5	16.333	17.944	6	5.056	8	16	16.944		0.310344	10.563
8.6934	11.056	14.556	2.778	2.111	5.278	12.222	9.556	7.611	27.056	12.167	7.056	4.722	3.389	46.722	8.556	5.611	5.167	3.444	6.056	23.389	4.222	7.944	4.444	17.556	20.5	9.889	5.278	4.389	13.222	17.667		0.314654	10.7871
8.8125	11.833	14.611	2.722	1.889	4.278	13.611	9.278	10.944	23.167	9.667	4.889	6.278	7.056	42.389	6	3.444	5.444	5.167	4.722	34.111	6.222	7.667	2.167	9.778	23.056	12.667	4.833	7.111	16.056	19.722		0.318965	11.026
8.9316	13.944	12.111	3.111	2.5	3.778	13.333	7.556	9.333	26.556	8.278	6.722	3.556	6.278	48.389	8.889	3.667	4.5	4.444	6.389	26.667	7.556	5.389	2.278	11.333	19.611	7.944	4.111	7.278	16.722	14.278		0.323276	10.55
9.0507	18.056	15.667	3.5	3.278	4.944	9.333	7.444	8.611	19.222	9.722	4.722	2.389	2.889	45.444	8.444	2.778	4.333	6.056	7.333	30.833	6.722	8.556	5.722	17.167	23.556	8.944	4.111	5.222	17.944	17.722		0.327587	11.0221
9.1698	16.611	15.333	1.722	2.5	3.944	12.056	7	10.556	19.944	9.611	8.5	4.667	5	39.889	8.444	4	3.5	5	8.111	20.111	5.722	10.278	7.278	10.611	22	5.667	7.333	7.389	12.944	17.889		0.331898	10.4537
9.2889	13.389	12.611	4.556	0.778	2.722	22.333	5.167	6	22.333	6.222	5.389	3.5	7.556	34.944	4.278	3.222	2.611	6.278	7.611	27.111	5.722	11.333	3.778	15.222	23	7.611	3.333	8.222	13.278	16		0.336208	10.2037
9.4079	12.722	11.167	4.389	1.778	2.722	18.833	9.333	11.389	20.278	8.778	7.222	6.167	3.611	36.722	6.222	3.111	3.056	5.389	4.167	24.833	6.389	11.5	4.056	10.833	23.111	7.889	3.611	8.111	12.5	15.278		0.340516	10.1722
9.527	14.667	9.833	3.556	1.611	3.222	25.667	9.167	12.389	26.278	10	6.444	2.833	3.222	34.5	9.722	3.833	6.167	2.389	4.667	29.389	6.944	8	2.556	9.056	18.111	9.167	5.278	6.167	15.778	16.222		0.344826	10.5612
9.6461	20.778	13.5	2.833	3.167	4	20.944	8.778	7.5	15.444	7.056	5.333	4.944	3.056	37.944	8.944	5.889	3.056	1.889	4.611	27.667	8.889	5.722	3.778	9.333	18.5	6.167	5.667	7.944	17.778	20.389		0.349137	10.3833
9.7652	14.944	10.333	4.5	0.167	2.833	15	6.778	7.222	22.056	10.056	3.278	3.389	4.611	39.5	9.278	5.722	3.778	4.389	2.667	30.611	6.222	8.111	8.389	11.222	17.444	7.056	3.333	5.611	18.944	14.833		0.353448	10.0759
9.8843	17.556	7.944	1.389	2	3.278	12.944	9.5	7	18.056	10.056	4.889	3.111	4.389	33.889	7.833	4.056	4.778	6.111	4.611	16.222	6.111	3.5	2.278	7.5	17.222	8.889	4.444	7.056	16.389	15.222		0.357759	8.94077
10.0034	12.5	7.556	3.611	1.056	3.056	16.056	4.556	8.056	23.667	7.722	5.5	2.222	3.667	38.167	4.556	4.833	3.056	5.111	4.556	23.833	7.5	4.889	4.722	7	21.778	5.889	7.111	4.833	16.278	13.389		0.362069	9.2242
10.1225	18.333	5.556	2.333	3.056	2.667	18.278	11	11	13.111	9.389	5.111	4.889	7.833	31.333	8	3.722	4.167	4.056	3.944	23.222	5.556	3.5	3.5	8.444	19.111	5	2	6.278	18.5	17.556		0.36638	9.34817
10.2416	16.222	6.111	2.611	3.389	5.333	11.278	10.667	8.333	19.944	9.722	5.056	2.167	3.889	29.5	9	3.333	4.778	6.333	3.944	28.944	3	4	6.333	10.611	13.611	6.111	5.667	7.5	16.111	19.222		0.370691	9.424
10.3606	14.611	9.944	3.278	2.778	8.5	13.778	9.444	4.556	19.611	6.944	4.056	3.556	4.667	20.944	9.5	2.889	2.944	3.444	4.389	24	5.444	4.5	3.222	6.667	15.833	7.444	4.056	7.111	13.889	14.333		0.374998	8.5444
10.4797	14.056	5.5	1.333	3	6.889	13.833	8.556	6.722	21	7.611	5.444	2.333	3.333	30.444	7.111	2.722	1.333	4.333	3.778	25.667	5.111	3.944	2.833	9.944	18.444	7.333	4.778	2.167	17.222	18		0.379309	8.8258
10.5988	22.556	5.944	1.833	1.444	4.778	22.278	6.556	6.667	21.5	9.833	4.5	3.5	4.111	21.333	7.333	4.056	1.667	5.389	7.444	24	5.167	5.111	2.833	10.444	20.944	7.333	6.722	7.889	23.667	16.667		0.38362	9.7833
10.7179	20.5	6.167	2.222	4.889	4.056	14	9.444	8.333	13.444	9.222	2.778	5.722	4.444	16.944	8.611	2.389	4.389	4.389	5.722	17.667	3.111	6.222	2.944	9.889	19.389	4	2.667	9.667	15.333	12.944		0.387931	8.38327
10.837	24	9	2.444	1.222	5.444	18.667	8.722	3.556	18.722	7.667	5.5	3.611	4.278	17.778	7.5	2.833	4.556	5.444	4.389	23.889	5.167	8	6.222	10.722	21.278	5.667	5.222	5.944	19.111	18.667		0.392241	9.5074
10.9561	19.167	7.722	1.944	3.833	6.667	12.5	11.056	7.222	19.722	5.722	4.333	3.889	3.444	14.778	8.667	1.722	5.222	4.278	6.167	20.556	5.167	4.278	5.944	8.167	19.389	3.333	4.667	8.556	17.222	12.056		0.396552	8.57967
11.0752	23.722	7.611	1.444	2.611	8	16.056	11.556	9.667	19	7.111	7.278	6.778	1.778	22.222	7.944	4.111	5.556	5.944	5.611	24.778	4.889	3.889	3.556	7.722	15.111	6.111	4.667	7.611	16.5	10.833		0.400863	9.32223
11.1943	20.444	6.333	1.889	5.5	5.056	14.444	9.167	8.611	13.5	5.389	2.667	2.722	3.889	11.444	9.722	5.722	4.444	1.833	3.778	22.722	3.944	3.778	7.667	5.389	16.389	4.667	5.222	7.778	15.667	9.889		0.405174	7.98887
11.3133	19.111	5.556	2.833	2.222	8.056	16.5	12.889	8.5	17.722	6.556	5.111	4.944	1.667	12.444	11.278	6.944	5	2.778	4.944	26.889	4.333	4.611	4.167	8.5	17.056	4.611	4.722	9.389	17.167	14.444		0.409481	9.03147
11.4324	21.222	7.111	2.5	3	6.056	19.111	5.333	6.333	18.167	6.222	8.722	2.222	4.222	8.111	9.222	6.167	4.444	5.444	4.667	19.056	6.778	3.278	3.667	8.5	20.056	3.278	5.722	9.222	16.889	13.556		0.413792	8.60927
11.5515	18.667	4.5	2.556	1.389	5	15.444	8.667	9.278	22.222	6.389	5.278	1.167	3.278	9.778	9.667	3.167	4.611	1.5	4.611	22.111	2.833	4.222	4.722	8.667	15.333	6.056	5	10.611	20	9.889		0.418102	8.22043
11.6706	18.5	4.667	3.222	1.833	9.611	15	6.944	7.056	15.056	7.556	4.778	3.222	3.667	9.333	8.556	5.444	7.333	5.944	7.389	23.111	4.778	1.889	5.667	6.833	17.389	5.556	8.278	9.167	20.389	10.889		0.422413	8.63523
11.7897	22	3.722	1	2.444	5.667	15.778	7.5	10.611	14.778	8.056	2.5	2.333	2	10.056	11.722	3.722	6.5	5.333	6.278	22.444	6.056	5.389	4.389	9	19.556	4.556	3.889	6.111	22.389	13.833		0.426724	8.65373
11.9088	19.5	2.556	2.056	3.278	3.222	18.444	6.333	8.944	16.222	3.944	5.111	3.944	4.111	11.333	13.056	3.611	4.056	5.778	7.111	19.778	5.722	5.167	6.167	8.056	15.389	9.056	4.667	11.222	16.556	9.389		0.431035	8.4593
12.0279	17.833	3.611	2.056	1.778	5.667	12.667	6.111	9.611	18.611	6.278	3.778	3.389	2.889	7.611	12.333	3.111	5.611	4.222	6.056	18.556	4.222	2.556	3.722	7.444	15.444	3.278	4.167	7.556	18	11.333		0.435346	7.65003
12.147	18.722	2.611	2.889	2.833	6.778	12.111	5.833	12.778	14.444	6.833	3.444	4.556	5.833	8	15.667	1.778	4.111	4.944	5.278	17.944	4.944	3	3.5	8.556	17.111	5.389	3.722	5.667	17.944	12.333		0.439656	7.9851
12.2661	20.222	2	2.833	2.222	3.5	10.278	8.611	8.722	21.556	6.167	5.222	2.278	5.611	7.889	13.167	1.389	3.5	4.5	4.389	20.722	5.167	3.278	4.444	7.056	15.333	3.222	3.722	6.889	15.333	10.111		0.443967	7.64443
12.3851	23.056	5.833	0.889	2.444	9.889	13.333	5.333	8.667	14.111	7.889	2.722	6.444	1.333	5.667	16.333	5.056	4.111	3.889	4.222	25.778	4.333	5.611	5.222	9.222	19.111	5.444	6.889	10.167	14.278	8.333		0.448274	8.5203
12.5042	16.667	5.444	2.056	2.389	7	13.389	4.944	11.5	15.111	6.167	3.833	2.278	3.333	3.222	14.722	4.778	3.611	4.722	4.111	25.944	5.333	3.167	4.667	10.222	19.278	6.333	8.111	10.5	17.333	11.111		0.452585	8.37587
12.6233	18.278	2.944	2.5	3.556	6.833	14.167	6.389	10.833	15.111	6.111	5.444	2.722	3.5	7.333	17.111	2.278	3.722	3.444	4.722	19.722	3.722	7.222	5.333	8.389	19.278	2.556	5.667	7.444	13.333	10.222		0.456896	7.9962
12.7424	16.278	5.722	2.556	2.333	9.444	15.778	10.111	8.889	16.389	7.722	6.167	0.944	4.056	8.167	13.389	3.722	2.833	7.167	3.889	24.444	3	6.667	3.5	10.333	19.944	5.944	7	7.056	15.833	10.389		0.461207	8.65553
12.8615	23.222	3.278	3.389	1.333	10.111	11.222	8.722	12	15.111	2.778	4.167	3.556	3.278	5.5	16.167	4.611	2.889	6.056	5	25.556	2.444	4.056	4.778	9.056	22	3.944	4.833	7.611	13.833	9.5		0.465517	8.33337
12.9806	15.889	3.278	4.667	2.278	7.111	12.889	6.167	8.111	20.667	5.056	3.833	2.444	1.833	5.056	16.889	3.889	2.944	3.889	4.167	23.167	7.611	1.833	4.222	6.556	14.444	5.889	3.556	7.722	13.111	12.722		0.469828	7.72967
13.0997	17.722	1.944	1.333	3.889	8.944	14.889	6.111	11.167	14.833	6.333	2.889	4.556	3.833	5.111	20.333	5.944	6	4.056	3.389	27.056	5.5	2.944	3.778	4.667	25.889	6.389	4.833	4.5	11.667	9.944		0.474139	8.3481
13.2188	18.667	2.889	1.333	3.389	8.389	12.333	6.556	10.111	19.889	7.611	4.389	2.389	2.111	4.389	20.111	2.5	3.444	4.389	3.778	20.722	4.444	6.556	4.333	5.667	21.944	3.667	4.833	7.111	12.278	11.667		0.47845	8.06297
13.3378	16.722	2	1.944	2.667	10.778	13.667	6.889	7.5	13.278	6.111	5.667	2.778	3.333	3.389	14.778	3.167	4.889	6.944	5.278	20.389	6.278	3.389	3.056	8	22.722	3.944	2.778	8.722	13.111	8.111		0.482757	7.74263
13.4569	24.833	2.333	2.778	2.111	10.667	15.389	6.667	11.111	15.889	5.778	4.556	3.167	2.111	4.778	19.167	4.5	4.889	4.833	2.111	20.222	3.556	1.389	3.611	4.722	23.167	5	7.278	6.444	11.778	10.111		0.487068	8.16487
13.576	17.611	3.278	2.778	2.5	10.389	12.889	9.278	8.722	18.611	7.333	5.5	5.778	2.444	4.278	22.889	3.389	3.333	4.222	3.889	23.5	3.556	6.611	1.667	7	24.222	4.333	2.944	8.389	14.667	8		0.491378	8.46667
13.6951	22.056	4.444	2.667	5.611	13.722	14.444	10.611	11.333	13	9.444	4.611	5.5	3.333	4	11.222	5.222	4.222	6	3	25.611	6.833	3.056	4.944	7.944	19.056	2.444	3.278	7.389	12.389	7.722		0.495689	8.5036
13.8142	15.056	5.333	1.222	2.944	15.444	16.5	7.333	10.444	12.667	4.611	4.278	4.278	5.111	6.833	19.667	3.722	4.389	3.778	5.444	26.222	5.5	3	6.889	7.333	18.722	4.222	3.556	8.278	15.944	11.333		0.5	8.66843
13.9333	14.611	3.111	1.944	5.389	9.889	12.722	11.056	8.056	10.667	5.556	3.444	3.611	1.111	3.5	14.278	5.611	6.944	3.5	4.556	24.667	3.222	5.778	4.389	8.278	21	2.889	4.556	5.444	11.222	8.611		0.504311	7.65373
14.0524	19.333	4.611	1.167	2.444	15.556	15.222	7.778	9.889	10.667	5.667	3.5	5.5	1.389	4.833	23.889	3.333	3.778	5.444	3.056	23.333	5.444	4.056	4.222	6.056	23.333	5.222	4.833	7.556	15.5	10.667		0.508622	8.57593
14.1715	15.611	4.556	1.333	2.444	14	11.667	10.833	9.667	15.167	3.556	4.611	3.722	2.056	5.444	18.056	5.278	4	3.278	2.444	18.056	5.444	2.056	7.333	11.444	20.389	5	6	7.5	10.111	9.611		0.512932	8.02223
14.2905	14	2	2.389	3.722	14.778	11.944	10	11.833	12.556	8.778	6.278	4.5	2.778	4.167	16.056	6	4.611	2.444	5.556	22.944	1.056	5.389	9.389	6.722	24.944	5.5	7.611	7.056	11.056	10.778		0.51724	8.56117
14.4096	13.056	2.778	4.389	5.167	13.5	12.944	8.444	15.833	11.889	5.944	4.167	4.5	2.667	3.389	18.278	3.167	4	1.889	6.611	28.556	4.333	4.333	6.444	7.5	21.889	4.444	4.333	8.056	18.444	10.111		0.52155	8.70183
14.5287	15.944	2.778	4.556	3.167	10.611	12.556	9.222	12.333	13.222	6.5	2.5	1.833	4.556	5.056	21.167	4.444	5.222	6.167	4.889	28.889	4.167	2.833	3.333	5.667	18.722	4.389	3	8.889	13.611	5.611		0.525861	8.19447
14.6478	12.944	2.5	2.111	5.389	17.111	12.722	14.889	10.389	11	3.056	2.889	5.722	2.389	2.778	21.444	5.444	3.667	2.611	3.778	31.167	5.222	4.833	3	8.444	22.389	4.5	4.5	6	15.889	10.056		0.530172	8.62777
14.7669	12.056	1.944	3.444	6	18.5	10.389	9.944	12.722	9.111	6.444	3.556	3.333	2.556	3.944	19.556	4.944	3.722	3.278	3.278	25.667	3.222	3.5	2.722	9.056	20.167	6	3.833	5.889	9.333	15.111		0.534483	8.10737
14.886	10.389	4.611	1.944	3.722	14.111	9.778	6.722	14.5	12.722	6.944	2.222	3.222	1.222	4	22.889	3.333	5.111	3.444	5.333	31.5	1.222	3.389	4.111	7.333	19.222	3.667	4	6.111	11.889	8.333		0.538793	7.89987
15.0051	12.611	2.778	3.5	5.722	19.333	14.222	9.611	15.5	11.389	4.778	3.722	1.722	3.611	5.056	15.833	5.333	2.5	6.444	3.556	36.667	4.167	4.278	3.111	5.333	20.722	2.833	5.667	9	16.722	11.833		0.543104	8.91847
15.1242	9.167	1.889	3.278	5	15.167	10.444	11.944	10.111	10.5	6	5.611	3.333	3.556	4.722	21.111	6.333	3.167	1.278	5.556	26.389	2.889	3.667	3.722	4.944	18.722	6.722	3.944	9.667	15.278	7.833		0.547415	8.0648
15.2432	11.333	3.278	2.444	3.556	14	11.944	10.556	10.667	9.389	8.611	4.778	4.333	3.611	2	15.667	4.667	2.667	3.111	3.222	35.111	3.556	3.5	7.667	8.5	20.111	4.444	4.444	9.111	11.389	14.5		0.551722	8.40557
15.3623	9.556	3.111	3.389	7.167	14.944	12.778	7.389	13.167	8.5	6.111	3.222	4.056	2.333	4.111	22.889	6.667	1.889	3.889	3.889	32.556	3.944	5.444	3.889	5.333	19.778	5.722	5.667	6.611	18.611	12.111		0.556033	8.6241
15.4814	8.444	3.444	2.389	4.056	9.833	11.056	9.556	15.389	10.833	6.222	5.278	5.167	3.944	2.278	20.611	3.722	2.556	3.722	4	28.722	5.5	4.278	5.5	12.778	16.056	8.5	2.944	6.556	16.111	16.056		0.560344	8.5167
15.6005	7.333	2.5	4.333	6.278	18	8	7.889	19.5	10.778	3.889	6.5	3.444	2.944	2.667	14.722	3.389	5.222	5.389	3.389	21.833	4.389	1.889	4.833	9.222	16.722	6.167	3.944	8.667	12.5	7.944		0.564654	7.8092
15.7196	7	1.778	2.333	4.833	12.278	16.833	12.167	16.556	10.167	6.556	6.778	3.222	3.444	5.556	18.556	1.778	2.722	2.389	7.111	32.111	4.167	1.611	3.889	7.111	14.556	4.333	3.5	7.944	19.333	9.444		0.568965	8.3352
15.8387	5.333	4.111	4.056	5.444	9.722	6.833	9.056	16.389	8.556	4.444	4.778	4.556	3.222	3.722	12.056	4.167	3.833	3.167	2.056	23.389	5.722	3.056	4.778	7.611	19.333	4.167	4.389	9.5	12.556	5.722		0.573276	7.1908
15.9578	5.167	2.167	1.5	5.389	16.5	9.944	9.944	18.222	10.111	3.278	8.833	3.278	3.278	3.944	17.778	2.778	3.667	3.222	5.167	26.833	7.833	5.556	4.444	8.444	16.556	6.333	7.222	7.889	14.611	10.167		0.577587	8.33517
16.0769	6.944	5.333	3	3.889	9.889	10.056	11.944	18.889	9.333	5.833	3.389	5.111	3.056	3.556	20.111	2.333	2.556	3.222	3.167	23.722	5.167	4.333	5.778	7.389	19.278	6.667	3.778	6.167	16.222	10.056		0.581898	8.0056
16.196	6.278	4.278	2.944	4.444	17.5	8.611	7.944	21.611	11.111	5.778	5.222	2.222	4.444	4.333	21.278	5.556	4.056	2.611	4.833	24.889	3.5	5.444	3.278	5	16.667	8.722	3.722	4.833	17	7.389		0.586208	8.18327
16.315	8	3.111	2.889	5.111	14.111	12	9.667	14.278	5.667	7.444	3.778	4.722	3.778	5	20.389	3.444	5.167	4.389	1.611	24.389	4.278	2.833	5.056	6.889	23.556	7.944	3.667	8.333	17.111	11		0.590516	8.3204
16.4341	3.167	4.056	1.833	3.611	18.278	8.722	9.278	20.778	9.667	4.778	4.889	2.444	3.222	3.722	17.556	5.944	3.556	3.556	3.944	21.167	7.278	3.111	5.111	7.389	13	6.278	4.444	9.222	18.667	8.889		0.594826	7.91857
16.5532	4.556	1.667	0.667	1.722	14.722	4.833	6.222	21.778	11.611	3.889	4.778	3.389	3.5	4.556	19.722	2.222	4.278	6.389	3.556	18.167	5.056	3.778	3.278	5.778	21.056	3.444	7.444	8.278	15.278	9.222		0.599137	7.49453
16.6723	3.556	2.556	4.056	2.889	16.722	10.278	6.778	29.556	7.944	7.222	4.5	3.889	1.944	8	18.778	5.278	4.111	3.833	4.444	20.167	9.556	2.722	2.167	4.111	20.944	6.722	4.333	9.111	19.944	8.944		0.603448	8.50183
16.7914	5.222	2.667	2.389	5.222	14.278	10.833	7	20.167	13.611	7.333	4.5	5.389	2.056	5.278	19	3.667	4.278	5.111	6.333	25.611	5.333	5.056	5.333	5.889	15.333	5.556	6.167	8.778	14.833	7.611		0.607759	8.3278
16.9105	5.667	1.667	2.611	5.5	13.556	6.278	7.444	21.722	7.111	4.556	3.722	4.778	2.333	4.389	23.556	2.778	6.056	3.5	2.056	20.222	4.333	7.278	7.111	4.722	17.889	6.5	5	11.333	18	9.389		0.612069	8.03523
17.0296	3.389	1.389	4.944	6.889	12.944	8.444	8.333	23.556	5.722	6.722	3.556	4.278	2	7.556	15.833	5.5	7.278	3.5	4.667	19	6.611	5.944	3.611	5.889	20.167	2.944	5	6.167	16.833	5.389		0.61638	7.80183
17.1487	4.278	0.889	4.056	10.278	15.389	8.611	10	29.722	8.222	6.556	5.611	4.833	2.833	2.444	20.444	4.889	3.5	3.222	5.556	19.278	5.278	3.167	4.722	6.889	16.333	4.611	5.111	6.167	24.389	5.833		0.620691	8.43703
17.2677	1.389	2.944	2.333	5.778	14.667	5.944	8.333	18.944	8.389	4.444	6.778	3.5	5.5	4.944	20.333	4.778	4.111	3.056	3.333	17	4.889	4.278	2.667	4.333	18.167	6.167	5.944	9.5	22.167	8		0.624998	7.75367
17.3868	3.833	3.444	3.667	5.889	11.611	8	6.5	18.889	7.278	4.556	7.167	3.611	5.611	5.222	20.389	2.556	3.056	6.444	4.222	15.444	6.333	5.5	3.556	6.556	22.056	4.611	7.389	11.556	25.333	7.111		0.629309	8.24633
17.5059	4.167	4.333	3.222	8.889	17.611	7.722	7.944	25.278	7.889	6.611	7.667	5.722	3.667	5.833	25.722	3.222	3.333	3.222	4.167	15	5.333	3.389	5.167	3.889	18.833	4.333	5.944	5.222	28	8.333		0.63362	8.65547
17.625	2.722	2.889	4.111	6.722	10.556	11.056	8.056	23.389	10.889	4.667	5.222	5.5	5.611	5.278	24.167	2.889	5.889	5.278	4.278	15.778	5.944	2.056	4.944	6.444	21.444	4.556	2.889	5.944	19.944	11.389		0.637931	8.35003
17.7441	3.389	2.944	1.722	5.944	15.5	9.611	9.556	22.556	11.222	6.5	6.333	3.444	2.5	2.389	21.056	4.444	5.5	4.833	2.5	20.111	7.667	4.778	4.333	6.722	14.444	4.389	5.889	11.889	20.833	9.778		0.642241	8.42587
17.8632	5.056	2.778	4.722	8.611	13.444	7.611	8.111	26.556	10.889	4.278	2.889	3.167	2.556	3	24	2.167	2.611	2.611	4.556	21.278	7.278	3.611	5.333	3.333	19.389	5.889	4	11.333	17.5	10.722		0.646552	8.3093
17.9823	2.833	4.111	2.667	6.944	14.944	10.278	8.778	20.944	11.167	7.056	3.556	4	3	2.444	16.722	3.056	5.222	5.556	2.833	19.167	6	4.889	4.5	7.056	17.944	5.056	4.722	7.278	22.167	13.056		0.650863	8.26487
18.1014	2.778	3.667	7	13.167	11.944	6.056	6.444	23.889	7.944	5.5	3.111	5.722	1.611	4	18.944	3.944	3.889	4.389	3.056	16.944	6.5	2.833	5.944	5.556	21.778	8.889	5	13.5	20.778	9.222		0.655174	8.46663
18.2204	1.944	2.389	2	8.667	10.389	11.333	7.056	19.333	9.667	7.056	5.056	5.389	3.944	2.611	21.722	3.611	3.611	4.444	5	22.667	6.778	3.5	3.889	4.889	19.5	5.889	1.5	10.833	23.556	4.889		0.659481	8.10373
18.3395	3.111	0.611	2.167	13.5	16.944	5.833	8.833	17.278	10.5	8.333	2.5	4.944	2.222	3.778	18.778	3.5	3.833	5.111	2.944	16.944	6.111	2.389	6.389	2.833	25.333	9.944	4.333	11.556	22.333	9.889		0.663792	8.4258
18.4586	3.833	4.611	3.889	10.389	14.333	6.778	9.556	23.222	10.778	8.389	7.278	3.944	3.778	7.444	22.556	4.722	4.611	2.5	5.667	22.333	5.056	3.278	3.722	3.833	20.944	6.5	4.611	11.5	24.833	10.944		0.668102	9.1944
18.5777	4.167	4.722	1.278	12.278	10.667	6	7.111	25.611	11.611	6.5	5.111	1.667	3.778	6.111	18.222	4.5	5.389	2.889	5.778	19.889	6.667	2.222	3	7.222	21.833	4.944	3.611	10.556	24.833	9.611		0.672413	8.5926
18.6968	2.222	2.778	4.778	13.389	11.222	7.556	10.111	21.5	10.667	8.667	4.111	4.111	3.389	6.556	20.333	5.167	5.056	2.944	4.5	17.167	5.389	5.333	4.222	7.389	17.722	5.333	8.889	8.556	17.056	8.556		0.676724	8.48897
18.8159	3.167	3.611	4.833	13.833	10.889	8.167	6.722	29.389	11.444	7.278	5.222	3.111	4.389	2.667	23.556	4.444	2.778	3.5	1.944	23	10.5	5.222	5.722	5.111	24.556	5.944	4.5	9.333	19.944	9.222		0.681035	9.13327
18.935	3.889	2.444	3.444	15.611	13.389	7.389	5.667	29.833	10.5	8.833	4.833	3.722	3.889	3.556	19.444	2.889	2.111	6.111	3	19.444	4.944	4.5	3.444	4.889	23.778	5.667	6.5	11.167	20.056	7.056		0.685346	8.7333
19.0541	5.778	2.667	2.222	13.111	8.444	10.611	9.167	26.444	12.111	7	5.833	5.611	3.889	4.667	22.333	3.222	3.5	2.833	5.722	24.056	3.389	4.278	2.278	8.056	21	6.333	4.722	8.278	18.222	8.222		0.689656	8.79997
19.1731	2.833	2.611	5.389	14.222	9.111	5.056	7.667	23.667	10.667	6.833	6	4.056	1.722	5.222	21.722	3	2.556	3.944	3.889	25.833	5.222	7.222	4.5	4.5	19.722	7.944	6.944	8.889	16.278	6.278		0.693963	8.44997
19.2922	2.944	4.556	4.167	23	10.5	9	10.611	26.833	13.167	12.444	4.944	4.056	4.278	6.722	24.833	4.944	4.278	3.056	5	25.111	10.111	2.667	4.111	4.556	21.944	3.278	6.111	7.944	18.778	10.778		0.698274	9.82407
19.4113	3.278	2.333	4.778	15.222	9.333	6.444	9.167	27.5	14.778	6.611	5.5	5.5	2.278	4.889	19.278	4.833	7.333	4.167	5.667	23.5	8.667	5.167	5.722	5.444	22.722	2.667	7.778	8.833	14.222	7.889		0.702585	9.05
19.5304	2.944	2.667	2.667	16.333	7.167	9.722	7.778	33.611	13.556	7.222	2.778	4	3.556	7.889	21.667	3.111	4.722	1.5	5.444	14.722	4	3.333	4.056	8.056	24.389	6.167	5.611	11.056	15.722	7.167		0.706896	8.75377
19.6495	4.056	3.167	4.889	19.944	7.222	8.889	7.889	34.833	13.722	5.222	4.333	4.556	7.556	9.167	22.278	4.556	1.667	4.111	4.667	20.722	6.889	4.722	4.222	5.667	30.444	3.722	3	9.111	18.833	13.444		0.711207	9.78333
19.7686	4.278	3.611	5.056	20.167	9.167	10.889	6.556	32.222	10.944	10.611	7.556	4.611	4.778	10.389	23.389	6.5	3.889	3.389	5.722	16.111	8.167	3.222	5.944	6.056	26.778	8.056	7.333	11.611	16.889	8.5		0.715517	10.0797
19.8877	3.667	2.5	5.667	14.944	8.778	10.278	9.833	39.167	12.833	8.278	5.444	4.944	5.5	6.556	18.5	5.778	2.444	4	3.389	24.389	6.5	6.111	3.5	3.944	25.278	5.056	5.333	7.556	17.778	6.611		0.719828	9.4852
20.0068	4.722	3.222	3.556	18.556	5.167	9.111	11.944	40.222	15.333	7	6.667	4.056	3.111	9.833	20.444	5	3	3.944	4.944	19.667	7.056	3.278	2.556	2.667	21.056	5.444	6.5	9.056	20.611	9.056		0.724139	9.5593
20.1259	2.389	1.667	5.389	11.111	7.056	8.556	13.556	31.278	11.056	5.944	5.278	4.278	3.722	8.556	20.167	2.944	5.111	5.778	4.333	16.333	7.556	4.889	2.722	3.5	19	6.722	5.722	9.556	17.611	9.611		0.72845	8.71303
20.2449	4.111	3.833	3.278	20.5	6.556	6.5	11.111	38.722	10.833	11.278	7.222	3.333	3.5	11.389	22.667	3.833	6.056	2.889	7.667	20.667	6.889	3	3.056	4.889	26.944	6.167	6.278	10.167	26.722	8.333		0.732757	10.2797
20.364	3	4.111	7.111	14.556	8.611	9.167	11.833	34.722	16.556	7	11.167	7	3.778	10.111	18.778	5.389	5.111	3.5	6.222	17.444	6.167	4.5	3.5	6.667	26.389	5.167	4.111	6.556	20.833	8.556		0.737068	9.92043
20.4831	3.944	2.833	3.556	17.611	10.111	11.556	9.444	35.056	14.333	14.056	5.944	6.722	2.778	7.333	22.278	5.278	4.889	3.667	4.333	15.722	7.778	4.5	3.556	4.944	29.667	7.667	7.167	8.056	26.944	8.333		0.741378	10.3352
20.6022	3.667	4.556	4.111	17.056	6.556	8.444	16.222	43.111	17.444	9.667	12.278	5.333	5.611	9.611	21.333	3.111	4.111	3.056	4.056	19.944	7.889	4.833	2.611	6.056	26.333	5.556	5	10.611	27.222	10.056		0.745689	10.8482
20.7213	4.444	3.667	4.111	18.889	4.5	6.611	16.333	37.278	14.889	11.111	7.444	2.833	4.056	9.333	24.833	2.944	4.222	5.5	5.889	19.5	7.389	3.556	5.056	5.444	24.5	6.056	7.5	8.056	20.5	10.722		0.75	10.2389
20.8404	6.278	2.5	2.556	15.778	5.111	9.722	19.778	42.444	22.167	9	10.111	6.056	8.111	9	26.722	2.333	3.944	3.444	7.611	18.222	7.667	4.667	3.944	6.722	29.389	6.444	6.889	7.611	23.278	12		0.754311	11.3166
20.9595	4.833	6.167	5.056	12.056	6.722	12.167	16.722	42.611	24.889	10.056	12.722	8.389	10.556	11.222	31.389	4.167	3.389	3.944	3.722	20.556	8.389	4.667	7.5	4.778	26.611	7.944	7.389	9.944	31.111	7.333		0.758622	12.2334
21.0786	6.389	2.056	3.111	21.389	7.778	9.389	26.889	36.889	22.611	11.944	12	9.444	10.444	12	20.278	5.167	4.444	3.611	6	19.889	8.889	2.944	5.556	4.5	23.944	11.778	7.5	8.333	24.556	9		0.762932	11.9574
21.1976	4.778	1.611	5.944	20.389	7.389	9.167	22.222	38.889	20.444	9.611	10.556	10.333	7.611	10.667	25.444	3.111	7.278	3.722	4.667	13.167	9.222	5.167	5.278	4.111	17.222	5.611	6.389	8.944	24.278	10.944		0.76724	11.1389
21.3167	3.667	2.444	8.056	13.778	7.556	11.389	25.444	46.333	18.222	14.056	9.889	9.333	6.611	12.222	23.556	4.556	3.667	4.667	4.167	16	9.278	4.667	3.389	7.833	25.056	3.5	7.222	8.5	24.167	12.167		0.77155	11.7131
21.4358	5.056	4.611	7.056	16.5	8.5	11.5	32.278	45.444	22.556	11.722	8.111	11.611	7.944	11.556	18.444	2.444	4.111	5.556	5.722	17.667	10.167	6.778	6.5	3.944	33.167	6.833	9.389	8	25.889	11		0.775861	12.6685
21.5549	4.056	4.889	4.944	13.389	6.444	17.5	30.778	41.111	22.944	18.167	11.056	12.5	13.111	14.056	25.333	5.889	3.389	3.889	7.056	16.556	8.111	6.5	2.722	5.833	32.222	5.667	8.5	6	22.611	8.389		0.780172	12.7871
21.674	3.444	4.778	7.722	16.5	5.833	11.556	28.222	45.056	25.222	14.389	14.444	13.611	12.333	15.722	25.667	5.5	6.722	4.278	8.5	18	11.833	3.667	2.667	5.944	28.056	5	10.222	4.667	22.611	11.611		0.784483	13.1259
21.7931	4.278	3.111	6.833	10.056	7.889	13.056	31.444	51.889	32.5	14.444	12.167	16.944	11.333	14.278	24.722	5.722	6.722	5.944	8.667	15.056	10.167	4.444	4.444	3.778	29.667	6.111	10.278	8.833	25.278	14.889		0.788793	13.8315
21.9122	4.333	4.556	2.111	5.667	8.056	9.056	37.944	32.667	20.889	15.111	13.889	21.278	18.111	14.111	29.111	6.056	6.5	4.889	8.056	12.056	7.556	4.944	4.389	7.5	31.667	6.722	9.611	9.722	33.056	10.556		0.793104	13.339
22.0313	5.167	5.944	8.944	6.333	8.722	10.333	35.667	35.222	23.778	18	17.167	28.5	13.889	14.722	29.611	6.278	5.778	4.278	6.056	19.556	9.722	4.556	6.833	5.278	25.5	5.889	8.111	8.5	24.444	11.833		0.797415	13.8204
22.1503	4.111	2.778	11.667	8.333	6.333	10.333	36.611	28.833	17.944	26.833	16.944	26.667	17.444	21.667	31.222	6.444	3.778	3.944	7.889	19.722	13.278	7.278	3.389	7.222	30.611	6.222	7.5	7.611	28	7.333		0.801722	14.2647
22.2694	6.944	3.556	11.556	7.833	11.333	16.722	34.778	27.944	17.111	22.611	18.389	28.944	19.056	21.111	39.5	7.833	6.333	4.056	6.889	16.111	9.778	8.278	5.667	7.333	27.722	7.833	7.222	7.556	35.611	13.444		0.806033	15.3018
22.3885	3.833	3.833	16.056	6.111	10.889	15.5	47	18.667	12.056	27.444	17	25.611	21.889	15	37.333	8.833	9.667	5.056	8.778	21	18.611	7.5	3.167	4.667	29	9.722	8.222	4.5	31.167	11.278		0.810344	15.313
22.5076	6.833	6.222	14.444	12.778	11.389	13.333	38	12.333	16	27.167	20.778	26.889	12.222	12.056	32.444	5.111	8.278	4	11.778	24.5	20.278	4.667	4.167	7.667	35.722	10.833	14.222	7.611	38.778	14.667		0.814654	15.8389
22.6267	9.111	4.333	18.722	13.5	7.167	9.333	37.944	10.667	15.667	21.278	17.222	20.944	12.278	19	35.833	8.944	5.389	5.333	8.611	26.833	14.222	6.944	6.722	6.444	36.944	10.278	9.722	11.278	31.667	17.556		0.818965	15.3295
22.7458	6.556	6.278	18.944	8.5	5.444	15.333	33.167	10.722	7.667	16.667	29.333	26.556	19	15.611	27.5	12.389	7.833	8.778	8.333	22.111	15.111	6.389	3.667	7.056	32.444	9	11.056	9.944	31.556	11.111		0.823276	14.8019
22.8649	10.889	5.611	20.444	8.222	11.222	15.278	26.278	6.722	5.278	15.333	23.222	26.944	18.833	17	21.722	12.556	12.278	9.111	12.056	23.833	22.278	8.611	7.167	5.556	32	6.056	12.056	9.389	34.944	15.167		0.827587	15.2019
22.984	10	3.333	21.222	7.444	9.667	13.222	26.833	3.667	5.389	15.278	28.444	21.778	14.111	18.056	28.667	9.611	9.222	8.278	9.944	25.333	26.222	9.889	5	4.778	29.833	10.5	11.222	5.444	29.167	14.667		0.831898	14.5407
23.103	12.5	5.889	22.056	8.389	17.222	16.444	22.667	7.278	4.278	10.833	31.056	25.222	14.611	13.833	34.889	15.167	18.556	8.889	11.611	30.889	31.611	7.722	6.833	8.667	31.5	11	7.889	9.889	37.389	19.333		0.836205	16.8037
23.2221	11.889	4.667	22.278	4.778	13.111	20.333	20.111	2.278	4.222	7.167	24	25.944	12.778	17.611	25.667	15.5	14.722	10.889	15.278	31.556	44.333	11.722	4.722	5.222	38.222	10.611	11.333	9	37.222	16.722		0.840516	16.4629
23.3412	10.944	5.167	16.389	9.667	17.333	18.778	15.944	4.111	4.222	7	32.167	16.778	11.444	14.889	24.5	19.444	19.833	19.778	19.889	36.722	36.167	9.5	9.167	6.111	36.556	14.444	10.5	10.611	34	14.944		0.844826	16.9
23.4603	11.833	3.722	20.778	7.556	13.056	18.5	13.278	2.722	2.111	4.444	23.167	16.889	13.333	12.833	27.278	21.389	26.611	20.056	24.167	29.722	45	14.778	7.833	5.944	39.944	12.778	14	10.833	39.5	24.944		0.849137	17.6333
23.5794	8.333	8.722	24.222	9	11.667	23.722	9.944	2.167	1.722	5.556	14.389	13.722	8.056	10.056	17	30.5	31.667	31.056	24.667	38.222	55.389	18.167	7.389	10.944	34.444	20.333	9.611	12.333	34.111	21		0.853448	18.2704
23.6985	6.833	6.833	17.333	5.389	20.111	24.111	5.667	2.778	3.056	3.167	13.056	12.333	9.444	6.611	11.833	27.556	25	31.667	25	37.667	59.778	20.944	9.389	9.333	48.167	26	10.722	15.944	40.111	25.833		0.857759	18.7222
23.8176	10.056	6.833	23.556	10.111	11.5	15.889	5.667	0.5	2.556	3.778	11.556	10.778	6	7.111	13.5	25.611	39.167	27.5	36.222	46.722	60.778	20	13.278	8.778	38.111	25.278	13.667	12.444	39.333	27.444		0.862069	19.1241
23.9367	11.222	11.444	22.889	12	17.111	19.611	4.889	1.278	3.611	3.778	8.111	5.944	7.111	3.778	14.389	17.556	42.056	45.389	29.833	44.111	64.944	24.444	9.611	8.556	39.778	26.056	11.111	16	35.556	25.778		0.86638	19.5982
24.0558	8.944	15.056	23.778	16	24.056	29.167	3.722	0.833	0.889	1.833	8.278	5.222	4.944	3.167	11.722	31.778	42.167	43.222	25.444	38.611	73.167	31.833	14.556	8.056	45.611	30.611	13.056	18.611	36.5	33.611		0.870691	21.4815
24.1748	10.778	9.278	16.778	14.222	18	17	3.056	2.222	2.389	0.222	4.722	4.389	7.333	5.611	4.333	28.889	42.389	43.722	22.944	42.556	79.778	32.5	16	9.167	45.833	38.889	10.944	20.667	45.889	34.944		0.874998	21.1815
24.2939	8.722	16.056	20.778	20.556	20.889	19.222	4.111	0.833	0.222	0.167	3.667	3.278	2.722	4	4.833	28.333	42.889	36.5	29.333	46.389	73.056	33.222	22.889	12.889	41.5	33.778	14.5	22.889	43.056	30.222		0.879309	21.3834
24.413	7.889	13.278	22.889	24.278	22	13.889	2.667	0.833	1.389	3.111	2.111	2.278	3.611	3.222	5.778	27.111	37.056	46.167	35.333	49.833	69.722	45.722	30.111	15.833	48.056	49.833	17.444	23.111	37.111	23.167		0.88362	22.8278
24.5321	10.5	15.944	17.556	22.111	22.944	12.944	2.333	1.444	0.444	1	4.556	3.111	1.944	2.556	2.333	24.556	36.333	45.778	29.444	46.278	55.5	47.111	46.111	15.222	50.5	50.389	19.278	36.333	54.611	16.278		0.887931	23.1814
24.6512	10.111	24.944	23.111	28.722	22.5	8.833	1.778	1.222	0.389	1.222	3.333	1.944	2.556	1.056	2.944	15.778	32.667	38.944	28.222	45.833	50	63.667	48.667	21.556	58	48.056	19.556	33.444	56	13.722		0.892241	23.6259
24.7703	8.222	18.167	24.778	24.778	22.5	4.944	2.667	0.722	0.389	0.889	3	2.167	0.889	0.667	1.278	14.889	24.889	32.278	30.611	41.556	32	57.111	55.667	26.556	51.111	58.333	25.556	34.889	58.722	7.611		0.896552	22.2612
24.8894	10.944	25.889	26.944	29.333	15.5	4.444	1.333	0.944	0.944	1.167	4.944	1.222	1.389	0.389	1.944	12.444	20.056	25.889	15.667	35.167	22.778	40.333	52.722	30.556	64.556	51.111	28.056	38.944	65.278	5.111		0.900863	21.1999
25.0085	14.444	25.778	34.778	36.556	17.389	2.944	0.556	1.444	0.778	0.833	2.222	2.389	1.278	0.833	1.556	10.111	17.222	21	12.833	18.556	27.222	39.056	55.389	34.222	66.944	51.111	34.833	34.556	57.556	4.611		0.905174	20.9667
25.1275	18.833	31	48.556	30.333	14.833	3.667	2.333	0.889	0.389	1.278	0.889	1.556	2.611	1.389	2.333	6.944	10.889	18.556	11.722	15.333	16.444	32.167	39.222	46.667	68.111	51.333	34.278	39.278	50.278	2.944		0.909481	20.1685
25.2466	16.5	27.944	53	28.611	10.778	2.278	0.333	1.722	0.222	0.278	1.611	0.722	1.611	1	2.389	6.278	11.278	7.056	7.611	9.833	9.444	22.889	35.778	61.944	58.722	55.222	40.056	24.222	43	1		0.913792	18.1111
25.3657	16.278	36.444	49.389	20.667	7.389	3.333	0.389	0.833	0.389	1.389	1.056	1.778	0.722	1.444	0.5	6.556	7.944	6.833	8	9.333	7.111	18.278	29.222	57.444	61.056	47.056	36.833	28.222	32.278	1.5		0.918102	16.6555
25.4848	18.222	32.778	48.222	14.722	6.278	3.056	0.444	0.222	0.222	0.389	0.333	2	0.833	1.389	1.667	5	4.333	3.056	5	5.833	5.611	13.056	15.056	72.944	43.611	37.167	41.333	33.333	18.333	1.889		0.922413	14.5444
25.6039	25.333	40.778	36.222	13.167	6.056	4.111	0.056	0.111	0.778	0	2.056	0.333	0.167	0.722	0.444	6.833	4.556	5.944	2.167	5.611	5.667	9.389	12.444	72.556	42.722	27.556	39.5	24.056	20	1.611		0.926724	13.6982
25.723	24.889	43.778	24.389	12.056	4.944	2.278	0.722	1.5	0.278	0	0	0.333	1.833	1.556	0.722	5.222	6.722	2.278	2.389	2.5	1.722	7.556	6.889	55.5	37.333	35.389	37.611	22.5	10.833	0.833		0.931035	11.8185
25.8421	29.056	53.333	14.389	8.056	4.111	3.5	0	0.667	0.444	1.833	0.333	0.167	1.056	0	0.667	2.222	4.611	2.222	3.722	3.111	2.667	3.167	9.278	47.278	29.167	39.444	39.833	23.722	11.278	1.222		0.935346	11.3519
25.9612	32.944	44.556	8.389	5.722	3.667	1	0.278	0.611	0.611	0.611	0.5	0.222	0.444	0.833	3.167	3.722	4.222	2.833	3.222	1.389	4.222	4.167	5.833	33.389	24.167	21.611	44.333	20.833	10.611	0.889		0.939656	9.63327
26.0802	31	37.5	5.889	8.056	2.111	0.611	0	0.111	0.556	1.111	0	0.389	0.944	0.778	0.611	2.778	4.556	2.611	1.167	0.611	2	2.778	2.944	24.111	15.056	29.889	42.111	21.722	8	0.778		0.943963	8.3593
26.1993	33.5	21.722	9.111	6.278	2.222	1.333	0.722	0.167	0.944	0	0.167	1	0.111	0	1.167	1.667	2.667	4	1.056	1.5	2.444	1.944	4.111	22.389	16	22.278	39.389	17.5	6.278	0.444		0.948274	7.4037
26.3184	35.778	19.222	6.833	4.222	3.333	0.056	0.389	0.833	0	0.5	0.611	1.167	0.611	0.667	0.889	1.833	2.833	2.278	1.778	1.278	1.167	2.222	5.444	14.944	8.833	12.556	39.722	15.111	5.944	0.5		0.952585	6.38513
26.4375	43.278	13.611	8.222	4.889	2.444	1.111	0.389	0.389	0.056	0	0.222	0.889	0.833	0.278	0	0.833	5.333	0.889	1.944	2.778	0.5	0.5	3.389	13.167	6.389	10.833	31.389	23.833	3.111	1.833		0.956896	6.11107
26.5566	35.722	8.889	4.833	2.722	1	0	0.5	0.944	0.333	0	0.722	1.333	0	0.333	0.833	2.556	1.5	2.333	0.778	0.833	0.556	1.444	1.944	8.444	4.833	7.556	26.889	13.556	2.111	1.167		0.961207	4.4888
26.6757	25.722	6.111	5.667	4.167	0.444	0.722	0.667	0	0.278	0.333	1.333	0.333	0	0	0.556	0.444	2.778	0.833	0.278	0.444	0.5	1.833	1.667	6.278	5.778	7.222	27.278	12.833	2.5	1.056		0.965517	3.93517
26.7948	18.778	3.222	4.278	2.556	1.944	0.778	1.333	0.778	0.278	0.278	0.778	0.111	0	0.5	0.556	2.111	0.556	0.778	0.667	1.5	0.278	1.056	2.444	5.833	2.5	6.5	28.389	13.889	2	0.778		0.969828	3.5149
26.9139	15.111	2.833	2.167	0.889	1.611	0	0.056	0.278	0	0.111	0.056	0.056	0	0.611	0.222	1.333	2.167	0.722	0.833	1.944	0.167	1.167	1.778	4.167	2.444	4.389	23.833	11.5	2.278	1.056		0.974139	2.79263
27.0329	11.444	1.333	2.667	1.111	2.167	0	0.444	0.667	0.111	0.667	0.444	0.222	0	0.222	0.5	0.167	0.778	1.278	0.5	0.833	0.667	1.444	1.444	3.611	3.111	3.611	20.778	12.278	2.333	1		0.978446	2.52773
27.152	9.167	1.222	2.222	1.389	0.611	0	0.056	0	0.056	0	0.944	0.333	0.722	0.167	0.167	2.389	0.389	0.111	0.389	0	0.278	0.944	0.722	2.889	1.056	2.667	13	9.5	1.444	1		0.982757	1.79447
27.2711	4.111	4	2.5	1.167	0.5	0	0.278	0.889	0.278	1.444	0	0.167	0	0	0.333	1.333	2	1	0.278	0.444	0.333	0.778	0.722	2	2.222	0.667	16.278	9	0.333	0.556		0.987068	1.78703
27.3902	2.778	1.5	3.611	0.389	1	1	0.722	0	0	0	1	1.056	0	0.389	0	0.111	0.722	0.278	0	0.278	0.333	0.778	0.722	2.5	0.556	2.611	10.944	5.833	0.889	1.444		0.991378	1.38147
27.5093	0.778	2.167	4.778	0.333	0.611	0	0.5	0	0.333	0	0.389	0	0	0.556	0.278	0.889	0.111	1.167	0.111	0.333	0.611	0.944	0.333	2.111	2.222	1.056	13.056	8.389	1.667	0.556		0.995689	1.47597
27.6284	3.222	0.833	1.5	0.444	0.111	0.111	0.222	0.167	0	0.556	0.333	0	0.5	0.333	0.056	0	0.944	0.5	0.889	0.333	0	0.222	1.056	0.889	1.333	0.167	10.278	5.056	0.667	0.222		1	1.03147

## Sheet: Image36
X0	Y0	Y1	Y2	Y3	Y4	Y5	Y6	Y7	Y8	Y9	Y10	Y11	Y12	Y13	Y14	Y15	Y16	Y17	Y18	Y19	Y20	Y21	Y22	Y23	Y24	Y25	Y26		Ap-Ba	Avg intensity
0	45.6196	24.799	34.3561	44.7226	26.2241	26.2106	22.986	29.618	20.0898	22.281	15.227	30.96	19.806	28.301	25.7087	26.1387	28.1982	27.6754	42.6145	43.0277	40.809	34.2738	60.165	59.601	57.192	61.249	44.692		0	34.9091
0.1191	52.7318	26.208	38.3801	42.6873	24.2896	26.275	29.8031	26.645	24.457	18.945	21.167	32.59	20.103	24.837	30.4037	22.1789	23.7249	27.2859	54.4083	45.4899	52.979	40.2818	63.855	69.974	61.26	67.21	47.089		0.00529155	37.6022
0.2382	59.3163	30.0712	38.9626	37.054	35.4652	22.0179	28.9076	38.438	31.1094	29.24	21.265	33.264	23.132	25.993	28.403	29.9504	22.428	41.0592	57.0329	48.9072	51.634	46.4907	66.575	81.088	61.113	81.157	53.155		0.0105831	41.6011
0.3573	69.4517	33.6482	42.285	37.9711	30.3378	31.1559	37.1132	47.744	30.9686	23.141	25.755	33.514	21.611	38.827	30.633	33.4335	27.2198	27.9715	67.2792	55.9519	52.73	62.6087	66.576	74.737	70.505	79.225	64.482		0.0158746	45.0695
0.4764	71.187	39.0707	40.7029	39.4908	42.0726	34.3666	41.1888	53.707	32.9329	38.977	25.795	31.898	26.074	35.102	35.8879	39.622	26.9683	30.9802	67.06	63.5279	60.955	66.6808	69.965	96.151	70.911	98.724	74.159		0.0211662	50.154
0.5954	69.7434	50.6993	41.9564	44.136	42.7	41.9348	49.2414	62.199	27.5059	38.624	31.065	42.266	30.913	31.389	42.8656	36.3687	27.9194	35.6207	65.0168	59.5588	70.429	74.8762	80.514	90.686	90.814	96.911	74.023		0.0264533	53.7028
0.7145	76.4652	64.4852	40.4953	42.0043	54.1245	41.6901	57.0226	72.459	40.6714	48.18	35.105	55.845	30.838	27.452	44.4756	51.2016	40.6075	39.5604	64.3915	63.4027	72.594	71.1171	80.772	104.249	76.923	113.646	93.254		0.0317448	59.3716
0.8336	78.9896	59.7396	42.8175	46.1055	48.2802	37.6288	56.4057	82.456	45.4447	57.132	39.018	48.921	32.396	38.947	61.3019	60.702	39.073	42.1407	66.8366	80.8092	93.838	69.7951	84.109	108.398	96.706	114.218	99.717		0.0370364	64.1454
0.9527	74.3492	74.6453	52.8202	54.6163	56.1414	47.3879	59.8091	91.66	47.6108	64.414	53.599	58.479	35.305	35.091	64.0295	71.4022	48.4602	42.3121	72.1537	82.8747	82.573	83.0444	96.002	107.356	111.797	120.647	106.791		0.0423279	70.1989
1.0718	68.7298	66.2416	51.1037	61.1434	63.0471	51.8778	62.4243	104.197	54.1982	69.757	66.075	57.256	41.433	44.575	68.5163	74.3719	51.7012	52.3762	69.999	79.6062	100.846	75.1202	103.623	114.517	123.541	120.67	97.71		0.0476195	73.8762
1.1909	63.6549	66.558	57.279	58.9522	63.5412	54.2601	64.3594	104.294	68.4064	96.411	85.484	72.237	49.199	48.365	76.3055	72.1	55.5664	55.8031	62.6157	75.7036	108.729	100.984	93.751	118.715	117.122	119.323	114.566		0.052911	78.6773
1.31	64.8466	69.3904	64.1795	64.3904	77.5298	50.625	64.6458	100.235	68.5288	104.87	95.033	73.194	55.507	54.767	81.3085	77.9114	64.4635	56.909	70.8552	83.1862	80.079	92.7765	111.407	115.853	122.361	112.352	120.185		0.0582026	81.3848
1.4291	58.4324	72.3241	69.965	65.8839	66.4583	63.541	66.4999	95.24	85.0838	109.165	104.158	92.886	62.15	58.864	96.8747	93.319	68.3233	64.0542	65.5927	95.8613	94.541	87.4933	113.74	116.743	117.312	114.137	113.849		0.0634941	85.6478
1.5481	48.7269	48.8102	57.7235	75.6244	73.083	62.7761	66.4058	95.67	84.2551	105.616	94.551	106.748	71.401	67.828	87.7232	94.9635	65.252	68.5802	76.7867	91.0607	80.758	89.8013	112.124	105.076	115.534	88.813	99.098		0.0687812	82.77
1.6672	39.9918	38.5638	63.2479	68.2117	66.0506	63.0248	76.1114	100.103	93.7945	92.757	93.2	98.838	82.403	82.904	84.8432	87.1401	70.5146	80.8531	76.4066	84.9627	80.31	92.1763	111.972	92.867	107.809	88.677	96.247		0.0740728	81.9993
1.7863	33.9289	40.0593	66.5714	56.1292	72.427	65.1571	66.6248	85.246	83.1817	89.485	91.553	94.098	93.297	84.076	92.2379	94.711	83.466	78.2314	66.6688	87.163	65.7	90.1666	106.789	83.225	97.498	95.104	94.529		0.0793643	79.9009
1.9054	26.8467	35.4225	66.1456	68.9471	70.8227	58.5046	63.0721	79.097	83.1669	80.411	87.401	92.631	93.555	92.996	83.3893	89.7691	85.4402	91.6436	74.9266	76.9376	53.152	81.0389	98.959	78.011	79.366	80.004	83.126		0.0846558	76.1031
2.0245	23.3739	26.1454	56.6859	59.9686	59.3826	59.0143	64.855	67.918	85.8264	68.03	69.939	89.575	103.758	104.946	77.6622	83.3279	79.3131	87.7878	72.3219	86.0648	58.869	84.2664	100.633	73.874	71.891	72.425	97.543		0.0899474	73.5332
2.1436	19.0331	28.0835	50.5956	56.2993	73.4188	59.6476	58.0975	59.368	78.8337	57.446	81.356	66.639	104.479	99.56	84.0695	71.9911	73.2399	81.4088	65.6144	76.0374	60.455	73.1258	81.683	71.034	56.75	62.993	91.083		0.0952389	68.2349
2.2627	22.7628	23.7045	44.0296	57.7825	58.4089	59.8004	51.1878	59.341	61.1827	59.659	72.694	70.483	92.151	92.654	70.346	78.1071	74.0359	69.7936	63.0972	72.9724	59.86	79.8013	84.729	55.41	49.74	57.404	71.52		0.10053	63.4318
2.3818	20.6277	31.1262	38.3787	59.2701	49.1067	49.3038	40.2575	40.601	64.4375	53.244	61.379	58.238	85.908	101.45	64.4559	62.2284	63.6453	76.7129	54.7052	78.7092	50.328	77.3765	83.496	49.964	54.819	45.416	59.433		0.105822	58.3192
2.5008	18.8479	28.6707	35.382	56.7554	34.8044	44.4658	37.851	36.89	47.7192	53.219	61.551	43.89	79.711	100.426	56.5332	56.0817	57.3865	59.7525	52.8252	75.2614	57.576	68.9727	76.106	49.772	54.068	41.988	61.982		0.111109	53.6477
2.6199	15.3522	23.443	31.9872	42.6921	37.0855	44.9466	39.9583	42.689	45.1017	47.896	62.317	37.48	57.668	99.098	68.3818	53.6636	58.0491	52.5221	56.8874	71.7868	48.079	85.511	64.17	53.789	44.543	41.47	49.517		0.116401	50.9661
2.739	10.7756	19.5852	33.2289	45.5869	32.8997	36.0055	29.1685	33.282	35.5965	35.275	57.384	32.493	46.507	93.074	53.1549	45.6471	41.6318	46.1697	57.4573	67.074	53.716	64.3492	51.856	56.482	45.401	37.528	50.975		0.121692	44.9001
2.8581	11.4322	20.5905	28.3777	30.0893	36.7749	40.8509	27.2304	26.881	39.8688	39.918	44.871	37.916	50.313	83.822	51.9148	43.4814	42.9554	39.3593	62.0514	59.0167	53.268	61.0463	44.835	52.351	40.309	31.68	50.609		0.126984	42.6597
2.9772	8.4404	16.8342	19.3275	29.3201	23.6263	34.0035	27.5091	26.013	33.8528	32.796	42.884	28.241	38.075	70.974	47.9455	35.9378	32.0714	32.9191	53.6119	56.2061	56.023	62.9869	35.112	43.802	36.312	34.121	37.147		0.132275	36.8923
3.0963	5.1731	12.2405	22.0313	21.3365	18.7649	26.9357	23.6234	22.014	38.6133	20.705	33.84	26.706	33.944	58.5	37.5689	28.0699	29.8757	25.9041	51.5163	53.863	53.46	45.9909	38.362	36.466	33.668	27.603	29.557		0.137567	31.716
3.2154	9.3557	11.3094	23.4305	20.7477	22.6972	20.6754	15.6406	17.483	36.2161	17.133	29.315	24.217	35.905	54.305	41.8535	31.7552	27.9356	28.1003	38.6369	61.3237	56.034	49.6838	29.648	30.177	26.066	21.803	33.854		0.142858	30.1964
3.3345	8.0282	10.025	17.3449	17.5669	12.7973	18.3371	16.6131	23.288	37.0544	15.793	20.108	22.409	28.146	45.619	35.9916	26.5235	23.98	31.1901	33.5086	54.8225	52.694	45.5636	33.332	28.333	26.192	28.574	26.23		0.14815	27.4098
3.4535	7.8431	8.7605	11.011	21.954	11.6723	18.7379	14.8031	14.019	28.4623	14.926	22.889	17.486	33.05	29.866	30.3481	19.2755	30.2232	25.3069	35.915	54.3307	40.145	33.6244	26.519	28.959	28.452	17.801	33.16		0.153437	24.4274
3.5726	5.7128	12.0222	11.8983	20.8243	14.453	12.105	12.3667	13.353	32.2813	17.999	17.9	15.974	22.539	30.981	25.8006	16.666	25.6251	24.4261	28.777	53.0238	47.819	32.6348	23.288	19.37	22.527	16.146	26.685		0.158729	22.3407
3.6917	5.2282	7.4753	10.0784	19.3027	10.5708	12.8192	12.8868	17.975	28.6634	13.162	17.294	10.768	21.072	23.229	21.9725	14.3325	22.1142	31.5595	25.981	49.5198	35.584	25.971	25.097	16.091	19.938	15.502	28.746		0.16402	20.1086
3.8108	8.1448	13.9745	7.4395	17.6386	9.0906	10.2218	11.4332	15.248	20.6233	11.294	14.405	8.315	10.163	34.49	14.0031	14.6044	14.8869	16.965	24.3602	45.4864	34.057	23.7552	20.896	16.932	21.012	14.306	25.876		0.169312	17.7638
3.9299	4.9353	9.7587	9.5265	12.7316	8.8733	6.6725	8.5243	10.163	29.4057	16.597	16.154	9.59	10.502	29.132	14.1502	13.4808	21.0273	16.7416	21.5537	48.204	34.216	18.749	23.181	18.837	22.36	15.652	25.465		0.174603	17.6364
4.049	4.9477	10.8028	7.951	12.7857	8.9625	8.6737	5.8845	7.259	19.3723	12.686	14.665	9.716	10.05	18.108	15.8473	13.1066	12.5264	28.7698	20.1723	34.095	29.855	21.1584	19.227	15.256	17.855	13.15	26.901		0.179895	15.5476
4.1681	3.7929	8.2244	8.9693	14.8455	9.5618	6.9888	7.3538	11.144	25.1998	8.315	10.984	8.216	13.473	19.856	15.1096	9.6264	16.2255	16.1164	16.6853	35.6388	22.54	22.785	18.153	13.994	18.874	5.331	21.552		0.185186	14.428
4.2872	6.5775	7.1304	5.0907	10.6536	9.8054	7.593	6.8802	7.232	19.4034	6.927	10.83	4.91	12.543	19.576	14.5532	7.617	16.6391	11.8667	16.9552	32.8116	21.067	19.4621	22.688	14.974	20.917	9.549	22.888		0.190478	13.5978
4.4063	5.1813	9.27	6.3639	12.7243	5.9616	3.5688	4.8528	9.915	21.745	9.581	8.193	5.194	10.136	12.761	12.8647	6.0813	11.7007	17.772	14.8549	37.608	16.787	20.2173	12.743	14.687	15.012	7.606	21.849		0.195769	12.4159
4.5253	5.8482	8.0364	7.0623	11.2855	8.8433	4.2885	5.3193	7.549	15.034	5.438	7.736	5.728	6.06	16.44	10.8568	4.6459	13.0216	17.1929	17.4619	36.0757	20.025	21.0382	17.491	15.755	13.278	6.419	22.009		0.201057	12.2199
4.6444	5.2715	6.8903	8.8464	9.5121	4.4462	5.5195	6.9572	6.973	16.144	5.657	8.544	6.508	8.66	13.536	8.2443	6.5697	9.2932	14.1265	12.5101	25.3056	20.116	21.4177	9.408	14.478	13.367	8.17	21.596		0.206348	11.0395
4.7635	5.389	8.7117	5.7782	8.817	8.7329	5.7062	5.4078	6.464	12.514	6.603	8.165	7.066	7.918	13.673	9.7279	6.5166	7.3978	10.4378	12.9949	23.1346	26.756	15.3944	12.114	10.903	14.698	5.517	20.292		0.21164	10.6233
4.8826	5.9535	3.3072	8.7533	9.4653	7.1178	2.9798	4.753	6.086	16.9208	7.25	6.999	5.027	8.358	14.552	9.507	6.3789	9.6955	7.5188	15.299	23.2757	24.633	16.5048	13.626	8.45	12.994	7.053	18.574		0.216931	10.4086
5.0017	6.8663	5.9628	5.9681	8.801	6.6153	5.7093	6.1768	6.544	14.4068	2.749	5.868	2.926	6.675	14.193	6.4775	3.2593	7.017	9.298	12.0677	18.2291	27.99	14.8279	13.148	11.944	15.014	7.52	13.701		0.222223	9.62796
5.1208	4.245	4.2067	3.5013	6.7443	1.9797	3.0288	3.071	5.207	12.6715	3.767	6.444	5.2	5.08	7.558	11.2526	4.6107	9.0297	9.6825	16.3174	18.0218	16.605	15.5492	8.012	8.781	13.172	4.261	11.221		0.227514	8.11927
5.2399	7.2451	4.9617	7.4175	7.4013	5.0427	3.0676	4.8152	6.769	15.3617	3.288	3.662	3.634	6.344	11.734	6.706	5.2613	10.9603	9.822	11.584	14.5855	14.892	10.6763	9.525	6.306	10.319	6.009	11.47		0.232806	8.10593
5.359	2.8352	6.9416	9.0787	6.7673	2.5928	2.6783	5.1045	4.642	10.7033	2.135	4.097	3.038	6.748	14.701	7.0447	4.9134	9.1197	9.0019	12.4887	10.7869	15.584	10.6134	10.467	6.198	7.826	5.858	11.378		0.238097	7.5312
5.478	5.0818	7.3139	5.8315	5.2546	3.3705	4.877	5.9536	4.803	12.0761	1.853	5.396	3.803	5.57	10.6	5.6764	5.2423	9.818	12.0537	11.2447	9.5423	14.292	13.6023	8.935	6.022	9.965	6.957	11.449		0.243384	7.65125
5.5971	4.9115	6.5563	4.9612	10.3714	3.5423	3.2882	3.9718	4.682	10.7491	1.827	4.469	2.395	3.65	5.676	5.3802	4.0907	6.3698	9.5422	8.8285	12.7835	10.965	12.504	12.909	2.821	6.52	4.467	5.432		0.248676	6.43199
5.7162	6.1248	6.2292	6.6369	3.5908	2.4634	1.9537	4.9102	4.31	5.8143	2.514	2.705	6.244	4.1	10.345	5.3743	3.0353	8.1906	11.1588	9.1934	9.2366	9.177	8.192	8.298	5.25	7.799	5.608	4.253		0.253968	6.0262
5.8353	3.8095	9.0494	6.927	5.7687	2.7327	5.279	4.884	4.172	11.3481	5.986	1.353	3.04	5.539	10.944	5.6736	5.1378	3.451	9.5495	7.2738	8.6405	11.213	12.8693	6.568	6.257	5.754	5.697	4.103		0.259259	6.40814
5.9544	5.3295	4.5039	8.308	3.6947	4.4302	4.3181	3.5218	4.259	9.2832	5.706	2.878	5.005	10.068	7.187	9.1148	6.6099	5.057	13.1724	11.8318	8.1365	10.556	7.8649	9.857	5.053	4.716	7.814	7.311		0.264551	6.87358
6.0735	3.8371	6.5507	8.2526	5.8385	4.6478	5.1193	5.2969	2.936	12.9524	4.649	3.379	3.101	6.914	10.569	8.7809	4.1378	4.3724	13.3886	11.5652	5.9052	4.351	9.4686	6.752	5.618	4.846	3.735	5.995		0.269842	6.40589
6.1926	5.9745	6.6269	9.4377	3.1638	3.0317	1.8648	4.2555	4.062	11.7586	3.309	6.08	1.824	6.9	7.819	4.3797	4.476	4.4733	9.6596	7.7378	6.886	5.619	8.5824	7.83	7.092	3.638	5.059	3.799		0.275134	5.75331
6.3117	5.1698	7.0716	11.6888	4.358	2.2602	3.3425	1.9886	4.972	12.5762	3.843	3.604	2.079	4.623	6.49	7.3564	4.4656	5.4668	9.1928	8.4036	7.0881	3.592	6.6403	7.897	5.215	5.795	7.347	4.576		0.280425	5.8186
6.4307	4.9934	9.3426	10.1633	3.3778	1.6232	3.7846	3.5978	3.904	10.7348	3.507	5.31	4.009	7.423	8.788	10.1989	3.0393	4.5019	13.2671	5.2491	5.8611	6.182	8.8218	7.73	6.463	5.682	7.61	2.77		0.285712	6.2198
6.5498	5.0431	11.4967	6.5141	5.0551	2.688	3.1998	3.4071	4.084	12.0307	4.071	2.134	3.004	9.97	8.023	7.197	7.4547	4.0984	11.7669	5.2678	7.3354	4.97	8.582	5.833	3.884	6.562	10.819	4.635		0.291004	6.26392
6.6689	3.9415	14.1194	8.0196	2.8498	3.4116	4.0759	3.2921	4.943	17.6271	4.384	2.973	4.109	9.863	7.409	6.5799	8.0546	5.0746	9.3759	6.7476	2.5413	4.285	6.0279	11.695	5.49	4.77	7.975	3.014		0.296295	6.3944
6.788	8.1458	8.5554	7.1856	4.3904	6.9799	2.4092	3.1384	4.367	12.623	3.506	2.668	3.55	6.709	8.072	8.6342	3.8205	6.1134	10.7037	5.0912	7.2215	5.086	4.6824	8.453	3.401	5.151	10.66	7.279		0.301587	6.24432
6.9071	6.5517	7.1048	7.3673	6.2404	3.818	3.8363	4.4653	2.067	10.3688	1.393	3.381	4.722	8.829	6.474	7.5175	5.0017	5.1194	15.2545	4.8155	4.1364	4.345	5.6271	10.846	5.604	3.119	11.052	6.511		0.306879	6.13214
7.0262	3.9267	7.3104	9.089	3.9224	3.5131	2.7503	1.8568	2.891	10.2546	2.706	3.786	2.244	10.587	10.323	6.9136	3.5366	6.1092	9.361	4.244	3.8818	4.772	6.2828	9.694	5.307	3.668	12.246	2.748		0.31217	5.7009
7.1453	4.8803	8.2726	9.2758	4.5324	3.7691	2.0059	3.828	4.904	13.0706	5.56	4.203	4.025	8.564	10.95	13.1736	5.3927	3.9567	10.3875	5.2456	5.2328	5.513	9.6587	10.48	3.038	5.991	12.382	6.666		0.317462	6.85031
7.2644	7.3855	6.3677	15.0048	4.6964	2.8909	4.8684	4.329	3.303	14.6219	4.621	5.467	2.777	6.41	14.341	10.341	5.1417	4.5919	8.5741	3.9787	1.4295	6.484	6.0132	4.697	3.705	7.953	14.184	5.753		0.322753	6.66406
7.3834	6.9473	8.217	14.8633	3.3303	3.7946	3.4904	2.1252	4.557	7.2517	5.453	2.185	5.503	4.881	11.523	14.348	7.1383	6.1477	15.4147	4.822	4.6701	5.165	6.4796	6.191	3.952	3.635	15.884	6.269		0.32804	6.82364
7.5025	4.038	11.3589	12.0565	5.0225	5.3084	1.6716	2.1518	2.27	12.521	4.078	2.999	3.21	4.606	11.681	15.6121	6.5275	7.3743	9.3464	5.0124	6.0826	5.766	6.4968	6.98	3.801	8.38	11.507	5.574		0.333332	6.71973
7.6216	5.6269	4.3839	13.4371	2.4919	2.8123	2.4059	1.9545	3.931	9.3602	5.191	5.763	3.831	9.805	14.201	13.8193	6.6488	7.3787	15.5228	3.4035	4.5251	3.722	4.3083	8.466	7.804	6.042	17.47	6.649		0.338623	7.07238
7.7407	4.8977	7.0993	17.2049	3.7719	2.4935	4.7409	3.4094	4.456	12.7717	4.59	5.347	1.942	5.057	13.05	16.3365	6.8685	5.6863	12.736	5.2402	2.1574	3.565	7.6459	8.697	6.201	6.181	14.227	3.966		0.343915	7.0496
7.8598	4.8874	10.7533	17.194	4.3054	2.5824	1.6667	4.1681	3.787	13.9291	5.15	2.092	4	3.862	11.602	16.1837	9.1877	4.5069	11.332	2.5172	3.7577	3.91	5.5416	9.371	4.006	8.035	17.26	7.417		0.349206	7.14834
7.9789	7.6824	8.9277	15.7988	4.9769	4.0066	3.4572	4.2903	1.791	14.6032	11.579	5.844	2.031	5.361	13.448	20.8536	9.7375	7.967	7.8515	4.6246	2.4008	2.766	5.148	7.243	5.182	4.696	17.302	7.403		0.354498	7.66563
8.098	8.5244	9.9883	12.193	3.9223	3.5312	2.7257	3.9515	2.97	13.0175	11.677	3.287	4.526	6.923	13.431	23.8857	9.6151	7.2231	14.8681	3.3956	4.549	4.263	3.9888	7.875	6.689	6.372	18.622	6.433		0.35979	8.09064
8.2171	4.7689	6.1951	15.2227	7.1383	3.0753	4.0846	2.6676	1.529	12.5279	13.072	3.432	4.708	6.611	15.077	24.6547	9.6744	8.119	11.8279	3.3819	5.5152	3.847	6.3615	9.013	6.263	5.347	23.086	4.854		0.365081	8.22422
8.3362	6.068	8.0552	16.5303	3.7583	0.9997	3.8115	2.8662	3.289	16.4289	15.729	3.638	3.215	8.339	15.011	30.6797	8.837	7.1315	14.5195	5.3261	4.8338	4.811	4.907	10.05	6.475	6.286	21.366	6.115		0.370373	8.85469
8.4552	7.1957	8.5835	16.9455	6.7988	5.0662	4.4641	2.5883	1.513	16.0409	15.273	4.475	4.437	5.229	17.012	33.6501	12.9091	4.6162	15.8992	4.4464	3.6347	4.74	4.5802	10.224	6.52	4.605	23.182	3.591		0.37566	9.19333
8.5743	7.48	9.7378	14.4756	4.2261	2.8432	4.8171	2.9261	3.73	17.1201	20.53	2.902	3.612	4.939	15.196	32.5338	7.1613	4.6394	11.9286	4.6558	2.3007	3.364	5.6647	8.89	7.268	6.463	25.567	5.491		0.380951	8.90601
8.6934	3.8859	9.1484	14.3933	6.3345	2.2855	3.5252	2.4416	1.207	16.5038	15.385	2.893	2.711	3.869	14.586	24.1647	8.9267	8.3204	13.251	2.8904	2.7922	2.515	6.4133	11.354	6.434	7.016	21.994	4.707		0.386243	8.14622
8.8125	5.4693	7.2629	19.4119	3.8262	2.4361	2.5482	1.8866	4.029	14.0533	22.667	5.282	3.681	4.145	14.283	27.5959	13.4777	10.8837	17.2239	6.8382	3.0961	4.207	4.1654	12.133	9.851	6.144	21.297	8.156		0.391534	9.48335
8.9316	6.0048	5.479	19.3003	4.9414	2.5951	3.0598	2.8482	3.175	15.8462	22.031	2.302	3.287	4.927	23.528	32.0455	9.6421	12.0022	18.126	3.0207	3.8384	4.404	6.7494	14.245	6.836	4.533	22.558	6.598		0.396826	9.77493
9.0507	5.7298	10.8592	15.6705	6.3396	7.195	3.8883	3.513	3.776	17.9281	29.33	3.446	3.617	9.699	18.48	27.7462	13.0995	9.4949	19.3061	3.932	4.6013	2.594	6.6961	13.487	9.501	4.245	27.554	2.806		0.402118	10.5383
9.1698	4.6213	10.8791	13.5345	5.3942	4.1482	3.2358	2.3576	2.537	13.1178	32.715	4.727	4.39	6.542	13.568	34.0608	12.471	11.1664	22.4083	2.2255	4.8517	2.544	5.4463	11.61	9.281	4.694	19.247	8.235		0.407409	10.0003
9.2889	4.6722	10.9647	20.8905	9.0739	2.2333	2.2017	2.4453	3.829	14.1988	24.946	5.703	4.635	8.451	17.217	37.872	10.7361	11.3714	20.0185	3.8973	2.9237	3.999	5.7708	14.679	6.6	2.154	20.629	7.275		0.412701	10.3477
9.4079	3.4316	8.0996	17.2466	7.4841	2.8598	1.9124	3.4379	3.204	8.8414	34.486	5.527	8.017	5.342	16.298	34.2182	14.7968	11.8436	29.6243	4.4013	3.0103	2.377	7.2323	10.983	10.148	6.088	20.783	10.212		0.417988	10.8113
9.527	4.0252	5.696	16.996	3.9459	3.0947	2.1686	2.5156	2.193	15.6582	36.504	3.598	4.718	7.066	17.087	29.5812	11.6522	10.3415	25.9005	3.1836	4.5813	5.401	7.0586	12.34	7.027	6.106	28.052	8.716		0.423279	10.5632
9.6461	3.9586	6.6173	18.3474	7.0049	5.9391	2.492	4.1533	2.851	9.6966	43.985	7.044	1.607	6.92	24.961	30.8414	14.4827	8.0051	27.9776	5.5941	2.2641	3.816	7.2057	15.66	11.058	3.114	19.524	9.328		0.428571	11.2758
9.7652	2.8189	7.4254	22.6259	7.4506	4.4621	2.0162	3.1375	2.318	9.7921	31.894	3.448	5.735	8.785	22.864	26.1252	16.8935	10.5994	34.2756	8.092	2.9695	4.451	7.2688	16.279	12.273	3.981	24.057	11.538		0.433862	11.6139
9.8843	5.2699	6.7384	19.8411	10.12	3.0263	3.6335	6.2443	4.457	10.04	33.107	3.609	4.331	4.509	24.593	30.1327	14.3869	10.2013	28.8329	5.7974	4.3984	5.756	6.9838	17.344	16.468	3.997	19.721	8.592		0.439154	11.5604
10.0034	2.7403	10.3726	18.6671	7.197	1.5486	4.1391	2.1696	2.717	8.1324	41.433	4.931	4.738	6.607	22.785	21.0425	18.1335	8.2559	27.7218	6.8689	5.1384	2.481	6.8002	11.374	11.214	4.282	20.806	5.797		0.444445	10.6701
10.1225	4.4919	5.5586	18.4852	8.9876	2.1166	4.0088	2.3826	4.558	6.5854	39.812	3.387	4.945	6.687	18.033	26.0711	13.6565	9.28	32.525	6.4873	2.7073	2.951	5.0797	13.008	15.111	4.55	19.254	8.775		0.449737	10.722
10.2416	4.4437	6.0999	14.2245	12.4624	2.408	1.6544	4.5238	3.238	7.6104	42.708	3.404	4.87	8.359	18.097	19.9076	16.7507	8.4927	33.01	5.6647	2.7471	2.223	5.7717	15.151	15.042	5.32	14.415	6.067		0.455029	10.5432
10.3606	5.3562	5.7016	15.191	7.9223	4.8764	2.4013	2.2675	3.234	6.7086	43.58	4.138	4.024	5.568	19.505	20.1874	18.588	8.5352	28.6944	4.8011	5.062	3.599	4.9323	20.811	19.605	6.373	14.721	7.051		0.460316	10.8679
10.4797	4.8813	5.6166	14.0419	9.7729	2.8299	2.0602	4.1776	4.634	6.8353	43.258	3.875	5.423	5.557	16.673	15.4922	14.3857	8.0709	37.9819	5.0723	2.2851	2.789	6.7317	19.241	18.071	7.01	16.17	8.486		0.465607	10.7934
10.5988	4.0861	6.3973	13.6554	10.2429	2.9979	4.9256	3.8588	2.827	3.9396	50.068	6.359	4.616	5.686	16.574	23.1219	18.6137	10.9698	33.9283	5.0305	3.1763	3.305	7.4328	29.079	20.151	4.168	13.686	10.876		0.470899	11.8434
10.7179	3.7376	7.4005	12.2393	12.4721	6.3756	3.3617	3.4021	2.543	5.5956	45.091	7.691	7.113	5.555	11.668	21.054	19.814	9.731	30.1825	5.3843	5.0987	4.113	6.3624	29.76	13.621	5.47	8.647	10.999		0.47619	11.2771
10.837	2.278	5.7166	15.9135	9.6384	5.238	2.9571	4.433	4.915	4.3834	32.778	5.92	3.352	5.319	13.677	20.9904	22.3424	8.0988	33.5104	3.5943	2.7716	1.968	7.8803	26.121	13.959	4.394	6.903	18.27		0.481482	10.6416
10.9561	2.3968	6.263	16.6921	9.2801	3.9207	3.076	5.31	2.369	6.836	39.855	3.661	2.224	4.336	7.483	24.8835	18.6687	7.5955	28.4998	4.1454	3.309	1.779	6.2161	36.881	14.575	6.292	8.335	14.023		0.486773	10.7002
11.0752	4.5314	3.5554	15.302	9.7615	3.4839	2.7619	3.0707	1.848	5.5123	40.055	3.297	4.607	6.279	9.195	22.704	15.1711	6.3532	26.1735	5.0021	2.9827	5.566	5.3608	43.695	18.303	5.762	9.781	14.426		0.492065	10.9089
11.1943	3.3146	4.5366	19.1079	10.0739	1.1194	3.8867	2.8615	2.761	8.3295	37.076	5.66	4.577	5.996	8.347	19.9012	20.6406	9.7408	25.9497	8.0721	3.3867	4.862	7.672	42.577	17.244	6.475	6.791	18.283		0.497356	11.4534
11.3133	4.0667	5.5753	18.7698	11.7626	2.4233	3.1644	3.1501	3.404	6.0617	36.156	5.381	5.315	4.64	5.741	22.1686	17.4692	8.6417	25.5155	4.8336	3.5847	3.215	8.8477	35.882	20.968	5.663	6.361	25.425		0.502644	11.2661
11.4324	5.3952	8.6779	14.7155	12.8038	4.0878	3.3066	2.3079	4.57	7.0941	37.817	7.277	2.704	2.434	8.559	25.1189	19.7125	9.6403	24.1212	5.6953	4.1415	2.914	5.0271	50.108	17.873	6.439	9.65	30.187		0.507935	12.3103
11.5515	7.4298	6.0718	14.2397	10.9533	3.7133	3.6756	3.8618	2.382	4.3134	36.764	5.308	1.92	6.163	6.694	23.4851	19.625	8.871	18.2656	7.2435	3.5667	5.676	6.4673	39.261	22.941	9.466	8.404	36.472		0.513227	11.9716
11.6706	4.8933	2.9645	14.968	10.2203	6.3383	3.9944	3.539	1.988	4.5802	34.268	5.082	6.495	5.482	8.351	24.5328	17.4829	9.9047	16.7944	3.6266	2.9709	3.811	5.7524	39.804	27.832	9.332	6.271	39.458		0.518518	11.8791
11.7897	5.6111	11.7969	11.8387	14.3838	4.9201	3.7657	3.2001	3.516	4.1504	32.901	7.445	6.949	5.317	7.024	25.1965	17.5528	9.7004	14.7955	6.1777	4.5398	4.858	4.2779	43.925	26.46	7.833	7.286	44.596		0.52381	12.5932
11.9088	3.8771	6.6865	12.7835	13.8885	4.6533	5.1742	3.8941	2.004	6.2397	32.857	6.046	4.216	4.444	6.914	25.4346	18.0127	8.55	20.2558	7.6787	3.5925	3.938	8.2484	36.82	29.244	7.818	7.605	38.269		0.529101	12.1905
12.0279	2.8549	3.907	12.1055	18.0514	3.2109	3.0062	1.361	2.593	5.3468	25.714	4.638	3.465	4.877	6.444	24.1195	19.0797	9.0136	20.7796	8.2976	4.0332	3.149	4.6675	38.857	25.297	5.124	9.35	39.804		0.534393	11.4499
12.147	3.7133	5.8024	6.8431	19.5795	1.5484	2.8874	2.6273	3.767	5.3926	31.858	8.412	4.795	4.411	4.054	22.2811	20.7485	8.3926	12.6474	6.2946	4.6707	3.516	4.2914	35.195	23.374	8.233	4.567	39.021		0.539684	11.0712
12.2661	5.294	7.2506	12.8275	10.8555	2.3823	3.8662	2.4595	3.584	6.3514	32.662	6.541	4.586	4.112	5.962	24.9139	21.8164	10.3086	18.4774	7.6968	4.0033	4.268	6.5597	31.856	24.089	4.102	5.739	37.657		0.544976	11.4897
12.3851	2.2742	5.1222	9.9103	11.4615	5.0261	5.7099	4.5721	3.749	4.5032	34.067	6.8	6.885	3.905	9.286	27.7852	18.582	6.4963	20.4654	5.7982	2.0295	3.041	3.9221	29.886	28.329	8.067	7.113	37.423		0.550263	11.5633
12.5042	7.4784	6.29	10.7535	18.2028	5.8025	6.5596	6.5661	4.594	7.6044	39.332	6.854	5.825	3.207	9.813	27.1346	11.6162	6.7421	20.7519	9.0637	6.1565	4.724	10.0708	28.809	26.043	6.99	4.741	38.672		0.555555	12.6073
12.6233	3.9618	7.8826	11.2215	14.8374	4.4	4.0089	6.3264	5.665	7.3248	40.167	7.749	3.087	5.712	7.324	25.8148	16.4436	6.5686	21.4741	5.7023	3.242	2.839	5.3466	26.004	30.792	8.554	5.905	41.331		0.560846	12.2105
12.7424	6.3239	4.7216	9.138	15.3535	4.3876	2.8131	2.2259	3.672	6.8518	24.737	10.293	3.161	3.876	7.79	24.3181	21.5363	7.8339	25.5832	7.2543	3.2421	3.68	4.6293	20.817	28.4	12.086	6.053	39.419		0.566138	11.4888
12.8615	5.145	5.3962	10.2816	19.2959	4.1124	2.9454	4.7514	2.948	3.8982	29.493	7.71	3.081	4.786	8.092	31.3352	13.5554	9.7162	25.4522	5.9729	2.9403	2.797	5.3386	15.876	23.542	9.248	7.487	40.828		0.571429	11.3343
12.9806	4.6139	3.8266	7.7915	18.1707	6.7505	1.3183	4.3662	3.159	5.2781	32.404	8.418	4.789	2.859	7.362	29.4692	20.3252	6.1655	27.8692	4.9763	3.6872	2.27	6.7104	19.453	23.207	8.347	4.331	34.131		0.576721	11.187
13.0997	1.5549	5.21	5.1274	14.917	5.7364	4.9664	1.8089	3.576	5.0572	30.993	8.5	6.375	4.82	8.407	32.3625	15.9285	5.5895	27.9271	7.2286	2.6086	2.95	4.2286	11.597	19.125	7.369	6.253	37.261		0.582012	10.6473
13.2188	3.1595	5.0804	5.8587	13.9332	2.7645	2.5433	1.5968	4.698	3.9854	27.249	12.316	4.17	5.462	12.208	34.2459	25.4689	2.1761	32.3834	7.0265	4.3439	1.835	7.5197	14.53	18.394	5.293	3.747	34.268		0.587304	10.9725
13.3378	4.2963	7.6238	9.6073	15.8623	5.1511	2.8977	2.6979	2.543	2.9769	29.052	7.743	4.381	5.986	7.627	39.8243	27.3215	7.8363	29.9513	8.3236	6.1369	2.076	6.0167	15.49	22.893	7.786	5.724	33.483		0.592591	11.9003
13.4569	6.5681	5.8162	4.3821	15.0495	3.2153	1.2946	5.5975	5.772	5.0644	24.658	15.184	2.433	7.171	9.067	28.0283	25.9035	7.4548	27.8326	9.4339	2.9342	3.544	5.7974	14.197	25.209	7.459	4.801	27.698		0.597882	11.1691
13.576	6.0284	4.8902	7.1915	15.8512	4.7318	3.669	2.2881	3.562	4.0713	25.504	11.932	4.991	4.974	9.099	24.0427	33.9509	6.9061	37.7114	10.4752	1.623	6.394	7.1453	19.365	24.096	9.951	4.563	23.107		0.603174	11.782
13.6951	4.6365	6.8639	6.2879	14.0422	4.2175	3.8446	3.3571	2.836	2.3147	27.692	11.055	5.355	6.627	7.758	26.1069	23.7418	6.2049	22.7809	5.2904	3.1618	5.239	4.3904	13.055	24.164	7.897	4.511	26.074		0.608466	10.352
13.8142	4.6258	5.2884	6.7638	15.9611	7.2831	3.3334	3.6243	3.628	3.5502	23.562	13.065	5.6	6.709	7.589	24.6417	24.4955	6.7758	24.5833	6.4448	3.1264	1.73	4.1609	14.49	32.157	10.316	3.487	25.633		0.613757	10.8379
13.9333	2.7305	6.0157	6.2953	11.8678	2.8147	2.1588	2.767	2.534	3.5312	19.73	13.535	4.208	6.458	7.511	21.209	27.1232	6.9732	22.2795	8.3973	6.8238	5.089	6.389	11.326	34.541	5.119	3.517	28.271		0.619049	10.3413
14.0524	5.054	4.754	6.1632	17.8085	2.7568	2.3102	4.4311	3.276	3.7839	11.889	17.381	3.26	6.44	8.477	12.7727	28.3467	8.3	20.1779	6.5544	2.3589	4.428	4.3649	9.684	38.404	7.797	5.188	28.537		0.62434	10.174
14.1715	4.1977	4.9652	5.3994	14.2796	3.5921	4.7698	2.5344	5.395	4.0532	17.051	18.633	3.227	5.935	9.674	18.73	24.3886	9.6521	19.2484	7.0793	1.3591	3.672	3.015	10.08	32.951	6.505	7.339	23.973		0.629632	10.0629
14.2905	4.3058	3.0703	6.6232	15.0076	4.4376	2.8604	2.3096	4.705	6.0772	15.359	22.594	6.065	5.841	5.731	11.8598	20.8549	5.9775	17.1202	10.0676	3.3181	3.493	5.8437	7.695	31.679	5.937	2.715	23.565		0.634919	9.44861
14.4096	3.643	3.3365	4.914	14.7339	3.9456	2.5833	2.1765	4.254	3.8998	10.703	26.02	3.979	5.355	5.659	11.0536	21.4115	6.001	15.1068	12.5595	2.81	5.608	3.8437	11.255	30.907	10.359	4.424	22.786		0.64021	9.38251
14.5287	5.3636	3.6621	5.9607	14.5699	5.582	4.738	2.0049	3.606	3.5793	11.629	32.925	4.727	7.145	6.23	13.4118	21.1119	5.1379	10.8821	10.5381	2.6558	5.23	3.2851	7.772	22.252	7.904	6.309	23.636		0.645502	9.32771
14.6478	3.967	3.8012	7.2585	17.395	3.9037	2.4394	4.0557	3.778	3.9077	8.885	30.121	4.68	5.483	7.201	11.5631	25.3275	8.8794	16.8256	10.2723	3.7869	5.583	5.7306	7.751	27.144	8.378	4.037	12.666		0.650794	9.4378
14.7669	6.9093	4.1389	5.4584	16.4604	2.2536	1.9364	1.8089	2.085	5.1064	9.916	31.495	5.272	3.64	8.894	12.4789	26.597	7.7691	15.7366	9.8642	2.3451	2.987	2.5339	9.29	29.107	6.504	5.327	18.061		0.656085	9.40649
14.886	3.8425	5.7181	5.2208	10.3933	6.8014	3.3794	3.5841	3.322	4.2343	7.607	35.988	3.481	8.353	3.476	12.808	24.4916	8.0679	13.3529	9.4527	4.7048	4.98	4.773	7.901	30.958	8.35	5.171	19.477		0.661377	9.62551
15.0051	2.8901	4.1261	6.696	13.4132	5.4832	3.4068	2.3924	1.782	3.7494	7.395	31.91	4.929	6.819	5.942	11.8363	27.8237	4.5433	16.9684	13.7653	4.2293	7.238	5.4017	9.357	28.828	8.164	4.902	13.577		0.666668	9.53956
15.1242	5.1258	7.1015	3.3968	17.7636	3.9421	5.6506	3.811	2.837	4.9547	10.299	31.699	6.106	6.797	8.375	12.0798	23.4118	5.9033	20.0013	16.404	3.2903	4.835	4.2261	7.664	29.719	6.851	3.429	14.602		0.67196	10.0102
15.2432	5.7077	4.01	3.7006	12.7405	6.0683	4.8434	4.4351	2.727	3.8537	5.947	33.758	4.658	6.942	6.058	11.3402	26.5084	4.2677	23.7572	14.4537	4.8025	6.856	3.3647	14.734	35.799	6.382	2.661	22.552		0.677247	10.4788
15.3623	5.208	3.5648	6.0176	15.3015	5.0469	4.6123	4.8107	3.978	3.853	8.589	43.952	4.264	6.072	7.991	15.6603	23.6885	5.747	27.1131	16.0702	3.6955	4.03	4.6173	6.891	31.222	5.149	6.449	13.858		0.682538	10.6464
15.4814	3.8818	2.3067	4.2059	11.8314	4.2551	3.0781	4.5966	3.121	2.1008	6.949	41.646	6.666	3.931	5.21	17.5527	24.5553	8.9096	30.1558	13.7954	4.1269	3.073	6.3846	10.097	36.437	8.489	2.794	13.636		0.68783	10.5106
15.6005	4.6341	3.0848	3.9111	15.9165	5.0096	2.3604	4.3602	3.06	5.1517	7.794	40.374	5.918	4.457	5.514	13.5502	22.6707	8.3163	24.825	11.5993	2.8841	3.135	6.2937	7.478	31.443	6.835	3.517	11.772		0.693121	9.84684
15.7196	5.9766	4.3641	4.7423	14.4375	4.2054	2.7955	2.7194	3.568	4.3343	8.719	39.213	4.291	6.325	4.98	12.3131	18.4446	10.5854	20.3347	17.3472	3.0204	4.29	3.4483	9.557	27.423	6.197	4.64	14.05		0.698413	9.71562
15.8387	4.5615	4.096	2.3128	12.3132	7.797	4.2855	2.3534	1.083	4.2696	6.25	40.329	5.225	5.208	6.504	13.9943	17.3827	7.7023	15.5637	15.6953	3.4929	4.438	4.1465	5.795	26.855	8.08	4.109	11.919		0.703705	9.10229
15.9578	2.7454	2.8162	5.9071	5.4811	5.0544	1.8286	3.2109	1.654	3.9391	8.524	38.092	5.949	5.728	7.611	11.291	21.9589	7.4034	19.7038	14.9912	5.0471	2.186	6.4377	4.506	34.187	7.02	2.533	10.845		0.708996	9.13522
16.0769	4.2511	4.3647	3.2668	10.7894	7.8833	5.0908	0.9891	4.945	3.6753	6.025	46.127	8.458	6.039	7.073	19.6125	20.7544	8.3737	20.767	11.749	2.3937	2.974	4.7548	5.409	24.075	7.055	4.413	11.476		0.714288	9.73276
16.196	4.5674	3.1743	6.0344	7.4339	4.5771	3.8529	6.362	2.591	2.9716	6.207	40.422	5.881	8.151	6.53	13.2413	22.3748	5.48	13.9064	8.8675	4.8153	4.559	5.6085	6.03	26.548	7.952	1.635	10.315		0.719579	8.89216
16.315	1.6122	2.2523	3.9542	8.183	6.2545	5.9113	5.6384	2.913	1.9168	5.887	40.022	7.463	3.901	8.544	15.037	19.8139	7.2449	14.8328	11.9449	1.3887	5.367	6.444	4.409	31.464	9.395	1.375	8.799		0.724866	8.96177
16.4341	6.728	2.248	7.6368	8.7346	8.9858	4.384	3.6487	2.883	3.8245	7.708	39.742	6.054	5.637	4.152	13.0076	18.1214	9.1927	15.5345	8.1818	4.1612	5.465	3.5358	6.166	30.895	8.188	4.223	7.227		0.730158	9.12094
16.5532	3.2807	2.6409	4.6235	6.5359	8.4498	3.3712	3.7762	2.977	3.3607	3.347	33.499	13.154	7.6	4.333	9.3264	18.7363	6.794	14.8969	10.1605	3.4829	4.338	5.5633	5.409	32.023	5.72	6.187	6.674		0.735449	8.52816
16.6723	3.5083	2.6227	4.4225	5.0712	8.3603	2.9942	2.5074	3.864	4.2712	4.048	33.845	12.108	5.958	6.738	16.4469	19.7419	6.5545	12.4952	15.4707	3.0386	3.818	4.8626	7.52	33.036	5.968	4.773	8.039		0.740741	8.96604
16.7914	4.672	2.8848	5.0005	8.0676	9.1115	4.7042	2.6527	5.619	3.0308	4.745	24.851	15.091	6.532	8.21	18.6261	19.4774	8.99	14.0568	8.0864	4.9933	5.044	5.8042	5.891	32.37	5.722	4.469	6.535		0.746032	9.08286
16.9105	6.3745	2.8719	3.082	6.9306	10.7733	4.1076	4.3091	2.503	2.5374	3.073	30.034	13.172	6.951	4.147	16.085	18.659	7.5185	14.5674	11.6837	2.9523	3.477	5.1528	7.088	33.408	9.033	6.029	7.274		0.751324	9.02941
17.0296	4.258	5.1179	2.9185	5.6857	11.3725	3.963	2.5343	1.786	4.8575	4.48	28.038	13.266	6.378	6.589	17.424	17.9997	7.7061	16.8545	12.5314	3.0734	2.878	7.1634	8.227	37.956	8.371	5.042	6.846		0.756616	9.38211
17.1487	6.3543	3.1644	4.0974	5.4973	12.8323	4.2484	2.6531	2.589	4.348	5.511	28.144	14.772	4.037	4.201	13.0254	19.0669	6.5522	13.1559	11.8684	4.2736	3.617	3.6241	6.408	26.84	3.297	6.265	6.773		0.761907	8.4154
17.2677	2.4336	3.536	3.0433	7.1193	15.2146	5.0702	3.6395	4.906	3.9516	5.594	33.988	23.314	7.594	6.189	13.6842	14.1231	5.4105	11.861	10.8875	5.9146	3.485	5.9544	8.163	18.075	7.821	3.24	6.998		0.767194	8.93372
17.3868	4.267	3.5452	4.988	4.7639	16.011	6.3298	1.4532	3.422	4.9639	4.596	29.726	21.518	8.535	10.001	11.0332	12.212	9.4157	10.986	8.5295	4.4183	4.991	4.533	3.625	17.9	10.798	4.24	5.685		0.772486	8.61062
17.5059	3.5125	5.1159	2.0494	5.9128	17.8356	4.0734	1.5771	4.691	2.9371	4.22	37.428	25.209	6.377	6.357	13.9313	13.8671	7.0261	11.5591	8.1753	7.4962	5.065	3.5736	5.433	12.236	9.62	2.936	4.059		0.777777	8.60272
17.625	4.0737	2.8932	3.3375	6.0428	22.5339	1.8628	3.7572	2.939	4.5545	4.857	22.362	27.154	7.065	9.093	13.4318	15.0474	6.598	14.6107	8.8134	8.02	4.682	4.0522	2.666	12.092	8.626	5.202	7.832		0.783069	8.67404
17.7441	4.6942	3.5974	3.1388	7.2933	19.531	3.696	4.021	3.232	2.9288	5.865	29.638	28.164	10.34	7.768	14.8167	14.2599	7.6333	14.0606	11.7861	6.5184	3.143	5.2699	4.204	14.91	6.375	4.245	6.924		0.78836	9.18716
17.8632	5.9851	3.7241	4.8676	6.5042	18.3211	4.4509	3.0453	3.191	1.3382	3.539	25.804	32.845	9.233	8.447	14.5876	14.5018	4.3307	11.1784	8.3937	5.2384	5.794	4.9557	5.126	13.406	6.643	4.691	5.287		0.793652	8.71959
17.9823	5.8023	2.0003	3.364	6.5586	28.4387	3.9804	3.5673	3.603	4.7647	6.666	28.871	30.025	7.745	9.565	15.6999	16.9594	10.4196	11.4903	12.4272	3.3446	3.705	5.4507	8.034	14.011	4.795	4.31	5.785		0.798943	9.68085
18.1014	5.4579	2.0224	2.8008	3.2155	22.7942	3.2618	3.0856	2.617	2.8297	4.486	25.95	33.817	9.636	7.41	19.3148	17.7197	13.1172	7.166	15.3055	4.7631	4.196	6.9348	5.121	14.549	7.525	5.516	5.231		0.804235	9.47567
18.2204	7.434	3.6309	4.054	6.9893	22.2999	4.2707	2.0212	6.481	7.296	3.638	28.469	37.752	16.165	10.359	17.3051	17.2759	12.3322	11.8506	11.311	5.3518	4.175	8.0489	5.04	14.532	7.808	4.732	5.116		0.809522	10.5829
18.3395	6.4894	3.6366	4.687	5.0055	23.1743	2.8048	4.3606	4.397	2.3384	5.351	22.392	48.234	15.161	16.869	18.88	19.3726	10.4424	11.4226	8.3203	4.4392	6.302	5.9928	5.12	10.076	9.178	3.968	6.251		0.814814	10.5432
18.4586	8.2404	7.0019	4.0336	5.1023	24.7414	3.1887	5.1888	4.21	4.3506	1.636	20.352	39.323	17.113	11.053	16.8561	20.4495	11.4341	7.3597	12.1973	4.5966	5.427	2.9756	6.928	10.116	11.189	4.491	8.034		0.820105	10.2811
18.5777	6.7709	4.8429	2.8923	4.1645	27.3618	4.902	5.1717	1.554	3.0323	5.125	21.868	34.361	16.771	18.869	19.7857	18.913	11.2886	15.398	9.0667	4.6586	5.785	4.3499	7.691	10.177	7.905	3.537	7.554		0.825397	10.511
18.6968	5.75	5.1227	4.7894	4.1716	20.3706	5.0169	1.4887	1.902	1.3722	3.619	21.967	36.661	26.727	16.133	23.5304	25.0481	11.9804	7.8731	10.7642	6.9763	2.361	4.4774	9.96	15.592	6.3	4.002	8.32		0.830688	10.825
18.8159	6.362	8.5426	4.6674	4.9826	27.9294	3.1393	3.249	4.452	4.1028	7.113	16.76	38.871	27.806	20.122	24.6905	29.5417	14.7399	13.0787	17.5207	4.124	5.059	5.0426	5.764	11.498	8.092	4.671	6.7		0.83598	12.1712
18.935	6.6922	8.1553	3.2379	3.8761	29.4678	1.0358	4.4374	2.874	2.2929	3.996	16.563	44.402	26.465	21.005	19.2016	24.6901	13.0732	9.9009	16.1475	4.704	4.177	5.589	9.09	9.71	12.005	5.56	5.737		0.841271	11.6328
19.0541	5.5152	5.2854	4.5803	5.8589	28.9526	3.3693	3.1062	2.484	4.5534	4.507	23.544	44.036	26.828	20.27	20.0967	22.3988	16.1075	13.2458	14.7346	3.8686	4.46	4.7178	7.256	12.017	10.993	6.274	3.774		0.846563	11.9568
19.1731	6.4452	6.9127	3.5141	5.0905	25.5955	4.757	3.7347	4.833	3.2442	6.407	21.948	45.815	31.027	20.052	18.9629	23.611	20.2045	16.4424	15.8521	4.2917	5.26	3.5934	7.671	7.902	9.892	6.8	4.252		0.85185	12.3745
19.2922	10.1101	7.2629	4.4469	6.1279	21.4858	4.1926	3.4238	2.679	3.5789	4.814	15.136	42.098	36.037	24.916	21.5512	26.2961	21.0296	12.8921	16.6142	5.0502	6.954	5.7201	5.112	10.722	8.571	8.749	5.239		0.857142	12.6226
19.4113	8.7431	7.2656	3.6321	6.1428	22.3674	3.5141	2.7778	4.199	2.8745	6.148	16.595	37.676	31.556	25.555	19.3171	21.9834	21.7033	17.235	22.331	4.8119	5.54	4.02	4.812	10.449	8.609	5.23	5.312		0.862433	12.237
19.5304	10.3401	12.2054	7.1044	4.6329	17.9355	5.3248	3.2414	4.673	6.4372	3.7	13.373	42.238	26.782	23.072	19.396	17.7221	19.22	15.5751	20.277	5.4734	4.974	5.7803	5.253	17.625	11.558	7.407	5.068		0.867725	12.4588
19.6495	11.4488	8.0402	6.8364	6.2234	13.638	4.8559	3.5289	3.222	4.7843	5.142	11.68	40.537	32.282	20.398	16.6869	16.1356	20.3371	19.3466	20.1724	8.4584	6.343	5.1024	6.294	15.202	10.067	3.217	4.53		0.873016	12.0189
19.7686	10.993	8.9597	6.1503	5.8605	7.8359	9.1727	3.1726	5.394	4.9317	5.612	11.95	30.848	29.61	19.888	16.4901	9.5855	16.8056	28.0659	19.3753	7.4172	10.101	3.9746	9.394	18.025	12.247	5.396	4.505		0.878308	11.9171
19.8877	7.6167	12.5274	10.9507	4.842	15.0208	7.1832	3.4196	5.692	4.6104	5.345	14.022	29.686	26.731	20.335	8.9629	6.4684	14.0192	23.5442	24.1451	7.9976	7.933	3.9379	8.514	17.159	13.382	3.544	4.682		0.883599	11.5656
20.0068	10.5989	9.2418	5.9689	4.9	11.709	9.272	5.1352	5.409	5.8226	8.19	13.181	27.7	25.543	12.931	10.9143	8.8295	19.4736	17.2588	21.5265	9.9713	3.817	7.7647	9.393	17.97	12.238	7.79	2.004		0.888891	11.2797
20.1259	11.9285	11.9271	7.2335	6.9838	13.2699	10.1212	2.8343	6.236	5.4229	10.147	16.354	28.12	20.584	18.643	10.5729	8.0823	15.02	11.6374	28.5334	8.8874	7.429	5.4453	9.844	13.374	17.256	4.319	4.867		0.894182	11.6694
20.2449	14.8377	12.9259	6.3957	12.5899	7.8717	11.3819	2.7351	3.608	4.864	11.626	14.873	25.596	18.492	15.903	9.4566	5.8617	11.3095	11.2467	31.062	12.7931	8.155	8.2133	11.726	17.662	16.9	3.959	4.245		0.89947	11.7144
20.364	16.0422	15.0128	12.7582	11.3505	13.4001	11.3078	1.9672	7.126	6.4882	12.328	18.214	19.43	14.456	16.194	8.6279	5.6527	11.3431	7.5118	29.1786	12.6224	9.033	5.2667	11.405	13.482	15.051	4.568	4.677		0.904761	11.6479
20.4831	13.241	12.8614	11.0637	10.2914	14.3028	17.4965	4.0462	6.507	5.7444	15.018	24.124	16.27	13.431	12.206	5.9842	6.282	6.1823	5.9652	25.5219	13.0849	9.752	8.4444	9.267	16.26	12.761	10.736	6.463		0.910053	11.604
20.6022	17.5035	11.6372	9.1132	12.075	14.7401	17.4489	5.2739	6.084	6.1722	13.038	29.856	11.135	12.062	7.836	4.3675	6.3437	8.0752	5.8736	25.3933	17.4216	14.499	7.0886	15.07	15.5	14.421	7.67	6.064		0.915344	11.9171
20.7213	15.0826	14.3498	10.3565	10.5337	19.4972	24.0007	5.6283	6.573	7.5418	17.602	21.673	11.18	10.745	7.159	2.644	3.0633	10.6784	3.9207	21.136	22.1292	16.397	6.135	13.454	17.96	17.569	5.777	6.587		0.920636	12.199
20.8404	15.8602	12.5275	13.7343	9.9478	17.8855	26.4395	5.0371	8.581	11.3724	18.688	26.592	8.495	5.945	8.474	2.7294	4.3872	7.5845	4.5494	11.9336	23.9068	17.046	9.507	13.942	18.799	19.52	5.776	3.193		0.925927	12.3131
20.9595	16.4552	10.0414	11.5595	14.0639	17.0836	21.0217	9.4707	7.993	15.961	20.684	35.302	4.187	4.608	6.251	3.3725	3.5814	5.4013	4.4882	10.1244	21.7651	15.353	9.6316	15.309	16.038	16.782	4.848	1.738		0.931219	11.9672
21.0786	18.0572	9.7573	7.9581	12.2343	14.0792	23.8815	8.7832	12.33	11.2528	21.986	27.692	4.923	6.189	5.917	2.3166	2.3225	2.9149	3.329	7.3823	24.095	20.371	13.504	16.299	16.169	17.358	2.521	4.445		0.93651	11.7803
21.1976	14.0656	8.0342	8.3036	6.8975	15.6385	26.857	8.611	11.39	12.912	20.241	24.588	4.203	3.376	2.962	6.14	2.3762	3.7383	3.3709	7.7467	33.5564	22.806	16.3094	17.037	16.564	19.566	6.453	5.338		0.941797	12.1882
21.3167	11.4882	5.2716	6.7537	11.3318	11.3062	34.4682	9.4286	11.391	19.7915	25.663	25.011	2.082	3.147	3.48	2.5983	2.2937	2.6688	2.3955	5.4685	24.3523	29.528	17.4029	18.433	16.66	13.363	7.51	5.034		0.947089	12.1601
21.4358	8.6949	6.4135	5.9422	12.8099	14.0852	36.1877	11.9631	13.619	21.2204	15.407	20.379	3.397	3.635	3.078	2.9572	1.4749	1.8669	4.9553	5.1769	27.3065	28.68	16.9877	16.118	10.504	17.038	6.727	7.135		0.952381	11.9911
21.5549	6.8098	5.5222	4.583	5.6209	15.683	28.933	8.9426	15.287	26.2252	21.69	16.01	2.045	3.398	3.224	1.5198	1.9314	2.0335	3.0639	3.1239	25.1666	21.71	18.7388	19.483	12.266	14.292	5.399	5.015		0.957672	11.0265
21.674	4.5112	4.5704	7.9186	7.3518	15.9428	29.1867	12.4232	11.026	22.137	16.63	10.389	2.011	1.605	4.049	2.5266	3.2742	1.7145	3.3556	3.3141	31.3329	16.773	17.7569	22.626	21.943	20.177	5.753	5.836		0.962964	11.3383
21.7931	4.4212	2.4431	6.5485	7.9701	14.655	27.2912	16.1987	17.452	26.2161	18.585	11.965	1.087	1.978	3.758	1.2509	1.0694	2.8766	4.2803	2.9031	25.0174	19.848	21.4528	23.379	13.78	15.841	8.7	5.697		0.968255	11.3579
21.9122	4.7827	2.1964	5.2281	7.6819	10.4271	30.3005	22.5463	17.801	34.4901	13.304	7.288	3.833	0.824	1.128	2.3899	2.0179	1.4737	2.0509	2.6483	17.2645	14.491	21.1521	21.364	14.25	13.749	5.593	6.431		0.973547	10.6188
22.0313	4.0892	2.3396	4.04	4.3779	12.3989	22.9303	15.4975	23.33	28.1666	10.916	6.861	0.678	1.838	1.169	0.493	1.3247	1.8999	0.7022	2.0633	19.0957	14.428	16.0394	23.255	12.507	20.071	7.26	4.96		0.978838	9.73079
22.1503	2.1073	1.8245	2.0129	4.3622	12.3394	20.42	18.486	21.049	25.6741	10.563	5.935	1.089	1.2	2.436	1.0996	1.167	0.9473	2.7241	1.2276	15.2579	11.418	20.6515	23.703	20.356	14.366	7.052	11.217		0.984125	9.65501
22.2694	4.3408	1.4823	1.1818	4.4603	10.3904	15.4091	24.5717	21.137	22.3215	7.405	4.737	0.948	0.746	3.381	0.3938	0.5121	0.9982	2.8549	2.2547	13.4768	6.743	21.7527	18.162	17.89	17.116	10.301	9.773		0.989417	9.06445
22.3885	1.0719	1.8616	1.4551	5.1834	4.9192	15.8936	23.34	15.114	13.3806	6.864	5.062	0.856	1.617	0.301	0.633	0.8295	1.9754	1.0354	1.7792	8.2042	8.187	13.7182	22.505	18.89	20.576	10.136	11.733		0.994708	8.04153
22.5076	2.6307	2.5689	2.431	2.5001	4.5553	12.8151	21.229	16.793	11.6069	6.018	6.305	1.063	1.524	2.975	0.7631	0.5135	0.5761	2.3593	1.2493	4.6561	4.247	17.1002	19.403	21.501	18.645	15.423	10.573		1	7.85276

## Sheet: Image17 (2)
X0	Y0	Y1	Y2	Y3	Y4	Y5	Y6	Y7	Y8	Y9	Y10	Y11	Y12	Y13	Y14	Y15	Y16	Y17	Y18	Y19	Y20	Y21		Ap-Ba	Avg intensity
0	18.8848	25.8762	31.6898	55.786	50.378	49.643	28.652	23.124	30.6	20.5384	27.382	21.894	25.313	60.082	38.49	32.315	34.304	28.82	13.302	19.925	18.244	14.746		0	30.4541
0.1191	19.5212	20.296	30.4439	54.81	63.524	49.911	34.119	26.061	31.52	24.5787	26.33	31.398	30.292	74.193	46.931	36.594	34.236	30.31	14.571	21.488	18.258	15.1557		0.00621183	33.3882
0.2382	20.3787	24.47	29.4662	74.53	66.783	54.548	37.316	28.016	34.749	26.9647	27.449	39.021	33.966	74.921	49.004	41.363	38.991	35.169	12.675	28.494	23.938	15.0353		0.0124237	37.1476
0.3573	18.972	28.4075	36.9062	77.634	82.551	57.162	41.571	34.532	36.342	35.5922	35.385	42.361	42.029	90.863	72.246	44.824	46.672	34.352	17.006	33.736	32.642	16.9741		0.0186355	43.58
0.4764	14.8808	27.4053	36.6809	93.576	91.804	63.331	44.488	38.783	52.433	39.9364	37.208	54.201	44.11	86.361	78.568	56.378	52.267	44.134	17.326	33.667	31.184	21.682		0.0248473	48.2002
0.5954	18.9843	29.5938	43.1858	100.32	113.754	74.054	49.992	42.708	65.076	53.6305	39.988	66.139	46.868	86.549	83.224	64.949	60.013	40.298	24.795	47.955	43.965	22.4174		0.0310539	55.3845
0.7145	19.9306	31.5276	47.2224	101.409	135.121	66.365	59.601	49.491	77.64	61.8429	50.753	70.236	61.452	92.629	96.183	69.932	61.076	47.086	31.708	66.034	51.852	24.6107		0.0372658	62.441
0.8336	20.9135	34.3377	55.3374	104.493	161.885	82.046	58.68	62.993	103.385	73.1785	59.685	82.781	72.083	88.599	106.454	88.268	74.918	56.353	34.958	68.866	68.79	28.3975		0.0434776	72.1546
0.9527	19.7011	29.538	62.2484	128.35	182.287	85.678	65.081	72.33	119.694	72.6549	67.849	85.96	80.588	85.214	109.45	92.24	74.343	59.374	46.519	82.332	73.644	30.933		0.0496894	78.4549
1.0718	19.9088	40.2697	62.2645	118.995	172.01	85.031	73.347	80.892	131.23	83.3449	79.415	85.429	79.228	85.214	102.894	97.445	88.462	73.59	58.257	88.987	83.208	34.2037		0.0559012	82.8921
1.1909	25.172	39.2377	71.3411	132.124	167.263	85.226	68.884	96.247	139.945	82.2637	87.166	97.685	80.451	89.304	99.203	107.648	93.138	92.246	64.916	104.578	91.931	36.7995		0.0621131	88.7622
1.31	22.3141	44.6373	76.896	140.792	170.995	93.829	77.389	107.399	145.81	82.7407	89.062	104.435	88.632	92.288	91	101.561	107.428	100.303	84.261	109.509	105.084	47.8392		0.0683249	94.7366
1.4291	22.9733	37.5167	77.2895	136.249	165.799	99.755	86.941	113.676	141.03	85.3716	104.439	89.486	93.576	94.315	84.967	95.77	100.425	101.527	99.327	115.018	99.533	54.0649		0.0745367	95.4113
1.5481	18.6864	39.552	75.0155	127.241	147.84	102.741	86.96	103.659	127.468	94.8153	95.873	105.123	91.121	91.075	68.98	81.163	103.77	110.685	97.078	123.562	116.158	58.1355		0.0807433	93.941
1.6672	16.0361	42.9317	75.9721	122.505	135.675	101.25	98.137	100.211	109.274	87.9349	87.137	100.273	103.02	95.207	64.123	79.126	93.06	110.338	101.006	126.762	109.955	65.9769		0.0869552	92.0868
1.7863	19.026	43.2391	76.5369	119.349	129.233	95.105	100.728	93.187	85.896	90.2004	79.874	91.408	104.733	103.375	67.287	70.712	72.176	111.357	110.144	137.854	115.072	74.9126		0.093167	90.5184
1.9054	21.9253	45.0598	84.521	120.028	116.919	106.166	94.679	88.694	72.972	84.8413	78.208	93.514	103.815	99.863	51.017	72.946	66.748	110.731	114.917	140.891	99.694	69.6163		0.0993788	88.0803
2.0245	21.5544	47.302	87.7068	121.754	90.345	112.355	88.657	71.457	59.008	85.8589	63.395	72.038	95.156	93.544	45.59	62.052	57.855	110.763	112.75	122.722	100.888	79.4063		0.105591	81.9162
2.1436	23.1375	47.9115	85.0804	105.948	74.6	109.756	75.953	59.062	52.694	79.2977	51.032	59.593	86.623	92.255	37.032	55.972	52.643	106.09	104.285	129.387	103.268	83.3915		0.111802	76.1369
2.2627	25.9189	47.9416	83.3572	106.51	61.414	106.908	55.411	55.669	47.77	76.1763	40.35	41.701	82.601	91.487	35.326	61.492	57.4	97.475	94.985	119.755	93.467	76.6674		0.118014	70.8992
2.3818	29.723	46.9566	87.2787	93.319	59.023	89.169	60.118	41.74	39.408	69.2357	34.677	37.296	65.741	80.647	39.954	52.374	50.855	92.367	93.951	105.272	82.449	80.6461		0.124226	65.1
2.5008	25.7532	41.4308	79.2052	93.546	55.786	84.243	47.214	41.079	40.475	75.9319	21.137	30.088	52.284	74.752	31.549	50.617	53.791	73.812	80.208	104.567	80.5	77.6305		0.130433	59.8
2.6199	27.3927	38.2985	71.4754	78.663	54.987	72.447	46	34.367	29.002	64.7209	24.033	26.053	48.614	72.873	29.654	48.437	55.547	68.292	69.838	94.772	65.362	60.798		0.136645	53.7103
2.739	30.676	32.3884	74.539	65.698	52.174	47.707	42.227	28.971	29.864	64.4302	20.244	24.576	43.722	59.668	27.274	41.01	55.506	58.109	70.922	81.838	50.41	51.1032		0.142856	47.8662
2.8581	29.977	36.5444	76.0398	63.429	40.874	44.572	34.016	27.911	27.559	51.1953	21.189	21.991	35.045	52.873	24.444	38.708	60.484	59.449	61.366	77.663	47.349	47.8807		0.149068	44.5709
2.9772	27.4538	30.6311	67.9049	52.473	37.535	35.062	31.552	27.752	26.65	53.1646	21.739	19.782	34.402	49.596	19.245	39.89	60.524	48.568	54.577	58.499	36.711	47.0488		0.15528	40.0346
3.0963	32.3675	28.4798	59.9786	45.485	33.465	32.336	27.09	22.41	22.235	53.3081	16.853	16.742	29.718	48.649	13.656	33.274	51.996	44.236	58.392	55.695	33.731	43.1313		0.161492	36.5104
3.2154	29.8287	31.4772	52.6121	40.588	30.589	25.5	24.07	24.492	19.015	48.7025	17.359	17.927	26.592	43.68	18.155	33.668	42.129	43.155	60.287	43.127	30.605	39.6982		0.167704	33.7844
3.3345	30.0934	28.8	58.2901	36.383	36.356	21.98	25.48	22.795	20.931	43.6182	16.618	16.609	23.593	42.856	14.544	30.392	42.488	44.606	53.753	41.588	24.036	33.8808		0.173916	32.2587
3.4535	32.1647	23.1225	40.3996	36.255	25.212	23.274	25.774	17.844	17.193	46.032	14.195	10.401	23.101	41.509	12.529	30.606	33.659	41.824	48.978	35.064	18.017	36.5902		0.180122	28.8065
3.5726	31.5181	26.7455	47.0392	25.091	22.415	18.876	20.047	14.71	16.059	46.2679	15.586	11.8	16.958	44.136	12.1	22.629	28.082	40.77	46.929	26.658	19.775	32.1631		0.186334	26.6525
3.6917	31.568	26.328	41.1763	26.701	25.414	18.424	20.993	15.256	14.757	43.8648	16.574	7.732	17.217	38.202	11.989	31.059	29.011	37.732	38.768	28.539	17.876	30.5302		0.192546	25.896
3.8108	32.4157	27.4521	35.9083	23.922	26.452	16.108	15.257	16.077	13.174	36.3351	14.735	11.806	17.693	32.371	10.5	25.56	22.49	41.139	39.198	22.515	17.617	28.9162		0.198758	23.9837
3.9299	29.3475	22.7942	35.5665	21.881	22.137	19.485	20.515	15.843	11.543	37.664	13.668	7.519	18.12	26.577	9.636	25.743	26.942	36.224	32.104	21.34	16.691	30.2355		0.204969	22.7989
4.049	32.5535	24.5813	29.0417	15.907	20.106	15.139	18.953	12.894	13.733	34.2275	12.886	5.933	15.032	28.699	8.163	20.66	23.581	38.394	23.152	17.788	14.989	19.8136		0.211181	20.283
4.1681	31.2526	22.4869	24.6966	16.816	20.928	11.978	16.522	7.872	12.762	28.2899	16.706	5.864	15.502	23.25	10.607	20.13	27.332	36.023	22.85	15.484	15.948	22.3642		0.217393	19.3484
4.2872	29.3869	24.6403	20.2303	16.146	22.598	14.711	17.928	11.129	11.779	23.4226	11.271	5.081	12.963	21.848	9.368	18.693	30.441	31.43	15.855	15.653	14.667	19.2022		0.223605	18.1111
4.4063	30.9924	26.1277	23.6836	17.082	22.638	13.899	16.441	9.817	8.374	21.6678	14.446	5.454	12.474	24.042	10.772	19.624	27.091	26.413	12.339	10.231	16.818	14.8646		0.229817	17.5132
4.5253	30.6672	20.3899	16.172	15.745	17.362	11.755	17.621	11.319	10.216	19.0594	14.272	5.947	11.521	17.974	9.252	15.384	26.984	27.467	12.718	9.432	13.797	15.3854		0.236023	15.9291
4.6444	26.4188	22.5902	19.436	15.818	17.86	13.87	13.86	14.175	10.089	20.5895	13.077	6.704	11.9	21.324	8.882	16.565	28.345	29.24	11.619	11.745	12.518	14.7151		0.242235	16.4246
4.7635	26.0371	19.2974	15.9783	13.429	16.856	14.498	14.324	11.89	12.704	22.6686	12.147	5.978	9.875	13.313	11.662	13.504	27.499	28.908	8.899	10.338	11.54	13.4457		0.248447	15.2178
4.8826	21.7446	16.9106	19.3857	10.619	16.603	14.46	13.542	10.797	10.432	14.5653	12.003	5.686	9.24	10.601	10.986	13.403	33.621	24.055	12.206	9.754	11.453	14.3		0.254659	14.3803
5.0017	20.2072	14.3964	17.2773	11.994	14.733	14.397	14.786	9.547	9.983	19.545	13.199	8.438	11.497	13.173	12.331	10.931	25.09	24.172	10.927	8.332	12.23	9.5063		0.260871	13.9406
5.1208	19.8064	14.7714	13.106	7.359	10.824	10.042	14.132	9.5	12.906	17.167	11.725	6.641	6.123	9.11	14.812	16.584	26.399	20.379	8.725	9.717	9.311	10.9313		0.267083	12.7305
5.2399	23.7199	14.5304	17.2826	12.675	11.427	11.393	11.657	9.836	10.325	16.7952	14.32	6.097	7.403	13.549	17.05	18.587	26.093	15.758	7.862	7.907	9.786	13.9641		0.273294	13.5462
5.359	24.6984	18.2019	10.9174	8.624	8.651	10.657	13.072	10.249	11.879	14.9792	13.566	6.688	8.345	10.412	17.758	17.5	29.877	17.433	7.417	10.747	9.744	10.0897		0.279506	13.2503
5.478	22.0593	12.3365	11.1595	11.448	9.44	8.373	11.944	10.076	10.007	14.6111	16.149	5.32	5.238	11.98	12.802	17.35	24.049	18.426	9.814	7.395	7.676	11.1746		0.285713	12.2195
5.5971	21.9795	11.9791	10.1691	8.846	7.435	9.984	12.806	12.287	10.566	12.951	17.284	9.05	7.379	9.306	12.655	20.277	25.084	16.879	6.977	7.819	10.471	11.4842		0.291925	12.4394
5.7162	15.6067	12.5914	10.3673	8.233	8.235	7.63	11.745	11.193	14.436	15.0171	13.385	8.901	5.527	9.022	14.263	20.177	29.059	16.405	6.188	5.871	8.912	10.0932		0.298136	11.9481
5.8353	14.6198	12.4885	9.8997	7.379	10.632	6.065	10.403	10.477	7.847	13.2058	19.131	3.961	5.147	8.9	12.359	25.057	25.875	13.591	6.166	5.652	8.424	12.7787		0.304348	11.3663
5.9544	16.2245	12.7733	11.2856	8.159	7.093	8.161	12.803	15.327	10.71	13.7104	16.452	6.55	4.39	11.156	14.214	32.862	30.395	13.154	4.897	5.705	9.722	11.2997		0.31056	12.5929
6.0735	17.136	11.3732	11.4017	7.889	7.598	7.743	12.846	11.205	11.368	15.9155	23.153	5.9	7.518	10.112	15.209	28.71	24.637	13.832	6.559	7.579	7.154	11.2864		0.316772	12.5511
6.1926	18.2588	8.6007	10.0261	8.47	8.164	6.023	15.11	11.127	11.611	15.4161	17.264	7.411	5.593	8.794	19.139	26.889	25.2	14.815	6.911	7.715	6.413	10.6779		0.322984	12.2558
6.3117	19.1415	9.1874	8.7439	8.087	7.574	8.273	15.451	9.797	11.311	16.9931	22.829	8.155	5.367	8.03	16.881	29.149	26.162	13.517	4.647	4.344	5.929	8.3461		0.329196	12.178
6.4307	19.2879	8.7593	10.4431	4.854	6.084	8.402	13.423	9.261	11.578	19.7141	18.536	5.517	5.367	8.13	23.796	28.967	24.986	18.872	5.344	6.131	7.292	8.2109		0.335402	12.4071
6.5498	15.7739	8.7587	6.6687	6.811	7.575	7.029	13.999	11.777	12.917	17.2631	25.007	6.765	4.916	9.174	27.107	26.194	26.816	16.836	6.89	5.275	6.381	9.4644		0.341614	12.6999
6.6689	15.0251	9.5261	7.9855	6.475	6.388	7.019	16.074	14.759	14.702	15.2927	27.669	7.216	5.818	7.876	26.617	23.017	21.414	14.863	3.404	4.075	4.287	8.8839		0.347826	12.1994
6.788	13.7083	9.3562	6.4363	6.071	8.759	7.263	16.867	14.89	12.152	15.7497	32.961	7.488	5.729	6.824	33.454	22.291	24.732	17.888	4.061	5.434	5.34	10.9643		0.354038	13.1099
6.9071	16.3947	11.3226	8.8548	5.791	9.684	11.838	16.211	17.762	15.687	18.1366	32.86	6.77	5.469	8.02	38.374	15.322	21.892	15.176	5.461	4.932	6.419	11.2155		0.36025	13.7996
7.0262	15.3918	8.9051	6.0172	6.772	8.14	9.097	19.881	19.641	16.506	19.5258	40.863	6.958	4.785	6.726	44.308	18.312	22.403	18.119	4.723	6.917	6.035	10.6956		0.366461	14.5783
7.1453	18.8079	12.5405	6.2115	6.153	7.708	10.344	19.593	19.024	15.793	18.9836	43.211	6.841	6.153	9.494	43.136	14.102	25.743	18.704	4.145	4.863	4.599	11.2433		0.372673	14.8815
7.2644	13.5354	10.0273	5.8603	7.688	7.747	5.709	18.343	16.783	18.214	18.0829	49.756	6.284	8.791	8.508	42.48	16.998	23.726	18.69	6.927	3.576	4.597	12.4235		0.378885	14.7612
7.3834	14.7065	9.5607	8.7441	9.076	7.087	8.785	23.793	19.846	19.667	17.2013	56.475	8.243	7.195	7.222	49.173	14.931	23.827	15.539	4.905	3.665	5.658	10.5335		0.385092	15.7197
7.5025	14.1359	9.0957	7.559	8.988	5.062	9.737	21.379	21.496	20.138	17.4609	60.461	7.811	6.923	7.709	48.858	14.525	23.626	20.553	5.765	4.783	5.964	8.0687		0.391303	15.9136
7.6216	15.2526	8.6507	8.2504	8.22	6.975	8.685	17.297	26.792	19.003	18.1999	46.139	9.835	7.134	5.965	45.029	15.245	26.536	20.918	5.591	3.646	6.153	6.6876		0.397515	15.282
7.7407	13.6638	12.3744	6.1186	6.531	9.939	11.967	19.818	32.455	19.704	18.9444	58.868	8.566	8.327	8.431	38.426	17.544	23.754	20.858	4.551	5.179	4.96	9.6587		0.403727	16.3926
7.8598	14.3602	9.7616	6.7203	8.641	8.894	9.804	22.686	27.316	21.434	16.6298	59.308	8.677	5.202	8.93	36.591	20.93	26.378	23.342	2.89	3.414	4.39	10.9828		0.409939	16.2401
7.9789	15.0854	10.6155	5.2172	7.713	8.501	8.529	20.421	35.306	26.243	20.2131	48.414	9.908	5.769	12.537	30.917	18.937	30.566	25.891	4.3	3.915	4.593	8.7456		0.416151	16.4699
8.098	15.1692	13.9259	7.82	8.473	7.65	8.395	24.039	32.275	32.007	18.8502	64.045	8.852	10.993	10.102	25.922	16.492	30.279	28.466	5.427	3.556	7.336	10.7623		0.422363	17.7653
8.2171	14.8877	13.5682	4.197	9.6	7.583	9.013	24.053	27.419	35.07	20.6919	54.143	8.918	8.31	7.305	24.208	15.486	30.017	32.375	5.446	5.492	4.914	13.1802		0.428574	17.0853
8.3362	18.6385	15.0071	6.9178	9.638	9.066	6.541	22.739	33.026	31.847	20.9348	45.089	9.849	7.583	11.073	23.475	18.21	33.136	39.483	3.57	4.095	4.295	9.4265		0.434786	17.4382
8.4552	15.0005	11.9063	7.7611	6.79	8.452	10.312	22.99	40.878	42.958	20.8575	40.927	9.635	7.98	11.284	18.3	12.813	35.57	46.048	5.897	5.531	7.002	10.6834		0.440993	18.1625
8.5743	14.5023	11.008	8.7616	9.477	7.585	8.581	21.1	31.39	48.094	22.5056	38.553	8.558	7.739	10.339	18.135	14.572	31.766	56.772	5.698	6.108	2.808	8.6206		0.447205	17.8488
8.6934	17.7748	13.015	7.7521	7.224	8.665	9.535	20.728	39.089	50.691	31.2117	39.907	9.202	7.251	12.729	17.861	10.053	38.63	46.737	7.015	6.391	4.269	13.5505		0.453417	19.0582
8.8125	19.2903	9.6741	6.3912	7.495	7.074	10.817	27.064	41.096	59.088	27.026	32.275	9.082	7.532	12.64	21.113	11.07	40.604	48.068	6.42	6.263	5.842	12.6111		0.459628	19.4789
8.9316	17.5364	12.6057	5.4327	6.746	8.802	10.207	21.788	42.21	59.635	31.4125	36.38	8.839	6.568	14.468	18.615	13.957	47.924	44.206	6.804	5.692	6.554	11.1232		0.46584	19.8866
9.0507	20.8256	9.3235	5.6424	6.071	7.174	9.991	20.832	49.809	62.39	29.197	28.091	8.427	6.648	14.156	19.525	11.869	42.935	47.353	4.288	4.787	6.491	13.0186		0.472052	19.4929
9.1698	18.2771	9.1301	5.3976	5.232	9.279	12.254	24.786	41.308	57.371	36.8827	28.293	11.213	8.258	15.213	16.102	14.132	50.578	45.006	3.621	4.998	5.187	8.6059		0.478264	19.5966
9.2889	21.931	8.3677	7.5209	5.965	8.765	9.328	23.079	43.637	52.984	34.957	25.98	10.672	7.23	16.734	19.685	14.551	48.767	54.938	6.524	2.947	6.576	11.053		0.484476	20.0996
9.4079	19.859	10.5045	7.125	7.806	9.874	14.161	23.414	46.144	54.361	38.6502	25.772	7.561	6.231	15.065	18.947	16.35	47.35	59.198	5.161	6.648	4.313	10.1857		0.490682	20.6673
9.527	24.9396	9.6602	6.5292	5.893	8.326	14.655	25.329	47.406	53.978	43.3474	25.77	8.659	7.761	10.998	17.053	17.111	44.479	61.571	7.042	4.765	6.03	9.416		0.496894	20.9417
9.6461	29.1311	9.5737	6.2658	5.523	7.526	12.722	23.676	45.381	43.613	33.6246	24.595	10.29	9.805	12.972	17.137	11.236	50.754	57.693	5.656	4.186	5.4	8.435		0.503106	19.7816
9.7652	29.2419	8.3776	5.4337	4.127	5.877	11.264	20.007	45.87	35.457	33.5835	21.657	10.505	7.664	11.949	18.087	11.419	50.817	63.163	6.499	3.706	5.621	9.8331		0.509318	19.0981
9.8843	28.6489	10.5986	5.3067	4.565	9.202	10.556	24.136	43.118	37.566	29.8412	24.567	10.566	7.728	14.031	17.516	12.828	44.608	64.188	6.324	5.127	4.921	8.2309		0.51553	19.2806
10.0034	22.6019	9.067	5.8686	5.768	6.311	16.826	20.902	38.852	29.246	28.0044	21.038	9.634	8.561	13.523	16.194	9.812	45.545	64.872	5.654	4.229	4.289	7.958		0.521741	17.9434
10.1225	24.6726	9.5711	4.4482	4.127	7.851	12.209	19.149	40.678	31.465	25.6079	22.251	10.331	7.886	12.411	12.182	12.07	47.714	62.282	6.413	4.367	4.744	7.5848		0.527953	17.7279
10.2416	23.3732	8.8706	5.2896	5.32	10.591	14.533	20.08	39.171	31.148	27.2139	21.328	9.484	7.438	8.278	18.582	11.552	46.7	74.635	6.789	4.125	4.382	8.9376		0.534165	18.5373
10.3606	22.6203	8.057	5.1292	5.811	9.493	13.422	20.775	37.681	30.194	21.6494	23.106	12.063	8.72	10.874	20.099	10.816	42.078	73.387	4.428	5.839	5.511	10.296		0.540372	18.275
10.4797	28.9309	9.7042	4.6161	5.084	7.979	11.457	17.506	30.886	38.22	19.6588	25.48	11.035	9.051	9.081	17.759	8.36	43.206	68.55	8.188	5.83	4.856	8.4779		0.546583	17.9053
10.5988	23.1313	9.5901	5.8342	5.016	8.435	11.881	14.272	33.823	30.051	19.2702	25.111	10.447	6.801	9.505	17.017	10.228	40.336	68.182	7.365	4.518	8.18	8.7268		0.552795	17.1691
10.7179	22.7396	7.7802	4.6533	5.276	8.007	13.053	15.215	37.301	29.266	19.4135	25.146	15.357	10.153	9.18	16.096	9.775	42.424	65.041	6.504	4.005	5.686	8.206		0.559007	17.2853
10.837	25.6189	7.5458	4.508	5.778	9.788	9.244	13.398	35.908	34.224	18.8536	22.354	13.94	10.222	10.194	14.593	11.782	36.408	72.519	5.401	5.528	4.978	6.5024		0.565219	17.2404
10.9561	20.8271	11.0195	6.1508	5.82	7.326	9.26	14.132	38.629	40.127	13.4862	25.204	14.902	7.552	9.424	16.199	11.415	38.861	62.435	5.67	5.383	4.265	10.086		0.571431	17.1897
11.0752	20.4058	11.45	6.0455	4.579	8.132	9.241	14.914	43.965	36.667	12.8142	26.797	14.975	5.561	9.526	16.007	12.115	38.339	59.221	6.248	6.513	7.618	6.5529		0.577643	17.1676
11.1943	15.0668	8.4879	7.0937	5.21	8.104	8.444	13.205	39.065	47.613	17.5024	23.97	15.589	6.261	9.868	23.73	12.174	36.659	56.466	5.935	4.191	5.847	9.7991		0.583854	17.2855
11.3133	17.8117	12.8462	5.8931	5.528	8.077	9.956	17.185	32.066	44.791	16.8126	27.134	14.414	6.705	9.182	23.972	17.243	38.773	55.459	7.226	6.004	7.166	9.3203		0.590061	17.8893
11.4324	16.6579	9.1649	4.7718	3.279	7.421	9.279	18.01	44.376	50.042	17.6625	24.035	18.27	8.417	7.924	18.387	18.715	38.423	57.333	7.772	6.035	4.588	6.4209		0.596273	18.0447
11.5515	13.645	12.4432	6.8228	7.09	8.486	6.965	17.794	41.15	57.05	15.3818	21.477	19.336	7.662	8.324	20.183	17.823	42.081	52.628	7.473	5.774	7.588	8.1183		0.602485	18.4225
11.6706	14.5387	9.9896	7.406	4.428	6.705	4.974	20.021	46.037	52.373	15.2688	17.113	19.267	10.014	8.813	26.197	22.618	37.25	53.505	6.615	6.258	6.611	7.5136		0.608697	18.3416
11.7897	15.4397	9.4561	6.641	4.624	5.598	7.808	19.16	43.385	64.848	17.2562	17.869	17.495	8.303	7.72	24.203	20.949	43.482	49.613	4.291	6.561	5.4	6.9353		0.614908	18.5017
11.9088	14.8288	7.7694	5.7197	6.505	5.34	7.457	20.133	46.112	52.279	15.5617	19.799	17.608	10.11	7.257	19.318	18.144	38.278	50.514	8.157	4.025	6.636	7.3313		0.62112	17.6765
12.0279	13.1651	10.3956	7.7814	4.226	5.235	5.98	16.917	45.575	58.637	14.1297	23.509	22.201	6.345	8.131	18.532	17.209	45.319	49.155	7.21	5.124	5.475	5.5822		0.627332	17.9925
12.147	13.0822	9.485	5.4906	3.962	4.839	7.423	15.606	37.677	59.734	19.5777	18.485	21.374	8.146	10.287	24.079	18.236	39.451	46.312	7.748	4.764	6.521	8.6376		0.633544	17.769
12.2661	13.6991	9.3233	6.4393	5.057	5.014	4.406	13.232	43.787	54.602	14.291	14.162	23.457	11.944	6.341	21.978	16.764	41.821	56.45	7.595	5.831	7.564	7.0353		0.639756	17.7633
12.3851	14.3503	7.7975	6.627	4.29	7.335	7.287	15.146	37.42	57.193	19.2083	18.502	24.519	9.394	9.039	23.934	16.266	42.153	44.202	6.83	6.303	6.401	8.021		0.645962	17.8281
12.5042	14.5339	9.0554	3.7501	6.903	5.141	8.148	14.437	45.031	54.013	17.7135	20.566	29.237	12.421	9.297	20.08	17.454	34.715	51.307	6.8	6.518	8.752	7.0813		0.652174	18.3161
12.6233	11.4579	8.4804	8.3007	5.824	6.454	8.131	13.294	41.377	54.87	17.4534	21.829	28.132	9.522	7.026	21.294	18.83	37.483	45.663	9.067	6.581	8.419	5.2615		0.658386	17.9432
12.7424	14.3038	8.6556	6.3361	5.524	7.991	7.242	14.122	44.866	52.952	14.8227	19.811	31.543	8.728	7.183	26.865	17.299	31.107	49.631	7.942	6.516	8.617	8.0842		0.664598	18.1882
12.8615	8.9691	9.2986	8.0319	8.308	7.393	8.429	12.386	41.179	50.008	18.3545	20.795	36.329	9.174	7.216	22.884	17.713	33.143	54.142	5.379	7.962	9.055	7.0259		0.67081	18.3261
12.9806	9.433	8.3174	6.2926	5.942	6.743	8.168	11.247	46.735	46.386	20.9213	22.691	39.575	8.846	7.154	26.974	15.684	31.571	44.016	6.103	8.665	6.802	6.649		0.677021	17.9507
13.0997	10.9968	6.8113	5.9098	7.716	6.739	10.746	15.215	49.019	50.007	20.0385	22.203	36.73	10.143	9.253	19.685	18.235	37.883	46.53	7.953	10.673	7.992	8.9166		0.683233	19.0634
13.2188	10.5983	8.2422	6.1335	5.704	7.965	10.368	11.958	53.098	46.267	22.9175	18.891	40.093	11.099	5.937	17.445	16.127	30.968	46.712	8.225	8.031	8.722	6.8039		0.689445	18.2866
13.3378	10.7715	6.7764	6.2589	7.524	8.371	9.376	17.056	60.514	55.718	25.5988	18.764	33.373	10.274	6.802	20.555	16.619	31.967	41.415	10.25	7.79	8.341	12.4369		0.695652	19.3887
13.4569	12.4052	9.6849	6.7564	7.021	10.311	10.883	16.914	63.035	49.617	24.5044	21.222	31.492	9.359	6.074	22.03	21.763	32.841	51.945	10.189	7.868	10.567	11.7163		0.701864	20.3726
13.576	10.6091	8.1049	6.7858	6.974	8.931	9.708	18.575	65.642	52.651	23.8005	19.894	32.864	8.159	7.712	19.462	16.424	29.602	44.507	15.435	13.095	11.601	17.7941		0.708075	20.3787
13.6951	10.486	8.6217	6.3769	5.477	9.134	7.489	16.707	71.703	54.864	29.8637	20.48	36.106	9.06	6.566	24.433	19.198	33.1	43.014	16.427	13.004	13.541	26.9559		0.714287	21.9367
13.8142	11.4109	9.8594	8.251	8.384	9.028	10.246	20.777	71.1	62.928	29.8532	19.197	39.354	9.468	8.61	22.926	19.788	43.789	45.162	15.384	15.155	13.534	28.1712		0.720499	23.7443
13.9333	12.3816	10.2224	7.7486	7.32	10.681	7.818	24.405	69.72	60.527	26.957	22.848	35.751	10.847	5.614	20.65	20.528	39.658	55.24	16.728	22.518	18.804	37.7109		0.726711	24.7581
14.0524	13.607	7.3544	5.8775	8.556	11.328	13.035	31.523	69.376	67.165	31.1919	22.552	37.678	11.165	6.019	23.047	18.725	48.156	50.111	20.791	23.364	28.565	39.4697		0.732923	26.7571
14.1715	13.2484	7.076	7.086	11.426	12.699	12.649	29.418	67.619	52.283	32.6994	25.71	45.106	12.607	7.249	22.677	20.609	48.951	43.124	20.904	26.297	35.027	44.1306		0.739135	27.2089
14.2905	14.4774	7.9563	8.3681	9.213	15.003	14.565	37.134	63.975	48.277	42.0027	26.552	40.537	11.283	6.055	24.692	17.759	45.64	40.122	30.19	25.672	45.764	46.5425		0.745341	28.2627
14.4096	11.3676	6.8291	7.8178	11.136	12.488	17.639	40.326	59.632	44.268	37.2365	24.511	53.705	12.35	11.02	28.8	16.909	46.436	49.126	30.388	31.527	57.56	62.2829		0.751553	30.607
14.5287	15.8016	9.4935	11.0724	10.307	17.547	17.687	35.841	51.662	47.051	52.4969	28.199	55.562	14.926	6.742	25.184	19.373	47.793	47.775	32.785	32.406	72.108	65.687		0.757765	32.6136
14.6478	16.0574	8.2596	9.4127	11.594	19.47	17.512	37.258	40.725	34.766	49.091	23.111	57.371	19.018	4.712	29.063	24.353	49.086	41.247	32.997	33.713	60.995	76.3409		0.763977	31.6433
14.7669	12.7664	7.1246	9.8717	11.677	24.792	26.11	41.584	28.543	27.344	58.302	26.045	61.498	23.85	6.22	31.358	21.755	50.895	44.872	38.532	31.874	62.745	62.7562		0.770188	32.2961
14.886	16.4423	8.5788	7.1883	10.734	26.998	26.674	44.608	26.887	18.903	69.6925	23.542	57.355	31.732	7.926	28.799	24.333	54.915	43.048	32.004	38	55.824	52.8867		0.7764	32.1396
15.0051	13.4647	7.3327	10.081	19.819	31.612	31.787	37.834	19.943	11.722	67.5065	20.747	53.021	36.973	9.401	40.094	22.15	48.606	41.618	31.17	37.47	50.179	51.8603		0.782612	31.5632
15.1242	11.7557	10.2412	13.2988	22.395	43.048	36.798	37.477	16.531	11.142	74.8242	24.592	41.225	39.001	11.046	44.08	26.621	54.353	42.984	28.202	27.709	42.921	40.283		0.788824	31.8422
15.2432	12.8443	12.3413	13.3082	27.069	47.211	38.203	30.075	16.558	8.934	57.4153	18.651	43.831	41.47	10.033	49.609	34.314	52.192	45.126	26.721	24.376	34.721	34.3884		0.795031	30.8814
15.3623	12.0961	8.9205	20.455	33.628	54.65	41.232	30.801	12.408	6.667	58.168	18.155	35.752	54.066	11.451	53.658	28.847	50.68	42.464	22.687	23.793	29.28	25.2548		0.801242	30.687
15.4814	11.6411	11.3333	17.5866	39.551	56.173	43.726	25.486	9.469	7.803	44.1866	12.744	26.313	66.157	11.809	61.596	42.578	60.612	43.739	19.188	22.448	24.388	16.3348		0.807454	30.6756
15.6005	14.2741	11.9815	20.8837	34.692	60.471	51.201	19.806	9.126	6.988	36.6264	14.448	21.126	69.194	13.467	62.991	36.808	47.321	52.011	20.569	16.821	20.922	12.914		0.813666	29.7564
15.7196	17.2276	12.2381	23.6304	39.882	65.733	51.642	16.947	9.361	7.493	25.1336	11.397	17.87	70.936	14.871	76.145	47.931	54.425	47.101	20.391	17.107	16.303	7.6019		0.819878	30.5167
15.8387	19.4805	14.9744	25.9133	35.215	60.392	52.093	13.623	7.637	6.573	18.9638	9.166	12.735	83.268	13.896	71.038	48.098	58.74	50.502	16.942	14.701	11.89	6.228		0.82609	29.6395
15.9578	21.16	17.6762	27.6616	35.616	61.123	53.491	11.585	8.221	5.405	10.1268	9.878	9.816	90.088	15.56	64.199	54.072	53.846	46.75	18.556	14.89	11.762	5.8739		0.832302	29.4253
16.0769	18.1816	17.7902	31.0943	41.23	58.527	42.699	7.394	4.788	5.203	7.9606	8.546	9.77	73.298	16.251	50.135	51.027	60.283	53.317	15.064	10.138	8.663	7.581		0.838513	27.2246
16.196	20.5795	20.9036	33.8116	35.818	51.432	30.708	7.798	6.698	4.869	6.5246	6.386	8.841	64.693	18.452	46.683	56.042	68.022	56.95	13.266	7.604	5.732	5.876		0.844725	26.2586
16.315	18.8052	25.1441	33.4375	32.955	45.37	26.486	6.645	4.463	3.565	6.2524	6.413	7.45	52.506	21.25	32.029	57.165	67.542	59.122	11.93	7.73	7.855	6.1652		0.850932	24.5582
16.4341	16.059	20.2188	39.1873	37.177	37.672	22.764	5.503	5.143	4.023	7.2984	4.225	5.625	34.924	28.614	24.458	63.981	65.307	62.803	9.697	7.37	5.771	3.4004		0.857144	23.2373
16.5532	12.8141	21.6919	38.4883	28.502	31.71	22.427	4.902	3.086	2.283	6.001	4.313	5.645	25.146	38.106	16.082	65.764	79.852	68.18	11.937	5.646	6.607	4.0228		0.863355	22.873
16.6723	14.6682	27.0213	44.3789	22.756	25.438	17.178	4.089	1.889	3.943	2.5685	5.001	4.599	19.231	40.684	10.004	60.962	85.356	66.536	6.024	5.271	6.833	3.5103		0.869567	21.7246
16.7914	12.8832	26.334	40.8907	15.129	16.888	11.371	3.186	2.273	1.963	4.0863	3.907	4.728	15.809	47.284	6.763	65.373	82.197	64.435	5.048	2.893	4.391	3.1953		0.875779	20.0467
16.9105	14.3304	27.3781	33.7538	12.137	12.604	8.695	3.36	1.211	3.288	5.8315	3.533	3.354	12.014	57.646	6.498	72.5	81.113	70.811	4.385	5.605	4.311	2.7944		0.881991	20.3251
17.0296	17.5922	27.1659	28.6582	13.888	9.334	6.696	3.023	0.838	2.246	3.5991	2.599	4.687	10.755	52.658	7.74	75.611	71.839	67.448	4.17	2.477	3.325	2.2931		0.888203	19.0292
17.1487	14.9446	30.8866	27.5295	10.208	8.382	5.44	3.183	0.968	2.064	5.1053	1.945	4.29	9.949	57.388	4.662	70.048	67.012	59.783	4.362	4.331	2.052	2.5875		0.894415	18.0509
17.2677	17.9567	30.3203	20.1547	8.795	5.885	3.844	1.703	0.838	1.621	2.9135	2.197	2.695	6.1	63.327	2.744	49.903	59.006	68.195	2.566	1.961	3.288	1.6099		0.900621	16.2556
17.3868	19.7847	26.5762	16.937	6.899	6.117	4.626	2.434	0.875	1.614	2.7895	0.767	2.052	6.059	47.768	4.77	28.216	50.662	64.108	2.061	2.153	2.615	1.4348		0.906833	13.6963
17.5059	23.5273	24.0549	16.8018	6.063	4.025	4.21	1.003	1.375	1.03	3.183	2.012	3.261	5.702	38.485	5.331	25.425	41.546	74.179	2.762	1.955	3.029	0.6174		0.913045	13.1626
17.625	22.7414	26.3268	16.9618	5.606	3.821	4.465	0.59	1.167	1.36	4.2024	0.821	2.06	4.129	32.091	4.348	17.499	35.353	71.42	1.441	1.289	2.116	1.8661		0.919257	11.8943
17.7441	20.3266	25.7315	11.6883	4.432	2.638	3.801	1.23	0.783	2.548	1.2255	1.531	2.011	3.029	25.539	2.772	9.542	21.859	57.73	3.973	2.195	3.699	1.0809		0.925468	9.51658
17.8632	22.6557	24.3606	9.9274	4.29	4.01	1.699	1.459	0.278	0.781	2.9973	0.956	1.61	4.412	21.021	1.355	7.184	12.042	53.055	1.687	1.429	1.205	1.203		0.93168	8.16441
17.9823	24.7944	24.0278	9.5511	4.388	2.685	1.744	0.896	0.461	0.552	1.0393	1.266	1.574	3.393	13.502	1.603	6.682	11.123	39.337	1.118	1.642	1.561	0.8592		0.937892	6.99085
18.1014	26.2552	20.7642	7.9562	4.101	3.038	1.617	1.042	1.189	0.732	1.6724	0.472	0.651	3.559	12.844	0.687	6.379	7.797	43.789	1.323	0.351	2.522	0.7755		0.944104	6.7962
18.2204	27.8415	20.8348	7.3912	3.124	1.415	2.26	1.235	0.948	1.045	0.936	1.907	0.624	2.488	10.792	1.371	7.212	6.429	23.154	0.82	0.119	0.798	0.2219		0.950311	5.58938
18.3395	27.9706	20.521	6.9309	1.467	0.752	1.414	0.876	0.13	0.864	1.2071	0.132	0.684	2.353	10.491	1.213	5.12	5.015	17.877	1.608	0.501	1.539	0.4266		0.956522	4.95874
18.4586	34.6282	17.647	7.1229	2.148	2.562	0.512	0.859	0.875	0.267	0.6867	1.242	1.202	2.974	9.152	1.322	5.034	4.947	8.157	0.777	0.441	0.32	0.982		0.962734	4.72081
18.5777	35.3734	15.8767	5.0378	2.946	0.959	1.937	0.638	0.609	0.668	1.316	0.086	0.495	2.041	6.793	1.969	4.147	5.06	8.648	0.517	0.683	1.095	0.7694		0.968946	4.43929
18.6968	45.4644	16.2012	2.5041	1.823	1.219	1.3	0.219	0.461	0.446	1.0614	0.721	0.287	1.407	4.421	0.496	2.754	3.657	4.896	0.608	0.23	0.345	0.4505		0.975158	4.13507
18.8159	34.8278	13.2382	4.6335	1.555	1.457	1.862	0.394	0.772	0.422	1.2819	0.501	1.206	2.497	2.175	0.07	3.09	3.783	4.326	0.656	0.967	0.33	0.3324		0.98137	3.65349
18.935	32.3881	11.6324	4.321	1.757	1.979	0.296	0.215	0.33	0.286	0.2889	0.443	0.967	1.042	2.839	0.705	1.52	2.754	4.595	1.426	0.113	0.248	0.3331		0.987582	3.20357
19.0541	32.4846	13.1123	2.7964	1.299	0.953	1.174	0.012	0.052	0.779	0.8695	0.063	0.331	0.691	3.124	0.626	2.203	3.189	3.122	0.783	0.332	0.926	0.2209		0.993793	3.14285
19.1731	26.4582	11.2949	2.8383	1.49	1.058	1.116	0.282	0.325	0.678	1.0998	0.479	0.559	0.837	2.679	0.331	2.697	1.881	4.289	0.351	0.112	0.165	0.7678		1	2.80855

## Sheet: Image16
X0	Y0	Y1	Y2	Y3	Y4	Y5	Y6	Y7	Y8	Y9	Y10	Y11	Y12	Y13	Y14	Y15	Y16	Y17	Y18	Y19	Y20	Y21	Y22	Y23	Y24	Y25	Y26	Y27	Y28	Y29		Ap-Ba	Avg intensity
0	15.8366	42.5264	29.1508	67.117	77.693	73.402	63.911	88.528	71.961	56.187	49.515	34.3724	35.0215	35.376	38.5478	36.4732	43.6754	43.9603	57.0691	15.5958	20.8472	27.2759	16.3276	22.0287	30.424	33.968	26.6848	45.8754	32.4656	33.4856		0	42.1767
0.1191	16.6258	45.5708	29.9393	69.021	85.397	74.966	77.122	79.981	72.957	52.227	45.103	31.6939	37.9655	34.064	39.9975	42.0699	46.3029	41.9838	56.7911	16.3193	20.8468	30.784	18.2662	23.9286	30.589	36.7688	31.1278	53.0487	39.4585	34.8988		0.00458762	43.8605
0.2382	20.0809	37.2407	30.6625	72.439	89.685	83.464	78.517	80.243	74.123	54.799	47.081	37.5338	42.0326	38.304	41.1523	37.1175	59.4881	42.6337	55.4594	19.2671	20.4028	31.4575	16.1753	24.1342	32.754	42.5083	29.9565	53.4863	40.6311	37.7188		0.00917523	45.6849
0.3573	19.7549	34.9395	39.2887	81.096	100.447	88.403	90.532	81.783	78.943	65.532	54.651	42.2693	46.5186	36.341	43.1443	48.2349	67.2376	46.8695	52.965	20.1123	22.1407	31.5006	20.7468	31.4975	35.968	46.6305	33.7134	59.4383	38.0543	36.5778		0.0137628	49.8443
0.4764	21.7642	44.139	49.4256	72.911	103.494	101.873	93.843	91.966	85.234	65.294	59.359	41.8849	48.3202	35.934	44.7621	48.5496	83.9674	49.3112	54.6909	21.9805	22.0435	33.8622	20.6534	31.5602	37.833	48.0497	33.8474	64.119	34.7785	34.8353		0.0183505	52.6762
0.5954	23.9787	49.8292	55.4229	72.202	103.965	118.188	93.036	96.117	92.609	67.863	68.719	45.3656	46.7905	38.141	46.0671	49.1889	85.565	47.904	50.1755	22.779	26.51	38.2342	23.9854	36.8721	37.201	48.5803	36.9819	62.324	39.06	34.6607		0.0229342	55.2772
0.7145	30.7324	47.1539	70.0824	70.498	100.073	126.777	96.847	97.46	92.686	74.582	82.048	52.8876	45.4908	37.397	51.2943	54.9348	86.0304	44.5863	51.0993	24.6879	30.5798	41.0171	29.374	42.8357	44.388	54.0797	39.0752	62.1185	43.8516	31.9361		0.0275218	58.5535
0.8336	37.1682	47.6394	73.6778	76.795	88.781	126.045	91.093	102.365	90.561	75.533	87.314	56.6531	47.2563	41.696	53.5404	55.4124	88.7613	48.0896	59.6452	25.6067	34.4515	44.9737	31.2231	50.532	54.479	54.4419	41.6531	69.5366	44.7708	36.6924		0.0321095	61.2129
0.9527	36.9184	53.6236	76.2639	74.52	80.18	136.833	106.769	106.563	92.481	83.241	92.391	61.0415	47.508	40.457	63.6881	60.684	85.9946	48.6506	58.1042	27.9329	29.8428	39.7706	34.2984	62.52	57.377	60.3478	48.658	71.7104	46.8735	39.3121		0.0366971	64.1518
1.0718	42.2552	55.0462	91.2831	73.967	77.824	152.773	111.054	113.628	89.098	91.856	101.636	59.5221	52.9968	42.678	69.9367	62.8451	77.3871	54.1207	53.1196	31.567	37.2567	42.2869	48.1182	67.476	66.483	62.7949	57.6088	66.6127	53.5033	31.3977		0.0412847	67.9377
1.1909	50.7695	62.924	100.294	68.08	62.972	150.384	109.535	109.915	97.714	91.852	111.615	61.9249	53.3327	47.673	68.5842	76.7206	71.0401	46.6433	58.1385	35.3066	47.0356	44.9308	59.4791	75.7637	76.418	68.5301	52.5342	64.7189	53.2616	30.4134		0.0458723	70.2834
1.31	59.065	63.3119	97.2693	74.634	54.762	157.744	110.249	115.083	102.299	89.935	116.697	65.1991	57.6778	54.714	67.883	73.6905	63.4788	48.288	56.5985	35.7016	50.7159	52.2129	69.7567	87.457	85.443	76.3549	60.5879	61.9039	58.3203	30.0251		0.0504599	73.2353
1.4291	60.1932	61.7748	89.7813	84.857	49.635	159.744	121.112	112.113	103.606	96.329	120.129	66.1234	64.5604	61.931	72.9766	68.5683	63.3319	46.3181	51.173	38.7124	50.9421	54.3279	88.1095	89.7452	86.357	77.7125	61.2617	62.5718	58.6622	33.0363		0.0550475	75.1899
1.5481	62.925	54.5243	89.8848	88.959	40.954	171.154	115.037	113.052	111.404	99.046	122.375	66.5141	70.6258	61.939	76.6011	73.9112	55.6256	48.5691	50.1961	41.068	58.0415	55.0058	94.2177	85.5384	104.763	82.3953	63.2264	67.3736	59.7123	34.6924		0.0596313	77.311
1.6672	65.9652	56.1985	84.6056	89.879	34.234	173.858	122.35	120.689	116.75	105.787	137.128	69.8676	77.953	65.895	87.7117	69.0171	54.642	49.4596	52.0225	47.7222	65.962	54.5597	95.2187	86.6242	104.069	92.8379	63.8711	60.0611	52.5318	31.2052		0.0642189	79.6225
1.7863	61.4593	58.3826	83.1844	104.894	40.388	181.595	132.532	118.653	117.673	110.669	136.958	75.5088	80.3239	66.867	94.2794	64.7064	54.1409	60.8566	49.7218	56.9306	72.0944	67.2866	92.1926	85.7322	112.65	84.4593	62.1195	57.3278	54.5992	34.5029		0.0688065	82.4229
1.9054	66.5642	60.5462	77.9935	106.079	38.149	179.892	147.326	112.794	124.89	114.337	141.269	79.0474	78.4798	68.635	90.3784	68.4736	53.609	54.2635	48.536	54.0805	76.4467	69.1969	75.4065	88.8207	107.404	86.2034	58.5682	60.9199	54.1683	29.1035		0.0733941	82.386
2.0245	68.5645	57.4344	78.1457	123.797	35.639	179.173	163.361	124.164	125.562	109.772	148.243	88.591	88.4942	80.336	90.731	70.8843	50.7562	56.3664	52.5037	57.7592	87.0463	72.7524	62.5357	82.699	105.251	79.0752	57.2976	60.8484	47.561	25.8978		0.0779818	84.3747
2.1436	72.0942	58.7812	77.5869	132.418	33.689	172.736	170.313	129.832	133.554	116.911	141.085	83.4238	82.2729	87.056	92.2886	62.9991	40.7486	51.3975	48.5268	58.1515	75.048	76.0879	59.142	83.8954	94.783	62.8505	54.1081	69.6995	41.4948	25.5466		0.0825694	82.9507
2.2627	65.9796	57.5783	76.5184	145.677	36.52	159.73	186.494	132.738	132.024	110.968	134.008	80.6553	86.8959	92.42	84.1321	60.8491	38.2124	50.9474	57.7557	63.1483	81.7066	78.4013	53.7911	82.6904	82.308	58.7933	53.5731	71.114	41.0918	28.9531		0.087157	82.8558
2.3818	63.919	60.3158	73.3535	148.413	35.34	149.09	182.485	127.161	131.666	113.547	137.435	82.6873	83.8023	100.782	79.5233	59.0531	45.2847	48.8746	69.4657	60.4027	76.4604	76.9128	53.5245	77.8389	72.555	59.3045	53.6081	63.2059	36.235	29.2736		0.0917446	81.7173
2.5008	58.8317	52.6526	69.2143	148.45	40.186	150.105	190.689	122.45	136.634	108.912	132.891	86.3963	84.9491	102.016	78.5793	51.8606	50.6539	44.2789	64.364	64.4042	66.3138	68.6415	54.5868	71.0123	64.428	50.9144	52.6573	69.7914	32.0046	27.3421		0.0963284	79.8737
2.6199	65.6862	49.357	68.251	145.609	42.323	143.081	205.453	122.629	131.946	107.386	125.362	85.8536	81.8749	101.757	81.9496	49.7526	56.2796	40.8437	61.3598	64.5191	55.1839	66.6673	57.2451	73.0777	61.728	48.3431	41.56	62.0124	29.8211	32.2532		0.100916	78.6388
2.739	67.3018	47.4653	63.031	152.106	39.26	146.974	198.35	132.91	134.329	105.702	125.575	79.8519	88.6057	103.074	77.7593	46.6634	60.8001	45.2651	62.8854	65.9708	42.2239	56.5675	57.5033	68.1052	58.249	44.0964	46.9715	66.8972	30.8229	33.5836		0.105504	78.2967
2.8581	60.2345	45.2553	66.9938	143.11	42.16	141.54	189.782	135.503	134.587	94.861	109.852	75.0659	91.7827	103.159	69.9675	41.1294	56.3848	45.5702	62.2005	71.3046	44.0555	42.9199	56.6532	63.1217	52.097	40.0664	48.8878	69.6374	28.4376	34.0808		0.110091	75.3467
2.9772	54.3715	40.946	66.0318	144.51	44.994	137.082	185.82	133.316	137.476	98.799	110.533	86.3814	87.0496	94.232	71.0116	39.7773	56.4617	39.9965	60.1775	65.3085	39.0895	36.4476	52.5664	59.4184	55.795	37.3121	51.1432	68.1236	25.6509	36.1962		0.114679	73.8673
3.0963	51.8961	38.6594	59.4828	145.159	39.418	134.816	175.19	120.169	138.693	94.746	105.551	82.4906	87.7395	105.168	66.651	34.1212	66.8462	36.6555	66.3428	60.2976	36.246	31.493	53.4593	52.0701	57.615	37.8667	46.6639	62.3888	25.2385	38.6712		0.119266	71.7268
3.2154	50.947	38.9406	54.0484	143.684	36.366	137.998	171.932	115.698	139.711	79.971	96.185	84.6398	80.435	100.582	66.6213	33.0048	75.0578	37.3571	59.9572	52.585	35.5146	30.5721	51.8274	48.5336	52.666	41.3131	47.0338	59.1777	23.2192	36.6809		0.123854	69.4086
3.3345	49.1079	37.8392	56.8107	135.719	38.783	140.689	159.311	112.074	143.884	70.594	101.469	77.9757	77.6712	103.2	61.3398	33.3655	73.7436	39.2811	62.3782	39.8466	32.0086	27.9845	51.3692	41.33	52.767	39.6387	48.9144	54.6851	22.9114	37.4223		0.128442	67.4705
3.4535	50.0357	34.4269	52.1911	138.119	42.469	138.969	140.57	106.065	145.047	64.737	98.077	81.1975	71.2864	101.849	56.9395	32.3094	74.902	33.1241	60.7297	30.7617	33.4219	25.0181	54.4501	37.802	54.851	37.0526	46.4221	56.8165	17.7637	34.7195		0.133025	65.0708
3.5726	44.8338	31.2662	48.5011	136.305	45.112	137.304	125.249	88.16	140.675	57.145	96.601	68.9787	73.2661	115.416	50.5117	32.4185	76.8322	32.3871	57.6982	28.2823	30.8356	25.6571	54.3719	34.5697	52.682	36.8508	45.5923	50.1725	15.6719	33.5321		0.137613	62.2293
3.6917	48.9146	25.0352	46.7906	129.297	47.107	132.515	110.989	80.266	138.739	48.27	97.641	74.8916	75.404	113.536	48.5506	32.5214	72.8214	35.8438	58.5073	20.6012	31.3645	26.346	45.7743	33.2881	50.818	32.4885	46.0917	51.0161	17.6858	28.2924		0.142201	60.0469
3.8108	42.9422	25.5664	47.2169	123.182	42.281	132.915	93.914	66.292	129.121	45.073	95.137	72.4505	76.1167	109.168	46.0985	38.1485	73.7952	33.2301	58.6358	18.802	36.0439	27.7687	39.8863	32.7677	52.566	34.4765	48.8402	49.0133	18.1182	28.1508		0.146788	57.9239
3.9299	38.9427	23.6766	50.146	113.643	45.758	124.928	73.753	49.656	139.735	43.728	102.732	68.413	76.7599	117.079	41.2957	36.1479	65.3753	32.6796	56.7756	17.3596	32.1202	25.8075	34.4195	27.5156	55.429	33.1732	43.0932	37.0944	15.8672	31.4716		0.151376	55.1525
4.049	39.3889	24.0932	45.9809	105.082	52.074	125.267	61.145	49.166	136.651	43.455	98.461	73.2915	68.2722	120.126	41.7195	32.8298	66.4679	31.5018	52.4053	20.9472	32.4037	29.3147	31.4868	31.0368	54.34	31.667	38.9609	33.0207	17.665	35.1665		0.155964	54.1129
4.1681	36.1565	23.5837	47.6724	99.107	51.457	112.063	50.384	33.047	135.241	34.627	99.525	71.9825	65.0918	107.215	41.5292	29.1624	57.4704	27.974	50.3651	16.5729	34.8912	26.7689	23.7821	22.7805	60.464	33.9779	34.9807	28.8272	19.3003	35.0002		0.160551	50.3667
4.2872	31.1914	20.7654	50.7982	92.54	55.39	102.001	38.452	31.432	131.019	33.652	93.65	74.4148	59.089	105.69	44.8366	27.5414	51.582	27.2019	54.9547	17.8068	30.7817	26.2768	24.3402	24.375	56.476	33.0426	33.5651	25.7637	20.8777	30.5674		0.165139	48.3358
4.4063	29.6467	22.7478	46.4356	80.22	56.926	93.66	28.965	26.746	112.969	26.315	91.856	83.7746	53.0475	98.22	51.8828	28.5582	47.824	29.8204	50.0565	16.7879	32.8848	27.806	18.0544	25.1835	61.952	36.7398	31.891	24.3741	28.1485	24.5052		0.169726	46.2666
4.5253	28.5222	21.4969	41.3636	79.515	62.425	77.762	25.418	20.326	101.322	28.078	89.939	82.2081	52.8835	81.898	43.6452	30.3787	39.0567	24.3643	41.1621	19.4861	30.2497	24.7693	17.5159	24.8876	64.212	34.2674	28.5031	22.3921	33.1182	30.0665		0.17431	43.3744
4.6444	29.5604	27.7948	44.2966	78.108	74.749	68.273	23.939	21.376	91.088	27.232	87.148	87.9028	51.2185	74.897	47.0694	30.1911	34.7623	26.5797	45.1576	15.8652	31.2013	27.2981	16.7723	26.5504	60.205	35.422	26.586	19.1113	37.0565	39.3802		0.178898	43.5597
4.7635	28.1455	23.5192	42.4442	72.721	77.873	68.888	21.903	21.351	67.215	26.634	83.058	81.6171	51.7562	67.757	48.262	29.0494	29.7527	22.6604	39.6084	16.8431	37.1639	25.7485	15.3754	25.4524	64.882	37.7824	23.8988	14.9302	38.7581	33.3953		0.183485	41.2815
4.8826	30.7269	21.1112	39.7071	80.755	80.907	55.636	18.539	16.635	48.823	22.713	83.339	86.2987	52.8602	61.263	49.2468	31.525	32.4523	25.0337	35.802	15.9124	35.8471	23.1639	16.058	22.6318	65.947	33.0844	20.2545	17.5236	38.399	32.6336		0.188073	39.8276
5.0017	30.2567	21.8589	34.2944	68.083	83.761	50.711	14.361	15.825	34.887	25.646	84.457	82.0474	53.7048	62.139	53.273	33.8141	26.6978	22.4202	33.5448	16.9665	32.43	24.5637	17.893	20.8718	66.085	34.8651	16.0186	15.7549	40.6945	37.4607		0.192661	38.5129
5.1208	28.6034	20.9099	37.3833	69.3	97.365	51.225	15.854	16.079	23.004	24.453	75.805	86.1077	64.5855	59.142	51.7986	27.5582	29.168	26.4476	33.4547	15.9353	32.1135	27.7022	18.1351	19.6187	61.491	32.5051	18.7136	16.0583	40.1505	37.681		0.197248	38.6116
5.2399	28.4232	24.0585	39.99	73.119	97.296	38.34	17.819	11.432	23.847	21.94	67.164	78.551	66.2557	51.812	52.6262	29.1438	25.7549	25.1209	33.074	14.6495	29.2999	25.5865	19.242	19.8616	64.343	35.9218	21.6529	14.5291	44.0948	38.1206		0.201836	37.769
5.359	30.7846	23.0942	35.3097	70.983	100.615	33.462	10.956	11.645	16.59	23.152	76.886	83.2976	64.6574	51.827	50.7251	35.2619	26.7737	29.5616	32.2493	18.318	30.1276	28.5994	16.8262	15.0675	57.001	36.6708	22.6642	15.6853	50.3956	45.7778		0.206423	38.1655
5.478	30.1851	24.6846	32.1864	74.28	105.524	31.544	8.532	13.325	13.519	20.354	72.828	86.5436	63.7156	50.061	51.0511	29.6458	29.6221	23.156	35.4424	15.1425	33.0927	26.9658	18.6943	16.8341	53.84	36.6352	23.1519	13.5407	53.9727	43.5752		0.211007	37.7215
5.5971	30.6586	24.2184	30.0929	74.098	93.64	22.788	10.858	15.317	14.254	17.66	73.631	86.1896	60.1394	43.993	47.4167	30.5803	26.5832	25.8341	36.1478	17.3235	30.8972	26.8892	17.5634	19.8797	49.085	42.4078	21.0979	11.1283	57.8509	38.8129		0.215595	36.5679
5.7162	28.1214	19.4981	29.421	74.28	93.959	21.255	9.893	12.122	14.978	15.988	76.406	77.5589	56.3349	43.464	48.486	29.7369	26.4656	24.1371	33.1581	16.9159	27.7646	26.1051	20.7524	18.5664	40.217	42.9501	21.107	9.8709	52.7516	36.1005		0.220182	34.9455
5.8353	33.6497	22.64	29.918	71.874	88.408	20.452	9.004	10.435	16.501	18.349	79.897	85.1236	56.4393	41.442	46.0149	25.3684	24.9876	23.9283	33.4058	16.8481	29.6572	24.8264	20.1259	16.9135	41.816	44.0688	19.1458	9.2589	47.9138	32.6709		0.22477	34.7028
5.9544	30.81	21.7908	26.1555	68.945	80.835	19.316	8.331	10.333	14.981	16.621	75.725	93.8076	50.3916	36.1	51.0775	22.9288	28.0473	20.7742	34.7002	17.1584	30.8781	25.3901	20.4226	18.2484	37.104	41.4381	20.2248	8.3926	54.3098	33.5332		0.229358	33.959
6.0735	25.857	23.1046	24.4138	65.43	86.203	15.597	8.002	10.45	14.621	16.727	63.595	96.382	49.0014	35.433	45.709	24.9372	33.4844	22.2494	33.1155	16.8272	24.125	21.027	23.8315	20.0896	35.861	50.1852	16.4174	7.9302	52.1345	38.3398		0.233945	33.3694
6.1926	29.6218	21.6027	27.8688	70.017	76.586	15.297	7.147	9.472	16.837	14.896	69.267	85.1809	49.6107	32.636	44.6091	23.6586	35.4091	23.9581	35.3539	16.5948	29.7734	20.2713	24.0392	17.0791	31.207	46.019	17.7506	7.467	56.3677	40.8458		0.238533	33.2148
6.3117	27.6637	20.1005	26.7771	73.064	69.043	13.788	7.638	6.698	17.217	15.986	74.02	91.6747	53.7804	31.369	44.7704	23.1337	36.8012	22.2904	41.7784	16.9972	31.9025	24.9759	24.6497	13.2959	29.182	45.1905	16.3415	5.9584	54.2575	46.2897		0.243121	33.5545
6.4307	29.5476	22.9604	27.3139	66.797	63.236	11.765	6.601	5.67	13.833	13.277	68.076	94.3182	59.3439	30.145	45.7345	22.3383	40.9852	19.3307	43.1118	15.9617	27.5287	23.281	28.1689	12.8528	25.463	48.3765	17.3664	8.5832	58.9952	46.199		0.247704	33.2387
6.5498	29.1398	21.1296	24.3238	67.856	60.354	11.771	6.332	8.362	13.366	14.088	60.118	88.7352	65.1698	29.521	43.0463	26.7918	42.9532	19.0473	47.18	15.9621	23.5597	18.7538	30.3515	14.4972	22.071	44.6199	20.8319	7.1256	60.826	50.148		0.252292	32.9344
6.6689	30.109	21.2505	24.6228	67.778	51.596	11.63	4.692	6.696	15.467	15.092	66.875	85.3372	58.5871	27.182	43.6561	26.9598	49.1505	16.2652	45.412	14.3972	24.289	16.2626	29.706	15.8435	20.404	40.6964	22.5798	6.7111	58.0284	52.6211		0.256879	32.3299
6.788	32.7414	21.0063	27.3652	73.447	50.049	9.444	6.27	6.361	16.605	14.162	60.7	86.863	54.202	28.63	46.9421	26.6835	52.8491	17.4275	52.6062	13.0513	24.9317	15.5692	34.6872	12.0784	14.588	41.7742	26.0116	7.962	62.0792	46.5308		0.261467	32.7873
6.9071	35.9721	17.5902	26.0713	67.027	43.596	8.44	5.273	5.253	15.424	15.303	59.415	82.9895	45.152	30.08	40.8995	29.6144	52.0917	16.1721	52.65	12.454	22.2074	14.9699	32.8027	11.742	16.023	42.8964	27.2281	9.8318	66.028	52.5468		0.266055	31.9248
7.0262	34.1764	21.7737	25.2689	67.602	41.009	7.795	5.194	6.23	13.246	16.255	54.656	86.0142	40.698	29.261	41.8532	31.8108	51.2809	14.4953	49.1302	10.6623	22.2357	13.7186	29.1709	11.1495	14.478	34.756	32.6478	8.6333	66.9453	51.9697		0.270642	31.1372
7.1453	35.9642	26.5717	24.6826	62.993	37.548	6.861	6.048	6.058	17.42	13.278	52.066	79.7621	39.5708	32.107	39.781	30.9616	55.121	14.6861	50.6383	10.2948	22.8341	14.4769	27.3305	9.8774	10.596	32.927	21.7206	9.3023	61.3644	52.3713		0.27523	30.1738
7.2644	33.6366	29.3462	24.5372	71.238	34.527	6.308	4.622	6.998	13.74	14.612	52.939	79.9788	40.2631	30.028	42.894	37.2582	55.4687	15.5127	41.6999	7.6945	16.616	13.8605	27.7962	10.5686	10.006	32.3505	20.8971	7.2056	58.6978	51.7937		0.279818	29.7698
7.3834	36.2608	35.1678	24.5211	71.821	33.451	7.79	5.435	6.398	13.477	15.233	47.129	77.3057	37.3608	29.867	42.2618	38.042	63.1324	18.2607	33.44	8.4085	17.215	13.3637	29.3566	9.6673	10.846	26.7114	19.5377	7.6976	65.5363	51.1862		0.284401	29.8627
7.5025	39.2344	37.4894	25.8122	73.379	33.238	5.038	5.263	6.624	14.787	18.132	42.68	80.0272	41.2961	27.028	37.5871	36.0121	59.2699	18.6444	31.8794	7.5411	14.4215	9.1578	22.7743	7.3141	7.592	23.182	14.4117	8.1615	64.5048	58.6372		0.288989	29.0373
7.6216	40.1046	42.9251	26.1158	69.086	36.325	4	5.765	4.508	13.88	19.691	38.292	83.2263	38.7853	24.279	40.7332	36.8355	56.9549	20.2954	32.397	7.728	15.9236	9.065	20.6771	10.2301	8.092	20.4296	15.4367	7.9104	64.7539	58.9573		0.293577	29.1134
7.7407	35.3073	37.8553	25.2009	69.087	36.379	5.787	5.63	5.234	16.179	19.23	37.238	83.67	41.7146	23.708	44.9531	37.3121	50.1109	19.6882	32.0695	4.9281	14.3973	9.6207	19.9942	9.9878	6.797	20.5589	12.6494	7.266	70.3776	49.9512		0.298164	28.4294
7.8598	41.1158	41.0603	24.3817	67.9	36.912	6.537	5.045	5.453	15.254	19.432	37.636	76.3169	37.1764	24.131	39.5725	36.818	49.1545	19.079	33.9819	6.0427	11.6854	9.1163	19.7143	8.089	7.101	14.9622	14.5831	8.7272	61.242	52.4266		0.302752	27.6882
7.9789	47.6015	45.3435	26.7758	66.765	36.842	5.869	5.948	5.852	13.387	20.969	34.656	72.0502	43.7694	23.612	35.6086	34.1473	45.0679	23.7014	31.8788	5.9724	9.8204	9.7782	19.1	9.3237	8.197	14.5181	15.5734	8.675	62.8687	48.4924		0.307339	27.7388
8.098	48.5827	50.7373	21.4624	67.841	31.766	5.45	3.631	5.988	13.075	22.467	29.729	72.7389	41.5821	24.537	37.396	27.4021	48.2775	17.0233	30.6573	6.2514	7.0197	7.1828	16.9083	6.8293	7.072	16.3188	12.3986	8.7287	56.1872	39.4334		0.311927	26.1558
8.2171	46.8472	51.4016	21.1421	62.272	37.348	5.504	4.679	5.973	12.839	19.123	28.269	68.9177	42.933	28.731	39.4783	28.3138	53.9814	18.8376	29.7742	6.5793	6.5065	8.3333	17.4307	6.0212	6.42	12.6392	11.6822	7.2867	58.2513	35.2484		0.316515	26.0921
8.3362	53.3239	58.5399	20.173	62.28	39.426	5.947	4.767	4.912	15.643	20.428	29.985	70.8191	42.5296	28.616	44.5324	29.2569	48.6562	19.3114	25.5786	4.3637	6.84	9.4377	13.2469	6.5805	4.688	12.7063	9.6043	6.2487	63.2889	34.4033		0.321102	26.5378
8.4552	47.413	54.12	17.2655	58.907	36.94	6.79	5.151	3.91	14.271	14.224	32.002	70.0113	41.3083	25.133	41.1185	32.5865	46.4102	22.0374	26.3217	5.6512	7.0368	6.8005	15.0477	6.6504	3.703	10.35	8.7404	6.939	66.1225	35.0971		0.325686	25.602
8.5743	54.5616	49.0265	19.0038	60.617	41.782	6.845	4.581	6.212	13.107	13.403	31.549	69.6724	46.3874	28.358	33.7296	30.6245	41.6681	19.0478	22.093	7.9354	6.0621	5.1272	18.7377	5.8072	5.004	12.0106	8.2859	7.3048	59.8773	29.8728		0.330274	25.2765
8.6934	56.1266	45.8102	15.113	64.962	35.826	8.429	3.469	7.022	13.583	15.255	27.364	65.8253	49.3456	23.891	35.3149	31.5907	42.7333	17.5627	18.8593	6.1095	7.5538	6.6303	16.6419	4.1428	5.234	13.376	6.7176	6.9376	61.2174	32.2015		0.334861	24.8282
8.8125	54.3578	41.5545	17.7912	62.732	36.299	8.25	4.274	5.467	12.605	15.023	27.348	59.2801	49.6567	21.57	36.6256	30.3159	47.8585	18.928	17.506	6.1771	3.1369	8.9211	15.6514	4.234	4.752	15.8051	7.0446	5.4462	54.8715	25.7038		0.339449	23.9729
8.9316	56.5079	33.2921	13.2498	55.934	34.264	5.143	4.949	6.43	13.427	14.95	25.978	56.3737	53.0744	24.599	39.7733	34.529	51.8344	22.5103	19.0476	6.1038	6.7029	5.6107	14.5099	4.8148	3.885	20.1239	5.2558	7.6228	52.483	25.1743		0.344036	23.9384
9.0507	57.0384	31.8023	11.2946	56.745	34.317	6.319	4.343	5.332	10.673	14.656	25.286	61.0797	52.3192	25.085	39.9721	36.3408	47.3745	27.0264	12.9071	4.4648	6.6502	7.0048	13.9835	4.5016	4.843	23.22	8.1904	6.4521	48.5897	24.4464		0.348624	23.7419
9.1698	50.4938	33.6462	12.4637	56.909	37.03	5.605	3.168	3.967	11.783	13.416	24.611	57.7281	42.0433	24.655	36.5762	33.298	45.0279	29.6806	11.3717	5.2616	6.4951	7.052	12.7816	3.6237	5.154	24.5629	7.2252	8.0638	36.0087	24.8966		0.353212	22.4866
9.2889	51.1283	32.0983	11.2755	55.838	38.116	7.486	3.428	4.604	16.034	15.164	28.228	49.9045	37.2904	22.629	33.5646	32.8009	45.5016	30.6043	9.1832	4.561	5.8881	7.2957	11.081	3.4684	6.706	26.8413	6.237	8.4374	29.9262	26.0161		0.357799	22.0446
9.4079	46.0152	27.9535	8.8506	56.411	42.075	5.921	4.979	5.231	13.264	11.884	29.548	50.7383	39.5173	22.643	30.8166	39.7116	47.8432	33.7746	10.4021	5.6516	5.7933	7.636	11.03	3.8506	6.885	27.9817	5.9612	5.529	26.3785	26.5497		0.362383	22.0275
9.527	43.8576	25.1426	8.3744	50.659	42.571	4.442	4.141	5.809	15.515	15.2	25.985	54.3499	34.4234	21.279	33.6671	41.0234	48.5063	30.0369	9.7948	5.5668	5.9711	7.5574	11.104	5.5503	7.247	27.4026	4.8198	5.7507	20.6406	30.7072		0.366971	21.5698
9.6461	44.7971	26.1889	7.3498	56.391	39.133	5.569	5.266	4.779	12.25	13.028	25.442	52.3649	36.1836	25.151	30.2705	35.8459	51.7285	35.435	7.3747	4.7382	5.5231	8.8219	10.6681	4.9379	9.499	26.804	6.5994	4.4472	18.3372	28.8058		0.371558	21.4577
9.7652	35.9257	25.2919	9.2002	52.458	48.817	6.539	4.968	5.393	15.54	15.237	23.921	50.1199	33.6853	23.582	27.5592	44.103	50.9342	41.2251	6.2465	4.6075	4.8616	8.5536	7.6689	4.4344	7.97	23.595	7.1784	6.1366	16.8858	28.2574		0.376146	21.3632
9.8843	36.8874	28.8307	8.756	49.304	45.984	4.8	4.404	5.332	16.614	16.396	21.241	51.1596	30.3281	20.284	28.862	48.0507	47.7244	40.363	6.8102	5.6159	6.7922	8.5201	9.2611	4.9629	7.253	27.818	4.5368	4.2895	12.7135	27.3059		0.380734	21.04
10.0034	35.4741	26.2758	6.3905	47.651	46.956	5.454	4.013	4.113	16.484	15.869	23.048	56.3537	33.612	20.313	25.0111	44.0289	50.1871	37.4987	6.1973	4.5401	5.5577	8.8876	10.2866	5.6311	7.938	23.8424	6.0368	4.4604	7.9136	23.0452		0.385321	20.4357
10.1225	36.4816	26.4229	8.216	38.779	51.33	5.958	4.368	5.51	19.207	16.239	24.126	45.5079	33.2924	20.343	24.1201	44.5806	50.8699	32.9841	6.087	5.0485	4.6299	9.9284	10.5575	5.6292	8.156	18.6262	5.752	5.0579	8.7849	29.1186		0.389909	20.1904
10.2416	34.5461	33.3435	8.6157	38.279	45.165	7.136	5.439	5.526	17.102	12.951	23.465	38.862	32.783	20.975	20.3906	48.5976	49.091	35.3575	5.6848	4.5961	4.3414	11.6874	7.7061	5.7697	10.867	19.0214	3.7276	4.903	7.6606	25.3777		0.394496	19.6323
10.3606	33.1652	29.6383	7.7185	40.369	43.202	6.318	5.071	5.819	15.141	13.133	25.398	38.7427	30.968	21.293	20.1418	39.8664	52.2435	33.4964	5.5988	4.6201	5.771	11.1195	9.0523	5.0331	12.301	16.8806	4.2102	4.7076	7.0077	24.2529		0.39908	19.076
10.4797	32.4502	26.8819	6.1896	26.815	43.334	5.159	5.093	5.493	13.451	12.179	19.337	33.9462	29.2818	18.586	23.7347	38.0382	51.4244	33.4626	6.0497	4.413	6.9576	12.7358	8.9766	3.6996	12.5	13.7175	5.7377	3.5876	5.7961	18.0792		0.403668	17.5702
10.5988	30.4972	31.1102	9.7993	26.186	42.353	8.652	5.216	7.691	13.069	12.687	19.664	32.4218	24.1588	16.764	21.8769	40.4317	48.018	33.6148	6.5435	5.5731	4.7505	11.7933	7.6164	5.1825	16.037	13.322	4.5029	4.5652	6.5524	17.2478		0.408255	17.5966
10.7179	24.4057	25.9911	9.5597	25.841	41.049	5.58	5.615	5.026	15.759	15.449	25.041	34.6685	22.6337	20.106	20.4916	37.696	45.7137	28.0113	7.1621	3.9634	4.7813	11.2745	8.9024	4.0826	15.393	10.7046	3.5148	4.8311	7.3856	16.5307		0.412843	16.9054
10.837	30.7678	29.7349	8.1414	22.047	41.27	5.121	5.67	5.242	12.631	12.503	21.845	29.7682	22.2743	20.684	18.0266	25.6449	37.9839	29.4126	5.9285	4.1064	4.6867	10.4577	8.7768	3.4781	19.187	10.9981	3.501	6.3577	7.0207	10.9618		0.417431	15.8076
10.9561	30.4432	22.9952	7.2054	22.15	36.506	6.281	5.932	5.086	11.382	13.772	17.212	26.9399	21.6061	21.593	19.7517	22.8908	36.2376	25.3185	4.9167	4.0896	4.9526	11.6711	7.6291	5.1545	15.511	9.5713	3.9268	5.0166	5.0915	11.1079		0.422018	14.7314
11.0752	28.881	19.3976	11.5875	18.129	35.379	6.375	5.86	6.448	14.571	13.466	19.112	28.4608	19.2414	23.573	17.7386	24.1102	32.6815	20.9559	3.8231	4.313	5.5188	12.1394	7.1947	3.2954	16.591	8.3586	4.4599	5.7675	7.4272	11.9565		0.426606	14.5604
11.1943	29.8633	22.1593	8.1871	16.314	29.754	6.808	4.44	4.483	12.577	11.339	15.46	28.3134	17.3442	22.658	14.8221	23.962	30.7046	21.5612	4.5332	3.4173	4.5827	9.4156	5.7284	3.3245	23.57	6.9546	3.6905	3.9999	8.899	12.9983		0.431193	13.7288
11.3133	25.8371	18.5506	8.6641	13.35	26.959	6.295	5.764	5.788	13.061	11.618	17.796	27.6248	22.8738	21.343	20.1323	23.2825	27.1087	18.7187	3.8289	5.0514	4.3913	9.6379	7.1589	3.7426	24.933	7.3598	5.295	5.3238	6.5419	13.913		0.435777	13.7315
11.4324	25.3053	18.4405	8.4722	14.126	31.473	6.319	3.768	6.495	13.213	10.993	13.993	23.1781	20.5787	22.461	19.4244	19.2951	24.9524	17.0306	4.0082	5.0331	5.1293	9.5067	6.5302	3.5121	18.306	6.2512	5.8682	5.1432	6.4128	13.9702		0.440365	12.973
11.5515	30.4671	18.3288	8.1263	10.117	34.388	6.488	5.463	4.49	11.352	10.317	11.992	25.6419	15.0571	21.808	20.0936	15.639	25.2427	13.8681	5.8049	3.5551	5.29	10.2599	4.9621	3.1854	20.774	6.325	3.9497	5.1785	5.353	9.1839		0.444952	12.4234
11.6706	22.5091	17.0477	8.5958	7.717	30.474	7.183	4.726	3.486	13.757	11.166	14.434	22.6576	21.3126	21.423	15.946	18.7346	23.217	16.0163	4.5002	3.0969	5.5705	9.0074	5.3595	3.1942	18.227	6.1207	3.5206	4.3828	7.1486	10.1785		0.44954	12.0237
11.7897	21.3976	15.4405	10.2764	8.857	31.678	7.422	4.814	4.318	15.231	12.642	14.135	24.6349	19.3484	22.854	15.7853	17.8823	18.3739	12.5471	5.923	2.698	5.3139	9.7564	4.6405	3.6307	17.514	5.787	5.0302	4.9141	8.5098	10.5829		0.454128	12.0646
11.9088	24.28	16.3042	8.737	6.263	28.835	6.781	4.419	5.646	14.846	14.061	12.251	24.7087	20.0264	20.836	15.9021	16.4364	18.9185	13.311	4.639	2.2844	5.5665	11.0763	4.1021	4.528	14.238	6.8067	4.8391	4.1765	10.874	10.7772		0.458715	11.8823
12.0279	20.7751	14.2554	7.7697	5.032	18.777	5.84	4.235	6.38	11.956	13.645	10.343	23.3841	17.8485	21.895	16.1	16.1683	18.2368	10.6523	4.9151	4.0053	6.7268	8.5831	6.506	4.7464	15.481	5.8362	4.1739	4.1877	12.0761	10.4331		0.463303	11.0321
12.147	21.2758	13.1593	9.4977	4.578	21.489	7.134	3.976	4.65	11.037	11.596	13.294	22.9281	17.2319	23.78	17.6605	14.7473	17.645	11.2291	3.8193	3.7712	6.0835	9.2832	4.9247	4.3218	12.859	4.2632	2.891	4.8694	11.4948	9.7639		0.467891	10.8418
12.2661	23.4701	15.3727	6.8681	4.669	20.572	7.773	3.761	5.903	11.527	14.327	13.471	21.3886	17.8191	19.923	19.4283	14.7203	20.7151	11.6692	4.2802	3.8163	4.9867	7.7056	5.7415	3.6203	12.693	5.7726	4.2208	4.5309	10.4694	8.3393		0.472478	10.9851
12.3851	21.7106	13.9229	7.6941	3.421	22.269	7.371	4.315	4.076	11.062	14.161	13.578	14.9257	17.474	17.445	17.1346	15.5903	19.8995	11.765	5.6954	3.5768	4.8484	7.9121	2.9768	4.1811	11.022	5.388	4.1921	5.3664	12.4913	8.6443		0.477062	10.4703
12.5042	19.4677	10.5937	7.6977	4.468	23.13	7.184	4.024	4.179	11.811	11.039	13.582	16.3309	16.8532	18.205	19.2927	14.6278	21.658	10.5578	5.0427	3.195	5.0882	10.5811	2.9116	4.2404	12.229	4.6603	2.8004	4.5662	13.9487	7.6404		0.48165	10.3869
12.6233	23.6127	10.9664	9.2217	5.359	21.211	6.87	4.73	5.896	15.184	10.377	12.682	18.9723	13.9392	17.838	16.5316	12.8629	22.0599	10.9159	4.4871	4.4126	4.5857	10.9849	3.3569	5.1746	7.809	4.4408	3.615	3.8848	17.6368	9.4092		0.486237	10.6342
12.7424	24.2876	11.36	9.3617	5.798	20.072	6.851	4.628	7.639	12.381	14.816	12.605	23.6884	13.6892	21.472	17.2222	11.8279	21.1015	9.9918	4.1088	4.393	4.4345	8.8869	3.1853	4.3058	8.052	4.7532	3.2713	2.9406	17.0132	8.4946		0.490825	10.7544
12.8615	21.7905	11.2342	8.8353	4.14	23.744	6.551	5.607	6.209	10.344	16.388	10.355	25.658	12.8319	20.76	16.6692	10.8189	21.2666	8.8991	3.5741	3.1027	4.9958	11.8983	2.8592	6.8541	10.546	3.4665	3.1169	3.4773	15.5272	7.5173		0.495412	10.6346
12.9806	21.7313	10.3173	6.731	4.304	24.469	5.433	5.118	4.827	13.212	15.129	12.408	26.9445	12.0332	20.887	15.0407	11.3361	22.8466	9.7986	3.3083	3.938	7.4234	12.2277	4.4063	5.8919	7.149	4.5162	3.9268	3.1511	14.8482	8.4358		0.5	10.7263
13.0997	19.3855	10.5074	8.4476	3.245	21.757	6.191	5.376	3.713	13.312	15.366	12.336	25.3516	12.344	23.708	14.2181	12.4825	22.5724	8.631	4.0921	4.7261	6.0942	10.171	4.3924	5.335	5.519	2.8258	3.6531	3.5054	15.8521	6.9609		0.504588	10.4024
13.2188	19.0547	12.7487	4.7499	3.032	17.965	6.014	4.387	4.451	13.724	15.586	13.137	26.816	11.3617	18.193	16.7281	11.4966	26.9301	9.7983	4.7956	3.1674	4.6496	12.2038	3.418	6.084	5.488	2.8189	2.8608	5.4911	17.7594	6.4977		0.509175	10.3802
13.3378	20.1815	11.7531	7.0413	4.282	17.546	6.869	5.447	5.444	14.01	15.538	13.614	29.7266	9.4017	17.863	14.3716	10.1831	28.116	7.9676	3.2415	3.9153	6.3289	11.0077	2.1801	6.877	6.722	3.165	2.6472	4.7553	15.4903	6.8114		0.513759	10.4166
13.4569	22.8114	10.2346	8.025	4.411	20.308	5.062	4.439	5.527	11.864	12.591	13.044	36.5928	11.3477	18.169	13.5634	9.6101	25.5454	8.2129	4.0279	3.276	5.4416	10.7736	3.4584	5.5385	5.763	4.3948	3.9604	3.8525	12.9842	4.7209		0.518347	10.3183
13.576	22.241	9.2639	7.8816	4.437	17.378	5.874	5.298	4.539	11.589	15.806	10.975	34.2506	11.5227	19.958	13.5895	8.1619	21.9635	8.7056	3.1602	2.9498	5.0123	9.3127	3.2105	6.4098	5.994	3.4085	3.2238	3.2971	12.6668	7.1035		0.522934	9.97278
13.6951	22.6797	8.7184	8.8497	4.04	15.952	6.413	5.283	2.444	10.503	15.769	12.758	32.6008	9.9601	19.748	14.3927	10.3453	21.0027	10.4729	4.6271	3.4274	4.8877	8.8739	4.0142	6.2606	6.22	4.6773	2.8545	3.861	11.8048	7.1508		0.527522	10.0197
13.8142	23.2825	9.6219	11.1213	3.617	12.867	7.323	4.601	4.781	12.617	14.327	9.848	27.4599	10.7239	18.279	16.1627	8.1219	24.0369	6.3915	3.2421	1.883	5.2295	7.7565	3.3019	7.2259	4.639	4.7149	4.2885	3.6231	9.0406	5.7494		0.532109	9.52923
13.9333	19.3528	8.5396	9.977	4.035	12.515	8.869	4.626	4.41	10.31	16.323	16.451	31.5648	11.2708	15.653	16.1338	9.7845	24.1249	7.4938	2.9087	3.5212	4.2562	7.8932	4.3147	9.1803	5.652	3.8704	3.7757	4.5822	10.682	6.5814		0.536697	9.95507
14.0524	21.9646	9.4181	8.8176	4.044	13.031	8.152	4.103	3.346	10.358	15.731	16.795	31.9638	12.898	16.709	11.3741	8.2272	23.1131	7.171	3.0398	3.9982	5.5882	9.5444	2.2872	8.3031	5.444	3.9966	3.5325	4.5463	11.6051	5.7166		0.541285	9.82728
14.1715	20.4456	8.1923	10.4629	3.454	11.036	9.221	5.833	5.734	8.55	15.649	13.967	32.5722	10.6286	16.232	12.8581	8.3004	19.6347	8.5229	2.7901	3.0975	4.8289	9.282	3.5356	11.7091	5.427	3.9989	3.3959	3.8287	9.1075	6.6826		0.545872	9.63258
14.2905	19.4888	10.0274	10.8102	3.6	10.527	8.121	5.304	5.293	11.403	16.42	14.203	32.9825	11.3866	17.845	20.829	8.8663	20.3196	8.5773	4.6122	4.6258	4.6556	7.1695	3.4514	9.5753	6.329	4.2317	3.4785	3.4975	9.3315	6.3508		0.550456	10.1104
14.4096	18.8866	9.5724	11.9993	3.624	8.401	8.627	4.881	4.458	10.309	16.962	12.616	26.3209	13.5666	17.381	18.332	8.5329	21.9004	7.3507	2.8478	4.2266	5.0291	6.5255	3.7854	9.7696	5.721	3.1763	3.5268	3.2929	8.1764	7.2126		0.555044	9.56703
14.5287	20.9253	10.5597	9.7904	3.438	9.439	8.038	4.565	5.361	10.117	19.58	14.426	24.8642	12.1457	17.877	19.2872	9.8244	18.2433	6.5615	3.496	4.8832	5.6355	9.1047	4.8312	8.4973	5.847	3.867	3.6431	4.1671	8.1848	5.6152		0.559631	9.76049
14.6478	21.8093	7.8972	11.3909	3.251	9.103	9.111	4.258	3.871	9.272	16.802	15.186	19.9377	13.3683	17.033	19.1119	9.6271	20.3914	5.8299	3.5981	3.4501	6.3692	7.4582	4.5473	9.2088	5.527	2.8411	2.7602	3.8876	7.9234	5.7919		0.564219	9.35379
14.7669	19.9859	7.705	15.6002	3.381	7.021	10.578	4.587	5.75	8.992	18.477	17.214	19.1383	13.0759	15.618	19.1597	10.9612	21.443	5.936	3.9866	4.1324	4.0301	9.8906	3.4904	8.6771	4.755	3.9342	2.8632	3.7714	6.9656	5.6414		0.568807	9.55871
14.886	18.9442	8.4462	14.592	3.078	7.497	8.354	4.709	5.743	7.861	17.965	15.592	19.0185	12.8175	14.438	19.5103	9.8109	20.3717	6.7097	4.4212	2.8621	4.4195	9.3096	2.1888	7.3543	3.021	3.2907	3.7561	5.7442	5.6056	6.4546		0.573394	9.12952
15.0051	20.589	8.7062	11.0041	3.652	6.57	6.502	4.976	4.742	8.152	17.748	16.947	18.6015	10.9052	14.786	20.6223	12.2098	21.5658	5.7606	4.3338	4.8695	5.2615	8.5186	2.51	9.6463	4.228	3.8424	4.4213	4.8864	7.8536	4.4353		0.577982	9.29487
15.1242	17.6839	8.9779	13.0557	3.085	6.472	7.547	3.896	4.804	7.953	17.372	17.338	15.7149	13.2416	14.959	18.9117	11.9954	19.998	5.4641	4.0195	3.9211	6.8034	6.9944	4.0967	10.6598	4.746	3.6538	4.5501	4.6775	8.3686	5.8262		0.582569	9.22621
15.2432	16.8469	8.3354	13.1334	4.135	6.432	7.952	4.993	5.626	8.2	13.599	18.323	15.5281	14.2831	14.498	22.5761	11.0828	22.7379	5.9053	3.2913	3.9126	5.7417	6.9977	4.6213	10.9865	5.176	4.114	4.1717	2.7613	7.2908	4.5999		0.587153	9.26173
15.3623	17.9646	9.8288	12.6917	5.404	5.277	7.798	4.444	3.863	8.006	13.863	17.068	18.0124	14.3029	14.306	21.5146	12.1834	22.3029	4.6813	3.2009	3.3193	4.6352	9.5539	3.9893	10.6655	4.512	2.6911	5.5382	5.1367	5.5954	4.4325		0.591741	9.22605
15.4814	18.5908	7.7682	13.1943	5.645	5.394	8.793	5.029	4.479	8.243	14.953	16.786	19.6307	16.6246	14.038	21.3037	12.5444	23.6806	5.8983	3.3213	2.297	6.413	8.7524	4.1962	10.8563	4.864	4.1573	5.7715	4.8213	7.1636	5.4542		0.596328	9.68879
15.6005	19.8677	7.4091	15.1677	3.739	7.266	10.283	5.5	6.043	7.729	12.976	15.922	17.9372	14.5697	15.672	25.3605	12.6321	22.8929	6.3073	3.2089	2.8791	6.2443	8.6146	2.752	10.2147	5.39	4.4075	3.2142	4.1428	6.7595	5.6972		0.600916	9.6933
15.7196	17.6673	9.7806	12.8095	2.533	4.315	11.173	5.089	5.44	7.885	14.489	17.699	15.86	17.6823	13.591	23.7963	11.9794	19.8683	5.9737	2.6154	4.5444	6.7558	7.8424	2.8287	8.9764	4.523	3.5954	2.7839	4.7616	5.7765	4.6182		0.605504	9.24177
15.8387	17.0231	7.4613	12.0486	3.076	4.484	10.951	3.27	6.375	7.493	13.097	19.689	17.8941	16.5932	15.688	23.2013	11.1366	23.8172	5.5401	4.3299	5.7504	5.3566	7.811	4.3416	10.1081	3.414	3.8535	4.0393	6.3497	6.588	3.9204		0.610091	9.49003
15.9578	18.3663	8.7561	12.0057	2.258	4.839	14.509	6.166	5.142	7.28	13.709	20.195	17.3135	16.5149	15.722	21.7262	12.5556	27.945	5.1284	3.6262	4.1582	6.4547	8.0889	4.1899	11.8212	3.216	2.5313	3.0734	6.1923	5.4953	2.6173		0.614679	9.71988
16.0769	19.9382	8.7178	16.8072	2.145	4.751	17.156	6.678	4.242	5.651	14.535	20.922	16.8234	16.2878	12.939	20.2118	16.866	27.2896	6.5377	2.2665	5.1559	4.1246	7.4474	4.5379	11.5577	2.486	4.3557	3.8465	6.3908	3.0458	3.3257		0.619266	9.9013
16.196	15.8598	11.0896	13.8272	4.259	3.712	16.539	5.464	6.087	7.266	10.343	20.842	16.2669	16.6407	12.344	23.866	15.384	21.3467	4.9693	2.5744	3.9583	5.4494	6.4881	3.9631	9.6301	2.523	4.2153	4.4338	6.027	4.166	4.7223		0.623854	9.47523
16.315	18.2355	8.2803	14.3931	4.195	3.408	20.222	5.348	4.593	5.97	9.619	21.074	15.8596	19.8311	16.489	22.0972	19.835	23.4885	4.6707	4.221	3.9686	4.5257	6.872	3.0475	11.0844	3.337	3.2939	3.3282	6.7882	6.5327	4.1931		0.628438	9.96004
16.4341	18.313	6.0896	15.2312	4.887	3.862	19.326	3.8	5.352	8.358	11.311	20.035	16.796	20.9347	15.904	21.0649	19.4651	23.4851	5.7441	4.1537	2.9785	4.9173	6.6338	4.0698	10.8423	3.676	4.1892	2.7964	9.3393	4.1537	2.9136		0.633025	10.0207
16.5532	18.7479	7.2489	13.8169	4.022	4.092	23.956	4.511	5.113	5.219	11.27	18.94	18.2263	20.6829	12.142	20.7228	18.455	20.2798	6.2523	3.567	3.0294	4.968	7.6313	3.8481	11.4748	4.697	3.4997	2.3349	9.8544	3.3413	3.0625		0.637613	9.83354
16.6723	18.8512	7.1153	13.0767	2.904	3.287	22.45	6.023	5.378	6.781	9.042	21.335	18.5811	23.936	13.238	24.2279	18.6066	19.2506	4.2117	4.4764	3.3359	5.6902	7.7094	3.5272	10.7032	4.314	2.6459	4.6127	10.7861	5.188	3.4427		0.642201	10.1576
16.7914	15.3522	6.8827	15.1701	2.85	3.863	21.176	6.751	6.5	6.54	8.358	21.705	15.9249	27.0568	14.219	24.7105	19.9523	17.3154	4.8381	3.1752	4.1765	5.0388	8.1821	3.5928	11.4625	2.233	3.6749	4.4302	9.5982	4.9208	3.7569		0.646788	10.1136
16.9105	16.341	8.9607	15.8684	3.804	2.912	21.813	7.739	7.407	7.129	8.508	20.776	14.5172	28.7451	14.674	25.4064	21.9204	19.0604	4.5588	3.9943	4.2158	5.6847	8.5361	5.8453	13.687	2.725	3.6827	3.9143	11.7288	4.5945	4.101		0.651376	10.7617
17.0296	15.2479	7.5711	15.1748	4.376	2.819	23.901	6.064	5.503	9.418	7.711	20.052	15.4269	25.939	12.676	19.9235	23.5109	20.3382	5.0233	4.6028	3.0915	6.6322	8.1984	4.2265	13.6952	3.28	2.2081	1.434	9.86	3.6067	4.0395		0.655964	10.185
17.1487	16.6655	7.3043	14.9278	3.521	3.629	21.265	8.29	5.221	8.799	7.586	21.377	17.7334	28.4823	12.146	17.8225	24.8029	17.433	5.0025	4.4583	4.2727	5.6131	8.6221	3.0408	13.4326	4.34	2.8924	2.8244	10.4047	4.5206	3.7747		0.660551	10.3402
17.2677	14.7197	6.8333	16.9582	4.972	3.341	17.387	8.501	5.907	7.858	8.008	17.705	19.9901	28.1817	13.557	20.0626	29.7816	21.0317	5.7279	3.0033	3.7306	5.9941	7.3261	3.8939	10.8098	4.042	3.7586	3.978	12.3478	4.2754	4.7943		0.665135	10.6159
17.3868	16.5286	6.6342	14.4861	3.175	3.78	21.309	10.95	5.794	6.875	8.346	21.095	19.8541	26.4709	14.138	16.9566	29.8966	18.5088	5.0188	3.0066	3.0228	6.3721	8.3045	4.21	8.6001	3.915	2.5364	4.3168	11.2905	4.0976	3.2157		0.669723	10.4235
17.5059	13.9574	7.5582	17.2605	3.729	3.513	23.447	10.476	5.342	5.744	9.31	19.903	24.9061	29.3069	12.939	17.4679	33.5703	17.6516	4.1783	3.8122	5.0741	5.7413	8.3869	3.6341	10.5329	3.893	2.0996	3.7239	9.8961	5.0267	3.7619		0.67431	10.8614
17.625	18.2796	8.9227	16.0858	6.058	3.992	23.58	10.547	7.551	5.969	8.378	17.463	24.1806	33.6032	12.635	16.2991	33.6067	16.7138	3.4034	4.5481	4.2459	7.2707	7.5295	5.0689	10.4886	2.26	3.849	3.0555	10.3308	4.0956	3.6441		0.678898	11.1218
17.7441	15.888	8.7966	13.3201	5.703	4.592	24.828	15.83	10.554	5.473	8.235	19.772	22.7698	33.3299	13.428	15.5158	29.1402	18.6107	6.5919	4.5725	3.8301	7.5963	8.842	5.2751	9.4899	3.178	2.7861	3.8534	10.3465	4.3986	3.7511		0.683485	11.3433
17.8632	14.9877	8.8691	14.6826	4.871	3.193	26.617	17.735	9.044	6.517	8.685	16.855	20.1	31.8773	10.633	16.9136	27.3661	17.0287	4.6228	4.9859	2.5657	8.1337	9.6494	5.1305	7.705	2.879	2.947	2.6858	11.4789	5.368	3.2093		0.688073	10.9112
17.9823	15.3687	9.5348	16.5924	4.663	4.499	24.29	18.676	6.643	6.245	8.282	14.419	20.8623	36.3269	8.805	19.4148	30.5843	15.2873	5.9845	2.713	3.7871	7.3246	9.0996	3.9778	9.8463	3.511	2.0297	3.1897	9.513	5.0551	6.4924		0.692661	11.1006
18.1014	16.1159	9.9881	16.1668	6.246	5.59	21.576	22.972	9.63	6.833	8.386	10.419	22.6244	38.9234	9.483	18.346	30.4267	16.3007	5.7373	3.5909	4.3345	7.7828	9.039	5.3671	9.9918	3.636	3.9303	3.1846	8.5205	4.655	5.5372		0.697248	11.5111
18.2204	15.0801	8.735	18.2773	4.797	3.081	20.908	27.921	11.104	7.457	9.894	15.092	24.2677	41.2136	10.421	16.0732	31.0089	12.981	5.7366	3.5457	4.2306	5.6681	9.5853	4.8654	9.4763	2.593	3.6163	4.5159	7.9673	3.2432	5.1022		0.701832	11.6153
18.3395	13.8904	9.6012	17.426	4.809	2.884	23.314	25.843	8.092	8.103	14.237	14.602	25.6509	38.4956	8.983	17.3965	28.9527	14.5234	5.8889	2.8828	3.8187	6.455	8.7309	4.426	8.5998	3.737	2.2245	3.2874	9.7506	5.7187	3.9977		0.70642	11.5441
18.4586	10.4569	11.0705	15.5261	6.123	3.036	23.038	30.199	8.996	8.854	14.78	11.805	24.4678	35.0271	12.347	18.2163	28.5483	12.059	7.1101	4.6086	3.0837	6.7469	8.788	5.4825	9.1466	2.805	2.5986	3.201	7.624	5.3475	4.7334		0.711007	11.5275
18.5777	11.7965	11.3073	15.6695	5.022	3.146	17.236	32.309	10.598	12.523	20.67	13.072	22.2532	37.7262	12.854	17.4054	30.2936	14.0772	4.9664	4.3296	5.0193	5.7621	7.9627	3.7562	8.9722	3.086	3.4068	2.831	9.6103	4.5632	3.9722		0.715595	11.8732
18.6968	11.0135	12.7896	15.2505	3.68	3.493	14.156	30.055	11.485	15.854	20.579	15.662	22.3279	35.6453	15.96	19.7641	30.852	12.9496	5.0523	4.4118	3.5658	5.5155	9.0801	6.1178	9.2497	3.403	3.2425	2.6751	8.3888	5.5241	2.8068		0.720182	12.0183
18.8159	11.9841	13.4076	17.749	3.531	3.643	12.434	28.942	12.649	21.081	27.079	15.054	23.0573	32.8864	15.851	15.0994	27.2514	13.3608	5.9801	4.605	4.7249	7.1349	6.8755	6.5753	7.109	3.074	3.6355	3.766	9.1971	5.9232	2.9376		0.72477	12.2199
18.935	12.3772	11.2272	16.4806	5.453	4.438	13.594	28.513	13.217	19.312	27.054	14.991	22.5932	29.9723	16.611	17.1171	24.3893	13.61	4.5846	5.2761	4.3401	7.9627	9.9577	7.2363	8.0525	3.579	4.336	3.0519	7.9703	5.1865	5.9706		0.729358	12.2818
19.0541	10.8951	14.7164	14.3198	6.645	3.739	12.446	30.466	11.633	19.865	32.21	15.265	24.9457	28.2416	17.003	16.8763	25.6196	12.5179	5.7941	4.6123	4.9697	5.9614	9.1148	6.0996	7.1285	2.696	2.5979	2.3053	5.5866	5.2126	4.5381		0.733945	12.134
19.1731	11.4728	15.3672	15.2769	3.776	5.143	9.166	24.476	16.593	21.389	35.394	17.42	23.1131	27.7417	21.77	18.3079	24.9756	15.595	6.9847	4.888	7.315	8.0118	9.4529	6.5957	6.2027	3.469	2.6617	4.4296	5.8081	6.5047	4.2221		0.738529	12.7841
19.2922	8.314	15.6754	17.1841	3.258	2.75	8.39	22.174	18.87	25.441	39.497	20.826	26.1481	22.6009	20.672	21.4078	26.8755	14.6057	6.1866	6.8196	6.8456	8.9438	10.0136	6.4023	9.5159	3.847	3.0035	3.7343	6.0694	5.8411	4.694		0.743117	13.2202
19.4113	8.1187	17.4737	18.4499	5.591	3.732	6.917	17.43	21.173	29.062	48.852	25.516	23.5936	21.2821	20.27	23.3822	28.0921	11.4598	5.9564	4.9447	5.988	6.9615	10.5423	7.3604	6.8803	1.72	3.1809	3.1502	6.5546	4.5778	4.6683		0.747704	13.4293
19.5304	9.3254	20.6934	14.9548	4.09	3.447	7.462	15.28	29.912	34.664	57.671	30.02	23.7726	25.9829	22.908	26.2121	30.164	12.3614	5.6802	4.8589	5.8574	5.2843	9.3612	6.8489	6.1567	3.114	2.8864	2.0446	5.6103	5.2735	4.6551		0.752292	14.5517
19.6495	11.5569	22.4305	14.3344	5.535	2.809	6.738	13.302	35.899	38.927	58.453	31.467	24.14	22.6972	28.16	29.3673	28.3555	13.6182	6.6082	4.4182	5.5926	7.7852	9.562	7.8155	5.5396	5.008	3.7415	4.574	7.6991	6.7652	3.8377		0.756879	15.5579
19.7686	10.026	21.7296	11.3314	6.996	4.539	5.933	10.97	36.849	46.23	50.907	38.426	25.5311	25.1124	30.111	26.426	26.7688	11.7851	5.1482	4.7967	8.112	9.0755	10.0091	5.0687	5.5907	4.291	3.6193	3.1532	6.1323	5.4721	4.5521		0.761467	15.4897
19.8877	7.2055	21.1548	14.1916	6.618	4.235	5.133	9.785	37.008	54.487	45.142	43.88	30.2431	19.0889	31.878	29.4718	27.792	11.1028	5.937	4.8447	7.027	7.4811	15.5907	7.7282	7.7048	3.988	3.4168	2.8209	4.2303	5.4473	5.7767		0.766055	16.0137
20.0068	6.563	25.5217	13.8128	5.807	2.748	4.15	9.452	38.607	65.65	37.418	58.739	31.5788	19.9432	35.835	36.7818	27.4036	10.0354	7.055	4.0232	7.8473	8.6786	12.3467	8.2555	6.3421	3.281	3.3903	3.6426	5.7438	5.5497	5.799		0.770642	17.0667
20.1259	9.6087	24.2211	14.3886	7.673	3.227	5.476	8.099	38.851	62.18	33.092	74.04	34.9817	22.0229	37.28	37.7932	29.886	11.4365	7.0468	4.8209	9.5521	10.0798	9.6819	8.7582	6.0046	3.709	2.4744	3.3806	4.1911	4.8342	7.2336		0.77523	17.8675
20.2449	10.5195	23.1346	13.5862	7.643	4.79	3.941	8.343	38.438	60.323	23.597	82.249	40.3485	20.3966	35.398	34.9986	30.1225	11.0818	5.829	3.3672	11.4605	8.8547	11.1072	8.1116	8.4351	2.743	3.0361	3.9372	4.5657	5.0014	6.2764		0.779814	17.7212
20.364	9.0509	24.819	12.6364	7.863	4.36	4.302	8.422	36.055	61.663	22.29	89.707	45.1804	25.0128	39.303	40.6775	28.12	10.7509	7.1075	5.087	8.9924	8.0288	12.8889	7.0712	8.578	2.021	2.5467	3.4163	4.1873	5.4088	7.2469		0.784401	18.4265
20.4831	8.625	26.5479	9.4604	8.185	3.55	2.726	7.32	36.259	64.486	20.903	90.064	53.0583	24.6893	41.318	43.8001	31.7137	11.9602	7.166	5.3702	8.5674	11.231	14.3681	8.314	6.6002	3.811	2.9051	3.8963	5.3381	3.5575	7.5346		0.788989	19.1108
20.6022	8.5014	23.5934	10.3215	5.748	2.86	2.918	5.992	33.614	62.443	14.964	79.487	59.2454	25.2283	41.984	51.4011	33.9674	11.538	7.4546	6.1177	12.0703	13.1196	12.6882	8.0828	6.5386	3.946	3.1722	3.1282	4.5507	3.9357	7.8116		0.793577	18.8808
20.7213	7.8321	24.2468	13.3258	6.774	3.805	3.45	4.851	25.746	54.813	14.839	66.155	64.8503	25.909	43.42	45.4712	37.1966	10.72	8.4726	5.6719	16.7609	14.2175	15.8873	10.0672	7.5823	3.843	3.8099	4.3417	5.1676	4.4468	8.2295		0.798164	18.7301
20.8404	8.5253	26.8582	13.2288	9.094	3.801	3.305	5.045	21.607	41.918	12.087	45.943	68.7043	27.6081	45.875	54.439	41.4501	14.1822	6.3796	5.6952	17.198	13.8033	14.1286	11.9355	8.2388	3.718	3.0851	5.3842	6.4155	5.0704	7.0817		0.802752	18.3935
20.9595	8.4768	28.6151	9.3226	9.323	3.925	3.471	6.329	19.581	38.559	10.868	36.334	58.8201	28.3422	55.309	64.5067	42.5876	12.2992	7.9132	4.599	21.6342	15.7994	16.8573	9.8891	9.7517	4.132	3.4397	4.3035	4.9095	7.1987	8.5775		0.807339	18.5225
21.0786	9.8218	26.8328	11.2354	8.45	2.632	2.859	5.189	16.181	35.557	8.352	27.973	44.6128	32.0529	50.181	65.6907	50.1621	13.7682	6.5212	6.6205	20.3502	14.2152	17.327	11.8266	9.3151	5.145	3.7902	3.612	3.8466	5.8761	7.8351		0.811927	17.5944
21.1976	10.9765	29.6682	11.3896	8.865	2.645	4.4	5.258	16.633	32.599	9.522	21.458	48.8659	35.5097	55.799	64.0887	48.1064	13.151	7.1299	6.7213	20.7307	18.6966	19.442	12.8751	10.839	4.989	3.9457	3.7226	3.4554	5.229	9.6497		0.816511	18.212
21.3167	10.9135	32.2682	11.2967	9.559	2.884	3.715	5.515	12.6	27.748	7.505	20.519	37.054	42.4019	53.859	66.4169	51.3098	11.7106	7.7943	7.319	18.9021	19.5346	20.9366	13.0409	9.805	3.78	3.1421	4.9621	3.3268	5.4065	8.0928		0.821098	17.7773
21.4358	13.0648	35.1458	11.4646	13.709	3.596	3.513	5.959	10.454	24.355	5.343	17.001	28.2902	41.4388	53.923	68.564	53.9799	13.9177	8.1016	7.7708	20.941	17.1289	20.8202	14.9471	12.0013	3.438	4.8486	3.8741	5.7911	3.8237	10.7576		0.825686	17.9321
21.5549	14.183	35.3758	11.4255	11.058	4.319	3.572	6.762	10.631	24.9	6.111	13.225	17.2652	51.4585	57.665	68.0702	55.0424	14.6015	7.7361	9.6913	23.886	16.6472	22.8407	11.9338	12.6755	3.667	4.6471	4.291	5.8026	2.7589	10.3415		0.830274	18.0861
21.674	11.8982	40.8406	11.451	9.915	4.351	4.66	5.205	12.682	23.057	4.547	11.126	10.6581	50.3256	58.938	72.5456	52.9509	14.3504	7.6352	10.5185	26.4884	18.6444	21.2813	14.8736	13.5433	4.545	3.7854	6.6083	4.6054	3.4679	10.0162		0.834861	18.1838
21.7931	17.8332	47.0006	10.3959	10.236	5.489	3.785	5.563	12.446	20.497	3.919	9.241	9.6458	50.8436	59.92	58.3547	52.6263	15.8689	9.1992	15.0136	20.6841	18.6977	20.9173	16.7685	12.6406	4.547	3.1668	5.7186	5.2686	4.4297	9.9727		0.839449	18.023
21.9122	23.6044	45.6495	11.5657	9.875	4.058	5.153	5.277	13.861	17.092	4.123	6.955	7.5982	51.8846	59.363	42.9111	49.9051	16.3686	10.7597	13.218	18.4559	16.6218	20.6531	19.4361	12.5923	3.071	3.0013	6.54	4.5144	3.1862	8.9147		0.844036	17.207
22.0313	24.9033	52.1534	15.6994	15.102	3.81	4.446	8.339	13.636	14.511	3.228	6.052	5.5001	52.4027	58.426	28.5911	42.1213	18.2461	9.9699	13.5319	17.0925	10.3365	19.3317	20.6658	14.0368	4.205	3.3926	7.4777	5.2794	2.7376	7.3448		0.848624	16.7523
22.1503	30.731	57.1074	15.5272	13.9	5.111	3.875	7.312	15.591	15.645	1.888	7.267	4.4135	55.4599	52.424	19.1466	41.666	16.9358	8.789	13.6067	11.963	11.717	18.9863	20.3242	13.9956	5.172	3.3223	7.2691	4.262	2.8594	8.4336		0.853208	16.49
22.2694	33.6576	61.6124	14.1583	11.886	3.672	2.919	8.144	19.713	15.42	3.057	5.897	4.2137	59.2728	46.325	17.7609	33.3437	19.2741	11.2988	17.1317	10.4487	10.6645	16.7654	17.3542	19.378	5.975	3.9759	7.4058	4.5206	3.9169	9.5336		0.857795	16.6232
22.3885	31.7209	66.1016	12.9677	14.337	4.93	2.408	8.484	19.375	12.401	3.276	3.224	4.5245	50.2799	41.384	15.3476	23.6135	16.7807	12.1374	18.7748	9.1667	8.8422	14.2617	16.1964	19.2642	6.068	3.6122	9.1036	6.476	4.3532	6.9072		0.862383	15.544
22.5076	34.2692	66.9803	14.9408	12.157	4.806	4.059	9.171	19.98	10.722	2.63	3.769	2.7562	42.371	34.785	14.9398	20.2823	20.6141	15.9449	17.7415	8.5229	7.7978	15.1525	16.2139	19.2646	6.703	2.8231	8.3989	5.3695	4.4643	5.6447		0.866971	15.1091
22.6267	36.0546	60.713	12.7225	12.555	4.64	4.268	10.904	24.305	9.697	1.65	3.139	3.4531	35.628	26.679	10.9693	13.9558	21.6614	15.1652	17.9484	6.4406	5.5394	12.5112	15.4556	19.4097	8.95	3.4268	8.2173	4.1485	3.2068	6.0581		0.871558	13.9824
22.7458	33.3848	47.0968	15.3693	12.737	4.643	3.368	10.737	24.738	8.01	1.934	2.967	1.893	26.1219	20.77	7.1264	12.443	22.7017	15.4651	17.756	5.45	3.8758	10.4089	15.8726	19.6692	8.832	2.9219	6.6538	5.4628	3.1482	6.2317		0.876146	12.593
22.8649	30.0303	39.1944	17.3338	11.052	3.727	4.316	16.579	29.831	7.708	1.949	1.584	2.6279	19.3384	19.244	7.5119	9.632	20.7899	16.896	17.78	4.7695	4.3446	9.0577	14.1342	24.724	8.164	3.0873	8.9274	4.514	3.0724	6.2186		0.880734	12.2713
22.984	21.0055	34.6111	16.8134	13.429	5.048	3.674	18.497	30.566	6.708	1.361	1.454	3.3142	14.697	13.261	6.6439	10.5506	24.1074	19.4379	16.0608	4.0502	3.7473	6.6845	11.8501	24.2532	10.756	2.9048	6.9176	5.8324	4.5488	5.4672		0.885321	11.6084
23.103	17.2337	33.7856	16.8084	13.57	3.982	3.921	21.825	29.176	3.495	1.26	2.715	2.9924	10.1475	13.852	5.1387	9.8602	25.3738	21.008	12.492	3.6268	3.4779	5.8661	8.4666	24.5848	8.758	2.795	5.8286	6.8634	3.4481	5.8765		0.889905	10.9409
23.2221	11.2382	24.3147	17.0097	11.929	3.665	4.441	28.136	28.782	3.864	1.114	1.285	2.5224	11.0086	11.295	3.6322	9.7438	22.0173	25.9055	12.4781	3.2648	2.9286	6.5907	7.9645	21.9584	11.04	3.6647	8.3872	5.6329	2.7052	6.2354		0.894493	10.4918
23.3412	7.0683	18.7318	15.5438	13.837	4.918	6.11	30.465	25.937	3.836	2.502	1.255	2.0982	9.3528	10.342	4.3818	5.9693	24.4126	25.9738	10.1504	4.4931	3.282	4.867	7.9982	23.2647	12.118	3.4965	9.6689	5.9149	3.3431	5.6458		0.89908	10.2326
23.4603	5.8497	13.2211	16.9183	14.879	4.823	4.698	30.305	25.514	2.977	0.999	0.931	0.956	8.955	8.703	4.181	4.3895	23.6823	25.3744	8.779	2.4344	1.9172	5.0631	7.8789	24.572	12.557	4.1269	9.5915	6.6408	3.3474	5.2774		0.903668	9.6514
23.5794	4.8857	9.3382	22.3579	14.547	6.587	5.9	37.788	22.137	1.921	1.391	0.906	1.6207	9.0201	6.719	3.3396	6.0669	28.1185	24.6753	10.0755	2.2726	1.1526	4.2541	6.2903	26.5301	13.15	4.7987	9.992	6.3369	3.6744	6.4291		0.908255	10.0758
23.6985	4.2302	7.625	20.0094	15.84	6.322	5.857	36.389	19.389	2.711	1.148	0.954	1.8918	5.8131	5.81	3.2132	6.0355	26.5513	20.3336	9.2444	1.6077	1.1267	3.7124	6.0748	26.3182	14.916	3.7447	9.3986	7.3117	4.7878	5.2484		0.912843	9.45382
23.8176	4.8635	5.1681	20.5805	16.427	4.349	7.423	36.101	16.186	2.575	1.584	1.033	1.9599	4.2382	6.133	2.2441	5.756	21.1269	17.5489	6.1875	1.8142	1.7421	2.6226	5.1082	24.7167	14.386	3.35	8.0286	6.5714	4.7445	5.7541		0.917431	8.67743
23.9367	3.9385	5.4345	21.8875	17.189	3.502	7.164	34.564	12.491	1.766	1.725	1.189	1.187	4.5063	4.89	1.9745	4.8429	18.8813	15.3877	5.1415	1.9651	0.7291	3.1519	4.4919	21.5384	15.629	3.1077	9.1062	7.0088	4.2782	4.7239		0.922018	8.11306
24.0558	2.7845	3.5234	23.8826	22.445	5.894	7.225	34.564	12.186	0.748	1.059	0.236	1.5676	2.8947	3.546	2.6891	2.9126	14.2618	13.7047	5.8856	0.9432	1.2133	2.408	3.4889	19.3275	16.578	3.1383	8.6456	8.7912	2.8526	4.5097		0.926606	7.79686
24.1748	1.774	2.4726	26.8762	19.853	6.156	7.963	32.299	7.994	1.332	0.994	0.73	1.2447	1.8074	3.718	2.3883	3.2303	13.8513	13.006	4.2344	1.0308	0.5731	1.9034	2.9767	21.266	16.269	5.7404	8.0439	7.7474	3.9461	4.6687		0.93119	7.53632
24.2939	2.4442	1.7703	34.7222	21.826	6.32	8.537	24.57	8.514	1.578	1.174	0.765	0.3806	2.0078	3.162	1.9481	2.1191	11.0226	11.4971	3.8752	1.9123	0.5752	2.2598	3.5479	18.2594	17.076	4.5807	10.1076	9.3964	3.4599	6.0769		0.935777	7.51618
24.413	2.0898	1.5794	37.0386	22.639	5.487	8.427	20.157	8.069	1.623	0.856	0.61	0.8327	2.5029	1.686	0.7324	2.026	12.7586	9.7496	2.7603	0.8026	0.6318	2.5333	3.0287	15.2949	15.544	2.8746	9.6901	10.0437	4.2694	5.5235		0.940365	7.06203
24.5321	1.8021	1.6075	44.2146	21.807	7.09	9.097	17.203	8.071	1.469	0.534	0.548	0.3848	1.9177	1.995	1.8494	2.4354	10.9947	10.0445	1.7683	0.2299	0.3205	1.9344	2.7862	13.062	16.391	5.0305	11.4682	11.961	5.7429	5.2342		0.944952	7.29979
24.6512	1.0339	1.9743	51.4522	24.059	4.648	9.885	13.144	5.757	1.349	0.727	0.718	0.7523	1.5827	1.361	0.7841	2.2557	10.1976	8.9723	2.1836	0.388	0.2868	1.1591	3.1472	10.82	11.938	4.5493	9.5412	13.9735	6.0596	5.0325		0.94954	6.99106
24.7703	0.5863	1.0884	51.457	23.579	5.638	14.502	10.467	5.45	0.885	0.767	0.34	1.0254	1.2259	2.235	0.9295	1.9188	10.9182	8.1256	2.1241	0.5521	0.6327	1.7043	2.5586	10.0082	14.604	5.2146	6.7319	12.1624	6.0332	5.0966		0.954128	6.95203
24.8894	0.1887	0.5535	46.013	21.256	4.583	18.164	10.62	2.651	0.921	0.261	0.465	0.8705	1.04	2.349	0.4516	1.5673	8.559	8.6387	3.0696	0.8024	1.1271	1.7279	2.7332	6.4573	15.464	5.3389	9.6788	13.865	4.4227	4.9182		0.958715	6.62525
25.0085	0.5864	0.7896	37.2816	20.413	4.686	20.516	8.307	2.479	0.715	0.406	0.988	0.4796	1.2891	1.836	0.5359	1.6635	8.4186	7.1801	3.243	0.6123	0.5524	0.3548	1.9241	6.119	13.809	6.4243	12.7434	16.9507	5.8382	5.9498		0.963303	6.43638
25.1275	1.0683	1.1496	30.9867	24.625	6.602	22.455	5.329	4.748	1.059	0.234	0.694	0.6123	0.3651	1.519	0.7886	1.3177	7.2628	5.9512	2.031	0.7186	0.1412	0.366	2.535	5.0434	12.709	7.4933	11.6346	18.6481	6.8204	7.3459		0.967887	6.40846
25.2466	0.5362	0.9814	22.9731	27.515	9.404	28.908	4.776	3.096	1.201	0.237	0.269	0.7051	0.7411	0.839	0.7436	1.2196	5.9904	6.5181	2.1296	0.7072	0.1058	0.6506	1.523	5.0532	11.955	5.6152	12.8909	17.4054	6.4846	6.4867		0.972474	6.25536
25.3657	0.7694	0.8265	13.3315	29.659	9.348	38.313	5.262	2.205	0.828	0.083	0.345	0.6739	0.4592	1.211	1.3182	1.1751	4.8662	6.0465	1.5964	0.0207	0.0078	0.6628	1.7115	4.0997	11.222	6.4808	13.3765	19.6156	6.0272	6.4582		0.977062	6.26666
25.4848	0.7581	0.1632	10.367	34.833	10.244	46.295	4.121	1.609	0.551	0.293	0.208	0.1797	0.7569	0.838	1.8658	1.4752	4.8725	5.6973	1.2439	0.0573	0.2076	0.29	1.0309	4.9014	12.288	8.8431	15.0929	22.9038	7.6945	6.6296		0.98165	6.87702
25.6039	0.3744	0.4846	6.3292	40.501	11.157	51.149	3.587	2.444	0.457	0.596	0.199	0.1256	0.9457	0.667	0.6774	0.636	4.8893	4.2784	1.0119	0.4513	0.408	0.5121	0.9301	3.1095	12.538	9.2932	14.9496	22.8287	7.1176	5.2841		0.986237	6.93106
25.723	0.4101	0.6796	5.5613	43.768	11.923	46.285	2.189	2.168	0.451	0.184	0.013	0.2473	1.1315	0.767	0.8745	1.0115	5.3216	5.2273	1.6348	0.695	0.3289	0.4882	0.6559	3.7462	9.433	8.0274	13.2944	23.6476	8.1708	4.6581		0.990825	6.76643
25.8421	0.3372	0.4896	4.2829	51.499	13.662	42.701	2.402	1.425	0.412	0.224	0.357	0.6463	0.7123	0.628	0.7778	0.8936	4.5793	3.4203	1.7812	0.2639	0.6643	1.2346	0.3323	3.4014	8.263	11.373	16.1604	21.3841	11.6872	5.5635		0.995412	7.05194
25.9612	0.4877	0.3949	3.0622	49.814	15.091	44.65	1.938	0.8	0.351	0.235	0.446	0.1856	0.7568	0.983	0.4966	0.1441	3.6482	2.297	0.9943	0.1073	0.3387	0.5591	1.1725	1.7278	8.165	12.0409	17.4113	24.7664	11.6215	7.276		1	7.0654

## Sheet: Image15
X0	Y0	Y1	Y2	Y3	Y4	Y5	Y6	Y7	Y8	Y9	Y10	Y11	Y12	Y13	Y14	Y15	Y16	Y17	Y18	Y19	Y20	Y21	Y22	Y23	Y24		Ap-Ba	Avg intensity
0	43.9132	21.7595	16.3354	13.4007	27.903	29.174	46.8101	39.6424	35.527	27.6134	35.218	34.248	48.625	56.8917	72.1206	30.6036	24.1392	41.1988	41.48	29.5531	46.757	53.543	56.598	61.223	71.207		0	40.2194
0.1191	44.9705	27.6953	16.3048	15.2782	30.611	27.63	46.6405	42.1975	38.101	31.8136	40.169	33.454	48.319	61.6326	72.0249	39.8351	29.6764	51.66	41.778	33.6097	48.779	55.599	60.128	60.568	78.108		0.00465164	43.0633
0.2382	44.4063	26.8985	23.4785	16.792	29.742	30.522	45.6012	37.2003	36.598	33.8567	46.814	34.224	54.719	67.8936	79.6618	35.0583	34.3934	57.5957	47.649	36.8349	58.593	64.466	61.301	61.09	83.602		0.00930327	45.9596
0.3573	40.9876	29.1927	29.3162	18.2346	32.281	31.981	52.2879	37.8569	37.913	40.4676	47.277	38.335	65.443	74.5308	76.0649	43.3531	32.3682	55.8368	47.226	36.9112	63.892	65.97	68.622	64.919	80.641		0.0139549	48.4763
0.4764	44.7646	34.8239	39.0622	20.1447	39.744	35.283	43.0634	47.0578	37.409	47.3483	52.706	43.068	73.116	90.0126	81.7031	47.5392	31.648	58.8007	53.334	43.8587	68.363	74.103	67.792	65.603	79.528		0.0186065	52.795
0.5954	45.998	40.5286	51.3075	19.4231	45.19	42.228	49.2853	50.9882	42.014	43.1375	64.646	46.358	70.682	96.9963	84.7425	44.1416	35.0216	66.3064	60.724	56.129	77.448	86.855	70.724	69.608	90.718		0.0232543	58.048
0.7145	47.9961	40.8218	58.3367	20.3388	51.227	44.494	48.3538	57.3647	43.72	48.0907	65.534	46.149	78.92	101.907	93.7597	43.542	39.7859	74.8324	68.267	66.2837	93.388	86.953	77.314	76.809	99.962		0.0279059	62.966
0.8336	50.3338	44.5677	68.8677	27.9546	57.455	44.753	48.741	67.8646	40.781	55.3421	71.524	57.743	76.364	98.0449	102.645	50.4373	38.0166	77.2087	76.259	68.3232	90.94	102.753	74.021	83.82	106.776		0.0325575	67.2615
0.9527	51.2393	46.4329	77.6085	31.6886	67.309	55.932	51.7322	81.6967	47.368	54.001	69.428	59.543	85.254	100.121	98.3401	57.9134	41.104	81.5042	87.432	76.8903	95.098	102.79	77.129	79.713	118.679		0.0372092	71.8379
1.0718	50.0713	54.9274	77.0129	42.9809	70.719	54.934	51.8165	80.3062	49.457	53.6991	74.168	59.471	91.838	100.514	93.5632	61.3437	47.9468	83.6219	85.387	75.0084	100.176	104.764	79.216	89.748	117.605		0.0418608	74.0118
1.1909	49.0442	54.228	89.1162	56.8402	80.628	57.826	51.2857	81.8514	56.017	61.1999	76.515	55.555	95.117	109.829	92.8662	63.3683	54.091	72.3336	83.545	74.2321	107.347	100.896	76.668	87.959	127.216		0.0465124	76.623
1.31	48.7067	59.3101	87.7183	61.6204	84.813	70.029	56.9894	82.7588	62.44	62.4529	69.52	64.261	108.559	104.932	88.9092	70.4908	62.9833	69.0297	81.855	75.0801	98.132	95.652	76.335	90.939	131.114		0.0511641	78.5852
1.4291	46.2639	60.1121	74.4854	73.7793	90.059	74.05	59.2524	83.7206	67.901	72.3531	71.519	66.777	111.174	105.909	81.5486	77.4933	69.7915	69.6006	83.927	77.9223	85.218	97.663	72.856	95.625	136.798		0.0558157	80.2319
1.5481	40.6488	61.0729	85.4954	83.256	95.043	78.805	60.2462	84.0212	75.194	70.9739	80.806	76.778	120.364	107.512	79.8386	76.6052	76.2885	68.3607	88.153	69.7135	72.111	85.997	83.097	93.056	120.939		0.0604634	81.375
1.6672	41.2981	63.7514	82.1828	74.4829	95.182	79.473	59.5768	71.7425	83.581	74.256	80.143	77.961	107.614	109.856	74.3254	73.1938	79.1447	60.8964	88.05	61.2617	61.373	87.23	77.365	91.422	119.066		0.0651151	78.9771
1.7863	39.4393	65.7377	74.5554	82.4448	111.878	90.499	55.5167	82.9726	81.784	87.4173	79.809	75.172	111.966	109.637	70.1944	71.1631	88.8163	58.0575	85.511	59.4913	50.102	85.762	79.298	86.979	112.477		0.0697667	79.8672
1.9054	37.9601	65.6835	64.7673	91.5226	122.051	99.505	58.5994	72.1722	79.111	85.7983	73.986	71.156	106.104	107.307	67.5832	67.1533	89.8966	56.37	86.724	59.737	46.341	81.107	83.765	96.074	103.836		0.0744184	78.9724
2.0245	33.3373	69.8471	57.4156	87.2756	120.717	100.239	62.1278	80.2511	92.773	82.092	86.955	71.333	108.204	94.1784	63.6484	71.0877	86.5824	55.5971	87.968	54.7839	40.557	78.39	81.913	91.831	104.653		0.07907	78.5503
2.1436	31.6484	72.9176	50.1395	84.6107	119.205	108.647	62.7853	88.5958	95.778	89.2355	86.97	75.52	104.523	93.2736	64.2748	67.8698	84.8426	59.1472	89.786	50.6097	41.807	77.648	84.162	93.355	104.84		0.0837216	79.2877
2.2627	30.8168	71.8602	46.032	83.1581	124.275	108.628	65.5024	87.4046	97.44	89.4294	88.32	77.455	99.491	93.501	63.9617	67.5906	79.9809	59.5403	85.109	51.6146	38.533	74.93	86.9	90.475	98.372		0.0883733	78.4128
2.3818	26.5978	71.5851	41.0579	91.2091	129.675	111.74	64.3054	82.5648	91.411	94.1958	85.446	70.369	105.574	89.0439	61.1241	64.7101	76.2545	62.844	89.331	47.1456	31.495	67.24	86.854	97.972	91.05		0.0930249	77.2318
2.5008	23.6043	68.5755	40.2525	91.7465	120.518	105.271	63.5436	77.6386	79.354	82.919	89.934	71.03	92.862	89.7637	68.3023	70.5972	66.27	57.0604	83.864	51.9132	27.784	68.182	86.166	94.828	96.338		0.0976726	74.7327
2.6199	21.5127	67.1002	36.4393	92.1154	124.599	97.947	65.299	84.4533	90.603	83.1638	86.274	70.91	94.001	88.555	58.7435	71.0207	62.5846	59.9963	84.329	44.4665	28.758	65.205	83.466	99.753	99.404		0.102324	74.428
2.739	20.2876	70.2343	36.2073	90.1335	122.803	104.111	64.8764	87.9089	93.018	80.1086	87.699	71.897	93.55	90.9119	57.5507	65.6944	59.6615	61.6258	92.166	42.021	27.166	53.214	81.94	108.697	101.249		0.106976	74.5893
2.8581	18.4585	74.6528	36.9174	95.2978	118.344	98.035	72.3003	88.8025	94.137	72.5247	90.358	68.045	94.439	86.287	53.6415	59.1472	55.1319	65.3763	93.2	44.969	28.359	52.148	89.998	122.176	103.867		0.111628	75.0645
2.9772	18.1885	67.9995	33.372	98.513	115.603	101.801	75.5753	81.3225	99.657	73.6118	94.836	71.376	89.918	92.8147	52.7891	58.821	46.9356	72.8437	96.387	42.0976	24.608	50.602	89.775	118.451	103.263		0.116279	74.8465
3.0963	20.5783	69.8586	26.7378	98.208	111.323	104.175	72.7724	76.1848	104.018	69.8166	102.424	73.486	92.032	85.7646	56.9455	51.5454	54.8146	74.0815	95.864	39.2642	24.558	48.854	93.537	125.073	111.037		0.120931	75.3181
3.2154	16.1542	70.456	25.968	95.8621	101.633	92.251	77.8125	77.961	94.917	75.1374	104.232	80.945	95.987	88.5914	55.3076	47.3434	53.4236	75.368	103.173	37.3945	26.585	49.834	93.828	128.257	104.173		0.125582	74.9038
3.3345	15.3347	71.1879	27.4777	98.8669	103.779	89.355	77.6191	79.6948	100.98	86.152	100.635	84.625	94.251	84.6365	51.5558	47.8267	54.2198	80.643	98.09	31.8592	26.783	48.718	98.001	125.536	105.281		0.130234	75.3243
3.4535	14.8606	66.4993	27.0499	91.6428	86.863	81.149	72.3141	71.4223	96.301	78.5151	113.196	82.729	88.507	81.126	53.5141	39.6348	48.7056	86.0848	95.717	33.2046	22.418	50.138	95.086	125.301	104.439		0.134882	72.2567
3.5726	14.9287	70.7504	30.5413	83.6981	78.711	77.1	71.9358	77.8716	95.723	79.7757	108.461	89.468	85.608	84.604	46.3513	35.4634	42.9449	86.0845	103.181	33.1121	22.978	48.392	100.203	122.445	103.156		0.139533	71.7395
3.6917	15.0225	74.8445	22.9176	77.5858	75.462	64.702	78.2034	88.4956	90.673	74.3546	107.848	94.945	76.476	86.8956	45.2877	39.1745	39.7891	83.8805	106.024	33.6564	26.235	45.326	102.867	113.138	106.063		0.144185	70.7947
3.8108	16.0229	77.0709	22.6431	82.4999	68.861	56.988	77.3373	77.9217	86.732	69.0911	112.862	94.022	88.403	82.0086	44.1231	38.5514	36.3087	86.7168	110.431	30.5821	26.431	50.351	99.806	120.247	106.913		0.148837	70.517
3.9299	17.832	77.5543	22.6044	78.6333	60.685	43.803	72.167	87.3647	83.985	66.0722	111.068	97.85	98.671	79.5962	45.9803	43.2867	35.5847	83.7761	106.583	30.5936	21.917	46.921	105.672	109.706	108.94		0.153488	69.4739
4.049	16.1008	77.1889	20.2688	71.9465	63.502	41.267	71.6717	76.4607	91.12	70.5605	101.77	111.475	94.489	80.1588	40.7133	41.265	33.0055	84.4847	112.985	33.0452	18.641	41.459	113.829	104.545	101.401		0.15814	68.5341
4.1681	19.1794	84.5744	22.4711	68.0526	64.152	38.907	61.5577	72.1459	97.597	67.5901	104.344	104.733	93.797	82.066	46.4185	42.1689	27.9077	76.563	103.362	27.7824	20.739	40.654	119.994	94.184	106.051		0.162792	67.4797
4.2872	20.1612	82.3746	21.0452	71.8533	53.686	34.488	56.3659	73.2119	116.055	68.1024	102.007	112.264	99.973	78.7252	40.216	39.4129	25.6303	74.3245	107.613	27.3428	21.635	39.984	105.964	103.035	105.33		0.167443	67.232
4.4063	22.1798	74.0342	21.0244	61.8056	51.77	28.755	54.843	60.3874	111.505	71.896	99.553	105.041	100.834	83.4849	42.4657	38.2729	25.7933	71.2767	103.822	27.9456	18.699	38.167	102.117	98.588	107.445		0.172095	64.8682
4.5253	20.4124	79.0235	21.9473	55.6447	45.879	31.063	55.5189	52.9024	116.591	70.1754	104.024	103.481	115.689	81.5235	42.5604	40.1812	24.7112	63.4917	103.71	30.1035	20.728	35.991	106.079	95.268	99.091		0.176743	64.6316
4.6444	24.9654	82.379	21.6785	50.0882	46.81	31.107	45.6215	46.0093	118.029	72.1058	109.915	105.967	124.847	79.9818	39.2797	41.1376	21.6322	58.0694	102.405	27.8957	23.507	33.584	110.871	85.223	98.067		0.181394	64.047
4.7635	23.4008	78.8956	20.6858	39.0879	45.576	27.139	48.0324	44.5904	122.246	69.3287	113.9	100.097	119.793	87.4266	36.8913	37.3948	21.6002	55.0507	99.411	26.825	21.759	34.827	104.437	89.939	102.126		0.186046	62.8184
4.8826	30.2161	70.4958	20.0461	37.5744	38.419	20.31	50.9823	38.2264	123.499	70.139	109.152	91.714	123.195	83.8024	34.8417	37.5128	22.3689	52.4105	103.358	22.3845	23.336	37.546	107.815	85.913	103.1		0.190698	61.5343
5.0017	40.3832	66.1378	21.6545	37.0206	37.652	19.292	46.5999	32.4379	113.116	71.933	101.427	75.367	128.776	76.5795	36.7664	38.8306	17.9544	47.4452	104.909	22.5527	19.594	37.619	102.891	79.849	98.743		0.195349	59.0212
5.1208	47.6968	70.2747	24.9459	37.9593	31.626	19.929	45.7265	28.5515	108.359	69.677	98.958	65.884	126.825	74.9368	35.7611	30.5215	18.3803	40.6744	100.282	22.3011	17.935	35.447	90.377	77.277	100.05		0.200001	56.8142
5.2399	54.071	56.7887	22.7911	31.2486	30.472	23.656	46.8161	26.5177	100.896	63.7914	99.792	48.448	122.381	79.419	34.0008	27.0848	16.6352	40.9876	95.693	21.4997	22.012	30.782	83.346	75.447	85.185		0.204652	53.5905
5.359	58.2391	55.2927	22.65	30.0657	26.731	21.209	49.2831	25.715	72.542	67.5855	90.144	46.827	121.83	71.1347	36.42	28.1879	15.0664	36.8259	99.587	19.1275	20.136	28.628	79.978	65.284	82.176		0.209304	50.8266
5.478	60.9105	42.4777	20.1573	20.1658	25.978	22.433	51.2444	25.0037	63.366	65.0011	89.368	40.638	112.096	60.046	31.5036	26.1183	17.437	28.6276	91.84	19.9704	19.558	29.32	78.778	54.996	70.138		0.213952	46.6869
5.5971	60.9029	40.4474	15.2526	21.3645	21.565	21.115	49.446	27.2304	51.507	65.0651	86.023	37.641	92.12	60.4839	35.9709	28.4303	16.5998	24.6404	83.741	18.4327	17.223	31.654	74.12	53.62	67.783		0.218603	44.0952
5.7162	62.6089	37.9523	17.2352	15.6368	16.723	20.773	47.0087	27.388	46.062	59.733	75.631	32.989	76.349	59.0637	37.1587	22.2905	13.2213	29.0013	89.78	19.9174	18.303	30.83	55.185	52.137	56.843		0.223255	40.7928
5.8353	62.8106	36.1875	16.4701	17.874	15.226	20.167	44.0063	29.2565	38.204	59.8657	69.203	26.36	65.957	48.9779	35.1422	20.2061	13.7183	23.1034	82.952	20.9349	16.769	22.896	54.264	47.678	50.954		0.227907	37.5673
5.9544	61.91	34.0743	14.4215	14.8236	13.857	23.457	43.7152	32.4986	36.018	58.9444	69.531	22.101	55.073	47.1626	31.0061	17.6549	12.4098	20.9586	70.295	20.7338	19.544	27.916	48.846	38.13	42.102		0.232558	35.0873
6.0735	55.064	34.2736	18.0328	14.1544	8.192	24.053	41.9549	28.5014	37.289	57.2664	66.398	16.04	47.639	46.4166	26.2852	19.1451	8.9495	21.9735	56.904	20.4354	14.401	25.656	36.836	36.677	34.631		0.23721	31.8868
6.1926	54.4331	34.8774	17.4334	12.5352	8.211	23.43	38.4536	27.861	33.608	48.5088	66.315	16.692	47.158	34.8195	26.961	17.5995	11.1345	19.3607	52.39	17.2854	15.313	18.907	35.417	34.426	26.539		0.241862	29.5868
6.3117	65.2446	37.0213	15.7657	13.7166	9.923	22.9	39.0551	32.4033	33.583	47.0527	64.666	22.754	37.958	32.4091	27.3095	15.2191	11.6166	19.6672	52.824	16.627	18.018	18.088	36.848	28.637	17.478		0.246513	29.4714
6.4307	61.4765	39.9285	14.558	11.7731	8.552	29.751	37.6359	32.1102	28.46	44.9017	62.57	17.393	34.359	30.2484	22.2959	14.763	10.9235	19.9271	45.331	15.7746	17.593	17.697	34.034	24.219	18.334		0.251161	27.7844
6.5498	67.2785	33.1843	15.3965	10.4932	6.791	30.937	39.4224	32.4525	26.855	46.184	71.394	15.542	35.269	29.2865	21.4487	14.4092	11.3485	20.3307	41.005	18.3284	18.288	18.458	27.686	22.403	12.435		0.255813	27.4651
6.6689	67.1182	34.6304	11.1007	10.2823	7.872	38.209	40.8683	31.6684	29.985	42.2351	73.604	15.022	31.843	26.0729	18.4708	15.1376	12.5225	17.7875	42.373	15.0025	14.753	18.17	24.649	16.481	8.14		0.260464	26.5599
6.788	62.2338	32.3198	14.2378	10.2556	5.392	37.709	38.5267	29.0616	30.256	42.3786	71.369	15.555	31.659	27.7061	18.1362	16.705	13.3241	17.9183	27.17	16.6406	13.93	14.722	20.146	14.732	9.35		0.265116	25.2574
6.9071	56.7654	30.9598	10.926	9.3593	7.292	41.902	39.387	28.9118	26.314	38.9957	59.535	14.501	30.42	24.0509	17.3163	15.4501	9.4293	17.7032	29.522	16.1788	15.53	16.22	23.902	16.143	8.687		0.269767	24.2161
7.0262	62.4323	29.9754	11.1343	6.3296	6.98	35.643	37.597	26.4816	30.198	44.8597	63.785	18.673	33.816	24.3922	18.5079	12.9747	11.0667	13.1234	28.83	15.5456	13.048	15.639	21.084	12.603	7.956		0.274419	24.107
7.1453	63.8781	32.1468	9.5335	5.5902	7.545	36.996	34.2338	28.178	30.363	35.5859	51.037	15.923	28.829	19.0136	20.5843	13.7994	11.3736	16.5491	26.55	14.3366	12.877	16.609	18.255	12.735	7.364		0.279071	22.7954
7.2644	65.4487	36.0111	8.146	7.4766	8.706	36.675	35.7024	28.3895	32.2	30.5138	52.583	14.127	27.588	18.2527	20.2043	14.2967	12.7305	16.1617	24.943	12.9758	14.001	15.835	20.788	11.487	7.509		0.283722	22.9101
7.3834	59.2392	33.7257	8.6549	6.2954	5.999	37.387	37.0088	28.5067	32.465	34.8569	45.393	17.84	25.046	19.0509	20.275	11.776	11.9964	16.6213	26.324	12.2093	10.851	12.74	18.557	11.994	6.391		0.28837	22.0481
7.5025	60.3572	38.9122	8.4711	6.1386	7.256	41.218	39.0111	31.3286	28.955	35.8257	44.265	13.977	22.611	19.4361	19.7384	10.1501	12.4319	16.456	26.123	10.3824	8.789	16.642	22.957	14.346	7.506		0.293022	22.5314
7.6216	54.8975	36.2852	8.4972	5.9568	8.597	34.536	34.0598	30.4408	29.64	32.3045	37.795	14.155	24.114	20.9783	20.1638	11.5593	11.967	17.3172	24.645	11.879	10.995	17.769	19.497	12.58	6.481		0.297673	21.4844
7.7407	47.0216	43.5844	7.8459	7.179	6.072	39.859	33.9025	32.4548	26.968	29.9456	35.144	17.462	19.458	17.0568	18.9035	13.482	11.2589	13.6996	22.911	12.724	10.439	15.324	20.025	13.216	6.421		0.302325	20.8943
7.8598	48.2483	40.8028	8.9591	5.8851	4.95	36.868	33.0363	30.0096	26.228	25.3927	35.298	19.16	22.396	15.7881	19.236	12.4256	11.4739	15.8208	22.537	11.8144	12.298	15.221	20.291	12.621	5.736		0.306977	20.4999
7.9789	47.8045	41.1886	10.1403	5.0962	5.571	30.883	31.9828	28.6525	27.141	29.416	32.294	19.615	24.204	17.148	16.8606	12.4694	11.8119	14.6272	21.089	10.8864	11.353	18.508	20.304	11.104	4.905		0.311628	20.2022
8.098	44.9073	42.8557	11.4851	5.6678	4.957	25.14	32.9759	31.1694	26.637	24.0706	26.269	20.318	20.462	16.3006	17.5061	11.432	10.8046	16.7445	19.535	14.2414	13.306	18.966	17.245	9.438	8.062		0.31628	19.6198
8.2171	39.0484	47.5471	9.0321	3.4091	4.4	21.828	25.1301	30.0748	23.53	24.5904	23.417	19.108	23.545	14.8424	16.1816	10.5427	10.5477	15.3777	19.302	14.8045	12.179	15.716	15.595	8.547	7.834		0.320932	18.2452
8.3362	38.6943	47.7757	9.8622	4.809	6.271	15.868	28.7368	31.3454	20.567	25.1095	28.406	20.76	25.591	15.3002	14.4588	12.1959	13.725	15.3887	22.313	17.9002	11.497	20.415	16.41	9.411	6.361		0.325583	19.1669
8.4552	40.209	47.1209	9.8269	6.0651	5.803	12.849	37.1308	34.2318	24.513	20.8893	31.018	19.908	22.658	13.2892	14.9758	11.1475	14.0387	17.8445	25.901	17.5354	13.784	19.385	15.656	14.059	6.502		0.330231	19.8536
8.5743	36.9537	49.6266	9.9123	4.9544	4.482	8.826	36.9498	29.4471	25.631	23.1272	25.673	18.376	24.085	13.0085	11.7442	8.3606	10.6426	21.0188	23.019	20.2891	16.355	23.723	14.927	9.728	6.897		0.334883	19.1103
8.6934	31.6554	49.7407	11.3238	5.8405	4.84	8.591	38.1746	31.983	24.457	22.2832	26.981	19.979	24.084	15.4439	13.1399	9.3901	11.486	17.2059	20.484	24.0075	19.144	21.239	14.099	7.342	5.431		0.339534	19.1338
8.8125	36.5339	54.3872	10.0514	4.4045	4.89	8.266	32.964	32.253	24.987	20.614	29.094	19.702	26.359	15.3081	12.3879	7.9708	13.1934	18.3711	21.651	25.7267	23.998	21.336	17.36	7.631	4.634		0.344186	19.763
8.9316	34.0195	51.3252	11.0672	5.8746	4.475	10.337	28.6356	26.8322	28.548	16.7587	30.531	20.417	24.407	14.5675	9.7705	5.9682	11.9218	17.8946	26.235	33.2089	25.786	19.958	15.91	10.363	5.646		0.348837	19.6183
9.0507	30.9597	48.4013	11.7884	5.0058	4.896	9.473	35.2804	27.2238	32.833	13.5212	30.932	21.522	24.335	14.4556	11.1553	8.4005	10.6971	17.2666	20.877	34.3474	31.506	16.263	15.923	9.875	5.436		0.353489	19.695
9.1698	28.0441	42.8196	11.5762	4.024	4.398	9.782	33.5124	34.9538	29.312	13.9416	32.456	22.456	25.718	16.1098	9.5205	8.8188	9.3549	15.2376	22.756	42.5714	34.981	16.905	18	7.019	6.554		0.358141	20.0329
9.2889	27.771	46.9081	10.5208	4.9933	4.218	10.677	29.8568	35.7454	31.177	16.7052	33.125	21.169	24.136	15.86	10.0779	7.5213	12.4581	17.506	19.082	43.4031	39.827	22.919	16.392	8.461	7.402		0.362792	20.7165
9.4079	33.6695	49.3657	11.9149	6.357	5.076	6.399	36.6861	31.8562	29.7	16.9171	31.098	19.657	23.163	15.1432	10.5605	6.9329	11.9779	19.1484	20.007	41.8215	38.52	20.631	15.866	6.437	7.008		0.36744	20.6365
9.527	31.9193	41.1263	12.584	6.3192	4.736	7.175	33.7115	29.7928	25.862	18.5358	30.315	18.012	26.059	15.7409	11.2012	6.5382	14.276	18.3767	20.928	44.2663	30.127	19.519	17.285	5.361	6.331		0.372092	19.8439
9.6461	30.8404	40.704	12.3854	4.8166	3.882	9.559	38.4951	28.0679	29.529	13.8277	29.855	12	21.417	15.5179	11.4571	7.4551	11.981	18.0909	18.75	40.6304	25.546	24.284	16.523	7.033	5.229		0.376743	19.1151
9.7652	28.4266	33.4135	13.4458	4.8609	4.645	8.361	36.9298	26.563	27.249	15.6354	28.603	13.734	28.001	14.5713	7.8	8.1976	11.854	20.0526	19.982	36.904	26.54	20.142	15.064	7.26	5.763		0.381395	18.5599
9.8843	27.0569	27.4883	13.2148	6.1472	3.785	6.821	38.3393	27.6362	24.506	12.7917	27.037	14.301	27.084	14.8873	8.5626	9.7215	11.9849	21.2614	19.649	33.6468	22.585	22.117	14.742	9.562	4.842		0.386047	17.9908
10.0034	28.0532	26.4692	17.8981	4.6064	3.874	8.638	39.9995	31.8705	21.711	15.2259	24.455	14.523	27.359	15.9965	8.9037	6.7277	12.3229	20.7238	20.822	29.4336	19.532	24.243	17.536	8.201	5.794		0.390698	18.1968
10.1225	21.3167	24.351	14.7728	5.9637	4.581	7.208	33.3143	33.9016	20.942	17.8462	21.787	18.122	32.633	15.1711	9.753	9.337	13.718	22.9647	17.056	29.3635	15.379	25.536	15.13	8.419	5.579		0.39535	17.7658
10.2416	20.3209	25.3841	17.6085	6.0296	4.409	7.463	35.0137	32.2658	21.228	16.0053	22.612	16.623	33.804	15.7493	11.1855	11.8818	16.0013	23.4991	22.652	26.9216	15.355	24.734	17.056	7.011	4.924		0.400002	18.2295
10.3606	20.5593	24.7458	16.2893	4.3579	3.106	7.587	32.576	31.809	20.215	13.4703	19.585	17.252	32.407	15.6324	9.4404	10.42	12.4055	24.7329	23.358	25.7756	14.266	24.261	15.89	6.546	6.552		0.404649	17.3296
10.4797	17.1469	24.0672	18.7449	4.898	4.232	5.154	27.9654	31.4035	20.896	13.2225	17.098	20.637	31.15	19.0951	8.39	10.9955	9.9906	20.5092	23.387	22.7962	15.654	28.416	17.761	7.642	5.594		0.409301	17.0738
10.5988	17.1587	21.6087	17.8653	5.9027	5.636	5.487	30.1849	30.8443	22.264	14.4769	17.053	18.331	30.751	19.0711	8.9219	10.7661	12.1703	24.8612	19.337	21.2225	12.728	26.636	17.745	6.549	7.113		0.413953	16.9874
10.7179	18.3045	22.4495	20.3171	4.1777	5.187	6.683	24.7592	31.0063	25.712	13.9699	18.358	19.566	25.018	16.0375	9.4798	9.9697	11.4436	24.6646	21.17	22.7647	14.515	24.896	17.571	6.086	5.131		0.418604	16.7695
10.837	15.9761	19.6566	18.9161	5.1225	4.401	5.277	25.7005	33.0829	27.015	16.1513	15.96	17.094	28.047	19.3329	11.229	8.9638	10.5221	25.2667	20.3	19.2254	14.589	25.503	19.877	8.563	3.799		0.423256	16.7828
10.9561	17.8976	21.0952	23.295	4.7811	4.854	6.151	25.3367	33.5215	25.42	13.2918	14.895	15.139	28.377	18.1908	12.1353	10.1699	12.4605	23.3106	21.935	16.3538	15.894	23.12	22.293	5.349	5.084		0.427907	16.814
11.0752	16.2093	17.742	24.9994	6.9536	4.708	5.777	23.6967	35.7205	23.07	15.5035	15.66	14.259	30.156	23.5582	12.3859	13.9722	9.4536	24.4953	19.514	18.0288	15.942	22.262	25.515	7.447	6.52		0.432559	17.342
11.1943	14.1482	18.6473	20.4214	3.495	5.316	6.783	21.2398	37.5318	21.81	14.8728	13.928	16.912	27.227	20.7486	14.9762	11.516	7.7236	23.2775	22.356	14.7829	13.523	22.71	26.935	6.684	5.986		0.437211	16.542
11.3133	12.8343	20.3636	22.3028	3.3712	5.33	6.197	21.7947	35.8211	21.25	11.5195	14.101	14.446	27.663	21.6279	12.0153	12.2232	8.2226	21.6819	25.848	14.5031	14.331	23.916	29.345	6.378	5.657		0.441858	16.5097
11.4324	10.5188	20.2249	22.4067	4.3214	3.836	4.683	25.4114	39.7486	20.409	13.1167	13.034	15.157	26.481	24.5058	15.2502	13.9134	11.2842	25.9829	22.442	13.3518	13.33	18.816	32.57	6.228	5.642		0.44651	16.9066
11.5515	12.0161	15.7954	23.0126	4.306	4.539	3.725	25.9044	41.0551	19.169	11.7887	11.428	13.398	29.786	25.1187	12.5622	16.3927	9.5239	25.1453	21.572	12.9139	15.839	21.211	29.354	5.322	7.13		0.451162	16.7203
11.6706	12.2214	14.9239	22.7837	3.2658	4.278	4.449	23.1604	34.3029	15.36	12.8068	15.518	13.852	29.543	28.3283	15.5148	14.5274	7.4576	26.0095	20.791	12.3332	11.871	18.368	25.444	5.633	6.434		0.455813	15.9671
11.7897	9.3911	16.6723	24.7284	3.8048	4.084	5.55	22.4694	35.3584	14.904	13.5329	12.563	14.307	27.713	28.6774	11.634	18.1843	7.2199	28.5542	19.939	12.716	12.418	17.1	26.087	6.33	7.638		0.460465	16.063
11.9088	10.2835	15.3915	23.2145	4.723	4.499	6.133	20.5897	36.7184	16.33	13.5936	12.971	14.506	28.746	31.1745	10.9252	13.7231	8.155	28.1953	20.472	10.4111	17.961	17.155	23.779	6.47	6.89		0.465117	16.1204
12.0279	10.123	12.931	24.6083	5.5493	3.177	5.665	24.9737	34.6384	16.018	14.1758	12.34	15.291	26.502	24.6843	18.1447	14.5497	8.0183	27.3323	19.786	10.3013	17.104	13.875	20.771	7.839	7.528		0.469768	15.837
12.147	10.1179	12.7149	27.0566	5.1494	4.001	4.763	21.4353	40.9924	15.977	12.3268	11.584	13.701	23.803	25.3359	16.2085	12.636	9.2155	23.108	21.345	9.3326	18.105	12.232	21.091	8.316	6.379		0.47442	15.4771
12.2661	11.1344	13.8456	25.9334	5.4036	3.066	5.124	20.2718	36.276	17.363	14.3016	11.982	13.01	22.179	22.0766	14.8902	12.4088	6.9969	21.1624	21.421	11.1418	17.008	14.456	20.9	7.865	5.765		0.479072	15.0393
12.3851	10.8703	13.4883	29.5119	5.8572	3.108	6.305	17.5963	37.3	14.859	12.3688	12.619	11.816	22.816	25.6315	20.7194	11.7434	9.3136	20.8869	24.099	10.7883	16.853	15.64	22.502	10.102	7.882		0.483719	15.7871
12.5042	9.5859	11.68	24.1594	6.5216	3.529	4.677	21.1411	41.8929	13.01	9.9863	11.484	12.648	22.937	22.0688	17.9358	12.4915	7.9413	26.5246	21.052	9.6813	16.436	12.219	22.781	10.328	6.944		0.488371	15.1862
12.6233	8.4769	12.7301	22.4673	6.465	4.008	5.147	15.2902	40.0223	16.616	12.7827	11.929	11.59	22.041	22.4068	18.6002	10.8242	6.7431	24.5384	20.512	7.2472	18.743	10.331	25.64	8.944	7.554		0.493023	14.866
12.7424	7.7491	12.6979	25.1295	5.1898	4.884	3.995	16.7692	42.3057	17.425	14.9843	12.107	11.679	21.69	21.7043	22.6809	12.7611	7.161	21.8851	20.028	8.9677	24.906	9.441	27.454	8.293	6.812		0.497674	15.548
12.8615	9.1525	12.2774	22.3082	5.0473	5.137	4.529	16.5289	44.5574	16.752	15.3203	11.659	11.386	26.341	18.0678	22.3434	9.8168	5.566	25.6706	18.338	11.3085	24.897	10.549	31.638	9.655	6.526		0.502326	15.8149
12.9806	8.003	13.525	23.5603	5.2894	3.229	4.14	16.229	42.9969	15.589	14.264	9.781	11.839	23.439	16.3157	19.1401	11.2188	6.1501	24.8527	17.856	11.8724	26.81	11.188	30.49	7.854	4.984		0.506977	15.2247
13.0997	8.2303	15.6337	23.7935	4.9691	2.708	3.632	17.2609	47.4228	17.463	16.4856	10.67	15.5	26.825	19.8714	16.4728	9.188	6.4516	24.9887	16.551	13.0902	24.918	9.556	30.353	7.22	7.536		0.511629	15.8716
13.2188	8.7935	14.4577	26.278	4.2292	3.906	3.528	19.6363	42.2714	18.549	15.611	11.233	15.485	27.537	17.507	16.6466	10.3976	6.2632	23.9328	20.794	13.5521	24.101	6.976	29.21	9.492	6.671		0.516281	15.8823
13.3378	7.7318	10.6862	21.6734	3.6428	4.999	3.627	19.8688	42.0061	16.282	12.6129	10.121	11.61	24.101	19.9194	16.4481	10.2676	6.6517	26.3798	18.675	12.0524	24.112	8.318	24.454	7.186	5.454		0.520928	14.7552
13.4569	8.1236	12.0793	21.4805	5.1952	3.487	4.302	17.3035	41.891	17.014	10.3735	11.858	12.903	24.644	19.3208	21.5706	11.4839	5.7489	25.666	19.926	16.1571	27.713	9.89	20.202	6.909	6.802		0.52558	15.2818
13.576	7.4987	10.2275	18.0987	4.8371	3.284	6.003	14.5097	41.9447	19.143	11.7088	10.916	14.525	23.295	16.8996	19.2727	10.4525	6.4109	28.9021	16.674	13.4703	28.725	9.722	22.502	6.701	6.35		0.530232	14.8829
13.6951	9.0086	8.4949	20.8327	4.7083	3.395	6.458	12.0822	41.9383	22.454	12.78	10.667	13.519	23.002	16.8685	15.3736	11.1037	7.5268	25.9251	20.818	15.8386	33.132	7.524	18.608	5.966	6.796		0.534883	14.9928
13.8142	6.7337	8.8472	19.9173	3.7352	4.396	6.9	13.6898	44.1891	21.31	14.1155	11.935	12.239	24.255	17.7796	15.835	9.5637	6.663	28.4414	17.874	15.8758	34.431	7.345	19.359	6.095	5.911		0.539535	15.0975
13.9333	6.2923	10.8448	20.7952	4.3437	4.068	5.521	14.6736	46.8607	20.242	13.3747	8.069	10.127	24.57	20.3624	16.1126	8.3751	6.6733	27.6015	18.127	14.5893	34.742	8.804	23.442	7.542	5.266		0.544187	15.2568
14.0524	5.3094	11.6623	20.7915	4.3319	5.759	5.528	11.9048	47.7224	19.314	12.0938	9.102	11.529	26.661	19.0502	19.4948	9.2431	6.2802	32.232	16.699	19.0185	35.594	7.438	26.606	6.142	5.483		0.548838	15.7996
14.1715	8.413	9.6724	17.098	4.3856	5.266	5.245	12.0858	43.2851	18.311	9.3153	10.96	10.586	25.793	16.95	18.3422	9.7332	5.1747	30.6171	14.754	18.83	29.211	9.748	23.033	5.966	6.101		0.55349	14.7551
14.2905	6.8826	9.3076	14.5128	4.342	5.286	5.216	10.2059	39.3584	21.419	10.211	12.995	12.645	25.828	18.327	17.761	8.8979	5.8032	26.624	15.124	20.9789	26.074	8.467	17.701	6.259	5.498		0.558138	14.229
14.4096	6.0412	6.8017	17.6573	3.2819	4.727	3.243	10.969	46.1284	19.018	11.833	10.581	13.436	23.536	17.6063	17.7869	6.2973	5.5239	25.3291	13.98	16.4617	31.326	9.193	21.663	5.035	6.166		0.562789	14.1449
14.5287	8.1771	8.7033	20.2674	4.7646	3.346	4.578	10.8596	52.4632	21.646	12.5471	10.644	12.723	25.529	17.3759	17.2471	8.3653	4.4477	25.2577	12.577	18.1012	30.923	8.303	24.546	6.522	3.812		0.567441	14.949
14.6478	7.6715	10.8983	18.5088	4.3574	2.821	4.852	10.2903	49.6607	17.34	14.4786	9.021	10.808	25.205	19.9537	18.7809	7.6287	6.3367	26.7789	12.593	20.0994	28.614	6.564	24.4	5.823	5.314		0.572093	14.752
14.7669	5.1538	10.8453	19.6794	3.2021	3.164	5.541	10.1049	49.6635	19.683	11.6727	9.847	13.304	22.105	17.086	20.9847	7.8684	4.225	24.5548	10.961	14.7186	27.172	5.493	24.074	6.206	6.708		0.576744	14.1607
14.886	4.7612	9.284	20.4344	3.1448	2.225	5.469	9.2455	58.3857	17.695	11.8073	9.999	13.186	25.71	15.9936	16.0541	6.8434	4.6889	24.7135	11.682	15.4383	24.034	5.737	26.217	5.212	6.586		0.581396	14.1819
15.0051	5.3129	9.2306	23.0808	3.822	4.758	5.66	10.3478	57.4632	19.171	12.2035	11.856	11.781	23.844	15.725	16.5033	7.0293	4.3134	23.9167	11.5	14.0234	20.256	7.305	31.007	5.244	5.064		0.586047	14.4167
15.1242	5.0479	8.4469	21.9546	4.5665	4.511	5.009	6.3954	58.1194	16.204	13.6175	12.145	10.747	27.068	18.4562	17.1488	8.2077	5.9888	25.4057	11.318	14.0179	18.294	6.886	25.239	6.547	6.223		0.590699	14.3026
15.2432	5.0749	9.3412	22.0722	3.8092	3.555	5.823	8.2088	58.0667	16.457	12.5421	9.973	11.516	23.106	19.7658	17.9973	8.7769	6.0604	25.8536	13.034	16.0592	17.011	7.237	26.632	6.453	6.531		0.595347	14.4383
15.3623	3.7823	9.0364	20.991	3.3549	4.922	4.979	9.5306	53.5606	16.498	12.4891	11.416	10.857	26.264	22.4591	20.5063	7.5881	4.8946	25.5078	10.885	11.4395	15.058	5.682	22.495	7.158	5.921		0.599998	13.891
15.4814	5.5677	6.4769	18.3125	4.3671	2.954	4.16	8.5991	52.574	17.785	14.101	14.984	14.075	24.805	18.0043	21.3883	6.1062	4.118	21.9362	9.775	13.7862	14.354	7.079	24.231	7.334	8.038		0.60465	13.7965
15.6005	4.1808	6.3464	20.8779	4.4164	5.293	4.179	7.3589	52.8689	21.718	10.3594	14.647	13.662	23.179	18.1818	14.7663	6.999	4.3364	24.3617	10.409	15.0173	17.006	7.823	21.915	8.392	6.326		0.609302	13.7848
15.7196	4.3621	5.6949	24.2984	3.5991	5.025	3.688	4.8532	50.3128	20.096	11.3264	16.24	11.208	22.738	17.2256	13.4146	6.2597	4.5854	28.2445	9.836	20.5603	13.443	7.638	24.741	5.427	7.036		0.613953	13.6741
15.8387	3.9331	6.088	21.4601	4.8921	4.26	6.245	8.2456	48.9979	16.984	13.9301	11.585	12.445	22.749	17.9797	16.7348	7.0959	2.827	23.9419	8.778	24.036	16.315	8.162	23.5	5.863	7.845		0.618605	13.7957
15.9578	5.7736	5.358	20.624	3.4359	3.499	4.803	7.3659	47.0797	19.338	14.0125	14.416	12.862	23.542	18.0238	13.2549	7.135	5.2062	23.8274	8.951	22.211	13.712	7.268	22.831	6.38	5.549		0.623257	13.4584
16.0769	5.1211	5.4727	25.4507	5.0858	3.563	4.738	6.7119	45.1392	18.984	15.0281	9.073	10.506	23.007	19.4429	12.382	4.2398	5.0371	24.4001	8.617	25.4285	11.772	7.061	23.138	5.997	6.208		0.627908	13.2642
16.196	4.565	7.6215	22.6357	4.3223	5.662	5.005	4.4268	41.9241	17.163	11.8609	9.926	13.401	23.707	21.6199	8.9288	5.7205	3.7784	22.0446	9.033	28.6128	12.924	8.171	21.832	7.107	6.372		0.63256	13.1346
16.315	5.1679	5.3469	25.1794	2.5235	3.825	5.711	4.5073	39.3532	15.619	11.9653	10.343	13.148	23.458	22.9049	12.2757	5.2877	4.7716	21.4569	9.12	23.4646	9.407	8.023	22.901	7.152	5.312		0.637208	12.729
16.4341	4.5247	5.7664	20.7907	4.9944	4.38	4.604	5.9169	37.5577	18.4	11.4282	12.305	12.605	21.868	21.0867	10.6017	5.7922	4.0897	23.5724	9.579	19.8726	12.169	6.73	24.83	5.78	6.827		0.641859	12.6429
16.5532	4.321	5.4632	24.4501	4.3162	5.141	3.462	5.7472	38.998	21.298	10.4459	14.299	13.63	23.074	28.7367	9.4853	5.6826	4.073	22.2516	9.106	20.6228	11.148	5.881	23.976	7.116	6.315		0.646511	13.1616
16.6723	4.7121	5.8976	21.7771	2.61	3.23	5.937	4.9195	37.7893	21.471	11.6507	9.704	14.295	20.09	24.6846	10.4014	6.497	4.0377	20.429	8.758	18.6919	10.642	6.795	20.288	7.458	6.743		0.651163	12.3804
16.7914	5.325	6.622	20.3395	4.2476	5.137	4.642	4.9183	37.8905	20.675	10.8855	12.42	12.454	19.159	23.8117	11.7166	5.531	4.4238	18.8861	5.551	20.3791	10.27	4.296	24.09	7.848	5.731		0.655814	12.29
16.9105	3.9723	5.8939	22.3782	5.3099	3.804	3.101	6.4913	37.014	21.474	10.1255	11.059	13.563	16.7	31.4631	9.7457	3.6492	4.5646	20.9647	10.155	18.1207	9.472	5.292	24.814	8.151	5.883		0.660466	12.5264
17.0296	3.5472	5.3782	23.2759	3.224	3.492	3.677	5.8749	31.492	24.211	9.508	12.845	10.226	16.429	28.5579	8.934	3.9977	5.2369	20.3234	7.669	21.9037	9.257	6.749	22.967	10.467	5.528		0.665117	12.1908
17.1487	4.1968	3.5376	21.7242	3.5366	3.417	4.81	4.8058	25.8571	21.282	9.4943	13.229	10.007	15.524	28.8041	10.3575	4.7298	3.379	21.0998	6.553	22.3114	7.471	8.386	24.211	8.433	6.604		0.669769	11.7504
17.2677	3.0631	3.913	18.1531	5.9335	4.391	5.276	6.401	27.9839	23.466	9.4343	11.76	11.425	17.648	30.1519	8.9814	5.7215	5.2793	19.9713	8.352	21.82	6.921	6.751	23.854	10.869	7.451		0.674417	12.1989
17.3868	4.3278	3.939	20.6894	4.3745	5.813	4.755	4.5681	28.2652	22.815	9.4424	9.706	10.945	13.377	30.7623	7.1104	5.4802	4.5365	18.7804	7.773	21.9465	6.495	3.765	29.115	10.773	4.885		0.679068	11.7776
17.5059	3.8127	3.9105	17.1009	2.8728	4.246	4.002	5.2643	28.2547	26.129	8.3964	11.485	9.004	11.646	27.0598	7.9914	4.5094	3.6783	18.8536	7.282	27.0592	5.551	5.677	23.895	10.796	5.273		0.68372	11.35
17.625	4.8173	4.7648	20.1003	4.7144	2.23	4.684	5.2438	24.5608	26.278	10.0092	12.285	9.577	14.306	30.7223	10.2487	5.6461	2.5513	18.7791	6.646	25.7586	6.603	5.931	28.656	10.174	6.596		0.688372	12.0753
17.7441	5.0982	4.8757	18.6809	3.4909	3.287	5.381	4.0863	21.6236	28.864	9.4518	11.092	9.019	11	34.6949	8.0476	6.2168	4.7816	16.722	6.814	23.8149	7.858	7.238	25.872	8.144	7.956		0.693023	11.7644
17.8632	4.5841	4.6615	22.2447	4.2799	2.119	4.817	4.6984	21.6352	33.324	9.2986	10.276	9.147	10.247	28.265	7.7308	5.6339	4.241	19.0652	9.523	20.2521	5.368	7.177	26.747	9.695	7.285		0.697675	11.6926
17.9823	3.9828	4.707	19.4479	3.8355	4.379	7.596	4.3649	23.6972	31.419	12.0972	9.975	8.647	10.508	34.8939	6.2314	5.7462	5.4693	18.8423	6.901	16.2225	5.589	4.88	27.178	11.486	5.665		0.702327	11.7504
18.1014	3.757	3.1348	19.1103	3.7028	4.981	8.643	5.7061	22.4543	32.631	11.3736	8.139	11.315	12.54	34.7563	7.5502	4.886	4.854	17.9379	6.104	11.2792	5.787	5.867	23.777	13.408	7.03		0.706978	11.629
18.2204	2.9951	4.225	23.2638	4.0656	3.868	7.06	6.5176	21.1511	33.404	7.92	7.843	8.503	9.187	35.0564	6.8593	5.6285	5.5994	15.9842	6.876	8.4439	5.524	3.854	22.067	11.071	7.087		0.711626	10.9622
18.3395	4.4147	3.5635	22.851	3.6545	5.522	7.26	4.3243	17.7381	35.968	7.5607	9.858	8.367	8.269	34.3884	7.0624	4.2718	5.3581	17.346	8.236	5.7991	4.855	5.799	23.542	9.404	6.665		0.716278	10.8831
18.4586	4.2119	3.8862	21.8955	3.0082	4.465	8.607	5.1143	17.9451	37.846	10.4283	6.928	6.483	9.16	31.8713	7.415	4.7432	5.7366	18.2837	8.452	5.3625	5.424	4.856	22.249	11.499	7.08		0.720929	10.918
18.5777	4.5659	4.465	20.2874	4.5133	3.945	7.865	6.2054	17.1136	37.085	10.254	7.308	6.154	10.49	32.313	6.3926	4.9132	4.0966	15.9604	6.559	3.0069	4.689	3.436	22.278	10.775	6.375		0.725581	10.4419
18.6968	6.4666	4.698	21.2717	4.4139	5.876	10.369	6.5036	11.957	34.502	9.4458	8.694	7.533	10.336	34.4872	7.9322	6.757	5.0005	16.5583	6.504	4.8961	5.392	4.691	21.788	12.957	6.875		0.730233	11.0362
18.8159	3.3873	3.8283	21.8998	3.9478	7.208	12.752	5.2061	10.5853	39.026	7.2566	7.476	7.1	9.104	32.5867	6.5691	2.9992	4.2135	20.8123	9.058	4.8385	6.395	5.976	20.802	10.665	7.331		0.734884	10.8409
18.935	5.9442	5.3744	20.6972	3.713	6.367	13.866	4.9846	10.4806	33.124	8.2221	8.909	6.95	10.115	28.7403	5.5063	4.7851	4.5177	17.3366	8.237	4.5688	5.436	5.932	20.338	11.228	7.293		0.739536	10.5066
19.0541	3.7736	4.0991	21.074	3.7136	8.578	17.948	7.0259	10.7338	40.166	8.0716	9.108	6.999	10.225	32.2641	6.2339	5.193	2.9907	16.6864	9.2	6.3527	5.815	5.073	22.518	10.988	8.188		0.744187	11.3207
19.1731	3.259	3.9725	21.2477	6.101	8.035	20.026	5.4639	11.5505	43.791	9.6371	6.497	7.434	8.846	32.4939	5.5333	5.0886	5.2528	15.5857	9.963	7.8707	5.61	6.601	22.679	10.584	8.315		0.748835	11.6575
19.2922	3.7597	6.4179	22.199	4.7793	8.08	24.329	5.8289	10.0224	41.904	8.4143	7.456	5.249	7.454	34.9837	6.3456	4.1246	5.5199	16.946	9.728	4.8267	4.296	3.776	21.354	10.618	7.325		0.753487	11.4295
19.4113	5.7767	4.7792	21.6477	5.2347	11.231	30.653	6.4387	7.6489	44.271	11.3054	7.562	6.405	7.064	31.0426	6.8138	5.5726	4.7952	15.7919	8.043	4.6049	6.117	3.737	19.695	13.464	8.094		0.758138	11.9115
19.5304	4.9609	4.7876	22.6799	4.154	14.837	33.935	7.6268	10.4409	47.772	11.2016	7.912	6.125	8.483	31.1479	5.3921	6.1013	6.0065	14.4042	11.129	4.8391	4.974	3.539	17.875	12.546	7.858		0.76279	12.4291
19.6495	4.7599	5.5012	21.1665	4.4358	16.159	33.075	7.5208	9.1698	52.876	9.2631	7.58	7.017	6.974	29.847	5.2258	4.9441	5.0273	12.2635	10.451	5.2462	3.706	3.469	19.717	13.72	7.477		0.767442	12.2637
19.7686	3.2116	4.0401	20.7512	3.9831	20.585	36.323	11.1682	8.7237	59.184	11.5931	8.87	7.006	7.395	28.2094	3.5601	3.7828	3.8384	11.5283	12.533	5.9294	3.149	4.468	16.598	13.687	6.155		0.772093	12.6509
19.8877	4.2341	5.1615	21.0934	4.8166	19.009	45.728	11.6507	9.1252	53.369	9.2334	7.78	7.076	7.054	25.4506	5.0973	3.2566	2.7042	13.6306	12.868	4.6129	4.833	3.256	16.307	16.501	6.102		0.776745	12.798
20.0068	4.5629	5.9191	21.6138	5.7774	24.764	41.266	13.3771	8.3511	59.049	7.4748	9.616	4.582	7.183	24.9977	5.7518	4.0032	3.9403	11.4731	14.801	5.0494	5	2.855	16.892	15.568	8		0.781397	13.2747
20.1259	4.5668	6.703	23.3558	6.9291	24.43	35.496	15.3537	7.3737	59.301	9.9421	6.53	6.411	6.995	29.1889	4.6713	4.8702	4.8743	7.5892	11.731	5.7292	6.233	3.424	15.137	15.45	8.234		0.786048	13.2208
20.2449	5.0107	8.616	24.7278	6.2162	25.011	30.716	18.436	9.1522	56.423	11.7325	6.766	5.416	7.719	28.5234	6.5556	3.4909	5.4567	8.6347	13.977	6.1593	3.921	2.522	17.842	11.933	9.482		0.790696	13.3776
20.364	7.7647	8.6278	24.689	5.3557	25.634	20.842	22.3965	9.074	55.738	10.2254	7.325	6.428	6.396	29.4564	7.8981	4.3139	5.0428	9.2634	16.68	5.96	3.561	4.22	19.299	15.571	9.603		0.795348	13.6546
20.4831	5.7442	8.2987	23.572	6.6227	20.107	16.237	22.7716	10.0715	54.007	8.0602	6.249	6.181	7.319	30.9734	6.9574	4.0436	6.9917	7.8187	15.362	5.6858	4.473	3.643	18.387	18.696	8.66		0.799999	13.0773
20.6022	7.8015	11.6086	20.876	6.2151	15.69	11.869	29.1588	8.3519	50.211	9.4336	5.143	8.262	7.975	28.6565	8.0014	4.8104	6.0654	8.777	17.633	5.5734	4.838	3.888	14.12	22.202	9.559		0.804651	13.0688
20.7213	7.6697	12.7548	20.4855	8.2937	15.626	8.63	33.2139	7.9625	45.578	9.1478	5.493	7.51	8.253	27.9852	9.9084	5.95	4.9705	9.3392	18.784	7.0791	5.081	2.861	14.704	16.541	11.302		0.809302	13.0049
20.8404	9.2946	13.6761	22.8932	6.5658	12.273	6.019	35.9467	6.795	46.112	8.5283	6.532	5.513	7.979	28.5725	7.51	6.3288	4.8421	7.6145	17.908	7.2586	4.233	2.173	14.497	17.118	14.284		0.813954	12.8187
20.9595	13.3246	15.3412	18.4409	8.4972	9.958	5.212	39.3919	7.2248	40.245	9.0305	10.742	5.502	6.487	26.9536	7.4812	5.3564	7.4436	7.5036	21.426	4.4531	4.044	3.763	11.272	23.951	16.285		0.818606	13.1732
21.0786	14.0321	19.6438	18.3961	7.8682	6.765	3.838	33.8062	6.8094	38.284	10.978	9.009	5.496	4.05	29.4003	8.0759	5.7322	6.3035	6.274	22.919	5.0282	4.702	3.235	11.494	24.646	19.098		0.823257	13.0354
21.1976	16.5746	26.2051	16.1247	7.2479	6.103	3.239	24.9692	7.2949	40.314	13.9797	8.175	4.961	6.728	25.7055	6.8505	8.0181	5.1848	7.9899	20.834	4.2327	3.444	3.734	11.13	28.019	21.772		0.827905	13.1532
21.3167	17.4594	30.3259	17.6072	8.2825	5.038	2.585	18.2695	6.9922	38.612	12.5655	6.244	6.223	5.077	24.7304	7.9702	5.9146	6.1912	7.2172	23.122	3.8994	3.541	2.634	13.532	32.836	21.709		0.832557	13.1431
21.4358	22.3286	33.2178	16.2044	9.6452	6.783	1.922	12.2423	8.7879	36.48	13.9261	7.223	5.085	6.872	21.526	6.5687	5.0323	6.1021	6.8927	27.568	4.6576	4.466	4.053	13.957	39.27	26.917		0.837208	13.9091
21.5549	21.0592	33.4549	15.8677	14.6695	5.381	3.217	12.732	11.1128	34.419	15.6615	7.466	7.49	7.123	21.9746	5.4601	6.4732	8.8567	8.0736	24.373	5.221	3.879	3.495	10.884	40.502	34.82		0.84186	14.5466
21.674	25.7199	35.2896	16.9643	13.1989	3.636	2.334	7.8129	10.3214	30.88	17.0433	9.576	6.791	6.134	28.5745	5.4702	4.0511	7.6789	6.9022	27.918	5.852	3.551	2.135	12.693	49.306	43.454		0.846512	15.3315
21.7931	33.2644	35.8074	15.8999	16.1008	2.858	1.621	7.4902	8.9101	28.22	17.4924	8.602	8.057	6.019	25.5768	7.4133	5.4968	8.5684	8.6656	32.008	4.9757	4.549	1.965	15.577	56.52	46.124		0.851163	16.3113
21.9122	34.1869	32.1386	19.2524	18.58	3.163	0.854	8.3668	13.3373	28.693	20.4019	9.31	7.472	7.647	25.8668	6.9001	5.2283	7.3494	7.7947	30.482	4.7187	4.201	2.897	12.509	53.66	45.375		0.855815	16.4154
22.0313	33.6441	33.1068	14.1194	25.5961	2.009	1.508	6.378	15.2908	30.557	19.4886	11.949	8.104	6.696	29.4304	6.9471	4.8808	10.6102	11.5917	30.883	6.0054	4.045	3.022	12.05	58.294	36.005		0.860467	16.8885
22.1503	39.5751	31.88	13.6743	29.1227	2.643	0.817	5.2084	15.8483	26.51	18.684	8.466	9.599	6.885	28.2096	7.5702	6.1675	10.8965	11.1454	31.815	4.9739	4.704	2.412	12.645	62.313	34.164		0.865114	17.0372
22.2694	41.2308	31.9417	13.6411	33.7061	3.414	1.022	3.754	18.7624	23.598	20.0785	10.179	8.707	7.366	26.3716	6.9316	6.2677	12.7219	12.4984	32.765	4.8787	4.933	2.869	14.834	57.909	27.553		0.869766	17.1173
22.3885	40.4808	26.2058	19.9506	33.7781	3.209	2.034	3.1663	23.4899	22.792	22.7009	8.72	10.077	9.97	25.8996	7.0724	6.7022	17.9446	15.6793	29.881	5.4974	3.964	2.975	10.782	55.935	20.898		0.874418	17.1922
22.5076	32.2096	19.0847	21.6104	43.3204	2.079	1.394	2.6245	26.1161	22.031	24.8202	13.677	8.391	9.603	24.3621	8.8336	5.4482	19.7737	18.9999	31.839	4.1192	2.879	4.239	10.718	38.278	12.254		0.879069	16.3482
22.6267	30.2308	16.9242	26.1759	44.4496	1.525	1.256	2.5058	26.909	23.488	30.2838	13.36	12.529	10.184	24.9389	9.1497	5.9193	25.0533	20.8902	29.704	4.8376	3.365	3.444	11.458	31.178	8.69		0.883721	16.738
22.7458	28.9271	12.4744	28.6332	47.1432	1.489	1.833	1.292	20.7741	24.963	30.8856	17.736	17.128	6.525	24.0018	10.4304	6.2987	35.6351	24.505	28.893	6.8988	3.537	2.792	12.768	23.018	6.631		0.888372	17.0085
22.8649	25.0358	11.3903	31.9546	42.0011	0.757	0.592	1.7764	20.7747	22.904	34.2266	19.545	18.534	12.784	24.919	10.744	7.6162	36.6824	27.4343	30.36	5.8403	4.297	3.488	12.098	18.506	4.401		0.893024	17.1465
22.984	20.7634	9.2744	37.7322	31.3819	1.322	0.61	1.8629	20.9661	21.557	41.0553	21.506	20.529	9.8	22.2013	11.9503	8.0402	44.1912	33.3101	29.149	8.3362	4.512	4.943	13.942	11.47	4.067		0.897676	17.3789
23.103	16.9401	9.6891	33.4921	26.8363	1.119	0.349	1.7924	14.3269	20.094	44.686	25.681	24.043	10.854	20.5979	9.7183	7.7716	45.6661	35.3666	27.208	6.0658	5.08	2.877	12.188	10.993	3.774		0.902323	16.6884
23.2221	16.4063	8.5679	32.9925	19.077	1.513	0.801	1.9487	11.6402	23.151	43.9891	26.298	28.289	14.955	21.3848	10.2029	8.2772	44.4736	39.4505	32.849	5.3081	5.264	4.433	12.47	10.946	4.118		0.906975	17.1522
23.3412	10.4515	5.6268	35.8466	14.8548	0.688	0.573	1.415	9.3991	22.408	46.3056	29.97	29.958	20.295	17.5935	11.5749	9.6271	43.4316	47.1318	31.982	6.4902	4.845	3.607	13.637	8.734	4.311		0.911627	17.2303
23.4603	7.2897	4.3053	25.8146	13.5593	0.647	0.482	1.3037	6.3065	19.601	51.187	39.253	32.547	23.777	20.8351	11.4613	9.8255	39.0821	45.4982	31.382	6.531	4.138	2.883	14.694	5.708	2.904		0.916278	16.8406
23.5794	7.0317	4.2372	19.9573	9.3574	1.138	0.715	1.0677	5.2667	21.891	54.9891	43.271	30.081	29.001	21.8645	15.0336	8.4108	28.6213	53.5649	31.11	6.7616	5.298	4.887	19.404	5.184	0.899		0.92093	17.1617
23.6985	5.572	4.2579	15.5946	9.8681	0.232	0.75	0.701	4.8856	27.857	54.6496	43.107	31.918	34.07	21.7961	16.4796	9.8573	23.0143	51.1697	38.103	7.4351	5.126	5.118	20.163	4.047	1.942		0.925582	17.5086
23.8176	4.3048	4.6563	12.0714	7.3245	0.14	0.529	0.6136	4.9459	27.537	60.2244	44.262	31.303	39.5	28.1917	19.683	13.4123	16.9548	48.5691	36.277	7.5682	4.46	4.478	17.924	4.007	1.795		0.930233	17.6293
23.9367	2.5426	4.3185	7.6218	6.034	0.799	0.768	0.6851	4.1915	32.307	57.7296	49.394	25.865	50.265	29.645	22.9617	15.4728	10.4426	49.9994	33.158	7.9397	4.298	3.604	17.136	3.086	1.134		0.934885	17.6559
24.0558	2.0214	2.9078	7.6489	5.3155	0.121	0.634	0.4881	3.2659	33.366	56.783	34.925	20.246	54.82	28.0739	22.0907	18.4469	9.9437	38.274	38.675	9.1899	5.918	6.375	22.324	2.505	1.163		0.939537	17.0209
24.1748	2.632	2.1967	7.176	5.7843	0.432	0.445	0.4912	3.5075	35.199	61.5683	37.262	20.356	56.292	38.2287	29.941	18.0982	8.0305	33.4728	39.952	11.2272	5.793	5.798	22.84	2.4	1.73		0.944184	18.0341
24.2939	1.8573	2.8198	5.5693	4.4671	0.051	0.208	0.555	1.7415	28.004	54.6654	40.283	17.267	56.763	41.524	33.8986	22.6367	9.7581	32.4913	44.086	12.1034	3.671	6.173	25.408	1.143	1.12		0.948836	17.9306
24.413	2.084	1.5764	5.5637	4.2983	0.364	0.207	0.1483	2.9074	22.397	49.1818	32.552	11.271	57.27	41.2967	34.1934	25.3398	6.9221	25.4183	45.33	12.2359	5.356	6.838	29.451	1.755	1.403		0.953488	17.0144
24.5321	0.9164	1.7662	5.9027	4.9123	0.537	0.287	0.3041	2.013	17.524	41.6296	29.486	11.036	44.771	38.7577	42.7732	34.2446	7.4157	14.7964	52.576	11.8845	6.202	8.614	36.522	2.267	0.749		0.958139	16.7155
24.6512	1.6156	1.2503	3.5978	3.2247	0.617	0.378	0.2718	1.7511	11.041	36.2911	20.417	9.437	40.273	36.3213	49.2312	46.5726	5.4886	8.9014	53.26	15.4739	5.69	8.008	47.156	1.134	0.857		0.962791	16.3304
24.7703	1.6825	1.3353	2.7925	3.1792	0.131	0.279	0.1803	1.6709	8.391	24.2787	14.331	7.276	37.075	32.66	46.4706	42.1182	4.1071	6.8995	50.19	15.5304	6.591	9.731	52.571	0.128	1.081		0.967442	14.8272
24.8894	1.1818	1.6922	4.1022	4.1089	0	0.556	0.4625	1.4485	6.38	19.1832	9.33	6.501	27.562	34.7958	45.31	48.5838	2.818	5.7631	46.971	20.3091	8.243	12.76	64.655	0.858	1.033		0.972094	14.9843
25.0085	2.4489	0.9424	2.5818	2.6899	0.43	0.118	0.1186	1.9183	3.798	16.2109	7.518	5.455	19.005	34.1813	43.9814	51.7776	3.4908	4.0233	35.027	22.6866	7.097	16.761	66.92	0.943	0.895		0.976746	14.0408
25.1275	0.6323	1.1162	2.2684	2.8369	0.546	0.105	0.36	1.0947	4.3	8.9612	6.866	4.135	14.01	32.0089	40.8067	59.9598	3.3518	3.1145	33.807	26.2828	9.122	17.109	69.57	1.286	1.096		0.981393	13.7898
25.2466	0.4521	0.8831	1.8948	1.9836	0.239	0.041	0.6442	1.0337	4.118	7.4897	4.56	4.056	9.24	26.3835	46.1899	62.5783	4.4455	4.1091	29.977	25.5456	11.384	22.542	56.645	0.609	0.477		0.986045	13.1008
25.3657	0.7163	0.8952	2.672	1.444	0.063	0.019	0.2356	0.9438	4.048	5.2717	4.236	1.998	7.031	23.5241	46.5796	46.3472	1.9174	3.5785	22.103	30.7757	11.882	32.656	51.509	1.028	0.211		0.990697	12.0674
25.4848	0.5361	0.0989	2.2078	1.4993	0	0.153	0.2374	1.1665	3.59	4.9994	4.785	1.449	6.036	25.1274	47.6198	41.5344	0.7403	2.8181	18.731	38.5882	18.044	33.098	35.79	0.479	0.348		0.995348	11.5871
25.6039	0.584	0.4682	2.7019	0.6409	0.115	0.521	0.322	0.6672	1.394	5.6704	4.084	1.446	6.546	21.4368	46.0538	28.6477	1.6202	1.6462	13.24	41.3515	21.326	39.084	23.466	0.321	0.275		1	10.5452

## Sheet: Image14
X0	Y0	Y1	Y2	Y3	Y4	Y5	Y6	Y7	Y8	Y9	Y10	Y11	Y12	Y13	Y14	Y15	Y16	Y17	Y18	Y19	Y20	Y21	Y22	Y23	Y24	Y25	Y26		Ap-Ba	Avg intensity
0	32.403	32.4367	28.789	58.932	49.439	58.62	53.868	67.272	51.734	39.61	47.249	82.388	60.965	32.255	38.463	44.802	26.65	32.908	68.159	74.087	57.679	59.358	47.365	47.416	69.006	93.03	93.55		0	53.6457
0.1191	34.797	36.2306	34.511	67.41	50.287	53.093	60.558	77.104	56.13	37.304	50.032	79.821	65.851	36.933	50.337	51.904	32.378	39.232	70.235	83.432	69.218	65.729	46.593	52.407	72.34	102.33	90.103		0.00510257	58.0111
0.2382	41.493	34.1906	35.222	71.622	58.622	48.572	55.232	80.481	64.198	42.076	54.961	77.006	75.226	39.863	52.442	47.4	32.716	45.709	77.68	87.077	69.348	66.763	43.402	55.516	79.851	105.305	90.744		0.0102051	60.471
0.3573	52.131	37.675	35.23	75.761	61.669	53.848	64.662	81.27	70.951	51.614	55.638	77.446	73.712	50.149	62.073	58.865	40.711	40.273	86.989	94.956	85.838	71.381	53.022	66.082	87.543	109.004	95.349		0.0153077	66.4386
0.4764	71.934	41.1797	40.431	88.076	73.757	57.7	68.041	93.058	77.6	59.588	59.674	81.215	82.444	64.264	69.725	67.929	50.767	46.038	82.955	105.557	104.083	84.492	43.836	63.57	90.59	116.347	93.487		0.0204103	73.2718
0.5954	81.931	45.8029	43.458	103.02	83.993	58.837	73.534	95.728	79.118	65.402	67.071	80.788	96.581	78.834	80.81	79.956	57.035	50.019	105.041	113.361	111.417	102.475	53.309	69.658	99.288	120.587	96.489		0.0255085	81.2423
0.7145	95.129	52.7311	52.813	110.352	103.005	72.234	81.489	116.026	81.697	75.373	72.048	85.088	112.433	97.008	84.244	102.478	70.98	56.326	111.863	117.281	117.162	111.901	55.591	73.127	107.862	118.187	98.151		0.0306111	90.0955
0.8336	101.612	65.3307	59.786	122.359	111.005	88.129	83.723	116.731	96.582	90.211	79.458	84.827	111.653	111.247	98.668	105.981	81.66	64.466	129.245	117.743	125.885	119.18	63.665	83.688	115.733	121.755	103.692		0.0357137	98.2968
0.9527	108.719	74.5427	71.015	118.937	115.486	103.047	87.636	120.01	99.831	97.336	88.041	80.517	132.33	119.141	105.862	115.658	100.884	76.919	128.421	123.54	136.467	141.095	77.574	96.236	122.747	128.584	122.327		0.0408162	107.145
1.0718	108.451	81.0512	87.645	118.659	117.828	118.052	109.172	126.658	114.567	111.893	96.388	88.536	140.961	131.863	113.884	133.53	125.353	84.173	138.117	129.678	137.401	152.266	81.696	91.464	120.374	121.642	123.446		0.0459188	114.991
1.1909	107.929	83.1512	99.066	122.994	110.898	129.857	125.474	126.377	118.139	118.586	104.029	79.908	153.942	144.74	130.124	132.448	140.372	89.627	149.347	129.134	146.355	157.451	82.792	90.017	127.959	132.11	127.003		0.0510214	120.734
1.31	109.88	87.8349	101.571	120.594	109.784	134.377	143.05	135.58	136.603	119.91	110.386	81.846	156.102	145.403	130.145	121.317	146.763	101.721	153.727	133.581	140.629	159.281	109.908	85.286	128.231	117.629	146.212		0.0561239	124.717
1.4291	104.165	93.9194	105.115	109.109	97.932	132.77	161.123	143.604	143.583	109.141	111.541	81.81	173.339	143.419	117.149	125.264	148.62	109.488	161.193	142.797	137.958	173.988	111.619	94.156	116.552	112.592	155.485		0.0612265	126.572
1.5481	105.201	93.2202	100.596	100.751	101.915	128.518	174.089	148.669	147.94	103.293	108.151	81.845	180.04	147.045	114.117	121.955	155.251	122.407	155.747	134.832	140.324	166.954	127.725	100.633	105.007	109.643	142.926		0.0663248	126.622
1.6672	103.162	76.0038	85.852	80.965	92.32	125.606	177.855	144.874	156.948	95.176	108.147	81.479	177.393	146.935	115.485	128.173	147.733	118.465	158.683	117.047	136.713	160.342	119.822	103.179	109.899	109.126	138.133		0.0714273	122.797
1.7863	94.423	76.0452	73.373	69.911	88.586	116.397	180.46	143.924	159.496	87.711	105.063	83.881	166.544	145.964	118.755	120.529	145.449	116.632	143.812	111.019	124.712	136.006	132.222	98.293	99.87	95.611	126.121		0.0765299	117.067
1.9054	95.776	69.7838	61.794	58.675	83.058	105.427	167.151	136.493	145.96	70.677	99.008	87.077	177.283	140.952	112.367	123.166	136.975	118.182	136.913	100.956	113.877	125.632	140.256	105.947	89.673	94.465	110.319		0.0816325	111.402
2.0245	100.327	65.4591	56.054	53.454	84.335	101.913	157.881	123.382	136.674	69.52	92.998	101.098	167.956	132.746	130.819	115.919	112.669	114.425	119.81	92.038	102.531	111.152	154.339	116.666	86.812	93.331	101.516		0.086735	107.253
2.1436	98.526	63.1116	42.092	43.191	86.596	102.762	145.889	123.185	128.081	62.377	84.075	108.758	165.051	126.214	123.415	104.412	106.804	120.095	104.63	78.439	82.582	97.952	138.696	112.12	72.677	90.492	88.443		0.0918376	100.025
2.2627	96.602	64.7646	44.061	37.212	83.728	97.701	130.72	116.879	111.828	51.874	75.181	116.361	153.836	139.392	124.428	96.499	94.406	113.548	95.641	72.564	74.072	89.129	121.761	117.919	78.964	94.76	75.358		0.0969402	95.1551
2.3818	82.852	52.5992	37.002	33.631	83.04	88.249	111.257	109.979	102.196	51.861	66.244	121.626	152.005	132.064	123.264	107.634	85.821	109.25	85.861	64.801	65.611	80.253	121.15	122.227	77.826	87.397	64.731		0.102043	89.6456
2.5008	72.476	54.2577	38.012	31	84.754	84.563	97.604	97.72	94.778	48.93	64.155	115.321	141.55	122.001	124.28	92.541	79.918	110.074	69.548	60.75	60.422	72.263	116.515	122.968	68.527	78.549	56.267		0.107141	83.6942
2.6199	62.762	47.3678	39.341	29.087	81.805	83.493	82.136	84.708	88.32	42.604	65.64	112.845	138.288	113.513	122.921	95.009	64.832	101.28	62.512	52.781	53.628	66.265	107.449	123.345	58.387	88.989	46.929		0.112244	78.3791
2.739	49.843	43.8658	31.617	28.015	86.779	82.232	84.645	77.167	81.31	38.418	59.957	114.292	123.925	102.672	113.199	81.484	61.161	103.131	54.477	46.214	43.055	62.337	89.039	110.333	64.195	83.42	37.611		0.117346	72.385
2.8581	42.282	35.8838	28.698	25.829	94.827	86.491	72.931	70.32	73.187	34.327	61.773	110.842	114.136	94.227	110.408	73.039	56.829	96.434	49.543	39.741	41.349	50.614	90.782	110.929	65.553	74.748	29.841		0.122449	67.9838
2.9772	36.177	32.3885	21.228	24.654	88.512	84.378	66.505	53.18	67.553	33.669	49.226	105.747	110.963	99.649	102.762	61.775	52.791	93.197	47.489	31.492	35.416	49.305	81.366	100.301	59.322	69.106	29.304		0.127551	62.4984
3.0963	27.891	27.961	19	24.788	82.959	86.692	62.805	46.621	61.864	24.402	48.733	101.971	107.511	95.901	98.781	52.08	53.754	93.011	41.096	27.857	33.638	43.003	71.353	93	60.033	74.7	23.839		0.132654	58.7127
3.2154	20.587	23.6517	19.857	20.381	89.678	91.331	54.843	38.789	54.923	22.371	42.256	85.285	89.561	94.51	82.582	43.434	57.749	86.794	35.519	25.798	29.203	39.4	70.027	87.779	62.656	75.765	22.023		0.137756	54.3242
3.3345	23.937	23.5055	16.374	16.877	90.436	87.874	53.153	39.704	48.764	25.744	37.736	73.242	84.636	96.343	77.87	40.02	50.367	88.164	31.112	22.972	27.457	32.896	64.016	73.192	64.537	76.21	23.838		0.142859	51.5176
3.4535	24.291	21.033	18.808	15.884	89.259	89.491	49.368	38.2	47.887	26.423	40.409	68.159	74.499	102.363	75.589	35.245	43.745	80.438	26.593	19.113	24.231	28.183	65.174	55.105	62.134	80.756	19.637		0.147957	48.9636
3.5726	23.245	21.9314	19.878	14.964	91.844	95.634	44.948	40.145	46.42	23.777	36.219	61.46	65.567	99.074	76.55	36.756	41.164	74.737	26.609	18.392	22.649	29.321	48.551	51.171	56.596	75.891	15.153		0.15306	46.6165
3.6917	19.186	20.0866	19.98	14.556	88.79	101.169	43.424	38.833	42.921	21.173	33.644	53.073	58.972	91.876	67.832	30.724	36.285	72.02	26.019	16.07	21.559	25.348	50.206	53.681	49.597	72.783	14.943		0.158162	43.8797
3.8108	18.691	17.4803	21.694	12.085	97.004	96.304	36.654	35.414	46.034	25.321	31.007	43.603	43.812	81.946	71.282	24.345	37.039	65.325	24.084	14.319	15.69	22.561	47.771	43.845	54.271	73.171	13.654		0.163265	41.2743
3.9299	15.604	18.0757	21.307	11.978	95.411	112.336	35.125	38.575	43.692	20.709	27.5	44.334	36.339	76.748	66.831	20.627	33.95	56.781	24.72	11.687	14.586	19.965	37.811	39.058	50.708	60.18	11.28		0.168368	38.7377
4.049	17.868	13.3948	21.165	11.987	95.415	114.767	31.359	36.11	37.539	19.538	25.934	43.692	33.243	68.57	57.563	21.657	33.044	50.827	25.288	9.898	14.93	17.423	33.583	34.333	46.943	60.714	10.85		0.17347	36.5791
4.1681	18.255	12.4197	19.936	13.3	95.172	121.336	21.117	33.116	33.748	20.034	24.339	36.286	28.749	65.965	54.187	18.743	25.337	43.41	27.379	7.828	13.113	15.951	29.469	32.552	45.402	54.07	13.023		0.178573	34.231
4.2872	18.46	13.0493	17.372	11.755	96.914	121.172	20.834	34.668	29.939	19.912	18.609	35.83	27.478	59.987	54.329	18.856	20.926	35.15	24.789	9.289	12.466	12.348	30.168	26.99	44.402	52.518	9.444		0.183675	32.5057
4.4063	20.626	12.9188	18.28	12.706	101.674	134.487	18.496	36.312	23.75	18.27	22.515	32.532	18.17	51.464	42.843	15.947	17.956	34.337	20.407	8.466	9.806	14.129	22.941	26.331	36.337	45.366	7.984		0.188778	30.5574
4.5253	18.522	9.5408	18.367	10.437	91.677	130.263	17.44	34.945	28.049	18.16	20.105	32.545	16.035	45.927	44.625	13.809	15.564	25.684	19.614	9.106	8.836	11.511	20.755	21.506	37.568	36.792	8.413		0.193876	28.3628
4.6444	15.1	9.7491	17.808	10.948	94.21	133.75	15.731	30.904	27.554	14.983	20.102	32.025	13.876	43.866	41.444	11.718	14.21	27.371	19.83	7.235	10.185	10.419	22.578	20.919	32.196	35.461	6.369		0.198979	27.4274
4.7635	15.203	9.3528	19.735	10.973	80.645	128.465	13.875	32.807	22.342	15.997	17.702	29.045	11.818	40.982	37.88	11.452	14.61	26.863	20.122	8.37	7.454	11.167	20.502	20.92	26.914	30.323	6.583		0.204081	25.6334
4.8826	15.48	9.8082	20.992	9.644	76.976	111.829	15.14	31.368	26.683	15.726	12.737	32.748	11.369	36.478	38.154	9.687	13.267	24.549	17.347	9.626	5.605	9.895	18.571	17.444	23.509	26.23	7.238		0.209184	24.0037
5.0017	12.94	9.0875	25.555	8.875	71.564	115.611	11.547	30.416	28.186	11.545	12.779	33.32	9.425	32.236	31.488	10.263	12.188	25.3	17.552	6.744	6.454	9.008	14.382	13.493	21.641	21.3	5.54		0.214286	22.5348
5.1208	10.428	7.7393	21.886	10.92	57.33	109.591	11.39	37.561	22.805	12.329	11.071	31.277	8.801	27.458	31.119	7.819	11.296	30.053	20.356	7.816	6.022	8.703	16.449	14.358	16.633	22.142	6.431		0.219389	21.4735
5.2399	13.149	7.6304	22.614	10.875	49.098	110.506	11.406	38.529	21.222	13.268	10.959	31.293	9.82	26.461	28.501	9.567	9.646	25.264	23.308	8.244	6.968	7.652	16.532	12.944	13.549	19.056	6.045		0.224491	20.8928
5.359	12.852	8.4	19.796	10.577	51.606	102.274	11.036	38.029	21.822	10.887	9.332	33.325	10.564	24.869	21.383	5.95	10.851	20.888	22.4	7.17	6.824	6.31	15.274	15.624	14.913	17.514	6.17		0.229594	19.8756
5.478	10.55	8.8422	17.77	9.079	45.182	86.159	13.696	36.464	21.22	9.966	7.571	33.8	10.45	21.171	19.987	6.97	7.061	23.925	19.16	5.46	6.281	6.52	13.131	13.287	12.809	14.39	7.196		0.234692	18.0777
5.5971	11.621	9.5384	19.924	12.793	35.425	78.554	12.708	37.205	20.077	10.234	6.356	30.596	11.795	19.748	17.841	5.889	8.485	16.03	19.763	7.283	5.527	5.585	13.037	16.092	11.887	16.206	4.515		0.239795	17.2116
5.7162	10.572	7.7309	20.833	12.113	33.519	74.579	10.277	31.313	16.924	7.646	4.756	26.773	9.67	17.066	17.125	5.075	5.466	17.201	20.808	5.883	5.973	6.368	10.904	13.125	8.467	13.374	6.311		0.244897	15.5501
5.8353	11.24	7.2604	22.334	10.626	30.059	68.714	10.87	29.705	20.574	6.393	5.426	26.868	10.233	13.581	15.83	5.211	8.209	13.464	19.096	7.126	5.003	6.805	9.398	13.949	9.825	14.898	4.785		0.25	15.0919
5.9544	9.696	9.1334	19.616	11.846	24.972	49.741	9.301	36.663	17.966	6.177	7.434	28.421	11.331	12.182	12.679	5.177	7.29	14.321	21.406	7.755	4.751	5.508	11.241	14.158	10.775	14.752	5.606		0.255103	14.4407
6.0735	11.613	9.6231	19.628	7.309	24.504	37.743	11.667	31.082	18.317	5.533	6.812	24.99	7.65	14.3	16.903	5.799	7.149	12.981	24.949	6.693	4.802	3.783	11.266	16.259	7.094	12.753	4.543		0.260205	13.5461
6.1926	10.726	7.0128	17.897	7.289	19.359	34.037	10.848	32.077	19.26	4.869	5.982	19.699	9.556	12.238	14.039	4.67	5.324	8.517	24.83	5.942	4.396	6.083	8.992	11.96	7.641	12.177	5.129		0.265308	12.2426
6.3117	11.861	8.2799	17.032	8.374	15.746	28.489	10.575	28.081	20.421	8.48	5.029	26.468	11.819	10.144	13.99	3.846	5.78	10.071	27.959	6.009	3.828	6.742	7.008	13.539	7.709	10.931	5.258		0.27041	12.3507
6.4307	10.398	8.437	19.578	8.544	11.118	24.836	11.25	31.62	15.404	5.934	4.327	27.721	12.125	8.654	13.954	7.096	6.443	8.604	29.273	5.106	5.114	5.16	8.291	12.326	7.563	11.619	4.824		0.275509	12.0489
6.5498	11.218	6.4206	19.374	6.329	13.285	22.73	10.198	32.43	14.933	5.846	5.752	29.451	11.121	8.207	11.309	6.899	4.829	9.136	33.052	6.937	5.972	5.721	9.015	11.554	7.995	10.497	5.068		0.280611	12.0474
6.6689	11.939	8.6907	22.07	5.39	10.109	20.473	8.854	31.599	17.01	7.446	5.875	35.607	9.717	8.227	9.61	6.394	5.852	6.315	30.674	7.845	5.25	4.277	9.099	11.537	7.748	10.588	4.845		0.285714	11.9645
6.788	13.547	7.8085	19.277	7.353	10.541	17.888	11.154	31.384	19.251	5.405	4.408	34.984	8.694	7.52	12.154	5.034	4.877	4.724	31.71	7.483	5.427	3.582	5.381	18.252	7.121	10.762	4.329		0.290816	11.8537
6.9071	15.616	7.8517	21.681	7.927	8.256	17.719	12.606	31.738	21.33	4.182	5.037	37.966	11.573	7.7	13.092	5.525	5.441	8.287	33.582	7.082	6.173	3.762	5.577	13.923	7.063	11.929	6.897		0.295919	12.5747
7.0262	15.91	6.9123	21.89	7.447	7.21	16.422	13.599	34.185	20.429	5.011	4.186	39.467	11.469	9.398	8.993	5.575	4.768	5.324	33.643	6.823	3.379	5.501	6.062	14.144	6.381	9.996	4.86		0.301021	12.1846
7.1453	15.184	7.5043	20.322	5.813	5.873	10.94	10.833	34.694	22.823	6.375	3.536	36.138	12.485	7.362	9.709	5.067	4.007	6.466	31.361	5.819	3.967	4.884	7.931	12.934	6.208	9.741	5.731		0.306124	11.6188
7.2644	16.864	10.5446	24.835	5.048	7.48	12.249	9.7	37.222	22.386	6.108	3.248	39.399	13.082	4.828	7.636	5.973	6.474	6.431	36.94	6.408	5.136	5.365	7.095	14.929	6.635	10.403	5.21		0.311227	12.5048
7.3834	15.45	8.0658	21.432	4.207	7.63	10.681	11.956	33.374	24.589	3.484	4.064	36.78	11.302	6.932	11.512	3.975	4.217	6.321	34.637	5.936	3.782	5.869	5.141	14.936	6.478	9.845	5.755		0.316325	11.7908
7.5025	15.577	6.5249	21.027	5.968	5.914	8.46	9.259	36.393	23.806	4.469	3.841	37.267	10.665	8.488	13.006	4.217	4.19	5.53	38.981	6.359	3.607	5.438	7.061	13.067	7.07	11.008	4.718		0.321427	11.9226
7.6216	15.772	7.4319	21.827	7.108	5.669	8.246	11.238	34.977	19.139	3.474	5.497	34.372	10.059	7.968	11.657	4.048	4.337	4.941	34.198	6.793	3.758	4.976	8.085	14.016	6.52	9.07	4.864		0.32653	11.483
7.7407	21.56	7.4837	23.008	6.869	6.964	6.798	11.397	42.55	18.666	4.884	3.88	32.144	12.888	8.729	13.156	3.959	3.639	6.404	41.159	6.817	4.62	3.914	8.795	15.282	6.905	9.845	5.497		0.331632	12.5116
7.8598	17.448	7.8424	32.436	7.079	4.915	9.807	11.036	46.886	15.657	4.282	4.4	31.309	9.42	7.938	12.904	4.352	4.723	5.719	39.857	8.62	3.98	4.403	7.659	15.06	5.554	10.555	6.032		0.336735	12.5879
7.9789	21.832	9.9627	29.491	6.377	5.693	8.156	11.808	49.076	13.851	5.108	5.166	29.44	11.243	7.734	15.073	4.599	3.574	6.399	38.351	5.901	5.213	3.687	8.213	13.751	7.801	9.046	4.544		0.341838	12.633
8.098	16.68	7.443	26.327	7.157	7.034	7.798	12.14	54.15	11.631	6.566	5.466	30.071	8.896	7.08	15.792	3.821	4.453	4.957	42.26	5.084	6.373	4.443	9.647	13.839	7.383	10.733	6.094		0.34694	12.7155
8.2171	17.61	8.4235	28.749	6.151	6.879	9.16	12.158	56.198	11.245	5.824	6.236	29.53	12.379	8.329	19.075	5.876	4.396	6.716	45.953	6.633	3.466	5.355	8.454	15.684	5.971	10.743	6.82		0.352043	13.482
8.3362	17.432	9.8712	30.67	8.606	5.299	6.719	12.444	61.286	15.075	5.108	5.766	30.572	10.057	5.668	15.408	4.896	3.687	6.165	48.697	7.509	5.398	4.808	8.434	16.241	5.924	11.873	6.429		0.357145	13.7053
8.4552	18.924	9.7112	31.595	9.16	7.258	6.244	12.677	57.504	13.354	5.949	6.516	28.551	9.847	8.1	16.132	4.791	5.127	7.258	46.975	5.521	5.181	6.009	9.157	16.027	5.157	11.412	5.952		0.362244	13.707
8.5743	18.824	12.3838	32.953	8.07	6.218	7.788	12.738	52.365	16.35	5.631	6.651	31.837	13.621	8.274	18.865	4.527	4.809	4.594	48.312	6.174	5.221	3.824	6.782	18.049	5.377	12.073	6.8		0.367346	14.0411
8.6934	18.083	11.7572	32.895	8.042	4.64	7.589	12.412	61.49	17.096	5.33	5.518	26.984	13.638	7.467	21.633	5.126	5.576	4.094	43.377	6.158	5.803	5.533	8.887	18.447	6.255	12.173	6.534		0.372449	14.168
8.8125	18.649	12.5991	30.953	7.121	6.94	4.78	12.377	66.258	15.786	4.976	4.346	28.345	13.495	10.671	24.286	5.236	4.378	6.348	52.054	7.994	4.91	5.489	7.171	17.635	3.936	12.495	6.421		0.377551	14.6537
8.9316	20.434	10.1886	33.09	8.663	5.912	5.485	9.606	71.658	17.867	4.458	6.424	29.93	12.584	10.604	28.583	6.362	4.319	6.706	49.182	6.378	3.518	4.54	8.008	19.052	5.282	13.572	9.002		0.382654	15.2373
9.0507	15.651	11.2611	32.625	9.269	6.053	5.103	8.867	82.443	18.982	3.158	5.175	29.506	14.8	9.922	28.798	6.799	4.197	6.867	44.795	6	6.683	4.937	7.621	16.538	5.7	16.212	7.337		0.387756	15.3814
9.1698	18.291	12.109	34.817	8.349	5.994	6.047	9.662	81.689	19.644	5.228	3.693	28.412	14.043	9.697	30.261	3.913	3.326	8.402	42.532	5.115	7.262	6.137	9.316	19.086	6.403	12.748	10.783		0.392859	15.6651
9.2889	17.05	8.2644	31.815	9.292	5.987	5.559	8.64	92.51	19.278	6.439	4.691	28.093	13.255	9.4	37.379	3.465	4.902	8.068	42.359	6.858	5.395	6.61	8.346	23.713	6.014	12.314	10.408		0.397962	16.152
9.4079	18.18	12.1604	31.589	10.334	5.828	5.282	11.538	94.555	19.811	4.608	4.76	25.895	15.221	10.226	39.27	5.008	5.527	10.709	42.396	7.851	5.684	4.47	9.185	20.937	5.734	13.003	10.684		0.40306	16.6832
9.527	17.139	11.7865	31.033	9.353	4.116	5.034	10.13	95.084	20.714	3.615	4.671	25.44	13.602	13.223	37.898	6.201	3.71	10.908	46.437	6.114	6.934	3.6	11.837	20.187	5.94	13.365	11.163		0.408162	16.6383
9.6461	18.243	11.3707	28.379	10.614	6.166	5.677	12.043	99.935	21.422	5.069	4.851	23.55	16.199	12.114	33.831	4.957	3.981	11.323	49.01	5.776	5.675	4.577	8.704	24.935	5.407	10.437	10.193		0.413265	16.8311
9.7652	16.498	11.8023	28.801	10.122	5.985	5.797	10.739	104.741	22.845	4.996	5.458	24.07	13.627	12.091	34.616	6.168	4.562	15.934	49.581	6.472	4.384	6.673	8.979	26.066	6.826	12.581	12.1		0.418368	17.5005
9.8843	17.481	13.0566	29.865	9.669	5.401	5.299	10.498	95.69	24.291	4.399	4.164	25.119	15.858	13.927	31.806	6.432	5.451	15.551	43.484	6.993	6.649	5.821	8.95	25.26	5.221	13.718	8.682		0.42347	16.9902
10.0034	17.909	14.6331	29.253	10.038	5.167	9.347	8.603	95.046	19.682	4.795	5.479	21.166	16.841	14.437	35.252	4.799	6.065	14.653	43.054	5.726	5.781	5.502	10.449	29.685	8.106	14.363	10.161		0.428573	17.259
10.1225	20.302	13.3418	29.834	11.008	4.753	6.076	11.723	84.931	24.232	5.498	4.685	18.731	16.67	13.948	33.397	3.721	5.149	15.993	33.541	6.345	4.567	6.725	9.352	32.845	6.305	14.928	9.457		0.433675	16.5947
10.2416	19.697	12.7067	26.341	10.723	5.701	7.393	11.105	86.084	25.181	4.688	3.824	16.833	19.451	14.39	36.814	3.317	5.18	17.816	32.552	5.426	5.288	5.481	8.247	34.309	5.857	13.804	8.448		0.438778	16.5428
10.3606	16.608	9.5129	23.212	11.35	5.47	8.23	7.724	71.401	21.491	6.25	4.517	14.735	19.452	15.091	40.476	4.844	6.825	18.461	32.733	5.755	4.245	6.429	10.014	37.15	8.419	15.872	9.705		0.443876	16.1471
10.4797	23.235	12.8523	22.409	12.72	4.784	6.598	8.994	67.268	21.956	6.568	5.153	14.893	17.083	14.557	46.985	4.56	6.263	17.201	29.067	6.493	5.874	6.662	11.37	38.098	8.369	19.395	7.86		0.448979	16.5655
10.5988	21.469	13.362	23.665	12.356	4.106	8.145	9.297	57.446	24.986	5.247	5.715	15.066	19.78	12.037	47.222	4.963	4.137	20.888	25.766	7.275	5.624	5.54	12.897	45.954	10.431	19.818	8.755		0.454081	16.7388
10.7179	20.169	10.7459	19.139	14.011	3.881	8.887	9.803	53.733	32.135	6.055	4.307	14.416	16.061	13.661	44.303	5.98	5.265	22.195	26.266	5.638	5.804	4.72	9.295	38.744	12.105	21.649	8.11		0.459184	16.1881
10.837	20.996	11.7207	20.619	14.66	5.219	4.749	8.638	44.571	29.933	3.636	4.205	16.274	16.412	11.032	42.025	5.451	4.919	21.876	23.314	5.392	4.336	4.157	10.755	39.086	9.584	20.392	7.718		0.464286	15.247
10.9561	18.654	13.7444	18.859	11.87	5.315	4.716	8.906	39.04	38.85	3.821	4.656	12.831	17.767	12.785	41.672	6.695	5.903	19.308	18.934	5.717	4.121	4.75	10.872	40.469	12.727	17.791	7.766		0.469389	15.1311
11.0752	15.851	12.4208	17.088	12.797	6.497	6.729	10.197	32.076	38.185	5.412	4.527	13.961	21.797	13.786	31.739	7.555	5.186	22.578	18.479	5.417	4.309	5.023	9.558	32.027	10.77	22.514	7.687		0.474491	14.5987
11.1943	14.965	12.6552	16.277	12.7	4.563	3.583	8.913	28.109	45.032	4.701	6.412	14.554	19.087	13.278	30.505	7.622	5.116	23.26	16.068	6.228	3.873	5.334	11.187	31.338	14.832	22.9	9.266		0.479594	14.5318
11.3133	19.577	12.5075	17.344	16.551	4.094	4.213	8.94	24.607	50.187	4.807	6.283	12.081	19.54	9.532	31.365	6.251	4.985	23.28	15.823	6.667	5.682	4.706	12.081	31.062	13.82	19.838	8.983		0.484692	14.6225
11.4324	16.17	13.1506	14.653	17.413	4.608	5.403	8.441	18.999	51.363	6.132	4.005	11.953	21.718	8.481	28.675	4.832	3.89	23.14	15.029	7.026	4.484	3.6	11.741	34.72	15.076	23.824	7.225		0.489795	14.2871
11.5515	16.266	12.6243	13.808	19.377	5.605	6.614	7.302	17.335	61.012	4.697	5.534	11.729	24.909	10.699	29.25	7.721	3.598	19.504	12.813	6.313	4.623	4.357	9.025	30.652	16.12	18.185	8.976		0.494897	14.3944
11.6706	17.215	12.9645	15.979	23.708	6.067	6.046	7.591	18.82	59.989	4.962	4.228	10.783	24.753	9.702	31.55	5.595	4.46	20.042	9.932	5.69	4.922	6.251	9.966	32.799	16.917	17.218	10.154		0.5	14.752
11.7897	14.137	10.7833	12.663	20.484	5.68	5.326	7.571	16.722	56.68	5.608	4.37	9.05	29.814	10.777	33.362	5.292	5.645	18.031	10.675	5.609	4.33	7.434	13.117	30.245	14.824	14.51	9.067		0.505103	14.141
11.9088	14.225	13.33	12.23	20.18	7.444	5.024	8.992	14.966	61.545	5.921	5.706	8.95	25.839	11.728	34.239	5.41	4.133	20.572	11.23	6.466	4.104	6.003	6.324	27.974	11.999	14.04	7.895		0.510205	13.9433
12.0279	15.843	11.9142	12.258	19.733	5.353	5.203	9.756	14.01	56.005	6.034	6.235	8.49	30.723	11.189	26.453	4.87	3.276	19.98	9.547	4.918	3.088	5.03	8.325	28.787	12.262	12.383	6.662		0.515308	13.2714
12.147	14.803	12.3328	12.01	22.148	4.585	6.731	6.506	13.043	50.746	5.221	5.502	7.986	25.644	12.843	24.371	3.616	4.88	19.891	9.275	6.782	3.738	5.066	8.65	27.451	12.357	15.772	10.184		0.52041	13.042
12.2661	14.665	10.3963	10.892	23.368	3.59	3.508	6.379	14.205	46.047	5.408	4.708	10.155	28.436	11.776	24.708	5.02	5.168	18.543	8.357	6.147	3.623	6.462	9.336	28.472	9.906	14.969	10.374		0.525513	12.7636
12.3851	14.011	10.8526	10.687	19.538	7.003	5.796	7.112	13.601	47.125	4.054	7.275	9.228	27.025	11.712	23.572	6.879	5.37	17.231	9.378	5.726	4.233	6.837	7.363	22.698	15.56	12.879	9.284		0.530611	12.6678
12.5042	16.577	11.7191	11.306	24.323	6.275	5.166	7.833	13.03	38.046	5.865	5.461	6.769	28.47	10.452	19.241	5.957	4.411	16.602	8.041	5.748	4.211	6.233	7.938	21.052	15.374	16.205	7.808		0.535714	12.2264
12.6233	18.386	10.2935	10.376	26.124	6.401	6.522	7.498	14.375	36.209	7.02	4.708	7.496	24.356	11.455	18.35	6.058	6.692	19.598	7.981	3.753	5.321	4.271	7.982	18.788	12.672	14.825	11.604		0.540816	12.1894
12.7424	16.365	9.8735	13.105	26.678	4.964	4.991	6.31	13.444	32.981	5.849	6.21	7.474	27.701	7.934	18.217	6.151	5.803	20.224	8.011	5.855	5.824	5.256	6.611	18.073	12.949	14.703	10.24		0.545919	11.9184
12.8615	13.918	11.1015	10.27	29.123	6.998	4.564	7.947	11.842	31.703	4.114	4.659	5.5	23.896	8.886	18.302	5.799	4.161	21.878	8.659	5.959	4.383	3.936	7.983	17.705	16.599	13.42	9.103		0.551021	11.5707
12.9806	17.301	9.2732	9.778	31.171	5.746	4.911	7.092	12.204	33.719	5.147	3.9	7.259	28.089	12.02	19.585	5.642	4.187	21.595	6.32	3.828	3.972	4.018	7.011	16.242	17.73	14.972	7.563		0.556124	11.862
13.0997	11.715	11.058	12.399	34.8	6.477	5.844	7.975	10.623	36.909	5.77	3.589	7.288	27.093	11.466	20.815	4.862	4.867	25.41	6.461	4.759	3.763	4.913	7.483	19.294	16.296	10.389	7.79		0.561227	12.2262
13.2188	11.515	10.8482	14.241	40.158	8.064	5.758	7.758	9.058	28.509	6.596	4.311	8.194	26.967	10.99	21.229	5.808	5.445	23.838	8.733	2.907	2.175	5.81	8.009	18.603	17.418	10.858	8.132		0.566329	12.2938
13.3378	13.612	11.0269	9.387	39.213	6.935	5.293	6.296	8.948	23.116	7.089	3.656	7.11	21.985	9.442	18.94	5.724	5.425	24.043	9.588	3.697	4.554	5.59	7.453	14.441	21.482	12.29	6.667		0.571427	11.5927
13.4569	13.601	10.4034	11.587	37.953	6.564	6.777	6.843	8.637	23.266	6.144	5.067	6.331	24.387	9.137	22.105	5.451	5.84	24.989	7.14	5.321	3.997	5.386	7.882	14.951	20.287	10.486	9.584		0.57653	11.8562
13.576	11.169	9.8989	9.916	37.472	7.049	8.678	7.048	9.439	19.628	4.423	4.858	6.751	26.795	9.228	23.844	6.653	5.915	24.894	5.868	4.701	4.259	3.729	6.516	14.326	16.112	11.555	8.687		0.581632	11.4597
13.6951	11.771	9.1291	6.299	36.587	8.492	6.559	5.022	8.917	19.585	4.472	4.189	6.17	27.989	7.584	23.406	4.754	5.739	28.776	6.249	3.478	3.49	3.762	7.398	13.973	16.468	9.829	7.435		0.586735	11.0193
13.8142	11.741	10.1246	7.99	29.389	7.977	5.524	6.154	6.294	26.221	5.442	6.284	5.482	25.409	10.364	29.793	5.839	6.507	33.393	6.289	3.419	2.925	3.928	5.779	11.617	19.033	10.578	9.326		0.591838	11.586
13.9333	11.828	9.8649	11.104	37.879	6.551	5.788	6.961	5.872	23.408	4.681	6.458	7.118	24.328	10.515	28.305	4.835	6.071	42.263	6.575	4.537	3.439	4.463	7.829	11.514	18.84	11.087	7.892		0.59694	12.2224
14.0524	8.727	11.4386	7.866	35.946	6.929	5.864	4.563	7.875	25.791	3.323	4.669	6.806	25.753	9.601	33.541	5.899	4.91	40.557	3.982	5.115	4.075	4.718	5.873	12.549	19.849	12.154	10.811		0.602043	12.192
14.1715	8.867	8.5343	8.207	38.196	9.646	8.138	5.6	6.992	19.755	4.143	4.101	4.925	22.25	11.556	33.01	6.244	5.542	34.736	4.91	4.182	4.271	3.858	6.055	13.42	19.321	11.143	8.4		0.607145	11.7038
14.2905	9.793	8.5488	10.322	34.037	9.946	4.488	6.333	7.887	19.409	6.499	4.646	8.228	24.41	11.545	29.039	6.78	4.107	39.971	5.07	3.609	2.124	3.915	5.315	12.427	20.717	10.299	9.998		0.612244	11.832
14.4096	10.305	8.5285	9.046	32.055	8.161	4.915	7.448	8.033	18.66	4.06	6.664	7.457	19.663	9.699	27.8	6.899	5.058	37.309	5.656	2.68	3.349	3.617	6.148	11.869	19.819	11.211	7.482		0.617346	11.2441
14.5287	10.18	7.9637	7.484	30.205	10.928	5.462	5.96	8.902	20.393	5.213	3.842	6.446	23.222	10.063	23.475	6.021	4.215	37.324	4.327	4.426	3.926	3.807	5.713	11.524	22.259	10.892	7.734		0.622449	11.1817
14.6478	9.73	8.4575	10.19	26.499	8.761	7.064	5.108	7.826	22.39	5.5	5.13	6.093	22.655	10.416	19.408	7.111	4.968	32.229	4.869	4.189	3.687	3.671	3.326	9.366	20.931	9.589	10.427		0.627551	10.7256
14.7669	11.554	9.9099	9.704	24.573	10.046	6.213	6.45	8.086	20.815	6.134	4.247	5.555	21.001	11.953	17.458	6.966	4.308	34.867	3.348	5.187	2.859	5.785	5.836	10.554	17.413	10.433	10.474		0.632654	10.8048
14.886	8.37	7.8921	7.822	25.575	14.188	7.056	7.65	8.521	22.446	5.079	4.116	5.789	22.033	14.085	17.28	8.617	5.427	39.075	5.814	5.857	2.487	3.457	6.008	12.674	20.37	11.003	7.62		0.637756	11.3449
15.0051	8.771	8.4812	6.564	22.383	14.722	7.097	5.982	7.318	23.11	4.63	4.952	5.877	20.048	13.967	15.203	8.451	5.736	34.102	6.412	3.668	2.107	3.747	6.102	12.892	20.056	13.691	5.39		0.642859	10.7948
15.1242	6.699	7.6763	8.348	20.198	15.275	5.694	5.403	6.492	25.612	5.471	4.892	5.122	21.412	12.098	15.971	7.628	4.312	29.195	5.006	3.282	2.31	5.106	5.086	10.255	18.006	11.16	8.087		0.647962	10.2147
15.2432	7.094	10.0953	7.017	19.744	19.616	6.178	6.202	6.397	27.851	4.311	3.497	6.304	23.502	10.322	12.948	7.089	4.956	32.23	5.278	3.555	2.668	5.301	5.447	9.514	15.799	10.684	7.61		0.65306	10.4152
15.3623	8.626	8.3242	7.981	17.802	19.255	4.755	6.916	8.042	28.776	4.298	3.656	5.788	18.862	11.341	14.236	6.987	4.794	29.309	5.408	4.432	3.204	3.712	5.15	8.243	16.811	12.733	6.5		0.658162	10.22
15.4814	8.587	7.9505	7.89	15.632	25.578	6.309	6.283	7.437	33.138	3.802	4.751	6.696	19.737	10.934	18.167	6.291	4.638	29.002	4.936	3.58	4.221	3.395	3.648	10.896	14.628	10.164	6.468		0.663265	10.5466
15.6005	7.927	7.5204	8.025	12.906	31.88	6.646	4.569	7.842	29.496	4.587	5.566	3.684	22.843	12.471	15.04	5.394	4.775	31.273	5.775	2.592	4.118	2.576	4.372	10.208	13.693	11.722	6.089		0.668368	10.5033
15.7196	8.931	5.9644	9.789	11.1	32.993	4.875	4.108	6.164	28.545	4.54	4.926	3.875	19.55	12.22	19.488	7.353	4	31.158	4.942	3.87	3.569	3.498	4.29	11.865	10.861	9.683	5.189		0.67347	10.2721
15.8387	6.532	6.305	7.942	12.55	32.032	5.137	4.848	5.604	28.996	3.884	5.694	5.736	16.861	13.218	19.103	5.88	4.509	35.509	3.051	3.179	3.268	4.135	4.582	12.206	9.786	9.071	5.831		0.678573	10.2018
15.9578	6.674	6.6785	7.926	10.015	36.754	5.142	6.494	4.411	29.67	4.484	7.077	5.114	18.534	13.745	21.867	6.349	4.043	32.988	4.182	2.335	4.14	5.162	4.782	11.542	11.399	9.486	4.979		0.683675	10.5916
16.0769	6.796	6.8108	7.709	11.754	33.311	4.865	7.078	5.283	30.818	4.988	5.985	4.934	17.618	13.059	18.886	5.945	6.037	29.147	4.903	3.607	2.526	3.837	5.303	9.439	10.694	7.321	4.558		0.688778	10.119
16.196	8.713	6.5078	9.056	12.65	33.911	6.767	6.907	6.887	29.337	5.763	5.639	5.982	17.716	14.619	16.326	5.556	5.599	27.351	4.947	4.79	2.188	3.6	4.016	13.755	9.19	8.525	5.377		0.69388	10.4324
16.315	6.321	8.0794	8.565	14.407	33.67	4.843	5.509	6.964	26.531	5.127	5.375	5.881	17.456	14.183	15.315	6.116	5.974	26	3.912	4.415	3.679	4.542	2.981	10.428	8.445	9.782	4.194		0.698979	9.95164
16.4341	5.718	8.3232	10.331	11.901	33.876	6.552	6.084	7.34	28.151	4.346	4.967	4.056	18.116	14.35	14.136	7.608	6.318	25.561	3.461	4.408	3.134	4.22	4.26	11.802	9.007	9.801	5.111		0.704081	10.1088
16.5532	6.853	7.7325	9.865	11.709	34.394	7.307	8.294	5.217	24.91	4.152	6.332	6.773	15.867	13.05	12.951	4.356	5.266	26.174	6.548	2.694	3.443	2.576	4.835	13.071	7.027	8.477	5.274		0.709184	9.82028
16.6723	7.824	6.911	11.705	12.777	40.131	8.191	8.086	7.728	26.046	3.791	5.918	5.116	15.08	13.864	15.726	5.782	4.708	26.056	4.585	5.289	3.409	4.19	6.22	13.044	7.425	8.45	4.009		0.714286	10.4467
16.7914	7.027	6.0056	12.815	12	44.7	8.975	8.75	7.901	24.336	5.185	5.062	5.722	15.268	13.895	12.521	6.122	5.567	26.912	4.207	3.027	3.793	3.759	5.273	11.55	9.077	10.163	3.749		0.719389	10.4949
16.9105	7.35	5.4924	14.577	14.491	43.013	10.697	9.111	6.627	24.55	5.5	3.796	4.675	19.448	12.539	12.245	6.923	5.088	27.561	5.261	2.836	3.422	4.63	3.893	9.202	8.412	9.298	3.867		0.724491	10.5372
17.0296	6.282	6.3049	13.172	17.602	46.35	12.422	9.739	7.82	23.127	5.528	4.226	5.723	18.553	13.833	12.979	6.775	5.574	26.681	4.928	2.952	3.262	4.338	4.06	9.499	6.814	7.866	3.919		0.729594	10.7529
17.1487	7.068	6.9179	15.809	16.849	43.024	9.838	10.371	7.939	23.42	5.332	3.763	6.237	15.975	17.214	9.827	6.343	4.414	33.737	5.968	1.619	3.922	3.635	5.477	8.069	6.979	11.449	3.967		0.734697	10.932
17.2677	6.644	6.0449	14.411	22.434	41.056	11.707	11.656	8.72	23.214	3.681	6.443	6.444	14.212	14.97	11.163	5.338	5.218	27.428	6.385	2.547	3.924	4.094	4.33	7.326	8.447	11.368	4.238		0.739795	10.8683
17.3868	7.569	7.3998	19.092	17.155	40.553	14.066	16.237	9.155	19.986	4.123	3.491	7.319	13.34	16.849	13.48	5.9	4.824	24.382	5.993	4.434	4.694	4.396	4.378	10.441	9.583	9.92	5.526		0.744897	11.2698
17.5059	7.213	7.7183	23.54	19.437	38.213	15.333	15.36	9.012	19.43	4.514	5.727	5.678	11.573	17.717	14.746	6.455	6.857	27.229	6.806	4.243	5.578	4.015	3.934	9.474	9.206	9.823	5.512		0.75	11.6423
17.625	7.363	7.8957	22.858	14.123	34.692	17.292	14.848	8.824	19.186	4.869	5.615	3.767	12.79	19.823	13.28	7.462	5.696	26.645	3.793	2.835	4.681	3.567	5.994	9.844	7.007	9.002	4.184		0.755103	11.0347
17.7441	7.733	9.2718	22.722	11.66	31.85	17.312	14.164	9.397	19.992	5.696	7.392	3.293	10.339	24.165	14.453	7.316	6.71	23.192	4.265	3.45	4.925	2.125	3.998	9.056	10.272	12.718	3.129		0.760205	11.1332
17.8632	6.498	6.689	23.765	7.265	27.945	15.06	10.96	8.23	19.366	4.578	6.43	4.845	11.068	25.245	15.565	7.586	6.16	21.256	3.717	3.867	4.493	3.489	4.499	10.462	9.129	12.034	3.068		0.765308	10.4914
17.9823	8.062	8.5015	17.118	4.97	22.851	16.304	10.807	10.225	22.528	3.098	5.006	5.102	11.692	25.189	16.015	7.122	5.405	20.349	5.305	4.286	5.876	5.381	6.691	9.206	9.443	7.239	2.273		0.77041	10.2239
18.1014	5.473	8.0611	15.033	3.656	17.228	14.781	9.348	11.546	19.187	4.586	5.092	3.265	9.714	23.87	12.43	6.808	5.505	20.514	4.677	4.031	6.684	5.075	5.118	8.896	9.554	6.584	1.791		0.775513	9.20397
18.2204	7.278	9.8042	10.342	3.865	11.929	12.225	6.617	9.805	18.002	4.612	4.976	3.521	11.32	28.211	16.075	7.111	6.146	20.902	3.903	4.722	5.667	5.458	5.716	9.757	9.452	4.632	2.683		0.780611	9.06412
18.3395	5.965	10.0484	8.424	2.747	9.615	11.185	4.377	10.86	16.757	5.774	5.828	2.84	9.774	25.915	15.751	8.219	6.246	22.478	3.87	6.163	6.495	5.889	6.495	8.6	10.411	5.878	2.086		0.785714	8.84039
18.4586	6.13	13.3111	8.212	2.392	7.441	8.96	3.913	10.526	20.542	4.554	6.045	3.757	7.365	23.55	14.425	9.681	6.309	17.348	3.345	5.367	4.627	4.6	6.876	9.126	12.568	5.512	1.806		0.790816	8.45511
18.5777	9.253	14.2481	7.105	2.487	4.855	7.115	3.319	9.983	18.584	6.023	5.222	3.26	8.415	25.763	18.146	7.988	6.951	19.262	3.59	4.718	6.561	4.946	8.32	7.282	11.19	4.745	1.876		0.795919	8.56323
18.6968	9.498	16.3598	5.136	2.598	5.56	5.318	3.06	9.284	16.986	4.373	5.696	2.968	7.616	25.315	16.148	9.581	7.523	16.417	3.053	4.332	8.292	8.588	5.992	7.183	10.649	4.707	3.019		0.801021	8.34266
18.8159	9.268	16.2488	4.07	2.529	4.053	4.085	4.513	6.619	12.992	4.793	5.402	4.083	8.815	28.071	15.772	9.974	7.355	17.024	3.123	4.386	7.434	7.955	4.024	6.604	11.308	5.502	1.425		0.806124	8.05288
18.935	8.909	19.3461	3.558	1.783	3.813	4.521	2.313	5.793	13.759	4.993	5.661	2.094	7.667	22.535	16.025	8.274	7.47	16.894	2.21	4.675	5.332	7.939	6.674	5.165	13.363	3.297	1.857		0.811227	7.62667
19.0541	11.253	20.8185	3.064	1.304	2.396	5.924	2.69	4.259	16.623	4.967	4.992	3.855	6.581	22.638	13.523	9.876	6.467	14.816	3.149	3.244	6.678	6.299	5.062	6.793	11.812	3.709	1.475		0.816329	7.56546
19.1731	11.872	22.872	2.021	1.392	2.063	4.693	2.125	4.484	12.394	8.333	3.861	2.196	5.861	28.292	15.686	8.24	8.751	16.739	2.231	3.646	7.616	5.739	4.348	8.163	10.128	5.245	0.521		0.821427	7.7597
19.2922	11.766	19.8258	2.164	2.39	2.28	2.345	0.922	2.138	13.362	5.59	4.649	2.735	5.425	19.476	18.015	5.785	8.499	16.514	2.47	4.125	8.552	7.152	5.172	7.714	9.862	4.919	1.837		0.82653	7.24755
19.4113	14.151	18.7543	1.737	0.498	1.811	2.526	1.506	3.345	11.961	5.251	2.682	2.325	5.218	16.099	19.065	8.905	9.091	16.798	2.631	3.55	6.333	5.701	5.28	7.685	8.332	5.025	1.245		0.831632	6.94464
19.5304	20.673	14.7049	0.703	0.589	1.474	3.56	1.386	3.149	8.986	5.712	3.672	3.295	3.833	14.691	19.896	8.144	7.521	19.006	2.943	1.893	6.428	5.589	4.508	6.255	8.472	4.474	1.402		0.836735	6.77626
19.6495	19.882	9.6502	1.144	1.5	1.725	2.741	1.015	3.292	8.433	6.352	2.761	2.12	3.21	14.205	24.174	8.292	8.153	18.31	2.257	2.225	4.69	7.584	4.644	5.789	7.224	4.047	1.315		0.841838	6.54571
19.7686	23.723	11.4336	1.161	0.708	0.769	3.286	0.923	1.495	7.898	5.973	2.782	3.328	5.099	12.472	25.678	9.437	9.632	14.075	2.827	1.478	7.774	5.698	2.408	4.798	6.203	4.164	1.705		0.84694	6.55287
19.8877	24.741	6.9626	0.563	1.021	1.259	2.268	0.503	1.31	8.647	5.418	3.404	1.593	3.561	10.553	24.42	11.553	9.529	16.68	2.419	2.293	4.614	7.744	3.591	4.461	6.127	3.507	1.522		0.852043	6.30606
20.0068	19.61	5.7244	0.844	0.905	0.958	2.685	0.638	1.064	7.407	5.771	2.687	0.96	2.595	9.552	28.574	10.182	8.508	14.885	1.421	2.471	2.786	7.021	3.147	4.049	6.074	2.819	0.99		0.857145	5.71583
20.1259	17.901	5.4794	0.349	0.782	1.146	1.636	1.3	1.779	6.491	4.827	2.502	2.337	2.179	6.64	23.481	9.691	8.008	12.779	1.467	0.886	2.855	8.832	4.081	2.726	4.757	3.849	1.33		0.862248	5.18853
20.2449	17.029	5.4115	0.84	1.468	0.757	1.736	0.764	2.498	3.402	4.866	2.177	1.648	1.485	5.424	19.592	10.405	9.209	12.732	2.144	1.132	3.077	6.491	4.154	3.127	5.775	5.223	1.139		0.867346	4.95206
20.364	11.914	3.1194	0.841	0.772	0.484	1.77	0.466	1.483	5.75	3.799	2.367	1.062	2.552	4.492	19.715	10.309	7.266	13.24	2.256	0.658	1.944	7.414	4.549	3.132	5.489	3.124	0.708		0.872449	4.46946
20.4831	7.998	1.5473	0.497	0.779	1.009	0.849	0.817	1.06	4.155	2.55	2.745	1.248	0.347	2.438	13.603	9.306	5.686	10.713	1.817	0.694	2.057	7.535	2.889	3.267	4.744	2.038	0.496		0.877551	3.44016
20.6022	6.749	2.422	0.766	0.139	0.61	1.08	0.277	0.918	4.043	2.427	1.862	0.855	1.042	2.527	13.738	8.408	7.905	11.889	0.489	0.983	2.146	7.185	4.228	2.761	2.46	2.06	0.852		0.882654	3.36374
20.7213	6.391	1.89	0.334	0.367	0.298	0.566	0.7	1.256	4.563	2.426	2.621	1.873	0.64	4.444	11.593	9.536	7.326	9.958	1.07	0.726	2.614	6.169	3.433	1.7	2.909	1.944	0.56		0.887756	3.25581
20.8404	4.848	1.5342	0.664	0.127	0.324	0.863	0.727	1.203	3.968	3.748	2.303	1.226	0.603	2.346	10.642	9.848	7.964	10.496	2.239	0.601	1.886	5.305	4.738	2.045	3.296	1.366	0.903		0.892859	3.17827
20.9595	2.994	1.8986	0.409	0.22	0.37	0.315	0.74	1.412	2.805	2.42	1.552	1.283	0.631	1.64	8.606	8.445	9.351	9.009	1.206	0.773	3.046	6.427	3.301	1.399	2.784	2.142	1.249		0.897962	2.83065
21.0786	4.938	0.8172	0.365	0.032	0.527	0.393	0.663	0.598	2.02	2.075	1.527	0.734	0.495	2.807	7.962	7.079	7.876	9.251	1.023	0.318	1.454	5.185	3.952	2.463	2.064	1.348	0.923		0.903064	2.55145
21.1976	3.763	0.6429	0.461	0.157	1.029	1.39	0.623	0.993	2.515	2.788	1.435	0.794	0.749	1.74	5.59	7.3	7.215	10.266	1.061	0.57	0.796	4.669	4.042	2.04	2.183	0.868	0.502		0.908162	2.45118
21.3167	5.671	0.4537	0.087	0.67	0.436	0.431	0.406	1.577	1.639	2.116	1.179	0.834	0.957	2.394	4.508	7.601	8.391	6.394	1.096	0.885	1.238	4.922	4.754	1.725	1.276	1.134	1.224		0.913265	2.37032
21.4358	3.036	0.5712	0.276	0.696	0.382	0.59	0.6	0.096	0.72	3.397	0.761	0.764	0.39	2.03	3.552	7.492	8.948	6.645	0.534	1.039	0.601	4.3	4.204	1.879	2.237	0.766	0.485		0.918368	2.11079
21.5549	1.643	0.6525	0.096	0.013	0.824	0.394	0.539	0.209	1.244	1.785	1.053	0.775	0.47	1.18	4.491	5.411	7.025	6.081	0.729	1.212	0.572	2.119	5.433	1.369	2.506	1.341	0.435		0.92347	1.83709
21.674	1.828	1.5675	0.25	0.395	0.65	0.597	0.22	0.726	2.018	1.363	0.769	0.722	0.405	2.074	3.974	4.714	5.781	6.249	1.073	0.307	1.044	2.836	3.728	0.878	2.114	0.85	0.338		0.928573	1.75817
21.7931	1.264	1.0736	0.347	0.213	0.625	1.201	0.58	1.459	0.744	2.75	1.526	0.626	0.416	1.466	2.902	3.656	5.58	7.121	1.397	0.61	0.509	2.63	3.252	1.087	1.465	1.335	0.068		0.933675	1.7001
21.9122	1.383	0.267	0.04	0.262	0.849	0.787	0.536	0.917	1.217	1.568	1.381	0.315	0.49	1.148	2.972	4.539	6.819	6.789	0.832	0.355	0.758	1.418	2.118	0.788	0.7	0.885	0.537		0.938778	1.5063
22.0313	1.371	0.6664	0.115	0.622	1.068	0.432	0.135	0.489	0.458	0.887	1.245	0.311	1.191	1.1	2.111	3.765	7.354	5.211	1.035	0.703	1.1	1.658	2.774	0.71	0.682	1.043	0.559		0.94388	1.43687
22.1503	2.31	0.511	0.16	0.232	0.689	0.379	0.008	0.658	0.389	0.921	1.027	0.433	0.293	0.832	1.74	3.094	5.912	5.765	0.524	1.034	1.385	2.052	3.59	0.843	0.818	0.861	0.507		0.948979	1.36915
22.2694	1.647	0.4846	0.161	0.361	0.059	0.02	0.264	0.084	0.355	1.765	0.724	0.85	0.134	0.733	1.079	3.102	4.767	5.231	0.331	0.599	1.354	1.349	3.416	0.657	0.554	0.373	0.175		0.954081	1.13439
22.3885	0.987	0.3627	0.313	0.245	0.82	0.504	0.11	0.474	0.656	0.87	0.603	0.312	0.516	0.873	1.13	3.822	5.419	5.877	0.226	0.336	0.761	1.36	3.326	0.744	1.443	0.373	0.214		0.959184	1.21025
22.5076	0.772	0.6964	0.35	0.037	0.55	0.193	0.168	0.337	0.508	1.263	0.215	0.346	0.262	1.092	1.562	4.415	4.496	4.229	0.903	0.266	0.909	1.854	2.939	0.515	0.9	0.091	0.656		0.964286	1.13053
22.6267	1.1	0.4506	0.208	0.063	0.242	0.308	0.38	0.469	0.286	1.302	0.178	0.317	0.4	0.818	0.95	3.502	4.042	3.639	0.526	0.418	0.37	0.849	3.166	0.227	1.162	0.069	0.446		0.969389	0.9588
22.7458	0.38	0.527	0.127	0.032	0.014	0.708	0.642	0.027	0.5	1.486	0.663	0.376	0.33	0.968	0.914	1.761	3.324	3.22	0.195	0.429	0.657	1.491	3.368	0.301	0.756	0.219	0.357		0.974491	0.880444
22.8649	0.899	0.5931	0.271	0.589	0.116	0.353	0.142	0	0.654	1.055	0.664	0.268	0.234	0.857	1.007	0.839	3.463	4.59	0.551	0.38	0.111	0.999	2.13	0.393	1.199	0.72	0.106		0.979594	0.858633
22.984	0.679	0.0837	0.069	0.166	0.133	0.085	0.006	0.098	0.339	0.808	0.679	0.027	0.127	0.771	1.131	1.138	3.632	4.841	0.081	0.118	0.097	0.702	2.179	0.782	1.184	0.311	0.145		0.984697	0.755989
23.103	0.551	0.5188	0.291	0.223	0.228	0.33	0.102	0.161	0.154	0.566	0.595	0.143	0.333	1.062	0.717	1.624	3.084	3.21	0.507	0.088	0.136	0.741	1.194	0.322	1.141	0.398	0.189		0.989795	0.689215
23.2221	0.38	0.2664	0.068	0.062	0.358	0.211	0.317	0.036	0.502	0.602	0.94	0.555	0.535	1.55	0.868	1.458	2.924	3.814	0.457	0.278	0.306	0.561	1.431	0.556	0.411	0.282	0.018		0.994897	0.731348
23.3412	0.371	0.3655	0.054	0.202	0.009	0.445	0.118	0.404	0.376	0.545	0.558	0.17	0.194	0.21	1.462	0.702	2.985	4.421	0.25	0.491	0.828	1.026	0.733	0.318	0.259	0.31	0.262		1	0.669204

## Sheet: Image17
X0	Y0	Y1	Y2	Y3	Y4	Y5	Y6	Y7	Y8	Y9	Y10	Y11	Y12	Y13	Y14	Y15	Y16	Y17	Y18	Y19	Y20	Y21	Y22	Y23	Y24	Y25		Ap-Ba	Avg intensity
0	19.5478	20.6881	21.5194	19.9353	27.3159	18.265	22.8844	22.2619	29.8561	17.8653	31.4733	19.3153	12.0884	18.0716	20.8558	16.5596	19.8816	9.7902	34.8418	13.1711	22.2186	19.1252	19.3652	47.0092	15.5473	14.4171		0	21.3027
0.1191	20.7458	20.8332	23.3647	16.5483	25.7647	22.2209	29.0211	17.8906	32.3112	20.164	32.4588	20.7808	19.4056	17.8994	22.9081	17.6728	16.055	13.0827	40.1562	14.0132	28.803	26.1311	21.6018	44.9857	14.9939	13.2763		0.00450496	22.8111
0.2382	25.3804	20.5558	23.0719	17.2981	27.6341	20.3223	27.4887	24.5256	31.27	18.035	25.7113	20.7285	15.82	25.4287	28.7098	17.5656	22.456	17.0532	47.9866	17.7992	27.8921	27.2953	26.2695	47.8122	14.4174	15.3117		0.00900993	24.3784
0.3573	28.6066	22.4779	24.5008	19.5984	25.16	24.2892	24.717	26.9205	33.6163	14.9672	26.5814	24.1247	13.1681	25.2257	34.7598	21.012	29.5927	16.8372	56.9581	25.906	34.1929	27.4849	28.62	49.3686	14.1196	17.019		0.0135149	26.5317
0.4764	22.1809	23.9243	21.7654	19.9609	30.1023	19.6479	25.3197	28.4139	31.1272	19.4849	24.439	22.4158	18.5636	22.2674	34.554	25.3254	33.1065	16.5577	63.0849	24.4474	33.1904	25.0406	32.7266	53.8522	16.026	23.8783		0.0180199	27.3617
0.5954	29.3352	24.8844	25.9844	28.809	28.7682	26.2104	30.9227	33.1245	33.9018	20.69	21.4903	19.943	21.5067	28.7762	42.3414	26.646	47.6165	25.7666	69.9254	28.9147	33.5125	28.7069	41.921	49.6968	19.4707	24.7545		0.022521	31.2931
0.7145	27.529	20.6452	27.8163	24.9488	29.4028	28.2362	28.7676	32.0392	34.8813	20.2245	22.9566	22.2218	20.4616	33.8364	50.0154	34.6446	53.5895	29.9123	61.7784	33.8967	34.2808	30.9107	44.6295	55.3041	21.2321	22.4203		0.027026	32.5608
0.8336	29.3098	26.227	29.3304	23.5464	27.4726	33.0623	26.5066	34.4117	32.9665	19.3907	28.4333	17.0236	26.72	31.8832	51.1257	48.9526	61.6937	38.7208	68.3188	39.7706	33.6213	31.4151	46.5369	46.2453	22.022	26.9726		0.031531	34.68
0.9527	27.4371	31.6584	25.9414	28.1596	25.3521	31.575	26.0708	47.4177	33.4753	21.9701	26.4908	26.7586	30.0346	32.9219	48.6126	49.5868	69.5875	52.8461	63.1389	48.2341	33.7951	30.8593	51.9881	42.9573	28.9806	25.7682		0.0360359	36.9853
1.0718	21.8471	28.3393	26.3471	28.1912	24.2284	33.3522	28.8399	48.2654	35.3913	29.2416	26.601	28.0736	26.4414	35.7345	53.5515	60.6471	77.0803	58.4587	48.0719	48.2955	41.3376	34.6394	48.5826	44.4363	30.1829	28.9241		0.0405409	38.2731
1.1909	26.1233	28.8066	33.9903	30.3794	26.0969	37.6043	27.9762	49.1552	38.7478	26.4429	30.1203	24.4668	32.8498	42.3642	48.0828	69.1279	72.7419	71.239	41.6056	50.3847	43.65	34.0919	49.0654	42.1305	27.7002	33.1902		0.0450459	39.9282
1.31	31.4532	26.0535	34.6939	32.9885	29.538	35.8093	27.4301	51.5581	44.8782	23.6729	30.6032	25.1048	35.6542	38.3086	50.0802	69.9029	70.6127	75.0748	33.0306	44.4934	53.9397	38.4302	47.88	33.5722	29.744	30.7349		0.0495508	40.2016
1.4291	33.1948	27.5827	31.3025	35.6028	25.449	36.3923	26.0558	49.3299	47.717	26.8324	26.876	26.7738	35.8231	45.704	47.0915	60.7321	73.0086	69.1167	28.4763	55.7436	53.0183	37.4991	49.281	32.0464	35.066	27.8655		0.0540558	40.1377
1.5481	29.0544	28.3244	32.8289	30.7023	25.5578	33.3697	26.7933	47.6881	51.3697	33.8013	32.8837	30.5773	37.4259	42.1613	45.009	54.7505	69.5938	57.0632	22.7935	61.7552	51.541	37.0992	48.7672	28.0416	32.8158	32.969		0.058557	39.413
1.6672	24.0241	23.6389	35.5832	31.0197	30.4686	33.8806	29.4303	44.0015	51.087	30.4684	38.0677	30.7618	34.4235	42.833	42.4171	56.2637	67.3065	50.6581	21.7774	60.2295	56.4138	42.4868	46.5272	36.4863	37.421	28.4576		0.0630619	39.4667
1.7863	27.6674	25.4688	27.075	33.9138	28.3204	36.7327	26.9498	43.611	49.1121	31.6492	28.9226	30.5173	36.6365	44.5922	42.1584	52.7252	47.5376	46.3097	18.0919	53.7936	57.2347	41.4169	40.4194	34.577	41.357	25.101		0.0675669	37.3804
1.9054	30.834	25.2956	27.6072	25.2436	27.6054	36.1198	28.3004	45.8714	49.6915	34.3175	37.5914	31.5998	36.2569	35.427	39.2374	47.0691	44.6745	41.5236	16.5118	57.2821	53.168	39.4345	39.5936	38.8947	35.0433	30.7089		0.0720719	36.727
2.0245	24.9506	18.4151	24.715	24.6352	24.6732	37.666	28.9225	43.1988	50.6026	33.1573	37.5219	35.3618	35.1814	37.6936	39.0417	40.1564	42.5635	36.7632	15.275	56.0434	43.4933	41.4345	36.7333	37.9665	36.6723	34.6599		0.0765768	35.2884
2.1436	21.8319	16.0511	26.6317	20.143	27.8015	35.8551	37.1282	44.6458	42.4097	30.9393	41.7491	31.8255	35.9617	33.0878	32.8275	35.6847	35.4466	27.0772	9.9155	48.0828	43.076	35.2056	31.9361	35.685	35.9597	29.2957		0.0810818	32.5482
2.2627	23.445	18.5391	25.202	20.3324	23.4346	32.5491	30.1367	46.7614	45.1093	31.0704	35.9148	30.1969	35.2652	36.5643	32.4136	29.0448	30.6185	24.6029	9.7508	46.1548	44.2208	30.6906	30.7602	39.6446	39.335	30.4021		0.0855868	31.6215
2.3818	22.8013	15.5467	23.9632	20.7829	19.8273	29.3782	29.3498	46.9647	46.7576	36.5369	33.634	30.0262	31.2931	30.4005	34.0701	30.4798	28.8338	24.4397	9.8882	44.0393	31.45	22.7086	27.0478	44.4449	37.1667	32.5608		0.0900917	30.1689
2.5008	26.2397	19.5002	18.3105	22.5712	15.4671	23.4065	30.7684	38.8656	44.5587	31.0176	32.6191	25.1763	26.6199	20.5093	31.5557	27.6532	22.6303	23.7302	5.9929	36.7213	28.5713	18.7813	29.4992	48.448	33.8862	35.9942		0.0945929	27.6575
2.6199	28.1786	20.5201	17.7047	20.6585	14.4656	28.4696	32.2366	41.9476	33.5351	31.1641	26.4878	27.311	25.2633	24.6775	37.0271	24.3947	17.9509	15.76	5.7985	32.5987	28.5609	12.8908	25.2325	51.8862	36.4173	36.2942		0.0990979	26.8243
2.739	21.8594	16.6532	13.3005	18.2006	13.2331	22.6303	30.2157	38.6967	30.962	25.0581	20.5638	22.2389	21.4572	18.199	30.5316	27.4058	16.8177	13.6797	6.9551	28.8478	28.5264	14.3733	22.8251	47.077	39.8227	39.2158		0.103603	24.2056
2.8581	23.7173	15.7772	12.2648	16.4281	15.1574	21.3628	27.5515	26.9705	26.8384	23.4572	23.2754	15.4479	16.6094	15.6169	24.8214	27.6785	14.546	12.5113	5.0538	19.931	19.8524	12.4269	16.5616	44.0311	34.1086	40.1061		0.108108	21.2347
2.9772	29.0904	18.61	12.1228	15.569	13.9995	15.8553	23.9388	25.7405	20.4049	19.0543	24.8631	14.9513	23.0966	19.3669	20.8063	27.2321	11.1351	13.9493	6.2457	17.459	21.3097	9.2335	13.2427	40.0037	31.3623	34.3299		0.112613	20.1143
3.0963	31.5549	18.9835	9.6908	15.9025	11.1783	10.8153	19.5795	26.7533	24.5583	16.4303	16.1309	12.2549	18.4084	14.0934	22.8688	20.1188	12.7745	12.728	4.8021	16.9663	15.1618	8.6482	12.9822	37.1707	28.7443	39.3445		0.117118	18.4094
3.2154	25.2222	22.1956	12.1722	13.4815	10.7635	14.3469	18.2	23.4105	19.0519	20.4706	13.4689	10.2212	14.937	12.7847	24.8018	26.1284	12.3635	9.6877	4.3579	18.9963	12.3963	10.6145	10.515	30.5376	27.811	45.1218		0.121623	17.8484
3.3345	22.5373	17.3729	10.3335	13.3924	8.509	11.503	13.3262	18.7322	17.2302	19.9997	13.4231	8.4211	12.2265	15.0695	23.3192	21.6853	10.7527	8.2038	5.4183	20.1908	18.3004	6.3135	8.9928	27.2717	25.9749	37.7088		0.126128	16.008
3.4535	24.0507	17.5357	7.4795	12.8849	11.1658	14.1009	13.5489	18.2748	16.3956	15.66	14.8247	8.0746	9.252	11.9052	23.4815	20.5443	9.2277	5.0755	3.9852	12.4451	15.6284	5.0443	9.0463	28.0987	23.5242	35.7151		0.130629	14.8834
3.5726	26.4021	15.3378	10.5107	9.6817	9.1096	13.7181	16.1829	18.5291	12.6904	14.9032	13.3302	8.3752	9.6898	9.8954	21.9016	20.9975	8.7419	4.6989	3.0607	8.0515	20.1356	6.0107	6.3824	32.8697	27.2193	34.681		0.135134	14.7349
3.6917	25.6135	16.7704	9.3558	8.0216	9.3264	11.7997	12.1879	17.1418	13.3814	11.9598	12.8466	7.148	9.7573	7.0192	17.7322	21.4026	8.3059	5.9881	2.5162	8.3746	16.0984	4.6671	4.8693	27.5091	19.6662	37.9736		0.139639	13.3628
3.8108	23.7486	16.7062	7.1632	8.0775	9.1008	10.794	12.1117	12.297	11.2108	12.0592	11.2241	9.5695	6.7274	7.803	18.4915	18.8572	6.3792	4.5949	3.0336	9.2224	13.2403	5.3795	4.2291	23.4467	19.2123	37.6273		0.144144	12.3964
3.9299	25.2989	15.6914	8.7593	5.0364	8.5578	9.2812	10.1709	10.5123	10.6851	10.8534	7.7204	6.6053	6.8366	8.5893	16.782	18.6374	5.7519	3.5389	1.5097	5.8602	10.4036	3.7448	4.9658	19.5575	19.0286	28.1498		0.148649	10.8665
4.049	21.0351	16.096	9.9341	8.6044	5.7278	6.5462	12.545	13.2236	12.2271	11.8738	7.078	5.215	8.7683	6.9573	15.7073	20.8144	5.3385	5.5066	1.9087	6.3467	11.3749	4.3663	4.5611	17.8412	17.5145	22.3616		0.153154	10.749
4.1681	18.3578	13.4875	8.3422	7.508	5.8556	10.3929	11.106	9.867	8.2097	10.0498	10.0207	5.8153	7.4011	11.1609	11.1351	18.8127	6.549	5.9787	3.8451	4.9155	8.8451	5.0958	4.6758	16.1002	17.7076	22.8181		0.157659	10.1559
4.2872	17.8124	16.1974	6.2475	7.4381	7.0124	8.7012	11.1989	12.6382	11.5474	8.6925	7.6301	6.9483	7.6421	8.9566	13.4225	18.7612	6.8522	3.5821	3.292	6.3708	8.2391	6.0538	3.5747	13.5968	14.8882	19.9009		0.162164	9.89221
4.4063	15.8047	11.7768	6.3507	5.7407	7.7244	6.9455	12.4997	9.2894	9.1556	8.2179	5.0656	7.1555	4.8794	5.724	10.8252	18.8856	6.3687	4.0155	3.709	6.2083	9.9845	4.8851	2.3283	9.3579	15.0199	13.4411		0.166669	8.51381
4.5253	16.1494	15.3327	6.2734	6.0636	6.6722	7.5811	7.4187	9.2248	8.0182	8.6756	5.0478	8.2021	4.4812	5.9553	8.6484	16.6522	5.3764	3.0574	3.2929	4.6429	8.8758	4.6273	4.3118	11.1629	14.228	12.3893		0.17117	8.16775
4.6444	13.9882	10.008	3.6375	7.5914	5.9007	9.087	7.8246	10.5016	10.8492	8.2708	5.4679	6.1487	5.9102	8.2724	7.4534	13.9365	4.3585	2.0534	1.4778	3.5829	6.8333	4.8029	3.9726	10.5047	12.0274	17.0024		0.175675	7.74862
4.7635	14.1853	11.087	5.07	4.5817	5.0879	5.9391	8.7842	7.6653	7.5102	6.5607	3.8435	4.7455	3.9308	6.9035	5.9221	12.0385	4.5686	2.9712	3.7475	3.3338	8.6055	2.7286	2.0945	9.3151	13.8299	14.2494		0.18018	6.89613
4.8826	11.3453	9.9172	5.261	6.1083	5.4584	7.3756	9.0546	5.0591	5.6998	7.9157	3.6189	2.2455	4.0265	4.2884	11.3635	13.3037	6.3334	3.5475	5.3765	3.3504	7.686	2.7859	2.3142	10.151	13.3006	16.5112		0.184685	7.05378
5.0017	11.1953	8.1906	4.7496	7.4055	5.0094	7.4565	7.1969	5.1207	4.8148	8.3767	5.6533	3.0414	5.1444	4.2556	9.5489	13.6165	6.7749	4.5551	2.6395	3.9154	7.7353	3.4558	3.4804	10.1755	11.751	14.9393		0.18919	6.9307
5.1208	9.2732	8.6832	3.1549	4.0767	4.7302	5.1651	6.6198	7.6635	5.6195	7.7155	6.827	4.0247	6.3753	6.8655	7.5268	8.0372	4.0292	3.5032	3.6726	2.3048	6.1056	2.8486	2.4758	8.077	12.7219	17.2303		0.193695	6.35873
5.2399	11.1756	5.1026	4.7202	3.7254	6.4226	4.5825	7.5588	7.8348	7.4515	5.4159	4.682	3.7988	4.5417	4.7144	5.3445	5.3097	3.6077	2.1488	2.7476	3.0809	6.7284	3.4918	3.6288	7.8344	11.9925	16.3166		0.1982	5.92148
5.359	9.4004	4.4144	7.0954	4.3962	6.0696	5.5632	5.5056	5.7639	5.7329	5.6609	2.9485	3.0323	5.4287	3.6409	4.9526	6.9076	4.1096	3.0197	1.3293	3.3557	4.7635	4.3521	2.8271	8.8862	9.9806	19.5516		0.202704	5.71879
5.478	12.5015	5.2257	4.8613	3.9488	3.7547	5.2433	5.0194	7.9784	3.0751	4.971	2.4766	3.1261	3.5493	3.7316	5.894	8.177	3.4203	3.7363	3.9905	4.0004	8.1864	4.7378	4.1489	10.921	11.3469	17.8858		0.207206	5.99647
5.5971	6.3413	6.5297	8.2462	3.5756	4.8948	6.2567	6.1806	6.4932	4.2257	5.5317	4.0469	3.5598	2.5218	2.417	8.9384	8.9068	3.3558	2.4405	3.7779	3.1684	7.7137	3.9229	4.6703	10.1202	10.5768	14.7902		0.211711	5.89242
5.7162	9.2065	5.3545	6.2227	5.0606	4.6409	4.5908	3.7194	5.2323	4.3102	4.6643	5.31	5.0439	2.8411	2.862	6.8936	8.6866	4.1367	2.4799	2.8906	4.6506	6.8611	3.2034	3.9666	9.1346	12.4514	13.1628		0.216216	5.67604
5.8353	6.6442	7.006	5.5728	4.0842	2.6758	3.6453	4.1058	6.5948	3.7866	4.9432	6.2894	3.2313	3.6124	3.0791	6.3217	6.4478	4.1348	3.232	2.0423	3.0019	8.9554	3.8674	3.3628	6.6101	11.1379	15.1762		0.220721	5.36774
5.9544	5.8088	4.9148	5.1412	3.716	3.0695	4.0451	3.7241	3.8239	3.2149	3.4407	6.0991	2.7278	2.7509	3.3049	8.2468	3.935	2.531	3.9542	2.6376	2.3335	6.6291	4.3398	3.638	5.4805	11.6076	15.1478		0.225226	4.85625
6.0735	6.1164	5.2662	4.066	4.4564	3.1814	3.5612	6.6866	2.5051	4.0483	2.9102	5.9865	2.2524	3.0296	4.6438	6.376	3.9066	4.4477	2.515	2.279	3.37	5.2983	4.6415	2.5256	4.7013	10.9306	13.3134		0.22973	4.73135
6.1926	6.4625	4.0949	3.2426	3.1224	1.9068	4.0206	2.5861	1.6812	4.2465	2.8342	5.5774	2.0303	4.1342	3.022	7.1913	4.8379	3.4379	2.9217	1.8688	3.3428	6.2982	3.6735	2.6159	6.1173	11	9.7493		0.234235	4.30832
6.3117	5.4088	4.9985	5.1016	2.2886	1.5026	5.0134	5.1085	4.0382	3.2605	1.7965	5.201	2.2893	4.201	2.454	5.5337	3.915	3.5757	2.5368	1.6676	1.7732	6.975	6.0769	4.0754	5.7636	10.5535	10.9289		0.23874	4.46299
6.4307	4.5591	5.624	7.6176	2.4136	1.661	4.0313	1.4961	1.8503	4.6996	2.9792	4.7248	4.1196	4.0535	4.145	4.4169	6.5818	2.9869	2.2498	1.5518	3.1405	4.9654	5.3198	2.8039	6.9287	9.625	14.2732		0.243242	4.56994
6.5498	4.2508	5.5297	6.4351	1.4091	2.5056	2.5159	2.6605	3.2903	6.107	3.3798	5.3036	3.1795	4.1306	2.8039	3.9538	5.0018	2.9804	2.6032	1.6327	4.7894	7.3353	5.8671	2.9884	6.4798	9.5892	12.6985		0.247747	4.59312
6.6689	5.8848	6.6709	4.5848	2.6308	3.2598	2.5488	3.7	1.7057	2.6486	2.2199	3.5064	2.7338	3.362	2.8187	4.7399	2.8997	3.1113	1.5383	2.1379	2.5812	6.3128	6.3169	4.0794	7.0628	8.7442	14.9304		0.252252	4.33576
6.788	5.4805	6.8881	4.9058	3.0289	3.5509	2.726	5.8576	1.216	1.6178	4.034	4.2486	1.5225	2.3491	4.0546	4.0754	3.9218	1.9019	3.1114	2.7273	3.5314	4.9937	5.3246	3.6623	6.1995	10.1649	10.3613		0.256757	4.28677
6.9071	4.8671	5.3489	5.4039	2.7389	3.1049	2.9692	4.7494	1.4061	3.1406	5.2889	2.3905	2.6468	4.5405	2.8803	5.2746	3.6723	3.9226	1.8156	1.6657	3.7567	7.027	5.9137	2.5058	6.8626	8.7189	8.2698		0.261261	4.26467
7.0262	4.535	6.102	3.8267	3.0219	2.0981	2.8725	3.1033	1.7246	2.4678	4.0201	2.8642	2.1504	3.4068	2.3931	3.7088	4.5097	3.4044	1.2092	1.042	2.0844	6.9543	5.3207	3.669	8.0285	9.7979	9.4908		0.265766	3.99255
7.1453	3.5892	5.7541	4.5374	2.8477	1.9822	2.2174	3.5812	3.2957	3.4582	2.3279	3.3018	2.4079	2.307	4.2256	4.991	4.3023	4.1665	0.9425	2.0712	2.7548	6.1938	5.9692	2.7522	8.0332	10.7496	10.8663		0.270271	4.21638
7.2644	4.0491	3.864	2.6831	3.1573	3.3704	1.4515	2.2537	3.3421	1.9054	1.6896	3.188	3.5539	1.8622	1.6039	5.9472	3.6744	3.7006	2.2655	2.4961	3.4098	5.5	10.3927	3.7756	7.4023	7.6012	9.7089		0.274776	3.99417
7.3834	3.5194	2.9649	3.1025	2.7131	3.9897	2.6348	2.8442	2.2078	1.2149	2.9529	3.7408	3.9326	2.9396	2.0411	3.8772	2.5773	5.5763	1.8247	3.1347	2.6763	5.4607	15.6203	3.4826	7.8811	10.2316	9.3319		0.279278	4.32588
7.5025	4.1571	4.3403	5.525	2.7157	2.168	3.1794	4.3869	2.3477	1.1751	4.0054	2.8188	2.2253	3.1584	3.3013	5.4861	3.8217	6.4657	1.7812	2.4127	3.3729	7.939	9.9058	2.1782	5.4012	10.22	8.699		0.283783	4.35338
7.6216	3.7208	3.1795	6.5581	3.7283	3.2259	3.7892	3.9285	2.1511	2.2323	2.0925	3.9479	3.0445	2.988	2.4954	5.341	4.0891	4.9798	2.0973	3.4172	3.7409	6.5767	13.5679	2.5332	6.1187	7.3769	7.6758		0.288287	4.40756
7.7407	3.3222	3.5373	6.1153	2.808	2.8636	2.5358	3.5841	2.5058	2.7417	2.4312	6.6008	4.8253	4.6972	1.9743	4.3257	4.6476	3.5271	3.4399	2.7579	1.9699	6.4221	12.8654	2.6908	4.8964	7.0458	10.5445		0.292792	4.44907
7.8598	4.6105	4.1628	3.7202	1.836	1.9886	2.026	3.5082	3.5116	3.3177	3.4686	6.0634	3.1359	2.3176	1.5536	5.9239	5.9531	2.9995	2.219	2.0613	2.1948	5.4544	11.1122	2.7485	4.0276	8.3423	11.0236		0.297297	4.20311
7.9789	3.1118	4.9695	4.9276	2.2831	2.0866	2.6127	4.8086	2.5191	3.5577	2.7769	5.2276	4.8846	3.5932	1.6617	3.8428	3.3031	4.0903	1.6055	2.6549	3.3733	6.1687	17.058	3.0528	5.3381	9.9532	9.741		0.301802	4.58471
8.098	3.878	3.8719	4.0904	3.7437	3.9917	3.3489	2.7934	2.7456	3.064	3.2619	5.0921	5.7722	5.0752	1.988	3.8535	3.1674	4.2272	2.2209	2.2418	3.2164	5.5102	19.0055	1.4438	5.3672	7.1799	7.5674		0.306307	4.52762
8.2171	3.919	2.7459	4.3718	4.7621	4.1193	3.1528	3.2509	3.1116	2.3191	2.3633	5.0985	3.9991	2.7425	3.1885	4.638	1.7019	3.1475	2.1039	1.686	4.478	3.8558	20.5296	2.0226	3.9232	7.0659	9.6078		0.310812	4.38095
8.3362	3.9773	3.506	4.0223	3.1989	3.0531	2.144	3.2438	3.9087	2.8925	1.9697	6.0661	7.884	3.7288	2.3462	5.165	1.2967	2.5478	2.7268	1.2642	3.5417	5.8076	20.3715	2.8079	3.3996	7.3079	8.0936		0.315317	4.47199
8.4552	3.0142	3.2744	4.0137	2.8029	3.651	2.1989	4.5235	3.5384	3.6101	2.0584	5.4681	7.1765	3.8698	1.7415	4.334	3.0185	3.5764	2.3842	0.9105	3.0749	7.2138	18.9221	3.3711	3.8107	7.8758	11.2101		0.319818	4.64013
8.5743	4.6063	4.0366	5.9668	1.4168	4.7588	2.6474	3.6972	3.2993	3.0872	3.5351	3.8183	6.9818	3.3065	3.209	6.6953	3.7581	3.7352	1.3358	1.9166	2.906	5.1361	17.1948	1.7637	3.2449	7.4909	10.0318		0.324323	4.59909
8.6934	2.9244	5.0647	5.8254	2.8556	3.6351	2.5546	4.4033	5.7454	3.175	2.6428	2.8425	9.4003	3.2739	4.4532	6.293	3.6429	3.8106	2.8455	2.4998	2.3531	5.6236	20.2816	1.5929	4.5616	6.9308	10.651		0.328828	4.99548
8.8125	2.6726	5.2896	5.3901	3.8206	2.0475	3.6391	3.5725	6.1504	3.341	2.3627	2.851	7.7184	2.6511	4.7502	7.9809	4.0899	6.1674	1.3216	1.8674	3.026	4.9497	14.0464	3.9856	3.5542	11.4984	10.7245		0.333333	4.97957
8.9316	3.2374	3.5214	4.1743	2.1414	2.841	4.0812	2.1942	3.7765	3.5677	3.1095	4.3118	7.479	3.4721	3.4036	7.6334	3.277	8.1804	1.02	3.006	1.7434	4.3833	19.4608	3.3328	3.4632	8.0198	10.5137		0.337838	4.82096
9.0507	2.8064	3.132	5.6813	3.0538	3.4456	4.039	4.1467	5.5668	3.9936	2.7116	4.6272	8.8138	4.0731	2.5557	9.8062	3.1908	5.1509	1.8757	2.006	2.398	6.1813	19.1122	2.4889	5.2019	8.7663	10.9884		0.342343	5.22358
9.1698	4.9543	2.9926	4.2183	2.7821	5.5894	2.1008	4.2903	7.1695	3.1535	3.0692	3.7851	8.7739	3.8393	3.6141	10.8848	3.5073	3.1112	2.6988	2.3792	4.6425	4.9813	14.1851	1.9936	2.6747	5.5992	8.4475		0.346848	4.82452
9.2889	5.1473	4.7406	4.9843	3.4633	3.4918	3.1774	5.4247	4.5635	2.9519	2.7959	4.3179	6.5954	4.5357	1.9503	13.1805	4.6672	5.6624	2.4001	1.7466	3.2495	3.7956	19.7446	3.132	3.2668	4.7004	6.1195		0.351353	4.99251
9.4079	4.2799	4.3611	4.7886	2.7861	3.4402	2.9036	3.9876	4.8216	5.2568	2.6175	5.6406	7.6851	6.9397	3.0939	13.2977	3.3201	4.9555	1.9992	2.4143	2.732	4.6311	21.2347	2.9326	2.2655	5.6472	8.0574		0.355854	5.23422
9.527	3.8382	2.619	5.6688	4.5882	5.4963	3.9755	4.0125	6.1694	4.9568	2.5429	4.148	9.8002	6.0974	4.1803	12.1619	4.1039	6.1953	2.7704	1.5128	3.923	3.8347	20.4538	1.9091	3.1808	6.5975	8.9528		0.360359	5.52652
9.6461	5.6472	3.2873	4.1646	4.6527	6.4579	2.5863	5.6794	8.2889	3.0441	2.9069	5.5264	11.0105	3.6857	2.3111	12.2375	3.0696	5.4444	2.5251	1.5765	2.2924	2.1104	24.3512	2.6363	4.5656	7.2135	11.1445		0.364864	5.70831
9.7652	3.9189	3.5652	5.9513	3.3877	5.696	2.35	5.0056	6.3141	3.7854	3.675	4.2817	11.4491	4.0963	2.9912	14.2407	1.7353	6.0095	2.2975	1.5105	2.5636	2.1581	26.2054	1.1941	4.1669	5.2319	14.8713		0.369369	5.7174
9.8843	4.2345	4.6189	5.8933	4.0188	5.4978	3.1052	2.9512	6.8605	4.0686	3.5404	5.459	12.0433	4.3525	4.2298	13.3462	1.9311	6.0469	1.6352	1.0331	3.9261	4.4635	26.6788	2.9079	3.6215	5.1013	13.7185		0.373874	5.97246
10.0034	2.4885	4.1464	4.2486	4.0253	4.0705	3.7447	4.3444	8.1245	3.2456	2.7731	3.9711	8.2329	6.3841	5.2494	16.3054	2.7853	6.5359	1.955	1.7014	3.1642	3.541	27.136	1.8432	2.4052	4.9818	13.5434		0.378379	5.80565
10.1225	3.9704	4.4382	5.0914	2.5274	2.9714	4.1799	4.6858	5.6105	4.3677	3.0982	4.2737	9.9036	4.5162	5.5436	16.0164	2.7907	5.6	3.0002	2.7016	4.6506	2.2914	29.8732	2.0368	3.5908	5.2243	11.52		0.382884	5.94131
10.2416	3.4738	5.3767	7.3913	3.4236	3.728	3.3318	5.0577	5.4682	3.9121	2.9795	8.568	10.1764	4.5766	5.2044	15.1117	2.7996	9.0312	2.2807	2.8791	2.5607	2.7669	22.9602	2.691	2.8692	5.5029	13.2386		0.387389	6.0523
10.3606	3.8272	4.7156	8.9563	4.6005	2.4715	2.9115	5.2447	5.2246	5.4134	4.1002	5.43	10.8147	4.6361	4.1926	16.8228	3.85	11.1129	3.3147	1.5136	3.104	2.6213	26.188	3.1931	1.3417	5.8988	14.2559		0.39189	6.37522
10.4797	3.6168	3.7302	6.517	3.4007	5.3477	3.3405	3.8382	7.7631	4.5518	4.7459	3.7081	8.1134	3.8407	4.7202	18.4435	3.5365	9.8278	3.1079	2.7423	2.8348	3.2838	25.2135	2.4961	1.7091	7.7432	12.5699		0.396395	6.18241
10.5988	4.3641	5.8382	9.1435	5.4147	4.5204	3.7356	5.268	10.6007	4.2895	4.1207	4.8339	5.5353	4.8849	3.7425	17.2474	2.3873	9.8073	1.9026	3.771	1.4779	3.2227	22.2705	1.9879	1.3435	6.0169	11.9783		0.4009	6.14251
10.7179	4.9523	3.4746	8.9998	4.8868	3.1836	3.6776	4.7819	8.8664	5.17	1.9667	4.6855	8.7682	5.9018	3.5178	17.4853	2.073	9.2288	1.9698	1.3424	1.4353	2.1605	20.5048	2.6936	1.2271	5.0742	16.0854		0.405405	5.92743
10.837	5.1798	3.8336	9.3592	5.7019	3.3336	2.3455	6.1536	7.523	4.8054	2.2287	4.6329	9.3608	5.1138	2.7389	12.5562	3.7307	7.6909	1.9361	1.5899	1.5074	2.7888	19.2253	2.5644	2.7856	5.6835	16.9464		0.40991	5.81984
10.9561	1.375	2.6614	10.972	5.1688	4.5874	2.2683	7.995	5.3776	6.4194	3.2796	4.5153	9.5565	4.4076	4.19	13.7158	4.625	5.7083	2.3709	2.4745	1.7969	3.1793	18.98	3.1708	3.1752	4.1765	13.0879		0.414415	5.73981
11.0752	4.2172	5.1636	9.6126	7.1237	4.3946	3.1459	7.6374	8.3394	3.3202	4.218	2.5828	7.0687	3.8433	3.0335	10.8008	4.3874	6.2037	3.4424	0.641	2.7367	2.1929	21.4252	2.0612	3.1254	4.5931	10.7361		0.41892	5.61718
11.1943	6.0161	6.7857	13.2306	6.4384	3.2007	2.767	8.7971	8.4931	5.1546	2.1351	2.636	7.1761	3.238	4.8175	10.8818	4.8701	6.4941	2.8059	1.4536	4.0427	1.3653	25.4156	2.0305	3.2452	6.7807	14.2881		0.423425	6.32922
11.3133	4.2613	6.4689	11.2084	5.067	4.2498	2.6458	6.4741	6.5828	3.8655	3.4031	3.2183	5.9121	4.4089	4.5191	13.1335	5.1444	7.4901	2.8123	1.2731	2.3841	2.3295	13.6233	1.9812	2.2139	7.4347	11.4902		0.427926	5.5229
11.4324	4.8863	5.0602	15.3935	4.0151	4.6513	3.7022	7.2599	6.2437	3.061	3.0211	3.6953	9.497	5.8677	4.2998	11.5658	8.1437	8.4627	1.584	1.5318	2.5824	1.8685	15.9526	2.942	2.1312	5.2023	10.807		0.432431	5.90108
11.5515	3.4388	3.8832	12.1303	5.3643	3.2173	2.8113	9.6853	8.0106	3.3248	4.5031	4.0923	7.868	5.2624	2.2693	10.3465	11.6929	6.4868	3.0808	1.8079	1.9358	2.2978	16.7671	1.5576	1.4234	5.363	13.1859		0.436936	5.83871
11.6706	3.7137	7.6544	10.6091	6.6048	3.9673	2.8745	10.0114	10.0054	1.6236	2.5287	4.9945	5.682	5.668	3.2809	10.8108	8.4781	6.9539	2.8031	1.9012	2.9491	2.5065	14.5947	1.7443	2.316	7.5935	12.1649		0.441441	5.9244
11.7897	6.0861	5.3317	9.4042	5.9462	4.0251	3.0352	7.2343	7.0872	2.3239	2.7365	3.63	10.0444	5.2802	5.0986	9.4601	7.1941	8.6707	2.6606	2.2669	1.638	3.6717	15.2494	3.8649	1.8306	6.6929	12.1952		0.445946	5.87149
11.9088	3.6505	4.5345	10.1356	4.4752	3.1569	3.0534	9.5688	7.0645	3.5856	3.4044	4.9366	9.226	4.1308	5.3135	9.1169	10.6738	6.4502	1.7696	3.1008	2.4917	3.3246	17.225	2.2491	2.0364	7.6029	12.0641		0.450451	5.93621
12.0279	6.1083	3.3261	11.9838	2.8223	2.6209	2.8566	9.043	9.0956	3.6102	3.3338	2.7796	6.0195	2.881	5.0883	9.9649	10.0445	3.8883	2.0018	1.1433	2.4811	3.5409	13.5954	2.146	2.0045	5.3777	11.7336		0.454956	5.36504
12.147	4.9391	2.1056	11.9627	2.8358	4.5196	2.1423	7.007	5.6551	4.6586	2.2918	2.8018	6.6796	2.9988	2.645	9.3272	9.7156	6.0827	1.0985	1.8187	1.9066	4.3745	15.2105	2.5604	2.7095	5.9483	11.826		0.459461	5.2239
12.2661	5.8588	3.5811	9.322	2.5406	4.1472	2.6876	7.6187	8.2275	2.9051	4.0041	3.0182	6.2232	2.7624	4.1228	9.6396	11.6242	8.9049	0.8409	2.6086	1.9166	4.8277	15.925	3.4908	3.2984	3.6832	10.9779		0.463966	5.56758
12.3851	5.0168	2.9835	9.1085	2.2901	4.5977	2.9993	7.3904	6.3268	5.4598	2.3675	2.9225	6.953	5.2205	5.2286	12.232	11.3461	9.4254	2.4883	1.9504	2.7223	2.4827	11.6274	3.2718	3.5443	5.6579	9.3267		0.468467	5.57463
12.5042	4.3341	3.7276	10.3844	3.7198	2.9814	2.0464	8.8339	5.4938	5.1716	3.361	4.1152	7.2351	5.669	4.8637	7.6764	8.1942	7.9295	2.025	1.2945	1.4129	2.6995	11.8152	2.9781	1.845	5.4422	11.2193		0.472972	5.2488
12.6233	2.291	2.4598	7.9412	3.5635	2.9008	0.7009	5.3731	6.7111	3.5055	4.8499	2.3313	4.8586	2.9366	5.1181	7.2997	11.1505	6.591	2.2479	2.3022	1.5614	3.9325	11.7852	1.9623	2.4412	4.9557	12.8711		0.477477	4.79393
12.7424	4.0637	2.4952	7.1331	3.3573	3.9255	2.3366	8.2675	6.5749	2.8638	4.5125	2.8668	5.2815	5.9891	4.1572	6.158	10.4331	6.947	1.9909	1.814	1.1535	3.8629	13.9139	1.853	2.3325	2.7715	10.8444		0.481982	4.91921
12.8615	4.5144	5.8988	7.1616	3.3235	2.4028	2.6065	7.2857	7.7174	2.678	3.2312	2.7009	6.9296	2.922	2.8937	8.0757	11.5828	6.3347	2.36	2.239	1.9686	3.2932	13.8571	1.599	2.5112	4.7389	6.4201		0.486487	4.89409
12.9806	4.4183	3.609	9.0776	3.8371	2.5724	2.2424	5.8746	7.7815	3.3142	1.9313	2.5699	7.9708	4.2127	2.9247	9.1643	10.1424	6.8576	3.9978	3.0341	2.5254	1.9504	13.2522	1.1803	2.1397	3.6858	8.7479		0.490992	4.96209
13.0997	5.2234	3.871	8.3504	3.8951	3.6609	2.3463	7.6336	5.9142	2.2036	2.1256	4.1634	5.9243	5.2211	4.6864	10.1856	8.4271	8.8161	2.5512	2.073	2.8078	1.2632	13.647	1.6199	2.555	4.4956	10.722		0.495497	5.16857
13.2188	4.8414	6.2644	5.436	3.9675	2.4364	1.5342	3.7561	6.7477	3.695	2.8902	6.257	5.6348	3.8156	3.8769	10.8331	9.0221	7.8853	2.2968	2.9208	1.5844	1.9291	13.792	3.4519	2.8774	5.1925	8.6795		0.500002	5.06223
13.3378	3.6057	4.5102	4.3266	1.9652	2.6343	2.8552	5.7588	5.3596	2.331	2.6295	5.5894	4.0865	4.2149	3.0535	6.9253	7.4616	7.8976	2.1073	2.6874	1.7677	2.1617	14.3311	4.0063	1.9789	4.4675	7.2046		0.504503	4.45836
13.4569	3.674	2.1008	4.596	1.5177	2.8974	1.2508	6.1672	7.247	2.8792	1.9839	4.4854	4.8338	2.9378	2.6804	10.0935	10.0639	6.6248	2.1614	1.086	1.7277	3.2213	12.6275	4.0478	2.6466	5.8686	8.491		0.509008	4.53506
13.576	4.9326	1.78	5.9504	5.191	2.3343	2.3728	5.6498	7.067	3.666	1.6873	4.7884	3.7919	3.1258	3.049	9.9939	8.1428	8.0229	3.0373	2.3119	2.5837	3.6765	12.3253	2.7089	2.5941	5.0441	8.3676		0.513513	4.77674
13.6951	4.0646	3.2475	8.4885	3.5988	2.9721	0.8736	5.5998	5.7743	3.8849	1.8714	2.6317	2.1983	2.619	4.0096	7.7585	7.1716	8.61	3.0777	1.8194	2.5049	3.7178	13.3414	3.0312	1.6954	6.4106	8.5597		0.518018	4.5974
13.8142	3.7717	3.3494	6.2918	4.0531	2.883	1.2926	4.9602	5.9753	3.5515	2.0779	3.6665	5.0274	4.09	3.7855	5.8923	6.4611	6.5155	3.0168	2.0224	2.9964	4.0051	11.9761	3.1814	3.3117	8.6647	5.3793		0.522523	4.5461
13.9333	5.6755	3.3243	5.8359	2.9041	2.5091	1.3435	4.6057	6.7232	3.5522	2.0245	3.9058	3.8922	3.6761	4.4364	6.773	8.5727	7.6785	2.5346	1.2431	2.1776	2.1304	11.4448	2.658	2.0814	7.8383	5.4919		0.527028	4.42434
14.0524	5.5085	3.7829	6.367	3.4506	2.8578	2.0339	3.4873	5.6057	4.0038	1.8427	4.0482	2.915	3.9499	2.8474	6.7505	7.9775	13.0694	2.3498	2.7273	2.409	1.3784	9.5144	4.4222	2.5668	7.5134	6.2372		0.531533	4.60064
14.1715	6.3554	4.0512	5.0737	4.3081	4.1922	1.8645	3.8029	5.0578	3.3429	1.8419	4.4973	2.7695	4.4095	2.2161	5.9577	10.0141	8.9194	1.8322	1.2578	1.2861	3.313	10.9201	4.4626	3.0289	5.9649	5.0158		0.536038	4.45214
14.2905	5.5668	2.4626	3.5594	3.1199	3.5331	1.7761	3.5084	7.1471	3.7827	2.2068	2.6936	4.6908	4.484	3.0732	4.6901	7.4579	8.5866	3.4072	0.0616	1.6711	1.9615	10.0578	3.317	3.4955	5.907	4.8738		0.540539	4.11891
14.4096	3.1966	3.6821	5.7089	2.4206	2.7937	1.4999	7.1345	7.9435	2.9766	2.3363	1.5371	4.6351	4.4242	3.2004	6.7278	6.157	7.0525	2.2933	1.3222	1.9496	2.2339	10.5391	4.0231	3.3218	5.5205	5.5169		0.545044	4.23643
14.5287	4.3428	3.5152	4.4564	2.5481	3.5339	2.2657	3.9993	5.7387	2.5703	1.2845	2.7086	3.4863	3.9809	3.0588	7.5879	7.6004	6.7079	2.0245	1.1044	2.0841	2.2417	11.502	3.1947	2.7549	7.6553	5.9608		0.549549	4.15031
14.6478	5.3424	4.5322	4.5392	3.8991	2.8071	2.493	5.9008	3.981	2.7744	1.3809	2.8397	5.1257	3.797	3.0232	6.8301	7.8608	6.8383	1.5101	0.7462	1.5466	2.3847	9.7528	2.0343	3.1145	6.9246	5.4232		0.554054	4.13084
14.7669	2.8946	3.1266	3.4966	5.3408	2.4625	2.586	4.1308	5.7312	4.2149	1.663	2.7887	4.6475	3.0358	3.8286	5.261	6.0619	9.7532	2.0856	1.2132	1.9232	2.7804	10.4687	3.7964	3.5481	6.428	7.4893		0.558559	4.25987
14.886	2.8989	1.8231	4.205	3.3455	2.3475	1.5714	5.4915	6.9862	4.0768	2.2904	1.62	5.5458	2.4443	2.3735	7.2985	8.9933	7.8456	1.5224	0.889	1.8241	3.0655	9.994	3.6623	2.4064	5.8994	6.5849		0.563064	4.11559
15.0051	2.7489	1.626	4.7499	4.0526	1.592	2.4657	4.0667	3.7148	3.8856	1.8392	2.4027	3.6595	2.5297	2.2522	5.8355	5.7573	6.955	2.5528	1.189	1.9122	2.5173	8.3515	1.8931	1.6867	7.8178	5.8726		0.567569	3.61255
15.1242	3.1966	2.6509	2.0854	3.2789	1.2743	2.8021	4.0902	4.0047	3.7253	2.9819	1.6559	3.7489	2.8643	3.1237	4.6374	5.7126	8.3687	2.1197	0.6153	1.4887	3.2304	8.4552	5.6733	3.0151	7.2744	4.311		0.572074	3.70711
15.2432	3.6924	2.0442	3.1173	3.8698	2.3925	1.9394	4.6759	5.6723	3.4668	1.5338	1.6392	4.5462	2.0867	2.7912	5.2793	4.6419	6.6579	2.4786	0.8343	2.7342	2.7649	6.5436	4.633	3.6927	6.5498	3.453		0.576575	3.60503
15.3623	3.593	3.7896	2.4923	3.954	1.8152	2.3111	3.7856	6.1921	3.8779	2.5167	2.473	4.1432	2.4163	4.0669	4.4514	4.7524	4.0297	2.278	1.9051	1.428	2.2965	8.6628	4.5709	4.3691	7.1224	2.0324		0.58108	3.66637
15.4814	4.1249	1.9814	2.7956	3.2761	0.9649	2.9	3.5203	6.1928	4.3725	1.8749	1.7629	4.6706	2.4925	3.3493	3.2319	6.4149	5.4674	2.0541	1.4356	1.7239	2.4073	7.1158	5.1465	4.9137	6.5993	3.2758		0.585585	3.61788
15.6005	4.7087	1.4028	2.3179	3.0773	0.9276	1.9752	5.4397	5.9845	3.4679	2.9809	2.4016	5.8626	3.0308	2.2171	3.3882	7.0295	5.6652	1.9133	1.4356	1.4585	1.3942	7.1416	5.7739	5.6103	7.6811	5.4033		0.59009	3.8342
15.7196	4.6398	1.2648	1.8593	3.975	2.5447	2.8761	4.7794	5.6755	2.6438	1.1373	1.5495	4.6342	2.6204	1.8482	4.1061	4.5505	6.4942	1.4768	0.9211	1.0889	1.9803	7.8577	2.6772	5.3577	5.9028	4.7012		0.594595	3.42933
15.8387	3.6271	1.1882	2.6584	2.6872	2.359	0.8834	2.5483	5.9721	3.2258	3.4302	2.2887	4.2913	3.0966	2.8741	4.242	4.0673	3.795	2.6235	1.052	1.4278	1.1764	9.4248	3.5126	4.525	7.277	4.1522		0.5991	3.40023
15.9578	3.9115	2.7347	2.7777	3.8684	1.5502	1.6687	3.8426	7.656	3.9	2.3358	3.9084	4.0877	2.7916	2.6913	2.4694	6.4191	4.5736	3.0823	1.2145	0.8107	1.9331	10.1598	4.2743	4.5886	7.5093	3.4812		0.603605	3.77848
16.0769	4.2006	1.5448	2.3984	2.7822	2.6927	0.9926	4.9649	6.2269	4.1265	1.3949	2.755	5.2882	3.3071	2.1493	3.2952	6.7963	5.2958	0.8538	1.0536	1.1515	3.5361	6.2704	2.5649	3.4059	8.3261	4.8055		0.60811	3.54535
16.196	3.2758	2.2292	4.771	4.8326	1.6346	2.2655	5.5885	7.3871	4.6165	3.5292	0.9568	6.996	5.286	1.6599	3.0815	4.4392	5.109	1.93	0.5687	0.7126	2.3644	7.8452	4.4417	3.9815	6.3004	3.5688		0.612615	3.82199
16.315	2.5896	4.1224	3.8436	5.8504	2.2737	3.3337	2.7586	5.2118	4.8372	1.615	1.9458	5.3061	4.2795	3.25	3.424	6.7761	6.3015	1.4905	1.0592	1.4611	1.913	10.9003	4.0265	3.5381	6.8271	3.1308		0.617116	3.9256
16.4341	3.3782	2.439	3.5148	5.773	1.9936	3.0589	4.0335	3.8051	4.0461	1.4794	2.8948	6.6079	3.3068	6.4986	2.7282	5.6737	5.7372	1.6046	1.9046	0.8841	1.3646	6.924	5.2553	5.043	4.9111	3.0026		0.621621	3.76395
16.5532	4.9386	2.3727	4.631	4.8351	1.8125	1.9221	4.4384	5.8521	4.5153	1.0523	2.57	3.3584	2.5958	2.8007	3.3877	3.5998	4.3346	1.4157	1.3067	0.4343	3.0942	8.139	5.7247	4.4558	6.3253	3.0627		0.626126	3.57598
16.6723	2.6135	4.1344	3.3587	2.5742	2.7171	3.0821	4.2133	5.5644	4.6743	1.9788	1.5138	5.9105	3.6479	2.0767	3.0378	3.7393	3.7305	2.0968	1.3074	1.1423	3.534	9.7724	3.0797	3.1562	5.4524	3.0868		0.630631	3.50751
16.7914	1.6246	4.517	2.1984	4.5649	2.1815	2.2973	3.366	5.6411	3.2431	1.8281	1.117	5.6607	2.1914	1.621	2.6607	7.7605	5.8694	1.9581	1.2593	2.5802	2.1307	6.9373	3.3233	4.7785	5.6599	2.4088		0.635136	3.43765
16.9105	2.7763	2.1975	2.0297	5.3346	2.0732	2.7733	3.5209	4.9215	2.3275	1.2766	2.0226	4.1841	3.1115	2.2132	1.6981	4.8172	4.434	2.7239	2.6009	1.7811	1.8198	4.4445	5.3762	4.7252	9.3157	3.0592		0.639641	3.36763
17.0296	4.8894	2.0501	2.4282	3.6835	3.2932	1.6988	4.7756	3.6608	2.8794	1.7048	3.7451	4.7128	3.6637	3.2712	1.353	5.545	3.5674	1.8714	1.6604	1.8606	3.6233	3.3309	3.6578	3.5719	7.5232	3.4568		0.644146	3.36455
17.1487	5.5961	2.0617	2.3031	3.772	2.8064	3.1526	3.6742	5.1278	3.9884	2.2568	2.9627	4.4242	2.1615	2.4449	2.2623	7.0556	5.9799	2.2098	2.0413	1.6884	2.342	5.1806	3.9929	2.5749	5.8656	3.2112		0.648651	3.50527
17.2677	3.5847	2.4468	1.9905	2.5864	1.6792	2.318	3.0985	6.0595	3.3706	1.1557	0.8659	5.6395	3.1034	3.6219	3.7221	5.3302	5.4339	1.4932	0.9046	1.3297	3.7656	5.8751	7.2368	2.3887	6.0088	2.2238		0.653152	3.35512
17.3868	6.5085	2.7789	3.0761	4.5578	2.1835	1.7954	3.5754	7.7053	1.667	1.2704	1.5629	6.8922	4.0662	1.7473	3.5576	5.6108	3.8358	1.2127	1.4082	1.6216	2.1852	4.9074	4.3566	3.1129	6.1677	2.6306		0.657657	3.46131
17.5059	6.0514	3.2273	2.8363	2.5295	1.6299	2.8833	4.7716	4.2776	3.4491	1.6163	2.4567	6.2886	4.4873	2.6329	3.3301	6.717	2.9	0.8058	1.4929	2.4602	3.4597	5.5578	2.8004	4.102	6.8051	1.8544		0.662162	3.51628
17.625	3.1254	2.7239	2.7318	2.8675	1.3713	4.6671	2.9905	4.59	4.8268	2.4528	2.7335	4.5603	3.9436	2.394	2.5574	5.3495	4.4444	2.1508	1.1363	0.5176	1.804	4.8536	3.2195	2.6713	4.6177	1.7874		0.666667	3.11877
17.7441	4.0351	1.7851	4.5765	5.4105	2.0439	3.5234	5.1851	6.2492	2.7912	1.2587	2.0454	7.4095	2.0892	3.4973	2.4245	3.7931	4.9629	1.5988	1.1636	0.2381	1.2864	4.0876	5.3606	3.0991	4.0489	2.2128		0.671172	3.31448
17.8632	4.2491	2.6543	5.3416	5.7948	2.149	2.2429	5.9911	6.3396	4.6232	0.9903	1.8435	4.2599	2.72	2.5978	2.553	2.1322	6.7996	1.0291	1.7428	0.5623	1.5307	6.2822	5.6554	2.6041	7.3314	2.4205		0.675677	3.5554
17.9823	3.751	2.9866	5.1188	5.8845	2.4071	2.3925	6.3608	4.3192	4.8364	2.5003	2.2323	4.7002	2.8739	1.6979	2.4748	2.446	7.0102	1.4144	0.4017	2.3536	1.9653	4.9757	3.9179	2.8486	4.8566	1.9185		0.680182	3.40942
18.1014	2.1417	2.5755	4.2811	4.0359	2.3914	4.0259	5.6116	4.6863	5.2473	1.3122	4.0333	7.2067	2.3926	3.8773	1.2422	4.7285	2.9412	1.5876	1.9217	2.8322	2.0735	5.1911	4.2093	3.9232	3.1829	2.3731		0.684687	3.46251
18.2204	1.9649	2.3478	3.7257	3.9051	3.5392	3.6723	4.6759	9.707	2.2175	2.1662	3.0546	7.933	2.0942	3.2802	1.9134	4.4793	2.8416	1.9368	1.13	1.8654	2.1792	2.9908	4.5661	4.1591	3.3489	1.9874		0.689188	3.37237
18.3395	3.4159	2.2174	4.1414	5.9886	3.1044	3.5111	6.1143	7.5548	4.3932	4.572	4.1417	6.4419	3.5485	3.1197	2.8496	4.2923	3.0526	2.0529	0.8248	1.2809	2.0297	1.4652	4.0408	3.5143	3.2159	1.6927		0.693693	3.56064
18.4586	2.5147	1.1762	5.054	7.4477	1.7558	2.6381	6.1349	5.1444	4.3493	1.5522	2.4002	5.8531	4.0868	2.0374	2.1092	3.1356	3.3035	0.7419	0.3495	3.565	3.3851	2.3243	2.7517	3.1926	2.7102	1.3447		0.698198	3.11762
18.5777	2.5914	1.8395	4.2687	5.8448	2.7193	1.2815	5.2867	7.5367	4.2559	1.83	3.7048	6.2814	4.5982	2.277	1.8115	2.3171	3.8811	2.0771	2.0481	2.2407	1.8825	2.0667	3.3059	4.8443	4.9635	1.981		0.702703	3.37444
18.6968	4.0409	2.5705	3.1822	4.2834	2.6855	2.5648	4.7628	7.1801	2.4479	1.8925	2.728	5.6256	3.802	1.8349	1.8408	3.0387	3.814	2.1296	2.6091	1.7153	2.7593	1.8983	3.0787	3.3205	4.5961	1.9607		0.707208	3.16778
18.8159	2.0347	2.9883	3.5688	4.3131	1.9575	3.0943	5.2558	8.0986	1.6055	2.2533	3.6545	5.1157	1.7928	1.8539	2.8599	1.3292	5.2536	1.3971	0.7598	2.1237	1.762	2.898	4.653	2.0012	4.6041	2.6041		0.711713	3.07048
18.935	2.9656	2.2386	3.7837	4.4466	3.2659	2.0981	5.1374	6.9735	2.4074	1.4708	3.7174	4.5518	2.2593	2.147	1.7983	1.9313	6.2975	0.7828	1.0537	1.4182	3.1222	2.8497	3.4484	2.96	3.149	1.5865		0.716217	2.99464
19.0541	2.8077	1.7735	3.985	3.4398	4.4129	1.3071	5.6815	6.7128	3.2097	3.0459	2.8581	3.7076	3.0891	2.0141	1.3085	3.1111	3.4235	2.0031	0.5263	0.9185	3.5009	3.239	3.409	4.1412	2.6512	2.2792		0.720722	3.0214
19.1731	1.5564	3.2658	2.5632	5.4254	3.936	2.7493	9.7434	7.9007	3.1502	2.762	4.0459	5.0744	3.9687	3.1859	0.9705	2.4162	3.4277	1.4329	0.3842	1.7601	3.1249	2.3975	4.0261	3.636	2.9941	0.7441		0.725224	3.33237
19.2922	2.8757	4.2694	3.9569	4.6065	3.1556	2.9411	6.8049	5.2355	2.4199	2.9318	4.3223	5.5413	2.9002	2.3152	1.4473	1.7084	3.373	1.8168	0.7155	1.4861	5.1714	2.8234	2.5145	2.6379	4.3896	1.4406		0.729729	3.22311
19.4113	2.403	1.6268	3.5466	3.4077	1.7203	2.9489	8.3045	6.1821	2.4422	2.348	3.6913	6.9582	1.3574	1.7175	2.0076	2.4775	3.6389	2.4103	1.2873	1.4707	6.6886	2.2686	5.8947	3.3795	4.0204	1.1708		0.734234	3.28344
19.5304	2.5479	2.8075	5.8903	3.7684	2.5722	3.2097	7.4254	5.9023	3.5791	2.8654	3.4524	5.1235	1.7867	1.5207	2.1128	4.3131	3.2157	1.8804	0.8372	2.0037	4.3818	2.3453	3.8889	5.2238	4.3838	1.7686		0.738739	3.41564
19.6495	3.2315	3.6334	5.3356	4.8513	3.9203	5.348	6.2628	5.4714	4.7538	4.7436	3.4059	4.1615	2.2566	1.0224	1.7699	2.8302	2.1365	1.8896	0.4259	0.8304	4.3169	2.2683	2.6587	4.7485	2.6107	2.2938		0.743243	3.35298
19.7686	4.5949	2.6851	5.1496	5.2369	4.4222	2.4907	6.5804	5.3201	2.7316	5.1524	5.3706	5.0477	2.2088	2.7668	1.5119	2.2631	2.8877	0.9635	0.7289	2.4227	4.264	2.2584	3.4234	2.8771	2.1403	1.8863		0.747748	3.36097
19.8877	2.4466	2.047	5.3232	3.5078	2.2063	3.2591	7.7674	3.7927	3.5521	3.8183	3.2509	6.3811	2.6182	1.2607	2.5347	2.252	2.1978	0.5337	1.926	1.689	4.3373	3.4088	2.6159	4.3024	2.9873	1.3846		0.752253	3.1308
20.0068	3.3966	3.5453	4.8348	5.208	2.6463	1.8465	5.3796	3.3121	3.3836	3.823	3.4269	8.2503	3.9244	1.3247	2.4434	3.2664	3.4142	4.0557	0.9113	1.7693	8.481	3.4834	4.0357	4.9132	1.7672	0.974		0.756758	3.60834
20.1259	2.596	3.2927	4.3445	4.7988	2.8551	3.4172	5.2065	5.1203	4.5261	6.8922	6.6335	5.7117	3.0647	1.7576	2.7652	1.0032	3.3525	1.6293	1.0696	1.7214	8.6494	4.2751	4.2453	5.2132	2.5886	0.5504		0.761263	3.74154
20.2449	2.157	2.2659	3.244	8.3509	2.1495	2.2913	5.6276	6.2216	5.8268	4.212	7.4664	6.4578	4.7626	2.2886	3.0096	2.1238	2.2662	1.856	0.6765	1.3682	5.7324	2.4142	3.7503	4.787	1.4565	1.8188		0.765765	3.63775
20.364	2.7865	3.4548	3.466	7.1394	3.999	4.8606	7.7285	4.878	4.8927	4.6011	7.1956	5.4892	3.8061	2.6427	1.9331	2.0915	3.9847	1.951	1.0409	2.2977	9.0723	2.6316	4.3702	5.9575	1.9857	2.1282		0.77027	4.09172
20.4831	3.4022	3.9433	3.0401	5.371	5.0973	2.3578	6.3099	4.0166	3.1838	3.6193	4.0907	6.2103	2.4072	0.8013	1.4969	2.3578	3.0439	0.7484	1.6847	0.7379	10.4648	4.3502	3.96	8.3495	2.5683	2.2205		0.774774	3.68591
20.6022	3.6667	2.3241	2.1982	6.0478	3.0458	1.8918	5.6678	4.9764	5.213	3.7647	3.831	7.7258	3.019	1.0473	1.8672	2.9496	3.324	0.4118	1.1234	2.0473	7.2053	1.8422	2.6182	9.3111	3.0181	1.4102		0.779279	3.52107
20.7213	2.2337	5.2789	5.6834	4.5347	1.8715	3.8246	7.1877	3.3853	5.1815	3.6186	6.9727	5.3389	3.0467	1.7281	1.6077	2.7521	1.5685	0.378	0.3919	0.571	7.3196	1.5792	2.503	9.9552	2.2079	1.1723		0.783784	3.53433
20.8404	1.7141	3.3144	4.9581	5.3793	3.1209	3.6927	4.6768	4.8086	5.2804	4.2845	4.8051	4.4785	3.1718	2.2814	2.568	2.1697	2.0603	1.1125	0.2946	1.4471	6.7879	2.4788	4.2995	10.0481	3.6756	2.0402		0.788289	3.65188
20.9595	2.9434	3.4668	3.4804	5.3269	3.6853	2.5485	4.3981	5.9103	4.0857	3.0864	4.4362	5.4327	4.6241	2.2409	4.407	1.5944	1.8459	1.5487	0.5152	2.2177	7.1481	2.7539	2.8363	9.1264	2.5073	1.9765		0.792794	3.62089
21.0786	4.5173	3.803	4.5009	4.7531	4.6428	1.9805	3.1804	3.3868	3.2161	2.2921	4.3187	3.7628	2.9505	1.4851	1.5575	1.4442	2.9349	1.525	1.6645	1.619	7.5529	1.3123	4.9261	10.1848	1.5257	2.193		0.797299	3.355
21.1976	2.5238	3.7641	3.1299	4.2352	4.3948	1.4734	3.5287	3.0477	2.9482	3.1878	5.2668	5.3083	1.888	2.1107	1.012	1.7109	1.443	1.9357	0.7233	0.8554	6.3443	1.5681	4.0675	13.1714	2.5104	1.3738		0.8018	3.21243
21.3167	3.6854	3.0288	3.3912	4.6625	5.7881	2.0048	1.9039	1.1114	2.7665	1.4496	2.4788	4.5835	3.8759	2.9985	1.4374	2.4957	1.3745	1.1487	1.2947	1.8575	6.709	2.3357	4.5746	10.553	2.8129	0.7044		0.806305	3.11642
21.4358	3.6716	3.5305	3.4414	4.2457	3.1395	4.3033	2.5995	1.9771	3.4861	4.0787	3.6369	4.5112	3.9033	1.4443	2.4736	3.2994	0.9927	1.4052	1.8028	0.7587	10.2416	3.3687	4.6032	10.425	2.8431	0.3766		0.81081	3.48307
21.5549	4.9277	4.1231	3.1872	5.051	3.9535	3.9129	2.2677	3.0924	2.1794	2.4121	3.7148	3.5476	2.2687	2.8592	1.9756	3.1082	1.9561	0.5293	1.6446	1.7379	9.7738	3.3494	4.3428	8.9939	2.3125	1.3881		0.815315	3.40806
21.674	4.6689	3.4298	2.6803	5.7354	3.7251	1.6595	1.2424	2.5038	2.5905	2.3564	5.0129	3.9828	4.84	0.8946	1.7452	3.6565	1.6699	0.7458	0.955	1.1529	7.7267	3.089	2.6674	7.2489	1.7479	1.105		0.81982	3.03202
21.7931	3.9879	4.9963	3.8952	2.4177	5.5523	2.735	0.7878	2.5565	1.6482	3.487	2.5934	4.5144	2.9619	1.8936	1.764	2.9408	2.4575	1.3641	0.8245	1.6687	8.7026	3.5474	4.3071	7.6758	1.6787	1.6057		0.824325	3.17554
21.9122	3.2561	3.5339	2.7958	6.3024	3.5607	2.1957	1.8762	0.6932	2.2103	2.3884	3.05	3.6231	1.7484	2.1572	1.953	2.9929	3.2609	1.12	0.3718	0.9967	6.9756	3.814	5.8893	10.9109	2.9315	1.8055		0.82883	3.16975
22.0313	2.9104	3.5439	4.2817	5.2971	4.4478	1.7733	0.9257	1.6265	1.5581	2.7084	2.9396	1.7407	2.7612	2.538	0.9615	4.9481	2.1219	1.4864	1.3051	0.8948	10.1896	3.264	3.5275	12.1087	1.6798	2.1155		0.833335	3.21751
22.1503	4.1803	4.1814	6.6062	3.4558	3.1947	1.6865	1.7298	2.3117	1.2677	1.3106	0.9405	2.1336	3.832	3.553	1.617	3.3038	2.4676	1.6055	0.8209	0.9675	9.4623	2.3798	2.0941	10.0397	2.9127	1.9965		0.837836	3.07889
22.2694	2.8141	4.7973	3.6759	3.0864	2.7428	2.0423	1.7025	1.8043	1.8439	1.5369	0.8035	2.9922	3.362	3.0042	2.9485	5.0508	2.279	1.1095	0.7573	1.2252	8.295	2.6295	3.6932	8.5226	5.1999	1.4741		0.842341	3.05357
22.3885	3.0272	4.3745	3.729	2.6294	2.7888	2.4819	1.0305	1.8343	1.8923	2.4225	1.4174	3.7768	3.5628	1.4334	2.8296	2.0323	1.6897	1.0942	0.5517	1.742	8.4958	2.6337	3.7239	9.9791	2.3782	1.0536		0.846846	2.86941
22.5076	2.7363	3.192	4.4545	4.2275	1.9508	1.7297	1.0672	1.0585	1.506	0.9961	1.3498	3.5249	2.8017	2.8656	2.1785	2.6332	2.1464	1.4681	0.5852	1.2733	5.175	2.379	3.8065	9.5008	1.6078	1.3097		0.851351	2.59708
22.6267	3.8627	3.0122	4.8109	2.5462	2.6201	1.7975	1.9925	1.3486	2.3869	0.8137	2.1937	3.0973	4.1748	4.4904	1.8187	2.3287	2.0513	0.7218	1.1138	0.7294	5.6121	3.405	3.513	9.6973	2.1606	1.8315		0.855856	2.85118
22.7458	3.8813	3.9708	2.4445	2.5854	2.4019	3.5933	1.6834	0.6554	1.4889	2.0673	1.6396	0.9186	2.7544	3.3812	0.798	2.6082	1.1683	0.6708	1.0685	3.1161	6.0478	2.0379	3.1922	10.1239	1.7517	1.1735		0.860361	2.5855
22.8649	2.8958	2.7933	4.5542	3.7318	2.819	3.0159	0.9162	0.4489	2.0442	1.1052	1.7619	1.1024	3.0037	3.4677	1.6036	2.2857	1.7217	1.4704	0.9228	0.7818	7.5442	2.1499	2.0026	11.3909	2.8519	2.1267		0.864866	2.71202
22.984	4.5213	2.7132	5.1455	4.0992	1.7498	3.388	1.7361	1.3009	2.5216	0.8918	0.7002	1.0688	3.0218	3.2884	2.184	2.8194	3.7585	1.7078	0.8194	0.628	4.0884	1.5933	2.9996	9.6403	4.5296	1.5669		0.869371	2.78776
23.103	3.2425	1.3717	2.348	3.4762	2.2759	0.8681	1.9988	0.5535	1.5384	1.6606	0.5352	0.4498	1.827	1.963	1.5839	2.9523	2.3284	1.1155	0.8237	1.1216	5.0287	3.5446	3.3122	10.3022	1.8277	1.5109		0.873872	2.29078
23.2221	4.4569	3.008	2.1353	1.2004	1.7172	0.6464	1.2545	1.4471	0.835	1.9774	0.5227	1.8465	1.7361	2.9151	1.4391	2.8056	3.0914	0.8488	0.512	1.0542	4.8112	4.8813	3.7298	8.5154	1.9566	0.7056		0.878377	2.3096
23.3412	3.4377	4.7604	1.7641	3.3556	2.2157	1.9352	1.0205	0.7619	0.34	2.1586	0.5761	1.3324	1.4978	2.425	1.6254	3.3471	1.2659	1.7939	0.6539	1.4815	5.7615	3.089	3.9398	7.3892	1.6447	0.7589		0.882882	2.32045
23.4603	5.1508	4.1269	3.184	3.1376	1.6186	1.1065	0.767	0.8347	1.6072	0.9482	0.6927	0.952	2.2904	2.3976	2.3522	3.1883	2.2868	1.7957	1.4629	0.8643	2.0352	2.8505	3.9661	10.4836	2.1753	1.7856		0.887387	2.46387
23.5794	4.8201	3.4966	3.4387	2.0299	0.9564	0.6568	0.9052	0.6564	1.4765	1.7729	0.7727	2.3474	0.9467	3.8563	1.9724	2.2522	2.9491	1.4577	1.3677	1.3338	4.1797	2.5902	2.1483	8.5632	1.0445	1.9342		0.891892	2.30483
23.6985	3.465	3.7743	2.9549	1.7801	2.5642	1.2301	1.26	1.137	1.0327	1.5207	0.8698	1.4308	2.0065	2.6943	1.572	1.6335	1.4872	0.8866	1.8796	1.7471	3.6293	2.398	1.9979	10.4841	3.4479	0.8893		0.896397	2.29896
23.8176	3.2492	2.8949	3.1189	2.3049	2.3451	0.4986	1.7798	1.4472	1.7053	1.9353	0.8909	1.2154	1.9034	1.0446	1.9502	1.2317	2.257	0.6841	0.7318	1.7921	5.9578	4.2685	3.1174	10.2459	1.5943	0.7704		0.900902	2.34364
23.9367	3.2859	3.3987	2.8905	3.6686	1.776	0.856	1.9216	0.7814	0.8404	1.2804	1.5869	0.9025	2.4025	2.569	2.7208	2.7095	1.4333	1.619	0.9852	2.3051	4.1999	2.4268	3.9377	10.9514	1.5634	0.3666		0.905407	2.43766
24.0558	2.1062	2.9241	2.03	3.6002	1.4464	0.9919	1.1798	1.4664	1.1142	0.7615	1.5868	0.6278	1.2604	2.4758	2.0834	2.0408	0.9014	1.5141	2.2397	3.731	5.6535	2.1025	3.6496	12.3695	3.1359	1.7689		0.909912	2.49084
24.1748	3.3586	4.3011	1.0717	1.4591	1.7767	0.3289	0.2915	1.6206	0.8149	0.1996	0.4495	0.8374	2.8513	1.8924	1.551	2.9965	1.9195	0.5731	1.5105	2.4165	2.512	1.9452	4.2486	10.6499	2.5538	2.2944		0.914413	2.17017
24.2939	4.4867	3.6443	2.1929	1.3774	1.5842	1.3882	0.5177	0.5937	1.4209	0.5729	1.2932	0.9678	1.2072	2.8332	2.1319	3.3034	3.2245	0.4334	0.2414	2.7133	3.8213	1.5515	4.78	11.2619	2.1436	2.4741		0.918918	2.39079
24.413	2.9067	2.1386	3.6848	1.0095	1.2441	1.2987	0.739	0.5826	0.9367	1.2712	1.0758	0.616	0.0991	1.8111	2.1803	2.5323	1.9986	0.6846	0.4742	3.3043	3.5032	3.5385	3.0812	9.7101	2.0429	1.1058		0.923423	2.06038
24.5321	3.3664	2.413	3.0385	1.9193	1.1375	1.8421	0.4622	0.9538	1.8468	0.5505	0.7784	0.978	1.3251	1.3597	1.112	2.1624	1.8361	1.1593	0.6728	3.6439	2.9011	3.0957	1.979	11.3557	1.3049	1.2845		0.927928	2.09533
24.6512	3.851	3.956	2.304	0.9843	0.5959	1.3674	0.4472	0.3434	0.7522	0.6141	0.3799	1.3478	1.0949	0.8	1.2018	2.9396	1.6532	1.1399	0.9381	4.6294	3.3728	2.2735	4.1682	8.7766	1.2595	0.9749		0.932433	2.00637
24.7703	2.0445	2.9955	3.6125	0.8239	0.5448	1.848	0.8393	0.1194	0.1962	0.8558	1.6375	1.0368	0.0991	1.7412	1.6846	2.7077	3.7826	0.6359	2.362	3.4803	3.6423	2.3869	3.5257	8.3179	1.4964	2.0954		0.936938	2.09662
24.8894	3.8409	2.788	1.9371	3.8174	0.9035	0.4051	0.7748	0.431	0.6473	0.308	0.6273	1.0704	0.4225	1.5574	1.9046	2.1903	2.5162	1.3064	1.7421	3.0613	1.8277	2.7235	2.5479	9.7484	2.6405	1.4157		0.941443	2.04443
25.0085	2.2628	3.0268	2.1991	2.579	1.531	0.7676	0.5055	1.1452	1.2426	1.5657	0.9705	0.4845	1.1186	1.8527	0.9572	1.5806	2.4564	0.7442	1.5638	3.4596	4.1311	1.0919	3.062	7.8493	2.9862	1.4127		0.945948	2.02102
25.1275	2.5583	3.0867	2.3295	1.758	0.9709	1.7366	0.1377	1.1927	1.2413	0.2531	2.0294	0.31	1.4795	1.2455	1.464	2.1151	1.3035	1.1184	1.5408	4.3821	3.2495	1.7773	3.6041	7.5116	2.5892	2.181		0.950449	2.04484
25.2466	2.789	3.3513	0.7361	1.7642	1.1697	0.882	1.6803	0.2788	0.1212	0.3409	0.426	1.0846	0.5518	0.0993	2.9999	1.7194	0.8625	1.5478	1.2998	6.1013	4.718	2.7422	3.702	5.8401	3.1769	0.9566		0.954954	1.9593
25.3657	3.8807	2.1778	1.5593	1.6649	0.7735	0.355	1.4559	1.0327	0.4499	0.628	0.4635	0.8719	1.0376	0.2858	1.9154	1.6403	0.8955	1.6972	0.9782	4.1254	3.3467	2.6912	3.4477	6.3141	2.4542	1.2664		0.959459	1.82342
25.4848	5.4349	3.1285	2.9795	0.7012	1.2646	0.1827	0.974	0.3849	0.3985	0.8885	0.4062	0.32	0.7647	0.2955	2.3178	0.9551	0.4488	1.3873	0.9749	8.3562	3.3151	3.4581	4.037	6.3069	2.1399	0.727		0.963964	2.02107
25.6039	2.5463	2.4591	2.3625	3.0342	1.0738	1.4953	2.0812	0.1138	0.1435	0.4446	0.1656	1.2604	0.2964	0.4393	0.4569	0.8455	0.7187	1.5117	1.9617	5.249	4.4195	2.0771	2.8055	6.3331	1.6758	0.8638		0.968469	1.80132
25.723	3.89	3.4831	2.4851	1.4985	0.5595	0.7581	0.1766	0.4647	0.4653	0.8961	0.3901	1.0196	1.5541	1.091	0.7541	1.0389	2.2886	1.2357	0.9565	3.3412	5.2847	2.222	2.8693	4.6662	1.7302	2.0326		0.972974	1.81353
25.8421	1.8151	2.6242	1.6036	0.7425	0.8021	1.3158	0.1062	0.2394	0.8649	0.4409	0.1337	0.6519	1.0785	1.1091	1.1519	1.3007	2.1014	1.7902	1.5387	6.7933	4.9739	2.7354	2.9187	6.2479	0.3417	1.0034		0.977479	1.78558
25.9612	2.8369	1.9886	1.6688	1.2539	0.336	0.6114	0	0.3883	0.5699	0.0356	0.0788	0.9683	0.5987	0.8152	0.8933	1.2947	0.9277	1.1741	3.3697	8.2932	5.2673	2.5931	4.0879	3.4435	0.7446	1.8852		0.981984	1.77403
26.0802	4.5673	1.9305	1.5675	1.1385	0.8696	0.1636	0.3207	0.5014	0.9241	0.5969	1.1551	0.9391	0.6019	0.5213	0.7191	1.2035	0.4416	1.6276	3.8882	5.4109	5.0472	1.662	3.9605	5.892	1.3382	0.7756		0.986485	1.83707
26.1993	4.6686	2.2812	1.5182	1.0929	0.9142	0.6717	1.1414	0.5424	0.3753	0.8463	0.4931	1.1948	0.8118	0.6164	1.0819	0.8179	1.4404	0.5775	1.5758	5.8833	5.1739	1.5656	1.8578	4.6767	1.0985	0.9668		0.99099	1.68786
26.3184	2.6952	0.9199	1.5317	0.7609	1.301	0.4192	0.8436	0.9131	0.2602	0.977	0.6104	0.5494	1.2006	0.9952	0.764	0.3912	2.5785	1.3428	2.5957	7.0588	3.7075	3.5196	3.9299	5.4676	0.9298	0.9875		0.995495	1.81732
26.4375	3.7725	3.3761	1.2461	1.1569	0.9752	0.4015	0.5879	0.3879	0.5246	0.5227	0.0966	0.0602	0.7496	2.5733	1.0257	0.3389	2.8893	0.8706	3.3737	7.5753	6.2624	4.2852	3.4445	5.3957	0.3811	1.6458		1	2.07382

## Sheet: Sheet1
Image17				Image14				Image15				Image16				Image17 (2)				Image36				Image37				Image38						Distance	Image17	Image14	Image15	Image16	Image17 (2)	Image36	Image37	Image38
Ap-Ba	Avg intensity			Ap-Ba	Avg intensity			Ap-Ba	Avg intensity			Ap-Ba	Avg intensity			Ap-Ba	Avg intensity			Ap-Ba	Avg intensity			Ap-Ba	Avg intensity			Ap-Ba	Avg intensity					0	21.3027	53.6457	40.2194	42.1767	30.4541	34.9091	51.4297	16.8517
0	21.3027			0	53.6457			0	40.2194			0	42.1767			0	30.4541			0	34.9091			0	51.4297			0	16.8517					0.05	32.0343	84.0311	59.9873	57.0745	54.4097	55.3916	90.9256	27.0531
0.00450496	22.8111			0.00510257	58.0111			0.00465164	43.0633			0.00458762	43.8605			0.00621183	33.3882			0.00529155	37.6022			0.00431078	54.926			0.00492662	18.888					0.1	32.8456	112.125	78.3697	80.6676	90.6816	77.1683	121.338	45.7896
0.00900993	24.3784			0.0102051	60.471			0.00930327	45.9596			0.00917523	45.6849			0.0124237	37.1476			0.0105831	41.6011			0.00862156	60.2314			0.00985324	19.4019					0.15	15.5098	62.5075	73.1662	66.9582	57.2648	40.1135	25.7278	18.2953
0.0135149	26.5317			0.0153077	66.4386			0.0139549	48.4763			0.0137628	49.8443			0.0186355	43.58			0.0158746	45.0695			0.0129323	65.2333			0.0147799	20.5613					0.2	7.57799	33.9189	63.6981	43.8199	28.8364	16.2287	10.4014	7.13359
0.0180199	27.3617			0.0204103	73.2718			0.0186065	52.795			0.0183505	52.6762			0.0248473	48.2002			0.0211662	50.154			0.0172431	71.0481			0.0197065	23.3492					0.25	4.98095	19.4124	38.8524	34.7613	17.1509	8.55653	9.01564	4.60421
0.022521	31.2931			0.0255085	81.2423			0.0232543	58.048			0.0229342	55.2772			0.0310539	55.3845			0.0264533	53.7028			0.0215503	76.4203			0.024629	23.6779					0.3	4.27984	12.5254	23.6608	30.2049	12.6801	6.26466	9.84087	4.69336
0.027026	32.5608			0.0306111	90.0955			0.0279059	62.966			0.0275218	58.5535			0.0372658	62.441			0.0317448	59.3716			0.0258611	85.9704			0.0295556	25.599					0.35	4.76876	12.325	19.5371	25.1246	12.4993	6.78267	10.5239	4.60166
0.031531	34.68			0.0357137	98.2968			0.0325575	67.2615			0.0321095	61.2129			0.0434776	72.1546			0.0370364	64.1454			0.0301719	93.9148			0.0344822	28.448					0.4	5.87803	14.9394	19.1088	20.5825	15.1661	9.02352	9.08029	4.15665
0.0360359	36.9853			0.0408162	107.145			0.0372092	71.8379			0.0366971	64.1518			0.0496894	78.4549			0.0423279	70.1989			0.0344826	106.046			0.0394088	30.7466					0.45	5.85712	16.7808	16.8889	14.2315	17.5085	10.8108	8.3145	3.77699
0.0405409	38.2731			0.0459188	114.991			0.0418608	74.0118			0.0412847	67.9377			0.0559012	82.8921	54.4097		0.0476195	73.8762			0.0387934	112.578			0.0443354	35.051					0.5	5.16182	14.8614	15.6096	10.8348	19.9932	11.0836	8.24291	3.47632
0.0450459	39.9282			0.0510214	120.734	84.0311		0.0465124	76.623			0.0458723	70.2834			0.0621131	88.7622			0.052911	78.6773	55.3916		0.0431042	125.072			0.049262	38.301					0.55	4.41894	12.7734	15.2546	10.0513	18.2421	11.8354	8.3111	3.31836
0.0495508	40.2016			0.0561239	124.717			0.0511641	78.5852	59.9873		0.0504599	73.2353	57.0745		0.0683249	94.7366			0.0582026	81.3848			0.047415	134.046			0.0541887	43.7615	27.0531				0.6	3.7297	11.831	14.2966	9.43277	17.5656	11.5299	8.10295	2.80564
0.0540558	40.1377	32.0343		0.0612265	126.572			0.0558157	80.2319			0.0550475	75.1899			0.0745367	95.4113			0.0634941	85.6478			0.0517258	145.117	90.9256		0.0591153	48.339					0.65	3.56096	11.0261	13.2025	9.87958	18.0236	9.92942	8.23704	2.85977
0.058557	39.413			0.0663248	126.622			0.0604634	81.375			0.0596313	77.311			0.0807433	93.941			0.0687812	82.77			0.0560329	149.474			0.0640378	50.3844					0.7	3.38757	10.2947	11.9424	10.9117	18.69	9.88823	8.77189	2.87383
0.0630619	39.4667			0.0714273	122.797			0.0651151	78.9771			0.0642189	79.6225			0.0869552	92.0868			0.0740728	81.9993			0.0603437	153.546			0.0689644	51.8529					0.75	3.21396	10.7516	11.0569	12.5077	25.4567	9.04993	9.81788	3.31535
0.0675669	37.3804			0.0765299	117.067			0.0697667	79.8672			0.0688065	82.4229			0.093167	90.5184			0.0793643	79.9009			0.0646545	154.752			0.073891	51.8623					0.8	3.60553	9.53526	12.8843	17.5689	31.7083	8.96819	12.683	2.61573
0.0720719	36.727			0.0816325	111.402			0.0744184	78.9724			0.0733941	82.386			0.0993788	88.0803			0.0846558	76.1031			0.0689653	151.507			0.0788176	50.6929					0.85	3.10921	7.13778	13.7723	17.7073	28.5069	11.2087	16.0332	1.45187
0.0765768	35.2884			0.086735	107.253			0.07907	78.5503			0.0779818	84.3747			0.105591	81.9162	90.6816		0.0899474	73.5332			0.073276	149.726			0.0837442	48.6078					0.9	2.47896	3.8946	16.9054	12.6407	20.1928	11.9131	21.3261	0.951802
0.0810818	32.5482			0.0918376	100.025			0.0837216	79.2877			0.0825694	82.9507			0.111802	76.1369			0.0952389	68.2349			0.0775868	141.087			0.0886708	45.6294					0.95	2.16895	1.76743	17.3799	7.95222	9.47633	12.0133	13.258	0.611214
0.0855868	31.6215			0.0969402	95.1551			0.0883733	78.4128			0.087157	82.8558			0.118014	70.8992			0.10053	63.4318	77.1683		0.0818976	126.394			0.0935975	40.9186					1	1.85403	0.876046	13.7988	6.6684	3.88279	9.85401	2.8037	0.336104
0.0900917	30.1689			0.102043	89.6456	112.125		0.0930249	77.2318			0.0917446	81.7173			0.124226	65.1			0.105822	58.3192			0.0862084	111.635			0.0985241	36.2542
0.0945929	27.6575			0.107141	83.6942			0.0976726	74.7327			0.0963284	79.8737			0.130433	59.8			0.111109	53.6477			0.0905156	98.6573			0.103447	33.3543	45.7896
0.0990979	26.8243			0.112244	78.3791			0.102324	74.428	78.3697		0.100916	78.6388	80.6676		0.136645	53.7103			0.116401	50.9661			0.0948263	86.3351			0.108373	28.9712
0.103603	24.2056	32.8456		0.117346	72.385			0.106976	74.5893			0.105504	78.2967			0.142856	47.8662			0.121692	44.9001			0.0991371	73.0426			0.1133	26.0485
0.108108	21.2347			0.122449	67.9838			0.111628	75.0645			0.110091	75.3467			0.149068	44.5709			0.126984	42.6597			0.103448	59.9018	121.338		0.118226	23.1836
0.112613	20.1143			0.127551	62.4984			0.116279	74.8465			0.114679	73.8673			0.15528	40.0346	57.2648		0.132275	36.8923			0.107759	50.5962			0.123153	20.1325
0.117118	18.4094			0.132654	58.7127			0.120931	75.3181			0.119266	71.7268			0.161492	36.5104			0.137567	31.716			0.112069	41.1963			0.12808	18.2721
0.121623	17.8484			0.137756	54.3242			0.125582	74.9038			0.123854	69.4086			0.167704	33.7844			0.142858	30.1964			0.11638	33.6129			0.133006	16.4629
0.126128	16.008			0.142859	51.5176			0.130234	75.3243			0.128442	67.4705			0.173916	32.2587			0.14815	27.4098			0.120691	28.5593			0.137933	14.5022
0.130629	14.8834			0.147957	48.9636			0.134882	72.2567			0.133025	65.0708			0.180122	28.8065			0.153437	24.4274	40.1135		0.124998	25.5481			0.142855	12.7969
0.135134	14.7349			0.15306	46.6165	62.5075		0.139533	71.7395			0.137613	62.2293			0.186334	26.6525			0.158729	22.3407			0.129309	22.1705			0.147782	11.659
0.139639	13.3628			0.158162	43.8797			0.144185	70.7947			0.142201	60.0469			0.192546	25.896			0.16402	20.1086			0.13362	19.7129			0.152709	10.9242	18.2953
0.144144	12.3964			0.163265	41.2743			0.148837	70.517			0.146788	57.9239			0.198758	23.9837			0.169312	17.7638			0.137931	17.3167			0.157635	9.81093
0.148649	10.8665			0.168368	38.7377			0.153488	69.4739	73.1662		0.151376	55.1525	66.9582		0.204969	22.7989	28.8364		0.174603	17.6364			0.142241	15.6297			0.162562	9.04016
0.153154	10.749	15.5098		0.17347	36.5791			0.15814	68.5341			0.155964	54.1129			0.211181	20.283			0.179895	15.5476			0.146552	15.0295			0.167488	8.0041
0.157659	10.1559			0.178573	34.231			0.162792	67.4797			0.160551	50.3667			0.217393	19.3484			0.185186	14.428			0.150863	13.6333	25.7278		0.172415	7.4746
0.162164	9.89221			0.183675	32.5057			0.167443	67.232			0.165139	48.3358			0.223605	18.1111			0.190478	13.5978			0.155174	12.2223			0.177342	7.25862
0.166669	8.51381			0.188778	30.5574			0.172095	64.8682			0.169726	46.2666			0.229817	17.5132			0.195769	12.4159			0.159484	11.8407			0.182268	6.75333
0.17117	8.16775			0.193876	28.3628			0.176743	64.6316			0.17431	43.3744			0.236023	15.9291			0.201057	12.2199	16.2287		0.163792	11.7111			0.187191	6.21172
0.175675	7.74862			0.198979	27.4274			0.181394	64.047			0.178898	43.5597			0.242235	16.4246			0.206348	11.0395			0.168102	11.1851			0.192117	5.52042
0.18018	6.89613			0.204081	25.6334	33.9189		0.186046	62.8184			0.183485	41.2815			0.248447	15.2178			0.21164	10.6233			0.172413	9.93517			0.197044	5.97303
0.184685	7.05378			0.209184	24.0037			0.190698	61.5343			0.188073	39.8276			0.254659	14.3803	17.1509		0.216931	10.4086			0.176724	10.0944			0.201971	5.28896	7.13359
0.18919	6.9307			0.214286	22.5348			0.195349	59.0212			0.192661	38.5129			0.260871	13.9406			0.222223	9.62796			0.181035	10.0075			0.206897	4.89998
0.193695	6.35873			0.219389	21.4735			0.200001	56.8142	63.6981		0.197248	38.6116			0.267083	12.7305			0.227514	8.11927			0.185346	9.36663			0.211824	4.37697
0.1982	5.92148			0.224491	20.8928			0.204652	53.5905			0.201836	37.769	43.8199		0.273294	13.5462			0.232806	8.10593			0.189656	9.6574			0.216751	4.38461
0.202704	5.71879	7.57799		0.229594	19.8756			0.209304	50.8266			0.206423	38.1655			0.279506	13.2503			0.238097	7.5312			0.193967	9.60003			0.221677	4.59329
0.207206	5.99647			0.234692	18.0777			0.213952	46.6869			0.211007	37.7215			0.285713	12.2195			0.243384	7.65125			0.198274	9.55927			0.2266	4.61694
0.211711	5.89242			0.239795	17.2116			0.218603	44.0952			0.215595	36.5679			0.291925	12.4394			0.248676	6.43199			0.202585	9.637	10.4014		0.231526	4.40867
0.216216	5.67604			0.244897	15.5501			0.223255	40.7928			0.220182	34.9455			0.298136	11.9481			0.253968	6.0262	8.55653		0.206896	9.1352			0.236453	4.77472
0.220721	5.36774			0.25	15.0919	19.4124		0.227907	37.5673			0.22477	34.7028			0.304348	11.3663	12.6801		0.259259	6.40814			0.211207	9.7315			0.241379	4.47955
0.225226	4.85625			0.255103	14.4407			0.232558	35.0873			0.229358	33.959			0.31056	12.5929			0.264551	6.87358			0.215517	9.29253			0.246306	4.82005
0.22973	4.73135			0.260205	13.5461			0.23721	31.8868			0.233945	33.3694			0.316772	12.5511			0.269842	6.40589			0.219828	8.92403			0.251233	4.68727	4.60421
0.234235	4.30832			0.265308	12.2426			0.241862	29.5868			0.238533	33.2148			0.322984	12.2558			0.275134	5.75331			0.224139	8.2111			0.256159	4.37044
0.23874	4.46299			0.27041	12.3507			0.246513	29.4714			0.243121	33.5545			0.329196	12.178			0.280425	5.8186			0.22845	8.53523			0.261086	4.7159
0.243242	4.56994			0.275509	12.0489			0.251161	27.7844	38.8524		0.247704	33.2387			0.335402	12.4071			0.285712	6.2198			0.232757	9.14083			0.266008	4.83633
0.247747	4.59312			0.280611	12.0474			0.255813	27.4651			0.252292	32.9344	34.7613		0.341614	12.6999			0.291004	6.26392			0.237068	8.85173			0.270935	4.56945
0.252252	4.33576	4.98095		0.285714	11.9645			0.260464	26.5599			0.256879	32.3299			0.347826	12.1994			0.296295	6.3944			0.241378	9.1111			0.275862	4.61795
0.256757	4.28677			0.290816	11.8537			0.265116	25.2574			0.261467	32.7873			0.354038	13.1099	12.4993		0.301587	6.24432	6.26466		0.245689	8.97583			0.280788	4.39167
0.261261	4.26467			0.295919	12.5747			0.269767	24.2161			0.266055	31.9248			0.36025	13.7996			0.306879	6.13214			0.25	9.26293	9.01564		0.285715	5.22853
0.265766	3.99255			0.301021	12.1846	12.5254		0.274419	24.107			0.270642	31.1372			0.366461	14.5783			0.31217	5.7009			0.254311	9.0722			0.290641	4.85473
0.270271	4.21638			0.306124	11.6188			0.279071	22.7954			0.27523	30.1738			0.372673	14.8815			0.317462	6.85031			0.258622	9.22587			0.295568	4.76243
0.274776	3.99417			0.311227	12.5048			0.283722	22.9101			0.279818	29.7698			0.378885	14.7612			0.322753	6.66406			0.262932	9.4573			0.300495	4.58616	4.69336
0.279278	4.32588			0.316325	11.7908			0.28837	22.0481			0.284401	29.8627			0.385092	15.7197			0.32804	6.82364			0.26724	8.92227			0.305417	5.41972
0.283783	4.35338			0.321427	11.9226			0.293022	22.5314			0.288989	29.0373			0.391303	15.9136			0.333332	6.71973			0.27155	9.77037			0.310344	4.73729
0.288287	4.40756			0.32653	11.483			0.297673	21.4844			0.293577	29.1134			0.397515	15.282			0.338623	7.07238			0.275861	10.1926			0.31527	4.83216
0.292792	4.44907			0.331632	12.5116			0.302325	20.8943	23.6608		0.298164	28.4294			0.403727	16.3926	15.1661		0.343915	7.0496			0.280172	10.2573			0.320197	4.95061
0.297297	4.20311			0.336735	12.5879			0.306977	20.4999			0.302752	27.6882	30.2049		0.409939	16.2401			0.349206	7.14834			0.284483	10.0944			0.325124	4.70815
0.301802	4.58471	4.27984		0.341838	12.633			0.311628	20.2022			0.307339	27.7388			0.416151	16.4699			0.354498	7.66563	6.78267		0.288793	10.163			0.33005	4.52203
0.306307	4.52762			0.34694	12.7155			0.31628	19.6198			0.311927	26.1558			0.422363	17.7653			0.35979	8.09064			0.293104	9.93143			0.334977	4.30402
0.310812	4.38095			0.352043	13.482	12.325		0.320932	18.2452			0.316515	26.0921			0.428574	17.0853			0.365081	8.22422			0.297415	10.4852			0.339904	4.19767
0.315317	4.47199			0.357145	13.7053			0.325583	19.1669			0.321102	26.5378			0.434786	17.4382			0.370373	8.85469			0.301726	10.5185	9.84087		0.34483	4.31095
0.319818	4.64013			0.362244	13.707			0.330231	19.8536			0.325686	25.602			0.440993	18.1625			0.37566	9.19333			0.306033	10.489			0.349753	4.22242
0.324323	4.59909			0.367346	14.0411			0.334883	19.1103			0.330274	25.2765			0.447205	17.8488			0.380951	8.90601			0.310344	10.563			0.354679	4.41327	4.60166
0.328828	4.99548			0.372449	14.168			0.339534	19.1338			0.334861	24.8282			0.453417	19.0582	17.5085		0.386243	8.14622			0.314654	10.7871			0.359606	4.2289
0.333333	4.97957			0.377551	14.6537			0.344186	19.763			0.339449	23.9729			0.459628	19.4789			0.391534	9.48335			0.318965	11.026			0.364532	3.83828
0.337838	4.82096			0.382654	15.2373			0.348837	19.6183			0.344036	23.9384			0.46584	19.8866			0.396826	9.77493			0.323276	10.55			0.369459	4.21193
0.342343	5.22358			0.387756	15.3814			0.353489	19.695	19.5371		0.348624	23.7419			0.472052	19.4929			0.402118	10.5383	9.02352		0.327587	11.0221			0.374386	4.37132
0.346848	4.82452			0.392859	15.6651			0.358141	20.0329			0.353212	22.4866	25.1246		0.478264	19.5966			0.407409	10.0003			0.331898	10.4537			0.379312	4.43463
0.351353	4.99251	4.76876		0.397962	16.152			0.362792	20.7165			0.357799	22.0446			0.484476	20.0996			0.412701	10.3477			0.336208	10.2037			0.384239	4.15583
0.355854	5.23422			0.40306	16.6832	14.9394		0.36744	20.6365			0.362383	22.0275			0.490682	20.6673			0.417988	10.8113			0.340516	10.1722			0.389161	4.09691
0.360359	5.52652			0.408162	16.6383			0.372092	19.8439			0.366971	21.5698			0.496894	20.9417			0.423279	10.5632			0.344826	10.5612			0.394088	4.30878
0.364864	5.70831			0.413265	16.8311			0.376743	19.1151			0.371558	21.4577			0.503106	19.7816	19.9932		0.428571	11.2758			0.349137	10.3833			0.399015	3.85028
0.369369	5.7174			0.418368	17.5005			0.381395	18.5599			0.376146	21.3632			0.509318	19.0981			0.433862	11.6139			0.353448	10.0759	10.5239		0.403941	4.06964	4.15665
0.373874	5.97246			0.42347	16.9902			0.386047	17.9908			0.380734	21.04			0.51553	19.2806			0.439154	11.5604			0.357759	8.94077			0.408868	4.03466
0.378379	5.80565			0.428573	17.259			0.390698	18.1968			0.385321	20.4357			0.521741	17.9434			0.444445	10.6701			0.362069	9.2242			0.413795	4.04628
0.382884	5.94131			0.433675	16.5947			0.39535	17.7658			0.389909	20.1904			0.527953	17.7279			0.449737	10.722			0.36638	9.34817			0.418721	4.19855
0.387389	6.0523			0.438778	16.5428			0.400002	18.2295	19.1088		0.394496	19.6323			0.534165	18.5373			0.455029	10.5432	10.8108		0.370691	9.424			0.423648	3.67282
0.39189	6.37522			0.443876	16.1471			0.404649	17.3296			0.39908	19.076			0.540372	18.275			0.460316	10.8679			0.374998	8.5444			0.42857	3.68377
0.396395	6.18241			0.448979	16.5655			0.409301	17.0738			0.403668	17.5702	20.5825		0.546583	17.9053			0.465607	10.7934			0.379309	8.8258			0.433497	3.64275
0.4009	6.14251	5.87803		0.454081	16.7388	16.7808		0.413953	16.9874			0.408255	17.5966			0.552795	17.1691	18.2421		0.470899	11.8434			0.38362	9.7833			0.438423	3.68602
0.405405	5.92743			0.459184	16.1881			0.418604	16.7695			0.412843	16.9054			0.559007	17.2853			0.47619	11.2771			0.387931	8.38327			0.44335	3.78212
0.40991	5.81984			0.464286	15.247			0.423256	16.7828			0.417431	15.8076			0.565219	17.2404			0.481482	10.6416			0.392241	9.5074			0.448277	3.66109
0.414415	5.73981			0.469389	15.1311			0.427907	16.814			0.422018	14.7314			0.571431	17.1897			0.486773	10.7002			0.396552	8.57967			0.453203	3.36182	3.77699
0.41892	5.61718			0.474491	14.5987			0.432559	17.342			0.426606	14.5604			0.577643	17.1676			0.492065	10.9089			0.400863	9.32223	9.08029		0.45813	3.7493
0.423425	6.32922			0.479594	14.5318			0.437211	16.542			0.431193	13.7288			0.583854	17.2855			0.497356	11.4534			0.405174	7.98887			0.463057	3.33585
0.427926	5.5229			0.484692	14.6225			0.441858	16.5097			0.435777	13.7315			0.590061	17.8893			0.502644	11.2661	11.0836		0.409481	9.03147			0.467979	3.51152
0.432431	5.90108			0.489795	14.2871			0.44651	16.9066			0.440365	12.973			0.596273	18.0447			0.507935	12.3103			0.413792	8.60927			0.472906	3.334
0.436936	5.83871			0.494897	14.3944			0.451162	16.7203	16.8889		0.444952	12.4234			0.602485	18.4225	17.5656		0.513227	11.9716			0.418102	8.22043			0.477832	3.68569
0.441441	5.9244			0.5	14.752	14.8614		0.455813	15.9671			0.44954	12.0237			0.608697	18.3416			0.518518	11.8791			0.422413	8.63523			0.482759	3.58528
0.445946	5.87149			0.505103	14.141			0.460465	16.063			0.454128	12.0646	14.2315		0.614908	18.5017			0.52381	12.5932			0.426724	8.65373			0.487686	3.4412
0.450451	5.93621	5.85712		0.510205	13.9433			0.465117	16.1204			0.458715	11.8823			0.62112	17.6765			0.529101	12.1905			0.431035	8.4593			0.492612	3.33335
0.454956	5.36504			0.515308	13.2714			0.469768	15.837			0.463303	11.0321			0.627332	17.9925			0.534393	11.4499			0.435346	7.65003			0.497539	3.41732
0.459461	5.2239			0.52041	13.042			0.47442	15.4771			0.467891	10.8418			0.633544	17.769			0.539684	11.0712			0.439656	7.9851			0.502465	3.36973	3.47632
0.463966	5.56758			0.525513	12.7636			0.479072	15.0393			0.472478	10.9851			0.639756	17.7633			0.544976	11.4897			0.443967	7.64443			0.507392	3.53406
0.468467	5.57463			0.530611	12.6678			0.483719	15.7871			0.477062	10.4703			0.645962	17.8281			0.550263	11.5633	11.8354		0.448274	8.5203			0.512314	3.19296
0.472972	5.2488			0.535714	12.2264			0.488371	15.1862			0.48165	10.3869			0.652174	18.3161	18.0236		0.555555	12.6073			0.452585	8.37587	8.3145		0.517241	3.61624
0.477477	4.79393			0.540816	12.1894			0.493023	14.866			0.486237	10.6342			0.658386	17.9432			0.560846	12.2105			0.456896	7.9962			0.522168	3.1852
0.481982	4.91921			0.545919	11.9184			0.497674	15.548			0.490825	10.7544			0.664598	18.1882			0.566138	11.4888			0.461207	8.65553			0.527094	3.29826
0.486487	4.89409			0.551021	11.5707	12.7734		0.502326	15.8149	15.6096		0.495412	10.6346			0.67081	18.3261			0.571429	11.3343			0.465517	8.33337			0.532021	3.32264
0.490992	4.96209			0.556124	11.862			0.506977	15.2247			0.5	10.7263	10.8348		0.677021	17.9507			0.576721	11.187			0.469828	7.72967			0.536948	3.34433
0.495497	5.16857			0.561227	12.2262			0.511629	15.8716			0.504588	10.4024			0.683233	19.0634			0.582012	10.6473			0.474139	8.3481			0.541874	3.45947
0.500002	5.06223	5.16182		0.566329	12.2938			0.516281	15.8823			0.509175	10.3802			0.689445	18.2866			0.587304	10.9725			0.47845	8.06297			0.546801	3.07814
0.504503	4.45836			0.571427	11.5927			0.520928	14.7552			0.513759	10.4166			0.695652	19.3887			0.592591	11.9003			0.482757	7.74263			0.551723	3.15234	3.31836
0.509008	4.53506			0.57653	11.8562			0.52558	15.2818			0.518347	10.3183			0.701864	20.3726	18.69		0.597882	11.1691			0.487068	8.16487			0.55665	3.17611
0.513513	4.77674			0.581632	11.4597			0.530232	14.8829			0.522934	9.97278			0.708075	20.3787			0.603174	11.782	11.5299		0.491378	8.46667			0.561577	3.09724
0.518018	4.5974			0.586735	11.0193			0.534883	14.9928			0.527522	10.0197			0.714287	21.9367			0.608466	10.352			0.495689	8.5036			0.566503	2.93114
0.522523	4.5461			0.591838	11.586			0.539535	15.0975			0.532109	9.52923			0.720499	23.7443			0.613757	10.8379			0.5	8.66843	8.24291		0.57143	2.62957
0.527028	4.42434			0.59694	12.2224			0.544187	15.2568			0.536697	9.95507			0.726711	24.7581			0.619049	10.3413			0.504311	7.65373			0.576356	2.66024
0.531533	4.60064			0.602043	12.192	11.831		0.548838	15.7996			0.541285	9.82728			0.732923	26.7571			0.62434	10.174			0.508622	8.57593			0.581283	2.87299
0.536038	4.45214			0.607145	11.7038			0.55349	14.7551	15.2546		0.545872	9.63258			0.739135	27.2089			0.629632	10.0629			0.512932	8.02223			0.58621	2.83918
0.540539	4.11891			0.612244	11.832			0.558138	14.229			0.550456	10.1104	10.0513		0.745341	28.2627			0.634919	9.44861			0.51724	8.56117			0.591132	2.81339
0.545044	4.23643			0.617346	11.2441			0.562789	14.1449			0.555044	9.56703			0.751553	30.607	25.4567		0.64021	9.38251			0.52155	8.70183			0.596059	2.61963
0.549549	4.15031			0.622449	11.1817			0.567441	14.949			0.559631	9.76049			0.757765	32.6136			0.645502	9.32771			0.525861	8.19447			0.600985	2.4169	2.80564
0.554054	4.13084	4.41894		0.627551	10.7256			0.572093	14.752			0.564219	9.35379			0.763977	31.6433			0.650794	9.4378	9.92942		0.530172	8.62777			0.605912	2.78117
0.558559	4.25987			0.632654	10.8048			0.576744	14.1607			0.568807	9.55871			0.770188	32.2961			0.656085	9.40649			0.534483	8.10737			0.610839	2.75074
0.563064	4.11559			0.637756	11.3449			0.581396	14.1819			0.573394	9.12952			0.7764	32.1396			0.661377	9.62551			0.538793	7.89987			0.615765	2.75802
0.567569	3.61255			0.642859	10.7948			0.586047	14.4167			0.577982	9.29487			0.782612	31.5632			0.666668	9.53956			0.543104	8.91847			0.620692	2.84229
0.572074	3.70711			0.647962	10.2147			0.590699	14.3026			0.582569	9.22621			0.788824	31.8422			0.67196	10.0102			0.547415	8.0648			0.625618	2.87202
0.576575	3.60503			0.65306	10.4152	11.0261		0.595347	14.4383			0.587153	9.26173			0.795031	30.8814			0.677247	10.4788			0.551722	8.40557	8.3111		0.630541	2.79989
0.58108	3.66637			0.658162	10.22			0.599998	13.891			0.591741	9.22605			0.801242	30.687	31.7083		0.682538	10.6464			0.556033	8.6241			0.635468	3.2027
0.585585	3.61788			0.663265	10.5466			0.60465	13.7965	14.2966		0.596328	9.68879			0.807454	30.6756			0.68783	10.5106			0.560344	8.5167			0.640394	2.897
0.59009	3.8342			0.668368	10.5033			0.609302	13.7848			0.600916	9.6933	9.43277		0.813666	29.7564			0.693121	9.84684			0.564654	7.8092			0.645321	2.83095
0.594595	3.42933			0.67347	10.2721			0.613953	13.6741			0.605504	9.24177			0.819878	30.5167			0.698413	9.71562			0.568965	8.3352			0.650247	2.86289	2.85977
0.5991	3.40023			0.678573	10.2018			0.618605	13.7957			0.610091	9.49003			0.82609	29.6395			0.703705	9.10229	9.88823		0.573276	7.1908			0.655174	2.88287
0.603605	3.77848	3.7297		0.683675	10.5916			0.623257	13.4584			0.614679	9.71988			0.832302	29.4253			0.708996	9.13522			0.577587	8.33517			0.660101	2.7368
0.60811	3.54535			0.688778	10.119			0.627908	13.2642			0.619266	9.9013			0.838513	27.2246			0.714288	9.73276			0.581898	8.0056			0.665027	2.88476
0.612615	3.82199			0.69388	10.4324			0.63256	13.1346			0.623854	9.47523			0.844725	26.2586			0.719579	8.89216			0.586208	8.18327			0.669954	2.82322
0.617116	3.9256			0.698979	9.95164			0.637208	12.729			0.628438	9.96004			0.850932	24.5582	28.5069		0.724866	8.96177			0.590516	8.3204			0.674876	2.69908
0.621621	3.76395			0.704081	10.1088	10.2947		0.641859	12.6429			0.633025	10.0207			0.857144	23.2373			0.730158	9.12094			0.594826	7.91857			0.679803	2.77766
0.626126	3.57598			0.709184	9.82028			0.646511	13.1616			0.637613	9.83354			0.863355	22.873			0.735449	8.52816			0.599137	7.49453			0.68473	2.93964
0.630631	3.50751			0.714286	10.4467			0.651163	12.3804	13.2025		0.642201	10.1576			0.869567	21.7246			0.740741	8.96604			0.603448	8.50183	8.10295		0.689656	3.1118
0.635136	3.43765			0.719389	10.4949			0.655814	12.29			0.646788	10.1136			0.875779	20.0467			0.746032	9.08286			0.607759	8.3278			0.694583	2.85981
0.639641	3.36763			0.724491	10.5372			0.660466	12.5264			0.651376	10.7617	9.87958		0.881991	20.3251			0.751324	9.02941	9.04993		0.612069	8.03523			0.699509	2.8164
0.644146	3.36455			0.729594	10.7529			0.665117	12.1908			0.655964	10.185			0.888203	19.0292			0.756616	9.38211			0.61638	7.80183			0.704436	3.08012	2.87383
0.648651	3.50527			0.734697	10.932			0.669769	11.7504			0.660551	10.3402			0.894415	18.0509			0.761907	8.4154			0.620691	8.43703			0.709363	3.43072
0.653152	3.35512	3.56096		0.739795	10.8683			0.674417	12.1989			0.665135	10.6159			0.900621	16.2556	20.1928		0.767194	8.93372			0.624998	7.75367			0.714285	2.7834
0.657657	3.46131			0.744897	11.2698			0.679068	11.7776			0.669723	10.4235			0.906833	13.6963			0.772486	8.61062			0.629309	8.24633			0.719212	3.24682
0.662162	3.51628			0.75	11.6423	10.7516		0.68372	11.35			0.67431	10.8614			0.913045	13.1626			0.777777	8.60272			0.63362	8.65547			0.724138	3.21098
0.666667	3.11877			0.755103	11.0347			0.688372	12.0753			0.678898	11.1218			0.919257	11.8943			0.783069	8.67404			0.637931	8.35003			0.729065	3.09144
0.671172	3.31448			0.760205	11.1332			0.693023	11.7644			0.683485	11.3433			0.925468	9.51658			0.78836	9.18716			0.642241	8.42587			0.733992	3.50489
0.675677	3.5554			0.765308	10.4914			0.697675	11.6926			0.688073	10.9112			0.93168	8.16441			0.793652	8.71959			0.646552	8.3093			0.738918	3.25768
0.680182	3.40942			0.77041	10.2239			0.702327	11.7504	11.9424		0.692661	11.1006			0.937892	6.99085			0.798943	9.68085			0.650863	8.26487	8.23704		0.743845	3.39076
0.684687	3.46251			0.775513	9.20397			0.706978	11.629			0.697248	11.5111			0.944104	6.7962			0.804235	9.47567	8.96819		0.655174	8.46663			0.748771	4.01551
0.689188	3.37237			0.780611	9.06412			0.711626	10.9622			0.701832	11.6153	10.9117		0.950311	5.58938	9.47633		0.809522	10.5829			0.659481	8.10373			0.753694	3.22129	3.31535
0.693693	3.56064			0.785714	8.84039			0.716278	10.8831			0.70642	11.5441			0.956522	4.95874			0.814814	10.5432			0.663792	8.4258			0.758621	3.35207
0.698198	3.11762			0.790816	8.45511			0.720929	10.918			0.711007	11.5275			0.962734	4.72081			0.820105	10.2811			0.668102	9.1944			0.763547	3.20029
0.702703	3.37444	3.38757		0.795919	8.56323			0.725581	10.4419			0.715595	11.8732			0.968946	4.43929			0.825397	10.511			0.672413	8.5926			0.768474	2.90014
0.707208	3.16778			0.801021	8.34266	9.53526		0.730233	11.0362			0.720182	12.0183			0.975158	4.13507			0.830688	10.825			0.676724	8.48897			0.7734	2.75173
0.711713	3.07048			0.806124	8.05288			0.734884	10.8409			0.72477	12.2199			0.98137	3.65349			0.83598	12.1712			0.681035	9.13327			0.778327	2.72812
0.716217	2.99464			0.811227	7.62667			0.739536	10.5066			0.729358	12.2818			0.987582	3.20357			0.841271	11.6328			0.685346	8.7333			0.783254	2.53765
0.720722	3.0214			0.816329	7.56546			0.744187	11.3207			0.733945	12.134			0.993793	3.14285			0.846563	11.9568			0.689656	8.79997			0.78818	2.3856
0.725224	3.33237			0.821427	7.7597			0.748835	11.6575			0.738529	12.7841			1	2.80855	3.88279		0.85185	12.3745	11.2087		0.693963	8.44997			0.793103	2.11438
0.729729	3.22311			0.82653	7.24755			0.753487	11.4295	11.0569		0.743117	13.2202							0.857142	12.6226			0.698274	9.82407			0.798029	2.2941
0.734234	3.28344			0.831632	6.94464			0.758138	11.9115			0.747704	13.4293							0.862433	12.237			0.702585	9.05	8.77189		0.802956	1.89322	2.61573
0.738739	3.41564			0.836735	6.77626			0.76279	12.4291			0.752292	14.5517	12.5077						0.867725	12.4588			0.706896	8.75377			0.807883	1.87146
0.743243	3.35298			0.841838	6.54571			0.767442	12.2637			0.756879	15.5579							0.873016	12.0189			0.711207	9.78333			0.812809	1.79729
0.747748	3.36097			0.84694	6.55287			0.772093	12.6509			0.761467	15.4897							0.878308	11.9171			0.715517	10.0797			0.817736	1.50361
0.752253	3.1308	3.21396		0.852043	6.30606	7.13778		0.776745	12.798			0.766055	16.0137							0.883599	11.5656			0.719828	9.4852			0.822662	1.36123
0.756758	3.60834			0.857145	5.71583			0.781397	13.2747			0.770642	17.0667							0.888891	11.2797			0.724139	9.5593			0.827589	1.34681
0.761263	3.74154			0.862248	5.18853			0.786048	13.2208			0.77523	17.8675							0.894182	11.6694			0.72845	8.71303			0.832516	1.25521
0.765765	3.63775			0.867346	4.95206			0.790696	13.3776			0.779814	17.7212							0.89947	11.7144			0.732757	10.2797			0.837438	1.32245
0.77027	4.09172			0.872449	4.46946			0.795348	13.6546			0.784401	18.4265							0.904761	11.6479	11.9131		0.737068	9.92043			0.842365	1.55412
0.774774	3.68591			0.877551	3.44016			0.799999	13.0773			0.788989	19.1108							0.910053	11.604			0.741378	10.3352			0.847291	1.30579
0.779279	3.52107			0.882654	3.36374			0.804651	13.0688	12.8843		0.793577	18.8808							0.915344	11.9171			0.745689	10.8482			0.852218	1.20072	1.45187
0.783784	3.53433			0.887756	3.25581			0.809302	13.0049			0.798164	18.7301							0.920636	12.199			0.75	10.2389	9.81788		0.857145	1.16924
0.788289	3.65188			0.892859	3.17827			0.813954	12.8187			0.802752	18.3935	17.5689						0.925927	12.3131			0.754311	11.3166			0.862071	0.980135
0.792794	3.62089			0.897962	2.83065			0.818606	13.1732			0.807339	18.5225							0.931219	11.9672			0.758622	12.2334			0.866998	1.01761
0.797299	3.355			0.903064	2.55145	3.8946		0.823257	13.0354			0.811927	17.5944							0.93651	11.7803			0.762932	11.9574			0.871924	1.04215
0.8018	3.21243	3.60553		0.908162	2.45118			0.827905	13.1532			0.816511	18.212							0.941797	12.1882			0.76724	11.1389			0.876847	0.955755
0.806305	3.11642			0.913265	2.37032			0.832557	13.1431			0.821098	17.7773							0.947089	12.1601			0.77155	11.7131			0.881774	0.924574
0.81081	3.48307			0.918368	2.11079			0.837208	13.9091			0.825686	17.9321							0.952381	11.9911	12.0133		0.775861	12.6685			0.8867	0.812445
0.815315	3.40806			0.92347	1.83709			0.84186	14.5466			0.830274	18.0861							0.957672	11.0265			0.780172	12.7871			0.891627	0.987755
0.81982	3.03202			0.928573	1.75817			0.846512	15.3315			0.834861	18.1838							0.962964	11.3383			0.784483	13.1259			0.896553	0.803845
0.824325	3.17554			0.933675	1.7001			0.851163	16.3113	13.7723		0.839449	18.023							0.968255	11.3579			0.788793	13.8315			0.90148	0.82451	0.951802
0.82883	3.16975			0.938778	1.5063			0.855815	16.4154			0.844036	17.207							0.973547	10.6188			0.793104	13.339			0.906407	0.767542
0.833335	3.21751			0.94388	1.43687			0.860467	16.8885			0.848624	16.7523							0.978838	9.73079			0.797415	13.8204			0.911333	0.731868
0.837836	3.07889			0.948979	1.36915			0.865114	17.0372			0.853208	16.49	17.7073						0.984125	9.65501			0.801722	14.2647	12.683		0.916256	0.738639
0.842341	3.05357			0.954081	1.13439	1.76743		0.869766	17.1173			0.857795	16.6232							0.989417	9.06445			0.806033	15.3018			0.921182	0.615274
0.846846	2.86941			0.959184	1.21025			0.874418	17.1922			0.862383	15.544							0.994708	8.04153			0.810344	15.313			0.926109	0.688116
0.851351	2.59708	3.10921		0.964286	1.13053			0.879069	16.3482			0.866971	15.1091							1	7.85276	9.85401		0.814654	15.8389			0.931036	0.619019
0.855856	2.85118			0.969389	0.9588			0.883721	16.738			0.871558	13.9824											0.818965	15.3295			0.935962	0.521713
0.860361	2.5855			0.974491	0.880444			0.888372	17.0085			0.876146	12.593											0.823276	14.8019			0.940889	0.528571
0.864866	2.71202			0.979594	0.858633			0.893024	17.1465			0.880734	12.2713											0.827587	15.2019			0.945815	0.445181
0.869371	2.78776			0.984697	0.755989			0.897676	17.3789			0.885321	11.6084											0.831898	14.5407			0.950742	0.456216	0.611214
0.873872	2.29078			0.989795	0.689215			0.902323	16.6884	16.9054		0.889905	10.9409											0.836205	16.8037			0.955665	0.481913
0.878377	2.3096			0.994897	0.731348			0.906975	17.1522			0.894493	10.4918											0.840516	16.4629			0.960591	0.432248
0.882882	2.32045			1	0.669204	0.876046		0.911627	17.2303			0.89908	10.2326											0.844826	16.9			0.965518	0.430355
0.887387	2.46387							0.916278	16.8406			0.903668	9.6514	12.6407										0.849137	17.6333			0.970444	0.3522
0.891892	2.30483							0.92093	17.1617			0.908255	10.0758											0.853448	18.2704	16.0332		0.975371	0.351845
0.896397	2.29896							0.925582	17.5086			0.912843	9.45382											0.857759	18.7222			0.980298	0.238423
0.900902	2.34364	2.47896						0.930233	17.6293			0.917431	8.67743											0.862069	19.1241			0.985224	0.292065
0.905407	2.43766							0.934885	17.6559			0.922018	8.11306											0.86638	19.5982			0.990151	0.290832
0.909912	2.49084							0.939537	17.0209			0.926606	7.79686											0.870691	21.4815			0.995078	0.24839
0.914413	2.17017							0.944184	18.0341			0.93119	7.53632											0.874998	21.1815			1	0.242768	0.336104
0.918918	2.39079							0.948836	17.9306			0.935777	7.51618											0.879309	21.3834
0.923423	2.06038							0.953488	17.0144	17.3799		0.940365	7.06203											0.88362	22.8278
0.927928	2.09533							0.958139	16.7155			0.944952	7.29979											0.887931	23.1814
0.932433	2.00637							0.962791	16.3304			0.94954	6.99106											0.892241	23.6259
0.936938	2.09662							0.967442	14.8272			0.954128	6.95203	7.95222										0.896552	22.2612
0.941443	2.04443							0.972094	14.9843			0.958715	6.62525											0.900863	21.1999	21.3261
0.945948	2.02102							0.976746	14.0408			0.963303	6.43638											0.905174	20.9667
0.950449	2.04484	2.16895						0.981393	13.7898			0.967887	6.40846											0.909481	20.1685
0.954954	1.9593							0.986045	13.1008			0.972474	6.25536											0.913792	18.1111
0.959459	1.82342							0.990697	12.0674			0.977062	6.26666											0.918102	16.6555
0.963964	2.02107							0.995348	11.5871			0.98165	6.87702											0.922413	14.5444
0.968469	1.80132							1	10.5452	13.7988		0.986237	6.93106											0.926724	13.6982
0.972974	1.81353											0.990825	6.76643											0.931035	11.8185
0.977479	1.78558											0.995412	7.05194											0.935346	11.3519
0.981984	1.77403											1	7.0654	6.6684										0.939656	9.63327
0.986485	1.83707																							0.943963	8.3593
0.99099	1.68786																							0.948274	7.4037
0.995495	1.81732																							0.952585	6.38513	13.258
1	2.07382	1.85403																						0.956896	6.11107
																								0.961207	4.4888
																								0.965517	3.93517
																								0.969828	3.5149
																								0.974139	2.79263
																								0.978446	2.52773
																								0.982757	1.79447
																								0.987068	1.78703
																								0.991378	1.38147
																								0.995689	1.47597
																								1	1.03147	2.8037
