# Supplementary material for: Crumbs organizes the transport machinery by regulating apical levels of PI(4,5)P2 in Drosophila
Source: eLife. 2019 Nov 7;8:e50900. doi: 10.7554/eLife.50900 (PMC6881148; doi:10.7554/eLife.50900)
Supplement: Figure 5—figure supplement 2—source data 1. [file elife-50900-fig5-figsupp2-data1.xlsx]

## Sheet: Ctl_Image1
	Area	Min	Max	X	Y
1	0	114	114	2224	57744
2	0	69	69	3415	57188
3	0	67	67	4766	56632
4	0	55	55	5798	56235
5	0	100	100	6831	55599
6	0	74	74	8816	57029
7	0	103	103	9611	58618
8	0	118	118	10087	60365
9	0	116	116	10802	62589
10	0	100	100	11040	64972
11	0	108	108	9372	55202
12	0	122	122	10246	54487
13	0	89	89	11358	53931
14	0	155	155	13106	53375
15	0	106	106	14694	52899
16	0	109	109	16521	54011
17	0	75	75	17236	55599		114	108	122	72	61	53	84
18	0	123	123	17315	57744		69	122	111	119	57	107	110
19	0	103	103	17633	60047		67	89	44	139	68	119	130
20	0	100	100	17633	62827		55	155	51	140	107	126	77
21	0	122	122	55043	47339		100	106	80	78	61	110	137
22	0	111	111	56870	47498
23	0	44	44	58220	47815		74	109	79	105	63	104	91
24	0	51	51	59729	48451		103	75	90	92	102	128	104
25	0	80	80	60921	49007		118	123	141	107	54	92	115
26	0	79	79	60206	51072		116	103	94	125	147	90	160
27	0	90	90	60047	53137		100	100	119	88	135	96	92
28	0	141	141	60047	55440
29	0	94	94	59412	57426
30	0	119	119	57982	59094
31	0	72	72	66401	51866
32	0	119	119	67672	52104
33	0	139	139	68546	52660
34	0	140	140	69499	53375
35	0	78	78	70293	54249
36	0	105	105	70690	56235
37	0	92	92	70373	57823
38	0	107	107	69737	59412
39	0	125	125	69579	61159
40	0	88	88	69737	63860
41	0	61	61	82446	50039
42	0	57	57	81572	48848
43	0	68	68	80698	47815
44	0	107	107	79904	46703
45	0	61	61	78951	45512
46	0	63	63	78951	43923
47	0	102	102	80063	42891
48	0	54	54	81413	41541
49	0	147	147	82843	40190
50	0	135	135	84114	38919
51	0	53	53	77760	44162
52	0	107	107	76330	43606
53	0	119	119	74741	43129
54	0	126	126	73391	42811
55	0	110	110	72041	42414
56	0	104	104	71723	40429
57	0	128	128	71882	38999
58	0	92	92	72041	37569
59	0	90	90	72279	35901
60	0	96	96	72994	34551
61	0	84	84	69499	41779
62	0	110	110	67116	41461
63	0	130	130	63860	41143
64	0	77	77	61953	40985
65	0	137	137	59491	40349
66	0	91	91	58220	38602
67	0	104	104	59332	37728
68	0	115	115	60921	36696
69	0	160	160	62668	35504
70	0	92	92	63860	33598
71	0	0	0	59412	93486

## Sheet: Ctl_Image2
	Area	Min	Max	X	Y
1	0	49	49	37093	65845
2	0	79	79	38761	65289
3	0	92	92	40190	64813
4	0	53	53	41541	64098
5	0	131	131	43367	63542
6	0	87	87	45671	64098
7	0	111	111	47418	65051
8	0	130	130	49007	66084
9	0	98	98	50198	67911
10	0	55	55	51390	69817
11	0	131	131	50039	60683
12	0	31	31	51310	60206
13	0	68	68	52502	59809
14	0	101	101	53931	59412
15	0	113	113	55758	58776
16	0	22	22	57982	58856
17	0	43	43	58856	59968
18	0	115	115	59650	61239
19	0	67	67	60206	62589
20	0	67	67	61080	65528
21	0	124	124	59253	57426
22	0	78	78	60524	56791
23	0	118	118	61715	56076
24	0	67	67	62907	55520
25	0	87	87	64416	55043
26	0	91	91	68467	54328
27	0	77	77	69579	55758
28	0	119	119	70214	57506
29	0	99	99	70929	59015
30	0	124	124	71882	60841
31	0	156	156	69261	52422
32	0	100	100	70452	51628
33	0	144	144	71644	50595
34	0	132	132	73073	49722
35	0	103	103	74582	48610
36	0	112	112	77204	48689
37	0	52	52	78474	49880
38	0	90	90	79428	51231
39	0	161	161	80222	52819
40	0	201	201	81493	54646
41	0	143	143	77283	47577
42	0	85	85	78474	46783
43	0	77	77	79904	45671
44	0	93	93	81810	44559
45	0	112	112	83399	43447
46	0	100	100	86179	43844
47	0	166	166	87370	45035
48	0	75	75	88403	46147
49	0	45	45	89753	47815
50	0	97	97	91103	49563
51	0	79	79	44797	56711
52	0	73	73	43606	57108
53	0	120	120	41858	57426
54	0	102	102	40508	57823
55	0	102	102	39317	58618		49	131	124	156	143	79	69	88	72
56	0	102	102	35742	57982		79	31	78	100	85	73	23	71	102
57	0	111	111	33995	57108		92	68	118	144	77	120	75	64	96
58	0	59	59	32486	56235		53	101	67	132	93	102	63	62	51
59	0	69	69	31374	55123		131	113	87	103	112	102	82	66	70
60	0	99	99	30580	52978
61	0	69	69	66560	48371		87	22	91	112	100	102	97	40	60
62	0	23	23	65369	49086		111	43	77	52	166	111	58	65	54
63	0	75	75	62907	50198		130	115	119	90	75	59	100	53	45
64	0	63	63	61239	51072		98	67	99	161	45	69	110	93	72
65	0	82	82	59015	51787		55	67	124	201	97	99	48	41	27
66	0	97	97	56552	51231
67	0	58	58	56314	50119
68	0	100	100	56076	49086
69	0	110	110	55838	48054
70	0	48	48	55282	46545
71	0	88	88	55520	52660
72	0	71	71	54011	53296
73	0	64	64	52263	54170
74	0	62	62	50516	54884
75	0	66	66	48133	55758
76	0	40	40	45671	55282
77	0	65	65	45035	53852
78	0	53	53	44718	52263
79	0	93	93	45035	51072
80	0	41	41	45194	49483
81	0	72	72	76727	43367
82	0	102	102	75218	44241
83	0	96	96	73391	45274
84	0	51	51	71405	46147
85	0	70	70	69499	47021
86	0	60	60	67116	46545
87	0	54	54	66719	45433
88	0	45	45	66163	44400
89	0	72	72	66163	43050
90	0	27	27	66322	41302

## Sheet: Ctl_Image3
	Area	Min	Max	X	Y
1	0	125	125	35028	48371
2	0	148	148	36457	47974
3	0	180	180	37887	48054
4	0	184	184	39237	48133
5	0	183	183	40429	48610
6	0	105	105	41779	50278
7	0	123	123	42097	52104
8	0	203	203	42176	53772
9	0	214	214	42335	55440
10	0	103	103	42176	57506
11	0	211	211	48927	48848
12	0	145	145	50357	48848
13	0	177	177	51469	49086
14	0	147	147	52819	49007
15	0	201	201	53931	49086
16	0	67	67	54726	51072
17	0	143	143	54805	52104
18	0	110	110	55043	53852
19	0	116	116	55123	55758
20	0	100	100	55202	57823
21	0	122	122	56314	48769
22	0	183	183	57188	48213
23	0	113	113	58379	48213
24	0	149	149	59412	48371
25	0	101	101	60524	48530
26	0	130	130	62271	49801
27	0	61	61	62986	50834
28	0	156	156	63701	52263
29	0	167	167	64019	53931
30	0	54	54	64495	56155
31	0	97	97	63304	48292
32	0	118	118	64177	47815
33	0	114	114	65607	47577
34	0	146	146	66799	47339
35	0	137	137	68069	47259
36	0	175	175	70134	47657
37	0	77	77	70849	49007
38	0	173	173	71326	50516
39	0	172	172	71723	52263
40	0	136	136	72200	54249
41	0	188	188	70214	46227
42	0	147	147	70929	45671
43	0	139	139	71644	45274
44	0	125	125	72517	44956
45	0	179	179	73788	44559
46	0	177	177	75853	45353
47	0	137	137	76806	46465
48	0	110	110	77601	47657
49	0	106	106	78554	49483
50	0	110	110	79586	51548
51	0	153	153	79348	42653
52	0	138	138	80460	41938
53	0	170	170	81572	41302
54	0	162	162	83161	40746
55	0	171	171	84431	40270
56	0	189	189	86894	40985
57	0	207	207	87767	42494
58	0	144	144	87132	43765
59	0	88	88	87926	45591
60	0	127	127	88800	48133
61	0	115	115	82605	37331
62	0	199	199	81651	37808
63	0	191	191	80142	38363
64	0	208	208	79110	38522
65	0	161	161	77521	38919
66	0	174	174	74980	37331
67	0	136	136	74900	36060
68	0	154	154	74662	34869
69	0	135	135	74582	33836		125	211	122	97	188	153	115	134	193	118	143
70	0	149	149	74265	30024		148	145	183	118	147	138	199	135	82	161	120
71	0	134	134	74582	38999		180	177	113	114	139	170	191	99	178	175	153
72	0	135	135	73868	39317		184	147	149	146	125	162	208	180	191	193	175
73	0	99	99	72994	39555		183	201	101	137	179	171	161	135	134	191	191
74	0	180	180	71882	39873
75	0	135	135	70452	40349		105	67	130	175	177	189	174	120	128	93	142
76	0	120	120	67752	38522		123	143	61	77	137	207	136	224	173	137	181
77	0	224	224	67116	37252		203	110	156	173	110	144	154	187	143	161	125
78	0	187	187	66799	35742		214	116	167	172	106	88	135	181	121	206	160
79	0	181	181	66640	33757		103	100	54	136	110	127	149	133	175	147	199
80	0	133	133	66322	31771
81	0	193	193	62112	41699
82	0	82	82	61239	41699
83	0	178	178	59571	41938
84	0	191	191	57823	42097
85	0	134	134	56076	42653
86	0	128	128	54964	40985
87	0	173	173	54408	39317
88	0	143	143	53693	37887
89	0	121	121	53296	36616
90	0	175	175	52660	35186
91	0	118	118	50913	42891
92	0	161	161	49880	42970
93	0	175	175	48213	43367
94	0	193	193	46942	43526
95	0	191	191	45353	43685
96	0	93	93	43447	41938
97	0	137	137	42255	40746
98	0	161	161	40985	39396
99	0	206	206	39873	38363
100	0	147	147	38602	37252
101	0	143	143	38284	44241
102	0	120	120	37410	44718
103	0	153	153	36696	44956
104	0	175	175	35504	45115
105	0	191	191	34472	44956
106	0	142	142	32486	43129
107	0	181	181	31612	41699
108	0	125	125	30421	40190
109	0	160	160	29150	38443
110	0	199	199	27561	36696

## Sheet: Ctl_Image4
	Area	Min	Max	X	Y
1	0	135	135	794	66560
2	0	183	183	1986	67116
3	0	80	80	3495	67672
4	0	117	117	4845	68069
5	0	149	149	6513	68467
6	0	98	98	8181	70293
7	0	93	93	7546	72200
8	0	102	102	6990	74026
9	0	58	58	6592	76171
10	0	113	113	5560	78316
11	0	106	106	9690	68943
12	0	95	95	11120	68943
13	0	105	105	12708	69102
14	0	138	138	13900	69499
15	0	107	107	15171	69976
16	0	106	106	16918	72835
17	0	118	118	16759	74821
18	0	125	125	16283	76648
19	0	128	128	16044	78395
20	0	163	163	15806	80301
21	0	140	140	18427	70690
22	0	102	102	20254	70690
23	0	112	112	21763	71008
24	0	149	149	23113	71167
25	0	58	58	24781	71326
26	0	149	149	25337	73312
27	0	126	126	25020	74821
28	0	110	110	25020	76648
29	0	71	71	24861	78395
30	0	117	117	25020	80381
31	0	141	141	27482	71405
32	0	148	148	29229	71564
33	0	151	151	30341	71961
34	0	146	146	31374	72279
35	0	90	90	32406	72358
36	0	115	115	33598	74026
37	0	75	75	33439	75377
38	0	161	161	33121	77045
39	0	79	79	32962	78792
40	0	98	98	32645	80937
41	0	95	95	34472	71802
42	0	138	138	35345	71644
43	0	154	154	36219	71405
44	0	108	108	37252	71485
45	0	130	130	38363	72041
46	0	133	133	39793	74106
47	0	153	153	40270	76012
48	0	128	128	40826	77680
49	0	144	144	41382	79189
50	0	159	159	42176	81334
51	0	121	121	44877	71723
52	0	166	166	45591	71246
53	0	111	111	46386	70770
54	0	126	126	47180	70532
55	0	181	181	48451	71008
56	0	146	146	50119	72358
57	0	42	42	51390	73947
58	0	95	95	52502	75138
59	0	191	191	53455	76648
60	0	121	121	54726	79189
61	0	119	119	60285	67513
62	0	137	137	61159	66799
63	0	110	110	62112	66084
64	0	197	197	63383	65687
65	0	165	165	64892	65687
66	0	102	102	66878	66401
67	0	106	106	67831	67752
68	0	120	120	68546	69817
69	0	101	101	69181	71882
70	0	73	73	69896	73629
71	0	162	162	67513	64257
72	0	123	123	68943	63542
73	0	92	92	70293	62907
74	0	115	115	72041	62589
75	0	134	134	73709	62271
76	0	146	146	75933	63701
77	0	124	124	76965	65289
78	0	135	135	77601	67116
79	0	119	119	78316	68943
80	0	147	147	79745	70452
81	0	155	155	8896	64575
82	0	146	146	7228	64336
83	0	148	148	5957	63463
84	0	74	74	4686	62986
85	0	150	150	3018	62986
86	0	157	157	2065	60762
87	0	226	226	2383	59571
88	0	92	92	2542	57744
89	0	148	148	2621	56076		135	106	140	141	95	121	119	162	155	149	118	99	132
90	0	166	166	2383	54011		183	95	102	148	138	166	137	123	146	140	180	119	109
91	0	149	149	16521	66004		80	105	112	151	154	111	110	92	148	115	115	110	128
92	0	140	140	15409	65925		117	138	149	146	108	126	197	115	74	139	151	91	107
93	0	115	115	14059	65687		149	107	58	90	130	181	165	134	150	56	127	83	127
94	0	139	139	12947	65210
95	0	56	56	11596	64972		98	106	149	115	133	146	102	146	157	114	129	108	99
96	0	114	114	10564	63065		93	118	126	75	153	42	106	124	226	145	106	87	88
97	0	145	145	10723	61318		102	125	110	161	128	95	120	135	92	116	146	139	84
98	0	116	116	11199	59888		58	128	71	79	144	191	101	119	148	123	171	165	98
99	0	123	123	11517	58220		113	163	117	98	159	121	73	147	166	147	101	104	159
100	0	147	147	11835	56235
101	0	118	118	27561	66640
102	0	180	180	25417	66560
103	0	115	115	22557	66640
104	0	151	151	20731	66640
105	0	127	127	18983	66481
106	0	129	129	17474	64019
107	0	106	106	17315	62192
108	0	146	146	17633	60365
109	0	171	171	17871	58776
110	0	101	101	17633	56950
111	0	99	99	41223	67037
112	0	119	119	39793	67513
113	0	110	110	37966	67752
114	0	91	91	36378	67831
115	0	83	83	34710	67355
116	0	108	108	34392	64813
117	0	87	87	35266	63463
118	0	139	139	35266	61874
119	0	165	165	35266	60285
120	0	104	104	35028	57982
121	0	132	132	63224	61239
122	0	109	109	61795	62271
123	0	128	128	59888	62986
124	0	107	107	58141	63145
125	0	127	127	56552	63224
126	0	99	99	53534	61397
127	0	88	88	52819	60047
128	0	84	84	51866	58776
129	0	98	98	50119	57267
130	0	159	159	49007	54884

## Sheet: Ctl_Image5
	Area	Min	Max	X	Y
1	0	102	102	55838	55123
2	0	177	177	56711	54646
3	0	112	112	57903	54249
4	0	108	108	58697	54249
5	0	111	111	59253	54170
6	0	79	79	59729	55996
7	0	124	124	60285	57585
8	0	151	151	60444	59332
9	0	85	85	60683	61556
10	0	107	107	61239	64733
11	0	101	101	73073	54011
12	0	120	120	74662	54487
13	0	47	47	76012	54805
14	0	75	75	77045	55202
15	0	75	75	77918	55917
16	0	120	120	78395	57823
17	0	100	100	78316	59253
18	0	90	90	78554	60603
19	0	50	50	78474	61874
20	0	132	132	77839	64813
21	0	148	148	81016	55917
22	0	100	100	82287	55758
23	0	51	51	83717	55679
24	0	88	88	85146	55599
25	0	71	71	86814	55679
26	0	84	84	87767	57506
27	0	117	117	87370	59094
28	0	140	140	87132	60921
29	0	111	111	86735	62509
30	0	142	142	86099	65131
31	0	79	79	89038	55361
32	0	71	71	90547	54964
33	0	61	61	92056	54805
34	0	129	129	93645	54805
35	0	99	99	94836	54646		102	101	148	79	107
36	0	67	67	94916	56711		177	120	100	71	147
37	0	142	142	95075	58379		112	47	51	61	119
38	0	154	154	95154	59809		108	75	88	129	73
39	0	69	69	94916	63224		111	75	71	99	72
40	0	97	97	94995	64575
41	0	107	107	81254	51310		79	120	84	67	75
42	0	147	147	79745	51707		124	100	117	142	42
43	0	119	119	78077	52025		151	90	140	154	52
44	0	73	73	76806	51946		85	50	111	69	49
45	0	72	72	75218	51866		107	132	142	97	19
46	0	75	75	74106	49960
47	0	42	42	73550	48530
48	0	52	52	73709	46624
49	0	49	49	74503	45433
50	0	19	19	75059	44321

## Sheet: Ctl_Image6
	Area	Min	Max	X	Y
1	0	155	155	8260	56552
2	0	120	120	9372	56950
3	0	139	139	10405	57744
4	0	130	130	11517	58379
5	0	80	80	12788	59015
6	0	161	161	13185	61239
7	0	130	130	13106	62748
8	0	78	78	12311	63860
9	0	136	136	10326	67752
10	0	135	135	9531	69023
11	0	102	102	14456	60127
12	0	42	42	15250	60444
13	0	176	176	15965	60921
14	0	119	119	16680	61397
15	0	103	103	17792	62430
16	0	119	119	17871	64654
17	0	143	143	17871	66322
18	0	132	132	17792	68387
19	0	109	109	17553	70293
20	0	79	79	17395	72041
21	0	137	137	20175	62907
22	0	95	95	21366	63065
23	0	165	165	22716	63224
24	0	72	72	23749	63224
25	0	165	165	25337	63145
26	0	102	102	25417	64892
27	0	141	141	24940	66401
28	0	50	50	25020	68069
29	0	85	85	25258	70055
30	0	132	132	25496	72200
31	0	123	123	27879	62827
32	0	155	155	29865	62430
33	0	114	114	31215	62271
34	0	122	122	32804	62271
35	0	118	118	34472	62430
36	0	71	71	36298	64257
37	0	131	131	36060	66004
38	0	135	135	35822	67434
39	0	102	102	36140	68784
40	0	167	167	36537	70929
41	0	132	132	38284	62430
42	0	125	125	40111	62351
43	0	102	102	41620	62192
44	0	183	183	43367	62351
45	0	86	86	44877	62271
46	0	103	103	46624	63860
47	0	110	110	46624	65448
48	0	119	119	46624	66957
49	0	127	127	46942	68467
50	0	142	142	47021	70214
51	0	106	106	47657	62033
52	0	90	90	48689	61636
53	0	124	124	49880	61239
54	0	47	47	50992	61239
55	0	105	105	52660	61239
56	0	143	143	53772	62748
57	0	113	113	55123	64019
58	0	85	85	56394	65289
59	0	106	106	57029	66957
60	0	132	132	57903	68705
61	0	145	145	63621	48530
62	0	69	69	62271	49086
63	0	65	65	60206	49722
64	0	95	95	58935	49960
65	0	129	129	56791	50357
66	0	136	136	54884	48927
67	0	102	102	54567	47498
68	0	128	128	54487	45750
69	0	119	119	54487	44241
70	0	136	136	54567	42653
71	0	92	92	54328	50675
72	0	95	95	53058	51151
73	0	85	85	51946	51231
74	0	73	73	50834	51231
75	0	99	99	49324	51231
76	0	167	167	47577	50278		155	102	137	123	132	106	145	92	168	120	100	69
77	0	125	125	47259	48769		120	42	95	155	125	90	69	95	130	155	102	92
78	0	174	174	46942	47180		139	176	165	114	102	124	65	85	118	118	94	107
79	0	117	117	46703	45591		130	119	72	122	183	47	95	73	47	77	111	107
80	0	38	38	46545	43526		80	103	165	118	86	105	129	99	125	86	98	100
81	0	168	168	47101	51628
82	0	130	130	46147	52104		161	119	102	71	103	143	136	167	115	156	86	59
83	0	118	118	45115	52581		130	143	141	131	110	113	102	125	116	133	87	80
84	0	47	47	44082	52899		78	132	50	135	119	85	128	174	117	158	146	106
85	0	125	125	43050	53058		136	109	85	102	127	106	119	117	118	149	146	61
86	0	115	115	41699	52025		135	79	132	167	142	132	136	38	133	96	156	71
87	0	116	116	40111	50754
88	0	117	117	39237	49404
89	0	118	118	38522	47657
90	0	133	133	37331	45433
91	0	120	120	37252	54011
92	0	155	155	36140	54249
93	0	118	118	35107	54408
94	0	77	77	33836	54567
95	0	86	86	32327	54567
96	0	156	156	30500	52422
97	0	133	133	29785	50992
98	0	158	158	28912	49007
99	0	149	149	28435	47339
100	0	96	96	28197	45591
101	0	100	100	78792	52899
102	0	102	102	77918	52581
103	0	94	94	76727	52263
104	0	111	111	75853	51707
105	0	98	98	74741	51310
106	0	86	86	73947	48133
107	0	87	87	73709	46386
108	0	146	146	73788	44877
109	0	146	146	74026	43050
110	0	156	156	74662	41699
111	0	69	69	98570	52502
112	0	92	92	97378	53375
113	0	107	107	95551	54170
114	0	107	107	93963	54487
115	0	100	100	92056	54090
116	0	59	59	91342	52184
117	0	80	80	91421	50278
118	0	106	106	91818	48292
119	0	61	61	92136	46306
120	0	71	71	92295	44241

## Sheet: CrbKD_Image7
	Area	Min	Max	X	Y
1	0	81	81	5639	61397
2	0	39	39	6434	60762
3	0	81	81	7228	59968
4	0	92	92	8419	59094
5	0	156	156	9690	58856
6	0	73	73	12391	59253
7	0	98	98	13582	60365
8	0	122	122	14376	61795
9	0	151	151	15727	63860
10	0	85	85	17236	65766
11	0	101	101	12550	57506
12	0	161	161	13264	56552
13	0	101	101	14535	55599
14	0	101	101	15727	54646
15	0	103	103	16997	54011
16	0	165	165	19380	55361
17	0	141	141	20095	56791
18	0	82	82	20731	57982
19	0	113	113	22081	59809
20	0	72	72	23987	61318
21	0	133	133	19380	52899
22	0	113	113	20333	52343
23	0	137	137	21445	51707
24	0	126	126	22240	50992
25	0	172	172	23352	50834
26	0	146	146	25020	51707
27	0	157	157	26132	52899
28	0	64	64	27005	53852
29	0	111	111	27800	55043
30	0	114	114	29070	56632
31	0	162	162	46783	41699
32	0	130	130	48213	41223
33	0	93	93	49642	41143
34	0	134	134	51310	41302
35	0	144	144	53058	40985
36	0	127	127	54964	42494
37	0	180	180	55520	44082
38	0	198	198	56076	45989
39	0	141	141	56473	47339
40	0	81	81	56870	49166
41	0	126	126	56235	40985
42	0	194	194	57903	40826
43	0	137	137	59094	40746
44	0	157	157	60841	40985
45	0	149	149	62351	41223
46	0	117	117	62748	42970
47	0	101	101	62907	44479
48	0	98	98	62827	45989
49	0	125	125	62748	47418
50	0	133	133	63065	48769
51	0	125	125	64336	41382
52	0	127	127	65528	41223
53	0	176	176	66322	41143
54	0	173	173	67196	41302
55	0	163	163	68546	41541
56	0	116	116	69817	42970
57	0	120	120	70690	43923
58	0	192	192	71326	45353
59	0	108	108	72041	46783
60	0	134	134	72517	48689
61	0	181	181	70929	41223
62	0	131	131	72041	40985
63	0	208	208	73470	40826
64	0	170	170	75059	40667
65	0	191	191	77045	40429
66	0	128	128	79507	41382
67	0	150	150	80857	43209
68	0	131	131	81095	44638
69	0	194	194	81095	46068
70	0	143	143	81254	47974
71	0	136	136	82287	40111
72	0	181	181	83478	39793
73	0	158	158	85464	39952
74	0	108	108	86894	40270
75	0	157	157	88641	41064
76	0	133	133	90230	43129
77	0	120	120	90865	44877
78	0	141	141	91103	46624
79	0	131	131	91898	48213
80	0	58	58	93248	48769
81	0	115	115	91659	35822
82	0	141	141	90468	36060
83	0	125	125	89118	35742
84	0	214	214	88085	35742
85	0	160	160	86258	35981
86	0	163	163	84431	34154
87	0	142	142	84511	32883
88	0	193	193	84114	31453
89	0	141	141	83875	30421
90	0	130	130	84034	28991
91	0	123	123	82922	36140
92	0	137	137	81413	36457
93	0	114	114	79586	37013
94	0	138	138	77680	37093
95	0	146	146	76409	36854		81	101	133	162	126	125	181	136	115	123	126	194	135	119	187
96	0	158	158	75138	33995		39	161	113	130	194	127	131	181	141	137	152	147	125	70	160
97	0	138	138	75377	32724		81	101	137	93	137	176	208	158	125	114	138	136	106	152	189
98	0	139	139	75615	31533		92	101	126	134	157	173	170	108	214	138	199	135	123	143	178
99	0	188	188	76012	30103		156	103	172	144	149	163	191	157	160	146	136	181	125	118	202
100	0	131	131	76806	28753
101	0	126	126	60841	36616		73	165	146	127	117	116	128	133	163	158	145	170	97	199	108
102	0	152	152	58776	36696		98	141	157	180	101	120	150	120	142	138	142	153	97	78	138
103	0	138	138	57108	37093		122	82	64	198	98	192	131	141	193	139	121	140	109	161	77
104	0	199	199	56155	37331		151	113	111	141	125	108	194	131	141	188	108	79	118	113	153
105	0	136	136	54646	37649		85	72	114	81	133	134	143	58	130	131	61	77	121	108	101
106	0	145	145	53931	35822
107	0	142	142	54249	34154
108	0	121	121	54487	32327
109	0	108	108	54567	30659
110	0	61	61	54408	29229
111	0	194	194	52660	37966
112	0	147	147	51151	38205
113	0	136	136	49722	37649
114	0	135	135	48371	37966
115	0	181	181	47259	38443
116	0	170	170	47418	36140
117	0	153	153	47021	34233
118	0	140	140	46862	32486
119	0	79	79	47021	30977
120	0	77	77	47180	29944
121	0	135	135	45035	38602
122	0	125	125	43526	39078
123	0	106	106	42494	39475
124	0	123	123	41541	40031
125	0	125	125	40270	40190
126	0	97	97	38125	38443
127	0	97	97	37966	37013
128	0	109	109	37172	35663
129	0	118	118	36775	34472
130	0	121	121	36537	32883
131	0	119	119	37252	40667
132	0	70	70	35981	41302
133	0	152	152	35186	41858
134	0	143	143	34313	42335
135	0	118	118	33518	42653
136	0	199	199	31533	41620
137	0	78	78	31453	40508
138	0	161	161	31136	39396
139	0	113	113	30977	38443
140	0	108	108	30580	37331
141	0	187	187	11120	51866
142	0	160	160	10008	52422
143	0	189	189	8737	53216
144	0	178	178	7228	53375
145	0	202	202	5560	53693
146	0	108	108	3654	52184
147	0	138	138	3654	50834
148	0	77	77	3733	48927
149	0	153	153	3733	47339
150	0	101	101	3733	45750

## Sheet: CrbKD_Image8
	Mean	Min	Max	X	Y
1	104	104	104	19301	63621
2	56	56	56	21684	63145
3	66	66	66	24186	62430
4	66	66	66	26688	61953
5	23	23	23	29309	61953
6	58	58	58	31453	63621
7	48	48	48	31692	65051
8	69	69	69	32168	66957
9	39	39	39	32526	68625
10	70	70	70	33360	70770
11	78	78	78	41461	61239
12	44	44	44	43248	60762
13	37	37	37	45274	59809
14	78	78	78	46703	59809
15	50	50	50	48848	60047
16	140	140	140	50992	61358
17	86	86	86	52422	62668
18	137	137	137	53614	64813
19	131	131	131	54328	66004
20	61	61	61	55758	68387
21	84	84	84	36457	50754
22	50	50	50	35385	50873
23	57	57	57	32406	51112
24	98	98	98	30143	51588
25	35	35	35	27402	51707
26	47	47	47	24662	50516		104	78	84	123	43	55	73	87
27	26	26	26	24186	48491		56	44	50	118	57	80	137	97
28	56	56	56	23590	47418		66	37	57	64	42	118	94	94
29	69	69	69	23352	46108		66	78	98	108	40	146	66	62
30	61	61	61	23113	44201		23	50	35	32	39	91	81	43
31	123	123	123	49086	49205
32	118	118	118	47776	49801		58	140	47	113	74	96	84	81
33	64	64	64	46227	49920		48	86	26	79	55	134	110	75
34	108	108	108	44082	50397		69	137	56	101	87	192	130	111
35	32	32	32	42533	50635		39	131	69	113	48	110	105	222
36	113	113	113	38959	49086		70	61	61	72	90	101	163	42
37	79	79	79	38125	47895
38	101	101	101	37053	45989
39	113	113	113	36219	44321
40	72	72	72	35504	42176
41	43	43	43	61358	45393
42	57	57	57	59928	46823
43	42	42	42	57545	48371
44	40	40	40	55996	48967
45	39	39	39	53494	48967
46	74	74	74	50397	47061
47	55	55	55	49920	45631
48	87	87	87	49324	43725
49	48	48	48	49086	41699
50	90	90	90	48729	39555
51	55	55	55	65647	56354
52	80	80	80	66838	55282
53	118	118	118	68030	54090
54	146	146	146	69340	53494
55	91	91	91	71604	53137
56	96	96	96	74106	53375
57	134	134	134	75774	54805
58	192	192	192	77084	55996
59	110	110	110	78276	57545
60	101	101	101	80063	60405
61	73	73	73	73748	51231
62	137	137	137	75059	50158
63	94	94	94	76370	48848
64	66	66	66	78038	48133
65	81	81	81	80897	46823
66	84	84	84	84948	45631
67	110	110	110	86616	46465
68	130	130	130	88165	47418
69	105	105	105	89713	48729
70	163	163	163	91262	48848
71	87	87	87	50992	59213
72	97	97	97	52541	58856
73	94	94	94	53971	58260
74	62	62	62	56235	57426
75	43	43	43	58618	57426
76	81	81	81	61477	58498
77	75	75	75	63383	59452
78	111	111	111	65170	61119
79	222	222	222	66957	63621
80	42	42	42	68149	65885

## Sheet: CrbKD_Image9
	Mean	Min	Max	X	Y
1	130	130	130	15846	59332
2	190	190	190	16799	58975
3	188	188	188	18348	58737
4	127	127	127	19777	58975
5	112	112	112	21088	59690
6	117	117	117	21803	61715
7	158	158	158	21803	63502
8	115	115	115	21803	64813
9	88	88	88	21565	66123
10	93	93	93	21326	67791
11	118	118	118	23233	59452
12	91	91	91	25139	59213
13	112	112	112	26569	58856
14	125	125	125	27998	58618
15	75	75	75	29904	58737
16	133	133	133	32049	60047
17	112	112	112	31453	61477
18	169	169	169	30858	63026
19	77	77	77	30262	64217
20	123	123	123	29190	66243
21	180	180	180	33121	58737
22	157	157	157	34908	58618
23	137	137	137	36696	58618
24	105	105	105	38006	58618
25	148	148	148	38602	59094
26	139	139	139	38840	61596
27	114	114	114	38840	62192
28	123	123	123	38840	63145
29	181	181	181	38721	64098
30	83	83	83	38840	65647
31	248	248	248	40270	58379
32	120	120	120	41461	58141
33	130	130	130	42295	57664
34	162	162	162	43487	57784
35	140	140	140	44797	57784
36	178	178	178	47061	58618
37	183	183	183	47776	60166
38	122	122	122	47895	61358
39	169	169	169	48371	63026
40	103	103	103	49086	64694
41	145	145	145	48491	57188
42	151	151	151	49563	56473
43	151	151	151	50873	56235
44	99	99	99	52541	55996
45	153	153	153	54090	55996
46	89	89	89	56592	57784
47	174	174	174	57426	58975
48	159	159	159	57784	59928
49	117	117	117	58618	61239
50	138	138	138	58618	62311
51	148	148	148	57903	54924
52	178	178	178	59809	55043
53	164	164	164	61239	54924
54	106	106	106	62907	54805
55	94	94	94	64932	54805
56	148	148	148	66243	56235
57	138	138	138	66719	57307
58	159	159	159	66957	58260
59	136	136	136	67434	59809
60	171	171	171	67672	61596
61	149	149	149	67434	54924
62	89	89	89	68506	54567
63	111	111	111	69340	54090
64	141	141	141	71008	53852
65	101	101	101	72319	54209
66	173	173	173	74106	54686
67	113	113	113	75178	56473
68	119	119	119	75536	57307
69	106	106	106	75536	58498
70	194	194	194	75655	59809
71	172	172	172	75655	61477
72	95	95	95	16322	49920
73	104	104	104	17395	50278
74	116	116	116	18705	50635
75	130	130	130	20373	50754
76	75	75	75	22279	51469
77	81	81	81	23352	49801
78	106	106	106	22875	48610
79	50	50	50	22041	47061
80	69	69	69	21565	45512
81	162	162	162	21088	43963
82	98	98	98	24781	51946
83	146	146	146	25973	51946		130	118	180	248	145	148	149	172	162	108	133	130	96	125	100
84	102	102	102	27164	51826		190	91	157	120	151	178	89	95	98	136	108	128	108	111	125
85	93	93	93	28713	51469		188	112	137	130	151	164	111	104	146	96	121	148	77	108	122
86	116	116	116	29428	50992		127	125	105	162	99	106	141	116	102	117	69	151	75	150	107
87	90	90	90	29547	49444		112	75	148	140	153	94	101	130	93	135	125	88	89	115	70
88	118	118	118	29428	48133		117	133	139	178	89	148	173	75	116	176	121	145	56	52	91
89	107	107	107	29070	46703		158	112	114	183	174	138	113	81	90	63	119	111	127	124	137
90	148	148	148	28951	45274		115	169	123	122	159	159	119	106	118	151	122	134	87	116	95
91	108	108	108	29428	42414		88	77	181	169	117	136	106	50	107	159	146	140	98	98	99
92	136	136	136	32764	52303		93	123	83	103	138	171	194	69	148	154	93	171	92	93	117
93	96	96	96	33598	52422
94	117	117	117	34551	52303
95	135	135	135	35862	51946
96	176	176	176	36815	51588
97	63	63	63	38602	49205
98	151	151	151	38363	48014
99	159	159	159	37649	46465
100	154	154	154	37053	44797
101	133	133	133	36219	42533
102	108	108	108	40985	51112
103	121	121	121	42057	51469
104	69	69	69	43367	51588
105	125	125	125	43963	51112
106	121	121	121	45035	50516
107	119	119	119	46108	47537
108	122	122	122	45989	46465
109	146	146	146	45631	45393
110	93	93	93	45631	44201
111	130	130	130	45631	42414
112	128	128	128	50873	50158
113	148	148	148	52065	50992
114	151	151	151	53971	50992
115	88	88	88	55282	49801
116	145	145	145	57069	50754
117	111	111	111	58379	47657
118	134	134	134	58141	46108
119	140	140	140	58022	44440
120	171	171	171	57664	43010
121	96	96	96	57069	36934
122	108	108	108	62311	49682
123	77	77	77	63621	49682
124	75	75	75	64932	49444
125	89	89	89	66362	49205
126	56	56	56	67434	48371
127	127	127	127	69579	46823
128	87	87	87	69579	45512
129	98	98	98	69579	43487
130	92	92	92	69340	41342
131	125	125	125	69459	38483
132	111	111	111	75297	48491
133	108	108	108	76370	49086
134	150	150	150	78038	48967
135	115	115	115	78991	48491
136	52	52	52	83756	37649
137	124	124	124	81850	45989
138	116	116	116	82684	44201
139	98	98	98	82922	42295
140	93	93	93	83280	40508
141	100	100	100	80182	53733
142	125	125	125	81731	52660
143	122	122	122	83041	52422
144	107	107	107	83995	52541
145	70	70	70	85305	52780
146	91	91	91	87211	53852
147	137	137	137	88165	54567
148	95	95	95	90071	56116
149	99	99	99	91501	57426
150	117	117	117	92811	58856

## Sheet: Crb_KDImage10
	Mean	Min	Max	X	Y
1	100	100	100	14118	53892
2	139	139	139	15071	53812
3	145	145	145	16183	53653
4	193	193	193	17216	53653
5	103	103	103	18090	54050
6	161	161	161	18804	55162
7	172	172	172	18884	56513
8	108	108	108	18646	57466
9	146	146	146	18725	58419
10	188	188	188	18407	62152
11	158	158	158	19360	53971
12	144	144	144	20314	53653
13	91	91	91	22061	53177
14	94	94	94	23014	53256
15	168	168	168	24285	53812
16	103	103	103	25794	55242
17	101	101	101	26191	56830
18	146	146	146	25953	58101
19	95	95	95	26112	60246
20	99	99	99	26588	61834
21	130	130	130	26986	54050
22	182	182	182	27859	54050
23	109	109	109	28495	54050
24	162	162	162	29448	53971
25	110	110	110	30163	53971
26	120	120	120	31275	55242
27	84	84	84	31672	56274
28	141	141	141	31989	57625
29	132	132	132	32545	58260
30	85	85	85	33181	62231
31	144	144	144	31910	53971
32	106	106	106	32545	53653
33	84	84	84	33737	53653
34	124	124	124	34452	53494
35	125	125	125	35167	53415
36	53	53	53	36120	54606
37	149	149	149	37311	56433
38	48	48	48	38502	57942
39	99	99	99	39376	59531
40	91	91	91	40170	61199
41	71	71	71	41203	52382
42	83	83	83	42394	52065
43	95	95	95	43109	51826
44	60	60	60	43824	51588
45	133	133	133	44777	51588
46	103	103	103	46445	52700
47	96	96	96	47240	53971
48	133	133	133	47954	55083
49	146	146	146	48193	56751
50	87	87	87	48034	58181
51	99	99	99	47240	51509
52	138	138	138	48034	51191
53	86	86	86	48828	51112
54	116	116	116	49861	51270
55	137	137	137	50973	51747
56	30	30	30	52482	53336
57	109	109	109	53355	54368
58	114	114	114	54229	55957
59	112	112	112	55341	57466
60	132	132	132	56294	59372
61	109	109	109	52561	51429
62	138	138	138	53673	50794
63	127	127	127	54547	50397
64	66	66	66	56135	50556
65	154	154	154	57247	50635
66	140	140	140	59233	51112
67	108	108	108	60107	52859
68	155	155	155	60980	54527
69	101	101	101	61536	56354
70	104	104	104	62331	58975
71	197	197	197	59868	49920
72	107	107	107	61219	50238
73	79	79	79	62569	50397
74	74	74	74	63919	50238
75	115	115	115	65190	49841
76	110	110	110	67335	50953
77	72	72	72	68129	52621
78	64	64	64	68367	53892
79	90	90	90	69082	55718
80	50	50	50	70194	57307
81	107	107	107	66938	46981
82	104	104	104	64952	47299
83	62	62	62	62728	47379
84	114	114	114	60504	47379
85	80	80	80	58439	47379
86	134	134	134	56374	45790
87	125	125	125	57645	43804
88	118	118	118	58598	42375
89	124	124	124	58280	40468
90	108	108	108	58042	38641
91	122	122	122	51449	46981
92	125	125	125	50417	47776
93	75	75	75	49146	48252		100	158	130	144	71	99	109	197	107	122	98	111	121	105	107
94	90	90	90	47954	48332		139	144	182	106	83	138	138	107	104	125	99	100	180	126	113
95	53	53	53	46684	47935		145	91	109	84	95	86	127	79	62	75	141	89	121	139	120
96	84	84	84	45730	46187		193	94	162	124	60	116	66	74	114	90	56	101	121	106	52
97	123	123	123	45889	44122		103	168	110	125	133	137	154	115	80	53	100	123	122	155	139
98	94	94	94	46366	42533		161	103	120	53	103	30	140	110	134	84	79	57	181	132	86
99	169	169	169	46048	40309		172	101	84	149	96	109	108	72	125	123	118	122	98	151	188
100	85	85	85	46684	37927		108	146	141	48	133	114	155	64	118	94	132	176	87	166	130
101	98	98	98	45016	46823		146	95	132	99	146	112	101	90	124	169	84	77	94	135	131
102	99	99	99	44221	47299		188	99	85	91	87	132	104	50	108	85	127	106	122	170	95
103	141	141	141	43427	47617
104	56	56	56	42474	47696
105	100	100	100	41282	47617
106	79	79	79	39694	45790
107	118	118	118	39456	44201
108	132	132	132	39456	42692
109	84	84	84	39297	41024
110	127	127	127	39217	38880
111	111	111	111	38582	47299
112	100	100	100	37549	48332
113	89	89	89	35961	48649
114	101	101	101	33499	48411
115	123	123	123	31116	48252
116	57	57	57	30321	45790
117	122	122	122	30242	44201
118	176	176	176	30321	42454
119	77	77	77	30242	40468
120	106	106	106	29845	39118
121	121	121	121	28574	47299
122	180	180	180	27462	48093
123	121	121	121	26112	48332
124	121	121	121	24920	48491
125	122	122	122	23252	48332
126	181	181	181	23094	46743
127	98	98	98	23411	45313
128	87	87	87	23252	43645
129	94	94	94	23491	41739
130	122	122	122	23808	40230
131	105	105	105	20552	48014
132	126	126	126	18248	48252
133	139	139	139	16183	48729
134	106	106	106	15627	48332
135	155	155	155	14357	48014
136	132	132	132	13721	46028
137	151	151	151	14436	44678
138	166	166	166	15310	43487
139	135	135	135	15866	42216
140	170	170	170	16501	40468
141	107	107	107	13086	47776
142	113	113	113	12450	48332
143	120	120	120	11656	48729
144	52	52	52	10306	48411
145	139	139	139	9353	48332
146	86	86	86	8876	46981
147	188	188	188	8241	45552
148	130	130	130	7685	44043
149	131	131	131	6970	42454
150	95	95	95	6255	39356

[truncated: 2 more sheets: Averages, Graph]
