# Supplementary material for: Crumbs organizes the transport machinery by regulating apical levels of PI(4,5)P2 in Drosophila
Source: eLife. 2019 Nov 7;8:e50900. doi: 10.7554/eLife.50900 (PMC6881148; doi:10.7554/eLife.50900)
Supplement: Figure 5—source data 1. [file elife-50900-fig5-data1.xlsx]

## Sheet: Image6
X0	Y0	Y1	Y2	Y3	Y4	Y5	Y6	Y7	Y8	Y9	Y10	Y11	Y12	Y13	Y14	Y15	Y16	Y17	Y18	Y19	Y20	Y21	Y22	Y23	Y24	Y25	Y26	Y27	Y28	Y29	Y30	Y31	Y32		Ap-Ba	Average int.
0	4.0203	1.973	1.6824	7.558	6.3109	9.6085	4.6867	6.3644	6.4037	8.0447	5.8175	2.5514	3.9341	3.8917	4.4214	9.1826	10.6548	20.4176	27.3794	16.241	7.1036	20.5653	11.1077	11.7759	23.5209	17.8319	28.1777	17.391	7.5587	10.5224	16.6319	12.1484	10.984		0	10.8019
0.1191	4.8919	2.066	2.4043	10.6956	7.4117	13.8597	5.7266	6.4621	7.671	10.2785	8.2325	3.3782	4.6613	3.9393	5.4828	11.9721	13.5841	22.9652	29.611	15.3741	7.4672	24.046	11.5091	12.0755	24.4455	17.001	29.9453	17.4996	7.8021	13.4829	18.0466	12.1073	13.6226		0.00684695	12.1127
0.2383	7.6783	2.1691	2.6745	14.1797	9.2844	16.3148	6.4272	8.3193	9.3062	15.4486	9.6512	4.4295	5.841	3.8827	6.4055	15.0726	14.0061	25.657	31.7615	15.3074	6.7388	29.247	12.8023	12.6436	29.611	18.3512	32.3058	18.9196	8.1238	16.4075	19.0189	13.8542	16.6366		0.0136997	13.8932
0.3574	11.5379	2.6172	3.1276	18.5584	12.6466	19.0809	6.5077	8.7881	12.5951	19.4018	14.6273	4.5784	7.9731	4.0771	6.6051	18.3142	17.3259	30.1608	36.1101	17.2268	10.2631	32.7659	14.3068	12.8899	32.8283	21.7447	32.4089	17.4239	9.6466	21.7726	20.6755	16.7441	20.5088		0.0205466	16.2376
0.4766	17.2953	3.7186	5.8721	22.6449	16.0635	23.5026	7.3524	10.3363	15.4658	23.8331	21.098	5.2819	10.423	4.8473	8.9392	22.6425	22.4641	36.2569	38.2321	18.0131	13.356	35.5711	18.2489	16.0467	36.3153	25.0001	34.8044	22.6146	12.5855	30.0724	22.0081	18.5297	26.7345		0.0273993	19.5809
0.5957	20.6246	4.6907	9.0554	24.9397	20.0219	26.2676	8.8679	14.0281	20.6403	26.1495	31.7027	6.6481	14.5607	5.2784	12.6057	28.6058	29.7635	41.9428	40.3171	17.8319	18.5527	34.6786	20.2058	17.8286	36.4987	27.9496	38.6311	24.6856	16.9861	35.9625	23.823	22.345	33.9909		0.0342463	22.9297
0.7148	22.4461	5.9074	13.8139	28.5693	26.2701	25.6537	10.7418	17.1686	24.3335	29.8065	42.8174	8.4736	18.2176	6.4213	16.8241	35.3477	39.9063	49.5327	41.9892	18.8546	24.5131	37.4227	21.1364	20.7572	40.1293	30.8534	45.1779	29.0859	22.1456	41.7869	29.9917	28.4273	38.5398		0.0410932	27.0625
0.834	24.8213	8.4596	19.7127	32.0707	33.4018	24.3196	13.1975	23.9069	31.9766	31.4174	51.7753	11.6456	21.9387	8.7982	26.0676	42.4435	47.5116	52.6692	42.4199	20.3881	31.4857	36.701	22.78	24.2548	44.2703	35.8699	54.6478	30.6438	29.4573	46.7837	39.1015	32.7168	41.3018		0.0479459	31.4835
0.9531	25.145	10.3761	26.2298	37.1716	41.3545	22.2195	18.2544	30.1116	38.7037	31.8576	56.9061	15.5816	27.1763	13.0605	38.6549	52.041	51.0013	53.6802	41.9694	21.0486	38.1003	36.5275	25.6557	26.031	45.8603	42.9472	65.4674	33.9255	36.4818	50.7904	46.4715	37.0272	43.9956		0.0547929	35.8129
1.0723	21.7559	14.5132	30.4746	42.9417	45.8933	22.2028	23.4086	40.0553	42.5965	32.2828	58.2061	19.889	29.0629	19.745	53.0908	56.0245	50.4574	54.3427	41.4278	23.6353	40.8904	35.8362	28.454	31.4682	46.8595	47.0183	71.1822	38.7988	41.7902	49.9169	56.8526	40.4468	45.215		0.0616456	39.295
1.1914	16.2516	18.3811	33.7777	44.7447	49.8768	20.8162	28.8418	50.3207	46.3496	29.3858	49.6901	29.5524	31.9416	28.9444	63.5532	57.8397	45.5468	49.8217	38.057	25.8031	45.8654	34.8248	29.4738	35.6525	47.9984	51.8854	71.3848	41.8948	41.2619	52.5578	64.6676	44.7772	47.4507		0.0684925	41.4906
1.3106	14.636	21.1509	36.6018	39.8439	45.7828	22.5041	34.4685	54.6428	47.4541	28.1638	37.7671	34.8049	32.3094	39.3724	57.7363	56.9299	40.856	38.7757	31.3596	30.0746	44.7241	32.4753	32.4644	40.2797	45.7487	51.1013	67.2267	47.0171	42.2536	52.0252	65.9631	49.9954	46.7051		0.0753452	41.3095
1.4297	14.4961	21.501	34.9027	29.7846	40.3466	21.2649	39.9832	52.0993	48.0125	27.8346	28.7736	35.1055	30.8637	49.7691	47.9418	52.6641	32.212	28.8644	23.969	32.3237	39.0471	26.8767	31.7628	39.9408	43.0565	54.4596	65.043	49.0633	40.9981	46.3993	65.2603	53.7309	40.8144		0.0821922	39.0656
1.5488	15.465	18.4439	30.2074	19.5545	33.6704	18.6013	42.557	43.0212	38.315	25.4615	21.6245	33.7729	31.5109	55.0427	36.2422	43.4274	26.2565	22.7625	20.6052	33.0525	32.0559	21.5398	32.7451	38.5362	36.3829	53.9471	56.7995	46.7802	40.7316	40.5447	63.3607	54.3954	34.1711		0.0890391	35.1995
1.668	17.1693	16.8226	23.8625	11.9188	25.8808	12.7019	39.686	29.0913	28.2251	23.7877	16.6997	30.3928	28.5641	48.669	27.7694	31.1083	21.665	17.1752	15.7348	26.768	27.0086	19.5653	32.724	35.2983	29.8377	48.3561	51.9385	40.8441	36.2384	33.8353	56.9434	51.1313	28.08		0.0958918	29.8634
1.7871	17.7783	14.8393	16.6626	8.4511	18.542	10.6222	30.6792	17.6449	18.0173	21.8361	12.914	27.1323	24.6267	39.3945	21.4123	21.0605	19.47	14.0599	13.7905	23.6751	21.7126	14.8008	31.891	31.0673	26.2399	43.6422	43.1833	38.673	31.8472	28.0328	50.446	49.5921	19.795		0.102739	24.9555
1.9063	17.3918	13.4459	12.4419	6.1968	13.4679	7.8279	20.4561	10.59	8.7969	18.4873	9.2969	22.4605	22.5308	31.2272	17.9132	15.1588	16.2174	12.3169	12.0636	19.9884	17.1963	13.2145	27.9856	26.5273	23.1349	35.5886	32.678	31.1938	30.0282	22.41	44.6348	44.6148	14.2787		0.109591	20.3564
2.0254	16.8153	13.1995	10.1588	5.2888	10.7662	5.0113	13.5042	6.1031	4.7429	13.6558	7.5681	17.5657	18.1448	23.2266	15.5191	12.8982	14.4518	11.2456	12.4344	16.7628	15.8101	11.1963	27.2794	25.4014	21.272	28.606	25.9285	25.9254	25.9298	18.8039	36.419	35.0114	11.6933		0.116438	16.9194
2.1445	14.5765	13.9806	8.6145	5.3483	8.6229	3.2715	7.242	3.8809	3.2212	9.4182	6.2316	13.2822	16.0759	21.6043	13.2656	10.838	12.7354	9.4866	10.6084	15.1965	14.8356	9.2005	22.8827	23.1063	18.3239	23.0307	20.0921	21.5199	20.1812	15.4526	32.2846	27.9693	9.639		0.123285	14.1218
2.2637	15.0399	15.5398	7.9619	5.0468	7.5008	2.8653	4.4339	2.9325	2.5609	7.066	5.3156	12.0046	14.0051	17.5537	9.9654	8.7958	10.7515	8.2775	9.8364	15.0086	13.6612	8.5152	20.5365	19.4451	18.7138	20.3923	17.6253	17.4849	14.6296	12.8556	24.1144	22.6545	8.3929		0.130138	12.1662
2.3828	14.5089	15.8486	7.6603	4.8288	6.961	2.797	3.2945	2.0804	2.2789	5.588	5.1938	11.7091	11.2501	16.7252	10.1491	8.0627	9.4308	9.8123	9.4591	14.9932	11.8602	7.176	18.4754	15.5341	15.9042	16.531	13.4838	14.9644	13.39	12.2025	20.2992	16.6699	6.5251		0.136985	10.7772
2.502	12.9184	15.6495	7.5267	4.8661	6.3671	2.1416	2.1201	1.8185	1.8877	3.9903	3.9445	10.4899	9.7099	16.1493	9.2023	7.289	7.5254	8.8527	9.1455	14.4638	10.9214	6.5595	16.379	15.0858	15.5346	12.7218	11.9527	12.6755	11.6615	11.112	17.3489	14.3737	5.6625		0.143838	9.63779
2.6211	9.3799	15.9836	6.611	4.401	5.6743	1.9087	2.3078	1.7545	1.6489	3.6036	4.122	10.0204	10.1725	16.3798	8.332	7.1373	6.944	6.9825	8.8656	14.9343	10.5164	6.3531	13.6331	13.8878	14.9951	10.4077	10.4174	11.8577	9.4608	10.2362	14.544	12.9088	5.3599		0.150685	8.84066
2.7402	7.1252	14.6513	6.1219	3.9528	5.3601	2.1933	2.1496	1.7511	1.6391	3.5959	3.8673	9.5768	9.9397	14.8353	8.3112	6.3099	5.8715	7.2634	8.7787	16.1613	10.0373	5.6708	10.7341	13.6508	12.7722	8.7898	9.2507	9.8483	8.7108	9.0179	12.3488	10.4792	5.2596		0.157532	8.06138
2.8594	5.4405	13.8847	5.9775	4.3711	5.2213	2.2045	1.6941	1.9478	1.5777	2.4307	3.679	9.2834	8.2931	12.9735	7.4509	5.494	5.5761	6.4487	7.7616	15.7205	11.2423	5.4865	9.732	13.1287	12.8195	8.3175	7.2862	8.4915	8.1196	7.7318	11.2418	8.2452	5.234		0.164384	7.40931
2.9785	4.3138	12.4488	5.4048	3.936	5.3093	1.9998	1.8984	2.0312	1.6211	1.8518	3.3776	10.5076	7.1292	12.6807	6.3787	4.8651	4.6302	5.379	7.0647	16.3159	11.3661	5.4918	7.5234	12.8216	12.6613	7.4538	5.6453	6.2784	7.5475	6.3097	9.6546	7.5763	4.5042		0.171231	6.7872
3.0977	3.7515	9.7584	5.3654	4.2128	5.1242	3.2107	1.7997	1.7797	2.2124	1.7467	3.9735	10.9991	6.9287	11.2535	5.7932	4.18	4.422	5.3689	6.7029	15.7333	10.6176	5.1685	7.3234	9.9861	11.3744	5.548	4.3532	6.573	7.1877	5.892	8.0568	6.6691	4.1821		0.178084	6.28026
3.2168	3.6928	7.3806	5.2293	3.7882	5.3534	3.2508	1.8947	1.5743	1.5048	1.8461	3.312	11.0108	6.5215	9.4512	5.1903	5.1183	4.702	5.2473	6.7257	16.1217	11.3953	5.2061	6.9652	10.7793	11.5324	5.9265	4.2337	5.5949	5.986	5.5077	6.4323	6.1366	4.3208		0.184931	6.02826
3.336	3.802	5.8407	4.9605	4.3134	5.4434	2.9209	1.7359	1.7014	1.2579	2.0357	3.2173	10.8071	6.3371	10.1172	4.6469	5.042	4.9292	4.9476	6.5642	16.6915	12.8677	4.8988	5.3424	9.9961	12.0156	6.6149	3.5399	4.9234	4.7624	4.1028	5.7074	5.4672	3.9876		0.191784	5.80418
3.4551	4.1749	5.3365	4.5469	3.8963	5.835	2.7844	1.7527	1.6762	1.353	2.3612	3.3086	11.8629	5.4399	8.9637	6.1959	5.0403	4.8655	4.3677	5.9963	17.5065	13.4907	4.3005	4.8346	10.0388	11.6618	5.8186	3.0914	5.1399	5.6647	4.0828	5.5897	4.2954	2.9182		0.198631	5.70277
3.5742	3.475	4.4017	4.2774	3.8517	5.6595	3.1499	1.7474	1.7678	1.2498	2.1193	3.432	12.7229	4.8393	8.2055	6.0496	4.9704	3.7979	3.6624	4.8381	17.3459	13.1046	4.1168	4.7108	9.573	12.1563	5.038	3.0352	4.5764	5.1299	3.3783	5.0161	4.3386	2.4474		0.205478	5.39954
3.6934	3.9187	3.721	4.539	3.7506	5.3827	3.4178	1.7926	1.6081	1.4381	2.1502	3.4742	12.4243	4.5399	8.9096	5.7412	4.931	3.4517	4.2182	4.9393	14.8072	12.6599	4.9033	5.4866	10.0457	15.0095	5.2572	2.7807	3.3267	4.374	3.678	4.7761	3.8091	3.0605		0.21233	5.40372
3.8125	4.1951	3.1988	4.3681	3.703	4.7394	3.7242	1.916	1.7467	1.4189	1.8776	2.8264	12.9621	4.7879	8.2882	5.5237	4.632	3.8063	4.1333	4.9993	11.3755	11.8828	4.838	4.4952	9.579	17.6375	4.8621	3.5725	3.7693	4.6491	3.674	3.9828	3.4655	2.6996		0.219177	5.25242
3.9317	5.1965	3.4276	3.9297	4.1751	5.0973	3.3921	1.8085	1.733	1.7127	1.7091	2.9122	14.6048	4.6458	7.0941	5.5114	4.8174	3.4863	4.029	5.2003	10.1239	11.3477	3.9378	4.4304	9.5216	18.6426	3.5922	2.9095	4.1785	3.5617	3.123	3.251	2.9377	2.1781		0.22603	5.09753
4.0508	4.8225	3.3708	4.278	3.8829	4.5177	3.5843	2.2134	1.5254	1.3451	1.4348	2.7252	13.7015	3.4488	7.2202	5.5148	5.0865	3.9549	4.2044	4.7337	9.842	11.7362	4.019	4.9196	8.0301	19.3759	3.6523	2.4333	3.8424	3.406	2.5293	3.4872	3.4958	2.38		0.232877	4.99133
4.1699	4.7298	4.2883	5.214	3.8401	5.1546	3.9448	2.3778	1.5084	1.3969	1.3642	2.6326	12.5211	3.2118	7.4144	6.2903	5.5664	3.5986	4.1354	5.6773	9.4141	13.3912	3.9565	4.0663	7.6679	21.5929	3.9991	2.349	4.0539	3.3482	2.6845	3.2002	3.0111	2.1454		0.239724	5.14385
4.2891	6.0093	4.5665	5.8671	4.8216	5.8723	4.5357	2.3734	1.3198	1.6002	1.272	2.568	11.4367	3.7366	7.1029	4.6126	6.7073	3.4299	3.8651	5.5744	8.3691	13.0694	3.614	4.1372	7.0819	23.7647	3.5805	2.6641	3.4991	2.7557	2.829	3.0383	2.634	2.3346		0.246577	5.171
4.4082	6.0104	5.5194	7.5922	4.6297	5.7112	4.69	2.8057	1.464	1.2936	1.7187	2.6616	12.9467	3.4068	7.6599	5.0849	9.6132	3.8028	3.5941	5.5258	9.6894	12.8577	3.2162	3.9629	6.1783	25.2344	4.2277	1.9671	3.7043	3.3611	2.2038	2.6708	2.7493	2.1895		0.253423	5.45282
4.5274	6.7065	6.4158	9.0247	3.7432	6.9083	5.103	2.9511	1.5268	1.3841	1.4872	2.4573	12.5004	3.4386	7.2242	4.4808	15.1844	4.0859	4.1617	5.5652	10.7344	14.0046	3.2194	3.7296	5.9166	24.869	3.6661	2.3795	3.0424	2.67	2.2343	2.8192	2.5217	1.8474		0.260276	5.69707
4.6465	6.3783	8.674	9.448	4.5963	7.1571	4.9431	3.3114	1.6198	1.3086	1.6239	2.404	10.6902	3.6993	6.4545	5.7748	23.2154	4.6078	4.0444	5.5402	10.9903	14.5113	3.2118	3.6225	6.4846	23.8125	3.4556	2.4772	4.3108	2.0899	2.0363	2.486	2.5978	1.8974		0.267123	6.0447
4.7657	6.5349	9.9129	9.5409	5.0121	8.2008	6.3328	3.4395	1.6418	1.4683	1.6026	2.2927	9.2925	3.6097	5.52	6.1398	31.2612	5.2657	3.7355	5.0495	11.1567	15.071	3.1623	3.9615	6.4978	23.5904	3.4163	2.1276	5.0013	2.0729	1.542	2.3407	2.412	1.5399		0.273976	6.35593
4.8848	6.4235	11.4215	8.4151	5.6847	9.1637	7.0441	4.6226	1.8135	1.6175	1.4942	2.5506	9.4755	3.0665	5.8231	6.698	32.7494	5.3786	3.687	4.6034	10.6958	12.7253	3.6179	3.6832	6.8954	24.1298	3.7285	2.0301	6.0279	1.8984	1.7444	2.6859	2.4184	1.5431		0.280823	6.53202
5.0039	6.2856	13.6131	7.5952	5.2093	9.2192	6.908	4.6606	1.9791	1.2527	1.3248	2.6318	7.3676	3.2338	6.4138	7.9344	30.3601	6.9849	3.7498	4.6398	10.097	13.9791	3.0683	2.9357	5.6871	23.0213	3.0723	2.0659	7.842	2.002	1.8989	2.2531	2.7551	1.5738		0.28767	6.47319
5.1231	6.4937	11.3951	7.8586	5.3496	10.2846	6.7029	4.5674	1.9323	1.3309	1.56	2.7136	7.6585	3.5315	6.3395	8.2719	27.1142	9.0734	4.4255	4.7585	9.7845	12.975	2.852	3.2757	6.3247	21.0917	2.6429	1.8815	9.8037	2.3014	1.3814	1.8395	2.0776	1.6525		0.294522	6.40139
5.2422	7.4106	11.1002	6.9401	4.7894	10.0669	6.6501	4.5479	1.9663	1.4273	1.3873	2.5407	7.8848	4.1644	6.6456	8.0503	23.1268	10.1572	4.5478	4.936	9.5289	11.9544	2.6573	3.2093	6.2622	18.1986	2.5704	1.8888	13.9542	2.5764	1.7709	1.7303	2.0209	1.4564		0.301369	6.30663
5.3614	9.2369	9.5128	6.4246	4.3185	9.3054	7.0214	3.6216	1.5611	1.6174	1.178	2.2524	7.9055	5.2286	7.0207	7.6005	19.5129	11.2287	4.1258	6.1465	9.6116	10.9169	2.327	2.9368	5.6017	17.014	2.7586	1.9593	16.4062	2.0198	1.7282	1.6873	1.9931	1.5917		0.308222	6.16277
5.4805	10.5218	7.0246	5.9339	4.5898	9.9839	5.7052	3.9568	1.9029	1.6688	1.5305	2.4544	9.1626	4.3618	7.3979	8.4375	17.7077	12.1805	4.5235	5.0586	10.9453	9.6066	2.3009	2.7825	5.2075	14.9585	2.9847	1.9294	17.0256	2.1318	2.0382	1.5826	1.9914	1.479		0.315069	6.09293
5.5996	10.5308	6.2161	5.9866	4.0604	10.0688	5.7448	3.7185	1.7078	1.6925	1.8148	2.2915	9.5611	4.9788	6.3995	8.5914	16.0205	9.8978	5.0788	5.4991	11.5664	9.8307	2.347	2.2785	4.6546	13.7344	2.8328	1.9057	16.9672	1.8405	2.1003	2.3811	2.0909	1.4373		0.321916	5.93415
5.7188	10.7177	6.0617	5.8351	3.3729	10.395	5.9179	4.2691	1.8467	1.5	1.7893	2.2209	9.878	4.9799	5.3669	7.8322	15.0125	8.1346	5.3696	4.304	12.2928	8.4195	2.4532	2.524	4.4511	13.7492	2.5237	1.6102	15.2767	2.3887	1.6431	2.0532	2.0334	1.6352		0.328769	5.69267
5.8379	11.4577	5.5452	6.198	4.0539	9.2578	6.1541	4.1081	1.8291	1.9172	1.6969	2.2515	10.5643	5.1827	5.4959	8.3482	14.8459	8.8336	5.7611	4.1754	13.5298	7.6156	2.2094	2.6886	3.9712	14.994	2.9678	1.8912	14.8899	1.6274	1.4014	1.8635	2.2108	1.8131		0.335616	5.79849
5.9571	12.0866	5.4719	6.0476	3.8596	9.2018	7.0196	4.5598	1.7457	2.1722	1.768	2.0686	9.5899	6.1582	5.3034	9.4667	12.8323	9.3656	6.0615	3.6849	15.7455	6.3109	2.2688	2.1687	3.9196	17.6554	3.273	1.7789	13.5842	2.0242	1.6752	1.9884	2.2305	1.5349		0.342468	5.89764
6.0762	12.529	4.8268	6.8521	3.8752	10.2714	7.7342	4.8368	1.9841	1.783	1.736	2.0646	8.3035	8.0239	5.4175	11.7329	12.7725	8.7822	5.7953	3.9149	17.9328	6.08	2.5021	2.1248	3.697	21.1984	3.113	2.405	12.3552	1.6803	1.4156	2.0387	1.8012	1.4799		0.349315	6.15333
6.1953	12.0349	4.7819	6.4022	4.3684	9.132	8.131	4.7448	1.9073	1.42	2.0385	1.6395	7.9143	9.9547	5.381	12.2594	10.9634	7.7496	5.3416	3.7434	19.1482	5.3587	2.2919	2.0722	3.1393	21.0124	2.8085	2.115	11.8888	1.6511	1.4742	1.9658	1.5033	1.3684		0.356162	5.99108
6.3145	9.8401	5.0754	6.5839	3.7598	9.2783	8.6536	4.3686	1.7002	1.2785	1.4923	2.0198	7.0658	11.4048	4.8243	12.0154	9.799	7.2279	5.5564	3.3962	20.2374	5.5659	2.2774	2.2021	3.4232	21.1956	3.2751	1.7405	12.5637	2.0668	1.1729	1.794	1.7711	1.5433		0.363015	5.94452
6.4336	8.9706	5.2495	6.8401	3.7303	8.774	9.7762	4.3476	1.5697	1.8194	2.0512	2.0164	6.4432	13.4486	5.2229	12.3633	8.1791	7.1266	5.5084	3.0384	20.3949	5.8854	2.2701	2.0038	3.218	18.4423	3.8135	1.6778	13.458	1.8736	1.4374	1.5087	1.9089	1.3184		0.369862	5.92989
6.5528	7.8333	6.7116	5.9895	3.6327	8.7129	10.0214	4.0076	1.7129	1.6385	1.9113	2.2672	5.8543	16.2658	6.0514	10.5558	6.6596	7.2239	6.702	3.3506	21.9022	5.7725	1.8885	2.108	3.5987	16.7953	3.5044	1.8168	12.4175	1.3456	1.2837	1.7954	1.6943	1.3622		0.376715	5.89053
6.6719	7.0835	8.9117	6.4769	3.3928	9.3179	10.5398	4.281	1.5734	2.073	1.4052	2.4122	5.2321	18.6498	6.5141	7.9936	5.8525	6.1637	6.9314	3.7063	20.8086	5.5783	2.0188	2.502	2.7438	15.8532	3.3215	2.3483	12.5401	1.6542	1.9339	1.8146	1.843	1.3865		0.383562	5.90478
6.7911	6.8158	10.9629	6.7306	3.9454	8.3771	10.6391	3.786	1.8338	2.0616	1.4151	2.2861	5.6516	19.0425	6.602	7.3186	5.8027	6.7269	6.342	4.3976	20.0726	5.8512	1.9161	2.1214	2.6418	13.9698	3.5958	2.1215	12.2468	1.7306	1.5156	2.089	2.0056	1.4747		0.390414	5.88151
6.9102	7.5167	12.9428	6.5253	3.3343	8.4046	9.5516	3.1621	1.6541	1.8706	1.9429	2.0861	5.3129	18.805	6.2134	7.0409	5.4086	6.32	5.7621	4.0873	17.9796	4.9574	1.6517	2.1574	2.6481	13.5076	3.8489	2.6061	10.5174	1.1072	1.4704	1.8583	2.0173	1.2585		0.397261	5.62204
7.0293	7.5538	15.5627	7.4064	3.6845	8.51	8.9326	3.3575	1.7668	1.6008	2.2465	1.7139	4.8243	19.4854	5.774	6.9366	5.878	6.1617	5.7351	3.9165	18.5457	4.5757	1.7641	1.8743	2.5347	11.3737	4.2385	2.9758	10.8173	1.3264	2.0456	1.8949	1.7738	1.4455		0.404108	5.70403
7.1485	6.5517	18.7854	7.2812	3.7673	7.0899	9.091	3.3428	1.8089	1.7643	2.1638	1.771	4.9458	18.162	5.2231	5.4722	5.8624	6.2376	6.951	3.8116	18.2227	4.71	2.0563	2.0973	2.1952	9.1821	4.9928	3.6305	10.939	1.5507	1.9973	1.558	2.0303	1.273		0.410961	5.65207
7.2676	5.767	21.0444	7.1765	4.0342	8.1729	8.263	3.4795	2.0164	2.0029	1.7569	1.8659	5.072	17.1407	5.7929	4.9843	4.6914	6.0772	6.6686	4.0549	17.5314	4.423	1.7618	2.0481	2.2988	8.2711	4.4548	3.8496	9.5443	1.3302	1.717	1.3427	1.5459	1.4961		0.417808	5.50535
7.3868	5.7123	22.2391	6.2887	3.7046	7.6933	9.8166	3.264	2.2114	1.589	1.6721	1.5688	4.5066	16.6543	4.8099	4.3768	4.7323	6.1868	6.8	3.8024	15.8981	4.6387	1.532	1.7909	2.1141	8.8447	4.363	3.8053	9.3325	1.4778	1.9148	1.1264	1.6068	1.392		0.424661	5.37776
7.5059	5.8987	23.098	5.4398	3.664	5.9802	9.8805	3.4624	1.6885	1.946	1.5843	2.0605	4.4674	14.1187	4.8889	4.0997	4.0473	5.9254	6.359	4.3251	15.5574	4.5102	1.5687	1.5923	2.1976	7.3328	5.63	3.8685	8.636	1.5113	1.6956	1.5538	1.6582	1.4931		0.431507	5.20424
7.625	5.1451	22.095	5.1074	3.0046	6.3935	10.1368	3.1349	1.4218	2.0816	1.6014	2.5439	4.4477	12.5255	4.8616	4.0802	4.0431	6.016	5.7292	4.1365	14.0293	4.2032	1.8016	1.4571	2.1923	7.3459	5.1279	4.8934	7.773	1.753	1.7944	1.5918	1.7851	1.5587		0.438354	5.02462
7.7442	5.7191	20.3908	6.2009	3.5463	6.2666	9.5718	3.3745	1.8282	1.3957	1.5943	2.4756	4.1988	10.5331	3.5378	3.6496	4.2076	7.0531	4.9424	3.9811	14.4603	4.1637	2.1426	1.5199	2.7535	7.6406	5.1559	5.3669	8.025	1.5194	1.4752	1.2649	1.9603	1.5098		0.445207	4.95228
7.8633	6.245	17.0321	6.0403	3.0082	6.2723	9.3591	4.0693	2.1167	1.4915	1.8858	2.3103	3.7609	9.3437	2.8545	3.672	3.4731	6.5312	4.9265	3.9462	13.3439	4.0604	1.9706	1.7149	2.4858	8.4091	5.8229	6.1794	8.5234	1.4272	1.5449	1.4261	1.6244	1.7824		0.452054	4.8077
7.9825	4.8983	15.6873	4.8065	2.779	5.2037	9.5116	3.8819	1.6202	1.5829	1.8913	2.58	3.7546	8.9243	3.5542	3.2941	4.0467	6.2038	5.2805	3.5364	13.1364	4.593	1.7878	1.5686	2.8648	8.8226	5.7453	7.0485	6.9919	1.2518	1.7496	1.9026	1.97	1.2395		0.458907	4.65787
8.1016	4.0692	16.8099	4.441	3.008	5.2341	9.5931	4.1228	1.7019	1.6145	1.8927	2.1844	3.9129	8.2767	3.4565	3.2931	4.1744	6.4562	5.2924	3.1834	13.3213	4.5287	1.5679	1.2844	2.911	8.0684	6.449	7.2863	6.6862	1.3975	1.9262	1.5329	1.9355	1.4797		0.465754	4.63916
8.2207	4.0776	17.8188	5.2871	2.752	5.4243	11.4082	4.1686	1.5804	1.4502	1.9369	1.8923	4.0806	8.2326	3.4468	3.951	4.3061	6.7892	4.8811	3.3568	11.4544	4.0325	1.5314	1.4299	2.6959	7.2358	6.9144	8.3637	6.2301	1.4882	1.6819	1.4895	1.5116	1.8352		0.472601	4.68894
8.3399	3.6205	15.3792	5.6888	3.1234	5.7167	11.7623	4.8906	1.6255	1.7677	1.9773	1.9599	3.4106	7.2384	2.7447	4.2529	4.1681	6.9601	6.2308	3.6959	10.5304	4.6573	1.8434	1.4793	2.7568	6.1173	7.6337	8.6171	5.1634	1.2523	1.7698	1.7866	1.944	1.6204		0.479453	4.64804
8.459	3.4437	16.1773	4.5484	2.995	4.375	11.068	6.2033	1.6783	1.9905	2.14	1.7913	3.9376	7.5687	3.2676	3.8632	3.9915	6.7007	5.8363	3.6333	10.2621	4.1873	1.7932	1.713	2.6433	5.6842	8.3817	9.4333	5.7428	1.4414	1.6438	1.8836	1.9543	1.2547		0.4863	4.64328
8.5782	4.1101	15.2444	4.963	2.7947	4.5448	10.246	5.4412	1.778	1.9587	1.9644	1.6392	4.3375	7.7788	2.7608	3.5936	4.3289	7.1954	5.3144	4.1099	11.0486	4.7377	1.904	1.2101	2.7424	5.293	8.6023	10.0464	5.3719	1.5966	1.5686	1.9989	1.8296	1.0091		0.493153	4.63827
8.6973	3.6612	14.8033	4.7392	2.7421	4.8034	10.4473	5.4229	1.5259	2.0102	1.822	1.9371	3.8175	8.0511	2.8946	3.3851	4.3369	7.5423	5.7673	3.3235	10.2449	4.4227	1.9037	1.2663	2.273	4.8858	11.6477	12.6103	4.3723	1.3273	1.6634	1.6236	1.7436	1.3191		0.5	4.67687
8.8165	2.8038	14.5631	4.0838	3.4414	4.571	10.9368	5.4342	2.0411	1.7649	1.7753	1.443	3.5138	6.8545	2.6494	4.1157	4.7236	6.278	5.9612	3.4472	10.3777	4.4962	2.1533	1.4617	2.112	4.7187	13.1918	15.4619	3.4329	1.3376	1.4271	1.953	1.4515	1.336		0.506853	4.70646
8.9356	2.493	15.1965	4.5406	2.9722	4.2163	11.587	5.6418	1.6849	1.5972	2.0221	1.6706	3.5123	7.1228	2.9266	3.756	4.2174	6.8869	5.4669	3.9751	10.377	4.8837	1.7832	1.7307	2.0999	4.2564	12.7418	17.5869	3.7804	1.8671	1.9329	1.577	1.8159	1.8333		0.5137	4.84098
9.0547	2.7076	14.0187	3.8549	3.3621	3.9794	12.065	5.9862	2.0837	1.4918	1.8987	1.7941	3.7146	6.8967	2.7635	3.3065	4.6607	7.8261	5.3129	3.1178	10.84	5.4296	1.8332	1.2844	2.2164	4.1918	12.9531	18.538	4.0075	1.7261	1.8291	1.4114	1.7141	1.4888		0.520547	4.85771
9.1739	2.8184	15.3561	4.364	3.5601	3.8924	11.6941	6.2777	1.7918	1.4656	1.9986	2.1509	3.6006	6.8195	2.4314	3.3682	4.3611	7.9814	4.5705	2.8121	11.3479	5.2466	1.694	1.7411	2.0699	3.5808	13.5053	21.1187	3.6556	1.4223	1.6817	1.4867	1.8321	1.5627		0.527399	4.94727
9.293	2.7522	13.8109	3.9146	2.9856	4.1564	10.7539	6.4155	1.8944	1.8298	1.8076	2.0988	3.6471	7.2041	2.4257	2.9486	4.6614	7.5677	4.4022	3.9609	10.4885	4.8466	1.3433	1.6631	2.3554	3.4072	14.5406	22.099	3.1539	1.8466	1.8774	1.6506	2.1176	1.5893		0.534246	4.91565
9.4122	2.7484	13.9508	3.6976	3.2608	3.7764	9.2022	5.3075	1.537	1.7066	1.7518	1.5644	4.1448	6.5855	2.5995	2.8215	4.6667	8.3156	3.9074	3.7751	10.983	5.2062	1.4301	1.5242	2.0325	2.4208	14.3484	24.6233	2.6973	1.7301	1.7504	2.0694	2.4551	1.6803		0.541099	4.85669
9.5313	3.2943	15.2219	3.8317	3.1548	3.8079	9.1464	5.4374	2.253	2.113	1.4659	2.0507	4.0782	6.943	2.4659	2.4979	3.8713	8.792	4.3543	3.8271	11.044	4.8392	1.5523	1.4946	1.7548	2.8156	13.6979	27.658	2.3488	1.8743	1.8503	1.7701	2.2244	1.8113		0.547946	5.01037
9.6504	2.6642	16.4298	3.6723	2.6406	4.0199	9.1827	5.9697	1.6786	2.1432	1.2677	1.8494	3.5787	5.8389	2.786	2.9707	4.196	9.4924	4.1857	3.5617	10.8369	4.8092	1.4857	1.804	1.8511	2.5783	13.1942	31.2287	2.2826	1.5298	1.8708	1.5353	1.9255	1.3333		0.554793	5.04223
9.7696	2.5951	15.5326	4.0826	3.1747	3.6675	9.5218	5.4436	1.9392	1.6413	1.675	1.5631	3.3973	6.0433	2.6437	2.5679	4.658	8.7367	4.6694	3.4093	10.6202	4.6674	1.6253	1.6996	1.7969	2.5866	10.8703	34.5098	2.0732	1.7779	1.6243	1.8392	1.542	1.5018		0.561646	5.02111
9.8887	2.3735	14.5416	3.6053	3.0017	3.8658	8.9312	4.9808	2.1238	1.4643	1.9687	1.3702	3.8566	5.8981	2.7085	2.5949	4.0849	8.4367	4.5606	3.9343	11.963	4.6034	1.5905	1.9224	1.8344	2.5731	9.3737	35.4839	2.3958	1.4397	1.3957	1.6488	1.6639	1.3594		0.568493	4.95604
10.0079	1.9862	13.6611	3.1448	2.7809	3.4454	8.2515	5.9068	1.7866	2.0037	1.7943	1.6597	3.7989	5.6729	2.4206	2.7334	5.4507	8.3677	3.9674	3.4508	11.3589	4.9043	1.5492	1.8774	1.8453	2.7929	8.5441	34.6152	2.4337	1.3317	1.4868	1.2477	1.8123	1.6325		0.575345	4.83986
10.127	1.7527	12.0499	3.3797	2.8465	3.5344	8.5527	6.3551	2.1394	1.4617	1.5468	1.6353	4.064	5.9252	2.292	2.3109	4.4566	7.9898	3.9206	3.5645	10.21	4.977	1.4091	1.6431	1.9787	2.2684	8.0218	35.0768	2.5322	1.683	1.469	1.6587	1.7184	1.6652		0.582192	4.72998
10.2462	1.853	11.4348	3.9147	2.5848	3.3963	8.1967	5.9225	2.1462	1.7195	1.7002	1.6967	3.7499	6.307	2.3343	2.7254	4.7263	7.6449	3.7812	3.4242	10.6614	5.1202	1.4815	1.7334	1.8531	2.4151	7.0612	30.0989	1.7739	1.4122	1.6407	1.9786	1.7944	1.6978		0.589045	4.54488
10.3653	2.0677	12.6891	3.8658	2.8477	3.2485	6.7735	6.8184	1.9107	2.3536	2.0093	1.9795	4.0574	5.4716	2.1624	2.5858	4.6215	7.8761	4.5156	3.3511	11.1183	4.7064	1.5312	1.4657	1.5555	2.36	6.1063	28.3883	2.1838	1.4601	1.6267	1.4815	1.6013	1.7227		0.595892	4.5004
10.4844	2.0824	11.1733	3.6729	3.0174	3.4444	7.0687	6.5786	2.0103	2.1432	1.6238	1.8083	3.6305	5.9437	2.1637	2.2246	4.2354	7.7458	3.7151	4.1283	11.5819	4.6098	1.724	1.6219	1.7637	1.9933	5.6591	25.0797	1.9663	1.5565	1.5582	1.3805	1.5669	1.5153		0.602739	4.30265
10.6036	2.4099	10.6329	3.4345	3.0373	3.262	6.3571	5.9708	1.6649	1.8794	1.7407	1.6573	4.1893	6.0143	2.3532	2.6959	5.1115	7.3174	4.8843	4.3724	11.1124	4.6472	1.5409	1.2391	1.5204	1.7668	5.0398	22.7106	1.9963	1.3343	1.8264	1.6699	2.111	1.6605		0.609591	4.21699
10.7227	2.4393	10.2256	3.7594	2.7963	3.2916	5.9693	7.3099	1.6872	1.8377	1.3741	1.7149	3.4546	6.3779	2.1454	2.0036	5.5892	8.5957	4.4573	3.2966	8.8137	5.2814	1.3544	1.6602	1.9364	1.738	4.1445	19.4875	1.8467	1.6751	1.3456	1.8393	1.6263	1.6942		0.616438	4.0233
10.8419	2.1197	10.8594	3.665	2.7137	3.0627	6.9535	7.4537	2.0695	1.5716	1.6797	1.835	4.1303	7.6567	1.5809	1.6954	5.4653	8.087	4.1658	3.9445	10.2024	4.3084	1.4693	1.7743	2.1229	1.83	3.3226	18.818	1.74	1.4972	2.0097	1.4687	2.1117	1.5471		0.623291	4.08884
10.961	1.8707	11.3934	3.8983	2.3297	2.88	7.2403	7.9052	1.7033	1.469	1.6144	1.8777	4.1995	7.8502	1.7334	2.5645	5.2291	7.5464	4.6859	3.6058	10.5662	3.6138	1.4711	1.7531	1.5283	2.1558	2.9048	18.7789	2.2305	1.7179	1.8875	1.9138	2.3028	1.7235		0.630138	4.1256
11.0801	1.928	11.0304	3.592	2.7	2.4574	7.9458	7.467	2.2135	1.8447	1.7149	1.581	3.3252	6.7243	1.8509	2.3389	5.2255	6.8861	4.5478	3.5498	10.4399	3.5144	1.4069	1.0799	2.0637	1.899	2.5748	17.9977	2.1031	1.6067	1.9668	1.9965	2.0441	1.751		0.636985	3.98084
11.1993	1.9981	11.1866	3.7613	2.7114	2.8536	8.402	8.5494	2.2001	1.877	2.3081	1.4524	3.6042	6.3986	1.8592	2.0388	5.0021	8.2088	4.9952	3.2163	9.9727	3.7617	1.8656	1.6117	2.159	2.02	2.9872	18.1417	2.126	1.6828	2.0336	1.5296	1.6925	2.0773		0.643838	4.12984
11.3184	2.1802	11.3244	4.086	2.779	2.7439	9.5232	7.1882	1.6852	1.5422	2.0059	1.4788	3.4139	7.1618	1.9831	2.0153	4.3021	8.1399	4.0155	3.5138	10.0251	4.1508	1.6774	1.5005	2.2683	1.8625	2.4216	18.0587	1.9881	1.6075	1.6511	1.3592	2.1155	1.8874		0.650685	4.05018
11.4376	2.2616	11.1279	3.8309	2.7131	2.8616	9.8393	8.159	1.94	1.9533	1.9582	1.781	3.3463	5.6406	1.7867	1.8592	4.2942	7.5232	4.0402	3.4499	10.4953	3.6201	1.5715	1.4895	2.0791	1.5457	2.2512	16.6782	1.7271	1.7394	1.8559	1.5286	2.376	1.6511		0.657537	3.96894
11.5567	2.1217	11.0034	3.7476	3.2361	2.3013	8.7716	8.8604	1.8187	1.8399	1.9907	1.3796	3.8381	5.4689	1.7835	1.7419	4.0511	7.343	4.3742	3.9045	9.6552	3.4632	2.0481	1.6406	2.0812	1.4437	2.1189	17.3772	2.0811	1.7281	1.4845	1.7069	2.1113	2.0099		0.664384	3.95534
11.6758	2.0729	11.8492	4.0679	3.178	2.8222	9.2853	7.8543	2.1147	1.6222	1.4817	1.3956	3.7025	5.1113	1.8038	1.8844	4.8012	7.2403	4.3906	3.6667	9.564	3.6647	1.77	1.3806	1.8282	1.5727	2.1487	15.6134	1.8975	1.6848	1.8329	1.433	2.0884	2.0054		0.671231	3.90391
11.795	1.6697	10.9156	3.5879	2.6314	3.4562	8.7828	8.7757	2.8229	1.9337	1.5485	1.3942	3.4542	5.3278	2.0643	2.1437	4.0295	7.8126	4.9925	4.117	9.8067	3.8121	1.6026	1.4855	1.7166	1.7561	1.4645	15.9155	2.0468	1.5784	2.044	1.6707	1.9476	1.9278		0.678084	3.94652
11.9141	2.1208	10.796	3.7957	3.167	3.0777	7.8495	9.0531	2.1488	2.0548	1.6107	1.6097	3.4162	5.6545	1.9536	2.2516	3.5856	7.5684	4.7292	3.5194	10.0775	3.6232	1.461	1.7133	1.7891	2.2483	1.3641	15.8163	2.2443	1.5873	1.871	1.8404	1.6621	2.1872		0.684931	3.92265
12.0333	1.7129	11.3048	3.6534	3.332	2.4862	6.9854	9.1592	2.0236	2.2666	1.589	1.4743	3.1541	5.9279	1.8525	2.1646	3.6315	7.5517	4.6651	4.2274	10.7757	3.4835	1.4634	1.848	1.7561	1.8366	1.6063	15.1014	1.8713	1.4214	2.1491	2.0184	2.3365	1.9516		0.691784	3.90247
12.1524	2.4326	11.4728	3.4184	3.7089	2.6472	6.3894	9.2629	2.4654	1.8973	1.5591	1.4641	2.9476	6.1558	1.7662	1.8759	3.37	7.0337	5.04	3.2011	9.1591	3.9692	1.5563	1.8671	1.8516	1.4924	1.7436	15.1238	2.1966	1.3036	2.0643	1.9733	2.3966	2.1055		0.698631	3.8458
12.2716	2.2345	12.1919	3.6603	4.0161	2.7109	6.5953	9.6519	2.5966	1.8622	1.5609	1.4191	2.7713	5.5372	1.9851	2.0617	3.6416	7.7384	5.0396	3.809	9.704	3.2281	1.376	1.8596	1.8228	1.8601	1.3958	18.8888	2.2693	1.4448	2.2536	2.2034	2.0208	2.0275		0.705483	4.04358
12.3907	2.4452	12.1416	3.8286	3.6807	2.9104	5.9798	9.4994	2.471	2.3282	1.2255	1.3468	2.6504	5.3714	1.4648	2.0731	3.8876	9.0157	5.2964	4.0363	10.0451	3.0749	1.3912	1.892	1.718	1.6425	1.9475	19.7337	2.1703	1.0003	1.7838	1.9459	2.0855	1.949		0.71233	4.06159
12.5098	2.5336	11.0819	3.8856	4.2341	2.1666	5.6913	11.5808	2.7358	2.5719	1.5801	1.5034	3.247	5.6229	1.5666	2.2458	4.1629	8.9239	5.6394	4.0284	9.1297	2.9923	2.1693	1.4734	1.7477	1.3851	2.1565	19.7794	1.837	1.5961	1.6311	1.5153	1.6604	2.0016		0.719177	4.12354
12.629	2.1158	10.4375	4.2387	4.4837	2.2204	6.4115	10.797	3.2718	2.4449	1.7833	1.4267	3.181	6.1904	1.851	2.1519	4.5465	10.3236	5.2249	4.4327	9.6424	2.8991	1.7263	1.6612	2.1979	1.5701	1.6088	19.2105	1.9607	1.4643	1.7007	1.8281	2.0256	2.3088		0.72603	4.22236
12.7481	2.0425	10.8213	3.6696	4.1948	2.5076	6.0065	12.9936	2.9977	3.3354	1.9873	1.448	3.1246	4.8848	1.8856	1.94	3.6822	9.3518	5.4296	4.562	9.9151	2.8139	1.8608	1.6953	2.0488	1.7397	1.6554	19.6036	2.1128	1.6932	1.8481	1.876	1.5047	2.3829		0.732877	4.23076
12.8673	2.7236	9.7966	4.1	4.6904	2.1468	6.0718	13.4425	3.4549	3.3078	1.7881	1.5462	2.6271	5.7738	1.622	1.7552	4.2582	8.265	5.4186	4.2647	11.4931	3.0057	1.6014	1.6154	1.8696	1.3539	1.5634	16.9224	2.1557	1.3697	2.2756	1.6602	1.9711	1.8389		0.73973	4.17422
12.9864	2.0324	9.4402	5.0483	5.8382	2.4501	4.6915	14.2503	4.7716	4.094	1.7225	1.6995	2.7075	5.3204	1.8353	2.4886	4.0666	9.0594	5.2332	3.612	12.3836	2.9846	2.004	1.3114	1.7781	1.3383	1.8427	15.1706	2.2124	1.856	1.867	1.7292	1.7602	1.9132		0.746577	4.25797
13.1055	2.435	9.977	4.1637	6.512	2.8628	5.7251	14.7019	4.965	4.614	1.9698	1.8585	2.7446	5.1413	1.5631	2.2858	3.5853	9.2694	5.6532	4.6211	11.7572	3.2209	1.4486	1.7264	1.8517	1.6526	1.6841	14.4669	1.7055	2.0929	1.6777	1.6348	1.8325	2.0048		0.753423	4.34561
13.2247	1.8982	9.3649	4.9477	6.5729	2.1008	5.5508	14.8409	6.0212	6.8831	2.006	1.3089	2.5947	4.4741	1.8299	2.3659	4.0163	8.4781	5.3681	4.5761	13.8739	2.7405	1.6332	1.4672	1.9074	1.8606	1.6021	14.3182	1.7531	1.6287	1.7865	1.6237	1.8957	2.6041		0.760276	4.42102
13.3438	2.4428	8.5687	5.1834	6.5173	2.6981	5.5537	12.2858	7.4221	8.8427	1.7792	1.7027	2.9248	4.7011	2.0472	2.2711	3.7849	7.5004	5.5436	4.5282	13.1064	2.971	1.8748	1.7501	1.6069	1.7092	1.7605	14.4047	2.3736	1.7269	1.933	1.6933	1.8804	2.515		0.767123	4.47284
13.463	2.536	8.0946	5.0435	8.4881	2.9155	5.9912	12.3695	8.6695	11.6332	1.7687	2.0349	3.4345	4.8681	2.0701	2.2884	3.9426	7.7789	5.9903	3.931	13.5392	3.0028	2.0557	2.2217	1.6859	1.8362	1.7505	15.0041	2.4289	1.9414	1.8572	1.7517	1.6821	3.171		0.773976	4.78112
13.5821	2.281	9.7371	5.7593	10.3896	3.1433	6.7386	11.8971	9.9191	16.9102	2.1476	2.0243	3.3625	4.7197	1.9432	3.1914	4.2509	7.8838	5.7396	5.1408	14.7824	2.5562	1.7777	1.5901	2.613	1.635	2.0022	16.929	2.3366	1.8649	2.2901	1.9658	1.7205	2.9195		0.780823	5.27764
13.7012	1.9897	8.5451	6.939	12.4481	3.5022	6.9268	12.891	11.8097	23.8534	2.2835	1.74	3.2091	4.4932	2.0889	2.7257	3.5183	7.8015	5.4811	4.7929	14.3621	2.7	1.6991	2.1804	2.2736	1.4862	1.6783	17.5048	2.1736	1.8576	1.9538	1.8231	1.8639	2.7559		0.78767	5.55611
13.8204	1.819	9.3842	8.9333	13.9498	3.8027	6.9112	12.8509	12.772	30.4448	1.9196	1.7868	3.6044	4.6201	2.467	2.4937	3.8735	8.3613	5.3073	4.858	14.9107	2.646	1.3564	2.1316	1.9291	1.4432	1.6776	17.0357	1.8809	1.6913	1.9636	1.8517	2.3376	3.2458		0.794522	5.9473
13.9395	2.1029	9.5399	11.0374	16.6691	4.208	7.4593	13.478	16.4342	33.6331	2.0405	1.8441	3.4756	4.2444	2.2099	2.3039	3.6272	8.359	5.8924	4.6948	15.1965	2.7477	1.6854	1.7664	1.8058	1.629	2.0851	17.5019	2.0446	1.5069	2.1776	1.9294	2.5288	3.622		0.801369	6.40851
14.0587	2.4924	10.7628	12.9699	20.9375	3.6723	7.9801	15.3998	19.2057	37.4349	2.3917	2.0792	4.1252	4.0459	2.8048	2.2461	4.1833	8.0353	6.4864	5.212	13.5137	2.6976	1.5909	1.617	1.8908	2.1083	1.8335	16.8585	1.8603	1.922	2.4209	1.9841	2.6455	4.3091		0.808222	6.96114
14.1778	2.564	10.5255	16.5013	23.4483	3.2172	11.0609	17.771	19.6704	30.7494	2.4137	2.3657	4.6714	3.8835	2.4151	2.0988	3.6533	7.7911	6.3146	5.6705	13.4131	2.422	1.5925	1.7396	2.2634	2.142	1.6986	19.2358	1.3744	1.8404	1.9565	1.8295	2.8405	4.8211		0.815069	7.15015
14.297	2.3942	9.8582	19.7598	24.7915	4.1775	14.3684	19.6685	15.2916	26.6197	3.0042	2.0242	5.1285	3.7617	2.4214	2.5762	3.4571	8.6979	6.7055	5.3798	14.0332	2.4167	1.7371	1.6932	1.8936	2.1623	1.7784	19.7837	1.7206	1.9301	1.7827	1.5489	2.3369	5.8964		0.821922	7.29696
14.4161	2.8466	10.4361	24.6078	27.7434	5.5555	18.6911	24.0603	8.9522	20.5045	4.0086	1.7747	5.5266	4.5061	2.7055	3.7046	3.4285	7.973	7.4163	5.4727	15.4737	2.3179	1.7201	2.156	1.7051	1.9479	1.7241	18.3776	2.2492	1.9036	2.0497	1.649	2.7651	5.5822		0.828769	7.62228
14.5352	2.538	9.0794	29.2695	29.6775	6.9644	24.4953	24.2795	4.9537	12.8982	5.0925	2.0812	5.6071	5.3008	2.6961	3.3848	4.0667	8.0432	6.9945	4.5921	15.7014	2.5284	1.6789	2.0739	2.2373	1.8022	1.8139	17.4867	2.2511	1.7282	2.1286	1.9614	3.0087	6.9174		0.835616	7.73735
14.6544	2.8645	9.8095	28.4848	30.5182	7.2532	30.3943	24.2495	2.628	6.5854	6.7249	2.4586	6.4102	5.3358	2.3102	3.3649	4.6961	7.6341	7.6633	4.6602	15.3004	2.0925	2.3177	2.1166	2.043	1.8558	2.068	19.2367	2.4613	1.5059	2.7474	2.6518	2.9452	7.9457		0.842468	7.9192
14.7735	2.9352	8.6948	29.4697	33.4883	9.5815	36.9928	18.2741	2.1671	3.7873	8.5583	2.7741	6.2935	5.4531	2.6232	3.7461	4.6978	7.9329	8.4401	5.0257	14.3066	2.3049	2.1589	1.9248	2.0447	2.4422	2.249	19.5115	3.0072	1.9183	2.988	2.1832	2.7494	10.4438		0.849315	8.21722
14.8927	3.3906	10.6345	31.8594	28.6168	14.3068	32.2405	10.5132	1.9479	2.9174	13.2404	3.8587	7.4931	5.0807	2.5834	4.6528	5.6083	8.4779	9.6391	4.3942	14.4841	2.5607	2.1768	2.0784	2.1606	2.6646	2.4141	19.4018	3.0649	1.8018	3.3582	2.4494	3.0849	14.773		0.856168	8.42209
15.0118	3.9662	11.5514	34.2758	23.9675	17.6595	27.6076	6.4531	2.1591	2.9259	18.9408	4.9994	8.4454	5.4216	2.3501	4.9269	7.8683	9.1388	11.8887	4.9225	14.4358	2.2967	2.1241	2.2635	2.1952	2.7745	2.3884	18.3786	2.7524	2.1659	4.6137	3.0059	4.3849	19.089		0.863015	8.8587
15.1309	3.3569	12.2337	32.5485	17.6874	21.3724	19.6827	4.9191	1.4197	1.9037	25.7741	6.8167	9.2493	6.2604	2.6317	5.971	9.9832	10.0801	13.4228	5.1046	14.8987	2.1667	2.4189	2.0385	1.9291	3.7193	2.9823	17.4716	3.0261	2.4937	5.0606	3.389	4.5858	24.6154		0.869862	9.12769
15.2501	3.2753	13.9163	27.6281	11.9662	25.9925	11.5921	3.1554	1.1585	1.3077	29.609	10.6907	9.5104	5.8593	3.2607	8.1301	15.655	12.0601	16.0883	5.7309	14.8194	1.9979	2.4403	2.0308	2.2908	3.4689	3.7279	16.5194	3.0469	2.3099	6.024	3.9483	5.2075	27.8638		0.876715	9.4631
15.3692	4.1038	15.167	20.8649	8.1178	30.2008	8.2228	2.675	1.216	1.3082	25.3857	14.0058	12.3927	5.5969	4.0878	9.2852	18.3458	15.1098	17.8391	6.5109	15.7738	2.4447	2.2004	2.4762	2.0675	4.2531	4.857	16.6489	4.0556	2.7344	7.7237	5.1325	6.6841	31.0602		0.883562	9.956
15.4884	5.329	16.136	17.1814	6.2505	26.1949	5.2317	2.2008	0.7654	1.3208	13.5207	20.0257	13.7915	8.0036	4.32	12.7063	18.4731	17.0464	17.9975	6.5876	15.4945	2.0695	2.6688	2.3531	2.026	6.4386	6.1127	16.8921	5.2149	3.2947	10.2709	6.0822	8.6342	34.6253		0.890414	10.1594
15.6075	7.7555	14.4824	12.5314	5.0295	22.2298	3.3576	1.7061	0.5324	0.9237	6.6071	23.0633	16.4877	8.5739	5.3127	17.8007	21.7784	18.0774	20.4028	6.8951	17.3596	2.5131	2.5853	2.663	2.3516	8.0254	8.3831	17.2035	5.0586	3.7328	15.5158	7.882	8.9706	33.3555		0.897261	10.5802
15.7266	8.5129	10.6293	9.0845	3.6554	16.6604	3.2351	1.7248	0.7974	0.7406	4.3533	22.7286	19.7827	10.4289	6.4203	25.3326	25.3726	22.9747	23.2622	7.523	18.9736	3.0059	2.6413	3.448	2.4228	10.825	9.6596	17.9142	7.7249	4.7026	22.6963	10.2216	10.3926	33.6393		0.904108	11.5602
15.8458	8.6435	8.1794	6.0462	2.6169	11.4179	2.8221	1.1805	0.7093	0.5846	2.9914	21.5673	24.0027	12.8497	8.107	32.6421	30.2158	24.1344	23.0391	9.7026	20.8259	2.405	2.862	3.6057	3.5011	14.13	11.0431	18.626	9.3246	6.8301	29.4991	14.8344	11.4613	30.383		0.910961	12.448
15.9649	7.6154	6.1652	4.6542	2.3118	8.0801	1.8342	0.9454	0.4252	0.5352	2.5262	17.9284	26.7947	16.4771	11.0671	36.4005	33.1482	28.6931	22.6975	9.9208	21.493	2.1314	2.8357	3.6408	5.2551	16.3264	14.3377	20.2444	12.6535	8.6218	33.5793	19.483	13.0174	25.2244		0.917808	13.2444
16.0841	5.9594	5.5621	3.4074	1.7349	5.4116	1.7882	1.2265	0.5331	0.3447	2.0781	13.4295	33.0136	21.2117	15.8856	32.9666	31.1923	30.8532	22.4669	12.9583	21.819	2.8837	3.0831	4.1436	6.181	17.9362	13.9866	21.8182	16.0605	10.4569	34.5935	24.0753	14.5424	20.0916		0.924661	13.7483
16.2032	4.1984	4.2995	2.3858	1.192	4.9465	1.0354	0.814	0.5119	0.2971	1.5036	6.917	36.0613	27.6264	20.6011	28.776	24.9228	29.8058	23.5786	15.2852	21.0024	3.6272	3.3257	3.6043	9.2368	18.4188	14.2619	25.3272	21.3771	12.2039	32.4634	24.7216	14.7497	14.7266		0.931507	13.7517
16.3224	3.7347	3.7265	2.5205	1.1943	3.344	0.625	0.4259	0.5396	0.3761	1.4563	3.9674	34.8732	31.1004	23.5793	24.0883	18.5817	24.1331	24.1926	17.2346	20.1933	3.674	3.0452	4.6654	12.7199	18.5085	12.1922	27.9131	28.6348	12.8552	31.5253	24.4137	13.5002	11.0032		0.93836	13.4708
16.4415	2.7195	3.1585	1.8441	0.995	2.4489	0.4841	0.5719	0.333	0.3818	1.066	3.7789	28.6112	32.0147	29.1107	19.8768	12.1219	21.0205	25.2825	21.4315	22.379	3.1391	3.6776	6.312	14.7068	17.2717	10.5001	29.5674	32.9508	11.9789	25.6043	23.1759	12.0133	8.0387		0.945207	12.9869
16.5606	2.1827	2.897	1.1749	0.9538	2.0508	0.4564	0.6221	0.5115	0.3413	1.1349	2.7377	21.2132	25.7883	29.7109	13.3638	5.7029	14.4763	23.1332	20.4092	21.303	3.5223	4.0253	7.0778	18.246	13.7454	10.8274	30.1658	34.0334	12.3058	18.4937	19.3637	8.3034	6.7176		0.952054	11.424
16.6798	1.6184	2.0455	1.2987	0.5891	1.4135	0.6061	0.3373	0.4289	0.3266	0.6735	2.6795	11.5079	18.1942	26.7934	6.2235	3.822	8.3922	18.9016	18.7329	23.1674	4	3.7713	9.5064	19.7113	11.204	9.4535	29.1072	32.4171	11.4279	13.869	12.5506	6.429	6.0416		0.958907	9.61337
16.7989	1.5007	1.7857	1.151	0.6716	1.1523	0.5005	0.364	0.2538	0.3254	0.5755	1.244	5.915	14.8337	22.3998	4.3873	3.2339	3.9114	12.4018	16.2383	24.6569	4.5063	4.2261	13.1693	21.051	7.5136	8.541	23.309	24.294	9.8362	9.9018	8.1246	6.1962	5.1442		0.965754	7.97927
16.9181	1.126	1.5124	0.9521	0.7633	1.1218	0.3563	0.351	0.3211	0.154	0.6478	1.3062	3.9122	10.7489	16.6662	4.309	2.2966	3.9491	7.4625	14.8293	25.865	4.7952	4.729	18.0729	20.8618	6.4863	7.4316	16.2921	17.597	7.8917	7.5481	4.6422	6.0181	3.5857		0.972606	6.80614
17.0372	0.7792	1.5981	1.0205	0.3668	1.0815	0.2543	0.1759	0.2786	0.2198	0.4754	1.0729	2.8521	6.2556	9.5507	3.783	2.4657	3.9285	4.3834	14.5269	29.7924	6.4693	6.3507	23.7912	18.3419	5.163	6.1369	12.0125	12.598	6.3969	6.421	4.4486	4.7339	2.418		0.979453	6.06495
17.1563	0.6584	1.3151	0.8939	0.3816	0.6985	0.2636	0.1733	0.1926	0.2459	0.3946	0.777	2.2573	3.7522	5.1653	3.0683	2.0399	3.3677	4.292	10.025	32.3106	8.5334	7.3903	27.0162	15.4656	4.9431	4.8022	8.7809	11.0383	5.2426	5.4716	4.1777	4.1725	2.4362		0.9863	5.50738
17.2755	1.053	0.9028	0.5352	0.306	0.7269	0.2593	0.3763	0.1575	0.2038	0.5753	0.4266	2.4895	3.6514	4.4797	2.3367	1.9066	2.5259	3.2788	5.2694	39.2834	10.3472	7.4764	30.8192	12.0361	3.908	3.4021	6.7165	8.7855	5.3122	4.0534	3.3996	2.6601	2.0623		0.993153	5.20372
17.3946	0.594	0.7854	0.4934	0.4442	0.8206	0.2749	0.2271	0.3138	0.165	0.3516	0.5904	1.606	3.5727	3.6182	1.7274	1.6676	1.8564	2.6321	3.2753	38.3981	11.0251	8.2993	30.5137	7.7308	3.0613	3.2281	6.3682	7.2307	4.3024	2.969	2.4918	2.6334	1.8486		1	4.7005

## Sheet: Image5
X0	Y0	Y1	Y2	Y3	Y4	Y5	Y6	Y7	Y8	Y9	Y10	Y11	Y12	Y13	Y14	Y15	Y16	Y17	Y18	Y19	Y20	Y21	Y22	Y23	Y24	Y25		Ap-Ba	Average int.
0	39.8446	33.1656	51.4819	29.0441	24.858	26.1783	18.0017	10.4563	11.6134	18.5929	18.1099	9.4133	7.8033	21.9755	28.522	25.4681	6.94	3.9974	9.8334	21.0133	16.2535	25.685	20.2668	41.5834	40.4557	38.2112		0	23.0296
0.1191	43.3139	34.8443	56.3518	30.6119	26.2577	32.1781	17.876	10.8554	13.2069	21.0254	23.0322	10.9298	8.4661	23.9586	29.9483	29.2484	8.1377	5.658	12.3389	22.3269	19.7572	28.123	25.0624	43.9744	43.8457	44.8903		0.00490027	25.6238
0.2383	45.0695	40.3646	57.4935	33.5251	31.1615	41.4199	19.1261	13.1979	14.5681	24.8704	26.1825	11.2855	8.9408	24.0318	32.0299	32.1197	9.7718	7.778	16.2243	24.5214	22.1971	29.714	26.6414	48.9704	47.5841	53.8204		0.00980465	28.5619
0.3574	45.9822	44.8895	59.8765	32.8547	34.6249	49.6256	22.4967	14.0271	17.2059	31.5784	31.0654	12.4933	9.8298	23.5736	33.8542	33.6345	13.0111	12.1386	18.9811	28.1268	24.3379	29.6863	28.6389	58.7674	51.5481	59.9931		0.0147049	31.6478
0.4766	46.179	50.5206	61.2996	35.5421	37.8406	57.7719	29.5207	15.5274	20.2589	36.4788	31.5636	12.9361	10.6186	27.0388	35.2087	39.8422	17.8678	15.6109	20.1238	32.2612	28.3899	31.1022	35.456	65.3818	52.9244	59.7352		0.0196093	34.8846
0.5957	48.6873	51.1175	61.9383	34.0937	42.0595	60.2769	37.2908	18.7254	24.464	42.3206	33.6212	12.6163	11.5298	28.0352	35.8923	43.262	23.2968	21.3596	24.8913	34.1083	32.6981	37.03	41.6504	70.0774	56.8783	56.8265		0.0245096	37.8749
0.7148	49.5888	52.0622	64.8071	38.7413	45.9766	58.9046	46.0251	19.867	28.9445	45.6317	34.3171	15.2602	11.9006	28.3378	38.7674	48.6098	29.7075	27.2301	29.5348	40.0089	37.1918	40.5439	43.8181	68.0903	61.1549	61.8109		0.0294098	41.032
0.834	49.4726	52.4746	59.289	41.4001	52.2896	55.6484	52.068	25.4011	34.5956	49.7047	34.9981	15.399	12.5844	26.9625	40.0408	47.4039	35.0713	36.8661	34.5675	44.2613	41.8324	41.7895	48.2632	64.9667	67.2938	60.3692		0.0343142	43.2697
0.9531	49.8424	47.6817	62.1173	44.1131	54.1936	52.1436	58.6104	31.6462	38.2059	52.1098	38.7535	16.9848	14.5814	29.9001	40.3762	51.7659	41.4886	44.8798	37.8946	42.3609	48.3483	47.6203	51.9084	59.0174	67.5121	61.4725		0.0392145	45.5973
1.0723	47.9772	43.8589	60.0382	50.006	58.6448	51.9042	63.7878	36.7912	43.8639	52.323	40.9906	17.1852	14.6517	31.2034	41.0405	52.5252	46.7688	55.2407	45.8987	45.8537	47.8575	52.8247	53.5004	50.4115	69.2002	63.1171		0.0441189	47.5948
1.1914	43.6977	41.0057	59.3081	54.9328	55.5089	49.7737	64.1928	40.4856	50.7751	51.0612	41.5206	20.2499	16.1748	34.455	45.4506	55.958	51.3224	61.5787	54.8186	47.0875	51.1319	57.5407	51.9764	40.5035	62.8661	60.8987		0.0490191	48.626
1.3106	40.5086	39.5441	58.5981	61.263	54.0851	49.0225	63.9379	49.3737	57.2378	49.7325	46.0441	22.7995	15.6689	37.1564	45.5408	51.9254	56.8786	68.1535	58.4663	45.4096	55.926	61.4125	53.2994	32.44	57.0211	59.0741		0.0539235	49.6354
1.4297	38.0063	35.5897	53.9013	66.0929	52.2865	50.3782	63.0213	56.0804	58.1023	46.4179	46.7689	23.2421	15.7485	40.016	45.3957	50.0079	61.9748	70.2774	62.6359	44.7601	55.8135	60.4484	52.2858	26.8061	45.7928	60.9764		0.0588238	49.3395
1.5488	35.3479	30.6662	51.5205	69.2211	51.8881	47.7265	57.9269	59.0659	59.1467	42.6123	43.0788	25.2022	16.5823	39.4857	44.3778	48.5085	58.4959	70.4469	68.9576	44.285	55.182	64.1284	53.3896	23.8153	37.6558	59.5128		0.063724	48.3933
1.668	34.9178	30.9322	47.5832	72.0309	49.9312	48.7139	55.3379	61.9448	59.0705	39.213	40.2603	28.4475	17.8786	37.918	45.9124	45.2676	59.2717	70.0044	71.0252	46.5863	59.24	66.8251	52.1441	20.6633	33.0947	57.9753		0.0686284	48.1612
1.7871	33.8908	30.9301	43.4051	71.4312	45.6296	46.2111	54.8603	67.8434	56.0659	36.3397	36.7169	31.6021	19.0814	37.7718	45.3366	42.4765	56.1875	61.0483	70.1805	41.3678	57.9732	67.2866	48.0093	18.191	27.3469	54.6681		0.0735287	46.2251
1.9063	32.5127	29.5551	39.2457	69.376	43.6715	44.9289	55.5854	65.6016	54.9366	36.0649	34.4227	33.8899	20.4933	38.2926	43.608	40.8098	52.6344	55.2808	68.5569	36.0382	57.5228	69.6192	46.403	17.7473	22.2518	50.4264		0.0784331	44.5952
2.0254	32.107	29.1848	36.1038	70.1358	42.0742	45.0352	57.0351	66.0731	49.4187	34.8817	30.8755	34.2296	23.6754	35.417	43.5155	37.5573	45.5848	46.9195	63.8709	35.2418	57.3642	72.3388	40.8117	14.4281	21.424	43.8245		0.0833333	42.6588
2.1445	31.6951	29.2126	32.7776	67.7634	43.0054	42.1982	56.5753	64.0088	45.5778	31.7838	31.3468	36.2278	27.853	33.1702	42.8657	37.2202	43.6787	38.7496	63.0155	32.8761	57.4085	73.1231	38.9291	13.0784	15.9341	42.7911		0.0882336	41.2641
2.2637	31.7467	29.1958	30.1174	67.4031	44.1335	38.8561	55.0024	65.4388	44.2715	31.0861	30.4645	36.0651	32.0255	30.185	42.9365	33.9773	37.7113	32.871	62.309	31.1515	56.2829	76.3492	38.694	10.7027	14.3151	41.4548		0.093138	40.1826
2.3828	31.3306	28.1552	28.4936	63.8956	42.8141	37.6631	53.1344	62.6024	42.7767	27.9592	29.8092	33.3372	35.7459	29.1832	40.6875	32.2422	33.9215	26.6473	54.8989	27.8297	55.1919	75.8691	36.929	9.6137	13.1046	37.9412		0.0980382	38.1453
2.502	32.1691	26.8521	26.9891	63.8448	44.0098	37.6424	49.7726	62.1925	41.6082	28.1258	29.3557	32.4591	37.6761	28.9877	40.5951	30.6784	29.8864	21.264	49.4767	27.0416	51.7368	78.3264	35.1868	9.9973	10.8772	33.1246		0.102943	36.9183
2.6211	29.6796	24.9543	25.5311	62.9961	45.6728	36.013	49.8945	62.2641	36.0718	25.1986	31.0713	32.2028	42.1597	25.9789	37.3173	29.0002	27.3776	17.3652	43.7553	26.4485	49.409	78.9287	34.1338	9.0991	11.256	31.4346		0.107843	35.5851
2.7402	29.4238	25.0001	26.5046	62.3741	48.1906	35.8638	48.3335	60.3202	35.2327	27.1699	31.4869	28.2958	46.5119	24.2992	37.5773	27.1843	23.678	15.4223	38.2022	25.9396	48.3958	76.2944	32.7439	9.2188	10.5917	27.0315		0.112743	34.6649
2.8594	31.7415	22.9743	24.3038	63.2699	44.7712	36.4661	44.4903	60.9394	32.1473	26.4346	30.3304	30.8915	46.5714	23.9043	34.5715	24.4639	20.9166	13.5587	32.9276	21.1236	48.7602	76.405	30.0121	8.0732	9.7787	22.3081		0.117648	33.159
2.9785	32.3482	25.5274	25.0383	63.4353	45.4809	36.2819	44.7277	62.7051	31.3096	25.56	30.6095	30.6756	47.7646	23.6524	32.2645	21.3753	18.661	12.6412	28.6034	20.2547	48.0448	77.3448	29.598	7.7211	9.012	20.7495		0.122548	32.7456
3.0977	31.3828	24.2806	23.3903	63.3841	45.975	37.8292	45.0966	65.7431	30.0938	26.0742	28.8515	29.065	51.3329	23.8274	28.6408	18.9016	15.8489	9.4424	24.6338	19.7932	44.6676	74.2912	28.5909	8.524	7.3112	19.1952		0.127452	31.7757
3.2168	31.7706	22.9026	22.6087	61.7191	43.0965	38.6806	46.6448	62.3849	32.6082	24.2893	26.825	28.26	52.7323	23.2296	25.9643	16.6627	15.9126	9.4739	20.5077	16.3968	41.9321	72.0688	26.3795	7.3864	6.5633	16.0529		0.132352	30.502
3.336	32.3312	22.7897	22.5351	61.0562	42.0343	36.1734	44.3567	58.9477	35.1848	23.1504	25.5739	27.6238	52.6444	20.2391	20.7539	14.0285	14.3202	8.793	16.8567	15.8936	41.3921	68.3208	24.9793	7.138	6.9442	14.0896		0.137257	29.1596
3.4551	30.7088	21.4451	22.3068	61.567	42.254	36.0094	43.7057	59.8652	35.0723	22.921	25.4501	28.0323	58.7099	20.1469	14.2938	12.8317	12.835	7.2049	13.0873	14.0231	41.2914	63.464	22.8661	6.2037	6.0075	12.8495		0.142157	28.2751
3.5742	29.2466	19.0223	22.7351	59.7113	42.941	36.7426	40.476	56.7845	34.6399	21.4558	23.6096	26.6668	58.4606	16.8301	12.2898	11.2652	11.186	6.2225	11.3813	13.3348	38.9585	58.9796	22.1861	5.7089	6.6064	12.4721		0.147057	26.9197
3.6934	29.843	19.5581	21.8966	58.769	43.1371	38.5207	41.8371	54.7749	35.4763	21.5563	24.6091	24.5182	56.534	15.1354	8.9183	9.2534	9.7122	5.9925	10.1881	12.7129	38.4448	50.8645	21.1697	5.5137	5.6548	11.0412		0.151962	25.9858
3.8125	30.3356	18.9556	19.9022	60.9433	42.4928	36.5156	42.8726	52.6196	34.9244	20.8068	23.7746	23.0018	53.2444	13.1041	7.5726	7.7204	8.7755	5.9857	9.5968	11.1541	35.022	40.1918	21.3713	5.2007	5.287	11.3418		0.156862	24.7197
3.9317	29.0176	17.5288	21.2957	61.0734	41.5852	37.2747	42.0557	52.7599	35.3286	18.1315	23.2411	20.2557	51.5803	9.786	5.6127	6.6099	8.6888	4.9953	8.7131	9.7592	34.7607	30.7089	21.9195	5.3009	5.532	11.2499		0.161766	23.6448
4.0508	26.5624	16.8686	20.1198	58.7619	41.4392	35.3919	41.2417	52.9711	35.5806	19.2673	21.9437	18.7609	47.0045	6.7117	4.6339	4.8213	6.8058	5.4152	7.2973	7.6411	35.8157	24.4517	21.6615	5.3683	5.9945	9.8558		0.166667	22.3995
4.1699	25.1375	15.9472	19.1006	59.9315	41.8136	34.2558	40.3841	52.2359	34.687	18.0723	21.9191	18.0715	44.0035	5.5414	4.1446	4.8833	6.0075	5.047	7.8405	6.3075	32.2997	18.8239	20.8057	5.3198	5.3242	8.8478		0.171567	21.4136
4.2891	23.3677	15.4938	19.3861	54.8919	40.5013	35.478	39.3682	48.7933	36.6245	18.451	20.1772	19.7187	40.6532	4.3947	3.7137	4.7034	5.9493	4.4011	7.3418	5.2042	30.6669	14.6679	21.8607	4.6281	4.3319	8.3076		0.176471	20.5029
4.4082	23.0619	14.1744	19.3836	52.8443	38.658	33.7031	37.5825	47.6169	34.9138	18.9241	18.642	19.2085	33.6852	3.5199	4.0818	4.852	5.1753	3.3815	6.9605	4.0203	27.9317	13.8516	21.1658	4.482	4.7706	8.0408		0.181372	19.4089
4.5274	21.761	13.9857	18.5682	52.3851	37.5574	32.8072	36.9684	49.2764	35.8051	18.7884	15.6526	19.2341	25.6559	2.7313	2.8552	4.3504	5.2388	2.9458	4.995	3.8825	22.7223	11.6208	19.4935	4.9293	4.1448	7.2464		0.186276	18.2924
4.6465	18.8716	12.0263	17.6097	49.3991	38.0419	33.4264	37.5181	50.6586	39.4682	16.8488	15.1921	18.6022	22.0099	2.5892	3.1936	3.6488	4.4939	3.5143	5.2532	4.151	18.7451	10.49	18.4202	4.567	4.3035	8.2114		0.191176	17.7405
4.7657	19.6871	11.1537	19.0892	47.5061	37.879	32.9765	35.319	48.6727	36.3086	17.0931	13.8387	15.8848	18.2692	3.2069	3.2521	3.3812	4.3117	3.4063	5.927	3.716	14.3465	9.558	16.8256	3.9263	3.9752	7.4892		0.196081	16.8077
4.8848	20.8381	11.0727	18.3214	47.5005	36.1147	33.3151	37.1798	50.3965	35.5352	15.4233	13.9122	12.9645	15.1552	2.7414	3.1762	3.5033	4.3001	2.6918	5.0092	3.5696	10.9288	8.5263	15.1397	4.2153	3.7995	6.4081		0.200981	16.2207
5.0039	18.4576	9.5461	16.7005	44.2389	36.8157	31.7652	36.4686	49.1827	31.7752	14.2049	14.1873	9.3259	12.7258	2.4259	3.3881	2.5503	3.8719	2.4979	5.011	3.3116	7.8387	8.6506	14.7601	5.0979	3.4568	5.6043		0.205881	15.1484
5.1231	17.6537	9.274	15.6389	42.2098	36.3886	33.7271	37.0769	48.167	29.5217	14.3114	11.6668	7.3386	9.0916	2.4659	3.3066	2.6184	3.4757	2.2752	4.978	2.7017	7.2565	8.3299	14.7419	3.8007	3.0257	5.7174		0.210786	14.4908
5.2422	18.0195	9.1937	14.4401	41.0675	38.0072	36.3323	36.5643	46.2078	27.9645	12.3502	10.0561	5.7442	7.9069	2.5986	2.4701	2.5756	2.9103	2.0557	5.0771	2.5466	5.9056	7.3726	13.3593	3.3644	3.4099	4.8783		0.215686	13.9376
5.3614	17.4329	7.6777	13.5654	38.3521	38.4202	35.8753	36.9593	48.1313	28.09	12.2095	7.8071	4.4323	6.7762	2.121	2.6577	2.2904	2.7211	2.1897	5.0123	2.2002	4.8342	6.4162	12.6405	3.0583	3.4542	4.3578		0.22059	13.4493
5.4805	14.8089	6.6341	13.2649	35.4676	40.1444	34.2054	36.3582	47.7001	24.0534	9.6166	5.8554	3.0896	6.5718	2.1217	3.0636	2.3025	2.5139	2.2585	5.3484	1.5581	4.3196	6.0469	11.5974	3.2751	3.0613	4.5725		0.22549	12.685
5.5996	13.3524	6.1411	11.1723	35.5677	38.6262	35.7669	35.6795	47.6013	21.4931	6.7209	5.0073	3.0127	6.0036	1.6886	2.8831	2.1693	2.0795	1.463	4.6598	1.4797	4.9516	6.6678	10.0323	3.4331	2.9611	3.6106		0.230391	12.0856
5.7188	10.8849	6.4876	10.8551	35.2723	41.2827	35.1032	36.9613	46.7429	19.1672	5.5373	4.4302	2.7215	5.8734	1.7281	3.4115	2.3675	2.7409	1.7835	4.9254	1.6041	4.5725	6.4943	8.8017	3.014	3.3226	3.8075		0.235295	11.919
5.8379	10.3861	5.8936	9.8553	33.3655	40.226	34.3436	38.3833	46.4954	17.0392	3.9858	3.082	2.8669	5.5623	1.7724	3.8711	2.1308	1.773	1.8623	4.4337	1.5614	3.1717	7.0821	7.2157	2.7128	3.1326	3.6256		0.240195	11.3781
5.9571	8.9687	5.0359	8.7301	30.8919	41.1504	33.2298	38.8512	41.2857	16.0165	4.007	2.7197	3.4259	5.2873	1.6539	3.993	2.9984	1.4136	1.7602	4.5997	2.0025	2.9209	6.8336	5.5101	2.4062	3.1608	2.9795		0.2451	10.8397
6.0762	8.6171	4.4753	8.7867	29.3771	42.5172	35.2896	39.0824	38.8511	13.6869	3.4573	2.0931	3.2577	4.9888	2.1164	4.3946	2.664	1.4125	1.8085	4.4399	1.5562	2.6318	6.7713	4.645	2.9209	2.2162	2.4607		0.25	10.5584
6.1953	7.3438	4.4463	7.9539	25.2959	44.2674	35.4803	40.7458	33.8781	10.1533	2.9617	2.1574	3.1114	6.5997	2.0501	4.4656	2.7723	1.6714	2.1945	4.4858	0.9521	2.4856	6.1554	4.9969	3.1124	2.1524	2.714		0.2549	10.1771
6.3145	6.5797	4.3274	7.6471	22.7847	48.1628	36.6785	39.3454	28.1798	7.0851	3.192	2.0532	3.5147	6.1756	1.8293	4.4728	2.5918	1.3902	1.6117	4.7623	1.5634	2.36	5.6795	5.0169	2.4464	2.0608	2.3322		0.259805	9.7632
6.4336	4.8836	3.6229	6.2635	20.1102	44.2936	36.1026	38.4225	26.2565	6.0507	3.0105	2.2047	2.6922	5.9684	1.5341	5.599	2.4655	1.466	1.0786	4.4549	1.5565	2.5325	6.3238	3.5052	2.5203	1.7517	2.1644		0.264705	9.10902
6.5528	4.3486	3.237	5.6629	16.477	44.3819	36.701	37.039	21.8285	5.7932	3.0152	1.6171	2.5264	4.5477	1.5778	5.3371	2.6046	1.3801	1.6726	3.8813	1.2987	2.3431	6.3131	3.0383	2.2596	1.9156	2.2803		0.269609	8.57991
6.6719	3.9423	3.0935	5.9514	13.6093	45.696	38.6546	39.9601	17.6506	6.1222	2.9799	1.795	2.812	4.8094	1.8531	5.9262	3.0685	1.0753	1.44	4.6265	1.7612	2.0096	5.9374	3.1595	2.2002	2.1135	2.0295		0.27451	8.62603
6.7911	2.6759	3.8129	4.9945	12.4062	42.4592	38.6543	40.5912	13.8877	5.7869	2.5321	1.7149	2.6476	5.3017	1.9713	5.7244	2.6758	1.2789	1.1074	4.5279	1.3333	2.3178	5.6041	3.0695	2.2469	2.2183	1.85		0.279414	8.20733
6.9102	2.7044	2.9369	4.5721	9.7543	39.9347	37.4286	38.7237	11.2873	4.9206	2.2354	1.7443	2.3116	5.1579	1.3498	5.6886	2.3584	1.3044	1.3944	4.8807	1.3229	2.1492	5.8668	3.8179	1.9757	1.4637	1.9522		0.284314	7.66294
7.0293	2.6623	2.8612	4.8956	8.6026	34.9746	38.6498	38.538	9.2998	5.1316	2.8185	1.8305	3.2409	5.9746	1.557	6.2375	2.7048	1.488	1.1534	5.5266	1.5508	2.1003	5.8449	3.1316	1.9196	1.5364	1.9491		0.289214	7.54538
7.1485	2.568	2.6187	4.9044	6.4509	28.4909	39.1589	36.9693	7.3844	6.2089	2.3434	1.7784	3.5443	5.3465	1.7827	6.084	3.0387	1.3826	1.4448	5.8193	1.4843	1.9857	6.4458	3.4508	1.8556	1.2526	2.0813		0.294119	7.14905
7.2676	2.3617	3.142	4.0854	5.7402	25.9873	36.844	35.2485	6.4682	4.9548	2.4282	1.595	3.7949	5.5261	2.2068	5.7639	2.796	1.3487	1.302	7.0225	1.1527	1.997	6.1871	3.0878	1.7756	1.6807	2.1761		0.299019	6.79512
7.3868	2.1592	2.1645	4.5719	5.5512	20.2041	34.1401	33.875	6.068	4.4345	2.1446	1.7827	4.2884	5.8935	2.1651	5.8207	2.4435	1.4276	1.0168	8.8277	1.1365	1.815	6.1878	3.2517	1.8481	1.8916	1.9802		0.303924	6.42654
7.5059	2.3182	2.0342	3.6646	5.3448	15.7669	32.9115	30.9181	6.0285	4.1013	2.0583	1.3756	4.1864	6.2687	1.8217	5.9556	3.011	1.3485	0.9424	8.8653	1.4927	1.6637	6.2083	3.1366	1.4143	1.6974	1.7161		0.308824	6.00964
7.625	2.0204	1.5943	3.5689	5.3227	14.0274	28.0128	28.1861	5.2879	4.7254	1.9589	2.1116	4.7596	6.2486	2.1531	5.4463	2.9185	1.5321	1.3581	7.3388	1.3084	1.6674	5.3123	2.6498	1.1408	1.208	1.8094		0.313724	5.52568
7.7442	2.1221	1.7182	3.8118	4.793	11.027	23.9348	26.2357	5.1925	4.0114	1.9179	1.7554	5.167	5.7188	3.0026	5.6472	2.91	1.4347	1.2051	7.6084	1.2379	1.4834	5.2212	2.7304	1.5515	1.655	1.3553		0.318628	5.17109
7.8633	1.9329	1.7711	3.5278	4.1412	9.1075	18.166	22.0595	4.7878	3.6359	1.5149	1.7656	5.031	6.5565	2.7249	5.4758	3.3285	1.197	1.3574	7.7651	1.1428	1.8122	5.049	2.6051	1.3328	1.3369	1.6904		0.323529	4.64675
7.9825	2.097	1.4894	2.9873	3.5379	8.6219	13.712	19.172	4.767	3.1582	1.3499	1.9057	4.8854	6.8968	2.0967	6.0013	2.9434	1.1829	1.2291	8.0025	1.3924	1.6395	5.6889	2.5018	1.3998	1.1361	1.5637		0.328433	4.28302
8.1016	2.2423	1.5914	3.413	3.9202	7.0644	10.1408	16.1798	5.0853	3.0948	1.3864	1.3963	4.6788	7.8379	1.9784	7.2477	2.6363	1.0822	1.3669	7.3364	1.3377	1.6743	5.2808	3.2724	1.2544	1.0798	1.4963		0.333333	4.04135
8.2207	1.5004	1.4666	4.2703	3.8619	7.0564	7.5397	12.0749	4.7111	3.5542	1.5273	1.438	4.4971	7.2849	2.7268	7.841	3.3408	1.2495	1.0406	8.1971	1.4421	1.9284	4.9091	3.0312	1.2302	1.3947	1.4277		0.338234	3.867
8.3399	2.0922	1.8619	3.9577	3.5395	7.0698	5.4715	10.5972	4.7974	3.554	1.0613	1.7069	3.2675	7.8916	2.4425	7.5696	3.073	1.2572	0.8841	9.5435	1.3396	1.4981	5.7509	3.0371	1.3773	1.3341	1.5981		0.343138	3.75283
8.459	2.0848	1.9176	3.7116	3.6721	6.9391	4.9976	9.0406	5.421	3.1766	1.3487	1.8476	2.7519	8.4337	2.8072	8.6222	3.0361	1.0801	1.302	8.8189	1.0234	1.4468	5.9023	2.8714	1.226	1.2334	1.745		0.348038	3.70991
8.5782	2.2135	1.8289	3.1223	3.5715	6.5987	5.1839	8.3602	4.9941	3.3407	1.4822	1.7653	2.4783	9.0037	2.958	8.4228	3.1539	1.4582	1.1942	7.9157	1.0484	2.1184	5.5255	3.0731	1.3726	1.0202	1.5036		0.352943	3.64261
8.6973	2.0481	1.7941	2.9005	3.6683	5.7407	4.3358	7.1827	4.9869	3.0863	1.5292	1.7915	2.4923	8.1921	2.4212	7.8407	2.6437	1.2462	1.4035	7.5602	1.3596	2.0931	6.1053	2.8896	1.1248	1.2837	1.5202		0.357843	3.43232
8.8165	2.5716	2.1093	3.3391	2.8898	6.2572	4.7197	6.33	4.9328	3.7563	1.5564	1.5341	2.5347	9.7942	2.4143	6.8671	2.7298	1.5267	1.4568	7.3184	1.6146	1.9881	5.9503	3.0067	1.2155	1.6691	1.4274		0.362747	3.51962
8.9356	2.6748	1.9313	3.2976	2.6982	5.8194	3.9273	6.5261	4.8198	3.0641	1.4411	1.5136	2.1738	9.2101	2.2391	5.8432	3.1218	1.2073	1.3887	6.825	1.6161	1.8129	6.2122	2.8771	1.3195	1.2099	1.6281		0.367648	3.323
9.0547	2.1913	1.6687	3.2375	3.1585	5.0992	4.0448	6.9927	5.8313	3.2319	1.5243	1.1094	2.2505	9.7724	2.2988	6.6387	2.9128	1.3616	1.6753	7.2185	1.4854	2.4671	7.808	3.15	1.2176	1.5166	1.4247		0.372548	3.51106
9.1739	2.1656	2.0494	2.6742	3.4352	5.3831	4.2945	7.2431	5.527	3.9984	1.4211	1.3088	2.4966	9.4156	3.438	7.1841	2.9773	1.593	1.266	7.4558	1.1121	2.2622	7.7353	2.938	1.2058	1.1976	1.4916		0.377452	3.58728
9.293	2.638	1.7028	2.5902	3.0418	5.6452	4.7589	7.707	6.5566	2.7138	1.4883	1.6915	2.4405	10.0791	3.2858	6.0398	2.7197	1.4785	1.3524	8.1209	1.4772	2.1969	7.021	3.061	1.0927	1.0525	1.2898		0.382352	3.58623
9.4122	1.6385	2.0769	2.3866	2.8584	4.9531	4.6012	6.737	5.2231	2.7057	0.9632	1.5627	2.5507	10.6355	3.5371	5.9354	3.2175	1.4225	1.3923	7.3392	1.719	2.3005	8.4398	3.2777	1.2301	1.381	1.3133		0.387257	3.51531
9.5313	2.3503	1.6215	1.9979	2.7481	5.1429	4.2187	6.1775	6.234	2.7516	1.1295	1.6663	3.5155	12.6247	3.6765	7.5816	3.001	1.4333	1.3785	7.9805	1.3136	1.8788	8.5553	2.9853	1.2869	0.9298	1.453		0.392157	3.67818
9.6504	2.1327	1.5644	1.9352	2.7862	6.3667	3.9887	6.9675	6.1069	2.6298	1.9899	1.7145	3.1311	14.7604	3.5116	8.2385	2.633	1.5418	1.3784	9.1406	1.3511	1.5	8.5743	3.1575	1.4207	1.0361	1.411		0.397057	3.88341
9.7696	2.4059	1.8916	2.0401	2.6271	5.6022	4.8826	6.7034	6.3034	2.6898	1.6568	1.5151	3.1259	16.3125	4.063	8.1709	2.7036	1.6666	1.3322	11.1014	1.785	2.0454	9.0502	3.1672	1.4996	1.2263	1.3489		0.401962	4.11218
9.8887	2.2163	1.4813	1.9015	3.1936	5.9288	3.9076	6.5458	6.1862	2.5118	1.5831	1.1161	2.8685	16.176	4.2373	9.2213	3.4773	1.6741	1.2095	11.8292	1.5399	2.3027	10.0611	3.358	0.9383	1.664	1.5731		0.406862	4.18086
10.0079	2.4663	1.4026	1.7934	3.0878	5.8129	4.5571	6.4822	5.6112	2.522	1.4217	1.9451	2.4639	17.1859	4.2182	10.3784	3.6504	1.384	1.0081	13.0237	1.5139	2.3281	10.5343	3.0431	1.1625	1.456	1.9091		0.411766	4.32161
10.127	1.9924	1.601	1.8947	3.1366	6.6288	4.273	7.4724	5.1615	2.884	1.2273	1.8216	3.2173	16.9855	3.94	11.1886	3.2346	1.2438	1.4805	13.7558	1.9745	1.9067	11.2798	3.0855	1.5799	1.5531	1.2379		0.416667	4.45218
10.2462	2.6825	1.509	1.6724	2.6741	6.129	4.2946	7.9018	5.0311	2.5685	1.2741	1.7689	2.766	15.7757	3.4827	10.9445	3.5462	1.5446	1.1579	15.7131	2.0418	2.3606	11.2954	3.2417	1.2753	1.2518	1.489		0.421571	4.43817
10.3653	2.2778	1.5	1.4104	2.3188	6.5363	3.837	7.6102	4.9315	2.5287	1.4351	1.7752	2.9169	15.858	4.2628	10.4186	3.0027	1.345	1.1797	16.4601	2.1846	2.6863	9.8883	3.3234	0.9318	1.4466	1.4175		0.426471	4.36474
10.4844	2.7511	1.8101	1.844	3.3547	5.8985	3.8478	6.6297	4.9874	2.8217	1.3889	1.7799	2.5106	15.2066	3.8283	9.7344	2.6961	1.6166	1.3691	14.6773	2.4677	2.4194	9.7158	3.9807	0.9979	1.2306	2.061		0.431372	4.2933
10.6036	2.6408	1.758	1.9374	3.3413	5.3487	4.1375	8.2647	5.7655	2.6805	1.3261	2.1435	2.5767	14.9726	3.5369	9.0733	2.8058	1.8194	1.3268	15.2026	2.2235	2.2207	10.2756	3.9862	1.3628	1.5334	1.4094		0.436276	4.37191
10.7227	2.6389	1.4432	1.5577	2.8766	5.1418	3.8189	7.311	6.0856	2.4487	1.308	1.9459	3.2425	15.419	3.5492	7.2659	2.4541	1.3954	1.3686	14.5127	2.379	2.1017	11.379	3.5215	1.2221	1.491	1.6601		0.441176	4.213
10.8419	2.5435	1.4344	1.3413	3.2869	4.5881	3.874	6.7488	5.8469	2.0855	1.2968	2.3946	3.1156	16.5837	4.1104	5.868	2.5758	1.1334	1.3612	13.6256	1.8612	2.5217	12.1353	3.4105	1.5215	1.1731	1.56		0.446081	4.15376
10.961	2.3755	1.9174	1.7549	2.9156	4.963	3.8646	7.9601	5.5432	2.4717	1.4535	2.5498	2.7449	17.3727	3.4857	6.0849	3.4334	1.4522	1.25	14.3979	1.7769	2.8718	11.5668	3.3639	1.3725	0.9996	1.3894		0.450981	4.282
11.0801	2.7046	1.4915	2.1852	2.9864	5.753	3.6857	6.3674	6.1396	3.0387	1.2965	2.4942	2.7337	17.8908	4.5357	5.7309	2.9585	1.0228	1.3919	15.1714	1.7364	2.651	9.4569	3.7667	1.3248	1.2818	1.5455		0.455881	4.28237
11.1993	2.6641	1.527	1.9994	3.2953	5.1703	3.3791	6.4919	6.014	2.8749	1.4589	2.493	3.1136	16.2051	4.1538	5.1539	3.0409	1.0973	1.2296	14.7764	2.4193	2.5637	8.9322	3.4982	1.3866	1.2338	1.7598		0.460786	4.15123
11.3184	2.4584	1.8389	1.789	3.5527	5.4379	4.3898	7.0718	6.5463	3.1303	1.3715	2.7038	3.0083	16.2866	3.2776	4.962	2.6031	1.5004	1.6377	14.4509	2.31	2.8386	7.4354	3.2738	1.4875	1.5561	1.4251		0.465686	4.16706
11.4376	2.6759	1.5803	2.1165	3.5461	6.2427	4.1138	7.4595	6.2144	3.6824	1.6905	2.6428	2.9625	15.8082	3.5901	5.4643	2.5206	1.4419	1.4294	15.1248	1.5247	3.5904	6.7927	3.8215	1.3398	1.6131	1.8936		0.47059	4.26471
11.5567	2.5406	1.6761	1.9874	4.5096	6.4946	3.578	6.8953	6.7792	3.6895	1.6085	2.5281	3.276	13.297	3.7412	4.4832	3.0596	1.2653	1.3132	13.0544	1.6627	3.6786	8.0465	4.5812	1.1015	1.4166	1.4696		0.47549	4.1436
11.6758	2.6966	1.6741	2.1768	4.4379	5.3111	3.6559	6.3181	6.7286	4.0499	1.2491	2.7272	2.7727	15.563	4.2682	4.5872	2.3215	1.4238	1.9036	10.2584	1.9352	3.5952	8.2492	3.8544	1.3256	1.4815	1.4268		0.480391	4.0766
11.795	2.3237	1.9356	1.9572	5.388	5.1632	2.9757	6.3558	7.4538	4.2165	1.2594	2.2917	3.0833	16.3829	5.0203	4.1488	2.4385	1.6381	1.9922	8.4756	1.8362	4.5722	6.1692	4.4433	1.588	0.96	1.7734		0.485295	4.07087
11.9141	2.7072	2.045	1.925	5.0664	5.2975	3.6364	5.7998	7.9495	3.5816	1.5423	1.7611	2.859	16.4154	4.9449	3.934	2.4632	1.7553	1.7274	7.7966	1.8516	4.1558	5.5184	4.4017	1.5771	1.1193	1.8098		0.490195	3.9862
12.0333	2.4327	1.7942	2.3049	5.8185	6.0308	3.0577	6.1039	8.7167	3.8511	1.4188	2.2648	2.9526	15.4282	4.6971	4.1376	2.0781	1.2143	1.5674	7.8649	1.4182	4.2745	5.5996	5.2714	1.0276	1.3704	1.75		0.4951	4.01715
12.1524	2.5199	2.1234	2.0459	6.1992	5.4936	3.6156	6.1364	8.2863	3.3252	1.3248	1.5838	2.9874	16.3247	4.8352	4.348	1.8813	1.1054	1.1147	8.6248	1.4079	3.1791	5.0033	5.002	1.4143	1.6935	1.6765		0.5	3.97124
12.2716	2.6698	2.0183	2.4774	6.6499	5.6665	4.1819	7.04	8.9137	3.7794	1.5287	1.6573	3.1688	14.277	5.9688	3.9031	1.8462	1.3482	1.1716	7.7265	2.0338	3.476	4.4434	4.4067	1.1077	1.6152	2.0277		0.504904	4.04245
12.3907	2.1251	1.7219	2.2743	7.2451	6.0916	3.8512	6.6119	9.2149	3.8868	1.3235	1.9038	3.0482	14.5827	5.5552	3.4912	1.8059	1.1795	1.2429	8.1118	2.1467	3.196	4.6407	4.6951	1.2514	1.226	2.052		0.509805	4.01828
12.5098	2.2397	1.3449	2.3846	8.0172	5.9956	3.6977	6.1181	8.6825	4.1897	1.3026	2.1232	3.0226	13.7096	5.9096	3.1953	1.8587	1.6555	1.2923	7.2389	1.7273	2.6652	4.2873	4.6251	1.2245	1.0334	1.8094		0.514705	3.8981
12.629	2.5661	1.8153	2.4211	8.5784	6.2957	3.5375	6.783	7.968	3.4104	1.3583	2.2657	3.4134	14.602	5.5252	2.4422	1.6966	1.5789	0.9492	6.7169	1.7289	3.3289	4.1307	5.5254	1.1799	1.3928	2.4408		0.519609	3.98659
12.7481	2.6479	2.0963	1.9742	9.0882	6.5575	3.8744	7.2949	10.7915	4.0923	1.2381	2.1135	3.3254	13.3323	5.6476	2.3275	2.0715	1.4446	1.2249	7.5601	2.0243	2.7392	4.4244	4.8467	1.477	1.5635	2.2976		0.52451	4.15675
12.8673	2.4322	1.9233	2.3076	9.6751	6.6359	4.7955	7.4219	14.4417	4.8406	1.4939	1.8921	3.4084	11.8002	6.244	2.3996	1.2582	1.3185	1.383	8.4392	1.6463	2.4186	4.9025	4.5251	1.5171	1.1497	2.1844		0.529414	4.32518
12.9864	2.1892	1.889	2.0792	9.6279	6.6031	6.172	8.5614	18.058	4.0452	1.7103	1.6717	3.2975	12.4177	6.4239	2.1954	1.5373	1.3793	1.3293	7.914	2.069	2.8519	5.487	5.0334	1.3296	1.2899	2.0719		0.534314	4.58593
13.1055	2.5379	1.7977	2.167	10.2717	5.9867	5.5693	7.9146	18.5872	4.4261	1.299	1.7011	2.4669	11.6373	7.3864	2.0097	1.3362	1.3748	1.4634	8.183	2.1872	2.5002	6.1043	5.0815	1.2545	1.6572	2.0884		0.539214	4.57651
13.2247	2.6099	2.0056	2.1922	10.7104	6.3895	6.6257	8.2842	16.6719	4.836	1.6604	2.0588	2.8793	12.1024	8.9121	1.7165	1.6717	1.7284	1.4021	7.7248	1.8611	2.6038	6.6387	5.6604	1.0788	1.3715	2.1646		0.544119	4.75234
13.3438	2.9327	2.0139	1.701	11.5674	6.6365	6.4608	7.7105	13.7828	4.8905	1.4627	1.5522	2.3026	11.8889	9.8389	2.0289	1.5825	1.6135	1.5954	6.8101	1.4603	2.4287	7.5407	5.7141	1.2695	1.1992	2.0031		0.549019	4.6149
13.463	2.4729	1.9939	1.8301	11.7215	7.1225	7.6275	8.9596	12.4497	4.181	1.435	1.6396	2.6055	13.2213	9.079	1.925	1.8988	1.3639	1.7688	6.1558	1.9982	2.1337	7.9868	6.2209	1.1218	1.2386	2.3476		0.553924	4.7115
13.5821	2.1309	1.8598	1.9128	12.0889	6.7471	7.15	8.5484	10.1381	3.6479	1.6425	1.797	2.0844	12.5668	9.2371	1.8947	1.5302	1.5968	1.414	5.9319	2.2368	2.2156	7.1247	6.4959	1.1407	1.2661	2.3547		0.558824	4.49053
13.7012	2.2707	1.5421	1.8958	11.121	7.736	7.0805	8.116	9.1386	3.779	1.77	2.1098	2.2139	13.2721	8.9497	1.8397	1.7288	1.51	1.7292	5.2335	2.6871	2.9103	7.1903	6.3618	1.0593	1.6194	1.7617		0.563724	4.48563
13.8204	2.7256	2.0155	1.4974	10.115	7.6953	6.3315	8.6376	8.83	3.1742	1.3927	2.0652	2.5636	14.738	7.9541	1.709	1.7066	1.6029	1.7034	5.5577	2.1115	2.6548	7.6905	5.9755	1.5089	1.596	2.7654		0.568628	4.47377
13.9395	2.8906	1.8258	1.5882	9.3506	8.1942	6.8406	8.081	7.7042	3.0343	1.233	1.5621	2.0933	15.2878	8.91	2.2337	1.6862	1.7451	1.7163	5.5051	1.6828	2.8624	7.1358	6.0439	1.4992	1.6183	2.1648		0.573529	4.40343
14.0587	2.697	1.5436	2.1708	8.2612	8.9758	7.2106	9.7604	7.8464	3.6661	1.3834	1.9467	1.8122	15.1099	7.9745	2.2596	1.7886	1.9844	1.7453	5.1373	2.3421	2.9382	7.5035	5.6458	1.3283	1.7965	1.6767		0.578433	4.48096
14.1778	2.447	1.7144	1.5316	6.373	8.6252	8.1253	9.4195	8.6229	2.9306	1.4778	2.0039	2.1039	15.4175	10.1615	1.8008	1.569	1.9544	1.5882	5.7184	2.215	2.9169	7.8471	6.0746	1.421	1.8807	1.6193		0.583333	4.52152
14.297	2.0966	1.953	1.8271	5.3181	9.7774	9.6355	9.231	8.3659	3.7644	1.7017	1.3373	1.8922	16.8857	9.1685	1.7597	1.9865	2.0442	1.7417	5.7837	2.2927	3.1184	7.235	5.8996	1.7485	1.8775	2.0288		0.588238	4.63349
14.4161	2.0012	1.7696	1.6978	4.2538	11.4982	11.3399	9.7838	9.0316	3.8108	1.7334	1.326	1.7589	17.5873	7.9802	1.291	2.0342	1.5363	1.469	5.7723	2.5686	3.8181	6.9076	5.4743	1.4205	1.5659	1.97		0.593138	4.66924
14.5352	2.2486	2.0515	1.6514	3.7355	14.5574	13.1212	10.932	10.0067	3.8638	1.5944	2.0727	1.6925	19.4247	7.8702	1.6467	1.8592	1.5562	1.4271	5.3914	2.8119	4.149	6.1583	6.3261	1.1589	1.4773	1.66		0.598038	5.0171
14.6544	1.7704	1.6096	1.7538	3.4443	17.2295	14.5981	12.2564	11.699	3.993	1.4852	1.6195	1.7037	18.9888	7.0444	1.4218	1.9597	1.4099	1.4677	5.2116	2.5277	4.5747	6.1951	6.3669	1.3601	1.552	1.326		0.602943	5.17573
14.7735	2.1166	1.6816	1.5996	3.2706	19.6272	19.0042	11.4968	11.937	4.9452	1.5803	1.7777	1.7208	19.0752	5.4012	1.4838	1.6389	1.5438	1.2866	4.5481	2.954	4.9874	5.9591	5.6611	1.5394	1.7309	1.847		0.607843	5.40054
14.8927	1.6585	1.7031	2.0019	2.6707	22.1453	21.0343	13.0121	11.2857	5.3133	1.4086	1.7475	1.9359	18.1361	6.571	1.8209	1.375	1.8703	1.484	4.4244	3.4092	5.0707	5.8057	5.201	1.4999	1.3073	1.5985		0.612747	5.5958
15.0118	2.0937	1.809	2.0171	2.5566	21.5817	22.4052	13.454	11.1039	4.9334	1.2013	2.0759	1.7983	19.9315	6.0944	1.7193	1.817	1.7083	1.3767	4.5881	3.9048	5.463	5.8516	4.9233	1.6996	1.6112	1.6987		0.617648	5.74683
15.1309	2.3838	1.3017	1.7552	2.3581	22.1409	23.9088	13.0289	10.4475	5.1814	1.2211	1.6634	1.8995	20.8469	6.0754	1.8801	1.4851	1.2711	1.6994	4.2967	2.9409	5.1214	4.6829	4.9522	1.9024	1.4954	2.0841		0.622548	5.69324
15.2501	1.8618	1.9493	2.1047	2.3991	21.6619	25.2793	12.9294	9.5388	5.4071	1.8675	1.9278	1.8639	20.6621	6.4014	1.7351	1.804	1.4447	1.5514	4.4874	4.1811	4.8929	4.7839	4.7001	1.7125	1.4533	1.8589		0.627452	5.7869
15.3692	2.0724	2.1113	1.7813	2.4369	21.8205	24.4985	11.597	9.3617	4.7026	1.4551	1.909	1.7005	19.494	6.3629	1.7918	1.5297	1.8452	1.7368	4.4905	4.2129	5.0404	4.7064	5.093	1.5532	1.2645	1.7074		0.632352	5.62598
15.4884	2.2154	1.5529	1.7911	2.5221	21.5431	22.3931	12.6114	9.3308	4.3956	1.2181	1.5839	1.8684	18.8712	6.3511	2.0244	1.3804	1.7604	1.414	4.4221	4.1935	5.3163	4.5208	4.8211	1.3575	1.6481	2.0574		0.637257	5.50632
15.6075	2.4639	1.81	1.2915	2.4198	21.8923	19.0822	13.1652	9.5036	4.1642	1.1365	1.3581	1.8011	19.9408	6.321	1.7695	1.7877	1.6297	1.1735	4.5803	5.0526	4.7565	5.0611	3.6864	1.3259	1.3572	1.7275		0.642157	5.39454
15.7266	2.3508	1.6118	1.6031	2.0415	19.2142	15.1153	12.709	8.2458	4.2279	1.4369	1.4324	1.8798	18.2395	6.1447	1.7014	1.4013	1.7397	1.3535	3.7985	4.1264	4.25	4.8987	3.3456	1.6519	1.5105	1.5121		0.647057	4.90547
15.8458	2.5317	1.4551	1.7591	1.5946	20.7884	12.653	14.3917	8.1765	3.5999	1.2184	1.5284	2.2358	17.1815	5.2389	1.6596	1.2401	1.6503	1.6703	3.6894	4.354	3.3532	4.7009	4.0235	1.5008	1.8012	1.8671		0.651962	4.8409
15.9649	2.3724	1.5969	1.6441	2.0873	18.2432	11.9052	13.9494	8.8235	3.7583	1.3672	1.4322	1.5113	16.6634	5.3416	1.5654	1.4094	1.2517	1.4652	4.6403	5.2129	3.6826	3.9125	4.1966	1.622	1.6184	1.5182		0.656862	4.72274
16.0841	2.0849	1.8249	1.7024	2.2196	17.8063	11.3198	13.9657	8.9749	3.4051	1.3615	1.313	1.7821	14.7414	4.7937	1.8267	1.3766	1.333	1.493	4.3383	5.4418	3.3024	4.5622	5.5832	1.4573	0.9892	1.5101		0.661766	4.63497
16.2032	2.4241	1.4294	1.6894	1.7602	17.1638	11.3594	13.4703	8.7345	3.9084	1.088	1.744	1.8339	13.1036	3.7311	1.4254	1.1862	1.5634	1.4382	4.027	5.6068	2.9415	4.2934	4.698	1.8327	1.4118	1.3872		0.666667	4.43276
16.3224	1.922	1.6082	1.5337	2.3204	18.2786	11.0183	15.6641	9.0374	3.9039	1.5036	1.8196	1.6133	11.9551	4.2094	1.5014	1.3074	1.5927	1.6944	3.6499	6.0223	3.2966	3.6236	5.032	1.9877	1.784	1.3214		0.671571	4.58465
16.4415	2.1935	1.9431	1.4121	1.8724	17.8774	10.9362	16.3464	8.5492	3.8378	1.5075	2.0698	1.8702	11.5522	3.9953	1.721	1.2791	1.8213	1.6082	3.7092	6.3892	2.8572	3.9488	5.4782	1.8149	1.3906	1.4081		0.676471	4.59188
16.5606	2.0871	1.9651	1.3072	1.8193	15.5333	10.1018	14.3817	9.188	4.9427	1.2348	1.846	2.0118	9.9637	3.9063	1.4917	1.3496	1.4567	1.1368	4.2823	6.358	3.2591	3.796	6.063	1.6122	1.305	1.3244		0.681372	4.37398
16.6798	2.2933	1.6303	1.7246	1.4746	15.8588	11.28	13.6793	8.4884	5.0732	1.5198	1.5615	2.0415	10.3088	3.4963	1.8057	1.3685	1.3067	1.594	4.2014	6.8956	3.4342	3.1048	6.2319	1.4545	1.5174	2.0116		0.686276	4.4368
16.7989	1.7256	2.0747	1.6333	1.5073	14.3767	12.6012	14.5499	8.1327	5.1697	1.4535	1.4886	1.645	10.7265	3.3476	1.6923	1.2052	1.4398	1.4552	3.507	8.1001	3.2057	3.2592	6.389	1.8186	1.2936	1.7013		0.691176	4.44228
16.9181	2.2029	1.6035	1.6605	1.8058	15.6028	14.2201	14.2357	8.1322	4.905	1.4656	1.5647	1.6438	10.1821	3.2993	1.366	1.2967	1.7123	1.5143	3.4059	7.5697	3.0544	2.9161	7.2342	1.482	1.4424	1.6166		0.696081	4.50518
17.0372	1.969	1.437	1.6574	1.9687	14.8121	13.6371	15.4981	11.6044	3.9259	1.1324	1.4662	2.2082	9.9948	2.8526	1.0817	1.2951	1.7681	1.5596	3.6128	7.434	2.901	2.5773	8.3066	1.6023	1.6361	1.9171		0.700981	4.60983
17.1563	1.7755	1.8451	1.3359	1.5781	16.2334	14.9423	16.1067	13.8896	3.8093	1.6871	1.9029	1.962	10.7391	3.2754	1.2408	1.3715	1.7185	1.6806	3.9272	8.2398	2.9818	3.0663	9.22	1.4795	1.478	1.7396		0.705881	4.97023
17.2755	2.7282	2.1173	1.6615	1.6382	17.1866	15.9083	17.6581	16.4693	4.1451	1.7459	1.3737	2.0596	11.2264	3.4473	2.0563	1.4496	1.5942	1.2277	3.9055	8.5129	3.1418	3.0813	8.5171	1.4451	1.7352	1.5621		0.710786	5.29209
17.3946	2.4149	1.688	1.6476	1.579	15.4817	15.6558	18.584	17.5593	3.8772	1.434	1.4314	1.4682	12.6858	3.0107	1.8994	1.3561	1.9359	1.6111	3.8496	9.2342	3.2277	3.2336	10.1242	1.4859	1.6424	1.8487		0.715686	5.38332
17.5138	2.8418	1.5857	1.6646	1.5259	13.0663	15.4753	18.583	19.1642	3.4791	1.0864	1.5471	1.5221	14.2853	2.8087	1.6585	1.5306	2.0694	1.6512	3.8582	8.5838	3.1191	2.8949	9.7753	1.8739	1.4925	2.1378		0.72059	5.35695
17.6329	2.3047	1.4417	1.8236	1.3301	13.64	14.556	19.3226	17.5265	3.6198	1.3597	1.3816	1.7969	13.1628	2.7154	1.3804	1.6659	1.7107	1.3647	4.3581	9.8614	2.9734	2.6676	10.769	1.4203	1.7151	1.7149		0.72549	5.29165
17.7521	1.8362	1.7038	1.6702	1.4214	14.2615	12.1212	21.0673	15.9512	2.9155	1.7283	1.3909	2.1007	14.0537	2.7401	1.5805	1.4569	1.3101	1.6879	3.8638	9.3769	3.0581	3.2094	11.3971	1.2896	1.6993	1.464		0.730395	5.24445
17.8712	2.2449	1.5038	1.5307	1.5353	14.2442	10.8632	23.2792	13.4714	3.7804	1.3073	1.4984	1.8751	15.3055	2.4304	1.2607	1.3349	1.1611	1.5252	3.7406	9.787	3.3343	2.6195	10.6259	1.4937	1.436	1.5948		0.735295	5.18398
17.9903	1.9674	1.6396	1.4823	1.8353	14.4701	10.563	25.0835	11.22	4.3567	1.0407	1.7056	1.8224	16.5803	2.4547	1.2002	1.847	1.1972	1.5416	3.9295	9.2119	3.4961	2.753	11.0303	1.4107	1.1738	1.5188		0.740195	5.25122
18.1095	1.8188	1.6785	1.8845	1.7847	15.2046	9.7968	25.172	10.4182	4.4718	1.4638	1.5682	1.6133	16.2515	3.1108	1.756	1.5573	1.5537	1.7932	3.3561	10.2411	2.8857	2.8499	10.9282	1.5119	1.6163	1.4705		0.7451	5.29836
18.2286	1.9417	1.8298	1.9563	1.5206	14.5744	9.7695	25.871	9.3921	3.7024	1.5718	1.2995	1.6056	16.6868	3.4175	1.4826	1.3022	1.6607	1.786	3.7547	9.6131	2.9608	2.8412	10.3668	1.9627	2.1299	1.7246		0.75	5.25863
18.3478	2.0399	1.45	1.7853	1.601	14.9959	9.8127	25.6053	7.5905	3.7913	1.5578	1.2687	1.7406	15.4709	2.7117	1.6485	1.1604	1.8888	1.9811	3.7026	10.6129	2.7438	2.7144	10.7636	1.8536	1.8942	2.0347		0.754904	5.17001
18.4669	2.2779	1.6299	1.5518	1.5511	14.7684	9.2293	26.199	8.4591	4.4968	1.7007	1.5261	1.7244	15.8971	2.4768	1.359	1.0883	1.4352	1.873	3.7512	10.692	2.8347	2.4104	11.6465	1.716	1.5872	1.7031		0.759805	5.21481
18.586	1.8303	1.6738	1.6864	1.5287	14.5535	9.3073	25.3523	7.2898	4.2973	1.2004	1.847	1.8061	15.5433	2.4876	1.6256	1.3819	1.778	2.2729	3.7031	11.7382	2.7481	2.0747	11.7067	1.3833	1.4025	1.6218		0.764705	5.14772
18.7052	1.7636	1.5624	1.6315	1.8124	15.7871	8.7957	24.2396	8.1583	3.7142	1.2439	1.3544	1.8004	14.5851	2.2144	1.9155	1.8093	1.6349	1.7857	3.2344	11.8397	2.4264	2.9576	12.1407	1.9374	1.9233	2.0617		0.769609	5.16652
18.8243	1.9352	1.8757	1.9201	1.6165	14.6884	7.6883	24.5097	8.5388	4.0165	1.2513	1.5859	1.9108	12.7716	1.825	1.4359	1.3568	1.4344	1.6994	3.4069	11.1515	2.401	2.6506	11.9152	2.0349	1.481	2.058		0.77451	4.96767
18.9435	2.09	1.5331	1.4428	1.7526	16.4219	8.8553	24.7175	8.6139	4.1078	1.1038	1.3658	2.1367	12.5061	1.7019	1.4056	1.3484	1.5412	1.6327	3.8752	11.9118	2.3969	2.2112	12.4106	2.1017	1.5101	1.7464		0.779414	5.09388
19.0626	2.0849	1.7191	1.5683	1.444	17.558	7.8576	24.7833	9.4742	4.8884	1.3014	1.3209	1.9566	10.7555	2.0791	1.3519	1.6004	1.5068	1.5603	4.6321	13.09	2.564	2.2001	13.5925	1.6572	1.6709	1.8839		0.784314	5.23467
19.1817	1.8462	1.8453	1.5813	2.026	19.0981	7.5771	26.1095	8.0994	4.5719	1.3716	1.7442	1.8876	10.222	2.4005	1.4492	1.3054	1.4811	1.6391	4.3123	13.1943	2.1085	2.9051	13.0146	2.0193	1.3705	1.956		0.789214	5.27447
19.3009	2.3537	1.9773	1.3882	1.5495	20.9176	6.8979	27.1512	8.6932	4.1014	1.3515	1.3021	2.2221	9.3905	1.9612	1.7336	1.173	1.6033	1.8891	4.4924	12.5457	2.3241	2.7509	11.7973	2.1247	1.5173	1.7263		0.794119	5.26673
19.42	2.2255	1.927	1.5808	1.8218	21.4262	8.1932	28.9691	8.4655	4.8212	1.0872	1.3421	1.7345	8.9073	2.5353	1.5005	1.3925	1.9419	1.7051	4.1633	13.122	2.604	2.8975	12.9275	2.4389	1.7274	1.8232		0.799019	5.51079
19.5392	2.1028	1.6965	1.4926	1.8568	21.9006	8.8736	30.669	6.9659	4.6676	1.3089	1.5589	2.1726	9.948	2.072	1.5612	1.2233	1.6292	1.3643	4.091	13.5724	2.2522	2.6498	13.8055	2.0475	1.5897	2.1182		0.803924	5.58423
19.6583	1.9933	1.547	1.3885	1.9189	22.7823	9.8713	30.1517	7.0731	5.5191	1.3515	0.9436	1.5434	9.8429	2.4903	1.3038	1.5824	1.7288	1.9845	4.9545	14.3967	2.3249	2.694	14.2571	2.435	1.8603	1.4871		0.808824	5.74715
19.7775	1.584	1.5121	1.6639	1.7686	22.3733	10.3622	31.3323	7.3708	5.6054	1.7063	0.9888	1.7938	9.2547	1.7843	1.5229	1.6255	1.8623	1.7789	5.5536	13.5339	2.1668	2.6379	13.7169	2.3012	1.8165	1.9839		0.813728	5.75388
19.8966	2.0298	1.365	1.6223	1.6784	22.6252	10.4921	31.9531	7.0003	5.3241	1.4755	1.2431	1.5296	8.9487	1.8147	1.7987	1.3276	1.9363	1.78	5.8206	14.0472	2.4126	3.3356	13.1925	2.6284	1.8629	1.9376		0.818628	5.81469
20.0157	1.8614	1.4878	1.1928	1.789	21.1882	10.4944	32.5373	6.4154	5.1165	1.5973	1.4049	1.5309	9.8533	1.4652	2.0086	1.682	1.706	1.791	6.2193	14.3682	2.3656	3.3544	12.5054	3.1842	1.9056	2.3429		0.823529	5.82183
20.1349	1.837	2.3119	1.2743	2.0482	21.7242	11.3241	33.6253	6.4073	3.9879	1.5629	1.6024	0.9871	10.081	1.9626	2.3429	1.8857	2.0402	2.0287	6.3766	15.3965	2.2374	2.9434	11.6012	2.4581	2.1954	2.2022		0.828433	5.94017
20.254	2.1756	1.9369	1.576	1.9737	24.4104	12.8292	31.5804	7.2918	3.9144	1.5543	1.3159	1.8623	11.4474	2.1915	2.2104	1.5012	2.0154	2.113	7.3643	14.667	2.7761	4.163	12.1424	2.7158	1.7797	2.3414		0.833333	6.22498
20.3732	2.0725	1.8606	1.6282	1.3538	24.8406	13.2546	32.2032	7.3074	4.1019	1.3997	1.3687	2.3323	9.5429	1.6703	2.6768	1.3164	1.9005	2.307	7.3502	14.9222	3.058	4.7478	12.0282	2.8704	1.6342	2.2706		0.838238	6.2315
20.4923	2.0333	1.9501	1.7834	1.8322	25.146	13.879	32.4687	6.7772	3.9452	1.6359	1.2873	2.2078	11.6691	1.8834	3.1658	1.3445	2.2608	1.8352	8.8364	16.9571	2.9579	5.342	11.8298	3.1063	1.9614	2.4005		0.843138	6.55755
20.6114	1.8383	1.6922	1.7094	1.8519	25.2447	17.9872	33.9145	7.2474	3.7437	1.3506	1.2644	2.1314	10.9073	2.0518	3.2265	1.432	2.1164	2.5002	8.7287	17.3047	2.8017	6.4674	10.9849	3.0417	2.3766	1.8551		0.848038	6.76041
20.7306	1.9289	1.5713	1.9225	2.2085	26.116	20.3613	33.5671	6.2228	3.1854	1.0583	1.0126	2.1386	9.466	1.9397	3.6627	2.0584	1.6337	2.2908	11.2992	18.8876	3.7838	7.5653	11.3165	3.2272	2.5889	2.2702		0.852943	7.04936
20.8497	1.8445	1.824	1.4763	1.9757	26.7007	20.8361	37.5061	5.7218	3.3616	1.4471	1.2041	2.6772	8.1566	2.021	4.214	2.0596	1.6477	2.6233	16.0688	19.4627	4.339	8.9445	10.4134	4.4849	2.1901	2.3977		0.857843	7.52302
20.9689	2.296	2.2424	1.7429	1.5252	27.9445	19.1825	37.1148	5.7079	3.8233	1.1932	1.51	3.084	6.4399	2.5502	4.3447	2.0611	1.9646	2.6651	18.4207	19.6594	4.8238	11.245	9.4261	4.2294	2.2102	2.7731		0.862747	7.69923
21.088	2.0767	1.8839	1.6495	2.2121	29.7054	18.223	38.2492	6.4355	3.4436	1.3479	1.7599	3.1362	7.0553	2.8717	5.3597	2.0005	1.9403	2.175	22.3523	19.3116	5.5304	12.1571	9.4646	4.2532	2.3735	3.208		0.867648	8.0837
21.2071	1.9861	1.6771	1.7817	2.3326	31.2626	19.141	39.0364	7.28	2.8468	1.3784	1.6357	3.9059	7.3358	2.3309	6.8497	3.0497	2.0172	2.928	23.1184	20.8102	7.1951	14.498	9.3083	5.5186	2.6571	3.8799		0.872548	8.68312
21.3263	1.8697	1.717	1.9653	2.5258	31.1694	21.8146	34.6219	6.5749	3.2855	1.6375	1.6279	4.1966	6.2043	2.2288	7.665	3.736	1.8562	2.9919	24.5039	22.474	8.1007	16.5138	8.2308	7.4239	2.1873	4.1244		0.877452	8.89412
21.4454	2.0725	2.0846	1.9535	2.7941	30.3083	21.9156	31.2701	5.7896	3.2302	1.2476	1.4019	5.7718	6.4685	2.9426	7.7967	3.7677	2.3602	3.6759	25.4826	25.3877	9.3557	16.6818	7.4668	6.9651	1.9939	4.3515		0.882352	9.02063
21.5646	2.1409	2.3962	2.0689	2.6257	29.8138	21.5433	28.6686	6.7059	2.3902	1.902	1.6747	6.1442	5.4133	3.5834	9.0269	3.8919	2.328	3.6561	25.8302	24.4893	10.2733	16.8167	6.5225	8.9864	2.6352	4.7275		0.887257	9.08673
21.6837	2.4705	2.341	2.281	3.0886	29.7034	20.2349	30.1926	6.559	2.4089	1.4207	2.02	6.6761	5.8779	4.4578	8.886	5.5597	2.8224	4.1	25.8828	24.8993	11.4092	17.1059	5.7904	9.9004	2.7314	6.5172		0.892157	9.43604
21.8029	2.4462	2.4473	1.9349	3.0096	30.4684	17.3054	30.1039	6.542	2.6973	1.7204	2.1605	7.1268	6.1353	4.7583	8.3086	6.5844	2.7933	4.7507	24.7459	25.2955	13.8635	14.5161	5.5081	11.9418	2.7546	9.1694		0.897061	9.58032
21.922	3.3089	2.5336	2.0475	3.1845	32.6369	17.91	32.2016	7.4815	2.6463	1.7964	2.4497	7.5395	6.2172	4.921	6.3838	9.139	2.5905	5.5877	20.2806	22.218	15.369	11.129	4.7729	11.3273	3.2805	10.1389		0.901962	9.58045
22.0411	3.3713	3.2268	1.9268	3.0905	33.8587	20.415	32.9634	6.7914	2.2448	1.6108	2.6569	9.5289	5.9194	6.1802	4.8475	10.8604	3.0631	6.3473	13.6255	19.2759	15.4895	9.2958	4.7721	11.2341	3.643	11.3766		0.906862	9.52368
22.1603	4.062	4.1069	2.1261	2.8026	33.6776	23.1629	32.0732	6.0144	2.4534	1.6591	2.5569	11.3227	6.618	6.0334	3.0103	9.8079	4.1411	7.5662	8.5389	18.0526	14.4184	8.6059	4.8036	12.9541	4.2077	12.0264		0.911766	9.4924
22.2794	5.4282	4.1679	2.5109	4.1518	30.6958	25.1934	27.4069	7.0957	2.3982	1.6549	2.3886	14.4178	9.0732	4.512	1.944	8.942	5.5297	9.4909	6.1784	13.3104	13.8457	8.7977	4.8142	15.0128	3.9575	15.1764		0.916667	9.54212
22.3986	6.1721	5.4699	2.3098	4.1216	29.1952	26.2758	29.5599	6.6036	2.2132	1.5392	3.0483	17.7704	11.6238	2.7092	1.9955	5.9688	6.2323	11.831	3.5315	8.9208	11.4523	7.3514	6.2785	15.8252	4.6649	18.0283		0.921571	9.64202
22.5177	6.5787	5.8973	2.6771	3.468	29.0571	26.0638	25.3151	6.8282	2.8412	1.8902	3.6698	23.2587	11.336	2.3974	2.0124	4.1273	7.9118	13.751	2.5258	6.5674	10.4746	6.9245	5.9313	17.2805	5.0761	18.3112		0.926471	9.69894
22.6368	8.0786	6.7348	2.9828	4.459	29.855	25.9804	25.7218	7.7375	2.8544	2.3234	4.4313	27.2554	13.5605	1.9345	1.0782	2.6349	9.9389	16.1457	2.3561	4.7774	9.5261	6.0283	7.9046	18.9872	7.0967	18.6267		0.931372	10.3465
22.756	9.0497	8.0214	3.6089	4.5844	31.3586	26.5206	24.5615	8.2885	2.985	2.1112	4.6284	29.03	12.7744	1.7126	0.9708	1.9129	12.8471	18.0821	1.4701	3.2674	8.8901	4.7884	8.163	20.6146	8.8669	19.5218		0.936276	10.7166
22.8751	9.1177	10.0705	3.8018	4.8011	32.9185	25.1079	26.0401	7.5226	3.5063	2.2577	5.2847	26.8325	10.8455	1.3979	0.8016	1.3914	12.8175	17.5021	1.3346	2.6009	9.0249	4.9122	9.919	21.5909	12.1151	20.5752		0.941176	10.9265
22.9943	9.78	13.7501	4.1067	4.8658	33.7457	27.174	25.9952	8.4034	4.5602	3.1091	5.3878	19.9718	6.9287	1.4034	0.8632	1.2273	13.2413	17.4383	1.4959	2.2172	7.2333	4.3018	12.286	24.6968	15.0042	18.2119		0.946081	11.0538
23.1134	9.3282	17.3987	4.9719	5.7068	32.5444	29.1832	26.5651	8.4809	6.4989	2.9891	7.1052	14.0677	3.995	0.8986	0.9308	1.0718	13.7159	16.3335	0.9173	2.2318	5.6988	4.0859	13.25	24.6339	20.1703	18.8591		0.950981	11.2166
23.2325	7.9232	22.9938	5.2435	6.5669	33.6825	31.3061	28.6387	8.7469	7.1564	3.8954	9.1233	9.4597	1.9221	0.8776	0.6977	1.2233	10.3906	13.2368	0.6829	1.4059	4.5443	2.9141	13.221	24.3686	21.8686	16.077		0.955881	11.0833
23.3517	6.7523	23.9166	6.6447	7.3225	33.4332	33.1186	29.7616	9.8486	11.6349	4.4414	12.8143	5.5635	1.7705	0.5806	0.7056	0.6944	6.5795	8.9351	0.7011	1.5776	3.2427	2.2475	14.6927	27.4579	25.2187	14.1585		0.960786	11.3006
23.4708	5.6829	25.1461	7.3044	9.3255	34.1144	35.4902	29.3354	11.4889	14.6813	6.1654	15.9516	4.311	1.7421	0.5077	0.5007	0.697	3.39	5.4178	0.6352	1.3587	3.2823	1.9868	14.6136	31.7399	25.6795	11.5594		0.965686	11.6195
23.59	4.1838	27.0291	8.3879	10.9682	31.5288	34.566	29.5029	14.0492	16.7681	8.9402	19.3097	3.6612	1.8603	0.3967	0.4893	0.7141	2.7212	3.4605	0.5422	1.1577	2.7665	1.643	15.2418	31.8364	24.7722	9.7232		0.97059	11.7777
23.7091	2.935	24.7394	9.1267	12.0669	27.466	35.607	25.3007	13.1199	19.9491	11.7957	18.1802	2.5599	1.7913	0.5978	0.3207	0.4937	2.2817	3.0709	0.6642	0.8227	2.1417	1.1709	13.9098	29.1591	21.9868	9.0489		0.97549	11.1656
23.8283	2.0989	20.5832	8.9048	10.3179	22.3687	31.9203	22.1183	12.5826	23.3203	14.9833	13.1541	2.0523	1.1359	0.3703	0.264	0.3165	2.179	1.8867	0.4775	0.5304	1.7066	1.2983	10.2388	23.9424	20.7846	6.2234		0.980395	9.83689
23.9474	1.6894	14.7977	7.7258	9.614	19.7477	27.5512	17.1881	11.326	22.2501	20.6823	7.8375	2.1367	1.2629	0.3407	0.3324	0.6414	1.5835	1.7159	0.4929	0.7266	1.3933	0.5734	8.1426	22.157	17.2599	4.5542		0.985295	8.60474
24.0665	1.6232	11.6583	5.3364	6.9763	16.1487	19.6503	14.6049	9.9602	22.2382	21.4928	5.2604	1.6346	0.8597	0.315	0.2589	0.4514	1.4363	0.9897	0.6334	0.6547	1.4418	0.4914	8.0367	18.6294	13.7072	4.9171		0.990195	7.28488
24.1857	1.5644	7.7119	3.1394	5.5398	12.6709	15.2048	12.2926	7.2294	18.255	20.038	4.4376	1.5546	0.7188	0.1439	0.1562	0.273	1.1189	1.0695	0.4311	0.6425	1.1637	0.8219	8.2996	16.9203	11.1818	4.6081		0.9951	6.04568
24.3048	1.3419	4.8895	2.1357	3.4974	8.7304	11.1113	10.2576	5.0132	15.9252	16.5377	3.4493	1.2435	0.4027	0.282	0.249	0.2123	0.9711	0.9465	0.215	0.461	0.9686	0.6081	7.0972	15.1337	8.6242	3.6069		1	4.76581

## Sheet: Image4
X0	Y0	Y1	Y2	Y3	Y4	Y5	Y6	Y7	Y8	Y9	Y10	Y11	Y12	Y13	Y14	Y15	Y16	Y17	Y18	Y19	Y20	Y21	Y22	Y23	Y24	Y25	Y26	Y27	Y28	Y29	Y30		Ap-Ba	Average int.
0	23.3825	22.3203	23.8968	24.7785	19.6953	24.5047	29.6768	42.0075	42.8392	24.2416	32.3558	22.4386	30.0945	34.9617	26.1612	19.4117	29.2036	41.5729	49.0235	42.7625	29.8717	20.8762	45.8302	46.758	67.3842	54.8481	36.738	43.6142	54.7586	53.0856	59.9873		0	36.0994
0.1191	25.5921	25.7583	27.9196	28.9364	20.2525	25.6182	29.747	44.0006	44.4344	31.1355	32.5032	30.3448	31.7113	40.0545	26.462	20.0972	32.9633	39.8089	54.0927	41.5182	32.5445	25.7523	47.169	41.8596	71.8313	52.6333	37.9635	45.8488	54.4208	58.5136	64.6364		0.00480602	38.2621
0.2383	25.2792	29.3943	29.0766	31.2557	21.3119	27.14	33.1447	46.31	47.6479	33.1731	36.6566	33.9293	37.6105	47.8554	27.1136	21.9622	40.453	46.719	60.0047	41.7847	37.0222	29.6422	51.4008	44.4194	64.1546	50.1138	40.1254	46.5942	58.2352	61.3083	66.5691		0.00961608	40.8841
0.3574	26.365	34.04	30.7303	27.7175	21.5449	28.382	34.358	48.8657	48.8985	40.1409	39.2481	37.8044	45.2265	53.5103	33.4063	23.7889	42.4537	47.5578	65.6167	48.021	44.4855	36.2658	52.0767	45.7169	58.1769	50.9108	39.4595	49.5009	62.278	64.3498	67.9713		0.0144221	43.5119
0.4766	31.7883	37.5903	31.0405	26.5594	21.0266	29.6791	36.7121	49.9663	54.8163	44.9713	41.663	45.3872	51.1388	59.4368	38.0532	27.4155	41.8103	50.7752	65.3379	52.8666	52.3997	43.4006	53.6279	44.6547	58.3243	46.6688	38.3684	50.2213	66.9405	66.5793	68.2996		0.0192322	46.049
0.5957	34.6416	41.6312	32.8577	29.7046	21.7899	29.5665	39.349	53.4765	57.1652	48.9858	51.3835	46.3618	57.0854	67.6541	41.6991	30.0786	45.8371	57.6379	67.4932	56.441	62.252	51.1698	57.2346	45.9596	51.1322	46.7503	37.2532	49.386	66.1443	68.5363	74.3603		0.0240382	49.0651
0.7148	33.8923	42.4533	33.7444	28.5975	22.1382	29.9284	38.3407	57.2511	54.6343	57.117	55.7916	51.0342	59.3446	71.2578	48.6204	33.5461	51.1611	63.673	70.8557	63.5858	76.311	57.075	59.8421	46.3804	49.9694	44.0569	37.3482	49.7893	74.103	72.8366	73.8025		0.0288442	51.8865
0.834	35.9143	42.3492	34.4399	28.2017	21.4581	33.3072	41.8234	57.2798	56.7793	54.5381	62.3358	52.3062	63.1532	67.9937	53.5383	36.8234	54.1867	67.9812	72.5103	69.531	82.4234	61.9204	60.6646	51.2512	48.4368	42.8365	36.2067	48.4419	72.0545	72.5434	74.7642		0.0336543	53.4837
0.9531	40.7512	40.9559	35.6924	28.5977	21.8957	33.2803	40.6193	58.5011	53.14	60.022	64.5425	49.744	65.0438	67.0432	56.2616	44.7025	56.5366	71.8513	71.826	76.389	87.3212	68.6836	62.2266	50.8239	45.2755	43.8159	36.2748	50.3148	71.9404	70.6826	73.928		0.0384603	54.7962
1.0723	38.2488	38.976	36.7574	27.2812	20.2868	35.1021	42.1619	59.7459	55.0766	62.8778	66.8068	50.4845	57.3807	59.2921	59.2187	49.0602	56.7479	75.1267	74.4451	79.1956	90.1865	70.2933	64.3388	50.4912	44.2891	42.3131	39.5529	48.9701	69.6921	71.4193	72.3847		0.0432704	55.1034
1.1914	39.728	34.9173	36.516	27.2935	21.9638	34.3346	36.7912	58.5684	53.8787	67.874	74.3975	49.2037	51.3001	50.8326	58.5756	54.9891	56.9635	77.1996	71.5839	84.3931	88.8437	72.6063	62.8676	51.9574	43.0703	37.3702	37.9984	50.8528	71.1758	71.5152	68.4884		0.0480764	54.7758
1.3106	35.8006	34.0441	36.378	29.2418	20.6775	36.44	40.5035	55.4364	54.0145	68.6457	73.6906	46.57	43.8924	40.6945	59.6969	58.1518	58.3976	79.5323	73.8869	79.8383	78.9128	68.6668	67.1398	53.7882	42.8948	37.6014	34.6453	49.666	68.116	70.2071	70.21		0.0528864	53.7865
1.4297	32.1509	28.7008	35.4215	26.3571	20.3257	35.5184	40.3285	50.0688	49.6663	73.2452	77.0515	44.1745	35.2345	34.3414	58.0195	57.1121	62.9871	82.9327	69.3284	72.689	70.2452	67.2351	68.7068	57.7021	43.1553	33.4833	34.5912	50.188	72.2881	71.0823	68.9926		0.0576925	52.3653
1.5488	26.5577	26.4087	33.5475	27.0033	17.7878	32.7095	39.7642	50.8317	54.1011	72.1443	73.3372	41.0909	32.583	27.9012	49.7335	58.5223	66.3768	78.3451	71.4896	68.7217	62.8276	64.4967	63.4848	54.8829	38.3893	31.2291	34.4313	51.698	72.2009	66.8039	66.0544		0.0624985	50.176
1.668	26.5176	22.9849	29.328	22.4557	16.4822	30.404	35.3851	48.7356	53.3741	64.5208	69.959	35.6298	25.0668	24.1316	41.621	51.0954	63.5076	74.625	68.0537	63.366	57.0255	61.5326	65.1283	52.2189	40.2303	30.0027	31.4027	52.5836	71.6031	64.091	68.2849		0.0673085	47.1402
1.7871	23.9749	22.4082	27.6532	21.9329	12.2126	27.746	38.2219	47.9412	53.4825	64.3756	65.6912	32.1745	21.7337	21.5533	35.2579	46.322	60.211	73.6882	63.7351	58.9551	50.4694	60.0835	66.4613	54.1013	39.9007	27.3998	30.5189	57.4757	69.2954	59.0213	72.0786		0.0721146	45.3573
1.9063	21.9795	18.6337	24.4058	19.7758	10.8468	25.1753	36.9804	47.2613	48.1383	60.2038	54.7281	33.8113	21.3316	19.0933	28.1621	36.8525	56.2839	68.5044	61.4371	55.9597	45.3967	52.2651	65.2119	51.1652	42.2713	27.4915	31.5302	55.3738	69.7284	59.8945	71.3043		0.0769246	42.6193
2.0254	18.991	17.9497	21.9645	16.2826	8.5852	20.3478	32.4507	40.413	46.7834	55.4779	47.2682	29.4728	17.6782	18.4481	23.0378	31.2017	54.6552	69.0172	57.8223	49.3834	41.773	51.5532	62.8525	53.0513	37.6021	25.7355	29.5264	53.9725	68.6505	56.7249	68.0858		0.0817307	39.5729
2.1445	17.5872	13.8146	20.5842	12.6328	8.2899	14.5324	31.139	39.3218	47.1113	49.5953	39.4544	25.8709	18.4854	18.2394	17.8456	27.7681	54.4053	69.1502	57.3624	47.7329	42.7646	48.314	59.3988	51.7336	38.0885	25.2117	29.5749	53.6135	67.565	57.9688	68.9659		0.0865367	37.8749
2.2637	14.6926	12.1892	17.7267	10.0455	7.4719	11.9892	28.9685	34.6062	46.0459	42.6452	31.428	24.3627	15.4533	16.8561	16.7432	22.459	51.9991	73.4269	53.6286	45.5582	37.5818	44.9944	56.411	52.3744	38.2467	25.6577	29.4901	56.2833	70.6065	60.5299	64.1397		0.0913467	35.9552
2.3828	11.4053	11.1175	15.316	6.6884	6.2364	9.7778	26.5082	34.6437	40.2346	36.986	25.0971	22.424	16.0167	16.8226	14.2957	20.6346	45.808	72.9307	51.1034	44.4118	35.0209	41.0974	53.8403	51.3267	39.445	23.6282	28.1717	57.2808	63.9431	62.9291	56.2319		0.0961528	33.5927
2.502	11.4574	9.6202	13.3979	5.867	5.5832	7.1343	23.5808	29.4897	36.0044	31.3056	21.843	20.1763	15.0786	16.0476	12.4324	17.7155	40.6651	66.7261	52.8706	41.9424	34.7804	40.595	49.2504	51.0024	41.188	21.2342	28.6213	58.1128	59.6005	58.844	52.6713		0.100963	31.4464
2.6211	9.7422	8.7223	12.4083	4.511	5.3002	6.206	21.423	27.2279	30.707	25.8094	18.3958	18.7335	12.79	13.7064	12.5411	14.6594	38.5702	71.9146	51.5801	41.4838	30.7943	33.5722	42.728	48.6747	44.7477	24.2831	26.1413	57.327	55.2572	57.5826	42.7587		0.105769	29.3645
2.7402	8.3938	7.9153	9.7729	4.246	4.5045	5.4609	20.2886	25.5732	27.0815	21.0818	15.3918	17.2714	12.4209	13.3164	10.0043	14.1397	36.9634	71.7687	50.6932	37.0135	31.5979	32.7152	37.7816	48.4563	43.4027	23.0801	26.1974	59.3427	50.4633	52.1803	38.6846		0.110575	27.6517
2.8594	6.0375	8.1876	9.0131	3.0281	4.3589	5.2958	17.2992	23.6695	26.8849	18.1914	13.9579	15.5347	10.363	13.6954	9.5728	12.0738	30.4948	67.4659	52.8944	38.7245	29.0198	29.2162	34.1769	50.379	42.7665	23.6958	26.1497	57.6081	48.476	44.3859	28.7928		0.115385	25.8519
2.9785	6.1059	5.7209	7.1779	3.447	4.7132	4.3878	15.0773	19.659	23.5288	16.0239	12.2952	12.6417	9.346	11.5325	8.3159	11.6394	29.2494	66.2648	49.3369	37.9132	26.957	29.773	28.626	52.7394	42.8532	25.3948	22.8521	54.6237	45.7159	37.4366	22.3259		0.120191	23.9895
3.0977	4.856	5.3856	7.2661	3.3019	3.9954	3.9818	12.3848	18.2	22.0461	13.5617	10.5843	12.7621	11.7501	11.932	7.7474	9.2865	25.4669	63.0479	49.3601	35.3991	25.792	24.7786	23.7255	52.5024	43.2791	26.5288	25.58	53.7148	40.1375	33.0276	18.4946		0.125001	22.5767
3.2168	4.4625	5.4627	5.889	3.2152	4.3426	3.4479	10.329	17.2006	18.8264	12.2402	8.9005	13.3097	9.2332	11.2684	8.2682	8.8872	22.7678	62.1483	49.9136	32.5794	25.3761	24.6113	18.9468	51.3365	44.6874	26.3036	22.8241	52.9193	33.9132	25.193	13.6273		0.129807	21.0462
3.336	3.3638	4.7281	4.5818	1.9811	3.7309	3.7926	8.0181	12.8229	14.5687	9.4778	7.2017	11.7802	8.9307	10.3874	8.2564	8.3715	20.5458	58.7523	48.1372	35.9594	24.8268	22.6093	14.3989	51.9558	45.9576	27.8002	22.6128	52.5331	29.9115	20.5097	11.5519		0.134617	19.6792
3.4551	3.0823	4.1802	3.1503	2.7476	4.7459	3.5488	7.106	12.9244	12.0208	8.6127	6.7134	12.4332	8.041	9.8692	8.0946	7.6032	16.9136	51.8097	46.6002	33.9372	23.2718	18.4256	10.636	54.1757	45.2191	27.0957	25.034	47.9728	25.0812	12.0109	8.5688		0.139423	18.117
3.5742	4.0528	3.549	2.79	2.8712	3.6003	3.413	5.98	10.7877	10.2466	8.6533	5.7714	11.8667	8.186	8.943	6.5997	7.1258	15.0742	44.5824	44.9388	30.3546	21.1696	18.5408	7.9251	47.102	48.832	27.5301	23.6852	44.0747	19.8521	8.2811	7.2256		0.144229	16.5679
3.6934	3.4892	3.0716	2.4826	2.6618	3.9184	3.3477	5.4881	10.1801	11.8032	8.182	5.1418	10.9442	8.2505	9.312	6.8568	6.1458	12.9954	37.359	43.204	30.0443	21.6762	17.056	6.8783	50.681	51.1292	28.9217	24.3651	41.3252	16.2116	6.2124	5.642		0.149039	15.967
3.8125	2.9974	2.3193	2.4792	2.0933	4.2257	3.4221	5.3729	6.2395	8.4083	7.1752	4.6737	11.262	6.985	8.0272	5.463	5.7073	11.5742	31.8651	43.2946	30.5773	20.29	15.4221	5.6014	50.2852	50.2916	27.5432	23.4344	37.499	15.3585	5.9778	4.4033		0.153845	14.8474
3.9317	3.3283	2.0778	3.0306	1.8526	4.6252	3.4013	3.8286	5.6072	7.2019	5.5711	5.844	9.5785	7.5668	7.5114	6.5998	6.3094	10.4876	23.2539	41.5879	29.0113	16.5124	13.8424	4.9948	46.8287	47.7054	28.9754	22.3124	29.1848	10.4971	3.8226	3.5921		0.158655	13.4369
4.0508	2.4526	2.0665	2.3661	2.5059	4.0232	3.301	5.0036	4.4723	6.4287	5.7024	4.3706	10.3112	7.9371	6.8511	6.3471	5.8537	10.1635	19.4209	38.7888	27.5015	16.6439	11.6913	4.6453	44.9351	50.7314	29.6393	24.3364	22.7093	9.1814	3.806	4.1344		0.163461	12.8491
4.1699	2.9964	2.4854	2.4746	2.1876	3.6614	3.4853	3.5228	4.5341	5.4511	3.8793	4.6487	8.9249	6.6848	6.9409	4.6919	5.6388	7.7349	17.8111	42.3959	25.409	15.5439	12.3202	4.6332	41.0786	51.1966	32.452	25.5031	16.7382	6.9583	3.694	3.0511		0.168267	12.217
4.2891	2.8605	2.2865	2.597	2.1636	4.175	3.1838	3.3986	4.1695	5.0909	4.2425	3.9455	7.2556	5.9619	6.1745	5.5757	5.2364	7.0631	13.4749	37.4043	24.4658	15.3197	12.0353	4.119	38.7321	50.0881	32.0517	24.517	11.9479	6.8918	2.8195	2.6926		0.173077	11.3529
4.4082	2.6092	2.3092	2.518	2.013	5.1348	2.6156	2.9692	3.4638	4.1689	3.9381	3.314	6.806	6.1483	5.9569	5.28	4.9539	6.3757	10.4078	34.9098	23.5163	14.0135	11.0787	4.4244	31.7714	51.2952	33.4495	25.5968	11.126	6.2672	2.7067	2.4995		0.177883	10.7625
4.5274	2.2392	2.1167	1.8772	2.5271	5.2373	3.108	3.2401	2.7754	5.063	3.7673	3.1038	7.2027	6.0531	5.9709	4.2889	4.2528	5.9335	8.3038	32.1025	22.185	13.0422	8.8742	3.9894	26.2468	48.8428	35.5001	26.0661	8.8267	4.5567	2.5631	1.9355		0.182693	10.0578
4.6465	1.8308	1.8793	1.6693	2.1136	4.2837	2.9101	2.8907	2.8805	4.751	3.3417	3.4135	7.1208	6.3368	5.5392	4.8256	4.9074	5.1622	7.5515	30.1259	19.2925	13.2166	9.305	4.3274	20.1278	49.6014	36.5145	28.7944	8.0967	3.4146	2.2577	1.9503		0.187499	9.69137
4.7657	2.3499	2.0148	1.8824	1.9231	4.0448	2.2899	2.3106	2.5059	4.395	3.0943	3.0124	6.9084	5.691	7.1606	4.6024	4.7474	4.8864	6.1846	26.3992	18.2904	11.7866	7.6864	4.8236	14.9845	47.9808	37.4243	26.3202	6.3648	2.7299	2.5571	2.0748		0.19231	9.01376
4.8848	2.2765	1.4597	1.9652	2.2958	5.0389	1.8688	2.2303	2.4458	3.4811	2.5616	3.1955	6.587	5.5368	4.7086	4.1543	4.2313	4.629	5.7024	22.6554	16.966	10.7877	7.4291	3.9911	9.3406	47.0942	39.4083	27.8364	6.1197	2.3437	1.974	1.6054		0.197116	8.44904
5.0039	1.7229	1.723	1.9525	2.2088	4.1387	2.5745	2.3211	2.4463	3.0051	2.6383	2.169	6.437	4.9736	5.8361	4.3196	4.9026	4.4531	5.5541	19.7124	17.7838	11.333	7.1727	3.5703	9.0063	48.0788	39.8128	31.9077	4.8126	1.8309	1.9547	1.7044		0.201922	8.45344
5.1231	2.2956	1.7705	1.9389	2.1459	4.9721	2.7787	2.6455	1.7859	2.855	2.7289	2.8825	6.9228	5.5142	5.5522	3.9557	4.5028	3.4109	4.8149	18.1187	15.6596	9.0044	5.2176	3.7912	6.5788	46.3133	40.9793	32.8983	5.085	2.2388	1.5484	1.7172		0.206732	8.14915
5.2422	2.2104	1.2595	1.5533	1.7851	4.2855	2.3354	2.2782	2.1137	2.0536	2.1915	2.7322	6.091	5.196	4.3098	3.2541	3.6814	3.9655	4.4453	15.2082	15.8116	6.9848	4.9776	3.5887	6.0603	48.339	40.5096	33.8307	3.7366	1.6055	1.8623	1.939		0.211538	7.74824
5.3614	1.9994	1.3846	1.7041	2.3311	4.1037	1.7909	2.238	1.8708	2.2319	2.1563	2.5786	7.2485	5.2971	4.8178	3.4854	3.1605	3.4877	5.0312	12.921	12.2253	7.0624	5.0675	3.6549	5.3141	49.0775	42.2689	32.2617	4.5032	2.175	1.5206	1.2839		0.216348	7.62108
5.4805	1.7458	1.1774	1.3713	2.073	3.8793	2.5688	1.7163	1.9928	2.2112	1.8259	2.7364	6.227	4.8587	5.3813	3.4227	3.3883	2.6781	4.7416	10.1462	10.9188	5.8707	4.8573	3.7871	4.4473	43.5411	41.5115	33.1714	3.6391	1.6473	1.4975	1.6631		0.221154	7.11917
5.5996	2.0092	1.1826	1.8766	2.0475	4.1502	1.8103	1.7523	1.8955	2.0646	1.7009	2.1295	5.6515	4.9228	3.8369	3.2841	3.7661	2.7037	4.7865	8.5539	10.778	6.5017	3.6337	3.2217	3.7215	44.4981	44.8438	36.7332	3.2695	1.7171	1.9008	1.2613		0.22596	7.16791
5.7188	1.7773	1.3224	1.797	1.7896	4.3115	2.1858	1.9945	2.1491	2.1399	2.0869	2.3983	6.3146	4.116	3.3187	3.1151	3.7456	2.538	5.0292	7.9103	8.6459	5.5055	3.4043	3.9539	2.4653	41.3007	43.3435	36.1471	3.1648	1.6989	1.75	1.1135		0.23077	6.85591
5.8379	1.8307	1.4019	1.5146	2.0659	4.0526	2.3014	2.0451	1.6559	1.7908	1.97	2.1477	5.4924	3.7432	3.8292	2.783	2.9759	2.2626	4.1593	6.2948	7.4462	5.4529	3.2263	2.992	2.0833	39.8532	44.709	34.5309	3.1716	1.7895	1.1716	1.4325		0.235576	6.52181
5.9571	2.0877	1.1831	1.5616	1.9748	4.7421	2.1352	1.5929	1.6301	2.0969	1.8062	2.4378	5.5989	3.7583	4.18	2.8176	3.0103	1.938	4.9267	6.4119	6.7153	3.791	2.9714	3.5737	1.8879	34.0008	40.2881	36.2077	2.6254	1.5656	1.7329	1.4421		0.240386	6.21587
6.0762	1.9212	0.9846	1.2389	1.7738	4.1873	2.037	1.866	1.6936	2.1087	1.6665	2.1164	5.7436	3.1339	3.19	3.1129	2.8789	2.2456	4.3313	4.656	6.1663	5.003	2.9056	3.7508	3.0701	30.9728	39.7819	37.8615	2.3657	1.3977	1.6263	1.3148		0.245192	6.03557
6.1953	2.334	2.0013	1.7805	1.8416	4.9443	1.7977	1.6503	1.2415	1.6754	1.4535	1.9028	5.9459	3.1724	3.5187	2.409	2.907	2.0437	4.3222	3.7516	5.8072	3.7524	2.3858	3.1583	2.2019	26.2395	40.7744	37.5135	2.899	1.6938	1.3517	1.9335		0.249998	5.8195
6.3145	2.1156	1.5004	1.2452	2.0427	4.1576	1.6626	1.5599	1.6018	1.5214	1.3939	1.9372	4.4628	3.2655	2.9271	2.648	2.2969	1.9717	3.5745	3.4398	4.8068	3.0651	2.0877	3.1989	1.8866	21.4783	37.0499	35.2393	2.8355	1.3047	1.5833	1.4001		0.254808	5.20196
6.4336	2.0648	1.4048	1.4068	2.3	3.9745	2.1392	1.7344	1.4868	1.6013	1.8929	2.1926	5.9188	3.0649	2.6642	2.6609	1.9933	2.1957	3.9656	2.9427	3.5087	2.4742	1.7306	3.5591	2.0882	16.5613	34.6142	33.6689	2.3245	1.3836	1.6492	1.1603		0.259614	4.91377
6.5528	1.6202	1.1976	1.8639	2.554	4.2975	2.5452	1.5154	1.9193	1.6571	1.6251	2.1051	4.7377	1.9325	2.4711	2.1071	2.2484	2.2377	4.0922	2.1993	4.3044	2.4991	2.4631	3.1257	1.617	12.1238	30.8087	34.8562	2.4383	1.1304	1.563	1.674		0.264424	4.63
6.6719	1.8738	1.3894	1.8188	2.3313	3.8609	2.0743	1.7721	1.1809	1.3283	1.265	1.7075	4.0757	2.144	2.5699	2.0574	1.9842	1.6415	3.5925	2.9964	2.8876	2.2847	2.4027	3.0455	1.9009	8.1573	27.2218	33.4194	2.9464	1.5249	1.4893	1.573		0.26923	4.21024
6.7911	2.3065	1.227	2.2048	1.6691	4.0236	2.5213	1.5596	0.9052	1.5678	1.5988	1.3719	4.6927	2.625	2.1545	1.2236	2.1164	1.9797	4.4145	2.6883	3.0678	1.8841	2.2862	3.7021	2.4902	5.1181	26.7373	30.3715	2.3473	1.6143	1.461	1.1575		0.27404	4.03509
6.9102	1.998	0.8878	1.9496	2.2929	4.969	2.8417	1.9654	1.1098	1.5827	1.3636	1.5278	3.951	2.5875	2.1074	1.3857	1.96	1.5451	4.0484	2.3893	2.5652	1.8933	2.1061	3.3195	1.7408	3.8154	20.9645	25.7482	2.2411	1.7446	1.6848	1.5968		0.278846	3.60913
7.0293	1.8115	1.5656	1.7495	2.7474	5.1615	2.2294	1.5938	0.9394	1.3031	1.2763	1.3522	5.055	1.6488	1.5957	1.8727	1.7011	1.8166	3.4076	2.4181	2.4366	1.3131	2.2611	2.6522	1.7687	3.2202	17.3875	26.4126	2.338	1.2541	0.8338	1.2408		0.283652	3.36658
7.1485	1.6636	1.2201	1.7495	2.7226	4.7166	1.8506	1.4194	1.1228	1.3726	1.6251	1.5578	4.3257	2.1147	1.815	1.4999	2.234	1.896	3.7188	2.0273	2.2823	1.9939	3.0767	3.0827	2.1	2.8265	16.3901	22.0382	1.9104	1.1666	1.9448	1.21		0.288462	3.24756
7.2676	1.7442	1.2033	1.4184	2.3607	4.8814	1.8331	1.9539	1.0678	1.4405	0.9459	1.2501	4.3312	2.1285	1.8028	1.5332	1.6714	1.5157	3.76	2.3676	2.2208	1.5834	1.3087	3.374	1.4272	2.802	12.0218	20.1026	2.0003	1.2088	1.801	1.0657		0.293268	2.90729
7.3868	1.8476	1.2959	1.4575	1.9397	4.7794	2.2185	1.6347	1.3812	1.1568	0.7865	1.2509	4.7573	1.3814	0.9985	1.3863	1.478	1.6014	4.0066	1.8178	1.7899	1.8213	1.5461	3.4877	1.9111	2.1864	10.3404	18.6869	1.7641	1.0029	1.3876	0.929		0.298078	2.71063
7.5059	1.1785	1.4206	1.7868	2.8463	4.8366	1.7079	1.2533	1.3727	1.1939	1.0901	1.3392	4.7705	1.385	1.247	1.4021	1.385	1.8749	3.7441	1.9331	2.011	1.9612	2.2488	2.6546	1.6936	2.2682	7.6788	15.8935	1.9233	0.8388	1.3508	0.8966		0.302884	2.55441
7.625	1.8621	1.113	1.6535	2.6138	6.4362	1.8292	1.1686	1.1287	1.1579	0.9519	1.4032	4.8114	1.3621	1.5737	1.4137	1.2677	2.016	4.163	1.5565	1.6104	1.2791	2.0892	2.769	1.8918	3.0489	5.7337	13.2471	2.0126	1.1522	1.8902	1.4518		0.30769	2.5051
7.7442	1.9404	1.5111	2.2729	2.5766	5.2227	2.0018	1.7631	1.5236	1.5132	1.2084	1.6261	4.5745	1.1509	1.5156	1.7195	1.2281	1.3455	3.8957	1.7706	1.5949	1.3912	2.0527	2.9698	1.6177	2.2826	5.0995	10.236	1.8745	1.3415	1.3194	1.1474		0.312501	2.36411
7.8633	1.9944	1.184	1.8845	2.6176	7.148	2.4636	1.4781	1.2841	1.2994	1.5311	1.1552	4.6934	1.1095	1.2607	1.6779	1.0018	1.6354	3.8769	1.6983	1.9148	1.6052	1.7859	3.4743	1.6941	2.4579	4.0617	7.9125	2.259	1.3176	1.6305	1.0784		0.317307	2.32857
7.9825	1.2768	1.5775	1.8959	2.871	7.6048	2.2442	1.7602	1.1613	1.4679	1.3216	1.4839	5.3859	0.895	1.1233	1.3796	1.2124	1.6988	4.0178	1.7666	1.4183	1.585	1.4929	2.7738	1.4677	2.3975	4.0875	6.8855	1.9046	1.2687	1.7468	1.4526		0.322117	2.27824
8.1016	1.5739	1.2447	1.9227	3.7028	6.6985	2.3512	1.4502	1.3438	1.241	1.2103	1.6499	4.0587	1.1778	0.9414	1.4211	1.5984	1.0742	4.5146	1.8549	1.4529	1.2841	1.8649	2.9179	1.3734	2.142	3.3212	6.8807	1.6894	1.4399	0.7238	1.0851		0.326923	2.16792
8.2207	1.3394	1.1241	1.751	2.6086	6.9626	2.7038	1.7084	1.3612	1.1705	0.9296	1.2318	4.1343	1.1546	0.9492	1.2318	1.0716	1.2909	4.0719	1.6208	1.6951	1.5886	1.6884	3.0813	1.8469	2.5416	2.9611	7.3149	1.3756	1.2227	1.0843	1.4209		0.331729	2.13669
8.3399	1.6322	1.2192	1.9183	3.4445	7.0845	2.2589	1.2895	1.4135	1.0058	0.9033	1.7867	4.0383	1.3463	1.2023	1.5187	1.1063	1.6127	3.795	1.3364	1.6206	1.895	2.06	3.7031	1.0788	2.2686	2.7374	6.2376	2.4638	1.1984	1.4475	0.8724		0.336539	2.17728
8.459	1.5531	1.1277	2.1879	4.0218	8.8649	2.4009	1.2181	1.2182	1.5064	1.0076	1.4461	5.774	1.2301	1.3073	1.039	1.0398	1.4039	3.9082	1.4481	1.931	1.2462	1.5979	3.7929	1.2727	2.5186	3.3054	5.8256	1.2026	1.3273	1.2029	1.5077		0.341345	2.27206
8.5782	2.335	1.0596	2.4265	2.7148	10.0323	2.0022	1.4878	1.1782	0.8522	0.9426	1.5295	4.4135	1.1659	1.2765	1.0717	0.8977	1.0258	3.6047	1.7416	1.7386	1.2887	1.6305	2.8153	1.7012	3.195	3.2615	5.9971	1.8244	1.2625	1.7141	1.5906		0.346155	2.25089
8.6973	1.6101	1.1555	1.9326	3.4757	10.0505	2.114	1.8315	1.912	1.2981	1.4032	1.3249	3.95	1.4059	1.3134	0.9446	1.0245	1.5138	4.5847	1.9368	1.4534	1.4729	2.7186	3.9377	1.2607	1.7529	2.5075	6.0488	1.8157	0.9143	1.413	1.4631		0.350961	2.30775
8.8165	1.6712	1.4019	1.8902	3.2209	11.7792	1.8015	2.0641	1.6663	1.3851	1.4506	1.2942	4.1667	1.1507	1.3727	1.0133	1.321	1.679	4.0977	1.7427	1.5539	1.2362	1.9441	3.6654	1.4527	2.2407	2.4101	5.9413	1.9359	1.7169	1.5288	1.3859		0.355771	2.36067
8.9356	2.0948	0.5437	2.3339	3.4182	11.9643	2.0215	1.6253	1.3365	1.2743	1.0205	1.4633	4.7155	1.2292	1.3244	1.1895	1.4468	1.173	4.4037	2.1933	1.4958	1.5454	1.4964	4.237	1.4914	2.1629	2.7499	4.8849	1.6497	1.2462	1.5454	1.294		0.360577	2.34099
9.0547	1.7176	1.1339	2.4647	4.1669	12.2481	2.1992	1.3369	1.0683	1.6897	0.973	1.3343	3.9815	1.0095	1.4373	1.3664	1.5368	1.4465	3.766	1.7524	1.4555	1.6124	1.6727	4.6674	1.2906	1.8063	1.7707	5.9021	1.7966	1.5986	1.7198	1.4118		0.365383	2.3656
9.1739	2.0209	1.338	2.461	3.7332	11.6268	1.808	1.5203	1.6301	1.3417	1.5867	1.2206	3.3413	1.174	1.0352	0.9239	1.2601	1.1333	4.1469	2.2154	2.3116	1.3967	2.0152	4.9773	1.5745	1.9561	2.1633	5.6853	1.9007	1.0723	1.4768	1.6978		0.370193	2.37887
9.293	1.5992	1.6668	2.0343	3.1618	14.2887	1.8779	1.6307	1.4617	1.1582	0.9304	1.3661	4.6809	1.2226	1.7372	0.8652	1.2341	1.448	4.1269	1.8269	1.8075	1.0439	1.6994	4.8086	1.6398	2.1019	1.9559	4.8819	1.4113	1.2747	1.5884	1.4703		0.374999	2.38714
9.4122	1.8705	1.1061	2.3777	4.1603	14.1449	2.1274	1.8138	1.7209	1.4368	1.6889	1.9053	3.6636	1.0851	0.975	1.3026	1.137	1.4156	4.0006	2.1919	1.2895	1.2732	1.5251	6.7685	1.7165	1.3437	1.6153	5.4864	1.8899	1.3159	1.9058	1.2011		0.379809	2.49855
9.5313	1.8258	1.5596	2.3708	4.5108	14.1616	1.9277	1.5319	1.3848	1.3287	1.1878	1.1561	3.86	1.2781	1.0151	1.2134	1.3613	1.3731	4.976	2.1364	1.6425	1.031	2.1897	6.4945	1.2539	1.9296	1.4275	4.3776	1.7118	1.3368	1.2287	1.4044		0.384615	2.45765
9.6504	1.6494	1.5387	2.2059	4.9851	16.4895	2.6435	1.5069	1.2279	1.5292	0.9726	1.3675	4.5044	1.1057	1.0527	1.2203	0.8913	1.3734	4.8073	2.0047	2.0688	1.3259	1.2631	6.6242	1.4484	1.5126	2.5872	5.2079	2.1477	1.1277	1.7293	1.4902		0.389421	2.63255
9.7696	1.6346	1.346	2.4998	4.4036	19.606	2.0933	1.8991	0.8537	1.2257	1.2454	1.5267	4.5378	1.4476	1.3475	1.2832	1.3816	1.1791	5.0105	2.2977	1.5628	1.6766	1.9982	5.5459	1.9167	1.5815	1.6691	4.3852	2.1272	1.4241	1.48	1.22		0.394231	2.69052
9.8887	1.9257	1.2124	2.0776	4.9725	20.8489	1.8059	1.3588	1.5266	1.0094	1.5326	1.1271	5.5597	1.3345	1.2105	1.495	1.4826	0.9803	4.4014	2.195	1.9473	1.8109	1.7803	5.6369	1.7626	1.5879	1.7118	4.9092	1.7208	1.6035	1.5158	1.1537		0.399037	2.7483
10.0079	1.8041	1.7816	1.9534	6.0694	22.0819	1.9846	1.2843	1.6307	1.292	1.1415	1.2186	4.4802	1.2809	0.8412	1.0905	1.3054	1.3127	4.1603	2.2903	1.0752	1.973	1.2883	7.0355	1.6748	1.4395	1.9279	4.1644	1.843	1.4425	1.2139	1.585		0.403847	2.76344
10.127	1.9125	1.62	1.62	6.7326	21.8649	1.4512	1.2632	1.0649	1.2985	1.2966	1.383	4.4464	1.2155	1.0151	0.8168	1.2974	1.3935	4.168	2.5638	1.8446	1.6133	1.8732	5.5815	1.7359	1.4567	1.6262	4.4947	1.9795	1.2001	2.0584	1.4427		0.408653	2.7526
10.2462	2.0915	1.2511	1.5497	5.7005	24.5883	1.7473	1.441	1.6069	1.3096	1.0022	1.571	4.5914	1.4496	0.911	1.1129	1.2456	1.4577	4.5735	2.4727	2.2225	1.7955	1.5079	4.9367	1.7918	1.6362	1.5647	4.2277	1.6164	1.7008	1.4453	1.2502		0.413463	2.81836
10.3653	1.8463	1.3286	1.9575	5.3554	21.8309	1.7529	1.1121	1.5114	1.2978	1.1786	1.4506	4.5725	1.388	1.3731	1.3155	1.2134	1.446	5.2578	2.411	1.9282	1.6412	1.5711	5.2772	1.6701	1.349	1.8252	4.7516	1.8652	1.6526	1.8136	1.2732		0.418269	2.78121
10.4844	1.9397	1.0733	1.851	5.3508	23.9504	2.1699	1.0359	1.3592	1.4836	0.957	0.9843	5.3206	1.5796	0.8571	0.9103	1.1381	1.2734	5.8878	2.4114	1.9559	1.6659	2.0825	5.1816	1.7959	1.5037	1.8005	5.0359	2.4067	1.7859	1.1638	1.5055		0.423075	2.88443
10.6036	1.8969	1.3797	1.3795	6.6407	22.2853	1.4798	1.2844	1.2704	1.2825	1.0045	1.3117	4.4394	1.5535	1.0112	1.1408	0.9504	1.313	6.1292	2.6805	2.7229	1.4023	1.4711	5.8022	1.7577	1.5958	2.1639	4.8665	1.8143	1.3031	1.0685	1.4421		0.427885	2.83367
10.7227	2.1585	1.4345	1.938	6.1679	21.666	2.1293	1.5582	1.0156	1.2182	1.0838	1.2212	3.9004	1.5781	0.7573	0.8545	0.8403	1.4349	5.776	2.1044	2.3212	1.5362	1.5422	5.6231	2.3552	1.509	1.9807	3.8715	1.8495	1.2841	0.9333	1.3886		0.432691	2.74296
10.8419	1.9498	1.4785	1.6445	7.5489	21.9506	1.5971	1.6028	1.3983	1.3174	1.2828	0.8068	4.2876	1.5521	0.9679	0.9979	0.8037	0.9153	6.9799	2.2556	2.2383	1.3596	1.9859	4.9426	1.7746	1.143	1.4941	3.7456	2.5936	1.9996	1.5634	1.44		0.437502	2.82638
10.961	2.6603	1.5579	1.3523	8.3266	21.9998	1.6115	1.4477	1.3586	1.2186	1.075	1.578	3.4662	1.3759	1.072	0.6233	1.2039	1.3976	8.0425	3.0585	1.6007	1.7538	1.6272	6.7638	1.8397	2.0345	1.6808	4.1645	2.1032	1.4074	1.475	1.3485		0.442308	2.97501
11.0801	2.2011	1.1171	1.3047	9.3497	22.4067	1.4905	1.383	1.0922	1.1009	1.3624	1.1835	3.8436	1.9478	0.7885	0.865	0.9935	1.3475	8.7124	3.0509	2.1247	1.5631	1.7143	6.5278	1.7532	1.9341	1.5279	4.7457	2.1181	1.3235	1.5483	1.6374		0.447114	3.03416
11.1993	2.8481	1.4416	2.0023	9.313	19.371	2.2424	1.661	1.5224	1.2114	1.3797	0.8896	3.9142	1.6746	0.7612	0.908	1.0984	0.8986	8.7139	2.4093	1.7783	1.6295	1.713	6.9927	2.1471	1.2361	1.9448	4.7401	2.0793	0.9708	1.0174	1.3443		0.451924	2.96304
11.3184	2.042	1.4365	1.9854	9.0798	21.5382	2.0379	1.8404	1.7734	1.3768	0.9145	1.1705	2.9058	2.4851	1.0002	1.1428	1.23	1.2574	7.46	3.1161	2.5278	1.8677	1.9741	7.7886	2.0183	2.3566	1.4845	5.0494	2.2219	1.4166	1.3405	1.6473		0.45673	3.14471
11.4376	2.0204	1.3488	2.1109	10.2258	17.4665	1.5123	1.0838	1.4141	1.4241	1.6271	1.3683	2.9579	1.7691	0.9699	0.6867	1.1902	0.8944	9.5762	3.0793	3.0198	1.4621	1.8896	7.5035	2.2901	1.7309	1.94	5.6453	3.0235	0.7632	1.7127	1.4231		0.46154	3.0687
11.5567	1.5614	1.3847	1.0027	12.2487	17.8247	1.9545	1.4409	1.5829	0.9037	1.2477	1.289	3.0213	2.7329	1.1544	0.8952	0.852	1.1493	7.3978	3.5885	1.9797	1.7343	2.5181	8.5215	2.8573	1.4918	1.8569	4.5964	2.2411	1.618	1.6724	1.9731		0.466346	3.10622
11.6758	1.4474	1.433	1.3379	14.2474	15.0658	1.3931	1.317	1.0799	1.3303	1.4856	1.2296	2.6108	2.6043	1.1473	0.884	0.9393	1.3872	6.1961	3.3139	2.4668	1.7601	1.6709	8.7256	2.347	1.3392	2.0574	4.5832	2.1174	1.051	1.0064	0.9565		0.471152	2.92037
11.795	1.7362	1.6544	1.5467	12.8522	12.8589	1.512	1.3296	1.3952	1.647	0.8455	1.3359	3.5391	2.9601	0.7523	1.148	0.7325	1.2764	6.672	3.2346	2.4004	1.4948	2.1794	9.7063	1.9574	1.5496	1.6678	4.9455	2.3634	1.306	0.9333	1.1761		0.475962	2.92608
11.9141	1.7994	1.1266	1.6097	13.464	10.3238	1.9393	1.2186	1.706	1.1768	1.0935	1.2691	3.0614	3.2769	0.8817	1.1113	0.8418	1.2914	5.2671	3.8831	2.6772	1.8869	1.0512	11.7082	2.0761	1.2035	2.241	5.3219	2.52	1.1992	1.1182	1.3542		0.480768	2.92578
12.0333	1.4858	1.4603	1.4802	13.9498	9.0918	1.3588	1.3456	1.0213	1.6242	0.9651	1.8786	3.5364	3.5684	1.1041	0.9027	1.0542	1.3556	6.2901	3.5391	3.2327	2.1782	1.6009	10.9855	2.5457	2.0021	1.8496	4.6131	2.4918	1.8069	1.4098	1.5836		0.485578	3.01006
12.1524	1.9764	1.3594	1.5046	14.7842	7.5052	1.9205	1.5711	1.0829	1.2824	0.885	1.2347	4.0594	4.5949	1.3724	0.8548	1.0985	1.4276	6.7605	3.5245	3.5513	1.8201	2.6218	13.155	2.6362	1.1754	1.9795	4.7131	2.4658	1.3756	1.42	1.2921		0.490384	3.12919
12.2716	1.9091	1.6547	1.4091	16.1646	5.9365	1.7198	1.1444	1.021	1.0554	0.8276	1.0721	4.0629	5.0585	0.8592	0.9789	0.7895	0.9514	7.2199	4.6507	3.6972	2.0317	2.4615	13.6224	2.9043	2.1745	1.5344	6.0542	2.4334	0.8105	1.4398	1.3317		0.495194	3.19293
12.3907	1.7292	1.285	1.9186	15.4211	5.0699	1.1726	1.3681	1.5529	1.3849	1.0537	1.1495	4.0546	4.6739	1.2716	0.8237	1.2655	1.1971	8.6085	4.5794	3.3462	1.1759	1.9667	13.9688	3.5194	1.605	1.6165	5.3931	1.9702	1.5964	1.3943	1.6026		0.5	3.185
12.5098	2.2942	1.0147	1.5668	15.0435	3.9391	1.3342	1.2894	1.4936	1.4347	1.0169	1.223	3.8035	5.2338	1.2637	1.0502	0.8552	1.0123	10.5456	4.7736	3.4526	1.6396	3.0052	12.7513	2.8542	1.8309	1.8324	5.8668	2.265	1.5476	1.0964	1.1191		0.504806	3.20804
12.629	2.3962	1.2804	1.726	13.0956	3.9494	1.5974	1.2837	1.1245	0.8558	1.4206	1.3345	3.841	4.7341	1.0625	0.8047	1.4376	1.2332	9.6346	5.1322	3.8605	1.6629	2.4152	14.8475	3.1256	1.8415	1.8753	5.3903	2.2905	1.2341	0.9781	1.5293		0.509616	3.19338
12.7481	1.7502	1.6539	1.4946	12.2515	3.6775	1.4957	1.2132	1.537	1.2098	1.0536	1.1838	2.8817	7.1748	1.2215	0.8783	0.9983	1.0759	10.1091	6.3051	4.0952	1.844	3.3166	15.9056	3.0957	1.6314	2.0912	5.7752	2.7731	1.378	1.3884	1.497		0.514422	3.35345
12.8673	2.0383	1.6455	1.1836	11.5646	2.9411	1.6109	1.388	1.3793	0.9558	0.9547	1.3009	3.4424	11.3858	1.1155	0.9407	0.9864	1.5081	10.4538	5.9359	3.1718	1.9437	2.6305	15.096	3.3794	2.3591	2.0287	6.9991	2.6458	1.4893	1.3247	1.796		0.519232	3.47082
12.9864	2.4461	1.2374	1.6062	12.4464	2.3664	1.0184	1.1322	1.2398	1.2707	1.431	1.2868	2.7762	13.28	0.9423	1.1174	0.9558	1.0545	10.6143	6.3604	3.4565	1.667	4.2481	15.3724	2.851	2.6954	2.1942	7.0531	2.0669	1.2523	1.4907	1.3871		0.524038	3.55861
13.1055	2.3734	1.2598	1.236	10.8003	2.4959	1.2825	1.4801	1.1746	1.4336	0.9031	0.9614	4.5969	16.4715	0.9013	1.2057	1.1967	1.3528	8.8598	5.8271	3.9295	2.2056	3.4714	15.3432	2.8405	2.7997	2.0056	6.8434	2.2054	1.3832	1.305	1.0182		0.528844	3.58591
13.2247	2.0383	1.0938	1.4272	11.3409	3.0464	1.4309	1.3191	1.7015	1.128	1.2794	0.9812	3.8506	16.9056	1.3406	0.919	0.7928	1.064	7.6263	6.2631	4.4224	1.8838	3.3015	15.5503	3.7813	3.1989	2.1196	8.0832	2.745	1.3738	1.3621	1.5773		0.533654	3.708
13.3438	1.6223	2.1207	1.933	11.3531	3.3247	1.6309	1.4467	1.1767	1.3875	1.0561	0.8273	3.9891	19.4773	1.3763	1.1941	1.0515	1.3729	6.4387	5.2662	4.0911	1.7199	3.4419	17.446	2.736	3.0064	2.3804	8.5298	2.0245	1.489	1.5575	1.3985		0.53846	3.80213
13.463	2.3029	1.1057	1.7888	11.363	2.4559	0.9908	1.3468	1.2188	1.0738	1.3524	0.7959	3.2902	17.4679	1.1804	0.9577	1.1043	1.2717	6.6892	7.5643	3.8129	1.9406	3.7139	18.1953	2.8947	2.2628	2.1666	9.5999	2.4726	1.109	1.4098	1.3549		0.54327	3.75011
13.5821	1.7997	1.0574	1.7732	13.9553	2.6851	1.5371	1.6339	1.3307	1.6046	1.2479	1.3629	3.2901	17.201	1.4674	1.2642	0.9308	1.4077	6.0101	6.9804	4.8534	2.4888	4.3664	26.3205	3.4824	2.794	2.1067	9.367	2.3497	1.2693	1.2946	1.2991		0.548076	4.21069
13.7012	2.3123	1.2186	2.0396	14.8229	2.5954	1.3873	1.8087	1.3112	1.487	1.1676	1.3629	2.8276	16.6071	0.973	1.0231	0.5801	1.3008	6.6348	8.0877	3.5195	1.7245	4.3311	28.6393	3.6193	2.0261	1.8142	11.4486	2.379	1.302	1.4586	1.4383		0.552882	4.29833
13.8204	2.0497	1.2254	2.1265	14.6249	2.5689	1.4975	1.5359	1.2361	0.8604	1.4675	1.2676	1.8824	18.2704	1.2523	1.4085	0.8448	1.3552	6.6201	9.7765	3.5212	2.2611	3.8591	31.5894	4.3075	2.5061	1.8516	12.4384	2.6665	1.6319	1.9289	1.3289		0.557692	4.57294
13.9395	1.5942	1.2143	1.5823	16.6461	3.542	1.7877	1.2437	0.8866	1.2758	1.2759	0.9513	2.016	22.6885	1.3718	0.955	0.9459	0.8811	6.0805	9.2095	3.9086	2.1074	4.1201	32.9542	4.1392	2.2771	2.3102	13.6508	2.3241	1.2712	1.6758	1.3486		0.562498	4.78179
14.0587	2.1891	1.0816	2.3959	14.663	3.2198	1.3212	1.2683	1.0475	1.2009	0.9149	1.1572	1.7569	23.54	1.5203	1.491	1.248	1.5893	6.1995	10.1048	3.4375	2.3165	5.6338	31.8154	4.0358	1.7603	1.7844	14.9946	2.5332	1.4784	1.0133	1.3392		0.567309	4.84037
14.1778	2.0783	1.5284	2.1559	14.1727	3.5208	1.4002	1.1117	1.3343	1.2037	1.1011	1.0221	1.5733	23.5863	1.2571	1.3849	1.1134	1.6503	6.2675	9.5301	4.3235	2.0085	6.5762	29.5398	3.8808	1.706	2.7	16.075	2.2782	1.7314	1.2172	1.1061		0.572115	4.84306
14.297	1.8314	1.1391	1.7692	12.3402	2.8662	1.6793	1.0692	1.2107	1.3287	1.5614	1.2806	2.2539	25.2848	1.576	1.1349	0.9952	1.5055	6.1515	9.7306	4.1087	2.2542	6.4526	27.1388	3.8725	2.1989	2.7954	17.7415	2.1367	1.4576	1.3261	1.5683		0.576925	4.83096
14.4161	1.8468	1.1289	1.6642	11.9554	3.4576	1.4582	1.3253	1.6005	1.1907	1.2288	1.1181	1.3896	26.9439	1.4336	1.4196	0.8017	1.5558	7.016	10.9998	3.7461	3.1148	6.4788	24.1379	3.9326	2.0211	2.5037	16.3825	1.9122	1.4473	1.0146	1.1487		0.581731	4.75403
14.5352	2.0265	1.7566	1.4629	11.9549	3.8524	0.9033	0.9008	1.6159	1.3206	1.3149	1.1589	1.634	28.0426	1.8552	1.5802	1.4746	1.447	7.1769	11.0593	3.8068	2.4599	6.9351	20.2045	3.9418	2.0222	2.4484	18.6015	2.308	1.6827	1.2741	1.6488		0.586537	4.83456
14.6544	1.7075	1.286	1.7467	9.3238	3.8741	1.0332	1.3343	1.5571	1.1086	1.2514	1.1594	1.945	30.729	2.0265	1.1642	0.8688	1.3156	7.9511	12.3055	4.1593	2.0123	7.8979	19.4786	4.571	2.6419	3.2544	16.2769	1.8648	1.4733	1.173	1.3159		0.591347	4.83249
14.7735	1.5009	1.2642	1.685	11.3758	4.3981	1.1055	1.4636	1.0174	1.073	1.3275	1.5485	1.4207	30.3334	1.4718	1.8581	0.811	1.6216	7.432	13.7373	3.79	2.0985	8.5989	16.991	4.2417	2.0849	3.0701	16.8334	1.9912	1.4529	1.4116	1.2158		0.596153	4.84598
14.8927	1.2964	1.1035	1.5868	9.566	4.4463	1.4191	1.1474	1.1232	1.2559	1.1754	1.1209	1.6753	28.3434	2.0082	1.9163	0.8582	1.2978	7.9664	14.4651	4.1222	2.8994	6.4395	14.8183	4.5926	2.3891	2.9611	17.4078	2.0819	1.4449	1.3678	1.7025		0.600963	4.70964
15.0118	1.6802	1.1116	2.4619	9.5285	4.4235	1.3759	1.1531	1.4355	1.2317	1.4138	1.3538	1.3116	24.6229	1.9773	1.396	1.3148	1.2421	8.2526	12.2741	4.2202	1.9781	7.2077	15.7652	4.2921	2.2327	3.1437	17.7356	1.6893	1.196	1.4111	1.2668		0.605769	4.57095
15.1309	1.3498	0.6631	2.1067	9.4678	5.6215	1.4405	0.9083	1.5321	1.6646	1.3644	1.7879	1.7383	22.7815	2.0314	1.6916	0.945	1.835	7.3307	12.1052	4.5234	2.113	5.54	13.942	3.7493	2.3534	3.1061	17.8962	1.7985	1.2487	1.3915	1.6072		0.610575	4.43983
15.2501	1.5948	1.1714	1.7357	10.2942	5.1012	1.2376	1.0493	1.2168	1.3442	1.2341	1.1263	1.6209	20.0297	1.6599	1.4346	1.0054	1.4158	7.8462	10.6635	4.2531	2.8374	5.3777	15.5023	4.5842	1.8825	3.3795	18.7198	2.0744	1.0861	1.3451	1.4396		0.615385	4.36333
15.3692	1.2655	1.2363	1.43	10.496	5.2294	1.1627	1.438	0.9545	1.2815	1.7245	0.9351	0.9674	15.1952	2.0849	1.3729	1.0971	1.4748	7.9241	9.4403	3.9328	2.8675	5.0775	16.1807	3.8857	2.5796	3.2772	18.6977	2.4691	1.0654	1.4669	1.7244		0.620191	4.19144
15.4884	1.3281	0.9904	1.5552	9.2348	7.9179	1.3852	1.0036	0.992	0.957	1.3948	1.0791	1.7253	12.8076	2.4898	1.7043	1.0708	1.5938	8.8712	8.906	4.3443	2.5816	3.9844	16.0933	5.2077	2.3225	3.1072	17.3023	1.9914	1.2762	1.68	1.316		0.625001	4.13593
15.6075	1.2496	1.3767	1.6899	8.2428	7.4771	1.2418	1.2108	1.2731	1.5194	1.0594	1.2056	1.3708	13.0222	2.2831	1.4265	0.8583	2.3005	9.0822	7.9522	4.2217	2.622	4.9833	14.4638	4.5313	2.1919	3.4324	17.106	1.6036	1.1157	1.3381	1.4754		0.629807	4.02991
15.7266	1.0161	1.1969	1.3817	7.1888	8.1284	1.7314	1.3491	1.0909	1.0703	1.3063	1.1033	1.5338	13.7999	2.5252	1.6978	1.7421	2.1425	10.7161	7.8354	3.9714	2.2447	4.6106	14.0084	4.2729	1.75	3.237	14.2555	1.7863	1.8249	1.5755	1.5474		0.634613	3.98841
15.8458	1.556	1.1962	1.5357	7.0711	9.6631	1.5755	1.2445	1.2696	1.3117	1.2314	1.4217	1.2436	15.8244	2.9673	1.6116	1.1426	2.1813	10.6053	8.7008	3.6735	2.8229	4.3314	12.8799	3.9922	2.339	2.681	14.5658	2.2265	1.4445	2.0269	1.3605		0.639423	4.11927
15.9649	1.2461	1.2443	1.7995	6.553	10.2623	1.0572	1.1781	1.1317	1.2213	1.3104	1.1934	1.1429	16.41	2.464	1.3397	1.0326	1.9997	11.2339	8.9331	5.0689	3.5671	4.4755	12.8942	4.3689	2.0799	3.4976	15.1491	2.0778	1.2563	1.0118	1.3919		0.644229	4.18039
16.0841	1.1088	1.1088	1.6583	6.0069	10.0602	1.7293	1.0315	1.0012	0.7219	1.2979	1.0876	1.4555	15.2385	3.033	1.6399	1.1786	1.7435	11.6033	9.1933	3.6317	2.929	3.9395	11.5219	5.0197	2.3428	3.8467	15.741	1.7434	1.5534	1.2082	1.713		0.649039	4.09962
16.2032	1.5288	1.257	1.5836	5.4625	11.438	1.6726	0.9844	1.2218	0.942	1.2772	0.9893	1.4764	12.6763	3.4802	2.003	1.1769	2.5633	12.9375	8.0979	3.4485	3.2925	4.1152	11.9758	4.967	1.9993	3.0088	13.8226	1.9088	1.2378	1.5547	1.416		0.653845	4.04889
16.3224	1.1736	1.3704	1.3279	5.3507	9.855	1.4686	1.1434	1.3804	1.1673	1.0761	1.3587	1.8198	10.3624	2.5049	1.5383	1.1432	3.1628	12.6631	8.4647	4.3447	2.6873	4.2419	11.2728	3.8624	1.7252	2.8881	10.1436	1.7052	1.8858	1.6881	1.6345		0.658655	3.75519
16.4415	1.5473	1.217	1.1142	5.3503	11.117	1.8062	1.1773	1.2849	1.1318	1.3245	1.3659	1.4626	10.9441	3.3875	2.2182	1.2621	3.0699	11.1198	11.3307	4.4674	3.0411	3.9729	11.0512	4.8423	2.2133	3.8639	13.0383	1.6201	1.3227	1.3961	1.7573		0.663461	4.05864
16.5606	1.3005	0.9577	1.9181	5.2884	14.093	1.4375	1.5	0.9116	1.077	0.8601	1.314	1.5061	9.1982	3.0215	1.835	1.5148	3.8041	10.834	9.5746	3.8761	2.7343	3.5259	11.8953	4.2907	1.8395	3.3124	11.7199	1.8845	1.3282	1.2382	1.8986		0.668267	3.91903
16.6798	1.6583	1.2411	1.4223	5.1931	14.2407	1.7298	0.8151	1.2737	1.0571	1.2644	1.0016	1.4203	10.1773	3.4362	2.3294	1.2826	3.6349	9.0693	10.5729	3.2162	2.7667	2.7414	12.336	3.627	1.6084	3.316	12.8457	2.0722	1.5571	1.6984	2.0056		0.673077	3.95519
16.7989	1.4442	1.343	1.6008	5.7103	15.8477	1.6001	1.3753	1.2934	1.6254	1.0962	1.4955	1.5166	9.3233	3.3639	2.1673	1.2477	4.4136	7.4247	11.5359	3.2809	3.1312	3.5067	12.68	3.2225	2.5205	3.1233	11.4405	1.6931	1.5887	1.9951	2.9002		0.677883	4.08089
16.9181	1.5415	1.0985	1.5627	6.2422	16.5179	1.8453	1.0508	1.3861	1.0459	1.153	1.0565	1.2259	10.3138	3.5455	1.7745	1.2742	5.4658	8.1636	12.6996	3.9799	3.0231	3.7741	10.1578	3.9727	1.7539	2.3292	11.3832	2.2355	1.7111	2.0686	2.2078		0.682693	4.11485
17.0372	1.2311	0.6379	1.5565	5.1942	18.277	2.1179	0.9355	1.0185	1.1883	1.6702	1.1453	1.2074	11.6317	3.4702	2.3606	1.5804	5.9064	6.466	12.1285	3.989	2.9549	3.3601	10.3631	3.5406	1.5135	2.682	12.7169	2.1994	1.2284	1.8262	2.7421		0.687499	4.15612
17.1563	1.4979	1.3506	1.3607	4.2638	17.8206	1.5104	1.2318	1.3104	0.9734	1.1566	1.2485	1.2906	11.6027	5.0932	1.7202	1.4688	6.0204	6.6258	9.8703	3.8432	2.7632	3.4173	11.9608	3.3437	2.1266	3.3739	12.9161	2.2994	0.9429	1.5982	3.5369		0.692306	4.17867
17.2755	1.2212	0.9991	1.6541	4.5041	19.2455	2.4633	0.9838	1.3355	1.4455	1.1918	0.9956	1.1511	9.0772	4.4207	2.0162	1.4985	7.2557	6.9676	8.392	3.0503	2.424	4.4474	12.6329	3.5678	1.4905	3.0145	11.4231	2.4078	1.7694	1.8138	4.4059		0.697116	4.16987
17.3946	1.0071	1.2842	1.5536	3.8628	17.6823	1.6187	1.8478	1.2198	1.1665	0.9973	0.8865	1.3122	9.4288	4.5892	2.7245	1.3979	7.689	6.3039	7.7471	4.1476	2.6213	3.0171	15.0726	2.6491	2.0493	2.9758	10.5168	2.6007	1.7271	1.5137	4.5938		0.701922	4.12271
17.5138	1.0267	1.2711	1.4625	3.3516	17.6742	1.9115	1.1481	1.3985	1.0601	1.161	1.2371	1.1399	8.6281	5.0406	2.2841	1.1851	8.4348	5.3263	6.6307	3.7277	2.437	3.5647	15.6568	2.9917	2.2818	2.8131	11.4597	3.0108	1.5265	1.6831	5.2076		0.706732	4.1204
17.6329	1.4779	0.9582	1.4221	3.7896	16.2453	1.4044	1.0734	1.5258	1.2223	1.0223	1.5094	1.2712	9.5043	4.49	2.6605	1.2685	9.2604	5.1843	5.7532	3.1549	2.782	2.8239	16.1721	3.6717	1.7352	2.648	9.5858	2.2127	2.0311	2.2708	6.5332		0.711538	4.08595
17.7521	1.1109	0.9884	1.5619	4.083	16.8978	1.952	1.4593	1.2835	1.0019	1.0883	1.3616	1.3753	8.9954	5.0848	1.8912	1.6545	9.596	4.8655	5.0168	3.1915	3.0841	3.2433	13.3563	2.5829	1.9441	2.0375	9.5509	2.7264	1.6736	2.0539	8.5619		0.716348	4.04111
17.8712	1.5476	0.9441	1.4047	3.1893	16.8537	2.0641	1.1911	1.0238	1.2915	0.9967	1.278	1.375	8.4497	5.7073	2.5575	2.1327	10.4412	2.8122	4.3573	2.5467	2.0457	3.1701	13.023	2.7361	1.4751	2.3439	9.6251	4.0571	2.2231	2.8406	10.8582		0.721154	4.08265
17.9903	1.3055	1.5753	1.0802	3.5099	16.4378	2.1125	1.3391	1.295	1.2634	1.3304	1.6742	0.951	9.5904	5.6757	2.547	2.1168	11.0333	3.7988	3.7131	2.7338	1.9045	3.4993	10.8644	2.919	1.613	2.3048	11.7131	4.8913	2.4519	2.9243	9.455		0.72596	4.18141
18.1095	1.2852	1.4056	1.4574	3.2403	15.5431	2.4591	1.483	1.4019	1.312	1.2843	1.14	1.2818	10.011	6.8876	1.8174	1.83	11.0725	3.4443	3.4508	2.9852	2.114	3.3053	10.5499	3.3268	2.1361	2.3731	13.8353	5.7609	2.4751	3.1216	8.4865		0.73077	4.267
18.2286	1.4186	1.0868	1.4039	4.1178	16.5043	3.1961	1.0544	1.0846	1.4711	1.5471	1.1753	1.3944	10.4948	6.2499	2.6292	2.1804	10.8533	4.125	2.8107	2.79	2.479	3.4712	12.0553	3.3894	2.0728	2.5784	14.0857	7.4436	2.9336	3.9041	11.8939		0.735576	4.64176
18.3478	1.2451	1.1372	1.4523	3.4475	15.229	3.176	1.0586	1.4749	1.6625	1.4177	1.5366	1.5175	10.4536	7.4469	2.5026	2.1501	11.2714	3.0585	2.4844	2.5286	1.9423	2.9733	12.9933	3.6941	1.6592	2.2933	15.3485	9.5099	3.2481	4.8529	11.6564		0.740386	4.7233
18.4669	0.9709	0.9866	1.3621	3.5023	13.4838	3.1677	0.8765	1.4317	1.3982	1.6611	1.4366	0.6874	9.5071	8.4805	2.1613	2.2158	10.5885	3.1466	2.0896	2.1999	2.2444	3.0006	10.9449	4.049	2.4831	2.2588	16.0907	13.0433	4.0576	5.0981	11.5708		0.745192	4.71598
18.586	1.116	1.2035	1.4018	4.0734	14.3729	3.9637	1.0883	1.2064	1.3793	1.3051	1.5694	1.2849	9.4527	7.7206	2.4654	2.4606	10.5822	2.2761	2.0441	2.265	2.0787	3.366	11.3931	3.9175	1.3693	2.2112	15.6711	13.7791	3.8169	6.0498	10.2488		0.749998	4.74622
18.7052	1.2641	1.2674	1.6853	4.1797	11.6198	3.4946	1.8701	1.1256	0.9838	1.2883	1.037	1.7807	9.2172	10.1529	2.4892	1.9543	9.9296	2.052	2.0921	2.1826	1.9771	2.9046	10.4219	4.5868	1.2765	2.1728	16.9555	16.6518	3.6675	6.7121	11.4389		0.754808	4.85264
18.8243	0.969	0.7992	1.3214	4.0831	10.5964	4.1176	1.0922	1.1632	1.2267	1.1417	1.5682	1.8705	7.7915	10.9545	2.7624	2.2878	9.3942	2.5252	2.1486	1.9619	1.9891	2.6703	8.931	4.5411	1.7968	2.3126	16.517	15.0224	3.3481	6.3247	12.1013		0.759614	4.68805
18.9435	1.4336	1.2604	1.1918	5.9919	8.6272	5.0371	1.0473	1.352	1.0274	1.2106	1.7458	1.4206	6.7006	10.709	3.1422	2.5376	9.1597	1.7349	1.5581	1.8692	2.3851	2.9112	8.5219	4.5779	2.1123	2.1214	16.2864	16.3996	3.422	7.1554	13.1238		0.764424	4.7669
19.0626	1.4324	0.722	1.0026	5.441	7.8116	5.2109	1.3607	0.8485	1.0826	1.9839	2.1007	1.6311	6.38	12.7292	3.066	3.3513	8.9866	1.8121	2.0635	1.8667	2.1516	2.6015	6.7297	4.6879	1.9777	1.9773	15.228	15.845	5.1458	9.6285	14.8379		0.76923	4.89336
19.1817	1.0771	1.1128	1.5718	6.0917	7.3816	6.2265	1.417	1.4323	1.3748	1.3658	1.8556	1.8442	4.8414	14.1317	3.4798	3.3312	8.4183	2.1828	1.7716	1.8605	2.1948	3.0452	7.048	4.8364	1.7296	2.2179	15.3324	18.1734	4.1587	10.2685	14.7268		0.774036	5.04839
19.3009	1.6588	0.9423	1.2241	7.1024	6.9625	6.7389	1.5962	1.2347	1.3667	1.7887	1.4653	1.6509	5.2707	15.5602	2.96	3.9079	8.2019	1.9578	1.7641	1.986	1.9168	2.9189	7.1598	5.4777	1.6389	1.8388	17.1878	20.5776	6.4813	11.7158	17.326		0.778846	5.47031
19.42	1.3853	1.1438	1.8361	8.2963	5.9412	7.4375	1.8115	1.301	1.1526	1.5585	1.8244	1.9953	4.2779	16.0909	3.9242	4.8241	7.3664	1.9578	1.5637	1.8165	2.0189	2.6092	7.0861	5.6306	1.4995	2.258	16.7471	23.1545	7.5205	12.171	21.2212		0.783652	5.78779
19.5392	1.601	1.5116	1.4196	9.1122	4.6042	8.5421	1.6782	1.2136	1.3889	1.7363	2.3025	1.6129	4.2741	15.8392	3.9878	4.2665	9.1191	2.9785	1.6966	1.7332	2.667	2.9547	6.1731	5.4449	1.727	1.8325	16.5373	25.558	10.0442	13.4342	25.3103		0.788462	6.20327
19.6583	1.2603	1.4144	1.2845	9.6368	4.7604	7.5033	1.7669	1.2929	0.9074	1.9357	2.3896	2.0429	4.537	17.1052	4.9444	4.8518	7.3929	1.703	1.9833	1.5761	2.09	2.7596	6.1931	5.7795	1.5843	1.8909	15.361	27.1154	13.7303	14.6179	29.3605		0.793268	6.47649
19.7775	1.2613	1.2247	1.61	9.2894	2.5308	7.15	1.6829	1.6019	1.0134	1.8015	2.6343	2.3087	3.5437	19.3731	4.9017	4.9559	7.9454	1.547	1.6971	1.8356	1.8884	3.7132	4.9383	6.261	1.9948	2.4879	13.0877	30.6667	17.4988	15.9344	36.5902		0.798078	6.93451
19.8966	1.2577	1.8994	1.5577	10.2523	3.1017	8.3459	1.7303	1.6109	1.5072	2.1769	1.7999	2.2204	4.5466	20.9433	4.9173	5.4432	8.032	1.8752	2.1537	1.5047	2.1363	3.5051	5.0696	6.1433	2.3463	2.0352	14.4912	35.2102	22.6656	22.3262	38.9616		0.802884	7.79893
20.0157	1.2974	1.2281	1.5636	9.504	2.5921	7.8379	1.8901	1.972	1.7439	1.5769	2.6221	2.3843	4.3512	21.9894	5.4715	5.8078	8.8355	2.4	1.4926	2.1897	2.494	3.7318	4.6823	6.5388	1.4238	2.2202	14.6514	34.7696	29.0336	25.3033	38.4309		0.80769	8.12999
20.1349	1.571	1.0944	1.414	9.5307	1.7182	8.9289	2.159	1.9224	1.4182	2.2008	2.5978	2.3363	5.609	22.7511	6.0801	5.8495	8.3695	1.8285	1.8507	1.8145	2.5292	4.4449	5.1978	6.6651	2.3264	1.7306	14.727	34.5209	31.9518	27.4734	35.4144		0.812501	8.32342
20.254	1.8495	1.3436	1.9818	10.7843	1.7313	8.0089	1.8315	1.8779	1.5105	2.2559	3.1409	3.0686	5.7029	21.7293	6.127	4.8756	9.0868	1.8663	1.718	1.7105	2.3569	3.5686	4.8306	6.1873	1.9442	2.1151	14.1418	35.6682	34.1911	28.9648	34.0395		0.817307	8.39385
20.3732	1.4599	1.3914	1.659	10.3682	2.0877	6.6463	2.0367	1.8543	1.5637	2.4428	3.0331	2.2968	7.9592	23.6047	8.2821	6.6642	9.0772	2.2878	1.4518	1.7261	1.8703	3.9531	5.1955	5.4946	2.1929	1.9171	15.682	35.3129	34.3034	25.9061	23.6649		0.822117	8.17374
20.4923	1.1108	1.573	1.8763	9.3639	1.2566	6.3189	1.7883	1.9091	1.6037	3.2504	3.9828	3.0892	8.3735	21.4501	8.2958	7.5431	9.6223	2.1512	1.4914	2.2057	1.5935	3.7177	5.4222	5.7907	2.3922	1.9477	16.0436	35.4237	24.8019	24.4215	22.263		0.826923	7.80883
20.6114	1.6913	1.2474	1.793	8.661	1.1359	4.6505	2.7059	1.7266	1.8804	2.8661	5.1556	3.1398	9.3095	22.4429	9.2134	9.2567	9.243	2.1838	1.3317	2.5328	1.8934	4.3682	6.3898	5.4153	2.2476	1.9947	17.0043	32.2107	15.6157	21.8759	13.9189		0.831729	7.26135
20.7306	1.4679	1.1691	1.8839	8.2665	1.0588	4.3909	3.4115	1.9988	2.5087	2.9052	6.3669	3.3162	10.6845	22.3477	9.5589	11.4867	10.4323	2.0502	1.8861	1.6627	2.4454	4.056	5.709	5.4154	2.4261	1.4686	16.4157	25.3872	11.7175	19.5591	8.6437		0.836539	6.84185
20.8497	1.6827	1.3904	1.7183	6.922	0.4226	3.6825	4.6066	2.3738	3.0009	3.0568	7.3293	4.0199	12.7172	21.5135	10.1757	13.1764	9.1171	2.9901	1.5996	1.3677	2.2844	4.4263	7.3365	4.8526	2.4898	2.2312	16.4133	16.753	8.9828	14.2245	5.8326		0.841345	6.40936
20.9689	2.0022	1.5165	1.4703	5.6439	0.6156	2.4809	6.1468	1.9924	4.2212	3.6655	9.1036	4.6398	14.7196	24.351	9.984	13.9521	11.779	3.6394	1.6518	1.433	2.0741	4.1789	7.6149	5.2894	2.3267	1.6919	17.6625	14.2304	7.9185	9.3487	3.6688		0.846155	6.4843
21.088	1.9725	1.9059	1.5643	5.6761	0.4784	2.5423	8.3995	2.3762	5.0723	3.9785	9.6772	4.5817	15.1873	23.6409	9.6041	18.0037	12.0935	5.7156	1.7212	1.7813	2.6021	3.4074	9.2326	6.2891	2.2077	2.3258	15.5892	12.9297	5.2659	7.2208	2.9106		0.850961	6.64366
21.2071	1.7378	1.8019	2.0598	4.1074	0.9451	2.6902	8.4955	2.5413	6.3208	5.194	11.0013	4.5708	15.8576	19.8564	12.0766	18.1985	11.6388	6.0641	2.2107	1.6733	2.5679	3.8228	11.4847	6.94	2.0933	2.3497	14.9135	11.432	4.5523	5.6668	2.3008		0.855767	6.68276
21.3263	1.6484	1.7837	2.4327	3.443	0.6791	1.9139	10.4761	2.8456	9.0758	5.1472	11.5824	5.5707	17.9351	18.0704	10.6434	20.1002	12.3029	7.9606	1.4329	1.6139	2.1389	3.377	14.9172	6.9786	2.2701	2.275	13.8718	9.4893	3.286	3.978	1.9207		0.860577	6.81163
21.4454	2.2041	1.9886	3.3559	2.7317	0.348	2.0928	11.0496	3.5018	9.11	4.7746	12.6468	5.3787	17.3626	17.1523	11.2093	18.796	10.709	12.1	1.5826	1.651	2.1741	3.7967	19.0127	8.1616	2.6004	1.7012	13.3774	8.5904	2.7279	4.353	1.9168		0.865383	7.03734
21.5646	2.7008	1.7448	3.4461	2.3227	0.2767	1.2546	12.3483	3.8789	12.81	5.4209	14.7449	6.1913	15.9849	13.5529	9.6141	21.023	10.4297	14.2618	1.5779	1.9188	1.9256	3.6635	21.5084	8.7687	2.4101	1.7879	16.6451	7.4507	2.0138	2.9978	1.7589		0.870193	7.30431
21.6837	2.2769	2.2218	4.375	2.1254	0.4938	0.974	13.3945	3.8675	13.7863	6.5703	12.6778	6.6548	14.7388	11.4666	9.7434	20.3164	9.3799	15.7641	2.0005	1.646	2.2859	3.1884	24.8676	9.3419	2.5951	1.8768	19.755	6.4429	2.0018	2.7169	1.1336		0.874999	7.44128
21.8029	2.7651	2.4736	5.7144	1.5772	0.325	0.6164	12.5229	4.6805	12.3987	7.8282	15.4193	8.1577	14.1648	9.4519	8.3214	20.842	10.093	17.759	1.8085	1.4478	2.7233	4.4368	24.7062	11.3825	2.1233	2.3062	22.8122	5.3371	1.2183	1.6913	1.0433		0.879809	7.68219
21.922	3.6623	2.6001	5.5959	1.5608	0.5536	0.7782	9.4766	4.7301	13.3234	6.8342	14.1688	6.7772	15.2469	7.2233	6.7302	20.625	11.1284	20.8954	1.7952	1.7791	2.407	4.941	24.339	14.414	2.6356	2.2502	26.141	4.7921	1.2625	2.0652	1.1829		0.884615	7.80372
22.0411	3.9829	2.6541	7.3828	1.5792	0.4385	0.4067	7.6121	5.1057	14.331	8.866	10.7856	7.1731	12.7151	5.0432	5.0335	18.9285	9.6515	20.5998	2.656	1.6748	1.7952	5.3927	21.9645	15.9837	2.7328	2.6741	25.1445	3.4371	1.4565	2.033	0.9657		0.889421	7.4258
22.1603	4.0985	3.7515	10.5992	1.1375	0.3754	0.7684	6.338	6.0837	14.078	8.5571	7.47	5.5368	11.3592	4.3361	3.7737	15.4993	9.3224	21.2436	1.7402	1.3777	2.3733	6.2411	17.397	20.2146	3.1924	3.245	25.2171	3.3811	1.687	1.7376	1.157		0.894231	7.20289
22.2794	6.1865	5.243	10.2155	0.9367	0.1875	0.349	4.7909	6.921	15.0119	9.7313	6.3558	5.2733	10.1992	3.6955	3.2081	12.7734	7.9665	23.7046	2.3348	1.7617	3.1556	7.3687	13.3268	23.9901	3.3841	2.7879	25.1234	2.3595	1.364	1.3564	0.9012		0.899037	7.16013
22.3986	6.1907	7.4371	11.521	0.8251	0.1724	0.6001	3.6226	9.0428	13.8985	10.0396	4.9384	5.2618	8.2521	2.9104	2.4858	10.8872	5.9999	24.4204	2.5719	1.7547	3.6926	9.2281	6.9959	24.4086	3.9343	3.28	27.3888	1.9102	1.0177	0.9569	0.6196		0.903847	6.9763
22.5177	9.3489	11.5572	12.7934	1.1531	0.3435	0.4379	2.2896	9.9981	14.4542	12.2561	4.8957	5.5566	7.7192	1.8807	2.2055	8.9664	4.3023	26.5926	2.9673	1.9418	3.7436	11.6702	7.8414	27.3411	3.3953	5.0327	24.5163	2.6719	1.2262	1.4122	0.5816		0.908653	7.4546
22.6368	11.0059	10.7353	12.1469	0.3968	0.2718	0.4069	2.6495	11.0337	14.2721	12.92	3.3961	5.9013	6.109	2.2974	1.6209	6.8131	3.2966	30.8065	2.4654	2.4242	4.4466	14.0238	6.1331	30.1932	4.5263	5.2319	20.416	1.2178	1.0624	1.1085	0.8883		0.913459	7.42636
22.756	11.1006	11.7232	10.0307	0.5004	0.2764	0.1112	2.5277	12.2601	13.9107	14.3456	3.2975	4.6454	6.4825	1.4784	1.3229	5.4781	3.1208	30.5148	2.9255	1.8876	5.2645	17.2367	4.259	29.7285	4.2493	6.0261	18.525	1.8736	1.2858	0.5359	0.677		0.918269	7.34198
22.8751	12.2858	11.7484	9.2151	0.6013	0.1106	0.2629	1.9873	12.2121	16.5922	13.3152	2.4189	4.8112	5.8403	1.2475	0.91	3.6658	1.9961	34.1597	3.2578	2.6523	6.3371	19.2728	4.0417	24.9203	5.7749	4.5566	17.1511	1.4288	1.1822	0.7287	0.4911		0.923075	7.26374
22.9943	11.8191	11.3115	7.8025	0.8146	0.119	0.2812	1.6637	14.2845	15.5031	10.4437	2.2162	4.6278	5.3391	1.0467	1.4192	3.6437	1.9443	28.1611	4.1983	2.6575	8.2676	18.367	2.7503	22.0826	5.6834	3.9499	17.8616	1.3082	1.145	0.9237	0.8215		0.927885	6.85347
23.1134	11.634	10.377	6.8936	0.4666	0.1667	0.334	1.3139	12.2075	17.8056	6.9028	1.7884	3.9966	3.7921	0.9456	1.2637	2.0612	1.6958	20.3246	5.0144	2.1962	9.1469	17.6798	3.5986	18.7473	7.9861	4.269	15.1019	0.939	0.9023	0.7856	0.5117		0.932691	6.1564
23.2325	11.9955	9.5473	4.4766	0.2903	0.2612	0.1567	1.4639	10.5481	16.8883	4.2612	1.4724	3.621	3.2985	0.7477	0.7093	2.0605	1.2371	12.5824	6.2983	2.9353	10.4436	17.2992	2.3586	16.2679	8.05	3.4442	14.3948	1.1387	0.982	0.84	0.2164		0.937497	5.49313
23.3517	11.8272	10.7215	4.4168	0.4794	0.0748	0.2221	1.8176	5.9965	15.3249	3.1484	1.4279	3.3082	2.8952	0.9412	1.0396	1.6684	1.2877	7.4042	8.7338	3.8943	14.4894	14.4134	2.826	14.0297	7.2839	2.8234	14.4081	1.2778	0.7878	0.3564	0.439		0.942308	5.1537
23.4708	11.3143	10.2707	2.8154	0.179	0.2164	0.1775	1.2757	4.29	10.3708	2.2281	1.2474	2.2142	2.0596	0.5134	0.6503	1.1762	0.9537	4.5929	9.5799	5.7979	16.8649	11.9058	2.2084	11.83	9.1355	3.5646	13.2541	0.9656	0.8746	0.5477	0.4386		0.947114	4.62946
23.59	11.9125	9.7799	2.3063	0.3226	0.1122	0.3172	0.8503	2.2895	8.9503	1.9998	1.2162	2.2151	1.798	0.6877	0.662	1.0243	1.0521	2.5852	12.3184	6.8629	17.7128	8.0812	1.9427	10.6226	8.2791	3.9605	12.2514	0.9391	0.6276	0.4684	0.2372		0.951924	4.335
23.7091	9.1908	9.2558	1.6251	0.2901	0.2719	0.2827	0.6309	2.0528	3.8077	1.4629	0.9422	1.5649	1.3395	0.7762	0.4449	0.7929	0.6581	2.8172	15.8134	8.9525	18.6527	6.968	1.4681	8.1955	8.4919	4.7665	12.3814	0.8475	0.5447	0.3435	0.3788		0.95673	4.06487
23.8283	9.1539	10.6912	1.6781	0.1679	0.1069	0.1192	0.9714	2.0437	3.3823	1.3133	1.0566	1.8184	1.1635	0.6847	0.4495	0.9839	0.8276	2.0295	17.977	10.6465	17.7315	4.6892	1.3706	6.1911	6.8772	5.5083	12.9046	0.8551	0.496	0.5503	0.2342		0.96154	4.02172
23.9474	9.4449	8.2336	1.7636	0.3199	0.0631	0.0574	0.6274	1.6386	2.1912	1.2796	1.1562	1.0197	0.6211	0.5571	0.7181	0.7148	0.8141	1.6292	20.2916	11.6195	15.8718	3.5557	1.2274	5.1793	7.4126	6.4267	12.5604	0.8696	0.4671	0.2251	0.3159		0.966346	3.83459
24.0665	10.3573	8.15	1.4433	0.2264	0.0609	0.4282	0.7025	1.7797	1.4776	1.5252	0.5735	0.8381	0.7718	0.3271	0.572	0.5174	0.7919	1.2331	23.9005	13.3748	14.2812	2.3797	0.641	4.6751	7.1928	8.5797	10.1576	0.635	0.4386	0.4878	0.5416		0.971152	3.84069
24.1857	13.1182	6.45	1.1725	0.2309	0.1069	0.1784	0.8339	1.2487	1.996	1.0867	0.927	1.2094	0.7896	0.2875	0.4297	0.9036	0.503	0.7953	23.8245	14.1417	11.1549	1.8666	0.8653	4.1336	6.0991	9.8934	10.6532	0.522	0.3837	0.3418	0.1864		0.975962	3.75269
24.3048	10.1425	5.5392	1.0691	0.2302	0.0507	0.3197	0.6063	1.3343	1.5196	1.4173	0.6896	1.0763	0.785	0.7688	0.284	0.2692	0.4388	1.1025	28.8041	14.0371	8.2776	1.6785	0.8339	3.5558	7.1433	11.0923	8.7829	1.1328	0.4002	0.3435	0.3248		0.980768	3.67903
24.424	7.4545	4.4033	0.9263	0.3745	0.0598	0.0666	0.633	0.8906	1.4927	1.2889	0.7229	0.8942	0.8053	0.4038	0.4365	0.3838	0.3406	0.9994	29.5671	15.8058	6.6425	2.0666	0.7854	3.3741	7.0331	12.5617	7.3096	0.4055	0.275	0.1629	0.117		0.985578	3.5059
24.5431	6.3646	3.0369	0.9481	0.2324	0.1058	0.0598	0.4328	1.1516	1.4982	0.8029	0.6587	0.9343	0.4656	0.4361	0.2774	0.275	0.2266	1.0035	25.9531	17.046	5.6611	1.1584	0.8273	3.27	5.8353	11.2754	5.6359	0.6739	0.3249	0.1651	0.0577		0.990384	3.1224
24.6622	3.5046	1.9345	0.7292	0.1651	0.0614	0.2158	0.2841	1.0459	1.1224	1.1005	0.71	0.6186	0.1699	0.2777	0.2772	0.3327	0.3306	0.7308	19.6696	16.8281	4.2865	0.8948	0.6694	1.8645	6.2593	9.8772	4.8052	0.5454	0.399	0.2281	0.1122		0.99519	2.58227
24.7814	4.0615	1.8211	0.3937	0.2869	0.1677	0.1149	0.5876	0.743	1.5919	0.9444	0.7158	0.5609	0.2238	0.1742	0.3926	0.2243	0.1736	0.4306	14.7709	17.9555	3.3276	1.1517	0.5641	2.5231	5.6912	8.0819	3.6003	0.5091	0.274	0.1597	0.1095		1	2.33313

## Sheet: Image38
X0	Y0	Y1	Y2	Y3	Y4	Y5	Y6	Y7	Y8	Y9	Y10	Y11	Y12	Y13	Y14	Y15	Y16	Y17	Y18	Y19	Y20	Y21	Y22	Y23			Ap-Basal to 1	Average intensities
0	3.003	3.9889	2.9177	4.1977	5.3514	2.9053	2.5322	4.5457	3.9647	3.0461	3.6863	6.9415	4.4128	3.4223	3.6433	5.1693	14.2969	8.8393	4.5967	6.6005	10.6149	4.286	3.4882	5.7964			0	5.09363
0.1191	3.6665	4.763	3.2881	4.3635	6.6686	3.0538	2.6931	3.4312	4.0762	3.5931	3.4822	9.0095	4.0149	4.1676	4.1786	5.3348	16.3556	10.8221	4.787	7.3912	10.4906	5.2561	4.0723	6.0533			0.00504875	5.62554
0.2383	4.0917	5.2181	3.4812	4.5417	6.3679	2.8864	3.343	4.1162	5.2159	4.4519	4.1537	11.5843	4.2034	4.8981	4.7766	5.8465	17.3894	12.393	6.3538	8.212	13.6527	6.2707	4.2919	5.9359			0.0101017	6.40317
0.3574	5.7987	5.7869	4.6834	4.904	7.2927	3.5182	3.6852	5.296	6.2094	5.1803	6.5079	15.5434	5.4335	5.7627	5.026	6.6734	18.9662	12.7175	6.5746	10.3924	16.8536	7.3269	4.708	5.3728			0.0151505	7.5089
0.4766	7.0117	7.097	5.4052	6.5674	8.9594	4.5193	3.9617	5.4822	6.5759	6.2032	7.8155	19.2255	5.8526	7.1976	6.7743	8.1541	20.0851	13.9557	8.1066	13.127	16.8197	8.5832	7.2255	5.8125			0.0202035	8.77158
0.5957	10.9402	8.866	6.9581	7.9355	10.3543	4.8388	4.296	7.2123	7.7617	9.0066	9.4746	21.9195	7.3912	10.5262	8.0877	10.9919	21.3784	17.0712	9.7713	14.5776	22.8192	10.5704	9.9724	5.9776			0.0252522	10.7791
0.7148	12.7954	8.9487	6.5478	11.3922	10.9146	6.082	6.5633	7.3735	9.9733	10.634	11.3224	23.0474	8.0927	13.0336	8.7339	12.8717	27.1226	19.9776	10.2431	16.4998	25.6327	11.8731	18.8534	6.7165			0.030301	12.7186
0.834	15.743	12.9095	8.7106	12.6812	13.5916	6.968	8.4722	8.7326	13.8101	15.3321	14.2941	25.0395	11.837	16.8144	12.5925	13.9507	31.0854	24.4498	11.3457	20.0191	26.9715	15.3487	27.4384	7.5125			0.035354	15.6521
0.9531	20.731	16.7074	11.995	14.811	18.014	10.5678	13.1646	10.3532	19.3134	21.4765	18.0882	27.0017	12.1416	20.7188	16.5224	17.7734	32.7214	31.0227	14.2145	23.2864	37.5502	16.5907	40.4636	8.9741			0.0404027	19.7585
1.0723	23.708	20.4548	14.8288	17.1046	22.0604	14.7591	18.6231	17.9183	26.8902	30.1775	26.0151	29.6191	13.2575	27.8591	25.5959	24.2296	36.555	38.7717	18.9849	28.4892	44.0264	19.2532	52.7341	12.2824			0.0454557	25.1749
1.1914	25.5083	25.4708	15.8587	18.8152	26.4235	19.839	26.0413	27.3875	35.5023	40.1613	27.8609	28.4669	14.6281	40.2121	37.3759	29.494	39.5246	49.1519	24.3602	30.9868	50.4806	23.1071	61.9142	17.037			0.0505045	30.6503
1.3106	25.6893	31.8561	17.918	18.5349	30.8974	29.1668	36.7536	36.4037	39.8773	49.0118	29.6042	29.2809	17.9109	53.8173	50.387	36.7738	45.4312	56.5174	29.7083	31.1793	52.4643	31.2432	67.25	21.1733			0.0555574	36.2021
1.4297	29.9291	36.8579	20.4829	20.2637	35.1203	38.6469	51.1078	49.0273	46.4547	54.1951	31.5071	26.5226	21.6073	63.2477	60.5831	43.2677	51.1048	65.4018	35.9473	35.5717	48.1585	37.2191	68.9968	26.7413			0.0606062	41.5818
1.5488	33.5603	44.6093	20.3648	21.9857	43.9843	50.9012	62.0367	59.2495	49.1738	58.3452	38.2723	29.5572	27.4224	74.1554	64.5343	52.1718	55.1126	66.0889	45.3722	37.5015	42.6356	44.7004	70.1992	32.0265			0.0656549	46.8317
1.668	37.5271	48.181	20.2677	26.4983	47.61	56.2541	69.84	65.0672	49.556	58.4888	41.5368	33.5179	35.4479	76.4753	70.1503	60.4076	59.6272	62.4969	52.9985	40.4537	36.6882	53.3546	63.3624	35.6498			0.0707079	50.0607
1.7871	39.0048	47.7936	26.1318	29.6893	49.8821	56.0153	74.9569	63.2818	43.6286	58.7697	45.292	38.0518	42.6402	75.0678	66.2032	65.022	67.5798	62.4606	61.5865	41.3693	31.8199	59.554	53.2439	42.8992			0.0757567	51.7477
1.9063	33.7772	45.4745	27.7968	31.4233	49.0394	58.3742	72.7328	58.4789	40.1194	52.4771	46.8643	39.6538	51.8	62.6515	55.7073	71.3494	70.9736	58.4808	71.28	41.8107	27.019	60.7075	45.4952	47.2902			0.0808097	50.8657
2.0254	24.6107	31.8354	32.3061	36.3829	45.6293	52.5432	67.8848	46.2913	36.7233	46.0381	46.8191	44.0304	51.6962	45.8787	42.9938	74.0812	70.8363	57.854	77.9598	38.306	23.535	59.3114	34.2162	45.6273			0.0858584	47.2246
2.1445	16.9449	21.9925	36.4972	39.0123	39.1526	44.3724	56.6205	32.7803	33.3767	37.4323	45.6323	45.8866	52.2704	29.9965	28.0524	72.0412	70.2724	55.3232	74.3413	36.3733	23.484	55.4934	27.9734	46.8615			0.0909072	42.591
2.2637	10.8362	16.8597	31.6778	35.6704	30.7956	33.5462	39.7351	23.7393	28.5887	29.5256	41.7793	43.6702	51.4199	16.0081	19.9192	68.7334	66.6089	49.3645	70.0485	32.5066	18.8282	47.3393	21.9529	45.7486			0.0959602	36.4543
2.3828	8.4089	14.1666	26.9362	33.7546	25.242	24.0926	28.2556	20.2539	26.1102	23.9727	34.3306	42.1647	47.473	11.552	15.4614	62.5723	58.3791	45.654	57.7337	28.9849	16.3892	36.8455	18.8804	46.7261			0.101009	31.4308
2.502	6.9135	10.5405	21.712	28.7268	19.1307	18.673	18.3646	17.8862	20.292	19.1637	26.8447	36.0494	38.2873	8.3581	11.6757	50.3286	46.4855	42.1357	48.5995	25.6278	13.3841	27.7608	16.1858	45.535			0.106062	25.7775
2.6211	6.2185	7.663	15.1636	23.8289	12.8012	14.4941	13.1839	16.4007	17.7171	19.0866	22.9089	30.8899	27.4109	5.8351	9.3726	38.8869	35.2813	36.0117	35.1743	22.023	10.5221	21.5483	12.719	41.4391			0.111111	20.6909
2.7402	4.9123	5.7482	10.2668	20.1281	8.2408	11.0902	8.8349	14.2982	14.0442	17.5227	17.7176	25.3344	16.1426	5.0211	7.6812	28.6323	22.9999	30.6338	24.9853	17.58	6.6981	15.8926	10.5279	36.286			0.116159	15.8841
2.8594	4.3068	5.0308	7.0518	15.583	6.8082	9.0202	7.4994	12.4763	14.4214	15.7795	15.9521	18.815	9.9838	4.4023	6.9583	19.5261	13.5256	25.2987	19.9707	13.5849	6.3243	13.4642	7.5733	29.8545			0.121212	12.6338
2.9785	4.0121	3.7773	5.3139	12.3223	6.0278	7.3602	6.0114	10.5547	12.505	13.2647	13.92	16.5987	6.3209	5.1962	5.957	15.2643	7.0314	16.3741	14.1436	9.3392	5.6652	10.1315	6.8272	25.3644			0.126261	9.97013
3.0977	3.4089	3.9864	3.8867	10.1174	4.6798	5.9369	5.3362	9.4874	11.5235	11.2729	11.6812	14.8285	3.5411	5.0458	5.2875	12.9872	5.0426	11.2777	10.5345	6.3288	4.4457	8.5296	5.6087	17.8952			0.131314	8.02792
3.2168	3.6429	3.0924	3.7939	7.5349	4.7509	4.6356	5.5319	8.3633	12.758	10.2182	9.9255	11.6876	3.2316	5.0819	6.0298	9.9386	3.9943	6.8699	7.615	5.1979	3.4195	6.5571	5.123	13.6427			0.136363	6.77652
3.336	3.147	2.8549	2.7929	6.8216	3.9832	4.9161	4.4386	8.1083	10.7003	8.3778	8.8985	9.5918	2.4546	4.2152	6.2391	9.5173	3.9238	4.5732	4.9114	4.2391	2.8798	5.2911	5.0325	9.8411			0.141416	5.73955
3.4551	2.7825	2.3764	3.2072	6.2562	3.9198	4.2511	4.8319	7.3586	11.0029	6.3189	6.0676	7.4356	2.748	4.9553	6.367	8.8289	3.1603	2.9313	4.3486	3.0912	2.0064	4.3349	3.2873	5.6707			0.146465	4.89744
3.5742	2.7249	1.7716	3.0479	4.8665	3.4989	4.1018	5.1191	7.1346	9.1416	6.2164	5.3623	5.6936	2.2551	5.0127	5.6789	8.6946	3.2867	2.7455	3.9632	2.9622	1.8326	3.3646	2.6742	4.5548			0.151513	4.40435
3.6934	2.1692	1.6481	2.7894	5.2714	3.5446	3.8373	3.4301	6.9548	6.5723	5.6525	4.3954	4.303	2.5902	5.0511	5.9862	6.8417	3.2359	3.0025	3.6209	3.0171	1.396	3.726	1.9165	3.4552			0.156566	3.93364
3.8125	2.4092	2.3588	2.1461	3.984	3.0655	3.7967	3.8294	7.0417	4.4952	5.1217	2.9814	3.4086	2.6034	5.4887	7.1124	6.7124	3.2845	2.5172	3.4078	2.501	1.277	3.3205	2.258	2.5549			0.161615	3.65317
3.9317	2.5344	1.8736	2.1542	3.5568	3.199	3.2135	2.9784	7.3151	4.1537	4.6475	2.5234	2.5195	2.5343	5.0697	7.181	5.2394	3.2025	2.7946	2.7764	2.7382	1.162	3.8102	1.6977	1.9187			0.166668	3.36641
4.0508	2.3928	1.9164	1.9455	3.6963	2.852	2.9257	3.9535	6.1268	3.3782	4.8093	2.2549	2.051	2.5347	4.6377	6.3352	5.4266	2.7256	2.3487	3.1499	2.7	1.4727	3.5066	1.9141	1.9775			0.171717	3.20965
4.1699	2.0065	1.5842	2.008	4.0103	2.645	2.5273	3.7643	5.2015	4.3423	3.7559	2.0141	1.7195	2.1452	4.2232	7.3882	6.0203	2.6777	2.375	2.7731	2.1361	1.1444	3.3305	1.472	2.2457			0.176766	3.06293
4.2891	1.6906	1.261	2.3989	4.4094	3.4581	2.1423	3.6834	5.0333	4.2033	3.7162	2.3391	1.4127	2.597	4.2376	7.9045	5.7024	2.282	2.0018	2.6136	2.9538	1.1381	3.6044	1.6513	1.6369			0.181819	3.08632
4.4082	2.3436	1.2289	2.4543	4.2473	3.3161	2.392	3.333	4.8581	3.3492	3.4283	2.2375	1.6494	2.688	4.6205	7.3416	4.6685	2.0933	1.5368	2.7056	2.3989	1.3922	3.787	1.2492	1.4602			0.186867	2.94915
4.5274	1.7095	1.3533	2.4027	4.1975	2.9315	2.0816	2.5553	4.7965	2.9595	4.1407	2.2984	1.0821	2.2796	4.8673	8.433	4.1714	2.1284	1.6155	3.0145	2.0128	1.381	4.1329	1.3057	1.6354			0.19192	2.89525
4.6465	1.823	1.3782	2.1152	5.7976	3.3597	1.7003	2.227	5.0658	3.089	4.294	1.7617	1.2263	2.1042	5.3744	8.0246	4.3408	2.0306	1.7733	2.9319	2.1394	1.159	3.81	1.5433	1.5632			0.196969	2.94302
4.7657	2.0406	1.3687	2.0636	6.4208	2.205	1.6618	2.9063	6.1146	3.1812	4.0104	1.4687	1.6925	2.5465	6.4599	7.2921	4.4803	1.6097	1.7074	3.199	1.929	1.3544	2.9746	1.3571	1.385			0.202022	2.97622
4.8848	1.6947	1.3267	1.8206	6.9092	2.6108	2.1721	2.9914	6.4076	2.9598	4.3539	1.2141	1.6031	2.0198	6.6442	7.8997	3.3433	1.7933	1.8192	4	1.6331	1.4767	3.4074	1.0798	1.5932			0.207071	3.03224
5.0039	1.6458	1.3418	2.1158	8.2167	3.1196	1.6449	2.6261	7.4173	2.5892	3.8444	1.1605	1.6198	2.0228	7.643	9.99	4.1219	1.9019	2.1257	3.358	1.9272	1.4183	3.2886	1.0166	1.5903			0.21212	3.23943
5.1231	1.324	1.1738	1.96	6.8937	3.1356	1.7067	2.8133	7.84	3.0085	3.8399	1.5982	1.3948	2.8056	7.673	10.3586	3.8826	1.5217	2.1017	3.3195	1.4208	1.6469	3.0918	1.2512	1.275			0.217173	3.20987
5.2422	1.003	1.4961	2.1956	7.677	3.8106	1.2105	2.7691	7.4646	3.0773	3.5009	1.3283	1.6257	3.21	8.7616	12.6697	3.0966	2.122	1.9701	4.3102	1.7025	2.075	2.7026	1.293	1.425			0.222221	3.43738
5.3614	1.229	1.3799	2.4869	7.7507	3.1451	1.5171	3.1883	7.5085	3.5856	3.8426	1.2725	1.3444	3.9568	8.7735	11.4885	3.0083	2.1797	2.1396	5.6153	1.9538	1.4221	3.6271	1.2125	0.9934			0.227274	3.52588
5.4805	1.2217	0.9628	2.5576	6.5421	3.0461	1.3483	3.4642	7.6179	4.012	3.1437	1.1308	1.4717	5.0472	9.2123	11.9915	3.0731	2.3768	1.9201	5.7272	1.6168	1.307	3.2487	1.362	1.431			0.232323	3.53469
5.5996	1.2872	1.2323	1.8737	7.4798	3.0189	1.0729	3.1219	9.8809	4.4861	3.5481	1.1445	1.6124	3.8523	11.0798	11.3635	4.2385	2.286	1.9313	4.963	1.8635	1.748	3.2261	1.0218	1.6966			0.237372	3.70955
5.7188	1.2372	0.9054	2.1789	8.0407	3.2595	1.346	3.3755	10.247	4.7676	2.9968	1.1878	1.6351	3.449	11.8558	12.5441	5.0278	3.2901	2.3233	5.8599	1.7736	1.8475	3.4442	1.1274	1.7656			0.242425	3.97857
5.8379	1.1844	1.1783	2.1974	8.5037	3.155	0.8067	2.9507	11.5583	5.8056	3.4928	1.3729	1.7458	3.2869	11.6898	11.3802	7.1779	2.5981	1.8813	5.6761	1.6229	2.184	4.0597	1.0368	1.752			0.247474	4.09572
5.9571	0.9135	1.1239	1.8176	9.732	2.0679	1.8269	2.4388	11.062	5.4922	3.4454	1.3576	1.92	3.0813	10.7187	10.6952	8.5825	3.0898	2.3876	5.9171	1.1859	1.7554	3.8568	1.3173	1.6574			0.252526	4.06012
6.0762	1.35	0.9631	1.6892	12.8579	2.8509	1.6645	2.4945	12.6964	7.9316	3.7119	0.9221	1.5222	2.8273	9.9864	9.7285	9.4519	2.9564	2.6941	6.1177	2.1112	2.829	3.3726	1.2479	1.5332			0.257575	4.39627
6.1953	1.1706	1.0945	1.9273	14.1958	2.0651	1.1265	2.2658	13.6656	9.3501	3.1486	1.0459	1.3131	2.704	9.7551	9.9018	8.9383	3.2909	2.4912	6.0648	1.6622	2.7952	3.213	1.3465	1.4114			0.262624	4.4143
6.3145	1.1306	1.2692	1.6095	14.3879	2.3583	1.0469	2.618	12.572	9.2282	2.612	1.2546	1.4668	2.5614	10.9954	7.9434	9.9431	4.0557	2.1248	7.2232	1.5697	4.0141	3.1461	1.2686	1.8539			0.267677	4.51056
6.4336	1.0146	1.1784	1.7207	13.7766	2.2539	1.1964	2.5164	11.4636	9.6863	2.0768	1.2307	1.8262	1.8303	11.6756	7.5048	9.9163	6.1757	1.9313	6.7738	1.2829	3.3657	2.9586	1.5139	1.228			0.272726	4.42073
6.5528	1.1973	1.0217	1.9469	10.8479	1.9539	1.2958	2.2186	9.2762	9.2024	2.781	1.2048	1.3549	1.4343	11.3346	7.3213	8.7382	8.0533	1.8128	6.6175	1.5294	4.739	2.5889	1.5363	1.0972			0.277779	4.21267
6.6719	1.3161	1.1362	2.1521	11.6878	1.9782	1.0923	1.9453	7.4765	10.2711	2.2879	1.417	2.0524	1.8399	12.9351	9.1493	8.9694	10.4536	2.5862	6.8871	1.4922	5.354	2.5467	1.8583	1.4494			0.282827	4.59725
6.7911	1.0183	1.0887	2.1756	11.0157	1.7019	1.8075	2.2863	6.8639	11.5565	2.8235	1.3459	1.9252	2.3096	12.715	11.9209	9.0871	10.5275	2.4559	8.6435	1.6317	5.6973	2.7376	1.3663	1.799			0.28788	4.85418
6.9102	1.1963	0.9597	2.0342	10.688	2.1499	1.616	2.2006	6.8582	13.6765	2.4349	1.1597	1.2624	1.8461	13.6903	13.6072	8.229	11.2972	2.7436	8.9718	1.489	6.4253	2.7482	1.2094	1.602			0.292929	5.00398
7.0293	1.1154	1.1318	2.1266	11.1718	1.4388	1.5414	2.2148	6.5035	14.9371	2.5134	1.4847	1.4317	2.198	13.2374	13.7122	8.3827	9.6923	2.1664	10.8035	1.6263	7.5543	2.5218	1.3883	1.4781			0.297978	5.09885
7.1485	0.9979	1.1987	1.9341	12.1526	1.5231	1.3024	2.5565	5.679	13.0495	2.4803	1.1642	1.4723	1.8752	13.2742	13.1527	8.7082	10.2664	2.6085	13.0962	1.8606	7.9104	2.5827	1.1716	2.1197			0.303031	5.17237
7.2676	1.2512	1.5913	1.6055	11.5903	1.661	1.3559	2.5602	5.3648	15.6719	2.7939	1.1591	1.5063	2.2818	16.3903	13.2762	7.4601	10.243	2.9226	16.3829	2.2775	8.2429	1.9059	1.2444	1.5515			0.30808	5.5121
7.3868	1.4536	1.2541	1.7143	11.7837	2.0136	1.0285	2.058	4.7268	15.2924	2.0706	1.4907	1.5466	2.037	18.53	10.8249	7.2578	8.0251	3.0675	19.0808	2.0733	9.8316	1.8108	1.2752	1.5728			0.313133	5.49249
7.5059	1.2071	1.1466	1.6185	11.6337	2.0451	1.0789	2.0277	4.6402	13.9165	2.1836	1.3286	1.416	2.0042	20.1185	9.4701	7.0534	6.8393	4.2056	21.8132	2.6437	13.7212	2.6741	1.3104	1.2938			0.318181	5.72458
7.625	1.7229	0.9406	1.8923	8.3388	2.744	1.1739	1.8675	5.332	12.982	2.1459	1.1614	1.4693	2.3641	23.2042	8.1353	5.4802	6.0291	3.5091	23.1361	2.6148	16.0788	1.8392	1.21	2.0858			0.32323	5.72739
7.7442	1.7648	1.439	2.2871	9.8004	2.1321	1.2662	1.8314	6.0581	13.1671	1.9088	1.3834	1.4891	2.1927	25.547	6.4061	6.1116	4.9608	3.9179	25.0334	2.3778	15.4648	2.0297	1.2961	1.7457			0.328283	5.90046
7.8633	1.1266	1.3435	2.0342	10.4092	1.3449	1.8224	1.7874	7.0071	10.8327	2.2578	1.5264	1.4512	2.3454	29.7291	5.9534	6.1403	5.0281	3.0754	26.2193	2.6841	14.0946	2.2106	1.4075	1.9253			0.333332	5.98985
7.9825	0.8649	1.0705	1.9651	8.5934	1.2473	1.3989	2.1128	8.3449	10.9269	2.0593	1.5247	1.5481	2.1472	33.3846	5.2784	6.4461	4.5431	2.9438	22.208	2.5537	14.3445	2.5568	1.2696	1.9499			0.338385	5.88677
8.1016	1.3581	1.2079	1.6249	8.4251	1.1508	1.0156	2.0092	10.0498	10.6265	2.2026	1.4181	1.6837	2.1981	35.9479	4.9366	6.6512	5.8808	2.4804	20.1077	2.2228	12.1205	2.2875	1.1171	1.8742			0.343434	5.85821
8.2207	1.2919	1.0709	1.8841	8.1738	1.8159	1.0929	2.0609	8.9114	10.8112	1.8718	1.2653	1.7024	2.3624	36.0384	4.3985	6.3271	6.1044	2.9778	16.8744	2.1815	8.8724	1.9798	0.9869	1.5813			0.348482	5.52656
8.3399	1.1533	1.2169	2.1008	7.3335	1.2541	1.3994	2.0213	8.7524	11.9327	1.5013	1.3841	1.5736	2.0903	36.3648	4.4835	7.0435	7.1239	2.8121	16.7534	2.0935	8.2771	2.2557	0.9131	1.8987			0.353535	5.57221
8.459	1.1123	1.2733	2.2515	7.8087	1.4659	1.2811	1.9889	8.5258	12.0568	1.4508	1.1039	1.3983	1.7931	39.242	4.9701	6.0808	4.954	2.98	16.0364	2.158	7.6983	2.5723	1.4764	1.9147			0.358584	5.56639
8.5782	1.0213	1.3428	2.153	7.1793	1.5535	1.2981	1.304	8.5881	13.2134	1.2685	1.2474	1.6961	1.948	35.9012	4.7965	5.4852	4.5561	2.9293	15.8851	1.942	9.4609	2.2277	1.1429	2.1048			0.363637	5.42688
8.6973	0.9236	1.48	2.0788	7.7352	1.3656	1.2425	1.1059	10.3362	12.7848	1.6109	1.0666	1.4283	1.8126	32.2195	4.2254	5.3577	4.6135	3.045	16.3559	2.2394	10.1747	2.1922	0.9982	1.5731			0.368686	5.3319
8.8165	1.2785	1.395	2.1388	8.5626	1.4534	1.3508	1.2989	10.1397	15.6985	1.9162	0.8675	1.4293	2.1468	28.865	4.5875	5.8617	4.9645	3.6476	15.9459	2.5513	10.7242	2.1986	1.4273	1.6187			0.373739	5.50285
8.9356	0.912	1.3697	1.9985	8.8337	1.462	1.3198	1.4007	9.9171	14.5555	1.8044	0.9609	1.2579	1.7159	27.4348	5.2467	6.2509	5.0559	3.6003	15.966	2.2472	10.6887	1.8571	1.4097	1.7477			0.378788	5.37555
9.0547	1.2826	1.1595	2.0655	8.341	1.1445	1.4841	1.6567	10.1375	14.8404	1.6891	1.4334	1.55	1.7387	25.7033	5.0809	6.0401	6.301	3.5186	14.7119	2.6191	15.268	2.2354	1.5568	2.4473			0.383836	5.58356
9.1739	1.2436	1.1179	1.9251	9.1525	1.3819	1.0628	1.634	9.172	15.9739	1.6012	1.3452	1.2875	1.7823	21.2254	5.1718	6.1705	5.3944	3.0847	14.3787	2.6244	13.6938	2.6596	1.3008	2.3067			0.388889	5.27878
9.293	1.0927	1.5757	1.957	9.6786	1.4425	1.2385	1.939	10.4648	16.5826	1.1039	1.5543	1.4475	2.023	20.7046	5.138	6.3349	5.1386	3.6229	13.7761	3.1346	14.3314	1.7549	1.3041	2.081			0.393938	5.39255
9.4122	1.2983	1.8127	2.0725	11.0212	1.5704	1.2756	1.6741	10.4684	19.1679	1.3447	1.0097	1.1168	2.3062	17.914	5.3888	6.5231	4.2191	3.8777	13.4486	3.1446	13.9976	2.699	1.2601	2.0265			0.398991	5.44323
9.5313	1.1156	1.2789	2.3105	10.4456	1.6101	1.048	1.5362	10.4485	19.2158	1.7083	1.2026	1.2993	1.7435	14.2852	6.4172	5.2814	4.5613	3.9261	14.3687	2.7505	14.2866	2.1741	1.325	1.8405			0.40404	5.25748
9.6504	0.942	1.1551	2.2632	9.6387	1.7783	1.0807	1.3103	10.0675	21.3499	1.5595	1.5876	1.4699	1.4403	11.8971	6.9983	6.3772	5.2356	4.2268	17.4481	3.4036	13.5811	2.2659	1.1394	1.8292			0.409089	5.41855
9.7696	0.9445	1.5135	2.9676	9.4501	1.747	1.2116	1.5208	13.0264	21.3802	1.4414	1.2341	1.1932	1.3841	11.5921	5.2366	7.2986	5.5592	4.1719	18.4374	3.2828	11.3257	2.3529	1.2912	2.4924			0.414142	5.5023
9.8887	0.85	1.2098	2.5024	9.451	1.2114	1.0404	1.5439	15.5419	19.5038	1.8227	1.2916	1.8125	1.2565	10.5195	5.1262	6.9332	7.2259	4.0806	17.9532	2.8271	9.8466	1.488	1.0461	1.7918			0.41919	5.32817
10.0079	0.8648	1.3559	2.286	10.0046	1.8635	1.1442	1.5324	17.8374	18.6091	1.4542	1.3046	1.2945	1.7861	10.4556	4.1396	7.7748	5.7168	4.3276	17.7305	3.0731	7.5217	2.014	1.104	2.3787			0.424243	5.31557
10.127	0.9584	1.2511	1.9697	12.2067	1.3866	1.2176	1.3665	20.2025	18.7515	1.7118	1.0575	1.4705	1.5738	11.0545	4.7476	8.6259	5.9626	5.4165	19.2187	3.0647	6.3056	2.0361	1.4343	2.6056			0.429292	5.64985
10.2462	0.8952	1.3476	2.2307	11.0951	1.561	1.0207	1.5009	21.9353	22.0026	1.636	0.9982	1.4982	1.7924	10.7683	5.1751	11.9401	5.8925	3.8707	16.7204	2.3038	7.3023	1.921	1.1808	2.3867			0.434345	5.79065
10.3653	1.1262	1.5091	2.0827	9.9032	1.6899	1.1194	1.414	21.8289	18.3802	1.9893	1.2918	1.6811	2.1546	10.118	5.1288	14.108	6.2941	4.1367	16.2389	1.9827	6.6072	2.1996	0.9981	2.3422			0.439394	5.6802
10.4844	1.7429	1.2457	2.4974	10.1099	1.7341	1.3638	1.439	20.9271	15.3849	1.8638	1.6855	1.7053	1.9094	11.2088	5.1114	15.1213	5.4942	4.4685	15.146	3.244	5.0695	2.122	1.1368	2.4424			0.444443	5.59057
10.6036	1.6398	1.1499	2.281	7.9582	1.6941	1.4713	1.7347	18.2656	14.4319	1.7792	1.5191	1.6233	1.5345	10.4791	5.4139	14.2143	6.3737	4.1165	16.5647	2.9045	4.8265	1.5463	1.1562	2.406			0.449496	5.29518
10.7227	0.9307	1.2158	2.2626	6.9951	1.8892	0.9243	1.6553	17.2731	11.4041	1.5217	1.7225	0.9788	2.7888	9.0187	5.268	11.4844	5.1599	3.6847	15.4084	2.3071	5.6585	2.1471	1.6217	2.276			0.454544	4.81652
10.8419	0.9377	1.2514	2.3511	6.902	1.8393	1.0885	1.3939	16.1013	10.4974	1.2856	1.4151	1.2627	2.1959	8.9316	6.4585	9.3692	5.4588	3.988	16.3048	2.8144	5.6799	2.3378	1.2961	2.6231			0.459597	4.741
10.961	0.9692	1.6335	2.1146	5.3773	1.378	1.342	1.3637	15.6517	9.7365	1.2597	1.3933	2.0212	2.7508	8.8	6.5334	8.0285	4.8694	3.7886	16.5815	3.1666	5.0259	1.8003	1.2304	1.8234			0.464646	4.52665
11.0801	1.0961	1.197	2.555	4.5439	1.0895	1.6448	1.517	15.8917	8.9458	1.539	1.477	1.8327	2.6668	8.8428	6.0913	6.8852	5.2562	3.3433	15.0289	3.1236	4.7323	1.9981	1.1946	1.7088			0.469695	4.34172
11.1993	1.133	1.2323	1.9393	4.1155	1.6365	1.298	1.3017	16.3687	7.892	1.6031	1.2823	1.2221	2.4191	8.1925	6.9035	6.0338	5.5143	4.571	14.107	3.4985	4.4508	2.3206	1.4339	2.3171			0.474748	4.28277
11.3184	1.2628	1.0985	2.4242	5.0539	1.6706	1.0294	1.3315	16.419	9.3174	1.4551	1.3574	1.4877	1.9269	7.8191	6.4217	5.9578	5.1236	4.3	10.9707	3.2269	4.9781	2.4258	1.4372	2.5351			0.479797	4.2096
11.4376	1.3203	1.1092	2.1342	4.566	1.8203	1.0611	1.9969	17.144	9.9101	2.0591	1.4448	1.3856	2.1904	8.0125	7.2771	5.1733	5.8382	3.6112	10.9314	3.7627	4.9391	1.8101	1.4213	2.2976			0.48485	4.30069
11.5567	1.3096	1.6252	2.4384	4.3506	1.812	1.3687	1.486	17.395	6.9896	1.501	1.7609	1.399	2.5451	7.3857	7.3098	6.5971	6.2425	4.1987	11.1119	4.6098	4.8558	1.663	1.0947	2.3883			0.489898	4.30993
11.6758	1.1473	1.5173	2.1758	4.6087	1.4541	1.1685	1.4496	16.1294	6.7802	1.436	1.5416	1.3276	2.3996	8.2676	6.9645	6.3208	6.1772	4.1175	9.5988	4.1514	5.7105	1.5731	1.7074	1.8988			0.494947	4.15097
11.795	1.0238	1.3722	2.294	4.7947	1.3538	0.9199	1.6719	13.6116	8.0168	1.7378	1.7022	1.6285	2.6838	8.4289	6.1506	6.0388	7.5367	3.9374	9.374	3.7827	4.8151	2.0574	1.4969	2.2097			0.5	4.10997
11.9141	1.3142	1.1815	2.491	4.1276	1.4412	1.1515	1.5366	13.1515	7.5313	1.5837	1.3564	1.9724	2.5981	7.1575	5.6501	5.4442	7.8592	3.3294	9.2403	4.6907	5.8245	1.5949	1.3599	1.9654			0.505049	3.98138
12.0333	0.8984	1.0894	3.2826	4.0324	1.4751	1.4003	1.6246	13.3535	6.7156	1.3224	1.1068	1.2686	2.5079	7.9761	7.3109	5.3276	8.4177	2.9488	8.6721	4.7511	6.0676	1.4602	1.8083	1.9932			0.510102	4.0338
12.1524	1.2778	1.3911	2.8597	4.3541	1.5373	1.2458	1.0533	12.2766	5.7224	1.4568	1.2112	1.1138	2.1917	8.2302	6.8217	6.4979	7.5846	2.939	7.2488	4.8528	5.0487	1.9189	1.9308	1.7807			0.51515	3.85607
12.2716	1.1468	1.5687	3.1822	3.6862	1.7676	1.1745	1.7201	10.8515	6.1963	1.7732	1.385	1.4442	2.2644	8.0827	7.0462	6.1	6.3524	3.7833	8.034	4.9786	5.1044	1.9549	1.5078	2.2519			0.520203	3.88987
12.3907	1.1752	1.412	3.0859	3.5305	1.6439	1.3679	1.3353	9.6526	6.9637	1.6595	0.9247	1.3331	2.2058	8.281	7.5537	6.3984	5.9653	3.3563	7.8003	4.6351	5.1053	1.8926	1.2646	2.1159			0.525252	3.77744
12.5098	1.029	1.5352	3.1341	3.7145	1.4921	1.2512	1.6328	9.6261	6.7004	1.6999	1.5589	1.4186	2.0966	7.2938	7.5136	5.5157	5.8486	4.8338	7.4747	4.525	5.4272	1.7553	1.3399	2.2523			0.530301	3.77789
12.629	1.3145	1.7593	3.0294	4.1119	1.6003	1.122	1.3292	9.1114	5.9161	1.4553	1.5578	1.6102	2.4725	7.3885	7.0853	5.0793	5.7904	3.462	6.5538	4.9773	6.0494	1.9506	1.1431	2.2962			0.535354	3.67357
12.7481	1.5559	1.2737	2.5811	3.7832	1.7777	1.1541	1.413	9.2868	6.3979	2.026	1.0496	1.1882	2.2302	7.2329	7.1783	5.1671	6.9078	3.0777	6.2043	5.5319	6.1347	1.722	1.3795	1.8207			0.540403	3.66976
12.8673	0.9629	1.4296	3.033	3.826	1.3933	1.4617	1.3058	9.2057	6.9484	1.9285	1.7562	1.3048	2.2788	6.7933	8.6038	6.3093	6.5484	3.3586	5.6507	6.612	6.9878	1.6424	1.3872	2.1175			0.545456	3.86857
12.9864	1.1468	1.5927	2.7	3.3197	1.9785	1.0738	1.5044	9.0037	5.0234	1.3392	1.4952	1.3776	2.1769	6.8354	9.2912	5.3339	7.1371	3.9102	6.2528	6.7672	6.8847	2.3227	1.5494	2.0508			0.550504	3.83614
13.1055	1.2731	1.9215	3.3709	3.2126	1.4925	1.2232	1.7876	10.095	5.1347	1.436	1.5486	1.209	2.2357	5.9038	7.7238	5.6397	7.7102	3.5133	5.5458	7.1915	6.5536	1.5176	1.3925	1.8825			0.555553	3.77145
13.2247	1.3998	1.2312	3.9674	3.3786	2.0346	1.5072	1.8966	9.5949	6.0003	1.5681	1.4744	1.2318	2.5026	6.1392	9.2172	5.1085	5.9392	3.6313	5.4369	5.4937	7.784	2.1191	1.8273	1.9461			0.560606	3.85125
13.3438	1.0667	1.0926	4.3155	3.0019	2.2048	1.6145	1.3846	8.6411	6.2863	1.5942	1.5386	0.8814	2.5769	5.9298	9	4.7521	5.3253	4.0531	4.8271	5.7902	6.9222	1.7084	1.7097	2.0766			0.565655	3.6789
13.463	1.2051	2.1484	4.2454	3.1248	1.6026	1.4611	1.4541	8.3725	6.9138	1.805	1.4187	1.0336	2.4147	6.3347	10.1285	5.6148	5.8038	4.3128	4.6895	5.7476	6.5155	1.846	0.9	1.9292			0.570708	3.79259
13.5821	1.1443	1.7463	4.5505	2.4425	1.3684	1.3733	1.6379	9.1833	7.3716	1.3408	1.5368	1.2484	2.7541	5.5487	10.897	5.0688	5.1684	3.4817	4.4698	6.1204	6.3421	1.8923	1.4521	2.2726			0.575757	3.76717
13.7012	1.2417	1.6002	4.3492	2.7206	1.3341	1.1288	1.4746	8.5052	6.6412	1.4451	1.253	1.1924	1.9898	7.3247	12.1098	4.6508	5.3452	3.2545	5.1459	5.9999	5.2926	2.1799	1.6249	2.0907			0.580805	3.74562
13.8204	1.0707	1.7146	5.3572	2.9035	1.5038	0.9293	1.7015	8.8818	6.095	1.7486	1.4892	1.4971	2.2913	8.1188	14.1819	5.4185	5.433	3.59	5.1877	6.586	5.4708	1.7351	1.2643	2.2998			0.585858	4.01956
13.9395	1.3317	1.5409	4.8479	3.1297	2.108	1.0821	1.1261	8.2028	6.2409	1.355	1.577	1.5206	1.9625	8.3701	15.9168	5.4776	6.1635	3.1473	4.9249	7.0394	4.7697	1.6937	1.0811	2.6106			0.590907	4.05083
14.0587	1.5097	1.5305	5.1964	2.9591	1.6967	1.7614	1.5768	10.0749	5.8002	1.4572	1.2965	1.2952	2.1146	8.7151	16.8341	6.2064	5.551	4.221	4.5286	6.6734	4.4279	1.7062	1.2954	2.8626			0.59596	4.22045
14.1778	1.1305	1.3512	4.6308	2.8629	1.4486	1.4814	1.733	10.9367	5.839	1.3109	1.3998	1.1732	1.7358	9.4922	16.704	7.1253	5.7264	3.8431	3.5957	6.914	4.1232	1.8878	1.1265	2.3776			0.601009	4.16457
14.297	1.059	1.6704	6.2024	2.7052	1.4963	1.7592	1.2969	12.1026	5.3585	1.3511	1.5737	1.4649	1.715	9.8156	14.1085	6.1887	4.4811	3.2057	3.8722	5.7533	5.1153	2.3232	1.5221	2.3062			0.606062	4.10196
14.4161	1.3331	1.6853	5.974	2.5296	2.2037	1.4934	1.6156	11.9583	5.1366	1.3471	1.1467	1.6626	2.5057	10.1506	14.7779	5.0515	5.0653	3.582	4.6235	6.3039	4.1324	2.0169	1.5952	1.7688			0.611111	4.15249
14.5352	1.2883	1.7125	5.666	2.2531	1.987	1.4258	1.5193	12.3875	6.3028	1.3847	1.6427	1.407	2.2519	11.2846	13.3363	4.5963	5.8494	3.6617	4.8833	6.6835	3.6883	1.7374	1.0559	1.7916			0.616159	4.1582
14.6544	1.4014	1.7375	6.8082	2.2719	1.5604	1.3945	1.7244	11.9682	5.5407	1.9345	1.1789	1.4142	1.6547	10.0044	14.2215	4.6773	4.7005	5.2372	5.1994	7.3929	3.1894	1.7004	1.3692	1.7392			0.621212	4.16754
14.7735	1.31	1.8008	6.1614	2.1912	1.7618	1.656	1.5333	13.5531	6.0823	1.645	1.6367	1.409	2.3362	8.2645	14.1564	5.4647	5.2124	4.4104	4.5556	7.5418	3.9205	1.4887	0.9959	2.0043			0.626261	4.21217
14.8927	1.2744	1.6675	6.4782	1.9881	1.9175	1.7142	1.439	14.5539	5.5059	1.2838	1.8315	1.8038	1.5959	8.0803	13.8023	5.413	6.2403	4.1972	5.0436	6.6886	3.6627	1.8333	0.9902	2.0345			0.631314	4.20999
15.0118	1.4648	1.6423	7.055	2.0127	1.538	1.3572	1.5599	14.7235	4.4308	1.6071	1.4991	2.2219	1.9248	8.1166	12.278	5.432	5.048	4.1056	4.4587	8.7562	3.8916	2.0353	1.1037	2.0238			0.636363	4.17861
15.1309	1.1082	1.4858	7.0845	2.2463	1.7993	1.7227	2.0948	13.4902	5.9727	1.3605	1.1565	1.8317	1.8081	8.0748	11.0734	6.1652	5.1183	4.435	5.0126	8.0189	4.6732	1.8011	1.2879	1.9852			0.641412	4.20029
15.2501	1.0727	1.3621	7.9285	2.0548	2.372	1.0057	1.8236	14.4852	5.5639	1.7671	1.2566	1.3629	1.7745	8.5071	11.4106	5.8027	6.5419	3.8907	5.1479	8.2012	2.9877	1.6565	1.3782	1.9867			0.646465	4.22253
15.3692	0.9963	1.4344	7.513	1.679	1.855	1.437	2.0222	14.3623	5.5076	1.9559	1.8643	1.4281	1.9741	7.2898	11.0157	5.8428	5.7372	4.2321	5.1792	8.7914	3.3417	1.6041	1.2801	1.7918			0.651513	4.1723
15.4884	1.5756	1.6306	8.0698	1.8551	2.0603	1.6835	1.6234	14.9947	5.6278	1.7374	1.4907	1.2879	1.5511	7.3804	10.5054	7.3834	6.9538	5.0351	6.0511	9.6891	3.3436	1.4632	1.3198	2.1809			0.656566	4.43724
15.6075	1.2461	1.2922	8.3196	1.8875	2.1927	1.422	2.1961	15.1534	5.4014	1.5013	1.6128	1.6705	2.1446	6.2303	11.4127	7.0394	6.5275	4.0633	6.0678	11.2006	3.611	1.5452	1.1539	1.7952			0.661615	4.4453
15.7266	1.2605	1.6877	8.4695	2.1079	1.7632	1.4161	1.7152	16.1956	6.1776	1.5745	1.7423	1.2398	2.144	7.2352	10.7295	7.1072	7.0701	3.5297	6.4184	10.3108	3.4665	1.5072	0.8104	1.7511			0.666664	4.47625
15.8458	1.6795	1.7262	7.8211	2.0337	1.8484	1.2859	2.222	16.4189	4.794	1.4267	0.9845	1.6323	1.7192	6.9694	10.4511	7.5848	6.8862	4.2057	5.2262	8.6237	2.6128	1.5156	1.0073	1.9116			0.671717	4.27445
15.9649	1.2636	1.7722	8.8414	2.3108	1.3931	1.6871	1.8234	16.4026	4.5116	1.2577	0.9848	1.7978	1.8786	7.0902	9.5594	7.3998	5.2016	3.9257	5.7809	6.4825	2.3404	1.418	1.3317	1.6159			0.676766	4.08628
16.0841	1.4398	1.4397	7.9007	1.503	1.6905	1.6803	1.5429	19.2737	4.5321	1.3753	1.2145	1.6035	1.4915	7.6552	9.1939	7.1839	4.471	4.0102	6.0131	5.726	2.6011	1.6033	0.8792	1.6558			0.681819	4.07001
16.2032	1.5715	1.9596	7.5475	1.2774	1.6694	1.7291	2.5248	17.8093	5.0399	1.6396	1.3229	1.7763	1.4834	6.9336	7.9605	8.0736	3.9338	3.9343	5.9195	6.2281	2.4262	1.2371	0.9649	1.6842			0.686867	4.02694
16.3224	1.2293	1.9302	7.2556	1.4167	1.7964	1.9013	2.0806	16.6876	5.5126	1.6846	1.0259	1.4349	1.1586	7.1809	8.8328	7.793	3.7465	3.8547	6.5138	6.5403	2.1726	1.4764	1.2793	2.3527			0.69192	4.03572
16.4415	0.9056	1.8772	8.0904	1.8906	1.5068	1.9051	2.2739	15.6461	6.0937	1.6953	1.1451	1.4452	1.4388	7.004	8.053	7.4665	3.196	4.3268	5.9167	4.9001	2.7298	1.2816	1.0445	1.9438			0.696969	3.90736
16.5606	1.6317	2.1415	9.3593	1.461	1.8556	1.6111	2.1942	15.2649	5.715	1.6058	1.62	1.6039	1.6413	6.4922	7.2567	7.2409	4.5089	4.3605	6.3	5.8119	3.0302	1.2769	0.8211	1.6717			0.702018	4.01985
16.6798	1.4939	2.0004	9	2.0208	1.8351	1.8803	1.8806	16.1798	5.9364	1.7858	1.1457	1.4395	1.6774	7.1685	7.0207	7.1068	4.8158	4.2174	7.0386	6.603	2.0392	1.5557	1.105	1.1934			0.707071	4.08916
16.7989	1.2635	2.1353	9.3508	1.542	1.9031	2.0807	2.0304	17.1162	6.0109	1.463	1.5927	1.7162	1.5255	6.8357	6.5235	6.6353	4.3475	4.2605	6.7542	4.8458	2.4283	1.2895	1.4727	1.1634			0.71212	4.01195
16.9181	1.5017	3.3415	9.2408	1.5262	1.1623	1.9579	2.2579	16.0372	6.2666	1.5093	1.5372	1.4491	1.6947	7.2784	7.492	6.4412	4.3302	4.2107	7.3763	4.2706	1.9532	1.0327	1.043	1.3282			0.717173	4.00995
17.0372	1.5136	3.2314	8.5697	1.6164	1.1917	1.6717	2.2889	16.1935	4.813	1.7106	1.4026	1.486	1.6858	5.9606	7.6374	8.4077	4.195	4.8344	8.1879	4.8924	1.7327	1.2854	0.9542	1.5643			0.722221	4.04279
17.1563	1.3599	3.7809	6.6865	1.6262	1.3432	1.8699	2.1462	17.5645	5.508	2.1299	1.6794	1.6663	1.4717	5.3949	9.1737	6.6991	4.2789	5.4136	8.893	4.6653	1.3099	1.3007	1.1589	1.349			0.72727	4.1029
17.2755	1.2739	4.243	7.0778	1.4349	1.585	1.469	2.5884	16.6362	5.8392	1.4671	1.719	1.0616	1.4136	5.1447	8.8408	6.0461	3.4207	4.6481	10.7097	4.9709	1.6472	1.4831	1.162	1.4414			0.732323	4.05514
17.3946	1.4992	5.2502	6.7069	1.5032	1.617	1.8368	2.8633	17.626	5.7543	1.7507	1.4576	1.1707	1.4944	5.2968	8.1063	6.2777	3.4447	4.5738	9.7225	4.8184	1.9458	1.3399	1.1318	1.2472			0.737372	4.10147
17.5138	1.368	5.1086	5.8218	1.6554	1.3472	1.7492	3.3626	17.5909	6.0797	2.0227	1.0108	1.4376	1.3776	5.1678	8.6456	4.5752	3.5112	4.4923	9.9947	4.0577	1.9258	0.968	0.7411	1.0968			0.742425	3.96285
17.6329	1.8406	7.627	6.4759	1.6077	1.5981	1.686	2.8927	15.9333	5.9824	1.7277	1.3999	1.3067	1.8081	5.2794	9.1372	5.4338	3.2677	4.3183	10.1109	4.0973	1.7584	1.2239	0.7341	1.3697			0.747474	4.10903
17.7521	1.3866	9.431	6.4659	1.7172	1.1008	1.6932	2.2634	16.4773	6.5287	1.7318	1.1923	1.7738	2.0617	4.1939	8.8803	4.8832	3.2575	4.6433	9.8984	4.4616	2.0406	0.8485	0.8734	1.1889			0.752526	4.12472
17.8712	1.3711	10.0332	7.5567	1.6326	1.1476	2.0579	2.7868	17.9493	5.4403	1.6762	1.5386	1.2955	1.4402	4.143	8.3413	4.1731	2.8514	4.4879	9.8717	4.0355	2.2928	1.2737	1.0133	1.3012			0.757575	4.15462
17.9903	1.651	9.6544	7.0605	1.8055	0.9315	2.0044	2.5225	17.4946	7.1741	1.8689	1.2926	1.5211	1.5399	5.2728	8.1847	4.3874	2.9829	4.7288	12.4305	3.0409	1.6927	1.4756	0.8561	1.4168			0.762624	4.29126
18.1095	1.9121	9.1248	6.9918	1.9617	1.0269	1.8677	2.5106	17.6993	8.4748	1.8219	1.0329	1.5767	1.631	5.016	9.028	4.752	3.5866	4.925	11.5369	3.1118	1.7598	1.2115	1.1029	1.2682			0.767677	4.37212
18.2286	2.1708	11.2889	5.9407	2.1283	1.6226	1.5975	3.1706	17.1001	9.1197	2.0336	1.2132	1.1569	1.3804	4.0685	7.9694	4.2461	3.1809	5.3391	12.3762	2.8436	1.4229	1.2369	0.8046	1.406			0.772726	4.3674
18.3478	3.4533	14.4878	6.1552	2.0672	1.2045	1.9055	3.342	17.866	9.7636	1.6877	1.4478	1.3382	1.6567	4.6792	8.5605	4.359	2.9268	6.0968	13.9306	3.143	2.0311	0.9842	0.8907	1.1097			0.777779	4.7953
18.4669	4.6585	16.2423	5.4892	2.0404	1.235	1.892	4.4872	19.2736	10.9931	1.8569	1.1266	1.0672	1.7874	4.1918	8.4298	4.2501	2.8857	7.1441	14.5089	3.4422	1.9681	1.2395	0.9049	1.3891			0.782827	5.10432
18.586	6.5892	17.8477	4.4525	2.1361	1.3377	1.7725	4.9095	17.915	10.3338	2.0327	1.0245	1.6662	1.6272	4.5953	9.3229	5.1953	3.3729	6.0264	13.5744	3.2398	1.7087	1.2367	1.1215	0.8678			0.787876	5.16276
18.7052	6.0383	19.5388	3.8339	2.2376	1.3101	1.7917	5.013	16.7888	13.5121	2.7432	1.2255	1.4496	2.1634	5.2664	8.8988	5.0677	3.6934	6.2936	13.2584	2.9638	1.4818	1.3688	0.8586	0.8423			0.792929	5.31832
18.8243	7.8163	20.6494	4.3721	2.1313	1.9668	1.6606	5.8888	18.345	14.8875	3.3286	1.2356	1.3335	2.0791	6.0414	8.7602	5.2064	4.4265	6.1401	13.3971	3.6815	1.7071	1.2576	1.0509	0.7949			0.797978	5.7566
18.9435	9.1545	19.9937	3.9553	3.7241	1.8081	1.5826	7.063	15.9909	15.9657	3.2046	1.6231	1.6373	2.2085	6.983	8.1261	5.2352	3.8308	6.4128	13.5139	3.1746	1.6222	1.8548	1.0151	0.9173			0.803031	5.85822
19.0626	12.0193	21.0015	3.45	3.3543	1.6509	1.6438	7.2634	18.6683	15.7665	4.2455	1.4924	1.843	2.0649	8.6113	8.9958	5.5301	3.7217	8.0841	14.6101	2.8213	1.1259	1.5341	1.0422	0.9428			0.80808	6.3118
19.1817	16.0162	19.0164	3.8646	4.032	1.5359	2.2456	8.0587	20.6426	15.663	4.872	1.5098	1.5266	2.1608	7.9844	10.5071	5.6323	4.4101	10.1962	14.8918	2.797	1.7094	1.4039	0.7419	0.8996			0.813128	6.76325
19.3009	18.5845	19.0946	4.9103	4.1705	1.712	2.2529	7.4519	20.3729	14.7859	5.0324	1.1708	1.6165	2.4538	9.4012	9.8325	5.2962	5.6468	12.7337	15.1832	3.6125	1.2135	1.2272	0.8218	1.0234			0.818181	7.06671
19.42	25.3024	16.0917	5.1668	5.4131	2.1091	2.0038	7.4653	20.851	13.9573	5.2379	1.6623	1.7046	2.5318	9.3974	10.1206	5.4177	7.2517	15.8679	15.5368	3.9178	2.0011	1.5828	0.6792	1.0166			0.82323	7.59528
19.5392	29.0422	14.5201	5.3776	7.6752	2.1379	2.6169	8.128	22.9479	14.1628	5.7014	1.7177	2.0799	1.987	9.1559	10.7923	6.5552	9.2064	16.2907	18.3241	4.385	1.8044	1.7444	0.9622	0.6329			0.828283	8.24784
19.6583	31.3394	14.1576	6.5461	9.6066	3.0534	3.3296	10.7892	26.2344	13.7095	6.8293	2.0774	1.776	2.7272	9.836	13.4369	8.4535	10.904	16.2342	16.5776	3.9008	1.9717	1.5435	0.9909	0.8594			0.833332	9.03684
19.7775	30.5804	10.9058	8.0695	13.4108	3.5843	3.879	13.7513	28.5402	15.484	8.2481	2.2096	1.8966	3.7717	11.1383	15.0486	7.8036	10.2525	17.9934	17.6723	5.392	2.0983	1.627	0.7939	0.9931			0.838385	9.79768
19.8966	24.5506	12.5841	8.0765	14.1409	5.8855	4.1969	14.276	32.1657	14.0382	9.5319	2.5635	1.8202	3.5169	11.8355	17.3941	9.597	10.4285	19.1475	18.4583	7.7222	1.7331	1.6978	1.1337	1.238			0.843434	10.3222
20.0157	21.9386	14.261	7.667	19.0264	8.0328	5.5837	18.7674	33.3623	15.2843	11.8395	2.5153	1.7793	4.3889	13.5051	18.7766	11.8757	10.0361	20.1223	21.6155	7.5348	1.677	2.0252	0.8842	1.2185			0.848482	11.4049
20.1349	17.0012	13.6088	7.862	20.3478	11.7983	7.6269	24.1664	34.1741	16.2391	15.8027	3.3711	2.4057	4.897	15.9074	19.7924	14.3499	7.9862	17.5718	22.9614	8.7032	1.8255	1.671	0.8069	1.1905			0.853535	12.1695
20.254	11.6152	17.3153	6.8525	20.4644	14.0819	10.2796	28.0469	33.6254	18.1328	19.3449	4.0209	2.9116	6.6254	16.9139	18.7442	16.805	8.1577	16.1103	20.176	12.9757	2.2352	1.9561	1.1188	0.7771			0.858584	12.887
20.3732	7.9417	16.3555	7.2585	18.6016	15.7536	15.2141	33.154	33.8091	17.7381	19.0055	4.9226	2.7617	9.2606	18.8145	18.4062	19.8943	9.0412	14.324	21.0622	13.581	2.1237	1.8625	0.9885	1.0621			0.863637	13.4557
20.4923	5.6463	12.2763	6.9404	17.042	18.4265	20.3355	35.2886	25.7912	16.0782	22.777	4.4513	3.1401	12.6497	20.4197	19.3961	21.9295	8.9032	12.2807	16.3488	15.4063	2.262	1.7127	0.9561	1.4509			0.868686	13.4129
20.6114	4.6982	10.3838	6.2597	15.9077	17.8212	23.2189	32.5903	21.5499	15.2365	23.1848	5.3243	4.3267	15.7382	18.7004	18.9629	23.583	9.6628	9.9858	13.5669	14.465	3.017	1.6164	1.085	1.4359			0.873735	13.0134
20.7306	3.1974	6.923	5.9384	11.3254	15.135	25.1831	28.018	16.1579	12.9889	24.7763	5.953	5.0803	21.1924	16.3717	19.7617	25.2689	8.1052	7.7284	11.3087	15.0892	3.0317	1.6417	0.9336	1.2031			0.878788	12.1797
20.8497	2.5639	4.7763	5.4627	6.5817	14.7195	26.0668	19.4414	11.8472	11.9945	28.4183	7.5903	6.3022	22.0869	13.0451	17.5802	22.3647	8.3564	7.0368	10.4612	15.3518	2.5288	2.1961	0.9837	1.4685			0.883836	11.2177
20.9689	2.431	3.7058	4.0086	5.398	11.7366	19.829	15.4877	8.983	10.7049	28.5984	9.6656	6.1881	23.194	11.2072	14.0743	18.0733	8.8468	5.3074	11.1826	15.1058	2.9885	1.9891	0.9226	1.1128			0.888889	10.0309
21.088	2.2756	2.735	3.0927	3.9621	9.063	12.4612	9.515	7.2211	8.3378	26.1379	12.1618	6.6118	25.7961	9.5405	10.8365	14.5932	7.7306	5.6007	10.4487	13.5544	2.7565	2.5702	1.1138	1.2921			0.893938	8.72535
21.2071	2.035	2.3654	2.2614	3.0293	6.1729	8.4975	6.0664	5.6165	7.2464	25.7184	14.7345	7.2272	22.8878	8.7948	8.5013	9.5695	5.8661	4.8682	7.0085	12.6167	3.0512	2.4483	1.0364	1.0758			0.898987	7.44565
21.3263	1.5787	2.3848	1.9746	3.1587	4.2449	5.8164	4.2069	4.5785	5.3948	21.6475	13.8316	6.9263	18.6343	5.8746	4.6071	6.6461	3.0938	2.8517	5.3547	10.0431	3.5686	2.9319	0.9768	1.2274			0.90404	5.89807
21.4454	1.7446	2.2384	1.6678	3.1929	3.3114	4.2537	3.8735	3.4676	4.4087	14.4116	13.1205	5.4788	17.389	3.7337	3.8884	5.3227	3.3025	2.4377	4.8717	6.7169	3.3837	2.5393	1.1163	0.9465			0.909089	4.86741
21.5646	1.4195	1.7551	1.4383	2.2312	2.7867	2.9221	3.759	2.6276	3.4346	10.654	12.8728	4.7392	14.631	2.7464	3.9969	4.2491	3.4119	2.6082	4.3619	6.6345	3.1528	2.8589	1.1388	0.8078			0.914142	4.21826
21.6837	1.3257	1.6808	1.4009	1.8174	2.3997	2.3484	3.5704	2.3711	3.1714	8.2439	10.3388	4.7586	10.104	3.0309	3.6902	4.1983	2.9576	2.8868	4.0199	4.9647	3.2137	3.2204	1.6085	0.7186			0.91919	3.66836
21.8029	1.1108	1.7499	1.2656	1.5837	2.0198	2.7278	3.512	2.0718	2.7931	5.3231	8.3993	4.7693	6.5533	3.6608	3.007	3.5535	2.5693	2.5352	2.9573	4.155	3.7367	3.606	1.6992	1.095			0.924243	3.1856
21.922	0.8036	1.3608	1.2541	1.1749	1.8844	2.5502	2.3209	1.9912	2.5361	3.5656	7.4425	4.6142	5.7868	2.9682	2.1277	2.8475	1.8321	1.7647	2.4155	3.4025	4.99	3.1727	1.4919	1.0476			0.929292	2.72274
22.0411	0.6119	1.1479	1.5346	1.5247	1.3839	1.727	2.4722	1.5073	2.2352	2.5574	5.2029	3.4395	5.0203	1.9153	1.5727	2.0002	1.6733	1.4617	1.8664	2.6642	5.4614	3.8953	1.5043	1.5188			0.934341	2.3291
22.1603	0.6252	1.3071	0.8813	1.2991	1.4072	1.1556	2.0956	1.4625	1.6248	3.2564	3.5568	2.2204	3.9453	1.5667	1.2503	1.9717	1.4863	1.7372	2.0849	1.9988	3.9651	5.8629	1.5677	1.3885			0.939394	2.07156
22.2794	0.5956	1.079	0.6646	1.0592	1.4102	1.0944	1.7439	1.3351	1.5653	2.8519	3.0747	1.7506	3.8753	1.4573	1.733	1.5615	1.8582	1.4994	1.3328	1.738	3.5658	7.6212	1.5464	1.0129			0.944443	1.95943
22.3986	0.3613	0.953	0.629	0.7257	0.8588	0.9277	1.1952	0.9454	1.2365	2.6396	2.7617	1.2558	3.5402	1.2361	1.118	1.4075	1.6089	1.1437	0.886	1.3425	2.3366	8.7695	1.8036	1.4142			0.949496	1.71235
22.5177	0.1529	0.7632	0.9414	0.3906	1.0641	1.4181	1.3246	0.6638	1.1755	1.9568	3.0591	1.8025	2.3112	1.1565	0.76	1.0049	0.8402	1.303	1.0275	1.3011	2.0939	10.6698	2.0721	1.3714			0.954544	1.69268
22.6368	0.1751	0.981	0.8499	0.8487	1.1462	0.8229	1.0038	0.7054	1.1353	1.363	2.2832	1.623	2.239	0.9467	0.8012	0.9639	0.7018	0.9506	1.3025	1.0481	2.2519	12.9646	2.1645	1.5348			0.959593	1.7003
22.756	0.1763	0.5007	0.6041	0.5891	0.9378	0.8584	0.6531	0.5896	0.9249	1.6006	1.8821	1.5048	1.5835	0.7879	0.6647	0.9651	0.7186	0.9873	0.529	0.7389	1.8576	12.9435	1.977	1.6288			0.964646	1.50847
22.8751	0.3715	0.5162	0.5962	0.624	0.5568	0.9546	1.0218	0.7485	0.8922	1.0724	1.5653	1.5951	1.5174	0.7023	0.6837	1.1075	0.8323	0.7268	0.6864	0.791	1.4148	10.6107	2.1611	1.3491			0.969695	1.37907
22.9943	0.586	0.437	0.2849	0.2544	0.5042	0.8788	0.8508	0.4485	0.7525	1.2191	1.3955	1.4253	1.3526	0.7736	0.5815	0.8977	0.682	0.9913	0.6446	0.9366	1.5959	6.5862	1.5865	1.4193			0.974748	1.12853
23.1134	0.3733	0.337	0.393	0.259	0.4485	0.588	0.9209	0.5122	0.611	0.6634	1.1896	0.9166	1.1744	0.7152	0.4326	0.4689	0.4797	0.7351	0.505	0.7925	1.3227	4.6892	2.0055	1.391			0.979797	0.913513
23.2325	0.3048	0.449	0.2936	0.2598	0.2889	0.5909	0.6533	0.4348	0.446	0.5662	0.8159	0.896	0.7736	0.6	0.6453	0.5614	0.4057	0.5416	0.4925	0.7747	0.8797	2.9093	2.5844	1.841			0.984845	0.792017
23.3517	0.1587	0.3808	0.2981	0.276	0.3308	0.4562	0.4733	0.353	0.4033	0.8196	0.7389	0.5878	0.6828	0.6148	0.3125	0.5001	0.2904	0.7858	0.2104	0.4824	0.9502	2.5495	2.7025	1.9216			0.989898	0.719979
23.4708	0.2575	0.2311	0.3244	0.3294	0.3419	0.45	0.6242	0.3604	0.417	0.8395	0.6945	0.5811	0.4946	0.4605	0.3007	0.3874	0.5871	0.2647	0.2989	0.2837	0.9518	2.3542	4.2186	1.6861			0.994947	0.739138
23.59	0.2258	0.3597	0.2965	0.3614	0.0933	0.2246	0.6185	0.4396	0.4587	0.3406	0.7263	0.4071	0.5302	0.3474	0.4673	0.1588	0.3266	0.2782	0.399	0.4538	0.6787	2.1223	4.5109	2.058			1	0.703471

## Sheet: Image37
X0	Y0	Y1	Y2	Y3	Y4	Y5	Y6	Y7	Y8	Y9	Y10	Y11	Y12	Y13	Y14	Y15	Y16	Y17	Y18			Ap-Basal to 1	Average intensities
0	1.5867	1.7624	2.0859	3.5157	1.4338	1.9719	1.6097	2.7249	2.1246	2.3141	3.7248	3.1815	3.4021	4.5071	4.4639	5.7429	9.7064	4.6943	3.1978			0	3.35529
0.1191	1.7832	2.2029	2.6123	4.3037	1.5991	1.9854	1.7547	2.9131	2.0372	1.9698	4.3041	3.4528	3.6184	4.7071	6.0328	7.1733	11.5547	5.1984	2.9155			0.00546258	3.79571
0.2383	2.3943	2.4791	2.9109	5.001	1.8146	1.9344	1.9061	3.5711	2.467	2.3084	5.0934	5.1969	4.1113	4.1763	6.1504	9.7223	16.4125	7.0073	3.4821			0.0109297	4.63892
0.3574	2.7693	2.7378	3.7512	4.9278	2.0894	2.3536	2.0897	4.396	2.8869	2.5378	6.0599	6.3046	5.2153	5.7473	7.2491	10.7096	20.8971	9.2963	4.4379			0.0163923	5.60298
0.4766	3.1335	3.8824	5.3953	5.5084	2.2977	2.5264	2.9585	4.8581	3.1293	2.229	7.6447	7.6182	6.1236	6.9563	8.6805	11.6734	25.0822	10.6329	5.7307			0.0218595	6.63479
0.5957	3.8314	4.6158	8.2238	7.3736	2.6535	3.016	3.7093	5.9311	4.7198	2.7253	10.2192	9.7817	7.7985	8.9582	10.1685	13.0331	29.4698	12.0765	6.9936			0.0273221	8.17362
0.7148	5.7322	7.7244	12.1902	7.7224	3.5874	3.1794	5.8146	7.3972	6.1366	4.4101	12.8736	12.0776	11.8392	10.6849	12.7037	13.2621	30.576	13.3267	8.7137			0.0327846	9.99747
0.834	6.4936	12.4318	19.2778	11.979	5.5522	3.6099	7.7245	10.7798	7.876	5.1331	16.6075	16.9711	17.5137	13.8476	13.8576	15.7081	33.48	14.3634	11.492			0.0382518	12.8789
0.9531	10.308	20.0506	29.4649	13.7975	8.8604	5.4979	11.7108	14.8467	9.7266	8.3236	21.7001	23.4182	27.2674	20.0735	17.7604	18.7922	36.4661	16.8128	15.943			0.0437144	17.4116
1.0723	13.9937	29.0784	43.0152	18.8443	15.0658	7.5785	16.9388	18.465	14.0771	12.2511	26.0707	32.1401	41.5251	27.0125	23.7099	19.8434	36.7207	19.045	19.5564			0.0491815	22.8911
1.1914	17.4511	40.6849	56.5836	25.1104	20.1692	9.7171	22.0358	21.2111	16.8653	16.8238	35.6583	39.2426	51.1594	34.3124	27.7741	22.8128	34.7342	22.5373	25.6039			0.0546441	28.4467
1.3106	23.3295	51.6414	70.0233	29.3846	28.0553	14.0245	26.3607	23.596	22.1896	23.0096	46.3925	47.4318	56.7632	42.2083	31.3452	23.9924	31.7939	23.7745	28.6269			0.0601113	33.8917
1.4297	27.5258	61.5472	73.6425	34.8755	31.7524	17.0437	27.8544	21.971	29.5243	29.9626	56.8332	55.313	56.3436	46.7102	35.1275	23.6229	29.0596	22.5579	31.4231			0.0655738	37.51
1.5488	34.1199	58.356	74.265	33.3763	31.9457	21.4539	28.822	23.337	33.3501	36.1291	62.7361	66.4091	54.2648	47.284	37.8113	22.0785	26.3158	20.9677	32.1356			0.0710364	39.2188
1.668	38.1011	53.0796	67.5564	31.2822	27.817	23.8711	28.2509	20.1854	40.992	38.9402	65.2502	72.7168	45.5984	47.5336	36.4768	21.6495	23.8266	18.4065	32.0024			0.0765036	38.6072
1.7871	37.1882	43.9755	52.852	24.1294	22.2885	26.3897	24.8146	18.4519	45.5863	37.4015	61.144	70.5857	36.0195	46.5763	32.9814	19.813	20.7464	15.5659	28.3071			0.0819662	34.9904
1.9063	33.6155	36.4585	33.8827	17.8348	16.8237	28.3982	23.4115	15.626	44.6936	38.8313	49.7378	61.9885	26.2207	42.0119	28.4842	18.7677	19.5084	14.2481	27.5838			0.0874333	30.4277
2.0254	31.4345	26.9609	20.5253	13.1241	15.3307	25.1258	20.1414	11.7236	40.4155	34.8164	38.5176	42.5526	18.5692	37.141	23.5267	16.5264	17.9264	14.5115	28.0939			0.0928959	25.1033
2.1445	28.7933	22.9647	14.1933	10.8695	14.175	25.004	15.1871	8.9569	31.4289	30.8386	29.2925	27.9778	14.6833	30.0655	18.8106	14.1514	14.3858	13.2088	25.089			0.0983585	20.5303
2.2637	26.8981	17.3518	11.3327	8.4656	12.2156	21.9835	11.1346	6.9861	23.514	27.8065	18.2589	18.0322	11.1351	25.4239	17.2127	12.6977	12.6148	11.2891	24.5415			0.103826	16.7839
2.3828	24.2465	13.5438	8.128	7.3304	10.1146	16.7719	8.8205	5.0707	17.4964	18.2877	12.0262	9.5462	9.0831	21.2298	14.3514	10.8815	11.1804	10.1081	20.7414			0.109288	13.1031
2.502	20.769	11.8419	6.9535	5.4858	10.2374	12.3282	8.1266	4.6329	13.7702	15.3487	6.9442	5.9621	6.5877	16.8487	11.6301	8.5945	8.4518	9.2255	15.8695			0.114755	10.5057
2.6211	19.5559	11.6761	5.9452	5.508	8.3188	10.4092	5.4031	3.1639	11.181	13.682	4.8433	4.4101	5.1891	11.055	9.4548	5.9898	5.833	7.2799	10.2853			0.120218	8.37808
2.7402	16.1978	10.6287	5.6183	5.3902	6.7357	8.1925	4.1873	2.3374	8.7802	10.1131	3.6598	2.5026	4.2409	8.9847	7.021	4.073	4.4468	6.196	9.8219			0.125681	6.79621
2.8594	14.1252	8.1643	4.3731	4.7661	5.8018	6.36	3.2788	2.0562	7.8957	7.8698	3.6982	1.9572	3.2703	5.7389	5.2465	2.6634	3.316	5.2375	8.001			0.131148	5.46421
2.9785	12.4607	6.8794	4.6927	5.0111	4.705	4.2569	3.0957	2.5433	7.8709	5.9997	2.4136	1.6656	2.981	4.6266	3.5615	2.4865	2.7064	5.309	6.6098			0.13661	4.73028
3.0977	11.1803	7.3205	4.6105	4.4571	5.4006	3.9743	2.537	1.907	6.548	4.9424	2.3675	1.8304	2.6556	4.2523	2.701	1.5344	1.9405	4.311	4.965			0.142077	4.18081
3.2168	9.8571	6.3577	3.8637	4.4775	4.2698	2.7008	1.8114	1.8329	6.3598	4.0657	2.4362	1.477	2.3138	3.6799	2.0738	1.9123	2.1147	3.6575	4.8391			0.14754	3.68951
3.336	9.8382	5.9254	3.0916	4.548	4.1008	1.8611	1.3266	2.002	6.1155	3.0218	1.8176	1.6623	2.1977	3.6049	1.6663	1.5845	1.8458	3.6283	4.5237			0.153007	3.38748
3.4551	9.2469	5.5174	3.4601	4.9424	3.7277	1.7582	1.743	1.6794	6.713	2.9542	2.0087	1.7732	1.5407	3.6697	1.0013	1.3364	1.4217	3.1171	3.8463			0.15847	3.2346
3.5742	8.6541	4.8514	2.9845	4.2995	2.9991	1.781	1.428	1.201	6.566	2.7497	1.969	0.9431	1.1466	4.905	1.5873	1.4493	1.2079	2.8724	3.3297			0.163932	2.99603
3.6934	7.0746	4.601	3.2059	4.8977	2.961	1.3867	1.2298	1.3418	5.6625	2.4768	1.2572	1.833	1.1418	5.032	1.625	1.1606	1.523	3.51	2.5622			0.169399	2.86751
3.8125	7.1781	4.0227	3.35	4.3661	3.1826	1.0674	1.4083	1.1875	5.7433	2.4788	1.1911	1.4909	1.5761	4.6402	1.6986	0.9733	1.2329	3.3544	2.9135			0.174862	2.79241
3.9317	6.5201	4.3757	3.5863	4.4637	3.0623	1.3278	1.4291	1.2426	6.3474	2.0084	1.5136	1.1231	1.3225	5.4059	1.2863	0.8166	1.1636	2.7525	2.431			0.180329	2.74624
4.0508	7.693	4.1916	3.0575	4.1896	2.8919	1.1013	1.2005	1.0827	6.5279	1.9865	1.3812	0.8863	1.5655	5.2777	1.7037	0.9786	1.1275	2.6014	2.0698			0.185792	2.71127
4.1699	8.1006	3.859	3.5903	3.9079	2.686	1.12	1.2789	1.1493	5.5092	1.5751	1.1253	1.0015	1.1844	6.5064	1.5287	1.1348	1.3338	2.9524	1.7849			0.191254	2.7015
4.2891	8.8383	3.2628	3.2028	3.7343	2.0229	0.9857	0.7577	1.0433	4.77	1.3361	1.0731	1.0386	1.3644	7.4256	1.5345	1.1996	1.4478	2.907	2.0094			0.196722	2.62915
4.4082	9.6985	3.6657	3.6903	4.7149	2.2582	0.8413	0.834	1.2381	4.392	1.3415	0.9606	1.1592	1.1121	6.7694	1.3245	1.1906	1.6599	2.8199	1.8038			0.202184	2.70918
4.5274	8.922	3.8641	4.4138	4.0296	2.5051	1.1848	0.7515	1.1073	4.6965	1.5654	0.8482	0.9639	1.1785	6.3943	1.6052	1.3784	1.4258	3.5285	1.5665			0.207651	2.73313
4.6465	10.2646	3.8262	3.9626	4.2575	2.3739	0.9234	1.2092	0.9558	5.2682	1.4601	0.9982	0.7761	1.1093	5.9281	1.2253	1.2492	1.4669	4.0663	1.6027			0.213114	2.78545
4.7657	9.7583	4.5452	4.2727	4.7976	2.9067	1.1941	1.1872	1.0044	4.2796	1.6304	0.7679	1.2522	1.2637	6.1481	1.6777	0.863	1.4175	3.6289	1.4405			0.218581	2.84398
4.8848	8.6071	3.8139	3.1808	4.6305	2.0817	1.0858	0.7899	1.012	5.2285	1.3014	0.8912	0.9905	1.037	6.7757	1.7245	0.9979	1.4742	3.8498	1.4613			0.224044	2.68072
5.0039	8.9719	4.1129	3.6313	6.0763	2.0111	1.271	0.8557	1.1412	4.1214	1.4775	1.3167	1.0048	0.8481	5.6452	1.619	1.0433	1.7449	3.9431	1.2268			0.229506	2.74012
5.1231	8.6782	3.7451	3.6783	5.8803	2.572	0.9277	0.6622	0.835	4.5352	1.0603	0.9677	0.8977	0.9319	5.9311	2.0927	1.2107	1.5164	4.2416	1.3289			0.234973	2.72068
5.2422	6.7107	4.1781	3.0821	5.5218	2.3296	0.9361	0.8257	0.9415	4.4332	1.9204	1.2113	1.0774	0.9533	6.5794	1.7624	1.2714	1.354	4.1719	1.6717			0.240436	2.68063
5.3614	6.4707	4.6653	2.6025	6.0101	1.9739	0.7395	0.7079	0.7508	6.2127	1.5692	1.1461	1.0148	1.0085	8.5575	1.4876	1.2847	1.3535	4.7566	1.5208			0.245903	2.8333
5.4805	5.9313	4.5116	3.1178	5.8581	2.9349	0.7416	0.8169	0.9099	4.7893	1.3508	1.0643	1.5777	0.8581	8.9372	1.987	1.3985	0.922	5.4914	1.2297			0.251366	2.86464
5.5996	5.3534	4.4031	2.9548	5.3773	3.2364	0.7705	0.6924	0.8306	5.6148	1.0989	1.033	1.1103	1.4085	8.8213	1.8953	1.5397	1.1879	6.1208	1.4018			0.256828	2.88688
5.7188	4.0765	5.2035	3.4575	4.7381	2.956	1.0694	1.1524	1.1363	6.0202	1.0025	0.9743	0.8255	1.0874	9.1253	1.9148	1.7797	1.6136	5.7161	1.4859			0.262295	2.91237
5.8379	4.241	5.6428	2.4807	4.478	2.8685	0.8419	0.7633	0.8573	6.2894	0.8187	1.071	1.0363	0.7038	10.4963	2.4956	1.3707	1.7002	7.4075	1.3733			0.267758	2.99665
5.9571	4.3029	7.0653	2.0778	4.6434	3.3103	0.8909	0.8331	0.9314	7.4314	1.1478	1.6298	0.8797	1.2148	10.4594	1.9995	1.6325	1.3492	7.0133	1.5226			0.273225	3.17553
6.0762	5.6597	6.5924	2.7704	5.2533	3.4579	0.8068	0.6978	0.6341	8.8797	1.3407	1.2301	1.6387	1.1642	11.2189	1.9345	1.8569	1.089	6.409	1.6102			0.278688	3.38128
6.1953	4.6595	6.4237	2.973	4.2253	3.1799	0.6839	0.7464	0.6136	9.7871	1.3723	1.0275	1.1039	1.4851	11.6696	2.1511	1.5506	1.046	5.8604	1.403			0.28415	3.26115
6.3145	6.0802	6.9265	2.7055	4.3301	3.1413	0.9201	0.9057	0.769	9.6625	1.5659	1.1888	1.0148	1.5891	11.5974	2.4565	1.288	1.0844	6.6026	1.4063			0.289617	3.43341
6.4336	7.1971	6.1644	2.407	4.0046	2.6119	0.8596	0.9569	0.7199	11.3859	1.3599	0.8396	1.1065	1.4739	12.3353	2.5507	1.7364	1.5894	6.6954	1.1646			0.29508	3.53468
6.5528	7.1795	5.7415	2.767	3.8494	1.9816	0.8931	0.926	0.6931	10.5645	1.9745	1.1871	1.4734	1.475	11.9372	2.1317	1.7324	1.4547	8.1886	1.5102			0.300547	3.56108
6.6719	9.1176	5.4432	2.4834	3.4397	2.5302	0.8554	0.7738	0.6863	10.8284	1.5044	1.0947	1.1222	1.2369	14.1044	2.692	1.6262	1.6955	9.4766	1.3525			0.30601	3.79281
6.7911	11.1903	5.8745	2.426	3.3247	2.6261	1.0188	0.8818	0.8584	12.1756	1.4223	1.3552	1.3095	1.0738	14.4479	2.4617	2.4454	2.0198	8.4627	1.6257			0.311477	4.05264
6.9102	13.9746	6.9514	2.0789	3.3224	2.3229	0.8981	0.7267	0.7712	10.9862	1.3726	1.2692	1.4732	1.1311	14.3732	2.5529	2.1304	1.7832	8.6434	1.9916			0.316939	4.14491
7.0293	14.6084	7.2067	2.4414	3.1313	1.9802	0.9246	0.85	0.7705	11.8907	1.528	0.9347	1.0236	1.2618	14.3181	2.9077	1.4926	1.7185	9.56	2.538			0.322402	4.26773
7.1485	14.8128	7.5346	3.326	3.2437	1.6512	0.6608	0.8081	0.6932	11.7326	1.4839	1.1866	1.1779	1.4203	13.7802	2.6494	1.8281	1.3849	9.6358	2.1527			0.327869	4.27173
7.2676	13.882	7.4233	2.875	3.2417	1.928	0.7695	0.6343	0.7515	11.3669	1.2328	1.1322	1.6728	1.1151	13.3015	2.792	2.3548	0.9642	9.8362	2.1741			0.333332	4.18147
7.3868	12.4955	6.7535	3.4425	2.7158	2.0286	0.8371	0.666	1.1279	11.0124	1.6537	1.3918	1.221	0.9576	13.3191	3.0214	2.175	1.4273	9.2957	2.79			0.338799	4.12273
7.5059	12.5883	5.8981	2.9081	3.6589	1.7971	1.0078	0.7996	1.116	9.7129	1.597	1.1752	0.9643	1.3685	11.5387	3.0982	1.7517	1.7269	8.0345	2.7485			0.344262	3.86791
7.625	11.2315	6.0403	2.9533	2.9559	1.7599	1.2188	0.847	0.9384	9.4084	1.4075	0.9278	1.2695	1.3791	11.388	3.5183	2.4752	2.0104	8.3219	2.3424			0.349724	3.81019
7.7442	9.4038	4.4303	3.0473	2.7904	2.2615	0.9319	0.9638	0.8668	7.8454	1.3108	0.9516	1.3621	1.5437	9.8604	3.2375	2.0525	1.7997	9.1966	1.9769			0.355191	3.46489
7.8633	8.3032	4.3568	2.3592	2.3396	2.5412	0.8364	1.0542	0.8695	8.5033	1.2754	1.4277	1.1886	1.3435	10.0771	3.3378	1.9595	2.0247	9.3852	2.3367			0.360654	3.4484
7.9825	8.4471	4.115	2.21	2.216	1.8792	0.8754	0.6913	1.2436	7.941	1.3583	1.6807	1.386	1.4578	10.0139	2.8284	1.804	1.9354	9.2898	2.7149			0.366121	3.37304
8.1016	8.3917	3.9279	2.4348	2.3834	1.86	1.0337	0.7982	0.8499	7.1344	1.2909	0.8269	0.9627	1.399	11.0831	3.1096	1.6202	1.5389	10.1933	2.5549			0.371584	3.3365
8.2207	8.4427	4.5059	2.8328	2.3871	1.8139	0.5357	0.9908	1.0223	6.1684	1.141	1.3471	1.0531	1.3255	11.267	3.1429	1.9959	1.3251	9.2152	2.2955			0.377046	3.30568
8.3399	8.8859	4.4304	2.4328	2.5064	1.9811	0.8107	0.6352	0.7828	5.8912	1.5037	1.1019	1.8171	1.5398	12.7861	3.4493	1.8705	1.2471	8.7646	1.985			0.382513	3.39061
8.459	10.4584	4.2939	3.3054	1.9231	2.6963	0.9926	0.6733	0.9201	5.7391	1.1537	1.3098	1.3015	1.4366	14.1402	4.0456	2.0821	1.4969	9.6251	2.1766			0.387976	3.67212
8.5782	9.3498	4.3577	3.4779	1.5319	2.4728	1.0648	0.8492	1.4624	6.2007	1.1745	1.4999	1.5147	1.3174	16.6828	4.279	2.1117	1.5195	7.5111	1.782			0.393443	3.69262
8.6973	9.0713	5.5062	3.432	2.0266	1.9348	0.6372	0.6674	1.2957	6.5751	0.7946	0.9228	1.4533	1.1665	15.9411	4.6955	1.8217	1.7019	8.0213	1.5576			0.398906	3.64329
8.8165	8.3695	7.6866	3.2364	2.3117	2.0915	0.8687	0.6821	1.3461	6.7506	1.0897	1.4076	1.1384	1.5384	15.8845	4.6827	1.4268	1.2158	9.1014	1.6504			0.404373	3.81468
8.9356	9.2648	7.3987	2.7194	1.6635	2.0131	0.9471	0.787	1.2736	7.9217	0.8736	1.3062	1.3187	1.0747	17.0274	3.7934	1.6632	1.093	9.0926	1.4248			0.409835	3.82403
9.0547	9.4327	7.9752	2.8212	1.7603	2.0982	0.9623	0.4186	1.3714	8.0621	1.2893	1.3036	0.9895	1.4494	16.6138	4.9467	1.4653	1.4766	8.9761	1.5019			0.415298	3.94285
9.1739	10.6664	7.5471	2.7834	1.4776	1.7133	0.9345	0.6174	1.1201	8.4956	1.3075	1.1028	1.3845	1.4888	16.2143	4.1355	1.4771	1.6034	7.2257	1.948			0.420765	3.85489
9.293	10.4685	6.8359	3.2354	1.8848	1.6729	0.9433	0.5399	0.7962	8.7471	1.3905	1.6114	1.2025	1.1979	16.1468	4.1993	2.3937	2.1651	7.0091	1.6781			0.426228	3.90097
9.4122	8.3054	7.2082	3.0554	1.6968	1.615	1.0936	0.5666	0.9802	8.5345	1.4813	1.4085	1.1977	1.4142	14.9838	4.2478	1.5791	1.5864	7.867	1.8358			0.431695	3.71881
9.5313	8.0269	6.8541	3.0538	1.9919	1.8054	0.6663	0.8793	1.0272	8.4696	1.6168	1.2496	1.1774	1.5977	14.3824	3.7223	1.8858	1.4825	7.1679	1.6345			0.437157	3.61534
9.6504	8.2426	5.5498	2.819	2.3206	2.0377	0.9027	0.9179	0.9812	7.4754	1.2047	1.1756	1.2991	1.3015	14.6298	3.9448	1.5568	1.5064	7.706	1.6106			0.44262	3.53591
9.7696	7.381	5.4154	3.0123	2.071	2.6205	1.3082	0.7686	1.0305	8.8465	1.3364	1.2933	1.166	0.9003	12.6617	3.6802	2.0144	1.1232	7.5655	1.7041			0.448087	3.46837
9.8887	7.0943	5.2107	2.9631	2.2009	2.5951	0.928	1.0433	0.8249	9.8078	1.4636	1.061	1.0785	1.4042	12.7152	3.8589	2.1083	1.196	7.171	2.2591			0.45355	3.52547
10.0079	6.0262	5.0307	2.8104	2.2502	1.9866	1.1439	0.7083	1.1155	9.6287	1.8802	1.5764	1.3185	1.2458	12.2879	3.6768	2.2077	1.2415	7.1209	1.6842			0.459017	3.41792
10.127	5.8812	5.1009	3.1253	1.8168	2.0507	1.1599	0.7862	1.1294	7.0381	1.5096	1.2753	1.2405	1.0424	12.3659	3.3794	1.5257	1.0181	7.6218	1.838			0.464479	3.20554
10.2462	4.222	4.3864	2.3416	2.0413	2.0372	0.5951	1.2749	1.2422	8.3536	1.2356	1.0717	1.0467	0.9595	12.7795	4.0896	1.3281	1.2324	8.1208	2.1204			0.469947	3.18308
10.3653	5.1204	3.742	2.7919	1.6305	1.8699	1.0543	1.0582	1.1631	8.788	1.2188	1.301	1.2927	1.3427	12.9686	4.3978	1.2148	1.5299	8.194	2.3317			0.475409	3.31633
10.4844	4.9825	4.7998	3.484	1.8454	2.0068	0.7748	1.013	1.0028	7.0655	1.2234	1.5321	1.0101	1.2714	13.4215	4.1206	1.3469	1.3942	7.5259	1.6761			0.480872	3.23667
10.6036	4.8175	5.8581	2.6391	2.0261	2.6063	0.987	0.9295	1.1117	6.8429	1.8368	1.0777	1.1263	1.3104	13.8583	4.6052	1.3846	1.2852	8.2409	1.1862			0.486339	3.3542
10.7227	5.1806	5.3321	3.1002	1.8817	2.815	0.7602	1.0001	1.2174	8.0262	1.3846	1.1501	0.9123	1.2108	14.3464	4.2636	1.6333	1.3765	8.2966	1.5712			0.491802	3.44521
10.8419	4.5215	5.7823	3.313	1.8719	3.1219	0.7434	1.1825	1.0092	7.9092	1.2342	1.1651	1.2122	1.0841	14.4035	4.5862	1.59	1.3028	7.9769	1.8742			0.497269	3.46758
10.961	3.7248	4.6414	3.3025	2.0032	2.2779	0.8681	0.7733	1.362	7.1663	1.2886	1.3395	1.1129	1.6285	14.65	4.3738	1.4724	1.1997	7.3481	1.3851			0.502731	3.25885
11.0801	4.0156	4.8088	3.0767	2.1725	1.9389	0.7876	0.9469	1.3573	7.8311	1.3657	1.2384	1.197	1.2719	14.2517	4.7128	1.4885	1.1075	7.2215	1.718			0.508194	3.28992
11.1993	5.4784	4.8633	3.1229	1.9781	2.3672	0.8904	1.1608	0.9532	9.111	1.355	1.3942	1.4075	1.0232	15.032	4.3821	1.6599	1.4434	7.4174	1.6747			0.513661	3.5113
11.3184	5.2909	4.3212	2.8881	2.0569	2.1321	0.6904	0.9944	1.4305	6.5781	1.5317	1.2178	1.0874	1.2135	14.453	3.726	1.1151	1.4985	7.3421	1.4841			0.519124	3.21325
11.4376	5.6838	4.2279	2.6525	2.5707	2.1546	0.8883	1.1034	1.1183	7.7521	1.4645	1.0568	1.2521	1.2869	12.5568	4.1672	1.359	1.5958	7.6036	1.0564			0.524591	3.23951
11.5567	5.62	4.1031	2.3675	2.317	2.3356	0.7268	1.0303	0.6973	8.8027	1.7161	0.9668	1.1209	1.5449	11.2492	4.1935	1.5234	1.417	7.5853	1.2176			0.530053	3.18605
11.6758	5.5499	4.7661	2.4715	2.3985	2.6276	0.6474	1.0588	0.8806	8.0128	1.0889	0.9536	1.181	0.9883	11.1621	4.3205	1.8153	1.3519	7.8545	1.1904			0.535516	3.17472
11.795	4.7463	4.0718	2.7885	1.3241	2.1499	0.781	0.5824	1.0626	6.9336	0.7474	1.0993	0.9597	1.358	10.3138	3.8559	1.3178	1.1216	8.6538	0.9988			0.540983	2.8877
11.9141	3.2695	3.7921	3.4277	1.941	2.2937	1.1355	0.6276	1.2075	6.1939	1.2191	0.9731	1.12	1.209	10.0272	3.1355	1.2318	1.2592	7.5687	1.079			0.546446	2.77427
12.0333	3.0074	5.7704	3.3971	2.4613	2.4517	0.8008	0.6869	0.9967	7.3317	1.9383	1.1421	1.386	0.8373	9.7837	3.2289	1.4638	1.6775	7.8292	1.2128			0.551913	3.02124
12.1524	2.998	5.1416	2.6467	2.3454	2.4354	0.6802	0.8073	0.9874	6.389	1.2828	1.4868	1.0277	1.1705	9.8368	3.8485	1.9473	1.7127	7.4897	1.1165			0.557375	2.91317
12.2716	3.306	4.9341	2.4706	2.2889	2.7843	0.9923	0.727	1.1152	6.2272	0.9966	1.2955	1.0849	1.4149	9.7835	4.4558	1.7213	0.8462	7.1908	1.2997			0.562843	2.89131
12.3907	3.1602	5.2604	3.0468	2.6533	2.8176	1.0053	0.793	1.0726	6.4256	1.1934	1.4066	0.8248	1.266	8.9907	3.697	1.866	1.1047	8.0361	1.4439			0.568305	2.95074
12.5098	3.0013	5.4214	2.7501	2.1932	2.7377	0.9969	0.835	0.7568	7.2826	1.1466	1.7716	1.4202	1.0551	7.7867	3.8087	1.9784	1.5138	7.3435	1.6563			0.573768	2.91873
12.629	3.0765	4.743	3.0309	2.5221	2.766	1.2717	0.8479	0.7216	7.5502	1.1368	1.1879	1.189	0.958	8.6536	4.2052	1.7358	1.0788	7.1937	1.5139			0.579235	2.91487
12.7481	3.1384	4.1798	3.104	1.8686	2.367	1.0945	1.055	0.7492	6.8143	1.4708	1.2556	1.1322	1.4929	8.0729	3.7868	1.488	1.0428	7.1115	1.2548			0.584697	2.76206
12.8673	3.0241	4.3174	3.4477	2.0398	2.7081	1.1142	1.1079	0.5766	6.9878	1.0936	1.1611	1.2749	1.1955	7.1767	3.9625	1.6595	1.3588	6.141	1.1117			0.590165	2.70836
12.9864	2.8632	4.6406	3.1178	1.7468	2.5173	0.9075	1.2409	0.9084	7.1823	1.6906	0.9913	1.3527	1.5131	8.4766	4.5986	1.2915	1.1134	6.305	1.6461			0.595627	2.84756
13.1055	3.0799	3.4357	2.9872	1.9834	2.8632	1.1142	0.68	0.8881	7.803	1.4605	1.0989	1.4158	1.6127	9.0608	4.4057	1.2756	1.3305	6.7682	1.3295			0.60109	2.87331
13.2247	2.7035	3.3564	3.7037	2.228	2.5288	1.0776	0.8175	1.2043	7.6039	0.8593	1.3982	1.6349	1.3274	8.8229	4.6486	1.529	1.3795	7.0767	1.3488			0.606557	2.90784
13.3438	3.0984	3.4051	3.1249	2.778	3.2286	0.91	1.3053	1.4933	7.1196	1.4912	1.0872	1.2667	1.2332	10.8623	5.3998	1.8847	1.2722	6.8533	1.2373			0.61202	3.10795
13.463	3.4942	3.4124	2.189	2.3047	2.7161	0.9257	0.876	1.4059	7.1477	1.7403	1.0695	1.2355	0.9124	11.8362	5.4907	1.9602	1.278	6.1734	1.1674			0.617487	3.01765
13.5821	3.48	3.3029	2.5455	2.6262	3.0873	0.9398	0.7718	1.0112	8.0048	1.5951	1.3002	1.0915	1.4106	10.7872	5.3962	1.7032	1.0278	6.0784	1.2416			0.622949	3.02112
13.7012	3.2698	3.386	2.8499	2.8362	3.1102	0.7422	0.9217	1.1464	7.6704	1.5397	1.4617	1.3848	0.9464	10.2124	5.4036	1.6911	0.8554	5.6788	1.1672			0.628412	2.96178
13.8204	3.2171	3.9573	3.1325	2.8559	2.9804	0.8515	0.9438	0.9336	6.9338	1.479	1.5172	1.1943	1.0759	9.2618	5.8021	1.8211	1.3859	4.6399	1.2578			0.633879	2.90742
13.9395	3.234	3.5586	3.37	3.4949	2.7304	1.1171	1.1796	1.3889	5.9774	1.604	1.2341	1.1766	1.5259	8.2201	6.8242	1.6653	1.7358	4.708	1.745			0.639342	2.97315
14.0587	2.9405	3.3893	3.2884	2.598	2.7525	1.1879	0.8438	1.2069	7.5044	1.693	1.2032	1.1779	1.3716	9.0646	6.4537	1.8599	1.0958	4.3734	1.5422			0.644809	2.92353
14.1778	3.0042	3.8644	3.2018	2.7704	2.9772	1.37	0.9576	0.7939	7.4213	1.5281	1.4073	1.1303	0.9564	9.3118	4.9755	2.113	1.0502	4.3244	1.468			0.650271	2.87504
14.297	4.6341	4.2387	3.5816	3.2475	3.5019	1.0714	0.6139	1.4058	7.2438	1.0653	1.4023	1.2314	1.145	10.806	5.5215	1.518	1.5132	4.6458	1.4122			0.655738	3.14734
14.4161	3.8331	3.2907	3.7507	3.1562	3.4735	1.0202	0.8119	0.9986	7.5513	1.6085	1.1859	1.9496	1.0712	10.1088	6.6198	1.741	1.3339	4.1085	1.3014			0.661201	3.10078
14.5352	4.0358	3.7812	2.9318	3.3806	3.947	1.3388	0.8967	0.82	6.7636	1.44	1.3346	1.8324	1.2112	8.0317	6.7389	1.7626	1.2168	3.9224	1.4079			0.666664	2.98916
14.6544	4.1199	3.2784	3.4803	2.8512	4.4675	1.2287	0.6435	0.8723	6.9934	1.7458	1.5012	1.6481	1.1982	7.4986	7.2505	2.0912	0.9649	3.7075	1.8788			0.672131	3.02211
14.7735	3.5693	2.9694	4.3676	2.7831	4.5641	1.3098	0.5642	0.9934	7.3169	1.9712	1.2288	1.1903	0.9296	7.6053	7.8284	2.13	1.2663	3.2607	1.9			0.677593	3.03939
14.8927	3.8255	3.4183	4.3408	3.6717	4.8893	1.407	0.9018	1.0109	6.5402	2.376	1.3314	1.2984	1.0561	6.2925	7.895	2.3002	1.359	3.19	1.6364			0.683061	3.09161
15.0118	3.8494	3.8583	4.5912	3.5346	4.3014	1.4271	0.9413	1.2059	6.2465	2.4763	1.6483	1.7919	1.2203	6.8046	8.6828	2.621	1.0921	3.5002	1.7745			0.688523	3.24041
15.1309	5.2827	3.7716	4.4399	3.5211	5.3189	1.2953	0.6171	0.763	6.7466	2.2834	2.1164	1.7232	0.9961	6.0904	9.3323	2.0564	1.0606	2.8258	1.9219			0.693986	3.27172
15.2501	6.3853	3.4482	5.0436	2.8697	5.7881	1.4059	0.9077	0.9607	7.17	3.0622	1.8525	1.5405	1.0929	5.6574	8.5864	2.0196	1.1974	2.8183	1.7809			0.699453	3.3467
15.3692	6.8675	4.551	4.5957	3.3816	5.0667	1.5413	0.9293	0.8244	6.3267	3.1352	2.2395	1.2328	0.9096	6.0852	8.4662	2.2664	0.9321	2.99	1.4127			0.704915	3.35547
15.4884	7.7838	4.3163	5.6206	3.3179	5.0308	1.4803	0.8576	0.9067	6.4446	3.033	2.4634	1.0694	1.1097	4.8465	7.9984	1.9207	1.4182	3.1676	1.6027			0.710383	3.38885
15.6075	7.721	4.3804	5.805	2.5506	4.6256	1.7354	0.9066	0.8689	6.2505	2.9195	3.3125	1.3285	1.4129	5.1251	8.7738	1.9256	1.216	2.826	1.5139			0.715845	3.43146
15.7266	6.4356	5.4158	5.9336	3.016	4.8311	1.9003	1.2067	1.259	6.3786	3.3748	3.8598	1.4065	1.617	4.8775	8.9194	2.1564	1.2016	1.9104	1.8685			0.721308	3.55624
15.8458	7.1583	4.9265	6.3302	2.5111	5.2376	2.3919	1.2822	1.1588	6.3493	3.812	5.4406	1.7475	1.2959	5.0439	7.8973	2.5424	1.0472	2.0244	2.1142			0.726775	3.70059
15.9649	7.951	5.2358	6.5236	3.472	5.5276	2.6893	1.7288	1.1739	5.4807	4.6347	8.559	1.5964	1.225	4.2696	8.3906	2.3395	1.3781	2.29	1.9622			0.732237	4.02252
16.0841	8.7455	5.6481	6.8833	2.5291	6.0131	2.8762	1.6051	1.4854	6.4305	5.3866	11.4617	1.6158	1.5234	5.41	8.7707	3.3724	0.9168	1.9528	1.611			0.737705	4.43355
16.2032	8.5155	5.8853	7.8944	3.0683	4.7901	3.1556	1.6463	1.1011	5.258	6.9663	12.3048	2.0216	1.3946	4.0257	8.1189	2.7338	0.756	1.8648	1.0613			0.743167	4.34539
16.3224	10.0206	7.8552	8.4233	2.7039	5.4348	3.2872	1.8478	1.2629	4.5553	8.4143	13.8192	2.0116	1.0261	3.5855	9.0833	2.9061	1.4692	2.062	1.5022			0.748634	4.80371
16.4415	9.7697	7.7475	9.5794	3.4852	5.3979	3.5288	2.378	1.01	4.6506	8.7981	11.894	1.9813	1.2577	3.4771	8.7288	3.6649	1.7256	1.6969	1.7273			0.754097	4.86836
16.5606	12.4558	9.7342	9.9994	3.8719	6.2344	3.3236	2.5087	0.9587	4.5664	10.5639	11.5211	2.1662	1.4352	4.0117	9.4574	3.3972	1.2315	1.7248	2.3753			0.75956	5.34407
16.6798	13.9187	12.1576	11.4874	4.685	7.2749	3.8461	3.0606	1.1855	5.1285	10.9497	12.4164	2.2014	1.6742	3.028	8.7459	3.2258	1.4212	2.0947	2.0903			0.765027	5.82063
16.7989	13.8546	12.7398	10.6315	5.3722	7.0301	4.6593	5.4759	1.5674	4.3301	13.7416	14.1475	2.3919	1.5	3.0442	8.027	3.5142	1.3535	1.7527	1.8585			0.770489	6.15747
16.9181	14.2176	13.2063	13.7182	5.5756	8.9235	5.9087	8.7692	1.4172	4.5568	15.0738	15.1107	2.9105	2.156	2.3683	7.8393	3.5112	0.9761	1.9264	2.0901			0.775956	6.85555
17.0372	15.048	13.9127	14.2188	8.0466	9.1609	8.146	11.9094	1.9653	4.4178	14.8661	18.2403	3.8364	1.8372	2.4578	8.1315	3.4057	1.1933	2.1018	2.2612			0.781419	7.63983
17.1563	16.0934	11.5423	12.0645	10.3664	9.7673	10.593	14.0451	2.6003	4.9111	16.3489	19.442	4.4899	2.3735	3.5551	9.7039	4.4751	1.7333	1.889	2.2179			0.786882	8.32695
17.2755	15.6199	9.946	11.1259	12.3543	11.1631	11.2924	14.0352	2.9129	5.2088	17.4281	20.6568	5.2574	2.8801	2.6848	10.7572	4.1494	1.4765	1.7411	2.6239			0.792349	8.59546
17.3946	16.1376	8.4414	10.5853	13.4423	13.6126	9.8412	13.3523	4.6509	6.6912	18.9077	17.4953	6.5937	3.7265	2.2268	12.2962	3.7252	1.4822	1.8572	2.9751			0.797811	8.84425
17.5138	14.6561	6.2017	10.1276	12.4209	12.9809	9.2411	9.5947	4.4478	8.0349	19.1107	14.0612	8.0429	5.0165	2.4932	12.1163	4.5646	1.2474	1.7062	2.3047			0.803278	8.33523
17.6329	13.3158	5.362	9.4299	12.2562	12.7559	6.9705	5.2803	5.2188	9.6679	19.3513	10.7935	7.6674	5.6021	2.3986	12.0755	4.3978	0.9596	1.8112	2.513			0.808741	7.78038
17.7521	9.7084	5.0488	8.942	10.3844	12.0695	5.3789	3.8774	5.6486	12.8234	17.4184	7.0212	9.132	6.6916	2.6779	13.2413	4.3702	1.2287	1.7298	2.2203			0.814208	7.34804
17.8712	8.2987	4.393	8.7826	9.0181	11.8331	4.0294	2.1981	5.9985	19.1238	18.2487	4.5669	8.6086	9.8171	2.4955	12.4345	4.7489	1.4727	1.7222	3.044			0.819671	7.41234
17.9903	6.0014	2.8627	7.1306	7.6162	9.7252	2.8377	1.7788	4.6275	21.8191	16.8902	3.5445	8.271	11.9797	2.6957	13.366	4.9385	1.0979	1.3709	3.0099			0.825133	6.92439
18.1095	4.3572	2.7428	5.5079	5.4536	8.4791	2.1447	1.3236	4.0356	25.4616	15.052	3.2599	7.2049	12.6228	3.186	12.537	4.0882	1.4173	1.8966	3.5227			0.830601	6.54176
18.2286	3.3619	2.3649	4.3971	4.0793	7.0253	1.8355	1.2799	4.3484	24.7419	10.3724	3.6614	6.2488	17.7771	3.8142	14.4556	4.5532	1.5721	1.6079	3.2556			0.836063	6.35539
18.3478	3.3668	1.9236	3.9629	4.1778	6.132	1.314	0.8912	4.6222	25.8355	6.931	2.1963	4.2926	19.5041	3.4457	14.279	4.5616	1.7108	1.6985	3.7586			0.84153	6.0318
18.4669	2.7623	1.6693	3.1192	3.3113	5.0666	1.0308	0.7884	5.0312	23.332	5.8346	1.7325	3.7983	24.6162	4.5243	15.5109	5.9256	1.3697	1.6273	3.5875			0.846993	6.03358
18.586	2.1963	1.5488	1.8489	1.959	4.1591	1.0397	0.9248	3.8183	18.4373	5.2552	1.394	3.7105	24.9788	5.3678	17.252	5.7658	1.6384	1.5863	3.853			0.852455	5.61758
18.7052	1.8751	1.5271	2.0534	1.9581	3.665	1.2781	0.8816	3.2535	13.6619	4.3559	1.338	2.5441	26.916	6.1503	19.4376	7.0969	1.7276	1.9435	4.9655			0.857923	5.61206
18.8243	1.5834	1.0822	1.5293	1.4198	3.8741	0.8511	0.3884	2.6797	11.2283	3.5477	0.9704	2.4042	26.9565	6.6022	19.6628	8.8108	1.647	1.5334	5.7545			0.863385	5.39609
18.9435	1.6931	1.0564	1.4499	1.2182	3.2474	0.7822	0.4831	2.2316	7.2889	2.9341	1.1277	1.7341	26.3089	8.0545	22.9955	8.6875	1.366	1.4435	6.1251			0.868852	5.27514
19.0626	1.2312	1.1784	0.7796	1.0124	2.4356	0.541	0.7001	2.1342	4.8506	2.5416	0.8702	1.6845	24.7555	10.3299	21.9241	8.1284	2.6214	1.2964	5.8943			0.874315	4.99523
19.1817	0.8884	0.9989	1.0903	0.6907	2.5607	0.6239	0.6858	1.7803	3.5121	1.7659	1.0132	1.4763	20.5984	12.9074	21.6138	9.4051	2.5865	1.7276	6.9288			0.879777	4.88706
19.3009	0.8631	0.7586	0.9578	0.7772	1.42	0.3158	0.7149	2.1516	3.0468	1.7344	0.8986	1.1535	18.1569	16.8637	20.6909	10.6463	2.0888	1.4812	7.3914			0.885245	4.84797
19.42	1.1116	0.5435	0.7332	0.3909	1.0742	0.0957	0.6583	1.3478	3.2555	1.3045	0.7237	1.3075	13.8101	20.8481	22.8717	10.8063	1.867	1.6737	8.5612			0.890707	4.89392
19.5392	0.7855	0.5249	0.7784	0.367	1.0634	0.4445	0.593	1.2804	2.3632	0.8705	0.6281	0.9202	10.7698	25.7236	20.5163	10.126	2.0505	1.4771	10.1285			0.896174	4.8111
19.6583	0.8645	0.6626	0.5215	0.486	0.921	0.3872	0.5115	1.242	2.6634	0.6251	0.5529	0.7583	6.9166	31.5187	23.3493	10.9507	2.6848	1.278	10.4408			0.901637	5.12289
19.7775	0.4484	0.8188	0.5211	0.5474	0.6803	0.383	0.5191	1.3316	1.801	0.4491	0.4853	0.7978	5.3786	32.9741	24.642	11.7385	2.7088	1.6442	10.4352			0.907104	5.17391
19.8966	0.7572	0.6	0.4106	0.5457	0.5759	0.3297	0.4021	1.186	1.2496	0.5828	0.4087	0.5836	5.3581	30.905	28.1221	12.3622	3.1335	1.944	10.7261			0.912567	5.27278
20.0157	0.5913	0.3192	0.5811	0.4955	0.8628	0.3895	0.4629	1.0859	1.2921	0.7935	0.707	0.7535	3.8334	25.761	28.6036	14.5799	2.5341	2.0014	11.1775			0.918029	5.09606
20.1349	0.6018	0.2962	0.4632	0.5401	0.7192	0.2923	0.5235	0.9214	1.2194	0.5117	0.4433	0.8181	3.2814	19.975	29.1906	17.1463	2.7452	1.7659	12.8788			0.923496	4.96492
20.254	0.6342	0.3006	0.2259	0.6441	0.5072	0.3023	0.3102	0.7721	1.0351	0.2752	0.4552	0.6268	2.6743	12.8447	31.8807	17.7695	2.7544	1.2218	13.0613			0.928959	4.64714
20.3732	0.4406	0.6102	0.1769	0.3845	0.3961	0.0653	0.2626	0.7329	0.9298	0.4232	0.1954	0.3204	1.8468	9.1611	28.9129	21.771	2.9394	1.7969	12.3817			0.934426	4.40777
20.4923	0.2452	0.2857	0.1348	0.1911	0.6031	0.2719	0.2596	0.5654	1.0071	0.4933	0.1916	0.4233	1.5906	6.4377	25.9293	23.4332	3.252	1.8511	14.864			0.939889	4.31737
20.6114	0.1645	0.4895	0.1883	0.459	0.4402	0.103	0.2239	0.4098	0.9642	0.3329	0.4767	0.3509	1.6603	4.9204	17.3731	23.4826	3.749	1.6596	15.9897			0.945351	3.86514
20.7306	0.0605	0.2681	0.3037	0.2179	0.3592	0.1443	0.1485	0.5569	0.9809	0.3777	0.3859	0.5454	1.3713	4.56	9.9205	22.9855	4.5097	1.6684	16.5711			0.950818	3.47029
20.8497	0.3342	0.0451	0.1862	0.2227	0.343	0.0845	0.168	0.3527	0.4328	0.545	0.3309	0.3045	1.5412	3.9453	5.4512	21.8868	3.9575	1.7795	15.1052			0.956281	3.00086
20.9689	0.5083	0.222	0.446	0.3701	0.2634	0.0841	0.1737	0.361	0.3948	0.1496	0.312	0.2885	1.1596	2.9435	3.7341	19.376	4.4142	1.9362	14.4747			0.961748	2.71641
21.088	0.4616	0.0649	0.1692	0.1321	0.3242	0.1151	0.0631	0.2687	0.505	0.2446	0.1979	0.2935	1.0998	2.5512	3.2153	17.7149	4.9735	2.3599	14.3529			0.967211	2.5846
21.2071	0.317	0.0769	0.137	0.1933	0.2969	0.1773	0.0156	0.3152	0.6564	0.2748	0.3501	0.2102	1.2104	1.9388	3.2336	15.1948	6.826	2.3996	15.6237			0.972673	2.60251
21.3263	0.2559	0.0972	0.1754	0.3304	0.1622	0.1804	0.1	0.2424	0.462	0.2629	0.3015	0.3022	0.7736	2.6155	2.4493	11.5849	6.3983	2.2974	16.1949			0.978141	2.37823
21.4454	0.0838	0.1809	0.0637	0.0806	0.2839	0.1212	0.0409	0.3253	0.2325	0.3152	0.0185	0.307	1.0537	1.296	1.9982	7.5674	6.6934	2.41	14.967			0.983603	2.00206
21.5646	0.0864	0.0752	0.2627	0.1348	0.3528	0.143	0.1075	0.2969	0.166	0.0895	0.0896	0.2223	0.6989	1.518	1.9679	5.6644	7.2666	2.4779	17.5195			0.98907	2.05999
21.6837	0.1128	0.0513	0.2661	0.3145	0.1419	0.303	0.116	0.2132	0.3355	0.12	0.0157	0.1297	0.3905	1.0816	1.1922	4.2337	9.2198	2.2294	17.1885			0.994533	1.98186
21.8029	0.1749	0.1516	0.0324	0.1162	0.1943	0.2363	0.0898	0.2367	0.5573	0.3689	0.0808	0.2752	0.4653	0.8158	1.1065	3.7396	11.5828	3.1307	16.4318			1	2.09405

## Sheet: Image36
X0	Y0	Y1	Y2	Y3	Y4	Y5	Y6	Y7	Y8	Y9	Y10	Y11	Y12	Y13	Y14	Y15	Y16	Y17	Y18	Y19	Y20	Y21				Ap-Basal to 1	Average intensities
0	5.7115	14.0739	8.5742	6.2482	6.2603	9.1733	3.6164	2.5346	3.1798	8.1944	5.8885	3.9445	2.9726	6.153	3.0316	3.6097	3.4049	5.766	10.2365	8.5568	9.3578	5.1264				0	6.16431
0.1191	7.2527	14.4195	8.7898	9.2717	6.797	10.8907	4.2798	2.7185	4.3364	9.2584	7.6557	4.5531	3.7458	6.6988	3.6094	4.6102	4.2622	8.6394	11.2353	12.6252	10.1714	5.563				0.00609544	7.33564
0.2383	10.6448	14.3393	10.2676	10.6603	6.3224	12.0823	6.4636	3.3501	5.0028	9.938	8.5859	7.6807	4.2302	8.3468	4.4215	5.3171	4.7824	10.3268	15.0663	19.0863	9.8265	6.1407				0.012196	8.76738
0.3574	13.1993	15.2239	9.81	13.9471	9.4424	14.0782	9.0097	4.0762	5.3791	9.6803	11.0732	11.2335	5.2766	9.2901	5.8528	6.2828	4.4956	13.6982	17.1152	22.1127	10.3891	7.1045				0.0182914	10.3532
0.4766	15.9719	17.9589	13.4714	16.3504	8.8024	14.4275	13.7939	5.337	7.5082	12.0491	13.181	16.041	6.748	10.1851	7.2598	8.4112	5.403	17.1692	23.1834	26.5207	11.0385	11.3635				0.024392	12.8261
0.5957	17.8396	20.8155	15.7723	16.7958	9.9609	14.8532	20.5282	6.5535	8.4903	12.8204	14.4421	20.7064	11.1891	13.943	9.289	10.9785	8.2115	24.1247	21.979	31.2349	11.6257	13.5845				0.0304874	15.2608
0.7148	20.0192	20.9748	18.0077	19.466	11.3621	14.5003	29.4047	7.6513	8.4988	13.8098	16.8529	27.68	14.8306	18.6978	12.5188	12.8273	10.8605	29.5352	24.1827	35.9757	11.671	15.6365				0.0365829	17.9529
0.834	21.4223	21.1183	19.7529	20.1811	12.7925	15.4825	37.8278	8.976	12.6135	16.8794	22.821	34.2251	20.2346	27.4083	15.305	17.377	14.575	34.5606	25.1916	39.4181	16.4368	18.0246				0.0426834	21.4829
0.9531	22.7158	23.4715	23.8988	22.2701	13.1035	17.0993	43.7633	13.892	14.9512	19.5832	28.5528	40.3292	30.0219	33.5623	20.8848	18.5572	20.3465	35.6534	28.0098	39.4832	20.3326	21.4834				0.0487789	25.0894
1.0723	26.8165	27.8905	29.9042	21.4546	14.2394	17.8876	41.2824	19.1028	18.9499	24.1507	35.3517	45.4517	39.7784	39.9879	26.7968	20.6865	21.611	33.7446	28.284	41.3111	24.9456	23.196				0.0548794	28.3102
1.1914	29.4419	32.0048	31.7011	22.5748	17.4788	19.0052	35.6088	23.7261	23.2783	29.546	44.8273	51.494	56.1017	46.1554	29.1405	21.3298	26.2204	29.7771	29.4242	40.8527	28.6902	29.7815				0.0609749	31.7346
1.3106	32.14	33.7251	31.2402	25.9746	17.7691	22.1027	28.7832	30.0112	25.671	35.1628	52.106	57.3041	66.2693	50.3436	35.2248	20.9459	28.8567	29.7748	31.8665	42.4829	33.3315	32.9393				0.0670754	34.7284
1.4297	37.1714	35.8758	29.9497	28.6485	18.3845	20.5646	24.3098	35.8317	29.1725	42.1159	53.4789	62.5987	80.145	56.2198	37.9118	23.1633	31.6064	27.437	31.7179	43.6912	40.0546	34.524				0.0731709	37.4806
1.5488	40.9025	36.4079	26.7969	28.1566	21.1125	22.6351	21.2553	40.5664	33.9937	43.1249	47.4838	58.5557	84.9532	60.0887	39.682	23.1939	33.8265	29.9559	35.0938	44.7116	46.1651	34.5609				0.0792663	38.7829
1.668	43.5577	39.5616	22.783	26.102	23.339	23.5861	18.9904	40.9686	35.3271	43.3602	37.2374	53.3659	89.3344	69.5787	42.5837	25.7406	38.152	26.7276	33.6959	45.311	47.6865	31.0314				0.0853669	39.0009
1.7871	41.0503	34.6281	21.13	23.9435	22.9684	23.9184	17.8796	38.6753	38.4427	38.9693	27.3751	46.1827	92.7299	65.4046	42.7522	26.2227	35.6831	27.4066	32.6981	45.7242	46.465	30.0202				0.0914623	37.285
1.9063	42.1578	30.1926	19.3451	24.0203	20.4649	23.0976	15.8819	36.019	37.6008	33.0533	18.9782	39.5976	91.8734	65.0712	41.7322	25.6551	32.0464	28.4744	28.7648	48.5624	40.2876	28.0247				0.0975628	35.041
2.0254	37.1231	25.46	16.66	21.8548	22.1637	19.9898	14.8853	30.6262	37.3806	30.3353	12.6136	31.7975	89.8813	60.4809	41.3131	24.8338	26.0024	29.5213	27.0142	48.1124	32.4278	26.444				0.103658	32.1328
2.1445	34.0978	21.0791	12.7331	20.5795	25.4114	19.2102	13.9297	26.6895	39.233	25.5481	7.4997	26.6718	81.1901	56.6634	36.6824	23.6309	22.2373	27.1458	23.7338	45.5196	26.0638	21.4364				0.109754	28.9539
2.2637	32.1019	20.5094	12.7893	18.8928	27.6262	14.0225	13.8624	21.3024	31.0189	18.191	5.9295	20.8761	73.57	51.013	32.9273	20.4475	14.0342	23.2576	21.2254	42.1411	20.8388	18.0889				0.115854	25.2121
2.3828	24.8268	17.5727	10.7109	17.307	24.9862	12.0233	11.6311	17.138	26.1267	11.6165	3.4737	18.7315	63.9218	49.2569	24.4214	19.6571	10.9394	20.7689	18.5532	39.0236	17.2625	15.602				0.12195	21.616
2.502	20.7554	16.2915	9.7799	13.8059	25.4093	9.6763	9.3188	15.7767	20.0116	8.1934	2.6248	13.9908	50.0765	41.48	19.7359	16.8511	7.8491	16.3143	17.7579	35.3209	15.2336	13.5218				0.12805	18.1716
2.6211	17.9414	12.5181	8.6899	13.2306	18.2609	9.4713	9.4075	14.2356	15.277	6.5413	1.6341	12.9148	41.2484	33.4369	18.0816	14.6287	5.1277	13.8848	16.1408	30.6394	12.3087	10.4036				0.134146	15.2738
2.7402	17.1491	10.7929	8.0328	12.6835	15.0924	7.9389	9.0918	11.0289	11.3479	4.5383	1.8881	12.883	29.9372	26.8434	16.0574	11.0411	3.9238	10.4105	16.011	27.5003	10.1481	8.173				0.140241	12.8415
2.8594	13.7434	9.2197	8.0164	11.0351	13.2175	6.8753	8.8963	10.2519	10.0154	4.0211	1.2867	12.3972	22.8645	21.8815	16.5934	9.829	3.4647	9.1162	13.6539	24.83	8.4558	7.251				0.146342	11.2235
2.9785	12.7994	8.1849	6.4177	9.5401	10.1596	6.3738	7.754	9.2501	9.394	3.6715	1.1481	9.9207	19.2007	18.2764	15.8653	6.1564	2.8314	8.8817	12.6539	21.8834	8.4111	5.5727				0.152437	9.74304
3.0977	11.2592	7.5568	6.2374	11.1401	9.868	5.8868	8.3045	8.8205	7.5084	2.7573	1.2158	9.4181	15.8824	15.6867	14.9745	5.4111	2.474	7.2844	11.6063	20.395	7.0702	5.1369				0.158538	8.90429
3.2168	9.7957	5.9687	5.0214	9.4038	8.3513	4.5521	7.7134	9.4252	6.9796	2.4551	1.1147	10.0751	13.6079	10.5447	13.1633	4.7519	1.7854	7.0294	9.9598	16.6281	7.0542	4.9919				0.164633	7.74421
3.336	9.3708	4.6041	4.4841	9.7832	7.4989	4.4514	8.6587	8.2399	6.0376	2.1604	1.5728	9.5665	10.6788	8.8373	11.9981	4.7401	1.7514	6.3689	9.8144	16.0475	5.3673	4.1487				0.170734	7.09913
3.4551	7.3356	4.4461	4.107	10.3082	5.8578	4.3153	8.4454	8.3723	5.4287	1.9626	1.6303	9.2145	7.9042	7.0708	9.0171	4.458	1.5168	5.8709	9.5881	14.5474	4.6053	4.3719				0.176829	6.38065
3.5742	6.247	4.3577	3.6563	11.4138	5.2827	3.6877	7.99	8.5529	5.3549	1.5242	1.3297	8.9193	6.1797	5.1887	7.9292	4.1474	1.5393	5.1317	7.2041	12.9758	4.8342	4.5974				0.182925	5.82017
3.6934	5.48	4.4824	3.6718	11.0311	4.4431	3.8709	7.9637	6.8327	5.2922	1.7497	1.6073	8.4838	5.3848	4.1541	7.3499	3.9672	1.5373	5.5092	6.6871	11.9775	3.9245	4.1595				0.189025	5.43454
3.8125	4.2719	3.5793	3.804	10.4317	4.5919	3.0122	7.4649	6.5258	5.3643	1.3269	2.5952	8.8128	5.1224	3.6648	6.4315	4.2347	2.6527	4.9768	6.9836	11.8947	4.2441	3.6173				0.195121	5.2547
3.9317	4.9114	3.0821	3.2082	9.3678	3.9873	3.2369	7.8119	6.1529	5.4374	1.1954	1.9006	8.1348	4.24	3.5478	5.4959	4.5906	2.2737	4.9538	5.3221	8.8474	3.094	3.3892				0.201221	4.73551
4.0508	4.551	3.1006	2.7539	10.8871	3.6938	2.4695	7.1447	5.1586	5.3593	1.3368	1.8781	8.8809	3.4883	3.115	4.7715	4.1681	2.205	5.8917	4.2305	6.5829	3.1802	3.3537				0.207317	4.46369
4.1699	4.2735	2.3577	3.6229	10.2468	3.6759	2.6581	6.4989	4.9831	5.9222	1.5566	2.4619	7.6448	3.4527	2.8722	3.9945	4.4106	1.5914	5.1916	4.4668	6.5218	2.8417	3.3622				0.213412	4.30036
4.2891	4.2337	2.4076	3.5109	12.7978	3.4822	2.5853	6.2312	4.7115	6.6467	1.6069	3.5059	8.224	3.093	2.2514	3.7788	4.4029	2.3117	4.8847	4.0749	5.6386	2.758	3.0545				0.219513	4.37237
4.4082	4.1016	2.1623	2.9344	11.7856	3.4623	2.7085	6.1631	3.3554	6.6302	1.3847	4.6658	8.5558	2.8936	2.0743	3.3053	4.9753	2.2245	5.1324	3.8909	4.6407	2.6882	2.5567				0.225608	4.19507
4.5274	3.7604	1.8283	2.0789	11.6231	2.8641	2.7921	6.635	4.1025	5.9486	1.4085	6.7122	8.829	2.3565	2.0449	3.4253	4.8796	2.2851	5.6232	3.311	3.8955	3.1649	2.8482				0.231709	4.20077
4.6465	3.4234	1.81	2.2218	11.6037	2.4913	2.6437	6.309	3.3103	6.7443	1.3261	6.6792	8.9075	1.919	2.2331	2.9559	4.874	2.161	6.1108	2.8493	2.8609	2.8058	3.6487				0.237804	4.08585
4.7657	2.9298	1.976	2.2531	11.955	2.1624	2.4968	6.8262	3.548	5.9635	1.0525	6.8748	10.0799	1.6109	1.8204	2.8724	5.4341	2.0023	5.738	3.0567	3.1678	3.3691	4.119				0.243905	4.1504
4.8848	3.2621	1.6182	2.3516	10.3416	2.3589	1.9531	6.5983	3.3915	6.0251	1.3073	7.206	8.9381	1.5029	1.6233	2.3118	6.1979	1.9238	5.8045	2.7804	2.8475	2.6193	4.1277				0.25	3.95868
5.0039	2.5755	1.4158	2.8196	12.5897	2.2941	1.9569	5.8502	2.9036	5.7398	1.834	7.3827	7.8561	1.6936	1.3352	2.4157	6.9049	2.8186	7.5496	2.7219	2.57	2.4729	3.0898				0.256095	4.03592
5.1231	2.2547	1.6158	2.4628	12.6259	2.0582	2.1147	5.2097	3.6767	6.2786	1.7655	9.4991	6.725	1.9125	1.573	2.5106	6.4897	2.6294	6.7492	2.8261	2.119	2.3779	2.7307				0.262196	4.00931
5.2422	2.5953	1.653	2.487	14.5334	2.5415	2.5473	5.4496	3.8408	6.8758	1.5926	9.7652	5.184	1.6148	1.7411	2.9837	7.4814	2.6124	7.2639	2.921	2.4188	3.3707	2.8768				0.268291	4.28864
5.3614	2.0313	1.7544	2.4329	16.3865	2.0693	1.5926	5.9754	3.2312	7.4244	1.4474	10.6327	5.1839	1.3875	1.8245	2.415	7.6083	3.1248	7.5053	2.075	2.2107	4.0061	2.5223				0.274392	4.31098
5.4805	1.8086	1.7417	2.3386	15.3728	2.111	1.5478	5.7754	2.8404	8.1753	1.385	10.4599	4.2885	1.301	1.4536	2.5793	8.298	3.5589	7.7846	2.2964	1.8201	3.7475	2.4711				0.280487	4.23434
5.5996	2.2754	1.7046	2.1404	16.0272	1.8134	1.5662	5.2603	2.5062	9.844	1.1246	10.62	3.7521	0.9057	1.2786	2.7285	8.8823	3.662	10.0632	1.9461	1.7224	4.6058	2.541				0.286583	4.40773
5.7188	2.206	1.5102	1.979	15.0675	1.5928	1.4577	4.6945	3.0774	10.1452	1.5761	11.8971	3.1606	0.8819	0.7513	2.3367	8.4824	3.4497	9.6067	2.0738	1.8398	6.6087	2.2166				0.292683	4.39144
5.8379	1.6152	1.3499	2.7892	13.1785	1.8604	1.3151	4.9904	2.982	9.7126	1.305	12.6395	3.2721	1.3566	1.0257	1.863	8.7726	4.8775	14.6961	1.9055	1.5232	8.2111	2.3049				0.298779	4.70664
5.9571	2.1186	1.1752	2.2442	11.9027	1.5654	1.2542	4.9063	3.2827	11.2007	1.1806	13.6489	2.7626	1.1318	1.2568	1.5609	9.1463	5.1356	13.3525	1.8814	1.0796	7.1537	2.1719				0.304879	4.59603
6.0762	1.9767	1.4444	3.0182	9.1414	1.4166	1.028	6.1385	2.6647	11.7333	0.849	14.1003	2.6315	1.1601	0.9463	1.4679	9.1008	6.8632	13.4554	1.3424	1.0946	7.9482	2.3443				0.310975	4.63026
6.1953	1.9949	1.4204	2.4902	8.0593	1.4221	0.9776	7.57	2.6255	11.8685	1.3627	14.0654	2.64	1.5683	1.2226	1.7378	9.9801	6.8636	12.953	1.5875	1.4372	8.7879	2.3176				0.31707	4.77055
6.3145	2.2867	1.3899	2.0393	8.028	1.3253	1.0466	6.9777	2.9638	11.0192	1.2316	14.988	1.831	0.9028	0.9376	1.8978	10.7289	7.4344	9.5453	1.7424	1.4302	8.6615	1.6742				0.323171	4.54919
6.4336	1.7414	1.5328	3.1544	8.9514	1.2983	1.12	6.9898	3.6435	9.015	1.2117	16.6794	2.1171	0.8952	1.0529	2.2587	12.1683	6.8478	8.9328	1.4486	1.2292	6.8815	2.0842				0.329266	4.60245
6.5528	1.8891	1.1206	2.4928	8.6025	1.1969	1.1299	5.5651	3.9878	8.79	1.2693	17.4408	2.4232	0.9576	1.0601	1.5652	14.2515	6.5926	8.1672	1.5888	1.2964	6.141	2.1152				0.335367	4.52925
6.6719	2.1653	0.9418	2.7686	7.3725	1.1204	0.7551	5.9895	3.5461	9.0181	0.92	16.7243	1.9039	0.9912	0.7531	1.9602	15.3837	6.1497	6.0391	1.6366	1.4125	5.2211	1.9062				0.341462	4.30359
6.7911	2.0764	1.2303	2.5935	7.7594	1.4836	1.2063	4.7994	3.0763	9.0488	1.1829	15.8241	1.902	0.7855	0.7672	2.1618	14.1408	5.1979	5.9521	1.4836	1.4041	6.4564	1.7675				0.347563	4.19545
6.9102	1.8904	1.2702	2.9125	7.1394	1.2302	1.4305	4.3038	3.079	7.8644	1.3806	17.1426	1.8289	0.6468	1.04	1.7672	16.9186	5.6446	5.9904	1.3141	1.2155	5.1127	1.6553				0.353658	4.21717
7.0293	1.6352	1.4839	2.7224	7.0606	1.3273	1.1671	4.0889	3.0464	7.2055	1.2089	17.7186	1.2897	0.9791	0.9521	1.6582	15.9875	5.4781	6.7968	1.4559	1.2539	5.9052	1.6829				0.359754	4.18655
7.1485	1.9467	1.0644	2.9051	7.5307	1.4548	1.1248	3.6499	3.4915	7.0647	1.3801	18.7788	1.2963	0.9353	0.8332	1.4076	13.5736	5.3051	7.5877	1.5021	0.946	6.6083	1.788				0.365854	4.18976
7.2676	1.4591	1.3434	3.5869	6.5227	1.4612	0.9697	3.2873	4.1148	5.6206	1.0564	18.5688	1.6574	0.8963	1.0541	1.2865	12.5739	5.6387	7.6161	1.0434	1.0781	6.3648	1.4994				0.37195	4.0318
7.3868	1.4236	1.1727	3.4109	6.4033	1.1436	1.4397	3.3669	4.1676	5.7634	1.1517	19.5459	1.8045	0.9648	0.7266	1.6045	12.1467	5.1445	7.503	1.1171	1.017	7.1704	1.7284				0.37805	4.08713
7.5059	1.2801	0.848	2.5082	5.9804	1.9711	1.382	3.2822	2.5625	6.5205	1.5018	17.2237	1.2735	1.336	0.9795	1.4663	10.93	5.1024	7.9147	1.3482	0.6764	8.4317	1.3264				0.384146	3.90207
7.625	1.269	1.2277	3.2991	5.6134	1.7809	1.2448	3.1022	3.1854	6.031	1.1631	15.5017	1.1733	1.016	0.8025	1.9705	10.2797	5.1858	8.6112	1.5443	1.0476	8.296	1.3881				0.390241	3.85151
7.7442	1.31	1.4601	3.0317	5.2797	1.4849	0.958	2.9769	3.323	4.7111	1.6027	14.5797	0.9293	1.3585	0.6774	1.8849	10.3693	5.8543	11.9893	1.152	0.7738	8.0895	2.0592				0.396342	3.90251
7.8633	1.6445	1.5651	2.8596	5.4481	1.2259	0.9937	3.3836	3.8835	6.4655	1.328	13.1584	1.6465	1.5258	1.0623	1.0621	10.8435	6.0639	14.1094	0.8533	0.9674	7.9771	1.479				0.402437	4.07028
7.9825	1.9556	1.4592	2.9523	5.0923	1.4205	1.2994	3.0448	3.8502	6.0561	1.4469	13.4204	1.3496	1.5115	0.9487	1.3116	9.6836	7.2358	17.1547	0.7525	1.1649	9.8712	0.9977				0.408538	4.2718
8.1016	1.6394	1.3748	3.1975	4.8094	1.2101	1.5522	3.0622	3.5344	6.5393	1.7185	12.1882	1.272	1.3518	1.4837	1.7139	10.755	7.8797	18.6704	0.842	1.1964	10.8618	1.534				0.414633	4.47212
8.2207	1.5241	1.2369	2.6284	5.0199	1.3033	1.3405	3.0136	3.6171	5.6696	1.1092	13.075	1.686	1.6677	1.1419	1.6494	10.6742	8.089	19.713	1.1638	1.1413	10.8314	1.4476				0.420729	4.48831
8.3399	1.5931	1.5404	2.464	4.8305	1.2699	1.278	2.5309	4.6693	4.6821	1.3005	12.1817	1.4961	1.2567	0.9731	1.8185	11.2792	8.4498	16.3662	1.2008	0.917	10.8146	1.213				0.426829	4.27843
8.459	1.4922	1.5282	2.728	5.0999	1.0445	1.2342	2.6968	4.1039	4.4421	1.0023	11.9387	1.437	1.2792	0.9858	1.5399	10.1417	10.1401	14.4705	1.3562	1.1826	11.7777	1.3787				0.432925	4.22728
8.5782	1.6728	1.117	2.6697	4.9515	1.3487	0.9348	3.5042	4.2272	4.2785	1.3842	10.4985	1.613	1.0883	1.1481	1.6728	8.1546	10.4615	13.5033	1.3188	1.3366	14.1287	1.6095				0.439025	4.2101
8.6973	1.3584	0.8439	2.7136	4.0123	1.1688	0.7328	2.8967	4.896	4.606	1.7052	9.7258	1.4691	1.3926	0.7801	1.6943	9.7163	10.5198	13.6013	1.3248	1.1256	14.3628	1.6153				0.445121	4.1937
8.8165	1.6485	1.2275	2.5873	4.1594	1.4335	1.1986	2.8673	4.6943	3.931	1.5283	10.2656	1.6712	1.22	1.1524	1.4846	10.258	11.167	13.0492	1.168	0.8759	17.8388	1.6025				0.451221	4.4104
8.9356	1.2708	0.9706	3.1108	3.3077	1.5743	0.9009	2.7358	4.4896	4.2856	1.997	8.8345	1.7356	1.0635	1.3174	1.5479	9.8453	14.3825	12.4634	1.4817	1.0674	16.5787	1.5485				0.457317	4.3868
9.0547	1.2867	0.9242	2.9807	3.313	1.6588	1.2154	3.0956	4.5919	3.9932	2.139	7.3786	1.138	1.3166	1.2749	1.4768	10.0443	16.9737	12.4436	1.0185	1.4393	19.1578	1.4912				0.463412	4.56145
9.1739	1.6046	1.8824	3.4851	3.717	1.3689	1.1644	2.6297	4.6791	3.7818	1.6082	6.2088	1.3385	1.0753	0.9343	1.303	9.7146	21.5657	10.0745	0.96	1.2081	15.0955	1.4831				0.469513	4.40375
9.293	1.5737	1.5374	3.4354	2.9095	1.5037	0.9898	3.0132	4.9106	3.389	2.1359	5.0014	1.2288	0.9316	1.3532	1.7198	10.2238	23.5974	9.2424	0.806	1.0096	15.7343	1.5472				0.475608	4.44517
9.4122	1.4597	1.304	3.4198	2.8921	1.1959	1.5686	3.3608	5.8344	3.9261	1.8453	3.8302	1.1752	0.9364	1.2726	1.6366	9.7698	25.0466	8.999	1.1671	1.3155	14.1637	1.8836				0.481709	4.45468
9.5313	1.5104	1.362	4.7359	2.5102	1.5485	1.3895	2.921	6.9375	3.7533	1.81	4.0424	1.4209	1.5277	1.4661	1.3591	11.0858	28.1946	7.7665	1.5433	1.1811	12.9784	1.5476				0.487804	4.66326
9.6504	1.696	1.6405	4.1979	2.1678	1.4108	1.2995	3.3039	6.2699	3.3646	1.8274	3.7284	1.2112	1.7399	1.609	1.2765	10.0612	34.7847	7.1543	1.2512	0.9516	11.4408	1.6437				0.493899	4.72867
9.7696	1.4226	1.6985	3.9749	2.3343	1.1983	1.2292	3.4039	7.7082	3.2203	1.9659	3.3767	1.6339	1.3048	1.1645	1.5135	8.197	34.5281	6.4522	1.2588	1.0298	9.3182	1.6131				0.5	4.52485
9.8887	1.4611	1.4187	4.1047	2.444	1.5692	1.2809	3.2588	8.1078	4.2389	1.9085	3.0736	1.075	1.4812	1.0526	1.3876	8.0459	36.181	5.313	1.3732	1.2661	9.1802	1.357				0.506095	4.57177
10.0079	1.8212	1.4459	4.3123	2.2787	1.4953	1.0374	3.6559	8.8128	3.6455	2.2031	2.479	1.4806	1.3703	1.1715	1.2226	6.5558	35.1794	5.5794	1.3068	1.02	7.3448	1.5144				0.512196	4.40603
10.127	1.4502	1.2946	6.386	2.3332	1.3349	0.9997	3.1584	9.3058	3.2395	2.0969	1.8758	1.3382	1.0474	0.9837	0.8423	6.1502	35.2526	4.3372	0.6935	1.1076	7.6476	1.6607				0.518291	4.29709
10.2462	1.3139	1.4507	6.1422	2.0864	1.2619	1.3769	3.2593	10.3518	5.0291	2.1139	2.0624	1.2166	1.312	1.1693	0.896	5.5416	36.6794	3.4186	1.0305	1.0808	7.9362	1.6385				0.524392	4.47127
10.3653	1.5868	1.2627	5.8702	2.5743	1.1148	1.6727	3.8903	10.2406	4.1095	1.9664	1.6589	1.2157	1.5394	1.5143	1.1587	6.1788	36.6915	3.5231	0.9941	1.0213	8.294	1.6635				0.530487	4.53371
10.4844	1.3344	0.7718	6.1736	2.1693	1.3765	1.4456	2.9453	11.1694	3.9975	2.366	2.1145	1.4197	1.2343	1.2086	1.2496	5.6859	30.0715	4.3498	1.1269	1.1444	7.3405	1.3659				0.536583	4.18459
10.6036	1.851	1.6212	5.9701	1.7007	1.4311	1.4978	3.2413	9.1157	4.2187	2.5347	1.9714	1.355	1.3211	1.2372	1.4414	5.8325	27.3534	3.7328	1.3652	0.7189	8.9724	1.0044				0.542683	4.06764
10.7227	1.8747	1.2858	7.1162	1.642	1.412	1.2383	3.5541	8.023	4.0607	2.8749	1.7686	1.1122	1.5227	0.9631	1.4573	5.7455	26.854	3.6546	1.2034	1.4692	9.2327	1.8208				0.548779	4.08572
10.8419	1.7943	0.9337	7.5639	1.667	1.7165	1.4165	4.2038	9.088	3.2039	2.9734	2.0166	1.2706	1.5254	1.7211	1.2541	5.486	24.7059	3.5443	0.9213	1.5642	12.0465	1.4675				0.554879	4.18566
10.961	1.2969	1.455	6.7449	2.0944	1.1982	1.2313	3.4202	8.8631	4.0102	3.3164	1.8621	1.6517	1.0098	1.0398	1.1203	4.6216	22.4092	3.3185	1.5341	1.2755	12.0907	1.2347				0.560975	3.94539
11.0801	1.3723	1.7316	7.997	1.8667	1.4065	1.3624	3.3317	7.7267	4.5634	4.1617	1.7615	1.6864	1.0703	1.2952	0.9904	5.3356	20.3082	3.375	1.1844	1.3979	10.9291	1.7085				0.56707	3.93466
11.1993	1.4207	1.793	7.031	1.6022	1.1829	1.1119	4.0891	7.3598	4.2735	3.6738	1.719	1.2914	1.4151	1.2209	1.1841	4.6768	18.3114	3.1723	1.2169	1.2983	11.2324	1.5529				0.573171	3.71952
11.3184	1.6268	1.7999	8.7959	1.9166	1.3617	1.189	3.6462	7.3196	3.7387	3.2066	1.4775	1.4647	1.288	1.68	1.0168	4.804	19.3969	2.7797	0.9909	1.3481	11.3272	1.2524				0.579266	3.79215
11.4376	1.4499	1.5536	7.8804	1.6229	1.3118	1.2879	3.9422	6.5595	4.2038	5.1433	1.5156	1.3155	1.6105	1.4004	1.1937	3.9815	21.0542	2.8481	1.1406	1.4774	12.1709	0.6895				0.585367	3.87969
11.5567	1.3582	1.8161	8.6605	1.7334	1.4476	1.3332	2.8959	5.4929	3.9938	5.2307	1.3388	1.2233	1.3983	1.2896	1.3402	4.8893	21.8875	2.9003	1.3555	1.4545	11.4412	1.2753				0.591462	3.898
11.6758	1.3434	1.783	9.6695	1.5251	1.4559	1.5122	3.3556	5.9091	5.0929	5.1738	1.4536	1.2815	1.061	1.0584	1.1335	4.3463	23.097	3.1504	1.0356	1.4159	9.5691	1.7759				0.597558	3.96358
11.795	1.9718	1.0932	8.036	1.6597	1.1423	1.1344	4.2011	5.0447	5.3501	6.3889	1.5136	1.3074	1.3312	1.024	1.4014	4.6341	23.2269	3.2297	1.3041	1.0047	9.8421	1.4872				0.603658	3.96948
11.9141	1.5128	1.695	9.0243	1.5063	1.4478	1.304	4.8864	5.0636	5.4702	6.5047	1.6259	0.9647	1.6401	0.9451	1.4629	3.946	19.9588	3.1657	1.0014	1.5165	11.0083	0.9579				0.609754	3.93675
12.0333	1.4136	2.1343	8.4706	1.2776	1.3507	1.0419	5.5034	5.154	6.366	7.9837	1.5512	1.6221	1.86	1.2622	1.1756	3.9778	18.1776	2.5195	1.3056	1.1107	10.5256	1.0643				0.615854	3.94764
12.1524	1.6166	1.5638	9.2114	1.6962	1.6134	1.4162	6.2936	4.8472	5.9828	8.5605	1.0405	1.2256	1.1383	1.4627	1.458	3.8139	18.5653	2.877	1.3335	1.5269	10.181	1.3435				0.62195	4.0349
12.2716	2.3067	1.463	9.0751	1.6116	1.3041	1.6772	6.9426	4.0337	6.5423	8.7666	1.325	1.094	1.3951	1.6385	1.0492	3.4795	17.477	2.5992	1.3496	0.984	11.0539	1.3515				0.62805	4.02361
12.3907	1.8149	2.1708	9.2801	1.2808	1.4252	1.5538	8.1296	3.6482	7.4775	9.5096	1.4962	1.1053	1.102	1.4319	1.1098	3.507	16.5387	2.6763	1.2783	1.0914	9.6582	1.6287				0.634146	4.04156
12.5098	1.7061	1.5073	9.7433	1.3126	1.5099	1.3525	8.5165	3.9728	6.6335	10.4566	1.7445	1.212	1.0671	1.0273	1.2065	3.2759	17.7144	2.6658	1.397	1.1138	8.3028	1.6091				0.640241	4.0476
12.629	1.4916	1.7058	10.1099	1.7475	1.6374	1.4333	7.8784	3.4745	6.6834	10.6717	1.3763	1.4966	1.048	1.2353	1.1392	3.2906	16.3095	3.066	1.2172	1.2404	7.8579	1.6538				0.646342	3.98929
12.7481	1.495	1.6321	10.0486	1.6992	1.4018	1.4278	8.5912	4.1929	7.2729	11.6569	1.3888	1.4709	1.3638	1.7226	1.3338	3.1317	16.5704	2.9085	1.3872	1.3746	9.9825	1.6408				0.652437	4.25882
12.8673	1.6994	2.5642	9.3404	1.3691	1.1361	1.2289	7.9361	3.9538	7.1075	12.2309	1.42	1.0935	0.938	1.3876	1.4827	2.7268	15.9131	2.8815	1.2942	1.3255	9.2924	1.3223				0.658538	4.07473
12.9864	1.7359	1.4816	9.9823	1.4162	1.2433	1.4308	9.5729	3.1922	7.519	12.3513	1.5739	0.8096	0.9868	1.4741	1.7028	3.0087	16.9583	3.3694	0.9676	1.2065	9.7614	1.7446				0.664633	4.24951
13.1055	1.6618	1.6523	8.1181	1.4235	1.4071	1.06	10.5326	3.2409	6.6912	12.8918	1.8026	1.3243	1.3998	1.267	1.2894	2.8141	13.8801	2.9741	1.2039	1.0933	8.8287	1.6262				0.670729	4.00831
13.2247	2.1719	2.0149	9.7139	1.3087	1.4948	0.9873	12.1823	2.9298	7.7654	14.3631	1.444	1.0462	1.5256	1.2673	1.5305	3.6114	15.6039	2.4014	1.2033	1.4028	9.7583	1.4572				0.676829	4.41745
13.3438	2.129	1.8083	8.3217	1.3669	1.3322	1.2877	12.2223	3.6624	7.1826	15.1613	1.5471	1.4964	1.4334	1.2399	1.3559	2.7363	14.6238	2.0696	1.1206	1.6106	9.0448	1.0696				0.682925	4.26465
13.463	1.7369	1.8379	9.887	1.6276	1.482	1.3769	12.9847	3.5302	7.9306	14.1008	1.3537	1.7439	1.3134	1.5244	1.1491	2.5087	14.2467	2.8207	1.1621	1.6	8.2182	1.0054				0.689025	4.32459
13.5821	1.7443	1.7514	9.5058	1.3746	0.9837	1.4325	12.5655	3.312	8.6478	15.0102	1.6064	1.3725	1.105	1.847	1.4508	3.2514	17.0314	3.1056	1.1114	1.1744	8.6977	1.5755				0.695121	4.52986
13.7012	1.7989	2.0639	10.601	1.3635	1.3049	1.612	12.9615	3.5705	8.3471	13.0073	1.7815	1.3322	1.4175	1.555	1.1069	3.2153	15.6724	2.7009	1.0834	1.6198	9.1711	1.1261				0.701216	4.4733
13.8204	2.3647	2.1785	9.539	1.2876	1.7161	1.2907	12.5168	3.1623	7.296	14.5959	1.633	0.9413	1.2322	1.2452	1.5599	4.2465	16.8916	2.7054	1.3012	1.4769	10.141	1.2399				0.707317	4.57099
13.9395	2.2371	2.0602	10.3321	1.151	1.3867	1.2492	13.1504	2.8583	8.2094	16.9643	1.4624	1.3325	1.7147	1.1604	1.0415	3.4186	16.3986	2.4244	1.1648	1.4141	10.6157	1.1131				0.713412	4.67543
14.0587	2.0106	2.1814	10.4872	1.1994	1.2884	1.7217	13.1365	2.8258	9.8372	17.3866	1.7463	1.6349	1.2571	1.821	0.8222	2.8828	16.4906	2.2372	1.267	1.2191	11.0191	1.209				0.719513	4.80369
14.1778	2.5284	2.5828	10.1247	1.4256	1.3157	1.4812	13.4354	3.0409	8.3157	17.6698	2.0047	1.3615	1.8951	1.1479	1.5439	2.8147	13.303	2.8804	1.5815	1.758	9.1331	1.2278				0.725608	4.66235
14.297	2.4936	1.9617	9.0714	1.4432	1.4767	1.7071	14.4938	2.4946	10.5755	16.5914	2.3732	0.988	1.6593	1.2455	0.9321	2.435	13.396	3.0277	1.3337	1.845	10.3933	1.3248				0.731709	4.69375
14.4161	2.1938	1.8982	9.4791	1.5145	1.3265	1.6864	13.7487	2.7892	10.0307	16.594	2.2898	1.366	1.0485	1.4622	1.3307	3.4492	13.8623	2.9549	1.8247	1.3705	9.9495	1.4771				0.737804	4.7112
14.5352	1.6287	2.4467	10.3949	1.621	1.4146	1.345	14.5585	2.7749	9.8831	17.3022	2.7985	1.3629	1.6956	1.1706	1.1375	2.8738	13.7523	3.1767	1.5517	1.251	10.9514	1.3009				0.743899	4.83602
14.6544	1.8021	1.4969	9.6291	1.4864	1.7151	1.3101	14.768	3.3153	11.0329	16.5787	2.2664	1.1194	1.5297	1.4418	1.7628	3.107	14.4359	2.7564	1.6956	1.7171	12.1483	1.3248				0.75	4.92908
14.7735	1.9909	2.3865	9.5535	1.6218	1.4829	1.2386	15.2363	3.0532	11.298	17.1032	2.7109	1.7481	1.5904	2.0176	1.2583	3.3013	13.5956	2.3548	1.435	1.4845	10.9205	1.6163				0.756095	4.95446
14.8927	1.7788	1.8704	9.9297	1.5373	1.4801	1.7387	14.2264	3.0284	12.1848	16.3244	2.8133	1.6128	1.7766	1.9812	1.4892	3.0653	16.3191	2.1485	0.8064	1.3348	10.6476	1.1698				0.762196	4.96653
15.0118	2.0588	2.4009	10.2349	1.227	1.1292	1.5608	14.8769	3.2814	13.5575	17.7478	3.8383	2.099	1.3994	1.2246	1.4814	3.2925	16.7995	2.3771	0.8723	1.7671	11.8552	1.1891				0.768291	5.28503
15.1309	2.687	2.8605	10.0188	1.48	1.6456	1.104	15.0426	4.1102	13.4596	19.7916	4.7545	1.7172	1.6303	1.1378	1.3968	3.6033	16.138	3.0194	1.5216	1.2952	13.2221	1.3049				0.774387	5.58823
15.2501	2.8784	3.361	8.9726	1.4616	1.9076	1.3629	16.1474	3.936	13.6252	19.6776	5.9123	1.9671	1.923	1.0953	1.4174	3.1427	16.0025	2.7151	1.3209	1.3009	12.7134	1.4608				0.780487	5.65008
15.3692	2.5418	3.4255	9.1929	1.4431	1.775	1.4566	15.6516	3.3752	11.7476	22.9028	8.5579	1.4495	1.4621	1.1095	1.1195	3.815	14.7753	2.4739	1.3411	1.8874	12.0455	1.2108				0.786583	5.67089
15.4884	2.3544	3.8724	8.9717	1.3165	1.6861	1.9321	14.1735	3.6468	11.2109	24.7668	11.1101	1.323	1.3017	0.9447	1.4213	3.4429	15.2709	2.5591	1.2329	1.5023	10.0205	1.0856				0.792683	5.68846
15.6075	3.1798	4.2816	8.8937	1.0364	1.9279	1.815	15.1297	3.8679	13.0816	23.471	15.1244	1.286	1.5052	1.2819	1.478	3.9585	14.6245	2.6977	1.3042	1.3298	10.2635	1.2727				0.798779	6.03686
15.7266	3.1196	5.6468	8.9765	1.4675	1.9784	2.3789	14.8003	4.4747	12.4834	25.0077	17.6912	1.7457	1.853	1.5194	1.6204	3.7658	15.2636	2.5557	1.7171	2.0114	9.7897	1.2609				0.804874	6.4149
15.8458	3.7167	6.7083	8.2987	2.0539	1.6142	2.2681	14.9812	4.94	13.0374	27.7988	21.3298	1.7655	1.6373	1.4716	1.6333	4.3974	14.1491	2.4038	1.944	1.327	9.6237	1.1106				0.810975	6.73684
15.9649	3.4209	7.7984	7.7268	1.7481	1.467	2.4649	16.1066	6.2102	12.7975	29.1401	21.6036	1.7846	1.5233	1.7892	1.7282	4.7088	15.2066	2.5984	1.3239	1.5755	9.6996	1.2485				0.81707	6.98503
16.0841	4.5501	9.2194	6.9618	1.6298	1.6814	3.4168	15.3393	5.7125	14.6049	29.1751	18.7971	2.2988	1.0962	1.1049	1.3253	5.7971	17.2214	2.697	1.4753	1.8213	9.6761	0.9545				0.823171	7.11619
16.2032	5.3503	10.4539	7.1237	2.1939	2.0251	3.8308	16.1968	5.8386	14.9481	32.142	15.6783	2.835	1.3675	0.9093	1.3756	7.4455	15.8345	2.3134	1.3163	1.7021	9.4828	1.4494				0.829266	7.35513
16.3224	5.4653	12.5035	6.7407	1.9692	1.7957	5.1667	17.8011	5.8571	16.2631	25.7745	12.6399	3.9433	1.4004	0.9242	1.2748	6.1294	16.9227	2.7824	1.6643	1.5723	10.2043	1.7026				0.835367	7.29534
16.4415	6.4765	14.8676	6.251	1.9376	1.6995	7.7442	20.2897	5.706	18.3019	23.2904	9.9174	5.4056	1.6362	0.9195	1.0492	5.9285	19.0064	2.7245	1.9257	1.958	10.8968	1.3333				0.841462	7.69389
16.5606	8.383	15.472	5.1056	2.1246	1.6181	10.7179	22.2967	8.272	21	18.7091	8.3246	9.9941	1.4852	1.0245	1.2067	6.6253	18.6609	3.1699	1.8134	1.7213	10.6247	1.2652				0.847558	8.16431
16.6798	9.5277	17.3668	4.477	2.5849	1.8643	13.8432	24.0979	9.0009	21.1302	13.0071	5.6038	14.9238	1.6205	1.4948	1.591	8.0402	18.6649	2.8206	2.0595	2.2072	9.9762	1.4843				0.853658	8.51758
16.7989	10.6454	17.5226	4.092	2.1014	2.0409	16.6201	26.5715	10.0341	21.6092	11.9913	4.6529	20.0754	1.7705	1.516	1.5707	8.8881	18.6113	3.078	1.5722	2.799	10.565	1.0495				0.859754	9.0626
16.9181	13.599	17.438	3.1794	2.7697	2.3097	16.9299	30.2309	11.6797	20.0557	10.1588	4.9228	26.1926	1.6253	1.3065	1.5039	8.4632	18.5558	3.7938	1.2609	2.6833	10.1246	1.4479				0.865854	9.55597
17.0372	17.2789	18.9571	3.7078	2.9268	2.5392	20.7734	30.7254	15.1257	18.432	10.2201	2.9932	29.4446	2.0157	1.2328	1.5782	11.1063	16.7171	3.3738	1.7216	2.6382	11.3211	1.0692				0.87195	10.2681
17.1563	22.0793	19.5148	3.953	2.9525	3.0832	23.4936	28.7658	16.2082	15.8308	8.3387	2.729	32.0053	2.0146	1.1966	1.3884	13.4606	15.2923	2.8405	1.8503	2.1969	10.2757	1.3843				0.878045	10.4934
17.2755	27.6902	24.2399	4.557	3.3643	2.6389	28.133	30.0456	15.4355	14.2399	6.8841	2.7382	33.0136	2.1283	1.3182	1.5334	13.9131	14.0938	3.1298	2.3986	2.0935	10.8873	1.638				0.884146	11.187
17.3946	31.3453	27.177	4.5032	3.104	4.0454	34.0017	29.7023	16.5057	11.9026	4.7013	2.8069	26.0052	2.378	1.1499	1.6487	13.6158	13.7491	3.8742	1.6167	2.434	10.6223	1.1377				0.890241	11.274
17.5138	34.8992	29.6898	6.1785	3.4197	5.6416	36.7251	26.5022	18.2772	10.5999	4.8667	2.7391	19.172	2.0528	1.4018	1.7057	12.8901	11.7742	3.552	2.0489	2.0534	10.5111	1.3525				0.896342	11.2752
17.6329	34.734	28.9758	7.4013	3.3224	6.1556	31.8814	23.7608	20.5415	8.5089	4.7042	1.9802	14.5167	2.7637	1.6084	1.66	10.9524	11.521	4.2566	1.472	2.6959	11.0336	1.7704				0.902437	10.7371
17.7521	28.6027	30.9136	9.5288	4.2622	8.5394	23.0636	19.0601	22.2829	7.6021	4.9732	1.8086	11.9795	3.9949	1.3583	2.0025	11.4768	11.8565	5.4928	1.3586	2.3888	10.9762	1.5148				0.908538	10.229
17.8712	20.5795	25.1685	12.1997	4.9755	10.8725	15.2443	13.7457	23.4413	6.2406	3.4833	1.7239	8.6005	4.3512	2.0446	1.463	10.8477	11.0109	6.8631	1.4976	2.2582	10.8662	1.6793				0.914633	9.0526
17.9903	13.9061	19.3669	12.4345	5.2598	14.6829	10.8813	9.902	24.3424	4.5231	3.2632	1.3542	6.0938	5.9381	2.2216	2.0944	10.9577	10.7101	8.2465	1.7698	2.3191	12.5286	2.0005				0.920729	8.39985
18.1095	11.432	14.6244	13.467	5.3295	14.9425	8.7675	7.4402	21.8928	2.9745	3.7032	1.1187	4.8668	9.616	2.7861	1.6599	11.3406	11.1983	6.4061	2.1106	2.5387	11.8415	1.6024				0.926829	7.8027
18.2286	7.8833	10.4535	11.0339	6.1973	17.9145	5.8539	5.1052	18.9616	2.6107	2.7904	0.8229	4.4533	14.7734	3.4832	2.15	11.0877	12.4693	5.5725	1.6732	2.9165	11.6364	1.6137				0.932925	7.33893
18.3478	5.2014	7.982	8.0091	6.4049	19.4434	4.8958	4.3837	15.0869	2.4717	1.9593	0.6847	4.0164	19.2308	3.6354	2.3968	11.706	15.2399	5.38	1.9216	2.9767	10.6943	1.5681				0.939025	7.05859
18.4669	4.5069	6.4589	5.5669	5.935	15.5777	4.0672	4.2569	11.5457	2.5435	1.6886	0.8311	3.2643	23.6951	5.6044	1.734	10.2252	19.6484	5.5913	2.0105	2.9238	9.59	1.7571				0.945121	6.77375
18.586	3.568	4.9677	3.6726	4.5471	12.502	4.2391	3.0088	9.8798	1.6451	1.6509	0.958	2.8681	31.7819	8.4856	1.8405	10.4728	19.6329	5.2832	1.7295	2.7582	8.7167	1.6385				0.951216	6.62941
18.7052	2.7952	3.9507	2.6578	3.9363	8.8322	3.5094	3.033	6.3058	1.3124	1.6064	0.4457	2.3158	31.4859	12.3908	2.7748	13.9685	19.4304	4.801	2.0044	3.0049	7.9042	2.0366				0.957317	6.38646
18.8243	2.6646	3.1957	2.215	3.6144	7.1133	2.2021	3.0645	4.7042	1.9074	1.7824	0.7738	3.0081	35.2669	18.1862	2.8296	15.4679	19.5531	5.4295	1.8852	3.8409	7.6777	2.0884				0.963412	6.74868
18.9435	2.1005	3.2911	2.6832	2.6071	5.2261	2.0097	2.7831	5.2418	2.2713	1.4197	0.5822	1.6203	28.5465	22.0085	3.4456	18.9989	21.4482	5.6719	2.2971	3.9107	7.599	2.2167				0.969513	6.72633
19.0626	2.2034	2.6746	2.3548	2.2776	4.1194	2.21	2.3548	4.16	1.3486	0.9068	0.4193	1.2104	22.3456	27.9664	3.9466	20.3374	23.3014	5.803	2.7123	3.1752	6.928	1.8852				0.975608	6.57458
19.1817	1.9979	1.9546	1.8547	1.5113	3.7757	2.3694	2.5702	3.2204	1.5167	0.8239	0.5044	1.5006	15.6513	32.0938	4.7721	22.4636	25.101	6.1071	2.4365	3.1695	6.492	2.5707				0.981703	6.56625
19.3009	1.7345	1.8726	1.8092	1.8743	3.3058	1.7031	1.8828	2.7887	1.3636	0.8987	0.3586	1.206	12.4577	33.1994	6.003	26.732	23.3981	5.4859	2.5379	3.9973	6.9136	2.2842				0.987804	6.53668
19.42	1.3264	1.9841	1.2389	1.7556	3.053	1.6908	1.2355	2.3269	1.271	0.6635	0.2829	1.1615	7.6684	30.7031	8.7697	23.8005	20.4247	5.9546	2.5696	4.5291	6.1802	3.1108				0.993899	5.9864
19.5392	0.8014	1.4056	1.4309	1.8421	2.4799	1.5761	1.4592	2.1497	0.8896	1.0511	0.3031	1.0503	6.6389	25.6362	11.1339	23.1664	13.7414	6.7946	2.5278	5.4068	7.3861	3.9794				1	5.58411

## Sheet: Image21
X0	Y0	Y1	Y2	Y3	Y4	Y5	Y6	Y7	Y8	Y9	Y10	Y11	Y12	Y13	Y14	Y15	Y16	Y17	Y18	Y19	Y20	Y21	Y22	Y23	Y24				Ap-Basal to 1	Average intensities
0	8.7972	15.6488	13.3162	15.4038	28.4099	24.1815	26.309	19.0683	19.1515	20.4058	20.8774	14.0631	28.039	24.21	30.205	12.497	27.252	40.352	74.35	73.49	40.81	74.844	80.085	83.367	49.9807				0	34.6046
0.1191	10.0208	23.2264	16.6501	18.1822	29.7494	25.5546	26.623	21.2469	21.0835	20.0643	21.6861	14.7767	29.55	23.839	37.447	15.526	29.357	47.791	77.579	81.984	44.287	83.258	81.423	82.321	55.4678				0.00537448	37.5478
0.2383	13.3042	26.5623	19.1221	20.9063	32.5785	21.6849	23.8753	22.8489	21.32	22.9187	25.8811	17.3353	33.086	26.812	41.723	16.774	39.937	55.777	88.414	85.977	45.136	92.911	88.492	85.297	60.2718				0.0107535	41.1578
0.3574	14.4783	37.6476	25.272	26.5781	35.6341	23.8748	24.321	26.5025	25.472	23.1106	30.2294	21.242	37.862	29.307	52.199	17.924	52.673	65.146	102.374	95.83	50.052	98.332	99.467	85.947	63.3262				0.0161279	46.5921
0.4766	20.568	45.5205	27.5083	26.8003	31.7692	27.5023	28.0392	30.5329	28.8478	25.8687	34.147	27.7146	43.662	33.611	62.825	25.297	66.593	70.155	122.188	102.255	53.969	124.313	108.854	95.659	66.8101				0.0215069	53.2404
0.5957	27.1578	54.3651	32.7238	31.6445	33.1692	29.7685	30.6746	37.0934	36.51	27.1971	41.9889	31.6089	52.442	35.13	72.061	30.142	83.654	78.589	142.044	113.417	62.769	137.88	126.673	104.78	68.1747				0.0268814	60.8663
0.7148	36.2924	51.4806	37.4381	37.256	30.5837	32.9827	33.4279	40.8055	42.8087	32.2373	50.2452	41.1416	64.475	42.186	90.448	43.51	101.622	91.77	154.841	114.517	73.907	160.575	144.586	102.217	75.5147				0.0322559	69.0747
0.834	47.8392	53.2849	46.0585	39.9859	30.4852	35.2912	36.0747	39.3869	45.6553	36.1016	61.201	54.4987	83.639	55.777	104.144	58.286	105.719	102.262	168.882	121.875	88.973	174.373	152.517	111.13	77.8847				0.0376349	77.253
0.9531	52.522	45.6794	46.0742	43.8941	32.3337	32.2439	36.0257	42.994	52.1149	43.6552	71.2776	64.0034	99.799	66.366	112.328	79.709	122.381	115.647	163.125	120.719	101.893	179.639	162.127	111.006	83.2978				0.0430093	83.2342
1.0723	55.7022	39.3641	51.3399	45.0722	28.7717	31.8742	35.6417	40.3376	46.8399	50.552	80.0834	72.4244	112.018	78.213	112.816	94.438	134.655	127.2	158.011	118.17	117.134	183.351	171.66	115.025	90.9351				0.0483883	87.6652
1.1914	55.3096	33.6651	46.8725	46.1745	27.5374	29.0019	32.7962	38.4542	41.5933	61.236	86.0473	80.8636	121.316	86.264	110.412	106.696	143.219	141.026	149.346	120.947	135.357	174.192	171.01	123.303	91.014				0.0537628	90.1461
1.3106	57.665	30.5714	39.2454	44.7436	27.4807	25.4613	29.1541	33.2137	41.4882	61.8774	83.2929	85.3555	112.1	94.559	103.777	112.879	130.607	149.638	144.277	117.622	147.866	160.739	176.727	118.779	92.7185				0.0591418	88.8735
1.4297	52.4353	25.6322	35.1731	41.9017	28.6	25.0126	25.6457	26.7967	36.8833	63.0172	79.3071	83.9125	99.675	100.987	95.05	119.565	121.785	154.035	132.041	119.665	153.709	130.429	172.056	115.169	88.7822				0.0645163	85.0906
1.5488	42.598	21.9524	27.0993	40.5918	22.6681	20.8022	21.1812	21.671	33.6195	57.7302	77.734	79.4241	85.025	100.805	78.18	109.452	108.622	136.373	117.209	107.344	158.16	99.475	161.168	102.035	92.1725				0.0698908	76.9237
1.668	37.9587	17.908	20.5861	36.9485	21.3702	19.7514	17.6996	17.5954	28.6734	53.6361	65.2154	67.3356	68.678	97.936	64.451	100.737	89.79	116.724	106.561	90.779	145.874	66.505	145.457	95.584	87.4664				0.0752697	67.2488
1.7871	35.0513	14.7207	16.6398	33.2864	17.6371	19.1549	16.7088	15.6657	23.1742	44.8519	50.7055	61.1347	52.924	87.408	51.117	85.486	68.93	96.322	91.012	72.062	125.5	41.007	122.36	82.916	81.3683				0.0806442	56.2857
1.9063	28.8394	13.6444	13.7837	28.2214	18.0276	17.1163	14.4143	12.6148	17.6243	38.7689	37.3016	53.3856	38.876	72.053	38.018	71.545	53.122	81.57	80.22	53.928	101.535	30.029	91.67	73.674	76.0288				0.0860232	46.2404
2.0254	24.8366	11.856	13.0861	21.7225	16.0209	16.2828	12.0274	10.9401	14.5386	35.5973	29.991	45.2197	27.833	52.097	29.579	59.947	45.777	68.221	64.539	34.139	77.316	26.654	69.887	65.399	65.8248				0.0913977	37.5733
2.1445	18.7586	9.0891	10.3834	20.8661	14.7857	13.361	9.8084	8.3368	11.8452	30.0359	20.8727	35.43	20.637	42.196	21.19	49.652	36.768	55.963	48.177	26.969	59.179	21.796	50.471	53.033	62.656				0.0967722	30.0904
2.2637	14.414	8.4209	9.9061	15.8604	12.1976	11.783	9.2359	7.8372	11.2502	24.5431	17.5108	27.4206	16.774	33.125	16.73	42.372	31.72	49.649	35.453	23.266	49.498	19.255	43.923	44.096	56.3085				0.102151	25.302
2.3828	12.3445	6.5447	8.7499	14.0978	12.8292	10.0339	6.2367	7.3386	8.498	20.8336	13.5313	22.0365	11.622	30.672	13.942	38.877	28.047	37.768	26.552	21.136	48.667	17.35	34.977	37.627	51.6734				0.107526	21.6794
2.502	11.3045	6.942	8.3875	15.5253	10.3301	8.6714	5.9822	7.2727	7.8752	18.6906	9.1871	18.3542	9.639	25.564	12.361	32.7	24.177	28.647	20.362	19.695	44.814	14.499	30.634	30.633	50.0291				0.112905	18.8911
2.6211	8.594	5.0584	7.5432	13.0569	8.4835	6.568	6.0351	5.9149	7.8682	16.3798	6.1976	14.4998	7.032	19.377	13.993	27.252	20.941	24.744	14.288	16.612	40.503	13.855	25.698	24.188	48.1599				0.118279	16.1137
2.7402	8.5114	4.4419	5.8983	11.9741	6.8424	5.9057	6.0915	5.1648	6.0009	13.6699	5.0443	12.0177	5.936	17.802	9.591	23.569	20.941	24.212	8.71	16.334	38.853	12.33	23.908	23.057	43.5148				0.123654	14.4128
2.8594	6.534	3.7917	6.5729	12.4547	7.6274	5.6239	5.5896	5.9506	5.9955	12.7441	3.7647	10.3499	4.179	14.769	8.562	22.031	15.734	20.004	7.729	14.521	32.947	10.732	20.63	19.84	38.9743				0.129033	12.7061
2.9785	5.9063	3.9795	5.2142	10.7341	7.4901	5.7686	4.5998	5.3594	5.5352	12.167	3.2811	8.479	4.211	14.46	10.076	16.954	12.785	17.078	7.009	10.936	29.849	10.087	19.993	17.629	38.3525				0.134407	11.5174
3.0977	4.6586	2.9896	4.5874	11.9014	7.6578	4.6774	3.9188	4.6654	5.1067	8.9569	3.4963	5.9588	3.626	14.054	8.069	13.755	10.775	16.529	6.805	9.582	27.681	10.181	17.673	16.641	33.4856				0.139786	10.2973
3.2168	4.4681	3.1568	4.6395	10.2851	6.8284	5.2996	5.3594	4.589	5.0708	9.6773	2.9317	5.4823	4.047	11.717	8.211	11.95	11.029	15.116	5.108	8.021	25.021	7.654	13.494	15.581	33.6224				0.14516	9.53438
3.336	3.7813	3.1649	4.6404	9.8737	6.3151	3.8448	4.4741	3.487	3.6492	8.1083	2.7586	4.5744	3.267	9.401	6.774	10.814	10.786	12.819	5.204	7.319	22.198	8.136	11.683	15.158	28.2204				0.150539	8.41805
3.4551	3.5081	2.6974	3.7744	9.6005	6.417	4.0155	3.8272	3.6842	3.2672	7.0925	2.7691	3.2482	2.956	9.187	6.845	10.112	8.797	9.266	3.663	4.953	20.946	7.969	10.354	14.784	24.5246				0.155914	7.53032
3.5742	3.2498	2.3308	3.6151	9.5581	5.6809	4.2467	3.9174	3.1008	3.5781	8.1891	1.9219	3.6212	3.311	9.588	6.026	7.54	6.123	8.87	4.782	4.777	17.043	8.13	9.879	11.82	22.142				0.161288	6.92164
3.6934	3.3179	2.7431	2.7071	8.304	5.4559	3.9041	3.9337	3.2222	3.0751	6.9579	2.8901	3.1371	3.282	9.012	4.056	8.063	7.35	8.567	4.544	4.331	15.88	7.98	8.341	8.926	20.8495				0.166667	6.43319
3.8125	3.6448	2.6302	3.4355	7.0999	4.9749	4.0669	3.4133	3.0192	3.4071	6.6759	2.4723	2.8917	3.411	9.08	3.656	7.754	5.947	7.413	3.643	4.077	13.024	7.075	7.107	6.956	18.4848				0.172042	5.81438
3.9317	2.9643	2.2084	2.0545	8.2086	5.3143	3.5737	3.0994	2.3918	3.0821	7.0779	2.294	2.6354	2.745	10.04	3.711	6.37	5.861	6.569	3.146	3.73	11.504	5.325	7.789	6.224	16.8783				0.177421	5.39187
4.0508	3.0246	2.3538	2.6362	7.3871	5.4544	3.448	2.9617	2.6028	2.8494	6.9029	2.5687	2.8861	2.77	7.363	3.845	5.202	5.238	6.91	4.059	3.774	10.748	6.034	6.438	6.28	16.8216				0.182795	5.22233
4.1699	2.4649	1.6724	2.0706	6.774	4.7127	3.2615	2.9152	3.0274	3.9273	5.59	2.2122	2.7686	2.349	7.007	3.467	5.828	4.408	5.312	3.771	3.762	9.881	5.657	6.513	5.321	16.0543				0.18817	4.82908
4.2891	2.2111	2.073	2.1189	5.398	4.9144	3.0152	3.2379	3.1737	2.4577	4.9041	2.3838	2.5247	2.091	5.297	2.935	4.526	3.839	4.797	3.526	3.961	9.635	6.004	5.693	4.974	15.0286				0.193549	4.42876
4.4082	2.3688	2.1283	2.4771	5.2185	4.3852	2.9612	3.0063	2.9054	2.6224	5.2639	2.5452	2.0973	2.074	4.63	3.249	3.538	3.155	4.2	3.298	4.094	7.991	4.836	5.007	5.096	15.6468				0.198923	4.19178
4.5274	2.7976	1.9517	2.01	6.8309	4.2691	2.7994	2.3279	2.0493	2.4006	5.2151	1.5156	1.9922	2.571	3.836	2.975	3.58	3.581	4.116	2.948	3.785	7.294	5.357	5.181	5.307	13.6454				0.204302	4.01343
4.6465	2.3625	1.4675	1.8999	6.4053	4.1277	2.9814	2.8081	1.6499	2.5474	4.8604	1.5868	1.8627	3.194	3.856	2.512	3.532	3.065	3.376	2.822	3.824	7.694	4.986	3.699	5.061	15.1408				0.209677	3.89286
4.7657	2.1236	1.5419	2.2537	6.0635	4.1513	3.1623	2.6741	1.6576	2.0929	4.835	1.8219	2.5407	2.604	4.125	2.086	3.943	3.251	2.609	3.177	3.581	6.967	4.802	4.111	5.228	13.5697				0.215056	3.79889
4.8848	1.8511	1.458	1.7867	5.777	2.9675	2.5933	2.2486	1.7242	2.2029	4.906	2.0544	2.1551	1.788	3.76	2.137	3.021	2.077	2.679	2.704	3.998	6.331	3.775	3.719	4.74	12.0869				0.22043	3.38163
5.0039	1.7236	1.7661	1.952	5.683	2.7928	2.6275	1.9899	1.8851	1.9134	5.7566	2.0751	1.5056	2.294	3.678	2.626	3.13	3.485	3.002	2.008	4.612	6.376	4.132	4.59	3.711	11.9138				0.225805	3.48914
5.1231	1.5339	1.7587	1.8493	5.5462	3.0546	2.7046	2.7343	2.1004	1.8012	6.4978	2.1388	1.7852	2.188	3.643	2.273	2.571	2.937	3.474	2.222	4.923	5.971	4.044	3.873	4.58	12.0896				0.231184	3.53174
5.2422	1.7474	2.0734	1.7426	4.9959	3.0922	2.1547	1.8754	1.5291	2.0659	4.8469	1.9085	1.6842	2.776	3.281	2.214	3.239	2.927	2.228	1.829	4.963	5.805	3.164	3.995	3.737	10.8069				0.236558	3.22724
5.3614	1.4472	1.7836	1.9612	5.1286	2.3958	1.7733	1.8014	1.7908	1.8695	5.2179	1.8917	1.9847	2.567	4.486	2.808	2.615	2.603	2.457	2.193	4.439	5.991	3.248	3.771	3.743	10.4051				0.241937	3.21487
5.4805	1.958	1.6111	2.0252	5.3822	3.0509	2.2352	2.9884	1.7209	2.0448	5.2237	1.7512	2.2025	2.057	4.73	2.137	2.576	2.171	2.701	2.356	3.866	4.408	3.456	3.422	2.616	11.5142				0.247312	3.20817
5.5996	2.1819	1.7278	1.9412	5.814	2.4954	2.0744	2.2101	1.6255	1.9922	6.7227	1.7181	2.0682	2.049	4.569	2.228	2.644	2.598	2.218	2.092	3.942	5.062	3.649	3.825	4.18	10.5996				0.252686	3.28908
5.7188	1.6161	1.4844	1.7821	6.0917	2.3995	1.9159	2.1434	1.4406	2.288	5.7335	1.8873	1.4444	1.364	3.638	3.405	2.279	2.077	2.222	2.13	4.781	4.356	3.423	2.987	3.739	11.6522				0.258065	3.1312
5.8379	1.7671	1.5749	1.5227	7.6484	2.8673	2.4683	2.0686	1.7449	1.4707	6.3898	1.5456	1.4828	1.725	4.076	4.509	1.937	2.265	2.302	2.341	5.27	4.445	2.174	3.118	3.325	11.739				0.26344	3.27108
5.9571	1.9018	1.345	1.9266	5.9399	2.3104	1.9181	1.992	1.5639	1.4955	6.8023	1.7127	1.7487	1.732	3.427	4.624	2.428	2.512	2.38	1.907	5.648	5.19	2.573	3.028	3.272	10.4278				0.268819	3.19223
6.0762	1.6617	1.4736	1.9109	5.9047	2.7613	1.838	1.8977	1.4317	1.1951	6.6347	1.873	2.0582	2.344	3.176	4.508	2.345	2.186	2.681	2.258	5.815	4.856	2.474	2.766	3.466	10.8316				0.274193	3.21389
6.1953	1.9717	1.3283	1.8605	7.4787	2.3446	2.6656	1.9003	1.5297	1.8164	6.6781	1.8571	1.418	1.668	3.781	6.284	1.802	1.84	2.437	2.485	5.393	4.856	2.223	2.91	2.51	9.7828				0.279568	3.23283
6.3145	1.8323	1.5026	1.8621	8.462	2.4181	2.4519	1.8293	2.1086	1.3047	7.8713	2.0068	1.5085	1.765	3.517	6.787	2.268	2.25	2.447	2.654	5.997	5.011	2.64	2.9	2.293	8.2352				0.284947	3.3569
6.4336	1.2327	1.6916	1.4104	10.6505	1.9711	2.395	1.4935	1.4551	1.6134	7.105	1.6025	1.3686	1.605	3.375	6.541	2.436	1.934	1.924	1.765	5.692	3.886	2.219	2.804	3.169	9.656				0.290321	3.23982
6.5528	1.1872	1.5761	1.7609	9.117	2.2328	2.034	1.7291	1.4443	1.6003	7.4964	1.488	1.6062	1.064	3.141	6.696	1.94	1.986	2.438	1.948	5.59	4.243	1.966	2.082	2.824	9.5655				0.2957	3.15023
6.6719	0.9166	1.2415	1.3397	9.5561	2.0694	1.5502	1.4551	1.1078	1.3274	5.3631	1.8007	2.1337	1.827	3.036	5.882	2.508	1.646	1.994	1.473	5.631	4.103	2.477	2.262	3.109	8.89				0.301074	2.98797
6.7911	1.4632	1.0969	1.5212	7.4951	1.8781	1.8344	1.7807	1.285	1.6579	6.7924	1.6249	2.0566	1.473	2.248	6.168	2.827	2.13	2.412	1.994	5.161	3.54	2.534	2.656	2.893	8.8402				0.306453	3.0145
6.9102	1.5219	1.3466	2.2773	9.5462	2.1857	1.9243	1.6712	1.486	1.4363	6.5791	1.8139	1.7403	1.873	2.637	5.578	1.998	2.016	2.126	1.455	4.631	4.329	1.81	2.118	2.569	7.6535				0.311828	2.97289
7.0293	1.373	1.4251	1.7452	10.4959	1.7512	1.4998	1.3795	1.3073	1.6554	6.9972	1.9141	1.4111	1.556	3.416	5.367	2.531	2.047	1.912	2.224	4.793	4.232	2.486	2.454	2.034	7.5241				0.317202	3.02124
7.1485	1.3215	1.435	2.1264	10.8974	2.2213	1.692	1.7724	1.5434	1.5998	6.2034	2.38	1.2929	1.74	2.334	4.856	2.159	2.359	1.811	1.831	4.743	4.033	2.076	2.188	2.49	9.4077				0.322581	3.06053
7.2676	1.555	1.6442	1.5726	12.1396	2.3851	1.925	1.3094	1.2902	1.3467	5.7832	2.0565	1.7441	1.369	2.947	3.41	2.09	2.184	1.804	2.314	5.11	4.393	2.567	2.594	2.732	8.6008				0.327956	3.07466
7.3868	1.5262	1.2671	1.9717	14.9884	1.4239	1.4934	1.2362	1.2499	1.4764	5.222	2.0937	1.707	1.717	3.239	3.772	1.869	1.729	1.617	2.057	6.45	5.202	2.048	2.973	2.346	7.5712				0.333335	3.12984
7.5059	1.7167	1.6568	1.8298	13.62	2.0672	1.5118	1.2754	1.7572	1.5282	5.5948	1.4036	1.9889	1.658	2.974	3.27	2.727	1.996	2.109	1.882	6.163	5.257	2.333	2.136	3.187	7.8022				0.338709	3.17778
7.625	1.6944	1.3094	1.2768	15.5491	1.3414	1.7814	1.2584	1.2952	1.1508	3.8143	1.5572	1.6233	2.01	3.354	3.548	2.106	2.206	2.305	1.814	6.236	4.501	2.34	2.394	2.986	7.5637				0.344084	3.08062
7.7442	1.4677	1.3453	1.9338	16.6677	1.9327	1.9798	1.8813	1.2253	1.4319	5.0747	1.6052	1.6408	1.464	2.803	3.021	2.399	1.502	2.192	1.506	7.591	4.428	2.823	2.38	2.374	8.1129				0.349463	3.23128
7.8633	1.3206	1.4935	2.4085	16.8497	1.883	1.7321	1.2412	1.6159	1.4609	5.8355	1.8925	1.8045	1.578	2.849	2.585	1.944	1.557	1.814	1.796	7.523	4.567	2.389	1.978	2.837	9.4622				0.354837	3.29668
7.9825	1.8206	1.6154	2.0565	14.3438	1.5202	1.761	1.2738	0.8846	1.2974	5.7919	2.0741	1.5554	1.84	2.73	3.677	2.023	2.029	1.772	2.263	8.427	4.789	2.624	2.52	1.901	10.6137				0.360216	3.32814
8.1016	2.0085	1.4322	1.8022	13.5038	1.3208	1.8535	1.3726	1.4182	0.9351	5.2851	1.8985	1.5603	1.696	2.77	3.316	2.279	1.779	1.9	2.248	9.807	5.218	2.512	2.275	2.074	10.7065				0.365591	3.31885
8.2207	1.5184	1.743	1.529	14.1344	1.2741	1.1351	1.0249	1.1028	1.0183	5.9274	1.6195	1.9289	1.925	2.963	2.974	2.748	1.789	2.144	2.191	10.829	5.488	2.256	2.007	2.783	11.7169				0.370965	3.43079
8.3399	1.7656	1.473	2.2194	15.508	1.7771	1.2922	1.1654	1.0987	1.284	5.9687	1.8168	1.4538	1.681	2.702	3.442	2.032	1.65	2.322	1.713	11.073	5.988	3.382	2.153	2.411	10.8678				0.376344	3.52958
8.459	1.1587	1.1966	1.4429	17.1774	1.2635	1.4858	1.5759	1.6789	1.246	6.5403	2.1666	1.0869	1.477	2.61	4.065	1.997	1.924	2.125	1.584	13.083	4.736	2.664	2.585	2.325	11.603				0.381719	3.6319
8.5782	1.7434	1.2472	1.7733	17.5836	1.3912	1.5098	1.4228	1.4891	1.3736	5.945	2.17	1.9506	1.649	3.105	3.118	2.167	2.044	2.405	2.216	13.949	4.904	2.348	1.704	1.782	11.7864				0.387098	3.71108
8.6973	1.7843	1.6851	2.067	18.3051	1.3322	0.9252	1.0545	1.5028	1.3005	6.4914	2.0163	1.9378	1.585	3.118	4.279	2.593	2.113	2.019	2.303	15.604	4.924	2.445	2.123	2.024	10.9003				0.392472	3.8573
8.8165	1.4221	1.6365	2.3047	18.6854	1.9937	1.4252	1.2452	1.1604	1.7091	8.0899	1.8676	1.4115	1.644	2.907	4.52	2.173	2.374	2.377	2.166	18.857	5.707	2.685	2.443	2.16	11.1116				0.397851	4.16304
8.9356	1.9594	1.7362	2.2849	18.7362	1.6161	1.2716	1.2961	1.7084	1.5942	8.1766	2.3557	1.5802	1.244	3.504	4.294	2.096	1.609	2.394	2.023	18.768	5.956	2.382	1.583	2.12	10.4379				0.403226	4.10906
9.0547	1.5578	1.9175	2.3929	19.6339	0.906	1.5271	1.5475	1.8962	1.2828	8.6757	2.1748	1.2473	1.362	3.315	5.094	2.327	2.332	2.178	2.135	21.189	4.706	2.995	2.639	1.908	9.7675				0.4086	4.26828
9.1739	1.3858	1.5742	2.4509	20.0629	1.1477	1.4244	1.0419	1.0558	1.7011	11.2042	1.6361	1.284	1.603	3.363	4.06	1.683	1.794	2.334	2.134	24.066	5.746	2.275	2.506	2.533	10.1228				0.413979	4.40755
9.293	1.6769	0.96	2.439	19.6468	1.0615	1.1443	1.4336	1.0762	1.2673	13.1822	2.0776	1.5212	1.22	3.569	4.754	1.78	2.579	1.951	2.645	25.428	4.929	1.971	2.291	1.842	9.4386				0.419354	4.47537
9.4122	1.5992	1.4881	2.1512	20.8263	1.3395	1.3366	1.4784	1.1671	1.21	14.9358	2.0255	2.1704	1.164	3.131	4.452	1.986	2.468	1.728	2.095	30.041	5.423	2.154	1.948	2.244	10.0947				0.424733	4.82627
9.5313	1.47	1.2078	2.3812	18.5324	0.833	1.3415	1.0121	1.162	0.8256	13.6038	1.9486	1.4602	1.236	2.913	4.722	2.7	1.884	1.751	1.773	29.644	5.118	2.465	2.232	2.457	9.4396				0.430107	4.56451
9.6504	1.7482	1.3005	1.9645	17.0746	1.1745	1.2252	0.7312	1.6657	1.3061	14.5218	1.9832	1.5767	1.608	2.558	5.245	2.29	2.012	2.038	2.858	35.054	4.559	2.28	2.208	2.56	9.5382				0.435481	4.84322
9.7696	1.8441	1.2015	2.2459	18.9514	1.625	1.0134	1.0297	1.1529	0.9318	13.1767	1.7457	1.6991	1.83	2.534	5.3	2.016	1.552	2.388	2.533	32.97	4.421	2.372	2.663	2.801	9.3298				0.44086	4.77308
9.8887	2.0169	1.3885	2.0449	19.2747	1.1584	0.8644	1.1992	1.0768	1.4813	12.1153	1.9264	1.4557	2.087	3.948	5.581	1.829	1.937	1.771	2.731	29.412	4.518	1.879	2.146	2.44	7.9937				0.446235	4.57101
10.0079	1.6844	1.3466	2.2621	19.8317	1.0434	1.2855	1.1491	1.249	1.4921	11.8136	1.7992	1.536	1.997	3.597	4.522	2.242	1.663	1.708	2.351	29.27	3.582	2.266	2.693	1.962	8.9226				0.451614	4.53073
10.127	1.711	1.3691	1.8794	20.0092	1.1545	1.466	0.868	0.9313	1.0526	12.6812	1.9168	1.7204	1.37	4.126	4.675	2.059	1.793	1.363	2.623	31.032	4.52	2.529	2.157	2.15	9.6144				0.456988	4.67084
10.2462	1.1804	1.2988	2.63	20.9072	1.4528	1.5747	1.1642	0.7658	1.8139	14.4361	1.8836	1.9052	1.477	3.371	5.071	1.806	1.885	1.265	2.37	29.238	4.698	2.036	2.487	2.774	9.5523				0.462367	4.76172
10.3653	1.6986	1.4098	2.2718	18.8238	1.2296	0.9573	0.8547	1.0206	1.2251	17.7115	1.9882	1.6799	1.719	3.323	4.17	2.501	1.677	2.487	2.522	29.151	4.463	2.185	2.326	3.25	9.201				0.467742	4.79384
10.4844	1.6799	1.7123	2.1542	17.0738	1.1108	1.247	0.9602	1.6156	1.5604	18.4782	1.9424	2.2652	1.586	4.233	4.418	2.297	1.521	2.572	2.398	30.262	4.39	2.926	1.992	2.417	7.3551				0.473116	4.80668
10.6036	1.7495	1.2715	1.8996	16.6697	1.2303	0.9929	1.0069	1.024	1.9544	19.6923	2.0292	2.0248	1.656	3.738	4.531	1.858	2.148	1.777	2.458	32.543	3.283	1.85	2.108	2.548	8.0269				0.478495	4.8028
10.7227	1.3381	1.062	3.1792	16.2744	1.26	1.5928	1.1524	1.3605	1.628	18.7955	2.1759	1.6015	1.451	3.559	4.415	2.47	2.132	1.836	1.819	34.185	3.431	1.804	2.548	2.058	8.5715				0.48387	4.86799
10.8419	1.3069	1.2128	2.8787	16.5796	0.6822	1.0582	1.0552	1.0237	1.7761	17.5243	2.1199	1.497	1.763	3.662	5.242	1.709	1.901	1.883	1.868	34.499	3.768	2.216	1.915	2.488	7.7826				0.489249	4.77645
10.961	1.097	1.5971	2.6224	17.5177	1.0578	1.0957	0.9353	0.7949	1.1299	15.2802	1.9464	1.9064	1.667	3.855	4.157	1.745	1.727	1.423	2.542	28.46	2.915	1.957	2.371	2.52	7.4847				0.494623	4.39218
11.0801	1.2917	1.9162	2.5075	17.7854	1.2597	1.1677	0.9668	1.0383	1.3509	13.397	1.9663	2.1862	1.556	3.628	4.383	2.94	1.898	2.275	1.714	27.522	4.047	1.966	1.797	2.081	6.7451				0.499998	4.37543
11.1993	1.6561	1.4355	2.408	15.8627	1.7835	1.0401	0.912	0.9311	1.9002	12.0816	2.0654	1.7416	1.92	4.154	4.553	2.33	1.736	1.439	1.926	23.221	3.795	1.911	2.011	2.754	7.1576				0.505377	4.10902
11.3184	1.7566	1.381	3.1799	18.8567	1.4815	0.994	1.2581	0.7855	1.6622	9.4351	1.6537	1.2194	1.032	4.304	4.637	1.976	1.908	1.145	2.59	23.724	2.999	2.298	2.363	2.488	6.7106				0.510751	4.07353
11.4376	1.2572	1.0295	3.1173	16.1911	1.2751	1.0752	0.9199	1.128	1.9491	10.3652	2.4654	1.7834	1.547	3.605	5.605	2.512	1.82	2.105	2.604	23.753	3.707	2.318	2.016	2.089	6.1885				0.51613	4.09704
11.5567	1.2371	1.6504	2.5831	17.5117	1.1234	0.9692	0.9811	1.4954	1.665	10.1559	2.4332	1.8839	1.313	3.204	4.113	2.17	1.894	1.947	2.713	23.109	2.835	2.411	2.146	2.364	6.0595				0.521505	3.99872
11.6758	1.3497	1.3345	2.0124	13.9731	1.592	1.0928	1.0023	1.1343	1.4337	9.2624	1.4506	1.5571	1.421	3.857	5.114	2.276	1.839	1.816	2.728	24.334	3.284	1.763	2.731	3.194	6.3015				0.526879	3.91414
11.795	1.3	1.2324	2.5445	12.9237	0.9302	1.1273	1.2118	1.076	1.4267	10.026	2.1921	1.7075	1.219	4.809	4.277	2.614	1.966	2.096	2.249	24.453	3.776	2.347	2.311	3.141	6.5507				0.532258	3.98028
11.9141	1.7061	1.1192	1.8864	12.2807	1.1877	1.1009	1.1587	1.2775	1.4451	9.9259	1.8192	1.4394	1.502	4.641	4.5	1.976	1.618	1.478	2.431	22.226	3.433	2.344	2.133	2.71	6.1849				0.537633	3.74095
12.0333	1.4608	1.6019	1.8191	11.2826	1.4836	0.9077	0.8811	1.4213	1.8524	11.3982	2.0105	2.2524	1.395	4.111	3.635	2.524	1.816	1.891	2.492	24.171	3.168	1.756	1.987	3.113	6.0463				0.543012	3.85908
12.1524	1.3683	0.8915	2.0911	11.2363	1.1855	0.6448	1.0939	0.7343	1.461	12.5018	2.4354	1.851	1.566	4.455	4.684	2.156	1.617	1.799	2.128	22.672	3.016	2.14	2.482	2.802	7.0345				0.548386	3.84186
12.2716	1.3334	1.576	2.1052	12.1008	1.0449	1.54	1.3025	1.2902	1.2503	14.9082	2.2944	2.1017	1.714	4.209	4.545	2.371	1.527	2.039	2.514	22.95	3.463	2.147	2.3	2.674	6.331				0.553765	4.06526
12.3907	1.9642	2.0081	2.1697	12.274	1.2216	1.0413	1.1906	1.3795	1.4412	14.5232	2.2682	1.3487	1.424	4.515	4.816	1.728	1.627	2.119	3.142	22.876	3.041	2.286	2.524	2.327	6.1235				0.55914	4.05515
12.5098	1.5095	1.4982	2.6404	13.4259	1.1409	1.0062	1.1925	1.3308	1.5894	12.0736	1.6392	1.9365	1.511	4.443	4.661	1.607	1.857	2.639	3.041	22.813	3.034	2.561	2.347	2.687	5.398				0.564514	3.98328
12.629	1.6009	1.0316	2.0089	13.858	1.6459	0.8115	0.8427	1.1385	2.1495	13.6734	2.0943	1.8954	1.665	4.71	4.104	2.597	1.534	2.102	2.695	26.292	2.943	1.639	2.228	2.65	4.5066				0.569893	4.09665
12.7481	1.8347	1.208	1.5928	12.7959	1.1883	0.9944	1.3799	1.39	1.4889	13.8907	2.0147	1.6209	1.596	4.839	4.047	1.824	2.047	2.158	2.174	25.704	3.134	1.774	2.426	2.435	5.403				0.575267	4.03841
12.8673	1.765	1.3246	2.2895	15.2691	1.3567	1.19	1.0123	1.1457	1.8795	11.6076	2.0919	1.5917	1.621	4.399	4.274	2.328	1.436	2.046	2.863	22.837	2.622	1.81	2.517	2.717	6.0546				0.580646	4.00193
12.9864	1.7276	1.7048	2.2028	15.8351	1.1906	0.7774	1.3967	1.418	2.4007	10.8051	2.6986	1.4003	1.802	5.285	4.757	2.374	1.905	2.071	3.673	23.565	2.884	2.523	2.87	2.921	5.1102				0.586021	4.21192
13.1055	1.5108	1.4138	2.862	15.831	1.5411	1.3246	1.3558	1.2265	2.2952	9.3512	2.4748	1.9863	1.344	5.395	4.452	2.248	1.482	1.857	2.801	20.881	2.808	2.606	2.812	2.696	4.7153				0.591395	3.97082
13.2247	1.1682	1.2267	2.239	16.9804	1.3296	0.9339	1.1481	1.1565	1.9128	8.612	2.767	1.4585	1.325	4.853	4.563	1.882	2.042	2.072	3.313	18.474	2.152	2.816	2.559	3.023	4.6834				0.596774	3.7876
13.3438	1.0231	1.3262	2.6449	19.0927	1.5835	0.9131	1.0908	1.2369	1.7773	9.1935	2.821	1.9025	1.614	5.33	3.925	1.886	2.292	1.858	3.265	18.819	3.334	2.166	2.424	2.894	4.9885				0.602149	3.97604
13.463	1.4775	1.2842	2.8586	19.043	1.4744	1.1249	0.9764	1.4055	1.9314	8.5163	2.4948	2.3799	1.241	5.197	4.847	2.36	2.132	1.973	2.338	18.467	2.502	1.926	1.789	2.797	5.1447				0.607528	3.90722
13.5821	1.2632	1.1693	2.5134	18.93	1.5156	1.0948	1.0688	1.4847	2.0384	8.7119	1.8407	1.7574	1.301	4.451	4.727	2.755	1.694	2.218	2.642	18.48	3.172	2.354	2.263	3.517	4.9195				0.612902	3.91527
13.7012	1.3931	1.5457	1.9777	17.5549	1.509	1.1492	1.3549	1.2528	2.1803	8.9234	2.2568	1.3068	1.401	4.252	5.641	1.761	1.891	2.042	2.675	17.737	2.734	2.249	2.189	3.76	3.9171				0.618277	3.78615
13.8204	1.2876	1.4694	2.8681	19.2884	1.5907	1.0852	1.391	1.0868	2.5113	7.9908	2.2451	1.7565	1.439	4.578	6.053	2.161	2.155	2.406	2.933	17.549	3.324	2.49	2.095	3.098	3.5708				0.623656	3.93691
13.9395	1.8209	1.4659	2.2867	18.9733	1.5122	0.8818	1.2374	1.4823	2.0799	8.1832	2.0351	1.7445	1.651	5.579	6.174	2.769	1.611	2.039	2.796	18.086	3.816	1.905	2.195	2.646	4.4242				0.62903	3.97578
14.0587	1.6517	1.3541	2.4634	18.9438	1.6342	1.0608	1.0593	1.4425	2.0298	8.3456	2.8464	1.9953	1.859	5.218	6.782	1.545	2.403	1.624	2.864	15.857	2.773	2.301	2.833	3.204	4.5547				0.634409	3.94578
14.1778	1.545	1.5739	3.1255	17.44	1.716	0.9178	1.0827	1.067	1.7812	9.4545	2.8037	1.6319	1.461	4.869	7.556	1.93	2.148	1.686	2.89	16.56	3.174	2.224	2.291	2.596	4.0858				0.639784	3.9044
14.297	1.5422	1.4285	3.1874	16.708	1.6281	1.0979	1.1563	0.9063	1.4844	10.7836	2.2487	1.6339	1.089	5.342	7.071	2.716	1.757	1.825	3.052	16.627	3.17	1.802	2.674	2.629	4.1256				0.645163	3.9074
14.4161	1.4627	1.5564	2.4826	19.5216	1.4282	1.7163	1.3578	0.9423	1.7096	11.6016	2.1024	1.1944	1.559	5.969	7.948	2.343	1.852	1.866	3.017	18.245	2.879	2.403	3.05	3.125	4.8504				0.650537	4.24729
14.5352	1.683	1.696	2.5369	18.6535	1.4561	1.1239	1.1318	1.4308	1.637	11.9346	1.9933	1.8967	2.102	6.323	6.543	2.186	2.502	2.096	3.262	15.879	3.214	2.217	2.81	2.565	4.555				0.655912	4.1371
14.6544	1.8873	1.5587	2.8241	16.9985	1.6472	1.1679	1.4308	1.4868	2.3263	9.027	2.4743	2.0915	1.807	7.838	8.223	2.235	2.137	2.223	3.689	16.723	2.682	2.291	2.383	3.017	3.8213				0.661291	4.15959
14.7735	1.4874	1.2187	2.9465	15.7029	1.1117	0.9621	1.358	1.3243	2.0432	9.9973	2.6661	1.9817	1.887	7.12	7.573	2.065	2.322	2.745	3.368	15.903	2.964	2.396	2.109	2.58	3.4497				0.666665	3.97126
14.8927	1.6266	1.6209	2.563	16.0329	1.6005	1.3596	1.065	1.587	1.7137	8.4332	1.9274	1.6973	1.781	7.476	8.01	2.173	2.28	2.486	3.242	14.15	2.492	2.356	2.101	2.453	3.9226				0.672044	3.84599
15.0118	1.2089	1.587	2.8327	16.9257	1.7617	1.1555	1.69	1.7368	1.9493	8.4197	2.0699	1.5383	1.915	7.551	9.228	1.752	2.316	1.968	3.613	13.65	3.029	2.063	2.108	2.542	3.1509				0.677419	3.91046
15.1309	1.8963	1.5523	2.5896	15.7439	1.7387	1.2283	1.1184	0.9698	2.5097	7.3487	2.5352	1.9842	2.199	8.444	8.761	1.911	1.795	1.817	3.909	15.472	3.329	2.307	2.88	2.966	4.4662				0.682793	4.05885
15.2501	1.5084	1.1315	2.7792	16.1808	2.0261	1.2383	1.4638	1.1954	1.9801	7.7902	2.2643	1.7283	2.084	7.863	8.263	2.923	2.251	2.109	4.743	17.695	3.138	2.617	2.723	2.649	4.4867				0.688172	4.19324
15.3692	1.2029	1.5925	3.1445	14.8477	1.8186	1.0688	1.2103	1.2748	2.0838	7.9977	1.5039	2.0458	1.686	8.463	8.106	2.447	2.076	2.365	5.292	19.337	2.852	2.061	2.449	2.379	4.7951				0.693547	4.16398
15.4884	1.2289	2.0702	2.5711	16.2991	2.4086	1.167	1.0045	1.5178	2.266	8.0749	1.5573	2.0724	1.737	8.807	8.314	2.336	2.627	2.263	5.944	19.339	3.256	1.837	2.272	2.506	4.5131				0.698926	4.31956
15.6075	1.4533	1.9411	2.5421	14.8092	2.5252	1.152	1.1582	1.3794	1.969	7.5114	1.7932	2.0534	2.299	8.926	9.644	2.625	2.121	2.119	7.391	20.621	3.484	2.544	2.335	2.296	4.5012				0.7043	4.44775
15.7266	1.647	1.8792	2.2177	12.4093	2.2059	0.9986	1.2853	1.8143	1.8193	7.9881	2.1349	1.7609	2.335	10.071	10.457	2.633	2.654	1.787	7.08	18.031	3.356	3.006	2.246	2.891	4.8272				0.709675	4.38139
15.8458	1.0969	1.3649	2.5137	10.4594	2.057	1.1759	1.1404	1.6011	1.9822	8.0382	2.3227	1.4303	2.114	10.818	10.377	2.076	2.402	2.648	8.753	17.371	2.895	2.123	2.606	3.282	3.9744				0.715053	4.26488
15.9649	1.5444	0.9521	2.7046	10.7045	2.1401	1.227	1.1009	1.6861	1.9424	7.0462	2.2245	2.0446	1.606	14.941	12.363	2.371	2.461	2.536	7.988	18.736	3.333	2.242	2.334	3.134	4.6936				0.720428	4.56224
16.0841	1.4925	1.4453	2.9415	9.7139	2.7945	1.0104	1.35	1.6484	2.1448	8.0534	2.3237	2.3003	2.621	15.855	13.198	2.659	2.512	2.238	8.069	20.528	3.72	2.101	2.689	2.821	5.8586				0.725807	4.88353
16.2032	1.1411	1.6338	3.0277	10.5805	2.9876	0.8511	1.2926	1.4859	1.9495	8.1698	1.8421	2.317	2.552	19.264	13.707	2.542	2.023	2.033	8.616	20.704	3.399	1.923	3.1	2.675	7.0624				0.731181	5.07516
16.3224	1.4137	1.5385	2.3581	8.9895	2.8549	1.3568	1.3702	1.5554	2.5754	8.0037	2.3104	2.5156	2.373	21.411	15.181	1.877	2.734	2.403	9.123	22.541	3.63	2.423	2.666	3.486	7.2456				0.73656	5.35743
16.4415	1.3184	1.4192	2.2587	9.015	4.2259	0.9174	1.397	1.9179	2.0316	8.7278	2.3063	1.9829	1.885	22.782	18.103	2.448	2.182	2.699	9.29	25.057	4.26	2.603	2.423	3.64	7.7566				0.741935	5.70587
16.5606	1.1877	2.0334	2.656	9.8431	4.9693	1.2171	1.763	1.4016	2.1026	8.8919	2.2135	2.4342	3.041	23.362	21.925	2.39	2.653	2.771	8.181	27.057	5.523	2.842	2.804	3.652	8.9851				0.747309	6.23598
16.6798	1.4504	1.1385	1.9199	9.5618	5.2299	1.2408	1.5338	1.8448	2.3506	9.1257	2.9268	2.6589	3.542	25.604	26.658	2.831	2.539	3.391	9.39	29.295	4.372	3.738	2.734	4.621	10.3001				0.752688	6.79988
16.7989	1.367	1.2867	2.095	8.6311	6.151	1.9954	1.499	1.7875	2.2568	9.0633	2.6724	2.5443	3.677	28.299	29.668	2.766	2.718	3.458	10.897	33.713	5.979	3.653	2.291	5.72	11.7062				0.758063	7.43579
16.9181	1.0568	1.6355	2.1922	8.7202	6.638	1.5445	1.6778	1.6851	2.6969	8.8133	2.563	3.0879	4.132	28.446	36.776	2.665	3.091	3.499	11.428	36.304	6.665	2.779	2.346	6.436	13.7474				0.763442	8.02502
17.0372	1.3791	1.1079	2.3301	8.9887	7.5014	1.1815	1.8282	2.5293	2.7594	9.255	2.7859	2.4737	4.259	32.594	37.118	2.908	3.09	4.507	14.099	34.079	7.462	4.043	2.899	7.55	13.467				0.768816	8.48781
17.1563	1.207	1.6626	2.1533	8.3716	8.1684	1.0595	2.2795	2.7131	2.6638	10.0807	2.8975	3.1025	4.68	32.659	42.705	3.514	3.024	4.726	16.212	34.136	7.91	4.924	2.941	6.858	15.4421				0.774191	9.04362
17.2755	1.262	1.8167	2.5816	10.9164	10.2449	1.2971	2.9598	2.9397	2.6563	10.9177	3.6785	3.3293	6.149	37.257	44.841	3.528	3.73	4.329	18.557	37.109	10.358	5.114	3.333	7.303	15.1868				0.77957	10.0558
17.3946	1.5157	1.2986	2.5484	9.8424	12.0194	1.2649	3.0357	3.1536	3.0337	12.2987	3.7241	3.8803	8.925	36.703	47	4.33	4.071	3.828	17.695	39.809	11.994	6.003	3.741	7.402	13.4982				0.784944	10.5046
17.5138	1.4114	1.2259	2.413	9.2218	13.1047	1.6807	2.6773	3.0398	4.2274	13.4708	4.9423	4.1508	12.872	37.768	39.337	4.965	5.452	5.382	18.226	35.086	15.854	7.62	4.992	8.311	13.0638				0.790323	10.8198
17.6329	1.1624	1.4129	1.5649	10.2385	15.7482	1.5819	3.0856	3.6405	4.7311	14.1797	4.9927	5.3534	15.815	33.159	32.827	5.222	6.107	5.948	18.559	32.008	15.694	8.829	6.107	8.824	11.4051				0.795698	10.7278
17.7521	1.047	1.5298	2.3728	11.7237	17.0656	1.6311	4.069	4.2274	4.7281	15.1063	7.5017	5.8191	20.871	27.029	22.09	5.588	8.019	6.806	18.091	29.962	16.086	11.911	6.177	10.818	11.6448				0.801077	10.8766
17.8712	0.8498	1.2677	2.2239	10.6309	16.8842	2.2622	3.994	5.0346	5.3231	19.1539	8.8722	6.2777	27.639	21.038	13.404	6.409	10.532	8.942	18.463	22.471	17.055	13.048	7.142	14.554	9.4304				0.806451	10.9161
17.9903	0.764	1.6785	1.9051	12.2797	17.5269	1.8817	4.3995	6.1813	5.7281	20.7471	10.5122	8.6955	30.698	16.463	9.611	8.872	14.437	9.366	20.102	18.441	21.164	13.365	7.517	13.739	8.3347				0.811826	11.3764
18.1095	1.0713	1.6273	2.0321	11.5861	15.9769	1.6518	5.6817	7.6706	6.3905	21.8737	13.5328	11.0234	28.176	11.054	5.803	8.809	21.816	11.421	23.696	15.308	21.512	15.69	10.246	15.247	8.3956				0.817205	11.8917
18.2286	1.2258	1.6872	2.3724	11.6466	16.6785	1.8708	6.6874	7.9584	6.9757	24.5543	15.6612	14.5653	24.852	6.255	3.595	9.847	24.357	14.051	28.963	10.337	19.981	17.5	11.607	14.626	9.2622				0.822579	12.2847
18.3478	1.3555	1.5218	2.2426	12.7868	16.1416	2.1938	7.6703	10.3156	7.7675	24.3058	20.725	17.4398	19.535	4.733	2.513	12.568	30.819	17.865	33.823	7.767	16.356	19.261	15.074	13.752	6.8682				0.827958	13.016
18.4669	1.486	1.2748	1.9347	14.2151	16.929	2.4374	7.2726	10.1689	8.0625	26.5514	21.3213	20.1803	12.861	3.035	2.214	15.142	36.939	20.328	32.687	5.977	11.598	19.765	18.873	12.144	6.6286				0.833333	13.201
18.586	1.3028	2.5942	1.9364	11.4759	16.832	2.9658	7.7562	11.2612	9.4142	24.3788	21.0024	27.5298	8.167	3.093	1.917	17.752	40.581	22.105	29.33	3.436	8.513	19.531	21.176	9.308	5.9775				0.838707	13.1734
18.7052	1.0392	2.0311	2.1074	11.2888	15.1247	3.089	9.1301	12.1519	8.9039	21.3506	20.7299	29.8328	5.184	2.302	1.059	20.804	45.695	25.927	24.765	3.68	6.972	14.944	23.924	7.067	5.4939				0.844086	12.9839
18.8243	1.5806	1.5532	2.2684	10.3098	15.635	3.0157	8.7276	12.7627	10.0263	16.6062	16.3962	31.1	2.609	2.047	1.34	26.762	49.194	31.472	17.62	3.24	5.801	9.394	22.599	5.837	5.2501				0.849461	12.5259
18.9435	1.7275	1.9578	2.1323	9.8143	13.1308	2.8313	9.9694	12.1817	10.3199	10.6122	13.2384	27.8337	2.382	1.397	1.001	33.961	41.44	39.503	10.833	2.855	4.548	6.064	19.673	3.921	4.3357				0.85484	11.5065
19.0626	1.7474	2.6511	2.437	9.5763	10.7399	3.7089	9.7853	13.8773	9.8611	5.6539	9.7131	22.0348	1.915	1.572	0.77	38.461	35.07	42.869	8.67	2.047	3.375	4.139	13.804	3.907	3.1157				0.860214	10.46
19.1817	1.4711	2.4224	2.6176	9.6838	8.8288	4.9402	11.4812	14.5436	11.0455	3.9213	7.0543	17.9328	1.05	0.974	0.752	37.63	27.212	46.39	5.713	2.135	2.308	3.589	10.575	3.262	3.7246				0.865588	9.65029
19.3009	1.4804	2.9663	2.3092	6.7379	6.0224	5.1011	14.1813	14.2782	10.1369	2.8693	2.6079	13.5355	1.247	1.103	0.694	27.863	20.883	42.828	4.098	1.524	2.222	2.928	7.289	3.438	3.5807				0.870967	8.07696
19.42	1.3883	1.8253	2.7709	6.0432	4.8532	5.6175	14.6489	14.1708	9.3452	2.3356	2.9017	8.4514	1.03	1.029	0.476	16.408	13.543	33.677	2.747	1.698	1.689	2.043	6.286	2.747	3.2156				0.876342	6.43762
19.5392	1.6576	2.9547	3.9402	4.541	4.3732	5.3897	16.4654	12.1448	10.0591	2.0575	1.98	5.6644	0.653	0.503	0.412	10.851	9.502	27.969	2.235	1.196	1.665	1.91	3.755	2.208	2.4475				0.881721	5.46136
19.6583	1.8975	2.9728	4.1943	2.9551	3.3476	6.875	20.1594	12.686	10.076	1.9331	1.9329	3.7241	0.587	0.632	0.53	6.396	6.662	17.859	1.812	1.019	1.55	1.821	3.402	2.125	2.1314				0.887095	4.77121
19.7775	2.7799	3.8788	6.3019	2.4326	2.2568	8.4742	20.8313	10.2222	8.1817	1.3193	2.0781	2.87	0.593	0.517	0.511	5.049	4.637	10.901	1.757	0.956	1.22	1.491	3.127	1.172	2.1678				0.892474	4.22902
19.8966	2.3217	3.1967	5.9758	1.4323	1.6149	8.2484	20.5238	11.9706	6.7496	1.615	1.7721	2.112	0.376	0.167	0.384	3.296	3.704	6.291	1.202	1.045	1.219	1.672	2.879	1.472	1.8203				0.897849	3.72241
20.0157	2.4792	3.9656	7.2616	0.9095	1.7843	8.9624	18.19	11.1385	5.5432	1.2216	0.9665	1.7373	0.278	0.189	0.206	3.045	2.569	3.983	1.282	0.739	0.893	1.142	2.395	1.555	1.6201				0.903223	3.36223
20.1349	2.1895	3.6786	8.6924	0.8665	1.4407	7.4693	16.2769	10.509	3.5213	0.9156	0.9508	1.5148	0.321	0.247	0.17	2.285	1.482	3.361	0.754	0.653	0.878	0.949	1.734	1.634	1.3807				0.908602	2.95496
20.254	3.2903	3.6832	10.2306	0.7054	1.4555	7.2198	17.5615	8.7781	3.1324	1.1711	0.81	1.0786	0.22	0.271	0.355	1.786	1.22	2.034	0.81	0.487	0.95	0.736	1.377	1.444	1.1244				0.913977	2.87724
20.3732	3.5938	4.5918	9.6887	0.3044	1.1015	6.9335	15.7901	7.7218	2.8681	1.0688	0.7575	1.1166	0.161	0.201	0.427	1.724	1.519	1.726	0.995	0.427	0.655	1.012	1.699	1.094	0.8486				0.919356	2.72101
20.4923	5.6844	4.7927	11.9092	0.6442	0.8038	6.2193	12.0288	5.2113	3.0269	1.0992	0.5283	0.7003	0.248	0.106	0.268	1.357	1.075	1.816	0.617	0.354	0.487	0.727	1.596	1.015	0.9611				0.92473	2.53102
20.6114	6.3774	3.5922	15.2008	0.361	0.5326	5.5103	10.9704	4.1778	1.8836	0.7084	0.2968	0.6447	0.217	0.154	0.391	0.816	0.98	1.356	0.538	0.38	0.643	0.764	1.144	0.953	0.6667				0.930105	2.37035
20.7306	9.5349	4.3048	17.81	0.1853	0.4964	5.4064	10.1815	3.4429	1.7649	0.7077	0.2818	0.7197	0.356	0.128	0.095	0.63	1.083	0.857	0.626	0.529	0.252	0.612	1.2	0.816	0.8929				0.935484	2.51653
20.8497	10.9708	4.4612	23.7046	0.3388	0.4414	4.8128	7.2115	2.7658	1.4224	0.2729	0.2771	0.4949	0.226	0.253	0.247	0.384	0.845	0.962	0.412	0.25	0.386	0.41	1.291	0.812	0.9202				0.940858	2.5829
20.9689	14.5425	5.0796	22.0617	0.632	0.401	4.4157	5.5569	1.5684	1.1347	0.6939	0.3345	0.118	0.25	0.103	0.197	0.68	0.717	0.932	0.432	0.212	0.629	0.303	0.661	1.129	0.5903				0.946237	2.53497
21.088	18.4021	7.4969	27.6677	0.2263	0.3907	3.3425	4.4236	1.4319	0.9189	0.3071	0.2669	0.3674	0.15	0.269	0.152	0.847	0.67	0.549	0.359	0.154	0.256	0.29	0.557	0.504	0.8892				0.951612	2.83553
21.2071	21.2062	10.0913	23.337	0.1075	0.2026	2.6962	3.4881	1.6903	0.8322	0.2469	0.2998	0.2895	0.063	0.112	0.158	0.555	0.564	0.563	0.383	0.22	0.202	0.297	0.959	0.755	0.6935				0.956986	2.80048
21.3263	24.4801	12.5092	22.6975	0.25	0.2726	2.5313	2.5421	1.1225	0.5692	0.2237	0.1273	0.1802	0.097	0.262	0.253	0.527	0.436	0.56	0.286	0.404	0.412	0.525	0.37	0.561	0.8994				0.962365	2.92392
21.4454	21.4135	19.6881	19.1093	0.0669	0.2019	1.9236	1.9543	1.0387	0.729	0.1557	0.112	0.1129	0.195	0.174	0.228	0.37	0.345	0.293	0.145	0.198	0.479	0.397	0.652	0.78	0.5456				0.96774	2.8523
21.5646	15.3756	23.4346	12.9783	0.2464	0.1953	1.4105	1.8532	0.9487	0.7504	0.2673	0.3957	0.1835	0.12	0.27	0.174	0.391	0.485	0.357	0.444	0.384	0.389	0.312	0.817	0.753	0.8593				0.973119	2.55179
21.6837	8.6873	26.9145	9.6626	0.1972	0.1823	1.5491	1.4668	0.8059	0.4341	0.2533	0.1055	0.2015	0.107	0.1	0.105	0.235	0.434	0.494	0.367	0.076	0.362	0.273	0.573	0.509	0.7317				0.978493	2.19307
21.8029	3.2845	25.2807	4.719	0.1142	0.1285	1.0426	1.5714	0.833	0.3774	0.1628	0.2219	0.0765	0.147	0.048	0.093	0.252	0.314	0.434	0.288	0.183	0.308	0.308	0.686	0.497	0.6179				0.983872	1.67954
21.922	1.411	20.2586	2.4659	0.0926	0.2832	0.702	1.0139	0.5857	0.3024	0.1785	0.1913	0.2162	0.073	0.101	0.002	0.24	0.363	0.248	0.161	0.244	0.229	0.303	0.35	0.411	0.1781				0.989247	1.22418
22.0411	1.3041	13.2479	1.0703	0.2912	0.1329	0.7507	1.0101	0.4557	0.3447	0.0606	0.0606	0.4007	0.023	0.229	0.095	0.244	0.354	0.13	0.142	0.187	0.362	0.141	0.213	0.344	0.1818				0.994621	0.871012
22.1603	0.7425	8.003	0.5705	0.2218	0.165	0.8476	0.8785	0.6428	0.526	0.2318	0.0521	0.2318	0.085	0.085	0.008	0.287	0.217	0.194	0.241	0.209	0.315	0.395	0.275	0.266	0.5201				1	0.64842

## Sheet: Image20
X0	Y0	Y1	Y2	Y3	Y4	Y5	Y6	Y7	Y8	Y9	Y10	Y11	Y12	Y13	Y14	Y15	Y16	Y17	Y18	Y19	Y20	Y21			Ap-Basal to 1	Average intensities
0	3.4024	4.3957	3.0718	3.5749	3.5119	5.0422	7.8979	8.3331	6.774	4.9381	3.3049	7.6337	5.6314	6.5376	6.7822	7.7689	8.0897	15.3253	11.0725	10.4692	7.2042	5.3348			0	6.64075
0.1191	3.6015	4.6853	2.8917	4.0227	4.3044	4.715	8.124	7.9417	7.0427	5.6081	3.8442	6.8109	6.2709	7.227	8.8282	8.4239	7.5837	16.0998	12.5241	10.4254	7.2652	5.8473			0.0036752	7.00399
0.2383	5.2723	4.5987	3.8618	4.6733	4.1389	5.0239	9.054	9.8282	6.9877	5.1927	3.8528	8.2814	6.3072	7.8405	7.9722	8.4327	8.7671	19.996	14.4218	14.6226	8.2522	6.1065			0.00735349	7.88566
0.3574	5.4444	5.7245	4.0374	5.1462	4.6569	5.7163	8.4337	10.324	7.0941	6.0162	3.8872	8.8822	7.3562	10.3435	12.022	10.7909	9.4465	19.8378	16.1448	13.8205	9.6041	5.9919			0.0110287	8.66915
0.4766	6.0984	6.4905	4.1148	5.1376	4.9008	6.2201	7.5234	11.1794	8.272	5.6922	4.5888	11.1623	8.1961	11.8166	13.072	11.8922	11.0195	21.3089	16.8622	15.7473	10.5636	7.2234			0.014707	9.50373
0.5957	7.9763	6.3813	4.9625	5.8169	6.7006	6.3817	9.1439	10.9013	9.3049	7.1459	5.1761	15.0484	7.932	12.2326	13.2532	13.4564	12.6026	21.9039	19.5593	17.0956	13.3451	9.5123			0.0183822	10.7197
0.7148	9.3458	8.3667	5.5318	7.6311	6.5366	7.6532	9.6594	13.4223	9.6193	8.1875	5.6995	15.9743	7.7788	14.2577	15.5434	15.0391	13.8925	25.02	24.2005	21.046	15.1504	8.3626			0.0220574	12.1781
0.834	10.0362	7.5447	7.6984	8.4761	8.025	8.5785	10.0209	16.607	12.1192	9.8405	5.9263	16.4005	11.6226	14.5103	16.4215	16.4881	14.9416	31.3831	33.6254	25.932	16.6368	11.0731			0.0257357	14.2685
0.9531	13.1495	8.216	9.7649	9.9765	12.1781	8.6217	11.8785	15.2198	13.7152	11.5389	5.9556	21.0543	13.0571	17.1501	17.6858	19.0436	16.5898	36.1773	44.8073	33.0627	19.2765	11.0004			0.0294109	16.7782
1.0723	15.0077	10.1359	11.4732	13.5918	12.2301	9.3776	13.0051	19.7905	16.7191	13.6462	6.1127	23.9943	16.6528	21.1898	19.2288	21.6807	18.5334	43.8977	53.0172	39.0738	27.1407	11.4892			0.0330891	19.8631
1.1914	17.696	13.3818	17.0243	17.6995	16.9148	10.5553	17.6737	23.4278	19.5244	18.0067	6.9262	25.0583	19.2651	21.4416	21.0642	26.5591	21.4047	47.0395	65.106	46.5868	32.4017	12.7145			0.0367643	23.5215
1.3106	19.3703	16.7974	20.7242	22.5403	19.2129	13.9435	20.4629	24.9755	23.5209	21.6849	9.7583	28.3281	23.0005	22.6595	23.6673	28.6701	23.1006	51.2493	73.7685	60.8379	42.8497	14.9581			0.0404426	27.5491
1.4297	19.475	20.3589	25.6095	30.0449	23.1885	13.2821	23.3337	27.5398	28.0266	24.5164	11.1077	29.6831	24.9964	25.8716	27.1169	30.8112	26.8961	59.1552	79.8245	67.6462	52.3215	20.5726			0.0441178	31.4263
1.5488	20.8568	22.7086	33.3593	36.6409	26.695	16.1711	27.3792	32.3722	35.9591	30.3174	13.5334	31.9228	32.1699	31.5131	27.9188	32.5134	30.0187	62.4104	83.4359	73.1921	63.4082	24.7217			0.047793	35.8735
1.668	19.8776	22.8438	41.0811	46.3214	28.9383	16.9763	29.9903	36.6233	44.3246	35.5157	16.0194	38.5917	31.4687	32.1559	33.6024	33.4156	31.1599	67.4329	83.6257	77.7482	64.3338	27.8057			0.0514713	39.0842
1.7871	19.9703	25.0238	41.9527	48.8091	31.6385	17.9376	34.8319	41.491	50.3751	40.1791	19.1288	39.2151	36.5798	38.6702	32.6792	33.7586	32.9239	71.0397	79.7702	74.5004	70.3637	31.5656			0.0551465	41.4729
1.9063	20.2017	29.9776	41.2208	53.4677	34.41	20.3536	38.6284	47.64	55.8956	43.3657	19.1226	37.8468	41.4316	39.7986	37.8291	33.5382	37.8372	76.5502	77.4341	73.6748	66.9439	40.5425			0.0588248	43.9869
2.0254	16.8558	33.0349	41.432	58.7255	37.6378	24.5082	45.9678	47.0847	55.7519	45.45	21.969	36.0038	43.932	40.4349	39.8194	36.6741	41.5316	74.2226	68.114	69.3081	63.8934	48.851			0.0625	45.0547
2.1445	16.8361	34.3378	39.2061	61.9689	43.1051	31.0977	47.2787	47.2996	52.7562	46.0109	28.2888	33.8778	45.5164	41.4922	40.2072	40.6023	41.8685	72.5451	57.578	59.3127	57.2703	50.4934			0.0661752	44.9523
2.2637	16.3819	37.3073	38.3143	62.8788	45.3975	33.094	44.0715	46.4084	48.0816	46.6121	30.2749	34.2111	42.0611	38.0237	41.1511	40.4979	42.7316	69.882	46.1691	45.6963	50.9124	57.21			0.0698535	43.5168
2.3828	13.2698	34.6563	35.8072	59.2978	46.6024	36.8792	48.2279	42.1259	42.5903	43.6648	35.3882	28.2647	37.588	39.0555	39.4914	38.1266	42.3087	63.1757	35.5658	39.3072	42.1514	62.119			0.0735287	41.1665
2.502	13.2499	34.183	34.1285	60.4069	51.6863	39.4223	46.4586	38.8362	34.4949	37.7085	35.1482	26.2244	32.87	37.5846	38.8726	37.2652	40.6601	52.1399	26.5871	28.9311	33.5836	60.8598			0.077207	38.241
2.6211	11.8914	34.3918	31.4203	49.658	52.4573	41.6415	45.1696	36.0075	29.5022	32.81	36.7999	24.8412	28.4703	37.5534	38.0776	36.1508	42.9234	43.4808	17.4544	22.9911	29.1247	64.5214			0.0808822	35.7881
2.7402	10.7571	32.0224	29.7368	48.9909	53.8001	44.3843	42.8712	30.7908	25.515	29.244	35.705	21.4445	25.9104	37.0948	34.6895	32.7857	39.2275	34.3404	12.7618	17.8321	24.2025	65.1092			0.0845574	33.1462
2.8594	8.6733	27.4826	27.1239	39.1707	51.4149	47.9665	41.1955	27.3673	23.0922	25.6684	38.108	19.4705	22.9659	34.3549	30.833	31.1857	40.97	24.7631	11.293	14.6263	23.3241	64.4116			0.0882357	30.7028
2.9785	8.6474	24.1374	25.1276	33.4228	51.2469	47.3323	34.871	21.789	18.5447	20.9159	36.6253	17.7627	20.9634	32.8968	27.606	30.4964	38.0729	18.9323	8.4854	12.2738	18.8461	59.6754			0.0919109	27.6669
3.0977	8.1145	20.1146	21.3352	29.6717	49.985	47.6841	28.7354	21.3401	21.0371	17.8354	35.5234	18.401	21.2625	29.6124	26.3508	29.6897	33.7619	14.9335	6.4433	9.4494	14.054	57.6202			0.0955891	25.5889
3.2168	6.9041	16.5078	19.1957	24.8098	47.5202	47.8987	24.313	18.5151	19.4207	18.0466	35.6312	17.2844	19.2514	28.7115	25.6427	28.8296	34.8074	12.8762	5.137	8.8535	12.923	51.7681			0.0992643	23.8567
3.336	6.4994	13.4812	19.0365	21.9327	44.3166	46.2787	21.9994	16.0317	16.2471	16.1661	34.7891	18.5807	17.9877	26.0751	20.5117	25.6173	32.7206	11.6437	4.6882	7.8267	10.8086	45.8701			0.102943	21.7777
3.4551	5.3909	11.93	15.1584	17.1161	41.786	44.1681	18.217	16.8305	16.5773	14.3042	32.5484	17.9178	17.0012	23.4283	19.6537	22.8231	29.5862	10.2076	4.7961	6.6059	9.4694	39.4645			0.106618	19.7719
3.5742	5.4046	11.353	14.4796	14.8349	38.78	40.5949	16.9619	16.3214	15.7478	11.3933	32.3075	15.9503	15.3738	22.2861	19.4465	20.8867	26.9412	7.7454	4.9411	5.3308	7.0824	31.6186			0.110293	17.9901
3.6934	4.2754	10.2065	13.31	12.8474	37.3616	37.9437	15.1352	15.1124	14.5868	13.0703	28.3069	15.4187	15.8156	22.8069	17.1107	20.0565	27.5317	8.0314	4.0257	4.6676	7.5068	23.291			0.113971	16.7463
3.8125	4.0559	9.3958	10.459	12.1844	34.6898	36.196	12.8138	12.6618	13.6438	10.9179	26.8937	16.7405	16.0704	21.1043	14.0286	19.689	25.1727	6.7595	3.7496	4.456	6.3778	16.7036			0.117647	15.2165
3.9317	4.3757	7.7231	11.2407	10.9351	33.3021	33.5163	12.9055	11.6796	13.6629	9.4498	24.8549	14.6065	18.3341	19.1713	14.2195	17.2038	22.6883	6.3225	3.5198	4.4058	5.963	16.1307			0.121325	14.3732
4.0508	4.0614	8.9655	10.5041	10.2744	29.5569	30.5745	11.4451	11.418	12.1596	10.0445	22.1572	13.7248	16.6878	17.2156	14.8143	16.3887	24.9189	5.0978	2.9055	3.8913	4.7887	11.9227			0.125	13.3417
4.1699	3.6348	6.6627	9.9047	10.2316	26.9643	27.7527	11.9631	10.3155	11.3654	9.7076	21.1732	12.136	14.5837	17.6598	13.0638	13.4811	23.035	5.5159	2.3847	3.1068	4.0698	11.0668			0.128675	12.2627
4.2891	3.6275	6.95	9.4747	9.9324	25.4892	25.5313	10.8752	10.4295	9.9908	7.9642	19.9012	12.2425	12.8237	17.2354	10.962	12.9825	20.9535	4.6603	2.574	2.8097	3.8098	9.9885			0.132353	11.4185
4.4082	3.0083	6.7944	8.3583	8.1244	25.2101	22.7813	10.6012	10.4734	10.1285	8.7049	20.8747	11.5469	13.3763	14.8345	11.2032	13.0595	19.9264	5.2634	2.6868	2.352	2.7354	7.4153			0.136029	10.8845
4.5274	3.2344	5.9634	6.5376	8.0666	22.8247	18.3834	10.4386	10.0253	9.29	7.0383	16.7306	9.6759	12.5433	14.3444	11.6493	11.8135	18.2187	4.2691	3.1271	2.9797	2.1402	6.7008			0.139707	9.81795
4.6465	2.0378	5.0709	7.7044	7.5842	21.8213	17.6757	10.2416	10.2413	10.1614	7.4759	16.787	9.5753	10.7006	12.7576	10.4334	10.037	16.9301	3.6158	2.6313	2.04	2.3587	5.0121			0.143382	9.22243
4.7657	2.4151	5.2315	8.0537	8.0751	17.9935	15.72	9.4218	9.8119	8.2367	6.1317	14.9032	7.9719	10.1455	13.6018	10.8737	9.5106	18.1383	3.85	1.9753	2.3902	2.6114	4.7988			0.14706	8.72099
4.8848	2.8839	4.9994	5.9262	6.6882	17.3472	13.7091	9.3304	8.1567	8.1836	6.6318	13.047	6.2359	8.6327	13.0469	10.264	10.3452	15.8344	3.4452	2.0467	1.9369	3.3225	4.6252			0.150736	8.02905
5.0039	2.222	5.3089	5.9855	5.6543	16.2393	12.7471	8.7484	8.382	6.8084	6.295	12.4345	5.7136	8.6399	12.6618	8.7502	9.4051	15.8125	3.9471	2.4908	1.5393	2.9039	5.32			0.154411	7.6368
5.1231	2.0487	5.1013	6.2008	5.3892	15.2853	11.0449	7.4229	7.5251	7.4693	5.5246	11.2152	4.6129	8.9353	14.4575	7.8319	8.0053	13.4793	3.5498	1.8787	2.1611	2.2183	4.0588			0.158089	7.06437
5.2422	2.1589	3.7664	5.2159	5.087	14.9471	10.0272	8.3658	6.4959	7.1492	5.0931	11.6606	3.1881	7.6019	13.205	8.2649	8.6128	14.4698	3.4421	2.4233	1.8322	2.3115	4.1718			0.161764	6.79502
5.3614	2.2813	4.6813	4.416	5.1609	15.4669	10.8786	7.3075	7.4577	6.8005	5.2874	9.9477	2.6583	6.9146	13.5377	8.4763	10.0411	12.3828	3.8047	1.3896	1.5755	2.4344	4.6022			0.165443	6.70468
5.4805	2.2497	4.0408	4.7827	5.3293	15.1255	10.3066	6.6918	6.3301	7.5204	4.3825	8.0649	2.1858	6.7011	12.1117	8.2648	8.4463	12.5069	3.6094	1.9116	1.8115	2.3364	4.0068			0.169118	6.3053
5.5996	2.2147	2.9681	4.83	4.9906	13.1331	8.8515	6.6397	7.0985	5.7889	4.5105	7.1682	2.2407	6.8335	12.4841	6.6313	7.7747	9.1398	3.5199	1.8797	2.0064	1.7088	3.6063			0.172793	5.72814
5.7188	2.0336	2.593	4.8136	5.1707	13.4013	8.9407	6.2629	6.5211	5.5921	4.4233	6.8223	1.7568	5.9306	14.4298	6.3326	7.4705	8.3613	2.7343	1.4971	2.0087	1.6847	2.6806			0.176471	5.52098
5.8379	1.856	2.4332	4.4362	5.0417	13.6068	7.7858	6.2457	6.5124	6.198	4.6271	5.3004	1.6803	5.8987	11.1105	6.5142	7.2689	9.0012	2.3328	1.9185	1.2283	1.4752	2.6312			0.180147	5.23196
5.9571	1.8402	2.2211	4.1395	4.4834	11.5848	8.5921	5.2297	6.0022	6.1172	3.6706	5.8992	1.5083	4.7476	10.7063	6.0042	8.7658	7.0567	3.0601	1.6249	1.9246	1.7966	2.0558			0.183825	4.95595
6.0762	1.9763	2.3598	3.3739	4.1371	10.8894	7.7751	4.937	5.9671	6.415	3.8083	5.1179	1.6611	3.4491	10.8628	6.1331	7.1442	6.1783	2.5492	1.0809	1.4765	2.0098	2.6153			0.1875	4.6326
6.1953	2.1766	2.2416	4.6288	3.4074	10.3886	7.1866	5.0442	5.578	4.7256	3.6476	4.8154	1.1273	3.617	9.1349	6.1354	7.127	6.6155	2.0197	1.4283	1.3428	1.6455	2.2249			0.191175	4.3754
6.3145	2.3314	1.9734	3.1597	3.8381	9.8966	7.6833	5.6381	4.8027	4.4522	3.3224	4.2358	1.7133	3.6806	8.454	6.552	5.451	6.8385	2.2876	1.5643	1.0277	1.7041	1.8277			0.194853	4.20157
6.4336	1.6306	1.0736	3.7542	3.7461	10.3568	6.8823	4.5969	4.9228	4.6048	2.8882	4.2478	1.1102	3.4	7.7032	6.0811	6.1661	5.5152	2.1737	1.4316	1.4038	1.2288	2.0695			0.198529	3.95397
6.5528	1.7872	1.5111	3.0495	3.2104	11.121	6.289	4.8196	4.3016	4.1148	3.0328	4.1131	1.2373	2.8574	7.6551	5.6012	6.6547	4.6496	2.0652	1.0923	0.9512	1.4673	2.0744			0.202207	3.80254
6.6719	1.9138	1.9352	3.0534	2.5481	10.3717	6.3296	3.8537	4.6802	4.0884	2.8659	3.9513	0.9609	2.0345	5.1715	4.5541	6.445	3.6261	2.1636	1.4827	1.4282	1.4916	2.2602			0.205882	3.50953
6.7911	1.9512	1.9537	2.5745	2.4514	8.9833	6.2465	4.0413	4.0524	4.0317	2.6956	4.3978	0.7992	1.6531	5.5074	4.9471	6.8741	3.8301	2.6086	1.5441	0.9819	1.7833	1.7627			0.20956	3.43959
6.9102	1.7156	2.0156	2.684	3.1197	7.7994	5.8686	3.7008	3.6604	2.9291	2.412	4.1738	1.2648	1.3717	5.7015	4.4951	4.9211	4.3054	3.0128	1.5776	0.9327	1.1363	1.2195			0.213236	3.18261
7.0293	1.6289	1.6768	2.1925	2.6256	9.0132	6.1501	3.34	3.3994	3.4062	2.1963	3.4637	1.488	1.5287	4.8107	3.2909	5.4807	4.3051	2.318	1.0507	1.1387	1.1858	1.3004			0.216911	3.04502
7.1485	1.9894	2.0257	2.6595	2.6217	8.55	5.2556	3.0847	3.0756	3.3091	1.8951	3.9532	0.9382	1.4795	5.1986	3.3131	4.3751	3.2258	2.603	1.3017	1.2286	1.4808	1.5014			0.220589	2.95752
7.2676	2.0701	1.9884	2.0992	2.7457	7.3377	4.7984	3.2501	3.2901	3.5561	1.5427	4.73	1.4786	1.5493	3.9967	3.1375	3.8367	2.8933	2.5209	1.2475	0.9227	1.293	1.9988			0.224264	2.83107
7.3868	1.6997	1.1615	2.7368	2.172	7.4309	5.7701	3.6795	4.0536	2.4914	2.2762	3.6889	1.2989	1.4649	3.6792	3.3165	3.589	2.7013	2.7453	1.4649	1.2184	1.2286	1.4524			0.227943	2.78727
7.5059	1.7665	1.7461	2.2725	2.0688	7.953	4.2402	2.7829	3.4208	2.8923	1.7199	4.0328	0.6	1.167	4.5169	2.5126	3.2459	2.5136	2.8886	1.2729	1.4918	1.3426	1.9679			0.231618	2.65525
7.625	1.6763	1.6297	2.7807	2.438	6.4252	5.2271	3.3029	3.1386	2.4904	1.6954	4.1355	1.179	0.8213	3.1691	2.2971	2.1455	2.4159	2.7521	1.1798	1.1604	1.2261	1.7528			0.235293	2.50177
7.7442	1.2732	1.5069	2.2827	2.5644	8.1573	4.6504	3.7824	2.9794	2.9274	1.6343	3.8623	1.0426	1.1079	2.9269	2.122	2.2172	2.8377	2.9757	1.5841	1.1484	1.3294	1.1914			0.238971	2.55018
7.8633	1.5345	1.3685	1.5491	2.0389	7.1931	4.7897	3.5456	2.9415	2.6738	1.9455	3.9907	1.0871	0.9128	3.0621	1.6988	2.0352	2.3386	2.7548	1.4342	1.1118	0.9005	1.6141			0.242647	2.38731
7.9825	1.8252	1.7567	2.1818	2.2886	5.9299	3.69	2.8123	2.4068	2.7322	1.5329	4.4282	0.8024	0.8731	3.2003	1.436	1.8371	2.3838	3.3049	1.6702	0.9179	1.3299	1.4531			0.246325	2.30879
8.1016	2.0275	1.7882	2.1677	2.5301	5.7409	4.2987	2.625	2.0523	2.2816	1.4863	3.8082	1.162	1.0177	2.8504	1.5488	1.9023	2.1733	3.571	1.4903	0.8158	1.046	1.9212			0.25	2.2866
8.2207	1.8203	1.3484	1.5982	2.1394	5.6285	4.2868	2.5622	2.5983	1.9667	1.3002	3.9497	1.1856	1.4445	2.787	1.2705	1.8754	2.4708	4.3492	1.5818	1.0094	1.1678	1.2565			0.253675	2.25442
8.3399	1.7153	1.3725	2.0148	2.0229	5.1366	3.6486	3.0841	2.5931	2.0142	1.4195	3.6567	1.0786	1.4227	2.8478	1.2486	1.6245	2.5379	3.4833	1.3137	1.0646	1.0472	1.4451			0.257353	2.17238
8.459	1.9129	1.3667	1.9119	2.2125	5.1685	3.7646	2.3552	2.0779	1.6758	1.6973	4.647	1.2998	1.4163	2.7011	1.0554	1.1494	2.67	4.3987	1.2744	0.9902	1.4659	1.6368			0.261029	2.22038
8.5782	1.5775	1.5116	1.9922	1.8845	4.8509	4.1263	2.3715	2.4426	1.6568	1.4444	5.5564	1.0001	1.3932	2.4526	0.9101	1.5861	2.3663	4.906	1.8394	0.834	1.4144	1.5162			0.264707	2.25605
8.6973	2.0393	1.6036	1.86	1.805	4.2045	4.0866	2.1783	2.0728	1.6223	1.2438	5.4763	1.2572	1.4273	2.7902	1.3456	1.43	2.3181	5.2083	1.4865	0.7903	1.3037	1.6002			0.268382	2.23409
8.8165	2.221	1.756	1.9049	2.0955	3.8708	3.5678	2.3741	1.3945	1.6402	1.8178	7.6257	1.339	1.3707	2.7302	1.6311	1.1054	2.7978	5.1991	1.5108	1.0666	1.0698	1.7609			0.27206	2.3568
8.9356	2.5781	1.602	1.6267	2.0942	3.4407	2.9464	2.1217	1.6435	1.2325	1.6895	8.0375	1.7366	1.5275	2.9187	1.1458	1.2154	3.4264	6.9549	1.1482	0.9593	1.2986	1.7513			0.275736	2.41343
9.0547	2.0621	1.5863	1.4821	1.8294	3.4577	4.015	2.1155	1.59	1.8734	1.343	10.1905	1.1665	1.2541	3.8628	1.4355	1.0686	2.8485	6.9349	1.4323	0.9774	1.2608	1.3966			0.279411	2.50832
9.1739	2.7307	1.7373	1.3111	1.4807	2.9276	4.2368	1.6571	1.4126	1.6257	1.3245	10.075	1.1151	1.3396	4.3751	1.1836	0.9925	2.3716	7.5656	1.2063	1.0576	0.8242	1.3083			0.283089	2.44812
9.293	2.4525	1.8883	1.3237	1.5781	3.0957	3.256	1.9506	1.3463	1.6861	1.1338	12.2496	1.1313	1.4232	4.6082	1.1559	1.0092	2.6343	7.1073	1.4035	0.9512	1.0987	1.9297			0.286764	2.56424
9.4122	3.1029	1.6413	1.5875	1.7859	3.5694	2.6275	1.9444	1.2615	1.1158	1.372	13.4892	1.2095	0.9931	4.4428	1.3743	1.2951	2.3316	6.1802	1.5879	1.2283	0.8971	1.3868			0.290443	2.56473
9.5313	2.7752	1.243	1.6134	1.4642	3.0166	3.4202	2.2196	2.1755	1.2748	1.3301	14.6381	1.2328	1.2285	4.7308	1.4776	1.4763	2.0949	6.3804	1.4583	0.9584	1.2235	1.606			0.294118	2.68355
9.6504	3.4759	1.3663	1.6115	1.6844	2.9995	2.8902	1.859	1.4718	1.4466	1.2787	17.7605	1.4676	1.3671	4.6588	1.7207	1.2358	1.956	6.5044	1.7919	1.4181	1.1822	1.6707			0.297793	2.85535
9.7696	2.8188	1.2336	1.5048	1.561	2.4369	3.2665	1.7659	1.3956	1.0115	1.595	18.755	1.5008	1.4427	5.632	2.04	1.35	2.3648	6.3989	1.4701	1.2513	0.9799	1.5566			0.301471	2.87871
9.8887	3.13	1.6177	1.3549	1.1961	3.0363	2.2081	1.7448	1.0913	0.7682	1.2798	20.2393	1.4484	1.5818	4.621	1.8936	0.9556	2.4933	5.5155	1.3705	0.9201	0.9917	2.0108			0.305147	2.79404
10.0079	3.8747	1.0763	1.4276	1.4576	2.8567	3.2495	1.952	1.3022	0.9629	1.4485	22.5028	1.4931	1.3975	4.4498	1.5513	0.7599	3.0971	4.8906	1.4472	0.9082	0.8348	2.2392			0.308825	2.9627
10.127	4.4484	2.0079	1.506	1.5496	2.7611	2.9551	1.3645	1.3138	1.0394	1.3466	21.311	1.3571	1.6079	4.6211	2.2757	1.1546	2.8802	4.3547	1.4781	1.5018	0.7694	2.0325			0.3125	2.98348
10.2462	5.3737	1.8825	1.3393	1.3403	3.09	2.8693	1.6629	1.4235	1.2282	1.466	19.3366	1.2924	1.396	3.225	2.2173	1.1459	3.532	2.9954	1.8508	1.6163	1.2201	2.5874			0.316178	2.91322
10.3653	4.6407	1.5593	1.0917	2.0747	2.7513	2.8043	1.0613	1.4966	1.9686	1.6651	18.9043	1.4999	1.2697	2.7246	2.4359	0.9635	3.471	3.382	1.2934	1.2553	0.9557	1.9108			0.319853	2.7809
10.4844	5.3737	1.9731	1.0276	1.749	2.5213	2.974	1.2505	1.3657	1.0727	1.6728	17.3245	1.5459	1.7699	2.7403	2.9306	0.9071	5.7724	3.324	1.3313	1.0835	1.3391	2.059			0.323529	2.86855
10.6036	5.2897	1.4979	1.3369	1.6177	2.1134	2.3432	1.3758	1.147	1.6092	1.2014	16.9354	1.3688	1.4676	2.5324	2.7611	1.0699	6.8427	3.2233	1.5719	1.3324	1.4387	2.3			0.327207	2.83529
10.7227	5.0914	1.2499	1.3417	1.7904	1.8536	2.6702	1.123	1.0269	1.1531	1.6939	20.0766	1.3951	1.4141	1.954	3.1979	1.1293	8.206	3.7856	1.3621	1.131	1.2427	2.317			0.330882	3.00934
10.8419	5.2954	1.6275	1.3933	1.5903	2.2705	3.1698	1.2244	1.2122	0.8398	1.3353	20.7696	1.1241	1.5863	2.1	3.6484	1.5141	9.2449	3.6323	1.1307	1.0928	1.0179	2.5169			0.33456	3.15166
10.961	6.094	1.1514	1.2311	1.8772	2.1591	2.9901	1.4909	1.0316	1.2544	1.0634	23.3809	1.1795	2.056	1.6523	3.2081	0.9499	12.7197	3.0101	1.6066	1.1077	1.8078	2.8207			0.338236	3.44739
11.0801	6.6144	1.1167	1.3695	1.5161	2.2144	2.8859	1.2762	1.0284	1.2433	1.8139	25.1684	1.1089	1.9214	2.6259	4.0019	0.9751	16.7495	2.4308	1.6356	1.3812	1.4664	2.1161			0.341911	3.75727
11.1993	7.0043	1.093	1.3294	1.5415	2.0775	2.9948	1.1744	1.5198	0.8783	1.6064	32.5189	1.1056	1.6805	1.9679	4.5222	1.2095	18.1004	2.5486	1.26	0.9411	1.2114	2.1228			0.345589	4.10947
11.3184	7.2254	1.1101	1.1921	1.2277	2.2599	3.7639	1.6191	1.2718	1.0363	1.5549	33.9712	1.2195	1.2597	1.6108	5.5306	0.9188	18.6796	2.3618	1.1073	1.2765	1.1984	2.6136			0.349264	4.27314
11.4376	8.1443	1.6388	1.2254	0.7733	1.5938	3.2887	1.2165	1.0163	1.0594	1.3176	32.3003	1.4453	1.781	1.9391	8.3721	1.4971	18.1299	2.4681	1.0289	1.3357	1.4454	2.5184			0.352943	4.34252
11.5567	7.8609	1.3262	1.1362	0.726	1.2298	3.8598	1.2289	1.3446	0.8736	1.884	32.9811	1.0159	1.4735	2.3996	10.3648	0.8754	17.73	2.4746	1.1349	1.3096	1.266	2.2667			0.356618	4.39828
11.6758	8.5478	1.0201	1.31	0.9416	2.1403	4.3222	1.579	0.9428	1.009	1.2577	32.7887	1.4692	1.1642	1.8297	12.73	1.3554	18.3413	2.6312	1.6035	0.9786	1.6253	2.6054			0.360293	4.64514
11.795	8.9927	1.191	1.0429	0.9883	1.9055	3.8709	1.2819	0.9632	1.1403	1.6642	30.8382	1.1213	1.2261	1.7086	15.7011	1.3341	14.789	2.8454	1.3115	0.7865	1.6237	2.3436			0.363971	4.485
11.9141	9.1546	1.3952	1.1112	1.3193	1.2882	4.7972	1.1816	0.9545	1.2688	2.4746	29.4192	0.7771	1.2981	1.9407	17.9426	1.4783	14.0832	2.2799	1.4777	1.5553	1.122	2.5453			0.367647	4.58475
12.0333	8.7075	1.3966	1.2597	1.2062	1.9481	5.0214	0.9556	1.5432	1.2942	2.2138	25.5489	1.1812	1.346	1.9383	18.6645	1.6544	11.4779	2.2758	1.4153	1.3533	1.559	2.5071			0.371325	4.38491
12.1524	8.578	1.4737	0.8585	0.7417	1.8482	5.7367	0.9773	1.1604	1.3995	1.4537	25.6378	1.5296	0.9946	1.788	20.7482	1.1269	12.4053	1.831	1.3018	1.3677	1.4086	2.7652			0.375	4.41511
12.2716	8.5814	1.173	0.9591	1.1414	1.6038	6.6635	0.9657	1.1157	0.988	1.1423	23.157	1.5384	1.3935	2.0774	22.3803	1.4947	11.3782	2.1458	1.7748	1.0808	1.2789	2.5158			0.378678	4.38861
12.3907	9.935	1.2787	1.0069	0.8989	1.4845	6.7481	1.0548	1.0174	1.4917	1.205	22.3655	1.1883	1.5727	2.4698	22.6683	1.61	15.237	2.0892	1.4351	1.2017	1.4037	2.5929			0.382353	4.63433
12.5098	11.0721	1.2324	0.7302	1.7084	1.8807	6.9944	1.4043	1.5267	1.2398	1.7242	19.7381	1.1748	1.8339	1.9761	22.006	1.6374	16.1948	2.3546	1.7459	1.0269	1.2556	2.6957			0.386029	4.68877
12.629	10.8913	1.2989	0.5156	1.2826	2.062	7.7723	1.4185	1.5382	1.1731	1.5506	21.037	1.1184	1.5352	2.0578	22.0133	1.6684	17.8969	1.7082	1.6697	1.2493	1.006	2.7868			0.389707	4.7841
12.7481	10.5109	0.9989	0.7863	0.8769	1.965	7.5758	1.7311	1.3628	1.1606	1.6027	17.437	1.3259	1.4701	1.9167	19.6847	1.718	18.2926	1.7903	1.7147	1.1726	1.8933	2.023			0.393382	4.50045
12.8673	12.1976	1.0924	1.0098	0.8999	1.3518	7.6342	1.3026	1.5809	1.3674	1.2036	17.6986	1.4833	1.518	1.9637	18.8748	2.1253	18.6033	2.0192	1.7254	1.0854	1.3747	2.8367			0.39706	4.58857
12.9864	11.5396	0.8823	1.0397	1.0578	2.1843	7.2862	1.3285	1.4747	1.4748	2.1299	17.0998	1.2569	1.7604	1.8474	19.9999	1.7939	18.3858	2.1492	1.3631	1.2858	1.7543	2.8828			0.400736	4.63532
13.1055	12.3233	1.196	1.4682	1.0472	1.7827	6.6761	1.2866	1.1785	1.0835	2.0085	15.7502	1.0585	1.8773	2.1861	19.286	1.5028	17.5726	2.5186	1.2924	1.2604	1.7867	2.3519			0.404411	4.477
13.2247	11.1227	1.3076	1.1053	1.205	1.7674	5.6704	1.1812	1.4112	1.2218	1.2873	17.7371	1.8993	1.6279	1.9789	18.0594	1.7866	17.9497	2.0913	0.9596	1.3168	1.0878	2.1953			0.408089	4.36225
13.3438	11.4943	1.4274	0.9017	1.4125	1.8032	5.8803	1.0338	1.0088	1.5051	1.3728	17.5721	1.4719	0.9986	1.9053	17.192	2.2691	17.9536	1.9585	1.1458	1.2279	1.5892	2.429			0.411764	4.34331
13.463	11.8695	1.4569	1.6036	1.0171	1.8309	4.4028	1.6187	0.9507	1.0067	1.0796	16.1657	1.1831	1.3375	2.1585	15.6297	2.1478	17.2634	2.2446	1.4087	1.2124	1.4229	2.3969			0.415443	4.1549
13.5821	11.1581	1.5395	0.651	1.1824	2.1487	4.2525	1.1234	0.9874	1.024	1.318	14.6556	1.202	1.3813	1.7089	15.0741	2.235	17.6246	2.1649	0.9775	0.9967	1.249	2.3068			0.419118	3.95279
13.7012	11.3199	1.6956	1.1455	0.7509	2.1649	3.6455	1.5964	1.1169	1.0884	1.4233	14.8652	1.3733	1.1273	1.9083	14.7371	2.9017	16.7286	1.4724	1.3515	1.1448	1.191	2.2867			0.422793	3.95615
13.8204	11.1003	1.3546	1.5846	1.4141	2.5153	2.9183	1.1182	1.2857	1.0739	1.1282	15.7307	0.943	1.302	1.8349	16.6819	3.1744	16.5392	2.4798	1.3923	0.9923	1.4498	2.3062			0.426471	4.10544
13.9395	10.8546	0.9316	1.4155	1.0007	2.1581	2.5912	1.551	1.0636	1.0046	1.1404	16.2543	1.1427	1.1541	1.5198	16.131	3.2452	14.5268	1.6499	1.0613	1.2075	1.1962	2.6121			0.430147	3.88237
14.0587	10.8494	1.1776	0.9737	0.8563	2.3045	2.8701	1.8629	0.9759	1.2153	1.3711	16.9338	1.6009	1.4724	1.9978	13.3867	2.9897	13.73	1.7254	1.2979	1.4315	1.3671	1.7956			0.433825	3.82662
14.1778	8.6272	1.1759	0.9765	1.0961	2.6876	2.6285	1.2335	1.4505	1.2922	1.6229	17.6514	1.1914	1.3276	1.7072	14.1268	3.027	15.241	2.1063	1.1636	1.3732	1.685	2.5552			0.4375	3.90666
14.297	8.4299	1.5234	1.1863	1.1122	2.7559	3.3418	1.688	1.0599	1.5196	2.0498	19.1171	1.3378	1.4503	1.4581	12.7976	3.7035	14.1156	2.0065	0.9197	1.2229	1.2217	2.3248			0.441178	3.92465
14.4161	7.9748	1.6249	0.9243	1.0584	2.8771	2.3011	1.6452	1.0155	1.1584	1.7066	17.8278	1.4247	1.4083	1.4304	11.9401	3.5907	14.1417	1.8329	1.3512	1.266	1.524	2.254			0.444853	3.73991
14.5352	7.9525	0.9558	1.0326	1.1294	3.3523	2.5654	1.3253	1.4445	1.6435	1.4481	19.451	1.1263	1.4171	1.9482	12.5118	3.7967	14.6772	1.8125	1.2753	1.3154	1.1875	2.2207			0.448529	3.89041
14.6544	7.4813	1.6653	0.8076	1.1558	3.5312	2.8058	1.4567	1.2886	1.1885	1.4078	19.7979	1.2169	1.7245	1.739	11.7205	4.5762	14.0063	1.7885	1.8329	1.1212	1.6948	2.3219			0.452207	3.92405
14.7735	6.0956	1.6176	0.8473	1.4963	3.756	2.6134	1.1237	0.789	1.4845	2.2133	21.1954	1.1401	1.0881	1.3234	12.9709	3.9396	13.3105	1.8882	1.2988	1.3243	1.4993	2.0384			0.455882	3.86608
14.8927	7.3162	0.9726	0.9304	1.0977	5.5482	2.3063	0.9962	1.6351	1.1434	2.0042	19.455	1.4119	1.648	1.662	15.203	3.9452	14.7288	1.8964	1.4039	1.2413	1.4357	2.2364			0.45956	4.10081
15.0118	6.3925	1.0201	0.867	1.4622	6.115	2.2015	1.2788	1.5457	1.5114	1.6461	18.2985	0.9442	1.2116	1.6545	16.113	3.9476	13.7569	1.9982	1.3795	1.0748	1.6019	1.7017			0.463236	3.9874
15.1309	5.3531	1.0353	1.141	1.2894	6.3362	1.5447	0.9284	1.5085	1.4553	2.0377	16.0051	0.9879	1.3553	1.4517	20.5012	4.2554	12.4454	1.6158	1.1224	1.0832	1.6256	1.8517			0.466911	3.95138
15.2501	5.3101	1.1051	1.1186	1.4968	9.7647	2.7776	1.7654	1.3692	1.1869	1.5636	17.8609	1.2784	1.3973	1.8279	21.2359	4.9117	12.3334	1.4577	1.5454	1.2476	1.2895	1.5988			0.470589	4.3383
15.3692	6.0137	1.5184	0.9412	1.2953	10.5937	2.4637	1.202	0.9178	1.355	1.514	17.6919	1.2753	1.5173	1.7832	22.4807	4.1827	10.7293	1.4476	1.5135	0.9532	1.3776	1.9865			0.474264	4.30698
15.4884	4.9874	1.364	0.9708	1.2	13.4815	2.0774	1.4233	1.247	1.2356	1.675	17.9694	0.8789	1.3267	1.6102	24.5859	5.01	9.4951	1.714	1.6334	1.2764	1.5382	2.7259			0.477943	4.51937
15.6075	5.0055	1.3389	0.9073	1.252	17.6594	1.9589	1.5055	0.8752	1.4384	1.5395	19.7913	1.2349	1.3634	1.3699	23.4321	5.612	8.0259	2.0403	1.0592	1.3102	1.4448	2.0676			0.481618	4.64692
15.7266	4.7783	1.3736	0.5542	1.1417	19.3627	1.8932	1.8367	1.2131	1.0141	1.5301	18.0637	1.42	1.7067	1.5972	23.0406	4.4535	7.8513	1.8388	1.602	1.3569	1.6317	2.0615			0.485293	4.60553
15.8458	5.546	1.4751	0.6796	1.0021	23.3491	2.052	1.4077	1.7205	1.1873	1.9133	19.1961	1.2584	1.1249	2.0316	21.9563	4.7578	7.8102	1.8718	0.8952	1.4142	1.5001	1.8041			0.488971	4.81606
15.9649	5.0479	1.0406	1.0712	0.8415	26.3976	1.9899	1.6326	1.4268	1.2612	2.1381	20.0141	1.072	1.3891	1.6073	22.6922	4.9484	7.2905	1.3277	1.5838	1.2693	1.5024	2.1334			0.492647	4.98535
16.0841	5.7002	1.3385	1.3175	1.2728	31.4967	1.493	1.5987	1.2269	1.0607	1.5754	21.8507	1.1799	1.3844	1.5413	18.2921	5.3705	6.7624	1.6873	1.2813	1.0307	1.7694	3.3371			0.496325	5.16216
16.2032	5.6488	1.1325	0.8295	1.2715	32.0942	1.5546	1.7613	1.1978	1.499	1.8009	20.1495	1.4457	1.1054	1.176	16.2747	5.6087	6.9099	1.7958	1.0123	1.4985	1.2543	3.0053			0.5	5.00119
16.3224	4.562	0.9655	0.967	1.1718	34.0589	1.802	1.1313	1.4352	1.4096	1.6602	19.6711	1.0185	1.3365	1.3	14.8678	5.7434	6.5059	1.1606	0.9561	1.5388	1.2827	2.6957			0.503678	4.87457
16.4415	3.8591	1.2555	1.0964	1.0499	34.7208	2.0656	1.2737	1.3935	1.0699	1.7332	21.0712	1.1359	1.6626	1.6699	13.3331	5.3057	5.7164	1.8672	1.3484	1.4561	1.3985	2.3851			0.507353	4.90308
16.5606	3.508	1.1994	1.2033	0.5998	37.4366	1.8898	1.9165	1.6132	1.136	1.5994	19.9271	1.3221	0.9518	1.6576	14.3562	6.8252	5.6097	2.0288	0.8226	1.3893	1.445	2.1867			0.511029	5.02837
16.6798	3.272	1.1767	1.1232	0.8632	34.6668	2.1222	1.3355	1.1203	0.6808	1.9286	19.276	1.122	1.3229	1.3821	12.1177	8.1926	6.3146	1.9644	1.3631	1.1117	1.4863	1.8963			0.514707	4.81086
16.7989	3.4192	1.0138	1.0455	1.0824	34.1635	2.1737	1.3329	1.349	1.1432	1.862	17.1754	1.6245	1.6212	1.5719	13.6071	6.9272	5.4467	1.3196	1.7218	1.7191	1.6769	1.6133			0.518382	4.755
16.9181	3.3396	0.733	1.1089	1.1012	31.0408	2.0187	1.7416	0.9976	1.1774	1.4409	16.7681	1.47	1.7725	1.4265	13.7862	6.5513	5.4486	1.569	1.3156	1.5117	1.3079	1.8752			0.52206	4.52283
17.0372	3.0737	1.0425	1.0851	1.1285	25.6387	1.6495	1.6165	0.9809	1.5687	1.6891	15.3963	1.7329	1.4883	1.2342	12.8051	6.6551	5.8564	1.6722	1.3478	1.1779	1.8593	2.9151			0.525736	4.25517
17.1563	2.6159	0.8527	1.4091	1.4302	25.1638	1.5938	1.0769	1.0973	1.4737	1.5763	18.6252	0.8689	1.113	1.3992	12.1463	6.2812	6.7223	1.6875	1.1298	1.6421	1.4199	2.4003			0.529411	4.26025
17.2755	2.4174	1.1156	1.2845	1.6267	24.7698	1.9076	1.4826	1.0301	1.4456	1.8026	20.1132	1.1458	1.7483	1.0713	11.0557	6.3395	5.6761	1.4971	1.2558	1.3162	1.4718	2.8462			0.533089	4.2918
17.3946	2.6169	1.4942	1.2892	0.9972	26.6958	1.4734	1.5298	1.3065	1.3674	1.79	19.9885	1.2834	1.5848	1.3384	9.6724	6.8316	4.56	1.7145	1.1204	1.3861	1.5971	1.9647			0.536764	4.25465
17.5138	2.7362	1.0444	1.2871	1.3046	24.2963	1.6368	1.6003	1.4176	1.6065	1.6899	20.6447	1.371	1.2639	1.4777	12.8319	6.7268	4.2561	1.7242	1.3727	1.1154	1.5648	2.1521			0.540443	4.32368
17.6329	2.4372	1.139	1.1917	1.3769	22.8511	1.4225	1.4422	1.3529	1.2825	1.7258	21.9274	1.5086	0.7987	1.3765	13.4769	6.1422	4.643	1.3548	1.4436	1.3207	1.7248	2.23			0.544118	4.28041
17.7521	2.8471	1.1875	1.0657	1.3953	20.9863	1.7127	1.7132	0.8563	1.5061	1.559	24.0265	1.3861	1.4238	1.1158	18.7306	6.281	4.1774	1.3878	0.9243	1.4913	1.7362	2.6486			0.547796	4.55266
17.8712	2.2023	0.7896	1.2372	1.2945	18.5495	1.4188	1.4965	1.1309	1.0966	1.3318	24.7913	1.0939	1.7327	1.0157	23.8826	6.3371	4.0209	1.4158	1.3651	1.6169	1.7896	2.9587			0.551471	4.66218
17.9903	1.9483	1.4312	1.6055	1.156	17.8348	1.5009	1.5041	1.2902	1.6389	1.9424	22.4654	1.6583	1.6942	1.3103	27.347	5.33	3.5286	1.05	1.093	0.8329	1.918	2.5696			0.555147	4.66589
18.1095	2.3313	1.3933	1.163	1.1274	16.9604	1.4902	1.4266	1.1203	1.4618	1.902	22.0194	1.5264	1.3921	1.3972	26.2968	5.5088	2.8576	1.4091	1.0881	1.3245	1.7424	2.6249			0.558825	4.52562
18.2286	1.9373	0.9409	1.3745	1.2601	15.5991	1.8765	1.1969	1.1442	1.3298	1.8079	23.5137	1.4626	1.2994	1.4555	26.9597	5.9409	3.044	1.2225	0.9444	1.4279	1.5239	2.6957			0.5625	4.54352
18.3478	1.8001	1.303	1.2558	1.2759	14.6031	1.6491	1.323	1.3533	1.6829	1.9504	23.5302	1.2627	1.3832	1.4228	20.5663	4.8951	2.6535	1.4899	1.3623	1.1866	1.5654	2.6533			0.566178	4.18945
18.4669	1.7162	1.4494	1.5134	1.0366	14.8001	1.3482	1.1584	0.9167	1.8876	1.8837	22.0765	1.3773	1.3474	1.8281	17.8381	5.4333	3.3341	1.148	1.6243	1.7612	1.5183	3.3706			0.569853	4.10761
18.586	2.2655	1.6098	1.3562	1.2252	14.9003	1.13	1.0796	1.45	1.3881	2.0185	22.6986	1.3111	1.8051	1.5483	14.3546	5.2901	3.4059	1.3883	1.652	1.2771	1.6011	2.6385			0.573529	3.97245
18.7052	1.8081	1.2147	1.0946	1.4313	15.2197	1.3133	1.4055	1.5978	1.6545	1.9669	22.6084	1.3057	1.1924	1.4448	15.4477	6.3266	2.7364	1.223	1.2025	0.9055	1.7697	2.8887			0.577207	3.98899
18.8243	1.8854	1.2748	1.218	1.4491	14.8218	0.983	1.5546	1.031	1.3177	1.7463	20.3831	1.3474	1.0234	1.3836	13.5643	6.9912	3.3303	1.3943	1.2002	1.3887	1.7277	3.0761			0.580882	3.82236
18.9435	2.044	1.2479	1.2832	1.5626	13.7591	1.6237	1.6777	1.23	1.2921	1.3228	21.2636	1.4067	1.2665	1.315	13.3276	6.8759	3.4007	1.9396	1.1904	1.0954	1.5084	2.2151			0.58456	3.81127
19.0626	1.6609	1.5145	1.426	1.547	12.8047	1.2196	1.8132	1.7921	1.2603	1.5161	17.8956	1.4168	1.5705	1.6482	13.5105	8.3902	3.6956	1.8812	1.3978	1.513	1.3498	2.8036			0.588236	3.80124
19.1817	1.5252	1.1874	1.382	1.5076	14.4467	1.5704	1.39	1.0803	1.3927	1.6738	18.1551	1.4912	1.7284	1.7459	13.6803	8.6073	3.2857	1.4529	0.9807	1.14	1.7791	3.2204			0.591911	3.83741
19.3009	1.2511	1.2573	1.2178	1.2409	13.3425	1.5454	1.6145	1.2408	1.3792	1.7717	19.6237	1.531	1.1941	1.403	12.2558	7.0734	2.6809	1.4292	0.9748	1.2247	1.6752	3.3295			0.595589	3.64802
19.42	1.8897	1.6564	1.198	1.1662	13.275	1.6453	1.0904	1.719	1.1978	1.5717	20.4136	1.595	1.8742	1.087	13.3008	8.6436	3.4498	1.6329	1.89	1.64	1.5376	3.5728			0.599264	3.95667
19.5392	1.6853	1.4078	1.3138	1.2797	14.1875	1.5029	1.2535	1.8349	1.4245	1.5788	20.7008	1.0969	1.46	2.0408	11.8039	7.7328	3.5555	1.3185	1.3466	1.5084	1.5519	2.8808			0.602943	3.83935
19.6583	1.3892	1.109	1.7152	0.9593	14.3241	1.381	1.5937	1.4558	1.2109	1.7566	22.2888	1.444	1.2542	1.4202	12.6529	7.8906	3.3281	1.3897	0.9037	1.5999	1.6311	4.0208			0.606618	3.94176
19.7775	1.5442	1.469	1.359	1.6985	13.0815	1.4749	1.6035	1.2654	1.3969	2.0124	20.2034	1.5816	1.3095	1.4712	13.0765	8.0141	3.081	1.6105	1.228	1.7588	1.465	4.2401			0.610296	3.90659
19.8966	1.443	1.5836	1.2923	1.5034	13.0183	1.5022	1.2036	1.5009	1.0057	1.2476	17.0701	1.3086	1.5579	1.4905	13.6377	8.6922	3.6131	1.6352	1.3434	1.1626	1.4858	3.2861			0.613971	3.70835
20.0157	1.7733	1.4254	1.165	1.3972	9.4009	1.4107	1.3831	1.1942	1.1781	1.2913	17.406	1.2571	1.389	1.5145	15.147	6.7063	3.394	1.3751	1.4107	1.1173	1.321	4.3763			0.617647	3.54698
20.1349	1.933	1.4718	1.0046	1.5322	8.3479	1.2174	1.1491	1.1527	1.2736	1.364	16.0385	1.0341	1.822	1.3554	15.6129	7.0297	3.3272	1.1658	1.3445	1.2093	1.8576	3.493			0.621325	3.44256
20.254	1.7611	1.4373	1.3771	1.4067	6.4765	1.6371	1.3988	1.1684	1.0272	1.7892	17.2295	1.5119	1.5342	1.277	19.3388	6.7151	3.6047	1.4153	1.4448	1.7933	1.5041	3.5092			0.625	3.6526
20.3732	1.3431	1.1094	0.9943	1.2884	6.0716	1.5972	1.4218	1.1775	1.3511	1.882	15.1093	1.5731	1.4975	1.5004	19.9764	7.0782	3.0961	1.308	1.5648	1.4274	1.6547	3.7552			0.628678	3.53534
20.4923	1.7884	1.0839	1.3327	1.731	6.3236	0.8889	0.9407	1.0105	1.6289	1.6646	15.7567	1.5236	2.1309	1.6657	19.0621	6.5607	2.979	1.3615	1.2043	1.3309	1.2853	3.2148			0.632353	3.47585
20.6114	1.6084	1.5524	1.1822	1.4601	5.5416	1.4565	1.4283	1.3337	1.4614	1.4867	15.1656	1.4216	1.6006	1.8572	18.0387	7.9753	2.7924	1.6274	1.4458	1.4449	1.9697	4.1118			0.636029	3.54374
20.7306	1.7666	1.2424	1.501	1.5737	5.0764	1.4016	1.3629	1.6214	1.1219	0.9182	14.5991	1.5496	1.0964	1.6398	21.2557	7.5865	2.3873	1.9902	1.092	1.3793	1.8259	3.241			0.639707	3.5104
20.8497	1.6277	1.4007	1.3437	1.5038	4.3749	1.459	1.1086	1.5631	1.0056	1.31	13.7167	1.0733	1.827	1.148	18.7072	9.4671	2.9163	1.8553	1.4163	2.1573	1.6316	3.7994			0.643382	3.4733
20.9689	1.4527	1.4137	1.2421	1.3971	4.2082	1.7545	1.4613	1.1938	1.4994	1.5303	13.8906	1.2232	1.1392	1.2726	17.0965	9.1168	2.9272	1.9233	1.486	1.2627	1.317	3.2741			0.64706	3.32192
21.088	1.4303	1.626	1.3855	1.6728	3.9147	1.1785	1.0922	1.352	1.6146	1.5062	12.9405	1.7951	2.0723	1.2656	16.2429	9.3655	2.3868	1.166	1.2841	1.4468	1.5334	3.2191			0.650736	3.24959
21.2071	1.1673	1.3157	1.1087	1.5064	3.1235	1.3035	1.4042	1.2503	1.3287	1.4409	10.7189	1.4004	1.394	1.2222	14.3071	8.3466	2.1335	1.445	1.4778	1.5407	1.2232	3.5022			0.654411	2.89367
21.3263	1.6563	1.279	1.3649	1.1404	3.3603	1.5598	1.157	1.0719	1.1028	1.2056	11.8264	1.3671	0.9652	1.0847	13.439	8.8731	2.1277	1.3971	1.1835	1.3062	1.3732	3.8599			0.658089	2.8955
21.4454	1.562	1.317	1.1516	1.3796	3.5352	1.0309	1.1144	0.9316	1.1982	1.5538	12.6573	1.3199	1.2635	1.2597	10.1009	9.0663	2.3794	2.0399	1.2559	1.7185	1.5835	3.3663			0.661764	2.85388
21.5646	1.4216	1.5066	1.1555	1.5716	2.3836	1.2085	1.4004	0.9506	1.185	1.3112	14.0454	1.415	1.1259	1.4629	8.9647	8.3756	2.5158	1.6155	1.4964	1.3596	1.4808	3.6807			0.665443	2.8015
21.6837	1.5856	1.417	1.1354	1.6892	2.5417	1.5328	1.333	0.866	0.8468	1.3432	13.8296	1.11	1.1089	1.544	9.9209	8.0681	3.2169	1.8316	1.5609	1.7987	1.501	3.8297			0.669118	2.89141
21.8029	1.2417	1.5402	1.2227	1.8272	3.4233	1.4863	1.4042	1.2912	1.4479	1.6269	12.8868	1.7717	1.071	1.6853	8.1196	8.5977	3.0392	2.3643	1.0435	1.4671	1.4976	3.3112			0.672796	2.8803
21.922	1.2479	1.4484	1.4843	1.639	2.6174	1.728	1.4436	1.4783	1.3643	1.2146	13.4683	1.484	1.2576	1.5368	8.359	9.5133	2.986	2.357	1.076	1.7838	2.0075	3.4634			0.676471	2.95266
22.0411	1.2741	1.6853	2.0285	2.3051	2.3851	1.4851	1.1997	1.1911	1.3089	1.4325	14.2379	1.1768	1.446	1.543	6.97	10.0471	3.1219	2.1233	2.0408	1.64	1.4159	3.59			0.680147	2.984
22.1603	1.2835	1.4679	1.1664	1.399	2.8736	1.3384	1.4024	1.3558	1.0049	1.6378	11.9425	1.3036	1.5929	1.2678	7.5302	10.5485	2.535	1.7442	1.871	2.0049	1.6744	4.0347			0.683825	2.8627
22.2794	1.0756	1.2646	0.9331	1.4025	2.3752	1.1309	1.3495	1.434	1.2847	1.2854	12.1323	1.1533	1.3589	1.3837	9.1813	10.7613	3.3289	2.0179	1.8151	1.3923	1.5393	4.3841			0.6875	2.90836
22.3986	1.854	1.3979	1.5023	1.9312	2.8421	1.2652	1.9103	1.1504	1.5158	0.8941	12.1805	1.4569	1.4371	1.3061	7.5508	12.173	3.2071	2.0576	1.3153	1.6221	1.5322	5.0217			0.691178	3.05108
22.5177	2.0747	1.6002	1.5934	1.8851	2.4394	1.4451	1.2716	1.3823	1.5971	1.3769	11.3586	1.8871	1.362	1.4758	7.2765	10.8792	2.921	2.8878	1.4738	1.5088	1.5091	5.2315			0.694853	3.01986
22.6368	2.0273	0.856	1.3153	2.2836	2.9061	1.3861	1.7298	1.4897	1.3172	1.3633	10.5654	1.5411	1.2517	1.1525	8.878	10.9654	2.5878	2.3137	1.3924	1.2184	1.9733	5.456			0.698529	2.99864
22.756	1.1568	1.3196	0.8696	2.0204	3.1469	1.4335	1.9031	1.2208	1.4422	1.8045	7.9452	1.4821	1.0747	1.0032	8.1349	12.4098	3.785	2.5175	1.741	1.0905	1.6342	6.0606			0.702207	2.96346
22.8751	1.1305	1.7096	1.4535	2.1178	2.7027	1.522	1.7022	1.4472	1.3105	1.7772	8.5324	1.3481	1.2666	1.323	6.0178	12.5381	3.9696	2.2587	1.4708	1.1233	1.9054	8.0446			0.705882	3.03053
22.9943	1.3435	1.2548	1.0612	2.3163	2.3559	1.3104	1.6025	1.6114	1.8026	1.6927	8.3426	1.2694	1.0503	1.7098	6.9233	11.794	4.2034	1.7923	1.9052	1.4115	1.5227	8.0373			0.70956	3.01423
23.1134	1.502	1.5769	1.1301	1.8453	2.8647	1.6291	1.0683	1.5991	0.9934	1.0825	7.607	1.4352	1.4684	1.0421	6.1972	12.1965	3.9365	2.0902	1.7925	1.8902	1.7541	8.2825			0.713236	2.95381
23.2325	1.7585	1.6369	1.5615	2.1697	2.412	1.7343	1.1339	1.2844	1.1269	1.1296	6.3497	1.1675	1.218	1.557	5.9571	11.8701	4.1836	2.7912	1.5898	1.315	1.8304	7.7549			0.716911	2.88782
23.3517	1.3898	1.6835	1.3111	2.3374	2.544	1.5275	1.3846	1.2278	1.0734	1.715	6.3209	1.3536	1.6058	2.1359	4.8771	14.9797	4.9357	3.4106	1.4019	1.7095	1.4201	8.0961			0.720589	3.11095
23.4708	1.5052	1.4038	1.564	1.9598	2.6892	1.9508	1.3742	1.2632	1.3749	1.6253	5.963	1.2988	1.2095	1.8213	6.5394	15.6538	4.9482	3.1782	2.1157	1.4317	1.4146	8.0248			0.724264	3.19588
23.59	1.3699	1.4862	1.3663	2.5003	2.9977	1.2803	1.4164	1.2906	1.2585	1.1833	6.4009	1.5125	1.3821	1.1847	4.7169	13.8708	5.728	2.3241	1.9974	1.6886	1.6773	8.6578			0.727943	3.05866
23.7091	1.4774	1.1364	1.1198	2.8964	2.551	1.5227	1.3261	1.1405	1.187	1.4984	5.7606	1.448	1.515	1.8994	5.8762	16.0589	4.9139	2.8537	1.7954	1.5756	1.6653	11.6559			0.731618	3.31244
23.8283	1.5509	1.5307	1.6519	3.1045	2.5175	1.7416	1.3845	1.2999	1.4283	1.2554	4.4286	1.8679	1.5014	1.4261	5.4055	18.7256	4.5574	3.1481	1.4272	1.0932	1.4913	11.3844			0.735296	3.36009
23.9474	1.6964	2.3423	1.5914	4.5817	2.8421	1.3265	1.1353	1.7368	1.1723	1.3937	4.7728	1.8371	1.3816	1.7911	4.9121	18.6421	5.1768	3.2476	1.6054	1.5282	1.9389	13.0768			0.738971	3.62405
24.0665	1.7122	2.1369	1.6596	4.84	2.9209	1.8929	1.6424	1.5052	1.1909	1.5929	4.5348	2.2969	1.4597	2.0436	6.0674	18.2914	5.453	3.5556	1.7906	1.9148	1.8089	13.7312			0.742647	3.82008
24.1857	1.6763	1.8193	1.6595	5.2709	3.4121	1.8728	1.2616	1.4921	1.3836	1.2087	4.2292	2.0155	1.5882	1.4653	7.1502	18.5022	4.6867	3.1562	1.4891	1.8691	2.0417	16.942			0.746325	3.91783
24.3048	2.184	1.9948	1.3858	4.8231	2.9667	1.8187	1.1692	1.067	1.2705	1.6476	4.9505	2.6063	1.588	1.354	7.2131	18.9085	5.3105	3.6777	1.6281	1.5495	2.0759	16.9687			0.75	4.00719
24.424	1.8347	1.4989	2.0889	6.127	3.4556	1.5413	1.4805	1.0778	0.9718	1.8179	4.5383	2.0619	1.8705	1.5576	8.1485	20.529	4.8065	3.651	1.8428	1.7118	1.8804	19.1206			0.753678	4.25515
24.5431	1.6798	2.0543	1.5843	6.9783	2.8377	1.544	1.7481	1.2237	1.742	1.5527	4.2064	2.7103	0.7774	1.9466	8.1695	22.763	6.0424	3.5471	1.7729	1.367	1.7943	18.3099			0.757353	4.37962
24.6622	1.6886	1.821	1.5988	7.1107	2.9553	2.3346	1.5078	1.4611	1.6092	1.2326	3.7008	2.9156	1.4161	1.6833	10.5425	26.067	5.6815	4.3425	2.049	1.3068	2.2999	20.8785			0.761029	4.82742
24.7814	1.5281	1.7863	1.7439	8.3378	3.4326	2.2293	1.2387	1.546	1.563	1.4804	4.418	3.1728	1.4903	1.3711	12.8898	26.5344	6.2772	4.7221	2.4559	1.8331	2.4681	20.9696			0.764707	5.15857
24.9005	1.6957	1.4176	2.0963	9.5228	2.9665	2.0266	1.263	1.4833	1.532	1.397	4.5214	2.9519	1.8541	1.7062	13.0877	28.9353	6.3272	6.1294	2.5151	1.1946	2.6759	22.4664			0.768382	5.44391
25.0197	1.3336	1.447	1.7986	10.7209	3.5542	2.4912	1.7479	1.291	1.239	1.7186	3.2889	2.755	1.7993	2.682	14.4076	30.8146	5.6121	5.6694	1.8892	1.334	2.9708	21.8052			0.77206	5.56228
25.1388	2.0716	1.9451	1.9656	13.9107	3.9603	3.3616	1.6709	1.4472	1.0206	1.9402	3.3308	2.6613	1.9547	2.301	18.0362	31.572	5.4476	6.2145	2.3401	1.93	4.4888	24.7538			0.775736	6.28748
25.258	1.7913	1.975	1.784	16.4119	4.0522	2.8461	1.8779	1.8996	1.0743	1.8673	3.5576	3.1788	1.9676	2.282	19.7789	28.7347	7.8578	8.4807	2.5281	1.3059	6.5349	24.8269			0.779414	6.66425
25.3771	1.7654	2.3552	2.0247	17.2743	4.1472	2.9122	1.9296	1.5065	1.077	2.0618	3.7223	3.6826	2.1015	2.4856	19.8513	27.8649	6.8801	9.6186	3.0518	1.1043	10.26	24.263			0.783089	6.90636
25.4962	2.4531	1.6876	1.8619	17.9084	4.2259	3.0908	1.9893	1.5591	1.0922	1.9155	2.9687	5.0163	2.0449	2.44	20.5439	24.5378	7.1494	13.7083	2.984	1.3059	15.349	25.714			0.786764	7.343
25.6154	2.7816	2.5005	1.7115	16.9512	5.0554	4.1477	2.0439	2.0161	1.7171	1.9609	3.811	6.1089	1.8402	2.558	19.5383	20.9017	8.4234	17.7976	3.125	1.9627	17.5624	25.8961			0.790443	7.74596
25.7345	2.4056	2.652	2.0849	19.3371	5.3171	3.8959	2.8293	1.9426	1.7689	2.1059	4.8422	7.6615	1.9723	2.9178	19.1814	18.5606	8.0754	20.1217	4.2721	2.4697	20.0772	29.2073			0.794118	8.34993
25.8537	2.6864	2.8764	2.5439	21.3751	6.0808	4.1348	2.5612	2.2294	1.3082	1.9138	4.0221	11.4379	2.1322	3.124	20.5217	15.3779	9.18	20.5626	4.75	2.5211	18.7323	32.5674			0.797796	8.75633
25.9728	2.5662	2.6292	3.0859	20.0383	6.0462	5.403	2.9613	1.5362	1.5347	2.149	5.4896	15.4912	1.6062	3.1917	21.3632	13.1999	9.3349	20.9846	6.2556	2.3867	16.978	35.9108			0.801471	9.09738
26.0919	2.8565	2.7756	3.2059	22.9346	6.4073	6.089	4.0741	2.1664	1.6625	2.4622	5.3128	17.627	2.3288	4.5602	24.2436	12.4633	10.8195	19.2622	7.1889	2.7151	16.6596	40.5843			0.805147	9.92725
26.2111	3.8107	4.1584	3.4826	24.0481	7.1432	8.6725	4.7046	2.1716	1.8952	2.3671	4.6832	21.3814	3.3681	5.1935	25.2799	10.7529	11.2617	18.297	10.1952	3.8645	19.2628	44.4649			0.808825	10.93
26.3302	3.9819	4.5301	3.902	22.7267	9.307	11.763	5.2045	1.9735	2.5109	2.0728	5.524	26.516	3.1007	5.789	26.9409	10.7439	13.5694	16.9915	15.7141	4.5778	19.0745	48.8245			0.8125	12.0609
26.4494	4.723	6.2287	5.349	24.8265	8.8189	15.7199	5.1301	2.355	2.2755	2.1611	7.8989	27.2913	3.8483	7.2337	25.5091	11.2629	13.7971	15.4276	19.5949	5.4205	17.6963	50.9175			0.816178	12.8857
26.5685	5.9588	6.4024	6.1815	25.6156	11.2303	17.8698	6.1101	2.6341	2.053	2.4404	10.2114	30.9037	4.5636	7.3876	27.3256	11.8939	15.651	11.9491	24.0636	6.272	20.044	54.563			0.819853	14.1511
26.6876	5.7228	8.5219	6.8713	27.1799	11.1813	17.4213	7.2501	2.2707	2.5263	2.433	13.3396	29.3243	5.8692	8.9725	29.0609	9.8421	16.639	9.834	23.1625	7.2821	20.066	54.5319			0.823529	14.5138
26.8068	5.4652	11.7203	6.4978	28.4108	10.6681	15.2203	10.1374	3.1693	2.6575	2.7303	17.4724	31.1191	7.4983	9.6959	29.6494	10.2622	18.0793	8.2722	20.203	9.7382	19.1233	51.9994			0.827207	14.9904
26.9259	6.7018	14.8166	8.3899	29.9325	11.496	15.0164	13.7774	3.3235	3.1172	3.5848	20.5389	35.7628	8.4444	10.8026	27.7634	11.2561	17.6851	7.3565	21.8286	11.4766	22.3913	50.2158			0.830882	16.1672
27.0451	7.5295	19.3825	8.6423	33.1468	14.245	14.2736	17.7299	3.2705	4.2918	3.6125	27.0256	41.4058	11.2	10.4976	28.4945	11.4512	16.7594	6.0142	20.1999	11.1342	25.0037	38.93			0.83456	17.0109
27.1642	7.8435	20.5948	10.6263	38.0715	20.6845	15.522	20.0917	4.067	5.9255	4.2305	30.6627	49.0952	12.542	12.2908	28.5839	10.5042	15.0801	4.4852	20.5689	11.3452	32.4193	30.8861			0.838236	18.46
27.2834	9.5181	22.2274	11.9114	39.498	27.9156	10.6217	22.9326	3.6679	5.2329	4.616	32.4859	48.0692	13.9809	12.8059	26.5731	12.409	14.6471	3.2661	24.552	11.5642	41.209	22.2969			0.841914	19.1819
27.4025	8.8241	23.2375	11.9323	47.3896	32.7032	11.1468	22.4741	5.1747	6.8362	5.9717	31.6783	47.4106	17.7794	12.2625	26.3764	13.3696	11.1583	3.0536	29.9085	11.1073	45.2352	14.1534			0.845589	19.9629
27.5216	9.7944	24.793	14.3135	52.9505	29.1423	8.9352	26.0307	5.6519	6.7866	7.8949	33.0254	42.2782	18.4058	13.5007	23.8639	12.8446	11.566	2.1404	32.0948	11.2277	49.3047	8.7469			0.849264	20.2405
27.6408	10.3964	21.2375	18.1029	58.1552	23.9286	6.3518	29.4883	5.8927	7.6034	10.8153	29.7087	32.4951	16.7386	14.5463	22.0943	15.0765	10.7105	1.3464	42.272	12.3486	48.8633	6.3009			0.852943	20.2033
27.7599	11.4744	19.5093	20.1826	57.3296	15.2579	4.8341	31.5949	7.0612	7.6584	12.5388	23.4836	19.3869	20.579	15.9977	19.3062	16.2745	10.0882	1.8093	41.1339	12.5967	47.8792	4.2014			0.856618	19.099
27.8791	15.3957	20.2929	28.0534	49.3637	9.3649	3.9069	33.8404	7.1591	8.2526	16.6193	19.3478	10.7528	22.8884	17.6425	19.3684	17.789	10.1967	1.1687	42.9256	13.6061	41.5572	3.3106			0.860296	18.7638
27.9982	18.4631	20.4952	35.665	37.6473	5.8775	3.2326	39.376	8.2754	12.8304	22.4081	18.3268	6.7626	25.6254	19.3325	15.5971	17.4037	10.3427	0.9825	37.6777	14.047	37.7874	2.2724			0.863971	18.6558
28.1173	17.5494	18.2346	33.9786	27.5629	3.3076	2.4181	41.6429	10.7438	14.7275	31.3849	16.2659	4.3209	28.2939	18.7799	14.2834	15.734	8.5378	1.216	26.7425	15.3615	29.9655	1.4713			0.867647	17.3874
28.2365	18.9137	16.5137	30.2629	18.84	3.0506	2.0631	39.7173	15.0664	15.1617	41.0552	11.8769	3.3131	26.8851	18.7546	12.1679	14.3084	8.7667	1.0736	14.4356	16.166	22.6226	1.2615			0.871325	16.0126
28.3556	16.9255	11.9119	24.1967	15.5499	2.4787	2.1108	36.7974	19.2454	16.3458	51.9837	6.9736	2.3011	24.184	17.4611	11.0007	12.1154	7.1787	0.4232	7.0321	20.7185	16.5873	0.7738			0.875	14.7407
28.4748	16.8814	7.6055	15.8092	10.5299	1.8309	2.4022	31.4769	24.3257	18.3209	55.1966	4.3967	1.6295	16.6222	13.3521	9.1171	10.9182	5.662	0.4251	3.1951	25.3407	11.0915	0.9187			0.878678	13.0476
28.5939	15.5497	6.0615	9.3982	7.5173	1.2964	1.6067	21.8449	29.9909	16.1188	46.2785	3.318	1.1588	10.8351	11.5521	7.9749	9.4752	3.8318	0.2752	1.8466	31.1625	5.9311	0.6808			0.882353	11.0775
28.713	15.9951	5.0195	6.172	5.0913	1.2693	1.1177	16.1424	38.8243	16.5668	38.168	1.8186	1.2884	6.1861	8.3111	5.9857	6.4661	3.0651	0.5056	1.608	37.0402	3.6615	0.5696			0.886029	10.0397
28.8322	14.2833	3.6298	4.1195	3.7845	1.0299	0.8221	11.9461	34.9739	14.9698	29.1285	1.6241	0.7372	3.7749	5.8268	5.5925	4.4376	2.5468	0.4536	1.2767	35.7705	2.0313	0.5569			0.889707	8.33256
28.9513	11.5077	3.7313	3.7716	3.819	0.8108	0.8933	8.344	27.5055	14.5635	21.7432	1.2728	1.1255	3.02	3.5852	4.4456	3.949	1.8136	0.4263	1.457	23.9186	1.1867	0.6775			0.893382	6.5258
29.0705	9.2101	2.7414	3.0169	2.1537	0.7154	0.6561	6.3759	18.3926	12.4918	12.7776	0.9087	0.6537	2.1216	2.5104	3.1664	3.0002	1.4275	0.3633	0.9863	11.2924	1.2092	0.4517			0.89706	4.39195
29.1896	7.4898	2.5053	3.908	2.0447	0.524	0.8054	3.778	8.1778	8.7013	7.2679	1.0756	0.8266	2.2501	1.6882	2.6337	2.3638	1.1919	0.1452	0.7798	4.3294	0.936	0.1853			0.900736	2.89126
29.3088	6.7193	2.0974	1.9699	2.1882	0.7089	0.8669	3.1516	3.7995	5.0387	4.0902	0.825	0.7549	1.645	2.1262	2.0943	2.1506	1.0064	0.2457	0.5415	2.2495	0.9183	0.2535			0.904414	2.06552
29.4279	5.3392	2.0392	1.7208	1.2143	0.7948	0.713	2.688	2.4517	3.6981	2.4083	0.7505	0.9574	1.5648	1.8728	1.821	1.5199	0.7329	0.1703	0.5152	1.174	0.5119	0.318			0.908089	1.58982
29.547	3.4883	1.263	1.6564	1.1113	0.6191	0.5398	2.3156	1.2308	2.69	1.9636	0.6356	0.6196	1.6664	0.8719	1.6748	1.5771	0.6819	0.0562	0.5056	1.1626	0.9219	0.4556			0.911764	1.25941
29.6662	3.1809	1.3021	1.4208	1.2152	0.6615	0.6641	1.8695	1.58	2.059	1.3464	0.7451	0.5929	0.9343	0.9463	1.5186	1.1619	0.5382	0.1018	0.4172	0.9456	0.3975	0.2608			0.915443	1.08453
29.7853	2.8549	1.0656	1.484	1.4353	0.5262	0.3662	1.1889	1.1325	1.8296	1.4685	0.606	0.4065	1.0958	1.3071	1.705	1.0474	0.5644	0.0883	0.3626	0.6787	0.6611	0.2058			0.919118	1.00365
29.9045	2.2838	0.8985	1.0633	1.0225	0.4423	0.3748	1.6127	1.4534	0.9734	0.7857	0.6255	0.482	0.9747	0.6094	1.0447	0.853	0.1511	0.1472	0.1813	0.1923	0.6007	0.2273			0.922796	0.772709
30.0236	1.6139	1.2283	0.9851	1.031	0.6013	0.6804	0.9096	0.3991	1.1094	0.7602	0.5092	0.3497	0.6861	0.696	1.5372	0.9403	0.3726	0.1929	0.3108	0.4154	0.5217	0.1433			0.926471	0.726977
30.1427	1.6033	0.9156	0.6463	0.7823	0.3747	0.7596	0.4643	0.5334	0.7122	0.7261	0.4158	0.4979	0.8109	0.6851	0.7772	0.9675	0.3499	0.1317	0.2029	0.4737	0.1205	0.0526			0.930147	0.591068
30.2619	1.1184	0.7503	0.4267	0.809	0.5812	0.5045	0.4496	0.845	0.7023	0.4623	0.1383	0.2731	0.5613	0.5228	0.7576	0.6242	0.1655	0.0186	0.243	0.2248	0.2815	0.1476			0.933825	0.482164
30.381	0.8703	0.8157	0.4262	0.5656	0.4633	0.4457	0.2832	0.542	0.8141	0.5592	0.1586	0.1149	0.5493	0.4634	1.1662	0.4813	0.2093	0.1923	0.1222	0.2817	0.3971	0.0983			0.9375	0.45545
30.5002	1.0727	0.6535	0.4112	0.6945	0.2537	0.5329	0.3643	0.2578	0.5577	0.4892	0.2015	0.2388	0.474	0.4439	0.8772	0.6258	0.1729	0.0532	0.2021	0.1316	0.1703	0.1357			0.941178	0.40975
30.6193	1.0012	0.3732	0.4258	0.4012	0.1481	0.3635	0.3041	0.3445	0.5581	0.4866	0.1714	0.2315	0.5354	0.2511	0.7362	0.5328	0.0991	0.0145	0.1728	0.2359	0.2187	0.1709			0.944853	0.353482
30.7385	0.97	0.2849	0.4054	0.3499	0.1507	0.2108	0.5233	0.2286	0.5422	0.3844	0.0482	0.1237	0.3487	0.233	0.7231	0.2192	0.1669	0.0065	0.069	0.2627	0.1011	0.0718			0.948532	0.292005
30.8576	0.9233	0.2813	0.4858	0.2879	0.5043	0.1384	0.3341	0.4153	0.5537	0.4818	0.0976	0.2884	0.4779	0.3418	0.7258	0.2568	0.2546	0.0902	0.297	0.1489	0.1206	0.089			0.952207	0.345205
30.9767	0.573	0.2981	0.2236	0.3406	0.3276	0.1766	0.0956	0.3907	0.4425	0.243	0.1013	0.2344	0.3439	0.2796	0.6828	0.1577	0.0072	0	0.1216	0.1444	0.0464	0.0745			0.955882	0.241141
31.0959	0.6289	0.314	0.4504	0.2598	0.116	0.2977	0.4146	0.3239	0.5792	0.3758	0.1607	0.1976	0.1954	0.1766	0.4348	0.2178	0.0523	0.09	0.0122	0.0691	0.1133	0.0767			0.95956	0.252582
31.215	0.5184	0.1609	0.2044	0.1999	0.0201	0.1192	0.2389	0.4102	0.3806	0.3951	0.1736	0.0764	0.2051	0.131	0.13	0.3072	0.1407	0.0205	0.2218	0.0595	0.0428	0.0472			0.963236	0.191068
31.3342	0.611	0.2499	0.2455	0.2326	0.4532	0.1026	0.4271	0.3711	0.1907	0.395	0.0103	0.0505	0.2049	0.2068	0.1045	0.0801	0.0486	0.0366	0.0429	0.0513	0.163	0.0567			0.966914	0.197041
31.4533	0.6942	0.1843	0.2025	0.0827	0.2226	0.1909	0.3021	0.2795	0.2437	0.1941	0.0451	0.0432	0.1518	0.1369	0.2109	0.1963	0.0472	0.054	0.058	0.054	0.1099	0.0513			0.970589	0.170691
31.5724	0.5384	0.2647	0.241	0.1442	0.094	0.207	0.4282	0.1489	0.4647	0.1466	0.0472	0.0634	0.2223	0.4258	0.1957	0.2466	0.142	0.048	0.1789	0.0391	0.0634	0.1166			0.974264	0.203032
31.6916	0.4782	0.5068	0.302	0.0354	0.0119	0.0376	0.198	0.3339	0.1795	0.1319	0.0176	0.1005	0.2904	0.094	0.2252	0.0765	0.0848	0.0064	0.0127	0.1577	0.0588	0.009			0.977943	0.152218
31.8107	0.3746	0.0912	0.1597	0.2106	0.0551	0.0976	0.307	0.1902	0.2736	0.1575	0.0985	0.1355	0.2625	0.0565	0.2937	0.1541	0.0945	0.0794	0.0929	0.068	0.0436	0.0466			0.981618	0.15195
31.9299	0.3974	0.1575	0.1345	0.2093	0.2237	0.2896	0.2067	0.272	0.2027	0.075	0.0021	0.0791	0.14	0.2772	0.2279	0.0627	0.0089	0	0.0123	0.1697	0.15	0.0505			0.985296	0.152218
32.049	0.1481	0.1853	0.0831	0.0195	0.1914	0.1385	0.0394	0.0798	0.1375	0.0883	0.0794	0.0938	0.2162	0.1237	0.1504	0.0582	0	0.0506	0.1698	0.0745	0.0662	0.0021			0.988971	0.0998091
32.1681	0.483	0.124	0.1156	0.0917	0.0513	0.0778	0.0479	0.1841	0.1763	0.1026	0.0258	0.0621	0.1603	0.0763	0.1505	0.0384	0.0822	0.0404	0.1736	0.0431	0.0034	0.0506			0.992647	0.107318
32.2873	0.4471	0.2228	0.2489	0.0115	0.1019	0.0164	0.0034	0.075	0.1066	0.1579	0.0036	0.0452	0.176	0.1061	0.1304	0.0203	0.0237	0.0142	0.0318	0.0622	0	0.0021			0.996325	0.0912318
32.4064	0.2546	0.1263	0.2269	0.0547	0.0081	0.0539	0.085	0.2813	0.0621	0.073	0.0229	0.0635	0.1094	0.1145	0.0992	0.0486	0.1039	0	0.1505	0.0007	0.0574	0			1	0.09075

## Sheet: Image19
X0	Y0	Y1	Y2	Y3	Y4	Y5	Y6	Y7	Y8	Y9	Y10	Y11	Y12	Y13	Y14	Y15	Y16	Y17	Y18	Y19	Y20	Y21	Y22	Y23	Y24				Ap-Basal to 1	Average intensities
0	9.83	6.228	8.95	16.493	7.331	6.362	10.8238	11.5032	10.8563	37.0761	20.1968	14.4106	9.2686	6.9013	9.4733	20.0939	13.9672	8.6346	13.5054	15.2416	26.5694	22.2119	38.241	26.135	35.1167				0	16.2168
0.1191	9.183	8.823	11.78	19.179	7.399	6.5369	12.6291	12.3324	12.4345	40.4995	23.0364	16.0767	11.2438	9.1978	11.643	24.8119	14.5363	9.7501	14.7951	16.2447	28.6475	24.1146	41.8872	30.748	38.077				0.00476025	18.2243
0.2383	10.093	11.608	14.954	21.118	7.706	7.0486	13.151	14.9637	13.0494	45.5175	25.5209	17.8767	13.2604	13.5805	14.5742	30.9348	19.0123	14.8783	16.5787	20.5924	30.3375	26.3196	45.1427	34.262	43.925				0.00952449	21.0402
0.3574	10.331	14.875	18.675	23.622	9.029	8.5762	14.542	15.4309	15.2805	48.104	29.9421	22.6738	15.9196	16.2457	16.8646	38.165	23.9168	19.9652	18.1769	26.9862	33.0068	27.9323	56.4479	38.326	51.8517				0.0142847	24.5954
0.4766	11.495	23.19	25.537	24.591	9.769	10.2285	17.5459	16.0105	14.738	51.7113	31.754	28.9551	19.6221	25.0687	19.4317	43.7564	30.1065	25.8135	19.9019	32.0974	33.4482	26.9328	64.37	48.17	60.5253				0.019049	28.5908
0.5957	11.519	35.825	34.899	27.39	11.01	12.0214	21.6567	18.1871	16.3184	59.4672	34.6516	34.8881	22.7624	29.7535	20.8214	47.6751	37.0895	36.2291	22.2221	35.6934	34.4559	33.2217	72.1706	59.546	64.5812				0.0238092	33.3622
0.7148	12.75	55.992	48.793	30.145	11.166	12.9648	26.1718	21.2963	20.0449	62.6147	37.9221	41.5716	30.6494	43.7054	20.1403	52.6546	43.3639	42.9435	25.6331	42.7281	34.8273	33.8765	79.1984	77.646	68.4823				0.0285695	39.0912
0.834	14.229	75.358	62.563	34.923	13.295	16.8674	30.7427	24.6273	24.9086	64.5728	39.3149	45.8177	37.5324	58.0257	23.7237	56.2986	49.7258	50.4257	27.585	47.1595	39.871	35.1927	83.7341	90.755	74.322				0.0333337	44.8628
0.9531	15.274	102.311	84.377	41.788	17.231	19.9167	38.8928	28.0638	29.0106	63.012	40.8454	48.3713	46.8401	75.0837	24.5118	58.9361	58.9366	58.6015	31.2564	51.4134	36.877	37.5447	91.3076	99.34	76.1105				0.038094	51.0341
1.0723	17.643	129.38	98.383	48.756	19.428	26.6536	50.4846	33.3877	34.4664	62.3334	44.6118	52.7956	59.9637	89.2235	28.6855	62.2169	69.5665	63.4294	35.6842	54.0793	36.7234	43.746	92.9219	101.736	78.4488				0.0428582	57.3899
1.1914	22.728	144.487	114.012	56.922	23.156	34.1708	55.348	38.0442	43.6722	63.6671	47.7951	56.3984	71.0617	98.3463	31.6057	68.4568	75.5063	73.7212	35.9624	56.9882	34.6505	50.0597	91.6355	101.647	82.3046				0.0476185	62.8939
1.3106	26.386	154.481	122.446	66.443	29.48	44.7218	61.9907	44.5773	52.3199	64.3118	49.3543	64.9638	80.8385	100.497	34.6853	70.5039	78.9738	70.5216	37.2711	57.5147	35.6786	54.3794	89.2434	91.836	88.5556				0.0523827	66.879
1.4297	31.795	155.035	130.118	77.675	33.312	54.7743	72.5617	48.9545	61.0269	66.5192	53.7739	69.4855	90.6328	95.0793	42.2707	71.1055	76.9381	73.6641	36.7132	55.3758	34.9095	55.2523	82.6802	80.138	91.6001				0.057143	69.6556
1.5488	43.362	148.378	138.223	94.629	41.779	67.4741	70.7418	50.0578	64.8612	65.4995	52.0019	75.909	91.0359	90.3207	44.0918	66.852	78.1186	74.6588	36.5444	51.9086	33.845	54.4296	80.1115	65.513	95.667				0.0619032	71.0405
1.668	54.922	143.548	133.124	109.328	55.859	76.3813	71.7556	55.9239	66.5453	68.5531	49.6767	79.1162	88.3981	76.1434	49.4347	67.5856	71.941	74.1968	35.6162	49.766	34.6408	56.0094	72.6637	55.081	98.2294				0.0666675	71.7776
1.7871	70.708	130.627	123.518	118.366	67.621	80.2831	66.2114	55.448	70.229	73.413	54.1925	73.5005	89.2389	67.6953	49.3364	73.5418	71.5847	72.1834	36.1108	49.5502	33.8927	58.8292	65.1554	50.18	95.7777				0.0714277	71.8878
1.9063	90.996	119.258	114.682	126.802	83.757	84.6347	66.2261	53.9619	74.8539	72.503	51.8484	74.0747	81.4596	59.5446	52.9987	70.3363	71.5607	73.2969	33.5919	45.5492	33.3204	57.5719	59.2493	44.7	94.5031				0.076192	71.6512
2.0254	111.17	110.014	103.912	131.013	97.946	87.077	56.5759	51.7904	71.3408	68.0182	53.5676	70.9232	68.0994	51.213	58.4415	73.409	68.1711	68.8254	35.7716	43.4619	31.9885	51.2505	52.694	36.784	86.3553				0.0809522	69.5925
2.1445	130.837	95.347	103.452	125.663	113.568	84.6367	52.302	50.4557	73.4334	68.2689	52.6273	64.9282	58.53	43.2058	62.3042	74.5483	66.794	67.1595	38.42	41.7729	29.238	52.5427	48.7178	32.001	84.5891				0.0857125	68.6137
2.2637	145.963	86.145	94.391	122.247	114.271	75.8568	44.2245	47.9294	71.5835	67.5754	59.2379	61.9236	51.1197	38.712	66.4395	78.9098	60.6618	60.5271	42.3215	37.6097	30.4026	51.115	44.3855	29.692	80.4637				0.0904767	66.5483
2.3828	160.698	71.18	86.879	119.655	122.958	69.3592	39.1399	42.2785	74.3125	68.184	56.8423	55.8774	41.8861	35.139	68.029	80.2789	62.0545	61.6044	46.0956	34.9836	28.1885	48.942	38.6964	28.525	76.6201				0.095237	64.7363
2.502	170.155	59.338	79.833	120.426	125.881	64.354	34.7584	40.1129	77.0716	67.5135	58.5643	49.2617	36.2074	33.0128	69.9255	79.802	57.6455	59.1854	48.3564	34.0129	26.0336	41.8033	33.5107	25.857	74.1071				0.100001	62.6692
2.6211	170.821	48.371	71.836	112.323	127.918	56.9261	29.4498	36.6746	75.7782	62.8551	57.6186	44.148	29.5823	27.3758	75.5774	80.4038	53.2461	53.8765	49.6152	33.0181	29.2137	38.5729	30.0356	23.499	67.527				0.104761	59.4505
2.7402	160.782	39.572	63.382	103.265	124.574	49.9602	26.7304	36.6005	74.5274	60.3985	57.4052	39.6844	24.0245	25.7376	76.99	79.5883	54.1751	53.9716	52.6469	32.4908	29.3617	35.3617	24.8798	21.708	62.0505				0.109522	56.3947
2.8594	153.141	33.931	54.592	92.532	118.651	40.9623	24.4867	33.0159	75.9804	60.3996	53.9105	32.2098	20.6024	23.5518	79.2343	79.9651	52.3352	51.8549	54.6889	33.1483	26.6361	30.9988	20.5748	19.087	56.2408				0.114286	52.9092
2.9785	136.963	29.957	48.006	88.887	112.74	33.8904	20.2695	33.9213	75.7628	58.2439	51.3107	26.6965	18.0168	22.7589	77.9519	76.4361	48.6976	51.6845	53.1053	29.7583	26.5178	26.1186	18.1885	17.678	54.8193				0.119046	49.5352
3.0977	115.894	28.239	44.21	83.603	107.086	28.3067	18.6962	30.7278	74.1927	57.9161	49.0808	23.8506	14.6508	22.3302	78.2309	67.9966	40.9986	46.023	54.7137	29.2681	26.2081	21.7455	15.959	16.38	50.9853				0.12381	45.8917
3.2168	109.148	23.142	37.866	78.667	98.551	20.3989	16.3061	30.4608	71.1371	54.321	47.216	19.7371	12.1471	20.4751	80.9593	69.1335	37.0349	46.0819	58.6278	29.033	25.7495	21.6733	13.7052	15.73	50.213				0.128571	43.5006
3.336	100.262	20.787	34.342	69.39	90.422	16.748	13.6184	27.9629	69.1513	52.5861	42.9034	17.8252	11.484	21.1941	83.411	60.3761	38.3769	41.4592	60.1163	26.7226	26.0474	18.8174	12.5851	15.57	48.099				0.133335	40.8103
3.4551	92.954	17.715	29.094	63.623	87.779	15.1696	13.6814	28.244	63.6857	50.9095	39.6291	15.1117	11.4763	19.6998	80.2384	57.8792	34.4159	40.1904	62.0061	26.708	29.1317	18.3217	11.042	13.406	44.8549				0.138095	38.6787
3.5742	77.88	14.827	27.812	58.992	76.341	13.0438	12.0919	24.9893	59.2688	50.9257	33.866	11.5982	10.3274	17.1455	74.9306	53.9557	28.6499	35.0878	59.2621	25.58	26.8259	14.6659	9.2571	11.304	38.3222				0.142855	34.678
3.6934	71.416	14.574	26.378	48.763	65.823	11.5693	10.9039	21.5605	54.328	48.9737	25.3909	9.2822	9.2643	17.3964	74.3524	49.7904	26.7146	28.7243	65.4387	25.5857	27.2148	13.0756	8.2033	11.573	34.8966				0.14762	32.0477
3.8125	60.461	14.088	25.284	45.295	55.796	9.5963	10.2838	18.5816	44.5498	44.8969	21.279	9.1187	8.1665	16.3525	78.8773	44.3576	25.535	27.1985	66.0539	25.638	25.0012	12.5153	7.2863	9.497	36.1738				0.15238	29.6753
3.9317	48.891	11.926	24.081	36.184	46.511	8.281	9.0583	17.666	33.4408	47.5307	17.0736	7.1442	7.6513	16.9799	75.6944	41.0539	20.4214	25.514	67.3173	23.7195	24.4819	9.5779	6.7133	10.623	32.6971				0.157144	26.8093
4.0508	38.41	11.62	22.573	33.778	39.038	7.1212	8.9642	16.6865	23.0368	44.2303	14.8991	5.6787	7.2198	17.8066	78.7935	37.3441	19.0079	22.721	67.3731	23.1241	26.1754	7.4459	6.113	9.909	27.5737				0.161904	24.6657
4.1699	33.299	10.544	18.784	29.887	30.252	6.1944	8.7175	14.621	18.2658	42.6235	11.2646	5.8445	7.3462	16.154	77.1755	33.2592	17.5301	20.5868	64.3286	25.9632	28.7572	6.3355	5.2731	9.084	22.2537				0.166665	22.5738
4.2891	27.474	9.148	17.177	26.659	24.603	5.486	8.1374	11.1398	13.5774	38.5408	9.3537	4.6224	6.4406	14.3508	77.3645	31.2867	16.3889	18.2665	59.4323	26.2907	29.0054	5.1664	4.2322	9.021	18.969				0.171429	20.4853
4.4082	24.077	7.78	14.885	22.339	16.539	5.5545	7.2503	8.8248	13.1576	34.3779	6.8134	4.8114	6.3847	14.9308	75.9177	23.9043	16.5516	16.6686	59.1843	24.3303	27.7687	4.5246	4.3865	7.72	16.5044				0.176189	18.6075
4.5274	19.99	7.183	12.556	20.879	16.022	3.8666	5.5763	9.7562	10.9191	27.3204	5.6719	4.0415	4.989	14.1582	74.122	20.6573	15.1498	16.3008	56.6548	22.5509	27.1119	4.799	4.1526	7.572	12.9486				0.180953	16.998
4.6465	14.799	7.579	10.816	18.538	14.852	3.1121	5.0983	9.1953	10.4465	21.4606	5.4296	3.456	5.8466	14.0283	71.1987	18.2819	12.5855	13.9746	48.0071	22.0494	27.0342	3.4511	4.0298	6.108	11.0814				0.185714	15.2984
4.7657	11.341	6.378	10.89	13.48	14.224	3.8994	5.1456	8.317	9.5717	13.0473	4.5482	2.3621	5.2887	12.9241	66.1471	17.3042	11.9551	10.2699	43.6718	22.274	21.9806	2.6836	3.0784	5.878	9.16				0.190478	13.4328
4.8848	9.83	6.27	10.686	11.605	14.723	3.2634	6.2499	6.8	8.9941	7.2284	4.4442	2.2237	5.71	14.2455	66.3489	16.0949	11.5624	6.9686	33.7841	24.3184	21.0831	2.5955	2.6384	4.981	8.1725				0.195238	12.4328
5.0039	8.77	5.545	9.218	9.876	13.698	3.3495	4.3067	6.0987	7.2597	5.3925	4.3473	2.8368	4.5379	13.361	60.7208	13.9775	10.021	7.2526	27.0758	21.6738	16.5396	3.268	2.567	5.092	6.3648				0.199998	10.926
5.1231	8.956	5.284	7.929	9.688	11.623	2.8101	4.2404	5.4817	8.1986	5.2745	4.9915	2.0454	3.756	14.278	57.8586	11.3685	8.9139	5.0217	21.2862	22.511	11.4357	2.5155	2.7971	4.962	5.0079				0.204763	9.92937
5.2422	7.347	5.428	7.88	8.605	10.817	3.2648	3.6976	4.9779	7.0343	4.8604	5.7177	2.4597	4.173	11.7446	50.7354	9.9971	7.3901	4.9486	15.3679	20.4482	9.0253	2.5744	2.0117	4.821	4.1967				0.209523	8.78094
5.3614	5.699	5.699	7.256	7.259	10.566	2.3411	3.8447	4.6183	7.9444	5.8416	4.6048	2.1386	3.3236	11.1644	43.5203	8.67	7.317	4.0095	12.5397	17.7272	5.4637	2.8722	2.3899	4.078	3.9549				0.214287	7.79372
5.4805	5.833	4.742	6.83	5.725	8.745	2.2049	3.4976	4.5717	6.7697	6.194	4.4951	1.9458	3.5116	11.8185	41.3019	6.8401	6.2974	3.2399	10.0967	18.3644	4.7095	2.0844	2.1247	3.215	3.1731				0.219047	7.13324
5.5996	5.601	4.963	5.318	5.078	8.988	2.6379	2.9762	3.4241	6.9483	7.03	4.7378	1.8379	2.8641	11.3942	35.6267	6.165	4.938	3.2862	10.0879	17.1246	3.8611	1.9655	1.3975	3.218	2.6323				0.223808	6.56405
5.7188	4.205	3.391	4.909	5.154	9.427	1.9335	3.0905	3.1534	7.2746	6.2499	4.8978	1.9777	2.9066	10.9418	33.877	5.4654	2.94	2.8678	8.9351	14.3387	3.3666	2.7031	1.9503	3.054	2.6719				0.228572	6.06727
5.8379	3.503	3.91	4.33	4.475	7.278	1.8279	2.7316	2.778	6.4122	5.5797	5.8035	1.9312	2.367	10.2726	29.8627	4.521	3.2718	2.7402	8.1589	10.4352	3.1451	2.1547	2.3088	3.13	2.1987				0.233332	5.40507
5.9571	3.714	3.034	5.085	3.81	6.314	2.1168	2.745	3.1375	7.3373	5.4325	5.273	1.7435	2.2933	8.7912	24.6999	3.7058	2.8349	3.1982	7.983	8.1323	3.7102	2.4361	1.508	2.033	2.1618				0.238096	4.92921
6.0762	3.989	3.094	4.27	3.744	6.201	2.1394	2.3058	2.7264	7.1309	5.9369	5.5768	1.9746	2.3928	9.2692	21.2879	2.79	2.1804	2.3572	6.7279	5.6773	2.763	2.4335	1.4728	2.073	2.3833				0.242857	4.51588
6.1953	2.962	3.4	3.321	3.333	7.313	1.8353	1.8531	2.4347	6.0391	4.4201	5.8334	1.9244	2.139	7.3323	19.3137	2.2801	2.8823	2.1255	7.8311	3.8904	3.2205	1.9463	1.1486	2.526	2.164				0.247617	4.13876
6.3145	3.181	2.947	3.769	3.365	6.798	1.8189	1.8698	1.9829	5.9653	3.8764	6.2756	1.863	2.1403	6.741	16.3132	2.5197	2.3453	2.1731	7.8806	3.6443	3.0073	2.8294	1.4121	2.124	1.9094				0.252381	3.95006
6.4336	2.664	2.896	3.4	3.322	7.098	1.3937	2.1408	1.8731	7.5943	4.0129	6.2052	1.6145	2.1454	5.904	12.9338	1.9797	1.6958	1.8606	5.858	3.5795	2.809	2.6363	1.2202	1.749	2.1365				0.257141	3.62889
6.5528	2.788	2.59	3.398	2.135	6.759	1.4954	2.1908	1.9926	7.245	4.2301	6.0307	1.655	1.7242	4.8486	10.3547	1.826	1.6983	1.482	6.0096	2.6331	3.869	2.4206	0.9799	1.946	1.9067				0.261906	3.36833
6.6719	2.42	2.067	3.054	2.182	6.295	1.2534	1.681	2.0693	5.866	4.8588	6.8445	1.84	2.0672	5.2054	8.1559	2.2961	1.6607	1.5091	6.8919	3.2154	2.8829	2.8475	1.4388	2.012	2.4624				0.266666	3.32305
6.7911	2.217	2.234	2.827	2.008	6.74	1.1598	1.7885	2.064	6.5466	4.5284	7.8664	1.9041	1.7941	4.0225	6.7753	1.9559	1.6663	1.5401	6.1713	2.8888	3.1227	2.9512	1.4892	1.784	2.1359				0.27143	3.20724
6.9102	1.974	2.406	2.456	2.276	6.854	1.645	1.8644	1.7129	7.2977	4.2342	6.5493	1.6581	2.0257	4.0638	8.6474	1.6065	2.1186	2.1715	6.1753	2.8559	2.7661	2.6789	1.0568	1.789	1.2888				0.27619	3.20688
7.0293	2.078	2.547	2.802	2.515	7.157	1.4395	1.623	1.6546	8.1699	4.9604	5.6749	1.5315	1.751	3.5222	7.8829	1.8516	2.226	2.0475	6.1592	3.3562	2.9615	2.8095	1.1476	1.442	1.1134				0.280951	3.21694
7.1485	2.193	2.578	2.488	2.003	6.189	1.3555	1.5784	1.8104	9.4711	5.1212	6.0622	1.786	1.7137	2.5117	6.5916	1.8189	1.8118	1.8134	7.1759	2.3006	2.4138	3.0398	1.3993	1.561	1.504				0.285715	3.13165
7.2676	2.449	2.675	2.096	1.999	6.596	1.5391	1.3267	1.9129	8.708	5.137	6.9209	2.4405	2.1026	2.3592	6.9412	1.4508	1.476	1.4626	7.5129	2.5621	2.516	3.3536	1.242	1.469	1.2399				0.290475	3.17952
7.3868	1.726	1.8	1.799	1.964	6.042	1.417	1.4683	1.5378	11.0202	4.9717	6.429	1.6981	1.495	2.4607	6.1621	1.3454	1.8153	2.0981	6.7709	2.8221	2.3977	3.3396	1.2048	1.414	1.4072				0.295239	3.06424
7.5059	1.67	1.962	2.093	1.851	4.606	1.425	1.4109	1.4246	12.6679	5.4715	6.1881	1.8919	1.7756	2.1238	5.5173	1.8557	1.4542	1.9774	6.5866	3.0746	3.1695	3.2973	1.2423	1.485	1.6937				0.3	3.1166
7.625	1.733	1.876	2.245	1.814	6.386	1.3562	1.5464	1.5033	12.792	4.951	6.0723	2.1859	1.5627	2.5636	4.937	1.6444	1.5794	1.7411	6.1123	3.3565	2.4844	3.2824	1.4441	1.472	1.4478				0.30476	3.12355
7.7442	2.182	1.669	1.926	1.634	6.181	1.4888	1.4601	2.0782	12.3381	4.7389	6.3657	2.0791	1.7208	2.2918	4.324	1.9651	1.8356	1.6877	7.4332	2.4999	2.2178	3.6727	2.1192	1.436	2.0412				0.309524	3.17544
7.8633	2.353	1.735	1.926	1.855	5.696	1.3769	1.4016	1.9049	10.9496	4.3087	5.3649	1.9901	1.7018	2.0036	4.6758	1.8667	2.5646	1.2922	5.6421	2.5145	2.6918	3.8936	2.2614	1.739	1.4666				0.314284	3.00702
7.9825	1.863	1.455	2.371	1.716	5.1	1.3049	1.5134	1.6452	8.6744	3.8138	5.8323	2.1175	1.2878	1.6072	4.5277	1.7061	1.6492	1.6044	6.0148	3.3389	2.5608	4.3274	1.8196	1.465	1.9851				0.319049	2.85202
8.1016	1.913	1.46	2.421	1.739	5.02	1.2002	1.4151	1.8011	8.9136	3.3435	5.2479	1.9756	1.1955	1.8276	4.4617	1.5519	1.5039	1.6805	6.3558	2.8538	2.2175	4.3984	1.4526	1.683	1.6549				0.323809	2.77148
8.2207	1.785	1.606	1.744	1.48	5.929	1.4516	1.0376	1.6328	8.929	3.6756	4.941	2.0013	1.3745	1.4791	4.0744	1.3536	2.3258	1.8727	7.3485	2.8264	2.2665	4.948	1.465	1.922	1.3304				0.328569	2.83199
8.3399	1.803	2.015	2.068	1.668	5.96	1.2894	1.3356	1.5496	8.9938	3.1742	5.2385	2.3368	1.223	1.6225	3.8741	1.3267	1.797	1.179	6.6852	3.2897	2.3736	5.3637	1.5288	1.802	1.2698				0.333333	2.83068
8.459	2.096	1.489	1.627	1.259	5.252	1.2441	1.1269	1.4825	9.5457	3.2771	4.3268	2.451	1.3022	1.5725	4.4466	1.8739	1.4571	1.3916	6.1022	2.9359	2.9913	5.8656	1.091	1.59	0.9134				0.338094	2.74842
8.5782	2.342	1.497	1.818	2.127	4.47	1.2989	1.4078	2.1402	10.4403	3.5445	4.3812	2.1789	1.0046	1.3928	5.1994	1.5309	1.9441	1.4632	5.9842	3.3486	2.9113	5.8046	1.2202	1.562	1.5042				0.342858	2.90064
8.6973	2.133	1.787	1.171	2.108	4.077	0.9655	1.3837	1.5881	13.0805	2.8776	4.8611	2.4723	1.1847	1.7416	4.4338	1.427	1.8398	1.5517	5.5577	3.2084	2.4968	5.4439	1.6229	1.307	1.2512				0.347618	2.86285
8.8165	2.379	1.857	2.181	1.797	4.189	0.832	1.3081	1.6691	13.4207	2.9612	5.0232	2.1383	1.2369	1.4014	3.8363	1.4759	1.8385	2.1305	5.9549	3.053	3.3142	6.2492	1.7973	1.411	1.425				0.352382	2.99519
8.9356	2.113	1.642	2.502	1.607	5.04	1.2361	1.6366	1.8	14.4826	2.8384	4.647	2.8413	1.1044	1.6188	4.1728	1.8673	1.613	2.001	5.2709	2.9453	3.3239	6.889	1.0345	1.667	1.6787				0.357143	3.1029
9.0547	2.218	1.943	1.874	1.165	4.484	1.2544	1.4273	1.7498	14.2257	3.0885	5.3249	2.7494	1.2084	1.7203	3.6812	2.0378	1.7146	1.9709	6.4717	2.5754	2.8399	5.9606	1.4575	1.804	1.6306				0.361903	3.06308
9.1739	2.029	1.662	1.935	1.602	4.717	1.3428	1.857	1.5824	15.4099	2.8134	5.0663	2.4041	1.1639	2.1635	3.823	1.5437	1.3291	1.5298	5.724	3.1141	2.6664	5.5336	1.3341	1.773	1.4059				0.366667	3.021
9.293	2.301	1.324	2.674	1.655	3.449	1.2384	1.1746	1.6668	16.7018	2.6886	4.0314	2.5846	0.8323	1.4086	3.9383	1.3383	1.7211	1.8791	6.2828	2.8911	2.565	6.1207	1.3776	0.969	1.786				0.371427	2.98396
9.4122	2.044	1.872	1.672	1.527	3.454	1.6786	1.2842	1.533	17.73	2.5706	5.2445	2.8626	1.4093	1.5906	3.4403	1.4444	1.5679	1.4034	5.5822	3.0241	3.593	5.0264	1.559	1.107	1.2704				0.376192	3.01962
9.5313	2.499	2.027	2.039	1.669	3.737	1.731	1.4415	1.9854	19.1721	2.9142	5.1404	2.8793	0.9207	1.8063	4.0296	1.4602	1.264	1.8383	5.3234	2.7739	3.5805	5.2227	1.3709	1.426	1.1512				0.380952	3.1761
9.6504	1.935	1.538	2.188	1.622	3.69	1.2278	1.6082	1.782	20.4136	2.6672	4.7639	3.1719	1.5713	1.5488	4.3472	1.4752	1.3411	1.9566	6.2685	3.0861	4.1978	5.7847	1.504	1.711	1.42				0.385712	3.3128
9.7696	2.301	1.644	1.871	1.722	3.03	1.5001	1.1707	1.79	21.0987	2.3732	3.6044	3.2014	1.2875	1.2555	4.0097	1.8539	2.0314	1.7507	5.7	2.9009	4.2202	5.5853	1.1458	1.468	1.6196				0.390476	3.2054
9.8887	1.796	1.91	2.069	2.477	2.814	1.1846	1.7106	1.8869	22.5248	2.5735	3.8908	3.7564	1.4365	1.4414	4.9737	1.3344	2.0229	2.0316	6.4249	2.7805	3.6931	6.9661	1.5261	1.305	1.5876				0.395237	3.4447
10.0079	2.176	1.679	2.28	1.462	2.517	1.5403	1.8178	1.7711	22.2907	2.6195	4.426	3.7288	1.0972	1.7974	4.9527	1.5854	1.8832	1.6737	8.0905	2.8067	4.5098	6.569	1.3921	1.303	1.7729				0.400001	3.50967
10.127	2.054	1.997	2.668	1.33	2.491	1.8092	1.5323	1.9525	25.3414	2.4767	4.3965	4.6366	1.2013	1.4101	5.9291	1.7756	1.5599	1.45	8.4496	3.035	3.4553	7.2797	1.4566	1.467	1.741				0.404761	3.71582
10.2462	1.812	1.74	1.934	1.808	2.389	1.5281	1.637	1.4732	28.3386	2.7321	4.8642	5.3036	0.9807	1.5277	5.5291	1.8949	1.6534	1.6472	8.5151	3.6168	3.8619	7.4901	1.2894	1.269	1.6678				0.409525	3.86012
10.3653	2.29	1.608	1.821	1.868	3.239	1.6028	2.1175	1.8587	28.725	2.5202	4.8436	6.5824	0.9868	1.3613	6.2061	1.937	1.3361	2.0697	9.698	2.9279	3.7206	8.3612	1.4737	1.342	1.5841				0.414286	4.08323
10.4844	1.729	1.315	1.725	1.699	2.519	1.4383	1.6478	1.7352	29.3041	2.1267	5.0987	6.5712	1.264	1.3306	6.9201	1.9973	1.5329	1.8171	10.3173	3.6559	3.2515	7.4256	1.3699	1.571	1.3358				0.419046	4.02792
10.6036	2.024	1.446	1.546	1.859	2.431	1.2078	1.3398	1.5951	30.9812	2.6817	4.3254	7.2558	1.6864	1.6862	6.7565	2.1529	1.8125	1.7141	9.5723	4.3431	3.5644	7.6205	1.1845	1.2	1.4208				0.42381	4.13628
10.7227	2.382	1.818	1.126	2.07	2.268	1.2114	1.1851	2.6412	30.5108	2.8328	4.0098	8.582	1.3995	1.5817	7.5979	1.9463	1.9387	1.9347	9.4944	4.6278	3.5456	6.6487	1.2921	1.176	1.5171				0.42857	4.2135
10.8419	2.192	1.835	1.367	2.034	2.592	1.717	1.6153	1.7804	30.9239	2.2966	4.7733	11.0062	1.2367	1.372	6.6657	1.4346	1.773	1.7347	10.4958	3.6905	3.8333	7.4288	1.6414	1.252	1.8268				0.433335	4.34072
10.961	2.435	1.692	1.771	1.901	2.42	1.8595	1.5758	1.7967	30.135	2.1957	4.6176	14.0411	1.4253	1.5828	8.1924	1.4931	1.2418	1.8758	11.5438	3.0397	4.9625	7.1262	1.8031	1.13	1.5658				0.438095	4.53691
11.0801	2.332	1.796	1.968	1.7	2.573	1.7481	1.5449	2.1276	31.5271	2.1193	4.7252	14.9414	1.0388	1.4111	8.0402	1.6998	1.5157	1.8819	12.1472	3.1234	4.9616	7.8457	1.7536	1.117	1.5919				0.442855	4.68922
11.1993	2.129	1.736	1.619	2.022	2.847	1.3808	1.6678	2.0458	28.0527	2.7202	3.6923	18.5671	0.9799	1.1988	7.724	1.8581	1.4814	1.9571	13.1225	3.7133	5.2534	7.4833	1.4093	1.475	1.7152				0.447619	4.71404
11.3184	1.876	1.878	2.13	2.246	2.81	1.8862	1.7311	1.7326	27.5397	2.2979	3.5561	19.235	1.2403	1.124	9.138	2.2025	1.7733	2.0053	14.5693	3.9357	5.4532	7.0781	1.0293	1.239	1.6039				0.45238	4.85242
11.4376	2.353	2.333	1.899	1.711	2.616	1.9651	1.3334	1.7303	26.3072	2.243	3.6627	19.4886	1.3842	1.5952	9.2326	1.2499	1.8163	2.6805	15.1932	3.3307	5.3762	7.3172	1.7406	1.427	1.4626				0.457144	4.85794
11.5567	2.94	1.893	1.645	1.986	2.308	1.7715	1.7636	1.8261	24.4809	2.5737	3.5038	18.3355	1.5858	1.9447	9.5223	1.8432	2.0551	1.8776	17.5957	3.6395	5.9415	7.9807	1.7978	1.47	1.8767				0.461904	4.96631
11.6758	2.071	2.466	2.154	2.069	2.414	1.8976	1.6673	1.9744	21.2421	2.5796	3.8489	17.5616	1.6947	1.5134	9.9444	1.841	1.9962	1.6322	16.9254	4.5362	5.6415	8.5723	1.4643	1.688	1.4217				0.466664	4.83267
11.795	2.263	2.546	2.151	1.807	2.27	1.9811	1.5815	1.8381	20.7459	2.367	4.1411	17.7918	1.3457	1.1966	10.0067	2.4652	1.721	2.0162	17.2195	3.4996	5.74	8.686	1.6523	1.747	1.3744				0.471429	4.80615
11.9141	2.546	1.707	2.008	2.196	2.777	2.3822	1.6372	1.792	18.5726	2.0042	3.0615	15.7448	1.2429	1.1384	12.0822	2.0236	1.3759	1.724	19.1835	4.0126	5.0066	7.5909	1.5335	1.446	1.6358				0.476189	4.65698
12.0333	1.878	2.201	1.564	1.888	2.845	2.268	1.4213	2.1566	17.4978	2.0733	3.0302	17.6013	1.4775	1.5163	12.6891	1.6748	1.694	1.5967	21.5837	3.3568	5.3455	7.3387	1.6997	1.399	1.6781				0.480953	4.77898
12.1524	2.172	2.008	2.389	1.992	2.59	1.815	1.6379	1.8437	15.8799	2.8169	3.4021	17.125	1.5521	1.4236	12.2505	1.8906	1.3162	1.8014	25.8543	3.7551	4.8129	8.734	2.2398	1.371	1.2369				0.485713	4.9564
12.2716	2.407	1.733	2.385	2.238	2.531	1.9045	1.4379	1.68	13.6159	2.8899	3.1017	15.2053	1.4628	1.4462	13.3999	1.8383	1.634	1.7104	28.3137	3.5794	5.1113	6.8205	2.0511	1.95	1.6651				0.490478	4.88448
12.3907	2.218	1.847	1.653	1.513	1.93	1.7488	1.9829	2.293	12.5982	2.6252	2.5575	17.4338	1.5869	1.2991	14.0596	2.1317	1.3688	1.4378	27.9648	3.5162	4.5102	6.17	2.4587	1.482	1.7957				0.495238	4.80728
12.5098	2.3	2.198	2.319	2.076	2.679	1.994	1.7475	2.1921	11.007	2.0748	3.0985	17.5692	1.587	1.7631	15.288	2.5019	1.3399	1.4679	31.7522	3.42	4.3389	7.4792	2.3643	1.432	1.6858				0.499998	5.10701
12.629	2.385	1.583	1.93	2.231	2.92	1.9229	1.6382	1.6982	10.9747	2.8804	2.9424	16.6589	1.6794	1.403	17.7128	1.9989	1.6233	1.5873	30.4217	3.3296	4.7867	7.7552	2.606	1.504	1.3888				0.504762	5.10246
12.7481	2.26	2.481	1.947	2.153	2.293	2.4195	1.3786	1.5984	10.6789	2.7463	3.2376	14.8667	1.3491	1.6972	19.5275	1.7115	1.3934	1.7906	29.0078	3.643	4.5937	8.9768	2.4347	0.903	1.5648				0.509522	5.06612
12.8673	2.273	2.131	1.714	2.113	2.929	2.8467	1.8665	2.3481	9.9446	2.8045	3.1627	13.9702	1.5071	1.4687	19.9625	1.4899	1.5662	1.4596	26.5164	3.9109	4.5299	10.3923	2.6521	1.596	1.6098				0.514287	5.07059
12.9864	2.431	2.056	1.751	2.287	2.667	2.2517	1.4044	2.1727	9.285	2.8876	3.3932	15.2521	1.4981	1.3545	18.5411	1.7799	1.1792	2.0845	24.6444	3.2833	3.9267	11.1694	2.1925	1.514	2.2031				0.519047	4.92838
13.1055	2.359	1.87	1.845	2.811	1.91	2.598	2.0246	2.0438	10.7554	2.7619	2.4723	14.7831	1.5678	1.605	17.1533	1.3952	1.9773	2.2246	20.7708	3.3874	4.357	11.7867	2.2877	1.56	1.4688				0.523807	4.79103
13.2247	2.444	2.208	1.731	2.328	2.923	2.2872	1.738	1.8774	11.5694	3.0815	3.4038	14.9842	1.3683	1.5918	14.5207	1.77	1.9008	1.6199	18.5607	3.6394	3.6052	14.2442	2.2292	1.909	1.429				0.528571	4.75855
13.3438	2.224	1.719	2.121	2.287	3.109	2.6575	1.6006	1.7563	12.0918	2.9865	3.1764	13.1379	1.9801	1.5898	12.1381	2.4636	2.0347	1.2971	17.2037	3.8315	3.8619	14.9907	2.2286	1.49	1.7732				0.533332	4.63
13.463	2.403	1.994	2.163	1.808	2.971	3.4951	1.7943	2.3291	11.853	2.6513	2.9079	16.3828	1.4761	1.4371	12.3079	1.6993	1.2682	1.4569	17.3084	4.2287	4.4131	16.4906	2.3928	1.525	1.8124				0.538096	4.82276
13.5821	2.399	1.631	2.237	2.389	2.746	3.7613	2.1608	1.9963	11.7962	2.2999	2.7906	18.025	1.3646	1.6	8.4788	1.6195	1.4229	2.054	16.882	5.471	4.5955	18.1054	2.6847	1.571	1.404				0.542856	4.85942
13.7012	2.416	1.88	2.187	1.753	2.191	4.6603	1.9782	2.3851	14.7296	2.7635	2.6969	18.3718	1.9655	1.4376	6.8959	1.8034	1.4411	1.9491	15.8509	5.2342	4.9065	15.7546	3.066	1.223	1.3995				0.547616	4.83759
13.8204	2.09	1.575	2.004	1.646	1.671	5.4814	1.5142	2.009	14.7819	3.1783	2.792	19.3948	1.8346	1.2834	6.3567	1.7074	1.9644	2.2038	14.3411	5.2656	4.4537	16.7836	2.4217	0.945	1.7788				0.552381	4.7791
13.9395	1.839	2.181	1.945	2.267	2.332	6.7356	1.4478	2.2157	15.1762	3.2718	2.6156	19.8867	1.7488	1.9641	6.106	1.8646	1.857	2.2068	14.6426	5.3476	4.7265	15.5918	2.4381	1.297	1.1955				0.557141	4.91599
14.0587	2.152	1.626	2.267	2.061	1.952	6.3259	1.1556	2.4303	15.3868	2.7039	2.8654	21.8838	1.8934	1.9022	5.8781	2.1558	1.8428	1.995	13.9812	6.1421	4.1541	14.7381	3.1881	1.029	1.9589				0.561905	4.94674
14.1778	2.085	2.193	1.494	1.786	2.314	7.7387	2.2842	2.5303	14.0923	3.2038	2.902	24.3293	1.3258	1.9419	5.4139	1.7859	1.9102	1.5618	12.7885	7.3193	3.5721	13.0528	3.3297	1.349	2.0231				0.566665	4.97306
14.297	2.003	1.883	1.441	1.875	2.821	8.3442	1.6918	2.1545	12.135	3.0576	3.5294	21.6947	1.5792	1.6397	5.6093	2.0003	1.5039	1.8605	12.4843	7.9408	3.3693	10.4167	3.4575	1.55	1.985				0.57143	4.72107
14.4161	2.13	1.921	1.384	2.437	2.84	8.5789	1.4887	2.1339	12.5821	3.0952	3.3724	21.7735	1.5038	2.557	4.9028	1.8383	2.0846	1.9253	12.719	8.1257	4.3412	7.4343	3.6754	1.196	1.6347				0.57619	4.70699
14.5352	2.036	1.857	1.786	1.988	2.509	9.5811	1.5607	1.9934	10.4501	3.4636	3.3123	19.9173	1.6598	2.6413	4.4652	1.6457	1.4164	1.917	13.6257	7.0257	3.9468	7.7408	3.9099	1.124	1.7464				0.58095	4.53277
14.6544	2.121	1.621	1.138	1.676	2.174	10.577	1.4451	2.1875	10.7967	3.5038	3.0276	19.2363	1.6232	2.3163	4.5561	1.7298	1.5199	1.7501	11.8281	6.7482	3.8443	7.4101	3.1186	1.084	1.5795				0.585714	4.34449
14.7735	2.214	1.617	1.681	1.722	2.109	13.2551	2.0325	2.3639	11.0847	3.5493	3.0038	18.5662	1.6094	2.812	3.5114	1.5023	1.9843	2.8929	11.6962	6.9537	3.8724	6.9908	3.165	1.669	1.7924				0.590475	4.54601
14.8927	2.793	1.9	1.69	1.983	2.336	14.5818	1.7599	2.0764	11.4713	3.113	2.8223	16.8113	2.011	3.1646	3.5852	2.3001	1.4932	2.2438	11.8998	8.4918	5.2509	5.5355	3.1522	1.544	1.3697				0.595239	4.61519
15.0118	2.083	1.966	1.441	1.683	2.51	16.5434	1.7469	2.0648	9.6193	3.7962	2.9429	14.7487	1.988	3.7196	3.8093	2.1133	1.2848	2.5737	11.2268	7.6167	5.4257	5.4799	2.9875	1.463	1.7917				0.599999	4.50501
15.1309	1.929	2.108	1.731	1.664	2.664	16.6279	2.3287	2.8378	10.0387	2.4653	3.2849	14.0986	1.7537	2.7839	3.9108	1.7592	1.588	2.1602	12.489	7.7989	5.6754	6.1393	3.1549	1.173	1.6557				0.604759	4.5528
15.2501	2.091	1.781	1.513	1.899	2.604	16.8518	1.7854	2.6194	11.0694	3.4703	2.5023	14.5245	2.3253	2.6326	3.7913	1.6776	1.5174	1.8009	12.0374	7.1609	6.1057	5.9396	3.1624	1.302	1.5886				0.609524	4.55011
15.3692	2.317	1.971	1.879	1.922	2.233	17.3919	1.8348	2.3625	12.336	3.7836	3.2182	13.362	2.3113	2.4421	3.3032	1.5351	1.4581	2.437	10.0871	6.5234	6.6797	6.0448	2.8987	1.403	1.5741				0.614284	4.53234
15.4884	1.937	1.903	1.66	1.836	1.97	17.5189	2.3037	2.6336	12.8526	3.1353	2.936	12.7768	1.7033	2.8407	3.4473	1.6077	1.7001	3.0239	9.5786	6.6948	6.7127	5.3941	3.0022	1.707	1.9156				0.619048	4.51164
15.6075	2.367	1.705	1.917	1.534	2.286	18.9321	2.2223	2.4598	10.4609	3.8168	2.9393	11.0143	1.6593	3.2054	3.6601	1.3964	2.0982	2.9149	9.9937	5.8979	6.3852	6.6407	2.7681	1.301	1.1884				0.623808	4.43055
15.7266	1.785	2.206	1.962	1.842	2.031	19.2385	2.1835	2.5051	9.4398	3.8414	3.3652	11.1687	2.1461	3.4251	3.3743	1.0494	1.78	1.9325	9.2136	5.8499	6.6659	5.9572	3.1239	1.399	1.4074				0.628569	4.3557
15.8458	2.372	1.993	1.829	2.206	2.473	20.9359	2.0105	2.5431	7.4816	3.0565	2.4917	11.026	2.3759	3.5685	3.4066	1.8612	1.5651	2.8724	9.1628	5.0148	7.5976	5.7973	2.9751	1.647	1.2811				0.633333	4.38175
15.9649	2.343	1.929	1.666	2.25	2.23	22.4302	1.9396	2.4271	6.5963	3.2775	3.18	11.0232	2.0303	3.3032	3.0333	1.5218	1.5197	3.1868	10.0001	5.2805	8.7705	5.9121	2.8233	1.661	1.677				0.638093	4.48046
16.0841	2.12	2.184	1.975	1.64	2.089	23.0903	2.0456	2.2531	7.7094	2.8402	3.1525	12.6621	1.7976	3.1683	2.8671	1.6601	1.4313	2.8955	8.6163	5.7154	7.3588	5.6961	2.7678	1.533	1.6397				0.642857	4.43633
16.2032	2.113	1.862	1.612	1.345	1.834	21.9564	1.8707	2.6579	8.7454	2.8425	2.9674	12.7165	1.8302	3.1384	2.8272	1.7093	1.6633	2.5598	8.649	6.3809	6.5656	7.5953	2.7565	1.463	1.5057				0.647618	4.44668
16.3224	1.655	2.109	1.565	1.705	2.12	18.8816	1.9164	2.4206	7.8636	2.873	2.7635	15.0511	1.9118	3.4392	2.5798	1.6775	1.3994	2.6938	8.6867	5.9378	6.7871	6.9639	2.9209	1.647	1.5558				0.652382	4.36498
16.4415	2.076	1.908	1.862	1.856	1.678	15.4589	1.974	2.1598	6.4987	3.3552	3.1955	15.6662	2.2444	4.1148	2.6313	1.4244	1.7084	2.3888	8.7569	7.1107	7.0392	6.1516	3.1529	1.375	1.3472				0.657142	4.28536
16.5606	2.295	1.864	1.695	1.586	2.313	11.4381	2.0519	2.1397	7.1458	3.0129	3.1163	17.0111	1.9243	3.9287	3.06	1.6218	1.9219	2.8262	7.8363	7.9811	7.9126	7.9207	2.9076	1.615	1.1359				0.661902	4.33044
16.6798	1.846	2.26	1.94	2.147	2.315	10.6125	1.8075	3.0962	8.5278	3.3104	2.7599	16.4436	1.5725	3.8732	3.1679	1.3946	1.4873	3.0412	7.6045	7.4768	7.047	8.1262	2.7095	1.645	1.7891				0.666667	4.32003
16.7989	2.025	1.829	1.669	1.583	1.947	9.5717	2.2447	2.4978	7.7043	3.436	3.7659	15.4389	1.9248	4.1491	3.0992	1.5307	1.5514	2.6238	7.8437	8.542	7.5022	6.9841	3.657	1.654	1.1428				0.671427	4.23668
16.9181	1.92	1.421	1.432	1.607	1.679	9.2031	1.9178	2.3018	7.1952	3.6488	2.742	14.7858	1.6889	4.6471	3.0267	1.8986	1.8995	3.0564	7.8629	9.105	7.1624	7.4853	3.4981	1.622	1.3266				0.676191	4.16532
17.0372	2.004	2.725	1.946	1.447	2.363	8.7311	2.1911	2.7956	7.5172	3.6315	3.3286	13.9078	2.1592	4.7034	3.1809	1.9195	1.6732	3.4163	8.6577	11.0062	6.4616	9.3774	2.9012	1.359	1.5056				0.680951	4.43636
17.1563	1.827	2.082	1.985	1.41	1.718	7.8738	1.7671	2.6264	8.1686	3.5695	2.2956	11.8027	2.0026	4.5494	3.1992	1.343	1.2111	3.5604	8.8499	11.0046	6.5081	9.3565	3.1972	1.377	1.8393				0.685712	4.20496
17.2755	1.916	1.98	1.882	1.59	2.003	8.6356	1.8836	2.2876	8.7534	2.8373	2.6178	11.1441	1.8888	3.908	3.4084	1.431	1.7818	2.9115	9.6584	12.6175	5.9212	8.7221	3.1464	1.653	1.4464				0.690476	4.241
17.3946	1.559	2.17	2.029	1.624	2.112	7.9358	1.8592	1.7821	10.1378	2.8353	3.2239	10.0052	1.9759	4.1746	3.0872	1.4721	1.9547	3.3295	11.3945	11.9246	5.1333	8.8301	3.5812	1.698	1.3706				0.695236	4.28798
17.5138	1.734	2.249	2.018	1.56	1.819	7.6582	1.8077	2.3265	10.8154	3.357	2.652	10.6897	1.7083	3.6829	2.9418	1.7581	2.3876	3.7018	13.5584	12.0313	5.9111	9.575	3.8175	1.588	1.345				0.7	4.50773
17.6329	1.907	2.182	1.889	1.748	1.97	6.5374	1.9949	2.4528	11.4356	2.7555	2.5222	10.9145	1.7221	4.1296	3.3049	1.2564	1.8203	3.7577	15.7436	11.3712	5.3426	9.3415	4.3899	1.835	1.6033				0.704761	4.55708
17.7521	2.059	2.06	2.278	1.765	2.308	7.0534	2.6352	2.1099	9.89	2.8256	2.5827	11.5395	1.7562	3.1429	2.5866	2.0353	1.5655	4.6097	17.5578	11.0745	5.1651	9.2051	5.297	1.642	1.437				0.709525	4.64724
17.8712	2.156	2.138	1.76	2.119	2.138	7.1919	2.5053	2.3979	10.1057	2.8525	3.0767	11.764	2.3234	2.7145	2.8824	1.8938	1.9636	5.4033	18.3052	9.0456	3.9564	8.4275	5.9511	1.598	1.3248				0.714285	4.63978
17.9903	2.258	1.989	1.823	1.474	1.92	7.9401	1.8211	2.3367	8.7934	3.0015	2.6837	11.1616	2.164	3.1983	3.3864	2.092	1.689	4.7599	17.6785	10.3776	3.4403	8.5316	6.8445	1.542	1.4673				0.719045	4.57494
18.1095	2.138	2.182	1.879	1.232	1.908	8.1736	1.9437	2.3296	8.4522	3.4827	2.6306	10.5254	1.8292	3.7464	3.6761	1.5905	2.2643	4.6027	15.4952	10.4263	4.1816	9.5507	7.2256	1.589	1.5513				0.72381	4.58423
18.2286	2.167	2.108	1.945	1.461	1.479	8.2979	2.144	2.2938	7.7998	3.2308	3.0462	11.7476	1.9999	3.6844	4.1431	1.7541	2.0936	5.0881	12.9885	10.7189	3.5327	8.9114	7.5055	1.531	1.4498				0.72857	4.52484
18.3478	2.117	1.967	1.804	1.677	1.943	8.3006	2.2014	2.1227	7.0097	3.0183	2.5708	10.2807	2.2632	3.4012	3.9268	1.6144	1.4075	6.0314	11.4025	10.8131	3.4832	8.3273	8.4537	1.778	1.7366				0.733334	4.38604
18.4669	2.326	2.172	2.128	1.496	1.822	8.7083	2.3936	2.4855	7.6416	3.0963	2.2972	10.8252	2.1596	3.2079	3.7471	1.8741	1.5421	6.0999	10.1572	10.891	3.6307	10.139	9.4602	2.306	1.6851				0.738094	4.57166
18.586	2.009	2.53	1.984	1.426	1.523	8.4549	1.8047	1.6745	8.7472	3.3768	2.9721	11.9824	2.1875	3.0614	4.3562	1.9108	1.2075	6.0212	9.1223	9.813	3.4376	10.5005	10.1355	2.395	2.0032				0.742855	4.58545
18.7052	2.203	1.83	2.01	1.372	2.196	8.6357	2.2847	2.2099	8.5305	3.1494	2.1759	11.673	1.7662	2.9553	4.0958	1.3515	1.0156	6.1742	8.4265	9.251	3.1441	9.9215	11.7621	2.039	1.5843				0.747619	4.47029
18.8243	2.791	1.864	2.179	1.733	1.674	9.9318	2.1809	2.4002	10.1162	2.6955	2.2558	12.5708	2.0303	3.4146	4.2738	1.2737	1.6228	5.2482	7.9786	8.669	2.6511	10.9235	10.9741	1.853	1.4738				0.752379	4.59115
18.9435	2.77	2.035	1.911	1.85	2.121	9.7718	1.8944	2.5178	10.1066	2.6957	3.577	12.4127	2.0782	3.4236	4.8155	1.465	1.7847	5.2379	7.7168	8.7126	3.7155	10.3593	11.5456	2.542	1.2523				0.757143	4.73248
19.0626	3.348	2.251	1.715	1.719	1.481	9.9879	1.7571	2.4508	9.5771	2.8232	3.5587	11.4355	1.9783	3.3114	5.0107	1.44	2.0876	6.4293	8.9174	7.9699	2.7618	9.223	11.1924	2.027	1.8894				0.761904	4.6537
19.1817	3.843	1.765	1.936	1.928	2.106	11.3006	2.1001	2.3559	9.6979	2.3061	2.341	10.8502	1.4197	3.1462	5.5748	1.6274	1.951	6.8996	10.3472	7.6629	3.0236	9.641	13.3958	2.042	1.8176				0.766664	4.84314
19.3009	4.554	1.435	1.511	2.019	2.005	13.9892	1.985	1.9861	9.9744	2.353	2.7521	10.3068	1.6608	3.1787	6.5227	1.7976	1.8293	8.1277	11.22	7.0386	3.1954	10.0971	17.4338	2.333	1.6404				0.771428	5.23783
19.42	5.071	1.824	1.725	1.61	1.752	13.4502	1.4818	2.0218	11.8517	3.2725	2.8871	11.5605	1.9697	3.5405	6.0022	1.7459	1.9787	8.8844	12.9107	7.9319	3.0536	10.4172	20.7802	2.173	1.5432				0.776188	5.65755
19.5392	4.818	2.023	2.362	1.588	2.296	18.4578	2.1282	2.313	10.2461	3.1684	3.2643	11.2365	2.0901	3.2648	6.4715	2.0624	1.3907	12.5233	16.6322	6.5911	3.0978	12.5998	21.7855	2.269	1.805				0.780953	6.25938
19.6583	5.068	1.487	2.315	1.498	1.982	20.4777	2.16	2.8094	9.5506	3.5401	2.682	12.6165	2.2755	2.8652	6.9011	1.6805	1.762	14.9734	16.0551	6.7922	3.1222	11.7486	21.9714	2.786	1.6492				0.785713	6.43075
19.7775	6.936	1.783	2.101	1.831	1.91	20.2597	1.7776	2.9831	8.4386	3.1421	2.9706	14.3845	1.9764	3.8186	5.9847	2.1766	2.0637	18.5438	16.1401	6.8101	3.3697	13.4051	19.7576	2.539	1.827				0.790477	6.67718
19.8966	7.518	1.855	1.765	1.725	2.439	23.5366	2.0484	2.6632	9.8223	4.0903	3.7915	12.9322	1.4817	3.5644	6.3971	1.8897	1.8035	19.5967	15.6125	5.592	3.8573	14.0096	18.2906	2.674	1.7994				0.795237	6.8302
20.0157	8.271	1.818	2.02	1.779	2.379	23.7982	2.205	2.8853	8.7008	3.253	3.3338	12.8646	1.4419	3.5094	6.3151	1.386	2.8824	20.8507	15.3875	5.2741	3.7819	13.2683	15.8862	2.663	1.7361				0.799998	6.70761
20.1349	9.044	2.607	2.204	2.067	2.183	21.4532	1.9986	2.8704	8.6541	3.0641	2.8198	12.0757	2.1846	3.8529	6.63	1.4145	2.5673	20.8119	15.1398	5.3784	4.1537	12.808	17.725	2.136	1.8734				0.804762	6.70866
20.254	9.563	1.89	2.711	1.618	2.983	24.359	2.044	2.8806	8.2279	3.2229	2.6326	12.729	2.2324	4.508	6.6621	1.9719	2.9209	23.5478	14.4395	5.3544	4.6315	11.9044	20.1674	3.06	1.7862				0.809522	7.1219
20.3732	11.662	2.509	1.588	1.709	2.873	24.1885	2.1375	2.7485	8.0831	2.4943	2.6512	13.7003	1.5995	5.0214	7.6173	2.1545	3.5697	20.708	15.7641	6.2107	4.132	14.1634	15.9885	3.938	1.5947				0.814286	7.15225
20.4923	13.89	2.601	1.956	1.753	2.805	23.4796	1.8513	3.655	7.7975	3.0525	3.5017	13.0718	1.7255	4.0841	7.0282	2.5576	4.1662	19.7277	15.4167	5.7822	4.1493	17.2595	18.0479	3.957	1.3638				0.819047	7.3872
20.6114	15.097	2.628	2.78	1.557	2.139	24.2241	1.8489	2.861	8.8533	3.136	2.8522	13.6397	2.2887	4.2168	7.5587	2.3511	5.5652	19.0265	19.2467	6.2612	5.2425	20.7772	18.456	3.769	1.344				0.823807	7.90879
20.7306	16.456	3.796	2.497	2.323	3.032	21.8664	2.285	2.3814	8.2187	2.8762	2.1312	13.6419	1.7984	5.9358	7.4454	2.635	7.1492	22.0212	20.1836	5.8527	5.0337	21.0609	18.2171	4.026	1.9867				0.828571	8.19402
20.8497	16.559	4.953	2.693	2.29	2.85	20.0863	2.048	2.8888	7.9136	3.3839	2.1628	13.4832	2.0402	5.1245	8.0414	3.1013	7.3247	16.931	22.4284	5.4215	5.4952	23.2264	17.1398	5.327	2.1125				0.833331	8.20102
20.9689	20.001	6.922	2.737	2.148	3.163	17.3349	2.1371	3.3046	7.9243	3.5909	2.9968	15.4141	2.5826	5.1255	7.6861	3.1699	9.9851	15.9212	25.887	6.6652	5.4774	21.1872	16.2602	4.638	1.8721				0.838096	8.56525
21.088	20.562	7.281	2.747	2.57	3.984	16.2216	2.0851	2.4524	7.8104	3.0504	2.7589	15.2622	2.0055	5.3365	8.8639	5.7679	11.9974	15.0715	26.8118	7.2697	5.6819	21.6004	18.9957	5.972	2.0396				0.842856	8.96795
21.2071	21.213	9.318	2.844	2.651	4.236	14.8796	2.1798	2.39	8.8208	2.5921	2.4889	16.2598	1.9395	4.5818	10.553	8.1608	14.3443	14.0522	29.5892	8.7464	7.5952	23.4063	17.8088	5.816	2.1757				0.847616	9.54569
21.3263	19.437	11.295	2.849	3.471	4.885	14.597	2.7761	2.489	9.1384	2.6731	2.2221	18.1787	2.3131	5.2829	10.6556	10.864	17.1431	15.8527	35.0801	10.5609	9.6724	28.3268	16.9566	6.409	2.4656				0.85238	10.6238
21.4454	17.381	14.052	2.946	5.61	7.153	12.645	2.1003	2.6522	11.6284	2.8986	2.9876	21.9748	1.9386	5.0321	12.1984	14.8463	16.354	16.6416	37.6209	11.5738	13.4452	26.9877	16.2335	9.117	2.2021				0.857141	11.5288
21.5646	16.994	16.26	4.075	8.403	7.952	13.9229	2.5267	2.8452	10.9274	3.2949	2.932	26.5353	1.7082	4.9994	13.3514	15.0663	18.0929	16.9055	38.1025	12.4414	13.9664	23.4927	16.8658	8.775	2.3475				0.861905	12.1113
21.6837	16.035	17.747	3.834	12.56	7.52	13.15	2.4675	2.5544	13.1647	3.5717	2.758	27.7105	2.5968	4.4386	12.7988	15.5871	18.9586	15.4769	40.6714	13.955	15.2826	18.6729	15.6983	9.257	2.995				0.866665	12.3785
21.8029	15.078	19.766	3.647	16.711	6.666	12.9712	2.4084	2.8918	15.2258	3.7738	2.7627	26.631	2.5148	4.4392	13.5441	22.8361	24.2604	19.4195	40.9732	16.0957	16.2793	15.6462	16.6334	11.715	2.8087				0.871429	13.4279
21.922	13.674	21.988	4.912	19.929	5.616	13.7678	2.2211	2.9533	17.8263	4.142	3.6269	26.5951	2.3404	4.0876	14.5869	29.6234	30.9566	21.8649	42.5789	19.0446	18.3032	14.0751	15.2102	12.522	3.2346				0.87619	14.6272
22.0411	9.775	21.176	5.801	21.209	3.587	13.7628	3.5257	2.6421	20.2168	3.5451	2.8443	25.4035	2.6802	4.4702	16.4469	35.8584	32.5529	27.7888	36.4059	20.5558	18.6812	12.7737	15.2346	13.14	5.0241				0.88095	15.004
22.1603	6.187	22.256	6.783	23.102	3.111	13.8873	3.2662	2.872	20.4161	3.7956	3.3499	24.3366	2.7099	4.2375	18.4139	42.5398	36.1172	34.883	31.2512	21.9189	18.231	13.0157	16.9044	15.474	6.1042				0.885714	15.8065
22.2794	4.214	24.598	6.683	24.791	2.741	13.5676	3.1678	3.2317	22.6419	4.196	3.4556	23.9937	2.9545	4.7479	21.5336	40.9678	38.7001	38.8814	20.3959	22.5473	18.8895	12.5972	15.9106	16.958	8.7135				0.890474	16.0431
22.3986	2.791	27.247	6.24	26.262	2.183	15.3245	3.9119	3.72	23.9524	4.5773	3.5315	22.3839	3.1775	5.0032	24.8667	45.8627	42.5222	45.1402	14.7406	23.3977	16.9007	12.9391	17.2981	17.53	12.2199				0.895239	16.9489
22.5177	1.421	25.838	7.17	24.643	1.668	18.5797	4.5556	3.3502	24.5209	4.5051	4.3144	24.3797	3.2007	5.0202	31.5214	41.5649	49.7479	50.866	8.1917	20.9984	18.4683	11.0554	16.2852	19.383	14.7103				0.899999	17.4384
22.6368	0.674	27.028	8.582	24.8	1.473	17.879	4.8584	4.0405	25.6683	4.6674	3.5069	24.4118	2.9643	4.3954	34.8648	34.4098	55.8347	55.0884	4.986	19.1259	20.8352	8.3874	16.8426	22.101	18.8737				0.904759	17.8519
22.756	0.673	25.099	10.715	24.991	0.848	19.8005	5.4265	3.7005	22.9614	5.3986	4.4509	26.8629	3.2631	4.6663	41.4865	24.8669	61.1891	55.7613	3.5688	15.2371	19.1286	6.7294	19.1416	25.974	24.5787				0.909523	18.2607
22.8751	0.516	22.076	11.246	19.456	0.85	20.0847	6.4723	4.1852	22.6426	6.8312	5.4549	27.3109	2.7401	4.5635	44.4668	18.3381	70.8262	53.2146	3.0617	10.469	15.8893	5.5078	23.3925	25.053	29.7106				0.914284	18.1744
22.9943	0.609	15.827	13.529	13.629	0.632	20.5847	5.7525	3.9791	22.6765	9.0539	5.5228	28.7849	3.5508	5.1475	50.5087	12.9339	72.8962	49.9318	2.7354	8.6272	12.0944	3.5595	27.628	28.938	29.2537				0.919048	17.9354
23.1134	0.531	10.7	13.712	8.9	0.787	19.4894	6.5239	5.1038	22.0786	11.5928	6.9276	31.5154	3.5301	5.9588	58.3257	8.5811	67.9302	38.3342	2.5834	5.7964	8.8229	2.4842	31.1368	27.856	28.6425				0.923808	17.1138
23.2325	0.647	8.141	15.392	5.216	0.592	19.7645	8.4259	5.5722	20.6544	13.7983	8.7385	31.3415	3.4275	6.8868	59.7387	5.9596	59.4764	26.4979	1.6977	3.478	5.7591	2.5686	37.7937	31.262	30.9982				0.928568	16.5531
23.3517	0.433	6.515	17.058	3.687	0.549	16.0631	9.4243	6.7308	21.1905	17.152	14.3625	31.0426	3.6743	8.6144	64.4329	4.6482	44.4284	17.2317	1.7626	2.4694	4.0435	2.2934	39.9001	34.327	32.9367				0.933333	16.1988
23.4708	0.44	3.535	19.704	2.808	0.371	12.8394	11.9063	8.2238	21.0846	19.617	22.5559	31.411	4.0412	10.0225	64.213	4.2835	32.9685	12.2975	1.1809	2.0448	2.8853	1.6145	35.5943	37.458	29.6235				0.938093	15.7089
23.59	0.262	2.832	15.956	2.362	0.492	10.351	11.1339	8.3107	18.3461	26.2112	34.6223	32.0611	4.544	12.5671	58.1404	3.6073	21.2412	8	1.2646	1.515	1.813	1.1813	31.6314	41.384	20.5714				0.942857	14.816
23.7091	0.48	2.237	12.831	1.647	0.397	9.228	11.8204	11.1258	16.1527	31.2857	45.4311	27.9618	4.0969	13.9268	51.4828	2.6497	13.4431	4.0221	1.1285	1.0193	1.911	0.5997	23.0937	43.339	12.4251				0.947617	13.7494
23.8283	0.297	1.439	11.345	1.389	0.334	7.3424	12.989	13.2612	14.5565	39.4256	52.0325	23.4734	5.196	15.9415	45.385	2.0697	6.9706	2.6545	0.8608	1.356	0.9575	0.8926	15.3892	44.673	5.915				0.952382	13.0458
23.9474	0.224	1.135	7.852	1.462	0.497	6.642	15.1139	15.5742	10.633	45.5134	58.5272	17.8727	6.6899	16.7434	34.028	1.9429	5.2821	1.6907	0.9343	1.0348	0.9834	0.4687	9.8109	43.74	3.6093				0.957142	12.3202
24.0665	0.166	0.949	5.374	1.128	0.536	5.0192	14.094	15.5685	8.3192	50.9054	62.075	12.3078	8.1914	18.4808	29.1208	1.6834	3.6088	1.5706	0.6217	0.6389	0.9874	0.4889	5.9	39.114	2.2003				0.961902	11.562
24.1857	0.279	0.978	3.751	0.908	0.222	3.3479	14.5598	16.3814	5.7845	52.459	68.2101	7.3459	8.2269	22.2859	23.3569	1.3532	2.5202	1.4443	0.4632	0.5706	0.8384	0.529	3.1973	34.165	1.5182				0.966666	10.9878
24.3048	0.01	0.718	2.915	0.796	0.295	2.9891	12.3114	16.7884	3.2908	53.0462	74.4029	5.6806	9.8975	24.4843	20.955	1.3877	2.1123	1.31	0.3008	0.6555	0.5378	0.3	1.786	30.576	1.1703				0.971427	10.7487
24.424	0.149	0.749	2.094	0.842	0.155	2.4481	12.9682	16.5909	2.6956	46.2712	67.8071	5.1529	12.0269	27.9019	16.0463	1.2301	1.5981	0.9662	0.4573	0.3865	0.393	0.3802	1.7916	25.319	0.8565				0.976191	9.89106
24.5431	0.347	0.93	1.843	0.695	0.278	1.9361	10.8953	15.3839	2.1902	35.2681	50.0853	3.7788	15.8006	29.7496	12.1088	0.8388	1.8772	0.854	0.3483	0.3835	0.4236	0.1963	1.2649	19.678	0.7728				0.980951	8.31708
24.6622	0.135	0.799	1.347	0.585	0.197	2.3672	8.9459	13.3273	1.4228	25.7929	29.1829	2.9898	19.6944	28.1648	9.6152	0.571	1.4225	1.1034	0.3951	0.538	0.408	0.3444	1.0146	16.576	0.504				0.985711	6.69773
24.7814	0.102	0.821	0.891	0.484	0.225	1.5909	5.3309	10.8472	1.0571	16.4844	14.4281	2.3437	21.1894	29.2576	7.1932	0.5772	0.7959	0.7078	0.434	0.4065	0.4213	0.2451	0.7163	13.414	0.611				0.990476	5.22298
24.9005	0.24	0.462	0.988	0.404	0.216	1.3496	3.6407	8.4763	0.8173	9.4449	6.6288	2.1686	23.5262	31.9844	7.1106	0.315	0.9709	0.3579	0.2409	0.2545	0.3833	0.2875	0.7367	12.504	0.3907				0.995236	4.55595
25.0197	0.064	0.363	0.811	0.354	0.242	0.6809	2.9463	5.7996	0.5578	5.2998	3.7737	1.5941	24.5811	29.6605	5.5788	0.5636	1.005	0.3304	0.1797	0.3366	0.2912	0.2879	0.5648	9.618	0.2582				1	3.82968

## Sheet: Sheet1
Image19				Image20				Image21				Image36				Image37				Image38				Image4				Image5				Image6					Distance	Image19	Image20	Image21	Image36	Image37	Image38	Image4	Image5	Image6
Ap-Basal to 1	Average intensities			Ap-Basal to 1	Average intensities			Ap-Basal to 1	Average intensities			Ap-Basal to 1	Average intensities			Ap-Basal to 1	Average intensities			Ap-Basal to 1	Average intensities			Ap-Ba	Average int.			Ap-Ba	Average int.			Ap-Ba	Average int.				0	16.2168	6.64075	34.6046	6.16431	3.35529	5.09363	36.0994	23.0296	10.8019
0	16.2168			0	6.64075			0	34.6046			0	6.16431			0	3.35529			0	5.09363			0	36.0994			0	23.0296			0	10.8019				0.05	38.6817	18.0644	61.9438	15.3543	11.257	13.4669	48.142	38.1148	21.1017
0.00476025	18.2243			0.0036752	7.00399			0.00537448	37.5478			0.00609544	7.33564			0.00546258	3.79571			0.00504875	5.62554			0.00480602	38.2621			0.00490027	25.6238			0.00684695	12.1127				0.1	68.8173	35.4942	57.0698	35.7733	30.7848	43.499	41.61	43.5883	35.8828
0.00952449	21.0402			0.00735349	7.88566			0.0107535	41.1578			0.012196	8.76738			0.0109297	4.63892			0.0101017	6.40317			0.00961608	40.8841			0.00980465	28.5619			0.0136997	13.8932				0.15	43.9611	12.9074	13.73	17.8794	6.69282	11.4802	21.4235	30.8773	13.2599
0.0142847	24.5954			0.0110287	8.66915			0.0161279	46.5921			0.0182914	10.3532			0.0163923	5.60298			0.0151505	7.5089			0.0144221	43.5119			0.0147049	31.6478			0.0205466	16.2376				0.2	17.469	5.49352	5.47768	6.42165	2.82088	3.20758	10.6284	20.1151	6.43411
0.019049	28.5908			0.014707	9.50373			0.0215069	53.2404			0.024392	12.8261			0.0218595	6.63479			0.0202035	8.77158			0.0192322	46.049			0.0196093	34.8846			0.0273993	19.5809				0.25	5.92782	2.80327	3.44818	4.2159	2.76474	3.58234	6.92542	12.6492	5.2161
0.0238092	33.3622			0.0183822	10.7197			0.0268814	60.8663			0.0304874	15.2608			0.0273221	8.17362			0.0252522	10.7791			0.0240382	49.0651			0.0245096	37.8749			0.0342463	22.9297				0.3	3.23335	2.4579	3.19735	4.33122	3.29358	4.66812	3.76242	8.1856	6.2587
0.0285695	39.0912			0.0220574	12.1781			0.0322559	69.0747			0.0365829	17.9529			0.0327846	9.99747			0.030301	12.7186			0.0288442	51.8865			0.0294098	41.032			0.0410932	27.0625				0.35	2.89757	3.30207	3.106	4.47474	4.02047	5.71906	2.27886	4.46499	5.96538
0.0333337	44.8628			0.0257357	14.2685			0.0376349	77.253			0.0426834	21.4829			0.0382518	12.8789			0.035354	15.6521			0.0336543	53.4837			0.0343142	43.2697			0.0479459	31.4835				0.4	3.18392	4.54872	3.67553	4.0277	3.51966	5.41592	2.5113	3.61486	5.83961
0.038094	51.0341			0.0294109	16.7782			0.0430093	83.2342			0.0487789	25.0894			0.0437144	17.4116			0.0404027	19.7585			0.0384603	54.7962			0.0392145	45.5973			0.0547929	35.8129	21.1017			0.45	4.2882	4.0319	4.58445	4.31902	3.70963	5.43876	2.86118	4.30715	5.21772
0.0428582	57.3899			0.0330891	19.8631			0.0483883	87.6652			0.0548794	28.3102	15.3543		0.0491815	22.8911			0.0454557	25.1749			0.0432704	55.1034			0.0441189	47.5948			0.0616456	39.295				0.5	4.88697	4.48365	4.69421	4.52108	3.3206	4.33037	3.0609	4.1131	4.65606
0.0476185	62.8939			0.0367643	23.5215			0.0537628	90.1461	61.9438		0.0609749	31.7346			0.0546441	28.4467	11.257		0.0505045	30.6503	13.4669		0.0480764	54.7758			0.0490191	48.626			0.0684925	41.4906				0.55	4.85435	4.55539	3.96799	4.3115	3.14422	3.83645	3.64904	4.3335	4.89717
0.0523827	66.879	38.6817		0.0404426	27.5491			0.0591418	88.8735			0.0670754	34.7284			0.0601113	33.8917			0.0555574	36.2021			0.0528864	53.7865	48.142		0.0539235	49.6354	38.1148		0.0753452	41.3095				0.6	4.6691	4.0507	4.01353	3.88781	2.86446	3.90624	4.78458	4.63514	4.69927
0.057143	69.6556			0.0441178	31.4263			0.0645163	85.0906			0.0731709	37.4806			0.0655738	37.51			0.0606062	41.5818			0.0576925	52.3653			0.0588238	49.3395			0.0821922	39.0656				0.65	4.44905	3.56223	3.94736	4.03502	2.96616	4.17761	4.19709	5.44965	4.08794
0.0619032	71.0405			0.047793	35.8735			0.0698908	76.9237			0.0792663	38.7829			0.0710364	39.2188			0.0656549	46.8317			0.0624985	50.176			0.063724	48.3933			0.0890391	35.1995				0.7	4.30159	2.9255	4.12078	4.2928	3.16047	4.17794	4.05112	4.53351	3.93615
0.0666675	71.7776			0.0514713	39.0842	18.0644		0.0752697	67.2488			0.0853669	39.0009			0.0765036	38.6072			0.0707079	50.0607			0.0673085	47.1402			0.0686284	48.1612			0.0958918	29.8634				0.75	4.55752	3.33027	5.25182	4.73532	4.06119	4.061	4.36058	5.25309	4.20229
0.0714277	71.8878			0.0551465	41.4729			0.0806442	56.2857			0.0914623	37.285			0.0819662	34.9904			0.0757567	51.7477			0.0721146	45.3573			0.0735287	46.2251			0.102739	24.9555	35.8828			0.8	5.88532	6.48412	9.55298	5.58394	7.32438	4.91809	5.72006	5.23923	5.26636
0.076192	71.6512			0.0588248	43.9869			0.0860232	46.2404			0.0975628	35.041			0.0874333	30.4277			0.0808097	50.8657			0.0769246	42.6193			0.0784331	44.5952			0.109591	20.3564				0.85	8.36678	15.7633	12.2876	7.48304	6.6717	8.8716	7.44703	6.19015	7.6658
0.0809522	69.5925			0.0625	45.0547			0.0913977	37.5733			0.103658	32.1328	35.7733		0.0928959	25.1033			0.0858584	47.2246			0.0817307	39.5729			0.0833333	42.6588			0.116438	16.9194				0.9	14.8333	12.382	6.24124	10.4817	5.0935	10.8266	7.22985	8.75874	9.95791
0.0857125	68.6137			0.0661752	44.9523			0.0967722	30.0904			0.109754	28.9539			0.0983585	20.5303			0.0909072	42.591			0.0865367	37.8749			0.0882336	41.2641			0.123285	14.1218				0.95	16.1556	0.816554	2.65828	7.91059	4.57949	2.84275	6.21078	10.2159	13.0106
0.0904767	66.5483			0.0698535	43.5168			0.102151	25.302	57.0698		0.115854	25.2121			0.103826	16.7839	30.7848		0.0959602	36.4543			0.0913467	35.9552			0.093138	40.1826			0.130138	12.1662				1	8.41331	0.161619	1.97164	6.38869	2.38006	1.06494	3.47373	9.34848	6.55362
0.095237	64.7363			0.0735287	41.1665			0.107526	21.6794			0.12195	21.616			0.109288	13.1031			0.101009	31.4308	43.499		0.0961528	33.5927			0.0980382	38.1453			0.136985	10.7772
0.100001	62.6692	68.8173		0.077207	38.241			0.112905	18.8911			0.12805	18.1716			0.114755	10.5057			0.106062	25.7775			0.100963	31.4464	41.61		0.102943	36.9183	43.5883		0.143838	9.63779
0.104761	59.4505			0.0808822	35.7881			0.118279	16.1137			0.134146	15.2738			0.120218	8.37808			0.111111	20.6909			0.105769	29.3645			0.107843	35.5851			0.150685	8.84066	13.2599
0.109522	56.3947			0.0845574	33.1462			0.123654	14.4128			0.140241	12.8415			0.125681	6.79621			0.116159	15.8841			0.110575	27.6517			0.112743	34.6649			0.157532	8.06138
0.114286	52.9092			0.0882357	30.7028			0.129033	12.7061			0.146342	11.2235			0.131148	5.46421			0.121212	12.6338			0.115385	25.8519			0.117648	33.159			0.164384	7.40931
0.119046	49.5352			0.0919109	27.6669			0.134407	11.5174			0.152437	9.74304	17.8794		0.13661	4.73028			0.126261	9.97013			0.120191	23.9895			0.122548	32.7456			0.171231	6.7872
0.12381	45.8917			0.0955891	25.5889			0.139786	10.2973			0.158538	8.90429			0.142077	4.18081			0.131314	8.02792			0.125001	22.5767			0.127452	31.7757			0.178084	6.28026
0.128571	43.5006			0.0992643	23.8567			0.14516	9.53438			0.164633	7.74421			0.14754	3.68951			0.136363	6.77652			0.129807	21.0462			0.132352	30.502			0.184931	6.02826
0.133335	40.8103			0.102943	21.7777	35.4942		0.150539	8.41805	13.73		0.170734	7.09913			0.153007	3.38748	6.69282		0.141416	5.73955			0.134617	19.6792			0.137257	29.1596			0.191784	5.80418
0.138095	38.6787			0.106618	19.7719			0.155914	7.53032			0.176829	6.38065			0.15847	3.2346			0.146465	4.89744			0.139423	18.117			0.142157	28.2751			0.198631	5.70277
0.142855	34.678			0.110293	17.9901			0.161288	6.92164			0.182925	5.82017			0.163932	2.99603			0.151513	4.40435	11.4802		0.144229	16.5679			0.147057	26.9197			0.205478	5.39954	6.43411
0.14762	32.0477			0.113971	16.7463			0.166667	6.43319			0.189025	5.43454			0.169399	2.86751			0.156566	3.93364			0.149039	15.967			0.151962	25.9858	30.8773		0.21233	5.40372
0.15238	29.6753	43.9611		0.117647	15.2165			0.172042	5.81438			0.195121	5.2547			0.174862	2.79241			0.161615	3.65317			0.153845	14.8474	21.4235		0.156862	24.7197			0.219177	5.25242
0.157144	26.8093			0.121325	14.3732			0.177421	5.39187			0.201221	4.73551	6.42165		0.180329	2.74624			0.166668	3.36641			0.158655	13.4369			0.161766	23.6448			0.22603	5.09753
0.161904	24.6657			0.125	13.3417			0.182795	5.22233			0.207317	4.46369			0.185792	2.71127			0.171717	3.20965			0.163461	12.8491			0.166667	22.3995			0.232877	4.99133
0.166665	22.5738			0.128675	12.2627			0.18817	4.82908			0.213412	4.30036			0.191254	2.7015			0.176766	3.06293			0.168267	12.217			0.171567	21.4136			0.239724	5.14385
0.171429	20.4853			0.132353	11.4185			0.193549	4.42876			0.219513	4.37237			0.196722	2.62915			0.181819	3.08632			0.173077	11.3529			0.176471	20.5029			0.246577	5.171
0.176189	18.6075			0.136029	10.8845			0.198923	4.19178			0.225608	4.19507			0.202184	2.70918	2.82088		0.186867	2.94915			0.177883	10.7625			0.181372	19.4089			0.253423	5.45282	5.2161
0.180953	16.998			0.139707	9.81795			0.204302	4.01343	5.47768		0.231709	4.20077			0.207651	2.73313			0.19192	2.89525			0.182693	10.0578			0.186276	18.2924			0.260276	5.69707
0.185714	15.2984			0.143382	9.22243			0.209677	3.89286			0.237804	4.08585			0.213114	2.78545			0.196969	2.94302			0.187499	9.69137			0.191176	17.7405			0.267123	6.0447
0.190478	13.4328			0.14706	8.72099			0.215056	3.79889			0.243905	4.1504			0.218581	2.84398			0.202022	2.97622	3.20758		0.19231	9.01376			0.196081	16.8077			0.273976	6.35593
0.195238	12.4328			0.150736	8.02905	12.9074		0.22043	3.38163			0.25	3.95868	4.2159		0.224044	2.68072			0.207071	3.03224			0.197116	8.44904			0.200981	16.2207	20.1151		0.280823	6.53202
0.199998	10.926			0.154411	7.6368			0.225805	3.48914			0.256095	4.03592			0.229506	2.74012			0.21212	3.23943			0.201922	8.45344	10.6284		0.205881	15.1484			0.28767	6.47319
0.204763	9.92937	17.469		0.158089	7.06437			0.231184	3.53174			0.262196	4.00931			0.234973	2.72068			0.217173	3.20987			0.206732	8.14915			0.210786	14.4908			0.294522	6.40139
0.209523	8.78094			0.161764	6.79502			0.236558	3.22724			0.268291	4.28864			0.240436	2.68063			0.222221	3.43738			0.211538	7.74824			0.215686	13.9376			0.301369	6.30663	6.2587
0.214287	7.79372			0.165443	6.70468			0.241937	3.21487			0.274392	4.31098			0.245903	2.8333			0.227274	3.52588			0.216348	7.62108			0.22059	13.4493			0.308222	6.16277
0.219047	7.13324			0.169118	6.3053			0.247312	3.20817			0.280487	4.23434			0.251366	2.86464	2.76474		0.232323	3.53469			0.221154	7.11917			0.22549	12.685			0.315069	6.09293
0.223808	6.56405			0.172793	5.72814			0.252686	3.28908	3.44818		0.286583	4.40773			0.256828	2.88688			0.237372	3.70955			0.22596	7.16791			0.230391	12.0856			0.321916	5.93415
0.228572	6.06727			0.176471	5.52098			0.258065	3.1312			0.292683	4.39144			0.262295	2.91237			0.242425	3.97857			0.23077	6.85591			0.235295	11.919			0.328769	5.69267
0.233332	5.40507			0.180147	5.23196			0.26344	3.27108			0.298779	4.70664			0.267758	2.99665			0.247474	4.09572			0.235576	6.52181			0.240195	11.3781			0.335616	5.79849
0.238096	4.92921			0.183825	4.95595			0.268819	3.19223			0.304879	4.59603	4.33122		0.273225	3.17553			0.252526	4.06012	3.58234		0.240386	6.21587			0.2451	10.8397			0.342468	5.89764
0.242857	4.51588			0.1875	4.6326			0.274193	3.21389			0.310975	4.63026			0.278688	3.38128			0.257575	4.39627			0.245192	6.03557			0.25	10.5584	12.6492		0.349315	6.15333
0.247617	4.13876			0.191175	4.3754			0.279568	3.23283			0.31707	4.77055			0.28415	3.26115			0.262624	4.4143			0.249998	5.8195	6.92542		0.2549	10.1771			0.356162	5.99108	5.96538
0.252381	3.95006	5.92782		0.194853	4.20157			0.284947	3.3569			0.323171	4.54919			0.289617	3.43341			0.267677	4.51056			0.254808	5.20196			0.259805	9.7632			0.363015	5.94452
0.257141	3.62889			0.198529	3.95397			0.290321	3.23982			0.329266	4.60245			0.29508	3.53468			0.272726	4.42073			0.259614	4.91377			0.264705	9.10902			0.369862	5.92989
0.261906	3.36833			0.202207	3.80254	5.49352		0.2957	3.15023			0.335367	4.52925			0.300547	3.56108			0.277779	4.21267			0.264424	4.63			0.269609	8.57991			0.376715	5.89053
0.266666	3.32305			0.205882	3.50953			0.301074	2.98797	3.19735		0.341462	4.30359			0.30601	3.79281	3.29358		0.282827	4.59725			0.26923	4.21024			0.27451	8.62603			0.383562	5.90478
0.27143	3.20724			0.20956	3.43959			0.306453	3.0145			0.347563	4.19545			0.311477	4.05264			0.28788	4.85418			0.27404	4.03509			0.279414	8.20733			0.390414	5.88151
0.27619	3.20688			0.213236	3.18261			0.311828	2.97289			0.353658	4.21717	4.47474		0.316939	4.14491			0.292929	5.00398			0.278846	3.60913			0.284314	7.66294			0.397261	5.62204
0.280951	3.21694			0.216911	3.04502			0.317202	3.02124			0.359754	4.18655			0.322402	4.26773			0.297978	5.09885			0.283652	3.36658			0.289214	7.54538			0.404108	5.70403	5.83961
0.285715	3.13165			0.220589	2.95752			0.322581	3.06053			0.365854	4.18976			0.327869	4.27173			0.303031	5.17237	4.66812		0.288462	3.24756			0.294119	7.14905			0.410961	5.65207
0.290475	3.17952			0.224264	2.83107			0.327956	3.07466			0.37195	4.0318			0.333332	4.18147			0.30808	5.5121			0.293268	2.90729			0.299019	6.79512			0.417808	5.50535
0.295239	3.06424			0.227943	2.78727			0.333335	3.12984			0.37805	4.08713			0.338799	4.12273			0.313133	5.49249			0.298078	2.71063			0.303924	6.42654	8.1856		0.424661	5.37776
0.3	3.1166			0.231618	2.65525			0.338709	3.17778			0.384146	3.90207			0.344262	3.86791			0.318181	5.72458			0.302884	2.55441	3.76242		0.308824	6.00964			0.431507	5.20424
0.30476	3.12355	3.23335		0.235293	2.50177			0.344084	3.08062			0.390241	3.85151			0.349724	3.81019			0.32323	5.72739			0.30769	2.5051			0.313724	5.52568			0.438354	5.02462
0.309524	3.17544			0.238971	2.55018			0.349463	3.23128			0.396342	3.90251			0.355191	3.46489	4.02047		0.328283	5.90046			0.312501	2.36411			0.318628	5.17109			0.445207	4.95228
0.314284	3.00702			0.242647	2.38731			0.354837	3.29668	3.106		0.402437	4.07028	4.0277		0.360654	3.4484			0.333332	5.98985			0.317307	2.32857			0.323529	4.64675			0.452054	4.8077	5.21772
0.319049	2.85202			0.246325	2.30879			0.360216	3.32814			0.408538	4.2718			0.366121	3.37304			0.338385	5.88677			0.322117	2.27824			0.328433	4.28302			0.458907	4.65787
0.323809	2.77148			0.25	2.2866	2.80327		0.365591	3.31885			0.414633	4.47212			0.371584	3.3365			0.343434	5.85821			0.326923	2.16792			0.333333	4.04135			0.465754	4.63916
0.328569	2.83199			0.253675	2.25442			0.370965	3.43079			0.420729	4.48831			0.377046	3.30568			0.348482	5.52656			0.331729	2.13669			0.338234	3.867			0.472601	4.68894
0.333333	2.83068			0.257353	2.17238			0.376344	3.52958			0.426829	4.27843			0.382513	3.39061			0.353535	5.57221	5.71906		0.336539	2.17728			0.343138	3.75283			0.479453	4.64804
0.338094	2.74842			0.261029	2.22038			0.381719	3.6319			0.432925	4.22728			0.387976	3.67212			0.358584	5.56639			0.341345	2.27206			0.348038	3.70991			0.4863	4.64328
0.342858	2.90064			0.264707	2.25605			0.387098	3.71108			0.439025	4.2101			0.393443	3.69262			0.363637	5.42688			0.346155	2.25089			0.352943	3.64261	4.46499		0.493153	4.63827
0.347618	2.86285			0.268382	2.23409			0.392472	3.8573			0.445121	4.1937			0.398906	3.64329			0.368686	5.3319			0.350961	2.30775	2.27886		0.357843	3.43232			0.5	4.67687	4.65606
0.352382	2.99519	2.89757		0.27206	2.3568			0.397851	4.16304			0.451221	4.4104	4.31902		0.404373	3.81468	3.51966		0.373739	5.50285			0.355771	2.36067			0.362747	3.51962			0.506853	4.70646
0.357143	3.1029			0.275736	2.41343			0.403226	4.10906	3.67553		0.457317	4.3868			0.409835	3.82403			0.378788	5.37555			0.360577	2.34099			0.367648	3.323			0.5137	4.84098
0.361903	3.06308			0.279411	2.50832			0.4086	4.26828			0.463412	4.56145			0.415298	3.94285			0.383836	5.58356			0.365383	2.3656			0.372548	3.51106			0.520547	4.85771
0.366667	3.021			0.283089	2.44812			0.413979	4.40755			0.469513	4.40375			0.420765	3.85489			0.388889	5.27878			0.370193	2.37887			0.377452	3.58728			0.527399	4.94727
0.371427	2.98396			0.286764	2.56424			0.419354	4.47537			0.475608	4.44517			0.426228	3.90097			0.393938	5.39255			0.374999	2.38714			0.382352	3.58623			0.534246	4.91565
0.376192	3.01962			0.290443	2.56473			0.424733	4.82627			0.481709	4.45468			0.431695	3.71881			0.398991	5.44323			0.379809	2.49855			0.387257	3.51531			0.541099	4.85669
0.380952	3.1761			0.294118	2.68355			0.430107	4.56451			0.487804	4.66326			0.437157	3.61534			0.40404	5.25748	5.41592		0.384615	2.45765			0.392157	3.67818			0.547946	5.01037
0.385712	3.3128			0.297793	2.85535			0.435481	4.84322			0.493899	4.72867			0.44262	3.53591			0.409089	5.41855			0.389421	2.63255			0.397057	3.88341			0.554793	5.04223	4.89717
0.390476	3.2054			0.301471	2.87871	2.4579		0.44086	4.77308			0.5	4.52485	4.52108		0.448087	3.46837			0.414142	5.5023			0.394231	2.69052			0.401962	4.11218	3.61486		0.561646	5.02111
0.395237	3.4447			0.305147	2.79404			0.446235	4.57101			0.506095	4.57177			0.45355	3.52547	3.70963		0.41919	5.32817			0.399037	2.7483			0.406862	4.18086			0.568493	4.95604
0.400001	3.50967	3.18392		0.308825	2.9627			0.451614	4.53073	4.58445		0.512196	4.40603			0.459017	3.41792			0.424243	5.31557			0.403847	2.76344	2.5113		0.411766	4.32161			0.575345	4.83986
0.404761	3.71582			0.3125	2.98348			0.456988	4.67084			0.518291	4.29709			0.464479	3.20554			0.429292	5.64985			0.408653	2.7526			0.416667	4.45218			0.582192	4.72998
0.409525	3.86012			0.316178	2.91322			0.462367	4.76172			0.524392	4.47127			0.469947	3.18308			0.434345	5.79065			0.413463	2.81836			0.421571	4.43817			0.589045	4.54488
0.414286	4.08323			0.319853	2.7809			0.467742	4.79384			0.530487	4.53371			0.475409	3.31633			0.439394	5.6802			0.418269	2.78121			0.426471	4.36474			0.595892	4.5004
0.419046	4.02792			0.323529	2.86855			0.473116	4.80668			0.536583	4.18459			0.480872	3.23667			0.444443	5.59057			0.423075	2.88443			0.431372	4.2933			0.602739	4.30265	4.69927
0.42381	4.13628			0.327207	2.83529			0.478495	4.8028			0.542683	4.06764			0.486339	3.3542			0.449496	5.29518			0.427885	2.83367			0.436276	4.37191			0.609591	4.21699
0.42857	4.2135			0.330882	3.00934			0.48387	4.86799			0.548779	4.08572			0.491802	3.44521			0.454544	4.81652	5.43876		0.432691	2.74296			0.441176	4.213			0.616438	4.0233
0.433335	4.34072			0.33456	3.15166			0.489249	4.77645			0.554879	4.18566	4.3115		0.497269	3.46758			0.459597	4.741			0.437502	2.82638			0.446081	4.15376			0.623291	4.08884
0.438095	4.53691			0.338236	3.44739			0.494623	4.39218			0.560975	3.94539			0.502731	3.25885	3.3206		0.464646	4.52665			0.442308	2.97501			0.450981	4.282	4.30715		0.630138	4.1256
0.442855	4.68922			0.341911	3.75727			0.499998	4.37543	4.69421		0.56707	3.93466			0.508194	3.28992			0.469695	4.34172			0.447114	3.03416			0.455881	4.28237			0.636985	3.98084
0.447619	4.71404			0.345589	4.10947			0.505377	4.10902			0.573171	3.71952			0.513661	3.5113			0.474748	4.28277			0.451924	2.96304	2.86118		0.460786	4.15123			0.643838	4.12984
0.45238	4.85242	4.2882		0.349264	4.27314			0.510751	4.07353			0.579266	3.79215			0.519124	3.21325			0.479797	4.2096			0.45673	3.14471			0.465686	4.16706			0.650685	4.05018	4.08794
0.457144	4.85794			0.352943	4.34252	3.30207		0.51613	4.09704			0.585367	3.87969			0.524591	3.23951			0.48485	4.30069			0.46154	3.0687			0.47059	4.26471			0.657537	3.96894
0.461904	4.96631			0.356618	4.39828			0.521505	3.99872			0.591462	3.898			0.530053	3.18605			0.489898	4.30993			0.466346	3.10622			0.47549	4.1436			0.664384	3.95534
0.466664	4.83267			0.360293	4.64514			0.526879	3.91414			0.597558	3.96358			0.535516	3.17472			0.494947	4.15097			0.471152	2.92037			0.480391	4.0766			0.671231	3.90391
0.471429	4.80615			0.363971	4.485			0.532258	3.98028			0.603658	3.96948	3.88781		0.540983	2.8877			0.5	4.10997	4.33037		0.475962	2.92608			0.485295	4.07087			0.678084	3.94652
0.476189	4.65698			0.367647	4.58475			0.537633	3.74095			0.609754	3.93675			0.546446	2.77427			0.505049	3.98138			0.480768	2.92578			0.490195	3.9862			0.684931	3.92265
0.480953	4.77898			0.371325	4.38491			0.543012	3.85908			0.615854	3.94764			0.551913	3.02124	3.14422		0.510102	4.0338			0.485578	3.01006			0.4951	4.01715			0.691784	3.90247
0.485713	4.9564			0.375	4.41511			0.548386	3.84186			0.62195	4.0349			0.557375	2.91317			0.51515	3.85607			0.490384	3.12919			0.5	3.97124	4.1131		0.698631	3.8458
0.490478	4.88448			0.378678	4.38861			0.553765	4.06526	3.96799		0.62805	4.02361			0.562843	2.89131			0.520203	3.88987			0.495194	3.19293			0.504904	4.04245			0.705483	4.04358	3.93615
0.495238	4.80728			0.382353	4.63433			0.55914	4.05515			0.634146	4.04156			0.568305	2.95074			0.525252	3.77744			0.5	3.185	3.0609		0.509805	4.01828			0.71233	4.06159
0.499998	5.10701			0.386029	4.68877			0.564514	3.98328			0.640241	4.0476			0.573768	2.91873			0.530301	3.77789			0.504806	3.20804			0.514705	3.8981			0.719177	4.12354
0.504762	5.10246	4.88697		0.389707	4.7841			0.569893	4.09665			0.646342	3.98929			0.579235	2.91487			0.535354	3.67357			0.509616	3.19338			0.519609	3.98659			0.72603	4.22236
0.509522	5.06612			0.393382	4.50045			0.575267	4.03841			0.652437	4.25882	4.03502		0.584697	2.76206			0.540403	3.66976			0.514422	3.35345			0.52451	4.15675			0.732877	4.23076
0.514287	5.07059			0.39706	4.58857			0.580646	4.00193			0.658538	4.07473			0.590165	2.70836			0.545456	3.86857			0.519232	3.47082			0.529414	4.32518			0.73973	4.17422
0.519047	4.92838			0.400736	4.63532	4.54872		0.586021	4.21192			0.664633	4.24951			0.595627	2.84756			0.550504	3.83614	3.83645		0.524038	3.55861			0.534314	4.58593			0.746577	4.25797
0.523807	4.79103			0.404411	4.477			0.591395	3.97082			0.670729	4.00831			0.60109	2.87331	2.86446		0.555553	3.77145			0.528844	3.58591			0.539214	4.57651			0.753423	4.34561	4.20229
0.528571	4.75855			0.408089	4.36225			0.596774	3.7876			0.676829	4.41745			0.606557	2.90784			0.560606	3.85125			0.533654	3.708			0.544119	4.75234			0.760276	4.42102
0.533332	4.63			0.411764	4.34331			0.602149	3.97604	4.01353		0.682925	4.26465			0.61202	3.10795			0.565655	3.6789			0.53846	3.80213			0.549019	4.6149			0.767123	4.47284
0.538096	4.82276			0.415443	4.1549			0.607528	3.90722			0.689025	4.32459			0.617487	3.01765			0.570708	3.79259			0.54327	3.75011			0.553924	4.7115	4.3335		0.773976	4.78112
0.542856	4.85942			0.419118	3.95279			0.612902	3.91527			0.695121	4.52986			0.622949	3.02112			0.575757	3.76717			0.548076	4.21069			0.558824	4.49053			0.780823	5.27764
0.547616	4.83759			0.422793	3.95615			0.618277	3.78615			0.701216	4.4733	4.2928		0.628412	2.96178			0.580805	3.74562			0.552882	4.29833	3.64904		0.563724	4.48563			0.78767	5.55611
0.552381	4.7791	4.85435		0.426471	4.10544			0.623656	3.93691			0.707317	4.57099			0.633879	2.90742			0.585858	4.01956			0.557692	4.57294			0.568628	4.47377			0.794522	5.9473
0.557141	4.91599			0.430147	3.88237			0.62903	3.97578			0.713412	4.67543			0.639342	2.97315			0.590907	4.05083			0.562498	4.78179			0.573529	4.40343			0.801369	6.40851	5.26636
0.561905	4.94674			0.433825	3.82662			0.634409	3.94578			0.719513	4.80369			0.644809	2.92353			0.59596	4.22045			0.567309	4.84037			0.578433	4.48096			0.808222	6.96114
0.566665	4.97306			0.4375	3.90666			0.639784	3.9044			0.725608	4.66235			0.650271	2.87504	2.96616		0.601009	4.16457	3.90624		0.572115	4.84306			0.583333	4.52152			0.815069	7.15015
0.57143	4.72107			0.441178	3.92465			0.645163	3.9074			0.731709	4.69375			0.655738	3.14734			0.606062	4.10196			0.576925	4.83096			0.588238	4.63349			0.821922	7.29696
0.57619	4.70699			0.444853	3.73991			0.650537	4.24729	3.94736		0.737804	4.7112			0.661201	3.10078			0.611111	4.15249			0.581731	4.75403			0.593138	4.66924			0.828769	7.62228
0.58095	4.53277			0.448529	3.89041			0.655912	4.1371			0.743899	4.83602			0.666664	2.98916			0.616159	4.1582			0.586537	4.83456			0.598038	5.0171			0.835616	7.73735
0.585714	4.34449			0.452207	3.92405	4.0319		0.661291	4.15959			0.75	4.92908	4.73532		0.672131	3.02211			0.621212	4.16754			0.591347	4.83249			0.602943	5.17573	4.63514		0.842468	7.9192
0.590475	4.54601			0.455882	3.86608			0.666665	3.97126			0.756095	4.95446			0.677593	3.03939			0.626261	4.21217			0.596153	4.84598			0.607843	5.40054			0.849315	8.21722
0.595239	4.61519			0.45956	4.10081			0.672044	3.84599			0.762196	4.96653			0.683061	3.09161			0.631314	4.20999			0.600963	4.70964	4.78458		0.612747	5.5958			0.856168	8.42209	7.6658
0.599999	4.50501			0.463236	3.9874			0.677419	3.91046			0.768291	5.28503			0.688523	3.24041			0.636363	4.17861			0.605769	4.57095			0.617648	5.74683			0.863015	8.8587
0.604759	4.5528	4.6691		0.466911	3.95138			0.682793	4.05885			0.774387	5.58823			0.693986	3.27172			0.641412	4.20029			0.610575	4.43983			0.622548	5.69324			0.869862	9.12769
0.609524	4.55011			0.470589	4.3383			0.688172	4.19324			0.780487	5.65008			0.699453	3.3467			0.646465	4.22253			0.615385	4.36333			0.627452	5.7869			0.876715	9.4631
0.614284	4.53234			0.474264	4.30698			0.693547	4.16398			0.786583	5.67089			0.704915	3.35547	3.16047		0.651513	4.1723	4.17761		0.620191	4.19144			0.632352	5.62598			0.883562	9.956
0.619048	4.51164			0.477943	4.51937			0.698926	4.31956			0.792683	5.68846			0.710383	3.38885			0.656566	4.43724			0.625001	4.13593			0.637257	5.50632			0.890414	10.1594
0.623808	4.43055			0.481618	4.64692			0.7043	4.44775	4.12078		0.798779	6.03686			0.715845	3.43146			0.661615	4.4453			0.629807	4.02991			0.642157	5.39454			0.897261	10.5802
0.628569	4.3557			0.485293	4.60553			0.709675	4.38139			0.804874	6.4149	5.58394		0.721308	3.55624			0.666664	4.47625			0.634613	3.98841			0.647057	4.90547			0.904108	11.5602	9.95791
0.633333	4.38175			0.488971	4.81606			0.715053	4.26488			0.810975	6.73684			0.726775	3.70059			0.671717	4.27445			0.639423	4.11927			0.651962	4.8409	5.44965		0.910961	12.448
0.638093	4.48046			0.492647	4.98535			0.720428	4.56224			0.81707	6.98503			0.732237	4.02252			0.676766	4.08628			0.644229	4.18039			0.656862	4.72274			0.917808	13.2444
0.642857	4.43633			0.496325	5.16216			0.725807	4.88353			0.823171	7.11619			0.737705	4.43355			0.681819	4.07001			0.649039	4.09962			0.661766	4.63497			0.924661	13.7483
0.647618	4.44668			0.5	5.00119	4.48365		0.731181	5.07516			0.829266	7.35513			0.743167	4.34539			0.686867	4.02694			0.653845	4.04889	4.19709		0.666667	4.43276			0.931507	13.7517
0.652382	4.36498	4.44905		0.503678	4.87457			0.73656	5.35743			0.835367	7.29534			0.748634	4.80371			0.69192	4.03572			0.658655	3.75519			0.671571	4.58465			0.93836	13.4708
0.657142	4.28536			0.507353	4.90308			0.741935	5.70587			0.841462	7.69389			0.754097	4.86836	4.06119		0.696969	3.90736			0.663461	4.05864			0.676471	4.59188			0.945207	12.9869
0.661902	4.33044			0.511029	5.02837			0.747309	6.23598			0.847558	8.16431			0.75956	5.34407			0.702018	4.01985	4.17794		0.668267	3.91903			0.681372	4.37398			0.952054	11.424	13.0106
0.666667	4.32003			0.514707	4.81086			0.752688	6.79988	5.25182		0.853658	8.51758	7.48304		0.765027	5.82063			0.707071	4.08916			0.673077	3.95519			0.686276	4.4368			0.958907	9.61337
0.671427	4.23668			0.518382	4.755			0.758063	7.43579			0.859754	9.0626			0.770489	6.15747			0.71212	4.01195			0.677883	4.08089			0.691176	4.44228			0.965754	7.97927
0.676191	4.16532			0.52206	4.52283			0.763442	8.02502			0.865854	9.55597			0.775956	6.85555			0.717173	4.00995			0.682693	4.11485			0.696081	4.50518			0.972606	6.80614
0.680951	4.43636			0.525736	4.25517			0.768816	8.48781			0.87195	10.2681			0.781419	7.63983			0.722221	4.04279			0.687499	4.15612			0.700981	4.60983	4.53351		0.979453	6.06495
0.685712	4.20496			0.529411	4.26025			0.774191	9.04362			0.878045	10.4934			0.786882	8.32695			0.72727	4.1029			0.692306	4.17867			0.705881	4.97023			0.9863	5.50738
0.690476	4.241			0.533089	4.2918			0.77957	10.0558			0.884146	11.187			0.792349	8.59546			0.732323	4.05514			0.697116	4.16987			0.710786	5.29209			0.993153	5.20372
0.695236	4.28798			0.536764	4.25465			0.784944	10.5046			0.890241	11.274			0.797811	8.84425			0.737372	4.10147			0.701922	4.12271	4.05112		0.715686	5.38332			1	4.7005	6.55362
0.7	4.50773	4.30159		0.540443	4.32368			0.790323	10.8198			0.896342	11.2752			0.803278	8.33523	7.32438		0.742425	3.96285			0.706732	4.1204			0.72059	5.35695
0.704761	4.55708			0.544118	4.28041			0.795698	10.7278			0.902437	10.7371	10.4817		0.808741	7.78038			0.747474	4.10903			0.711538	4.08595			0.72549	5.29165
0.709525	4.64724			0.547796	4.55266			0.801077	10.8766	9.55298		0.908538	10.229			0.814208	7.34804			0.752526	4.12472	4.061		0.716348	4.04111			0.730395	5.24445
0.714285	4.63978			0.551471	4.66218	4.55539		0.806451	10.9161			0.914633	9.0526			0.819671	7.41234			0.757575	4.15462			0.721154	4.08265			0.735295	5.18398
0.719045	4.57494			0.555147	4.66589			0.811826	11.3764			0.920729	8.39985			0.825133	6.92439			0.762624	4.29126			0.72596	4.18141			0.740195	5.25122
0.72381	4.58423			0.558825	4.52562			0.817205	11.8917			0.926829	7.8027			0.830601	6.54176			0.767677	4.37212			0.73077	4.267			0.7451	5.29836
0.72857	4.52484			0.5625	4.54352			0.822579	12.2847			0.932925	7.33893			0.836063	6.35539			0.772726	4.3674			0.735576	4.64176			0.75	5.25863	5.25309
0.733334	4.38604			0.566178	4.18945			0.827958	13.016			0.939025	7.05859			0.84153	6.0318			0.777779	4.7953			0.740386	4.7233			0.754904	5.17001
0.738094	4.57166			0.569853	4.10761			0.833333	13.201			0.945121	6.77375			0.846993	6.03358			0.782827	5.10432			0.745192	4.71598			0.759805	5.21481
0.742855	4.58545			0.573529	3.97245			0.838707	13.1734			0.951216	6.62941	7.91059		0.852455	5.61758	6.6717		0.787876	5.16276			0.749998	4.74622	4.36058		0.764705	5.14772
0.747619	4.47029			0.577207	3.98899			0.844086	12.9839			0.957317	6.38646			0.857923	5.61206			0.792929	5.31832			0.754808	4.85264			0.769609	5.16652
0.752379	4.59115	4.55752		0.580882	3.82236			0.849461	12.5259			0.963412	6.74868			0.863385	5.39609			0.797978	5.7566			0.759614	4.68805			0.77451	4.96767
0.757143	4.73248			0.58456	3.81127			0.85484	11.5065	12.2876		0.969513	6.72633			0.868852	5.27514			0.803031	5.85822	4.91809		0.764424	4.7669			0.779414	5.09388
0.761904	4.6537			0.588236	3.80124			0.860214	10.46			0.975608	6.57458			0.874315	4.99523			0.80808	6.3118			0.76923	4.89336			0.784314	5.23467
0.766664	4.84314			0.591911	3.83741			0.865588	9.65029			0.981703	6.56625			0.879777	4.88706			0.813128	6.76325			0.774036	5.04839			0.789214	5.27447
0.771428	5.23783			0.595589	3.64802			0.870967	8.07696			0.987804	6.53668			0.885245	4.84797			0.818181	7.06671			0.778846	5.47031			0.794119	5.26673
0.776188	5.65755			0.599264	3.95667			0.876342	6.43762			0.993899	5.9864			0.890707	4.89392			0.82323	7.59528			0.783652	5.78779			0.799019	5.51079
0.780953	6.25938			0.602943	3.83935	4.0507		0.881721	5.46136			1	5.58411	6.38869		0.896174	4.8111			0.828283	8.24784			0.788462	6.20327			0.803924	5.58423	5.23923
0.785713	6.43075			0.606618	3.94176			0.887095	4.77121							0.901637	5.12289	5.0935		0.833332	9.03684			0.793268	6.47649			0.808824	5.74715
0.790477	6.67718			0.610296	3.90659			0.892474	4.22902							0.907104	5.17391			0.838385	9.79768			0.798078	6.93451			0.813728	5.75388
0.795237	6.8302			0.613971	3.70835			0.897849	3.72241							0.912567	5.27278			0.843434	10.3222			0.802884	7.79893	5.72006		0.818628	5.81469
0.799998	6.70761			0.617647	3.54698			0.903223	3.36223	6.24124						0.918029	5.09606			0.848482	11.4049			0.80769	8.12999			0.823529	5.82183
0.804762	6.70866	5.88532		0.621325	3.44256			0.908602	2.95496							0.923496	4.96492			0.853535	12.1695	8.8716		0.812501	8.32342			0.828433	5.94017
0.809522	7.1219			0.625	3.6526			0.913977	2.87724							0.928959	4.64714			0.858584	12.887			0.817307	8.39385			0.833333	6.22498
0.814286	7.15225			0.628678	3.53534			0.919356	2.72101							0.934426	4.40777			0.863637	13.4557			0.822117	8.17374			0.838238	6.2315
0.819047	7.3872			0.632353	3.47585			0.92473	2.53102							0.939889	4.31737			0.868686	13.4129			0.826923	7.80883			0.843138	6.55755
0.823807	7.90879			0.636029	3.54374			0.930105	2.37035							0.945351	3.86514			0.873735	13.0134			0.831729	7.26135			0.848038	6.76041
0.828571	8.19402			0.639707	3.5104			0.935484	2.51653							0.950818	3.47029	4.57949		0.878788	12.1797			0.836539	6.84185			0.852943	7.04936	6.19015
0.833331	8.20102			0.643382	3.4733			0.940858	2.5829							0.956281	3.00086			0.883836	11.2177			0.841345	6.40936			0.857843	7.52302
0.838096	8.56525			0.64706	3.32192			0.946237	2.53497							0.961748	2.71641			0.888889	10.0309			0.846155	6.4843			0.862747	7.69923
0.842856	8.96795			0.650736	3.24959	3.56223		0.951612	2.83553	2.65828						0.967211	2.5846			0.893938	8.72535			0.850961	6.64366	7.44703		0.867648	8.0837
0.847616	9.54569			0.654411	2.89367			0.956986	2.80048							0.972673	2.60251			0.898987	7.44565			0.855767	6.68276			0.872548	8.68312
0.85238	10.6238	8.36678		0.658089	2.8955			0.962365	2.92392							0.978141	2.37823			0.90404	5.89807	10.8266		0.860577	6.81163			0.877452	8.89412
0.857141	11.5288			0.661764	2.85388			0.96774	2.8523							0.983603	2.00206			0.909089	4.86741			0.865383	7.03734			0.882352	9.02063
0.861905	12.1113			0.665443	2.8015			0.973119	2.55179							0.98907	2.05999			0.914142	4.21826			0.870193	7.30431			0.887257	9.08673
0.866665	12.3785			0.669118	2.89141			0.978493	2.19307							0.994533	1.98186			0.91919	3.66836			0.874999	7.44128			0.892157	9.43604
0.871429	13.4279			0.672796	2.8803			0.983872	1.67954							1	2.09405	2.38006		0.924243	3.1856			0.879809	7.68219			0.897061	9.58032
0.87619	14.6272			0.676471	2.95266			0.989247	1.22418											0.929292	2.72274			0.884615	7.80372			0.901962	9.58045	8.75874
0.88095	15.004			0.680147	2.984			0.994621	0.871012											0.934341	2.3291			0.889421	7.4258			0.906862	9.52368
0.885714	15.8065			0.683825	2.8627			1	0.64842	1.97164										0.939394	2.07156			0.894231	7.20289			0.911766	9.4924
[truncated: 86 more rows]
