# Supplementary material for: Crumbs organizes the transport machinery by regulating apical levels of PI(4,5)P2 in Drosophila
Source: eLife. 2019 Nov 7;8:e50900. doi: 10.7554/eLife.50900 (PMC6881148; doi:10.7554/eLife.50900)
Supplement: Figure 5—source data 2. [file elife-50900-fig5-data2.xlsx]

## Sheet: Image9
X0	Y0	Y1	Y2	Y3	Y4	Y5	Y6	Y7	Y8	Y9	Y10	Y11	Y12	Y13	Y14	Y15	Y16	Y17	Y18	Y19	Y20	Y21	Y22	Y23	Y24	Y25	Y26	Y27	Y28	Y29	Y30	Y31	Y32	Y33		Ap-Basal to 1	Average intensities
0	20.6878	49.5465	28.8532	28.1729	42.0124	37.333	73.964	66.0347	62.1856	37.2248	65.3285	64.9286	17.8409	20.7692	24.859	56.704	46.08	26.217	39.246	43.148	35.828	16.767	31.7732	22.5324	34.7881	9.0097	16.6752	23.6513	13.5731	19.1745	14.264	9.904	33.463	24.4155		0	34.0281
0.1191	21.9164	55.3575	32.4967	28.261	49.7445	44.021	77.187	68.4796	64.2156	39.5961	68.0394	63.7221	19.6204	22.3147	28.428	55.58	47.239	30.929	43.569	43.875	41.1	19.145	38.2969	24.8913	39.7572	11.0907	18.0132	27.0888	15.9556	22.2097	17.938	12.07	31.021	26.9383		0.0049244	36.7679
0.2383	28.0949	59.4144	36.7854	31.9338	56.336	47.411	82.185	69.2805	61.4363	43.0838	74.5193	68.3803	20.2379	26.1023	34.084	58.204	50.666	38.019	52.393	43.77	46.791	22.766	41.4479	30.7924	46.4723	14.8598	19.5045	32.0605	17.486	24.2554	21.857	11.753	33.14	25.97		0.00985293	40.338
0.3574	32.9227	66.6517	42.721	34.5754	58.8068	60.2	81.534	74.1195	63.8168	47.9487	76.0251	69.2467	22.0188	28.7541	41.831	61.245	58.485	47.345	63.048	46.548	54.633	22.099	45.8664	36.3982	54.5504	17.9431	26.084	36.421	20.0606	29.9929	25.792	14.577	37.216	24.5365		0.0147773	44.8239
0.4766	39.3076	70.4185	48.7728	35.4547	67.4934	70.756	88.038	68.6994	64.1096	54.9093	76.6491	68.2408	24.892	32.6596	53.01	63.398	64.64	55.928	78.022	56.237	63.542	25.898	50.2463	43.8167	63.9406	19.1787	29.341	37.8871	22.7113	34.5056	28.405	16.355	42.346	26.8392		0.0197059	49.6073
0.5957	46.1852	72.7494	53.8234	37.7407	75.8819	83.422	87.802	70.2929	65.7166	55.1633	79.8479	73.4031	28.0556	39.7384	59.817	65.111	68.72	65.116	97.684	65.35	75.008	26.824	55.3718	50.4878	65.1615	22.8807	33.9564	41.6744	27.6896	42.919	36.583	20.757	45.233	29.9663		0.0246303	54.8863
0.7148	51.2389	77.4753	60.6972	46.9046	80.3472	89.723	88.927	67.3778	64.0144	63.8138	86.9176	73.8899	30.7224	43.9048	62.87	72.621	81.688	75.54	111.403	76.917	86.108	28.086	64.7624	56.2238	69.39	24.3566	38.1308	44.8278	28.2316	50.8329	41.834	27.134	56.231	31.866		0.0295547	60.4414
0.834	62.6707	77.3909	69.9384	55.4374	88.757	93.671	94.258	68.1187	66.9364	70.475	88.0882	71.0846	35.2248	51.0523	69.516	77.727	84.524	92.273	120.565	84.503	100.537	30.727	69.3466	66.1901	67.5983	23.2583	42.7199	49.155	33.3812	62.5375	51.223	33.769	65.442	39.415		0.0344832	66.3974
0.9531	60.9412	82.4652	77.2614	62.854	91.5979	97.389	96.836	65.2701	63.1879	70.4388	88.3304	73.0239	35.9365	56.29	75.616	83.823	89.596	95.517	130.478	100.604	109.249	36.562	74.4464	68.5676	72.2701	23.9604	46.7764	45.8771	38.4418	67.7734	59.011	48.914	81.174	42.9264		0.0394076	70.9825
1.0723	73.1189	83.0139	84.4032	76.1534	90.5485	103.108	98.065	74.71	64.122	73.0627	85.2053	71.4453	42.6583	60.7507	84.126	89.677	104.376	104.792	136.214	112.982	115.369	41.42	81.3714	76.6601	68.9356	23.1966	47.5236	50.2109	46.0678	72.2798	65.546	59.98	83.966	49.1137		0.0443361	76.2992
1.1914	76.9699	83.3788	90.0743	83.0888	85.4755	102.37	101.25	77.8127	62.748	72.0249	83.5595	73.9262	47.4266	69.3821	87.784	98.524	106.218	105.939	137.588	117.205	123.843	45.885	82.6585	81.7336	71.4616	27.5771	55.4437	51.0747	51.1921	73.5356	73.734	74.463	95.419	55.1726		0.0492605	80.1747
1.3106	78.4811	86.0031	93.0145	87.4548	76.7795	105.885	100.472	76.7118	59.6032	66.3873	81.6519	69.4316	49.2003	75.8058	94.705	104.851	108.121	101.493	143.502	122.765	132.986	55.068	85.9767	85.2187	68.3362	29.2721	51.4922	50.2173	61.1695	81.6423	76.663	87.9	99.39	65.5423		0.054189	82.741
1.4297	88.0875	86.8107	94.1213	94.0704	67.0749	97.173	96.895	76.9012	52.3155	64.555	76.3817	72.3735	54.8607	81.1148	99.609	112.545	106.459	95.158	135.061	131.195	142.375	67.037	87.3488	82.2677	71.1969	28.0869	59.6961	53.5491	63.0385	79.9359	82.728	101.846	110.115	78.5915		0.0591134	85.0169
1.5488	91.8734	88.5487	93.852	98.1989	54.9836	85.044	88.582	72.4008	47.7291	55.9526	69.3364	71.0623	57.6801	79.9801	103.543	114.656	105.545	91.308	128.005	137.479	145.94	84.131	84.7186	83.1804	67.636	27.4781	59.7071	62.5553	71.2928	78.6388	94.551	106.288	107.191	85.7815		0.0640378	85.1426
1.668	89.7655	84.7746	93.9033	100.795	46.8227	72.89	75.76	66.7096	47.388	46.808	55.012	72.7427	57.2827	87.6156	110.185	124.947	93.608	78.926	116.044	140.515	150.186	91.819	86.0526	87.187	65.0016	30.0007	62.5327	67.102	73.555	83.848	97.323	114.812	113.145	85.1646		0.0689664	84.4184
1.7871	88.9558	85.9252	96.3479	100.476	42.2931	56.197	61.868	56.2751	45.3061	37.9565	44.0243	75.5219	63.7867	87.5044	118.345	127.575	84.847	69.358	95.22	138.703	148.151	100.138	80.9523	86.972	61.4623	31.4181	69.8325	76.9265	81.0545	85.08	110.408	116.512	113.675	87.4354		0.0738908	83.1324
1.9063	90.4537	83.9467	99.049	93.0951	34.0797	39.314	50.769	51.1723	41.3677	31.6766	35.1139	80.3725	59.0762	94.0874	118.368	125.261	76.267	58.459	65.16	132.1	144.643	114.383	74.9048	88.1899	62.4572	32.1394	78.9	82.8212	84.8746	90.8139	110.9	124.596	106.278	87.9748		0.0788193	80.6784
2.0254	89.3789	82.3508	98.9563	88.8403	32.1101	31.274	38.788	38.578	39.3443	27.8413	28.9699	75.3194	56.4411	98.945	119.492	128.905	63.446	47.901	47.849	118.493	131.133	119.421	72.7006	84.8788	60.4413	32.0615	83.0677	86.6919	89.2788	93.5182	114.058	122.64	99.699	89.6598		0.0837437	77.4257
2.1445	86.6455	80.6843	101.23	83.6872	29.3279	26.876	33.071	33.1023	39.2754	21.0403	23.2913	69.8781	57.4123	94.9679	121.044	128.044	53.103	38.777	37.253	95.789	106.215	118.881	61.9666	83.4557	61.0743	34.1038	83.2909	92.011	84.0434	96.4744	122.692	119.32	87.444	82.872		0.0886681	73.1866
2.2637	83.0958	75.6021	96.9445	82.7565	25.9142	23.964	25.592	25.3433	35.3438	19.3087	19.3156	61.8255	55.0114	88.9156	118.881	127.249	47.481	33.553	28.787	71.836	91.879	119.062	59.3339	73.8899	66.1376	35.3382	85.4717	96.5441	76.6031	91.4113	114.349	107.172	75.321	76.5074		0.0935966	68.11
2.3828	84.5544	71.6002	91.6889	75.6913	21.2421	19.569	20.664	21.5012	31.7345	16.1211	15.7178	53.4097	49.1033	83.6564	111.592	118.971	42.241	26.445	22.043	53.214	73.598	116.97	49.9627	68.0492	71.6884	37.458	85.6551	99.6214	69.3438	83.9601	109.606	92.758	61.921	65.5183		0.098521	62.2609
2.502	85.3771	66.1643	86.165	69.987	19.054	16.397	17.45	20.2016	28.3482	13.9727	15.0487	41.929	49.1853	81.2032	108.939	103.766	36.049	25.484	17.784	34.291	54.51	117.598	43.1007	60.8639	80.4218	38.7503	84.2502	92.1613	50.288	79.2345	94.145	76.433	47.147	55.2471		0.10345	56.2043
2.6211	81.5045	67.5127	79.2708	62.7865	18.7575	15.251	13.856	16.1257	27.934	11.6828	13.2635	31.1012	47.3285	78.6537	100.591	96.402	31.111	20.668	13.613	25.427	41.32	109.826	35.6795	54.8204	81.7146	41.9985	83.7121	91.0052	38.7249	69.5754	73.344	59.075	36.977	45.5679		0.108374	50.4759
2.7402	77.6135	60.9455	72.3685	55.683	15.9957	13.916	12.385	14.8525	24.861	13.2005	10.9457	24.613	42.2102	75.7826	92.007	84.641	29.394	16.663	12.953	20.964	31.205	103.688	27.6062	40.3514	78.316	44.3675	82.3136	80.8765	25.7367	60.6702	51.758	42.681	28.872	40.8048		0.113298	44.4483
2.8594	73.5687	52.9152	64.8595	42.8515	16.3352	11.613	11.833	13.4183	20.0988	11.0645	10.0676	17.1209	38.7885	69.9353	79.97	73.776	25.399	14.412	10.199	17.239	27.543	90.649	21.8303	31.7172	85.087	49.6148	77.146	70.6043	21.254	54.6683	39.941	32.742	25.885	33.7525		0.118227	39.35
2.9785	70.6164	44.6669	61.3496	34.9221	14.8963	9.456	9.469	10.9355	15.7353	9.9906	8.1857	12.993	33.971	69.976	75.499	69.257	22.383	12.004	9.109	14.655	22.219	73.122	16.1668	24.1234	79.6723	58.3813	73.4684	65.1102	14.5316	44.8631	34.844	25.594	19.745	26.0334		0.123151	34.9396
3.0977	62.5152	40.3929	50.5698	30.6855	15.2645	8.813	9.084	8.6565	14.436	8.2342	7.1695	12.1124	27.7613	62.5484	66.997	59.36	21.507	11.019	8.861	13.762	17.202	55.898	13.8547	19.7012	75.0641	62.0723	63.9577	50.4093	13.1608	33.9115	23.155	20.718	17.082	19.2927		0.12808	30.1538
3.2168	59.1397	32.3281	43.8059	26.5378	14.2249	8.142	7.376	8.5041	12.4304	7.2065	7.1544	8.7134	25.4845	61.2524	64.213	54.635	20.387	8.79	8.493	11.607	16.6	44.848	11.0332	16.0796	71.5796	67.9593	55.6406	42.5334	11.9479	24.4219	18.184	16.369	13.347	17.2236		0.133004	27.0057
3.336	50.255	28.2296	38.9269	22.1652	12.6888	6.493	7.622	7.38	10.4483	6.8676	6.6559	8.1118	22.1124	55.2104	61.118	52.607	18.845	8.778	6.6	9.404	12.364	37.029	9.4694	13.5683	71.4249	70.0415	48.3006	36.1082	11.3027	19.5488	14.203	12.873	11.121	13.8221		0.137933	24.1675
3.4551	40.0825	22.2699	36.5299	21.9581	12.3303	7.196	6.223	6.629	9.9703	5.4993	6.2194	7.3344	16.7008	51.0875	55.952	49.205	20.671	6.721	6.789	9.919	10.558	28.263	7.8114	10.5765	66.4596	74.0031	39.2242	32.1572	11.1044	14.3198	13.183	10.963	8.88	9.9287		0.142857	21.6682
3.5742	32.1332	19.0163	29.0137	18.8203	11.3136	6.751	5.923	5.7273	8.1343	4.7208	4.5392	6.2517	14.3234	45.684	56.752	48.166	17.632	6.216	6.235	8.192	9.456	20.913	7.0078	8.5509	58.0668	75.8619	27.8166	23.5609	9.9774	10.5675	9.455	10.224	8.715	9.6687		0.147782	18.982
3.6934	25.8353	13.3108	27.0193	17.9018	9.8911	6.711	5.218	4.5904	8.4872	4.9574	4.3556	4.3743	10.9177	42.4266	55.956	40.842	17.202	6.828	5.93	8.416	8.492	16.716	5.2316	7.4644	53.7216	75.1414	26.1122	17.9142	9.5259	9.4394	7.73	7.738	5.806	8.6488		0.15271	17.0839
3.8125	20.6456	10.1887	21.0728	18.5414	8.7628	6.047	4.896	4.6515	7.4199	4.6155	4.3627	4.4983	9.1276	36.8809	52.469	38.185	14.848	5.605	5.563	7.147	8.075	14.38	5.7252	6.2313	45.1928	81.0516	19.4978	15.1348	11.1163	7.3825	6.675	6.178	6.168	8.152		0.157634	15.4849
3.9317	16.7097	8.6073	17.067	16.5373	8.1272	5.045	4.844	4.064	5.8002	5.0704	3.8682	4.8158	7.2649	35.4375	48.087	36.054	14.232	5.878	4.539	6.295	7.755	11.567	4.0426	6.0314	36.3923	75.507	16.7978	10.0714	8.9126	5.7725	5.543	5.47	4.078	6.5714		0.162563	13.6134
4.0508	14.7733	6.7331	12.2565	13.7542	6.9312	4.994	4.176	4.3251	7.2295	3.3833	3.9674	3.9372	6.5176	28.1993	43.584	35.246	12.477	5.79	4.961	5.468	6.989	10.13	5.0093	4.8327	31.5762	72.3142	13.9319	7.8378	9.4104	4.1545	4.771	4.14	3.88	5.346		0.167487	12.1478
4.1699	14.8498	6.296	9.7306	12.8709	5.6792	4.905	3.935	2.9496	4.2227	3.1598	2.6502	3.8681	8.0486	26.3661	42.941	30.809	11.537	5.381	4.947	4.988	5.785	9.189	4.1983	4.2479	29.0801	66.9363	11.6563	4.7965	8.881	4.871	4.399	3.438	4.068	6.0511		0.172412	11.1098
4.2891	14.4996	5.6917	7.4001	11.7971	5.5226	4.181	4.083	2.8163	4.6427	3.0656	2.6938	3.5542	6.2965	22.2466	39.646	27.619	11.709	4.556	4.033	4.419	5.103	7.973	3.428	2.8171	24.1861	61.6962	10.0107	4.0677	7.8592	3.1786	3.312	3.496	3.297	4.711		0.17734	9.87084
4.4082	12.3409	4.835	6.2691	11.0458	4.8648	4.073	4.104	2.6672	4.2962	2.9108	2.668	2.7543	6.4007	20.0387	38.177	25.66	10.949	4.935	3.815	4.679	5.409	8.768	3.3598	3.4757	20.1261	56.4273	8.8354	3.9894	8.3522	3.0268	2.753	3.244	2.514	4.3342		0.182265	9.17936
4.5274	12.8554	5.3206	5.3666	9.2102	4.719	3.134	3.109	2.9689	4.2758	2.3088	2.5054	3.0574	5.4508	18.8176	34.847	22.163	9.637	4.769	3.839	5.02	4.443	8.058	3.1085	3.0745	19.6325	50.1385	7.7927	3.2588	8.137	3.1784	2.358	2.317	2.491	3.9707		0.187193	8.39215
4.6465	12.3173	4.2934	4.5216	8.492	3.8592	3.95	3.246	3.3492	3.2726	2.1455	1.82	3.1602	5.4265	15.6144	32.452	18.658	9.367	3.254	3.427	4.223	4.657	7.065	2.9221	3.444	13.6937	46.1765	7.2312	2.8974	8.2743	3.2069	2.801	2.51	2.162	3.4909		0.192118	7.57003
4.7657	10.127	4.1995	4.2707	8.6936	3.6221	3.888	3.417	2.529	2.3301	1.9564	1.9107	2.2294	5.3612	15.4169	32.293	18.434	7.948	4.012	3.295	4.791	3.307	6.299	2.5452	3.1705	11.9236	39.1859	7.5669	3.1428	7.2556	2.6055	2.418	2.467	1.792	2.5286		0.197046	6.96859
4.8848	9.4007	4.906	4.8811	8.0547	3.2066	3.951	3.065	3.07	2.7541	1.5645	2.248	2.683	6.0489	12.3635	31.361	15.853	6.862	3.756	3.594	4.15	3.743	6.154	2.8248	3.1029	9.1559	27.2782	7.7305	2.9406	8.5991	3.1521	2.328	1.994	2.034	3.1421		0.201971	6.41036
5.0039	8.7512	4.1573	4.6265	7.2519	3.7664	3.834	3.31	3.0118	2.7219	1.7929	1.8612	2.5935	6.0667	12.3922	25.589	13.665	5.913	3.327	2.651	4.016	3.394	5.939	2.4106	2.6655	6.783	20.6722	6.3442	3.2831	7.2246	3.2462	2.253	2.197	2.419	2.4842		0.206895	5.66512
5.1231	7.5214	4.2229	4.7711	8.2975	4.042	2.717	3.093	2.5361	2.3035	1.8156	1.8362	2.013	5.4957	9.3745	22.126	13.036	6.581	4.303	2.879	3.45	3.018	5.855	1.9361	2.1616	5.4622	13.239	6.3297	2.978	6.5487	2.475	2.14	1.917	2.045	2.4282		0.211824	5.02788
5.2422	7.8752	4.3478	3.6501	7.0388	3.056	3.55	2.009	3.3199	2.2191	1.5811	1.4135	1.8354	5.3862	7.5746	19.883	12.95	7.013	3.964	2.272	3.102	3.045	5.808	2.441	2.498	4.5231	8.0721	6.5281	2.1382	7.6793	2.6484	1.778	1.9	1.872	1.9618		0.216748	4.6157
5.3614	7.1693	3.6842	4.009	6.0864	2.9899	3.312	2.619	2.999	1.6744	1.5305	1.6375	1.7444	5.4694	7.3023	17.055	11.05	5.673	2.524	2.027	2.659	2.471	5.993	2.355	2.309	4.6587	7.5053	6.3009	3.1705	8.1247	2.5281	1.777	1.674	1.674	2.8344		0.221676	4.3115
5.4805	7.2635	4.2814	3.8974	6.9562	2.5513	2.78	2.252	2.8837	1.8649	1.2756	1.4605	1.7475	4.3699	5.9278	19.274	13.041	5.679	2.721	2.147	2.846	2.835	5.809	2.027	1.8929	4.4023	6.8202	6.5603	2.5777	6.7898	2.1607	1.691	2.429	1.555	2.3363		0.226601	4.26782
5.5996	7.9857	4.1456	4.5135	6.5736	3.0464	2.925	2.055	3.3454	1.9758	1.2967	1.5693	1.6501	4.4723	4.5291	17.697	11.536	4.573	3.229	2.124	2.78	2.952	6.062	2.3287	1.9788	2.5828	5.2313	6.0955	3.099	7.6307	2.4051	1.73	2.183	1.18	2.3181		0.231525	4.11175
5.7188	6.1701	4.2772	3.9308	6.1861	2.9215	2.352	1.949	2.851	1.5824	1.282	1.2111	1.4902	5.0285	3.4439	17.035	9.22	4.842	2.445	2.239	3.184	2.7	5.369	1.9946	2.1495	2.7801	4.825	5.9341	2.5703	7.833	1.6525	1.768	1.166	1.219	2.112		0.236454	3.75629
5.8379	6.2289	3.8465	4.761	6.2029	2.2627	2.35	2.384	2.9197	1.922	1.4477	1.5522	1.4331	4.8755	3.5593	15.803	9.708	3.346	2.991	2.08	2.184	2.677	5.461	1.9076	1.8124	2.3986	3.8087	5.141	3.1544	6.8125	2.0249	1.679	1.403	1.412	2.1051		0.241378	3.6369
5.9571	6.234	3.7367	3.5722	6.4972	3.0895	2.145	2.103	3.0161	1.4777	1.4237	1.6553	1.5905	5.8432	3.4842	16.561	7.449	4.25	3.065	2.105	2.194	2.222	4.883	2.0378	1.8983	2.4005	3.9054	5.3959	2.8834	7.5554	2.2579	1.734	1.379	1.723	2.0206		0.246307	3.64084
6.0762	5.2194	3.6832	3.5282	6.5806	2.346	2.22	2.145	3.9213	1.9826	1.7536	1.6454	1.5781	4.5533	2.9794	13.423	6.284	4.031	3.576	1.452	2.498	2.321	4.614	1.9137	1.6675	2.6102	4.904	5.2305	3.3677	7.3315	1.6803	1.487	1.279	1.727	2.1422		0.251231	3.46105
6.1953	5.0127	4.0678	3.8889	6.5603	2.6274	2.041	2.324	3.7926	1.7226	1.1252	0.835	1.5274	5.2715	3.0142	11.222	7.024	3.565	3.293	1.608	2.393	2.715	5.102	1.5915	1.4911	2.2014	3.6978	4.5223	3.3794	7.0154	1.7639	1.223	1.832	1.517	2.0735		0.256155	3.32473
6.3145	5.4673	3.8173	3.8569	6.8636	2.643	1.824	2.212	3.1949	1.6263	0.8941	1.3897	1.7718	4.9507	3.1272	9.779	5.052	3.042	3.148	1.598	2.052	2.282	5.097	1.799	1.4449	2.8422	3.0044	4.8569	3.6568	6.4165	2.1103	1.772	1.297	1.66	2.1992		0.261084	3.19847
6.4336	4.8128	3.4037	3.9945	6.8526	2.4463	1.914	2.47	3.4858	1.4724	1.0925	1.2867	1.1334	5.0428	3.105	8.948	4.912	3.806	2.864	1.578	1.578	1.767	5.265	1.8024	1.942	1.5474	3.0185	3.584	3.495	8.2086	1.9666	1.474	1.092	1.319	2.1026		0.266008	3.08184
6.5528	5.7673	3.5498	3.6116	5.9094	2.4382	1.509	1.982	4.0385	1.9224	0.9408	1.3722	1.5631	5.0706	3.3785	7.987	4.313	3.892	2.676	1.481	1.776	2.031	4.839	1.7679	1.3317	2.3354	2.7337	3.8994	3.3449	8.1544	2.1885	1.117	1.374	1.979	2.2448		0.270937	3.07409
6.6719	5.8067	3.7241	3.7061	6.3175	2.1262	1.995	1.747	3.88	1.2579	1.1516	1.3433	1.3143	5.0556	3.1726	4.855	4.025	3.274	2.583	1.272	1.871	1.725	4.95	1.688	1.9384	2.0606	2.5502	3.1301	3.9599	8.4572	1.5999	1.829	1.872	1.359	1.7603		0.275861	2.92228
6.7911	5.1023	4.0093	3.2067	6.9064	2.119	1.966	2.1	4.1272	1.213	1.1518	0.9556	1.1686	4.8859	3.3511	4.648	3.13	3.265	3.152	1.615	1.9	2.087	5.738	1.9757	1.7383	1.9997	2.7258	2.762	3.4144	9.1649	1.6178	1.306	1.267	1.04	2.1831		0.28079	2.91155
6.9102	6.2255	3.2463	2.4602	7.3872	2.2809	1.982	1.999	3.9819	1.6928	0.9127	0.9217	0.9475	5.6707	3.7552	4.233	2.938	3.282	2.999	1.603	1.802	2.007	5.697	1.4267	1.6041	1.8721	2.5637	3.1541	3.3103	9.5587	1.7853	1.358	1.409	1.835	1.9775		0.285714	2.93762
7.0293	5.5048	3.7386	3.3097	7.6337	2.617	2.154	1.512	4.045	1.6559	1.2105	1.5122	1.3454	3.6175	2.981	3.83	2.721	2.462	2.624	1.494	1.225	1.839	6.313	2.0593	1.8701	1.6477	2.1618	2.5498	4.1981	7.9252	1.1493	1.467	1.384	1.397	1.7611		0.290639	2.79164
7.1485	5.3602	3.8001	3.5584	8.0089	2.6247	1.686	1.485	4.3904	1.6179	1.2431	1.5692	1.7478	4.1276	3.0461	2.945	2.778	2.828	2.974	1.435	1.302	1.566	5.218	1.8579	1.7363	1.5391	2.4793	2.5525	4.3748	8.1294	1.6775	1.036	1.586	2.073	2.1591		0.295567	2.8386
7.2676	5.515	3.9577	3.7564	5.9733	2.1799	1.92	1.558	4.7722	1.7525	1.3446	1.302	1.0838	5.2041	2.9554	2.562	2.38	3.005	2.773	1.656	1.582	1.716	6.56	1.6639	1.5576	1.5762	2.22	3.1345	4.8562	9.0503	2.0297	1.608	1.242	1.622	2.0341		0.300492	2.88539
7.3868	6.157	3.6225	3.0182	6.9185	2.77	2.181	1.997	4.6585	1.832	1.0232	1.0299	1.4898	5.1872	2.9812	2.665	2.335	3.809	3.013	1.34	1.654	1.664	7.555	1.7895	1.2968	1.4758	2.3173	2.999	3.8848	9.7489	1.628	1.442	1.151	1.553	1.8028		0.30542	2.94088
7.5059	5.7702	3.0074	3.5392	7.5179	2.2806	2.318	2.255	4.7312	1.6713	1.0011	1.322	0.9974	5.2228	2.7114	3.018	2	3.583	2.467	1.527	1.384	1.758	9.63	2.1762	1.6751	1.2724	2.1761	3.4629	4.2927	9.2123	1.995	1.33	1.323	1.55	2.5508		0.310345	3.02144
7.625	5.5043	3.3954	2.7935	6.1962	2.48	1.739	1.548	5.548	1.5115	1.0886	0.9344	1.3232	6.7148	2.597	2.693	2.475	3.431	2.589	1.062	2.109	1.595	11.43	1.9752	1.6822	1.3411	1.8298	2.9152	5.0586	10.9133	1.8752	1.524	1.327	1.875	2.1263		0.315269	3.09414
7.7442	5.7926	3.5211	3.0525	6.3411	2.7275	1.747	1.705	6.258	1.8801	1.3645	1.2356	0.9975	6.2718	2.5537	2.775	2.017	3.407	1.855	1.801	1.503	1.508	10.87	1.9778	1.4992	1.5852	1.5798	2.8113	5.574	11.2877	1.8467	1.933	1.228	1.805	2.3844		0.320197	3.13812
7.8633	6.252	3.5635	2.9928	5.4843	2.2289	1.909	2.651	5.2379	1.8562	1.1427	0.9577	1.3813	5.9281	2.5961	2.393	1.557	3.491	2.103	1.887	1.152	2.171	11.883	2.3065	1.5996	1.8419	2.1031	2.9634	5.8886	10.6225	1.3146	1.362	1.263	1.411	2.231		0.325122	3.10958
7.9825	6.256	2.8684	3.0592	5.9225	2.5745	2.152	1.971	5.6387	2.0809	1.3697	1.066	1.3476	5.9329	2.1688	1.753	1.83	3.421	2.286	1.604	1.623	1.527	12.696	1.8611	1.4787	1.5966	1.817	2.8811	4.9326	11.8431	1.9178	1.206	1.383	1.629	2.6535		0.33005	3.12787
8.1016	6.0582	3.7882	2.2345	7.0714	2.9934	1.814	1.744	7.25	1.3415	1.2705	1.1406	1.5939	7.0892	2.8504	1.96	1.877	3.59	3.055	1.759	1.411	1.886	15.105	2.1793	1.5935	1.9364	2.02	3.2732	6.9002	14.4182	1.8186	1.461	1.473	1.464	2.77		0.334975	3.53501
8.2207	6.4752	3.8801	2.5835	7.3665	2.5405	1.914	2.384	6.0582	1.9307	1.0961	1.252	1.1611	8.0673	1.9925	2.23	1.718	3.409	2.864	2.119	2.04	1.523	16.882	2.0451	1.331	1.7697	1.8145	4.064	6.9826	17.7071	1.8143	1.446	1.441	1.374	3.0287		0.339899	3.71484
8.3399	5.6404	2.7659	2.7229	9.7298	3.1893	1.834	2.151	8.1418	1.6811	1.1139	0.94	1.2853	7.9226	2.1646	1.995	1.716	2.883	2.55	1.656	1.818	1.802	20.549	2.09	1.3304	1.3685	1.8364	4.7096	6.7084	19.8591	1.7289	1.805	1.858	1.744	2.9956		0.344828	3.94957
8.459	5.947	2.9546	2.7649	9.5903	3.1307	2.126	2.133	7.572	1.5881	1.4285	1.2557	1.6233	9.089	2.7075	2.464	1.423	3.566	2.965	1.449	1.598	2.331	21.369	2.2424	1.3036	1.4131	1.9408	4.9125	7.5353	26.1179	2.1531	1.904	1.588	1.499	2.6469		0.349752	4.30389
8.5782	6.4151	4.519	2.5373	9.5528	3.6774	2.112	1.558	8.0243	1.8389	1.0812	1.3185	1.6903	9.1337	2.8972	1.953	1.537	3.558	3.326	2.04	1.017	1.932	25.4	1.9758	1.2332	1.4863	1.648	4.9309	9.1868	27.645	2.2013	1.631	1.682	1.851	2.6857		0.354681	4.56693
8.6973	6.9236	3.2755	3.1496	9.9262	2.2782	1.787	1.679	8.2383	1.4956	1.2405	1.0235	1.2139	9.8547	2.6566	2.106	1.791	3.048	3.597	1.786	1.619	2.086	29.23	1.8039	1.2555	1.2515	1.9248	6.1925	12.2286	25.2021	1.939	1.637	1.362	1.576	2.2536		0.359605	4.66564
8.8165	6.4662	3.6141	3.3972	10.2304	3.4119	2.186	1.761	10.5158	1.2541	0.8755	1.1855	1.2528	13.935	2.284	2.575	2.056	3.435	3.48	1.859	1.288	1.992	31.791	2.156	1.0924	1.1793	1.8582	7.1267	12.4273	26.2817	2.0556	1.609	1.318	1.446	3.2302		0.364534	5.07723
8.9356	7.0812	3.6963	3.082	11.8346	3.1284	2.165	1.601	11.0245	1.6203	1.0483	1.0709	1.1288	15.4658	2.4474	1.988	1.542	3.747	3.885	1.9	1.733	1.519	36.856	2.218	1.259	1.5073	1.8483	7.8277	13.2995	24.956	2.4288	1.508	1.773	1.55	2.9001		0.369458	5.37177
9.0547	7.1027	3.8175	2.8305	11.7293	2.9566	2.084	1.67	11.7577	1.7666	1.3532	1.418	1.3703	18.534	2.088	2.238	1.931	3.636	3.977	1.488	1.664	1.353	42.456	2.0676	1.8937	1.7353	1.9405	7.9632	15.3511	26.1426	2.0476	2.023	1.515	2.061	3.7975		0.374382	5.81646
9.1739	7.0679	4.4386	2.4293	12.5682	3.4149	1.77	1.822	12.8989	1.8933	1.6569	1.2076	0.9024	20.5389	2.0214	1.937	2.128	4.311	3.755	1.893	1.848	1.707	48.127	1.9966	1.1914	1.1885	2.3574	8.1634	16.9551	25.7758	2.1986	1.606	1.503	1.436	2.8382		0.379311	6.1043
9.293	7.3502	4.062	3.2359	12.2597	3.0343	2.059	2.731	14.4223	1.7396	1.1034	1.0867	1.3452	20.765	3.1398	1.952	1.723	4.122	3.508	1.719	1.65	1.866	51.224	2.6906	1.5354	1.9946	1.8755	8.4421	20.1605	24.525	2.1848	1.777	1.829	2.059	2.8647		0.384235	6.41283
9.4122	6.8649	3.8314	3.3806	12.7795	2.4177	2.313	2.199	15.1025	1.7782	1.446	1.3816	1.8005	21.5413	2.4247	1.697	1.971	3.584	3.737	1.631	2.001	2.159	48.376	2.9005	1.6197	1.5153	2.0859	6.2328	21.5662	21.993	2.043	1.634	1.516	1.63	3.251		0.389164	6.24719
9.5313	6.7445	4.4673	2.9788	13.2731	2.8635	2.162	1.876	18.5296	1.7591	0.7548	1.2297	1.6107	24.953	2.6042	2.419	2.036	4.028	4.521	1.922	1.806	2.119	50.685	2.3459	1.4692	1.4338	2.1162	6.3429	26.3896	20.7185	2.2239	1.602	2.284	1.739	3.8765		0.394088	6.70246
9.6504	7.8733	4.5547	3.8241	12.7314	2.8431	2.22	2.335	20.4469	1.2305	1.0277	1.1115	1.4574	28.0073	2.2145	2.355	2.748	3.995	3.772	2.539	1.791	1.991	48.874	2.6296	1.5548	1.8418	1.9994	7.0518	25.6937	19.9747	2.5593	1.67	1.235	2.111	3.3144		0.399013	6.81111
9.7696	7.239	4.4295	2.6809	13.1309	2.9309	1.962	2.884	23.6429	1.6609	1.2691	1.3452	1.7538	29.872	2.0108	1.912	1.971	4.01	3.206	2.05	1.245	1.917	48.519	2.5961	1.5596	1.621	2.0591	5.6138	29.3549	20.1439	1.6655	1.386	1.622	1.731	3.5113		0.403941	6.89724
9.8887	9.2785	5.0448	2.8352	13.3604	2.9167	2.133	2.406	24.9539	1.9528	1.2164	1.1336	1.6939	33.7179	2.0011	2.323	1.925	4.767	3.577	1.576	1.975	1.633	48.316	2.3988	1.7098	1.6541	1.9934	6.1029	31.104	18.8644	2.7184	1.561	1.467	1.966	2.9787		0.408866	7.21337
10.0079	8.4831	5.5054	2.7619	13.4116	2.4008	2.176	2.349	24.7369	1.9643	1.5936	1.0774	1.958	38.7816	2.3232	1.955	2.214	4.542	5.056	1.507	1.703	2.098	46.215	2.7881	1.6715	1.7259	1.9944	5.3126	37.3746	19.1308	2.6034	1.458	1.62	1.668	3.3045		0.413794	7.51366
10.127	8.927	6.9735	3.1785	13.4877	2.2001	2.215	2.811	27.4709	1.7825	1.2373	1.3877	2.8386	41.2949	2.5827	2.166	3.147	5.222	3.653	1.727	1.815	2.162	41.094	2.8077	2.1906	1.8175	1.9304	4.7169	40.1562	22.9691	2.8006	1.684	1.892	1.688	3.4284		0.418718	7.86632
10.2462	7.7637	6.6167	3.3375	14.3344	2.3677	2.614	2.671	24.3023	1.6122	1.0619	1.4426	2.1839	38.5406	2.5848	2.399	2.387	4.754	4.684	1.617	1.573	2.59	34.734	2.6036	1.7168	1.5153	2.107	3.752	38.8539	24.6388	2.4411	1.523	1.62	2.104	3.0317		0.423647	7.41407
10.3653	7.7778	7.3539	3.7922	16.3957	2.9834	2.404	2.828	26.0058	1.9264	1.3284	1.2529	1.5609	41.295	2.6992	2.442	2.539	6.27	4.044	1.696	1.984	2.194	29.106	2.8051	1.8718	1.548	2.312	5.0571	45.6563	29.8554	3.0824	1.675	1.455	1.63	2.9876		0.428571	7.93571
10.4844	8.0971	9.0574	3.88	14.4329	2.5973	2.82	2.801	23.589	2.0929	1.1239	0.9858	1.6531	39.1998	1.9899	2.287	1.743	6.481	4.685	1.722	1.837	2.693	25.397	3.1945	1.9887	1.5503	2.0378	3.7889	42.0647	36.6356	2.7357	2.016	1.258	2.039	4.1829		0.433496	7.78404
10.6036	8.4725	8.1907	3.5173	14.2407	2.1045	2.79	2.588	21.2595	1.7389	1.0939	1.5031	1.801	41.0723	2.7533	1.84	2.466	5.914	4.261	2.295	1.974	2.431	23.043	3.4617	2.0993	1.2396	1.9334	4.037	42.3908	38.0067	3.4549	2.06	1.905	1.979	4.1028		0.438424	7.76529
10.7227	8.8691	8.3097	3.203	14.5053	2.6733	2.574	2.599	20.4198	2.1055	0.824	1.1615	1.7523	42.9582	2.5212	2.468	1.976	6.867	4.18	1.925	2.084	2.276	22.287	3.4209	2.0332	1.6891	2.0681	3.6906	44.0922	37.6949	2.5022	1.612	1.164	1.912	3.8916		0.443349	7.77381
10.8419	8.5364	8.3887	3.5441	14.1223	3.29	2.129	2.923	21.1638	1.8371	1.1748	1.5588	1.7647	46.9357	2.2344	2.129	2.116	7.075	4.751	1.946	2.85	2.596	19.225	4.4527	1.9552	1.6682	2.2378	4.0925	46.0987	33.5788	2.7029	1.182	2.096	1.961	3.8392		0.448277	7.88694
10.961	9.257	8.2917	3.1333	14.5997	2.617	2.303	3.078	18.1733	1.6141	1.1254	1.6657	1.8402	49.4243	2.5429	2.703	2.525	7.413	5.984	2.396	2.33	2.241	18.496	4.3356	1.3367	1.9124	2.1544	3.6831	46.9003	28.1949	2.9186	2.213	1.827	2.261	3.6987		0.453202	7.79969
11.0801	9.2215	7.1509	3.8801	13.5632	2.7733	2.332	2.758	17.5034	1.2737	1.8039	1.868	1.3598	48.2908	2.5034	2.034	2.113	8.738	7.197	1.711	2.024	2.588	15.181	3.5678	1.356	1.5848	1.8938	3.4159	48.3051	24.6238	3.0962	1.821	1.932	2.162	3.4139		0.458126	7.50119
11.1993	8.0378	7.6677	3.5977	14.6047	2.8027	2.082	2.89	16.2871	1.8763	1.201	1.5546	1.8854	49.921	2.2718	1.842	1.866	9.923	7.389	2.35	2.061	2.17	14.414	4.2764	1.7745	1.4923	2.1806	3.807	47.9893	23.6009	2.5111	2.455	2.141	1.772	2.7843		0.463055	7.51409
11.3184	9.7025	7.0839	3.643	14.5025	3.2465	2.516	3.39	14.9244	1.6124	1.003	1.2852	1.9973	51.6122	1.9583	2.309	2.687	13.316	7.712	1.546	2.447	2.674	12.901	4.5135	1.6961	2.5531	2.1974	3.465	48.2105	21.1117	2.9598	1.922	2.057	1.847	3.304		0.467979	7.6443
11.4376	9.6263	7.349	3.2483	14.3779	2.7982	1.983	3.399	16.1318	1.547	1.2695	0.9972	2.1726	51.4304	1.9439	1.835	2.101	13.157	7.569	1.804	2.388	2.465	11.911	4.8623	1.9397	1.6513	2.1668	3.6342	46.3862	20.1878	3.2234	2.322	1.394	1.788	3.5457		0.472908	7.4884
11.5567	8.7976	7.2724	4.0431	13.9371	2.8892	2.106	3.493	14.581	1.7312	1.525	0.957	2.3074	49.6488	2.3747	2.092	2.73	17.92	8.206	1.789	2.062	1.949	13.279	3.132	1.3324	1.8545	2.1175	3.0356	42.2748	19.6334	2.9769	1.74	1.8	1.676	3.5331		0.477832	7.37637
11.6758	10.5225	9.9524	3.6639	15.6368	2.4663	2.519	3.419	16.7309	1.4056	1.2217	1.4253	2.2016	51.258	2.1757	1.737	2.575	19.383	8.494	2.088	2.093	2.577	12.507	3.588	1.2986	2.0862	1.9354	2.8977	34.9089	20.8318	3.291	1.804	1.999	1.717	3.636		0.482756	7.53077
11.795	9.7323	9.1426	3.7895	14.6725	3.0989	2.522	3.112	16.6266	1.96	1.1898	1.407	2.2806	47.2402	2.3856	2.137	2.202	21.99	7.292	2.034	1.562	2.316	14.071	3.461	1.7421	2.1634	2.334	2.9678	32.0274	25.8184	3.0567	1.873	1.403	2.253	4.4638		0.487685	7.53904
11.9141	10.568	9.9163	3.0473	16.4436	2.5152	2.388	3.449	16.7201	1.6939	1.1341	1.2274	2.0092	45.7186	2.0777	3.311	2.689	21.889	6.948	2.793	1.691	2.337	14.158	3.6079	1.831	1.5136	2.1793	2.5494	27.4821	27.1037	3.1283	1.983	1.446	1.848	4.449		0.492609	7.46605
12.0333	11.3515	8.4415	3.539	17.4505	2.701	2.215	3.234	16.9441	1.3743	1.3183	1.1686	2.5863	43.7206	2.3229	2.456	2.553	26.356	5.798	2.181	2.317	2.392	13.234	4.3527	1.9125	1.6879	2.1746	2.6935	21.6641	28.7761	3.4494	1.788	1.81	2.226	5.7517		0.497538	7.46886
12.1524	12.893	8.9932	3.7016	17.0427	2.6041	1.969	3.867	17.239	1.1294	1.5423	1.6955	2.4274	41.7373	2.4922	2.983	2.349	32.456	5.021	2.008	1.96	2.131	15.669	3.5495	1.8955	1.7618	2.5661	3.1396	19.4933	30.552	2.9292	2.143	1.399	2.472	5.8468		0.502462	7.69584
12.2716	13.3599	9.74	3.8423	16.29	2.3038	2.473	3.127	18.7949	1.1091	1.4449	1.5485	2.5489	40.4576	2.4839	2.632	2.913	34.702	4.848	1.933	1.873	2.055	16.742	4.8374	1.9825	1.7803	1.9566	2.9822	19.4433	28.3177	3.2809	1.579	1.12	2.337	6.2716		0.507391	7.73854
12.3907	13.4361	9.4118	4.2473	16.2128	2.9757	2.34	3.078	16.0113	1.5118	1.4855	1.5174	2.8496	36.2799	2.0237	3.074	2.309	31.979	4.526	1.91	1.786	1.953	16.129	4.9197	1.9035	2.0582	1.9393	2.3832	17.2123	29.166	3.2767	1.895	1.323	2.219	7.4507		0.512315	7.4351
12.5098	14.2679	10.157	4.8235	17.7083	2.6588	2.928	3.519	13.8427	1.6506	1.2848	1.589	2.4426	35.6188	2.7776	2.888	3.098	30.887	4.587	1.95	2.271	2.191	15.26	6.6388	1.7161	1.9968	1.6813	2.9738	18.3023	28.1734	2.9575	2.16	1.698	1.953	8.2535		0.51724	7.55603
12.629	15.9047	11.3985	4.6979	15.9533	3.0633	2.544	3.674	13.5011	1.7141	1.392	1.6521	2.4502	33.6856	2.6538	2.798	3.064	29.84	3.495	1.673	2.148	1.753	15.053	4.9672	1.701	1.9758	1.799	2.4389	18.0591	24.9749	2.8105	1.711	1.257	1.725	8.5183		0.522168	7.23666
12.7481	14.8068	10.6867	4.3365	15.4843	2.8687	2.449	3.198	11.1298	1.4634	1.1797	1.3131	2.1825	31.7633	2.4837	2.905	2.931	27.024	4.066	2.193	2.106	2.379	14.231	5.2213	1.5832	1.6733	1.9866	2.9821	17.4352	23.3732	2.7206	2.159	1.346	1.672	8.1988		0.527092	6.86858
12.8673	15.5434	10.3035	4.3222	14.272	2.5299	2.296	3.209	11.9109	1.4487	1.9697	1.601	2.8223	29.0619	2.4197	3.263	2.998	27.605	4.032	1.556	1.72	1.782	12.776	6.017	1.9218	1.6376	1.6762	2.678	19.1433	24.5338	3.1589	2.334	1.764	1.731	9.4038		0.532021	6.92475
12.9864	15.2089	10.5352	5.7813	13.5274	3.0085	2.492	4.136	9.1814	1.4905	1.6753	1.2535	2.4725	28.046	3.2624	4.14	3.377	30.566	3.521	1.842	1.578	1.745	12.981	5.4806	1.3944	2.1397	2.1498	2.851	18.4804	21.931	3.0978	2.001	1.284	2.14	9.3473		0.536945	6.88582
13.1055	14.1221	12.3816	6.0416	13.2318	2.6759	2.188	3.604	9.1158	1.32	1.377	1.8232	2.7469	24.4156	2.816	4.193	3.672	26.867	3.62	1.821	1.993	2.218	10.406	5.9038	1.7038	1.8325	1.8306	2.7794	20.253	22.6789	3.086	1.687	1.543	2.234	9.3641		0.54187	6.69252
13.2247	15.4663	14.9059	7.6972	12.8127	2.867	3.394	3.556	10.1619	1.6258	1.1352	1.5531	2.2651	21.5047	4.0829	4.236	3.315	26.66	3.201	2.31	1.673	2.318	8.485	4.6006	1.6192	1.9594	2.0784	2.7576	21.4163	20.1334	3.2866	1.874	1.724	1.887	9.2431		0.546798	6.70016
13.3438	16.4481	18.3027	9.5467	14.7211	3.1418	2.079	4.501	8.7998	1.7931	1.812	1.6023	2.8516	19.5116	3.8718	3.948	3.808	24.988	3.789	2.051	1.895	2.788	8.555	4.0073	2.0261	1.7183	1.5207	2.9336	22.177	20.3395	3.4028	1.939	1.961	2.745	7.5604		0.551723	6.85692
13.463	18.8715	20.047	12.0894	14.3943	2.8058	2.336	5.033	7.0583	1.8926	1.2814	1.4594	2.4187	19.672	4.9787	4.697	3.811	26.501	3.409	2.536	2.271	2.281	9.635	4.1991	1.7551	2.2381	2.3038	2.5355	22.7058	20.2624	3.0992	1.837	1.588	2.268	8.0187		0.556651	7.12617
13.5821	16.9009	22.614	13.0515	15.7479	2.4657	2.097	4.301	7.8932	2.0989	1.4864	1.6562	2.5534	16.9126	5.3655	4.219	4.223	30.556	3.163	1.967	2.147	1.836	8.328	4.1245	1.812	2.0722	1.7374	2.6622	21.6904	19.1146	3.8577	1.718	1.614	2.282	8.5452		0.561576	7.14157
13.7012	17.8351	25.3426	14.3214	15.7937	3.2276	1.835	4.555	7.2142	1.4222	1.461	1.6646	2.9897	15.9681	5.7259	4.694	3.959	34.21	2.689	2.22	1.645	2.781	10.006	4.127	1.9812	1.4679	2.168	2.6343	18.8198	20.7434	3.3058	2.107	1.815	1.786	7.7742		0.5665	7.36146
13.8204	18.5327	22.5923	13.3566	16.0911	2.904	2.22	4.479	8.1022	1.1685	1.8525	1.9851	2.6112	14.3806	5.3297	4.265	5.074	39.105	4.238	2.417	1.745	2.015	10.449	3.0963	1.991	1.5439	1.8843	2.3118	18.4305	22.1279	2.9921	1.653	1.94	2.163	9.2816		0.571429	7.48026
13.9395	21.9111	23.2575	14.5551	18.7456	2.8792	2.089	5.509	7.4283	1.621	1.3923	1.8368	3.2093	15.3861	5.1647	4.91	4.516	43.644	2.96	2.105	1.777	1.795	8.625	4.3609	2.2699	1.9086	2.1767	2.6594	16.5897	23.8897	2.703	1.807	1.558	1.912	9.8623		0.576353	7.85336
14.0587	21.2954	21.2936	13.8549	20.7931	2.4543	2.235	5.445	7.743	1.5959	1.9114	1.6081	2.4503	15.3771	5.8402	4.307	4.143	49.088	3.082	1.799	1.793	2.015	8.618	3.9026	1.711	1.8435	2.2481	2.3668	14.8604	25.6805	3.1007	1.676	1.674	1.89	10.2553		0.581282	7.93974
14.1778	19.8648	20.0864	14.386	22.3167	2.25	2.153	5.122	6.8578	1.3796	1.6866	1.7405	2.7804	17.3463	6.1632	4.977	4.456	53.179	2.89	1.808	1.469	2.981	10.073	4.3779	2.1238	1.7651	1.9472	2.8397	16.0418	30.8597	2.5612	2.055	1.714	2.564	10.9723		0.586206	8.40553
14.297	22.4144	19.4785	15.8559	22.9698	2.7827	2.544	4.338	6.5321	1.4517	1.5068	2.0558	2.4431	17.0557	6.1281	4.845	4.673	58.344	2.713	2.241	1.939	1.889	9.239	4.0232	2.2581	1.9404	1.7626	2.6934	13.1361	32.5342	3.2554	2.3	2.089	2.204	11.5223		0.591134	8.6223
14.4161	22.2632	18.456	15.3494	23.65	3.1728	2.621	4.175	6.2875	1.336	1.4515	1.7566	2.6695	17.7652	6.8672	5.139	4.172	60.588	2.704	2.424	2.199	2.11	9.003	3.8388	2.2896	2.0424	1.6697	2.9718	14.5459	35.5911	2.9867	1.774	1.832	2.158	12.7341		0.596059	8.841
14.5352	22.2202	17.6811	17.1786	22.9283	2.4067	1.749	4.609	5.812	1.7116	1.1561	1.7621	2.3773	18.5346	6.0491	4.756	4.142	60.65	2.528	1.792	1.83	2.17	8.27	4.4206	2.123	1.891	2.4557	2.9607	12.6996	38.5063	2.8213	2.134	1.649	2.283	11.7345		0.600983	8.76448
14.6544	22.5953	18.3506	14.5811	24.1094	2.8179	2.233	4.852	6.1465	1.0968	1.5283	1.5365	3.0622	18.8594	6.4366	4.418	4.184	64.418	2.476	2.674	2.195	1.944	8.355	5.152	1.8026	2.1355	1.9331	2.9732	13.1032	38.0973	2.7031	2.351	2.056	2.684	10.4947		0.605912	8.95163
14.7735	23.1942	18.47	14.5045	22.7565	2.1546	2.687	3.806	5.0405	1.3389	1.2498	1.6982	2.1284	16.1624	6.5173	4.239	3.73	57.397	3.077	3.069	1.721	2.232	6.257	5.2196	2.3498	1.8605	2.682	3.2581	13.1944	43.0588	3.1341	2.003	1.654	1.785	9.8084		0.610836	8.63053
14.8927	24.4281	19.562	13.1065	23.7196	2.8836	2.354	4.508	7.1184	1.3711	1.3859	1.0221	3.0999	17.6996	6.3114	4.947	4.509	55.869	2.583	2.321	1.977	2.062	5.921	7.4966	1.7917	1.8561	1.9522	2.5463	14.7783	45.1216	3.1256	1.589	1.974	2.209	11.3407		0.615765	8.95707
15.0118	23.8379	22.8409	12.2763	22.1067	2.7403	2.798	4.304	5.8078	1.187	0.9439	1.2695	3.6766	14.5922	6.0884	4.271	4.624	45.423	3.304	2.367	2.461	2.414	5.087	5.5793	1.647	1.1528	1.943	2.9182	13.5614	47.4017	3.0132	1.504	1.848	2.298	13.0903		0.620689	8.54051
15.1309	23.0858	20.1575	12.5348	25.6581	3.0172	1.965	4.53	5.6452	1.1422	1.7706	1.7299	3.196	12.9363	5.7362	4.687	3.816	35.638	2.54	2.49	1.772	1.949	5.806	7.3246	1.771	1.7035	1.7851	2.818	14.7059	49.2411	2.6417	1.897	1.919	1.905	12.4222		0.625613	8.29226
15.2501	24.9191	20.3912	10.7733	25.0919	2.7936	2.76	4.761	5.2837	1.2482	1.5508	1.6181	3.9574	11.4678	4.8765	4.26	3.904	31.649	2.545	1.635	1.976	1.94	6.572	6.7408	2.3257	1.5976	1.8395	3.174	13.1654	51.3658	2.4303	1.627	1.894	1.804	13.4857		0.630542	8.15951
15.3692	24.9833	18.2396	11.8599	28.2317	2.9815	2.417	5.041	4.4641	1.4931	1.3041	1.7366	3.4436	10.8954	5.2893	5.264	3.929	24.581	2.424	1.758	1.707	2.037	5.337	7.1357	1.9567	1.718	1.8066	2.661	14.6006	48.9099	2.4336	2.102	1.539	2.131	12.5401		0.635466	7.91034
15.4884	28.8899	19.0233	11.7601	25.9688	3.0987	1.485	3.755	4.7285	1.2451	1.2482	1.6728	3.785	9.7554	4.7592	4.643	3.352	24.925	2.643	2.895	2.333	2.148	4.755	6.8136	2.1137	1.5147	2.0081	2.2634	15.419	46.3507	2.8151	1.496	2.221	1.896	11.0547		0.640395	7.78926
15.6075	30.4428	15.9678	13.7453	29.9505	2.5812	1.617	4.596	3.6339	1.2371	1.3016	1.7074	4.6461	10.2081	5.3433	3.768	3.549	27.825	2.436	2.266	1.968	1.64	4.698	6.816	2.4046	1.425	2.0316	2.1555	16.059	47.8183	2.7098	1.763	1.789	2.534	9.8952		0.645319	8.01556
15.7266	27.5157	17.8535	16.9737	30.0212	2.6036	2.368	3.313	2.8957	1.3151	1.47	1.9816	5.8432	8.6828	4.5675	3.861	2.754	30.717	2.369	1.725	2.101	2.291	5.223	7.0833	1.8437	1.5246	1.738	2.5849	16.9809	44.4992	2.0801	1.927	1.341	2.319	10.5485		0.650244	8.02694
15.8458	31.7493	16.717	16.5608	30.1107	2.5106	2.291	4.365	4.0969	0.861	1.112	2.1503	6.3928	8.606	4.1945	4.436	4.034	30.834	2.936	2.431	1.882	1.732	4.44	8.4258	2.0794	1.98	1.6573	1.9147	16.9441	38.8999	2.1788	1.957	1.816	2.07	12.8321		0.655172	8.15288
15.9649	36.0052	18.51	16.8195	27.9544	3.357	2.15	4.615	3.2501	1.8408	0.9956	1.8519	5.7787	7.8066	4.1243	4.019	2.957	34.206	2.715	1.884	1.89	1.855	4.263	8.6129	1.9737	1.4248	1.9953	2.6385	18.5984	31.0125	1.8681	1.995	1.747	1.746	14.8594		0.660097	8.15646
16.0841	38.2146	18.2568	16.4463	30.9847	2.8949	2.082	4.799	3.36	1.0778	1.4106	1.5647	6.8821	6.728	3.9131	3.619	2.996	33.456	2.392	2.014	1.722	1.721	4.37	10.0171	2.2615	1.4615	2.0776	2.4019	16.8646	26.4165	2.1071	1.671	1.409	2.459	16.2773		0.665025	8.12731
16.2032	42.6297	19.2682	15.0603	31.7422	3.01	1.834	4.988	3.4507	1.4929	1.3988	1.9573	6.6282	6.5143	2.9643	3.379	2.844	32.32	2.533	2.403	1.841	2.017	4.437	11.6276	2.0597	1.9056	1.7863	2.1439	14.9019	24.7326	2.7889	2.154	1.635	2.875	15.9554		0.66995	8.21408
16.3224	44.8901	19.8979	15.7294	32.4631	3.1117	1.603	4.9	3.4182	1.0976	1.5066	1.8088	5.1797	6.6369	3.2104	3.095	3.049	30.128	1.952	1.877	1.888	1.987	4.114	12.1355	2.0725	1.8707	1.8621	2.2608	14.4487	21.0584	2.9293	2.203	1.961	2.263	14.2105		0.674878	8.02409
16.4415	47.2478	18.986	13.3638	31.9028	2.7022	2.101	4.36	3.8792	1.6028	1.4864	1.9427	5.3136	5.1765	2.7612	3.804	2.909	26.203	2.804	2.137	2.169	2.458	4.012	12.4702	1.9281	1.5868	1.44	2.5137	14.9148	21.2917	3.041	1.689	1.827	2.156	15.4419		0.679803	7.93006
16.5606	48.8605	18.6783	11.4513	31.9048	2.5389	2.044	4.675	3.2261	1.1006	1.4493	1.4617	4.4079	4.9574	2.805	3.806	3.419	24.802	1.992	2.362	1.52	1.66	3.909	14.1851	1.6571	2.0625	1.7392	2.4856	14.3697	19.4386	2.8552	1.903	1.97	2.337	15.5684		0.684727	7.75301
16.6798	49.0807	18.3506	11.4647	33.74	2.7391	2.021	5.121	3.6617	1.087	2.0983	1.9175	4.4292	5.5512	3.2784	2.446	2.845	21.21	2.216	1.941	1.434	1.781	3.105	16.2608	1.9844	2.0772	1.7367	2.9663	11.9106	18.9705	2.0147	1.957	1.598	2.754	18.647		0.689655	7.77634
16.7989	49.6352	18.5424	9.7036	33.9585	4.1169	2.439	5.485	3.3133	1.264	1.2043	1.6429	5.9534	4.6737	3.0622	3.113	2.779	18.736	2.339	2.087	1.729	2.615	3.422	20.3463	1.6667	1.811	2.2396	3.3777	14.6428	19.5101	2.7813	1.772	2.042	2.244	16.7805		0.69458	7.97142
16.9181	47.0464	18.9074	8.0144	33.4953	3.3477	1.97	5.274	3.8896	1.3273	1.4748	1.3883	6.827	4.6929	3.1079	2.695	2.847	16.998	2.529	1.466	2.036	2.194	3.494	23.0836	2.5312	1.5236	1.463	2.7724	14.4647	24.4478	2.254	1.837	1.663	2.599	19.8496		0.699508	8.04444
17.0372	46.0281	20.6143	8.6846	35.3457	2.3495	1.919	5.35	2.9948	1.3032	1.4398	1.4705	7.3143	4.7769	3.1357	2.881	3.029	17.629	2.443	1.645	1.753	1.797	3.161	24.8669	2.377	1.9704	1.5652	3.2038	14.2572	29.7237	1.9408	2.217	1.7	2.363	19.7485		0.704433	8.32347
17.1563	42.8532	19.2289	9.1735	31.7135	3.3042	1.92	4.78	3.7404	1.141	1.7527	1.7809	6.8888	5.083	2.4601	2.822	3.518	16.504	2.443	2.055	2.151	1.996	2.388	24.2926	1.9444	1.7692	1.8958	3.0116	14.0906	27.8538	1.9615	1.934	2.296	2.023	19.1956		0.709357	7.99898
17.2755	41.8945	21.4356	9.2393	27.9723	2.7543	1.91	5.413	4.123	1.1297	1.5479	1.842	8.3773	4.9096	2.7827	3.132	3.061	17.95	2.155	1.682	2.113	2.059	2.48	20.4049	2.3759	1.4868	1.7981	2.5961	14.1495	27.486	2.4237	1.488	2.058	2.34	18.6378		0.714286	7.85906
17.3946	39.6733	20.0769	8.134	30.1607	2.5162	2.105	5.902	2.5497	1.3644	1.3707	1.7303	8.3464	5.4529	3.1766	2.577	2.721	17.394	2.41	2.357	2.172	2.104	2.876	18.4604	1.7279	1.5526	1.5922	2.9988	14.3079	25.0226	2.3142	2.051	2.083	2.104	21.9961		0.71921	7.74649
17.5138	36.3817	21.4809	9.2611	30.0929	2.2073	2.165	6.139	2.5423	1.5343	1.5352	1.8492	11.0367	4.6805	3.6113	3.418	2.618	13.971	2.349	2.525	1.817	1.916	2.307	15.97	2.0077	1.4552	2.3461	3.0037	15.1757	22.3706	2.0888	1.986	1.686	1.542	22.4672		0.724139	7.57463
17.6329	37.0451	23.2095	9.5302	25.6715	2.779	1.717	5.597	2.3147	1.506	1.354	1.7604	11.15	4.2196	3.6338	2.456	2.39	15.315	2.37	2.217	1.898	1.388	2.675	14.6136	1.6356	1.9981	2.2698	2.6256	14.1913	20.4792	1.814	2.09	1.632	2.183	20.5948		0.729063	7.30364
17.7521	35.7136	19.7579	9.1757	26.7746	3.6748	1.744	5.937	2.6185	0.9832	1.4185	2.0628	12.2016	5.0404	3.0686	2.934	2.272	12.329	1.998	2.058	1.331	2.364	2.747	14.1973	2.1817	2.2283	1.7055	3.2953	14.2684	20.819	2.057	1.507	2.098	2.172	18.373		0.733992	7.1502
17.8712	34.3981	18.7428	9.9359	23.8818	2.5933	1.686	5.415	2.0648	1.103	1.1656	1.682	12.8317	6.3393	3.0593	2.803	2.735	9.875	2.009	2.277	1.961	1.94	2.453	14.4927	2.0482	1.3981	2.5988	3.4105	14.2745	17.901	1.7343	1.676	1.76	2.403	17.6867		0.738916	6.83339
17.9903	37.518	17.138	9.5224	26.3223	2.7014	1.561	5.724	2.4082	1.3462	1.5121	1.8602	11.413	5.8355	3.0101	2.47	2.946	8.393	2.642	1.935	1.795	1.765	2.365	14.2007	2.111	1.8579	1.5717	3.0257	16.7031	17.3167	1.9768	1.833	2.001	1.475	18.4751		0.74384	6.90386
18.1095	38.608	14.2513	9.8441	24.581	3.1837	2.046	6.843	2.2184	1.1379	1.8916	2.0112	10.4667	5.3211	4.2973	2.944	2.531	8.194	1.805	1.751	1.765	1.52	2.192	13.8313	2.0994	1.5681	2.0978	3.2037	18.0491	14.236	1.8971	1.893	2.204	2.293	16.8578		0.748769	6.75393
18.2286	36.8902	13.0753	8.402	23.4353	2.8743	2.478	6.54	2.3342	1.0118	1.1998	2.0479	11.7325	5.1581	3.1457	2.573	2.906	6.348	1.454	1.966	1.824	1.708	1.989	15.4971	1.7034	1.724	2.1112	3.6733	19.2767	13.989	2.6123	1.736	1.814	2.184	16.0936		0.753693	6.57376
18.3478	37.3411	10.61	9.8697	23.7234	3.0579	2.499	7.159	2.4026	1.3332	1.593	1.9339	11.9638	5.1834	3.9409	2.627	2.371	5.385	1.41	1.969	2.012	1.825	2.316	17.353	2.3188	1.8639	2.0626	4.4073	22.3959	10.7139	2.0063	1.736	2.012	2.636	19.2524		0.758622	6.80247
18.4669	37.1884	11.1562	8.1221	23.9856	3.0965	1.856	6.304	2.02	1.1576	1.4767	1.4586	11.5878	4.8239	4.0389	2.75	2.836	5.414	2.407	2.023	1.67	1.654	1.941	17.6348	2.0006	1.4612	2.1687	3.5548	26.4864	11.0317	2.3448	1.724	2.019	2.694	17.2695		0.763546	6.74579
18.586	34.8785	10.2909	8.7442	23.8602	3.1062	1.688	6.032	1.9619	1.0281	1.3484	1.6191	14.008	4.3934	3.878	3.788	3.324	4.107	1.901	2.293	1.799	2.091	2.255	16.2989	1.6607	1.7847	1.8287	4.0367	27.637	9.5445	1.6623	1.661	1.286	1.947	16.9564		0.768471	6.60879
18.7052	33.7342	11.1914	8.7127	21.4391	2.7408	1.869	7.294	1.8486	1.1901	1.6477	2.2888	12.2068	5.2734	4.5803	3.504	3.713	3.914	1.923	2.19	1.508	1.941	2.081	18.3606	2.1844	2.0821	1.5045	3.5272	27.0724	8.0827	1.8347	1.644	1.55	1.997	18.0282		0.773399	6.60761
18.8243	36.5919	9.8844	10.1818	21.207	2.9559	2.003	7.466	2.2808	0.9835	1.3267	1.9298	14.4683	5.0202	4.0065	3.545	4.217	4.19	1.739	1.854	2.002	1.96	2.044	15.855	1.6122	1.735	1.9708	4.3739	31.06	9.021	1.9438	2.011	1.792	2.161	16.2898		0.778324	6.81419
18.9435	36.5091	13.213	9.3969	20.9654	3.3882	2.043	8.734	2.2375	0.6154	1.5364	2.4915	13.4426	4.5256	3.7081	3.675	3.807	3.61	1.944	2.189	1.352	2.016	2.68	15.0683	2.4369	1.8238	1.7577	5.815	32.288	7.4242	2.2998	1.922	1.735	1.901	13.4547		0.783252	6.82371
19.0626	34.7804	11.4879	9.1307	19.8912	4.0968	2.038	8.169	2.3207	1.4391	1.4843	2.2954	15.3367	5.0436	5.3493	4.417	5.273	3.902	1.409	1.855	1.239	2.356	1.763	17.0241	1.8696	1.3083	2.0582	6.666	37.2721	8.2259	2.0861	2.352	1.781	2.214	12.8484		0.788176	7.08185
19.1817	34.4905	11.5642	7.7163	20.0255	4.1498	2.593	8.925	1.7222	1.131	1.2764	1.9616	17.4559	4.7916	4.3048	3.826	5.958	4.23	1.616	1.8	1.384	1.94	2.629	13.9427	1.788	1.864	1.918	6.7076	44.5419	8.1228	2.0512	2.096	1.619	1.932	9.6765		0.793101	7.11031
19.3009	37.6893	11.4608	8.4236	17.3062	4.5666	2.267	8.416	2.0699	1.138	1.7087	1.7374	16.1248	4.9757	4.9892	4.534	7.708	3.472	1.673	1.636	1.652	1.693	1.962	15.9052	1.5106	1.6655	2.3347	8.1754	46.1205	9.5437	2.3822	1.442	1.605	2.198	10.5452		0.798029	7.37151
19.42	38.54	13.8124	8.2072	17.6073	3.9442	2.233	8.571	2.3342	1.5806	1.9592	2.3962	17.5794	4.4413	5.8437	5.018	9.192	2.608	1.872	1.701	2.191	1.911	2.591	16.1502	1.4405	1.8975	2.1135	10.5865	47.3354	9.9479	2.0873	1.943	2.036	1.964	9.2918		0.802954	7.73316
19.5392	42.0707	13.9055	7.793	18.6913	4.7693	2.676	9.412	2.0696	1.3376	1.6297	1.7671	17.9682	4.4871	5.7379	4.829	11.354	2.682	2.208	1.776	2.017	1.849	2.893	15.2429	1.7612	1.9118	2.4101	10.6162	46.7652	13.6651	2.13	1.824	1.95	2.055	9.6696		0.807882	8.05659
19.6583	44.3384	16.8426	7.9273	16.5964	5.315	2.522	12.273	2.7515	1.6238	1.5825	2.2988	19.9244	5.2003	6.263	5.215	13.716	2.519	1.81	1.912	2.115	1.641	2.332	17.3534	2.0158	1.841	1.9134	12.1411	49.4761	16.0824	2.394	1.782	1.952	1.858	8.5533		0.812807	8.64946
19.7775	46.643	15.7804	8.1666	16.3868	4.6258	2.043	15.28	2.1709	1.4716	1.7616	2.6361	22.9098	4.2202	5.7322	4.54	14.282	2.022	2.151	1.984	2.09	1.721	2.045	17.5606	2.3223	1.9922	1.856	12.8934	49.3713	19.283	2.4806	1.796	1.549	2.115	9.1803		0.817735	8.91361
19.8966	47.4883	16.1022	7.9842	16.8489	5.9526	2.337	15.746	2.3739	1.3772	1.4495	2.2867	25.3987	3.7459	5.5775	4.618	16.595	2.582	2.059	1.861	2.139	2.019	2.28	18.2572	1.802	1.562	2.3124	12.2649	52.6155	24.3566	2.4688	2.21	1.753	2.195	9.6604		0.82266	9.41998
20.0157	52.067	14.8775	7.1158	13.6549	5.2386	3.011	17.122	2.085	1.4364	1.1626	2.385	22.095	4.8683	5.4999	5.339	17.098	2.492	1.957	2.168	2.193	1.551	2.1	19.7079	2.3507	2.3407	2.1938	13.4765	51.5796	24.3966	2.1311	2.109	1.402	2.253	10.018		0.827584	9.45517
20.1349	55.504	12.9531	8.3285	13.8256	6.1579	2.948	18.165	2.4881	1.9622	1.421	3.2027	22.2762	5.1423	5.7381	4.76	19.06	2.471	1.941	1.92	1.895	1.546	2.378	21.7669	1.6548	2.1719	1.9502	12.6133	50.3613	24.5275	2.3523	1.873	1.69	2.35	10.4406		0.832513	9.70104
20.254	57.093	11.8177	7.7602	13.6353	6.9946	2.635	20.773	2.4263	1.5817	1.8329	3.0489	19.429	5.1439	4.5141	5.049	18.723	1.966	2.22	2.245	2.135	2.085	1.625	21.392	2.1062	2.3793	2.0459	14.8455	47.0553	30.2809	2.4563	2.033	1.73	2.16	12.3335		0.837437	9.86916
20.3732	58.4498	12.2452	7.5375	12.4848	7.1021	3.154	21.67	2.257	1.7295	1.1962	2.7247	16.065	4.5362	5.5752	4.79	20.106	2.187	2.314	2.441	2.191	1.78	1.925	22.5587	2.3498	1.798	2.7781	16.1229	44.6411	30.1444	2.4362	2.254	1.46	2.671	13.4571		0.842366	9.91566
20.4923	56.8537	11.1266	6.966	12.2424	8.7395	3.078	22.482	2.6509	2.2697	1.1184	3.2586	15.0943	4.9629	7.3886	6.304	22.808	2.813	2.606	2.483	1.937	1.737	2.294	27.9828	2.5636	1.7453	1.84	17.0842	45.8248	32.8475	2.7628	1.995	1.911	2.523	14.1329		0.84729	10.4243
20.6114	52.0996	12.4398	8.3182	12.2679	9.5117	2.259	24.937	3.3247	1.9477	1.5614	3.2937	15.1376	5.047	6.9479	6.097	23.027	2.137	2.611	1.819	2.816	2.184	2.586	28.9839	2.4512	2.6228	2.1883	19.8412	41.3377	33.5169	3.5507	2.443	1.977	2.547	17.3752		0.852214	10.6237
20.7306	49.4502	11.2885	6.9666	12.0122	11.4707	3.216	28.837	3.9777	2.0172	1.3504	3.3892	11.3289	5.995	7.7136	7.091	21.805	2.209	2.5	2.903	1.711	1.872	2.42	31.4683	2.5525	2.9521	2.4409	24.8299	41.2694	38.7378	3.9736	2.228	2.177	2.284	21.5539		0.857143	11.1174
20.8497	43.5018	10.2426	7.4148	12.3889	11.436	3.386	31.615	3.5835	2.3267	1.7068	4.6891	12.1869	6.0324	7.5915	7.052	23.837	2.135	3.427	3.127	2.062	2.326	2.168	32.727	3.0545	2.4279	2.7689	26.5396	36.543	42.3357	5.1226	3.004	1.552	2.476	22.4889		0.862067	11.3317
20.9689	38.9177	9.4779	8.1845	12.9931	13.2996	3.477	34.465	3.8479	2.1306	1.4262	4.4526	11.1238	6.7926	9.3563	6.811	21.187	2.473	3.363	2.614	2.489	2.14	2.691	31.3314	2.8612	2.3511	2.3764	27.2281	32.5604	39.554	5.9756	3.351	1.581	2.998	26.6233		0.866996	11.2501
21.088	32.686	9.3333	8.0938	13.7345	15.3778	2.664	37.608	5.4391	2.2538	1.8	4.1913	10.3754	8.0488	10.1803	6.899	22.843	2.178	3.833	3.147	1.764	2.516	2.669	32.6942	3.6806	3.2843	2.8771	30.8335	26.2898	30.9334	8.0582	2.932	2.041	2.927	30.6788		0.87192	11.3196
21.2071	31.5883	10.4533	8.6954	13.3441	17.1582	3.834	41.654	6.087	2.9828	1.5796	5.0675	9.9276	9.231	11.8515	7.577	25.347	2.991	3.729	3.532	2.575	3.054	2.517	34.0516	3.1666	2.9486	3.4472	29.9222	19.9077	22.569	10.7625	2.712	2.096	3.3	30.6794		0.876845	11.4806
21.3263	28.596	9.3073	8.6614	14.853	19.2577	4.559	47.028	7.8283	3.1728	1.9107	5.4228	9.7419	11.9135	13.4525	6.99	24.079	2.285	3.743	3.865	2.834	2.387	3.011	33.4309	4.2512	2.9281	3.1486	22.6895	16.4032	18.9523	12.1159	3.378	1.897	4.055	36.307		0.881773	11.6016
21.4454	23.6692	12.9075	9.0541	14.7819	22.9091	4.424	52.231	10.4145	4.2504	1.4837	5.8009	9.9045	15.6022	14.3028	7.906	27.383	2.421	3.879	4.004	2.297	2.212	2.639	38.0646	5.8783	4.1886	3.9641	18.4882	12.2656	12.8286	13.5605	3.438	2.29	2.97	36.5029		0.886698	12.0269
21.5646	19.5645	13.481	9.9514	15.3877	25.809	4.906	52.322	12.9955	5.4511	2.2636	5.5767	10.5485	20.4942	15.5065	8.511	26.439	2.475	4.324	4.84	3.344	3.292	3.384	39.3728	7.2267	5.7621	4.9259	13.5092	6.864	9.7192	14.036	4.514	2.203	3.554	37.433		0.891626	12.3525
21.6837	16.0689	15.5712	11.4228	17.6535	28.9998	6.447	48.775	16.3443	5.7637	2.1339	6.7014	10.531	28.4171	16.1248	8.441	27.172	3.025	4.591	4.052	2.854	3.655	5.171	41.7484	12.4557	6.9595	6.3749	9.8035	5.65	6.6225	15.7453	4.909	2.436	4.27	41.0951		0.89655	13.176
21.8029	12.659	16.2569	13.1284	17.6043	29.2231	7.897	48.487	17.626	8.1543	1.954	7.9845	13.021	37.4183	23.1029	8.655	26.437	3.17	5.039	5.588	3.593	3.641	5.549	43.3968	17.7272	9.7568	6.4913	7.2772	3.8766	5.0914	20.376	5.362	2.82	3.482	43.9488		0.901479	14.2881
21.922	10.3855	17.3676	16.4851	19.0553	32.4204	9.754	41.183	18.4952	10.9354	2.2176	8.7907	14.067	43.9079	27.052	7.918	23.41	4.175	5.753	5.246	4.089	5.79	9.352	46.217	27.4856	13.122	10.4495	5.9548	3.8651	3.6723	22.5095	5.826	2.264	4.632	42.0368		0.906403	15.4672
22.0411	7.1237	19.3981	18.4422	21.5202	33.3878	12.03	37.159	18.4569	14.7368	2.0285	9.242	15.4216	47.7693	32.7717	7.958	23.193	3.589	6.958	6.068	4.456	6.99	11.041	52.3079	31.9149	15.875	15.5841	3.8597	2.6586	3.3243	23.6819	9.41	2.611	4.579	47.0249		0.911328	16.8404
22.1603	7.3489	17.8712	19.2978	22.1964	36.6979	15.157	29.977	16.5181	19.5156	2.7015	10.3009	17.0595	50.466	39.5444	8.137	22.806	5.196	7.141	7.764	6.349	9.666	15.596	56.5845	35.5772	19.6768	19.3148	3.3756	2.267	2.7872	24.9508	12.076	3.019	6.258	57.2764		0.916256	18.5433
22.2794	5.857	15.339	20.3736	24.1825	38.1446	18.888	23.707	15.2573	22.4677	2.4044	13.0877	17.3842	42.9305	47.5891	8.486	19.557	6.516	7.789	9.6	5.867	12.235	18.881	56.6494	42.2852	21.932	23.1677	1.9254	1.9274	2.5502	27.5377	14.958	3.525	5.648	62.2726		0.921181	19.4389
22.3986	4.0141	14.0713	22.7159	25.3426	41.3888	18.999	18.967	11.1616	28.114	3.2182	14.7138	18.9552	36.1484	47.4972	10.687	20.918	6.782	8.824	13.685	6.644	15.356	22.989	51.4487	40.4507	22.5755	30.4181	1.8861	1.6516	2.0593	31.2645	17.691	3.819	6.372	72.509		0.926109	20.3923
22.5177	2.7687	15.8721	23.7235	25.1612	39.7992	20.98	13.958	10.3444	32.6187	3.5406	13.3381	18.8022	24.8544	42.7791	12.267	21.169	8.735	11.505	18.188	7.227	20.048	31.718	43.0363	40.506	24.2554	30.2227	1.0268	1.7531	1.2892	36.2873	21.813	3.934	7.352	70.8135		0.931034	20.6378
22.6368	3.6732	13.7841	22.9632	22.5575	37.4111	23.445	10.186	7.3616	27.4159	3.8716	14.9725	20.7288	17.9468	32.824	14.183	19.997	8.434	14.339	23.425	9.419	20.737	36.321	35.8073	38.1896	21.7744	30.0356	1.1032	1.5628	1.646	40.1796	26.148	4.697	6.385	66.6358		0.935958	20.0047
22.756	2.8419	12.4677	23.5698	22.9188	32.0874	29.776	8.743	4.9814	24.7389	5.3362	17.9017	20.5988	13.3215	23.6242	19.08	19.281	9.503	18.469	27.903	14.108	23.728	34.892	26.6705	34.91	18.4551	25.643	0.6249	1.4417	1.5479	42.1835	35.057	6.459	8.153	58.4194		0.940887	19.6893
22.8751	2.5168	9.7535	19.6596	20.7779	27.9176	31.512	5.723	3.1045	19.0646	6.0745	22.4753	23.1243	9.7143	18.557	18.928	19.367	9.7	23.481	32.559	18.02	23.869	25.03	21.8603	31.1393	13.3802	21.0376	0.7525	1.0095	1.3722	35.701	40.525	9.41	10.556	47.7731		0.945811	18.3955
22.9943	1.8429	7.083	19.5193	19.0418	20.1974	38.327	3.26	1.8608	12.3597	7.4331	26.617	26.7367	7.5616	13.9402	21.991	19.238	12.139	28.812	37.715	22.376	25.616	13.968	14.7301	26.7431	10.6605	15.3194	0.6164	1.0336	1.0437	34.9934	43.729	15.045	14.52	35.7286		0.950739	17.6999
23.1134	1.4605	5.5906	16.4315	14.1767	14.9722	38.612	3.324	1.6446	7.6708	7.6932	29.4105	31.6167	5.0433	12.5492	22.399	19.696	13.305	29.959	41.689	22.843	20.713	8.876	11.9928	18.7216	8.7167	13.0822	0.4726	0.6671	0.688	23.3218	48.17	21.665	20.064	23.5878		0.955664	16.4949
23.2325	1.9581	5.0542	13.5723	11.9952	9.3817	35.422	2.746	1.4042	5.0302	11.0075	33.5644	34.7036	3.6472	8.6237	22.585	20.081	17.547	28.469	39.253	25.569	15.194	5.943	7.6562	14.9178	7.6864	10.0612	0.483	0.6551	0.8172	16.1605	53.107	30.51	26.934	20.6676		0.960588	15.9532
23.3517	1.5048	4.0278	12.4269	8.8048	6.7253	30.331	2.479	0.918	3.5997	12.6888	34.765	39.1307	3.7231	7.319	24.842	21.539	19.505	26.945	31.24	21.881	11.643	4.052	6.2904	11.0508	6.1774	6.9298	0.4549	0.5493	0.8862	12.3652	54.177	37.755	37.833	12.8454		0.965517	15.2178
23.4708	1.8807	3.8095	11.2195	6.3792	4.6828	25.279	1.361	1.3213	3.3347	14.1335	36.5532	39.9701	2.9337	4.4405	25.68	24.967	23.614	20.661	25.652	17.93	9.08	4.136	4.9437	8.8144	6.3557	5.9626	0.5004	0.4439	0.6028	9.3751	50.697	42.782	42.482	11.4573		0.970441	14.5128
23.59	1.3087	2.623	11.0659	5.2072	3.9381	17.979	1.307	0.7924	2.3283	14.1017	34.1181	40.2117	2.1975	3.937	31.105	27.265	27.721	14.507	22.906	16.266	7.216	3.013	3.5745	7.6045	5.0864	3.8308	0.326	0.4365	0.192	6.188	47.607	46.098	47.959	7.9964		0.97537	13.7651
23.7091	1.1346	2.2109	8.6032	3.8504	3.2884	12.915	1.505	0.8689	2.3429	13.683	30.8526	36.1144	2.5299	2.7583	39.069	31.158	27.362	10.134	17.922	15.058	5.604	2.447	2.9226	6.2241	3.3597	4.4405	0.225	0.3333	0.5389	5.2918	42.912	46.135	55.678	6.5379		0.980294	13.1179
23.8283	1.2183	1.6473	6.423	3.5554	2.1383	10.102	0.923	0.5261	0.9914	9.0594	24.4603	32.7176	1.6942	1.7791	44.027	37.698	28.213	6.711	16.645	13.158	4.921	1.648	2.3221	4.3291	3.4435	3.0028	0.2772	0.1722	0.3369	4.2972	34.775	52.918	56.25	3.9519		0.985223	12.2451
23.9474	0.6909	1.6063	4.8127	2.9581	2.2416	6.75	1.271	0.8142	1.1578	6.6802	18.6073	25.7658	1.3535	2.2318	50.892	39.222	31.447	6.111	12.452	8.689	3.845	2.325	1.61	3.6323	2.3951	2.9961	0.2757	0.0681	0.3299	3.9493	27.857	52.773	52.974	3.0519		0.990147	11.2893
24.0665	1.0832	1.1312	4.2423	3.3169	2.3176	4.704	0.964	0.7256	0.896	4.9242	14.2585	17.7461	1.1046	1.7007	54.029	43.602	28.537	5.555	9.191	7.415	3.139	2.125	1.5462	3.2528	2.1992	2.339	0.1138	0.2129	0.1744	3.465	18.417	48.026	36.728	1.8602		0.995071	9.73654
24.1857	0.3944	0.8851	3.4165	2.225	1.4559	3.073	0.87	0.3982	0.7811	3.0335	11.4771	12.8595	1.1051	1.3629	53.919	43.936	20.179	2.354	6.076	5.992	3.348	1.892	1.0665	2.921	2.2783	2.1216	0.3834	0.1204	0.3317	2.3798	12.6	42.296	24.666	1.7277		1	8.05664

## Sheet: Image8
X0	Y0	Y1	Y2	Y3	Y4	Y5	Y6	Y7	Y8	Y9	Y10	Y11	Y12	Y13	Y14	Y15	Y16	Y17	Y18		Ap-Basal to 1	Average intensities
0	76.36	48.5	28.345	23.5379	11.6669	19.5166	24.0722	19.5922	28.0986	19.4573	27.8385	42.575	28.185	31.9634	40.6981	20.8122	13.9328	16.7035	9.7135		0	27.9773
0.1191	71.641	57.762	31.787	25.1704	13.0457	26.027	29.2405	20.6252	29.4035	19.4309	28.7431	48.284	28.584	29.6912	45.2976	24.6433	14.8787	19.2363	10.2226		0.0054329	30.1955
0.2383	69.555	66.272	37.213	27.5016	13.5211	30.5597	33.4917	24.1138	30.7775	19.9832	31.8972	54.938	30.706	29.195	48.8441	27.0631	14.9264	21.8951	11.7401		0.0108704	32.8523
0.3574	62.389	73.051	43.664	29.0916	14.1778	36.9629	39.0439	28.6342	35.8912	19.6991	34.822	59.166	28.416	29.1483	53.7782	29.3271	17.8199	23.2447	12.3484		0.0163033	35.2987
0.4766	60.159	77.057	56.415	35.9377	16.2392	46.6262	41.9215	33.4331	42.8872	21.1526	38.0867	61.298	31.065	29.6542	58.6568	28.465	24.7026	28.2505	13.9899		0.0217407	39.263
0.5957	59.202	77.689	68.558	42.9384	18.5499	58.7099	41.9377	42.4701	53.425	23.299	43.7763	65.651	30.067	29.7172	63.4861	30.7851	30.553	33.4958	17.4414		0.0271736	43.7764
0.7148	57.1	86.596	76.635	49.2866	22.5135	67.7508	45.8348	46.8742	58.3577	27.8571	47.4336	72.369	31.654	29.8741	65.8862	32.7646	40.2148	35.9144	19.5286		0.0326065	48.1287
0.834	58.004	93.423	84.671	54.0673	26.4933	82.5898	47.1614	56.4127	70.1683	30.8247	52.7462	77.648	33.575	32.1299	63.9731	34.2718	51.4177	42.8946	24.1162		0.038044	53.5046
0.9531	62.273	105.707	95.951	58.7613	31.4967	91.5443	50.1992	65.9913	74.9447	34.3261	58.2323	83.641	35.074	31.9165	62.2682	38.4376	64.0123	53.7291	25.7971		0.0434769	59.1738
1.0723	69.522	115.277	103.932	61.891	33.5743	93.5886	54.8861	71.3314	80.834	40.0545	65.5626	90.013	37.296	33.298	65.5066	42.7943	75.4631	62.2887	30.9133		0.0489143	64.633
1.1914	84.934	121.675	111.299	68.2313	34.8203	97.131	63.8104	81.4581	84.4668	38.1833	70.9385	95.167	39.336	36.1635	69.4683	48.2641	80.4502	71.618	35.2831		0.0543472	70.142
1.3106	96.968	130.519	118.326	73.7282	36.2072	93.9117	73.7983	86.9784	88.5899	41.6202	77.6645	96.123	42.257	40.8686	68.7989	53.0799	83.3828	79.8503	39.4353		0.0597847	74.8477
1.4297	114.3	137.56	121.379	81.2083	45.3451	85.6199	81.8303	89.7626	87.6186	44.6768	82.9374	99.865	46.945	42.4648	68.6014	56.3748	83.6068	85.5033	45.9701		0.0652176	79.03
1.5488	125.753	141.123	121.673	85.8082	50.5536	74.494	86.0766	90.2101	84.984	46.9466	88.8826	98.664	49.295	45.6638	68.4526	55.9495	85.1522	87.9899	51.0563		0.0706505	80.9857
1.668	132.099	131.919	124.454	88.5251	55.6256	67.4156	90.0738	87.9932	77.4934	50.291	92.8318	98.759	53.63	51.5569	70.5163	60.0198	87.8689	88.1139	56.4015		0.0760879	82.3994
1.7871	136.38	127.827	121.063	90.3433	59.0764	63.0967	92.6604	81.4296	70.5017	52.3837	94.0232	97.809	57.035	57.1635	74.0952	62.6056	84.8421	87.3829	59.7555		0.0815208	82.6039
1.9063	134.157	122.724	108.708	87.8695	62.407	57.2195	94.2103	76.9077	69.0091	51.7126	94.4289	99.503	61.343	61.977	72.564	67.398	82.6102	79.3888	64.8684		0.0869583	81.5266
2.0254	126.634	113.134	100.238	86.8144	69.2205	51.5571	90.9186	69.6071	64.563	55.2342	93.0041	105.026	66.092	66.4811	68.2349	68.3501	76.6491	77.6191	65.2103		0.0923912	79.7151
2.1445	115.754	100.013	92.6	82.6159	72.9005	45.8586	85.1818	63.7963	60.7209	59.3453	87.2929	105.272	76.159	67.4016	69.9338	70.6955	69.4077	71.9219	64.843		0.0978241	76.9323
2.2637	99.662	80.758	85.448	79.0981	73.594	44.5178	80.4978	57.0115	57.7504	64.6426	83.7024	107.719	79.141	68.4965	70.1576	70.7572	65.9393	64.8278	66.8827		0.103262	73.716
2.3828	91.341	64.057	78.342	79.0627	74.0832	41.1794	75.3185	53.5575	55.6013	69.9854	74.2687	108.881	89.21	71.9468	73.8287	71.0109	64.4955	64.924	64.141		0.108694	71.8545
2.502	80.915	50.219	72.119	77.725	73.5557	38.7651	69.1298	48.4513	53.9791	77.5775	63.8624	111.832	96.331	74.8034	72.4423	72.5554	64.2868	61.1396	57.0618		0.114132	69.3027
2.6211	74.18	34.367	62.921	75.7679	75.0278	38.7171	60.1904	45.4356	54.0767	83.3111	53.9382	108.07	104.118	74.6639	71.9067	75.0261	64.4191	56.1901	50.6626		0.119565	66.4731
2.7402	66.548	26.368	54.08	74.8189	73.0097	33.7213	54.8897	40.2645	49.4095	90.3555	48.1391	101.571	104.458	76.7652	71.937	75.8611	65.8692	53.7877	42.8561		0.124998	63.4058
2.8594	52.723	20.91	43.774	66.095	68.3858	33.1817	49.8114	36.0887	49.7452	88.5921	43.4054	97.586	104.448	74.0115	66.8608	72.6184	61.7467	50.6132	36.9807		0.130435	58.8199
2.9785	41.78	16.558	36.081	53.774	61.3746	31.3973	45.1791	33.5357	49.1679	87.5118	36.8244	95.474	106.101	69.3534	63.7484	69.5753	58.275	47.3207	33.2669		0.135868	54.542
3.0977	33.652	14.474	32.307	39.5773	56.7298	27.9409	40.3485	31.7535	46.507	86.3913	31.914	88.654	100.716	66.959	62.5602	63.7449	50.8098	44.2173	29.441		0.141306	49.9314
3.2168	29.115	12.079	29.163	25.6432	50.5158	28.5585	36.7904	27.9526	41.9386	89.3877	30.426	76.336	92.631	60.5684	59.9889	60.9114	48.3765	42.4152	23.7426		0.146738	45.6074
3.336	23.248	9.472	26.164	16.732	43.1707	26.6884	36.4001	25.4379	42.0006	81.7651	26.0631	64.426	81.164	54.3619	53.7764	55.8465	46.4118	39.2001	20.4944		0.152176	40.6749
3.4551	18.049	9.36	23.987	13.0881	37.6338	25.1344	32.5421	24.991	40.6847	80.4228	23.4555	53.181	66.825	48.9843	48.0081	55.5132	45.2889	33.927	19.2069		0.157609	36.857
3.5742	17.723	8.778	22.041	10.794	34.7569	26.2571	31.0907	23.7963	39.4939	78.0011	23.0399	41.897	55.153	41.5483	42.0731	53.8493	43.7947	28.7383	16.185		0.163042	33.6321
3.6934	14.688	9.467	20.501	9.4386	28.3276	25.1672	31.5077	23.4736	42.6472	70.5159	20.8584	36.02	45.591	36.0602	34.744	48.8056	42.5826	26.0428	14.0301		0.168479	30.551
3.8125	12.921	8.314	18.553	8.429	25.5829	24.9122	29.6418	21.44	41.4726	63.6397	18.2994	30.691	37.724	28.4571	26.4219	43.2284	39.0317	19.1429	12.1601		0.173912	26.8454
3.9317	11.944	7.12	16.188	8.2323	23.7203	23.2636	28.3131	22.0671	43.1496	54.8224	15.6953	27.019	31.205	21.4481	20.9364	37.3325	35.9204	15.5953	10.0394		0.17935	23.8954
4.0508	10.997	6.87	15.284	8.1105	20.6194	23.7759	26.5051	21.9286	44.1332	49.6462	13.9277	24.052	24.874	17.0186	15.9845	32.0623	29.1683	13.4168	8.6881		0.184782	21.4243
4.1699	8.991	6.521	14.224	7.7726	19.2798	21.9109	26.2816	18.5059	42.3279	47.5244	14.1015	20.946	19.667	15.9915	13.733	29.0856	23.0494	11.6221	7.873		0.190215	19.4425
4.2891	7.457	5.494	15.47	7.6169	18.6311	21.2289	25.5192	19.8803	42.9602	42.4437	10.8619	16.716	16.259	14.7716	11.015	27.4747	16.5634	11.6985	6.48		0.195653	17.818
4.4082	6.136	5.203	13.496	7.6048	17.8553	21.7193	23.1527	21.4559	43.3991	38.1197	9.6752	15.798	12.472	13.199	9.5315	21.7384	13.2682	10.2108	7.2758		0.201086	16.3848
4.5274	6.004	4.937	13.971	7.3191	15.1549	19.9537	23.6056	20.8351	40.3517	36.6042	9.647	13.441	9.29	12.7518	9.9003	19.6049	9.8265	10.6076	6.896		0.206523	15.3001
4.6465	4.989	4.086	12.528	7.9411	12.8954	19.209	23.1731	18.4325	39.2109	31.6512	7.9655	12.856	9.17	12.1649	9.7226	15.2963	8.7606	8.0588	7.8134		0.211956	13.996
4.7657	4.756	3.467	13.09	7.6522	12.1875	16.7256	23.7855	18.5566	40.0763	29.4411	7.4626	12.109	7.894	12.8696	8.613	14.2274	8.2652	7.2672	10.109		0.217393	13.6081
4.8848	4.981	3.572	11.91	7.3978	12.0577	15.8322	24.3257	18.3779	38.6294	28.9622	7.6343	11.385	7.031	11.3616	8.6627	12.2942	7.7756	6.5485	10.5162		0.222826	13.1187
5.0039	4.182	3.174	12.168	7.1506	9.8777	15.7267	22.7009	18.9373	39.1996	24.4743	5.6527	10.035	6.282	9.8891	8.0434	11.4946	6.913	5.289	10.4193		0.228259	12.19
5.1231	4.058	3.64	12.059	7.1938	9.7381	15.1053	21.626	18.5675	40.5693	25.376	4.5131	10.188	4.796	8.9987	7.7024	10.272	6.125	5.2487	10.3349		0.233697	11.9006
5.2422	3.892	3.915	11.638	7.1543	9.094	13.6665	21.2197	17.586	35.9478	23.6123	3.6728	9.142	4.762	8.8436	7.3703	9.6442	6.0685	4.5654	8.883		0.23913	11.0883
5.3614	3.949	2.911	10.56	7.1402	8.8196	13.7362	19.1354	17.3899	35.0878	22.6044	3.9954	7.51	5.128	7.9161	6.8671	9.5243	6.1064	4.1402	8.9144		0.244567	10.6019
5.4805	3.363	3.261	9.597	7.1663	7.7948	13.0816	17.9681	17.174	33.4215	21.9237	3.6239	6.842	4.61	8.113	6.7972	7.926	6.42	3.8965	8.664		0.25	10.0865
5.5996	3.415	2.707	8.267	7.1789	7.1775	12.6051	18.0816	14.7989	33.22	19.4593	3.7662	6.552	5.887	7.8265	5.5595	7.9152	6.2762	3.2931	8.3658		0.255433	9.59746
5.7188	3.522	3.487	6.213	7.9209	6.3787	11.8845	17.9584	13.1496	32.87	21.2523	3.0931	5.263	5.228	7.4092	6.4454	7.8453	5.4712	2.979	7.0862		0.26087	9.23457
5.8379	3.59	2.911	4.394	6.9129	6.9188	11.9982	16.9692	11.9977	31.4822	19.5991	3.0211	4.294	5.098	7.9495	6.4647	6.9213	5.2712	3.1697	6.548		0.266303	8.71108
5.9571	3.39	2.373	4.525	6.8307	7.2928	11.6552	16.7031	12.2014	29.9419	16.0323	2.2205	3.434	4.956	7.712	6.2527	6.6271	5.3403	3.5565	5.7412		0.271741	8.25188
6.0762	3.101	2.677	3.497	6.5317	5.9458	11.9347	16.1729	13.0033	27.8166	13.4298	2.6444	3.059	4.993	7.1534	5.7796	6.2143	4.87	3.3879	4.6607		0.277174	7.73011
6.1953	2.917	2.998	3.647	6.5437	5.5	11.8797	15.7003	12.4851	26.3407	12.0448	2.8805	2.868	4.637	8.246	6.3582	5.5409	4.8195	3.2929	4.6791		0.282607	7.54623
6.3145	3.163	2.807	3.123	6.4982	5.5301	11.554	13.7539	12.1485	24.4631	9.6885	2.134	2.747	4.741	7.1133	6.0994	5.1331	5.0903	3.5208	3.693		0.288044	7.00006
6.4336	2.525	2.823	3.656	6.5683	4.2169	10.9704	12.5712	12.0927	23.598	9.1305	1.933	2.234	4.618	8.4198	5.8937	5.725	5.1235	3.7186	3.4758		0.293477	6.80492
6.5528	2.447	2.354	3.644	6.7894	3.4172	11.0214	12.0905	10.311	20.0393	7.7302	1.9075	2.326	4.492	8.0699	6.2538	5.5241	5.2326	4.3062	3.3442		0.298914	6.38423
6.6719	2.955	2.93	3.985	7.4332	3.3327	9.7562	12.9086	10.5829	15.2402	6.9183	1.7249	2.923	4.448	7.0239	6.0763	5.1218	3.9833	3.7654	3.4221		0.304347	6.02794
6.7911	2.816	2.858	4.173	6.2813	3.0019	9.726	13.4188	10.68	13.5799	5.9547	2.0822	2.264	3.978	8.0902	5.98	4.9972	4.8196	3.679	5.0841		0.309785	5.97178
6.9102	2.269	2.661	4.463	6.4047	3.7325	8.5164	10.5472	8.3937	12.4819	5.5771	2.301	2.467	3.855	8.2113	6.1899	4.8366	4.9553	4.239	5.3112		0.315218	5.65331
7.0293	2.058	3.119	4.654	6.8812	3.0605	7.5797	10.4585	9.5027	10.8541	5.3693	2.3092	2.69	3.921	8.7711	6.6527	4.5565	5.8917	4.2636	5.0733		0.32065	5.66664
7.1485	2.236	2.838	5.481	6.8853	2.816	7.2525	10.1954	8.5245	10.3535	4.7781	2.0803	2.64	3.585	8.4872	6.5756	5.0279	5.4068	3.5701	5.4793		0.326088	5.48487
7.2676	2.616	2.942	5.066	6.4664	2.9216	5.8134	9.27	7.262	9.0772	4.4781	2.0656	1.963	3.681	7.8466	6.2351	5.2506	4.3665	3.7885	5.1551		0.331521	5.06656
7.3868	2.125	3.368	5.651	7.2452	2.4992	3.9246	8.5496	7.594	8.6027	4.6131	1.6501	2.194	4.433	8.3216	5.8395	5.3092	4.6198	3.739	5.6136		0.336958	5.04696
7.5059	1.957	3.195	5.606	7.0092	2.8181	3.5169	7.4749	6.6374	8.9727	3.6109	1.7593	2.601	4.563	8.1133	5.0892	4.847	4.2517	3.5134	5.9611		0.342391	4.81564
7.625	2.055	2.831	6.146	6.5755	2.8362	3.2433	6.3439	6.1775	8.9637	3.4379	2.0194	1.868	4.311	6.9113	5.224	5.725	4.7516	3.6261	5.8435		0.347824	4.67842
7.7442	1.937	3.508	6.126	5.5637	3.0772	2.6889	6.7081	6.3118	8.7149	3.2306	1.9166	2.338	3.888	8.4654	4.9396	4.7596	4.9838	3.3067	5.4275		0.353262	4.62586
7.8633	1.649	3.205	7.242	6.8272	2.8861	2.5195	6.3701	6.0184	7.6616	3.2548	1.9942	2.624	5.001	7.4759	4.904	4.6885	5.0759	3.8177	5.9793		0.358694	4.69443
7.9825	2.32	3.61	7.485	6.2647	2.7007	2.3997	6.4643	5.6313	7.8041	2.985	1.918	2.172	4.813	7.7643	4.8127	4.4669	4.0889	3.9636	5.64		0.364132	4.59496
8.1016	2.741	3.34	9.93	6.3672	2.803	2.1665	4.8018	4.3055	7.409	2.4344	2.0422	2.247	5.168	6.4779	4.9854	3.5171	4.8514	4.0375	6.0374		0.369565	4.50854
8.2207	2.954	3.307	13.054	6.3914	3.0687	1.7536	4.9094	3.2153	6.7831	1.939	2	2.392	5.29	6.3754	4.4459	3.1123	4.625	3.4764	5.66		0.374998	4.46066
8.3399	2.629	3.227	15.208	5.9301	3.0114	2.0556	4.4978	3.6711	5.9052	2.5441	1.8543	2.107	5.473	6.9841	5.0043	3.5061	4.4842	3.915	5.3551		0.380435	4.59802
8.459	1.884	3.86	16.465	6.9814	2.3173	2.135	5.1597	2.7326	6.1888	2.1344	1.6778	2.737	4.961	6.9009	5.2691	3.5957	5.3382	4.2126	4.6722		0.385868	4.69593
8.5782	2.249	4.082	16.669	6.7841	2.7033	2.0082	4.2243	2.9542	6.843	2.0087	2.0984	3.504	5.667	6.6832	4.3675	2.747	5.7343	3.5203	4.4882		0.391306	4.70188
8.6973	2.646	4.326	16.524	7.2066	2.6755	1.7956	2.9698	2.6716	5.5942	2.0218	1.7519	3.353	5.493	6.8354	4.5042	3.1969	4.8644	3.1179	4.1668		0.396738	4.51129
8.8165	2.315	4.02	19.318	8.286	2.9655	2.1279	3.3676	2.7547	5.5595	2.1792	1.9444	3.634	4.92	6.3401	4.0732	2.7179	5.1348	4.1241	4.1891		0.402176	4.73532
8.9356	2.404	4.09	21.328	9.267	3.072	1.8519	3.4461	2.4149	4.6702	2.2762	1.6821	4.403	5.017	6.9089	4.1566	2.9071	5.5891	4.5968	3.8672		0.407609	4.94464
9.0547	2.205	3.88	21.056	9.7745	3.0826	2.0252	2.8583	1.5519	5.8409	2.417	1.9545	4.882	5.303	7.0135	4.39	2.7061	5.4645	5.451	4.0768		0.413042	5.04909
9.1739	2.609	4.117	19.601	12.4957	3.1722	1.4315	3.0573	1.7882	6.1739	1.9158	1.9333	5.502	5.326	6.278	4.6763	3.006	6.2891	6.3834	3.5203		0.418479	5.22505
9.293	2.411	4.334	19.712	14.2056	3.1913	1.8974	2.701	2.0136	5.666	1.7206	2.1217	4.833	5.937	6.1685	4.1357	2.6521	6.4821	6.8128	3.8179		0.423912	5.30596
9.4122	2.726	4.636	22.941	13.3851	3.4454	1.9437	2.8239	1.8984	6.0543	1.5742	2.2202	4.934	6.329	5.5114	4.3826	2.8483	6.4928	10.036	3.9077		0.42935	5.68895
9.5313	2.852	4.512	26.911	15.5338	3.6647	1.8051	3.0962	1.9277	6.0264	1.6148	1.8493	5.04	7.257	5.7478	3.6735	2.9287	6.05	9.717	4.2805		0.434782	6.02566
9.6504	2.65	4.318	28.937	16.7417	3.5208	1.952	3.199	1.8714	5.8909	1.9604	1.9598	5.674	7.138	7.19	4.4989	3.0941	6.4715	11.1327	4.5342		0.440215	6.45971
9.7696	2.931	4.085	37.568	15.052	2.5417	1.9192	3.3469	1.8813	6.4122	2.2453	2.1159	5.865	7.874	6.1905	3.8302	2.9344	6.4296	12.9987	3.9598		0.445653	6.85162
9.8887	2.902	5.436	43.105	14.0211	3.1357	1.7851	2.9504	1.9905	7.5936	2.1567	2.084	5.575	7.254	6.0294	4.7425	2.7051	6.937	13.0532	5.026		0.451086	7.28854
10.0079	2.733	5.576	45.356	12.5474	3.0258	1.5717	3.3355	1.8565	6.6425	2.0664	2.2287	5.528	8.282	6.0855	4.3006	2.7289	6.2877	13.7548	5.6262		0.456523	7.34385
10.127	2.405	6.098	44.068	11.3218	2.8214	1.6658	3.496	2.2809	8.1393	1.9061	2.7208	6.098	9.616	6.3744	4.3143	2.6365	6.1596	12.9087	5.4626		0.461956	7.39438
10.2462	2.723	5.987	41.737	10.7594	2.9829	2.188	3.626	2.143	8.3846	1.9009	2.4813	6.169	8.801	6.6405	3.7731	3.2492	6.3087	12.0215	5.4511		0.467393	7.22775
10.3653	2.706	8.723	36.057	10.5575	2.9694	2.2129	3.4348	1.6484	8.5535	1.6771	2.2043	6.031	9.605	6.7931	3.9955	3.3307	6.0604	13.6906	6.7959		0.472826	7.21295
10.4844	2.638	9.023	28.076	8.5996	3.6563	2.1506	3.4732	1.8562	9.5773	1.9538	1.954	6.458	9.531	6.7113	3.9089	3.0445	5.1214	15.8191	7.8589		0.478259	6.91637
10.6036	2.702	7.963	27.261	8.0497	3.5438	2.2506	3.8355	1.8371	9.9388	2.2495	2.2144	6.712	10.029	5.9117	3.7566	3.7295	5.5162	16.4023	7.8855		0.483697	6.93622
10.7227	2.486	7.536	30.099	7.3622	3.1686	1.7871	3.1659	2.0049	9.9976	2.1357	2.0131	7.395	9.49	6.8105	3.7416	3.454	6.1349	17.9731	8.1497		0.48913	7.10026
10.8419	2.666	7.172	35.189	6.3188	3.9297	2.0824	3.4059	1.839	11.6001	2.1527	2.7701	8.715	9.628	6.4731	4.9241	3.1458	6.2038	18.9825	8.4644		0.494567	7.66644
10.961	2.454	7.071	38.314	5.8542	3.597	1.9834	3.7926	2.355	11.3877	2.2757	2.5022	9.283	9.426	6.819	4.0612	3.3246	6.17	18.4184	8.1278		0.5	7.74825
11.0801	3.061	7.421	40.683	6.7857	4.0737	2.136	4.9496	2.6038	13.2847	2.0389	2.4258	9.476	10.734	6.6326	2.9961	2.7489	6.4407	19.7302	7.7495		0.505433	8.20901
11.1993	3.058	6.833	38.863	5.8997	3.6096	2.1486	5.0694	2.3005	13.122	2.0793	1.7464	8.882	11.275	7.105	3.0976	3.5516	6.1048	19.2223	7.8413		0.51087	7.98995
11.3184	2.641	6.416	31.491	6.7082	4.1268	2.3405	4.8673	2.4543	13.1696	2.0523	1.9481	10.157	11.062	7.1634	3.8688	3.9036	6.1195	17.651	7.8241		0.516303	7.68234
11.4376	3.402	6.536	24.121	6.827	3.5729	1.8586	5.6624	2.107	13.5413	2.4363	1.8969	10.182	9.004	6.8937	4.4492	3.8942	6.3664	13.7377	7.2628		0.521741	7.03955
11.5567	2.957	7.848	20.501	8.2918	4.1024	2.2276	7.0517	1.9635	11.6441	1.9712	2.0752	9.989	9.508	6.6084	4.4001	3.1863	6.4061	12.1911	7.5443		0.527174	6.86667
11.6758	2.88	6.05	20.084	9.0216	4.2389	2.219	7.4583	2.6038	11.4564	1.6211	2.2665	9.936	9.78	6.9736	4.5205	3.9411	8.2323	10.2666	7.4106		0.532607	6.89265
11.795	2.784	6.199	19.875	10.9532	3.777	2.3979	6.8266	1.963	11.8989	1.6393	2.2752	10.152	8.725	7.7087	4.0631	3.7298	7.9839	9.9145	7.4645		0.538044	6.85951
11.9141	3.153	6.109	22.13	11.5871	3.1753	2.1289	7.5151	1.7075	13.346	2.1181	2.5579	10.498	9.523	7.9571	3.7318	3.4708	8.3323	10.7188	5.7145		0.543477	7.13022
12.0333	2.986	5.545	23.724	12.5349	3.5436	2.275	10.0443	1.7589	15.383	2.4549	2.5092	8.827	7.721	8.4134	3.6453	3.8383	9.3496	10.2851	4.9563		0.548914	7.35762
12.1524	3.44	5.89	25.29	14.0475	3.3982	2.4293	10.5934	2.4819	17.9746	1.7815	2.2735	8.929	8.19	8.6108	3.1284	3.9142	9.8096	10.5721	5.503		0.554347	7.803
12.2716	3.257	6.596	28.293	13.4343	3.9553	2.1058	11.8665	2.8864	19.6456	1.9219	2.7946	7.693	7.777	7.0328	3.7161	4.0532	9.0346	9.3293	5.0869		0.559785	7.91996
12.3907	3.615	7.327	28.141	13.0128	3.7185	2.3872	14.1229	2.1722	19.6172	2.3421	2.8352	6.304	8.067	8.0706	3.5221	4.2726	9.0083	10.1048	5.0552		0.565218	8.08925
12.5098	3.819	7.948	27.651	10.79	3.7975	2.4015	16.2401	2.2356	18.4277	2.0654	2.6805	6.205	8.258	7.6397	3.4294	4.4149	9.1826	11.8427	4.617		0.57065	8.08661
12.629	3.549	9.059	24.867	8.9509	4.6725	2.7531	19.4136	3.6228	20.4558	1.9736	2.6892	6.294	7.708	6.7987	3.5127	3.8749	9.019	12.8419	4.6402		0.576088	8.24715
12.7481	4.03	10.351	23.601	10.5437	3.8429	2.573	21.8898	2.8905	19.2959	2.0915	2.255	8.116	8.46	6.812	3.284	3.5582	8.8156	13.423	4.475		0.581521	8.43727
12.8673	3.716	10.831	22.222	9.8211	3.0857	2.7934	23.9042	3.091	17.0385	1.8103	2.7488	7.687	8.584	6.3878	3.6009	3.6807	8.8471	15.1851	4.8221		0.586958	8.41351
12.9864	4.16	11.35	22.121	8.6801	3.8165	2.8733	22.3807	3.0523	15.5316	2.4389	2.5132	7.162	8.81	6.4912	4.4056	3.4143	9.6233	15.8641	5.4796		0.592391	8.42988
13.1055	4.143	15.409	22.56	9.2788	3.8551	2.2001	22.8613	2.9626	12.15	2.476	2.1888	8.137	12.071	6.715	3.9565	3.8092	8.3844	17.1832	6.2712		0.597824	8.76906
13.2247	4.492	17.285	27.359	8.3258	3.3144	2.4652	23.0061	3.0557	10.6299	2.4187	2.5589	8.166	14.97	6.7914	4.5243	3.9406	7.8085	16.6341	6.1772		0.603262	9.15383
13.3438	4.029	16.63	31.773	8.7561	3.3862	2.4016	22.696	3.5509	8.8826	1.7771	2.2831	10.355	18.088	7.0679	3.9503	3.7005	7.5391	16.7053	6.7974		0.608694	9.49311
13.463	4.214	15.504	35.235	7.4274	4.3521	2.1939	27.6473	3.7387	6.7752	2.1429	2.4611	10.073	17.844	7.3679	3.4949	3.5733	8.2829	16.5268	6.6182		0.614132	9.76172
13.5821	5.279	13.777	35.575	7.1738	3.8469	2.3345	30.1228	3.604	5.1143	2.4359	2.3182	9.542	21.594	7.569	3.6617	3.5757	8.9327	17.632	6.4905		0.619565	10.0305
13.7012	4.867	11.547	32.094	6.8825	3.4811	2.662	32.9008	3.7897	3.7098	2.6782	2.4843	9.753	23.705	7.7801	3.8266	3.968	9.5446	19.4294	6.988		0.624998	10.1101
13.8204	5.243	11.758	29.523	7.8321	3.799	2.7571	33.5261	3.9632	3.5115	2.9386	2.4896	9.709	25.869	6.8801	4.243	3.9603	11.4307	20.8923	8.0027		0.630435	10.4383
13.9395	5.541	12.685	22.883	6.7273	3.9066	3.2194	35.3489	4.428	3.639	2.1743	2.6838	9.686	25.788	6.7831	4.074	4.1527	11.6358	19.843	8.6913		0.635868	10.2047
14.0587	5.603	13.945	18.367	5.3935	3.0012	3.2055	37.4733	3.4114	2.9025	2.3207	2.5154	9.039	25.231	7.4266	4.0679	3.8525	14.4925	18.6719	9.497		0.641306	10.0219
14.1778	5.473	14.086	15.791	6.9326	3.6682	3.0501	36.8048	4.065	3.055	2.4986	2.1752	7.283	21.551	6.4196	4.384	3.6222	16.4616	17.6631	8.0267		0.646738	9.63214
14.297	7.092	15.065	14.324	5.7618	3.5233	2.942	34.9774	4.2589	2.3863	1.9685	1.8153	6.367	19.248	6.7726	4.508	3.7003	17.1369	16.2748	7.7794		0.652176	9.25797
14.4161	6.912	14.351	12.985	5.147	3.4028	2.9397	37.4435	4.1695	3.197	2.3298	2.1497	5.05	20.456	6.8621	4.3733	4.1138	16.2661	14.1672	7.622		0.657609	9.15461
14.5352	7.289	14.883	12.915	5.2576	3.4695	2.6004	36.3431	4.3291	3.1041	2.329	2.4948	5.007	16.926	7.0277	4.9167	3.7713	16.0002	11.5482	7.0088		0.663042	8.80108
14.6544	5.929	14.731	10.615	5.3049	3.7482	2.6138	33.568	4.522	2.8337	2.3609	2.8467	4.896	13.294	6.3365	4.4234	3.6774	14.0521	9.3739	6.3862		0.668479	7.97435
14.7735	6.547	13.479	9.768	4.3828	3.944	2.6945	31.8935	4.0079	2.2833	2.4811	2.3995	4.616	11.83	6.9053	4.9332	4.2886	13.7352	8.744	6.5961		0.673912	7.65942
14.8927	6.561	13.919	9.086	4.3465	3.1104	2.8397	31.6437	3.6614	2.5942	2.4058	2.5923	4.567	9.787	6.9905	5.1779	4.2486	13.3356	9.5666	6.6689		0.67935	7.53169
15.0118	6.003	13.19	9.816	3.8164	2.9158	2.8958	32.6208	4.0312	2.4264	2.2902	2.3992	5.05	9.429	6.8934	4.4403	3.3722	12.9055	8.1824	6.5818		0.684782	7.32944
15.1309	6.52	12.876	9.425	3.8208	2.7669	2.8034	33.0202	4.0073	2.8112	2.0775	2.2134	4.005	10.781	7.1482	3.9448	4.0389	12.7848	7.8284	7.2629		0.690215	7.37556
15.2501	6.408	12.592	9.051	4.0776	2.9143	2.8341	34.8339	4.2855	2.3592	2.1096	2.5152	4.855	10.333	8.0573	4.3897	4.684	11.9667	9.4517	5.9127		0.695653	7.5595
15.3692	7.411	12.512	9.635	4.2574	3.1976	3.2317	37.8596	4.8035	2.5997	1.7289	2.6965	5.485	11.712	7.7934	4.733	4.5745	13.4423	11.638	6.7102		0.701086	8.21165
15.4884	8.35	13.408	8.888	3.8808	3.5226	2.8958	37.1265	4.8477	2.5569	2.4424	2.5996	5.632	11.983	7.3132	4.6612	4.6955	13.489	10.8108	7.2377		0.706523	8.22846
15.6075	9.588	15.784	8.332	3.9167	3.8517	2.6927	39.7882	4.7579	2.5223	2.3083	2.4222	6.203	12.259	7.8306	4.2029	4.538	13.3368	12.032	8.2245		0.711956	8.66267
15.7266	9.525	16.656	8.362	3.763	3.5351	2.5848	36.2327	5.1517	2.3272	2.2523	2.3194	6.821	14.281	8.1987	4.1626	4.6059	12.9374	11.2935	7.5817		0.717389	8.55742
15.8458	11.231	15.388	8.005	3.7931	3.0525	2.4901	36.0953	4.9015	2.2077	2.2772	2.0789	7.083	15.75	7.3511	4.4008	5.4633	12.1888	10.8673	9.7926		0.722826	8.65354
15.9649	10.06	15.536	9.044	4.1735	3.0018	2.6426	32.4963	5.1489	1.8144	2.2315	2.3608	6.457	17.518	7.5918	4.937	5.2739	13.0365	10.8339	10.2652		0.728259	8.65385
16.0841	10.746	15.194	10.183	4.156	3.4057	2.9898	28.0379	5.644	2.4524	1.9179	2.4301	6.012	20.275	7.8808	4.723	5.482	11.2499	9.4289	13.2675		0.733697	8.70926
16.2032	13.478	15.819	10.379	3.7861	3.5152	3.0238	26.0646	6.4643	2.6016	1.7733	2.0333	5.831	21.826	7.7199	4.6586	5.4873	11.7444	11.0412	14.5371		0.73913	9.04125
16.3224	13.07	16.726	12.352	3.8382	3.0895	2.8531	22.6695	7.919	2.6705	1.8076	2.6717	5.634	24.157	7.3046	4.5824	5.4027	11.422	11.3259	14.4117		0.744567	9.15302
16.4415	11.589	16.716	14.086	3.9866	2.6551	3.355	20.5241	9.4013	2.6352	1.6951	2.067	4.485	25.336	6.9736	5.1312	5.1149	12.2119	11.9158	15.1614		0.75	9.21264
16.5606	11.805	18.596	13.578	4.3921	2.572	2.7238	16.8477	10.8982	1.8838	2.2899	2.2681	5.236	25.778	6.863	4.7992	5.7943	10.5468	9.4131	14.4613		0.755433	8.98665
16.6798	11.631	20.454	12.995	3.9762	3.6527	3.3214	14.5741	11.9769	2.2327	2.4202	2.2196	4.644	25.098	7.6325	4.7334	5.0415	11.3536	9.1153	16.7309		0.76087	9.14753
16.7989	11.365	18.644	13.698	3.5408	3.4687	3.6215	14.5225	13.0715	2.0483	1.9799	2.5391	4.087	25.174	7.1208	4.671	4.9089	11.2641	9.3014	16.5966		0.766303	9.03279
16.9181	9.804	21.465	12.191	3.7292	3.4616	4.2589	11.6905	15.7598	1.9945	1.8994	2.2831	5.113	23.318	7.5382	4.8439	5.0635	11.4952	8.5174	18.0831		0.771741	9.07944
17.0372	8.451	23.856	13.125	3.8176	2.7578	3.478	9.0463	16.8153	1.5534	2.2759	2.3852	4.874	21.408	7.4201	5.1297	4.5101	10.5556	7.4134	20.8517		0.777174	8.93285
17.1563	7.477	26.025	12.49	3.907	3.0626	3.6905	7.7093	19.8069	1.5428	2.1149	2.075	4.678	20.69	6.9735	5.0357	4.6614	10.8232	6.9744	21.3322		0.782607	9.00365
17.2755	7.996	28.479	12.315	4.081	3.5212	3.9384	7.0467	20.9522	1.7426	2.0169	1.7344	4.851	18.426	7.6069	5.0855	4.9621	12.9392	8.3618	23.6334		0.788044	9.45733
17.3946	7.34	27.254	11.674	4.5597	3.5217	3.9751	5.5075	24.1173	2.0518	2.2456	2.3811	4.47	16.666	7.3908	5.1348	4.4278	12.6253	7.9669	26.7668		0.793477	9.47769
17.5138	7.162	22.432	11.095	4.4734	4.4196	3.4723	4.7893	22.8013	1.893	2.3642	2.5628	3.8	13.78	7.7304	5.3078	4.335	13.9995	10.5472	28.2779		0.798914	9.2233
17.6329	7.922	21.31	9.299	4.7067	3.8966	3.8985	5.0658	22.0447	2.3558	1.9796	2.1436	4.212	14.932	7.7763	4.8812	4.8365	14.1464	12.4008	31.839		0.804347	9.45508
17.7521	8.581	20.751	9.14	5.0198	4.419	4.3187	4.7662	24.2991	1.8465	1.6329	2.1464	4.914	16.681	7.8005	5.072	4.6794	17.5948	14.2733	31.0685		0.809785	9.94758
17.8712	10.181	20.581	9.339	5.855	4.2368	4.6173	4.9553	26.7527	1.7295	1.8443	2.831	5.192	18.69	7.795	4.428	4.3848	17.1531	16.6708	35.1399		0.815218	10.6514
17.9903	12.154	20.633	9.309	6.4871	4.5318	4.4902	4.4034	27.6368	1.7307	2.2703	2.5417	4.973	20.626	6.8582	4.9518	3.5264	18.2727	18.6442	36.2543		0.82065	11.0681
18.1095	14.035	23.024	9.117	6.8013	5.4457	4.0716	4.048	25.2875	1.9513	2.2374	2.4123	5.346	19.802	6.9856	4.9099	4.1203	18.4289	21.2369	32.0155		0.826088	11.1198
18.2286	16.986	26.948	11.756	7.8384	6.5621	4.5915	4.3938	24.3575	2.2268	2.1928	2.5201	5.131	20.949	6.7564	5.0693	4.7887	16.9302	19.9486	27.4635		0.831521	11.4426
18.3478	18.552	27.598	13.991	10.0781	8.1166	5.9672	3.3354	26.2662	1.7026	2.1283	2.2265	5.506	22.39	5.6741	4.8783	4.8008	14.9112	17.8346	25.6766		0.836958	11.6649
18.4669	20.212	30.192	17.92	11.3701	9.5213	6.3107	3.4648	29.2461	2.0515	1.9535	2.4673	5.914	21.039	6.1083	4.6056	5.1445	13.4089	16.3782	26.6294		0.842391	12.3125
18.586	24.745	31.063	20.23	14.6722	11.6443	6.4383	3.252	33.8501	1.9088	2.1717	2.5923	6.246	19.739	6.0749	4.4793	6.0392	13.7942	16.0011	31.1298		0.847824	13.4774
18.7052	27.412	32.41	21.077	18.869	16.3299	9.3987	3.6953	37.5044	1.534	1.9266	2.3884	6.78	20.896	6.536	4.374	6.1818	13.8712	15.9677	29.4777		0.853262	14.5595
18.8243	29.014	37.251	22.905	21.6091	22.9661	11.3582	3.0283	37.1272	1.6163	1.9701	2.9479	6.751	20.377	6.3872	4.8329	6.2357	13.065	16.3305	29.5079		0.858694	15.5411
18.9435	30.189	43.396	22.997	23.901	26.5762	12.9998	2.8057	35.0079	1.7178	2.089	3.2911	6.209	18.6	6.2145	5.1228	7.6304	13.9535	17.3794	30.1891		0.864132	16.33
19.0626	31.724	50.186	22.947	30.1493	30.5099	14.5773	2.4124	31.6768	1.9339	2.4605	3.64	6.636	16.879	6.317	5.2236	8.9061	15.2118	18.8979	31.0293		0.869565	17.4378
19.1817	29.525	54.35	22.07	33.4103	32.4502	16.8634	2.0867	27.2449	1.8032	2.5155	3.9842	6.879	17.432	6.1544	7.1488	10.2597	17.3839	20.2697	30.2454		0.874998	18.004
19.3009	24.093	54.208	22.171	37.0199	31.6365	19.4329	2.0844	21.1117	2.0669	2.3885	3.5125	8.566	16.045	7.1172	5.1335	11.4911	19.6628	23.3185	28.5087		0.880435	17.872
19.42	22.907	48.586	21.899	36.9796	31.2907	21.0667	2.2913	17.6667	1.8742	2.2327	4.2081	10.159	15.799	7.3749	6.0329	13.7182	21.1178	25.6234	25.9662		0.885868	17.726
19.5392	21.818	40.058	25.464	36.2531	29.9583	23.6835	1.9664	12.8074	1.7965	2.3549	4.0699	10.798	15.122	8.5225	8.9871	17.5133	26.4674	28.1181	21.4696		0.891306	17.7488
19.6583	20.816	31.022	28.531	35.0251	28.788	24.8063	2.0047	11.2053	1.6496	2.8391	3.924	11.646	15.131	10.676	10.2677	21.5342	28.9717	26.0065	17.6162		0.896738	17.4979
19.7775	18.22	18.644	25.616	28.6349	26.0581	25.1482	2.2289	10.7145	2.3289	2.8815	4.6803	13.601	16.517	13.8463	11.5569	27.1413	32.4566	23.4574	13.4196		0.902176	16.6922
19.8966	17.724	10.986	19.285	22.5723	22.6805	25.5468	2.0189	10.3235	2.389	3.608	4.9801	12.949	17.824	16.8046	12.8505	32.3354	35.9745	22.5571	9.5671		0.907609	15.9461
20.0157	17.089	7.514	13.246	17.4453	20.9624	27.5346	1.8655	10.2131	2.5318	3.8154	5.8847	13.437	17.573	18.7872	15.9272	37.5941	38.4771	20.6831	6.64		0.913042	15.6432
20.1349	14.229	6.045	9.128	14.549	18.1682	33.0715	2.1596	10.7415	2.5533	4.2283	6.5445	14.793	18.7	20.1505	17.5037	38.4994	40.1555	18.144	4.2858		0.918479	15.4553
20.254	11.502	4.421	6.065	12.4073	14.1939	35.0935	2.5701	9.8162	2.5484	5.3711	8.6021	15.55	20.93	21.9217	20.0682	35.3216	38.2605	15.2159	3.3299		0.923912	14.9047
20.3732	8.749	2.913	5.669	8.9138	10.6975	35.8252	3.1842	10.7132	2.4962	8.6957	9.6692	16.374	21.924	22.3542	25.6619	29.5987	33.0861	10.1593	2.4502		0.92935	14.165
20.4923	6.441	2.57	4.807	6.2239	8.5107	35.4114	4.0449	10.9396	2.357	14.0628	11.8871	16.437	22.595	23.3378	29.5126	26.7036	27.4624	7.4731	2.925		0.934782	13.879
20.6114	5.618	2.281	3.65	4.4307	6.2024	36.6862	4.2512	11.9081	3.0978	19.2861	12.8983	15.593	21.156	26.1382	30.5738	24.4887	21.0478	4.8386	1.861		0.940215	13.474
20.7306	4.351	1.929	2.632	3.1225	4.3391	38.22	5.2725	13.7126	3.3438	24.6971	15.3719	17.282	22.96	27.5579	30.1529	17.8171	13.9079	3.6253	1.5158		0.945653	13.2532
20.8497	3.826	1.464	2.621	2.4329	2.9771	43.7077	5.8329	16.3029	3.4549	28.257	16.3864	18.05	23.36	27.6771	27.9003	13.1228	8.2747	3.1693	1.1923		0.951086	13.1584
20.9689	3	1.144	2.483	1.7921	2.2279	44.4953	7.9827	22.3233	4.6154	29.7838	16.1412	20.113	25.852	26.2887	21.754	7.4553	5.7491	2.6114	1.0175		0.956523	12.991
21.088	2.246	1.339	1.566	1.6195	2.2284	41.9936	11.0859	28.307	6.4314	28.3294	12.9762	20.897	26.773	20.605	16.0802	4.8742	4.0883	2.1061	1.1627		0.961956	12.3531
21.2071	1.929	1.407	1.423	1.4068	1.6313	39.4405	13.656	34.5446	9.4022	26.733	7.8985	21.165	26.5	13.1253	11.5264	3.4047	3.0869	1.7172	0.9006		0.967389	11.6262
21.3263	1.421	1.232	1.11	1.1063	1.1211	31.6831	15.6466	41.5231	11.0988	20.8904	4.8692	20.769	24.082	8.3216	8.5649	2.5693	2.5954	1.6536	0.6276		0.972826	10.5729
21.4454	1.595	1.164	0.826	1.209	1.044	27.1473	16.5858	48.389	11.5787	14.633	3.8176	18.858	19.727	5.4935	5.287	1.9735	2.3479	1.5838	0.6024		0.978259	9.67697
21.5646	1.346	1.141	0.833	0.8529	0.7522	23.6518	16.9402	47.6622	11.5262	10.8483	3.2932	16.626	15.268	3.7638	4.3676	1.4474	2.6084	1.1709	0.7433		0.983697	8.67592
21.6837	1.165	1.037	0.775	0.7716	0.6198	20.5406	18.9353	43.8931	10.1468	6.3459	2.759	11.462	11.471	2.6436	2.6931	1.1009	1.8887	0.9473	0.6227		0.98913	7.35886
21.8029	1.011	0.645	0.432	0.9462	0.4128	16.9804	20.1845	35.1397	8.2183	4.7066	1.9672	7.759	8.392	2.0938	1.7501	0.8043	1.9551	0.8624	0.4083		0.994567	6.03519
21.922	1.097	0.315	0.582	0.5573	0.4162	12.481	19.9981	25.1645	6.0195	3.5745	1.4321	5.288	6.072	1.7712	1.4526	0.6992	1.6276	0.9047	0.6417		1	4.7418

## Sheet: Image7
X0	Y0	Y1	Y2	Y3	Y4	Y5	Y6	Y7	Y8	Y9	Y10	Y11	Y12	Y13	Y14	Y15	Y16	Y17	Y18	Y19		Ap-Basal to 1	Average intensities
0	21.6186	14.8965	32.9144	19.1187	10.929	17.5668	7.0508	12.2806	14.2538	10.4414	10.1155	9.4204	15.8048	9.294	7.1614	6.304	7.0331	10.6297	17.7599	17.9754		0	13.6284
0.1191	19.9623	14.9052	35.6576	22.794	11.0824	16.4355	8.9175	11.6012	15.8018	11.7512	9.8562	8.7383	17.1159	9.6889	7.5799	6.9451	6.772	10.6951	19.6379	20.3646		0.00421794	14.3151
0.2383	20.9125	16.1781	38.1931	24.5924	11.9043	18.2153	9.4063	11.2582	16.0919	12.3753	9.475	9.4068	17.8397	10.8343	7.4109	6.8198	6.5772	11.6367	21.3435	22.9881		0.00843943	15.173
0.3574	21.1964	16.905	38.8105	27.2058	11.8974	18.2357	9.5479	12.0104	17.6498	13.9564	9.8711	9.5347	17.7857	12.7538	8.6978	6.2479	7.2355	13.239	22.7807	24.9937		0.0126574	16.0278
0.4766	24.0795	21.137	40.0218	29.4191	13.7864	16.2535	9.7765	12.3566	21.1766	16.5605	9.1271	9.1592	18.2781	13.365	8.3995	5.7987	7.5209	15.5898	26.3243	28.0503		0.0168789	17.309
0.5957	24.788	21.4278	38.9495	30.2213	15.4468	16.6606	9.3904	13.3051	21.5519	17.6772	8.7089	9.4174	16.8444	15.3473	10.0595	7.1172	8.5664	17.9527	27.0102	30.6782		0.0210968	18.056
0.7148	28.521	21.2682	38.3009	29.8428	17.6693	15.0394	10.4354	13.6731	24.0504	19.0509	9.2081	10.9865	17.956	18.1778	12.0954	8.4119	8.8236	21.2045	29.7113	35.1199		0.0253148	19.4773
0.834	29.2382	23.0529	36.5424	28.1894	20.7873	15.0309	12.259	14.2081	28.6412	20.9677	9.2893	11.0421	16.4382	20.7726	12.6586	9.3711	9.4501	24.5636	33.9846	32.6892		0.0295362	20.4588
0.9531	30.1954	25.7548	39.3103	27.5706	21.8078	14.9841	12.5049	16.3571	29.2461	22.8734	8.8078	10.2001	16.4923	22.8981	16.2214	10.677	9.2938	26.3099	34.1609	32.6429		0.0337542	21.4154
1.0723	31.7058	26.2819	37.1614	23.0475	23.9411	15.2627	13.6267	18.0271	33.6925	21.3331	8.7062	11.2422	16.4139	25.5314	17.6382	13.7008	10.4039	29.6475	34.9441	32.27		0.0379757	22.2289
1.1914	33.2665	27.2175	36.8522	20.6147	23.6029	16.2869	15.2769	18.5289	32.5219	21.4846	7.9098	10.9672	16.8222	26.972	18.6611	14.5271	12.9663	27.285	39.8979	31.1342		0.0421936	22.6398
1.3106	32.9557	31.2941	35.5774	19.6811	24.1147	17.4393	15.6067	18.5219	34.4401	23.724	8.264	11.4253	16.332	26.9331	20.9171	16.2755	12.9959	28.0901	43.9231	32.1539		0.0464151	23.5333
1.4297	35.4351	33.206	33.1626	18.6513	24.2591	18.9382	16.9881	18.8765	34.443	24.8879	8.9659	13.023	17.281	31.3221	20.8049	17.2402	16.243	27.3879	44.2255	30.6999		0.050633	24.3021
1.5488	35.0255	34.315	32.8343	17.058	22.7044	19.5706	18.8688	20.0035	34.2891	27.7883	9.532	12.4689	17.8594	32.7188	21.9652	17.858	17.079	27.3438	47.9591	31.5806		0.054851	24.9411
1.668	35.8402	34.5805	31.6095	17.7318	23.9485	18.184	19.1232	21.6474	33.2412	28.456	9.1265	13.9958	18.4664	33.0054	23.0758	17.8316	16.5841	25.946	53.8407	35.2716		0.0590725	25.5753
1.7871	34.7122	37.582	31.181	19.0979	26.1453	19.0924	19.0279	22.1247	34.2308	28.2118	9.8967	15.1786	22.8569	31.4741	22.8084	17.909	15.9358	23.5665	53.1123	38.0031		0.0632904	26.1074
1.9063	34.1173	36.9823	29.954	18.0729	27.9886	20.3817	20.9545	22.986	35.2957	30.8727	10.3314	16.5103	23.2908	32.2456	22.0684	16.3203	18.9467	22.6467	50.5932	41.3188		0.0675119	26.5939
2.0254	32.2474	38.4238	28.4835	18.1451	29.2365	20.1024	21.6776	22.3294	34.1028	30.5411	12.9666	16.7935	22.9664	34.5688	23.689	16.648	20.3828	21.8313	47.3761	44.2952		0.0717299	26.8404
2.1445	30.6484	42.0116	28.0533	19.7451	31.6099	19.5625	21.7014	23.3026	33.1856	31.1835	11.5491	19.5603	25.4085	34.8025	23.088	15.766	19.8853	20.3408	42.2849	46.7917		0.0759478	27.0241
2.2637	30.4112	43.5485	27.4716	20.1479	36.8297	19.9477	22.8094	22.3988	34.69	34.0449	13.763	22.4466	27.6188	33.4702	23.6973	16.1625	20.907	22.0333	38.5484	51.2589		0.0801693	28.1103
2.3828	29.395	40.5901	27.5624	19.5065	42.912	21.1491	23.3715	21.8159	35.251	36.3147	14.4234	25.4353	28.0807	31.4257	24.2096	14.4529	21.4903	20.8017	32.5067	53.4989		0.0843872	28.2097
2.502	27.9892	40.3161	27.2156	20.1348	43.4357	21.9958	25.6959	23.494	35.9254	38.4328	14.6003	28.4464	27.2642	33.8278	23.8994	15.0384	19.815	19.2051	26.9055	55.2958		0.0886087	28.4467
2.6211	25.6115	40.8075	26.4571	23.2187	45.6035	24.184	28.5946	25.258	34.8918	37.0457	17.3332	34.1015	27.8678	34.0342	21.9799	14.1735	19.3298	18.6983	21.9231	55.5562		0.0928267	28.8335
2.7402	24.5911	40.1781	27.0387	23.129	47.9782	26.2499	32.8814	26.0952	37.5342	36.9089	18.7282	35.0786	26.083	32.7662	21.7362	11.7138	18.7688	18.613	18.8234	52.4793		0.0970446	28.8688
2.8594	25.9523	40.0749	27.2756	25.9604	49.2666	26.0888	32.5105	27.8504	37.601	38.496	20.9129	35.8018	23.8688	31.8009	21.3281	12.5153	18.8271	18.9063	15.862	49.3588		0.101266	29.0129
2.9785	24.4016	42.0329	27.4604	26.5987	51.4417	26.1409	35.3897	32.1241	38.5968	38.5005	22.2693	33.0244	24.2095	31.4058	20.7907	13.2291	19.57	20.582	13.2494	44.8195		0.105484	29.2919
3.0977	21.8746	41.132	27.7204	25.8286	51.7939	28.8607	35.117	34.157	40.9232	36.7919	22.0976	32.7633	24.8853	28.8135	20.8438	11.655	20.7469	17.9595	11.0329	42.968		0.109706	28.8983
3.2168	21.3066	38.8128	29.9263	25.8856	51.7379	27.7332	37.1133	32.974	43.0892	35.2647	23.3546	33.2093	24.8979	28.9381	20.4537	11.3843	21.5073	17.6628	10.4658	41.4436		0.113923	28.8581
3.336	18.2344	36.916	30.9454	25.3163	52.4298	27.0269	37.1055	34.941	41.3643	36.706	24.2327	34.9339	24.3955	30.703	17.6425	11.7763	20.3703	17.7973	10.1671	35.0672		0.118145	28.4036
3.4551	17.8725	36.2841	31.3661	25.2939	49.1521	26.8387	39.3151	35.6879	43.8783	37.2455	25.2629	37.2891	24.2202	31.5383	18.1187	11.8095	22.8296	18.8912	9.814	33.515		0.122363	28.8111
3.5742	15.0621	34.1747	33.6677	25.9553	48.0924	28.0026	42.0044	36.3642	44.6982	35.1745	23.4266	37.9521	25.2605	33.1748	16.1286	10.6848	22.5694	19.4457	8.981	33.2237		0.126581	28.7022
3.6934	14.3976	32.1691	33.7468	22.3879	46.8646	29.6186	36.9454	34.0604	45.6602	33.4448	23.9175	40.9229	27.7649	32.6992	17.1177	9.6768	21.2258	18.8582	8.4632	32.9236		0.130802	28.1433
3.8125	13.1607	29.725	36.5784	21.4733	47.5267	32.1283	37.6313	34.008	44.2726	34.1181	22.5896	42.0728	28.074	30.8299	15.8455	9.1114	22.4945	18.9107	8.539	33.1836		0.13502	28.1137
3.9317	12.4702	24.338	36.9112	21.7858	45.3748	32.8099	35.0871	33.8993	44.9383	32.5889	22.714	40.9191	25.6289	33.5596	16.2902	7.4895	23.5661	18.6778	7.2349	33.8428		0.139242	27.5063
4.0508	11.7039	21.3838	37.1171	21.2217	45.2571	36.9441	36.7885	34.2707	43.5531	33.8618	22.5668	41.9829	26.2579	33.2537	14.8761	8.7246	25.0888	19.7465	6.7203	33.8323		0.14346	27.7576
4.1699	10.6027	20.2246	38.0909	21.6957	44.0348	38.2799	40.4573	33.6813	40.254	31.8748	23.3913	41.3605	24.8507	34.5413	14.5901	9.3742	23.1731	20.0635	7.7537	31.277		0.147678	27.4786
4.2891	9.146	15.2233	40.5141	21.0522	47.4585	42.0878	42.4559	33.3738	39.0112	29.305	21.6296	40.2497	26.4503	34.7066	14.5238	8.0826	21.5371	21.8194	6.9279	30.8404		0.151899	27.3198
4.4082	8.4108	11.5861	41.3291	20.1557	44.8496	44.1265	43.6276	32.829	37.989	29.2235	19.9477	42.8626	24.8735	34.7572	14.0195	8.5342	19.2424	21.3205	6.6676	30.3004		0.156117	26.8326
4.5274	7.3491	10.1292	41.7967	19.943	42.6009	47.6918	44.837	31.139	35.9849	27.3938	16.4482	42.8595	24.936	34.5603	14.3145	9.5753	19.2692	21.3873	6.8332	31.6666		0.160339	26.5358
4.6465	5.6764	8.2844	43.9204	18.2688	40.4989	48.6007	43.8713	30.5184	36.7308	23.6161	14.0725	40.6367	25.143	34.8351	14.8677	9.9437	20.1976	23.2069	7.6481	30.5193		0.164557	26.0528
4.7657	4.7251	5.9027	48.9306	18.258	38.0189	47.7488	44.3241	30.6354	35.4881	21.4875	11.667	43.4479	23.2693	37.0759	14.9892	9.476	18.4114	24.9133	8.0051	30.2038		0.168778	25.8489
4.8848	4.0381	5.2025	49.2243	18.957	36.6733	49.6883	42.2801	29.0525	33.7601	19.0717	10.046	41.6235	24.4381	37.7484	16.0689	9.2886	17.7437	24.1307	7.386	29.8565		0.172996	25.3139
5.0039	4.147	4.6886	50.2813	20.0273	37.2141	48.6564	40.4667	29.8653	32.848	16.7924	9.2256	41.6299	22.8834	39.8736	14.7576	9.2434	17.8629	23.2763	8.151	28.4599		0.177214	25.0175
5.1231	4.1982	5.047	52.9303	20.4097	37.5065	49.6999	38.0033	31.765	31.4723	13.5293	7.6843	41.2191	23.0433	42.3562	16.6485	9.9808	17.1085	24.9695	8.1021	31.5112		0.181435	25.3592
5.2422	3.6127	4.863	56.7679	20.7791	37.9926	48.727	37.8812	31.8804	31.4944	10.2976	8.5257	41.1239	20.7918	42.0478	15.9647	10.1313	16.7175	26.3507	7.6989	27.9475		0.185653	25.0798
5.3614	3.5193	3.6372	56.687	22.378	37.7707	50.7785	38.4619	32.4283	30.4804	7.2536	9.1818	39.9873	20.0319	41.4062	15.211	8.1692	17.0205	26.035	8.2874	28.1802		0.189875	24.8453
5.4805	2.7853	3.3279	57.8933	22.9867	36.5145	52.1175	39.5139	33.3772	28.0859	6.7377	9.5846	40.3749	19.0328	40.3579	14.3421	8.6796	15.6322	26.9888	8.59	28.3361		0.194093	24.7629
5.5996	3.0216	2.9429	58.5436	24.3907	37.5946	52.828	37.5534	37.6336	26.5847	5.7688	10.334	39.2812	17.9734	38.9539	14.7801	9.3959	14.378	26.2959	8.2913	28.7614		0.198311	24.7653
5.7188	2.7994	2.9418	54.4499	24.5155	40.913	46.8049	34.2385	38.8898	27.3111	4.8334	12.0453	37.7927	17.6185	41.8765	13.4127	9.3588	15.4984	26.2744	9.5502	28.3789		0.202532	24.4752
5.8379	2.8039	2.7564	51.0918	24.6415	41.3884	46.8696	31.313	40.6864	24.7812	5.0571	13.2978	36.2028	15.8187	42.6087	14.4384	8.8116	15.9723	28.8355	8.7797	26.29		0.20675	24.1222
5.9571	2.6296	3.0748	45.1428	26.3683	39.5176	44.6555	27.6575	36.5662	20.8365	4.8156	13.9702	35.6498	13.6853	44.3562	15.1041	8.3542	14.0824	30.7095	9.5565	26.1193		0.210972	23.1426
6.0762	2.7003	2.1063	38.6124	29.6307	42.2469	44.8511	21.9712	37.3617	17.157	4.3731	15.1578	33.9994	11.6495	45.4132	14.3333	8.7971	15.9253	30.4332	9.057	27.416		0.21519	22.6596
6.1953	2.4311	2.3196	32.5378	32.2337	42.0984	45.9127	17.6256	35.7555	13.6033	4.406	16.9429	32.3318	9.9078	44.6583	14.2525	9.6469	15.5886	30.9767	9.2538	26.1772		0.219408	21.933
6.3145	1.5009	2.1272	26.1966	34.4328	43.9589	47.2349	16.481	30.6159	10.0049	3.9859	16.466	33.6361	9.3892	46.9373	13.1748	8.8919	16.1615	31.3427	10.3395	27.8543		0.223629	21.5366
6.4336	1.8272	2.3075	22.5559	37.2756	51.5544	44.3284	13.8922	26.0015	8.3181	3.9789	18.1118	32.587	8.3871	45.0161	13.4048	8.2265	16.4191	33.4562	11.5187	27.7003		0.227847	21.3434
6.5528	2.1151	2.0605	21.163	39.0126	54.5685	40.2604	12.0111	21.698	6.6815	4.9132	18.8739	31.7496	7.7568	42.253	14.3772	8.957	14.8438	34.192	11.6462	27.7472		0.232068	20.844
6.6719	2.2678	2.1097	17.6548	42.4273	57.5572	38.9605	9.9323	16.4242	5.1903	5.4928	20.1467	30.6446	7.3717	40.4706	15.3019	8.677	14.7807	35.3539	11.7806	26.2533		0.236286	20.4399
6.7911	2.32	1.9509	17.289	44.2763	57.3116	34.4063	7.6874	11.8836	4.658	5.6204	20.5304	34.7118	7.4745	39.6894	16.0264	7.8785	13.6577	37.7607	12.7234	26.6457		0.240508	20.2251
6.9102	2.1185	1.7974	17.6219	45.3051	54.0028	29.9129	4.9946	9.1438	4.0854	5.2062	20.1145	33.434	6.0447	35.5315	16.0987	7.9516	13.3634	37.4919	13.2792	28.3414		0.244726	19.292
7.0293	1.8024	1.8733	15.2666	46.1793	49.9555	23.0713	4.2021	6.2558	4.8483	5.2628	21.7657	30.4759	5.4713	34.0994	17.1705	8.2478	13.8039	35.7578	14.1793	28.1934		0.248944	18.3941
7.1485	2.077	1.6474	13.3329	47.5144	48.3452	19.4954	4.299	5.2722	3.7924	5.9997	22.4478	30.3897	5.3692	29.5789	18.0147	8.8172	13.9969	36.0735	14.8603	28.2291		0.253165	17.9776
7.2676	1.9763	2.3772	11.7547	45.9113	47.156	15.7097	3.2792	4.0713	3.3054	6.6635	23.029	26.4666	5.9082	26.4458	18.5681	8.4309	12.1935	37.6436	16.1519	27.5161		0.257383	17.2279
7.3868	2.0109	2.1431	10.1245	46.767	42.559	11.6886	2.9412	3.7398	2.7972	6.4808	22.0684	23.7653	7.7114	22.7559	20.5932	9.075	11.9987	38.0974	18.6032	30.5306		0.261605	16.8226
7.5059	1.7499	1.9598	8.7111	42.8457	43.8645	10.3894	3.0978	3.5542	2.5529	6.3186	23.8985	20.7196	8.427	18.1177	20.2439	8.7251	12.2376	37.516	20.7383	30.599		0.265823	16.3133
7.625	1.5989	1.665	7.1418	40.6399	43.3194	7.8801	2.9722	3.0853	3.2315	6.9431	24.1464	18.6183	8.077	18.2196	20.0083	8.0079	12.4168	37.142	21.5379	29.1396		0.270041	15.7895
7.7442	1.6013	1.9724	6.4663	40.9826	44.4757	6.2615	3.1654	2.8783	3.2508	7.4696	24.7677	16.1945	9.6073	13.5821	20.0979	8.2198	11.6118	35.9918	21.5947	29.1476		0.274262	15.467
7.8633	1.7726	2.0492	5.8092	37.0106	44.6133	5.7561	2.3961	2.7848	2.7977	7.6149	27.8542	15.0294	10.4638	12.5772	18.8971	8.108	10.6733	35.2532	22.4746	26.8747		0.27848	15.0405
7.9825	1.9354	1.8965	5.4587	33.5245	45.7968	5.8415	2.3484	2.4351	2.8156	8.8562	28.5555	14.0075	11.7762	10.5293	17.692	7.3798	9.9789	37.1421	23.0169	25.2559		0.282701	14.8121
8.1016	1.8793	1.7697	4.9111	29.6346	44.8916	4.6832	2.0885	2.9619	2.9625	10.1217	31.5398	15.1141	13.317	9.4317	15.5251	7.4124	10.5159	32.2741	24.2163	23.7418		0.286919	14.4496
8.2207	1.8161	1.6983	4.1432	25.6624	40.8028	4.4779	2.2112	2.1482	3.3689	11.0508	34.6424	14.3252	13.0837	10.0863	14.123	5.738	8.7212	32.6758	26.3033	21.6665		0.291137	13.9373
8.3399	1.5809	1.8685	3.3428	20.8457	38.9586	4.821	2.832	2.851	3.6289	10.6874	34.5011	14.5842	14.9137	9.3366	13.7819	6.0534	8.7704	32.5923	28.3027	21.4239		0.295359	13.7839
8.459	1.2339	1.6631	2.9506	18.4113	34.9306	4.8383	3.0255	2.9767	4.9946	13.1796	33.0389	14.7495	17.1999	7.5335	11.9559	6.5469	8.1764	30.1584	25.515	19.7782		0.299577	13.1428
8.5782	1.5282	1.563	2.9745	15.1425	30.5009	4.0266	2.4266	2.8046	4.9094	14.0799	34.7957	14.071	18.6757	6.8415	10.0595	5.6564	7.4612	32.8316	23.9855	18.9827		0.303798	12.6659
8.6973	1.697	1.6416	3.0936	12.7839	26.3451	5.2537	2.6024	2.8252	5.7639	13.7091	31.3717	11.7213	21.9139	6.5588	9.847	5.5597	7.7786	28.6595	23.3317	18.7229		0.308016	12.059
8.8165	1.5579	1.7203	3.169	11.1719	22.6427	4.7368	2.5587	3.101	6.0986	15.6316	28.3869	10.8217	23.4487	6.8689	8.7743	5.4035	8.1672	25.1419	22.406	16.3409		0.312238	11.4074
8.9356	1.9244	1.4287	2.7733	10.3808	18.1341	4.9184	2.5097	3.1317	4.965	16.2019	24.7951	12.5947	22.6307	6.7924	8.6181	5.3719	7.2469	21.095	19.0301	15.0849		0.316456	10.4814
9.0547	1.8626	1.1489	2.7771	9.1187	13.6101	4.943	2.7499	3.2587	5.7486	15.2829	21.889	14.5206	24.3577	6.175	8.2643	4.491	6.7395	19.1979	19.7574	13.9913		0.320674	9.99421
9.1739	1.4813	0.8941	2.9916	8.4842	10.963	4.7903	2.7117	3.0687	6.2649	16.1958	18.9657	11.8139	22.8962	5.1273	7.3125	4.4324	6.272	15.5311	18.1289	13.5932		0.324895	9.09594
9.293	1.844	1.2441	2.6344	6.4515	8.9092	4.9939	1.9645	3.2441	6.1351	15.9435	15.5371	12.3961	20.3318	5.5933	7.1651	3.6789	6.0707	13.4041	15.419	12.3533		0.329113	8.26569
9.4122	1.7856	1.7808	2.743	6.0584	8.9662	4.8529	2.6838	3.999	6.2652	15.6497	11.9849	11.6599	18.9934	4.5206	6.7809	3.5533	5.583	11.9724	14.0371	12.2891		0.333335	7.80796
9.5313	1.8114	1.5508	2.9958	5.7367	7.7764	5.9226	2.2705	3.872	6.2424	14.8967	9.635	12.283	15.8004	4.2423	5.743	3.1889	5.2502	9.5647	13.3325	11.8854		0.337552	7.20003
9.6504	1.6425	1.5122	3.004	5.4995	7.8853	6.1146	2.3711	3.2708	6.3679	14.3849	7.7662	12.5786	14.4403	3.5573	4.9533	3.5262	5.0613	8.4012	13.2947	10.5927		0.34177	6.81123
9.7696	1.4903	1.4491	2.9412	5.407	7.4673	5.7433	2.8682	3.2589	6.6488	15.9368	6.791	13.5162	14.6017	3.8846	5.4144	4.3302	3.5657	6.0913	12.7508	12.1433		0.345992	6.81501
9.8887	1.6285	1.2596	3.0967	4.8864	7.4386	5.7327	2.4468	3.2232	6.7592	16.2594	5.7724	16.3676	11.8222	3.8636	5.8099	4.3311	3.8512	5.6367	11.5085	12.5648		0.35021	6.71296
10.0079	1.6687	1.0687	2.6306	4.592	7.1518	6.5112	2.1897	3.5773	6.4029	16.1778	5.144	17.5504	11.4275	3.4121	5.4719	4.2888	3.3676	5.3761	11.7474	12.3851		0.354431	6.60708
10.127	1.3909	1.735	2.2195	3.8268	6.2804	7.7793	2.6049	3.8867	6.6902	16.877	4.7168	17.9469	11.8677	4.1729	4.9679	3.4127	3.1173	5.0352	10.7299	12.0144		0.358649	6.56362
10.2462	1.8097	1.7125	2.5257	4.1903	4.993	8.3744	2.735	3.7359	7.2667	20.1454	5.1039	16.4777	12.4203	4.3518	4.3977	3.9664	3.2426	3.9162	10.3856	10.2726		0.362871	6.60117
10.3653	1.865	1.3761	3.01	4.5873	4.4047	8.194	2.3722	3.3034	8.1074	20.2644	5.4939	15.4584	11.9588	4.8188	5.1217	3.9112	3.2707	3.7494	8.1604	9.978		0.367089	6.47029
10.4844	1.1194	1.294	3.4494	4.4184	4.2418	6.9293	2.5696	3.442	8.5469	20.4985	4.6002	12.3282	13.2898	6.5501	4.5577	3.8373	2.6212	4.2087	7.6541	8.4037		0.371307	6.22802
10.6036	1.1795	1.7415	2.8477	4.6326	4.4906	6.1408	2.3291	3.7866	8.7223	20.1416	4.177	12.1552	13.0879	8.2236	5.1586	3.4232	2.5871	4.4954	7.581	9.1461		0.375528	6.30237
10.7227	1.5041	1.82	2.9187	3.6224	3.604	5.9915	2.3203	4.2191	8.433	19.023	3.9487	11.1005	12.7281	9.0359	4.9621	3.5249	3.072	4.2122	6.8391	8.7764		0.379746	6.0828
10.8419	1.7178	1.3298	3.0306	3.9496	3.5639	6.3076	2.3001	4.3066	8.2329	21.4442	4.6351	11.4279	12.7295	9.666	5.6125	3.1549	3.1276	3.8111	6.4661	9.8838		0.383968	6.33488
10.961	1.6101	1.4055	2.7513	4.4957	3.4463	5.3399	2.5321	4.2788	8.6858	20.8875	3.9033	12.4771	11.0894	10.8024	5.7404	4.4634	2.8154	3.9184	5.985	9.7666		0.388186	6.31972
11.0801	1.3024	1.4266	2.4394	4.6285	3.0728	4.6951	2.4907	4.6157	7.6634	19.8219	3.818	11.5874	10.3193	11.5141	6.2427	3.6151	2.8563	4.2621	6.1335	9.3885		0.392403	6.09467
11.1993	1.63	1.3805	2.4151	4.8333	2.9855	4.8765	2.4592	3.5799	7.8591	20.409	4.5153	11.2183	10.7898	11.5529	5.5941	4.1981	2.6557	3.6111	5.8443	9.7973		0.396625	6.11025
11.3184	2.0603	1.0497	2.3009	5.4725	3.4072	4.6436	2.0573	3.6299	7.1556	21.7748	3.9066	10.6151	9.9931	12.5871	5.9583	3.862	3.163	3.6218	4.9318	9.2061		0.400843	6.06983
11.4376	2.0958	1.5205	2.9055	5.922	3.3719	4.4015	2.1598	3.5585	7.6717	19.5011	4.8778	8.8928	9.0456	13.8429	6.2517	4.2593	2.6683	3.7757	5.4113	9.5709		0.405064	6.08523
11.5567	1.3858	1.7963	2.7303	5.8167	3.5253	4.4043	2.2165	3.465	7.4071	20.1136	5.6563	9.887	9.0638	13.3026	6.1719	4.1706	3.2585	3.7466	5.0827	9.409		0.409282	6.1305
11.6758	1.3169	1.8108	2.5553	5.258	2.6478	4.0523	2.2671	4.1935	6.0302	18.9033	6.2441	8.6771	10.2927	13.8654	6.4917	4.426	2.9771	3.6323	4.2903	10.2077		0.4135	6.00698
11.795	1.6824	1.46	2.7074	6.9407	2.9172	4.027	2.026	4.635	5.7157	17.6941	5.8981	7.0375	9.8613	14.2059	7.1199	4.9996	2.5009	3.8974	4.1223	9.546		0.417722	5.94972
11.9141	1.4833	1.841	2.7566	6.1665	3.3329	3.5287	2.9342	4.3762	5.4245	15.4285	6.0086	6.2714	9.3554	13.5274	7.4649	5.2087	2.3562	4.4529	4.4273	9.8528		0.42194	5.8099
12.0333	1.5388	1.8445	2.7017	6.588	3.3255	3.9482	2.5917	4.3705	4.6081	13.7201	6.3693	6.0974	9.5376	12.3749	8.0969	4.5868	2.5478	4.7573	4.2722	9.2474		0.426161	5.65623
12.1524	1.7191	1.527	3.2357	6.6978	4.2642	3.5558	2.8016	4.111	4.0007	13.0147	5.9494	5.3237	9.5477	11.6435	8.0974	4.8344	2.4539	4.676	4.4875	9.0973		0.430379	5.55192
12.2716	1.7578	1.4141	2.478	9.1489	4.9348	3.6536	2.5671	4.0715	4.8468	12.0407	5.6312	5.3311	10.2246	10.8818	8.6283	4.599	2.6718	5.2231	4.3666	9.1106		0.434601	5.67907
12.3907	2.0695	1.5887	2.5696	9.2231	4.6074	3.9955	2.3174	3.912	4.1056	10.5717	6.6064	5.3631	11.3699	9.7643	8.6872	5.2679	2.5879	5.7179	4.7566	10.5465		0.438819	5.78141
12.5098	1.5977	1.5691	2.1887	10.1138	4.9491	3.8077	2.7731	4.7095	3.6633	12.3239	6.6727	5.9905	10.8955	9.7272	10.2995	4.7137	2.5968	5.7881	4.5866	9.9029		0.443036	5.94347
12.629	1.9398	1.668	2.1417	10.6019	5.2193	3.8319	2.5942	4.584	4.3697	10.9816	7.4038	5.5493	11.6127	8.3017	9.2799	4.6072	3.1124	5.3371	5.351	10.9461		0.447258	5.97167
12.7481	2.2381	1.7795	2.7111	10.7034	4.4445	4.6819	2.2536	3.6134	3.8183	10.2406	7.4247	5.4281	11.6267	7.3467	10.0613	4.33	2.9929	6.2907	5.0273	10.0501		0.451476	5.85314
12.8673	2.409	1.7848	2.718	11.0997	3.7887	4.5259	2.8651	3.7464	4.3786	9.6267	7.9324	5.0253	12.7165	7.6396	10.3545	4.0185	2.5598	7.3706	4.7433	9.8484		0.455697	5.95759
12.9864	2.2341	1.5561	2.5766	12.23	3.8878	5.2099	2.8075	3.0786	4.6502	9.5559	7.1905	5.5065	13.3171	7.0497	10.6082	4.9611	3.2145	7.6714	5.3539	9.2425		0.459915	6.09511
13.1055	2.6125	1.4511	2.627	13.8425	4.3929	5.0234	2.1398	2.841	4.6599	9.8311	7.3917	5.9461	13.0436	5.7791	10.3829	4.6345	3.005	10.1287	4.9327	9.4759		0.464133	6.20707
13.2247	2.7342	1.5414	2.1654	14.9054	4.1855	4.3356	2.2013	2.9846	4.3473	9.0895	7.9509	5.4543	13.4497	5.456	9.8354	5.3782	3.1969	11.8235	5.0721	8.4162		0.468355	6.22617
13.3438	3.3381	1.5706	2.5038	16.7639	4.76	4.7434	2.3375	3.0276	4.7006	8.9116	8.5151	5.9655	12.4701	5.3485	8.7619	5.6326	3.4932	12.9079	4.1008	9.0572		0.472573	6.44549
13.463	4.0054	1.8152	2.1739	16.8027	6.2292	4.7415	2.1712	3.2408	4.0772	10.0543	7.672	6.6232	11.9365	4.6643	7.9695	5.7222	4.0783	14.8438	4.0125	9.2621		0.476794	6.60479
13.5821	4.3172	1.6365	2.0203	18.0404	6.493	4.1972	1.9938	2.7101	3.5921	9.557	8.0533	5.7785	12.9319	4.2545	7.2088	5.9518	4.079	14.5217	3.5403	9.2616		0.481012	6.50695
13.7012	5.215	1.5928	2.527	18.2019	6.4752	3.6213	2.5067	3.1533	4.0448	8.9678	8.6527	5.8112	12.2793	3.5404	6.7777	6.5985	4.5172	13.5965	4.3356	10.1189		0.48523	6.62669
13.8204	6.1261	1.5683	2.6253	17.7744	7.0193	3.9015	3.2457	2.9498	3.9252	9.2747	6.6056	4.6835	12.0398	3.8486	6.5645	6.7137	4.8293	14.3434	4.0917	12.6536		0.489452	6.7392
13.9395	6.6384	1.6037	1.9259	18.3015	7.3766	3.2499	2.6263	2.519	3.8649	9.1533	5.7774	6.5175	12.1044	3.9653	6.6549	6.7992	4.9692	13.868	3.8926	12.212		0.49367	6.701
14.0587	7.992	1.8897	1.8892	17.0794	8.1129	3.4246	1.9386	2.3796	3.2763	8.7679	5.3137	6.1575	12.0289	3.1641	6.4091	7.1103	5.2972	14.3806	3.9456	11.9306		0.497891	6.62439
14.1778	10.3849	2.095	1.956	15.0844	7.4437	3.2649	1.9833	2.3928	3.7103	8.1603	5.6274	6.3515	12.7939	3.5186	5.0787	7.8428	6.1224	13.9418	3.9862	11.9691		0.502109	6.6854
14.297	10.4849	1.7427	1.6788	13.5516	8.0824	2.8447	2.058	3.0071	3.0556	8.6378	6.1544	6.8426	12.9334	3.5977	5.5858	8.63	5.9277	13.2892	3.5729	11.587		0.50633	6.66322
14.4161	9.924	1.566	1.9549	12.611	8.745	3.3387	1.9165	2.5804	3.3421	9.1115	5.9299	7.7127	13.167	3.6541	4.9728	8.2015	5.4399	12.0942	3.021	12.526		0.510548	6.59046
14.5352	8.8557	1.3316	1.8788	11.8875	8.9199	2.8096	2.0718	2.3707	3.677	8.2898	5.3461	9.1261	12.6561	3.5235	5.6451	9.2817	5.0508	11.0207	3.5851	13.1093		0.514766	6.52184
14.6544	9.8515	1.8176	2.2051	10.1766	8.3167	3.0901	2.6144	2.3105	3.5671	8.3388	4.9412	9.0228	13.0891	3.7527	5.5789	9.5627	5.2459	9.9424	3.7369	11.7855		0.518988	6.44733
14.7735	10.3644	2.0121	1.8695	10.0658	9.4273	2.8997	2.5742	2.0127	3.6615	9.58	6.001	10.0575	12.9756	3.6132	5.9967	9.5215	6.3392	9.5537	3.4068	10.6748		0.523206	6.63036
14.8927	11.0288	1.973	1.4939	9.4046	9.7095	2.7484	2.3135	2.6811	4.0169	9.6019	5.3677	10.7866	13.2743	3.8061	5.4413	11.0807	6.5187	8.48	3.2824	9.6168		0.527427	6.63131
15.0118	10.5931	1.7417	1.3517	8.533	9.1477	3.0457	2.1057	2.3923	3.6201	8.4917	5.1159	11.8908	12.2465	3.4978	5.5231	11.6011	6.613	8.8984	2.951	9.5637		0.531645	6.4462
15.1309	10.2902	1.5739	1.7243	7.5837	8.7703	2.7306	2.4841	1.8298	3.9064	9.3061	4.8627	12.1557	12.1736	3.349	5.2023	10.573	6.3591	9.2529	2.7702	8.6435		0.535863	6.27707
15.2501	9.9233	1.8969	1.817	7.2539	9.306	3.4241	1.6182	2.379	3.2606	9.812	4.8697	12.8383	12.3348	4.1481	5.502	10.7926	4.735	8.5921	2.4646	7.6429		0.540085	6.23056
15.3692	9.8599	1.8791	1.7045	6.4751	8.7186	3.1044	2.4202	2.3207	3.7356	9.1659	5.2923	13.8935	11.968	4.3101	6.6755	10.1836	4.9705	7.3586	2.9269	8.7194		0.544303	6.28412
15.4884	10.0686	2.2003	1.7572	6.6654	8.9224	2.8945	2.3093	2.1156	3.4817	8.4526	4.8086	15.6504	12.4161	3.953	5.9161	10.8299	6.1953	6.7777	2.8479	8.9302		0.548524	6.35964
15.6075	11.173	1.9971	1.7988	6.8784	7.6756	3.542	2.4389	2.4911	3.7613	8.494	3.7787	16.9315	12.7312	3.7859	5.5209	9.6805	6.4911	6.4651	2.8536	8.0613		0.552742	6.3275
15.7266	11.3944	2.2922	1.6465	6.2796	8.2324	4.0222	2.1526	3.025	3.3144	9.4539	4.2717	16.1063	12.6246	3.509	5.6907	10.6477	5.5119	5.3489	2.5496	8.1433		0.55696	6.31084
15.8458	13.0038	2.1577	1.7232	6.4468	7.8157	3.5878	1.9728	2.6839	3.1897	9.901	3.9917	16.2466	11.6237	3.4933	6.1033	11.3636	6.2155	5.8699	2.5357	8.1057		0.561181	6.40157
15.9649	14.5196	2.1355	1.6017	6.2062	7.852	3.5816	1.6975	1.844	2.8913	9.3974	4.1943	16.65	12.3204	2.7376	6.2321	12.5853	5.9381	4.9847	2.0164	9.6461		0.565399	6.45159
16.0841	16.0309	2.3467	1.7071	5.4559	7.1854	3.6293	1.9639	2.0246	3.1506	9.2474	4.3021	15.6577	12.2042	3.2486	5.3026	12.4726	5.1695	4.8551	2.2505	9.5024		0.569621	6.38535
16.2032	17.6493	2.4991	1.7323	5.5429	7.4679	3.1491	1.9713	2.4268	3.2379	9.5572	4.5759	16.4996	11.0305	3.1336	5.0487	14.6285	5.4085	5.0368	2.5314	9.1559		0.573839	6.61416
16.3224	16.6285	2.276	1.4301	5.6956	7.3786	3.3985	2.1358	2.3	2.9116	9.7702	4.5426	14.8636	9.2453	3.2097	4.8408	15.5423	6.0399	4.5301	2.3409	9.9801		0.57806	6.45301
16.4415	15.1734	1.9918	1.4156	5.3792	6.3723	3.8429	1.7528	1.6536	3.3543	10.2914	4.5283	14.1209	10.6755	2.7754	4.7334	15.0904	6.0838	5.1347	2.3999	10.8085		0.582278	6.37891
16.5606	13.4259	2.4057	1.7531	5.9587	6.6816	4.0585	2.1403	2.1315	3.5812	10.5207	3.9804	13.1493	9.532	2.6146	4.941	16.8288	5.4177	5.4374	2.5601	10.4377		0.586496	6.37781
16.6798	13.1233	3.0633	1.8467	5.7114	5.5963	4.2551	1.8987	2.6635	3.4828	10.3528	4.1611	11.369	8.1345	2.4418	4.4976	18.8984	6.0262	5.6129	3.2603	11.2031		0.590718	6.37994
16.7989	12.0915	2.9362	2.1329	5.432	5.7712	4.6901	2.2416	2.0789	3.1351	9.5303	4.6646	9.3144	7.0477	2.1653	3.5384	18.1885	5.8417	5.0647	3.4375	11.346		0.594936	6.03243
16.9181	12.3149	2.6155	1.5114	5.2298	6.2732	4.8545	2.3774	2.1346	2.5833	9.0925	4.3859	7.0635	4.7953	2.2209	3.8615	19.2894	5.9451	5.8322	3.2736	11.1206		0.599157	5.83876
17.0372	12.9228	2.648	1.6815	5.446	6.0489	4.8149	2.5725	1.9889	3.0566	8.1156	4.9234	5.7542	3.3066	2.3067	3.554	19.7266	6.2247	6.2168	3.4956	10.6947		0.603375	5.77495
17.1563	13.1478	2.443	1.5372	5.2454	6.5943	4.5991	1.8783	2.0992	2.6693	8.3089	5.061	4.5081	2.3427	2.6176	4.0072	20.275	6.701	6.0982	3.7324	10.8118		0.607593	5.73388
17.2755	13.2195	3.2912	1.49	4.2293	7.1582	4.6961	2.1547	2.0437	2.4515	7.6349	4.6879	3.3874	2.1562	1.9752	3.7968	19.3246	7.2255	6.779	3.3231	9.2869		0.611814	5.51558
17.3946	13.3234	3.6564	1.8534	3.7084	7.1826	5.1937	2.712	2.5308	2.5943	6.1781	4.7748	2.8305	2.0637	1.8262	3.3282	18.0075	7.5719	8.3082	3.4739	9.0878		0.616032	5.51029
17.5138	12.5452	3.4286	1.7286	4.0012	6.853	6.4378	2.1778	2.2814	2.4311	5.6813	5.9582	2.8321	1.7606	1.9535	3.7055	16.4718	7.4626	9.9985	3.6422	8.5497		0.620254	5.49503
17.6329	13.1289	3.312	1.5481	3.3269	7.8057	6.7143	2.3338	2.2775	2.6208	5.1647	5.827	2.462	1.9776	1.9912	3.9365	15.0858	9.979	11.7977	3.3629	7.4255		0.624472	5.6039
17.7521	11.0425	3.2538	1.7105	2.7104	7.8729	6.4221	1.9291	2.6533	2.7126	5.2451	6.652	2.4567	1.995	2.056	4.6089	13.6807	11.2391	10.6245	3.4104	7.7878		0.628693	5.50317
17.8712	11.1231	2.9557	1.4946	2.834	7.9583	6.8234	2.1516	2.3593	2.7666	4.6038	7.302	2.7515	1.5112	2.0355	4.1534	11.4427	13.4319	9.4338	4.0494	7.7979		0.632911	5.44899
17.9903	13.0541	3.8812	1.5454	2.6952	8.4515	6.8625	2.3251	2.1463	2.6417	4.244	7.2522	2.4589	1.6054	2.3104	3.6192	10.5793	14.6072	8.5142	4.2423	8.0749		0.637129	5.55555
18.1095	13.7846	3.9037	1.4039	2.5243	9.6606	8.9424	2.3211	2.5916	2.4571	4.0557	7.4916	2.9169	1.9873	2.1268	4.035	8.4577	15.7295	8.2121	3.3158	7.7719		0.641351	5.68448
18.2286	13.1236	3.4845	1.3133	2.3333	9.8832	9.4816	2.4632	2.4183	3.0517	3.6061	8.585	3.2924	1.8294	2.2637	3.9287	7.0278	17.6397	6.6672	2.9911	8.0169		0.645569	5.67004
18.3478	12.6396	3.6668	1.3928	2.4218	9.4743	10.6258	2.5374	2.3795	2.5136	3.6546	7.9893	2.8226	1.8243	2.3892	4.4632	6.8851	20.784	6.3317	2.9564	6.985		0.64979	5.73685
18.4669	13.3349	4.1254	1.7222	1.8545	9.8057	11.8257	2.3555	2.3435	2.5939	3.6614	8.7783	3.2539	1.9368	2.4746	3.9771	6.085	23.8289	6.7656	2.6021	6.9428		0.654008	6.01339
18.586	13.2769	3.7514	1.6446	2.2647	10.5696	13.6466	2.0631	2.5468	2.2889	4.244	8.3445	3.0177	2.063	2.3227	4.1626	6.0962	26.0448	6.3219	3.4155	6.3538		0.658226	6.22196
18.7052	12.5422	5.0239	1.5435	2.3381	10.5913	14.1586	2.4107	1.89	2.346	3.3337	7.8687	3.2439	2.3545	2.1469	4.2941	6.5915	26.5565	5.9894	3.5996	7.2156		0.662448	6.30193
18.8243	12.0425	5.1875	1.6327	2.0307	9.464	14.372	2.6191	1.8579	2.3144	3.8332	8.9679	3.1154	2.0447	2.1408	3.7128	7.0345	29.8089	6.1461	3.3034	7.0504		0.666665	6.43394
18.9435	12.1081	5.7878	1.6896	2.1905	9.2539	15.766	2.539	2.2879	2.2114	3.4938	8.1999	3.4387	2.1593	2.3163	3.6509	5.6861	31.3454	6.3407	3.1561	6.8368		0.670887	6.52291
19.0626	11.3259	6.7418	1.6735	1.829	9.0285	15.2277	2.5643	2.9808	2.0765	3.655	9.5316	2.7673	1.8875	2.1292	3.5813	6.0312	31.9781	6.5209	3.1564	6.5602		0.675105	6.56234
19.1817	10.4392	7.6268	1.5842	1.9544	9.4815	16.778	2.6675	2.799	2.4558	3.8167	9.7115	2.7692	1.6784	2.0647	3.6421	5.3333	30.7222	6.6697	3.3207	5.4729		0.679323	6.54939
19.3009	10.1069	7.5576	2.1052	1.9041	9.5762	17.2931	2.5366	2.3222	2.2642	3.2422	10.0857	3.4451	1.8161	2.2901	4.1392	5.4534	29.7204	7.115	2.8038	5.6947		0.683544	6.57359
19.42	8.3859	8.2511	1.7376	2.0607	9.4233	17.8723	2.379	2.6475	1.7528	3.1095	10.4839	3.0133	1.8148	2.6048	4.4924	5.9749	30.766	7.1663	2.5928	5.5558		0.687762	6.60424
19.5392	8.112	8.706	1.2501	1.8764	9.3379	18.5064	2.492	2.1187	2.0537	3.1099	11.2172	3.083	2.1312	2.3199	4.2152	5.4509	29.1312	8.3729	2.5756	4.6903		0.691984	6.53753
19.6583	7.6355	10.2815	1.6064	2.0225	9.3301	17.4029	2.0037	1.9032	2.0716	3.13	11.2329	3.5284	1.8967	2.0112	4.2925	4.7408	27.8237	7.6196	3.509	4.46		0.696202	6.42511
19.7775	6.8451	10.2471	1.6969	2.106	8.8465	17.0913	2.2487	2.0106	1.9635	3.1275	11.423	4.24	1.9141	2.0855	5.37	5.1602	28.2779	6.8918	3.5441	3.8755		0.700423	6.44826
19.8966	6.8328	10.2247	1.6668	2.0667	9.1121	16.5152	2.5636	2.0572	1.6465	2.9668	12.5466	3.7607	1.9055	2.3554	5.0963	5.2779	25.6869	7.6999	3.1623	3.6843		0.704641	6.34141
20.0157	6.0927	9.4193	1.6935	1.9434	8.848	16.4087	2.4801	2.1031	2.2105	3.0827	12.816	3.8922	1.8417	1.9053	4.3903	4.9797	24.3291	7.3964	3.3585	2.9658		0.708859	6.10785
20.1349	4.5199	9.4612	1.9787	1.8179	8.7415	16.0871	2.462	2.5117	2.1456	3.5854	11.6826	3.6206	1.7606	2.1055	3.6386	5.2968	22.913	6.3931	3.7517	2.6365		0.713081	5.8555
20.254	4.8016	10.5204	1.8614	2.1515	9.1397	16.1833	2.4549	2.7161	2.606	2.9528	9.9138	3.5143	2.0842	2.3279	3.3441	5.0718	21.9239	6.1366	3.5551	2.3411		0.717299	5.78002
20.3732	4.6754	9.8068	2.6905	2.1055	9.5127	15.4826	2.5736	2.8005	1.9902	3.1436	10.3127	3.8471	2.0433	2.0715	4.0991	4.7107	22.6988	7.2314	2.8914	2.2323		0.72152	5.84599
20.4923	4.7465	9.9411	2.3495	1.9177	9.5597	14.5159	2.2354	2.4727	2.0297	2.9167	9.1327	4.233	2.0026	1.7385	4.0369	5.1674	21.2744	7.7609	3.1949	2.3744		0.725738	5.68003
20.6114	4.7774	10.6218	2.1771	1.7643	7.5219	14.0601	2.3687	2.4843	1.9777	2.1749	7.6022	4.1932	2.3028	1.929	4.4703	5.5303	21.0972	7.6833	3.4805	2.3554		0.729956	5.52862
20.7306	3.7009	11.0262	2.4713	2.3017	8.3987	13.6182	2.4139	3.1249	1.9225	2.6232	7.2815	4.4378	2.1148	2.0778	4.8475	5.5557	22.33	7.1945	3.0133	2.2784		0.734177	5.63664
20.8497	3.2493	11.1417	2.1992	2.39	9.1467	13.87	2.5545	2.655	2.434	2.9165	7.4552	4.6647	2.1426	1.9702	4.3202	4.8009	20.8634	7.9064	4.0664	2.0861		0.738395	5.64165
20.9689	3.563	11.2105	2.5648	1.908	8.4554	15.2875	3.1601	2.8147	2.8368	2.9431	6.6471	5.1708	1.9146	2.2508	3.5594	4.4476	19.82	6.3014	4.2359	1.7561		0.742617	5.54238
21.088	2.8078	11.0636	2.2668	2.2484	8.4652	15.5293	3.4925	2.3565	2.4153	3.1999	7.9627	5.5539	1.696	2.1687	5.2743	4.5115	20.2442	6.6225	3.6114	1.9774		0.746835	5.6734
21.2071	2.9843	11.1188	2.5459	2.0291	8.1642	15.4489	3.4207	2.5039	2.3638	3.3624	7.1795	5.3967	2.1626	2.3169	5.3221	5.1273	19.6968	7.0565	4.5804	2.0079		0.751053	5.73944
21.3263	3.1194	11.7915	2.5565	2.2065	7.5441	16.6853	2.879	1.9285	2.3356	3.2534	6.6957	5.884	2.0545	2.2089	5.0788	5.8799	19.4496	7.1075	4.3102	2.0883		0.755274	5.75286
21.4454	2.7032	11.4539	2.5024	2.1023	7.207	15.7206	3.3933	2.0295	2.4234	2.5035	6.8988	6.4493	1.7742	2.0458	4.6191	5.439	18.6689	8.0205	3.8526	2.2387		0.759492	5.6023
21.5646	2.7385	11.5103	2.3711	1.9509	7.7044	14.8453	3.7638	2.1622	2.0562	2.5232	6.596	6.1267	2.1892	1.9279	4.2608	5.4174	17.4098	7.5559	3.8832	2.0751		0.763714	5.45339
21.6837	2.8515	12.7719	2.2999	1.8979	7.5144	14.6433	4.5461	2.4157	2.0701	3.1576	6.2931	7.0464	2.4827	2.0557	5.0222	5.463	16.4599	6.6672	3.7019	2.3676		0.767932	5.5864
21.8029	3.1136	12.7842	2.6688	1.8632	7.1649	14.2877	4.4649	2.1677	2.4131	3.1885	5.9463	7.3498	2.4899	2.1772	5.2216	5.3854	16.6512	6.7697	4.3368	2.2196		0.772153	5.63321
21.922	2.5303	12.3175	2.995	1.7009	8.0124	15.8196	4.9624	2.5814	2.5556	3.121	7.5733	6.6834	2.6344	2.2908	5.0017	4.9751	16.6263	7.2708	4.6111	1.8815		0.776371	5.80723
22.0411	2.389	13.0852	3.2283	2.0084	8.044	15.1192	5.2622	2.2901	2.4185	3.5908	7.9348	7.5356	3.0762	2.202	4.0071	5.1947	13.1802	7.5359	4.8296	1.8579		0.780589	5.73949
22.1603	2.5931	12.613	3.1342	1.6384	6.6152	14.8201	7.8893	2.8526	2.7486	4.2253	8.4456	7.4439	3.326	2.0496	3.7667	5.8444	12.2816	7.5775	3.802	2.0947		0.78481	5.78809
22.2794	1.8496	12.133	3.5697	1.357	6.7706	15.2201	8.0138	2.9086	2.9156	4.6878	8.7712	7.2626	3.1862	2.0794	3.9606	5.6938	13.5118	8.3788	4.0098	2.0791		0.789028	5.91796
22.3986	1.8974	12.2375	3.4677	1.6601	6.9939	16.2656	8.5592	2.9196	3.6886	4.2744	9.4798	6.8453	3.4331	2.1366	4.0629	5.8976	12.0901	8.8774	3.6481	1.9211		0.79325	6.0178
22.5177	1.9648	12.1237	3.6358	1.9344	5.9292	14.2204	11.0685	2.6257	3.5235	5.0298	9.1656	6.4165	2.7927	2.1889	4.082	5.9556	12.0288	9.0093	3.745	2.1692		0.797468	5.98047
22.6368	2.0888	11.2662	3.6553	1.9293	6.0719	14.2539	14.2045	3.1706	3.1595	5.9748	10.3832	7.0737	2.9853	2.3159	3.6283	6.0997	11.0538	9.7622	3.8036	2.1972		0.801686	6.25388
22.756	1.8813	8.3743	3.6812	2.0059	4.8313	14.0073	17.2668	3.3297	3.6865	6.2942	11.2731	6.7835	3.2195	1.978	4.2176	5.519	11.8427	11.4841	3.9686	2.3197		0.805907	6.39821
22.8751	1.5842	7.968	3.6294	1.9824	4.5906	13.8886	19.4219	3.2638	4.6123	6.5371	11.852	6.4841	2.8811	2.4124	3.7057	5.5801	12.61	12.9617	4.6835	1.8634		0.810125	6.62562
22.9943	1.886	5.5533	4.6717	1.7101	4.8139	16.0304	21.3343	3.9137	5.3913	7.3419	13.2481	7.5049	3.2207	2.2451	3.4723	6.0113	11.5298	12.5567	4.5556	2.116		0.814347	6.95535
23.1134	1.9546	6.109	4.216	1.4676	3.9984	15.8476	25.185	4.5854	6.3541	8.5904	13.4711	7.3601	3.4199	2.292	3.9828	7.2088	11.1118	13.2538	4.7946	2.7455		0.818565	7.39743
23.2325	2.3911	4.9791	5.4255	1.686	3.1662	15.8734	26.4351	5.6789	7.2161	9.393	14.0845	7.6924	4.5865	1.7941	3.9523	7.326	10.7508	14.3201	4.7995	2.3186		0.822783	7.69346
23.3517	2.0702	4.9998	5.7743	1.757	3.2858	16.8666	30.1963	6.7556	8.8542	10.8248	17.2844	7.6073	3.8731	1.8405	4.2702	6.7983	9.8883	14.7606	4.1756	2.0469		0.827004	8.19649
23.4708	1.3052	4.565	7.5538	1.5909	2.8991	16.1805	30.136	9.0492	10.1144	13.8678	20.9626	8.0487	5.0365	2.1131	4.4687	7.3182	9.4279	16.458	4.1617	2.3475		0.831222	8.88024
23.59	1.6786	4.3608	8.4767	1.8196	3.6851	15.0107	32.7149	11.3438	11.5147	15.2021	21.998	8.5967	4.6083	1.5869	4.0984	7.8349	9.8762	16.2299	4.5649	2.8333		0.835443	9.40173
23.7091	1.9536	3.7906	9.6952	1.844	3.0339	12.8365	33.8891	14.8165	13.8275	18.1164	23.1277	8.4039	5.7163	2.0977	4.4586	7.6787	8.683	16.8413	4.1235	2.6678		0.839661	9.88009
23.8283	2.1944	4.3111	11.1052	1.5793	2.8899	11.1588	30.0359	18.2107	16.6936	21.3246	27.5987	9.0866	6.8171	2.8713	4.4095	7.1937	7.9141	16.9258	3.7804	2.68		0.843883	10.439
23.9474	2.3499	4.9227	13.72	1.7823	2.8308	10.0348	28.6935	20.8999	21.0502	26.2084	28.7868	11.4078	7.1715	2.8623	4.4072	7.2252	8.2634	17.316	3.8494	3.0074		0.848101	11.3395
24.0665	2.2338	5.0222	15.2538	1.9462	2.9186	9.2677	24.922	25.8569	22.2463	28.0775	28.015	12.2817	8.7742	2.8083	4.7363	8.77	7.7114	18.3427	3.5108	3.0719		0.852319	11.7884
24.1857	2.5541	5.3633	16.6617	1.891	2.3776	8.1881	20.8781	28.0453	24.7806	24.9109	27.6871	14.6425	9.6377	3.4376	5.2285	9.127	6.9382	18.352	3.7722	4.1616		0.85654	11.9318
24.3048	2.1124	5.1109	17.8418	2.4142	2.3988	7.1853	22.2217	28.6887	28.4477	23.357	23.4547	14.9981	9.687	3.8124	5.5038	8.1857	8.1462	17.8897	3.973	3.9971		0.860758	11.9713
24.424	2.3804	5.3212	20.9207	1.9146	2.5259	6.9194	19.8009	30.8486	29.8681	20.2344	23.4329	16.5249	11.2692	3.8384	5.9879	8.5547	8.9165	18.1841	4.4132	5.0406		0.86498	12.3448
24.5431	2.2964	5.6817	23.0217	1.8464	2.1633	7.2444	15.1398	27.6512	25.7483	15.1213	19.7049	17.6284	14.4001	4.074	6.2199	9.1673	9.7029	19.3191	5.0385	5.1912		0.869198	11.818
24.6622	2.1128	6.6594	24.8074	2.747	2.6263	9.9988	12.1829	21.8194	21.7657	11.6975	15.5993	19.0383	18.6424	4.5237	6.0919	8.7797	9.5041	18.7436	4.0524	5.5599		0.873416	11.3476
24.7814	2.4507	8.5519	26.1946	2.6286	2.479	12.9054	9.8544	18.2002	14.9193	8.0339	12.1503	17.788	21.3246	4.27	5.6801	7.1634	10.359	20.1734	4.1959	5.7155		0.877637	10.7519
24.9005	3.1171	11.7461	27.0294	2.524	2.6824	15.4192	7.3345	12.1685	9.5886	6.956	9.2331	13.595	22.9011	5.5833	5.4441	7.5937	11.5605	22.549	5.0139	5.491		0.881855	10.3765
25.0197	3.9854	15.9983	29.0919	2.8691	2.244	18.9202	6.0057	9.2245	6.385	6.5864	9.0955	12.5529	24.1017	7.1064	5.5797	8.1164	14.4596	22.5516	5.7018	6.5979		0.886077	10.8587
25.1388	4.939	21.4889	31.8015	2.7038	2.2938	20.9238	4.7733	7.2284	5.4735	4.472	7.6617	8.6612	19.7358	7.0343	5.3352	9.0935	14.9496	21.4421	5.4362	7.6854		0.890294	10.6567
25.258	6.0482	30.092	32.8646	3.2269	2.6106	21.2112	4.5858	6.0785	4.5704	3.7064	5.6869	6.5902	17.1933	8.7648	6.8695	10.2807	16.2943	21.9537	7.0281	8.534		0.894516	11.2095
25.3771	7.1501	38.0879	31.7881	2.4984	3.0347	19.487	3.0978	5.4584	3.9631	2.9478	4.7521	5.3386	11.2529	12.1188	6.3482	11.9095	17.7036	24.345	7.8079	11.0655		0.898734	11.5078
25.4962	9.2393	41.9957	31.9418	3.3439	2.9592	18.2925	2.931	4.3194	3.5496	2.3089	4.4416	4.1204	7.5127	15.5317	5.9234	13.276	19.4363	25.857	7.9149	12.3456		0.902952	11.862
25.6154	10.7215	44.367	32.8107	3.5812	3.0006	15.2405	2.3961	3.2075	3.1137	2.4812	3.4732	3.5643	5.6324	16.481	7.225	15.2582	22.3054	26.5561	7.8924	13.6864		0.907173	12.1497
25.7345	11.3437	44.1789	32.5335	4.152	3.9645	11.9402	1.7793	3.3323	2.6397	1.7549	3.2252	3.0339	4.7722	18.5737	8.2718	17.9823	25.3933	27.2388	8.5096	13.696		0.911391	12.4158
25.8537	12.3412	39.1641	30.4689	4.7875	4.3846	8.7773	2.048	2.2681	2.4199	1.7665	2.6793	2.3013	3.4064	17.6594	8.8575	21.4938	27.4399	32.5846	8.8868	11.2888		0.915613	12.2512
25.9728	14.3828	30.7772	31.1513	4.8836	6.0401	6.6742	1.942	2.301	1.8345	1.3468	2.2721	1.6322	3.3394	13.3693	11.228	25.0404	29.2808	36.1809	8.7963	9.108		0.919831	12.079
26.0919	17.5313	23.2862	28.0715	5.7194	7.2935	5.0095	1.765	2.0817	2.0747	1.1705	1.559	1.409	2.2218	11.3345	14.425	25.0102	29.5279	35.9483	8.6663	6.7396		0.924049	11.5422
26.2111	17.9654	18.0159	26.0785	7.2968	8.5334	4.3707	1.3395	1.6551	1.5795	1.7198	1.666	1.5099	1.8211	7.9339	16.0009	27.4187	29.2416	35.2299	7.15	5.3828		0.92827	11.0955
26.3302	20.322	12.0633	22.8261	7.9408	9.2108	4.2009	0.9033	1.7064	1.5094	1.3118	1.5284	1.6353	1.6754	5.7134	19.5508	31.2322	25.7319	34.9882	6.5513	3.7516		0.932488	10.7177
26.4494	19.38	9.7792	20.6362	7.5781	11.3298	2.5563	1.1978	1.5647	1.3907	1.045	1.0842	1.2258	1.3854	3.9628	22.0251	31.9393	23.5537	30.9856	5.4026	3.1598		0.93671	10.0591
26.5685	16.9112	8.216	15.5065	9.9984	12.106	2.4335	0.9711	1.3169	1.2585	1.2531	1.2265	0.8599	1.2663	3.1673	20.4496	27.8613	19.5662	26.4999	5.7216	2.7568		0.940928	8.96733
26.6876	15.0824	7.2437	12.5271	12.1759	15.5108	2.3801	0.7643	0.9206	0.9949	0.7478	0.9401	0.8338	0.8929	2.4973	19.3689	20.9312	13.9151	22.8876	5.508	2.4376		0.945145	7.92801
26.8068	12.0829	5.431	10.3297	16.8003	16.6821	2.2937	0.6401	0.8681	1.0296	0.7758	0.7829	0.6172	1.1552	2.4152	18.2793	16.2861	9.771	18.8673	4.8486	1.8476		0.949367	7.09019
26.9259	8.9114	4.8027	7.8214	17.2376	19.2591	1.5724	0.6294	0.5425	0.8866	0.8125	0.4189	0.4535	1.0691	2.2513	14.2622	12.1317	6.3818	16.2269	4.5371	1.6826		0.953585	6.09453
27.0451	6.8417	3.7702	7.1655	19	22.2253	1.7057	0.6613	0.6193	0.891	0.6271	0.4453	0.4861	0.9795	1.7077	11.6002	9.2606	5.4078	11.3474	3.8204	1.265		0.957806	5.49136
27.1642	6.0555	2.7539	5.3284	21.2939	22.8775	1.9753	0.4298	0.8198	0.7879	0.3044	0.5639	0.4397	1.0824	1.4431	8.1309	6.4734	4.1031	8.0356	3.4725	1.2237		0.962024	4.87973
27.2834	5.6147	2.6986	4.7734	21.6301	21.4167	1.7008	0.7906	0.8237	0.6478	0.2277	0.3506	0.3777	0.7651	1.3549	6.7505	4.7954	3.3633	5.4588	3.0894	1.0508		0.966246	4.38403
27.4025	3.617	2.5488	3.9842	19.4531	18.3172	1.1456	0.7873	0.7297	0.7601	0.1668	0.348	0.3945	0.3898	1.5396	5.0093	3.9041	2.6823	4.6986	2.7571	1.0227		0.970464	3.71279
27.5216	3.5563	1.5665	3.5383	17.4419	13.2725	0.8198	0.6606	0.5367	0.6336	0.5265	0.1569	0.3728	0.5455	1.4849	4.1065	2.7136	2	4.3089	2.5696	0.911		0.974682	3.08612
27.6408	3.4556	1.7881	3.863	16.692	9.2673	0.9126	0.2777	0.6211	0.4716	0.3781	0.1578	0.2767	0.5439	1.0933	3.4594	2.2515	1.9403	3.7712	1.8892	0.9531		0.978903	2.70318
27.7599	2.9381	1.5037	2.9647	12.8743	6.5315	0.7912	0.5513	0.7673	0.4898	0.436	0.2117	0.5049	0.5136	1.069	3.3475	1.8755	1.7742	2.4091	1.8542	1.0147		0.983121	2.22112
27.8791	2.6564	1.4065	2.1758	10.3524	5.0795	0.8128	0.3757	0.5807	0.3553	0.1136	0.2297	0.2379	0.4372	0.912	3.2036	1.4204	1.334	1.9562	1.6992	0.6618		0.987343	1.80003
27.9982	2.9601	1.2667	2.2923	7.0979	4.6943	0.5656	0.4191	0.1939	0.2122	0.3396	0.2002	0.2157	0.3549	0.739	2.3753	1.1717	1.0331	1.9646	0.8353	0.4506		0.991561	1.46911
28.1173	2.6535	1.1734	1.9839	6.3216	3.2607	0.4615	0.5477	0.3125	0.391	0.3993	0.1066	0.0993	0.3848	0.6116	2.3699	1.4892	1.1178	1.7447	1.16	0.5857		0.995779	1.35874
28.2365	2.4866	1.3724	1.6834	5.1018	3.2091	0.5043	0.2505	0.3388	0.3414	0.2954	0.1581	0.1894	0.2613	0.3096	1.7089	1.4034	0.912	1.7522	0.707	0.5643		1	1.17749

## Sheet: Image29
X0	Y0	Y1	Y2	Y3	Y4	Y5	Y6	Y7	Y8	Y9	Y10	Y11	Y12	Y13	Y14	Y15	Y16	Y17	Y18	Y19	Y20	Y21	Y22	Y23	Y24	Y25	Y26	Y27	Y28			Ap-Basal to 1	Average intensities
0	12.525	23.984	15.396	18.192	21.055	24.659	27.305	54.3923	25.165	23.879	27.777	18.723	28.581	60.271	31.207	15.848	16.5931	22.512	19.868	26.0463	20.9311	9.6559	12.0811	18.9365	24.754	15.381	17.3617	30.072	25.9328			0	23.7615
0.1191	11.885	27.025	19.312	20.199	24.049	25.524	29.2591	63.5925	27.571	26.275	32.204	20.789	29.175	70.537	37.969	22.124	20.1887	22.899	21.389	31.4585	23.5941	11.54	12.3744	21.6993	28.383	22.248	17.9257	33.0882	27.1632			0.00482925	26.9462
0.2383	12.198	30.551	23.632	23.639	27.65	27.477	34.0309	69.1377	29.487	26.357	36.111	22.034	29.326	81.166	48.926	26.781	22.6499	29.401	25.622	32.6819	26.7943	12.7668	15.95	22.8753	35.73	25.985	21.2301	31.6915	28.2993			0.00966256	30.3511
0.3574	13.341	34.779	29.548	27.629	31.109	29.233	38.7663	71.1045	31.6	29.763	41.381	26.514	31.293	93.019	53.146	36.55	26.0346	32.515	28.545	35.0766	29.2511	15.0403	18.1245	25.2453	42.823	28.096	21.9849	30.9107	29.8944			0.0144918	33.873
0.4766	17.42	39.931	40.43	33.941	37.066	31.793	43.1168	76.0832	30.089	32.751	45.735	28.499	36.512	95.698	62.986	45.819	32.6166	35.2	32.127	36.879	37.037	18.9682	21.2931	32.9932	48.74	30.887	25.6534	33.341	29.4105			0.0193251	38.3799
0.5957	18.949	44.695	45.997	42.561	41.283	33.146	52.0075	79.3494	31.17	37.289	49.957	30.221	44.174	94.578	66.051	51.844	39.2782	38.63	34.372	40.4148	37.8154	22.3895	25.9267	33.6399	58.015	36.218	27.8264	34.9836	29.6992			0.0241544	42.1545
0.7148	23.09	52.402	55.269	48.854	51.055	39.464	59.0629	77.9792	34.074	43.661	61.687	34.118	51.569	96.022	66.714	61.807	39.9869	46.054	35.355	48.3131	44.8064	25.3647	26.5586	42.8751	70.075	41.674	28.6288	34.8182	34.2075			0.0289836	47.4326
0.834	29.034	60.929	57.023	51.773	62.311	49.603	62.7256	78.9436	35.003	51.515	74.363	41.996	59.506	88.483	67.335	70.561	43.6088	50.078	40.516	52.8949	46.966	26.7796	32.4229	49.6852	79.979	42.614	29.5425	37.5951	35.6683			0.0338169	52.0502
0.9531	31.105	71.35	58.156	59.845	74.486	56.194	68.7612	80.1526	41.287	63.479	89.661	48.312	67.083	91.179	69.927	67.214	45.583	62.934	47.678	54.5993	53.4042	29.3004	35.0396	59.2713	91.295	49.337	34.141	40.4631	41.3583			0.0386462	58.0206
1.0723	38.853	78.365	65.28	57.834	83.548	67.602	72.6338	78.4418	45.413	70.902	105.96	54.859	75.959	87.834	71.218	69.359	47.6048	70.541	46.527	57.4545	52.3324	34.0382	38.1177	65.2727	103.099	50.404	39.4366	41.0414	40.6142			0.0434795	62.4326
1.1914	45.435	87.392	72.911	61.748	99.103	71.28	76.7814	82.6895	52.686	79.14	120.788	64.736	82.665	87.043	73.151	68.864	49.5574	74.411	54.481	61.3607	56.0072	34.5092	41.8994	73.737	99.091	50.88	42.8104	41.3708	48.6696			0.0483087	67.4206
1.3106	57.663	95.108	84.996	60.263	112.108	73.476	80.2398	84.7212	65.148	92.818	134.951	83.649	87.163	83.882	77.806	65.955	49.2055	82.521	64.989	62.7242	55.7786	37.4424	45.2893	85.1611	105.584	54.132	49.3514	46.229	49.8933			0.0531421	73.3879
1.4297	69.319	106.768	93.356	63.123	111.975	78.483	90.1286	80.2667	68.724	107.837	148.403	99.392	94.5	85.14	82.66	65.117	48.7104	85.548	70.415	68.1517	58.349	41.7681	49.0564	94.2945	114.365	53.284	50.2044	49.0094	57.5581			0.0579713	78.8244
1.5488	85.645	113.898	97.465	77.016	120.759	83.65	91.0003	81.2267	71.428	118.181	158.037	111.648	102.105	93.499	85.991	62.166	49.6022	91.59	78.707	67.4947	55.1237	43.978	52.2369	98.2589	109.665	56.941	53.9725	55.5991	53.1242			0.0628006	83.4486
1.668	95.702	113.303	106.23	86.359	124.287	84.269	89.9339	87.2263	83.483	128.211	165.48	125.255	105.534	101.593	95.31	64.383	50.7425	98.684	86.626	74.1019	57.5895	41.1652	58.225	99.9292	109.413	65.511	57.552	61.9142	56.0895			0.0676339	88.7621
1.7871	107.142	111.294	116.407	108.142	123.698	89.975	93.0092	83.8659	91.67	140.349	168.262	136.454	108.649	107.312	98.963	63.406	50.6871	102.054	97.988	70.6952	59.3985	46.8878	61.8249	99.3795	100.08	70.429	64.1192	66.2962	60.2514			0.0724631	93.0582
1.9063	109.014	112.838	121.547	122.38	129.61	96.237	94.9099	85.1509	102.227	149.127	185.255	159.14	112.841	111.524	97.63	63.257	52.5961	104.801	98.813	73.9991	60.7949	51.7851	62.6723	87.3604	96.284	78.292	64.3934	74.1238	65.6199			0.0772964	97.387
2.0254	116.102	113.599	129.005	127.8	125.171	98.764	94.2995	92.821	120.173	157.86	191.697	175.449	115.968	118.522	98.281	68.247	54.5436	110.138	101.769	75.4324	60.4202	57.3607	67.5109	82.8414	88.388	76.849	68.1722	79.7706	67.1852			0.0821257	101.177
2.1445	110.117	114.572	127.396	121.889	116.57	99.39	89.4104	91.3189	126.318	159.31	195.084	179.772	120.811	124.363	101.62	69.467	53.5919	111.181	106.009	81.09	61.3426	58.8771	72.1978	72.0518	73.917	85.955	74.2873	80.8148	71.9025			0.0869549	101.746
2.2637	94.512	110.278	123.6	109.914	99.692	109.368	81.474	84.8812	138.339	165.801	200.103	180.863	128.017	129.745	99.978	76.456	57.0218	119.249	102.275	86.2755	65.1561	59.8112	74.198	61.0204	61.611	88.115	77.2913	79.0166	76.6453			0.0917882	101.404
2.3828	76.688	104.957	114.152	96.88	82.947	108.644	83.4333	91.715	144.761	170.808	202.384	185.522	130.753	124.059	104.517	73.77	60.8833	113.17	98.857	89.0604	65.4747	58.0327	77.9727	47.6501	53.814	89.227	83.5159	74.6039	75.6301			0.0966175	99.4442
2.502	59.724	95.206	97.799	79.915	60.096	107.668	79.2115	86.0352	144.566	169.371	203.409	183.395	130.586	122.373	103.238	80.01	61.0628	108.93	104.264	90.4293	66.3345	62.2712	76.1276	35.0996	46.929	100.387	81.7926	69.1944	70.9843			0.101451	95.7382
2.6211	48.117	76.962	84.662	56.769	43.162	103.632	73.2754	86.9754	153.651	168.864	200.819	171.811	137.962	120.948	107.524	86.634	63.5637	103.544	96.054	94.1116	69.1809	63.6397	75.3337	29.0908	39.134	102.486	86.3199	60.2267	63.6981			0.10628	92.0052
2.7402	36.509	62.191	62.053	47.042	28.887	93.971	71.71	88.9291	151.686	168.901	193.782	159.468	133.627	120.153	107.322	87.776	72.2925	99.733	97.008	94.4654	71.675	67.6306	73.9242	27.9419	33.92	111.097	81.3173	49.0407	52.119			0.111109	87.799
2.8594	29.563	45.879	46.082	36.802	22.25	76.212	65.8219	83.5241	156.537	164.594	193.123	137.797	133.406	121.232	106.181	89.961	81.3963	95.722	94.019	95.9221	73.682	65.7963	76.6793	31.8359	24.206	113.314	78.081	43.7827	42.1832			0.115943	83.6409
2.9785	23.393	36.815	35.367	30.365	22.648	58.635	56.6561	81.1262	147.004	155.108	179.21	121.635	128.951	116.916	100.811	92.815	85.6674	89.491	100.466	95.3026	71.379	62.2772	74.1323	30.8725	26.012	115.222	85.4833	37.778	31.3649			0.120772	79.0656
3.0977	22.403	27.097	28.083	28.57	22.276	42.799	44.6337	75.2574	139.851	149.809	166.786	101.585	119.691	113.779	102.688	95.771	90.2632	85.06	104.583	92.156	79.8327	59.4831	75.7383	31.2698	24.055	123.679	81.8066	33.6036	26.7155			0.125605	75.494
3.2168	18.826	20.087	22.843	23.797	23.81	32.297	35.1805	76.0147	137.456	142.212	146.429	92.385	102.084	116.379	99.222	100.542	91.0516	86.675	99.679	88.7503	84.104	59.4997	75.7591	29.3281	23.012	119.893	80.5017	28.7602	24.487			0.130434	71.7609
3.336	18.374	16.477	21.652	23.057	21.692	25.687	26.1969	69.8156	131.166	146.822	136.666	82.369	78.347	121.676	95.162	94.775	91.2482	84.939	103.308	93.255	84.04	65.5959	64.9088	26.5557	20.225	120.35	84.1684	27.3394	21.9222			0.135268	68.8893
3.4551	18.435	14.595	20.728	21.56	21.66	18.541	23.9832	62.4591	127.596	148.349	119.217	70.537	59.08	121.464	97.78	98.362	90.658	82.712	107.657	83.5067	81.6985	66.3798	61.7165	24.6876	16.804	119.257	83.0871	20.0066	19.6014			0.140097	65.5903
3.5742	17.141	12.999	17.76	19.764	21.32	15.55	22.1188	55.5644	121.321	149.256	104.107	64.731	45.772	119.915	102.815	99.357	89.2144	81.428	105.122	80.5968	78.6802	64.97	61.6265	22.9709	14.292	118.581	86.3396	15.0565	18.5138			0.144926	62.996
3.6934	16.121	12.844	17.933	20.047	18.139	13.343	21.0626	52.0656	113.878	153.512	90.423	59.169	38.722	106.318	103.075	97.509	84.8023	83.021	104.315	79.2113	74.3237	65.6602	55.7103	22.0903	12.351	111.048	88.4423	12.5161	17.1104			0.14976	60.1642
3.8125	15.481	13.237	17.035	17.881	15.212	12.021	19.4164	46.4941	105.943	144.65	73.3	51.344	38.979	93.216	105.229	95.263	82.3067	75.974	100.377	77.5295	77.3144	65.206	49.4012	21.3594	9.996	105.784	89.1099	10.5035	13.0841			0.154589	56.643
3.9317	14.361	11.771	16.853	17.974	15.291	9.91	15.685	39.7311	105.097	138.971	52.4	46.18	46.192	79.874	107.07	99.167	83.0113	70.903	90.274	71.1734	75.5145	66.9308	41.0776	18.92	8.61	99.179	93.236	9.0438	11.7864			0.159422	53.6616
4.0508	12.228	9.661	16.901	19.502	14.609	8.966	16.1548	36.7963	103.958	139.485	36.241	39.166	46.336	60.866	108.472	95.73	77.5822	62.714	78.6	70.2988	75.3476	65.214	38.5423	17.0382	6.775	93.944	95.4154	6.7064	9.6933			0.164251	50.4463
4.1699	13.001	8.38	15.297	14.691	15.159	8.259	14.5489	33.7612	93.857	142.8	26.957	31.186	40.883	49.069	113.47	99.924	73.1195	54.277	67.152	73.1387	75.5293	66.8775	36.9228	15.4854	5.877	84.357	93.5226	5.3786	8.3803			0.169081	47.6297
4.2891	10.856	8.863	15.165	10.786	11.455	7.653	12.0317	33.4687	80.43	143.719	23.017	25.609	41.18	45.973	108.837	103.499	71.6051	43.798	56.12	73.4558	72.7971	63.6021	28.727	16.3044	5.715	71.936	94.4277	3.9533	6.3246			0.173914	44.5279
4.4082	9.577	9.941	15.595	11.298	9.067	5.539	10.6433	33.1089	64.021	139.368	21.036	22.382	38.327	44.032	102.069	97.463	69.523	33.748	51.789	78.9617	80.6058	65.0723	24.9697	14.1237	5.054	56.791	89.8312	3.0561	5.0769			0.178743	41.7955
4.5274	10.447	9.057	15.786	11.434	6.725	6.35	9.5294	33.6269	52.546	133.422	16.513	17.383	35.583	43.959	86.55	101.437	62.0859	26.09	48.434	78.21	79.4286	67.1879	22.1049	13.6079	5.023	42.027	89.6363	2.9336	5.0632			0.183576	39.0407
4.6465	9.442	8.192	16.013	12.608	5.505	6.211	8.1756	31.6147	42.394	115.509	14.711	16.009	36.764	37.382	67.377	99.702	54.6977	19.08	43.297	77.4814	84.0688	66.4189	18.0666	12.0931	4.255	27.045	80.3887	3.0699	4.761			0.188406	35.2528
4.7657	6.631	7.137	15.747	12.944	5.949	6.31	7.5871	31.5535	31.947	102.801	13.318	14.841	31.461	29.922	58.402	85.898	49.6205	14.059	37.501	74.3799	82.8793	69.5042	15.6822	10.7946	4.083	16.957	73.1137	2.3982	4.4415			0.193239	31.6504
4.8848	7.94	6.974	12.841	11.133	6.745	6.236	6.888	30.9187	23.173	82.817	14.892	11.923	28.593	23.012	52.695	71.723	46.5976	10.631	33.977	73.486	82.6424	63.0505	14.6353	7.1622	3.178	10.5	64.0202	3.1689	3.7331			0.198068	28.1133
5.0039	6.217	6.828	13.03	9.558	5.953	7.498	7.5131	28.0172	17.788	64.263	13.122	9.225	22.017	19.113	46.462	59.702	40.0733	11.613	28.715	68.2985	80.8944	60.8892	10.5609	8.6325	3.286	8.058	51.0283	3.7251	3.5966			0.202898	24.6785
5.1231	5.882	5.942	14.261	9.752	4.985	6.754	6.5193	26.0959	14.704	45.102	11.79	8.885	18.501	16.44	41.071	51.63	32.9779	9.472	20.209	64.8347	83.3448	66.0865	7.1266	7.5984	3.028	5.343	41.4988	3.737	3.2928			0.207731	21.9608
5.2422	5.241	5.442	12.662	7.871	6.493	5.691	7.0198	22.4427	13.777	34.2	11.244	6.442	16.647	14.953	38.195	47.747	27.5677	6.996	13.211	58.9512	83.119	59.0186	5.3938	7.6068	4.316	4.741	33.6889	3.5265	2.5487			0.21256	19.5432
5.3614	4.974	4.296	13.062	8.218	5.552	5.212	5.7922	19.6383	11.724	21.479	10.317	4.429	14.509	14.419	34.958	40.954	25.5987	6.2	8.515	56.4964	81.9915	61.176	5.55	6.5819	4.584	3.734	25.7997	3.3417	2.72			0.217393	17.649
5.4805	4.977	4.606	12.382	6.604	5.363	4.746	7.4648	16.772	10.09	15.362	8.304	4.121	12.462	14.458	31.347	36.402	21.831	6.242	6.198	48.4362	82.8561	60.7622	4.2762	6.9392	4.492	4.246	18.0647	3.5015	3.4992			0.222223	16.0967
5.5996	4.784	4.053	8.839	7.286	4.93	3.785	5.0586	13.9863	9.284	10.732	7.406	3.337	12.252	13.075	30.174	35.082	18.8341	5.835	4.871	41.0683	86.7026	61.3032	3.6309	6.8678	4.803	3.268	12.9827	3.962	3.2278			0.227052	14.8766
5.7188	5.606	4.915	8.723	6.153	5.034	3.942	6.8619	15.6643	7.261	6.955	7.532	3.842	12.59	13.676	24.485	31.994	17.2965	6.302	4.166	34.7707	86.8825	57.5281	2.9726	6.9334	5.605	3.192	8.4589	4.0592	2.7026			0.231885	14.0036
5.8379	4.514	4.427	7.477	5.753	4.143	3.407	6.6657	15.0973	7.228	6.165	5.358	2.952	11.191	12.318	22.172	30.353	15.1077	5.96	3.74	23.9389	91.0741	54.322	4.196	5.4718	5.773	2.637	7.4064	4.3359	1.71			0.236714	12.9274
5.9571	6.119	4.116	7.799	6.65	4.088	3.394	4.8889	11.3305	5.642	4.945	4.303	2.536	12.016	13.391	19.814	27.095	13.3557	7.23	3.217	16.3433	85.6746	55.5785	4.671	5.4689	6.134	3.481	6.105	4.5212	2.8442			0.241548	12.1639
6.0762	5.421	3.844	7.092	6.55	4.062	3.2	4.9157	9.1764	5.269	4.379	4.312	2.311	8.287	11.926	15.277	24.107	11.5579	7.036	3.02	9.4765	88.9579	53.6003	3.6032	5.0863	5.837	3.355	5.1404	3.4618	2.1238			0.246377	11.1167
6.1953	5.075	5.089	7.715	5.826	4.501	2.911	5.817	7.4788	4.082	4.306	3.452	3.138	5.022	11.097	12.427	25.789	10.4163	8.242	2.397	6.5708	79.9712	51.619	4.638	4.7594	6.088	3.172	3.9786	3.1511	1.7943			0.251206	10.3629
6.3145	4.403	4.711	8.35	6.732	4.881	3.14	5.7941	6.1482	3.49	2.888	2.771	2.793	4.646	9.614	9.736	19.494	10.2135	7.416	2.582	4.3222	75.4893	49.7978	3.21	5.9521	6.641	2.996	4.0416	2.4085	2.4586			0.25604	9.55586
6.4336	4.532	5.04	7.189	6.451	5.214	3.343	4.944	5.9339	3.768	2.787	3.079	1.985	4.377	9.387	9.435	18.306	10.8819	7.224	2.67	3.0828	74.0386	44.3001	3.3372	5.5671	6.734	2.931	3.5822	2.5781	1.8667			0.260869	9.12292
6.5528	4.159	5.239	8.059	5.92	4.276	4.135	5.3778	5.9843	3.082	2.591	2.288	2.065	3.997	9.784	8.321	15.309	9.1049	8.21	1.834	3.2967	71.6407	37.061	3.9383	5.4868	6.18	3.55	2.6853	2.0878	2.0961			0.265702	8.5434
6.6719	5.223	4.279	7.739	5.734	4.65	2.556	5.0841	6.2207	2.819	2.621	2.66	3.306	3.491	9.847	6.501	12.854	8.4512	8.531	2.542	3.8663	65.7147	28.054	4.3194	4.4654	7.418	2.973	2.3163	2.4844	2.831			0.270531	7.91557
6.7911	3.762	5.232	7.472	5.78	4.407	2.985	5.9806	5.3141	2.906	2.117	2.087	2.283	4.311	10.071	6.592	9.014	8.2683	9.514	1.936	2.6175	61.8618	20.9508	3.6027	5.0144	7.156	4.16	2.3537	2.3294	2.5906			0.275365	7.33341
6.9102	4.314	4.169	7.537	5.689	4.63	3.164	5.6479	4.0302	3.035	2.783	2.35	2.554	3.883	9.851	5.852	7.49	8.3861	8.305	2.511	3.0344	46.6395	14.1955	3.8217	5.428	8.76	4.142	1.5669	1.7601	2.8042			0.280194	6.49426
7.0293	4.722	5.109	6.738	5.659	4.518	3.089	5.4949	4.5004	2.765	2.568	2.251	2.291	3.49	9.741	6.286	5.835	7.6078	10.128	3.141	3.5659	35.6417	11.5065	3.4453	4.6986	9.005	4.716	1.7573	2.0622	2.6624			0.285023	6.03431
7.1485	4.342	4.46	8.675	5.227	4.284	3.126	4.5668	4.4543	2.635	2.049	2.353	2.732	4.107	8.643	4.952	4.947	7.7283	10.931	2.713	2.579	24.8871	10.3075	3.2747	4.2942	8.055	4.123	1.9572	1.5708	2.5315			0.289857	5.39674
7.2676	4.109	5.283	8.16	4.926	3.713	2.683	4.9744	4.8982	2.421	1.813	2.791	2.118	4.194	8.391	4.695	3.828	8.8103	10.933	2.602	3.3796	13.4344	8.5938	3.6645	4.1964	8.156	4.237	1.8023	1.864	2.5723			0.294686	4.93942
7.3868	5.123	7.037	8.194	5.41	5.056	1.817	5.3214	4.7948	2.422	2.423	2.003	2.571	4.228	9.774	3.601	3.967	5.9727	10.33	2.735	3.2498	9.128	8.6428	3.8502	4.5657	8.427	3.711	1.4604	2.0924	2.6229			0.299519	4.84587
7.5059	4.546	7.721	10.985	6.114	4.696	3.351	5.7653	4.2123	2.171	1.715	2.139	3.016	3.894	9.748	3.544	3.074	5.2525	10.192	2.906	3.0311	7.5196	9.0201	4.2198	4.5119	7.702	4.366	1.5104	1.6917	3.094			0.304348	4.88651
7.625	4.435	9.732	11.195	6.58	5.661	2.607	6.2182	4.7214	1.967	1.965	2.252	2.254	4.873	8.273	3.928	3.026	5.2342	10.248	2.636	3.1029	4.888	8.4062	4.0361	4.7119	8.151	4.966	1.8997	2.2935	2.5745			0.309178	4.92537
7.7442	5.165	13.022	13.671	6.241	4.885	3.821	6.2376	4.9358	2.44	1.887	2.136	2.518	4.403	6.779	3.916	3.112	5.4232	10.268	3.193	2.7694	4.4781	8.6087	4.2999	5.4576	8.35	5.728	1.8952	1.7915	2.2723			0.314011	5.16222
7.8633	7.252	11.335	17.253	6.923	4.162	2.979	4.8008	4.3133	2.132	2.323	2.144	3.066	5.252	8.322	3.402	3.415	5.078	9.97	3.478	2.9173	2.9747	8.6049	4.5237	5.5863	9.046	5.784	1.904	1.2388	2.6832			0.31884	5.27114
7.9825	7.043	11.88	19.395	5.727	3.64	2.605	4.727	4.8518	1.894	1.875	2.103	2.949	4.147	7.611	3.327	3.62	5.75	7.727	3.079	3.1008	3.1689	6.2371	4.9797	5.4795	9.5	5.656	2.0229	1.6911	3.0632			0.323673	5.13276
8.1016	7.685	8.784	21.12	6.324	3.885	2.488	4.6266	3.9304	1.982	2.017	2.036	3.272	3.607	7.991	3.102	4.343	5.5511	6.943	3.321	2.3354	4.2765	5.4024	4.3801	4.8889	10.524	5.817	2.2526	1.5973	2.2465			0.328503	5.05961
8.2207	10.316	7.686	28.533	7.599	4.102	2.517	5.2077	4.7087	2.094	1.952	2.309	3.579	4.112	9.353	3.14	4.832	5.5659	6.041	4.122	2.4047	2.6569	4.0541	4.5946	6.6167	12.076	7.573	2.2751	1.5829	2.7893			0.333332	5.66871
8.3399	9.469	8.126	30.968	6.744	4.016	2.459	5.8731	4.4857	2.08	2.377	1.974	3.038	4.066	9.498	3.3	4.053	5.8038	6.321	5.919	1.7402	3.1323	4.795	3.9214	5.8208	11.714	7.685	2.6491	1.7605	2.9178			0.338165	5.74851
8.459	10.017	10.606	34.18	7.129	4.125	2.72	6.2704	4.0968	1.823	2.087	2.363	3.459	3.669	11.401	2.757	4.982	4.9343	8.2	6.916	2.5398	2.9832	5.4445	5.4516	7.4739	13.61	8.806	2.1881	1.4558	2.8817			0.342995	6.36449
8.5782	10.859	11.669	36.057	6.637	4.342	2.514	6.8016	5.2299	1.702	1.982	1.961	2.707	3.603	15.609	3.099	5.231	4.1511	7.216	7.854	3.1523	2.7213	6.0144	4.5396	8.7423	12.457	9.81	2.7403	1.3942	1.9978			0.347828	6.64806
8.6973	14.927	12.336	36.743	6.373	4.451	2.466	5.7411	4.4773	1.838	2.19	2.282	3.114	4.475	17.846	2.799	4.799	4.0554	8.979	8.581	2.39	3.2348	6.7837	6.5649	11.4937	13.311	11.004	2.3399	2.1703	2.3456			0.352657	7.2452
8.8165	14.721	13	35.524	6.777	4.73	1.886	7.2759	4.8525	2.223	2.415	2.084	4.073	4.907	22.265	2.914	5.784	3.9964	11.041	8.576	2.3648	3.5357	8.3925	6.1258	13.6894	16.203	10.583	2.2475	1.8337	3.2446			0.35749	7.83672
8.9356	16.735	15.813	34.155	7.642	4.189	2.309	8.6834	5.4253	2.3	2.083	2.343	3.235	5.407	25.238	2.864	3.69	3.3588	12.632	10.121	2.2799	3.084	8.0183	6.7567	16.6093	16.149	11.557	2.2758	2.2857	2.5997			0.36232	8.27031
9.0547	16.537	18.013	33.792	7.535	3.373	2.382	8.8248	6.1733	2.341	1.905	1.995	3.401	4.391	23.611	3.008	4.479	4.0414	14.184	13.863	2.9245	3.5768	8.6183	7.3464	20.6766	19.374	11.213	2.2198	1.7534	2.6037			0.367149	8.764
9.1739	21.371	19.44	28.76	5.723	3.009	2.327	11.1497	6.2027	2.209	2.075	1.696	3.446	3.977	21.298	3.127	4.785	3.0932	16.982	14.565	2.0684	2.5548	8.4057	7.3254	20.8797	21.611	10.757	2.5596	2.1612	2.2107			0.371982	8.81962
9.293	22.723	22.332	27.403	6.377	3.413	2.343	13.7566	5.9763	1.904	1.963	1.883	3.814	5.64	20.745	3.114	4.036	3.9736	17.55	16.356	2.4289	3.9315	7.8562	7.1654	17.8036	21.346	11.392	2.3628	1.781	2.7782			0.376811	9.10856
9.4122	23.724	23.686	26.092	4.572	2.707	1.991	15.444	6.7547	2.007	2.229	2.483	4.135	5	20.635	3.742	3.503	3.2823	15.304	19.393	1.9222	3.4627	7.1311	8.6319	16.9054	19.696	9.669	2.7778	1.7807	2.8844			0.381645	9.0188
9.5313	27.889	25.965	23.979	4.548	3.612	2.104	13.3987	9.0144	2.576	1.974	1.949	2.924	5.149	20.694	3.276	3.966	2.6821	14.149	21.354	1.7605	3.3352	6.1648	11.4422	18.4719	18.296	10.144	2.5192	2.0947	2.6473			0.386474	9.2441
9.6504	24.93	26.3	24.528	4.621	2.942	2.664	10.5886	7.9385	1.782	1.987	1.653	3.273	6.345	24.648	3.015	3.99	3.5	10.296	22.177	2.4411	3.3704	5.7976	15.0635	15.6183	18.242	9.496	3.0901	2.235	2.7308			0.391303	9.147
9.7696	22.315	22.263	23.385	3.711	2.942	2.035	8.3271	8.9021	2.006	1.999	2.027	3.819	7.832	30.231	3.527	4.348	3.5847	8.145	23.468	1.983	3.5085	5.7656	15.1802	12.4027	19.339	8.498	2.7954	2.1324	3.3083			0.396137	8.95793
9.8887	25.191	19.844	23.599	2.91	3.103	2.665	10.269	10.4108	1.801	2.004	2.661	2.863	7.081	40.211	3.005	3.684	2.9795	5.924	21.73	2.5644	3.8272	5.1921	15.6578	13.4411	19.82	9.223	2.6707	1.8299	2.1627			0.400966	9.25256
10.0079	22.999	19.356	20.997	2.9	2.948	2.618	9.7205	11.5367	1.921	2.022	2.584	3.591	6.533	41.69	3.353	3.902	2.9236	6.558	25.297	2.3223	3.3704	5.313	16.256	14.1784	19.016	11.026	2.9706	1.7911	2.2029			0.405799	9.37574
10.127	24.132	17.624	18.827	2.907	2.317	2.154	8.7789	10.3022	2.663	2.035	1.978	3.866	6.543	42.133	3.786	4.078	3.1029	6.486	25.969	2.4021	3.6517	5.6113	16.7477	13.2301	18.713	12.856	2.9802	1.4471	1.8893			0.410628	9.28312
10.2462	23.227	14.718	18.82	3.208	2.558	2.571	10.3751	11.6941	1.955	2.169	2.581	4.16	6.947	42.564	3.211	4.321	3.8572	7.541	27.002	2.0285	4.0229	5.336	14.8728	13.2923	19.788	13.312	3.0123	1.203	2.3662			0.415462	9.40391
10.3653	23.166	14.515	18.125	3.845	2.525	2.464	10.5011	10.3669	2.803	2.3	1.8	4.099	6.012	45.696	3.33	3.949	3.4756	7.314	27.267	2.4429	3.6634	5.9704	12.5433	12.0405	22.581	14.01	3.7682	1.5296	2.6618			0.420291	9.47464
10.4844	18.211	13.926	17.014	3.172	2.382	2.907	8.6236	9.7869	2.352	2.634	3.033	3.466	6.131	45.303	4.591	3.962	3.0207	7.63	23.037	2.2446	2.8652	5.8707	11.9948	11.9394	23.309	14.863	3.5122	2.0278	1.9937			0.42512	9.02768
10.6036	15.344	12.149	17.779	4.049	3.119	2.45	9.203	10.3264	2.405	2.474	2.765	3.779	7.823	49.323	4.497	4.868	3.3702	7.184	22.105	2.7281	3.4592	8.2313	9.9118	13.1368	23.708	15.016	3.9232	1.6303	1.9766			0.429954	9.26669
10.7227	12.747	13.549	18.178	3.424	2.376	2.225	9.4396	10.3661	2.433	1.85	2.003	3.734	6.49	47.77	4.007	4.819	2.7296	8.164	19.212	2.9611	3.1304	7.4014	9.0134	12.8893	22.518	15.58	4.0034	1.2746	2.1724			0.434783	8.84346
10.8419	10.27	13.544	15.161	2.593	2.654	2.255	11.3301	8.7042	2.296	2.223	2.199	3.487	6.941	44.482	4.244	6.459	2.7692	6.911	17.167	2.6399	4.2948	7.4877	9.2179	11.5502	27.357	16.17	3.9672	1.3364	1.8767			0.439616	8.67542
10.961	9.02	15.262	17.154	2.589	2.394	2.249	12.3284	10.6058	2.731	2.4	2.811	4.275	7.898	40.951	4.137	5.796	2.6852	7.17	16.131	2.8626	4.0311	7.8361	7.545	11.6694	26.924	16.149	3.6015	1.7416	2.1747			0.444445	8.72836
11.0801	8.758	13.032	16.599	3.04	2.016	2.418	13.9531	8.9906	2.601	2.135	2.647	3.708	6.943	41.813	5.096	6.003	2.59	6.329	15.834	2.6596	3.1413	8.5895	9.5155	11.0534	27.794	14.7	4.3821	1.8559	2.4013			0.449275	8.64132
11.1993	9.98	12.414	17.766	3.197	2.257	2.877	13.1561	7.5426	2.766	2.243	2.554	3.565	7.769	35.759	5.422	5.264	2.6738	5.15	18.877	2.2702	3.8172	8.5819	8.4427	9.899	24.878	12.925	4.7321	2.0961	2.1439			0.454108	8.31099
11.3184	12.023	10.016	21.287	2.685	1.896	2.375	12.9116	8.472	1.93	1.947	2.421	3.802	6.962	31.85	6.625	5.84	3.187	5.721	18.496	2.5248	3.3429	8.0477	8.5464	9.0568	24.907	12.558	4.7324	2.0447	1.986			0.458937	8.21356
11.4376	11.929	10.413	23.855	2.969	2.186	2.458	11.5731	7.4841	2.399	1.618	2.39	3.33	6.347	26.376	6.094	5.099	2.5479	5.858	19.373	2.5958	3.8355	8.188	11.4899	9.5623	21.839	14.568	3.4954	1.6728	1.3674			0.46377	8.03149
11.5567	11.92	11.685	26.127	3.126	1.823	2.621	10.6562	7.1855	1.769	2.139	2.261	4.305	6.96	19.357	6.565	6.602	2.5224	4.026	19.546	1.7941	3.9105	7.8565	11.6814	8.5353	21.908	13.593	4.6083	1.3754	2.0619			0.4686	7.88002
11.6758	10.499	11.477	28.146	2.99	1.937	2.312	10.3355	6.6256	1.865	1.881	2.642	3.074	6.719	18.04	5.117	6.167	2.4696	4.522	19.282	2.0254	3.6705	6.7034	11.1408	7.3493	17.257	15.546	4.7974	1.6655	1.8793			0.473429	7.52191
11.795	10.121	11.857	25.582	2.184	2.041	2.264	10.6053	6.9138	2.096	2.25	2.464	3.256	5.977	21.849	5.579	5.293	2.4594	3.878	22.789	2.3911	3.3145	7.1261	10.7186	7.4728	14.99	16.89	4.8497	2.3043	1.9006			0.478262	7.63504
11.9141	7.684	11.71	25.429	2.023	2.404	1.482	10.246	7.0612	1.538	2.089	1.922	4.134	6.042	27.384	6.465	5.714	3.0579	3.039	23.08	1.9252	4.0529	6.335	10.3027	7.2792	13.044	16.975	5.4154	2.5207	1.5419			0.483092	7.65159
12.0333	8.241	10.037	28.3	2.543	2.326	1.764	10.8587	7.3891	1.857	1.619	2.031	3.139	5.661	31.602	6.121	5.071	2.249	2.85	23.016	2.0795	2.4587	5.7088	9.6261	6.4373	12.501	20.2	5.3798	1.7638	1.4956			0.487925	7.73536
12.1524	8.218	8.652	28.047	2.21	2.595	2.234	13.286	6.5777	1.872	1.67	2.523	3.56	5.583	34.177	6.911	4.688	2.5284	3.661	20.956	2.4292	3.5578	4.9562	10.2356	7.1018	11.985	20.105	4.635	2.0683	1.3538			0.492754	7.87506
12.2716	8.471	9.873	29.082	2.189	2.213	2.335	13.7373	7.9102	2.169	2.137	2.846	3.24	6.229	37.3	6.361	3.982	2.596	2.542	20.058	2.2778	3.3003	4.3377	9.0013	6.612	8.575	22.973	5.6773	2.2455	1.9175			0.497587	8.00648
12.3907	6.528	8.791	29.462	2.363	2.346	1.858	14.3134	8.2361	2.211	1.971	2.02	3.324	4.925	39.327	6.699	3.974	2.5523	2.478	17.121	1.975	3.3649	4.2122	8.6407	5.314	7.693	22.683	5.9208	2.1463	1.5797			0.502417	7.72515
12.5098	7.372	10.623	32.411	3.302	2.208	2.1	11.9475	8.2812	2.191	1.894	2.46	2.628	4.089	38.429	6.904	4.293	2.9126	2.406	16.736	2.046	3.6197	4.2828	8.6942	5.9249	7.486	23.48	5.4117	1.6047	1.9235			0.507246	7.85037
12.629	7.175	11.916	31.333	2.728	1.86	2.127	13.6834	7.4879	1.738	1.912	2.232	2.913	4.952	38.405	6.424	4.487	2.5773	2.591	14.099	2.3602	3.9414	3.927	9.1354	5.1661	7.066	27.057	5.3458	2.7686	2.2303			0.512079	7.91857
12.7481	5.695	13.279	31.779	2.921	2.106	2.073	12.1848	6.311	2.087	2.276	2.931	2.821	5.258	35.218	6.3	4.865	2.8911	2.535	12.153	2.8717	3.6946	3.713	8.361	6.4031	5.488	25.735	4.6716	2.0063	1.3758			0.516908	7.58634
12.8673	5.853	14.343	31.763	3.057	1.988	1.659	11.7685	6.1205	1.808	2.328	2.668	3.554	3.732	28.84	6.219	5.579	2.9502	2.215	9.608	3.2382	3.1814	3.3122	8.7253	3.8938	5.825	24.718	5.5956	2.1106	1.9089			0.521742	7.1918
12.9864	6.116	12.236	31.149	3.195	1.934	1.486	9.537	5.4193	1.88	2.225	2.989	3.119	5.129	23.4	7.414	5.712	3.0303	3.01	9.868	2.2785	3.6038	3.6284	7.5549	4.0225	6.716	27.004	6.1584	2.0538	1.7693			0.526571	7.02201
13.1055	5.861	11.702	32.598	3.834	1.695	3.117	8.8988	4.5909	2.359	1.934	1.797	2.906	4.459	23.978	5.604	4.81	2.6689	2.488	8.672	2.7362	4.1033	3.5358	6.8958	5.0698	6.311	29.082	6.2858	3.0201	1.5607			0.5314	6.98528
13.2247	5.282	8.438	31.036	4.383	2.393	1.997	9.2552	5.2516	2.123	1.691	2.578	3.007	4.441	20.739	8.365	4.891	2.1603	2.169	7.223	2.7398	3.1591	3.2925	5.3262	4.1821	5.801	28.484	6.8662	3.1375	1.5514			0.536234	6.61941
13.3438	6.054	8.592	29.116	4.049	2.023	1.463	8.2679	4.483	1.959	1.823	2.251	2.576	4.848	21.334	8.82	4.779	2.9312	2.253	5.996	3.2695	3.0369	3.5584	5.3086	4.095	5.249	26.963	6.0666	2.2787	1.6739			0.541063	6.38337
13.463	5.877	7.749	29.478	4.949	2.357	1.843	9.0358	3.8322	1.54	1.505	2.028	2.385	4.446	21.928	10.266	4.253	1.8555	2.885	6.038	2.8509	3.1783	2.9165	5.8316	4.3601	4.852	31.457	7.4359	2.1627	1.572			0.545896	6.58164
13.5821	6.105	7.862	30.568	4.418	2.025	1.843	7.968	4.4135	1.399	1.565	2.395	2.654	4.441	21.041	10.69	3.964	2.6647	1.642	6.516	4.0122	2.9426	3.3461	5.2495	3.6717	4.97	28.878	8.4304	2.9379	1.5179			0.550725	6.55622
13.7012	5.856	8.397	32.198	4.335	1.984	2.282	8.2042	3.186	1.745	2.555	2.697	3.027	5.342	20.369	13.217	3.775	1.8836	2.166	6.448	3.3686	2.6941	2.4711	4.5908	3.7279	5.143	27.536	9.2765	3.4105	1.4868			0.555555	6.668
13.8204	4.702	7.257	33.737	4.201	1.828	1.492	9.066	4.6264	1.673	1.948	1.922	2.615	4.575	20.936	13.906	4.072	2.3441	1.724	6.995	3.4732	2.452	2.6975	4.7817	2.9728	4.421	26.925	9.316	3.3672	1.7215			0.560388	6.61198
13.9395	4.855	6.898	32.415	4.669	1.285	1.927	9.9551	3.6443	1.515	2.207	2.436	2.398	4.325	17.98	13.787	3.205	2.8585	2.017	5.558	3.2431	3.4064	2.9167	3.9407	3.9646	3.852	24.101	11.6271	3.268	2.0536			0.565217	6.42442
14.0587	4.529	5.669	34.14	5.274	1.805	1.872	9.479	4.0371	1.449	2.317	2.433	2.486	4.291	18.277	12.18	3.136	2.2584	2.099	5.879	3.9126	3.1402	2.531	3.3205	3.729	3.783	22.935	12.2691	2.8023	1.6302			0.570051	6.33322
14.1778	4.383	4.626	35.287	5.514	2.409	2.216	9.4745	3.9559	1.679	1.584	2.155	2.595	4.175	15.586	10.599	2.695	2.5249	2.548	4.794	4.5674	3.2173	2.5663	4.0361	3.5043	4.078	20.739	11.9207	3.6742	2.0156			0.57488	6.17652
14.297	3.588	5.199	38.374	4.095	2.181	1.973	10.7686	4.5194	2.108	1.945	2.01	2.162	3.828	13.932	9.948	2.56	2.3239	2.073	5.283	4.4105	3.1071	3.3092	3.5657	3.303	5	18.523	12.8643	3.5357	1.822			0.579713	6.14867
14.4161	3.407	5.496	36.495	3.621	1.914	1.684	9.4311	3.8104	2.185	2.157	1.782	3.279	4.249	12.976	9.258	2.608	2.2011	2.006	6.213	4.7483	3.1165	2.585	4.1846	3.3992	5.213	15.22	14.3132	3.8186	1.4742			0.584542	5.96018
14.5352	3.427	4.65	38.262	3.279	2.299	1.632	9.2041	4.9679	1.475	2.081	1.642	2.901	4.111	12.79	8.329	2.524	2.0855	1.8	5.939	5.4887	2.4693	2.1062	3.2181	3.4084	4.262	12.54	18.063	3.2124	2.4353			0.589372	5.88282
14.6544	3.721	5.005	37.61	3.329	2.09	1.606	11.6394	4.72	2.026	2.033	2.199	3.508	4.084	9.949	7.852	2.484	1.7123	1.949	5.434	5.3632	2.7544	2.63	3.8546	3.5768	4.491	9.855	18.7915	2.9206	1.5351			0.594205	5.81803
14.7735	3.837	5.31	34.11	3.317	1.586	1.979	12.1213	5.8958	1.477	2.277	1.745	2.303	3.935	8.477	9.581	2.274	2.2057	2.337	5.406	6.0228	2.4395	2.4729	4.1257	3.8767	5.159	9.211	20.6713	2.8238	1.8377			0.599034	5.82118
14.8927	3.08	5.335	33.802	3.236	1.583	1.461	12.113	5.8278	1.871	2.352	1.757	2.498	4.167	8.863	9.071	2.511	1.78	2.005	4.389	6.0313	2.4945	2.2826	3.5353	2.8997	4.406	8.933	20.2295	3.5309	1.7358			0.603867	5.6476
15.0118	3.278	5.277	28.894	2.752	1.65	1.774	11.5299	5.7208	1.675	1.973	2.268	2.469	3.35	9.184	7.909	2.174	2.3003	2.041	5.155	6.1575	2.5541	2.3706	2.8859	3.2703	5.124	7.749	21.9265	3.9099	2.6751			0.608697	5.51713
15.1309	2.794	4.988	29.892	3.446	1.745	1.828	11.6683	5.2826	1.702	1.646	1.512	2.59	3.69	8.04	8.049	2.154	2.5479	1.815	5.074	6.3785	2.5733	2.5279	3.22	4.2143	4.684	8.218	22.9656	3.5449	2.234			0.613526	5.55256
15.2501	2.229	3.548	26.251	2.772	1.485	1.403	12.2568	6.8269	1.711	2.386	1.246	1.895	3.683	8.135	7.624	2.243	1.9555	1.727	3.343	8.0539	2.0607	2.9852	3.432	3.5788	5.88	8.528	24.2586	3.7864	1.5189			0.618359	5.40699
15.3692	2.111	3.343	23.882	3.554	1.877	1.642	11.0253	7.399	1.462	1.819	2	2.425	3.591	8.738	6.557	2.66	2.938	1.905	4.369	7.4774	2.3538	2.4402	4.377	2.868	5.517	6.312	28.2221	3.2562	2.154			0.623189	5.45776
15.4884	2.124	3.195	22.433	5.001	1.702	2.068	9.6042	6.9898	1.716	2.395	2.453	2.141	3.833	8.459	6.134	3.319	2.1117	1.998	4.686	7.5901	2.3378	2.5917	3.112	2.8403	6.64	8.195	29.2177	4.1377	2.5322			0.628022	5.57094
15.6075	2.341	3.604	21.038	4.802	1.601	1.988	9.4284	7.7959	1.342	2.327	2.656	2.287	2.962	8.402	7.64	2.686	2.7508	1.963	3.563	8.4219	2.2969	2.8263	3.1109	3.2092	5.597	7.876	30.8654	3.5581	2.185			0.632851	5.55599
15.7266	1.859	4.854	17.524	4.896	1.784	2.102	7.7511	6.5513	1.225	1.852	2.389	2.27	2.779	7.344	6.541	2.193	2.1802	2.612	3.572	9.05	2.4565	2.4806	3.589	2.8303	7.119	7.88	32.6427	3.4911	2.1862			0.63768	5.37945
15.8458	2.203	5.046	16.049	5.612	1.785	1.753	8.3654	8.4479	1.83	2.57	1.656	2.391	3.243	7.458	8.269	2.383	2.681	1.824	3.467	8.5653	2.0338	2.2394	3.2885	2.4466	5.878	8.654	30.0522	4.7897	2.9788			0.642514	5.44688
15.9649	1.42	4.413	15.706	6.366	2.006	1.415	9.509	7.8485	2.077	1.184	2.099	2.937	3.48	6.225	8.128	2.721	2.3896	1.889	3.547	7.8638	2.5906	1.8516	3.3952	2.9516	5.895	9.871	30.7822	4.8362	2.8706			0.647343	5.45751
16.0841	2.368	4.015	12.524	6.065	2.001	1.668	8.4308	8.8585	1.948	1.378	1.946	2.01	2.91	7.134	10.737	2.87	2.281	2.184	3.559	7.0016	2.3176	2.3396	2.9395	3.0647	7.235	8.9	30.9713	5.1671	3.3823			0.652176	5.45538
16.2032	2.268	4.222	12.515	6.49	2.349	1.91	8.737	8.3798	1.928	1.644	1.477	2.055	2.856	6.725	10.966	2.677	1.3804	1.941	3.124	6.5783	2.2478	2.5633	2.8989	3.2632	5.81	10.713	32.4272	5.6257	2.6371			0.657005	5.46237
16.3224	2.202	4.406	11.597	5.445	1.916	1.293	9.4167	7.7886	1.935	2.128	1.734	2.057	2.844	6.349	12.096	3.089	2.4144	1.506	3.157	6.9064	1.815	3.3084	3.5876	2.7136	7.089	9.905	30.0668	5.4544	2.7549			0.661839	5.41292
16.4415	2.027	4.402	12.433	5.482	2.432	1.717	8.3099	7.0423	1.833	1.843	2.232	2.717	3.513	6.989	12.985	3.491	2.0758	1.933	3.458	7.6614	1.6022	2.0863	3.1026	2.9075	6.694	10.072	29.446	5.0923	3.0222			0.666668	5.46902
16.5606	1.603	4.977	9.765	5.014	1.853	1.613	8.5563	6.3191	2.02	1.91	2.094	2.851	3.498	6.432	14.495	2.464	2.4127	2.152	3.012	7.3588	1.7035	2.4893	3.6952	2.8748	5.713	10.607	27.3643	6.356	2.8602			0.671497	5.31252
16.6798	2.126	5.042	9.889	5.771	2.204	1.544	7.8126	6.5533	2.363	1.723	2.452	2.361	3.167	5.833	17.382	3.412	2.3971	1.349	3.601	9.0449	1.9304	2.752	3.4009	2.8395	5.305	9.94	29.4123	6.0348	3.1609			0.676331	5.54492
16.7989	1.321	5.155	8.018	6.397	2.004	2.215	7.0276	5.6747	1.896	2.057	2.165	2.56	3.079	6.331	17.351	3.223	2.1039	2.142	3.651	9.7355	1.5444	2.8118	3.3291	2.3357	7.504	10.702	29.7794	6.4955	2.8779			0.68116	5.5685
16.9181	1.673	4.082	8.069	8.182	2.189	1.77	6.0233	5.0422	1.41	1.847	1.643	2.342	3.041	5.778	14.386	3.121	2.1514	2.132	3.486	9.6135	1.8963	2.9666	2.911	2.5963	7.07	10.611	33.989	8.6987	3.4597			0.685993	5.59241
17.0372	1.728	3.85	7.614	7.919	2.648	1.554	5.7683	5.5098	1.777	2.074	2.274	2.092	2.837	4.809	12.853	2.914	2.2055	1.941	4.164	8.8012	2.0078	3.2616	3.1	2.9899	7.019	8.988	32.9754	8.9695	3.4532			0.690822	5.45163
17.1563	1.579	3.637	7.59	8.364	2.576	1.484	5.1793	4.3326	2.283	2.357	2.008	1.955	3.243	5.356	12.062	2.839	2.1524	1.999	5.046	9.5917	1.9408	2.8137	3.4521	3.4888	6.105	11.529	29.5299	10.1156	3.3946			0.695652	5.4484
17.2755	1.937	3.965	7.705	9.219	3.041	1.543	6.0026	5.0724	1.96	1.963	1.922	2.252	3.825	5.405	10.28	3.643	2.3686	2.47	5.377	9.8779	2.1519	2.625	3.7674	3.4831	5.926	13.466	26.3327	13.6347	4.2671			0.700485	5.70629
17.3946	1.784	4.203	8.946	9.585	2.386	1.612	5.9294	4.0956	2.119	2.138	1.901	2.204	3.564	5.209	9.186	2.273	2.1672	2.504	4.682	10.6514	1.7677	1.948	3.1602	2.9948	7.601	13.812	24.8054	11.436	3.4697			0.705314	5.45291
17.5138	2.107	3.975	8.113	10.676	3.178	1.642	5.5093	4.6575	1.789	1.983	2.071	1.95	3.011	6.062	9.846	3.073	1.754	2.229	5.485	11.2407	1.5717	2.8606	3.7807	3.3177	7.713	16.34	23.1848	13.2484	3.5431			0.710148	5.72109
17.6329	1.523	3.094	7.763	10.312	4.946	1.426	4.7516	4.2908	2.234	1.818	1.854	2.185	2.9	6.334	10.294	2.442	1.5814	2.207	5.21	11.5077	2.024	3.2534	3.64	3.1841	7.479	18.018	20.2832	11.7114	5.097			0.714977	5.63323
17.7521	1.666	3.212	7.607	9.481	3.69	1.912	5.1366	3.6526	2.499	1.642	2.191	1.999	2.733	6.493	11.293	3.205	2.154	2.334	7.166	13.6215	1.5827	2.9293	3.7194	3.961	7.064	16.792	19.9616	13.8225	6.0846			0.71981	5.84844
17.8712	2.022	3.074	7.148	10.757	5.181	1.219	5.2129	4.2683	2.292	1.919	1.754	2.38	3.595	5.487	10.576	3.442	1.964	3.313	7.073	14.5685	2.5904	2.6783	3.1591	4.1865	6.859	15.915	19.0586	14.3981	5.8766			0.724639	5.92991
17.9903	1.581	3.713	6.331	11.303	4.308	1.628	5.0336	3.2108	2.144	1.859	2.316	2.029	3.286	6.067	9.721	3.24	2.7844	2.383	6.313	14.4062	2.3875	2.8864	3.5615	3.7875	6.676	15.032	17.889	17.5877	6.5378			0.729469	5.86215
18.1095	1.484	2.783	5.841	10.668	4.292	2.105	4.4859	3.6683	1.839	1.409	1.305	2.544	3.95	6.693	9.927	3.187	3.0411	2.333	8.362	13.5128	1.5727	2.5326	3.5771	4.0302	6.66	13.006	16.2303	15.8506	8.1314			0.734302	5.69038
18.2286	1.899	2.975	5.777	10.826	4.376	1.802	5.1621	3.9185	1.657	1.27	1.682	2.701	2.636	6.39	9.426	3.595	2.1047	3.551	7.832	11.2798	1.7345	3.3956	4.0862	4.3658	7.203	11.505	14.3075	12.7062	8.4053			0.739131	5.4679
18.3478	2.461	2.801	6.969	9.811	4.749	2.438	3.5946	3.178	1.927	1.749	2.704	1.702	2.703	6.508	11.981	2.964	2.0348	2.486	9.422	14.1918	1.8248	3.0971	4.1716	5.545	6.988	9.518	12.3567	9.9619	7.747			0.743964	5.43394
18.4669	1.967	3.414	6.967	9.026	5.169	1.77	4.9992	4.3424	1.655	1.72	2.197	2.209	3.103	6.65	13.451	2.908	2.6753	3.295	11.48	15.4564	1.4636	2.7874	4.8849	6.4379	7.598	7.653	8.8359	8.0822	8.1131			0.748794	5.52794
18.586	2.17	3.67	9.158	11.101	5.755	2.431	3.8932	3.9314	2.281	1.853	2.455	2.304	2.498	6.428	13.648	2.745	2.0127	3.921	11.825	16.5907	1.618	2.778	5.6924	6.7295	8.573	5.589	6.7365	5.3524	6.3501			0.753623	5.52034
18.7052	2.476	3.8	8.514	8.938	5.759	2.078	4.3453	4.4129	1.699	2.143	2.238	2.677	2.232	6.319	14.171	3.051	2.2922	3.977	12.722	19.851	2.2544	3.2099	6.0856	7.0048	7.941	4.858	5.1923	4.3863	5.8905			0.758456	5.53511
18.8243	2.535	4.491	8.428	7.44	5.91	2.323	4.6055	4.8473	1.939	1.885	2.117	1.931	2.432	6.006	14.573	2.722	2.2136	4.301	14.215	23.2196	2.0966	2.8498	6.3026	10.0065	8.499	3.141	2.9632	2.6213	4.7548			0.763286	5.56444
18.9435	2.946	4.248	8.82	4.955	5.627	2.368	3.489	5.2288	2.091	1.981	2.433	2.337	2.854	4.716	14.767	2.971	2.0951	5.117	16.834	24.3365	2.1123	3.5212	7.8146	10.6017	6.529	2.156	2.4199	1.9252	3.1641			0.768119	5.53305
19.0626	2.818	5.559	7.363	4.133	5.7	3.176	3.2775	5.9016	1.577	2.572	2.082	2.459	3.275	5.125	14.562	2.756	2.5999	5.906	20.586	25.3262	1.9391	3.9348	6.9939	10.2765	7.737	2.075	1.6063	1.7817	3.1805			0.772948	5.73376
19.1817	2.689	5.284	5.189	2.726	5.464	3.486	3.6438	7.2754	1.696	1.888	2.031	2.308	2.81	4.776	14.364	2.835	2.638	6.593	19.033	25.1307	1.8542	3.6254	8.4537	11.6376	5.858	1.885	1.297	1.3441	2.8243			0.777777	5.53928
19.3009	2.417	3.748	4.62	1.736	4.932	3.799	3.7275	5.9661	1.65	1.637	2.437	2.437	2.291	5.669	13.921	2.98	2.4858	6.299	21.785	23.7135	1.9116	4.2376	8.7131	11.0637	4.624	1.688	1.2261	1.5138	2.4037			0.782611	5.36664
19.42	2.798	3.535	2.627	1.682	5.245	3.865	3.4411	6.1558	1.786	1.778	2.015	2.188	2.458	5.056	15.136	3.662	2.2765	9.327	22.459	21.8319	2.1553	3.9295	8.9645	10.929	4.109	1.154	1.252	0.9467	2.0172			0.78744	5.33722
19.5392	1.694	2.635	2.118	0.923	4.294	4.071	4.1731	7.4325	2.377	2.27	2.657	1.791	2.942	6.073	17.146	2.667	2.2853	11.427	20.384	23.3322	1.8581	4.0497	9.0676	8.4173	3.56	1.342	0.9909	1.1061	1.7343			0.792273	5.33856
19.6583	1.139	2.673	1.42	0.876	2.514	4.026	3.269	6.2555	1.882	2.015	1.898	2.513	2.391	4.832	17.299	2.306	2.327	14.122	21.447	24.6851	2.263	3.2448	8.9547	5.3857	2.44	1.311	0.7467	0.9955	0.9822			0.797102	5.04183
19.7775	1.212	2.094	1.249	0.762	2.432	3.359	2.9968	6.2505	1.902	2.055	1.931	2.736	2.672	6.236	20.772	3.601	2.0167	19.785	22.368	29.4218	1.5721	3.0248	7.5207	5.0664	2.167	0.799	0.9477	0.6227	0.8584			0.801936	5.46312
19.8966	0.875	1.206	0.744	0.522	2.207	3.528	3.7381	7.1987	1.685	2.983	2.493	2.837	3.155	5.282	21.547	3.398	2.6975	21.904	22.88	30.4034	2.5296	3.8983	7.9943	2.8344	1.332	0.671	0.8481	0.7667	0.8881			0.806765	5.62228
20.0157	0.973	0.977	0.53	0.763	1.726	3.278	3.1667	6.5774	2.435	2.598	1.98	1.99	2.905	5.279	22.071	3.278	3.2962	25.766	22.151	35.3672	2.1652	3.5722	5.5949	2.612	1.016	0.342	0.7539	0.5571	0.4505			0.811594	5.66108
20.1349	0.369	0.499	0.392	0.513	1.821	2.905	3.7001	5.4654	2.175	2.689	1.886	2.451	2.573	4.638	21.401	3.492	3.0949	22.767	21.747	38.3424	2.5137	2.8118	6.1847	2.0645	0.969	0.35	0.899	0.411	0.4539			0.816428	5.5027
20.254	0.502	0.803	0.505	0.324	1.181	3.148	2.272	5.1576	2.19	3.136	2.05	2.691	2.063	5.862	20.914	3.343	3.2566	23.692	19.522	34.0081	2.6097	2.7855	6.8895	1.6277	0.858	0.798	1.0368	0.6206	0.34			0.821257	5.31676
20.3732	0.497	0.851	0.559	0.415	0.997	2.616	2.2711	5.5786	2.309	3.694	1.852	2.374	2.644	5.26	20.171	3.484	4.4728	24.637	15.993	34.4282	2.2162	3.0358	6.159	1.783	0.58	0.489	0.4966	0.425	0.5546			0.82609	5.20148
20.4923	0.314	0.572	0.254	0.402	0.645	2.253	2.0332	5.2018	2.748	3.844	1.855	2.709	2.957	5.618	18.119	3.223	4.6763	25.212	11.416	26.8542	3.7642	4.7901	6.6163	1.5053	0.632	0.62	0.5637	0.4215	0.5163			0.830919	4.83917
20.6114	0.243	0.273	0.263	0.689	0.673	2.447	2.2997	3.9415	2.503	5.093	2.251	2.593	2.892	5.652	18.904	3.267	4.9464	25.332	5.006	18.3378	3.7735	8.8207	7.6287	1.1108	0.905	0.29	0.3848	0.5769	0.368			0.835749	4.53327
20.7306	0.378	0.267	0.261	0.378	0.489	1.662	2.1005	4.5379	2.215	4.948	2.219	2.547	3.239	5.128	20.109	3.646	6.0816	23.388	3.648	10.7581	4.4928	12.2225	5.9515	1.0574	0.565	0.301	0.2656	1.0063	0.4255			0.840582	4.28578
20.8497	0.298	0.368	0.166	0.201	0.271	1.467	2.1213	3.5603	2.417	5.597	1.706	2.235	3.268	4.716	16.247	3.59	6.4276	17.765	2.46	5.9515	4.9769	16.956	6.6507	0.957	0.485	0.281	0.4041	0.6592	0.4801			0.845411	3.88561
20.9689	0.21	0.328	0.208	0.163	0.505	1.684	2.2037	3.3865	1.947	5.516	2.2	2.689	3.093	7.362	14.867	3.958	9.8478	14.433	1.55	2.6114	5.937	16.9208	5.3995	0.6379	0.321	0.136	0.0611	0.5563	0.4483			0.850245	3.76484
21.088	0.163	0.293	0.205	0.175	0.185	1.223	1.8853	3.7402	2.089	5.766	2.461	2.278	3.368	7.021	15.401	4.444	10.5903	8.572	1.157	2.1084	7.6543	16.5697	5.599	1.2438	0.373	0.29	0.3537	0.5985	0.2234			0.855074	3.65623
21.2071	0.116	0.287	0.215	0.281	0.196	1.131	1.6209	3.2343	2.666	5.793	3.116	2.603	3.073	8.667	14.001	4.417	13.5749	4.587	1.163	1.3208	8.4302	16.3699	4.1093	0.4902	0.523	0.241	0.167	0.3745	0.5512			0.859903	3.56273
21.3263	0.154	0.41	0.171	0.172	0.175	0.825	1.6825	3.3889	3.185	5.543	3.454	2.594	3.105	9.076	16.143	4.779	14.373	3.868	0.593	0.8726	7.4961	15.9922	3.8695	0.4855	0.321	0.349	0.3587	0.3324	0.1947			0.864736	3.58493
21.4454	0.096	0.055	0.2	0.108	0.059	0.874	1.2663	3.1734	4.672	5.89	4.337	2.619	3.354	12.066	16.038	4.875	17.6567	2.934	0.668	1.0637	7.4808	13.9168	3.2239	0.3473	0.331	0.081	0.5218	0.2615	0.3967			0.869566	3.74365
21.5646	0.106	0.162	0.046	0.006	0.101	0.427	1.4707	2.778	4.906	5.827	4.3	2.653	3.804	14.882	15.431	6.351	19.4856	2.513	0.909	0.5612	5.6893	15.6232	1.6826	0.4596	0.149	0.295	0.378	0.2583	0.2712			0.874399	3.84571
21.6837	0.099	0.201	0.112	0.097	0.165	0.902	0.8923	2.9287	5.679	6.972	4.547	3.076	4.915	14.457	15.97	7.429	19.1111	2.317	0.718	0.3499	6.9428	13.1754	1.2804	0.4851	0.304	0.268	0.2652	0.3026	0.2145			0.879228	3.9371
21.8029	0.009	0.22	0.114	0.112	0.306	0.309	1.0095	2.787	5.395	4.982	5.636	2.879	4.26	16.085	15.644	10.263	14.3789	1.617	0.676	0.3118	7.9911	12.5066	0.8172	0.3262	0.179	0.266	0.2049	0.3201	0.1157			0.884061	3.78348
21.922	0.049	0.155	0.103	0.149	0.206	0.315	0.8132	2.352	5.172	5.12	5.224	3.593	4.93	18.932	14.538	10.549	10.0884	1.096	0.531	0.5235	10.3855	11.7322	0.4817	0.3174	0.246	0.277	0.1748	0.3056	0.2			0.888891	3.74342
22.0411	0.219	0.094	0.205	0.056	0.277	0.419	0.889	2.1496	3.778	5.968	4.602	4.132	4.928	17.174	15.582	12.64	6.9946	1.198	0.499	0.3211	11.5587	8.6026	0.4571	0.3959	0.298	0.292	0.577	0.239	0.2639			0.89372	3.61412
22.1603	0.104	0.06	0.109	0.054	0.045	0.45	0.6645	2.0978	3.391	5.617	4.653	4.883	6.415	14.407	17.277	12.333	5.9226	1.031	0.499	0.0681	10.1624	7.6855	0.1938	0.1073	0.327	0.155	0.3994	0.3577	0.2128			0.898553	3.43731
22.2794	0.057	0.115	0.09	0.087	0.006	0.23	0.8961	1.8341	3.142	4.326	4.191	4.889	5.504	14.005	17.263	11.493	3.6892	0.663	0.804	0.2716	7.5474	6.4737	0.2457	0.3324	0.069	0.115	0.1879	0.128	0.2134			0.903383	3.06443
22.3986	0.14	0.084	0.075	0.163	0.1	0.251	0.3493	1.265	2.349	3.932	3.796	4.381	8.166	13.238	19.387	14.167	2.7051	0.538	0.188	0.3579	5.3803	4.326	0.1667	0.1171	0.163	0.105	0.1397	0.1041	0.2121			0.908216	2.97746
22.5177	0.013	0.052	0.142	0.014	0	0.387	0.5734	0.9275	1.659	2.66	4.074	5.429	8.711	11.595	17.17	14.282	2.8721	0.647	0.089	0.3601	3.5363	2.5147	0.3316	0.1974	0.151	0.025	0.0521	0.0959	0.0569			0.913045	2.71097
22.6368	0.052	0.105	0.146	0.143	0.043	0.442	0.1877	1.1758	1.923	2.225	3.669	4.62	8.448	10.654	17.358	12.787	2.4992	0.612	0.062	0.1669	2.3774	1.9276	0.1736	0.3442	0.255	0.267	0.1058	0.1504	0.0063			0.917874	2.51469
22.756	0.000284	0.0005678	0.0002841	0.103	0.009	0.361	0.3522	0.5514	1.564	1.984	3.599	4.831	8.704	13.081	17.119	12.407	1.6247	0.433	0.102	0.0567	1.6237	1.3416	0.3056	0.1779	0.059	0.111	0.0675	0.0792	0.0544			0.922708	2.43804
22.8751	0.043	0.142	0.051	0.122	0	0.116	0.4428	0.8933	0.903	1.169	2.593	6.111	9.076	13.328	20.443	11.176	1.2104	0.575	0.121	0.1126	0.9743	0.94	0.2648	0.0903	0.252	0.099	0.1923	0.1899	0.0942			0.927537	2.47327
22.9943	0.014	0.068	0.001	0	0	0.196	0.334	0.6426	1.043	1.57	1.988	5.847	9.385	13.574	20.097	9.755	1.1301	0.239	0.301	0.1188	0.8515	0.6873	0.2227	0.0495	0.227	0.141	0.0246	0.1379	0.0769			0.93237	2.36972
23.1134	0.048	0	0.094	0.148	0.092	0.256	0.2066	0.7947	0.523	1.512	2.594	4.824	9.147	11.833	18.568	7.789	1.0397	0.239	0.227	0.2287	0.326	0.6725	0.3549	0.0041	0.312	0.108	0.1346	0.0702	0.1585			0.937199	2.14843
23.2325	0	0.054	0.117	0.01	0.153	0.115	0.2332	0.772	0.582	1.415	2.02	4.858	8.913	9.01	16.325	7.143	1.1251	0.335	0.176	0.0451	0.5218	0.6395	0.3639	0.0706	0.13	0.162	0.3055	0.1222	0.0918			0.942029	1.92444
23.3517	0.01	0.243	0	0	0.019	0.117	0.3485	0.4981	0.54	0.891	1.746	4.57	7.042	5.635	12.364	6.098	0.7472	0.15	0.063	0.193	0.8415	0.4299	0.0328	0.3531	0.451	0.207	0.1743	0.3562	0.1101			0.946862	1.5252
23.4708	0.095	0.024	0.047	0	0.0001857	0.2	0.2299	0.3971	0.563	0.458	1.583	3.19	5.667	3.924	9.214	5.329	0.4526	0.193	0.192	0.2508	0.4872	0.4914	0.053	0.3094	0.108	0.068	0.059	0.2006	0.0781			0.951691	1.16773
23.59	0.054	0.03	0.105	0.005	0.055	0.093	0.1075	0.3346	0.565	0.666	1.787	2.568	4.981	3.651	7.013	5.249	0.3958	0.346	0.062	0.0765	0.4164	0.5421	0.2542	0.0344	0.006	0.338	0.0515	0.0227	0.271			0.956525	1.03727
23.7091	0.051	0.062	0.058	0.073	0.057	0.026	0.1554	0.3642	0.477	0.374	1.384	2.063	3.519	2.605	4.579	2.956	0.5943	0.134	0.193	0.1675	0.1977	0.259	0.0649	0.0525	0.193	0.257	0.1619	0	0.0744			0.961354	0.729407
23.8283	0	0.019	0	0.01	0.046	0.055	0.251	0.0945	0.319	0.586	0.714	1.568	3.12	2.07	2.636	3.039	0.4115	0.015	0.079	0.392	0.565	0.4677	0.0985	0.0972	0.085	0.056	0.1288	0	0.009			0.966187	0.583869
23.9474	0	0.062	0	0.096	0.051	0.145	0.1804	0.2239	0.353	0.475	0.767	1.238	2.359	1.644	3.297	2.443	0.6856	0.163	0.047	0.0639	0.0523	0.3301	0.2265	0.0082	0.14	0.161	0.0172	0.0437	0.1871			0.971016	0.5331
24.0665	0	0.077	0.048	0.014	0.009	0.05	0.0619	0.0796	0.105	0.13	0.483	1.077	2.414	1.037	2.415	2.414	0.4582	0.202	0.046	0.0163	0.0992	0.1894	0.1476	0.1869	0.062	0.103	0.1687	0.2978	0.1713			0.975846	0.433203
24.1857	0.051	0	0.057	0.054	0.048	0.015	0.0536	0.1513	0.178	0.358	0.562	1.203	1.711	0.784	1.903	1.48	0.3012	0.159	0.103	0.0725	0.2537	0.1712	0.2109	0.217	0.11	0.019	0.063	0.1715	0.0011			0.980679	0.360759
24.3048	0.002	0	0	0.046	0.051	0.1	0.344	0.3127	0.151	0.337	0.344	0.823	1.345	0.659	1.874	1.401	0.1648	0.152	0.008	0.0978	0.1554	0.3019	0.075	0.0695	0.049	0.01	0.1057	0.1114	0.0546			0.985508	0.315338
24.424	0	0.046	0	0	0	0.099	0.0255	0.3165	0.151	0.375	0.217	0.741	0.927	0.559	1.623	0.968	0.0608	0.057	0.049	0.0598	0.0601	0.2593	0.0982	0.0015	0.106	0.051	0.0972	0.0122	0.0699			0.990341	0.242414
24.5431	0.001	0.007	0.054	0.043	0	0.004	0.1457	0.2085	0.165	0.219	0.249	0.719	1.2	0.714	0.927	1.065	0.4376	0.143	0.01	0.1488	0.0496	0.1276	0.0496	0.1574	0.084	0.054	0.0628	0.0476	0.0535			0.995171	0.246438
24.6622	0.052	0	0.143	0.009	0	0	0.0608	0.1829	0.166	0.191	0.255	0.349	0.743	0.737	0.807	1.021	0.4789	0.189	0.097	0.1236	0.2136	0.1195	0.0061	0.1045	0.001	0.066	0.2934	0.0061	0.1267			1	0.22559

## Sheet: Image28
X0	Y0	Y1	Y2	Y3	Y4	Y5	Y6	Y7	Y8	Y9	Y10	Y11	Y12	Y13	Y14	Y15	Y16	Y17	Y18	Y19	Y20	Y21			Ap-Basal to 1	Average intensities
0	15.2695	18.0178	9.2893	8.386	9.0956	19.73	23.77	29.4939	27.1977	19.8825	19.7799	24.2113	40.447	42.393	44.134	18.397	26.126	24.601	30.925	23.402	20.3335	12.9786			0	23.0846
0.1191	15.2872	21.8009	10.5886	8.169	9.9824	19.958	23.213	33.7419	25.7095	24.4286	23.5528	24.2742	41.247	46.829	48.656	18.257	30.077	26.109	30.275	25.254	19.6094	13.8775			0.0047377	24.5862
0.2383	15.7681	26.9777	11.878	10.6899	13.2466	21.251	23.35	36.5806	25.6855	25.1222	26.5942	24.6436	44.474	53.01	50.098	17.874	37.493	26.395	31.593	26.452	17.9626	14.3396			0.00947937	26.4308
0.3574	17.0926	30.0962	14.7938	12.537	15.2261	21.716	27.975	42.5878	28.0673	25.08	30.3645	24.7588	49.872	55.219	52.075	19.808	42.633	29.934	29.275	26.708	17.2371	14.6585			0.0142171	28.5325
0.4766	19.3851	37.002	20.1966	14.2705	15.7578	26.626	30.651	42.5077	31.5273	28.8546	36.1405	29.1738	52.341	63.852	56.402	23.142	45.506	30.064	28.979	28.853	18.0126	16.2749			0.0189587	31.6145
0.5957	26.1057	40.5836	26.4343	17.2578	16.7615	30.57	34.022	44.4513	32.8138	32.6181	41.5599	32.7964	54.535	68.823	61.462	27.701	55.621	34.55	29.604	32.726	19.2404	15.0212			0.0236964	35.239
0.7148	30.6738	46.0334	32.4463	19.6349	16.982	40.607	36.673	45.4361	33.7077	36.5514	41.8899	34.9272	55.693	68.787	67.817	28.206	61.297	39.835	29.131	37.661	22.2743	14.6163			0.0284341	38.2218
0.834	36.3943	51.1863	40.28	23.3181	18.3799	53.317	42.42	48.9264	35.7708	41.5693	46.4015	43.165	55.547	74.101	78.254	33.561	66.429	47.025	30.327	42.232	22.6482	13.6428			0.0331758	42.9498
0.9531	42.4121	56.1346	47.5206	25.3696	20.4891	64.22	47.17	51.4712	38.6722	47.952	50.228	46.2695	62.151	79.808	88.143	40.198	70.353	51.894	31.936	50.586	27.3249	14.2363			0.0379135	47.9336
1.0723	50.4076	60.2779	55.0135	30.4912	21.7971	78.871	58.992	60.0154	43.9635	54.807	56.1844	48.1973	64.483	84.24	103.864	47.534	76.023	58.531	35.739	61.073	32.7927	14.6105			0.0426552	54.4504
1.1914	56.3864	62.0561	56.2599	33.6388	23.5969	89.22	75.345	67.4547	52.3543	57.6488	58.8655	54.9927	66.82	94.771	109.255	54.586	79.96	69.07	36.503	74.243	39.2811	15.1529			0.0473929	60.3391
1.3106	58.3139	59.5733	58.012	37.5515	24.0105	103.845	83.137	73.7806	54.7243	65.3155	65.4017	57.9924	74.32	104.715	118.162	60.972	83.54	74.938	38.246	84.881	47.4434	14.5074			0.0521345	65.6083
1.4297	63.3439	56.4606	57.674	43.395	25.663	116.104	92.721	80.0672	59.8676	69.949	68.5591	58.7087	77.998	113.721	123.049	68.44	88.078	78.417	43.651	96.241	56.6849	15.3822			0.0568722	70.6443
1.5488	59.9942	48.3604	54.1254	43.3447	29.9013	113.109	101.942	83.8057	63.9013	73.4616	68.0504	59.0812	87.824	123.835	130.85	81.885	93.24	83.606	49.157	110.939	63.1068	17.2154			0.0616099	74.5789
1.668	50.5195	40.0833	52.998	45.8083	30.2616	109.433	106.609	84.7838	67.889	69.6119	70.6897	63.6731	94.778	130.63	141.773	82.433	98.388	90.114	57.227	114.455	71.696	17.1802			0.0663516	76.8652
1.7871	43.5903	35.8199	45.867	44.4932	32.0205	99.411	106.849	86.0333	74.5713	74.1641	70.5795	63.8909	101.42	143.564	151.715	93.078	98.089	95.117	65.846	121.807	79.1035	17.4781			0.0710893	79.2958
1.9063	38.3338	27.9237	37.5977	42.9009	33.9266	78.477	95.091	84.0505	72.431	78.9118	65.8846	61.3693	107.963	151.754	150.664	95.409	101.441	99.43	76.147	122.776	81.3503	19.5411			0.075831	78.3351
2.0254	32.2742	20.5371	27.6796	41.4684	34.7213	58.647	84.283	77.5411	69.8501	73.0374	63.6886	60.6913	113.998	155.266	151.748	102.242	105.745	106.415	78.642	131.695	90.7802	19.4263			0.0805687	77.2898
2.1445	22.9251	16.5786	22.814	39.4582	42.7557	42.879	70.366	70.0599	67.4314	72.5828	61.2552	57.42	116.323	171.992	147.647	102.483	104.209	106.748	88.563	130.649	93.1694	20.453			0.0853064	75.8528
2.2637	18.2441	12.5219	19.6549	35.4602	48.6608	34.034	56.501	57.6982	64.6596	62.1491	58.6195	57.0329	115.691	175.424	148.093	101.209	107.997	108.643	94.709	130.672	95.0169	22.5841			0.0900481	73.8761
2.3828	14.325	11.5012	15.5399	32.3409	51.9845	24.667	46.024	49.466	56.5431	59.897	55.1211	55.2934	124.015	179.478	147.869	95.085	105.309	113.442	97.861	130.708	95.2103	24.0499			0.0947857	72.0787
2.502	12.1822	9.8237	13.5907	28.0924	57.1844	17.797	39.578	40.2376	51.2102	51.5957	48.3031	53.6502	122.961	179.863	143.801	77.621	99.527	117.856	99.875	123.519	95.4758	27.0906			0.0995274	68.6743
2.6211	11.2038	7.1708	12.7781	23.3861	58.5463	14.868	34.919	32.9258	45.5045	46.0963	43.4152	49.612	122.078	184.18	129.887	62.802	96.435	121.322	104.63	113.921	90.3419	31.2786			0.104265	65.3319
2.7402	9.0119	6.2129	9.7222	20.3486	61.5131	13.062	29.425	27.0346	39.0251	42.9182	37.9351	49.7032	123.247	179.068	115.021	46.674	92.723	122.268	111.406	104.589	82.6361	28.0098			0.109003	61.4343
2.8594	7.0863	4.9994	7.8963	18.5206	65.4586	11.912	23.989	23.8069	31.4549	35.8403	32.044	50.1451	124.057	168.56	95.125	32.513	85.268	121.93	113.185	89.581	76.0581	26.2251			0.113744	56.6207
2.9785	6.9325	5.7483	7.5666	15.4301	65.9759	9.51	20.033	19.2511	27.8935	32.9491	29.9353	48.498	126.626	167.178	75.308	29.908	77.954	128.654	110.884	78.471	70.4735	22.5687			0.118482	53.534
3.0977	5.4162	5.069	6.8839	14.5087	62.2667	9.461	16.956	17.7887	21.0182	29.4406	26.3038	48.8363	123.633	153.236	53.905	26.747	73.19	128.623	106.352	64.786	56.6006	17.6266			0.123224	48.5749
3.2168	4.8954	4.8596	6.3801	11.7754	55.1906	7.951	15.973	15.8304	17.8752	25.1503	24.7965	45.3502	122.06	134.383	35.204	24.24	66.044	126.258	103.226	52.999	48.0493	17.1986			0.127962	43.895
3.336	4.6615	4.4655	5.3909	12.685	46.2115	7.206	14.011	14.4139	15.6037	22.1581	23.0613	44.0749	112.115	117.71	23.99	23.657	47.614	124.958	99.229	40.944	41.6089	15.5042			0.132703	39.1488
3.4551	3.2656	4.2854	5.3637	11.6317	39.204	5.37	11.969	13.5473	13.1415	19.9865	22.5298	41.713	93.294	98.078	17.05	22.35	31.749	123.446	96.824	32.694	31.0339	14.0999			0.137441	34.2103
3.5742	3.6301	4.1735	4.4506	10.7086	30.1846	4.815	11.251	13.783	13.076	18.7361	22.1326	38.2935	78.769	80.174	13.308	21.253	25.19	115.782	93.699	27.929	24.0769	13.3445			0.142179	30.3982
3.6934	3.9458	3.5879	4.5283	9.8518	27.8334	4.454	9.265	13.5644	12.2288	17.2076	20.522	39.0276	60.474	62.587	11.936	19.784	22.094	103.684	84.166	27.971	18.9505	14.4879			0.14692	26.916
3.8125	3.5507	3.5655	3.7197	10.1118	21.5526	4.484	10.661	11.4632	10.0376	13.2713	20.3635	33.8763	44.934	42.436	8.683	19.341	25.527	94.935	72.255	25.184	18.5783	15.1502			0.151658	23.3491
3.9317	3.3904	3.9659	4.2284	8.0994	19.0801	4.593	9.261	11.1616	10.0518	11.0773	18.2774	29.5164	35.758	31.588	8.714	18.182	25.928	87.764	60.832	22.311	14.9842	13.9936			0.1564	20.5799
4.0508	2.8754	3.6756	4.1457	7.1125	17.2084	3.568	9.116	9.3195	10.5585	12.8116	15.5496	27.025	28.363	27.86	7.168	17.988	26.21	76.245	48.294	18.522	13.1935	11.8193			0.161137	18.1195
4.1699	3.1586	3.5094	4.064	6.3107	14.642	3.864	8.982	7.7015	9.0215	11.6163	14.5065	23.1522	22.898	24.325	6.641	16.045	23.343	69.789	35.372	16.092	11.8531	12.1389			0.165875	15.8648
4.2891	2.9593	3.6066	4.0679	6.3175	11.3956	3.739	6.858	7.7251	8.075	11.3025	14.0705	20.1772	18.873	19.191	5.057	15.292	22.244	65.353	23.798	13.366	11.7366	10.3914			0.170617	13.8907
4.4082	2.8972	3.1047	4.0427	7.0843	10.8133	3.934	7.087	6.6564	8.4899	10.0726	11.8879	18.0541	14.784	18.4	4.397	13.065	19.527	55.781	17.35	12.23	10.208	10.5714			0.175354	12.2926
4.5274	2.6421	3.0017	3.7021	5.3301	10.1545	3.021	6.537	6.9195	7.5744	8.9389	9.9975	16.5963	14.124	15.626	3.787	14.024	15.931	48.461	15.924	11.663	9.2113	9.0921			0.180096	11.0118
4.6465	2.6819	2.793	3.9501	5.8087	9.4829	3.309	6.662	6.0821	6.8371	8.4964	8.6566	14.1115	12.927	14.064	3.675	12.451	15.242	39.246	12.688	9.274	8.1297	8.3431			0.184834	9.76869
4.7657	3.8481	2.1737	4.6234	5.5749	7.2645	3.226	5.777	5.9223	7.3285	6.6781	7.5383	12.6637	11.766	11.518	2.738	12.357	13.069	30.222	10.896	9.293	6.9234	8.8882			0.189575	8.6495
4.8848	3.2255	2.8443	3.4039	5.4457	7.517	2.548	5.546	6.3434	7.2021	6.1293	7.4956	10.3912	10.677	10.069	2.574	11.251	11.998	26.356	10.756	10.414	7.7217	10.111			0.194313	8.18271
5.0039	2.253	2.7555	2.6709	5.7052	6.5131	2.836	5.378	6.8533	7.7959	6.2002	6.7793	11.1048	11.6	9.468	3.173	10.679	9.808	23.878	9.055	9.247	7.307	9.8065			0.199051	7.76667
5.1231	2.5659	2.5322	3.067	5.847	5.9439	2.759	4.969	5.9415	6.6605	6.0994	6.2919	9.2563	10.104	9.671	3.124	10.159	7.847	21.447	8.698	8.547	6.9673	9.0767			0.203793	7.16248
5.2422	2.4729	2.3464	3.0664	5.8196	7.0547	3.114	4.109	6.0329	5.563	6.2942	6.4652	8.0506	8.605	8.479	2.503	10.113	7.583	20.41	7.666	7.76	6.8113	9.9184			0.20853	6.82898
5.3614	2.6973	2.0446	2.9496	6.6025	4.6089	3.086	4.984	5.6491	6.3979	5.4044	4.8519	7.451	9.091	7.508	2.624	9.201	6.696	19.898	7.581	8.54	5.7048	9.2227			0.213272	6.49062
5.4805	2.2437	2.4309	2.6565	7.3602	4.6397	2.891	4.39	5.3772	5.6003	6.2117	5.0864	7.8267	8.703	8.342	2.293	7.833	8.196	16.768	7.466	6.956	6.1494	9.2207			0.21801	6.30188
5.5996	2.187	2.3201	2.2289	7.5421	4.9537	2.59	4.421	4.9363	5.3645	5.6499	4.2262	7.8586	8.654	8.865	2.321	6.797	9.151	15.447	7.056	4.704	5.8625	7.73			0.222747	5.94845
5.7188	1.9379	2.2247	2.6703	7.0033	5.1808	2.207	3.928	4.5424	4.7319	4.4751	4.5574	7.6455	7.453	8.553	2.353	6.898	7.72	12.921	7.21	3.95	4.2007	8.3087			0.227489	5.48508
5.8379	2.0177	2.2268	2.339	6.2181	4.4288	1.697	3.84	4.651	4.9122	4.2057	3.7087	7.3454	7.485	7.719	2.784	6.667	6.454	11.06	7.376	4.223	4.8871	7.6343			0.232227	5.17635
5.9571	1.6055	2.0321	2.1901	6.131	4.3325	2.177	3.463	5.0004	3.6035	4.2999	3.7222	8.2816	6.978	6.69	2.001	5.706	5.889	10.141	7.477	3.77	4.2433	8.1027			0.236968	4.90167
6.0762	1.6388	2.1404	2.8804	5.2732	4.9779	2.253	2.619	4.3653	3.7466	3.8048	3.7275	7.0976	5.615	4.769	2.376	5.279	6.139	9.567	6.083	3.94	3.6279	6.7333			0.241706	4.48426
6.1953	1.649	2.4329	3.0674	5.703	6.3676	2.041	2.688	4.6217	3.6001	3.6087	3.1262	6.6353	5.573	2.692	2.229	5.992	6.005	8.859	6.557	4.473	2.9282	6.0499			0.246444	4.4045
6.3145	2.021	2.0148	2.3521	5.3492	5.8872	1.584	2.406	3.9373	3.1857	2.7597	2.8621	6.7352	4.695	2.362	1.922	5.433	6.447	8.571	5.914	4.183	2.7501	6.0858			0.251185	4.06624
6.4336	1.5946	1.8539	2.5218	5.8989	6.216	1.982	2.383	3.9573	3.2697	3.5432	2.9886	5.195	4.815	2.27	2.153	4.865	6.286	7.18	5.619	3.255	3.1077	5.7286			0.255923	3.94015
6.5528	1.8269	1.4628	2.3794	5.8232	5.1501	1.934	2.045	4.6319	3.0834	2.9336	2.8101	5.55	4.339	2.364	1.931	4.477	7.134	6.883	5.515	2.999	2.3132	5.0085			0.260665	3.75428
6.6719	1.9178	1.491	2.5333	5.8171	3.9726	2.028	2.253	4.5443	3.1507	2.633	3.1292	6.7107	4.077	2.35	2.184	4.563	6.24	6.921	5.56	2.958	2.4471	4.1088			0.265402	3.70862
6.7911	1.6574	1.4269	3.0554	6.8948	3.625	1.721	1.498	5.521	2.3096	2.8042	2.8972	6.3426	4.107	1.882	2.323	5.039	6.823	6.627	6.39	3.594	2.7594	3.9657			0.270144	3.78469
6.9102	1.7839	1.5406	3.0132	7.911	2.9667	1.573	1.862	5.0322	2.5621	2.537	2.1205	6.2702	4.188	2.617	2.479	3.924	7.05	6.328	6.168	3.513	3.0091	4.3265			0.274882	3.7625
7.0293	2.1302	1.8635	3.1536	9.0206	3.981	1.65	2.13	4.645	2.5094	2.6277	2.1584	6.2074	4.481	2.114	2.224	4.458	7.383	7.042	5.753	2.549	2.9443	4.1346			0.27962	3.8709
7.1485	2.0218	2.2296	3.1113	10.4962	3.666	1.633	2.365	4.8959	2.7198	1.9199	2.4358	5.3226	4.556	1.749	2.498	4.19	6.952	8.212	4.886	2.981	2.8827	3.6368			0.284361	3.88002
7.2676	1.4537	1.7529	3.0258	15.715	3.0176	1.342	1.86	5.8503	2.1887	2.2983	3.1019	7.7884	4.133	1.94	2.326	4.45	6.84	5.897	4.715	3.117	2.5061	3.7035			0.289099	4.04646
7.3868	1.6035	1.4822	3.3048	17.1174	3.4268	1.711	2.116	6.0537	2.5972	2.367	3.1704	7.1461	3.911	2.059	2.212	4.117	6.843	6.072	4.176	3.319	3.4271	2.7994			0.293841	4.1378
7.5059	1.7223	1.4528	3.86	19.9431	3.3963	1.687	1.894	6.4057	2.6282	1.9633	2.5945	7.0705	4.83	2.394	1.975	3.733	6.731	5.792	4.335	3.283	3.1712	3.0035			0.298578	4.26661
7.625	1.7858	1.5988	5.457	20.271	3.3659	1.726	1.4	7.6745	3.2095	1.657	2.8492	6.8986	5.257	2.272	2.361	3.543	7.336	6.136	3.976	3.472	3.0757	3.2535			0.303316	4.4807
7.7442	1.517	1.5248	7.3129	20.7301	2.6245	1.615	1.447	8.1455	2.6954	1.9941	2.4917	7.0557	4.612	1.547	2.39	4.148	7.803	6.124	3.993	3.638	2.8265	3.4743			0.308058	4.53225
7.8633	1.1887	1.4724	8.0895	19.8449	2.45	1.764	1.43	9.0302	2.2381	1.4909	2.7017	6.9257	4.783	1.927	1.632	4.673	8.563	6.476	4.554	3.098	3.0918	3.0229			0.312795	4.56576
7.9825	1.5682	1.2634	7.8889	19.823	2.4835	2.218	1.932	11.7147	2.006	1.4941	2.0754	6.2659	5.101	2.199	2.232	4.937	7.599	5.751	4.603	2.977	2.6971	3.0906			0.317537	4.63272
8.1016	1.4006	1.2748	7.2716	18.6109	2.6219	1.634	1.551	13.4196	2.3169	1.6216	2.0292	6.103	4.882	1.837	2.033	4.725	9.112	6.089	3.586	3.286	2.3618	2.7694			0.322275	4.56983
8.2207	1.2458	2.0507	5.4083	20.1812	2.3102	1.645	1.831	14.334	2.6658	1.6605	2.1414	5.4706	4.74	2.118	2.11	5.068	10.501	5.843	3.974	3.537	2.4648	2.8279			0.327012	4.7331
8.3399	1.3139	1.6432	5.0629	20.5412	2.2647	1.719	1.922	15.7729	2.4758	1.5114	2.5104	6.3276	4.353	2.371	1.995	5.372	12.427	5.674	4.955	3.027	2.6479	2.2651			0.331754	4.916
8.459	1.3742	1.2535	4.7546	21.0516	2.4553	1.706	1.862	19.0874	2.0623	1.6756	1.9665	6.0779	4.242	2.352	1.982	6.196	13.749	6.776	4.981	3.343	2.3047	2.7602			0.336492	5.1824
8.5782	1.1771	1.1914	4.5135	21.3027	1.9188	1.317	1.886	20.0292	2.1504	1.834	1.6161	6.8104	4.961	2.283	2.208	5.983	16.663	6.915	5.624	3.377	2.7451	2.9143			0.341233	5.42818
8.6973	1.294	1.4813	4.874	19.8575	1.982	1.459	1.758	22.8915	2.3063	2.0819	2.2385	6.4907	4.359	2.208	2.465	6.814	22.07	7.456	5.621	3.41	2.4901	2.2634			0.345971	5.81233
8.8165	1.3607	1.7022	5.1976	19.7209	2.5807	1.606	1.744	26.4556	2.2343	1.8069	2.0531	5.803	4.523	2.293	2.227	6.813	21.755	7.417	5.928	3.058	2.3464	2.7975			0.350713	5.97377
8.9356	1.8809	1.1913	5.8612	16.9119	1.9258	1.65	1.976	26.1481	2.6079	1.8376	2.1789	6.1076	4.758	2.305	2.589	6.388	23.257	6.983	5.62	2.793	2.6415	2.7788			0.355451	5.92684
9.0547	2.1974	1.534	6.5831	16.276	1.6921	1.911	2.02	28.2584	2.3101	2.1367	2.0804	6.6743	4.779	2.082	2.141	6.604	22.602	6.799	6.085	3.505	2.8075	2.7916			0.360188	6.08498
9.1739	2.0025	1.5451	6.9824	14.7223	2.0881	2.259	1.709	27.1037	2.207	2.0312	2.6922	5.7913	4.53	2.687	2.249	5.899	24.66	7.188	6.705	3.584	2.652	2.8661			0.36493	6.0979
9.293	2.2475	1.8173	7.2261	11.4639	2.2716	1.464	1.851	25.8653	1.9982	2.0097	2.5152	5.7256	4.529	1.864	2.116	5.965	26.944	7.357	6.402	3.508	2.4324	2.2476			0.369668	5.90093
9.4122	1.6603	1.9184	8.4028	9.9095	1.7488	1.694	1.94	26.0035	2.4407	1.9173	2.6583	5.57	4.51	3.065	2.604	5.221	26.447	7.092	6.06	3.656	2.7051	2.4349			0.374409	5.89357
9.5313	1.8671	1.6077	8.6616	8.6626	2.0791	1.896	2.228	25.4897	2.5909	1.6899	2.5849	6.9423	3.622	2.319	1.686	5.341	28.261	7.134	5.944	2.682	2.0741	2.2583			0.379147	5.80096
9.6504	1.7318	2.2452	8.9651	9.106	2.6259	2.091	1.745	26.2609	3.1598	1.672	2.4506	7.0548	4.577	2.22	1.755	5.83	29.674	6.421	7.658	3.503	2.497	2.3616			0.383885	6.16385
9.7696	1.8695	1.8908	10.4379	7.711	2.0995	1.681	1.925	28.2605	2.5523	1.8939	3.0847	5.9835	4.364	2.613	2.113	5.537	30.782	6.688	7.768	3.143	2.7748	2.4866			0.388626	6.25723
9.8887	1.9813	2.2214	10.3264	8.1789	1.9908	1.915	1.873	32.4793	2.8977	1.9858	2.8131	7.0821	3.892	2.271	2.697	5.3	33.469	7.772	9.369	2.872	2.3897	2.419			0.393364	6.73616
10.0079	1.7429	2.3549	10.1675	8.1531	1.6609	1.809	2.271	34.1359	3.276	2.4205	3.5812	6.5563	5.3	2.155	2.377	4.997	32.923	7.31	9.922	2.99	2.349	2.2606			0.398106	6.85058
10.127	2.2001	2.7154	13.7425	7.5662	1.871	2.09	2.158	32.6185	2.5256	1.8749	2.7513	7.7116	5.874	2.359	2.472	4.09	31.955	8.09	11.05	2.916	2.8156	2.0493			0.402843	6.97709
10.2462	2.6345	2.4889	15.037	6.9652	2.4688	2.095	2.366	28.0069	1.8889	2.0027	2.936	7.4803	6.629	2.62	2.069	3.919	32.578	8.504	11.315	3.385	2.5422	2.3298			0.407585	6.92096
10.3653	3.1232	2.7307	14.6929	5.8681	1.9652	1.825	1.665	24.3962	2.4734	2.2031	3.5819	8.2885	7.822	2.457	1.782	4.088	29.698	9.823	11.49	2.929	2.2156	2.2922			0.412323	6.70045
10.4844	2.8155	3.0169	13.7245	4.3783	1.5531	1.874	2.215	21.0767	2.2673	2.5902	3.9943	8.6616	8.453	2.171	1.915	3.724	27.47	9.72	11.744	3.014	2.1745	2.384			0.41706	6.40622
10.6036	2.2828	3.21	14.6662	3.4785	1.9559	1.691	1.924	21.9738	2.9702	1.8413	3.6419	8.8313	8.853	2.304	1.917	3.223	27.719	11.948	11.812	3.512	2.4063	2.218			0.421802	6.56269
10.7227	2.5406	3.0293	13.4778	4.4131	1.4255	2.049	1.791	21.0954	2.5102	1.7881	3.6233	8.8933	8.95	2.29	2.324	2.792	22.995	15.94	12.508	2.986	2.3414	2.138			0.42654	6.45005
10.8419	2.8118	3.0423	11.8911	4.1764	1.5846	2.115	2.035	20.6872	2.5311	2.353	3.6475	10.0265	8.934	2.281	2.427	3.232	22.112	19.214	10.061	3.414	2.6196	2.9356			0.431282	6.55144
10.961	2.5194	2.6908	9.3018	4.2123	1.7516	1.811	2.238	22.481	2.5395	2.1442	3.8616	11.0489	8.046	2.206	2.499	2.949	21.708	22.004	10.144	3.199	2.1786	2.1064			0.436019	6.5291
11.0801	2.7333	2.8902	9.9278	4.099	1.7765	1.71	1.759	22.2773	2.5715	2.8464	4.4765	11.9684	6.922	2.02	2.479	3.596	20.569	24.254	10.054	2.996	2.3747	2.5573			0.440757	6.67536
11.1993	2.8831	2.9634	9.4759	3.9332	1.6423	1.626	2.049	20.0701	2.2707	2.8609	4.0364	12.9524	7.975	1.64	2.444	3.831	20.185	26.057	10.872	3.181	2.1321	2.2193			0.445499	6.69545
11.3184	3.0671	2.5033	9.4215	3.5607	1.4781	1.682	2.252	18.4408	2.4658	3.0239	3.7597	13.3757	7.68	1.924	2.219	3.231	18.498	28.188	11.738	2.99	1.7428	1.9073			0.450236	6.59767
11.4376	3.8804	2.7143	8.8753	3.6693	1.6069	1.674	2.663	19.0074	2.9259	2.7438	4.8016	13.8038	7.619	2.19	2.382	2.88	16.841	29.274	12.482	2.978	1.6392	1.881			0.454978	6.75145
11.5567	2.7568	3.3083	9.0727	4.3531	1.8827	1.546	1.971	18.7664	2.9343	2.6789	5.0036	12.6615	8.426	2.798	2.585	3.039	13.784	30.546	13.495	3.204	2.2626	2.325			0.459716	6.7909
11.6758	2.6129	3.4467	9.6821	4.4349	1.7495	1.55	2.193	18.2115	2.2457	2.8478	4.5258	12.1572	8.499	2.556	2.443	2.902	11.628	30.381	12.732	3.414	2.5706	2.7271			0.464453	6.61408
11.795	2.9935	3.2746	9.5583	4.3778	1.4846	1.604	2.547	19.6151	3.1022	3.2305	5.0505	14.3221	8.725	2.436	2.183	3.021	9.824	28.118	13.992	3.078	2.3624	2.2898			0.469195	6.69043
11.9141	3.7331	3.5223	7.8171	4.0879	1.5008	1.878	2.374	22.3084	3.0154	3.035	6.123	12.6148	9.013	2.307	2.377	3.3	10.409	29.345	14.233	3.245	2.5024	1.8973			0.473933	6.8472
12.0333	3.1828	4.0233	7.6098	3.8015	2.2435	1.936	2.691	22.3918	2.7886	3.8843	6.3423	14.2497	9.867	2.16	2.193	2.843	9.252	32.562	13.977	3.665	2.1051	2.1754			0.478674	7.08837
12.1524	3.2023	4.1288	8.3576	3.4916	1.6267	1.676	2.436	23.9114	2.8833	4.3429	6.3356	14.6836	9.222	2.368	2.403	2.938	7.319	36.516	15.21	3.244	1.84	2.3811			0.483412	7.29622
12.2716	2.817	3.9547	8.3502	3.3404	1.8648	1.848	2.296	25.4788	2.9212	4.7414	6.1224	15.7713	9.897	2.209	2.075	3.034	6.431	37.052	15.208	3.277	1.9654	2.2364			0.488154	7.40414
12.3907	4.3204	4.2411	7.7675	2.6377	2.0676	2.291	2.506	25.0859	2.5753	3.6888	7.0257	15.5244	9.98	2.491	1.932	2.745	6.097	36.732	14.578	3.462	1.877	2.0371			0.492891	7.3483
12.5098	3.989	4.5189	8.0123	2.4254	1.942	1.572	2.605	23.9445	2.9886	3.947	7.2265	15.0958	9.842	2.459	2.605	3.211	5.669	37.256	14.335	4.254	1.5295	2.0461			0.497629	7.33971
12.629	3.5768	4.5853	8.3968	2.834	1.6978	2.096	2.201	23.208	2.3202	3.2892	7.1464	15.4475	8.925	2.556	2.206	3.011	5.323	36.987	13.217	2.871	1.8686	2.2519			0.502371	7.09161
12.7481	4.2822	4.5176	10.0338	3.0601	1.6678	2.114	1.99	23.1746	2.7565	5.0409	6.7228	13.989	10.45	2.058	1.902	2.393	5.29	34.493	11.812	2.965	1.8025	2.3713			0.507109	7.04028
12.8673	4.6973	4.6915	9.5347	3.1556	1.5775	1.697	2.452	23.795	3.0443	3.8561	6.872	14.6683	10.396	2.674	2.226	2.45	5.681	32.345	11.84	2.978	1.9591	2.1643			0.51185	7.0343
12.9864	4.8117	5.3169	9.3989	2.7316	1.5434	1.484	2.951	23.9674	2.4538	3.1801	5.9895	17.2025	8.381	2.092	1.96	2.438	5.186	32.404	11.762	3.467	2.043	2.4865			0.516588	6.96592
13.1055	5.0826	5.102	8.5565	3.1219	2.2649	1.579	2.515	24.4011	2.4422	3.2128	5.5042	18.4116	7.959	1.832	2.349	2.369	4.752	31.927	11.958	3.714	1.9484	1.4871			0.521326	6.93133
13.2247	5.0281	4.8896	8.8645	2.8982	1.9633	1.595	2.433	24.2381	2.6582	3.8699	6.7393	16.8703	7.618	2.439	2.202	2.414	4.536	37.315	11.257	2.996	2.2375	1.5423			0.526067	7.11838
13.3438	5.412	6.0097	9.4016	2.6578	1.3109	1.937	2.579	24.4868	2.1704	3.3368	6.2641	17.952	6.98	2.429	2.328	3.073	4.277	35.026	11.728	2.624	2.1676	1.6243			0.530805	7.08068
13.463	5.329	6.4097	9.7075	2.6147	1.3524	2.032	2.544	24.9117	2.3514	3.3114	5.9851	19.6425	5.968	2.205	2.471	2.803	4.769	33.917	11.94	3.171	2.938	2.0177			0.535547	7.1996
13.5821	5.3891	7.5486	9.4424	2.5572	1.8581	1.588	2.707	22.1414	2.2658	3.8229	5.9524	17.5805	5.845	1.636	1.874	2.784	4.419	33.542	12.696	3.17	2.2599	2.096			0.540284	6.96251
13.7012	5.5875	6.9832	9.7977	1.732	2.0833	1.694	2.551	18.5142	2.9935	3.9918	5.5634	16.2354	6.671	1.571	1.628	2.175	4.352	30.688	14.286	3.75	1.9739	1.5977			0.545022	6.65544
13.8204	6.2839	7.4048	9.3667	2.1079	1.6379	1.914	2.173	18.1789	2.3964	4.2851	6.1708	16.4275	6.365	1.706	2.138	2.493	4.154	32.23	14.898	3.291	2.3262	1.9147			0.549764	6.81195
13.9395	6.0099	8.3774	7.4451	2.0289	1.5359	2.108	2.186	18.7874	2.7774	3.7843	6.5121	15.4118	5.648	2.502	1.93	2.204	3.958	29.806	15.446	3.305	2.409	1.97			0.554501	6.64283
14.0587	7.4305	8.1103	6.8973	2.4426	1.5101	2.558	2.609	18.4177	2.7893	3.1828	4.9149	15.7194	6.407	2.736	2.229	2.384	3.649	28.158	16.423	3.33	2.0733	1.4368			0.559243	6.60945
14.1778	8.4928	8.4737	9.0898	1.9438	1.4624	1.684	2.961	19.2719	2.2243	3.7073	4.9428	17.6047	6.724	2.924	2.785	2.285	3.486	25.489	17.719	3.118	2.0177	1.6253			0.563981	6.81961
14.297	8.1804	9.5792	10.184	2.1428	1.3987	1.659	2.423	17.1594	2.4113	3.1831	5.3782	20.3466	6.188	2.661	2.141	2.418	3.246	25.256	19.517	3.194	2.4246	1.8489			0.568722	6.95183
14.4161	8.9553	12.1158	10.539	1.7847	1.3561	2.073	2.736	17.6835	1.9806	2.9556	4.9734	19.2643	4.989	2.276	2.269	1.676	4.131	26.025	19.388	2.785	2.1945	2.1245			0.57346	7.01251
14.5352	8.4684	13.25	8.4217	1.9874	1.6863	1.597	2.196	16.7692	2.7105	3.1083	5.2864	19.846	4.888	2.426	2.001	1.706	3.268	25.304	22.543	4.464	2.4135	1.917			0.578198	7.10262
14.6544	8.4208	14.6109	6.8846	2.1645	1.4114	1.377	2.366	16.988	2.4506	3.084	4.7234	20.5535	4.496	1.995	2.176	2.021	3.365	24.544	24.136	4.059	2.3649	1.8811			0.58294	7.09421
14.7735	9.0751	16.0415	6.5876	1.8677	1.4801	1.766	2.596	16.5487	2.3376	3.3846	4.4902	19.7811	5.838	1.966	1.963	1.517	3.077	24.605	27.889	3.592	2.1789	1.5779			0.587677	7.28
14.8927	8.3941	17.4406	5.5537	2.0296	1.699	1.836	2.758	15.2214	2.6007	3.4586	4.1831	20.081	5.667	1.906	2.142	2.048	2.559	24.538	32.345	3.608	2.2371	1.5458			0.592419	7.4478
15.0118	7.7387	19.9197	6.2409	2.2522	1.5989	1.793	2.882	16.5494	2.4039	2.991	4.2933	20.858	5.015	2.396	2.323	2.266	3.332	24.849	33.38	4.418	2.0414	2.3037			0.597157	7.81114
15.1309	7.6698	19.5068	6.6707	2.1823	1.5657	2.164	2.844	16.4283	2.7977	2.9876	4.1978	19.4869	5.525	1.943	2.04	1.949	2.907	25.333	36.27	4.064	2.321	2.0786			0.601894	7.86055
15.2501	7.8529	20.8182	5.8557	1.5424	1.2439	1.641	2.834	16.7422	2.5258	2.7835	5.1665	20.0162	5.027	1.696	1.949	1.859	2.904	24.916	35.347	3.539	2.3647	1.9173			0.606636	7.75188
15.3692	8.6715	23.1302	7.8107	2.0859	1.7799	1.519	2.121	15.7273	2.7151	3.182	6.0817	23.8526	4.925	1.929	1.437	2.164	2.757	23.884	36.624	4.194	1.9221	2.2151			0.611374	8.21491
15.4884	8.7501	25.0135	8.307	1.8918	2.0087	1.665	2.461	15.4373	2.926	3.3319	4.8729	24.2164	5.305	2.296	1.501	2.389	2.509	21.926	37.754	4.07	2.1727	2.0266			0.616115	8.3105
15.6075	8.5301	28.3972	8.2414	1.7024	1.561	1.953	3.03	14.1457	2.6687	3.0966	5.0656	26.4662	5.459	2.654	1.693	2.023	2.525	21.849	38.689	4.267	2.7715	1.8476			0.620853	8.57436
15.7266	8.4782	26.7393	7.4918	1.7193	1.6296	1.76	2.951	13.1687	2.4725	3.0908	5.1991	25.3722	4.693	2.43	2.02	2.128	3.481	18.298	36.736	4.44	2.5635	1.6904			0.625591	8.11602
15.8458	7.708	28.8313	8.2788	1.6917	1.7563	1.634	2.465	13.5628	2.3448	2.9158	4.7368	26.0218	4.492	2.24	2.261	2.225	2.907	15.772	34.586	4.336	2.2046	1.8696			0.630332	7.94729
15.9649	8.9143	30.9046	8.3788	1.8552	1.8127	1.741	3.525	14.339	1.9752	2.8437	4.8107	25.3026	4.742	1.948	2.205	1.676	2.622	15.2	31.6	4.89	2.5884	2.6784			0.63507	8.02512
16.0841	8.2758	34.7589	7.4104	2.0439	1.5057	1.935	3.066	11.7192	2.1735	3.4063	5.1968	24.051	4.426	2.034	2.095	2.19	2.542	12.726	33.423	4.453	2.4222	2.1824			0.639812	7.91073
16.2032	7.7858	40.3636	7.2304	2.4343	1.4999	2.014	2.71	11.1258	2.5916	3.5328	5.05	25.4415	4.989	2.323	1.739	2.341	2.661	9.689	33.884	4.612	2.7522	1.9569			0.644549	8.12395
16.3224	9.8443	42.9837	8.1055	2.1096	1.7529	1.98	3.496	12.285	2.1121	3.0625	5.0581	25.1865	4.383	2.663	1.858	2.205	2.596	8.685	35.464	5.167	2.65	2.3364			0.649291	8.4538
16.4415	9.6616	46.0212	7.2438	2.0968	1.6446	1.557	4.273	12.6374	2.4793	3.0869	5.9631	25.605	4.36	1.813	1.82	1.966	2.515	8.231	31.95	5.872	3.0389	2.1538			0.654029	8.45406
16.5606	9.697	45.7796	6.7297	1.7904	1.8108	1.975	5.603	13.5423	2.7525	3.5618	6.0608	23.7207	4.583	2.115	1.823	2.046	2.238	7.29	34.732	5.8	3.379	1.9378			0.658767	8.58943
16.6798	12.4177	46.2733	7.7923	1.7956	1.7817	1.86	6.643	13.3764	3.0925	3.5077	4.9996	24.5973	4.616	2.261	1.849	1.992	1.718	7.21	35.532	4.904	3.2544	1.8419			0.663508	8.78706
16.7989	11.9984	48.9204	6.8762	1.9196	1.3985	2.051	7.359	13.806	2.3267	3.6313	4.5252	24.1088	4.57	2.114	1.849	1.906	2.112	8.253	37.15	5.624	3.8588	2.1384			0.668246	9.02256
16.9181	13.6726	49.2347	6.839	2.0877	1.6423	2.362	8.422	14.3691	2.7209	3.8676	5.2463	24.3564	4.701	2.538	2.123	2.477	2.313	6.998	38.651	6.061	3.118	2.3648			0.672988	9.37115
17.0372	16.0458	48.8645	6.9491	2.069	1.3986	2.363	7.478	14.2894	2.5289	2.931	5.2795	22.9937	4.084	2.263	1.826	1.677	2.494	7.494	40.361	5.516	3.2819	1.8009			0.677725	9.2722
17.1563	18.7935	45.0174	7.1171	2.1097	1.6886	2	6.714	15.1448	2.7841	3.1619	4.5993	22.2921	3.706	2.219	2.267	1.411	1.872	6.558	41.933	5.983	4.2081	1.9484			0.682463	9.25127
17.2755	23.2351	41.9161	6.528	1.9903	1.6011	2.721	7.425	14.002	2.659	4.0034	3.8502	20.5116	4.57	2.415	2.345	1.863	1.849	6.824	44.56	6.528	3.8123	2.276			0.687205	9.43114
17.3946	25.5456	40.2863	6.7889	1.7707	1.6742	2.509	8.489	12.6373	2.7902	3.4269	4.0734	18.3248	5.034	2.365	1.79	2.299	2.253	6.667	45.055	7.314	3.8959	2.3913			0.691942	9.42639
17.5138	27.5431	40.612	7.5899	1.8594	1.9576	2.559	8.592	12.5535	2.7372	4.0738	4.1803	18.4738	5.231	2.683	1.846	2.041	2.553	5.695	45.966	7.35	3.7319	1.7062			0.696684	9.61521
17.6329	31.3277	43.941	7.1057	2.145	1.6383	2.372	7.997	11.9806	3.0089	3.222	4.8073	17.3848	4.624	2.565	1.986	2.858	2.433	6.139	49.526	7.634	3.4944	1.9079			0.701422	10.0044
17.7521	32.6632	51.4826	7.8895	2.4948	1.7915	2.045	10.282	10.6469	2.8519	2.9432	4.395	17.1632	4.552	2.439	2.01	1.976	2.052	5.222	56.141	8.793	3.5846	2.2599			0.706163	10.7126
17.8712	35.4244	53.395	7.6773	2.6134	1.4384	2.151	11.269	11.2128	2.5059	2.934	4.0009	14.8663	4.174	2.085	2.239	1.823	2.312	6.263	57.531	9.48	3.5623	2.4602			0.710901	10.9735
17.9903	33.9983	57.6044	8.4113	2.314	1.965	2.273	13.402	10.8308	2.5107	2.8129	4.5396	15.5998	4.693	1.938	2.061	1.708	2.372	5.662	57.691	10.256	2.9652	2.2798			0.715639	11.2676
18.1095	32.8569	54.8702	7.7289	2.5734	2.1192	1.781	12.675	10.5568	2.9442	3.1286	4.0266	17.5616	5.384	2.33	2.174	1.735	2.395	5.562	59.831	11.886	3.2494	2.3005			0.72038	11.3486
18.2286	27.3706	50.4054	8.7465	3.2343	1.8019	2.547	14.911	11.014	3.2837	2.4756	3.8825	17.223	5.086	2.096	2.263	1.886	2.473	5.581	58.357	12.986	2.9952	2.4888			0.725118	11.0503
18.3478	23.405	41.337	8.9795	2.3867	1.7587	2.011	15.845	10.1986	2.4882	2.6447	4.34	18.2555	4.749	1.555	2.056	1.709	1.955	5.395	57.74	14.556	2.4456	2.387			0.72986	10.3726
18.4669	17.6245	33.1824	12.2377	2.9363	1.8642	2.556	17.537	11.3611	3.365	3.0481	5.0188	17.3494	5.352	1.964	1.67	2.086	2.138	5.259	57.507	16.02	2.6623	3.173			0.734598	10.2687
18.586	11.6348	23.487	13.813	2.9344	1.5816	2.544	16.359	10.4156	3.0115	3.5343	4.4978	18.8189	4.939	2.107	2.358	1.82	1.704	6.494	56.514	18.066	3.2254	3.9427			0.739335	9.71827
18.7052	7.2834	14.151	17.4714	3.5104	1.6642	1.697	18.62	10.1379	3.5858	3.3951	3.6985	20.1609	5.316	2.466	2.021	1.999	1.948	6.426	53.368	21.126	3.0552	4.2589			0.744077	9.42544
18.8243	5.6712	9.1684	20.4355	3.3537	1.963	1.967	20.807	9.5389	3.6877	3.2511	4.6119	19.9062	4.498	2.478	2.009	1.642	2.378	5.791	51.565	26.189	2.6259	5.1669			0.748815	9.48656
18.9435	3.9053	5.3852	22.153	3.4774	1.9744	2.628	22.933	9.8154	3.9347	3.1365	4.463	20.4891	4.533	2.071	2.09	1.79	2.442	5.134	47.737	31.955	2.798	6.0021			0.753556	9.58396
19.0626	3.1348	3.0432	22.3754	3.1531	1.9682	2.857	25.011	10.3804	3.6724	2.8813	3.6919	21.7488	4.454	1.918	2.026	1.523	1.677	5.281	42.943	31.856	2.705	6.382			0.758294	9.30375
19.1817	1.9062	2.1012	19.8122	4.0976	2.0767	3.464	23.715	10.8638	3.6526	4.1036	3.5055	19.6455	4.33	1.889	1.886	1.539	1.835	5.591	39.859	33.92	3.2779	8.9588			0.763032	9.18316
19.3009	1.3342	1.8487	16.0683	3.9942	2.6376	3.739	22.981	10.4653	4.0044	4.1167	4.0058	18.4154	4.472	2.051	1.626	2.141	1.842	6.147	36.663	33.031	3.3728	12.8744			0.767773	8.99231
19.42	1.0111	1.2753	13.3066	3.9259	2.3018	3.838	23.868	10.3566	4.6954	3.2602	4.0821	18.6906	3.801	1.612	1.718	1.896	2.333	5.753	35.195	28.279	3.5415	13.8645			0.772511	8.57294
19.5392	0.7928	0.9734	8.7269	4.734	2.1501	5.322	21.223	9.861	6.1979	3.5111	4.0342	21.1443	3.701	1.981	1.959	2.571	2.478	6.785	32.915	24.702	3.1875	15.3412			0.777253	8.37688
19.6583	0.6854	0.3981	7.1372	4.8818	2.1005	6.805	22.18	11.8145	8.669	4.7582	4.4313	22.1488	4.002	2.158	2.011	2.045	2.662	5.977	27.811	21.496	3.8212	15.5337			0.78199	8.34212
19.7775	0.466	0.3255	5.5706	5.0433	1.8513	7.736	22.752	12.4258	11.2229	4.1613	4.1699	24.0096	4.24	2.318	1.743	1.872	2.519	6.629	24.753	18.571	3.9129	16.7672			0.786732	8.32088
19.8966	0.2329	0.2788	3.483	5.0403	2.1844	8.842	23.478	13.6492	12.5475	5.0666	4.3502	24.1605	3.528	1.563	1.922	2.167	2.438	7.289	22.81	18.791	3.2566	18.3095			0.79147	8.4267
20.0157	0.1215	0.2505	2.9483	5.7903	3.2046	11.309	23.929	16.3793	15.1419	6.168	4.8297	24.6493	4.581	1.803	1.763	1.932	2.49	6.371	22.131	16.247	3.938	20.0555			0.796207	8.91059
20.1349	0.1929	0.2588	2.6472	6.6779	3.2327	13.514	24.594	15.1215	19.0644	7.1785	4.9279	25.3044	4.259	1.657	1.631	2.459	2.389	6.99	20.535	14.802	4.0636	20.9073			0.800949	9.20032
20.254	0.0862	0.2597	2.3697	5.6973	3.0787	16.743	28.382	14.8522	20.2947	7.1577	4.5577	24.7021	4.174	1.975	2.194	2.076	3.001	7.489	23.322	14.128	5.4931	23.3614			0.805687	9.79066
20.3732	0.0978	0.1351	2.5505	6.2154	4.1764	17.785	33.11	14.0799	19.5795	7.9625	5.1103	24.2718	4.067	2.056	1.715	2.368	2.639	9.375	22.725	12.738	5.794	24.3177			0.810429	10.1304
20.4923	0.0345	0.2552	2.8172	6.0992	3.8887	22.112	36.369	11.9599	17.7473	11.2365	6.0643	24.0046	4.727	2.253	1.589	2.856	2.438	10.989	21.027	11.678	7.3477	23.3066			0.815166	10.4909
20.6114	0.0149	0.1288	2.5234	7.1293	4.8468	26.124	36.194	12.5801	14.7655	12.8974	6.9053	25.8566	4.23	1.975	2.155	2.082	3.063	10.844	20.618	11.192	7.8591	20.4213			0.819904	10.6548
20.7306	0.0748	0.2487	2.6079	7.5872	5.3932	25.21	37.956	12.2619	9.7932	15.9971	6.7129	25.6175	4.812	1.881	1.979	2.29	2.615	10.603	19.944	8.844	10.0677	19.8243			0.824646	10.56
20.8497	0.1019	0.1089	2.2752	8.5256	6.5924	26.795	36.194	12.8224	7.5967	18.5432	7.4322	27.0874	4.936	1.742	1.586	3.08	3.178	10.585	18.246	8.105	13.2701	17.8783			0.829383	10.7582
20.9689	0.0189	0.0517	2.1643	11.2508	8.9972	26.707	32.468	9.3732	5.1645	21.682	7.3032	25.651	5.198	1.934	2.271	3.808	3.577	9.713	17.771	7.543	14.8597	20.2476			0.834125	10.807
21.088	0.0791	0.2136	1.6085	14.0917	11.2268	23.654	24.528	7.6501	2.7379	25.057	7.7468	26.7185	4.839	1.699	2.135	3.677	3.134	9.661	17.327	6.208	16.0697	17.3864			0.838863	10.3385
21.2071	0.0788	0.1915	1.36	15.1486	14.6448	18.083	17.739	6.0198	1.552	25.1381	9.5672	25.8984	4.232	1.726	2.401	3.694	3.2	10.406	17.208	4.768	18.1166	15.0105			0.8436	9.82651
21.3263	0	0.0118	1.3323	21.56	17.6795	12.659	13.735	4.0224	1.4417	23.7717	10.5031	27.5698	4.668	1.744	1.711	4.369	3.714	10.402	16.113	4.398	18.3638	13.9623			0.848342	9.71506
21.4454	0.0346	0.0651	1.224	24.2337	22.1987	8.472	8.437	2.6516	0.9615	20.9681	13.1918	30.0356	4.719	1.608	2.831	4.921	3.687	11.32	13.296	3.703	18.64	11.6765			0.85308	9.49433
21.5646	0.0181	0.11	1.0833	29.0776	24.2028	5.888	6.501	2.2225	1.0363	18.0342	13.2772	30.2073	4.917	1.732	2.519	6.876	3.857	11.022	10.665	3.048	18.8692	9.0257			0.857821	9.28133
21.6837	0.0302	0.0598	1.0221	35.8648	27.6607	3.426	3.897	1.0937	0.6896	17.6756	16.4076	31.8498	4.656	1.83	2.408	8.7	3.63	11.108	8.391	2.555	20.011	6.5335			0.862559	9.5227
21.8029	0.1011	0.0406	0.6372	42.2849	27.4197	2.149	2.87	0.6693	0.5974	15.6676	18.4323	30.6608	5.625	2.098	2.877	10.771	3.764	11.573	7.843	2.532	20.7224	5.9023			0.867301	9.78353
21.922	0.0652	0.0703	0.5363	42.2033	25.562	1.49	1.96	0.5089	0.3873	14.2313	18.5771	30.2297	5.123	2.038	3.384	15.223	4.654	10.148	6.799	2.208	17.9743	4.2584			0.872038	9.43778
22.0411	0.0342	0.011	0.4472	36.1951	21.8728	0.878	1.152	0.3546	0.5093	10.7182	22.5958	29.569	4.311	1.963	3.227	19.225	5.154	12.709	5.492	1.827	14.8262	3.3305			0.876776	8.92736
22.1603	0.0422	0	0.2489	30.9633	17.0116	0.691	0.883	0.4619	0.3218	7.7467	24.2889	31.7574	4.465	2.306	4.134	21.765	5.329	13.604	4.264	1.322	11.7733	2.8316			0.881518	8.46412
22.2794	0.0278	0	0.1958	21.3197	10.9762	0.58	0.551	0.2404	0.3222	5.0806	23.177	31.7652	4.927	2.466	5.341	19.703	6.023	14.41	4.225	1.363	9.6739	2.3065			0.886256	7.4852
22.3986	0.0391	0	0.1125	13.4018	6.3956	0.339	0.738	0.309	0.418	2.8843	21.6341	32.672	5.232	2.704	6.688	15.831	7.52	14.24	3.479	1.298	7.857	1.9523			0.890997	6.62476
22.5177	0.02	0	0.0647	8.861	3.2413	0.265	0.428	0.3879	0.2245	1.7177	19.7463	36.7896	6.22	2.74	9.406	11.721	9.081	14.218	3.104	1.016	5.9788	2.2385			0.895735	6.2486
22.6368	0.0625	0	0.0906	5.5295	1.8247	0.323	0.453	0.5217	0.1863	1.0302	16.8383	35.897	8.926	2.044	13.216	7.087	7.785	12.778	2.644	0.817	4.9403	1.7425			0.900473	5.66985
22.756	0.2246	0.0098	0.0207	2.8535	1.1043	0.153	0.292	0.2967	0.1788	0.8809	13.6304	34.4104	9.979	1.926	17.551	5.25	8.01	13.744	2.536	0.636	3.8349	1.2604			0.905214	5.3992
22.8751	0.0625	0.0703	0.0233	1.4926	0.6979	0.032	0.328	0.1068	0.2537	0.4132	10.0596	28.5076	13.496	2.065	21.639	3.189	7.754	12.3	1.649	0.947	4.1037	1.4251			0.909952	5.02797
22.9943	0.1998	0.058	0.0551	0.9075	0.4559	0.0004413	0.24	0.1162	0.245	0.4983	6.9456	25.6526	14.982	2.567	25.505	2.412	7.68	12.49	1.776	0.746	3.2213	1.2663			0.914694	4.91
23.1134	0.1146	0.0198	0.1287	0.3288	0.2215	0.129	0.119	0.0613	0.0617	0.4488	4.445	21.4941	17.319	2.805	26.305	1.903	6.614	13.097	1.459	0.568	2.3178	1.0588			0.919431	4.59177
23.2325	0	0	0.0939	0.3359	0.2473	0.06	0.046	0.1823	0.1121	0.3565	2.5793	16.9448	18.984	2.767	24.788	2.01	5.424	10.806	1.038	0.491	2.2951	1.3477			0.924169	4.13222
23.3517	0	0	0.0423	0.401	0.2705	0.215	0.191	0.1722	0.0433	0.4257	1.4483	12.8293	21.495	3.649	19.744	1.7	5.169	9.932	1.176	0.381	1.6468	1.0535			0.928911	3.72659
23.4708	0.0373	0.035	0	0.152	0.3534	0.221	0.321	0.0884	0.0233	0.6536	1.1249	9.6409	24.066	3.846	13.246	1.381	5.433	9.282	0.85	0.553	1.4006	0.8183			0.933648	3.34212
23.59	0.0111	0.1227	0	0.1641	0.1451	0.12	0.338	0.1532	0.1403	0.2253	1.1251	6.6198	23.994	4.732	8.886	0.956	4.961	7.592	0.838	0.559	1.3275	1.0709			0.93839	2.91278
23.7091	0	0.0645	0.0306	0.3299	0.2307	0.048	0.247	0.022	0.2426	0.2052	0.69	4.1472	22.416	5.398	6.473	1.266	3.779	6.276	1.047	0.577	1.4352	0.5957			0.943128	2.52366
23.8283	0.0741	0.0407	0.0927	0.262	0.2039	0.129	0.165	0.1786	0.1442	0.2215	0.4882	2.3275	21.063	7.274	3.639	1.214	3.964	4.699	1.099	0.645	0.7242	0.6306			0.947869	2.23996
23.9474	0.1605	0.0252	0.022	0.2768	0.0971	0.134	0.188	0.0279	0.2162	0.2436	0.3946	1.3413	21.054	8.792	3.067	0.734	3.149	3.626	0.795	0.486	0.842	0.9403			0.952607	2.11875
24.0665	0.1247	0.0801	0	0.2337	0.1514	0.03	0.062	0.0963	0.1464	0.213	0.2622	1.3193	22.658	10.32	2.362	0.697	2.852	2.815	1.023	0.41	0.8745	0.671			0.957345	2.15462
24.1857	0.0401	0.0388	0	0.0096	0.1648	0.028	0.029	0.0834	0.0265	0.0293	0.1873	1.0079	23.697	12.487	1.827	1.103	2.699	1.665	0.893	0.491	0.9474	0.8898			0.962086	2.19745
24.3048	0.0217	0.0738	0.0657	0.0499	0.1283	0.019	0.049	0.0113	0	0.0306	0.3029	0.966	24.613	17.112	1.636	0.787	2.696	1.715	0.747	0.302	0.5063	0.6449			0.966824	2.38534
24.424	0.0307	0.0453	0.1449	0.1026	0.1267	0.071	0.096	0.0495	0.0316	0.0856	0.2677	0.9492	24.207	21.718	1.397	0.942	1.693	1.49	0.765	0.076	0.6089	0.5355			0.971566	2.51969
24.5431	0.1287	0	0.008	0.1428	0.0921	0.05	0.107	0.0496	0.0653	0.0821	0.2619	0.6856	26.8	25.145	1.2	0.588	1.481	1.281	0.98	0.333	0.3665	0.5268			0.976304	2.74429
24.6622	1.959e-05	0.0479	0.0446	0.0181	0	0.063	0.142	0.0034	0.0084	0.0887	0.1998	0.4335	22.869	29.909	0.931	0.379	1.478	1.038	0.604	0.387	0.3677	0.4702			0.981041	2.70374
24.7814	0	0.0573	0	0.0003	0.0646	0.042	0.027	0	0.0652	0.0778	0.3234	0.3917	20.42	29.616	0.578	0.456	0.76	0.846	0.536	0.349	0.5688	0.2387			0.985783	2.51899
24.9005	0	0.05	0.0426	0.1018	0.1751	0.096	0	0.0535	0.0562	0.083	0.2746	0.5492	18.136	25.877	0.612	0.473	0.62	0.987	0.486	0.361	0.5674	0.5621			0.990521	2.28016
25.0197	0	0.0199	0.1345	0.1084	0.0974	0.128	0.183	0.0518	0.087	0.2458	0.1021	0.185	17.304	24.181	0.57	0.478	0.717	0.621	0.577	0.318	0.3907	0.4152			0.995262	2.13249
25.1388	0.0038	0	0.1256	0	0.0587	0.027	0.118	0.0177	0.0021	0.172	0.0371	0.2719	14.444	21.306	0.486	0.469	0.492	0.865	0.303	0.224	0.254	0.1932			1	1.81228

## Sheet: Image27
X0	Y0	Y1	Y2	Y3	Y4	Y5	Y6	Y7	Y8	Y9	Y10	Y11	Y12	Y13	Y14	Y15	Y16	Y17	Y18	Y19	Y20	Y21	Y22	Y23	Y24	Y25	Y26	Y27	Y28	Y29	Y30	Y31	Y32	Y33	Y34	Y35	Y36	Y37	Y38	Y39			Ap-Basal to 1	Average intensities
0	18.368	15.079	29.263	33.368	37.132	53	24.816	45.026	44.684	61.211	61	68.211	37.632	25.658	38.184	35.947	18.737	24.289	21.553	16.684	13.763	19.684	19.158	20.132	35.1316	19.7895	30.6579	22.0263	14.553	16.474	12.158	28.342	9.711	11.763	15.342	29.026	21.342	41.526	36.316	20.684			0	28.6855
0.1191	18.237	16.026	34.447	39.526	39.658	51.868	26.421	46.421	50.026	69.921	66.263	66.237	38.868	25.921	42.132	45.5	19.5	27.421	24.421	20.395	15.526	20.553	22.289	23.553	34.8421	18.4474	36	22.0263	13.474	17.553	14.579	31.184	10.053	11.184	17.789	30.105	24.237	53.553	37.342	21.053			0.00452332	31.1138
0.2383	23.974	19	36.211	41.105	41.553	56.526	26.158	50.289	53.342	78.816	75.289	67.263	43.868	29.132	52.395	47.684	19.5	30.684	24.711	19.5	20.684	26.079	26.553	28.816	34.7105	25.2105	46.5789	25.2105	16.474	20.421	16.263	33.553	10.026	14.868	19.947	32	27.053	72.526	39.5	29.105			0.00905044	35.0645
0.3574	26.026	25.868	39.5	47.184	43.395	60.132	27.421	59.526	61.842	88.132	79.342	67.079	48	33.605	53.632	56.921	21.895	34.316	27.921	20.184	25.079	27.632	31.026	38.789	35.9737	27.7368	56.6842	27.0263	19.395	25.605	16.184	37.211	11.053	17	21.526	36.895	30.5	81.868	39.553	34.316			0.0135738	39.0743
0.4766	33.053	31.474	47.237	47.868	43.421	64.658	29.289	65.526	68.105	102.421	87.105	68.605	52.579	37.711	58.842	60.816	22.711	34.921	28.974	24.105	27.553	34.579	38.895	48.526	36.1053	35.3158	55.7632	29.8684	23.447	34.684	17.763	35.553	13.289	20.763	30.132	35.921	34.105	100.763	41.158	39.211			0.0181009	43.5704
0.5957	45.211	37.658	49.079	50.632	47.868	63.184	32.105	78.553	73.658	114.342	95.158	71.447	57.895	38.974	65.816	63.711	24.763	42.474	34.553	29.395	34.368	44.553	42.895	54.184	39.3684	43.0526	56.8158	36.6316	27.526	40.711	19.368	36.474	14.105	26.105	38.263	46.263	42.421	111.605	43.158	44.789			0.0226242	48.9783
0.7148	47.921	46.026	55.763	54.632	50.526	69.842	37.5	88.5	77.474	123.132	98.816	73.737	63.684	44.237	70.079	67.632	30.605	48.237	38.421	33.526	42.211	52.553	48.553	62.474	40.2368	53.6842	65.8684	39.7895	37.553	49.974	23.947	42.684	17.658	34.342	56.184	51.605	51.342	114.211	47.289	55.632			0.0271475	55.202
0.834	58.974	56.526	61.868	63.316	55.684	74.316	43.816	94.816	82.553	120.816	101.789	68.947	69.816	48.053	71.342	72.658	35.974	50.132	51.5	40.632	55.868	66.684	58.105	72.553	36.3947	60.8947	64.8421	47.9474	43.237	63.737	31.421	48.947	24.658	43	70.342	59.053	59.368	122.632	50.289	68.684			0.0316747	61.8046
0.9531	68.026	66.289	73.158	74.342	64.895	69.026	54.316	102.658	87.842	128.579	105.053	70.895	76.342	52.921	71.211	81.447	39.605	57.816	63.184	55.5	65.474	81.158	65.526	84.684	42.0789	66.9211	69.9737	52.7368	53.763	74.895	41.842	55.921	30.184	58.842	87.737	69.763	61.342	127.974	52.526	85.711			0.036198	69.8039
1.0723	68.368	76.605	86.079	91.763	68.632	75.211	68.105	107.132	94.553	126.289	109.947	77.289	86.5	53.263	67.947	91.342	47.605	60.158	76.684	60.868	80.763	91.684	69.368	92.211	41.8421	79.0263	72.8684	56.7632	62.026	86.026	59.105	62.053	37.342	70.211	100.605	78.842	69.026	125.237	58.184	102.289			0.0407251	77.2453
1.1914	77.053	84.921	95.237	94.921	70.632	74.5	73.184	111.263	100.553	118.947	107.105	81.079	93.895	62.632	69.421	94.053	49.868	65.763	87.579	72.632	85.474	99.342	83.053	96.526	42.4474	79.3421	70.0789	64.8947	69.105	91.974	81.5	72.711	51.921	87.526	102.974	96.658	77.632	126.974	61.974	108.079			0.0452484	83.3856
1.3106	84.237	99.974	102.395	97.5	74.842	77.263	78.974	117.895	97.526	115.421	105.132	88.132	95.684	61.395	69.658	98.5	59.211	75.868	99.368	85.474	95.447	103.421	93.395	109.605	43.0789	79.1579	71.3684	70.6842	75.5	100.789	98.895	90.289	66.947	98.711	106.895	101.895	80.316	113.947	73.868	112.368			0.0497755	89.2757
1.4297	95.132	111.579	106.947	94.737	84.368	78.526	83.289	118.842	99.395	114.737	100.079	92.5	98.816	72.921	71.553	96.526	73.105	86.474	116.289	95.816	104.026	108.711	98.474	110.316	49.8947	81.9211	75.7895	72.8158	77.263	106.474	120.211	102.947	81.053	106.632	109.395	106.947	93.553	107.658	83.263	119.921			0.0542989	95.2224
1.5488	103.974	120.5	110.921	95.053	92.737	80.368	91.868	117.789	102.816	103.368	96.368	105	99.5	73.842	76.842	106.553	84.053	97.737	121.868	107.184	121.658	108.789	107.474	110	55.1053	80.1316	80.1316	77.3684	87.211	114.079	131.684	118.526	92.526	105.447	98.842	110.368	103.211	100.632	88.816	123.895			0.0588222	100.106
1.668	110.184	131.342	116.974	104.316	92.737	85.632	96.526	126.079	110.184	98.658	93.421	103.737	103.737	80.632	82.658	107.263	95.421	102.789	130.395	117.053	129.868	114.553	113.316	104.474	55.7368	75.7895	76.8684	83.1842	96.5	109.474	130.842	125.684	98.526	114.053	93.632	100.526	115.079	95.289	97.447	123.132			0.0633493	103.593
1.7871	116.342	145.526	120.737	99.816	97.658	90.316	100.711	123.895	100.947	92.132	91.947	111.026	105.553	86.105	90.658	109.921	110.526	109.263	136.026	131.447	133.368	103.974	117.947	96.053	63.2105	78.7105	77.4737	80.5526	97.105	113.895	131.868	137.816	107.368	102.053	80	101.316	119.895	92.105	99.789	122.526			0.0678726	105.689
1.9063	118.316	149.868	128.289	109.711	93.079	90.763	109.553	115.711	103	85	88.105	108.579	100.421	95.184	100.684	110.316	113.158	117	144.974	135.526	124.921	94.395	111.921	86.684	67.3421	77.9737	73.1842	79.6053	100.711	101.079	127.553	141.711	106.921	97.658	69.053	95.895	122.368	89.053	102.579	116.237			0.0723998	105.102
2.0254	122.421	150.5	129	109.474	96.263	93.316	117.947	113.395	98.026	85.158	88.237	104.237	104.553	100.632	106.658	121.026	122.342	125.316	133.158	137.974	115.526	80	112.237	75.842	75.6053	81.9211	68.1053	77.8947	93.711	89.289	115.895	146.895	113.789	91.816	67.316	94.132	106.816	88.895	105.579	104			0.0769231	104.122
2.1445	126.553	151.553	124.447	117.816	98.158	95.684	114.474	108.816	92.079	81.658	86.868	103.421	98.605	107.5	109.763	120.342	123.421	122.316	124.342	136.105	94	74	104.263	62.974	80.6579	83.5	65.8947	72.1842	85.816	74.526	103.158	135.763	115.526	77.658	60.605	83.763	98.447	81.395	112.789	89.211			0.0814464	100.001
2.2637	122.105	154.053	129.211	117.868	91.158	98.842	107.158	106.079	89.211	84.579	86.711	95.974	89.921	123.737	113.421	125.737	122.5	129.763	108.711	112.289	67.711	57.763	95.474	55.211	76.1579	84.7632	67.5	66.4211	74.211	58.316	89.026	114.079	115.263	66.763	55.211	76.447	92.684	89.842	119.447	73.605			0.0859735	95.1231
2.3828	125.658	143.553	129.5	113.947	87.132	101.421	97.763	96.763	87.079	80.237	84.842	87.289	85.421	124.237	113.632	119.737	117.921	132.368	94.289	98.579	47.5	53.895	84.711	51.526	81.3158	88.5	63.6842	54.8947	57.737	42.079	75.316	99.789	111.105	59.395	51.026	77.605	90.842	87.868	116.342	60.447			0.0904968	89.4236
2.502	128.711	141.342	134.526	116.526	88.368	99.921	82.079	85.316	86.053	77.132	82.553	76.316	85.342	132.053	119.947	110.316	108.842	134.974	73.895	71.632	32.316	41.947	80.737	50.395	77.7895	89.1316	65.9474	47.3158	48.658	28.974	63.079	72.632	94.263	46.526	40.737	70.211	79.895	85.789	114	46.421			0.095024	82.8152
2.6211	120.421	135.053	130.868	102.684	90.868	102.658	74.921	85.105	89.816	79.868	80.895	70.974	85.026	130.368	124.026	98.658	98.921	125.553	57.579	57.895	27.921	37.553	73.342	51.289	79.4211	84.3421	68.6053	45.7368	42.289	24.974	47.105	48.132	82.789	41	30.553	62.789	77.737	90.974	105.868	38.158			0.0995473	77.5684
2.7402	114.658	125.632	134.132	110.263	87.737	101.211	66.737	77.342	84.368	79.684	86.658	53.737	88.684	138.895	130.158	84.237	80.342	120.579	41.658	41.158	22.368	32.789	68.316	46.289	85.2895	84.8684	66.2105	34.0789	42.605	16.526	31.289	30.395	69.474	33.5	25.553	58.579	75.763	86.474	88.658	30.026			0.104071	71.923
2.8594	108.605	108.237	129.763	102.395	90.974	96.868	62.132	71.895	83.421	86.684	87.737	44.579	87.368	139.658	128.737	69.947	62.316	109.763	31.921	30.026	20.079	31.237	61.526	46.526	88.4474	84.8947	63.2368	27.7632	32.395	13.184	22.895	18.184	53.368	27.316	26.632	51.237	60.895	86.342	70.737	22.605			0.108598	66.0632
2.9785	108.289	105.342	128.447	99.053	101.553	87.053	57.895	66.526	80.684	92	81.105	36.789	91.026	135.895	124.237	52.868	48.105	89.105	26.947	24.132	19.316	30.053	50.079	40.421	80.7105	83.2105	61.4211	24.6842	23.605	11.763	16.263	9.184	43.053	24.868	23.816	48.421	59	80.263	57.342	17.237			0.113121	61.044
3.0977	104.868	96.263	127.158	92.684	93.684	77.684	54.263	65.737	71.447	86.842	80.342	30.579	88.158	130.947	114.895	40.816	40.132	80.237	23.895	18.842	19.632	29.211	47.342	41.184	77.7895	78	56.8684	17.8158	17.421	8.947	12.184	6.211	31.132	22.763	22.842	41.632	54.237	76.342	46.368	13.474			0.117648	56.0217
3.2168	105.184	88.395	130.368	89.868	98.632	68.132	51.105	68.763	73.105	87.684	68.947	27.263	89.868	124.447	104.789	31.553	35.158	61.263	19.711	17.447	14.974	25.658	46.211	39.132	74.8947	78.4474	53.7895	14.6316	15.974	6.105	10.632	4.605	22.421	19.132	18.763	35.895	47.553	79.632	33.737	9.342			0.122171	52.3303
3.336	100.263	85.447	129.342	86.263	90.947	62.053	48.368	64.658	70.316	85.816	61.158	31.632	85.632	119.132	88.947	25.342	26.842	46.658	17.579	14.132	12.658	28.763	43.053	38.789	64.7895	75.1842	45.0263	11.3947	11.053	5.079	9.553	2.789	18.447	17.553	18.395	31.763	41.605	78.263	26.737	6.474			0.126699	48.1974
3.4551	94.921	78.158	130.263	81.368	90.421	50.342	42.289	53.184	66	83.895	52.474	33.237	77.921	106.342	69.184	21.105	22.737	33.684	15.105	12.526	13.368	25.579	37.184	39	53.2105	68.6316	48.7105	9.5526	7.974	4.105	9	2.263	10.658	12.579	17.263	28.184	36.211	80.526	19.079	5.5			0.131222	43.5934
3.5742	91.079	75.737	124.342	82.632	84.579	39.658	39.105	43.316	59.053	69.789	46.132	46.684	66.632	82.842	60.789	16.5	19.263	26.921	13.579	12.395	10.816	23.632	35.105	35.526	50.6842	60.9474	45.1316	6.3421	5.289	4.316	7.184	2.316	7.921	10.947	18.316	25	31.789	80.605	12.947	4.263			0.135745	39.5026
3.6934	87.632	71.447	117.158	78.132	83.474	34.658	33.237	33.447	48.289	62.395	40.763	48.447	48.263	64.789	43.263	13.789	15.105	21.789	11.342	11.368	10.553	20.868	32.579	36.632	40.1579	54	43.6842	5.3684	3.737	3.211	5.526	1.526	5.5	9.526	15.368	23.816	30.395	86.921	9.737	4.026			0.140272	35.298
3.8125	80.053	70.737	114.237	75.289	83.711	28.579	27.789	22.605	37.053	50.632	39.132	49.526	33.737	49.395	28.579	10.947	13.605	21.263	10.895	10.184	10.816	19.737	34.026	31.342	35.6579	41.3947	38.7368	6.5789	3.158	2.526	6	1.447	4.737	7.474	14.184	22.211	25.447	91.289	6.605	2.974			0.144796	31.6072
3.9317	74.395	67.605	103.237	74.553	82.368	27.132	22.526	17.132	31.289	38.553	31.526	42.026	27.184	34.816	20.605	8.658	11.5	21.579	7.658	9.132	10.789	20.289	32.447	30.079	29.8421	33.1053	29.3947	6.1053	3.289	1.868	6.763	1.605	3.079	6.605	15.289	23.105	22.474	87.632	5.105	2.605			0.149323	28.1236
4.0508	66.947	64.026	99.105	69.421	76.842	22.579	18.947	10.263	23	28.974	28.579	36.026	21.447	23.921	17.368	7.921	10.368	20.105	7.842	8.158	9.447	18.974	28.658	27.895	28.0263	25.1579	21.8158	4.8158	1.395	1.868	5.447	1.368	3	6.395	15.026	18.737	19.816	81.395	3.842	2.053			0.153846	24.6743
4.1699	58.895	63.868	85.553	69.526	73.211	19.632	16.105	8.211	21.474	28.868	22.579	28.132	15.5	18.421	10.579	6.842	8.342	17.026	5.447	6.684	9.184	18.395	33.553	25.342	24.1842	20.2632	13.8684	4.9211	2.763	1.974	5.868	1.895	2.447	4.684	17.289	19.158	20.421	69.211	3.684	1.947			0.158369	22.1487
4.2891	53.289	61.053	75.868	62.184	61.737	17.368	16.289	7.868	17.237	28.026	20.5	25.026	13.632	12.026	9.421	5.421	8.974	16.132	4.632	7.263	8.974	15.132	32	18.974	19.4737	16.4474	7.7632	4.0789	1.868	2.132	5.526	1.737	2.5	3.658	20	15	18.447	65.447	2.921	2.289			0.162897	19.7079
4.4082	49.184	57.605	62.711	53.289	53.342	13.895	14.789	6.684	15.763	28.474	14.026	19.868	11.605	8.211	7.132	4.632	8.447	15.474	5.053	7.079	10.921	12.184	29.368	16.553	16.7632	15.6316	4.5526	3.4474	2.579	1.316	4.605	1.526	1.605	1.763	14.684	14.447	16.211	55.289	3	1.974			0.16742	17.1421
4.5274	40.184	48.289	58.026	46.974	43.895	12.316	13.211	5.737	12.737	24.237	9.605	16.895	11.5	5.342	7.737	3.316	7.368	16.5	4.921	6.526	10.632	9.895	26.711	13.368	12.1316	11.5	5.2895	3.2368	2.868	1.553	5.842	1.684	2.132	3.158	9.921	10.947	15.974	48.632	2.211	1.447			0.171947	14.8612
4.6465	36.895	47.605	51.947	41.816	34.842	9.079	16.316	5.079	10.421	19.842	9.026	16.184	11.737	4.605	5.895	3.316	6.421	16.789	5	6.053	12.947	7.263	19.816	11.579	10.5	12.5526	4.5789	2.9211	3	1.395	4.816	1.474	2.184	1.868	7.211	6.158	12.079	37.684	2.342	1.5			0.17647	13.0684
4.7657	32.132	45.605	46.184	35.632	26.921	7.395	15.026	6.395	8.447	20.026	6.526	12.105	12.158	2.947	5.5	3.184	5.895	17.079	5.079	6.289	10.921	7.342	17.237	9.184	7.6053	11.8158	4.5	2.6053	3.553	1.079	4.079	0.974	1.421	2	6.842	5.447	13.105	35.579	1.474	1.526			0.180997	11.7204
4.8848	29.237	39.105	39.579	35.211	21.921	6.421	14.684	5.447	8.868	12.895	4.684	9.184	14.132	3.184	4.842	2.316	5.421	15.421	4.579	5.263	9.632	4.289	12.474	8.211	6.5789	10.7632	5.5263	4.2632	3.263	1.658	4.921	1.421	1.368	1.842	6.605	4.816	11.105	32.605	1.632	1.447			0.185521	10.4204
5.0039	23.895	34.842	38.816	33.474	16.553	5.816	11.053	5	6.447	10.132	3.816	9.895	12.026	3	4.5	2.737	5.5	16.763	3.974	5.947	10.079	5.053	8.395	6.421	5.6053	11.6842	3.3421	4.3684	4.395	1.211	6.184	1.605	1.474	2.237	8.289	4.395	10.079	28.921	1.895	1.421			0.190044	9.531
5.1231	22.026	32.474	33.5	29.368	15.605	4.816	8.105	3.737	6.316	9.605	3.447	6.395	11.842	2.737	4.263	2.632	5.132	12.421	3.974	4.526	9.763	3.5	6.579	5.868	4.2632	9.2105	4.1579	4.5263	4.053	0.974	4.158	1.421	1.711	2.026	7.5	4.237	8.553	25.763	1.868	0.763			0.194571	8.3454
5.2422	19.237	29.737	28.711	30.026	13.553	3.947	6.763	4.026	5.053	8.289	3.421	5.632	10.816	1.842	2.947	2.211	6.132	9.053	3.474	4.553	8.342	2.132	4.895	6.053	4.9737	7.5526	3.2368	4.1579	4.447	0.947	4.737	1.789	1.684	1.342	8.579	3.316	6.395	26.289	1.158	1.105			0.199095	7.56385
5.3614	17.184	23.158	24.842	25.132	12.789	3.632	5.447	2.737	4.868	8.079	3	4.579	13.132	2.5	2.816	2.395	4.368	9.737	3.763	5.526	8.763	3.395	5.316	4.526	3.1842	5	3.2368	3.6579	3.553	1	6.211	1.632	0.763	1.395	8.026	3.132	5.237	24.684	1.395	1.053			0.203622	6.8711
5.4805	17.447	21.789	21.526	23.868	13.763	4.316	5	3.447	4.5	7.158	2.526	4.526	14.368	2.211	2.026	2.842	4.684	9.5	4.132	4.395	9.921	2.105	4.553	3.237	3.9474	3.6316	3.3158	4.1579	2.868	1.184	8.316	1.605	1.474	1.316	10.026	3.658	4.211	23.842	1.447	1.526			0.208145	6.75914
5.5996	14.605	19.211	20.053	24.474	12.053	3.579	3.553	2.737	4.711	6.526	2.816	3.395	11.658	2.105	2.974	2.474	4.737	6.868	3.789	5.263	10.184	1.895	4.368	3.368	2.1316	3.8684	3.8421	5.3421	3.395	1.605	11.158	2.026	1.289	1.289	11.211	2.868	2.921	21.579	1.395	1.5			0.212668	6.3704
5.7188	14.553	17.737	17.211	21.053	9.447	3.105	3.263	2.737	3.447	5.947	3.053	3.632	9.553	2.474	2.553	2.763	4.974	8.158	3.553	4.5	9.5	2.211	3.579	2.868	2.2368	4.3158	2.7105	4.7368	2.526	1.237	12.263	1.447	1.632	1.658	10.711	2.711	4.132	19.053	1.737	1.605			0.217195	5.91457
5.8379	15.316	15.263	13.132	20.921	10.395	2.711	2.711	1.842	3.842	5.342	3.132	3.158	12.132	2.816	2.211	2.132	4.421	6.711	4.553	4.842	8.684	2.789	3.789	2.526	2.4211	3.9474	3.9737	5.6053	3.368	1.263	17.474	1.605	1.079	1.342	12.684	2.316	3.132	18	1.289	1.342			0.221719	5.90531
5.9571	13	11.158	11.816	18.947	10.632	3.395	2.421	2.711	3.026	3.632	3.105	2.921	9.316	2.605	2.263	2.316	5.105	6.684	3.684	4.763	10.816	2.868	2.789	2.895	3.0263	4.0263	3.4737	5.7105	2.816	1.395	12.895	2.316	1	1.868	11.921	2.395	3.158	17.211	1.474	1.816			0.226246	5.48425
6.0762	12.842	10.5	9.211	17.763	8.868	3.421	2.053	2.658	3.395	4.579	2.895	2.579	10.053	2.447	2.211	2.105	3.974	5.974	4.763	4.579	11.579	1.816	2.395	2.632	3	3.7105	3.6316	6.3947	3.579	1.079	16.658	1.421	0.895	1	12.553	1.947	2	16.921	1.553	1.5			0.230769	5.32837
6.1953	10.763	9.289	8.895	16.474	9.158	3.579	1.895	1.921	2.132	4.237	3.368	2.737	9.447	2.237	2.158	2.474	4.579	3.763	6.395	3.237	11.632	2.079	2.789	2.132	2.3684	4.3684	3.6053	6.9737	5.395	1.842	16.947	1.658	1.289	1.184	13.711	1.579	2.526	15.316	1.5	1.553			0.235293	5.22965
6.3145	9.684	5.921	8.947	14.658	8.816	2.921	2.079	2.5	2.763	4.053	3.211	1.447	9.579	1.737	2.5	2.289	4.895	5.447	5.447	4.711	11.526	1.868	2.737	2.237	2.5263	3.9474	4.0526	7	5.974	1.395	19.842	1.895	1.263	1.447	17.816	1.237	1.921	13.658	1.079	1.395			0.23982	5.21053
6.4336	8.132	6	8.447	12.237	8.553	3.447	1.684	1.895	3.842	4.553	3.395	2.526	9.395	2.368	1.895	2.5	4.711	5.921	5.237	3.211	10.447	2.237	2.395	2.026	2.5526	3.2895	2.9211	6.4474	7.263	1.632	18.921	1.474	1.316	1.447	19.526	2.421	2.553	13.053	1.421	1.684			0.244343	5.12439
6.5528	7.105	5.053	7.316	9.368	7.342	3.421	2.053	1.947	3.158	3.684	3.053	2.289	9.474	1.816	1.474	2.237	4.737	6.053	5	3.605	8.105	2.316	3	2.079	2.0263	3.4211	3.3158	7.1316	9.395	1.316	18.947	2.421	1.026	1.289	23.053	1.553	2.184	11.868	1.395	1.711			0.24887	4.94344
6.6719	6.289	4.368	7.026	7.289	8.158	3.132	1.289	1.895	3.395	3.789	2.842	1.895	8.079	2.711	1.921	2.579	4.711	5.711	5.974	2.842	7.421	2.158	2.921	1.342	2.7105	3.4211	5.3947	8.8421	7.895	1.974	18.368	1.842	1.184	1.974	33.368	1.553	1.921	10.737	1.474	1.105			0.253393	5.08751
6.7911	5.263	4.026	5.895	6.421	8.053	2.974	1.316	1.789	2.868	4.237	2.763	2.289	6.605	3.342	1.974	2.5	4.763	6.211	6.395	3.158	8.974	2.105	2.658	1.605	2.6579	4.4737	6.8158	10.2632	7.105	1.737	18.395	2.026	1.316	1.237	44.737	1.316	1.947	10.947	1.526	1.632			0.257921	5.40789
6.9102	5.658	3.947	7.158	5.5	9.395	3.079	1.711	1.421	2.632	4.211	2.632	2.158	6.553	3.763	1.921	2.921	5.526	6.316	6.263	3.842	10.026	2.211	1.974	1.579	1.8158	3.9211	6.5	9.8421	7.816	1.395	17.974	2.474	1.026	1.579	48.421	1.421	1.158	9.789	1.789	1.342			0.262444	5.5165
7.0293	5.237	3.447	5.868	5.026	7.132	3.211	1.921	1.684	2.763	3.553	2.368	1.579	6.105	3.605	2.211	2	6.395	6.526	5.395	3.579	9.184	2.079	2.553	1.789	1.9474	5.4474	7	11.8947	7.026	1.632	21.158	2.105	1.5	1.368	52.632	2.263	1.763	10.105	2.237	1.974			0.266967	5.68156
7.1485	3.737	3.158	4.526	5.079	8.763	3.105	1.763	1.579	2.816	4.289	2.316	1.289	6.053	3.421	1.553	2.711	5.974	6.026	6.474	2.947	8.368	1.711	2.237	1.947	1.7368	5.6842	7.2895	8.7368	7.921	1.974	23.368	2.421	1.289	1.395	55.079	1.395	1.5	9.842	1.816	1.579			0.271494	5.62171
7.2676	3.526	2.395	4.368	4.658	8.868	3.447	2	2.105	2.474	4	2.158	1.553	5.789	4.053	1.289	2.947	5.553	5.5	5.5	3.553	8.605	2.184	2.5	2.132	2.2895	5.1053	5.9737	7.3158	8.184	1.816	24.684	2.263	1.526	1.158	53.026	1.947	1.079	9.895	1.868	1.737			0.276018	5.52561
7.3868	3.684	3.053	3.658	4.158	9.105	3.5	1.263	1.579	2.526	3.474	2.474	1.737	5.658	5.579	2.026	2.211	5.921	6.421	5.684	2.947	7.211	2.263	1.868	1.579	2.5526	5.8684	7.5789	8.7368	9.079	1.579	29.026	1.658	1.237	1.053	54.632	1.737	1.974	10.816	1.763	1.526			0.280545	5.75989
7.5059	4.079	3.605	3.974	4.947	8.605	3.474	1.342	1.605	2.132	4.053	2.947	1.868	6.342	4.684	2.184	2.184	4.684	5.921	6.026	2.789	7.263	2.132	2.5	1.763	1.6842	6.3421	5.3158	8.5526	12.579	2.053	27.658	1.789	1.342	1.605	53.684	1.684	1.053	10.289	1.921	1.974			0.285068	5.76572
7.625	3.158	2.605	3.711	4.658	8	2.5	2.132	1.947	2.895	4.395	2.816	1.632	5.132	7.237	1.816	2.526	6.237	6.632	6.921	3.711	7.526	1.868	2.158	1.421	2.1316	6.8684	6.0526	10.6579	12.737	1.711	27.5	1.5	1.263	2.132	48.263	1.579	1.553	10	1.658	1.711			0.289591	5.77379
7.7442	3.447	2.632	4.053	5.526	9.053	3.316	1.447	1.658	2.447	4.342	2.605	1.316	4.421	5.763	1.868	2.579	6.579	8.579	6.579	4.316	9.421	2.395	2.5	1.605	1.8421	7.5263	5.1579	12.5526	12.368	1.895	29.237	2.474	1.526	2.553	40.842	1.632	1.5	9.395	2.368	1.868			0.294119	5.8296
7.8633	3.526	3.395	3.184	4.553	9.474	4.053	1.395	1.632	2.158	4.658	2.947	1.789	4.211	7.105	2.053	2.421	5.921	7.974	7.184	4.132	7.395	1.974	1.921	1.421	1.2895	7.2105	3.1316	12.3158	12.079	1.921	32.895	1.816	1.316	2.289	33.053	1.737	1.316	10.632	1.579	2			0.298642	5.57641
7.9825	3.579	2.789	2.579	6.5	8.895	3.211	1.763	1.605	2.053	4.737	4.211	2.289	3.395	7.211	1.895	2.737	5.368	8.474	6.132	3.974	7.684	2.658	2.395	1.579	1.8947	6.9737	4.4474	9.7368	13.579	2.5	34.237	2.105	1.553	1.842	26.947	1.421	1.711	10.158	2.079	1.579			0.303169	5.51192
8.1016	3.342	2.789	2.605	4.395	8.316	3.395	1.368	2	2.289	5.5	3.921	2.421	3.842	8.158	1.921	2.974	6.684	6.632	7.105	3.868	8	1.947	3.237	1.895	1.3158	7.4474	4.8158	9.6316	12.658	2.132	32.316	1.395	1.526	1.974	27.737	1.763	1.5	9.737	2.421	1.553			0.307692	5.46317
8.2207	2.816	2.658	2.921	5.684	9.105	3.342	1.447	1.658	2.158	7.579	3.579	2.237	4.158	9.026	2.579	2.211	6.211	6.632	8.737	3.763	8.395	2.026	2.079	1.526	1.9474	6.6316	4.2895	8.0263	11.947	1.974	34.895	1.737	1.553	2.763	29	1.658	1.211	11.158	1.974	1.605			0.312216	5.62242
8.3399	3.974	2.526	3.816	4.658	9.158	3.895	1.5	1.974	3.132	7.526	3.789	1.947	2.895	10.211	1.632	2.526	6.921	6.789	8	3.711	8.342	2.947	2.5	1.711	2.4474	7.2895	3.8684	7.0789	10.895	2.132	31.474	2.263	1.447	2.947	32.237	1.947	1.342	12.921	3.184	1.974			0.316743	5.78818
8.459	3.632	1.947	3.211	6.158	8.579	3.711	1.684	1.368	2.237	7.237	3.342	2	4.316	12.342	2.158	2.605	7.421	6.737	7.579	3.868	9.684	2.237	2.763	1.474	2.6316	7.0526	4.4211	7.2368	8.737	2.211	30.421	1.658	0.868	3.974	33.579	1.789	1.368	13.632	2.632	2.158			0.321266	5.81648
8.5782	3.211	2.132	3.447	4.474	7.605	3.895	1.579	1.211	1.684	7.053	2.921	1.895	3.737	13.868	1.316	2.632	7.711	6.053	8.553	3.763	8.737	2.5	2.684	1.132	1.6316	7.3158	5.0263	5.7632	8.053	2.158	27.026	1.816	1.658	3.658	32.816	1.868	1.237	17.5	2.658	2.237			0.325793	5.65537
8.6973	3.789	2.737	3.474	4.895	7.026	3.789	1.947	1.605	2.395	7.132	4.105	2.842	3.921	14.842	2.053	3.316	7.868	6.263	7.684	3.895	9.132	2.474	2.579	1.605	2.6579	6.4737	4.7632	7.5263	6.816	2.237	25.5	1.868	1.342	2.684	32.947	1.816	1.368	19.079	3.053	2.211			0.330317	5.84275
8.8165	2.763	2.5	3.447	5.526	7.184	3.921	1.158	1.763	2	6.684	2.263	1.711	2.737	15.421	2.105	2.5	6.105	5.737	9.421	4.368	10.684	2.368	3.132	1.474	2.8947	5.9737	6.0789	6.0789	4.211	2.474	25.5	1.289	1.816	2.737	31.237	1.474	1.658	20.211	2.842	1.763			0.334844	5.63026
8.9356	3.684	2.342	3.211	4.789	6.263	3.395	1.711	1.5	2	5.868	2.921	2.868	3.105	18.474	2.026	2.211	6.842	6.421	10.5	5.105	9.079	2.947	3.711	1.895	2.8947	7.5526	7.5	7.2368	5.053	1.737	21.316	2	1.263	2.447	30.289	1.763	1.868	25.395	2.789	1.632			0.339367	5.8901
9.0547	4	2.842	3.526	4.026	6.632	4.842	1.658	0.763	2.237	6.211	2.579	1.816	2.211	19.684	1.579	2.289	6.158	6	10.395	4.579	8.921	2.711	3.053	1.316	2.7632	6.5789	9.3421	7.5789	4.211	1.553	17.816	1.316	1.316	2.447	26.184	1.105	1.895	22.763	3.184	2.053			0.34389	5.55335
9.1739	4.158	2.289	2.079	4.842	6.211	4.895	1.895	1.263	2.263	5.974	3.868	2.526	3.158	26.053	2.184	2.395	6.553	4.974	13.763	4.421	10.684	2.763	3.421	1.737	3.2368	8.0263	8.1579	8.2632	3.921	1.579	17.474	1.132	1.184	2.816	25.263	1.474	1.632	24.842	4.632	1.974			0.348417	5.99941
9.293	3.974	2.263	2.974	4.026	6.184	4.789	1.658	1.605	2.158	5.263	3.737	2.105	2.421	27.895	2.632	2.579	4.789	5.132	14.5	4.842	12.632	3.316	3.632	1.868	3.3684	6.5789	7.9737	7.6316	3.289	1.368	16.395	0.974	1.263	2.737	24.737	1.579	1.158	27.105	3.289	1.579			0.352941	5.94999
9.4122	4.658	2.816	2.579	3.842	5.947	4.263	1.421	1.658	2.526	5.289	4.684	2.211	2.658	27.211	2.158	2.526	4.974	5.263	15.184	4.763	13.632	3.5	3.316	1.158	2.7368	5.6316	7.1842	7.6579	5.053	1.158	17.789	1.316	2.053	2.789	22.763	1.579	1.368	30.079	3.237	2.579			0.357468	6.08026
9.5313	3.974	2.342	2.605	4.526	6.026	5.026	1.579	1.632	2.737	7.079	6.658	2.263	2.447	29.474	2.474	1.842	5.763	5.342	18.974	4.684	14.579	3.079	3	1.947	2.3947	5.5789	6.7368	8.1579	4.921	1.316	20.895	1.763	2.132	2.658	18.263	1.342	1.289	34.658	3.289	1.895			0.361991	6.43353
9.6504	4.184	2.342	3.053	3.921	6.026	4.421	1.237	1.447	1.921	8.447	9.658	1.921	2.105	28.816	2.658	2.289	4.526	5.763	22.421	5.553	15.316	2.947	3.895	2.342	3.1316	4.6842	8.4474	7.9211	5.263	1.553	19.395	2.026	1.184	2.553	14.974	1.737	1.632	33.079	2.579	1.947			0.366514	6.48288
9.7696	3.974	1.868	2.737	3.974	5.263	4.684	1.632	1.368	2.263	8.316	9.5	3.026	2.474	23.421	2.289	2.211	4.868	6.763	21.763	3.974	18.053	3.658	4.158	2.763	3.5789	4.5	9.6579	8.4737	5.079	1.447	21.711	1.816	1.263	3.237	14.053	1.947	1.237	33.447	3.158	2.368			0.371042	6.54934
9.8887	4.605	2.842	2.368	5.237	4.711	4.342	2.316	1.5	2.184	10.5	11.605	3.079	1.895	25.026	2.447	3.263	4.395	5.816	18.632	4.684	20.395	4.289	3.737	3.763	3.4737	4.2895	12.8421	8.8684	4.605	1.711	21.447	1.658	1.158	3.105	12.026	1.737	1.842	37.289	3.026	2.263			0.375565	6.87429
10.0079	4.237	2.342	2.316	4.289	4.921	4.158	1.842	1.605	3.026	12.737	14.789	2.658	2.237	23.526	3.026	2.526	4.763	5.711	19.842	5.684	21.816	4.5	3.895	4.158	4.0526	4.0789	16.8421	7.8421	4.026	1.816	20.579	1.421	1.342	3.5	10.368	1.868	1.395	37.684	3.684	2.842			0.380092	7.09862
10.127	3.895	2.711	2.368	3.921	5.026	5	2.158	1.395	1.763	14.474	16	2.816	2.053	26.789	2.237	2.737	4.579	6.579	17	6.947	21.553	4.447	4.553	5.842	3.6842	3.9474	19.9211	7.3158	2.921	1.553	20.316	1.342	1.421	4.684	10.474	2.289	1.947	38.079	3.263	3			0.384615	7.32501
10.2462	4.026	2.395	3	4.5	4.921	5.632	1.816	0.789	2.553	14.684	17.211	2.237	1.947	24.789	3.158	2.605	4.421	4.789	15.842	5.816	22.368	4.526	4.026	5.026	4.3684	3.2368	22.7895	6.9211	2.447	1.579	17.263	2.079	1.053	2.763	9.184	1.658	1.395	37.763	3.789	2.632			0.389143	7.09995
10.3653	3.763	2.447	2.474	5.526	4.947	4.711	2.368	1.105	2.368	17.658	16.579	2.316	1.342	27.026	3.184	2.947	4.474	6.079	15.632	7.289	18.816	5.395	3.289	5.763	3.1579	3.5789	27.9211	7.2632	2.605	1.579	15.447	1	1.026	2.895	10.132	1.184	1.184	35.105	2.763	3.105			0.393666	7.1861
10.4844	3.579	2.316	3.342	5.711	3.789	5.211	2.5	1.895	2.632	19.579	16.658	2.474	1.921	24.395	2.395	2.342	5.053	4.526	15.711	6.5	16.789	4.895	2.605	6.684	3.3158	3.5263	26.1053	5.7368	2.026	1.289	11.263	1.342	1.158	2.368	8.921	1.316	1.289	34.684	3.658	2.474			0.398189	6.84935
10.6036	3.974	2.658	2.684	7.526	5.026	5.658	2.395	1.684	2.237	22.342	18.868	3.053	1.605	26	2.763	2.684	4.395	6.263	17.053	7.947	14.947	4.763	2.316	9.053	4.2368	3.7632	26.8421	5.5	2.079	1.316	11.184	1.5	0.763	1.974	10	1.737	1.605	29.5	3.737	2.658			0.402716	7.15723
10.7227	3.974	2.816	3.395	8.237	4.974	5.026	1.947	1.868	2.263	23.553	19.789	3.026	2.211	27.026	2.605	2.342	3.868	5.737	18.132	8.632	13.105	4.658	2.974	11.026	4.7632	3.8158	24.8684	4.6316	1.658	1.632	8.079	1.237	1.105	2.289	14.395	1.5	1.368	27.026	3.026	2.395			0.40724	7.17432
10.8419	3.974	2.184	2.474	9.447	5.474	6.079	2.5	1.763	2.789	21.053	15.947	2.921	1.526	28.579	2.947	2.053	3.842	4.789	14.368	9.132	10.316	4.158	2.474	13.868	4.1053	3.3421	24.2368	3.8684	1.474	1.421	8.447	1.895	1.632	1.947	16.132	1.763	1.316	25.211	2.974	2.868			0.411767	6.93224
10.961	3.842	2.342	2.289	10.237	5.132	6.237	3.368	1.526	2.211	23.5	18.474	2.763	1.763	30	2.737	2.079	3.289	5.868	14.842	9.026	11.368	4.105	3.816	21.526	3.2632	3.8421	29.7105	3.8158	1.395	1	6.974	1.737	1.237	2.5	17.895	2.026	1.211	23.079	3.263	2.526			0.41629	7.44536
11.0801	3.474	2	2.711	11.5	6.5	6.605	2.632	1.5	2.632	25.763	16.368	3.079	2.132	34.974	2.658	1.763	3.605	5.658	15.474	10.079	10.237	4.105	3.421	23.553	3.4474	4.2895	27.4737	3.6842	1.158	1.368	7.895	1.789	1.026	2.289	16.395	1.368	1.737	18.026	2.474	3.289			0.420813	7.50329
11.1993	4.368	3.053	2.5	11.474	6.842	7.105	2.658	2.105	2.737	23.526	16.105	3.474	2.395	34.921	3.632	2.368	3.579	7.211	15.842	10.132	10.5	3.711	3.316	27.421	2.7105	4.1316	24.0526	3.4737	0.947	1.579	7.763	2	1.211	1.658	14.868	1.711	1.395	16.079	3	2.974			0.42534	7.51321
11.3184	4.421	2.711	3.421	11.368	8	6.842	2.553	1.658	2.868	29.447	15.421	2.789	2.053	39.763	3.184	1.5	3.237	6.395	14.395	11.447	12.763	3.921	3.184	28.895	3.9211	4.7895	22.3684	3.6316	1.263	1.526	7.237	1.289	1.026	1.763	12.079	1.526	1.526	14.895	3.263	3.605			0.429864	7.69862
11.4376	4.053	3.026	2.316	12.526	8.553	7.447	2.921	1.842	2.421	35.289	15.211	2.816	1.974	44.158	3.368	1.579	3.079	7.526	12.763	9.5	10.026	3.658	2.658	28	2.7895	4.5	20.5	3.7632	1.789	1.684	6.526	1.342	1.447	1.763	11.211	1.368	1.5	15.921	2.947	2.895			0.434391	7.71639
11.5567	4.737	2.789	2.789	10.579	8.816	9.289	2.263	1.553	2.474	38.132	14.237	3.579	2.079	48.079	2.947	2.132	2.868	7	11.342	12.132	11.368	4.842	2.974	27.763	2.8684	5.8947	16.6579	3.7368	1.263	1.316	6.921	1.368	1.263	1.5	10.789	1.632	1.237	16.132	3	3.395			0.438914	7.89342
11.6758	4.211	2.842	2.395	9.974	10.5	9.711	3.053	1.289	1.947	40.105	15.105	4.289	2.553	44.711	3.211	2.079	3.342	7.842	12.921	10.921	11.816	4.921	2.579	26.105	2.0263	5.4737	14.8421	4.0263	1.605	1.553	5.132	1.316	0.974	2.263	13.895	1.316	1.737	16.553	2.711	3.237			0.443438	7.92706
11.795	4.184	2.921	3.263	9.605	11.605	11.526	3.053	1.316	2.342	42.658	17.237	3.684	1.579	48.395	2.658	1.921	3.421	7.079	9.737	12.816	12.895	6.026	3.263	21.158	1.7895	7.0263	12.8947	3.9211	1.158	0.895	4.553	1.026	1.158	1.789	13.342	1.605	1.553	14.579	3.158	3.842			0.447965	7.96579
11.9141	4.737	3.658	1.789	9.289	10.816	12.342	3.105	1.579	2.474	41.132	15.763	5.526	1.921	50.421	3.053	1.947	2.474	8.105	11.632	14.053	13.289	6.289	3.026	18.632	2	6.8684	9.3684	3.1579	1.553	1.5	4.342	1.553	1.237	1.816	11.211	1.211	1.026	15.579	3.368	3.289			0.452488	7.90329
12.0333	4.368	3.105	2.658	7.158	12.263	15.079	2.447	1.711	2.316	35.553	13.5	4.711	2.474	51.737	3.368	2.132	2.868	7.026	9.263	13.026	13.105	8.105	3.711	16.553	2.3158	8.5	10.7895	4	1.447	2.158	4.211	1.289	1.053	1.5	11.711	1.368	1.237	17.658	3.368	3.605			0.457015	7.86118
12.1524	4.947	2.895	2.895	6.789	13.474	18.132	3.079	1.474	2.263	29.711	14.921	4.5	2.474	54.921	2.711	1.474	2.816	7.711	10.737	14.526	11.132	9.711	3.395	15.237	2.0789	8.3684	7.8158	4	1.868	1.921	4.079	1.053	1.474	2.105	14.895	1.368	1.474	18.368	3.421	3.5			0.461538	7.99285
12.2716	6.447	3.368	3.737	7.579	12.658	17.868	3.053	1.737	2.421	28.421	14.974	6.395	2.921	53.289	2.737	2.053	2.658	8.289	9.632	16	14.026	11.842	4.105	10.974	1.7632	8.2368	6.7632	3.2895	2.447	1.974	4.868	1.105	1.079	1.342	13.763	1.158	1	18.658	3.921	4.605			0.466066	8.07892
12.3907	5.553	4.158	2.447	7.632	11.289	19.289	3	1.921	2.421	23.026	15.605	5.237	2.921	50.342	2.658	2.105	3.053	8.816	10.447	15.316	11.395	12	3.974	9.947	1.8947	5.9474	4.7895	3.1579	1.395	1.789	4.921	0.895	1.263	1.447	15.763	1.553	1.316	15.842	3.579	4.526			0.470589	7.61576
12.5098	5.842	3.737	2.658	7.316	13.105	18.789	3.105	1.842	2.421	20.026	13.921	5.816	2.105	54.684	2.342	1.605	1.947	9.184	11.947	17.342	10.684	11.579	3.684	9.579	1.8158	6.2368	5.6579	3.1579	1.553	1.237	3.737	0.947	1.132	1.553	13.974	1.421	1.711	15.5	4.526	4.079			0.475112	7.58746
12.629	5.605	3.895	3.395	6.079	11.342	19.263	2.526	1.974	2.5	16.211	12.921	5.053	2.053	55.474	3.053	1.395	2.211	7.237	12.632	16.605	10.158	14.184	4.658	8.868	1.8684	5.7105	5.2895	3.2895	1.737	2.289	4.632	0.921	1.289	1.553	12.763	1.842	1.368	11.158	4.263	3.447			0.479639	7.3178
12.7481	7.421	3.895	3.132	5.395	14.132	18.316	3.158	1.421	2.474	14.947	12.763	4.263	2.105	54.368	2.842	1.974	2	8	11.5	17.316	9.553	13.289	3.684	7.526	2.0526	4.5	6.1842	2.5789	0.921	1.395	4.053	1.053	1.079	1.605	10.605	1.605	1.368	10.684	5.947	3.105			0.484163	7.10524
12.8673	7.711	5.026	3.079	5.632	15.026	19.658	3.105	2.105	2.5	12.5	12.789	4.684	2.211	56.579	2.921	1.526	2.447	7.079	13.447	18.263	10.658	15.605	4.842	7.263	1.7368	4.1842	6.6842	2.4211	1	1.263	4.632	1.158	0.842	1.342	10.158	1.342	1.289	8.974	5.816	3.184			0.48869	7.31706
12.9864	9.658	4.684	3.526	6.368	15.868	15.868	3.5	1.474	1.816	11.658	12.737	4.868	2.158	56.553	2.684	1.474	2.5	7.158	13.921	21.026	10.079	17.421	3.868	5.947	1.8158	3.3684	5.6579	2.1316	1.395	1.658	3.974	1.342	1.237	1.579	9.5	1.711	1	7	6.842	3.263			0.493213	7.25722
13.1055	10.421	4.553	3.632	9.132	18.237	16.421	3.553	1.711	2.211	8.763	14.368	4.211	1.895	57.237	3.289	1.605	2.105	8.263	12.737	22.737	11.5	14.553	4.842	7.132	1.8684	2.9211	5.6579	1.3684	1.368	1.711	4.316	1.026	0.737	1.079	8.947	1.026	1.289	5.711	7.5	2.868			0.497736	7.36254
13.2247	11.132	6.605	2.842	7.816	21.395	12.026	4.316	1.368	1.816	8.632	13.342	4.105	2.816	56.553	2.237	1.895	1.974	8.553	13.789	26.158	10.053	13.974	4.5	5.316	2.2895	2.5789	6.1053	1.6579	0.711	1.737	4.895	1.237	1.079	1.605	7.632	1.053	1.5	5.368	8.711	2.684			0.502264	7.35142
13.3438	12.395	5.553	3.132	7.842	25.211	12.395	3.421	1.553	1.553	8.289	13.947	3.763	1.895	60.763	3.316	1.5	3.026	6.605	13.711	31.763	12	14.368	4.842	4.553	1.4737	3.0526	5.8684	1.7632	0.842	0.974	5.211	1.079	1.395	1.263	7.868	1.395	1.211	4.553	7.763	2.526			0.506787	7.64085
13.463	12.368	7.211	3.737	8.842	24.947	12.737	3.737	2.289	1.632	7.132	15.447	4.5	2.711	57.579	2.263	2.079	2.237	7.158	15.053	38.553	14.868	14.895	3.868	5.368	2.4737	3.1579	4.5789	1.6579	1.289	1.684	5.316	0.789	0.789	0.842	8.816	1.737	1.263	6.263	9.316	2.5			0.511314	8.09208
13.5821	13.184	7.605	3.053	8.289	24.316	13.289	4.053	1.526	1.763	6.105	18.026	4.842	2.421	53.763	2.447	1.895	2.026	5.816	12.158	42.921	19.447	16.105	4.132	4.947	1.5263	3.5526	5.1579	1.1053	0.737	1.658	5.605	1	1.211	0.868	7.632	1.553	0.842	8.974	7.763	1.947			0.515837	8.13153
13.7012	14.132	7.368	3.553	8.816	26.421	11.658	4.026	1.947	1.895	6.211	21.368	4.553	2.079	45.263	2.947	1.684	2.605	6.895	11.737	48.974	22.553	15.763	3.237	5.053	2.5	3.2632	4.4474	1.4737	1.105	1.5	5.737	0.763	0.737	1.132	9.158	1.132	1.342	7.5	8.237	2.211			0.520361	8.32441
13.8204	15.658	6.632	3.763	9.526	25.368	12.789	4.316	2.079	2.342	4.816	21.947	4.711	2.553	39.395	2.474	1.763	2.421	6.816	12.868	54.579	22.105	16.684	3.289	6.289	1.9211	2.6842	5.2632	0.7368	0.684	1.789	5.632	1.184	0.789	1.105	9.053	1.105	0.868	8.605	8.737	2.658			0.524888	8.44993
13.9395	16.342	9.053	3.974	9.132	27.605	12.316	5.868	2.158	1.842	4.289	23.289	5.316	2.895	35.447	3.342	2.184	1.421	7.105	11.737	59	24.342	14.763	3.237	5.158	1.8684	3.6053	5.1053	1.7895	0.579	1.474	3.553	0.737	1.105	1.368	8.132	1.026	1.211	9.789	8.211	1.579			0.529411	8.57369
14.0587	18.553	9.342	3.553	9.053	29.026	12.368	4.684	2.026	2.105	4.789	24.316	5.395	2.763	37	3.395	1.342	1.974	6.579	11.658	68.289	26.184	12.368	2.368	5.184	2.0526	2.5263	4.7632	1.1579	0.711	0.921	3.868	0.763	0.579	1.737	6.026	1.579	0.921	7.421	8.368	1.553			0.533938	8.73153
14.1778	19	10.579	3.395	8.158	27.289	12.763	5.789	1.658	2.316	4.526	20	4.526	2.737	34.684	3.553	1.474	2.105	7.079	11.474	66.658	27.605	13.184	2.474	5.211	2.2105	3	4.3158	0.9474	0.974	1.184	3.711	0.816	0.895	1.132	8.053	1.158	1.184	6.5	6.316	2.289			0.538462	8.57307
14.297	20.053	11.711	4.184	7.658	29.553	14.368	5.447	2.289	1.895	4.579	23.763	4.053	3.105	33.737	3.526	1.526	2.053	6.368	11.026	66.895	30.289	9.474	2.132	5.5	2.3158	3.3684	5.3158	1.2105	0.842	0.842	2.421	0.789	0.974	0.816	6.553	1.395	1.263	6.763	6.184	2.211			0.542989	8.71119
14.4161	22.842	10.868	4.132	7.789	26.763	15.053	6.947	2.658	2.053	4.053	21.632	4.132	2.289	36.421	2.579	1.868	1.579	6.395	8.263	63.316	26.842	10	1.921	6.711	2.0526	2.9737	4.3947	1.1579	0.553	1.263	3.184	0.895	1.184	0.842	7.105	1.447	0.789	4.474	5.368	1.5			0.547512	8.40722
14.5352	27.263	10.921	4.632	8.763	22.974	14.211	5.842	2.105	1.737	2.947	22	4.237	3.079	34.632	2.342	2.132	2.658	5.526	9.553	65.316	30.974	7.684	1.737	8.211	2.2105	3.3158	5.3947	1.0263	0.447	1.632	2.974	0.711	0.763	0.947	6.842	1	1.053	4.737	4.684	1.974			0.552035	8.52968
14.6544	27.579	11.895	4.368	8.579	21.026	18	5	2.263	1.816	3.026	19.5	4.5	4.132	38.263	2.895	1.605	1.974	5.921	10.763	65.105	30.816	5.421	2.158	9.737	1.7895	3.2105	4.6053	0.7368	0.737	1.763	2.368	1.105	0.711	1.211	6.816	1.158	1.132	3.342	4.579	2.079			0.556562	8.59213
14.7735	29.842	11.816	4.079	9.895	21.079	17.132	6.816	2.211	1.842	2.816	18.342	3.447	2.368	37.842	2.605	1.368	1.789	5.158	9.658	55.684	35.816	4.974	2.368	9.342	1.8947	3.2632	4.6579	0.8947	0.684	0.868	2.421	0.895	0.658	0.553	5.684	1.553	1.105	4.105	3.5	1.684			0.561086	8.31774
14.8927	32.974	9.921	4.053	9.947	16.368	17.105	5.316	2.5	2.289	2.605	14.395	4.132	3.237	41	3.211	1.684	1.658	4.474	10.316	50.921	40.132	3.632	1.421	9.184	2	2.8947	5.0263	0.5789	0.263	0.737	2.658	0.816	0.842	1.263	5.368	1.421	1.079	2.763	3.184	1.816			0.565613	8.12962
15.0118	33.711	9.868	4.053	10.737	13.553	17.5	6.211	2.316	1.921	2.974	12.553	6.026	3.421	44.421	2.579	1.763	1.684	3.395	10.711	42.658	36.789	3.474	1.526	7.684	2.1842	2.3947	4.7105	0.5263	0.658	1	2.605	0.526	0.842	0.868	5.553	1.053	1.105	2.526	3.5	2.605			0.570136	7.85462
15.1309	33.684	9.105	3.079	10.868	12.632	17.158	6.947	1.842	1.684	2.842	11.105	5.737	3.053	45.974	3.211	1.632	2.158	3.974	11.105	37.579	35.342	2.553	1.842	7.132	1.7368	3.7368	5.3158	0.4737	0.553	0.868	2.658	0.816	0.842	1.316	5.895	1.395	1.184	3.237	2.289	1.816			0.57466	7.65925
15.2501	33.026	8.421	4	11.237	11.868	20.553	8.289	2.211	1.579	3.158	9.132	5.895	3.579	53.868	2.684	1.868	1.947	4.632	12.421	33	34.474	3.105	2.105	7.579	2.7895	3.5526	4.9211	1	0.553	1.184	2.447	0.763	1.053	1.368	5.974	1.395	0.789	3.026	2.368	1.711			0.579187	7.88813
15.3692	31.553	8.421	3.605	10.368	9.974	22.868	8.053	1.684	1.237	3.237	8.895	4.868	2.711	58.342	3.079	1.605	2.105	4.789	12.342	33.658	35.632	2	2.105	6.421	2.3158	3.0263	4.7632	0.7632	0.553	0.974	2.579	1	0.974	1.184	4.789	1.395	0.658	2.842	3.237	1.632			0.58371	7.80594
15.4884	30.026	6.842	4.395	9.684	9.553	22.316	6.658	2.132	1.789	2.605	9.5	5.605	3.5	59.737	2.474	1.579	1.789	2.632	12.053	32.184	35.053	2.842	1.605	7.5	1.6842	3.4474	4.6316	0.5789	0.789	0.895	3	1.079	0.737	0.789	5.342	1.132	1.237	2.605	2.132	2.447			0.588237	7.66448
15.6075	30.789	6.658	3.974	8.605	10.289	25.184	7.658	2.053	1.474	2.421	11.026	5.579	3.842	63.053	2.526	1.553	2.053	3.211	10.316	27.711	30.658	2.158	2.158	6.184	1.8421	3.0789	4	0.7895	0.789	1.026	2.447	1.184	1.053	1.421	5.158	0.684	1.079	2.5	1.816	2.158			0.59276	7.55396
15.7266	29	6.053	4.421	10.211	11.684	26.526	7.763	2.842	1.868	2.5	9.947	5.5	3.921	65.553	2.711	1.605	1.921	2.789	10.974	25.684	28.895	2.368	2	8	2.2895	2.5	3.9211	1.0526	0.789	0.816	3.316	1.079	0.868	1.158	5.263	0.605	0.816	2.5	2.579	2.211			0.597284	7.66248
15.8458	25.947	5.895	4.895	8.474	12.605	27.921	7.474	2.447	1.658	1.711	9.526	6.211	3.868	66.316	2.579	1.842	2.263	2.632	13.474	22.684	29.605	1.632	2	6.447	1.6579	2.3158	4.2368	0.5526	0.474	0.816	2.553	0.895	0.947	1	4.947	1.079	0.579	2.474	1.921	1.921			0.601811	7.46188
15.9649	25.842	6.789	3.789	8	13.289	26.553	6.947	2.447	1.395	2.816	8.632	6.474	3.605	65.526	3.158	1.684	1.974	2.605	10.579	19.368	28.316	1.816	1.658	6.763	1.5789	2.6842	3.3684	0.8158	0.447	0.447	2.737	1.474	1.368	1.316	4.263	1.184	1.132	2.421	2.368	2.184			0.606334	7.24533
16.0841	21.842	5.553	4.605	8.158	12.447	24.737	7.474	2.474	1.816	2.421	8.395	7.368	3.579	67.5	2.789	1.553	1.737	3.211	12.737	21.789	27.579	1.553	2	5.605	1.8947	2.1579	2.5789	0.5263	0.289	0.842	2.474	1	1.053	1.237	4.184	0.895	0.947	2.447	2.079	2.342			0.610861	7.14672
16.2032	20.342	5.816	4.526	8.211	13.789	23.711	7.263	2.237	1.553	2.395	7.526	6.474	4.237	60.947	2.158	1.684	1.421	3.053	12.632	22.421	30.237	1.605	1.526	4.658	1.8947	1.8684	3.6316	0.6842	0.684	0.789	2.053	1.184	1.158	1.132	5.132	1.289	0.868	2.632	2	1.816			0.615385	6.98095
16.3224	18.553	5.947	3.289	8.421	15.105	18.842	6.711	2.211	1.184	2.026	6.316	7.974	4.316	59.132	2.605	1.605	1.316	3	12.263	22.974	26.921	1.605	2.053	3.737	1.8684	1.8947	2.4474	0.4474	0.605	0.842	2.395	1	1.395	1.711	4.105	1.132	1.105	3.395	1.684	1.658			0.619912	6.64477
16.4415	16.737	5.5	3.605	7.947	14.079	19.921	5.368	2.395	1.789	2.211	6.447	10.658	4.684	56.974	2.605	1.553	1.579	3.026	10.895	22.342	30	1.632	1.368	3.763	2.3947	1.8421	2.6316	0.9737	0.605	0.868	1.842	1.211	1.289	1.605	4.395	1.158	1.342	3.079	2.842	1.816			0.624435	6.6743
16.5606	17.5	4.053	3.816	7.632	13.842	18.816	7.079	1.947	1.421	3.026	5.947	11.868	3.421	56.237	3.184	1.658	1.632	2.079	12.474	22.684	28.895	1.316	1.263	3.553	2.1053	1.7895	2.1316	0.3684	0.816	0.974	1.474	0.684	1.184	1.368	3.737	1.211	1.342	2.605	1.947	2.816			0.628958	6.54739
16.6798	14.605	4.789	4.289	7.658	13.026	19.921	7.105	2.579	1.474	2.605	6.368	12.737	4.263	54.526	2.237	1.158	1.658	2.632	11.737	24.211	20.579	0.947	1.658	2.974	2.4211	1.3421	2.6842	0.5	0.5	1	1.632	1.053	1.447	1.974	4.263	0.763	0.605	2.5	2.132	1.895			0.633486	6.31118
16.7989	12.921	4.316	3.895	9.026	13.737	21.263	6.553	1.763	1.684	2.632	7.5	11.605	4.868	50.289	2.5	1.5	1.5	2.526	12.342	25.105	15.632	1.395	1.579	3.974	1.8158	2	2	0.6579	0.579	0.974	1.289	0.921	1.553	2.605	2.789	1.132	1	2.868	2.289	2.184			0.638009	6.16904
16.9181	11.184	4.079	4.421	7.947	14.026	22.763	5.947	2.053	1.816	1.974	6.447	12.184	5.263	55.553	2.158	1.421	2.5	2.026	10.237	24.289	12.263	1.526	1.921	5.658	1.8158	1.5789	1.8947	0.4211	0.474	0.842	1.395	1.158	1.158	2.026	3.395	0.842	0.947	2.605	2.763	2.026			0.642536	6.12494
17.0372	9.842	4.421	4.368	7.421	14.737	23.632	4.974	2.158	1.711	2.658	5.763	13.079	5.026	51.316	2.579	1.658	1.658	3.211	10.868	26.684	8.921	1.737	1.474	4.711	2.1842	1.2632	2.3947	0.7895	0.816	0.789	1.421	0.816	1.184	3.079	4.132	1.053	1.342	2.605	3.026	1.737			0.647059	6.08096
17.1563	9.632	3.658	3.789	7.579	17.211	21.711	5.553	1.789	1.842	2.474	6.737	13.658	5.921	40.342	2.316	2.026	1.763	3.105	9.526	25.684	7.368	1.5	1.421	4.289	1.3947	1.4474	2.5	0.6053	0.763	0.921	1.5	1.395	1.237	1.658	3.053	1.263	0.868	2.421	2.816	2			0.651583	5.66841
17.2755	8.842	4.368	3.632	7.974	13.553	24.211	4.895	2	1.474	2.132	5.947	14.868	4.368	36.105	2.289	1.579	1.421	2.684	9.921	26.474	5.737	1.947	1.632	2.868	1.8421	1.3158	2.6842	0.8158	0.474	0.974	1.079	0.605	1.263	2.368	3.368	0.816	0.895	2.474	3.316	1.763			0.65611	5.42435
17.3946	6.289	3.289	4.184	6.158	13.711	25.316	4.553	2.447	1.289	2.368	6.053	17.474	6.605	30.711	2.053	1.421	1.421	2.342	8.737	25.842	6.447	1.237	1.158	2.895	2.4211	0.9211	1.8158	0.9474	0.5	0.816	1.184	0.789	1.368	1.868	3.316	1.053	1.211	2.079	3.816	1.5			0.660633	5.24013
17.5138	7.816	3.105	3.447	4.684	13.053	31.026	4.237	1.789	1.342	2.632	6.026	17.368	6.658	26.158	2.553	1.316	1.789	2.605	9.579	26.763	5.658	1.474	1.395	2.5	1.6842	0.7105	2.1053	0.6053	0.447	0.684	1.158	1.368	1.526	2.237	2.921	0.842	0.974	2.5	2.947	1.658			0.66516	5.23351
17.6329	8.105	3.289	3.289	6.237	11.5	33.605	4.079	1.842	1.842	2.263	5.816	17.711	5.474	20.579	3.053	1.658	1.553	3.184	7.658	27.5	5.289	1.263	1.237	2.368	1.4211	1.2368	2.1579	0.7368	0.421	1.105	1.237	1.132	1.842	1	3.237	1.395	0.789	2.395	3.5	1.474			0.669683	5.13684
17.7521	7.921	2.974	3.605	4.263	10.184	35.526	3.474	1.974	1.158	2.079	4.763	18.763	5.816	22.737	2.079	1.263	2.053	2.421	8.316	30.158	5.763	1.684	1.421	2.237	1.7895	0.8421	2.4474	0.8947	0.421	1.605	1.316	1.211	1.658	1.184	2.395	1.447	0.737	2.921	4.263	2.289			0.674211	5.25132
17.8712	9.132	2.947	3.079	5.342	8.474	35.658	5.237	1.737	2	2.263	4.684	17.158	5.974	20.947	1.816	0.816	1.605	3.684	6.947	30.368	6.947	1.079	1.105	2.237	2.6579	0.8947	2.1579	1	0.368	0.842	0.974	1.237	1.895	1.289	3.158	1.447	0.868	3.026	3.447	2.921			0.678734	5.23546
17.9903	7.842	3.211	2.579	5.526	7.105	35.579	4.211	1.737	1.526	0.974	4.895	19.368	6.053	20.447	2.316	1.737	1.5	3.211	6.842	33.605	6.895	1.474	1.895	2.026	1.6579	1	3.0789	0.5789	0.474	0.737	1.211	1.263	2.526	1.342	2.184	2.237	1.211	3.079	3.789	2.026			0.683257	5.27372
18.1095	9.684	3.368	2.237	4.316	6.895	34.658	4.026	1.868	1.526	1.842	5.711	21.737	4.132	24.026	3.289	1.684	1.763	2.263	5.737	35.763	7.395	0.868	1.605	2.158	1.7368	0.7368	3.1579	0.7368	0.289	1.289	1.026	1.184	2.263	1.263	1.816	1.711	1.289	2.553	2.816	2.579			0.687784	5.37493
18.2286	9.553	2.921	3.263	4.632	5.526	33.053	4.395	2.342	1.658	2.053	3.921	20.816	3.921	23.421	1.789	1.5	1.447	2.895	6.553	35.737	7.842	1.211	2	2.211	1.2895	0.8421	3.6316	0.7632	0.579	0.658	0.947	0.658	1.632	0.974	2.132	1.974	0.763	2.211	3.474	2.105			0.692308	5.23233
18.3478	9.684	3.079	3.184	3.632	5.526	32.105	4.5	1.526	1.605	1.947	6.711	17.658	3.789	23.553	2.526	1.842	1.474	2.632	6.158	37.5	10.263	1.316	1.553	1.895	1.5	0.9211	2.9474	0.5789	0.263	0.421	0.895	0.737	2	1.421	1.763	1.763	0.763	2.632	2.474	1.684			0.696835	5.21054
18.4669	8.395	2.184	2.579	2.868	5.553	27.263	3.842	2.5	1.079	1.526	5.921	17.263	4.868	21.921	1.605	1.368	1.816	3.395	6.026	36.053	7.289	1.184	1.763	2.342	1.2895	0.8684	2.8421	0.8421	0.526	0.553	0.842	0.553	1.316	0.895	1.132	1.842	0.711	2.605	3.079	2.184			0.701358	4.81708
18.586	8.421	2.737	2.5	2.763	4.605	26.053	4.895	1.684	1.526	1.658	6	14.132	6.184	20.158	2.711	1.526	1.895	2.289	6.711	40.079	7.447	1.211	1.079	2.132	1.3947	0.7895	4.3947	0.5	0.5	0.526	0.711	0.658	1.447	0.789	1.763	1.211	1.316	2.868	2.658	1.553			0.705881	4.83687
18.7052	9.447	2.447	2.579	2.711	4.526	22.447	5.132	1.632	1.395	1.263	6.289	11.395	4.184	16.579	2.632	1.474	1.368	2.289	5.921	34.579	5.342	1.421	1.395	2.816	1.5789	1.3158	4.2895	1.0263	0.868	0.658	1	0.579	1.316	0.737	1.632	1.237	1.868	2.105	2.789	1.079			0.710409	4.38354
18.8243	10	2.658	2.763	3.526	4.105	19.658	5.658	1.763	1.553	1.684	6.842	10.184	4.868	18.632	1.763	2.026	1.526	2.605	6.658	33.737	6.789	1.316	1.211	2.474	1.6579	0.8684	3.5263	0.8684	0.237	1	0.974	0.526	1.789	0.816	1.447	1.237	1.605	2.579	2.132	1.132			0.714932	4.40985
18.9435	7.816	2.289	2.553	2.789	4.342	15.079	6	1.553	1.026	1.211	6.789	10.789	5.553	16	2	2.211	2	2.211	5.816	33.474	5.763	1.184	1.395	3.842	1.2368	1.1579	5.0526	0.7895	0.368	0.895	1.132	0.763	1.474	0.789	1.184	1.184	1.974	2.658	2.368	0.816			0.719459	4.18817
19.0626	8.263	2.947	2.895	2.947	4.395	15.684	6.711	2.211	1.684	1.5	6.895	8.526	6.053	16.237	2.132	2.5	1.658	2.684	6.658	32.921	4.263	1.658	1.842	2.395	1.2368	0.9474	5.0526	0.6053	0.421	0.684	0.684	1.026	0.842	0.974	1.132	1.237	1.816	2.263	1.289	1.211			0.723982	4.177
19.1817	7.605	2.026	2.474	2.474	4.395	14.842	5.921	2	1.184	1.263	6.5	9.342	6.711	16.474	2.053	1.237	1.526	2.658	4.842	33.737	4.526	1.605	1.105	2.342	1.1579	1.6053	3.8421	1.3684	0.474	0.632	0.737	0.579	0.789	0.816	1.079	0.921	1.895	2.605	1.421	1.053			0.728506	3.99542
19.3009	6.289	1.842	3.026	2.526	3.737	12.737	6.421	1.789	1.421	1.711	5.184	8.947	7.553	16.263	2.132	2.447	2.132	2	4.211	36.842	5.658	1.395	1.237	2.158	1	0.9211	4.2105	0.5526	0.421	0.816	0.368	0.632	1.105	0.763	0.684	1.105	2.105	2.632	0.895	0.526			0.733033	3.95985
19.42	6.737	1.684	1.921	2.658	4.316	11.447	6.105	1.289	1.158	2.026	4.368	10.053	7.526	13.289	2.368	2.026	1.711	2.053	5.368	40.474	5.553	1.342	1.026	2.368	1.1316	0.8421	3.3947	0.3947	0.263	0.421	0.658	0.895	0.789	1	0.816	1.105	1.632	2.5	0.816	0.632			0.737556	3.9039
19.5392	6.605	1.737	2.342	2.237	4.605	9.211	8.132	1.711	1.237	1.368	4.026	10.553	7.368	12.579	2.711	1.868	1.842	2.421	4.421	41.579	6.947	0.974	1.237	2.553	0.8947	0.5526	4.2105	0.7368	0.5	0.868	0.526	0.421	0.5	0.474	0.974	0.974	2.132	1.842	0.5	0.421			0.742083	3.91976
19.6583	6.605	2.079	2.5	2.368	3.921	9.053	9.763	1.921	1.132	1.289	3.526	13.289	7.474	9.5	2.395	1.553	2.079	2.053	5.816	42.158	6.711	1.421	1.026	2.684	1.1053	0.5526	3.5789	0.6316	0.605	0.368	0.632	0.316	1.053	0.711	0.395	1.132	1.632	2.289	0.526	0.658			0.746607	3.96254
19.7775	5.895	2.763	2.447	2	3.421	9.053	11.763	1.421	1.132	1.211	2.789	11.316	9.211	11.026	3.079	2.263	2	2.026	4.947	39.211	6.474	1.237	1.342	2.158	1	0.8947	3.2632	0.3158	0.316	0.579	0.474	0.342	0.368	0.316	0.842	1.132	1.737	1.974	0.842	0.368			0.751134	3.87372
19.8966	5.079	1.5	2.263	2.316	4.184	8.579	13.658	1.553	1.316	1.158	3.132	13.737	9.658	10.079	2.763	2.263	2	3.053	4.763	39.921	8.237	1.579	1.079	2.158	0.9211	1.1053	3.4737	0.4474	0.368	0.421	0.342	0.237	0.526	0.684	0.289	1.263	2.132	2.053	0.421	0.263			0.755657	4.02436
20.0157	4.526	1.684	2.421	1.842	2.658	6.632	15.184	1.684	1.5	2.026	2.684	15.316	10.658	12.868	2.895	2.789	2.053	2.553	4.658	39.211	8.921	1.5	1.132	2.316	0.9737	1.1579	3.3158	0.2632	0.474	0.342	0.474	0.289	0.395	0.395	0.421	1.237	1.579	1.789	0.421	0.579			0.76018	4.09542
20.1349	4.842	2.684	2.105	1.947	3.395	6.158	18.658	1.632	1.316	1.184	2.684	13.711	10.105	12.658	3.447	3.474	2.211	2.921	4.368	41.237	10	1.474	1.342	2.447	0.8684	1.1053	2.8158	0.3684	0.658	0.342	0.237	0.158	0.526	0.421	0.342	1.105	1.5	2.184	0.526	0.132			0.764707	4.23222
20.254	5.316	2.289	2.237	2.316	3.053	6.342	23.526	1.895	1.447	1.579	2.605	14.737	10.368	15.553	3.789	3.579	2.526	2.421	3.947	40.605	12.553	1.053	0.763	2.737	0.8158	1.3684	2.6842	0.3421	0.526	0.158	0.184	0	0.158	0.316	0.447	1.974	0.789	2.368	0.421	0.474			0.769231	4.50654
20.3732	4.5	1.737	2.316	2.447	2.395	5.132	19.158	1.105	1.474	1.474	2.395	14.368	9.658	15.342	4.316	4.237	2.079	3.079	5.605	44.711	13.737	1.868	1.053	3.474	1.1842	0.8947	1.6579	0.1053	0	0.211	0.447	0.368	0.368	0.316	0.316	1.132	0.868	1.789	0.184	0.211			0.773758	4.4428
20.4923	4.947	1.368	2.263	2.921	3.158	5.763	20.237	1.763	1.132	0.921	2.658	14.579	10.132	16.842	4.105	5.737	2.447	2.737	6.474	51.816	15.211	1.868	1.526	3.5	1.0263	1.4474	2.3947	0.3158	0.158	0.211	0.474	0.237	0.105	0.263	0.263	1.316	1.447	2.184	0.658	0.263			0.778281	4.9217
20.6114	5.053	2.053	2.211	2.105	2.526	6.421	20.211	1.868	1.158	1	2.526	13.474	12.316	18.474	5.447	6.895	2.158	2.789	7.737	55.421	15.395	1.868	1.158	2.395	1.0526	1.3421	2.1053	0.5263	0.316	0.316	0.132	0.158	0.184	0.316	0.421	0.842	1.553	3.184	0.053	0.105			0.782805	5.13163
20.7306	4.737	2.5	2.026	2.368	2.763	5.263	18.579	1.921	1.053	1.237	2.132	14.421	15.395	21.526	6.026	9.947	2.237	3.974	7.368	56.947	15.526	2.079	0.895	2.895	1.8158	1.2632	1.6316	0.0526	0.105	0.263	0.158	0.211	0.079	0.026	0.158	0.895	1.474	2.026	0.237	0.158			0.787332	5.35921
20.8497	4.553	2.079	2.447	2.579	2.711	5.132	21.474	1.237	1.237	1.842	2	14	18.842	21	6.105	10.553	2.737	3.474	8.816	53.737	15.158	1.895	1.237	2.421	1.8158	0.9474	1.1579	0.1053	0.263	0.211	0.211	0.105	0.263	0.316	0.263	0.684	1.263	2.895	0.158	0.158			0.791855	5.45206
20.9689	4.263	1.921	1.711	2.237	2.553	5.263	22.211	1.5	1.316	1.053	2.342	13.763	25.447	23.316	8.026	14.579	3.526	5.211	9.605	47.842	14.974	2.474	1.474	2.447	1.4211	1.0789	0.9737	0.2632	0.158	0.158	0.211	0.158	0.421	0.105	0.289	0.632	1.816	2.947	0.105	0			0.796382	5.74477
21.088	4.263	1.947	2.053	2.395	2.079	6.316	23.737	1.789	1.474	1.237	2.474	14.105	30.711	23.289	8.632	18.237	6	6.158	12.211	37.079	14.053	3.079	1.237	2.684	1.3684	0.8947	0.8947	0.0526	0.395	0.053	0.158	0.211	0.316	0.132	0.421	0.526	1.263	3.368	0.105	0.158			0.800905	5.93889
21.2071	4.947	2.316	1.553	2.921	2.974	7.474	31.895	1.553	0.974	1.632	2.026	15.211	35.368	23.237	9.895	20.132	8.447	10.658	15.053	31.974	15.579	3.789	1.579	2.947	1.4474	0.7632	0.8947	0.1053	0.026	0.395	0.105	0	0.079	0.158	0	0.711	1.026	3.211	0.263	0.211			0.805429	6.58824
21.3263	4	1.789	1.711	2.579	2.632	8.421	33.395	1.158	1.316	1.395	1.632	19.184	32.553	20.079	12.474	24.895	11.816	14.211	16.184	21.947	12.579	4.816	1.263	2.553	1.8947	0.5	0.8421	0.3158	0.211	0.053	0.211	0.368	0.105	0.158	0.158	0.237	0.711	2.316	0.105	0.184			0.809956	6.57379
21.4454	3.921	1.816	1.789	2.316	2.895	6	36.237	1.474	1.158	1.368	1.658	24.158	36.211	21.316	14.158	31.026	14.763	17.5	16.184	15.632	14.184	7.237	1.526	2.395	2.3158	0.8947	0.6316	0.1579	0.158	0.158	0.105	0.237	0	0.211	0.263	0.263	0.474	3.237	0.184	0.053			0.814479	7.15663
21.5646	3.553	2	2	2.526	2.316	7.211	28.316	1.421	1.553	1.211	1.921	27.553	39.211	20.526	15.368	33.474	19.447	21.237	17.526	12.289	11.184	8.605	1.263	2.211	1.8421	0.5526	0.4211	0.1316	0.263	0.158	0.053	0	0.211	0.211	0.105	0.368	0.684	3.132	0.289	0.079			0.819006	7.31056
21.6837	5.132	2.789	2.026	2.053	2.868	6.632	26	1.5	1.079	1.526	2.342	30.316	33.895	22.105	18.947	30.684	21.368	23.026	15.737	9.526	12.368	11.658	1.658	2.026	1.3947	0.7632	0.6842	0.1053	0.158	0.053	0.105	0.053	0.158	0.053	0.053	0.474	0.553	2.789	0.105	0.237			0.82353	7.37499
21.8029	4.526	1.763	2.316	2.079	2.974	5.5	20.237	1.921	1.316	1.316	2.895	31.921	32.763	15.474	20.158	26.842	26.263	21.553	19.816	7.974	13.158	12.632	2.5	2.263	1.2105	0.5	0.3421	0.1053	0.158	0.053	0.026	0.079	0.105	0.211	0	0.237	0.579	2.421	0.105	0.053			0.828057	7.15862
21.922	4.053	2.526	2.921	2.079	2.842	6	20.684	1.132	1.289	1.474	2.421	33.816	28.079	13.5	20.526	24.579	26.158	22.395	20.237	8.184	8.947	14.263	1.526	2.132	1.1053	0.3947	0.3684	0.1053	0.026	0.211	0.053	0.158	0.053	0	0.053	0.158	0.421	2.947	0.105	0.158			0.83258	6.95199
22.0411	4.316	2.263	2.158	2.053	3.737	8.105	19.211	2	1.368	1.526	2.763	32.158	25.868	10.658	20.921	16.684	21.158	26.921	18.526	4.789	6.474	15.184	1.395	2.5	0.9737	0.2895	0.5263	0.0789	0	0	0.132	0.105	0.105	0.053	0	0.368	0.579	3.079	0.105	0.053			0.837103	6.47959
22.1603	4.237	3.5	2.079	2.895	3.368	7.158	15.684	2.026	1.5	0.974	3.026	31.842	19.053	10.211	17.947	12.947	16.342	28.421	17.342	4.342	3.553	17.579	2	2.105	1.5	0.4211	0.1842	0.0526	0.053	0.158	0	0	0.079	0.105	0.158	0	0.421	2.421	0.105	0			0.841631	5.89472
22.2794	3.579	2.737	2.342	3.026	3.184	5.974	16.974	1.711	1.447	0.842	2.921	30.5	17.421	7.237	17.132	8.184	11.474	30.263	14.947	3.895	3.079	16.658	2	2.289	1.3421	0.5263	0.3421	0.0263	0.105	0.105	0.105	0	0.184	0	0.053	0.053	0.316	2.158	0.053	0			0.846154	5.37962
22.3986	4.658	2.553	2.368	2.868	2.316	8.553	12.684	2.316	1.684	1.579	3.789	27.211	16.079	7.158	10.974	5.605	9.026	32.526	13.289	3.158	2.526	15.132	2.395	2.105	1.0526	0.1842	0.4211	0.1053	0.053	0.211	0.053	0.053	0.026	0.079	0.105	0.132	0.184	2.132	0	0.053			0.850681	4.93491
22.5177	3.763	2.789	2.342	2.684	2.579	9.711	11.763	2.184	1.632	1.079	3.184	24.395	12.842	5.289	6.474	3.974	7.658	36.211	9.553	3.395	3.026	13.842	2.711	2.263	0.5526	0.2895	0.1579	0.2105	0.105	0.105	0	0	0.105	0.158	0	0.158	0.342	1.658	0.053	0			0.855204	4.48094
22.6368	3.342	2.447	2.553	3.342	3.632	10.211	10.632	2	2.211	1.316	4.947	23.579	11.316	5.711	4.974	3.237	5.211	29.474	7.184	2.711	2.342	13.684	2.789	3.605	0.5789	0.2105	0.5	0.0526	0.026	0	0	0.053	0	0	0.105	0.053	0.105	1.579	0.105	0.053			0.859728	4.14677
22.756	3.526	2.658	2.289	2.789	3.289	13.263	10.158	2.553	1.447	1.605	5.132	19.842	8.947	5.158	2.526	3.447	3.474	23	6.342	2.395	1.737	11.868	2.079	2.421	0.4474	0.1053	0.3158	0.0526	0.105	0.105	0	0	0.158	0	0	0	0	1.684	0	0.053			0.864255	3.62428
22.8751	3.816	2.763	3.553	3.816	4.026	15.711	10.158	2.421	1.658	2.026	4.316	15.263	7.342	5.737	3.237	2.105	2.868	16.947	5.579	1.816	2.053	7.632	2.447	2.605	0.7895	0.2895	0.2105	0.0789	0.105	0.263	0.053	0	0	0.132	0	0.053	0.342	1.526	0.026	0			0.868778	3.34409
22.9943	3.237	2.316	1.921	6.079	4.842	15.237	10.447	2.553	1.447	1.5	5.868	12.211	5.947	4.158	2.895	1.658	2.921	13.921	5.526	2	1.421	5.447	2.579	2.605	0.2632	0.1053	0.2105	0	0.053	0.053	0	0.079	0	0.053	0	0.079	0.053	0.737	0.079	0			0.873305	3.01252
23.1134	3.079	3.684	2.947	4.579	4.789	16.447	9.053	3.368	1.474	1.763	6.947	9.684	5.342	3.105	1.711	2.105	1.632	8.868	4.5	1.395	1.553	4.816	3.447	2.711	0.3684	0.2105	0.2105	0	0.105	0	0.053	0	0.105	0.053	0	0.053	0.158	0.921	0.053	0			0.877829	2.78224
23.2325	4.684	4.289	3.026	5.789	6.342	16.421	8.947	3.105	2.237	2.289	8.132	8.158	3.763	3.368	1.947	1.579	1.579	6.053	3.053	1.816	1.5	4.026	3.474	2.526	0.5789	0.1316	0.1316	0	0	0.053	0.053	0.053	0	0	0.053	0.105	0.053	0.789	0.053	0.158			0.882352	2.75788
23.3517	4.421	4.316	3.395	7.842	6.974	14.711	9.211	4.947	2.158	3.184	9.816	6.237	3.5	2.579	1.868	1.079	2.026	5.079	2.684	1.974	1.263	2.737	3.184	2.421	0.4211	0.0526	0	0	0	0	0	0	0	0.053	0	0	0	0.789	0.053	0.105			0.886879	2.72699
23.4708	6.816	4.526	3.184	14.579	9.053	16.395	8.026	4.632	1.658	2.026	12.5	4.684	2.842	2.263	1.447	0.947	1.605	4.079	2.947	1.237	1.211	2.579	2.868	2.368	0.3421	0.1842	0.1053	0.0526	0	0	0.105	0	0.105	0.053	0.105	0.079	0.316	0.579	0	0.053			0.891402	2.91378
23.59	6.868	6.974	4.816	22.526	12.211	16.605	10.921	5.474	2.658	3.211	18.553	3.184	2.632	2.158	1.342	1	1.474	2.553	2.211	1	0.974	2.842	3.079	2.5	0.2105	0.2632	0	0.0526	0	0	0	0.053	0.079	0.105	0	0.105	0.211	0.553	0.105	0			0.895929	3.48758
23.7091	9.026	7.947	4.711	27.789	14.868	21.842	11.079	6.316	3.474	3.974	24.895	2.132	1.737	1.342	0.816	1.026	1.132	2.263	1.974	1.184	1.105	2.816	2.868	1.921	0.2105	0.2105	0.1842	0	0.053	0	0.105	0.105	0	0.053	0	0.105	0.105	0.474	0.053	0			0.900453	3.99738
23.8283	12.553	13.737	5.658	30.763	22.316	27.711	11.184	7.263	3.368	5.684	34.605	2.158	1.579	1.368	1.079	0.632	0.947	1.947	1.974	1.053	0.868	1.895	2.868	1.553	0.2632	0.1053	0	0	0	0	0.053	0	0.026	0	0	0	0.053	0.184	0	0			0.90498	4.88619
23.9474	17.553	20.5	7.921	34.316	27.184	26.605	12.921	8.711	4.711	6.395	36.947	1.368	1.763	1.395	1.368	0.789	1.368	2.895	1.316	1.211	1.079	1.553	2.868	1.842	0.1842	0.0263	0.1053	0.0526	0.053	0.053	0	0.053	0.026	0	0.158	0	0.079	0.395	0.053	0			0.909503	5.64544
24.0665	21.5	24.737	8.658	35.553	35.421	30	14.605	9.289	4.737	9.395	38.579	0.974	1.447	1.053	0.711	0.947	0.711	1.868	1.711	0.842	0.684	1.263	2.947	1.132	0.0526	0.1053	0.0789	0	0.158	0	0.053	0.053	0.053	0.053	0.053	0.026	0.053	0.395	0.105	0			0.914026	6.25007
24.1857	24.895	25.553	10.237	37.421	37.895	30.789	19.105	10.158	9.474	13.342	35.842	1.211	1.079	0.605	1.079	0.447	0.842	1.342	1.211	0.763	0.5	1.211	2.026	1.289	0.2105	0	0.0526	0	0	0.105	0	0	0.105	0	0	0.105	0.105	0.368	0	0			0.918554	6.73418
24.3048	26.079	26.947	11.289	35.5	38.921	27.974	20.895	11.974	10.816	20.711	33.237	0.816	0.895	1.132	0.421	0.579	0.158	1.658	1.184	0.711	0.526	1	2.184	0.711	0.1053	0.1842	0.1842	0.0526	0	0	0	0	0	0.053	0	0.053	0.053	0.395	0	0.053			0.923077	6.93628
24.424	32.026	27.868	10.895	33.974	39.895	27.026	22.237	12.579	16.632	29.079	24.289	0.921	0.368	0.921	0.553	0.5	0.447	1.895	1.316	0.553	0.684	0.947	2.474	0.947	0.1053	0.1053	0.0526	0.0526	0	0	0	0	0.053	0	0	0	0	0.263	0	0.026			0.927604	7.24209
24.5431	34.053	26.632	10.868	33.553	37.684	30.184	22.895	12.579	21.605	31.395	18.237	0.553	0.632	0.579	0.737	0.342	0.447	1.132	1	0.789	0.289	0.605	2.079	0.368	0.1053	0.0526	0	0	0	0	0	0	0	0	0	0.105	0.026	0.263	0.053	0.053			0.932127	7.24737
24.6622	35.263	28.079	9.947	29.184	31.158	29.658	22.158	18.658	26.211	34.132	10.316	0.974	0.526	0.474	0.632	0.474	0.632	1.316	0.684	0.5	0.316	0.816	2.474	0.632	0.3421	0.1053	0	0.0526	0	0	0.053	0.105	0	0	0	0.053	0.053	0.053	0	0			0.936651	7.15077
24.7814	33.316	27.184	10.5	21.447	25.316	22.026	23.868	21.711	26.842	33.842	5.368	0.684	0.579	0.632	0.211	0.263	0.553	1.263	0.842	0.658	0.553	0.316	1.526	0.395	0.2105	0	0.0526	0	0	0	0	0	0.026	0.105	0	0.053	0	0.105	0	0.053			0.941178	6.5125
24.9005	31.079	27.579	14.658	18.342	18.132	14.053	25.053	26.184	27.105	29.605	2.842	0.316	0.526	0.632	0.421	0.368	0.5	1.289	0.579	0.579	0.526	0.395	1.553	0.474	0.1053	0	0	0	0	0	0	0.053	0	0	0.026	0.053	0.105	0.105	0.053	0.158			0.945701	6.08621
25.0197	22.816	21.658	13.632	14.105	12.632	9.5	21.079	28.816	20.474	22.079	2.263	0.474	0.526	0.421	0.316	0.211	0.316	0.789	0.421	0.289	0.263	0.474	1.132	0.421	0.1316	0.0526	0.1053	0.0526	0	0	0	0	0	0	0	0	0.105	0.237	0	0			0.950228	4.89478
25.1388	17.553	21.079	15.289	11.947	11.053	6.263	16.5	25.289	14.553	13	1.658	0.316	0.421	0.368	0.474	0.289	0.342	1.079	0.289	0.342	0.237	0.289	1.211	0.342	0.1053	0.0526	0.0526	0.0526	0.105	0	0	0	0	0	0	0	0	0.105	0	0			0.954752	4.0164
25.258	11.658	20.921	10.158	8.658	8.447	4.553	9.211	13.895	8	5.763	2.079	1.026	0.316	0.447	0.395	0.421	0.289	0.737	0.447	0.342	0.158	0.421	0.895	0.421	0.3684	0	0.0263	0	0.105	0	0.105	0	0	0	0	0	0	0.053	0.079	0.105			0.959279	2.76249
25.3771	12.579	15.553	8.605	7.605	6.895	5.263	6.5	9.895	4.789	3.895	1.395	0.263	0.5	0.342	0.789	0.211	0.289	0.711	0.553	0.421	0.263	0.237	0.658	0.263	0.1053	0.0526	0.0526	0	0.053	0	0	0	0	0.053	0	0	0	0.105	0	0			0.963802	2.22239
25.4962	10.895	12.895	5.711	7.158	5.895	3.816	4.211	5.368	3.368	3.553	1.263	0.342	0.447	0.289	0.316	0.211	0.053	0.368	0.289	0.368	0.263	0.316	0.526	0.237	0.3158	0	0.0526	0	0.053	0.053	0	0	0	0	0	0.053	0	0	0	0			0.968325	1.71713
25.6154	7.605	8.553	4.553	7.316	3.921	2.026	2.421	3.289	2	2.395	0.711	0.474	0.263	0.079	0.211	0.158	0.395	0.684	0.368	0.289	0.263	0.263	0.447	0.289	0	0	0	0	0	0	0	0	0	0	0	0	0	0.105	0	0			0.972852	1.22695
25.7345	6.237	6.605	3.763	5.395	3.184	2.316	2.105	2.237	1.974	2.474	0.579	0.211	0.237	0.553	0.184	0.211	0.211	0.5	0.474	0.368	0.421	0.316	0.658	0.368	0	0	0	0	0	0	0.026	0	0	0	0	0	0	0.053	0	0			0.977376	1.0415
25.8537	4.658	5.211	3.395	4.947	3.211	1.395	1.737	1.526	1.921	2.237	0.632	0.211	0.605	0.368	0.263	0	0.447	0.447	0.263	0.211	0.158	0.105	0.526	0.211	0	0	0.1053	0	0	0	0	0	0	0	0	0	0	0.105	0	0.053			0.981903	0.873707
25.9728	5.553	5.053	2.816	4	1.921	1.711	1.658	1.789	1.605	1.789	0.658	0.579	0.184	0.105	0.211	0.053	0.053	0.526	0.421	0.474	0.211	0.158	0.368	0.079	0.2368	0	0	0	0	0	0	0	0	0	0	0	0.053	0.105	0	0			0.986426	0.809245
26.0919	3.684	4	2.5	3.579	2	1.132	1.263	1.342	0.947	1.211	0.474	0.158	0.263	0.342	0.211	0.263	0.237	0.368	0.263	0.368	0.105	0.158	0.342	0.237	0	0.0526	0	0	0	0.053	0	0	0.053	0	0	0	0	0.211	0	0			0.99095	0.645415
26.2111	3.553	3.053	2.158	3.368	1.053	0.947	1.289	1.184	1.026	1	0.5	0.211	0.263	0.105	0.132	0.105	0	0.132	0.211	0.211	0.263	0.211	0.368	0.105	0.1579	0	0	0	0	0	0	0.053	0	0	0	0	0	0	0	0			0.995477	0.541473
26.3302	3.263	1.947	2.289	2.079	0.974	0.921	1.447	0.974	0.711	0.974	0.447	0.289	0.237	0.053	0.316	0.158	0.421	0.211	0.105	0.368	0.105	0.184	0.395	0.211	0.2105	0.0526	0	0.0526	0	0	0	0	0	0.053	0	0	0	0.053	0.053	0			1	0.488843

## Sheet: Image26
X0	Y0	Y1	Y2	Y3	Y4	Y5	Y6	Y7	Y8	Y9	Y10	Y11	Y12	Y13	Y14	Y15	Y16	Y17	Y18	Y19	Y20	Y21	Y22	Y23	Y24	Y25	Y26	Y27	Y28	Y29	Y30	Y31	Y32	Y33	Y34			Ap-Basal to 1	Average intensities
0	69.3455	29.7698	20.679	34.4939	22.5623	7.9324	16.1022	24.8467	17.103	12.582	16.281	14.6841	10.3544	39.6289	14.632	5.3983	7.0592	21.5228	33.1025	51.565	49.8637	26.5029	20.2542	33.5518	36.7509	26.6657	16.062	24.323	44.144	30.4077	29.5401	35.644	24.9574	45.447	35.014			0	27.1078
0.1191	72.1886	31.5026	25.7867	37.346	21.9157	8.3398	18.2209	24.5401	18.709	14.705	18.227	13.9706	11.562	36.6436	14.1228	5.8467	8.1303	22.4891	34.7189	53.358	48.8538	25.1253	20.7572	32.8419	38.4174	26.8189	16.414	23.94	45.916	32.3904	32.399	41.513	27.9804	49.2482	37.4952			0.00446275	28.3553
0.2383	78.1531	33.5509	26.559	37.863	22.464	6.9678	16.6412	25.8175	18.806	14.524	20.038	13.9081	12.3342	34.732	13.8594	7.3302	10.8851	24.5665	37.3987	54.216	51.6274	25.5524	20.935	31.3288	38.0946	27.344	17.123	24.098	44.506	34.1809	32.331	44.0892	29.0069	49.8913	35.9313			0.00892924	29.0473
0.3574	82.358	39.1977	27.2089	36.517	24.5033	8.4147	16.25	26.1481	20.515	17.386	18.823	13.551	13.9238	37.7984	13.6557	9.1884	11.9324	23.6604	39.204	57.355	51.3405	28.4328	21.2234	28.1403	37.6647	28.3024	18.44	22.697	44.395	33.15	32.357	47.2597	31.7457	52.554	36.8415			0.013392	30.061
0.4766	83.2772	42.7384	29.1636	39.7173	27.2141	10.828	17.4424	26.6719	23.023	18.563	19.502	14.6009	16.058	37.377	13.8055	11.6131	14.0129	24.2628	43.0358	57.7	57.7877	31.641	22.841	26.978	37.3781	30.8591	21.357	25.982	48.035	36.7863	33.3051	49.2289	33.8516	53.2261	38.8469			0.0178585	31.9632
0.5957	87.4502	46.659	31.8236	38.2375	27.3323	10.6612	17.1606	27.1221	25.28	21.17	22.174	17.8314	18.5191	39.2414	13.825	14.4451	18.3997	25.7057	45.731	64.699	59.9799	34.0332	23.556	26.9059	36.4312	32.6905	20.962	29.85	47.245	38.5243	30.0592	51.6725	37.0668	53.043	40.4421			0.0223212	33.598
0.7148	90.2573	53.9096	32.2152	41.5554	30.5611	11.0126	17.9735	28.0065	26.748	23.054	28.99	20.4861	21.5231	37.609	15.37	17.762	20.601	23.5675	46.8691	63.096	62.4461	40.8412	25.7722	27.7546	36.1224	39.1864	23.538	30.743	49.334	39.567	30.6866	49.5277	41.8961	57.3132	45.4995			0.026784	35.7541
0.834	94.9557	58.6839	33.6376	43.9499	29.3881	12.1151	20.1677	28.2961	31.666	28.218	30.753	23.5696	26.6896	33.9042	16.4516	20.2529	24.712	23.9536	51.6591	65.469	64.39	43.711	27.9714	26.0075	38.5488	42.8443	25.956	33.243	51.1	39.8925	31.6776	51.6965	49.4888	56.319	47.7797			0.0312505	37.9748
0.9531	94.6551	66.2845	35.2775	44.7551	28.5899	13.7464	20.7394	30.1372	36.192	33.764	42.573	28.7731	29.9714	32.3592	18.6983	26.3858	28.8631	23.3948	60.4465	65.693	63.0626	45.5925	31.2048	26.2709	40.3393	46.7305	28.89	35.885	51.618	39.8669	33.6708	52.7489	53.7954	56.0562	47.9419			0.0357132	40.4278
1.0723	97.338	69.0613	38.2295	42.2023	29.6839	15.6973	24.4347	36.7762	45.056	40.83	47.678	34.4838	33.1296	31.996	21.5756	32.9477	34.0163	25.7263	64.5918	60.678	62.8015	48.8306	33.0791	28.7954	40.9859	53.2852	31.534	38.521	59.136	40.9131	39.5256	51.4789	59.8171	57.581	54.002			0.0401797	43.612
1.1914	93.5096	70.1392	39.5088	47.8739	29.4298	18.4034	28.1423	44.2226	52.872	49.276	60.564	41.8446	35.4403	30.0874	24.8262	35.9744	40.338	31.2653	72.2733	59.629	66.7663	54.0152	34.8215	32.4775	44.7806	57.388	36.161	44.173	63.687	42.7229	41.5021	51.1276	61.813	61.3517	56.1181			0.0446425	47.2722
1.3106	97.6356	72.5886	43.6533	49.8173	31.5268	20.2434	31.1177	47.7738	60.746	56.963	70.974	47.877	39.6774	29.7028	25.9033	40.8729	44.9106	31.5569	75.9135	59.842	65.1459	59.0613	35.8676	32.0977	46.0505	62.4162	42.541	50.459	65.006	44.1195	41.3734	50.3584	63.0664	62.574	59.7979			0.0491089	50.2637
1.4297	95.2023	78.0325	48.5868	49.8709	32.4243	23.6678	35.4266	53.7925	73.514	64.387	80.174	53.4372	45.2139	29.0512	31.2747	44.7164	52.1956	31.5167	76.8287	66.782	66.2063	63.1152	37.3341	32.8752	47.0702	63.5737	46.876	58.926	73.348	45.951	45.8875	50.8582	66.7222	64.9585	58.3954			0.0535717	53.9484
1.5488	94.75	78.941	50.825	52.1187	34.6386	24.7212	38.1921	56.3632	80.249	73.081	85.212	57.5877	47.6145	30.0134	34.7592	44.4866	60.2599	33.3871	82.078	69.89	66.9466	66.8633	38.3527	36.021	49.9105	63.0833	45.992	65.951	76.817	49.3156	51.9941	49.3437	67.6641	64.8306	62.4708			0.0580344	56.7064
1.668	91.1985	77.6161	53.3734	53.1143	36.5251	30.2606	42.2372	57.9778	87.017	82.824	92.644	63.0423	47.0644	31.3307	36.5615	47.6923	65.5589	35.0205	81.1008	72.115	69.293	69.1989	41.1696	39.3548	54.0892	64.7691	52.309	73.021	79.92	51.7537	62.0921	48.1682	73.8044	67.0863	68.4578			0.0625009	59.9646
1.7871	91.4398	77.7772	57.6278	51.6512	38.8994	34.5602	42.5984	59.216	89.959	90.514	92.685	63.987	45.5575	34.291	37.9927	49.2042	70.3355	38.6607	85.0382	80.01	67.0113	69.9696	44.832	40.736	57.788	64.3041	60.988	78.569	85.894	57.0177	71.2098	51.4108	81.8341	70.255	67.7387			0.0669637	62.9018
1.9063	93.4891	74.4881	55.2389	53.0378	38.1563	36.9437	43.43	60.913	93.142	94.334	94.297	65.2543	47.8594	39.7723	42.6951	50.239	74.0765	43.7026	89.1256	87.686	65.411	75.5684	46.8627	40.236	56.8466	64.2245	69.127	87.536	89.881	65.3336	78.9732	54.2657	81.7334	72.8827	71.8798			0.0714302	65.6755
2.0254	87.5382	72.617	57.9092	50.8209	39.9164	36.2812	43.0133	57.4692	95.869	102.687	93.275	70.4566	47.5755	41.3363	42.4972	52.6984	77.0203	46.6743	89.759	90.868	63.2281	74.167	49.7763	44.3534	56.2	61.1454	80.191	91.184	86.379	69.2328	82.6237	54.2731	84.5222	76.1379	75.0931			0.0758929	66.994
2.1445	87.3477	74.0703	60.2425	49.1272	41.3107	37.5106	45.3772	52.5215	100.405	111.137	100.214	70.6693	45.3576	42.875	45.0516	51.9871	80.5518	46.8155	89.9167	93.565	64.9964	69.5655	49.5657	45.2741	54.7075	61.1513	90.703	98.905	88.951	75.2394	88.7317	58.6544	81.8128	78.0671	77.2781			0.0803557	68.8473
2.2637	84.257	72.1191	55.6716	50.0183	42.52	37.8204	47.5325	51.1107	100.484	105.576	89.898	66.5578	50.0347	42.1103	43.9704	50.7835	84.2277	50.5988	95.0652	98.27	65.9607	68.2983	51.268	46.9927	49.7602	59.6547	95.671	102.701	93.007	79.1605	91.7166	60.1987	81.4061	78.0904	79.7364			0.0848222	69.2071
2.3828	81.093	71.1611	55.3439	49.5331	43.6375	42.0465	48.8161	50.1736	102.883	105.041	84.534	63.1111	48.7478	48.4929	47.7163	52.0572	83.4856	54.2573	91.9613	100.336	67.1429	64.7171	52.3042	47.8673	50.8734	57.9779	101.907	102.04	102.154	78.6994	91.7867	62.2135	76.7861	79.4136	77.5659			0.0892849	69.6536
2.502	88.7661	72.4953	55.1147	49.7029	40.4597	41.6522	48.4746	44.6393	100.636	104.847	80.175	58.9137	47.5163	53.1295	52.5564	50.6057	85.4559	59.9593	93.3927	102.339	73.3285	67.273	51.9587	47.6985	48.1649	55.2405	99.493	106.091	102.289	82.8481	94.922	66.3824	77.1344	83.4472	79.66			0.0937514	70.4789
2.6211	83.6538	71.5098	59.1273	49.2602	37.9801	43.1838	49.6256	46.633	98.916	101.076	83.502	59.5738	46.9213	53.0364	51.5331	51.3752	81.6634	68.7677	91.6073	99.695	77.4984	66.1629	54.0514	48.4669	46.3009	50.4424	99.574	107.032	103.29	85.5164	96.2989	70.6599	82.1756	85.1506	78.9583			0.0982142	70.8634
2.7402	86.5487	73.1028	61.9682	48.9999	41.0085	42.9261	46.5543	44.5459	92.717	98.487	76.601	51.7364	43.1593	51.2393	49.9259	50.1626	77.3596	73.6461	89.5741	101.555	80.0146	65.9683	54.949	48.5456	43.0341	46.6355	101.401	113.166	103.457	88.0781	98.9985	74.5424	77.9814	83.6379	81.8104			0.102677	70.4011
2.8594	86.7234	69.5019	61.9674	47.2718	39.12	40.1356	42.1292	41.9433	92.262	94.618	75.187	48.1324	40.5162	45.1955	46.3419	49.9488	71.4639	77.8436	83.95	103.665	82.9086	65.6518	52.7238	55.2086	42.466	43.4177	101.402	110.051	108.202	92.4236	96.9643	77.5876	78.3268	85.0031	78.1294			0.107143	69.3824
2.9785	91.2703	71.0627	64.39	44.0824	35.7631	39.4525	40.7408	40.8501	86.986	99.521	76.117	47.431	37.316	41.5047	48.8618	51.0499	70.1343	76.7172	78.3281	99.456	87.3098	66.2459	53.67	57.5336	44.7298	38.3868	94.481	110.88	109.246	93.7697	90.8423	80.3547	76.6826	79.0875	74.8484			0.111606	68.5458
3.0977	92.7122	67.3984	66.3887	42.3368	34.9143	39.6831	39.7146	41.8684	82.554	96.114	68.881	48.0028	38.7912	41.2768	46.606	47.3809	65.9157	78.869	68.7861	98.874	87.999	62.4856	54.0452	57.5021	41.458	33.3812	90.708	112.183	109.632	94.3321	84.9717	80.4147	73.527	75.2808	74.9751			0.116073	66.8561
3.2168	94.217	64.1201	69.4324	41.6744	33.8368	36.707	38.7123	34.4047	78.932	95.096	70.396	48.6356	33.0598	39.7592	44.0136	47.5827	61.1929	73.57	64.8988	99.606	87.3636	64.3509	52.8249	58.8553	39.8319	30.0815	89.976	112.465	109.448	96.8799	83.0997	82.4989	74.4266	73.8396	75.4752			0.120535	65.7504
3.336	94.6564	64.3809	72.5691	41.1968	36.0014	32.8849	38.1499	38.5579	77.368	93.384	67.202	46.3477	31.3353	38.0368	45.4371	47.3387	60.2321	71.3616	60.4949	95.751	81.7943	62.0436	53.6738	59.9328	37.8947	26.7176	83.391	109.446	110.498	92.493	73.986	77.6454	78.7777	72.7518	77.185			0.125002	64.3119
3.4551	98.069	61.0566	71.4848	42.6037	37.3138	31.6271	33.9115	36.1483	73.556	95.525	64.877	39.5856	30.003	35.6832	45.48	48.8591	58.3489	66.4922	54.0178	91.879	77.7893	62.0697	51.9339	54.8657	35.9153	22.9884	77.283	109.985	111.58	88.3229	65.796	77.9354	79.4932	72.6695	72.938			0.129465	62.2311
3.5742	96.1767	64.2083	71.9355	44.44	36.8395	29.9155	34.3678	35.9176	73.162	95.041	61.604	39.9704	34.1245	34.4043	44.4758	48.1875	55.3326	58.1412	49.9367	84.84	74.3289	61.1452	50.6593	58.0533	34.86	20.5399	76.29	106.241	110.833	88.0017	53.785	80.4081	80.6763	71.8726	74.5346			0.133927	61.0071
3.6934	97.821	62.0731	75.8597	45.6692	37.2642	32.1824	29.92	34.7856	74.044	94.112	63.282	41.3897	30.6616	31.1426	39.4858	46.8694	55.2961	51.7692	50.1141	79.929	69.1899	62.7298	50.4675	57.0956	35.0707	18.08	69.962	101.217	112.045	87.8763	44.3283	77.0967	79.778	70.1965	78.0288			0.138394	59.6238
3.8125	93.1937	60.0674	71.8326	43.163	38.4111	30.9761	30.7681	36.269	68.413	91.486	59.504	38.9232	35.2949	30.2938	38.8099	49.0237	55.7919	46.5594	41.845	73.721	64.2884	58.6296	54.2922	56.0186	34.0329	16.3357	69.27	102.584	110.818	82.8139	40.8031	75.937	77.104	70.5536	81.0913			0.142857	57.9691
3.9317	90.2783	58.0296	72.2767	46.2029	37.4909	32.0847	26.1495	34.5867	66.976	86.944	58.234	37.6302	37.0227	27.8639	35.8201	51.8072	52.0994	43.8089	37.3393	64.252	59.201	56.1614	54.2759	52.2533	32.4567	14.2147	65.059	103.174	108.569	79.0375	37.0599	75.5778	78.5318	68.2782	79.5627			0.147323	56.0089
4.0508	86.1097	54.0213	73.9404	43.826	36.1973	28.607	27.3692	32.4224	57.54	86.281	58.332	34.8445	37.3401	26.8154	32.4406	48.7363	49.077	40.3976	36.2717	49.484	54.0574	54.9328	53.3325	49.2638	31.2087	12.1618	61.699	102.486	106.089	69.0194	31.0645	76.7309	79.6897	71.8984	78.6881			0.151786	53.4964
4.1699	81.8344	51.6726	76.8141	46.1773	39.0077	27.1633	24.2997	29.2864	52.757	85.454	57.164	38.9183	40.799	27.0439	29.4666	48.1863	46.0643	33.9014	31.9561	39.123	53.3537	50.9814	50.9842	48.6126	29.1093	11.6094	58.533	109.334	103.85	61.6511	28.257	77.3837	82.2977	71.1912	80.7417			0.156249	52.1423
4.2891	73.2879	48.5874	73.0657	45.1638	36.0182	26.6958	21.4373	30.3583	51.258	78.796	49.463	38.2699	45.2844	22.6243	27.4003	46.016	39.8505	32.8196	29.925	34.63	50.7493	50.5243	48.0797	40.9757	25.9971	12.6253	53.553	109.744	104.247	51.7836	27.1574	72.3681	77.8017	73.0115	80.8107			0.160715	49.4394
4.4082	70.6665	46.1567	72.2205	46.463	37.6532	25.9021	23.1548	28.7681	51.444	76.213	49.584	39.9642	43.514	22.5937	26.3761	45.0463	39.0134	30.3719	23.8639	29.364	44.4002	48.2432	44.5146	36.2714	24.0539	11.9868	47.518	106.899	96.872	42.5288	24.6535	68.5335	76.3605	73.5418	79.2465			0.165178	47.2559
4.5274	65.6425	42.3391	67.8604	42.7168	34.419	26.6778	19.4906	31.1378	51.045	70.329	48.221	40.5444	43.4662	19.8957	24.6569	41.9047	36.854	29.9621	18.903	25.497	40.4847	44.6889	39.0149	28.8705	21.2317	9.7841	45.067	106.134	86.432	31.4967	22.328	59.8135	76.186	75.053	78.041			0.169644	44.1768
4.6465	60.7867	36.2718	64.7602	42.9524	34.5194	23.4096	18.3466	28.2632	50.871	67.861	50.323	40.4977	44.3947	21.3722	23.2736	36.3028	35.5734	29.5706	17.8933	23.169	38.6061	36.5079	36.8491	24.4739	20.5019	10.2742	39.816	106.023	79.465	26.5938	20.7463	53.8534	72.6181	77.3317	77.6515			0.174107	42.0493
4.7657	56.1135	31.9048	57.6628	41.8091	35.5434	23.4808	18.6176	27.5765	53.414	67.684	50.552	41.0257	45.2948	19.8634	22.4223	32.7184	34.0675	26.4989	14.6719	23.331	34.7579	31.331	30.7173	19.2259	20.5145	10.1581	36.142	106.56	70.524	22.0607	17.2996	48.7148	68.6113	78.8967	81.9016			0.178574	40.0477
4.8848	46.3346	26.0044	50.5633	36.1926	32.4759	23.6124	19.1438	24.7187	50.608	67.096	49.299	39.5234	41.1108	18.8646	21.8876	32.2259	29.8111	25.4941	12.5776	23.786	30.7428	25.1613	29.9087	17.0918	21.0136	8.8775	31.376	99.573	62.278	18.0089	15.796	46.2192	68.2727	75.7792	78.7109			0.183036	37.1468
5.0039	38.7516	21.5763	40.7986	35.768	33.816	22.5121	16.8707	22.0597	46.038	59.472	47.009	43.5872	44.2963	18.3442	19.7431	28.3923	30.2207	24.1774	13.2227	25.697	26.6674	19.6056	25.5723	18.4402	22.0723	9.7133	27.816	93.95	48.946	15.2403	11.9409	42.3319	70.949	79.3662	77.274			0.187499	34.9211
5.1231	32.8102	16.461	33.707	37.0342	31.518	21.3252	14.3548	20.0141	35.538	59.072	42.872	41.8029	41.3361	18.6828	19.1751	27.0897	27.6053	21.3226	10.9405	23.949	21.5638	17.2392	23.015	16.3242	19.9082	8.4973	25.09	90.232	40.231	15.2009	10.1489	39.5264	66.8421	79.7395	72.5938			0.191966	32.0789
5.2422	26.2023	12.0147	24.0891	35.3723	31.4712	18.7201	12.5832	19.29	25.954	53.799	42.44	32.4136	42.2671	18.6138	18.5094	23.5574	21.7069	20.0788	9.1898	21.654	19.115	15.4599	19.1774	15.9571	19.9157	8.3303	21.57	86.321	32.312	15.2955	8.1848	38.9128	68.4632	80.6731	72.2349			0.196428	29.4814
5.3614	20.473	9.548	18.0002	33.8993	31.7189	12.8635	11.5691	15.5102	17.56	48.49	37.387	29.5152	35.7258	15.8731	17.7257	22.3881	20.4635	22.7779	8.6896	20.065	16.0264	12.0176	15.8618	14.5124	18.2511	7.1932	21.726	78.347	26.477	13.2834	5.8963	34.2331	66.8638	79.5522	71.9447			0.200895	26.6408
5.4805	17.4162	7.9133	12.6694	28.795	31.5215	10.448	9.3014	15.6233	13.41	41.288	31.316	25.4062	35.7357	14.3034	16.4404	21.0443	21.1902	17.8684	6.5992	18.329	13.6444	10.198	12.8445	14.2475	17.0566	5.3041	20.896	73.245	22.047	11.2135	4.0912	32.5114	66.1788	81.614	70.8173			0.205358	24.3579
5.5996	13.656	7.1747	9.0121	26.0441	33.6682	6.4728	9.0577	15.6597	10.78	34.952	23.659	21.8763	32.5521	13.4837	14.4424	20.413	18.246	16.3772	7.49	17.011	12.6913	8.5702	11.8731	13.2125	15.6135	4.9439	19.643	71.109	17.944	8.8965	4.3562	30.4818	64.4712	78.1697	62.493			0.20982	22.1856
5.7188	11.1039	4.9748	9.1064	17.5302	31.6856	3.8985	10.4033	14.4804	10.285	23.655	16.851	18.4791	28.6764	10.7814	13.872	18.4796	18.0653	15.4929	5.6897	16.601	10.2753	7.5134	10.089	12.5705	13.5531	4.698	16.501	68.552	18.069	9.4347	3.3761	26.7858	69.2253	74.7434	55.0722			0.214287	20.0163
5.8379	8.7288	4.0341	7.3638	14.1224	30.5917	3.2264	11.3963	14.6702	8.807	17.242	12.644	15.7532	25.2253	9.1192	13.7076	17.5804	15.3295	15.9868	5.1862	14.398	10.009	7.0244	9.7997	11.8052	10.8886	4.2342	16.247	64.921	17.66	9.3354	3.1466	23.9104	69.4737	73.9948	51.6811			0.21875	18.5498
5.9571	7.1116	3.8205	6.377	11.5564	28.1357	4.0107	10.6858	13.2619	9.626	14.285	10.57	13.7805	22.1412	9.9849	12.6422	16.707	15.8207	13.6834	4.6776	14.862	7.9333	6.2623	8.3151	10.8157	13.507	4.8241	15.899	60.557	15.595	8.0916	3.021	20.2824	74.6211	69.837	47.7237			0.223216	17.4579
6.0762	6.0083	3.2895	6.8899	9.2663	27.6235	3.3703	10.5487	11.1961	8.444	13.588	10.086	13.3698	20.4332	7.638	12.2563	15.2758	13.5828	13.0368	4.4423	14.321	6.8774	5.2137	7.3877	12.0952	14.0191	5.4725	13.446	47.824	13.768	8.985	2.7843	16.1965	78.5056	67.2968	46.0624			0.227679	16.3029
6.1953	4.9642	3.266	5.2443	8.4895	23.756	3.7321	10.9588	10.9617	7.872	13.676	11.047	11.4047	17.6441	6.8839	10.9309	13.3723	13.9035	13.0472	4.8549	11.609	7.1952	4.6771	6.2407	10.0233	13.6624	5.407	12.818	34.8	11.576	9.0541	2.9233	13.5209	77.6931	62.6819	42.417			0.232142	14.9231
6.3145	4.9221	3.0575	4.8887	7.4108	17.242	3.5032	10.6577	11.7714	7.705	15.161	10.302	10.6831	15.4118	6.6555	10.9824	13.1755	12.9844	11.7851	3.9531	10.957	8.091	4.8555	4.7825	10.215	11.7567	4.9	12.885	21.859	10.288	9.6255	2.7722	10.7309	79.674	57.0621	38.4135			0.236608	13.7463
6.4336	3.4091	2.7612	4.9801	8.5788	12.8828	3.121	11.865	9.7143	6.815	14.706	9.303	9.1443	15.676	6.8339	10.9631	12.6037	11.3455	10.8652	3.0609	11.311	7.3317	4.469	4.2286	10.7879	11.2163	4.6092	10.877	17.526	7.558	8.9426	3.238	9.1723	81.5836	52.1942	39.7161			0.241071	12.954
6.5528	3.8194	2.802	5.0888	7.4747	8.6796	2.8663	13.0615	10.0194	6.303	16.533	9.466	8.9307	13.6367	5.8731	9.7719	10.7506	9.9296	11.8124	2.8471	11.129	7.7314	4.7853	4.9612	11.421	10.3106	4.0833	8.822	13.234	6.322	9.3057	2.9523	6.9573	80.2336	44.9576	37.531			0.245537	12.1258
6.6719	3.0379	2.3083	4.1495	6.5599	6.5209	2.7606	12.8472	10.3199	7.583	15.001	8.521	7.0855	12.3181	5.6355	9.0048	11.8573	9.7203	12.3118	3.0356	10.55	6.5431	3.9745	4.8369	11.7227	10.3433	3.53	7.455	11.535	6.598	9.8712	2.7054	6.0085	78.7861	35.651	36.772			0.25	11.356
6.7911	3.6289	1.9629	4.5007	6.5245	5.2723	2.5824	12.5907	10.6072	6.936	13.767	7.964	5.9102	10.9754	4.6301	8.7424	9.313	10.0124	10.5278	2.6958	9.618	5.9099	3.9555	4.6398	10.2604	8.8399	3.9519	6.136	10.023	5.985	7.6847	2.9762	4.3119	75.4127	28.4509	37.1645			0.254466	10.4133
6.9102	3.0564	1.9916	3.9377	6.7033	3.8426	2.7257	12.0623	10.5785	7.641	13.164	8.237	4.848	9.5907	4.9514	6.9935	8.902	8.5057	11.1122	2.7761	9.583	4.991	3.3295	4.0666	9.5601	8.3898	3.4229	4.741	8.895	4.936	6.7587	3.6237	4.2738	74.2407	23.7507	36.7612			0.258929	9.79838
7.0293	2.8186	2.0163	4.6115	6.0003	3.6018	3.1188	10.2751	8.1533	7.404	10.544	7.768	4.4423	10.0565	4.1594	6.1764	8.4626	8.3812	10.7391	2.5467	10.578	5.0162	3.677	3.5434	7.7937	8.2145	3.1842	4.742	7.021	4.898	6.935	2.9099	3.4921	69.5505	18.8832	33.8766			0.263392	9.01689
7.1485	2.569	1.8194	4.4834	5.0369	3.0754	2.73	8.5216	8.1102	7.513	9.3	7.307	3.2794	9.7726	3.7813	6.346	7.6246	8.3184	10.0635	2.423	10.341	4.6807	3.8095	3.1694	7.0101	5.9729	2.8809	4.057	6.356	4.676	6.4742	2.8908	2.8404	63.177	15.6325	34.4803			0.267858	8.30067
7.2676	2.4936	2.0912	4.3065	5.5185	2.1933	2.4227	9.6384	7.5124	6.475	8.075	7.574	3.1459	9.1479	4.0491	5.7004	6.6657	7.8881	11.0769	2.2037	8.875	3.4137	4.5266	2.4352	6.3317	7.3702	3.1427	4.196	5.33	3.996	5.5077	3.3006	2.8868	55.9097	11.8682	29.8149			0.272321	7.63095
7.3868	2.1156	1.9197	3.657	5.7382	2.3359	2.5286	8.8057	7.6055	7.315	7.033	6.853	3.3669	7.6961	3.9393	5.0172	6.4047	7.5735	9.8295	2.6539	7.938	3.4009	2.7694	2.8624	5.4733	7.9693	2.8018	3.452	4.04	4.814	5.6345	3.1619	3.5099	46.8475	10.4676	26.7556			0.276788	6.97961
7.5059	2.4946	2.1918	2.9375	5.9443	2.8192	2.2174	8.8052	7.4975	6.368	6.27	5.872	4.9031	8.0549	3.2927	4.6467	5.5995	7.4455	10.1419	2.9137	7.637	3.8427	3.2258	2.9337	3.846	8.1796	2.805	3.831	3.977	4.001	4.7572	3.8252	2.8885	35.7489	9.0883	24.7422			0.28125	6.44985
7.625	2.3394	2.102	3.4134	5.4841	3.4032	2.3074	8.3083	8.1551	7.085	5.343	6.115	4.1514	7.7797	2.6165	3.7062	5.2584	6.6794	9.64	2.4121	8.03	4.5086	2.9818	2.618	4.531	8.831	2.6456	2.804	4.122	4.709	5.0496	4.0673	2.725	26.3985	6.9226	21.6823			0.285713	5.96931
7.7442	2.1238	1.8984	3.5812	5.2878	2.7301	2.4192	7.8733	8.5053	6.612	5.377	5.66	4.1178	7.7563	3.1779	3.7939	5.1974	6.7298	9.5571	2.6285	7.747	4.5136	3.6257	2.5966	4.4456	9.3813	2.6428	3.224	2.85	4.283	4.9047	4.6502	2.7375	19.8525	6.522	19.7333			0.29018	5.67819
7.8633	1.6869	1.8279	3.8018	5.0962	2.543	2.5358	7.4601	7.8405	5.766	5.438	4.374	3.767	7.7582	3.0864	3.6219	4.5454	5.906	9.7139	2.7218	7.353	3.4711	3.7611	2.6078	3.7539	8.9062	2.3023	2.383	3.026	4.296	4.7068	4.671	1.9779	14.8348	7.747	18.4774			0.294642	5.25046
7.9825	1.6046	1.8664	2.9019	4.2828	3.1019	2.3743	7.2495	7.6387	5.233	4.669	4.187	3.8296	6.9799	3.168	3.4017	4.036	5.8258	8.9142	2.8781	7.786	2.9981	3.5003	2.608	4.0888	11.3794	3.0283	2.789	2.817	3.43	3.9452	4.7384	2.6165	10.9652	6.4684	16.404			0.299109	4.963
8.1016	1.4672	2.2642	2.8616	3.6209	3.4533	2.2497	7.466	6.7092	5.148	4.449	3.778	3.6558	6.7982	2.3864	3.3489	3.9011	5.488	8.6845	2.2964	7.762	3.4227	2.5484	2.211	4.1314	10.6415	2.5187	3.126	2.907	3.976	3.6365	5.4329	2.4549	9.9797	5.0989	14.0589			0.303572	4.6838
8.2207	1.4533	1.8671	2.9317	3.7882	2.2696	2.5057	8.3267	6.7887	4.602	3.612	3.773	4.41	7.204	1.9774	2.7023	3.9917	4.1759	9.337	2.7056	8.484	3.0248	3.4069	2.6563	3.6038	11.233	3.0991	3.332	2.562	4.076	4.1381	6.2073	2.7547	8.7599	5.355	11.2858			0.308034	4.64002
8.3399	1.7336	2.1888	3.6185	3.7171	1.7459	2.4199	8.0802	7.0966	4.412	3.703	3.473	4.2968	7.193	2.6007	2.6752	2.9528	4.614	8.6828	2.2699	8.514	2.511	2.8362	2.2518	3.6264	9.9404	2.5765	2.768	2.229	3.129	4.0997	6.4573	2.5484	9.7114	5.4005	10.1989			0.312501	4.46492
8.459	1.4147	1.6739	3.4299	3.2896	1.7801	2.88	6.1868	6.0262	5.582	4.222	3.569	4.6218	7.2493	2.5866	2.2056	3.2411	4.3429	7.8208	2.7153	8.311	2.3993	2.4347	2.254	3.1316	10.7896	2.5303	2.388	2.688	3.243	3.3726	6.908	2.1938	10.3292	5.4135	8.6175			0.316964	4.33833
8.5782	1.4137	1.5997	3.1067	3.4898	3.0271	2.4009	7.3851	6.6191	6.542	3.853	3.881	4.2338	6.4417	2.1043	3.2666	3.4953	3.9316	7.4258	2.3869	7.997	2.5899	1.993	2.2754	2.7423	12.0942	2.8683	2.431	2.687	3.848	3.6314	7.9939	2.488	10.5206	5.7163	7.3725			0.32143	4.45294
8.6973	1.7475	2.2587	3.1702	3.1431	2.1353	2.1551	6.8294	7.0463	6.439	3.179	3.663	4.4871	6.2325	1.8754	1.991	2.7942	3.0741	6.4508	2.3777	8.427	2.3802	2.2798	2.4413	3.0864	11.3317	2.7065	3.351	3.379	3.256	4.0469	8.1052	2.3094	9.4259	3.7062	6.7145			0.325893	4.22847
8.8165	1.7401	1.9345	3.0793	2.7918	2.1456	2.4766	7.4255	7.4144	6.221	2.806	4.212	4.6171	4.529	2.9086	2.1824	2.7656	3.0063	7.0254	2.5657	6.936	2.1236	2.9837	1.9515	3.0309	10.2869	3.3097	3.304	2.877	3.562	3.6441	8.2112	2.5628	9.7077	4.1773	6.968			0.330359	4.21381
8.9356	1.9775	1.4809	3.4817	3.1237	2.2479	2.4039	6.5683	6.587	6.642	2.431	3.572	4.9656	4.5824	2.5961	1.9909	3.2919	3.0763	7.0919	2.2611	6.689	2.2167	2.3331	2.0591	2.7192	9.8703	2.4437	3.412	3.403	3.656	3.684	6.6758	2.3501	9.1985	4.0403	5.8718			0.334822	4.02842
9.0547	2.2288	1.7695	3.2082	2.8643	2.1825	2.0211	6.1279	6.9812	5.404	2.471	3.956	5.0639	6.0403	2.2524	2.1472	3.0201	2.8888	6.1366	2.42	7.218	1.5263	2.4706	2.0861	2.5717	8.9399	2.7768	3.227	3.997	3.619	3.165	6.9922	2.3165	9.08	3.5177	6.0862			0.339285	3.96497
9.1739	1.4955	2.0861	3.0638	3.6061	1.8683	2.3027	6.1708	8.2154	5.252	1.937	3.047	4.3745	5.5196	2.0797	2.1114	2.8583	2.986	6.4917	2.6089	8.423	2.0344	1.848	2.374	2.207	8.8056	2.9127	3.561	3.317	2.942	2.9535	6.6896	2.0192	8.3474	3.374	6.1677			0.343751	3.88717
9.293	1.4199	1.7089	2.8325	3.2729	2.1246	2.6956	7.4895	9.016	4.357	2.583	3.408	5.0467	6.1149	2.3349	1.3701	2.092	3.284	6.4432	2.5649	7.733	2.3163	1.3848	2.0153	2.719	8.3041	3.0645	3.436	3.556	2.958	3.7318	7.2732	2.2258	8.5841	3.6528	5.2427			0.348214	3.95303
9.4122	2.3382	2.019	3.09	2.9161	2.0562	2.0631	6.6338	10.6487	4.555	2.302	4.393	4.8718	4.8826	2.1801	1.9753	2.5432	3.5313	6.6272	2.5511	7.311	1.6247	2.2412	2.6546	2.8036	9.1836	2.8749	3.843	3.044	3.59	3.1715	6.8671	2.5041	7.7902	4.0242	5.0905			0.352681	4.02274
9.5313	2.2162	2.0922	3.7717	3.0477	2.2979	2.233	5.7072	9.9975	3.683	2.639	4.756	5.0701	4.6314	1.9596	1.5655	2.7561	3.7939	6.1691	2.7086	7.631	1.8248	2.2854	2.2753	2.6544	10.411	3.1251	3.796	3.235	4.006	3.4949	8.0571	3.0991	8.5735	3.5287	5.1117			0.357143	4.12013
9.6504	1.8732	1.9001	3.498	2.8475	2.0952	1.8944	6.5829	11.3953	4.108	2.598	5.558	3.8652	4.4511	1.7269	1.4443	2.8202	3.4868	5.3434	3.2081	6.812	1.9128	2.0542	2.0635	2.619	9.6466	3.1972	3.38	3.973	4.245	3.7632	10.3181	2.763	8.558	3.7937	5.0083			0.361606	4.13726
9.7696	2.0027	2.1021	3.5675	2.2212	1.7458	1.907	7.6799	12.4877	4.243	2.999	5.967	4.0614	5.3377	2.0785	1.5965	2.5654	3.1148	5.8602	3.5082	6.316	1.8907	1.9938	2.2486	2.9363	10.6467	3.7555	3.298	3.798	4.704	3.9867	10.4238	3.0173	9.3872	3.4499	4.9851			0.366073	4.33952
9.8887	2.2314	2.3497	3.3277	3.1604	1.9918	2.5945	8.0936	10.3252	3.496	2.888	7.129	3.9735	5.9815	2.3948	1.6542	2.8265	2.9441	6.6112	3.0155	6.634	1.5699	2.5084	1.7848	3.017	12.9421	3.281	4.172	3.551	5.026	3.8071	11.9771	2.5047	7.3682	3.3032	4.2977			0.370535	4.42094
10.0079	1.6902	2.7426	3.7296	3.1102	1.9006	3.1073	7.9716	8.2264	3.418	3.544	6.78	4.0528	6.5252	1.8848	1.351	2.5115	3.3055	5.7091	3.542	5.797	1.5367	2.2933	2.0603	3.4277	16.6226	3.1507	3.964	3.283	4.315	4.3663	13.4072	2.4525	7.642	3.4159	4.573			0.375002	4.49742
10.127	1.8396	3.183	3.8659	2.9565	1.8902	2.8335	8.4477	9.177	3.55	3.101	7.086	3.3072	6.0389	1.7989	1.2453	2.3228	3.2137	5.9246	3.902	6.372	1.7958	1.5499	1.8568	3.4228	18.0167	3.1516	3.406	2.586	4.369	3.8256	12.705	2.612	7.2586	3.2427	5.587			0.379465	4.49832
10.2462	1.9427	2.6548	4.1758	2.4176	2.0217	2.9213	8.7892	9.2515	4.164	2.785	6.732	3.6523	5.9126	1.9307	1.5949	2.0843	3.4022	5.236	2.6589	6.81	1.7354	2.1663	1.9212	3.7964	18.6606	3.0368	3.088	2.957	4.316	3.9799	13.2281	3.0245	7.3522	2.8392	5.7798			0.383931	4.5434
10.3653	2.3362	2.3546	4.2816	3.1334	2.3821	2.6259	9.0173	8.5622	4.243	3.986	5.859	3.7718	5.838	1.7355	1.6494	2.1427	4.3552	5.4884	3.2082	6.802	1.9021	1.8319	1.5658	3.318	17.0252	3.2449	3.511	3.079	4.323	4.0801	11.4945	2.5535	7.284	4.0846	5.001			0.388394	4.51632
10.4844	1.9113	2.6104	4.2897	3.3491	1.9143	2.6982	9.3562	9.2496	4.501	3.941	5.354	3.6852	5.5549	1.7524	1.6748	1.9485	4.766	4.9312	4.053	9.072	1.5961	2.5788	2.0805	3.3463	18.9751	3.1162	3.163	2.603	4.212	4.7976	9.1165	2.6917	7.4882	4.1106	5.5086			0.392857	4.62849
10.6036	1.6076	3.0009	5.9678	3.2345	2.4168	2.9257	11.4077	9.0958	4.536	3.362	5.451	4.3353	4.8	1.9511	1.831	2.4328	5.3697	5.4444	3.4659	8.224	1.9272	2.0454	2.7544	2.9255	19.6303	3.0791	3.491	2.449	3.623	5.0995	8.3787	2.7583	7.3219	3.3305	5.4814			0.397323	4.71872
10.7227	1.9898	3.6911	5.1226	3.2089	2.6986	3.0964	12.212	9.7032	4.281	3.198	5.262	4.491	5.4675	1.9724	1.8071	2.2539	4.1901	5.4901	4.0584	7.917	2.3305	2.3042	1.9794	3.1764	18.9199	2.7861	3.237	2.983	3.495	4.6158	8.0454	3.0352	7.7884	3.7368	5.2603			0.401786	4.73727
10.8419	1.7626	3.4143	5.0774	2.7146	2.453	3.5104	13.0612	9.6963	3.827	4.034	4.927	4.3898	5.9708	2.0389	1.7576	1.6839	4.054	5.3518	4.7601	8.531	1.7216	1.9633	1.8468	3.513	18.7798	3.3623	3.374	2.028	2.864	5.1015	9.1159	2.7513	6.3488	4.4969	5.2232			0.406252	4.72875
10.961	2.0268	3.8178	7.2759	2.7388	2.7321	3.4634	12.8641	8.3336	3.433	3.595	4.524	4.2715	5.7276	2.0926	1.5489	1.9976	4.1176	4.5993	4.0748	7.645	1.7262	2.118	1.9505	3.7819	19.9013	3.7454	3.657	1.915	3.66	4.9994	10.2998	3.2226	6.1922	5.662	4.7674			0.410715	4.81366
11.0801	2.2866	3.6722	6.9652	2.2757	3.2314	3.5906	12.7642	8.2907	3.961	3.901	4.823	4.9146	5.2403	1.8535	1.7876	1.6111	4.3198	4.6739	4.2533	7.056	1.6469	1.8368	2.2309	3.4051	20.9532	4.1499	3.327	2.14	3.704	4.8139	10.027	3.3862	6.9425	5.9105	5.1977			0.415178	4.88981
11.1993	2.3864	3.5835	6.3909	3.7719	2.9272	4.1297	12.8016	9.0919	4.694	5.458	5.138	4.816	4.8706	1.6914	2.1138	1.8395	4.1348	5.442	4.6547	6.445	2.2158	1.733	2.1117	3.0804	20.8374	4.0942	2.957	2.599	3.138	4.1249	9.9371	4.0005	6.1916	6.0007	5.4456			0.419644	4.99565
11.3184	2.8586	2.918	5.5214	3.115	3.009	5.2079	13.2599	7.6181	4.925	6.593	5.434	4.9441	5.2215	1.392	1.4562	1.7267	3.0575	4.7869	5.1982	7.061	1.6593	2.3848	1.8948	2.1341	18.1922	4.5349	3.489	2.594	2.797	4.1034	10.0524	3.5189	6.2435	5.6067	5.5585			0.424107	4.85907
11.4376	2.1312	3.7159	5.4164	3.1499	3.445	4.9047	13.6214	7.7054	4.377	6.9	5.068	5.8832	5.5507	2.3875	1.3272	1.5433	2.8544	5.7046	5.5433	5.614	1.6293	2.0456	2.1771	2.8299	20.6025	4.0937	2.681	2.648	2.907	3.9534	8.7112	3.3797	5.489	6.5286	5.4746			0.428574	4.91411
11.5567	2.581	3.2921	6.9354	2.9851	4.4002	4.0473	13.8466	9.3508	3.642	7.478	4.689	5.6412	5.8736	2.9599	1.1888	1.6769	2.5304	6.0897	7.0145	6.066	1.6505	2.0773	2.6509	2.6108	19.122	4.6423	2.513	2.724	2.557	3.8795	8.4649	3.9154	4.8565	6.7772	5.7044			0.433036	5.04098
11.6758	2.4086	2.9264	8.1581	3.1336	4.1433	4.3345	13.6362	8.442	3.676	7.989	5.192	4.4127	6.3616	2.8535	2.1423	1.8565	2.9923	7.0534	8.1215	5.789	1.7035	1.9886	2.6141	2.2925	17.4466	3.7071	2.374	2.554	3.009	4.4199	7.1111	3.6551	4.2577	6.783	5.5261			0.437499	5.00185
11.795	2.1227	3.5596	9.8419	3.2737	3.4185	4.3643	13.0978	7.9984	3.534	6.704	6.068	5.5572	6.0194	2.9162	1.6739	1.8712	2.8591	6.2869	8.3592	5.698	1.966	2.3091	1.9436	2.2263	16.7281	3.572	2.977	1.856	2.733	3.5721	7.2319	5.6156	4.3609	7.325	4.8074			0.441966	4.98423
11.9141	2.219	2.9595	10.7031	3.3173	3.3241	4.6998	12.6497	7.8966	3.473	7.493	5.44	5.7421	6.4852	2.7695	1.4263	1.5725	2.0088	7.0939	9.2809	4.45	1.5052	2.3163	2.1652	2.2966	15.9161	2.8277	2.837	1.664	2.275	3.5119	8.239	6.1772	4.249	7.3791	3.8517			0.446428	4.92044
12.0333	1.732	3.4285	12.3496	3.367	3.19	5.5083	11.9841	8.9676	2.864	8.867	5.144	5.6242	7.7326	2.9782	2.3182	1.6853	2.7233	6.97	9.903	4.592	2.0598	2.5363	2.4981	2.1279	15.2799	2.5107	2.654	1.855	2.006	3.5597	8.6676	5.7983	3.6563	6.7312	4.2054			0.450895	5.08786
12.1524	2.3057	4.2055	12.3808	4.0198	3.2324	5.7776	10.3478	8.7224	4.123	8.953	5.185	5.4745	7.9293	3.074	1.8042	1.7803	2.3515	6.9482	11.0491	5.14	1.4222	1.9791	1.6515	2.4105	16.1991	2.8277	2.277	1.977	2.176	3.8815	9.4461	6.2836	3.8739	8.8205	4.308			0.455358	5.26679
12.2716	2.3778	3.7619	12.6385	4.1187	4.3793	6.0579	9.8903	7.4454	4.64	10.341	4.825	5.2451	7.4646	3.0238	1.5667	1.6325	2.2512	7.158	13.9338	5.003	1.7716	2.1395	1.8774	2.36	17.0264	2.7716	2.326	1.966	2.481	4.2958	8.276	6.1099	4.0811	6.5021	4.4471			0.459824	5.3196
12.3907	2.435	4.4463	12.506	4.3709	3.9904	5.7314	10.6503	7.3996	4.649	12.317	5.801	5.01	7.3001	3.6425	1.9664	1.7534	2.4043	7.4983	14.3427	4.592	2.0203	1.9158	2.1215	2.2905	16.908	2.7001	2.596	2.107	1.83	3.8255	8.3065	7.0963	3.6811	6.756	4.0965			0.464287	5.45879
12.5098	1.9172	5.1458	12.7614	3.9187	4.4683	6.0796	10.96	6.2274	3.817	11.616	6.745	5.768	5.8358	3.8085	2.0923	1.9622	2.3216	7.647	16.7154	4.77	2.456	1.926	1.6735	2.0053	18.3886	2.7694	2.034	2.326	2.361	3.5906	8.6989	7.4878	3.7434	6.723	3.822			0.46875	5.55951
12.629	1.9413	4.6233	12.7607	3.3693	4.216	4.7142	10.214	5.5244	3.92	11.996	6.471	6.2337	6.3948	3.2797	2.0393	1.6766	1.8607	8.1246	15.016	4.774	2.4814	1.9466	2.6044	2.4112	19.4565	2.6165	2.215	2.52	2.569	3.6008	7.9271	8.4281	3.6521	6.6611	3.812			0.473216	5.48718
12.7481	2.4807	5.2497	14.7995	3.83	4.8952	4.788	11.6175	4.0075	3.765	10.946	6.904	6.062	6.5179	3.5483	1.9576	1.6217	2.4431	8.0596	12.825	4.193	2.114	2.161	2.5359	2.3539	19.347	2.7206	2.37	1.715	2.473	3.429	6.5631	9.0798	3.3484	7.5514	3.5015			0.477679	5.47928
12.8673	2.5231	6.1618	16.525	3.9039	5.1568	5.5275	12.7197	2.7235	4.136	10.461	6.554	6.0886	5.5455	3.3822	1.8477	1.7875	1.8678	7.7449	11.5991	4.105	1.8304	2.5782	1.9843	2.0913	17.3718	2.8457	2.564	1.922	2.03	3.429	6.8372	9.024	3.9009	9.1062	4.4394			0.482145	5.49471
12.9864	2.2681	5.8393	17.5905	3.625	5.5466	4.6896	12.6731	2.9001	4.119	9.977	7.502	6.465	5.8655	2.9966	1.4867	1.664	2.1066	7.1986	9.8345	3.526	1.5705	2.2154	1.5515	1.9426	15.7747	2.2979	2.276	1.943	2.022	2.4284	7.1685	10.1892	4.6161	8.5393	4.6353			0.486608	5.34412
13.1055	2.4674	5.5596	15.7164	3.3763	5.6246	4.6526	10.2275	2.2949	3.668	10.079	7.618	7.1628	7.5538	3.8632	1.9638	1.9893	2.1176	7.3725	8.6201	3.629	1.9846	1.9078	1.7776	1.7837	15.8024	1.9346	1.992	2.374	2.361	2.218	6.5313	11.5532	4.6457	8.925	5.8473			0.491071	5.34842
13.2247	2.8122	6.4328	14.3371	4.4097	5.9071	4.2486	9.6779	2.6173	4.331	10.655	7.471	8.9149	7.844	4.1462	2.8096	2.0094	2.0825	7.9386	8.0187	2.982	1.5638	2.2039	1.7207	2.5584	15.2786	1.6606	2.319	1.679	2.775	2.2955	5.5622	12.4611	4.0506	9.5553	5.9499			0.495537	5.46512
13.3438	2.6801	7.8124	11.9543	4.1058	4.9933	3.7201	8.6899	2.266	4.345	10.536	8.094	8.2719	7.3195	3.8437	2.6356	2.1066	2.4748	7.7152	7.7032	3.37	1.8465	2.1791	1.7161	2.1898	14.5255	2.4658	2.249	2.038	2.248	3.0493	5.8666	13.5242	4.2134	10.2989	6.7471			0.5	5.42271
13.463	3.3588	6.9988	11.105	3.673	4.9583	3.3242	8.577	2.5717	3.889	9.796	8.198	10.1837	6.2476	3.9134	2.3506	2.4313	2.473	9.0127	8.6001	3.464	1.8416	2.0315	2.0526	2.0811	13.2709	2.4346	2.428	2.001	1.972	2.1866	5.3774	13.6629	4.0827	12.8667	8.0837			0.504466	5.47141
13.5821	3.1723	8.0102	11.2126	3.9225	4.1212	3.4543	8.8982	2.1828	3.25	9.097	7.503	11.9348	6.2012	3.9539	2.4237	1.8269	2.2073	9.1226	8.1353	3.389	1.6494	1.7506	2.2217	2.2657	12.6651	2.3044	2.127	1.768	2.634	3.0481	5.0334	14.9794	5.079	13.2402	8.451			0.508929	5.52102
13.7012	2.7275	7.2641	10.1424	3.3994	4.3939	2.9353	8.3243	1.9889	2.441	9.995	7.627	11.8724	5.1742	4.9227	2.1327	2.3176	2.2855	8.1589	9.9548	3.231	2.2524	1.8475	2.3103	2.5632	12.2128	1.7547	2.211	1.745	2.927	2.3721	3.6098	17.7893	5.7301	17.0446	7.8356			0.513392	5.58554
13.8204	3.4704	7.4366	10.5126	3.937	4.5205	3.3586	7.6863	2.0619	3.631	11.038	6.859	11.1719	5.5074	7.2407	2.1608	2.3189	2.6769	8.8494	11.2542	3.224	2.2012	1.8094	1.7911	1.8716	10.9413	2.3363	2.055	1.683	2.431	2.7063	4.315	19.5625	5.6493	16.328	9.3647			0.517858	5.82748
13.9395	3.0901	8.4241	13.1951	4.1898	4.2981	3.1542	9.4536	2.1332	3.617	10.141	6.587	12.247	5.0961	7.1023	3.1085	2.1846	2.2358	9.3172	11.5785	2.533	1.6359	1.8981	2.2299	1.7441	9.4251	2.6249	2.169	1.656	2.422	2.5152	4.5007	18.9741	5.8189	17.2386	8.498			0.522321	5.91533
14.0587	3.3449	8.7104	15.5418	4.7282	4.0251	2.9618	11.9351	1.7777	3.737	8.375	6.577	12.3355	4.6179	7.9318	3.3046	2.5303	2.4583	9.9596	11.3882	2.795	1.4485	1.941	1.7012	1.7907	8.6988	2.3163	2.524	1.9	2.558	2.8927	4.949	17.1028	6.1586	19.3209	9.2086			0.526788	6.10132
14.1778	3.8261	9.2549	14.2337	4.4382	3.818	2.4334	15.3644	1.7403	3.457	8.699	6.424	12.8675	4.2581	9.8349	3.5688	2.7559	2.6225	10.6474	11.9241	2.881	2.1563	2.1876	1.6244	1.9771	8.126	2.2362	2.16	1.743	2.403	2.4517	4.0887	17.1614	6.7505	20.2102	9.4603			0.53125	6.27959
14.297	3.1154	8.8638	13.9501	4.1677	4.282	3.0616	15.8561	2.6589	3.659	7.834	6.089	12.4321	4.7433	9.8699	3.6072	2.4258	3.3639	10.0205	13.6849	2.76	2.2398	2.2375	2.114	2.1826	7.711	1.9329	1.482	1.328	2.243	2.3435	4.6022	18.5984	6.5099	19.6736	11.0905			0.535717	6.36383
14.4161	2.9526	9.804	11.9064	4.3787	5.2722	2.6317	14.2113	1.971	3.432	6.736	6.588	11.6672	5.5246	11.3412	3.595	2.1386	2.7362	11.3119	15.7053	2.783	1.8131	1.7303	2.0492	2.0039	6.7064	1.9635	1.971	1.684	3.028	2.1101	4.2124	18.7868	6.1253	16.9475	11.2961			0.54018	6.26041
14.5352	3.1224	9.6973	10.3078	4.5265	3.526	2.6747	13.774	2.6001	2.892	6.196	6.48	14.5631	7.0026	12.1253	3.4042	2.613	2.6201	11.4293	16.6372	2.723	1.9984	2.0816	2.271	2.0316	6.0849	2.2314	2.091	1.938	2.659	2.106	3.8019	18.8903	5.4481	14.0545	13.0797			0.544642	6.27663
14.6544	2.4996	8.4292	7.486	3.9358	3.1298	3.4149	11.3992	1.9387	3.581	5.724	5.801	14.4666	7.3313	10.3985	4.1561	3.1933	2.5968	11.6505	17.2977	2.582	1.9901	1.8839	2.2255	1.6133	5.7809	2.5941	1.502	1.971	2.284	2.6319	4.405	18.82	4.277	13.6759	15.1286			0.549109	6.05129
14.7735	2.5923	7.7834	7.0591	3.7783	3.1416	2.9314	9.7643	1.9938	3.049	6.634	5.46	10.5114	7.2989	9.9607	3.1605	2.5498	2.699	11.5861	16.886	2.44	1.8623	1.6345	1.7998	1.5581	5.4631	1.9254	1.318	1.616	2.319	2.4638	3.755	17.5386	4.8131	12.882	15.7596			0.553572	5.6568
14.8927	3.4393	8.0828	5.6953	4.235	2.4057	3.0075	9.268	2.06	3.125	6.892	5.174	12.6895	6.541	9.2396	4.0821	2.8209	2.7461	9.7613	17.3607	2.452	2.0298	2.0603	1.57	2.2233	5.8978	1.8178	1.328	2.28	1.723	2.5546	3.7476	18.0768	5.0802	13.235	15.4019			0.558038	5.71725
15.0118	3.0107	7.3115	4.4826	4.1471	2.5019	2.6364	9.2433	1.9884	2.968	5.437	5.717	11.5586	7.6482	7.5599	4.6939	2.9108	2.6295	9.2375	15.1349	2.499	1.9621	2.2129	2.1621	2.2055	6.1519	2.1794	1.396	1.809	2.09	2.1882	3.2455	17.2169	4.219	13.1634	16.1976			0.562501	5.47759
15.1309	2.7422	7.0199	5.5313	4.4193	2.8612	2.419	7.8391	2.3352	3.833	6.109	6.271	11.7087	9.2058	7.1847	5.6347	3.0945	2.7614	9.6985	14.4599	3.2	1.4695	2.1924	1.6666	2.2683	5.3729	2.055	1.898	1.783	2.759	2.4894	3.6252	15.6717	4.7869	12.8264	17.4281			0.566964	5.61774
15.2501	3.0461	7.4002	5.495	4.1251	2.0355	1.7773	7.4646	2.1521	3.25	7.286	6.093	12.1943	8.8835	7.4559	5.6171	2.996	2.9213	7.5164	14.472	3.185	1.9606	1.9459	1.979	1.8463	5.2274	2.2303	2.288	1.819	2.835	2.108	3.4531	14.1796	4.8916	11.4032	17.8103			0.57143	5.46696
15.3692	3.3572	6.6962	5.6923	4.1998	2.1626	2.2305	7.0479	2.0336	3.234	8.412	5.28	13.2696	9.0546	6.5294	6.207	2.8997	3.6659	6.6741	13.9811	2.45	2.0014	1.9362	1.931	2.3942	4.2017	2.6401	2.073	1.604	2.476	2.2033	2.7669	12.8533	4.8772	11.8141	20.7115			0.575893	5.47318
15.4884	2.8517	6.2561	5.3877	3.992	1.9715	2.1563	5.9783	1.9861	3.701	11.141	6.429	14.7506	8.9125	6.6898	5.6167	2.6282	2.8975	6.8298	13.866	2.81	1.9009	1.6043	1.8502	2.0097	3.9193	1.9615	1.565	1.777	2.359	1.9138	3.0488	13.1251	4.8665	13.4424	21.7481			0.580359	5.54124
15.6075	2.4089	6.5187	5.0296	3.3786	2.2902	2.5283	6.7298	1.8142	3.046	8.574	7.482	15.1532	8.1349	6.8793	5.4837	3.1466	2.9734	6.7604	14.3173	3.413	1.6788	2.4294	1.8353	2.1423	4.5135	2.6093	1.72	2.2	1.973	1.5826	3.5014	13.2924	5.1209	13.1003	24.7178			0.584822	5.67083
15.7266	2.6277	5.9345	5.6397	3.6153	2.4991	2.8117	6.2772	1.638	3.245	6.968	7.204	15.4969	7.3252	5.9866	6.1685	3.9378	3.1702	7.0472	11.5711	2.473	2.2795	2.2529	1.9267	2.296	4.1751	2.2118	1.966	2.015	2.263	1.7784	3.2386	12.9951	5.5283	11.647	25.5341			0.589285	5.53555
15.8458	3.1599	5.2128	5.0209	4.1617	3.1298	2.4608	5.8182	2.0719	3.598	6.226	8.246	16.1792	8.4959	4.4712	6.058	3.4143	2.8599	6.6522	12.4697	2.558	1.9646	2.7801	1.3074	2.4067	3.8982	2.3695	1.957	1.888	2.366	1.918	2.6766	13.4805	5.6545	12.5999	26.5777			0.593751	5.60312
15.9649	2.705	5.1843	6.1041	3.7923	2.9478	1.9531	5.3667	2.2562	3.435	5.779	9.601	17.9819	6.9222	4.4968	5.5739	3.7034	3.0306	7.2208	14.6104	2.8	1.6425	2.5135	1.959	2.0208	3.6878	2.762	2.051	2.036	1.785	1.7954	3.03	13.6068	6.0928	11.915	25.4203			0.598214	5.65093
16.0841	2.7394	5.2128	6.3412	2.9394	3.1789	2.2381	4.8037	2.1526	3.671	6.62	8.655	17.6306	7.4539	4.5619	4.8279	3.4554	3.1708	6.0631	15.4349	2.331	1.772	2.7989	2.0835	2.5092	4.0475	2.9768	1.986	1.735	1.773	2.3205	2.3459	14.4727	6.4068	11.813	25.0004			0.602681	5.64351
16.2032	2.4333	4.7011	6.4027	3.1058	2.8176	2.0639	4.5137	1.8207	3.797	6.322	9.809	18.4535	5.4214	4.5236	4.2204	3.7091	3.2847	4.8445	17.7642	2.833	1.9899	2.1435	1.7182	1.7723	4.1392	3.2325	1.723	1.745	1.913	2.7543	2.4028	14.66	5.5758	10.7318	23.4066			0.607143	5.50712
16.3224	2.7075	4.4921	6.3162	2.9704	4.2299	1.904	5.7227	2.0905	3.649	6.073	11.147	19.9573	4.3219	5.448	3.5841	3.271	3.5351	4.7026	21.408	2.551	2.214	2.4042	2.6444	1.8976	2.8161	3.4621	1.546	1.374	2.062	2.375	2.5949	12.4542	6.4161	9.307	21.6508			0.61161	5.57999
16.4415	2.6448	3.7855	7.6989	3.1477	3.4471	2.3065	5.7166	2.2056	3.404	6.713	9.661	20.6133	5.075	5.1435	4.6111	3.9215	3.7054	5.7987	24.7593	2.771	2.2337	2.7386	2.7172	2.215	2.9926	4.0088	1.951	1.64	2.316	1.8891	2.8804	11.4558	6.8266	9.3387	21.5832			0.616073	5.82618
16.5606	2.5844	4.5127	6.4646	3.1031	3.2141	1.8209	5.9289	1.8465	3.162	5.792	10.318	19.5806	5.0777	5.8765	3.804	3.9605	3.2541	4.8187	27.5729	2.849	2.1052	2.3353	2.6285	1.8171	3.1396	4.4307	1.728	1.938	2.343	2.4665	2.3895	9.4451	6.4735	8.7411	21.5217			0.620535	5.68697
16.6798	2.6145	4.6478	6.421	3.4659	2.869	2.7542	6.5995	1.733	3.219	6.539	10.01	20.0561	5.3073	5.92	3.7685	3.7826	3.4244	4.3168	30.5248	2.863	2.2153	3.0276	1.9412	2.1173	3.0119	5.2371	1.327	1.981	1.818	1.8842	2.6392	7.7378	6.1721	8.9469	21.0374			0.625002	5.76944
16.7989	2.8829	4.8738	5.2102	2.3865	2.95	2.3674	6.2072	1.5615	2.835	6.871	8.933	18.2247	5.3774	5.5792	3.6013	3.7046	3.3742	4.199	33.3272	2.555	2.1988	3.4217	1.3783	1.7111	2.4233	4.7707	1.731	2.253	2.328	2.1947	2.2063	7.5283	6.8801	8.3059	19.5571			0.629465	5.59741
16.9181	2.2729	5.1298	5.1902	2.8532	2.4899	2.1177	6.8222	1.9154	3.277	6.942	8.5	19.0615	6.3004	6.0806	4.1525	4.1257	3.7012	5.0257	33.8162	2.915	2.094	2.4505	1.8991	2.0069	2.6265	5.4587	1.75	2.1	2.171	1.8727	2.5769	5.3749	7.501	8.255	18.3887			0.633931	5.69186
17.0372	2.4725	5.4002	4.48	2.7855	1.8507	2.2062	6.7453	2.1512	3.556	7.466	9.979	16.4406	6.5306	5.3394	4.3278	3.502	3.3384	4.4478	33.851	2.546	1.8251	2.3134	1.908	1.59	3.2552	6.1728	2.155	1.744	1.826	1.8702	2.3928	4.8128	7.4931	8.7771	18.6176			0.638394	5.60484
17.1563	2.8535	5.0696	4.0182	2.1767	2.2416	2.2358	7.0311	2.0492	3.259	8.138	9.925	17.1341	7.7091	5.3125	5.1096	3.5961	3.0444	4.6646	33.8293	3.304	2.0802	2.9693	1.7004	1.6782	2.9185	6.8615	1.892	1.964	1.817	1.8322	2.3646	5.0994	6.6695	8.4682	17.0923			0.642857	5.66025
17.2755	3.009	5.6567	3.8658	2.0816	2.2611	2.0895	7.5032	2.4779	3.034	7.325	10.282	17.5348	8.5337	5.645	4.3085	2.9705	3.5678	4.3585	32.6629	2.829	2.1232	2.764	1.2144	1.8122	3.1486	7.7683	1.558	2.003	1.725	2.026	2.0457	4.7721	7.6794	7.9316	14.6282			0.647323	5.57703
17.3946	2.4708	5.736	4.4323	2.9888	1.8993	2.2891	8.9259	2.411	2.99	7.702	10.438	17.1859	8.5833	4.7728	5.5056	3.7346	2.9034	4.42	32.6196	2.609	1.9946	2.6152	1.9967	1.4698	2.8988	9.2514	1.736	1.931	2.094	1.9584	2.1943	5.3249	7.8595	8.7526	12.7577			0.651786	5.69864
17.5138	2.5144	7.5089	4.4783	2.2924	2.2509	1.9577	8.6336	2.2466	3.703	8.65	11.098	20.6068	9.4443	5.2258	4.9134	3.2412	3.5822	3.7177	30.1977	2.691	1.9262	2.5071	1.8686	1.4336	2.559	9.0265	1.522	1.948	2.263	1.9599	2.176	4.5649	7.5439	9.7611	11.9552			0.656252	5.77054
17.6329	2.4359	6.6127	4.5476	1.9503	2.3009	2.4607	7.6462	1.8424	3.496	8.107	11.087	21.4244	8.9802	6.7508	4.7115	3.1142	3.177	3.7922	26.7881	2.885	2.0674	2.7817	1.802	1.5114	2.5891	9.3419	1.436	2.026	2.893	1.8554	2.3535	4.3403	7.2227	10.1061	11.7942			0.660715	5.66374
17.7521	2.581	6.712	4.4524	1.5825	2.1858	1.8303	7.8457	2.0704	2.884	10.084	12.046	24.4838	8.1016	5.6144	4.9566	2.7233	3.4771	5.0038	25.3826	2.894	2.7694	3.09	1.8329	2.2277	3.1385	9.6657	1.666	1.747	2.12	1.8486	2.516	3.8447	7.6061	9.1862	10.5217			0.665182	5.73405
17.8712	2.8614	7.2775	3.6009	2.0576	2.0881	2.3057	6.4421	1.7162	2.707	8.286	11.285	26.7557	7.3142	5.4469	5.2925	3.357	3.4815	4.7691	23.5468	2.754	2.669	2.8766	1.8432	2.5957	2.7489	10.8823	1.837	2.086	2.009	1.51	2.2782	4.2117	7.5399	9.6274	8.919			0.669644	5.62797
17.9903	2.8637	5.9455	3.1225	3.3223	1.9388	2.436	7.998	1.9344	3.484	8.81	12.357	28.7269	7.5641	5.9615	5.4508	3.6983	2.8108	4.2864	20.6106	3.004	2.3092	3.0418	2.0339	2.1492	2.614	11.8556	2.479	1.775	1.94	1.6015	2.5339	4.2651	9.4549	9.6424	8.3684			0.674107	5.78256
18.1095	2.3514	5.8085	3.5186	2.168	1.86	1.5732	8.9031	1.9398	3.39	8.01	12.033	27.2082	6.4842	5.8659	4.903	2.8363	2.5785	4.3848	18.7529	3.616	2.4152	3.1221	1.9989	1.8112	2.6621	11.4046	2.243	1.625	1.904	2.2682	2.8288	3.4154	10.6253	9.566	7.2979			0.678574	5.52495
18.2286	2.3668	5.2264	3.8836	2.0444	2.1142	2.194	8.0205	1.9181	2.955	6.863	13.074	27.3125	6.2237	6.1724	4.5837	2.2955	3.3195	3.8823	18.1428	3.619	2.7555	3.6066	1.8072	1.7235	2.1031	11.8847	1.615	2.26	2.099	2.1418	2.0823	3.2815	11.2253	8.9684	8.074			0.683036	5.48112
18.3478	2.6932	6.3763	3.6017	1.7885	1.9062	1.7166	7.6342	2.1708	3.327	9.124	11.474	26.106	6.1006	7.0834	4.147	2.5551	3.0273	3.7173	18.8818	3.482	2.5788	3.5151	1.8286	1.5427	2.939	12.8243	1.805	2.199	1.902	2.0713	2.5274	2.6613	12.1682	8.8429	8.121			0.687503	5.55542
18.4669	2.4769	6.7761	3.2873	1.4648	2.1247	2.0249	7.692	1.9987	3.843	7.818	13.283	27.741	6.4621	7.9789	4.6009	2.6625	3.1942	4.266	18.6459	4.036	2.4104	3.3968	2.5256	1.7464	2.802	13.6906	2.034	1.726	2.176	2.2398	2.2138	3.1813	11.916	9.1319	9.422			0.691966	5.7997
18.586	2.3735	7.8636	3.2997	1.7745	1.5262	1.9141	7.1438	1.6711	3.63	7.363	12.413	28.199	6.296	8.4415	3.9716	3.5111	3.4365	3.7643	19.6553	4.532	1.9252	3.8731	2.3222	1.6796	2.5085	15.4477	1.742	2.06	2.673	2.4697	1.5597	4.1186	13.8035	10.1353	9.8279			0.696428	5.96931
18.7052	2.4759	6.5576	3.3113	1.3757	1.3224	2.39	6.7899	1.6135	3.189	7.996	14.084	23.2989	6.759	9.338	3.4614	4.3904	3.371	3.3403	18.8075	4.592	2.2407	4.0073	2.1397	1.8247	2.7596	15.0876	1.99	2.028	1.991	2.122	2.2387	3.0571	14.2635	11.1625	10.7659			0.700895	5.88977
18.8243	1.9397	9.5585	3.5568	1.6131	1.8091	2.1756	7.8468	1.6436	3.671	7.782	12.984	21.0059	7.2637	11.533	3.1534	3.7679	3.2338	4.1986	18.1293	4.188	3.597	4.2342	2.1374	2.2341	2.6995	15.2044	1.86	1.947	2.467	1.9585	1.7584	2.6864	13.8041	11.0859	9.9775			0.705358	5.96301
18.9435	2.5911	9.7536	3.5137	1.7298	1.8304	2.2153	8.4962	2.0252	3.867	6.814	11.791	18.3085	7.6697	12.8176	3.5581	5.1056	3.4041	4.9308	18.2278	4.451	3.4507	5.2853	2.4073	1.5687	2.9841	17.8796	2.015	2.265	2.068	2.0983	2.1387	2.3981	13.4212	10.3537	10.2411			0.709824	6.10501
19.0626	2.5929	10.5225	3.8913	1.5082	1.2317	2.2912	8.9424	1.3019	4.153	7.613	12.858	15.6271	6.2416	12.8129	3.9036	4.2583	3.1249	5.0923	18.0651	5.064	4.2344	4.5859	2.4031	1.7666	2.8216	16.7238	2.397	2.449	2.073	2.2578	2.2499	2.7213	13.2076	9.0659	13.9128			0.714287	6.1133
19.1817	2.968	11.061	4.4096	1.3642	2.0461	2.4197	8.8021	2.1594	3.571	6.973	14.725	14.4816	7.57	12.0592	3.807	4.0998	3.0248	5.2043	18.2476	5.278	3.6421	5.5888	2.4466	1.2888	2.3779	18.1668	1.957	1.739	1.902	2.0842	2.0489	2.591	13.9246	8.444	14.5706			0.71875	6.20125
19.3009	2.4324	10.1958	4.7465	1.2706	2.0148	2.2621	8.0907	2.1666	2.684	7.199	14.561	13.7994	9.1286	10.8338	3.538	3.4471	3.4036	3.9311	17.7691	5.047	4.0398	6.3276	2.2828	1.4873	2.2316	17.6921	1.875	2.198	2.182	1.9551	1.7998	2.4255	14.1983	7.5768	15.1552			0.723216	6.05566
19.42	2.7248	8.6145	4.579	1.6298	1.4237	2.2104	8.8395	1.8121	2.767	6.53	16.244	11.5892	8.7694	9.8435	4.1829	3.8965	3.9749	4.4011	17.7268	6.27	4.1321	7.3998	2.4705	2.1114	2.4027	18.1686	1.684	2.332	2.13	2.3321	1.7534	2.3905	13.9535	7.0187	15.3708			0.727679	6.10512
19.5392	2.4284	8.4422	3.3507	1.7812	1.4838	1.8297	9.7289	2.0761	2.479	6.474	17.239	11.2322	9.6404	9.5178	5.0008	3.2263	3.8445	4.9241	16.5714	5.214	4.1897	9.9419	2.9311	1.8677	2.6558	18.4732	2.183	2.387	1.745	2.1275	1.8199	2.2988	13.082	6.9762	12.9751			0.732145	6.0611
19.6583	2.7111	7.1933	3.9195	1.5228	1.4874	1.7326	9.3607	2.3054	3.012	6.763	21.566	9.8846	10.3259	9.3871	4.8621	3.7554	3.668	4.5649	17.3455	5.62	4.9012	11.6852	3.542	2.1277	2.4807	20.2326	2.465	2.891	2.692	2.8378	2.0622	2.2812	14.5421	7.2626	11.5006			0.736608	6.41403
19.7775	2.6437	7.6366	3.5501	1.6172	1.3672	1.4997	8.8488	2.1356	2.864	6.596	21.591	8.6716	9.5681	9.3094	5.447	3.5677	3.5455	5.5014	19.0333	5.813	5.1659	11.9705	3.9794	1.8842	2.8446	19.5277	2.28	2.236	2.331	2.5771	2.4125	2.1836	16.1328	6.2061	9.9645			0.741075	6.35722
19.8966	2.89	8.2084	3.7523	1.3665	1.7598	1.4285	8.5371	2.528	2.674	6.076	19.742	9.5823	8.3369	8.2149	5.0426	3.4257	5.0924	5.324	17.8635	5.643	6.0466	14.4312	4.0905	1.8548	2.8843	20.1029	2.82	2.962	2.803	2.1384	2.3256	2.121	16.0634	6.7138	8.7607			0.745537	6.38875
20.0157	2.7304	8.1211	4.3258	1.7085	1.1842	1.6499	7.9221	1.8864	2.928	5.574	19.09	8.0982	6.8398	6.664	5.0307	3.1743	5.7059	5.1562	15.514	7.441	5.6346	18.9924	4.0034	1.8593	2.7548	19.8531	2.788	2.627	3.04	2.5067	2.3908	2.0937	14.1973	7.4414	7.3635			0.75	6.23687
20.1349	1.8423	7.1753	3.5846	1.4697	1.3811	2.0768	8.3024	1.8376	2.553	5.566	22.825	7.9579	6.708	6.3537	5.5826	3.6505	5.3682	4.4466	15.1062	8.23	5.7955	22.2351	3.9625	1.3582	3.1959	20.3106	2.332	2.735	2.344	2.5717	2.5357	2.3072	14.1016	6.6845	7.629			0.754466	6.34617
20.254	2.5571	6.5584	3.1559	1.5079	1.5854	1.8405	8.6389	1.9394	3.833	5.435	26.822	7.679	6.7115	5.6342	5.1818	3.0962	5.7008	5.8102	13.1179	7.61	5.6029	27.316	5.668	2.0586	3.4057	22.2013	2.486	2.728	2.309	2.16	2.0446	2.7746	14.2757	8.431	8.283			0.758929	6.74741
20.3732	2.3183	7.7401	3.5552	1.7883	1.4419	2.2691	8.7276	1.9441	2.883	5.205	27.205	7.1136	7.7326	5.9892	5.4655	4.9301	7.3554	5.3763	11.892	8.348	7.9148	32.1697	6.9025	1.9127	4.5571	21.2952	3.223	2.561	2.753	2.0612	1.7388	2.1588	15.1223	8.8067	8.6741			0.763396	7.17518
20.4923	1.7693	8.2428	2.9618	1.7397	1.3757	2.5218	8.1146	1.9335	2.792	5.215	28.584	5.8198	7.3812	5.6517	6.9045	3.8829	6.8645	5.8498	12.1328	9.298	8.1617	38.1948	9.4799	1.6343	5.85	22.3116	3.651	2.738	2.205	2.5388	2.5883	2.0074	14.5053	7.6731	8.6437			0.767858	7.46338
20.6114	2.1271	7.5909	3.3146	1.518	1.4483	2.2249	8.2932	1.8884	2.645	4.689	29.516	5.4052	7.2401	6.5533	6.0633	3.6648	6.203	5.1077	11.609	9.229	9.1955	35.583	13.3628	1.4366	6.409	24.9339	4.024	2.987	2.065	2.3783	2.3644	2.2764	12.8099	10.3137	10.0594			0.772321	7.61513
20.7306	2.4548	7.9091	2.7819	1.6294	1.5151	1.9952	9.436	1.9917	3.094	4.67	32.268	4.678	6.7534	6.5192	5.673	3.6476	6.7313	5.7174	11.583	9.084	11.4134	30.0054	13.1184	1.8212	7.4439	24.6369	4.096	3.777	2.304	2.4607	2.6252	2.195	13.2174	12.1929	10.348			0.776788	7.76536
20.8497	2.6541	7.7197	3.0186	1.6807	1.4257	1.9805	10.0185	2.269	2.586	5.254	35.366	4.7857	6.8114	6.9017	5.6393	4.1275	6.9239	5.8374	10.7491	9.038	16.5926	20.5213	16.8085	2.1871	8.2304	22.9539	4.477	3.521	2.04	2.5531	2.7421	1.8008	13.0158	14.5754	10.9104			0.78125	7.93475
20.9689	2.5188	8.7537	3.184	1.5467	2.1047	2.0447	10.9921	2.4305	3.282	4.498	33.905	4.5633	5.9244	6.75	6.2862	3.5778	6.7473	6.232	11.9867	10.171	18.2301	11.4428	19.0736	2.7414	10.221	23.7377	3.701	3.8	2.672	3.0548	2.7997	1.7786	12.0702	15.3074	10.5735			0.785717	7.96293
21.088	2.7485	8.7595	3.2794	1.1806	1.6828	2.1484	11.6219	2.134	3.087	4.466	36.372	3.8823	5.2117	6.442	6.4509	3.2496	7.2983	5.2954	10.9088	11.041	20.033	5.7427	18.5283	2.3995	10.687	22.8327	4.615	3.957	1.844	3.0367	2.4433	1.9897	11.3011	18.5847	10.7795			0.79018	7.88669
21.2071	2.9081	9.2881	3.1528	1.5832	1.6361	2.0182	11.7401	2.3685	3.381	4.862	38.485	4.037	5.322	6.6568	6.6461	3.6664	7.4793	5.0394	10.1942	13.115	25.7646	3.5656	17.5095	2.6575	11.8074	23.0419	4.887	5.382	2.326	3.426	2.9479	1.737	11.7333	18.8148	11.7421			0.794642	8.31205
21.3263	2.8624	9.6441	3.4824	1.35	1.5062	2.5752	10.123	2.5471	2.996	4.202	45.104	4.8346	4.3772	6.5961	6.0154	4.2119	6.4726	5.6135	9.6423	12.712	26.5889	2.1728	12.2058	3.4726	12.2492	23.1734	6.771	7.769	2.506	2.7153	2.4623	2.1627	10.8375	21.7629	10.2485			0.799109	8.39903
21.4454	2.3677	8.3271	3.3418	1.7199	1.3093	1.6593	10.8766	2.4326	2.632	5.058	50.046	4.0914	5.0577	5.5485	5.0754	4.1497	7.602	5.8999	9.4458	12.723	28.3094	1.7818	8.1318	3.8084	13.4997	26.5898	7.421	9.536	3.465	3.1398	2.423	2.2816	10.4654	21.8015	10.7			0.803572	8.64908
21.5646	2.2512	7.9551	3.2564	1.7665	1.4618	1.3991	10.6174	2.3931	2.823	4.247	51.111	3.6768	4.6096	5.4875	4.7941	3.9899	6.8443	6.9801	8.4483	14.966	33.4242	0.9911	5.2516	4.6034	14.122	27.1523	9.957	12.672	3.194	3.202	2.8389	1.7689	9.4101	25.5311	10.2436			0.808038	8.95544
21.6837	2.7393	7.7607	3.1988	1.2995	1.1808	1.5629	11.3655	2.0057	2.85	4.52	49.486	3.9203	4.6361	6.6348	5.1643	5.2735	7.002	6.6775	8.7405	14.696	34.397	0.6895	3.664	4.6159	15.1496	27.5308	15.868	15.812	2.576	3.2801	3.1721	2.3389	7.2719	25.2844	12.2966			0.812501	9.27603
21.8029	2.4312	7.0307	3.1847	1.6797	1.2312	1.6896	10.1735	2.4833	2.833	4.503	47.212	3.8141	5.2175	6.294	4.5106	4.823	6.6969	7.6384	9.3219	13.551	35.0728	0.609	1.8827	6.2954	13.0323	30.4803	21.263	19.379	3.144	3.0352	3.1068	1.7552	6.6693	23.5958	11.9494			0.816967	9.3597
21.922	2.852	5.8249	3.2747	1.5685	1.5906	1.6397	10.3248	1.9598	2.847	4.602	44.657	4.3971	4.2801	7.1083	4.9863	4.0897	7.4902	6.8128	8.7428	12.611	30.7394	0.4612	1.5585	7.0723	9.647	31.8125	29.413	26.751	4.546	3.5051	3.5153	1.9077	6.236	24.2652	11.76			0.82143	9.56713
22.0411	3.0369	5.4604	3.1837	1.6522	1.8713	2.1061	12.0668	2.5727	3.341	4.677	41.183	4.0667	3.9676	7.3609	6.3784	5.4618	7.0949	6.8106	7.9916	13.021	22.6373	0.3585	1.3465	8.1828	7.2533	35.8264	33.116	35.725	3.747	4.1355	3.6432	1.9155	5.5966	21.2708	13.3034			0.825893	9.75321
22.1603	2.5872	6.491	2.6897	1.7701	1.6193	2.2987	13.2926	2.6551	2.75	4.303	40.919	3.8407	4.4382	6.7905	5.9421	6.5465	6.1271	7.1149	9.4986	12.9	12.5615	0.7217	0.8334	9.7264	5.2522	36.5121	39.014	43.269	5.788	3.8879	3.4023	1.7598	5.7784	20.2415	14.1127			0.830359	9.92672
22.2794	2.6773	5.3657	2.8429	1.5768	1.4184	2.54	12.1533	2.553	3.859	4.316	40.104	3.6081	3.7406	7.2088	5.6174	6.7059	6.2262	6.145	9.6424	13.698	7.8728	0.4983	0.6719	11.1468	4.253	32.5401	46.943	53.061	6.32	4.6545	3.9004	1.7043	4.6329	18.4621	13.836			0.834822	10.0713
22.3986	2.7441	5.6695	2.7854	1.6128	1.1301	2.5565	12.8556	3.3969	3.107	3.85	39.381	4.0205	3.8599	7.3339	4.734	7.4167	6.2771	7.0979	10.2627	13.738	5.6847	0.6191	0.7421	10.3033	2.6537	28.1002	48.73	66.608	6.389	5.4567	4.0087	1.9953	4.4969	15.4247	18.1524			0.839289	10.377
22.5177	2.9776	4.7648	3.0246	1.9428	1.0584	2.8788	13.4045	3.8029	3.069	3.534	39.674	4.2899	4.1122	8.1209	5.9571	9.1353	6.2648	7.0925	9.594	12.596	3.4471	0.3385	0.6773	10.8469	2.4413	22.6111	47.155	72.475	9.611	7.7144	4.5568	2.0995	4.012	16.1991	18.5686			0.843751	10.5728
22.6368	2.9443	4.6287	3.5838	1.7509	1.2461	2.4378	13.9859	4.2328	3.194	3.962	37.504	3.9561	3.999	9.4194	7.3158	9.5761	5.9265	7.3611	9.8493	12.033	3.1034	0.2687	0.4728	8.919	1.7493	16.7509	38.583	80.405	11.601	9.7673	6.2244	2.2279	4.0567	15.7964	18.7057			0.848214	10.5011
22.756	2.9461	5.398	3.5609	1.2723	1.3939	2.5059	15.5541	5.6222	3.632	3.41	37.43	3.671	4.1873	8.6527	7.197	8.6291	7.6462	9.0402	9.3336	11.565	2.3132	0.6141	0.3893	6.7719	1.1906	10.2957	30.359	82.134	15.85	12.7943	8.4434	2.0367	3.9353	14.0187	19.718			0.852681	10.386
22.8751	2.7127	5.3076	3.0058	1.4842	1.3599	3.0034	14.924	7.1099	3.472	3.965	33.119	4.5164	4.9038	9.8697	7.8225	7.7782	7.9341	8.5913	9.0935	11.138	2.1625	0.297	0.3677	6.1799	1.1989	6.661	21.594	77.281	21.486	18.08	10.7169	2.3475	4.0082	13.9445	19.2039			0.857143	10.1897
22.9943	3.5313	5.8772	3.3842	1.6921	1.2234	3.1069	17.3646	9.0916	4.371	3.345	29.811	3.5213	5.1406	9.8742	7.5788	6.6342	6.859	8.4365	9.2658	11.088	1.5154	0.286	0.5026	4.65	0.9093	4.5988	13.859	57.372	26.154	24.3637	12.6411	1.9664	3.749	13.539	18.0424			0.86161	9.5813
23.1134	3.1633	4.7212	3.1349	1.3239	1.3219	3.6067	19.5731	9.98	5.134	3.77	27.892	3.8011	5.9076	10.1926	6.501	6.731	6.6977	9.2221	9.6199	8.384	1.2199	0.3572	0.2664	4.2184	0.9791	3.5699	7.006	38.276	28.981	30.1506	15.4016	2.1137	3.3866	12.7902	18.9808			0.866073	9.09644
23.2325	3.2787	6.1489	3.2016	1.7315	1.7029	3.946	21.594	11.7679	6.635	5.151	26.848	4.9176	5.5431	9.4054	6.6061	6.2508	7.2226	9.2617	9.7858	5.854	0.8956	0.2071	0.3409	3.017	0.4783	2.6799	5.097	21.196	29.74	35.7929	19.3786	2.5661	2.9782	12.826	21.5126			0.870535	9.01597
23.3517	3.4722	5.8079	3.7147	1.7423	0.9763	5.0327	23.2418	12.9804	8.433	5.786	26.287	4.0879	7.1643	8.8695	6.2651	5.9012	7.8584	10.2845	11.9786	5.042	0.9503	0.1092	0.1396	2.367	0.5076	1.9889	2.657	10.498	28.391	38.6034	22.1971	2.8516	3.293	13.0141	19.9684			0.875002	8.92749
23.4708	4.0074	8.0033	3.9993	1.9344	1.0787	6.054	25.8146	12.5786	13.031	5.879	24.539	3.6882	8.3969	9.0734	6.5547	6.4858	8.5916	10.3279	10.1587	3.706	0.552	0.136	0.0898	1.8397	0.3608	1.7104	2.077	5.853	26.634	35.8982	22.7096	3.8588	3.1426	11.1728	20.9535			0.879465	8.88259
23.59	4.0803	9.1485	3.8958	1.4693	1.3192	6.8113	25.6398	11.4537	13.522	6.418	24.358	3.9337	7.8299	8.7127	7.5996	7.1885	6.8594	9.6553	11.2428	3.533	0.4152	0.0716	0.1283	1.7874	0.4685	1.1911	1.856	4.14	23.029	29.4591	21.3379	3.7952	2.7393	11.6413	22.219			0.883931	8.54142
23.7091	4.2435	10.4412	4.3009	1.852	1.5545	8.5424	26.4273	11.6207	14.823	8.041	23.432	4.3846	8.0812	7.9883	9.1126	6.6351	7.6701	10.2621	12.7985	2.643	0.143	0.2145	0.0694	1.1862	0.266	1.0947	0.891	2.296	20	25.9005	21.3948	3.4492	2.6137	11.2529	21.9427			0.888394	8.50196
23.8283	5.5404	12.7032	5.2462	2.3571	1.6707	8.824	23.9311	10.2489	13.753	9.697	21.353	5.3187	8.1976	7.9468	9.5007	8.5172	8.6466	11.5828	11.9241	2.703	0.2923	0.1975	0.0814	0.8495	0.1451	0.9685	0.752	1.689	16.491	18.5397	20.971	4.0351	2.8712	9.2081	24.7263			0.89286	8.32799
23.9474	5.7483	15.4496	5.6587	2.3919	1.4356	9.3986	23.2025	8.0851	14.332	12.585	21.641	5.1414	9.125	6.1696	9.5765	8.9052	9.0322	11.3796	12.6257	2.565	0.2943	0.1966	0.1836	0.9313	0.1522	0.939	0.797	1.446	11.468	12.4606	20.3318	5.3	2.4054	8.8937	23.6577			0.897323	8.11159
24.0665	6.5378	16.6201	6.1002	2.0504	1.4892	10.2885	19.1668	7.2389	12.704	16.368	19.902	5.2304	6.9186	6.768	10.7006	10.2646	11.124	15.3523	12.5324	1.939	0.1674	0.2462	0.1301	0.3843	0.1121	0.7979	0.574	0.773	8.167	9.6187	17.8391	6.5751	2.4977	9.7488	23.6305			0.901786	8.01593
24.1857	5.8596	15.3787	7.5271	2.7448	2.1858	9.3666	14.25	4.6368	9.14	19.232	19.087	5.1904	6.7784	5.6287	11.4915	12.3188	11.9069	16.8468	11.0611	1.11	0.2937	0.1012	0.1068	0.4103	0.2353	0.4775	0.319	1.017	5.712	6.9605	12.7054	8.6178	2.4677	9.7098	25.4016			0.906252	7.6079
24.3048	6.4034	16.1485	7.2125	3.6649	2.5129	10.5236	13.1478	3.3064	6.372	20.91	17.445	6.0971	8.2968	4.2264	13.0345	13.1302	15.1198	18.5484	10.6634	1.121	0.184	0.1843	0.1029	0.2475	0.2449	0.444	0.51	1.079	3.415	4.5108	8.538	9.1274	2.7403	9.4333	29.197			0.910715	7.65266
24.424	7.0376	17.8291	7.0395	4.2779	2.7564	9.1075	10.0669	2.5037	3.649	17.582	13.865	5.6932	7.5286	4.9752	13.4621	14.7359	17.8718	21.9241	8.4317	1.155	0.4482	0.1207	0.0185	0.2033	0.0878	0.3391	0.755	0.698	2.168	2.8452	5.8162	13.2323	2.917	8.6221	32.2505			0.915182	7.48612
24.5431	7.3096	16.5365	7.5624	5.9199	3.9672	8.1493	6.7795	2.1695	2.554	15.374	11.216	7.0284	7.0903	4.4926	16.5381	15.3358	19.767	22.6481	6.3024	0.835	0.1163	0.0313	0	0.2714	0.203	0.2654	0.2	0.517	1.369	2.7124	3.6615	16.4575	2.6809	8.3124	37.4944			0.919644	7.48195
24.6622	8.1236	13.5642	9.4832	6.8729	4.3293	6.9105	4.1673	1.8576	2.587	11.079	7.573	7.1776	5.8949	3.7811	18.0303	12.9796	22.2178	25.7255	4.3944	0.328	0.0597	0.1771	0.1295	0.1707	0.2577	0.2669	0.211	0.293	1.116	1.9863	2.8966	21.1109	2.3328	7.4769	38.68			0.924107	7.26405
24.7814	9.2742	12.704	11.6462	8.766	5.2703	6.4508	4.6417	1.5439	1.642	7.556	6.558	6.7561	4.2201	3.8885	15.664	14.6483	26.2807	27.7974	3.7209	0.375	0.0157	0.0535	0.1297	0.1078	0.0858	0.2863	0.183	0.271	0.75	1.1636	2.0072	23.4587	2.3356	7.9129	41.87			0.928574	7.42957
24.9005	11.3925	10.665	12.354	9.3428	7.6425	4.5723	3.4762	1.3056	0.813	3.78	5.094	7.7795	3.1052	3.8738	14.0364	14.1313	26.6805	28.4806	3.4187	0.355	0.2752	0.0864	0.0511	0.1188	0.0911	0.0762	0.113	0.224	0.741	0.8806	1.7559	26.1589	2.5056	7.3391	45.4546			0.933036	7.3763
25.0197	13.1643	11.4721	14.9564	9.3918	8.0975	3.3798	2.9937	0.8657	0.829	2.365	3.633	6.2662	2.0876	2.7776	10.8158	15.7063	25.1555	31.4828	2.4312	0.184	0.2185	0.0645	0.0551	0.1434	0.0935	0.1974	0.107	0.08	0.447	0.7597	1.7357	28.8137	2.2298	9.1465	48.657			0.937503	7.45155
25.1388	13.4337	10.97	17.2663	10.6306	10.7616	2.8954	2.137	0.758	0.707	2.126	2.599	4.4582	1.7076	2.5335	10.6625	15.9778	23.3534	30.3009	1.9126	0.051	0.107	0.1383	0.2081	0.0309	0.0781	0.0527	0.207	0.312	0.176	0.7199	1.7454	30.1615	2.6991	9.4942	57.1587			0.941966	7.67231
25.258	14.9311	11.7929	18.0505	11.2336	11.706	2.2542	1.6935	0.7958	0.779	1.304	1.382	2.6549	1.5209	1.9982	9.8991	16.9718	19.3025	28.2547	1.675	0.181	0.1302	0.1228	0.0577	0.0615	0.2438	0.3153	0.228	0.431	0.359	0.4447	1.2042	23.9709	3.0963	9.5092	59.9521			0.946432	7.38593
25.3771	18.2325	14.3797	20.6359	9.5628	14.1926	1.6364	1.1055	0.7442	0.819	1.493	1.165	1.7886	1.0374	1.2132	8.1453	15.9711	15.8459	30.1812	1.6865	0.237	0.0006	0.0403	0.0529	0.2421	0.1518	0.2954	0.165	0.126	0.319	0.2658	0.6486	17.2063	2.535	10.5626	61.5102			0.950895	7.2627
25.4962	21.3587	19.5245	19.9297	8.1387	13.588	0.9884	1.642	0.5433	0.507	0.967	1.304	1.4258	0.7359	1.4075	7.3013	17.3651	11.4857	30.1217	1.0492	0.196	0	0.2009	0.0334	0.1839	0.0784	0.2506	0.194	0.169	0.358	0.1311	0.6125	13.3653	3.4199	10.9329	59.4293			0.955358	7.11253
25.6154	23.7564	23.7239	18.6891	5.2749	12.1499	1.4112	0.9469	0.4817	0.598	1.069	1.046	1.4771	0.7305	1.0393	6.6687	19.3541	9.5205	31.4548	1.062	0.22	0.1096	0.0778	0.0777	0.1181	0.0602	0.0993	0.155	0.145	0.409	0.1681	0.5623	10.4348	3.2947	12.3978	44.5626			0.959824	6.66703
25.7345	24.575	23.2414	17.2554	3.6854	10.6437	1.2382	0.5802	0.5645	0.275	0.628	0.97	1.3236	0.9436	1.2099	4.7634	18.3265	7.692	32.2542	0.7575	0.132	0.0813	0.0476	0.0533	0.0499	0.072	0.0877	0.079	0.077	0.195	0.2488	0.4672	7.6962	3.5644	13.4955	30.3855			0.964287	5.93314
25.8537	24.7087	21.1207	12.8335	2.7696	6.905	1.0606	0.4837	0.4749	0.326	0.675	0.417	0.884	0.7721	1.0191	4.7973	17.8325	5.5521	31.1499	0.7984	0.146	0.1199	0.0051	0.046	0.1154	0.0627	0.2164	0.029	0.119	0.069	0.2633	0.4542	5.637	4.1953	13.8241	18.9621			0.968753	5.10985
25.9728	22.8095	16.8916	9.0585	1.6805	4.4814	0.916	0.7187	0.4181	0.317	0.573	0.482	0.5942	0.5893	0.7308	4.4695	15.4974	4.7036	32.9463	0.3815	0.17	0.0591	0	0.0497	0.1507	0.0527	0.1269	0.077	0.174	0.099	0.2939	0.2849	4.6202	6.1671	14.5255	9.1249			0.973216	4.4067
26.0919	20.6203	9.8066	5.3752	1.5458	3.7398	0.6927	0.8947	0.3667	0.274	0.505	0.361	0.7242	0.6165	0.7339	4.1446	11.9175	3.7796	31.9761	0.2999	0.322	0.128	0	0.096	0.0523	0.0269	0.1749	0.029	0.172	0.256	0.0687	0.1693	3.4107	6.455	18.0737	5.4586			0.977679	3.80763
26.2111	15.7437	5.9834	3.1974	1.4501	2.9209	0.6521	0.4049	0.2607	0.141	0.474	0.297	0.5205	0.6395	0.5516	3.0962	10.2571	3.1144	32.4791	0.5801	0.058	0.1167	0.0501	0.0649	0.0795	0.1857	0.1745	0.004	0.108	0.188	0.1425	0.2965	2.5824	9.5058	20.2043	3.2916			0.982145	3.42332
26.3302	9.4553	4.4177	1.8984	1.486	2.1798	0.274	0.1033	0.5058	0.256	0.335	0.276	0.3317	0.5167	0.7241	2.4119	5.9334	2.9207	31.3077	0.3966	0.033	0.1267	0.0025	0.0674	0.0643	0.1226	0.1165	0.048	0.142	0.093	0.1667	0.2637	2.1298	11.1607	23.5446	1.8384			0.986608	3.01857
26.4494	4.2017	2.5928	1.9891	1.3833	2.0184	0.6144	0.2281	0.339	0.211	0.41	0.256	0.4275	0.2883	0.4887	2.5772	5.2877	2.1066	30.1254	0.143	0.025	0.1839	0.0408	0.0787	0.1534	0.0763	0.0939	0.213	0.075	0.105	0.0587	0.1652	2.0365	13.2549	24.6685	1.3957			0.991075	2.80893
26.5685	2.4156	1.6084	1.8546	0.8655	1.353	0.5536	0.1763	0.3119	0.019	0.092	0.107	0.4433	0.2587	0.3225	2.3432	4.7699	1.9744	28.6489	0.1696	0.12	0.1098	0.0124	0.0514	0.0818	0.0095	0.0244	0.129	0.114	0.159	0.0006	0.1499	1.3218	18.9998	28.2847	1.2504			0.995537	2.8316
26.6876	1.8911	1.5302	1.4779	0.7919	1.6958	0.1708	0.1392	0.1904	0.152	0.179	0.082	0.4102	0.2649	0.4903	1.8686	4.0408	2.0162	22.2345	0.4145	0.124	0.331	0.0562	0.0493	0.1406	0.0315	0.0282	0.13	0.101	0.107	0.0339	0.481	1.0981	24.376	25.0321	0.7006			1	2.65317

## Sheet: Image25
X0	Y0	Y1	Y2	Y3	Y4	Y5	Y6	Y7	Y8	Y9	Y10	Y11	Y12	Y13	Y14	Y15	Y16	Y17	Y18	Y19	Y20	Y21	Y22	Y23	Y24	Y25	Y26	Y27	Y28	Y29			Ap-Basal to 1	Average intensities
0	55.0533	59.478	47.0795	46.2279	46.198	30.3543	31.2756	36.518	31.333	39.495	26.6959	33.157	31.162	35.907	31.1508	40.3844	20.236	26.876	44.8113	25.3374	23.2155	23.9129	16.5205	20.2525	36.136	27.9576	36.6908	35.5608	22.7125	14.5405			0	33.2077
0.1191	57.5856	67.889	52.336	49.1736	50.9672	30.1092	34.3535	38.006	38.075	47.163	29.8261	34.3761	31.155	35.643	35.8522	41.7809	22.434	28.594	45.1781	22.5106	24.2311	26.237	19.7307	21.96	41.3879	28.8567	39.9585	34.6536	24.2409	14.6283			0.00499826	35.6298
0.2383	61.4053	76.2	58.9281	49.5268	56.5513	32.9158	37.5517	43.777	41.262	51.126	31.9167	40.4225	33.868	37.198	36.0084	43.35	23.092	30.227	55.6077	23.3543	29.0082	23.8675	23.1159	29.9208	43.403	26.2344	38.7625	39.9841	26.7923	15.4971			0.0100007	38.6958
0.3574	60.3748	81.722	61.15	54.4377	62.9277	36.8612	42.5241	47.027	46.3	56.543	41.1092	45.2628	33.693	40.835	38.9924	41.8621	24.362	29.36	60.8563	22.9072	31.9319	26.2774	24.5102	29.7309	44.1691	26.8238	42.4488	38.3092	26.6129	15.6838			0.014999	41.1868
0.4766	61.5119	84.595	62.6569	58.6468	65.6318	37.7941	41.8357	54.185	55.784	61.59	47.3474	54.9724	36.946	46.447	40.8736	38.9697	31.038	31.723	56.0089	25.2971	39.7524	25.0623	28.5094	30.093	46.7787	28.8619	44.1081	39.8823	30.7205	17.8301			0.0200014	44.1818
0.5957	68.7051	84.721	63.5198	58.3349	71.4898	42.161	50.0536	59.436	61.95	67.569	55.6848	54.4675	40.181	49.953	46.5617	42.2384	34.411	33.538	63.8105	26.0668	47.0274	29.2693	33.5169	30.6167	48.1979	30.0371	47.4217	44.1737	33.7797	18.6238			0.0249997	47.9172
0.7148	67.1297	85.853	69.4969	66.1854	76.9603	48.7523	50.0049	64.704	71.51	78.021	61.7649	55.0612	46.149	51.241	49.3837	40.6417	37.562	32.773	59.9446	26.5812	47.4494	33.5708	37.9463	36.404	49.4751	30.9652	43.0448	47.5304	37.4531	18.365			0.0299979	50.7308
0.834	66.0814	87.063	70.5116	75.0883	76.8764	54.6461	54.1653	70.825	79.624	85.039	67.2911	57.7232	50.232	56.979	52.4067	41.5665	39.748	33.148	60.0784	25.2377	51.2942	35.2224	39.542	41.3162	49.1001	33.7159	46.8173	47.3343	38.9688	20.551			0.0350004	53.6064
0.9531	53.8149	84.59	68.0007	79.2314	76.6823	59.9855	57.7166	77.39	87.267	94.642	67.097	57.0121	52.541	58.502	54.485	43.5432	42.952	39.553	59.045	24.523	52.808	40.6932	39.9553	46.1403	51.2135	40.3661	44.8867	52.776	43.9175	22.7267			0.0399987	55.8019
1.0723	44.9227	86.728	71.5726	83.1984	74.8351	64.0725	59.9002	84.625	93.938	95.911	72.5405	60.4416	59.236	61.057	59.0323	48.164	50.022	45.967	57.09	22.7322	54.7661	41.7123	38.7707	53.4052	55.2833	41.5255	46.1546	58.9645	46.778	24.0836			0.0450011	58.581
1.1914	38.4746	91.593	72.9785	85.4621	76.3612	70.5219	61.5095	91.076	97.207	102.961	72.6337	61.337	64.649	60.323	60.8835	51.0793	54.525	52.044	51.1318	22.4169	55.6313	44.7154	42.5435	57.9364	59.7045	44.7952	45.8015	59.2008	49.4907	26.2454			0.0499994	60.8411
1.3106	37.7496	88.302	74.1518	85.8804	70.1947	72.6842	59.566	96.952	100.822	113.472	66.2129	61.1764	70.099	61.143	60.4001	60.2206	54.494	56.618	53.8029	22.206	52.5611	46.4308	42.4314	57.9362	60.281	43.6088	42.4513	58.9007	50.2893	28.5783			0.0550018	61.6539
1.4297	41.8097	92.591	72.204	83.4176	67.1601	72.9999	57.8056	94.759	105.614	118.881	63.1193	58.0502	76.837	60.896	64.7991	63.9549	56.198	61.063	51.5643	21.7123	52.5681	50.6103	44.3248	58.7906	65.3093	47.5801	45.7274	59.8207	52.7653	30.507			0.0600001	63.1147
1.5488	44.1451	95.563	67.199	74.6792	65.1632	77.0816	62.0638	98.087	106.95	117.158	61.9997	59.7359	74.18	58.334	67.4972	71.5566	57.517	61.714	45.5204	21.2185	53.7291	51.1221	45.8254	59.2879	70.9345	49.8137	44.6974	64.6642	51.8619	34.024			0.0649983	63.7774
1.668	47.0263	95.867	62.4785	69.0567	60.2792	80.268	62.7904	101.375	106.005	120.773	55.9245	63.5153	74.254	57.454	67.4289	72.192	55.16	55.449	43.7668	21.5789	48.8907	53.2894	50.5232	62.5885	71.1009	55.294	45.953	63.884	54.9556	33.752			0.0700008	63.7625
1.7871	55.1385	100.073	61.9567	65.1585	61.9988	79.6416	64.2657	104.609	107.43	117.857	51.8617	62.268	77.891	62.331	66.5763	69.5559	57.115	53.013	39.4633	19.5266	50.6125	50.5378	50.7974	61.9947	72.9999	59.9149	49.2805	61.3241	52.9183	32.8218			0.0749991	64.0311
1.9063	66.456	99.623	58.3446	61.8051	62.2266	72.2747	67.7135	106.881	118.849	114.175	45.9553	59.3826	80.309	65.019	62.9708	70.9266	58.303	46.398	39.4142	18.8096	51.1326	48.5286	55.2049	66.4979	68.1345	61.1463	53.0653	57.5259	53.5147	36.5915			0.0800015	64.2393
2.0254	71.6801	101.415	60.269	62.6551	62.7407	69.639	70.5318	107.508	119.613	114.146	41.1006	48.9055	74.971	64.145	65.5352	67.4113	56.815	41.596	37.8733	19.5183	55.0694	46.8182	55.3992	69.6511	65.677	64.7275	57.3991	55.8384	50.6607	38.0256			0.0849998	63.9112
2.1445	76.5341	104.306	56.0652	62.0183	67.3282	67.7542	69.8815	106.446	119.004	115.6	31.3209	41.5771	77.514	67.557	60.4156	69.3881	54.251	38.117	35.2364	18.469	54.7817	51.0959	56.6496	72.0121	67.106	67.0408	67.3276	50.9475	49.4771	33.7817			0.089998	63.6335
2.2637	83.4151	102.555	53.6648	64.2611	67.5501	64.1598	71.7288	102.135	121.886	114.424	21.8868	34.7924	73.623	69.825	52.5902	69.3763	51.592	40.471	33.868	17.7069	55.514	45.3296	60.7828	74.9013	63.0303	71.7821	68.7433	49.7173	50.7107	31.2155			0.0950005	62.7746
2.3828	87.8599	106.513	52.3879	64.4451	71.5907	68.1748	73.4105	92.996	116.906	112.039	18.185	31.5405	74.552	73.543	45.1152	69.6865	45.675	39.28	32.5019	19.6364	63.2706	48.1285	61.1064	77.3967	61.9095	71.4735	69.9245	47.9332	48.8564	31.7999			0.0999987	62.5946
2.502	86.5925	108.572	45.8832	67.8264	69.4026	68.9647	64.522	89.736	117.234	115.575	14.8725	28.8861	65.423	73.642	37.767	69.7912	45.358	38.73	35.2682	20.3278	64.4406	50.7235	63.0246	75.0522	62.8112	71.5508	69.4048	49.9145	52.5967	30.6612			0.105001	61.8185
2.6211	85.5657	110.304	45.4585	71.0493	72.3783	69.0151	53.8293	80.044	107.097	116.899	13.5541	24.8056	66.596	75.038	32.0971	64.7099	44.464	40.039	33.0882	20.4514	67.9798	55.5164	66.163	77.2063	64.6006	71.5055	58.7355	43.839	53.0237	28.6516			0.109999	60.4568
2.7402	85.2047	108.453	43.1347	70.8872	71.6518	67.0712	48.5958	71.399	105.772	116.746	13.6729	24.2425	61.786	75.173	26.4461	61.0597	43.726	38.69	30.5966	22.2427	72.1501	56.1023	64.3621	78.8765	65.7784	77.3783	53.2982	40.3856	51.614	25.2898			0.114998	59.0595
2.8594	87.8348	105.181	40.2717	76.2386	76.7517	73.1401	44.3471	64.789	104.513	117.292	14.9802	21.7689	61.478	73.487	21.509	53.0837	40.091	39.584	30.1977	24.5119	76.4897	60.584	64.7809	78.9838	63.8792	76.4465	45.8171	36.4109	53.5418	22.6565			0.12	58.3547
2.9785	84.3478	105.83	39.7616	78.4381	77.1321	74.3899	40.9523	61.871	103.99	116.262	14.9712	20.0417	59.063	70.68	19.373	46.5134	37.298	43.078	28.644	24.4457	71.4016	64.3892	65.3259	80.637	63.1947	76.7332	38.8732	29.5975	52.0549	20.3117			0.124998	56.9867
3.0977	87.6478	102.503	38.5086	80.7816	81.1858	76.5112	38.1231	53.603	97.986	112.493	15.4103	18.8325	61.471	71.614	16.9715	44.0957	35.883	43.858	26.5166	24.2392	69.2043	67.6626	61.0397	79.7797	61.9276	75.1979	32.8103	27.6404	48.1213	15.4064			0.130001	55.5675
3.2168	90.0555	100.946	34.6198	81.1201	89.5685	76.6792	36.3143	48.376	93.688	117.836	14.8792	18.5065	60.621	64.272	17.3107	40.9171	34.418	48.106	27.508	21.4028	67.6912	68.6268	55.7793	78.5625	61.7675	65.7432	32.2968	24.9365	47.2754	16.3772			0.134999	54.54
3.336	90.0706	99.222	34.5273	82.0184	91.1298	77.0572	31.9394	45.521	81.973	112.857	15.3998	15.6378	57.583	69.264	18.2098	38.7927	35.172	51.728	26.6576	21.2979	68.0191	65.8742	48.2095	78.9284	66.7383	58.5843	29.8315	22.5285	46.4985	13.4312			0.140002	53.1567
3.4551	88.2919	96.528	30.9498	78.3352	95.3846	80.7757	31.4622	43.018	77.473	116.738	14.1644	14.912	57.099	69.916	17.6476	38.3809	33.362	54.387	24.2871	21.8425	65.8846	66.2386	38.9755	79.0925	64.2854	50.7001	26.8186	22.7833	44.3688	11.8331			0.145	51.8645
3.5742	91.356	90.391	31.5161	78.4388	96.6216	81.9398	29.8231	34.808	75.405	114.336	16.0042	14.7507	54.664	65.715	16.981	36.2287	32.496	53.995	22.8753	20.3138	65.3328	65.6699	32.7549	74.4577	68.9112	44.1515	21.8247	18.8989	44.4965	12.0371			0.149998	50.2398
3.6934	86.4057	87.201	27.8274	78.5736	99.4107	84.8769	26.3927	31.809	75.601	110.236	16.2458	15.2175	55.765	64.984	16.9656	35.3481	35.433	52.923	22.0919	21.1933	66.1927	63.9369	31.0121	65.8005	68.6507	44.8134	21.1288	20.7285	40.6764	10.2698			0.155001	49.257
3.8125	90.1164	86.083	24.9567	80.9066	95.4469	87.1351	24.2505	28.537	65.016	105.497	16.2051	17.4791	55.185	60.932	14.7075	34.242	35.398	54.447	20.1308	18.3544	61.1279	65.5064	26.3726	62.3975	69.4434	43.2716	19.3451	23.4367	42.6636	10.2461			0.159999	47.9612
3.9317	99.8595	85.304	24.2696	82.7293	97.6337	91.2999	20.3404	26.014	57.286	106.349	15.9986	16.5847	56.588	55.997	13.6804	34.5483	36.989	52.524	20.2095	17.862	60.8143	70.8376	25.2255	59.8262	68.6491	39.1452	17.605	23.4293	40.0172	10.8236			0.165001	47.6147
4.0508	100.581	81.917	26.7518	79.3305	101.216	94.6138	21.1982	22.933	52.292	102.158	14.1748	16.8761	59.217	51.842	12.5133	34.3297	37.431	57.914	20.1264	17.7637	53.8332	73.1037	22.6326	52.8836	64.672	36.0016	17.2479	22.586	37.248	10.6397			0.17	46.5343
4.1699	99.2501	77.82	22.8016	77.7182	94.9504	90.4333	18.5643	22.937	48.473	91.596	14.342	16.2093	64.054	48.542	11.778	31.7059	39.064	56.006	18.654	18.4467	48.5143	72.6077	22.2355	54.4208	65.5026	33.0824	17.6819	21.6652	35.0928	8.827			0.174998	44.7659
4.2891	97.0068	73.592	17.8417	79.2342	94.4454	89.8727	15.6487	18.803	43.214	86.507	13.6807	15.3214	68.589	44.077	12.9862	29.6141	42.647	55.729	18.6943	16.8197	40.6149	68.6475	22.5607	52.2523	61.0227	32.8216	18.6839	23.8358	34.0096	9.7054			0.18	43.2826
4.4082	94.9432	66.354	16.3167	76.2194	92.6851	90.5746	14.3792	14.455	36.583	80.905	16.2851	16.426	70.11	39.19	12.5851	29.0748	45.733	58.404	17.6983	15.3933	29.2909	65.7374	19.8362	50.948	58.4946	33.2154	17.2901	23.4717	33.6184	10.3858			0.184999	41.5534
4.5274	94.8073	65.218	15.9032	72.7726	89.4017	87.9832	14.3288	16.252	31.541	75.272	16.5378	16.2447	67.744	41.223	9.5924	27.5987	47.665	62.322	17.0548	15.3321	22.8218	61.9591	20.1443	55.8596	52.5102	32.2111	16.695	24.2088	33.0375	10.1992			0.190001	40.4814
4.6465	96.6398	64.207	16.2482	67.1084	91.0903	87.3245	12.1018	15.091	28.553	68.44	17.0101	16.408	68.219	40.423	7.1941	27.3752	51.595	65.345	17.2664	13.9884	19.432	55.5222	19.9169	55.4068	54.0749	29.0416	17.152	22.5348	34.0048	10.3189			0.194999	39.6344
4.7657	91.1657	65.345	12.1932	57.4014	86.0819	86.3667	10.617	13.394	25.643	60.35	20.5877	17.0092	67.926	42.534	6.7485	23.389	53.37	68.014	18.1028	14.5484	19.1636	46.8773	19.5485	51.6246	50.6718	26.3241	17.0979	24.6229	30.8945	10.687			0.200002	37.9433
4.8848	96.6563	62.933	10.9089	57.9837	83.6017	83.2841	9.9905	13.707	24.107	50.536	21.8767	13.3616	69.161	42.749	7.3217	22.5701	59.283	66.366	18.9495	14.7762	17.711	38.9919	19.1413	50.9867	50.3623	21.5392	15.6762	27.3184	35.1456	12.3841			0.205	37.3127
5.0039	98.4664	56.832	10.7357	53.299	81.0092	85.4917	7.9147	13.421	21.966	46.387	21.2165	13.722	64.004	47.282	7.3926	22.7981	63.851	67.62	20.637	13.8581	15.1149	33.6562	15.2033	56.0365	45.2154	21.359	14.9817	26.5759	29.8941	11.2807			0.209998	36.2407
5.1231	97.3076	56.676	12.305	48.407	78.589	83.2866	6.4217	12.047	17.946	42.106	19.4282	14.6718	57.232	48.232	6.8862	22.6381	68.087	66.442	20.6877	14.2858	13.6905	30.9701	14.9393	55.7187	41.2634	20.1199	14.4085	27.5604	31.5531	11.1771			0.215001	35.1695
5.2422	91.3236	53.63	10.0167	40.201	73.8808	80.8051	7.5619	13.052	15.924	41.052	17.2746	17.9444	55.531	55.337	5.6127	23.5949	74.582	72.954	20.5587	13.9586	13.4431	28.1971	15.3837	56.0315	38.521	19.9342	12.6005	28.4975	31.2536	11.8518			0.219999	34.6836
5.3614	89.4818	49.713	9.6972	37.8009	76.4567	82.6848	5.8926	12.946	14.431	35.98	15.2459	18.4364	58.018	61.639	6.0906	21.4331	81.312	72.466	20.5776	14.3521	11.7999	28.0951	14.9386	59.8928	36.0642	16.4349	12.0189	28.7166	32.7168	12.1133			0.225001	34.5815
5.4805	89.0312	43.636	7.6734	32.9283	74.8143	80.8234	6.846	12.918	12.778	29.827	13.092	20.7327	59.695	66.269	8.2636	21.999	85.839	71.923	21.832	13.8695	10.3722	27.264	15.2848	63.875	32.986	15.861	10.518	27.2387	36.0154	10.3364			0.23	34.1514
5.5996	81.7625	37.631	6.9588	25.6695	70.1862	78.838	4.8394	12.057	12.917	26.166	14.1364	20.5949	61.934	69.039	8.2951	22.1024	87.922	75.808	20.0883	16.0695	8.2217	20.6403	14.0799	63.7086	32.3947	14.8807	10.1182	26.1816	36.578	9.4789			0.234998	32.9766
5.7188	77.6823	35.178	5.7677	20.1692	65.0174	79.5962	5.4862	12.748	12.776	21.201	14.7395	22.3425	62.398	72.002	8.6519	18.554	87.21	73.265	20.1965	14.1448	7.8707	19.7599	13.0802	68.9691	29.5545	14.5867	10.1098	25.9693	39.1132	9.5131			0.24	32.2551
5.8379	66.5663	31.659	5.15	15.8295	61.5096	77.8827	5.7942	13.077	10.497	16.757	14.5089	25.6062	64.083	72.77	10.1612	17.5973	85.6	70.867	17.4879	14.0592	6.8279	18.227	11.7927	66.2383	30.4467	14.3256	8.4178	25.5384	40.2521	9.5731			0.244999	30.9701
5.9571	56.452	34.782	5.0438	11.6696	55.0786	79.706	5.1519	12.009	9.133	16.84	15.0254	24.8753	63.145	77.692	9.001	16.7544	87.205	69.874	16.6735	14.7758	6.9421	16.3522	10.8634	66.649	32.0963	15.0022	6.9293	24.0339	38.811	8.6489			0.250001	30.2405
6.0762	50.6241	33.403	5.2488	11.5711	47.7674	76.8141	5.7687	12.451	8.531	16.149	15.3361	23.2582	66.598	81.206	10.1152	14.7695	92.513	73.504	16.6582	13.979	6.1679	17.1982	11.0299	63.1868	30.0523	14.0219	7.4642	23.6846	40.2349	9.154			0.254999	29.9487
6.1953	43.9858	31.831	4.4823	11.3591	44.137	72.0631	6.3962	13.818	7.378	15.603	17.5881	24.6016	70.7	85.914	10.6729	12.9858	85.805	76.037	17.1391	15.0221	6.24	15.8434	9.3637	62.8251	34.7578	14.1129	7.7492	22.9745	43.8448	10.0037			0.259998	29.8411
6.3145	40.7922	30.872	3.9911	11.3599	37.3565	69.5813	6.1174	12.877	7.804	15.313	17.5676	26.3668	73.319	89.346	9.6487	12.5196	89.264	81.396	14.3181	13.7808	5.9302	13.9912	10.0732	60.5394	36.3106	13.6517	8.3617	21.1291	44.6315	9.3011			0.265	29.5837
6.4336	40.2088	29.191	4.1464	11.988	34.3519	65.3208	5.5756	12.351	7.287	19.259	16.472	27.0829	77.696	86.727	11.2053	13.9021	86.926	83.341	13.9708	14.459	4.3534	13.5594	8.6322	60.1991	35.1748	13.8893	8.669	22.2776	44.0315	8.0951			0.269998	29.3448
6.5528	37.7312	26.439	3.6551	11.0311	29.036	65.0747	5.5218	11.711	7.926	19.053	19.4648	25.4593	82.526	90.927	10.6496	12.7144	89.212	87.844	13.8287	15.9913	3.4628	12.7784	7.5216	58.5079	38.7236	12.9426	7.3439	19.4653	42.4634	8.228			0.275001	29.2411
6.6719	31.2604	25.055	4.4402	9.4753	25.05	57.6809	6.0989	14.531	7.234	13.724	20.6775	25.759	86.661	94.927	9.9517	11.5658	94.202	91.87	13.8822	14.9208	3.7612	11.6322	7.2686	58.6221	40.2154	10.9587	7.1177	18.8763	47.6062	7.9449			0.279999	29.099
6.7911	27.481	21.771	4.0382	9.6002	21.6512	55.3351	7.2352	13.779	6.584	11.749	19.6542	25.4332	89.571	96.416	10.6301	12.3396	95.27	95.379	13.0865	15.215	4.4538	11.2459	7.7064	62.7597	40.0407	9.2166	6.1604	17.436	44.5766	7.2641			0.285001	28.7693
6.9102	26.1684	21.853	3.7906	8.6276	18.9121	53.0205	7.1948	14.323	6.402	10.507	20.3041	25.5708	90.674	98.977	9.9392	11.9794	99.979	99.987	11.4959	15.9745	5.1087	12.3799	6.4589	61.4309	40.8207	9.7742	5.4527	14.6598	43.1992	8.1395			0.29	28.7701
7.0293	17.9401	20.966	4.2378	8.39	15.1533	48.1052	6.5003	13.405	4.193	10.971	19.823	26.3758	95.9	104.83	9.8828	11.7004	98.11	100.751	11.2925	16.6671	4.0655	8.994	7.2274	65.0409	42.4748	8.5118	5.6988	11.9895	47.3891	6.3163			0.294998	28.4301
7.1485	14.8682	19.651	4.4437	7.9076	17.0899	44.2606	7.7556	12.817	4.233	10.662	18.1519	24.7884	95.919	101.682	8.3174	11.4165	102.298	101.458	9.8285	15.2219	4.6422	9.5173	7.0001	65.3712	44.2518	7.7247	6.3327	10.3961	43.878	6.7255			0.3	27.9537
7.2676	10.1658	19.069	5.2269	8.1919	18.2243	40.4585	9.0075	12.557	4.073	9.343	20.3542	24.8423	99.386	109.626	8.0147	10.5292	101.411	100.693	11.6519	15.4614	5.7904	7.9903	7.2042	69.685	46.413	8.7063	5.9671	7.897	42.0536	5.7404			0.304999	28.1911
7.3868	7.558	19.416	5.3121	7.4279	16.631	38.5997	10.7009	13.936	3.177	7.7	18.6456	22.81	94.444	109.952	7.6137	11.2093	96.807	97.315	11.6714	14.5209	4.6746	7.3626	8.4636	69.3383	47.2286	7.9385	5.2749	6.4094	45.5764	5.5383			0.310001	27.4418
7.5059	5.6011	17.553	6.0805	6.4996	13.2558	35.5209	12.6014	14.976	4.49	6.444	17.6579	23.7911	106.144	112.793	6.5868	10.817	98.141	102.12	10.9026	14.8623	4.8061	8.1883	7.4881	65.7225	49.3186	6.9559	4.7802	5.4602	44.0366	4.7983			0.314999	27.6131
7.625	5.3491	13.471	5.2809	6.9588	10.4527	30.2049	12.8885	13.969	4.901	4.284	16.7087	21.5825	111.225	119.163	6.62	10.3572	102.117	109.261	11.063	14.3425	5.6081	8.0331	8.7801	66.9791	58.1086	6.4416	4.6379	5.3572	39.3863	4.911			0.319998	27.9481
7.7442	3.8149	13.314	5.4724	6.8075	9.1326	24.9169	14.0817	12.212	5.097	3.966	18.3017	22.3217	112.702	122.597	5.5632	10.5569	103.142	111.308	10.3049	13.2374	4.9645	9.1556	8.924	57.8668	61.0178	6.1413	4.8279	3.6872	39.9606	5.6238			0.325	27.7006
7.8633	3.9262	10.704	5.8295	7.8962	8.3434	20.2275	12.5169	13.226	4.942	4.434	20.3452	21.1711	113.19	121.457	5.7314	9.3467	105.121	111.854	10.2844	13.498	5.1857	8.618	7.2488	57.3663	62.8699	5.428	4.7484	4.8487	37.1224	5.0793			0.329998	27.4187
7.9825	3.7653	9.977	6.5572	7.6094	7.1272	16.9349	13.5814	12.212	5.574	4.558	18.6541	23.3094	119.121	126.793	5.6524	9.6198	113.765	115.766	10.1527	12.928	3.9333	8.9991	6.4882	53.9935	68.4297	5.5604	4.2578	4.197	34.4623	4.3632			0.335001	27.9447
8.1016	3.8746	9.13	8.9485	8.8128	7.8658	14.9452	14.5202	12.916	6.003	4.15	19.4161	21.3913	125.023	125.894	5.4305	10.613	114.437	116.681	9.1818	12.3416	5.1895	9.4101	5.7797	47.8315	71.084	5.3522	4.7969	3.9791	32.332	4.3666			0.339999	28.0566
8.2207	3.9193	9.954	9.8826	8.1954	7.246	15.4194	13.9313	10.942	5.967	4.221	19.1874	24.6763	126.506	130.476	4.4631	9.4402	113.594	114.195	8.9374	13.8025	4.382	8.7794	5.9526	40.8997	75.3703	4.4741	4.1595	3.5601	29.9726	4.3783			0.344997	27.8961
8.3399	3.3282	9.742	13.1379	9.0598	5.7553	13.3144	13.2745	9.956	7.352	3.171	20.3458	25.3897	132.521	126.28	3.958	8.8333	113.243	118.164	8.0837	11.3007	4.0764	9.1899	5.7851	36.9358	81.5999	3.5305	3.46	3.6035	27.5504	3.6353			0.35	27.8526
8.459	3.8661	10.426	16.3106	8.2715	4.8883	11.8278	14.5465	12.102	7.543	3.691	22.7082	27.8781	135.63	126.364	4.0433	8.5209	103.893	121.289	6.6904	10.2486	4.3315	8.6105	4.5996	34.8413	82.9916	3.406	4.3187	2.6274	29.7659	3.9101			0.354998	28.0047
8.5782	4.3593	11.704	17.0475	7.7053	4.7361	11.9353	18.4003	11.73	7.481	2.73	22.5578	27.7975	135.677	121.097	3.8603	7.9196	99.5	119.443	5.7623	9.3039	3.2774	8.2486	4.1371	30.4556	90.9226	3.4542	5.0522	2.1379	25.4049	3.5186			0.360001	27.5785
8.6973	3.8572	12.679	17.8962	9.1974	4.6328	12.3451	16.1517	11	6.365	2.73	20.9069	28.8168	137.127	123.757	3.6139	8.8986	92.751	113.937	6.3066	7.9092	2.4824	6.65	4.5248	29.0026	84.8862	3.5807	4.4648	2.4338	21.9856	4.4942			0.364999	26.8461
8.8165	4.4476	13.525	17.0565	11.8455	4.573	11.1359	17.1842	13.207	7.056	2.779	14.1074	28.11	142.267	120.736	2.707	8.6143	93.231	107.422	5.3449	8.2935	2.44	7.2921	3.5182	25.4609	86.8344	2.9169	3.1377	2.6583	17.667	4.3668			0.370001	26.3312
8.9356	3.6935	12.77	16.4144	11.4533	4.5838	9.5727	17.759	13.187	7.127	2.259	11.4116	30.642	142.825	110.644	3.3185	8.7247	89.061	101.113	5.8218	7.9334	3.1402	7.2786	3.4681	25.9106	83.2865	3.2086	3.5418	2.2899	14.5675	3.6887			0.374999	25.3565
9.0547	4.319	12.756	13.5439	13.4762	5.0801	8.8405	17.7837	14.625	6.224	1.919	10.0259	29.4083	147.317	108.187	3.185	7.7644	88.989	96.586	5.1369	7.8159	2.3682	5.8656	3.0676	23.1228	74.9108	3.3353	4.2345	2.3512	12.6056	3.6139			0.379998	24.6153
9.1739	3.9132	13.351	16.276	15.5671	5.4241	6.7754	17.9535	15.682	6.037	2.112	10.0199	27.6947	148.888	108.855	3.1324	7.5971	82.695	97.232	5.3048	6.7444	2.8333	6.9072	3.3445	23.3593	71.8125	2.8669	3.6091	1.8655	9.6864	3.5288			0.385	24.3689
9.293	3.5421	13.499	15.9815	16.1763	5.8847	6.3289	17.2057	17.06	5.484	2.402	8.5426	25.3933	154.551	106.656	3.3408	7.3218	74.925	96.088	5.793	6.0738	2.6846	9.2131	3.1319	25.7004	64.4446	3.1861	3.9564	1.8389	6.6987	3.3719			0.389998	23.8825
9.4122	3.4963	14.994	12.2375	22.2423	6.1616	5.5201	18.6223	20.416	5.76	2.256	9.4934	26.0238	161.098	109.619	2.5517	7.9383	66.858	97.629	6.7441	6.5216	1.9772	11.0492	3.22	24.1738	59.5319	3.7224	3.9279	1.7924	3.4414	3.4607			0.395001	24.0827
9.5313	4.0151	15.862	12.3277	26.5393	6.4652	5.0126	20.8746	21.102	5.541	2.293	9.4731	22.3995	157.566	104.22	3.5413	8.0883	58.736	96.301	7.7341	5.6637	2.618	12.1961	3.4242	22.1859	53.7365	4.3036	3.3044	1.3487	3.7366	2.4935			0.399999	23.4368
9.6504	3.9222	20.223	10.6902	27.6741	6.6333	4.3722	19.2786	21.141	5.641	2.54	9.4895	23.0947	160.582	104.299	2.9205	9.0494	48.444	94.686	9.6147	5.977	2.8973	13.6758	3.336	17.6003	47.6952	3.8729	2.8263	1.4488	2.8805	3.1458			0.404997	22.9884
9.7696	4.1074	20.382	10.3924	29.5044	5.8964	4.559	18.6286	20.414	5.548	1.771	9.9323	20.2749	160.12	106.2	2.7931	7.4452	39.675	90.469	7.373	5.6728	2.9998	13.7824	2.9268	13.1499	43.9879	3.8918	3.0737	1.6362	2.2266	2.9204			0.41	22.0585
9.8887	4.3132	19.052	11.2787	29.938	7.4964	4.0678	16.9846	21.163	4.999	1.869	8.3841	17.9247	157.573	104.627	2.6284	6.6454	32.635	84.194	6.8391	5.4827	2.353	14.153	3.7568	10.6813	38.5542	3.5848	2.9106	1.4622	2.0614	2.9677			0.414998	21.0193
10.0079	3.639	20.489	10.0532	27.1489	7.4633	4.3988	15.2723	19.201	4.559	2.239	8.8391	11.8114	148.896	106.13	2.7271	6.7616	24.799	72.826	7.3384	4.3879	2.2367	16.4484	4.1129	8.2801	32.859	2.7945	2.5176	1.5676	2.4572	3.3117			0.420001	19.5189
10.127	3.2093	22.066	9.9994	24.3624	7.9388	4.7171	15.3631	18.829	4.122	2.135	8.923	9.5821	149.325	101.778	3.0298	7.4941	18.027	67.027	7.9125	4.8248	1.9081	16.6546	3.6969	6.9242	33.2132	3.1454	2.9659	1.3444	2.1105	2.7561			0.424999	18.8462
10.2462	3.8911	22.299	10.715	18.1396	7.4143	4.1607	17.9938	19.501	4.821	2.317	8.8588	7.5369	132.852	95.212	3.1746	6.9788	15.305	58.947	5.743	4.7087	1.991	17.5237	3.9172	7.7614	27.5672	3.8254	2.8408	1.8498	2.3055	2.4737			0.430001	17.4208
10.3653	4.382	21.606	12.3837	16.5917	8.4888	3.1676	18.9458	20.892	4.328	2.281	7.7954	6.6055	118.876	92.911	3.7675	7.2432	11.023	51.162	5.4435	5.4134	2.312	15.3747	4.1264	7.7669	23.3902	4.5554	2.4811	2.2899	1.906	2.0821			0.435	16.3197
10.4844	3.6283	19.051	14.9787	14.4139	9.7344	3.4808	20.9127	25.105	4.428	2.445	8.0678	5.4344	103.438	84.656	3.9757	8.4425	11.126	46.537	4.8372	5.3426	2.1693	16.538	3.018	7.4151	20.5062	3.5074	2.4544	1.7591	1.692	2.0459			0.439998	15.3713
10.6036	3.5465	20.401	15.464	13.5115	9.0614	2.9305	18.8125	26.987	4.264	1.941	9.4188	4.6622	89.609	82.001	3.4098	7.9811	9.836	41.678	4.4729	4.2619	2.492	16.4885	3.3415	6.4702	14.5899	3.8334	1.9647	1.6746	1.6663	2.1365			0.445	14.2969
10.7227	4.1539	19.354	15.0526	13.209	9.4636	3.7136	20.6343	31.697	3.246	2.043	7.6128	4.8789	82.128	75.112	4.6284	8.276	9.061	38.468	4.4714	4.846	2.2825	18.4763	3.1068	4.5184	13.5348	3.2466	2.3169	1.6117	1.6751	2.2771			0.449999	13.8365
10.8419	4.1459	23.454	14.8645	14.2502	10.6507	4.4144	23.171	33.322	4.32	2.157	7.5479	4.8381	75.347	74.776	4.1145	7.9962	8.205	39.964	3.3204	4.0854	2.3216	17.7021	2.8018	2.9169	12.5617	3.4128	2.3765	1.4894	1.3929	2.2592			0.455001	13.806
10.961	4.8276	23.936	14.4218	14.0143	9.9578	3.8996	22.345	36.679	3.315	2.101	7.0121	4.8176	68.72	69.001	3.9603	7.575	6.356	37.876	3.5999	3.5077	1.888	14.9076	2.6526	2.6701	10.3355	3.7431	1.9606	1.1427	1.5557	2.4381			0.459999	13.0406
11.0801	4.9075	25.959	15.0334	17.5336	9.6682	3.6533	19.356	32.777	3.582	2.215	6.598	4.4682	55.286	66.285	3.7924	8.9002	4.628	39.937	2.7875	3.8155	2.2907	13.4705	1.9172	2.307	6.0461	4.2267	1.9285	1.7885	1.8923	2.8773			0.464998	12.3309
11.1993	3.3517	27.897	14.6079	15.6877	8.4968	4.3297	20.0311	28.695	2.849	2.533	6.7677	5.1264	45.214	60.676	3.3335	9.0251	4.126	35.943	3.0144	4.1923	2.4883	11.2232	2.6422	2.0599	4.9332	3.4485	2.0917	1.3546	1.4668	2.7462			0.47	11.3451
11.3184	3.7602	26.133	15.19	18.5691	8.2068	4.2373	19.2534	26.132	3.015	2.325	5.3261	4.9341	36.697	56.684	3.3877	9.7701	4.503	33.501	2.8359	3.758	2.1259	11.9515	2.6974	2.681	4.464	3.4731	2.2952	1.3656	1.1918	2.6838			0.474998	10.7716
11.4376	4.5063	24.472	15.37	19.6323	8.0718	4.0511	19.6524	25.921	3.116	2.232	6.0862	4.4763	34.196	53.233	3.5936	9.9915	3.512	30.511	2.7825	3.1079	1.6575	12.2484	2.6685	2.8558	3.0518	4.0206	1.9947	1.3135	1.4002	2.1891			0.480001	10.3972
11.5567	4.7296	24.408	12.3221	21.4721	7.652	3.6792	21.7602	27.148	2.903	2.032	5.6803	4.6904	34.742	48.143	3.7317	10.3286	3.495	28.998	3.3817	3.5922	1.5717	13.7125	2.2731	2.8716	2.832	4.135	1.7197	1.5658	1.7882	2.7446			0.484999	10.3368
11.6758	4.7293	24.911	14.3991	23.0539	7.4009	4.0928	20.64	27.789	3.171	2.485	5.749	4.18	36.214	41.792	3.573	9.232	3.159	26.606	2.6637	3.2335	1.9642	14.8852	2.6159	2.6662	2.1851	4.0103	1.7109	1.1908	1.634	2.867			0.489997	10.1601
11.795	4.4081	22.558	13.9072	26.6771	6.3134	5.0068	21.02	29.102	2.373	2.723	4.8456	4.1602	29.653	30.474	3.2502	10.0011	2.307	21.338	2.3947	3.6727	2.4562	18.1654	2.335	2.3881	2.201	3.5876	1.8658	1.1675	1.283	2.3342			0.495	9.46563
11.9141	4.6572	22.787	12.9875	24.9045	6.1692	3.8708	24.145	29.797	2.519	2.05	4.7647	3.3755	25.36	29.612	3.1508	8.6745	2.133	16.905	2.173	2.9375	1.7977	20.3658	2.0956	1.9603	2.0893	3.8245	1.8667	1.5956	1.6284	2.7869			0.499998	9.09947
12.0333	4.9909	19.864	10.5957	24.3496	5.3838	3.804	21.5637	27.975	1.961	2.288	4.6173	3.8651	23.755	28.651	3.7477	9.3006	2.378	12.606	2.1536	2.7035	1.8636	21.5471	2.1437	1.833	2.279	3.866	2.3372	1.8854	1.2619	2.6859			0.505	8.60854
12.1524	4.6677	20.267	9.7467	24.6827	5.8249	4.7118	18.0855	27.509	2.285	2.213	4.0133	4.0196	23.685	28.699	4.2195	9.1274	2.718	8.144	1.8956	3.2476	2.2469	25.1107	2.6579	2.3552	2.0027	3.2297	1.9064	1.5529	1.7218	2.4817			0.509999	8.50094
12.2716	4.2916	21.175	10.0546	22.1231	6.0391	3.7632	17.3892	24.518	2.312	1.99	4.089	4.7064	22.528	24.804	3.3156	9.8384	2.556	5.649	1.8206	2.715	2.4446	24.0747	2.4002	2.1644	2.9106	2.889	1.9456	1.0915	1.2341	2.7763			0.515001	7.98696
12.3907	6.5545	21.215	10.4534	20.2442	5.689	4.5215	17.9083	24.009	2.658	2.266	4.7379	4.1237	19.612	18.446	2.8386	9.9732	2.535	4.945	1.9432	2.5651	2.148	23.184	2.6172	2.2809	2.3857	3.3454	1.7359	1.4432	1.136	2.4477			0.519999	7.66542
12.5098	5.1451	22.893	9.6036	18.9131	4.6561	4.0454	15.2002	25.429	2.831	2.17	5.8506	4.2513	16.191	18.204	3.8237	10.7563	2.276	4.456	2.5562	2.2346	1.7152	23.2204	2.1769	1.6796	1.8753	4.7437	1.3698	1.3225	1.298	2.1936			0.524998	7.43604
12.629	5.7742	22.396	11.3492	16.982	5.3935	4.4231	13.9831	23.962	2.963	2.302	5.3246	4.1433	12.378	18.201	2.8731	9.756	1.927	2.975	2.6708	2.5727	2.0293	22.7275	2.7152	2.1973	2.5612	4.7867	1.6417	2.0978	1.6528	2.4829			0.53	7.2414
12.7481	6.3322	23.384	10.767	15.4807	5.0784	5.3743	13.7867	24.873	2.241	2.247	5.5561	3.5833	8.547	17.048	3.1747	11.7082	2.277	2.695	1.8302	2.2417	1.9208	21.2661	2.3734	2.3958	2.7089	4.5826	1.2851	1.2983	1.7474	2.6675			0.534998	7.01571
12.8673	5.8395	24.099	12.222	14.524	6.0829	4.2345	12.8697	25.06	1.927	2.287	5.0355	4.446	6.748	14.141	3.0646	11.4764	2.051	1.819	1.8179	2.7718	2.1702	21.8664	1.8657	2.1824	2.4178	5.0475	1.2991	1.0904	1.4599	1.9953			0.540001	6.79705
12.9864	5.3468	26.016	13.3444	12.9238	6.0906	4.1	11.0161	28.119	2.54	2.137	4.8931	4.2992	6.628	10.444	2.8048	12.0369	2.117	2.126	1.7648	2.1258	2.015	23.0004	2.1241	2.5155	2.2829	4.7681	1.32	1.6348	1.1898	2.1282			0.544999	6.79507
13.1055	5.7435	25.175	14.9166	13.6064	6.1951	4.6239	9.6577	26.172	2.471	2.022	6.3247	4.306	5.817	8.257	2.7714	10.52	2.304	1.807	2.2667	2.0685	2.039	24.3314	1.518	2.3231	2.2169	5.103	1.5066	1.3618	1.391	1.9255			0.549997	6.69139
13.2247	6.4535	25.52	16.4213	13.7461	6.2789	4.5335	9.2997	27.781	2.814	1.928	6.7223	4.009	4.699	6.463	2.4848	10.6489	1.592	1.597	2.0149	2.3642	2.2304	25.9933	2.576	1.916	2.2815	5.1355	1.6428	1.3855	1.3335	2.6579			0.555	6.81745
13.3438	7.0864	27.493	17.8276	12.7169	6.5264	4.8021	9.7644	29.342	2.349	1.916	6.9691	3.7741	3.591	4.59	2.5947	12.3179	1.575	1.633	2.3801	1.9793	2.1414	25.8013	2.5881	2.1535	2.25	5.2872	2.021	1.0189	1.1278	2.5837			0.559998	6.94003
13.463	7.8951	29.209	18.8122	12.2798	6.3452	4.4265	9.3046	27.871	2.365	2.227	6.5575	4.5294	2.939	4.47	2.8245	13.469	2.361	2.049	2.0892	2.1866	2.8319	25.1096	2.5418	1.9546	2.1364	4.7674	1.68	1.2719	1.3353	3.1453			0.565	7.03283
13.5821	9.1995	27.438	16.2233	11.9664	5.4541	4.3648	9.8947	28.525	2.629	2.284	6.1319	5.0974	2.143	4.3	2.6607	13.8921	2.35	1.992	1.9044	1.8207	2.6311	23.0378	2.2904	2.0536	1.3695	4.4993	1.1463	1.2324	1.6369	2.6389			0.569999	6.76024
13.7012	8.9488	24.677	15.2912	11.5662	5.8502	4.5498	9.6701	31.463	2.643	1.924	5.5855	4.6419	2.501	3.189	3.0767	14.1894	1.864	1.848	1.9546	1.9628	1.9851	21.5789	2.2129	2.312	1.6436	5.029	1.7072	1.2804	1.4317	2.3293			0.574997	6.63021
13.8204	9.3721	24.302	14.0825	10.8552	5.91	4.8275	8.2425	33.272	2.775	1.686	5.5603	5.2509	2.112	2.693	2.4873	14.5021	1.98	2.32	2.136	1.9416	2.1593	19.3379	1.7516	2.167	2.0256	4.6985	1.5421	1.3864	1.4393	2.1089			0.579999	6.49749
13.9395	8.3508	22.256	11.9861	10.5651	6.1766	3.955	9.9638	35.806	2.103	2.316	4.994	4.3544	2.111	2.492	2.4405	12.5144	2.011	2.318	1.9207	1.5834	2.3675	17.709	1.9455	1.8939	1.8574	5.5546	1.6813	1.343	1.3153	1.9121			0.584998	6.25991
14.0587	7.3842	21.167	11.538	10.5635	5.32	3.7312	9.9969	36.539	2.327	1.738	4.8767	4.4124	2.445	2.549	2.4952	10.6069	1.44	1.942	1.9008	1.999	2.524	18.0266	2.3375	2.0142	1.9292	4.5219	1.5739	1.3175	1.1619	2.0213			0.59	6.07999
14.1778	7.8384	19.683	10.6792	11.4009	6.127	4.2309	9.4063	33.622	1.676	2.195	5.7936	4.3021	1.697	2.42	2.3922	9.5924	1.96	1.72	2.2247	2.1479	2.6047	15.7943	1.678	2.0135	1.9568	6.2051	1.2105	1.3341	1.3354	2.5672			0.594998	5.92694
14.297	8.6164	20.276	9.6602	9.5734	7.0989	3.613	10.0361	33.823	1.915	1.679	6.1584	4.0886	1.91	2.124	3.2568	9.4583	1.576	2.173	2.3733	1.9738	2.154	16.7347	2.7022	1.7198	1.8314	5.9626	1.0676	1.4241	1.6226	3.0388			0.600001	5.98803
14.4161	8.2616	17.979	9.4128	11.0424	6.1089	3.7153	9.0852	33.688	1.785	1.763	5.5132	3.6077	2.534	1.78	2.8684	9.5139	1.66	1.528	2.1363	1.8427	2.2288	21.2289	2.5614	2.1365	2.0466	5.4889	1.4452	1.2137	1.4992	2.0851			0.604999	5.92532
14.5352	8.3041	22.25	8.6219	10.5742	5.1577	4.1202	8.5072	33.583	2.22	1.808	5.4063	3.5091	1.896	1.835	3.2794	8.6511	2.229	1.8	1.6969	1.7885	3.1143	21.7651	2.007	2.3488	2.1879	6.7865	1.1292	1.2983	1.1752	2.1289			0.609997	6.03929
14.6544	7.9415	22.519	8.9401	11.3139	5.4066	4.1373	9.877	32.558	2.762	2.061	6.8443	4.2497	1.854	1.561	2.6063	9.1757	2.202	1.905	2.3368	1.5936	2.9347	23.1016	2.5061	2.1381	1.82	8.3643	1.5286	1.5224	1.0091	2.0426			0.615	6.29374
14.7735	8.8359	22.847	8.6554	10.3449	5.9355	2.9147	9.2017	29.208	2.395	2.051	5.8337	3.6758	2.343	1.839	3.0116	10.1403	2.032	2.596	1.5202	2.1292	2.4796	24.016	2.485	2.0242	1.8806	9.4906	1.3042	1.1177	1.572	2.2343			0.619998	6.2038
14.8927	8.6211	20.305	9.2355	10.3673	6.2301	3.7957	9.9224	28.109	2.178	2.469	5.7448	3.8905	1.97	2.005	2.7302	9.684	1.788	2.385	1.6251	1.8244	2.9149	20.3913	2.2456	2.0066	1.7365	9.9218	1.2711	1.2202	1.1801	2.1176			0.625001	5.99619
15.0118	8.0614	21.609	7.1376	10.0728	5.7613	3.2518	9.2846	28.406	2.223	2.143	6.6806	3.7268	2.411	1.95	2.574	9.0865	1.737	2.126	2.1574	1.7986	2.8413	19.2532	2.3277	1.9782	1.7122	11.3805	1.6319	1.1311	1.1893	2.3203			0.629999	5.93214
15.1309	9.7487	21.328	9.1943	11.3584	6.2487	2.9665	9.0712	33.788	1.621	2.097	6.6208	4.3521	1.952	2.053	2.9065	8.9294	2.571	1.818	2.0137	1.3906	2.5879	16.672	2.6397	2.3271	1.8658	11.1951	1.1503	1.2196	1.3425	2.5017			0.634997	6.18435
15.2501	8.1135	19.844	8.6562	9.6552	6.4724	3.5204	9.3721	29.728	1.472	1.864	6.8819	3.7429	2.14	1.869	2.8699	8.5667	2.62	1.78	1.6893	1.7758	3.027	17.2419	2.061	2.1396	1.6597	14.1065	1.3545	1.3727	1.5849	2.9922			0.639999	6.00578
15.3692	9.601	21.247	8.3139	9.3687	6.0097	3.5627	9.0465	27.336	1.83	1.983	7.0469	4.0461	1.578	1.545	3.7714	9.3404	2.444	2.537	1.7837	2.2828	2.2321	15.9462	2.8186	2.5125	2.4004	18.2761	1.6212	1.1828	1.0412	2.7095			0.644998	6.18048
15.4884	9.6659	22.122	8.5829	9.7161	6.1147	3.2996	8.8293	26.984	2.17	1.727	8.0468	3.6884	1.932	1.674	2.7036	9.5211	2.247	2.031	1.705	1.9977	3.3843	15.7507	1.889	1.5197	2.1786	19.4261	1.318	1.5512	0.9747	2.777			0.65	6.18425
15.6075	9.7593	22.468	8.5722	10.2363	5.1828	4.0705	9.1051	26.277	1.964	1.905	7.7218	3.8312	1.939	1.946	3.5951	10.7426	2.513	2.081	1.5799	1.9766	2.8801	14.8608	1.972	1.5624	1.9767	19.0501	1.4171	1.5397	1.3281	2.7047			0.654998	6.22527
15.7266	10.2007	23.952	7.9499	10.2622	4.7758	4.9264	8.5038	24.172	2.046	2.138	6.9769	4.2266	1.962	2.652	2.6484	10.3296	2.823	2.472	2.0209	1.9829	2.9262	14.5369	2.1685	2.2004	1.8941	19.5238	1.4977	1.4686	1.2987	3.2264			0.659997	6.25875
15.8458	9.9125	24.799	10.0772	10.2223	5.5533	4.3039	9.0234	23.056	1.647	1.983	6.9274	3.8561	1.489	2.07	2.3924	12.1181	2.602	1.612	1.7453	1.4233	3.3938	12.3307	2.8483	1.8596	1.7886	18.2901	1.1299	1.3837	1.6171	3.7238			0.664999	6.17263
15.9649	9.6634	23.785	8.7466	8.8452	5.4232	4.5124	8.227	22.066	2.078	2.06	7.4885	4.685	1.964	2.32	2.7816	12.0446	1.58	1.513	1.4843	1.6643	2.8261	11.814	2.6408	1.5439	1.8274	15.944	1.1148	1.0569	1.4898	2.9265			0.669997	5.87054
16.0841	10.0245	26.067	10.0612	9.7111	4.9132	3.6426	7.8819	21.14	1.9	2.596	7.3813	3.7903	1.814	1.913	2.7054	12.3046	1.703	2.309	1.5116	2.027	2.5474	9.93	2.4055	1.5086	2.1606	12.8294	1.1415	0.8897	1.9715	3.2943			0.675	5.80251
16.2032	10.099	26.376	9.271	9.5648	4.4541	4.0326	7.6562	20.904	2.019	2.402	8.6617	3.8225	2.108	1.698	3.0464	10.8807	2.302	2.113	1.902	1.9574	2.9219	7.9008	3.0215	1.7697	1.9011	12.3462	1.6754	1.4489	1.2134	2.977			0.679998	5.74821
16.3224	9.8909	23.721	9.2846	9.5461	5.0441	3.8427	6.8557	21.271	2.146	1.869	8.4422	3.8869	1.86	2.145	3.5079	9.0526	1.996	2.132	1.8326	2.0812	3.5253	8.9106	2.3329	1.6659	1.7661	12.2562	1.0702	1.2031	1.3787	2.9019			0.685001	5.58061
16.4415	10.5304	24.811	8.1268	9.095	5.9764	3.099	7.2818	19.987	1.828	2.171	8.9261	3.3499	2.329	2.805	3.007	11.5989	2.151	1.707	1.6474	1.832	3.8537	8.4303	1.669	1.8252	1.8798	10.7227	1.0164	1.1094	1.4795	3.6697			0.689999	5.59718
16.5606	10.6832	28.489	7.7202	9.1893	4.9894	3.3475	7.0196	21.661	2.246	1.96	8.9309	3.2743	1.721	2.166	3.8448	10.262	1.93	1.953	1.8973	2.253	3.6057	7.4083	2.1165	1.6455	2.0255	13.6517	1.5939	1.3477	1.4242	4.5553			0.694997	5.83039
16.6798	10.4847	28.704	6.9227	8.7675	3.9396	3.5219	7.4475	19.585	1.823	1.898	9.5217	3.1009	2.025	2.305	4.0847	11.3037	1.877	2.958	2.0117	1.7241	3.0803	6.9719	2.0706	1.9542	1.6206	11.8767	1.4129	1.385	1.5026	4.3455			0.7	5.6742
16.7989	9.79	28.755	6.7455	8.9556	4.851	3.5199	8.0354	20.018	1.547	2.104	8.9436	3.869	1.995	1.979	3.8313	11.4103	1.856	2.632	1.6868	2.2291	3.6673	5.951	2.6631	1.9771	1.6666	14.0578	1.1251	1.5018	1.3605	4.3228			0.704998	5.76822
16.9181	10.8993	29.745	8.9075	8.9381	5.0705	3.7091	7.3129	21.585	1.973	2.325	9.5751	3.8258	2.348	1.999	4.0793	10.6483	1.993	2.379	1.4369	1.9252	3.9997	5.1796	1.9659	1.7872	2.0885	13.7183	1.2749	1.513	1.3651	4.8639			0.71	5.9477
17.0372	11.1389	30.245	9.1513	8.9909	4.6186	3.2712	7.5786	20.238	1.848	1.96	10.8153	4.0612	2.664	2.702	3.549	12.6136	1.978	3.139	1.8738	1.5578	4.0135	5.996	2.613	1.4059	1.5843	14.6062	1.1232	1.4153	1.3841	5.5858			0.714999	6.12405
17.1563	10.9601	33.69	8.5218	9.4202	5.3032	2.9566	7.691	21.289	1.833	1.876	12.1495	3.6379	1.823	1.947	2.9753	12.3024	1.758	2.56	2.3862	1.7216	4.4315	4.5863	2.4009	2.0421	1.9085	15.7685	1.2697	1.2325	1.3844	5.1344			0.719997	6.23202
17.2755	10.8295	33.948	8.1996	9.5603	3.9955	3.4511	7.2861	21.312	1.88	1.748	13.2918	3.5696	2.21	2.279	3.9381	13.1322	2.198	2.551	1.8499	1.4792	4.4308	4.6824	2.1607	1.9543	2.075	13.8346	1.4367	1.1278	0.9956	6.0191			0.724999	6.24753
17.3946	10.6619	31.444	8.2895	9.7804	4.2847	2.9344	8.2299	21.055	2.156	1.749	14.3067	4.1737	2.731	2.412	4.0727	14.479	1.892	2.408	1.4146	2.1171	4.6485	5.0565	2.2233	1.9603	1.7394	13.0867	1.6861	1.4476	1.6178	7.0326			0.729998	6.36968
17.5138	11.1156	31.672	9.1652	9.0563	4.7615	3.7407	7.763	22.47	1.754	2.312	14.0287	4.0418	2.402	2.078	4.0787	15.8185	1.643	2.457	1.7902	2.1935	4.3498	4.7142	2.0426	1.8302	1.5164	10.3155	1.2144	1.2061	1.4497	5.9443			0.735	6.2975
17.6329	11.2112	28.475	12.0177	9.927	3.9693	3.4316	7.5549	21.3	1.773	2.251	14.1546	4.1747	2.602	2.416	4.2155	15.9555	2.301	2.277	2.1248	1.9426	4.6202	4.2348	1.8859	2.2028	1.7272	10.5884	1.1818	1.604	1.4524	6.0774			0.739998	6.32164
17.7521	12.6333	30.007	10.4329	10.4905	4.3008	3.161	7.2861	22.017	1.7	2.071	13.191	4.5718	2.402	2.181	3.7662	16.6842	2.679	2.478	1.986	1.8271	4.6309	3.9424	2.0152	1.8411	2.0805	11.0589	1.4056	0.8014	1.2314	6.004			0.745001	6.36258
17.8712	11.6981	29.168	10.4759	9.5454	3.9116	3.4994	7.0263	24.746	1.485	2.17	14.0489	4.5554	1.815	2.646	4.6731	15.4678	2.222	2.742	1.7321	1.5714	5.1991	3.9545	1.9287	1.9752	2.1594	10.0243	1.3334	1.1942	1.5301	6.3667			0.749999	6.36217
17.9903	11.7526	34.718	11.036	10.1142	3.9916	3.3913	7.5097	27.4	1.735	1.807	15.1238	5.0982	2.164	1.909	4.0643	16.6662	2.054	2.858	2.1302	1.4508	5.3036	3.4705	1.8018	2.0534	2.264	11.0888	1.1404	1.3853	0.9556	7.0423			0.754997	6.78265
18.1095	11.4011	32.275	11.2942	8.4278	3.7195	3.1807	7.4212	26.815	1.856	1.915	16.8857	4.3001	1.693	2.392	4.0827	16.5396	2.179	2.882	2.0619	1.6588	5.4233	3.2292	1.8067	1.6666	1.963	9.9288	1.4363	1.1275	1.2747	7.7014			0.76	6.61793
18.2286	11.1864	34.287	10.7407	9.9189	3.4645	3.1401	9.1041	28.693	1.699	2.498	17.6945	4.2477	2.288	2.221	4.232	16.5297	2.413	2.253	2.187	1.9517	5.2366	3.7366	2.3682	1.3675	1.4807	10.4658	1.2503	1.1757	1.179	7.5816			0.764998	6.88638
18.3478	11.9003	36.641	10.7358	9.3668	3.9996	2.8892	9.1594	27.272	1.44	1.799	17.6367	3.8446	2.851	1.926	4.2414	14.7893	2.198	3.128	2.4924	1.8435	4.9945	3.2135	2.0551	1.8098	1.7587	11.0272	1.2413	1.0967	1.1611	7.9891			0.77	6.88337
18.4669	12.7303	35.19	11.1994	7.7903	4.7601	3.3614	9.2101	27.428	1.542	2.228	22.4987	3.4743	2.995	2.305	5.1867	16.1395	2.857	3.257	1.8832	1.761	5.7273	2.7222	2.5108	1.7089	1.9607	11.1156	1.0807	1.3153	1.0801	6.913			0.774999	7.13105
18.586	13.6001	33.688	12.5043	8.4574	4.0985	3.1147	9.2235	27.142	2.06	2.445	22.1036	4.5977	2.687	2.395	5.6503	18.1291	2.708	2.621	2.3073	1.891	7.3298	3.2523	2.1978	1.896	2.1446	11.0363	1.3692	1.546	1.0855	7.318			0.779997	7.3533
18.7052	13.4292	34.91	12.2449	7.2622	3.6284	2.9209	10.4694	26.023	1.924	2.175	23.621	3.8022	2.34	2.679	5.617	17.6907	2.97	2.749	2.2471	1.7628	7.8516	2.6731	1.9994	1.3177	2.1684	9.7358	1.6443	1.3377	1.0541	7.8637			0.784999	7.27039
18.8243	13.3379	35.25	11.2177	7.3858	4.0111	3.3367	9.3648	27.297	1.601	1.867	27.4279	5.0103	2.776	3.186	5.3713	19.748	2.601	2.865	1.976	1.8725	8.2735	2.9643	1.7631	2.0181	1.7572	9.8945	1.6564	1.7111	1.0665	7.991			0.789998	7.55329
18.9435	14.9946	32.874	11.5224	7.7482	3.6738	3.5458	8.9601	26.137	1.792	2.197	25.7796	5.2799	3.45	2.86	4.6649	23.2659	2.721	2.706	2.0619	2.06	8.6952	2.9349	1.8253	1.647	2.163	11.1652	1.0353	1.2294	1.2895	8.3434			0.795	7.62074
19.0626	14.5558	30.031	11.3124	6.5017	3.3417	3.2546	10.3096	23.944	2.255	2.275	29.6102	5.0228	2.974	2.825	4.3569	22.5933	3.095	2.814	2.001	2.0155	8.7828	3.1186	2.1429	1.9944	1.9557	10.7055	0.9853	1.2804	0.9914	8.8037			0.799998	7.52831
19.1817	14.3637	28.263	10.2488	6.7135	3.1026	2.9877	11.2424	20.25	1.829	2.125	32.1414	5.5726	3.21	3.701	4.5248	23.7876	3.038	3.467	2.0451	2.5027	8.7314	2.5102	1.913	1.6744	1.7872	10.6087	1.0647	1.5479	1.2925	7.4273			0.804997	7.45577
19.3009	15.7161	29.836	8.6739	6.5819	3.4707	3.2265	11.843	18.234	1.961	2.538	34.7531	6.9887	3.401	4.795	5.1383	21.3028	2.833	3.909	2.3031	2.0847	9.736	2.3564	1.7197	1.5193	2.0807	11.264	0.7316	1.2854	1.1546	7.9581			0.809999	7.64652
19.42	15.0441	27.483	10.1595	5.8541	3.6221	2.9123	13.1218	13.341	1.769	2.657	39.4959	7.5911	3.917	4.897	4.639	21.2278	2.878	4.011	2.0977	2.4456	11.1339	2.5736	1.8062	1.7998	2.1268	11.4161	1.112	1.6738	1.2555	7.4673			0.814997	7.71763
19.5392	14.0336	28.673	11.5645	5.9607	3.5666	3.2244	13.2443	11.827	1.543	2.443	45.6209	8.8207	4.211	6.562	5.4937	22.1607	3.026	3.614	1.8093	2.1094	11.2385	2.8633	2.163	1.9854	1.9619	11.4416	1.0089	1.4236	1.2622	6.8554			0.82	8.05705
19.6583	16.6997	27.991	10.8542	6.3066	3.0392	2.7704	11.6779	10.691	2.061	2.174	50.6109	9.6111	4.109	6.863	5.6471	24.3703	2.774	3.526	2.348	2.1531	12.0147	2.6694	1.9375	1.6731	2.0969	11.1851	1.1286	0.9946	1.4406	7.6057			0.824998	8.30079
19.7775	15.9205	29.392	11.3809	5.9505	2.7605	2.8446	13.0453	9.379	1.832	2.392	57.3646	11.5922	4.254	7.692	4.806	25.4214	2.647	3.797	2.1032	2.0068	11.938	2.3715	1.8662	1.358	1.8013	11.0805	1.0089	1.2134	1.108	6.2524			0.83	8.55266
19.8966	16.3798	32.069	11.1196	6.4118	3.4632	3.0369	13.2045	8.243	1.787	3.008	60.9646	13.5061	3.849	7.609	5.0651	25.2295	3.441	3.535	2.0568	2.0948	12.7011	2.0525	2.0428	1.7427	2.0249	11.5229	1.5403	1.2891	1.5763	7.712			0.834999	9.00928
20.0157	16.5946	31.647	12.2389	6.0138	3.1755	2.9137	14.4049	8.228	1.627	3.053	65.1988	17.4997	5.225	6.994	5.8612	24.6247	3.478	3.544	2.212	1.9834	13.0402	2.3928	1.436	2.0579	1.6674	10.5859	1.2504	1.1525	1.4461	8.0728			0.839997	9.32064
20.1349	15.8716	33.972	10.2442	5.9727	3.1456	2.841	13.2208	7.436	1.966	2.175	70.4416	22.3715	5.613	7.472	6.8378	24.0781	4.142	3.615	2.3416	1.8717	13.5679	1.6528	1.4977	1.46	1.9719	10.5479	1.1901	1.6001	1.6538	7.3574			0.844999	9.60429
20.254	17.6991	34.452	10.9022	6.8677	3.0256	3.0548	13.2587	7.016	2.193	2.749	70.4647	26.4108	6.795	8.409	7.5156	22.2767	3.677	5.216	2.4834	1.8865	14.2196	1.6292	2.0252	1.7443	1.8302	9.5592	1.4587	1.5858	1.1655	6.4634			0.849998	9.93446
20.3732	15.8433	32.757	10.5077	6.0503	3.3944	2.323	11.158	8.529	2.266	2.206	71.9579	29.8581	9.005	9.018	7.8042	23.2151	3.373	5.569	2.3565	2.3692	15.0937	1.8044	1.8293	1.2874	1.9756	9.4999	1.082	1.6463	1.5068	7.9396			0.855	10.1075
20.4923	15.7492	29.815	10.311	6.8817	3.592	2.9355	9.3623	8.236	2.084	2.596	76.1068	31.7333	8.304	9.152	8.9204	23.6227	4.5	5.165	2.4189	2.2119	14.4292	2.3917	1.951	2.2018	1.7699	9.0631	1.0863	1.3378	1.1511	6.5371			0.859998	10.1872
20.6114	15.9631	29.245	10.7639	6.4345	3.5034	2.9912	9.4171	9.808	1.598	2.248	73.5965	34.2521	11.175	10.117	10.1547	25.8595	3.824	6.234	3.3642	2.1544	14.3348	1.7981	2.0128	2.1194	1.547	8.5317	1.6243	0.8823	1.5047	5.5574			0.864997	10.4205
20.7306	15.1016	28.121	10.9387	6.2147	3.2481	2.9245	9.7562	9.639	1.871	3.398	74.6927	36.9677	13.909	11.29	10.5604	26.7618	4.355	7.263	3.1112	2.3789	13.1656	2.0412	1.4805	2.0501	2.0513	7.6773	1.6001	1.2603	1.674	6.6085			0.869999	10.737
20.8497	16.1693	27.999	11.7343	5.8836	2.9507	3.0176	8.4027	10.223	2.262	3.329	63.2167	39.2471	17.784	11.469	14.7051	26.2584	4.691	7.374	3.696	3.1593	14.2522	2.1645	1.7894	1.9728	2.0303	7.1595	1.4124	0.8741	1.7436	7.3579			0.874997	10.8109
20.9689	16.8853	27.749	13.0173	6.2501	3.4393	3.603	9.7818	11.158	1.838	2.705	55.1386	40.499	20.219	13.481	17.0276	28.5245	6.859	8.054	3.5784	2.7635	13.8249	1.9806	1.4205	2.0425	2.3574	6.3695	1.2264	1.4546	1.5605	6.4465			0.88	11.0418
21.088	18.3595	27.11	14.1045	8.2475	2.9888	3.0326	10.6827	11.038	2.065	3.046	42.5074	37.9406	24.35	16.678	20.9681	29.4259	6.716	8.48	4.0491	2.8791	14.0367	1.7685	1.734	1.7989	1.9913	4.9868	1.4791	1.519	1.1747	6.2178			0.884998	11.0459
21.2071	18.2085	30.395	15.3503	7.1617	3.3667	2.4702	10.7688	12.083	2.505	3.894	30.377	30.9855	27.487	16.575	26.7377	26.3933	8.274	10.193	4.9581	2.7745	14.4126	1.5464	1.6421	1.805	2.1527	4.2723	1.1202	1.6705	1.3554	6.1251			0.889996	10.902
21.3263	21.6452	29.282	16.8128	8.0198	2.7883	2.9092	12.0553	12.226	2.464	3.411	19.5861	25.0495	30.282	17.247	33.2786	30.5609	9.398	12.976	5.0183	3.3327	15.1708	1.6581	1.9621	2.1541	3.1737	4.7417	1.4659	1.4083	1.3155	5.1704			0.894999	11.2188
21.4454	23.3019	28.704	14.792	9.5559	3.4318	3.3301	13.8711	11.923	2.127	4.081	14.5129	19.8702	23.043	18.305	37.3005	32.4796	11.953	16.547	6.9971	3.6289	14.379	2.3013	2.1535	2.1117	2.261	4.0906	1.1781	1.4929	1.6126	4.8111			0.899997	11.2049
21.5646	24.5044	33.096	15.1601	8.8611	3.658	2.8105	14.7061	11.21	1.951	3.827	10.1132	14.7112	17.505	19.827	41.6474	35.1293	15.618	19.168	8.1983	3.7879	14.5938	2.3247	1.5719	2.14	2.4095	3.6053	1.4366	1.3709	1.3659	4.5705			0.905	11.3626
21.6837	28.7195	33.477	14.1229	9.8897	3.9345	2.9039	15.3412	12.549	2.785	4.488	7.7243	10.1997	13.297	19.076	37.1901	35.9898	21.671	20.356	8.3099	4.2649	14.9886	1.9515	1.3262	1.8141	2.4201	2.4975	1.3493	1.6076	1.5791	3.9679			0.909998	11.3264
21.8029	33.9615	36.991	16.8924	9.5157	4.1914	3.2954	15.0298	12.047	3.098	5.288	5.7945	6.7815	9.261	19.219	29.943	36.8823	28.664	20.482	9.1253	3.2561	14.0302	1.6535	1.8416	2.1008	2.6965	3.1826	1.3976	1.9921	1.6377	3.1867			0.915	11.4479
21.922	39.525	36.838	16.1019	10.3257	4.9645	2.964	14.9289	11.121	2.999	5.685	4.5904	7.4745	6.064	19.268	23.517	39.3567	33.258	24.99	7.998	3.9588	13.337	2.1844	1.5915	1.7917	3.0996	2.7859	1.1361	1.5159	1.8196	3.079			0.919998	11.609
22.0411	46.0509	38.653	15.5764	11.6233	4.2192	3.1603	14.6928	9.861	2.34	6.593	4.4345	5.6732	4.957	13.403	18.2285	45.5114	34.647	24.749	8.5488	3.7683	13.3507	1.649	1.8748	1.9329	2.4871	2.739	1.282	1.1997	1.8003	3.7547			0.924997	11.6254
22.1603	50.0337	38.874	19.1329	12.2772	4.2216	3.3263	10.1129	10.062	2.881	6.715	3.0299	4.1174	5.132	10.54	16.5173	48.9393	35.565	24.525	9.069	3.7414	11.9196	1.7772	1.615	2.0948	2.9329	2.3635	1.3274	1.3825	2.1692	2.6053			0.929999	11.6333
22.2794	54.0607	46.16	20.0964	12.5932	5.1657	3.815	8.2837	9.656	3.175	7.055	1.8719	3.3322	4.585	7.333	14.3474	47.0289	35.989	23.129	7.2333	4.9386	11.123	1.7332	1.7261	1.8806	3.0163	2.3741	1.319	1.2697	2.0542	2.7559			0.934997	11.6367
22.3986	57.1845	47.742	19.7915	11.8036	5.7654	2.7212	8.5385	9.615	3.155	9.025	1.5152	3.1233	3.834	4.461	10.8357	44.1338	30.003	21.799	7.3327	5.7501	10.0039	1.6318	1.9864	2.0119	2.7911	2.0121	1.5963	1.4015	1.536	2.2988			0.94	11.18
22.5177	62.3972	51.476	23.4165	11.5821	5.0009	3.7166	9.3241	9.265	4.686	8.716	1.0274	2.8981	3.52	4.895	7.7817	35.7228	27.244	19.011	7.8868	7.2034	9.2455	1.4301	1.6078	1.7515	2.99	2.0886	2.2112	1.6744	2.6201	2.2778			0.944998	11.1556
22.6368	63.842	57.906	25.4854	12.7299	5.7206	3.6685	10.4965	9.909	5.213	9.888	0.9388	3.3001	2.848	4.439	7.1772	24.8313	22.78	11.25	6.9009	7.5092	8.1513	1.7293	1.3804	2.5437	3.7156	2.1794	1.931	1.8504	2.717	2.2859			0.949996	10.8439
22.756	58.2209	61.498	28.9732	14.1365	5.941	3.2913	10.0934	11.263	6.957	12.671	0.7087	2.2811	2.409	4.093	6.8458	17.0316	18.221	8.491	4.917	9.0818	8.8338	1.6653	2.0629	2.0459	3.9882	2.2069	1.7089	2.0402	3.0687	2.4044			0.954999	10.5717
22.8751	48.9521	67.871	31.7395	15.5381	6.1931	4.3773	13.3837	13.92	8.007	14.97	0.534	1.4609	1.787	3.044	5.1397	10.6032	15.043	6.93	5.0187	10.4947	8.4201	1.6921	1.7136	1.8686	4.0745	1.8977	1.8418	2.1367	2.8036	2.0661			0.959997	10.4507
22.9943	36.4212	62.502	36.0897	16.9286	6.8231	3.8184	14.5623	16.572	10.557	13.971	0.7975	1.3632	1.499	2.794	4.8824	7.6996	13.684	5.295	4.573	9.2135	8.3023	1.9126	1.9416	2.1786	4.3018	2.5274	2.5568	1.7028	3.4774	1.8552			0.965	10.0268
23.1134	28.8352	56.454	45.3984	16.4369	8.682	5.308	17.8505	25.952	13.119	16.934	0.4794	0.7036	1.332	2.486	3.7923	6.0594	11.241	4.312	4.1242	6.8641	7.7883	1.5644	2.0744	1.9178	5.4675	2.4528	2.5342	2.2259	4.7373	1.747			0.969998	10.2958
23.2325	14.7757	43.342	49.5609	17.0118	10.3268	5.6936	21.1177	31.098	19.564	20.985	0.461	0.8925	1.574	2.512	3.8157	5.5571	8.64	3.491	3.261	6.6975	6.7148	1.8247	1.4054	1.8539	5.8397	1.9731	3.2868	2.8002	5.463	1.8924			0.974996	10.1144
23.3517	9.5321	30.234	62.4743	18.7911	11.0407	5.6419	22.5061	39.68	21.844	23.161	0.3861	1.0417	1.511	2.657	2.9573	5.005	6.008	2.995	3.3957	5.5659	7.2352	1.8584	2.1643	1.9425	5.242	2.4277	3.8655	2.5238	6.7279	2.0918			0.979999	10.4169
23.4708	6.7302	18.221	76.0089	21.3291	13.6759	6.0424	24.8254	48.151	25.848	26.58	0.3688	0.9567	1.363	1.722	2.6093	4.6052	5.516	1.888	2.9317	4.8834	5.8103	1.809	2.2063	1.9515	6.0147	2.8757	4.7145	3.6698	6.6874	2.4137			0.984997	11.0803
23.59	4.4332	10.954	77.0905	23.2976	16.9521	8.4943	26.704	53.617	28.972	29.711	0.2975	1.0334	1.412	1.472	2.4208	3.2861	4.648	1.695	2.6445	4.6247	5.2908	1.6075	2.1623	2.3146	6.3065	2.5687	4.9603	4.9464	8.6262	2.8081			0.989999	11.5117
23.7091	4.6201	7.468	73.4575	25.0622	22.8106	10.1065	29.4942	57.648	29.141	32.236	0.2003	0.613	1.644	1.492	2.2046	3.4838	3.756	1.71	2.7612	5.3205	5.1083	1.3776	1.9529	2.7099	6.5671	2.5564	5.8455	5.2189	10.3003	3.1229			0.994998	11.9996
23.8283	3.7973	5.065	58.2551	30.4418	29.6283	12.5384	32.6984	60.331	29.649	30.263	0.1865	0.5331	1.314	1.145	1.2936	3.0226	3.055	1.57	2.4155	4.7735	4.7284	1.3786	2.0211	2.3322	8.0522	3.5021	5.0493	5.9918	11.011	4.7221			1	12.0255

## Sheet: Image24
X0	Y0	Y1	Y2	Y3	Y4	Y5	Y6	Y7	Y8	Y9	Y10	Y11	Y12	Y13	Y14	Y15	Y16	Y17	Y18	Y19	Y20	Y21	Y22	Y23				Ap-Basal to 1	Average intensities
0	24.3868	27.1845	27.0301	31.878	30.2352	38.7846	52.7995	28.3746	18.1065	13.795	20.3228	22.274	29.242	21.1511	13.8647	29.5324	18.5266	24.6842	36.2902	34.8575	43.707	34.4794	53.9605	27.9182				0	29.3077
0.1191	25.482	29.1186	27.049	32.399	31.7448	42.0403	52.6325	27.7077	21.2987	16.22	24.5953	23.354	30.032	23.9235	14.9447	32.239	19.2356	25.3994	35.3631	35.4866	50.474	34.1417	64.14	34.2225				0.00420023	31.3852
0.2383	28.3031	28.7688	30.2408	33.463	32.6116	43.2736	53.7241	29.7881	26.8356	17.246	29.6571	25.186	35.947	28.8327	16.9791	33.9637	20.0845	26.9591	38.5294	36.403	56.028	36.8153	70.7017	42.3295				0.00840398	34.278
0.3574	28.6413	25.0796	29.5737	31.422	34.7695	45.8222	49.5181	33.3717	33.9628	20.133	33.7869	30.393	34.939	34.4476	16.3277	38.9889	22.3544	28.966	39.1429	37.9676	61.801	40.398	73.8314	50.9843				0.0126042	36.5259
0.4766	28.1266	23.0368	28.123	29.852	33.931	48.5389	51.6517	38.1556	40.0236	24.999	40.1891	34.618	37.857	40.8917	18.7676	40.2404	25.0444	31.468	42.2938	43.007	64.715	46.1458	70.3032	64.326				0.016808	39.4294
0.5957	27.6036	21.3341	27.5359	29.907	33.6973	47.5612	50.4349	44.2916	49.1713	29.057	46.5844	36.559	41.795	49.4096	18.8854	41.4238	28.5211	35.9556	43.4662	54.1294	73.075	48.4395	63.547	72.1779				0.0210082	42.2735
0.7148	26.8234	21.8727	26.676	32.907	31.9951	44.6668	47.8015	51.1901	55.0972	33.701	53.1579	38.334	47.359	58.1634	22.006	40.2189	32.8502	43.3633	43.6295	59.5948	77.26	48.4883	54.5769	78.5157				0.0252084	44.5937
0.834	24.3658	20.4068	28.8864	35.111	32.3827	39.5986	48.4989	59.3499	64.8074	42.016	59.5549	42.479	53.702	66.1154	25.3973	41.4535	37.1053	50.681	51.1388	64.4166	77.466	49.2061	48.4548	78.4978				0.0294122	47.5455
0.9531	20.6692	17.4836	27.6693	34.979	29.2083	32.3823	49.0205	64.0432	75.2272	53.093	66.415	49.351	58.926	72.8851	28.3554	45.0689	43.2219	57.8291	56.7156	70.0473	72.4	45.688	44.9317	71.1969				0.0336124	49.4503
1.0723	20.1224	17.9738	27.665	37.521	25.0468	28.6197	48.2835	68.1553	83.8161	60.624	76.236	54.485	65.418	80.0371	31.5735	47.7818	47.3865	66.0365	66.3459	67.7997	67.187	43.5177	43.0292	63.5988				0.0378162	51.5942
1.1914	18.1531	18.8708	30.5126	42.077	22.5395	25.2	49.4024	65.9899	88.5123	65.027	80.0974	62.228	74.104	84.8004	35.9857	52.1212	54.8362	70.6758	68.8707	59.6615	56.628	41.363	39.6352	52.8443				0.0420164	52.5057
1.3106	16.7029	19.7203	34.6216	46.904	19.7275	23.5771	46.2825	64.4718	87.2143	75.03	81.1127	67.855	77.705	87.7019	41.3094	55.8765	63.036	69.1781	66.7514	50.3209	46.33	34.8587	36.8828	41.3795				0.0462201	52.2729
1.4297	13.7676	21.1638	37.6688	51.031	18.9098	20.3244	43.0551	62.8181	85.0364	80.632	87.9578	74.675	83.958	93.552	47.3494	57.7525	66.7066	67.2689	61.3815	41.9841	42.965	30.7342	34.83	37.3575				0.0504204	52.62
1.5488	11.6678	23.6853	39.6945	53.867	14.0377	21.0417	40.6783	55.8165	79.4454	86.764	87.1825	84.72	92.176	95.2435	54.7395	63.1683	69.4854	67.1552	50.2557	32.0947	39.242	26.4972	28.4104	32.8981				0.0546206	52.0819
1.668	10.0637	26.2616	41.2092	56.009	13.3622	22.3828	37.6591	47.9601	78.6385	88.462	89.2417	90.841	101.292	94.3522	56.9425	64.2012	76.5813	58.5947	40.9499	24.1286	37.76	25.5604	25.7001	27.4969				0.0588244	51.4854
1.7871	9.1859	27.504	42.8908	59.755	13.722	20.8553	33.611	43.5208	71.0886	92.596	89.9275	98.877	104.3	90.767	59.14	64.2459	82.4723	49.4092	36.2222	17.617	37.44	23.1741	23.6255	24.1779				0.0630246	50.6719
1.9063	8.9649	28.481	46.6229	55.721	13.5917	20.8825	32.1755	39.0321	65.8448	96.851	89.7836	108.601	106.737	93.2345	59.7283	67.026	84.1698	41.0392	32.2065	13.9532	38.459	20.0118	20.5126	23.467				0.0672283	50.2957
2.0254	8.9579	29.2481	49.5317	57.422	13.0437	20.89	31.5816	38.5688	57.2933	97.87	90.8777	113.475	109.267	90.5201	64.2121	64.4864	83.9014	33.3816	28.7778	11.6313	37.52	17.9793	19.1897	21.1534				0.0714286	49.6158
2.1445	9.335	29.6107	50.4687	54.305	12.0311	20.4	32.4098	37.0774	56.0154	99.249	90.251	114.501	111.709	83.5122	64.2345	63.1555	83.7621	28.5247	27.5523	10.783	37.679	17.721	18.7721	20.4895				0.0756288	48.8979
2.2637	9.9082	34.9739	53.7627	48.209	12.1779	21.4192	32.8663	34.5418	51.9252	103.42	85.1374	119.05	108.291	78.2002	70.5064	62.8307	82.216	23.6473	25.9758	10.1472	39.179	16.6022	18.9358	19.6765				0.0798326	48.4833
2.3828	10.6642	41.0805	55.4444	44.467	12.9756	22.0789	31.2734	35.9818	51.3724	104.676	79.2771	117.94	104.301	78.5906	72.6047	63.3588	83.5204	21.9636	23.5027	9.8803	39.475	14.9036	18.1922	22.6423				0.0840328	48.3403
2.502	12.373	42.8994	57.7057	43.794	12.3942	22.9943	28.6843	34.6332	50.141	97.831	76.5468	121.258	102.148	68.671	68.9671	65.1276	83.3044	22.7014	19.0903	7.1084	43.611	14.6069	17.2691	23.2914				0.0882365	47.3813
2.6211	15.1393	45.9198	56.9949	44.229	10.8746	24.3588	27.2018	37.176	49.4846	86.227	73.8801	116.575	100.637	63.8289	64.8588	71.272	86.9516	23.0367	15.7547	7.0225	48.716	13.3941	16.6039	23.6122				0.0924368	46.8229
2.7402	17.1268	51.3248	55.0013	43.294	10.083	23.3972	24.2472	39.098	46.0858	82.414	68.8065	107.827	97.41	54.9939	64.5955	73.4367	88.8249	21.4543	14.8489	6.3658	56.89	13.781	16.0094	26.0753				0.096637	45.9746
2.8594	20.4002	55.7935	54.591	42.306	9.8438	24.4378	21.8807	38.6069	44.1489	73.905	64.1174	102.325	91.199	50.4533	65.571	76.9366	86.8465	21.4002	14.6762	6.7222	60.566	15.0643	16.4213	26.6737				0.100841	45.2036
2.9785	25.218	60.9782	59.7875	41.552	9.4496	25.2911	20.0958	41.102	43.3686	69.432	60.2806	92.92	89.511	48.4101	63.9984	79.7817	85.2487	22.382	12.8059	6.6953	66.612	16.4841	17.4279	30.5794				0.105041	45.3922
3.0977	30.665	64.9383	63.66	43.349	10.3679	23.9969	20.3748	45.3897	42.4359	62.569	62.2629	81.01	86.554	47.1132	59.4234	77.7966	75.242	21.4721	11.4451	6.3448	67.129	18.3737	18.8411	30.8345				0.109245	44.6495
3.2168	39.3532	65.5484	63.8756	39.311	12.7939	23.4701	19.5413	50.4378	42.8137	53.32	60.829	70.446	79.844	44.9855	54.1962	75.3298	67.2508	21.8467	11.6166	5.361	71.42	20.5265	18.6039	30.517				0.113445	43.4682
3.336	45.146	65.6132	61.2964	39.509	13.0659	23.2093	19.7926	49.4029	39.8186	47.941	59.2859	60.015	74.149	42.1418	49.5125	72.3644	59.5487	20.0502	10.9184	5.8417	76.812	24.1791	18.7644	31.9562				0.117649	42.0973
3.4551	53.9921	70.6358	57.4739	39.31	13.8447	25.0429	19.6655	48.5994	38.2031	44.734	58.0163	53.439	65.728	40.7046	41.666	68.6142	51.6704	22.4093	11.6861	5.9331	82.602	29.236	20.7916	35.0661				0.121849	41.6277
3.5742	55.3694	74.6436	52.8332	38.401	14.2724	27.9852	21.2722	51.677	39.0888	45.192	59.8698	48.147	61.379	36.4977	33.1412	62.2228	42.5474	25.6865	11.737	5.7203	87.551	31.5255	21.7296	35.2642				0.126049	40.9897
3.6934	54.8312	78.6088	46.7524	40.105	16.1769	27.8728	23.8693	51.9012	39.0154	46.467	59.7903	43.003	57.375	35.1523	26.5666	59.0083	36.995	27.2218	12.4584	5.9174	92.506	34.7241	22.6674	36.1545				0.130253	40.6308
3.8125	58.5767	78.5461	41.6509	42.261	17.6803	28.5819	23.9167	53.4552	39.0625	48.025	61.8148	38.309	52.581	29.6933	21.7744	50.4599	34.0741	31.4468	10.4725	5.5887	100.282	41.1324	23.2401	37.0206				0.134453	40.4019
3.9317	62.2143	73.6171	34.8807	42.072	19.4964	30.3934	24.6835	54.3895	40.4105	47.953	65.5771	35.963	48.894	24.5473	18.902	47.1438	31.9359	34.7354	11.6607	5.3406	111.779	44.7909	23.184	36.2049				0.138657	40.4487
4.0508	65.3688	72.5527	30.4129	44.125	18.1064	32.169	23.5066	56.9358	40.8021	48.342	68.711	33.508	44.341	21.1966	15.4696	44.0566	29.6857	36.4661	10.4248	5.1436	121.72	48.6896	23.2584	40.8027				0.142857	40.6581
4.1699	70.7871	68.2786	28.0106	48.428	19.1153	33.9368	22.8975	62.0541	42.193	53.091	72.6455	31	46.421	18.8663	14.7999	39.9338	27.1894	37.3139	10.8201	5.4407	130.065	49.7546	22.1784	45.3764				0.147057	41.6915
4.2891	75.1065	67.2666	24.6004	50.129	18.3074	33.3934	21.5608	59.7332	38.6941	53.757	75.8144	30.198	45.03	17.2564	14.1343	34.8547	26.31	39.0092	10.3015	5.6538	138.417	54.8943	24.8403	45.578				0.151261	41.8683
4.4082	78.7542	67.346	21.8109	56.81	15.5231	33.7105	18.8455	61.2351	40.475	55.239	78.1931	28.369	39.258	15.9342	13.9922	30.5964	23.7083	42.3537	10.2097	6.5688	142.852	56.5499	24.6024	47.2416				0.155461	42.0908
4.5274	80.6325	68.2663	21.2683	58.324	14.0914	34.6855	17.4439	66.0339	43.3519	62.084	83.5935	27.464	34.161	14.2258	11.9126	26.3191	24.5747	43.224	9.3784	6.4079	138.642	57.7969	26.3737	49.2335				0.159665	42.4787
4.6465	80.4895	69.497	18.9408	62.161	13.8296	36.2738	15.5587	66.8481	45.9075	69.937	84.0063	27.485	31.367	12.8136	10.6679	25.3905	27.5767	44.2817	9.1784	5.8634	139.663	63.5729	26.6516	51.9777				0.163865	43.3308
4.7657	79.1329	69.3855	17.9372	64.132	14.1933	36.5001	14.9778	66.2541	44.9772	68.142	86.4582	26.61	28.698	11.3751	10.5427	23.4277	27.5694	45.8956	9.3019	6.7804	138.518	63.7478	24.4538	52.2549				0.168069	42.9694
4.8848	78.0423	73.4325	14.2466	64.815	12.3049	37.7841	14.8688	66.284	45.6078	71.115	89.9543	25.375	25.35	9.608	9.2751	22.64	27.438	44.804	10.6191	7.0163	138.217	62.9038	25.9749	52.2952				0.172269	42.9155
5.0039	77.5518	71.979	15.1501	67.556	10.276	39.1363	15.3428	62.1994	42.4958	73.417	86.4055	27.309	23.141	9.8212	8.7235	19.3241	27.0451	44.3177	10.0531	6.4816	139.032	68.1385	23.4176	49.5798				0.17647	42.4122
5.1231	77.2488	78.3056	14.2136	69.866	10.9304	37.5344	14.427	65.3786	39.5561	76.346	87.0057	25.027	20.729	9.7093	9.1224	19.6354	27.4855	46.0982	8.9357	6.4054	141.713	66.2813	22.8498	46.7667				0.180673	42.5655
5.2422	79.7381	80.8159	14.9586	67.352	10.0201	38.8204	14.9894	64.224	39.9119	81.524	90.4533	23.962	16.785	7.9514	7.3637	18.0011	27.8016	48.8595	9.8773	6.3346	140.994	60.9633	21.7879	44.8914				0.184874	42.4325
5.3614	83.1956	82.9786	13.4485	69.095	9.0205	42.5886	14.587	66.9694	38.5995	84.59	94.5492	23.749	14.581	7.0217	7.0329	17.2371	26.4381	52.1605	9.8771	6.724	140.303	58.5192	23.0852	39.3441				0.189077	42.7373
5.4805	76.3351	74.4687	12.3026	72.67	9.4376	41.9981	14.2229	66.9532	39.4038	87.802	92.8504	23.758	12.587	5.8628	6.5252	16.2733	27.5202	49.1889	9.585	7.7177	135.179	56.1802	24.8662	39.1834				0.193278	41.7863
5.5996	83.0186	73.006	11.0558	73.839	8.4274	41.5235	13.0973	63.9492	39.3169	92.416	90.9827	22.949	11.509	5.3217	6.0912	15.1194	29.8153	49.8712	9.8618	8.2742	133.817	46.7903	26.8676	37.1045				0.197478	41.4177
5.7188	82.4221	68.1765	10.1249	75.868	8.4312	42.0985	13.1205	60.5728	42.9645	94.74	86.0135	22.164	9.972	5.4747	6.1372	13.3633	28.2426	51.6604	9.5137	8.271	132.571	42.9168	25.9247	34.7867				0.201682	40.6471
5.8379	83.1268	62.5458	8.9374	76.304	9.6956	41.2732	14.5849	64.7462	40.8562	96.015	80.4999	22.077	7.873	4.9519	5.1111	14.0705	28.5963	55.0228	9.7429	7.7153	135.378	36.9126	24.9905	31.5916				0.205882	40.1091
5.9571	77.5926	56.4985	8.2252	81.362	9.2032	41.9641	14.937	66.7527	41.5666	93.876	74.4266	20.658	6.902	4.5078	4.6455	13.4946	27.1152	53.9999	9.5328	7.691	142.661	33.4075	22.8588	30.9021				0.210085	39.3659
6.0762	74.3153	55.1188	6.7267	88.23	9.4128	42.6823	13.6296	72.0038	39.7377	90.195	68.3866	19.526	5.539	3.9254	4.4851	11.7823	27.5435	55.0876	8.7946	7.2434	143.994	33.4822	22.9237	27.7072				0.214286	38.853
6.1953	73.3369	50.4048	5.6246	90.581	9.5783	42.7913	13.5275	70.984	35.5817	83.471	63.4746	19.541	4.618	4.0125	3.9369	11.5427	26.0294	57.9973	9.3027	6.5476	143.064	34.7831	23.3587	24.7516				0.218486	37.8684
6.3145	71.12	44.7333	5.8585	95.799	10.1825	41.7883	13.3918	70.2145	34.8674	83.998	61.9558	17.781	4.099	3.419	3.9678	11.9487	27.748	61.6155	9.4983	6.2422	145.246	36.7494	22.7088	20.1956				0.22269	37.7137
6.4336	67.5793	41.3918	5.3701	99.267	11.6016	40.8131	13.024	72.2119	32.8019	77.93	62.6662	15.321	3.983	2.9421	3.7443	11.5231	29.1421	69.4107	9.7797	7.2275	149.328	38.3555	21.0573	17.9194				0.22689	37.6829
6.5528	64.5284	35.1266	4.9122	106.011	10.4922	41.9221	11.9237	71.2848	33.5503	65.864	58.8787	13.98	3.572	3.4468	3.5633	10.062	32.8303	74.3415	8.8688	6.2556	142.524	36.2252	20.9203	15.6467				0.231094	36.5304
6.6719	56.6886	28.2563	5.5388	105.033	11.2635	39.0487	12.6534	75.1586	31.1284	56.316	57.5004	13.104	3.238	3.316	3.2255	10.1162	34.7869	76.172	9.2815	6.1859	145.677	35.4376	19.2081	14.6953				0.235294	35.5429
6.7911	57.627	24.7658	5.62	101.307	11.6806	38.6593	12.2819	73.9762	30.0679	49.357	51.3568	13.114	3.571	3.4835	4.0054	10.6315	38.7821	79.4186	9.1241	6.0609	148.757	33.6607	16.2184	12.7228				0.239498	34.8437
6.9102	55.9242	22.6562	6.3649	101.091	10.9936	34.3206	12.4527	75.3851	30.7336	46.62	47.4252	12.399	3.054	2.5916	3.3054	12.3109	39.855	76.1441	8.2781	6.2592	145.994	33.4601	13.0881	11.6628				0.243698	33.8487
7.0293	51.6173	18.9666	6.4511	98.099	10.2286	31.5486	11.9885	71.0678	31.7816	41.604	40.3957	10.727	2.981	2.4375	4.2097	11.6344	40.8343	74.4633	8.0028	7.6593	141.536	31.1041	9.3182	10.8982				0.247898	32.0648
7.1485	46.5818	16.4685	6.1395	94.5	8.4826	30.304	11.3798	71.7498	30.567	38.9	37.8447	10.753	3.916	2.4837	4.0457	11.9324	40.2702	71.7258	6.8403	8.4687	134.324	26.8139	7.7558	10.4912				0.252102	30.5308
7.2676	42.9728	14.3077	6.4519	89.372	7.1616	29.0488	10.5103	70.2047	25.2141	37.257	37.6016	13.021	2.842	2.2422	3.8694	11.0347	43.0736	70.8454	7.5576	8.9091	126.718	26.1955	6.1141	9.2357				0.256302	29.24
7.3868	44.4571	12.69	6.2869	83.843	8.2252	26.3729	10.0753	67.967	21.8812	34.403	34.0533	11.962	3.259	1.8558	4.0313	10.3076	45.168	64.2678	6.8864	8.9014	118.849	19.9538	5.8765	8.7649				0.260506	27.5141
7.5059	42.9281	12.2722	8.2196	79.547	8.9168	25.0219	9.1346	64.9484	18.1068	30.659	30.4181	12.181	2.803	1.7843	3.6805	10.9787	44.7623	59.9221	6.9504	10.3931	105.209	14.8091	5.2457	8.5864				0.264706	25.7283
7.625	39.1835	10.9783	7.0566	78.535	6.6654	25.7725	9.1374	62.0579	16.7664	28.591	28.4225	10.621	2.389	2.5308	3.2247	11.1797	43.0294	61.609	7.7152	11.5738	87.566	13.0652	5.3883	8.9853				0.268906	24.2518
7.7442	38.5786	9.93	6.2976	72.59	6.2082	24.9093	8.4744	60.5256	16.0522	28.175	25.1605	11.458	2.454	2.6265	3.0116	10.393	39.2539	63.6122	6.1981	11.001	76.146	11.6865	4.3424	8.8427				0.27311	22.8303
7.8633	34.1883	8.951	6.5984	64.647	5.6625	22.7376	8.0236	57.4393	12.9938	27.833	22.594	10.935	2.017	2.3842	3.2833	10.0532	38.8258	60.6667	6.8483	11.1963	68.347	10.5144	4.5024	8.3516				0.27731	21.2331
7.9825	30.2981	6.9846	7.3171	53.395	5.2943	21.7732	7.1301	60.0961	12.556	26.241	21.9921	9.495	2.571	2.2855	3.9455	12.091	37.4258	61.5347	5.9305	12.3901	61.853	8.885	4.2633	9.2594				0.281514	20.2086
8.1016	26.8969	7.4452	8.092	47.867	5.8488	23.0936	7.8046	56.8504	11.7202	23.275	19.1788	10.283	2.815	1.8171	3.5417	12.5763	34.4683	66.5517	5.7449	14.4582	55.023	7.7503	3.4273	9.0407				0.285714	19.3987
8.2207	24.4671	7.5271	9.8825	39.364	6.7777	19.9698	7.9647	54.144	11.2654	24.884	17.97	11.556	2.514	1.8048	3.5486	14.0166	36.3198	64.7788	6.1073	16.3072	48.407	8.6371	3.1143	8.9307				0.289915	18.7608
8.3399	22.4334	6.8649	10.7352	31.834	6.6519	18.2565	7.5706	50.2246	11.5139	22.636	17.1097	9.982	2.565	1.5765	4.004	14.9515	35.2547	65.4701	6.8816	16.9906	44.475	9.3817	2.6503	9.2991				0.294118	17.888
8.459	22.3066	5.9966	10.1	27.92	6.3614	17.0959	7.3263	46.0433	12.8701	20.477	15.0771	9.65	2.616	2.3942	3.676	13.7425	32.3192	58.557	6.648	18.5707	41.42	9.4042	3.0732	8.1923				0.298318	16.7432
8.5782	20.3962	7.2827	10.5394	24.29	6.57	17.4139	7.8524	43.2909	12.2871	15.66	12.1823	9.762	2.553	2.3229	3.6027	14.5684	33.7921	55.7514	7.47	19.3502	33.271	7.9819	2.3648	8.4209				0.302522	15.7907
8.6973	20.2733	7.3591	9.2925	24.428	5.3431	16.7078	8.1026	38.9551	12.0431	14.27	11.0765	9.08	2.462	2.1141	3.3642	16.0267	33.9452	52.8189	7.5361	20.8122	30.432	6.2227	2.7225	9.1913				0.306722	15.1908
8.8165	18.8611	7.8091	10.2198	23.634	5.8665	14.8534	8.6554	33.6038	13.0001	14.259	9.603	9.655	2.312	2.1047	3.2349	16.3528	33.9323	49.0461	6.9678	22.2513	26.404	6.4195	2.7596	9.7225				0.310926	14.647
8.9356	15.6501	9.6347	11.0006	19.268	5.8293	12.0802	8.3482	29.2335	13.4786	14.089	7.2214	9.52	1.908	2.2167	3.2298	18.3278	35.9686	43.9043	6.2551	24.9614	24.485	6.6966	2.554	9.038				0.315126	13.9541
9.0547	14.3059	10.3171	11.4217	19.249	5.4004	11.4641	8.8229	26.3961	14.3926	11.513	6.5617	9.642	2.03	2.3121	3.6649	19.4606	33.3249	41.7793	5.9723	28.5504	20.502	5.5413	2.5262	9.548				0.319327	13.5291
9.1739	12.878	13.6836	11.706	18.401	4.7185	10.054	7.4541	26.9504	14.1573	9.172	5.5563	9.853	1.87	2.4122	3.285	19.7102	30.4183	41.2554	5.8064	30.2293	16.043	4.4711	2.2401	12.0074				0.32353	13.0972
9.293	11.2356	15.4511	13.1543	16.752	4.382	6.9396	8.8061	26.982	13.3495	5.301	4.6294	8.982	1.846	2.1864	3.5023	19.1662	30.1538	37.1497	5.8859	34.8234	13.638	3.9502	2.4726	16.2772				0.327731	12.7923
9.4122	9.8042	17.4774	13.3119	13.985	4.5794	7.1253	8.6352	25.6235	13.9716	4.368	4.4147	10.078	2.15	1.8718	2.8242	21.307	27.3624	35.1948	4.9545	39.969	11.302	3.2745	2.5788	19.5723				0.331934	12.739
9.5313	8.8016	18.8286	13.0435	14.162	4.2528	7.236	8.0162	21.6071	13.7805	3.492	2.9249	10.207	2.458	2.2657	2.8734	20.5277	24.4755	31.3942	3.7332	45.9995	9.232	2.8955	2.4619	24.6481				0.336135	12.4715
9.6504	9.5742	18.837	14.074	15.222	3.9555	7.1217	7.4681	21.0804	12.9831	3.209	2.4697	9.737	2.549	1.7608	3.0054	19.5568	21.5632	28.7012	3.5626	47.97	8.399	2.4534	2.1842	31.7153				0.340335	12.4647
9.7696	9.42	16.7888	16.743	13.613	3.9225	7.0218	7.7323	19.6253	13.1755	3.712	2.8179	12.269	2.906	2.4211	3.3041	20.1479	19.4609	24.0122	3.5491	52.1076	6.436	1.8962	1.9933	36.9019				0.344539	12.5824
9.8887	9.4832	14.2611	19.3888	12.439	3.277	7.739	8.5658	17.5408	12.2385	3.664	3.1055	13.429	2.211	2.5944	3.2509	20.4015	17.5367	22.4006	3.0118	54.9898	4.722	1.9065	2.2058	35.9269				0.348739	12.3454
10.0079	10.8052	12.9872	23.0331	11.537	3.1772	8.8896	10.6855	16.3788	13.9085	3.596	2.1582	14.156	2.029	2.1392	2.8176	20.1103	15.5725	20.1666	2.6411	55.249	2.968	1.9854	2.2479	36.2386				0.352943	12.3116
10.127	10.76	12.6075	26.3891	10.14	3.1575	9.7508	12.7807	15.0599	16.3073	3.57	2.4146	15.938	1.953	2.0612	4.1357	20.8421	15.5941	20.0735	2.5337	60.9365	2.147	1.5608	2.3068	35.561				0.357143	12.8575
10.2462	10.2027	13.1115	28.1345	7.528	3.3027	10.7914	12.1158	16.5818	18.7366	3.045	2.2575	19.355	2.258	2.3576	3.2847	24.8338	15.6632	17.7026	2.8474	61.4882	1.651	1.8291	1.7432	37.4246				0.361347	13.2602
10.3653	9.8047	13.17	26.015	6.507	2.7122	9.3811	13.0057	14.759	18.6816	3.277	2.2271	20.376	2.043	2.5944	2.8324	26.0419	14.1969	17.1091	3.0357	64.8509	2.096	1.2737	1.7796	35.9874				0.365547	13.0732
10.4844	10.8972	11.939	30.0264	4.652	2.8022	9.717	14.0711	13.9518	19.5547	3.626	1.9736	20.65	1.7	2.9239	2.9557	26.6653	12.5083	13.9208	2.7374	64.8783	2.596	1.7258	2.0056	30.0215				0.369747	12.8542
10.6036	11.2406	12.2315	30.9065	4.238	2.6939	8.4432	14.1305	14.101	21.6737	3.139	1.935	21.905	2.306	2.5355	3.2905	26.4914	13.1188	9.4205	2.8665	62.2556	2.082	1.4399	1.789	27.9127				0.373951	12.5894
10.7227	12.6921	14.6506	28.9119	4.441	2.6823	7.3991	15.4675	12.8867	22.6681	3.152	1.9537	26.961	1.946	2.1747	3.2172	26.5479	11.9201	7.6336	2.9972	59.6127	2.537	1.3807	2.3259	25.0297				0.378151	12.5495
10.8419	14.6194	12.5589	26.0743	4.054	2.6626	6.8725	15.7348	13.5386	24.176	3.471	2.377	31.677	1.987	2.4995	3.3911	25.6312	9.7878	5.7274	2.949	55.2485	2.208	1.5667	1.8122	23.9408				0.382355	12.2736
[truncated: 147 more rows]

## Sheet: Sheet1
Image24				Image25				Image26				Image27				Image28				Image29				Image7				Image8				Image9				Distance	Image24	Image25	Image26	Image27	Image28	Image29	Image7	Image8	Image9
[truncated: 240 more rows]
