# Supplementary material for: Crumbs organizes the transport machinery by regulating apical levels of PI(4,5)P2 in Drosophila
Source: eLife. 2019 Nov 7;8:e50900. doi: 10.7554/eLife.50900 (PMC6881148; doi:10.7554/eLife.50900)
Supplement: Figure 5—source data 3. [file elife-50900-fig5-data3.xlsx]

## Sheet: Image16
X0	Y0	Y1	Y2	Y3	Y4	Y5	Y6	Y7	Y8	Y9	Y10	Y11	Y12	Y13	Y14	Y15	Y16	Y17	Y18	Y19	Y20	Y21	Y22	Y23	Y24	Y25	Y26	Y27	Y28	Y29	Y30	Y31	Y32			Ap-Ba	Average int
0	9.1091	8.9719	12.9866	17.523	18.6497	14.0893	14.4208	24.9595	9.379	16.2559	12.632	4.5543	6.0199	20.2907	31.3131	23.1132	22.0572	8.5707	6.6111	6.7281	6.2057	3.7503	9.5888	23.1687	21.8211	18.1339	15.5103	14.3659	21.0649	24.0051	21.6793	12.9705	19.9134			0	15.164
0.1191	12.5978	12.5271	13.2194	20.9063	18.6259	12.8552	15.6548	22.1528	12.0102	22.1449	16.493	5.3839	7.0856	21.7531	30.706	24.2669	20.6477	11.4033	10.2894	7.693	6.0112	3.7805	9.2684	24.2841	23.4193	24.2824	16.8065	16.678	21.9781	25.2664	26.0963	14.6337	22.0436			0.00355749	16.7565
0.2383	15.9487	12.5009	13.4436	21.2916	21.8042	12.9497	18.3758	23.9407	14.1146	27.8904	19.828	5.9826	7.4151	20.177	30.6485	25.3074	20.7669	13.3685	12.3008	8.6348	8.401	4.8318	12.4256	29.2126	23.5413	22.7243	17.9489	20.5133	23.579	28.4604	27.2051	16.3466	21.9249			0.00711796	18.2971
0.3574	22.5367	15.0503	15.3191	24.3967	22.7386	15.1335	16.5427	27.2998	18.3843	35.4656	28.852	7.5175	7.3021	21.6783	30.3625	26.1904	24.391	18.4217	19.3187	12.1134	9.6938	6.4639	12.9978	28.3505	26.7674	26.849	19.0894	22.1724	24.869	30.3814	32.0758	18.1953	24.6183			0.0106754	20.9557
0.4766	26.4601	17.2182	15.1556	26.63	25.3913	18.076	19.938	29.2338	21.6858	46.557	37.496	9.6394	10.5692	25.612	31.1988	30.488	25.5185	26.6815	26.8519	16.4157	10.4937	6.423	14.5893	32.9346	28.7916	29.3917	18.7342	23.5491	27.6932	35.0329	32.5284	17.7837	32.2796			0.0142359	24.1528
0.5957	32.117	23.5838	15.4956	30.7662	28.144	18.6978	20.4693	30.8864	24.9465	58.1656	49.402	12.6295	12.7496	28.3386	32.2018	30.8799	24.4693	29.5039	38.0335	25.4061	15.5096	7.5121	17.208	35.9608	30.7842	35.4143	23.2582	28.0618	32.5926	36.9432	37.7435	21.7199	34.3619			0.0177934	27.9987
0.7148	40.3267	26.5953	18.8775	28.7581	29.433	20.0318	23.4	33.0368	30.0944	67.8422	62.459	17.3424	16.2875	31.7467	32.0013	30.9765	28.9848	39.55	45.9163	35.4899	20.5029	7.098	17.6207	38.6299	30.3647	36.5865	24.5162	29.8805	36.0304	40.1586	42.7487	24.1593	40.4148			0.0213509	31.7534
0.834	42.8978	29.2571	20.7869	31.1559	33.0459	21.6437	23.7248	36.0507	36.8009	72.7943	75.774	24.8178	18.5595	35.311	30.1543	31.1733	33.1163	49.1331	60.1184	48.6738	27.9561	11.0188	19.9717	42.234	35.6396	39.2745	26.6089	30.5633	37.5187	40.8331	42.7997	27.2343	42.9296			0.0249114	35.7446
0.9531	51.4742	35.6008	22.5234	36.2164	33.5612	23.4625	22.7805	42.3607	39.0522	81.7871	88.679	33.7393	24.781	40.9972	30.996	31.4007	33.4049	50.8746	68.4721	63.8245	39.5288	14.7428	24.8117	40.579	37.2449	46.4429	31.3905	31.7163	36.5714	42.5681	42.4297	31.3558	48.6187			0.0284688	40.1209
1.0723	53.908	36.641	26.1569	33.3694	35.4509	26.3437	22.603	44.8522	51.6828	85.5661	94.058	53.0913	31.1602	45.3677	31.2027	29.9512	36.6073	56.7502	73.9745	80.4849	56.0445	18.8799	28.9321	45.5308	41.2279	48.0463	34.4719	34.5886	41.0485	42.8196	42.9598	33.9828	48.9033			0.0320293	44.4442
1.1914	57.3379	36.6842	27.7793	35.0675	39.9142	31.8342	25.2673	46.848	57.6758	86.1788	99.895	64.9405	36.2745	46.7544	28.9167	32.6718	39.99	60.767	82.7254	88.1113	70.2911	25.8556	31.9307	45.9903	41.8518	51.3023	36.6655	38.6629	42.7334	46.2445	45.7295	33.8804	51.7972			0.0355868	48.1385
1.3106	57.9071	38.038	30.0795	34.9009	38.5573	32.2553	24.7376	48.6501	64.4259	87.0451	104.427	80.4301	48.9605	49.8005	32.2816	30.3163	43.1078	61.6398	87.6082	94.5859	78.7588	31.0364	38.1067	48.3862	49.2966	54.4567	42.3062	41.5652	44.2934	45.5662	44.2622	39.5964	56.9951			0.0391473	51.6479
1.4297	58.4888	39.003	31.9944	32.3297	34.6676	32.7134	26.6878	54.2354	65.2237	79.2945	101.392	88.0178	53.9196	56.7127	34.8637	31.5298	46.1233	63.3369	88.5807	97.8255	86.0445	40.7102	40.746	45.7697	47.8653	56.1781	45.1698	43.3405	46.4889	47.0601	44.6261	41.828	57.7723			0.0427048	53.3497
1.5488	55.3538	44.8667	32.4339	34.0397	36.111	35.8862	26.573	55.7464	66.5761	75.6952	87.739	91.0785	59.845	58.2476	36.3662	32.0901	52.2802	64.6634	82.7088	94.4271	90.8094	48.5603	46.336	48.5853	52.1119	55.5199	47.4457	49.164	46.0911	47.4847	45.4553	43.8254	62.6042			0.0462623	54.7491
1.668	53.4798	46.6189	39.8761	32.6155	34.024	36.6172	30.2425	55.7724	69.4973	62.3443	75.315	93.9884	67.0907	57.4437	38.5099	31.2615	52.0915	62.2517	68.6334	83.2105	91.6961	61.9383	54.4173	46.0308	54.5911	56.7168	49.0702	48.9053	50.1649	46.2098	45.7217	45.7749	69.0681			0.0498227	54.8845
1.7871	53.3676	42.1625	41.0363	31.8979	29.8358	36.7752	29.8788	57.5429	64.9883	56.457	63.172	89.8446	67.798	59.1218	39.1135	33.2321	52.8359	59.6364	62.3656	72.2505	86.9443	67.2185	54.3769	46.0899	55.1485	54.2269	51.801	47.9594	44.275	44.5034	47.582	46.6099	69.4079			0.0533802	53.3169
1.9063	50.1056	49.992	44.0432	31.0042	30.8664	38.2244	29.4412	56.7273	64.5178	49.95	43.202	80.8667	72.2483	63.2977	40.3716	33.1312	55.7863	55.4013	56.3506	54.9129	78.8256	71.0331	62.8382	46.7167	53.5666	59.4372	53.7512	50.2864	49.2248	45.3072	52.3504	48.527	69.247			0.0569407	52.7743
2.0254	42.8196	47.5605	47.2875	29.1306	31.1931	37.0896	26.9398	57.962	62.2027	38.476	30.498	75.9052	71.2224	62.2115	41.1407	35.3786	52.9212	56.0701	42.3243	34.8882	71.4036	76.1889	63.7261	48.3	52.9633	54.7924	56.9545	51.7153	48.3797	44.5803	51.5193	48.7983	69.6057			0.0604982	50.3682
2.1445	39.5844	52.1198	49.8441	30.0659	30.8867	39.1605	28.071	55.862	57.1143	29.321	21.293	63.2856	76.8969	59.434	40.7732	41.0116	55.9518	49.2533	37.4222	28.614	54.64	77.3246	64.4329	45.0516	55.645	55.6938	54.1954	55.3768	48.7936	44.9348	53.6388	48.761	68.1156			0.0640557	48.8657
2.2637	36.398	46.7469	50.4608	27.541	29.1429	32.8392	28.767	52.9671	51.3851	24.2553	18.846	51.1392	69.1895	63.1361	40.8059	39.5152	55.796	47.6364	30.136	24.1309	41.1825	74.3989	67.6625	44.3662	55.0754	50.5103	53.4103	52.1339	48.72	45.6221	52.8525	51.7762	63.059			0.0676161	46.1092
2.3828	28.5657	43.6642	53.9362	30.3302	30.387	35.5472	29.8022	50.1328	50.3958	17.7372	15.058	42.4529	66.7048	59.1554	41.8573	38.596	51.0342	44.5592	24.6214	18.6484	28.0311	67.4248	67.0907	43.9063	53.4893	53.3851	53.3908	53.5534	48.2864	44.9728	54.6972	54.2823	63.6201			0.0711736	44.2217
2.502	22.2476	40.0511	54.7992	27.4223	29.5943	35.8428	30.3339	45.5058	45.0804	13.4845	12.582	32.1694	62.6242	51.5749	40.6937	37.0681	47.1502	40.5036	21.1639	15.3251	21.1291	60.005	63.9881	40.2079	46.51	48.6618	53.9002	52.9481	46.4671	43.216	53.1157	50.9123	60.8201			0.0747341	40.8212
2.6211	17.6322	38.4688	53.3948	28.0972	25.5457	38.4113	29.3533	41.2396	41.9422	10.44	11.933	24.9153	59.5263	47.6094	42.3292	37.4267	46.9723	39.1615	16.8369	14.0605	17.4979	52.0863	60.5134	37.9611	41.5713	49.6071	48.8158	51.3725	45.9874	42.7281	49.8239	57.1034	56.4539			0.0782916	38.6915
2.7402	15.9635	34.0929	55.6423	28.1483	27.3681	36.1068	29.6423	32.1186	34.0721	10.3964	9.384	22.8304	51.0228	44.2018	38.8996	36.6651	39.7486	32.6155	15.3228	11.6604	14.9338	44.4066	55.6778	35.8348	41.4669	46.3313	47.4939	50.407	38.7029	39.4913	43.9922	53.8767	48.663			0.0818491	35.3691
2.8594	11.7236	30.3047	54.6457	26.2254	23.617	37.5054	29.9705	27.5404	30.5376	10.0166	8.735	18.1725	43.3447	34.3213	33.7252	32.3906	37.2517	31.1062	12.9294	10.7979	10.3978	35.7934	50.9304	33.5292	36.9944	39.4302	48.9414	51.9355	40.4015	37.2277	44.1981	58.1158	44.8985			0.0854095	32.6562
2.9785	10.0476	26.3515	55.2608	26.5703	25.0837	38.3141	32.4374	23.2398	26.832	7.4216	6.923	16.3346	36.5751	26.6788	31.8373	27.3951	28.6885	23.4704	10.7394	8.6525	10.3299	32.333	47.0126	31.4148	34.0368	39.0005	43.7655	47.386	39.7549	33.9874	42.7992	54.9766	40.5128			0.088967	29.8837
3.0977	9.2836	24.3943	54.6664	26.4656	24.7292	37.0704	33.4669	16.5543	23.179	6.4682	6.994	12.5227	33.7173	22.4461	30.7079	29.1003	24.2338	21.7116	9.5223	8.3193	7.9628	26.2327	41.3644	30.9258	30.0825	34.6712	41.9686	43.8261	40.278	32.7699	43.085	55.0673	38.3435			0.0925275	27.9434
3.2168	8.9876	20.373	54.4239	25.1387	25.0945	35.629	31.9286	12.1722	18.3101	7.13	5.987	9.9066	24.4438	18.0266	26.9369	24.6923	20.9785	18.3594	7.0044	6.4637	8.5701	23.1328	32.7939	27.1193	28.6052	32.8658	38.9981	42.4749	37.001	30.3308	42.6468	55.2416	35.2541			0.096085	25.3643
3.336	8.281	18.3342	51.1885	23.5424	24.9914	39.0183	36.9121	11.0597	15.2094	6.0414	5.861	10.3052	20.8919	14.4137	28.9177	24.9793	17.3173	13.5976	7.8271	5.0046	6.6091	18.884	28.1619	26.0698	23.1838	31.2685	33.8207	35.9106	34.028	28.043	41.6625	51.5211	33.9204			0.0996454	23.5387
3.4551	7.5701	16.1099	52.9948	26.2854	24.5893	36.6899	40.747	10.5054	12.9648	3.9774	4.729	9.4113	19.7981	9.1361	25.6183	20.1802	17.1786	14.1755	5.9792	5.192	5.064	16.4112	22.5479	24.4269	23.2714	24.8968	32.0211	30.6673	31.735	26.45	40.2642	49.1822	32.9475			0.103203	21.9308
3.5742	7.2629	12.0517	48.6253	22.9236	23.4669	36.306	38.7415	8.7938	10.3527	4.9111	4.871	7.7557	15.4753	9.1347	22.8251	21.0522	13.6088	11.7474	5.4505	5.449	5.7995	13.3586	18.0176	21.3095	19.5845	21.9034	28.9009	23.1597	33.3321	26.7181	39.2402	50.7003	29.9086			0.10676	20.083
3.6934	7.3306	11.2817	45.0973	25.1979	24.594	35.506	43.817	6.4606	9.6099	4.8839	4.176	7.3546	13.0404	6.5249	20.0586	18.5806	10.4694	11.8958	5.7278	4.1941	4.3448	13.1371	13.1458	21.1573	16.5578	18.1571	24.5078	19.0363	31.2507	23.3274	35.5975	46.4778	29.0962			0.110321	18.5332
3.8125	5.7689	10.1663	45.6726	23.9133	24.4608	35.0423	41.732	7.0942	8.5441	4.5952	3.946	6.4699	11.3033	6.7862	19.4441	15.3767	8.7437	9.8915	4.8471	3.6208	4.1943	9.8918	10.5339	18.1579	15.996	14.81	19.1589	13.7705	29.8161	21.4662	36.0075	47.3442	24.7816			0.113878	17.0711
3.9317	5.7868	9.0205	42.4544	22.2727	23.4872	36.1091	41.1681	5.3807	7.0639	3.3604	3.555	5.029	8.2438	6.276	17.6129	14.1992	7.8377	9.9336	3.5271	2.8079	5.2504	9.4361	8.4356	16.835	13.1925	13.2554	16.9248	9.9391	28.4344	21.6177	34.4816	46.5863	18.6589			0.117439	15.7022
4.0508	5.17	7.7636	38.1476	21.856	21.5793	37.9984	41.9685	4.7622	6.4534	3.4352	2.998	5.5367	6.7933	5.5607	13.1587	10.3216	8.1541	9.1576	4.0337	4.1139	3.7526	9.216	7.7531	13.8666	10.3136	10.7841	13.4252	6.5107	26.1551	20.3698	37.7116	44.364	14.2662			0.120996	14.4682
4.1699	3.8853	7.9791	33.7024	23.1554	22.6525	38.1799	35.8612	4.6345	5.0364	3.3906	3.158	4.7002	5.7217	4.7761	13.6013	10.4571	7.4216	8.6248	3.7136	3.217	3.4468	6.5258	5.6539	12.4228	9.5468	7.8958	9.6216	5.2154	23.9317	20.3545	33.3711	40.1681	12.3919			0.124554	13.1641
4.2891	4.2862	6.8248	28.6658	23.1941	23.6267	35.8296	37.1448	3.7076	4.8251	3.3978	2.238	4.0118	4.3178	4.9151	12.2536	9.2171	7.6773	6.6976	3.035	3.0714	3.0637	7.5979	5.7685	10.3825	6.868	5.4446	8.9674	5.5057	23.415	17.3232	31.9428	37.8515	7.7712			0.128114	12.1466
4.4082	3.6324	6.6281	29.0964	22.9849	21.7841	35.4477	41.2718	3.9663	4.7891	2.9128	2.84	4.1715	2.1792	3.828	10.2411	6.2113	6.5507	5.9804	2.691	2.7311	3.3862	5.6606	4.2231	8.1702	6.3164	5.8947	6.4219	4.9443	22.2815	18.4539	29.8943	35.6021	5.6418			0.131672	11.4191
4.5274	3.9719	6.316	25.2799	22.9166	21.6105	36.3092	38.016	3.6954	3.3569	2.447	2.258	3.2943	3.233	3.4048	8.7205	6.1694	6.0229	5.4376	3.0385	2.0027	2.8963	5.8722	4.1885	6.5979	5.0961	4.568	4.8126	3.8481	20.5017	16.2781	28.4229	33.8305	4.3655			0.135232	10.5691
4.6465	3.5201	5.6422	22.6549	19.1077	21.9243	34.542	39.7402	3.5789	2.7144	2.0314	1.483	3.3489	3.0191	3.6039	6.9734	4.2658	6.5011	4.7005	3.4472	2.7412	2.9408	4.4383	3.8637	5.3808	4.7374	3.2565	5.1377	3.3925	17.2019	14.2162	25.0973	31.2699	2.8083			0.13879	9.6752
4.7657	3.2165	5.5466	21.7731	20.2067	20.7133	34.1079	34.5291	2.7916	2.3172	2.3524	1.86	3.1434	2.2026	3.0642	5.2325	4.3683	5.9845	5.3484	2.7957	2.3344	3.1448	4.9851	3.001	4.2487	2.9226	3.2396	4.2348	3.304	15.1278	14.4504	23.8906	29.4221	2.5073			0.14235	9.04143
4.8848	3.5126	3.8071	20.3672	19.8101	19.3833	31.2987	37.0614	2.8085	2.5957	2.2954	2.281	3.0718	2.154	2.6236	4.2522	4.0385	4.6157	3.9576	2.4436	2.424	3.3061	5.4612	3.0115	3.4582	2.7113	1.9821	3.0813	3.8325	13.4754	13.0368	22.7571	28.0659	3.3064			0.145908	8.55418
5.0039	3.1647	4.3727	20.045	22.4175	19.3977	29.791	32.504	3.1971	2.1355	1.8181	1.895	2.3225	2.0551	3.4029	5.1495	4.0603	4.8454	3.4538	2.1091	1.6408	2.3565	4.6465	2.7875	4.5363	2.6755	1.6803	3.2753	3.1943	11.7713	13.6145	21.3918	22.3941	2.7713			0.149465	8.08706
5.1231	2.8792	4.897	17.5525	20.8513	20.6221	30.5978	28.8372	2.7223	2.099	1.787	2.128	2.7304	2.0171	3.447	3.9447	4.4776	4.6369	2.8605	2.1298	1.6244	2.0991	3.7091	2.5299	3.1486	1.8718	1.6522	3.3156	3.4649	8.6401	11.3293	20.9333	20.564	2.6365			0.153026	7.53746
5.2422	2.9193	4.528	15.1005	20.803	17.7113	25.989	28.0172	3.0759	1.663	1.3613	1.789	1.7838	1.7397	3.0021	4.5042	3.7568	4.4805	2.4959	1.7168	1.8358	1.8377	3.2176	2.4115	2.7244	1.8909	1.2752	3.0634	3.1023	7.9829	10.7733	17.5765	17.264	2.0109			0.156583	6.76981
5.3614	3.0344	4.4487	13.9104	19.3471	18.3595	26.6696	24.3365	2.6895	1.5313	1.6287	1.425	2.0472	1.6946	2.7042	3.8175	3.8905	3.6473	2.2137	1.5556	1.539	2.0942	3.4065	2.5574	2.2934	1.9862	1.1629	2.7216	2.4426	8.3585	11.1554	17.4744	16.3792	2.2368			0.160144	6.50786
5.4805	3.1039	4.089	12.3922	19.3718	14.7057	23.8985	22.2428	2.3307	2.0541	1.4088	1.326	1.7267	2.1196	2.2755	4.7252	4.3817	3.6486	2.6262	1.9406	2.0305	2.3321	2.9067	1.9994	1.5398	1.1854	1.7218	2.235	3.362	7.2242	11.581	14.5681	13.6143	2.0564			0.163701	6.02195
5.5996	2.9091	3.7546	11.2988	17.3161	15.346	24.8035	19.8198	2.919	1.4685	1.7343	1.051	2.0462	1.8477	2.4723	3.3811	2.8985	3.0422	2.049	1.5959	1.5182	2.0434	2.6906	1.9866	2.1173	1.4624	1.3758	2.5007	2.6111	8.6852	10.1734	16.3024	12.6492	2.1872			0.167259	5.75931
5.7188	2.7379	3.5126	10.2799	16.8058	15.7394	21.666	14.9586	2.7372	1.3007	1.6593	1.082	1.6727	1.3681	2.9795	2.8401	3.563	2.8902	2.2373	1.2405	1.3071	0.9854	1.8224	2.2411	1.829	1.7497	1.4207	2.4406	2.3297	6.5289	9.3437	12.4046	11.6307	2.036			0.170819	5.13153
5.8379	1.9887	3.7169	8.7646	15.488	12.9381	18.89	14.1547	3.0949	1.0969	1.109	1.855	1.6757	1.4953	2.1871	2.0395	3.1864	2.0363	1.9334	1.7177	1.0552	1.4665	2.9411	1.7969	1.7529	1.0861	1.4053	2.3098	2.7594	5.2522	9.4063	12.0579	9.2511	1.8235			0.174377	4.65856
5.9571	2.7205	4.2704	6.9351	14.7505	11.1703	18.4633	10.0482	3.0341	1.1205	1.2485	1.424	1.1781	1.4834	2.6866	2.3037	2.4822	3.0936	1.0885	1.2942	1.0402	1.4503	1.8224	2.7916	2.1943	0.9293	0.8247	1.7476	2.5552	4.1425	9.3864	10.7249	8.218	1.9225			0.177937	4.25896
6.0762	2.6246	3.0495	7.525	14.9542	10.6367	17.016	7.2018	2.9964	0.6742	0.9826	1.665	1.1429	0.7978	2.0712	2.2623	2.121	2.6031	1.4567	1.2809	1.8188	1.8437	1.5836	2.4795	1.6587	1.3667	1.1878	2.0244	3.0078	4.1869	9.5128	12.3435	7.2543	1.8123			0.181495	4.09523
6.1953	2.7401	2.8567	6.328	14.1004	9.1692	14.7161	6.156	2.1287	1.5999	1.36	0.888	1.1004	1.4125	2.5041	1.4198	2.1642	2.4876	1.3503	1.2591	1.1644	1.0982	1.6045	2.0987	2.1463	1.2617	1.3506	1.2296	2.6457	3.5578	7.8039	10.6772	5.8697	1.9185			0.185052	3.64145
6.3145	2.1132	3.0489	5.0407	13.5407	9.3417	13.3895	6.4384	3.1729	1.2964	1.3808	1.002	0.6134	1.1051	2.1353	2.0689	1.5682	2.2948	0.9518	1.0439	0.6385	1.2378	1.5983	2.624	1.2347	0.9659	1.2897	1.6979	3.3209	2.8887	7.4195	10.1247	5.516	1.2495			0.188612	3.43493
6.4336	2.3123	2.7502	6.5778	13.4236	9.1692	8.7855	5.4975	2.8472	0.8991	1.1502	1.172	1.5463	1.2548	2.4662	1.9977	1.4758	2.6901	0.9939	1.4113	1.1544	1.1579	1.465	2.598	1.8522	1.061	1.3168	1.5312	3.0244	2.2852	6.1384	9.2922	5.0682	1.8241			0.19217	3.27848
6.5528	1.867	2.2139	5.7302	12.2572	8.0681	8.2801	4.3196	2.2812	1.8066	0.9013	1.269	1.4157	1.4218	1.9964	1.7231	1.6114	2.7935	1.6173	0.9344	0.7013	1.1999	2.0919	2.3358	1.7086	1.265	1.2697	1.5422	3.3206	2.365	4.8087	9.0889	5.8224	1.9876			0.19573	3.09138
6.6719	1.7271	3.0746	4.9002	11.4732	7.5124	6.6017	4.1152	3.0924	1.0582	1.2708	1.099	1.1684	1.3308	2.506	1.5932	1.4618	2.0184	0.7423	1.0348	0.9936	1.1689	1.3704	2.4276	1.9142	1.2047	1.2003	1.6152	3.2387	2.2559	5.5799	8.0706	5.5106	1.8372			0.199288	2.91419
6.7911	1.3778	2.0739	4.6103	10.6472	5.6684	3.5662	3.8114	2.4999	1.4564	1.0591	0.645	1.0964	1.3191	2.6394	1.3783	1.3239	2.3954	0.9553	0.8351	0.9514	1.0568	1.013	1.7071	1.5347	0.7618	1.1757	1.3291	2.5108	1.2956	4.4742	7.8514	5.5956	1.9837			0.202848	2.50301
6.9102	1.7682	2.2599	3.5021	8.9356	4.6413	2.7291	2.9803	2.5776	0.9999	1.0588	1.51	1.0604	1.2963	2.5118	1.5446	1.6217	1.8165	1.5235	1.1016	0.9445	0.8532	0.9969	2.4473	1.8973	1.4165	0.8408	1.311	2.9366	1.8277	3.4329	7.1029	4.3321	1.6496			0.206406	2.34632
7.0293	1.8073	2.4099	3.9712	7.7936	4.015	1.9889	3.195	2.4901	1.1636	1.2067	1.053	0.7917	0.7745	2.3942	1.8301	1.7923	2.2174	1.1164	1.2166	0.7372	0.8339	0.9054	2.4857	1.7636	1.3163	1.018	1.0627	3.1726	2.0556	4.09	5.959	3.5733	1.7871			0.209963	2.24206
7.1485	1.6402	2.2116	3.7638	6.9807	2.2319	2.1032	2.8717	2.7519	0.9545	0.7918	0.95	1.1313	1.7104	2.8036	1.59	1.7001	2.5525	1.0959	1.1643	0.8018	0.8417	1.2309	1.8082	1.495	1.6446	1.308	1.3301	2.9009	2.2517	3.5599	6.174	3.224	1.7918			0.213524	2.16248
7.2676	1.356	2.0714	3.9863	6.2259	2.548	2.156	1.9248	2.9613	1.1452	1.1937	0.651	1.0674	1.3771	3.0383	1.8412	1.9739	2.1295	1.2794	1.0297	1.2544	0.8478	0.9168	1.8595	1.5022	1.5679	1.2011	1.1197	3.2427	1.9705	2.95	5.258	3.1114	1.422			0.217081	2.06606
7.3868	1.5203	2.3392	3.0144	4.4355	2.5259	2.9291	3.1703	2.8475	0.9446	0.5995	0.782	0.9059	1.5075	2.6623	1.4259	1.5602	2.3538	1.3663	0.6167	0.7553	0.9329	0.8984	1.8799	1.4787	0.4877	0.9963	1.1849	3	1.7497	2.9985	5.1265	1.8357	1.1546			0.220642	1.87836
7.5059	1.4768	2.2915	3.0857	4.2818	2.7679	3.1884	2.3176	2.3066	1.3181	0.7269	0.641	1.2548	0.8016	2.11	1.3236	1.3338	2.414	1.1017	1.0374	0.7445	0.7985	1.6059	2.3496	1.6364	1.1145	1.095	0.9602	2.4784	2.4046	3.3623	4.8694	1.8395	1.7232			0.224199	1.90185
7.625	1.062	1.957	2.5321	2.9387	2.2728	2.7426	2.3652	2.4041	1.2055	0.8987	1	1.2637	1.6158	2.2469	1.6205	1.5346	2.2131	1.0246	0.5771	0.6809	0.7974	1.2234	2.1627	1.8306	0.9593	0.9015	1.1958	2.2602	1.7963	2.8912	5.4533	1.9813	1.6952			0.227757	1.79709
7.7442	1.3925	1.7579	2.2573	2.8346	1.603	2.4668	2.8381	2.302	0.8904	1.051	1.196	0.9592	1.1153	1.9504	1.1886	1.3072	1.9662	1.5006	0.6863	0.7365	1.0963	1.0999	1.8354	2.0392	0.8342	1.0562	1.0982	2.6757	1.6984	2.5355	5.247	1.2269	1.6431			0.231317	1.69957
7.8633	1.1822	1.4736	1.9355	2.4532	1.7836	1.6379	2.7296	3.296	0.8534	1.0577	0.945	1.1119	0.8144	1.9917	1.5819	1.8224	2.209	0.9076	0.9373	0.9407	0.7957	0.8386	1.9938	1.9585	0.8382	1.0018	1.0015	3.2534	2.2076	2.378	4.4007	1.4484	2.1351			0.234875	1.69442
7.9825	1.5685	1.8794	1.7812	2.8515	1.8449	2.5157	2.3031	2.5611	1.3738	1.3538	0.982	1.1008	1.4985	2.3094	1.4284	1.4224	2.3221	1.2389	0.8527	1.2501	1.1349	1.1127	2.5127	1.4631	1.0556	0.8916	1.1235	2.5332	1.7252	2.657	4.4495	1.3754	1.5743			0.238435	1.759
8.1016	1.4119	1.6658	1.9366	2.8881	1.5726	1.7826	2.9206	2.7809	1.4207	1.0564	0.798	0.5847	1.2647	2.6055	1.5783	1.4888	2.3791	0.7115	0.9496	0.8562	0.8555	0.6406	1.9101	1.2682	1.0928	0.8903	1.4119	2.4196	1.4812	1.9786	3.6336	1.5327	1.486			0.241993	1.61375
8.2207	1.3221	2.4156	2.5635	2.7592	1.34	1.7865	2.1719	2.8179	1.0573	1.1435	0.69	0.9473	1.1698	2.0258	1.4671	1.4632	2.3013	1.1493	0.8355	0.9952	0.638	0.7879	2.1116	1.1865	0.9429	1.5099	1.0591	2.696	2.3578	2.0436	3.8263	1.4753	1.6814			0.24555	1.65874
8.3399	1.2594	1.6596	1.8664	2.5219	1.6132	1.2791	2.5502	2.0462	1.0932	0.9258	0.699	1.2533	1.1445	1.803	1.6367	1.7347	1.8572	0.8065	0.7333	0.6012	0.6255	0.8384	2.565	1.3589	1.006	0.7043	1.0026	2.8866	2.1964	1.3254	3.3072	1.4098	2.1647			0.249111	1.52955
8.459	1.1609	1.322	2.2953	2.5084	1.5669	1.5701	2.1461	2.9059	1.1228	1.0528	0.779	1.0512	1.1035	2.7252	1.8998	1.0656	2.2034	1.3584	0.6394	1.1876	0.6368	0.6884	1.7895	1.2566	1.0047	0.5231	1.2012	2.6877	1.7576	2.0122	2.5627	1.1555	2.3509			0.252668	1.55428
8.5782	1.0025	1.3314	1.8073	2.1044	1.4822	1.708	1.9475	2.3272	1.19	0.8808	0.731	0.8583	0.9607	2.9871	1.1625	1.5226	1.7744	1.7163	0.8343	0.6439	0.5851	0.9256	1.9044	1.6423	1.1003	0.5971	1.4677	3.1963	1.9907	1.3386	2.9334	1.2242	2.0446			0.256229	1.51281
8.6973	1.0081	1.481	1.803	2.5543	1.9516	1.9311	3.2694	2.8702	0.9048	0.8354	0.839	1.0452	1.4029	3.2845	1.9823	1.3164	2.5071	1.2153	0.4324	0.6939	0.5693	0.6424	2.0494	1.5555	0.7431	1.345	1.1876	2.4816	1.3938	2.0538	2.893	1.417	1.9124			0.259786	1.62339
8.8165	1.1016	0.8793	1.7281	2.8905	1.368	1.7423	2.5876	2.4453	0.8452	0.9001	1.014	0.6534	1.2786	2.4305	1.6366	1.3614	2.0946	1.1788	1.1888	0.8777	0.728	0.5402	1.9559	1.3519	0.7792	0.6038	1.651	2.7706	1.6163	1.4851	2.6334	1.3184	2.0005			0.263347	1.50414
8.9356	0.8556	1.0993	0.7677	1.9318	1.4711	1.8724	2.2072	2.4688	1.2534	1.0007	1.151	1.3767	1.3733	3.6609	1.5724	1.4721	2.3353	1.302	0.9677	0.9858	0.6506	0.7819	1.6384	1.4496	0.7933	0.8314	1.0014	3.6824	1.9517	1.4751	2.3617	1.0083	1.6937			0.266904	1.52863
9.0547	0.9713	0.7391	0.9938	2.7141	1.3678	1.5752	2.3048	3.2052	1.1671	0.5795	1.003	0.2901	0.9918	3.0738	1.4766	1.1761	2.6382	1.2191	0.8979	0.656	0.78	0.6412	2.1972	1.4573	0.8851	0.8376	1.2733	2.7125	1.8871	1.3663	2.6707	1.4608	1.7994			0.270462	1.48512
9.1739	1.3884	1.1624	1.3264	2.8029	1.2657	1.7941	2.4215	2.3427	1.3123	0.4745	0.532	0.8343	0.9971	3.3838	1.8636	1.4103	2.1033	1.6705	0.89	1.1429	0.3909	0.8	1.8275	1.6583	0.8959	1.3567	1.3576	2.756	1.95	1.2607	1.8413	1.6341	1.5665			0.274022	1.5277
9.293	1.0074	1.0135	1.7737	3.3348	1.727	1.9152	2.1787	2.8795	1.1901	0.7887	0.626	0.8234	0.9529	3.7703	2.5453	1.2465	2.6545	1.3171	1.1415	0.803	0.7268	0.6175	2.8026	1.6006	0.6479	0.9482	1.1121	3.133	1.5228	1.4356	2.0542	1.6427	2.0117			0.277579	1.63469
9.4122	0.788	0.7233	1.2223	2.1421	0.9124	1.9713	2.7736	2.1614	1.0516	0.8449	0.792	0.862	1.0967	3.5022	2.1953	1.8258	2.2501	1.0324	0.8478	0.9301	0.8321	0.7828	2.2729	1.9845	1.0428	0.9469	1.2732	2.2705	1.6762	1.337	1.8533	1.2615	1.3285			0.28114	1.47841
9.5313	0.7885	0.8216	1.0353	3.0307	1.6153	1.1155	2.2035	2.1308	0.7067	0.899	0.682	0.3883	1.1543	3.5752	2.4595	1.0312	1.9475	0.8625	0.6109	1.009	0.3413	0.6892	2.0844	2.1904	0.8409	0.6461	0.9201	2.5878	1.3853	1.7209	1.8864	2.1225	1.6202			0.284697	1.42736
9.6504	0.7845	1.0156	1.5646	2.8962	1.0247	1.474	2.1205	2.4263	1.0458	0.6898	0.631	0.7409	1.1622	3.7371	2.6888	1.367	2.234	1.8136	1.2261	0.9497	0.9398	0.7312	2.6007	1.8607	0.8921	0.8423	1.2468	1.7932	1.8655	1.2939	1.3301	1.5443	1.6885			0.288255	1.52186
9.7696	0.6329	0.8179	1.4411	2.8696	1.0953	1.6425	2.7965	2.4338	0.9129	0.786	0.544	0.492	1.362	4.1246	3.9315	1.3164	1.9408	1.5715	0.6512	0.4688	1.1484	0.8935	2.6613	1.3956	0.6463	0.9414	1.4812	2.2648	1.5021	1.2194	1.776	1.1728	1.9442			0.291815	1.54177
9.8887	1.1012	1.292	1.0265	3.0495	1.147	1.2289	3.386	2.4649	1.5555	0.6412	0.772	0.5831	1.1288	3.0495	4.3916	1.7096	2.8738	1.6318	0.6949	0.8905	0.8433	0.7346	2.486	2.6483	0.6255	0.7477	1.1159	2.6951	2.1481	0.91	1.809	1.2559	1.3108			0.295373	1.6348
10.0079	0.8679	1.4567	1.1163	2.4443	1.4274	1.8219	2.8598	3.0961	1.3617	1.0985	0.792	0.7818	1.2235	3.0482	2.9678	1.5994	2.7388	1.509	1.1754	0.9329	0.8771	0.599	2.968	1.8205	0.5172	0.7513	1.3482	2.4853	2.3067	1.634	1.1319	1.3699	1.4177			0.298933	1.62261
10.127	1.145	1.1802	1.2976	2.9012	1.2758	1.7461	2.8944	2.3723	1.5223	0.6408	1.103	1.1525	1.2027	3.9202	3.039	1.2667	2.1811	1.701	0.9685	1.1896	0.5861	1.0774	3.0363	1.8009	0.8873	0.9303	0.8039	2.2903	1.8405	1.2679	0.8153	1.1225	1.6029			0.302491	1.59884
10.2462	0.9188	0.8347	1.0342	2.9631	1.4184	1.8083	3.7021	3.1688	1.1415	0.7851	0.834	0.8997	1.4078	3.3472	3.1387	1.88	2.4447	1.5639	1.3841	0.8883	0.8384	0.9736	2.3417	2.2338	1.0518	0.9127	1.2624	2.9379	1.8006	1.1391	1.4545	1.2743	1.6059			0.306051	1.67849
10.3653	1.2462	0.9468	1.1012	3.1355	1.1616	1.5285	3.2817	3.3008	1.008	0.5456	0.651	0.9438	1.0031	3.7148	3.0888	1.6679	2.685	1.821	1.2038	0.9018	0.4672	0.9396	3.8113	1.9251	0.7975	0.9307	1.486	3.4654	1.6855	1.2019	1.3586	1.5147	1.875			0.309609	1.70895
10.4844	1.164	0.6833	1.103	2.7155	0.8457	1.7447	2.6261	2.612	1.1646	0.7807	0.69	1.1024	0.868	3.9968	2.953	1.6797	2.8557	1.4446	0.8778	1.0181	0.5285	0.7664	3.2142	2.6144	1.0479	0.9941	1.3197	4.0008	1.9379	1.2238	1.1299	1.4849	1.4504			0.313166	1.65572
10.6036	0.6581	0.849	0.7895	2.6711	1.3426	1.618	3.8283	3.8598	1.5566	1.1971	0.615	1.1996	1.2676	3.9086	2.9887	1.7786	2.5007	1.782	1.094	0.642	0.7992	1.1531	4.2401	2.712	0.9065	1.0114	1.2957	3.0292	2.0456	1.0564	1.1453	0.9961	1.5534			0.316727	1.76033
10.7227	1.4848	1.4015	1.2754	3.3776	1.0631	1.1914	3.423	3.1978	1.2701	0.6306	0.758	0.8967	1.3629	4.0014	3.1899	2.1961	2.2497	1.3897	0.4577	0.7858	1.0772	0.5968	3.949	3.2079	0.9958	0.8833	1.2451	3.8289	1.5744	1.4507	1.3566	1.2544	2.0747			0.320284	1.79085
10.8419	0.6936	1.2071	1.3591	3.3418	1.3245	1.7645	3.3954	2.3514	0.912	0.6451	0.744	0.952	1.1665	3.6423	3.8257	2.0761	3.7828	1.6157	1.4644	0.8925	1.0401	0.8907	4.1253	2.7516	0.991	0.86	1.213	3.232	1.9892	1.1265	1.2306	1.2389	2.0949			0.323845	1.81637
10.961	0.8014	0.7964	1.553	2.9578	1.8823	1.3331	3.7981	3.1075	1.0576	1.3403	0.431	0.9283	1.3518	3.9641	3.7534	2.3802	3.336	1.3854	1.4431	0.9471	0.9096	0.7468	4.8717	3.6686	0.9568	1.0405	1.4107	4.672	1.5821	1.1292	1.5165	1.2296	1.535			0.327402	1.93385
11.0801	0.6775	0.6763	1.536	4.0872	1.5401	2.1631	4.461	3.276	1.2903	0.7006	0.749	0.5484	1.4918	3.7782	3.8807	2.774	3.079	1.7826	1.2235	0.7795	0.7401	0.7714	6.185	3.5344	0.8056	0.5606	1.0189	3.664	1.7504	0.9358	0.9866	1.2591	1.5097			0.33096	1.94595
11.1993	0.9317	0.9798	1.4114	2.8395	0.9917	1.2598	4.5609	3.5149	0.8782	0.5981	1.104	1.0972	1.239	2.8991	3.3999	3.0812	3.6179	1.3834	1.1099	0.778	0.7454	1.1313	5.8466	3.6224	1.2106	1.406	1.0599	4.1107	1.2717	1.3838	1.0845	1.0067	1.9503			0.33452	1.92441
11.3184	0.6401	1.1539	1.3352	3.4116	1.4204	2.2566	4.2391	3.4853	1.3237	1.0289	0.583	0.3951	1.1638	3.2598	5.2882	3.3299	2.7756	1.5696	1.4195	0.4897	0.6789	0.6961	7.0332	4.7791	1.0983	0.9051	1.2438	4.909	1.7908	0.9084	1.5021	1.5267	1.7279			0.338078	2.10207
11.4376	1.1412	1.0839	1.5197	3.7048	1.0909	2.1516	3.0376	3.779	0.7533	0.6497	0.959	0.7287	1.4303	3.5912	3.3748	3.1138	2.7629	1.2254	1.1749	0.9347	0.9648	1.0447	6.9237	4.3061	0.9584	0.953	1.0203	5.055	1.8869	1.2642	1.2784	1.4305	1.4602			0.341638	2.02284
11.5567	0.8828	1.1304	1.0997	3.564	1.0623	2.5336	4.6088	3.4596	1.4806	0.4865	1.003	0.721	1.2924	3.2311	3.6381	2.6249	3.2637	1.177	1.0758	0.939	1.3161	1.1629	7.3922	5.8533	1.1675	0.9532	1.2858	5.4139	1.8927	0.8564	1.7166	1.5163	1.9744			0.345196	2.17502
11.6758	0.911	1.0069	1.2379	3.3751	1.0992	2.1403	3.658	3.9802	1.0504	0.4793	0.42	0.9577	0.6081	2.5515	3.4775	2.6897	2.9865	1.3332	1.2715	1.4099	0.9284	0.8707	7.1533	6.0239	1.2115	1.0915	0.897	5.4201	2.3206	1.6084	1.4914	1.3854	2.15			0.348753	2.09685
11.795	1.2626	1.5335	1.5454	3.2962	1.8297	1.4896	4.1748	3.0834	1.4261	0.917	0.6	1.1487	1.3387	2.9416	3.5183	2.9257	3.4736	1.2572	0.9454	0.9208	1.0032	0.9847	6.3114	6.5814	1.3271	1.3944	1.3609	6.0431	1.8735	1.0492	1.0186	1.1677	2.0693			0.352314	2.17615
11.9141	1.2774	0.8324	1.3054	3.8117	1.4251	1.2287	4.1269	3.814	1.0126	0.5637	0.991	1.0202	1.6776	2.9784	3.9026	3.0055	3.7392	1.4089	1.4308	1.0355	0.6833	1.253	7.5558	6.3411	0.884	0.9894	1.2686	5.4484	3.2691	0.8589	1.0214	1.5121	2.0604			0.355871	2.23434
12.0333	0.9832	1.0553	1.2573	4.0449	1.3279	1.8319	3.7026	4.8814	1.098	0.9692	1.313	1.1825	1.6113	2.5602	4.4179	3.6669	4.4253	2.059	1.1048	0.8417	1.1219	0.8766	6.6569	7.6911	1.1557	1.0915	1.2284	4.9008	2.7412	1.1123	1.0423	1.5512	1.8443			0.359432	2.34389
12.1524	0.7551	1.0775	1.2548	3.8679	1.541	1.6469	4.7233	4.8632	0.8439	1.043	1.435	0.9078	1.0029	2.9337	3.725	2.6894	3.5307	2.1093	0.8503	1.0474	0.9312	1.1917	6.2276	7.7748	1.5549	0.7083	1.3342	4.439	2.5263	1.2215	1.5172	1.352	2.4074			0.362989	2.27376
12.2716	0.9555	1.2485	1.139	3.8664	1.4003	2.0373	4.9519	4.9266	1.2833	1.2863	1.183	1.0506	1.4662	3.468	5.0018	4.3009	3.109	1.4212	1.2916	1.135	1.1655	0.8652	6.6502	8.9153	1.1833	0.745	1.3288	5.2675	3.2679	1.0803	1.1668	1.1023	2.1631			0.366549	2.46738
12.3907	1.218	0.7643	1.4744	3.0567	1.3631	1.1749	4.7469	5.4618	1.1553	1.1788	0.698	0.8562	1.1644	2.9487	5.2191	4.4292	3.4255	1.9625	1.2013	1.4112	1.1118	1.3202	6.024	10.4606	1.0696	1.0045	1.8157	5.3959	3.0979	1.1692	1.1472	1.1053	2.9037			0.370107	2.50109
12.5098	0.672	0.9931	1.7794	3.0403	1.1187	2.2867	4.7255	5.7453	1.4189	0.831	0.518	0.5973	1.3201	3.2073	3.9806	4.7137	2.9965	1.7119	0.9438	1.3202	0.9986	1.2116	5.9384	8.8308	1.5643	0.9381	2.0641	4.3117	3.1081	0.9525	1.2131	1.1826	2.7761			0.373664	2.39425
12.629	1.1867	1.056	1.1574	3.5196	1.2971	1.7672	5.0722	7.3614	0.9042	0.7213	1.109	1.0135	0.9237	3.6208	4.3641	4.5961	4.3001	1.8461	1.0467	1.1884	1.1238	1.0698	7.8918	8.6219	1.2776	0.8987	2.0046	6.2911	2.8625	1.2215	1.0511	1.2944	3.188			0.377225	2.63177
12.7481	0.5889	0.8984	1.8463	4.2303	1.6118	2.0218	5.4196	8.7314	1.2908	1.1005	0.989	0.9403	1.3849	3.6452	4.9411	5.2072	3.5225	1.8741	2.2261	1.3224	1.1349	1.4002	6.1116	7.7885	1.2586	0.9143	2.2674	5.8092	3.6348	1.4204	1.3715	1.4422	3.3934			0.380782	2.77999
12.8673	0.9876	0.8133	1.5139	4.0475	1.5558	1.7408	5.1466	8.105	1.2316	1.357	0.903	0.8278	1.1718	4.0048	5.4992	5.0381	4.4789	2.0693	1.5124	1.2506	0.8626	1.0758	7.8205	7.4819	1.1663	0.8404	1.5654	6.038	3.9131	0.8386	1.4532	1.3201	4.2619			0.384343	2.78463
12.9864	1.262	1.2541	1.5563	2.8637	1.3305	1.2868	6.2279	8.3641	1.1623	0.9213	1.134	0.8856	1.1522	3.1452	6.2437	6.8236	2.8826	1.523	1.504	1.0306	0.9285	1.4704	6.7821	7.5579	1.0426	1.2127	1.5637	6.4637	3.29	1.1666	1.5967	1.2789	3.9857			0.3879	2.75433
13.1055	1.0538	1.0656	1.1934	2.6616	1.3965	1.744	5.9395	7.4359	1.1683	0.9934	0.922	0.9864	1.6527	2.9933	6.1393	5.5445	3.7901	1.8296	0.9645	1.2104	0.8123	0.7881	7.3556	6.8471	0.9579	1.0548	1.8627	5.8334	3.1611	1.4803	1.3999	1.3746	4.4124			0.391458	2.66742
13.2247	0.9425	1.3861	1.5629	4.4448	1.2443	2.2533	5.5107	7.4477	1.0213	0.8363	0.729	1.1078	1.2679	3.1235	4.9024	5.796	3.911	1.6742	1.3674	1.1179	0.7665	1.5394	6.889	7.9377	1.1206	1.8172	1.9943	7.8219	2.5298	1.5453	1.0597	1.2694	4.7223			0.395018	2.80788
13.3438	0.8957	1.2526	1.4708	4.4408	1.3781	1.9513	5.5954	8.8212	1.5628	0.7551	0.954	0.5626	1.7118	2.6542	6.2332	5.5897	3.4088	1.3121	1.3393	1.0552	1.4753	1.2013	7.3058	6.872	1.1016	0.9377	2.2022	7.2664	2.8108	1.725	1.1437	1.414	5.1826			0.398576	2.83585
13.463	0.9779	1.3426	1.6684	3.3327	1.319	2.2285	6.6274	10.5143	1.3632	1.1991	1.003	0.921	1.8526	3.0429	5.8461	6.1802	3.2819	1.706	1.1382	0.9117	0.8359	1.0814	7.1615	7.241	0.9526	0.8426	2.128	7.9934	2.6609	1.4983	1.4413	1.1888	5.2667			0.402136	2.93179
13.5821	1.3621	0.8676	1.5883	5.1784	1.3533	1.6945	6.5225	8.7859	1.2676	1.748	1.433	1.2837	1.415	2.6641	6.0404	5.7654	3.6485	1.3799	1.1696	1.0729	1.1167	1.2153	6.9063	7.323	1.4274	1.281	2.8646	9.123	2.6995	1.2503	1.2797	1.6811	5.6168			0.405694	3.03107
13.7012	0.996	0.9112	1.2945	4.3778	1.5979	1.9886	7.5542	8.2826	1.1479	1.0581	1.002	1.5755	1.4651	1.7896	6.6233	6.1457	3.3227	1.4058	1.2361	0.9882	0.9987	1.1693	6.7131	7.7548	1.7006	1.4678	2.7108	8.1587	2.8037	1.3561	0.9087	1.9707	6.3889			0.409251	2.9959
13.8204	1.0547	1.0011	1.4981	3.2674	1.3642	2.3824	7.404	7.6439	1.2315	1.8236	0.947	0.8016	1.6499	2.813	6.5896	6.9175	3.1	1.4659	1.5561	1.1361	0.9787	1.0217	5.9278	7.2459	1.3935	1.5123	3.203	7.557	2.9904	1.7144	1.4247	1.5416	7.3657			0.412812	3.01589
13.9395	1.0512	1.3172	2.0682	4.0302	1.4081	1.8502	6.8295	7.8258	1.0127	0.9373	1.063	1.4944	1.4564	2.1519	7.1477	8.0688	2.9128	1.5565	1.6909	1.8581	1.1652	1.5546	5.7249	6.9771	1.3752	1.3742	3.6814	8.1385	2.8733	1.6866	1.7251	1.9135	7.3182			0.416369	3.12845
14.0587	0.7323	0.924	2.125	4.7011	1.8429	1.7636	8.821	8.1685	1.3291	1.5699	1.414	1.1768	1.3516	3.2306	7.0423	6.8798	3.2328	1.6177	1.3739	1.1027	1.1928	1.5689	4.7676	7.5437	1.4472	1.2785	4.5848	5.5152	3.0598	1.4311	1.2923	1.6249	6.7044			0.41993	3.10336
14.1778	1.7075	1.0193	1.8301	3.9949	2.0011	1.7809	9.1448	6.6112	1.7768	0.8859	1.318	1.2628	1.433	3.2134	8.6842	7.1212	3.3469	1.6022	1.1894	1.1356	1.2476	1.1088	5.7346	6.9027	1.913	1.4337	4.4912	6.1387	3.482	1.3604	1.5655	2.0741	7.2384			0.423487	3.20454
14.297	1.284	0.9471	2.0767	5.5466	2.0422	2.2021	10.6933	5.871	1.3645	1.106	0.681	0.8138	1.5595	2.5923	8.5479	8.2536	3.2743	1.5927	1.4152	1.3944	1.0103	0.9036	6.5177	6.2127	1.0263	0.9519	4.9772	6.0899	3.203	1.2981	0.8439	1.7259	7.9613			0.427048	3.21152
14.4161	0.9075	1.2351	1.8001	5.1018	2.1849	2.4543	10.2454	6.8077	1.319	1.0475	1.189	1.5065	1.7025	2.3681	8.1678	7.4655	2.9218	1.2489	1.116	1.8019	0.9571	1.0306	7.0935	8.8245	1.9171	1.6521	4.1161	5.2789	2.8094	1.5236	0.9524	1.5691	7.7067			0.430605	3.27341
14.5352	0.8033	1.1556	1.3809	5.8251	1.6207	2.1665	11.3059	6.4463	1.243	1.3247	1.062	1.1587	1.7969	1.6323	9.1198	7.9917	2.5092	1.4778	1.3667	0.9975	1.059	1.1729	8.4958	8.762	1.2738	1.3996	4.5273	6.5881	2.626	1.2801	1.1278	1.7728	6.6514			0.434163	3.3067
14.6544	0.7499	1.372	1.7514	6.1429	1.1837	1.5985	10.5759	5.2026	1.3397	1.1469	0.874	1.0081	1.5322	2.4072	9.1085	8.1665	2.781	1.3548	1.3188	0.9525	0.6267	2.0264	8.4906	6.9715	1.7459	1.3278	4.7128	7.8271	3.1953	1.782	1.2	1.7209	6.1771			0.437723	3.28398
14.7735	0.5719	0.9925	1.6084	5.5272	2.156	2.0422	11.73	5.4233	0.893	1.2084	0.8	1.4587	1.7254	2.1547	10.1501	8.3022	3.3774	1.065	1.5529	0.817	1.4048	1.3292	11.9479	9.1275	2.0082	1.0736	3.9866	7.9804	3.645	1.7806	1.7011	1.9627	5.2382			0.441281	3.53764
14.8927	1.5044	0.8213	1.826	4.5278	1.6929	2.297	11.5388	4.74	1.1879	0.691	1.335	0.8096	1.7535	2.355	10.2025	9.6758	2.5921	2.1038	1.2066	1.1273	0.86	1.4419	10.8352	8.622	2.2325	1.2023	5.1312	9.1282	4.0637	1.6296	1.3225	1.9805	4.1658			0.444841	3.53345
15.0118	1.2994	1.704	1.4023	5.3989	1.7018	2.1285	12.2054	5.1785	1.8786	0.8595	1.229	0.9692	1.7669	1.6585	11.9094	11.1626	2.6291	1.9839	1.3546	1.0894	1.241	1.4709	9.8847	8.8354	1.9465	1.4693	4.7711	11.3688	2.7348	1.898	1.1407	1.7782	5.0153			0.448399	3.72922
15.1309	1.4899	1.394	1.8408	6.3215	2.0149	2.395	11.8888	4.2937	1.018	1.3486	1.394	1.2542	2.0498	2.4413	13.7705	11.058	2.1492	1.8927	1.0856	1.3714	0.9039	1.3501	10.0358	9.4687	1.9812	1.5761	4.2081	11.7844	3.4286	2.0287	1.4757	2.1272	4.3464			0.451956	3.85415
15.2501	0.9298	0.6925	1.4563	5.999	2.6108	2.0403	13.2609	3.7813	1.1055	1.245	1.077	1.1357	1.3153	2.4515	15.9452	12.6689	2.498	1.5691	0.9822	1.3429	0.8483	0.8563	8.783	8.2384	2.0353	1.4173	4.7813	10.4585	3.1545	2.4438	1.1758	2.1596	4.2432			0.455516	3.77886
15.3692	1.1544	1.22	1.5067	6.1885	2.1782	2.5139	13.8548	4.1547	1.2562	1.0706	1.182	1.2009	1.5529	2.0639	21.2666	13.6675	2.2188	1.7003	1.5384	0.7715	0.9643	1.363	10.8216	9.4486	1.8255	1.6384	4.3559	10.1034	3.3029	2.3518	1.3357	2.4863	4.7578			0.459074	4.152
15.4884	1.6656	1.235	1.8173	6.4056	2.2762	2.4313	14.5728	3.9397	1.2775	0.7255	0.727	0.9484	1.8694	1.9882	20.4938	15.9795	2.3799	1.2049	1.1182	0.8841	1.1727	1.2664	8.412	7.7959	1.8317	1.6281	4.2478	12.4218	3.9325	2.8863	1.3904	1.9722	4.582			0.462634	4.16605
15.6075	0.9564	1.4522	1.6507	5.9173	2.5089	2.0311	17.5671	3.5651	1.0357	1.3771	1.075	1.0914	1.2181	2.3893	20.207	17.7277	2.2877	2.0233	1.5224	1.1695	1.1679	1.4559	7.2136	5.859	2.0193	1.1815	3.3557	10.2685	3.5547	2.6054	1.158	1.9815	4.1008			0.466192	4.08166
15.7266	1.2987	1.2056	1.7352	5.9874	2.1496	2.3153	15.6399	3.4045	1.2778	1.2366	1.104	0.8921	1.7249	1.9185	18.2274	18.103	2.0852	1.3521	0.9111	1.1188	0.9766	1.4521	5.8548	6.1353	2.0182	1.444	2.225	9.5262	3.5284	2.0127	1.0991	2.3509	3.8515			0.469749	3.82311
15.8458	0.9215	1.1691	1.9784	7.8035	2.7917	2.8026	17.4897	2.5748	1.7869	1.0202	1.33	1.4672	1.5518	2.065	18.3746	15.8865	2.2767	1.5362	1.1212	1.0877	0.9221	1.6824	5.252	4.7914	2.2056	1.5977	2.9188	8.0143	3.5547	2.4698	1.1347	1.9481	4.6891			0.47331	3.88533
15.9649	0.684	0.8855	1.5479	6.8157	2.8578	2.5385	19.5028	3.4304	1.057	1.1051	1.543	1.2313	0.9914	2.0039	17.758	16.1086	2.3734	1.6208	2.0485	1.0376	1.1245	1.3684	4.3719	5.0108	2.6172	1.7565	2.488	8.537	3.5488	2.6403	1.4715	2.3718	5.1841			0.476867	3.92824
16.0841	0.683	1.0834	1.9162	7.268	3.3069	3.6764	18.3791	2.9148	0.9377	1.0809	0.884	1.1548	0.96	2.3491	22.4447	14.239	1.8274	1.6782	1.2875	1.1563	1.1221	1.2375	3.7058	5.0583	1.9734	1.4302	2.3166	10.0349	3.1671	2.2903	1.6795	2.8503	4.7712			0.480428	3.96559
16.2032	1.2544	1.1952	1.8025	7.5871	4.1762	3.3031	19.6238	3.1127	0.8707	1.0373	0.921	0.5947	1.3458	2.0298	19.9697	15.6304	1.4679	1.1983	1.1887	1.0665	0.9354	1.4582	3.5806	4.0518	1.9425	1.4634	2.6629	9.6322	3.9086	2.365	1.5557	2.4748	6.1648			0.483985	3.98702
16.3224	0.711	1.3185	2.445	6.8974	5.5757	3.0488	24.8197	4.2117	1.1578	1.0865	1.085	0.8597	1.4318	1.3856	19.4222	15.3871	1.9051	1.9425	1.6543	0.8932	1.2248	1.3399	2.9012	4.0671	1.9442	2.0323	2.3291	11.146	4.1108	3.2231	1.3308	2.3453	6.5869			0.487546	4.29758
16.4415	0.9503	1.1692	1.5167	5.7453	6.4824	3.7474	22.3774	2.8155	1.3085	0.9571	0.95	0.725	1.2312	1.8269	19.4844	15.8941	1.978	1.7484	1.646	0.9003	1.029	1.3048	2.6783	4.7755	1.8174	1.1683	3.3855	10.8222	4.7969	3.1553	1.9008	4.0013	5.3955			0.491103	4.23288
16.5606	1.3278	1.6349	1.8646	6.4565	6.8764	3.8721	26.2556	3.866	1.1049	1.2488	0.898	1.1022	0.9038	1.5964	20.8008	15.6652	1.4021	1.0674	1.342	1.0732	0.8676	1.4022	2.9501	4.421	2.0642	1.6386	2.3604	12.8721	5.6991	2.2041	1.282	2.5964	5.5996			0.494661	4.43382
16.6798	1.4802	1.6213	1.8688	8.3825	6.106	4.314	26.4735	2.808	1.338	1.0857	1.061	0.9188	1.5597	1.2218	19.3803	15.7386	1.8352	1.0752	1.1387	1.2312	0.9295	1.6154	2.0221	3.5719	2.0009	1.2007	2.3306	12.9739	5.9592	2.6347	1.4921	3.0363	7.186			0.498221	4.47248
16.7989	0.9204	1.4387	1.9553	6.9285	7.8109	3.6763	30.6931	3.2371	1.0817	0.9898	1.125	1.0002	1.2867	1.6147	21.4801	14.8028	1.383	0.4582	0.8186	1.134	0.8462	1.3245	2.3549	4.4386	1.8592	1.5285	2.9268	13.123	5.3097	2.2943	1.6798	2.5534	8.3666			0.501779	4.61941
16.9181	1.1961	1.3488	1.5211	8.358	5.9201	3.5162	34.6186	3.7004	1.0029	1.0144	1.132	1.3124	1.6013	1.7294	19.2756	14.3399	1.6425	0.9181	1.3617	1.2967	1.3005	1.135	2.8775	5.5224	1.9018	1.5815	2.0682	11.7591	6.8275	2.8781	1.9519	3.7772	9.3298			0.505339	4.8399
17.0372	0.7374	1.5325	1.72	7.9896	7.8813	4.8437	35.1243	3.6358	1.4129	0.9879	1.099	1.0956	1.0289	1.5529	17.6689	15.7289	1.9164	1.1454	1.5047	1.1712	0.8551	1.1424	2.4554	4.8392	2.3136	2.1735	2.0454	12.188	5.4868	2.0531	1.4176	3.6492	10.7349			0.508897	4.88277
17.1563	0.8515	0.9079	2.7213	7.9799	6.6004	5.778	38.2435	3.1181	1.3152	0.8137	1.182	0.8563	1.2541	1.997	17.8035	15.0225	2.087	1.1421	1.7291	1.6036	1.3333	1.3701	2.2207	5.2237	2.7462	1.5157	2.1555	12.3778	5.9472	2.5455	2.1494	2.6182	8.9801			0.512454	4.97546
17.2755	1.1508	1.2795	2.6901	7.5358	5.5534	7.6115	41.1024	3.9421	1.0896	1.4882	1.337	1.0094	1.3572	1.6176	15.863	13.8756	1.6738	1.7797	1.1623	1.1083	0.9058	1.1969	1.941	4.1626	1.8455	1.513	1.6432	11.6459	4.3403	2.3114	1.318	2.7416	8.5772			0.516015	4.79908
17.3946	1.0699	1.0836	1.8089	7.7564	5.8948	7.6426	40.2177	3.0309	1.3176	0.9468	1.147	1.0103	1.1067	1.5459	16.5163	15.0535	1.915	1.486	1.1526	1.1372	1.0311	1.2061	2.5127	4.1437	1.9461	1.4049	2.708	9.709	5.79	2.8457	2.0658	3.4446	8.6712			0.519572	4.85814
17.5138	1.1306	1.2631	1.7148	7.1883	5.4154	7.9926	38.8499	4.1097	1.129	1.5294	0.972	0.7378	1.4898	1.3465	16.9195	14.0646	1.4816	1.0385	0.9261	0.9452	0.7609	1.5404	2.0382	4.3745	1.9453	1.8674	2.067	9.9487	6.9822	2.9548	2.1317	3.7541	9.3841			0.523133	4.84829
17.6329	1.5361	1.4353	1.6578	7.4532	5.403	9.3933	40.9518	3.3916	1.3571	1.0611	0.833	0.9775	1.458	1.6236	16.1401	13.692	1.297	1.0623	1.373	1.4046	1.3138	1.0906	2.1095	4.1695	2.0762	1.7814	2.6642	9.0545	6.1476	2.5049	1.8589	2.7435	9.0835			0.52669	4.8515
17.7521	0.7014	1.0354	2.0902	7.1324	8.2362	12.271	42.283	3.2458	1.1769	1.0706	1.004	1.1429	1.3362	1.3722	18.0939	13.1592	1.844	1.0492	1.1223	1.0499	1.2164	1.2072	2.1634	4.0203	2.1937	2.0459	2.3156	6.9496	6.0423	2.8696	2.076	3.9759	7.8769			0.530251	5.0112
17.8712	1.2352	1.0821	2.3159	7.0975	10.7634	12.5239	41.439	3.7637	1.2236	0.8429	0.918	0.9924	1.5161	1.3565	17.5455	14.9288	1.6349	1.2578	0.8845	1.1357	1.5355	1.5819	1.6872	4.9067	2.1137	2.444	2.3314	6.8436	6.1176	2.7797	1.8917	3.5086	9.0063			0.533808	5.18804
17.9903	1.235	1.134	2.5512	6.9973	12.2545	13.1075	43.3844	3.9319	0.7004	1.3283	1.304	1.2232	1.2629	1.4088	16.9393	15.9568	1.8056	1.1199	0.9808	1.7452	1.4469	0.8515	1.9192	3.5268	1.4993	2.0027	2.1991	6.1687	4.8832	2.7862	2.5012	3.5025	9.667			0.537366	5.25228
18.1095	0.8634	0.9468	1.6457	7.9377	11.1807	15.2372	38.2445	3.7798	1.0748	1.6761	0.708	1.3827	1.2865	1.2793	17.5413	16.2343	1.6314	1.1016	0.9281	0.8423	1.1273	1.2092	1.758	4.1862	1.2702	2.4293	2.3403	6.1678	5.39	2.7521	2.4781	4.486	7.4686			0.540926	5.10865
18.2286	1.0761	0.8785	1.7564	8.7607	12.5483	14.9898	35.0952	4.7038	1.5914	1.1849	1.039	0.8408	1.4838	1.8548	19.3899	18.081	1.9445	1.139	0.9989	1.118	0.7673	0.9319	2.18	4.7003	1.8014	2.2992	1.5559	6.081	4.7346	3.1812	2.1659	3.6126	7.044			0.544484	5.19788
18.3478	1.2143	1.331	1.9772	9.4535	16.3208	14.9822	33.4073	5.7293	1.1569	1.0755	0.944	0.6491	0.9856	1.6529	20.7004	16.7812	1.92	1.1149	0.8317	0.992	1.2369	1.4717	2.7061	4.5437	1.7777	1.7528	1.6161	6.7207	4.1126	2.5762	2.034	4.4064	6.5022			0.548044	5.29324
18.4669	0.9357	1.2068	1.7819	9.2181	14.3079	11.7799	27.9525	5.3158	1.2201	1.1545	0.622	1.4622	1.1735	1.3502	19.6173	17.8678	1.8363	0.9344	1.5243	0.8851	1.6433	1.2191	1.8101	4.9217	1.8492	2.0341	2.5189	6.4278	4.5526	2.903	1.522	4.0355	6.1338			0.551601	4.96113
18.586	1.1	1.4508	1.6296	10.7973	12.9432	11.5346	25.5185	7.2463	0.9694	1.2051	1.669	1.2565	1.5549	1.4599	20.3978	17.0045	1.7442	1.0953	1.0302	1.1993	1.1121	1.6561	2.0041	4.4019	1.4903	1.9253	2.0331	6.8043	4.6166	2.6549	2.387	3.5963	5.8473			0.555159	4.94957
18.7052	1.0388	0.9372	1.8647	14.1077	13.8927	12.8281	26.3284	8.7229	1.0879	1.5179	1.065	1.0308	1.317	1.5891	19.0263	17.9078	1.9373	0.9502	1.1831	0.9016	1.3091	1.134	1.5252	5.2249	1.6195	1.2579	2.0326	5.322	5.313	1.979	1.5816	3.8878	6.3499			0.558719	5.08397
18.8243	1.1057	1.2053	2.4869	16.015	12.8874	15.7606	21.3778	9.8518	1.3039	1.3401	1.279	0.7034	1.2343	1.1601	17.9181	17.6951	1.6897	0.9062	1.142	1.1926	1.1015	1.6697	1.7419	5.2956	1.2037	1.8147	1.554	5.1771	5.3244	2.073	2.0406	3.4651	5.0518			0.562277	5.02328
18.9435	1.0177	1.438	2.1026	18.6558	14.6431	17.6236	20.6203	12.968	1.1382	1.4813	1.027	1.2988	1.4266	1.3758	17.7004	20.2319	1.718	0.9053	1.2639	1.1672	0.8277	1.0186	2.376	4.2724	2.1431	1.404	1.8104	6.0052	5.4564	2.286	2.2128	3.5329	4.4161			0.565837	5.38076
19.0626	0.9232	1.2291	1.9103	20.9604	15.809	23.8747	22.8769	12.0281	1.1929	1.1916	1.226	1.0991	0.9291	1.519	17.5396	20.0026	2.3128	1.2075	0.7433	1.2559	1.1917	0.7158	2.6639	4.6652	1.7277	1.4248	1.8545	4.5147	5.5506	1.844	2.1305	3.0171	5.3635			0.569395	5.65137
19.1817	1.0077	1.4091	2.4338	21.4745	17.2989	24.9854	20.1584	16.0755	1.2275	1.5434	1.081	1.546	1.1232	1.5591	16.9066	21.3425	1.71	1.1586	1.3074	1.3395	1.2281	1.0142	2.4537	5.9123	2.0789	2.0992	1.8688	3.3694	5.8059	2.5143	2.4114	3.3982	4.5204			0.572952	5.92009
19.3009	1.1516	1.287	2.2762	22.5003	15.2044	24.3411	20.1762	16.5153	1.4892	1.6485	1.575	1.1631	1.2927	1.4892	15.1182	22.4954	1.6656	1.0333	1.1173	0.7468	1.0222	1.5653	2.2826	5.4435	1.7753	1.767	1.6963	3.8137	5.16	2.4035	2.2319	3.4155	4.0563			0.576513	5.78544
19.42	0.9115	0.9719	1.9568	23.7737	13.3077	23.5955	22.5141	18.3112	1.0001	1.5049	1.062	0.9119	1.0255	1.6865	13.6075	22.4806	1.3058	0.9835	1.2842	0.6738	1.0223	1.5489	2.2431	4.8112	1.4639	2.0384	1.5683	3.2203	6.216	2.2369	2.3724	3.9069	3.7836			0.58007	5.73639
19.5392	1.1717	1.1036	1.9143	27.0724	14.1857	21.959	23.9007	19.3359	1.2298	1.5279	0.938	1.1159	1.721	1.4945	13.7613	21.8743	2.0007	1.4093	0.7036	1.2437	1.1304	1.9916	1.9127	5.8965	1.4636	1.4772	1.8261	3.906	4.8884	2.533	2.2178	3.3968	2.9896			0.583631	5.91797
19.6583	0.9173	1.1454	1.6599	25.4177	12.0162	22.7821	25.5303	17.6099	1.1808	1.0797	0.594	1.1045	1.1584	1.5691	10.6635	23.0807	1.3046	1.0447	0.831	1.2721	0.9646	1.5742	2.3051	5.7814	1.6501	1.5162	1.8223	3.3607	5.1961	1.9861	2.3945	2.787	3.1388			0.587188	5.64967
19.7775	1.2208	1.1932	2.0916	24.5304	11.098	20.2998	25.5833	18.8275	1.513	1.1831	1.025	1.171	0.894	2.0893	12.3494	21.3652	1.5966	1.364	1.0986	0.7778	1.1675	1.2819	2.2055	4.867	1.6379	1.4576	1.6347	2.9016	5.173	2.2865	2.565	3.1529	3.8856			0.590749	5.62086
19.8966	0.7177	1.3118	2.4283	24.0535	10.7815	18.4855	26.191	19.5856	1.4703	0.7319	1	0.7062	1.1581	1.2323	11.6567	20.0788	1.5753	1.2731	1.0738	1.6184	0.864	1.134	1.9553	5.1099	2.3054	1.0801	0.8556	2.5095	5.286	2.0907	2.3638	2.2922	3.4906			0.594306	5.40809
20.0157	0.9539	1.4703	2.0031	23.7676	9.4573	16.9868	29.1832	16.8108	1.4526	1.2708	1.461	1.1376	1.6079	1.0831	11.4954	19.2143	1.8964	1.2753	1.0073	0.9298	1.418	1.314	1.8549	4.3185	1.4326	1.4936	1.7652	2.7324	4.2279	3.4095	2.6094	3.1357	2.7311			0.597864	5.36083
20.1349	0.7479	1.0792	1.5238	23.7882	9.6528	15.8485	25.8577	15.0967	1.2646	1.1221	1.577	1.2354	1.5285	1.4616	10.0829	16.6869	1.9445	1.2691	1.0276	1.2974	1.0205	1.5895	2.1078	4.1638	1.7202	1.5321	1.9883	3.3418	4.4105	2.9388	2.588	2.2698	3.2362			0.601424	5.0606
20.254	1.1744	1.5066	1.6034	26.1724	9.5509	13.8579	29.9824	12.3676	1.7744	1.3496	1.131	0.685	1.558	1.7505	10.3715	16.0786	1.9149	1.149	0.8542	1.2364	1.3586	1.5144	2.144	5.1095	2.587	1.4763	1.662	2.5381	4.2549	3.2686	2.4295	2.7397	2.5971			0.604982	5.14389
20.3732	1.0188	1.4589	1.5891	24.9566	8.7376	12.7565	29.567	9.5099	1.4767	1.5467	0.795	0.7244	0.9647	1.3347	9.5055	15.4203	1.7295	1.2939	0.9009	0.9354	0.9842	1.0592	2.0728	5.088	1.8656	1.2523	1.7197	2.9473	3.0245	3.0823	2.2426	2.5001	2.8153			0.608542	4.75382
20.4923	1.3263	1.3508	1.3708	22.8074	6.2772	10.8759	27.5128	7.477	1.2011	0.9409	1.394	0.7457	1.4543	1.4905	9.734	14.0878	2.3561	1.1337	0.9879	1.1165	1.9282	2.0377	1.6889	5.3465	1.3907	1.2636	2.1014	2.504	4.1805	2.7732	2.2863	2.5787	2.6611			0.6121	4.49641
20.6114	0.9407	0.9715	1.6875	20.2884	7.6929	8.5374	29.756	5.7022	1.6032	1.3722	1.213	0.932	1.1824	1.9068	10.4217	12.227	2.2385	1.3966	1.2034	1.1957	1.5076	1.277	1.6549	5.3699	1.3137	1.1815	1.9865	2.7627	4.7228	3.6388	2.1053	2.6621	2.4671			0.615657	4.39755
20.7306	1.3352	1.1019	1.3939	23.0023	7.3556	6.9715	29.0622	6.1132	1.1988	1.544	1.344	1.1132	0.9513	1.755	10.5453	13.5469	1.8951	1.3394	1.18	0.9247	1.4393	0.9076	2.1183	5.2054	1.6396	1.1726	2.1327	2.5225	3.2858	3.7084	2.8918	2.7967	2.8112			0.619218	4.4335
20.8497	0.9787	1.2699	1.2341	22.6222	6.4164	6.7406	33.011	5.8482	1.1196	1.1426	1.035	1.4105	1.1269	1.7352	10.2338	11.1907	2.3076	1.3515	1.0965	1.0405	1.5689	1.0049	1.8702	4.704	1.5604	1.8129	1.6831	2.4225	4.6641	3.969	2.7449	1.7929	2.4855			0.622775	4.39984
20.9689	1.1755	1.1698	1.2213	26.6676	6.6241	8.5237	29.3717	6.0045	1.334	1.0708	0.722	1.1425	0.8538	1.3014	10.1672	11.4027	2.0382	1.4224	1.2187	0.9509	0.9184	1.3786	2.6366	4.837	1.4707	1.6908	2.1691	2.3073	4.4013	4.5671	2.1389	2.7101	2.5649			0.626336	4.49011
21.088	1.3556	1.0682	1.9515	23.5222	7.7321	7.8241	30.9638	6.3749	1.8165	1.3032	1.565	1.2902	1.4644	1.4402	9.1959	11.7437	2.0014	1.1591	1.0458	1.1723	1.5142	1.6084	2.1674	4.8027	1.9268	1.1723	1.3814	1.8463	4.5484	4.6888	1.7612	2.3112	2.6635			0.629893	4.49645
21.2071	0.9913	1.4733	1.6581	22.8206	6.7927	10.3371	33.7693	4.8759	1.2028	1.5411	0.76	1.1173	0.8766	1.5052	8.1835	10.6714	2.3392	0.8024	0.8396	1.3826	1.7149	1.4328	1.4337	5.5398	1.734	1.5846	1.3822	2.221	3.7773	4.2011	1.9973	2.3298	2.7056			0.633451	4.42406
21.3263	1.0723	1.1902	1.109	24.279	6.6498	12.0162	31.5118	4.172	1.5203	0.7992	1.042	1.2634	1.2205	1.9788	8.5308	9.6017	1.8702	1.3983	1.0872	0.6562	1.6198	1.6011	1.6008	6.8411	1.8552	1.5976	1.4738	2.0754	3.8293	4.3725	1.8906	2.0834	2.8936			0.637011	4.44555
21.4454	1.065	1.1609	1.3192	23.3104	8.3765	13.9142	33.3578	5.9788	1.6008	1.2219	1.316	1.3342	1.4547	1.8066	9.3407	10.8552	2.5636	1.3372	0.8958	0.7844	1.213	1.2007	1.9013	5.2157	1.764	1.0427	1.9429	2.7723	3.6076	4.734	1.9211	2.126	2.4281			0.640568	4.69283
21.5646	1.3225	1.3613	2.4109	24.5482	7.4485	12.6436	37.0298	5.8129	1.8868	1.2105	1.067	0.9439	1.0242	1.9698	8.217	8.0415	2.4293	0.9065	1.303	1.2433	1.3706	1.4153	2.1594	5.6126	2.1576	1.1466	1.6434	2.2076	3.406	4.9123	2.432	2.2923	2.8753			0.644129	4.74095
21.6837	1.1155	1.7243	1.9776	20.9352	8.2894	13.4521	34.1212	5.4282	1.0639	1.2654	1.216	1.2562	1.0523	1.7214	7.3248	8.7651	2.3665	1.337	0.9688	1.087	1.4556	1.119	2.2476	6.129	2.047	1.4088	1.7334	1.9009	3.7861	4.0249	2.5101	2.4221	3.5724			0.647686	4.57045
21.8029	0.8511	1.1773	1.5585	18.4976	8.4306	11.8654	34.3904	4.6934	1.0414	1.1707	1.36	1.1315	1.1004	2.0215	7.2225	8.5734	2.6712	1.3779	0.7907	1.1023	1.3887	1.4116	1.6329	5.973	2.2854	1.8067	1.1084	2.0144	3.6314	5.3998	2.2294	2.6663	3.8518			0.651247	4.4372
21.922	1.4665	0.9822	1.8016	18.6727	9.0066	10.3407	34.1986	5.8411	1.5443	1.2737	1.308	1.096	1.1132	1.8692	8.1645	9.3551	2.2922	1.1427	1.0992	1.1227	0.7644	1.4162	1.6744	5.5412	2.9813	0.9657	2.0195	2.1542	3.3044	4.9937	1.9002	2.2502	3.4757			0.654804	4.45854
22.0411	1.3191	1.4847	1.7885	20.1065	9.7113	11.2824	30.2664	5.3081	2.0584	1.552	1.227	1.2036	1.0527	2.2998	8.8574	8.2132	2.927	1.3124	1.2507	1.0309	1.1873	1.4191	1.6908	5.6919	2.3466	1.0597	1.4558	1.6093	3.8484	4.6308	2.5628	2.3373	3.2617			0.658362	4.46526
22.1603	1.2344	1.2346	1.4192	17.4506	10.4812	11.1981	31.8001	6.1075	2.0403	1.4495	1.549	1.4586	0.5461	2.1561	9.4783	9.831	2.4911	1.8245	1.0186	1.0136	1.3079	1.3923	1.9279	5.7578	2.9932	1.4169	1.7709	2.3405	3.4169	4.9281	2.2999	2.4438	2.7729			0.661922	4.56216
22.2794	0.9824	1.0158	1.4066	15.5573	10.1235	9.7407	30.3092	7.5507	2.0385	1.1975	1.183	1.0527	1.161	1.7812	9.7876	9.8406	2.7127	1.1967	1.2653	1.1309	1.2561	1.3606	2.2119	5.1074	2.6525	1.6247	2.2748	2.251	3.6569	4.0157	1.7831	2.4697	3.6529			0.66548	4.40458
22.3986	1.0278	1.2095	1.6623	16.1015	11.0878	9.841	31.0672	8.1963	1.5091	1.1158	1.467	0.8393	1.1979	2.2313	9.9949	11.1129	3.1072	1.2523	0.9475	0.6738	1.4642	0.8984	1.6353	5.3798	3.6159	2.1018	2.0076	1.7632	3.4847	3.9849	2.4521	3.0548	3.6195			0.66904	4.57893
22.5177	1.3047	1.3871	1.8333	16.1457	10.2942	9.4289	27.3858	7.8356	1.0587	1.794	1.024	1.3426	0.7495	2.5617	11.9674	12.0496	4.0279	0.8932	1.4609	1.0585	1.0469	1.0082	2.2353	5.1378	3.3794	1.2573	1.7486	2.1649	3.2259	4.9468	2.4022	2.8031	2.8786			0.672598	4.54055
22.6368	1.1572	0.7053	1.6811	15.7003	11.1885	8.9714	28.1073	7.7662	1.8773	1.2756	1.669	0.8963	0.9569	2.2887	12.0032	11.9077	3.7873	1.2891	0.7151	1.4876	0.7797	1.2279	1.6466	5.9464	3.2704	1.7325	1.4795	2.3737	3.2332	4.4038	2.6888	2.1865	3.321			0.676155	4.537
22.756	1.0081	0.7057	1.6704	14.4715	11.883	9.5504	26.0956	9.607	2.158	0.9815	0.903	1.3195	1.3904	2.8142	10.9224	13.0944	4.4537	1.3648	0.9777	1.1477	1.3899	1.1995	2.1333	5.8887	4.9104	1.6358	1.9165	2.0205	4.3674	5.3091	1.915	2.787	3.966			0.679716	4.726
22.8751	0.9622	1.1943	1.5589	15.6544	13.616	9.9357	25.4044	10.7376	1.4954	1.1996	1.06	0.9198	0.9611	2.5747	12.9336	15.9929	4.8398	1.4361	1.0515	0.851	1.3186	1.3524	1.6357	5.2238	4.7141	1.8669	2.813	2.2067	4.0277	4.2211	1.9533	2.8709	3.0348			0.683273	4.89752
22.9943	1.0418	1.5715	1.6078	15.1074	12.923	10.4074	24.8772	10.1066	1.9941	1.2546	1.245	1.0591	0.7547	2.7644	11.9628	17.0981	5.2844	1.8326	0.9588	1.0994	1.0383	1.129	2.0817	6.0088	4.9561	1.9588	2.0704	2.358	3.7342	5.5177	2.417	3.4776	3.7556			0.686834	5.01375
23.1134	0.9943	1.6288	2.2431	15.3647	15.4414	11.5971	26.8399	10.0728	1.7114	1.4652	0.906	1.2358	1.0413	2.4585	15.1748	17.7718	6.7424	1.2814	1.0033	1.1199	1.0215	1.3	2.1006	5.985	5.0298	2.0926	2.4136	2.2014	3.7904	5.4999	2.5701	3.1847	4.1082			0.690391	5.37551
23.2325	1.2839	1.028	1.4585	15.0474	13.7949	10.6023	25.0498	10.125	2.5274	1.1196	1.523	1.1577	1.3174	2.8797	14.1993	17.9306	7.3866	1.1449	1.2432	0.9591	1.7128	1.473	2.0544	6.8648	4.3251	2.3682	2.5269	2.4194	4.0247	5.4352	4.0341	3.4637	4.5443			0.693949	5.36439
23.3517	1.1622	1.1695	2.2422	14.0554	14.7063	13.3729	25.6973	9.5259	2.3601	1.159	1.131	1.2607	1.1419	4.0689	16.784	16.7979	7.6408	1.3196	1.0235	1.2164	1.5253	1.604	2.2327	7.9994	4.9354	2.7289	2.8146	2.0505	4.059	5.5545	3.4413	2.7565	5.1519			0.697509	5.59665
23.4708	0.9146	1.4314	2.1105	15.6141	15.6887	12.6238	24.8334	10.4198	2.8108	0.7098	1.212	1.2175	1.2171	3.8843	14.6367	16.6959	7.8209	1.5205	0.9195	1.4547	1.0894	1.379	1.927	6.8041	5.1944	2.8365	2.9189	2.6044	3.6854	6.3373	4.0574	2.798	4.3678			0.701067	5.56775
23.59	1.2957	1.076	1.9496	13.9695	16.6108	13.6948	27.6977	9.2472	2.6794	1.5055	1.277	1.1716	0.8956	4.8507	15.94	16.3795	8.5933	1.8494	1.0859	1.5075	1.4168	1.1049	2.0377	8.7726	6.0141	3.0386	2.7568	1.9809	3.4002	6.6062	3.8537	2.9812	4.9386			0.704627	5.82361
23.7091	1.5182	1.7051	1.9242	14.9601	14.5881	15.238	30.4333	11.1165	2.248	1.2422	1.244	1.0979	1.0507	5.9223	15.631	16.2594	8.3641	1.6951	1.1453	1.3235	0.8741	1.6229	1.7764	8.0502	5.6963	3.8076	2.2218	2.6006	3.2742	6.1677	2.8874	2.937	5.2043			0.708185	5.93417
23.8283	0.7094	1.2147	1.6734	14.1434	14.0737	16.7103	29.0581	12.8023	2.1342	1.2662	1.044	1.2602	1.2422	6.4462	15.8469	19.0665	7.4666	1.4285	1.0908	1.2625	1.6561	1.2992	2.1029	10.5898	5.9729	3.5413	2.8269	3.3262	3.0861	5.5446	3.0629	2.9054	5.8519			0.711745	6.11231
23.9474	1.3005	1.3495	2.541	15.6975	15.989	14.7145	30.0093	14.1369	2.8684	1.1171	1.152	1.3683	1.307	7.5078	16.4372	18.7482	9.3201	1.9032	0.9143	1.1663	1.3792	1.361	2.4958	9.7553	5.3855	2.8453	2.6848	1.9985	3.183	7.9535	3.9403	3.5259	6.7336			0.715303	6.44818
24.0665	1.0642	0.7998	2.4573	15.0267	17.4248	17.6106	28.0551	17.8775	3.9309	1.2174	1.038	0.8695	1.0575	8.4316	16.5705	16.4065	9.1539	1.7434	0.8357	0.9533	1.6336	1.2761	2.7864	10.3895	5.2096	2.7394	3.2756	1.9697	3.0282	6.7725	3.1409	3.6068	5.291			0.71886	6.47405
24.1857	1.0488	1.0467	2.655	14.5357	18.5723	19.9584	28.3877	20.2721	3.6737	1.5122	1.072	0.8413	1.4182	8.099	16.716	18.1702	8.5642	1.7235	1.1721	1.417	1.1228	1.5143	3.0944	11.2241	5.8564	3.9703	2.5033	2.7396	3.2361	7.1364	2.5379	3.6823	8.1848			0.722421	6.89875
24.3048	0.6884	1.3594	3.1803	15.5531	16.5377	20.8734	30.0047	20.8357	3.2454	1.3812	1.048	1.1596	1.2718	9.1057	18.9983	18.8091	9.8174	2.1987	1.1912	1.1167	1.563	0.9558	2.5669	11.2512	5.0036	3.0077	3.1329	2.9164	2.1923	7.7127	3.7474	3.6095	7.5021			0.725978	7.07689
24.424	0.8777	1.1673	3.5775	16.3377	18.4542	22.4227	29.8289	21.7818	4.0916	1.6181	1.195	1.5144	1.0079	11.1684	18.3596	20.8273	9.4997	1.8699	0.9676	1.704	1.5783	1.2086	3.7337	11.0291	6.3691	3.0252	2.6973	3.2241	2.2758	8.762	3.0355	3.7505	10.1199			0.729538	7.54789
24.5431	0.6398	1.1065	3.9762	17.1176	19.9928	22.6849	31.3138	22.6747	5.1592	1.3145	0.66	1.4753	1.2505	10.9519	20.9456	19.5523	10.2902	2.611	1.3935	1.1738	1.31	1.4285	5.237	10.8788	5.7018	3.1064	3.458	3.041	2.6163	9.4717	3.4093	4.7155	10.3217			0.733096	7.90849
24.6622	0.6963	1.4664	4.261	19.2204	19.1635	24.0215	31.7764	23.1866	6.6017	1.3171	1.244	1.0632	0.9984	12.756	20.2553	21.9305	11.1748	1.3794	1.0034	1.1188	1.2134	1.5135	5.919	9.9461	5.4451	3.4292	2.5556	2.6494	2.6709	9.1309	3.7211	4.9683	12.203			0.736653	8.18182
24.7814	1.1827	1.3843	5.4953	18.9472	18.8432	25.8681	28.4034	27.4175	8.926	0.8364	1.004	1.298	1.0029	12.7022	22.2878	22.3345	11.3689	1.4345	1.317	1.0457	1.2677	1.1763	5.6518	12.4936	5.9132	3.2435	3.1074	4.1864	1.8708	9.4955	3.7125	5.8948	13.7703			0.740214	8.63283
24.9005	1.1258	1.4633	6.2471	17.5699	20.8364	25.1638	30.5651	28.0441	8.3742	1.1086	1.362	0.9243	1.0997	13.069	22.5849	23.2872	11.7621	1.8226	1.0715	0.6941	1.1097	1.3648	5.4095	12.7549	5.8177	4.1274	3.681	4.3102	2.3857	9.232	3.6545	6.6946	15.1805			0.743771	8.90601
25.0197	1.2923	1.0596	6.4383	20.0896	21.048	26.7776	31.9873	29.5807	6.5851	0.8026	1.073	1.261	0.821	12.6819	25.6366	24.3834	12.1185	1.855	1.4973	0.9502	1.5657	1.3104	5.7295	13.6794	8.1245	3.7239	4.5302	3.9395	2.1525	8.6091	4.0784	7.7578	16.4888			0.747332	9.38269
25.1388	0.8103	0.9039	7.7461	21.7698	23.3188	28.0913	32.2206	28.8774	5.6424	1.0998	2.022	1.3584	1.858	12.7203	24.0103	29.101	13.1467	1.922	1.7759	1.3077	1.3363	1.2048	5.3892	13.2243	6.1023	5.8577	4.6839	4.9036	1.71	9.7132	4.553	9.9791	18.1152			0.750889	9.89319
25.258	0.9957	1.6983	7.9634	22.4355	22.5859	26.8073	30.691	30.6343	5.6167	1.1467	1.222	1.1047	1.5917	14.3191	23.8956	29.6552	12.6579	1.8912	1.5854	1.1071	1.0484	1.5164	5.5178	15.5158	6.5532	4.9726	5.4841	6.7647	1.6457	11.0365	5.0936	11.1772	19.0268			0.75445	10.1502
25.3771	1.3035	1.2601	10.0738	22.3114	25.7084	28.1585	28.4197	31.2012	5.6685	1.1179	1.213	1.1757	1.4774	14.4948	22.8044	34.4103	12.7149	2.3974	0.9174	1.4064	1.251	1.4898	4.7086	16.4109	6.6064	5.1989	5.8836	10.0923	2.0981	8.3205	5.8014	15.4045	17.7252			0.758007	10.5826
25.4962	1.1645	1.855	11.2756	21.2101	25.7165	31.5213	28.2039	32.8883	6.2323	1.3091	1.151	1.4724	1.3748	13.6698	24.1146	34.1133	14.4206	2.4712	1.0119	1.1678	0.993	1.3214	5.0266	18.9957	6.2311	6.6618	6.8529	10.5107	2.4147	8.0235	4.6173	18.9266	17.9962			0.761565	11.058
25.6154	0.6587	1.4864	13.2501	20.4826	29.3338	29.2003	32.3281	31.131	5.4778	1.1723	1.059	1.5749	1.3141	12.7999	24.7467	30.706	14.2873	2.649	1.2934	1.469	1.3741	1.562	5.0689	17.6487	6.4469	7.4522	8.0999	10.9967	1.8014	8.7355	4.3878	20.0665	20.7236			0.765125	11.2359
25.7345	1.445	1.6712	12.9367	19.3066	28.9493	30.4385	33.7689	28.2479	5.0779	1.4001	0.737	1.6222	1.4208	13.2428	25.1726	32.8507	12.2783	2.2405	1.1099	1.0115	1.0933	1.0713	6.0961	15.8916	7.3475	7.5695	11.3087	12.3125	2.1053	8.1409	4.6972	20.0853	26.2585			0.768683	11.482
25.8537	1.3726	1.661	12.8311	22.2766	28.066	30.097	33.3819	26.4152	5.671	1.9414	0.797	1.2497	1.5039	13.3485	22.7694	30.4203	15.1342	3.2792	1.0682	1.0408	1.2433	0.902	6.3237	17.2045	9.4813	11.2793	11.4059	13.9562	2.123	8.5408	6.0268	20.1487	27.3469			0.772243	11.8275
25.9728	1.22	1.4191	15.0264	19.3776	27.3545	27.7742	29.788	23.804	5.5586	1.4457	1.252	1.1722	2.4125	15.3607	20.3461	28.1403	16.1156	3.1068	1.416	1.0558	1.5179	1.1605	6.2709	13.7852	8.8493	11.2143	12.5484	14.7312	2.0742	8.5459	6.3069	22.0053	35.791			0.775801	11.756
26.0919	1.104	1.3441	15.9873	19.4916	28.4179	28.3911	32.3421	18.7673	5.7022	2.2868	1.057	1.1538	1.8829	17.9528	18.1395	29.194	15.8178	3.6866	1.4163	0.7493	1.4214	1.5227	6.6254	12.4482	9.6737	13.5341	13.8053	17.2806	2.5554	8.8461	5.9986	23.2055	41.1897			0.779358	12.2119
26.2111	0.7025	1.2114	16.3271	20.8039	30.993	30.3643	36.2357	15.8867	6.1917	1.5876	1.219	1.2992	2.3605	18.7314	15.7799	28.2763	16.2776	4.0068	2.0974	1.3174	0.9574	1.5233	9.3986	13.5077	9.6738	13.4268	13.7453	19.7935	2.4004	7.1199	6.4567	22.67	45.1768			0.782919	12.6521
26.3302	1.0478	1.704	16.5827	19.8852	30.6585	28.2167	37.0375	15.5416	7.8187	1.4123	1.416	1.7281	3.0552	17.8228	15.454	22.2617	14.0903	4.2368	2.0477	1.2141	0.9917	1.0775	9.9066	11.7786	10.5348	15.6913	15.2386	18.091	2.4129	7.3039	8.2574	24.7555	44.3061			0.786476	12.5327
26.4494	1.0089	1.4639	19.3335	19.6405	29.7929	27.3221	37.0845	13.1275	8.0322	1.9654	0.816	1.3241	2.6827	20.4276	13.3444	19.5089	12.7952	3.8951	1.3859	1.0879	1.2124	1.0159	11.1695	14.146	11.7926	16.3391	18.2203	19.5199	2.5201	7.7275	7.8465	25.5616	41.9			0.790037	12.5761
26.5685	1.5137	2.2578	20.004	20.18	27.0311	26.5716	37.6521	10.013	9.4936	1.7978	1.354	1.6132	2.7693	16.9132	11.6701	16.8636	9.139	5.0251	1.7238	1.1541	0.896	1.4943	12.4123	14.2039	13.6056	15.4708	17.3562	19.771	2.6511	7.6323	8.2462	28.0456	34.299			0.793594	12.1462
26.6876	1.1078	1.7915	21.9899	19.6542	24.448	24.867	40.3482	8.7476	9.0553	2.1251	1.206	1.4492	3.9988	22.4027	9.2986	13.9132	7.4741	6.5478	1.8455	0.8085	0.9549	1.3703	13.363	13.9613	13.2373	11.7473	18.6882	20.5389	2.7102	7.1361	9.9446	31.061	29.0609			0.797152	12.0258
26.8068	0.7841	1.6822	24.0536	18.142	23.4461	24.6126	35.0541	7.9318	11.4323	2.4507	1.318	1.5027	3.2322	20.9761	7.4067	11.1046	6.039	6.444	1.4142	1.1562	1.2854	1.8684	14.8063	13.3101	13.4778	11.2952	19.0576	21.4706	3.2778	6.9555	13.1085	33.4495	25.967			0.800712	11.8034
26.9259	1.0516	1.1468	26.934	16.1156	21.547	23.3436	32.2925	5.6208	11.8492	2.1129	1.687	1.6629	4.1959	22.4155	5.7716	10.827	4.5453	6.9356	1.7863	1.3756	1.2427	1	16.3722	17.3785	11.8344	14.1579	20.45	20.6063	4.122	8.8752	13.8533	33.6122	21.1256			0.80427	11.7529
27.0451	1.0394	1.6822	28.1324	15.6913	18.3979	24.4428	29.3374	5.9245	13.5699	1.7738	1.616	1.5355	5.8874	23.2814	5.1224	6.8229	4.6012	8.2066	2.3888	1.0022	1.9254	1.9516	18.6281	17.6497	12.6365	16.2465	21.169	19.0302	4.5723	8.9714	17.3526	38.33	19.4577			0.80783	12.072
27.1642	1.0911	1.6003	30.0476	12.2049	16.1298	24.2377	25.5927	3.2978	17.3346	2.2936	0.775	1.0241	4.3607	17.5099	4.2512	6.0269	4.1016	6.9782	1.8212	1.8288	1.6105	1.7585	22.5548	20.5463	13.5204	15.401	23.2767	20.0028	4.3966	8.8561	17.1695	41.1499	17.9823			0.811388	11.8404
27.2834	1.2726	2.1288	30.3969	10.9756	13.6002	22.0215	21.5912	3.2781	19.0823	2.2384	1.397	1.8872	5.5122	18.1043	4.7115	5.1308	4.1418	9.7896	2.3416	1.3566	1.4246	1.3715	26.3816	21.1443	17.5411	18.9041	23.8392	19.9526	4.7637	9.3003	22.599	36.6685	15.3936			0.814948	12.1286
27.4025	1.0633	2.3117	29.6795	10.2735	10.8048	19.405	20.5902	2.4324	22.6701	2.0521	1.838	2.1375	5.6035	13.7449	3.7239	3.9447	3.4478	8.957	2.8511	1.8286	1.4149	1.429	32.9293	21.5486	18.4965	20.9174	25.5614	21.3037	5.4024	8.6001	21.5456	34.4445	14.5498			0.818505	12.0455
27.5216	1.3067	1.3784	28.1198	7.7136	10.7803	17.9098	18.6386	1.8005	27.3888	2.5893	1.698	1.5704	4.9461	12.7678	3.1068	2.5968	2.7796	11.5882	2.476	1.5133	1.5378	1.7148	39.5485	22.6101	22.6386	20.9231	23.2636	21.2984	6.6705	10.2393	26.2304	35.9065	14.3022			0.822063	12.4107
27.6408	1.1192	2.359	26.7215	7.1095	11.1011	16.319	18.8117	2.1923	27.3374	2.219	1.979	1.963	6.9841	9.9201	2.3808	2.2455	2.6612	11.7036	3.1632	1.6065	1.5008	1.8843	41.6246	25.9359	20.9853	20.5101	22.995	23.9718	6.6866	9.9617	23.8384	30.0748	12.3505			0.825623	12.1884
27.7599	1.5457	2.3483	25.0548	6.5834	9.6145	14.2433	16.1695	1.3533	30.8753	2.3802	1.27	1.8616	7.0215	8.552	2.1881	1.4522	2.9047	14.5511	3.9821	2.1051	1.9265	1.6298	43.2923	24.8115	22.0851	21.4536	23.6053	25.6139	8.5188	11.0002	22.6144	29.5931	9.5574			0.829181	12.1745
27.8791	1.4371	1.9964	25.2838	5.8551	9.3233	11.4762	15.58	0.9959	32.0873	3.6391	1.827	2.0899	9.615	5.856	2.1654	1.475	2.0873	13.9079	4.51	1.7598	1.9177	1.9674	38.5247	27.5249	21.996	18.9631	21.8874	24.4048	7.1651	10.9174	21.1923	25.9752	8.8959			0.832741	11.6454
27.9982	1.3186	2.0774	23.9972	5.1554	8.384	8.7552	14.3578	0.8733	32.3667	3.0412	1.802	2.9424	8.9568	5.3161	1.4975	1.1906	2.1156	18.2838	6.6029	1.4934	1.499	1.8792	36.1215	24.697	20.7438	16.188	22.4873	25.3875	8.314	10.9861	22.5537	25.432	7.2278			0.836299	11.3347
28.1173	1.0509	2.4349	22.4653	4.3112	7.3337	8.3805	11.9444	1.0549	31.3455	3.0828	1.966	2.2713	10.1479	4.0742	1.3743	1.0769	1.5218	17.6493	7.6938	1.9658	1.7031	2.4804	33.2059	25.2754	21.9571	15.6386	17.2302	22.5325	11.7441	9.8889	21.004	22.1665	6.3757			0.839856	10.7378
28.2365	1.5249	3.1203	19.8228	3.47	6.3375	6.6878	8.0758	0.6863	32.2391	3.0578	1.768	2.1241	12.7585	4.3394	1.4145	0.9044	1.3377	16.3151	10.0112	2.486	1.957	2.4527	26.9975	22.6509	20.4961	14.6923	14.341	19.4865	12.9741	12.6604	23.5287	22.3447	3.8826			0.843417	10.2105
28.3556	1.9329	2.6854	19.4364	2.8449	4.8635	5.6969	7.4926	0.7428	28.2631	3.7129	1.486	2.7091	15.091	3.2236	1.0528	0.8578	1.1265	17.8318	11.0732	2.5436	1.4661	2.2681	24.0467	18.2797	17.7069	14.2497	14.0766	16.9563	16.1963	12.7237	25.8366	17.2317	4.0392			0.846974	9.68922
28.4748	2.383	2.9578	16.2456	2.4207	4.2558	4.8204	7.0963	0.6356	24.5147	3.9084	1.591	3.0994	16.023	3.0411	0.9799	1.0613	0.8412	14.8195	16.0368	2.6476	1.9612	2.7147	20.2637	13.8948	15.4114	11.7065	12.2385	13.9779	17.3774	11.1747	26.7656	15.3548	3.5575			0.850535	8.96296
28.5939	2.1237	3.5634	12.3675	2.1437	3.7872	4.704	5.1032	0.6849	23.0586	4.2333	1.479	3.2892	15.6336	2.3224	1.4817	0.6844	0.5984	11.6488	17.5902	2.9155	2.1347	2.7836	16.4382	11.637	12.88	11.9295	12.0063	13.8457	20.6749	12.4894	29.564	12.0726	3.4771			0.854092	8.52563
28.713	2.4004	3.4624	11.6945	3.2517	2.7597	4.4164	3.4806	0.3724	19.2133	4.2978	1.58	2.8931	19.0023	1.2525	0.6506	0.4423	0.543	7.9124	17.1418	2.7538	2.5909	3.0918	11.7655	8.47	9.0854	8.4643	9.8783	12.4695	22.9595	13.6715	29.6917	12.1848	2.991			0.85765	7.78288
28.8322	1.8397	3.8711	8.0614	2.6244	2.6156	3.5608	3.3243	0.3309	16.8077	3.9978	1.892	4.2685	17.6344	1.5165	0.5572	0.5356	0.2241	6.8171	16.5236	3.6286	2.2701	3.664	7.8152	8.0245	11.027	7.7339	11.5857	11.3254	25.5493	15.3007	30.2746	10.0423	2.8493			0.86121	7.51798
28.9513	2.5569	5.6197	7.4487	2.2941	2.1584	3.0747	2.7691	0.4802	13.4917	6.0101	2.072	5.5204	21.7918	1.201	0.6879	0.5243	0.1823	5.0474	17.7565	3.226	2.8614	2.9227	5.9788	6.211	9.0128	7.2501	8.8291	9.6676	26.062	16.8868	28.6933	9.2116	2.3226			0.864768	7.26736
29.0705	2.9451	9.0681	5.8098	1.824	1.8467	2.7507	2.3497	0.5581	10.5483	5.5909	2.326	6.2263	20.7539	0.9181	0.439	0.5494	0.5249	3.6232	18.4289	5.4761	2.9772	4.369	6.0596	4.9748	6.9428	5.3187	8.3981	7.1797	24.355	17.8987	26.9552	8.2958	2.6696			0.868328	6.93792
29.1896	4.5329	10.295	4.6489	1.2127	2.3141	1.8834	1.7345	0.5089	8.2795	7.0336	2.433	8.3135	23.2363	1.2186	0.6233	0.6152	0.6285	4.0331	17.7031	5.8936	2.5089	6.6657	4.1004	4.279	6.7909	5.6463	6.6892	7.3221	23.1681	18.3898	25.2785	7.8947	1.2937			0.871886	6.88391
29.3088	4.8117	10.3479	3.2092	1.9079	1.6438	2.079	1.7902	0.4087	6.0926	10.7297	2.608	8.3725	23.4985	0.8897	0.4871	0.3726	0.2855	2.581	18.5553	8.2978	2.973	7.9089	3.263	4.1448	6.5769	5.9744	5.8103	5.621	21.5513	21.7757	28.2335	6.4854	1.4367			0.875446	6.99162
29.4279	5.15	12.2473	3.4653	1.8266	1.4252	1.9911	1.6877	0.3648	5.1246	11.6886	1.69	9.4445	20.4741	0.6964	0.3056	0.2813	0.1584	2.7868	23.1481	11.0305	3.2285	11.743	2.7233	3.5875	4.8573	3.9544	6.0516	3.6088	21.0019	21.3163	25.1044	5.0586	1.2749			0.879004	6.92416
29.547	8.5632	12.4442	2.9416	1.1827	1.2721	1.6741	1.6911	0.217	3.5198	14.2888	2.956	11.8915	18.8221	0.6532	0.4346	0.3629	0.0759	2.1896	22.9096	14.668	3.9808	14.6106	2.3942	2.8022	6.2438	4.0137	4.4577	4.6834	21.7852	24.1097	25.7394	4.8232	1.0208			0.882561	7.37645
29.6662	10.6658	13.4202	2.7461	1.5685	1.2717	1.4908	1.3077	0.1601	3.2579	18.3673	3.551	14.2553	15.6063	0.4142	0.3002	0.375	0.545	1.8337	27.8661	18.261	3.9149	16.7448	2.1067	2.5268	3.9555	3.1865	4.0149	3.4433	22.8687	27.9658	25.4437	4.4221	1.4178			0.886122	7.85683
29.7853	12.2339	14.4089	2.615	1.6954	1.051	0.9641	1.0868	0.105	2.6651	21.9467	5.692	15.174	13.9201	0.5184	0.1144	0.4441	0.2742	1.733	31.1327	18.7016	5.7344	18.4136	1.7979	2.3297	4.1978	2.9745	3.0311	3.2085	19.083	32.5506	26.1261	4.0557	0.8633			0.889679	8.20735
29.9045	14.6124	13.1411	2.7305	0.9417	1.2803	1.3784	1.0362	0.1102	2.0732	23.8449	7.071	17.3611	10.611	0.4487	0.3812	0.2885	0.548	1.8216	30.998	20.9406	7.127	18.9622	1.4966	2.2051	3.6373	2.3077	3.0547	3.4319	18.0909	34.8383	23.5357	4.3482	1.0794			0.89324	8.35556
30.0236	15.9106	13.9887	2.1768	1.3328	0.7173	1.3265	0.6427	0.2406	2.1295	28.7425	10.093	18.7314	8.6083	0.571	0.2775	0.1578	0.1651	1.8025	30.7651	22.2196	9.5994	16.9191	1.2757	2.1142	2.9174	2.0962	2.4253	2.2917	16.1701	41.2323	22.6144	4.278	0.7915			0.896797	8.6462
30.1427	17.2819	17.8467	2.0368	1.4562	0.7578	1.0808	0.7418	0.0039	1.4012	30.3987	15.634	22.3796	5.8289	0.4818	0.2426	0.3619	0.2541	1.7041	31.3785	22.4647	9.1713	22.5283	1.6079	1.81	2.8855	2.87	2.0811	2.3622	14.4293	41.9205	24.1497	2.9923	0.8306			0.900355	9.19317
30.2619	18.8248	18.615	1.9546	0.8454	1.1204	1.0912	0.7956	0.1014	1.4393	28.7679	16.277	19.6994	4.4626	0.1707	0.3351	0.2458	0.1069	1.3155	28.5396	22.5243	10.3239	23.596	1.4268	1.199	2.226	1.7788	1.9125	1.6548	12.3755	39.0915	25.2657	3.2756	0.7275			0.903915	8.85109
30.381	20.1068	21.8735	1.3142	1.1263	0.8112	0.7452	0.4774	0.1621	0.9164	24.7838	19.31	19.5128	3.8151	0.5527	0.2679	0.2477	0.1401	1.1306	22.1953	23.3689	12.6951	22.2926	1.0556	0.8733	2.6759	2.0251	1.1132	1.8254	8.5047	40.2735	21.4177	2.284	0.6038			0.907473	8.49994
30.5002	23.309	24.4648	1.6524	1.2625	0.7487	0.8041	0.6432	0.1051	1.1793	19.7281	22.871	20.4287	2.9433	0.4205	0.1558	0.2279	0.0045	1.4594	18.4573	25.4277	11.8136	22.0539	0.6821	1.1322	2.296	1.2934	1.9226	1.8632	7.8506	36.1346	19.3031	2.0015	0.5696			0.911033	8.33969
30.6193	25.6825	22.2616	1.6479	0.8448	0.7443	0.4832	0.376	0.1531	0.565	16.1634	23.923	23.7972	2.1113	0.2649	0.379	0.0627	0.1526	1.0844	10.409	27.0271	12.3174	21.5632	1.0375	0.9548	1.9924	1.3644	1.2943	0.854	6.2937	33.5949	19.5941	2.2279	0.5583			0.91459	7.93272
30.7385	26.7061	23.8653	1.0789	0.9252	0.8586	0.7381	0.367	0.0573	0.474	14.0444	24.85	26.6421	2.0404	0.3694	0.0119	0.3221	0.1103	1.193	7.3611	27.6711	15.8235	21.0442	0.795	0.9566	1.2442	1.3152	1.1198	0.7019	6.8252	30.6004	17.2992	2.1222	0.5698			0.918151	7.88192
30.8576	27.0286	25.7854	0.8704	0.821	0.3961	0.5576	0.5301	0.0022	0.6302	9.843	27.491	27.1611	1.8909	0.23	0.2064	0.0074	0.0522	0.8577	4.5927	28.9799	16.6051	15.9531	0.5974	0.7984	1.0091	1.4316	1.2338	0.8093	5.0639	24.3717	14.9329	1.7023	0.6628			0.921708	7.36683
30.9767	29.086	21.3368	0.9443	0.5135	0.5672	0.8236	0.7125	0.103	0.6122	7.2858	25.636	24.3677	1.8494	0.1626	0.1519	0.1615	0.0004	0.8417	4.408	27.9493	18.5698	12.5391	0.4612	0.7282	1.4463	1.3603	0.6736	0.6569	4.6878	19.1399	11.196	1.4395	0.4451			0.925266	6.69264
31.0959	28.4554	16.8875	0.6685	0.4234	0.6219	0.737	0.2871	0.1523	0.7164	6.2383	23.124	20.7998	1.4671	0.4686	0.4092	0.3452	0.1559	0.6363	2.9296	26.4255	19.4631	7.1077	0.2506	0.6704	1.1462	0.7129	0.7634	0.6741	3.716	16.5667	11.0684	1.2307	0.7554			0.928826	5.94165
31.215	23.8336	13.4834	0.78	0.5759	0.547	0.6937	0.3166	0.0575	0.3045	5.1118	20.369	17.7514	1.3167	0.2993	0.2773	0.4661	0.1598	0.6415	3.1387	26.4525	21.104	4.9155	0.5171	0.8498	0.9571	0.9308	1.0517	0.4465	3.269	11.2738	10.0877	1.0753	0.3921			0.932384	5.25596
31.3342	24.026	9.2761	0.7915	0.4402	0.4271	0.3716	0.1643	0.0008	0.417	4.8623	16.35	13.5141	1.3588	0.0601	0.1085	0.2178	0.1602	0.5996	2.3786	24.4457	23.6703	3.551	0.52	0.4922	0.8062	1.1274	0.7615	0.4731	3.4666	6.8231	7.6366	1.0772	0.2749			0.935944	4.56516
31.4533	24.7858	9.2136	0.7322	0.5528	0.6156	0.4911	0.2574	0.0026	0.3073	3.6851	13.992	10.7436	0.7434	0.0851	0.2019	0.0557	0.1052	0.2282	2.1981	19.5112	21.9205	2.8906	0.2889	0.1828	0.9402	0.6612	0.5675	0.5229	2.9227	5.9567	8.0572	0.6041	0.6253			0.939502	4.08026
31.5724	25.6944	5.9541	0.3728	0.5142	0.2374	0.3554	0.3227	0.1511	0.295	2.8295	10.651	7.2165	1.4308	0.4052	0.0628	0.206	0.1526	0.4687	1.4602	15.6474	19.0847	2.5244	0.2735	0.3491	0.9993	0.5436	0.5985	0.5391	2.2456	4.6516	6.9929	0.564	0.4865			0.943059	3.46305
31.6916	26.9941	4.4068	0.4756	0.5775	0.5645	0.6696	0.4433	0.0042	0.2342	2.9025	9.843	5.6792	1.2259	0.3569	0.2048	0.0064	0.0583	0.3641	1.3062	11.3289	13.8506	2.4204	0.4997	0.4129	0.5876	0.5142	0.8272	0.5484	1.9117	3.4115	5.8411	0.4209	0.2186			0.94662	3.00336
31.8107	24.7384	3.6505	0.5539	0.5295	0.4498	0.209	0.4916	0.0719	0.3518	2.2188	5.873	4.835	1.008	0.1573	0.0909	0.2549	0.2064	0.2664	1.1739	7.1341	9.2949	1.8889	0.5139	0.2534	0.4095	0.5315	0.402	0.3052	1.889	3.1324	3.4253	0.8149	0.4156			0.950177	2.34975
31.9299	18.0965	2.7172	0.4239	0.6097	0.2659	0.3255	0.1802	0.0558	0.2182	1.4032	5.032	4.0627	0.7181	0.0588	0.1096	0.0054	0.1046	0.3711	0.9161	4.4645	5.3855	1.5966	0.2889	0.2625	0.4222	0.4451	0.3191	0.3518	1.9283	3.0405	3.6047	0.7483	0.3199			0.953738	1.78341
32.049	13.3682	2.5639	0.261	0.3601	0.3064	0.6047	0.6687	0.0541	0.1064	1.8571	4.584	3.4949	0.6951	0.1552	0.1522	0.2021	0.1056	0.2285	0.8717	3.2124	3.6108	1.4046	0.3074	0.268	0.404	0.4211	0.2311	0.4864	1.6072	2.5471	3.2017	0.6362	0.3327			0.957295	1.49426
32.1681	8.5697	3.1009	0.3652	0.3653	0.4076	0.692	0.225	0.1023	0.1058	1.6601	3.867	2.9593	0.888	0.1606	0.0628	0.1129	0.0019	0.2073	0.8267	3.311	2.8092	0.9932	0.3248	0.4081	0.7416	0.6006	0.2154	0.1119	1.3281	1.6755	2.1473	0.3956	0.0899			0.960853	1.20705
32.2873	7.0381	2.039	0.3935	0.1951	0.371	0.2755	0.2541	0.05	0.3307	1.2146	2.919	2.7364	0.6146	0.2828	0.053	0.0523	0.0511	0.1643	0.7311	2.6061	2.8012	0.8111	0.4978	0.2247	0.3217	0.5758	0.364	0.1519	1.3183	1.8108	2.1623	0.4317	0.2039			0.964413	1.03174
32.4064	5.5622	2.3757	0.3887	0.2058	0.2238	0.4645	0.1862	0.0568	0.2609	1.4406	2.709	1.8018	0.6163	0.1131	0.1026	0	0.1068	0.3287	0.7544	2.2589	2.0956	0.74	0.1632	0.2538	0.1576	0.3826	0.171	0.2109	1.0517	1.7601	1.7066	0.4178	0.1767			0.967971	0.886194
32.5256	4.0595	2.0625	0.4354	0.2086	0.1575	0.2979	0.0598	0.1323	0.0624	0.8121	2.264	1.3624	0.3827	0.0542	0.209	0	0.1067	0.3153	1.0028	1.5091	1.5174	0.7074	0.1023	0.3228	0.542	0.3277	0.3905	0.1098	0.6116	2.2191	1.3694	0.3444	0.0579			0.971531	0.730803
32.6447	3.8109	1.9197	0.3059	0.2589	0.0851	0.2646	0.2829	0.0008	0.0022	0.4385	1.951	1.6411	0.4852	0	0.0568	0.0019	0.3621	0.168	0.5845	1.7419	1.663	0.3814	0.0571	0.3067	0.3494	0.1626	0.2617	0.1029	0.5229	1.0979	1.4165	0.2424	0.0049			0.975089	0.634285
32.7639	2.8862	1.5882	0.1823	0.2367	0.2841	0.2098	0.1572	0	0.1519	0.4544	2.034	1.249	0.3026	0.0016	0.0223	0.1008	0.0553	0.3113	0.5566	0.9654	1.5838	0.5843	0.4091	0.1591	0.3223	0.3115	0.1498	0.3138	0.4432	1.1316	1.2718	0.4203	0.1549			0.978649	0.575915
32.883	3.2063	1.3201	0.2131	0.0071	0.2053	0.2587	0.0583	0	0.2575	0.9519	1.764	1.1767	0.469	0.1263	0.0037	0.0026	0.0026	0.1587	0.4005	0.9503	1.0098	0.6796	0.0925	0.1567	0.1854	0.4206	0.1604	0.1604	0.8853	1.3047	1.1981	0.2421	0.2109			0.982207	0.552703
33.0021	2.3253	0.8958	0.1124	0.158	0.2887	0.1083	0.0801	0	0.0636	0.4667	1.588	0.9216	0.318	0.1785	0.1049	0.0508	0.1019	0.0583	0.5034	0.8657	0.972	0.3936	0.1338	0.1575	0.2827	0.2358	0.229	0.159	0.6306	0.897	0.8535	0.509	0.3098			0.985764	0.45313
33.1213	2.1437	1.1352	0.3106	0.3618	0.1872	0.312	0.103	0	0.2588	0.5599	1.602	0.5419	0.1581	0.0587	0.1534	0.0045	0.0568	0.0504	0.7721	0.8826	0.7618	0.4678	0.309	0.0865	0.2365	0.2154	0.0601	0.1056	0.573	1.4054	1.1452	0.4406	0.0289			0.989325	0.469348
33.2404	1.8329	1.0731	0.2587	0.1352	0.0289	0.2853	0.0875	0	0.1332	0.3526	1.468	0.7621	0.2626	0.0553	0.1586	0.0993	0.0515	0.0038	0.4779	0.3943	0.4283	0.2412	0.3444	0.1598	0.1117	0.1056	0.2067	0.0004	0.4277	0.8242	0.7092	0.2041	0.4106			0.992882	0.366506
33.3596	1.4014	0.6609	0.1631	0.2502	0.0038	0.0587	0.3321	0.1026	0.0565	0.4696	0.946	0.7489	0.34	0.1579	0.0798	0.0034	0.0526	0.1059	0.6827	0.4452	0.6569	0.3746	0.2146	0.1061	0.3524	0.1053	0.397	0.0523	0.5453	0.7309	0.8176	0.21	0.0627			0.996443	0.354152
33.4787	1.3609	0.7062	0.0489	0.0154	0.2038	0.1579	0.0574	0.0026	0.2047	0.2475	1.045	1.1268	0.1376	0.1553	0.0633	9.435e-05	0.1053	0.1821	0.2695	0.8351	0.4191	0.4171	0.2328	0.2623	0.4576	0.3112	0.52	0.2041	0.2716	0.6623	0.6394	0.361	0.1049			1	0.357236

## Sheet: Image15
X0	Y0	Y1	Y2	Y3	Y4	Y5	Y6	Y7	Y8	Y9	Y10	Y11	Y12	Y13	Y14	Y15	Y16	Y17	Y18	Y19	Y20	Y21	Y22	Y23	Y24	Y25	Y26	Y27	Y28			Ap-Ba	Average int
0	4.516	9.9862	17.6636	7.9664	10.9827	10.7719	18.226	13.9646	18.6267	11.8212	13.4673	14.7976	17.141	22.4496	9.2035	5.6569	10.4083	8.8081	8.6869	10.7546	16.0411	13.2372	13.4875	11.5838	30.1649	41.0988	8.2257	27.8357	23.9576			0	14.8804
0.1191	4.797	12.8207	19.0763	9.7764	12.2685	11.3214	20.5008	16.4475	24.7687	12.944	13.3361	16.317	17.023	22.0435	12.2328	7.0343	11.7041	9.6702	9.8116	10.6946	20.2496	12.6959	14.4058	14.4242	33.3747	47.5249	8.9746	27.3475	24.4399			0.0038897	16.4836
0.2383	5.241	15.6632	25.3387	12.2759	17.6717	14.6378	22.4751	17.5195	28.8997	16.7513	15.4911	19.8579	18.763	22.5389	14.7179	7.5888	13.5067	12.2642	13.2637	13.4568	21.9055	14.9869	15.9484	14.9608	36.8633	43.4033	9.4971	30.5982	24.341			0.00778267	18.6354
0.3574	5.146	16.4988	31.4655	13.4204	20.6048	18.9377	21.6233	20.4032	35.4836	17.6637	15.3104	21.8478	21.0772	24.1528	16.8829	9.3186	11.8063	13.8747	17.5697	13.7919	25.1511	17.2507	15.2696	20.0581	36.7382	41.1288	10.6546	27.4304	28.789			0.0116724	20.3224
0.4766	6.9	21.0693	35.6158	20.7404	26.4128	24.5094	23.6397	27.9456	38.5207	23.343	15.305	21.7462	22.356	22.7751	20.284	10.8966	15.7534	16.0308	18.3039	17.2101	26.9825	19.7818	16.9395	24.0609	39.2113	44.9375	12.8607	23.4786	30.3302			0.0155653	23.0324
0.5957	8.002	28.0942	43.0344	26.2382	33.5906	31.5593	23.4017	32.1155	43.8521	25.2793	20.8869	23.7723	23.8221	25.7388	23.2502	14.8063	18.3618	17.9667	23.2445	18.1247	31.4883	23.2857	19.2232	29.5779	38.6529	42.8086	14.5736	22.1704	28.362			0.019455	26.0443
0.7148	12.596	31.2307	49.8587	33.0049	44.7321	42.7328	27.2745	35.0842	46.7099	26.7044	22.0295	27.5236	26.8242	23.1971	28.5695	19.8933	19.8183	20.7946	24.756	21.273	36.1312	27.5476	21.2275	34.6074	37.2405	46.0825	17.4448	23.3265	30.4678			0.0233448	29.6098
0.834	17.048	37.3123	56.4961	43.8333	53.7759	55.0431	29.5448	36.6552	50.2074	32.7028	21.9919	28.9608	30.6799	26.5429	31.1475	22.2069	24.6068	23.2456	28.8869	24.1251	40.6985	28.9559	20.7714	41.362	40.2805	48.1011	22.1272	23.1238	36.4773			0.0272377	33.6866
0.9531	20.463	42.2184	62.2832	55.4607	65.3437	64.5062	36.0651	43.9874	54.4602	37.2631	24.3754	32.4806	29.0439	28.3865	39.0089	27.7889	28.4005	26.3944	27.9944	26.5806	41.8454	35.7665	23.0271	43.2836	41.0575	46.8223	24.9825	29.5223	35.1756			0.0311274	37.7237
1.0723	28.668	48.4387	60.5086	67.2695	72.3723	75.4639	39.5	43.4673	59.5664	39.4669	26.0842	33.6534	32.9615	26.5375	44.7565	32.5166	33.8817	30.7522	33.4782	31.8144	44.7141	42.3534	23.9999	48.7103	44.6184	48.6367	32.3681	29.27	37.9555			0.0350204	41.8546
1.1914	34.772	59.8846	61.9251	72.0927	80.9804	75.9093	43.3098	46.9542	60.365	42.2801	31.6362	38.0925	36.4182	33.046	52.0211	38.3265	37.9428	34.6722	35.7165	34.161	49.293	40.664	26.1806	50.5562	45.8433	52.2161	37.8162	30.2211	46.2953			0.0389101	45.848
1.3106	39.694	64.0169	63.921	79.8923	83.7365	75.619	47.1409	51.0262	63.7642	47.9023	33.5087	41.1965	38.7862	36.1955	63.5685	41.1897	42.6243	37.715	35.2195	38.7904	49.4966	45.9248	29.7876	53.7884	48.1465	51.0375	40.8668	31.8295	46.7849			0.0428031	49.0748
1.4297	47.076	69.6366	60.6595	78.5093	81.7381	71.0405	54.2173	55.0807	62.8025	49.8676	34.6769	41.6304	44.3507	42.9646	75.0796	47.6884	41.8473	43.2732	37.4437	40.0423	56.8607	51.3058	33.9308	53.3399	45.0984	49.8339	47.6836	35.3759	53.4149			0.0466928	51.9472
1.5488	55.907	66.6193	51.9046	77.7916	77.6944	69.2019	57.7665	56.5438	66.9417	51.9213	39.0331	44.8666	49.6394	46.2617	76.8389	53.2181	46.3143	46.0705	36.9595	42.5523	54.9567	52.8236	39.362	54.9276	48.3763	50.5722	52.2722	36.6349	56.4112			0.0505825	53.8063
1.668	58.665	69.1698	44.7537	69.0127	66.5655	58.719	57.8975	55.716	64.516	56.0557	44.2624	49.3977	50.6688	54.8853	87.0529	61.6042	49.0403	47.008	39.5301	45.4204	59.972	53.8935	42.9618	54.51	53.1217	50.8253	53.5958	45.3408	60.9971			0.0544754	55.3503
1.7871	63.896	66.4998	35.7536	59.5154	56.7138	48.3964	56.0531	57.2371	63.0115	54.9419	44.0267	51.5134	54.8503	60.8623	95.1274	65.659	52.1238	46.5766	44.1082	45.1942	62.1579	58.7536	43.6903	54.3955	55.2005	49.8334	55.8699	43.9534	65.1617			0.0583651	55.5544
1.9063	70.328	63.4385	30.0357	44.6468	44.6409	38.6288	51.0955	61.0049	61.2485	57.0593	47.8699	53.8646	57.5683	65.493	98.5499	69.2396	50.0362	46.0494	43.7222	48.9591	61.656	60.7593	44.1094	53.6579	57.4002	48.9953	57.5176	54.1038	67.8758			0.0622581	55.5019
2.0254	77.417	61.8315	24.7957	35.11	32.4554	32.0575	44.3176	55.1057	57.282	56.9301	48.7771	54.9621	62.4236	69.5071	99.4076	73.7624	47.8092	42.794	47.2731	48.345	62.1053	57.3132	50.0317	52.1422	62.1046	46.6684	62.2786	60.2724	67.6596			0.0661478	54.929
2.1445	81.761	57.3575	19.4586	26.1622	21.9684	31.9832	41.3727	54.4182	55.3511	53.5816	48.0465	55.9135	62.4814	75.8943	96.5028	77.3564	46.7149	42.5467	43.799	46.4915	65.8101	53.0611	44.4478	50.793	64.6846	43.5857	60.2595	59.7042	67.6978			0.0700375	53.4209
2.2637	87.635	54.9377	15.6295	21.3781	20.2438	28.5056	35.1051	51.4623	49.1992	54.017	47.9457	59.3723	66.7362	78.6584	96.0779	77.6558	44.3042	43.1029	41.4818	47.6084	60.1574	50.5101	50.6178	47.724	67.7404	43.4347	59.9957	62.498	64.4784			0.0739305	52.697
2.3828	89.604	48.7291	11.3874	16.9022	15.0626	26.7355	33.9681	50.7459	45.5686	49.7369	48.528	56.7248	62.2523	80.0187	92.4565	80.2526	40.9321	40.8644	43.2696	41.6909	59.9806	46.234	49.6239	44.6611	68.8183	45.9638	55.092	59.2769	69.644			0.0778202	50.8526
2.502	92.013	44.11	11.2333	12.8541	13.5599	23.9046	30.6639	45.9225	41.208	45.0871	47.3832	60.0512	63.6046	83.2991	92.9328	84.0876	36.911	34.733	39.917	41.7955	56.7632	39.9989	51.3894	39.0981	65.7791	43.3929	52.3336	61.4408	63.7708			0.0817132	48.9392
2.6211	95.642	39.7688	9.9981	12.2472	13.9686	20.5798	28.9284	41.2143	37.4046	43.2692	41.3212	62.1774	68.3074	84.645	90.0607	85.2158	35.5114	31.059	37.2786	36.7298	60.7202	36.196	51.1318	34.1077	64.8671	42.4543	51.4947	61.8399	64.9959			0.0856029	47.6943
2.7402	95.93	34.2887	7.1405	9.5519	10.787	15.7192	31.3561	38.0218	35.7682	37.2094	34.7443	59.0167	70.6587	86.2348	89.7872	91.7872	34.6799	25.8319	30.4518	30.0599	53.4494	35.6713	51.957	28.9302	61.1917	38.5196	45.9442	56.5919	64.8736			0.0894926	45.0398
2.8594	99.472	29.8988	6.7471	7.7613	10.7767	15.4216	28.444	31.4612	33.7885	34.7662	31.5417	57.6429	68.2706	88.6205	83.0476	86.542	31.8242	21.2848	25.9523	23.7149	50.8731	34.528	51.7921	25.6518	57.6494	37.8282	44.8864	58.8544	65.9117			0.0933855	42.9294
2.9785	101.681	27.9616	6.8097	7.5381	8.6929	13.0982	24.8005	27.7017	32.2305	32.7553	30.8832	57.9264	73.0553	82.3788	80.8285	83.9536	31.7968	18.3641	20.7947	18.6204	52.3713	32.6978	57.1478	19.8577	56.7418	34.9678	46.3987	56.0569	63.7279			0.0972752	41.4427
3.0977	101.786	23.3349	5.8998	6.8817	7.6549	10.4456	22.5413	23.2859	27.1001	27.4532	28.0937	55.8633	77.4001	70.7902	73.9256	81.0298	26.8043	18.7803	15.4716	14.9162	51.1884	32.3863	55.931	16.5814	51.8629	36.8832	40.376	53.3581	60.5558			0.101168	38.5718
3.2168	103.76	21.3409	5.5555	5.1889	6.7085	10.754	21.4693	20.5779	25.0973	22.8134	23.6674	52.4066	72.3162	64.5886	67.6478	79.9878	27.1077	15.8694	14.457	11.9645	47.5933	30.5287	53.9657	14.9174	50.0379	36.1145	38.9497	55.667	59.3796			0.105058	36.5666
3.336	97.335	18.5937	4.9169	4.9203	5.974	7.379	17.9169	17.1176	20.0296	21.403	19.439	44.1291	68.0039	59.3886	64.9768	77.1216	25.7598	13.8814	11.4181	13.5222	41.1231	31.8916	57.6538	11.7141	47.1454	37.6585	36.2314	56.7723	53.2624			0.108951	34.0234
3.4551	90.299	15.8331	4.2551	4.8021	4.3122	7.4623	17.1226	18.8251	16.2077	19.1627	19.2184	39.8677	68.1809	49.1165	59.2772	78.609	21.7171	13.2652	9.2033	13.1275	39.7725	31.1171	58.1277	10.0868	44.8111	37.0637	40.2996	53.2704	53.9351			0.112841	32.3569
3.5742	89.779	15.147	4.187	4.8362	4.3756	5.5775	15.1404	16.2744	13.971	15.1124	16.2213	31.8777	61.9959	45.119	51.4045	72.9591	18.9191	12.2244	8.707	9.7098	33.6577	30.0919	52.9251	10.2464	38.6715	35.6731	35.8937	50.1989	46.5699			0.11673	29.223
3.6934	83.731	13.8408	3.9077	4.5369	3.9827	6.2304	13.893	12.9816	12.6088	14.5168	14.2668	26.4925	55.6487	42.176	42.5898	68.0284	17.4767	8.3649	7.1577	10.4131	30.3635	27.9062	49.0184	8.6518	35.6419	33.601	35.1024	45.4863	43.0397			0.120623	26.6088
3.8125	77.088	12.8714	3.9168	4.3728	4.3089	6.7762	12.7275	12.7659	10.9225	12.783	14.0993	21.0254	59.0806	41.2161	34.7753	67.4048	14.6314	9.2418	6.724	9.2646	27.9231	28.192	48.5178	7.0696	35.083	32.4483	33.1904	45.6629	38.4587			0.124513	25.2601
3.9317	74.555	10.6976	3.8637	4.413	3.622	5.5867	12.6359	10.878	10.975	13.755	12.5368	15.3605	53.6281	39.1938	29.7115	67.7725	13.2551	8.0616	6.6623	7.4799	24.016	23.8882	43.1166	6.6723	30.7496	31.8618	33.1948	41.2972	37.4742			0.128406	23.3419
4.0508	70.767	10.3892	3.373	2.7352	2.512	4.638	11.2584	8.8731	9.6595	11.6883	9.6927	12.3707	42.4345	34.146	24.9588	66.7477	13.2327	9.175	5.3928	7.2365	21.5998	22.2349	42.6449	6.1153	22.14	31.584	32.9047	33.5546	37.6589			0.132296	21.0937
4.1699	65.459	9.7986	3.8997	2.4608	2.4166	4.2395	11.408	8.289	9.6138	11.1835	10.821	12.5346	36.7155	30.1813	23.3727	61.0428	11.6993	7.8722	4.8139	5.53	20.2816	20.8989	39.7753	6.2038	17.8565	32.1846	34.2561	28.6744	34.0739			0.136185	19.5709
4.2891	56.523	7.2473	2.3516	3.2378	3.3503	3.7777	10.9047	7.9376	7.9236	10.2752	9.0389	10.6536	29.5776	25.1477	19.7836	58.1678	11.0792	7.4041	6.3848	5.9811	20.2517	20.2676	34.55	5.3109	13.1317	30.6112	37.2104	21.9645	27.5639			0.140078	17.5038
4.4082	58.061	7.4411	2.7597	3.0815	2.8659	4.5149	9.9396	6.3607	6.9762	9.1774	7.9603	11.1831	27.7071	22.9222	16.1219	51.7562	11.0708	6.5443	4.6467	4.5991	19.3784	21.0773	30.9178	4.3147	9.9911	30.4701	35.479	19.6823	22.4822			0.143968	16.1891
4.5274	55.708	5.5745	2.5455	2.9583	2.6465	4.4727	9.8664	5.8348	5.5786	8.3105	6.6862	9.5722	22.6904	19.4588	13.0544	51.7487	11.4417	7.4476	6.0291	5.7007	17.0584	22.1538	26.183	4.5979	8.1521	28.371	34.5231	16.289	18.1625			0.147861	14.9247
4.6465	51.033	5.9809	2.401	2.9126	2.6255	3.8857	9.6821	6.1891	4.9398	7.9882	6.6555	7.4163	17.9439	15.2255	11.3674	45.6846	10.5747	5.7283	4.627	5.4976	15.2871	18.2969	21.7003	4.2915	7.3311	26.6062	32.4855	14.3905	17.4414			0.151751	13.3169
4.7657	47.312	5.9196	2.5082	2.8382	2.2626	2.9347	9.8945	5.0985	3.4714	6.4759	5.7618	5.9765	16.0059	13.5906	13.1724	40.6246	10.1582	5.7832	4.0508	6.0092	14.1176	17.3755	17.7074	3.0568	6.3895	22.8358	34.8676	13.0406	17.3263			0.155644	12.2954
4.8848	43.75	6.4086	2.4988	2.5648	2.4923	3.1347	9.9502	3.8189	4.2443	6.3605	4.8256	4.9033	14.9081	10.9009	9.5645	34.4158	8.995	6.1676	3.6463	5.1414	10.6055	14.0278	15.6118	2.8068	5.5494	18.3373	30.582	11.1739	14.149			0.159533	10.7426
5.0039	43.818	6.1541	2.449	2.1337	2.8419	2.9678	9.9742	3.3931	3.8039	5.9354	5.2003	4.3643	12.6074	9.9986	8.5537	33.4543	5.8828	5.0311	3.7517	4.7398	12.4678	13.042	12.762	3.0743	4.8372	16.5866	30.4931	10.7973	12.6882			0.163423	10.1312
5.1231	37.788	6.1445	2.9619	2.4593	2.1779	2.3787	10.1201	3.0741	3.5429	5.2487	3.8902	4.2396	11.4865	7.7173	7.8694	25.9428	6.8506	5.6689	3.5351	4.4135	8.9573	11.9025	11.3883	3.4101	4.6599	17.8778	31.4892	8.3097	12.9139			0.167316	9.25582
5.2422	34.452	5.9902	2.1839	2.4648	2.0421	2.6941	8.3576	3.0172	3.1633	5.2863	4.2292	3.584	11.3862	8.3155	6.8121	22.8253	6.2905	3.7725	3.5798	4.3396	9.6832	11.7936	10.1536	3.3236	3.4994	16.162	30.3052	6.9897	10.2742			0.171206	8.51623
5.3614	30.763	5.7249	3.1313	2.0189	1.7291	2.391	7.0934	3.0486	2.5978	4.6668	3.5438	3.0178	10.4874	7.4862	6.0658	19.6235	5.8494	4.5666	2.9485	3.7094	8.0186	12.2419	9.3736	2.6943	3.6529	14.989	27.3339	7.8948	10.9164			0.175099	7.84754
5.4805	27.995	5.5442	2.8844	2.2396	2.1625	2.0588	6.5814	2.2907	3.0647	4.3615	3.9727	3.1068	9.3643	6.2495	4.7292	16.1413	5.3921	3.5009	2.8853	3.7694	7.7809	10.3995	8.2639	2.8297	4.5357	14.0969	23.1881	6.2909	8.4446			0.178988	7.03878
5.5996	24.906	6.3865	2.3551	2.0267	1.428	2.1109	6.6651	2.87	3.3242	4.2358	3.7059	2.2671	8.1821	6.3417	3.9529	15.4315	4.4925	2.9769	3.1289	4.1188	7.0704	10.025	8.921	3.216	3.8007	13.1207	22.4268	6.131	6.1018			0.182878	6.61103
5.7188	23.666	6.3181	1.8047	2.6437	2.3675	2.382	5.4678	2.9216	2.1051	3.8426	3.0622	2.9757	7.2122	6.2659	5.0816	13.8872	4.4692	2.6341	3.0473	3.6019	6.542	8.8671	7.2116	2.4322	3.5328	12.8952	22.0328	5.3976	4.4164			0.186771	6.17531
5.8379	19.051	6.3068	2.1865	2.4497	1.5978	2.5367	4.4863	2.2641	3.1246	3.852	3.3069	3.1853	5.9317	5.3389	3.9242	11.5332	3.8003	2.3609	3.2037	3.7366	5.7005	7.6667	8.0391	2.8944	2.9534	10.5973	19.4867	6.3243	4.5264			0.190661	5.59883
5.9571	16.568	6.2502	2.3837	1.8327	1.6349	2.3857	4.057	2.5209	2.6146	3.4446	3.2988	2.6782	6.2456	5.3312	4.174	9.2807	3.3284	2.3508	2.2503	3.5364	5.5319	7.5857	6.4671	2.6233	2.7342	10.0179	17.2163	4.6159	4.547			0.194554	5.08641
6.0762	16.499	5.4434	2.5476	1.9328	1.5913	2.4955	3.9728	2.135	2.4265	3.8179	2.8331	2.7007	5.0118	4.9311	3.9348	8.789	3.3189	2.9022	2.6254	3.9896	6.0978	6.9991	6.5763	2.2238	2.4869	8.704	17.5262	4.6834	3.8329			0.198443	4.93203
6.1953	16.446	5.7631	2.2173	2.1828	1.6653	2.1073	3.953	2.1198	2.1405	3.1927	2.3096	2.7715	4.3858	4.0435	3.5105	7.1843	2.191	1.8287	2.027	4.0774	4.3281	6.9174	6.4736	2.0792	2.6557	9.0097	15.5413	3.5529	3.6239			0.202333	4.49307
6.3145	15.204	6.2868	2.3323	1.8917	1.5593	3.114	3.2111	2.3891	2.3276	3.8299	1.9846	2.4243	5.553	4.0134	3.6158	6.8701	2.3423	1.7528	2.4912	4.2179	3.9565	7.1669	6.7671	1.8169	2.3119	8.3999	14.7542	2.7528	3.2597			0.206226	4.43438
6.4336	14.396	5.575	1.758	2.4559	1.5094	2.9335	3.9806	2.1337	2.2082	4.5871	1.739	2.6351	6.188	3.9592	2.7884	5.7607	2.1384	1.9479	2.2762	2.8926	4.6517	6.9501	5.8912	1.8414	2.2215	7.311	11.6376	2.8334	3.1432			0.210116	4.14979
6.5528	11.952	5.493	2.2155	1.5515	1.4324	2.8444	2.6299	1.1367	1.534	4.9991	1.8897	2.1532	4.5618	3.5944	3.2228	3.9645	1.8304	2.3279	2.2781	3.4106	3.9303	6.7537	7.5706	1.8099	2.0678	7.0806	9.4926	2.6139	3.2209			0.214009	3.77801
6.6719	11.557	4.8488	1.8178	1.5459	1.9919	4.2884	2.5912	2.1691	1.3876	4.3277	2.0792	1.7989	3.3863	4.2745	3.1735	4.7009	2.3283	1.87	2.0274	3.7082	4.2606	7.9686	6.5562	2.5688	2.199	7.5866	9.5537	2.3189	2.8135			0.217899	3.85167
6.7911	12.64	5.4551	1.2533	1.6857	1.2003	3.7789	3.053	2.1973	2.0489	4.0365	2.1772	2.3064	2.8055	4.3691	2.5094	4.2441	2.1045	1.9244	2.4533	4.1714	4.2521	8.6353	5.7535	2.1198	1.705	5.7689	8.8388	2.4245	3.0714			0.221791	3.75806
6.9102	11.367	6.4877	1.8938	1.7281	1.3834	4.1482	3.4149	2.3925	1.466	3.9106	1.5417	2.1237	2.329	3.6963	2.2369	4.0942	2.1973	1.4701	2.222	4.5908	3.8655	8.9903	6.4399	2.0587	2.1724	5.7078	6.9539	2.7075	2.9567			0.225681	3.67403
7.0293	10.249	6.3547	1.6385	1.5636	1.7455	4.3453	3.3047	1.9683	1.687	3.774	1.4625	1.8232	2.638	3.3376	2.2676	4.3083	1.5448	1.7948	1.3645	4.9652	4.1727	8.0789	6.7102	2.2879	2.1682	5.845	6.8177	2.0252	2.8698			0.229571	3.55561
7.1485	9.862	6.2624	1.9009	1.5615	1.7098	5.1865	4.0123	1.8954	1.0086	3.4047	1.8311	1.8711	2.2208	3.8123	1.9267	3.6681	1.9926	1.4259	1.1542	4.4674	4.6257	7.7275	6.862	1.9464	1.5479	6.0848	6.207	3.3376	2.6698			0.233464	3.52355
7.2676	9.99	4.9002	2.1519	1.2484	1.8639	5.4515	4.1329	2.1651	1.2843	3.0698	1.4964	1.5899	2.4537	3.7683	3.1508	3.3589	1.5809	1.2971	1.895	4.2967	2.9726	8.4331	5.6109	1.7102	1.9869	4.1994	4.9952	2.2303	1.992			0.237354	3.28539
7.3868	9.132	6.803	2.3286	1.5239	1.5781	4.6661	4.4481	2.3464	1.2524	3.5372	1.464	1.989	2.437	3.2274	2.0922	3.8983	1.5668	1.6456	1.6395	5.1613	3.2245	7.3862	6.695	2.3217	1.6484	6.0014	4.6666	2.1352	1.6811			0.241247	3.39645
7.5059	8.554	6.2757	1.44	1.9419	1.0848	5.3419	4.8367	2.1485	2.1659	3.7306	1.3266	1.5456	1.9318	2.6143	2.5114	3.0696	1.2409	1.4333	1.3589	4.3539	2.9112	6.4639	4.8511	1.5642	1.9353	4.8228	4.9928	1.9125	2.0483			0.245136	3.11753
7.625	8.404	6.2691	1.3402	1.6568	1.3737	6.4505	5.4436	1.6612	1.797	3.1839	1.7101	1.177	1.7748	3.0422	3.0069	3.4654	1.3208	1.0956	1.8248	4.0696	3.3674	6.3714	5.691	1.9073	1.6411	5.3851	5.9239	2.0078	2.1758			0.249026	3.25993
7.7442	7.703	7.5851	1.5997	1.6739	1.0303	6.1584	6.4436	2.3339	1.5146	3.0668	1.4677	1.57	1.5018	4.2119	2.7727	2.5506	1.1087	1.3823	1.7984	3.3984	2.538	5.4953	4.5576	0.9225	2.147	5.0398	4.6944	2.4881	2.164			0.252919	3.13512
7.8633	5.974	6.8948	1.3452	1.1592	1.8186	7.6826	7.2707	2.5781	1.5124	3.5601	1.2875	1.6898	2.3438	3.8075	2.5624	2.7875	1.4324	1.1163	1.9889	4.1832	2.715	5.0771	5.0951	1.2759	1.5809	4.1045	4.7365	2.4936	2.2883			0.256809	3.18489
7.9825	7.458	7.1059	1.76	1.3276	1.0251	6.34	5.3108	2.3501	1.4465	3.0736	1.6154	1.1872	1.5944	4.2877	2.632	2.9258	1.201	0.9661	1.8399	5.5487	3.5119	4.3385	4.766	1.8298	2.2182	4.1198	5.813	1.9657	1.8184			0.260702	3.15093
8.1016	6.092	6.5358	1.7415	1.2654	1.4583	7.8682	4.7501	2.1722	1.4933	3.8842	1.2171	1.1016	1.51	3.5338	1.8977	2.9719	1.481	1.461	1.7398	4.6773	2.9254	4.7881	4.1031	1.3759	1.6396	3.5352	3.3302	1.8024	2.0295			0.264591	2.90971
8.2207	6.207	7.7308	1.3049	1.2445	1.3242	7.7041	4.574	2.8875	1.7882	4.4273	2.2414	1.1981	1.5879	4.0847	2.3012	3.5708	1.247	1.4448	1.9134	4.7394	2.7318	3.9456	4.708	1.9802	1.3465	3.6488	4.8428	2.9307	1.7803			0.268481	3.15296
8.3399	6.061	8.4104	2.1323	1.3192	1.2759	7.6555	4.265	1.97	1.4433	4.3157	1.7918	1.4697	1.6999	3.9307	2.2686	2.8712	1.4057	1.2029	1.6402	3.9724	2.6762	4.5834	3.6537	2.0608	1.8954	2.9393	4.3604	1.5336	1.679			0.272374	2.98218
8.459	5.722	8.7293	1.954	1.5884	1.5631	6.7455	3.929	2.4117	1.3475	3.9422	1.2714	1.2465	1.8756	3.7267	2.0576	2.6559	1.2283	1.1023	1.3888	5.4387	2.317	5.3455	2.9534	1.2235	1.6432	2.1233	3.7314	1.5973	1.8732			0.276264	2.85284
8.5782	5.208	9.1632	1.7513	2.0176	1.2769	7.2984	4.1247	1.9584	1.7295	4.4438	1.1585	1.409	2.6818	3.5519	2.4597	2.8082	1.0853	1.4147	1.4707	4.6958	2.549	5.7435	3.1614	1.172	2.0051	2.7526	4.0766	2.1078	1.6643			0.280157	2.99792
8.6973	6.153	9.1076	1.8703	1.745	1.5076	7.8798	4.343	2.5966	2.0479	5.3105	1.7627	1.4883	3.0969	3.251	2.0192	2.8356	1.0132	1.0218	1.2746	5.1984	2.7901	5.4292	3.1075	1.8353	1.5169	2.5884	3.9135	2.4614	1.901			0.284046	3.14022
8.8165	5.277	9.62	1.5467	0.9856	1.6946	8.9436	5.6142	2.8349	1.6455	4.9201	1.4512	1.1079	2.1144	3.3591	2.0702	2.6775	1.62	1.3561	1.8979	4.8679	2.005	4.3866	3.2454	1.35	1.662	2.5077	3.7656	2.0954	1.7384			0.287939	3.04691
8.9356	5.049	8.4517	1.1418	1.5279	1.2247	10.722	6.6279	2.7173	1.3103	6.2808	1.5276	1.6742	1.5991	3.7828	2.079	2.7646	1.5208	1.268	1.7307	6.423	1.9427	3.2321	3.5929	1.8879	1.5006	2.9642	4.0725	2.3	1.7407			0.291829	3.19506
9.0547	4.387	11.0738	2.2507	1.3486	1.4296	9.8393	6.3687	2.8172	1.9039	6.5325	1.6695	1.6221	2.4561	3.9532	2.2714	2.9193	1.6789	1.1563	1.7521	7.008	2.275	3.3325	2.9265	1.5197	1.3719	2.2393	4.1125	1.7603	1.7587			0.295719	3.30119
9.1739	4.981	13.4977	1.7583	1.4844	1.2098	11.8576	7.0466	3.4451	1.7125	6.9612	1.4143	1.5365	1.7737	3.1985	1.5712	2.6569	1.4269	1.3825	1.6034	5.6901	2.1251	3.7898	2.5912	1.0697	1.8687	2.3417	3.8287	2.2211	1.8704			0.299612	3.37637
9.293	5.179	15.358	1.8833	1.6143	1.7844	13.1854	8.337	3.524	1.8663	7.4697	1.7726	1.6713	2.1081	3.3	1.7039	2.6424	1.1908	1.2758	1.5891	6.3872	2.1445	3.5956	2.6196	1.3837	1.2999	2.4593	3.8643	1.8437	1.7465			0.303501	3.61378
9.4122	4.894	18.1768	1.2579	1.7317	1.9928	14.5756	9.8067	2.9232	1.7229	7.2426	1.6995	1.8277	2.9297	3.3011	1.7288	3.2921	1.2417	1.1402	1.2526	6.469	2.0614	3.1977	2.7825	1.4771	0.8623	2.7794	3.4244	1.7003	1.8019			0.307394	3.76874
9.5313	4.814	19.4225	2.1751	1.5699	2.2352	14.8123	10.0693	3.3377	2.0145	8.159	1.6573	1.2595	2.2616	3.1179	2.2841	3.2319	1.9243	1.4718	1.6498	7.0632	2.0165	3.0953	2.9587	0.9878	1.374	3.0959	4.0766	2.2058	1.8337			0.311284	4.00604
9.6504	4.623	18.1395	2.3529	1.8692	1.8011	16.7639	12.1633	2.8395	1.5151	8.3085	1.5324	0.8385	2.5877	3.1696	2.0659	2.6262	1.3931	1.632	1.7225	8.3113	2.0991	2.1748	2.808	1.7533	1.3485	2.5135	3.4407	2.3662	2.2432			0.315174	4.03457
9.7696	4.161	17.0008	2.0242	1.9485	2.1402	15.2503	13.3	3.3549	1.5681	7.5898	1.4321	1.5197	1.9474	3.2901	1.9971	2.8719	1.5781	1.6745	1.3168	8.2818	2.2386	2.7397	3.3149	1.6223	1.3917	2.2163	4.3668	2.5003	2.2071			0.319067	4.02914
9.8887	4.948	20.1235	1.574	1.6277	2.6664	18.0353	12.7832	3.047	1.5638	7.4321	1.4135	1.5959	2.324	3.0196	1.5811	3.0451	1.3686	1.1815	1.5365	8.4377	2.1069	2.0976	2.8697	1.6196	1.3327	2.0005	3.5466	2.1438	1.8588			0.322956	4.09933
10.0079	4.554	20.9696	1.6152	2.1143	2.2906	17.6453	12.0373	3.5646	1.9549	8.5801	1.2977	1.3388	2.8875	3.5946	2.1977	3.2132	1.8245	1.3376	1.6466	7.8182	2.5661	2.3009	2.2799	1.638	0.9272	2.2767	3.9601	2.6691	1.7753			0.326849	4.23709
10.127	3.565	19.8211	2.2571	1.7095	2.753	17.6086	12.7503	4.0061	1.6331	8.1116	1.5266	1.3672	3.2795	3.5923	2.1271	3.7747	2.0406	1.2542	2.2321	8.5082	3.157	2.7549	1.8737	1.5297	1.5878	3.1143	4.6296	2.3103	1.7707			0.330739	4.3671
10.2462	3.873	22.6621	1.9283	1.9258	2.3005	18.5133	13.1015	3.6163	1.7137	9.4062	1.3145	1.8831	3.74	4.0506	1.2927	2.8825	1.3704	1.2819	1.9238	9.9606	2.61	2.45	2.9048	1.7976	1.2066	2.5249	4.4168	2.4366	2.0738			0.334632	4.52282
10.3653	3.329	22.1193	2.6023	2.0916	2.9986	19.8141	15.8328	3.3944	1.6396	9.0915	1.6464	1.8333	4.1185	3.5991	2.5859	3.1972	1.999	1.3538	1.8911	9.5359	2.8837	2.7685	2.1238	1.3616	1.6936	2.8469	4.6125	3.0494	2.0655			0.338522	4.76134
10.4844	2.944	24.832	2.5994	1.3455	3.5285	18.6682	14.4197	3.1404	1.2535	7.8678	1.5216	1.208	3.8808	3.1344	1.6104	3.3823	2.2669	1.2292	1.6562	10.6346	4.0406	2.2832	3.1269	1.2973	1.1093	2.2647	4.4973	2.8157	1.9228			0.342411	4.63728
10.6036	2.732	21.407	2.4267	1.6405	3.0671	19.4725	15.1085	3.215	2.2617	8.4386	1.1872	1.2887	4.073	3.6892	2.1334	4.1559	1.817	1.1847	1.7549	11.434	2.9125	2.2349	3.4924	1.0686	1.1707	2.27	5.0986	2.9527	2.1388			0.346304	4.68368
10.7227	2.868	25.373	2.3379	1.4462	4.4383	20.3258	17.5873	3.6651	1.4895	8.0693	1.3099	1.7209	4.1029	3.6227	2.908	3.9549	1.7178	0.9643	1.8539	12.3308	3.2267	2.6784	3.4584	1.5072	1.3619	2.4869	4.1003	3.1981	2.684			0.350194	5.06167
10.8419	2.149	28.5231	2.4768	1.7563	3.6301	17.9846	15.1216	3.7237	1.9314	7.1105	1.4654	1.5054	4.7724	2.9071	2.3821	2.926	1.98	1.3469	1.9322	13.2996	3.5768	2.4389	4.0077	1.4713	1.3526	2.2233	4.5045	2.4946	2.5309			0.354087	4.94913
10.961	2.973	28.9461	2.2504	1.568	4.6118	17.6385	14.8547	4.7532	2.1217	8.2576	1.2165	1.7638	4.5084	3.6177	1.5755	3.7185	1.9845	1.4961	1.9726	13.1013	3.5573	1.9841	4.027	1.4524	1.4085	2.2957	4.6182	2.8028	2.1935			0.357977	5.07826
11.0801	2.662	32.4584	1.776	1.9743	5.0989	16.7268	14.993	3.9257	1.6799	9.7984	1.5055	1.7361	4.7896	3.2309	2.5442	3.6514	1.7263	1.0606	2.1778	11.9847	2.8755	2.4754	4.3706	1.4433	1.3432	2.6841	4.7336	2.7687	1.6704			0.361867	5.16777
11.1993	3.145	32.1642	2.7453	2.0372	5.0694	18.8372	13.5623	4.733	2.5997	9.8595	1.4997	1.7033	4.6814	3.7528	2.3063	3.8202	2.5226	1.1629	2.1236	12.8445	3.5679	2.7454	6.0967	1.6594	1.2954	2.6566	4.7354	2.7094	2.2077			0.36576	5.47738
11.3184	2.879	33.729	3.6424	1.6116	5.8482	16.5506	13.0326	4.0475	2.8148	11.4386	1.4804	1.8447	5.9181	4.6922	2.5763	4.3888	1.7926	1.4728	2.4712	13.2602	4.7644	2.4526	6.3312	1.7354	2.0035	2.8343	5.2	2.7061	2.0057			0.369649	5.70775
11.4376	2.696	34.5143	2.4001	1.7778	6.5371	18.6527	10.518	4.3937	1.8742	13.4442	1.8423	1.9262	6.4212	5.4333	2.3174	4.8264	1.9482	1.5503	2.0493	14.1913	4.0473	3.0262	6.6368	1.6806	1.4677	3.4685	4.9782	2.2311	2.1475			0.373542	5.82751
11.5567	2.791	36.602	3.8028	2.1403	6.5909	17.6622	11.5338	4.1817	1.7601	14.7316	1.7644	1.6717	6.4651	4.2513	2.4139	4.4952	1.9282	1.3074	1.7005	13.9627	3.6249	2.8861	7.2271	1.9466	1.3353	3.5641	6.4125	2.6511	2.2686			0.377432	5.98873
11.6758	2.01	36.8953	2.9979	2.5211	7.8026	16.7829	10.681	4.2333	2.1603	18.5913	2.134	1.6737	6.5618	3.3801	2.4558	5.0842	1.7581	1.832	2.164	15.0288	3.5324	2.9557	7.9584	1.8909	1.3887	3.1824	6.5444	2.4511	1.4989			0.381322	6.14314
11.795	2.432	35.672	3.1113	2.4961	8.7631	18.1923	10.0895	4.3309	1.8695	21.768	1.8768	1.9516	6.8381	3.858	3.184	4.4612	1.6444	1.377	1.3367	14.2717	3.9488	4.54	7.1565	1.4467	1.7568	3.4841	6.3745	2.4602	1.6011			0.385215	6.28596
11.9141	3.009	36.739	3.7874	2.3149	8.3932	18.9143	9.7909	4.4236	2.3992	21.2751	1.7253	1.7687	7.5225	4.1344	2.3297	5.5034	2.5059	2.0166	2.5988	13.482	3.7333	3.8577	8.3088	2.1179	1.3941	3.0783	6.0443	2.2127	2.0045			0.389104	6.46157
12.0333	2.751	34.6683	3.7698	2.1839	9.5828	17.9235	9.3448	3.4906	2.279	23.2228	1.3855	1.583	8.5232	3.625	2.468	7.1451	2.8791	1.225	1.7374	11.8546	5.5595	4.3819	8.8505	2.2473	1.693	3.5528	7.0992	2.5357	1.8911			0.392997	6.53288
12.1524	2.628	31.0988	3.3805	2.3673	11.461	18.4476	8.6234	3.9143	1.9487	22.577	1.9778	1.6644	9.5449	3.89	3.0163	7.2609	2.4633	1.4076	1.9773	10.5859	4.4824	3.8372	7.9414	1.8741	1.0997	4.4871	7.3817	3.5988	1.7186			0.396887	6.43641
12.2716	2.064	29.0777	3.5934	2.2672	11.0347	16.5414	7.7584	3.7167	2.3333	23.3517	1.6255	1.5916	10.5643	4.1109	3.0234	7.4671	2.2522	1.4358	2.3933	10.0382	5.5534	4.6077	7.7487	2.6547	1.3373	4.1062	8.0195	3.0292	2.5607			0.40078	6.4089
12.3907	1.856	30.4455	4.39	2.3736	13.3941	16.4823	8.8407	3.6661	2.2242	26.2404	2.1035	1.9612	11.7898	3.5436	2.2555	8.4878	2.3508	1.5875	1.83	8.4896	5.423	3.38	8.6039	2.1165	1.7512	5.2811	8.0663	2.7289	2.4976			0.40467	6.6952
12.5098	2.26	26.7284	4.9053	2.6507	12.8036	16.9759	8.0599	4.4066	2.2937	24.0214	2.191	1.711	11.3692	4.644	2.6944	9.1991	2.6762	1.6265	2.3718	9.8119	5.6121	4.3318	8.76	2.4062	2.024	3.9388	8.9435	2.4437	2.1419			0.408559	6.68974
12.629	2.347	24.2212	3.6843	2.1804	12.9497	18.0795	11.2396	4.0819	2.1455	23.4367	1.7189	1.736	11.8198	4.0013	3.0004	9.8805	1.9968	1.136	1.9855	11.0928	5.552	4.1764	7.7969	2.4986	1.7666	3.9362	9.2312	2.703	2.118			0.412452	6.63837
12.7481	2.278	22.4493	5.0724	2.0609	13.5291	16.4784	8.7825	4.3208	3.1829	22.004	1.2802	1.9734	12.3643	4.8764	2.8849	9.5366	2.0203	1.6878	2.6984	11.3613	7.3695	4.6246	9.0578	1.6875	1.457	4.1944	8.3445	2.5844	1.9335			0.416342	6.62397
12.8673	2.432	20.0788	4.0215	2.2628	12.074	13.3285	12.4149	4.3943	2.6816	20.2668	2.2276	2.0877	11.7207	4.4077	2.9394	9.7503	1.9483	1.5341	2.0825	11.0359	7.0151	5.8295	8.5521	2.5919	1.8147	4.3599	9.0814	2.7269	1.5964			0.420235	6.45715
12.9864	2.02	19.143	4.5651	2.1192	12.1138	10.7452	11.6935	5.0317	2.1815	18.1041	2.1447	2.421	12.6776	4.7089	3.0997	8.8932	2.0558	1.6373	3.1124	11.8562	6.6862	5.8414	8.6147	2.2663	1.9352	4.4514	10.9071	2.5307	2.3302			0.424125	6.4099
13.1055	1.971	19.0443	4.4239	2.2585	13.4634	7.9757	10.6265	5.3685	3.4003	16.0162	1.6865	2.0904	13.3261	4.47	2.9803	8.1937	1.9359	1.344	2.3787	12.5016	6.3262	7.2182	8.7386	2.3226	2.4553	4.4519	13.9012	2.2539	1.629			0.428014	6.37077
13.2247	1.993	16.7065	4.5168	2.0424	14.0097	8.9698	12.5464	5.5057	3.3329	13.8717	1.8914	2.2181	13.7074	4.0287	3.1698	10.6053	2.9626	1.3023	2.4139	10.6452	6.5277	9.9529	7.5519	1.6376	1.836	4.0087	15.1454	2.1554	2.1172			0.431907	6.46112
13.3438	2.363	15.3923	3.8718	3.0865	12.4906	7.6637	13.8081	4.8466	3.4461	12.184	1.4941	2.2393	14.4502	3.8722	2.9677	11.1519	2.3543	1.2722	2.1452	12.3685	5.931	12.5063	6.8328	2.3432	2.1447	5.0132	14.0775	2.4375	1.5276			0.435797	6.42352
13.463	2.165	15.3277	4.3079	2.1063	14.0928	5.4053	12.6125	6.231	3.3232	11.8972	1.6051	2.2824	15.117	3.7594	3.3239	8.8212	2.71	1.4143	2.222	11.3297	6.4407	14.941	6.7052	3.0753	1.8214	6.2087	14.2767	2.1824	1.722			0.43969	6.46301
13.5821	2.25	14.7303	4.3623	2.3956	12.5942	4.9394	14.1944	4.5353	3.1361	11.3625	1.8464	2.9034	16.8028	3.9518	3.4147	9.9986	2.3918	1.6624	1.9945	11.8177	6.53	15.6289	6.0961	2.0905	1.8738	6.3731	13.4224	2.1432	2.6385			0.44358	6.48554
13.7012	2.676	17.6024	4.5104	2.2134	11.6094	5.0222	16.8283	4.7806	2.8562	10.4699	1.3527	2.3045	17.0866	4.019	3.7175	10.6754	2.2648	1.6656	1.8867	11.671	4.9205	18.0575	5.4254	2.2878	1.8375	5.8825	13.1082	2.4733	1.737			0.447469	6.58422
13.8204	2.79	19.5023	3.4313	2.6721	10.3962	4.5696	18.52	5.3579	3.2778	10.8836	1.2858	1.8638	15.6586	4.2669	3.8643	11.8113	2.3432	1.9404	2.1979	11.5571	4.2305	23.1703	6.4604	1.8507	2.5307	5.8684	16.0014	2.7079	1.5535			0.451362	6.98496
13.9395	2.951	20.5973	4.6405	2.5714	9.8897	4.32	20.2278	5.4672	3.5751	10.2187	1.3902	2.3092	16.2314	4.1942	4.249	13.3123	3.1222	1.9257	2.4654	11.2495	5.3855	26.2014	7.302	3.034	1.4701	5.9244	16.91	2.8255	2.3666			0.455252	7.45956
14.0587	2.567	24.8978	4.2127	2.2702	13.1394	4.5167	22.8517	5.5678	3.4278	8.8301	1.263	2.1136	14.7154	4.9568	3.5509	15.5978	2.8216	1.4267	1.941	11.5782	6.4143	24.9507	6.0706	2.4356	2.1448	5.4127	17.977	2.1996	2.2555			0.459145	7.65886
14.1778	1.945	23.9972	3.6354	3.0222	11.1147	4.3412	20.9002	5.5202	3.4041	10.8694	1.2568	1.5635	13.9276	5.444	2.7453	18.3858	2.653	1.8817	1.9429	10.4393	5.6902	25.5612	5.3415	2.3319	2.3089	5.4997	16.6308	2.7594	1.7288			0.463035	7.47731
14.297	1.747	27.2099	3.8749	2.1901	14.7535	4.384	20.1951	5.377	4.0891	8.8504	1.8058	2.0068	14.666	4.1297	4.4809	18.9812	2.607	1.9146	2.9002	10.5927	5.8613	26.1914	5.8076	2.1122	2.3396	6.0818	18.8049	1.8699	2.3197			0.466928	7.86704
14.4161	2.667	30.1041	4.4461	2.8808	12.9838	5.3134	23.5884	5.2004	3.6884	7.7399	1.8024	2.5997	16.8032	4.5314	4.9345	18.9913	2.5647	1.8808	2.2543	12.245	7.3098	26.2821	7.0397	2.4159	2.703	6.5395	19.1044	2.3414	2.0289			0.470817	8.37877
14.5352	2.655	32.7437	2.8267	2.7306	14.2506	5.5094	20.8068	5.0862	3.7155	7.9629	1.4182	2.2834	15.1274	4.2083	4.9638	18.6465	2.8281	1.5398	2.2123	12.7895	7.3665	21.3757	6.8443	2.5515	2.1116	6.418	21.9569	2.1124	2.0394			0.474707	8.17521
14.6544	3.386	34.9133	3.2218	2.5418	13.8358	5.0452	22.0464	6.0205	3.2396	9.3552	1.2967	1.9675	15.8236	3.3916	5.0947	18.285	3.1755	1.5165	2.2343	11.6566	7.8582	22.9516	7.9767	2.4435	1.9087	5.033	23.5858	1.8118	1.7515			0.4786	8.39201
14.7735	3.167	34.4	3.1855	2.3336	11.503	5.1154	20.5863	5.3807	3.8697	9.8862	1.7759	1.6042	16.0703	3.2216	4.9878	16.5677	2.7962	2.4251	2.0961	10.6065	7.6179	20.343	8.0501	2.147	2.1321	5.7666	26.2522	1.9965	1.9491			0.48249	8.20115
14.8927	3.142	33.4114	3.1053	2.6882	11.0503	4.8793	17.6627	6.3858	4.3181	7.2141	1.4417	1.8215	16.6478	3.2075	4.9642	19.396	3.1798	1.8398	3.2105	10.3122	8.9516	24.499	7.6635	2.1198	1.8645	5.0777	28.8986	1.8702	1.8586			0.486383	8.36833
15.0118	3.274	28.6474	3.9195	2.2817	10.5263	5.2326	16.69	6.7538	4.0231	8.6077	1.8177	2.0657	15.7708	3.6671	5.0883	16.6077	2.8581	1.5445	2.5634	11.2256	8.4916	22.8092	8.0211	2.3885	2.4939	5.061	25.1206	2.408	1.5533			0.490272	7.98318
15.1309	3.559	23.2165	4.3658	2.0882	9.8535	4.0424	14.709	6.1532	4.5372	8.5159	1.5861	2.0525	17.9659	4.2739	4.6153	16.2594	2.9442	1.5723	2.8589	9.939	8.4336	19.0218	6.2951	2.1612	2.0974	4.256	24.1651	1.6438	1.879			0.494162	7.4159
15.2501	2.711	22.1721	3.9695	2.0585	11.1821	4.46	12.9243	6.9121	4.5574	7.9263	1.9923	2.2697	19.3798	3.574	4.9088	14.3438	3.0429	1.7971	2.6657	9.1373	11.2917	20.6571	6.001	2.2005	2.346	4.5771	22.0825	2.4045	1.9362			0.498055	7.43039
15.3692	3.36	18.9535	3.9554	2.4498	10.5941	4.3956	14.2032	7.4174	3.7916	7.0303	1.7702	1.9692	22.0756	3.662	5.5988	15.0294	2.5023	1.1536	2.2506	8.6266	11.3121	22.6776	6.0028	2.4118	1.86	4.3517	20.6427	2.1344	1.9597			0.501945	7.38421
15.4884	3.015	18.5209	4.5109	2.1803	11.6083	4.7033	14.0535	7.5636	5.1857	6.515	1.7721	2.5577	22.997	4.0731	6.202	14.301	2.562	1.7636	2.0222	8.6954	11.0477	23.4482	5.8037	2.2787	1.9603	5.3801	20.6019	2.3081	2.0248			0.505838	7.57435
15.6075	2.911	19.3859	4.6494	2.7983	11.8139	4.2772	13.6846	7.4327	5.058	6.4729	1.8468	2.2029	20.1292	3.9499	7.8492	15.5811	2.4989	2.2282	1.9473	9.5086	10.0507	23.2963	6.1338	2.5708	1.8033	4.8289	19.6159	2.5937	1.6494			0.509728	7.54375
15.7266	2.335	19.405	3.7791	3.5256	13.3476	3.6969	12.9635	8.7344	5.4767	6.075	1.4974	2.5059	17.846	4.6345	6.5568	16.1989	2.7805	1.6007	2.3242	10.3448	10.4415	26.1768	5.4567	2.7948	1.6467	4.8342	16.4965	2.6055	1.8866			0.513617	7.51613
15.8458	2.439	20.7414	4.5374	3.0281	14.5522	4.168	15.9195	8.2254	5.7923	5.5397	1.1581	2.523	13.5947	4.6941	8.1084	18.9889	2.6712	1.9937	2.3675	11.3498	10.0758	30.4417	4.4987	2.5767	2.0956	3.8926	15.5181	2.1011	1.514			0.51751	7.7623
15.9649	2.604	22.4371	3.3672	3.508	15.6107	3.8149	18.5899	7.868	6.2276	5.4179	1.5336	2.2542	14.0962	4.4221	7.6126	19.1015	2.3096	1.8181	2.0468	9.6315	10.0893	31.9358	5.1969	2.3029	1.7951	3.9773	13.7497	2.0637	1.92			0.5214	7.83801
16.0841	3.275	24.472	3.9518	3.8551	16.1762	4.1521	17.967	7.1202	5.2323	5.7165	2.1596	2.3103	10.7937	5.3364	8.2331	17.6164	2.0901	2.2997	2.2165	10.472	10.688	33.7674	5.3643	2.0438	1.8039	4.8032	15.8226	2.171	1.491			0.525293	8.04832
16.2032	2.961	24.3085	3.0274	2.5599	16.3346	3.7131	17.2226	8.2645	5.017	4.8605	1.7812	2.2065	12.3585	4.4485	7.525	16.3117	2.0847	2.1307	2.5155	10.961	10.9629	34.9555	3.5042	2.1763	2.2632	4.4068	14.8405	2.4035	2.0783			0.529183	7.8684
16.3224	3.768	23.9495	3.7358	3.1338	16.5738	3.6326	19.6009	6.1337	5.095	4.2891	1.8111	2.5222	13.0738	4.332	6.8993	18.162	1.7946	1.3357	2.3523	11.1421	11.1465	35.1117	4.6096	2.3972	1.8199	4.6283	13.4932	2.3893	1.7892			0.533076	7.95594
16.4415	3.585	23.4775	3.6713	3.1396	17.6111	3.598	19.1305	6.6084	3.8368	5.146	1.7552	2.2403	18.1499	3.7681	7.3354	14.6028	2.0391	1.8717	2.5599	10.7523	12.7253	35.0218	3.4919	1.8108	1.7432	3.4787	15.1409	1.8879	1.7648			0.536965	7.99808
16.5606	2.596	20.3891	3.2052	3.6849	17.8201	2.8719	18.1193	6.1482	4.9635	4.9167	1.3426	2.293	19.8048	4.4009	7.5108	12.4352	2.6651	1.5996	2.8034	10.8572	12.2493	33.1033	3.4154	1.8169	1.8896	3.895	14.4656	1.9338	1.862			0.540855	7.76063
16.6798	2.729	20.7573	3.1057	2.9964	19.507	2.5528	17.125	4.7386	5.9816	5.3914	1.4102	2.5014	21.3006	3.9747	7.3962	13.6132	2.1291	1.8881	2.3037	9.9159	11.1949	31.0549	3.2625	2.0986	2.2535	3.8281	16.3382	1.7028	1.6266			0.544748	7.74752
16.7989	2.39	19.7775	2.6341	2.7487	16.0599	3.0059	14.5278	5.6497	5.4848	4.6319	1.7181	2.3799	22.4651	5.0814	8.489	10.712	2.0121	1.4457	1.7584	13.0946	11.0866	27.6039	3.8003	2.1919	2.0038	3.7757	16.3291	3.2591	1.78			0.548638	7.51369
16.9181	3.629	23.0831	3.4632	3.6488	16.2916	3.2781	12.0463	4.6827	6.8876	4.3236	1.8693	2.2339	21.6454	4.1067	8.3919	8.2188	1.8038	1.7807	2.4722	12.9114	11.707	26.2496	2.9356	1.8988	1.4555	3.6522	13.9549	2.3075	1.7729			0.552531	7.33456
17.0372	3.088	21.8998	3.7482	3.8964	16.4699	3.0811	10.8977	4.9687	5.9041	3.3859	1.6678	2.3254	22.2107	4.4572	9.6786	7.7022	1.7146	1.9132	2.5349	14.5535	12.5767	22.2988	2.6754	1.6016	2.1812	3.47	17.221	1.5331	1.4289			0.55642	7.27878
17.1563	3.623	22.4574	2.493	3.0875	15.6431	3.2295	10.118	4.7069	7.3029	3.3427	1.2516	2.321	23.852	3.7576	11.0349	7.1807	2.5039	1.2677	2.0047	11.2906	11.4179	24.1691	3.1228	1.7407	1.9873	3.6206	15.9332	1.8857	1.6651			0.56031	7.1728
17.2755	4.096	24.7577	4.0899	3.2346	14.3617	3.0458	7.6098	4.9511	7.7189	3.6477	1.4526	2.3455	18.8029	4.5645	8.9886	7.1497	1.9483	1.2839	2.8247	12.1263	11.9338	25.6389	3.0666	2.0992	1.3463	3.3723	19.5406	1.7823	2.0903			0.564203	7.23691
17.3946	3.544	21.5816	3.3068	4.151	14.3005	3.1574	8.2883	4.5618	6.9579	4.1247	1.5242	2.9354	14.8546	3.9033	9.6698	7.7201	2.056	1.7609	3.3831	11.255	11.0287	26.6151	2.2123	1.8694	2.0057	3.3073	18.736	1.9608	1.7371			0.568093	6.98306
17.5138	3.605	18.7449	3.6608	3.922	15.0111	2.5912	9.31	4.9958	7.2949	2.8828	1.5482	2.9495	12.8836	3.9705	8.9238	7.3811	2.2479	2.383	3.5178	12.2567	13.4183	26.7378	3.1923	1.544	2.2605	3.3409	18.4133	1.7809	1.7673			0.571986	6.984
17.6329	3.904	18.3326	3.3215	3.4664	13.1144	3.1008	9.7001	4.1649	7.9163	3.4531	1.5069	2.6391	10.8296	3.6954	10.5146	6.377	2.2764	1.6217	2.9628	12.8934	13.8571	28.8592	2.5574	1.5386	2.0634	3.0086	16.9707	2.346	2.0025			0.575875	6.86188
17.7521	3.004	19.4638	2.8477	3.8216	14.3025	2.8461	10.514	4.5807	8.4951	3.1263	1.4932	3.0275	9.0748	3.7109	9.9765	6.9042	2.1105	1.7712	2.8677	13.0814	13.4924	33.6062	2.9273	2.3434	2.0459	3.4992	18.7793	2.6058	1.4747			0.579768	7.16531
17.8712	2.947	16.5297	3.2043	5.6934	13.7036	2.2946	10.9975	4.817	7.6071	3.9677	1.8992	2.7578	10.5111	4.1514	11.5568	6.8836	1.8558	1.8954	2.4028	12.391	14.3105	31.7918	3.7921	1.4249	2.0586	2.6664	18.5017	1.9361	1.7441			0.583658	7.11355
17.9903	3.128	17.3014	3.4397	5.914	12.9723	2.5966	10.7854	4.2762	7.6396	4.1077	2.2926	2.6406	10.4377	3.8001	9.8767	5.6054	2.2733	1.9075	2.9011	12.4475	14.487	32.3203	3.0407	2.4573	2.1086	3.5019	17.6094	2.0894	1.5779			0.587548	7.08744
18.1095	3.19	18.9159	3.7687	5.6921	13.0593	2.908	9.9679	5.143	9.074	3.6035	1.6661	2.3035	11.8062	4.2204	13.2473	5.8618	1.2913	1.7214	3.1929	12.3774	15.6185	36.0031	3.8805	2.0009	1.6879	2.5991	16.4489	1.7705	1.7301			0.591441	7.40518
18.2286	3.747	18.5886	3.6391	5.9935	11.3227	3.0445	9.8875	5.1726	8.3789	3.1258	1.6515	1.9223	11.7998	3.464	13.1017	6.8645	1.6221	1.4604	2.5448	10.8969	15.267	35.1243	3.285	2.1516	1.4393	2.9033	13.3898	2.2181	1.8302			0.59533	7.09782
18.3478	3.599	19.2972	3.6209	5.4537	11.0341	2.5469	10.1906	6.5911	10.4446	3.8664	1.6582	2.474	11.0954	4.1239	13.3819	5.8607	2.2257	1.6689	2.93	10.6014	15.0335	36.5942	3.5065	2.3081	1.7936	3.6515	14.3926	1.7158	1.5906			0.599223	7.35348
18.4669	4.021	25.4127	3.917	5.5201	10.2076	2.6193	9.8724	5.7074	8.9236	3.6364	1.3737	1.9581	13.1201	3.1669	14.1842	5.3229	2.0865	1.4837	3.2838	12.4287	13.2133	37.8783	3.6971	1.6137	2.1435	3.4967	12.8445	2.0222	1.8453			0.603113	7.48278
18.586	3.468	24.8302	3.5906	4.6323	11.55	2.9343	9.2759	6.7108	11.581	3.2923	2.0425	2.9186	14.5169	4.0067	14.3341	4.8705	1.581	1.5904	2.1904	13.2214	13.9611	30.8188	3.0024	1.6225	2.1222	3.3657	12.9547	2.3917	1.9836			0.607003	7.42623
18.7052	3.577	22.401	3.5424	5.7786	11.5744	2.7472	9.4835	5.6896	11.5806	3.2217	1.8183	2.5015	15.0503	3.8125	14.2312	4.4893	2.3096	1.3974	2.5862	12.5062	14.6802	27.8649	4.2376	1.3467	1.7845	3.239	11.4853	2.2611	1.2518			0.610896	7.18792
18.8243	3.829	22.5143	3.6983	5.5677	11.7581	2.3986	9.0471	5.7358	11.4539	2.889	1.9353	2.1349	15.8669	3.5463	14.792	5.6133	2.0346	1.6089	2.4237	11.6613	15.7771	28.6513	3.5744	2.0003	2.1848	4.2068	12.9226	1.3367	1.8152			0.614785	7.34408
18.9435	3.708	19.6757	4.3073	5.8558	11.83	2.6828	8.5004	5.5389	12.4566	3.5803	1.4039	2.5699	15.0518	4.0575	13.8632	5.4874	1.6309	2.1208	2.7365	12.6741	16.1266	26.8015	3.3326	1.6612	2.0324	4.187	11.7581	1.6228	1.4802			0.618678	7.19773
19.0626	4.005	21.0875	3.4031	5.2243	13.2021	2.2901	9.1999	4.761	12.2842	3.0549	1.4486	2.2381	14.8154	3.958	14.497	4.3789	1.7325	2.0076	2.7079	11.8624	15.1805	25.0473	3.2642	1.715	2.0705	3.5894	10.7035	1.6531	1.844			0.622568	7.00779
19.1817	4.588	19.2569	3.4351	6.919	13.8643	2.2875	10.1745	5.1216	11.3783	3.0474	1.9579	1.9318	17.6348	4.4894	14.255	5.3145	1.229	1.2951	2.2392	11.8525	18.3727	24.0935	3.2441	2.057	2.0405	3.9182	11.2478	1.6616	1.397			0.626458	7.25187
19.3009	3.944	21.9654	2.8466	6.0906	11.3476	2.7336	9.3261	5.7658	12.2196	2.5155	1.5642	2.6757	19.5362	4.0787	15.1848	4.6767	1.1457	1.6582	2.8011	11.3115	17.7915	21.5401	3.3131	1.8514	1.9053	3.3563	12.263	1.5954	1.6913			0.630351	7.19638
19.42	3.901	20.5634	4.0809	6.8452	11.1557	2.3893	9.2079	6.0194	10.235	3.5224	1.3866	2.0561	21.2294	4.0174	14.7919	5.0825	1.9404	1.9671	3.8551	12.6544	17.3025	20.945	2.8292	2.0045	2.5818	3.5075	11.0847	1.9523	1.3791			0.63424	7.2582
19.5392	4.261	23.492	4.3193	7.2022	10.8772	2.6238	9.0625	7.1177	9.757	2.2186	1.9612	2.162	23.5071	4.0522	14.8542	3.7901	1.5545	1.7093	3.9519	11.1819	15.4608	20.3865	2.9948	2.2488	1.8637	4.1929	9.9223	1.7737	1.5573			0.638133	7.24333
19.6583	3.644	18.3649	4.1261	7.1466	9.5411	3.008	8.0975	5.3753	9.0708	1.9761	1.6011	2.0476	21.0858	3.2509	15.3352	4.5483	1.6737	1.977	3.78	13.7555	16.4806	22.0871	2.9658	1.8135	1.4695	3.9061	10.2786	1.7665	2.0684			0.642023	6.97385
19.7775	5.12	17.9308	4.0994	5.5136	8.8404	2.7937	8.1242	7.0941	12.1574	2.6942	1.6565	2.7547	19.2013	3.5787	16.5903	3.5212	1.7495	1.7481	2.5335	13.1639	18.727	23.494	3.602	1.8216	2.1615	3.5013	9.9623	2.1676	1.3073			0.645916	7.15897
19.8966	5.017	17.6836	4.1717	4.8288	8.0505	2.2772	8.8133	6.4502	10.3575	2.5917	1.7371	2.3495	17.6489	4.9047	14.072	2.7938	1.0907	1.3277	2.8993	12.8196	21.5775	24.6085	2.9424	2.0159	1.7648	4.6752	8.5394	1.7073	1.497			0.649806	6.93837
20.0157	5.612	16.0331	4.562	5.4105	7.884	2.8143	8.2288	6.8215	10.2239	2.2	1.8921	3.3637	15.777	3.6451	12.3528	3.0308	1.6435	1.7784	2.4393	11.8318	21.6008	26.251	3.1176	2.003	1.7945	4.3454	8.6924	1.9229	1.7687			0.653696	6.86348
20.1349	5.36	15.9424	3.7321	5.4656	8.3792	2.5053	8.6898	8.691	11.0366	2.5582	1.5721	2.9358	16.5011	3.5639	12.5974	3.5415	1.179	1.964	2.2877	13.7491	20.2091	28.0242	3.3698	2.2386	2.1662	4.6161	9.1186	2.2777	1.4786			0.657589	7.09485
20.254	5.695	15.3831	4.1328	4.7467	8.8804	2.5563	8.1995	7.6749	12.0076	2.3863	2.0467	2.9004	14.473	3.8734	11.9972	3.6272	2.0278	1.3413	2.6689	14.5549	19.1191	30.4348	3.5753	2.5526	1.723	4.9145	10.6199	1.7636	1.8798			0.661478	7.164
20.3732	5.679	16.513	4.3296	6.2504	8.8425	2.3375	8.0947	7.5112	11.2736	2.5734	2.5057	2.034	17.7693	3.5234	14.2376	3.1395	1.7959	1.7978	2.8726	15.5496	18.9354	32.8588	3.7349	2.2523	2.1732	5.5461	12.9419	1.6314	2.1343			0.665371	7.61512
20.4923	6.318	14.3032	5.2245	6.0046	10.264	2.6356	11.4185	7.8063	12.8992	2.0592	1.5538	2.6204	14.0592	3.7707	11.136	3.4403	2.3339	1.4736	2.3144	17.576	17.928	31.3931	3.3159	2.4611	2.0713	4.2368	11.9966	1.9777	1.8297			0.669261	7.46281
20.6114	7.125	13.5589	4.4574	5.5421	10.3345	3.2328	9.3707	10.3441	14.1929	1.5258	1.5892	2.5859	14.505	3.9888	11.2404	3.6475	1.379	1.4358	3.5702	16.0793	20.4244	37.034	3.6326	2.2968	1.7441	5.1894	13.9522	1.9402	1.5836			0.673151	7.84492
20.7306	8.795	12.3466	4.4433	5.5143	10.8659	2.9468	9.1021	11.3683	15.1502	2.5612	1.6022	2.6699	13.7991	3.3962	11.3241	2.861	1.4145	1.952	2.5508	15.3868	20.4901	43.4572	3.3959	2.2615	1.8086	5.0805	15.598	1.9381	1.7651			0.677044	8.1326
20.8497	9.374	13.4207	4.184	7.3862	10.0582	2.5752	9.1078	13.4734	15.8716	2.1739	1.424	2.4219	14.7005	3.7738	11.8549	2.7214	1.6517	2.0649	3.139	13.8593	22.8942	45.4577	3.6408	1.9848	2.2279	4.1685	14.1966	1.4979	1.3073			0.680933	8.36593
20.9689	9.484	14.2608	5.296	7.4769	9.9442	2.6227	8.225	12.9357	14.6356	1.8475	1.1611	2.2504	14.6339	4.4944	11.461	3.7217	0.9857	2.1734	3.4847	13.936	22.3215	47.9694	4.3255	1.7297	2.2535	4.4603	15.9179	1.5537	1.1887			0.684826	8.50865
21.088	11.373	14.1763	4.5191	7.4802	9.2038	3.0946	8.7637	14.3906	15.1797	1.8153	1.5836	2.8553	13.1365	4.3441	12.9405	3.297	1.3549	1.9511	3.364	12.666	25.7239	49.8106	4.4413	1.6574	2.141	3.3078	15.6685	1.5354	1.0997			0.688716	8.71982
21.2071	9.79	15.0942	3.6153	7.2703	10.5278	3.91	8.887	12.6677	14.8614	2.2192	1.2774	2.725	13.2303	4.1101	14.3426	3.2879	1.5407	1.4492	2.9281	12.5833	26.8694	49.3829	4.9478	2.2286	1.9737	4.2298	16.2311	1.616	1.4124			0.692606	8.80032
21.3263	11.767	16.946	4.4879	7.0371	7.951	2.9835	8.334	12.686	15.8128	1.8981	1.8519	2.4141	11.2371	4.3942	14.4248	2.6108	1.4591	1.5093	3.72	12.2355	25.9748	51.7971	4.705	2.0936	1.8242	3.5813	16.6295	1.998	1.585			0.696499	8.82582
21.4454	13.642	20.8302	4.1544	6.7438	8.389	3.5791	8.5657	13.5505	16.0556	2.2248	1.5792	2.9629	11.0708	4.4288	19.1848	3.0515	1.3243	2.2215	2.9716	11.6374	25.6219	47.184	4.482	2.5876	2.0172	3.5499	17.2503	2.1622	1.1294			0.700388	9.1087
21.5646	13.075	26.9041	4.908	6.9447	9.048	4.0734	8.2676	15.5312	15.1677	2.2501	1.8685	2.6928	10.7123	4.7935	19.828	2.1725	1.5373	1.7781	3.0832	11.3042	25.8518	48.1498	4.0485	2.7748	2.1053	3.3087	16.6868	2.0957	1.101			0.704281	9.38147
21.6837	14.384	30.1584	4.4743	6.7802	8.4963	3.7944	7.7259	15.3678	15.2019	2.051	1.3194	2.8042	11.1424	3.9293	19.6508	2.8728	1.4088	1.7642	3.3612	10.1765	23.5779	44.2195	4.719	2.4515	1.9711	4.8412	15.6625	1.899	1.3694			0.708171	9.22672
21.8029	14.161	32.6907	4.6781	7.3018	8.1601	4.0212	9.4132	17.4107	14.0996	1.9118	1.278	3.455	9.8584	4.198	18.8611	2.7601	1.6342	1.7249	3.4011	10.9788	24.3988	43.2953	3.92	2.1413	1.9329	3.032	13.5334	1.7014	1.6035			0.712064	9.22608
21.922	13.079	38.791	4.5826	6.2802	9.4088	3.7613	7.9637	17.38	12.9658	2.7008	1.5003	2.6022	9.6252	3.6584	17.5315	2.8403	1.3847	1.5777	3.627	11.9501	23.4624	39.4558	3.2578	2.1709	1.7711	4.1333	15.0308	1.7076	1.3826			0.715954	9.15803
22.0411	14.235	42.2098	6.0056	5.6633	8.2655	4.2191	8.6454	17.0029	13.5288	2.0786	1.753	3.2592	10.5864	3.8425	16.4092	2.7204	1.3831	1.2616	3.6552	13.981	24.8275	34.6272	4.2182	2.0778	2.0712	4.0461	14.6037	1.8276	1.4516			0.719843	9.32609
22.1603	15.419	42.7238	8.5828	5.7393	9.1562	3.1492	8.1589	15.1426	13.0802	1.7194	1.4681	2.6452	12.2025	4.397	16.6569	2.5803	1.0889	1.8938	3.8276	13.6001	26.8621	32.1157	4.3943	2.1093	2.4678	3.5213	18.0566	1.8485	1.6864			0.723736	9.52737
22.2794	16.774	42.5981	8.8833	4.5153	9.9817	3.5778	7.5068	14.4452	12.4266	2.4575	2.1978	2.5397	11.9852	4.459	15.4751	1.8718	1.3692	1.9508	4.462	13.9385	24.0948	30.4119	4.0678	2.0977	2.097	3.2056	17.4879	1.9612	1.7146			0.727626	9.32944
22.3986	20.468	44.762	11.437	4.8481	12.4976	3.7401	7.1171	14.5995	11.552	2.1872	1.3004	2.6899	13.7531	4.027	15.5706	1.9579	1.4944	1.7344	3.06	15.4037	23.3496	29.8622	5.5842	2.2872	2.1939	3.1471	17.5068	1.8453	1.9515			0.731519	9.72165
22.5177	22.292	47.8609	14.0759	4.8825	11.8588	3.7828	6.2369	13.4171	11.7743	2.212	1.8611	2.829	12.9636	3.2825	15.5417	2.4663	1.8888	2.034	3.7417	14.6392	21.2027	31.8414	5.0681	1.9306	2.4304	3.6836	15.3581	2.204	1.8062			0.735409	9.83332
22.6368	24.496	50.2657	15.9535	4.0748	12.4562	4.3179	6.7277	16.0008	11.5913	1.9121	2.3522	2.6282	12.704	4.7345	15.6575	1.6302	1.4014	1.792	4.4215	16.4059	22.4786	30.5385	4.5191	1.9842	2.4037	3.0589	14.7586	2.1789	1.8537			0.739298	10.1827
22.756	27.667	51.9375	18.3482	4.8412	12.8286	3.0173	5.9321	18.9877	13.4792	1.8721	1.4528	2.5217	12.3131	4.2793	15.6427	1.8877	1.5793	1.8474	4.5159	16.6914	22.1279	25.8021	5.585	2.6165	2.0828	2.6101	14.3653	2.3024	1.6018			0.743191	10.3702
22.8751	25.597	48.6647	19.4783	4.7576	13.86	4.0034	4.9905	21.3259	14.9723	2.1076	2.0092	3.1496	14.8113	3.7233	14.5522	2.1102	1.5319	1.7346	4.6697	17.4845	24.1649	25.7774	5.5734	2.4463	2.1423	3.4942	14.4421	2.1106	1.598			0.747081	10.596
22.9943	26.29	46.4533	23.2978	4.7658	13.4403	4.4002	5.3529	23.9413	14.8951	2.2875	1.4272	2.2559	14.368	4.0348	14.1052	2.2123	1.7658	1.6621	5.3532	16.4682	26.1798	27.3072	6.5499	2.4213	1.9343	3.2631	16.0624	1.7802	1.5345			0.750974	10.89
23.1134	30.829	43.9595	22.5635	4.6307	15.4416	3.8997	4.3278	21.0382	16.0473	2.2911	1.8264	2.6144	14.0407	4.5521	15.4727	1.9091	1.7393	1.5532	4.3052	15.8067	26.9664	23.0835	6.4255	2.6212	2.3622	3.054	13.7495	2.0697	1.2873			0.754864	10.7058
23.2325	31.883	42.2265	22.3342	6.1726	14.9583	3.1934	5.8798	18.2116	15.124	1.9735	1.8491	2.3793	13.0333	4.6125	14.1659	1.9019	1.4609	1.71	4.9454	14.0041	30.5064	24.2089	5.6681	2.9976	2.6376	3.3455	13.591	2.5182	1.4227			0.758753	10.6523
23.3517	29.812	40.7971	18.3575	6.2208	17.6665	3.9624	5.5089	18.0336	19.0622	2.283	1.4756	2.1642	12.0057	5.1473	13.9785	1.9653	0.999	1.696	4.4041	13.3773	29.4258	24.116	5.2382	2.6876	2.5411	3.2602	14.1373	2.2924	1.5656			0.762646	10.489
23.4708	29.574	35.3005	17.7296	6.6275	22.3134	4.1242	5.6693	17.963	16.6157	2.0155	1.6961	2.9746	9.9239	5.2736	12.7323	1.6502	1.5929	1.8895	5.2687	13.668	32.4066	25.1139	6.4618	3.1291	2.7589	2.9958	14.5348	2.683	1.4999			0.766536	10.5581
23.59	29.734	31.6243	14.7974	7.1547	23.1794	3.5332	5.3601	19.9212	18.4967	2.1	1.6949	2.5254	11.1863	5.0716	13.0587	1.7526	1.8118	1.9387	6.2023	14.4856	36.8099	25.1123	6.5284	3.275	3.1799	3.4283	16.735	2.3326	1.7604			0.770429	10.8549
23.7091	29.489	25.4941	13.4745	10.5361	22.7366	4.248	5.4219	20.3234	19.9335	1.7155	1.7116	2.0792	10.0533	5.0578	14.0421	1.7986	1.6696	2.4826	6.434	15.6405	40.1742	28.0762	5.3763	3.4454	3.4829	2.9101	12.8169	1.748	1.2947			0.774319	10.8161
23.8283	30.688	21.4085	13.9397	11.9611	23.6227	3.5178	5.5845	19.8276	18.9214	1.8426	1.4903	2.1287	8.9571	5.4561	14.5313	1.7535	1.2267	2.0545	5.8122	15.592	43.2385	29.5227	5.6158	3.2642	3.9404	3.72	13.0926	2.7889	1.9577			0.778212	10.9468
23.9474	29.94	15.7835	15.6371	13.1736	25.5905	4.0557	5.078	19.1396	20.3014	1.788	1.8631	2.5995	8.529	5.8541	13.7849	1.7776	1.5549	2.1671	5.8783	18.2026	41.0467	30.825	5.0447	2.7937	4.5802	3.2806	14.3331	3.2094	2.2478			0.782101	11.0365
24.0665	30.023	13.9109	13.8499	16.0907	25.9355	4.2722	5.9815	17.7501	17.1337	1.5559	1.5512	2.7094	8.1531	5.9043	14.4923	1.8367	1.6404	2.2187	6.6987	19.2631	40.1264	32.3899	5.2478	3.8128	3.5883	3.2297	15.2569	3.4368	1.5096			0.785991	11.0196
24.1857	29.635	10.5155	17.4479	16.1663	25.7111	4.1718	5.8563	20.6303	21.9717	1.6979	1.7054	2.5696	7.8566	5.852	12.9563	1.1897	1.275	2.165	5.8513	20.3365	35.3688	33.8762	4.8891	5.061	4.6149	3.5637	17.9705	2.7805	1.8124			0.789884	11.2241
24.3048	32.077	9.7144	19.1479	18.1539	24.624	4.16	6.5427	18.9206	18.6249	1.9389	1.7786	2.736	8.4172	6.3105	12.8062	1.4005	1.424	2.1633	6.103	21.4703	34.0688	34.5834	5.7089	5.0533	5.2893	3.3075	17.5555	3.3639	2.1787			0.793774	11.3663
24.424	30.475	5.8985	20.634	19.2009	24.3439	5.2584	6.8775	18.5295	19.5667	2.478	2.0155	2.2123	9.4941	7.5802	10.9817	1.4973	1.4186	2.2365	5.3534	22.5228	30.0344	34.9759	6.4729	4.4113	5.8241	3.4639	18.8223	3.7812	2.0406			0.797667	11.3242
24.5431	26.902	6.2326	20.1943	20.3462	23.9645	6.0321	6.3407	20.3025	20.8557	1.9916	1.567	2.9178	9.8108	8.0597	13.0487	1.3951	1.4619	1.6829	5.3849	23.4292	28.3886	36.4715	6.4735	4.9677	6.7929	4.0066	20.7605	3.7429	2.3995			0.801557	11.5836
24.6622	24.235	4.9855	22.7451	22.285	23.7538	6.9284	6.6222	17.6601	20.4892	1.8909	1.371	3.1619	9.1909	8.312	12.2569	1.659	1.3063	1.6735	5.4265	24.3404	28.528	39.2408	7.2654	6.9291	8.9342	4.3214	20.3418	4.3623	1.7551			0.805446	11.7921
24.7814	24.069	3.3485	20.047	23.764	24.0289	10.2683	7.4003	16.6641	18.0214	2.2773	1.6154	2.8218	7.7682	8.5678	11.2503	1.6467	1.3756	2.2438	6.6054	24.5118	28.0474	36.9331	6.8305	8.0583	10.0498	4.7219	18.8902	5.2195	1.7841			0.809339	11.6838
24.9005	23.623	3.949	17.0632	23.6691	20.2103	11.3283	7.2199	15.2212	18.7599	2.3767	1.9271	2.9496	8.8002	9.0029	10.2276	1.6533	1.2281	1.9017	6.2458	24.8037	29.6943	39.0049	9.2812	7.8923	11.2749	5.8731	20.2032	5.8268	2.1696			0.813229	11.8407
25.0197	21.362	3.131	14.5946	27.6938	18.8302	12.8596	7.8872	17.5058	20.3841	2.1603	1.6987	2.6955	7.5627	8.9808	10.0299	1.6667	1.4906	2.3918	6.2532	23.9363	25.0622	43.0763	11.245	8.6133	11.5767	5.9213	18.9176	6.5899	2.2773			0.817122	11.9446
25.1388	19.678	2.4383	11.0014	30.0736	16.1414	17.1333	6.799	16.2226	19.1709	1.9337	1.7472	2.8447	7.7411	10.998	9.4024	1.4531	1.5144	2.3327	5.6896	23.4045	25.3717	40.5198	13.8657	10.0244	11.6879	6.6816	16.884	7.5134	2.0719			0.821012	11.8048
25.258	19.664	1.4867	8.3149	31.7002	13.2122	17.8635	8.0198	13.136	18.3734	1.6629	1.3694	2.7841	7.3691	9.1473	9.1208	2.0586	1.4497	2.432	5.4929	20.2563	24.273	46.3459	15.3086	10.7312	12.4939	8.4511	15.8375	9.2079	2.7235			0.824905	11.734
25.3771	18.21	1.7935	5.9215	33.3256	13.1118	18.5949	8.6976	12.9574	17.0392	1.8352	1.7729	3.3381	7.8627	11.7938	9.7547	1.5027	1.1715	2.6681	7.1923	16.4792	23.9968	49.276	18.7354	12.8348	12.6268	12.2623	15.9457	8.6702	3.0769			0.828794	12.1534
25.4962	19.458	1.9805	4.8422	38.2255	12.9596	18.4123	10.0272	12.2876	18.2285	1.937	1.7323	3.1049	8.2113	13.0343	9.8693	1.3573	1.8662	1.5688	7.4898	15.1877	24.4131	41.4195	22.0436	14.7281	14.0212	12.8609	14.4564	8.9796	3.478			0.832684	12.3511
25.6154	19.074	1.5719	3.021	36.5787	11.4925	16.7594	11.9271	9.9746	17.6117	1.8337	1.1383	3.2673	7.9917	13.1102	7.6677	1.4461	1.5317	1.6069	7.5118	13.8563	22.7452	36.5979	26.8294	17.664	15.1991	15.1235	12.1496	10.5627	3.0713			0.836577	12.0316
25.7345	20.262	1.2936	2.264	37.3576	8.7889	16.2398	10.99	11.0367	15.0596	1.8456	1.127	2.6051	9.2202	14.502	7.0514	1.7976	2.1209	2.9709	6.5422	13.6727	19.5241	31.5261	29.3164	18.2099	17.7664	17.6938	12.5794	13.0359	4.0166			0.840467	12.0833
25.8537	26.696	1.3456	1.6659	33.1238	7.2532	17.9793	11.363	9.745	16.444	2.1017	1.1042	3.2771	10.3016	15.5209	6.9396	1.6861	1.3114	2.2287	7.3923	12.3134	18.3567	27.6153	32.1503	18.1448	18.0132	21.651	13.3848	14.8562	4.4168			0.84436	12.358
25.9728	25.617	0.9937	1.9501	29.8184	6.7299	16.6082	13.9878	9.3562	17.1375	2.087	1.2033	2.8924	12.114	17.8116	7.5006	1.0994	1.4092	2.6914	7.3067	12.2245	15.4555	24.2144	33.6903	18.5143	21.8488	22.792	13.5062	14.3101	7.3391			0.848249	12.49
26.0919	22.922	1.0554	1.6074	28.0265	5.3265	16.3761	12.0665	9.5617	17.7213	2.2925	1.5576	3.208	11.9892	18.1378	8.07	1.4782	1.6979	2.3968	8.1619	11.4133	13.7894	27.2304	34.6602	16.22	22.7435	19.983	15.7599	14.1551	10.9606			0.852139	12.4334
26.2111	23.382	0.5827	1.2135	22.3582	5.844	17.1344	11.6859	8.4093	18.8764	2.3095	1.8418	3.4342	13.9083	19.586	7.8904	1.3162	1.5838	1.9226	8.1639	11.3641	10.5987	28.5761	35.8898	14.9552	23.7265	18.3657	17.5101	18.7891	17.4701			0.856032	12.7134
26.3302	24.888	0.6105	0.9333	18.3722	3.7187	15.1049	10.1578	7.1721	16.565	2.0374	2.0346	3.3577	13.3567	20.7337	8.2189	1.6097	1.574	2.3869	7.422	9.7886	9.3342	30.6752	35.022	15.1114	21.2093	13.9772	20.8466	16.2625	22.2246			0.859922	12.2312
26.4494	22.69	0.702	0.6851	14.2451	3.1279	12.6495	8.1628	6.4365	14.9384	2.2377	1.9323	3.6445	14.1867	21.937	8.6095	1.4803	1.2902	2.4256	8.8447	6.6076	7.8195	32.1287	40.049	16.2083	18.5636	13.6695	23.7047	21.2048	26.1899			0.863815	12.2887
26.5685	23.89	0.9981	0.6731	8.7588	2.139	9.9827	6.1529	6.8399	15.3511	2.076	1.8433	3.4996	16.0688	25.7717	9.4211	1.7273	1.4683	2.0933	8.6731	4.9767	6.3167	38.3153	45.0538	15.9799	16.9788	14.6841	24.3833	24.7481	32.8343			0.867704	12.8172
26.6876	27.84	0.688	0.5144	5.6963	2.0309	6.7363	4.2522	5.3386	13.5929	2.4535	2.0062	3.4834	13.6136	26.2746	8.4529	1.0837	1.1921	2.4211	8.1853	5.2367	5.3923	34.6827	42.6435	17.0573	14.6087	13.8042	26.2041	26.0462	32.449			0.871594	12.2062
26.8068	26.579	0.6433	0.7223	3.9669	2.1646	4.8509	4.1135	4.9697	12.8406	3.1179	2.1271	3.1389	13.8519	29.832	10.0548	1.5189	2.0784	2.3824	9.3951	3.6634	4.7701	34.4966	40.0777	17.0394	12.3768	15.2407	27.6142	24.9004	34.0501			0.875487	12.1578
26.9259	26.826	0.6577	0.6092	2.5981	1.708	4.9183	4.1259	4.1957	13.117	3.4655	2.2575	3.9271	13.3582	37.2313	9.8072	1.445	1.7336	2.3422	7.88	2.8764	3.2505	35.3291	32.1915	18.0832	10.1263	14.8293	31.4533	27.371	33.5177			0.879377	12.1114
27.0451	26.009	0.2384	0.5485	2.0512	1.1271	4.3565	3.0418	4.3551	12.1753	3.2742	2.9013	3.4897	14.993	34.457	11.4934	1.9611	1.4963	2.4263	8.4305	2.3781	3.1757	37.8404	28.8037	13.5879	7.6696	17.1075	35.8811	27.2757	32.9053			0.88327	11.9121
27.1642	25.617	0.3046	0.53	2.2349	1.0201	3.6129	2.3652	3.2285	10.2383	3.6984	3.2244	4.0226	15.3471	37.6812	10.4965	2.1997	1.4254	2.0818	8.7893	1.6285	2.1617	35.7525	23.0776	13.2703	6.1617	17.3862	38.7854	26.1196	32.909			0.887159	11.5645
27.2834	21.826	0.118	0.2636	1.7834	1.4152	3.2707	2.1295	3.3306	8.7929	3.7207	3.3145	4.22	17.3605	38.3369	11.7661	2.4355	1.2414	1.8345	8.9198	1.2158	2.2028	34.0277	18.1604	9.5508	6.2454	14.0445	42.4311	22.9172	31.8128			0.891052	10.9893
27.4025	18.174	0.451	0.2769	2.0024	0.8679	2.4951	1.5542	2.4357	9.1513	5.9263	4.3692	5.3514	20.2154	36.8583	13.2727	2.3273	2.1905	2.1297	8.474	1.3242	2.3042	32.9693	15.5902	7.4383	4.6199	11.3599	43.954	19.6144	27.2207			0.894942	10.5144
27.5216	17.56	0.5112	0.4169	1.5252	0.8552	1.926	1.316	2.6304	8.3422	4.973	6.4013	5.2637	20.9773	32.7676	13.4569	2.0569	1.9994	2.0548	8.3108	1.2605	1.5037	25.7799	14.7242	5.8995	5.4654	8.7321	44.1005	13.9883	21.0829			0.898832	9.51317
27.6408	16.761	0.1738	0.4021	1.3316	0.6772	1.8578	1.4497	2.2161	5.3783	6.8671	7.3742	5.3633	20.1573	26.2415	14.5317	2.4773	1.5787	2.2722	9.3857	1.2512	1.4317	18.6591	11.2168	5.1219	5.3156	5.6639	40.5339	9.0475	17.536			0.902725	8.35428
27.7599	12.88	0.2034	0.0698	0.9703	0.9626	1.0323	1.5344	2.4421	4.8848	7.1611	9.6072	5.8314	19.4563	21.7277	16.4655	2.2932	1.7974	2.6442	11.5042	0.9489	1.7803	14.7787	11.2947	4.4855	4.4384	4.2925	30.5054	5.391	9.6254			0.906614	7.27616
27.8791	12.849	0.1092	0.1047	0.8887	0.5867	0.9381	1.526	1.6728	4.0842	7.8427	13.0522	6.6251	18.77	18.4817	16.2306	2.3049	2.1514	2.9423	11.4302	0.8492	0.987	9.5843	7.6702	3.9532	3.6041	4.3096	23.1586	3.9014	6.4922			0.910507	6.45173
27.9982	10.544	0.091	0.1193	0.9054	0.4231	1.1493	0.9749	1.3057	3.5547	10.4174	20.2943	6.9016	17.954	12.5536	15.5849	2.1404	2.3993	2.9805	15.3767	0.9409	0.97	6.6871	6.2735	3.6513	2.5013	3.0158	16.7653	3.3908	5.2209			0.914397	6.03748
28.1173	7.559	0.1026	0.1821	0.9932	0.4936	0.9571	0.9627	1.5073	2.9347	10.8176	21.9046	7.4959	18.397	10.4325	17.8296	3.1613	2.641	3.9532	23.5156	0.4662	0.8562	6.2831	4.8246	2.9918	2.585	3.354	14.0417	2.9747	3.6649			0.918287	6.13389
28.2365	6.972	0.0027	0.1703	0.6852	0.2878	0.6936	0.9073	1.2564	2.5818	14.8801	25.3477	8.7902	21.477	8.2073	18.7342	2.7654	3.4533	3.7278	30.5164	1.0247	0.792	5.9239	4.2258	3.6921	2.4653	2.3237	10.0181	2.3655	3.1517			0.92218	6.46342
28.3556	5.114	0.0957	0.1046	0.4022	0.251	1.0941	0.9139	0.8954	2.1922	14.0867	24.7089	9.4837	23.0178	7.0977	18.6164	2.9876	3.0137	3.4746	29.043	0.812	0.8832	3.598	3.3583	2.9594	2.1453	1.7863	10.2584	1.5414	2.4322			0.92607	6.08164
28.4748	4.738	0.1675	0.0987	0.6828	0.5703	0.622	0.7746	1.4017	2.2704	14.8035	25.8749	11.237	25.4879	6.8828	19.9934	3.3123	3.0057	5.3464	32.4232	0.4562	0.6688	3.122	3.0827	2.5222	1.5295	2.015	7.3298	1.6548	1.8259			0.929962	6.34138
28.5939	3.827	0	0.1094	0.3828	0.2073	0.3571	0.5696	0.643	1.0274	12.7097	28.1988	13.7143	28.3101	5.5583	21.8278	3.7878	4.4031	7.1136	28.1036	0.2715	0.6769	2.5506	2.2221	2.0758	1.5192	1.5105	6.5122	1.1451	2.0248			0.933852	6.25377
28.713	3.666	0.0475	0.2676	0.5223	0.303	0.5577	0.5357	0.6958	1.0634	14.6883	31.5323	15.7674	29.1425	4.0236	19.1988	4.5668	5.4358	9.146	22.8805	0.2572	0.8093	2.1195	1.9689	1.4744	1.591	1.9438	5.3938	1.3447	1.6922			0.937742	6.29779
28.8322	2.959	0.0649	0.1558	0.4381	0.5984	0.1995	0.7471	0.651	1.7196	11.2435	27.1096	16.4891	29.9567	4.13	15.863	5.5624	6.3561	12.5485	20.101	0.1163	0.4083	2.39	1.5197	1.8504	1.4482	1.3203	3.9257	1.2425	1.4732			0.941635	5.95131
28.9513	2.954	0.0833	0.121	0.3964	0.2959	0.5641	0.369	0.4009	1.6794	11.531	26.8827	18.9562	29.4306	4.3851	13.7744	6.2535	7.9566	17.2127	19.6337	0.0881	0.5835	1.7766	1.4495	1.4391	1.201	1.2282	3.8245	1.1216	0.889			0.945525	6.08557
29.0705	2.822	0	0.1536	0.3443	0.1608	0.4802	0.5916	0.4347	1.2598	8.9769	24.3947	22.0343	29.1646	2.922	12.759	7.5887	9.6385	18.3031	17.934	0.214	0.637	1.398	1.5971	1.8131	1.1093	0.9514	2.8077	0.8511	1.2952			0.949418	5.95299
29.1896	3.238	0.0927	0.1107	0.6612	0.0817	0.3904	0.3576	0.6733	0.752	7.6666	18.3593	24.7382	29.0545	2.496	10.5493	9.1916	10.0287	18.691	14.9664	0.249	0.4333	1.0888	1.606	1.3724	0.9223	1.0202	2.7107	1.2253	0.973			0.953307	5.64483
29.3088	2.487	0.1639	0.1207	0.2308	0.2088	0.2704	0.184	0.2907	0.5048	6.1437	12.0495	26.0599	27.4092	2.3695	8.0108	11.5191	12.5764	22.2039	12.4289	0.2983	0.5527	1.0636	1.3635	1.2652	0.8527	0.8695	2.5714	1.2722	0.6409			0.9572	5.37869
29.4279	1.631	0.0066	0.0124	0.3637	0.106	0.2264	0.3902	0.3866	0.9379	7.1393	9.2583	26.3039	22.6435	2.0587	6.4291	14.2265	13.5849	24.8234	9.5724	0.2675	0.5618	1.3831	1.3331	1.3566	0.8051	0.5109	2.9064	0.9696	0.8572			0.96109	5.20869
29.547	1.942	0.0452	0.1381	0.1743	0.205	0.2668	0.3279	0.1169	0.6773	5.1341	6.5245	23.7332	18.3248	1.7529	4.8639	17.967	15.5504	21.2644	5.0556	0.1181	0.4017	1.3873	1.3037	0.904	0.3628	0.8246	2.7915	0.7934	0.9026			0.96498	4.61566
29.6662	1.398	0.0987	0.1177	0.0612	0.1601	0.1663	0.2728	0.3144	0.63	3.5547	5.9797	20.5597	16.4958	1.6883	3.7811	22.4583	16.9876	17.7095	2.9744	0.2507	0.4661	1.007	1.4786	0.9185	0.654	0.6766	1.6003	0.6871	0.4331			0.968873	4.26139
29.7853	1.655	0.014	0.0043	0.11	0.368	0.1891	0.5532	0.4405	0.992	2.945	4.5345	17.5254	12.8355	1.5434	3.1225	31.8876	19.7721	14.1366	1.8085	0.235	0.2919	0.9225	0.9124	0.7005	0.3807	0.4433	1.608	0.7183	0.4162			0.972762	4.17469
29.9045	0.899	0	0.1032	0.1942	0.1929	0.2093	0.1277	0.2337	0.4668	3.087	3.7743	13.4814	11.2061	1.4132	2.3017	33.0245	22.6742	15.5042	1.2049	0.2583	0.4653	0.559	0.753	0.5707	0.3955	0.4987	1.1016	0.6131	0.4177			0.976655	3.99073
30.0236	1.132	0	0.0043	0.0633	0.1047	0.1585	0.0049	0.3381	0.6149	2.2446	4.6436	11.7709	9.4398	1.0944	1.8456	34.2677	24.7833	15.5643	1.1955	0.4161	0.263	0.6578	0.5964	0.9446	0.2603	0.5718	0.8645	0.8032	0.9837			0.980545	3.9873
30.1427	0.949	0.0048	0.0502	0.0049	0.1397	0.2492	0.0922	0.1254	0.4611	1.8954	2.9541	9.6677	6.7482	0.9365	2.075	32.3012	31.6296	16.0726	0.8362	0.1331	0.1016	0.7305	0.54	0.5128	0.2616	0.3461	0.9307	0.7279	0.2148			0.984435	3.85145
30.2619	0.853	0.2057	0.0236	0.0551	0.2891	0.125	0.199	0.3891	0.7201	1.8288	3.026	7.0283	4.916	0.6285	1.2118	27.0608	32.398	20.1573	0.5037	0.1855	0.2107	0.4698	0.7	0.1852	0.2143	0.2648	1.0148	0.3829	0.2982			0.988328	3.63949
30.381	0.94	0.0527	0.053	0.1489	0.1213	0.0987	0.0197	0.1874	0.3348	1.3656	2.3406	5.4422	3.6396	0.7704	1.269	24.014	30.6792	19.7573	0.5467	0.2155	0.4808	0.533	0.584	0.3843	0.4445	0.345	0.6918	0.4267	0.6551			0.992217	3.32903
30.5002	0.588	0.0049	0	0.1078	0.0924	0.1086	0	0.3011	0.6653	1.5745	2.1959	4.8137	3.5472	0.5973	0.7591	17.49	19.5837	16.3647	0.6246	0.154	0.165	0.7302	0.5836	0.4182	0.5482	0.2608	0.5272	0.4372	0.4681			0.99611	2.54177
30.6193	0.663	0.0477	0	0	0.0131	0.1047	0	0.0612	0.7059	1.008	1.9173	4.3268	2.7066	0.7221	0.5102	10.4462	7.3622	9.5843	0.6992	0.1626	0.561	0.4714	0.5856	0.3157	0.3398	0.2954	0.7588	0.2642	0.3431			1	1.5509

## Sheet: Image14
X0	Y0	Y1	Y2	Y3	Y4	Y5	Y6	Y7	Y8	Y9	Y10	Y11	Y12	Y13	Y14	Y15	Y16	Y17	Y18	Y19	Y20	Y21	Y22	Y23	Y24	Y25	Y26	Y27	Y28	Y29	Y30	Y31	Y32			Ap-Ba	Average int
0	7.4586	6.2841	4.5806	4.434	10.7693	8.2507	7.4985	9.5884	10.1443	12.7332	8.5294	6.7189	20.904	39.574	23.962	12.3389	4.6983	4.401	4.245	7.9341	11.2074	6.475	8.9856	20.2313	13.8795	12.8762	9.5592	10.1127	12.0309	19.7325	35.2591	24.5235	19.8865			0	12.7214
0.1191	8.5283	7.5096	4.2481	4.8943	12.0943	9.0789	7.6544	9.7902	10.65	14.5433	10.1412	8.2509	23.152	39.517	26.767	15.2421	4.8658	4.754	3.759	8.6745	15.0265	7.311	8.8143	24.9925	16.8853	13.5548	9.4363	12.4016	13.4457	20.9022	38.431	26.7008	22.2582			0.00454388	14.0689
0.2383	8.9958	7.5183	4.7036	4.2648	16.7777	10.233	7.1724	9.7504	13.4877	16.9909	13.5287	8.4867	24.806	44.669	33.57	18.2761	6.0541	6.09	4.504	8.3281	16.9796	8.73	10.7847	28.1608	21.7055	16.357	10.3885	14.049	16.5755	22.6659	42.5673	29.4617	25.8644			0.00909157	16.1363
0.3574	10.7729	7.574	4.7001	5.3923	17.7212	10.8243	9.5943	12.2358	15.1617	19.9744	13.2604	10.207	25.761	46.198	35.775	22.9752	7.8657	7.728	5.339	11.8014	20.8133	11.353	15.1773	34.0407	28.5904	19.7445	13.1657	16.1226	18.2883	24.1757	44.4924	30.7297	25.1865			0.0136354	18.2649
0.4766	12.1411	8.8148	5.1741	6.2624	23.3919	11.3374	11.2301	13.5587	17.325	23.7166	17.3955	12.2585	31.662	47.367	42.556	24.5876	11.5572	9.955	5.667	16.0805	26.0014	16.452	18.9803	39.1949	33.7401	21.5521	13.922	22.5763	21.0636	28.3415	47.6515	30.3254	29.5142			0.0181831	21.2531
0.5957	12.2071	11.7639	6.2073	7.1247	28.3626	13.9439	11.1291	15.4261	21.0296	26.7077	19.6524	12.8183	32.564	52.618	47.529	29.6545	19.4861	12.21	7.648	20.5397	30.4152	21.263	24.3697	42.7608	39.8586	28.8546	18.2771	26.7811	24.959	29.8351	50.7537	34.0156	32.6403			0.022727	24.6487
0.7148	12.7502	15.2561	7.3999	7.3717	32.9029	15.039	12.6477	18.2027	25.3447	31.0294	21.727	15.995	40.836	53.919	53.309	40.4265	29.672	17.492	8.254	26.0812	36.6386	29.893	32.6425	49.6539	50.2684	39.4275	22.8837	32.7924	30.3098	33.1249	56.0309	38.9752	36.4458			0.0272709	29.5377
0.834	14.979	17.8906	7.0008	8.7612	40.7258	19.1939	15.4089	21.5192	31.2045	38.21	25.6744	18.625	42.964	63.387	63.609	47.5477	41.9583	21.079	12.325	31.3026	40.9553	38.532	41.9863	54.8785	59.9057	45.3345	29.6754	36.9865	35.0919	35.9034	61.1051	41.0198	41.4107			0.0318186	34.7318
0.9531	17.5697	23.5048	10.621	11.5525	48.1685	22.2431	17.9084	30.0414	37.7059	46.9988	31.0702	22.9758	44.713	64.617	69.686	57.649	56.0592	33.992	16.906	37.8845	44.6103	43.124	48.0234	58.6519	68.7721	52.729	35.634	45.9791	39.5141	40.5041	65.868	46.3675	47.5629			0.0363625	40.582
1.0723	20.8973	26.6025	13.2808	14.0741	52.6304	27.7409	20.5714	36.1857	42.1013	55.9286	38.2048	28.9618	53.706	79.393	75.03	66.0362	68.6379	49.437	25.05	47.8315	51.7576	53.142	56.1678	63.2875	74.5599	58.3678	47.1198	53.5604	45.8405	47.4135	71.4074	48.4565	53.3459			0.0409101	47.4766
1.1914	22.8743	32.1037	16.4111	19.5478	58.8412	38.0526	24.5238	41.6988	46.9709	61.4043	46.3405	36.6107	62.306	85.244	81.919	73.6662	83.2661	68.702	44.39	60.2887	59.5793	67.026	59.6949	70.608	80.9305	69.2106	57.3592	64.0927	56.0329	51.2847	73.9009	57.1554	60.7211			0.045454	55.5381
1.3106	23.7619	39.0819	23.3796	25.5477	61.0695	47.4515	29.2335	45.0459	53.6803	72.7948	55.9498	41.4625	70.691	93.426	87.821	80.8729	92.0133	90.482	63.122	67.6031	66.122	71.437	68.5792	67.5734	87.3357	78.1395	66.8763	68.0323	63.3709	59.5822	82.8595	64.6253	66.5321			0.0500017	62.8956
1.4297	27.2753	41.3884	28.5133	31.1268	60.599	56.1292	36.0314	54.6593	58.5613	80.3258	71.1606	47.1933	80.435	98.204	92.126	84.2248	94.5463	105.711	79.217	74.7938	71.0846	80.289	74.4323	69.6405	90.0976	85.3172	73.4851	71.725	68.2566	66.888	83.4606	71.7152	75.4887			0.0545456	69.2152
1.5488	31.6272	45.6502	35.8746	36.7204	60.8475	65.0443	38.9657	56.4112	64.0976	89.2042	78.5047	57.38	89.721	103.309	97.814	85.2657	99.0258	112.822	94.536	82.5721	77.0908	91.567	78.2956	70.0076	85.0816	85.2727	81.7654	77.3929	70.4455	74.1905	82.9624	78.6039	81.0201			0.0590895	74.5179
1.668	34.696	45.3111	48.5113	40.2616	65.2302	69.4551	45.7206	59.9097	65.3095	92.7383	85.2882	63.9581	100.16	111.864	102.926	87.2372	99.2987	114.982	100.548	87.0023	78.0146	95.858	82.4846	69.1811	82.8175	92.1354	85.244	79.8434	69.4896	80.0028	78.9115	80.6571	83.688			0.0636372	78.1435
1.7871	33.1678	46.676	49.4284	42.922	63.2222	74.8352	47.2977	62.4417	65.379	86.9948	84.8852	69.3631	101.653	117.176	99.901	82.2536	92.3404	113.395	107.411	84.3284	81.8119	99.288	85.9447	65.7352	73.4241	95.77	85.6401	78.146	60.6457	81.496	79.1365	77.8445	86.1115			0.068181	78.0626
1.9063	35.5246	42.7489	53.5984	47.0559	56.4155	77.0163	51.9031	59.5255	60.8411	81.4229	87.0078	73.6948	104.736	116.677	97.601	82.4951	87.1286	104.503	107.364	84.2742	81.7616	101.825	89.1312	60.6506	70.0057	95.2374	80.555	80.0109	54.697	80.6528	80.6298	83.5401	84.534			0.0727287	77.4171
2.0254	37.9363	42.558	56.8997	49.7148	52.7339	74.8083	53.9171	57.0423	54.1576	72.3369	91.2415	74.6965	102.878	114.801	95.787	74.0675	72.045	93.075	109.26	75.1044	79.0815	100.249	88.1442	56.1306	58.9975	85.6667	78.6004	73.1671	50.7885	84.2356	71.1273	79.688	81.2507			0.0772726	74.0057
2.1445	41.5753	39.5378	57.0806	50.4533	45.0286	71.6213	55.1966	53.8074	48.9586	61.2284	90.7399	73.984	88.078	114.187	89.686	66.4408	61.8054	75.481	103.331	73.1021	78.101	100.706	79.1423	53.7667	52.1072	80.1247	71.0421	64.2314	44.5288	80.5149	64.8156	74.2634	80.5572			0.0818165	69.2492
2.2637	41.6633	37.4822	56.7282	51.2401	36.0097	63.3774	62.2535	49.2421	42.1007	52.1682	85.9164	71.549	69.207	104.255	79.051	57.2978	48.2368	56.142	91.23	69.9916	74.4938	98.475	77.7901	47.4231	45.0592	75.867	59.9062	55.5746	37.3337	75.2392	55.6352	69.825	76.4461			0.0863642	62.8549
2.3828	44.2155	34.9739	50.4568	51.6811	27.2575	56.3563	62.9661	41.7955	33.8218	39.6431	85.6387	66.7065	44.098	100.131	73.79	47.0387	43.1043	38.788	76.74	63.0229	71.6509	94.392	77.3981	43.1597	34.1956	66.8223	54.0671	44.5415	31.6704	64.278	45.7101	63.5551	70.3672			0.0909081	55.8798
2.502	46.3351	33.7491	45.0551	52.5719	18.7983	50.1689	62.4137	34.0567	26.6983	30.5903	74.5954	62.2003	27.368	80.361	66.927	38.0107	39.0388	31.091	61.715	57.219	65.044	84.363	70.4247	38.1411	29.0734	58.0149	44.8207	36.6813	29.0128	55.0452	35.2854	53.6162	58.8674			0.0954557	48.4047
2.6211	46.482	29.9535	39.8248	51.0284	13.5919	47.4432	61.6005	30.1651	20.4184	25.0952	62.4159	56.3584	15.996	67.542	58.88	35.7018	31.2952	25.088	51.787	47.9637	63.0064	77.068	68.7437	35.4616	22.5539	44.2611	38.8482	29.3867	24.1863	45.4911	24.7182	45.3949	54.4921			0.0999996	42.1892
2.7402	45.7339	28.0413	37.4623	52.0049	9.7547	38.4808	58.9524	26.4675	16.3573	20.8032	47.6922	53.7207	11.589	50.118	49.227	26.3577	26.3067	20.9	41.31	38.2844	65.1546	71.036	62.2988	28.2463	19.1829	37.1716	28.7249	21.8361	20.9683	37.59	17.3	39.1219	41.2082			0.104543	36.0425
2.8594	44.7568	24.8087	33.5674	51.887	7.471	33.0677	56.3681	21.7603	13.451	17.328	37.264	43.2302	8.782	31.209	41.01	24.1713	22.9176	17.807	32.654	33.4717	65.0181	69.574	58.7383	27.2803	14.7846	31.1177	24.9133	18.093	19.7352	33.3161	10.7342	36.2136	31.5129			0.109091	31.455
2.9785	47.9108	24.2795	30.234	45.9909	6.4464	28.2292	52.1025	19.0713	11.2366	14.1528	29.6498	30.9683	8.13	20.292	34.221	20.6275	18.955	14.804	27.847	31.6974	61.9606	65.029	56.4812	23.2795	13.2256	22.5746	20.2175	16.4499	14.1356	29.9542	8.3218	32.3248	26.1311			0.113635	27.4828
3.0977	47.4919	23.0748	26.2902	41.448	4.6658	20.017	46.2519	18.4429	8.551	10.479	23.4625	21.1514	7.889	11.682	28.736	21.158	17.558	13.611	24.42	23.5729	64.0527	65.774	51.2793	18.9845	10.5013	16.2186	17.6576	14.3347	13.6502	23.3963	5.867	29.6332	21.2256			0.118183	24.016
3.2168	49.6312	21.402	24.9205	40.0861	4.2561	15.1045	41.3601	16.0684	7.3935	9.0024	18.9957	19.6358	6.867	10.229	22.628	16.1809	15.0434	11.944	19.704	21.3915	63.3269	60.403	50.9581	15.0188	8.4582	13.7729	14.279	12.916	14.3676	21.8448	5.2899	26.6085	18.1601			0.122727	21.7348
3.336	46.6185	20.9606	22.374	37.0386	3.6186	10.7474	37.6765	14.4183	6.53	6.5127	17.2886	13.8485	6.407	8.744	16.74	16.4603	12.2066	9.511	17.092	19.2609	62.6429	59.43	46.0044	13.536	7.0677	12.8552	11.1127	11.7371	11.8369	16.3157	4.0376	22.1262	12.6291			0.127274	19.2541
3.4551	48.0035	19.2372	21.1195	35.4859	2.5274	9.4858	33.644	14.161	4.8911	6.4997	13.8802	11.0242	6.943	7.513	12.709	13.8671	11.7258	10.192	16.48	15.043	65.0344	53.228	41.8802	11.7809	5.7277	9.7181	8.7182	9.8487	10.4483	13.6168	3.6142	18.1211	10.9825			0.131818	17.4894
3.5742	43.0373	17.09	18.8117	33.7123	2.3522	7.0513	27.4609	13.0847	4.6513	4.4797	11.3465	10.1307	6.608	6.822	7.803	13.0693	10.6104	9.417	11.836	13.4626	62.699	48.64	40.1801	10.6613	5.7727	8.7115	8.6448	10.4125	9.8899	10.0612	2.6587	14.0266	7.7062			0.136362	15.5425
3.6934	40.0429	16.7056	18.6768	27.5305	2.4354	6.2119	20.8364	10.9404	3.8097	4.0294	8.9243	8.4308	6.544	7.449	5.168	11.3425	10.1147	8.283	12.17	12.8793	59.6801	45.747	34.3382	9.808	5.2474	7.7261	7.8746	8.7293	8.0497	8.632	2.1409	10.2224	6.8627			0.14091	13.8662
3.8125	36.4149	15.0199	17.8019	21.7743	1.6624	4.4705	16.6356	9.0118	4.005	4.3918	7.7121	7.7395	6.338	6.082	4.266	12.0147	9.0748	6.523	10.811	12.968	54.7296	41.789	32.3743	8.2818	4.8057	6.6698	7.5061	7.1675	6.2952	8.0737	2.4809	6.8907	7.513			0.145454	12.4029
3.9317	34.0656	14.3248	16.7312	17.7978	1.6377	4.3063	15.4287	8.0657	3.5313	3.5592	6.1161	6.1615	5.988	6.893	3.697	11.3122	8.0365	6.165	10.033	11.2335	50.9005	40.863	30.4899	6.9923	4.5921	6.9456	7.4322	7.2627	7.5747	6.7331	2.7384	5.3282	6.3774			0.150001	11.4944
4.0508	32.262	13.1673	17.2249	16.4693	1.7323	4.0124	12.8994	6.9188	2.7465	3.5459	5.8437	5.8263	7.436	5.582	3.436	9.2327	8.3238	6.098	9.508	10.3942	49.7234	39.511	28.1677	6.5906	4.6273	5.3219	7.2042	6.7307	7.1829	5.2589	2.6108	4.7662	5.9779			0.154545	10.798
4.1699	25.6743	12.2201	15.5867	14.2799	1.4788	3.9987	9.6572	6.4024	2.3036	3.029	4.5143	4.8167	7.356	6.014	3.37	8.6794	7.6309	6.216	9.838	10.2713	47.1959	35.104	27.1189	5.5276	4.112	4.981	6.823	5.9807	5.175	4.855	1.9874	3.7328	5.8011			0.159089	9.74945
4.2891	22.753	10.4325	13.8975	8.5479	1.601	3.5181	7.9664	6.6892	2.6231	2.8462	4.2023	4.2435	6.36	4.973	2.443	7.2448	6.9337	6.035	8.375	10.0833	46.8277	32.749	23.7984	5.963	4.204	4.8337	5.7201	5.8655	5.2802	5.3082	2.015	3.6539	5.528			0.163637	8.8944
4.4082	17.7454	9.3121	15.1598	7.0205	1.86	2.7733	6.5939	6.275	2.324	2.9206	3.6222	4.462	5.767	5.008	2.097	6.6849	6.201	5.626	9.408	9.6118	42.7031	31.603	22.2105	4.9016	3.3001	5.0841	4.725	5.2387	4.5783	4.1567	1.9249	2.912	4.7704			0.168181	8.13882
4.5274	14.595	7.1974	12.3249	6.4016	1.6563	2.7267	5.8199	4.838	2.2047	3.1054	2.9211	3.3065	5.59	5.403	1.741	6.3542	5.8721	5.228	7.915	8.7226	38.3312	26.43	23.3564	4.3738	2.8788	4.9886	4.9514	4.5799	3.6608	5.0196	1.7196	2.6281	5.2527			0.172728	7.33619
4.6465	11.3363	7.0721	10.3537	6.0628	1.5583	2.7584	5.5109	4.5665	2.2208	2.0378	3.5386	3.8473	7.265	4.643	2.104	5.1473	4.8155	5.826	8.351	9.0257	36.5959	26.727	22.9317	3.9036	2.9772	3.203	4.9996	3.757	3.6573	3.7335	1.6255	2.2616	4.1894			0.177272	6.92737
4.7657	8.2678	6.3146	10.2295	4.9994	1.3327	2.1245	4.5354	4.9762	1.8316	2.1669	2.8536	3.4408	5.493	5.074	2.41	6.0778	4.4252	4.781	6.576	9.3677	32.7488	23.948	20.4076	4.3981	2.1912	4.2242	3.8013	3.5897	3.4885	3.8628	1.5176	2.2506	3.7452			0.18182	6.2864
4.8848	6.4521	5.3151	8.4633	3.834	1.2952	1.9394	6.1901	3.7543	1.9281	2.0607	2.7298	3.201	4.684	4.914	2.582	4.7112	4.5862	6.189	7.735	9.0232	30.651	24.781	20.5373	2.9531	2.8034	3.5509	3.5169	2.6761	3.0394	3.5484	1.3807	1.5734	3.6793			0.186364	5.94784
5.0039	4.4083	3.6265	7.1714	4.1296	1.1156	1.9626	5.7213	4.0199	2.1859	1.6466	3.1899	2.4975	6.15	4.852	2.837	4.4691	4.884	5.585	7.18	9.4829	27.4923	23.301	18.8197	3.0857	2.8691	2.8776	4.0881	3.2742	3.1661	3.5025	1.2882	1.6252	3.5853			0.190908	5.63909
5.1231	3.6305	3.1218	5.1139	2.9259	1.4346	1.8356	4.7396	3.5127	1.5227	1.3957	2.4918	1.7704	5.104	5.448	2.257	4.3492	4.6131	5.366	6.728	7.1298	24.5156	22.149	16.4543	2.8529	2.8202	2.9639	3.9583	3.1973	3.2395	2.8904	1.2935	1.485	3.6467			0.195455	5.029
5.2422	3.0343	2.421	4.5831	3.6124	1.1139	1.6752	3.945	3.321	1.4955	1.4613	2.102	1.8942	4.904	4.476	2.935	3.5579	5.6203	4.533	7.023	7.3197	23.7229	21.516	15.4229	2.6507	2.5114	2.5965	3.5819	2.2285	2.6055	2.7178	1.3563	1.7833	3.1856			0.199999	4.75476
5.3614	3.5857	2.7431	4.0301	3.5227	1.5503	1.8765	3.4856	3.629	1.7728	1.3227	1.8235	2.2244	5.893	4.614	2.512	3.481	4.56	4.678	6.451	6.2715	22.9471	20.575	13.0464	2.6046	2.4372	2.3494	2.8929	2.233	2.6138	2.8708	1.3651	1.612	3.2128			0.204547	4.5693
5.4805	2.7555	2.7407	2.8814	3.0542	1.5589	1.8411	3.7616	3.2644	1.0818	1.3891	2.0923	1.889	5.672	4.891	2.096	3.3785	4.0439	4.489	6.714	7.592	20.6481	21.602	11.1182	2.9529	1.9873	3.0307	2.6659	2.2622	2.2642	2.8733	1.3298	1.2268	2.7767			0.209091	4.36135
5.5996	2.6507	2.0562	3.2794	3.0582	1.4898	1.3853	3.6817	2.863	1.718	1.5293	1.7076	2.1183	5.986	4.793	2.705	2.8675	4.815	4.934	5.895	5.0466	19.7552	20.285	10.0768	2.9076	1.8997	2.3049	2.1913	1.7266	1.8324	2.8637	1.3351	1.5644	3.0473			0.213635	4.13241
5.7188	2.8182	1.8432	2.6081	2.4557	1.0294	1.0665	2.9018	2.9742	1.4319	1.6851	1.6155	1.8753	5.721	4.785	3.106	2.4816	4.4985	4.43	5.655	5.8104	19.016	19.199	7.4592	2.2476	1.7953	2.3049	2.7652	1.7313	1.8645	2.9294	1.3563	1.7904	2.7684			0.218182	3.87939
5.8379	2.7796	1.898	1.9647	3.1157	1.0473	1.3093	2.8218	3.4237	1.7904	1.1458	1.976	1.3473	6.08	4.579	2.482	2.2179	3.559	4.386	5.381	5.7089	18.3967	20.435	5.7259	2.6993	2.0896	1.8976	2.2042	2.0889	1.7303	2.7169	1.0499	1.7547	3.3215			0.222726	3.79163
5.9571	2.3387	1.7772	1.9464	2.7245	1.2488	1.3227	2.616	3.6546	1.8559	1.329	1.8598	1.0561	5.332	5.002	2.385	2.2533	3.9157	4.465	5.537	4.7004	14.8561	17.926	5.2981	2.4439	1.8531	2.1516	1.8549	1.7933	1.6341	2.8892	1.5328	1.1216	2.6933			0.227274	3.496
6.0762	2.4631	1.7499	1.4575	2.388	1.3943	1.2314	1.7824	3.4157	1.1497	1.3726	1.3385	1.3133	5.142	5.171	3.502	2.193	4.6823	3.758	5.317	4.568	14.8698	17.475	5.2504	2.1516	2.5606	2.2107	1.7645	1.9355	1.5157	3.1064	1.0601	1.1179	2.7722			0.231818	3.4297
6.1953	2.3543	1.4875	1.3066	2.7799	1.7924	0.9462	1.9608	3.2954	1.0512	1.7134	1.3679	1.3169	3.221	4.948	3.109	1.7267	3.917	3.65	4.654	3.8429	12.6019	16.669	3.7374	2.5468	1.9848	2.2903	1.9456	1.5694	1.807	3.2091	1.2114	1.6013	2.7547			0.236362	3.16272
6.3145	1.9498	1.1267	1.1752	2.607	1.1362	1.4366	2.3296	2.5118	1.2046	1.323	1.1879	1.2015	3.725	6.033	3.338	1.493	3.4855	3.802	5.074	4.1058	11.2783	13.622	3.9141	2.199	1.534	2.1304	1.5962	1.4055	1.7105	3.4544	1.3738	1.3476	2.2104			0.240909	2.97038
6.4336	1.9716	1.5704	1.7325	2.8799	0.9501	1.3854	2.1263	2.7273	1.234	1.1957	1.2316	1.3185	3.493	5.498	3.423	1.4405	4.3353	3.426	4.588	2.9086	9.2089	11.534	4.7293	1.8764	1.463	2.015	1.7324	1.2675	1.8582	2.84	1.2747	1.244	2.8657			0.245453	2.82863
6.5528	2.4908	1.1992	1.5993	2.2217	0.8521	1.5289	1.8603	2.7371	1.2683	1.4204	1.8188	1.3122	3.329	6.285	3.026	1.7429	3.3986	2.526	4.864	2.3283	8.3503	9.244	3.4294	2.0669	1.5231	1.7449	1.6654	1.3844	1.5212	2.8958	1.0662	1.1145	2.4762			0.250001	2.61488
6.6719	2.213	1.1453	1.7432	2.4085	1.1662	1.2413	1.6314	2.4966	1.4906	1.0351	1.1918	1.5662	3.386	4.706	2.594	1.7664	2.8968	3.117	5.23	2.3856	8.0361	8.39	3.2634	2.6442	1.6975	1.6879	2.2268	0.9865	1.2979	2.8166	1.2051	1.105	3.1358			0.254545	2.54254
6.7911	2.6809	1.2749	0.9456	2.1695	0.9483	1.1413	1.2953	2.7578	0.7955	1.1134	1.2645	1.4962	2.746	4.517	3.395	1.3086	2.9483	2.983	4.308	1.5271	7.0734	5.639	3.1712	2.1522	1.4789	1.6904	1.6637	0.7506	1.9481	2.4315	0.9645	1.1264	2.1699			0.259093	2.23867
6.9102	2.1682	1.3071	1.416	2.4436	1.1799	1.1173	1.3667	2.5453	0.9781	1.1281	1.3761	1.3896	3.05	4.733	2.368	1.103	2.9918	2.978	4.084	1.5553	7.336	3.794	3.377	2.3362	1.1094	1.1722	1.6546	1.1476	1.8972	2.6164	1.1512	1.3097	2.0912			0.263636	2.19005
7.0293	2.1267	1.4188	1.1273	3.0504	1.3665	0.7247	1.7865	2.9266	0.5096	0.924	1.2522	0.8764	2.555	4.19	3.117	1.3896	3.0208	3.002	3.35	2.0031	6.6582	3.93	3.3772	2.277	1.4049	1.72	1.635	1.1385	1.4792	2.7639	1.4681	1.1501	2.6591			0.26818	2.19328
7.1485	2.2366	1.2034	0.9849	1.9259	1.2286	1.3338	1.2526	3.5106	0.8781	1.0356	1.2326	1.0811	2.63	3.341	3.429	1.1114	2.714	2.869	2.507	1.4049	6.1066	2.539	3.532	2.461	1.1998	1.3173	1.3007	1.0667	1.3215	2.5412	1.1566	1.2311	2.4332			0.272728	2.00354
7.2676	1.9381	0.8726	0.8699	3.0353	1.1907	1.0409	1.2904	2.8859	1.1051	1.2269	1.188	0.8747	2.664	3.831	2.598	1.2456	2.8319	2.708	2.874	1.2683	4.3883	2.213	2.7026	2.1381	1.1329	1.4749	1.3839	0.8968	1.8453	2.063	1.2241	1.1779	1.8555			0.277272	1.87987
7.3868	2.4136	1.6464	1.0325	2.1998	1.3274	1.0476	1.1422	2.5162	1.1762	1.1736	1.1325	0.9998	2.264	3.82	3.066	1.859	1.8493	2.272	3.045	0.9564	4.6639	1.761	2.6205	2.7613	0.9205	1.1717	1.3401	1.2114	2.0579	2.3185	1.351	1.5004	2.4484			0.28182	1.91109
7.5059	2.0986	0.9668	0.9247	2.4187	0.9271	0.9909	1.3073	2.2933	1.2643	1.2976	1.3882	1.0118	2.181	3.813	3.251	1.3881	1.9938	2.16	2.314	1.176	5.3152	1.88	3.0256	2.6251	1.1809	1.4602	1.5754	0.844	1.7629	2.4546	1.0952	1.2805	2.3687			0.286363	1.87983
7.625	2.3556	0.916	1.1699	2.4039	1.1621	1.0013	0.6503	3.0512	0.9954	1.0667	1.1637	1.2648	2.769	4.265	4.02	1.4709	1.5873	2.289	2.668	0.8087	4.2967	1.908	2.1805	2.5474	1.2976	1.7304	1.2677	0.7882	1.3458	2.1012	1.0844	1.431	1.9441			0.290907	1.84854
7.7442	2.1033	1.5697	1.0917	2.0176	1.1968	1.3262	1.0404	3.6774	0.7405	1.0027	1.0737	1.1197	2.207	4.284	4.109	1.1327	1.699	2.637	2.658	1.1902	4.2097	1.624	2.6483	2.3955	1.0831	1.7787	1.5323	0.8314	1.7564	3.1323	1.191	1.2042	2.1071			0.295455	1.92032
7.8633	2.2691	1.0921	1.0947	2.2962	1.5016	0.8455	0.9012	3.0461	0.3965	0.8823	1.4617	1.3265	2.139	6.518	4.264	1.4826	1.785	2.526	2.05	0.9151	3.6609	1.987	2.8208	2.1438	1.1693	1.7083	1.4306	1.1332	1.926	2.3838	1.2062	1.3188	1.9557			0.299999	1.92841
7.9825	2.2195	1.0909	0.8656	2.5098	1.7232	1.124	0.7589	2.7335	0.72	0.6074	1.4302	1.3567	2.162	5.955	5.292	1.182	1.5764	1.839	1.746	0.9464	3.6618	1.886	2.8168	1.8452	1.352	1.0807	1.2852	1.0034	2.3265	2.5518	1.2173	1.1363	1.7248			0.304547	1.87049
8.1016	1.4708	0.9392	1.167	2.0883	1.5951	1.4138	0.7231	3.7019	1.238	1.0448	1.1311	1.2342	2.05	6.204	4.396	1.0515	1.3745	1.69	1.771	1.258	4.2779	1.713	2.9357	3.1533	1.2717	1.4822	1.075	0.7318	2.3341	2.3744	1.3448	1.3611	1.861			0.30909	1.92298
8.2207	2.3819	0.7233	1.352	2.4813	1.34	1.1063	1.1011	4.2905	1.0361	1.3312	1.0319	1.2639	2.085	5.529	4.786	1.6277	1.2696	2.31	2.065	0.9975	3.8163	1.362	2.9133	3.1857	1.2945	1.2105	1.4579	0.8105	1.7551	2.0834	1.4194	0.866	2.3145			0.313634	1.95753
8.3399	2.1138	1.2324	1.0932	2.5853	1.2702	1.1758	0.9447	4.4209	0.9665	0.9318	0.9255	1.2095	2.355	5.28	5.235	1.5398	1.7395	1.718	1.689	1.3101	3.2701	1.58	3.1699	2.5744	1.2507	1.2915	1.369	1.2144	1.8805	2.1888	1.6235	0.8625	1.8473			0.318182	1.93511
8.459	1.3603	1.1089	1.1764	2.1729	1.3399	1.0214	1.2371	4.3815	1.0862	0.9619	1.2138	1.1348	2.671	5.885	5.201	1.3161	1.7887	1.685	1.286	1.1826	3.1255	1.495	3.8155	2.8015	0.9932	1.6576	1.4667	1.2129	1.6113	2.2087	1.9171	1.1826	1.6022			0.322726	1.94849
8.5782	1.6595	0.9317	1.3167	2.3864	1.5525	1.172	1.1528	5.2137	1.0554	0.9229	1.1222	1.1691	2.046	6.999	5.852	1.5347	1.2042	1.933	1.461	1.0313	3.6062	1.634	2.4515	2.8743	0.8016	1.3303	1.0795	1.1202	1.8629	2.1297	1.5878	1.4879	1.6375			0.327274	1.97938
8.6973	1.8476	1.1953	1.2441	2.4335	1.457	1.0468	0.9727	4.3809	0.9572	0.7851	1.262	0.9659	2.289	5.627	6.867	1.3969	1.136	1.32	1.411	0.9016	3.4674	1.936	2.9558	3.364	1.1437	1.0907	1.3002	1.2341	1.9221	2.2118	2.131	1.2715	1.8848			0.331817	1.98211
8.8165	1.9851	1.5331	0.9303	2.2243	1.4661	0.8539	1.1423	6.0001	1.39	0.949	1.3899	1.0429	2.463	7.617	7.427	1.3918	1.4258	1.119	1.353	1.3873	3.3641	2.07	3.2511	3.3443	1.1602	1.0191	0.9505	1.2167	2.3938	2.5986	1.8987	1.0338	1.9817			0.336365	2.16283
8.9356	1.5035	1.1979	1.1345	2.1715	1.3593	1.0461	1.4997	6.5474	1.6562	1.2168	1.6084	1.1491	2.648	6.263	6.17	1.4027	1.5228	1.054	0.687	1.3344	2.6941	1.717	3.5522	3.6934	1.1117	0.9236	0.6402	1.0156	2.1672	2.3064	1.7824	1.0055	2.2414			0.340909	2.0613
9.0547	1.6237	1.2837	1.5331	2.556	1.8171	0.9911	1.0717	5.9981	1.1922	1.0655	1.1922	1.1486	2.026	7.785	5.91	1.9992	0.9385	1.304	0.967	0.8496	2.1116	1.763	3.8678	3.857	0.9408	1.2971	0.9821	1.1818	1.6058	2.266	1.5742	1.0822	1.532			0.345453	2.03981
9.1739	1.9462	1.213	1.1873	2.3256	1.576	1.0171	1.2651	6.3985	0.9346	0.6144	1.2212	1.3919	2.062	6.122	5.962	2.3244	1.0058	0.936	1.009	1.0021	2.3985	2.009	2.9442	4.0621	1.0002	0.7509	0.9035	1.5248	2.4647	2.837	1.7361	1.0294	2.0429			0.350001	2.03689
9.293	1.8843	0.9796	1.6288	1.9913	1.3768	1.1736	1.0273	6.8764	1.2987	0.9571	0.8717	1.5277	2.653	6.153	6.562	1.859	1.1318	1.063	1.255	0.8916	2.8786	2.131	3.4413	5.1936	1.0403	0.8851	1.0328	1.173	2.5921	2.9055	2.1857	1.5307	1.9087			0.354544	2.18364
9.4122	2.3651	1.1884	1.1823	1.6785	1.7315	1.2333	1.3427	7.0162	1.246	1.0719	1.025	1.5304	2.835	5.932	6.51	1.2104	1.4603	1.018	0.812	1.0982	2.7322	2.347	4.1539	4.5732	0.9841	1.0573	0.9946	0.9396	1.8123	2.9237	1.5716	1.2781	1.505			0.359092	2.13212
9.5313	1.6573	1.7	1.2714	1.793	1.365	1.1074	1.0765	9.2864	1.3543	1.2589	1.0499	1.2197	2.216	6.784	6.296	1.3419	1.4714	1.25	0.804	1.2757	2.0826	2.549	3.7154	5.0507	1.1882	0.9324	1.0184	0.665	1.8612	3.4942	2.1181	1.697	2.0466			0.363636	2.24235
9.6504	2.1009	1.6709	0.9457	2.2143	1.4037	1.2213	1.5825	10.011	1.5079	1.2238	1.3149	1.5857	2.318	7.206	6.395	1.8194	1.6051	1.162	1.381	0.9606	1.6644	2.188	3.66	5.343	1.0686	0.837	0.9236	1.036	2.2525	3.1011	2.2926	1.5221	1.9829			0.36818	2.34853
9.7696	2.2099	1.0945	1.0563	2.6056	1.4633	0.6356	1.4783	10.0191	1.8047	1.0645	1.1813	1.5996	2.396	8.566	7.078	1.3527	0.8517	1.219	1.113	1.1326	1.7406	2.232	3.9028	5.1563	0.8923	1.0602	1.257	1.1271	1.721	3.0369	1.6998	1.2204	2.295			0.372728	2.34131
9.8887	2.2158	1.2894	1.3575	2.3864	1.472	1.3046	1.2896	10.2509	1.1903	1.4089	1.2519	1.4121	1.856	8.364	6.783	1.4354	0.9613	1.286	1.233	0.8793	2.2947	2.831	4.3375	6.071	1.3202	0.8889	1.258	1.0449	2.0759	3.1084	1.7287	1.9231	2.5802			0.377271	2.45727
10.0079	2.2725	1.3307	1.3482	3.0101	1.7714	1.4128	0.7831	11.1223	1.5635	1.4567	1.0135	1.4728	2.291	8.539	6.953	1.839	0.8969	0.947	1.484	0.8655	1.8348	2.638	3.7444	6.068	1.0807	1.1101	1.4944	0.9965	2.303	4.0479	1.9785	1.8449	2.3608			0.381819	2.54167
10.127	1.8275	1.5185	1.1316	2.8216	1.5715	1.1024	1.2925	10.3685	1.5664	1.144	1.1577	1.3329	1.882	8.879	8.711	1.771	1.1872	0.891	0.923	1.4454	1.9641	2.397	3.24	6.1819	1.4699	0.8706	1.1309	1.3298	2.7544	4.1445	2.1413	1.7924	2.1854			0.386363	2.5493
10.2462	2.1512	1.3606	1.5333	2.5598	1.4154	1.0655	1.4797	9.3508	0.9692	0.919	1.1199	1.3161	2.446	9.594	9.049	1.6496	1.5741	0.86	1.101	1.0698	2.0925	3.006	4.2709	7.3979	1.3314	0.7532	1.1187	1.2836	2.7659	4.2029	2.0425	1.967	2.0523			0.390911	2.63239
10.3653	2.4945	1.5571	1.6854	2.4289	1.2204	0.9148	1.3706	9.3087	1.4251	1.1948	1.8188	1.1535	2.216	9.873	9.266	2.0161	1.1857	1.112	0.974	1.2027	2.1707	3.481	4.9304	7.7849	1.162	1.2001	1.2762	1.3597	2.9822	4.6803	2.699	2.0067	2.4226			0.395455	2.80527
10.4844	2.5422	1.3174	1.5896	2.0586	1.2127	1.345	1.4277	9.4299	1.5157	0.9379	1.2166	1.6166	1.622	11.111	10.222	2.5175	1.4595	1.546	1.066	0.9288	2.1004	4.396	5.8921	7.8789	1.2095	1.2597	1.1051	1.1914	2.1351	3.9926	2.3383	1.9337	2.1619			0.399998	2.85689
10.6036	2.4568	1.5143	1.6272	2.2418	1.5544	1.0304	1.6848	10.0612	1.4549	1.5509	1.1809	1.2283	1.925	10.305	9.18	1.4138	1.3073	1.367	1.042	1.2784	2.0552	3.513	5.9326	8.1577	1.0964	0.8083	0.9972	1.0908	2.4564	4.2047	2.3025	1.6992	1.9963			0.404546	2.77923
10.7227	2.6789	1.2683	1.685	2.5128	1.793	1.3021	1.3223	9.2128	1.8156	1.1925	1.4381	1.2279	2.002	11.217	9.311	1.4768	1.9359	1.263	0.731	1.4268	1.3577	5.187	5.7113	8.8767	1.2407	1.0883	1.4065	1.2982	2.6307	3.8489	2.7704	2.3398	1.7186			0.40909	2.91781
10.8419	2.917	1.0254	1.7217	2.709	1.5488	1.4039	1.5625	10.7419	1.5899	1.4748	1.0727	0.9664	1.996	12.47	7.997	2.3505	1.6073	1.3	1.019	1.3141	1.3406	4.393	6.5704	11.0809	1.1028	1.3152	1.3277	1.4643	3.0412	3.6729	2.8699	2.1276	1.9334			0.413638	3.06145
10.961	2.9829	1.0906	1.9876	3.0782	1.6869	1.4062	1.6344	9.0476	1.5781	1.2546	1.3458	1.5878	1.845	14.264	8.723	2.4305	1.1995	1.216	0.966	0.8689	1.8161	5.131	6.0861	12.8132	1.0052	1.2232	0.9904	1.1878	2.3899	3.8531	2.4959	1.7267	2.2556			0.418182	3.1263
11.0801	3.0436	1.5611	1.568	2.9657	1.784	1.5418	1.7829	8.0462	1.5703	0.9686	1.0978	1.6915	2.173	12.212	8.758	2.3816	1.322	1.304	1.008	1.2725	1.8844	5.59	5.8969	15.9442	1.4352	1.2225	1.139	1.3178	2.2846	4.3527	3.0659	1.8104	2.4477			0.422725	3.22557
11.1993	3.7153	1.753	1.4503	3.3766	1.6279	1.4964	2.3718	9.9571	1.8235	1.0497	1.1221	1.4685	2.067	14.499	9.101	2.1332	1.3501	1.344	1.184	1.2377	2.0951	6.023	6.9031	19.4255	1.0966	1.4446	1.3509	1.5994	2.5985	3.8758	2.4847	1.9174	2.2353			0.427273	3.55085
11.3184	4.21	1.2869	1.547	3.2552	1.4162	1.0863	1.5566	10.6416	1.7942	1.1587	1.004	1.309	2.216	17.288	11.367	1.6424	1.6292	1.286	1.243	1.53	1.9226	6.07	6.5659	22.1354	0.9772	1.3803	0.7794	1.5008	2.6742	4.0743	2.594	1.9179	2.1383			0.431817	3.73326
11.4376	3.9429	1.2358	1.9552	2.9783	1.3424	0.9261	1.7647	10.5379	2.0307	0.8967	1.0531	1.2568	2.276	16.745	10.804	1.9677	1.9473	1.053	1.338	0.9995	2.1754	5.744	6.5591	22.8205	1.4522	1.1926	1.0516	1.327	3.469	3.8207	2.7041	1.916	2.3987			0.436365	3.74794
11.5567	5.7744	1.3801	1.511	2.9894	1.4827	0.8681	1.9212	10.5096	1.7459	1.3563	0.7413	0.8795	1.9	17.041	9.927	1.9546	1.3764	1.515	1.54	1.2813	2.6382	5.339	5.9351	26.8998	1.6466	1.0655	0.6701	1.1456	3.4836	4.6472	2.7424	2.2429	3.2588			0.440909	3.9215
11.6758	6.0399	1.6067	1.8717	2.9587	1.4049	1.4253	2.642	11.0218	1.6579	1.4044	1.8212	0.9917	2.402	20.524	11.103	2.1148	1.4445	1.129	1.393	1.3079	2.1773	5.209	6.2286	27.3595	1.0468	1.049	1.3781	1.7517	4.0047	4.3841	2.992	2.0814	3.4138			0.445452	4.22244
11.795	6.0522	1.9845	2.183	3.356	1.4673	0.9339	3.1017	9.6946	1.3304	1.2659	1.3039	1.2393	1.952	21.393	11.628	1.9489	1.1586	1.515	1.74	1.3361	2.5157	6.043	6.0153	29.3018	1.2586	1.2502	1.127	1.3728	3.8554	5.2581	3.548	1.9437	3.6811			0.45	4.35621
11.9141	6.1298	1.9769	1.6555	2.7975	1.6196	0.905	3.4569	9.6545	1.3861	1.1626	1.1004	1.4378	2.252	20.731	11.749	1.6474	1.1318	1.281	1.486	1.5435	2.2146	7.092	6.1399	29.5976	1.7486	1.2405	0.8429	1.2809	3.9712	4.3834	4.7156	1.6318	3.3262			0.454544	4.34211
12.0333	7.272	1.708	2.0955	2.8957	1.5624	1.0794	3.407	8.5902	1.4078	1.2195	1.4324	1.0066	1.941	20.85	13.178	2.0638	1.5636	0.97	1.345	1.3282	1.6461	7.613	6.575	28.5841	1.4279	1.4618	0.6171	1.25	3.6398	5.1866	4.3416	1.5726	3.6047			0.459092	4.37686
12.1524	6.8468	1.8858	2.0476	3.061	1.4989	1.2208	2.8338	7.0276	1.2468	1.0096	1.2953	1.1387	2.453	21.47	13.007	1.9624	1.568	1.107	1.462	1.2658	1.8774	8.439	7.6024	30.4539	1.6769	1.3981	1.08	1.4127	4.2795	5.6362	4.3414	1.5272	3.8516			0.463636	4.51467
12.2716	7.0611	1.6245	1.7409	3.9965	1.3783	1.0607	3.3116	5.7423	1.3726	1.2496	1.227	1.471	2.53	20.879	15.788	2.074	0.9039	1.371	1.516	1.3156	2.1863	7.371	9.2917	30.4095	1.5604	1.2045	1.1315	1.6414	4.4387	6.1399	5.9945	1.9603	3.8602			0.468183	4.69102
12.3907	6.795	2.0441	1.4644	3.4585	1.0258	1.1937	3.6724	5.1357	1.6982	1.298	1.3371	1.121	2.557	18.672	17.189	2.5415	1.1156	1.661	1.751	1.3756	2.3569	7.158	10.6018	31.3219	1.518	1.2413	0.9876	1.6248	5.6137	6.6618	6.178	2.0821	2.9221			0.472727	4.76893
12.5098	6.2648	2.4145	2.0001	3.9987	1.2666	1.2262	3.4584	4.5142	1.5915	0.8317	1.0826	0.8913	2.538	18.332	19.934	1.9198	0.959	1.356	1.373	1.8447	2.3263	6.533	12.9522	32.3242	1.6966	1.4874	1.2269	1.2688	4.5214	8.075	6.1996	2.0062	4.1792			0.477271	4.92709
12.629	8.2521	2.2778	2.1256	3.731	1.3981	1.0619	4.1637	4.6362	1.5074	1.519	1.3679	1.2223	1.713	18.892	20.662	2.5626	1.4231	1.403	1.098	1.8707	1.9285	7.251	11.6923	32.7101	1.2701	1.1063	1.5656	1.3703	4.2044	7.8472	5.9866	1.8445	3.6048			0.481819	5.00815
12.7481	8.0364	2.3901	1.7324	4.6094	1.5483	1.0278	4.7642	4.5603	1.5779	1.35	1.0403	1.647	1.781	19.329	22.086	2.4645	1.4747	1.138	1.15	1.8249	2.17	9.111	10.5754	33.072	1.4324	1.1748	0.8745	1.099	5.6598	9.6863	6.1739	1.5725	2.7192			0.486363	5.17736
12.8673	7.6058	2.3512	1.8936	5.6894	1.4804	0.9852	4.9493	3.4383	1.4408	1.3447	1.159	1.426	1.894	18.218	25.687	2.4944	1.3574	1.145	0.949	2.0267	1.8143	7.526	10.6462	31.3258	1.5435	1.1112	0.9956	1.3211	5.3809	10.3823	7.041	1.351	2.8546			0.49091	5.17663
12.9864	7.1359	2.2737	2.7553	5.6272	1.2387	1.2357	5.4205	3.0747	1.3904	1.3625	1.2457	1.2249	1.906	15.446	28.05	2.1735	1.2325	1.055	1.071	1.3547	2.1083	9.306	9.9895	29.5169	1.6947	1.0536	1.3543	1.8039	5.5859	12.0142	6.8687	2.0535	4.0675			0.495454	5.26336
13.1055	6.6877	2.6268	2.5192	5.6543	1.2183	1.2716	5.7643	2.938	1.1376	1.1048	1.1803	1.1827	2.058	17.374	27.809	2.2955	1.1102	1.25	1.3	1.3836	2.6605	7.553	11.4459	31.8338	1.6137	1.0254	1.3461	2.0311	6.4855	15.3885	6.1118	1.9038	2.9639			0.499998	5.46148
13.2247	8.9028	2.7186	2.7454	6.1582	0.7888	1.5108	5.4836	3.0475	1.5074	1.2961	1.5742	0.8867	1.946	15.996	28.258	2.5839	1.2226	1.236	1.005	1.1538	2.163	9.112	11.9701	31.8048	1.2585	1.4906	1.5363	1.6153	6.0608	17.4832	6.5807	1.3967	3.3272			0.504546	5.63093
13.3438	10.5394	2.0086	2.3778	5.8053	1.0389	1.1855	5.8943	3.1614	2.245	0.9942	1.426	1.3311	1.853	15.293	28.457	2.5401	1.6952	1.352	1.36	1.741	2.2796	8.027	10.8899	30.701	1.5241	1.3357	1.0023	1.4629	4.9322	20.1869	5.9347	1.959	2.9464			0.50909	5.62062
13.463	8.9523	1.6997	2.4037	6.4116	1.3403	1.2482	5.7076	3.4976	1.7828	0.9908	1.5163	1.2774	1.596	13.062	28.514	2.8641	1.9176	1.025	1.309	1.2855	1.8482	10.314	11.8623	29.0696	1.9333	1.0746	0.9832	1.9099	6.5161	19.9721	4.7483	1.7823	2.5322			0.513637	5.54387
13.5821	10.4853	2.4984	2.9737	6.1282	1.1466	1.3957	4.7949	3.0725	1.3288	0.9319	1.2621	1.2717	1.77	15.104	30.46	2.7758	1.7961	1.057	1.571	1.5222	2.3042	9.427	13.3142	28.494	1.7504	1.4354	1.4834	1.6176	5.2525	21.0912	4.7323	2.2429	3.9842			0.518181	5.77198
13.7012	9.7468	2.7653	2.4522	5.4945	1.0344	1.5277	4.6516	3.1658	1.4349	1.2889	1.2671	1.596	1.755	16.116	29.798	2.8376	1.7571	1.044	1.178	2.2682	1.8065	8.497	15.5794	29.9607	1.6665	1.3016	1.1154	1.5657	4.8844	20.8737	4.5226	2.3851	3.5817			0.522725	5.78544
13.8204	9.8928	2.5217	2.401	6.303	1.0875	1.3047	4.1321	3.1554	1.6507	1.2416	1.3	1.128	1.612	18.227	30.342	2.75	1.8197	1.383	1.051	1.9167	2.4021	11.698	14.6958	27.1905	1.7977	1.1791	1.1099	1.5906	4.7202	16.9376	5.882	2.2292	3.2177			0.527273	5.75365
13.9395	10.0796	3.0715	2.8992	6.5593	1.3073	1.1131	3.5308	3.0988	1.322	1.4927	1.2747	1.313	1.714	19.195	35.969	2.871	1.7619	1.199	1.645	1.4092	2.103	10.263	15.3616	27.81	1.3786	1.4236	1.16	1.3947	4.0124	16.5626	5.4059	2.1877	3.7197			0.531817	5.92754
14.0587	9.8907	2.4288	3.2351	5.1126	1.4414	1.1318	3.9794	3.3858	1.2752	1.4359	1.5008	1.2421	1.493	19.377	34.247	3.3131	1.7067	1.893	1.562	1.4782	2.1454	11.147	16.0985	25.803	1.2107	1.4364	1.2593	1.5445	3.9124	15.2686	5.0867	1.9198	2.9917			0.536364	5.78647
14.1778	10.7026	2.9379	2.843	5.6154	1.0984	1.2916	3.8263	3.4063	1.3999	1.1408	1.5264	1.1603	1.651	19.149	35.686	2.9805	1.6125	1.619	1.648	1.5315	2.3334	11.137	14.4538	26.1589	2.0326	1.2631	1.1588	1.2886	4.3637	15.8553	4.4241	2.2817	2.9958			0.540908	5.83555
14.297	8.7117	3.0207	2.9681	5.8474	1.2299	1.2735	3.5538	2.5493	1.3805	1.2871	1.2728	1.4589	1.551	19.912	39.379	3.3461	1.9011	1.631	1.673	2.006	1.6698	11.384	15.8851	28.5746	1.6695	0.9384	1.0343	1.2118	2.9921	14.7951	4.6185	2.5906	3.9067			0.545456	5.97647
14.4161	7.4883	2.7601	2.577	5.2605	1.3135	1.3851	4.2562	3.0128	1.4525	1.1572	1.4892	1.3672	1.219	21.51	37.296	2.9757	1.6022	1.221	1.286	2.3708	2.1102	11.626	13.0364	28.9381	1.8889	1.2505	1.2548	1.3342	3.3998	15.3068	3.981	2.1932	3.767			0.55	5.85113
14.5352	6.0245	2.847	3.3922	5.2261	1.2584	1.532	3.3354	2.6163	1.3845	1.2198	1.0091	1.3151	1.158	21.253	39.75	2.83	2.1536	1.719	1.764	2.2737	1.971	12.794	12.4088	33.198	1.888	1.6531	1.3108	1.4381	3.5897	15.6081	4.3944	2.5886	3.7598			0.554544	6.08073
14.6544	6.8448	2.866	3.3378	4.6255	1.1995	0.9654	4.5399	2.794	1.5544	1.2992	1.0907	1.0429	0.972	20.444	39.477	2.2903	1.7741	1.848	1.73	1.8986	1.8504	12.437	13.0024	36.3139	1.3719	1.8223	1.1387	1.0659	3.5226	12.7098	4.0284	3.2292	5.0636			0.559091	6.06516
14.7735	5.02	3.0068	2.6588	4.9398	1.1465	0.8846	3.5432	2.4341	1.2803	0.979	1.1962	1.3091	1.353	18.604	39.867	3.5266	1.858	1.624	1.451	1.7024	1.8181	14.444	13.1113	42.9905	1.2878	1.3243	1.1645	2.1151	3.4043	13.1828	3.9622	3.2176	5.1709			0.563635	6.22963
14.8927	4.5883	3.2194	3.1665	5.1782	1.3764	0.9671	3.878	2.6279	1.2924	1.3059	0.863	0.8761	1.327	16.707	39.783	2.6851	1.7221	1.263	1.632	2.2637	2.3414	14.23	15.7706	47.4159	1.7475	0.9225	1.2746	2.0424	3.5873	11.3168	3.6372	2.9971	5.7167			0.568183	6.35522
15.0118	3.5791	2.8472	3.3622	4.784	1.0233	1.1699	4.9125	2.4252	1.267	1.2175	0.9199	1.4376	1.724	16.014	37.831	2.9913	1.8712	1.722	1.611	1.438	2.139	14.651	19.4263	52.8815	1.3286	0.9833	1.4159	1.6521	3.5264	8.391	3.3274	3.1323	4.5771			0.572727	6.41151
15.1309	4.3861	2.6584	4.0814	3.9447	1.2139	1.1633	5.0949	2.6944	1.3261	1.2654	1.1178	1.2731	1.636	17.124	33.262	2.3872	1.7001	2.194	1.648	1.8199	2.3132	15.775	22.403	58.0081	1.6082	1.4825	1.2258	1.3572	3.241	9.0521	3.3316	3.4243	5.3333			0.577271	6.68321
15.2501	4.6485	2.9419	4.1488	4.161	0.8296	1.1813	5.4404	2.1597	1.3943	1.0987	1.166	0.8828	1.522	16.036	33.349	2.5072	1.7159	1.543	1.508	2.3807	1.915	17.394	26.7231	58.2631	1.5682	1.1744	1.6443	2.1788	2.9258	7.2712	4.4558	3.4478	4.6171			0.581818	6.79374
15.3692	3.7156	3.1929	4.6268	4.0825	1.1382	1.2296	6.192	2.4546	1.5615	0.9815	1.1131	1.1639	1.343	13.872	30.377	2.9904	1.7225	1.418	1.482	1.7091	1.8655	16.82	34.5019	64.6968	1.5131	1.4226	1.3979	1.7704	2.742	7.2172	5.6782	4.2395	4.7919			0.586362	7.12192
15.4884	3.3902	2.934	4.7153	3.6505	1.5867	1.2035	7.1502	2.2359	1.5813	0.9049	1.0657	1.3315	1.891	13.077	26.469	2.8884	2.1872	1.355	1.781	2.0094	2.1034	15.637	38.4036	65.7731	1.2111	1.4108	1.0741	2.2837	2.9099	7.9447	4.6783	3.7051	3.549			0.59091	7.09368
15.6075	3.3986	2.7586	4.8917	3.2016	1.3776	1.2005	8.0938	2.1014	1.1114	1.3286	0.9516	1.255	2.288	12.627	22.878	2.5987	1.56	1.4	1.593	1.6295	2.1694	14.149	43.5367	64.7621	1.9026	1.4891	1.1912	1.7823	2.4203	8.4858	4.9364	4.2445	3.6262			0.595454	7.05879
15.7266	2.9098	2.5879	4.6432	3.0765	1.0724	1.194	8.7615	2.3722	1.2059	1.0829	1.102	1.3422	1.776	11.8	21.952	2.2249	1.5408	1.573	1.564	1.7458	2.2643	14.813	48.7988	66.6215	1.3715	1.3248	1.4627	1.6461	2.3979	7.5905	4.922	3.6915	3.4398			0.599998	7.14762
15.8458	3.927	2.8262	4.1398	2.6852	1.115	1.4742	8.934	1.9288	0.9422	1.3543	1.1756	1.4695	1.7	10.494	18.419	2.3159	1.7904	1.478	1.544	1.7206	2.2101	13.284	54.7759	67.0558	1.0591	1.1235	1.2271	1.8941	2.4039	7.6215	6.3837	3.0619	3.6707			0.604545	7.18803
15.9649	3.9381	2.9377	4.0145	3.0149	1.3383	1.1451	8.4497	1.8063	1.0063	1.407	1.4905	1.3249	2.215	8.606	16.36	1.8041	1.6641	1.336	1.164	1.7917	2.1086	14.625	51.2719	65.1924	1.6236	0.9647	1.0313	1.6929	2.5839	5.9935	7.293	3.5498	3.8221			0.609089	6.92627
16.0841	3.722	2.964	4.386	2.4151	1.0093	1.2963	9.2025	2.3913	1.1144	0.8446	1.0123	1.209	1.469	8.832	13.378	2.5285	1.7245	1.644	1.549	1.6029	1.2605	12.429	48.165	67.5829	2.0004	1.4354	1.3527	1.7185	3.0985	5.9565	7.1779	2.9978	4.0666			0.613637	6.77383
16.2032	3.7616	3.362	4.3858	1.9036	1.2288	1.067	11.2037	2.0389	1.2182	0.6882	1.055	1.7536	1.467	7.974	11.614	2.5096	1.5767	1.419	1.664	1.8258	1.3755	13.346	51.8176	66.4423	2.2925	1.3406	1.2451	1.9607	2.7508	6.773	8.3607	3.2899	4.299			0.618181	6.9397
16.3224	3.1561	2.2195	4.5703	1.5261	1.7223	1.0545	10.1759	2.1368	1.4593	1.1081	1.2779	1.299	1.415	8.381	11.373	2.5917	2.0542	1.902	1.823	1.8827	2.045	12.405	52.5712	64.8374	2.1875	1.4531	1.3391	1.3386	3.0408	7.2379	9.1214	3.3792	4.3437			0.622729	6.92207
16.4415	4.4219	2.1271	5.0323	1.8749	0.9712	1.2626	10.9665	1.9714	0.7616	0.8579	1.13	1.4408	1.541	7.503	9.03	2.4901	2.0977	1.883	1.681	2.0725	2.0445	13.463	51.0518	62.223	1.7951	1.2928	1.1145	1.6444	2.203	7.9093	9.4598	3.0968	3.8624			0.627272	6.73566
16.5606	3.7079	2.1564	4.8359	1.4912	1.0673	1.1356	12.2024	1.4781	1.341	1.0405	1.194	1.5209	1.075	6.589	7.634	2.3633	1.7351	2.05	1.539	2.1936	1.95	12.162	47.1843	58.8262	1.7006	1.4802	1.1411	1.3376	2.2125	7.1323	9.1298	3.3582	3.525			0.631816	6.34818
16.6798	3.1502	2.6085	6.3531	1.6214	1.0965	1.1485	11.2407	1.8782	1.6903	0.9046	0.8395	1.505	1.44	6.612	6.991	2.3563	1.3686	1.842	1.303	2.4352	1.8099	11.823	45.2904	57.8101	1.5075	1.3297	1.5017	1.2964	2.7935	7.2459	8.178	3.795	4.9542			0.636364	6.29454
16.7989	4.3557	2.6215	6.7786	1.4956	1.1484	0.8116	11.0272	1.8782	1.3068	1.4416	1.276	1.5003	1.891	6.954	6.024	2.1624	1.563	1.668	2.153	1.9738	2.3889	13.955	46.7386	55.418	1.4407	1.5297	1.9223	1.5838	2.2996	6.6329	8.6912	2.852	5.2699			0.640908	6.38646
16.9181	4.036	3.1692	7.2363	1.6144	1.4413	1.0421	11.9368	1.904	1.4106	1.311	0.753	1.4176	1.373	6.843	5.576	2.0401	2.2297	1.374	2.112	1.5751	1.6448	12.752	46.9404	53.2256	1.2359	1.5041	1.7018	1.5068	2.613	4.6732	7.4945	3.3742	5.4556			0.645456	6.19749
17.0372	4.3702	2.4941	8.5426	1.7637	1.1412	1.2572	15.4563	2.039	1.1457	1.3117	1.2005	1.3889	1.499	6.118	5.474	2.2633	1.5286	1.844	1.801	1.6571	2.0007	10.302	46.7494	50.7007	1.8999	1.5387	1.3063	1.6355	2.3494	4.8703	7.1945	2.772	4.326			0.649999	6.11944
17.1563	5.2315	2.9321	9.2656	1.5566	1.1833	1.019	12.6318	1.8974	1.1711	1.1824	1.6198	1.2927	1.477	5.817	5.49	2.1295	1.5265	1.675	1.651	2.1469	2.1347	11.103	48.0383	49.4936	1.5002	1.4899	1.3932	1.6921	2.5368	4.3426	7.5799	3.4165	5.1555			0.654543	6.14462
17.2755	6.1515	3.0208	10.0777	1.8448	0.9746	1.3291	12.5334	1.8012	1.329	1.1261	1.0164	1.5934	1.911	6.631	5.889	2.882	2.2388	1.71	1.769	1.4937	1.64	9.953	51.2671	50.8707	1.962	1.2146	1.2076	1.5628	2.4147	3.7817	8.7618	2.6851	4.2989			0.659091	6.33159
17.3946	5.8005	2.9312	10.9055	1.4092	0.9519	1.1704	15.095	1.9128	1.2654	1.27	1.1851	1.1773	1.783	7.108	6.23	2.5359	1.9184	1.729	2.029	2.03	1.7792	9.833	54.964	52.4766	1.7491	1.052	1.1148	1.502	2.6963	3.2957	9.3094	2.221	4.9202			0.663635	6.58639
17.5138	5.8481	3.1758	11.8423	1.9436	1.3916	0.919	12.8908	1.3869	1.2141	1.1027	1.3092	1.117	1.426	6.88	5.907	2.3861	1.7978	1.471	1.845	2.3299	1.862	10.013	56.548	51.3871	1.3398	0.8878	1.0814	1.5833	2.3607	3.1615	9.5942	3.0233	4.0426			0.668183	6.51723
17.6329	5.2934	3.0533	9.938	1.8546	0.8992	1.4302	12.0104	2.0269	1.1536	1.3868	1.3567	1.2383	1.6	7.182	5.093	3.0528	1.8118	2.243	2.052	1.777	1.3764	8.881	58.0771	49.0532	1.8821	1.4986	0.7872	1.821	1.8017	3.6286	9.9262	3.5983	3.6944			0.672726	6.43875
17.7521	6.0506	2.8853	8.8546	1.7214	0.9543	0.8948	10.2153	1.8198	1.2381	1.0808	1.5326	1.4491	1.39	8.758	5.469	2.8041	1.2384	1.944	2.019	1.6138	1.2356	8.115	58.5741	47.3548	1.3901	1.6003	1.1458	1.6222	2.3866	3.9336	10.7004	2.8709	3.9728			0.677274	6.32834
17.8712	5.5625	2.5303	8.9157	2.9865	1.103	1.0377	9.9681	1.8324	1.203	1.7355	1.3874	1.2223	1.722	8.23	5.237	2.5866	1.9168	2.002	2.221	1.8853	1.2856	7.288	57.9466	43.4341	1.3056	1.299	1.411	1.6235	2.6759	3.9598	11.426	3.0168	4.4596			0.681818	6.25505
17.9903	5.9693	3.2458	9.4229	3.4304	1.6798	1.0872	10.0127	2.3247	0.9356	1.3862	1.1871	1.1393	1.176	8.404	5.64	2.2505	1.5319	1.876	1.909	1.7884	1.6913	6.498	60.4264	40.4606	1.7064	1.339	1.2724	1.8511	2.7885	3.4054	11.4759	3.4704	5.8279			0.686362	6.32152
18.1095	6.2402	2.7989	9.05	3.4846	1.0768	1.3034	10.2804	1.262	1.1754	0.8569	1.1015	1.5018	1.545	8.603	5.634	2.0426	1.4294	1.845	2.012	1.7397	1.7875	5.227	57.5331	38.6718	1.9384	1.1183	1.1488	1.2998	3.1275	3.3814	12.4317	3.042	5.1686			0.69091	6.08662
18.2286	6.1752	3.4494	9.0411	3.4191	1.047	1.2063	9.457	1.5155	1.4275	1.3318	1.2777	1.0311	1.2	10.384	5.769	2.8702	2.008	1.994	2.017	1.9999	1.4922	5.363	55.0867	34.8719	1.6774	1.349	1.1004	1.9105	3.3426	3.963	13.1573	3.3419	4.8605			0.695453	6.06476
18.3478	5.7183	3.6467	8.4751	4.1765	1.1129	1.6121	8.979	1.6375	1.6195	1.437	1.1569	1.3951	1.624	9.929	6.627	1.7196	2.237	1.769	1.824	1.849	1.4787	5.177	51.6365	37.1275	1.4965	0.8606	1.0663	2.1476	2.3936	3.6538	15.3294	3.1975	4.3938			0.700001	6.01527
18.4669	6.2962	3.199	8.0358	4.2209	0.8092	1.3917	9.736	1.2799	1.4399	1.1239	0.88	1.1943	1.308	10.711	6.905	1.956	1.7854	1.832	1.693	1.8185	1.4999	4.14	49.6169	33.4864	1.9928	1.0058	1.0857	2.0883	2.612	3.651	15.8642	3.3137	4.4235			0.704545	5.83018
18.586	7.031	3.5175	8.1641	4.1057	1.3143	1.4032	8.7476	1.8445	1.0768	0.7174	1.098	1.4451	1.497	11.258	7.006	1.7254	1.7549	1.862	2.298	1.8608	1.5203	3.791	44.4121	33.7355	1.983	1.0774	1.2797	1.8462	3.2231	3.3378	13.9915	3.0289	5.8468			0.709089	5.72123
18.7052	7.2255	4.3563	9.7084	5.7443	1.0149	1.0606	9.3234	1.5592	1.187	1.0144	1.2441	1.1604	1.5	10.85	6.861	1.9341	1.9464	1.909	2.353	1.5488	1.6613	3.118	37.765	36.5069	1.8256	1.0942	1.2869	1.4037	3.408	3.2274	13.0893	3.7246	6.1195			0.713637	5.68882
18.8243	7.1565	3.0703	8.7183	5.0323	0.889	1.2281	9.8164	1.5726	1.3907	1.0358	1.5176	1.4561	1.903	11.441	7.19	1.9764	2.167	1.87	2.135	1.612	1.8442	2.297	31.1496	35.2399	1.7161	1.2569	1.6096	1.8275	2.783	3.5023	12.0354	4.0984	5.4825			0.71818	5.39456
18.9435	8.0041	3.8662	7.6793	4.4463	1.0136	1.5163	8.1824	1.4836	1.1833	1.0196	1.3208	0.8603	1.656	11.024	7.641	2.0635	1.6726	1.676	1.945	1.7327	1.2267	2.809	27.4769	34.6521	1.8238	1.1461	1.4143	1.9934	3.2167	3.8884	11.9574	3.8697	6.6473			0.722728	5.21541
19.0626	8.6281	3.4405	6.3985	4.4621	1.0672	1.2251	9.4879	1.5852	1.2097	1.2767	1.2893	0.9852	1.585	12.067	6.973	2.1249	1.5999	2.257	2.643	2.0818	1.6912	2.283	26.4362	35.0242	1.8881	1.2143	1.4362	1.7642	2.7633	4.3601	12.1185	4.2438	7.8883			0.727272	5.31814
19.1817	8.5555	3.8052	5.6876	5.4751	1.3834	1.4626	8.3412	2.1259	1.0177	1.1223	1.4267	1.0846	1.81	12.645	6.989	1.7859	1.8646	1.879	2.518	1.8157	1.4163	1.863	19.4445	36.3224	1.7263	1.0211	1.3934	2.3556	2.8573	4.0704	12.1762	3.5917	7.4284			0.731816	5.1049
19.3009	9.6817	3.9334	6.5981	5.2619	0.8159	1.1675	8.7684	1.8452	0.7982	1.2258	1.2468	0.9458	1.759	13.341	6.75	2.4669	1.688	2.448	1.913	2.1077	1.7914	1.614	18.3049	37.2037	1.869	1.6194	1.7251	1.8978	4.0594	4.9808	14.4206	3.8542	5.7331			0.736364	5.26775
19.42	10.5134	3.6012	6.6357	4.938	0.7804	1.3393	8.1839	2.3004	1.1999	0.8606	1.2839	1.2077	1.709	14.671	7.914	1.688	1.8027	1.932	2.119	2.0524	1.5175	1.805	16.9599	42.5036	1.7245	1.286	1.3846	1.7794	3.0775	5.0665	17.201	5.1345	6.1697			0.740907	5.52552
19.5392	9.7884	4.496	6.5205	5.1648	1.0649	1.3202	7.883	2.2325	0.9253	1.3588	1.2178	1.3317	2.311	14.454	7.584	1.769	1.5388	1.879	2.013	1.8506	1.9185	1.736	12.9007	42.2219	1.7596	0.8348	1.3362	1.9731	3.9021	5.074	18.5401	5.0788	7.1894			0.745455	5.48995
19.6583	10.6608	5.3737	7.2555	5.4405	0.9142	1.2847	6.9226	2.4395	1.1373	1.9034	0.9929	1.2095	2.067	14.335	7.63	1.9519	1.6423	2.026	2.57	1.8061	1.6979	2.257	11.4513	42.8714	1.4472	0.7604	0.9919	1.7061	3.1206	4.2767	21.5733	4.9647	8.797			0.749999	5.62056
19.7775	10.8221	4.4648	6.9281	5.4989	1.3888	1.3489	8.0582	2.3016	1.6003	1.3098	1.2277	1.6728	2.019	16.09	7.988	2.1539	1.7016	2.265	2.227	2.0956	1.5343	1.764	10.6559	44.183	1.6874	1.5716	1.3949	1.9032	2.9762	4.5658	23.3333	4.5914	8.4636			0.754547	5.81172
19.8966	11.5786	4.3256	6.2709	5.5198	1.3989	1.6626	6.8575	2.3249	1.1416	1.3563	1.049	1.5317	2.106	12.832	8.141	2.149	1.7712	2.1	2.526	1.9458	1.27	1.673	10.8688	41.3309	1.4087	1.3104	1.0336	1.411	2.8271	5.5599	25.5982	4.3278	11.052			0.759091	5.70484
20.0157	11.1469	5.2593	6.4909	5.5307	1.3646	1.783	7.6413	1.8285	1.1012	1.3827	1.4102	1.4288	2.119	13.056	8.851	2.2037	1.4032	1.476	2.058	2.4271	1.5179	1.667	9.7638	42.6813	1.8793	1.2656	1.0451	2.0293	3.4407	5.7939	29.6694	4.9727	10.7024			0.763634	5.95123
20.1349	9.8056	6.3622	7.3989	6.105	1.2793	1.9095	8.0954	1.6187	1.7089	1.4253	1.2017	1.1275	2.061	15.791	8.331	2.4568	1.8866	1.764	1.787	1.736	1.9775	1.486	10.0034	43.8275	1.8023	1.068	1.8625	1.9826	2.8626	5.2064	33.0315	4.656	13.4662			0.768182	6.27527
20.254	10.492	7.1092	7.9867	6.4511	0.8432	2.3824	6.5725	2.061	1.5543	1.2777	1.581	1.0003	2.008	17.761	7.22	2.2332	1.6495	2.002	1.55	1.8167	1.6574	1.803	10.1695	47.2809	2.1254	0.9262	1.3771	1.9524	3.0419	6.2379	39.0139	5.1222	15.6185			0.772726	6.72358
20.3732	10.046	6.7971	7.2486	6.5453	1.2163	2.7018	7.4294	2.5077	1.2379	1.2533	1.5632	1.7293	2.614	19.734	7.935	2.9914	1.7309	1.977	2.004	1.6847	1.5816	1.642	10.7088	45.8027	2.4887	1.4912	1.6004	1.5977	3.5159	5.9277	42.2992	5.2901	16.5305			0.777274	7.01283
20.4923	11.6466	6.7059	6.3891	6.2669	1.7943	2.9881	7.1845	2.4901	1.2024	1.29	0.8228	1.5524	2.468	19.323	7.395	2.5379	1.9218	1.86	1.77	1.6911	2.0447	2.202	10.9096	45.7347	3.5046	1.7727	1.2264	1.7924	3.9923	6.5852	41.8408	5.9965	18.5291			0.781818	7.13427
20.6114	11.5242	7.9924	7.9061	8.6204	1.72	3.4889	7.1339	2.1175	1.5719	1.4763	1.3335	1.2398	2.962	21.992	7.982	2.3218	1.6517	2.107	2.098	1.9891	1.7855	1.949	9.4703	45.5768	3.1438	1.5561	1.3179	2.0893	6.3483	8.0593	46.1364	6.0474	20.9685			0.786362	7.68718
20.7306	12.4602	7.8835	8.2283	8.2229	1.4744	3.8365	6.366	1.922	2.2131	1.2765	1.4003	1.2696	3.889	19.865	7.943	2.7332	1.5805	1.747	2.833	1.5748	1.9367	2.499	9.474	44.7463	3.2908	1.3461	1.2966	1.9621	5.5923	8.6159	48.0234	8.0125	23.515			0.790909	7.84938
20.8497	12.6326	8.2632	7.7739	9.2056	1.8032	4.8966	6.145	2.0841	1.7039	1.1331	1.2715	1.502	3.984	21.277	7.688	3.8593	1.6262	1.57	1.959	2.0581	1.5598	1.738	8.0859	42.927	3.0233	1.2032	1.5452	1.7626	4.8289	7.6747	45.2856	8.3926	23.9593			0.795453	7.70977
20.9689	14.4153	9.1417	7.8702	9.6325	1.7934	6.2399	5.4238	2.3943	1.5114	1.0214	1.34	1.4052	4.404	21.239	8.992	3.4896	1.7255	1.391	2.368	1.8707	2.0089	1.809	8.8869	35.4811	2.4247	1.3019	1.5054	1.4854	5.6135	9.8688	44.5358	9.4808	28.0323			0.800001	7.88192
21.088	16.0229	9.4328	7.6414	10.9879	1.8138	7.8629	5.7906	2.9581	1.4752	1.5373	1.8313	1.2473	5.658	21.443	10.609	4.5662	1.7289	2.063	1.88	2.7488	2.0325	2.155	7.7065	37.6973	3.2771	1.0721	1.4826	1.8811	5.1465	9.3814	41.9627	9.8538	31.2822			0.804545	8.30998
21.2071	16.1704	9.7424	7.1082	13.2164	1.7772	9.1796	6.6318	3.1137	2.1171	1.4412	1.2638	1.9269	6.384	23.74	10.831	5.8562	2.2182	1.578	1.555	2.1819	1.9662	2.069	8.9199	34.7217	3.2739	1.2273	1.4221	1.9975	5.5884	11.0813	39.7281	11.9063	30.7453			0.809089	8.56606
21.3263	15.9225	10.2598	7.7746	15.026	2.1081	11.1666	6.9318	3.8331	2.1701	1.9368	1.1355	1.0644	7.652	23.934	11.018	7.763	1.8526	1.923	2.016	1.9645	1.899	2.128	9.8513	31.5311	3.7722	1.4812	1.3289	1.9379	6.3155	10.9421	41.9352	12.8313	28.1148			0.813636	8.83397
21.4454	16.9517	12.9645	9.0905	16.2777	2.5805	14.4558	7.0233	4.3184	1.6156	1.465	1.6088	1.5171	8.317	24.624	12.528	10.1358	1.6817	1.558	2.614	2.3961	1.7867	2.673	11.2316	30.3268	3.3573	1.118	1.7046	2.0261	7.767	14.4412	43.8138	14.4001	26.8471			0.81818	9.55202
21.5646	19.1924	14.7368	8.7885	14.5144	2.972	17.5441	8.0303	5.8482	1.7598	1.5124	1.4171	1.3007	9.75	26.687	14.365	11.7053	1.5412	1.643	1.491	2.4959	2.223	1.913	11.4754	28.032	3.1767	1.4806	1.3602	2.6224	8.4912	16.4583	42.7233	17.5149	22.2238			0.822728	9.90878
21.6837	18.7616	14.976	8.1689	16.9725	3.5771	19.6957	7.6797	6.1502	1.8835	1.6089	1.0774	1.2422	10.038	29.42	20.765	13.4133	1.9138	2.127	1.669	2.3451	1.8892	2.075	11.3958	25.4693	4.0289	1.5013	1.5292	3.1998	9.9481	23.0009	43.0253	20.6206	20.0378			0.827272	10.6426
21.8029	17.0239	16.8534	8.197	17.4224	3.8373	22.813	8.0496	5.9972	2.2198	1.9559	1.5043	1.7986	13.249	30.746	25.498	13.129	2.0626	1.417	1.331	2.4245	1.9934	2.224	11.5819	23.6018	4.4345	1.7648	1.5589	2.5856	12.6997	26.7671	39.9542	23.6979	17.5801			0.831819	11.1507
21.922	16.837	17.7212	8.2102	18.8709	5.1713	25.3239	7.5587	6.9434	2.0183	1.471	1.1794	1.3979	15.812	36.333	31.755	16.0731	2.167	2.33	2.238	2.6925	2.5517	2.172	11.0604	18.9441	4.7752	1.6319	1.8	2.3803	18.3893	30.3775	41.0207	24.3001	17.5443			0.836363	12.0925
22.0411	14.188	17.9156	10.1102	18.2763	5.6082	27.9265	7.2473	9.1005	2.2014	1.6147	1.1769	1.233	20.164	40.16	37.956	17.3188	2.0814	1.471	2.047	1.9898	2.8442	2.411	9.6127	18.4968	6.3461	1.7874	1.5936	2.7321	22.1985	34.0452	32.325	24.8231	15.6261			0.840907	12.5645
22.1603	12.7149	17.7182	9.5364	19.1129	7.5701	32.7518	7.5213	10.6358	2.1758	1.8826	1.276	1.8874	19.337	45.896	41.602	18.0107	2.7518	1.983	2.038	2.6596	2.3905	2.477	10.9485	16.393	6.9922	1.8329	1.6249	2.8164	26.5186	34.8582	28.0355	28.2363	16.4731			0.845455	13.2927
22.2794	10.6286	18.4373	10.6088	20.6984	11.5207	38.6886	9.5726	11.9006	2.3235	1.8221	1.5421	2.1917	24.674	50.479	41.42	19.002	3.327	1.806	2.434	1.7323	2.7305	2.144	12.253	14.3862	7.3731	2.114	1.6149	3.2476	28.7685	35.9963	19.2468	24.9387	15.9516			0.849999	13.8053
22.3986	8.3091	18.1804	9.6542	19.1884	15.2418	40.637	9.1186	14.5153	2.1278	1.8364	1.7257	1.932	22.532	49.108	34.455	21.6031	2.8626	1.787	1.971	1.8241	2.528	2.441	12.5056	13.2679	8.0139	2.0696	1.9992	3.091	34.886	32.28	12.724	26.1033	15.305			0.854546	13.5098
22.5177	6.5205	17.8687	12.0201	19.5969	16.4456	40.5431	9.998	16.287	2.3131	1.8637	1.7121	2.1088	22.278	43.251	31.571	21.3853	2.5804	1.836	1.995	2.2499	2.9106	2.478	14.1202	13.0274	11.3349	1.6565	2.2059	4.28	40.9924	26.9503	9.9157	23.9243	12.9834			0.85909	13.3698
22.6368	6.0902	17.7265	12.0015	19.988	17.326	37.0094	11.1211	18.6476	2.9615	2.1379	2.0187	2.793	22.517	33.831	26.946	20.0333	2.9233	1.876	2.636	2.3138	3.2514	2.599	15.7223	10.0126	15.0307	1.7617	1.554	5.2599	41.8745	19.0541	6.5629	24.9591	9.7031			0.863634	12.7346
22.756	4.897	17.2456	11.8633	19.8129	16.997	32.453	11.162	21.3281	2.9968	2.1797	1.3575	2.8878	24.845	25.236	25.415	21.8373	2.594	1.6	1.81	2.5664	3.3916	2.221	17.1738	8.1161	16.6226	1.959	1.5772	6.3339	41.8578	11.1413	3.8113	22.6639	8.2417			0.868182	12.0059
22.8751	4.4312	14.5747	14.0696	19.65	14.7177	26.3928	12.3909	23.4564	2.6176	2.6648	1.652	4.1297	27.908	14.865	20.656	24.3751	3.0469	1.566	2.075	2.9347	3.6999	2.598	18.0424	5.5564	20.1945	2.3549	2.3184	7.8519	35.0666	5.7294	2.877	18.7235	6.8011			0.872726	11.2118
22.9943	3.5698	13.1142	15.8959	21.8802	10.8349	21.1213	13.282	24.4665	3.7858	2.6518	2.1677	5.3321	31.719	10.706	16.19	26.4257	3.6288	2.688	1.812	2.9423	4.0365	2.196	19.2153	5.7855	22.0501	2.4525	2.5242	9.4226	26.0147	3.2978	2.4787	15.6788	5.2246			0.877273	10.7452
23.1134	2.8583	12.1114	16.6655	22.5573	9.3951	18.8186	15.2937	26.9583	4.3125	3.0335	2.3356	9.3742	36.589	6.532	11.221	27.8935	4.2049	2.021	2.399	2.737	4.1266	2.748	21.043	4.1221	22.0728	2.1827	2.3601	11.1408	14.4804	1.6118	1.9892	15.4795	4.5079			0.881817	10.4599
23.2325	3.0088	11.0166	18.1821	23.7449	6.1874	17.1543	16.7019	27.7075	5.9129	3.8192	2.5205	14.3292	38.63	3.344	7.348	30.1884	3.9229	2.079	2.441	3.5178	4.5271	2.332	22.5033	3.6314	22.8961	2.3438	3.3626	12.6064	8.4869	1.3893	1.6167	10.3696	3.7512			0.886361	10.3507
23.3517	2.7554	9.1496	20.128	23.7991	4.4417	16.0752	20.0021	26.0602	8.7415	3.8043	2.5281	18.3794	36.505	2.344	4.731	35.6268	3.3266	1.937	3.167	4.0321	5.0549	3.291	23.3932	3.2282	22.1893	2.444	3.2494	16.2869	4.0289	0.9538	1.3078	7.9885	2.5584			0.890909	10.4093
23.4708	2.0169	8.5823	22.673	22.6042	2.8657	15.2791	20.1578	24.6479	11.1515	5.4032	3.1621	22.6461	31.859	1.891	2.251	42.4694	4.1997	2.467	2.586	4.9326	6.0036	2.983	23.9376	2.8098	22.1123	2.8829	4.3943	17.9664	2.3976	1.005	1.2785	7.3445	2.3438			0.895453	10.6456
23.59	2.4152	5.8981	23.4312	21.535	2.4103	10.7267	19.8481	21.7951	15.4163	5.5927	3.764	22.2518	25.832	1.511	1.629	49.9895	4.897	2.335	2.457	5.4027	6.0213	3.358	24.8733	2.0123	15.7211	2.9753	4.7953	19.2495	1.3422	0.7827	1.3095	4.2798	2.3606			0.9	10.249
23.7091	1.536	6.2001	22.4563	18.7298	2.4235	9.4251	22.157	18.2407	20.4928	8.0063	4.965	27.958	15.615	1.108	1.54	53.0606	4.5515	2.341	3.175	6.1047	6.2497	4.049	23.5646	1.9212	13.9341	3.2119	7.0362	21.2789	0.8214	0.809	1.2736	3.9021	1.9184			0.904544	10.3047
23.8283	1.2946	5.3691	20.3709	19.1348	2.1254	7.5944	21.5269	11.7052	25.2919	8.8116	6.91	30.8812	7.665	1.142	1.253	52.4267	5.0908	2.268	3.136	6.4273	6.866	3.706	23.2664	1.7046	12.6861	3.6712	9.6484	21.632	1.058	0.8171	0.7778	3.5463	1.5148			0.909092	10.04
23.9474	1.2442	3.9136	20.1622	16.6285	1.5089	4.7989	20.7247	6.9887	33.7345	12.1721	10.1464	30.7785	4.466	0.753	0.774	39.5618	5.6535	2.573	3.092	8.3182	6.9418	4.678	23.8382	1.3583	11.2864	4.0666	12.2373	23.9987	1.0864	0.609	0.9699	2.4665	1.5052			0.913636	9.78894
24.0665	0.9879	3.4637	16.1602	14.1317	1.4247	4.157	20.6398	3.6407	39.1951	17.5143	13.8991	31.4295	2.839	0.834	1.04	28.5682	5.5496	2.919	4.157	11.3335	7.2884	5.355	23.0952	1.4545	9.7089	4.8367	14.7859	18.1896	0.5307	0.2741	0.8467	2.7847	1.5644			0.91818	9.5333
24.1857	0.6553	2.6785	15.0588	11.359	1.4122	4.0706	18.5688	2.2252	46.1401	20.5613	19.1281	29.3214	1.707	1.23	1.01	19.3769	6.3449	3.358	4.635	14.4417	7.6328	5.803	23.6569	1.3713	10.292	6.2101	17.7494	16.1242	0.5191	0.452	0.5268	1.5801	1.5327			0.922727	9.59798
24.3048	0.5462	2.2458	15.5752	8.1385	1.8214	4.0917	15.7838	1.5483	40.9127	22.3318	26.0745	23.5165	1.247	1.106	0.651	13.299	8.6217	3.246	6.311	17.8702	8.6502	8.408	22.4068	0.7713	7.6692	7.8633	20.2756	12.2841	0.6292	0.3381	0.7707	1.1954	1.1297			0.927271	9.31303
24.424	0.7217	2.2828	14.0056	6.4246	0.9841	3.4924	13.616	1.6355	27.4479	19.081	26.7461	17.8785	1.131	0.822	0.804	8.1272	8.821	4.277	10.624	23.6437	8.5292	10.006	20.3039	0.5703	6.1283	8.6735	21.9803	7.6519	0.3731	0.2312	0.7662	1.2079	0.9244			0.931819	8.48219
24.5431	0.8635	1.4656	10.2765	3.7149	0.7892	2.5183	8.306	1.0639	17.1178	13.1792	23.3367	12.9908	0.696	0.674	0.637	4.8317	10.2368	4.795	13.196	26.4159	7.3017	12.416	19.5902	0.8131	6.0904	10.8446	23.7746	5.8377	0.4785	0.3233	0.6333	1.3334	0.6821			0.936363	7.49163
24.6622	0.7659	1.2743	8.75	2.6653	0.8387	2.9493	6.1223	1.0745	9.7209	7.3883	15.7358	8.6835	1.042	0.611	0.712	3.9696	11.5047	5.393	17.784	31.9424	9.9499	14.765	16.9868	0.5509	5.4069	14.627	25.3488	3.2636	0.3338	0.3998	0.4181	0.9571	0.6261			0.940907	7.04731
24.7814	0.5128	1.2966	7.3304	2.1563	1.3566	2.8162	4.7377	0.9426	4.8374	4.2812	8.5032	7.6089	1.045	0.622	0.655	2.9614	14.6146	5.841	21.578	34.9894	9.7101	16.086	16.3413	0.5254	3.8487	14.9432	27.3751	1.9387	0.2481	0.2491	0.5344	0.5697	0.5711			0.945454	6.71598
24.9005	0.5863	1.3813	5.3022	1.3945	0.987	2.1598	4.0101	0.6521	2.5362	2.7573	3.9752	5.9206	0.402	0.573	0.289	1.9943	16.6333	7.453	22.081	44.8224	12.1333	18.518	12.9707	0.8238	3.177	19.6374	27.7546	1.4345	0.2393	0.5098	0.488	0.6717	0.6664			0.949998	6.81622
25.0197	0.5479	1.2627	4.9828	1.5459	0.4609	2.6595	3.4762	0.6096	1.714	2.002	3.1706	4.4367	0.566	0.897	0.624	1.4621	19.64	11.667	22.849	46.2821	13.7486	21.231	11.0576	0.8152	2.983	23.2156	29.6018	1.0907	0.3868	0.5308	0.3219	0.6373	0.792			0.954546	7.18995
25.1388	0.5198	1.1093	3.3268	1.1337	0.781	2.5162	1.8536	0.6518	0.9835	1.9493	1.8035	2.7404	0.54	0.68	0.595	0.9614	22.2414	10.202	24.158	47.0085	16.0485	25.168	8.9107	0.5985	2.166	25.7506	26.982	0.9253	0.2561	0.3201	0.3052	0.776	0.6383			0.95909	7.10911
25.258	0.4754	1.1108	2.6395	0.8427	0.6642	1.7773	1.8876	0.5634	1.0284	1.5619	0.9978	1.6175	0.469	0.472	0.65	1.3646	26.4574	10.284	26.399	48.5	19.7471	26.019	6.7225	0.6174	1.4941	26.2908	24.3198	0.8003	0.1418	0.2167	0.2886	0.5601	0.5519			0.963638	7.19796
25.3771	0.6424	0.9103	2.349	0.8213	0.9061	1.7171	1.6829	0.5529	0.9842	1.0977	1.1782	1.3293	0.53	0.628	0.702	1.0052	28.0914	12.098	25.429	46.3988	22.7011	27.738	5.0846	0.4946	1.6954	24.7671	18.7808	0.6051	0.2639	0.2378	0.1674	0.2332	0.4683			0.968181	7.03912
25.4962	0.3493	0.5286	2.5637	0.7544	0.8617	1.5218	1.3302	0.4881	1.0574	0.8202	1.0945	1.0286	0.348	0.387	0.397	1.3133	32.8699	12.779	23.13	44.4182	25.793	29.364	4.3515	0.6912	1.2174	23.5892	14.7644	0.4267	0.2913	0.1599	0.3437	0.2989	0.258			0.972725	6.95728
25.6154	0.5175	0.7032	1.9063	0.6883	0.4078	1.5826	1.2476	0.4094	0.7984	0.7457	0.7934	0.6676	0.297	0.634	0.178	0.9595	34.279	13.426	24.364	37.8425	28.7024	33.677	3.6862	0.3226	1.4926	17.9928	11.0449	0.3259	0.1489	0.1436	0.3423	0.4557	0.5489			0.977273	6.70702
25.7345	0.382	0.6225	1.5872	0.5181	0.7932	1.1123	0.9122	0.382	0.5086	0.768	0.6598	0.6353	0.187	0.521	0.226	0.7023	32.8867	13.876	22.569	29.4853	31.0704	35.308	2.6285	0.1867	0.9132	11.4273	8.3916	0.4429	0.1896	0.0379	0.2923	0.4496	0.1942			0.981817	6.08687
25.8537	0.3628	0.661	1.7764	0.6364	0.6573	1.4441	0.8775	0.2194	0.4362	0.9271	0.5751	0.4013	0.248	0.302	0.262	0.466	30.0085	13.961	24.89	20.6598	35.4974	39.099	2.6021	0.2424	0.9621	6.5432	4.4153	0.4684	0.229	0.0894	0.2475	0.3255	0.3691			0.986365	5.78371
25.9728	0.2286	0.408	1.4818	0.514	0.6212	1.5345	0.8309	0.7542	0.4381	0.5601	0.494	0.583	0.346	0.381	0.174	0.6587	27.9081	16.328	25.925	11.9868	32.7386	39.169	2.3388	0.2867	0.7474	5.6188	3.6219	0.7374	0.1511	0.2697	0.3098	0.3003	0.72			0.990908	5.42926
26.0919	0.2219	0.4038	1.1424	0.789	0.3238	0.6869	0.8516	0.3147	0.6251	0.4296	0.3725	0.4232	0.49	0.325	0.229	0.5471	20.6432	18.524	29.308	6.9014	31.3974	37.593	2.0224	0.3458	0.7391	3.4532	2.924	0.6357	0.2007	0.2608	0.2662	0.1689	0.4392			0.995452	4.96965
26.2111	0.4011	0.4763	0.9208	0.5942	0.372	0.4454	0.8715	0.3104	0.7037	0.381	0.6652	0.5569	0.178	0.21	0.252	0.4555	13.0456	20.097	30.272	4.8441	27.5486	33.24	1.4636	0.4154	0.889	3.435	2.3117	0.2386	0.0636	0.3034	0.0393	0.1865	0.2549			1	4.43765

## Sheet: Image13
X0	Y0	Y1	Y2	Y3	Y4	Y5	Y6	Y7	Y8	Y9	Y10	Y11	Y12	Y13	Y14	Y15	Y16	Y17	Y18	Y19	Y20	Y21	Y22	Y23	Y24	Y25	Y26			Ap-Ba	Average int
0	21.0216	20.1622	10.5932	18.0387	29.9313	29.9026	9.59	11.7298	24.725	20.3068	15.9323	15.5415	10.408	8.1489	6.4051	6.1396	5.7086	8.386	22.5342	41.3616	30.6428	15.17	24.7735	34.2925	30.4695	12.8443	13.216			0	18.4435
0.1191	27.6192	26.909	13.8155	19.6913	37.4301	38.8141	11.5745	15.7809	33.5643	30.0549	22.8893	20.9708	12.8767	9.3671	7.6151	7.7439	7.2266	9.309	25.3294	45.9449	30.649	16.9562	26.9669	41.6762	30.6801	14.5629	16.953			0.00482925	22.3323
0.2383	35.2425	36.1379	18.7056	25.0762	43.0844	46.3942	17.2726	19.7731	42.3435	39.3855	32.4967	29.3206	16.9904	12.9286	8.6681	13.3151	7.8976	12.566	27.8559	48.6989	34.4453	20.6651	32.9012	45.4882	33.0494	18.0966	19.8892			0.00966256	27.3588
0.3574	45.1897	47.774	24.683	31.2039	48.9166	53.4381	20.8548	26.1058	46.3738	49.9077	41.2127	38.4126	25.3839	17.2093	12.714	22.392	9.8761	14.2164	36.584	49.7107	34.9127	23.6717	34.1138	55.8859	34.0663	26.9096	26.6624			0.0144918	33.2734
0.4766	49.0676	59.4105	29.4539	33.9918	60.7678	61.7307	26.375	33.8327	54.3466	63.8973	57.6259	52.0392	36.7695	24.1253	22.0294	33.1966	13.4279	15.3459	47.1519	47.5155	36.067	27.2263	41.6478	62.832	40.0548	36.7839	31.1988			0.0193251	40.6634
0.5957	61.0083	69.8396	39.6466	42.8201	66.312	62.4971	36.1712	41.5361	63.2115	76.7686	67.0438	64.7467	48.6794	33.536	29.1393	45.4349	19.2781	19.6527	53.4056	51.2912	36.6887	29.0562	45.4334	67.9421	44.5085	46.9808	33.8242			0.0241544	48.0168
0.7148	69.1945	78.7074	49.5439	50.5103	71.7466	66.9495	50.6269	45.4535	66.526	81.4279	72.83	78.6321	66.1839	48.0915	41.2862	61.1234	24.5833	26.9402	62.3938	53.7309	39.1473	33.6228	51.5603	67.3564	42.3704	58.7678	33.8697			0.0289836	55.3028
0.834	75.8785	88.3538	58.0202	56.1963	77.4731	74.4875	56.1594	52.8977	76.0412	85.4001	79.6779	86.0583	82.541	58.487	53.8077	72.0911	35.2798	32.8361	73.563	55.0008	44.5545	41.6176	54.0485	69.7796	46.4521	68.8276	38.3922			0.0338169	62.7379
0.9531	76.2055	90.886	67.5188	69.9156	81.5883	76.3562	68.8474	55.2246	77.2187	84.9066	81.9676	90.8989	91.2803	70.7495	60.948	73.8817	50.4224	41.102	76.7712	63.7013	47.2747	46.7482	55.7242	72.8277	48.6525	72.8998	50.7641			0.0386462	68.3438
1.0723	79.7219	87.3117	75.1297	72.1118	80.7741	79.4963	70.7388	64.1619	72.4232	82.8482	78.846	85.8717	92.8837	77.8184	68.5807	78.7409	57.9114	52.2166	80.2037	66.9683	48.4079	57.2788	63.1088	67.8333	48.6309	66.8521	63.7397			0.0434795	71.1337
1.1914	78.9718	83.1222	80.1113	75.0427	72.7027	78.7388	78.1443	69.3599	68.5473	75.7739	72.6911	81.6648	97.9874	82.1815	68.2232	80.3452	68.2174	64.6235	84.0295	72.7767	51.9218	59.5799	66.2112	65.0457	45.991	61.9018	66.1626			0.0483087	72.2248
1.3106	81.7575	71.773	84.5308	73.0107	69.1401	70.1168	76.4873	69.1277	64.0803	61.7633	66.6887	67.7986	91.1974	80.6888	68.0147	79.3141	76.1447	74.715	83.1302	79.9378	59.1085	67.7151	67.8326	59.4539	44.3968	48.8105	70.6408			0.0531421	70.6435
1.4297	73.6466	64.5966	79.8885	69.2886	61.8938	65.644	78.2228	72.4313	53.5806	46.5949	57.1396	55.1497	76.9685	80.4112	60.4546	72.0662	87.4477	82.6484	84.0481	79.5032	65.7917	72.9505	68.7872	51.8359	38.4164	36.9388	71.1489			0.0579713	66.9442
1.5488	67.1095	56.4753	73.7465	66.2086	56.8922	53.5503	76.9139	71.0672	44.7856	37.8051	45.8349	40.9352	64.1376	75.7054	50.1323	62.4911	92.4194	84.3901	83.4808	85.3937	73.9487	80.0336	70.0553	46.4175	33.5638	26.8527	67.6756			0.0628006	62.5193
1.668	60.8854	45.1129	60.1013	55.7434	48.5747	44.6188	71.496	65.2029	38.1946	29.5923	36.1628	27.2122	51.4679	59.634	40.2974	54.9088	91.2613	92.4589	82.6095	85.6129	77.0534	83.246	66.6874	40.3537	27.6005	18.243	63.367			0.0676339	56.2111
1.7871	52.7753	37.0459	45.0002	46.9173	41.8294	38.314	63.0151	61.3431	32.929	19.9678	29.4548	20.2726	40.8593	47.2802	30.97	43.6731	86.784	92.205	78.712	77.9094	75.3059	82.5932	64.2795	34.5344	20.8901	11.6747	46.8245			0.0724631	49.0133
1.9063	44.1917	32.4612	37.7518	41.9885	35.4176	33.1558	51.3427	56.5771	29.8982	17.7902	24.6136	16.9619	34.2473	37.4089	22.4126	33.4744	82.6214	92.8812	68.8271	67.6194	81.0106	86.125	60.4306	30.1079	17.439	8.9598	34.6198			0.0772964	43.7161
2.0254	38.4487	25.8312	27.4009	33.8382	33.4673	29.9623	45.7417	46.5983	25.6353	15.0837	20.7877	13.9936	26.6653	25.8391	15.4183	25.3083	72.568	94.554	68.2146	64.2721	81.771	82.1475	55.2154	29.3935	16.1408	8.2479	23.9033			0.0821257	38.7573
2.1445	30.954	21.7534	20.3632	30.4206	28.5512	25.816	34.1106	40.0461	20.0041	11.5919	15.8355	12.1017	22.0682	19.1589	11.4361	18.8629	59.1602	92.0687	62.9888	56.787	77.3473	72.4034	49.4914	26.0235	14.1086	5.8581	18.6606			0.0869549	33.2582
2.2637	27.3499	17.2255	17.1293	25.1916	22.6175	21.8746	28.4336	30.8118	19.635	9.7049	14.457	11.4753	15.3525	15.1304	9.858	16.3221	46.5446	86.2788	63.6479	45.8728	78.8913	62.0077	40.0614	22.8332	10.5731	6.3758	12.954			0.0917882	28.8374
2.3828	24.8305	11.4338	14.9512	23.0888	18.3688	18.4476	22.1227	27.2582	15.7149	8.0184	10.5355	9.7009	11.8112	14.8363	8.674	13.44	38.8263	81.9629	61.8139	40.4462	67.9004	57.9474	30.9602	22.137	7.5723	4.7353	9.2468			0.0966175	25.066
2.502	18.5632	9.5016	10.0953	19.5664	16.2375	14.4127	16.2145	22.5389	14.3767	7.4396	7.9046	7.5363	9.8725	12.0688	5.2989	9.8774	29.9366	69.1957	56.5897	32.2523	62.093	45.2248	24.6118	20.0004	6.2106	3.2927	8.7784			0.101451	20.7293
2.6211	16.1408	7.729	7.1949	19.0526	13.7308	13.216	14.2033	17.2232	11.2332	5.9589	6.7342	6.1389	8.3232	9.9133	4.4164	6.6553	23.5126	57.5806	51.0419	30.7591	55.7248	36.6333	19.6083	18.395	5.6515	2.5744	5.7252			0.10628	17.5952
2.7402	15.6637	6.5727	6.2195	16.4897	10.2228	12.7752	12.953	14.5341	9.9327	4.8766	5.1303	4.9931	5.4889	11.1017	4.7479	5.3221	19.5244	46.3666	46.79	26.4899	42.2273	27.5614	17.4257	17.1723	5.2169	3.0188	5.2998			0.111109	14.9673
2.8594	14.1467	4.8992	5.5773	14.7534	8.5648	8.2001	11.6895	11.9626	8.4374	4.7093	4.5576	4.0761	4.3817	9.1523	5.0208	4.6194	16.7507	34.9996	42.6107	20.4451	33.5261	24.8142	15.5557	15.1417	4.9042	2.8958	4.9664			0.115943	12.6429
2.9785	13.3107	5.2456	5.1514	13.3683	5.241	8.226	9.1775	10.4755	5.9973	4.8206	3.2056	3.3359	3.751	9.0664	3.6407	4.6287	14.9213	28.6054	33.5209	15.4464	25.3935	23.236	15.7651	13.507	4.8338	2.8532	4.551			0.120772	10.788
3.0977	13.2428	4.4694	3.6118	12.282	5.1827	7.077	8.0789	11.0157	5.1369	3.1392	3.082	2.7281	4.363	7.7989	3.2921	3.7524	12.4357	22.6586	27.8251	13.5152	21.4066	18.2662	13.0124	9.9788	3.8961	2.962	3.538			0.125605	9.17584
3.2168	11.7872	3.0322	2.9794	9.5917	4.8857	5.458	6.57	8.9313	5.1691	3.6544	2.7428	2.0628	4.3685	5.9179	3.204	3.6554	10.9284	23.481	24.4742	10.0553	19.569	16.1289	11.9545	9.3137	3.127	2.8948	2.6582			0.130434	8.09613
3.336	9.8909	2.5649	2.6652	10.1053	4.3927	5.8179	6.3618	9.3509	4.9757	3.4109	2.9512	2.2598	3.1631	5.8651	2.7514	3.6273	8.6634	21.1896	22.0936	9.993	17.6616	14.5581	11.2447	9.0836	3.3228	2.1652	2.4961			0.135268	7.50466
3.4551	7.5104	2.753	2.7301	9.0173	4.3026	4.4177	5.0091	7.432	3.5018	3.06	2.6643	2.2806	3.1338	4.7494	2.509	2.5083	8.2778	18.2834	18.9125	7.4398	17.6426	10.7276	9.8324	7.4734	3.7649	2.447	2.9368			0.140097	6.49324
3.5742	7.3291	2.8356	3.0957	7.9693	3.2202	4.6721	4.1344	7.1543	3.1017	2.9095	2.2664	1.7279	2.8083	3.8579	2.4797	2.0576	8.0702	16.5626	15.9378	5.8777	15.1726	9.5597	8.6355	6.0972	3.8731	2.0681	2.0044			0.144926	5.75847
3.6934	7.1404	2.1727	2.2167	7.2916	2.8177	4.126	3.8396	6.5427	2.1996	2.7668	1.5777	2.3846	2.7333	3.2834	1.9153	2.6358	6.3966	14.5472	14.4572	4.5875	15.0082	10.2308	8.1204	5.5659	3.1091	2.408	1.7213			0.14976	5.25171
3.8125	6.5449	2.1016	2.2368	7.1354	2.6526	3.394	3.7455	5.6587	2.309	2.3862	1.6115	2.1312	2.962	2.7344	2.0596	2.2526	4.5557	14.5205	11.667	4.0272	12.0254	8.2261	6.7267	4.398	3.3963	1.8967	1.9437			0.154589	4.64071
3.9317	7.281	2.2459	2.0759	6.8273	2.5278	2.7076	2.965	6.315	2.1262	1.9853	1.2674	2.0465	2.467	1.9004	2.2645	2.5077	4.012	13.3763	10.075	4.8257	10.7896	8.1175	6.0896	5.1518	3.2456	1.9648	1.5626			0.159422	4.39707
4.0508	6.9757	1.9272	2.0741	7.3914	2.5695	2.5667	3.0169	5.6586	1.7986	2.1673	1.4544	1.4134	3.062	2.0218	2.179	1.9555	3.907	11.8987	8.8461	3.4711	8.4374	5.7728	4.6945	5.9328	2.3861	1.8004	1.5075			0.164251	3.95876
4.1699	6.0949	2.2602	2.7865	6.0402	2.8541	2.08	2.1983	4.7429	2.0699	1.6208	1.3548	1.2828	3.5388	2.1981	1.9633	2.0216	2.8714	9.0242	7.2759	2.9892	6.5991	5.7713	4.3797	5.4536	3.3799	1.5352	1.6706			0.169081	3.55768
4.2891	5.0904	2.3799	2.6599	7.0243	2.0166	1.7858	2.5322	4.2319	1.6737	1.8108	1.5069	1.2295	3.2523	1.8408	1.8683	1.3466	2.5349	7.7148	5.2801	2.6517	6.4252	5.554	3.8086	4.7113	2.5866	2.2594	1.9801			0.173914	3.25024
4.4082	6.0463	1.8055	2.0652	8.359	2.5195	1.8831	2.2652	4.4377	1.7365	1.7036	1.0485	1.4685	4.0475	2.4016	1.4501	1.2648	2.4725	6.3371	4.5691	3.4443	5.3556	5.6257	3.5749	5.4507	2.5451	1.6002	1.8568			0.178743	3.23461
4.5274	5.8624	1.5215	1.8636	7.1571	1.6369	1.7353	1.8272	4.6265	1.9955	1.2897	1.2049	1.6005	3.4863	1.7339	1.4887	1.7798	1.6981	6.5612	3.9452	2.7335	4.209	4.4981	3.7535	5.9392	2.1646	1.7475	1.6942			0.183576	2.95385
4.6465	6.1632	1.6762	1.4784	6.8225	1.7559	1.3611	1.7521	4.6773	1.6423	1.5867	1.51	1.4971	4.3488	1.2514	1.1822	1.5369	2.3205	7.0058	4.3413	2.6142	4.7745	4.5994	4.0224	4.908	2.0446	1.7751	1.3422			0.188406	2.9626
4.7657	6.988	1.8376	1.4936	7.2095	1.8608	1.5545	1.5122	4.0166	1.5773	1.3923	1.2188	1.4389	3.7147	1.5398	1.6041	1.0873	1.6337	6.0986	3.7823	2.4559	5.0205	4.4081	4.4205	5.7306	1.9664	1.7931	1.5806			0.193239	2.92357
4.8848	4.9838	2.1472	1.484	6.0347	1.8576	1.4457	1.4371	4.1775	1.5108	1.4249	1.5197	1.527	4.371	1.3298	1.3731	1.1862	1.3578	5.6716	3.5792	2.3692	4.7159	4.2084	3.7286	5.0232	2.0757	2.2335	1.7721			0.198068	2.76094
5.0039	5.4732	2.1878	1.3931	6.7051	1.9867	1.5826	1.9043	3.8555	1.1326	1.1405	1.3381	1.7455	3.4349	1.8986	1.6232	1.199	1.4892	5.4364	3.1426	2.8606	4.661	4.2941	3.7095	6.5139	1.6807	2.0367	2.27			0.202898	2.84057
5.1231	5.8049	2.2235	1.7154	5.8545	1.6812	1.317	1.0284	4.1001	1.7576	1.4079	1.4581	1.1341	4.1838	1.9052	1.7448	1.3206	1.3148	6.3261	3.1297	2.2481	4.5927	4.0928	2.6239	6.4305	1.6404	2.184	1.7846			0.207731	2.77795
5.2422	5.759	2.255	1.749	5.8104	1.4209	1.2509	1.379	3.2039	1.5031	1.2227	1.2605	1.2645	4.86	1.5721	1.7394	1.1548	1.6489	3.8785	2.2563	2.2088	4.8254	4.0317	3.5892	5.7012	1.3415	2.0872	1.97			0.21256	2.62755
5.3614	5.4342	1.8857	1.4529	6.7891	1.9405	0.9569	1.5186	4.6514	0.715	1.2491	1.6679	1.3545	3.8289	1.3208	1.9029	1.4055	1.81	4.3852	2.5357	3.2153	4.493	3.7774	3.0903	4.7409	1.8581	2.1112	1.7739			0.217393	2.66166
5.4805	6.0878	1.942	1.1688	7.4123	1.2083	1.053	1.5905	4.5376	1.5863	1.1548	1.3801	1.7629	3.4101	1.6927	1.1314	1.1433	1.8197	4.7145	2.5824	2.5084	4.6157	3.7201	2.85	4.4188	1.7678	2.0413	1.3654			0.222223	2.61726
5.5996	6.0826	1.9655	1.4468	6.7418	1.7164	1.2129	1.3092	5.2015	1.3148	0.9941	1.3659	1.7728	3.3917	1.9457	1.0823	0.9762	1.7601	4.0637	2.3284	2.5051	4.2059	3.981	2.8603	5.2348	1.9854	1.5429	1.0201			0.227052	2.59289
5.7188	6.6719	2.1788	1.5181	6.9167	1.5216	1.3454	1.3005	4.9777	1.0797	1.5936	1.8776	1.77	4.8125	1.4871	1.4584	1.1832	1.5903	4.7926	2.6114	2.6929	4.9358	3.7103	3.1391	5.049	1.4626	1.7742	1.3439			0.231885	2.77018
5.8379	6.0238	1.7599	1.1352	7.7354	1.3714	1.4004	1.4001	5.0696	1.4355	1.2653	1.7704	1.7295	5.3193	1.3446	0.8484	1.2218	1.4577	4.3515	1.8959	2.4056	4.1531	3.5836	2.6031	4.337	1.826	2.0301	1.4517			0.236714	2.62689
5.9571	6.1226	2.9187	1.0404	9.0087	1.1256	1.0149	1.3278	5.8266	1.142	1.2652	1.457	1.5159	4.2062	2.0134	0.734	1.0542	1.286	4.2844	2.3783	2.1454	4.0786	2.6949	2.7265	4.7235	1.619	2.3918	1.7861			0.241548	2.66251
6.0762	5.1214	2.6632	1.7651	9.2213	1.5924	0.9444	1.2741	5.5099	1.2469	1.2672	1.1057	1.4662	5.2259	1.635	1.0949	1.0686	1.5588	3.7907	2.201	2.528	3.998	3.8325	2.8984	4.228	1.4726	1.8742	1.5796			0.246377	2.67274
6.1953	5.4096	2.0202	1.9479	8.7345	1.4777	0.8938	1.1383	6.3179	1.139	1.223	1.3649	1.5979	4.5588	1.7976	1.0728	0.9934	1.7812	4.2516	1.7332	1.9163	3.8183	3.9766	2.7295	4.6925	2.3969	2.7404	1.5639			0.251206	2.71436
6.3145	4.7697	3.1963	1.7497	10.2477	1.5379	0.7825	1.0884	5.7394	1.4908	0.9191	1.3202	2.0206	6.0307	1.4445	1.2527	0.9902	1.5292	5.1059	2.5963	2.1478	3.3792	3.3085	3.5434	4.9229	2.2919	1.7962	1.555			0.25604	2.84284
6.4336	4.1614	3.1924	1.0662	9.3193	1.6811	1.1554	1.5593	6.9972	1.5014	1.1653	1.2593	1.8268	4.5239	1.6211	1.9217	1.4647	1.4872	3.9256	1.4644	2.787	4.1197	3.6156	3.0284	4.4803	2.3424	2.5889	1.1124			0.260869	2.79142
6.5528	4.4515	3.351	1.1408	10.6135	1.1949	1.27	1.616	6.1932	1.5402	1.4145	2.0151	1.6236	4.9247	1.9106	1.2621	1.1038	1.2312	3.4712	2.2893	2.6399	3.8294	3.632	3.1948	4.5749	1.6528	2.4981	1.8813			0.265702	2.83409
6.6719	3.941	3.3374	1.43	11.742	1.6827	1.2668	1.1144	7.4837	1.1293	1.2351	1.8731	1.9876	5.4265	2.33	1.3285	0.8992	1.3824	4.1554	1.9997	2.9791	3.8218	3.1008	2.6116	4.0833	1.6873	2.7883	1.274			0.270531	2.89226
6.7911	4.2023	4.0551	1.6553	11.079	1.411	1.2701	1.8639	8.6075	1.0169	0.7362	2.1583	1.8407	5.7227	1.8241	1.3699	0.9543	1.6522	3.8117	2.1383	2.7303	3.3443	3.2641	2.562	4.097	1.8944	2.9741	1.2328			0.275365	2.94328
6.9102	4.6935	4.2556	1.5372	11.5183	1.7344	0.9278	1.3316	9.4166	1.2974	0.8902	1.7315	2.8568	5.9421	1.8827	1.3765	0.8293	1.2785	3.1968	2.2804	2.8701	3.4014	3.5081	2.7206	4.0065	2.0007	2.4776	1.7106			0.280194	3.02492
7.0293	5.9032	4.3843	1.3567	11.6025	1.4309	1.1962	1.1796	10.518	1.8388	1.3872	1.669	2.1308	6.2068	1.301	1.2002	1.4282	1.4101	2.935	2.041	2.8391	3.4142	3.2134	3.8137	3.9283	2.5916	2.4244	1.8356			0.285023	3.15481
7.1485	8.3962	6.6931	1.8281	13.195	0.8267	1.2582	1.0183	13.5164	1.0207	1.1944	1.7423	2.4624	5.4966	1.8361	1.9657	1.1619	1.3525	3.4193	2.5843	2.7886	3.8264	3.5171	3.6214	4.0051	2.1659	2.3387	1.6253			0.289857	3.51321
7.2676	9.4551	6.5375	2.1634	14.3453	1.0698	1.3482	1.4899	13.5667	1.7353	1.3226	1.6939	2.9604	6.598	1.6942	1.3437	1.1321	1.2561	3.907	2.2736	2.9043	4.4576	4.212	4.3626	4.2984	1.6213	2.2676	1.8803			0.294686	3.77396
7.3868	9.3929	8.4088	1.7601	16.0084	1.3269	1.2156	1.27	14.8773	1.4924	1.0748	1.799	3.0854	6.4663	2.1477	1.337	1.4422	1.9224	3.2803	2.3074	2.3351	4.4224	3.9726	4.297	4.5561	2.2182	2.2954	1.7201			0.299519	3.94192
7.5059	9.4134	9.3733	1.709	16.7691	1.75	1.3824	1.6539	15.5114	1.3697	1.3148	2.2869	3.2547	6.7888	2.1374	1.6771	1.337	1.9022	3.2614	2.1007	2.7865	4.7425	3.9868	4.2626	4.9218	2.3242	2.0129	2.0745			0.304348	4.15204
7.625	8.2939	10.4081	1.5237	19.0657	1.6131	1.2049	1.4449	16.4845	1.8468	1.5486	2.245	3.1373	6.8059	1.6734	1.8188	1.7348	1.3216	3.2911	2.203	3.9375	6.3245	4.4627	4.0465	4.6664	2.8705	1.9421	2.1595			0.309178	4.37314
7.7442	7.9838	9.3054	1.8943	19.1612	1.6607	1.3254	2.0913	16.1702	1.4307	1.2414	1.5666	3.1407	7.2781	2.2553	1.9472	1.311	1.5299	4.0194	1.5208	3.4386	7.4222	4.2807	4.7728	4.9775	3.1175	1.7219	1.3315			0.314011	4.36652
7.8633	6.0553	10.9547	2.0115	20.1708	1.7607	0.7406	1.7809	17.4625	1.3077	1.1172	1.5778	3.5588	6.6206	2.4188	1.2125	1.4977	1.541	3.8296	2.2976	2.5952	8.2064	4.1779	4.6936	4.6435	2.8988	1.7155	1.2655			0.31884	4.37454
7.9825	5.2341	9.731	1.2457	17.975	1.7988	1.447	1.6238	18.4153	1.5056	0.9294	2.0382	3.231	6.8929	1.9832	1.4057	1.7366	1.5387	3.2688	2.2539	3.7184	8.5204	4.5072	4.2661	4.7522	3.3523	1.5017	1.8587			0.323673	4.3234
8.1016	5.6157	8.036	1.4977	18.1605	1.5452	1.3524	1.2929	19.6493	1.163	1.3703	1.5034	3.3643	6.8988	1.7689	1.2411	1.7092	2.1467	3.8871	2.4113	4.2929	8.0951	5.1339	4.3048	4.6279	2.5036	1.8264	1.9996			0.328503	4.34807
8.2207	5.6413	9.643	1.4683	13.7174	1.7278	1.0156	1.49	18.253	1.7101	1.6939	1.4006	3.4248	6.0865	2.3727	1.3724	1.7185	2.2628	3.3671	2.11	3.8332	8.1932	5.8617	4.6753	4.6671	2.4111	1.9209	1.8902			0.333332	4.21957
8.3399	5.0105	9.0362	2.2743	12.1851	1.6457	0.9407	1.6235	20.0455	1.6907	1.3673	2.3034	4.6394	7.66	2.2514	1.2903	1.2488	1.8778	3.6028	2.3515	3.7687	9.192	6.8968	3.8499	4.6226	2.9316	2.4737	1.8813			0.338165	4.39487
8.459	5.3802	10.0028	2.11	10.4272	1.7733	1.1823	1.325	18.5488	1.9733	1.5689	2.0621	3.8834	7.3068	2.7312	1.3341	1.3373	1.5633	4.2488	2.2809	4.2254	9.5004	5.1562	3.408	4.9431	2.8852	2.4255	2.3598			0.342995	4.2942
8.5782	6.023	10.5984	1.8915	9.1192	1.6168	1.5696	1.8211	17.9012	1.777	1.4792	2.6918	4.488	8.3078	1.994	1.1935	1.0857	2.173	3.3799	2.5728	5.032	8.1011	7.08	4.5435	6.1578	3.1004	2.4907	2.0986			0.347828	4.4551
8.6973	6.1071	12.4663	1.7142	7.56	2.205	1.2693	1.7745	18.5248	2.0287	1.0882	2.2798	4.0726	7.795	2.0726	1.3225	1.7383	1.8347	4.4105	2.5481	4.5555	9.1332	6.4804	4.9959	5.2901	3.2145	2.4608	1.8832			0.352657	4.47503
8.8165	5.7341	14.1157	1.8444	6.4097	2.1822	1.2082	1.6816	16.8539	2.2551	1.2678	2.7878	4.3011	7.5586	2.0625	1.2912	1.5241	2.4679	4.3466	2.4515	5.6222	9.96	7.4465	5.6779	5.5401	3.8718	2.5847	1.6832			0.35749	4.61964
8.9356	5.953	14.4989	1.7269	6.6013	2.8066	1.4117	1.7577	18.9905	2.4963	1.1389	2.6253	4.2627	8.0837	2.0725	1.6628	1.234	2.5215	5.0004	2.2205	4.4199	12.2458	6.4313	5.6636	5.0559	3.7457	3.0289	1.8355			0.36232	4.79599
9.0547	6.3866	16.5327	1.897	5.7256	3.363	1.4212	1.7054	19.8988	2.3304	1.3743	2.2937	3.8234	8.6908	1.9519	1.6084	1.4231	2.6893	4.2481	2.2037	6.3382	17.1357	6.1423	6.0914	3.7894	3.5342	2.9065	1.4834			0.367149	5.07365
9.1739	6.2939	16.1618	1.8858	6.5015	3.8215	1.2879	1.4814	21.5634	2.477	1.6851	2.0294	3.4731	8.8884	2.1645	1.6336	1.4143	2.5768	4.7972	2.3861	7.0199	21.7489	6.6457	6.7328	4.3886	3.9037	2.9306	1.5196			0.371982	5.45972
9.293	6.2488	14.9795	1.776	6.6466	3.2673	0.7771	1.7768	22.5411	2.6352	2.0333	2.0658	3.8235	8.9699	2.0003	1.3758	1.6729	2.7153	4.9598	2.6611	7.9233	29.3436	7.5019	8.1799	5.1519	3.7343	2.4651	1.3805			0.376811	5.87432
9.4122	6.3201	13.1957	1.7813	7.2143	3.5579	0.9497	1.5839	20.3286	2.4683	1.8107	1.8649	4.1768	10.7989	2.4715	1.222	1.5239	3.1885	4.8062	3.0622	10.9936	31.2145	8.0005	6.3887	4.9923	4.0077	2.0893	1.0675			0.381645	5.96591
9.5313	5.4759	13.7166	2.0777	8.0151	3.9065	1.1708	1.3766	19.1416	2.76	1.2644	1.8944	3.6338	12.9422	2.4042	1.3474	1.2199	2.8284	5.8529	3.0956	15.1112	34.2	7.3482	7.1298	5.4938	4.9171	2.4783	1.2297			0.386474	6.37156
9.6504	4.9772	13.6781	2.1653	7.2789	4.8595	1.2931	1.6931	17.7605	2.8764	1.7381	2.2513	3.8516	12.0246	2.119	1.5908	1.2601	3.2091	4.9159	2.5688	16.1069	37.9719	8.3192	6.9595	5.8441	4.346	2.133	1.6419			0.391303	6.49755
9.7696	4.9803	13.987	2.3816	6.0084	5.1738	1.3266	1.5816	17.3094	2.4537	1.0582	2.0865	3.8903	12.9953	2.4134	1.2466	1.5033	3.5633	6.7155	2.7824	20.0917	41.2269	8.0474	7.393	5.6624	3.8109	1.8216	1.8033			0.396137	6.78942
9.8887	4.5489	14.5644	2.2795	6.4735	5.1394	1.214	1.636	16.3029	3.1748	1.4564	2.5592	3.2068	13.6698	2.3097	1.1796	1.1389	3.9478	7.0132	3.3134	20.6917	42.3837	7.8517	8.6159	5.3411	3.5049	1.6216	1.6142			0.400966	6.91678
10.0079	4.1942	15.2132	2.0578	5.7791	4.9591	1.2775	1.64	17.0933	4.075	1.7266	2.3781	3.3666	11.8922	2.3474	1.1299	1.1542	3.329	7.7203	3.3912	19.5037	41.9164	8.7901	8.5894	4.2031	3.4737	1.9573	1.1896			0.405799	6.8277
10.127	4.4374	13.4493	2.3029	5.2322	4.254	1.0801	1.4011	16.3759	4.0268	1.3265	2.5165	4.1805	14.3575	2.3341	1.4863	1.036	3.6046	7.6303	4.166	23.583	39.5829	8.4366	9.1507	3.5422	2.9215	1.7633	1.7203			0.410628	6.88513
10.2462	4.5542	13.9083	2.1288	6.1787	4.0398	1.3803	1.0517	15.58	4.811	1.4751	2.0822	3.7742	16.6981	1.9814	1.3184	1.4852	3.7742	8.5872	3.7995	24.3864	35.4234	8.6049	8.9166	3.0716	2.4045	1.753	1.2235			0.415462	6.82934
10.3653	4.8666	13.0624	1.7885	4.7567	4.3451	1.1748	1.7375	14.8853	4.6288	1.7048	2.335	3.4991	15.4003	2.7145	1.8068	1.4439	3.9723	8.4689	4.4603	30.05	30.1821	8.0279	8.9673	4.0075	2.2065	1.5916	1.6381			0.420291	6.80454
10.4844	4.4809	10.91	1.9035	4.5102	4.5896	1.2173	1.565	14.456	5.1348	1.3959	2.2208	3.3821	17.1434	2.9631	1.2026	1.0016	4.4592	9.5029	3.4012	30.542	31.972	8.7068	8.2002	4.2814	2.5665	1.405	1.5196			0.42512	6.83828
10.6036	4.5194	9.7674	2.107	4.6038	5.5037	1.0209	1.5526	15.0659	4.7837	1.7909	1.6565	3.0477	17.2211	2.2624	1.62	1.5102	4.6665	10.4656	4.2296	29.5054	31.4273	8.1352	10.1861	4.1562	3.2126	2.0506	1.47			0.429954	6.94586
10.7227	4.1584	7.8185	1.8758	4.2519	5.9618	1.2948	1.3603	13.5081	3.9528	1.7807	2.0628	2.9128	17.4814	2.0979	1.139	1.186	4.2907	11.2561	4.5002	28.1224	30.4042	6.8633	11.2624	4.5315	3.3776	1.7723	1.4917			0.434783	6.69316
10.8419	4.0282	7.6433	2.3861	4.26	6.52	1.1089	1.6731	13.4729	3.4842	1.8432	2.2319	3.0454	17.2611	2.3477	1.2292	1.754	3.8742	10.7091	5.1852	25.0302	29.1908	8.9041	9.727	4.8109	3.4935	2.1119	1.9619			0.439616	6.6403
10.961	4.1871	7.9822	1.9506	3.6528	5.396	1.2987	1.2465	12.4341	3.4559	1.6609	2.0473	2.4857	17.6229	3.03	1.0163	1.398	4.127	10.9991	4.3417	26.7223	27.0147	8.0478	9.3337	5.2929	3.403	1.9124	1.79			0.444445	6.43887
11.0801	3.478	7.4903	2.2054	3.418	6.128	1.7903	1.4902	12.0896	3.3752	1.8172	1.674	2.8179	16.6718	2.8344	1.5323	1.1709	3.609	10.5718	5.4008	25.2174	24.0392	7.9148	9.9041	5.414	3.4048	2.4036	1.5007			0.449275	6.27273
11.1993	3.7977	7.2785	2.0755	3.5162	5.8454	1.3955	2.142	11.8038	3.2342	1.4358	1.3997	3.4321	16.8811	2.7178	1.6999	1.3715	3.6893	10.5269	5.5326	24.9636	23.1109	8.165	10.4015	7.0682	3.0799	1.5575	1.4824			0.454108	6.28165
11.3184	4.5473	8.4126	2.229	3.9479	4.7702	1.3806	1.649	10.463	2.8644	1.4855	1.6594	2.6739	17.4401	2.2817	1.6197	1.5854	3.7191	12.2976	6.1267	25.6214	26.3748	9.1505	10.5618	7.1018	3.3715	2.0636	1.7701			0.458937	6.5618
11.4376	4.0613	9.7177	2.2093	3.948	5.7995	1.3579	1.6094	10.1428	3.8072	1.3927	1.4091	2.7544	16.1582	2.1136	1.2741	1.2719	3.4956	12.6616	6.8812	25.758	26.2892	10.8786	10.7747	7.5375	3.3386	1.6112	1.7031			0.46377	6.66505
11.5567	3.972	9.6779	2.1298	3.8355	5.7441	1.1827	0.9964	8.7991	4.2954	1.991	2.0494	2.5547	17.0864	2.1061	1.2516	1.5622	3.3496	14.7871	6.9745	25.9937	25.1725	10.9748	12.4441	8.9823	2.9667	1.7956	1.6376			0.4686	6.8264
11.6758	4.8552	9.6805	1.6488	3.9972	5.8403	1.2407	1.8829	8.6784	4.0097	1.5718	1.5527	2.8065	16.7229	1.7909	1.2235	1.3794	3.4791	15.1886	6.2093	25.6348	29.6542	10.9806	11.6173	8.7535	2.8699	1.4752	1.7207			0.473429	6.9061
11.795	5.5012	10.6929	1.9943	4.3282	7.5559	1.6226	1.5586	9.4283	4.7313	1.1659	2.2153	2.9272	17.6598	1.8725	1.5221	1.5818	4.126	16.5819	6.3899	24.1948	28.3703	10.7475	13.6943	8.6618	3.1058	1.8192	1.6403			0.478262	7.24777
11.9141	4.7772	8.7684	1.6668	4.7639	7.1929	1.6149	1.3447	10.0125	4.8219	1.9781	1.5015	3.0624	18.4828	2.015	1.8113	1.7293	3.527	18.2809	5.8884	22.3381	33.1167	10.9263	14.2252	8.0121	2.7975	1.5333	1.7858			0.483092	7.3324
12.0333	4.8327	9.1361	2.0003	5.1495	8.8775	1.2354	1.3353	9.4796	4.2447	1.7616	1.6209	3.4162	17.7503	2.6686	1.9475	2.2406	4.1652	16.2314	6.2169	22.2499	30.8211	9.7033	16.3683	7.1653	3.1462	1.5774	1.4205			0.487925	7.28749
12.1524	5.2488	12.3492	2.0806	5.3991	8.3167	1.5225	1.5628	8.5021	4.7953	1.2118	1.5089	3.2218	18.8118	2.184	1.7123	1.8314	4.5706	19.6064	6.5897	19.036	29.4486	10.8509	16.4698	6.6445	2.2609	1.9142	1.6906			0.492754	7.38301
12.2716	4.7193	13.3792	2.2699	4.4669	10.4257	2.0292	1.5609	7.8345	4.6061	1.7685	2.0288	2.8483	18.3846	1.5273	1.2754	1.38	3.7749	22.4271	5.8642	18.6742	23.0805	9.8071	15.364	5.7193	2.5177	1.8025	2.0125			0.497587	7.09439
12.3907	4.032	14.3974	2.3864	3.671	10.8728	1.1857	1.9087	7.4062	4.7516	1.2535	1.9419	3.0815	16.695	2.239	1.6654	2.0287	2.8679	25.2244	5.2212	16.9412	18.8071	10.5039	15.101	6.4765	2.665	1.7774	1.9012			0.502417	6.92606
12.5098	3.0623	16.5569	1.8545	3.7015	12.2858	1.5919	1.6954	7.6318	5.7853	1.2366	1.8349	2.7401	15.1108	2.1984	1.7549	2.3553	3.4103	27.2401	5.2877	16.3742	19.5803	11.723	15.5996	6.9137	2.5375	1.5753	1.8181			0.507246	7.16504
12.629	3.554	16.0539	2.443	3.233	11.6396	1.7302	1.6897	7.3715	3.871	1.3232	1.5389	2.6155	12.8329	2.8384	1.7045	2.048	4.1372	29.1762	5.8725	14.8235	20.4947	11.1595	17.5081	6.9144	3.0562	1.8686	1.1078			0.512079	7.13356
12.7481	3.389	15.2834	2.4167	1.8947	11.0851	1.1436	1.3778	6.4076	4.5294	1.7327	1.7796	3.4164	12.8613	1.9143	1.578	2.222	4.1987	28.271	5.8949	14.4643	19.0596	11.4016	17.6323	6.7553	2.5037	1.7651	1.3616			0.516908	6.90147
12.8673	3.6099	14.9171	2.5991	1.9539	9.8094	1.4535	1.3586	7.555	6.5143	1.8258	2.0173	3.5026	12.7662	2.055	1.3675	1.9712	4.3547	26.1932	6.6668	13.0615	20.0776	11.8533	15.2278	7.3781	3.1896	1.5913	1.5469			0.521742	6.90434
12.9864	3.3386	14.7403	3.2826	1.7642	9.0051	1.5514	1.2755	6.9488	6.1222	1.9169	1.7528	2.9188	13.9656	1.6412	1.6458	1.973	3.9365	24.0613	7.2763	11.9367	19.8336	13.4842	16.9309	7.2186	3.4744	1.3076	1.4231			0.526571	6.8417
13.1055	3.8793	12.4776	3.2875	2.0676	8.5627	1.4955	1.6416	6.0096	5.5364	1.4569	1.7909	3.2853	13.696	1.8755	1.2249	1.849	3.5951	23.9444	8.331	10.6503	19.3174	12.2162	14.5505	6.1369	3.1055	1.7389	1.7574			0.5314	6.49926
13.2247	3.3324	10.8633	3.0657	2.2092	10.1951	1.3847	1.3138	5.4909	6.4428	1.4487	1.8869	3.4581	13.6016	1.8918	1.5478	1.5755	3.0232	22.5709	9.997	10.8446	18.4493	13.6227	14.7293	6.3593	3.782	1.4965	1.6123			0.536234	6.52576
13.3438	3.3438	11.2243	2.7003	2.0277	9.5668	1.4433	1.3596	5.1271	6.9055	1.5146	1.8567	3.1487	13.8862	1.6859	1.4066	1.9175	3.6588	21.9378	10.2726	11.9187	15.6599	14.2567	13.616	5.7803	3.6966	1.5775	1.2742			0.541063	6.39866
13.463	3.311	11.0818	3.3182	1.7989	9.0729	1.6831	1.3924	4.9975	8.6502	1.5958	1.3231	3.0475	13.5744	1.6357	1.2034	2.0717	3.1557	21.689	11.4976	12.7215	15.9227	18.2292	13.7249	5.1166	4.6454	1.3252	1.6261			0.545896	6.64487
13.5821	2.7993	11.0538	2.8551	1.4584	8.5746	1.4096	1.2929	5.1424	9.8571	2.2488	1.6905	2.8679	14.2232	1.4205	1.2021	1.6976	2.9426	20.6338	9.9156	14.3424	14.0947	19.6532	13.4424	5.0559	4.0831	1.3205	1.336			0.550725	6.54126
13.7012	3.687	11.6124	3.9563	1.5294	10.2755	1.3037	1.3549	4.8498	9.256	1.5432	1.4488	2.9396	13.0936	1.6507	1.2323	1.6371	2.8343	20.0591	11.0491	15.8868	13.3017	18.3661	12.4089	5.6591	3.6073	1.5716	1.116			0.555555	6.56409
13.8204	3.1604	11.7458	4.6501	1.9086	9.1502	1.3632	1.1529	5.0276	11.1468	1.3459	1.6677	3.3566	16.2858	1.7794	1.3684	1.4686	4.0636	20.657	11.4692	18.4738	12.7102	22.0828	12.8959	5.821	3.6567	1.6733	1.2898			0.560388	7.08783
13.9395	3.3798	10.6756	3.8807	1.7713	10.1694	1.0324	1.2689	5.4303	13.6396	1.6544	1.4636	3.0238	15.4742	1.8342	1.5639	1.6965	3.3452	19.5364	11.2945	18.4685	9.6581	26.162	12.187	5.7562	3.8965	1.6434	1.0539			0.565217	7.0726
14.0587	3.5449	11.569	4.0596	1.781	10.9307	1.2386	1.9049	4.881	16.0765	1.9154	1.7563	3.2507	15.8262	1.4195	1.5187	1.7089	3.2238	20.6677	11.0699	18.5392	9.6753	29.4189	14.262	5.9467	3.8607	1.92	1.0606			0.570051	7.51951
14.1778	3.6265	10.8468	5.7506	1.7508	10.2631	1.5147	1.2034	4.3496	15.5431	2.0794	1.5837	2.8002	17.1155	1.4831	1.1789	1.519	3.2506	20.18	12.0799	17.4872	9.9739	32.0835	13.2909	6.5031	3.0977	1.5761	0.8008			0.57488	7.516
14.297	2.9078	10.4551	6.143	2.016	11.1271	1.2738	1.5962	4.589	16.3879	1.7479	1.7473	2.9548	18.0102	1.7913	1.3411	1.8822	3.1809	20.19	13.3319	14.3201	11.7842	34.5599	12.7684	5.3612	3.0798	1.4682	1.1978			0.579713	7.67456
14.4161	3.0245	10.4408	7.0256	1.5067	11.507	1.4257	1.6371	3.6964	16.9431	1.6569	1.7596	2.8289	16.9516	1.6072	1.4989	1.5417	3.4568	20.3339	10.5185	15.0462	12.9938	37.1427	13.4779	4.9425	3.2463	1.5469	1.5012			0.584542	7.75031
14.5352	3.185	10.2082	8.4968	2.2851	15.4833	1.3067	1.738	4.886	15.7833	1.7764	2.1726	3.0105	17.5893	1.5801	1.6216	1.9584	2.7316	19.4396	11.9579	13.5399	14.5683	39.368	10.9771	5.0297	2.7709	1.6787	1.4383			0.589372	8.02153
14.6544	3.4285	9.3791	9.4592	1.3931	17.9359	1.6198	1.503	4.477	16.7152	1.5429	1.7694	2.8122	17.93	1.7603	1.9454	1.7269	3.2895	18.4353	11.5771	11.5022	14.0112	47.0343	9.1007	3.3547	2.9621	1.8961	1.7556			0.594205	8.15988
14.7735	2.6395	9.7286	8.2355	1.4843	16.5339	1.2888	1.4513	4.3609	14.9614	1.1902	1.8495	2.6232	17.8314	1.6674	1.5256	1.7382	3.4719	16.609	10.2841	9.8319	15.8882	51.4703	8.5434	3.7144	2.8054	1.6634	1.5882			0.599034	7.96222
14.8927	2.3332	10.2942	8.2957	1.5458	17.939	1.0419	1.638	3.8605	14.2942	1.4778	1.6255	2.573	15.4261	1.9318	1.3022	1.4354	2.8286	15.6087	11.2006	8.6555	17.0799	53.7421	6.3378	3.7972	2.8234	1.7235	1.3196			0.603867	7.85671
15.0118	2.8652	10.5826	8.6964	1.4891	19.8163	1.4147	1.6589	3.9476	11.9575	1.044	1.3886	2.9897	17.0828	1.9628	1.6853	2.1517	3.6814	15.8254	10.8231	9.4612	15.2595	56.4231	6.055	3.4176	2.4953	1.5115	1.6035			0.608697	8.04777
15.1309	2.4976	9.5877	10.1206	1.5582	18.3703	1.6495	1.6448	3.595	12.2475	1.1469	1.7204	2.6757	17.3995	1.7766	1.5996	2.0691	2.4872	17.8192	9.7829	9.6583	11.8267	63.6139	5.4884	3.0755	2.6952	1.772	1.3327			0.613526	8.11893
15.2501	2.4144	11.6374	8.4035	1.5402	18.8043	1.5476	1.4615	3.5508	11.83	1.7033	1.5188	3.2668	15.2241	1.8373	1.4216	2.3482	3.1583	16.9185	9.9656	9.4556	11.3401	61.8613	4.8732	2.5882	2.5615	1.5687	1.0212			0.618359	7.91933
15.3692	2.6598	11.2098	10.401	1.5742	17.3605	1.6648	1.2218	3.7519	12.8546	1.613	1.8184	3.3336	13.7816	1.9989	1.269	2.2416	3.4271	18.5256	10.3305	11.4985	9.7291	63.255	5.6129	2.4741	2.6145	1.8097	2.0382			0.623189	8.15073
15.4884	3.4456	12.2909	10.3016	2.0803	21.0064	1.5519	1.8907	4.4378	11.1735	1.2355	2.0118	3.2946	13.3219	1.8956	1.4212	2.1972	3.5663	17.5743	9.6563	12.7278	8.7151	66.6833	4.4734	3.4518	1.99	1.5414	1.6033			0.628022	8.35331
15.6075	3.2544	13.6686	11.9128	2.3408	19.5128	1.4867	1.5628	3.8307	9.7562	1.8459	1.7145	2.7783	14.0858	2.1947	1.3905	1.9803	3.4121	18.7786	8.2986	11.4092	9.792	66.3527	4.4101	3.3752	2.6509	1.8165	2.0488			0.632851	8.3578
15.7266	2.8325	14.4811	10.4091	1.8053	17.2294	1.414	1.0727	2.9613	10.0647	1.4669	1.8438	3.4102	13.5211	1.9549	1.8604	1.6432	3.6045	17.6668	9.7846	11.377	11.3438	67.0547	4.1644	2.8814	2.0903	1.927	1.9222			0.63768	8.21434
15.8458	2.4712	12.9238	11.649	2.309	16.4632	1.1512	1.4514	2.7739	10.9562	1.4585	2.0249	2.9093	14.1587	1.8501	1.1881	1.6531	3.6177	17.339	9.4645	11.376	11.2871	69.8794	3.8677	3.0338	2.0103	1.5615	1.5762			0.642514	8.23721
15.9649	2.677	10.6543	11.8795	3.0446	15.942	1.4513	1.9245	3.3843	11.0204	1.592	1.5971	2.6533	12.3495	1.889	1.7015	1.6436	3.8919	15.2526	10.3219	9.7961	10.284	69.7889	4.8427	3.5532	1.8823	1.8446	1.3948			0.647343	8.08359
16.0841	2.4597	9.4197	13.5366	2.7995	16.9135	1.4016	1.6888	2.9444	11.1962	1.8579	1.8613	3.1729	13.3874	1.8827	1.4247	2.1955	2.8428	13.6676	11.086	9.4247	11.2959	69.0357	4.1973	3.2046	1.3592	1.6159	2.0937			0.652176	8.07281
16.2032	2.7178	8.9142	10.8885	3.3802	14.2668	0.8595	1.6797	3.1884	12.4896	1.8412	1.6131	3.4601	13.9355	1.6261	1.5257	2.2423	3.0874	12.286	11.7067	9.7751	9.0162	68.5019	4.1396	2.4181	1.7787	1.5091	1.4367			0.657005	7.7883
16.3224	2.2248	8.4105	9.6012	3.7315	13.7415	1.6572	1.0528	2.5684	12.5675	1.565	1.3649	2.8272	13.8965	1.9785	1.9141	2.0155	3.4674	9.6	12.9008	8.4376	10.7846	64.9606	3.5221	2.3759	2.1367	1.8215	1.8291			0.661839	7.51679
16.4415	2.6854	7.8376	9.2693	4.063	15.1731	1.27	1.5947	2.1054	13.6733	1.9822	1.3943	2.5285	11.5655	2.1089	1.8183	1.5573	3.3436	9.9416	11.2371	8.4873	11.0425	65.9545	3.7752	3.1655	1.6945	1.5174	1.7614			0.666668	7.50176
16.5606	2.6549	7.2151	8.8325	4.2159	13.9671	1.2437	1.7101	2.0499	13.1034	1.6577	1.5648	2.664	10.546	1.7645	1.5582	1.8643	3.1853	8.8406	12.4905	8.1118	11.7023	64.9707	3.8171	2.8846	1.6798	1.2521	1.8611			0.671497	7.31141
16.6798	1.9982	8.4636	8.6045	4.2788	12.5215	1.3362	1.6445	2.3043	13.278	1.5554	1.3248	3.1098	9.9668	1.8462	1.9558	2.2967	2.6274	9.1363	11.1388	8.8897	10.8634	61.999	3.9313	3.1041	1.9666	1.2125	1.8126			0.676331	7.15433
16.7989	1.803	7.6975	9.1246	5.5912	12.3706	1.4247	1.4969	2.7301	13.3581	1.6349	1.6519	3.1299	10.5877	1.7845	1.51	1.6863	2.996	9.3156	12.2581	7.1368	11.6959	59.9066	3.635	2.667	1.6506	1.6039	1.8522			0.68116	7.12221
16.9181	2.0629	9.5182	8.7126	5.6819	12.9803	1.3632	1.101	2.7762	12.3725	1.824	2.0492	3.1148	11.4527	2.0098	1.4145	1.5537	2.533	10.5216	11.4833	7.4532	7.8393	55.7578	2.9608	2.9518	1.9803	1.2619	1.8817			0.685993	6.91156
17.0372	2.2225	7.6641	8.4693	6.3257	11.5234	1.2019	1.5152	2.2131	15.0625	1.9496	1.3706	2.5377	10.3012	1.7862	1.4155	1.8565	2.6341	10.7487	11.058	7.8839	7.2135	52.5139	3.7533	2.5718	1.7526	1.4509	1.6511			0.690822	6.69062
17.1563	2.558	7.6891	8.2876	5.8008	11.8554	1.3869	1.5198	2.4724	15.2171	1.9111	1.4758	3.0673	9.8864	1.6063	1.0687	1.3668	2.3012	12.3127	11.4152	7.2236	8.3449	48.3046	4.2166	2.0338	2.2003	1.5473	1.3028			0.695652	6.60639
17.2755	2.4367	7.0699	6.7591	6.031	10.5873	1.0773	1.548	2.4429	13.9337	2.0601	2.0092	2.396	9.3428	1.4103	1.514	1.9212	2.941	12.7025	10.2409	7.9191	10.0241	42.5972	3.8642	2.5889	2.2353	1.559	1.9422			0.700485	6.33903
17.3946	1.9832	6.9602	7.8132	6.1515	11.2228	1.0834	1.3357	2.792	13.2363	2.0769	1.8759	2.9316	10.4234	2.1039	1.5062	1.8377	3.3597	15.6441	11.6867	7.7345	11.3468	43.417	3.8255	1.9121	1.9739	1.4921	2.2357			0.705314	6.66526
17.5138	2.2536	6.966	8.2071	8.1096	11.48	1.394	1.5721	2.2179	12.5804	2.2214	2.0415	2.4118	11.2412	1.9993	1.2099	1.9424	2.9362	16.7627	13.3518	8.5449	10.2447	40.3275	3.6752	2.0593	2.4888	1.2343	2.3007			0.710148	6.73238
17.6329	2.159	8.3565	7.6382	7.2708	13.3362	1.3357	1.2957	2.4434	13.8388	2.3897	2.3399	3.3024	10.7172	1.5868	1.498	1.5521	2.3813	18.2026	11.2424	9.6187	9.9565	36.9495	3.3425	1.7649	2.0088	1.3466	1.8294			0.714977	6.65569
17.7521	2.7259	9.957	8.161	7.0017	14.0123	1.3696	1.1798	2.468	14.394	1.7504	1.848	3.1244	13.0258	1.5339	1.8682	2.0406	3.013	16.8423	10.8788	9.2834	10.4296	33.7545	2.8216	1.8591	1.8924	1.2474	2.0578			0.71981	6.68669
17.8712	2.2563	11.5596	7.5164	5.8543	14.5475	2.0058	1.4026	1.9476	15.3116	1.9046	1.49	3.0839	12.4065	1.9735	1.1006	1.9397	2.0471	15.5072	13.5607	9.3877	10.0728	31.2799	3.2132	1.7148	1.7511	1.5134	2.4375			0.724639	6.6217
17.9903	2.1436	12.0258	8.1961	6.31	15.3921	1.963	1.1477	2.4745	20.4088	1.7542	1.747	3.2697	13.3477	1.6753	1.7057	1.9123	2.5004	14.6504	14.8522	8.9339	10.163	30.1381	2.8981	1.8677	1.6654	1.5895	2.1562			0.729469	6.92179
18.1095	2.2213	11.3748	8.3373	5.785	16.4317	1.6793	1.5752	2.1154	20.5398	1.8635	1.3757	3.8056	15.2594	1.7963	1.6512	1.6768	2.3682	11.7761	15.9108	10.7295	9.1397	26.1188	2.2662	2.3886	1.9781	1.5169	2.1682			0.734302	6.80924
18.2286	2.0477	10.4723	8.4787	8.6493	16.5972	2.204	1.3099	1.8838	22.1991	2.2282	1.7948	3.1243	15.4488	1.9417	1.7243	1.5623	3.0473	11.2342	20.3083	10.0945	10.387	23.5448	2.0589	1.8978	1.9542	1.1309	2.0831			0.739131	7.01509
18.3478	2.5755	9.7911	8.7153	9.2419	15.9083	1.6139	1.7056	1.6856	22.6141	2.0995	2.102	3.095	15.167	2.0997	1.5729	1.7996	3.159	10.3065	19.223	11.127	10.2129	20.9159	2.5287	1.6046	1.4504	1.4548	2.3497			0.743964	6.89331
18.4669	2.8896	7.2205	8.3163	8.636	14.9839	1.4443	0.7638	1.84	21.724	1.86	1.6555	3.5003	16.5701	2.6546	1.771	1.6539	2.6231	9.4552	20.0676	10.8101	11.9737	21.0189	2.9393	1.5355	2.0646	1.4234	2.0566			0.748794	6.79451
18.586	2.6256	7.1073	8.5832	8.8923	15.3077	1.9206	1.7637	1.9751	19.8997	2.3572	1.6703	3.0581	15.9658	1.7318	2.053	1.7374	2.7691	9.2436	23.8726	11.5809	14.3818	20.8619	3.631	1.5967	2.0691	0.8689	2.1427			0.753623	7.02471
18.7052	2.7442	7.4873	9.114	9.6801	14.8383	1.6958	1.7198	2.3097	17.7797	2.012	2.0153	3.987	16.7837	2.0159	1.7191	1.7723	2.4094	8.8413	23.8134	13.2678	16.6235	20.2212	2.4424	2.3024	1.6612	1.3846	2.4016			0.758456	7.14974
18.8243	2.7239	8.3525	8.0607	10.0933	14.3466	1.4573	1.3628	2.1812	16.179	1.7353	2.2222	3.2977	18.3257	2.3598	1.7362	1.8737	2.4796	10.2054	29.0352	16.0007	17.6883	21.833	3.3353	1.8865	1.7118	1.4079	2.2404			0.763286	7.56044
18.9435	3.0848	7.9353	9.1117	10.2127	14.48	2.0022	1.5661	1.9145	16.2723	2.2067	1.7659	3.3128	17.488	1.8549	1.6807	1.4948	2.3694	10.18	34.0446	17.4586	18.2318	20.5767	3.6865	2.7623	1.8648	1.4089	2.4809			0.768119	7.8314
19.0626	3.5946	10.0675	10.0354	10.3582	16.1349	2.2849	1.4555	1.8259	14.5623	2.2119	2.0021	3.3372	19.3704	2.2446	1.2865	2.0175	2.1445	11.1456	36.289	20.4357	19.2913	21.291	3.7665	2.5326	1.2785	1.3596	2.7142			0.772948	8.33474
19.1817	3.7637	11.3868	11.7762	10.4953	14.5417	1.7116	1.5414	2.0702	12.2185	1.7676	1.899	2.674	20.5306	2.1784	1.6375	1.7406	2.447	9.0797	37.9687	21.3742	20.6992	20.8492	4.2848	2.5425	1.4874	1.4131	2.3681			0.777777	8.38693
19.3009	3.5715	11.4481	11.3095	11.6238	12.4415	1.819	1.8422	1.7802	12.486	1.9765	1.9245	3.3506	18.971	2.2142	2.0108	1.8419	2.3914	9.022	37.3228	22.6007	21.8196	19.3029	4.2553	2.5868	1.4508	1.1971	2.5858			0.782611	8.33876
19.42	3.0649	10.3841	13.5614	10.7098	13.6548	2.1306	1.8201	1.8607	11.4413	2.2805	2.2287	3.6834	20.0217	2.6791	1.9088	1.6192	2.6356	8.3582	35.7351	23.1526	23.1718	18.96	4.3698	2.29	1.3411	1.2682	2.3279			0.78744	8.39479
19.5392	3.3514	9.1902	14.5432	11.2961	12.8548	1.9977	1.655	1.6666	11.5954	3.0235	2.5119	3.7652	21.077	2.662	1.4649	1.4389	2.1627	8.7725	32.8424	25.147	27.3701	18.8613	4.0545	2.3649	1.6489	1.148	2.8671			0.792273	8.5679
19.6583	3.8492	9.4839	13.8099	14.0441	16.0506	2.1525	1.6394	1.6825	11.848	2.3148	2.0327	3.5944	23.7999	2.9646	1.7645	1.266	2.2551	8.2374	31.9059	24.9998	28.1608	18.4665	3.7934	2.009	1.7218	1.468	3.0586			0.797102	8.82864
19.7775	3.7916	10.0836	15.0376	13.5847	18.3677	1.7708	1.9095	1.6589	10.0243	2.6663	1.8237	3.2548	24.7779	2.7797	1.3852	1.8379	2.2708	8.2184	29.6535	26.5306	30.2264	16.8316	3.2047	2.5697	1.4526	1.0602	3.3183			0.801936	8.89226
19.8966	3.6623	8.6968	17.2753	14.7142	18.6584	2.5724	1.369	2.2136	10.1399	3.203	2.2869	4.1124	25.8238	3.4623	1.5262	1.7979	2.7228	8.6183	28.71	25.1736	32.6748	17.1237	4.6909	2.2215	1.3476	1.496	3.5137			0.806765	9.25212
20.0157	3.6162	8.7954	15.0912	16.1642	19.5563	2.3523	2.0456	1.714	9.8299	3.4009	2.0254	3.1398	25.531	2.3527	1.3178	1.4427	2.5692	7.4076	28.9471	26.7968	33.7829	16.1579	3.842	2.1702	1.3364	1.4002	3.3838			0.811594	9.11739
20.1349	3.5144	8.4737	15.1407	19.1824	18.5637	2.6179	1.5881	2.0448	9.0591	3.1098	2.0486	3.5062	28.045	3.0574	1.6666	1.2443	1.8866	7.3518	27.0586	26.9694	33.7681	16.0151	4.0281	2.2864	1.6047	1.1307	4.1247			0.816428	9.22544
20.254	3.4368	10.3539	17.3663	22.4367	21.1497	2.4679	1.5051	1.4029	9.6986	3.6194	1.9456	3.3492	29.2298	3.0613	1.3756	1.3457	1.7522	8.4618	26.9891	26.9657	33.1961	13.6311	3.4517	2.1214	1.5874	1.2579	3.8756			0.821257	9.5198
20.3732	3.1809	10.0122	18.735	23.6881	23.7839	2.7405	1.7027	1.581	8.7893	2.9547	2.6635	3.5272	29.0618	3.6115	1.4564	1.3043	1.7223	10.2805	27.4881	29.5888	35.2336	14.0666	2.9846	1.8875	1.4586	1.3548	3.6357			0.82609	9.94423
20.4923	3.9441	12.3596	17.7127	24.389	23.5438	2.6747	1.8001	1.6171	10.6537	2.9147	2.025	3.5473	26.7524	3.1127	1.7635	1.3461	2.1879	11.3758	28.4449	29.8676	37.2085	15.1584	4.0011	2.0938	2.0792	1.492	3.9776			0.830919	10.2979
20.6114	3.3575	12.7674	20.3681	27.1405	23.2463	3.2084	1.9121	1.8911	9.6517	3.479	2.2427	3.8033	31.5826	3.8841	1.8697	1.5404	2.3498	10.8021	28.7068	33.1629	36.1892	14.7801	2.9857	2.2209	1.6854	1.4187	4.2895			0.835749	10.7606
20.7306	4.2832	12.2449	22.4712	29.0866	25.113	3.4352	1.5983	2.0297	9.0617	4.5821	2.9318	3.8954	30.1298	3.9557	2.1399	1.886	2.2296	11.6732	28.0476	32.7343	35.915	13.351	3.6671	2.1933	1.9972	1.591	4.4201			0.840582	10.9876
20.8497	6.3888	12.1665	24.1761	30.1066	25.2464	3.6571	1.8782	1.9278	8.8869	4.419	2.3036	4.5158	32.8223	4.0216	1.817	1.8666	2.3981	11.91	29.2496	32.4261	33.8882	15.2141	3.5693	2.3526	1.8658	1.3302	4.7597			0.845411	11.3024
20.9689	7.2672	15.6056	23.9615	35.0603	25.0854	4.0199	1.4814	1.9485	9.4245	4.6148	1.6971	4.4683	31.7428	4.6479	1.5583	1.3214	2.1104	12.7335	28.0919	32.5996	33.7023	14.756	3.3808	2.5436	1.9434	1.8013	5.0225			0.850245	11.5774
21.088	9.4655	16.8363	25.617	38.9073	26.0414	3.911	1.8087	2.0639	8.2558	4.9542	1.4723	3.9668	29.6692	4.6022	2.2512	1.9603	2.2321	13.7692	30.9915	33.5058	28.1012	15.0406	3.6094	2.493	2.3913	1.0712	5.7234			0.855074	11.8782
21.2071	14.6911	18.427	28.37	42.0011	27.2406	4.6186	1.9797	1.7947	7.4438	6.4405	2.1339	3.8586	30.2569	6.0391	1.9126	1.2407	2.5637	14.942	30.6118	29.6942	27.5588	15.1039	3.4743	2.3791	2.0549	1.1479	7.2879			0.859903	12.4173
21.3263	18.9886	23.3241	29.2261	44.74	29.5145	5.6175	1.7367	1.8309	6.8576	6.7579	2.1771	4.9568	28.8963	5.7904	2.1404	1.8576	2.6018	15.5934	28.46	31.3606	23.1842	14.6616	3.6346	2.7942	2.0777	1.7207	8.0443			0.864736	12.9091
21.4454	23.6021	24.2297	27.2916	48.2122	30.621	5.1353	2.1133	1.5063	5.5099	7.6666	2.4767	5.1808	27.1151	6.7356	1.9944	2.4515	2.1395	17.1065	27.6048	31.0303	24.3869	15.041	3.5955	2.6466	2.1817	1.8775	8.1861			0.869566	13.2459
21.5646	26.9493	25.9628	23.6731	49.0715	32.2497	6.5253	2.3307	1.8058	5.9147	8.3483	2.4581	4.2716	25.4403	8.9629	2.0632	2.4302	2.248	16.777	27.7443	30.6833	21.0486	14.4477	4.2379	1.8739	2.0475	1.2221	7.6395			0.874399	13.2751
21.6837	30.9129	27.5237	23.3424	48.5966	34.3985	5.4478	2.0759	1.9485	4.9907	9.2534	2.3497	4.7467	22.9459	9.8163	2.2253	2.5386	1.8132	20.3135	27.3455	32.8283	20.1013	12.7488	4.8225	2.0251	1.8273	1.357	8.5757			0.879228	13.5878
21.8029	35.0806	31.38	24.6822	42.8448	34.1514	7.7873	2.2584	2.1098	5.5372	10.2111	2.2625	4.5702	22.8224	11.5894	2.3764	2.9595	1.9402	18.9919	24.3813	30.2616	18.1742	12.2041	3.5948	2.2052	2.1327	1.8351	8.9873			0.884061	13.6049
21.922	36.0038	34.8823	25.3064	36.3831	36.4015	7.2163	2.1122	1.9813	4.7509	11.8181	2.7936	5.1736	22.9863	11.1652	2.4725	3.0219	2.1787	21.0302	25.5064	29.0502	15.4033	12.3486	4.2357	2.3387	2.4241	2.2235	9.3217			0.888891	13.7233
22.0411	37.1935	39.0095	27.1187	32.792	37.6064	9.0227	1.9215	1.9791	5.3367	14.0986	2.9899	7.4427	19.0942	12.2782	3.1605	3.761	2.3254	22.1864	22.9634	20.2564	16.0439	12.2204	4.502	2.5994	2.1163	1.7499	11.6869			0.89372	13.8317
22.1603	41.8182	41.8672	29.5825	26.7048	40.3524	9.6918	1.7926	2.2013	4.7216	13.7525	2.6948	6.8532	17.6863	14.1195	2.8737	3.7471	2.74	24.5267	21.7694	15.94	14.9355	12.6405	4.0739	2.5558	2.2998	1.5089	13.4155			0.898553	13.958
22.2794	44.6378	39.8713	35.257	24.1922	38.1281	11.3616	2.257	1.8785	4.2834	16.0987	3.79	7.0075	16.2069	14.9464	3.65	4.1149	2.7549	23.6749	18.9736	12.4684	16.1242	12.7177	4.5969	2.6067	2.6109	2.1304	14.0523			0.903383	14.0886
22.3986	51.0691	44.4329	39.387	18.904	34.4082	10.8778	3.2363	1.8852	3.8882	16.4982	2.9626	7.953	12.613	19.6377	3.0417	4.6632	3.1395	21.3924	18.8639	9.3891	13.6675	12.726	5.2204	2.6762	2.4319	1.919	15.1977			0.908216	14.1512
22.5177	50.7486	44.6009	45.1602	14.7185	29.3933	11.5884	3.5694	1.6089	3.7086	19.4074	3.4627	7.9441	13.4267	21.8094	3.009	5.8973	4.4204	20.962	14.8746	7.0621	12.3691	12.6486	5.7513	3.0369	2.317	1.7716	16.0778			0.913045	14.1239
22.6368	42.6797	47.5173	50.3877	13.3193	22.0637	13.4358	3.3846	1.9411	4.1705	18.3958	3.2262	8.0691	12.2992	21.917	3.377	6.4873	4.6444	19.9624	14.3522	6.1121	13.5188	14.6777	5.1142	2.9851	2.0074	1.8274	13.8436			0.917874	13.7673
22.756	30.8768	47.2232	53.9398	12.1082	17.0935	20.0211	3.2698	2.402	3.3906	21.0527	3.9547	10.5318	11.751	23.8584	4.5268	7.108	5.5461	19.4359	13.973	4.3208	12.756	14.4307	5.1334	3.1786	2.3008	2.2711	14.0101			0.922708	13.7209
22.8751	21.9046	47.7296	52.4821	9.9902	10.8854	22.2032	4.523	1.5475	3.0872	21.7421	5.5693	12.1665	10.9468	23.627	4.6907	7.5818	5.94	19.301	12.0947	4.3482	11.0409	15.447	6.1616	2.9617	2.7731	2.2131	13.7242			0.927537	13.2105
22.9943	14.5693	47.0447	53.6537	8.1896	6.8737	24.7625	4.691	1.8824	3.7766	24.3095	5.9649	13.1758	12.4522	21.3182	5.894	9.6845	7.6733	18.2922	11.0054	4.4457	10.906	15.9711	6.5787	3.3585	2.7792	1.9835	15.5145			0.93237	13.213
23.1134	7.8572	39.4731	53.1549	6.8548	5.612	28.4069	6.1752	2.33	3.6048	25.7605	7.8964	15.3747	9.672	19.2891	5.788	10.3285	9.9586	16.2345	8.6057	3.8543	11.6943	14.7667	6.4419	3.3132	2.3628	2.4938	15.7835			0.937199	12.7069
23.2325	4.4606	41.7078	46.2304	4.8002	4.0551	27.0288	5.4503	3.2418	3.1553	26.1983	10.4424	18.6194	9.7582	13.9447	5.8707	12.4267	11.2904	14.3861	8.5422	4.1468	12.04	14.3501	5.8033	3.355	3.5981	3.1568	18.0091			0.942029	12.447
23.3517	2.7718	35.3709	39.8311	3.3234	3.0917	25.2923	7.1338	2.5381	3.4122	26.2454	11.8093	21.5224	8.5497	10.1473	6.405	16.3552	11.9036	12.9524	8.7185	4.0122	11.7094	14.8571	6.4113	3.0477	2.9699	3.5877	17.2419			0.946862	11.8967
23.4708	2.255	26.1665	29.6893	2.3611	2.6948	21.0729	8.2814	3.1841	4.1298	26.6083	14.133	25.1283	8.3016	7.0185	7.5832	16.4956	11.8615	11.6739	7.682	3.4812	9.1619	12.6699	7.9001	3.4107	3.7274	3.3234	18.3497			0.951691	11.0498
23.59	1.8149	19.6271	22.0226	1.8919	2.0431	22.6474	8.9227	2.2291	3.8491	25.0949	17.3477	27.4036	8.5703	4.6266	7.8968	19.5391	11.8552	10.8589	8.4162	3.7011	8.1382	11.6282	7.221	3.6793	3.5155	3.7603	18.7491			0.956525	10.6315
23.7091	1.4509	13.2501	18.317	1.0817	1.7757	19.3933	9.9215	3.4566	4.1513	22.2333	21.7174	30.0744	7.4288	2.0958	9.641	21.9618	11.4272	10.3652	7.089	4.1881	7.8521	10.3026	7.906	4.4441	3.4522	3.3115	15.7169			0.961354	10.1484
23.8283	1.2694	8.0987	14.8842	0.8386	1.2777	14.4	11.4509	2.9951	4.39	23.2984	25.9571	32.2426	6.2784	1.571	12.9025	19.3316	11.0851	9.2655	6.0177	3.4745	6.9087	9.2962	8.0382	4.7917	3.3549	4.2584	15.9017			0.966187	9.76218
23.9474	1.1671	4.2843	13.4572	1.108	1.452	11.9114	10.5617	4.5429	6.1576	23.7891	26.23	34.5714	5.1766	1.8592	17.4357	20.6939	9.8448	9.2725	5.4574	3.7317	6.4235	9.8886	7.405	5.3559	3.5	4.4809	16.101			0.971016	9.84664
24.0665	1.0898	3.2378	7.6834	1.2604	0.8148	8.0183	14.4755	4.4056	6.7015	20.3789	28.8251	39.5925	5.3781	1.4098	19.6738	17.4521	9.0189	7.7348	5.731	3.8141	6.0249	9.5777	8.305	6.8416	3.6474	4.0441	15.3659			0.975846	9.64825
24.1857	0.7039	2.7296	4.0046	0.7875	0.8908	5.5455	13.8688	4.7648	8.2572	21.5911	31.1957	39.7825	4.0842	0.8858	16.0709	16.3855	7.9145	7.9218	5.1562	4.0393	6.0259	9.1105	7.8945	5.6182	2.3871	4.1957	18.0258			0.980679	9.25326
24.3048	0.665	1.5545	2.3816	0.8619	1.2446	4.22	17.1656	6.5566	9.5533	21.4966	33.5978	44.0568	3.3154	0.7775	11.4705	12.2464	5.6628	7.2726	4.9779	3.8025	6.3493	8.829	9.8911	5.3298	3.9528	3.8946	16.9586			0.985508	9.18834
24.424	0.4425	1.4341	1.9769	0.7034	0.9851	3.3511	20.0795	8.0363	10.2198	20.4023	34.7367	46.293	3.2165	0.9617	5.9844	10.5165	4.932	4.8424	4.2287	2.7517	4.586	8.9449	10.2887	5.724	3.6461	4.3271	17.981			0.990341	8.94787
24.5431	0.53	1.1816	0.8577	0.658	0.6927	3.1073	21.6278	9.3266	11.4353	22.4626	39.6111	43.1706	2.2447	0.7272	3.5123	9.1426	4.2364	4.7999	3.3883	2.9446	4.7082	7.6185	9.9155	5.9032	3.7278	4.103	19.7836			0.995171	8.94137
24.6622	0.4916	0.9873	0.6139	0.553	0.6109	2.6188	27.4409	14.6941	13.8363	24.8927	42.2994	35.8092	0.9559	0.368	2.258	5.3311	2.7756	4.0576	2.3018	2.355	3.7014	7.5567	11.5011	6.3461	3.2335	3.4615	20.0336			1	8.92907

## Sheet: Image65
X0	Y0	Y1	Y2	Y3	Y4	Y5	Y6	Y7	Y8	Y9	Y10	Y11	Y12	Y13	Y14	Y15	Y16	Y17	Y18	Y19	Y20	Y21	Y22	Y23	Y24	Y25	Y26	Y27	Y28	Y29	Y30	Y31	Y32			Ap-Basal to 1	Average intensities
0	5.2705	5.0142	9.8563	9.9753	16.1677	7.438	5.6221	2.717	7.8405	4.0611	3.1321	3.7466	3.3285	6.4404	3.3027	6.6091	6.0751	3.6553	7.949	7.2099	11.8624	13.5414	5.4831	3.7028	8.0367	18.3321	9.8835	8.9805	3.2464	3.8147	5.1298	3.5084	5.5774			0	6.86396
0.1191	5.3519	6.3546	13.1165	11.9986	15.352	8.1937	6.2255	3.0168	10.4761	4.1713	3.5607	3.995	3.6899	6.7967	3.9205	6.3716	7.14	4.6357	8.7549	7.0914	12.655	13.1376	6.4045	3.1757	9.3289	18.8988	11.8317	11.125	3.7179	3.6525	5.8103	4.3985	5.2663			0.00490027	7.56412
0.2383	6.334	8.2453	15.1628	14.2726	16.4947	9.7999	6.946	3.0397	13.5539	5.6685	3.7899	5.1591	4.4931	7.4448	3.5257	7.0705	6.6772	5.1604	9.0242	6.8072	13.8125	11.8361	7.6726	3.6456	9.3892	21.7256	12.7334	12.956	4.1597	3.7627	6.5152	6.5342	7.5634			0.00980465	8.51442
0.3574	7.1691	9.103	18.0916	16.207	15.7343	11.4839	9.2407	4.7498	15.8196	8.2393	4.0788	6.1007	5.5942	8.8595	4.2831	8.5217	6.9755	6.3387	10.5804	7.6175	15.4315	11.3077	8.8945	4.6262	10.6404	22.1285	13.0725	15.942	5.9987	4.2089	8.7264	9.6544	11.7275			0.0147049	9.91356
0.4766	8.0002	10.331	18.6854	16.3304	13.6508	12.4042	12.7439	6.9647	19.8196	11.799	4.0157	7.3066	7.7864	9.3338	4.8407	9.8283	8.3315	8.1717	11.3151	9.0071	15.0065	11.4436	10.3129	4.4397	13.0918	22.902	14.3353	17.4109	8.5647	7.1523	9.5313	12.7962	16.1774			0.0196093	11.3282
0.5957	10.5302	13.912	17.433	15.7101	14.974	15.0882	18.698	9.7858	20.8314	18.7095	4.5885	9.4143	11.6509	11.5039	4.2351	10.0016	10.0633	8.9619	14.557	8.5847	16.5695	11.1303	11.3661	5.7296	11.7609	22.6869	14.2561	16.1273	11.5366	6.8996	11.7884	17.4016	21.9691			0.0245096	12.9835
0.7148	15.2784	15.8633	17.7258	16.4501	14.705	16.5375	23.4787	13.7583	21.6873	24.8401	5.9546	10.9208	16.318	12.2989	4.9466	12.8049	11.135	14.2728	19.0237	9.5119	18.3281	10.5966	11.2132	5.7982	13.003	23.2413	16.1921	17.7349	16.3203	9.2393	15.1042	22.9903	28.8418			0.0294098	15.3368
0.834	20.0108	18.6358	16.4882	15.5086	13.7049	20.9384	26.5241	16.3412	24.4962	28.7323	6.7174	14.0842	19.4429	13.83	6.4234	15.6874	13.4323	21.6266	24.8918	12.0445	16.5476	9.6505	10.2402	8.2227	11.7925	25.4156	18.3607	16.5226	23.8731	13.6968	22.8883	26.4996	35.5344			0.0343142	17.8426
0.9531	25.3472	24.2058	18.21	13.6631	13.5561	23.4669	29.6883	20.0038	22.7928	29.4798	8.9573	17.0836	22.1014	20.6406	7.4663	18.0045	17.3312	25.8663	28.6181	14.1013	17.9058	9.8605	11.4988	8.6839	12.989	24.5505	20.7308	17.6676	30.0642	21.6898	29.0758	28.7713	35.0604			0.0392145	20.2768
1.0723	30.2202	28.9132	17.9788	13.2901	15.1882	27.9751	28.5089	19.9399	20.3565	27.4929	11.1095	18.5182	21.9093	26.5722	8.2628	21.2118	19.9206	26.0582	32.1699	14.2901	17.984	9.4672	12.5198	8.2224	14.1767	23.2141	21.5157	17.7638	36.052	31.2373	39.8231	31.4625	36.683			0.0441189	22.1215
1.1914	34.1841	30.7339	19.8103	12.0544	15.6059	28.8017	23.7945	22.7277	20.3944	24.4216	14.0244	21.0726	23.3762	30.2196	11.882	20.9817	21.8049	22.9602	32.6488	13.518	19.3747	8.6301	13.4694	10.9472	16.0734	24.6739	24.5733	16.7509	38.4896	43.7314	51.7107	32.9543	39.3512			0.0490191	23.8105
1.3106	41.5973	31.3085	21.5185	14.0678	16.5382	29.39	21.2353	25.4883	19.7427	21.7671	15.8825	23.7529	21.3417	33.3068	18.2798	22.8574	23.8119	16.8716	29.3475	13.1868	20.6001	9.9443	14.3243	11.5092	16.985	24.5085	25.7161	17.459	35.6763	51.4	54.0561	33.0007	42.0118			0.0539235	24.8025
1.4297	47.6227	34.2112	21.9679	13.2236	17.0221	28.7945	19.4397	24.6322	19.3695	18.4331	17.8561	22.5215	18.1827	32.0826	26.2422	23.4532	21.9313	12.2214	23.9563	13.1396	23.3757	8.513	15.0328	10.3186	18.9023	25.4156	29.0223	15.5238	30.5931	53.7622	53.2651	32.4949	39.1829			0.0588238	24.5971
1.5488	50.2323	35.5365	21.6202	11.1102	19.7077	29.2327	18.0765	25.0975	23.0184	16.4051	20.0684	22.927	16.2004	31.1815	31.5855	21.6513	18.0134	11.2111	16.7079	12.4891	22.2211	8.4142	14.7608	10.478	19.052	26.1152	34.0591	14.851	23.0994	53.3812	52.4452	29.6246	37.3506			0.063724	24.1795
1.668	53.3724	33.8472	23.4405	10.0701	19.3866	29.3916	16.8741	26.3286	24.2512	15.3331	20.8326	22.7892	14.0572	28.1952	32.8708	19.1006	16.0103	10.4777	13.0032	10.7126	22.0007	8.8659	17.6111	11.4883	20.831	26.9152	34.1816	14.3263	17.5608	45.2233	43.7079	26.377	34.8678			0.0686284	23.1607
1.7871	57.3959	34.0095	24.4676	8.4632	19.1236	28.9693	15.3588	26.6028	25.712	13.2236	21.5795	22.8111	10.8981	22.8017	31.753	17.3234	13.3752	9.0329	11.3818	10.0482	17.4364	9.196	15.5711	12.7988	21.4027	28.4454	35.2837	14.431	15.0303	37.0466	34.648	25.2519	32.1338			0.0735287	21.9093
1.9063	56.8241	32.581	26.7649	7.2903	20.6026	29.8178	16.2107	27.2161	27.4145	12.5776	20.5366	23.0796	8.5455	21.3517	29.0694	15.2147	12.9501	8.0571	9.8638	9.0157	16.7035	8.5712	11.7756	16.2219	23.0228	33.5578	37.0078	14.2866	12.06	28.791	26.3226	21.0617	28.2478			0.0784331	20.9883
2.0254	55.029	29.4805	26.9945	7.6008	19.6031	26.2728	16.3317	26.3913	28.6956	12.058	20.1368	23.3264	8.6553	18.8629	24.6022	14.9678	9.73	6.8859	7.3374	8.2736	14.4714	7.7706	10.9832	18.2411	24.2705	37.6604	35.692	12.1095	9.8576	26.6264	18.3215	16.6916	27.0077			0.0833333	19.7254
2.1445	51.4058	25.794	28.4847	7.2591	17.5384	23.8988	16.2272	27.33	26.4701	10.9416	18.6545	23.3235	6.9793	16.7552	23.1234	12.8411	7.5828	6.5158	6.2669	6.1436	11.9199	7.061	7.9485	18.7623	27.362	41.5374	35.5183	11.3016	8.4056	22.0688	12.3442	12.8676	24.6942			0.0882336	18.3432
2.2637	44.028	21.9229	30.2579	8.2928	15.6912	21.2485	14.1594	26.5913	25.6298	9.3761	17.6067	23.2988	6.0181	14.1465	20.7377	13.1512	5.9162	5.4948	5.5663	4.6618	9.0007	6.5578	7.5741	18.5677	28.4708	49.3723	34.7199	11.1837	7.1853	18.6137	8.6797	10.428	22.9459			0.093138	17.1847
2.3828	39.9014	17.5848	32.0328	9.0266	13.326	18.8252	15.0191	26.1481	24.3923	8.5397	14.6228	20.6872	5.4228	13.8665	19.2988	11.6183	4.7034	4.373	4.243	4.5435	6.0101	6.2278	7.4643	17.991	28.6866	51.8518	33.685	11.942	5.9394	14.9444	6.2406	8.8075	20.7269			0.0980382	16.021
2.502	35.6769	16.4956	32.2087	8.6246	10.2787	17.3945	14.3827	26.6735	20.8892	7.7756	16.4308	19.8619	5.1817	13.112	20.1689	10.5069	4.0853	3.5045	4.4955	3.5666	5.0273	6.466	5.9665	17.583	29.9179	52.7912	31.1231	8.3375	5.8435	12.3944	5.0075	7.7415	18.455			0.102943	15.09
2.6211	30.8301	14.5346	32.6288	8.6452	8.8984	13.282	12.9541	27.8953	21.1308	6.7074	16.5925	15.3795	5.2746	14.236	19.8034	8.1966	3.8918	3.2848	3.3891	3.1358	4.1472	5.517	3.8778	15.2899	29.1417	49.6856	27.6801	7.5628	5.8438	10.877	3.7415	6.5418	16.4093			0.107843	13.8487
2.7402	26.6558	13.9726	32.9362	9.1096	7.7788	10.6602	14.0096	27.5401	20.533	6.397	16.0719	12.4505	4.9696	14.7095	19.0732	7.2066	3.8381	2.8947	2.7344	3.6394	3.3267	5.0684	3.7397	13.6835	26.7778	49.6286	24.9361	6.9807	5.1691	8.862	3.0147	5.3585	15.3012			0.112743	13.0008
2.8594	25.1989	13.1812	29.2996	9.022	5.3567	9.8467	12.0653	29.1716	21.8003	5.9873	15.3387	9.9546	4.1036	14.152	19.088	6.3954	3.6603	2.434	3.3745	3.342	3.7014	5.2069	3.4779	10.7937	23.9726	45.9193	21.6299	6.4074	3.9399	6.5526	2.4146	4.7868	13.1365			0.117648	11.961
2.9785	22.0156	11.7562	27.9214	8.9795	5.398	10.3148	10.9398	27.5769	22.0059	5.5897	15.5181	8.5216	3.291	12.2963	17.4694	6.013	3.3962	2.1516	3.0399	3.3353	3.0098	5.7536	3.103	9.1673	20.5414	43.8961	20.6428	5.6443	3.0537	5.6872	1.9694	4.4429	12.2992			0.122548	11.1134
3.0977	19.6954	10.6248	28.1493	10.133	4.8412	10.0471	9.9264	28.7186	23.7756	5.2737	15.53	6.236	3.3579	13.4308	14.1981	4.6976	3.2856	1.9075	2.8744	2.8732	2.9835	5.9208	2.0932	7.9165	17.5331	40.8699	17.5205	4.9338	3.0653	5.1603	1.9428	4.1847	9.9457			0.127452	10.4135
3.2168	18.6579	9.8902	28.0845	9.0537	4.5579	10.7427	9.0309	29.8194	23.8921	4.7189	16.7949	5.3162	2.5643	12.107	12.399	4.887	3.2196	2.0024	3.0366	3.0372	2.7133	5.1891	2.0503	6.5752	12.092	37.3612	13.3576	4.4887	2.4457	3.9655	1.6298	3.6184	9.2789			0.132352	9.65388
3.336	16.241	8.9959	26.2808	10.2714	4.046	9.9883	8.1079	30.2823	26.4664	4.9914	17.9578	4.8266	2.7329	11.3867	11.2151	4.3481	3.1105	1.8383	2.8191	2.9757	1.9205	4.6362	2.4298	5.4978	7.8807	35.8787	12.1509	3.8815	2.4334	3.6629	1.7418	3.1629	7.8042			0.137257	9.15041
3.4551	14.6179	7.7071	26.0885	11.5212	3.6737	8.5691	7.3549	26.8588	27.3057	4.777	18.3901	4.4978	2.7506	10.0063	10.5012	4.5907	2.8413	1.6188	2.4494	3.23	2.2367	4.4678	1.7309	6.2304	6.3095	31.5749	11.4574	4.1291	1.5934	2.246	1.1689	2.757	7.2036			0.142157	8.55926
3.5742	13.5039	7.42	25.4052	12.0183	3.5167	7.91	6.7009	23.1887	27.0248	4.6665	17.1695	4.1287	2.6703	9.1153	8.1785	3.339	2.4951	1.4797	2.3542	2.9942	2.2576	3.4481	1.8767	4.9492	3.379	27.3899	9.127	4.1813	1.4191	1.5086	1.2627	2.2159	6.516			0.147057	7.72153
3.6934	12.0765	7.7304	24.8591	13.0245	3.2864	7.6058	6.0444	21.7545	25.0858	4.2823	15.5443	3.4361	2.5061	8.2076	7.4511	3.6997	2.8777	1.2804	2.0734	4.109	2.0098	2.1678	1.3254	4.7427	2.563	18.6943	7.6928	3.7766	1.4071	1.662	1.2843	2.2179	6.2603			0.151962	7.0527
3.8125	10.6203	6.7712	23.3935	15.1673	3.0933	7.8213	5.2833	18.8626	24.3603	4.1509	13.2229	3.4998	2.529	7.0386	7.3425	2.679	2.2669	1.3845	1.6782	4.8456	1.8217	2.1097	1.5613	4.4267	2.0809	14.0536	7.0428	3.281	1.1387	1.6606	1.3084	2.0849	6.1048			0.156862	6.50564
3.9317	10.3051	7.0019	23.882	17.1414	3.4359	7.8848	4.287	16.5671	25.2147	3.8092	11.6792	3.4251	2.2237	7.3214	6.2128	2.7669	2.016	1.2954	1.5676	4.6757	1.8188	2.7207	1.6869	3.898	2.5782	7.6505	5.3017	3.5757	1.2981	1.0291	1.0933	2.1706	4.8555			0.161766	6.13303
4.0508	8.2702	6.1613	26.5633	16.9109	3.3622	7.2307	4.5988	14.9012	24.8492	4.2239	10.1076	3.7683	1.8321	5.5654	6.5223	3.1664	1.9909	1.3286	1.0051	4.9437	2.6704	2.5372	2.1366	3.4925	1.9003	5.3487	4.2304	3.5162	1.114	1.003	1.1757	2.8479	5.663			0.166667	5.90721
4.1699	7.5434	5.225	24.9151	20.2137	3.1279	7.0804	4.6905	12.6016	24.3149	4.0991	8.1373	3.7371	2.2719	4.7582	5.0392	3.1362	2.077	1.1853	1.4067	5.751	2.51	2.4515	2.0487	4.2691	1.7841	3.3805	3.4642	3.7077	0.9566	1.1566	1.1917	2.4085	5.4391			0.171567	5.63878
4.2891	7.061	4.945	27.5997	18.4485	2.6749	7.0281	4.892	10.7236	24.4436	4.599	7.4906	3.4979	1.9441	4.8272	5.3717	2.7051	1.8713	1.1055	1.8682	6.7213	2.0935	2.7055	1.7761	3.9009	2.25	2.9913	2.8525	4.1968	1.0564	0.9173	1.6162	2.4081	4.0203			0.176471	5.53343
4.4082	5.5446	4.0426	25.2248	19.6164	3.4441	7.1305	5.503	9.2404	24.7242	4.8559	6.3767	2.5468	1.7519	4.4195	4.6567	3.0929	1.8924	1.3014	1.9297	5.6121	2.1639	2.7129	2.1241	4.5259	1.6879	2.7284	2.365	4.7737	1.2596	0.8682	1.0018	1.7787	5.1504			0.181372	5.33476
4.5274	5.9359	4.4285	25.4768	20.3941	3.0798	6.9058	5.137	7.5215	25.8565	4.087	5.0806	2.5923	1.697	3.4262	4.9409	3.3715	2.0814	1.1702	2.3554	5.7035	2.1843	2.2681	1.6811	4.8422	1.7664	2.5361	2.3593	5.3621	1.0633	1.4618	1.1845	1.8064	6.4662			0.186276	5.34011
4.6465	4.9892	4.4125	20.9252	23.5273	3.3554	6.0162	5.6085	5.7413	21.726	4.3588	4.0773	2.1397	1.9137	3.3114	5.5299	3.5321	2.015	1.2629	2.6408	5.7412	2.1776	2.1241	1.9677	5.3656	1.8975	2.1576	1.617	5.2891	0.9093	1.1584	1.2664	2.1351	6.9976			0.191176	5.0875
4.7657	4.949	4.3815	18.3814	20.9885	3.0771	5.088	6.0981	4.3361	19.4345	4.9053	4.2201	1.6769	1.5854	2.9304	4.7226	4.293	1.7693	1.7217	2.1506	5.9809	2.2382	2.3322	1.7417	5.7543	1.4318	1.63	1.5005	5.3578	1.1289	0.8207	1.0056	1.9759	8.2476			0.196081	4.7835
4.8848	4.9902	5.6865	13.9197	18.1291	2.5245	5.3503	5.5935	3.5122	17.9842	3.3916	3.4701	2.0933	1.7014	3.469	4.0416	4.5609	1.9807	1.3546	1.8369	6.162	2.1058	2.3289	1.6626	5.3876	1.4744	1.2677	1.7774	5.3133	1.0198	0.9054	0.8816	1.7644	7.1869			0.200981	4.38873
5.0039	4.2793	6.2824	11.4832	13.7807	2.6235	6.5922	6.0804	2.9837	16.3664	3.3887	2.848	1.8022	1.6621	2.9071	3.6577	4.6276	1.5996	1.5094	1.8473	5.5116	1.8284	1.81	1.9322	6.4164	1.5367	1.1077	1.2505	6.8995	1.2154	0.8775	1.0371	1.9868	8.8995			0.205881	4.20093
5.1231	3.3456	5.9727	9.3018	12.0342	2.5814	6.5078	6.8467	3.4856	15.4705	3.3717	3.1354	1.8966	1.4361	2.8991	2.9534	5.2974	1.4827	1.0279	2.1018	5.1091	2.0548	2.217	1.9894	6.6012	1.5948	0.798	1.3371	7.3915	0.7128	0.9604	0.8745	2.2475	12.4082			0.210786	4.16499
5.2422	2.7373	6.7653	7.3931	11.4369	2.2671	7.0667	9.0872	3.0442	12.8496	2.6974	2.541	1.8242	1.612	2.6876	3.4666	4.8762	1.7304	1.2792	2.2411	5.262	2.4509	2.4611	1.7149	5.6284	1.2969	0.9431	0.8539	9.1343	0.9468	0.8553	0.8221	2.0463	15.3733			0.215686	4.16341
5.3614	2.846	6.3929	5.3289	8.8756	2.2154	6.9667	8.9305	3.3139	10.4363	2.2102	3.2385	1.673	1.6403	2.5299	2.5963	4.4971	1.7264	1.3154	2.2062	4.5431	2.4412	2.5067	2.1722	4.9281	1.6358	1.4304	0.7542	11.2508	1.085	1.0461	0.8084	1.8441	21.2388			0.22059	4.14013
5.4805	2.733	6.3928	3.9007	7.5584	2.067	7.4734	9.57	2.6274	7.8271	2.242	2.1611	1.5236	1.3089	2.0521	2.7526	4.8156	1.6104	1.4603	2.0702	3.7881	2.7957	2.3087	2.2209	5.2767	2.1298	1.3835	1.097	9.4698	1.1304	0.9134	1.2218	2.3478	26.6305			0.22549	4.08669
5.5996	2.6208	6.3058	3.6946	6.8736	2.1065	7.9272	9.8456	2.776	7.411	2.16	2.08	2.0501	1.6169	2.0727	2.3004	4.5875	1.6478	1.0312	2.1702	3.8223	2.4307	1.9318	1.9389	4.6894	1.9977	1.2569	1.3839	10.0934	0.8736	0.9911	1.2659	1.9567	31.9436			0.230391	4.17739
5.7188	2.2868	5.8833	3.4883	5.787	2.2535	7.305	8.2675	3.0526	6.62	1.877	1.7122	2.0701	1.3755	1.8981	2.1353	4.7307	1.8511	1.0466	2.0505	3.4977	2.6389	2.4342	1.5446	4.3354	2.1554	1.1548	1.1954	9.4498	0.6784	0.876	1.172	1.9614	34.6204			0.235295	4.04259
5.8379	2.2264	6.5208	2.6788	6.1726	1.9995	7.3559	8.8078	2.4784	4.1547	1.6552	1.9602	2.0851	1.2247	2.0134	2.2892	5.1808	1.8484	1.4602	1.4918	3.5294	3.8121	2.2759	1.8218	4.1073	2.7641	1.3739	0.9692	7.7183	0.7727	0.9114	1.251	1.6407	38.8547			0.240195	4.10322
5.9571	1.8659	7.2311	3.1641	5.8438	2.4343	7.8529	8.2454	1.988	3.1533	1.2165	1.6542	1.661	1.3718	2.4996	1.9666	5.64	2.1717	1.4078	1.7059	4.0165	3.0017	2.4745	1.7035	3.5149	3.3822	1.0816	1.4607	6.7497	1.2316	0.8148	1.2491	1.6543	37.7733			0.2451	4.03583
6.0762	2.491	8.9329	2.9804	5.266	2.3611	7.3059	8.8962	2.1127	2.2217	1.1668	1.7287	1.8744	1.2579	2.031	2.1421	4.8034	2.1268	1.4927	1.4578	4.0947	3.4136	2.1073	1.9373	3.0048	3.5802	1.2877	1.349	5.3658	1.0549	0.7124	0.7462	1.5629	35.5155			0.25	3.89036
6.1953	2.1458	10.3055	3.2308	4.9199	2.1182	8.2142	9.0492	2.5669	1.4578	1.3995	1.5308	2.1038	1.4772	1.5165	1.8864	4.9484	2.1195	1.4522	1.4958	4.1994	3.706	2.446	1.6511	3.5176	3.9419	1.293	1.2054	5.9565	1.297	0.8412	1.1482	1.271	28.9548			0.2549	3.79902
6.3145	2.4574	10.3089	3.3691	5.1407	2.3032	8.3269	8.4451	2.6919	1.3855	0.9397	1.7667	2.2962	1.2932	2.0125	1.8224	5.4304	3.0283	1.5284	1.4642	4.3611	3.3195	2.3846	1.9285	3.3648	4.2985	1.126	1.7483	5.9551	1.5182	1.0161	1.2499	1.4851	22.1897			0.259805	3.69564
6.4336	2.5072	10.5452	3.2767	4.0719	2.0236	7.0079	7.9322	2.0208	1.2143	1.2714	2.2077	2.0884	0.9914	1.9682	1.7446	5.6857	2.6406	2.3936	1.6083	4.1196	3.2342	3.3848	2.0599	3.0339	5.1884	0.9693	2.1853	6.2256	1.2388	1.0456	0.77	1.4692	18.8579			0.264705	3.54492
6.5528	2.3228	12.0563	2.9954	3.1421	1.7455	8.7627	8.6203	2.272	1.045	1.2999	1.8317	2.7587	1.1304	1.6737	1.9435	5.5814	2.9295	2.7148	1.5944	3.2685	4.5663	3.2206	2.0816	2.6083	5.5141	1.1886	1.8493	6.2612	1.4763	0.842	1.064	1.6064	12.8297			0.269609	3.4787
6.6719	2.403	13.6327	3.4328	2.1612	2.138	10.5192	9.3327	2.3811	0.9958	1.0482	2.0954	3.2005	1.6031	1.5702	1.8093	5.1502	3.8038	2.6669	1.5386	3.1005	4.5233	2.8546	2.2124	2.5866	5.7437	1.1228	1.7388	6.4371	1.5081	0.7036	1.0572	1.4025	12.6869			0.27451	3.61093
6.7911	2.415	12.6292	4.5656	1.9231	2.198	11.4532	10.4748	1.8795	0.6891	0.9885	2.1252	3.5363	1.3446	1.8344	2.2224	5.163	3.8911	2.6997	1.3962	2.9328	3.9862	3.3332	2.3002	2.9242	5.7571	1.0649	2.2211	7.6052	1.6693	0.6648	1.063	1.5508	12.1987			0.279414	3.71819
6.9102	2.3589	12.443	4.6692	1.579	1.7834	12.5684	8.1726	1.7967	0.7664	1.394	1.9689	3.6692	1.5823	1.7685	2.1841	5.6498	5.1355	3.6535	1.6419	3.2118	4.134	4.2673	2.269	2.7422	6.8689	1.398	2.3254	7.2845	1.7123	0.808	0.7867	1.4307	11.9028			0.284314	3.81597
7.0293	2.8058	12.2703	3.4362	1.7858	1.5268	11.7596	8.4699	2.1117	0.9049	1.4341	2.1387	4.2414	1.5851	2.0563	2.001	5.5081	5.7266	4.0124	1.505	3.523	5.8698	3.8089	2.7767	2.3817	6.3504	1.3093	2.0643	7.2459	1.6887	0.9402	0.8349	1.2439	10.3405			0.289214	3.80782
7.1485	2.8494	11.6906	3.5609	1.2888	1.1065	14.7846	8.1819	2.1241	0.8636	1.1585	2.1523	4.7548	1.5667	1.882	2.3017	6.7488	6.457	4.3323	1.9483	3.745	4.8701	3.6143	2.29	2.5421	6.9277	1.4198	2.0256	7.6946	1.5346	0.7154	1.0753	1.6622	11.3348			0.294119	3.97589
7.2676	2.5871	10.8926	3.1425	1.1925	1.3285	17.138	8.5912	1.9971	0.6308	1.017	2.0186	4.0186	1.5715	1.7066	2.3277	7.5178	7.1144	5.53	1.6009	2.9166	4.1121	4.2337	2.8318	2.9639	7.0238	1.7709	1.7776	6.7045	1.7607	0.5396	1.0464	1.1043	10.0138			0.299019	3.96131
7.3868	2.5078	10.8689	2.9408	1.2472	1.7707	17.2837	8.9237	1.8121	1.1222	0.7443	1.9221	3.4402	2.0128	2.0909	2.873	9.6828	8.1159	7.0126	1.2489	2.8839	4.3253	5.4947	4.2505	2.9128	5.9481	1.7599	1.7741	6.6809	1.8827	0.8273	1.0125	0.723	8.5352			0.303924	4.14035
7.5059	2.4433	11.6664	2.8754	1.1885	1.8834	17.9737	9.22	1.8483	1.0864	0.7759	1.7703	3.1651	1.6353	2.2754	2.5262	10.9643	8.9495	7.8118	1.2828	2.9877	4.9332	6.1774	3.9779	3.4128	4.9103	1.9475	1.7259	6.3496	1.9653	0.7111	1.0934	1.3782	5.9563			0.308824	4.20814
7.625	2.5016	11.2895	1.8228	0.9168	1.1978	21.7146	8.2566	1.7935	0.9567	1.0376	2.42	2.6074	2.1326	1.9662	3.1823	10.2628	7.2129	8.5888	1.4705	2.6404	5.4987	6.8528	3.8434	2.726	5.0044	1.7304	1.9472	5.2302	2.3187	0.9211	1.118	1.1566	5.9902			0.313724	4.19118
7.7442	2.349	12.1426	1.5761	1.0553	1.7333	20.3693	9.4615	1.9151	0.9658	0.8528	2.4526	2.3807	1.1939	2.0832	2.891	10.2076	6.7765	9.2853	1.6352	2.628	6.6239	7.8539	4.5166	3.1988	5.1898	2.036	1.8724	4.2982	2.0324	0.8451	0.9585	1.1556	4.9801			0.318628	4.22776
7.8633	1.806	10.424	1.2416	1.0242	1.5815	20.6059	7.3878	1.6327	0.9026	0.7049	2.7836	2.937	1.4834	2.6339	2.4035	11.2066	7.212	8.8646	1.9769	2.4751	6.2508	7.4725	4.5693	2.9108	4.7534	1.8934	2.1218	4.1386	1.9342	0.9131	1.03	1.2657	4.0795			0.323529	4.07942
7.9825	2.0255	8.8006	0.8802	1.0128	1.2863	21.8564	6.4825	1.8774	0.8416	0.9701	1.8776	2.4501	1.4641	2.6655	3.2002	11.1919	5.6698	8.2181	1.7467	2.1727	6.199	7.9803	4.9103	2.9738	4.3847	1.9848	1.8035	3.6026	2.0908	1.1673	0.855	1.2244	3.5214			0.328433	3.92085
8.1016	2.2324	8.7901	1.0383	0.7547	1.3082	20.8126	5.7918	1.8088	0.9485	1.157	2.2354	2.2864	1.5611	2.6652	3.2124	9.7694	4.2347	7.0984	1.8808	2.5121	5.544	7.2556	4.3073	2.8328	4.6197	2.5232	2.3751	4.0732	2.3065	0.8672	0.739	1.2882	2.6799			0.333333	3.74273
8.2207	2.1909	7.9142	1.2768	0.8638	1.3395	19.2373	4.9267	1.3661	0.815	1.0889	2.4714	1.987	1.8178	3.1934	3.0556	9.3704	4.5466	5.7812	2.1202	2.0293	6.7543	7.5972	3.9596	3.2442	5.3683	3.1337	2.473	3.0044	2.5607	0.8369	0.5196	1.1127	3.0519			0.338234	3.66693
8.3399	2.4442	7.629	1.2066	1.1647	1.3302	20.6494	4.7113	1.5353	0.8373	0.8003	3.0221	2.105	1.7211	2.677	3.0892	7.5733	4.2948	5.8396	1.9967	1.4019	7.1257	7.0442	4.3224	2.4027	5.0486	3.9368	2.0369	2.6361	2.3403	0.9496	0.654	1.1142	2.806			0.343138	3.58929
8.459	2.1589	7.4539	1.0545	1.1	1.5161	19.9931	4.9176	1.5293	0.8648	1.0597	3.3207	1.9554	1.4885	2.5081	3.0092	6.7837	3.8489	5.158	1.823	1.9187	6.8002	7.6083	4.2676	2.4454	4.4832	4.0026	2.8126	2.6916	2.3823	1.0748	0.6841	0.9227	2.0343			0.348038	3.50521
8.5782	2.249	7.4846	0.9509	0.9304	1.2177	19.1513	4.1825	1.2445	0.9195	1.0841	3.4091	2.4608	1.5477	3.2642	4.3252	5.9888	3.4059	4.7398	1.9772	2.0967	8.2785	7.5466	4.3673	2.8369	4.369	4.2171	3.1108	2.3035	2.9087	1.2372	0.6247	1.1446	1.9705			0.352943	3.56198
8.6973	2.8607	7.6207	0.9792	1.0956	1.1687	22.0551	3.4079	1.3947	0.7913	0.8885	3.2824	2.7302	1.7821	2.7912	3.5822	5.0109	3.6025	3.7941	2.3372	2.0404	7.6925	8.7182	3.6138	2.4202	4.947	4.7093	2.4608	2.283	2.6119	0.8261	0.8757	1.1656	2.4124			0.357843	3.57431
8.8165	3.0235	6.1529	0.9959	1.075	1.2717	24.1668	3.1826	1.4095	0.8878	0.6779	3.1705	2.78	1.7766	3.121	3.4332	4.9729	4.2678	3.324	3.3495	2.0151	7.6954	8.608	3.9564	2.9337	4.4647	4.9858	2.7806	2.5747	2.7921	0.7679	1.0476	0.9284	2.2405			0.362747	3.66152
8.9356	2.5565	6.7399	0.8811	0.9194	1.0597	23.6384	2.9173	1.2146	0.7712	0.8131	2.8029	2.869	1.6992	2.5915	4.2495	4.9763	4.2842	3.0678	4.4504	1.6978	7.6241	9.1873	4.3583	3.308	4.1041	3.9668	3.2209	2.9122	3.5816	0.8462	1.0157	1.0174	1.7782			0.367648	3.67032
9.0547	2.4671	7.0305	1.0828	1.0336	1.2764	24.089	3.1078	0.9098	0.7379	0.757	3.2062	2.3054	1.9246	3.2426	3.8313	5.3765	4.1413	2.9142	5.0776	1.354	7.5011	8.7919	4.4012	4.0356	3.9133	4.2832	2.2664	2.4919	4.277	0.7424	1.1374	0.9068	1.7516			0.372548	3.70804
9.1739	3.1587	6.7235	1.1942	0.9333	1.5302	25.1271	3.5121	1.2935	0.9346	0.8663	3.2716	2.1284	1.5361	2.782	4.3525	5.3962	3.538	2.8164	5.5015	1.4477	7.8198	8.811	4.8982	4.0459	4.2217	4.5116	2.4358	2.1603	3.9023	0.8648	0.7586	1.2398	1.463			0.377452	3.79323
9.293	2.9664	5.8643	1.0216	0.7737	1.8103	23.5575	3.3951	1.2741	1.4504	1.0449	3.3709	2.2248	1.4716	2.0792	4.6419	5.8325	3.4552	3.0286	5.6887	1.9586	7.6831	8.5206	4.8893	3.9797	3.8659	5.6293	2.4087	2.4569	4.7576	0.6347	1.3346	1.002	1.4719			0.382352	3.80438
9.4122	3.1776	4.9622	0.9681	0.9017	1.4785	21.1442	2.7667	1.1131	1.1619	0.9091	4.1839	2.5799	1.4693	2.0621	3.0572	6.1258	4.3728	3.6346	6.1125	1.6348	7.0984	8.9269	5.416	4.3544	3.177	5.3367	3.0842	2.6991	5.0099	0.6144	1.264	1.1165	1.6072			0.387257	3.74305
9.5313	3.8869	5.6119	1.0812	0.8069	1.2908	22.3964	3.1685	1.1616	0.8217	0.9777	4.5527	2.3329	1.8059	2.1717	3.4061	5.45	4.4666	2.8769	6.4439	1.3198	6.2575	8.7844	5.2241	3.8869	3.2217	5.289	3.3608	2.5301	5.0382	0.9439	1.1456	0.9112	1.278			0.392157	3.75459
9.6504	3.3765	5.1817	1.2639	1.2291	1.3826	23.3643	3.2767	0.9805	0.9583	1.0967	3.8521	2.3097	1.7931	1.8706	3.8753	4.7352	3.7958	2.8782	5.6713	1.3516	6.0626	8.532	5.1021	3.3248	3.497	4.7427	3.4075	2.8719	5.2967	1.0828	1.1178	0.9584	1.2741			0.397057	3.68223
9.7696	3.5866	6.0818	0.9506	0.9113	1.1747	19.6033	2.9206	1.0538	0.7135	1.1906	4.5499	2.7731	1.7401	1.9511	3.9693	4.3062	3.3097	2.6118	6.1557	1.1788	5.2471	9.505	5.8687	3.3492	3.039	4.442	2.9019	2.7862	4.5706	0.8916	1.143	1.3201	1.4882			0.401962	3.55409
9.8887	3.7953	5.8693	0.8795	0.7167	1.3604	19.1909	3.1429	1.1484	1.0126	1.0329	4.5308	2.4812	1.6349	1.3704	3.7727	3.9136	3.854	2.2978	6.0452	1.2928	5.601	8.5432	6.0881	3.4265	2.7084	4.0928	3.0978	2.3787	5.7935	1.0464	1.2358	1.1712	1.0003			0.406862	3.50079
10.0079	3.2905	4.7426	1.2688	0.9692	1.1936	19.558	2.693	1.249	1.072	1.1623	4.2856	2.6134	1.7752	1.5667	4.538	3.6586	3.5089	2.232	5.5882	1.199	5.6806	7.3116	5.9667	3.6888	2.9416	3.7949	3.309	2.601	8.439	1.1118	0.9918	1.1169	1.1071			0.411766	3.52198
10.127	3.1597	4.8127	0.875	0.8392	1.1557	20.1525	3.2989	1.0878	0.7495	1.0287	4.5883	3.0083	1.758	1.926	4.7076	3.3481	3.8851	2.3243	5.9585	1.3524	5.5516	6.2075	6.3229	3.4951	3.1059	4.3634	3.9912	3.2262	8.9632	1.2233	0.8122	0.8949	1.1078			0.416667	3.61459
10.2462	3.0694	5.3496	0.9328	0.866	0.9831	21.0201	3.2006	1.4895	1.0778	0.7842	4.7861	3.0318	1.8505	1.3804	5.5083	3.3295	3.5688	1.9446	5.7416	1.2724	5.8357	5.5833	5.7579	3.477	2.4424	4.232	4.0065	3.4056	9.0645	1.2246	1.1874	1.0309	1.4616			0.421571	3.63323
10.3653	3.3131	5.4752	1.2216	0.7669	1.4276	19.1415	3.2634	1.0909	1.1255	1.2349	3.9857	3.1101	2.0144	1.2806	5.3956	3.3603	3.5399	1.9441	5.0416	0.9912	5.9405	5.8945	5.4579	3.6221	2.6418	4.2326	2.9808	3.3956	9.1188	0.9042	1.0903	0.9146	0.9607			0.426471	3.51147
10.4844	3.6636	6.0019	0.8736	0.6244	1.3443	19.5406	2.6645	0.9094	0.9045	0.7738	3.9744	3.4183	2.1201	1.7513	5.1627	3.339	5.0147	2.0908	5.401	1.1764	5.6973	4.9312	6.0697	3.646	2.9879	4.1769	3.7092	3.3053	8.6574	0.7879	1.2042	0.8638	1.1502			0.431372	3.57383
10.6036	2.8745	5.7192	1.2291	0.8267	0.9921	18.6024	2.2214	1.0501	0.5842	0.9366	4.3954	3.2112	1.636	2.2302	5.9742	2.6073	4.0866	1.6963	5.2202	1.5188	5.2299	4.2497	6.4178	4.1056	3.0384	5.0246	3.8799	3.1851	7.4012	0.9093	0.9801	0.8818	1.1603			0.436276	3.45685
10.7227	3.0127	5.5793	1.2358	0.8445	1.366	19.7708	1.9947	1.1713	1.1645	0.9613	4.095	2.626	1.7867	2.7261	6.4783	2.5811	4.0972	1.7336	4.6366	1.0007	4.3831	4.6903	5.9797	3.9416	2.5552	5.5443	3.9865	3.0808	7.0083	1.2592	1.1242	1.0315	1.15			0.441176	3.47263
10.8419	3.411	5.9233	1.1083	0.865	1.3058	21.8231	2.1391	1.2249	1.0661	1.022	4.3561	2.7863	1.7906	2.9587	6.2411	3.0876	4.744	1.8342	4.319	1.0624	5.2366	4.248	5.9145	3.416	2.442	6.5943	4.9678	3.8867	6.9593	1.3384	0.9212	1.3878	1.4845			0.446081	3.6929
10.961	3.0792	5.6916	1.4416	0.9909	1.3019	22.5207	1.9241	0.9266	1.0311	0.7407	4.8555	3.1299	2.1179	2.9813	6.0482	2.2954	4.2086	1.772	3.9414	0.9939	4.2689	4.2842	5.1675	3.2776	2.2237	5.6423	4.8033	3.6132	6.0472	1.2411	0.7771	0.9877	1.525			0.450981	3.51065
11.0801	3.2322	5.4558	1.2048	0.9925	1.4076	21.9712	1.9967	1.1523	1.0063	0.9188	5.4057	3.3069	2.3417	2.9184	6.945	2.1987	4.4977	1.2427	3.6639	0.9259	4.371	4.6186	5.88	3.3535	2.3624	5.0233	4.5768	3.6481	6.2851	1.6823	0.724	1.2575	1.0829			0.455881	3.56516
11.1993	2.9632	4.7276	1.3677	1.2242	1.2666	21.2308	1.5149	1.0507	0.9198	1.2164	4.5322	3.2213	2.1537	2.7964	7.7496	2.489	5.5834	1.9034	3.9627	1.5244	4.0619	4.071	6.0963	2.8179	1.9672	4.2847	4.5234	3.6065	6.2839	1.6145	0.8139	1.4571	1.3203			0.460786	3.52475
11.3184	3.1893	5.1277	1.3925	1.1465	1.0317	19.448	1.5239	0.9238	0.8077	1.2727	5.4716	3.0816	2.1292	3.1551	8.0565	1.9044	5.6518	1.9991	4.4074	1.515	4.2079	3.4719	6.0049	2.8472	2.0599	3.6529	4.4045	4.0427	5.5049	1.1692	1.1564	1.0628	1.4362			0.465686	3.46233
11.4376	2.8611	5.0926	1.1173	1.0645	1.2875	17.8117	1.3007	1.0067	0.8523	0.9017	6.3679	3.2159	2.724	3.1174	8.1184	2.1108	6.1172	1.8027	4.3534	1.0136	3.7839	2.9065	5.7951	2.7924	2.0919	4.0709	4.1757	4.37	6.1861	1.0631	0.808	1.326	1.4611			0.47059	3.42631
11.5567	2.6189	6.0013	1.403	1.0332	1.4127	15.0994	1.8561	0.8862	0.7871	0.7782	7.7393	3.2349	2.9597	3.6724	7.603	1.7344	6.8307	1.5813	3.8094	1.094	3.6743	3.4135	5.448	3.2872	2.1857	3.6894	4.6046	4.4854	6.3456	0.966	1.371	1.2639	1.1462			0.47549	3.45503
11.6758	3.0138	4.8959	1.3962	1.0092	1.6062	13.8561	1.2352	1.1189	0.9631	1.15	7.5487	2.7833	2.7688	4.0944	7.5485	1.4871	6.1865	2.2272	3.8715	1.0267	3.4571	3.1401	4.872	3.632	2.2621	3.2777	4.7149	4.9601	6.1007	1.1649	0.9521	1.0402	1.1264			0.480391	3.34811
11.795	3.6714	5.8758	1.0358	1.1104	1.1564	12.7658	1.5466	0.838	0.8715	1.1196	6.5293	2.827	2.9562	4.3607	8.7484	1.5156	6.5053	2.5947	3.5947	0.8999	3.6048	3.4841	4.879	3.4912	2.0911	2.567	4.1283	5.251	5.5592	1.1603	1.4908	1.2318	0.914			0.485295	3.34472
11.9141	3.9	5.7025	1.0729	1.0421	1.4627	12.0514	1.6518	0.688	1.0785	1.1999	6.8337	2.9524	2.9627	3.8447	8.4152	1.7878	7.3575	2.5419	3.8928	0.8487	3.4706	3.4388	4.9915	3.9855	1.8812	2.1673	4.348	5.703	6.093	1.1437	1.2365	1.047	0.8701			0.490195	3.38374
12.0333	3.3196	5.0332	0.9199	1.1771	1.4554	9.8376	1.3167	0.6886	0.9968	1.1165	7.6829	3.2066	2.9521	4.2928	8.7794	1.7389	7.8843	2.3529	4.1482	1.1937	3.6652	3.3587	4.7711	3.4702	1.7621	2.2569	4.0624	4.9729	5.7409	1.0567	1.3031	0.9623	1.1596			0.4951	3.29198
12.1524	3.6388	4.0681	1.0353	0.9199	0.9461	10.7179	1.434	1.0083	1.0772	1.1844	7.7355	3.4208	2.8275	3.9969	9.5705	1.566	6.8654	2.2906	4.9332	1.5011	3.6355	3.1352	4.5587	2.8607	1.9098	2.4057	5.9272	4.9799	5.9575	1.3322	1.1529	1.0245	1.5375			0.5	3.36833
12.2716	3.7633	4.6668	1.0483	0.9808	1.2947	9.809	1.1203	1.1606	0.9526	1.0844	5.9118	3.4932	3.1295	3.6134	10.0368	1.5739	7.2705	2.2973	4.8282	1.0229	2.756	3.1743	5.7215	2.6996	1.4616	2.2965	5.2928	4.8834	6.2718	1.2707	0.8328	1.0884	1.0295			0.504904	3.26779
12.3907	3.2771	5.7781	1.0375	1.164	1.4439	9.443	1.0327	1.4031	0.9725	1.0221	5.7327	3.4352	3.3229	3.7642	9.7864	1.648	7.8394	3.2634	4.7459	1.1653	2.3073	3.9569	4.9687	2.818	2.0092	2.9086	5.1935	4.228	5.7799	0.9489	1.0688	0.9364	0.9284			0.509805	3.31303
12.5098	4.2053	4.5795	1.481	0.8531	1.2223	9.7667	1.307	0.9102	0.9554	1.02	6.1044	3.3681	3.1585	3.9053	9.438	1.7486	8.2608	3.3269	3.8987	1.1534	3.0389	3.7359	3.9066	2.5006	1.9833	3.5674	5.9984	4.783	6.3046	1.4429	1.2504	1.0544	1.284			0.514705	3.3792
12.629	4.8044	4.3503	1.6067	0.8372	1.4942	8.1868	1.3518	0.9775	1.0697	1.0412	5.717	3.0671	2.7125	4.2573	9.9435	1.8697	8.5198	4.0869	3.7632	1.1242	2.857	3.4452	3.2942	2.3903	1.5815	2.8775	6.804	4.1573	6.1986	1.65	0.959	1.1029	1.4456			0.519609	3.31952
12.7481	4.5295	4.8561	1.4127	0.9888	1.4753	8.905	1.0452	0.875	1.0059	0.9992	6.3256	3.6287	2.4821	3.536	8.9179	2.1847	8.2713	6.4016	3.2916	1.1967	2.7157	3.4989	3.1978	2.3206	2.1677	2.5456	6.3626	4.7402	6.4683	1.2859	0.7508	0.9421	1.0729			0.52451	3.34539
12.8673	3.8793	4.368	1.347	0.8945	1.2771	8.8397	0.9806	0.7708	0.7914	1.0724	7.4871	3.7741	2.9906	4.1204	9.9299	2.0917	7.6907	8.1415	2.6324	1.2269	2.7908	3.8311	3.6024	2.2733	1.8472	2.0599	5.8203	5.1738	5.9018	1.4619	1.3368	0.9634	1.1844			0.529414	3.4107
12.9864	4.6309	4.8569	1.3503	1.0456	1.4961	9.1484	1.1487	1.0151	0.9397	1.0743	6.6645	3.2282	2.7062	4.3338	9.7271	1.5846	6.8023	8.6922	1.8658	1.0908	2.5923	4.044	3.175	2.0165	1.998	2.5621	6.1497	4.1934	5.6909	1.5774	1.5441	0.8165	1.2442			0.534314	3.36381
13.1055	4.7638	4.7427	1.0865	0.9218	1.5789	9.0389	1.307	1.092	1.0053	1.2247	7.664	3.4831	2.7693	4.0007	10.5493	1.7175	6.8107	10.0515	1.5055	0.9074	2.4696	3.7136	3.3485	1.942	1.9149	2.3067	6.0045	4.7007	6.1668	1.1413	1.3636	0.9531	1.3312			0.539214	3.44173
13.2247	4.9365	4.5715	1.204	1.4643	1.309	7.5273	1.3636	1.2025	1.2141	1.2473	8.1487	3.4017	3.4435	4.3241	10.3605	1.4655	5.3363	10.3334	1.5472	1.3666	2.8677	3.8172	2.9137	1.7363	1.5678	2.5567	5.6203	5.0552	6.5183	1.3445	0.8966	0.9555	1.2327			0.544119	3.4197
13.3438	4.7445	5.6548	1.2359	1.3846	1.16	7.7704	1.7035	1.0725	1.0043	1.1634	7.7382	3.3828	3.2445	4.0758	9.756	1.7185	4.8817	10.7927	1.3102	1.142	2.5686	5.2346	2.4265	1.8229	1.9326	2.3024	5.1954	5.785	6.8403	1.1822	0.8614	0.9669	1.3662			0.549019	3.43701
13.463	4.3913	5.3442	1.1737	1.0953	1.5079	8.1606	1.1694	0.95	1.1603	1.1589	7.6982	3.0068	3.4484	3.1495	9.7414	1.8338	4.4017	11.4156	1.1652	1.0669	2.5967	4.3888	2.2908	1.9469	1.9232	2.4138	4.8561	5.5111	6.2996	1.5652	1.0263	1.1251	1.2124			0.553924	3.33925
13.5821	5.0626	5.7325	1.5555	0.9767	1.7646	7.4037	1.4052	0.8873	1.0346	1.2096	8.6051	3.0663	3.011	4.0871	8.942	1.6894	3.6242	10.2559	0.7623	1.4586	2.9711	4.3818	2.0798	1.8793	1.1934	2.9216	4.8821	5.444	5.5362	1.4614	1.0962	1.1123	1.0239			0.558824	3.2884
13.7012	4.4276	6.0525	1.6223	0.9868	1.4225	7.4774	1.5545	1.0007	1.205	0.8815	7.8507	3.3222	3.2418	4.6324	7.8967	1.2861	2.5249	8.1283	1.2007	1.2795	2.1944	4.688	2.1461	1.4089	1.5716	1.9451	4.8903	5.6816	6.1822	1.5116	1.1879	1.2185	1.2709			0.563724	3.14822
13.8204	4.6163	5.5502	1.486	0.8698	1.6455	7.3876	1.3721	1.1949	1.3071	0.9652	7.9502	3.0528	3.2113	4.2785	9.386	1.181	2.2344	6.6167	1.1837	0.9879	2.1895	4.2453	2.203	1.3886	1.9363	1.7335	4.6517	4.8992	6.1506	1.3316	1.5804	1.2791	1.1065			0.568628	3.06583
13.9395	4.9002	5.813	1.3749	0.8297	1.44	6.8595	1.4013	1.1353	1.4469	1.3991	7.828	3.3815	3.8294	4.6323	8.8977	1.3671	1.7871	4.3661	0.8531	0.868	2.2512	4.9971	2.2808	1.4049	1.5645	1.8635	3.8954	5.2313	6.3372	1.398	1.2792	1.2111	1.043			0.573529	3.00507
14.0587	5.031	5.3457	1.3455	0.6796	1.5793	6.4676	1.2883	0.9506	1.1056	1.5132	8.7151	3.6381	4.3123	5.4444	9.9503	1.3268	1.3409	2.6267	0.8177	1.2964	2.3421	4.9252	1.9332	1.466	1.2363	2.0959	3.5458	5.2996	6.3674	1.1756	1.1217	1.2518	1.0742			0.578433	2.98818
14.1778	4.3824	5.4287	1.3005	0.8503	1.8968	7.0386	1.0769	1.1366	1.1518	1.0487	9.6709	3.407	3.9525	5.535	9.1801	1.7909	0.6715	1.7618	1.1086	1.2626	2.1338	5.3614	1.9979	1.4057	1.3438	2.081	4.2486	4.6485	6.9214	1.0114	1.3879	1.4631	1.4321			0.583333	3.00269
14.297	5.5113	5.9083	1.0998	0.9618	1.3059	7.8949	1.0881	0.9768	1.2051	1.1533	7.9948	3.2666	3.5538	4.731	9.697	1.6486	1.0754	1.3326	1.3953	1.0044	2.3541	5.9751	1.8713	1.4686	1.6685	1.9916	4.4849	4.5658	6.506	1.4458	1.1948	1.3958	1.0489			0.588238	2.99321
14.4161	5.8637	6.6608	1.0124	1.1941	1.7773	6.986	1.2061	0.8932	1.4073	1.0426	7.3472	3.091	3.7315	4.0067	9.4081	1.4117	0.8182	0.7891	1.0732	0.6742	1.937	6.3719	1.9105	1.51	1.629	2.1005	4.4016	4.427	5.6933	1.4072	1.4618	1.1643	1.0631			0.593138	2.89308
14.5352	5.8119	7.2442	1.0365	0.9584	1.9649	7.3009	1.5715	0.9564	1.3154	0.9102	7.4488	3.4236	4.2434	4.1602	8.8575	1.4806	1.0994	0.8975	1.3197	1.1252	1.851	5.9313	2.0458	1.6563	1.2467	1.4774	3.1658	5.0852	6.0482	1.1065	1.404	1.1738	0.5962			0.598038	2.9065
14.6544	5.362	6.7838	1.2278	1.189	1.8293	7.7836	1.2268	1.1211	1.2443	1.2116	7.4989	2.6937	4.0138	4.0902	9.0054	1.2997	1.17	1.3753	1.2551	1.0971	2.0256	5.8503	2.0596	1.4483	1.4009	1.5319	3.7513	5.2382	6.4257	1.173	1.4191	1.1707	0.7104			0.602943	2.9298
14.7735	5.9142	6.6568	1.2043	1.1444	1.747	7.2573	1.4386	0.8915	1.405	1.3905	6.8724	2.9083	4.1608	3.8308	9.9229	1.6919	1.2434	1.0622	0.8911	1.0573	1.7416	5.6616	1.7341	1.2983	1.2326	1.5212	2.5531	5.7784	6.8509	1.4983	1.0719	1.2933	0.753			0.607843	2.89936
14.8927	5.3393	5.6736	1.5154	1.1657	2.1942	6.8189	1.2735	1.1129	1.3219	1.2309	7.2969	2.2772	4.1849	3.5828	9.5336	1.5035	1.1392	0.8628	0.9833	1.354	1.7999	5.4491	1.4234	1.2268	1.4582	1.5751	2.782	5.9925	6.9517	1.2277	1.1245	1.0501	1.2528			0.612747	2.83874
15.0118	5.0056	5.5448	1.7367	1.0903	2.1555	7.0845	1.4712	1.1824	0.9889	1.5721	6.9884	2.8461	3.4828	3.66	10.3478	1.7104	0.9002	1.0628	1.1368	1.3887	1.8145	5.3689	1.2395	1.4638	1.6272	1.484	2.9236	6.9331	6.3576	1.3025	1.3134	0.7574	0.9775			0.617648	2.87633
15.1309	6.5235	5.8186	1.7256	1.0966	2.1586	6.873	1.3345	1.4562	1.441	1.6047	7.39	3.5276	3.6175	3.49	9.2289	1.543	1.1363	1.1194	0.9347	1.2236	1.7777	6.1339	1.4695	1.3536	1.3696	1.4965	3.8133	7.1463	6.5668	1.0001	1.0789	0.9623	0.9124			0.622548	2.97952
15.2501	7.351	6.6279	1.2891	1.2665	2.3431	6.114	0.8316	1.3835	1.5668	1.5488	7.6138	3.2919	3.8766	3.5086	8.3515	1.6794	1.0462	0.9041	1.3794	1.1052	1.4681	5.5053	1.4607	1.5316	1.6876	1.6933	2.7546	6.768	6.1933	1.2369	1.1211	0.8662	1.0591			0.627452	2.92196
15.3692	7.3205	5.3384	1.3044	0.9543	2.4707	5.1377	1.4766	1.3119	1.1895	1.7106	6.6914	3.2137	4.8931	3.8603	10.006	1.6703	1.2878	1.1608	1.5379	1.0296	1.4217	4.4916	1.7065	1.4752	1.9663	1.1707	2.228	7.0695	5.7145	0.9708	1.0232	0.9772	0.8891			0.632352	2.86878
15.4884	7.8593	5.1481	1.065	0.9218	2.7353	5.0637	1.317	0.9176	1.3174	1.4858	8.1666	3.5462	3.9905	3.2237	9.9912	1.5697	1.3592	1.268	1.2353	1.0328	1.3479	5.3519	1.6397	1.4409	1.5924	0.9635	2.0908	8.0229	6.1433	1.5982	1.415	1.2736	0.7558			0.637257	2.93485
15.6075	8.9939	5.8121	0.9133	1.2339	2.7523	4.6455	1.0465	1.0431	1.1683	2.3706	6.6907	3.7703	3.4133	3.7839	9.1862	1.5885	1.13	0.9574	1.1716	1.1911	1.5066	4.8955	1.3206	0.9486	1.8329	1.4209	2.5772	7.7999	6.1607	1.3696	1.0457	1.2417	0.8316			0.642157	2.90345
15.7266	8.0381	6.1447	1.359	0.9571	3.035	4.3285	1.2278	1.1186	1.4473	2.596	5.3443	4.0558	3.1124	3.4666	10.2106	2.1242	1.0938	1.0551	0.9701	1.1836	1.3166	5.3897	1.256	1.2547	1.8125	1.3334	2.7168	7.9896	5.0934	1.2476	0.8568	1.4724	1.1961			0.647057	2.90316
15.8458	7.4621	4.5777	1.6008	0.8395	2.264	4.4284	1.2906	0.7343	0.7967	2.4255	6.5408	3.694	3.5214	3.39	12.1917	1.7208	1.2201	0.8323	1.3879	1.2936	1.5018	5.3259	1.1423	0.9282	1.8593	1.1508	2.1199	9.0206	5.0676	1.6367	1.4855	1.3994	0.8673			0.651962	2.90053
15.9649	8.9512	4.7892	1.8421	0.9665	2.2421	4.6971	1.3205	0.8742	1.1606	1.9988	6.4537	3.5174	3.9704	3.8043	13.1429	1.3392	1.5938	1.2851	1.4047	0.9607	1.831	5.1357	1.1912	1.1028	1.5522	1.4631	2.3231	8.8358	5.1471	0.9967	1.26	1.0067	1.4941			0.656862	3.01982
16.0841	9.3561	4.8678	1.5376	1.1897	2.2845	4.3977	1.2468	1.1933	1.3001	2.2742	5.864	3.5225	3.8027	4.3235	13.7118	1.2482	1.0731	1.228	0.8892	0.8101	1.5934	5.6606	1.3114	1.4431	1.3549	1.3703	2.6369	8.1605	5.0256	1.2744	0.9952	1.0765	1.1071			0.661766	3.00396
16.2032	8.5667	4.3177	1.5153	1.1499	2.3408	3.4886	1.3149	0.9723	1.0192	1.774	6.0022	3.0443	3.7893	3.2425	13.7381	1.6638	0.9294	1.055	0.9051	1.1809	1.2325	6.6023	1.8616	1.2518	1.3341	1.6439	2.3924	10.374	5.6502	1.2166	1.4375	0.7874	0.8013			0.666667	2.98775
16.3224	8.9782	4.2902	1.454	1.2047	2.295	3.2165	1.2142	1.117	1.2774	1.7988	5.8773	4.0175	3.8383	3.568	13.2798	1.8532	1.3676	1.065	1.0689	1.0105	1.5871	5.604	1.7168	1.2572	1.2161	1.4087	2.2579	9.9078	5.1854	1.4121	0.8853	0.985	0.8786			0.671571	2.97255
16.4415	8.5268	4.3654	1.3173	1.2155	3.1008	3.0995	1.3563	0.9278	1.352	2.1286	6.2017	3.7645	3.3265	2.9483	13.695	1.791	1.4124	0.9541	0.9792	1.214	1.9341	6.1431	1.4503	0.8434	1.8365	1.4188	1.9309	8.5446	4.1754	1.7612	1.0203	1.3141	0.9724			0.676471	2.94005
16.5606	8.1046	5.1099	1.1662	1.7696	2.9795	3.5198	1.3151	0.9087	1.4059	1.9573	6.8154	3.5825	3.1914	3.1446	14.5789	2.0687	1.0724	1.3267	1.0624	1.0176	1.5267	7.0206	1.397	1.5785	1.1014	1.226	2.3379	9.361	4.3734	1.4787	1.1849	1.0378	1.247			0.681372	3.05964
16.6798	8.7176	5.8569	1.6614	1.2452	3.4302	3.4128	1.1808	0.8221	1.5155	2.0443	7.3857	3.2342	3.7238	3.7708	14.5173	1.9271	1.2333	1.1221	0.9518	0.957	1.6583	6.5508	1.1962	1.0977	1.3917	1.4423	2.6838	10.7635	4.9775	1.4723	1.3525	1.0693	1.0779			0.686276	3.19526
16.7989	8.7796	5.7299	1.4338	1.3574	3.0278	2.6778	1.0681	0.8599	1.7014	2.4094	6.5087	3.9901	3.5512	3.5378	13.3978	1.7601	1.2362	1.3389	0.9786	1.0509	1.6269	7.5952	1.0932	1.321	1.2863	1.6515	2.2144	9.491	4.775	1.4318	1.0685	0.6897	1.168			0.691176	3.08509
16.9181	9.1944	4.6728	1.6945	1.1622	2.4237	2.8747	1.0264	0.7902	1.2909	2.3039	6.2621	3.6132	2.9764	3.2378	12.781	1.4929	1.1206	0.9618	1.1212	1.3253	1.6262	8.4579	1.312	1.3959	1.208	1.2573	2.0793	10.8568	4.998	1.4378	1.0691	0.8359	0.8707			0.696081	3.02215
17.0372	8.972	4.535	1.8636	1.2093	2.4912	3.0053	1.8617	1.0807	1.0481	2.0358	6.0124	3.6347	3.4113	3.7706	12.2746	1.1862	1.1884	1.0933	1.1107	1.4924	1.4232	8.4422	1.4237	1.4521	1.7367	1.3714	2.6156	10.2515	4.3857	1.5756	1.5483	1.3336	0.9149			0.700981	3.08339
17.1563	9.3587	4.7235	1.5756	1.0591	2.7047	3.2044	1.8375	1.0002	1.1975	2.0612	5.3429	4.2358	4.1153	4.1661	11.9596	1.198	0.9485	1.3761	0.9592	1.1622	1.9332	8.5655	0.9954	1.0883	1.3312	1.5626	2.7576	9.5251	5.1314	1.395	1.1645	1.3186	0.9488			0.705881	3.08798
17.2755	10.227	4.3597	1.8276	1.2172	3.16	2.9157	1.6241	0.9084	1.8785	2.148	5.0177	3.7052	3.4046	4.5338	12.6841	1.2842	0.8572	1.4103	1.1782	1.1171	1.6801	7.9696	1.1344	1.1522	1.5184	1.1733	3.2649	9.6893	5.9812	1.6625	1.2498	1.7186	1.0318			0.710786	3.17226
17.3946	11.42	3.9235	1.8549	1.2337	2.5667	2.5624	1.3669	1.3635	1.4622	2.007	5.0499	3.5152	3.1432	4.7075	13.5124	1.6136	1.1235	1.2088	1.4672	0.9187	1.5215	7.9987	1.264	1.4218	1.775	1.4733	2.316	9.7119	6.271	2.6452	1.8161	1.111	1.1168			0.715686	3.22615
17.5138	13.3693	3.6028	1.3916	1.3179	3.0564	2.7583	1.2709	1.3218	1.2528	2.2074	5.3346	3.3201	3.5706	5.1007	12.6846	1.2601	1.0703	1.1849	1.1009	0.8086	1.6159	8.6732	1.1704	1.3382	1.8577	1.3785	3.112	10.1754	5.8923	2.5755	1.1968	1.0533	1.3215			0.72059	3.28319
17.6329	12.426	4.6278	1.9341	1.4961	2.8539	2.4046	1.0383	1.0455	1.4371	2.1045	5.5891	3.8331	3.5577	5.8732	12.1323	1.5725	1.1449	0.9733	1.0995	1.2643	1.3932	9.654	0.8324	1.6282	1.8037	2.124	3.6843	9.9974	7.1515	2.7833	1.479	1.4157	1.6187			0.72549	3.45373
17.7521	12.6677	4.3076	1.7098	1.4245	3.4541	2.3817	1.0736	1.0171	1.1764	2.6681	5.777	4.4692	3.5125	5.4197	12.3178	1.394	0.9206	0.9986	0.996	1.2519	1.2054	10.4449	1.2465	1.6915	1.4099	1.9426	2.9845	11.5415	8.2447	2.3339	1.6325	1.0357	1.2989			0.730395	3.51365
17.8712	11.9874	3.5666	1.619	1.2276	3.2471	2.1877	0.917	0.87	1.0835	2.9687	6.3121	4.7795	4.1221	4.9274	11.2122	1.3212	1.2161	0.949	1.0984	1.2103	1.1882	10.3592	1.4153	1.4223	1.1797	1.6231	4.5579	11.9493	8.1834	2.4379	1.7009	1.208	0.9768			0.735295	3.4856
17.9903	12.7617	4.2835	1.69	0.9467	3.0521	2.1088	1.5911	1.0219	1.2631	2.5969	5.9115	4.3669	4.6613	4.5024	11.5801	1.2973	0.9858	0.8256	0.8523	1.1632	1.2029	10.028	1.437	1.5735	1.9853	1.483	4.2965	11.6259	9.2259	2.491	1.8597	1.8728	1.3568			0.740195	3.57274
18.1095	12.5495	4.7732	2.1191	1.1729	3.0156	1.876	1.6812	1.0724	1.3149	3.0462	6.379	5.2406	5.5587	5.0019	11.5982	1.1899	1.1177	1.2362	0.9793	1.0724	1.3714	11.4648	1.2656	1.5788	1.8541	1.7892	5.5931	11.2269	10.5702	2.4147	1.8893	1.4838	1.5708			0.7451	3.82023
18.2286	11.5276	3.8677	1.6183	1.2543	3.2069	1.7953	1.0392	0.765	1.5278	2.9702	5.3776	5.0115	4.9495	4.1172	10.7299	1.3382	1.2239	1.4758	1.0315	1.4413	1.678	10.6124	0.8786	1.192	1.5977	1.7359	7.0107	11.763	9.3838	3.0428	2.327	1.4919	1.6151			0.75	3.65447
18.3478	9.6345	3.6024	1.9116	1.4194	2.819	1.9533	0.8275	0.794	1.6976	2.6455	5.7564	4.9704	4.658	4.7431	9.8459	1.6518	1.2548	1.046	1.1325	1.1874	1.3943	9.7486	1.4938	1.5216	1.5142	1.6072	7.608	12.1058	9.7129	3.1317	2.8123	1.5925	1.4664			0.754904	3.61395
18.4669	9.2831	4.1983	1.9054	1.4478	3.0199	1.8727	1.129	0.9717	1.3541	2.9344	6.198	5.2652	4.0659	4.4897	10.0711	1.2625	1.0872	1.2695	1.3896	1.0923	1.2445	9.8952	1.2883	1.2805	1.4409	1.6844	9.1929	13.1575	9.4314	3.5723	4.0901	2.2904	1.6504			0.759805	3.77352
18.586	9.3715	4.6071	2.2491	1.6149	2.7051	1.6694	1.0267	0.9508	1.3484	2.8467	6.2773	5.4925	3.9629	4.3829	9.3409	1.3914	1.4849	1.277	1.3903	1.2393	1.3408	10.2837	0.8559	1.3364	1.6786	1.9835	11.4679	11.6998	8.4363	3.4634	4.4058	3.4656	1.9377			0.764705	3.84802
18.7052	10.0188	5.3112	2.1502	1.2072	2.7758	1.5758	1.2193	1.0828	0.918	3.0616	5.6175	4.5633	3.4539	5.1092	10.0032	1.4635	1.1541	0.9114	1.1944	1.4775	1.5678	11.7978	1.294	1.6141	1.5059	2.197	13.2411	11.0098	8.2123	3.795	6.1726	3.6854	2.5042			0.769609	4.02623
18.8243	9.6478	6.3141	2.3501	1.1603	2.945	1.9381	1.0923	1.2145	1.3017	3.1433	6.2597	3.9967	2.8323	4.4238	11.1953	1.5932	0.8579	1.0634	1.2823	1.2582	1.6209	13.5397	1.2545	1.828	1.935	2.1853	14.9421	13.1125	7.9122	4.4298	8.1339	4.6553	2.3393			0.77451	4.35632
18.9435	10.6519	5.7539	2.5958	1.0698	3.1009	2.2873	1.1747	0.8964	1.367	3.3508	5.2621	3.5172	3.0677	4.4423	11.0982	1.2886	1.0615	1.1413	0.9426	1.3271	1.7754	13.2677	1.1076	1.5257	2.2548	1.9461	15.1567	14.2889	8.9965	4.7039	9.1291	6.5406	3.1017			0.779414	4.52096
19.0626	11.3521	5.9992	2.208	1.1056	3.2251	2.6213	1.091	1.0534	1.3352	3.3437	5.0953	3.2478	3.4482	5.217	10.4779	1.4408	1.3664	1.07	1.1829	1.2935	1.5591	13.0311	1.7227	1.5244	2.383	2.9353	15.0447	15.4809	10.0636	5.3988	10.4808	7.5794	2.8927			0.784314	4.76578
19.1817	10.7401	6.7725	1.9237	1.4581	3.5657	2.6405	1.3822	0.9104	1.7295	3.537	4.5193	3.3528	3.1461	5.8194	9.8388	1.461	1.2309	1.1402	1.1246	1.6332	1.7577	13.4318	1.3882	1.443	2.924	2.871	14.8113	17.1746	10.3969	6.1075	11.6092	9.8465	3.7966			0.789214	5.01468
19.3009	9.6445	5.8313	2.799	0.9265	3.1922	2.4113	1.0568	1.0675	1.6446	3.0011	4.6206	3.1287	3.339	4.9956	9.3842	1.4728	1.3718	1.6308	0.9685	1.2	1.6843	12.5008	1.4779	1.7587	2.3941	3.5322	13.9643	19.4275	9.8844	6.7431	12.7701	10.7196	4.934			0.794119	5.01448
19.42	11.9442	5.3113	2.4065	0.9603	2.6441	2.4614	1.2385	0.8958	1.6511	3.4731	4.6643	2.9057	3.9117	4.3207	8.7672	1.8648	1.6673	1.6631	1.2142	1.3187	2.1341	12.6874	1.3389	1.6145	3.2528	4.5004	12.7383	18.1738	11.9313	8.0831	12.471	11.4907	5.8625			0.799019	5.19887
19.5392	12.7259	6.8342	2.2536	1.3032	3.0556	2.2918	1.055	0.9913	1.5031	3.8531	4.6326	3.014	5.5147	4.7648	8.8174	1.7757	1.4408	1.1646	1.6077	1.2581	3.2225	12.0085	1.4065	2.0561	3.4961	5.1196	11.6236	19.6005	13.3506	8.7267	12.3252	12.8873	6.9077			0.803924	5.53297
19.6583	11.9743	6.8007	2.1117	1.3985	3.792	2.5968	0.9911	0.9801	1.9127	4.5427	4.2068	3.227	5.3186	4.7929	8.8334	1.4156	1.3977	1.5149	1.4978	1.4462	4.4445	13.2548	2.0153	2.5032	3.7838	5.9426	9.1457	18.893	13.2518	11.0481	10.8861	13.7803	7.7765			0.808824	5.68113
19.7775	12.5774	5.8237	2.4974	1.4803	4.0549	2.5817	0.9737	1.1801	1.6237	4.779	4.7537	3.6621	5.8699	5.0677	8.6426	1.7818	1.4809	1.246	1.6243	1.9798	3.9876	12.8638	2.2912	1.9771	4.5625	7.977	6.8542	17.0795	15.0348	12.3576	9.7078	11.883	9.2929			0.813728	5.74393
19.8966	12.0515	6.4236	2.5803	1.613	3.4346	2.9847	0.9987	0.9077	1.7229	5.2243	4.5789	3.4075	5.4893	4.6053	9.1677	1.5204	1.4272	1.62	1.8901	2.2087	4.5896	12.6273	2.4659	2.5437	5.3164	8.2676	4.7845	15.4946	15.4404	12.1933	8.1767	10.8939	10.353			0.818628	5.66677
20.0157	11.4029	6.5739	2.5322	1.3815	3.7453	2.4919	1.2518	0.7503	1.9151	4.6454	3.5165	3.0858	4.3554	4.6134	7.694	1.5848	1.2892	1.4914	2.145	2.4064	4.6206	12.8321	2.728	2.2987	5.5584	9.8605	4.01	13.2721	16.113	13.3368	7.842	10.0326	12.1536			0.823529	5.56153
20.1349	12.4132	6.037	2.8738	1.2359	3.5648	2.4982	1.2108	1.1875	1.3688	4.3475	4.1417	3.2918	4.7912	4.6119	7.8068	1.6908	1.4285	1.6774	2.4065	2.3977	5.6001	13.7373	4.2081	2.6558	6.1822	10.4983	2.9427	11.5537	13.885	14.578	5.7077	8.4393	12.2867			0.828433	5.55323
20.254	12.7666	7.1342	2.7084	1.8061	3.7466	2.8729	1.0326	1.1235	1.8678	4.4674	3.6128	3.4369	5.23	5.0774	6.6177	1.6117	1.8613	1.7145	2.4665	3.5445	4.761	13.156	4.5568	3.383	6.6446	8.9421	2.0527	9.4528	12.6443	13.642	4.7145	7.2916	11.7397			0.833333	5.38426
20.3732	15.294	6.9696	2.7041	1.7521	4.3134	2.395	0.9065	1.3296	1.7911	4.9472	3.3542	3.7649	5.4154	4.6962	7.4898	1.6423	1.7672	2.1162	2.4544	4.5287	4.8422	13.3383	4.9442	4.324	7.2649	8.9133	1.5019	6.3737	10.738	10.3214	3.8979	5.5714	9.8801			0.838238	5.19828
20.4923	14.9442	7.0754	2.5963	1.5597	3.9755	2.9197	1.149	1.7645	1.7729	4.1248	3.5398	3.679	5.571	3.6603	7.0947	2.4308	1.1035	2.0236	2.9015	5.9373	4.8273	12.5212	5.5614	5.7462	6.096	6.7123	1.1336	4.6454	8.71	8.1018	3.1058	4.3181	9.8539			0.843138	4.88353
20.6114	15.9643	7.7913	2.2469	1.3877	4.019	3.226	1.277	1.3296	1.9218	4.0546	3.7006	3.6438	5.6657	4.1253	6.2865	2.3515	1.3249	2.285	4.6867	6.6531	5.8898	12.0326	6.5748	7.2472	5.8577	5.4963	0.8742	3.3248	8.0316	5.3223	3.0868	3.7076	7.6114			0.848038	4.81813
20.7306	16.1647	8.7559	2.2771	1.9794	4.394	2.8135	0.9675	1.2919	1.3937	4.2389	3.9515	3.9745	5.7686	4.4601	6.4324	3.3236	1.7793	2.2882	5.6587	7.4213	5.2848	13.2103	5.6236	8.6999	5.7085	5.0482	0.9279	2.3087	5.6536	3.1732	2.1448	2.6478	6.0434			0.852943	4.7215
20.8497	16.8972	8.4859	2.6427	1.6457	4.7494	3.158	1.2482	1.1697	1.7438	5.7008	4.2305	4.2007	5.9892	3.9127	5.6121	2.6355	1.8267	3.4721	5.6498	8.3068	6.2656	12.9778	6.708	11.0551	5.2406	3.2518	0.7176	1.9494	5.2441	3.1235	1.4594	2.3912	4.5499			0.857843	4.79429
20.9689	16.6789	9.2871	2.465	1.6484	3.8723	3.5923	1.2548	1.2329	1.8367	4.8784	3.8534	4.778	6.8248	4.1038	5.7648	3.3927	1.7033	4.4382	6.4613	8.345	5.8859	13.1131	7.5516	12.0944	5.1331	2.1036	0.4653	1.6416	2.9242	2.65	1.4849	2.1846	3.6429			0.862747	4.76628
21.088	15.8611	9.8057	2.5303	1.9751	4.408	3.3702	1.3117	0.9985	2.0344	4.7407	4.0885	4.932	5.5975	4.5654	5.933	4.5266	2.6042	5.1663	6.5237	7.6908	6.0297	12.4854	9.6585	11.7383	3.8753	2.0616	0.6096	1.2036	2.1393	2.1788	1.0383	1.6573	2.9296			0.867648	4.73542
21.2071	17.8995	10.0038	2.306	1.3092	4.0395	3.2322	1.1359	0.8815	2.4218	5.2585	3.9233	5.008	5.5566	4.5387	5.8867	5.2022	2.863	6.2847	6.3757	6.2061	5.6173	13.3269	10.3679	11.9104	2.6567	2.071	0.435	0.7981	1.8713	1.7046	0.9718	1.531	2.2004			0.872548	4.72107
21.3263	18.8511	9.9064	2.7955	1.3217	4.8259	3.586	1.0343	0.8799	2.2996	5.1797	3.3261	5.0978	5.3762	5.8812	4.8936	6.5301	2.5221	8.0028	5.5175	4.3709	4.1422	13.3685	10.3531	11.1827	2.1369	1.2904	0.2715	0.6303	1.9306	1.41	0.8296	1.0147	2.2574			0.877452	4.63686
21.4454	21.1169	9.9122	2.8875	1.7433	5.8454	3.7798	1.0587	1.0223	2.791	5.8692	3.5467	6.1281	4.5942	5.6076	4.7073	7.2702	3.6769	10.2932	4.5159	4.1312	3.1054	13.0682	10.1634	11.221	1.4947	1.043	0.2631	0.9362	1.3352	0.6189	1.0791	0.8473	1.9233			0.882352	4.77565
21.5646	24.0572	10.4436	2.989	1.9376	7.3907	4.0757	1.0889	1.3189	2.8131	5.5287	3.3468	6.603	5.077	5.4636	5.7833	7.1315	3.9517	11.7247	3.2739	2.5628	2.294	12.6452	9.701	10.4644	1.4874	0.8167	0.269	0.7206	0.9083	0.6178	0.8827	0.6929	1.6672			0.887257	4.84027
21.6837	26.3415	11.4333	2.358	1.9229	7.1865	3.355	1.2513	1.356	2.7919	5.4317	3.7334	5.3216	4.7504	5.925	6.7103	8.4757	4.8068	13.0379	3.0223	1.8052	1.6889	12.0544	10.3487	8.9282	1.4145	0.7385	0.4421	0.6505	0.6337	0.762	0.5198	0.5874	1.2093			0.892157	4.87863
21.8029	27.9776	14.2083	2.1657	1.6303	7.4958	3.8746	1.2657	1.147	3.1367	4.7541	3.9005	5.2389	4.2428	5.9555	7.0737	7.7584	6.4155	11.1105	1.9022	2.0071	1.583	11.6318	9.8336	8.4474	1.2737	0.519	0.393	0.4202	0.6864	0.586	0.5057	0.6837	0.763			0.897061	4.86628
21.922	30.8701	15.1441	2.7959	1.9997	8.1509	3.9653	1.0975	0.6506	2.5324	5.0787	3.4341	5.2982	4.6215	5.6841	7.3941	6.6535	6.637	9.0683	1.7071	1.5484	1.5318	9.4177	7.1469	6.397	0.9989	0.4149	0.182	0.5484	0.3897	0.6535	0.6011	0.7061	0.4696			0.901962	4.66028
22.0411	32.4459	17.7693	2.3248	1.6029	8.2381	4.0523	1.0607	0.9415	2.4595	5.0674	3.8423	6.2249	3.8706	6.1952	9.9989	5.4332	5.6855	5.5381	1.4682	0.9625	1.3249	7.9643	6.1329	4.2752	0.3878	0.46	0.1176	0.5273	0.4635	0.5631	0.5475	0.3405	0.3034			0.906862	4.50272
22.1603	34.3685	17.8306	2.4822	1.7534	8.7895	4.1603	0.8938	0.9353	3.3658	4.4414	3.9806	5.3038	3.6295	5.9249	11.8304	4.334	4.1556	3.9512	1.0907	0.9739	1.0993	6.6407	4.4647	3.2427	0.4653	0.4231	0.1347	0.3073	0.3362	0.3805	0.2993	0.2148	0.3141			0.911766	4.31873
22.2794	33.9009	19.7582	2.602	1.803	9.86	5.3617	1.6391	1.2562	4.1617	4.2177	3.2991	4.8989	3.6798	6.6099	12.1553	3.6706	3.3081	3.2374	1.1304	0.6281	0.9673	5.2053	3.2439	2.4261	0.5182	0.3522	0.0825	0.2654	0.2996	0.3698	0.1966	0.0808	0.2747			0.916667	4.28668
22.3986	28.9471	20.9108	3.2073	1.6572	11.4414	6.0867	1.217	1.4336	4.9721	4.7036	3.8966	5.3657	3.9983	6.3064	12.3099	2.7346	2.6027	2.7669	0.7034	0.5584	0.5575	3.215	2.226	1.9945	0.3007	0.3005	0.1919	0.2447	0.1145	0.3792	0.161	0.0395	0.2354			0.921571	4.11455
22.5177	25.7092	19.9262	3.7289	2.0645	10.7015	6.5656	1.2173	1.2136	4.5282	4.9417	3.9236	5.4684	5.746	7.4074	11.9949	2.0062	2.0698	2.2772	0.4623	0.9604	0.6534	2.2445	1.9728	1.4901	0.315	0.3607	0.2116	0.1414	0.0674	0.1945	0.2046	0.2673	0.1818			0.926471	3.9763
22.6368	19.4074	22.9112	4.8836	2.2436	11.9547	7.7547	1.0195	0.939	6.0921	4.6458	3.0109	4.711	5.888	8.1809	10.5549	2.0181	1.531	2.2557	0.6418	0.7606	0.5079	2.1757	1.4622	1.2482	0.3656	0.3153	0.1383	0.2004	0.1555	0.2882	0.0783	0.2064	0.1462			0.931372	3.89978
22.756	14.99	23.558	5.1639	1.9339	11.2903	7.3511	1.123	1.0701	4.7814	4.3171	3.5568	4.9512	6.0084	10.1657	10.8932	1.4491	1.2993	1.5782	0.6711	0.5156	0.329	1.812	1.3541	0.9097	0.2135	0.1947	0.0898	0.2096	0.1739	0.226	0.1105	0.422	0.2587			0.936276	3.72639
22.8751	11.4705	22.2312	4.5824	2.1863	11.8294	7.7649	1.249	1.1128	5.944	3.4858	4.0394	5.1727	6.7779	11.1759	9.9165	1.2987	0.9384	1.2147	0.3509	0.4228	0.211	1.5265	0.9905	1.1691	0.3032	0.0204	0.0783	0.2167	0.3294	0.131	0.1921	0.2379	0.176			0.941176	3.59837
22.9943	8.6899	22.5449	5.0295	2.3337	11.8847	7.9707	1.3179	1.2845	5.8006	4.1435	3.6749	5.4736	6.8293	11.4461	7.3866	1.1406	1.096	1.3989	0.38	0.5376	0.2283	1.3346	0.6967	0.811	0.122	0.0941	0.081	0.1506	0.1984	0.2152	0.1289	0.0945	0.0868			0.946081	3.4729
23.1134	5.1035	23.0076	5.6459	2.657	11.9547	9.7818	1.0814	0.9782	5.8234	4.3913	3.8737	5.9573	7.2931	14.7527	5.6536	1.0737	0.9773	0.7799	0.6057	0.5411	0.5196	0.8834	0.68	0.6979	0.1381	0.102	0.1041	0.133	0.1638	0.1089	0.1241	0.1805	0.0764			0.950981	3.51045
23.2325	2.9522	19.2447	6.6957	2.3113	13.6371	11.6127	1.3355	1.3017	6.1452	3.5761	3.587	6.2977	8.6206	14.1134	3.3398	0.7646	0.6986	0.8542	0.51	0.3885	0.4372	0.7976	0.678	0.6332	0.1297	0.1088	0.0497	0.0513	0.2523	0.1127	0.1833	0.3281	0.0698			0.955881	3.38843
23.3517	2.6247	17.3628	7.7374	2.5905	16.2369	13.8453	1.5015	1.4254	5.9245	3.6311	3.4729	5.9325	7.8323	14.4945	2.033	0.7552	0.4133	0.8075	0.4246	0.3644	0.2146	0.9398	0.6495	0.5616	0.2058	0.1628	0.0835	0.0931	0.2403	0.1544	0.0987	0.2118	0.1003			0.960786	3.42808
23.4708	2.3071	12.9341	9.3712	3.1238	18.3741	15.3569	1.8602	1.3203	6.8703	4.7834	2.9744	5.2318	7.1272	14.1996	2.2543	0.4174	0.3533	0.6432	0.2371	0.1839	0.1077	0.7445	0.5727	0.3288	0.2005	0.1154	0.2257	0.1845	0.2512	0.2163	0.0768	0.1653	0.0848			0.965686	3.43024
23.59	1.7442	9.6371	10.9254	2.9966	19.1492	15.0725	1.7249	1.3285	7.642	3.6945	3.1038	5.7292	6.791	16.4246	1.9213	0.581	0.5854	0.404	0.3262	0.2752	0.293	0.8143	0.3932	0.289	0.0871	0.1174	0.3054	0.0717	0.097	0.0389	0.1822	0.1419	0.036			0.97059	3.42193
23.7091	1.6999	6.2934	11.6377	3.6987	16.8016	14.9169	1.6587	1.6486	7.3544	3.0906	3.2476	5.756	7.92	17.2258	1.5515	0.5845	0.2618	0.2138	0.3397	0.1486	0.2135	0.5768	0.3152	0.2095	0.1424	0.2152	0.1509	0.0747	0.0894	0.0519	0.1536	0.1166	8.666e-05			0.97549	3.28362
23.8283	1.2942	5.0601	12.9122	3.4989	14.8592	12.4572	1.8972	1.9816	7.081	3.3058	2.9904	5.3045	8.4076	17.9722	1.2926	0.2956	0.4365	0.3402	0.214	0.1838	0.1843	0.4404	0.31	0.2647	0	0.1652	0.0103	0.0403	0.0718	0.0601	0.2082	0.059	0.0592			0.980395	3.14116
23.9474	1.4462	3.9011	12.9298	3.5491	12.9727	10.2017	2.1854	2.0527	8.2609	3.9735	2.9851	6.7952	8.9576	19.7101	1.2371	0.1727	0.4778	0.1539	0.2603	0.1745	0.272	0.5218	0.2362	0.2823	0.0154	0.1183	0.0077	0.079	0.1229	0.0499	0.0431	0.1153	0.0969			0.985295	3.16237
24.0665	1.273	2.4767	14.2076	4.0897	9.797	7.6511	2.8661	2.4931	9.5125	3.2569	3.3734	8.7984	9.1964	18.0912	0.8792	0.1606	0.1523	0.3761	0.1611	0.1031	0.4432	0.205	0.0717	0.2903	0.0502	0.077	0.0718	0.0341	0.071	0.057	0.0369	0.082	0.1127			0.990195	3.04601
24.1857	0.6812	2.5228	15.6481	4.7083	6.5911	6.2365	2.9765	2.7208	10.8348	3.6814	3.8906	10.718	10.577	16.2239	0.8809	0.1283	0.2171	0.1723	0.0926	0.1863	0.2789	0.1645	0.0797	0.1605	0.0511	0.0157	0.0885	0.1452	0.1268	0.0199	0.0385	0.1285	0.047			0.9951	3.06162
24.3048	0.723	2.1301	17.0508	4.3303	4.7932	4.9459	3.1514	3.4082	10.3971	4.1241	2.937	12.2644	9.9287	15.2684	0.4999	0.059	0.1828	0.0172	0.0386	0.1273	0.0984	0.2134	0.0893	0.1077	0.0998	0.0071	0.0286	0.1339	0.0955	0.0714	0.1011	0.0314	0.0355			1	2.95426

## Sheet: Image64
X0	Y0	Y1	Y2	Y3	Y4	Y5	Y6	Y7	Y8	Y9	Y10	Y11	Y12	Y13	Y14	Y15	Y16	Y17	Y18	Y19	Y20	Y21	Y22	Y23	Y24	Y25	Y26	Y27	Y28			Ap-Basal to 1	Average intensities
0	5.3776	11.1053	8.6762	8.2855	7.7883	4.9392	2.2341	2.1655	2.8204	3.8751	3.8083	6.7445	6.6813	7.5348	10.6556	7.1712	10.4016	12.4125	11.3317	14.2884	8.7953	8.6546	5.5522	18.9957	9.7058	12.25	13.8421	20.7957	10.3872			0	8.87158
0.1191	5.4853	11.5327	8.7846	9.7224	7.9263	4.5573	2.259	1.9219	2.3419	3.8516	5.598	7.3589	7.5943	6.5652	10.0864	8.7708	10.8248	14.5868	14.1614	14.3981	8.2033	9.1364	6.3034	19.6667	11.5371	12.3567	14.1952	19.2193	10.2396			0.00487635	9.28226
0.2383	5.9766	14.5503	9.1045	11.0355	8.2926	6.2714	2.1949	2.5425	2.164	3.7181	6.3926	7.1516	8.4225	6.2893	10.9862	7.9653	12.5015	14.7246	16.3287	14.4129	7.5783	9.4822	7.212	21.8152	14.1533	15.5505	15.879	19.3626	9.5705			0.0097568	10.0562
0.3574	5.577	15.8973	11.2973	10.6961	9.0737	7.6752	2.5303	2.5309	2.6916	3.8916	7.7729	8.0558	9.0872	7.2792	11.8373	9.8008	14.1971	13.9302	19.0364	15.2266	8.1096	10.4914	7.9108	23.8761	16.7117	17.8802	17.6988	23.3775	12.2045			0.0146331	11.2533
0.4766	6.0692	16.9071	12.0649	10.49	10.0848	8.8894	2.7051	2.8376	2.5402	6.8392	7.922	9.4542	10.5483	7.6885	11.5705	12.4639	15.9347	14.9946	23.2895	16.8645	8.0297	11.9432	8.5523	24.0657	18.6855	20.1236	20.5148	22.9023	12.3091			0.0195136	12.3202
0.5957	5.9677	17.4781	13.8332	12.3695	11.1904	10.3646	3.8374	3.3592	3.014	8.1502	9.4209	12.3735	12.474	9.2177	12.5065	13.4364	18.0277	16.371	28.6091	21.4387	10.7656	11.1658	9.254	29.0211	21.068	23.5953	21.3527	25.5796	13.4324			0.0243899	14.0922
0.7148	7.0854	20.3508	16.0367	12.1291	12.3942	12.2967	5.6376	4.0012	3.6592	8.6652	11.6175	12.9382	13.7054	10.6728	16.0562	14.6737	21.5868	16.9946	34.2523	25.7835	12.2816	12.5322	11.2152	32.5038	22.5283	23.1008	24.3506	25.2244	15.1337			0.0292663	15.8416
0.834	8.179	22.0923	16.6496	14.846	12.1261	14.6111	8.1056	4.6399	4.455	10.9905	13.8812	16.7022	16.6743	16.2017	18.7943	14.7183	23.0775	17.6602	38.7215	28.7592	13.4035	12.9444	12.7703	33.7205	25.3688	20.9895	24.5728	26.1526	17.0368			0.0341467	17.5464
0.9531	9.4909	23.355	18.466	14.8221	13.0933	14.7297	9.8933	6.2603	5.8904	14.1757	13.9534	18.6855	19.1133	19.4511	21.7052	17.3814	26.3151	20.4057	39.9158	32.6179	15.5851	14.6985	14.9174	36.4703	27.0065	22.4688	30.5632	28.5634	18.2697			0.0390231	19.5953
1.0723	12.5021	23.2665	20.2271	16.5239	15.6705	15.9814	12.1738	7.9664	7.5545	16.5796	15.7173	20.7923	20.4412	23.048	25.9189	18.6445	27.1329	19.8863	40.2586	33.7222	17.5442	17.6931	17.9586	35.9817	29.7237	23.202	31.8026	28.0271	17.3574			0.0439035	21.1482
1.1914	13.0696	24.3843	20.7673	19.6464	17.4892	13.6915	13.1288	7.5694	10.295	16.9249	16.618	24.3138	22.5029	24.9881	29.8232	17.8959	27.1477	22.5995	41.8028	35.2841	18.986	20.3592	21.6886	35.7041	32.2195	25.4548	35.1549	30.5237	19.5505			0.0487799	22.7443
1.3106	16.2334	24.9635	23.9711	21.5295	18.8671	13.6504	14.4047	8.7902	12.5262	20.2493	18.5662	27.432	23.9147	24.0417	31.5977	20.5976	28.6863	23.7487	39.7175	35.4493	19.6147	20.5348	26.5588	40.0634	32.664	22.1185	37.1949	33.5793	20.1314			0.0536603	24.1861
1.4297	18.3513	25.3368	25.0196	23.9005	20.6969	14.9574	13.7469	9.9325	14.7425	20.6799	18.4893	27.0683	23.8818	21.3255	30.7788	20.8083	25.0886	26.2379	38.0458	34.4377	23.1791	20.4559	29.3253	39.3865	34.506	22.6844	39.2018	34.225	20.9084			0.0585367	24.7379
1.5488	19.0808	25.2001	27.1206	26.2276	22.6392	13.9632	14.308	10.4862	16.3992	19.7915	18.8015	29.4244	20.7357	19.0182	29.7931	25.2492	23.5859	25.1077	39.2705	35.0469	22.9223	21.6785	34.2063	36.8144	38.2097	21.3467	38.545	33.1583	22.197			0.063413	25.1837
1.668	21.0735	27.9162	24.7767	28.4435	23.3882	13.4799	15.1172	11.5816	17.1554	18.9914	17.5811	30.0571	20.7504	16.4094	24.862	25.9872	24.3611	28.0132	35.5893	31.8226	26.4707	22.4016	35.9776	35.957	37.4174	24.41	35.3391	30.9476	21.6247			0.0682935	25.1001
1.7871	23.0721	25.3464	24.337	29.3495	24.439	11.9307	13.9985	11.9588	17.0013	16.6785	17.3384	34.2347	19.5735	14.908	23.9175	24.9902	21.8501	30.9319	38.2064	30.8382	28.5746	25.6783	39.0992	34.6143	38.0664	26.3957	32.5809	30.1514	21.1868			0.0731698	25.2155
1.9063	25.2523	22.6621	23.0177	32.0977	25.8919	11.695	13.2264	13.245	16.7555	12.2643	15.4957	31.9451	19.2901	12.452	21.4328	25.2177	19.9101	31.8863	34.5541	26.5045	29.3919	25.1839	43.4975	27.6822	38.3158	24.5571	29.9286	28.2646	21.1773			0.0780503	24.2343
2.0254	26.5177	21.5535	20.9995	33.1477	25.1017	10.7876	11.062	12.2842	14.5871	9.8186	14.4383	28.5242	18.3184	12.6959	18.8233	27.7817	20.134	29.9407	32.0258	23.8598	30.2568	26.8944	43.408	22.4111	36.6549	22.9813	26.244	26.6045	21.8374			0.0829266	23.0929
2.1445	28.8551	20.1851	19.1259	31.3985	23.9561	9.8775	9.7586	12.9719	13.6281	8.4194	13.2428	30.395	16.1911	12.0986	18.5172	29.3781	18.0588	32.8736	26.9849	21.4774	28.0341	28.961	43.4313	21.2935	34.9918	22.874	23.1782	27.4932	23.5489			0.087803	22.4552
2.2637	31.0701	17.0535	17.9405	30.036	25.0364	9.3361	10.0863	11.8455	14.4782	6.6728	11.9785	28.6304	14.8206	11.6014	18.804	28.5582	18.9547	33.3507	25.8985	21.3758	28.3125	30.7931	38.2157	14.8043	34.4776	21.4535	21.5468	23.3588	24.3966			0.0926834	21.5478
2.3828	27.6387	14.2087	14.508	30.4442	23.3166	8.8753	9.2105	9.7854	13.882	5.9435	10.874	25.7212	13.1091	11.3587	18.7034	28.5888	18.0991	33.0548	25.1026	20.2681	26.9214	28.2496	31.4395	13.1231	30.5806	20.7223	19.3731	21.6201	24.3945			0.0975598	19.9695
2.502	27.576	12.8429	13.9132	28.0539	22.5076	9.0824	7.5652	8.6108	12.8374	4.3955	11.1526	23.8737	13.995	11.0501	19.7849	31.2928	19.1215	32.8454	23.1909	17.4948	24.3993	26.5565	21.6061	11.9735	27.5636	22.4783	18.2959	18.7067	24.9269			0.10244	18.886
2.6211	31.9955	10.7908	11.9077	25.7697	22.4835	7.8627	8.0725	8.2131	10.7585	3.8927	9.6689	21.8223	14.0225	10.1796	20.0467	30.6242	18.7376	27.0447	19.4	16.1908	23.9743	24.9402	18.0804	11.2822	24.7584	22.9822	18.2237	17.7737	22.7934			0.107317	17.7342
2.7402	28.2101	9.8772	8.9435	26.528	19.6562	7.0548	8.0355	6.6129	10.0258	3.5607	9.9831	20.0237	13.4177	9.8804	18.6616	29.2502	20.7863	24.1911	18.0943	16.2107	22.7776	24.4449	13.9513	10.7402	22.6705	20.2009	15.741	17.6101	24.6863			0.112193	16.6147
2.8594	24.1097	6.3193	7.8273	25.621	20.9943	7.1279	7.2419	6.0545	7.6979	2.9774	8.3285	18.1184	13.3333	10.1217	17.6792	25.6773	21.4737	25.9684	16.3486	14.4755	19.8146	22.7386	10.8976	8.1817	19.8463	19.5127	14.6864	16.1746	24.2809			0.117073	15.2976
2.9785	21.1322	6.4237	7.367	24.5372	18.7599	7.2388	6.7883	5.3974	7.0223	2.8566	6.9831	14.9385	14.2623	10.6029	17.0173	23.6855	19.7015	25.0015	14.538	13.2746	16.141	19.9089	9.1298	7.433	18.9423	21.983	13.7629	14.3176	23.5314			0.12195	14.2303
3.0977	19.0309	5.6824	5.8772	25.4467	17.9664	6.6248	6.7522	5.0358	6.3248	3.4848	6.4782	12.202	13.5168	11.728	17.1394	24.0504	17.8797	21.1878	12.2595	11.0988	14.7806	16.8722	6.3749	8.0788	17.0443	20.4557	13.4389	13.7681	24.1416			0.12683	13.2663
3.2168	15.2614	4.8522	4.5806	22.4767	16.387	6.2029	6.5433	5.0184	4.6577	3.2183	5.3526	9.6767	13.7273	10.9366	16.8903	23.6504	18.9407	18.4898	11.1132	11.2724	14.281	13.2548	6.3599	6.3862	15.3696	19.2379	13.0158	12.4286	24.4816			0.131707	12.2091
3.336	11.9764	3.7075	4.0445	20.2137	17.7035	5.9286	6.734	5.676	4.102	2.6262	5.4027	7.6054	12.7367	10.8269	17.3315	21.8266	19.8614	15.771	9.4595	10.7438	13.5518	11.1668	6.5889	5.6883	13.9671	17.4113	13.0774	11.9148	24.9185			0.136587	11.4677
3.4551	8.6473	3.3564	3.5488	17.3128	15.5638	4.76	5.9589	5.4415	3.1496	2.5256	4.6005	5.9734	11.3831	11.5942	15.4496	23.2634	20.1582	12.4927	7.6138	9.8062	11.4415	9.7019	5.6938	4.6679	14.3908	14.3648	13.6995	11.9762	24.3176			0.141463	10.4432
3.5742	6.7241	2.9026	3.3339	18.8147	14.4687	4.8414	5.6053	4.5462	3.2507	1.9122	3.3773	6.0294	10.8244	9.4092	14.2942	24.9475	20.5864	9.9933	5.8407	8.2592	8.0684	8.2291	5.1911	4.1155	12.8679	12.6532	14.9486	13.2724	26.4021			0.14634	9.85206
3.6934	5.9548	2.3321	2.2848	16.0893	13.6939	4.8531	4.5473	4.2904	2.8784	1.6093	3.794	4.4858	10.1711	8.8496	14.3832	25.1693	21.231	6.3447	4.8408	7.8443	7.7958	7.823	4.4957	4.8566	11.643	11.542	12.7905	12.9447	26.8244			0.15122	9.18493
3.8125	3.8101	1.9728	2.4963	12.0173	13.6271	5.1451	5.2277	5.8009	2.3827	1.6134	2.7513	4.0056	8.8994	7.8076	13.9417	22.6426	20.2357	5.1575	3.8651	6.4394	6.6362	7.1919	5.018	3.9452	11.5736	9.4767	12.4362	13.4228	27.6385			0.156096	8.52339
3.9317	3.061	1.9713	2.2707	10.7571	11.8787	4.2746	3.5961	4.5498	2.2567	2.0614	2.5007	4.0828	7.7902	9.0461	13.1603	21.3996	20.7377	3.7778	3.6378	5.8959	6.0067	6.4884	3.8961	4.4525	9.8635	8.4898	13.8115	12.1097	26.0351			0.160977	7.92619
4.0508	2.6525	2.1929	2.3529	9.4895	11.7606	4.1133	3.2233	4.6364	2.0158	1.7422	2.098	2.8611	8.0122	8.7087	13.5561	20.3382	19.4113	3.6356	2.5246	4.3935	5.1608	5.8288	4.3233	3.4552	7.8021	8.0599	14.1945	13.0613	23.6774			0.165853	7.42352
4.1699	1.973	2.069	2.4237	8.103	12.615	3.6339	3.4064	5.0197	2.3545	1.7311	2.0162	2.3433	7.6882	10.6476	14.4282	20.6718	17.6074	3.8939	2.1509	3.7367	4.6785	5.493	3.6419	3.4222	7.1191	6.8315	13.3616	14.076	27.7755			0.17073	7.41079
4.2891	1.7175	1.5133	1.7447	7.6417	10.5771	3.5176	3.2785	4.8743	1.5918	1.5603	2.071	2.2549	6.9255	10.1105	13.4755	21.1173	14.313	3.2918	1.7696	2.9593	3.8238	5.2218	3.338	3.396	5.4979	4.9827	13.5558	14.2968	26.3073			0.17561	6.78363
4.4082	1.6654	1.3636	1.7114	5.1271	10.684	3.5123	2.9788	3.8127	1.1417	1.5324	1.2691	2.4403	6.1604	9.6291	14.3512	21.1305	10.8223	3.2259	2.0355	2.8132	3.1683	4.3234	2.975	2.7072	3.9377	4.915	13.055	14.2882	27.8658			0.180486	6.36698
4.5274	1.8896	1.5291	1.884	4.5543	8.8756	3.9486	2.2946	3.645	1.6936	1.4149	1.6629	1.9066	4.7676	10.7789	13.2876	20.4835	7.6632	3.3368	1.9451	2.37	3.398	4.2028	2.5142	2.7498	3.1163	4.1257	12.2568	13.5817	27.7383			0.185367	5.98673
4.6465	1.5853	1.6493	1.7232	3.425	7.481	3.4585	2.8214	4.0832	0.8814	1.7838	1.7729	2.3296	4.1229	10.7165	13.4449	18.5097	5.4238	3.5482	1.5418	2.4117	3.1201	5.2963	2.3201	2.2924	3.0105	3.3433	13.2948	14.2661	27.5711			0.190243	5.76651
4.7657	1.2573	1.4883	1.5514	3.4919	5.6639	2.6887	2.7487	3.3537	1.0031	1.5717	1.4015	2.0658	3.5167	10.5883	14.5234	17.1597	3.7715	3.135	2.0707	1.9188	2.7084	4.8583	2.2668	1.7556	2.3632	3.7685	12.0562	14.7915	28.5246			0.195124	5.45046
4.8848	1.336	1.4968	1.4587	2.4676	4.2545	2.8002	2.7323	2.9413	1.2718	1.0544	1.0424	2.2595	2.9708	10.4427	13.5684	16.1115	3.1513	3.4771	1.6667	2.3401	2.7319	3.6295	2.2468	2.0436	2.0365	2.8741	11.025	15.1782	29.3701			0.2	5.17172
5.0039	1.9202	1.3521	1.3124	2.5775	3.428	2.8142	2.21	3.0174	1.4264	0.9881	1.4221	1.9282	2.7587	10.3158	12.8415	16.4156	2.617	3.4148	1.9787	2.0769	2.4253	3.2403	2.1052	1.7066	2.4108	2.9052	12.3255	16.1136	27.8439			0.204876	5.09972
5.1231	2.0233	1.1702	1.2725	2.1396	3.1754	2.6177	2.5775	2.9345	1.0119	0.9338	0.9023	1.8974	2.073	11.0108	12.0316	13.0213	2.5644	3.1934	1.5617	1.5943	2.1779	3.7622	2.0752	1.3875	1.8722	2.3654	13.8171	15.6027	27.0914			0.209757	4.8227
5.2422	1.5107	1.1621	1.1186	1.805	2.935	2.7085	1.8802	2.4518	1.2659	0.8822	0.9482	1.6636	1.8083	10.3457	10.7691	10.7799	2.7452	3.0368	1.2835	1.8883	1.8651	3.7571	2.0588	1.4276	1.6587	2.2142	12.3115	16.9371	26.4271			0.214633	4.53951
5.3614	1.2177	1.3538	1.3228	1.8265	2.5044	1.6675	1.9845	2.7779	1.4167	0.7715	0.6124	1.9465	1.5081	9.3496	10.8827	9.5359	2.2703	2.7726	1.2036	1.4945	1.7906	3.817	1.5569	1.3748	1.6332	2.0885	8.4714	17.4804	25.2861			0.219514	4.20408
5.4805	1.5658	1.1247	1.1726	1.9765	2.3974	1.788	2.0763	2.5851	0.927	0.5009	0.5681	2.2949	1.4625	8.7369	10.062	9.2967	2.0738	2.6394	1.4671	1.5683	1.6982	4.0041	1.3316	1.3443	1.8051	1.9525	7.2281	18.0634	23.1146			0.22439	4.02848
5.5996	1.5428	1.3696	1.3809	2.2453	1.8073	1.5989	2.0781	2.4437	0.7583	0.8115	1.0063	1.9784	1.3811	6.5984	9.5388	6.4668	2.2344	2.9626	1.7195	1.2698	1.7901	3.5422	1.8265	1.1634	1.6291	1.8816	5.6564	17.6042	20.4403			0.229266	3.68022
5.7188	1.4679	1.3684	1.1157	1.8401	1.9116	1.9121	1.7083	1.9841	0.8983	0.6885	0.6898	2.2615	1.3446	4.8376	8.4039	4.0492	2.4272	3.1393	1.6351	1.4757	1.608	4.1092	1.3701	1.1996	1.7538	1.8076	5.1785	16.2066	17.2275			0.234147	3.29723
5.8379	1.7365	1.1933	1.3943	1.552	2.0446	1.956	1.6462	2.1937	1.1276	0.6389	0.4835	1.9061	1.2509	2.862	6.924	3.0694	2.1158	3.0782	1.1629	1.0073	1.5394	3.9522	1.4104	1.4331	2.1975	2.4151	3.8787	15.8379	16.9302			0.239023	3.06682
5.9571	1.6083	1.1173	1.5101	1.879	1.4809	1.5861	1.9416	2.0909	0.7884	0.9176	0.7742	2.1343	0.8971	2.4716	5.5437	2.7373	1.7395	3.2827	1.2921	1.2301	1.6868	3.4763	1.6338	0.9459	2.0545	2.481	3.4524	15.1497	14.5247			0.243904	2.84234
6.0762	1.6973	1.3089	1.6612	1.6956	1.709	1.5454	1.748	1.5513	0.7269	1.1748	0.6616	2.3743	1.0555	2.6504	4.2411	2.9917	1.9606	3.4735	1.3239	1.1704	1.3995	3.795	1.4734	1.393	1.5597	2.5353	2.4637	13.5023	11.7548			0.24878	2.64131
6.1953	1.5809	1.2138	0.9555	1.4094	1.9053	1.6441	1.3799	1.5428	0.6879	0.6362	0.5993	2.7163	0.8405	2.1857	3.6941	2.4647	2.0347	4.2598	0.983	1.5686	1.6503	3.8535	1.1586	1.3874	1.59	2.2503	3.3208	12.0204	8.2565			0.253656	2.40656
6.3145	1.4942	1.1752	1.0752	1.6126	1.8821	1.3697	1.6442	1.5315	1.0288	0.9186	0.6695	2.6817	0.844	1.7608	2.9396	2.607	1.7416	3.5837	1.1952	1.5256	1.5196	2.8873	1.0182	0.7237	2.4694	2.208	2.3074	9.6535	7.8733			0.258537	2.20487
6.4336	1.5998	0.9705	0.8204	1.5596	1.8038	1.144	1.4531	1.6942	0.9351	0.7718	0.6941	2.889	0.6685	1.4297	2.5074	2.3721	1.7787	3.0504	1.2248	1.1876	1.4317	3.3847	0.9432	0.9298	2.273	2.3641	2.1623	7.9745	6.8579			0.263413	2.0302
6.5528	1.2578	0.9426	0.8997	1.8281	1.2202	1.3497	1.2448	1.4875	0.6691	0.6697	0.5569	2.8457	1.0646	1.5981	2.7689	2.2773	1.6544	3.4672	1.7265	1.2799	1.5694	3.9042	1.5684	0.7906	2.2408	2.1408	2.1253	6.2773	6.2203			0.268293	1.98779
6.6719	1.2558	1.0706	0.8847	1.4541	1.0852	1.2483	0.9966	1.0942	0.7612	0.6928	0.6121	2.6681	0.9495	1.4026	2.5994	1.6108	1.8205	4.1335	1.152	1.1103	1.511	3.9252	1.2795	0.7272	2.8226	2.0485	2.1694	4.5906	5.8805			0.27317	1.84679
6.7911	1.4438	0.8297	1.1544	1.387	1.5616	1.0295	1.2254	1.5278	0.571	0.6292	0.5815	3.1535	0.6886	1.3774	1.8721	1.5675	1.8121	4.5374	1.1983	1.2552	1.2677	4.5507	0.6042	0.9549	2.0827	2.2705	1.6188	4.093	5.1057			0.27805	1.79142
6.9102	1.1192	1.0541	0.9575	2.0126	2.3135	0.9016	0.9155	1.5909	0.6894	0.8071	0.6464	3.1632	1.0367	1.3709	1.9406	1.9656	1.5735	4.6501	1.1647	1.3758	1.3972	4.3107	0.9937	0.6275	1.9806	2.3641	1.1827	3.0549	5.0488			0.282927	1.80031
7.0293	1.1576	0.8886	0.8716	2.0202	1.7243	1.0784	0.9792	1.197	0.6883	0.8029	0.643	3.385	1.1786	1.2348	1.6196	2.1458	1.4505	4.8059	1.1174	1.3536	1.3471	4.7266	1.0276	0.5989	2.5409	2.1194	1.3744	2.9621	4.4645			0.287803	1.77599
7.1485	1.1355	0.9218	1.15	2.0286	2.0985	1.118	0.9995	1.2349	0.8172	0.5478	0.4045	3.0919	0.927	1.277	1.5096	1.3862	1.3568	6.0116	1.0053	1.4373	1.4127	5.2422	0.6758	0.8743	1.8535	1.8543	1.1996	3.6245	3.9721			0.292683	1.76441
7.2676	1.3378	0.8812	1.0023	1.3741	2.1843	1.1314	1.3273	1.2763	0.6365	0.4403	0.6616	3.6895	1.0865	1.0333	1.6044	1.8666	1.5606	5.8923	0.9825	1.3264	1.1223	5.3843	0.8634	0.9613	2.17	1.9166	1.0984	3.1706	3.9877			0.29756	1.79206
7.3868	1.0654	0.9893	1.1625	1.6977	1.4367	0.6531	1.0994	1.3244	0.5965	0.4772	0.5959	3.4819	1.2196	1.0666	1.463	1.8892	1.3526	5.6417	1.3507	1.1992	1.2357	6.0359	1.1595	0.8751	2.1256	1.8593	1.0781	2.7121	3.9235			0.30244	1.7506
7.5059	0.8719	0.7468	1.0158	1.5212	1.6277	0.9274	1.1446	1.6907	0.5924	0.6031	0.4519	3.8763	0.7644	1.0697	1.3496	1.7181	1.5163	5.5357	1.0629	1.1511	1.4445	5.7349	0.8922	0.8685	2.211	1.7521	1.0345	3.2273	3.9948			0.307317	1.73784
7.625	0.929	0.9451	1.0158	1.1805	1.5149	1.064	0.7599	1.411	0.7104	0.4908	0.7564	3.459	1.0361	1.1721	1.4417	1.7022	1.6286	5.9275	0.9501	1.8056	1.1743	4.4515	1.0466	0.7663	2.1537	1.2338	1.4142	2.4391	4.0415			0.312193	1.67661
7.7442	1.2586	1.0678	1.1211	1.1764	1.8808	1.2055	1.1014	1.3635	0.7869	0.6902	0.8656	3.4316	0.8146	1.2238	1.8128	2.1473	1.6159	7.0352	1.3049	1.1763	0.932	4.5034	0.9525	0.6956	2.1443	1.5682	1.4753	3.0128	3.0947			0.317073	1.77445
7.8633	1.1341	1.2065	1.0635	1.5323	2.0059	0.8846	0.9342	1.6076	0.8004	0.7379	0.595	4.0058	0.8975	1.0054	1.3729	1.5542	1.7425	8.5635	1.2189	1.5064	1.4175	4.0726	1.1369	0.9074	2.2457	1.9952	1.3355	2.6552	3.2317			0.32195	1.84023
7.9825	1.2861	1.0896	1.2361	1.1907	1.3875	1.1373	0.8484	1.6685	0.6779	0.8557	0.6437	3.4511	1.0487	1.0778	1.2899	2.1184	1.3497	9.1082	1.2153	1.0407	1.7476	4.4546	0.9162	0.7708	2.0129	2.1056	1.1303	2.687	2.6399			0.32683	1.79952
8.1016	1.0335	1.1115	0.83	1.1812	2.2909	0.9327	0.9598	1.3961	0.8872	0.5754	0.624	3.609	0.7592	1.0647	1.2535	1.9765	2.002	10.1564	1.3133	1.1971	1.372	3.8475	0.9776	0.956	2.5237	1.9827	1.168	2.9192	2.7143			0.331707	1.84879
8.2207	1.4682	0.9418	0.8065	1.585	2.5299	0.8286	1.0168	1.3334	0.6338	0.7909	0.7175	4.4764	0.6539	0.903	1.4314	2.1106	1.6233	11.8489	1.3785	1.0228	1.0395	3.3921	0.7995	0.7821	3.0673	1.899	0.9532	3.1768	2.1935			0.336583	1.91049
8.3399	1.3114	1.2391	0.8464	2.0106	2.4141	1.1807	0.9317	1.1246	0.6291	0.5986	0.8246	5.2429	1.0287	0.8861	1.314	2.4008	1.9833	11.194	1.2709	0.9535	1.2284	3.6178	0.921	0.9554	2.5276	2.2222	1.3425	2.4614	1.6085			0.341463	1.94034
8.459	1.7619	0.8935	1.021	1.7631	2.3575	1.3463	0.7599	1.2588	0.6332	0.5865	0.4705	5.298	0.827	0.8566	1.3306	2.5829	1.6794	11.3198	1.0377	1.1429	1.5164	3.3465	0.8428	1.3058	2.7521	2.7335	1.9759	2.2628	2.1438			0.34634	1.99333
8.5782	1.673	1.0027	1.2551	1.1348	1.9846	1.2522	0.9404	1.5907	0.7168	0.4931	0.5996	5.7213	0.8189	1.4913	1.0266	1.9151	1.4861	8.7247	1.2869	1.3516	1.2974	3.783	0.8196	1.4232	3.1906	3.6004	1.6753	2.1777	2.7096			0.35122	1.97042
8.6973	1.3326	0.9995	1.2005	1.6022	2.2191	1.4546	0.6258	1.2551	0.8287	0.768	0.8144	5.487	0.9729	1.0144	1.2407	2.7459	1.7462	8.5437	1.0495	1.5545	1.5145	3.1253	0.9053	0.9895	3.3645	4.0634	1.7567	1.9509	3.1768			0.356096	2.01042
8.8165	1.5337	1.183	0.7528	1.2079	2.5183	1.4197	0.6474	0.8489	0.7667	0.8018	0.6814	6.0131	1.3913	0.7211	1.3763	2.7361	1.5315	7.9643	0.8383	1.1551	1.1603	3.3933	0.9755	1.2582	3.3477	4.4059	1.8976	1.4888	2.6641			0.360977	1.95449
8.9356	1.0497	0.9636	1.0574	1.2053	2.6417	1.4925	1.2013	1.2217	0.8676	0.6302	0.5235	4.9899	1.1058	0.8934	1.2366	3.0761	1.6081	6.7656	1.3524	0.8758	1.2457	3.6962	0.9181	1.142	3.5635	4.0218	2.0447	1.9074	2.7109			0.365853	1.93133
9.0547	1.2805	1.0995	1.0828	1.235	1.7483	1.573	1.0634	1.4398	1.0179	0.7376	0.737	4.1593	0.876	1.1393	1.5104	2.9518	1.9995	7.6935	1.4424	0.9701	1.2854	4.1023	0.6186	1.2918	4.1914	3.7521	2.3645	1.6217	2.3011			0.37073	1.97538
9.1739	1.0585	1.453	1.0534	1.5751	2.316	1.5738	1.1096	1.3946	1.1236	0.7299	0.821	3.691	0.8118	0.9815	1.1598	2.7936	2.0025	8.4008	1.382	0.84	1.1879	3.8943	0.5475	1.4347	3.6559	4.258	2.0309	1.4303	2.3978			0.37561	1.96927
9.293	1.3299	1.0677	0.8339	1.5354	2.3763	1.3436	1.3721	1.701	1.0571	0.8046	0.5678	3.7089	0.9158	1.1074	1.3349	4.9329	2.6995	7.3705	1.3462	1.3016	1.1799	3.4117	0.8543	1.1684	5.8421	3.8691	1.9846	1.3706	1.8485			0.380486	2.07711
9.4122	1.335	0.951	1.1573	1.5755	2.1981	1.2097	1.3582	1.7214	1.1595	0.9519	0.5017	3.6619	0.7003	1.1217	1.4793	5.2299	2.8789	8.157	1.2303	1.4837	1.5643	4.3031	1.1256	1.2979	4.7145	3.8764	1.7606	1.8784	1.8621			0.385367	2.15328
9.5313	1.4671	1.1106	1.5201	1.416	2.0199	1.5512	0.9662	1.7156	0.7102	0.459	0.926	3.3998	1.0136	0.8281	1.5864	4.9948	2.7529	8.2699	1.1161	1.3776	1.4167	3.8493	0.882	1.4238	4.5303	3.9732	1.7786	1.6738	2.2236			0.390243	2.10181
9.6504	1.3497	1.1347	1.1274	1.4892	1.7275	1.938	1.2256	1.8667	1.0648	0.6829	1.0843	3.124	0.8213	1.2837	1.4325	4.9089	2.8911	7.0813	1.1674	1.4702	1.4151	3.8444	0.84	1.2211	6.2059	3.4667	2.0064	1.829	2.2695			0.39512	2.13687
9.7696	1.7127	1.3592	1.1811	1.6091	2.0132	1.5724	1.4723	1.8479	0.9561	1.0311	0.6415	3.5717	0.8156	1.144	1.3816	4.7915	3.153	5.6156	1.3403	1.2661	1.1655	3.4878	0.786	1.8256	6.5492	3.9507	1.8334	1.8578	2.7685			0.4	2.16209
9.8887	1.3601	1.2408	1.4453	1.2267	3.7757	1.376	1.1633	1.7321	0.966	0.7093	0.5731	3.3604	1.0205	1.0579	1.6471	4.6301	3.3083	5.746	1.4689	0.9928	1.2981	4.703	1.1107	1.8773	6.5532	3.5112	2.2894	1.8433	2.4765			0.404876	2.22287
10.0079	1.2629	0.9645	1.3381	1.2049	3.5013	1.6023	1.2523	1.9651	1.4979	0.8605	0.7746	3.765	1.6453	1.3418	1.4573	4.4246	2.4474	5.5472	1.7795	0.9725	1.3429	4.3937	1.2334	1.8749	7.0826	3.8816	1.5538	2.021	2.7179			0.409757	2.26575
10.127	1.3145	0.8459	1.1769	1.295	4.5197	2.0085	1.6251	2.3125	1.9129	0.5918	0.4356	5.5168	1.1512	1.2452	1.3268	4.2114	2.6291	4.8201	1.5963	0.9161	1.2073	4.8619	1.059	1.7205	7.2133	4.2015	1.7697	2.022	2.2367			0.414633	2.33598
10.2462	1.7438	0.9537	1.2811	1.2042	6.1069	1.9439	1.3325	2.8155	1.8629	0.6565	0.686	5.212	1.2044	1.3676	1.4054	4.1817	2.7654	5.2458	1.5237	1.0645	1.1205	5.2598	1.1969	1.9315	7.6356	3.7666	1.8639	2.9251	2.1793			0.419514	2.49782
10.3653	1.4482	1.2299	1.1362	1.5689	7.5126	1.7748	1.2111	3.0154	1.1978	0.8908	0.714	4.2357	1.4957	1.0768	0.9592	3.6067	2.4108	5.5593	1.527	1.019	0.9759	5.1595	0.9409	1.9147	6.3769	4.4724	2.1923	3.222	2.3886			0.42439	2.45631
10.4844	1.4568	0.6834	1.1787	1.1787	8.1238	2.4072	1.317	3.7542	1.4184	1.0059	0.3692	4.0198	1.2047	1.4046	1.0533	4.0763	2.6413	5.2629	1.4042	0.981	1.0791	5.6055	0.8753	2.0133	6.8653	4.0707	2.4759	3.4464	1.8386			0.429266	2.52453
10.6036	1.4268	0.8508	1.1448	1.1734	9.8372	2.4373	1.1479	4.5411	1.6364	0.6857	0.658	2.875	1.1259	1.3196	1.4024	3.6245	3.3458	5.1446	1.2599	1.4052	1.002	6.8805	1.0996	1.6924	8.0436	4.1294	3.0626	2.9947	1.915			0.434147	2.6849
10.7227	1.5935	0.9543	0.9366	1.4846	10.2629	2.039	1.1632	4.3773	1.6479	0.9241	0.8209	2.0033	1.4695	1.2774	1.623	4.5744	3.528	4.7145	1.2699	1.105	1.2358	6.7253	0.9168	1.6564	8.8866	3.9885	3.5343	3.4913	1.9247			0.439023	2.76307
10.8419	1.682	0.8858	1.2058	1.83	10.5051	2.305	1.4773	5.205	1.8286	0.6827	0.4878	1.4393	1.3921	1.4017	1.7216	4.4816	3.4002	4.2381	1.1271	0.7022	1.2703	6.1726	0.9396	1.6161	11.1328	3.9659	3.2411	4.1642	2.445			0.443904	2.86023
10.961	1.4868	1.045	1.0021	1.1695	9.8263	2.7571	1.3236	5.9683	1.8794	0.6989	0.627	1.6358	1.5038	1.1097	1.6649	5.1411	4.1623	3.7492	1.3508	1.0008	1.2523	7.5787	1.2108	1.4034	11.4959	3.9923	3.1367	4.7385	2.8939			0.44878	2.99327
11.0801	1.6837	1.0159	1.2133	1.3578	11.1481	2.6165	1.2584	6.6716	1.7125	0.5375	0.6134	1.7066	1.6683	1.0903	1.7427	5.8932	3.9053	3.3343	1.3885	0.9219	1.4144	7.7073	1.078	1.2812	11.9783	4.0812	3.2809	6.6964	2.7193			0.453656	3.16265
11.1993	1.3824	0.8892	1.4206	1.198	10.702	2.8607	1.3304	6.0304	1.8816	0.3754	0.7387	1.6616	1.6605	1.4074	1.9332	6.9931	3.923	4.0665	0.9599	0.9851	1.2666	8.5198	1.0036	1.3297	9.984	3.9826	3.4245	8.3249	2.6406			0.458537	3.20262
11.3184	1.525	0.8403	1.2299	1.1883	11.237	2.8499	1.5178	5.2488	1.6445	0.6377	0.916	1.9611	1.641	1.1874	1.4526	7.0221	4.1725	3.6335	0.9977	0.89	1.4534	9.7641	0.9383	1.7771	10.2451	4.5878	3.1348	9.3756	2.4835			0.463413	3.29492
11.4376	1.3446	1.0398	1.3729	1.1968	10.8674	2.817	1.1217	5.0362	1.1183	0.4719	0.721	2.2516	1.8469	0.9501	1.6291	7.1876	3.973	3.9431	1.2525	0.9997	1.4596	9.5613	1.2961	1.3045	8.337	5.191	2.9574	10.127	2.8171			0.468293	3.24801
11.5567	0.9748	1.175	1.2329	1.4201	9.2802	3.0126	1.2072	4.6351	1.0128	0.4215	0.3399	1.9597	2.2695	1.2796	1.4552	8.1314	3.5873	3.3337	1.2015	1.0832	1.0652	9.6777	1.2089	1.3958	7.6359	4.9977	2.3428	10.3129	2.8479			0.47317	3.12062
11.6758	1.0644	0.7453	1.3332	1.2118	10.0698	2.7758	1.3132	4.5256	0.8935	0.3149	0.4733	1.6235	2.4427	1.448	1.5856	8.1859	4.4202	3.3637	1.2028	1.0036	0.9986	9.1658	1.2406	1.5321	6.924	4.9608	1.977	9.1701	2.9682			0.478046	3.06669
11.795	0.8954	0.8144	1.1018	1.0819	8.2173	2.4849	0.9559	4.9506	1.261	0.7067	0.9044	1.5646	1.8624	1.0024	2.014	6.7352	4.6209	2.9686	1.0642	0.8822	1.0225	11.753	1.0004	1.237	5.6864	6.0613	1.9576	7.4833	2.8349			0.482927	2.93535
11.9141	1.0327	0.8128	0.8184	1.2813	7.7004	2.2665	1.1517	4.5265	0.8877	0.9655	0.7726	1.368	2.0583	0.9781	1.6408	6.2233	4.033	3.034	1.3826	0.8782	1.3061	11.2047	0.9348	1.6061	5.0117	5.4254	2.5501	5.8816	3.0752			0.487803	2.78649
12.0333	1.3235	0.7841	0.8404	1.0825	7.0305	2.9686	1.1166	4.5629	1.0559	1.1474	0.704	1.4191	2.0661	1.2821	1.7702	6.1632	4.7211	2.8851	1.1043	0.8364	1.5972	9.7947	1.0997	1.9106	4.076	5.4597	2.3325	6.1552	2.763			0.492683	2.76043
12.1524	1.2694	0.8838	1.1173	0.9563	6.3727	2.6766	1.0385	4.5588	0.931	0.9192	0.6109	1.3013	2.6812	1.4048	1.5991	5.0952	4.9546	2.9552	1.0848	1.4324	1.4321	10.2954	1.1797	1.7406	5.0277	7.0898	1.9952	6.1769	2.9818			0.49756	2.81939
12.2716	0.994	1.0411	1.1331	0.6787	6.1921	2.2154	1.2923	3.8158	1.1039	0.6416	0.5928	1.3304	2.5389	1.6146	1.8001	5.31	4.4393	2.3392	1.0482	1.3946	1.7005	11.6841	0.9905	1.1239	4.4313	6.1146	2.0686	6.5154	2.5106			0.50244	2.71226
12.3907	1.0734	0.9756	1.2498	0.9156	5.1539	1.845	1.3324	3.4206	1.0972	0.548	0.7797	1.0974	2.1166	1.35	1.5055	4.3248	4.2323	2.488	1.3391	1.1437	1.8401	10.3863	1.1803	1.1701	4.5382	7.5531	2.8514	7.1081	2.1966			0.507317	2.64872
12.5098	1.0732	0.8363	1.4931	0.9084	5.3394	2.2815	1.0283	3.3983	0.8689	0.6198	0.4618	1.2928	2.0445	1.5113	1.7501	4.1207	4.2458	2.5475	1.0312	0.9377	1.6598	10.3018	0.6997	1.2238	5.0874	9.6412	2.7061	7.2688	2.7442			0.512193	2.72839
12.629	0.9385	1.0416	1.0639	1.5208	6.1541	2.0962	1.0546	3.7075	1.0572	0.5441	0.7003	1.1721	2.122	1.631	1.4976	4.342	4.3691	2.1238	1.0077	1.07	1.365	10.7125	1.1719	1.6461	4.6621	9.6888	2.8465	7.1833	1.9827			0.517073	2.77493
12.7481	0.9608	0.7156	1.127	1.3677	5.9841	1.8733	1.004	3.374	1.1716	0.7755	1.0906	1.2463	2.4701	1.0974	1.3197	3.1604	4.5827	1.9463	1.1751	1.1637	1.4813	12.2264	1.1435	1.6765	5.0155	8.3496	2.7112	6.7426	2.0325			0.52195	2.72362
12.8673	1.3253	0.9629	0.994	1.3042	5.1719	1.9175	0.9122	2.8375	1.075	0.603	0.6851	1.255	2.709	1.9768	1.7363	2.6904	5.4696	2.3044	1.2043	1.0411	1.1858	11.3756	1.2531	1.6837	4.9178	6.3941	3.6118	7.1574	2.109			0.52683	2.68496
12.9864	1.1208	0.8512	1.1444	1.2241	5.0493	1.7328	1.5917	3.7479	1.1702	0.6096	0.8849	1.0165	2.2975	1.6273	1.478	3.3192	4.9648	2.2057	1.2792	1.135	1.4712	11.1076	1.0166	1.6323	5.0996	5.987	3.6968	6.6879	2.1334			0.531707	2.66491
13.1055	1.1654	0.984	1.2241	1.4822	4.8956	2.6449	1.1734	3.9813	1.2133	0.62	0.7152	1.1921	2.5688	1.497	1.7874	2.7119	4.8443	2.245	1.3105	1.1566	1.5305	9.402	0.9313	1.8778	4.2924	5.4615	4.0801	6.1141	1.9001			0.536583	2.5863
13.2247	1.0831	0.7965	1.1718	1.2965	4.1458	2.5039	1.1662	4.3748	1.167	0.4209	0.4093	1.0146	2.5022	1.3571	1.5557	3.4708	5.8532	2.0169	0.9943	1.0815	1.2944	7.6364	0.9641	1.5222	3.7239	4.5063	6.0357	5.3013	2.0981			0.541463	2.46429
13.3438	1.0943	0.8865	1.2314	1.1697	3.7499	2.5001	1.4207	2.995	1.0507	0.6242	0.5054	0.8095	2.1209	1.2804	1.473	3.0554	6.7103	2.4527	1.1765	0.8832	1.233	6.6151	0.842	1.4234	3.5906	4.6772	6.163	5.1097	1.84			0.54634	2.36841
13.463	1.0766	0.9186	0.8885	0.965	3.7068	2.4539	1.2414	3.4744	1.3106	0.7052	0.5323	1.0332	2.2374	1.1744	1.2813	2.7483	5.9411	1.996	1.3159	1.192	1.4882	6.1135	1.0811	1.4648	4.0679	4.3833	5.6503	5.3883	2.382			0.55122	2.35215
13.5821	1.057	0.7038	0.7693	1.2393	3.4884	1.9813	1.1504	3.8007	1.2708	0.5728	0.8484	0.9096	2.0996	1.4207	1.7508	3.34	6.1882	1.6809	1.0139	0.9322	1.5741	6.1134	1.0112	1.5936	4.3582	4.6208	5.7071	5.8078	2.145			0.556096	2.38446
13.7012	1.0538	0.6165	0.8291	1.3321	3.043	1.5865	1.2312	3.0813	0.9758	0.6392	0.6746	1.2638	2.8173	1.4166	1.8799	2.6979	8.1012	2.3511	1.1183	0.8197	2.0726	7.4267	1.0971	1.5587	4.0324	4.6963	6.6464	6.0251	2.1702			0.560973	2.52601
13.8204	1.0342	0.6186	0.73	1.1731	2.9552	1.8256	1.3012	2.7436	0.8665	0.7551	0.3881	1.0549	3.1175	1.2395	1.7004	2.5989	7.5054	1.5374	1.0027	0.872	1.424	6.9025	0.9969	1.3904	4.2085	4.7227	6.9384	5.4525	2.1445			0.565853	2.38622
13.9395	0.8114	0.4784	0.6523	1.0902	2.1065	1.6885	1.3366	2.4963	1.0541	0.6334	0.6273	1.0711	3.326	1.3429	1.686	2.7839	7.8165	1.4449	1.1129	1.0179	1.1188	7.2951	0.945	1.2919	3.8254	4.7937	8.4935	5.0651	2.0446			0.57073	2.39483
14.0587	1.0309	0.6469	0.6277	1.0536	1.6919	1.7509	1.4686	2.6948	0.8683	0.7117	0.8219	1.4503	3.5768	1.7478	1.5573	2.5946	9.3095	1.456	1.0523	1.0544	1.3131	7.8498	0.7583	1.3878	4.0604	4.8964	9.7044	5.3295	2.06			0.57561	2.56986
14.1778	0.8721	0.5358	0.7189	1.0803	1.8208	2.0562	1.2023	3.0477	0.9835	0.7341	0.65	1.0112	3.5401	1.2985	1.4783	2.3788	8.6847	2.1436	1.0986	1.1056	1.477	8.1243	1.4088	1.5263	4.635	5.9897	9.6004	4.5427	2.106			0.580486	2.61556
14.297	0.731	0.806	0.7058	1.1738	1.5767	1.73	1.5124	3.1682	1.2439	0.8139	0.5838	0.9142	3.6802	1.3519	1.6452	2.3943	8.5981	2.0862	1.0734	1.034	1.2897	8.2665	1.2379	1.2443	4.2963	6.9654	8.3521	4.4994	2.1482			0.585367	2.59044
14.4161	0.9838	0.6716	0.6442	1.082	1.8261	1.7881	1.4351	2.4314	1.1499	0.629	0.7337	1.052	4.2191	1.4288	1.5226	2.3829	7.4112	2.0592	0.7167	0.9932	1.3598	8.9065	0.9627	1.0747	4.094	8.0242	8.2827	5.2553	2.0606			0.590243	2.59245
14.5352	0.8357	0.8186	0.7726	0.9968	1.5681	1.5931	1.322	2.564	1.1861	0.6598	0.67	0.9117	3.869	1.4334	1.3321	2.3511	7.4402	1.6435	0.8271	1.0604	1.1712	9.6237	0.7987	1.226	3.8648	8.0438	8.9655	6.072	2.0507			0.59512	2.60937
14.6544	0.5825	0.8813	0.6769	1.0828	1.4341	1.7501	1.2022	2.5609	1.3379	0.6465	0.742	0.7101	3.9544	1.1729	1.4586	2.414	8.3047	2.1074	0.7052	1.3583	1.3902	10.6296	0.983	1.0322	3.5769	8.3989	7.4134	6.0369	2.0739			0.6	2.64199
14.7735	0.6862	0.2841	0.7447	1.2317	1.781	1.6758	1.2293	2.289	1.2925	0.8677	0.524	0.7303	4.0993	1.0954	1.1566	2.6852	8.8403	1.9358	1.0533	0.8314	1.6815	10.8609	1.2222	0.9645	3.328	9.5055	8.2186	6.0684	1.9303			0.604876	2.71771
14.8927	0.8492	0.4882	0.7173	1.2	1.7731	2.1177	1.0771	2.2946	1.1996	0.7425	0.8364	0.8174	4.4765	1.2703	1.038	2.2193	7.8229	1.8186	1.133	0.6001	1.9312	12.5886	1.2733	1.0128	2.9682	11.6217	8.8574	6.3046	1.6828			0.609757	2.85284
15.0118	1.0103	0.5739	0.7141	1.0594	1.7614	2.0664	1.2987	2.7146	1.0169	0.7452	0.7593	1.0037	4.1406	1.0766	1.3965	1.9939	8.1451	1.8834	1.2178	0.7629	1.3334	14.2858	1.7238	1.2093	2.4851	11.9052	9.798	6.416	1.9121			0.614633	2.97963
15.1309	1.2113	0.6288	0.6138	1.1529	1.1732	1.9846	1.4804	2.6483	1.3289	0.4691	0.6171	0.8585	5.5001	1.1798	1.5658	2.5861	7.8995	2.0759	1.2	0.5679	1.2617	14.6421	1.3711	1.211	2.3568	13.8792	8.789	7.0171	2.3089			0.619509	3.08893
15.2501	1.1418	0.5779	0.5779	1.1322	1.547	1.9148	1.0396	2.6188	1.4315	0.4901	0.7438	0.7716	5.1205	0.9357	1.2913	2.6107	7.8663	2.0679	1.2065	0.7745	1.591	15.999	1.339	1.4243	2.3203	17.1442	9.1868	5.8553	1.9592			0.62439	3.19584
15.3692	1.2511	0.5787	0.6377	0.9478	1.2219	1.9569	1.1711	2.5549	1.2774	0.5666	0.6162	0.9852	4.5395	1.2672	1.5143	1.9619	8.0144	1.8592	1.2547	0.8192	1.7616	15.8211	1.2116	1.2689	2.5665	16.4217	8.976	5.1	2.291			0.629266	3.11773
15.4884	1.4869	0.4346	0.7316	0.8665	1.0981	2.4327	1.0195	3.0398	1.3933	0.6219	0.6036	0.5983	4.8591	1.3471	1.557	2.0537	9.2128	1.697	1.1061	0.9366	1.4683	15.8848	1.6686	1.6182	2.8647	16.5256	7.9539	4.9171	2.0699			0.634147	3.17473
15.6075	0.6797	0.8285	0.9042	0.7917	1.2749	2.351	1.3891	3.4001	1.995	0.8252	0.7229	0.8709	4.9352	1.6912	1.8054	1.9759	8.7698	1.4975	1.1294	0.8104	1.5435	13.6023	1.4015	1.1149	3.2507	17.1326	7.8756	4.4693	2.6921			0.639023	3.16312
15.7266	0.8021	0.7778	0.3977	0.8018	1.4676	2.4252	1.2404	2.907	1.5256	0.4941	0.565	0.94	4.7045	1.5088	1.9583	2.1549	8.7972	1.5305	0.9325	1.0276	1.2526	12.3882	1.3406	1.2958	2.7743	17.3291	8.5435	3.7261	3.4148			0.643899	3.06978
15.8458	1.0219	0.5304	0.7956	0.8605	1.271	2.619	1.3296	3.2596	1.916	0.4476	0.7015	1.023	5.5708	1.0637	1.5175	2.3017	8.7361	1.8712	0.9954	0.9999	1.5915	10.8277	1.883	1.2201	2.3946	16.0231	8.2021	3.9375	4.2457			0.64878	3.07439
15.9649	0.9629	0.9416	0.657	1.101	1.0449	2.5801	1.6044	2.6783	2.0048	0.7563	0.5645	1.1399	6.1297	1.1571	1.5143	2.1977	8.4882	1.6229	0.9607	1.2162	1.2533	10.1955	1.6561	0.9318	2.6254	16.6616	7.7676	3.0551	4.6966			0.653656	3.04019
16.0841	0.7436	0.5514	0.9137	0.7171	1.2227	2.7656	1.0906	2.1973	1.8834	0.6679	0.7204	0.4682	6.2329	1.342	1.7166	2.0317	7.5291	1.8471	1.2343	0.9033	0.9524	8.4413	1.6181	1.0249	2.7063	15.5689	7.6896	2.2566	4.6022			0.658537	2.81514
16.2032	0.9953	0.6203	0.6862	0.6947	1.291	3.3843	1.1312	2.0638	2.3141	0.5221	0.5825	0.5273	5.1526	1.0308	1.2281	2.2202	7.3357	1.8485	0.9167	0.7172	1.2486	6.7858	2.1894	1.0261	1.9477	16.6396	7.4089	2.3272	4.5209			0.663413	2.73644
16.3224	1.1383	0.7365	0.5484	0.8777	1.2325	3.8461	1.2567	2.3286	2.5614	0.4828	0.5459	0.6251	5.0363	1.4389	1.324	2.1178	7.7452	1.8998	1.0246	0.66	1.9767	6.9737	1.8665	1.2523	2.1875	18.0394	7.4141	2.4742	4.8717			0.668293	2.9132
16.4415	0.9674	0.8207	0.5278	1.0959	1.1047	3.7016	1.7858	2.7863	2.7674	0.8444	0.8605	0.6519	6.0446	1.5762	1.5267	1.99	7.325	2.1179	1.3523	0.9905	1.3604	6.0527	1.6624	1.5104	2.0338	20.1217	5.7604	1.7778	5.0579			0.67317	2.97156
16.5606	0.695	0.7619	0.6211	0.856	1.1726	4.1622	1.297	2.5159	2.5842	0.5541	0.6472	0.8425	5.2825	1.1854	1.4207	1.8904	6.7485	1.8395	1.0149	1.3661	1.4104	5.9101	1.8261	1.5607	2.5274	21.5398	5.7104	2.6442	4.5696			0.678046	2.93643
16.6798	1.1539	0.5387	0.4542	0.7926	0.7611	4.8443	1.3813	2.3991	2.1125	0.5279	0.4548	1.0924	5.4942	1.4092	1.3258	1.9538	8.6735	1.8055	1.0867	1.0733	1.0977	5.4628	1.6021	1.4463	1.72	21.6334	5.0418	1.9803	5.1441			0.682927	2.91253
16.7989	0.9085	0.7685	0.5418	0.8407	0.799	4.3891	1.4788	1.8079	2.1022	0.5997	0.4021	0.79	5.9575	1.5623	1.3857	2.3399	8.3708	1.5736	1.0112	1.061	1.118	5.6939	1.5856	1.4912	2.2794	21.7136	4.196	1.9149	4.7638			0.687803	2.87747
16.9181	1.1205	0.4628	0.7978	0.7495	0.9462	4.0703	1.3675	1.8418	2.0773	0.7617	0.4365	0.8958	6.4103	1.4979	1.3658	2.0812	8.237	1.8063	0.9945	0.9015	1.0044	5.6114	2.1651	1.2394	1.9905	21.4224	3.707	2.0176	4.8825			0.692683	2.85733
17.0372	0.914	0.6613	0.776	0.8861	1.0506	4.5351	1.2546	2.4108	2.2673	0.7276	0.6643	0.8208	5.7307	1.7709	1.5938	2.7613	8.4043	1.4614	1.2593	1.119	0.9854	5.0077	2.6561	1.3691	1.6921	19.4286	3.5046	1.7683	4.5853			0.69756	2.82988
17.1563	0.8789	0.4831	0.4538	1.2236	0.8213	4.1029	1.2532	2.0871	1.7443	0.9723	0.6748	0.8328	6.1332	1.8186	1.5838	2.566	8.6303	1.7421	1.5746	0.7282	1.2342	5.1937	2.3412	1.6319	1.4384	18.7075	3.0303	1.8917	5.208			0.702436	2.79248
17.2755	0.7224	0.4694	0.5143	1.0407	0.8988	3.6317	0.9537	1.7327	1.7502	0.9214	0.5361	0.9897	5.7398	1.4238	1.4685	2.5223	8.2187	1.8458	1.2115	0.8438	1.3983	5.0229	2.2931	1.6343	1.7787	18.4346	3.2682	1.687	5.5768			0.707317	2.7079
17.3946	1.0577	0.7143	0.6975	0.799	0.9749	3.6781	0.9838	1.9396	2.552	1.0192	0.5998	1.0602	5.5433	1.5311	1.0543	2.6442	8.474	1.7093	1.1758	0.981	1.0345	4.4765	2.8867	1.603	2.2919	18.8554	2.938	1.6198	4.943			0.712193	2.75303
17.5138	0.9627	0.7385	0.6315	0.7063	0.7683	3.357	1.1513	2.1872	2.4189	0.8428	0.8736	1.0585	6.4925	1.8253	1.2561	2.6767	9.2869	1.7929	1.0257	0.8468	1.2787	4.5542	2.2458	1.4628	2.0425	17.6639	3.2339	1.7121	5.7013			0.717073	2.78602
17.6329	0.669	0.7249	0.6823	0.7457	1.0821	4.1636	1.1509	2.3675	2.3711	0.8928	0.6385	1.1324	6.7383	1.5219	1.4289	2.5442	8.1525	1.8074	0.99	0.6487	1.2299	4.1213	2.0673	1.4654	2.2569	17.2992	3.1542	1.7946	5.269			0.72195	2.72795
17.7521	0.7003	0.2732	0.4391	0.6262	1.2177	3.829	1.0316	2.5005	1.9171	0.8581	0.6743	0.7869	5.6559	1.4603	1.1962	2.4967	7.319	2.3367	1.1898	0.7705	1.3233	3.8951	2.1186	1.3746	1.9889	15.5963	3.1421	1.8766	4.9744			0.72683	2.53686
17.8712	0.8879	0.5281	0.7548	0.6167	1.0216	2.9905	1.3221	2.3572	2.105	1.0709	0.6419	1.1671	6.3208	1.6308	1.1514	2.4457	7.8109	2.5323	1.1044	0.8817	1.4012	4.2142	2.5049	1.8011	1.7748	15.2351	2.8241	1.8522	4.7347			0.731707	2.6098
17.9903	0.6519	0.6307	0.7705	0.5113	1.0084	3.1631	1.2444	2.2275	2.1353	0.8738	0.6086	1.4484	6.0679	1.8584	1.3349	2.6771	10.0199	2.3479	1.3855	1.0407	1.1798	3.1527	2.5666	1.6163	1.9163	15.7067	2.7889	1.6942	4.5002			0.736583	2.65958
18.1095	0.9027	0.4259	0.4959	0.5621	0.8451	3.6269	0.7722	2.0806	2.2228	1.2095	0.5628	1.476	6.36	1.6122	1.3784	2.8109	8.9816	2.654	1.1729	1.0388	1.236	3.8137	3.1216	1.2897	1.7245	14.5705	2.7124	1.3885	4.211			0.741463	2.59514
18.2286	0.7735	0.6372	0.5861	0.728	1.0374	3.8099	0.9708	2.1741	2.455	1.1184	0.7662	2.0201	6.0982	1.4731	1.1241	2.9604	9.6986	2.3912	1.2177	1.2398	1.1047	3.6702	3.5032	1.6296	1.5251	15.2721	2.1924	1.4951	4.4533			0.74634	2.69398
18.3478	0.8094	0.4957	0.6653	0.7521	0.9526	2.9457	1.1314	2.4842	2.7437	1.3166	0.8173	1.6543	6.5756	1.7603	1.2766	2.9115	10.6611	2.8266	0.9533	1.0426	1.0814	3.7161	3.4275	2.1494	1.536	14.9686	1.8259	1.8022	3.9906			0.75122	2.73357
18.4669	1.0107	0.4157	0.6835	0.8776	0.8097	3.5829	1.5099	2.1905	2.8788	0.9927	1.3753	1.8322	8.2694	1.9842	1.5729	2.6249	10.276	3.2862	0.8222	0.8214	1.3198	4.2074	3.2862	2.073	2.0434	14.3043	1.6903	1.3312	3.6839			0.756096	2.81918
18.586	0.7625	0.4938	0.6855	1.0539	0.6802	3.5997	1.195	2.2563	3.0197	0.8721	1.1552	2.2685	7.3657	1.8438	1.5482	2.7598	10.2612	3.4361	1.4824	1.0207	1.0437	4.0407	2.9162	2.15	2.2101	13.3258	1.7948	1.2977	3.4953			0.760973	2.75981
18.7052	0.9405	0.486	0.4602	0.9268	0.8445	3.3375	1.299	2.0646	3.3814	0.8752	0.8667	1.983	7.2474	2.7048	1.6161	2.985	10.7206	3.6437	1.0858	0.9159	1.1425	3.8791	3.3502	1.795	2.113	12.2651	1.7881	1.4071	3.6975			0.765853	2.75249
18.8243	0.941	0.6292	0.7864	0.7187	0.8435	3.8083	1.04	1.8284	3.669	1.3348	1.1674	1.9783	7.6688	2.1375	2.0767	2.7017	11.0686	3.4991	1.1866	1.233	0.9218	4.0443	3.6722	2.3788	2.5451	11.4568	1.7606	1.3142	3.0829			0.77073	2.81013
18.9435	0.948	0.7385	0.7289	0.4771	1.2527	3.92	1.0772	1.6866	3.3284	1.3099	1.2296	2.6136	7.2956	1.9985	1.9067	3.0891	10.1521	3.9003	1.0849	1.3658	1.1636	3.4304	3.7467	2.572	3.7125	11.1773	1.6989	1.5815	3.3407			0.77561	2.84576
19.0626	1.2375	0.7087	0.5141	0.584	1.3311	3.9536	1.1626	1.5424	3.7619	1.3292	1.0962	2.2531	7.5785	1.6032	2.0609	2.6477	11.0312	3.605	0.8013	1.3585	0.9859	3.069	4.0716	2.3811	3.9792	9.5431	1.1592	1.6322	2.8991			0.780486	2.75452
19.1817	0.9117	0.403	0.4798	0.8082	1.0294	4.3195	1.5057	1.7269	3.2106	1.9291	1.4598	2.3903	8.1175	2.4136	1.9842	3.3388	11.3641	3.7058	0.9844	0.8301	1.163	2.8319	4.2875	2.0693	4.5413	10.3986	2.0881	1.8123	3.5284			0.785363	2.95286
19.3009	0.7548	0.4011	0.6029	0.9536	1.0908	4.1962	1.4775	1.3818	3.221	1.9152	1.5286	2.3447	7.3331	2.8529	1.7034	3.4174	13.0869	4.4144	1.1146	1.0834	0.8653	2.3593	4.2053	2.3159	5.9154	11.6837	2.1145	1.8444	3.0116			0.790243	3.07551
19.42	0.5349	0.6615	0.6381	0.8502	1.2041	4.6735	1.4563	2.1047	3.3393	1.6189	1.8989	2.5092	7.6237	3.32	1.8059	3.1795	11.5827	5.0484	1	1.2076	0.9787	2.9467	4.8722	1.8953	5.9324	11.6639	1.5937	1.3253	2.7586			0.79512	3.11118
19.5392	0.8806	0.4774	0.7879	0.8391	1.1986	4.5173	1.8255	1.5786	3.5782	2.1559	2.1753	2.0088	6.7036	3.7746	2.0414	3.7343	11.9062	5.6453	1.7065	1.148	1.0653	2.9081	4.914	2.5559	6.5833	12.7425	1.7603	1.4345	2.7538			0.8	3.28968
19.6583	0.9995	0.7848	0.7275	0.8529	0.6545	4.3432	2.0827	2.008	3.0685	2.435	2.2884	2.2696	7.4499	3.4005	2.2129	3.8613	12.0122	5.9765	1.4503	1.0227	1.3498	3.506	5.5919	2.7583	8.1883	11.7715	1.8201	1.7116	2.7432			0.804876	3.42557
19.7775	1.307	0.7703	1.2319	0.8764	1.1058	4.6326	2.7022	2.6609	2.6138	2.6209	2.6931	1.8229	7.9338	3.4932	2.1758	4.0583	11.4148	5.7765	2.0949	1.2444	1.4325	3.6591	5.2176	3.419	8.0413	12.1852	1.5833	1.2589	3.2032			0.809757	3.55964
19.8966	0.7902	0.5464	0.9047	1.0915	1.4065	4.4962	2.6635	2.6338	2.2329	2.7238	2.5923	2.0874	8.723	4.788	2.3135	4.4429	10.7181	6.3752	2.3129	1.3706	1.2973	3.5776	5.5037	4.0708	7.8578	11.1915	2.108	1.1659	3.1292			0.814633	3.62466
20.0157	0.8176	0.9278	1.1183	0.9846	1.2788	4.3747	2.6282	2.6213	2.1189	2.5555	2.3515	1.6951	8.0785	4.2475	2.1778	4.0838	11.0584	6.9322	1.9965	1.4797	1.199	3.1329	5.3176	4.2852	8.4837	11.7747	2.0112	1.1727	2.9082			0.819509	3.57972
20.1349	0.8333	0.6708	1.0186	1.5566	1.2935	3.0885	2.8472	1.7005	1.638	2.7528	2.31	1.1045	7.8601	5.0035	2.2964	4.3388	10.9032	6.8416	2.3837	1.5374	1.1747	3.1422	5.0128	4.5665	9.4688	12.821	2.052	1.3985	3.0625			0.82439	3.60959
20.254	1.1582	0.6804	0.8094	1.1915	1.2397	2.5525	3.0741	1.9263	1.3326	3.2021	2.1422	0.8142	7.8247	4.6462	2.1659	4.7477	11.1051	6.1029	2.3839	1.3656	1.5044	3.1632	4.9583	4.4074	8.0712	12.3652	1.4456	1.3586	3.4571			0.829266	3.48952
20.3732	0.7691	0.5332	0.9791	1.4175	1.4339	2.4498	2.4173	1.6469	0.8002	2.3098	1.906	0.6904	7.5589	4.9126	2.4453	4.6236	11.7228	5.6685	3.0875	1.606	1.6186	2.6524	4.4926	4.6187	8.8645	12.8385	1.8098	1.5584	2.8889			0.834147	3.45934
20.4923	1.0114	0.3891	1.0858	0.8297	1.2581	2.0368	2.2851	1.4558	0.7443	2.5052	1.4277	0.8702	6.5514	6.0351	3.1039	4.3405	11.3462	6.4697	4.4007	1.7323	1.6269	2.9255	4.795	4.5188	7.979	9.9273	1.9016	1.4087	3.3551			0.839023	3.39024
20.6114	0.8346	0.7611	0.9379	0.8247	1.602	1.5716	1.9995	1.1997	0.5912	2.2866	1.6384	0.6314	7.0673	6.4279	3.5084	4.4409	10.9174	6.5237	4.9679	1.6447	2.0218	3.6914	4.7912	4.4045	6.6425	9.6177	1.8775	1.6609	3.513			0.843899	3.39991
20.7306	0.8147	0.7628	0.6542	0.8515	1.794	1.4038	1.3887	1.3063	0.6293	1.4081	1.8165	0.503	6.1697	6.8302	2.8759	4.4476	9.2329	5.6098	6.6861	1.9755	1.4776	4.2663	3.6324	4.5088	5.5886	8.0388	1.8765	1.7689	3.464			0.84878	3.16491
20.8497	1.4094	0.572	0.6545	0.8414	1.6098	1.6126	1.2481	1.1725	0.5615	1.0291	1.3664	0.5892	7.2944	6.3141	3.3201	4.7684	8.9737	4.46	7.7692	1.924	2.012	3.5856	2.6353	4.1754	5.521	6.4036	1.6465	1.448	2.8564			0.853656	3.0267
20.9689	0.9304	0.7326	0.8089	0.8034	1.5634	1.2777	1.2067	0.67	0.3918	1.0257	0.6772	0.3757	5.4249	7.7275	3.9456	5.0937	8.1088	3.4599	8.3688	2.4029	2.055	3.1766	2.6611	3.9523	4.3491	5.9076	1.8482	1.6079	2.8967			0.858537	2.87759
21.088	0.9581	0.8313	0.43	0.6335	1.3815	0.9047	1.4836	0.6755	0.2439	0.8994	1.0148	0.6849	4.1014	8.5363	3.6964	5.0793	6.3637	2.9876	8.651	3.3277	2.3541	2.8795	2.224	3.0756	3.0701	4.5962	1.8235	2.5008	3.1622			0.863413	2.70933
21.2071	1.1116	0.6038	0.4978	0.5884	1.2052	0.7655	0.9875	0.4959	0.2371	0.6398	1.0191	0.4403	3.496	9.8467	4.3243	5.7796	5.7713	2.4246	6.6071	3.3893	2.9533	2.7531	1.5707	2.1495	2.7434	3.9537	1.3726	2.1418	3.6514			0.868289	2.53519
21.3263	0.8342	1.0441	0.4613	0.3379	0.6599	0.7376	0.6992	0.6812	0.1367	0.8359	0.7013	0.2167	2.7119	9.5226	4.7319	5.2088	4.5639	1.919	6.1604	4.1683	3.238	2.0373	1.5983	1.4526	1.6671	3.9337	1.9111	2.1149	3.9971			0.87317	2.35458
21.4454	0.8528	0.7305	0.6213	0.4523	0.7773	0.6917	0.7294	0.3708	0.1078	0.9231	0.5286	0.2981	2.5643	9.5078	4.8061	3.8023	3.3971	1.5923	6.0429	5.0833	3.5425	1.5031	1.3087	1.0426	1.354	3.7078	2.0781	1.7787	4.4688			0.878046	2.2298
21.5646	0.9512	0.6608	0.5328	0.514	0.6776	0.44	0.6649	0.3117	0.1098	0.4114	0.3906	0.2458	1.412	9.4754	5.8461	3.2522	3.4655	1.3323	5.0277	6.7618	5.6091	1.2307	0.6111	0.8029	0.9144	3.2785	2.5802	2.0153	4.1178			0.882927	2.19461
21.6837	0.9725	0.7575	0.5552	0.597	0.5025	0.4931	0.4015	0.2658	0.1672	0.3508	0.6272	0.1763	1.4017	8.8774	5.3979	3.6017	2.317	1.0806	3.5378	6.6175	5.062	0.7898	0.7488	0.984	1.2935	3.6458	3.1963	2.2548	4.4028			0.887803	2.10607
21.8029	1.0219	0.7322	0.464	0.4441	0.8241	0.8786	0.44	0.3438	0.1572	0.3811	0.6121	0.1474	1.3556	8.854	6.508	4.1218	1.9449	1.1034	2.1242	6.252	5.2336	1.1219	0.6729	0.9628	0.9124	2.5369	2.6156	2.5526	5.2776			0.892683	2.08954
21.922	1.0569	0.8631	0.5206	0.3684	0.5119	0.4626	0.1812	0.1971	0.0492	0.2682	0.388	0.0777	0.8207	9.1179	6.5414	4.1143	1.5239	0.7078	2.0509	5.9981	4.497	1.0169	0.3214	0.5781	0.4488	1.6798	2.4391	3.1853	5.2803			0.89756	1.90574
22.0411	1.4645	1.0057	0.531	0.2272	0.211	0.3788	0.2134	0.2936	0.0996	0.1093	0.4229	0.0737	1.1459	7.6716	6.9724	3.9791	1.3123	0.8574	1.5796	5.105	3.2181	0.7631	0.296	0.3477	0.2867	2.0806	2.4541	2.951	4.9517			0.902436	1.75872
22.1603	0.9715	0.941	0.5356	0.1596	0.2821	0.1933	0.1641	0.3239	0.0511	0.2053	0.3546	0.0653	0.6828	6.9343	7.6293	3.269	1.2045	0.4964	1.1175	3.5732	2.1302	0.6515	0.3612	0.5662	0.423	1.5231	2.5219	2.657	5.3621			0.907317	1.56381
22.2794	1.1011	0.9962	0.3338	0.3976	0.3118	0.3015	0.1601	0.1374	0.1743	0.2649	0.2303	0.1731	0.2756	5.8137	7.767	2.7217	1.2573	0.5522	0.7406	3.1686	1.9809	0.5693	0.2458	0.4797	0.3129	1.106	2.7752	2.9964	4.0461			0.912193	1.42728
22.3986	1.1824	0.6227	0.3051	0.3235	0.2596	0.2671	0.2389	0.005	0.2122	0.0916	0.0749	0.2365	0.6513	4.6724	7.2726	2.8017	0.6747	0.5248	0.9364	2.7107	1.6971	0.3596	0.1588	0.4261	0.484	0.9927	2.5145	2.8913	3.7856			0.917073	1.28875
22.5177	1.5873	0.6636	0.3615	0.2232	0.3738	0.3391	0.1581	0.0009	0.1743	0.0864	0.1023	0.1237	0.535	3.7217	6.3115	2.195	0.6704	0.4043	0.6354	2.0219	1.5569	0.4098	0.2619	0.4569	0.448	0.9607	2.9117	3.0752	3.3287			0.92195	1.17583
22.6368	1.3857	0.6332	0.5195	0.3208	0.2658	0.1463	0.2959	0.1221	0.1162	0.0867	0.0803	0.0615	0.5434	2.584	6.3749	1.7535	0.8494	0.4992	0.5194	1.929	1.2652	0.2604	0.1623	0.4855	0.3225	0.6731	2.9966	4.133	2.3663			0.926826	1.09489
22.756	1.5913	0.3985	0.2003	0.5483	0.2352	0.0289	0.1081	0.1071	0.0052	0.1003	0.2507	0.0012	0.4215	2.0198	5.4919	1.6986	0.5033	0.3322	0.9801	1.4373	1.0503	0.0772	0.101	0.1961	0.3795	0.7318	2.8104	3.3394	2.2533			0.931707	0.944786
22.8751	1.5093	0.379	0.0261	0.3268	0.2707	0.0762	0.2236	0.1563	0.0497	0.0878	0.1298	0.0464	0.4055	1.616	4.2309	1.0196	0.401	0.1801	0.6419	1.294	1.0759	0.1772	0.103	0.2387	0.4145	0.6398	3.1027	3.5057	2.0225			0.936583	0.839679
22.9943	1.1749	0.1852	0.1325	0.2366	0.1517	0.0834	0.1344	0.2264	0	0.2065	0.1487	0.105	0.23	1.1208	3.3013	0.9869	0.2479	0.3163	0.4658	0.9063	1.0857	0.1309	0.2179	0.2428	0.3528	0.4195	3.1364	3.4257	1.3387			0.941463	0.714172
23.1134	1.1499	0.1276	0.1908	0.1775	0.1899	0.1464	0.0809	0.2356	0.0584	0.1109	0.0528	0.114	0.2272	1.6149	2.7418	0.5503	0.2907	0.1097	0.3745	0.7033	0.747	0.043	0.0873	0.1216	0.179	0.2791	2.6364	3.0308	0.9916			0.94634	0.598721
23.2325	1.2257	0.0867	0.1804	0.0485	0.292	0.1528	0.0753	0.113	0.047	0.0908	0.0741	0.0517	0.3018	1.1002	2.0047	0.7416	0.4203	0.1749	0.4751	1.1246	0.8448	0.1728	0.0577	0.1722	0.15	0.6777	2.4775	3.471	0.8398			0.951216	0.608438
23.3517	0.8835	0.1074	0.093	0.0381	0.1879	0.085	0.0895	0.1095	0.0247	0.0088	0	0.1181	0.3114	0.6847	1.3172	0.4149	0.3299	0.3491	0.4186	0.9215	0.8771	0.0653	0.0738	0.1267	0.2998	0.7383	3.2405	3.2022	0.6935			0.956096	0.545172
23.4708	0.7584	0.3968	0.0868	0.0747	0.1632	0.0818	0.1089	0.0802	0.102	0.0416	0.0416	0.0915	0.2082	0.6234	1.2159	0.3427	0.2668	0.2158	0.2132	0.9338	0.5871	0.1876	0.2223	0.1958	0.2439	0.4933	2.1585	3.2081	0.4937			0.960973	0.477159
23.59	0.7395	0.1434	0.264	0.1175	0.1824	0.0383	0.0907	0.0254	0.0529	0.0781	0.0102	0.0314	0.1351	0.7133	1.0474	0.4075	0.2192	0.0622	0.0921	0.4515	0.6893	0.1122	0.1602	0.1683	0.2988	0.2165	1.7703	2.9708	0.3641			0.965853	0.401814
23.7091	0.5647	0.0684	0.0853	0.1656	0.1509	0.0629	0.0937	0.0811	0.0217	0.0704	0.0339	0.1485	0.0413	0.6078	0.9121	0.1964	0.1125	0.0862	0.1013	0.4431	0.2745	0.2722	0.0947	0.1103	0.0663	0.2881	1.9702	2.7375	0.3331			0.97073	0.351541
23.8283	0.4056	0.1007	0.1477	0.2439	0.1123	0.1391	0.1176	0.0999	0.0709	0.0242	0.0714	0.0817	0.0314	0.3949	0.851	0.2641	0.035	0.2514	0.1414	0.417	0.1626	0.223	0.1166	0.0573	0.1278	0.1564	1.7944	2.55	0.4536			0.97561	0.332514
23.9474	0.3113	0.0925	0.0442	0.0714	0.0345	0.0464	0.0715	0.0417	0.0758	0.2126	0	0.0638	0.1111	0.2954	0.6171	0.1358	0.0425	0.125	0.3148	0.4623	0.284	0.0248	0.0691	0.0658	0.1326	0.2151	1.7167	2.0046	0.4242			0.980486	0.279538
24.0665	0.2827	0.1091	0.0003	0.1061	0.0235	0.0697	0.0372	0.0656	0.0516	0.0908	0	0.0979	0.0962	0.3834	0.4609	0.0692	0.0762	0.0539	0.0797	0.3165	0.2949	0.0749	0.0342	0.0115	0.0107	0.1709	1.1894	1.6614	0.1794			0.985363	0.210269
24.1857	0.3988	0.0503	0.0304	0.0998	0.1023	0.0525	0.0532	0.1004	0.1459	0.0076	0.0792	0.0048	0.0895	0.3735	0.5614	0.1375	0.1071	0.0097	0.1607	0.3052	0.3568	0.0295	0.0853	0.0937	0.1704	0.1727	0.9713	1.6913	0.2796			0.990243	0.231738
24.3048	0.1408	0.0432	0.1448	0	0.1104	0.1158	0.1348	0.0753	0.0276	0	0.0788	0.1518	0.0198	0.2078	0.5486	0.2314	0.0809	0.0016	0.1806	0.2335	0.487	0.0803	0.0013	0.0953	0.1476	0.287	0.9659	1.2308	0.2856			0.99512	0.210631
24.424	0.2562	0.2545	0.0207	0.0126	0.1115	0.0949	0.0025	0.0029	0.0364	0.0173	0	0.0023	0.079	0.1475	0.5302	0.1602	0.1313	0.0929	0.3031	0.2977	0.3978	0.0391	0	0.0143	0.0452	0.342	0.7941	1.0084	0.1968			1	0.18591

## Sheet: Image63
X0	Y0	Y1	Y2	Y3	Y4	Y5	Y6	Y7	Y8	Y9	Y10	Y11	Y12	Y13	Y14	Y15	Y16	Y17	Y18	Y19	Y20	Y21	Y22	Y23	Y24	Y25	Y26	Y27	Y28	Y29	Y30			Ap-Basal to 1	Average intensities
0	12.7014	9.878	18.0734	30.2773	22.9162	11.7538	10.4432	4.4559	3.9772	6.2904	10.9022	19.3593	18.9021	9.8046	6.0408	5.7069	5.8159	15.1294	16.9568	20.3108	9.4117	8.7987	7.384	9.1325	7.728	10.5959	12.2969	10.0586	15.9669	9.8119	14.9728			0	12.1243
0.1191	15.2148	9.8019	18.9936	37.3415	23.4108	12.906	9.7563	5.0866	4.307	5.471	12.3556	20.7001	17.4905	11.9755	8.2111	5.8088	6.7878	21.7681	16.7965	23.4371	9.3908	10.2296	9.3123	8.2828	7.6458	10.7084	14.8726	10.7217	15.4435	10.633	13.9522			0.0049734	13.1875
0.2383	18.1809	10.1378	23.453	36.506	24.7422	13.9085	11.6071	7.4459	4.745	8.0127	14.0147	23.3039	24.1582	15.8136	8.3848	7.5873	6.3925	24.8937	15.8164	27.3834	10.3609	11.0155	7.5285	11.4379	9.3609	13.2535	18.4722	11.093	15.509	13.6678	14.4957			0.00995098	14.9252
0.3574	18.9297	11.8157	23.7877	42.2207	25.0738	15.9892	12.5539	9.9412	4.9757	8.3239	15.9068	24.2564	23.5918	14.8228	9.3649	8.7136	7.2546	26.0974	18.7899	35.7468	11.7577	10.5939	7.9603	12.9845	9.6474	14.7147	18.448	14.7902	13.7929	16.5974	14.4428			0.0149244	16.2544
0.4766	19.8187	14.2448	25.1875	39.856	28.6013	18.1035	14.8659	12.465	5.1466	10.4642	18.1885	23.6407	25.4545	19.7694	11.2514	12.2031	9.3292	24.3188	17.2231	34.4461	11.484	12.4641	9.7434	18.0877	9.5797	18.8092	20.9275	18.9754	14.0331	19.6681	18.654			0.019902	17.9679
0.5957	19.4563	16.2962	28.4084	39.4062	31.5628	19.8448	15.8337	14.8786	6.7234	14.1331	18.1498	23.9059	26.2071	19.5646	13.5869	16.0621	12.3018	26.2312	19.9867	38.1655	13.2199	12.5751	12.3114	22.3084	11.955	21.2445	22.4488	22.8898	15.913	22.3098	17.1284			0.0248754	19.839
0.7148	26.1446	19.9766	30.5289	38.406	31.4444	21.0586	16.9857	16.6152	11.292	16.3563	20.6303	27.5578	28.2221	23.4249	16.4952	19.3486	16.2503	30.2642	20.4089	40.6916	16.6667	15.3085	16.0227	24.3043	14.4104	22.5737	22.6859	26.9703	15.7747	25.7944	19.9867			0.0298488	22.342
0.834	26.8512	27.0366	36.3832	35.9394	28.8595	24.5043	19.8385	17.1355	15.0842	19.6837	25.8749	30.6403	32.7716	27.2521	19.9203	24.5645	19.345	32.9994	25.9143	41.1632	20.7887	16.0124	19.5238	26.8697	13.9999	27.4664	22.2351	32.1153	17.0443	28.3295	24.1954			0.0348263	25.1723
0.9531	28.9199	26.3538	36.6813	33.952	31.3304	25.9709	21.6277	16.8715	16.0547	17.3464	24.1277	31.1483	36.2154	26.905	25.134	28.8026	21.0626	35.6417	27.0645	43.0873	24.5541	17.8517	21.4141	30.9755	17.293	35.0827	22.3445	34.299	19.942	29.2096	24.5796			0.0397997	26.8337
1.0723	32.5171	27.8121	39.5306	33.3165	28.6822	26.9994	24.1142	15.2416	17.3753	18.6458	25.4466	36.4632	36.7011	24.6116	28.2538	33.5226	22.9624	39.1031	27.5617	42.5362	30.627	20.6758	27.7612	29.8192	20.9438	36.5714	24.4537	35.296	23.2035	29.2309	27.5627			0.0447773	28.6304
1.1914	30.6121	32.1633	38.7385	30.8832	27.7265	24.5039	26.707	14.6152	16.0345	19.8893	26.2744	36.9255	37.2174	26.0289	37.1924	41.396	26.9476	36.8777	29.1266	43.2512	28.3966	23.8506	29.3961	33.288	24.7338	43.7953	24.8814	37.1095	28.9595	27.9555	31.8311			0.0497507	30.2358
1.3106	29.3397	30.5713	41.8297	31.7998	27.4457	25.6132	27.5121	11.7404	11.0589	16.7954	27.6363	42.1422	38.6594	23.5128	44.5541	48.814	31.3084	44.3701	32.1948	43.6411	32.1846	25.4043	34.921	33.1376	31.1943	44.4975	27.5636	35.8711	33.4204	30.0122	32.5322			0.0547283	31.9767
1.4297	25.9676	30.9844	38.823	28.0224	27.4281	23.057	30.1372	9.3204	9.5707	17.5621	26.0617	39.4861	42.3405	21.1718	46.9497	54.8988	32.4801	41.8998	34.5725	42.8484	33.5635	30.8881	39.8646	35.5926	37.4743	46.515	30.5876	33.0779	37.8627	26.2257	31.3398			0.0597017	32.4701
1.5488	23.7777	25.2738	39.4514	27.9536	25.7511	22.0435	31.8636	11.0956	7.8409	16.3023	27.0246	40.5673	40.1853	21.7165	56.2914	56.0339	36.3624	43.6549	32.9726	38.0631	36.0983	31.7383	41.2085	35.7177	38.7584	43.4591	27.3193	30.2775	38.1437	27.5533	31.4537			0.0646751	32.4501
1.668	19.7798	24.3407	37.4284	27.8078	24.3776	20.0523	33.6033	10.1043	6.2119	13.67	24.2235	44.189	37.5045	19.8873	51.6178	58.9591	39.8121	46.2134	33.73	35.7979	35.6252	31.8515	40.2511	33.5699	41.1271	44.8089	30.0748	24.979	37.8297	24.8973	29.7896			0.0696527	31.7456
1.7871	15.8005	23.3647	36.2388	27.327	23.6744	21.6154	32.7061	8.6921	5.8626	11.3351	25.6956	46.6454	37.841	22.2267	55.4978	58.0736	44.2251	45.8884	31.8816	32.5748	36.9564	36.0021	42.7719	33.8146	42.9286	48.1518	29.6666	24.584	37.1767	23.5231	28.6031			0.0746261	31.9789
1.9063	15.6481	19.9952	34.2522	26.5482	22.148	21.5396	30.5628	6.6718	5.6108	10.8975	23.999	40.7977	37.3945	22.0928	51.4148	55.4165	50.4604	49.4267	29.2972	31.7718	31.7311	33.4599	39.8731	34.7237	40.2553	43.2	30.9629	23.671	33.6418	23.2159	29.1115			0.0796036	30.6384
2.0254	12.6096	16.2532	36.7567	25.395	21.3178	23.7946	34.9625	6.6883	5.1645	8.937	24.3296	45.9958	33.3595	21.6664	49.5025	49.5584	54.6046	48.7207	24.9849	27.9647	30.3542	35.1111	34.1355	31.5132	42.5627	42.3476	29.8856	20.4637	28.7001	21.9694	28.4103			0.084577	29.6135
2.1445	10.8887	15.0945	35.0846	28.1692	18.951	23.9566	31.3924	6.2676	4.623	8.5186	24.9017	44.2653	30.8628	20.6502	41.6026	42.4124	54.5869	43.1603	23.4502	27.0018	29.677	31.2638	32.0237	32.7119	38.1748	42.3144	27.9497	17.7698	24.0294	16.7375	25.6531			0.0895504	27.5531
2.2637	10.0826	11.5114	38.6262	26.6589	17.4567	24.4791	25.4767	5.4093	4.8091	9.1073	23.8087	37.4298	32.2919	22.1762	34.3347	43.3705	58.9675	38.8806	22.9144	27.1639	29.5177	26.1499	26.6017	29.9555	32.2383	39.8156	25.1891	17.3537	20.1651	16.031	25.5868			0.094528	25.9213
2.3828	8.1357	10.6441	34.3695	26.1563	15.9532	25.6318	22.7083	5.4477	4.3913	7.5976	22.1484	34.9124	29.3313	23.8766	25.5947	36.7795	60.1225	35.8154	22.9437	24.425	30.6372	22.473	22.7795	30.4295	34.1797	37.7065	27.227	18.655	19.0448	15.8173	20.3858			0.0995014	24.3974
2.502	10.6347	9.4549	33.0801	24.4993	15.0761	25.2778	20.9205	5.0119	3.827	6.6848	21.9194	32.7632	29.2606	24.2899	17.3619	28.7838	57.3165	31.6068	22.223	21.9097	29.7418	21.2936	18.2272	27.8794	29.8924	34.1232	25.0453	16.2837	17.4489	15.8997	22.3721			0.104479	22.5842
2.6211	8.32	10.0887	32.1272	24.4198	16.3602	22.7114	18.9302	4.6622	4.5675	6.4253	21.6205	31.6117	24.4561	25.0442	10.6081	25.3598	58.8746	27.0719	22.3505	23.674	25.3791	15.719	12.7649	24.1863	23.3588	30.0811	24.0531	15.3327	17.8404	14.7996	18.9495			0.109452	20.7016
2.7402	8.14	7.9192	30.3891	24.3503	18.2185	26.1135	16.271	5.1496	4.3034	5.7852	19.6522	27.4439	25.477	30.0017	10.5327	18.828	51.9309	21.7443	22.6432	21.6016	28.7489	15.0843	11.1273	23.5184	21.3241	28.8878	20.8329	14.6136	16.0063	12.6384	18.138			0.114426	19.594
2.8594	8.3659	8.519	29.0852	25.0771	17.4439	26.2958	14.2644	5.1903	3.4766	4.5767	18.0499	27.1129	23.9427	33.8306	7.4709	14.8157	48.5039	17.9074	21.6328	19.8148	25.7927	12.8339	7.6868	20.1958	17.561	22.6824	19.5295	14.3436	14.2816	11.5093	16.2504			0.119403	18.0014
2.9785	6.7899	6.7256	29.3693	22.3534	20.4272	28.8274	14.7043	4.4989	3.1643	5.1908	16.9686	25.3435	22.599	31.0797	5.7449	11.4106	42.2936	16.6286	21.4485	20.4277	28.9327	9.2168	7.312	16.5943	16.4956	16.8172	17.8851	10.8354	15.0955	12.3117	17.0779			0.124377	16.9216
3.0977	5.9352	6.6984	26.8033	22.2188	20.4092	31.4172	13.7534	5.0719	2.6992	5.9375	16.0335	23.562	21.677	34.3728	5.8272	7.4692	37.9577	12.3035	20.5028	19.3476	26.6573	10.8718	5.8	16.2674	14.7546	12.3964	15.777	11.0821	12.3873	12.3584	15.6596			0.129354	15.9358
3.2168	6.3372	5.781	26.961	25.2078	18.6883	31.3956	10.5793	4.1719	2.9018	3.7664	16.1231	22.1222	19.834	31.9841	5.0459	5.7556	32.1216	9.2254	21.5078	18.8128	25.696	9.3834	4.5433	14.3502	12.8705	10.924	14.6293	11.0294	11.4162	11.4522	14.2951			0.134328	14.8036
3.336	5.1017	5.0369	20.9817	22.0813	17.4632	30.8809	10.4991	4.1025	2.9458	4.4824	14.5778	22.0683	17.7473	31.7923	4.8354	6.5089	26.1819	7.2228	20.2195	19.3335	26.8867	8.4615	4.8132	11.824	10.1196	9.0645	14.3174	11.813	12.5737	9.6195	14.6118			0.139305	13.8119
3.4551	5.8225	3.7799	22.7652	22.2288	19.234	32.604	10.2777	3.8418	2.3665	4.7681	15.4914	20.6081	16.1732	27.1448	4.6693	6.0632	21.6149	5.8589	21.0956	17.4728	27.261	7.4789	4.6732	11.6989	9.1352	7.0546	11.9772	8.7426	9.0533	8.7847	12.4697			0.144279	12.9745
3.5742	4.4993	4.5728	20.7769	22.8866	18.4305	33.6908	9.1245	3.7126	2.5963	3.6107	15.1505	19.5931	14.6288	24.9678	5.5541	5.5983	17.9422	4.3197	20.2344	18.698	25.9581	5.9871	3.6758	10.1791	7.4299	8.0446	10.9277	8.7295	10.3297	9.1646	13.1789			0.149252	12.3933
3.6934	4.4435	4.3928	18.8389	18.1939	19.9021	32.079	9.2766	3.4843	3.7552	3.6064	15.8106	16.6348	12.5157	20.8353	4.2706	5.6838	13.8775	4.4841	18.5463	19.5832	27.6113	3.9754	3.2275	9.7922	6.6718	6.5294	9.8165	7.6004	8.6377	9.7162	10.1321			0.15423	11.4169
3.8125	4.7545	2.8484	17.1013	20.3666	19.3205	32.1089	9.6057	3.5232	2.3591	4.7753	15.7583	15.3513	12.0605	15.566	4.307	4.5527	13.0887	3.213	18.8133	20.2673	26.7382	3.3344	3.7064	8.43	6.0507	6.3779	8.9215	8.3356	9.5	10.9783	9.3546			0.159203	11.0151
3.9317	3.3329	2.5128	15.3874	18.3546	17.711	32.4336	7.9571	4.3122	2.565	3.7338	12.6424	15.0783	11.7396	15.6683	4.763	5.4381	8.9309	2.6852	22.2822	20.6542	23.5045	2.9071	3.244	8.2552	4.7146	6.4427	9.489	7.5684	6.9351	8.9128	7.3492			0.164181	10.2421
4.0508	3.1198	2.5634	13.4192	20.3722	20.357	28.5038	7.1945	3.2151	2.927	4.0384	12.7082	11.1167	9.7176	14.1929	3.4428	5.5738	7.9414	2.5616	16.8581	20.0684	22.7752	2.5512	3.1559	8.3403	4.4996	5.663	9.6339	6.685	7.1086	9.5677	5.1602			0.169154	9.51718
4.1699	2.7035	2.1507	10.1669	22.4467	17.7516	26.2568	7.2964	3.3732	2.864	4.7173	12.6734	10.3724	8.9092	12.5494	3.7707	4.6909	5.9342	2.4022	18.2105	20.0261	21.9946	2.3931	2.7546	7.8873	4.0095	4.1125	7.7366	7.0278	6.8137	8.475	4.5318			0.174127	8.93557
4.2891	2.9036	1.4829	7.5616	21.8547	19.1666	23.9808	5.5435	3.4286	2.4805	4.4171	10.0123	9.015	7.3168	9.9003	3.7253	4.436	5.0857	2.7891	18.0384	17.2151	18.7952	2.0244	2.5408	7.9712	2.9882	3.5558	6.8283	5.9804	7.4457	10.3277	3.8565			0.179105	8.15058
4.4082	2.5657	1.5684	5.2399	20.5965	19.8865	17.6234	6.031	3.011	3.0335	3.8086	11.8036	7.8278	6.4084	9.7509	2.1305	3.7846	5.0094	2.135	19.2622	17.3579	17.7507	2.1777	2.7299	7.917	3.0401	3.1613	5.9777	5.5682	7.148	8.4899	4.6349			0.184078	7.65904
4.5274	2.1122	2.1085	3.7612	22.8427	17.8956	14.8734	5.2879	2.7976	2.3939	3.4372	9.2457	9.278	6.7397	7.7274	4.0382	3.7918	4.0397	2.5963	14.7383	13.1282	10.6883	1.7992	1.885	5.0224	2.0473	2.5977	6.0021	5.8623	6.9467	7.7392	3.9445			0.189056	6.6893
4.6465	1.9799	1.4024	3.3026	21.4168	15.691	9.8547	4.7211	2.9921	2.7958	3.8649	7.8839	7.6885	5.3202	6.7553	3.3004	4.0026	3.6262	2.292	12.6874	10.2491	8.7266	1.6739	1.5992	5.2849	2.0643	3.1526	5.4584	4.6942	5.5285	7.5555	3.2667			0.194029	5.83328
4.7657	1.9657	1.4753	3.0516	20.8931	16.4769	8.5766	3.6975	2.9616	2.5422	3.6406	6.1347	8.0893	4.314	5.6141	2.969	3.5586	3.142	1.6136	10.957	7.3493	5.9691	1.3225	1.9606	4.7758	2.0507	3.0856	4.5457	3.7153	6.9377	5.5221	2.763			0.199007	5.21519
4.8848	2.6341	1.5823	2.8893	21.2997	14.6117	6.8954	4.4499	3.3251	2.1098	3.2917	6.1184	6.8979	3.2214	5.3403	2.657	2.5017	2.5425	1.5857	8.6036	5.445	5.4247	1.8768	1.4937	3.4811	2.1839	3.1094	3.9215	4.9244	6.9478	4.3457	2.6061			0.20398	4.78444
5.0039	1.792	1.5292	2.0334	19.4028	14.8612	5.9251	3.919	2.5971	2.6696	4.6725	4.332	5.8479	3.2198	5.0529	2.3775	2.4085	2.6317	1.9324	6.6358	4.2198	4.2765	1.5735	1.6575	3.9845	2.0327	3.8952	3.7648	4.5189	5.831	4.1514	2.6804			0.208954	4.40086
5.1231	1.2301	1.4152	2.3648	19.4302	14.2536	6.2932	3.5438	2.4646	2.3847	3.9845	3.5152	5.0289	2.7463	4.8305	2.7548	2.2412	2.8803	1.6231	6.1192	2.5641	5.7005	1.9306	1.7164	2.7301	1.4872	3.3652	3.3017	3.3834	5.3727	4.4195	2.2289			0.213931	4.1066
5.2422	1.2588	1.0048	2.0811	17.4175	12.8546	4.6883	3.7799	2.7821	2.4663	3.4753	3.3968	5.757	3.2746	5.2584	3.1954	2.0382	3.6092	2.0754	5.3021	2.5503	4.0724	1.5528	1.6754	2.4831	1.3929	2.6164	2.7845	3.1666	3.768	3.7409	2.5011			0.218905	3.8071
5.3614	1.4267	0.8948	2.3382	12.2068	11.5365	5.5692	3.3147	2.7188	2.4244	3.6742	3.9033	5.2458	2.3258	4.5852	2.6958	1.9137	2.7153	1.7554	3.8885	2.3158	3.9486	1.6784	0.9735	1.919	1.4931	3.3733	3.2123	3.2466	5.783	1.9565	2.212			0.223882	3.45952
5.4805	1.2729	0.9653	2.486	8.104	9.1299	3.9675	2.9978	2.7655	1.9535	3.4549	2.7756	4.6015	2.6684	3.3803	2.8088	1.4601	1.8613	2.0462	3.9099	2.4986	3.419	1.5886	1.2403	1.6856	2.0676	2.4833	2.9142	2.3565	4.1626	2.6376	2.608			0.228856	2.97649
5.5996	0.9712	1.0935	1.9037	5.0775	8.5693	5.1321	3.0724	2.223	2.007	2.9189	2.6657	4.5721	3.4722	3.0591	2.7255	2.2087	1.8649	2.2268	3.2823	1.7081	3.3144	1.6142	1.7319	1.1115	1.08	3.4867	1.8522	2.552	3.6556	2.5993	2.0769			0.233829	2.76867
5.7188	0.8153	0.7637	1.6042	5.0685	6.1475	5.1914	3.7028	3.0345	1.5747	3.3711	2.57	4.1316	2.8479	2.4968	1.9131	1.5766	1.7133	1.9385	3.1995	2.2388	3.3721	1.4309	0.9196	1.3846	1.2352	3.108	1.6845	2.5058	4.3767	2.1256	2.1929			0.238807	2.58825
5.8379	1.1595	1.0231	1.8161	3.5836	4.6886	5.1594	2.4578	2.0734	1.8382	2.2871	2.6949	4.4839	2.7398	3.4271	1.82	1.625	1.5577	1.8757	3.6127	2.0241	3.28	1.4281	1.1524	1.27	0.9522	3.4139	1.5709	2.0335	2.9263	2.4897	2.0445			0.24378	2.40352
5.9571	0.5826	1.4413	1.5632	3.0276	3.618	5.2695	2.4993	2.4585	1.5254	3.4723	2.7289	3.8656	3.0072	2.5709	2.1788	1.0288	2.0027	1.7728	3.0834	1.601	2.7699	1.3718	1.2443	0.879	1.868	2.595	1.9466	1.7985	4.0832	1.761	2.6801			0.248758	2.3321
6.0762	1.1419	0.701	1.4798	3.5205	3.8011	6.4301	1.4874	1.993	1.7145	2.6436	2.1696	3.4861	2.6221	3.1307	2.2688	1.9851	1.5168	2.0889	2.4043	2.1492	4.0028	1.2811	1.2915	0.8284	1.6181	3.7798	1.5992	1.7748	2.3296	1.2793	2.5969			0.253731	2.29406
6.1953	0.5759	0.7857	2.2003	2.9471	2.7546	4.5734	1.859	2.5903	2.3435	2.9272	2.3612	3.6696	2.4457	3.2478	2.0232	1.5175	1.2944	1.4925	3.6223	1.7034	2.678	1.3198	1.6574	0.8073	1.7585	3.1402	1.7041	1.5723	2.7464	1.3206	2.1187			0.258704	2.18574
6.3145	0.7988	1.3131	2.2184	3.2321	2.5648	4.1941	1.5934	1.5697	2.14	2.2111	2.321	3.8437	2.4305	2.5044	2.4415	1.3629	1.6287	1.945	3.6472	2.162	2.9321	1.4141	0.9964	1.1147	1.7929	3.3022	1.5894	1.4452	1.8527	1.4862	1.998			0.263682	2.13053
6.4336	0.5275	1.0368	2.2079	2.1965	2.632	3.4301	1.8726	2.1668	2.1262	2.9166	2.1678	3.3017	2.8286	2.7645	2.4646	1.3788	1.6403	2.1442	3.9786	1.896	3.4934	1.71	1.2013	0.6478	1.7083	3.0169	1.8013	1.4167	2.3281	1.1792	2.1136			0.268655	2.13854
6.5528	0.8999	0.9469	1.6647	1.0991	2.6685	2.8495	1.5333	1.8112	2.0294	2.7586	1.807	3.4123	2.1324	2.9362	3.2093	1.4702	1.434	2.3563	3.4617	1.225	2.779	1.9304	0.791	1.0251	1.195	3.3945	1.2402	1.6603	2.2479	1.1042	2.081			0.273633	1.97271
6.6719	0.6218	0.7552	1.2084	2.279	2.1948	2.6116	1.7098	2.2897	2.1287	2.2531	1.9493	4.1095	2.7728	3.1648	2.4152	1.4248	0.8496	2.4366	4.1883	1.6111	3.0656	2.0044	0.9225	0.9322	1.0086	3.9701	1.4398	1.2531	1.5213	1.4829	2.2035			0.278606	2.0251
6.7911	0.8218	0.9941	1.7996	1.9277	1.287	2.3125	2.2612	1.3621	2.0214	2.0514	1.9727	4.1026	2.012	3.5067	2.8795	1.7344	1.0188	2.2473	3.9146	1.6609	3.5016	2.1865	1.0016	1.1597	1.3763	4.6894	1.6558	1.3197	1.448	1.0957	2.6623			0.283584	2.06403
6.9102	0.8801	1.1346	2.0891	1.9094	2.0938	2.7833	2.5438	1.7287	2.3808	1.9109	2.6193	3.4066	2.7852	2.9421	4.0758	1.7453	1.3446	2.5297	3.4868	2.03	3.8432	1.4534	1.2433	1.36	1.1603	4.6393	1.6338	0.7668	1.9541	1.3572	2.7447			0.288557	2.21213
7.0293	0.6461	0.6398	2.0089	2.2283	2.4608	2.9902	2.1809	1.5846	1.7555	2.2085	1.9148	3.5674	2.6108	3.4418	3.2884	1.2243	1.4196	1.7216	4.0519	1.2152	3.1076	1.3806	0.7727	0.9106	1.0506	3.2669	1.4176	0.9933	1.4338	1.2114	2.4931			0.293531	1.97412
7.1485	0.5125	1.2447	1.802	1.8184	1.6408	2.5444	1.8709	1.4691	1.6747	2.4654	2.2452	3.3136	1.8473	2.8767	3.9708	1.6549	1.4413	2.3823	3.6998	1.5302	2.5799	1.3971	1.0019	0.8296	1.2933	3.8702	1.8809	1.1805	1.172	1.0549	2.6541			0.298508	1.96514
7.2676	0.515	0.5386	1.9951	1.6354	1.586	3.2326	1.6717	1.3849	1.7535	2.3585	1.6474	2.8241	2.404	2.8455	3.2332	1.8023	2.0707	2.403	5.0053	1.5807	3.0192	2.2928	1.1167	0.6852	1.2459	3.7058	1.7608	1.121	1.1676	1.134	2.294			0.303482	2.00098
7.3868	0.8144	0.8349	1.9859	2.1889	1.7037	2.4239	1.6999	1.3131	1.8285	1.5136	1.9102	4.0889	2.2941	2.6672	3.7536	1.3349	1.068	2.3739	3.8754	2.1148	2.4949	1.9836	1.1831	1.093	1.2922	3.9308	1.9065	1.4272	1.0027	1.1942	2.5573			0.308459	1.99527
7.5059	0.6714	0.8929	2.0996	1.7787	2.5619	2.4069	1.9087	1.2363	1.5446	1.8641	1.7246	3.4758	2.1198	2.6436	3.5312	1.4544	1.6664	2.7252	3.6207	2.2552	3.2331	2.0101	1.1508	0.6958	1.3659	3.65	2.1077	1.0876	1.48	1.4194	2.4581			0.313433	2.02711
7.625	0.8849	0.6437	1.898	1.5426	1.639	2.8865	1.7587	0.8651	2.0841	1.3691	1.3692	3.3602	2.6411	2.2944	2.9381	1.7482	1.3376	2.3025	3.9999	1.6277	3.3112	1.4117	0.9616	0.9639	1.1788	3.5772	1.9134	1.2364	1.4942	1.5505	2.8494			0.318406	1.92384
7.7442	0.5152	0.6629	2.9173	1.6427	1.8594	2.7006	1.8629	1.9397	1.3705	1.6384	1.6259	3.3331	2.5047	2.9617	3.3012	1.8831	1.0225	2.7493	3.529	1.7833	2.261	1.8745	0.8011	1.1474	1.1097	3.1224	1.9987	1.4024	1.751	1.8079	3.1466			0.323384	2.00729
7.8633	0.8856	1.0605	2.8358	1.52	1.6652	2.7909	1.8787	1.3296	1.1756	1.519	1.6925	3.2099	2.5062	2.9893	4.3179	2.0392	1.3052	3.1927	4.2335	1.7954	2.4457	1.6095	1.0666	1.2103	1.1728	2.78	1.6894	0.8913	0.8865	1.2429	2.5079			0.328357	1.98212
7.9825	1.1954	1.181	2.794	1.6307	1.9888	2.5918	1.976	2.0462	1.6591	1.4766	1.4812	3.0362	2.6943	4.1511	4.5838	1.5149	1.7309	2.8461	3.4928	1.9468	2.836	1.8046	1.5777	0.885	1.2351	3.2536	1.7118	1.301	1.0112	1.2796	3.211			0.333335	2.13304
8.1016	0.7503	0.648	2.279	1.2923	2.7077	3.0063	1.9662	1.5639	1.2147	0.9921	1.452	3.0798	4.0966	2.8795	5.2957	1.6954	1.0548	2.8079	4.8988	2.131	2.7348	2.1694	1.2943	0.6405	1.0231	3.6995	1.9489	0.9567	1.2091	1.6256	3.463			0.338308	2.14764
8.2207	0.6887	1.1291	3.3385	1.3072	1.9598	2.2332	2.0969	1.6249	0.9589	1.794	1.6965	3.2149	3.2527	3.4993	5.4363	1.4612	1.2534	2.8434	4.9407	1.4895	2.7636	2.399	1.3449	0.8268	1.4358	2.9424	2.3958	1.1553	1.4497	1.4784	2.4892			0.343282	2.15806
8.3399	0.5421	0.8955	2.4042	1.1781	1.8469	2.157	2.4838	1.3397	1.0875	1.2146	1.3699	4.5643	3.9831	3.5298	5.4446	2.2124	1.2888	2.6213	4.4683	1.437	3.2617	2.4134	1.4078	0.9795	1.268	2.5712	2.0827	0.9936	1.3894	1.6855	2.2439			0.348259	2.14083
8.459	0.9533	0.9025	2.5576	1.3258	1.8545	3.5386	1.9116	1.3474	1.3172	0.9608	1.6896	2.8251	3.418	5.1686	5.463	1.9773	0.9054	2.4086	5.058	1.6156	2.8614	2.1549	0.8049	0.8878	1.4283	2.5497	2.0449	0.938	0.7021	1.3646	2.8404			0.353233	2.12179
8.5782	1.1056	1.003	2.7766	1.1733	1.932	2.6564	1.9217	1.5645	1.4718	1.0865	1.306	3.6555	3.0788	4.7045	4.5732	2.7829	1.1017	2.9215	6.1579	1.747	3.0209	2.2577	0.8966	0.7972	1.439	2.9218	1.7016	1.0636	0.9858	1.7166	2.9311			0.35821	2.20814
8.6973	1.1138	0.8381	2.2862	0.9073	1.4244	3.1891	3.1088	1.3074	1.2611	1.135	1.1077	3.6917	3.0582	5.3464	5.3092	2.155	1.2188	2.1309	4.6134	1.9719	3.0352	3.1022	1.0002	0.8372	1.0567	3.1787	1.3515	1.3699	1.04	1.5961	3.3102			0.363183	2.19524
8.8165	1.1002	0.9816	2.3242	0.9613	1.8292	3.208	2.4572	1.836	1.4225	0.8167	1.4135	3.3703	3.1335	4.6814	4.8259	2.4042	1.4412	1.9506	4.3418	1.6348	3.3777	2.9127	0.7924	0.9903	1.4636	3.1807	1.6003	1.1519	0.6605	1.5137	3.1968			0.368161	2.16047
8.9356	0.9181	0.8078	2.5382	1.2403	2.2109	3.4398	2.8195	1.9807	0.7326	0.8892	1.0686	4.2354	3.8936	5.02	4.611	1.8085	1.3931	1.7311	4.3483	2.1336	4.0465	4.3882	0.7595	1.0882	1.247	3.2448	2.1689	1.0126	0.8854	1.4933	2.5729			0.373134	2.28154
9.0547	0.9089	1.2546	2.7287	0.8337	1.7111	2.6607	2.032	1.2244	0.9065	1.2041	1.7251	5.2823	3.5786	4.9152	6.0886	2.1123	1.0241	1.9309	5.5048	2.2068	3.0376	4.5606	1.158	1.1427	1.2811	3.974	1.4041	1.0075	1.0005	2.5164	2.9403			0.378108	2.38246
9.1739	0.8018	1.5752	1.8941	0.8465	1.9052	2.9144	2.8725	2.0006	1.0508	1.2214	1.0508	5.97	3.1443	5.7287	4.9014	2.0022	1.5284	1.7122	6.607	1.9402	3.2925	6.663	1.2481	0.7992	0.9536	3.2552	1.3471	1.2542	0.9391	1.8928	2.9656			0.383085	2.46058
9.293	0.952	0.8113	2.4035	0.9296	2.3417	2.8607	2.1874	1.3678	0.9143	1.2452	1.7863	4.8583	4.057	5.5636	4.7807	1.8412	1.2319	1.4632	5.4142	2.3838	3.4242	7.2479	1.105	1.0017	1.7708	4.1755	1.7662	1.0265	1.0419	2.0279	2.4845			0.388059	2.46664
9.4122	1.2953	1.0601	2.6497	0.9608	1.7916	2.9366	2.889	1.4603	1.2419	1.0027	1.3735	3.7291	3.8868	5.772	4.5144	2.387	1.3264	1.862	6.2259	1.7543	3.5203	7.9009	1.3504	0.7437	1.4337	4.628	1.9705	1.4576	0.6933	1.3178	2.269			0.393036	2.49692
9.5313	0.9016	0.8927	1.7667	0.7447	2.447	3.4968	2.9018	1.2152	1.4219	1.2574	1.9866	4.6722	4.0695	4.6779	4.7978	2.0193	1.4635	1.5652	6.5112	1.8745	3.4501	8.9157	1.3614	1.0375	1.0557	3.9299	2.2624	0.8986	1.1159	1.5683	3.5259			0.39801	2.57435
9.6504	0.8946	0.94	2.7583	0.7541	2.0643	3.1185	2.4797	1.2223	1.2539	1.2602	1.3331	4.3264	4.6478	4.1566	5.0693	2.2589	1.3812	1.4499	6.0821	2.7157	2.6697	8.4452	1.0582	0.7007	1.2525	4.0546	2.084	1.2036	0.9434	1.4221	3.2587			0.402983	2.49225
9.7696	1.089	0.6317	2.3676	1.0184	1.9839	3.1779	3.294	1.9713	0.9987	1.2424	1.4367	3.6611	4.1607	4.4819	5.2651	2.3696	1.4764	1.5339	7.9066	2.5686	2.9033	8.8501	1.5768	1.201	1.6686	4.6068	2.0775	1.2163	1.1043	1.1043	2.6796			0.407961	2.63304
9.8887	0.9483	1.0463	2.5864	0.5472	1.8935	4.1982	2.0762	1.8529	0.861	0.8061	1.4204	3.3285	5.2401	5.2351	5.3183	1.9372	1.3835	1.3788	6.1695	3.7058	3.4825	9.9209	1.0555	0.8454	1.3761	4.3384	1.9975	1.0616	1.2588	1.2362	2.7921			0.412934	2.62253
10.0079	1.205	1.0164	2.8568	0.9045	2.2931	4.498	2.3426	1.7792	1.1803	0.9993	1.4161	4.3438	4.3563	4.7015	5.8592	1.9156	1.3156	1.5231	7.4524	4.2591	4.2244	8.964	0.7101	0.6407	1.2677	4.9123	1.9938	1.2673	0.8459	0.592	3.2239			0.417912	2.73742
10.127	0.8051	1.0534	2.8925	1.4125	2.131	4.0289	2.3962	1.3684	0.7577	0.8908	1.6307	4.8798	5.3664	4.7238	5.603	2.5289	1.3138	1.627	7.3318	4.164	4.1963	8.5451	0.9492	0.4831	1.5267	4.2942	1.7227	1.4776	1.6171	1.3717	3.2402			0.422885	2.78483
10.2462	0.9382	0.9433	3.4918	1.3528	1.5959	4.9173	3.4526	1.4292	1.2602	1.2653	2.0071	4.9257	5.2378	5.5944	7.3094	1.914	1.558	1.3332	6.9254	4.1212	3.7223	9.2165	0.9124	0.7844	1.9244	4.9518	1.6977	1.3136	1.1538	1.5853	2.8826			0.427863	2.95863
10.3653	1.0053	0.7856	3.2101	1.2065	2.6313	5.1447	1.8637	1.6692	1.0047	1.4523	1.992	5.3084	5.0302	5.966	6.5959	2.0516	1.0107	1.814	9.1729	4.0815	4.2172	7.8485	0.9503	0.8911	1.4167	5.2439	1.6765	1.2181	1.112	0.8567	2.4688			0.432836	2.93214
10.4844	0.8875	0.6951	2.7878	1.2025	2.5621	4.7523	2.3212	1.1183	1.1981	1.2561	1.4063	5.8429	5.9382	6.1853	6.2842	1.4565	1.3209	1.6806	9.235	4.4344	3.8909	8.8849	1.3172	1.099	1.4174	5.2956	1.5443	1.5584	0.8644	1.3082	3.1992			0.43781	2.99822
10.6036	1.1703	1.3581	3.8751	0.6004	2.3212	4.7865	2.6037	1.2591	0.64	0.9449	1.6361	5.3066	6.111	6.6823	7.2292	2.1844	1.0533	1.596	6.1166	5.3957	3.2738	9.1316	1.2715	0.5269	1.4703	5.0952	1.8911	1.0181	1.9043	1.6128	3.392			0.442787	3.01478
10.7227	1.2569	0.9042	3.4892	0.7928	1.9548	4.2438	1.7602	1.5536	0.7998	1.0473	1.6206	4.6992	8.0307	7.58	8.0984	1.4091	1.1565	1.5918	6.4251	5.1962	2.7939	8.7447	1.6855	0.846	1.5761	4.8352	1.639	1.3215	0.9541	1.2175	2.5051			0.447761	2.95899
10.8419	1.1028	0.7328	3.1951	0.8987	2.3961	3.2077	2.3055	0.8557	1.5172	0.994	1.4828	4.6967	8.6748	6.9233	9.6585	1.4821	1.4193	1.3945	7.4357	5.818	3.4986	9.3457	1.2273	1.0439	1.5673	5.0816	1.5898	1.4234	0.9441	1.0586	1.9134			0.452738	3.06081
10.961	1.0134	0.9025	3.1515	1.1058	1.654	4.0138	2.665	1.3575	1.147	0.6946	1.6846	4.0446	10.7996	7.3466	10.6279	1.5279	1.2193	1.9809	5.9303	6.705	3.4574	9.1068	1.4663	0.5857	1.5713	5.4675	2.0942	1.0054	0.8004	1.2201	2.3928			0.457711	3.18515
11.0801	1.1073	0.8358	3.4579	1.4277	1.9541	2.8168	2.0486	1.2769	1.5247	0.7374	1.4801	3.8349	12.3196	7.3792	9.0313	1.6427	1.473	1.3746	5.3562	9.957	3.5939	8.7248	1.3776	0.4884	1.0463	5.1842	1.3326	0.981	1.5144	1.3533	2.2115			0.462685	3.18851
11.1993	1.3076	1.0906	2.7541	1.4458	2.3058	3.7788	1.4517	1.2565	1.2644	0.685	2.0098	3.1554	12.4582	6.061	8.7881	1.8292	1.7273	1.6181	5.1006	8.9104	3.5714	9.4371	1.632	1.1985	1.4889	5.2545	1.8276	0.6875	0.7558	0.9421	1.8487			0.467662	3.14976
11.3184	1.1102	1.0541	2.2581	1.4153	2.2488	3.7171	2.8332	1.0552	0.8463	0.6854	2.1101	3.3104	13.4904	7.0653	9.295	1.606	1.2101	0.7564	3.4262	8.6133	4.163	8.9629	1.5805	0.8959	1.679	5.8791	2.0179	1.2108	0.9964	1.3678	1.792			0.472636	3.18233
11.4376	0.9548	0.9539	2.8789	1.1082	2.3296	3.3467	2.1087	0.7456	1.4886	0.6838	2.2013	4.0967	14.5341	6.5146	9.6716	1.6174	1.4785	1.1007	4.1345	9.6496	3.745	8.467	1.9915	0.795	1.7239	6.7562	2.1169	1.2044	0.8943	1.1207	3.1183			0.477613	3.33971
11.5567	1.3673	0.9965	2.4309	1.204	2.9722	3.8784	2.4296	1.1564	1.271	0.9417	1.6351	3.6254	12.1148	5.5221	9.3537	1.1729	1.935	1.2561	3.2117	10.2789	2.8619	11.2967	1.4947	0.9961	1.2598	6.2886	2.6056	1.1153	1.37	1.4637	1.829			0.482587	3.26887
11.6758	1.2169	0.7355	2.6698	1.065	2.181	2.7014	2.3103	0.7393	1.3064	1.2588	2.2483	3.316	11.7811	6.237	9.8443	1.4781	1.6403	1.5158	4.5495	10.8809	2.6191	9.6544	2.1016	0.8399	1.0064	6.8236	1.8619	1.3058	1.4264	1.3055	2.5805			0.48756	3.26454
11.795	1.5683	0.6443	2.5379	1.4061	2.1911	2.5951	2.1211	0.9362	1.4588	0.9004	1.7386	3.5738	10.0755	7.7726	10.4677	1.6213	1.6183	1.0648	3.478	12.9412	2.7886	12.3215	1.5944	0.6918	1.2122	5.8473	2.5148	1.2714	1.2075	1.0508	2.0016			0.492538	3.32945
11.9141	1.1648	0.8935	3.2647	0.9106	2.2054	3.13	2.677	0.8505	1.3716	1.2582	1.7376	4.0526	9.2859	7.0141	11.5157	1.5166	1.3188	1.4729	3.84	13.6573	2.5106	9.9003	2.0359	0.8881	0.9979	5.6152	2.2686	1.6352	1.2088	1.4254	2.1929			0.497511	3.34893
12.0333	1.5768	1.3191	3.3075	1.3056	2.3661	4.1719	2.556	1.4191	1.6785	1.3315	1.6388	3.6386	9.2836	6.6296	11.8492	1.1271	1.4793	1.5192	4.6923	15.9739	2.37	10.7191	1.8366	0.7945	1.5109	4.2531	1.8979	1.4723	0.9526	1.318	1.8625			0.502489	3.47907
12.1524	1.313	1.3022	3.3533	1.0559	2.0487	3.1751	2.4551	1.5205	1.3217	1.4111	1.7796	2.6056	9.8302	7.81	12.5074	1.932	1.1168	1.5199	3.761	16.42	2.3346	11.6186	1.8128	0.8929	1.1768	5.1472	1.8923	1.361	1.2551	1.1609	3.132			0.507462	3.54914
12.2716	1.6934	1.0676	3.4854	1.008	1.9518	3.6599	2.6621	0.9663	1.4866	1.7226	1.1122	3.1931	11.4174	7.7386	9.1339	1.7834	1.418	1.5241	3.4467	15.0125	2.1575	8.5086	2.3	0.8914	1.1	5.9064	2.0497	1.0004	1.0597	1.3673	2.7507			0.51244	3.3734
12.3907	1.8373	0.992	3.4091	1.6173	1.8445	3.4585	2.1079	1.3525	1.9242	0.8592	1.4764	2.742	11.4054	9.5102	8.6038	1.7387	1.3689	1.2634	3.5317	16.5082	2.0854	10.0421	1.9476	0.9932	0.8523	6.0153	2.2718	1.4709	0.8388	1.363	2.6645			0.517413	3.48697
12.5098	1.8526	1.2505	2.8056	1.2627	2.0982	2.8151	2.4604	0.8572	1.265	1.2016	1.6162	3.3505	11.1806	8.7012	7.225	1.7947	1.5575	1.4606	3.5392	17.0953	3.609	10.173	1.7353	0.4842	0.9446	5.8267	2.8451	1.066	0.9571	1.2616	2.0324			0.522387	3.42983
12.629	2.354	1.1697	2.8835	1.0728	1.8484	3.4636	2.0127	1.3084	1.3761	1.0099	1.4656	2.2536	11.6441	6.992	7.9792	1.3747	0.8598	0.8093	3.6643	19.7443	3.2155	10.5458	2.0512	0.6926	0.8013	4.7961	2.7525	1.5167	1.1492	1.2193	2.6189			0.527364	3.44016
12.7481	1.5242	1.101	2.3406	1.5102	1.6912	4.2008	2.3452	1.0522	2.1769	1.3655	1.2233	2.207	12.3478	7.1248	6.1986	1.4188	1.4129	1.2104	2.5659	21.7646	4.2846	8.7188	1.6947	1.1973	1.086	5.1927	3.2583	0.7071	1.2086	1.2802	2.5929			0.532338	3.48397
12.8673	1.3569	0.7399	2.3718	1.7238	2.2418	4.0433	3.1635	1.0459	1.2961	1.1034	1.6312	2.1593	12.1328	6.2883	5.3697	1.9788	1.2626	1.0073	2.8631	22.551	5.8484	8.2706	2.7222	1.0514	0.9049	4.8388	3.5049	1.7246	1.1507	1.5704	2.369			0.537315	3.55763
12.9864	1.0193	0.8026	2.6631	1.2585	2.229	3.079	2.4198	1.2085	1.562	0.9044	1.7481	1.8763	13.5844	6.0431	3.7356	1.3957	1.0509	1.3128	3.6237	20.4382	6.2128	7.9318	2.7804	0.8953	1.1442	4.427	4.3386	1.0503	1.22	1.071	1.6511			0.542289	3.37669
13.1055	1.6224	1.0053	2.4961	1.1086	2.1259	4.0508	2.1184	1.2644	1.3657	0.9373	1.9426	2.8005	13.4069	4.3487	2.4809	1.7094	1.1741	1.0035	2.7076	24.4226	6.6031	7.698	2.6182	0.6971	0.8469	5.3847	4.0398	1.1576	1.1019	1.3036	1.9998			0.547262	3.46911
13.2247	1.7229	0.9306	2.685	1.1463	2.4094	5.0874	2.4861	1.0629	1.5198	0.9448	2.1038	2.3119	13.4275	4.6907	3.0494	1.6943	1.1401	1.0704	2.5356	25.6906	5.1094	6.5616	2.2481	1.033	0.7937	5.4354	4.529	1.044	1.0112	1.1125	2.0013			0.552239	3.50286
13.3438	1.798	0.8577	2.7384	0.907	1.7147	5.6435	2.1748	1.4574	1.4848	1.149	1.9031	2.3371	13.07	4.8344	3.0282	1.6376	0.8013	1.357	1.5283	21.6558	5.1828	4.5654	1.7931	0.897	0.9035	5.1125	4.5378	0.6471	1.9307	1.0557	2.3687			0.557213	3.2604
13.463	2.3629	0.9373	2.5425	1.2068	2.9887	4.6991	2.508	1.1699	1.1142	0.7457	1.9411	1.9618	11.561	5.8414	2.6404	1.5757	0.6434	0.9517	2.1029	21.395	5.1227	4.7401	2.135	0.7525	1.3742	5.1356	4.7269	1.4598	0.9965	1.2667	2.0772			0.56219	3.24764
13.5821	1.4413	0.7356	2.7971	1.0446	2.3321	5.7659	1.9579	1.2655	1.0031	1.0506	1.2502	1.6428	9.3601	5.8195	3.3225	0.9598	1.4646	0.8494	1.5569	20.1075	4.6104	3.6559	1.7304	1.196	0.8884	3.983	3.4572	1.221	1.46	2.2959	2.0662			0.567164	2.97714
13.7012	1.5196	0.9835	2.5489	1.0123	2.8314	6.3032	2.6065	1.3421	1.3787	1.0665	1.2722	1.5699	9.3816	6.5719	2.8981	1.3192	1.0752	1.4119	1.8136	16.8436	3.7843	4.4363	2.8472	0.8479	1.209	3.9146	3.4842	1.3581	0.9677	1.298	2.3131			0.572137	2.97453
13.8204	2.1913	0.5978	2.6289	1.8659	1.71	5.5999	2.5826	0.5411	1.4223	1.0352	1.2787	1.3396	9.6674	7.8058	2.8102	1.5766	1.2195	0.7997	2.2991	13.8867	4.9296	3.1705	1.993	0.8956	1.3149	2.9394	3.9057	1.11	1.3105	1.7802	1.6082			0.577115	2.83277
13.9395	1.9022	0.8385	2.3727	1.3267	1.9443	6.7308	2.0428	1.256	1.6199	1.3539	1.8291	1.4667	10.3225	7.9198	3.2964	1.5382	1.1107	0.7931	1.7516	13.5982	3.2639	3.2132	1.7598	0.8402	0.4881	3.0959	3.7509	1.0904	1.6255	1.2649	2.5681			0.582088	2.8379
14.0587	2.6397	0.8048	2.6076	1.2115	1.9624	6.6739	2.5448	1.0524	1.0836	0.598	1.6224	1.4927	9.0862	9.8519	3.4746	1.3023	0.9532	1.3307	1.7367	10.0532	4.0549	2.6557	1.8279	0.9924	0.7754	2.2458	2.9692	1.2108	1.5999	1.6002	2.1164			0.587066	2.71391
14.1778	2.1691	0.8954	1.9703	1.5481	2.2915	4.5731	1.9121	0.7381	0.8972	1.3641	1.488	1.3622	9.7545	11.1994	2.8826	1.0581	1.1153	0.7485	1.652	8.9674	3.577	3.3953	2.6736	1.0619	0.8387	2.3753	3.7861	0.8483	1.0551	1.0749	1.8006			0.592039	2.61528
14.297	2.2214	1.1463	1.6304	1.7207	2.3692	4.9721	2.2231	1.2714	1.5357	1.2847	1.6611	1.7266	10.2679	13.9642	2.3366	1.3986	1.047	0.8435	1.6274	7.9241	4.6663	3.1452	2.0264	0.7874	0.9444	2.1297	3.2116	0.9535	1.1261	1.5061	2.3812			0.597017	2.7758
14.4161	2.3528	0.896	1.6028	1.6496	2.1098	5.3289	2.2245	1.4677	1.4224	2.0733	1.3167	1.3589	12.1622	13.1644	2.4923	0.8025	0.9553	0.934	1.5845	7.8024	4.8508	2.908	2.1836	0.8877	1.1031	1.3454	2.6607	1.2115	0.9064	1.1797	2.1032			0.60199	2.74326
14.5352	2.3424	0.533	1.3328	1.4531	2.3107	4.1852	2.0815	1.2129	1.5278	1.8717	1.435	1.1218	9.7344	15.5378	2.3758	1.6187	1.402	1.1854	1.5433	7.3721	4.5988	1.9219	2.8587	0.7403	0.7887	1.2323	3.7692	1.3601	1.4583	1.3059	2.501			0.606964	2.73266
14.6544	1.901	1.2149	1.7349	1.2508	1.611	3.9859	2.3676	0.8285	1.926	2.8542	1.8853	0.9898	7.1755	16.0381	2.5646	1.0434	1.1163	0.5018	1.2829	5.7028	6.0507	2.1791	3.4253	1.1095	1.2198	1.5769	2.6128	0.7828	0.8523	1.1709	1.7029			0.611941	2.60188
14.7735	2.631	1.3227	1.3347	1.7202	1.6953	3.4877	2.3739	0.9961	3.0285	2.8716	2.1249	0.7336	7.6546	17.7408	1.7483	1.308	0.9231	0.7862	1.5283	5.2401	6.1387	2.7564	2.4223	1.1582	1.2218	1.7201	2.2513	0.9545	1.1098	1.1653	2.1031			0.616915	2.71778
14.8927	1.8753	0.8597	1.1651	1.9767	1.7095	3.6674	2.5098	1.0124	2.8158	4.2212	1.3229	1.2655	7.6918	17.9005	2.1152	1.4971	1.2433	0.8317	1.2747	4.7357	6.3656	2.9324	2.9984	0.8681	0.9514	1.6355	2.5231	1.1384	1.3572	1.6816	2.1399			0.621892	2.78332
15.0118	2.1122	0.8899	1.0271	1.6254	1.512	2.9577	2.9246	0.8907	2.9962	4.8756	1.9537	1.4317	6.8774	20.693	2.1706	1.6177	0.9071	1.1049	1.0652	4.3096	6.2497	2.3395	2.7761	1.0285	0.5484	1.3662	2.8417	0.6513	1.1122	1.3039	1.4357			0.626866	2.76115
15.1309	3.0328	0.4676	1.2159	1.8181	1.1248	3.8487	2.3632	1.075	4.4562	6.0666	1.2705	1.579	6.6522	21.4934	1.8348	1.4689	0.6492	1.0532	1.12	4.1631	5.6511	2.1212	3.4756	0.9023	0.9728	1.8948	3.8669	1.1396	1.1221	1.0693	1.4801			0.631839	2.91771
15.2501	2.2825	0.6911	1.5332	1.7189	1.5239	3.545	2.1703	1.14	3.8308	6.6953	1.564	1.0593	7.0018	21.7585	1.9223	1.4082	1.1109	0.8647	1.4203	4.8351	7.119	2.692	2.1565	0.9379	0.7646	1.2885	3.9703	1.2501	1.0712	1.2689	1.5362			0.636817	2.97198
15.3692	3.1104	0.8266	1.5359	1.7034	1.8304	4.0532	2.8217	1.5663	6.4431	8.7242	1.4629	1.1528	5.3445	25.4548	1.1238	1.0112	1.4845	0.8314	1.5933	3.9186	7.4001	2.6284	3.1545	1.0035	0.8969	1.4364	5.3895	0.9939	1.0468	1.0707	1.2972			0.64179	3.30035
15.4884	2.9882	0.9416	1.0588	1.6985	1.5251	4.2383	2.1389	0.8806	7.2333	10.8703	0.9887	1.4199	5.376	24.3511	1.8018	0.6921	1.1319	0.9438	1.5383	3.8415	7.2108	2.4906	3.1292	1.1719	0.7336	1.4044	5.9494	0.8419	0.7961	1.52	1.2548			0.646767	3.29553
15.6075	2.4447	0.9461	1.6776	1.064	1.6881	4.394	2.6891	1.279	6.6414	11.9467	1.1368	1.1626	5.4885	24.9827	1.4125	0.735	0.9613	1.1026	1.3415	2.9154	7.693	2.639	2.9116	0.7343	0.5601	1.1713	6.6117	1.6251	1.4583	1.0709	1.3809			0.651741	3.35051
15.7266	3.5999	1.0052	1.2933	1.1461	1.5918	4.007	2.2791	1.0511	6.7941	12.635	1.1877	1.2347	4.9816	25.4928	1.1719	0.8473	1.6115	1.3704	1.2736	3.0124	8.0155	3.5266	2.9497	1.0763	0.6516	1.5726	7.7636	1.171	0.7402	1.3326	1.3951			0.656714	3.47682
15.8458	3.3001	0.9485	0.995	1.6254	1.9055	4.4284	2.0318	1.1155	4.6833	14.9778	1.2572	0.9348	5.083	26.8688	1.5601	1.2388	0.8232	1.5664	1.0134	2.6678	8.2829	3.2598	2.9788	0.7095	0.7377	0.9507	7.0033	1.8129	1.2602	1.0662	1.4739			0.661692	3.50196
15.9649	2.6849	0.6005	1.0171	1.3306	2.0136	4.6827	1.5076	0.9841	5.4719	14.2673	1.3328	1.1684	5.3654	28.1953	1.6978	1.1594	0.6836	1.323	1.5756	1.734	10.5641	3.5295	4.2013	1.2002	0.9878	1.1579	7.0166	1.1731	0.8535	1.2474	1.6295			0.666665	3.6244
16.0841	3.2757	0.8783	1.2139	1.5603	1.742	4.3999	1.4646	1.2946	4.8448	15.3787	1.2527	0.698	6.8063	28.7221	1.5263	1.0076	1.3837	1.0002	1.0879	1.6595	10.6078	3.4157	3.6481	1.2105	0.6693	0.9348	6.8341	1.8479	0.9902	0.9465	1.0194			0.671643	3.65553
16.2032	2.4893	0.7516	1.2145	0.928	1.4711	4.7232	1.4912	1.4142	4.1222	13.5004	0.9428	0.747	4.572	31.8092	1.3431	0.9775	0.7047	0.9171	1.4055	1.2646	10.3428	3.2499	4.1132	0.8364	1.0006	0.7594	6.9955	1.6318	1.1142	0.8703	1.7497			0.676616	3.53074
16.3224	3.2516	0.5263	1.0976	1.3568	1.2227	4.2572	1.425	1.0789	3.1814	10.5732	0.6067	0.9278	5.8228	33.6043	1.4974	1.67	0.4785	1.2938	1.0081	1.7577	9.2812	4.8	4.1072	0.9462	0.7334	0.7802	6.5643	1.0546	0.8668	1.3155	1.6246			0.681594	3.50683
16.4415	2.486	0.5122	1.1515	1.5411	1.5531	4.5222	1.5893	1.0947	2.6904	6.4212	0.7902	0.9332	4.7886	28.0139	1.6843	0.9716	0.7046	0.8744	1.0411	1.8478	8.964	4.0632	6.202	1.4437	0.6404	0.7834	6.1012	1.1858	1.042	1.3427	1.6756			0.686567	3.18243
16.5606	2.0054	0.6921	1.3377	1.4725	2.5713	3.6791	1.8762	1.0916	1.8366	5.2413	1.1062	1.1935	4.2634	29.014	1.7542	1.0065	1.231	1.3222	1.1539	1.3284	10.0371	4.3205	5.5592	0.6968	0.4317	1.3031	6.7839	1.1003	1.2255	1.2105	1.6625			0.691541	3.20994
16.6798	2.1725	0.744	0.9095	1.3634	2.6568	3.8665	1.5992	1.0255	1.6178	3.1317	0.8626	0.7496	3.4839	30.958	1.4192	1.467	0.8349	0.7962	1.0642	1.3642	8.7903	5.0486	6.8158	0.935	1.2049	0.9223	7.1379	1.6691	1.0887	1.2238	1.5212			0.696518	3.17562
16.7989	1.7862	0.5309	1.2084	1.7226	1.4897	3.9151	1.9161	0.9352	1.1505	2.3953	0.5968	0.8012	3.1599	29.069	0.9417	1.3283	0.9512	0.734	1.1176	1.3786	8.3847	5.249	6.3949	1.1515	1.0584	0.9733	7.1603	1.3736	1.4124	1.333	1.5625			0.701492	3.00587
16.9181	1.7099	0.828	1.2585	0.9126	1.3703	3.0674	1.77	1.1878	1.2392	1.8117	0.7894	0.6954	2.8853	28.6976	1.2568	0.8956	1.1488	0.7169	0.9924	1.6584	8.128	5.7617	7.162	0.79	0.9979	1.5393	8.2075	1.6831	1.2506	1.163	1.1625			0.706469	2.99154
17.0372	2.2603	1.099	0.8666	1.2137	1.2162	2.9918	1.1681	0.862	0.8697	1.6185	0.7061	0.9034	2.39	27.4426	0.9367	1.0184	1.1752	0.5937	1.0397	1.0309	8.9139	6.1285	7.1152	0.8943	0.959	0.8451	6.9368	1.5215	1.2855	1.1707	1.109			0.711443	2.84781
17.1563	1.7122	0.5792	0.8715	1.1364	1.301	3.0026	1.8967	1.1969	0.6206	1.1024	0.4886	0.9934	2.3196	23.9354	1.2025	1.1531	1.1277	1.1007	1.1075	1.237	8.0436	6.2568	8.014	0.9893	1.1468	0.8684	5.8034	1.374	1.1633	0.8745	1.3844			0.716416	2.70979
17.2755	1.455	0.783	1.1672	1.5084	1.4222	3.228	1.9699	0.8815	0.5428	0.6369	0.9446	0.716	2.4647	21.0081	1.2117	1.2951	0.3809	1.1808	1.32	1.7951	7.4149	6.5551	8.7862	0.809	0.8822	1.1377	5.7894	1.181	1.2514	1.2506	1.121			0.721394	2.64808
17.3946	1.8798	0.5558	0.9592	1.2825	1.3663	3.0825	0.9483	0.8812	0.7123	1.0511	0.7963	0.5066	2.1585	19.2322	1.2057	1.3443	1.1072	0.9394	1.0572	1.1074	5.1433	7.7291	8.434	0.9535	0.8844	1.398	5.8205	1.2408	1.5957	1.1213	1.2742			0.726367	2.50866
17.5138	1.9664	0.2988	0.9081	1.0947	1.027	3.4011	1.6562	0.7751	1.0003	0.8536	0.8829	0.813	2.6005	13.9197	1.0162	1.4731	1.052	0.9534	1.0029	0.9248	6.3765	9.5257	7.6326	1.088	0.8477	0.7388	5.3727	1.3021	1.5103	1.3155	1.5466			0.731345	2.41536
17.6329	2.2275	0.5274	0.9158	1.2147	1.0974	2.8246	1.2651	0.9015	1.1353	0.7818	0.9818	0.8961	2.5701	12.3178	1.1173	1.1678	0.7799	1.0997	1.246	1.3163	5.8008	9.719	8.5007	1.1341	1.0168	1.5784	3.9113	1.3922	1.1612	1.0789	1.0103			0.736318	2.34476
17.7521	1.2887	0.7303	1.3009	1.1875	1.0588	2.1934	1.7677	0.7969	0.9118	0.9296	1.1587	0.9433	1.8762	11.3761	1.0469	0.4891	1.034	0.5094	1.0157	1.5196	5.4753	11.4957	6.8482	1.2868	0.7955	1.3127	6.5998	1.3672	1.2423	1.3276	0.7491			0.741296	2.3108
17.8712	1.3966	0.7799	1.2472	0.9885	0.9827	2.1922	0.9437	0.8947	0.759	1.2651	0.5471	0.951	1.4948	9.1688	1.0996	1.4197	0.7934	0.7311	1.2421	1.6131	3.5514	13.767	8.0266	0.6891	0.9634	1.4593	6.9261	1.6693	0.86	0.9396	1.1231			0.746269	2.27372
17.9903	1.5714	0.7209	1.3851	1.0788	1.0971	2.5531	1.4055	0.7764	0.8074	0.6319	0.747	0.9547	1.7833	6.8047	1.4276	0.751	0.577	0.5756	0.9193	0.7025	3.8382	12.9921	6.3897	1.3889	1.2652	1.0026	8.114	1.9054	1.0684	1.0954	1.0836			0.751242	2.17464
18.1095	1.7367	0.6308	1.3999	1.1728	1.2728	2.6547	1.427	0.9618	0.8571	0.8407	0.4386	0.5134	1.3262	8.0132	1.4016	1.2593	0.9844	0.5673	0.8685	1.1075	3.3849	13.6072	5.6563	1.2539	1.2666	1.5146	8.7874	1.8621	1.0368	0.9795	0.9118			0.75622	2.24824
18.2286	1.4221	0.586	1.3142	1.1848	1.2501	3.0161	1.3452	0.676	0.6835	0.6872	0.9476	0.3843	1.623	7.4158	1.3877	1.4815	0.4995	1.0836	0.9915	0.8532	2.7138	13.1404	5.7319	1.3914	1.2356	1.2803	8.4116	1.707	0.8506	1.6107	1.3682			0.761193	2.2024
18.3478	1.3251	0.873	0.8523	1.395	1.3658	2.3784	0.9075	1.0399	0.7458	0.6427	0.3673	0.4717	1.9193	7.0062	0.803	0.6738	0.9924	0.6526	0.8461	0.9894	2.2359	11.0274	4.3799	1.4752	1.2521	1.1257	8.2435	1.9378	0.7722	0.8893	1.5873			0.766171	1.97334
18.4669	1.3872	0.7349	1.0036	1.3492	0.9928	2.2854	1.228	0.3296	0.5236	0.9394	0.5102	0.7164	1.3676	7.0335	1.0919	1.2218	1.2372	1.8507	1.0121	1.1735	2.0219	9.1812	4.995	1.5699	1.7064	1.5926	6.8665	1.8666	0.9472	0.8778	1.0692			0.771144	1.95751
18.586	1.7118	0.8942	1.6287	1.5943	1.5314	2.159	1.6753	1.1781	0.8968	0.5964	0.5964	0.5669	1.2278	7.2752	1.1182	0.8494	0.8327	1.0298	1.1468	0.9107	1.6961	10.2852	5.1403	1.4265	1.6322	1.4764	7.3685	2.0372	1.0295	1.3094	1.2089			0.776118	2.06549
18.7052	1.8311	0.7601	1.1297	0.748	1.0855	1.3339	1.2816	0.6413	0.8645	0.4406	0.5719	0.8447	1.284	7.1579	1.1647	0.9777	1.015	0.8094	1.2724	1.2367	1.9062	7.9665	5.2782	2.1131	1.2563	1.6682	8.0309	1.7329	0.7217	1.3859	0.8396			0.781095	1.91452
18.8243	1.0658	0.8001	1.0495	0.7991	1.0324	1.6471	0.9803	1.0531	1.027	0.6431	0.8063	0.9369	1.5873	8.2111	1.0625	1.227	1.012	1.6146	1.0075	1.0693	1.5632	7.23	7.1779	2.3117	1.4085	2.1298	6.061	2.2124	0.9693	0.9951	1.4025			0.786069	2.00301
18.9435	1.0378	0.8948	1.0204	1.0231	1.1103	1.6713	0.8944	0.8008	0.8431	0.6721	0.721	0.8057	1.0847	8.5326	1.1808	0.8515	1.0699	1.2463	1.2011	0.8574	1.8081	7.9748	6.5375	2.8163	1.5881	2.6628	6.42	2.2449	1.3201	0.8859	1.2774			0.791046	2.03403
19.0626	1.4255	0.7795	0.9103	1.7562	1.3428	1.6458	1.6807	0.6931	0.6541	0.7406	0.592	0.5357	1.2844	8.8825	1.6208	0.5912	0.9394	1.3736	0.8492	0.812	1.5829	5.5471	5.8303	2.132	1.5874	2.9297	4.3867	1.7404	1.1228	1.0934	1.8782			0.79602	1.9013
19.1817	1.6008	0.704	0.9711	1.3725	1.0657	1.6615	1.4701	0.894	1.0256	0.6772	0.6	0.936	0.9468	10.8739	1.6048	0.5004	0.8803	1.5839	0.9247	0.9064	1.788	5.3949	6.4111	1.8854	2.4357	3.0245	5.3158	1.6961	1.4271	1.3376	1.2637			0.800993	2.03805
19.3009	1.0986	0.9849	0.9792	1.0911	1.1521	1.6175	1.2963	0.5517	0.6374	0.8775	0.4675	0.8118	1.0495	11.4704	1.6795	1.0593	0.9033	1.7849	0.5903	0.9325	1.3868	5.1006	7.267	2.2024	2.1146	2.7274	4.4541	2.3922	0.9548	1.2098	0.5867			0.805971	1.98167
19.42	1.3593	0.7096	0.8313	1.3674	0.9456	1.4499	1.5111	0.4455	0.4981	0.5872	1.2541	1.1146	1.4418	9.2069	1.5185	1.1394	0.8861	1.7379	0.9666	0.9391	1.5599	3.1191	6.8631	2.0856	3.0598	3.0896	4.3281	1.9607	0.9876	1.4496	1.0471			0.810944	1.91807
19.5392	0.7807	0.8672	0.716	0.8358	0.9069	1.4971	0.973	0.7824	0.9596	0.5992	0.4876	0.776	0.9835	8.9341	1.3616	0.9284	0.5916	1.724	0.5971	0.7491	1.349	3.1698	6.8507	1.4537	2.8884	2.0854	3.2951	3.3032	1.3704	0.7278	1.1877			0.815922	1.73329
19.6583	1.3281	0.5517	1.1098	1.3381	1.2601	1.3457	1.2839	0.5853	0.8628	0.7208	0.7824	1.0036	1.2599	8.768	1.7852	1.0806	0.4629	2.3987	1.0745	1.2012	1.5797	2.322	7.585	2.0962	3.0182	2.2394	4.5214	2.9646	1.6693	1.3112	1.309			0.820895	1.96191
19.7775	1.3291	0.7613	1.5596	1.2141	0.9697	1.7858	1.2125	0.7497	0.7171	0.9551	0.594	0.8631	1.3866	7.9833	2.0268	0.789	0.7736	2.7404	0.8966	1.1862	1.7484	2.2741	9.5258	1.8628	2.3275	1.5144	5.0089	2.4645	1.2596	1.3613	1.6033			0.825873	1.98207
19.8966	1.3724	0.937	1.1276	0.8052	0.9735	2.1998	1.2145	0.7627	0.6345	0.848	1.0782	1.1741	1.152	8.2728	2.4166	0.9301	0.6487	3.3272	1.116	1.1218	1.5837	1.8115	8.9027	1.7468	2.6057	1.8496	4.9108	2.5365	1.3871	1.02	1.5403			0.830846	2.00024
20.0157	1.8618	0.3418	0.9066	1.4133	1.0011	1.6889	1.4331	0.7077	0.5392	0.8122	0.9525	0.7449	1.1003	6.5622	3.1637	1.1313	0.719	2.8564	0.9724	0.9623	1.0411	2.1193	10.263	2.4817	2.0619	1.1552	5.1308	2.9353	0.9116	0.9867	1.7143			0.835819	1.95715
20.1349	1.4163	0.7164	0.9804	1.4449	0.9935	1.5715	1.3459	0.8608	0.3705	0.5305	0.9968	0.7218	1.5585	5.6032	4.0238	0.8963	0.9787	2.4408	1.126	1.0315	1.4444	1.6983	10.6681	1.7566	1.6665	1.0853	6.1874	2.6756	1.2755	1.2035	1.8705			0.840797	1.97225
20.254	1.5082	0.9591	0.6698	1.0528	0.9626	1.6273	1.1515	0.4317	0.2856	0.8334	1.0883	1.2248	1.0788	3.9499	3.8687	0.8217	1.0276	2.2893	1.2738	0.7895	1.1991	1.2613	8.8009	2.686	2.394	1.1689	7.3355	2.234	1.2895	0.8958	2.2381			0.84577	1.88379
20.3732	1.6694	0.8096	0.9738	0.8935	0.8695	1.1732	1.5968	0.6818	0.5082	0.716	0.9782	1.2639	1.2775	3.2808	4.2633	1.2797	1.5126	1.5392	1.3264	1.1	1.0902	1.6252	8.4765	2.5153	1.7789	1.358	6.9259	3.7456	1.1927	1.1446	1.6386			0.850748	1.90984
20.4923	1.1646	0.9504	0.6068	1.0953	1.0079	1.2067	1.4894	0.5652	0.7569	0.6163	0.9852	1.5212	1.3764	3.7522	5.1839	1.239	1.0972	2.1399	0.7713	1.2294	0.9889	0.853	7.6805	2.5451	1.3261	1.0985	7.2605	3.1008	1.2913	1.1174	1.5524			0.855721	1.85709
20.6114	2.0676	1.1068	0.8877	1.3603	1.3173	1.7458	1.7035	0.8749	0.6477	0.6284	1.1232	1.9938	1.8388	3.3252	5.8661	1.2315	1.028	1.3574	1.583	1.1953	1.6339	1.1014	5.3993	2.1655	1.681	0.5944	6.5195	4.0108	1.6699	1.1796	2.4042			0.860695	1.97554
20.7306	1.4641	1.026	0.9862	0.9814	0.6124	1.2147	1.5765	0.8849	0.5575	1.0594	0.9398	1.9526	1.4763	3.2461	5.7082	1.9056	1.2509	0.6893	1.5807	1.5976	0.9685	0.8899	3.189	1.7271	1.096	0.4899	6.1465	3.0763	1.5232	1.6229	2.1936			0.865672	1.7301
20.8497	1.482	0.5136	1.1162	1.0735	0.8932	1.6873	1.4831	0.6651	0.6113	0.7459	0.5906	2.0191	1.449	3.1986	4.529	1.305	1.2941	1.1643	1.4085	1.1594	1.3755	0.6014	3.478	0.9882	0.9549	0.3197	6.7577	5.3515	1.5128	1.394	1.9953			0.870646	1.71348
20.9689	1.8246	1.2954	0.8805	1.2839	0.7918	1.6765	0.7819	1.0027	0.6231	0.6729	0.884	1.9337	1.3706	3.511	5.7576	1.9207	1.4265	1.1709	1.9142	1.4244	1.3908	0.6385	2.2716	1.0786	0.8995	0.5399	5.1491	4.6888	1.0686	1.4084	1.7963			0.875623	1.71216
21.088	1.025	0.6414	1.1731	1.2494	0.6562	1.3267	1.1153	0.7211	0.3148	0.5549	1.7566	2.6971	1.2733	2.678	4.598	1.762	1.1203	0.3393	2.3069	1.1939	1.5108	0.2741	2.0838	0.7097	0.6531	0.2033	5.3091	5.69	1.4243	1.8919	0.9036			0.880597	1.58571
21.2071	0.851	0.9928	0.9108	0.8458	0.6683	1.5842	1.0984	0.7753	0.9124	0.2607	1.0766	1.8963	1.4373	2.3238	4.2674	1.1444	1.8763	0.3078	2.0032	1.1761	0.4982	0.3443	1.3288	0.6799	0.3708	0.5027	4.5209	4.9	1.3658	1.8603	1.1541			0.88557	1.41725
21.3263	1.1998	0.9274	1.0908	1.125	0.8336	1.364	1.1278	0.8144	0.7367	0.7394	0.9826	2.7386	1.37	1.7602	2.909	2.0011	2.7156	0.354	2.3772	1.9505	1.7218	0.261	0.5694	0.5516	0.5221	0.5287	2.8597	5.5301	1.6651	2.0845	0.7734			0.890548	1.48984
21.4454	1.2462	1.0902	0.9558	0.9421	0.5605	0.8713	1.3795	0.8808	0.6688	0.8208	0.881	1.7127	1.2074	2.0712	3.2996	2.3895	3.3039	0.3743	1.307	1.1918	1.1051	0.5729	0.5527	0.3883	0.6195	0.3191	2.2176	6.0006	2.2355	1.4571	0.961			0.895521	1.40593
21.5646	0.9811	0.7589	0.9896	0.6203	0.8118	1.1044	1.105	1.0242	0.8742	0.8564	1.2801	1.414	0.9707	2.0416	2.2897	3.3275	4.1856	0.4434	1.7204	1.7539	0.9656	0.2698	0.6573	0.3145	0.2722	0.3663	1.2232	6.0193	2.2056	1.9115	0.865			0.900499	1.4072
21.6837	1.1075	0.7782	0.975	1.1955	0.5885	1.0083	1.199	0.9746	0.7884	0.8353	1.4732	1.8389	1.3637	1.4939	2.0717	3.6391	3.9676	0.3097	1.3522	1.2095	0.9927	0.4928	0.6739	0.3186	0.32	0.2941	1.2107	5.7875	2.5756	2.3547	0.8634			0.905472	1.42109
21.8029	0.6331	1.3111	0.9775	1.018	0.9607	1.7803	0.8214	0.8487	0.8737	0.8661	1.5348	1.3731	0.8714	1.4013	1.6549	3.5822	4.0286	0.0919	1.24	1.4117	0.977	0.5766	0.1951	0.621	0.4676	0.2129	1.0209	5.5909	2.084	1.9921	0.594			0.91045	1.34234
21.922	1.3304	0.7187	1.0024	0.8147	0.6283	1.7486	1.4518	1.0942	0.7591	0.899	2.5065	1.36	1.336	1.639	2.1149	3.4592	3.5834	0.309	1.2712	0.513	0.5065	0.1109	0.3201	0.2723	0.2098	0.1588	0.5358	4.5304	2.5872	1.4066	0.5292			0.915423	1.28087
22.0411	0.8011	1.3469	1.0341	0.763	0.7625	1.4938	0.8711	0.7081	0.5615	0.8383	1.9742	0.9358	0.6361	1.2329	1.2096	2.4281	3.48	0.4575	0.5442	0.5103	0.8839	0.1584	0.3161	0.36	0.1556	0.2578	0.6256	3.1228	2.6142	2.0432	0.7888			0.920396	1.09405
22.1603	1.003	0.9499	0.9838	0.6252	0.7126	1.4275	0.8492	1.0135	0.8131	1.2076	2.2048	1.3207	0.8503	1.2456	1.0764	2.5474	2.4348	0.1386	0.9686	0.7721	0.3218	0.16	0.4814	0.1113	0.0617	0.1347	0.5814	2.4678	3.4744	1.5978	0.5966			0.925374	1.06883
22.2794	1.0374	0.9272	1.3547	1.1	0.4728	1.606	1.1274	0.7728	0.8388	1.2195	2.2779	0.5606	0.6622	1.2546	0.754	1.3529	1.7782	0.1546	0.9881	0.6801	0.3151	0.256	0.3656	0.2228	0.2092	0.0019	0.3744	1.6211	4.55	1.7134	0.3686			0.930347	0.997352
22.3986	0.541	0.7455	0.7638	0.6145	0.4846	2.0707	1.1416	1.1458	0.8679	1.4605	1.9126	0.7387	0.4799	0.5834	1.0359	1.1377	1.0882	0.1594	0.9166	0.6335	0.2747	0.0043	0.157	0.1066	0.2084	0.1057	0.268	1.0103	3.99	1.0396	0.2172			0.935325	0.8356
22.5177	0.9106	0.9872	0.6282	1.0273	0.4516	1.521	0.9738	0.6996	1.1332	1.3521	1.5171	0.4498	0.6371	0.5042	0.4817	1.2151	1.1367	0.0748	0.8403	0.5714	0.491	0.1287	0.0517	0.1318	0.1542	0.0817	0.3409	1.2169	4.8994	1.4317	0.4053			0.940298	0.8531
22.6368	0.7935	0.3801	0.6077	1.1806	0.7618	1.4474	0.9047	1.339	1.3706	1.2343	1.9374	0.5973	0.688	0.7496	0.2142	0.8937	0.5102	0.0564	0.6012	0.5295	0.5551	0.1553	0.1558	0.2598	0.0556	0.156	0.3627	0.7424	4.1524	1.2883	0.3785			0.945272	0.808358
22.756	0.9989	0.5212	0.373	0.7415	0.6862	1.3197	0.7168	1.1125	1.4991	1.4022	1.1843	0.2569	0.5425	0.4979	0.4947	0.9803	0.5746	0.1096	0.4791	0.3501	0.2895	0.0536	0.108	0.1583	0.1021	0.0549	0.2093	0.7869	4.3693	0.6625	0.5011			0.950249	0.714084
22.8751	0.6832	0.664	0.5016	0.7361	0.633	1.5878	0.5602	1.1541	1.9109	1.5912	1.0186	0.3163	0.1942	0.7827	0.2648	0.5407	0.2162	0.0539	0.6004	0.527	0.3393	0.0027	0.155	0.0542	0.0579	0.0523	0.1585	0.7611	2.3486	0.7897	0.2875			0.955223	0.630442
22.9943	0.629	0.5196	0.3683	1.026	0.5022	1.5466	0.8065	1.5182	1.6513	1.8391	0.6347	0.183	0.5662	0.2999	0.449	0.9395	0.4213	0.099	0.5846	0.2828	0.3491	0.2812	0.0525	0.1609	0.2054	0.0541	0.1161	0.6492	2.4805	0.9447	0.3372			0.9602	0.661216
23.1134	0.6126	0.1386	0.2657	1.0737	0.8162	1.2613	0.5736	1.0419	1.9544	2.2347	0.5791	0.3686	0.4729	0.5506	0.3211	1.0417	0.443	0.1603	0.5821	0.1071	0.2841	0.0593	0.0277	0.1301	0.0538	0.1548	0.2616	0.4246	1.4941	0.7635	0.2675			0.965174	0.597429
23.2325	0.786	0.647	0.5256	0.7936	0.6504	1.8943	0.231	1.1486	2.4385	2.0094	0.4291	0.2111	0.3627	0.5091	0.3102	0.5827	0.2662	0.0505	0.4213	0.1322	0.0846	0.0246	0.1562	0.052	0.1041	0.0017	0.363	0.1667	0.5698	0.5045	0.1098			0.970147	0.533435
23.3517	0.6855	0.2946	0.6509	0.955	0.5264	1.3257	1.0817	0.8164	1.5358	2.309	0.5962	0.3701	0.2869	0.4464	0.4728	0.2955	0.1565	0	0.4158	0.158	0.0533	0.1099	0.0283	0.056	0.0031	0.0524	0.1588	0.4503	1.0285	0.4734	0.3105			0.975125	0.519474
23.4708	0.6613	0.2113	0.329	0.7295	0.9512	1.5436	0.2696	0.9204	1.5448	1.4056	0.4977	0.4234	0.1589	0.3405	0.3182	0.5717	0.1551	0.1037	0.2157	0.2569	0.1042	0.2586	0	0.1546	0.1541	0.0529	0.1054	0.8024	0.5133	0.417	0.4664			0.980098	0.472161
23.59	0.7348	0.286	0.7602	1.1779	0.9666	0.9264	0.2956	0.8152	1.639	2.0063	0.3479	0.4685	0.0566	0.3428	0.3117	0.4552	0.1379	0.053	0.4131	0.1341	0.0001	0.0031	0.1043	0.0532	0.005	0.0019	0	0.3721	0.9174	0.0847	0.0635			0.985076	0.449487
23.7091	0.4251	0.2102	0.238	0.7674	0.6652	1.0845	0.2566	0.9171	1.9905	1.4429	0.2862	0.2177	0.3341	0.2726	0.1109	0.7872	0.308	0.0518	0.1614	0.1332	0.0009	0	0.2111	0	0.0512	0.205	0.0246	0.5225	0.5754	0.2347	0.2638			0.990049	0.411284
23.8283	0.5541	0.0577	0.32	0.577	1.0977	1.0013	0.1604	0.6861	1.6231	1.9798	0.0821	0.309	0.2391	0.6739	0.1072	0.3136	0.1091	0.1589	0.0556	0.2389	0.1553	0.0039	0.109	0	0.0017	0.0052	0.0012	0.2179	0.3804	0.2108	0.3592			0.995027	0.380297
23.9474	0.6561	0.182	0.7049	0.5829	0.9478	0.7895	0.3687	0.8208	1.1963	1.219	0.2579	0.1095	0.1642	0.2414	0.3358	0.5279	0.0024	0.0009	0.2605	0.1813	0.1104	0.1536	0.1533	0.0012	0.053	0.0543	0.159	0.2084	0.6045	0.237	0.1122			1	0.367635

## Sheet: Image44
X0	Y0	Y1	Y2	Y3	Y4	Y5	Y6	Y7	Y8	Y9	Y10	Y11	Y12	Y13	Y14	Y15	Y16	Y17	Y18	Y19	Y20	Y21	Y22	Y23	Y24	Y25	Y26	Y27	Y28	Y29			Ap-Basal to 1	Average intensities
0	12.6141	7.1816	5.1029	4.2652	8.2774	13.5784	13.3193	14.7991	16.133	22.0333	15.5499	5.8994	2.5979	2.2102	9.8944	13.341	16.6074	14.3608	6.405	2.6167	2.9453	2.8781	11.229	15.6543	3.8589	2.217	2.926	13.4582	13.4865	8.7949			0	9.47451
0.1191	13.5618	8.7373	5.8503	4.721	7.5179	12.1045	14.9019	16.9072	16.3804	25.1705	15.6522	6.586	2.6911	3.0462	10.3499	15.2435	17.0392	12.5161	5.7241	2.7946	2.6367	2.9694	12.3196	15.9223	5.1879	2.5484	3.5913	12.3997	15.3153	10.0555			0.00425384	10.0147
0.2383	15.5565	11.2578	4.2719	5.1594	7.7285	13.6515	15.0836	16.5303	15.5062	24.6623	15.5012	7.6369	2.4399	4.2948	11.7011	18.5062	17.0609	10.723	6.6945	2.98	3.1754	3.9662	14.4707	16.1439	6.2602	3.274	3.8177	14.4001	14.6001	12.285			0.00851126	10.6447
0.3574	15.0761	13.1833	5.6532	5.8157	8.0283	13.6386	16.3175	18.274	15.0532	28.7271	14.3007	10.1227	3.1362	3.7163	12.7041	17.8875	20.1436	12.7306	7.8393	4.9454	3.6539	4.3819	17.0802	17.9033	9.0467	4.0345	3.8954	15.3187	14.9357	13.7155			0.0127651	11.7086
0.4766	15.3855	15.7773	5.9319	5.4867	8.6727	14.3604	18.8697	18.4001	15.4749	25.1976	14.271	12.9439	3.1444	5.3403	12.0172	20.3805	20.586	13.5058	9.5255	8.817	5.3579	4.4609	19.3195	18.6426	11.8792	5.5881	4.9416	16.5639	15.1905	13.7495			0.0170225	12.6594
0.5957	15.081	16.0595	8.077	6.3989	8.4756	17.2085	20.6182	19.2492	13.7996	24.2466	16.2558	15.1827	4.3439	7.1779	13.1379	20.6412	19.5157	13.9231	10.5552	12.6808	7.0523	4.9095	20.3844	19.5769	14.1493	7.8599	5.8611	17.2367	16.5894	14.9151			0.0212764	13.7054
0.7148	17.8447	17.0751	9.8396	7.1969	9.5859	18.2384	23.8228	23.1005	15.4875	23.035	19.2089	17.5052	5.8982	7.1012	14.0567	22.9684	20.8869	17.8564	12.524	18.3594	11.3929	7.216	25.8894	19.6586	16.0042	10.9367	8.3743	16.2451	20.3063	17.9955			0.0255302	15.8537
0.834	20.897	21.5077	14.266	7.5319	11.6179	17.031	23.563	23.848	15.4043	23.9452	22.3688	22.9961	8.5859	7.8766	15.3217	24.7037	23.9132	20.5538	14.7041	23.5969	19.5433	10.2046	28.4357	22.1532	18.1666	15.2773	11.9524	18.3592	21.589	19.7748			0.0297876	18.323
0.9531	23.2118	25.2087	17.9635	8.3252	11.4234	20.6321	22.5292	24.2634	18.1818	26.183	25.7535	27.6825	12.3952	12.0921	16.4509	25.4242	26.1896	21.5854	16.5811	25.3902	27.6322	11.3943	32.757	24.7934	21.5934	17.2882	13.4498	19.6955	25.7177	22.4765			0.0340415	20.8088
1.0723	25.1756	29.4113	17.2235	9.0989	13.4301	19.3348	22.6733	23.7466	20.5828	24.7192	30.2278	29.4406	18.1828	20.2809	16.1987	25.8966	29.131	26.4786	18.2787	31.1794	35.0855	14.8657	37.595	26.1592	18.8992	18.201	17.408	23.3808	30.0391	22.6925			0.0382989	23.1672
1.1914	29.841	33.6758	18.498	8.9792	14.2918	22.3224	19.7419	23.7709	20.5399	25.4293	35.1122	33.1961	26.0982	23.309	18.5256	26.3154	30.4797	30.0478	18.2668	35.4993	38.6033	17.6508	39.2671	29.1891	23.0982	18.1975	21.8409	27.98	34.1662	23.8538			0.0425527	25.5929
1.3106	31.4278	37.2501	17.9518	10.5027	17.9031	24.9371	18.8065	24.6918	23.8872	25.3338	37.1295	39.2724	32.5735	27.899	23.9541	29.3169	34.482	35.3645	21.1579	39.4303	34.1457	21.1986	42.5845	31.1528	25.0211	17.7435	28.5077	31.8842	35.101	22.0725			0.0468102	28.0895
1.4297	31.7418	41.5657	19.8756	11.4377	17.8958	23.8806	20.3007	24.9217	23.9939	27.6236	42.5652	37.7141	39.9953	33.6762	29.9883	31.9171	32.1314	38.4175	22.6705	43.6993	28.7721	26.3456	40.6671	33.231	24.1148	19.2933	28.6837	34.4024	38.3507	22.6883			0.051064	29.752
1.5488	36.7862	44.1551	19.8325	14.7115	20.2877	22.7543	21.6326	27.3798	22.9388	30.965	44.4437	38.2512	45.3669	35.4233	34.5583	32.1955	31.6389	42.4945	25.6726	46.4359	24.2725	28.3702	43.2474	36.0086	23.9041	18.0503	30.3401	37.4597	38.8604	19.4782			0.0553178	31.2639
1.668	38.2993	49.1798	23.7512	20.3388	22.8322	23.9452	23.7399	28.4418	22.8673	33.0148	47.0825	36.5193	50.8491	36.5321	39.195	34.331	30.5446	48.5983	28.7068	43.5288	20.7531	30.9319	42.7863	37.9207	22.9066	18.2879	27.3965	40.2232	34.1862	20.2651			0.0595753	32.5985
1.7871	41.9848	52.0559	26.6964	27.3376	25.772	25.9085	29.0574	30.1296	23.2392	34.9071	51.8102	36.6884	52.0772	35.0608	43.9435	37.3235	27.7471	56.0613	34.5704	41.1095	16.409	31.4017	42.3824	37.8624	23.9885	19.0213	28.1363	44.1294	29.5994	19.6038			0.0638291	34.2005
1.9063	43.0549	52.8054	32.4293	35.6044	29.2625	26.2002	34.8702	28.3948	24.1617	37.7531	51.2344	35.9274	51.2915	31.07	48.1759	39.6764	28.1206	58.7536	37.1592	37.3998	15.5147	31.6705	43.4308	41.486	22.2492	16.3807	27.3951	40.9164	20.3383	17.5903			0.0680865	34.6772
2.0254	42.6604	49.5696	33.551	38.7734	30.7149	28.7727	35.5616	32.0819	22.2606	45.882	51.0945	32.0258	45.0979	28.9609	53.4937	42.4427	28.2232	61.4596	41.5737	31.9558	15.1048	30.5195	42.5246	38.6648	23.9192	16.0218	25.4505	34.9093	16.0284	18.24			0.0723404	34.5846
2.1445	42.3462	46.683	36.2877	45.4584	34.6355	28.3467	31.5723	34.7589	23.001	49.015	54.7114	30.6144	39.3845	30.3358	53.8998	45.3221	25.4977	60.9239	44.9869	26.6635	16.0753	28.9262	41.7864	36.7983	22.2301	14.4837	26.2716	30.0515	10.6627	16.41			0.0765942	34.2713
2.2637	40.3385	40.3783	38.158	46.4677	38.4951	26.0706	31.0163	38.235	24.0468	49.3277	57.9235	29.2197	33.1635	26.3493	52.742	42.9814	25.9512	55.3992	38.4894	22.1338	15.3971	28.2835	44.9861	32.4474	20.1554	13.9895	25.4236	24.2979	5.7832	15.9506			0.0808516	32.7867
2.3828	38.4911	36.9773	40.765	47.9074	42.3273	27.288	25.2357	42.7039	24.0177	54.6904	58.2885	25.4688	28.06	20.9729	47.5372	46.5616	24.5358	51.6259	36.4804	19.2567	16.8161	28.4184	44.2298	24.7039	19.6788	12.1019	24.6622	17.5428	3.6908	14.1933			0.0851055	31.5077
2.502	36.5029	35.9018	43.4003	50.4955	46.23	27.2238	20.7562	47.4244	24.8465	48.8144	58.8288	27.2348	20.2981	18.7164	38.9771	46.9987	26.2636	41.8287	36.3637	15.6634	18.5342	26.7126	40.7595	19.2052	17.8282	11.1512	21.6787	13.7544	2.3909	13.0181			0.0893629	29.9267
2.6211	28.4754	36.0679	45.742	45.8172	50.2324	29.8392	17.3756	54.9944	23.0911	47.0029	49.8484	29.524	16.758	18.2989	34.6103	43.1284	29.6262	32.5203	33.812	13.2002	15.6749	22.2963	41.2214	12.7556	19.607	9.9098	20.8991	9.2482	2.5679	11.3293			0.0936167	28.1825
2.7402	23.4888	34.2083	42.6961	45.2304	51.5156	31.9053	13.0874	62.9848	24.8214	41.0677	47.0355	26.2152	12.4823	17.2433	30.5827	36.8963	32.0478	21.9693	30.5712	12.2142	13.6214	20.8225	38.2339	8.4728	18.1589	9.1145	20.915	6.0453	2.0877	8.6721			0.0978706	26.1469
2.8594	18.9656	32.6136	43.0585	43.7666	51.5639	33.1445	9.9349	59.475	23.5145	32.0272	39.4423	26.815	11.922	13.4331	22.2668	29.5862	32.4418	14.8338	27.4873	12.2008	12.18	19.2606	32.3737	6.1426	17.614	7.8918	19.6502	5.8602	1.9657	6.6352			0.102128	23.6022
2.9785	18.0302	29.2935	39.7573	38.9212	48.8988	37.8056	5.8995	55.0857	23.9945	27.9311	30.9975	26.3388	11.3321	12.8098	13.8153	21.2169	31.4726	9.3207	24.5438	11.3401	11.8002	16.8585	24.4819	4.3537	18.0655	7.7881	19.5444	5.6925	1.7638	6.1437			0.106382	21.1766
3.0977	15.6833	27.1072	32.499	35.9681	49.0455	39.0391	4.4537	49.7731	28.3349	23.8678	22.819	29.1089	9.2571	13.5901	7.995	13.5406	34.1855	6.9546	20.6606	10.9133	9.6063	14.6918	23.8679	4.6755	17.3321	7.7507	17.7026	4.6133	1.8696	5.3798			0.110639	19.4095
3.2168	13.2623	23.4539	28.8425	30.4618	46.0778	38.8547	3.8039	41.2829	32.1366	16.1566	19.3354	26.5063	7.2837	13.7549	5.6041	9.6349	34.5404	5.865	19.003	10.3309	8.1227	12.391	20.1547	4.698	17.0739	6.7299	16.4177	4.2897	1.8141	5.1285			0.114893	17.4337
3.336	11.434	21.2807	25.5608	25.5975	38.5626	37.4146	3.6647	34.7409	37.6905	11.9093	15.0218	24.2677	6.5011	14.2343	4.3212	6.3369	29.7632	4.7476	15.0425	9.9919	8.9253	10.6725	15.5891	4.5374	18.0131	6.8476	16.6642	4.1038	1.8839	4.9785			0.119151	15.6766
3.4551	8.8487	17.8684	21.6387	21.6054	35.6583	34.3228	3.2628	27.6817	40.1695	8.4115	12.3499	22.445	6.3038	14.318	3.3251	5.4077	27.7914	5.049	13.0881	9.2492	7.2201	8.6284	12.5041	4.7085	18.0307	7.9985	17.1019	3.6305	1.8343	5.0305			0.123404	14.1827
[truncated: 206 more rows]

## Sheet: Image43
X0	Y0	Y1	Y2	Y3	Y4	Y5	Y6	Y7	Y8	Y9	Y10	Y11	Y12	Y13	Y14	Y15	Y16	Y17	Y18	Y19	Y20	Y21	Y22	Y23	Y24	Y25	Y26	Y27	Y28			Ap-Basal to 1	Average intensities
[truncated: 205 more rows]

## Sheet: Image42
X0	Y0	Y1	Y2	Y3	Y4	Y5	Y6	Y7	Y8	Y9	Y10	Y11	Y12	Y13	Y14	Y15	Y16	Y17	Y18	Y19	Y20			Ap-Basal to 1	Average intensities
[truncated: 232 more rows]

[truncated: 1 more sheets: Sheet1]
