# Supplementary material for: Crumbs organizes the transport machinery by regulating apical levels of PI(4,5)P2 in Drosophila
Source: eLife. 2019 Nov 7;8:e50900. doi: 10.7554/eLife.50900 (PMC6881148; doi:10.7554/eLife.50900)
Supplement: Figure 5—source data 4. [file elife-50900-fig5-data4.xlsx]

## Sheet: Image31
X0	Y0	Y1	Y2	Y3	Y4	Y5	Y6	Y7	Y8	Y9	Y10	Y11	Y12	Y13	Y14	Y15	Y16	Y17	Y18	Y19	Y20	Y21	Y22	Y23	Y24	Y25	Y26	Y27	Y28		Ap-Ba	Average int.
0	3.2024	2.8728	2.6673	4.7856	2.7684	3.5538	4.6153	6.1382	10.9619	18.6165	11.8691	10.0982	13.8201	7.2053	4.6181	4.5566	3.7759	7.9098	3.9947	3.4267	3.8902	3.4397	4.8321	8.2758	17.9445	17.9845	22.0543	32.4558	32.4616		0	9.4757
0.1191	4.0521	2.7109	3.6931	7.54	3.379	3.4679	5.1992	7.1267	10.3389	19.9088	12.9316	9.4624	14.7003	9.5485	5.2907	4.5992	4.974	9.649	3.9293	3.3824	3.7991	4.0734	5.1387	7.8554	19.022	18.2062	20.331	33.0169	33.9288		0.00403087	10.0433
0.2383	5.3132	2.8708	3.975	8.4668	4.949	5.0863	6.0497	6.7917	11.3303	21.4018	13.3037	12.0052	16.8982	10.21	5.5435	4.986	5.9415	13.6442	5.0269	4.1409	5.1099	4.7115	6.1189	8.2721	22.4592	20.6038	22.1371	32.6112	37.4622		0.00806512	11.2904
0.3574	9.0026	3.7879	5.2636	13.5166	5.5903	5.9973	6.2311	7.9373	12.8274	20.0135	14.1172	12.7877	17.0539	12.9303	6.0822	5.1691	7.6909	15.9836	6.987	4.4622	6.0839	5.8128	7.4837	9.5242	25.1126	25.0519	23.0042	35.2839	43.4385		0.012096	12.9044
0.4766	14.6582	5.4325	7.3546	19.8129	8.2592	7.9577	6.2622	10.3798	14.0996	21.6594	14.4922	13.9159	16.5279	16.5127	7.8284	6.3607	8.6562	21.9668	10.8018	6.1503	7.4971	8.5155	8.8095	10.5751	28.1265	27.9865	25.0005	39.3634	42.786		0.0161302	15.0948
0.5957	19.9931	8.1485	10.8495	25.7325	11.1796	11.6543	8.8631	11.1572	13.9868	23.4481	15.4666	16.2313	17.3706	19.0513	9.3239	7.0713	10.4906	26.7086	14.5657	8.0729	9.9532	14.2458	12.3502	12.6713	31.8214	32.3762	27.5365	39.5762	45.3956		0.0201611	17.7687
0.7148	30.4104	11.097	13.346	30.1678	15.8325	16.1805	10.6899	11.9609	16.262	23.4458	16.683	18.0694	18.9845	23.0278	11.9191	9.2198	12.2103	32.1967	17.9765	12.7397	14.4117	19.8274	15.6953	16.645	35.5354	35.4594	30.613	42.7483	45.1311		0.024192	20.9823
0.834	40.748	13.8747	18.6038	30.8957	20.8389	23.6239	13.0605	14.3982	17.0644	23.4599	20.4859	19.0019	21.6257	27.8798	16.5821	11.3804	17.0464	34.3381	24.6733	20.5399	19.9214	26.3825	21.951	19.845	39.6547	39.7881	35.2899	44.6035	48.4369		0.0282262	25.0343
0.9531	49.1971	20.9667	22.4148	32.4826	25.4184	24.3992	15.7421	16.8355	19.8603	24.3528	20.4507	20.9515	22.6479	28.3703	20.4173	16.179	19.8608	39.8446	32.0608	29.0928	31.4452	35.374	27.7699	22.0865	42.7736	47.3796	37.3932	48.1614	52.3979		0.0322571	29.1837
1.0723	52.7049	26.9156	28.2786	35.6836	31.0527	28.3422	17.7058	16.394	21.9222	22.2275	22.2788	20.2488	23.1121	31.5248	27.9325	21.1764	23.231	44.518	38.7386	38.9551	39.856	47.4884	32.825	25.038	43.1582	49.3951	42.4021	51.8577	52.1672		0.0362913	33.0045
1.1914	52.5843	35.6723	32.9428	34.8124	34.9084	32.4666	21.275	18.619	21.6352	24.3835	22.8452	22.1713	26.9669	33.4348	32.242	27.0706	27.827	43.7615	45.3039	51.9409	52.2094	60.9184	39.7286	29.3051	44.8108	52.8261	50.3294	53.1121	57.2309		0.0403222	37.3564
1.3106	50.6643	44.2896	36.5867	31.4644	35.229	30.9432	23.3623	20.0101	22.841	23.5371	24.1228	20.7293	28.8391	34.2389	38.308	32.5279	32.1955	46.6324	49.35	60.6937	60.2815	70.5337	44.3997	36.7893	46.7479	54.4768	51.9872	59.0526	62.7264		0.0443564	40.4676
1.4297	47.107	45.6208	36.2944	27.9537	32.3569	32.4429	26.2944	22.3398	27.1723	23.8665	24.1338	21.6423	29.186	36.0298	42.2	36.856	37.6229	43.3591	49.4117	66.0609	68.4965	73.8412	45.002	42.5586	47.1513	56.2188	57.349	61.9003	68.7216		0.0483873	42.3859
1.5488	39.7522	46.8548	36.553	23.1451	31.8058	31.509	26.1648	25.2344	29.3913	23.7316	23.4135	26.0078	30.0095	36.0762	44.0929	40.0232	40.0652	40.8381	50.1255	65.4483	70.2346	77.5236	47.4575	48.3497	44.2997	52.1242	55.7342	69.1858	68.3306		0.0524182	42.8787
1.668	30.0426	44.3541	34.6126	20.1493	28.9584	26.0661	27.7246	29.7193	30.0406	23.6596	26.5873	23.7275	33.0759	34.8176	42.261	43.0719	42.1515	36.7224	48.1693	63.3937	69.6296	80.1407	47.6537	49.8267	45.6513	49.624	59.7407	67.0433	73.4002		0.0564524	42.4833
1.7871	22.3659	40.4068	32.7512	18.4761	23.8697	23.2847	26.2005	26.7647	30.0034	25.1454	24.8837	23.4581	33.2077	34.7293	38.9953	42.5629	38.9127	34.6618	43.5681	58.9324	65.1826	73.6117	43.883	54.7887	44.7481	47.1499	56.5704	67.0392	73.0119		0.0604833	40.3161
1.9063	14.751	31.6761	29.6011	14.5899	20.568	22.4153	25.6794	25.1242	30.6078	23.3985	23.2444	22.5318	33.9996	31.8071	36.6991	41.2847	38.1613	31.1687	41.0655	46.3555	54.4939	63.872	45.135	54.6364	38.9374	39.8832	54.3135	61.5767	71.5302		0.0645175	36.8658
2.0254	11.0368	26.4429	24.5272	14.9206	18.1063	20.661	24.0635	25.0675	28.7907	21.4325	22.2876	21.9834	32.237	28.3015	33.2025	40.4775	37.62	26.7591	32.8669	36.024	42.0075	56.2519	45.9457	55.6251	38.3457	37.3837	45.944	55.85	70.2626		0.0685484	33.6009
2.1445	7.4424	20.2725	20.0064	12.9168	15.8929	18.8721	23.8417	24.8337	29.3052	19.6196	21.7739	23.4056	33.2106	23.4833	30.9567	35.5145	37.776	24.7437	26.9261	27.2558	29.8501	48.7535	40.8153	54.9292	35.5159	34.933	40.3233	46.1905	59.1594		0.0725793	29.949
2.2637	7.3845	17.1195	16.0642	11.4593	15.442	17.1822	24.3289	25.4076	26.4846	19.9136	21.0877	22.524	33.4296	19.8845	25.3858	33.0063	36.8254	21.0485	23.5963	23.9039	22.175	37.8431	40.1598	50.3008	31.6664	30.9297	33.7654	31.9749	46.1984		0.0766135	26.4308
2.3828	5.6067	13.824	13.6048	10.8444	13.0574	17.3326	22.0192	24.573	25.6302	18.5488	19.8292	22.1643	30.914	14.5786	19.3537	27.8986	34.5834	16.8404	19.0636	19.7015	19.9816	29.7413	34.6733	44.9007	27.4637	27.9473	27.6768	21.2549	34.1078		0.0806444	22.6799
2.502	4.8242	10.9052	10.2122	8.5209	12.051	17.6073	20.0888	24.1786	23.1656	18.4367	19.042	22.1919	25.9649	11.7401	14.7188	25.1531	31.3756	14.8733	15.9737	16.9471	18.5435	24.4023	31.6079	38.3903	23.7079	21.5711	22.6498	13.1168	22.5852		0.0846786	19.4671
2.6211	3.9945	9.0939	9.1819	8.2909	11.3386	18.0333	21.0671	22.0976	23.834	16.3361	17.4704	21.7737	24.0632	9.0578	12.1986	21.7027	26.9041	12.5973	15.4208	15.7972	15.3233	20.7767	26.7185	34.1074	19.5409	19.8808	16.918	9.5238	15.0493		0.0887095	17.1756
2.7402	3.3472	6.938	7.1297	6.2861	10.8667	16.5101	20.0548	19.3329	20.5205	15.9008	18.355	20.8314	19.0294	6.1003	8.9127	18.1276	22.5599	11.9786	11.9349	13.0506	13.3042	16.274	23.8105	25.8858	17.1582	17.3238	11.5336	6.8398	9.9825		0.0927404	14.4786
2.8594	3.1979	5.8257	6.216	6.048	10.6934	15.9922	18.2138	18.7427	17.6972	15.0764	16.1856	18.9279	15.5835	4.8784	6.8925	14.8955	19.7101	10.9484	12.3048	11.4998	10.8134	14.9142	22.9609	22.8586	14.2654	14.1101	9.6893	6.1849	7.4238		0.0967746	12.8535
2.9785	2.6606	5.2082	5.3195	5.5406	8.7761	14.5804	18.0432	15.9634	15.4226	13.916	16.5342	19.1924	11.9728	4.3227	5.6342	12.0048	17.047	9.8035	11.6383	11.2991	8.9275	12.9231	18.7936	22.1498	12.2767	11.7147	7.7901	5.2749	5.9687		0.100805	11.4034
3.0977	2.3324	3.8271	4.9694	4.4165	8.4882	13.1724	16.7315	15.1215	13.2002	13.3891	14.468	19.1311	9.0907	3.9031	5.0299	9.6134	15.2103	7.9708	10.456	10.3138	8.8601	10.3585	16.2717	20.4695	11.2007	9.3675	5.1073	4.5845	4.5487		0.10484	10.0553
3.2168	2.4244	3.5339	4.0749	3.6125	7.683	11.7699	17.9525	13.1607	11.94	12.8184	13.1512	17.1501	8.7291	3.2916	4.2289	8.5737	14.113	7.6882	8.8926	8.9134	9.1166	10.5766	15.4432	17.1695	8.9453	8.8527	4.3956	4.042	4.2347		0.108871	9.1889
3.336	2.4627	3.2332	4.1772	2.97	6.8246	12.3241	16.4322	12.3054	9.0505	11.0472	13.2526	17.2659	6.5909	2.7132	3.606	6.5457	11.131	7.5669	8.2818	7.9378	7.5027	9.2407	14.1148	16.6391	7.0558	7.1473	4.0253	3.3406	4.2397		0.112905	8.24224
3.4551	2.0869	3.0688	3.3767	2.4862	5.4507	10.3341	17.3612	10.2391	7.3803	10.0411	15.1329	17.0282	5.7524	2.206	3.2898	5.4799	9.938	7.5087	8.4447	6.7964	7.2052	7.3927	14.489	14.0117	7.5412	4.9103	3.4308	3.282	3.5616		0.116936	7.55954
3.5742	2.3158	2.787	3.0853	2.5226	5.1839	9.7931	15.9436	9.5908	5.5784	10.4853	13.7206	15.7695	5.5289	2.8767	3.5269	4.8818	9.2899	5.8215	7.2998	6.2485	7.1904	6.6028	11.5667	11.8366	6.0661	4.0262	2.9157	2.8898	3.4772		0.120967	6.85591
3.6934	1.9003	2.2495	2.404	2.5234	5.0167	9.8023	14.0012	8.0926	4.9431	8.632	11.8638	15.395	5.1074	2.223	2.5133	4.9906	7.5397	5.8786	7.1163	6.502	5.9234	6.319	10.4733	11.5995	5.6569	3.8964	2.1859	2.8542	3.322		0.125001	6.23881
3.8125	1.348	1.7604	2.6716	2.1837	4.8382	9.8963	13.0931	7.1724	3.9299	7.5246	12.2296	15.213	4.2091	1.9982	2.2817	3.8368	7.4945	5.214	6.1492	5.3924	5.515	6.4177	10.3084	11.6301	5.2564	3.4007	2.8363	2.8374	2.8762		0.129032	5.84534
3.9317	1.5149	1.9715	2.5699	1.4654	3.6757	8.9553	11.715	6.5928	3.5498	6.7466	11.6514	16.381	4.3713	1.9619	2.8355	3.3087	6.4508	4.7329	5.9626	5.5209	5.0275	5.4784	9.0308	12.0763	4.1748	2.4265	2.6767	2.9667	3.0797		0.133066	5.47832
4.0508	1.3344	1.7555	2.8392	1.842	3.9635	8.1514	10.7922	5.6239	3.0967	4.5043	10.9018	15.0847	3.3041	1.7716	2.3016	2.6091	5.8756	4.9539	5.5032	4.6098	5.131	5.0722	8.83	9.4738	4.4483	2.5938	2.3284	2.3429	2.2325		0.137097	4.94039
4.1699	1.592	1.3432	1.9869	2.3797	2.5009	6.6147	10.4628	4.2057	3.0612	3.046	10.8175	14.9493	2.8331	1.8647	2.1541	2.1871	5.3902	4.5046	4.6933	4.5397	4.5025	5.3055	7.742	7.5101	3.9064	2.3406	2.2425	1.7101	2.456		0.141128	4.44284
4.2891	1.3762	1.4168	2.0659	1.4369	2.4979	6.2572	9.2559	4.2863	3.0038	2.8135	9.6249	13.4658	2.5913	1.7526	1.5965	2.8932	4.9931	4.808	4.6745	5.1058	3.8476	5.1235	6.7435	6.1548	3.6561	2.6132	2.1542	1.7321	2.8002		0.145162	4.16349
4.4082	1.2789	1.221	2.0761	1.2874	2.8681	5.6579	8.5559	3.7552	2.8036	2.3552	9.2461	14.2222	3.2001	1.7086	1.5399	1.8786	4.7023	4.1906	4.9726	4.2936	3.926	5.2554	6.0316	6.9461	2.6374	2.0931	1.9294	1.842	2.3606		0.149193	3.95984
4.5274	0.8086	1.3115	2.1365	1.3471	3.5316	4.5251	7.2208	2.3692	2.7875	2.5599	10.2848	13.3648	2.7923	1.4876	1.8787	1.8975	3.2123	4.3145	4.7479	4.0483	4.1664	4.79	5.5779	6.0825	2.6669	2.2045	2.1986	1.7702	2.3288		0.153227	3.73836
4.6465	1.0828	1.3581	2.1233	1.2216	2.5981	4.5181	6.2031	1.4433	2.1222	2.1895	8.7118	13.2032	2.0767	1.223	1.6432	1.5553	3.5349	3.8888	4.7802	4.3597	3.8743	3.7029	5.572	5.7626	2.4449	1.3808	2.1386	1.397	2.3647		0.157258	3.39568
4.7657	1.2444	1.271	1.6821	0.9166	2.1627	4.3768	6.4155	1.361	1.9142	2.5899	9.0007	12.0992	2.2456	1.2864	1.8278	1.6966	3.2254	3.9504	3.6925	3.8465	4.2089	3.2909	3.6699	5.5558	2.4097	1.9874	1.7646	1.849	2.1293		0.161292	3.23003
4.8848	1.0131	0.9182	1.5868	0.8089	1.9241	4.3661	5.0963	1.5145	2.4096	1.9609	6.4033	11.6979	2.4491	1.8884	1.6919	1.7433	2.9702	4.3661	3.3436	3.4612	3.3913	3.8958	3.2409	4.5052	2.4019	1.9996	1.8638	2.6999	1.6791		0.165323	3.01003
5.0039	0.9302	1.1467	2.1613	1.2018	1.9759	3.5162	3.8313	1.74	2.014	1.6786	5.8341	9.3497	2.3645	1.6259	1.3063	1.6834	2.9966	4.0933	3.2494	3.562	3.2842	3.6542	3.3662	4.4954	2.3425	1.4021	1.6209	1.6822	1.9182		0.169354	2.75956
5.1231	0.9133	1.0767	1.6874	1.2709	1.4141	2.5263	4.2767	1.4506	2.4916	1.2665	5.361	8.8977	1.5819	1.3505	1.5573	1.3619	2.3269	4.7814	3.8985	3.4972	3.3157	3.7496	3.1504	4.028	1.998	1.5176	1.8627	1.6309	2.0942		0.173388	2.63226
5.2422	0.9379	0.9239	1.3698	0.8165	1.635	2.5035	4.0807	1.651	3.0971	1.1369	4.0972	7.6945	1.6996	1.1892	1.3451	1.1961	2.6973	3.6447	3.364	3.7396	2.5372	3.9758	3.2889	3.5799	1.9773	1.4602	1.7852	1.789	1.6854		0.177419	2.44478
5.3614	0.8934	1.2067	1.3239	0.9088	1.3331	2.7289	3.4104	1.4472	2.784	1.161	3.3242	7.1342	1.9763	1.1383	1.7093	1.234	3.1583	3.644	3.2868	4.1719	2.634	3.2959	2.2779	3.7612	1.9775	1.433	1.597	1.5939	1.5372		0.181453	2.34767
5.4805	1.1186	0.9756	1.8488	0.9525	1.2559	2.453	2.6508	1.5486	2.1623	1.3278	2.8329	6.5448	1.5883	1.0639	1.581	1.501	2.6977	3.3351	3.4602	3.2091	2.8922	3.9908	2.3856	3.3028	1.7847	1.3081	1.5827	1.3794	1.4047		0.185484	2.21169
5.5996	1.114	0.688	1.6454	0.6439	1.0822	2.0173	2.5845	1.4251	2.606	0.9799	2.2455	6.1414	1.4969	1.4747	1.3279	1.3051	2.0811	2.9686	3.2626	3.403	3.2814	3.4771	2.0249	3.0962	1.654	1.8569	1.4163	1.5992	1.7073		0.189515	2.08988
5.7188	0.869	0.7867	1.5515	0.5536	1.24	1.4007	2.1726	0.9983	2.3234	1.1824	1.9665	4.9156	1.4107	0.9614	0.6723	1.36	2.3778	3.0081	3.2892	4.0743	2.828	3.9217	2.4476	3.6036	1.6801	1.753	1.276	1.3679	1.6526		0.193549	1.98774
5.8379	0.9263	0.6085	1.4825	0.969	1.0663	1.792	1.7734	1.0534	2.0803	1.1679	1.6571	4.0447	1.6875	1.1975	1.103	1.3622	2.9127	2.6938	3.1695	3.3744	2.6373	4.2909	2.3357	2.6559	2.1971	1.4349	1.2921	1.4822	1.3185		0.19758	1.92299
5.9571	1.1694	0.7609	1.5336	0.9728	1.0788	1.4981	1.8252	1.4739	2.5086	1.63	2.2006	3.826	1.5879	0.8074	0.9407	1.1021	2.2324	2.2971	3.3274	3.3688	2.5442	3.7952	2.0234	2.6811	1.6831	1.5478	1.1522	1.461	1.3116		0.201614	1.87384
6.0762	1.1444	0.945	1.3637	0.7668	1.1313	1.1767	1.4952	1.7231	2.2262	1.2631	1.7644	3.6472	1.3887	1.1449	1.0247	1.3586	2.8136	2.2242	3.1183	2.6422	2.3944	2.9282	2.2106	2.7951	1.6831	1.4896	1.0639	1.1257	1.7159		0.205645	1.78513
6.1953	0.7072	0.7722	1.1273	0.7729	1.3151	1.1285	1.3858	1.0216	2.2819	1.3738	1.6119	2.8911	1.2618	0.7951	1.2225	1.2533	2.1643	2.2434	2.5932	3.0799	2.1961	2.891	2.1206	3.5456	1.803	1.43	1.0337	1.4501	1.5312		0.209676	1.6898
6.3145	0.722	0.915	1.5751	0.7721	0.8246	1.4542	1.3684	1.0832	2.0887	1.2908	1.3401	2.7107	1.4239	1.002	1.0067	1.3671	1.9885	2.2122	2.7195	3.0686	2.2962	2.9541	2.4547	3.5475	1.7611	1.5793	1.0312	1.3775	1.8707		0.21371	1.71744
6.4336	0.8647	1.0626	1.5002	0.8513	0.7886	1.1939	1.2807	0.9999	2.4766	1.4873	1.5926	2.0778	1.9214	0.8167	1.2448	1.0769	2.1707	1.6598	2.4993	2.9514	2.0513	2.3764	2.2252	2.9241	1.7738	1.9093	1.4978	1.0248	1.5395		0.217741	1.64963
6.5528	1.0712	0.8811	1.3529	0.8297	0.6848	1.1381	0.8884	1.1633	2.2845	1.3215	1.1726	2.4396	1.8288	0.9799	1.251	0.8868	2.1824	1.6402	2.28	2.6772	1.9519	2.0785	1.8757	3.2113	1.35	1.3583	1.2199	1.5093	1.4278		0.221775	1.54954
6.6719	0.8495	1.1248	0.9514	0.7272	0.9971	0.7421	1.0301	1.0097	2.1015	1.3833	1.3578	2.4179	1.4636	1.1037	1.0492	0.6374	2.1139	1.7294	2.4121	2.7618	1.8676	2.269	1.8237	2.487	1.3568	1.3604	0.7862	1.1255	1.2028		0.225806	1.45664
6.7911	0.7645	1.1273	1.7824	0.5193	0.5957	1.0917	1.1435	0.9164	1.9356	0.934	1.1351	2.1825	1.3121	1.2019	0.8864	0.8711	2.0217	2.1581	2.335	2.4522	1.7996	2.1724	1.9255	2.6873	1.5339	1.3363	1.3778	1.5008	1.3717		0.229841	1.48523
6.9102	0.7352	0.6417	1.3628	0.8571	0.9126	1.0918	1.1469	1.1657	1.9878	1.0221	1.2505	1.643	1.1365	1.0779	0.8348	1.2	1.8744	1.7637	2.3668	2.298	2.0759	1.9581	1.8687	2.391	1.4268	0.9648	1.0685	1.3451	1.5212		0.233871	1.41343
7.0293	0.9252	0.6619	1.0156	0.9256	0.7647	1.0222	1.1001	1.4144	2.3917	0.9184	1.3137	1.7838	1.1991	1.2595	0.8299	0.7446	1.6794	1.4027	1.8987	1.6165	1.8599	1.6986	1.81	2.5377	1.4644	1.086	1.042	1.4154	1.5202		0.237902	1.35524
7.1485	0.7308	0.8107	1.1015	0.845	0.908	0.9914	1.1362	1.2591	2.5654	1.0175	0.9826	1.9071	1.1978	1.2253	0.5465	1.0736	1.5851	1.9212	2.5154	1.5204	1.9519	1.4405	1.8348	3.1094	1.6918	1.3293	1.0719	1.273	1.5702		0.241937	1.4177
7.2676	1.0063	0.6592	1.2475	0.6119	0.8393	0.7374	1.5032	1.6635	1.8925	1.2271	1.2206	1.668	1.5629	0.6914	0.8835	1.312	1.729	1.6731	2.5576	2.1333	1.8039	1.3203	1.7232	2.6064	1.2819	1.08	0.9403	1.2923	1.4389		0.245967	1.38988
7.3868	0.4401	1.0735	1.6255	0.7395	0.5908	0.8639	1.0155	1.553	1.992	1.2646	1.5329	1.2763	1.3909	1.0186	0.565	0.8723	1.966	2.0518	1.6489	1.8045	1.3399	1.7034	1.6508	2.6879	1.9076	1.0965	1.1391	0.8318	1.4645		0.250002	1.34852
7.5059	0.7424	1.0539	1.1451	0.7428	0.5699	0.8204	0.8603	1.2738	1.7764	1.1741	1.3482	1.5298	1.3321	0.722	0.6225	1.1488	2.155	1.4844	1.6821	1.5787	1.7315	1.0925	1.6286	2.6376	1.5075	1.1492	1.307	1.3839	1.5234		0.254033	1.30082
7.625	0.6428	0.5812	1.0356	0.9627	0.7633	0.6003	0.7191	1.1542	1.7498	1.3704	1.1916	1.6969	1.3231	0.7036	1.0516	1.1984	2.3003	1.1684	2.125	1.3433	1.2891	1.3979	1.4666	2.2208	1.6169	1.2439	1.3962	1.162	1.5225		0.258063	1.27578
7.7442	0.7952	0.6565	1.1414	0.8222	0.8205	0.6328	0.8173	1.226	1.7991	1.116	1.3831	1.5051	0.999	1.0333	0.8525	0.8702	1.9665	1.1608	1.9051	1.4838	1.2555	1.5685	1.5224	2.4188	1.696	1.109	1.1899	1.0503	1.4578		0.262098	1.25016
7.8633	0.656	1.0199	1.2594	0.472	0.734	0.7917	0.6999	1.2696	2.0018	1.2953	1.5227	1.7761	1.5476	0.9741	0.8981	1.1844	1.7027	1.0591	1.6074	1.1802	1.1049	1.098	1.3103	1.975	2.1419	1.1999	1.5956	1.2641	1.7592		0.266129	1.27934
7.9825	0.5255	0.8817	1.1294	0.8138	0.8616	0.7832	0.6867	1.547	1.2764	1.1371	1.1186	1.5847	1.4649	0.7904	0.7617	1.0252	1.7119	1.2378	1.4748	0.9141	1.207	1.0658	1.7571	2.6296	1.702	1.2441	1.1094	1.5472	1.9012		0.270163	1.23758
8.1016	0.4516	0.8253	1.0656	0.7251	0.655	0.6523	0.7267	1.0549	1.8176	0.9532	1.1645	1.6806	1.3509	0.9082	0.6701	0.9694	1.6599	1.1147	1.2044	1.0664	1.0646	1.1961	1.7403	2.3198	1.8935	1.0755	1.2601	1.2914	1.791		0.274194	1.18444
8.2207	0.4249	1.1492	1.1732	0.7503	0.7383	0.7723	0.907	0.9294	2.0093	1.0956	1.1457	1.7734	1.9091	0.9901	0.7632	0.6962	2.477	1.0261	1.3725	1.1069	0.8657	1.6874	1.5486	2.1009	2.1429	0.8189	1.256	0.8867	1.9954		0.278225	1.25904
8.3399	0.6065	0.9055	1.9504	0.7889	0.561	0.5271	0.7143	1.1121	1.433	1.5232	0.8807	1.6208	1.7381	0.9889	0.4711	0.9763	2.2094	1.0923	1.8018	1.1652	1.1239	1.0477	1.4999	2.3445	1.6697	1.2695	1.2386	1.0262	1.7025		0.282259	1.241
8.459	0.5848	0.6614	1.8652	0.7768	0.5293	0.7561	0.728	1.0432	1.5752	0.7982	1.2926	1.5934	1.6175	1.2163	0.5551	0.9057	1.7152	1.2322	1.3423	1.1284	1.1858	0.8775	1.2645	2.5088	1.6851	1.3283	1.3007	1.3069	1.4439		0.28629	1.20063
8.5782	0.7789	1.1123	1.5401	0.6867	0.478	0.5518	0.7533	0.9907	1.8842	1.346	1.5364	1.5783	1.1079	1.1035	0.8943	0.8845	1.7139	1.2683	1.0422	1.0485	0.8647	0.8765	1.3014	2.8642	1.8502	1.3889	1.275	1.0863	1.9185		0.290324	1.23191
8.6973	0.7614	0.8468	1.4315	0.6421	0.9188	0.5659	1.025	1.4304	1.6195	1.1848	1.0809	1.667	1.3918	0.5147	0.8823	0.7579	1.6996	0.9877	1.3186	1.1737	0.7348	1.0723	1.4738	2.8036	1.9262	1.0875	0.9977	1.5952	1.656		0.294355	1.21543
8.8165	0.5365	0.9156	1.3943	0.7121	0.6421	0.9487	0.8359	1.2688	2.043	1.0389	0.7539	1.6197	1.6124	0.5671	0.5465	0.9067	2.0878	1.0571	1.2246	0.9289	0.8418	1.1597	1.3052	2.462	2.2519	0.9784	0.9884	1.7474	1.8202		0.298389	1.21364
8.9356	0.6753	0.908	1.9627	0.4588	0.6969	0.8182	0.8386	1.34	1.9615	1.1543	1.1169	1.7891	1.4696	1.1412	0.5364	0.8144	2.3923	0.8301	1.1264	1.1103	0.7193	0.6598	1.2817	2.6835	1.4701	0.8324	0.9908	1.4998	1.7051		0.30242	1.20633
9.0547	0.7507	0.875	2.5628	0.4442	0.5346	0.9462	1.0692	1.2606	1.7453	1.6528	1.1308	1.869	1.9544	1.1059	0.879	0.8402	2.7087	1.022	1.2469	1.0469	1.0318	0.834	1.8176	2.7739	1.9335	1.1125	1.2026	1.7939	2.239		0.306451	1.39255
9.1739	0.8418	0.7048	2.0856	0.5253	0.6106	0.6606	1.1347	1.2466	1.8943	1.383	1.0794	1.5812	2.0975	1.1018	0.6874	1.018	2.7145	0.9629	0.9504	0.9869	0.9115	0.7797	1.324	2.9588	2.184	1.2082	1.4986	1.5635	1.9907		0.310485	1.33401
9.293	0.7449	0.6423	2.4613	0.8903	0.6966	0.6778	1.3011	0.832	1.7964	1.2099	1.2571	1.9091	1.7212	0.8031	0.5434	0.6929	2.3735	1.2705	1.0286	0.581	1.061	0.9546	1.3389	2.9791	1.7919	1.0779	1.3951	1.659	1.5583		0.314516	1.28444
9.4122	0.9648	0.8031	2.3155	0.4697	0.4949	0.9458	0.9099	1.0133	2.1886	1.6468	1.4844	1.9116	2.7507	0.917	0.7037	0.5982	2.1065	0.9072	0.9306	0.944	0.8363	0.9902	1.1958	2.4588	2.5598	1.3223	1.1777	1.9025	1.8464		0.31855	1.35504
9.5313	0.669	1.1036	2.3634	0.4136	0.7048	0.7551	0.7605	1.1912	2.1133	1.694	1.1438	1.5669	2.7267	0.9225	0.7347	0.6659	2.1134	1.1245	0.8745	1.1151	0.7402	0.9004	1.2765	2.1736	2.2997	0.7826	1.6428	1.828	1.571		0.322581	1.30936
9.6504	0.7009	0.7821	2.3931	0.4057	0.6053	0.2974	0.5765	1.108	2.4493	1.5408	1.0339	1.5303	3.2913	0.6486	0.4106	0.8279	2.2999	1.2502	0.7981	0.7238	0.9128	1.0662	0.8812	2.4306	2.0017	1.1157	1.5378	1.6204	2.1616		0.326612	1.28971
9.7696	0.4239	0.7911	2.4125	0.5367	0.641	0.5604	0.8072	1.5273	2.9316	1.7334	1.1048	1.8753	3.5377	0.9065	0.8647	1.1018	2.7939	1.3052	1.281	0.7295	1.0836	0.9605	1.0459	2.3005	2.016	1.219	1.8224	1.5387	1.5654		0.330646	1.42819
9.8887	0.5651	0.6922	2.9864	0.8558	0.5713	0.7094	0.8228	1.5243	2.4705	1.8192	0.9915	2.0937	3.1945	1.0237	0.8541	0.7746	2.2065	1.2549	1.3068	0.8198	0.8024	0.8915	1.2223	2.0628	1.8689	1.0695	1.6457	1.4959	1.4267		0.334677	1.3801
10.0079	0.8397	0.7469	3.8422	0.6927	0.3777	0.6576	1.0091	1.1751	2.5233	1.3614	1.2487	2.4017	3.8663	1.0687	0.7616	0.7107	2.6185	1.2942	1.1294	0.7851	1.2978	0.7323	1.277	2.7892	2.454	1.375	1.8807	1.45	1.3593		0.338711	1.50779
10.127	0.7066	0.6197	3.5904	0.7678	0.6938	1.0564	0.7814	1.134	2.4205	1.2573	1.328	2.3081	4.0572	0.818	1.1171	0.6973	2.5046	1.1977	1.0593	0.8312	1.0688	0.8713	1.091	2.6005	2.1022	1.0403	1.4395	1.2266	1.2932		0.342742	1.43723
10.2462	0.5815	0.372	3.6627	0.9264	0.9165	0.719	0.5738	1.0536	1.9809	1.1795	1.3158	1.816	3.3361	0.7344	0.9726	1.2998	3.2136	1.098	0.9827	1.1373	0.9853	1.0767	0.9285	2.374	1.9193	1.1248	1.8221	1.2574	1.6291		0.346776	1.41343
10.3653	0.891	0.6836	4.0273	0.8874	0.7881	0.7051	0.7668	1.0803	2.665	1.2879	1.4971	2.2052	3.5098	1.084	0.8114	0.8219	3.3793	1.5262	0.8872	0.7895	1.2496	0.7388	1.1558	2.6569	2.0573	1.2065	1.7908	1.1586	1.3959		0.350807	1.50704
10.4844	0.6942	1.0978	3.9653	0.8157	0.6731	0.7592	0.7745	1.6955	2.4349	1.3002	1.4507	2.0931	3.1571	1.1456	0.7908	0.9396	3.0589	0.9835	1.1184	0.8623	0.8603	0.9749	1.4079	2.8604	1.883	1.5124	1.3416	1.123	1.2997		0.354838	1.4853
10.6036	0.463	1.1298	4.189	0.708	0.8899	0.472	1.1455	1.5677	2.3385	1.5319	1.3552	2.028	3.5543	1.0514	0.7139	0.7784	4.1373	1.4196	0.9861	1.1202	0.7482	1.164	1.6761	2.4057	2.033	1.3006	1.7009	1.3254	1.2223		0.358872	1.5571
10.7227	0.6739	0.9343	4.7381	0.7406	0.7787	0.4355	1.0373	1.2878	2.6707	1.5536	1.338	1.9285	4.3238	0.7686	0.8833	0.9742	3.2373	1.0683	0.8977	1.0411	0.4777	1.365	1.3164	2.4044	2.1405	1.5305	1.8561	1.3491	1.3752		0.362903	1.55608
10.8419	0.4689	1.0358	4.9841	0.7909	0.5585	0.4592	1.0425	1.5987	2.451	1.7035	1.905	1.997	4.1048	0.9021	0.9659	0.8136	4.3523	1.1418	1.015	0.689	1.0161	1.3021	1.408	2.2065	1.8139	1.3674	1.8283	1.568	1.5213		0.366937	1.62108
10.961	0.5224	1.198	4.8101	0.6138	0.7096	0.5213	1.1384	1.413	2.9764	1.734	1.8724	2.418	4.067	1.323	0.6375	0.7056	5.286	1.2916	1.0619	0.7392	0.8262	1.6057	1.5413	2.1331	1.7499	1.5811	1.3064	1.4649	1.6142		0.370968	1.6849
11.0801	0.821	1.1396	4.6268	0.6125	0.614	0.7566	1.1731	1.8906	2.2244	1.6548	1.5403	2.6179	3.1206	0.7813	0.9258	0.9057	5.5003	1.1668	0.9493	0.8974	0.9912	1.3297	1.1358	2.386	1.7246	1.4401	1.6284	1.4905	1.2788		0.374999	1.63186
11.1993	0.6005	1.3108	5.1653	0.8267	0.7037	0.8926	0.9675	1.3792	2.2612	1.6718	1.4407	2.6774	3.5281	0.9642	0.9848	0.8669	6.3123	1.4864	0.6722	0.9831	0.9914	1.1057	1.3447	2.5345	1.8844	1.5136	1.1682	1.4033	1.339		0.379033	1.68897
11.3184	0.6521	1.5178	3.7046	0.5825	0.9356	0.946	1.3355	1.4048	2.0866	1.8823	2.2953	1.8638	3.3803	1.1364	0.7922	0.8608	6.4353	1.6995	0.8795	0.821	0.7722	0.7735	1.3556	2.4797	2.0152	1.3448	1.3264	1.155	1.4154		0.383064	1.64999
11.4376	0.6327	1.2146	5.3575	0.9085	1.0545	0.8169	1.4026	1.4497	2.4621	2.1994	1.8863	2.183	3.8393	1.2902	0.8241	0.9259	6.7989	1.205	0.8297	0.9583	0.9267	0.9685	1.5013	2.4899	2.3326	1.2161	1.6824	1.0538	1.3317		0.387099	1.78421
11.5567	0.6518	0.801	4.6886	0.7394	0.812	0.7602	1.1054	1.6176	2.684	1.8432	1.5406	2.0542	3.6412	1.1282	0.9449	0.9136	8.1465	1.1408	1.104	0.9013	0.7948	1.1893	1.1173	2.6246	1.7996	1.2949	1.5582	1.7208	1.3725		0.391129	1.74795
11.6758	0.6936	1.4014	4.5225	0.8558	0.6902	0.9592	1.1004	1.3708	2.752	1.627	2.264	2.5677	3.5426	1.49	0.6872	0.7557	7.5329	1.7042	1.004	0.8159	0.9253	1.2592	0.8367	2.3633	1.9787	1.5376	1.656	1.0942	1.616		0.39516	1.77945
11.795	0.5896	1.271	4.5537	0.7637	0.6895	0.5814	1.047	1.3472	2.9461	2.5704	2.3151	1.9526	3.2893	1.9231	0.7586	1.2495	9.6394	1.2105	0.9282	1.0358	0.7837	1.0119	1.436	2.319	2.4786	1.6511	1.8853	1.1615	1.7678		0.399195	1.90195
11.9141	0.7515	0.9156	5.1215	0.8121	0.7508	0.8004	1.6396	1.6191	3.0741	2.7354	2.1422	1.7753	2.7843	1.7612	0.9403	1.43	9.5998	1.2355	0.6112	0.7888	1.1216	1.0217	1.4475	3.0809	2.6115	1.7423	1.5295	1.4004	1.9284		0.403225	1.97147
12.0333	0.7496	0.903	5.3964	0.6903	0.8486	0.7382	1.5817	1.7903	3.2845	2.577	2.6507	2.1708	3.3345	1.2716	0.7085	1.2941	8.7533	1.6085	1.1138	0.6218	0.8691	0.9748	1.434	2.4748	3.1768	1.5617	1.7102	1.3222	1.0697		0.40726	1.9545
12.1524	0.7125	0.9802	4.4015	1.0225	0.7573	1.159	1.3823	1.8809	3.3316	2.5761	1.9405	2.4254	3.3907	1.3171	0.5572	0.9992	9.8189	2.0333	1.1572	0.8233	0.8497	1.1283	1.4959	2.3656	2.9378	1.2246	1.7227	1.343	1.4311		0.41129	1.97122
12.2716	0.5509	1.3211	4.1628	0.9438	0.6873	1.1123	1.3684	1.7416	3.9401	3.7858	2.1708	2.5527	2.89	1.5067	0.9299	1.4072	9.4036	1.7167	0.9808	0.6296	1.2792	1.2892	1.3868	2.4811	2.7566	1.3913	2.1651	1.5584	1.0906		0.415325	2.04139
12.3907	0.8522	1.0738	5.1419	0.9212	0.9124	0.9216	1.4762	1.6456	3.8462	3.8591	2.3617	2.0642	2.1394	1.6033	0.5764	1.6161	10.0838	1.3677	0.7068	1.2034	1.6171	1.4724	1.3583	2.5682	2.7467	1.2167	1.9721	1.2504	1.5065		0.419356	2.07177
12.5098	0.7136	1.2612	4.5536	0.8364	0.5338	0.9349	2.3059	2.1077	4.3446	4.3883	2.5948	1.9249	2.0548	1.3551	0.8312	1.2058	10.7521	1.461	0.7442	1.1205	1.2157	1.1319	1.3212	2.3288	2.8284	1.3667	1.6181	1.2897	1.4774		0.423386	2.08973
12.629	0.8123	1.5535	5.0328	1.1098	0.8344	1.0793	2.1924	2.3091	4.2489	3.4265	3.7657	2.7206	2.0536	1.5378	0.5842	1.1199	10.4604	1.3983	0.856	0.9126	1.4156	1.024	1.2302	2.1927	3.4321	1.7956	2.2356	1.5215	1.4485		0.427421	2.21738
12.7481	0.6816	1.3669	4.4052	1.116	1.1936	1.267	2.1183	2.9397	4.1068	2.7625	3.9781	2.5876	2.1414	1.8215	1.1586	1.2724	8.7313	1.1146	0.6611	1.0651	1.1265	1.0644	1.5792	3.2228	3.2389	1.4864	1.9861	1.2311	1.4447		0.431452	2.16791
12.8673	0.7586	1.3985	4.0279	0.797	0.8466	1.1202	2.6218	2.3975	3.9187	2.5917	4.9063	3.0961	1.9313	1.5892	1.1904	1.2045	9.7526	1.5496	0.7896	0.9354	1.152	1.006	1.7042	2.8631	3.4723	1.3349	2.1122	1.3403	1.531		0.435486	2.20481
12.9864	0.8126	1.6875	4.1125	0.6344	0.882	1.5076	2.831	2.489	3.5834	2.5138	4.6524	3.8786	1.7887	1.445	0.5551	1.264	9.8131	1.5717	0.8638	0.853	1.038	1.0997	2.0529	3.1759	3.573	2.0493	1.8797	1.4159	1.5671		0.439517	2.26175
13.1055	0.9339	1.6345	5.3366	0.7699	1.1117	1.2947	2.8979	2.623	4.2536	2.5599	4.1218	4.232	2.3461	1.185	0.971	1.1337	10.6768	1.9204	0.7484	1.0531	1.344	1.0927	1.5956	3.3579	3.9057	1.8106	1.9097	1.647	1.5396		0.443548	2.41403
13.2247	0.7385	1.0221	4.3154	0.6422	1.0636	1.3761	2.4734	3.6452	3.4531	2.8278	4.2547	3.9551	1.5713	1.3061	0.9545	1.2992	10.4909	1.9158	0.6248	1.2865	1.1431	0.899	1.6278	3.5749	4.1801	1.8286	1.937	1.1615	1.7729		0.447582	2.32211
13.3438	0.8509	1.4218	4.1796	0.9918	1.0382	1.2132	2.1898	4.36	3.5608	3.0557	4.1116	4.2189	1.924	1.8092	0.8161	1.4379	9.6886	1.4642	0.7053	1.0834	1.1808	1.2312	1.6832	3.7284	4.2579	1.77	2.3928	0.8869	1.5622		0.451613	2.37291
13.463	0.7903	1.6	4.0711	0.6991	1.3086	1.0687	2.8546	4.2588	4.0774	2.441	4.7578	4.6489	1.7255	1.4947	1.0988	1.1391	10.0651	1.5495	0.8639	1.059	0.9408	1.4251	1.2902	3.1861	5.8269	1.4902	1.5006	0.771	1.4226		0.455647	2.39398
13.5821	1.0138	1.4633	5.6853	0.8633	0.9518	1.6205	2.3384	4.9458	4.6625	2.2544	4.5239	5.1621	1.7285	1.3835	1.0327	1.0608	10.1316	2.5274	1.0173	0.9914	1.09	1.1322	1.7151	4.1956	7.2468	1.5385	2.3964	1.3624	1.3651		0.459678	2.66898
13.7012	0.8013	1.6548	4.937	1.2029	1.008	1.6622	2.5236	5.8168	5.3599	2.2328	4.5156	5.1735	1.6774	1.4376	0.9549	1.2468	9.816	2.4001	1.0956	1.3047	1.0861	1.0393	1.7649	3.833	8.1829	1.9022	2.5024	1.4092	1.0465		0.463709	2.74441
13.8204	0.8073	1.6871	5.2477	1.0132	1.1356	1.6563	2.3326	6.492	6.4953	2.4815	4.7663	5.2625	1.758	1.6058	1.0662	1.4782	10.743	2.2765	1.2042	1.3032	1.026	1.1518	1.5534	4.1491	9.3325	2.1364	1.6738	1.6413	0.9984		0.467743	2.91294
13.9395	0.7702	1.8267	4.4454	0.934	0.687	1.2899	2.6768	8.1138	8.4247	2.7365	4.0604	5.0562	1.4625	1.699	0.6743	1.0605	12.2705	2.2153	0.9334	1.0301	1.1496	1.066	1.5184	5.3175	11.909	1.9934	1.714	1.2142	1.1176		0.471774	3.08162
14.0587	0.8073	1.9963	3.8664	0.7856	0.6914	1.2915	1.7869	7.1806	9.5705	2.502	4.1494	5.7716	1.4389	1.505	0.9449	0.6403	11.1652	1.7979	1.2317	0.8078	1.1494	1.4065	1.8551	5.4291	13.2866	1.9618	2.2914	1.3216	1.5384		0.475808	3.10935
14.1778	0.9934	1.6806	5.2559	0.8795	0.7548	1.3955	2.4317	7.4062	8.454	2.0555	3.232	6.6163	1.7282	1.3983	0.9967	0.9024	11.0497	1.9668	1.0758	1.255	1.1381	1.1334	2.2761	6.0775	14.0475	1.8462	2.7726	1.2795	1.3285		0.479839	3.22164
14.297	0.9442	1.5303	5.4844	0.9951	0.9964	1.4649	2.1073	7.2308	10.4003	2.1716	4.3229	6.4317	1.6445	1.021	0.9042	0.9591	11.092	2.1407	1.3441	1.4331	0.8853	0.9511	1.5433	6.6034	14.482	1.669	2.5585	1.3946	1.4221		0.483873	3.31476
14.4161	0.7934	1.8993	6.2469	0.6971	1.1439	1.4921	2.4845	8.383	9.602	2.159	3.6931	6.4606	1.7728	1.3537	1.0125	1.2875	9.9265	2.3953	0.9413	1.1152	1.3433	1.1345	1.6897	7.7996	14.3199	2.1266	2.3203	1.4104	1.5578		0.487904	3.39868
14.5352	0.7955	1.7099	4.9311	0.6166	0.9741	1.4105	2.524	8.5618	10.604	1.8117	3.2465	6.2143	1.9604	1.2595	0.8951	1.4213	7.5605	1.8078	1.2357	0.9563	1.2728	1.0348	1.9065	9.1653	16.7413	2.4776	2.6025	1.4614	1.8165		0.491935	3.41294
14.6544	0.7393	1.3108	6.8485	1.1596	0.4832	1.3136	2.3348	7.2886	8.6403	1.7286	3.2099	7.5884	1.7143	1.3325	1.1008	1.3992	6.8997	2.2822	1.39	0.8048	1.2192	1.3022	2.8342	10.0683	15.9096	2.622	2.2546	1.3366	1.4005		0.495969	3.39711
14.7735	0.9068	1.536	5.1159	1.0605	0.7403	1.4448	2.3907	8.6779	8.9771	1.8862	2.5844	6.5793	1.3098	1.6988	0.8534	1.3783	6.3891	2.3357	1.1453	1.0113	1.3431	1.0707	2.4123	11.7607	15.5842	2.457	2.4182	1.0618	1.1191		0.5	3.3534
14.8927	0.876	1.3254	5.3771	1.0807	0.8074	1.4382	2.066	9.2377	9.0101	2.3359	2.6382	7.8305	1.4869	1.6266	0.5876	1.1615	6.7535	2.7466	1.6056	1.4575	1.1413	1.2466	2.4416	12.9153	16.1133	2.4691	1.8045	1.1752	1.356		0.504034	3.5211
15.0118	0.8798	1.3361	4.9543	0.9963	0.8273	1.6962	2.2592	8.489	7.8344	1.7018	3.003	9.0297	2.3872	1.6451	1.0319	1.3617	6.3139	3.055	1.2317	1.3196	1.3945	1.5312	2.2531	13.3289	16.4238	2.8215	1.8226	1.2393	1.3691		0.508065	3.57025
15.1309	1.4041	1.6286	5.555	1.1647	0.8505	1.7043	2.1461	8.6585	6.8178	2.2351	2.777	10.1091	1.7541	1.5777	1.1273	1.1109	5.5667	4.7136	0.9085	1.1413	1.4621	1.8575	1.8861	12.5822	19.8658	2.7411	1.6702	1.0502	1.0973		0.512096	3.69529
15.2501	0.9761	1.5936	5.1836	1.1239	0.8307	1.5945	2.314	8.8218	4.6961	1.6963	2.6149	10.1462	1.8675	1.749	0.8384	1.3573	4.7089	4.575	1.2876	0.7739	1.44	1.5755	2.4229	11.2167	18.0366	2.1113	1.7316	1.2503	1.3985		0.51613	3.44596
15.3692	1.0007	1.4327	6.5669	0.9035	1.0204	1.8548	2.4166	9.0199	3.878	1.8457	2.7859	9.6144	1.5166	1.1287	1.1308	1.2116	4.6538	4.4853	1.4363	1.042	1.3166	1.3894	2.4519	10.5477	16.153	1.98	1.4272	1.0864	1.363		0.520161	3.3331
15.4884	0.9689	1.8726	5.2981	1.262	0.8792	1.4198	2.2929	8.7951	2.9165	1.5884	2.545	8.8819	1.6479	1.1815	0.8173	1.197	3.589	5.167	1.5156	1.3112	1.2932	1.7791	3.3191	11.3913	16.1673	2.2495	2.1409	1.045	1.436		0.524195	3.30925
15.6075	0.9723	1.3745	4.7662	1.2356	0.708	1.2611	2.2752	9.2361	2.4268	1.7506	2.1011	10.5773	1.7356	1.1991	0.9056	1.0647	3.2106	5.0358	1.1864	1.4488	1.6329	1.5089	3.1852	12.5911	13.9693	2.4775	2.1833	1.0491	1.1924		0.528226	3.25038
15.7266	0.7959	1.6787	4.6541	1.2058	0.9811	1.1191	2.1566	8.309	2.401	1.635	2.7119	11.8402	1.964	1.5043	1.3027	1.0969	3.818	5.2066	0.8324	1.3444	1.7034	1.4766	3.4757	13.7971	14.1888	2.4038	1.8027	1.1918	1.4236		0.532257	3.38004
15.8458	0.646	1.3397	4.8741	0.9254	1.3793	1.2287	2.1548	8.1906	2.1186	1.4844	2.4056	12.1043	1.7482	1.1774	1.135	1.2173	2.4483	5.8399	1.9785	1.1925	1.2252	1.5193	3.4439	14.7355	15.397	1.8453	1.9151	1.3716	1.5894		0.536291	3.40107
15.9649	0.5914	1.229	4.1483	1.1632	0.8967	1.5563	1.9071	7.325	2.2411	1.7893	2.3534	11.3108	1.705	0.904	1.219	1.3278	2.2259	5.8327	1.9374	1.1368	1.3499	1.1199	3.2026	15.6949	16.1746	2.573	2.1244	1.159	1.0205		0.540322	3.35238
16.0841	0.9339	1.4014	5.0926	1.4689	0.9649	0.9198	2.185	7.7966	2.4178	1.7614	2.4688	11.6126	1.9474	1.0118	1.1149	1.2073	2.6481	6.183	1.8792	1.1427	1.5802	1.2125	3.593	14.3479	15.9656	2.2665	1.9234	1.192	0.8817		0.544356	3.41796
16.2032	1.0345	1.8662	4.7901	0.9031	0.6867	1.2245	2.2769	7.8606	2.2855	1.7468	2.4898	12.7181	1.8237	1.2618	0.923	1.3403	2.4416	5.6055	2.1673	1.3759	1.7277	1.4188	2.8092	14.3176	16.2424	2.0309	1.4764	1.2735	1.4849		0.548387	3.4346
16.3224	0.5192	1.4926	4.4343	0.87	0.8212	1.0662	1.4687	6.4834	2.1483	1.6457	2.9956	11.3939	1.6695	1.0493	0.8913	1.2091	2.7513	6.3018	2.0412	1.0637	1.3871	1.6229	2.4265	15.4508	14.8148	2.5875	1.6731	1.2177	1.5256		0.552422	3.27663
16.4415	0.4866	1.6638	4.1924	0.9896	0.5532	1.0312	1.8618	5.8432	2.2254	1.4457	2.2487	12.9859	1.5644	1.0753	0.9234	1.333	2.4195	5.9628	1.8102	1.4954	1.3089	2.189	2.8041	14.7217	14.3522	2.1064	1.4997	1.2602	1.5273		0.556452	3.23728
16.5606	0.4732	1.2741	4.5905	1.5215	0.8711	1.2706	1.5188	5.5579	2.0823	1.6853	2.9222	13.1485	1.5114	0.8658	1.0273	1.2291	2.6085	6.1836	1.5504	1.5564	1.4572	1.9421	3.148	12.4857	16.0218	2.4647	1.2089	1.2614	1.3178		0.560483	3.26745
16.6798	0.5518	1.6181	3.6388	1.1643	0.9348	1.4305	1.8461	5.8517	1.8387	1.8965	2.8357	12.9192	1.6573	1.0548	0.7434	1.4329	2.2813	5.1091	2.0779	1.2903	1.3452	2.5974	2.9211	11.5392	14.6259	2.6106	1.1875	0.9516	1.2191		0.564518	3.14382
16.7989	0.6681	1.5097	3.5735	1.2505	0.8377	1.171	1.897	5.9105	1.9651	2.3007	2.998	11.4572	1.5917	1.097	0.8187	0.8833	2.1473	5.1949	1.933	0.735	1.7644	1.5676	2.7527	9.5395	13.746	1.9478	1.6791	1.133	1.3594		0.568548	2.94584
16.9181	0.4855	1.2742	2.8749	1.2008	0.8634	1.0811	1.7626	4.2314	2.1363	1.941	2.1357	13.1315	1.3248	1.1798	1.0755	0.9327	2.2103	4.4924	1.8869	1.3811	1.3168	1.2809	2.838	8.1495	12.3552	2.1799	1.3929	1.2703	1.4849		0.572583	2.75415
17.0372	0.6159	1.3214	3.9096	1.0588	0.8083	1.0087	2.5097	3.7329	1.8769	1.715	2.3278	10.7606	1.1953	1.1823	0.7971	0.8362	1.9521	4.3257	1.6723	1.1716	1.3107	1.138	3.3856	6.7614	11.2925	2.1795	1.2962	1.3708	1.4226		0.576614	2.58398
17.1563	0.6666	1.3627	4.3279	1.1745	0.9582	0.7866	1.7348	3.5009	1.7242	1.9155	2.3805	10.0908	1.3413	0.9507	1.0806	0.9753	1.9686	4.1045	1.935	1.5187	1.4415	2.0492	3.7234	6.1055	11.2009	2.5712	1.7317	1.5173	1.6688		0.580644	2.63819
17.2755	0.7653	1.1799	3.285	0.8214	1.0108	1.4847	1.9374	3.6919	1.9946	1.7218	2.5815	10.3577	1.354	1.0483	1.117	0.9391	1.8901	4.516	2.2397	1.4892	1.2406	2.061	3.1307	5.0791	12.6571	2.3717	1.1045	1.1131	1.1841		0.584679	2.59887
17.3946	0.5448	1.5073	3.0892	0.8267	1.0425	1.1119	1.5877	3.1842	2.424	1.6953	1.7725	10.79	0.975	0.9449	1.0984	1.0725	1.8035	5.0295	2.5343	1.7834	1.4444	2.0122	3.8291	4.8417	13.0651	2.2199	1.2731	1.2516	1.3212		0.58871	2.62331
17.5138	0.783	1.3724	3.1044	0.9054	0.9671	1.0462	1.4334	3.4517	2.1666	1.7816	2.1899	9.0852	1.0843	0.8808	0.9241	1.3397	1.8371	4.9773	2.8336	1.5257	1.443	2.1347	3.8036	5.6709	13.1062	1.767	1.603	1.0563	1.6092		0.592744	2.61667
17.6329	0.6107	1.0744	3.4802	1.0463	1.0112	1.0161	1.7196	2.6525	1.9059	1.6631	1.996	9.7854	1.3362	0.7863	0.8675	1.0822	1.3007	4.8541	3.085	1.2368	1.4316	1.7209	3.8404	6.0701	13.0714	2.1155	1.2243	1.3367	1.0603		0.596775	2.56488
17.7521	0.6531	1.2182	3.4221	0.8906	0.9667	0.9145	1.8775	2.812	1.9947	1.7291	2.0668	9.5324	0.9646	0.8619	1.1408	1.1116	1.4624	5.3029	2.6619	1.1094	1.0269	1.8511	3.565	5.4982	14.7199	2.2387	1.4864	1.2036	1.1226		0.600809	2.60019
17.8712	0.7982	1.4942	3.6832	0.7675	1.0237	0.9674	1.7002	3.5897	1.9847	1.943	1.8382	8.5521	1.1464	1.0895	0.8627	0.9235	1.7241	5.6195	2.1616	1.3628	1.4785	2.075	3.6189	5.0752	14.0182	2.2953	1.3124	1.4675	1.3338		0.60484	2.61748
17.9903	0.6933	1.4517	3.1074	0.8451	0.6576	1.032	1.5587	2.838	2.0946	1.7045	2.0269	7.4108	0.9475	1.2218	0.8515	0.8347	1.7675	5.8043	2.3727	1.3867	1.5388	1.9285	3.787	4.1129	13.047	1.6893	1.6066	1.3107	0.9167		0.608871	2.43258
18.1095	0.4797	1.5542	3.7225	1.0571	0.857	1.3452	1.7666	3.1741	2.4009	2.0155	2.3427	7.0235	1.0286	0.9952	0.6662	0.8963	1.7845	5.9988	2.4426	1.3841	1.4374	2.2272	3.4559	4.1749	14.0754	2.1861	1.2343	1.1159	1.1281		0.612905	2.55071
18.2286	0.8939	1.6819	3.702	0.9699	0.4733	0.822	1.7406	2.6373	2.0881	1.6381	2.3813	7.893	1.1942	0.8362	0.9532	1.1874	1.5332	6.5294	2.1939	1.1822	1.0902	1.8314	3.1776	4.1134	16.1225	2.4237	1.0423	1.4718	1.4452		0.616936	2.5948
18.3478	1.0859	1.584	2.9473	0.8462	0.5816	0.5798	1.5059	2.8326	2.2877	1.6606	2.2018	6.7238	1.2385	0.9597	0.6882	1.1416	1.4228	6.1594	2.4269	1.7403	1.2632	1.566	3.1131	3.7137	13.1096	1.703	0.952	1.4992	1.5337		0.62097	2.38166
18.4669	0.8364	1.2822	3.6787	1.1433	0.7876	0.8002	1.6098	1.9695	2.1785	2.6251	2.3125	6.2131	1.1594	1.3623	0.8956	0.8619	1.4126	5.9139	2.2066	2.1936	1.3076	1.8266	2.915	3.8288	14.3836	1.8538	1.3684	1.0044	1.0632		0.625001	2.44808
18.586	0.7129	1.2667	2.7393	0.7552	0.7869	0.8857	1.7346	2.1173	1.9281	1.6853	2.6587	5.6557	1.0714	1.2976	1.0295	1.0774	1.6315	5.5737	1.9732	1.9434	1.3462	2.1447	3.0054	4.0247	15.4298	1.8168	1.3372	1.2524	1.0683		0.629032	2.41206
18.7052	0.8636	0.8948	4.1816	0.9391	0.9997	0.7684	1.7954	2.7763	2.032	1.8223	2.9652	5.2954	1.182	0.9876	0.8294	1.1248	1.2603	6.8734	2.2856	1.9791	1.3884	1.881	3.9543	4.3885	14.8796	1.5466	1.2831	1.2047	1.2557		0.633066	2.53924
18.8243	0.8181	1.4496	3.5511	1.2629	0.5953	0.9092	1.462	2.6755	2.0861	1.6563	2.139	5.6897	1.112	0.9742	0.8534	0.8047	1.3748	7.2429	2.0916	1.9419	1.254	1.6063	2.8146	4.0629	15.5373	1.306	1.4207	1.3377	1.0445		0.637097	2.45084
18.9435	0.7466	0.9474	4.0319	0.9727	0.8719	0.5084	1.6443	2.2731	1.817	1.9603	2.1715	5.2757	0.8567	0.797	1.0991	0.7561	1.4139	6.1676	2.0289	1.3564	1.6398	1.893	3.1056	5.0451	16.7828	1.5421	1.1384	1.1556	0.9654		0.641131	2.44704
19.0626	0.8482	1.6048	3.6921	0.8463	1.2269	0.6469	1.6887	2.9618	1.338	2.0059	2.4657	4.7042	1.077	0.8409	1.085	0.6365	1.2129	6.854	2.1419	1.8398	1.4888	1.7666	3.0211	4.5243	17.1145	2.127	1.3465	0.9871	0.9091		0.645162	2.51733
19.1817	0.4742	1.336	3.9495	0.8077	0.8531	0.9936	1.4328	3.2296	1.0292	1.7994	1.7861	5.1797	1.189	1.1484	1.2386	0.8336	1.7175	7.33	1.9228	1.7732	1.0822	2.0288	3.5105	4.5417	17.791	1.7293	1.5391	1.1982	1.0403		0.649193	2.56845
19.3009	0.4784	0.9815	3.4924	1.0036	0.8346	0.7269	1.3425	4.2015	1.1745	1.725	1.6013	4.8431	1.1018	0.9349	1.4752	1.4462	1.659	7.1816	1.9436	2.081	1.2738	1.6434	3.1229	5.3603	20.8269	1.8445	1.6316	1.0457	1.1151		0.653227	2.69286
19.42	0.6513	1.4001	3.7265	0.8299	0.9022	0.7879	1.3555	3.9945	1.6907	1.6532	1.6942	3.6367	0.8972	1.0934	0.9029	0.9583	1.2248	7.5609	1.7367	1.9943	1.0552	1.8775	2.7587	5.1627	25.0372	1.8573	1.0379	1.2689	1.3359		0.657258	2.76147
19.5392	0.5014	1.436	3.2808	0.8342	0.7093	1.0693	1.5341	3.8518	1.4616	1.4705	1.8677	3.9885	1.0873	0.8495	1.0949	0.9504	1.2422	6.393	1.7449	1.9687	1.1267	1.6002	2.6671	4.8532	29.2778	2.2458	0.9501	1.4116	1.3472		0.661292	2.85572
19.6583	0.6803	1.4163	3.8953	0.994	0.8722	1.2106	1.661	3.5948	1.4774	1.589	2.4372	4.0176	1.1282	1.0724	1.0072	0.8761	1.3493	6.6462	1.9801	1.9542	1.2271	1.4693	2.7083	4.7391	29.0561	1.7574	1.2058	1.2225	1.1889		0.665323	2.91151
19.7775	0.8148	1.2029	3.787	1.1689	0.8818	0.8396	1.5976	4.3857	1.8018	1.8048	2.6434	3.933	1.061	0.7392	0.7789	0.5795	1.2974	6.0464	1.8867	1.7112	1.2506	1.3655	2.8014	5.0724	27.5503	1.8042	1.6404	1.4128	1.185		0.669357	2.86359
19.8966	0.5544	1.2781	3.3771	0.7823	0.9153	1.0268	1.4126	4.7374	1.8655	1.9953	2.3355	3.7951	1.1462	1.0469	0.8376	0.9694	1.1721	6.257	1.523	1.5482	1.4938	1.3756	2.5095	5.3225	26.1047	1.487	1.6436	1.1162	1.3561		0.673388	2.79258
20.0157	0.7713	1.4796	3.7364	0.6361	1.3645	1.0534	1.2841	4.6536	1.7023	1.5946	2.6731	2.9523	1.049	0.9715	0.9484	1.2052	1.2969	7.655	1.6615	1.4755	2.0297	1.8241	2.5732	4.1016	24.0529	1.7121	1.3219	1.0885	0.9822		0.677419	2.75347
20.1349	1.0404	1.1491	3.3775	0.8715	1.1977	0.8616	1.4517	3.8615	1.54	1.6449	2.7934	3.5106	0.8945	1.1592	0.8468	0.8783	1.2644	7.7654	1.6321	1.3297	1.6526	1.2693	2.4323	3.7227	21.721	1.5944	1.3984	1.5038	1.5319		0.681453	2.61713
20.254	0.736	1.162	3.561	0.7645	1.1303	1.0504	1.479	5.5058	1.5955	1.8356	2.7517	3.1687	0.9296	0.8285	0.9734	0.7663	1.3541	8.5965	1.7496	1.1672	1.165	1.3731	2.2656	4.0627	22.7543	1.3796	1.745	1.2623	1.2211		0.685484	2.70119
20.3732	0.9348	1.4923	3.946	0.9771	0.7462	1.0035	1.2887	4.8353	1.098	1.6256	2.9727	2.4456	1.4845	1.2912	0.9858	0.6393	1.3233	8.5531	1.505	1.8167	1.3291	1.9108	1.7218	3.3	21.1904	1.3496	1.3115	1.5185	1.1739		0.689518	2.61277
20.4923	0.4871	1.5567	3.851	1.0838	0.5906	1.0036	0.7296	4.6193	1.621	1.7628	2.7261	2.3787	0.9655	0.6944	0.8824	1.2526	1.1236	7.4161	1.4962	1.514	1.4806	1.7093	1.6806	3.4989	19.9933	1.2381	1.0223	1.3827	1.2292		0.693549	2.44793
20.6114	0.5864	1.7926	4.4123	1.0786	0.799	0.8959	1.2918	5.2455	1.5103	2.1653	3.3738	2.4775	1.1693	1.0879	0.8419	0.99	1.2652	8.6997	1.4779	1.4614	0.9592	1.0748	1.8195	2.9677	19.5344	1.1273	1.1575	1.3258	0.7563		0.69758	2.52913
20.7306	0.8	1.8136	4.1207	1.163	0.6506	0.8831	1.0328	4.7828	1.732	1.8618	3.8119	2.1203	1.534	0.8734	1.0736	0.9972	1.227	9.5773	1.7233	1.4212	1.2124	1.4545	2.2671	2.6905	19.6634	1.5108	1.2684	1.2942	1.0517		0.701614	2.60733
20.8497	0.7737	1.2861	4.5348	1.2659	0.9967	1.055	1.4091	4.018	1.4946	2.0175	4.0001	1.8378	1.3342	0.9257	1.3215	1.0007	0.8973	11.3867	2.0417	1.2646	1.2453	1.3533	2.6582	2.9107	19.3626	1.5115	1.4346	1.145	1.4047		0.705645	2.68578
20.9689	0.7834	1.2354	4.8099	1.0092	0.8089	0.9342	1.5653	4.2886	1.4349	1.9904	3.5751	2.2302	0.9501	0.7576	0.9455	1.0465	1.2138	11.8639	1.9029	1.3525	1.6273	1.2935	2.2898	2.6091	21.998	1.735	1.5982	1.4855	1.4413		0.709679	2.78538
21.088	0.779	1.2772	4.3865	1.1142	0.8341	0.6719	1.5311	3.6693	1.4712	1.6007	3.4628	1.5843	1.2684	0.8721	0.7231	0.6956	1.1871	12.0065	1.5947	1.2562	1.0416	1.3907	2.4068	2.3563	21.4877	1.7284	1.7164	1.4112	1.5834		0.71371	2.65891
21.2071	0.9258	0.9433	4.364	0.7453	0.9768	0.6235	1.7964	3.7768	1.4334	1.4675	3.9835	1.961	1.22	0.9457	1.2987	1.2506	1.1446	11.7235	1.1494	1.3683	1.2202	1.1625	2.2554	2.3478	22.1492	2.0147	1.1575	1.1563	1.777		0.717741	2.70133
21.3263	0.88	1.3225	3.231	0.9561	0.6091	0.6326	1.4811	2.8473	1.248	1.6203	4.269	1.9361	1.0311	1.0061	1.1704	0.9517	1.0033	12.0105	2.1326	1.5684	1.1123	1.42	1.4784	2.0228	22.5097	1.8501	1.3848	1.189	1.6716		0.721775	2.63951
21.4454	0.7843	1.3848	3.6263	0.9431	0.8376	0.6589	1.4734	3.3829	1.2879	1.7117	4.7733	1.3483	1.1958	0.9437	0.7624	0.9147	1.2693	11.3219	1.7148	1.4147	1.0498	1.3775	1.7619	2.1277	21.595	1.5216	1.4905	1.0535	1.7066		0.725806	2.60117
21.5646	0.7046	1.3536	4.2504	0.8521	0.7451	0.8371	1.3766	2.4919	1.8271	1.7459	4.4258	1.6997	1.1085	1.1127	1.0913	0.9568	1.2852	9.613	1.474	1.5829	0.8672	1.3148	1.7686	1.9276	20.9879	1.6429	1.7677	1.4167	1.6743		0.729841	2.54834
21.6837	0.5847	1.1967	4.2754	0.5013	0.4679	0.6447	1.1777	3.0696	1.903	1.721	4.7791	1.5727	1.3916	0.9258	0.7635	1.1892	1.1425	8.7311	1.5137	1.9599	1.3104	1.3943	1.9404	2.2069	18.4884	1.6016	1.3972	1.2562	1.6529		0.733871	2.43998
21.8029	0.8314	1.5164	3.9489	0.4675	0.7581	0.8687	1.4398	3.2735	1.8917	1.6301	5.1482	1.5768	1.3929	0.9518	0.91	0.9452	1.0856	8.0909	1.8056	1.3522	1.6428	1.4915	2.0802	2.4914	15.655	1.5884	1.5449	1.2345	1.7315		0.737906	2.39122
21.922	0.6782	1.9892	4.3097	1.0353	0.7045	1.4111	1.4376	2.4173	1.718	1.3784	4.8803	1.5928	1.2548	0.9797	0.9734	1.4961	1.3754	7.299	1.5696	1.563	1.6606	1.4954	2.1121	1.8749	14.1254	1.5075	1.5832	1.1482	1.5203		0.741937	2.31348
22.0411	0.7139	1.655	3.2973	0.7747	1.2066	0.6888	1.0574	2.3294	1.9209	1.782	4.9619	1.8901	1.5185	1.0325	1.3524	1.3655	1.7779	7.343	1.7445	1.4508	1.2915	1.2474	1.9781	2.2475	13.3112	1.5741	1.3907	1.1295	1.8646		0.745967	2.27233
22.1603	0.8779	1.6393	3.5268	0.7755	0.9931	0.8254	1.2257	3.0378	1.7415	2.2485	4.5912	1.5773	1.339	1.0363	1.0935	1.4216	1.1037	6.1266	1.6694	1.3861	1.2201	1.1211	1.8275	1.9197	11.1316	2.1185	1.8581	1.3915	1.9767		0.750002	2.16555
22.2794	0.795	1.4733	3.4251	0.8263	0.877	0.8904	1.2775	3.3865	1.8226	2.3449	3.6021	1.1323	1.7001	1.0041	1.0667	1.2755	1.4506	5.6034	1.6535	1.4041	1.4409	1.102	1.8456	2.2536	8.6707	2.1332	1.9674	1.4111	2.3506		0.754033	2.07538
22.3986	0.6443	1.4252	2.6719	1.1081	0.7207	1.0477	1.2241	3.0673	2.3843	2.0827	3.9462	1.5308	1.4308	0.9389	1.4429	1.0242	1.3154	5.1918	1.7023	1.4057	1.2715	1.2359	2.3973	1.841	7.9103	1.9382	1.369	1.7825	2.654		0.758067	2.02431
22.5177	0.7579	1.1774	2.5102	1.1968	1.2303	1.091	1.2504	2.9313	2.2449	1.6803	4.1087	1.7002	1.2825	1.1982	0.9365	0.8135	1.2686	4.8463	2.1881	0.9653	0.9862	1.359	2.1044	2.4057	7.8795	1.8813	1.2416	1.9425	2.58		0.762098	1.99168
22.6368	0.7379	1.1929	2.5566	1.0306	1.1803	1.176	1.4193	2.3608	1.8476	1.4813	4.1674	1.6427	1.665	1.0628	0.9346	0.8577	1.3355	4.2693	2.0282	1.1585	1.3815	1.0653	1.9638	2.8352	7.9224	1.7364	1.5324	1.9344	2.8278		0.766129	1.97601
22.756	0.7508	1.5907	2.8527	0.7789	1.401	0.8315	1.4599	2.4234	1.9816	1.7044	4.3368	1.7328	1.754	1.0696	1.2861	1.0548	1.2348	4.012	1.977	1.0239	1.2361	1.2783	2.1833	2.339	7.2029	2.2574	1.6211	1.9116	2.4924		0.770163	1.99237
22.8751	1.1008	1.5149	3.1653	0.9944	0.6858	0.6114	1.3358	3.2133	2.3654	1.772	4.086	1.6689	1.3705	1.0622	0.8556	1.1478	1.0089	3.8839	2.3157	1.4293	1.3814	1.6994	1.8752	2.2664	8.7501	2.1904	1.6235	2.057	2.8879		0.774194	2.07997
22.9943	1.1029	1.5335	3.807	0.9605	0.808	0.7751	1.4227	2.4241	2.2149	1.9164	4.7321	1.54	1.5819	1.1313	0.9101	1.261	1.4219	4.1264	2.2788	1.2013	1.2229	1.4701	2.1047	2.3265	8.8078	2.3911	1.6012	1.8266	2.4377		0.778228	2.11512
23.1134	1.0196	1.4641	3.4566	0.8926	0.5269	0.8607	1.4558	2.5955	2.3509	2.018	4.2023	1.6178	1.576	1.0615	1.0335	1.2861	1.0906	4.1735	2.0348	1.2267	1.3951	1.5877	1.5706	2.3799	8.641	2.0124	1.7701	1.8796	2.8867		0.782259	2.07126
23.2325	1.261	1.8684	3.6526	0.8536	0.6142	1.0378	1.7915	2.0834	3.1524	1.9429	4.4896	1.9652	2.0671	1.5215	1.2184	1.3454	1.3817	4.4681	2.5083	1.7365	1.3959	1.335	1.723	2.4182	8.8132	1.8554	1.4874	2.0119	2.5282		0.78629	2.2251
23.3517	1.351	1.6706	3.6762	1.0999	0.7043	0.9839	1.7166	1.9358	3.2001	2.2265	4.582	2.1811	2.1455	1.0261	1.366	1.3892	1.6869	4.1758	2.8578	1.1093	1.5826	1.2761	1.9107	1.7797	7.8069	2.5652	1.5247	2.1228	2.9451		0.790324	2.22753
23.4708	0.9032	2.0198	3.2606	1.1359	0.9878	1.0091	1.395	2.3596	3.5377	2.4928	4.8859	1.7215	2.0696	1.8096	1.3062	1.1918	1.7822	4.8231	2.8304	1.601	1.5744	1.5695	2.1637	1.9492	8.354	3.0085	1.3375	2.9091	2.0542		0.794355	2.34631
23.59	0.8667	1.6109	3.4721	1.0888	0.6233	1.5392	1.5282	2.1324	4.6914	2.5685	5.2701	1.3757	2.5374	1.5836	1.6903	1.2709	1.4996	4.495	2.9777	1.9523	1.6319	1.7789	2.3351	2.0641	6.9265	2.7073	1.5435	2.9521	2.3752		0.798389	2.38237
23.7091	0.9401	1.9597	3.4453	0.8538	0.4823	1.156	1.5256	2.6068	4.5616	2.9543	5.318	2.1114	2.941	1.271	1.4037	1.5229	1.8714	5.0087	3.5441	1.5472	1.434	1.2885	2.365	2.4897	5.4975	2.8243	1.5972	2.8478	2.7132		0.80242	2.41662
23.8283	1.1061	1.7397	3.8992	0.7935	0.9163	1.1342	1.1179	3.0436	5.6088	3.0271	5.4494	2.2214	3.2624	1.7699	1.3816	1.4618	1.8106	4.34	3.139	1.2945	1.7551	1.3022	2.2709	2.6283	6.3799	2.676	2.1215	3.2969	3.2822		0.806454	2.55966
23.9474	1.1797	1.5567	4.4865	1.0804	0.7188	1.0708	1.4689	3.5741	5.9986	3.8573	6.1253	1.7084	3.5233	1.7823	1.4985	1.0685	1.948	3.468	3.7128	1.6504	1.6957	1.7638	2.186	2.2671	6.4631	3.3098	1.5488	3.6785	3.4899		0.810485	2.68552
24.0665	1.0144	1.9736	4.2705	0.9052	1.0225	1.0039	1.5639	2.7055	6.1636	3.9579	5.2309	1.8733	4.5428	2.4509	1.6195	1.3044	2.3645	3.3396	4.7569	1.7508	1.7518	1.5763	2.8783	3.0953	6.4695	3.5335	1.4317	3.6187	4.7582		0.814516	2.85958
24.1857	1.2655	1.6741	3.498	0.8256	1.1833	1.1094	1.6539	2.4404	6.6371	4.2971	4.5975	2.2662	5.117	2.5522	1.5384	2.0148	2.365	3.0343	5.4555	1.766	1.4181	1.7049	3.2969	4.0008	7.4979	3.6303	1.7883	4.2533	5.42		0.81855	3.04489
24.3048	1.1386	1.4007	3.6347	1.0093	0.8022	0.948	1.5546	2.8887	7.0386	5.5026	4.9072	1.9241	6.1092	2.8082	1.4869	2.083	2.5498	3.2504	5.0606	1.6606	1.4453	2.0724	2.9689	3.2687	9.1042	3.6709	1.4947	5.2278	6.5151		0.822581	3.22503
24.424	0.7711	1.4954	4.0783	0.7849	0.6074	0.8927	1.3358	3.5575	6.7143	6.1056	4.6618	2.7136	6.6678	2.7513	1.5935	2.0509	2.1583	2.6637	4.5839	1.7106	1.9536	2.0798	4.1393	3.6991	8.8232	3.1308	1.4312	5.6834	8.017		0.826615	3.33986
24.5431	1.1393	1.7127	4.4029	0.8336	1.1003	1.0114	1.8078	3.7994	7.7422	7.405	5.533	2.6567	8.342	3.3742	1.7012	2.0474	3.4823	2.8336	6.7039	2.1121	1.6053	1.9444	5.2329	4.1941	8.1891	3.1698	1.7227	6.4138	10.5515		0.830646	3.88843
24.6622	1.205	2.4045	4.2197	1.2789	1.1665	1.0236	1.6566	4.3283	9.0702	8.5541	6.5567	2.6217	8.3592	4.841	2.292	2.282	3.8765	2.7967	7.6271	2.0065	1.756	2.292	7.8478	5.0287	9.1132	3.6131	1.7551	8.4239	14.3162		0.834677	4.56251
24.7814	0.9765	2.5399	4.1874	0.8866	1.0162	1.2503	1.7926	4.4379	11.2293	9.2057	6.5336	2.9199	8.231	5.8086	2.6548	2.58	4.2492	3.2955	8.7009	1.9994	1.6535	3.7733	10.2869	4.794	9.3858	3.5872	1.9931	10.8022	18.0267		0.838711	5.13097
24.9005	1.324	2.0512	4.4299	1.4427	0.8382	1.2396	1.7014	4.9702	10.409	11.0762	7.4012	2.9747	7.2026	6.266	2.5916	2.9915	4.9569	4.0414	11.8569	2.6298	1.5826	4.6454	11.4345	5.9834	11.5941	3.7714	2.2203	11.3152	17.9916		0.842742	5.6184
25.0197	1.3622	1.4514	4.4941	1.2612	1.0695	1.0205	1.5939	4.8422	11.9437	12.8087	8.1743	3.8406	5.8761	7.7007	3.5793	3.5913	6.5526	4.5763	13.9003	2.3918	2.4333	5.8871	14.0158	6.6069	14.6677	4.147	2.9433	12.3106	17.5858		0.846776	6.29752
25.1388	1.1588	1.6044	5.0821	1.0948	1.0659	1.0749	1.9033	6.4524	13.4331	15.4348	9.0199	4.7675	4.7199	10.9818	4.1678	3.6571	8.8071	4.9363	16.6005	2.7951	2.071	7.7717	16.8583	9.0749	18.2261	4.3107	3.9114	15.1465	16.9011		0.850807	7.34583
25.258	1.1446	1.6058	5.6384	0.7896	0.9343	0.94	2.0066	8.3797	13.9278	15.5282	10.719	5.1377	4.2832	13.1374	6.1956	4.9663	10.9001	4.8634	20.4518	2.3324	2.2123	10.6607	17.128	14.3491	20.4692	5.6944	4.1098	14.991	17.5781		0.854841	8.31291
25.3771	1.3288	2.004	5.7315	1.1625	1.0517	1.251	1.8541	7.8367	14.2309	17.1003	13.3496	7.994	2.6243	14.4127	9.3024	6.7055	16.6223	5.4603	22.8132	2.923	3.0167	15.5703	18.5566	17.427	21.7592	6.001	4.6135	15.8575	17.8108		0.858872	9.53005
25.4962	1.73	1.7542	7.2918	0.9134	0.7502	1.7504	1.9697	7.8193	12.3609	16.7342	14.5528	8.2961	2.1024	16.8898	12.702	9.8882	18.9921	9.0263	24.4979	3.5881	2.4303	21.6238	18.741	26.6567	24.0097	6.1642	4.9628	17.6313	17.5037		0.862903	10.8046
25.6154	1.8474	2.1711	8.5456	0.9849	0.9333	1.3174	2.7599	7.4513	11.1088	15.7014	14.8863	10.927	1.4	19.6364	13.9078	13.9078	21.9096	10.4545	23.2754	4.3921	3.562	24.5526	22.0164	33.6064	26.7615	6.4244	4.676	17.4512	19.3383		0.866937	11.9278
25.7345	1.5053	2.4284	8.9422	1.018	0.8672	1.2626	1.9334	10.2394	11.6299	14.384	15.8087	13.2509	1.2417	21.0145	15.9638	21.7425	28.195	11.8375	23.5935	6.1415	4.0691	28.5868	24.6907	41.6516	29.9812	6.8529	5.1842	16.2997	20.439		0.870968	13.4743
25.8537	2.0968	2.1369	8.1408	0.9806	1.0631	1.4091	2.5994	10.1664	11.4537	11.9363	17.1799	14.1009	1.0366	22.7729	19.3285	29.9356	33.0067	16.921	27.434	7.7828	5.6049	33.9287	31.4298	48.645	35.4796	8.4611	6.5188	18.1906	21.2949		0.875003	15.5529
25.9728	2.0314	2.6324	8.8335	1.0487	0.7398	1.274	2.4794	9.5314	9.9932	10.0421	19.0308	17.5774	1.1665	18.8209	23.7865	35.6743	37.906	22.6048	28.7526	12.4031	7.3607	39.2157	35.4458	50.3976	41.2819	9.5465	5.9731	21.5007	25.265		0.879033	17.3212
26.0919	1.8231	3.046	9.6907	1.2483	1.0216	1.2429	2.8791	10.2147	8.6127	8.9104	21.899	21.4145	1.3586	14.3488	28.567	43.307	39.5857	30.9817	30.9521	15.8816	11.2716	42.6257	37.0662	55.4403	45.427	9.8017	6.56	22.784	26.533		0.883064	19.1205
26.2111	2.4826	2.7904	9.9611	0.8862	1.0905	0.8801	3.2843	12.7017	8.1251	8.2391	22.7691	20.5741	1.2088	7.9522	35.0454	45.9164	37.0364	37.2894	35.0201	19.5634	14.0951	41.7739	40.5889	58.2247	49.0345	9.8541	8.9409	25.9182	25.0645		0.887099	20.2176
26.3302	2.5523	2.4852	10.2342	1.1563	0.752	0.9528	3.5126	11.653	7.6659	7.4586	22.1028	19.936	1.0686	5.1663	39.5322	40.5297	30.6828	41.632	34.6077	23.1207	15.8426	42.8495	43.0001	53.0848	51.7916	11.4903	12.9249	29.7718	25.5839		0.891129	20.4531
26.4494	2.8742	2.9947	11.44	0.9971	1.1728	1.3594	3.9834	12.4706	6.0755	6.0965	21.2528	19.5038	1.0032	2.9523	39.6161	35.7899	22.3746	46.6888	35.2166	26.2099	21.0963	41.9468	42.8422	39.8825	55.1236	10.5737	17.3173	32.6268	20.5711		0.895164	20.0708
26.5685	3.1297	2.7679	11.3796	1.2302	1.1104	1.3621	4.0752	12.7281	6.0616	5.2553	19.9912	17.7752	1.3313	2.3132	36.3063	24.9716	13.873	47.2377	35.7938	30.5569	27.3661	42.1905	38.7851	28.0746	53.052	12.8864	18.7998	34.2563	17.6811		0.899195	19.0463
26.6876	3.7607	2.9881	12.5317	1.0359	0.856	1.07	3.7935	12.3059	4.493	4.5586	16.484	12.8895	1.1704	1.9782	27.2259	15.7896	8.3736	42.6349	38.5332	35.3954	33.7108	45.8437	29.5963	15.4137	53.0371	14.8209	21.0377	33.7864	14.473		0.903225	17.572
26.8068	4.7822	3.7296	13.7112	1.5346	1.4845	1.0784	3.8052	9.9307	4.0175	3.9686	13.69	9.4697	0.9656	1.7436	18.5979	9.7492	3.9868	38.2284	39.0393	39.2268	38.0886	51.9435	18.1539	7.4061	52.9068	15.8881	24.4554	35.0557	12.7555		0.90726	16.5308
26.9259	6.1724	3.4122	15.5425	1.7156	1.2244	1.6153	5.0866	10.0337	2.8864	3.6365	11.9709	6.1358	1.0284	1.5288	10.6707	5.1155	2.6567	33.3664	37.9979	45.8072	40.3736	53.0013	8.6808	5.096	44.2759	20.9028	26.921	37.4693	9.5477		0.91129	15.6508
27.0451	6.5824	3.9188	16.4055	1.6124	1.1509	1.2131	5.3573	9.6008	2.571	2.5895	10.7507	4.9413	0.8006	1.6874	6.2733	2.5856	2.5119	25.7285	39.1308	52.4636	46.9785	53.577	4.0612	2.8407	35.9742	25.9468	29.5914	37.6048	7.6551		0.915325	15.245
27.1642	8.7072	3.9044	16.8168	2.1103	1.3748	1.3888	5.3757	8.9767	2.1599	2.2693	8.2319	3.589	1.1077	1.1705	3.8541	2.6866	2.5389	20.0496	35.8028	53.9497	52.3848	51.2374	2.9063	2.1546	26.8042	29.0262	31.086	33.2237	4.9548		0.919356	14.4773
27.2834	10.2148	4.2797	19.2006	2.6503	1.4271	1.6255	5.4772	7.9491	1.8375	1.7166	6.9874	2.3315	1.2362	1.0523	2.8247	2.8083	1.093	13.4636	34.2573	53.323	53.8595	46.9289	2.1179	2.0797	17.9556	35.0405	33.3261	29.7444	4.0278		0.92339	13.8219
27.4025	11.1071	5.7726	21.9735	3.1928	1.3559	1.6713	5.9546	6.859	1.8621	1.4155	5.2506	1.5096	1.3837	0.9211	2.3357	1.9153	0.7767	9.6315	29.5542	50.3213	49.3131	35.8403	1.4626	1.7958	9.0675	36.7044	35.3585	24.7993	3.3991		0.927421	12.5002
27.5216	12.2503	7.9208	22.9543	4.0709	1.5356	1.5346	5.1144	5.3032	1.3538	1.5394	4.9391	1.3929	1.1256	1.0411	2.2902	1.2577	0.8089	5.1972	23.8477	44.3732	40.3939	20.1434	1.4632	1.4894	4.9136	37.5964	36.1665	23.8845	2.4738		0.931452	10.9785
27.6408	14.3534	9.2179	24.1193	5.1663	1.4342	1.4367	6.581	4.7005	1.2157	1.8398	3.7941	1.2416	1.0847	0.4083	2.0851	1.2757	1.0776	3.5973	18.9	33.8018	27.6173	10.2404	1.2516	1.1809	3.6536	41.0553	39.2626	20.6662	2.672		0.935486	9.8252
27.7599	13.6502	12.1585	26.4725	5.7378	1.8438	1.7273	8.0071	4.6751	1.0215	1.1259	3.0712	1.2555	1.0009	0.5867	1.7078	1.3164	1.0863	3.1567	16.2824	23.9105	17.2173	5.483	1.2222	0.9596	3.0894	41.8905	43.1889	17.5083	2.2747		0.939517	9.05614
27.8791	14.9113	15.2297	26.351	5.6005	2.2331	2.2848	8.9179	3.6381	1.0222	1.0373	3.27	1.08	1.1944	0.6865	1.5576	1.1813	1.1386	2.5858	12.8473	15.1281	9.793	3.6671	0.9397	0.8676	2.3404	38.8075	44.0158	14.1138	2.6516		0.943551	8.24455
27.9982	15.0226	19.38	27.4856	6.2621	2.2078	2.9418	9.676	3.3483	0.915	1.0223	2.9265	0.9899	0.8234	0.4669	1.2003	1.2055	0.9171	1.9372	8.8898	9.8644	4.909	3.2317	0.9657	0.725	2.1854	33.7078	40.8152	11.1969	2.0078		0.947582	7.49059
28.1173	17.3191	22.424	25.56	8.8485	2.6085	3.2319	12.1371	2.4463	0.7615	1.1496	2.1971	1.1391	0.8131	0.5104	0.843	1.0015	0.7613	2.3009	6.762	6.2815	3.5664	2.1526	0.6352	1.0633	2.119	26.0134	34.9987	6.9321	1.6311		0.951613	6.83477
28.2365	20.0134	27.3947	25.5087	10.2765	3.4941	4.1915	13.4083	2.3668	0.977	1.1837	2.2846	1.0316	0.8891	0.5309	1.0449	0.7761	0.6754	2.1693	4.5252	4.7667	3.4126	1.6705	0.5839	0.6913	1.5842	22.5221	27.3519	6.6156	1.9856		0.955647	6.68711
28.3556	22.2769	28.9815	22.4017	11.2953	5.3323	5.1917	15.9443	2.2883	0.6359	0.9042	2.006	0.854	1.0586	0.739	0.742	0.4619	0.558	1.5003	4.2241	3.0831	2.4373	1.3217	0.685	0.6431	1.2388	15.7963	22.7865	4.5533	1.5731		0.959678	6.25911
28.4748	21.417	24.9017	18.7502	12.626	7.288	7.6068	18.2774	1.559	0.6174	0.926	1.4776	0.6552	1.1916	0.5083	0.4807	0.673	0.2556	1.4839	3.0749	2.2431	1.3526	1.2875	0.6746	0.3329	1.3225	12.3606	16.5021	3.537	1.7762		0.963712	5.69515
28.5939	19.2921	20.0864	14.2275	16.0909	9.3147	11.4697	21.0545	1.3944	0.5105	0.7351	0.8302	0.9632	0.9391	0.396	0.7088	0.4526	0.1992	0.8572	2.4444	2.0386	0.9859	1.2603	0.5765	0.4184	1.3801	9.3722	11.8197	2.9105	1.8262		0.967743	5.32948
28.713	18.3219	15.6094	9.485	19.1626	12.5307	14.0947	23.7001	1.1099	0.326	0.4092	0.7335	1.2019	0.7776	0.3772	0.5039	0.4052	0.2202	1.0457	2.4057	1.4119	1.0937	0.7097	0.3006	0.4786	1.1422	7.3395	7.6437	2.578	1.3066		0.971774	5.04913
28.8322	14.6469	9.3327	5.0369	20.0019	13.7952	17.7396	25.1199	0.6314	0.9548	0.4106	0.876	0.8894	1.0257	0.5035	0.8134	0.243	0.2498	0.8545	2.098	1.2453	0.852	0.687	0.3302	0.4627	0.9065	5.2283	6.4298	2.0538	1.1359		0.975808	4.63982
28.9513	10.138	5.327	2.6195	21.1072	15.4866	23.2028	24.9387	0.7739	0.587	0.5888	0.8169	0.8977	0.8694	0.4592	0.5079	0.396	0.0302	0.6416	1.2939	1.1683	0.8394	0.4991	0.4978	0.6759	0.7518	3.5974	4.4556	2.0278	1.0142		0.979839	4.35206
29.0705	6.6561	2.8008	1.5742	24.4692	14.9715	24.5404	19.4719	0.7741	0.452	0.7575	0.8475	1.3313	0.8244	0.4287	0.4173	0.5897	0.3138	0.6333	1.3034	0.8732	0.8594	0.5213	0.2691	0.3502	0.5866	2.5176	3.5583	1.5982	0.971		0.983873	3.97455
29.1896	3.4398	1.4141	0.7499	24.3304	14.1796	23.9537	16.2377	0.6304	0.4068	0.6279	0.7598	0.7499	0.9443	0.3351	0.4526	0.3889	0.3301	0.6358	0.9221	1.0795	0.6448	0.1779	0.3785	0.3612	0.9005	1.9251	3.264	1.5911	0.7912		0.987904	3.53802
29.3088	1.4812	0.5987	0.7313	21.6032	14.9307	24.8054	12.6442	0.6102	0.2792	0.5282	0.5196	1.0293	0.7804	0.4343	0.4105	0.5412	0.1983	0.6478	0.6937	0.575	0.3553	0.1828	0.2024	0.3301	0.5469	1.6246	2.8812	2.3138	0.6755		0.991938	3.21224
29.4279	0.8293	0.7062	0.6334	17.235	17.3349	25.681	8.3636	0.789	0.5202	0.5458	0.871	1.1154	1.1555	0.4917	0.6178	0.2274	0.0942	0.55	0.6794	0.6082	0.192	0.5073	0.2995	0.3174	0.6955	1.7775	2.2634	1.3676	0.9404		0.995969	3.01412
29.547	0.5113	0.5539	0.4133	12.7124	18.3113	28.9953	5.8328	0.4807	0.3117	0.2983	0.6509	0.9726	1.0553	0.2393	0.4571	0.289	0.2592	0.4015	0.5751	0.4594	0.4455	0.3906	0.191	0.1436	0.4149	1.7098	1.8489	1.0337	0.5376		1	2.77572

## Sheet: Image30
X0	Y0	Y1	Y2	Y3	Y4	Y5	Y6	Y7	Y8	Y9	Y10	Y11	Y12	Y13	Y14	Y15	Y16	Y17	Y18	Y19	Y20	Y21	Y22	Y23	Y24	Y25	Y26	Y27	Y28	Y29		Ap-Ba	Average int.
0	4.3475	4.8605	6.1902	3.9568	6.1371	13.6962	6.3662	15.4155	19.6107	9.8087	5.9353	2.7688	4.3431	4.9535	9.5099	7.7375	5.3226	3.6733	3.0737	6.1043	7.2197	3.7355	13.0575	31.0238	25.4715	12.2832	5.1879	8.3946	5.3935	7.1045		0	8.7561
0.1191	5.9276	6.2349	7.6007	4.6575	10.5947	16.125	6.6634	17.4868	22.806	10.6973	7.5041	2.9358	5.4828	7.7187	11.2089	9.706	7.3224	3.5214	3.4072	6.9774	7.6551	5.0856	13.7878	32.1549	27.004	14.4697	6.4387	9.006	6.4312	7.4142		0.00399862	10.1342
0.2383	5.8327	6.47	9.0243	4.7615	12.0393	19.6464	8.4081	16.59	23.5992	13.3302	7.6433	4.455	5.5625	10.2823	13.5269	12.4216	7.9051	3.8538	4.5715	11.1236	12.1577	8.5087	16.6294	33.6775	26.3022	15.6898	7.27	10.4929	6.2686	10.9868		0.00800059	11.6344
0.3574	7.1042	9.0338	10.7604	5.5647	13.3009	24.5683	11.2567	20.3091	24.6739	12.1691	8.4169	4.5374	7.6364	11.7789	17.5274	12.224	10.8925	5.0988	5.6896	13.7788	16.1363	10.4195	18.6524	35.5479	32.031	18.5066	8.9313	11.8974	8.0441	15.0827		0.0119992	13.719
0.4766	7.5889	11.9668	12.1059	7.0877	16.3733	28.8158	14.0672	23.0755	25.5903	14.0645	9.3749	4.8059	9.258	15.9427	19.8971	18.3147	12.0029	5.4607	7.8875	19.2963	19.114	12.521	20.6687	35.8083	33.0216	18.0907	9.7538	13.2783	11.1321	20.9281		0.0160012	15.9098
0.5957	9.224	13.0994	18.277	9.6516	18.6543	27.2317	17.1843	23.0757	26.6155	16.4277	10.5749	7.5345	9.9876	17.2582	23.0995	20.9998	15.921	7.1503	11.8503	27.9463	27.1502	16.193	22.1654	35.4588	32.8529	19.6011	11.7439	16.2006	12.907	26.5872		0.0199998	18.4208
0.7148	11.853	18.4448	21.7723	9.6921	21.4577	29.7433	23.6328	27.3143	26.8579	18.5867	11.856	8.5213	12.2091	19.2927	26.5407	24.3443	19.1103	9.0278	16.4412	39.8437	36.2304	18.7953	23.4741	33.8549	30.9186	19.8991	14.3362	21.2799	16.1608	34.4442		0.0239984	21.5312
0.834	14.6947	24.8036	27.4552	11.2389	22.5297	33.841	25.0067	30.6159	29.4038	20.4293	13.4865	11.5808	14.6582	20.7194	32.963	30.8209	24.0561	11.6839	23.0432	43.8628	43.569	24.8593	28.0994	35.3121	32.868	24.8905	16.8139	25.8213	22.9283	42.6		0.0280004	25.4885
0.9531	18.0536	30.5019	32.9309	14.2871	25.9714	35.6743	31.1435	32.9371	33.7627	21.1068	15.283	11.7699	15.0548	25.0648	38.6398	35.5294	31.9566	17.3424	29.9333	56.9261	47.1417	28.7628	29.5136	36.86	32.7985	27.2692	22.3364	30.7975	29.4457	50.6188		0.031999	29.6471
1.0723	21.9147	33.44	35.6888	16.5965	27.3893	36.1948	26.1442	34.7535	37.2193	21.8501	16.6005	13.1815	20.0135	24.9702	40.6354	39.7579	39.9369	23.4164	36.3657	62.9555	51.0792	30.8213	34.6873	32.2274	33.9245	27.4932	29.0927	38.1154	38.5739	55.9416		0.036001	32.6994
1.1914	25.9171	42.7126	37.0503	18.9622	28.4723	36.921	32.41	39.32	37.8271	27.6781	17.7802	17.0051	22.1183	29.1143	43.0536	45.0151	45.7373	32.0237	42.6051	65.2813	56.5855	33.1979	35.6858	35.5367	31.5599	30.4021	38.867	49.3442	48.6385	59.8329		0.0399996	36.8885
1.3106	29.2109	41.3541	37.3436	22.48	31.0737	38.1366	32.5407	42.0746	41.9792	31.0854	18.9889	17.8311	23.4237	29.1118	40.4224	50.2812	53.1659	35.248	47.0451	64.8087	58.5355	33.4201	38.7013	30.0311	31.2291	32.69	46.8626	56.4999	59.4988	61.9004		0.0440016	39.2325
1.4297	32.9073	38.9524	36.3789	23.8709	31.0506	41.6973	33.4173	48.1246	41.7098	33.9505	18.1432	18.3743	27.4179	30.4519	45.3092	54.1001	54.8221	44.3393	55.254	66.1464	62.3604	36.7372	41.2783	32.6847	34.8373	36.8151	57.4567	58.3446	67.1279	61.5879		0.0480002	42.1883
1.5488	32.7938	41.8125	36.3516	29.3705	33.6332	37.3854	34.609	47.3295	40.7476	38.8524	17.0429	23.6674	27.3136	34.5543	45.3301	51.79	60.7267	51.268	56.8185	63.5358	56.027	40.1068	39.424	33.5026	34.9085	39.3508	67.0239	62.2668	75.3579	57.3793		0.0519988	43.676
1.668	35.0861	37.0035	30.2404	30.0645	32.3134	34.8448	35.0034	44.5266	44.9145	40.4366	23.2127	21.6452	27.6056	35.3458	44.4756	55.3333	57.9347	52.062	56.204	59.6967	56.4573	38.9101	43.583	32.973	33.5762	45.2621	70.7991	64.1754	74.7959	53.2982		0.0560008	43.726
1.7871	34.0485	30.6017	26.5274	31.1325	33.6223	30.8109	35.0372	45.7326	48.8827	44.7895	21.4405	22.5434	28.071	38.3134	40.3145	49.2661	50.5974	52.9075	56.4335	51.5236	50.1544	41.5736	39.8288	32.6485	33.9508	50.486	71.6537	57.6531	71.2162	45.1385		0.0599994	42.23
1.9063	33.6795	27.6835	23.9054	30.4975	33.716	26.3645	31.8061	45.9163	41.7735	44.0196	21.6479	21.083	28.9923	35.4564	39.9044	43.9594	46.0449	54.5259	54.1042	43.0198	49.6014	39.7603	41.166	32.2478	35.8976	54.717	67.2512	54.6956	61.5734	37.8128		0.0640014	40.0941
2.0254	33.025	21.7424	18.9696	32.9039	34.9625	21.4897	27.9588	42.184	40.5112	46.4089	26.0022	20.9593	28.4628	36.1248	32.0228	36.2323	33.1247	56.5867	47.3414	37.7201	40.0017	43.2854	39.5827	34.1132	35.6042	58.3297	60.8184	50.3245	48.4733	33.432		0.068	37.2899
2.1445	30.5775	19.2419	16.5916	33.8035	28.3697	17.366	26.9419	37.9331	35.5391	47.3982	26.1339	21.0006	29.7074	36.5335	28.585	29.7705	25.2077	56.2157	44.357	33.2734	34.5189	37.1828	38.9284	32.7059	37.6798	63.3704	55.7275	41.5595	43.1781	28.8919		0.0719986	34.6097
2.2637	28.6326	17.2893	15.2673	32.1336	25.84	17.4558	22.6369	30.2525	30.7719	45.037	25.4109	20.1642	28.2966	34.5084	23.1159	22.7139	19.9341	50.0679	42.8662	29.7216	31.3861	34.4274	33.865	30.8831	37.6703	68.2031	45.2822	37.2223	36.0167	24.1975		0.0760006	31.3757
2.3828	27.223	15.9872	12.1274	32.7797	22.839	13.5138	17.3937	26.805	23.9725	41.7578	26.9001	21.406	27.2806	31.2772	19.209	17.3602	16.9726	43.8514	34.5775	25.441	28.2935	33.6701	30.9531	33.2026	42.9039	61.3443	36.3471	30.4443	31.0105	19.0276		0.0799992	28.1957
2.502	22.533	11.9271	11.5822	32.2417	21.4633	12.861	19.0244	23.3547	18.5446	36.8155	28.8397	20.4294	28.1912	28.6127	16.8341	13.8455	11.8968	41.2215	31.214	22.3466	25.7172	30.866	29.462	31.2883	43.9038	57.3355	26.1491	23.8834	30.1901	15.1897		0.0840012	25.5921
2.6211	19.415	11.7694	10.4788	31.6694	20.9392	9.1151	14.6235	16.724	15.4721	35.2658	28.9539	17.7562	25.3312	24.4571	14.94	12.7487	10.6443	35.7622	24.574	18.9193	20.2588	27.7006	26.7834	31.303	41.702	54.9274	18.1395	16.0615	29.6317	12.7953		0.0879998	22.6287
2.7402	18.1078	10.5667	8.7248	27.4463	18.1253	8.611	11.961	15.7754	10.718	27.6899	30.3613	21.7924	26.5491	20.7602	12.4951	9.6828	9.1401	32.9138	23.55	17.4536	19.6015	24.7094	20.6984	31.9074	40.7542	46.0709	12.4921	13.9246	27.4067	10.5602		0.0919984	20.3517
2.8594	14.7163	10.606	8.2622	23.6527	18.3107	8.1348	11.2744	11.6533	10.2531	17.7147	31.2578	20.6729	24.0995	17.6211	10.3391	7.6959	7.2336	30.369	21.4632	15.5254	16.4757	23.4965	20.2219	34.2924	40.7472	37.4455	9.8972	10.1997	22.4544	8.7334		0.0960004	18.1607
2.9785	13.8468	8.9774	8.5805	19.7981	17.2802	6.528	9.2776	9.8877	7.7423	14.797	30.7484	17.601	23.9904	12.8438	8.1438	7.1922	6.6199	29.6163	17.3782	13.4208	13.2163	17.4095	18.248	32.2928	32.3331	27.5089	8.177	8.9311	22.3815	6.8359		0.099999	15.7201
3.0977	12.3877	9.4966	8.7679	17.8297	15.9444	5.6125	7.9254	9.0753	6.2294	10.2383	31.1354	15.9342	21.1335	12.897	6.7211	5.4856	4.9116	27.4834	14.9465	11.0219	10.4377	16.1896	14.7324	25.4069	24.5885	20.691	6.4719	7.8411	19.3307	7.6546		0.104001	13.6174
3.2168	10.8534	9.4676	7.5926	14.8792	13.7115	5.9761	6.7176	8.2756	5.6528	6.6181	28.5618	16.0226	19.6556	11.3366	5.4714	5.547	4.1869	20.3161	13.0843	10.0624	8.1118	12.5378	15.2554	23.4952	20.3785	15.1187	4.9838	6.6322	17.2705	7.4324		0.108	11.8402
3.336	10.9386	8.5504	7.1717	13.0033	13.5386	5.9694	6.8285	7.8653	5.9784	5.8527	27.9123	13.6925	17.7629	7.9704	4.7239	4.7968	4.5073	19.4503	12.7245	8.7367	8.7688	11.2123	12.6152	22.9384	16.4924	12.2213	4.0762	6.027	15.5317	6.0074		0.112002	10.7955
3.4551	11.2475	7.9925	7.0268	10.5651	10.6267	3.9961	4.7204	6.6603	4.9146	4.5376	28.6607	11.9296	14.5599	7.1093	4.9422	4.0697	3.9402	16.3493	10.5375	7.0121	8.5809	8.6487	11.1598	20.0913	11.1165	8.9658	4.2505	5.7009	13.8183	4.9913		0.116	9.29074
3.5742	8.9887	7.393	7.3516	10.9387	11.7087	3.8744	5.3984	5.6779	4.4172	4.6879	24.5869	11.4857	14.7009	6.5618	4.1195	3.1021	3.326	13.9671	9.1211	5.7507	5.7669	8.0649	10.4723	14.8948	9.3986	9.1712	3.7349	5.5144	10.6063	4.3688		0.119999	8.30505
3.6934	8.7093	5.4689	7.1328	8.9899	9.5165	3.6008	5.9501	5.8851	2.8269	4.3165	22.672	10.7742	13.7702	5.5962	2.8373	4.1522	3.407	12.6295	8.8282	4.7813	5.5174	5.8577	10.6951	11.5398	8.1614	7.8173	2.6966	4.2584	11.7679	4.5217		0.124001	7.48927
3.8125	8.8468	6.2105	5.1332	7.5256	9.9358	3.943	4.601	5.4559	3.1124	3.4068	17.7905	11.9558	12.6163	4.1565	3.4126	2.8152	2.9333	10.3073	7.8261	4.0084	4.2536	5.6277	7.9559	9.2551	8.0075	5.0173	2.7682	4.1592	9.4344	4.424		0.127999	6.5632
3.9317	10.1798	5.2429	5.3361	7.5103	8.7932	3.5981	3.8158	3.5394	2.9048	4.192	14.419	10.8984	12.4013	3.4593	2.6976	2.3797	2.6537	11.2701	6.0925	3.267	3.9048	5.5623	7.8058	7.944	6.4201	5.0847	3.1567	3.6943	8.2971	4.3756		0.132001	6.02988
4.0508	8.0485	5.2082	4.6481	7.4173	7.83	4.1341	4.0673	2.8936	3.5064	3.7847	12.5821	9.7188	11.2912	3.2629	3.6779	2.2875	2.4576	12.9317	5.1129	3.2733	3.5845	5.2926	7.3716	6.0249	4.6821	3.9887	3.2732	3.2081	6.462	3.9552		0.136	5.53257
4.1699	6.2531	4.9105	5.3836	6.6216	6.9805	3.1262	3.7953	3.496	2.4468	3.471	8.2626	10.8542	10.3861	3.3005	2.2362	1.9648	2.4209	12.3029	4.2214	2.2863	2.8259	4.8362	5.8926	5.7741	4.4328	3.937	3.0927	3.469	6.5419	3.1739		0.139999	4.95655
4.2891	8.0338	5.8344	4.3568	5.7516	5.4205	2.6812	3.3982	2.2687	2.8135	3.8958	5.9135	9.2678	9.88	2.6812	1.7109	1.7418	2.0242	13.1679	4.1522	2.874	3.0404	4.1385	5.5907	5.1626	3.6495	2.8591	2.3778	2.4402	6.824	3.5676		0.144001	4.58395
4.4082	6.9288	4.0963	4.2722	6.1197	6.157	2.8689	3.1652	2.308	3.1416	3.7331	5.514	11.8703	8.8999	2.6068	1.9441	2.1576	1.7748	12.2563	3.0924	2.459	2.7436	3.1275	5.2611	4.6912	4.4296	2.8306	2.1553	2.7919	6.7102	2.7395		0.147999	4.42822
4.5274	5.5981	3.7131	3.3869	4.4934	4.735	1.8035	3.9284	2.2171	3.0682	3.2836	5.0145	12.1447	7.9901	2.6833	1.8288	1.8069	1.9197	9.2947	2.8681	3.2304	2.9987	4.1121	5.0805	5.6554	3.7345	2.3375	2.35	2.3132	7.1289	4.1209		0.152001	4.16134
4.6465	4.7237	3.3357	2.7158	5.1601	5.3412	2.4501	2.9571	2.2447	2.2044	3.4012	4.3907	10.8601	6.7269	1.7708	1.5617	1.5796	1.9801	8.5394	3.0872	1.664	2.2573	3.3631	5.7148	4.3957	3.613	2.4718	2.2962	2.5507	6.6482	3.0776		0.156	3.76943
4.7657	4.8707	3.6803	3.3623	4.2208	4.74	2.7499	3.6036	2.3742	2.3425	2.7628	2.9472	9.5234	5.9724	2.3269	1.5714	1.9068	2.1703	8.1304	2.5971	2.7715	2.2099	3.0533	5.2922	3.3181	2.6411	2.5953	1.8921	2.1191	6.7598	2.3982		0.160002	3.56345
4.8848	3.998	2.7657	2.68	4.7335	3.5578	2.2016	2.3856	1.7247	1.8015	2.7132	3.691	10.0752	6.3445	1.9283	1.6665	1.3994	1.4673	7.0596	2.6035	1.9322	1.8111	3.3848	4.5427	3.1941	2.5936	2.38	1.7289	2.2283	5.9408	2.6298		0.164	3.23877
5.0039	3.8684	3.3324	1.6485	4.0105	4.1307	2.2918	3.1694	2.0116	2.1178	2.1241	3.8569	9.155	6.2564	2.9182	1.6889	1.1398	1.4848	7.384	2.5217	1.5737	2.6945	3.1932	4.6244	3.3267	3.2723	1.96	1.6913	2.1953	5.8061	3.0417		0.167999	3.283
5.1231	2.5819	2.7948	3.124	4.3086	3.1693	2.1785	3.779	1.741	1.5793	2.0311	3.6155	6.9638	5.8409	1.7143	1.0565	1.442	1.7971	6.4199	2.2557	2.0154	1.6227	2.0954	4.4802	2.5691	3.4698	2.0401	1.8532	1.9551	5.8966	3.2007		0.172001	2.98638
5.2422	3.4947	2.9284	2.0447	4.9362	4.2404	2.2488	3.1213	1.2819	1.718	2.6521	2.8182	6.5531	5.0664	1.6645	1.4142	1.4098	1.5078	7.0087	1.9155	1.7164	1.725	2.1506	4.2734	2.6547	2.7483	1.3054	1.5705	1.9724	5.9847	2.8539		0.176	2.89933
5.3614	2.5609	3.0179	2.0055	3.795	3.2727	2.4792	3.0817	1.447	1.6709	2.8272	2.9739	5.3868	5.5309	1.7398	1.6062	1.5814	1.451	6.2584	1.8625	1.5719	1.3936	2.1862	4.8146	2.7177	2.861	1.9054	2.0236	2.1406	5.43	2.8492		0.180002	2.81476
5.4805	2.561	2.4939	1.9713	3.6291	3.7592	1.9665	3.2385	1.61	1.9065	1.9916	2.2518	6.7169	4.4421	1.7336	1.5217	1.122	1.2556	5.6748	1.8103	2.2176	1.614	2.568	4.2336	2.2871	2.3265	1.9147	1.1302	1.6221	5.6731	2.4695		0.184	2.65709
5.5996	3.1884	2.4156	2.028	3.7361	3.7388	1.6987	3.0703	1.6781	1.7782	2.1564	2.7721	3.5148	4.7963	1.5234	1.399	1.3715	1.1936	6.3409	1.9762	1.1837	1.6871	1.8867	4.0832	2.4725	2.3448	1.7641	1.3366	1.7353	6.2223	2.3303		0.187999	2.58077
5.7188	2.0971	2.2116	1.9661	3.4308	2.7778	1.6375	3.2391	1.7387	1.8809	2.2047	3.1813	4.2681	4.7133	1.4757	1.232	1.4651	2.2702	5.511	1.3325	0.7967	1.1006	2.4765	5.0485	2.5933	1.7888	1.8637	1.3115	1.7992	4.9456	3.0027		0.192001	2.51202
5.8379	2.552	2.1915	1.3501	4.6285	2.9257	2.082	3.8886	1.8124	1.7544	2.6873	3.3617	3.535	4.0064	1.6033	1.0435	1.1881	1.2398	5.9254	2.2932	1.6571	1.3934	2.0854	5.0387	2.1113	2.4221	1.6959	1.5043	2.3358	5.2299	3.6833		0.195999	2.64087
5.9571	2.1459	1.3781	1.4373	4.7888	2.6892	2.0541	3.9189	1.52	1.5079	2.0695	2.9328	3.1671	4.8188	1.2158	1.1901	1.5855	1.4875	6.1333	1.2807	1.6061	1.1797	1.3613	5.612	2.0289	2.0735	1.6942	1.2246	2.8611	5.3821	2.2701		0.200001	2.48716
6.0762	2.1627	1.6937	1.5217	3.6075	2.8645	1.4367	3.5744	1.3051	1.4946	2.298	2.2389	3.3025	3.9033	1.0813	0.6106	1.3442	1.4817	5.5477	1.6775	1.0926	1.3372	2.133	4.7129	2.1741	1.5602	1.3889	1.2014	1.9558	4.7738	2.693		0.204	2.27232
6.1953	2.0576	1.7049	1.4818	3.9159	1.6647	1.7961	3.4433	1.6413	1.6591	2.2498	2.9481	2.714	3.5386	1.2405	1.2164	1.1377	1.5711	5.8014	1.6701	1.3518	1.3891	1.7841	5.4098	2.4762	1.6687	1.3874	1.2739	1.9255	5.2165	2.8009		0.207999	2.33788
6.3145	1.8693	1.7566	1.5973	5.4592	1.7744	1.6241	3.3261	1.7935	1.2485	3.101	2.8575	2.8314	3.9546	1.5274	0.6193	0.8418	1.1371	5.3473	1.4484	1.5918	1.0775	1.8647	4.1669	1.8222	1.9065	2.1154	1.2002	1.505	4.8192	2.5042		0.212001	2.28961
6.4336	1.7437	1.4778	1.8649	3.9117	2.3444	1.569	3.5323	1.5766	1.4298	2.7369	2.6383	2.838	3.3869	1.2838	1.0857	0.9191	0.8849	5.3952	1.2313	1.2646	1.3768	1.7442	3.7296	1.5644	1.6054	1.6603	1.431	1.3031	5.312	3.6406		0.215999	2.21608
6.5528	1.9037	1.7272	1.8022	3.1612	2.4406	1.1467	3.2888	1.3932	1.2287	2.6956	2.8186	2.8769	4.2571	1.6776	1.2197	1.0975	1.1202	4.6873	2.2631	1.2451	1.9934	1.2644	3.5872	2.3083	1.4015	1.6948	1.1968	1.3552	4.5246	2.8479		0.220001	2.2075
6.6719	1.9628	1.0416	1.6584	3.0735	1.6132	1.4727	3.4641	1.3273	1.0799	3.5302	3.4884	1.9057	4.4517	1.145	0.8793	0.7926	0.9976	4.1449	1.8489	1.1722	1.2792	2.1751	4.3067	1.8578	1.2018	1.9315	1.583	1.5725	4.2788	2.0895		0.224	2.11086
6.7911	1.4897	1.3745	1.1587	3.6164	1.6358	0.9859	3.1331	0.8083	1.3489	2.6946	2.3619	2.2192	3.3232	1.7467	1.3533	1.1331	0.8636	5.0202	1.0754	1.1666	1.1665	1.2995	4.5786	1.1041	1.524	1.6675	1.8766	1.3735	3.3187	1.8358		0.228002	1.9418
6.9102	1.636	1.6491	1.1941	3.5982	2.0429	1.5454	4.4956	1.2045	1.4756	3.4298	2.4717	2.0843	3.399	0.9348	1.4515	0.7596	1.536	5.4395	1.8005	1.6982	1.2969	1.3752	3.6299	1.2919	1.5342	1.4646	1.2353	1.8978	5.1425	1.692		0.232	2.14689
7.0293	1.125	0.8019	1.3593	3.1279	1.5239	1.0241	4.3673	1.1745	1.0696	2.6727	2.4987	3.0594	4.4535	1.1265	0.6169	1.1029	1.1384	4.2519	1.503	0.9714	1.3848	1.5041	4.2542	1.4566	1.2051	1.3799	1.4433	1.5721	4.8914	2.0926		0.235999	2.0051
7.1485	1.263	1.1491	0.968	2.3224	1.6535	1.055	4.0552	1.511	1.4954	2.0621	3.1214	2.5146	3.4331	1.2884	0.7734	1.1087	0.9192	4.0597	1.4908	0.9027	0.8937	1.1157	4.3839	1.6967	1.5243	1.4696	1.799	1.663	4.0728	2.215		0.240001	1.93268
7.2676	1.1465	1.3424	1.1875	2.51	1.34	1.1213	3.2522	1.4827	1.5002	2.2445	2.8041	1.856	3.5451	1.0721	0.8052	0.9458	1.0043	4.7155	1.4741	1.0463	0.748	1.3705	4.0777	1.6341	1.1806	1.8791	1.0505	1.2265	3.7788	1.6612		0.244	1.83343
7.3868	1.048	1.0051	1.3107	3.4363	1.6683	1.2633	3.9958	1.2069	1.2651	1.9651	2.9626	2.1548	3.3121	1.3078	1.313	0.547	1.1186	4.2195	1.6707	1.1862	1.3221	1.3068	3.6473	1.5229	1.492	1.6483	1.3513	1.5111	4.2674	2.24		0.248002	1.9422
7.5059	0.8094	0.8422	1.3544	2.7776	1.5812	0.8819	4.1796	1.1346	1.1534	2.5027	2.5415	1.2746	3.3863	0.9589	0.7935	0.6179	1.3357	4.4583	1.2708	1.3006	0.9068	0.9192	5.5105	1.4398	1.3282	1.8405	1.5525	1.717	3.4878	1.3553		0.252	1.84042
7.625	1.0327	0.6915	1.6388	3.2276	1.1731	1.1945	3.3983	1.2258	1.5362	2.4288	2.8921	1.8807	3.044	1.4296	0.9638	0.9338	1.2321	5.4843	1.0868	1.3295	1.391	1.5823	3.9728	1.4344	1.3073	1.3179	1.3603	1.8883	3.4973	2.2429		0.255999	1.92728
7.7442	0.8944	0.8954	0.8667	2.9964	1.2837	1.327	4.7684	1.1118	1.0495	1.5662	2.9483	1.4132	3.4053	1.471	0.808	0.6304	0.9633	4.1325	1.3367	1.3494	1.5364	1.2837	3.2718	1.4645	0.9718	1.2043	1.5459	1.0153	3.1813	1.4231		0.260001	1.73719
7.8633	1.2018	1.2413	0.8954	3.2658	1.1164	1.2199	5.0433	1.5522	0.9058	1.9235	2.5434	1.7903	3.9865	1.1215	0.9089	1.0564	1.7534	4.3769	1.3697	1.263	1.1229	1.1583	4.5376	1.3415	1.3747	1.9024	1.3551	1.1686	4.2781	1.4527		0.263999	1.94091
7.9825	1.3717	1.103	1.3122	2.8071	1.4074	1.1078	5.6615	1.2	1.6406	1.8883	2.7963	1.2829	3.3577	1.0471	0.9405	0.7994	1.2849	4.634	0.8955	1.4805	1.1706	1.1717	3.2883	1.2705	1.1277	1.6086	0.8535	1.2556	3.5351	1.5917		0.268001	1.82972
8.1016	0.8536	0.8486	1.0156	3.395	1.007	0.8924	6.0397	1.5607	1.1331	1.8371	3.577	1.9171	4.867	1.2682	1.0304	0.751	1.5064	4.9796	1.2161	1.4186	1.4459	1.4577	3.8022	1.4571	1.4658	1.9089	1.364	1.5897	3.4766	1.7906		0.272	2.02909
8.2207	0.6814	0.7973	1.0489	2.7179	1.5566	0.8546	5.9538	1.2724	1.2929	1.9354	3.0212	1.6794	4.9409	1.1484	1.2396	0.6362	1.5854	4.9985	1.8728	1.2046	1.3082	1.2171	4.2213	1.2261	1.2202	1.1003	0.9615	1.4234	3.2515	1.2166		0.275999	1.91948
8.3399	0.995	1.2647	1.2334	2.7991	0.912	0.9203	6.6624	1.0902	1.45	1.6859	3.9311	1.9894	4.1376	1.3205	0.8	0.7657	1.2917	4.8357	1.0776	1.2759	0.5632	1.2582	4.9178	1.1869	1.3807	1.3907	1.0744	1.4433	3.1755	0.9935		0.280001	1.92741
8.459	0.9258	0.9833	0.9612	2.888	1.6326	0.8047	6.7405	1.1392	1.7792	1.2756	4.8439	1.743	3.7972	1.641	1.1047	1.1395	1.5934	5.1786	0.8874	1.2658	0.9465	1.0639	4.9895	1.6367	1.4932	1.3105	1.1606	1.0384	2.9293	1.7805		0.283999	2.02246
8.5782	1.3338	1.1832	0.9055	2.9663	1.3738	1.1065	7.1044	1.5709	1.3764	2.11	4.7066	0.9109	5.2259	0.94	1.0731	0.7346	1.7602	5.0624	1.3988	1.2169	1.241	1.0472	5.2231	1.5353	1.4732	2.0069	0.7906	1.1407	3.1195	1.3272		0.288001	2.09883
8.6973	1.1032	0.7981	0.8949	3.1714	1.0128	1.2399	7.0387	1.5256	1.669	2.1392	5.7712	1.6534	6.277	1.2745	0.9668	0.9391	1.3052	6.8456	1.2563	1.0991	1.1474	1.1057	5.126	1.6906	1.2081	1.2604	0.873	1.6734	3.4184	1.4501		0.292	2.23114
8.8165	1.0945	0.7524	0.8141	3.4237	1.1913	0.8512	7.9672	1.2746	1.7538	2.6705	5.7494	1.9745	6.4494	1.5237	1.0744	1.0643	1.9942	7.133	0.9517	0.9856	0.8873	1.0216	5.0809	1.467	1.7299	1.717	0.9928	1.6328	3.0219	1.8428		0.296002	2.33625
8.9356	1.157	0.9371	0.9495	2.663	1.0939	1.2704	8.2228	1.0296	2.5293	2.5422	6.09	1.7918	4.9832	0.8732	0.8481	1.1178	2.2995	7.0954	1.0534	1.0352	1.0594	1.4152	6.3169	2.0094	1.3476	1.2038	1.4153	1.3244	3.3988	1.4575		0.3	2.35102
9.0547	1.4282	1.0833	0.7126	2.6817	1.6963	1.132	8.7634	1.7785	1.6351	4.7588	8.069	1.5829	6.4199	0.9718	0.595	1.2092	1.9428	7.2185	1.0348	0.9934	0.8454	1.1181	6.2087	1.8466	1.6793	1.7344	1.4197	1.783	3.9883	1.3069		0.303999	2.58792
9.1739	1.1659	0.7623	1.1808	3.062	1.0061	1.0871	8.2891	1.6841	1.3827	4.6075	9.3249	1.8299	7.1238	1.4201	0.9824	0.5864	1.8702	8.1247	1.3098	1.1066	1.1517	1.3415	6.9728	1.7606	1.5122	1.5201	1.4517	1.4171	2.9864	1.1833		0.308001	2.64013
9.293	0.8029	0.7858	0.7958	3.5165	1.3107	0.8118	6.9424	1.3807	2.1278	5.2927	9.2679	1.8819	9.2223	1.3714	0.8498	0.9335	2.1705	8.1838	1.2492	1.1642	1.4074	1.6656	7.0847	1.6419	1.4003	1.3351	1.2638	1.6293	2.9756	1.4085		0.312	2.72913
9.4122	1.2899	1.0294	1.252	3.4764	1.2895	0.7042	7.1495	1.2264	1.9241	5.1852	9.9816	1.8972	9.3282	1.619	1.0655	0.7488	2.1589	8.137	1.4713	0.892	0.9895	0.9821	6.7647	2.1521	1.4694	1.5352	0.9687	1.2034	3.0081	1.1212		0.316002	2.73402
9.5313	1.5073	0.8136	0.6682	3.2626	1.0182	1.4808	8.3621	1.0472	2.4243	4.9405	11.6433	1.8042	9.3937	1.2743	1.1033	0.8061	2.4357	7.8752	1.739	0.7586	0.7711	1.8491	7.6273	2.5048	1.2236	1.5786	1.2433	0.9056	2.7155	1.0936		0.32	2.86236
9.6504	0.9119	0.5779	1.0859	3.2124	1.17	1.2157	8.5226	0.8993	2.4305	5.9137	14.2861	1.9332	11.9081	1.394	1.3066	1.0997	2.6055	7.9075	1.8345	1.2895	1.5331	1.1509	8.1553	1.587	1.457	1.7721	0.9321	1.5677	2.8166	1.4086		0.323999	3.1295
9.7696	0.8869	1.3043	0.9103	4.1412	1.0869	1.5173	8.4054	1.5846	2.4324	5.8777	15.4713	2.0471	12.3768	1.5261	1.1668	1.254	2.4283	7.345	1.2275	1.1188	1.1314	0.9463	7.8826	1.5872	1.752	1.0878	1.2981	2.0164	3.5866	1.2684		0.328001	3.22218
9.8887	0.4932	0.9227	0.7959	3.8857	1.4814	1.2785	8.9518	1.3268	2.0313	4.9473	15.7953	1.4384	13.1853	1.2763	1.2223	0.5743	1.7382	6.5038	1.0192	1.0593	0.8477	1.5739	9.8934	2.2562	1.6477	1.6063	0.7462	1.6358	2.8575	1.453		0.331999	3.14816
10.0079	1.0483	1.0964	0.5791	3.3804	0.9572	1.5084	10.091	1.5801	1.8265	6.5765	17.7807	1.8302	17.6104	1.6268	0.741	0.7171	1.851	7.5034	1.3663	1.0739	0.9503	0.9923	9.2892	1.6237	1.524	0.816	1.0551	2.0459	3.137	1.3774		0.336001	3.45185
10.127	1.3495	0.7923	0.7169	3.5216	1.4523	1.5662	9.9065	1.2379	1.6228	6.8301	15.0582	2.2548	17.8931	1.6096	1.1419	0.7892	1.9663	7.0232	0.9659	1.5093	1.2208	1.3173	10.4451	2.1948	1.3496	1.4295	1.4	2.0438	3.5641	1.5381		0.34	3.52369
10.2462	1.0377	0.6724	0.9087	4.0373	1.2105	1.5801	11.2828	1.6101	1.6589	4.9815	15.9766	2.1597	18.5159	1.9908	0.9058	0.9004	2.0306	8.7644	1.4418	0.7513	0.8454	1.2083	11.1026	2.1836	1.0093	1.1118	1.578	1.8828	3.7259	1.015		0.344002	3.60267
10.3653	0.9544	0.737	1.1053	4.1465	1.2177	1.7088	11.9912	1.27	2.0711	4.7276	16.3159	2.5484	22.531	2.3988	0.6456	1.1941	2.7258	7.3741	1.5163	0.7421	0.9975	1.1911	13.4838	1.8469	1.3182	1.3706	0.8958	1.6342	3.1344	1.2653		0.348001	3.83532
10.4844	1.4077	1.2941	0.9534	3.9483	1.0614	1.0048	12.7463	1.8071	2.0893	5.0084	19.2838	3.1995	23.6584	2.1901	0.819	0.8454	2.5216	8.9945	1.2129	1.3536	1.303	1.2216	12.809	2.0068	1.3708	1.4875	1.1818	1.7786	2.543	0.8531		0.351999	4.06516
10.6036	0.9087	0.9566	0.9255	4.6213	0.8535	1.3692	13.5314	1.831	1.6732	5.5017	16.8635	2.347	23.5789	1.7432	1.3012	0.8476	3.4592	7.703	1.3273	0.6879	1.045	1.1386	12.9591	1.6889	2.3872	2.0326	1.1594	1.9805	2.4204	0.8388		0.356001	3.98938
10.7227	0.6853	0.9881	1.0378	4.6157	1.3426	1.485	15.9095	1.61	1.5753	5.6806	17.5085	2.5802	23.5646	1.8966	0.6497	0.8915	2.6242	9.9969	1.0453	0.9711	0.9899	1.1455	15.9809	1.8393	1.658	1.7917	1.2521	1.7991	3.0202	1.3686		0.36	4.25013
10.8419	1.1997	0.9574	0.9636	4.8584	1.1036	1.3254	16.923	2.0489	1.2696	5.4345	16.5715	3.1239	23.0094	1.8179	0.7854	0.9525	2.3095	9.5178	1.153	1.345	1.241	1.3663	17.3039	1.6893	1.9828	1.4399	1.0554	2.1906	2.4706	0.9703		0.364002	4.27934
10.961	1.3237	1.6278	1.1924	5.0918	1.413	1.4864	17.6774	2.1873	1.5189	4.942	14.8409	3.5049	21.1971	1.8098	1.096	1.052	2.5594	8.3696	1.6259	0.8126	1.2982	1.2585	15.6371	1.9598	1.8484	1.4464	1.5726	2.8125	2.7947	1.2588		0.368	4.24053
11.0801	0.9971	0.9602	0.6133	4.8245	1.4553	1.3229	16.805	1.7489	1.5311	5.8244	15.2786	2.4387	21.0784	2.294	0.8431	0.9456	2.9352	9.5112	1.5299	1.4697	0.9827	1.5776	17.2872	1.9729	2.6358	1.434	0.8001	2.6285	3.126	0.7982		0.371999	4.255
11.1993	1.1551	1.0978	1.0981	5.1245	1.3229	1.3135	15.9404	2.4674	1.8666	4.6308	13.1148	4.0533	20.569	1.9878	1.0103	1.344	1.8009	9.7727	1.1969	1.2168	1.0709	1.9085	17.7608	1.6576	1.8851	1.4243	0.9436	2.7541	2.3831	0.9982		0.376001	4.16233
11.3184	1.3089	0.8899	1.157	5.4709	1.1682	0.8114	16.7408	2.2941	1.3296	4.7768	13.9071	3.4628	17.7096	1.7448	1.1973	0.8048	2.7957	10.8158	1.5227	0.9087	1.3169	1.5249	16.4963	1.9727	2.0639	1.7568	1.5202	2.9065	2.9549	1.2197		0.38	4.15166
11.4376	0.693	0.8967	0.9959	5.5658	1.5207	1.4673	15.3696	2.6208	1.7898	4.6461	15.712	3.5068	17.1798	2.3589	0.8277	0.8494	2.9425	11.2853	1.3566	1.2464	0.9515	1.5653	16.0484	1.6099	1.7322	1.4927	2.09	3.096	3.0363	1.1816		0.384002	4.18783
11.5567	0.573	0.9981	0.6852	5.7541	1.1675	1.1153	14.5979	1.9742	1.0064	5.5847	17.6952	3.6795	18.8951	2.2169	0.9472	1.1578	2.416	9.8805	1.2106	0.4382	1.0033	1.729	13.9892	2.3174	1.7236	1.3549	0.7975	3.0792	2.6361	0.691		0.388	4.04382
11.6758	1.3536	0.8985	0.4796	5.172	1.2655	1.065	14.4393	2.2325	1.839	4.9172	19.1828	3.6981	20.6978	1.9547	0.886	1.0538	2.2085	8.8834	1.064	0.9382	1.1497	1.5729	13.9017	2.2071	1.5117	1.6419	1.004	3.1515	3.1159	0.8904		0.391999	4.14588
11.795	0.5463	0.5864	0.7888	4.966	1.6181	1.7573	15.7309	1.8169	1.8311	4.0139	19.4031	4.1623	20.2385	2.3091	1.1057	1.0974	2.9642	8.8979	1.3051	1.0092	0.9596	1.732	15.7865	1.3349	1.9922	1.7517	1.1625	3.1825	2.6915	1.0041		0.396001	4.25819
11.9141	1.1995	0.8914	0.5915	4.9723	1.291	1.0222	15.0665	1.7822	1.6963	6.1708	20.1017	3.4962	21.198	1.9147	0.9539	1.1487	2.5961	9.9657	0.6868	1.2128	1.5488	1.7142	13.6879	1.7431	2.0556	1.5789	1.1967	2.9127	2.4657	0.9056		0.399999	4.25892
12.0333	1.0083	1.2675	1.0499	5.1434	1.4271	1.7195	14.3899	2.2444	1.6724	4.8632	18.7028	3.957	20.6717	2.5363	0.946	1.001	3.0447	8.8786	1.0419	1.2503	1.1624	1.7652	14.1752	1.7721	2.0797	1.0468	0.9646	3.3695	2.4916	1.0929		0.404001	4.22453
12.1524	1.2106	1.0193	0.9034	5.5086	1.0725	1.468	16.7738	2.387	1.4208	4.9901	16.9514	4.6196	19.0997	2.1166	0.8456	1.5339	2.4456	9.711	1.3143	1.1616	0.8653	1.5717	12.4159	1.6018	2.2139	1.634	1.348	3.172	2.9437	1.1735		0.408	4.18311
12.2716	0.9032	0.871	0.9871	6.5388	1.2915	1.4609	17.2077	1.8184	1.0663	5.3981	18.1379	5.2549	17.4509	1.5831	0.9971	1	3.8369	9.8436	1.3619	1.075	1.3001	1.581	12.4996	1.8374	2.3286	1.3759	1.0026	3.7176	3.5062	0.8987		0.412002	4.27107
12.3907	0.7888	0.5884	0.8535	8.0712	1.89	1.4077	18.1781	2.0242	1.6823	4.9096	14.9934	5.8532	18.7972	1.7979	0.8564	0.9989	3.4613	7.9165	1.1148	1.2635	1.0029	1.5671	13.0054	1.6334	1.7821	1.2068	1.4089	3.6555	3.4843	0.9488		0.416001	4.23807
12.5098	1.0803	0.9902	1.5888	8.406	1.9035	1.2707	16.3691	2.4473	1.3079	3.3538	12.1002	5.6611	17.4127	1.938	1.4581	0.9353	3.7452	9.3558	1.1517	1.3603	1.3793	2.2435	13.0904	1.8314	1.7386	1.1981	1.0543	3.6544	2.6213	1.2732		0.419999	4.13068
12.629	0.6031	0.8508	0.96	8.5824	1.4962	1.0518	18.8002	1.9066	1.8749	3.6958	12.7089	7.0887	16.4507	1.3734	0.7535	0.9012	5.365	8.8432	1.4281	0.9611	1.6761	1.923	11.8249	2.0563	1.5315	0.955	1.0075	4.1044	2.9201	1.5024		0.424001	4.17323
12.7481	1.0986	0.7877	1.2025	9.4717	1.7834	1.06	16.701	2.0638	1.7395	3.3735	12.4603	4.9865	14.9874	1.2762	1.4547	0.7392	4.2708	6.9686	1.2781	1.2127	0.9978	1.3923	12.7414	1.8303	1.6767	0.999	1.1549	3.4994	3.3382	0.7489		0.428	3.90984
12.8673	0.8356	0.9513	0.8918	7.597	1.5002	1.6256	16.9384	2.4742	1.5465	3.0571	9.2132	6.5062	13.3104	1.4218	0.7572	1.1996	3.9807	6.4646	1.1078	1.0079	0.9045	2.428	13.7445	1.5718	1.4201	1.422	0.7494	4.6032	2.4745	1.1005		0.432002	3.76019
12.9864	0.6409	1.3515	1.0946	7.5399	1.9384	1.3067	14.29	2.3654	1.8364	2.6244	10.5551	6.1749	14.6424	1.5702	1.3015	1.0043	4.9147	6.2891	1.5584	1.5271	1.1633	2.4692	14.1777	1.8922	1.9362	1.2678	1.4114	3.9237	3.0392	1.0045		0.436	3.8937
13.1055	0.6985	0.582	0.4294	7.7736	1.8568	0.9618	13.9032	2.0649	2.0356	2.695	9.6079	4.8418	12.1386	1.1772	1.1635	1.0047	6.2185	5.7805	1.5401	1.2102	1.2763	2.5084	14.5242	1.9927	1.4476	1.1727	0.7534	4.8045	3.2014	0.8413		0.439999	3.67354
13.2247	1.2963	0.4874	0.6327	7.2842	1.5587	1.519	11.3435	2.9876	1.213	3.7275	10.7622	4.0053	13.084	1.3261	0.7366	1.1564	5.0407	5.5748	1.7192	1.2139	1.4109	2.3457	12.6465	2.0565	2.0997	1.6295	1.3605	4.9186	4.2166	0.8023		0.444001	3.67186
13.3438	0.9044	1.4934	0.8403	6.1056	1.8436	1.2155	11.0617	2.1308	0.8454	4.777	12.8586	3.691	12.1678	1.8902	1.2982	0.8898	4.5026	5.2618	1.9979	0.9505	1.1577	2.2701	10.6565	1.7332	1.9884	0.842	1.3701	6.2092	4.0637	0.8985		0.448	3.59718
13.463	0.6932	1.0163	0.9965	7.4987	2.0505	1.3107	10.7559	2.2698	1.517	3.2125	11.6368	2.4411	10.2992	1.7949	1.2219	0.5916	4.7967	5.8622	1.5718	1.4723	1.1452	2.4065	12.9555	2.0025	1.5349	1.3112	1.2084	8.233	3.3337	1.2018		0.452001	3.61141
13.5821	0.949	0.8984	0.8474	7.1586	1.6509	1.3137	10.8577	2.5192	1.0085	3.2846	11.9224	2.43	9.9083	1.7903	1.1088	1.5092	3.63	4.9169	1.5858	1.3687	1.1151	2.2152	10.164	2.0101	1.5322	1.3696	1.2702	9.1244	3.8612	1.2062		0.456	3.48422
13.7012	0.987	0.7343	1.2591	8.0541	2.1689	1.257	10.891	2.5826	1.1083	3.2757	11.5837	2.8876	9.8396	1.3162	1.8784	0.8378	4.8976	4.9582	1.3153	0.8563	1.3141	2.1294	12.1004	2.3026	1.6705	1.2151	1.7257	10.5198	3.2941	0.844		0.459999	3.66015
13.8204	0.8515	0.9459	0.8973	6.7747	2.1645	1.2153	10.0468	2.1526	1.308	3.7408	10.8447	2.7478	11.8234	1.4314	0.96	1.1582	4.1978	4.6762	1.7897	1.359	1.2717	1.6561	12.127	1.5477	0.914	0.9009	1.1634	10.9446	3.2223	0.736		0.464001	3.51898
13.9395	0.889	0.7951	0.4294	5.7573	2.7252	1.2121	9.407	1.9078	1.2206	3.3215	7.4784	2.0609	10.5525	1.4738	1.0017	0.8544	3.6137	5.4615	1.374	0.9543	0.8506	2.3079	12.8613	2.2053	1.6685	1.163	0.8969	13.7483	2.6382	0.846		0.467999	3.38921
14.0587	0.7925	0.8367	0.6809	7.2898	2.0284	1.3719	10.8597	2.1755	1.4668	3.7604	7.8094	2.1079	9.2472	1.3996	1.3065	1.1036	2.7349	3.6913	1.1637	0.8908	1.1604	2.4477	13.3418	2.0433	1.4165	1.3703	1.0997	14.8095	2.8994	1.3713		0.472001	3.48925
14.1778	1.0515	0.8943	0.7372	6.2585	2.3214	1.4077	9.746	2.8335	1.1564	3.1624	7.3837	2.1028	10.6197	1.272	1.1597	1.0007	1.6546	4.9405	1.516	0.9486	1.5273	2.4108	13.1349	1.6021	0.8082	1.1148	1.1627	14.395	3.1668	1.0494		0.476	3.41797
14.297	0.8032	0.5317	1.3523	6.4204	2.2164	1.117	8.8272	2.6922	1.3124	2.6493	7.5421	2.5781	10.9408	1.3739	0.9484	1.0975	2.7036	4.8646	1.7395	1.0481	1.2127	2.4777	14.2129	1.9389	1.7269	1.4198	1.3251	15.1617	3.2028	0.8486		0.480002	3.54286
14.4161	1.4076	0.7343	0.7017	7.546	2.3392	1.3137	8.0068	2.5712	1.2114	3.0946	6.853	2.4883	10.7341	1.4772	0.8514	0.9523	2.4366	4.91	1.3762	1.0508	1.3071	2.4265	13.9122	2.0932	1.4169	1.3194	1.6918	13.6029	2.4787	1.0573		0.484	3.44541
14.5352	0.9567	0.5253	1.0978	8.2266	2.8908	1.2078	8.1592	2.2246	1.3733	2.806	6.4604	2.9321	11.5189	1.518	0.9486	1.0019	1.9057	4.8262	1.6222	1.1012	1.0565	2.9375	15.04	2.3729	1.5313	1.1493	1.8779	11.6231	2.9927	1.1029		0.487999	3.49958
14.6544	1.0446	0.3208	1.2639	7.2013	2.0656	1	7.7925	2.4795	1.1074	3.3418	6.8908	2.2701	11.0065	1.0526	1.3055	0.9489	2.2912	3.8867	1.4777	0.8514	0.7404	2.0576	13.358	1.5824	1.634	1.1118	1.0018	11.0216	2.8985	1.4706		0.492001	3.21585
14.7735	0.9526	0.8982	0.8453	10.0699	3.1493	1.1094	6.9084	2.9991	1.3644	2.7501	7.9188	2.5242	10.782	1.0056	1.1067	1.4191	2.8347	5.8116	1.8863	0.9034	0.8387	1.9457	13.8243	1.8967	2.1523	1.469	1.0019	10.0245	2.7353	1.3128		0.496	3.48134
14.8927	1.3061	0.9908	1.0029	7.8777	2.8555	1.3791	7.9215	3.1625	0.8986	2.3758	6.4444	2.4851	11.1157	1.4118	1.1085	1.001	2.4984	5.1164	1.375	1.1003	1.0984	2.1571	12.3883	1.9365	1.6326	1.2176	1.1538	9.4321	2.6923	1.2123		0.500002	3.27827
15.0118	1.0019	0.6353	0.8888	7.7496	3.3511	1.468	7.4646	2.7431	1.3129	2.8283	7.409	3.2581	10.128	0.9587	1.0494	1.0066	2.8782	5.0933	1.223	1.1021	1.0647	3.0334	9.7534	2.0125	1.5741	1.5179	0.8548	8.2662	2.5801	0.9501		0.504	3.17191
15.1309	1.0005	0.9031	0.8997	6.698	2.8158	1.5661	7.542	3.5717	1.3165	2.4719	7.4786	3.2606	9.747	1.1024	0.9478	1.3085	2.7974	4.993	1.7735	1.2074	1.5801	2.5859	10.0773	2.1537	1.1638	1.6209	1.2614	7.9584	2.5293	1.2616		0.507999	3.18646
15.2501	0.8412	1.2006	1.3102	7.4727	3.4948	0.9538	6.7421	3.7001	1.0034	2.0643	8.8067	2.7344	10.0792	1.2667	1.2036	0.9418	2.7972	4.6545	1.3277	1.3099	1.414	2.6575	9.1642	1.6245	1.3073	1.0059	1.2648	9.3351	2.6214	1.5199		0.512001	3.19398
15.3692	0.6906	0.8412	0.999	7.5703	3.0578	1.2053	5.8869	4.3673	1.5707	2.6087	6.7753	2.3734	8.5738	1.3242	0.6398	0.8968	3.3415	5.8629	1.4651	1.0595	1.3717	3.1927	9.0424	1.6315	1.0165	0.9081	1.2579	8.1998	2.8329	1.5271		0.516	3.06969
15.4884	0.5765	0.9013	1.1062	7.4855	3.4372	1.1101	6.779	4.4151	1.6455	1.8108	8.9772	2.5811	10.5057	1.7226	1.309	1.0451	2.556	4.4598	1.7746	1.5671	1.2651	2.7449	9.4151	2.0562	1.4711	1.4685	1.4241	8.8257	2.4054	1.6229		0.520001	3.28215
15.6075	1.4562	0.7819	1.2093	7.6018	4.085	1.5747	6.5945	4.7195	1.7235	2.1712	7.3759	2.7264	10.2689	1.3251	0.9537	0.9153	3.3155	4.7141	1.2729	0.9648	1.0956	2.6369	7.6212	2.1442	1.5659	1.4707	1.1085	7.3706	2.063	1.3223		0.524	3.1383
15.7266	0.9164	0.7893	1.0112	7.3971	3.8022	1.4295	7.2174	4.9319	1.3631	2.8168	9.2193	2.2655	10.6142	1.3087	0.9326	1.5745	2.8127	3.9621	1.4243	1.0491	0.9671	3.3711	7.9778	1.58	1.2161	1.0542	1.0978	8.7186	2.2101	1.4759		0.527999	3.21689
15.8458	1.1034	0.9996	0.841	7.2596	3.5724	1.3738	5.7467	4.3153	1.3238	2.1675	9.3513	2.5228	11.2936	1.719	0.6907	1.0561	3.41	4.9633	1.0476	1.0461	1.7704	3.0111	7.6726	1.6897	1.0546	0.9421	1.1094	8.7652	2.5669	1.688		0.532001	3.20245
15.9649	0.9451	1.098	1.1555	8.4865	3.8704	1.1515	5.2206	4.454	0.9597	1.7023	10.6476	2.2424	10.3235	0.7688	0.7972	1.2088	2.886	4.6541	1.4229	0.8956	1.0596	2.5119	7.43	1.4258	1.5777	1.11	1.3555	8.6077	2.4204	1.4146		0.535999	3.12679
16.0841	0.4818	0.695	1.0943	8.4947	3.5125	1.4076	4.6116	4.0789	1.6296	2.3027	9.0089	1.3272	10.6805	1.7655	1.1097	0.7932	3.1725	3.942	1.5719	0.6812	1.3647	2.0122	7.0657	2.136	1.5258	1.3775	1.4858	9.3024	2.4135	1.4236		0.540001	3.08228
16.2032	0.8884	0.7354	0.7363	8.0418	4.3472	1.0084	4.8379	3.9063	1.9375	2.4247	8.7315	2.3661	9.9905	1.164	1.1442	0.7356	3.0699	5.3461	1.0632	1.002	1.3209	2.5407	7.1825	1.2811	1.2657	1.7158	1.0144	12.1476	2.1023	1.2138		0.544	3.17539
16.3224	1.0009	1.0416	0.7934	7.039	3.2104	0.8404	3.7863	3.3186	1.5386	1.8623	7.1867	1.5539	10.3161	1.4725	0.742	1.2435	3.4519	4.9015	1.3659	1.4204	1.3055	2.6865	6.4221	1.7348	1.0499	1.3635	1.5116	11.6242	2.7169	1.5809		0.548002	3.00273
16.4415	0.7916	0.9596	0.6336	5.5445	4.1804	1.3198	3.7636	3.7141	1.6671	2.1119	6.3008	2.8694	10.3749	1.4684	1.2622	0.9619	2.7742	5.6627	0.9637	0.8955	1.0573	2.5434	6.6622	2.1511	1.0173	0.8573	1.0218	12.7275	2.5757	1.6719		0.552	3.01685
16.5606	0.7357	0.8475	0.6405	5.4234	4.3683	1.1573	3.7154	3.2709	1.6306	2.4072	6.7012	2.9207	10.1567	1.2629	1.4595	1.5722	2.8735	6.2467	1.6252	0.9552	1.0978	2.3557	6.2405	1.9907	1.8269	1.0035	1.8388	11.7665	2.5643	1.535		0.555999	3.07301
16.6798	0.8948	1.1017	0.8904	5.1815	3.0527	1.2586	3.7049	4.5341	1.1042	1.9083	6.4479	2.5115	11.5908	1.2689	0.8998	1.222	2.4537	6.0543	1.2129	0.9962	1.1114	2.9553	5.6129	1.7895	1.1154	1.1086	1.2605	11.1731	1.9378	1.881		0.560001	2.94116
16.7989	1.0453	0.8343	1.1188	5.0348	3.706	1.1093	4.117	2.642	1.0949	2.3074	6.4799	2.7971	9.2556	1.6752	0.8037	1.0594	2.404	6.517	1.3678	1.0498	1.7842	3.6215	6.0867	1.3171	1.429	0.9524	1.2043	9.8276	2.402	1.662		0.564	2.8902
16.9181	0.8925	1.1029	1.0421	4.7252	2.9317	1.2019	4.6614	3.6021	1.0065	1.7059	6.7345	2.6247	10.1518	1.3141	1.1516	1.0467	3.2222	6.3986	1.6744	0.9096	1.1532	3.2277	5.7976	1.7241	1.1069	1.1538	1.5769	10.8683	1.9064	1.5287		0.568002	2.93813
17.0372	0.8497	1.3617	0.8487	4.7338	3.0961	1.2632	3.7656	3.0469	1.1639	2.1092	6.5791	1.998	10.7561	1.727	0.9552	1.5213	2.1177	6.3846	1.1621	1.1046	1.2634	4.3495	4.4382	1.5957	1.2582	1.2588	1.6225	10.1316	2.2556	1.2738		0.572	2.86639
17.1563	0.8432	0.6953	0.8947	4.1241	2.8644	1.2011	4.2741	3.1358	1.547	2.3144	5.897	1.9451	11.6993	1.1716	1.0485	1.5202	2.2509	6.9914	1.5811	1.3831	1.2869	3.4367	4.2484	1.4617	1.007	0.9571	1.582	10.3069	2.8993	1.5722		0.575999	2.87135
17.2755	0.788	1.0917	0.7395	4.7159	2.9283	1.2192	3.3831	2.5451	1.58	2.5055	7.3181	2.2777	11.4866	1.6779	1.4637	1.4216	2.754	7.4859	1.426	1.3587	1.2577	4.1708	4.1947	1.2648	1.1538	1.2043	1.3882	10.705	1.8676	1.5392		0.580001	2.96375
17.3946	0.6824	0.8314	0.9952	5.2347	1.9951	0.8045	3.3693	2.9742	1.322	2.2175	7.7865	2.3604	12.9549	1.2092	1.1054	1.4697	2.4781	10.4408	1.7426	1.2624	1.2359	3.5044	4.5137	1.5822	1.008	1.1093	1.3209	9.1154	2.6515	1.2524		0.583999	3.01767
17.5138	0.6276	0.9424	0.9508	4.2452	2.2993	1.4661	3.1508	2.9156	1.3743	1.5289	7.4552	1.9839	14.3912	1.5569	0.9942	0.8511	2.3485	9.5384	1.3693	1.0738	0.9105	3.8474	2.9719	1.4801	1.1561	1.4223	1.782	9.4015	1.9801	1.2074		0.588001	2.90743
17.6329	0.5294	0.7997	0.681	3.5588	3.217	1.2498	3.2155	2.3676	1.424	2.5309	7.5611	2.0947	12.3613	1.1281	0.9071	1.3017	2.4396	9.5352	1.3243	1.11	1.5596	3.756	3.0178	1.4711	1.6791	1.1084	1.202	8.541	2.5189	1.5269		0.592	2.85725
17.7521	0.6323	1.1106	0.6487	4.6093	2.4549	0.9961	2.7733	3.074	1.3741	2.4915	7.8411	2.4734	13.7846	1.473	0.9679	0.9076	1.8247	8.1283	1.4746	1.0099	1.2738	4.3386	3.3991	1.4709	1.0745	1.1602	0.9478	10.4502	2.3086	1.5225		0.596002	2.9332
17.8712	0.9425	1.0447	0.8419	4.1143	2.1497	1.3652	2.9913	3.0155	1.7775	2.637	7.7441	2.6303	12.1643	1.7764	1.1473	1.3522	2.1644	8.6881	1.4709	0.9768	0.9	4.2057	3.6571	1.8041	1.111	1.0457	0.9872	8.2712	2.035	1.6839		0.600001	2.88984
17.9903	0.6866	0.7008	0.8901	3.7645	2.3399	1.114	4.1109	3.7874	1.9359	2.8703	8.1197	2.5356	11.5106	1.7319	0.8009	1.3154	1.8401	10.101	1.865	1.1273	0.9886	3.7575	4.2537	1.4623	1.2545	1.6753	1.0177	8.8907	1.9311	1.3512		0.603999	2.99102
18.1095	0.9038	0.9869	0.8556	3.7776	2.3911	1.1804	3.6728	3.9714	1.3981	2.9101	7.3553	2.5115	10.4239	1.6174	1.0467	1.4678	2.3131	8.9136	1.167	1.4761	0.6889	3.729	2.9217	1.4794	1.1996	0.9358	0.9947	7.7932	1.5419	1.4806		0.608001	2.77017
18.2286	1.0357	0.9063	1.4913	3.8173	2.0967	1.2445	3.2091	4.303	1.2624	2.4127	7.2761	2.3606	9.4295	1.3042	0.8247	1.7197	1.7233	7.9184	1.6312	1.521	0.796	4.5297	2.8758	1.7302	1.2119	0.8047	1.5303	7.987	2.1539	1.8738		0.612	2.76603
18.3478	0.7998	0.8361	0.9101	4.0357	2.2904	1.1983	4.2815	4.2845	1.5827	2.2827	6.2857	2.6795	10.4626	1.2625	0.7952	1.3585	1.7705	8.197	1.7797	1.1756	0.9526	5.1386	2.8016	1.7889	0.4873	1.0939	1.2485	9.2057	1.6934	1.8103		0.616002	2.81631
18.4669	0.7954	0.5894	0.8424	4.2372	1.9935	1.4028	3.1121	4.9574	1.2229	2.5812	6.2739	1.9852	10.4179	1.4128	1.1132	1.1218	1.1282	6.8359	1.3907	1.3494	1.2153	4.9492	2.3069	1.7715	1.6806	1.1835	1.6329	9.3806	2.2071	2.1119		0.62	2.77343
18.586	1.2015	1.0965	0.8425	4.2116	1.7946	0.9482	3.4844	4.3428	1.4854	2.2673	6.9109	2.7624	9.3412	1.3412	1.0411	0.903	2.1457	7.4089	1.4195	0.8928	1.2271	4.5459	2.7294	1.3624	1.1065	1.6282	1.9375	10.1612	2.4018	1.7061		0.623999	2.82159
18.7052	0.8529	0.8728	0.6362	4.887	2.202	1.0439	3.7747	5.8519	1.3755	2.5432	6.7421	1.7125	9.8025	1.6433	0.9061	0.7894	1.591	6.465	1.3658	1.0489	1.1513	5.4747	2.428	1.2946	1.2569	1.4216	1.2747	13.3048	2.3242	1.6316		0.628001	2.9223
18.8243	0.9297	1.1627	0.4679	4.5454	1.7928	0.8093	3.4898	5.7078	1.3716	1.5613	8.3032	2.9795	9.688	1.3764	0.9965	0.9035	1.3765	6.313	1.675	1.0489	1.1566	4.9942	1.8314	1.4302	1.4701	1.4262	1.2171	11.5133	2.348	2.4072		0.632	2.87644
18.9435	1.0535	0.4805	0.6383	4.3742	2.7754	0.9849	2.6887	5.454	1.252	2.7176	8.772	2.4176	8.8021	1.3214	0.8467	0.9501	1.8317	4.3147	1.3749	1.1561	0.7359	5.1538	1.8694	1.6837	1.1594	1.694	0.7946	11.354	2.0218	1.4946		0.636002	2.73892
19.0626	0.8771	1.2034	0.8363	4.6857	2.6731	1.1563	3.1006	6.333	1.574	2.8454	7.5632	2.5487	7.7029	1.776	0.8459	1.4265	1.7251	4.4187	1.1635	1.2276	0.9427	5.7877	1.6475	1.4338	1.5136	0.7906	0.945	10.3737	2.5477	1.8423		0.64	2.78359
19.1817	0.7997	1.0194	0.6954	3.6793	1.9942	0.8327	3.8656	6.6137	1.2771	2.0115	7.5023	2.5899	8.2407	1.5658	0.9499	1.6105	1.7142	3.7165	1.2584	1.8227	0.8398	7.3105	2.4063	1.5162	1.5086	1.7746	1.5203	9.4613	1.8877	1.5846		0.643999	2.78565
19.3009	0.7856	1.0608	0.8066	4.0004	1.9861	0.9677	3.3136	6.369	1.8904	2.2025	7.2541	2.4865	8.0336	1.7146	1.1303	1.0179	1.4671	4.629	1.6054	1.1125	1.1052	6.4897	2.2806	1.7861	1.2592	1.2749	0.9467	9.977	1.9646	2.3361		0.648001	2.77513
19.42	1.2461	0.9481	0.8799	3.903	2.3299	1.3501	2.7738	6.5746	1.6952	2.204	7.5256	2.5799	7.1828	1.3544	1.5123	1.2599	1.48	4.0092	1.3609	1.1078	1.3223	8.1724	1.2176	1.7959	1.4698	1.21	1.4523	9.6463	2.488	2.2647		0.651999	2.81056
19.5392	0.6789	1.2236	0.9888	2.7587	1.8361	1.1879	3.0125	7.2825	1.3027	2.3484	7.9184	2.4216	8.0882	1.3618	1.0723	0.9037	1.1893	4.9613	1.6193	1.4777	0.9619	8.9586	1.7117	1.4984	1.1607	1.5833	1.3281	9.0299	2.2394	2.0995		0.656001	2.80684
19.6583	1.0697	1.2205	0.7955	3.9642	2.7787	1.1401	2.6477	5.669	1.328	2.3629	7.4613	2.7899	8.3867	1.8982	0.9044	1.155	1.541	4.4364	1.3711	1.8233	0.8639	9.8497	2.0516	1.7103	1.505	1.519	1.0131	10.3919	1.9067	2.191		0.66	2.92486
19.7775	1.5746	0.9612	0.9556	4.5839	2.1428	1.6177	3.2004	6.1086	1.7832	2.3639	6.4582	2.571	8.8734	1.5483	0.7556	1.0603	1.5121	4.6676	1.0262	1.3374	1.1866	12.4549	1.5995	1.7202	1.4386	0.8909	1.0237	10.8031	2.6063	2.1538		0.664002	3.03265
19.8966	1.0594	1.2514	1.3914	4.6351	2.4653	1.6309	2.1987	5.9889	1.3739	2.9153	8.0166	2.8105	8.2022	1.8136	1.1498	0.9394	1.5585	6.2313	1.8029	1.4703	1.3148	11.4861	1.5709	1.6173	1.5353	1.1559	1.2602	8.9458	2.3312	1.8409		0.668001	3.06546
20.0157	1.3051	0.9411	1.3729	3.7847	2.2835	1.1422	2.6893	6.1641	1.7736	2.2852	6.821	2.2923	9.1648	1.5829	0.9368	0.8011	1.1909	6.8151	1.3084	1.1675	1.5421	10.7854	1.5561	1.4879	1.3944	1.2243	1.0109	8.6675	2.8284	2.2217		0.671999	2.95137
20.1349	1.1606	0.9631	0.8462	3.6136	1.9572	1.1687	2.542	5.3328	1.5648	2.7603	6.8808	2.7395	10.6196	2.5514	0.7481	1.1071	1.935	7.6108	1.9113	1.7145	1.5666	10.5541	1.6598	1.7329	1.5546	1.8715	1.5093	10.2348	1.7688	1.9772		0.676001	3.13857
20.254	0.9905	0.9201	1.1544	4.3802	3.2442	1.5092	2.9592	6.7592	1.2659	3.0742	8.3114	2.992	11.8317	1.8373	1.0949	1.3987	1.2534	8.3383	1.2183	1.3681	1.2109	11.9428	1.6954	1.4161	1.1301	1.9957	1.5465	8.6343	2.8151	2.2462		0.68	3.35114
20.3732	0.943	0.9514	1.463	4.0805	1.9919	1.32	2.8653	6.5571	1.3294	2.8857	8.4808	3.6185	11.8661	2.305	1.5676	0.802	1.1474	10.1027	0.8651	1.5677	1.2259	11.2325	2.467	1.171	1.3055	0.9081	1.3315	10.1217	2.2062	2.0345		0.684002	3.35714
20.4923	0.9564	1.249	1.1464	5.0464	2.2401	1.0622	4.1858	6.6918	1.5928	1.9497	7.0913	2.9106	13.2176	1.7609	0.7581	1.0966	1.6408	9.9323	1.3035	1.4872	0.7795	12.1338	2.165	1.4063	1.2498	1.2619	1.3225	9.0896	2.5603	3.3526		0.688	3.42136
20.6114	1.309	0.9969	0.8679	4.5467	2.6073	0.953	2.9287	7.0409	1.0416	2.6861	5.5773	2.3632	13.6156	1.5115	0.8379	1.0667	1.112	10.059	1.437	1.1815	1.2342	11.4922	1.8059	1.3841	1.2482	1.3032	1.831	10.2243	2.9457	2.0501		0.691999	3.30862
20.7306	0.7744	1.067	0.974	4.6169	2.2407	1.2876	2.8631	6.2696	1.0521	2.9028	4.5554	3.0952	11.9727	1.8182	0.9405	1.4153	1.424	11.3164	1.8433	1.6251	1.2191	13.319	1.5635	1.7851	1.0806	1.1041	1.2498	10.0243	2.2587	2.4255		0.696001	3.33613
20.8497	0.8953	1.2566	1.2705	3.5591	2.668	1.5104	3.2498	6.4103	1.4898	2.3444	5.721	2.2265	12.8591	2.6856	1.0573	1.057	1.3642	10.2075	1.7273	0.8966	1.4531	12.9801	1.4031	1.5354	1.2337	1.0479	1.2369	9.7297	3.1171	2.6161		0.7	3.36031
20.9689	1.0723	0.9496	1.3903	4.2856	1.8394	1.36	3.5469	5.2976	1.4441	2.9875	4.5924	2.944	13.4976	1.9362	1.7931	1.2306	1.6884	10.1051	1.7845	1.8381	0.9872	11.0455	1.3236	1.6779	1.4706	0.9978	1.5836	10.4515	3.4375	1.7601		0.704002	3.34395
21.088	1.5275	1.2608	1.3229	4.215	2.492	1.7406	2.5894	5.0702	1.2956	2.7025	5.2396	2.4772	12.2034	1.4701	0.9156	0.6479	1.3679	10.167	1.3537	1.4805	0.7828	11.4977	1.5431	1.801	1.5455	1.519	0.9992	10.2736	3.6353	2.5742		0.708	3.25703
21.2071	1.4735	1.3781	1.7455	4.9194	1.8909	1.3731	2.572	6.5116	1.7569	2.9538	4.9522	2.8775	12.1531	2.0764	1.246	0.9375	1.1969	10.3976	1.6407	1.9184	0.9196	13.6937	1.7817	1.5378	1.2795	1.3772	1.44	9.5617	3.4776	2.5704		0.711999	3.45368
21.3263	1.1243	1.1051	0.7983	4.2843	2.3299	1.3284	2.4896	7.2102	1.7164	3.6434	5.2777	2.9313	11.3509	2.0701	1.4754	1.1575	1.2893	10.7037	2.1915	1.2109	1.0972	11.5381	1.3079	1.7378	1.7907	1.6453	1.4984	11.4129	2.8434	2.4209		0.716001	3.43269
21.4454	1.6869	1.5957	0.9572	4.6809	1.7127	1.7334	3.0198	7.2908	1.6836	3.0271	5.0194	3.502	12.0436	2.6723	1.1413	1.0544	1.4824	11.0114	1.5362	1.541	1.3466	12.5193	1.3314	1.524	1.9135	1.4564	1.8567	10.9426	3.2549	2.5775		0.719999	3.5705
21.5646	1.1297	1.4881	1.5767	4.9549	1.8873	1.1158	3.0876	6.9395	1.8759	3.0737	5.2742	2.8123	11.8092	2.1606	1.1097	1.0369	0.8948	11.3637	1.4866	1.2539	1.5714	11.4625	1.3444	2.2685	1.1714	1.1521	1.3293	10.6464	3.712	2.3936		0.724001	3.44609
21.6837	1.8328	1.413	1.8023	4.3431	2.1702	1.4015	2.5549	6.9492	2.211	4.1957	3.9069	3.3448	12.6754	1.861	1.2358	1.0662	1.3139	9.9206	1.2579	1.3088	1.3104	11.46	1.6137	1.6276	1.0861	1.7354	1.0844	9.7596	4.426	2.7346		0.728	3.45343
21.8029	1.2276	1.367	1.587	4.7966	1.8225	0.9229	3.6695	8.6145	1.349	3.6213	4.7561	2.9704	10.7894	2.3294	0.9672	1.251	0.9395	11.1714	1.1405	0.8698	0.8786	10.456	1.4613	1.513	2.028	1.6541	1.3504	9.9647	4.0755	2.2684		0.732002	3.39375
21.922	1.301	1.4824	1.6015	5.7835	1.566	1.1336	2.8907	8.7267	2.0346	3.2521	4.7336	2.9082	9.6757	2.1693	1.3492	0.9259	1.0071	11.5215	1.5901	1.9721	1.0485	10.7577	1.3811	1.6747	1.4572	1.1067	1.3079	10.7799	4.3563	2.5688		0.736001	3.46879
22.0411	1.4615	1.3191	1.7816	6.1808	1.8362	1.0958	2.5554	8.5445	1.8841	4.0127	3.9996	3.4676	9.9295	2.0918	1.0025	1.2347	1.3244	10.0753	1.737	1.4188	1.0658	10.0237	1.4987	1.0601	1.5993	1.2007	1.6519	11.5768	4.5417	3.002		0.739999	3.47245
22.1603	1.1791	1.292	2.194	6.4911	2.1354	0.9842	1.8316	9.2065	1.5042	4.0864	5.495	3.0658	9.4037	2.3974	1.2117	1.2338	1.8256	10.9346	0.6672	0.818	1.1064	9.7722	1.0733	2.0521	1.1832	1.5488	1.7373	11.7186	4.8353	2.3751		0.744001	3.51199
22.2794	1.72	1.2893	2.0423	7.903	2.4991	1.3496	2.4566	8.4905	2.3222	4.4414	5.3126	4.5357	11.6412	2.4079	1.1654	1.012	1.1156	8.5355	1.1107	1.3881	1.7161	9.6194	1.5387	1.7471	1.3566	1.6804	1.5204	14.2575	5.4534	3.4312		0.748	3.83532
22.3986	2.1022	1.7191	2.0157	6.8043	2.4402	1.4327	2.4957	9.4415	1.9963	5.8903	5.1319	4.9211	12.2533	2.3953	1.26	0.588	1.3708	9.5146	1.5845	1.2328	1.6227	10.4234	1.4487	1.6188	1.4637	1.3697	1.8472	14.7223	5.5092	2.7889		0.752002	3.98016
22.5177	1.051	1.7979	2.2004	8.9132	1.7047	1.2224	2.6976	9.2425	2.0857	4.8862	6.7774	5.2568	12.1683	2.6114	1.2649	1.4932	1.6937	9.2552	1.383	1.0948	1.5711	8.8443	1.1252	1.3895	1.4571	1.2239	1.9621	16.0174	5.4265	3.7622		0.756	4.05265
22.6368	1.4607	2.3651	2.7752	9.2932	2.6661	1.1822	2.0078	10.9532	2.6641	5.1424	6.6786	4.7059	10.7992	2.6762	1.5887	0.9117	0.9592	8.9332	0.9318	1.305	1.3968	10.3606	1.5485	1.7026	0.9633	1.2975	1.8994	16.5136	6.5691	3.5079		0.759999	4.19196
22.756	1.6831	2.2473	2.4884	9.8903	3.386	0.9632	2.7247	9.7539	2.7418	4.5186	7.368	5.6402	12.062	2.7945	1.1305	1.084	1.3217	7.3309	1.6555	0.7875	1.2169	10.9619	1.0416	2.0189	1.5468	1.4408	1.1224	19.6596	9.7342	3.6552		0.764001	4.46568
22.8751	1.7398	2.1265	2.7162	9.0062	3.4248	2.0356	2.298	10.9641	2.7097	5.5928	6.2535	6.0384	12.7157	3.2673	1.56	1.0192	1.7264	8.2152	1.1417	1.0325	1.6733	10.4391	1.485	2.3503	0.9836	1.4751	2.1918	23.2327	11.478	3.6964		0.768	4.81963
22.9943	3.1724	2.906	3.3387	9.8632	3.5112	1.4281	3.3408	11.6774	2.1239	7.4138	7.1725	4.9154	12.7407	3.0843	1.7213	1.4298	1.7845	10.2629	1.2647	1.2856	1.2013	9.4502	1.1266	2.2535	1.163	1.2626	1.5536	25.7325	13.4617	3.3534		0.772002	5.16652
23.1134	3.2693	4.0844	3.878	9.8991	3.1771	1.6587	2.039	12.8953	2.5261	7.8824	6.8442	5.6081	12.7068	3.798	1.4559	1.1711	1.2675	9.716	1.1627	0.8922	1.2059	8.1738	1.6701	2.3346	1.3585	0.7967	1.4053	29.3191	16.6555	3.7135		0.776	5.41883
23.2325	4.2776	4.7916	4.516	13.1801	3.637	1.117	2.6876	14.0365	2.9145	7.2577	8.8416	6.346	14.8092	4.4508	0.7448	1.2536	1.4581	11.1855	1.2399	0.842	1.0156	10.8009	1.6533	1.6731	1.274	1.1721	1.7408	31.4649	19.2905	4.5566		0.779999	6.14096
23.3517	5.5153	4.9738	5.9103	13.9664	3.7237	1.6666	2.8913	14.8875	3.9208	8.418	9.9456	6.0668	14.4789	3.6606	1.0412	1.3295	1.295	9.9813	1.833	0.9811	1.1658	7.9681	1.5883	2.066	1.318	1.6218	2.4026	36.1054	23.1852	3.244		0.784001	6.57173
23.4708	7.4458	6.4467	5.949	13.9086	4.7697	1.3654	2.5566	17.8331	3.8738	8.6408	11.8289	5.6113	14.8212	5.0227	0.9107	1.5303	1.7128	11.5492	1.1164	1.0799	1.3407	8.6099	1.7029	1.5107	1.4551	1.459	2.022	36.6755	22.9719	3.4611		0.787999	6.97272
23.59	9.2255	5.8651	6.7105	16.2516	4.6614	1.9045	2.6657	21.365	4.1798	10.7069	12.5883	6.1608	15.6551	4.0812	1.5163	1.2006	1.6143	11.4158	0.9856	1.0532	1.756	7.3765	1.4237	1.5968	1.0773	1.3954	2.2255	37.2497	27.7306	4.906		0.792001	7.55149
23.7091	9.8483	7.256	9.4693	17.2614	4.8941	1.9905	2.4653	24.4787	3.9887	11.5725	13.4945	6.6504	17.1594	6.761	1.5825	1.478	1.2936	10.7685	1.2481	1.2136	1.6274	8.0648	1.4154	1.7448	1.3096	1.7524	1.9976	39.393	28.3033	5.2801		0.796	8.19209
23.8283	13.3742	7.6031	9.1102	17.6407	4.9952	2.5049	3.3149	26.7286	4.7511	9.3822	13.0204	8.0563	20.1898	7.5082	2.0343	0.9185	1.7688	9.7883	1.6108	1.2312	1.8488	6.3855	1.1114	1.5042	1.7312	1.3941	2.4375	44.9042	31.9943	4.9912		0.800002	8.79447
23.9474	15.6941	11.052	10.6424	20.0965	6.422	2.4103	3.6061	29.8441	5.8455	12.4218	15.3386	8.1353	21.2609	8.2337	1.8526	1.3342	1.2242	8.0177	1.2102	1.0866	1.7177	7.4946	1.2465	2.0815	1.483	1.7739	2.3267	45.6626	37.2183	5.7391		0.804001	9.74909
24.0665	14.0159	10.2333	10.6	18.7844	7.0829	3.3227	3.9999	30.6558	7.91	12.486	16.0932	10.9055	22.0216	9.9265	2.2768	2.0591	1.8988	7.7381	1.7819	0.9848	1.5824	6.1047	1.8013	2.2486	1.3539	1.5975	2.6406	49.7044	38.1826	7.2718		0.807999	10.2422
24.1857	14.7475	12.9612	13.2234	21.4707	8.1147	3.3551	4.7081	28.9876	8.3564	12.3165	17.6944	12.3613	25.8211	9.8452	1.8122	1.5899	2.4904	7.7006	1.6709	1.3885	2.0217	7.6959	1.6864	1.8081	1.4729	1.1485	2.6857	50.2988	38.8996	7.4902		0.812001	10.8608
24.3048	16.1741	15.5028	14.7212	19.2535	9.2013	4.7276	5.1616	28.1275	9.2852	13.7083	17.5598	16.5302	37.288	9.5943	2.7958	1.736	2.1366	7.66	1.6702	1.1895	2.0917	6.5769	1.2926	1.9477	1.1531	1.4633	2.8977	55.6048	46.2453	8.7955		0.816	12.0697
24.424	14.6977	16.3275	17.6048	17.9462	10.8961	3.9836	6.3925	32.2939	10.408	12.3235	20.2819	19.4642	39.4854	10.5026	2.6462	1.7374	1.8004	7.6815	1.1737	1.172	1.753	7.2104	1.7755	1.5565	1.8653	1.0799	1.8887	56.6105	44.1154	9.4396		0.820002	12.5371
24.5431	14.8187	17.2837	17.9194	16.7837	14.3344	4.7409	8.3797	29.8048	13.1595	12.4608	22.0114	21.193	43.3307	13.0702	2.3144	2.1671	1.3057	8.3461	0.9771	0.7447	1.5958	6.1425	1.5149	2.3104	1.6318	1.7483	2.6787	57.6869	49.1851	13.0338		0.824	13.4225
24.6622	11.8546	17.7121	16.377	12.5852	17.6611	4.8376	11.7231	28.8515	15.7123	13.0961	24.0751	25.7051	46.5416	15.5085	2.5377	2.3347	1.9576	8.8416	2.0926	1.1664	1.5913	7.5076	1.3808	1.6485	1.5341	1.637	2.6552	58.8691	53.6044	17.3696		0.827999	14.299
24.7814	10.485	18.1439	12.756	8.7894	20.2152	6.1435	12.9467	29.2043	15.7776	16.0013	21.8099	28.0218	49.1016	17.0294	3.295	1.5924	2.1751	8.9354	1.6739	1.1949	1.8243	6.2367	1.2153	1.5862	1.6139	1.8418	3.7877	57.4293	56.7919	20.6243		0.832001	14.6081
24.9005	5.5917	14.739	10.2816	7.304	26.1021	8.4673	15.7352	26.8473	18.1346	17.0543	27.1233	33.2836	46.162	20.486	3.7754	2.6012	2.6445	8.2837	1.8518	1.222	2.46	6.3284	1.3101	1.9005	1.5934	2.147	3.7495	52.3132	53.7313	19.1582		0.836	14.7461
25.0197	3.9922	12.6789	6.6954	5.1745	31.3515	10.6056	19.0053	21.8917	18.9072	19.3832	23.6043	34.1663	44.714	23.3866	4.274	2.2546	2.5839	10.0738	1.5125	1.8824	2.2124	4.9127	1.8795	2.6056	1.7301	1.8628	3.7178	44.0446	50.2343	17.6647		0.840002	14.3001
25.1388	3.1393	9.7211	4.5195	3.4875	29.4726	10.3351	22.3801	18.0227	16.4432	18.3541	24.8562	36.0744	44.3388	28.2608	4.8868	3.173	2.9783	11.2408	2.0149	1.4085	2.1718	6.077	2.067	1.6616	1.8272	1.6303	4.7646	38.3611	52.3418	18.3474		0.844	14.1452
25.258	2.2348	6.3107	4.0145	2.7292	32.2284	12.6073	20.9623	15.6365	17.7995	20.1258	23.0332	35.3819	40.5493	32.1834	6.1222	3.2631	3.3906	10.4966	1.3311	1.352	2.4164	5.1413	1.5743	1.3415	1.7545	1.7527	4.4802	35.8951	47.0168	17.2402		0.848002	13.6788
25.3771	1.4867	4.4267	2.3294	3.1594	28.8064	15.0166	24.8007	13.2434	15.4077	23.7892	21.8902	39.1201	38.2495	31.9727	9.3759	3.523	3.6718	12.162	1.7852	1.227	2.7733	4.4691	1.6979	2.0589	1.7223	1.6951	5.0796	28.477	45.8986	16.0032		0.852001	13.5106
25.4962	1.9162	3.52	2.6013	1.5604	23.6163	18.4485	26.3053	9.9633	14.159	25.7873	22.7409	37.9238	32.0664	36.277	9.3024	4.4895	3.7275	11.5852	2.0814	1.1252	2.5844	4.5065	1.2	1.8341	2.0004	2.2639	6.6427	27.8341	42.2324	16.2443		0.855999	13.218
25.6154	1.9393	2.4506	1.6869	1.3598	14.2615	22.0035	29.8444	7.6859	14.3711	24.9357	21.126	36.2426	25.7126	38.5785	11.177	5.5029	5.4749	10.4767	2.2773	1.5949	2.4372	4.0302	1.6128	2.4374	2.0665	2.3015	8.0682	21.6952	37.7159	15.6401		0.860001	12.5569
25.7345	1.4379	2.6454	2.048	1.8659	8.0866	28.5481	28.1028	7.9655	15.7008	27.1487	21.0647	33.0468	21.7072	35.4985	14.0002	7.2228	5.9842	13.5402	2.0774	1.0968	2.4935	4.4623	1.6862	2.2083	2.2661	2.1084	10.23	19.1494	35.5788	16.3335		0.864	12.5102
25.8537	1.0451	2.128	1.7116	1.5495	4.8212	30.6804	29.6116	6.4085	13.7429	27.7614	20.5802	32.2379	17.7985	33.0828	14.651	7.7668	6.1606	18.7407	2.4253	0.8965	2.0975	3.8397	1.6512	2.1812	1.9469	2.3048	12.2004	17.5855	28.339	18.8804		0.868002	12.1609
25.9728	0.8924	1.907	1.8251	1.3698	3.3546	33.8726	26.6565	4.9054	13.3004	25.214	16.0525	27.8888	12.113	31.6785	21.7611	9.1471	8.9018	20.9275	2.5005	1.4418	2.9295	4.1086	2.1158	2.389	2.4773	2.5368	13.0109	15.6243	25.2196	17.546		0.872001	11.7889
26.0919	0.6371	0.9802	1.5013	1.1897	2.941	35.4521	26.1748	4.896	12.8909	21.4173	15.2733	25.6674	10.9912	25.4127	26.0979	9.5573	11.6587	23.6568	2.3767	1.4167	2.9583	3.4282	1.864	2.8888	2.6442	2.5832	14.6401	15.1475	23.8322	18.7234		0.875999	11.63
26.2111	1.0756	0.9428	1.173	0.5889	1.8928	34.8899	25.2913	3.0227	11.2703	17.6231	16.2113	23.0494	7.3551	22.6251	31.2535	11.2846	13.9841	26.3429	3.3096	1.6408	3.0525	3.3943	2.1592	3.2741	2.2954	3.5912	19.6831	12.5162	19.4427	20.593		0.880001	11.4943
26.3302	1.0361	1.2304	0.9963	0.7873	1.7581	30.9256	22.4401	2.1687	10.5008	17.3071	14.4464	20.0644	8.3345	18.3195	31.2976	12.1653	14.1363	28.6443	3.5986	1.7231	3.7956	3.7624	1.9868	3.2073	2.8033	3.5191	22.5306	12.2044	17.0735	19.0101		0.884	11.0591
26.4494	0.8366	0.7673	0.9701	0.6602	2.2436	25.4412	18.0352	2.1354	9.1726	14.6339	13.9953	19.0842	5.3678	13.2879	33.717	15.9425	19.5164	34.5527	4.0833	2.0367	4.4081	3.3516	2.3492	4.2921	3.3718	4.3938	23.4697	10.9188	14.0305	19.0841		0.888002	10.8717
26.5685	0.3478	0.6892	0.8093	0.7142	2.346	16.9693	14.5252	2.8469	7.9015	13.8198	11.6466	16.494	4.1027	9.8141	28.4396	20.0651	22.3698	34.1091	3.7551	1.4583	5.491	3.1947	2.418	4.0941	4.1349	5.1069	23.8801	9.5487	11.0346	20.7084		0.892	10.0945
26.6876	0.3713	1.0143	0.7276	0.509	1.2678	10.2005	9.9488	1.4881	8.1736	11.8464	10.964	13.4831	4.0991	7.9887	23.2755	28.1436	24.7934	34.6246	5.6314	1.4463	6.0855	3.1552	2.5614	3.7014	4.7807	5.98	23.3475	8.6484	9.2865	25.0884		0.895999	9.7544
26.8068	0.3679	0.7109	0.4772	0.504	0.886	6.6395	6.8231	1.5275	6.2366	9.6776	9.0692	11.0281	2.6163	7.5705	23.6706	32.0977	30.885	34.7815	5.2088	1.9117	9.2034	2.8903	3.1308	3.8788	6.2383	7.7745	20.8454	8.5983	6.8417	30.0703		0.900001	9.73872
26.9259	0.4736	0.6196	0.7025	0.547	0.8726	4.0209	4.9876	1.3933	5.3359	8.5368	7.9276	8.3787	2.693	6.674	21.2622	35.2622	34.3674	39.6301	6.6769	2.3708	7.6667	2.228	2.278	5.4157	6.2083	9.328	21.5496	6.3323	6.4648	35.0089		0.904	9.84043
27.0451	0.3666	0.576	0.6063	0.3675	0.9688	3.1557	3.7065	1.6252	6.5875	7.3629	7.3521	7.5061	2.4793	5.7232	15.5864	36.0694	35.1175	47.0228	8.2293	2.181	7.7992	2.3999	3.2368	7.0141	7.1204	9.4512	21.5564	5.9463	5.4237	38.6735		0.908002	10.0404
27.1642	0.2648	0.5355	0.547	0.3174	0.8243	2.5559	3.0391	0.9738	4.5294	7.2231	6.5122	5.4399	1.3416	4.2895	10.8627	31.5537	38.7147	49.0131	10.8201	2.634	7.6149	2.508	3.183	8.4639	8.3918	10.3746	18.774	6.1948	4.2432	45.2815		0.912	9.90072
27.2834	0.5942	0.4448	0.4254	0.3176	0.4006	1.9259	2.069	0.7967	3.737	4.741	5.4986	5.4025	1.9964	2.8044	8.8809	30.8633	33.9796	50.5748	10.1981	2.211	10.6518	2.62	3.7626	9.8436	10.8283	11.8902	17.394	5.39	3.4069	47.5967		0.916002	9.7082
27.4025	0.3016	0.395	0.6081	0.2959	0.4228	1.2649	2.2945	0.9969	3.3918	4.2399	4.3941	4.2369	1.552	3.7868	6.144	25.0301	32.6578	47.2127	13.054	2.7554	10.6522	3.1244	4.3402	13.8172	15.6016	13.6864	16.9327	3.8571	3.2925	50.2638		0.920001	9.68678
27.5216	0.3634	0.5046	0.4088	0.2085	0.5791	1.6293	1.4689	0.6942	2.4517	3.9045	3.5704	4.1864	1.5426	2.408	4.8834	20.26	27.984	43.6783	12.1033	4.0421	10.7944	2.7594	5.2995	13.722	17.1717	12.1726	13.6727	3.1128	2.8838	51.1856		0.923999	8.9882
27.6408	0.2126	0.7055	0.5567	0.1039	0.5809	1.1109	1.0395	0.8763	1.9707	3.946	2.9701	3.6674	1.2464	2.3056	5.4168	16.0635	25.7936	43.867	13.7699	3.7442	15.5088	4.0405	6.4386	15.1232	18.5944	14.5893	13.9499	3.4391	1.9758	50.5782		0.928001	9.13951
27.7599	0.4407	0.4723	0.3879	0.3131	0.1924	0.7979	1.6196	0.6926	1.7394	3.2736	3.2972	3.0727	0.9166	1.8455	3.9581	10.578	20.4643	41.2338	17.3659	5.0542	16.3899	3.3406	6.0706	17.4175	23.046	15.2835	10.1372	3.3606	2.6175	48.7284		0.932	8.80359
27.8791	0.3192	0.4133	0.1615	0.1094	0.5231	0.8968	1.2152	0.6837	2.1532	3.0604	2.1808	2.0201	0.9503	1.3338	3.1127	7.7298	17.384	33.3438	18.4082	6.2008	20.2862	3.4228	8.0448	19.6829	24.9241	16.7901	9.2456	3.0871	2.0454	46.199		0.936002	8.53094
27.9982	0.3644	0.367	0.3918	0.2101	0.4984	0.9972	0.795	0.6551	1.6276	2.5572	2.8541	2.566	0.8401	1.9218	2.2628	5.3779	12.9336	25.6797	23.1211	8.8003	23.6408	3.4276	11.8893	20.9104	26.8297	19.9053	9.1914	2.0411	2.2751	39.4614		0.940001	8.47978
28.1173	0.1105	0.1099	0.4732	0.2092	0.2722	0.5096	0.8189	0.3185	1.2695	3.1323	2.251	1.8392	0.9251	1.659	2.9557	5.4164	9.9802	19.917	25.9976	10.744	25.0385	3.6151	14.954	23.6165	33.0512	27.0132	7.5737	1.6204	1.5629	36.5772		0.943999	8.78439
28.2365	0.053	0.1577	0.2611	0.1546	0.3395	0.9878	0.7353	0.2092	1.2467	2.3575	2.3339	1.5415	0.5587	1.2653	2.0382	4.072	7.2184	14.2437	30.1309	13.3759	26.8995	3.8371	18.9516	25.6637	36.1843	32.8911	8.0601	1.8178	1.4871	35.8704		0.948001	9.16479
28.3556	0.2418	0.3456	0.2696	0.1318	0.1311	0.4038	0.7877	0.3674	1.1031	2.3047	1.9473	1.4517	0.7586	0.8939	1.9068	3.7301	5.2258	11.7406	38.1725	14.4503	29.3694	3.8786	21.9827	28.3775	33.1611	37.7703	6.1369	2.0296	1.4608	29.7305		0.952	9.34205
28.4748	0.2641	0.316	0.6537	0.0767	0.0749	0.3975	0.6637	0.4724	0.8227	1.5172	1.1926	1.1354	0.3454	1.2545	1.9474	3.0485	4.4281	8.4143	45.2044	17.094	30.2645	5.5292	23.796	35.8443	30.58	37.6219	6.3527	1.7873	1.0867	25.2152		0.956002	9.58004
28.5939	0.1083	0.5192	0.2846	0.0256	0.1611	0.4917	0.3657	0.2192	1.2079	1.5416	1.6574	1.3266	0.6351	1.0287	1.9897	1.9837	3.4645	7.0941	52.1107	20.4279	38.0949	6.2524	30.1586	44.9574	30.3338	32.2464	5.8637	1.7007	1.0482	19.1175		0.96	10.2139
28.713	0.2087	0.2663	0.1592	0.2087	0.2075	0.2686	0.4684	0.3925	0.4299	1.8034	1.5784	1.0777	0.6797	1.0581	1.2714	2.2189	2.5284	4.4633	50.8986	23.5756	39.5816	7.72	39.2008	44.3909	29.7868	29.0692	4.9816	1.2176	0.8497	17.6679		0.963999	10.2743
28.8322	0.1062	0.2103	0.2138	0.2617	0.1348	0.3146	0.666	0.4109	0.5827	1.2187	0.922	1.0248	0.4983	0.6343	1.3899	2.6103	2.4505	3.9175	48.2733	27.365	45.3224	11.4072	42.5969	48.5987	26.9299	23.3199	5.3511	1.0823	0.668	13.7554		0.968001	10.4079
28.9513	0.1052	0.1646	0.261	0.1612	0.2048	0.2689	0.6858	0.4267	0.7261	1.0261	0.8456	0.8691	0.549	0.8899	1.27	2.2396	2.2873	2.8542	54.5073	34.9964	50.1018	13.295	46.8776	45.5139	24.0693	18.1622	3.8538	2.1186	1.0703	13.3344		0.972	10.7912
29.0705	0.131	0.3109	0.1103	0.1589	0.2085	0.4154	0.704	0.1606	0.4212	0.9991	0.7331	0.9405	0.5292	0.7697	1.4465	0.9618	2.2307	2.9783	51.492	41.0204	55.7726	16.9276	47.612	37.2649	19.9704	15.1398	4.1146	0.9894	0.9933	10.6703		0.976002	10.5392
29.1896	0.1589	0.1064	0.1554	0.128	0.159	0.2399	0.11	0.0548	0.4226	0.6636	0.4589	1.2918	0.5242	0.6294	1.0278	0.9946	1.6655	2.6631	43.2572	48.5861	57.8741	23.0904	47.9461	32.7393	16.1717	11.3657	3.4725	0.9736	0.6611	8.2695		0.98	10.1954
29.3088	0.2111	0.3175	0.21	0.0027	0.0541	0.3625	0.3143	0.3921	0.2909	0.6838	0.7558	0.5338	0.1335	0.787	0.9926	1.3399	1.6535	1.4734	33.5372	53.742	50.6715	26.2627	45.5835	21.7644	15.1448	10.2326	2.8185	0.9285	0.2963	7.4249		0.984002	9.29718
29.4279	0.1811	0.2635	0.0521	0.1584	0.0009	0.2176	0.2599	0.2599	0.1598	0.7365	0.3516	0.3461	0.3681	0.7137	0.6879	1.3124	0.8736	2.2732	24.6044	54.1776	50.8231	32.7455	42.1189	15.8494	9.7583	8.5779	3.034	1.1271	0.4988	6.4277		0.988001	8.63197
29.547	0.1605	0.1595	0.2085	0.1591	0.0259	0.2326	0.1591	0.2676	0.3666	0.3728	0.7569	0.6031	0.3219	0.4707	0.3947	0.8761	0.8234	1.0309	17.9345	50.168	40.201	34.6695	32.0026	9.1751	8.6665	6.2935	2.6128	1.1067	0.5799	7.404		0.991999	7.27347
29.6662	0.0549	0.3589	0.1084	0.2592	0.0048	0.1088	0.082	0.2615	0.3678	0.3659	0.1876	0.5768	0.3933	0.2604	0.6067	0.7358	1.204	2.0277	12.7457	39.7067	33.378	43.794	21.3936	6.7827	5.9835	5.3176	2.9543	0.7669	0.4711	6.4144		0.996001	6.25577
29.7853	0	0.0342	0.2598	0.002	0.2575	0.3666	0.1085	0.0781	0.2088	0.4756	0.3384	0.4764	0.4163	0.3191	0.5283	0.8676	1.1828	1.036	9.7977	29.21	25.2623	44.2934	14.7787	5.1069	4.4848	5.8007	2.5988	0.9143	0.5254	4.4632		1	5.13974

## Sheet: Image29
X0	Y0	Y1	Y2	Y3	Y4	Y5	Y6	Y7	Y8	Y9	Y10	Y11	Y12	Y13	Y14	Y15	Y16	Y17	Y18	Y19	Y20	Y21	Y22	Y23	Y24	Y25	Y26	Y27		Ap-Ba	Average int.
0	7.0341	8.4555	10.7265	9.1091	4.98	4.1049	4.5162	3.8153	6.5427	7.6004	9.2098	10.3396	14.0197	14.1421	10.416	9.8337	9.9634	11.0167	16.6854	11.4804	9.8018	15.4081	8.7192	13.9171	17.4143	15.1174	12.2747	15.6143		0	10.4378
0.1191	9.5148	8.9716	11.6108	11.1145	5.6083	4.39	4.2315	5.7236	7.2701	9.5488	9.6083	10.3306	17.9147	16.2854	13.4011	11.6095	10.0802	11.4955	18.6964	12.4586	11.743	17.6981	9.8455	17.9438	19.9712	16.3085	13.4458	17.4923		0.00546258	11.9397
0.2383	9.4241	9.7796	11.0079	12.6803	6.978	4.6155	5.4159	5.2751	6.9865	9.9194	10.2948	11.9399	19.5431	21.4429	13.9974	12.6686	12.1794	13.2891	20.3634	14.1609	13.8215	18.4976	11.8066	18.8476	24.0533	17.4794	14.8856	21.4765		0.0109297	13.3154
0.3574	9.7774	15.2774	10.1707	12.8019	7.4996	5.4493	7.3739	5.5891	7.6125	10.205	11.3225	11.3605	21.1975	22.3332	15.775	14.956	14.5141	16.7273	23.6911	15.8833	14.3019	22.2606	12.8353	20.9139	27.3068	18.7305	15.1574	25.2867		0.0163923	14.8682
0.4766	10.4522	13.3348	13.623	15.3293	9.9531	6.9702	8.9806	6.5946	9.6008	11.0185	12.2478	15.7175	25.797	30.9294	18.9112	16.6167	16.4717	18.5396	28.8459	19.7768	17.237	22.9677	13.8703	21.7379	29.5457	21.7613	17.7483	26.725		0.0218595	17.1894
0.5957	12.9375	17.2505	16.7471	18.7448	11.559	8.4215	10.9956	8.6997	11.2729	12.8698	13.8545	17.2254	29.4859	35.6176	21.303	18.9027	18.0786	20.8727	35.488	23.076	20.6276	27.984	15.8953	23.5322	33.3756	23.2989	18.6594	29.0485		0.0273221	19.8509
0.7148	15.0602	18.7777	17.3837	22.5492	12.9471	13.0653	14.0292	10.3906	13.7816	15.4491	14.7311	20.8968	34.9775	42.5586	25.5079	20.7482	19.3758	24.4538	37.1291	28.675	27.708	33.5221	20.5701	24.0543	35.0179	26.9709	20.5183	29.9936		0.0327846	22.8872
0.834	17.8927	20.7887	19.8621	24.8704	15.2174	14.1089	19.0694	14.2327	17.8463	19.4789	17.0206	22.2394	36.4851	47.4373	29.9606	23.5556	24.0218	29.3446	42.7895	34.5285	32.4811	43.1382	21.985	25.8332	39.8752	30.2205	22.481	33.0888		0.0382518	26.4233
0.9531	20.1639	24.6473	25.8437	29.1037	18.2299	15.8465	24.6337	18.069	21.7507	22.4898	17.9205	25.477	45.9677	55.5841	32.8041	26.0315	25.3631	32.4153	44.3314	40.4682	42.9582	46.5077	26.5968	26.7944	40.997	33.5407	20.1923	29.4336		0.0437144	29.7915
1.0723	26.3402	28.6326	33.5205	32.6706	23.211	22.3567	31.0154	19.8155	28.0398	22.8346	20.758	30.0984	48.8972	63.4647	35.3902	28.4812	30.4205	38.1043	47.6825	45.5911	49.9207	48.1875	30.5861	23.2446	42.5966	32.5502	23.1155	29.3484		0.0491815	33.4598
1.1914	29.2411	36.2412	35.4153	40.9209	25.9374	27.9824	34.5455	24.8002	29.8087	25.7799	25.5994	35.2149	49.6679	68.6056	42.6713	30.2326	37.1897	40.0482	48.7678	51.944	54.8856	48.8871	30.2775	24.0752	44.2858	36.7297	20.9798	28.5666		0.0546441	36.7608
1.3106	28.7911	40.2983	45.1476	41.6999	30.9435	36.2641	45.8144	31.514	36.6559	33.7713	31.2995	40.7327	58.4146	75.8549	43.3505	32.2284	39.6788	42.6804	48.9429	56.0896	60.0512	51.1223	33.9948	26.6303	48.2013	37.0844	23.1498	29.9421		0.0601113	41.0839
1.4297	30.445	43.9254	52.3888	45.3242	36.0609	40.8362	45.1749	35.363	41.308	34.2195	34.1893	44.5404	60.9161	77.9438	45.5869	36.429	41.2561	44.4102	40.4662	51.9773	55.0364	43.5016	33.554	27.6385	42.9552	42.1613	22.4252	26.2953		0.0655738	42.0117
1.5488	32.9487	50.8831	64.6792	49.1014	41.2366	48.1047	52.6231	37.6395	46.8537	37.3818	38.4665	51.7118	63.9821	84.1695	53.7331	38.0728	40.0065	46.1663	38.0625	46.5615	50.7557	43.3675	32.4753	28.2046	43.482	43.0318	20.547	28.5854		0.0710364	44.7441
1.668	31.1353	58.3669	66.9952	49.2764	45.7367	55.8237	54.963	41.8329	45.6338	37.4235	42.3211	55.9023	68.8023	90.3956	57.0049	37.2726	41.7161	45.6428	31.8558	42.6341	45.626	38.8712	31.6045	25.3854	37.4477	45.6704	20.4384	25.3389		0.0765036	45.3971
1.7871	36.8479	61.0549	70.4402	52.7222	47.5982	55.8596	53.2736	39.6892	39.1186	33.1975	46.9383	59.9128	68.9165	88.5064	58.0724	38.297	36.9382	38.6363	29.1669	30.0484	33.0786	35.1788	26.8249	25.2185	39.2404	45.1883	21.4583	25.8967		0.0819662	44.19
1.9063	36.2799	56.6694	72.6	52.142	51.5088	61.8156	54.5589	37.1103	34.0954	32.2178	48.3769	62.628	77.8667	92.7645	59.0179	41.8766	34.8982	35.4631	22.1522	22.1144	21.6333	31.172	22.7544	27.1949	38.4281	45.9847	21.1096	22.9669		0.0874333	43.4786
2.0254	42.2682	58.1278	64.552	49.3763	51.9631	58.1748	48.6324	28.9029	28.8221	32.1736	47.892	66.4645	79.7645	88.1006	62.7409	36.367	34.176	32.3593	19.0073	19.6898	15.3998	28.2769	19.5532	24.5091	39.1991	42.4945	22.2104	23.6961		0.0928959	41.6034
2.1445	45.2029	50.8755	54.8355	47.84	48.0131	51.6127	37.8712	26.8419	22.2663	27.2448	44.911	67.5795	80.0515	84.3687	62.4155	38.2981	27.0483	28.5235	16.014	14.373	11.4677	24.8554	14.2884	26.3366	38.5057	46.3253	22.8309	24.7089		0.0983585	38.7681
2.2637	45.6638	40.2837	41.3249	44.5509	45.9479	44.764	33.9619	20.6685	17.3528	23.4285	42.6155	62.835	81.6632	86.1093	64.3957	37.9654	22.5134	24.0599	15.6005	12.6646	8.6701	20.7759	11.9846	22.3281	39.0768	45.4993	25.0209	24.0428		0.103826	35.9203
2.3828	50.4938	29.6962	31.6339	35.6545	37.5272	36.6938	24.2087	16.9863	13.6561	19.2573	34.715	66.8365	78.1714	83.6872	65.8422	33.6534	20.4141	23.761	14.2963	8.7737	8.3752	16.7179	12.5779	18.329	36.7137	42.3192	25.3812	23.3791		0.109288	32.4911
2.502	51.8653	20.0572	20.6919	33.2889	33.294	32.4494	20.4067	14.3451	11.3858	17.9664	30.6118	54.8342	77.9083	80.6586	66.4498	32.3778	19.1335	20.6631	10.7452	8.9871	6.2537	11.0808	9.328	14.929	35.0656	43.1401	27.9882	22.705		0.114755	29.5932
2.6211	55.7792	13.0583	12.7497	24.3783	25.9339	27.7078	16.4523	10.894	10.6804	15.1448	22.2118	47.4077	66.4719	70.0379	63.3265	30.6182	17.462	18.1503	11.3476	7.865	6.5529	9.6114	8.2614	12.0332	33.7031	38.4838	27.6411	18.5851		0.120218	25.8053
2.7402	51.6416	8.2345	10.8633	20.3482	23.8608	22.1633	12.9667	6.9383	7.385	12.4094	15.9009	37.9082	60.5869	67.6465	62.6912	32.4954	14.4886	14.5676	10.1879	7.2033	5.0973	8.2083	6.3838	10.7983	32.6999	36.5569	25.9205	20.1425		0.125681	23.082
2.8594	46.9018	7.1632	9.6417	14.9941	24.4105	17.4746	9.3986	6.2172	7.7948	10.4031	14.2417	26.9596	51.0638	60.551	64.5662	28.4949	12.1531	14.7843	10.602	5.7515	4.71	7.2555	4.827	7.8604	30.9526	34.5027	25.0448	20.0577		0.131148	20.6707
2.9785	41.9739	4.554	8.2886	10.6345	21.79	14.8432	8.4661	5.6776	6.954	7.5991	10.6662	22.4686	43.6953	58.4657	58.9635	23.9442	9.8518	12.514	9.2332	5.9146	5.9396	6.7164	5.4498	6.8606	26.5638	28.3283	25.8407	19.7132		0.13661	18.2825
3.0977	35.754	4.7748	6.9995	5.8643	19.1522	15.3491	5.9062	5.0739	6.487	6.919	8.9819	14.7066	35.4646	53.8542	62.2374	20.462	9.2947	11.7997	8.8302	4.8164	3.4193	5.1714	5.5086	4.7992	24.7757	28.2155	24.3254	17.8227		0.142077	16.3131
3.2168	30.0796	4.0181	5.6408	5.8039	17.6256	10.9958	4.4942	4.2792	5.8717	5.577	6.0732	9.7328	26.6954	48.9367	55.2444	17.7357	8.0167	8.293	7.8419	4.5957	4.1482	4.9684	5.5384	4.5888	19.5611	24.8722	25.2648	14.785		0.14754	13.9742
3.336	21.8367	4.8528	4.9311	4.8062	16.8961	11.8584	5.1334	4.4615	5.8945	4.5707	5.3576	10.2165	21.6561	49.547	53.5269	13.497	6.384	7.2554	7.4484	4.4626	3.6558	5.2057	3.977	3.7842	16.6437	16.9948	24.2953	14.8822		0.153007	12.644
3.4551	16.8388	3.9228	5.2042	3.8695	15.2184	10.4267	3.8717	4.4691	4.8046	2.5703	4.6898	9.8724	18.2035	44.7211	48.5768	12.4728	4.9197	6.2175	7.4085	4.2673	3.9524	5.0022	4.0938	3.2169	12.901	12.5161	21.4436	12.5838		0.15847	11.0091
3.5742	12.1124	3.8508	5.3973	3.8893	12.4741	7.4843	3.7066	3.9074	4.203	2.8627	4.1857	10.4085	14.2367	43.7947	42.8491	10.8245	4.2244	4.8489	5.4092	3.1975	2.9428	4.3467	3.3122	2.5183	9.1547	9.9883	20.1032	11.7466		0.163932	9.57071
3.6934	11.6485	2.8803	4.2755	3.7598	10.1473	5.9264	2.6116	2.8403	4.4606	2.9034	3.8804	10.7402	11.4145	37.9884	41.0081	11.8874	3.6005	5.2832	5.0862	3.5897	2.6872	4.2052	3.4906	2.529	6.8067	6.6415	18.8219	11.6696		0.169399	8.67086
3.8125	8.2716	2.8566	5.1905	2.4003	7.5753	4.8089	3.3739	3.5675	4.4679	2.1872	2.9456	9.9329	9.2621	39.5856	36.8607	11.9807	4.1013	3.9247	4.1944	3.028	1.7874	3.699	3.0189	2.6636	3.882	5.4291	18.3485	10.3699		0.174862	7.84693
3.9317	7.031	3.0683	5.2247	2.6765	5.9566	5.1592	2.8941	2.8365	2.5707	2.4629	3.3547	10.7629	7.7074	37.1053	31.4679	11.0926	2.935	2.9416	4.0096	2.7826	2.5783	4.0665	2.2405	2.1805	3.39	4.8369	13.669	8.7083		0.180329	6.98965
4.0508	6.4037	3.6157	5.3252	2.5425	4.0571	4.3677	3.4467	2.3575	3.1619	2.1333	2.9144	9.5484	7.2834	34.5299	26.1634	9.7361	2.7621	2.9785	3.2751	2.7498	1.9518	4.0344	2.3539	1.9262	3.6411	3.8698	12.2567	7.1181		0.185792	6.30373
4.1699	5.364	3.9308	5.2978	3.0541	3.7986	3.3986	2.3343	2.3743	2.1294	2.4629	4.2961	6.6723	5.4285	33.9795	21.3929	11.1163	3.0137	3.2454	3.2151	2.5919	2.0042	4.0539	2.1144	1.9753	2.6198	4.345	12.4602	6.8163		0.191254	5.9102
4.2891	5.5409	3.9091	4.6346	3.1068	4.2931	2.9284	1.8681	2.5446	1.9181	1.9916	2.8758	7.8752	5.1888	31.3015	16.0183	9.7858	2.3087	2.9434	2.4022	2.1313	1.8983	3.8356	1.8876	2.0047	3.316	3.0196	8.4956	6.6193		0.196722	5.23725
4.4082	6.1144	5.4794	4.6779	2.7884	3.0066	2.824	2.5823	2.5783	1.5263	1.5936	2.8085	7.8896	4.357	28.2277	12.3349	6.6353	2.1213	2.9356	2.9838	2.0977	1.8385	3.5854	1.6467	1.5061	2.6774	2.9228	7.2385	5.9033		0.202184	4.74576
4.5274	5.3345	5.197	5.3339	3.887	2.6524	3.7053	1.8549	2.2098	1.8247	1.9492	3.0006	8.3679	4.3066	27.0493	9.4353	7.0219	1.8834	1.8066	2.5929	2.2625	1.6046	3.1906	2.0099	1.7703	2.2732	2.4839	7.334	4.0756		0.207651	4.51492
4.6465	5.7318	7.2263	4.8084	2.6662	1.9148	2.3976	1.9646	1.9054	1.9156	1.8572	3.9191	7.1227	4.0267	23.8816	9.9441	4.8607	2.0358	1.8814	3.5394	1.3233	1.6163	3.7859	2.4544	1.381	1.8603	2.7971	5.5826	3.6958		0.213114	4.21772
4.7657	5.9444	8.1647	5.3565	3.987	2.1778	2.5283	1.9872	1.7731	2.0403	1.9299	3.3245	6.288	3.9639	21.1698	8.1614	4.6623	2.0107	1.3705	1.8692	1.8048	1.6995	3.3625	2.0646	1.7756	2.0289	3.3653	4.1286	3.8021		0.218581	4.02648
4.8848	5.4213	9.6153	5.3813	3.5777	2.0481	2.6634	1.5815	1.7049	1.7586	1.5695	3.4828	6.0807	4.149	16.2244	7.7831	4.4272	1.5862	1.4934	2.8749	2.0038	1.4949	3.4022	1.4694	1.5046	1.9508	2.7105	4.6291	2.6056		0.224044	3.75694
5.0039	4.7799	6.8974	4.2389	4.1042	1.3804	1.6878	1.8364	1.8978	1.9959	1.7565	3.712	4.8585	3.1971	16.2733	5.426	5.1393	1.8502	1.5079	2.6236	1.7915	1.9296	3.1846	1.4737	1.4794	1.6233	3.2802	4.3556	3.2146		0.229506	3.48199
5.1231	5.578	9.5836	4.9679	3.3659	1.6702	2.1379	1.8412	1.2613	1.95	1.9362	3.0765	5.0887	2.8131	11.4078	5.566	3.8409	1.2004	1.3595	2.1257	1.4839	1.4994	3.2363	1.8156	1.6397	2.2059	3.1024	3.6106	2.2332		0.234973	3.27135
5.2422	4.9159	8.9642	6.0492	3.2869	1.712	2.1103	1.5084	1.3361	1.2295	1.7363	3.8994	4.0161	3.0079	9.7538	4.4729	4.6126	1.4586	1.6579	2.0391	1.4122	1.5799	3.8923	1.4744	1.7124	2.1061	2.3865	3.7188	1.978		0.240436	3.14385
5.3614	4.8893	8.4063	5.3127	2.6771	1.5976	2.0468	1.3089	1.5832	1.5542	1.6388	3.9498	4.0039	2.6016	8.8105	4.3584	4.2866	1.2768	1.6307	2.0859	2.0194	1.4404	3.6616	1.179	2.175	1.9316	2.0667	3.4554	2.4608		0.245903	3.01461
5.4805	4.837	5.9569	3.931	3.0986	2.0915	1.8977	1.354	1.3194	1.8214	2.0237	3.0447	4.1281	2.5857	7.4327	4.5279	4.7044	2.136	1.923	1.5205	1.4095	1.4679	2.9879	1.3094	1.6201	2.2885	2.7681	2.8402	1.6899		0.251366	2.81127
5.5996	3.6901	7.1917	3.7273	2.0671	1.7987	2.16	1.715	1.6874	1.91	1.8342	4.0553	3.2815	2.4913	5.6728	3.3752	3.9346	1.7694	1.2004	1.2208	1.1916	1.0333	3.7168	1.4687	1.9552	1.8946	2.9929	2.7203	1.6311		0.256828	2.62098
5.7188	4.9408	8.3948	4.0058	3.4746	1.6299	1.8358	1.5205	1.6641	1.2532	2.2949	3.5142	3.1493	2.6578	5.8046	3.3882	4.5136	2.0349	1.4611	1.2517	1.3282	1.6972	4.4585	1.6495	1.3147	1.2555	2.4667	3.166	1.9151		0.262295	2.78719
5.8379	5.3574	8.0396	4.5087	2.8785	1.9979	1.506	1.6623	2.2427	1.8143	2.093	3.4102	2.9199	2.7779	4.3319	3.0148	4.845	1.526	1.5044	1.5252	1.3679	1.3414	4.1046	1.4119	1.164	1.387	1.844	2.6038	2.0245		0.267758	2.68589
5.9571	3.179	5.7673	4.799	2.6681	1.5814	1.2361	1.4685	1.5652	1.4507	2.052	4.4469	2.288	3.1665	4.5712	2.4776	4.4912	1.8292	1.5099	1.4527	1.2469	1.7196	5.0493	1.9127	1.6632	1.9891	2.3853	2.5783	1.9234		0.273225	2.58815
6.0762	4.7937	5.6151	3.5558	3.0013	1.4249	1.7156	1.1918	1.7529	1.1844	1.819	5.0627	3.1494	2.5969	4.51	2.7041	3.5482	1.733	1.2998	1.1983	1.4558	1.6744	5.0862	1.8861	1.7021	1.1747	2.3595	2.7495	1.998		0.278688	2.5694
6.1953	4.7382	5.185	4.3359	2.9082	1.5763	1.4711	1.3716	1.0773	1.5956	2.2678	5.5145	2.584	2.2489	3.463	1.5421	5.0357	1.6691	1.3462	1.4947	1.2683	1.3585	3.837	1.469	1.5264	1.8592	2.1538	2.8685	1.721		0.28415	2.48168
6.3145	4.4639	5.7088	5.285	3.7599	1.6198	1.5685	1.6092	1.225	1.2555	1.6593	5.4935	2.87	2.3414	3.743	1.899	3.5663	1.7393	1.4537	1.5298	1.4842	1.3078	3.7249	1.8297	1.2512	1.4963	2.0896	2.9901	2.2145		0.289617	2.54211
6.4336	4.025	5.4918	5.005	3.8514	2.1109	1.2655	1.6585	2.1572	1.5248	2.4659	5.5329	3.2412	1.9778	3.2285	2.1031	4.8539	1.4569	1.3887	1.3239	1.2291	1.5571	3.439	1.8276	1.3574	1.7753	2.4601	2.4895	2.0161		0.29508	2.6005
6.5528	4.9041	5.6773	6.0416	4.1324	1.6705	1.7456	1.6128	2.2922	1.5839	2.6625	6.7046	3.1092	2.9594	3.2463	1.942	4.2232	1.75	1.3989	1.0463	1.3726	1.2889	3.1135	2.0028	1.1585	1.1257	2.2397	2.4076	2.3184		0.300547	2.70466
6.6719	5.2987	4.0796	6.2513	3.9346	1.3414	1.3303	1.4444	1.9449	1.2776	2.379	7.9551	3.852	1.9331	3.0138	1.6324	3.9471	2.0542	1.5307	1.8399	1.5708	1.7196	2.5618	2.2855	1.1393	1.4276	2.079	3.1627	2.4189		0.30601	2.69305
6.7911	5.019	4.2626	7.2606	4.2927	2.1172	1.666	1.3784	1.1334	1.9863	3.689	8.0513	4.1769	1.9925	2.4179	1.4182	3.5008	1.9006	1.059	1.1224	1.2664	1.2294	3.0599	2.0443	0.8559	1.8159	2.1279	2.713	2.4507		0.311477	2.71458
6.9102	4.709	5.4184	7.4373	4.492	2.1537	1.8104	1.2134	1.4249	1.4687	2.6434	8.8651	3.902	1.6857	1.8523	1.5641	3.3396	1.9803	1.1632	1.3128	1.0673	1.1129	3.2178	1.5773	2.0015	0.9951	2.6207	2.3572	1.529		0.316939	2.67554
7.0293	5.0603	4.5144	9.5646	4.8985	1.4935	1.3205	1.7479	1.9975	2.067	3.6775	8.6212	4.1701	1.9845	1.7894	1.7278	3.661	1.4646	1.5374	1.4523	1.125	1.572	3.6948	2.2821	1.6933	1.7716	2.523	3.0978	1.4788		0.322402	2.92816
7.1485	6.011	3.6499	10.4558	4.8057	1.8376	1.164	1.2157	1.8512	2.3182	4.0537	8.1277	5.0712	2.1778	1.7371	1.4631	2.9302	1.6858	1.3681	1.6747	0.9228	1.4346	3.2369	2.1959	1.7564	1.1674	2.3395	2.5452	2.3006		0.327869	2.91064
7.2676	5.7314	4.2416	10.5397	4.9739	1.8209	1.3056	1.3331	2.0708	1.8322	3.8013	8.4268	6.1379	2.6247	1.9055	1.2795	3.2313	2.5704	1.6764	1.3399	1.8526	1.1478	3.4935	1.7033	1.4422	1.2349	2.2446	2.8917	2.5078		0.333332	3.04862
7.3868	5.5709	3.856	12.597	6.4699	2.169	1.451	1.6996	2.1445	1.7398	3.8685	10.7711	6.333	1.9193	2.3756	1.3562	4.1494	1.7543	1.6333	1.8872	1.3263	0.9881	4.0915	2.3861	2.0609	1.9627	2.2993	3.1161	2.9508		0.338799	3.39026
7.5059	6.2071	3.9169	13.2546	6.3786	1.7072	1.2721	0.9022	1.7335	1.7827	4.4597	13.1675	6.8451	2.3928	1.9661	1.4939	3.5018	1.7673	1.6061	0.7618	1.5649	0.9557	3.478	2.027	1.992	1.5721	1.7305	3.4385	2.1911		0.344262	3.35953
7.625	6.2048	2.6339	11.5574	6.7166	2.0999	1.5922	1.2592	1.6011	2.0774	4.398	12.4327	7.5074	2.1924	2.1884	1.4929	4.7424	2.2335	0.9646	1.3643	1.0095	1.8525	3.182	2.1347	2.1602	1.3254	2.102	2.4836	2.1195		0.349724	3.34388
7.7442	5.6557	2.774	10.7316	6.1558	1.6265	1.57	1.8217	1.7418	2.2947	4.3987	14.8671	8.1122	1.7859	1.8887	1.5715	3.905	1.5239	1.7639	1.2571	1.0767	1.6855	3.2282	2.155	2.077	1.6464	2.2455	2.409	2.2328		0.355191	3.36435
7.8633	5.3834	2.7137	11.7308	6.8687	1.7747	1.2185	0.9521	1.3222	2.1682	4.8099	16.1685	8.0887	2.2208	2.2543	1.2249	4.1828	1.5586	2.1795	1.2749	1.741	1.5428	3.1074	1.8305	2.1016	1.5172	2.248	2.2171	2.4359		0.360654	3.45845
7.9825	5.4083	3.1912	11.7774	6.1936	1.698	1.425	1.3416	1.61	1.9531	4.4651	17.2899	7.8479	1.5961	1.9212	1.4196	3.7182	1.9726	1.2686	1.089	1.2135	1.134	3.5492	2.4704	1.9933	1.1583	2.4209	2.6889	2.5829		0.366121	3.44278
8.1016	6.0206	3.1089	11.8289	5.3186	1.8505	1.5301	1.115	1.8647	2.9309	6.826	18.9968	9.9455	1.7693	1.8984	1.28	3.3491	1.8493	1.9375	1.7774	1.1518	1.2533	3.3732	2.1403	2.4947	1.5203	2.675	2.6604	2.5527		0.371584	3.75069
8.2207	5.2465	2.5505	11.2759	6.8504	1.7844	1.3081	0.9522	1.597	2.3353	8.784	20.3214	10.8064	2.4069	1.6551	1.2134	3.0789	2.1968	1.2249	1.6177	0.9647	1.8175	2.7017	2.4641	2.4167	1.6691	2.094	2.1945	3.2367		0.377046	3.81303
8.3399	5.7657	3.0196	10.7479	8.302	1.5302	0.9012	1.2127	2.0976	2.1853	7.0056	20.5129	12.6958	2.1256	1.5247	1.4592	3.2769	1.7504	1.3628	1.5172	1.4721	1.9729	3.0368	3.2229	1.3394	1.5221	2.2932	2.9907	2.4118		0.382513	3.90197
8.459	4.6529	3.4642	9.1474	9.4548	1.8627	1.4031	1.8905	1.6583	2.5565	7.4096	22.2039	13.2841	2.155	2.0058	1.6277	2.5764	2.2135	1.37	1.5103	0.9966	1.9069	2.9952	2.2931	2.5473	1.557	3.462	2.8011	2.6862		0.387976	4.06043
8.5782	6.0296	3.8838	7.8139	10.6209	2.0639	1.0063	1.2694	1.6643	2.9525	6.9048	21.3502	12.5519	1.5848	1.7514	1.6338	2.687	2.7833	1.0731	1.1795	1.2918	1.5971	2.9885	3.1919	2.5669	0.9186	4.3763	2.9951	2.8613		0.393443	4.05685
8.6973	4.5793	3.0276	6.7347	11.126	1.5391	1.3147	1.41	1.6468	2.7349	8.1857	24.546	13.2283	2.7617	1.5488	1.7656	3.8162	1.8706	1.6203	0.9559	1.4571	1.4919	3.1953	2.3741	2.144	1.5589	4.4212	3.3239	2.9916		0.398906	4.19179
8.8165	5.7883	3.5618	8.8032	12.0439	1.8001	1.6137	1.2759	1.5056	1.6954	7.8591	25.3552	11.1652	1.808	1.7817	1.3731	3.6841	2.783	1.2648	1.1474	1.2385	1.8364	3.2611	3.1205	2.4272	1.3125	5.0337	3.2488	2.5828		0.404373	4.29896
8.9356	5.2732	3.7757	9.6493	11.999	1.9527	1.3276	1.6963	1.6209	2.0023	7.8468	25.6458	10.9079	2.3675	2.0564	1.896	3.4434	2.4243	1.6717	1.3393	1.2176	1.6326	4.0331	2.8838	2.6998	1.3815	5.7574	2.8589	2.7887		0.409835	4.43391
9.0547	5.0505	3.6065	9.7507	14.0146	1.8517	1.5708	1.8193	1.5913	2.8842	8.1699	25.0548	7.8631	2.2072	1.74	1.6297	2.6293	3.1708	1.5844	1.4124	1.5176	1.3758	3.2613	3.0126	2.0455	1.2916	7.2325	2.6182	2.4224		0.415298	4.37067
9.1739	5.7394	3.9934	10.7596	12.2344	2.2135	1.3778	1.5341	1.5667	2.7065	8.0732	21.0787	7.9907	1.7401	1.9786	1.9711	3.2805	2.4846	1.3902	1.4708	1.1917	1.5178	3.5216	3.4652	2.1217	1.3647	7.4634	2.4375	2.4062		0.420765	4.25263
9.293	5.6608	3.491	11.7801	11.1734	2.21	1.3549	1.22	1.6237	2.3312	7.7002	17.2343	5.5402	2.5536	2.1545	1.4242	3.4682	2.6048	2.2608	1.5769	1.9897	0.9783	3.0075	2.7298	2.8305	2.0137	8.1582	3.8606	2.7795		0.426228	4.13252
9.4122	4.9666	4.2305	11.5209	10.3347	2.0981	1.0934	1.4841	1.5724	2.6786	7.8525	17.5613	6.8958	1.8011	2.3153	1.4842	3.3012	2.8337	1.5123	1.9285	1.8401	2.1297	3.3827	2.7771	2.1706	1.2863	6.5578	3.3752	2.3341		0.431695	4.0471
9.5313	4.8049	3.5355	11.3766	9.343	1.9957	1.1673	2.2876	1.6963	2.3464	10.4077	18.743	6.6052	2.2863	1.7855	1.6821	3.5963	3.3679	1.0675	1.7298	1.3824	1.9939	3.0943	3.3663	2.0058	1.4217	7.0316	4.3353	3.1011		0.437157	4.19846
9.6504	5.5275	2.9661	10.1633	7.1293	1.5992	1.0074	1.1249	1.8321	2.3255	10.407	18.6387	6.6808	2.1441	1.5434	1.7299	3.5825	3.6039	1.6827	1.2244	1.3044	1.2368	3.0664	3.2302	3.2902	1.5734	6.6009	5.6411	4.0107		0.44262	4.10239
9.7696	3.9058	3.0613	8.8052	6.0922	1.9416	1.2636	1.5685	2.1925	3.1501	7.5058	18.5316	7.9706	2.9309	1.9942	1.8021	3.236	3.9151	1.6323	1.6665	1.7769	1.6713	3.0592	3.1467	2.7368	1.8533	6.6698	5.2604	3.1315		0.448087	4.01685
9.8887	5.57	3.8235	8.76	5.3666	1.8564	0.8031	1.4108	2.4161	2.6932	9.9329	20.0361	7.0292	3.1514	2.2804	2.3498	3.8	3.4412	1.6201	1.285	1.2663	1.3578	3.1943	4.3035	2.6921	2.4687	8.3604	6.3154	4.3001		0.45355	4.35301
10.0079	5.4775	3.886	8.2255	5.48	2.2496	1.3538	1.5769	1.9616	2.6253	8.5933	22.1348	7.9718	2.3844	1.9623	1.9626	4.2843	3.5456	1.3965	1.7314	1.2647	1.9731	4.1146	4.5139	2.2783	2.0969	8.7494	6.5206	3.3139		0.459017	4.41531
10.127	4.5739	3.5477	7.3853	5.4999	2.0023	1.1537	1.5361	2.0316	2.1244	8.2235	22.2128	8.6041	2.8791	1.8989	2.2567	4.5007	3.2072	1.6294	1.3113	1.5198	1.2734	3.6045	4.42	3.0411	1.8988	10.0823	6.1277	3.5387		0.464479	4.36017
10.2462	5.3501	4.1303	7.9262	4.4316	2.0498	1.2191	1.4724	1.7941	2.8349	7.6891	22.2522	8.2093	2.7324	1.9548	2.2755	4.7811	3.2353	1.4828	1.3295	1.3407	1.5834	4.0033	4.4937	2.5135	2.1313	10.1926	5.9694	3.8648		0.469947	4.40154
10.3653	4.794	3.9923	8.4758	4.9145	1.6867	1.1068	1.3293	1.9813	2.948	7.8403	22.2261	7.0163	3.2536	1.7781	2.3049	4.4441	4.8101	1.8876	1.7159	1.5214	1.2769	4.1381	4.1081	2.6102	3.2262	8.7384	5.9022	3.4424		0.475409	4.40963
10.4844	5.1906	3.5885	9.6128	5.4033	2.0591	1.1772	1.8341	2.0611	2.9937	6.3937	20.4559	6.8882	3.1709	1.8911	2.4192	4.3846	5.3126	1.5244	1.6447	1.6777	1.7162	4.2578	5.1468	2.5088	2.0985	8.8637	5.454	4.3053		0.480872	4.4298
10.6036	5.578	3.1543	11.0743	5.4331	2.3129	1.9727	1.837	1.6285	3.6316	7.6482	22.34	6.3412	2.9823	2.2581	2.003	4.7953	4.4667	1.6696	1.6373	1.4359	1.2235	4.6879	4.6486	2.4592	2.9596	10.3787	5.0222	4.3619		0.486339	4.64077
10.7227	4.7607	3.2236	10.5843	5.5594	2.277	1.4245	1.6254	1.3748	2.6358	7.9416	24.1982	5.0734	3.2479	1.7417	1.8484	5.6096	5.6695	1.285	1.9366	2.4511	1.4307	3.4448	4.1619	1.6013	2.8106	7.3143	6.2322	3.7973		0.491802	4.47363
10.8419	4.8784	3.1504	10.1524	6.9859	1.8791	1.3658	1.0747	1.4181	2.6239	8.1926	26.2558	6.7635	3.3763	1.487	2.1642	4.9592	6.459	2.0902	2.0403	1.6776	1.6168	3.6914	4.6367	2.4079	3.3137	8.4768	7.9578	3.7718		0.497269	4.81669
10.961	3.8712	3.1042	9.2416	5.1012	1.5244	1.2605	1.6131	1.7862	2.2723	8.5885	27.4868	5.5766	3.3874	2.1029	3.2966	5.1688	7.4094	1.7346	1.3297	1.3299	1.5192	3.8651	4.5688	2.0503	3.2629	8.4647	6.8645	3.9116		0.502731	4.70332
11.0801	5.0685	3.2146	11.0106	5.2526	1.9492	0.9516	1.0575	1.5399	2.9468	8.3624	26.8898	5.828	4.054	1.9005	2.5345	4.7119	8.3824	1.794	1.4608	1.2133	1.5301	5.6983	5.2059	2.1588	3.932	9.0072	6.8666	3.6051		0.508194	4.9331
11.1993	4.6221	3.0583	9.4912	4.4247	2.2108	0.7938	1.3783	1.775	2.8339	8.5308	27.3151	6.2465	3.5084	2.3645	1.964	3.5969	9.4919	1.3152	0.9103	1.2104	1.7884	4.6421	4.9265	2.0543	3.9967	7.1278	8.2887	4.3155		0.513661	4.79222
11.3184	4.0939	3.5443	9.4008	5.9005	1.9508	1.1525	1.5163	1.6382	2.4351	8.1766	24.0192	6.1981	4.0457	1.9399	3.2345	4.1633	7.3722	1.4736	1.3078	1.8823	1.1176	3.9907	4.5695	1.8888	4.1741	7.3929	7.0511	4.7127		0.519124	4.65511
11.4376	4.7637	3.4746	10.2869	6.7669	2.1373	1.2619	1.1724	2.105	2.4788	7.5964	23.4551	5.2173	4.2474	2.6235	2.6991	4.7735	9.4678	1.3741	1.2681	1.436	1.6146	4.8725	4.1777	1.7164	3.6222	7.9647	7.2238	4.3597		0.524591	4.79134
11.5567	3.5687	3.2833	11.2171	6.3185	1.477	1.0139	1.3038	2.2101	2.4669	7.5996	22.8026	5.0349	3.3144	2.8888	2.0199	3.6373	10.7279	1.1745	1.3207	2.0842	0.9722	4.3975	4.8886	2.1466	3.1256	7.4413	7.9682	5.1193		0.530053	4.69726
11.6758	3.8464	2.8624	9.4682	5.713	1.218	1.3025	1.1144	1.4837	2.6397	7.7472	23.2143	5.6948	4.6357	2.5716	2.6282	4.7272	10.8711	1.9294	1.6316	1.9572	1.5038	4.8415	5.8425	2.052	3.7485	6.9194	8.0589	3.7973		0.535516	4.78645
11.795	4.6777	3.214	10.3022	4.4106	1.5782	1.1099	1.9851	1.781	2.6884	7.5509	26.7832	5.7813	4.4832	2.116	2.9942	4.6883	11.0559	1.4269	1.7818	1.5832	1.4389	5.3111	4.8695	1.995	3.1661	6.604	8.8606	4.6756		0.540983	4.96117
11.9141	5.0332	2.7541	13.4672	5.1653	1.9498	1.37	1.2751	1.1264	2.3158	7.6944	24.1728	5.3104	5.4223	2.3168	2.9372	4.8464	14.5399	1.8511	1.6776	1.5799	1.6799	4.1907	4.7755	2.466	3.9802	6.8241	7.8608	5.1359		0.546446	5.13281
12.0333	5.4268	3.344	15.1208	4.6807	1.9891	1.4786	1.3569	1.5661	1.9617	7.506	27.0318	5.4715	5.6309	2.0267	2.6748	4.7695	15.0948	2.0466	1.7516	1.4768	1.6663	4.1738	4.5224	1.7321	3.8744	5.1549	6.9925	4.4749		0.551913	5.17846
12.1524	4.3788	3.8543	14.151	5.1151	1.5267	1.4104	1.3115	1.4839	2.8132	6.0507	23.6209	5.459	5.4676	2.5297	2.522	3.5987	14.2608	1.9322	1.6922	1.522	1.3731	4.0832	4.8898	1.2837	4.5835	4.1505	7.7123	4.2281		0.557375	4.89303
12.2716	5.5975	3.8867	15.6092	5.8505	1.4897	0.8641	1.1114	2.4976	2.0032	6.5241	22.2487	4.4847	5.3433	2.792	2.0389	3.5459	14.0874	2.2148	1.4766	1.264	1.3193	4.4535	4.6929	2.1205	4.7484	4.8917	7.3822	4.5135		0.562843	4.96615
12.3907	4.8568	2.8266	12.053	5.0786	2.0765	1.5888	1.1716	1.6319	1.9183	6.2739	23.3018	5.3062	5.8918	3.1476	3.2527	3.553	12.7105	2.3009	0.9507	1.263	1.6362	4.3767	5.7472	1.2563	3.5478	4.3704	7.331	4.419		0.568305	4.77996
12.5098	5.9063	4.0693	11.5011	3.356	1.5893	1.3124	1.4661	1.575	2.2115	5.7108	23.3371	4.469	3.9269	2.335	3.3033	2.6036	13.654	1.791	1.1179	1.3635	1.3663	5.0604	4.7239	2.35	3.7767	3.4917	7.0676	4.5506		0.573768	4.60665
12.629	5.9796	4.2175	10.3896	3.0101	1.2013	1.002	1.2801	1.5976	2.8752	5.6503	28.2055	5.5866	5.0763	2.7499	3.0742	3.4297	13.2839	1.5841	2.0793	1.4752	1.0574	4.907	3.9976	2.5018	2.8319	3.4721	7.8087	4.2746		0.579235	4.80711
12.7481	6.2109	5.1401	10.1036	3.468	1.6069	0.894	1.8851	1.7419	1.564	4.4028	26.817	5.3521	4.65	3.4074	3.7439	3.8433	13.8669	2.2047	1.8374	1.7019	1.1071	3.393	6.3425	2.0209	2.893	3.6337	7.5628	4.1825		0.584697	4.84205
12.8673	5.6446	4.3074	8.0097	3.5608	1.3283	1.0738	1.3286	1.5584	2.1472	5.3482	32.7549	5.7806	4.5499	2.9878	3.8754	3.2831	13.8573	2.0389	1.6615	1.0707	1.7613	3.1329	5.7125	2.1368	3.8407	3.2928	9.1118	4.2655		0.590165	4.97934
12.9864	7.2445	5.2853	9.3218	3.7492	1.4661	1.5491	1.2154	2.5575	2.5855	5.4427	33.9111	5.7719	4.4293	3.619	2.7759	3.0895	16.0455	1.9825	1.8266	1.3173	1.2795	2.8337	4.6944	2.2163	3.3822	3.3605	9.0005	3.8391		0.595627	5.20685
13.1055	6.8102	5.5053	8.9593	3.9105	1.5822	0.7027	1.0001	1.6408	2.7083	5.4485	37.228	5.3243	5.0693	2.9574	3.4398	2.6922	15.2849	1.6818	1.5897	1.4889	1.0631	3.1555	5.4984	1.9086	2.9449	2.8194	9.7197	3.8815		0.60109	5.21483
13.2247	8.1927	5.8447	8.7231	3.5588	1.6343	1.3953	1.2711	0.9812	2.5215	4.3559	40.7301	5.9978	6.0825	2.9163	2.6119	3.013	14.2977	1.7414	1.2542	1.562	1.502	3.3105	4.4624	2.1792	2.2753	3.4626	9.2422	3.8863		0.606557	5.32164
13.3438	9.1851	8.7857	11.4287	4.584	1.7708	1.2573	1.5564	1.6443	2.121	4.8709	40.6266	6.1314	5.1977	2.5975	3.2502	3.1145	13.9939	1.564	1.2087	1.5744	1.4097	3.1659	4.5857	1.7745	2.3431	3.1667	8.9689	4.0503		0.61202	5.56885
13.463	9.3045	7.8688	10.1044	3.4406	1.5297	1.1114	1.6891	1.9462	2.9706	3.6437	41.871	5.6643	4.4605	2.7812	2.8885	3.1912	12.7517	1.4396	1.5641	0.8378	1.4084	3.4706	4.7687	2.5897	3.056	3.1238	8.1767	3.1231		0.617487	5.38485
13.5821	9.8469	10.3493	11.2714	2.3723	1.6071	1.1595	1.5423	1.6187	3.1851	4.5005	44.2847	6.4558	6.5857	3.3887	3.3525	4.8846	14.3713	1.5489	1.2215	0.9622	0.983	2.6616	4.557	1.9473	2.1796	4.164	8.0806	4.2839		0.622949	5.8345
13.7012	8.4894	10.2527	11.5964	3.1226	1.457	1.1047	1.2361	1.306	2.7803	4.4548	40.3861	6.3796	6.0486	2.6037	3.0603	4.4419	14.4016	1.1969	1.2542	1.0101	1.6434	2.51	3.8704	2.5241	2.6644	4.1884	7.6431	3.3771		0.628412	5.53585
13.8204	9.4854	12.6638	13.4038	3.3853	1.4245	1.1761	1.5166	1.4177	2.7481	5.3361	39.3167	6.9385	6.8897	3.3775	3.1766	4.6527	16.4425	1.8718	1.2739	1.7078	1.3223	2.7466	3.6618	2.044	2.3985	4.8468	8.9497	4.1882		0.633879	6.01296
13.9395	8.6596	10.5178	14.0636	3.619	1.7013	1.521	0.8644	1.7022	3.0913	5.3097	38.3573	6.3518	5.4058	3.2596	2.9022	4.3749	16.7074	2.1639	1.6394	1.3109	1.3512	2.0708	4.2023	2.4439	2.1084	3.8294	7.9824	3.7751		0.639342	5.76024
14.0587	10.4617	9.4788	16.1862	3.9836	1.6507	1.7616	1.5439	1.3876	2.9526	4.3545	38.2951	5.9911	6.6741	3.1305	2.7916	5.1888	15.0854	1.9412	1.5467	0.9715	1.2937	2.297	5.1571	2.7929	2.0592	3.0659	9.1483	3.6868		0.644809	5.8885
14.1778	9.4223	10.8655	15.9516	3.681	1.7857	1.6105	1.1174	1.3295	2.7781	3.4723	39.5469	5.5477	5.8392	3.3904	3.1019	6.4692	13.8334	1.8006	1.584	1.4695	0.8692	2.3914	5.8516	2.1876	2.4203	3.3945	9.6943	3.7244		0.650271	5.8975
14.297	11.6016	11.7846	14.761	3.0052	1.881	1.6756	1.1602	1.6982	2.6778	3.9536	37.7232	6.1964	6.1206	3.2059	3.9518	5.1527	13.9767	1.9173	1.7264	1.2177	1.5828	2.8129	4.3856	2.0365	2.0904	3.1715	8.2766	3.2055		0.655738	5.81962
14.4161	12.2297	17.4531	15.4702	3.4977	1.8438	1.4656	0.9157	1.3662	2.8783	4.2927	38.2732	5.5979	5.5897	3.0399	3.0924	5.3317	14.2049	1.5824	1.8854	1.7599	1.6872	3.1796	5.032	2.2997	1.4639	3.2068	9.6008	3.705		0.661201	6.14091
14.5352	13.0183	18.85	13.7214	4.067	1.8655	1.6399	1.437	1.6253	3.1744	3.5163	39.682	5.2017	6.3801	2.9875	3.0247	6.5508	13.9819	1.2698	1.4926	1.2146	1.163	1.6119	4.9951	2.2853	2.3991	2.7319	9.4523	3.7236		0.666664	6.18082
14.6544	15.3352	20.7669	12.7304	3.1064	1.2047	1.2501	1.2169	1.3544	2.4542	4.6181	39.7366	5.6654	4.9502	2.9551	4.128	6.9759	13.9103	1.9084	1.3279	1.2221	0.9794	1.891	5.4898	2.5394	1.7795	3.143	9.7845	3.912		0.672131	6.29771
14.7735	17.2848	22.704	13.7657	2.8863	1.4471	1.323	1.6244	1.4491	2.2972	3.9152	41.0155	6.0794	6.797	3.2125	3.4673	7.1488	15.8216	1.5165	1.696	1.1554	1.9257	2.0079	4.3559	2.037	2.2041	2.8907	10.6555	3.0592		0.677593	6.63367
14.8927	19.3461	24.7292	15.7011	2.7653	1.8319	1.2128	0.8117	1.5084	2.3183	3.9247	40.2624	6.5757	7.2312	2.881	4.0204	6.4064	14.715	1.2928	1.1965	1.264	1.237	1.7648	5.0528	2.3097	1.6921	3.3682	9.7923	2.932		0.683061	6.71942
15.0118	19.3217	21.8303	13.1911	2.8053	1.4484	1.351	1.5697	1.5576	2.3872	4.264	42.4348	7.0638	6.7713	3.6117	3.9312	6.5763	15.9031	1.9342	2.0806	1.5072	1.4507	2.3178	4.2587	2.2662	1.586	3.3227	10.9158	3.3774		0.688523	6.82271
15.1309	22.1361	25.3543	15.6292	3.1049	1.6859	1.4501	1.1055	1.7765	2.8106	4.3883	39.9619	6.143	7.5284	2.3038	3.2453	6.9541	15.1437	2.0949	1.1814	0.9558	0.9497	2.1777	4.3343	2.0648	1.5472	3.2562	10.676	4.3603		0.693986	6.94
15.2501	21.6994	22.3712	14.4009	3.5374	1.1803	1.3466	1.5247	1.1348	2.5319	4.84	38.3832	6.5318	6.6253	2.7998	3.8898	7.5508	14.4293	1.4873	1.8303	0.8215	0.8155	2.0591	5.0276	2.217	2.0332	2.9749	9.3218	3.7774		0.699453	6.68367
15.3692	24.2735	23.149	17.3101	3.8643	1.9325	1.813	1.7741	1.3268	2.0259	4.6468	40.4086	5.9321	6.9858	3.1187	4.6427	8.5719	12.5705	2.0186	0.9714	1.4467	1.5892	2.5847	4.048	2.4213	1.5734	2.8416	9.3052	4.2288		0.704915	7.04911
15.4884	24.1703	21.3799	17.8692	3.3785	1.1796	1.1231	1.2938	1.27	2.9602	4.239	37.3781	7.0176	7.8659	2.5736	4.2315	6.3754	11.9805	1.5309	1.1519	1.2089	1.5862	1.4304	4.5027	2.4987	1.8386	2.6117	10.1102	4.6532		0.710383	6.76463
15.6075	31.1288	16.2856	17.8969	3.4726	1.6768	1.5879	1.231	1.9853	2.7388	4.1609	32.8851	7.2998	8.345	2.4215	3.358	8.3504	12.1336	1.7778	1.9729	1.2644	1.7506	1.5314	4.2448	2.8331	2.0987	2.3061	10.8023	5.8294		0.715845	6.90605
15.7266	26.8445	15.9534	17.82	4.5106	1.8714	1.1853	1.3616	2.2077	2.4035	3.9806	33.6049	6.51	8.5694	2.6309	3.5156	7.7341	13.1227	1.9488	1.8359	1.1087	2.0343	1.6798	5.1428	3.2167	1.9834	3.4659	11.4957	5.9273		0.721308	6.91663
15.8458	26.4734	14.4348	19.4626	4.3728	1.1701	1.4058	0.9696	1.6222	2.7201	5.0071	31.7723	6.3116	8.2946	2.5143	3.4077	8.2374	10.5931	2.2097	1.3276	1.634	1.5593	1.8171	4.6883	2.6022	2.0453	2.704	11.1306	7.6838		0.726775	6.72041
15.9649	28.7725	13.4208	18.952	4.404	1.8491	1.416	1.533	0.9773	2.7534	4.212	28.0135	8.0869	7.6556	2.9807	3.9494	9.1547	12.509	1.512	1.2917	1.1495	1.3259	1.9521	4.783	2.9537	1.9028	2.3677	12.6337	6.8874		0.732237	6.76426
16.0841	25.6065	14.8235	17.8081	4.9964	1.3218	1.1335	2.0008	1.1657	2.6243	4.5532	27.9566	6.7076	8.1448	3.5033	3.7314	7.9035	12.4556	1.632	1.4031	0.9059	1.5854	2.2083	4.5383	2.7596	1.998	1.9439	10.4662	7.9507		0.737705	6.56529
16.2032	24.8708	16.1985	18.1763	5.8676	1.3311	1.525	1.4887	1.3372	2.2148	5.2364	28.3507	7.5973	9.1744	3.1344	3.9512	7.7831	11.3364	1.4791	1.6747	0.9515	1.6947	2.0411	5.0999	2.9579	1.9221	2.4232	11.0339	11.1158		0.743167	6.85599
16.3224	24.2295	16.1783	16.6861	5.3796	2.2436	1.1175	1.4645	1.4718	2.4411	5.521	26.7582	8.6491	9.8649	2.9623	3.8999	7.0279	11.0083	1.8873	1.4778	1.4091	1.8802	2.4949	4.9357	2.6885	1.589	2.113	11.2248	11.1586		0.748634	6.77723
16.4415	21.481	17.4558	15.7446	6.3831	1.0825	1.3713	1.148	1.8351	2.4313	4.9225	26.9832	7.7038	9.0243	3.027	4.057	6.9425	13.6499	1.9401	1.4585	1.6328	1.5716	1.815	4.5528	3.0124	2.5933	2.9382	13.0931	12.9208		0.754097	6.8847
16.5606	20.0712	16.9894	15.178	7.9582	1.8483	2.1075	1.1995	2.0245	2.8407	4.5765	26.6874	7.884	8.7833	2.4421	4.5457	7.4563	15.0837	2.1449	1.2971	0.9026	1.3212	2.0727	4.9199	2.8779	1.8272	2.8317	13.3674	12.3016		0.75956	6.91216
16.6798	19.5174	14.6075	13.2997	7.1981	1.6892	1.7761	1.1852	1.7843	2.4043	5.8423	24.4006	6.8241	8.7712	2.7719	4.5717	7.4419	13.0382	2.4305	1.2081	1.1863	1.3766	2.1065	5.048	2.6603	1.5613	2.373	14.2221	13.8515		0.765027	6.61242
16.7989	16.7909	15.0865	16.1448	7.5269	1.8502	1.5767	1.6986	1.6776	2.2809	6.3316	23.8299	7.8074	8.3213	3.2023	3.648	8.3778	14.4524	1.9377	1.3054	0.908	1.1308	1.6833	6.5051	2.8114	1.5132	2.146	12.4045	15.5178		0.770489	6.73096
16.9181	17.9523	16.9553	14.1035	9.7282	2.2303	1.3037	1.4715	1.8124	3.0727	6.5582	23.1134	7.1623	8.7466	2.958	4.2148	9.0292	13.1858	1.3926	1.3702	1.4774	1.5245	1.8422	4.7143	3.2312	1.5375	2.1811	14.967	17.3926		0.775956	6.97246
17.0372	15.852	14.7226	13.3409	9.179	1.8339	1.8166	1.6615	1.4056	2.6651	6.1541	25.4862	7.8392	9.292	2.5755	4.6694	8.3152	11.8247	2.3507	1.1266	1.3558	1.4558	2.4397	6.7251	2.8072	1.4367	2.3717	12.6393	19.8496		0.781419	6.8997
17.1563	13.5797	12.4	16.067	8.3786	2.0888	1.5778	1.935	1.6175	2.4215	5.4951	26.2674	7.987	8.916	2.984	6.8083	10.0871	13.7415	2.3305	1.4062	1.2584	1.7194	1.7687	6.4587	2.4758	1.9833	2.6604	14.5499	21.9972		0.786882	7.17717
17.2755	15.1484	12.2614	17.7021	10.773	2.0953	1.2501	1.8249	1.6792	1.8581	5.903	25.874	7.8983	9.1286	2.9578	6.8637	11.4302	11.7966	3.0123	1.4124	1.3495	1.4009	1.6658	6.3997	3.2178	1.6468	2.7044	14.5898	23.5827		0.792349	7.4081
17.3946	13.3748	11.7353	19.1767	10.8246	2.7599	1.2451	1.4409	1.186	2.8649	6.6438	25.2787	7.7543	9.2498	3.0442	7.3609	12.2374	11.9367	2.1185	1.6357	1.8029	2.112	2.2455	5.8751	3.1611	1.1895	2.3254	14.0068	25.4174		0.797811	7.50014
17.5138	11.7588	11.5524	19.0486	10.8865	2.2842	1.9711	1.3294	1.7281	3.2254	8.1144	24.8494	9.72	9.6497	2.4607	8.024	11.4367	10.7145	1.9015	1.7989	1.4662	1.3777	2.3464	7.2549	2.8889	1.584	2.3413	11.6134	22.7936		0.803278	7.36145
17.6329	12.7352	13.3479	19.3809	13.6869	1.9655	1.7112	1.5989	2.0802	3.3859	8.891	25.651	8.8914	10.5708	2.2033	8.3659	11.5159	11.169	2.2026	1.5109	1.242	1.1643	2.6997	6.6765	4.3645	1.2213	2.6587	12.6193	23.7762		0.808741	7.76025
17.7521	12.2486	13.8615	18.5367	12.081	2.7855	2.1185	1.264	2.3218	3.1644	9.6491	25.8327	10.238	8.835	3.056	6.7692	13.5332	12.1457	2.6061	1.8504	0.9274	1.9384	1.9721	6.6247	3.6345	1.735	2.3315	11.8828	20.2856		0.814208	7.65105
17.8712	11.9492	14.3387	19.3057	11.5528	2.2155	1.5244	1.6108	1.9788	3.1909	11.1074	27.1938	10.8936	8.2245	3.7607	6.6083	13.1969	11.2306	2.5146	1.375	1.1252	1.5422	2.081	6.983	2.604	2.2648	2.6348	11.1591	22.4775		0.819671	7.73728
17.9903	11.3854	13.5288	19.8534	12.4214	1.9957	1.6806	1.197	2.2589	3.5699	10.6819	24.0602	12.2986	8.6927	3.2846	8.7627	13.1097	12.728	2.8455	1.4981	0.9356	1.4548	1.8493	7.7383	3.1105	1.5468	2.4844	14.5746	24.2269		0.825133	7.99194
18.1095	10.7614	14.5765	19.6962	11.7391	2.1167	1.623	1.1	1.9182	4.1258	10.7641	26.8867	11.3996	9.2993	3.3648	7.5737	14.6795	11.8472	1.8845	1.9008	1.3873	1.6222	2.4806	6.8016	3.7193	1.3317	3.1448	13.3179	21.6048		0.830601	7.9524
18.2286	13.7194	16.8296	23.7623	12.4773	2.9331	1.2097	1.3145	1.9023	3.7767	11.4423	26.5245	13.4189	7.4259	3.9036	7.6173	14.2695	8.9679	2.7354	1.1467	1.6907	1.8362	2.4955	7.398	3.3944	1.6251	2.7308	14.1241	21.0131		0.836063	8.27446
18.3478	15.1221	15.1673	18.842	10.9245	2.0444	1.5775	1.8187	1.8559	4.2158	14.7582	31.7679	13.6932	9.1108	4.8572	6.3333	13.7015	10.5592	2.5978	1.6075	1.471	2.0212	2.197	7.858	4.0167	1.3894	2.932	15.5925	18.9782		0.84153	8.46467
18.4669	12.6718	13.1425	17.795	10.521	2.5242	1.6477	2.0694	2.5109	4.1192	12.333	31.1012	14.8139	8.9453	5.1657	7.3514	15.1043	10.7884	2.574	1.5205	1.7639	1.6873	2.9078	8.7243	3.7443	1.5644	2.8303	15.8241	21.3062		0.846993	8.46614
18.586	14.2382	14.3949	15.8159	11.2897	2.9425	1.8352	1.7713	2.0193	5.2928	12.5998	31.0445	15.9129	8.9232	5.3158	6.5942	13.0049	10.814	2.5357	2.0276	1.3618	1.8703	2.8445	10.1196	4.9653	2.1828	3.0009	16.1379	20.5605		0.852455	8.622
18.7052	15.1599	14.4441	14.7457	11.5969	3.3326	1.671	1.7234	1.8311	5.884	11.0189	28.2466	16.4589	9.4935	5.7894	6.4755	15.0196	12.7529	2.4041	1.8564	1.4602	1.4058	2.0643	10.9268	4.7446	1.4996	2.8151	18.6681	21.3536		0.857923	8.74438
18.8243	14.8459	13.8434	14.3257	10.767	2.6494	1.0475	1.429	1.7892	6.4899	11.7445	29.0897	18.815	8.6341	6.6743	6.3816	13.8131	13.2843	3.6023	1.6672	1.6447	1.4008	1.9651	11.888	4.1969	2.0289	2.0418	17.4138	18.6382		0.863385	8.64683
18.9435	13.7461	13.7348	13.3036	10.771	3.082	1.2959	1.5535	2.495	7.6617	12.0487	24.6336	17.5445	9.3509	6.5786	6.7211	16.1095	13.2558	3.114	1.8743	2.0167	1.6341	3.1881	13.1463	4.6203	2.1146	1.8875	15.9806	19.4757		0.868852	8.67637
19.0626	16.2055	13.0721	11.9581	12.3486	3.3278	1.3318	1.7212	1.932	6.926	11.1154	26.9876	16.8136	9.8748	8.6851	7.1477	18.9895	14.1765	3.2293	2.1392	1.4637	1.8	3.3355	12.1551	5.737	2.7151	2.1942	15.1873	20.8627		0.874315	9.05116
19.1817	15.9175	15.2355	13.739	13.6717	3.3644	1.4418	1.7954	2.5851	8.8533	12.1941	21.2695	17.0063	11.41	7.7859	6.7748	16.0784	13.7699	3.7764	2.0372	1.482	2.0847	3.7608	15.0427	5.8322	1.7527	2.3274	16.4405	14.9462		0.879777	9.01341
19.3009	20.3269	16.0599	15.6787	17.6434	4.51	2.1522	2.1136	2.6864	6.9937	13.6318	19.5961	17.6918	10.981	10.0344	7.7334	15.5356	18.4504	3.9367	2.1453	1.6263	1.8273	4.0832	17.6298	5.8303	1.7309	2.0546	16.8521	18.7601		0.885245	9.93914
19.42	22.8933	15.7278	15.1603	19.9034	4.7338	1.8135	1.3635	2.7431	9.1297	16.0021	18.3083	16.2689	11.7389	10.776	8.2885	16.6704	18.247	3.3894	1.8337	1.5184	2.8385	3.8902	19.7734	6.5993	1.7338	2.5826	14.5712	14.5782		0.890707	10.1099
19.5392	27.4106	17.0706	12.5883	22.8737	5.7571	1.9551	1.6302	3.9521	10.5816	13.9169	18.024	13.9709	12.1913	11.1043	8.4746	16.635	20.1129	4.5335	2.1703	1.7695	2.3425	4.7217	19.5198	6.2869	2.2606	2.3263	15.0671	15.1673		0.896174	10.5148
19.6583	33.5216	17.1358	11.6344	25.4208	5.5087	1.879	2.8135	4.0537	11.5456	15.3399	16.3405	13.2171	13.1136	11.3821	8.1865	16.6528	21.5743	4.2198	2.1244	1.774	2.5664	5.0319	20.854	7.3915	2.3469	2.3125	14.4165	14.4241		0.901637	10.9565
19.7775	35.7132	11.0908	7.155	24.9264	8.2685	1.7299	2.46	3.8989	12.727	16.2437	15.4831	12.3716	12.4523	12.7527	8.782	14.0707	23.646	4.9951	2.4178	1.8183	3.0202	5.9416	17.784	8.3504	2.4673	2.2999	14.8569	13.4289		0.907104	10.7554
19.8966	33.4805	8.9492	4.5809	24.3177	8.2318	1.8583	2.3152	4.4443	13.5582	17.0262	13.3157	11.8707	10.4632	13.0966	10.1901	16.6632	25.6553	5.3478	2.4805	2.4723	2.9287	8.048	17.9813	7.3378	2.3762	3.4377	16.7185	11.7278		0.912567	10.7455
20.0157	31.4889	5.9445	3.4471	19.5728	9.6915	2.501	2.4098	4.8969	14.2789	17.7564	12.7045	10.3592	11.348	14.0177	11.6392	14.1086	23.4396	4.7052	3.0014	1.799	3.4631	9.1891	15.6647	9.1991	1.9227	3.7161	16.1893	11.2166		0.918029	10.3454
20.1349	24.5609	3.4164	1.9439	13.7935	12.173	2.4333	2.991	5.3323	14.1547	18.7038	11.969	9.7452	10.7844	14.5598	13.2137	14.57	22.931	5.6991	2.8469	2.3018	4.1957	12.602	12.8808	8.1899	2.6055	4.4687	16.4447	11.47		0.923496	10.035
20.254	22.3604	2.6397	1.5065	10.1676	12.6844	3.1868	2.4133	5.3671	16.4983	19.7512	8.5961	10.4841	8.6489	14.2441	13.4449	11.7141	21.2335	6.2132	2.6427	2.385	5.0406	14.5382	11.1907	10.7776	2.3979	5.4776	15.6083	8.9394		0.928959	9.64829
20.3732	14.1392	1.4892	0.9624	6.0944	16.1058	2.8979	2.9049	6.8183	19.352	19.6985	8.7069	9.2071	9.1146	14.1583	14.8337	10.2685	16.8675	6.335	3.6302	3.0943	4.4042	20.1731	10.8225	9.6001	3.7296	6.3731	18.9677	7.8901		0.934426	9.59425
20.4923	8.2637	1.586	0.4547	3.5981	14.3425	2.7828	3.1347	9.2235	18.1275	18.2072	6.0354	8.4841	9.4573	12.887	14.5996	5.8522	16.0897	7.5051	3.3885	2.4167	6.3466	22.3022	8.1381	9.84	2.8887	7.8659	17.4029	9.6703		0.939889	8.96039
20.6114	5.0929	1.1486	1.2169	2.0009	15.0714	3.4614	3.4794	9.3267	20.2548	16.2633	4.6967	7.8323	10.2858	12.7017	16.0536	5.6781	13.8603	9.3446	4.306	3.8424	5.9194	22.6562	6.9519	8.1431	3.9279	7.005	17.4261	7.3533		0.945351	8.76074
20.7306	3.4176	0.8944	0.5892	1.2778	14.7267	3.3825	4.1582	10.6855	20.8466	13.3914	3.5155	6.2236	8.2534	12.5113	15.4267	5.0669	12.259	11.0154	4.9827	3.2242	8.1033	20.8172	6.4034	8.2444	5.3653	11.5244	15.5785	7.4404		0.950818	8.54734
20.8497	2.5458	0.7425	0.6872	1.9046	14.9624	2.907	6.4587	11.3702	18.6338	11.9045	3.0884	5.7746	7.1205	11.9044	16.479	4.039	9.3336	12.8649	5.839	3.8497	9.8244	19.2059	6.4892	7.9828	6.1091	12.0788	13.5719	6.8761		0.956281	8.37671
20.9689	2.037	1.0953	0.4212	1.5056	14.8491	2.9957	7.2729	12.6697	15.149	9.1197	2.7738	4.3528	8.069	11.5301	14.9328	3.489	7.5701	16.3773	5.811	5.0603	12.7202	15.9189	5.2843	8.2875	8.4274	16.479	12.4886	7.0166		0.961748	8.34657
21.088	1.8955	0.7183	0.4915	0.716	15.7623	3.7747	10.9888	14.1407	12.7602	7.7273	2.3022	3.7552	6.5044	8.3222	15.0423	3.3888	5.2208	18.8396	5.8954	10.4192	18.1176	11.9012	5.8767	6.2199	10.1579	15.9188	10.4242	5.4809		0.967211	8.31295
21.2071	1.5629	0.8727	0.4293	0.7404	14.1468	3.9562	11.2729	12.1747	11.9075	6.3236	1.9192	3.3911	7.0671	7.7008	13.4503	3.7367	3.8906	21.8138	6.4361	11.5408	22.8389	8.0778	4.741	6.1523	12.3699	20.5305	7.4499	5.6823		0.972673	8.292
21.3263	1.412	0.6024	0.5774	1.4041	14.0308	4.5306	13.9363	13.2742	10.874	5.7154	1.7483	2.3262	5.3425	8.3823	11.4542	2.5575	4.9225	25.523	7.1384	15.6522	27.6813	5.522	4.1325	6.9633	16.5048	21.1006	7.1873	4.4075		0.978141	8.74656
21.4454	1.1356	0.6108	0.2379	0.6153	12.0603	4.6934	16.5983	11.6901	11.4229	3.9336	1.9186	2.8838	5.7893	6.8505	12.4582	1.9052	4.7156	28.6286	9.7523	17.9086	28.7707	3.8998	3.013	7.2024	17.6035	21.93	5.3517	4.7194		0.983603	8.86784
21.5646	1.2019	0.8329	0.3152	0.5051	9.6477	5.553	18.0937	9.0611	6.8526	3.9074	1.2728	2.636	4.87	7.7241	11.1405	2.1518	3.8995	25.6574	11.396	19.3278	28.7628	3.5726	2.8857	6.2099	16.8033	18.3714	3.2143	3.6143		0.98907	8.19574
21.6837	0.697	0.633	0.0538	0.5483	8.3623	6.6345	20.5362	8.8524	7.0478	2.979	1.0141	1.8671	3.6547	8.5706	7.4676	1.5577	2.7183	23.7147	12.891	22.8402	29.0294	2.8847	2.1014	6.3296	18.0076	16.4956	3.4444	3.3447		0.994533	8.00992
21.8029	1.0362	0.5587	0.1114	0.7578	6.1708	6.9447	18.42	9.1598	5.8011	2.5173	1.3077	1.302	2.6114	7.4387	7.0684	1.1922	2.6002	18.3938	15.4002	21.5408	26.9699	2.3195	2.9853	4.558	14.6648	14.3199	2.9238	2.643		1	7.20419

## Sheet: Image28
X0	Y0	Y1	Y2	Y3	Y4	Y5	Y6	Y7	Y8	Y9	Y10	Y11	Y12	Y13	Y14	Y15	Y16	Y17	Y18	Y19	Y20	Y21	Y22	Y23	Y24		Ap-Ba	Average int.
0	17.3905	10.4914	7.9854	7.016	6.252	5.0558	5.6084	7.4087	6.9113	3.8574	5.8	10.8007	14.6977	16.7219	16.2162	12.8196	10.9864	9.5448	10.6138	7.6613	6.4433	5.4533	8.4424	8.341	7.7503		0	9.21078
0.1191	19.0592	11.8386	7.5505	6.9322	5.7854	5.5781	6.0728	6.118	8.6304	4.4488	6.3142	11.3663	15.0762	20.1316	19.0254	13.9605	12.4003	10.3996	11.7957	8.4366	8.6167	5.9927	10.4172	7.6277	9.4574		0.0038897	10.1213
0.2383	19.0334	12.2187	8.3363	6.9852	6.6214	7.0912	7.966	7.4078	11.0268	4.92	6.6359	12.8823	15.3974	19.8596	19.8339	14.2213	13.7857	12.2865	17.2626	10.1893	11.0013	7.4162	11.9145	8.673	10.7142		0.00778267	11.3472
0.3574	19.0409	12.081	8.4565	6.9003	7.2092	6.7912	7.4617	8.4096	12.7039	4.0576	6.8354	13.7446	15.5406	21.2826	20.0574	14.4586	14.9869	13.0393	21.8453	13.0817	13.1019	9.3963	14.3116	11.8307	13.977		0.0116724	12.4241
0.4766	21.8358	13.5996	8.5139	8.4185	7.9602	8.0187	8.4587	9.6095	12.8891	5.621	7.6195	13.594	18.0399	23.3973	21.1634	15.8446	15.8186	15.3073	29.1142	19.833	17.4144	10.9088	20.0395	16.8327	16.4793		0.0155653	14.6533
0.5957	21.0031	14.7225	9.6551	8.528	8.3597	8.6355	9.1058	11.0642	16.0792	6.9868	7.9673	14.9473	18.5594	23.8001	19.7348	18.5362	18.3573	16.4221	37.3453	29.0123	25.0587	13.8883	29.228	24.0854	20.5534		0.019455	17.2654
0.7148	22.4215	14.8888	11.5352	9.1729	9.1033	10.3003	10.6009	12.8449	17.1773	6.5557	8.3603	17.2823	19.7528	24.6319	22.6628	21.6505	19.2204	20.7234	47.8465	37.7493	31.5176	18.643	41.846	32.4855	24.6812		0.0233448	20.5462
0.834	24.5872	15.3937	11.8409	8.9808	9.4581	10.1105	11.383	15.4523	21.4323	8.375	8.4856	17.0083	21.1599	27.265	25.3631	22.639	20.9807	23.4723	55.7964	53.0811	42.0655	29.275	51.9806	45.3985	33.2012		0.0272377	24.5674
0.9531	25.0616	18.6933	11.4967	10.519	12.6182	8.9654	12.5782	16.371	27.8314	7.9396	9.3417	16.8567	22.1863	29.1908	25.2695	27.0659	23.0729	26.2178	63.4494	67.334	55.8139	42.5591	65.7676	53.6473	46.8935		0.0311274	29.0696
1.0723	30.7136	19.0554	13.9237	10.9697	11.6354	11.5933	15.4026	17.6751	30.3046	10.9754	11.805	16.557	22.2593	27.7758	25.8396	26.9665	25.9798	28.6901	70.3505	83.3029	71.0293	60.0347	78.5655	66.7357	60.3372		0.0350204	33.9391
1.1914	32.0338	19.2041	13.614	12.479	13.476	13.5824	17.2577	18.9933	33.9621	11.9342	12.3607	18.9256	23.4291	27.8801	27.3697	26.6655	30.2871	35.7503	78.7536	90.1452	82.9155	77.1212	84.7873	77.3007	67.5065		0.0389101	37.9094
1.3106	34.4616	24.0869	16.3749	13.0303	15.273	15.5345	19.0768	22.613	38.224	13.9799	12.4894	17.7159	21.97	28.1661	26.3249	28.4396	35.6045	40.5353	87.8166	93.7052	94.0137	84.1724	86.0953	81.1365	76.3635		0.0428031	41.0882
1.4297	36.8519	25.9898	17.648	13.4007	18.199	18.2611	23.1463	23.7454	40.8551	17.4293	13.3433	19.285	21.7334	30.2274	26.6718	30.5071	35.4883	46.7194	83.3511	98.0134	99.7544	89.785	86.2212	85.6607	79.3565		0.0466928	43.2658
1.5488	35.4894	29.9537	17.6359	15.4632	18.2193	20.5198	25.7395	28.4415	39.7437	20.3661	15.7668	23.5737	22.856	29.1707	29.8609	34.2207	40.3866	51.5556	84.3304	94.024	99.5554	89.61	77.3869	76.3269	75.1233		0.0505825	43.8128
1.668	34.7686	33.168	18.7424	16.7149	20.777	24.3072	29.1085	30.0017	39.4587	23.6771	17.0565	24.4771	24.1186	29.8206	30.7897	36.4799	43.7413	55.1932	77.8415	87.9332	90.5844	89.3568	60.2741	68.0935	68.6652		0.0544754	43.006
1.7871	32.9682	36.1031	19.1119	17.7976	23.9654	27.4798	31.3217	32.0121	43.4374	28.7236	20.4204	25.7574	23.055	30.1576	31.6354	35.9539	49.3008	59.1169	67.415	76.1749	80.8845	80.3618	41.0375	52.3132	57.5002		0.0583651	40.9602
1.9063	34.3582	35.6565	21.7356	18.5831	28.0764	33.7904	36.8354	33.6912	43.1449	30.3295	22.9076	26.5681	23.7277	28.6196	32.0373	38.0821	55.1142	63.3625	58.8025	65.974	66.6594	63.2121	29.4672	37.1029	41.5112		0.0622581	38.774
2.0254	37.08	38.4353	20.3264	20.0189	28.3463	36.3888	42.0408	32.9522	43.0511	35.1171	25.318	28.653	25.4463	28.9119	33.4907	39.6349	61.4661	63.4143	48.0175	49.4575	49.9291	45.0482	21.032	28.348	27.3468		0.0661478	36.3708
2.1445	35.8282	38.8345	22.3629	22.8564	31.988	37.1706	41.6015	36.4623	40.3942	39.9126	29.8507	31.6389	26.938	27.9827	33.4246	43.6292	65.7056	65.9919	38.3114	35.1631	36.4454	31.683	15.8794	21.9335	19.1506		0.0700375	34.8456
2.2637	39.3177	36.9424	22.6264	21.6569	33.9374	37.3603	42.0929	36.0048	34.7928	42.9374	30.5371	31.9496	25.0627	28.7678	34.3788	44.4548	69.2262	66.9505	29.7905	23.5478	24.8717	21.0787	11.2312	15.2701	13.3944		0.0739305	32.7272
2.3828	39.885	35.4363	23.6002	20.9116	34.873	34.6288	40.0318	35.6251	30.2896	45.3226	33.5485	34.6297	26.0643	28.4263	32.431	46.3523	72.1372	67.9341	24.7841	16.4107	18.1944	15.8651	8.559	10.4568	9.6597		0.0778202	31.4423
2.502	41.3566	32.1661	24.8274	21.3291	35.3393	33.7097	38.8778	35.3662	25.7921	46.728	38.5089	34.8892	24.8501	30.5148	37.5097	46.9537	74.1509	68.9765	18.6738	10.5704	12.4814	11.3567	7.9479	7.2152	6.6484		0.0817132	30.6696
2.6211	35.4901	32.4358	24.7653	22.0943	36.5422	31.6203	33.1613	31.9746	20.9195	46.394	42.8443	36.3015	27.1695	31.0951	37.7517	51.1918	73.5238	68.4072	13.2487	7.725	8.8805	8.3659	5.6745	5.4622	4.3993		0.0856029	29.4975
2.7402	35.257	32.9846	24.8632	22.4915	37.4295	26.833	28.7784	30.6535	18.3084	41.5556	46.018	36.5922	27.1603	30.6162	37.1625	53.8693	72.9637	61.1687	10.6626	5.9162	7.7866	6.7363	4.4508	3.948	3.253		0.0894926	28.2984
2.8594	33.2792	32.0074	24.5265	23.5011	33.9515	26.772	25.8681	25.5436	17.2017	39.4011	50.4843	37.928	27.6804	32.1571	38.6757	57.1841	69.2227	54.9395	8.64	4.6773	5.9741	5.3907	3.8119	3.8508	2.7427		0.0933855	27.4165
2.9785	29.7853	28.9595	26.202	23.9625	34.5353	22.4466	22.4191	22.8191	14.9258	35.235	54.3337	34.8473	24.8731	33.5225	39.4888	57.3653	70.8832	48.6485	6.4907	3.9355	5.0846	4.5416	2.8398	3.1715	3.1558		0.0972752	26.1789
3.0977	27.8308	25.9402	26.9856	26.178	32.9086	20.946	19.4195	21.5936	12.5231	30.1187	54.4594	34.0795	25.612	33.0357	41.9043	59.3668	63.0499	38.9629	5.9915	2.8696	3.6372	3.8872	2.7231	3.2758	1.7674		0.101168	24.7627
3.2168	24.078	28.3471	26.7449	25.0508	34.9173	18.2618	15.5715	18.9571	10.5915	27.0035	50.9147	36.1677	27.4242	33.908	43.1773	59.2742	60.8787	34.2868	5.0417	2.7975	2.7844	3.0281	2.0155	2.5325	1.877		0.105058	23.8253
3.336	21.541	27.084	24.9308	23.2109	33.1111	16.8462	11.9059	15.5917	10.5924	25.5745	45.5399	36.5214	26.9889	34.2603	43.1854	56.4138	54.6968	24.3331	3.8702	2.0021	2.6896	2.3091	2.2322	2.0185	2.0107		0.108951	21.9784
3.4551	18.9354	27.1134	25.8878	25.4086	31.7596	15.0878	11.9832	13.3403	8.9556	19.6242	40.6983	33.2857	29.5934	35.4949	40.5535	57.5585	46.0329	20.3011	3.0305	2.5776	2.6638	2.6105	2.1268	2.1871	1.6278		0.112841	20.7375
3.5742	20.9791	25.6273	21.6335	24.2089	30.6222	13.4426	10.3638	11.8428	7.3779	13.7019	34.8741	31.4759	30.11	34.9391	40.3789	53.6118	38.4556	17.2454	2.8639	2.1855	2.2108	2.044	2.3386	2.003	2		0.11673	19.0615
3.6934	17.037	22.0751	18.9733	21.7599	27.1725	11.7728	9.338	10.7243	6.413	11.0154	29.2861	30.686	30.0568	34.3066	39.5603	48.3269	34.1527	13.9444	2.6038	1.5146	2.1098	2.0711	1.8512	1.7581	2.0427		0.120623	17.2221
3.8125	14.0634	18.2579	18.9798	20.0584	23.116	10.8048	8.9908	8.9528	5.1336	9.2039	24.0921	28.5901	30.7304	33.4794	35.4026	46.7688	27.6834	11.3914	2.5468	1.5351	1.6639	1.972	1.6885	1.1098	1.1938		0.124513	15.4964
3.9317	12.9791	16.3052	17.7043	17.0778	23.1131	11.5613	7.9488	7.1504	4.8536	8.5823	21.0259	27.1868	31.5325	28.4685	35.8945	44.4992	20.4348	10.1222	2.0852	1.5373	1.7925	2.0742	1.4994	1.2442	1.5794		0.128406	14.3301
4.0508	12.2166	15.1473	17.1574	17.1044	20.9246	9.5021	6.9589	6.5637	4.5113	7.0301	15.3447	23.9394	30.4156	26.926	33.0104	36.1726	16.1776	10.057	2.2784	1.4559	1.9573	1.8699	1.4314	1.2273	1.6145		0.132296	12.8398
4.1699	10.3288	12.4212	15.4127	16.4663	18.3084	8.7784	7.1947	6.6279	4.6747	6.4365	13.5126	20.1533	24.6532	25.1712	33.4471	31.1085	15.4912	9.0503	2.2987	1.3848	1.722	1.9101	1.3675	1.3736	1.6978		0.136185	11.6397
4.2891	9.6233	11.348	15.5962	14.359	18.0117	7.2339	6.4708	5.7394	4.4859	5.6607	10.4491	18.3935	24.1212	22.1953	29.7938	26.3852	13.5369	8.2214	1.7803	1.3761	1.2784	1.5945	1.4919	1.6385	1.4779		0.140078	10.4905
4.4082	8.939	11.0511	13.0614	12.709	15.5623	6.4559	5.8553	5.1831	3.638	4.6959	8.314	14.0321	23.3303	21.9865	27.3012	20.58	10.7742	8.1862	2.1138	1.6174	1.4187	1.4822	1.8166	1.4081	1.1242		0.143968	9.30546
4.5274	7.3858	9.7158	10.7899	12.1561	11.103	5.6622	6.066	6.1246	3.7249	4.3172	6.3212	11.4349	20.8952	17.749	22.1193	17.2681	9.2309	7.6637	2.0201	1.6479	1.6216	1.3793	1.6405	1.3582	1.385		0.147861	8.03122
4.6465	6.9991	8.7103	11.7997	11.6539	10.2249	5.1008	6.62	4.405	3.2567	3.896	5.6924	9.3392	17.6334	14.6582	16.674	12.6634	7.8444	8.2847	1.8064	1.5364	1.6142	1.8389	1.5398	1.4229	1.6165		0.151751	7.07325
4.7657	5.8245	7.4571	10.2626	10.9483	10.6881	4.8936	5.3344	5.1125	3.2265	4.4161	5.2887	8.162	15.7389	12.294	13.7008	9.158	6.1204	8.1367	1.9335	1.5256	1.2467	1.3371	1.5937	1.4597	1.2054		0.155644	6.2826
4.8848	4.8385	8.05	8.5144	10.0809	8.7123	4.6009	5.1914	4.1567	2.9881	4.2436	4.4465	6.8735	13.986	9.5658	9.6159	7.8938	5.6247	7.4238	1.959	1.6489	1.5194	1.1859	1.3178	1.246	0.9825		0.159533	5.46665
5.0039	4.9811	6.629	9.4142	9.2093	9.5543	4.2058	4.398	2.9386	2.5246	3.1932	3.1461	6.7652	12.5329	8.566	7.5786	6.8516	4.5571	7.1764	2.2919	1.4754	1.5561	1.8231	1.3364	1.4974	1.5749		0.163423	5.03109
5.1231	4.4474	5.6032	8.2476	8.6437	7.987	4.221	5.654	3.4614	3.1511	3.0373	3.2191	5.1105	13.1618	7.4549	5.4171	6.2614	4.0134	7.6318	2.0422	1.0182	1.7828	1.556	1.258	1.3966	1.5223		0.167316	4.69199
5.2422	4.8256	6.5413	7.6213	8.1583	7.4585	3.776	5.4802	3.6795	3.1083	3.0551	3.668	5.2047	13.5982	6.5057	5.5334	5.9256	4.4172	7.8963	1.6528	1.2917	1.5953	1.4724	1.5079	1.4219	1.429		0.171206	4.67297
5.3614	4.502	5.0991	6.5735	7.2618	6.119	3.6682	4.2735	3.3353	3.3549	3.4995	4.1874	5.45	12.0463	5.4828	4.3149	4.7286	3.5475	6.7214	1.9029	1.3136	1.2147	1.2569	1.1138	1.2158	1.3012		0.175099	4.13938
5.4805	4.1961	5.6481	5.2568	7.4943	7.4462	4.0428	4.334	2.7904	2.2396	2.9559	2.7222	4.4153	10.8163	4.1339	4.8545	4.6222	2.8325	6.9067	1.5381	1.324	1.0978	1.3569	1.4212	1.3073	1.1412		0.178988	3.87577
5.5996	3.9555	5.3893	5.1382	6.599	8.6237	3.7099	4.2975	2.5028	2.4822	2.7377	2.4584	4.5643	9.1001	3.5405	3.9458	3.8791	2.2636	5.9504	1.858	1.2322	1.2608	1.5238	1.1937	1.1236	1.3847		0.182878	3.62859
5.7188	3.3526	4.1886	4.3561	7.0138	7.4835	3.3268	3.5611	2.4937	2.731	2.3792	2.9653	4.3436	6.0666	3.8457	3.4519	3.2897	2.5449	7.4665	1.8018	1.3635	1.3133	1.0762	1.1354	1.16	1.3751		0.186771	3.36344
5.8379	3.3785	3.4601	3.9256	6.7328	6.8605	3.2857	3.3691	2.4079	2.4025	2.4462	2.3717	3.4023	6.3084	3.5259	3.6607	2.3514	2.7386	6.9142	1.5323	1.2336	1.1947	1.1111	1.0636	1.2255	1.5856		0.190661	3.13954
5.9571	2.9016	3.6388	3.335	5.8453	7.2946	3.3822	2.7576	2.2343	2.0578	2.3465	2.3916	3.9439	5.7442	3.0848	2.7699	2.6588	2.6533	6.5768	1.3095	1.2132	1.3483	1.0005	0.9975	0.9886	1.5203		0.194554	2.9598
6.0762	2.7455	3.2824	3.9577	6.0633	6.2839	2.5152	2.4789	2.3625	1.7342	1.774	2.7692	4.127	4.3755	3.0747	2.6524	2.9743	2.1861	6.7372	1.1585	1.3324	1.4149	1.3077	0.8058	1.2923	1.3901		0.198443	2.83183
6.1953	2.9299	2.7729	3.695	4.8553	5.9806	2.796	2.8854	2.5908	1.4576	1.8677	2.3577	3.3111	3.6633	2.7176	1.9232	2.8303	2.3124	6.1416	1.4284	1.2133	0.917	1.7553	1.1246	1.206	1.441		0.202333	2.64696
6.3145	2.1266	2.592	3.7324	5.0408	6.8176	2.7249	2.7261	2.343	1.9388	2.1982	1.6019	3.3638	3.6616	2.5057	1.69	2.7848	2.5718	6.2395	1.5619	1.4458	0.8448	1.3045	1.0463	1.4087	1.5146		0.206226	2.63144
6.4336	2.3258	2.3013	3.9145	5.5421	7.3837	2.0714	2.3947	2.9448	1.7403	2.3428	1.9241	3.0489	3.7858	2.3773	2.0577	2.8697	1.6775	5.168	1.4203	1.4093	1.2376	1.0371	1.1677	1.3978	1.6946		0.210116	2.60939
6.5528	2.4208	2.2355	2.8981	5.4449	5.6635	2.2881	2.0897	2.8222	1.4694	1.9468	2.1648	3.3158	3.1359	2.2493	1.725	1.8177	1.7627	5.7668	1.377	1.4849	0.8854	0.9433	1.0702	1.4811	1.6143		0.214009	2.40293
6.6719	1.86	2.0069	2.3861	4.5447	6.3579	2.5405	2.1172	2.0966	1.6612	1.7374	1.7704	3.1985	2.8566	2.1354	1.4047	2.2628	2.2199	5.1689	1.7366	1.2117	0.7609	0.9063	1.0872	1.1097	1.7771		0.217899	2.27661
6.7911	1.8907	2.5426	2.2988	3.8106	6.9262	2.3181	1.7964	2.1981	1.7932	1.5226	1.6791	3.0389	2.6485	1.9275	1.6754	2.1069	1.8773	5.4305	1.5187	1.3622	0.616	1.4041	1.2295	1.5343	1.689		0.221791	2.27341
6.9102	2.0241	2.6839	2.7368	4.3062	5.7573	1.6412	1.6525	2.039	1.5412	1.5693	2.4872	3.133	2.7684	1.7411	1.9837	2.5523	2.3848	4.9373	1.2484	1.6892	1.0665	1.377	0.9192	1.5662	1.4148		0.225681	2.28882
7.0293	1.7936	2.2397	1.9789	4.4072	5.7628	1.861	2.5246	1.7508	1.5006	1.7876	1.3533	3.2989	2.7692	2.0141	2.4859	2.0628	1.6895	5.4905	1.3275	1.614	1.1258	1.3359	0.9556	1.4762	1.7541		0.229571	2.2544
7.1485	1.8312	1.6294	2.1101	3.9663	6.1929	1.8125	1.9066	1.9366	1.4596	1.3721	1.7975	3.3812	2.8884	2.0915	1.8893	1.6213	1.7526	5.2508	1.5161	1.2584	1.2443	1.3327	1.0596	1.2381	1.9431		0.233464	2.17929
7.2676	1.4464	2.2018	2.7872	3.4656	5.4708	1.6981	2.116	1.8791	1.3684	1.5851	1.7132	3.1213	2.5727	2.2947	1.8927	2.2307	2.3837	4.5341	1.6711	1.2159	0.9298	1.1884	1.0877	1.3689	1.9448		0.237354	2.16673
7.3868	1.2323	1.783	2.566	3.4207	6.5831	1.7221	1.9773	2.1228	1.6246	1.318	1.6901	3.5882	3.5096	1.7438	2.0323	1.8006	1.9227	5.2612	1.7157	1.1278	1.0941	1.1607	1.4267	1.6203	1.61		0.241247	2.22615
7.5059	1.4022	1.6849	2.3206	3.292	7.2595	2.0229	1.9904	2.0417	1.8403	1.1998	1.799	3.8827	3.5525	1.6944	2.2163	1.5907	1.5771	4.9377	1.528	1.3247	1.2734	1.2771	1.2552	1.3876	1.4178		0.245136	2.23074
7.625	1.8348	1.6003	2.4466	3.0373	6.6176	1.8114	1.2127	1.8454	1.7472	1.3262	1.4627	4.1735	2.8247	2.3644	2.1003	1.8858	2.066	4.894	1.8613	1.2735	0.7451	1.1615	1.691	1.5209	1.9363		0.249026	2.21762
7.7442	1.8073	1.5771	2.3524	3.0441	6.5011	1.6571	1.4763	1.4775	1.4207	1.3066	1.4077	5.1255	3.0316	1.7392	1.6746	1.7757	2.3305	4.1755	1.6985	1.4099	0.8279	0.9555	1.2975	1.241	1.7168		0.252919	2.1211
7.8633	1.15	1.4774	2.2246	2.3452	6.3129	1.4533	1.6847	1.5728	1.3535	1.5514	1.9165	4.3966	3.0431	2.1115	1.9379	1.9312	1.8086	3.7508	1.2998	1.6664	1.1424	1.4263	1.5138	1.6853	1.5648		0.256809	2.09283
7.9825	1.2172	1.8327	2.0218	2.2238	6.4043	1.2651	1.4497	1.6288	1.6109	1.3509	1.4442	4.5191	3.4968	1.8384	1.4336	1.8356	1.6447	3.6884	1.3332	1.5907	1.5361	1.1667	1.1503	1.5122	1.9763		0.260702	2.04686
8.1016	1.435	1.4216	2.5993	2.4446	8.3769	1.0277	1.1822	2.1308	1.3806	0.9339	1.5546	5.6845	3.8604	1.8878	1.5284	2.0391	1.9698	4.7608	1.6427	1.5991	1.2619	1.0981	1.3152	1.3238	1.3679		0.264591	2.23307
8.2207	1.183	1.3241	1.8168	2.4677	8.5666	1.4658	1.476	1.8626	1.8711	1.0582	1.7474	6.4458	3.3266	2.0592	1.5599	1.6623	1.9455	3.6009	2.1036	1.4639	1.3544	1.1334	1.2359	1.6608	1.6406		0.268481	2.24128
8.3399	1.4239	1.2998	1.4421	2.4145	8.6626	1.7097	1.3757	1.7627	1.5588	1.2483	1.7346	6.6359	3.8057	1.5963	2.1957	1.8344	1.8857	3.5505	2.1256	1.6406	1.257	1.2827	1.344	1.2615	1.9583		0.272374	2.28026
8.459	1.2822	1.2554	1.1955	1.9788	8.8855	1.8955	1.8283	2.0126	1.2147	1.2283	1.5618	7.0168	4.0763	1.5369	2.084	1.8859	1.833	4.0532	1.8629	1.3937	1.2023	1.2043	1.0892	1.3216	2.0906		0.276264	2.27957
8.5782	1.3364	1.0621	1.2548	1.7192	8.8749	1.5065	1.3957	1.3149	1.2018	1.6539	1.6595	7.0484	4.9735	1.7857	2.194	2.682	1.8721	4.0636	2.0253	1.1837	0.9151	1.1255	1.2327	1.4686	2.0135		0.280157	2.30254
8.6973	1.0417	1.3741	1.2176	1.8362	7.2722	1.5204	1.416	1.3524	1.1389	1.3346	1.6591	8.4828	4.5899	1.6605	2.306	2.5677	2.1034	4.5697	1.9869	1.5942	1.2808	1.7336	1.5649	1.6024	1.6746		0.284046	2.35522
8.8165	1.3924	1.1823	1.2436	1.7313	9.2056	1.5494	1.4803	1.656	1.449	1.2886	1.5376	6.9255	4.8597	1.5423	1.9709	2.3504	1.4936	4.2857	1.6035	1.2624	1.4952	1.3114	1.4286	1.8957	1.9098		0.287939	2.32203
8.9356	1.3033	1.2097	1.2765	1.933	7.6405	1.699	1.339	1.458	1.3444	1.1185	1.6205	7.7949	4.6093	1.9261	1.9392	1.9126	1.4445	3.6061	1.7466	1.26	1.0327	1.1679	1.8849	1.4815	1.878		0.291829	2.22507
9.0547	1.1103	1.2049	1.0645	1.934	8.6227	1.7536	1.4872	1.3955	1.4279	1.2019	1.7354	7.0756	4.689	1.9214	1.7374	2.1537	1.9176	4.3809	1.7087	1.6841	1.2211	1.0852	1.6096	1.487	1.5099		0.295719	2.28476
9.1739	0.8486	1.1911	1.3373	1.4448	9.862	2.1084	1.6545	1.2531	0.9297	1.2974	1.6003	6.4243	4.9214	1.7833	1.989	1.5368	2.1095	4.5021	1.9705	1.5231	0.9727	1.3598	1.4338	1.4985	1.3472		0.299612	2.27597
9.293	0.9086	1.0917	1.1792	1.56	11.0324	1.767	1.3528	1.2937	1.4202	1.7925	1.6538	5.1974	6.1882	1.3512	1.593	1.7708	1.4265	4.1046	2.1132	1.3848	0.9419	1.1423	1.3282	1.5726	1.1602		0.303501	2.25307
9.4122	0.9162	1.3651	1.6678	2.0671	11.7534	2.0974	1.6126	1.9236	1.1926	1.5218	1.796	5.3422	7.5911	1.9392	2.07	1.9559	1.4545	4.1201	2.0679	1.2934	1.0663	1.182	1.2216	1.3099	1.5034		0.307394	2.48124
9.5313	1.2361	1.5004	1.4651	2.0825	12.8246	2.6701	1.1648	1.5113	1.3051	1.4896	2.1596	4.94	8.521	1.9046	2.2717	1.9812	1.8457	4.0337	1.7712	1.4592	1.2575	0.967	1.5822	1.2525	1.9864		0.311284	2.60732
9.6504	1.5231	1.3226	0.9871	2.2004	15.0162	2.7568	1.583	1.3402	1.5335	1.3877	1.8407	5.8787	7.5439	1.6991	2.0214	2.0604	1.8657	4.3967	1.7964	1.5977	1.1755	1.0744	1.096	1.323	1.4996		0.315174	2.66079
9.7696	1.3076	1.3135	1.0589	1.4684	18.0321	2.055	1.5336	1.335	0.8608	1.802	2.0135	5.738	7.8045	1.6461	1.6157	1.8574	1.5914	3.9623	2.3478	1.3873	1.2204	1.2393	1.4011	1.5023	1.4817		0.319067	2.70303
9.8887	1.192	1.3647	1.0741	1.4118	23.2183	2.0195	1.6178	1.397	1.206	1.5797	1.7925	6.6943	8.1551	1.7685	1.9402	2.1759	1.4648	4.3849	2.1674	1.7552	1.3825	1.3983	1.0786	1.4385	1.5481		0.322956	3.00903
10.0079	1.1145	1.2707	1.0949	1.6288	27.0707	2.1332	1.4335	1.288	1.2283	1.537	1.8041	6.9738	6.9709	1.8289	1.6837	1.9527	1.3499	4.5534	2.4339	1.6887	1.2716	1.2472	1.5392	1.7515	1.5558		0.326849	3.1362
10.127	1.1602	1.1712	0.9298	1.5514	33.2518	2.1337	1.1151	1.0548	1.4117	1.4656	2.163	7.1817	6.8176	1.6601	1.9079	1.7757	2.1132	4.2928	2.1883	1.6309	1.1712	1.0274	1.2999	1.6216	1.4402		0.330739	3.34147
10.2462	0.9772	0.9842	1.2887	1.322	37.3137	1.9822	1.1625	0.9352	1.5394	1.5187	2.2236	8.476	7.3867	2.0209	1.97	1.6447	2.2518	4.2051	2.257	1.4388	1.2071	0.9534	1.2655	1.6963	1.3898		0.334632	3.57642
10.3653	1.1937	1.1759	0.9438	1.1506	39.3884	1.8243	1.2722	1.25	1.2365	1.2824	2.0021	8.7047	8.9808	1.872	1.964	2.5513	1.7355	3.5358	2.2689	1.3564	1.5837	1.1256	1.5707	1.6829	1.3854		0.338522	3.7215
10.4844	1.0817	1.0978	1.1583	1.4787	41.1963	2.135	0.8431	1.55	1.3439	1.0825	1.8265	7.7892	8.7846	1.9877	1.9275	2.4484	1.8601	3.4847	3.0512	1.6295	1.3693	1.1248	1.4101	1.3095	1.2017		0.342411	3.76688
10.6036	1.0247	0.9914	0.9369	1.745	42.4454	1.7651	1.2342	1.1377	1.7075	1.1772	2.4388	8.2667	8.5885	2.0161	2.0493	2.3747	1.6138	4.0702	3.3645	1.749	1.2524	1.0155	1.4559	1.5235	1.5455		0.346304	3.89958
10.7227	1.2993	0.904	0.8214	1.3998	41.6596	2.3555	1.519	1.0104	1.328	1.314	1.9584	7.5439	9.7288	2.1645	1.913	2.4627	1.8024	3.3156	3.3157	1.7547	1.5489	1.0133	2.1587	1.5665	1.4877		0.350194	3.89383
10.8419	1.0952	0.9366	1.1319	1.0287	38.9863	2.0205	1.432	1.2257	1.2102	1.1602	1.6305	7.7455	9.7077	2.5805	1.5394	2.9136	2.1151	3.572	3.4974	1.3555	1.5591	1.2687	1.658	1.6706	1.2978		0.354087	3.77355
10.961	0.9503	1.0418	1.1482	0.9529	38.6478	1.6911	1.335	1.2987	1.4786	1.2887	2.01	6.7238	12.3317	2.975	1.8093	2.9768	2.4298	3.3926	3.8078	2.124	1.5156	1.2468	1.5296	1.6476	1.5456		0.357977	3.91596
11.0801	1.109	0.8669	1.1165	1.0864	38.1565	2.0361	1.6648	1.1174	1.41	1.8437	2.0085	6.1038	14.688	3.3805	1.8845	3.4835	2.9758	3.5427	5.1087	1.7922	1.2261	1.4432	1.1544	1.0819	1.3104		0.361867	4.06366
11.1993	1.1531	1.0992	1.0194	0.811	38.9321	2.0893	1.3103	1.2418	1.7959	1.312	1.3896	5.3651	17.4485	3.6115	2.2182	3.4883	3.2531	2.9315	4.888	2.3235	1.6581	1.0503	1.6119	1.2583	1.3796		0.36576	4.18558
11.3184	1.112	1.1174	1.3118	1.4634	44.5757	1.6115	1.4469	1.2202	1.3315	1.3873	1.5018	5.7655	18.2309	3.8479	2.0872	4.0752	3.3957	2.3389	5.4722	1.7622	1.1838	1.2286	1.5375	1.3184	1.8413		0.369649	4.48659
11.4376	1.1041	1.521	0.9687	1.238	41.4877	1.7604	1.2042	1.2126	1.3856	1.3649	1.7209	4.3145	19.8593	4.3203	2.1545	4.1904	3.6195	3.2038	5.8201	1.7798	1.5933	1.2742	1.4095	1.2616	1.2688		0.373542	4.44151
11.5567	1.013	1.0838	1.1616	1.2054	40.6258	1.5624	1.3815	1.3878	1.3987	1.4487	1.7986	4.7559	20.9309	5.9566	2.6335	4.3363	4.7702	3.4824	6.859	1.9093	1.7715	1.0218	1.8306	1.4851	1.6272		0.377432	4.6975
11.6758	1.3011	1.1681	0.9583	1.4105	43.1108	1.7834	1.0806	1.3079	1.3162	1.3577	1.9927	4.1625	23.3469	6.3213	1.9608	4.6447	5.5674	3.4239	6.5416	1.9612	1.5576	1.4218	1.9543	1.9915	1.4574		0.381322	4.92401
11.795	1.2433	1.0219	1.0538	1.3585	40.1795	1.5327	1.4206	0.7413	1.5984	1.3495	1.7751	4.1475	23.276	7.6061	2.0201	4.6816	7.2796	3.5397	8.8295	1.8793	1.5707	1.2016	1.7208	2.2371	1.8138		0.385215	5.00312
11.9141	1.0993	1.1745	1.114	1.6095	36.4568	1.7883	0.9921	1.1851	1.3786	1.2122	1.9436	4.6553	22.4218	8.2705	2.5436	5.1039	8.8656	4.1114	9.9756	1.6564	1.4323	1.6283	1.7919	1.4671	1.5311		0.389104	5.01635
12.0333	1.0107	1.3324	0.87	1.0593	36.7533	1.9597	1.4315	1.2698	1.4849	1.6018	1.5137	4.9285	21.9251	8.4053	2.4915	5.1179	10.7417	3.8187	10.1966	1.9509	1.5076	1.7518	1.3601	1.3202	1.5175		0.392997	5.09282
12.1524	1.2006	1.6201	0.9956	1.211	34.0531	1.6179	1.119	1.4049	1.1676	1.3055	2.0855	4.8092	21.6663	8.4841	2.5691	4.6991	12.1641	3.9311	11.1824	2.1778	1.9395	1.495	1.6977	1.2186	1.4472		0.396887	5.09048
12.2716	1.1707	1.2525	1.3456	1.0531	33.3998	1.5647	1.0135	1.2894	1.1957	1.3401	1.7017	5.3533	20.7115	8.3973	2.541	5.6461	12.4629	4.0093	11.4459	1.5513	1.693	1.4975	2.2934	1.4706	1.3792		0.40078	5.07116
12.3907	1.1821	1.1148	1.1673	1.0298	31.0287	1.4081	1.4142	1.4599	1.1458	1.2811	1.308	4.2812	18.9896	9.2139	3.242	6.9874	13.2264	4.5822	10.3876	1.6747	1.2081	1.4856	1.67	1.5361	0.9219		0.40467	4.91786
12.5098	1.3522	1.4697	0.9796	1.2008	29.3495	1.904	1.4967	1.5476	1.1025	1.7356	1.5726	5.3832	15.3945	8.5239	3.1794	6.2994	13.1955	4.3007	10.4905	1.6865	1.1908	1.7285	1.4738	1.6681	1.2048		0.408559	4.77722
12.629	1.1257	1.1548	1.2393	1.0788	28.9939	1.8519	1.5314	1.2332	1.3793	1.8664	1.6951	4.7789	14.7869	6.7904	3.706	7.2357	13.0276	5.0069	11.0419	1.605	1.5061	1.6236	1.7047	1.3997	1.0103		0.412452	4.73494
12.7481	0.8968	1.444	1.3174	1.1981	26.4495	1.8944	1.2899	1.1246	1.0925	1.2659	1.7918	4.1961	15.1346	6.9183	3.2526	10.0454	14.5316	5.9561	10.5863	1.5449	1.6326	1.3628	1.3639	1.5026	1.0352		0.416342	4.75312
12.8673	0.9661	0.9006	1.0624	1.1346	22.5514	1.3321	1.6747	1.3359	1.2397	1.5582	1.4577	4.411	16.0682	6.7233	3.3417	11.1123	12.5001	6.2137	10.5771	1.9471	1.544	1.5327	1.3133	1.9337	1.5678		0.420235	4.63998
12.9864	1.1425	1.0488	1.3958	1.1904	20.5108	1.861	1.6077	1.3487	1.784	1.6484	1.5883	4.3258	17.1628	6.43	4.7823	14.1831	12.995	5.6688	10.6888	2.1572	1.2826	1.4979	1.2399	1.8983	1.2351		0.424125	4.82696
13.1055	1.1581	0.8953	1.3139	1.5552	20.0757	1.7414	1.5078	1.2689	1.1095	1.6409	1.6242	3.9481	19.3684	6.0302	3.7266	15.8997	13.2414	5.2359	11.1652	2.3164	1.6132	1.8596	1.3479	2.074	1.144		0.428014	4.91446
13.2247	1.2599	1.1684	1.2899	1.5315	20.35	0.9713	1.6077	1.4006	1.2906	1.2893	1.3934	4.1555	21.3076	5.5137	4.6125	19.0827	13.2533	7.2632	12.7253	2.4081	2.0495	1.3566	1.3797	1.8585	1.4662		0.431907	5.2794
13.3438	1.0811	1.5119	1.3724	1.8655	19.5397	1.2505	1.2692	1.5179	1.3097	1.2969	1.5444	3.8227	20.0351	6.4136	6.2023	21.0217	12.8336	8.6065	13.1849	2.3045	1.7482	1.6412	1.2197	1.8108	1.3041		0.435797	5.42832
13.463	1.1907	1.7261	1.2619	1.4798	22.4451	1.7809	1.322	1.3868	1.5896	1.5165	1.6433	2.9753	21.6364	7.8919	6.3663	24.5272	15.4409	9.5461	13.0218	2.3466	1.4484	1.9437	1.1967	1.3782	1.3234		0.43969	5.93542
13.5821	1.3602	1.336	1.3341	1.5997	20.7462	2.0657	1.4457	1.3446	1.5057	1.1773	1.6104	3.1314	20.9203	8.7643	5.8247	24.7528	15.4787	10.0683	13.3427	2.0342	1.3342	2.0206	1.6483	1.4167	1.6348		0.44358	5.9159
13.7012	0.7945	0.9882	1.3125	1.5744	20.9547	1.9405	1.6222	1.3584	1.4202	0.9716	1.6141	3.205	21.1164	10.0574	5.7842	25.5218	15.8071	9.4739	14.3725	2.3363	1.7293	1.594	1.5512	1.6558	1.6702		0.447469	6.01706
13.8204	1.4946	1.0113	1.8013	1.4309	19.4857	1.4969	1.117	1.2788	1.2076	1.3012	1.2207	3.293	22.8003	10.7632	4.4556	22.6392	15.2714	9.7863	14.9984	2.7172	1.8683	1.7708	1.6857	1.907	1.4529		0.451362	5.93021
13.9395	0.9953	1.1133	1.8162	1.3708	19.1579	1.3024	1.7694	1.6572	1.5025	1.5484	1.2684	2.6269	22.5882	10.3902	4.6497	18.8217	14.2782	8.7486	15.1504	2.408	1.7275	1.7144	1.9511	1.7827	1.282		0.455252	5.66486
14.0587	0.9117	1.2869	1.1951	1.4031	18.4163	1.9077	1.6532	1.8084	1.0638	1.2151	1.2447	3.3067	19.7562	11.3371	4.2526	17.472	13.4391	9.4378	15.9726	2.0808	2.163	1.5851	1.8468	1.2872	1.3205		0.459145	5.49454
14.1778	1.3711	1.0755	1.1427	1.557	19.0692	2.0823	1.5488	1.3949	1.2156	1.4213	1.2205	2.8565	16.158	10.9732	5.4031	16.725	11.4214	8.8702	16.2651	2.4134	1.5014	1.6589	2.045	1.1483	1.0146		0.463035	5.26212
14.297	1.2505	1.4353	1.3308	1.5677	19.6991	1.7956	1.2302	1.0459	1.2664	1.4954	1.5927	2.5852	12.6451	11.9421	5.3346	15.0971	10.408	7.5583	16.1017	2.7614	1.5266	1.5857	1.5239	1.2865	1.4985		0.466928	5.02257
14.4161	1.2773	1.1235	1.5883	1.3881	20.9519	1.7074	1.7062	1.0914	1.3746	1.3005	1.6066	2.8381	10.809	12.7249	5.5116	14.6356	10.3887	10.3383	16.0059	2.968	2.0514	1.5199	1.4678	1.7708	1.6897		0.470817	5.19342
14.5352	0.9858	1.1314	1.419	1.4809	22.3438	1.7218	1.8338	1.5141	1.0776	1.458	0.9828	2.2674	9.5131	14.1477	6.7193	13.7697	9.2958	9.5646	17.3647	3.2592	1.7582	1.9566	1.4268	1.2273	1.3996		0.474707	5.18476
14.6544	0.8982	1.7619	1.2496	1.1026	23.559	2.0338	1.4505	1.4214	1.3908	1.6624	0.8792	2.2816	9.1274	15.4819	6.3012	12.6507	9.905	11.8486	19.0064	2.5019	1.7657	1.7333	1.5426	1.4206	1.4966		0.4786	5.37892
14.7735	1.2454	1.3052	1.5489	1.307	24.3094	1.6121	1.269	1.7176	1.153	1.061	1.044	2.5621	8.2334	16.2914	6.5131	13.274	8.5915	15.1076	20.6915	2.8664	1.5716	1.5694	1.4585	1.4369	1.6533		0.48249	5.57573
14.8927	1.448	1.3504	1.3567	1.4651	24.3415	1.4486	1.4509	1.5847	1.0982	1.0731	1.6628	2.9842	8.4401	14.7163	6.5919	13.6113	6.3767	18.9054	20.2985	2.694	1.5603	1.6397	1.7533	1.4987	1.2224		0.486383	5.62291
15.0118	1.3592	1.3899	1.3296	1.2944	23.5279	1.6456	1.1679	1.3904	1.4145	1.3586	1.195	2.6678	7.5492	15.6858	8.7555	14.616	6.5979	20.8003	20.3719	3.4165	1.5492	1.5462	1.6769	1.5548	1.267		0.490272	5.80512
15.1309	0.8614	1.0961	1.2315	1.302	26.0459	1.5406	1.1269	1.2763	1.2793	1.5635	0.958	2.2576	7.8615	15.3362	13.0709	15.3862	6.5164	22.4483	23.7826	2.5934	1.094	2.0069	1.5135	2.0824	1.1993		0.494162	6.21723
15.2501	1.0429	1.5307	1.2602	1.8625	25.7147	1.6841	1.1507	1.2793	1.4298	1.3346	1.0309	2.5253	7.4651	14.7173	20.4397	15.057	6.5216	25.0248	23.3659	3.0964	1.2275	1.9615	1.3754	1.6711	1.3967		0.498055	6.60663
15.3692	1.1875	1.5689	1.0746	1.6981	24.3958	1.6646	1.2033	1.6803	1.2506	1.0787	0.75	2.7363	6.483	15.8257	26.6058	15.6755	7.1343	21.8874	22.7579	3.2822	1.4837	1.7643	1.3689	1.2858	1.6055		0.501945	6.69795
15.4884	0.835	0.9641	0.8789	1.7412	21.6522	1.5595	1.0077	1.4146	1.8904	1.0309	1.1054	2.4978	6.9039	15.5118	30.6098	15.8211	7.5613	17.4452	22.8592	3.6503	1.8943	1.605	1.7327	1.5311	1.512		0.505838	6.60862
15.6075	1.2439	1.4688	1.2868	1.9876	21.046	1.7406	1.2349	0.7496	1.7515	1.3194	1.761	2.1577	5.9707	18.1829	34.9947	17.6463	8.5203	13.4075	22.4082	3.9859	1.7265	2.1228	1.7153	1.7194	1.4828		0.509728	6.86524
15.7266	0.7846	1.8014	1.4095	2.1262	20.5555	1.3943	1.2357	1.2703	1.5735	1.2812	1.2971	2.3032	6.8464	20.1713	35.9128	15.3091	7.0458	12.3147	22.5076	4.1418	1.3876	1.8966	1.4151	1.6986	1.409		0.513617	6.76356
15.8458	1.1993	1.399	1.2447	2.0844	17.0907	1.4056	1.7063	1.0859	1.3278	1.2666	1.5111	2.1209	7.3096	20.1774	35.568	12.3256	7.1877	12.0441	23.8523	3.5148	1.6546	1.6135	1.6771	1.2989	1.0576		0.51751	6.50894
15.9649	1.3546	1.4886	1.1445	1.7889	15.8391	1.3624	1.4737	1.2022	1.3608	1.8031	1.3256	2.3107	7.3813	20.3362	33.4605	11.759	7.1689	12.7807	23.0388	4.7737	1.6119	1.7877	1.4125	1.6661	1.3087		0.5214	6.43761
16.0841	1.1227	1.6728	1.2552	2.1725	15.5144	1.5708	1.4515	1.0516	1.5527	1.3027	1.5392	2.301	7.4331	20.2627	29.7432	10.5209	7.7408	13.7366	22.1468	6.0804	1.761	1.7905	1.6644	1.4204	1.375		0.525293	6.32732
16.2032	1.199	1.3351	1.1431	2.4556	16.4946	1.668	1.1582	1.4116	0.8023	1.4785	1.5077	2.0701	7.0039	18.148	19.5971	11.1115	8.6332	15.6839	22.0153	5.5077	1.6429	1.4846	1.4577	1.6053	1.2151		0.529183	5.9132
16.3224	1.0713	1.3635	1.103	1.7091	17.166	1.3053	1.3854	1.3312	1.6684	1.0999	1.4939	1.8234	7.0507	19.6111	14.5431	12.0878	8.5654	19.0497	21.4975	5.4814	1.6216	1.7626	1.3673	1.4551	1.4376		0.533076	5.92205
16.4415	0.8877	0.9558	1.4524	1.1872	17.1382	1.4446	1.3942	1.5582	1.2554	1.3738	1.2988	1.5001	6.9981	20.4102	11.6505	14.2801	9.006	21.2479	22.0817	6.3229	1.7406	1.9731	1.3421	1.5644	1.6712		0.536965	6.06941
16.5606	1.2845	1.0292	1.2298	1.0933	18.8491	1.2963	1.4289	1.563	1.0677	1.1155	1.2955	2.7127	7.7952	22.1461	11.2492	16.1269	9.986	23.375	21.9102	6.3312	1.7343	1.9159	1.663	1.6054	1.5834		0.540855	6.45549
16.6798	1.0437	1.3499	0.8634	1.3153	20.446	1.5625	1.5722	1.2492	0.9601	1.1885	1.6852	2.5535	7.9271	23.7508	10.9372	17.446	7.891	22.9003	23.9044	5.7739	1.6387	2.1211	1.6438	2.0032	1.0405		0.544748	6.5907
16.7989	1.0063	0.982	1.5374	1.5059	20.9547	1.3037	1.7386	1.5208	0.9467	1.2042	1.1999	1.5986	6.9134	24.615	8.8275	15.5387	8.2557	21.7572	23.8987	5.1565	2.1195	1.8673	1.7388	1.4904	1.4581		0.548638	6.36542
16.9181	1.1924	1.0578	1.1864	1.5215	21.3508	1.5678	1.5749	1.5522	1.3511	1.3579	1.4153	2.1531	7.1994	26.4384	11.519	14.1434	7.4673	21.2398	23.0239	4.8567	2.1597	1.8395	1.5338	1.4539	1.4117		0.552531	6.46271
17.0372	1.377	1.3365	1.3384	1.7591	21.2466	1.3029	1.385	1.5859	1.1667	1.3971	1.5822	2.1051	7.6454	32.6675	10.5466	16.2694	8.0651	19.6247	21.177	5.0723	1.8089	1.5061	1.4786	1.4513	1.5128		0.55642	6.65633
17.1563	1.3113	1.1103	1.2395	1.4942	20.2701	1.3609	1.6273	1.3094	0.9798	1.6047	1.343	1.8897	6.7975	36.5411	9.2612	15.1855	7.3898	19.6442	23.0317	5.8396	1.2175	1.482	1.3362	1.5048	1.8091		0.56031	6.66322
17.2755	0.9691	1.4166	1.1415	1.7214	17.6049	1.0387	1.584	1.2935	1.2797	1.2811	1.0833	1.8033	7.6886	37.8929	9.8265	14.7846	7.263	20.1073	22.0574	6.4807	1.8899	1.2043	1.7252	1.4818	1.5013		0.564203	6.64482
17.3946	1.4038	1.1378	1.1294	1.5711	17.682	1.4285	1.3031	1.2108	1.2596	1.9583	1.2465	2.1645	9.3635	41.4097	9.2452	13.9027	6.9318	20.164	20.3489	6.5551	1.5746	1.3528	1.8306	1.8637	1.3137		0.568093	6.77407
17.5138	1.0568	1.5622	1.1962	1.2372	17.5524	1.2046	1.3321	1.2595	0.8347	1.5879	1.1376	2.0728	8.5373	40.7054	8.5686	11.7958	7.1016	20.2344	20.0697	6.8789	1.8571	1.443	1.3107	1.5159	1.3006		0.571986	6.53412
17.6329	1.0053	1.1628	1.1216	1.424	17.4734	1.2534	1.3196	0.9995	1.1977	1.3144	1.1509	1.7069	8.5899	38.66	9.6934	10.7807	8.7982	20.5165	18.1384	5.7704	2.0787	1.8247	1.4179	1.5547	0.9799		0.575875	6.39732
17.7521	1.0058	1.1097	1.0357	1.4107	19.4072	1.523	1.2475	1.1175	1.2283	1.5511	1.3077	1.9006	8.2163	34.2705	9.8308	9.0774	9.2287	16.4858	18.1319	5.9814	1.752	1.8559	1.3781	1.7494	1.1947		0.579768	6.11991
17.8712	0.9174	1.4057	0.9438	1.5773	20.7885	1.8178	1.1858	1.3392	0.937	1.2254	1.7103	1.9959	8.7195	34.9441	9.4827	8.5094	10.6609	14.8054	19.0984	6.0775	1.9721	2.4217	1.4355	1.6933	1.7137		0.583658	6.29513
17.9903	1.548	1.3429	1.3786	1.4099	19.4163	1.5095	1.1748	1.453	1.4041	1.4291	1.2323	1.9055	8.0887	37.2298	10.0236	8.0068	12.4853	13.1996	17.5278	5.8612	1.9504	2.0192	1.7597	1.5562	1.6584		0.587548	6.26283
18.1095	1.064	1.2065	1.2696	1.4287	17.6038	1.6391	1.3877	1.3082	1.369	1.5488	1.0784	1.7812	8.1431	37.7063	10.6079	8.9111	12.1465	11.9591	17.1623	6.0609	2.0594	1.7961	1.57	1.2955	1.6464		0.591441	6.14998
18.2286	0.7178	0.8054	1.0438	1.1249	17.4123	1.0506	1.5033	1.4219	1.3778	1.5754	1.5273	1.9414	6.3698	40.1519	12.4903	10.6517	13.1767	12.0718	16.6683	6.0771	2.1355	1.5669	1.6245	1.2627	1.4353		0.59533	6.28738
18.3478	1.0802	1.0872	0.9788	1.0968	16.6367	1.4828	1.5009	1.4532	1.2283	1.4148	1.7313	1.6271	6.4737	41.8854	12.1519	12.0581	13.661	12.416	17.0749	6.8228	1.9621	2.1808	1.4771	1.4731	1.1277		0.599223	6.48331
18.4669	0.8775	1.2172	1.0513	1.2887	17.9079	1.2625	1.1251	1.2422	1.1789	1.3831	1.5464	1.97	7.9506	43.9152	10.7224	10.9108	12.027	11.0319	16.445	6.556	1.889	1.7536	1.0601	1.8478	1.4308		0.603113	6.38364
18.586	1.2413	1.5375	0.9342	1.3872	16.0702	1.4553	1.2212	1.2317	1.1815	1.3886	1.3959	2.2003	6.6286	42.6622	9.7908	11.3016	12.8811	10.6544	16.3443	6.6311	1.9962	1.9789	1.2884	1.5132	1.4178		0.607003	6.25334
18.7052	1.1136	1.3573	1.0774	1.3502	14.4307	1.7073	1.0303	0.9828	1.0149	1.4365	0.981	2.0683	5.6932	45.3525	9.2208	12.0804	11.1442	9.4714	19.1927	6.5262	1.644	1.8214	1.0805	1.7688	1.6075		0.610896	6.20616
18.8243	1.2075	1.6853	0.801	1.4891	14.2777	1.5023	1.1981	0.9685	1.1014	1.458	0.9304	2.2091	6.0161	46.4146	8.0644	11.2823	9.4985	8.5023	18.6881	6.0583	1.8432	1.7799	1.2772	1.8216	1.5695		0.614785	6.06578
18.9435	1.2566	1.1771	0.9166	1.3061	14.9838	1.5383	1.7253	0.9928	1.2936	1.3223	0.959	2.5108	5.7209	41.259	7.1663	10.1119	6.9103	9.4312	20.4468	7.3643	1.9903	1.309	1.3959	1.4723	1.5269		0.618678	5.8435
19.0626	1.6516	1.0522	0.948	1.3683	13.7663	1.4171	1.5489	1.1635	1.0985	1.618	1.2726	2.491	6.0656	41.2622	7.2638	8.5348	7.1955	9.5657	21.4387	6.0818	1.7881	2.0948	1.3842	1.7992	1.5937		0.622568	5.81856
19.1817	1.4933	1.2642	1.0634	1.3687	11.8848	1.3563	1.6232	1.093	1.6116	1.6488	1.1949	2.2728	5.9183	37.7636	7.3604	8.0593	6.0374	8.6055	24.1134	6.7798	1.7028	1.6164	1.5699	1.2191	1.6767		0.626458	5.6119
19.3009	1.3515	1.731	0.959	1.3815	11.27	1.4139	1.719	0.9306	1.2584	1.5773	1.1162	2.5602	4.2862	30.5701	7.947	6.2563	4.6275	8.62	25.0682	6.6834	1.8539	1.4674	1.5671	1.5604	1.7315		0.630351	5.1803
19.42	1.5194	1.3232	1.2068	1.8022	11.7228	1.4923	1.4935	1.2051	1.3051	1.4683	1.2815	2.0973	5.0669	27.8518	6.1022	6.1024	5.0103	8.6621	28.5446	6.5242	2.1656	1.7782	1.5805	1.2737	1.6198		0.63424	5.20799
19.5392	1.3038	1.4942	0.9982	1.6244	10.409	1.4425	1.4586	1.3064	1.0267	1.2091	1.6907	2.5459	4.417	26.3286	5.9066	6.5898	6.0921	9.6377	27.6336	6.4344	2.2323	1.6983	1.397	1.2551	1.9097		0.638133	5.12167
19.6583	1.0638	1.1208	0.9981	1.9236	8.5574	1.259	1.6329	1.0939	1.371	1.5941	1.4228	2.8364	5.1919	24.0521	4.8934	6.3464	6.7035	9.0064	27.0968	7.074	1.9742	1.2998	1.6107	1.6561	1.0822		0.642023	4.91445
19.7775	1.1394	1.3393	1.149	1.6841	7.9716	1.552	1.4832	0.9647	1.3099	1.6838	1.0674	2.7489	6.1007	23.5882	4.6787	5.542	6.6233	8.4443	25.5092	6.2855	1.8721	1.5859	1.3489	1.7773	1.3538		0.645916	4.75213
19.8966	1.2687	0.9765	1.3149	1.943	8.233	1.4126	1.5937	1.2494	1.3718	1.5079	1.2312	2.6444	6.9534	25.8644	4.5978	5.7104	6.4676	8.8095	25.6691	5.9129	1.753	1.4131	1.2554	1.6623	1.4237		0.649806	4.88959
20.0157	1.0941	0.893	1.3669	1.8791	7.4003	1.5671	1.2991	1.0638	1.5311	1.3352	1.337	2.3022	6.6433	27.7996	5.0247	7.3185	7.2295	8.0891	25.6826	5.9565	2.112	1.4782	1.2976	1.1486	1.4949		0.653696	4.97376
20.1349	1.7307	1.3602	1.1207	1.9274	7.1927	1.5852	1.2387	1.2118	1.1291	1.3701	1.2161	2.3347	7.7328	29.2039	5.2144	6.8591	7.6395	6.7453	22.4743	6.6772	1.6859	1.2751	1.9141	1.2754	1.1645		0.657589	4.93116
20.254	1.053	1.246	1.0879	1.9555	6.5844	1.5921	1.2883	0.8733	1.4104	1.4851	1.0722	2.3771	6.9487	29.4979	4.5942	5.5744	6.6837	6.2522	22.4542	6.6689	1.6883	1.5034	1.779	1.6523	1.5235		0.661478	4.75384
20.3732	1.532	1.1493	0.9704	1.5633	6.1164	1.6559	1.0278	1.1769	1.6317	1.1845	1.4253	2.7788	7.544	31.2922	4.0428	5.6407	7.0164	6.2634	19.9384	7.4739	1.7226	1.498	1.3826	1.2743	1.3979		0.665371	4.74798
20.4923	1.2061	1.1488	1.0309	1.884	5.8384	1.7096	1.5504	1.2071	1.1651	1.3159	1.5045	2.8435	8.0585	29.8939	5.282	5.9106	5.8307	5.1618	18.9977	8.7089	2.2853	1.7012	1.6952	1.3734	1.3313		0.669261	4.74539
20.6114	1.2031	1.1777	0.983	1.8349	4.8751	1.5191	1.5778	1.2187	1.4818	1.5958	1.5016	2.3205	10.4845	28.3139	4.1848	5.2785	5.3178	5.3175	19.68	8.9538	1.9477	1.2787	1.3139	1.7763	1.3921		0.673151	4.66114
20.7306	1.2449	1.1855	1.2471	2.3774	4.9952	1.1262	1.3889	1.1249	1.6255	1.5652	1.2409	2.6502	12.0714	29.1329	5.0486	5.0959	4.7366	5.0546	18.5124	9.2109	2.446	1.3545	1.4604	1.5643	1.4283		0.677044	4.75555
20.8497	1.1196	0.8565	1.3971	2.4425	4.8624	1.5409	1.2175	1.1369	1.1956	1.6307	1.4165	2.3025	11.9944	28.8764	4.8736	4.4601	4.169	4.8005	18.5828	11.6287	1.8707	1.4279	1.3846	1.6834	1.6358		0.680933	4.74026
20.9689	0.9957	0.8389	1.3607	2.2283	4.4994	1.3593	0.8766	1.1415	1.1364	0.991	1.308	2.1306	13.4414	25.9602	5.5482	3.8826	4.7232	4.6065	17.7126	10.6721	1.9132	1.5946	1.473	1.7033	1.6119		0.684826	4.54837
21.088	1.1187	1.0151	1.0572	2.1914	3.8429	1.3489	1.1413	1.4399	1.8509	1.0593	1.417	2.766	12.4615	24.5427	4.7057	4.6866	5.4503	5.3046	17.4899	10.08	1.7767	1.7559	1.7171	1.3854	1.3679		0.688716	4.51892
21.2071	1.4219	1.21	1.6391	2.0335	3.6495	1.3754	1.3757	1.5216	1.453	1.4981	1.3369	2.649	14.0563	26.0142	4.6705	5.2494	5.2872	6.2833	17.513	10.5033	1.7152	1.3105	1.7672	1.5706	1.5436		0.692606	4.74592
21.3263	1.1365	1.1405	0.9539	1.6889	3.869	1.2948	1.5416	1.2293	1.6326	1.462	1.7185	2.9696	14.0059	25.8656	5.318	4.2095	3.849	5.2456	18.4795	11.4718	2.1233	1.734	1.7321	1.6002	1.4549		0.696499	4.70906
21.4454	0.9035	1.2416	1.4001	2.206	3.3855	1.4679	1.4505	1.2138	1.3392	1.4171	1.7321	2.9016	14.5236	26.8851	4.7646	3.7033	3.9288	5.5282	18.0716	11.885	2.4249	1.9241	1.3787	1.2779	1.3168		0.700388	4.73086
21.5646	1.0825	1.2227	1.2552	2.2742	3.2429	1.1985	2.0777	1.0016	1.4398	1.6055	1.7207	2.9214	14.9328	25.2056	4.782	3.7168	4.4156	5.2813	16.3153	12.2734	2.2615	1.9816	1.8666	1.2001	1.5494		0.704281	4.67299
21.6837	0.6853	0.9028	1.3778	2.1438	3.6908	1.211	1.4586	1.0671	1.4199	1.4213	1.4993	2.9551	16.9695	25.3358	4.1763	4.1273	4.9797	5.4804	14.2001	11.631	2.0705	1.4903	1.9218	1.6957	1.7119		0.708171	4.62492
21.8029	0.9528	0.985	1.4874	2.5374	3.201	1.093	1.4234	1.3641	1.3177	1.2038	1.9766	2.6426	19.1526	25.5566	4.8083	3.9287	4.686	5.6484	14.1281	12.2079	2.6656	1.9222	1.1699	1.3778	1.5539		0.712064	4.75963
21.922	0.9137	1.226	1.0606	2.4318	2.8653	1.1765	1.6935	1.6259	1.5158	1.3901	2.0944	3.1557	17.4975	24.2917	5.2542	4.6832	4.4237	5.1287	16.1576	12.7412	3.1646	1.5783	1.5451	1.5573	1.4012		0.715954	4.82294
22.0411	0.8871	1.2802	1.151	2.8886	3.2521	1.2252	1.7301	2.0038	1.9572	1.2092	2.0073	3.1578	18.2831	23.4221	4.8192	5.7076	4.1788	5.4337	13.9571	12.7077	2.9244	1.556	1.2745	1.4555	1.3634		0.719843	4.79331
22.1603	1.2683	1.0755	1.1674	2.7113	3.4447	1.0784	1.1586	1.7761	1.4989	1.6106	2.3658	3.4611	18.5252	23.3803	5.1506	5.8846	4.4323	5.0607	14.0266	12.4513	2.5639	1.7469	1.7448	1.9233	1.3149		0.723736	4.83288
22.2794	1.2185	1.2699	1.0889	2.9095	3.3689	1.1875	1.2808	1.5515	1.2648	1.3643	1.7034	3.4152	17.5432	23.1464	5.4931	5.7055	4.2803	4.4197	12.2988	11.5457	3.3494	1.8093	1.6173	1.6229	1.6808		0.727626	4.64542
22.3986	1.1032	1.5277	1.5466	4.1871	3.1225	1.1727	1.5257	1.6945	1.6794	1.161	1.6435	4.7433	17.7872	23.0856	5.0494	4.8819	4.906	3.6703	11.8418	10.2651	2.9262	1.8931	1.7094	2.045	1.7705		0.731519	4.67755
22.5177	1.3099	1.7755	1.21	3.6758	3.1496	1.3134	1.5411	1.4184	1.995	1.6393	1.6211	6.1842	19.3924	23.5127	5.6621	4.9468	4.175	3.6062	10.9678	9.0933	3.0004	1.4584	1.2746	1.5411	1.4899		0.735409	4.67816
22.6368	1.0959	1.3083	1.297	3.9034	3.3993	1.1027	1.6192	1.6153	1.7343	1.2601	2.0515	8.1224	19.8719	22.5502	6.1816	4.9561	4.2289	4.0496	9.6621	9.0423	2.6764	1.7837	1.4884	1.7506	1.5077		0.739298	4.73036
22.756	0.96	1.2026	1.6211	3.8763	3.2254	1.1481	1.4784	1.9223	1.8157	1.4098	2.3613	9.5725	18.7105	26.0948	7.6383	4.6628	3.8057	4.1899	10.1613	8.0163	3.1304	1.6305	1.2043	1.341	1.1795		0.743191	4.89435
22.8751	1.0223	1.325	1.1571	4.4825	3.2219	1.3511	1.5281	1.4327	1.8951	1.5575	2.6272	13.3727	20.8465	29.9873	7.4588	4.0846	4.3881	4.6974	8.9355	8.4014	3.818	2.3927	1.4294	1.8115	1.4106		0.747081	5.3854
22.9943	1.1064	0.9442	1.1227	4.1934	3.187	1.7475	1.7224	1.4673	1.6654	1.3903	2.8973	13.5717	20.9337	32.5961	10.0947	3.8497	4.4049	3.9238	8.483	8.9421	3.1771	1.9892	1.3866	2.2384	1.4594		0.750974	5.53977
23.1134	1.0986	1.094	1.215	4.3352	3.1168	1.2251	1.4353	1.6463	1.6815	1.4963	2.7708	16.4647	22.0085	33.4183	9.9362	3.9397	4.9176	4.2919	9.3142	8.0252	3.3994	1.6846	1.2578	1.8353	1.4303		0.754864	5.72154
23.2325	1.1973	1.1199	1.0437	4.641	3.3176	1.6791	2.0667	2.2307	1.4303	1.6037	3.0114	21.0629	25.4409	39.6847	9.7838	4.1899	5.2804	4.2485	9.6525	8.8297	3.3326	1.9265	1.5104	1.5423	1.6119		0.758753	6.45754
23.3517	1.3813	1.0483	1.3437	6.1925	3.1175	1.5167	1.845	2.0544	1.4402	1.4942	2.707	23.7477	25.905	39.6791	10.0709	4.3207	5.7235	4.8583	9.2254	10.3278	3.7633	2.3456	1.7217	1.4913	2.4502		0.762646	6.79085
23.4708	1.5563	1.5158	1.3087	6.002	3.1457	1.3947	1.539	1.9175	1.5192	1.6332	3.3743	25.6513	25.5571	41.9279	10.1687	4.2854	5.4132	4.122	8.5146	11.5122	3.5098	2.2948	1.3057	1.8217	2.5474		0.766536	6.94153
23.59	1.5885	1.3356	1.3912	6.5172	2.8036	1.6391	1.4719	1.598	1.4699	1.3452	3.7151	25.1496	25.5053	44.1568	11.8163	4.7585	5.5793	4.0574	7.6659	11.675	3.9481	2.3223	1.6703	2.0398	2.2043		0.770429	7.09697
23.7091	1.3286	1.2766	1.3591	7.452	3.1997	1.6764	1.2653	1.5683	1.5716	1.7797	2.8688	20.1508	25.7034	45.7577	13.7364	4.3135	6.392	4.2409	7.9027	11.7149	4.2371	2.1507	1.2891	2.0632	2.7392		0.774319	7.10951
23.8283	1.2931	1.7075	1.3049	10.235	2.6897	1.5025	1.6327	1.6364	1.6166	2.039	3.9623	17.1676	24.9292	44.6431	14.4478	5.5219	7.1325	4.7075	7.9706	11.5576	3.5027	1.638	1.178	1.9954	3.7877		0.778212	7.19197
23.9474	1.4305	1.4971	1.6074	11.061	2.4964	1.6347	1.6007	1.6122	2.081	1.7874	3.4665	16.918	23.9872	45.237	13.6798	5.431	7.8276	4.0745	9.0067	10.9084	3.4342	1.4625	1.0937	1.9307	4.2497		0.782101	7.18064
24.0665	1.4036	1.8412	1.5232	10.497	2.6452	1.7901	1.6148	1.8117	1.9309	2.3371	4.3794	17.8493	27.0355	47.4132	16.4545	4.9109	9.5209	3.7834	7.4104	10.3454	3.2245	1.9888	1.0982	2.184	4.7171		0.785991	7.58841
24.1857	1.2805	1.3874	1.3083	9.1986	2.6086	2.0343	1.6911	2.1775	1.7769	2.2513	4.2627	19.1502	33.3683	47.5946	18.4946	5.9418	10.4146	4.1955	8.0198	9.6865	4.7199	2.3867	1.6966	2.4109	4.7668		0.789884	8.11296
24.3048	1.6019	1.3536	1.754	8.4853	3.2042	1.2155	1.6842	2.162	2.0442	2.0171	5.2671	18.2421	38.752	43.2506	18.1841	5.333	11.014	3.7689	7.7012	10.2653	4.1368	1.8595	1.4861	2.1073	4.3502		0.793774	8.04961
24.424	1.649	1.7135	1.7895	8.7058	3.3217	1.7821	1.4535	1.7165	2.3765	2.3079	6.4064	20.9859	42.0258	39.3846	20.036	5.9406	10.9662	4.5226	8.3123	10.1554	4.5029	2.105	1.5725	2.3978	4.077		0.797667	8.40828
24.5431	1.2118	1.891	2.4365	8.251	3.0981	1.574	1.5518	2.1696	2.0325	2.8316	7.4649	23.9563	47.8604	34.1548	24.3407	8.0121	12.3791	3.7339	9.2535	9.7187	4.7648	1.7725	1.915	3.1305	4.5129		0.801557	8.96072
24.6622	1.5597	1.9056	2.0263	9.9224	3.4596	2.0003	1.7724	1.9419	1.7786	3.3124	12.8464	27.6691	47.2985	29.6746	28.8719	8.1218	12.6507	3.4331	9.5646	10.022	4.2168	2.4245	1.713	2.8328	4.5945		0.805446	9.42454
24.7814	1.3718	1.1819	1.7165	10.5235	3.582	1.8821	2.4334	2.0565	2.5049	3.2085	15.3668	31.5757	44.3727	26.3723	29.8668	8.4842	12.3384	3.3256	8.7104	10.2076	4.878	2.7538	1.7587	2.9065	3.8715		0.809339	9.49
24.9005	1.6089	1.4817	2.2541	10.6531	4.1223	2.2526	2.1745	1.5151	2.664	3.1745	17.6729	33.8609	39.0923	26.7598	27.9918	9.7899	13.0797	3.2077	8.3207	9.1285	4.5441	2.173	1.7648	3.5013	4.1374		0.813229	9.47702
25.0197	1.5573	1.6002	2.0317	10.4914	3.8525	1.8588	1.4839	2.215	2.2793	2.8179	20.5132	36.78	30.9794	24.1458	28.9538	10.3839	13.7841	3.1477	7.7906	9.0846	5.1255	2.2742	1.5855	3.7978	4.9755		0.817122	9.34038
25.1388	1.6473	1.7457	2.2496	9.4108	4.3479	2.3434	1.6181	2.1214	2.6224	3.1038	23.3576	40.3517	25.0933	19.8586	30.3277	11.7423	14.1546	3.9256	8.0088	9.6677	5.6968	3.2317	1.4201	3.113	6.9995		0.821012	9.52638
25.258	1.606	1.6544	2.3092	10.5421	4.8988	1.9031	1.9493	1.9427	2.4702	2.2566	23.1994	42.2172	20.0045	16.7428	30.0047	13.4556	17.4225	3.7707	7.6254	9.7005	5.596	2.4873	1.2389	3.7383	10.3267		0.824905	9.56252
25.3771	1.7444	1.9016	2.4562	12.5184	4.3997	2.285	2.0919	1.5466	2.7741	3.3388	21.5045	40.8775	16.4679	14.1084	31.3069	19.2648	17.4275	4.19	8.4303	10.456	5.405	2.9954	1.9064	5.6263	12.4713		0.828794	9.8998
25.4962	1.7427	1.2843	2.615	14.2619	4.5522	2.2265	1.8818	1.7451	3.4145	3.5981	19.8354	40.2156	12.0112	13.7716	32.6535	22.2367	18.4387	4.0089	7.5636	11.1587	5.0544	2.7036	1.8346	6.0354	17.7934		0.832684	10.1055
25.6154	1.6014	2.0836	2.6838	21.4493	4.9917	2.5887	2.4256	2.0115	3.512	3.479	21.2418	33.5382	7.6326	11.137	30.5283	27.7248	22.636	4.113	7.9367	10.8205	5.2203	3.1468	1.2261	5.2907	20.5814		0.836577	10.384
25.7345	1.7166	2.0013	2.5467	26.4068	5.4	2.8723	2.4206	1.6772	3.0803	3.2643	19.2857	27.1127	4.4186	10.1475	28.3148	33.5393	27.2989	4.5364	7.4761	9.2296	4.4473	2.8023	2.0371	5.5175	23.4329		0.840467	10.4393
25.8537	1.6064	2.1536	2.6692	27.3445	5.1122	2.8982	2.5627	1.8029	3.1666	4.2085	17.3847	18.2812	3.0461	8.857	23.2857	40.5338	30.065	5.6591	6.5914	10.0631	5.0892	2.9066	2.041	5.5914	24.1381		0.84436	10.2823
25.9728	2.2508	2.7272	2.9641	27.9186	5.7197	3.0328	2.9584	2.0417	3.0566	3.7083	19.3068	12.3402	2.0639	7.7429	22.0159	44.9347	32.3217	5.6362	7.858	10.3928	5.8709	3.5736	2.0033	5.7297	23.3781		0.848249	10.4619
26.0919	2.5074	3.3099	3.2277	24.0243	6.3681	2.735	3.0187	2.0781	3.7831	4.212	21.7762	8.3284	1.7823	5.1719	21.4569	53.3462	36.5796	5.9949	7.8889	8.3235	8.2331	3.8938	1.9816	6.9302	25.8525		0.852139	10.9122
26.2111	3.085	3.7612	3.4601	24.7952	6.7992	3.0644	3.0774	3.3542	3.6029	5.4355	27.6387	5.6794	2.0822	3.2635	15.2384	54.8225	42.2488	5.8288	6.7649	7.5203	6.8799	3.4345	2.4639	8.9193	29.7474		0.856032	11.3187
26.3302	2.8693	4.1064	3.9861	27.2254	7.5847	3.1995	3.824	4.0315	4.7449	6.5984	29.9407	3.7248	1.5956	2.7674	11.6457	48.087	44.4961	6.8155	6.6676	7.195	8.0627	4.5536	1.9297	10.855	28.7476		0.859922	11.4102
26.4494	3.8672	5.4653	4.0272	32.1821	7.849	3.2644	4.2871	3.9714	5.2374	8.9302	33.4239	2.9188	1.0944	2.1891	10.9972	43.3474	46.4985	8.0865	6.9183	7.976	7.7001	4.893	2.4922	11.5597	29.7432		0.863815	11.9568
26.5685	4.411	6.9438	4.2122	29.491	8.4985	2.9303	4.098	3.743	6.8972	9.6291	35.2783	2.0961	1.0423	1.7812	8.6677	40.435	43.168	8.3513	7.0464	6.7582	7.7297	5.1795	2.6346	15.0489	29.4539		0.867704	11.821
26.6876	5.3708	8.4747	3.8405	26.9107	9.5644	3.6263	3.9235	4.6523	8.2653	13.7059	34.0439	1.5427	0.9891	1.3834	6.9801	34.5427	39.7086	7.9827	6.8352	6.5597	10.8909	6.539	2.7527	16.9068	24.8771		0.871594	11.6348
26.8068	6.0957	8.6626	4.6261	23.7186	8.5539	4.5983	4.516	4.9642	10.4814	17.9422	30.0739	1.2523	0.6992	1.0681	4.8857	25.4122	38.2592	9.4209	8.3123	6.1849	10.0911	6.6432	3.0951	20.5293	23.925		0.875487	11.3605
26.9259	8.2737	10.7648	5.277	22.9596	8.9218	5.1719	4.4934	5.3375	11.9423	25.8473	21.473	1.0516	0.5533	1.0516	3.0137	19.0379	38.5516	10.4758	8.0784	6.128	10.5328	6.9646	2.63	25.5541	21.3054		0.879377	11.4156
27.0451	12.599	13.7058	5.737	21.7758	8.3733	6.6256	6.2627	5.568	12.4066	34.9916	14.9328	0.9158	0.7342	1.329	2.891	14.8232	34.6549	10.0272	7.9963	6.6427	11.4964	7.7107	2.6829	29.4268	21.4462		0.88327	11.8302
27.1642	16.7372	18.1007	6.0148	21.4012	8.5613	6.3576	7.8391	6.3879	12.9821	37.3022	9.4666	0.9737	0.533	1.0988	2.173	10.4411	27.6379	13.0265	7.8255	6.3668	12.895	8.2405	3.5193	35.7365	20.2484		0.887159	12.0747
27.2834	21.3548	21.2799	7.8093	19.1074	7.4071	7.2317	7.2039	6.9687	14.3323	36.5754	5.7147	0.7874	0.4239	1.0473	1.6091	6.5138	19.1088	15.4289	7.8726	5.959	13.6744	7.4624	4.1045	37.4784	20.0228		0.891052	11.8591
27.4025	25.6657	21.2364	11.3618	21.8085	7.8909	7.6125	8.414	7.6632	15.4266	30.5684	4.041	0.5104	0.4486	0.8038	1.451	4.7832	13.2977	19.8419	8.6383	6.3302	16.3871	8.3873	4.4884	38.496	17.6669		0.894942	12.1288
27.5216	28.3501	19.917	11.7962	24.0498	8.5783	9.9844	9.0221	7.3037	18.5989	22.3519	2.952	0.472	0.6251	0.5762	1.1692	3.0973	7.4254	23.4346	8.664	7.1269	16.872	10.1966	6.3005	38.5879	15.4536		0.898832	12.1162
27.6408	28.6675	20.3985	12.1979	25.9467	9.8248	12.7591	9.89	6.7893	19.8117	13.8134	2.1636	0.5159	0.4396	0.4325	0.8407	1.6857	4.1051	24.7145	8.8602	6.6085	15.6734	11.1197	7.4638	39.4716	14.4689		0.902725	11.9465
27.7599	27.8438	21.8313	13.9901	28.1736	9.538	15.5043	14.3124	8.4633	21.0357	9.2165	1.822	0.496	0.3313	0.3588	0.6096	1.0096	2.3666	28.3066	9.5583	7.6574	15.5513	11.2213	10.8585	41.2008	11.4393		0.906614	12.5079
27.8791	28.2625	24.8941	13.4706	27.2283	10.1028	19.7101	15.9979	8.652	21.1643	6.3641	1.1078	0.549	0.3583	0.4791	0.6054	0.9489	1.6049	33.0864	10.2661	8.2724	15.1242	11.9308	16.0489	36.8223	9.7403		0.910507	12.9117
27.9982	29.8449	25.3658	14.3366	26.5696	10.7089	25.3301	22.3129	12.3489	18.9636	5.1853	1.13	0.5211	0.2373	0.5501	0.6197	0.8964	1.0547	35.9495	10.0432	8.4075	16.2666	13.5155	19.7768	31.6725	10.1253		0.914397	13.6693
28.1173	27.595	24.9652	17.5184	27.9868	9.4935	30.0238	25.1787	18.0518	15.261	3.8445	0.8671	0.5554	0.2912	0.5007	0.7749	0.8588	0.8253	36.1866	9.9764	8.5697	18.1267	13.1296	21.921	25.6808	7.6221		0.918287	13.8322
28.2365	22.9013	27.2624	19.9452	28.9382	11.1556	32.3577	27.9656	22.8508	12.2587	2.5835	0.7631	0.3159	0.2825	0.4483	0.397	0.8348	0.7607	36.6106	10.3547	8.8583	17.9835	11.5169	27.7581	23.2987	4.9482		0.92218	14.134
28.3556	17.832	27.0045	23.819	29.4543	10.5299	34.7541	33.2933	28.0014	9.1689	2.137	0.6109	0.2399	0.2409	0.2886	0.3436	0.9507	0.4467	39.1003	11.8348	10.0448	18.9547	12.4	33.0498	19.043	4.8157		0.92607	14.7344
28.4748	10.9489	24.7073	27.3162	25.0635	13.1379	33.1398	39.1305	29.534	6.269	1.8639	0.6103	0.1827	0.1876	0.3199	0.24	0.3954	0.3442	40.3258	11.9341	9.9953	19.0276	10.9638	34.6046	15.1894	4.2878		0.929962	14.3888
28.5939	6.3141	19.9989	27.7497	23.5732	15.6168	33.2187	40.52	31.3578	5.0011	1.3224	0.4313	0.1679	0.1925	0.3024	0.4161	0.4198	0.3911	39.8838	14.2441	11.524	18.8735	11.586	34.6772	12.9542	3.4734		0.933852	14.1684
28.713	3.5448	16.3007	29.6117	24.3107	17.5009	31.8899	42.2517	27.6183	4.5648	1.1754	0.3442	0.3655	0.4043	0.2155	0.3011	0.3563	0.491	37.0438	14.5761	13.9946	16.9468	14.2346	33.0708	11.3929	2.5608		0.937742	13.8027
28.8322	1.9324	11.4942	29.7648	23.2872	18.9381	33.3764	39.7612	26.1678	3.4646	0.9214	0.6005	0.483	0.3152	0.2174	0.1803	0.1563	0.2077	29.3707	17.5382	15.6765	16.851	15.4872	30.774	8.9955	2.3719		0.941635	13.1333
28.9513	1.4243	8.7354	24.2347	22.3063	22.5646	30.143	36.5204	21.157	1.9556	0.5714	0.3304	0.3479	0.3118	0.1249	0.317	0.4214	0.4265	19.6541	22.9626	19.0651	14.4325	16.7887	27.431	7.0557	2.0388		0.945525	12.0528
29.0705	1.2303	5.8226	19.8812	19.949	24.7604	23.0528	27.3948	16.8993	1.9994	0.6812	0.2985	0.285	0.1199	0.1119	0.1109	0.1242	0.1682	13.8336	27.4787	21.1467	15.7627	17.3527	26.9411	6.5193	1.8003		0.949418	10.949
29.1896	1.0417	4.4847	13.8861	18.2825	23.9019	19.1658	23.7745	13.7868	1.1902	0.6104	0.2769	0.1497	0.1727	0.3801	0.2986	0.1061	0.1419	7.4281	31.3052	21.2035	15.946	20.6767	23.2401	5.7387	1.4905		0.953307	9.94718
29.3088	1.2263	3.3582	10.0181	14.7947	24.1771	16.5665	18.6981	10.2351	1.2594	0.4133	0.2234	0.1655	0.3215	0.1853	0.2178	0.1335	0.0413	3.3616	37.7815	18.8782	16.0735	23.8432	22.7171	4.6046	1.351		0.9572	9.22583
29.4279	1.1695	2.5961	7.3568	11.9699	23.9338	16.1955	13.3569	8.0104	0.9472	0.5344	0.3074	0.0479	0.2651	0.1897	0.0328	0.1092	0.1268	1.5735	37.1901	18.1677	16.6998	26.6396	20.7352	4.5188	1.2445		0.96109	8.55674
29.547	0.8042	1.8236	5.0332	10.0402	21.5716	13.2329	12.1676	7.9489	0.7311	0.449	0.2147	0	0.1788	0.1519	0.1733	0.2591	0.2654	0.4468	36.9554	14.9857	17.6932	27.6462	17.7123	3.5638	1.1014		0.96498	7.80601
29.6662	0.707	1.1753	3.0462	8.2033	19.1115	12.2419	10.6105	6.8892	0.8088	0.2382	0.1613	0.1111	0.1901	0.0252	0.0678	0.1625	0.1693	0.3431	37.6765	13.6712	18.4322	28.5079	15.1011	3.3897	0.9376		0.968873	7.27914
29.7853	0.5597	1.3471	2.1317	5.3719	16.689	9.9346	9.2551	5.5564	0.6067	0.2954	0.3251	0.1416	0.116	0.0951	0.0228	0.1718	0.1351	0.2648	36.6805	13.1074	18.7691	30.1328	11.9625	2.9599	0.9544		0.972762	6.70346
29.9045	0.3186	0.83	1.5528	2.9817	13.3593	8.2014	7.8065	3.7119	0.4709	0.2231	0.1522	0.1184	0.058	0.1198	0.203	0.1124	0.0731	0.2195	35.455	14.3431	20.7638	28.8752	10.8817	2.6991	1.0206		0.976655	6.18204
30.0236	0.203	0.4442	1.0443	1.6916	12.1104	7.1946	7.2185	4.5653	0.3751	0.3239	0.2587	0.2044	0.0394	0.1902	0.1899	0.0306	0.071	0.231	33.1759	14.8829	22.7118	27.399	9.4968	1.6056	0.6208		0.980545	5.85116
30.1427	0.1507	0.6208	0.8277	1.8859	8.4089	5.6169	6.345	3.79	0.3012	0.1404	0.2031	0.1178	0.1532	0.1407	0.0819	0.1057	0.2204	0.4398	35.3634	16.8098	24.0974	24.6117	7.6177	1.3492	0.9151		0.984435	5.61258
30.2619	0.3545	0.5004	0.6382	1.7079	6.1437	4.6455	5.6036	2.6528	0.2723	0.0429	0.1072	0.0051	0.2162	0.2183	0.1713	0.1699	0.0949	0.1827	35.098	21.4977	27.0568	24.1753	6.7122	1.6114	0.7305		0.988328	5.62437
30.381	0.3325	0.387	0.4531	1.0177	4.9604	4.8669	5.7625	3.1137	0.4424	0.1579	0.0479	0.0888	0.07	0.2375	0.1342	0.0184	0.0838	0.1844	32.6686	26.997	25.954	23.2091	5.6666	1.4386	0.4349		0.992217	5.54912
30.5002	0.2513	0.1737	0.6112	0.9043	4.3915	4.2964	5.5444	3.0217	0.3071	0.1795	0.0231	0.1398	0.1224	0.0099	0.0504	0.1457	0.0478	0.264	28.9821	30.1239	29.5921	22.2959	4.4856	1.1556	0.4692		0.99611	5.50354
30.6193	0.1062	0.1802	0.3804	0.8193	2.6195	3.573	4.0427	2.0777	0.2948	0.1565	0.0906	0.1103	0.1896	0.0488	0.0968	0.1091	0.0841	0.1517	27.3423	34.0487	34.1028	22.8382	4.6187	1.1712	0.5416		1	5.59179

## Sheet: Image27
X0	Y0	Y1	Y2	Y3	Y4	Y5	Y6	Y7	Y8	Y9	Y10	Y11	Y12	Y13	Y14	Y15	Y16	Y17	Y18	Y19	Y20	Y21	Y22	Y23	Y24	Y25	Y26	Y27	Y28		Ap-Ba	Average int.
0	5.1715	8.6771	7.4179	8.0992	5.0057	14.8747	24.1766	18.5998	15.3409	11.7415	11.0167	5.5136	7.3628	12.9771	26.998	22.7467	14.9325	9.805	9.3332	9.6208	8.931	10.73	12.725	17.1165	21.9042	18.6662	23.692	19.591	21.2649		0	13.9321
0.1191	6.0866	9.4522	7.8078	9.0118	6.4924	17.2391	26.8762	18.3088	14.5512	16.0609	13.6291	7.1321	7.2872	12.5271	30.2906	23.1977	18.2942	11.2001	9.6315	12.8442	11.869	12.437	13.481	20.9128	23.0222	20.4539	25.821	22.779	22.8429		0.00478304	15.5703
0.2383	6.9114	11.0016	8.7062	10.3156	6.7169	16.7821	26.7053	19.1348	15.8408	20.2682	17.8784	7.934	7.8931	14.3658	34.3979	23.8477	20.9165	13.9717	12.0769	15.9879	15.69	17.025	14.91	21.5429	29.6872	24.7408	28.684	22.525	20.9314		0.00957009	17.4962
0.3574	8.128	11.8308	11.0073	13.8561	8.0458	20.3115	26.1737	19.778	17.0958	25.5674	22.5869	9.4718	9.8021	16.7044	36.8401	23.9822	22.1277	15.4757	14.7448	21.5454	20.484	21.281	17.337	24.9617	31.1858	28.6407	30.944	25.656	20.8309		0.0143531	19.8757
0.4766	10.3088	14.8276	11.7215	14.4262	9.6339	20.6468	24.707	19.8787	17.028	28.5802	28.4212	10.8271	11.9746	17.733	37.2522	24.7223	25.0947	19.6318	17.5176	26.7686	28.851	26.644	20.15	29.9529	33.2028	34.2971	35.072	33.666	23.9112		0.0191402	22.6706
0.5957	11.239	14.8862	12.4384	14.3116	10.8242	20.8541	22.6294	21.7621	22.0475	32.3255	36.5181	14.1472	15.8719	21.5863	38.0967	27.2862	29.6894	23.2719	21.5853	34.0941	43.712	33.247	27.939	36.9419	40.2449	42.335	40.611	41.983	26.7049		0.0239232	26.8684
0.7148	13.9404	18.2029	14.8888	15.99	12.0766	23.7526	25.5893	23.2974	23.6012	37.7232	41.316	19.3856	21.6278	25.2841	40.6619	29.4431	31.7426	28.4866	26.2997	44.5604	54.188	44.471	36.479	45.875	43.4936	51.7331	47.717	47.265	30.1803		0.0287063	31.699
0.834	18.2371	21.1628	17.4244	17.8381	13.714	22.4195	28.3906	22.2163	27.3157	41.2714	47.7671	26.9405	29.6096	27.7997	45.4731	31.634	34.8218	34.6133	30.8356	56.8313	68.523	54.808	47.254	57.7372	51.7042	62.3567	53.85	51.247	36.5037		0.0334933	37.2517
0.9531	21.8881	22.5253	18.481	18.0997	14.7282	24.2756	29.6276	22.1225	30.3741	45.6108	54.0454	38.3956	41.6899	32.2203	44.5524	32.9444	37.8115	38.6381	38.1754	63.7461	84.018	69.144	59.26	66.8367	59.6894	70.8075	65.226	63.69	42.0681		0.0382763	43.1273
1.0723	24.8907	22.2403	16.9052	20.3087	16.5152	25.6923	29.5219	23.3678	32.6465	49.8409	53.5008	50.1215	49.4942	39.9485	44.8881	35.0668	44.4081	44.8489	46.6941	72.2041	96.882	79.39	73.681	75.9297	64.8813	79.1648	76.563	72.235	48.281		0.0430634	48.6246
1.1914	31.4264	25.0926	19.5056	21.5214	19.0846	28.2581	28.2395	22.782	34.1013	47.7868	50.1593	60.7958	59.4393	45.826	47.009	35.0413	48.8998	49.8574	51.4512	76.566	105.806	93.833	86.504	82.9972	70.5217	87.0232	89.518	79.534	50.605		0.0478464	53.4202
1.3106	36.8372	27.9658	19.5985	22.7647	19.5474	27.3728	27.8289	22.1078	37.7472	46.3041	45.3013	67.2307	64.3981	48.9537	49.465	38.7037	57.4635	56.0181	55.5515	80.1507	101.269	106.037	94.94	86.0193	76.0613	94.337	101.667	87.619	58.6155		0.0526335	57.1681
1.4297	43.554	26.2405	20.4552	24.1265	24.2522	25.4532	28.7579	21.2304	37.9641	44.4615	36.6684	67.1557	64.4453	54.3243	49.049	41.9061	57.5089	57.1036	57.9195	73.1515	96.922	107.319	103.854	89.1775	81.9426	94.7959	113.646	95.839	64.5032		0.0574165	58.7492
1.5488	45.0082	27.2377	21.5334	22.8179	26.3483	24.214	28.872	20.1351	40.5558	40.6723	29.7132	60.5441	60.1964	55.9839	49.2001	46.6891	61.0229	62.6436	53.0476	67.3993	84.564	109.493	106.153	84.2605	84.3214	90.5106	121.577	103.927	71.7464		0.0621996	58.6341
1.668	48.3315	28.3419	20.2238	22.6363	30.0468	24.0144	24.3252	20.8636	39.2109	34.9364	20.1012	54.6357	48.5268	54.6188	51.5913	48.8619	67.258	64.3572	46.3356	57.9408	64.459	100.985	97.195	82.9168	78.6693	85.7176	123.429	105.709	74.5815		0.0669866	55.8904
1.7871	49.7459	26.6666	20.7938	22.4473	32.6568	24.1815	25.0724	21.6301	40.1349	33.0459	16.5749	44.903	35.7491	51.9529	49.1783	47.7078	65.0094	61.4272	40.4734	45.8561	49.271	81.356	75.707	72.8267	72.0122	75.9323	121.338	106.905	74.984		0.0717696	51.2255
1.9063	50.2701	26.9795	22.0352	23.8581	35.9282	26.5207	23.5075	21.5001	40.3957	26.8646	11.1305	29.721	28.3284	46.645	44.333	47.3103	58.135	55.0308	36.4098	33.7129	35.068	62.019	56.69	64.317	57.2369	60.6894	108.179	102.04	76.1393		0.0765567	45.2067
2.0254	48.8417	24.8838	22.623	20.8652	35.2715	24.2827	20.6695	22.6304	38.3766	21.7757	8.9337	21.3573	21.3373	38.1075	40.8323	44.8397	55.6378	48.5134	31.4586	25.9394	27.647	45.207	37.36	52.5889	40.2375	45.9341	91.061	96.194	71.6321		0.0813397	38.7944
2.1445	44.3333	23.957	21.3405	20.4903	39.4919	21.5922	20.6354	21.4946	36.1331	18.1726	6.6009	16.8283	16.203	31.1997	32.539	41.3903	44.819	39.3775	27.7811	20.7935	18.882	29.012	25.501	42.9784	26.0513	32.7332	72.75	77.707	62.939		0.0861228	32.1975
2.2637	40.4512	22.6197	20.9414	18.9373	39.5212	22.3266	18.7275	19.4621	34.5413	14.552	4.745	14.5931	13.7602	24.7604	26.0152	35.0061	38.176	30.0956	23.6833	16.7587	13.08	19.245	18.974	34.0428	19.7848	24.758	50.48	62.573	52.1263		0.0909098	26.7151
2.3828	34.9878	20.376	21.2049	19.4571	41.827	21.3443	18.784	18.4139	31.0598	12.5277	3.6323	11.8336	11.844	17.6898	20.6903	27.4808	33.2179	21.306	20.3221	15.3226	10.015	13.083	13.289	26.4954	15.2027	19.001	36.012	51.049	42.2642		0.0956929	22.4046
2.502	27.9713	17.2674	21.5581	17.9188	38.8985	18.2952	16.2598	20.3021	28.2711	10.3182	2.9638	8.9454	9.7638	13.8385	15.4306	22.354	25.7597	15.3968	17.0217	12.3415	8.13	10.869	10.279	20.9247	13.2654	15.5107	27.638	39.374	33.7347		0.10048	18.6414
2.6211	23.9745	15.6789	16.8146	14.1155	38.7306	17.7869	14.9086	22.4944	23.6819	8.8513	2.613	7.2237	7.7477	10.2055	12.3247	16.8319	19.5758	11.7619	16.2554	11.2491	6.957	9.352	8.471	19.7492	11.997	13.1242	21.927	29.832	27.9616		0.105263	15.9378
2.7402	20.5538	14.0511	14.7815	12.6625	33.2739	19.2012	14.012	21.488	20.8355	7.418	2.6027	5.9257	5.4783	7.5005	10.6916	12.0586	14.778	10.0407	13.2832	9.0803	6.116	6.322	8.09	18.4264	9.2404	9.8531	15.531	24.214	24.7746		0.110046	13.5271
2.8594	16.4857	12.2064	14.8002	11.4062	29.7656	20.0706	12.658	21.7554	18.8068	7.2938	2.0748	3.2414	4.0621	5.1957	10.0688	8.7814	11.3026	7.6838	12.6991	7.1789	4.873	5.478	5.786	13.8403	7.8731	8.2109	13.029	20.98	18.331		0.114833	11.5841
2.9785	12.6778	11.6333	13.1558	10.8719	25.2665	19.4533	12.7652	21.079	17.4341	6.0985	1.6464	3.1197	2.9839	4.27	8.7139	7.3582	9.4893	7.5357	10.8138	6.2144	4.928	5.281	4.764	11.1867	7.7368	6.4363	10.081	17.923	17.8913		0.119616	10.3038
3.0977	9.8758	10.6809	11.9673	9.7127	20.3776	18.5523	12.5637	24.586	13.9947	5.1502	1.6832	2.318	2.514	3.4067	9.411	7.5843	9.8889	7.2656	8.0823	4.9426	4.527	4.499	4.158	11.8517	6.4455	6.2349	8.861	13.183	16.0936		0.124403	9.32453
3.2168	7.6942	10.1143	10.9007	9.9757	16.6987	19.6445	10.0297	24.645	11.2734	3.6916	1.9592	2.5055	2.6843	3.1999	8.1377	7.5886	11.3246	6.7222	7.254	4.3081	2.755	3.801	3.177	11.0402	5.7773	6.0911	7.795	10.552	12.9893		0.129186	8.42517
3.336	6.3459	8.6211	9.7928	8.7238	15.7104	17.8815	12.481	25.3772	8.5677	3.4308	1.7461	1.896	2.0565	3.1215	6.572	8.5795	11.0113	7.1592	6.5135	4.1746	3.08	2.977	3.142	11.3511	5.5352	5.7385	7.048	10.823	10.5309		0.133973	7.93062
3.4551	5.9587	7.43	7.5206	8.964	12.8535	17.9395	12.1585	23.5764	7.1509	2.9314	1.522	2.0981	2.323	3.3741	6.3097	9.8952	9.8573	6.7034	5.1811	3.7224	2.587	2.196	2.993	11.1431	4.8012	5.3025	5.736	8.484	9.5827		0.138756	7.25156
3.5742	4.922	6.6393	7.3935	6.6543	10.8024	19.0557	11.9508	23.1955	5.4018	2.2791	1.6431	1.9967	1.6875	2.5388	6.2645	7.9334	9.3161	7.2977	5.3978	2.9446	1.74	2.561	3.011	10.7835	4.5025	4.3645	5.695	7.375	9.7324		0.143539	6.72688
3.6934	4.3394	5.6948	6.9684	6.7445	10.7786	19.2613	11.1224	26.727	4.8395	2.2887	1.7835	2.2092	2.2887	2.6668	6.6078	6.8181	8.732	6.1725	4.0744	2.7471	2.191	2.053	2.383	9.5173	4.3678	4.0659	4.854	7.106	7.5513		0.148326	6.44669
3.8125	4.2607	5.9057	5.8317	6.6014	10.0459	19.1511	13.0303	24.8824	4.8901	2.2728	1.5601	1.8447	1.9809	2.5327	5.5993	5.0158	8.2231	6.3414	4.1402	2.3119	1.975	2.073	2.177	9.9557	4.1457	3.9714	4.434	6.642	6.2334		0.153109	6.13894
3.9317	3.9957	5.5795	6.1346	6.0422	9.049	19.375	11.9784	25.0318	4.3156	2.1719	1.4234	1.9818	1.5639	3.0146	5.7774	4.611	8.3799	5.3529	3.7095	2.5185	1.762	2.266	2.155	9.9115	3.691	3.7005	4.799	5.511	5.445		0.157896	5.90509
4.0508	3.6114	4.5359	6.0652	5.0613	9.3323	20.6926	12.0842	23.7424	3.8661	2.66	1.4087	1.9256	1.8191	2.9143	5.7739	4.426	8.0059	5.224	2.2699	2.1539	1.65	2.103	2.454	10.3228	3.0835	3.4857	4.024	5.41	5.3966		0.162679	5.70698
4.1699	3.9893	4.5598	5.0186	5.4793	10.0653	17.9306	12.596	24.2186	4.5034	1.8086	1.2446	1.5884	1.6678	2.657	5.7901	4.1904	8.4752	4.4335	2.2479	2.121	1.477	1.935	2.731	11.5149	3.2227	3.069	3.594	4.101	5.816		0.167463	5.58779
4.2891	3.6988	4.0029	4.9117	4.9495	9.4256	17.7066	12.3471	23.0611	3.0641	1.5721	1.0575	1.5164	1.4834	2.9112	5.5972	3.8225	9.0484	3.5097	2.2787	1.9176	1.557	1.68	2.281	11.6829	3.0036	2.1318	3.43	3.499	4.6655		0.17225	5.23493
4.4082	3.3429	3.4842	4.7	4.7036	10.0491	18.4075	13.806	20.9288	3.1979	1.8219	1.7594	1.4131	1.6145	2.6381	6.0788	4.2307	8.3198	3.7199	2.0028	1.7159	1.443	1.882	1.763	11.4341	2.7517	2.1264	2.697	3.966	3.9463		0.177033	5.1705
4.5274	2.9254	3.427	4.186	4.6038	9.9317	17.6347	13.0286	19.6739	2.9281	1.9287	1.6317	1.3326	1.6831	2.4859	5.4353	3.9909	6.5568	2.9172	1.887	1.6191	1.414	1.587	2.439	11.981	2.2528	2.7524	2.403	3.371	3.6161		0.18182	4.88358
4.6465	2.8417	3.7914	3.8786	4.6069	9.1716	16.3342	13.8365	18.2423	2.5823	1.8137	1.1412	1.4575	1.7659	2.5471	5.8482	3.2136	6.7226	3.2306	1.9322	1.8079	1.604	1.383	1.629	11.4723	2.3879	3.0067	2.857	3.169	4.0132		0.186603	4.76856
4.7657	2.5498	3.6851	3.5136	4.5879	8.2949	15.1203	13.3576	17.9899	2.2211	1.7714	1.0603	1.3616	1.3077	2.4645	6.225	4.0761	5.3206	2.9598	2.2063	1.4575	1.39	1.829	1.388	10.726	2.2869	2.4449	3.373	2.74	4.2553		0.19139	4.55049
4.8848	2.1119	3.1264	3.4559	4.1138	7.4933	14.6392	13.1469	15.8627	2.8184	1.5222	1.2281	1.0349	1.4779	2.4472	5.0822	3.2746	5.4156	3.3689	1.6117	1.4554	1.658	1.458	1.83	9.2169	2.2509	1.9518	2.448	2.862	3.4776		0.196173	4.20139
5.0039	2.1436	3.0333	3.1065	4.1274	7.7928	12.2471	12.0041	12.5394	2.7348	1.3358	1.0074	1.5311	1.2839	3.0454	5.0185	2.5108	5.2229	2.7488	1.672	1.7138	1.558	1.791	2.034	9.4261	1.9483	1.7786	2.486	3.132	4.0127		0.200956	3.96504
5.1231	2.2661	2.9734	3.2144	3.7988	7.1014	11.4578	10.791	11.0932	2.8355	1.3516	0.925	1.2914	1.0434	2.8945	5.6246	2.858	5.3032	2.024	2.1132	1.3888	1.586	1.617	1.624	11.5988	2.2327	2.0131	2.582	2.755	3.4964		0.205743	3.85704
5.2422	2.1613	2.294	2.896	3.8273	7.8471	9.4017	8.9674	9.6859	2.5287	1.438	1.1159	1.2775	1.0891	3.0179	5.7241	3.2833	5.7023	2.5125	1.607	1.3818	1.325	1.658	1.555	10.4291	1.804	1.8365	1.941	2.764	3.6383		0.210526	3.61068
5.3614	1.6743	1.989	3.0108	3.9606	6.3081	8.2766	7.7355	8.8251	3.1378	1.3947	1.1651	1.3724	1.3721	2.5602	4.2318	3.6259	5.6895	2.9845	1.2771	1.4043	1.216	1.41	1.358	10.2676	2.0928	1.795	1.849	2.243	3.128		0.215313	3.35706
5.4805	1.511	1.8374	2.8491	4.2732	5.1682	6.3924	6.9672	7.3659	2.7355	1.203	1.1882	1.3405	1.1806	1.9848	4.0087	3.7571	5.4262	2.1498	1.3139	1.4562	1.376	1.599	1.156	10.2936	2.1515	1.3601	1.841	2.342	2.7526		0.220096	3.0683
5.5996	1.4002	2.0279	2.6245	4.0692	4.8905	5.9102	6.8539	6.5561	2.3876	1.1829	1.4503	1.317	1.2488	1.9512	5.097	3.0768	5.4135	2.3145	1.5563	1.2851	1.359	2.104	1.639	9.1767	2.2064	1.3277	1.786	2.822	2.733		0.224879	3.02646
5.7188	1.157	1.9583	2.4594	4.0498	5.1501	5.9425	5.7654	5.7199	2.5279	0.8942	1.0451	1.0623	1.335	1.8556	4.7558	2.9082	5.347	2.1087	1.3201	1.4087	1.322	1.619	2.064	9.412	2.2414	1.7326	1.528	2.336	3.189		0.229666	2.90397
5.8379	1.5717	1.9233	2.3537	3.0817	4.2894	6.2059	4.2248	6.1713	2.5355	1.2761	1.4559	1.2701	1.3449	1.9884	3.7903	2.4484	4.3195	1.87	1.3605	1.1029	1.328	1.22	1.499	8.845	1.8846	1.9096	1.805	2.568	3.2194		0.234449	2.71941
5.9571	1.49	1.8579	2.2139	2.7949	3.5003	5.6364	4.1782	6.5354	2.4556	1.6379	1.139	1.0741	0.982	2.1289	2.8793	2.7926	4.8734	2.6648	1.5477	1.0855	1.006	1.311	1.489	10.0587	1.9284	1.3303	1.432	2.363	2.8409		0.239236	2.663
6.0762	1.2652	1.7397	2.4374	3.0094	3.1699	4.5919	4.2492	4.9024	2.7829	1.2668	1.0557	1.1228	1.4438	2.0073	2.5002	2.8271	5.0162	2.2925	1.4164	1.3359	1.268	1.166	1.336	9.9304	1.4627	1.6642	1.391	2.27	2.5121		0.244019	2.53218
6.1953	1.4184	1.3744	2.3333	3.2833	3.3141	4.3404	2.9437	3.7694	3.9264	1.2197	0.9742	1.1147	1.1934	2.0368	2.3637	2.7778	5.4597	1.7198	1.5863	0.9008	1.552	1.293	1.193	9.3613	1.6796	1.9332	1.666	2.442	2.5772		0.248802	2.47406
6.3145	1.1268	1.8101	2.1359	2.882	3.5571	3.7794	2.5505	3.5498	2.7326	1.4343	0.8353	1.2053	1.1709	1.9328	2.8361	3.3882	5.5539	1.8292	1.6965	1.1658	1.145	1.223	1.731	8.9931	2.3157	1.6735	1.614	1.845	2.8187		0.253589	2.43212
6.4336	1.2735	1.961	2.2254	2.5304	2.7088	3.8195	2.9058	3.1931	2.5062	1.079	1.0686	1.4424	1.1816	2.2432	2.7028	2.9255	5.2663	2.136	1.1635	1.0344	1.503	1.31	1.373	10.5999	2.2182	1.9035	1.865	1.84	2.325		0.258372	2.4243
6.5528	1.2582	1.5362	1.6838	2.3527	2.2294	3.9686	2.6523	2.8652	3.1345	1.1951	0.618	1.3812	0.9657	1.813	3.3024	2.6761	3.7382	2.2576	1.1893	1.1279	1.257	1.222	1.101	9.5645	2.0363	1.6856	1.73	1.5	2.5555		0.263159	2.22749
6.6719	1.2722	1.5827	1.4186	1.795	2.6284	4.0246	2.8358	2.7473	2.817	1.0718	0.733	1.0044	1.1175	1.5372	2.5318	2.4506	3.2148	2.5436	1.2769	0.9179	1.197	1.855	1.571	11.0958	2.2549	2.4076	1.528	1.487	2.4547		0.267942	2.25421
6.7911	1.4052	1.1344	1.6189	1.6886	2.402	4.3674	2.4781	2.4602	2.5762	1.1176	0.9671	0.978	1.1004	2.0836	2.4273	2.9631	4.5695	2.659	1.5622	1.2814	1.404	1.935	2.117	11.2656	1.9219	1.9867	1.55	1.661	2.5798		0.272729	2.35383
6.9102	1.3897	1.5965	1.8195	1.5498	2.4188	4.2159	2.4958	2.8361	2.4963	1.4391	1.2199	0.8592	1.148	1.7025	3.3579	2.8029	5.299	1.8663	1.3842	1.1754	1.372	1.82	1.687	11.1749	1.9719	1.8654	1.471	1.803	2.4976		0.277512	2.37019
7.0293	1.0169	1.8575	1.3956	1.3049	2.2028	4.0123	2.0695	2.6553	2.5609	1.4574	1.1875	1.0746	1.1946	1.9963	3.1139	2.6271	4.9542	2.2198	1.0284	1.2364	1.45	1.635	2.044	10.6196	2.2109	1.9797	1.529	1.667	2.1466		0.282296	2.2913
7.1485	1.9299	1.5561	1.2944	1.6422	2.1305	4.6423	2.2043	2.0605	2.6222	1.0939	0.9991	0.9425	1.2475	2.0692	3.3882	2.4859	5.9178	1.9141	0.8872	1.2673	1.422	1.083	1.706	10.0877	2.3187	1.5743	1.48	1.529	2.1407		0.287083	2.26333
7.2676	1.4636	1.1861	1.7155	1.5813	2.4473	4.6907	1.7975	2.64	2.7802	1.0611	1.0383	0.8464	1.0825	2.2021	3.7471	2.5856	5.7813	1.9684	1.1402	1.9124	1.165	1.123	1.588	11.4942	2.9992	1.5396	1.405	1.293	2.1973		0.291866	2.3611
7.3868	1.2966	1.0855	1.4075	1.4802	2.4128	4.9569	2.0814	2.4807	2.7733	1.0955	0.9457	0.9572	1.1727	1.658	4.065	2.121	5.8059	2.4117	0.9135	1.3557	1.117	1.367	1.056	11.5647	2.7196	1.2575	1.51	1.651	1.9925		0.296653	2.30042
7.5059	1.3202	1.4813	1.1874	1.3332	2.2485	3.8783	2.5761	2.3272	2.1187	1.5233	1.4427	0.927	1.5579	1.9056	4.6577	2.1165	7.6801	3.051	1.2153	1.6041	1.528	1.075	1.364	12.3652	2.6892	1.3603	1.213	1.095	1.8525		0.301436	2.43773
7.625	1.0453	1.1875	1.2334	1.4039	2.2763	4.0159	2.2033	2.6507	1.9625	0.7408	0.926	0.9406	1.3262	1.7412	5.5957	2.2845	9.0405	3.02	1.29	1.4809	1.584	1.036	1.505	14.4982	2.5428	1.2476	1.589	1.268	1.6813		0.306219	2.52818
7.7442	1.394	1.3901	1.0355	1.4389	2.256	3.2936	1.6172	2.814	2.5013	0.797	0.8706	1.2783	1.214	1.5483	7.0639	1.9384	9.3768	2.7928	1.3401	1.5888	1.394	1.116	1.904	15.3829	2.4649	1.5741	1.723	1.69	1.4167		0.311006	2.62811
7.8633	1.4093	1.1187	1.024	1.3787	2.2767	3.5045	1.5351	1.9788	2.0579	0.7924	0.8703	0.8859	1.0636	1.926	8.8886	2.0985	9.3773	3.9162	1.3628	1.6767	1.382	1.5	1.484	15.5178	2.5836	1.2846	1.76	1.524	1.8577		0.315789	2.69089
7.9825	1.5065	1.1814	0.9979	1.1856	2.3195	4.4617	1.6001	2.1618	2.2665	0.9566	1.1031	1.0189	1.1398	2.4209	9.2898	2.2132	10.7757	3.5844	1.4155	1.4805	1.049	1.686	1.101	15.4187	2.8468	1.6339	1.693	1.494	1.9268		0.320576	2.82512
8.1016	1.3167	1.5115	1.126	1.404	2.4083	5.0734	2.0044	2.1553	1.961	1.1541	0.8914	0.8874	1.1887	1.7075	10.2194	2.5752	9.5629	4	1.1859	1.7146	1.516	1.492	1.636	16.1703	2.5085	1.6992	1.366	1.854	1.691		0.325359	2.89589
8.2207	1.0256	1.5191	1.4323	1.0836	2.0248	5.4423	1.424	2.3137	2.586	1.0784	0.9428	1.0883	0.9801	2.1215	12.5462	2.7422	10.3104	4.9087	1.1312	1.3691	1.936	1.451	1.626	17.6162	2.0531	1.6421	1.316	2.058	1.5955		0.330142	3.08152
8.3399	1.2411	1.7696	1.4765	1.1549	2.2534	4.6808	1.7573	2.2002	2.4731	0.8712	1.2743	1.6373	1.263	1.9963	13.8357	2.6601	10.7852	5.6472	1.3992	1.4534	1.258	1.047	1.735	17.6195	2.9796	1.3202	1.279	1.492	1.5635		0.334929	3.17668
8.459	1.0892	1.0714	1.1921	1.4591	2.4058	5.7271	1.074	2.2023	2.6613	0.985	1.0523	1.2847	1.2231	1.8742	14.9409	2.507	12.1654	5.9768	1.5054	1.5334	1.203	1.42	1.731	19.7687	2.4938	1.4709	1.346	1.185	1.7072		0.339712	3.31918
8.5782	1.3106	1.3338	1.6041	1.1779	2.4758	6.6434	1.2215	2.4197	2.5364	1.4375	1.1034	1.0101	1.1036	1.7931	14.9784	3.064	11.839	6.9348	1.9128	1.6823	1.457	1.299	1.836	18.5648	2.1621	1.149	1.571	1.295	1.9418		0.344499	3.40889
8.6973	1.1177	0.9802	1.1536	1.2839	2.1602	6.6176	1.3203	2.3175	2.4681	1.3656	0.9339	0.9748	1.0485	2.4579	13.0541	2.933	12.6406	7.072	1.6934	1.5679	1.366	1.437	2.036	20.5898	2.2741	1.3267	1.382	1.233	1.6875		0.349282	3.39631
8.8165	1.5066	0.9403	0.9774	1.3421	1.8562	7.0671	1.1662	2.4209	2.7856	1.1769	1.1925	1.2061	1.1563	2.453	11.2267	2.5308	12.5326	5.7126	1.3161	1.5616	1.264	1.143	1.266	22.0999	2.0437	1.6274	1.386	1.363	1.6567		0.354069	3.30956
8.9356	1.1978	1.1538	0.9661	1.4305	2.096	8.1103	1.3441	2.2768	3.5786	0.7873	0.9593	1.0067	1.0353	2.5987	10.1201	2.5354	15.3983	7.6604	1.3579	1.2779	1.363	1.158	1.315	21.0824	2.1078	1.319	1.439	2.102	1.6405		0.358852	3.46269
9.0547	1.6291	1.4832	1.1325	1.5736	2.0914	8.5577	1.5025	2.222	4.0079	0.841	1.192	1.2536	1.3012	2.4955	10.0908	2.643	15.9074	8.8268	1.522	1.8375	1.673	1.131	1.484	21.3073	1.8918	1.1531	1.314	1.705	1.3224		0.363635	3.62387
9.1739	1.1657	1.0221	1.1383	1.3429	1.842	9.6304	1.6788	2.4079	3.8641	1.13	1.2319	1.1804	1.4895	2.5453	9.9255	3.369	18.7502	9.7416	1.8025	1.656	1.246	1.074	1.356	22.1737	2.2143	1.0431	1.178	1.556	1.5306		0.368422	3.80296
9.293	1.271	1.2409	1.1278	1.5654	2.0712	9.4708	1.5892	2.1017	3.661	1.3139	1.4407	1.2368	1.7403	3.5359	10.4506	4.1702	20.3649	9.9441	1.4548	1.161	1.17	1.142	1.496	19.951	2.0823	1.1386	1.235	1.415	1.3975		0.373205	3.85999
9.4122	1.2949	1.0779	1.2125	1.1581	2.4304	9.9773	1.2963	2.7625	4.0223	1.205	0.9529	1.2009	1.7367	3.264	10.652	3.5027	21.3746	8.7315	1.4895	1.6711	1.508	1.22	1.484	20.2416	1.9544	1.3939	1.267	1.468	1.2292		0.377992	3.88894
9.5313	1.1381	1.1631	1.1639	0.8169	2.6247	9.2079	1.9164	2.3698	3.2308	0.9018	0.9238	1.1715	1.7426	3.1961	11.2088	3.7888	19.2943	9.4078	1.6368	1.8582	1.258	0.989	1.315	22.6589	2.194	1.4007	1.144	1.238	1.2082		0.382775	3.86786
9.6504	1.1868	0.8572	1.0205	1.5942	3.2826	8.5439	1.5395	2.3564	2.9908	0.9502	1.1083	1.0965	1.6298	3.5772	11.3765	3.8665	17.1276	9.8317	1.1454	1.6231	1.35	1.082	1.427	22.1561	2.2598	1.4594	1.144	1.655	1.1184		0.387558	3.80539
9.7696	1.1792	1.2236	1.556	1.7276	2.222	8.5314	1.5424	2.2714	3.1092	0.8508	1.0815	0.8041	1.5374	4.0973	12.6604	3.5734	17.241	10.6757	1.5038	1.1911	1.304	1.311	1.812	22.588	1.9072	1.4022	1.209	1.355	1.8966		0.392346	3.90911
9.8887	1.0485	1.0992	1.3088	1.1853	2.1485	9.9117	1.5891	3.0417	3.0064	1.1261	0.9634	1.0582	1.5632	4.8524	12.2006	3.2126	16.3132	9.2637	1.5656	1.4935	1.439	1.279	1.361	22.549	1.6122	1.6117	1.245	1.276	1.9012		0.397129	3.86986
10.0079	1.1953	1.195	0.9336	1.4569	2.913	9.6277	1.7241	2.9708	2.5809	1.3339	0.5892	1.0211	1.4527	5.3364	12.0831	3.2629	18.2867	9.1763	1.1457	1.184	1.747	1.101	1.354	21.8031	1.5747	1.6472	1.556	1.462	1.6458		0.401916	3.90897
10.127	1.093	1.108	0.9133	0.9579	2.4495	10.2562	1.6963	3.5725	2.8307	1.2361	0.8416	0.9724	1.4584	5.6618	11.1583	2.606	17.9465	7.9904	1.4463	0.9958	2.01	1.205	1.381	21.382	1.9723	1.5708	1.337	1.733	1.2914		0.406699	3.83012
10.2462	0.9545	1.3085	1.2173	1.6831	2.3267	9.7152	1.48	4.4806	2.6481	1.16	0.9428	1.3374	1.0186	5.3992	8.3971	3.0104	17.6838	7.6304	1.3947	1.3743	1.56	1.228	1.432	20.3987	2.3775	1.4903	1.422	1.538	1.5969		0.411486	3.73124
10.3653	1.0465	1.3155	0.9744	1.7277	2.2045	8.9621	1.6498	6.0196	2.7361	1.1274	0.8442	1.1424	1.7418	7.045	8.668	3.4167	15.1701	5.4812	1.1909	1.6411	1.449	1.277	1.527	19.681	2.1159	1.0925	1.048	0.909	1.6277		0.416269	3.6149
10.4844	1.1867	1.2102	1.2331	1.1882	2.5083	10.8767	1.9089	5.9654	1.8822	1.1981	0.8347	1.2662	1.8346	5.9611	8.7802	3.3264	13.2224	5.8515	1.1696	1.0416	1.295	1.301	1.522	21.6223	2.2925	1.5931	1.297	1.384	1.9598		0.421052	3.67975
10.6036	1.5144	1.2164	1.1115	1.0637	2.2686	12.6074	1.7681	7.5526	2.1395	1.0965	1.2238	1.3627	1.911	6.0957	7.3303	4.1658	12.9054	6.0095	1.1511	1.2448	1.386	1.685	1.212	21.5456	2.1905	1.3328	1.342	1.286	1.6478		0.425839	3.77126
10.7227	1.1503	1.1092	1.2926	1.2464	2.3555	15.186	2.1448	9.0502	2.1789	1.0344	0.7825	1.3116	1.906	6.3287	7.3708	5.1797	12.7562	5.2228	1.4029	1.412	1.624	1.743	1.117	19.9662	2.8118	1.2555	1.8	1.112	1.4151		0.430622	3.90573
10.8419	0.9233	0.6198	0.8444	1.1819	2.4316	18.1303	2.152	9.1016	2.1917	1.3476	0.8598	1.0358	1.7437	8.4004	7.5985	6.2113	13.6843	4.1196	1.6011	1.5709	1.6	1.713	1.088	19.2247	2.6973	1.3879	1.396	1.326	1.8968		0.435409	4.0717
10.961	0.9716	0.9239	0.9641	1.0971	1.9222	20.3807	2.4781	9.8615	2.0864	1.1896	1.1393	1.035	2.209	7.4496	7.1354	5.858	13.7771	4.3724	1.4091	1.8568	1.485	1.313	1.475	18.555	2.1958	1.5632	1.36	0.986	1.7104		0.440192	4.09518
11.0801	1.4696	1.0917	1.2696	1.0276	2.0746	19.9241	2.004	9.6843	1.8972	1.3777	1.088	1.3187	1.6251	8.7521	6.5141	6.149	14.8214	5.0351	1.8416	1.5037	1.435	1.074	1.204	18.5935	1.8683	1.4495	1.045	1.529	1.5167		0.444975	4.14428
11.1993	1.0871	0.8833	1.4424	1.1486	1.8354	22.5146	2.4288	10.2703	2.4656	0.7498	1.2316	1.2712	1.7855	8.0723	6.8097	6.7163	13.5757	4.472	1.9926	1.505	1.401	1.145	1.412	17.2595	1.9977	1.1506	1.255	1.056	1.3339		0.449762	4.14719
11.3184	1.0917	0.9209	1.7132	1.3612	2.1315	25.1626	2.3326	10.2145	2.0061	1.1525	1.1229	1.2926	1.6872	6.8538	6.1956	5.4527	13.6729	4.7123	1.6503	1.4226	1.717	1.049	1.309	16.3111	1.6952	1.3314	1.283	1.644	1.3176		0.454545	4.13128
11.4376	1.1696	1.1062	1.2994	1.2353	2.6881	24.6451	2.7324	9.9401	1.5449	1.0654	0.8335	1.0636	1.7481	6.7175	6.0148	5.3851	12.9899	4.6946	1.4849	1.3806	1.612	1.206	1.486	16.8195	1.9956	1.2067	1.216	1.624	2.0064		0.459332	4.10039
11.5567	1.1128	1.227	0.9374	1.1795	2.8095	25.7608	2.6242	10.2937	1.9606	0.7246	0.7306	1.1986	1.9759	5.7868	5.5014	6.1975	11.7538	3.9328	2.1817	1.2032	1.447	1.575	1.266	18.7884	1.7785	1.5071	1.53	1.261	1.8374		0.464115	4.14079
11.6758	0.799	1.0876	1.1468	1.2151	2.2278	24.5428	2.7485	10.2164	2.2271	0.9145	0.7155	1.2213	1.3852	6.1379	7.2063	5.8811	10.2044	4.6223	1.8386	1.308	1.984	1.124	1.365	19.9571	1.2578	1.4615	1.592	1.252	1.7048		0.468898	4.11532
11.795	1.3119	1.0272	1.2481	1.3017	2.0288	23.6324	3.2361	10.2032	1.7789	0.937	0.8424	1.1464	1.5756	5.3325	6.3419	4.5234	9.0108	5.0463	1.6535	1.3704	1.574	1.136	1.084	19.638	1.3198	1.3751	1.419	1.353	1.8037		0.473685	3.93969
11.9141	0.9431	1.1437	0.9062	1.6705	2.0351	21.4444	3.1203	9.9408	1.7667	1.082	0.8942	1.2073	1.5076	4.9289	6.3548	4.8318	9.8408	5.8789	1.7164	1.3142	1.896	0.985	1.073	20.4317	1.7791	1.5714	1.391	1.513	2.1139		0.478468	3.97523
12.0333	0.8316	1.6002	1.2305	1.8766	1.6848	18.171	3.2776	9.6703	1.4645	0.7986	0.9223	0.9989	1.7714	4.0259	5.6731	4.0341	9.4424	5.9249	1.6598	1.4312	1.9	1.239	1.324	21.2356	2.0954	1.3183	1.423	1.362	1.5379		0.483255	3.79051
12.1524	1.184	1.2627	1.2655	1.6284	2.2925	16.7243	3.3197	9.1496	1.3403	1.0419	0.8147	1.2358	1.4876	3.8621	5.8728	3.6376	8.7551	5.6156	1.6301	1.5778	1.415	1.429	1.36	22.1242	1.8583	1.1091	1.266	1.523	2.0402		0.488038	3.71803
12.2716	1.3895	1.1978	1.2154	1.4407	1.9856	15.7214	3.2067	9.498	1.4467	0.9628	1.0876	1.0824	1.3145	3.8106	6.1115	3.3542	9.2865	7.2499	1.2737	1.3454	1.071	1.319	1.356	22.4659	1.9032	1.1734	1.165	1.181	1.9095		0.492825	3.70776
12.3907	1.0567	1.1595	0.8932	1.1893	2.0836	16.0871	2.8513	10.2702	1.3219	0.8213	1.0812	0.7672	1.5491	4.4419	6.4521	3.1249	8.1384	6.9799	1.5901	1.6564	0.945	1.134	1.164	20.3841	2.0088	1.1236	1.237	1.479	1.8018		0.497608	3.61354
12.5098	1.1796	1.0197	1.0377	0.8728	1.7053	16.4368	3.0589	11.1661	1.1321	0.9349	0.6589	0.7887	1.5431	3.8713	7.116	3.1692	8.7098	7.3655	1.5334	1.419	0.933	1.207	1.279	20.3469	1.6034	1.4804	1.737	1.816	1.8505		0.502392	3.68869
12.629	1.3665	1.3505	1.2354	1.7025	2.024	18.2456	3.6189	9.9562	1.2231	0.9346	0.7986	1.0552	1.4838	3.5321	7.4942	3.0543	7.8787	8.5116	1.449	1.3397	0.872	1.449	1.472	20.9465	1.4719	1.2799	1.265	1.654	2.0544		0.507179	3.8179
12.7481	1.2957	1.202	1.226	1.3433	2.0357	16.3556	3.4864	9.2841	1.46	0.9985	0.9231	1.0707	1.2706	3.7359	7.8562	2.4926	7.9208	7.6179	1.4075	1.2397	1.054	1.217	1.716	18.3128	1.3169	0.9831	1.534	1.718	2.4447		0.511962	3.6041
12.8673	0.9111	1.0746	1.075	1.2601	1.3587	17.9305	3.4385	9.579	1.2677	0.8304	0.7795	1.0929	1.2275	3.849	6.8678	2.976	9.1154	10.3017	1.4906	1.5848	1.468	1.521	1.663	16.7923	1.5366	1.0827	1.48	1.428	2.4467		0.516749	3.70445
12.9864	0.8787	0.8068	0.9496	1.3843	2.1189	18.3808	3.875	9.4234	1.3923	0.8981	0.6434	0.9885	1.5141	3.6563	6.4849	3.2469	8.8089	9.669	1.2574	1.6505	1.706	1.555	1.293	14.7877	1.883	1.7557	1.251	1.641	2.4057		0.521532	3.66572
13.1055	1.0305	0.9171	0.9344	1.6033	1.8194	19.3655	4.1731	8.8794	1.371	0.8822	1.1467	0.7737	1.5752	3.9913	6.0545	2.9706	8.4323	9.8386	1.4574	1.1772	1.283	1.74	1.401	16.2228	1.4448	1.1652	1.427	1.666	2.2251		0.526315	3.68856
13.2247	1.227	1.2707	1.3316	1.1832	1.7482	18.4965	5.1854	8.3862	1.394	0.862	0.8098	0.9899	1.3382	3.9004	6.3835	2.6584	9.0881	9.2839	1.2526	1.5735	1.336	1.446	1.316	14.6279	1.3983	1.309	1.713	1.441	1.8281		0.531102	3.61305
13.3438	1.172	1.2881	1.4855	1.354	1.9552	19.928	5.2061	8.4623	1.1524	1.1866	0.8658	0.8842	1.5447	4.0623	5.1306	3.1834	11.9594	9.2064	1.7987	1.2562	1.389	1.213	0.97	13.7325	1.5043	0.9043	1.289	1.566	2.264		0.535885	3.72117
13.463	1.0033	1.1977	1.0708	1.5936	1.5994	20.2605	6.7629	9.1977	1.3447	1.2471	0.814	1.0604	1.2261	3.4724	4.6518	2.6919	12.6062	10.2062	1.2543	1.5873	0.848	0.957	1.196	13.3033	1.7023	1.3404	1.676	1.637	2.9468		0.540672	3.8088
13.5821	1.1961	0.9705	1.4056	1.3937	1.7443	20.6331	9.0105	9.5419	1.4095	0.878	0.9052	0.8999	1.3415	3.1329	4.8106	2.722	12.1237	9.2719	1.2001	1.2742	1.142	1.031	1.68	13.4384	1.641	1.0965	1.55	1.665	2.5585		0.545455	3.85061
13.7012	1.2149	0.9167	1.0105	1.4343	1.8337	22.0411	10.8214	8.9757	1.4822	0.78	1.1399	0.9516	1.0114	3.3028	4.5458	2.7692	12.557	10.3626	1.6339	1.0987	1.269	1.237	1.497	13.2883	1.5534	1.4334	1.172	1.375	2.273		0.550238	3.96488
13.8204	1.36	1.2984	1.0586	1.6793	1.9488	20.0603	14.7794	9.1262	1.4859	0.9852	1.4441	0.8546	1.0986	3.3728	5.6276	2.6507	11.8594	11.6075	1.3638	1.274	0.988	1.285	1.266	14.2556	1.3721	1.1911	1.515	1.699	2.1406		0.555025	4.16026
13.9395	1.2048	1.1691	1.3007	1.1061	1.398	19.7731	15.5201	10.644	1.4007	1.2818	0.8161	0.6361	1.2912	3.1568	5.2737	3.0417	12.5589	11.2641	1.4913	1.6692	1.037	1.321	1.675	14.0115	0.9953	1.1546	1.347	1.692	1.9852		0.559808	4.17987
14.0587	1.388	1.1497	0.9816	1.4776	1.7237	20.2379	17.2213	12.7599	1.4675	0.9104	1.0937	1.04	0.9234	2.9668	5.3363	2.936	14.1258	11.0263	1.2844	1.9514	1.033	1.249	1.384	16.2877	1.0541	1.3216	1.677	1.349	2.4088		0.564595	4.47469
14.1778	1.2152	1.5554	1.1795	1.6014	1.5056	20.0587	17.2968	14.2156	1.5324	0.8625	0.9112	0.8672	1.1878	3.4584	5.5194	2.9646	13.9945	11.7008	1.4565	1.1899	1.462	1.279	0.985	18.1956	1.5213	1.4104	1.582	1.475	2.299		0.569378	4.63733
14.297	1.1053	1.1354	1.1074	1.2043	1.544	18.711	20.2432	15.0913	1.1396	1.0298	1.2405	1.1228	1.1523	2.8783	4.8926	3.0759	14.5295	12.5763	1.4394	1.3674	1.49	1.008	1.396	18.3742	1.8297	1.5469	1.95	1.47	2.0715		0.574165	4.74906
14.4161	1.0691	1.1259	0.9826	0.8077	1.5406	17.5372	21.968	14.2625	1.358	1.1277	0.666	1.071	1.2556	2.3645	5.3811	3.4488	14.8966	12.1829	1.5579	1.1989	1.264	0.86	1.566	20.169	1.4108	1.5708	1.343	1.498	2.1289		0.578948	4.74528
14.5352	0.9205	1.477	1.32	0.9525	1.6161	18.5468	23.2822	17.1589	1.7264	1.2027	0.9163	0.8267	1.2357	2.8114	6.6993	4.056	15.2466	12.1379	1.5794	1.6068	1.232	1.068	1.456	19.4254	1.586	1.3752	0.916	1.513	2.1373		0.583731	5.03545
14.6544	1.1607	1.0929	1.4376	0.8803	1.8282	17.55	24.3758	17.5779	1.6623	0.8419	1.1271	0.5276	0.8977	2.8175	6.0444	4.3248	15.2184	13.1085	1.3076	1.4745	1.122	1.152	1.391	17.0447	1.3349	1.2489	1.438	1.314	1.7009		0.588518	4.93111
14.7735	1.2279	0.9568	1.197	0.9419	1.4648	16.7848	24.1261	18.0005	1.9092	1.1478	0.8122	0.7103	0.6995	2.3742	6.3973	4.2722	15.0421	14.1707	1.0739	1.2729	1.218	1.552	1.318	16.1391	1.1907	1.3965	1.542	1.931	2.1414		0.593301	4.93141
14.8927	1.1935	1.1116	1.5201	1.224	1.8617	16.9784	25.5095	17.3027	1.5053	1	0.8904	0.8388	1.04	2.7231	6.1771	4.4005	14.7455	13.2946	1.2506	1.6882	1.613	1.123	1.536	15.874	1.2366	1.023	1.444	2.135	2.5471		0.598088	4.99267
15.0118	1.0071	1.0862	1.1254	0.9139	1.4624	17.0812	23.5305	17.3987	1.6839	0.99	0.8637	1.0823	1.1893	2.743	8.3548	4.5731	16.3901	13.682	1.4424	1.4694	1.405	1.572	1.27	15.8779	1.312	1.2788	1.399	1.436	2.2198		0.602871	5.02896
15.1309	1.1271	1.1307	1.3614	1.2598	1.5592	15.6105	22.9383	16.788	1.3671	1.2421	0.6506	1.0723	1.1449	2.2541	7.5757	4.1571	14.5415	13.6954	1.6766	1.5912	1.229	1.097	1.513	14.393	1.1849	1.2088	1.597	1.515	2.7217		0.607654	4.8001
15.2501	1.1746	1.5066	1.2104	1.1294	1.6324	14.1817	22.6106	16.4986	1.5232	1.3503	1.033	0.9686	1.4559	2.3224	8.3788	3.6863	16.7208	13.4356	1.7006	1.2175	1.31	0.962	1.242	13.622	1.149	1.5169	1.714	1.15	2.1926		0.612442	4.77917
15.3692	1.4703	1.5532	1.1621	1.0155	1.9086	13.9082	21.035	16.2306	1.2081	1.0379	1.1908	1.0155	1.4917	2.6436	8.4859	4.8128	16.5502	13.576	1.9557	1.1032	1.411	1.309	1.198	9.9579	1.1707	1.3499	1.674	1.429	1.9917		0.617225	4.64987
15.4884	0.9176	1.1751	1.2622	0.9699	1.5516	13.3766	20.1722	15.981	1.5245	1.0788	0.9455	0.5635	0.9714	2.79	8.6689	4.0914	16.9178	11.7786	2.007	1.3708	1.382	1.488	1.262	11.123	1.4569	1.1135	1.484	1.865	2.1934		0.622012	4.53387
15.6075	1.2179	1.1203	1.5372	1.0644	1.626	12.8239	18.729	15.7797	1.7121	1.2929	0.7554	0.6535	1.3981	2.7118	7.3374	4.2767	16.6517	12.2789	1.6143	1.4032	1.446	1.14	1.23	10.9515	1.7026	1.2642	1.306	1.508	2.4125		0.626795	4.44639
15.7266	1.109	1.0458	1.2726	1.0176	1.6067	12.0376	18.2246	14.4076	1.6259	1.49	0.623	0.9123	1.1967	2.342	8.3974	3.7677	19.8918	10.7047	1.6281	1.6485	1.439	0.905	1.11	9.5377	1.3229	1.0068	1.484	1.235	2.1001		0.631578	4.31345
15.8458	1.3422	0.89	1.4445	1.2977	1.8522	11.1453	16.0456	14.1769	1.5513	1.4428	0.7142	1.0255	0.893	2.0128	8.3271	3.9692	17.7999	11.3853	1.7059	1.6097	1.19	1.192	1.392	9.3991	1.612	1.4648	1.326	1.722	2.3579		0.636365	4.21679
15.9649	1.0695	0.8794	1.0012	1.5926	1.5623	9.7486	15.1076	12.1323	1.2649	1.2303	0.7342	0.8548	1.1308	1.9552	9.0805	3.5902	17.2878	11.518	1.8013	1.2446	1.154	1.371	1.472	9.6779	1.6584	1.4002	1.55	1.856	2.3306		0.641148	4.04332
16.0841	1.3783	1.1652	0.926	1.6525	1.8651	8.8344	13.47	11.4361	1.0785	1.102	0.7609	1.1031	1.3117	1.7345	8.9146	4.2195	16.9177	11.4411	1.5849	1.0797	1.527	1.353	1.18	9.377	1.5702	1.5012	1.206	1.687	2.7786		0.645935	3.93641
16.2032	1.7151	1.346	1.2692	0.8716	1.8992	8.3909	13.022	9.3773	1.4854	1.3449	1.0705	0.9355	1.0643	1.7981	10.4353	3.3892	16.5462	9.8518	1.2941	0.943	1.269	1.388	1.37	8.526	1.1865	1.5936	1.594	2.193	2.8826		0.650718	3.79491
16.3224	1.7576	1.1549	1.4762	1.1086	1.6923	9.1099	12.723	9.6495	1.3984	1.2628	1.0209	1.254	1.0212	2.4779	9.0506	3.6235	17.4618	8.79	1.5573	1.0832	1.428	0.96	1.677	10.769	1.565	1.6397	1.183	1.848	2.7764		0.655505	3.87999
16.4415	1.5562	1.2135	1.051	1.1295	1.455	7.9997	12.0752	8.6904	1.4157	1.0297	0.9949	1.1824	0.9284	1.3485	9.0911	3.8349	16.729	8.2668	1.6014	1.4895	1.132	1.169	2.47	10.6403	1.599	1.5403	1.675	1.863	2.8346		0.660288	3.72434
16.5606	1.2564	1.2244	1.1735	0.8577	1.7697	7.277	11.0717	8.1615	1.3746	1.2479	0.9204	0.8127	1.1097	1.6343	8.2032	4.0436	16.4318	7.7129	1.4511	1.2475	1.052	1.437	1.796	11.4219	1.4032	1.3432	1.549	1.757	2.6868		0.665071	3.56647
16.6798	1.4152	1.1532	0.9464	1.1024	1.6491	7.8796	10.5209	6.038	1.3123	1.4556	0.8189	0.8874	1.1601	1.6964	7.7778	3.4971	17.6098	7.3899	1.7646	1.2966	1.57	1.211	1.482	11.608	1.4527	1.358	1.288	1.898	2.2362		0.669858	3.49914
16.7989	1.4017	1.2685	1.0344	1.2058	1.5194	8.3873	11.1707	5.7546	1.2234	0.8906	0.7141	0.8119	1.1816	1.2776	7.5079	3.6457	14.7348	6.4047	1.2278	1.0924	0.88	1.343	1.638	12.6012	1.6037	1.6751	1.685	1.71	2.3103		0.674641	3.3759
16.9181	1.4989	1.3475	1.0456	1.2084	1.6588	7.5849	10.6198	5.2097	1.185	1.1539	0.8346	0.6829	0.9119	1.1554	5.7865	4.166	14.3692	6.524	1.2115	0.9808	1.032	1.471	1.859	12.4777	1.5048	1.6924	1.381	1.712	2.1037		0.679428	3.2541
17.0372	1.6409	0.8458	1.6649	1.2993	1.3541	7.013	9.6736	5.025	1.4262	1.3618	0.8852	0.7997	1.0295	1.1416	5.5652	4.5609	12.4436	6.4671	1.4041	1.3245	1.362	1.489	1.833	12.3698	1.1822	1.219	1.857	2.078	2.4377		0.684211	3.1984
17.1563	1.871	0.9645	1.3729	1.1807	1.9439	5.5557	8.9453	4.3576	1.5169	1.5987	1.0697	0.7088	1.1086	0.9381	5.7007	4.8222	11.7177	6.398	1.9742	1.5224	1.2	0.929	1.643	11.5273	1.336	1.2189	1.781	2.083	2.2333		0.688994	3.07652
17.2755	1.2891	1.2945	1.1954	1.0115	2.0138	6.2336	9.1148	4.0488	1.3723	1.4294	0.9141	0.6892	1.0433	1.0505	4.9337	4.9025	11.3757	7.2261	1.541	1.5795	1.238	0.965	1.591	10.7181	1.4372	1.3716	1.01	1.69	3.0351		0.693781	3.01086
17.3946	1.864	1.114	1.3301	1.1866	2.2444	6.2612	8.9698	3.8968	1.0566	1.4906	0.9432	0.9216	0.8332	0.9633	5.0832	4.0575	13.4153	7.2633	1.5463	1.5315	1.213	1.142	1.974	11.8597	1.5635	1.5312	1.155	1.796	3.0972		0.698564	3.14842
17.5138	1.3064	1.6252	0.828	1.3312	1.8369	5.9947	7.3151	4.0557	1.0183	1.2928	0.9831	0.9553	1.1627	1.2574	4.6657	5.0833	13.9494	7.4071	1.652	1.2068	1.369	0.949	1.744	11.7895	1.7913	1.7596	1.481	1.702	2.8963		0.703351	3.11754
17.6329	1.6143	1.3992	1.1212	0.9168	2.5849	5.4317	7.9145	3.8879	1.4078	1.0925	1.3122	0.6195	1.1855	1.4831	4.0995	5.7301	13.788	7.2938	1.5029	1.4954	1.084	1.028	1.917	12.473	1.2939	1.7865	1.707	1.492	3.6919		0.708134	3.18462
17.7521	1.5451	1.5809	1.3773	0.7383	2.8315	5.3598	9.0504	3.9961	1.1621	1.7188	1.2201	0.8356	1.2589	1.3108	4.6098	5.1732	13.9766	8.1746	1.5388	1.2157	0.985	1.355	1.849	14.0783	1.1735	1.5998	1.374	1.742	2.973		0.712921	3.30359
17.8712	1.8507	1.4507	1.1089	1.0487	3.4861	5.7793	7.8265	4.1018	1.5525	0.7756	1.0396	0.9723	1.3486	0.9993	3.3077	4.7745	12.9985	8.7514	1.5366	1.4465	1.222	1.293	1.551	14.5703	0.9634	1.7655	1.128	1.608	2.9701		0.717704	3.21473
17.9903	2.0564	1.4938	0.6655	1.2342	3.5502	6.8076	8.0874	4.1789	2.008	0.9013	0.7811	0.9767	1.2543	1.0025	3.2897	5.3796	10.6683	8.387	1.7263	1.3949	1.441	1.172	1.23	16.8129	1.3813	1.7052	1.426	1.621	2.9954		0.722488	3.29753
18.1095	1.9253	1.6085	0.8155	1.4164	4.2328	5.8743	7.6201	4.8767	1.7983	0.8492	1.3235	0.9383	0.898	1.2686	3.8104	5.253	11.2769	8.8395	2.2845	0.944	1.177	1.227	1.713	17.5695	1.898	1.3159	1.729	1.735	2.8438		0.727275	3.41593
18.2286	2.2088	1.9711	0.9834	1.1308	4.6524	6.8227	8.0739	4.3481	2.4688	0.9923	1.2536	0.7821	1.0456	1.2326	2.701	5.3819	11.5592	9.3374	1.4545	1.1315	1.233	1.346	1.912	18.2107	1.5546	1.5811	1.587	1.877	2.8557		0.732058	3.50651
18.3478	2.1605	1.4957	1.1996	1.289	4.9152	6.758	8.1196	5.7758	2.6122	1.1739	1.259	1.1648	1.0894	1.5011	3.4188	5.9025	11.0048	8.9065	1.5577	1.2804	1	1.394	1.612	16.9776	1.5993	1.4676	1.887	1.755	2.8798		0.736845	3.55713
18.4669	2.7739	1.6382	1.0703	1.5173	6.4443	7.1741	6.568	5.7228	2.574	1.1764	1.2278	0.7982	1.1439	1.3887	3.9725	4.9863	11.5127	8.5183	1.6259	1.2242	1.062	1.172	1.899	18.4443	1.8804	1.3618	1.496	1.841	2.7903		0.741628	3.62085
18.586	4.2002	1.6169	0.9951	1.7283	5.9985	7.9862	7.3192	5.1374	2.6626	1.1531	0.8865	0.8125	1.4545	1.182	3.6574	5.5102	9.6099	10.5565	1.9727	0.7899	1.102	1.36	1.706	16.4624	1.8885	1.7502	1.848	2.084	3.1253		0.746411	3.67434
18.7052	4.6316	1.6954	0.9373	1.5848	5.4196	8.7542	7.4901	5.3465	3.0391	1.7343	0.9249	0.7262	1.7106	0.9018	3.9035	4.3196	10.0983	11.6407	2.1	1.0864	1.21	1.015	1.332	15.2102	1.237	1.1637	1.741	2.205	2.686		0.751198	3.64982
18.8243	5.279	1.9405	0.8938	1.7857	6.013	9.2223	7.2017	4.8364	3.1984	1.4609	1.3232	1.0645	1.3385	1.1704	3.7421	4.989	10.2192	11.039	2.0908	1.1385	1.339	1.268	1.478	14.3814	1.5605	1.9792	1.721	2.551	3.1256		0.755981	3.77071
18.9435	7.4655	2.8773	1.3196	1.1643	6.5391	8.8083	7.0353	4.9417	3.6744	1.1309	0.9112	1.3961	1.062	1.341	3.0178	4.8601	8.1016	13.2967	2.3514	1.2973	1.321	1.077	1.888	14.1453	1.5244	1.8027	1.722	2.09	4.0599		0.760768	3.86972
19.0626	9.67	2.5208	1.2333	1.7891	7.4654	9.8771	7.8027	5.6363	3.6298	0.9857	1.2389	1.2595	1.2354	1.2891	3.3159	5.0833	8.3634	15.7365	2.2493	1.5063	1.258	0.887	1.641	13.4167	1.1904	1.5655	1.601	1.791	3.4353		0.765551	4.0922
19.1817	12.3055	2.2658	1.4512	1.6271	7.4381	9.5729	7.6517	5.236	3.5512	1.259	1.3565	1.0513	1.0753	1.0446	3.075	4.753	7.2756	16.5916	2.3892	1.5022	1.214	1.429	2.135	11.3067	1.7858	1.5378	1.866	1.984	3.8709		0.770334	4.12421
19.3009	13.5263	2.223	1.8113	1.565	8.236	9.3337	7.0749	5.0137	3.8467	1.0568	1.3759	1.0869	0.9746	1.2872	3.5039	3.9224	7.0095	17.2059	2.9392	1.6902	1.228	1.477	2.041	12.1033	1.6978	1.8725	1.473	1.623	3.2818		0.775121	4.18898
19.42	14.8217	3.2643	1.5686	1.6923	8.9757	10.0126	6.358	5.7292	4.6639	1.6271	1.2578	0.7428	1.1131	1.1519	3.0261	5.2471	7.5796	18.9637	2.9404	1.7499	1.111	1.587	1.752	12.1814	1.9981	1.3016	1.626	1.469	3.8775		0.779904	4.4617
19.5392	17.3323	3.8384	1.492	1.7462	10.1174	8.9844	8.0754	5.6795	4.6975	1.4791	1.1868	0.9833	1.2769	1.5412	3.6458	5.3749	8.0633	19.4438	2.623	1.501	1.131	1.675	1.894	10.8437	1.6894	1.6307	1.642	1.718	4.123		0.784691	4.66997
19.6583	20.0368	3.8807	1.7914	1.6478	10.4771	9.9932	8.4599	5.2077	4.4531	1.481	1.1475	1.0018	1.3825	1.2205	2.7235	4.383	8.7786	20.7374	3.2303	1.8028	1.206	1.224	1.8	11.7317	1.8953	1.8827	1.695	1.852	4.0259		0.789474	4.86721
19.7775	19.5191	4.8486	2.2266	2.7028	12.623	8.2421	8.2413	6.0657	4.6287	2.0175	1.5611	0.9721	1.1357	1.1061	3.2866	4.7753	8.9774	20.0514	3.7736	1.4124	1.087	1.042	2.127	11.9613	2.035	1.898	1.529	2.051	4.2041		0.794261	5.03798
19.8966	19.9021	5.3537	1.5901	2.6271	13.7531	8.2729	9.0544	6.0524	4.5006	1.8275	1.1365	0.8154	1.0701	1.2785	2.9994	4.5457	9.2571	20.9245	5.8282	1.2527	1.209	1.107	2.234	12.5959	2.253	1.8766	1.616	2.431	4.7956		0.799044	5.2469
20.0157	20.1518	6.1276	1.6043	2.8244	14.7948	9.6546	9.9596	6.6869	5.1879	1.4268	1.2072	1.0317	1.1948	1.3843	2.8928	4.2901	9.7042	21.5981	6.5857	1.1895	1.772	1.836	2.154	12.8662	2.3961	1.4952	1.431	2.771	5.6425		0.803827	5.58142
20.1349	15.455	7.2069	2.3486	2.9421	15.9716	9.1782	10.0795	6.7808	4.8166	1.7141	1.4708	1.1808	1.3159	1.5442	2.9533	4.9778	10.2754	20.9504	6.7772	1.914	1.451	1.414	2.075	13.3648	2.4572	1.7544	1.786	2.016	6.4781		0.808614	5.60861
20.254	12.2373	7.7986	2.6098	3.0289	15.9156	11.1757	11.4436	7.8227	5.836	1.7209	1.7076	1.3074	1.2711	1.6485	2.904	5.3188	10.8404	20.6333	7.286	2.2721	1.169	1.477	2.49	13.4099	2.3462	2.3452	2.116	2.496	7.2607		0.813397	5.85822
20.3732	9.2582	8.5148	2.0791	2.7294	17.153	11.5788	12.4423	7.7165	7.1023	1.4139	1.2923	1.4907	1.5006	1.5401	3.0089	5.974	12.4515	22.2542	8.6421	1.6931	1.518	1.757	2.391	14.207	2.5263	2.66	2.134	2.725	9.0268		0.818184	6.16486
20.4923	6.0516	9.8777	2.2607	4.2192	16.2653	11.274	13.6022	7.3431	7.4831	1.8296	1.3238	1.3608	1.239	1.7965	2.9581	5.2769	12.3325	25.48	10.9814	1.8033	1.501	1.981	2.777	14.0508	2.6707	2.103	2.319	1.91	10.1532		0.822967	6.35257
20.6114	3.98	11.7724	2.939	4.8404	17.9164	13.2545	16.6572	8.3265	7.781	2.232	1.2203	1.18	1.0193	1.8893	3.5661	4.7629	14.4907	25.1819	11.6526	2.0401	1.51	1.471	1.947	14.6853	2.4379	2.2069	1.705	2.21	13.1096		0.82775	6.82708
20.7306	3.6107	12.2067	3.6786	5.3432	20.2706	15.2271	17.283	8.6213	7.4674	2.7667	0.9092	1.341	1.1296	1.5988	3.3746	4.2652	14.9637	27.5444	12.2494	2.3498	1.491	2.29	2.815	15.3022	3.0951	2.5962	2.021	2.583	14.0369		0.832537	7.32522
20.8497	3.6492	13.728	4.3423	5.1778	21.5658	16.824	17.1629	9.1661	8.443	2.9664	1.2731	1.5103	1.7812	1.7298	3.0933	5.4923	16.063	26.0928	14.3657	3.3919	1.719	2.386	3.702	18.0834	2.8162	2.743	2.088	2.696	14.9027		0.837321	7.89501
20.9689	2.4731	16.6963	4.5598	6.4592	20.5438	18.3032	18.7913	9.4784	8.358	3.1608	1.1745	1.2196	1.2797	1.837	3.5496	6.5038	16.5421	24.1138	13.6359	3.1321	2.193	2.083	3.921	21.7495	3.6635	3.3567	2.268	2.53	18.3318		0.842108	8.34167
21.088	2.3074	15.0226	5.1431	7.7381	20.9397	17.9409	18.0746	9.9216	9.3531	3.1606	1.2718	1.3649	1.278	1.8944	3.2648	5.8147	17.1118	25.1845	15.505	3.8345	1.894	2.147	4.437	22.3249	3.7648	3.5637	2.553	2.978	20.6873		0.846891	8.6371
21.2071	2.0541	11.4735	6.6277	8.5263	20.8133	20.1191	18.0246	9.5389	8.2126	2.4584	1.3208	1.3419	1.1508	2.008	4.3535	5.4288	17.0299	21.1943	17.5675	4.7679	2.064	2.442	4.699	25.3314	4.1132	3.4276	2.863	3.259	22.2947		0.851674	8.77606
21.3263	1.6757	11.4106	7.15	7.923	18.2906	21.649	20.4742	10.1718	8.5397	3.0857	1.2761	1.1263	1.5131	1.6788	4.3508	6.2399	17.5743	18.0476	17.2997	5.9292	2.087	2.676	5.574	27.7242	4.6732	3.3021	2.564	3.62	24.4096		0.856461	9.03573
21.4454	2.0755	10.7358	8.4355	8.3148	18.2111	20.7465	21.9414	9.0542	9.5855	3.4164	1.3644	1.1062	1.7674	2.5334	4.8836	6.6946	16.4719	14.6923	17.8998	5.8091	2.897	2.491	4.652	35.4212	5.1643	4.538	3.536	4.835	27.2854		0.861244	9.53653
21.5646	2.0192	8.9443	10.363	8.9961	18.0011	22.0089	21.2748	10.4155	9.2281	3.5083	1.5248	1.4604	1.7308	2.263	4.8972	6.691	16.4172	11.9087	20.6892	5.9884	2.506	2.905	5.039	39.235	6.9666	4.6276	4.508	5.983	31.1685		0.866031	10.0437
21.6837	1.5123	5.5682	10.4488	11.7831	18.2258	22.0844	21.1608	10.2044	9.6211	4.4906	1.4017	1.7004	1.9589	1.5814	5.3423	8.2269	14.5687	8.6581	20.8416	7.3545	2.704	3.794	5.537	49.234	8.0027	5.1521	5.255	6.984	32.8923		0.870814	10.5617
21.8029	1.7216	4.4684	11.441	12.8143	17.0733	22.0708	19.7787	10.8982	8.5107	5.0454	1.5276	1.5752	1.6262	1.6084	5.617	6.9152	14.5986	7.425	22.3247	7.6911	3.766	4.384	6.306	54.3032	11.5906	5.8378	7.444	9.73	34.8909		0.875601	11.1374
21.922	1.3577	3.659	13.4516	11.4106	16.3275	20.4851	21.1081	10.8435	8.7697	4.3592	1.6661	1.5664	1.4565	1.8732	5.0362	6.1235	13.6611	6.9898	23.845	8.5136	3.604	5.193	6.698	56.882	15.0506	7.6693	10.481	11.124	34.6368		0.880384	11.5118
22.0411	1.4526	2.9704	13.1425	13.9425	14.8773	18.1247	20.5416	10.4814	6.2347	4.9947	1.2461	1.3581	1.7293	2.3971	4.9637	7.6536	13.5887	4.5743	26.9763	10.0666	4.575	7.255	9.311	54.4251	19.6167	10.1057	13.489	12.986	32.8958		0.885167	11.9302
22.1603	0.9787	2.8369	13.2697	14.0452	13.6672	15.9017	18.866	10.297	5.2858	4.4665	1.53	2.1529	1.7633	2.5111	5.9589	7.4442	13.7426	3.8401	26.6719	10.3252	5.128	10.816	13.236	49.8322	23.9485	12.6545	15.642	16.768	28.247		0.889954	12.132
22.2794	0.9633	2.8131	13.97	13.3864	12.6284	14.2545	18.9739	11.6747	5.2343	4.8808	1.5649	1.5132	1.6266	2.7622	4.9137	7.747	13.1346	2.4748	23.8678	10.4963	7.192	14.727	21.352	47.2869	31.1142	12.5706	14.892	22.316	18.6976		0.894737	12.3803
22.3986	0.8982	2.251	12.0801	11.7087	12.0732	11.7477	15.9824	9.6135	4.6947	5.9131	1.5037	1.92	2.0999	3.0363	5.3076	7.7708	11.6745	3.1062	23.2789	13.148	8.231	15.691	30.009	40.0867	37.2975	16.9795	17.369	28.218	13.1283		0.899524	12.6489
22.5177	1.0528	2.0298	11.4703	13.028	9.6545	11.7302	15.7611	10.9555	3.2819	6.1978	1.8609	2.6761	2.2366	2.9049	5.438	8.1872	11.0197	2.7624	21.347	14.5785	9.038	18.886	36.794	29.6737	41.5166	17.4171	18.458	29.739	11.6738		0.904307	12.8058
22.6368	1.1347	2.2615	9.4946	13.9011	8.4533	9.2118	13.2374	9.7374	3.2753	5.0677	1.9743	2.3299	2.9548	3.5112	6.204	7.8781	9.0632	2.2355	19.9842	17.8039	11.105	21.767	40.733	22.3506	45.1206	20.5844	21.482	25.881	10.951		0.90909	12.7479
22.756	0.9035	1.931	7.9599	13.2664	7.1723	8.3753	13.5219	7.5524	3.1324	4.8923	1.2463	2.3363	2.6318	3.6954	6.4244	8.2102	7.9203	2.0984	18.1594	19.5615	11.028	21.685	47.93	15.9353	48.7194	21.3639	21.173	19.794	12.4898		0.913877	12.4521
22.8751	0.7124	1.4926	6.4478	12.1413	6.5384	6.4718	10.4409	7.1668	2.0911	5.788	1.7533	2.3203	2.228	2.9977	5.8222	8.9465	6.3644	1.4555	15.9095	19.5149	12.561	21.754	53.593	12.3912	48.6612	24.3088	22.33	16.458	12.2142		0.91866	12.0991
22.9943	0.5282	1.5234	4.811	11.2733	3.969	4.872	9.2908	5.8006	1.6183	5.4844	2.1372	2.1134	2.5998	3.3781	5.5606	10.2209	5.3844	1.3805	11.9011	19.6403	14.979	22.402	55.537	9.6391	40.646	25.6836	26.776	13.713	13.6754		0.923447	11.6048
23.1134	0.7372	1.5303	4.6756	10.1228	3.2249	4.5845	8.2764	5.8333	1.0838	5.2241	2.3914	2.7086	2.9309	3.8329	6.7985	11.0598	4.5497	1.4101	8.8726	19.6542	16.589	21.169	53.438	7.9652	33.9799	30.3894	27.786	14.78	14.8662		0.92823	11.3953
23.2325	0.8141	1.2931	3.8316	8.32	2.9431	4.0923	7.0341	5.335	0.936	5.7157	2.2555	2.2338	3.4652	4.3104	7.612	10.9584	3.2946	1.1985	7.1842	21.1484	20.231	23.237	45.866	7.4159	26.1205	30.4959	34.747	16.018	16.8008		0.933013	11.2037
23.3517	0.533	1.2493	3.1781	6.8212	2.6764	3.0304	6.5404	4.7531	0.7936	5.1773	2.0264	2.4204	3.698	4.6988	8.2913	10.5298	2.78	1.2188	5.2494	20.2305	23.175	23.849	40.858	5.274	16.6791	31.9661	38.347	18.803	15.5924		0.9378	10.7048
23.4708	0.5324	1.2863	2.5801	6.0272	2.3447	2.7829	5.4585	3.9074	1.0113	5.0958	1.5373	2.6304	4.0069	4.4962	9.2459	11.1175	2.0275	0.8904	4.5272	19.6286	27.537	23.74	34.198	4.0257	10.1757	37.0645	36.127	19.068	16.9644		0.942583	10.346
23.59	0.6821	0.8712	1.8111	4.6872	1.9672	2.1323	4.4343	3.7322	0.6257	4.4857	1.7662	1.8017	4.0901	4.9594	9.001	9.985	1.6427	0.8584	3.4577	15.4524	27.432	28.163	24.583	3.2386	7.2759	33.7581	37.259	17.631	17.284		0.947371	9.48511
23.7091	0.4209	1.399	2.1391	4.1234	2.1283	1.914	3.7769	2.9017	0.583	4.8111	2.4316	2.3685	5.1566	5.0925	10.2767	11.1733	1.3406	1.1721	3.2528	14.275	29.887	31.507	18.066	3.104	5.5499	30.5918	40.848	18.901	17.8808		0.952154	9.55423
23.8283	0.3606	1.4767	1.7607	3.6668	1.7581	1.7293	3.6706	2.9352	0.9522	4.39	2.4016	2.1219	5.2395	6.2667	11.3282	10.0062	1.6216	0.8406	2.3856	12.3281	32.293	34.466	12.089	2.3743	4.0367	25.8304	42.135	20.671	17.4549		0.956941	9.26174
23.9474	0.4148	0.9641	1.4973	3.355	1.4212	1.9311	2.9954	2.9523	0.7735	3.5992	3.1242	2.1991	5.0279	6.0951	10.5998	8.1845	1.2917	0.8721	2.1181	10.9598	25.232	39.147	8.401	2.1821	3.7303	18.1748	39.283	22.554	16.4371		0.961724	8.46612
24.0665	0.3331	1.0705	2.0276	3.194	1.461	1.5699	2.8221	2.1382	0.5161	3.2656	2.8688	2.7062	5.1522	6.1892	10.6834	8.0949	1.2317	0.7616	1.8084	7.8689	19.98	39.344	6.501	1.7567	3.5307	12.3514	35.058	26.622	20.2043		0.966507	7.96936
24.1857	0.2413	0.7838	1.5332	2.5137	1.2273	1.2468	2.9384	1.8013	0.4502	2.3942	3.3717	3.3237	5.3136	7.0158	9.7029	5.0521	0.7059	0.6107	1.9921	6.9803	16.832	35.56	5.03	1.5656	2.5266	8.1919	31.254	28.282	21.4256		0.971294	7.23678
24.3048	0.4006	0.7186	0.8406	2.4125	1.142	0.9882	2.2234	1.3912	0.5315	1.7191	3.2634	3.0292	5.6599	7.7631	6.9171	4.0105	0.5915	0.7575	2.0671	5.2556	11.61	29.907	3.79	1.4218	2.3339	6.965	23.263	26.881	21.2777		0.976077	6.17697
24.424	0.3619	0.5802	0.7819	2.1416	1.1864	1.4253	1.5428	1.2278	0.507	1.5776	3.5431	3.0001	6.802	7.4177	4.6652	3.0668	0.7114	0.4686	1.2822	4.1477	9.392	20.838	2.987	1.311	2.1417	4.2776	19.078	24.323	20.9613		0.980864	5.23265
24.5431	0.2155	0.4547	0.7833	1.6329	1.1045	0.8319	1.5054	1.1381	0.485	1.4711	3.8146	3.2859	6.1031	8.2704	3.5538	2.0997	0.4983	0.2931	1.1903	3.2328	7.642	13.499	2.511	1.1812	1.8367	3.1682	14.987	24.477	20.8707		0.985647	4.55646
24.6622	0.2528	0.637	1.0028	1.5952	0.6883	0.7693	1.2052	0.7575	0.3004	1.009	3.6253	3.5276	6.6124	8.3637	2.9184	1.5752	0.6306	0.44	0.9775	2.3134	6.664	8.746	1.663	0.9987	1.841	3.6335	10.808	20.407	22.1015		0.99043	4.00222
24.7814	0.2349	0.7671	1.1848	1.4108	0.6833	0.6956	1.4597	1.0005	0.3581	1.1031	3.7046	3.7126	6.155	8.4811	1.837	1.0043	0.5344	0.2877	0.7465	2.2481	5.379	5.834	1.773	1.108	1.5529	3.5012	8.409	17.475	22.1644		0.995217	3.61399
24.9005	0.4002	0.4493	0.8472	0.8071	0.8489	0.7066	1.1792	0.9007	0.4306	0.7124	3.4408	4.2866	6.0369	8.4041	2.0296	1.3255	0.7067	0.1859	0.6314	1.5904	4.12	4.227	1.387	1.0328	1.3359	2.919	7.701	12.997	22.2388		1	3.23719

## Sheet: Image21
X0	Y0	Y1	Y2	Y3	Y4	Y5	Y6	Y7	Y8	Y9	Y10	Y11	Y12	Y13	Y14	Y15	Y16	Y17	Y18	Y19	Y20	Y21	Y22	Y23	Y24	Y25	Y26		Ap-Ba	Average int.
0	11.8907	5.5277	5.616	3.822	4.356	5.783	4.824	3.718	3.4044	7.7347	7.4374	6.0539	5.1095	3.8423	5.8483	6.7042	6.5979	4.2395	3.81	5.4775	5.7195	6.7186	5.6949	7.5928	6.4142	5.7885	5.4097		0	5.74575
0.1191	12.2923	5.6862	5.611	4.19	3.453	6.278	5.226	3.754	4.897	8.397	8.3629	5.5996	4.8644	4.075	6.0745	6.8139	5.602	3.9438	4.2969	6.1453	6.4389	6.7876	5.8193	10.5983	7.8475	5.9653	6.613		0.00395121	6.13454
0.2383	13.9107	7.2798	6.488	5.455	3.863	5.543	5.01	4.046	4.6781	12.1685	8.4279	6.2622	5.2458	4.9838	8.1487	7.3466	5.5753	3.6283	4.7919	5.8377	8.8465	8.3998	5.6288	13.6698	8.3207	6.9476	7.2898		0.00790573	6.95531
0.3574	17.1005	7.2849	9.248	6.363	4.753	6.112	5.075	4.135	6.1755	14.0407	9.3571	6.4318	5.1165	5.629	9.053	8.3868	5.8764	4.8176	3.6933	7.1564	8.9177	10.7091	6.301	13.1123	8.7985	8.856	7.7795		0.0118569	7.78813
0.4766	18.1361	7.1369	10.966	8.767	5.501	6.621	5.451	5.313	7.1164	16.5982	13.1282	9.0729	6.7377	5.878	8.3451	9.9368	6.8935	4.6745	3.6132	6.457	10.5182	11.9143	8.595	15.1373	8.2891	9.2198	8.9504		0.0158115	8.85065
0.5957	21.2641	7.1703	15.736	8.611	5.452	7.314	5.776	5.368	7.6138	17.5384	13.5433	9.6776	7.6513	6.0919	9.4131	8.0662	7.2632	5.2464	3.7057	8.5646	11.4785	13.1078	8.4375	18.3269	11.6425	10.4921	9.4363		0.0197627	9.77735
0.7148	29.0398	8.5435	20.462	11.085	8.909	9.163	7.168	6.901	8.9156	20.2379	15.806	12.102	7.8208	7.7768	9.8102	10.038	8.2058	6.4785	4.7782	9.3559	14.0674	16.1304	12.1501	23.0647	13.1152	13.3135	12.8574		0.0237139	12.1221
0.834	34.5774	10.4669	27.047	17.097	10.697	11.648	9.607	7.77	9.9003	22.8326	17.6061	13.3429	10.5009	9.8807	12.0718	12.3705	8.0521	8.2794	4.9266	10.0809	17.7677	20.1022	13.2254	25.8561	13.6243	16.5806	17.2612		0.0276684	14.5619
0.9531	39.1496	11.0722	32.845	20.651	13.433	14.766	12.431	9.304	10.6576	25.695	21.5568	13.5727	11.6117	8.5218	13.5734	13.5577	7.393	8.7984	5.8274	12.4459	19.6248	25.8957	15.7336	26.4936	16.2274	18.7611	22.4329		0.0316196	16.7419
1.0723	43.9799	13.7522	41.749	27.262	18.905	19.22	18.027	14.14	13.9115	31.3076	26.0768	17.4139	13.6279	11.0065	15.9486	15.8132	9.1937	11.379	6.9163	13.7314	23.8897	30.7385	19.4305	30.0661	21.3883	23.4725	26.7022		0.0355741	20.7055
1.1914	46.9612	13.9924	49.824	36.338	25.678	30.891	26.293	18.538	14.4069	31.707	31.4044	21.7288	18.1903	12.4355	21.6179	19.6332	12.646	15.4928	8.6987	16.6917	29.1258	35.8609	21.5775	36.2951	25.6716	28.743	31.7408		0.0395253	25.2661
1.3106	50.8909	17.1323	58.809	50.018	35.069	45.348	34.026	26.231	16.4788	36.8397	39.624	27.3967	21.7573	14.6612	22.319	25.1365	17.8922	19.5028	11.3114	17.9453	32.4259	38.3659	24.5102	36.3734	28.2881	36.0273	35.0379		0.0434798	30.3488
1.4297	48.6551	20.0259	72.531	66.539	49.226	58.437	48.701	39.615	22.5002	39.5345	46.2845	35.8499	28.1567	16.9231	31.184	29.3586	22.4348	23.5824	15.4109	22.8527	37.9601	49.4376	30.147	38.098	31.266	39.7818	37.0638		0.0474311	37.0947
1.5488	47.4578	24.6183	84.428	88.135	69.906	78.289	66.851	50.766	27.4157	45.0523	55.1488	44.2528	37.8007	22.8241	32.8315	34.4961	26.6556	28.5359	18.9463	26.9512	44.4141	52.039	35.3394	39.5885	36.6354	45.4755	42.5874		0.0513823	44.7201
1.668	48.8329	31.4074	93.519	100.673	91.291	97.17	84.644	68.43	31.1269	45.8608	62.2717	55.313	50.2548	26.163	38.5393	40.2942	33.2675	36.5089	22.309	27.8684	46.4698	53.2173	38.3269	41.296	40.892	47.7298	46.0347		0.0553368	51.8412
1.7871	47.5268	40.3485	100.063	111.985	105.326	105.647	100.167	79.676	37.3707	54.2773	70.6444	62.9774	58.126	28.8073	43.0334	46.6044	38.7551	37.8327	27.5026	31.9651	48.3977	57.4552	39.9689	38.8859	41.2102	50.5326	43.2353		0.059288	57.3452
1.9063	48.0171	49.1769	107.646	117.657	117.434	111.993	121.135	94.414	49.0751	54.0827	74.0097	69.3522	64.7893	32.8577	47.5696	53.5366	42.3158	41.2442	33.8411	40.4874	51.2018	57.1647	44.2304	38.4618	41.0465	51.1163	44.7073		0.0632425	62.9097
2.0254	54.6297	58.1962	107.061	124.091	120.748	121.983	129.892	99.876	56.2018	60.2973	75.6671	77.6931	69.2564	38.0343	53.5083	50.5713	47.023	44.2596	36.2716	42.5806	51.1833	52.8402	48.134	37.3061	39.9255	50.8975	42.5536		0.0671937	66.3215
2.1445	59.045	63.1089	97.836	123.458	128.677	118.9	129.17	105.843	58.7911	62.0845	73.553	73.594	70.0787	42.2272	56.3269	51.2165	50.1154	45.6302	37.94	46.5504	54.3364	52.5882	46.8039	31.4281	43.4849	46.3851	34.8519		0.0711449	66.8157
2.2637	58.7108	72.9246	92.366	117.774	123.586	118.903	122.869	103.191	71.812	66.6158	69.5901	77.5107	67.3989	44.6343	61.392	47.0565	52.3462	44.0588	39.5648	50.194	56.6727	53.6304	48.1253	28.6143	41.7116	38.653	28.9894		0.0750994	66.6257
2.3828	61.586	79.6446	77.244	112.443	118.159	108.575	110.886	97.651	72.9995	59.36	62.9604	74.6002	65.0543	49.438	60.9963	48.449	53.5879	43.3783	39.526	50.0123	54.4464	49.5983	45.8879	27.9423	39.9471	35.7745	23.9834		0.0790506	63.8567
2.502	64.9212	84.403	61.258	92.453	100.77	95.125	99.1	91.455	77.377	59.2188	51.215	68.2484	60.0046	52.0548	64.3336	47.0388	50.8044	41.1785	41.6998	48.5056	48.9485	44.4621	42.3747	24.9297	37.4724	28.4878	22.1136		0.0830052	59.2575
2.6211	61.0791	82.904	45.874	77.052	80.817	85.762	81.712	77.399	72.5375	50.9085	40.3938	62.8808	55.5811	55.0815	64.9763	43.8219	47.8595	39.706	39.1294	55.3169	46.8033	40.23	37.9174	23.2565	33.7987	22.1341	17.1767		0.0869564	53.4114
2.7402	63.6172	84.254	31.383	58.552	59.702	64.613	63.735	65.227	73.0851	48.298	31.03	50.5282	48.7867	53.5346	61.5387	45.5366	43.5472	36.3911	40.8699	51.982	43.7354	36.4593	34.2735	18.7318	31.1237	17.5239	14.918		0.0909076	47.1473
2.8594	62.3332	85.0808	25.132	42.329	41.99	45.73	48.505	52.814	66.0123	40.5575	25.176	40.6722	44.6832	55.4994	60.2799	41.6627	39.1794	32.389	35.5444	47.3028	44.1082	31.8644	32.9661	13.3924	28.1651	14.4255	12.4376		0.0948621	41.1197
2.9785	63.7912	80.4168	21.656	34.114	32.856	33.097	36.833	41.894	55.8893	36.4562	20.305	35.1486	41.4391	53.8183	55.2301	38.2366	33.4343	26.7425	32.1158	45.6906	41.941	27.0239	29.0976	14.0799	23.1953	12.6975	9.4336		0.0988133	36.1716
3.0977	65.275	72.7013	18.222	27.357	25.182	24.803	28.976	32.298	41.8382	28.039	16.5817	30.904	37.1052	54.1326	47.0855	32.8931	28.54	21.0974	29.5451	42.526	35.2812	23.2208	25.8578	10.5401	20.9113	12.2549	8.1814		0.102768	31.1611
3.2168	61.3871	66.5635	13.498	23.876	22.485	20.043	23.513	24.663	37.207	22.5806	13.3206	24.2792	32.1987	57.0089	39.6346	29.8765	26.8714	17.3138	23.5317	34.6262	32.6779	19.7854	23.3641	9.7214	16.8035	11.6483	6.0617		0.106719	27.2052
3.336	59.009	58.0966	13.206	20.254	16.484	14.84	19.084	19.898	33.9977	17.8846	10.0118	20.3264	27.6355	53.6197	28.6797	23.3006	21.4422	13.1606	23.4419	27.8766	31.8319	16.6626	21.0467	8.5502	15.3738	10.3013	5.5506		0.110674	23.3913
3.4551	61.1457	47.7699	11.532	15.691	14.108	12.125	14.335	15.387	30.5404	14.9949	8.6774	16.08	22.6794	53.3785	22.7493	20.7592	16.8213	11.9931	18.8686	22.1397	29.3441	16.8532	18.6138	8.2394	13.2691	8.3581	5.4621		0.114625	20.4413
3.5742	55.7634	38.6055	9.347	12.5	11.89	10.446	10.075	13.648	28.241	11.6766	7.519	13.699	21.571	49.0974	18.3676	16.9928	14.6117	10.5752	16.6697	18.4255	24.6195	14.7573	15.9008	6.9708	11.9533	7.9228	5.2024		0.118576	17.6685
3.6934	51.6147	34.8796	7.574	10.656	10.209	8.661	6.764	10.675	25.5958	11.6373	7.3888	11.1467	17.6425	46.3173	14.532	14.9914	11.351	8.6863	15.3527	13.4761	21.5325	13.6393	14.1332	6.0312	8.5494	8.1958	4.9677		0.12253	15.4148
3.8125	43.3144	28.1568	7.905	8.634	8.77	6.835	6.395	8.086	21.5638	8.8569	5.7687	9.5293	15.7293	40.9177	11.5968	11.387	9.9294	7.3398	13.2268	12.092	20.3804	12.4769	12.3414	5.8454	8.0235	7.1885	4.0933		0.126482	13.1994
3.9317	43.365	22.1592	7.465	5.758	8.312	5.311	6.349	6.108	18.2432	7.8099	5.0127	8.189	14.4218	33.3592	10.8942	10.1784	8.135	6.565	11.1441	10.5519	15.8299	11.0697	9.6306	4.4812	6.7991	5.821	3.9272		0.130436	11.3663
4.0508	41.9582	17.215	4.59	6.192	6.352	5.183	5.978	6.517	14.0331	7.266	4.8443	6.9933	12.7234	28.0511	9.1406	7.9103	6.4562	5.3379	9.7653	9.7108	10.3056	9.6725	6.9448	4.2178	6.0038	6.0444	3.4537		0.134387	9.73556
4.1699	37.4041	15.8286	4.857	6.875	5.931	3.962	4.304	5.757	12.3931	6.7131	3.2296	5.9771	11.1759	25.8804	7.813	7.4256	6.294	5.5495	9.2788	7.3526	8.5149	7.3753	6.2202	3.1694	4.4229	6.0253	2.2642		0.138339	8.59236
4.2891	36.6174	12.6885	4.833	6.257	4.471	4.519	4.588	4.908	9.9446	5.6571	3.3117	5.4145	10.1567	18.9863	8.1105	7.3372	4.8103	5.1932	8.169	6.9054	8.1549	7.1136	5.5596	3.1104	5.1176	5.4455	2.2191		0.142293	7.76293
4.4082	35.42	11.1435	4.743	4.846	3.987	3.432	3.319	4.975	9.838	5.0452	2.7943	4.9316	9.2132	13.2168	8.023	7.3952	4.0214	4.7203	6.6579	6.1972	7.81	5.1948	4.8526	2.7277	4.4059	5.0317	2.6654		0.146244	6.9114
4.5274	31.2444	10.3637	4.504	4.541	4.797	3.438	3.408	4.012	7.1956	3.7223	3.1746	4.1817	8.0608	10.295	8.1011	5.8008	3.8732	4.6864	6.2897	5.5853	7.9546	4.4712	3.9045	2.374	3.2162	4.5424	2.2416		0.150199	6.14737
4.6465	29.8644	8.2761	3.702	3.586	3.961	3.429	3.234	3.395	8.0306	3.4615	2.9172	3.7922	7.1362	7.4722	7.1996	6.4042	3.5024	4.0932	5.4767	5.4889	5.8522	4.3445	4.3557	2.1095	3.2111	4.3874	1.769		0.15415	5.57229
4.7657	28.1916	6.3231	3.609	3.232	3.267	2.827	3.13	3.983	6.3499	3.2855	2.5418	3.1592	5.8242	7.3175	6.4555	4.8758	3.3228	3.6952	5.5256	4.7426	4.9165	4.6583	3.5693	1.9649	2.5591	3.5606	2.0271		0.158105	4.99682
4.8848	24.7814	6.8118	2.652	3.669	2.968	2.07	2.82	2.905	5.0384	3.3144	2.1183	3.1353	5.364	6.8705	5.6723	4.8474	3.287	3.5971	5.0024	4.4678	3.9182	4.9498	3.8943	2.1553	2.1084	3.4857	1.3893		0.162056	4.56641
5.0039	20.5584	5.109	2.468	3.165	2.791	2.158	2.897	2.673	6.3437	2.4876	2.049	3.2861	5.4845	4.7303	4.0652	4.4916	3.7545	3.1823	5.0237	4.4581	4.004	3.4986	3.3245	2.1675	2.0251	3.6951	1.4689		0.166007	4.12443
5.1231	21.5448	4.894	3.168	2.593	2.657	2.909	2.483	2.57	5.4103	2.9244	1.5671	3.2124	4.4292	5.0516	3.9159	2.8814	2.7029	2.9428	4.5977	3.6584	3.2788	3.1077	2.2284	1.6996	2.8408	2.9644	1.0463		0.169962	3.82514
5.2422	18.7443	4.8853	2.489	3.116	2.477	2.584	2.528	2.393	4.5749	2.2806	1.3942	2.8616	2.6823	4.3929	3.4212	2.7681	2.6263	2.7907	3.9848	3.5204	2.7041	2.6217	2.5282	1.4011	2.6629	3.1726	1.2957		0.173913	3.44077
5.3614	18.7973	4.4203	1.874	2.55	2.387	2.631	2.138	3.145	6.274	2.5848	1.5807	3.537	2.8682	4.2178	2.8982	2.6862	2.5541	2.5099	3.3608	3.2149	2.3786	2.8682	2.2929	1.7051	2.1326	2.3372	1.3794		0.177867	3.38234
5.4805	16.3226	3.6506	2.67	3.068	2.164	1.985	1.853	2.102	5.3603	2.1232	1.5233	2.5275	3.0099	3.7635	2.8385	2.5426	2.1994	2.34	2.7208	2.7078	3.0433	2.4914	1.9599	1.7981	2.5829	2.0291	1.3716		0.181818	3.06475
5.5996	12.669	4.2401	2.226	2.56	2.353	1.894	2.108	2.156	4.4458	1.7574	0.9408	2.1322	2.8486	2.718	2.2069	1.9679	2.2492	2.4131	2.4099	3.0533	3.2894	2.2478	1.8167	1.3709	2.4948	2.3465	1.4295		0.18577	2.75351
5.7188	11.7989	3.6286	2.207	2.594	2.133	1.683	1.782	1.88	4.1855	1.3949	1.1031	2.0697	2.7461	2.8159	2.6023	2.034	2.0239	1.9142	2.4713	2.687	3.1354	2.2433	2.0262	1.1348	2.0637	1.7804	0.9877		0.189724	2.56022
5.8379	10.6112	3.0517	1.798	1.985	1.866	2.097	1.972	1.877	4.044	1.6105	1.3273	2.0393	2.3017	2.3992	2.4398	1.9305	1.4162	2.1419	2.6477	2.284	3.0354	1.6333	1.5593	1.4158	1.9411	1.3168	1.1027		0.193675	2.36461
5.9571	10.9442	3.7701	1.877	1.711	1.948	2.431	1.62	1.979	3.8595	1.705	1.2724	2.2591	1.7563	3.4092	2.7756	2.1276	1.3567	1.9758	1.9334	2.5729	2.656	2.0818	1.7352	1.2774	2.1719	1.4958	0.7891		0.19763	2.42559
6.0762	10.805	3.0644	1.65	2.175	1.946	1.77	1.624	1.649	3.2417	1.593	1.4669	2.0398	1.9734	2.6693	2.2886	1.3265	1.6103	1.4574	1.8158	2.493	2.1462	2.1205	1.4597	1.5076	2.2217	1.9895	1.1836		0.201581	2.26992
6.1953	9.3087	2.8053	1.664	2.394	2.021	1.253	1.273	1.694	3.7873	1.2168	1.2752	1.6338	1.6038	2.4979	1.9117	1.1614	1.5421	1.7282	2.0082	2.5047	1.9684	1.7826	1.7033	1.1654	2.4334	1.4117	1.2554		0.205532	2.11127
6.3145	8.4426	3.0554	1.574	2.052	1.854	1.652	1.108	1.41	3.8712	1.1618	1.2934	1.8747	1.8205	2.7643	2.038	1.1745	1.4589	1.2664	2.1619	1.7403	2.059	1.6168	1.7752	1.243	2.1807	1.5313	1.0762		0.209487	2.04652
6.4336	8.9538	2.5832	1.653	2.264	1.834	2.002	1.424	1.829	3.5296	1.5141	1.2283	1.8457	2.0013	3.1428	1.246	1.194	1.5588	1.2291	1.7211	2.2815	2.5219	1.041	1.5456	1.2178	1.8383	1.6244	1.3665		0.213438	2.08114
6.5528	9.0046	2.5176	1.492	1.65	1.61	1.379	1.299	1.41	3.0076	1.5712	1.1929	1.7688	1.4789	3.6417	2.0227	1.0357	1.2578	1.6127	1.489	2.2153	2.6034	1.4087	1.5589	1.2682	1.9224	1.3665	0.7167		0.217393	1.98153
6.6719	7.4993	2.6833	1.61	1.641	1.504	1.691	1.295	1.307	3.7319	1.7215	0.7153	1.6782	1.8929	3.3443	2.1388	1.0938	1.3666	1.3467	1.1133	1.7051	2.3995	1.5854	1.7074	1.1559	2.5301	1.1329	0.7709		0.221344	1.9393
6.7911	7.3277	2.4085	1.535	1.493	1.194	1.257	0.994	1.333	3.288	1.4289	0.8289	1.6244	1.55	2.8438	1.7899	1.1086	1.3382	1.6121	1.5166	1.9962	2.3484	1.4347	1.5396	1.3626	1.71	1.2874	0.8192		0.225298	1.81369
6.9102	7.4532	2.123	1.583	1.314	1.419	1.434	1.205	1.558	3.6865	1.2087	1.0029	1.5103	1.4915	3.0584	1.3483	1.0494	1.2435	1.2638	1.7698	2.0729	2.6308	1.7473	1.4913	1.4986	1.5138	1.3414	1.1757		0.22925	1.85904
7.0293	6.5863	1.7258	1.597	1.382	1.481	1.427	0.83	1.385	3.1133	0.942	1.1133	1.9775	1.756	2.508	2.1215	1.3987	1.1751	1.3799	1.5085	2.3174	2.1685	1.042	0.9721	0.9808	1.4115	1.3512	1.2811		0.233201	1.73824
7.1485	7.699	2.0311	1.323	1.477	1.699	1.028	1.156	1.16	3.0213	1.5457	1.1834	1.4705	1.9284	2.1837	1.9371	1.453	0.743	0.909	1.5797	2.2931	2.4552	1.6264	1.4165	1.125	1.6353	1.5836	1.0731		0.237155	1.80504
7.2676	6.5732	2.3798	1.62	1.135	1.676	1.39	0.918	1.464	3.2904	1.1633	0.9432	1.6528	1.803	2.4049	1.52	0.9653	1.4118	1.0051	1.236	1.9628	1.829	1.4771	1.4969	0.8001	1.641	1.651	0.7635		0.241106	1.71012
7.3868	5.4734	2.2557	1.378	1.553	1.507	1.284	1.194	1.398	3.5345	0.955	1.2137	1.3475	1.3284	3.0279	2.1859	1.0302	1.2922	0.9869	1.0254	1.9956	1.4777	0.9178	1.2465	0.9992	2.1912	1.6398	1.0377		0.245061	1.6843
7.5059	6.4704	2.1086	2.072	1.07	1.188	1.176	1.267	1.23	3.8312	1.1909	1.5467	0.7483	1.2508	2.5286	1.5718	1.1125	1.2471	1.0796	1.3258	2.4028	1.5729	1.0269	1.0556	1.0206	2.2334	1.3939	1.1411		0.249012	1.69861
7.625	5.9408	2.0399	1.857	1.464	1.384	1.264	0.992	1.059	3.3003	1.144	1.1565	1.2449	1.3758	2.047	1.8614	1.0293	1.2949	0.7392	1.3878	2.0002	1.477	0.8573	1.3198	1.1023	2.345	1.5983	0.951		0.252963	1.63825
7.7442	5.4424	2.1726	1.607	1.817	1.137	1.382	1.085	1.404	3.8191	1.4132	1.3548	1.0978	1.8622	2.2951	2.181	0.8802	1.1394	0.9108	1.0219	1.9524	1.344	0.9964	0.9501	1.9382	1.8677	1.7345	1.1766		0.256918	1.70305
7.8633	5.3993	1.8577	1.991	1.309	1.849	1.534	0.812	1.396	3.7476	1.1625	1.251	1.0951	1.22	1.9949	2.1423	1.0674	1.1358	1.0032	1.3755	2.1011	1.4886	1.0189	1.0741	1.5592	1.7542	1.7611	1.1255		0.260869	1.67504
7.9825	5.2435	1.9456	1.92	1.364	1.531	1.506	1.312	1.397	4.0823	1.3983	1.4669	1.1365	1.3602	2.0124	2.3197	1.2796	0.8752	1.2699	1.2448	1.7374	1.762	1.4778	0.7112	1.4389	1.8066	1.5436	0.8388		0.264824	1.70301
8.1016	4.954	2.7082	1.523	1.268	1.226	1.193	1.326	1.421	3.9814	1.1076	0.864	1.1705	1.3481	2.2512	1.9987	1.3225	0.8783	1.1286	1.1889	2.2324	1.8388	1.3434	0.7908	1.4533	1.4834	1.3751	0.7596		0.268775	1.63466
8.2207	3.9916	2.3139	1.545	1.351	1.282	0.653	1.086	1.041	4.5322	1.4626	1.1991	1.0872	0.8948	2.0183	3.2855	1.2186	0.9914	0.8226	1.3152	1.746	1.9898	1.3496	0.8836	1.2726	2.05	2.007	1.0211		0.272726	1.64484
8.3399	4.7745	2.4191	1.818	1.277	1.093	1.445	1.022	1.381	6.1828	1.4903	1.1442	1.3664	1.3012	1.8896	2.9593	1.0232	1.0696	0.8952	0.7871	1.9141	2.1119	1.1829	1.1694	1.1054	2.2161	1.9099	1.2329		0.276681	1.78449
8.459	4.4822	2.4369	1.935	1.499	0.977	1.255	0.969	1.22	8.4371	1.2362	1.0183	0.8446	1.1596	2.2186	3.3264	1.3982	1.0783	1.1613	1.174	2.2686	2.0618	1.3966	1.1824	1.3851	1.5205	1.7572	1.0235		0.280632	1.8675
8.5782	4.2021	2.0096	1.525	1.424	1.189	1.439	0.966	1.184	10.1119	1.5295	1.2008	0.8924	1.2236	1.9874	3.5301	1.205	0.8454	1.1072	1.3739	2.2884	2.2103	0.8936	1.166	1.0763	1.6257	1.9193	0.9359		0.284586	1.89116
8.6973	2.9121	2.7049	1.364	1.18	1.421	1.003	1.243	1.612	11.3827	1.9187	0.9989	1.4368	1.3139	2.6049	4.046	0.6756	0.9941	0.8007	1.0513	2.3881	1.6242	1.1639	0.8987	0.9013	1.232	1.8535	1.1933		0.288538	1.92291
8.8165	4.0841	2.9434	1.45	1.141	1.673	0.967	1.02	1.531	11.068	1.5624	1.1065	1.0516	1.5164	2.7639	4.7648	1.0501	0.8697	0.9402	1.2331	3.1612	1.9994	0.7996	1.0044	1.0508	2.0389	2.2288	0.7686		0.292492	2.06622
8.9356	3.4861	2.6432	1.25	1.26	1.186	1.713	1.153	1.816	10.2717	1.3894	1.3422	1.0268	1.4241	2.637	5.0205	1.0527	1.0093	0.906	0.7039	2.0346	2.0371	1.3289	1.2892	1.2452	1.8849	1.9464	1.17		0.296443	2.00841
9.0547	3.9999	3.4606	1.666	1.528	1.22	1.513	0.676	1.943	8.4176	1.338	1.2577	1.0128	1.0922	2.4355	6.0479	1.3448	1.1099	1.1366	1.2409	2.6415	1.9638	0.8379	0.8227	1.3	1.5255	2.0533	0.996		0.300394	2.02152
9.1739	3.6581	3.0099	1.28	1.149	1.212	1.084	0.89	1.877	9.635	1.4433	1.2001	0.6199	1.2049	2.5874	6.6416	1.0867	0.6499	0.8109	1.3592	2.5896	2.3719	1.2421	0.8882	0.8894	1.231	1.9867	0.8949		0.304349	1.98121
9.293	5.0959	2.9123	1.053	0.863	1.33	1.072	1.008	2.109	9.1161	1.4561	1.2602	1.1504	0.9217	2.2621	7.8842	1.3975	1.0857	0.9444	1.1363	3.0388	2.3954	0.9155	1.0629	1.1876	1.9584	1.8977	0.8129		0.3083	2.12323
9.4122	4.6609	2.9214	1.486	1.355	1.191	1.453	1.284	1.758	9.7331	1.19	1.5277	1.3062	0.8583	2.6943	7.7094	1.5173	1.027	1.0039	1.3571	3.0842	2.2757	1.4	0.9719	0.9575	1.7525	1.8033	0.9549		0.312255	2.19384
9.5313	4.9257	2.7938	1.049	1.559	1.106	1.258	1.046	2.322	10.1224	1.1945	1.3424	0.8692	1.4204	3.4193	8.8251	1.4213	0.8063	1.2522	1.0645	3.5587	2.9277	1.1689	0.9884	0.9973	1.3646	1.7154	1.3824		0.316206	2.29261
9.6504	3.9092	3.5887	1.237	1.244	1.452	1.283	0.971	2.38	11.4106	1.8914	1.4006	0.9081	1.7422	4.2189	8.2949	1.3789	0.8858	0.9071	1.4797	5.2907	3.5906	1.2936	1.2614	1.0989	2.3305	2.208	0.6099		0.320157	2.5284
9.7696	3.2748	2.9704	1.194	1.122	1.056	1.166	1.093	2.416	10.6691	1.7171	1.0974	1.0362	0.8397	4.0143	8.3417	1.6353	0.8301	0.9747	1.4597	4.8136	4.4543	0.8121	1.0827	1.0302	2.2845	2.494	0.8803		0.324112	2.39849
9.8887	3.5111	3.0616	1.322	1.353	1.009	0.734	1.197	2.393	10.8467	1.6157	1.3074	0.9834	1.0771	4.8069	9.6741	1.434	0.4903	1.2279	0.8891	4.311	4.4041	1.1451	1.1965	1.4839	2.6897	2.4131	0.8542		0.328063	2.49744
10.0079	5.3733	2.4861	1.095	1.145	1.522	0.805	1.298	3.75	10.7464	1.4084	1.5179	0.8231	1.1764	4.3476	10.8395	1.254	0.9775	0.8302	1.1168	5.9717	4.6105	1.1917	0.9665	1.1776	2.5271	2.4683	1.2316		0.332017	2.69101
10.127	6.1646	2.6284	0.753	1.21	1.153	0.907	0.866	3.737	11.6931	0.9268	1.3155	1.0269	1.237	4.454	12.5755	1.5494	1.4451	1.2589	0.9221	6.945	6.453	0.9868	0.565	1.4889	2.0877	1.9011	1.0149		0.335969	2.86169
10.2462	7.2805	2.141	1.578	1.324	1.282	1.353	1.099	3.709	11.1268	1.6405	1.3729	1.3884	1.0441	5.3581	11.6046	1.6643	1.0478	1.0325	0.94	8.258	6.1228	1.3471	0.9331	1.8634	2.2893	2.2366	1.3416		0.339923	3.05105
10.3653	9.4881	2.2198	1.741	0.914	1.02	1.146	1.282	4.422	10.6481	1.6732	1.2013	1.2811	1.1002	5.5896	11.6307	1.1539	0.7111	0.7978	0.9923	9.6872	6.7302	1.2414	1.1582	1.4643	2.6222	2.6011	1.2021		0.343874	3.17477
10.4844	9.6912	2.2068	1.543	0.592	0.6	1.249	1.124	6.352	9.0084	1.5731	1.5376	1.033	1.4263	6.3026	11.1805	1.8962	0.9655	0.9907	1.3692	10.1785	6.6271	1.2161	1.2982	1.5824	2.4302	2.6454	0.7862		0.347826	3.23723
10.6036	9.9263	2.2351	1.161	1.188	1.008	1.196	1.291	5.781	8.7065	1.6409	1.2645	1.3578	1.1806	7.5177	12.0672	1.4425	0.9464	1.3719	1.1757	10.4264	7.6171	1.1908	1.1577	1.3548	2.4916	2.064	1.1218		0.35178	3.32897
10.7227	11.7848	1.8513	1.601	1.152	0.744	1.208	1.14	7.854	7.7954	1.1703	1.269	1.1878	0.9827	8.369	8.8634	1.3782	1.1458	0.9857	1.1932	10.0797	7.3237	0.9664	0.9778	1.1799	2.0442	2.7892	1.2038		0.355731	3.26816
10.8419	15.1505	1.6345	1.411	1.196	1.151	1.055	1.469	7.8	8.188	1.14	1.3853	1.4593	1.688	8.3517	10.8584	1.2074	0.8263	1.1056	1.6358	9.4059	7.642	1.2603	1.1508	1.1646	2.5154	2.7953	1.1996		0.359686	3.54988
10.961	14.7144	2.178	1.282	0.805	1.304	1.121	1.51	7.228	8.7383	1.144	1.6596	1.0945	1.6994	8.8984	9.2668	1.532	1.1517	1.6374	1.5008	8.6666	8.663	1.4229	0.8228	1.0123	2.5955	3.4707	1.0354		0.363637	3.56128
11.0801	15.0147	1.9586	1.109	1.213	0.897	1.257	1.057	8.504	9.0481	1.6204	1.5907	1.3336	1.3046	9.9945	10.3802	1.2475	1.019	1.3757	1.4294	8.1449	9.5879	1.579	0.9894	1.082	2.7374	3.7016	1.2402		0.367588	3.71913
11.1993	16.2461	1.844	1.156	1.19	1.219	1.185	1.195	9.844	8.1192	1.8045	1.2007	1.5433	1.4442	9.9836	11.7025	1.1051	1.2729	1.2688	1.6908	8.2993	9.828	1.8673	0.8629	1.2296	2.9975	3.2269	0.756		0.371543	3.8549
11.3184	17.2215	1.4341	0.942	1.319	1.799	1.081	1.403	9.536	7.5148	1.1989	1.0008	1.8837	1.37	11.6027	10.8118	1.3004	1.3827	1.2916	1.3763	8.1364	11.3329	2.5906	1.6814	1.2536	2.6288	3.6624	1.3404		0.375494	4.00355
11.4376	19.6234	1.6934	1.386	1.083	1.099	1.267	1.048	10.908	6.8326	0.945	1.0708	1.5037	1.7815	11.6415	10.3893	1.9375	1.2412	1.3659	1.6564	8.4497	11.7582	1.5729	1.0003	0.9676	2.8651	3.2958	1.5039		0.379448	4.06988
11.5567	22.0063	1.2668	0.994	1.297	0.863	1.083	1.182	12.201	6.9571	1.6991	1.2084	0.9672	1.8417	10.9587	10.4862	1.5821	1.3006	1.3109	2.0617	9.5371	12.5272	1.511	0.9917	1.5313	2.2773	3.9518	1.4318		0.3834	4.26022
11.6758	20.7471	1.4737	1.126	1.182	0.835	1.134	0.968	11.71	5.5223	0.925	1.6247	1.6428	1.5508	10.9221	9.8667	1.6362	1.0938	1.3314	1.7695	10.633	11.795	1.645	1.3847	1.382	2.2047	4.627	1.4502		0.387351	4.15491
11.795	23.9501	1.6051	1.328	1.21	1.263	1.16	1.049	11.463	5.3009	1.431	1.149	1.0646	1.2596	11.6311	9.0508	1.3599	1.6907	1.0702	1.873	9.7957	13.0705	1.9908	0.9729	1.2756	2.9877	6.0504	1.5724		0.391305	4.35648
11.9141	26.8684	1.8915	1.169	1.316	1.301	1.443	1.123	11.917	5.1649	1.19	1.3486	1.2691	1.5648	10.7397	8.3442	1.3637	1.1997	1.492	1.8183	11.2838	12.5831	2.0557	1.0369	1.6079	1.9779	6.5515	1.6886		0.395257	4.49294
12.0333	32.0621	1.6668	1.661	1.169	1.326	1.236	1.608	9.971	4.1176	1.1514	1.0896	1.3702	1.5285	11.8663	9.3624	1.7447	1.2925	1.3439	1.4597	13.509	11.7352	1.9631	1.0769	1.3116	2.4607	7.5021	1.9078		0.399211	4.759
12.1524	30.4813	1.4333	1.434	1.391	1.382	0.872	1.946	8.901	3.8678	1.334	1.1346	1.7301	1.7944	10.8567	8.5181	1.7287	1.2468	1.0767	1.6948	14.3883	12.4956	2.0363	1.1627	1.1869	3.5009	9.5847	1.5572		0.403162	4.768
12.2716	31.3445	1.5005	1.096	0.909	1.121	1.214	1.477	8.554	3.3617	1.3331	1.2264	0.9848	1.4901	11.0383	8.6974	1.4539	1.0063	1.1833	1.8969	15.9449	12.1828	1.658	1.059	1.2022	2.607	8.7161	1.4322		0.407117	4.6552
12.3907	34.8848	1.5086	1.381	1.312	1.19	1.129	1.099	8.178	3.3154	1.5954	0.971	1.1666	1.4675	12.228	7.5803	1.824	1.6947	1.0477	2.1415	15.2277	13.3137	1.5912	1.2994	1.2887	2.322	10.5	1.7987		0.411068	4.928
12.5098	31.8635	1.4517	1.371	1.09	1.244	1.056	1.321	7.073	3.234	1.563	1.1845	1.2061	1.9254	11.6928	7.895	1.6834	1.1433	1.9772	1.5981	14.3922	11.7841	2.3883	0.9545	1.6123	2.2452	10.3125	1.915		0.415019	4.71026
12.629	30.4284	1.5697	1.23	0.997	1.177	0.893	1.503	7.606	2.4483	1.4672	1.2989	1.4217	1.4802	10.9784	7.5764	1.7477	1.3552	1.48	1.8509	14.8679	12.6333	1.7309	0.9149	1.1057	2.2555	9.6778	2.086		0.418974	4.58448
12.7481	31.3182	1.1271	1.16	1.753	1.604	1.129	1.329	7	2.4164	1.3844	1.2104	0.7066	1.7356	9.9593	7.6708	1.5247	1.5092	1.513	1.7068	13.5448	12.5044	2.2044	1.1067	1.7606	1.9938	10.4484	2.052		0.422925	4.56936
12.8673	28.4514	1.391	1.443	1.04	1.41	1.327	1.565	7.403	2.6425	1.0349	1.1169	1.0478	1.2821	9.4953	6.1575	1.6444	1.0843	1.334	2.2199	13.0737	12.4727	2.4826	1.4927	1.1575	2.3425	11.344	2.4586		0.426879	4.44127
12.9864	23.8008	1.544	1.074	1.252	1.238	1.576	1.421	6.798	2.8486	1.188	1.4719	1.1994	1.4967	8.4906	6.5042	1.6568	1.4012	1.3221	1.764	13.2789	13.9205	1.997	0.9844	1.1939	2.1382	11.3095	2.1762		0.430831	4.26096
13.1055	22.9016	1.3859	1.5	1.534	1.345	0.962	1.054	6.795	3.0278	0.9876	1.0782	1.0642	1.3297	8.0738	7.5728	1.6957	1.8486	1.6829	1.8756	13.1052	12.6646	1.8001	1.211	1.6061	1.8998	10.0464	2.4321		0.434782	4.16591
13.2247	21.0883	1.3206	1.045	1.417	1.626	1.42	1.25	7.629	2.7321	1.6677	1.2305	0.8681	1.6101	6.2191	6.7704	2.0548	1.2803	1.5215	1.7781	10.7328	11.1282	2.4005	0.8758	1.5643	1.9848	10.6437	2.6963		0.438736	3.94648
13.3438	19.1713	1.3465	1.334	1.795	1.26	1.24	0.977	7.67	2.9578	1.3095	1.1175	1.1321	1.5614	6.0968	5.6664	1.7221	1.8082	1.7881	2.1936	10.402	9.3228	2.3766	1.3816	1.5258	1.8145	9.555	1.9715		0.442688	3.72211
13.463	18.5071	1.5603	1.368	1.625	1.461	1.471	1.366	8.109	2.6281	1.0229	1.0124	1.4284	1.9232	5.0782	5.4512	2.0761	1.7093	1.5861	2.2713	10.061	9.6792	2.5781	1.2434	1.3218	1.4386	10.9923	2.3559		0.446642	3.75277
13.5821	18.0021	1.3258	1.185	1.179	1.234	1.207	1.736	9.708	2.2407	1.367	1.2697	1.3301	1.6292	5.6236	6.5823	1.9338	1.5568	1.8292	1.9688	8.6011	8.4941	2.4845	1.3155	1.5219	2.0262	8.2821	3.2027		0.450593	3.6606
13.7012	17.6358	1.4717	1.731	1.209	1.67	1.192	1.218	9.854	2.0199	1.2926	0.7636	1.1713	1.5306	5.2777	5.3701	2.1061	1.7982	1.9505	2.8579	7.4996	6.5561	3.0498	1.4746	1.743	2.0783	7.961	3.0214		0.454545	3.53718
13.8204	14.279	1.5824	1.45	1.149	1.27	1.269	2.223	10.171	2.1908	1.5231	1.2297	1.4549	1.9013	5.1066	6.2369	1.6975	1.617	1.9444	1.9848	7.8045	5.7996	2.6156	1.053	1.495	1.8643	8.6182	3.6821		0.458499	3.45232
13.9395	13.3497	1.6867	1.152	1.503	1.351	1.175	1.438	10.975	1.9397	1.2443	1.3628	1.204	1.6	5.9948	7.0839	1.4918	1.328	1.6363	2.4603	6.8499	5.7008	2.2815	1.3302	1.2294	1.9372	9.6699	2.95		0.46245	3.40464
14.0587	12.6158	1.3324	1.553	1.523	1.264	1.011	1.754	12.003	1.5527	1.2467	1.3579	1.1285	1.6665	5.3305	6.1365	1.9257	2.0303	2.0306	2.48	7.1999	4.9025	2.3812	0.9803	1.4671	1.6143	9.4718	3.5963		0.466405	3.39094
14.1778	12.0804	1.6926	1.314	1.088	1.163	1.261	1.442	11.324	2.0269	1.0663	1.1478	0.9086	1.6862	5.666	6.0538	2.5771	2.1003	1.6683	2.596	9.1233	3.7676	2.7257	1.704	1.4395	1.6638	9.3423	3.6837		0.470356	3.41897
14.297	9.8599	1.2843	1.026	1.004	1.144	1.332	1.47	10.02	1.7535	1.4084	1.4248	1.095	2.2445	5.4178	5.6827	2.0029	1.9011	1.9833	2.1805	9.726	3.9838	3.0075	0.9399	1.1742	1.709	10.5503	4.5913		0.474311	3.33025
14.4161	9.6171	0.9881	0.845	1.099	1.056	1.218	1.59	9.426	1.3692	1.42	1.72	1.1101	1.8398	5.4057	5.8566	1.6849	1.741	1.4835	2.839	9.6408	3.5541	1.8404	1.1742	0.9819	1.9081	8.3968	5.0007		0.478262	3.14096
14.5352	8.6197	1.6817	1.39	1.822	1.687	0.98	1.863	10.459	1.7302	1.4854	1.8568	1.3297	1.3863	6.8659	5.4836	1.9841	1.716	1.6329	2.9937	9.6513	3.5411	1.8927	1.1505	1.8311	1.566	9.069	6.382		0.482213	3.40929
14.6544	7.9093	1.2493	1.289	1.204	1.18	1.791	1.741	10.725	1.5511	1.5572	1.0051	1.1468	1.3846	7.492	5.6085	1.9083	1.9686	1.4776	2.9592	9.2027	3.9512	1.0946	1.5012	1.852	1.9874	9.1497	7.5691		0.486167	3.38724
14.7735	6.6628	1.5244	1.57	1.345	1.162	1.235	2.325	10.616	2.0149	0.9669	1.1759	1.3873	1.3751	7.9013	5.2039	1.5004	1.9343	1.7829	2.9131	8.7414	3.2629	1.6666	1.3584	1.3842	1.3398	7.7718	7.6393		0.490119	3.25039
14.8927	6.7189	1.6668	1.201	1.489	1.118	1.044	1.971	11.805	2.0808	1.2709	0.8674	1.3979	1.8424	7.5683	4.0824	2.0174	2.5375	1.8316	3.7388	9.39	3.0936	1.4657	1.1006	0.962	1.5422	6.7713	8.3294		0.494073	3.29274
15.0118	5.9471	1.4634	1.352	1.379	1.054	1.23	1.865	10.991	1.4744	1.2669	1.3113	1.6731	1.4571	7.1138	4.2109	2.0023	1.7927	1.3006	2.7406	8.8908	3.3527	1.4571	1.3129	1.3539	1.838	5.587	8.861		0.498024	3.12143
15.1309	4.797	1.5022	1.414	1.091	1.515	1.229	1.667	11.68	1.6253	1.2129	1.4942	1.1381	1.8006	8.2382	4.2795	1.9113	1.9041	1.4069	2.3074	10.2509	3.2246	1.5949	1.4316	1.1234	1.6907	5.4704	9.4584		0.501976	3.20217
15.2501	3.7999	1.6432	1.131	0.722	1.178	1.235	1.851	12.898	1.4324	1.312	1.4242	1.4345	2.0238	7.1642	4.1371	1.6683	2.0555	1.662	3.3402	9.7389	3.7693	1.5796	1.0337	1.1102	1.6473	5.102	8.7773		0.50593	3.14336
15.3692	3.881	1.4864	1.878	1.085	0.932	1.232	1.549	15.314	1.368	1.4204	1.3754	1.3139	1.7819	7.5378	4.499	1.684	1.7063	1.6118	4.0533	9.4045	3.2007	1.562	1.5364	1.6196	1.4569	4.5338	10.3552		0.509881	3.31031
15.4884	2.7008	1.5677	1.514	1.462	1.139	1.139	1.603	13.844	1.0643	1.3018	1.064	1.3313	1.4435	5.8202	4.2432	1.5509	1.4625	2.2046	3.169	12.2118	4.3368	1.5465	1.169	1.3238	1.3842	4.4759	12.4883		0.513836	3.28004
15.6075	2.6025	0.9989	1.335	1.546	1.444	1.102	1.54	13.107	1.3898	1.579	0.807	1.0311	1.7889	4.9359	3.5225	1.3494	1.9744	1.5829	3.9739	13.305	3.5084	1.546	1.2517	1.3196	1.4844	4.2576	13.8338		0.517787	3.26358
15.7266	2.4138	1.5102	1.409	1.216	1.127	1.623	1.344	14.042	1.2465	1.0239	0.9048	1.4377	2.0931	5.4183	3.3322	1.9083	1.9162	2.1736	3.7604	15.4228	3.6062	1.3411	1.2254	1.388	1.6461	3.9671	13.2901		0.521738	3.39951
15.8458	2.8722	1.748	1.288	1.697	1.218	1.457	1.718	14.873	1.2723	0.939	0.8143	1.1711	1.8051	4.8968	3.8172	1.7632	2.0164	2.6346	4.1256	14.3203	3.6527	1.0915	1.2256	1.3502	1.7386	3.5465	15.2734		0.525693	3.49354
15.9649	2.5533	1.7237	1.8	1.392	1.132	1.361	1.399	12.512	1.4374	1.7833	0.8581	1.1944	1.2044	3.8779	3.486	2.1383	1.4178	2.5302	3.5554	16.5053	3.7047	1.6155	1.1527	1.1611	2.1313	3.1229	15.5385		0.529644	3.41808
16.0841	2.5921	1.3621	1.497	1.266	1.611	1.668	2.017	11.752	1.3218	1.2764	0.8924	1.2519	1.614	4.8983	4.6336	2.0525	1.4259	1.8922	4.011	15.89	3.2512	1.5338	1.2469	1.0782	1.4916	3.0906	14.0445		0.533599	3.35785
16.2032	1.9446	1.58	1.556	1.105	1.283	1.683	1.733	11.124	1.4792	1.3015	1.283	1.5058	1.2654	4.1781	4.5752	1.6539	1.3322	1.781	4.6992	15.123	3.4703	1.4269	1.4995	0.9988	1.4546	2.344	12.7443		0.53755	3.1898
16.3224	2.2362	1.8727	1.6	1.203	1.332	1.215	1.676	12.692	1.4122	1.4837	1.4545	1.0127	1.3328	4.0187	5.4655	1.9065	1.6363	1.7821	3.7773	16.2343	3.2623	1.2052	1.3543	1.4907	1.3731	2.1535	13.0966		0.541504	3.30664
16.4415	2.0455	1.4072	1.248	1.381	1.153	0.872	1.216	12.673	1.5455	1.1003	0.893	1.1143	1.6523	3.0699	4.8824	1.6797	1.881	2.1747	4.3496	15.5123	3.2106	1.4175	1.6338	1.4178	1.1259	2.0887	11.4432		0.545455	3.11808
16.5606	2.038	1.5255	1.643	1.42	1.015	1.065	1.669	11.355	1.5177	1.3289	1.4395	1.1741	1.8182	3.4113	5.2849	1.3697	1.8331	1.7435	3.5599	14.7993	3.8516	1.653	1.566	1.6055	1.2085	2.5429	11.3912		0.549407	3.14183
16.6798	1.7031	1.5117	1.594	1.22	1.485	1.083	1.948	11.609	1.3512	1.2686	1.3505	0.9135	1.62	3.0918	5.3599	1.2025	1.8068	2.3303	3.815	13.2421	3.5209	1.6668	1.2129	1.4218	1.8083	1.8106	11.1653		0.553361	3.04121
16.7989	2.5288	1.212	1.051	1.344	1.384	0.995	1.241	10.995	0.9973	1.3709	1.016	1.0246	1.3958	2.9016	5.8673	1.7849	1.9609	1.8719	3.5347	12.6191	3.5636	1.3962	1.4205	1.1397	1.6835	1.854	11.555		0.557312	2.95216
16.9181	2.3067	1.4232	1.362	0.866	1.36	1.303	1.457	11.31	1.1666	1.3229	1.1517	1.3141	1.4076	3.2054	5.9698	1.6881	2.0675	2.7211	3.591	13.0252	3.8436	1.6896	1.3683	1.4062	1.534	2.7746	12.4895		0.561267	3.15277
17.0372	1.8906	1.1926	1.58	1.041	1.193	1.305	1.575	11.212	1.14	1.3688	1.2297	1.4596	1.6371	3.3454	6.4384	1.7187	1.5958	1.8712	4.119	11.6428	3.3487	1.4062	1.2754	1.3342	1.4566	2.2458	12.1174		0.565218	3.02741
17.1563	1.9316	1.1964	1.323	1.533	1.372	0.833	1.935	11.226	1.1554	1.1343	1.1065	1.3931	1.484	3.0223	6.3922	1.3606	1.7907	2.78	2.3219	11.1066	2.8843	1.3521	1.1364	1.5288	1.6852	1.801	11.6411		0.569169	2.90469
17.2755	2.1757	1.4461	1.479	1.407	1.204	1.303	1.85	11.003	1.3377	1.3522	1.0722	1.1537	1.6123	3.6817	6.6811	1.6039	1.5326	2.0717	3.701	9.7109	3.562	1.191	1.502	1.3643	1.8221	2.2207	10.7591		0.573124	2.95556
17.3946	2.0061	1.837	0.823	1.183	0.937	1.098	1.972	10.086	1.5148	1.416	0.9831	1.2191	1.3027	3.6518	7.1546	2.3053	1.8504	2.3291	3.7203	9.6092	2.8197	1.4544	1.3434	0.8988	1.4102	2.0605	10.9615		0.577075	2.88693
17.5138	1.7936	1.6301	1.547	1.097	1.336	0.873	2.207	11.025	1.4905	1.5109	0.9747	1.2698	1.8179	3.3184	6.9739	1.801	1.6082	1.6515	4.5225	8.3851	2.1696	1.5955	1.3678	0.9278	1.6038	2.1456	10.5859		0.58103	2.86034
17.6329	1.9985	1.1284	1.349	0.964	1.252	0.936	2.235	10.837	1.6194	1.4221	0.9968	1.3221	1.2141	2.9775	7.5969	2.1263	1.5019	2.1961	3.663	8.429	2.6388	1.4484	0.9214	1.4965	1.4143	2.3221	11.7194		0.584981	2.87874
17.7521	1.2951	1.016	1.115	1.013	0.952	0.968	1.739	11.525	1.4107	1.4791	1.5681	1.7531	1.6088	3.3256	7.3546	1.2841	1.5772	1.6521	2.93	8.3472	3.0155	1.7041	1.4153	1.3999	1.1981	2.3265	10.7476		0.588935	2.80447
17.8712	1.6539	1.6535	1.573	1.079	0.898	0.936	1.709	11.545	1.4123	1.1051	1.728	1.556	1.4134	3.3191	6.6233	1.738	1.8241	1.3502	3.9656	9.1926	2.1394	1.8482	1.2222	1.6799	0.9922	2.132	11.7537		0.592887	2.89047
17.9903	1.5424	1.5069	1.532	1.788	1.418	0.925	2.753	11.758	1.0487	0.9943	1.2172	1.277	1.5742	3.6806	7.0839	1.4925	1.4403	1.5825	3.8513	8.6116	2.7554	1.6331	1.8875	1.1865	1.1846	2.086	12.9511		0.596838	2.99117
18.1095	1.5125	1.2467	1.72	1.704	1.222	1.22	2.147	11.67	1.6143	1.1248	1.1513	1.2017	1.4643	3.1823	6.6589	1.5468	1.4029	1.8536	4.3543	8.6804	2.5998	1.3583	1.457	1.5005	1.5044	1.5308	10.7881		0.600792	2.86729
18.2286	1.8352	1.5497	1.128	1.247	1.213	0.744	1.972	11.079	1.3928	0.8474	1.3767	1.5053	0.9983	3.4023	6.4588	1.2279	1.3241	1.545	3.2276	7.5785	2.8555	1.9717	1.0277	1.3639	1.3369	1.5248	11.6613		0.604743	2.71831
18.3478	1.6999	1.8609	1.242	1.353	1.106	1.34	2.069	9.091	1.5169	1.2016	1.27	1.225	1.4505	4.1049	7.3777	1.3568	1.4658	1.6397	3.6759	8.0303	2.4857	1.0859	1.2228	1.5741	1.0781	1.6305	9.8388		0.608698	2.70344
18.4669	1.3661	1.4985	1.184	1.68	1.109	1.366	1.575	8.626	1.4284	1.3286	1.4224	1.4123	1.358	3.3607	6.2589	1.545	1.3399	2.0259	3.7698	8.6008	2.4754	1.7006	1.1985	1.0738	1.2693	1.8687	11.6596		0.612649	2.72227
18.586	1.5718	1.9821	1.509	1.222	1.263	1.187	2.184	7.318	1.4372	1.2589	1.1425	1.1847	1.3087	2.9833	6.9716	1.7302	1.7141	1.4787	3.2543	7.7977	2.581	1.5466	1.548	1.6255	1.3921	1.7521	10.6639		0.6166	2.65215
18.7052	1.2554	1.7166	1.823	1.541	1.268	1.005	2.836	6.112	1.8136	1.6131	1.2872	0.9935	1.5566	3.091	6.4739	1.5175	1.536	1.5658	3.4093	10.3884	2.2648	2.1091	1.1035	1.0174	1.2475	1.7814	11.2332		0.620555	2.72444
18.8243	1.7919	1.3618	1.564	1.504	1.171	1.42	2.712	5.742	1.7801	1.2445	1.1878	0.9389	1.071	2.7934	7.2499	1.5936	1.6091	1.5581	3.0407	9.9871	2.8802	1.3661	1.4096	1.2237	1.2402	1.4029	10.5333		0.624506	2.64359
18.9435	1.7367	1.3804	1.533	1.43	1.167	1.216	3.485	5.338	1.7876	1.165	1.3377	1.3213	1.5142	3.3993	6.474	2.1358	1.3806	1.3875	2.8336	10.2566	2.4713	1.4191	1.8069	1.0113	1.1846	2.0104	10.8921		0.628461	2.70648
19.0626	1.4779	1.0246	1.754	1.211	0.766	0.966	4.234	5.023	1.2459	0.864	1.3113	1.4063	1.2849	3.7161	6.8832	1.5363	1.3829	1.6417	3.4305	9.2606	2.3725	1.1887	1.1199	1.3514	1.3262	1.4044	11.229		0.632412	2.60786
19.1817	1.1968	1.2431	1.411	0.905	1.125	1.332	4.988	4.915	1.3699	1.3939	1.1089	1.0472	0.9757	3.2204	8.1027	1.1784	1.698	1.7016	3.2028	10.1918	1.943	1.086	1.3053	0.9512	1.1538	1.9394	10.8518		0.636363	2.64954
19.3009	1.5197	1.1672	1.335	1.17	1.235	1.206	5.258	3.957	1.3204	1.1377	1.1915	1.2794	1.547	2.5422	8.7743	1.3019	1.5298	2.0379	3.2714	10.5301	1.8729	1.4297	1.1267	1.0742	1.236	1.7569	9.9039		0.640318	2.65599
19.42	1.3193	1.5657	1.502	1.373	1.173	1.398	7.707	3.129	1.7084	0.8042	1.4124	1.3408	1.2382	2.7182	9.59	1.4019	1.2768	2.1005	3.387	9.9237	2.1913	1.393	1.8711	1.0355	0.9609	1.7499	8.6846		0.644269	2.73909
19.5392	1.3532	1.2066	1.518	1.391	1.088	1.412	8.67	3.159	2.0888	0.9504	1.5439	1.5711	1.0419	2.0696	9.617	1.9573	1.3844	1.9095	3.6164	9.6109	1.6859	1.2301	1.5038	0.861	1.2741	1.3081	9.7561		0.648223	2.76956
19.6583	1.4985	1.2594	1.259	1.475	0.94	1.129	7.551	3.229	1.69	1.3733	1.2457	1.3092	1.3776	2.7879	11.8818	1.4312	1.3333	2.1946	3.2817	11.9319	1.8316	1.4846	1.5917	1.2816	1.3718	1.6237	9.0295		0.652174	2.90347
19.7775	1.7366	1.361	1.62	1.246	1.629	1.128	8.554	3.447	1.7272	1.5088	1.1298	1.1821	1.2302	2.2499	12.5822	1.5765	0.9787	2.2609	3.2502	9.5426	1.7297	1.5734	1.1471	1.3763	1.1332	1.1701	9.1067		0.656129	2.85841
19.8966	1.4045	1.3415	0.972	1.458	0.819	1.409	8.819	3.077	1.8037	1.844	1.3	1.3916	1.2205	2.4536	12.6846	1.5451	1.3007	1.8358	2.6464	8.9088	2.0328	1.1614	1.0846	1.3449	1.1909	1.1762	8.2455		0.66008	2.75819
20.0157	1.9107	1.4987	1.865	1.292	0.904	1.324	9.994	2.991	1.6732	1.3375	1.1765	1.3702	1.5711	3.0736	12.142	1.2636	1.288	1.5345	2.7426	8.6698	2.4438	1.3964	1.4407	1.2731	1.322	1.7904	7.7169		0.664031	2.85205
20.1349	1.4303	1.1567	1.316	1.683	0.794	1.233	11.977	3.194	1.3836	1.0197	1.0204	0.9965	1.2487	2.4542	11.8062	1.6982	1.4391	2.2099	2.6521	8.4675	1.5761	0.9355	1.2166	1.3208	1.6803	1.3822	7.3637		0.667986	2.76501
20.254	1.4896	1.6427	1.482	1.17	1.267	1.16	13.276	2.631	1.9781	1.5457	1.3202	1.4	1.3224	2.275	12.7328	1.5994	1.4986	1.8199	2.9433	9.307	1.9312	1.2317	1.5079	1.5149	1.264	1.5062	7.6575		0.671937	2.98052
20.3732	1.8263	1.5907	1.469	1.093	1.051	1.272	13.057	3.016	2.0071	1.367	1.5744	0.9721	1.3802	2.7838	13.2322	1.5847	1.5261	2.0616	2.9139	10.0561	1.7544	1.4026	1.2638	1.6768	1.2374	1.2102	6.9379		0.675892	3.01175
20.4923	1.632	1.1049	1.341	1.343	1.169	1.192	14.453	2.36	2.3243	1.6734	1.4073	1.0716	1.4547	2.7737	13.2211	1.8689	1.7413	1.7875	3.0556	8.3904	1.9399	1.6206	1.6335	1.416	1.5991	1.1962	7.1615		0.679843	3.0345
20.6114	1.457	0.7851	0.929	1.098	0.949	1.189	13.709	2.427	1.3486	1.4722	1.0145	1.327	1.5774	2.168	13.6486	1.5567	1.3116	1.6302	2.1857	7.4228	1.5785	1.101	1.4962	1.3012	1.1708	1.4118	7.2004		0.683794	2.75801
20.7306	1.0461	1.5344	1.684	1.328	1.375	1.243	15.241	2.366	1.6542	1.4274	1.1299	1.4125	1.6752	3.001	13.5937	1.7418	1.1743	1.8231	2.8846	7.9979	1.4118	1.1612	1.5772	1.0437	1.3154	1.5451	7.2354		0.687749	2.98603
20.8497	1.6036	1.6841	1.322	1.501	1.145	0.905	16.121	2.683	1.6002	1.3084	1.3476	1.2923	1.3	2.6383	14.3576	1.8319	1.0424	2.1591	2.9741	8.6261	1.4227	1.3636	0.9494	1.2373	0.9961	1.415	5.8077		0.6917	2.98646
20.9689	1.8548	1.29	1.223	1.205	0.967	1.233	14.85	2.701	1.9815	1.1393	1.1774	1.5261	1.2488	2.0216	13.5668	1.5339	1.22	2.1448	2.5103	7.6789	1.8327	1.029	0.8216	0.9229	1.324	1.4546	5.6255		0.695654	2.81791
21.088	1.9487	1.4148	1.751	1.184	0.83	1.186	14.627	2.634	1.635	1.5374	1.3755	1.1864	1.0658	2.6138	14.9985	1.6201	1.2329	1.6764	2.2436	8.3549	1.3868	1.0073	1.0965	1.2951	1.1143	1.4003	5.1939		0.699606	2.87444
21.2071	1.525	1.4006	1.113	1.249	1.176	1.345	15.251	2.938	1.826	1.8403	1.4364	1.0773	1.6911	2.6215	13.1664	1.3655	1.3271	1.8653	2.6566	8.1805	1.9342	1.3577	1.0001	1.4189	1.0631	1.197	5.3106		0.703557	2.90123
21.3263	1.234	1.5559	1.371	1.363	1.254	0.807	16.402	2.593	1.6043	1.3092	1.3661	1.3858	1.2125	2.1565	12.4778	1.6487	1.1648	1.8395	3.0908	7.684	1.2449	1.2288	1.0727	1.0375	1.0153	0.8357	5.5768		0.707511	2.79747
21.4454	1.8617	1.4756	1.603	1.169	0.948	1.083	15.227	2.802	1.7068	1.317	1.5651	1.0123	1.2988	1.8481	10.5108	1.5684	1.8103	1.9649	2.9442	7.027	1.3946	1.2624	1.2588	0.8825	1.2866	1.7182	4.1175		0.711462	2.69124
21.5646	1.7618	1.4833	1.624	1.208	1.332	0.981	16.895	3.046	1.6107	0.9889	1.1942	1.3322	1.174	2.4104	11.2244	1.8367	1.4385	2.393	2.534	8.0559	1.3173	1.4863	1.1999	0.9756	1.2366	1.6492	5.0061		0.715417	2.86648
21.6837	1.7121	1.4778	1.704	1.405	1.099	1.628	18.262	3.136	1.6087	1.4349	1.7084	1.2699	1.4851	2.8165	10.3072	1.604	1.021	1.8901	2.4111	8.3565	1.3933	1.9472	0.9249	0.8095	1.0813	1.3778	4.6619		0.719368	2.90864
21.8029	1.6212	2.1158	1.334	1.202	1.402	1.292	17.929	2.875	1.8055	1.9436	1.247	1.1951	1.9199	2.3985	10.297	1.8252	1.6307	2.4965	2.3107	8.4433	1.3816	1.364	1.0354	1.3528	1.3487	1.5304	4.0698		0.723323	2.93951
21.922	1.5293	1.8565	1.085	0.96	1.347	1.336	17.033	2.555	2.1144	1.9417	1.4277	0.9285	1.5822	2.711	9.0159	1.8864	1.6138	1.8623	2.6146	8.5263	1.3423	0.9958	1.5649	1.3858	1.5079	1.7721	4.0781		0.727274	2.83606
22.0411	1.5378	1.2907	1.304	0.853	1.331	1.213	19.813	2.643	2.0248	1.4133	1.1747	1.5333	1.5805	2.1551	9.5921	1.4112	1.4433	2.055	3.0051	8.8648	1.4859	1.1447	1.3397	1.4536	1.4503	1.5134	4.3979		0.731225	2.92682
22.1603	1.7145	1.9491	1.723	1.231	1.016	1.417	17.617	3.716	1.9847	1.631	1.0859	1.1022	2.1569	1.9048	9.1281	1.9197	1.0864	2.4793	2.3346	9.2576	2.0311	1.4124	1.41	1.5171	1.2071	1.1537	4.5671		0.73518	2.95383
22.2794	1.719	1.7644	1.427	1.537	1.254	1.495	15.408	4.078	2.4831	1.8233	1.2367	1.1678	1.8076	2.5127	12.1887	2.2209	1.2694	2.1392	2.8279	9.7223	1.8022	1.5282	1.37	1.1376	0.9306	1.3961	4.1495		0.739131	3.05171
22.3986	1.5507	1.5923	1.191	1.562	1.31	1.483	15.52	4.008	2.3671	1.7993	1.2614	1.1659	1.8025	3.3263	11.4089	2.7741	1.2835	2.0496	2.4774	10.4533	1.5342	1.2347	1.5612	1.7284	0.9038	1.5521	4.4593		0.743085	3.08741
22.5177	1.9388	1.231	1.701	1.571	1.211	1.568	13.865	4.42	2.7125	1.7947	1.3458	1.3905	1.5623	3.0012	11.1298	2.4808	1.3438	2.0027	2.5923	12.6069	2.0627	1.0938	1.2941	1.3212	0.8694	1.0559	3.9114		0.747037	3.07695
22.6368	1.7304	1.6256	1.039	1.64	0.946	1.686	11.993	5.012	2.8058	1.6201	1.6181	1.8574	1.4923	3.1468	13.1398	2.7454	1.5137	2.1419	2.4026	11.7812	1.318	1.0224	1.4771	1.1336	0.9872	0.9776	4.1332		0.750988	3.07356
22.756	1.8176	1.5891	1.388	1.68	1.227	2.484	10.768	5.597	2.5243	1.8006	1.6548	1.3996	1.8349	3.5851	11.6825	3.1695	1.5005	1.9637	2.4462	13.296	1.6531	0.8796	1.5362	1.4923	1.2666	1.1131	4.0956		0.754942	3.16463
22.8751	2.0779	1.6322	1.485	0.922	1.025	2.53	9.723	4.956	3.297	1.7156	1.6623	1.419	1.9856	3.4067	12.8229	3.368	1.1057	2.2282	2.4689	11.6397	1.5406	1.1622	1.5365	1.0461	1.2881	1.317	3.8166		0.758894	3.08066
22.9943	1.8361	1.7138	1.613	1.158	1.521	3.919	8.949	5.441	3.5657	1.5382	1.4148	1.1728	1.7362	3.0772	14.6439	3.8264	0.9787	1.8081	2.1718	12.1869	2.0402	1.3519	1.2002	1.5637	1.236	1.2995	3.8597		0.762848	3.21566
23.1134	1.7798	1.6388	1.659	1.503	1.256	5.353	8.246	6.297	4.0361	1.8274	1.657	1.573	1.7572	3.4539	12.0669	4.4366	1.5674	1.4813	2.2644	11.8063	1.3835	1.1378	1.7282	1.6042	0.9992	1.486	3.4249		0.766799	3.23792
23.2325	1.935	1.6051	2.061	1.315	1.146	6.737	8.405	7.42	4.3765	1.8752	1.6291	1.5908	1.7622	2.9767	14.1108	4.5663	1.5342	1.5451	2.5012	10.7856	1.5168	1.239	1.2435	0.9575	0.8232	1.3096	3.8463		0.77075	3.36347
23.3517	1.7644	1.478	1.301	1.239	1.464	7.96	8.831	7.914	4.2783	2.2797	1.4337	2.2372	1.7608	3.3286	14.1651	4.6584	1.0729	2.2427	2.8806	9.7405	1.4678	1.769	1.3073	0.689	1.2705	1.2131	3.5801		0.774705	3.45654
23.4708	1.9627	1.5419	1.931	1.104	1.711	11.556	8.765	7.452	5.7206	2.1159	1.8047	1.9051	1.5613	4.5095	14.5142	5.46	1.3996	1.524	2.8398	9.9079	1.5891	1.5351	1.3409	1.3101	1.4224	1.3382	3.7402		0.778656	3.76156
23.59	1.5672	1.7543	1.619	1.289	1.483	13.802	8.872	7.399	7.2022	2.7134	1.9841	1.7509	1.9714	4.4063	14.3153	5.7647	0.948	1.6983	3.6154	10.3846	1.957	1.4583	1.6625	1.0418	1.3187	1.0609	3.0235		0.782611	3.92825
23.7091	1.7011	1.996	1.742	1.528	1.215	15.864	9.605	7.75	8.8538	2.6753	1.2815	1.641	2.9103	5.2991	15.2775	5.8853	1.716	1.7607	3.5193	11.6337	1.86	1.4806	1.9913	1.0155	0.9313	1.5653	2.8474		0.786562	4.27948
23.8283	2.4546	2.0427	2.501	1.126	0.922	19.06	9.326	9.285	10.1198	2.8437	1.7255	1.9053	2.4645	4.9782	16.1334	6.5935	1.869	2.1911	3.8815	11.9984	1.9256	1.7305	1.1225	1.0149	1.4313	1.7582	3.1378		0.790516	4.6497
23.9474	2.0104	2.1513	1.828	1.438	1.299	23.358	10.653	8.912	11.4959	2.6182	1.8165	1.765	3.2108	6.1538	16.2008	6.7281	1.9388	2.4024	4.2101	12.1761	2.1563	1.4116	1.1861	1.5606	1.2844	1.0545	3.5695		0.794468	4.98479
24.0665	2.5914	2.4552	2.575	1.385	1.25	26.172	11.984	9.687	16.1676	2.3738	1.9232	1.6332	2.8712	6.7304	19.6548	6.5205	1.2855	2.0975	3.8606	13.5653	1.8559	1.7117	1.2525	0.9566	1.3043	1.1521	3.0555		0.798419	5.48414
24.1857	2.9707	2.355	2.924	1.165	1.834	30.402	15.153	9.973	19.8534	3.0033	2.1148	1.9772	3.6532	6.9349	19.2628	6.4215	1.5259	2.0977	4.4002	14.245	2.2235	1.6116	1.2873	1.0866	1.2767	1.5499	3.625		0.802373	6.10841
24.3048	2.5425	2.7438	2.244	1.355	2.168	32.388	17.321	12.822	23.2607	3.0152	1.9204	2.4379	4.3027	9.2793	19.1228	7.4031	1.4093	2.6165	5.2894	15.6468	2.1515	1.6543	1.141	1.5606	1.0893	1.3743	3.086		0.806325	6.7165
24.424	2.5302	2.7181	2.954	1.806	1.978	36.247	20.563	13.637	27.6011	4.874	1.572	1.9971	4.3505	11.8864	20.7104	7.6625	1.5676	1.8189	5.2023	16.8716	2.1672	1.7151	1.5897	0.9296	0.9882	1.3989	4.177		0.810279	7.46346
24.5431	2.8094	2.3764	2.933	1.958	2.762	39.53	22.122	16.588	30.7899	4.7917	2.1343	2.4531	4.657	12.7189	21.0577	9.6203	1.9056	2.4234	5.6372	18.1902	1.8145	1.6772	1.5025	1.1887	0.832	1.2194	3.8954		0.81423	8.13288
24.6622	3.0855	2.8637	3.116	2.042	4.168	37.769	22.529	19.601	31.8452	6.7378	2.6332	3.2911	5.4774	14.3822	23.6877	9.0744	2.2835	3.1252	5.7683	15.8288	2.7339	1.403	1.2093	1.2627	1.4148	1.0785	4.192		0.818182	8.61493
24.7814	2.097	2.6517	3.457	2.47	6.052	39.846	22.784	23.592	31.941	7.8353	2.7934	2.753	7.0429	18.0123	24.3045	10.3101	1.8664	3.0419	7.3793	19.0067	2.6954	1.7298	0.9673	1.0738	1.1611	1.2016	3.9359		0.822136	9.33339
24.9005	2.4209	3.174	5.052	2.837	9.075	38.583	23.762	27.281	33.183	9.4581	2.7986	4.0059	8.7271	19.7589	25.4985	11.9432	2.3866	4.7399	5.9174	18.1604	3.7258	1.4461	1.2303	1.0276	1.0358	1.2786	3.646		0.826087	10.0797
25.0197	2.5418	3.6168	4.477	3.442	12.975	37.4	23.873	28.337	33.7856	13.2467	3.304	4.3616	11.0134	23.7309	25.6906	10.6615	3.4858	4.4258	7.3544	18.7329	4.3875	1.1223	0.8606	1.3055	1.3911	0.822	3.5759		0.830042	10.7378
25.1388	3.1264	2.9872	4.911	4.896	18.301	35.183	24.359	30.21	36.0199	18.7469	3.804	4.6806	13.1561	26.9378	23.3818	12.2483	3.2755	4.0849	7.8084	18.9504	4.1806	1.6785	1.4385	1.3819	1.7813	1.2287	3.6926		0.833993	11.5722
25.258	3.8227	2.9947	5.389	5.695	18.63	34.086	28.968	33.918	35.8015	23.2453	5.1395	5.4615	14.0615	27.2246	23.7843	14.6891	4.4879	4.7913	7.2953	19.2431	4.5079	1.6322	1.3292	0.9071	1.0618	1.7597	3.5649		0.837947	12.3515
25.3771	4.4494	3.5797	5.953	7.074	19.203	36.213	29.702	33.117	41.1176	28.5135	7.0251	5.3097	17.1603	30.7175	23.4267	15.256	5.4843	5.0376	8.8656	22.5092	6.1132	1.7541	1.1622	1.0896	1.3011	1.5711	3.8197		0.841899	13.575
25.4962	3.3643	4.0462	5.709	8.534	18.426	39.119	25.885	33.706	49.3392	32.7402	9.4531	6.939	18.9172	30.3825	22.69	15.6121	6.6059	6.369	11.2653	22.2761	7.9444	1.8653	1.1917	1.0627	1.4882	1.4372	3.4187		0.84585	14.4366
25.6154	4.7131	3.5085	6.492	9.711	18.452	39.476	26.366	35.055	51.1569	44.8644	15.5999	7.2391	22.9015	32.3202	17.4144	15.0987	6.8149	7.955	12.4397	21.4312	7.7686	2.0764	1.0877	1.1657	1.1796	1.7097	4.6559		0.849804	15.5057
25.7345	5.9122	4.0248	7.833	12.282	19.346	41.124	26.822	34.268	50.5199	49.8149	23.3399	9.9031	25.3099	33.2254	13.3647	18.4189	10.0201	9.3105	15.336	21.9135	10.926	1.9666	1.2072	1.2489	1.1486	1.1718	3.7838		0.853756	16.7978
25.8537	6.954	4.235	7.932	14.594	23.488	42.487	25.779	34.733	50.6181	52.0445	29.1313	12.9277	28.4502	31.0825	11.1054	21.4095	11.7593	11.9981	18.8121	22.4346	13.3247	2.2106	1.3492	1.2475	1.0328	1.2517	4.865		0.85771	18.0465
25.9728	6.6228	4.3857	8.345	15.293	30.492	42.411	27.019	36.66	38.8234	49.103	35.1419	15.8937	28.686	25.09	7.5942	18.4641	12.1995	10.7028	19.7737	23.7404	14.2728	2.2115	1.3821	0.9149	1.3842	1.5182	5.054		0.861661	17.8955
26.0919	9.5031	4.7907	7.754	16.618	40.281	42.827	29.405	40.622	25.1773	37.6442	39.8856	20.137	29.2326	19.1033	6.419	21.7468	14.9641	12.5064	23.229	25.6711	18.0057	2.5078	1.5991	1.2391	1.2102	1.3991	4.4925		0.865613	18.4434
26.2111	11.716	4.6104	9.282	15.631	44.752	49.81	34.225	42.389	14.2335	25.0872	46.5226	27.1391	31.6127	12.4433	6.5113	21.1565	17.5076	13.1817	25.3371	24.6264	18.7425	2.6894	1.2744	1.391	1.5572	2.0106	4.2715		0.869567	18.8782
26.3302	13.4057	5.0303	11.27	15.35	51.445	47.499	35.741	46.443	6.6222	16.0613	54.3109	27.0244	33.8579	9.4203	6.4695	22.2674	16.5819	13.8946	27.249	24.7348	17.6949	2.8932	0.6686	1.496	1.7381	1.4286	4.7698		0.873518	19.0877
26.4494	15.1494	4.9987	15.49	17.554	56.184	50.05	36.307	51.484	3.9855	8.7173	59.8283	26.9371	35.8682	6.9136	4.2377	23.0386	18.7065	14.2583	28.1588	25.7918	18.4996	3.8838	1.2425	1.4398	1.5646	2.0436	4.5236		0.877473	19.8836
26.5685	17.2633	6.5375	22.572	17.04	57.605	48.287	40.266	53.237	3.8355	4.4458	60.8433	27.3474	34.2279	5.2212	5.3196	22.0944	19.2853	16.2514	27.857	24.4725	17.7421	4.2353	1.35	1.2402	1.5556	2.1931	5.766		0.881424	20.2997
26.6876	17.3192	7.061	25.261	18.14	56.281	47.954	41.454	48.492	3.2103	3.9681	56.8898	27.7024	29.212	4.9693	3.7139	20.6355	18.8425	17.8574	29.8793	23.417	17.3754	5.6021	1.8006	1.5573	1.9748	1.5958	5.6811		0.885375	19.9203
26.8068	17.2564	7.9798	28.787	21.472	46.389	48.087	40.65	40.017	2.3266	3.8021	40.4097	26.7229	22.1606	3.6229	3.438	22.1961	20.197	19.8535	25.9898	23.2047	17.2612	5.7435	1.7508	1.6027	1.6067	2.1063	6.6576		0.88933	18.5663
26.9259	15.9432	12.063	29.555	22.956	43.463	44.027	40.278	28.885	1.9045	2.6854	24.4719	27.1252	12.6745	3.524	2.5876	20.1126	21.1808	19.0903	24.9833	22.7399	18.0502	7.9915	1.9802	1.703	1.7316	2.4615	7.6934		0.893281	17.106
27.0451	15.0966	12.9841	33.942	24.7	45.103	40.176	39.214	15.932	1.9803	1.8511	12.3753	22.671	8.429	3.182	1.9316	17.2704	21.0036	20.3662	23.8431	20.3724	20.816	8.1148	1.6773	1.8346	1.7296	2.7351	6.5073		0.897235	15.7718
27.1642	14.9589	16.0225	41.718	25.219	40.496	39.657	37.782	8.825	1.8007	1.6257	5.7655	17.2754	5.8036	3.073	1.2768	15.6515	20.6526	22.0982	18.9454	16.7923	21.7307	8.7432	1.6676	1.5329	1.7881	2.0268	7.4777		0.901187	14.8299
27.2834	14.5928	19.5093	43.178	22.559	31.969	40.978	33.795	5.136	1.1974	1.2931	3.4261	12.673	3.6583	2.8698	1.3906	13.541	19.1673	22.8654	17.5951	15.0514	26.3843	9.581	2.0955	1.5762	1.6537	2.259	8.2568		0.905141	14.0093
27.4025	16.4762	16.316	40.221	21.461	28.788	41.688	29.857	3.828	0.9627	1.0439	3.2445	7.1281	3.2951	2.3369	1.2994	12.8386	19.8021	22.1348	15.9723	12.2125	28.1788	10.1679	2.0716	1.8388	1.4882	2.4858	9.2076		0.909092	13.198
27.5216	16.8249	18.2009	35.902	21.67	27.867	44.337	22.283	2.909	1.0123	1.4727	2.619	4.2818	2.5287	2.5756	1.3055	9.9998	21.6739	23.1642	13.4457	9.2375	33.0227	10.898	2.0172	1.8265	1.5847	3.1002	10.0862		0.913044	12.8091
27.6408	16.8458	16.2237	31.502	23.041	28.326	45.736	14.324	2.146	0.9563	1.1006	2.2423	3.1255	2.7919	1.8043	1.0815	8.0901	19.4098	18.9949	10.8055	8.2493	32.822	10.9468	2.0389	1.8813	1.9041	2.9047	10.9794		0.916998	11.862
27.7599	16.9904	18.2569	27.062	21.92	29.209	48.066	8.079	2.266	0.8281	0.9902	1.6804	2.5188	2.0268	2.2546	0.9378	6.273	19.6894	16.283	8.6188	5.2504	36.9398	13.505	2.1553	2.227	2.7993	3.6739	11.293		0.920949	11.5479
27.8791	18.5737	18.3708	26.27	22.361	28.987	46.687	4.545	1.845	0.5802	1.3819	1.6371	1.8267	1.6006	1.606	0.8471	4.6231	19.4669	15.4163	7.6051	4.2768	40.5895	14.4836	2.6811	2.0595	1.5552	3.4234	13.932		0.924904	11.3789
27.9982	18.3307	22.7007	26.565	23.828	29.04	45.415	3.371	1.05	0.8171	0.701	1.6775	1.2992	1.4374	1.4864	0.9862	3.7707	18.1232	14.5893	5.8245	3.473	41.0909	13.8102	2.6835	2.4707	2.6765	4.2144	16.4396		0.928855	11.4027
28.1173	18.9722	25.7399	30.117	24.972	30.379	41.14	2.356	1.244	0.7482	0.8108	1.1676	1.5981	1.4793	1.0502	0.6411	2.6638	16.7948	10.6023	4.9835	3.7389	37.5946	16.5932	3.2364	2.7332	3.3617	5.0323	15.5563		0.932806	11.3076
28.2365	21.2759	30.7571	33.647	28.507	35.39	35.784	1.843	0.822	0.488	0.8784	1.1811	1.2408	1.4554	1.3724	0.5667	2.2534	15.3364	9.0577	3.4527	2.467	33.5379	19.4547	3.5032	3.0607	4.3888	6.5217	16.4683		0.936761	11.656
28.3556	22.1546	35.4854	38.57	32.377	40.878	27.848	1.326	1.004	0.424	0.6304	1.2796	1.1822	1.2964	1.1196	0.378	1.8351	12.165	7.8849	2.753	1.8404	27.9364	21.3067	3.6865	2.7663	5.2755	9.1805	17.3629		0.940712	11.8499
28.4748	26.6215	39.4143	44.8	33.168	42.604	20.967	1.219	0.445	0.2809	0.6851	1.0418	1.0958	1.3503	0.7269	0.4876	1.9125	11.5215	5.8808	2.6101	1.5253	17.9531	22.448	3.4919	3.7491	6.8475	11.7764	19.4553		0.944667	12.0029
28.5939	32.1157	43.9519	49.227	35.282	42.731	12.109	1.167	0.479	0.3333	0.868	0.9653	0.665	1.041	1.0731	0.6453	1.3328	9.1584	4.5764	1.8015	1.676	12.6826	25.2299	3.2473	5.7798	8.4237	12.021	21.0266		0.948618	12.2078
28.713	37.2215	43.7505	50.33	44.248	41.714	8.185	0.915	0.62	0.5243	0.2993	0.7434	0.8279	1.0819	0.7971	0.483	1.1855	7.7088	5.1575	1.955	1.6305	7.5013	25.2478	5.1099	7.3091	11.2941	14.5225	19.8843		0.952569	12.6017
28.8322	39.8703	42.6984	49.553	46.547	43.07	5.064	0.758	0.397	0.3386	0.3407	1.0236	0.8676	1.0668	0.5499	0.522	1.2758	7.0632	3.7935	2.2838	1.4925	4.9517	29.3927	4.4871	9.2225	11.8617	15.7677	22.1095		0.956523	12.8285
28.9513	42.3704	37.1954	47.037	47.984	37.022	3.412	0.694	0.269	0.429	0.7426	0.7053	0.6555	1.0431	0.3548	0.5653	0.8946	5.672	3.6583	1.3478	0.7664	3.3085	30.3455	7.7165	10.4256	14.1906	17.4741	22.7005		0.960475	12.5548
29.0705	45.1351	31.5871	39.256	47.49	32.477	2.453	0.481	0.242	0.5198	0.6136	1.0678	1.0074	1.2489	0.7019	0.3428	0.7251	4.0483	3.1457	0.9419	1.2031	3.1337	31.8195	10.2464	12.2023	17.3391	17.9023	22.9838		0.964429	12.2339
29.1896	52.5829	19.5687	28.819	48.291	21.966	2.103	0.557	0.274	0.3067	0.3838	0.5362	1.0757	1.0343	0.642	0.1667	0.8799	3.3113	3.1356	1.1921	0.828	2.464	33.3719	14.2349	15.1905	17.6203	20.3681	23.759		0.96838	11.6542
29.3088	48.485	11.7175	17.976	39.784	14.353	1.429	0.549	0.211	0.4005	0.474	0.6117	1.2749	0.6312	0.3682	0.198	0.716	2.7121	2.7181	0.9927	0.609	2.4003	34.78	16.4099	15.7976	19.8382	22.7694	24.0277		0.972335	10.4531
29.4279	40.2141	6.0112	11.003	34.238	7.276	1.093	0.373	0.209	0.4233	0.531	0.7348	0.9889	0.5293	0.3165	0.1909	0.83	2.2079	1.9414	1.0854	0.6355	2.3649	28.1685	19.1409	20.3648	21.2085	25.1768	22.4069		0.976286	9.2468
29.547	29.2188	4.5654	6.353	28.918	4.402	1.059	0.211	0.396	0.1946	0.4715	0.6661	0.5842	0.5459	0.3194	0.2128	0.301	1.827	1.5232	0.9309	0.8399	2.018	28.0105	19.2904	25.5236	23.8737	28.9378	23.954		0.980237	8.70917
29.6662	16.1264	4.2597	4.49	20.555	3.088	0.997	0.359	0.118	0.311	0.5069	0.449	0.5452	0.8963	0.4091	0.4479	0.6317	1.5019	1.4921	0.6089	0.4067	1.7703	21.874	23.0562	28.9935	30.4368	30.5051	19.9732		0.984192	7.95589
29.7853	11.8588	3.0888	4.847	10.883	2.803	0.923	0.132	0.184	0.4469	0.2756	0.4244	0.8206	0.6177	0.4076	0.3423	0.6335	1.667	0.8519	0.4401	0.7076	1.6671	18.2083	23.4295	33.9809	33.5473	31.0078	15.8669		0.988143	7.40973
29.9045	7.7102	2.1886	4.298	5.896	2.132	0.824	0.336	0.364	0.345	0.387	0.4335	0.5268	0.3212	0.3373	0.0951	0.3226	1.0267	0.7588	0.6892	0.4767	1.2708	12.8258	24.0683	35.0296	35.6093	31.2359	11.1249		0.992098	6.69012
30.0236	5.1091	2.2125	2.672	3.647	1.673	0.672	0.227	0.279	0.199	0.1156	0.4255	0.7093	0.6098	0.3011	0.1851	0.2338	0.8121	0.6057	0.4336	0.5671	1.1205	10.3058	25.61	31.4016	35.3805	29.3745	7.4571		0.996049	6.01257
30.1427	4.3239	1.5569	2.039	3.589	1.667	0.23	0.125	0.155	0.1153	0.1609	0.6744	0.9356	0.5012	0.2266	0.0832	0.1953	0.8957	0.6995	0.4592	0.4406	1.4258	7.528	32.8888	27.6027	34.3367	22.2126	4.7357		1	5.54828

## Sheet: Image20
X0	Y0	Y1	Y2	Y3	Y4	Y5	Y6	Y7	Y8	Y9	Y10	Y11	Y12	Y13	Y14	Y15	Y16	Y17	Y18	Y19	Y20	Y21	Y22	Y23	Y24	Y25		Ap-Ba	Average int.
0	4.1455	4.492	5.1666	4.273	7.8455	8.0963	2.4471	4.1849	6.6677	14.3588	14.3162	8.8415	4.4189	4.06	3.5646	8.4629	13.7183	15.6868	7.9595	5.2482	3.7273	2.9974	3.2536	7.0693	5.8226	4.4766		0	6.74235
0.1191	5.4041	6.0341	6.3941	5.0314	11.8842	10.8218	3.6442	4.0628	7.3735	20.7281	17.2051	11.9947	5.105	5.3117	4.5184	10.1314	17.5045	18.1688	9.0003	6.0668	4.9762	4.5966	3.8805	9.2011	7.4407	5.7974		0.0059151	8.54913
0.2383	7.8806	6.9008	5.877	5.1383	11.667	13.5093	4.9539	5.0715	8.2879	22.7614	21.4021	17.4315	6.9845	7.8538	5.5909	11.0402	21.6651	22.8842	11.3007	8.3893	6.5637	6.083	5.2655	10.4688	7.7192	7.4201		0.0118352	10.3889
0.3574	9.4503	9.041	8.6451	5.1457	13.7236	14.9259	6.7494	7.5511	9.8721	27.1109	22.686	18.6161	11.0441	12.5179	8.407	13.1064	25.1238	28.3236	13.4649	10.2446	10.9726	9.0097	6.3942	14.0712	9.3129	9.5903		0.0177503	12.8885
0.4766	11.2022	13.222	10.4457	6.7414	14.1086	17.779	9.5293	7.6386	11.3474	30.8237	24.5605	23.8118	14.8986	20.3447	14.5235	18.1055	27.293	34.092	16.3797	12.3964	18.4432	12.9476	7.904	16.7196	12.1864	13.7674		0.0236703	16.2005
0.5957	16.8441	19.6967	13.3807	8.887	16.1801	19.5347	12.1786	9.2235	11.6101	34.9768	27.4546	26.2628	19.7448	29.2037	22.4528	21.616	31.9667	40.5644	20.6902	18.4115	29.0032	18.5612	11.4894	19.3149	14.1538	17.7141		0.0295854	20.4276
0.7148	19.6622	27.4145	19.6577	10.9487	16.4653	23.1497	17.0213	13.1289	16.2866	39.8845	31.2943	25.7071	25.7259	36.852	31.0905	27.3707	36.7773	45.5376	25.4441	23.7502	36.9405	22.7306	14.844	24.6719	19.0162	25.6544		0.0355005	25.2703
0.834	23.3884	35.9196	27.2	12.3931	21.3284	23.303	19.9635	15.8949	19.1186	43.5815	37.4026	29.9708	33.1937	47.8165	40.2562	30.1156	40.3045	51.2731	30.4306	29.8401	42.2349	29.8557	19.3766	26.8759	23.799	30.3847		0.0414206	30.2008
0.9531	29.63	41.6331	32.3251	18.1932	21.8403	26.7933	23.3987	18.3033	25.4185	45.3172	37.2997	29.8907	40.2269	52.2468	45.142	35.4921	43.4758	56.6764	34.6538	37.3474	46.1115	35.9926	23.3592	30.4301	31.9763	32.0378		0.0473357	34.4312
1.0723	32.8816	48.1119	37.5088	26.2395	22.557	24.968	26.8414	23.8826	29.6319	44.8183	40.7523	30.6751	45.8923	54.0346	49.7455	38.5756	45.589	57.8888	37.8302	42.6733	43.7782	42.6815	31.6552	29.5654	33.2789	35.7526		0.0532558	37.6081
1.1914	35.3018	52.2865	44.9182	33.3228	25.3079	25.9188	30.3933	26.1517	34.2628	44.7813	42.4063	28.3502	45.348	50.1004	47.5965	41.0692	48.0195	58.8864	42.4056	49.3448	43.8609	42.256	37.9194	29.9459	34.8413	37.2854		0.0591709	39.7031
1.3106	39.0049	52.5009	47.6717	38.8143	27.7442	28.6416	30.5006	30.6338	37.4241	40.2861	40.4085	26.6357	44.0079	48.307	47.5965	42.8769	50.4249	59.8646	43.4703	49.5665	42.7593	43.409	39.4765	28.0002	35.2624	34.509		0.065091	40.3768
1.4297	47.3704	50.7065	46.9439	42.8296	30.0594	26.6842	33.0463	31.729	38.7932	35.7274	41.2129	25.6023	44.1738	38.0142	45.0545	45.7203	57.3497	61.1681	46.6257	50.6152	36.995	42.7497	42.5531	27.4612	33.8215	34.8337		0.0710061	40.6862
1.5488	48.0813	52.1101	47.3607	51.5969	32.6416	26.3813	29.7343	31.1933	39.2138	31.1141	39.6719	28.5377	39.5337	31.7802	40.7692	45.0164	56.2347	57.6682	47.0501	45.9514	32.2704	38.6104	43.7878	26.8704	31.8013	30.2498		0.0769212	39.432
1.668	46.1096	45.7375	46.5299	58.1748	32.5906	25.0827	26.3261	29.1586	35.5369	26.9491	39.8773	27.0337	31.3917	21.7657	33.7971	44.2051	53.1353	53.5	48.882	43.3921	23.6577	34.9923	35.3035	22.5426	27.1536	26.3357		0.0828412	36.1216
1.7871	46.1039	42.996	45.3133	57.2111	33.121	22.6797	25.4794	28.4828	32.1767	22.2273	35.0667	24.3539	26.1687	16.3508	24.7428	37.5337	51.7861	51.2519	53.3158	34.5063	18.003	34.0123	33.6298	21.4792	23.4975	23.6536		0.0887563	33.2747
1.9063	42.8379	35.18	39.3	58.5315	32.0489	21.4116	23.4561	27.1172	29.0909	18.6377	28.7023	22.9821	23.0952	13.1264	19.6106	30.2344	45.2102	43.4144	52.9847	30.2064	14.7463	27.2088	28.35	19.1175	19.0785	19.5298		0.0946764	29.4311
2.0254	36.6324	30.4118	29.2083	56.4149	29.3157	19.8523	23.0611	20.023	25.4855	15.47	25.9128	21.0118	18.2747	11.3746	13.3908	26.1577	38.253	38.5631	54.9062	28.1184	13.3702	23.4549	23.6267	17.3387	16.6506	16.7396		0.100592	25.8853
2.1445	34.2965	24.692	23.6589	45.2884	23.2705	16.8643	19.7259	17.1857	18.3316	11.5705	20.2664	18.2616	15.7305	10.2853	10.7706	23.0939	32.6546	32.1349	54.2066	25.6623	10.6491	19.668	18.3987	17.2377	13.7592	14.3081		0.106507	21.9989
2.2637	30.3911	20.1327	20.0765	32.7362	20.9006	15.6942	17.6928	14.5109	14.4187	9.7679	17.704	18.2487	14.2194	9.7505	11.431	18.6473	26.3887	28.9932	51.9251	20.3633	11.3052	15.3433	14.848	14.8141	13.7624	14.8337		0.112427	19.1884
2.3828	26.7743	16.8234	15.0338	25.6375	18.8023	16.1965	17.108	13.7289	11.6444	7.7122	13.7049	15.9648	11.9798	8.8947	9.9107	15.8065	19.8121	22.7144	52.8229	16.9942	9.7294	11.6348	12.7611	13.1058	12.7231	12.605		0.118342	16.5625
2.502	21.1959	13.8578	10.8192	19.0311	16.9006	10.6282	15.1451	11.4802	10.2934	6.4255	10.793	13.2601	10.5872	9.1986	8.4729	11.3159	15.9392	17.9445	47.7671	14.1257	8.4843	10.6705	11.2662	13.7871	13.1498	12.4196		0.124262	14.0369
2.6211	16.4231	11.47	8.7497	12.0644	16.8199	10.2292	13.5209	9.3498	7.8548	5.7437	9.399	11.3739	9.8629	8.2628	8.7053	10.1025	12.3427	14.3468	44.5405	12.5998	8.8207	9.981	10.6153	12.653	11.3624	12.6162		0.130177	12.3004
2.7402	12.8311	11.0134	8.2562	9.4086	12.7786	9.2069	12.4725	9.2435	7.2735	4.8517	7.6634	12.1488	7.9448	8.4128	8.5313	9.5874	8.6402	11.5753	39.2024	10.6256	7.0118	7.6039	9.6694	11.5282	10.973	11.8819		0.136092	10.7822
2.8594	10.3011	9.0381	6.1743	9.2441	11.2202	8.7722	9.8981	7.3451	5.1449	4.4612	7.1259	10.7608	7.5671	6.9868	6.8884	7.574	6.7414	9.174	37.0517	9.5888	7.0599	6.902	7.8231	10.3157	8.8383	9.588		0.142012	9.29174
2.9785	8.6756	7.6022	4.7377	7.6881	10.6691	7.1496	10.5723	6.7695	4.8541	4.2106	6.1997	10.6559	6.6592	6.9132	7.3869	5.3629	6.2463	5.3515	33.798	8.0361	5.4913	6.0987	7.8105	10.8461	9.0361	9.6872		0.147927	8.40417
3.0977	7.2862	7.9026	4.3213	7.0638	9.8669	5.8323	9.6288	5.8012	4.4343	3.0089	4.6381	8.2714	6.2875	6.7909	7.1892	6.2244	4.6795	4.8343	28.6371	6.8269	5.2838	5.9701	7.6241	8.4265	8.3524	8.9741		0.153847	7.46756
3.2168	5.8868	6.0943	4.5269	6.0717	9.2317	4.8851	8.2875	5.7893	4.2417	3.1459	4.1208	8.5921	6.5415	6.1153	7.0022	4.6107	4.7785	4.4005	22.1815	5.8912	5.4483	5.5622	6.471	8.7405	6.4292	7.8373		0.159762	6.64937
3.336	6.986	5.1679	3.3428	7.0961	7.8663	5.2659	7.6392	4.611	3.618	3.5525	3.2729	5.8486	6.7304	5.5079	5.8535	4.3082	4.542	4.7823	18.2936	5.9017	4.4418	4.721	6.8057	7.6314	7.0187	8.1695		0.165682	6.11442
3.4551	5.7655	4.2552	3.6231	5.7646	6.4006	3.6037	6.8325	4.7859	3.7829	2.7174	3.3503	4.8754	6.4492	4.4683	6.1424	3.9134	3.6968	4.614	15.274	4.806	4.5944	4.5334	6.3093	7.5614	7.0263	6.9534		0.171598	5.46536
3.5742	4.652	3.6532	1.988	5.1367	6.8037	3.7644	6.7915	3.7508	3.4523	2.6279	2.5567	3.5226	6.6635	6.1926	6.0744	3.0168	3.5316	3.4054	12.86	5.0912	4.612	4.5392	4.7863	6.9881	6.6537	6.0476		0.177513	4.96778
3.6934	4.3656	2.3652	2.3693	4.5287	4.6318	2.9427	4.6888	3.7143	2.6921	2.976	3.0132	4.1551	5.9769	4.1737	5.3573	3.5246	3.0554	2.9243	12.5937	4.8334	3.8921	4.5251	4.7412	7.5071	6.0879	5.7369		0.183433	4.51432
3.8125	3.9804	2.768	2.4556	5.4923	5.1351	2.5367	5.1333	4.1063	2.322	2.6691	2.6198	3.5108	5.8024	4.5652	3.8207	2.5427	3.1937	2.9701	10.4899	3.4608	2.5469	4.8334	3.6235	6.4876	5.1175	4.2333		0.189348	4.09297
3.9317	3.1443	2.2375	2.3587	6.0764	4.3097	2.6071	3.8281	3.1006	1.5158	3.5257	1.9462	3.0324	4.9797	4.1088	3.6063	2.6646	3.4384	2.9957	9.3559	3.6287	3.3799	3.2392	4.2364	7.0634	5.6093	4.2481		0.195268	3.85527
4.0508	3.079	2.0226	1.552	4.9562	4.3464	2.1799	3.6497	2.8131	1.44	2.9098	2.4105	3.1792	4.095	3.4265	3.2834	3.025	3.4577	2.5138	9.0623	2.9583	2.6979	3.3984	3.9489	5.586	4.9546	4.5696		0.201183	3.51984
4.1699	2.6314	2.0029	1.8117	4.247	4.0232	1.5722	3.6498	3.3637	1.6708	2.8173	2.0651	2.5527	4.3767	3.7296	3.2118	2.4057	3.0363	2.1413	7.5745	2.9131	3.3913	3.2291	3.6573	7.0977	5.654	4.9261		0.207098	3.45201
4.2891	1.8892	1.7505	2.0969	4.7776	3.9072	1.9732	2.6616	2.579	1.4653	3.4194	1.6632	2.0124	4.0753	3.3948	2.6624	2.5305	2.9746	1.9319	7.2377	2.9075	2.248	3.0668	3.4406	6.3085	4.3718	4.5613		0.213018	3.15028
4.4082	2.0299	2.1402	1.2436	4.6645	2.7989	2.0785	3.4765	2.1841	1.273	2.9226	1.8168	1.8204	3.4768	3.8507	2.8758	2.2068	3.2921	1.7289	5.9997	2.445	2.2313	2.9514	3.123	6.4023	4.2478	4.2968		0.218933	2.98375
4.5274	2.0916	1.8238	1.8307	4.9718	2.6074	1.7708	2.3019	2.0764	1.5821	3.5645	1.841	1.7995	2.7584	3.5529	2.6686	2.6373	3.3925	2.0641	5.8885	1.955	2.1136	2.4396	2.8203	6.4617	3.9579	3.5097		0.224853	2.86468
4.6465	2.0337	1.6325	1.477	3.1362	2.3197	1.7221	2.5053	1.9431	1.3999	2.4798	2.3512	1.3271	2.8296	3.2516	2.0705	2.2102	3.169	2.2379	4.4028	2.1196	2.0468	2.5666	2.315	6.8429	3.5306	3.8534		0.230768	2.6067
4.7657	2.3374	0.9458	1.231	3.9938	2.7042	1.653	2.5912	2.1359	0.9867	2.9412	2.675	1.358	2.4723	2.8383	1.8402	1.8472	3.0573	2.1376	3.268	1.9439	1.5881	2.7325	2.1798	6.4563	3.5562	3.1581		0.236689	2.48573
4.8848	1.3484	1.4464	1.021	4.6341	2.167	1.3493	1.8596	2.2823	1.079	2.8936	2.2418	1.2523	1.9755	3.1771	1.8827	2.3518	2.8665	1.4836	2.495	1.7952	1.9422	2.1924	1.8513	6.2951	3.3411	3.12		0.242604	2.32093
5.0039	1.3746	1.0992	1.4275	4.3408	2.1904	1.7199	1.8676	2.1484	1.0154	3.107	2.6447	1.1739	1.5532	1.6291	1.5793	2.1115	2.4665	2.5214	2.277	1.5885	1.5009	1.9136	1.9426	6.0643	3.27	3.1311		0.248519	2.21763
5.1231	1.3029	1.2389	1.2799	3.8021	2.4125	1.1472	1.9726	1.9048	1.0246	3.2809	1.9819	1.2829	1.8825	1.4185	1.5845	1.7027	2.1831	2.7538	2.6154	1.6053	1.3483	1.6956	1.9259	7.414	3.4543	3.0132		0.254439	2.20109
5.2422	1.2977	0.8936	1.5181	4.2063	2.5574	1.2393	1.9999	1.2183	1.2023	3.5931	1.5909	1.1117	1.683	1.8675	1.3814	1.8216	2.1829	2.2672	2.0554	1.6422	1.341	1.7701	2.1414	6.1165	3.2143	3.4856		0.260354	2.13072
5.3614	1.2259	1.574	1.2528	4.7668	2.1553	1.4228	1.814	0.852	0.9696	3.5563	1.5554	1.0739	1.4921	2.3224	1.684	2.3634	2.0884	2.6466	2.3936	1.6309	1.6713	1.3623	1.4518	5.2882	2.8152	3.0697		0.266274	2.0961
5.4805	1.1066	1.4411	1.2635	5.9725	1.7485	1.1859	1.5567	1.3878	0.7957	2.6395	1.5401	1.5505	1.565	1.5939	1.7612	2.0231	2.163	2.0722	1.8181	1.2421	1.7134	1.8941	1.7287	4.2714	2.9849	2.8207		0.272189	1.99385
5.5996	1.057	1.5876	1.444	6.6261	2.2108	1.2208	1.4264	1.145	1.0697	3.7755	1.9748	0.9039	0.9258	1.6514	1.9576	2.5509	2.5623	1.72	2.2649	1.6031	1.2079	1.1503	1.4067	3.782	1.8605	2.3679		0.278104	1.97896
5.7188	1.3236	1.2076	1.1304	8.9749	2.2068	1.4982	1.0617	1.0629	0.974	3.5721	1.7982	1.1487	1.3136	0.9789	1.7832	2.9681	2.1518	2.1098	2.1768	1.4181	1.1837	0.9659	1.4897	3.3421	1.8237	2.7997		0.284024	2.01785
5.8379	1.4077	1.0174	1.5034	9.7021	1.9687	1.2873	1.0876	1.1577	1.2356	3.3127	1.5598	0.997	1.3266	1.3664	1.9708	2.4015	2.0597	2.2512	2.0249	1.8534	1.079	1.272	1.0251	3.5384	1.957	2.4891		0.289939	2.03277
5.9571	1.2328	0.7078	0.9038	11.4966	2.1306	1.2486	1.7838	0.8765	0.858	4.3437	2.0803	0.8552	1.1562	1.45	1.3758	2.5865	2.2541	2.1563	2.3091	1.558	0.9185	1.1622	0.9504	3.7269	2.1146	2.2842		0.295859	2.09694
6.0762	1.4446	0.8864	1.3893	13.2992	1.993	1.1333	1.4955	1.0651	1.0112	4.4429	2.0286	0.9943	0.9817	1.7178	1.7433	2.3487	1.7545	2.5022	2.3636	1.2046	0.8743	0.923	1.1586	4.3281	2.0393	3.24		0.301775	2.24473
6.1953	1.2506	1.7412	1.1069	12.6249	2.1033	1.3024	1.2987	1.1084	0.7873	4.5781	1.6587	0.9789	1.2132	1.2704	1.2613	2.4918	1.8055	2.5536	2.4889	1.4451	1.007	0.8467	1.4581	4.0455	1.3906	2.3199		0.30769	2.15912
6.3145	1.0737	1.2953	1.136	12.251	2.1703	1.4005	1.6712	0.9965	1.2327	4.4052	1.7249	1.2696	1.1429	1.1549	1.0931	3.0457	1.9896	2.1711	2.5969	1.3648	1.1134	1.0574	0.9823	3.3798	1.6583	3.0653		0.31361	2.17086
6.4336	1.0921	1.4336	0.827	10.6493	1.2442	1.0443	1.2861	0.7436	0.7574	4.008	1.6935	1.336	1.158	1.2258	1.3638	2.5433	2.2393	2.3099	2.6817	1.0601	0.6921	0.7833	1.5785	3.5937	2.1899	2.6033		0.319525	2.0053
6.5528	1.5663	1.3301	1.3088	10.2515	1.4569	1.0267	1.617	0.8688	1.6526	4.4405	1.3235	1.2826	1.2039	1.1707	2.1079	3.2268	2.0739	1.861	1.7905	1.5199	0.5617	1.1194	1.1164	3.796	1.101	2.3219		0.325445	2.04217
6.6719	1.1414	1.5571	1.3574	10.1075	1.6187	0.759	1.4435	1.1082	0.9545	4.5128	1.7064	0.846	1.3331	1.049	1.5082	3.0509	2.0178	1.4869	2.4362	1.7298	0.6372	0.974	1.4878	4.4513	1.7532	2.2041		0.33136	2.04738
6.7911	1.003	1.1311	1.1327	11.755	1.5624	0.6158	0.9467	0.7439	1.021	4.6042	1.6739	0.9808	1.3557	1.3496	1.7935	2.5034	2.4725	1.5382	2.0784	0.969	0.8847	1.0074	1.2511	3.436	1.9917	2.2223		0.33728	2.00092
6.9102	1.2167	0.9614	0.9876	12.6793	1.6557	0.8822	0.8675	1.4898	1.0514	5.1804	1.1076	1.0364	0.9965	1.189	1.5675	2.754	2.7311	1.363	2.2584	1.5452	1.3996	1.0648	1.0419	4.0033	1.5738	2.7781		0.343195	2.13008
7.0293	0.9877	1.0123	0.5905	12.9506	1.6141	1.2647	0.9373	1.0325	1.7523	5.3556	1.7476	0.9513	0.9172	1.2104	1.8393	2.8764	2.0901	1.848	2.1531	1.2913	0.6465	0.7991	0.8436	3.3662	1.345	2.6117		0.34911	2.07825
7.1485	0.8593	0.819	1.0579	15.4569	2.2467	1.287	0.9349	1.3971	1.0872	5.7463	1.7214	0.8756	1.2058	1.1016	2.226	3.4298	2.7998	2.1189	2.569	1.6859	1.4685	1.1266	0.9042	3.8656	1.5787	2.6462		0.35503	2.39292
7.2676	1.1738	0.8269	0.603	15.2106	1.9115	1.1988	0.8932	1.3471	1.1956	5.3637	1.7971	0.7656	0.9328	1.0976	1.8141	2.8156	2.5634	2.021	3.5334	1.9429	1.0896	0.8663	1.4473	4.0937	1.3579	3.2935		0.360945	2.35215
7.3868	1.5923	0.7457	0.8796	14.2466	1.6975	1.0417	1.0031	1.0897	1.3002	5.0362	1.793	1.2608	0.9482	1.1814	1.5984	2.7055	2.7733	2.0694	3.268	1.5878	1.2685	1.1775	0.9771	2.8231	1.4238	2.0611		0.366865	2.21344
7.5059	1.1458	1.1097	1.0347	11.9252	2.243	1.0105	1.0598	1.3268	1.2323	5.7071	1.7542	1.0283	0.9432	1.1292	2.121	3.1154	2.9329	1.7352	3.1429	1.5234	0.8368	1.3313	1.0789	3.9729	1.6696	2.1955		0.372781	2.24252
7.625	0.9614	1.2844	1.0399	13.3292	1.787	0.9179	1.073	1.2093	1.1804	5.6374	1.7931	0.8485	0.9971	1.1515	2.0339	3.5147	2.4659	2.1085	3.9428	1.7378	0.9667	1.4542	1.3205	3.5785	1.1834	2.6867		0.378696	2.31553
7.7442	1.3177	0.8833	1.1203	10.8757	1.9953	0.9398	1.0045	1.052	0.8685	5.4398	1.6097	1.1708	1.0176	1.2224	1.7301	3.602	3.2344	2.0972	5.1409	1.5735	1.0616	0.8556	0.8247	4.4326	1.4675	2.5522		0.384616	2.27268
7.8633	1.1512	1.0728	0.8701	10.2858	1.9342	1.0537	1.1447	1.1371	1.0985	5.5983	2.1318	1.1452	1.0658	1.2795	1.8703	3.1434	3.0834	1.9785	5.3445	1.9187	0.9106	0.6878	1.4234	4.047	1.3119	2.2295		0.390531	2.26607
7.9825	0.9436	1.3457	0.9415	10.5886	2.0786	1.316	1.1822	1.4815	0.878	5.3173	2.1608	0.8018	1.417	1.3526	2.8278	3.2414	3.3571	2.3539	6.4558	1.7962	1.1114	1.1408	1.0153	4.9477	1.0166	2.7175		0.396451	2.45333
8.1016	1.1805	0.8782	1.3398	10.6582	2.1581	1.1877	1.1919	1.258	0.8977	4.7812	2.0622	1.4246	1.0413	1.1724	1.7684	3.5268	4.703	2.5364	6.6239	1.3081	1.3505	0.805	1.1022	6.1369	1.4551	2.5037		0.402366	2.50199
8.2207	1.2724	0.9782	0.7077	9.367	2.1666	1.2864	1.0213	1.2763	1.1543	4.6964	1.7604	1.461	1.0702	1.2696	1.8461	4.3894	4.2572	2.163	6.4859	2.0788	1.0505	1.1151	1.3865	6.551	1.2405	2.5235		0.408281	2.48367
8.3399	0.9917	1.3722	1.1221	9.5497	2.0124	1.5835	1.2079	1.2251	1.2613	5.8001	1.8027	1.432	1.0638	1.7537	1.9796	3.7744	5.2485	1.6335	5.3141	1.4585	0.7558	0.9435	1.2503	5.594	1.1805	2.4901		0.414201	2.45388
8.459	0.7968	1.0074	1.2541	9.3742	1.9243	1.4927	1.1065	1.0545	1.4585	6.5469	1.8859	1.8572	1.3296	1.3322	2.3637	4.4012	5.4855	1.5918	5.2089	1.602	0.7025	0.9957	0.7721	6.4893	1.6328	2.1484		0.420116	2.53133
8.5782	0.8209	1.04	1.4073	7.7502	2.0855	0.8085	0.7025	0.8925	1.107	6.6033	2.055	1.2536	0.7965	1.5232	1.9353	4.5455	5.1419	2.1877	6.0471	1.8543	0.8702	0.8046	1.1163	6.5261	1.2988	2.5636		0.426036	2.45144
8.6973	1.1759	0.8458	1.363	8.8898	2.6329	0.7493	0.6694	1.5036	1.3159	7.1882	2.8188	1.2787	0.8696	1.8015	1.6544	4.7659	6.9631	2.0461	6.6603	1.3893	1.1583	1.2264	1.2629	7.3005	1.1955	1.8509		0.431951	2.71446
8.8165	1.237	0.9655	1.2919	7.9367	2.7961	0.9778	1.0583	1.2065	1.5425	6.0428	2.394	1.4934	1.0013	1.5551	2.2408	4.258	6.6237	2.3036	6.6304	1.8708	1.1103	1.3233	1.4793	6.324	1.5071	2.3265		0.437872	2.67295
8.9356	1.1145	1.5593	0.9625	7.5078	2.866	1.1411	1.1657	1.3414	1.0459	6.634	3.0928	0.7718	1.1209	1.2726	1.7638	5.6362	6.9561	1.6174	7.0944	1.8146	1.1981	1.2611	1.359	7.5451	1.3091	1.877		0.443787	2.73185
9.0547	0.8736	1.2119	0.673	7.2856	3.0256	1.175	0.6108	1.1614	1.3871	7.3901	3.1291	1.2213	1.3519	1.1103	1.9088	5.8952	8.1868	2.0396	8.6021	1.6382	1.2558	1.1663	1.0913	7.5963	1.3319	2.0159		0.449702	2.85903
9.1739	1.1448	0.8852	0.9228	7.0217	3.0652	1.168	1.0899	0.9368	1.3393	6.9265	3.2298	1.3989	1.0008	1.6635	1.9969	6.4997	6.8544	2.357	9.9117	1.8793	1.0201	1.0366	1.3195	9.1112	1.3188	1.6826		0.455622	2.95312
9.293	0.7872	1.1715	0.973	7.1801	3.1358	0.8197	0.8989	0.8798	1.2385	5.3326	2.6999	0.9748	1.2487	1.5196	1.591	5.7276	6.3833	1.7667	11.0015	1.5977	1.2649	1.0874	1.2499	9.0202	1.0895	2.097		0.461537	2.79757
9.4122	1.2111	1.333	1.0005	7.9817	2.5154	1.288	0.9865	0.7886	1.0539	5.2489	2.8118	1.434	0.9633	1.1018	1.841	5.4975	7.5187	2.1401	12.0591	1.9755	1.6143	1.0566	0.8073	7.5825	1.327	1.9173		0.467457	2.88675
9.5313	0.8471	1.5537	1.0945	6.7094	2.0345	1.173	0.9706	0.6311	1.3146	5.1786	2.2257	1.3669	1.214	1.3639	2.0457	4.88	8.8968	2.2661	13.4646	1.5292	0.8498	0.7703	1.5201	7.5352	1.1006	1.7206		0.473372	2.85602
9.6504	1.0693	0.9253	0.821	6.2329	2.7184	1.1436	0.8719	0.9554	1.268	4.9123	2.4656	1.5017	1.3314	1.0734	1.5207	4.0889	9.0334	2.1192	14.7463	1.786	0.9652	1.1397	1.3633	6.1256	1.186	1.5859		0.479287	2.80578
9.7696	1.0087	1.2659	0.7885	5.379	2.3943	1.8267	1.0359	0.6696	1.1953	5.8485	3.0068	1.4855	1.1616	1.1361	1.5451	4.5053	8.7476	1.8548	14.3029	1.6712	1.0661	1.0703	1.1704	5.5069	1.4447	1.6465		0.485207	2.79747
9.8887	1.441	1.0088	0.9586	5.0075	2.3753	1.1947	1.1211	1.0081	1.2341	6.007	2.9749	1.2185	1.1812	1.2457	1.8706	4.2422	8.4509	1.5291	12.5337	1.5795	1.2315	1.327	1.6456	5.4154	1.1938	1.6983		0.491122	2.719
10.0079	1.2562	0.9686	0.8954	4.085	2.5449	1.109	0.9551	0.8825	1.9281	6.1965	2.7266	1.2636	1.1417	1.3096	1.8027	4.1819	9.4051	1.8603	11.1466	1.4648	1.4275	1.3701	1.4326	5.0666	1.2029	1.7829		0.497042	2.66949
10.127	0.8738	1.5909	1.0018	4.7023	2.3917	1.4181	0.7971	0.9853	1.1949	5.7747	3.2159	1.2978	1.0655	1.1001	1.6689	3.8985	10.3651	2.0124	10.561	1.8544	1.1399	1.3368	1.2556	4.8663	1.4142	1.9157		0.502958	2.68072
10.2462	1.5164	1.0043	0.836	5.4556	2.9821	1.0337	1.1789	1.1327	0.9003	5.265	2.5997	1.4432	0.8943	0.9671	1.2991	3.5114	9.5328	2.0217	11.6862	1.5179	1.1944	0.8863	1.766	4.6912	1.2452	1.8763		0.508878	2.63222
10.3653	1.3213	1.071	1.0585	5.624	2.188	1.5773	1.1537	1.2479	1.5638	5.3921	2.0928	1.0348	1.1655	1.3423	1.3809	4.1493	10.6674	1.6888	10.8126	1.5996	1.3036	0.9785	1.8159	4.5038	1.4724	1.7841		0.514793	2.69192
10.4844	1.3122	1.4117	1.0795	4.967	2.8111	1.8613	1.2807	1.1071	1.5497	4.724	2.3864	1.4771	0.9602	1.1548	1.4927	3.5449	6.8038	2.0865	10.7146	1.6057	1.1561	1.3196	2.1595	3.4881	1.3526	1.0092		0.520708	2.49293
10.6036	1.3912	1.226	1.0559	4.9327	2.5132	1.295	1.0684	1.1103	1.6724	4.3847	2.3691	1.3949	1.0286	1.2319	1.1395	3.1509	7.0376	1.9977	12.5538	1.7621	1.2866	1.1037	2.5012	3.8782	1.5703	1.7966		0.526628	2.55587
10.7227	1.1638	1.2624	1.0248	5.0902	1.8823	1.0652	1.0652	0.9925	1.0392	4.9583	2.0792	1.3442	0.931	1.3309	1.2533	4.0569	7.6202	1.6864	13.0252	1.7015	0.7804	1.0835	2.3807	3.0105	1.4162	1.4545		0.532543	2.4884
10.8419	1.2991	1.0166	1.2443	5.1126	1.8321	1.2142	0.8993	1.2138	1.3225	5.2034	2.9909	0.9658	1.0676	1.7725	1.6058	3.8114	6.4882	1.4681	10.6312	1.681	0.8691	1.0455	2.4225	3.2565	1.3315	1.792		0.538463	2.44452
10.961	1.6006	0.888	1.263	4.9624	2.5034	1.5488	1.1698	1.2266	1.052	3.5682	2.422	0.6621	1.0998	1.5392	1.9774	3.0037	7.1599	1.9674	11.5908	1.4404	1.1233	1.2558	1.9894	2.8594	1.0311	1.8135		0.544378	2.41223
11.0801	1.4355	1.1355	1.4632	5.2639	2.5554	1.2948	1.2628	1.1854	0.8976	4.4043	2.2968	1.2023	1.4322	1.7227	1.1449	3.8567	5.3671	1.9103	11.8712	1.6731	1.1858	0.9191	2.6027	2.2051	1.3383	1.654		0.550293	2.43387
11.1993	1.3011	1.1154	0.9408	4.844	2.124	1.2202	1.2968	1.0835	1.5899	5.3539	1.9467	1.4516	0.7974	1.5804	1.3573	3.0937	4.8376	2.2702	10.5157	1.347	0.9976	1.5963	2.5712	3.2441	1.3542	1.5413		0.556213	2.36046
11.3184	1.0726	1.1493	0.7261	5.0457	2.2538	1.6569	1.0192	1.0107	0.9335	4.2578	2.5762	1.6625	1.345	1.5256	1.484	2.3463	6.1314	1.708	12.197	1.4444	1.2672	1.3981	2.4912	2.4335	1.3818	1.3368		0.562128	2.37902
11.4376	1.2799	0.866	0.9833	4.5324	2.2814	1.513	1.3888	0.8652	1.2379	4.5086	2.5843	1.2834	1.3409	1.1954	1.3802	2.8672	6.0745	1.5597	10.0853	1.3267	1.1541	1.3824	2.7976	2.668	1.5072	1.1153		0.568049	2.29918
11.5567	1.3717	1.2051	1.0189	4.9883	1.9756	1.3311	0.8014	0.7797	1.0967	4.3291	2.4292	1.5914	1.2008	1.1071	1.6678	2.8661	5.6213	1.7881	10.4089	1.8297	1.2226	1.3542	2.6948	2.2068	1.3721	1.0585		0.573964	2.28142
11.6758	1.4483	1.046	1.0671	6.2193	1.9957	1.0466	1.1611	1.3737	1.0685	4.3333	3.2411	1.266	0.9785	0.9772	1.1439	2.1511	5.4297	1.9619	11.0342	0.8102	0.939	1.0906	2.9803	2.1991	1.3674	1.8536		0.579879	2.31475
11.795	1.4602	1.145	0.957	5.4954	2.4458	1.2254	1.3022	1.1721	1.4489	5.3724	3.0338	1.7125	0.932	0.8336	1.3334	2.7665	6.2932	1.4684	13.1354	1.3669	1.6035	1.1413	3.342	2.2742	0.8853	1.7706		0.585799	2.53527
11.9141	1.5737	1.3424	0.93	5.7318	2.0843	1.3235	1.0171	1.1862	1.2055	3.9761	3.2392	1.6205	1.1802	0.9373	1.0562	2.033	6.2234	2.1828	11.5277	1.2479	1.0974	1.0573	2.8891	2.0498	0.9439	1.1642		0.591714	2.33925
12.0333	1.0949	0.8538	1.1349	5.8703	1.8982	1.5706	1.4285	0.9963	1.3688	3.619	2.5422	1.6969	0.9821	1.3657	0.9712	2.3688	6.535	1.655	9.5602	1.5966	1.0757	1.0412	3.1989	1.8941	1.0377	1.5542		0.597634	2.2658
12.1524	1.3609	1.4607	1.1376	6.3736	2.5964	1.1776	0.9449	0.8198	1.5673	4.2474	3.07	1.2689	1.25	1.8845	1.1708	2.5962	6.0925	1.7221	11.6112	1.4729	1.0434	1.1165	2.5976	2.1109	1.031	1.0761		0.603549	2.41542
12.2716	1.2265	1.3185	0.8374	6.2372	1.5312	1.2873	1.0647	1.2408	1.6801	3.5608	2.7241	0.9095	0.6963	1.3935	1.8408	1.9277	6.0054	1.8115	9.5806	1.4141	1.2313	1.4983	3.1255	2.9559	0.7995	1.3286		0.609469	2.27797
12.3907	1.4382	1.2292	1.1592	6.2859	1.8475	1.3677	0.9964	1.3079	0.9739	3.2885	3.6725	1.7281	1.4259	1.401	1.5905	2.5663	6.2704	1.5933	11.2217	1.6825	1.0527	0.9098	3.1577	1.5741	1.1646	1.5736		0.615384	2.40304
12.5098	1.049	0.7996	0.948	4.8353	2.6144	1.4841	1.3741	1.0107	1.2434	3.5481	2.6521	1.7365	1.4925	0.9558	1.3566	2.5005	7.1018	2.0345	10.3718	1.6694	1.1648	1.4265	2.934	1.7938	0.9828	1.6958		0.621299	2.33753
12.629	0.984	0.828	0.8835	6.2162	2.5157	0.9467	1.1756	1.2019	1.1537	3.3233	3.2174	1.3661	1.2209	0.9813	1.2379	2.575	8.2685	1.7657	9.7733	1.1517	1.2563	0.988	3.2677	1.4908	1.1976	0.9312		0.627219	2.30454
12.7481	1.0192	1.1237	0.9777	6.1368	2.1158	1.6652	1.0607	1.0745	1.2344	3.1525	3.9056	1.3791	1.2711	1.4643	1.4948	2.8185	8.5156	1.8258	10.0577	1.6911	1.2243	0.8241	3.1658	1.6689	1.2493	1.4285		0.633135	2.44404
12.8673	0.812	1.5179	1.1995	7.2966	1.9284	1.2158	1.1338	1.0666	1.4182	4.1094	4.1719	1.7089	1.3792	1.1444	1.8443	2.9189	8.2554	1.7599	9.7206	1.5222	0.9606	1.2079	3.0587	2.0335	1.2108	1.386		0.639055	2.53775
12.9864	1.2377	1.1281	0.653	8.0754	2.6803	1.8635	1.6054	1.4517	1.2962	4.5506	4.1313	1.6508	1.2065	1.6522	1.2535	2.9432	9.9834	2.1539	7.4022	1.404	1.166	0.9841	3.0516	1.9148	1.1537	1.1886		0.64497	2.60699
13.1055	1.3123	0.9918	1.509	8.2211	2.3663	1.5411	1.4547	1.4417	1.6223	3.3401	5.2395	1.8938	1.5409	1.586	1.4585	2.5385	6.9294	2.0307	8.0323	1.23	1.6776	1.0696	4.0377	1.8821	0.9064	1.1782		0.650885	2.57814
13.2247	0.9921	0.8422	1.2741	7.0728	2.6605	1.4277	0.8858	0.8077	1.4522	3.8738	5.4556	1.4622	1.852	1.4192	1.1456	2.426	7.7783	1.982	7.361	1.2361	1.6336	1.1948	4.0661	1.4065	1.0541	1.2901		0.656805	2.46354
13.3438	1.0981	1.1468	1.1095	6.5518	2.7926	1.2433	1.2839	1.2833	1.3051	3.5118	5.7407	1.5436	1.6384	1.0902	1.9505	2.8173	7.6293	1.6941	7.8943	1.3833	1.2229	0.9952	4.925	1.8493	1.2362	1.4339		0.66272	2.55271
13.463	1.3223	1.0922	0.831	8.8309	3.1206	1.2477	0.7549	1.2764	1.2211	4.1463	7.225	1.7261	1.4752	1.3477	1.674	3.7392	6.164	1.5329	7.4	1.3756	1.2557	1.039	5.0036	1.2168	1.5381	1.1374		0.66864	2.64207
13.5821	0.9867	1.3729	1.1839	8.287	2.7543	1.3467	0.9416	0.9052	1.314	3.6226	6.3339	1.4801	1.6326	1.3968	1.8906	4.1456	7.2697	1.7336	6.9779	1.1129	1.188	1.4848	4.5273	1.1283	1.1048	1.2524		0.674555	2.59132
13.7012	1.1982	1.4829	1.1464	8.5798	2.4669	1.4699	0.9461	0.9767	1.1903	3.602	6.5989	1.9825	1.2786	1.5355	1.6396	4.1172	7.2295	2.1508	7.2375	1.0014	1.6469	1.7441	4.4452	2.0978	1.0527	1.0165		0.68047	2.68592
13.8204	1.3608	1.1768	1.3993	7.356	2.3523	1.335	1.1517	1.1018	1.5373	3.37	7.3439	1.4837	1.5453	1.6778	1.9046	5.1429	7.2004	1.9402	6.9613	0.7447	1.0861	1.6705	5.2822	1.1634	0.9	1.0009		0.68639	2.66111
13.9395	1.2792	0.9946	1.4215	8.1861	2.8267	1.8193	0.9953	1.2181	0.8495	2.8322	7.027	1.8325	1.5653	1.5712	1.8167	6.32	6.4886	1.8933	9.389	1.6025	1.0049	1.2345	5.5863	1.1078	1.1048	1.2087		0.692305	2.81445
14.0587	1.095	1.4919	1.6854	7.6146	3.2009	1.7891	1.009	1.4762	1.035	2.8407	7.6133	2.0945	1.342	1.7559	1.885	6.5309	5.7059	2.437	7.6792	1.6785	1.1966	1.7944	5.6153	1.1534	1.356	1.1774		0.698225	2.85589
14.1778	1.1267	1.6747	1.5205	8.3452	2.5345	1.6446	1.1519	1.403	1.4649	2.8483	6.4205	1.5803	1.273	2.0855	2.5062	7.1812	5.964	2.0008	8.3451	1.2466	0.894	1.6321	5.9354	1.7163	1.051	1.2881		0.704141	2.87825
14.297	1.394	1.4896	1.3025	6.7656	2.8578	1.3178	1.1942	1.2193	1.5303	3.0617	6.7833	1.9081	1.3786	2.8812	2.023	7.7956	6.2652	2.3003	7.6175	1.3764	1.1652	1.6238	6.4025	1.7111	1.047	1.2172		0.710061	2.9088
14.4161	1.3431	1.1084	1.2328	8.5641	3.2297	0.9875	0.9344	1.2388	1.3124	2.6229	6.6526	2.368	1.8496	2.6658	2.8629	6.0825	7.3869	2.2292	7.2059	1.1571	1.1561	1.6153	8.6177	1.2999	1.3783	1.3182		0.715976	3.01616
14.5352	1.1743	1.135	1.5965	9.1205	3.1794	2.1164	1.0053	1.404	1.3241	2.9993	7.3769	2.2057	1.6878	3.2565	3.5674	6.887	8.6919	2.347	7.4044	1.49	1.9357	1.1085	7.9175	1.6908	1.3338	1.3844		0.721891	3.28231
14.6544	1.5523	1.4499	1.8283	8.5513	3.1412	1.9346	1.6955	1.119	1.099	1.9046	6.9347	2.0001	1.6848	3.9839	4.9381	7.1492	8.8107	2.9167	6.7472	1.6094	1.7988	1.5459	9.6405	1.1496	1.1021	1.1724		0.727811	3.36384
14.7735	1.2209	1.1071	1.8383	10.4778	3.8303	1.4139	1.3618	1.2716	1.0108	2.2581	8.3878	2.876	1.9989	4.3474	5.7531	6.957	10.434	3.3708	6.2109	1.6964	1.5007	1.5463	8.9803	1.4175	1.4803	1.4458		0.733726	3.62284
14.8927	1.3329	1.1314	1.9894	8.544	3.4763	1.3201	1.1215	1.3141	0.9849	1.9125	8.5666	2.7744	1.8433	6.5945	6.6905	8.4421	11.8065	4.1698	6.3689	1.173	1.7806	1.8316	9.0512	1.1797	0.8312	1.3611		0.739646	3.75354
15.0118	1.6447	1.1892	1.7733	8.1178	3.5868	1.4296	1.3705	1.1493	1.5768	2.124	8.5977	2.3453	2.3307	6.5505	7.8222	6.8057	11.0912	3.9825	5.6672	1.7565	1.3143	1.6391	8.2297	1.5345	1.1412	1.3353		0.745561	3.69637
15.1309	1.2896	1.5504	2.2624	8.3012	4.4484	1.8063	1.5602	1.1525	1.8792	2.7701	10.3282	2.4076	2.1652	7.9862	9.3887	7.7359	11.432	3.5385	6.7894	1.672	1.3128	1.5928	7.9139	1.0613	1.0455	1.2038		0.751476	4.02285
15.2501	1.2371	1.505	2.9853	10.5153	4.4066	2.194	1.4139	0.8615	1.3734	3.1275	10.6222	3.5309	3.291	8.9473	11.0843	9.0282	11.6129	4.3389	6.3176	1.1402	1.5808	1.8694	9.0256	1.3286	1.5321	1.1193		0.757396	4.46111
15.3692	1.8027	2.2487	3.6487	9.4562	3.8536	1.7745	0.9698	1.1191	1.3421	3.1884	13.3371	3.0375	3.0493	9.0502	13.0062	8.9084	12.3941	4.5445	5.9474	1.9061	1.2589	1.2022	8.5113	1.3159	1.1398	1.302		0.763311	4.58903
15.4884	1.6326	2.1522	2.8731	11.8976	4.4814	1.628	1.1742	1.5579	1.2393	3.4251	12.0341	3.1367	2.7462	11.2363	12.7844	8.4785	12.2869	5.3632	6.1068	1.5569	1.5656	1.1687	8.582	1.0265	1.1052	1.4843		0.769232	4.72014
15.6075	1.6596	2.3188	2.4816	13.321	4.2968	1.7084	1.1919	1.6433	1.5105	3.5812	13.9266	3.413	3.3796	12.2686	16.0101	11.0979	12.8842	5.401	5.8508	1.7687	1.3263	1.7365	7.8365	1.4718	1.5936	1.5214		0.775147	5.19999
15.7266	2.0336	2.6148	4.9215	13.0209	4.9103	1.5363	1.6157	1.4925	1.6051	3.5067	14.0623	3.4214	3.166	10.9666	15.7591	10.3759	13.217	5.3351	6.1702	1.8345	1.6187	1.658	7.6973	1.393	0.864	1.4951		0.781062	5.24198
15.8458	2.7282	2.7734	5.028	14.8892	6.006	1.6746	1.4955	1.2992	1.1459	2.6851	13.383	2.7258	3.4244	11.6487	17.4846	11.4131	14.9012	6.3997	5.204	2.2145	1.9783	2.1756	7.0773	1.1267	0.9499	1.1956		0.786982	5.50106
15.9649	2.5752	3.2261	6.0926	16.4753	5.6577	1.4171	1.5144	1.6198	1.6359	2.9195	14.0659	4.305	2.9651	11.4388	16.7376	12.7513	15.3704	5.5482	4.8253	1.8743	1.4217	2.1791	7.0743	1.5625	0.9865	1.3978		0.792897	5.67836
16.0841	2.591	2.7035	5.9972	16.2862	8.0625	1.7955	1.0959	1.2511	1.7504	3.8433	15.2581	3.5248	3.1414	10.8918	15.7729	14.6039	16.2562	7.1151	5.2079	1.7637	1.3989	2.0933	6.5975	1.3331	0.8606	1.1226		0.798817	5.8584
16.2032	3.2851	2.7041	7.4441	18.9785	8.3838	2.0288	1.1139	1.4731	2.0837	3.763	14.8891	3.9248	3.0883	9.9045	15.5493	14.0177	14.4784	7.7726	4.7452	1.934	1.3814	1.6022	5.8311	1.1391	1.1809	1.1632		0.804732	5.91769
16.3224	4.1852	2.921	9.579	21.5144	9.0124	2.089	1.4991	1.5979	1.7502	3.5124	14.3363	3.8439	3.2895	7.9298	14.6661	13.2407	13.4475	8.4358	4.4314	2.193	1.5391	2.0577	6.0506	1.6187	1.4659	1.6194		0.810652	6.07023
16.4415	4.5348	3.7481	9.3772	28.199	8.7584	2.0989	1.6015	1.9316	2.3126	4.2053	15.5112	4.0722	3.1944	8.5354	14.7384	10.9637	12.6837	8.7255	4.0799	2.5727	1.7474	1.9867	5.7976	1.2104	1.1636	1.3166		0.816567	6.34872
16.5606	5.129	4.2569	12.5771	29.1653	9.2851	2.2551	1.5476	1.9461	2.1142	4.2176	14.5031	4.373	3.7679	8.2938	12.8146	9.6793	11.4893	10.2786	3.9866	2.7521	1.7297	1.5806	6.4013	0.9097	1.3324	1.6478		0.822482	6.46284
16.6798	6.3325	5.6297	13.5914	28.8512	9.8029	2.0341	1.5425	2.4298	2.5259	5.3545	14.3076	3.5542	3.7609	8.1421	10.9336	7.1684	10.6283	10.1253	4.4578	2.8689	1.7144	2.0072	6.1853	1.2308	1.1639	1.376		0.828402	6.45074
16.7989	6.7872	6.8462	14.0734	27.4635	13.0493	2.1513	1.4403	2.0019	2.7403	5.8522	13.7555	4.0605	5.1408	8.4761	8.5564	5.8043	8.637	11.3698	4.2357	3.4968	1.8741	2.6936	5.1234	1.1816	0.667	1.4216		0.834318	6.49615
16.9181	7.328	8.8807	12.9789	25.1862	14.1109	2.7132	1.7827	1.7428	2.1193	7.2822	14.7216	4.1207	5.3139	7.5021	6.8623	4.9057	7.7504	11.3717	4.7679	4.4629	1.9781	1.9969	5.9194	1.0224	0.9912	1.5072		0.840238	6.51228
17.0372	8.516	10.2567	12.9346	20.4846	16.6824	2.6864	1.7469	2.4059	2.6698	6.4432	14.9328	4.8518	6.0922	7.1899	5.5492	3.996	5.3595	11.5369	4.45	3.9226	2.6424	2.5882	5.3555	1.1485	1.1691	1.2114		0.846153	6.41625
17.1563	9.0811	12.0021	14.3769	15.574	17.5808	2.3176	1.4945	2.3853	4.382	9.1116	14.5667	4.6954	6.3909	5.9594	4.1393	2.2463	6.1045	12.7239	4.8667	5.0147	2.1625	1.9432	5.3406	1.3509	1.1488	1.5256		0.852068	6.4802
17.2755	10.6829	13.3043	15.4095	12.8864	19.7728	2.5524	1.2822	2.4128	3.3179	10.4847	15.5951	6.9459	6.938	6.6388	2.8274	1.2943	4.5522	11.2106	5.4111	5.1322	2.0467	2.5499	5.6799	1.3702	1.101	1.5462		0.857988	6.65175
17.3946	14.7659	15.5524	14.0141	10.0592	22.9109	1.8907	1.1607	2.8267	4.6744	11.4378	14.5928	6.7117	7.8236	6.4691	1.9759	1.4843	3.5643	11.1601	4.6779	5.3229	2.7749	2.4308	5.9976	1.0832	1.4988	1.3114		0.863903	6.85277
17.5138	16.913	16.0375	15.2292	8.3961	23.6177	2.8458	1.3766	3.7167	5.0964	13.7092	13.5216	7.568	8.487	4.9087	1.6662	0.9239	2.7291	12.266	5.5605	5.6565	3.9043	2.1871	5.7956	1.1943	1.2694	1.3868		0.869823	7.15243
17.6329	18.3136	15.5887	14.0096	7.3813	24.1485	2.9905	1.7732	4.5764	6.3624	13.1594	13.5342	10.007	7.9325	5.8018	1.8324	0.9492	2.607	11.3067	5.0287	6.7847	4.2223	2.8766	5.1591	1.1953	1.3517	1.7468		0.875738	7.33229
17.7521	19.4635	17.2725	14.0722	5.3934	21.8742	3.8915	1.8329	4.5481	8.4576	14.8109	14.8851	11.4037	10.5389	4.7752	1.5259	0.8885	2.1507	13.123	4.616	5.8043	4.1669	2.8719	5.1438	1.5012	0.9052	1.2169		0.881658	7.58208
17.8712	19.5027	15.2576	14.2762	5.782	19.1734	5.0065	1.4052	5.7155	9.6357	14.4133	14.1722	13.3588	10.5107	3.7421	1.4273	0.8211	1.7876	11.7244	4.1684	5.5764	4.7604	3.2956	5.8619	1.3765	1.1671	1.3204		0.887573	7.50919
17.9903	17.5074	14.8891	15.8834	4.4629	15.9629	5.705	1.5629	7.1634	10.5925	13.9618	14.8835	12.8669	10.2159	3.6122	1.1079	0.7537	1.4634	9.6336	3.9288	6.0998	5.9919	3.6062	5.5218	1.8826	1.13	1.3686		0.893488	7.37531
18.1095	14.3974	13.8724	16.4816	4.9808	10.4709	7.3988	2.1909	8.9865	13.1311	12.5401	15.2243	11.5889	9.8859	3.1101	0.8657	0.4437	1.384	9.5843	3.9402	5.9198	6.4028	4.5669	4.8475	1.5578	1.1302	1.6353		0.899408	7.17453
18.2286	9.3665	11.47	14.1422	4.3101	7.0106	10.7285	2.8129	10.3496	15.8476	9.9836	14.5173	9.7043	9.2761	2.573	0.7882	0.8542	1.1738	7.6581	4.3166	5.3433	7.576	4.2837	5.4185	1.9546	1.5315	1.6007		0.905324	6.71506
18.3478	5.9724	9.7537	12.7845	3.4433	4.868	12.4307	2.7009	12.3379	14.7541	9.1313	14.1953	9.0712	8.8184	2.1636	1.2928	0.5889	1.1358	7.6029	4.6015	6.1442	8.4547	4.1196	4.6559	1.776	1.3138	1.7421		0.911244	6.37898
18.4669	3.7292	9.1317	10.5534	2.4654	3.5039	14.615	2.4366	11.3918	15.9565	8.909	14.2916	8.8756	8.1241	1.1954	0.6901	0.5319	0.6894	6.9932	4.7087	5.6118	8.4188	4.6005	4.9418	2.6357	1.6036	1.5351		0.917159	6.0823
18.586	3.2633	6.5279	10.2981	2.1093	2.9727	15.8213	3.1649	11.3915	17.6078	6.7788	13.6185	8.6293	8.2242	1.1609	1.0409	0.5049	0.9742	4.3756	4.7355	5.6683	8.6078	4.4548	4.145	2.6698	1.3803	2.4592		0.923074	5.86865
18.7052	2.7315	6.3399	7.0161	1.969	2.317	20.8556	3.8417	12.1337	16.5022	5.6711	13.3078	8.9919	6.671	1.0409	0.4663	0.4295	1.0125	4.148	5.5422	5.7234	10.0656	4.9277	5.1143	3.2699	1.134	1.9199		0.928994	5.8901
18.8243	3.0367	5.3491	6.5026	2.2003	1.5174	19.7047	5.7209	14.0578	14.8502	4.7759	11.4978	8.4414	6.0298	0.6015	0.6555	0.4436	0.8533	2.4848	4.7081	5.1835	8.8482	4.5821	4.2822	3.3482	1.7468	1.741		0.934909	5.50628
18.9435	2.4158	4.6835	5.3702	1.5615	1.6531	21.1451	6.7193	14.201	14.8347	3.8954	11.7142	8.5665	5.2564	0.7086	0.6929	0.3161	1.0831	1.4689	6.0351	4.432	8.9462	4.5878	5.2306	3.8851	1.4658	1.7524		0.940829	5.48543
19.0626	2.5426	3.3803	3.6783	1.6378	0.9623	19.1624	8.1905	14.1954	13.1849	2.7437	11.1078	8.6386	3.967	0.7875	0.5878	0.5033	0.3997	1.6275	5.5894	3.5276	8.2863	5.5938	6.4268	4.033	1.8307	1.4157		0.946744	5.15387
19.1817	2.5453	3.085	3.2207	0.8445	1.3075	16.1986	10.0839	15.3382	11.7985	2.2024	10.326	7.5075	3.0299	0.6961	0.4053	0.5235	0.8495	0.8634	4.4757	3.0633	8.1345	5.6219	5.8474	4.5816	1.7729	2.1332		0.952659	4.8637
19.3009	1.2423	2.5544	2.4602	0.7691	0.9536	11.1948	12.9969	16.6202	9.4757	2.3279	7.9552	7.6331	2.292	0.7197	0.2945	0.7334	0.704	0.9016	4.3972	2.0173	6.4707	5.3761	5.967	6.8721	1.7373	1.9024		0.958579	4.48341
19.42	2.0438	1.8357	2.0309	1.0487	0.6529	7.2996	14.7202	16.7127	7.5836	1.4664	6.9566	7.6847	1.8889	0.6228	0.4411	0.4658	0.497	0.779	4.6703	1.9591	7.3016	6.6617	6.6227	8.6212	1.874	2.3734		0.964494	4.41594
19.5392	1.7924	2.1696	2.1118	0.6687	0.7705	4.4261	15.6112	15.8154	6.0386	1.3577	6.3737	7.5868	1.9309	0.4249	0.3686	0.4299	0.5486	0.693	4.035	1.8475	6.0857	7.9299	6.9514	7.9406	2.9433	1.8738		0.970415	4.18175
19.6583	1.1098	1.5425	1.7745	0.8659	0.799	3.4123	17.154	14.9787	4.8611	0.8801	4.8498	5.9729	1.4725	0.5996	0.3323	0.3153	0.4709	0.5796	4.6513	1.1959	5.0093	7.7718	7.092	8.08	3.0219	2.5618		0.97633	3.89826
19.7775	1.1008	1.5217	1.9265	0.7873	0.6484	2.0015	18.9347	17.6096	4.1845	0.6498	4.2996	4.7979	0.9861	0.4922	0.793	0.28	0.3465	0.3796	3.8959	1.3658	4.6106	7.7582	8.0705	8.6131	3.8988	2.1925		0.98225	3.92866
19.8966	1.1889	1.7279	1.4993	0.818	0.4347	1.5306	19.2983	16.0095	3.0963	0.4938	3.0434	3.8595	1.1106	0.514	0.3188	0.2395	0.54	0.4476	3.7927	1.1842	3.6245	9.0038	8.1341	8.882	2.8983	2.2559		0.988165	3.69024
20.0157	1.4497	1.5118	1.067	0.2917	0.2921	1.5576	17.6489	14.5726	2.7566	0.5538	2.717	4.3438	0.8266	0.3429	0.4195	0.2131	0.3596	0.2756	2.9857	1.4555	3.1362	9.354	8.8764	7.921	3.8948	2.4396		0.99408	3.51012
20.1349	0.865	1.0379	1.049	0.4121	0.4452	0.9311	14.0494	12.8234	1.8736	0.904	2.2589	3.7323	0.8935	0.4521	0.4471	0.1934	0.3062	0.4571	2.9412	0.7987	2.3988	8.4038	9.0241	6.5657	5.082	2.6		1	3.11329

## Sheet: Image19
X0	Y0	Y1	Y2	Y3	Y4	Y5	Y6	Y7	Y8	Y9	Y10	Y11	Y12	Y13	Y14	Y15	Y16	Y17	Y18	Y20	Y21	Y22	Y23	Y24	Y25	Y26	Y27	Y28	Y29	Y30	Y31	Y32	Y33	Y34	Y35	Y36	Y37		Ap-Ba	Average int.
0	10.3441	8.8205	6.7296	6.5839	5.5982	6.1199	5.3165	3.7771	9.0263	3.9535	7.4652	13.8782	14.0543	13.9954	10.9129	16.738	18.15	16.9522	24.5295	8.8205	6.7296	6.5839	5.5982	6.1199	5.3165	3.7771	9.0263	3.9535	7.4652	13.8782	14.0543	13.9954	10.9129	16.738	18.15	16.9522	24.5295		0	10.6904
0.1191	10.7833	8.2874	7.7145	6.2751	6.5902	6.2847	5.9067	4.5598	9.8933	4.4417	9.5242	14.4416	14.6133	19.0007	13.9378	17.6604	19.5784	17.128	26.5172	8.2874	7.7145	6.2751	6.5902	6.2847	5.9067	4.5598	9.8933	4.4417	9.5242	14.4416	14.6133	19.0007	13.9378	17.6604	19.5784	17.128	26.5172		0.00398268	11.7701
0.2383	9.9979	9.1587	8.5753	7.1741	7.9647	7.3424	6.0969	5.262	10.4191	5.4643	9.6498	15.9953	18.0791	20.3397	16.6532	18.2809	20.5996	16.5915	27.3648	9.1587	8.5753	7.1741	7.9647	7.3424	6.0969	5.262	10.4191	5.4643	9.6498	15.9953	18.0791	20.3397	16.6532	18.2809	20.5996	16.5915	27.3648		0.0079687	12.7573
0.3574	11.5661	9.5261	9.6023	9.042	9.5886	7.782	7.0478	5.3362	11.4992	6.4045	12.7751	19.2601	19.2899	25.3682	18.2589	19.5176	22.036	17.5451	27.0068	9.5261	9.6023	9.042	9.5886	7.782	7.0478	5.3362	11.4992	6.4045	12.7751	19.2601	19.2899	25.3682	18.2589	19.5176	22.036	17.5451	27.0068		0.0119514	14.1983
0.4766	11.905	9.8017	9.943	10.3423	9.8276	9.085	7.7417	7.1241	11.6827	8.6211	13.8804	21.6509	23.0298	31.1452	21.5952	20.2947	24.7643	20.3944	29.6188	9.8017	9.943	10.3423	9.8276	9.085	7.7417	7.1241	11.6827	8.6211	13.8804	21.6509	23.0298	31.1452	21.5952	20.2947	24.7643	20.3944	29.6188		0.0159374	16.0268
0.5957	11.9507	11.5209	11.5887	13.1836	11.6658	8.4126	9.1849	7.4017	13.2734	10.1791	14.027	24.8377	26.6173	37.2416	27.361	20.4058	27.0717	21.1127	33.4122	11.5209	11.5887	13.1836	11.6658	8.4126	9.1849	7.4017	13.2734	10.1791	14.027	24.8377	26.6173	37.2416	27.361	20.4058	27.0717	21.1127	33.4122		0.0199201	18.0796
0.7148	13.9272	12.9085	14.1987	14.6196	15.6088	10.6019	11.0704	8.5943	15.9526	11.1881	16.8246	26.7073	30.2587	39.8615	28.6005	24.8646	29.3762	24.4062	34.5074	12.9085	14.1987	14.6196	15.6088	10.6019	11.0704	8.5943	15.9526	11.1881	16.8246	26.7073	30.2587	39.8615	28.6005	24.8646	29.3762	24.4062	34.5074		0.0239028	20.3845
0.834	17.4983	17.5497	14.0143	17.2441	16.7663	12.0532	12.9797	11.0264	16.6063	14.6266	20.1313	26.9599	33.5278	42.6388	34.525	30.2337	34.1197	26.3867	37.0369	17.5497	14.0143	17.2441	16.7663	12.0532	12.9797	11.0264	16.6063	14.6266	20.1313	26.9599	33.5278	42.6388	34.525	30.2337	34.1197	26.3867	37.0369		0.0278888	23.0906
0.9531	20.8725	18.7357	15.4052	19.4543	22.4227	15.8429	15.2328	14.3961	18.7689	15.944	25.5849	33.682	37.7122	42.5066	39.993	33.1661	39.0348	32.3164	39.5947	18.7357	15.4052	19.4543	22.4227	15.8429	15.2328	14.3961	18.7689	15.944	25.5849	33.682	37.7122	42.5066	39.993	33.1661	39.0348	32.3164	39.5947		0.0318715	26.4989
1.0723	26.4433	22.6166	17.7792	24.0319	26.9121	19.433	19.462	14.5656	21.007	16.4514	27.925	35.0756	41.4324	44.1004	44.1141	39.7058	43.7237	38.5624	41.4172	22.6166	17.7792	24.0319	26.9121	19.433	19.462	14.5656	21.007	16.4514	27.925	35.0756	41.4324	44.1004	44.1141	39.7058	43.7237	38.5624	41.4172		0.0358575	29.8128
1.1914	32.9956	22.219	17.877	27.4486	27.742	22.277	22.8815	17.2366	24.8238	18.8378	31.1194	39.4307	43.0717	45.0963	44.6884	46.186	48.9449	40.4511	42.0417	22.219	17.877	27.4486	27.742	22.277	22.8815	17.2366	24.8238	18.8378	31.1194	39.4307	43.0717	45.0963	44.6884	46.186	48.9449	40.4511	42.0417		0.0398402	32.3714
1.3106	37.1651	23.5888	22.737	32.4027	30.3856	23.5833	22.8315	18.957	29.1403	22.8521	33.5387	42.5394	48.4136	45.6698	47.8386	53.18	52.3882	44.8513	45.8715	23.5888	22.737	32.4027	30.3856	23.5833	22.8315	18.957	29.1403	22.8521	33.5387	42.5394	48.4136	45.6698	47.8386	53.18	52.3882	44.8513	45.8715		0.0438262	35.6406
1.4297	41.8096	27.4813	26.1816	34.3981	32.8874	24.1383	24.0943	22.5196	34.2148	27.3219	35.4412	47.9762	49.598	49.9828	50.8623	58.7711	56.3288	42.5735	46.0144	27.4813	26.1816	34.3981	32.8874	24.1383	24.0943	22.5196	34.2148	27.3219	35.4412	47.9762	49.598	49.9828	50.8623	58.7711	56.3288	42.5735	46.0144		0.0478089	38.4698
1.5488	44.681	28.5362	30.0998	37.4613	35.9214	26.9287	27.4493	26.7677	38.5094	31.8403	36.6853	48.2322	50.7638	49.4894	52.602	58.4089	57.8642	48.1006	47.5719	28.5362	30.0998	37.4613	35.9214	26.9287	27.4493	26.7677	38.5094	31.8403	36.6853	48.2322	50.7638	49.4894	52.602	58.4089	57.8642	48.1006	47.5719		0.0517915	40.8418
1.668	49.0978	27.9479	32.1098	34.768	34.2817	30.3648	30.6573	28.8996	43.0246	34.6374	35.9447	46.1634	55.3195	50.1789	48.7549	59.5373	55.0413	46.5247	51.2396	27.9479	32.1098	34.768	34.2817	30.3648	30.6573	28.8996	43.0246	34.6374	35.9447	46.1634	55.3195	50.1789	48.7549	59.5373	55.0413	46.5247	51.2396		0.0557776	41.6186
1.7871	50.4529	31.118	31.5857	33.0595	34.6141	29.0319	30.5725	29.2161	45.9882	38.6774	35.5328	52.6691	57.2198	54.0473	49.5955	56.5182	50.9888	43.3896	52.0992	31.118	31.5857	33.0595	34.6141	29.0319	30.5725	29.2161	45.9882	38.6774	35.5328	52.6691	57.2198	54.0473	49.5955	56.5182	50.9888	43.3896	52.0992		0.0597602	42.2243
1.9063	51.729	34.7964	32.2851	32.5205	30.1261	28.1164	28.8298	31.5885	46.9164	41.905	36.4966	52.6539	58.6268	60.227	47.4893	52.954	44.9448	40.5281	50.1739	34.7964	32.2851	32.5205	30.1261	28.1164	28.8298	31.5885	46.9164	41.905	36.4966	52.6539	58.6268	60.227	47.4893	52.954	44.9448	40.5281	50.1739		0.0637463	42.0023
2.0254	54.3089	37.4288	31.6311	30.2461	31.7366	26.475	26.3992	31.8244	46.3108	44.3718	36.6129	49.0711	60.1456	60.3975	45.2197	43.5373	38.8212	37.9986	49.7269	37.4288	31.6311	30.2461	31.7366	26.475	26.3992	31.8244	46.3108	44.3718	36.6129	49.0711	60.1456	60.3975	45.2197	43.5373	38.8212	37.9986	49.7269		0.0677289	40.8167
2.1445	53.8967	36.7271	29.4134	27.1999	29.0326	28.0957	25.6383	34.0335	48.5	43.1653	36.2545	48.8731	61.5633	60.1251	42.1975	38.0416	35.0862	34.6812	53.5263	36.7271	29.4134	27.1999	29.0326	28.0957	25.6383	34.0335	48.5	43.1653	36.2545	48.8731	61.5633	60.1251	42.1975	38.0416	35.0862	34.6812	53.5263		0.0717116	39.9515
2.2637	52.4485	38.1266	27.2972	24.6236	27.0913	27.8863	25.9687	38.7293	51.0863	43.0638	35.6385	42.4454	62.2949	63.2452	41.3107	34.3904	32.6403	30.9644	51.3612	38.1266	27.2972	24.6236	27.0913	27.8863	25.9687	38.7293	51.0863	43.0638	35.6385	42.4454	62.2949	63.2452	41.3107	34.3904	32.6403	30.9644	51.3612		0.0756976	39.1561
2.3828	48.7993	39.2397	25.7928	24.1449	26.4079	28.1211	26.2281	45.1675	51.0309	38.4473	37.4798	40.4431	61.4913	60.4538	38.2053	29.8561	29.3054	27.0973	47.675	39.2397	25.7928	24.1449	26.4079	28.1211	26.2281	45.1675	51.0309	38.4473	37.4798	40.4431	61.4913	60.4538	38.2053	29.8561	29.3054	27.0973	47.675		0.0796803	37.8912
2.502	47.0242	39.4159	23.9094	23.7684	26.198	27.4609	26.2077	50.313	51.5267	38.1424	34.9734	36.8605	55.992	58.3247	32	25.4569	26.6354	24.2081	41.8639	39.4159	23.9094	23.7684	26.198	27.4609	26.2077	50.313	51.5267	38.1424	34.9734	36.8605	55.992	58.3247	32	25.4569	26.6354	24.2081	41.8639		0.0836663	36.0416
2.6211	43.6653	37.9339	22.9858	23.6713	27.4301	27.6738	25.3213	56.6858	48.8636	36.5237	31.3663	30.4648	55.2205	55.2434	27.9527	23.4408	26.6051	22.6107	39.842	37.9339	22.9858	23.6713	27.4301	27.6738	25.3213	56.6858	48.8636	36.5237	31.3663	30.4648	55.2205	55.2434	27.9527	23.4408	26.6051	22.6107	39.842		0.087649	34.6848
2.7402	40.3212	39.0451	22.1604	21.2536	25.5393	30.3177	28.5837	56.7017	46.5603	34.6624	29.3271	25.1408	49.994	54.001	27.0879	21.6598	24.778	20.0232	33.7706	39.0451	22.1604	21.2536	25.5393	30.3177	28.5837	56.7017	46.5603	34.6624	29.3271	25.1408	49.994	54.001	27.0879	21.6598	24.778	20.0232	33.7706		0.0916317	33.0144
2.8594	35.6833	41.2567	20.5136	20.208	27.395	29.0759	33.2045	59.4663	42.9654	30.6001	28.4818	19.5036	43.7484	54.2722	25.0212	20.32	21.8202	19.1664	27.9991	41.2567	20.5136	20.208	27.395	29.0759	33.2045	59.4663	42.9654	30.6001	28.4818	19.5036	43.7484	54.2722	25.0212	20.32	21.8202	19.1664	27.9991		0.0956177	31.5059
2.9785	35.2205	41.0491	20.2623	20.39	26.5121	26.3542	33.9447	53.4446	34.7912	27.1682	26.8595	17.0811	39.0247	50.5996	22.2139	16.4771	20.0477	15.2635	25.5104	41.0491	20.2623	20.39	26.5121	26.3542	33.9447	53.4446	34.7912	27.1682	26.8595	17.0811	39.0247	50.5996	22.2139	16.4771	20.0477	15.2635	25.5104		0.0996004	28.8975
3.0977	29.9291	36.4204	21.9687	19.1941	23.1128	25.6719	33.6873	50.2301	32.1408	24.6174	25.3374	13.7726	35.7038	52.2614	19.2972	16.9361	19.3767	13.331	21.5078	36.4204	21.9687	19.1941	23.1128	25.6719	33.6873	50.2301	32.1408	24.6174	25.3374	13.7726	35.7038	52.2614	19.2972	16.9361	19.3767	13.331	21.5078		0.103586	27.0017
3.2168	26.1731	34.5063	19.449	15.682	21.752	23.1089	30.9199	43.3436	25.9066	21.29	19.7983	11.2443	31.0931	48.0323	20.4126	16.3504	16.4046	12.2508	19.734	34.5063	19.449	15.682	21.752	23.1089	30.9199	43.3436	25.9066	21.29	19.7983	11.2443	31.0931	48.0323	20.4126	16.3504	16.4046	12.2508	19.734		0.107569	24.0197
3.336	25.3469	32.0154	18.8739	15.1793	21.2935	19.96	28.1138	35.7242	20.8699	17.0608	19.8036	9.3378	26.4167	44.2269	18.4074	13.9486	14.8361	11.3526	17.1782	32.0154	18.8739	15.1793	21.2935	19.96	28.1138	35.7242	20.8699	17.0608	19.8036	9.3378	26.4167	44.2269	18.4074	13.9486	14.8361	11.3526	17.1782		0.111555	21.4742
3.4551	22.539	28.8729	20.2608	11.9145	20.2506	19.5822	22.6209	29.513	17.5884	15.4993	15.659	9.0622	21.8423	37.3384	17.5277	14.0193	13.4926	10.9543	12.7559	28.8729	20.2608	11.9145	20.2506	19.5822	22.6209	29.513	17.5884	15.4993	15.659	9.0622	21.8423	37.3384	17.5277	14.0193	13.4926	10.9543	12.7559		0.115538	18.9202
3.5742	18.0666	26.0405	21.1406	11.2949	18.2029	15.7701	20.9807	23.0361	15.9966	14.1795	12.5201	8.1635	18.6962	34.0241	18.167	13.6201	12.8283	10.1758	11.9702	26.0405	21.1406	11.2949	18.2029	15.7701	20.9807	23.0361	15.9966	14.1795	12.5201	8.1635	18.6962	34.0241	18.167	13.6201	12.8283	10.1758	11.9702		0.11952	17.0725
3.6934	17.5147	23.2577	21.4876	12.0025	15.525	14.5745	17.6833	20.8881	12.9162	12.7659	10.1177	8.2159	15.3301	30.817	17.1339	14.5759	11.2979	9.7323	10.7754	23.2577	21.4876	12.0025	15.525	14.5745	17.6833	20.8881	12.9162	12.7659	10.1177	8.2159	15.3301	30.817	17.1339	14.5759	11.2979	9.7323	10.7754		0.123506	15.5597
3.8125	14.9699	20.9225	17.7102	10.0056	13.036	12.9897	14.8505	17.5452	10.4628	10.3048	8.9411	6.9553	11.862	28.5611	16.3973	12.7602	9.8339	8.4943	10.1035	20.9225	17.7102	10.0056	13.036	12.9897	14.8505	17.5452	10.4628	10.3048	8.9411	6.9553	11.862	28.5611	16.3973	12.7602	9.8339	8.4943	10.1035		0.127489	13.4714
3.9317	16.0534	18.3989	18.0774	8.8321	9.9421	13.1407	14.5981	13.3308	9.169	7.6766	7.7904	6.2327	11.025	22.7729	14.3999	12.5855	10.8759	8.3537	9.6744	18.3989	18.0774	8.8321	9.9421	13.1407	14.5981	13.3308	9.169	7.6766	7.7904	6.2327	11.025	22.7729	14.3999	12.5855	10.8759	8.3537	9.6744		0.131475	12.1569
4.0508	15.2776	18.277	16.9646	8.1943	8.9913	12.1763	11.1756	11.841	7.1209	6.2918	7.8008	6.4046	8.7141	20.3232	14.6296	10.8445	9.4631	7.8297	8.1838	18.277	16.9646	8.1943	8.9913	12.1763	11.1756	11.841	7.1209	6.2918	7.8008	6.4046	8.7141	20.3232	14.6296	10.8445	9.4631	7.8297	8.1838		0.135458	10.9657
4.1699	14.3632	17.5959	14.5542	7.6233	6.4278	11.8888	9.3828	9.874	6.6303	5.0999	7.0681	5.1743	9.0479	18.8572	14.3892	11.511	8.4244	6.5868	9.0761	17.5959	14.5542	7.6233	6.4278	11.8888	9.3828	9.874	6.6303	5.0999	7.0681	5.1743	9.0479	18.8572	14.3892	11.511	8.4244	6.5868	9.0761		0.139441	10.0753
4.2891	13.6661	17.5931	13.8812	6.5151	6.7507	11.3404	8.1981	10.2103	5.0647	4.4631	6.078	4.5454	8.0486	18.3078	14.7032	10.4766	7.9775	6.3137	7.703	17.5931	13.8812	6.5151	6.7507	11.3404	8.1981	10.2103	5.0647	4.4631	6.078	4.5454	8.0486	18.3078	14.7032	10.4766	7.9775	6.3137	7.703		0.143427	9.45965
4.4082	14.8198	17.435	12.3445	5.3606	6.6109	11.7204	7.1625	8.0072	4.127	4.3892	5.7778	3.8807	6.308	17.1039	13.358	11.3121	7.3361	6.4475	6.5236	17.435	12.3445	5.3606	6.6109	11.7204	7.1625	8.0072	4.127	4.3892	5.7778	3.8807	6.308	17.1039	13.358	11.3121	7.3361	6.4475	6.5236		0.147409	8.78999
4.5274	13.4211	15.8688	10.2987	4.7353	5.6763	10.6313	6.3803	5.5862	3.5178	4.0147	5.8154	3.1572	5.5589	15.9437	13.6244	10.0824	7.5279	6.259	5.545	15.8688	10.2987	4.7353	5.6763	10.6313	6.3803	5.5862	3.5178	4.0147	5.8154	3.1572	5.5589	15.9437	13.6244	10.0824	7.5279	6.259	5.545		0.151395	7.94237
4.6465	12.2204	15.2357	8.7602	5.0215	3.5402	9.5935	6.2149	4.6171	3.5162	3.6632	5.3908	3.3028	4.8568	13.8848	13.2703	9.6288	7.2311	5.5647	6.1997	15.2357	8.7602	5.0215	3.5402	9.5935	6.2149	4.6171	3.5162	3.6632	5.3908	3.3028	4.8568	13.8848	13.2703	9.6288	7.2311	5.5647	6.1997		0.155378	7.32986
4.7657	9.8946	15.4533	9.3361	4.1678	3.9709	8.276	5.9713	4.8312	3.2866	3.0549	5.461	2.9286	4.2619	12.168	12.1198	9.993	6.7897	4.8554	5.3905	15.4533	9.3361	4.1678	3.9709	8.276	5.9713	4.8312	3.2866	3.0549	5.461	2.9286	4.2619	12.168	12.1198	9.993	6.7897	4.8554	5.3905		0.159364	6.8791
4.8848	9.3586	15.3344	8.7261	4.2755	3.5069	7.8085	4.8785	3.4315	2.9855	2.392	5.6378	2.5353	3.9733	11.576	12.2359	8.5704	5.7232	5.4512	5.0799	15.3344	8.7261	4.2755	3.5069	7.8085	4.8785	3.4315	2.9855	2.392	5.6378	2.5353	3.9733	11.576	12.2359	8.5704	5.7232	5.4512	5.0799		0.163347	6.42169
5.0039	8.2728	12.9749	7.2664	3.5257	3.1726	7.276	5.3363	3.9474	2.3828	2.9878	5.4511	2.3785	3.6553	10.5553	12.2496	7.4529	6.1265	4.9372	4.2171	12.9749	7.2664	3.5257	3.1726	7.276	5.3363	3.9474	2.3828	2.9878	5.4511	2.3785	3.6553	10.5553	12.2496	7.4529	6.1265	4.9372	4.2171		0.167329	5.94756
5.1231	7.1855	11.7917	6.8723	3.4463	2.4517	7.1567	5.5268	3.4026	3.0129	2.6107	4.4905	2.1905	3.3756	8.7763	10.519	7.9384	4.6389	3.6544	4.3912	11.7917	6.8723	3.4463	2.4517	7.1567	5.5268	3.4026	3.0129	2.6107	4.4905	2.1905	3.3756	8.7763	10.519	7.9384	4.6389	3.6544	4.3912		0.171315	5.39672
5.2422	6.5874	10.9657	6.0907	2.9401	2.8815	7.4598	5.4509	3.3803	2.5935	2.6657	3.8465	2.5248	3.4252	7.2378	10.1538	7.857	4.6913	3.4923	4.3228	10.9657	6.0907	2.9401	2.8815	7.4598	5.4509	3.3803	2.5935	2.6657	3.8465	2.5248	3.4252	7.2378	10.1538	7.857	4.6913	3.4923	4.3228		0.175298	5.14991
5.3614	6.0031	11.519	6.6692	3.0045	2.7721	6.2956	5.6548	2.9786	2.5164	2.2249	4.2173	2.6788	2.896	6.5337	8.3986	6.8512	4.2243	3.5106	3.9181	11.519	6.6692	3.0045	2.7721	6.2956	5.6548	2.9786	2.5164	2.2249	4.2173	2.6788	2.896	6.5337	8.3986	6.8512	4.2243	3.5106	3.9181		0.179284	4.85758
5.4805	4.916	9.9039	5.9162	2.9654	2.4339	6.558	5.3636	2.5603	1.8427	1.9863	4.0627	2.2804	2.909	6.0262	8.2841	6.8621	4.2146	3.2859	4.1665	9.9039	5.9162	2.9654	2.4339	6.558	5.3636	2.5603	1.8427	1.9863	4.0627	2.2804	2.909	6.0262	8.2841	6.8621	4.2146	3.2859	4.1665		0.183267	4.54485
5.5996	4.4294	8.729	5.3008	2.4647	2.447	4.8899	5.8728	2.8488	2.081	2.8	3.7652	1.9864	3.2278	5.6282	7.2032	7.156	4.6387	3.1729	3.5809	8.729	5.3008	2.4647	2.447	4.8899	5.8728	2.8488	2.081	2.8	3.7652	1.9864	3.2278	5.6282	7.2032	7.156	4.6387	3.1729	3.5809		0.187249	4.32476
5.7188	3.601	7.1309	5.3545	2.1581	2.1713	4.9275	5.2734	2.6949	1.7902	2.1884	3.549	2.3368	3.1382	4.3804	6.6842	6.6122	4.081	2.5002	4.0252	7.1309	5.3545	2.1581	2.1713	4.9275	5.2734	2.6949	1.7902	2.1884	3.549	2.3368	3.1382	4.3804	6.6842	6.6122	4.081	2.5002	4.0252		0.191235	3.93497
5.8379	3.8767	5.8866	4.793	2.4622	1.9171	4.1952	4.8883	1.8558	1.4897	1.9038	3.4365	2.294	3.3548	3.5637	6.2419	6.9711	4.7555	2.4646	4.013	5.8866	4.793	2.4622	1.9171	4.1952	4.8883	1.8558	1.4897	1.9038	3.4365	2.294	3.3548	3.5637	6.2419	6.9711	4.7555	2.4646	4.013		0.195218	3.69866
5.9571	3.2846	5.5103	3.9838	2.438	2.6648	4.5731	5.3326	2.0681	2.1614	2.8025	3.4432	2.1367	3.2308	3.349	6.1919	6.0059	4.0674	2.7358	3.8493	5.5103	3.9838	2.438	2.6648	4.5731	5.3326	2.0681	2.1614	2.8025	3.4432	2.1367	3.2308	3.349	6.1919	6.0059	4.0674	2.7358	3.8493		0.199204	3.68578
6.0762	3.5842	4.822	3.8341	2.361	2.456	4.9527	5.2307	2.0462	2.0439	2.2587	2.9399	1.8976	2.8048	3.0929	4.4793	5.1208	3.7145	2.3328	3.7814	4.822	3.8341	2.361	2.456	4.9527	5.2307	2.0462	2.0439	2.2587	2.9399	1.8976	2.8048	3.0929	4.4793	5.1208	3.7145	2.3328	3.7814		0.203187	3.34926
6.1953	2.8764	4.427	4.2555	1.8117	2.2214	4.8311	5.5841	2.1028	2.0317	2.5108	3.2236	2.1053	3.0199	3.3164	4.2538	4.6937	3.4264	2.2137	3.1231	4.427	4.2555	1.8117	2.2214	4.8311	5.5841	2.1028	2.0317	2.5108	3.2236	2.1053	3.0199	3.3164	4.2538	4.6937	3.4264	2.2137	3.1231		0.207169	3.27515
6.3145	2.5212	3.5404	3.6871	2.6267	2.4361	4.73	6.1811	2.2162	1.86	2.6759	2.9563	2.2943	2.741	3.6264	4.1952	4.6306	2.991	2.4269	3.5175	3.5404	3.6871	2.6267	2.4361	4.73	6.1811	2.2162	1.86	2.6759	2.9563	2.2943	2.741	3.6264	4.1952	4.6306	2.991	2.4269	3.5175		0.211156	3.27531
6.4336	1.8514	3.672	3.9259	2.6516	1.6824	5.1973	6.2358	2.4915	1.9303	2.2689	2.9467	2.9591	2.892	3.0718	3.4319	4.352	2.5974	2.3945	3.6422	3.672	3.9259	2.6516	1.6824	5.1973	6.2358	2.4915	1.9303	2.2689	2.9467	2.9591	2.892	3.0718	3.4319	4.352	2.5974	2.3945	3.6422		0.215138	3.20373
6.5528	2.2962	2.5323	4.1177	2.5324	2.244	4.4113	7.0318	2.2199	1.6295	1.8178	2.5836	2.621	2.7846	2.8182	3.7298	3.5434	2.6523	2.131	3.5855	2.5323	4.1177	2.5324	2.244	4.4113	7.0318	2.2199	1.6295	1.8178	2.5836	2.621	2.7846	2.8182	3.7298	3.5434	2.6523	2.131	3.5855		0.219124	3.03428
6.6719	2.1513	2.6222	3.8885	3.2093	2.3921	4.7442	7.5301	2.1696	1.372	2.171	2.2259	2.1245	2.1809	3.297	3.3781	4.2585	2.2833	1.8628	4.3999	2.6222	3.8885	3.2093	2.3921	4.7442	7.5301	2.1696	1.372	2.171	2.2259	2.1245	2.1809	3.297	3.3781	4.2585	2.2833	1.8628	4.3999		0.223107	3.09111
6.7911	2.0046	2.4086	4.009	2.9774	2.3377	4.972	7.7364	2.1434	1.6661	2.3968	2.3325	2.833	2.4894	2.87	2.621	4.399	2.0668	1.5882	4.2213	2.4086	4.009	2.9774	2.3377	4.972	7.7364	2.1434	1.6661	2.3968	2.3325	2.833	2.4894	2.87	2.621	4.399	2.0668	1.5882	4.2213		0.227093	3.08491
6.9102	2.2954	2.0202	4.4406	2.4716	2.5641	4.6347	7.5226	1.7216	1.6444	2.5425	2.6273	2.9741	3.033	2.6405	2.5297	3.4108	2.3962	1.9827	4.1127	2.0202	4.4406	2.4716	2.5641	4.6347	7.5226	1.7216	1.6444	2.5425	2.6273	2.9741	3.033	2.6405	2.5297	3.4108	2.3962	1.9827	4.1127		0.231076	3.04957
7.0293	1.4255	1.9312	4.7228	2.4619	2.8336	4.4532	9.2163	2.39	1.8901	2.1967	2.8417	3.3536	3.5054	3.4889	2.5471	3.6181	2.3239	1.7256	3.8212	1.9312	4.7228	2.4619	2.8336	4.4532	9.2163	2.39	1.8901	2.1967	2.8417	3.3536	3.5054	3.4889	2.5471	3.6181	2.3239	1.7256	3.8212		0.235058	3.24508
7.1485	1.3792	1.9667	4.7467	2.7297	2.148	5.1229	10.7562	2.4133	1.5552	3.3173	3.7266	3.727	3.3629	4.2585	2.2897	3.164	2.1725	1.5813	3.8591	1.9667	4.7467	2.7297	2.148	5.1229	10.7562	2.4133	1.5552	3.3173	3.7266	3.727	3.3629	4.2585	2.2897	3.164	2.1725	1.5813	3.8591		0.239044	3.43715
7.2676	1.4596	1.8911	4.4166	3.2458	2.2238	4.3726	12.9667	2.6645	1.6195	3.9696	3.2606	3.5551	3.4033	3.2019	2.4644	2.6375	2.0629	1.589	4.7769	1.8911	4.4166	3.2458	2.2238	4.3726	12.9667	2.6645	1.6195	3.9696	3.2606	3.5551	3.4033	3.2019	2.4644	2.6375	2.0629	1.589	4.7769		0.243027	3.5163
7.3868	1.9616	1.7928	3.9754	3.3294	2.0905	4.6922	16.1191	2.2822	2.0665	4.4912	3.3238	3.4708	3.068	2.9483	1.8486	2.5368	1.9574	1.473	3.4864	1.7928	3.9754	3.3294	2.0905	4.6922	16.1191	2.2822	2.0665	4.4912	3.3238	3.4708	3.068	2.9483	1.8486	2.5368	1.9574	1.473	3.4864		0.247013	3.56396
7.5059	1.4687	1.6191	4.3929	3.0511	2.1122	5.6296	18.0763	2.0406	1.9665	4.3343	3.1542	4.0411	2.8636	3.8227	2.4268	2.3182	2.1134	1.5447	3.4355	1.6191	4.3929	3.0511	2.1122	5.6296	18.0763	2.0406	1.9665	4.3343	3.1542	4.0411	2.8636	3.8227	2.4268	2.3182	2.1134	1.5447	3.4355		0.250996	3.76633
7.625	1.603	1.8612	5.7009	3.3027	2.5995	5.1983	20.2133	3.0879	1.7504	4.6514	3.4904	5.014	3.1754	3.4715	2.0282	2.2139	1.9169	1.6281	4.332	1.8612	5.7009	3.3027	2.5995	5.1983	20.2133	3.0879	1.7504	4.6514	3.4904	5.014	3.1754	3.4715	2.0282	2.2139	1.9169	1.6281	4.332		0.254978	4.13176
7.7442	1.6231	1.8185	5.4759	3.0371	1.9448	5.5863	23.6911	2.5437	1.6536	4.8585	4.3644	6.5817	3.3566	3.2122	1.8581	2.1391	1.5906	1.4547	4.8946	1.8185	5.4759	3.0371	1.9448	5.5863	23.6911	2.5437	1.6536	4.8585	4.3644	6.5817	3.3566	3.2122	1.8581	2.1391	1.5906	1.4547	4.8946		0.258964	4.37152
7.8633	1.5633	1.8109	5.803	3.319	2.3649	5.9828	25.73	2.3002	1.478	5.3669	4.6671	9.0624	3.1491	3.3227	1.826	1.9568	1.6734	1.4184	3.8478	1.8109	5.803	3.319	2.3649	5.9828	25.73	2.3002	1.478	5.3669	4.6671	9.0624	3.1491	3.3227	1.826	1.9568	1.6734	1.4184	3.8478		0.262947	4.64114
7.9825	1.4834	1.8848	6.7558	3.4784	2.1061	6.5781	26.2775	1.7714	2.0558	6.9661	3.4285	9.188	3.2425	3.0735	1.3736	2.1747	1.543	1.6423	3.7444	1.8848	6.7558	3.4784	2.1061	6.5781	26.2775	1.7714	2.0558	6.9661	3.4285	9.188	3.2425	3.0735	1.3736	2.1747	1.543	1.6423	3.7444		0.266933	4.75817
8.1016	1.5633	1.6417	6.4546	2.9705	2.0471	7.5324	26.7962	2.0381	2.5697	7.1339	3.6442	11.1139	3.2429	3.196	1.5953	1.8306	1.6953	1.4072	4.0617	1.6417	6.4546	2.9705	2.0471	7.5324	26.7962	2.0381	2.5697	7.1339	3.6442	11.1139	3.2429	3.196	1.5953	1.8306	1.6953	1.4072	4.0617		0.270916	4.95962
8.2207	1.6717	1.9012	8.5045	3.2165	2.2098	8.1364	25.8118	2.4631	2.0839	7.9406	3.2036	11.7344	3.4888	3.0005	1.838	1.7956	1.2665	1.4882	3.745	1.9012	8.5045	3.2165	2.2098	8.1364	25.8118	2.4631	2.0839	7.9406	3.2036	11.7344	3.4888	3.0005	1.838	1.7956	1.2665	1.4882	3.745		0.274898	5.11699
8.3399	1.6219	1.8096	6.196	3.3509	1.9034	9.7335	25.6323	2.1373	1.7625	9.9209	2.6246	9.8312	3.7946	2.9385	1.7841	1.7925	1.2849	1.3525	3.0617	1.8096	6.196	3.3509	1.9034	9.7335	25.6323	2.1373	1.7625	9.9209	2.6246	9.8312	3.7946	2.9385	1.7841	1.7925	1.2849	1.3525	3.0617		0.278884	4.95794
8.459	1.4232	1.6369	6.4959	3.0802	2.2645	10.5471	24.0731	2.0541	1.9897	9.1253	2.992	9.7121	4.513	3.1807	1.5532	1.7772	2.0316	1.4385	2.971	1.6369	6.4959	3.0802	2.2645	10.5471	24.0731	2.0541	1.9897	9.1253	2.992	9.7121	4.513	3.1807	1.5532	1.7772	2.0316	1.4385	2.971		0.282867	4.98096
8.5782	1.1714	1.4947	6.8652	3.4951	2.6285	13.0675	23.4515	2.0335	1.8184	8.7707	3.267	10.545	3.2247	3.3197	1.6259	1.6017	1.4594	1.4172	3.9333	1.4947	6.8652	3.4951	2.6285	13.0675	23.4515	2.0335	1.8184	8.7707	3.267	10.545	3.2247	3.3197	1.6259	1.6017	1.4594	1.4172	3.9333		0.286853	5.11377
8.6973	1.2782	1.5798	7.2849	3.9868	2.4756	17.7697	22.4186	2.075	1.8298	9.7448	3.1442	10.5708	3.0115	3.0109	1.1231	1.8444	1.1243	1.529	4.9127	1.5798	7.2849	3.9868	2.4756	17.7697	22.4186	2.075	1.8298	9.7448	3.1442	10.5708	3.0115	3.0109	1.1231	1.8444	1.1243	1.529	4.9127		0.290836	5.40946
8.8165	2.2356	1.6372	7.0043	3.442	2.6565	20.5211	20.8887	2.2953	2.1013	10.7091	3.2366	10.7614	3.5986	2.7655	1.6819	1.6041	1.4572	1.2331	4.8508	1.6372	7.0043	3.442	2.6565	20.5211	20.8887	2.2953	2.1013	10.7091	3.2366	10.7614	3.5986	2.7655	1.6819	1.6041	1.4572	1.2331	4.8508		0.294822	5.59797
8.9356	1.5318	1.4914	7.3894	3.9144	2.5363	23.589	17.2081	2.8094	1.4165	9.4009	3.2379	9.5444	3.3914	2.9829	1.6169	1.3402	1.5272	1.1668	4.1676	1.4914	7.3894	3.9144	2.5363	23.589	17.2081	2.8094	1.4165	9.4009	3.2379	9.5444	3.3914	2.9829	1.6169	1.3402	1.5272	1.1668	4.1676		0.298805	5.37819
9.0547	1.2917	1.9056	7.9452	3.5123	3.2739	27.0022	14.898	2.7859	1.9855	9.9212	3.6895	9.4534	2.8885	2.7002	1.6492	1.2907	1.663	1.0663	4.5161	1.9056	7.9452	3.5123	3.2739	27.0022	14.898	2.7859	1.9855	9.9212	3.6895	9.4534	2.8885	2.7002	1.6492	1.2907	1.663	1.0663	4.5161		0.302787	5.55635
9.1739	1.3718	1.3247	7.547	3.8711	3.2703	27.3342	11.3354	2.5642	2.2898	11.384	3.5385	11.4758	3.1589	2.8078	1.2522	1.2186	2.148	1.7011	4.0161	1.3247	7.547	3.8711	3.2703	27.3342	11.3354	2.5642	2.2898	11.384	3.5385	11.4758	3.1589	2.8078	1.2522	1.2186	2.148	1.7011	4.0161		0.306773	5.56344
9.293	1.3146	1.2064	7.5267	3.3236	2.9067	26.5318	11.3895	2.5446	2.3888	11.2816	3.3589	11.9956	3.2658	2.5019	1.5609	1.5161	1.5672	1.5439	4.7144	1.2064	7.5267	3.3236	2.9067	26.5318	11.3895	2.5446	2.3888	11.2816	3.3589	11.9956	3.2658	2.5019	1.5609	1.5161	1.5672	1.5439	4.7144		0.310756	5.50171
9.4122	1.7637	1.7643	8.0615	3.5107	2.4505	25.0014	8.9351	2.8497	1.9551	11.1675	3.2725	13.6919	3.8985	2.9609	1.3747	1.3793	1.2186	1.8179	5.3412	1.7643	8.0615	3.5107	2.4505	25.0014	8.9351	2.8497	1.9551	11.1675	3.2725	13.6919	3.8985	2.9609	1.3747	1.3793	1.2186	1.8179	5.3412		0.314742	5.48828
9.5313	1.4361	2.2023	8.6139	3.612	2.739	22.6715	8.744	3.2809	2.0811	10.7885	2.8167	16.1725	3.8262	2.0755	1.56	1.7896	1.1664	1.542	5.4031	2.2023	8.6139	3.612	2.739	22.6715	8.744	3.2809	2.0811	10.7885	2.8167	16.1725	3.8262	2.0755	1.56	1.7896	1.1664	1.542	5.4031		0.318725	5.50288
9.6504	1.4473	1.9052	9.1231	3.6964	3.3083	18.7093	6.7575	2.4006	2.3768	11.8566	3.5918	16.4557	3.2229	2.0954	1.2826	1.6292	1.4113	1.5704	5.0645	1.9052	9.1231	3.6964	3.3083	18.7093	6.7575	2.4006	2.3768	11.8566	3.5918	16.4557	3.2229	2.0954	1.2826	1.6292	1.4113	1.5704	5.0645		0.322707	5.25304
9.7696	1.4337	1.5177	9.5629	3.3935	3.2157	17.5404	6.3461	2.6871	2.1256	12.1013	3.3896	18.6771	3.3482	2.1944	1.6863	1.3782	1.3871	1.5914	5.4499	1.5177	9.5629	3.3935	3.2157	17.5404	6.3461	2.6871	2.1256	12.1013	3.3896	18.6771	3.3482	2.1944	1.6863	1.3782	1.3871	1.5914	5.4499		0.326693	5.31402
9.8887	1.2183	2.6635	9.6987	3.2079	2.7515	15.1828	6.6151	2.3408	1.8791	13.1546	2.7062	19.3283	3.4746	2.5559	1.6834	1.5014	1.0159	1.817	6.2605	2.6635	9.6987	3.2079	2.7515	15.1828	6.6151	2.3408	1.8791	13.1546	2.7062	19.3283	3.4746	2.5559	1.6834	1.5014	1.0159	1.817	6.2605		0.330676	5.32142
10.0079	1.2993	2.239	8.7814	2.8114	2.3696	13.6409	6.0153	2.2527	2.5353	13.4873	3.4242	18.8665	3.4343	2.4775	1.1954	1.7878	1.0683	1.8591	6.5908	2.239	8.7814	2.8114	2.3696	13.6409	6.0153	2.2527	2.5353	13.4873	3.4242	18.8665	3.4343	2.4775	1.1954	1.7878	1.0683	1.8591	6.5908		0.334662	5.16143
10.127	1.2827	2.1462	8.6177	2.9202	2.8966	12.7587	5.801	2.4	2.1739	14.2694	3.0561	20.7217	3.8898	2.5134	1.1654	1.4502	1.0261	2.0832	6.9883	2.1462	8.6177	2.9202	2.8966	12.7587	5.801	2.4	2.1739	14.2694	3.0561	20.7217	3.8898	2.5134	1.1654	1.4502	1.0261	2.0832	6.9883		0.338645	5.27131
10.2462	1.8337	1.997	10.7983	2.9042	2.8093	12.4384	6.4354	1.9582	2.1926	15.8867	3.2434	21.3861	4.2213	2.8319	1.5406	1.3701	1.2325	1.7179	6.4732	1.997	10.7983	2.9042	2.8093	12.4384	6.4354	1.9582	2.1926	15.8867	3.2434	21.3861	4.2213	2.8319	1.5406	1.3701	1.2325	1.7179	6.4732		0.342631	5.53265
10.3653	1.3534	2.1359	12.1383	2.356	2.5963	13.2327	6.1527	2.0581	2.1275	14.9913	3.609	21.1173	4.5956	2.8826	1.4944	1.2109	1.3159	1.6603	6.9605	2.1359	12.1383	2.356	2.5963	13.2327	6.1527	2.0581	2.1275	14.9913	3.609	21.1173	4.5956	2.8826	1.4944	1.2109	1.3159	1.6603	6.9605		0.346613	5.58443
10.4844	1.3134	2.0329	13.5669	2.5522	2.8501	13.3813	6.4976	2.377	2.1543	13.7069	3.282	24.1703	4.5425	3.2228	1.3077	1.3953	1.4505	1.5397	6.7066	2.0329	13.5669	2.5522	2.8501	13.3813	6.4976	2.377	2.1543	13.7069	3.282	24.1703	4.5425	3.2228	1.3077	1.3953	1.4505	1.5397	6.7066		0.350596	5.80504
10.6036	1.3097	2.6642	13.9391	2.8478	3.5114	13.5391	6.545	2.0381	1.8927	12.5063	3.2142	23.8984	4.449	3.5938	1.2973	1.3578	1.3201	1.7769	7.1823	2.6642	13.9391	2.8478	3.5114	13.5391	6.545	2.0381	1.8927	12.5063	3.2142	23.8984	4.449	3.5938	1.2973	1.3578	1.3201	1.7769	7.1823		0.354582	5.85018
10.7227	1.5311	1.8759	14.9689	3.0043	3.3155	15.1141	6.2342	1.8468	2.1253	11.7867	3.7123	22.1882	4.0975	3.3535	1.483	1.7887	1.4936	2.2745	7.3527	1.8759	14.9689	3.0043	3.3155	15.1141	6.2342	1.8468	2.1253	11.7867	3.7123	22.1882	4.0975	3.3535	1.483	1.7887	1.4936	2.2745	7.3527		0.358565	5.88007
10.8419	1.5879	1.9168	13.5995	2.9242	3.2798	15.4918	5.903	1.9829	1.4903	10.2108	3.4401	23.3306	4.3814	3.5702	1.7414	1.3808	1.3594	1.7126	9.2158	1.9168	13.5995	2.9242	3.2798	15.4918	5.903	1.9829	1.4903	10.2108	3.4401	23.3306	4.3814	3.5702	1.7414	1.3808	1.3594	1.7126	9.2158		0.362551	5.82299
10.961	1.9121	2.5267	14.641	2.3694	3.0109	16.9328	5.4039	1.7499	1.7259	11.2854	3.0692	22.6067	4.5709	3.454	1.2065	1.3354	1.1824	1.5952	8.1533	2.5267	14.641	2.3694	3.0109	16.9328	5.4039	1.7499	1.7259	11.2854	3.0692	22.6067	4.5709	3.454	1.2065	1.3354	1.1824	1.5952	8.1533		0.366533	5.82571
11.0801	1.567	2.8391	15.3817	2.8657	2.4388	19.4018	5.3279	1.8242	1.985	14.5956	4.0467	20.8373	4.6762	4.2423	1.5863	1.1744	1.5515	1.735	9.2676	2.8391	15.3817	2.8657	2.4388	19.4018	5.3279	1.8242	1.985	14.5956	4.0467	20.8373	4.6762	4.2423	1.5863	1.1744	1.5515	1.735	9.2676		0.370516	6.30057
11.1993	1.3717	2.5616	13.0554	3.6229	2.1691	18.8253	4.3999	2.2447	2.1379	14.8415	3.4498	21.0332	5.2467	4.4588	1.9098	1.3696	1.3319	2.1022	9.4256	2.5616	13.0554	3.6229	2.1691	18.8253	4.3999	2.2447	2.1379	14.8415	3.4498	21.0332	5.2467	4.4588	1.9098	1.3696	1.3319	2.1022	9.4256		0.374502	6.20928
11.3184	1.7273	2.8589	13.7262	2.6989	2.9973	21.2303	3.5821	2.328	1.7996	16.2909	3.6853	18.4901	4.604	4.1563	1.6696	1.2215	1.5456	1.9306	8.3785	2.8589	13.7262	2.6989	2.9973	21.2303	3.5821	2.328	1.7996	16.2909	3.6853	18.4901	4.604	4.1563	1.6696	1.2215	1.5456	1.9306	8.3785		0.378485	6.16526
11.4376	1.6685	2.8786	12.8807	3.1876	2.6762	23.5281	2.7856	1.9245	1.7691	16.4059	3.945	18.2687	4.994	5.0887	1.5574	1.5286	1.4633	1.9602	8.8287	2.8786	12.8807	3.1876	2.6762	23.5281	2.7856	1.9245	1.7691	16.4059	3.945	18.2687	4.994	5.0887	1.5574	1.5286	1.4633	1.9602	8.8287		0.382471	6.29758
11.5567	1.7661	3.4754	13.1302	3.0659	2.5342	26.1019	2.713	2.1934	2.1964	20.2832	3.6095	18.6446	4.8005	4.9543	1.5669	1.5052	1.1633	2.2311	8.7036	3.4754	13.1302	3.0659	2.5342	26.1019	2.713	2.1934	2.1964	20.2832	3.6095	18.6446	4.8005	4.9543	1.5669	1.5052	1.1633	2.2311	8.7036		0.386454	6.68949
11.6758	1.7702	3.4177	10.8913	2.479	2.7878	26.519	2.7368	1.9098	2.1979	25.9358	3.3245	20.3232	4.2661	6.4013	1.5877	1.0519	1.5573	2.4505	7.2544	3.4177	10.8913	2.479	2.7878	26.519	2.7368	1.9098	2.1979	25.9358	3.3245	20.3232	4.2661	6.4013	1.5877	1.0519	1.5573	2.4505	7.2544		0.390436	6.91768
11.795	1.7317	3.7966	10.0026	2.6531	2.8444	29.9489	2.8202	1.8422	1.6419	26.659	3.775	20.3024	4.7857	6.5339	1.5229	1.5174	1.4225	2.6082	7.955	3.7966	10.0026	2.6531	2.8444	29.9489	2.8202	1.8422	1.6419	26.659	3.775	20.3024	4.7857	6.5339	1.5229	1.5174	1.4225	2.6082	7.955		0.394422	7.21609
11.9141	1.4503	3.5541	9.878	3.0832	2.8507	33.9387	2.2761	2.1452	1.8387	30.2611	4.5571	19.5697	6.0472	7.3565	1.8517	1.653	1.4755	2.8556	6.8813	3.5541	9.878	3.0832	2.8507	33.9387	2.2761	2.1452	1.8387	30.2611	4.5571	19.5697	6.0472	7.3565	1.8517	1.653	1.4755	2.8556	6.8813		0.398405	7.71884
12.0333	1.9353	3.5862	7.83	2.8557	2.978	31.8651	2.1747	1.6871	1.391	31.7005	4.5532	22.3691	6.2157	7.2697	2.1076	1.5492	1.1768	2.6294	6.1043	3.5862	7.83	2.8557	2.978	31.8651	2.1747	1.6871	1.391	31.7005	4.5532	22.3691	6.2157	7.2697	2.1076	1.5492	1.1768	2.6294	6.1043		0.402391	7.62221
12.1524	2.4106	2.9978	7.1409	2.8986	2.5644	31.0177	2.3871	1.8359	1.4775	37.0046	4.1757	23.9076	6.2672	9.5152	1.7231	1.7463	1.2134	3.4399	5.5295	2.9978	7.1409	2.8986	2.5644	31.0177	2.3871	1.8359	1.4775	37.0046	4.1757	23.9076	6.2672	9.5152	1.7231	1.7463	1.2134	3.4399	5.5295		0.406374	8.00258
12.2716	1.9355	3.0101	6.838	3.3195	3.0151	33.1805	2.6354	1.5898	1.7118	39.6913	3.186	27.6521	7.5492	9.6584	1.8308	1.6713	1.3636	4.0149	4.4176	3.0101	6.838	3.3195	3.0151	33.1805	2.6354	1.5898	1.7118	39.6913	3.186	27.6521	7.5492	9.6584	1.8308	1.6713	1.3636	4.0149	4.4176		0.41036	8.50287
12.3907	2.0588	3.1766	6.2824	3.0592	2.9313	35.4081	3.0489	1.6001	2.0156	38.912	4.0238	32.6279	8.4424	9.5346	1.7505	1.5404	1.7305	4.4888	4.3937	3.1766	6.2824	3.0592	2.9313	35.4081	3.0489	1.6001	2.0156	38.912	4.0238	32.6279	8.4424	9.5346	1.7505	1.5404	1.7305	4.4888	4.3937		0.414342	8.97277
12.5098	1.8065	2.7811	6.4866	2.8858	3.0767	32.1902	2.9236	1.3728	1.6998	40.6515	3.6941	34.2178	9.8841	10.3405	1.5639	1.2069	1.8369	5.0475	3.848	2.7811	6.4866	2.8858	3.0767	32.1902	2.9236	1.3728	1.6998	40.6515	3.6941	34.2178	9.8841	10.3405	1.5639	1.2069	1.8369	5.0475	3.848		0.418325	9.006
12.629	1.6535	2.3082	5.9592	2.6461	3.1017	35.6252	2.0839	1.4491	1.6914	38.4552	4.0463	34.0007	10.9259	11.245	1.5373	1.7004	2.0122	5.5475	3.9036	2.3082	5.9592	2.6461	3.1017	35.6252	2.0839	1.4491	1.6914	38.4552	4.0463	34.0007	10.9259	11.245	1.5373	1.7004	2.0122	5.5475	3.9036		0.422311	9.13868
12.7481	1.4889	2.8666	5.6939	2.8241	2.9696	37.8274	2.7541	1.3718	1.7703	36.0223	3.8088	37.8477	11.5249	10.2577	2.1954	1.3741	1.675	5.0392	3.2669	2.8666	5.6939	2.8241	2.9696	37.8274	2.7541	1.3718	1.7703	36.0223	3.8088	37.8477	11.5249	10.2577	2.1954	1.3741	1.675	5.0392	3.2669		0.426294	9.28834
12.8673	1.3827	2.4731	5.7881	3.3439	2.7729	38.662	2.2161	1.5377	1.8702	39.7326	3.6975	37.2817	13.1837	11.0851	1.9617	1.4025	1.4551	5.2542	3.0515	2.4731	5.7881	3.3439	2.7729	38.662	2.2161	1.5377	1.8702	39.7326	3.6975	37.2817	13.1837	11.0851	1.9617	1.4025	1.4551	5.2542	3.0515		0.43028	9.59248
12.9864	1.4046	2.5375	5.3176	3.059	2.1144	38.9584	2.2852	1.7692	1.7191	36.7477	3.2345	34.3671	12.4945	10.9388	1.9377	1.1817	1.5773	5.6884	2.9585	2.5375	5.3176	3.059	2.1144	38.9584	2.2852	1.7692	1.7191	36.7477	3.2345	34.3671	12.4945	10.9388	1.9377	1.1817	1.5773	5.6884	2.9585		0.434262	9.16697
13.1055	1.1235	2.6007	6.0235	2.9784	2.8316	38.0825	2.1743	1.7089	1.444	32.1741	2.931	30.6194	12.9756	8.4947	2.1819	1.3136	1.746	4.8702	2.91	2.6007	6.0235	2.9784	2.8316	38.0825	2.1743	1.7089	1.444	32.1741	2.931	30.6194	12.9756	8.4947	2.1819	1.3136	1.746	4.8702	2.91		0.438245	8.57417
13.2247	1.274	2.5426	5.286	2.6768	2.9862	40.3647	2.1683	1.4042	1.4878	29.7501	3.3582	26.5561	12.2969	8.3656	1.9303	1.2749	1.7436	5.7391	2.7775	2.5426	5.286	2.6768	2.9862	40.3647	2.1683	1.4042	1.4878	29.7501	3.3582	26.5561	12.2969	8.3656	1.9303	1.2749	1.7436	5.7391	2.7775		0.442231	8.28897
13.3438	1.6557	2.2735	6.4753	2.744	2.6833	41.487	2.486	1.4967	1.7291	29.0819	3.0688	20.4545	13.6137	8.4701	1.7669	1.4119	1.6099	6.7858	2.717	2.2735	6.4753	2.744	2.6833	41.487	2.486	1.4967	1.7291	29.0819	3.0688	20.4545	13.6137	8.4701	1.7669	1.4119	1.6099	6.7858	2.717		0.446214	8.17207
13.463	1.5367	2.8068	5.5611	2.5064	3.0779	40.1987	3.0937	1.2058	2.0972	31.6606	3.1673	18.0808	14.0844	8.2375	2.1217	1.7698	1.6145	7.7634	2.4858	2.8068	5.5611	2.5064	3.0779	40.1987	3.0937	1.2058	2.0972	31.6606	3.1673	18.0808	14.0844	8.2375	2.1217	1.7698	1.6145	7.7634	2.4858		0.4502	8.23253
13.5821	1.2661	2.6086	6.7729	2.5386	3.5827	38.7612	2.1709	1.5384	1.5422	29.5494	3.1112	17.0395	14.0309	7.606	1.9887	2.071	1.6284	8.0203	2.5725	2.6086	6.7729	2.5386	3.5827	38.7612	2.1709	1.5384	1.5422	29.5494	3.1112	17.0395	14.0309	7.606	1.9887	2.071	1.6284	8.0203	2.5725		0.454182	7.98738
13.7012	1.6486	2.5241	6.6331	2.5748	3.198	38.5298	2.0153	1.7543	1.3271	27.4665	2.8673	14.8225	13.5419	7.7476	1.7966	1.7511	1.266	7.701	2.6269	2.5241	6.6331	2.5748	3.198	38.5298	2.0153	1.7543	1.3271	27.4665	2.8673	14.8225	13.5419	7.7476	1.7966	1.7511	1.266	7.701	2.6269		0.458165	7.6199
13.8204	1.5952	2.4922	6.2059	2.5418	2.5411	36.5501	2.6233	1.7923	1.5638	25.4807	3.5556	13.9178	14.3658	7.6165	2.0554	1.5315	1.3742	8.2596	2.1961	2.4922	6.2059	2.5418	2.5411	36.5501	2.6233	1.7923	1.5638	25.4807	3.5556	13.9178	14.3658	7.6165	2.0554	1.5315	1.3742	8.2596	2.1961		0.462151	7.43034
13.9395	1.2799	2.0863	6.7495	2.5889	3.0799	36.6979	2.5303	1.2713	1.6957	24.971	3.2176	13.9729	14.4789	7.932	1.7136	2.0685	1.7561	8.4173	2.603	2.0863	6.7495	2.5889	3.0799	36.6979	2.5303	1.2713	1.6957	24.971	3.2176	13.9729	14.4789	7.932	1.7136	2.0685	1.7561	8.4173	2.603		0.466134	7.4849
14.0587	1.4934	2.0724	7.3608	2.6668	4.0596	37.8207	2.2425	1.4141	1.5072	20.9777	4.3628	14.0774	14.0508	11.0011	2.0833	2.0473	1.6991	8.2029	2.4195	2.0724	7.3608	2.6668	4.0596	37.8207	2.2425	1.4141	1.5072	20.9777	4.3628	14.0774	14.0508	11.0011	2.0833	2.0473	1.6991	8.2029	2.4195		0.47012	7.6115
14.1778	1.3801	2.4157	6.8621	2.592	3.4694	35.1166	2.6771	1.7292	1.5302	21.1961	3.4729	13.1546	15.3702	11.6032	1.9746	1.9314	1.9953	7.5576	2.2403	2.4157	6.8621	2.592	3.4694	35.1166	2.6771	1.7292	1.5302	21.1961	3.4729	13.1546	15.3702	11.6032	1.9746	1.9314	1.9953	7.5576	2.2403		0.474103	7.43668
14.297	1.8632	2.644	7.2945	2.5912	3.6335	31.0859	2.9872	1.6885	1.5767	21.0618	3.0439	16.6749	15.1708	12.5902	1.7369	1.4961	1.9612	7.6892	2.057	2.644	7.2945	2.5912	3.6335	31.0859	2.9872	1.6885	1.5767	21.0618	3.0439	16.6749	15.1708	12.5902	1.7369	1.4961	1.9612	7.6892	2.057		0.478089	7.45487
14.4161	1.381	2.2079	6.3713	2.9032	3.1522	28.0048	3.7409	1.5191	1.6548	21.1811	3.1021	17.8134	14.7441	14.1509	2.1261	1.673	2.1466	8.0704	2.002	2.2079	6.3713	2.9032	3.1522	28.0048	3.7409	1.5191	1.6548	21.1811	3.1021	17.8134	14.7441	14.1509	2.1261	1.673	2.1466	8.0704	2.002		0.482071	7.41916
14.5352	1.5133	2.5208	6.4363	2.7537	2.8447	29.0912	2.7717	1.64	1.8057	19.643	3.2129	18.686	15.373	15.7786	1.9385	1.4961	1.5994	7.4615	2.1894	2.5208	6.4363	2.7537	2.8447	29.0912	2.7717	1.64	1.8057	19.643	3.2129	18.686	15.373	15.7786	1.9385	1.4961	1.5994	7.4615	2.1894		0.486054	7.45941
14.6544	1.0851	2.7573	6.7947	2.5717	3.1582	29.5142	2.4602	1.6571	1.6421	16.8382	3.2882	20.8326	15.522	16.5068	1.909	1.9883	1.762	7.7235	1.9807	2.7573	6.7947	2.5717	3.1582	29.5142	2.4602	1.6571	1.6421	16.8382	3.2882	20.8326	15.522	16.5068	1.909	1.9883	1.762	7.7235	1.9807		0.49004	7.5378
14.7735	1.288	2.5675	6.8064	2.5225	3.1776	26.3819	2.3224	1.1455	1.514	16.9395	2.9133	20.6434	16.4432	14.7083	1.9221	2.1321	2.0749	8.156	1.7216	2.5675	6.8064	2.5225	3.1776	26.3819	2.3224	1.1455	1.514	16.9395	2.9133	20.6434	16.4432	14.7083	1.9221	2.1321	2.0749	8.156	1.7216		0.494023	7.28304
14.8927	1.0562	3.0609	5.4221	2.951	3.1401	25.4569	2.7549	1.1643	1.2792	17.0497	3.2444	20.0535	15.2423	12.9168	2.2943	1.2909	2.1577	8.2355	2.1485	3.0609	5.4221	2.951	3.1401	25.4569	2.7549	1.1643	1.2792	17.0497	3.2444	20.0535	15.2423	12.9168	2.2943	1.2909	2.1577	8.2355	2.1485		0.498009	7.04817
15.0118	1.334	2.3518	5.3152	3.4104	3.0818	24.0693	2.2375	1.5195	1.2296	17.0058	3.6782	18.0115	16.5554	12.8526	1.9808	1.1533	2.0616	8.701	1.6465	2.3518	5.3152	3.4104	3.0818	24.0693	2.2375	1.5195	1.2296	17.0058	3.6782	18.0115	16.5554	12.8526	1.9808	1.1533	2.0616	8.701	1.6465		0.501991	6.89345
15.1309	1.1473	2.0738	5.3162	2.5779	3.2872	21.6679	2.3929	1.5572	1.4557	16.2309	3.8667	17.6119	15.0734	12.8598	2.1125	1.5384	1.5187	6.8969	1.6392	2.0738	5.3162	2.5779	3.2872	21.6679	2.3929	1.5572	1.4557	16.2309	3.8667	17.6119	15.0734	12.8598	2.1125	1.5384	1.5187	6.8969	1.6392		0.505974	6.50005
15.2501	1.3456	2.0275	5.5236	2.7629	3.5711	22.2482	1.9744	1.3288	1.8213	16.664	3.395	18.282	14.5896	12.3499	1.7402	1.8383	1.5527	7.6792	1.7607	2.0275	5.5236	2.7629	3.5711	22.2482	1.9744	1.3288	1.8213	16.664	3.395	18.282	14.5896	12.3499	1.7402	1.8383	1.5527	7.6792	1.7607		0.50996	6.58282
15.3692	1.2959	1.8125	5.211	3.0668	2.9436	21.3887	1.8723	1.618	1.7364	16.4782	3.7635	16.3173	12.8401	12.5018	2.2174	1.8165	1.89	8.2627	1.6085	1.8125	5.211	3.0668	2.9436	21.3887	1.8723	1.618	1.7364	16.4782	3.7635	16.3173	12.8401	12.5018	2.2174	1.8165	1.89	8.2627	1.6085		0.513943	6.37801
15.4884	1.2422	2.5295	5.5063	2.882	3.2087	19.1463	1.5834	1.4805	1.5561	15.5689	4.3701	15.4559	13.988	13.8171	1.8025	1.8237	2.1721	9.6657	1.5568	2.5295	5.5063	2.882	3.2087	19.1463	1.5834	1.4805	1.5561	15.5689	4.3701	15.4559	13.988	13.8171	1.8025	1.8237	2.1721	9.6657	1.5568		0.517929	6.41809
15.6075	1.5508	2.5219	4.0223	2.9473	3.4986	18.7035	1.9523	1.4074	1.6749	16.26	4.0569	15.1054	13.2181	13.4468	2.2137	2.3139	2.1272	10.7579	1.709	2.5219	4.0223	2.9473	3.4986	18.7035	1.9523	1.4074	1.6749	16.26	4.0569	15.1054	13.2181	13.4468	2.2137	2.3139	2.1272	10.7579	1.709		0.521911	6.41689
15.7266	1.4882	1.6932	3.64	2.99	3.1261	17.8401	2.1246	1.6391	1.7556	16.3694	3.3224	15.1333	13.0556	13.9179	1.8361	2.2307	2.0658	11.2456	1.9031	1.6932	3.64	2.99	3.1261	17.8401	2.1246	1.6391	1.7556	16.3694	3.3224	15.1333	13.0556	13.9179	1.8361	2.2307	2.0658	11.2456	1.9031		0.525894	6.30447
15.8458	1.4095	1.9228	3.3851	2.8133	2.6907	17.6624	1.7053	1.8728	1.703	16.3804	3.6026	14.7133	12.659	15.8425	2.329	2.1937	1.8332	9.3958	1.9402	1.9228	3.3851	2.8133	2.6907	17.6624	1.7053	1.8728	1.703	16.3804	3.6026	14.7133	12.659	15.8425	2.329	2.1937	1.8332	9.3958	1.9402		0.52988	6.23513
15.9649	1.3132	2.1277	2.8225	2.6474	2.64	17.661	1.9419	1.4366	1.6069	14.9986	3.7519	14.6338	12.3571	16.1269	2.2552	2.3304	2.0079	10.5036	1.9438	2.1277	2.8225	2.6474	2.64	17.661	1.9419	1.4366	1.6069	14.9986	3.7519	14.6338	12.3571	16.1269	2.2552	2.3304	2.0079	10.5036	1.9438		0.533863	6.18648
16.0841	1.1954	1.7374	3.0154	2.9222	3.7507	17.2757	2.0803	1.5058	1.4511	14.7537	3.5806	16.24	12.0172	16.5916	2.0909	1.7427	2.0138	11.4924	1.7917	1.7374	3.0154	2.9222	3.7507	17.2757	2.0803	1.5058	1.4511	14.7537	3.5806	16.24	12.0172	16.5916	2.0909	1.7427	2.0138	11.4924	1.7917		0.537849	6.30545
16.2032	1.1928	1.9755	2.9882	3.6087	3.4521	16.4784	2.3514	1.3184	1.7517	14.2142	3.8196	17.445	10.405	17.5037	2.1667	1.7184	2.2203	11.9166	1.8672	1.9755	2.9882	3.6087	3.4521	16.4784	2.3514	1.3184	1.7517	14.2142	3.8196	17.445	10.405	17.5037	2.1667	1.7184	2.2203	11.9166	1.8672		0.541831	6.36743
16.3224	1.3375	2.2707	2.8557	3.0621	3.574	16.378	2.1793	1.3707	1.9151	14.0476	3.994	17.2458	10.2431	16.9574	2.2937	1.9567	2.0904	12.3172	1.8499	2.2707	2.8557	3.0621	3.574	16.378	2.1793	1.3707	1.9151	14.0476	3.994	17.2458	10.2431	16.9574	2.2937	1.9567	2.0904	12.3172	1.8499		0.545818	6.33893
16.4415	1.1615	1.7802	2.5818	3.0781	3.6593	15.8228	1.9922	1.2298	1.1979	13.1456	3.9077	15.6817	9.573	15.8323	2.6045	1.8109	2.2522	11.7318	1.8467	1.7802	2.5818	3.0781	3.6593	15.8228	1.9922	1.2298	1.1979	13.1456	3.9077	15.6817	9.573	15.8323	2.6045	1.8109	2.2522	11.7318	1.8467		0.5498	5.96266
16.5606	1.1485	2.0417	3.0477	3.1294	4.2982	16.2908	1.7223	1.1924	1.3418	11.3803	4.4043	13.6747	7.5186	14.945	2.67	1.8329	2.5102	11.4968	2.0381	2.0417	3.0477	3.1294	4.2982	16.2908	1.7223	1.1924	1.3418	11.3803	4.4043	13.6747	7.5186	14.945	2.67	1.8329	2.5102	11.4968	2.0381		0.553783	5.73565
16.6798	1.0332	1.9162	3.3754	3.2214	4.1825	16.4564	1.5984	1.3795	1.7335	9.9647	4.0773	12.8416	6.5775	14.6048	2.4987	1.9908	2.3254	11.1995	1.56	1.9162	3.3754	3.2214	4.1825	16.4564	1.5984	1.3795	1.7335	9.9647	4.0773	12.8416	6.5775	14.6048	2.4987	1.9908	2.3254	11.1995	1.56		0.557769	5.51461
16.7989	0.9702	1.8312	3.2141	2.6074	3.6635	15.6695	1.9118	1.3846	1.5787	10.0157	4.7288	11.871	7.4736	13.6967	2.401	2.4928	2.0902	10.2752	1.3741	1.8312	3.2141	2.6074	3.6635	15.6695	1.9118	1.3846	1.5787	10.0157	4.7288	11.871	7.4736	13.6967	2.401	2.4928	2.0902	10.2752	1.3741		0.561752	5.33865
16.9181	1.0297	1.8354	2.5127	2.1576	3.6528	15.8246	2.0432	1.2514	1.3913	8.6719	4.5422	10.5114	6.6336	12.0198	2.1676	2.1361	2.6893	9.76	1.4863	1.8354	2.5127	2.1576	3.6528	15.8246	2.0432	1.2514	1.3913	8.6719	4.5422	10.5114	6.6336	12.0198	2.1676	2.1361	2.6893	9.76	1.4863		0.565738	4.96227
17.0372	1.0873	1.6236	3.3335	2.0725	3.9002	16.5171	1.843	1.4998	1.1493	8.4594	4.6698	9.3054	7.5113	12.7034	2.3668	1.5113	3.4298	9.4718	1.9426	1.6236	3.3335	2.0725	3.9002	16.5171	1.843	1.4998	1.1493	8.4594	4.6698	9.3054	7.5113	12.7034	2.3668	1.5113	3.4298	9.4718	1.9426		0.56972	5.0732
17.1563	1.2567	1.691	3.0428	2.6625	3.9339	15.4311	2.108	1.1765	1.9882	7.6725	4.0287	9.6437	7.3244	11.1709	2.5094	1.1858	2.0156	9.5567	1.8892	1.691	3.0428	2.6625	3.9339	15.4311	2.108	1.1765	1.9882	7.6725	4.0287	9.6437	7.3244	11.1709	2.5094	1.1858	2.0156	9.5567	1.8892		0.573703	4.84645
17.2755	0.9602	1.5966	3.0352	2.4884	3.1624	16.3051	1.8739	1.0767	1.7821	8.1089	3.7763	8.5931	6.3803	11.0082	1.9543	1.817	1.9671	8.7969	1.8584	1.5966	3.0352	2.4884	3.1624	16.3051	1.8739	1.0767	1.7821	8.1089	3.7763	8.5931	6.3803	11.0082	1.9543	1.817	1.9671	8.7969	1.8584		0.577689	4.65195
17.3946	0.9716	1.9328	2.7739	2.7708	3.603	17.1693	2.0073	1.5866	1.6948	7.0734	3.6878	8.1937	7.5826	9.9253	1.9717	1.8585	2.641	8.9359	1.2875	1.9328	2.7739	2.7708	3.603	17.1693	2.0073	1.5866	1.6948	7.0734	3.6878	8.1937	7.5826	9.9253	1.9717	1.8585	2.641	8.9359	1.2875		0.581672	4.71252
17.5138	1.4703	2.1542	3.0215	2.275	4.5444	15.7095	2.2453	1.4212	1.3639	7.4443	4.1445	8.7489	7.7486	9.8271	1.8844	1.7676	2.1256	9.7322	1.349	2.1542	3.0215	2.275	4.5444	15.7095	2.2453	1.4212	1.3639	7.4443	4.1445	8.7489	7.7486	9.8271	1.8844	1.7676	2.1256	9.7322	1.349		0.585658	4.76986
17.6329	1.0268	1.9983	2.6205	2.1606	4.741	15.6628	1.8594	1.2866	1.055	7.6977	4.3857	8.3183	7.686	9.0065	2.4812	1.7508	2.0688	9.4979	2.0329	1.9983	2.6205	2.1606	4.741	15.6628	1.8594	1.2866	1.055	7.6977	4.3857	8.3183	7.686	9.0065	2.4812	1.7508	2.0688	9.4979	2.0329		0.58964	4.69316
17.7521	1.0251	1.7061	3.0132	1.9973	4.657	16.6767	2.0227	1.531	1.3581	6.7207	4.7727	9.165	7.3807	9.834	2.1771	1.8623	2.7112	11.0322	1.6561	1.7061	3.0132	1.9973	4.657	16.6767	2.0227	1.531	1.3581	6.7207	4.7727	9.165	7.3807	9.834	2.1771	1.8623	2.7112	11.0322	1.6561		0.593626	4.90739
17.8712	0.9878	1.708	3.9721	1.9975	4.66	14.0864	2.043	1.4896	1.5645	6.8765	4.5282	8.9123	7.2742	8.9818	2.569	2.0602	2.847	10.7408	1.628	1.708	3.9721	1.9975	4.66	14.0864	2.043	1.4896	1.5645	6.8765	4.5282	8.9123	7.2742	8.9818	2.569	2.0602	2.847	10.7408	1.628		0.597609	4.78016
17.9903	1.4189	1.6734	3.8616	2.5797	4.9917	15.0047	1.8133	1.208	1.6895	8.3431	5.5126	9.1421	7.3819	7.7758	2.1702	1.6208	2.6685	9.9022	1.6521	1.6734	3.8616	2.5797	4.9917	15.0047	1.8133	1.208	1.6895	8.3431	5.5126	9.1421	7.3819	7.7758	2.1702	1.6208	2.6685	9.9022	1.6521		0.601592	4.84868
18.1095	0.9593	1.5781	3.5742	2.315	4.3089	14.1369	2.2443	1.5373	1.7423	8.5546	5.2235	8.5937	6.7712	8.0832	2.4855	1.4147	2.7473	10.5036	1.3067	1.5781	3.5742	2.315	4.3089	14.1369	2.2443	1.5373	1.7423	8.5546	5.2235	8.5937	6.7712	8.0832	2.4855	1.4147	2.7473	10.5036	1.3067		0.605578	4.73517
18.2286	0.9647	1.8543	4.3188	2.7427	4.2237	15.1136	2.3938	1.3376	1.485	6.5395	4.4203	8.2724	6.7609	8.4427	2.0492	1.834	2.8567	12.0702	1.2789	1.8543	4.3188	2.7427	4.2237	15.1136	2.3938	1.3376	1.485	6.5395	4.4203	8.2724	6.7609	8.4427	2.0492	1.834	2.8567	12.0702	1.2789		0.60956	4.78252
18.3478	0.9458	1.7039	4.9535	2.2855	4.5251	14.8048	2.2476	1.2841	1.5313	6.1178	6.3868	7.5245	5.8087	6.8569	1.6349	2.1566	2.5015	13.013	1.2279	1.7039	4.9535	2.2855	4.5251	14.8048	2.2476	1.2841	1.5313	6.1178	6.3868	7.5245	5.8087	6.8569	1.6349	2.1566	2.5015	13.013	1.2279		0.613546	4.70472
18.4669	1.2399	1.3139	4.1437	2.2687	5.0761	14.9226	2.4368	1.6527	1.2483	5.3314	6.1918	7.1515	5.977	6.833	2.2637	2.5782	2.7309	13.8379	1.4411	1.3139	4.1437	2.2687	5.0761	14.9226	2.4368	1.6527	1.2483	5.3314	6.1918	7.1515	5.977	6.833	2.2637	2.5782	2.7309	13.8379	1.4411		0.617529	4.7578
18.586	1.543	1.4525	4.3879	1.9646	4.4888	17.0477	2.3079	1.4135	1.6482	5.4091	8.2891	8.1598	4.6317	6.9305	2.2336	2.0522	3.3434	12.6902	1.6178	1.4525	4.3879	1.9646	4.4888	17.0477	2.3079	1.4135	1.6482	5.4091	8.2891	8.1598	4.6317	6.9305	2.2336	2.0522	3.3434	12.6902	1.6178		0.621512	4.91027
18.7052	1.3117	1.5835	4.4884	2.0347	4.1448	16.4402	2.0797	1.8087	1.5332	4.8033	8.6335	8.1885	5.5849	8.0967	2.0998	1.9767	3.2929	12.2368	1.7794	1.5835	4.4884	2.0347	4.1448	16.4402	2.0797	1.8087	1.5332	4.8033	8.6335	8.1885	5.5849	8.0967	2.0998	1.9767	3.2929	12.2368	1.7794		0.625498	4.94387
[truncated: 94 more rows]

## Sheet: Image18
X0	Y0	Y1	Y2	Y3	Y4	Y5	Y6	Y7	Y8	Y9	Y10	Y11	Y12	Y13	Y14	Y15	Y16	Y17	Y18	Y19		Ap-Ba	Average int.
0	5.9339	9.2368	13.6778	11.1068	7.479	7.9236	13.1888	7.1408	12.9088	20.4879	17.3765	11.0581	11.0657	11.6203	7.2748	12.4317	17.2561	18.8238	20.0422	29.008		0	13.2521
[truncated: 241 more rows]

## Sheet: Image17
X0	Y0	Y1	Y2	Y3	Y4	Y5	Y6	Y7	Y8	Y9	Y10	Y11	Y12	Y13	Y14	Y15	Y16	Y17	Y18	Y19	Y20	Y21	Y22	Y23	Y24	Y25	Y26	Y27	Y28	Y29	Y30	Y31		Ap-Ba	Average int.
[truncated: 258 more rows]

[truncated: 1 more sheets: Sheet1]
