# Supplementary material for: Crumbs organizes the transport machinery by regulating apical levels of PI(4,5)P2 in Drosophila
Source: eLife. 2019 Nov 7;8:e50900. doi: 10.7554/eLife.50900 (PMC6881148; doi:10.7554/eLife.50900)
Supplement: Figure 5—source data 5. [file elife-50900-fig5-data5.xlsx]

## Sheet: Ima5
X0	Y0	Y1	Y2	Y3	Y4	Y5	Y6	Y7	Y8	Y9	Y10	Y11	Y12	Y13	Y14	Y15	Y16	Y17	Y18	Y19	Y20	Y21	Y22	Y23	Y24	Y25			Ap-Ba	Avegrage int
0	126.173	106.135	134.45	137.612	109.188	115.542	190.102	207.848	166.551	208.539	164.63	164.291	214.71	127.224	179.468	147.918	127.635	119.213	155.863	87.525	74.134	140.198	80.59	51.633	48.112	57.314			0	132.408
0.1191	140.154	110.172	138.24	147.059	116.975	127.592	212.524	220.099	179.543	212.655	175.726	167.866	201.047	139.652	190.974	161.321	139.815	134.943	166.236	93.434	79.353	152.321	77.911	57.496	60.111	75.682			0.00624784	141.496
0.2383	142.691	121.12	143.485	158.398	128.212	144.138	225.157	235.435	190.065	214.487	188.674	170.593	201.167	156.945	201.423	181.525	155.511	153.02	173.431	112.263	83.064	167.837	79.727	71.808	72.302	92.241			0.0125009	152.489
0.3574	146.9	130.585	137.73	158.804	139.949	161.152	233.489	245.932	197.591	226.629	200.934	176.413	188.415	174.872	207.85	208.035	165.454	167.803	191.212	123.317	92.32	178.599	86.669	84.35	84.01	112.553			0.0187488	162.368
0.4766	147.796	138.993	145.274	168.654	152.655	169.873	233.538	250.149	206.437	230.791	209.562	190.718	190.487	181.081	214.084	232.244	180.444	184.123	210.227	142.645	102.63	181.077	89.455	101.77	92.583	139.452			0.0250018	172.567
0.5957	152.359	147.03	147.271	172.784	178.895	186.368	237.208	250.88	212.904	240.107	218.271	208.991	192.528	180.637	223.041	236.404	195.697	198.777	223.2	163.703	115.175	200.145	89.185	117.132	107.79	158.255			0.0312497	182.875
0.7148	159.948	161.301	150.829	178.338	195.398	193.331	243.643	253.818	218.9	238.61	226.556	232.19	196.521	182.412	224.493	243.481	200.002	210.251	234.403	183.998	127.321	209.241	93.279	132.586	128.248	172.448			0.0374975	191.983
0.834	173.368	176.913	152.69	181.078	210.62	205.647	243.412	254.512	221.203	233.483	228.147	237.356	194.18	172.812	224.5	245.206	202.444	222.134	239.905	213.6	138.969	217.201	102.278	145.669	143.198	191.718			0.0437506	198.932
0.9531	188.279	194.764	162.345	180.306	218.128	212.319	245.185	254.003	219.909	236.122	231.932	239.15	202.878	162.929	223.943	245.295	212.209	235.973	247.195	230.272	155.403	226.231	106.523	159.374	162.962	204.001			0.0499984	206.063
1.0723	204.991	210.048	173.341	178.463	225.697	207.852	244.923	254.498	225.199	236.134	230.168	246.341	209.951	164.324	223.583	249.423	216.929	241.449	247.701	243.545	178.737	232.642	123.183	174.595	187.008	213.943			0.0562515	213.256
1.1914	223.883	225.647	199.984	188.95	223.402	199.312	247.413	254.858	228.471	237.751	230.764	245.085	209.075	148.719	221.226	243.191	218.594	246.073	249.347	245.689	202.752	235.049	137.008	184.221	212.22	219.779			0.0624993	218.402
1.3106	240.052	240.1	215.915	191.957	213.832	192.092	244.834	254.125	226.306	230.702	236.221	237.657	204.913	127.774	208.186	236.699	219.483	241.152	247.331	250.415	227.724	243.767	162.805	203.076	225.48	229.057			0.0687524	221.218
1.4297	243.889	245.264	222.066	203.476	204.494	179.189	242.393	251.865	219.078	218.407	238.956	226.571	205.327	115.013	197.686	221.756	221.238	237.311	245.052	249.701	246.92	247.608	182.253	204.465	239.57	233.685			0.0750003	220.894
1.5488	241.822	253.187	228.361	210.631	195.088	162.431	232.382	247.171	208.895	192.149	240.187	217.546	199.945	97.567	182.01	210.621	224.101	233.013	235.579	252.065	253.721	248.063	195.038	219.779	241.244	233.058			0.0812481	217.525
1.668	240.087	252.702	222.426	215.132	175.774	138.322	218.456	234.179	198.639	166.776	245.635	196.662	193.332	80.961	159.359	196.976	221.651	215.637	216.189	251.722	254.011	247.979	216.768	216.614	242.227	241.152			0.0875012	209.976
1.7871	241.311	252.762	205.296	217.614	159.514	107.392	194.234	213.284	180.134	137.999	239.86	176.495	178.63	68.365	150.267	179.881	206.977	200.657	189.985	247.861	253.843	252.216	233.421	220.804	244.216	237.028			0.093749	199.617
1.9063	238.099	245.672	191.162	222.242	142.698	91.494	164.779	191.209	155.422	103.316	228.304	159.503	159.104	46.421	131.764	175.749	190.65	186.113	153.506	227.835	254.524	253.49	239.806	228.979	239.3	228.331			0.100002	186.518
2.0254	235.918	234.36	165.787	222.323	109.969	71.878	141.008	169.477	134.491	81.115	206.748	150.243	134.008	27.55	121.746	164.919	170.958	164.155	115.403	204.604	252.475	253.201	245.848	226.757	233.042	218.719			0.10625	171.412
2.1445	227.45	199.875	137.936	216.842	78.875	55.481	112.25	146.742	112.011	57.36	169.366	127.724	107.669	20.199	98.963	141.898	149.825	151.462	76.023	164.707	245.084	253.775	237.389	213.603	220.619	198.276			0.112498	150.823
2.2637	219.928	148.254	116.563	202.631	48.346	44.981	84.504	121.625	93.852	37.919	120.647	115.718	85.824	14.286	81.82	112.73	121.258	129.178	51.931	117.505	230.192	254.119	225.283	206.281	197.718	176.782			0.118751	129.226
2.3828	207.464	94.213	95.912	179.963	33.162	34.126	69.169	97.966	78.858	30.305	82.887	97.833	61.226	10.739	70.553	84.468	96.137	105.496	34.981	81.671	193.231	250.401	202.865	184.551	176.249	153.309			0.124999	107.99
2.502	182.208	57.075	79.312	143.969	22.077	23.16	51.866	67.221	64.225	20.64	52.288	82.049	48.525	10.47	51.898	60.239	76.767	84.167	29.075	58.231	158.261	241.686	183.584	160.184	150.281	133.928			0.131252	88.2072
2.6211	149.799	41.791	69.333	98.707	17.226	18.829	45.672	43.613	42.786	13.575	34.403	72.532	36.747	8.347	38	37.689	65.166	59.399	25.255	40.333	113.913	215.434	150.87	129.104	121.684	110.058			0.1375	69.241
2.7402	115.003	34.297	58.756	60.545	13.956	16.926	40.449	28.109	29.073	12.686	28.143	63.826	30.732	8.011	30.937	28.611	56.14	45.886	22.752	28.689	81.527	190.042	127	107.326	95.578	87.803			0.143747	55.4924
2.8594	75.637	32.453	49.855	42.744	13.356	15.678	38.19	18.828	22.927	9.733	25.502	55.34	23.04	7.225	25.192	23.499	43.801	32.293	18.035	23.354	56.639	149.195	93.57	82.29	73.675	69.982			0.150001	43.1551
2.9785	51.854	31.961	44.765	32.646	13.906	13.758	36.701	15.286	20.844	10.836	24.722	43.686	19.714	6.529	22.664	18.788	35.202	23.228	15.213	18.166	44.851	114.255	67.073	60.804	54.079	58.226			0.156248	34.606
3.0977	36.398	33.152	36.783	25.585	12.841	12.688	31.37	14.675	20.697	9.337	26.727	34.629	20.288	6.156	19.396	15.312	28.386	18.634	12.36	15.668	36.643	82.369	49.996	44.774	36.139	50.407			0.162501	28.1312
3.2168	28.453	31.999	32.248	24.761	12.811	12.434	28.203	17.156	21.053	8.429	27.463	25.676	19.624	6.556	18.42	14.153	26.298	15.904	9.96	14.474	32.392	62.824	38.475	37.013	28.987	37.069			0.168749	24.3398
3.336	29.206	29.012	30.462	23.216	13.187	12.297	28.923	16.436	23.526	8.437	26.814	19.2	17.954	6.485	17.965	10.953	23.933	13.827	9.551	14.34	26.391	44.762	31.023	25.801	22.928	29.573			0.175002	21.3924
3.4551	24.439	28.164	27.597	21.993	12.427	11.635	30.722	15.783	22.753	8.186	27.648	13.355	17.986	5.231	16.294	10.011	21.902	14.487	10.612	14.021	22.026	32.237	24.684	19.701	17.275	25.968			0.18125	19.1207
3.5742	26.854	25.979	26.834	19.568	14.628	12.151	27.49	14.991	21.868	7.53	24.556	9.635	15.623	5.24	15.95	11.085	20.499	14.006	9.61	13.264	19.495	27.527	21.059	15.367	13.649	20.36			0.187498	17.493
3.6934	26.357	28.837	24.988	18.089	14.185	11.982	25.436	14.608	22.29	8.46	21.465	10.573	16.326	4.788	16.683	11.606	19.487	13.319	9.841	13.803	19.321	24.953	19.451	12.287	12.7	19.17			0.193751	16.9617
3.8125	29.668	25.793	23.881	18.535	13.044	11.539	24.229	12.657	21.301	7.905	20.743	10.309	18.916	4.758	15.751	8.791	17.653	13.093	8.927	14.677	19.684	22.527	20.513	10.51	10.57	19.174			0.199999	16.3518
3.9317	29.032	24.696	23.052	18.854	12.549	13.249	22.353	14.304	21.45	7.77	20.774	8.693	19.344	6.1	15.848	9.807	18.015	12.219	8.939	13.749	19.182	22.177	19.549	7.913	9.961	18.986			0.206252	16.0987
4.0508	27.739	22.502	24.345	19.488	12.123	13.176	21.399	16.228	23.503	7.81	20.713	8.036	19.261	5.023	15.593	8.977	15.185	12.321	8.457	13.964	20.748	19.731	17.61	8.557	7.809	19.426			0.2125	15.7586
4.1699	24.4	25.211	25.657	15.16	13.631	12.594	21.777	15.901	19.125	7.684	19.473	9.479	20.251	5.326	16.551	8.251	14.65	11.575	8.82	15.334	20.439	18.02	16.47	7.11	7.743	17.911			0.218748	15.3286
4.2891	23.668	25.904	23.819	13.665	11.625	13.75	19.485	15.684	23.398	8.433	20.05	9.479	19.397	4.725	15.741	7.275	13.941	13.791	9.159	14.512	19.412	17.05	17.091	6.889	7.299	17.069			0.225001	15.0889
4.4082	21.216	24.19	21.764	11.865	11.703	15.52	20.094	15.703	22.982	6.498	19.397	8.935	19.326	4.664	16.821	7.227	13.699	14.03	9.127	16.298	19.402	14.036	16.034	6.073	8.683	15.884			0.231249	14.6604
4.5274	22.052	26.293	23.08	11.199	12.365	13.564	19.371	15.529	22.395	6.608	20.428	10.476	20.201	4.47	19.221	6.61	13.049	13.546	8.553	15.896	19.163	14.537	16.246	7.327	7.85	14.648			0.237502	14.7953
4.6465	23.231	24.975	22.287	9.778	12.031	12.87	19.871	15.052	24.3	6.194	17.913	9.468	18.127	5.032	21.545	6.747	13.585	11.793	8.973	16.598	19.635	15.324	15.422	6.889	7.141	14.595			0.24375	14.5914
4.7657	25.97	24.472	21.389	9.948	11.742	14.046	20.213	13.781	22.961	7.318	21.188	8.745	19.114	4.394	22.822	7.125	13.028	13.065	8.79	18.445	20.446	13.745	16.221	6.893	9.831	14.522			0.250003	15.0082
4.8848	27.045	23.436	21.575	11.243	13.043	13.8	18.724	12.909	24.176	6.474	25.283	8.362	21.791	4.338	23.22	6.566	12.422	12.287	7.271	19.49	21.996	13.266	16.226	7.413	7.152	12.903			0.25625	15.0927
5.0039	26.648	25.844	22.14	10.335	12.894	14.275	19.163	14.189	21.971	6.065	24.4	9.596	20.347	5.141	23.091	7.287	10.817	14.098	8.657	21.251	24.344	14.353	14.61	5.919	7.531	14.417			0.262498	15.3609
5.1231	23.463	28.257	25.253	9.616	13.951	14.107	19.07	14.224	23.328	7.885	24.529	8.489	19.926	5.336	21.391	8.857	11.872	12.419	9.023	25.138	23.657	13.691	16.315	7.407	8.274	15.688			0.268751	15.8141
5.2422	24.074	28.008	25.183	9.302	15.685	14.072	19.509	13.526	21.686	6.508	29.185	8.946	19.681	5.314	16.57	7.801	10.895	13.678	7.34	29.38	23.551	14.779	17.995	7.075	7.801	16.144			0.274999	15.9111
5.3614	19.96	29.976	25.762	9.675	16.526	12.308	19.303	13.957	20.414	6.804	34.152	8.892	20.133	4.791	17.492	7.582	9.989	15.484	7.68	29.083	24.912	13.664	16.779	7.679	8.08	17.557			0.281252	16.1013
5.4805	21.621	29.174	30.914	9.763	16.962	12.853	17.644	14.738	20.249	8.072	33.513	9.609	21.962	4.24	16.501	9.103	9.145	14.615	8.534	29.174	26.292	15.836	17.904	7.125	8.169	19.707			0.2875	16.67
5.5996	21.504	30.7	36.164	10.868	17.317	12.658	16.464	13.654	18.351	7.745	37.611	8.969	20.747	5.513	17.295	9.768	9.148	14.99	8.764	31.634	28.596	18.477	16.945	8.105	9.405	22.132			0.293748	17.4432
5.7188	19.912	28.953	37.345	10.84	16.866	13.878	16.285	14.786	19.836	8.026	38.252	8.358	24.228	5.176	16.964	9.281	9.899	16.274	8.194	32.487	30.047	20.091	16.613	7.888	9.497	22.038			0.300001	17.7698
5.8379	19.61	26.556	31.779	9.326	18.278	13.799	16.344	14.711	19.652	8.372	40.221	8.592	24.766	5.293	15.816	11.661	10.059	16.452	8.061	33.091	28.817	20.6	17.411	7.79	9.058	22.354			0.306249	17.6334
5.9571	17.068	25.28	29.083	10.363	19.548	12.331	15.821	14.05	16.107	8.469	39.214	9.579	24.251	4.298	13.182	11.318	10.332	18.669	8.509	33.736	30.52	21.732	17.431	7.982	8.847	21.116			0.312502	17.2629
6.0762	17.914	23.427	32.368	9.868	17.3	11.903	15.712	16.267	18.091	7.727	39.45	9.208	24.757	4.808	13.121	11.339	9.793	21.757	10.969	32.797	31.166	21.731	18.113	9.068	10.745	21.321			0.31875	17.72
6.1953	16.078	24.177	33.13	9.123	18.153	11.678	15.16	18.332	18.537	8.242	38.015	9.597	27.682	5.236	13.742	13.774	9.071	22.607	12.071	33.538	33.186	19.874	17.07	10.196	11.524	17.853			0.324998	17.9864
6.3145	16.099	24.389	37.234	10.944	18.111	11.172	15.044	19.221	18.772	9.006	35.097	9.226	29.677	4.998	13.415	14.676	11.043	22.597	10.976	33.204	31.301	19.158	18.102	9.744	12.2	18.575			0.331251	18.23
6.4336	16.311	20.841	44.111	8.975	18.099	10.889	15.188	18.63	19.186	9.218	31.277	8.039	31.405	4.931	14.262	15.395	11.48	24.491	11.026	37.521	26.653	17.564	17.748	9.528	11.221	18.913			0.337499	18.1885
6.5528	17.209	20.231	42.86	10.302	18.602	11.342	16.217	17.375	18.474	8.557	32.626	9.065	30.331	4.999	15.419	14.823	11.241	24.241	10.64	33.48	26.379	16.972	17.371	10.566	13.235	18.074			0.343752	18.1012
6.6719	16.788	20.832	40.503	7.813	21.298	11.027	15.923	19.92	16.311	8.466	32.831	7.591	33.239	4.775	16.851	15.285	11.224	25.919	11.172	31.069	26.7	17.132	19.102	10.398	13.803	16.464			0.349999	18.1706
6.7911	15.88	21.02	40	8.296	21.633	12.971	17.335	18.333	17.539	8.485	33.412	8.466	33.089	5.155	16.34	15.126	12.096	25.135	12.262	31.88	27.286	18.961	18.717	11.915	14.127	14.755			0.356253	18.4698
6.9102	16.94	23.078	34.187	8.939	20.895	12.142	14.142	17.45	15.776	9.029	35.708	9.319	33.61	5.131	17.259	14.179	12.414	25.953	13.443	29.936	26.21	20.151	18.546	11.273	14.891	16.001			0.3625	18.3308
7.0293	18.234	22.744	35.001	9.285	21.45	14.818	14.518	17.539	14.728	9.104	36.08	8.324	33.935	5.602	16.052	15.654	11.691	23.49	14.612	29.223	25.686	19.214	19.807	12.766	14.654	17.893			0.368748	18.5425
7.1485	15.951	24.67	31.061	11.174	21.654	18.139	16.68	16.419	14.69	8.766	31.183	8.094	37.94	5.446	16.01	13.745	11.861	20.875	13.805	30.094	25.081	17.862	20.069	11.846	16.956	20.473			0.375001	18.4825
7.2676	16.268	24.873	29.487	8.785	23.024	17.142	16.186	19.282	15.192	8.788	32.033	8.02	35.063	4.998	16.667	15.242	11.928	19.502	14.953	30.587	25.746	19.788	19.574	11.561	19.174	17.741			0.381249	18.5232
7.3868	17.691	24.454	27.309	9.794	21.744	18.843	16.903	18.939	15.687	7.678	30.113	7.562	30.588	5.257	17.117	15.307	11.802	16.699	14.03	33.154	27.536	21.769	19.073	11.292	19.425	17.349			0.387502	18.3506
7.5059	16.905	22.412	26.101	8.265	22.757	17.559	18.769	18.172	16.588	7.62	27.417	7.19	30.469	4.843	17.36	15.119	12.219	18.402	12.947	35.764	27.781	22.445	18.547	10.428	17.972	16.265			0.39375	18.0891
7.625	16.75	20.683	24.283	9.139	21.051	16.046	18.39	21.49	18.172	7.256	23.641	7.438	28.382	4.846	15.629	15.276	11.692	19.07	12.223	34.214	26.837	22.75	18.866	11.462	19.855	15.735			0.399998	17.7375
7.7442	18.21	19.874	25.376	8.74	22.877	15.168	21.22	18.726	18.367	7.192	20.138	8.082	29.434	4.49	16.193	14.534	12.181	19.869	11.553	34.413	26.62	22.635	17.151	12.681	19.925	14.009			0.406251	17.6792
7.8633	18.182	17.535	25.519	8.764	22.43	14.401	22.41	19.986	19.969	7.294	18.334	7.245	28.853	5.971	16.598	17.005	13.003	20.408	10.31	34.974	25.946	21.817	18.938	11.835	21.412	12.484			0.412499	17.7547
7.9825	19.039	17.857	23.975	10.732	21.882	12.591	24.967	21.432	21.135	7.497	20.032	8.873	29.918	5.218	16.804	13.422	12.47	19.924	9.911	36.361	24.864	22.397	19.399	11.891	20.371	10.562			0.418752	17.8278
8.1016	21.496	17.903	27.626	9.465	21.199	14.098	29.45	23.035	22.305	6.862	16.94	8.116	31.88	5.173	17.769	11.59	11.638	19.399	9.566	35.307	24.978	26.104	17.834	11.768	21.543	9.475			0.425	18.1738
8.2207	19.051	16.455	27.852	9.756	23.44	15.003	25.914	23.065	25.403	7.331	15.932	8.861	33.225	4.802	21.36	12.058	13.922	20.775	10.538	37.259	22.356	25.522	17.169	11.844	22.936	10.085			0.431248	18.5352
8.3399	19.716	16.997	27.246	10.169	23.195	15.963	27.59	22.64	20.56	7.937	14.3	8.717	34.362	5.45	26.186	10.752	13.863	18.648	8.874	37.864	23.032	25.473	18.783	10.071	25.646	8.652			0.437501	18.5648
8.459	16.404	17.437	25.576	10.349	22.462	18.105	28.578	21.643	20.648	5.107	13.915	7.934	35.585	5.616	29.762	10.589	13.278	17.687	9.499	43.144	24.976	27.996	17.445	11.896	24.997	8.689			0.443748	18.8199
8.5782	16.344	18.586	25.608	11.594	23.783	16.372	34.628	20.625	19.372	7.574	14.459	7.71	36.765	4.748	29.939	11.246	14.232	16.272	9.249	49.895	27.157	29.089	18.953	10.722	24.218	9.045			0.450002	19.5456
8.6973	15.472	17.197	26.955	10.878	22.585	15.493	34.942	19.015	20.447	6.142	13.498	8.855	39.79	4.944	29.397	11.811	12.725	17.668	10.709	52.814	25.134	27.407	18.38	12.898	24.305	7.892			0.456249	19.5136
8.8165	18.766	20.617	24.702	11.941	20.251	18.023	42.141	20.537	21.564	6.457	12.79	8.529	39.153	5.808	31.433	11.223	13.84	17.757	9.058	52.081	25.21	29.05	19.282	13.555	24.693	7.632			0.462502	20.2343
8.9356	16.443	21.487	24.771	12.739	21.162	15.342	48.034	19.174	21.892	5.971	12.99	8.413	41.489	5.586	29.516	10.541	15.324	17.99	10.502	52.499	25.801	29.978	20.988	14.615	26.75	9.436			0.46875	20.7474
9.0547	17.281	22.317	24.156	14.929	19.533	17.442	51.526	17.008	25.64	7.166	11.813	8.273	40.461	5.227	28.539	8.818	15.675	18.232	10.04	51.975	28.65	28.498	18.803	13.913	25.034	8.202			0.474998	20.7366
9.1739	17.928	25.581	22.612	16.484	19.184	19.78	56.901	19.377	26.488	6.673	11.996	8.72	39.749	5.478	29.213	8.659	15.47	19.462	10.088	49.983	29.358	26.546	20.417	14.844	22.899	8.213			0.481251	21.2347
9.293	15.996	27.708	19.876	15.916	21.474	20.057	60.118	16.31	26.314	6.47	11.132	9.578	39.971	5.799	31.613	9.578	15.161	19.777	8.733	49.501	30.054	25.438	20.592	16.616	25.755	7.698			0.487499	21.4321
9.4122	13.861	28.018	20.56	13.653	20.433	22.652	62.677	17.065	25.844	5.735	9.957	8.685	39.175	6.758	28.575	9.536	14.742	20.478	9.186	49.505	31.32	24.081	21.172	18.323	24.324	7.883			0.493752	21.3153
9.5313	14.141	28.222	21.409	12.923	20.86	23.316	62.514	15.837	29.271	7.211	9.8	9.357	43.867	6.435	23.385	9.707	14.239	21.6	9.7	46.161	33.66	24.491	23.172	18.28	25.779	6.378			0.5	21.6044
9.6504	14.072	27.992	19.128	14.698	20.884	23.359	57.933	15.786	28.234	7.081	10.193	9.492	38.804	5.686	25.667	7.904	13.749	21.739	8.1	44.802	34.536	26.595	24.782	20.038	25.332	7.545			0.506248	21.3127
9.7696	13.295	28.544	18.417	13.953	20.413	20.052	53.729	14.336	28.966	6.078	9.513	10.58	37.529	5.443	24.145	8.027	14.578	21.883	10.551	43.966	37.808	25.636	24.038	19.253	27.688	6.26			0.512501	20.9493
9.8887	12.548	27.113	17.984	12.554	22.512	19.147	44.874	13.108	28.756	6.147	9.339	10.315	38.879	5.454	24.825	7.585	15.029	20.778	8.787	47.544	34.721	26.198	27.033	20.14	27.151	6.481			0.518749	20.577
10.0079	12.913	24.775	17.018	13.362	24.29	19.405	35.615	12.31	28.329	6.466	9.292	9.566	41.165	4.802	22.531	8.178	16.071	21.643	8.569	42.109	35.179	28.666	25.143	21.232	25.751	6.359			0.525002	20.0284
10.127	11.5	22.189	16.805	13.513	25.284	18.259	27.796	11.431	27.973	5.857	8.554	10.267	36.367	4.617	22.322	8.064	15.151	19.836	9.775	38.992	36.62	24.749	26.032	20.185	28.076	5.144			0.53125	19.0522
10.2462	11.74	22.907	15.81	13.404	27.076	20.638	26.242	12.025	29.599	6.276	8.255	11.089	38.828	5.303	23.788	9.099	14.94	17.74	9.892	39.561	38.506	24.894	26.323	24.393	27.616	5.512			0.537503	19.6714
10.3653	11.899	20.122	14.971	12.134	27.211	26.358	22.772	10.952	31.1	5.647	8.336	10.689	35.862	5.168	21.337	8.557	14.764	16.3	8.884	37.448	34.002	26.478	24.344	22.55	27.119	4.477			0.543751	18.8262
10.4844	11.609	18.925	13.144	14.171	25.114	25.812	19.097	10.019	29.859	5.884	8.588	12.23	36.189	4.779	20.547	7.509	16.159	16.958	8.718	37.109	29.632	26.217	23.675	25.262	25.917	5.254			0.549998	18.3991
10.6036	11.355	21.059	13.794	12.151	23.545	24.828	18.707	10.899	29.322	6.825	7.994	12.009	32.077	5.564	19.707	7.991	14.709	17.313	7.325	34.724	30.431	27.478	22.959	29.022	28.155	4.895			0.556252	18.263
10.7227	10.269	21.399	15.128	14.123	21.451	21.864	19.401	10.54	29.393	5.136	7.296	12.6	31.164	5.759	21.566	8.194	14.769	17.519	7.774	31.03	30.935	26.566	21.66	33.233	24.915	5.799			0.562499	18.057
10.8419	9.322	20.605	15.848	17.629	22.181	24.093	20.214	11.067	29.883	5.153	7.206	12.156	32.233	6.702	21.403	9.506	15.728	17.402	9.576	33.443	31.401	27.894	22.009	39.522	26.813	4.241			0.568752	18.9704
10.961	8.229	21.087	15.668	15.575	24.709	21.365	18.036	10.384	32.556	4.915	6.616	13.038	31.516	5.876	19.872	7.696	16.498	18.88	8.575	34.394	30.475	27.882	19.825	47.914	25.719	4.84			0.575	18.9285
11.0801	8.183	21.199	17.221	17.058	25.183	20.033	19.031	11.208	31.676	4.762	6.728	14.771	28.509	5.172	19.982	7.792	15.108	17.912	8.794	36.366	31.268	28.186	22.098	51.998	25.829	4.741			0.581248	19.2618
11.1993	8.668	19.988	14.65	17.114	24.097	21.079	18.457	12.107	30.216	5.094	6.22	16.525	30.445	5.938	20.479	7.524	15.493	18.211	7.618	33.676	33.48	28.452	19.165	53.315	24.948	4.554			0.587501	19.1351
11.3184	8.456	22.206	14.111	17.029	27.267	21.945	20.164	10.778	33.997	5.808	6.529	16.984	29.655	5.288	21.88	8.082	16.422	17.839	7.765	36.239	35.53	28.675	20.123	46.959	24.418	4.856			0.593749	19.5771
11.4376	7.5	23.558	13.562	16.886	28.023	23.3	19.715	10.034	32.801	5.401	6.169	18.002	29.787	6.401	21.423	7.716	16.587	16.372	8.32	35.178	36.082	28.416	19.784	39.577	25.597	5.337			0.600002	19.2895
11.5567	7.503	23.435	13.393	17.074	29.791	25.818	19.271	11.002	30.842	5.363	6.706	18.64	30.204	6.175	21.246	8.621	17.206	17.673	8.262	33.895	39.845	31.025	20.204	34.334	26.203	4.515			0.60625	19.5479
11.6758	7.623	21.127	12.699	16.805	27.62	22.406	21.7	10.757	30.687	4.9	6.697	20.334	28.364	6.507	21.579	7.839	16.064	16.062	9.378	36.094	42.498	34.52	20.638	33.446	26.989	5.486			0.612498	19.57
11.795	7.391	20.706	12.178	15.86	26.312	22.703	21.356	10.74	31.935	5.444	6.68	19.883	29.763	5.528	22.493	8.428	16.484	16.863	8.934	35.774	47.707	33.827	21.378	34.28	26.418	4.404			0.618751	19.7488
11.9141	7.463	20.004	13.164	13.778	26.445	22.434	21.223	11.254	32.761	5.458	6.669	21.762	29.685	5.758	21.686	7.04	14.012	18.018	9.347	34.384	50.12	37.24	19.011	34.426	28.269	4.49			0.624999	19.8423
12.0333	6.666	18.434	13.119	16.102	24.229	20.617	23.789	10.732	31.889	5.299	6.156	22.869	31.641	5.726	22.107	8.068	15.582	18.75	8.245	36.717	52.783	36.731	18.861	34.314	27.066	5.409			0.631252	20.0731
12.1524	6.676	16.343	13.163	13.682	20.99	19.125	22.717	12.236	35.232	5.333	6.293	24.509	29.581	5.713	21.033	7.313	15.576	16.975	7.51	38.416	54.284	38.652	17.949	32.869	28.892	5.333			0.6375	19.8613
12.2716	6.869	17.578	11.798	15.516	21.17	19.837	20.107	10.502	34.512	5.506	5.278	19.922	30.047	5.575	22.656	6.247	16.258	17.789	10.187	39.308	53.779	39.647	18.138	34.626	30.328	4.594			0.643753	19.9144
12.3907	7.107	16.892	13.41	15.592	18.897	20.739	18.435	14.077	33.004	5.944	5.951	21.762	31.168	6.698	21.407	8.033	16.458	17.707	9.825	40.451	50.464	42.773	18.757	33.981	28.889	4.141			0.650001	20.0985
12.5098	6.605	18.484	12.958	12.416	17.472	20.273	17.852	10.755	31.249	5.54	6.249	20.804	33.047	7.223	23.535	8.152	15.739	19.534	8.415	41.103	45.791	43.709	19.251	37.203	30.367	4.307			0.656248	19.9243
12.629	6.477	17.672	11.827	10.4	19.404	18.606	18.579	9.765	33.092	5.198	5.575	22.294	31.043	6.643	20.357	7.378	16.726	19.111	9.292	41.055	44.309	42.113	20.574	40.293	27.458	5.203			0.662501	19.6325
12.7481	7.08	15.828	11.464	9.753	17.979	19.696	18.493	9.929	31.832	5.146	6.62	22.951	31.207	7.264	22.107	7.052	17.487	18.544	9.875	41.811	40.977	44.919	19.779	39.422	26.626	4.989			0.668749	19.5704
12.8673	7.039	16.029	10.65	9.524	19.248	19.441	19.118	8.921	30.959	5.302	5.666	23.462	32.498	7.006	22.146	6.661	17.276	16.864	9.404	43.974	40.897	46.299	19.195	39.164	25.898	4.591			0.675002	19.5089
12.9864	7.167	17.196	11.533	8.947	18.564	17.65	18.132	9.795	33.883	5.175	6.614	24.755	33.926	7.389	22.828	7.137	16.799	18.842	8.539	44.202	35.731	45.653	17.804	38.897	24.894	4.915			0.68125	19.4987
13.1055	6.767	13.893	12.256	9.362	17.126	21.022	20.23	8.754	31.025	5.663	6.521	23.928	33.199	6.979	23.038	7.508	16.398	18.184	9.176	46.27	34.241	49.785	20.549	39.392	25.272	5.241			0.687498	19.6838
13.2247	7.267	14.685	11.917	9.187	15.562	19.236	21.712	7.881	35.102	6.682	6.321	24.167	34.28	7.111	21.882	8.44	16.14	19.535	8.81	46.215	33.254	49.984	18.941	39.754	25.264	5.114			0.693751	19.7863
13.3438	6.642	12.854	11.295	8.894	16.475	19.27	22.697	8.58	29.739	6.4	5.07	25.064	35.094	7.099	23.66	7.62	16.957	19.144	9.909	49.485	31.733	46.203	19.239	38.636	21.462	5.719			0.699999	19.4208
13.463	5.957	13.459	11.568	9.185	17.544	20.668	21.659	8.347	32.087	5.422	5.684	27.787	34.239	6.255	22.047	7.037	15.814	18.76	9.525	46.847	31.141	43.027	19.223	38.418	19.167	6.452			0.706252	19.1277
13.5821	6.736	12.893	11.506	9.602	17.002	19.974	20.512	8.834	33.257	5.475	5.907	27.846	33.668	7.623	22.576	7.105	15.382	20.369	9.45	49.96	30.047	48.591	20.466	36.793	18.121	6			0.7125	19.4498
13.7012	5.902	12.102	11.533	8.655	14.879	20.665	22.572	7.678	32.146	5.722	4.759	25.322	31.148	7.274	22.622	7.854	14.437	19.753	10.915	47.441	27.799	46.742	20.06	37.466	15.379	6.345			0.718748	18.7373
13.8204	6.17	10.54	11.726	7.351	14.792	21.755	22.821	6.752	31.271	5.356	5.211	29.02	33.655	5.892	22.166	8.428	16	19.107	10.099	41.835	28.084	46.45	20.617	37.917	13.687	5.653			0.725001	18.5521
13.9395	5.895	11.586	12.022	7.998	15.225	22.627	23.602	8.156	32.952	5.734	5.032	31.811	31.823	6.265	24.304	7.199	15.741	19.757	10.192	41.506	28.388	47.878	18.632	34.75	13.667	6.633			0.731249	18.8221
14.0587	5.581	11.316	11.562	7.679	13.437	22.165	23.9	6.99	33.159	6.122	6.044	31.653	34.562	7.054	22.885	7.758	16.21	19.622	9.591	41.858	26.933	49.134	22.665	34.374	12.075	6.757			0.737502	18.8879
14.1778	5.217	10.498	11.447	8.063	14.333	21.351	23.117	7.515	33.938	6.046	5.459	35.073	32.856	6.626	24.773	6.565	13.95	20.218	9.297	40.292	28.437	48.978	19.716	34.648	11.684	8.965			0.74375	18.8101
14.297	4.717	10.761	11.452	8.087	14.136	21.152	23.708	6.39	31.429	5.149	5.727	36.646	35.446	7.003	23.274	7.749	15.141	19.892	9.922	40.83	28.244	46.541	20.814	33.473	11.99	10.026			0.750003	18.8346
14.4161	4.824	9.251	11.368	6.853	12.836	18.818	23.479	7.06	33.961	5.67	5.165	36.519	40.35	7.167	21.748	7.564	14.178	22.442	9.447	41.996	29.481	50.9	19.986	36.168	10.01	10.468			0.75625	19.1427
14.5352	4.749	9.924	10.153	8.102	14.299	18.248	23.225	7.007	30.923	5.333	4.852	40.074	43.85	7.065	21.667	7.97	15.325	23.555	10.298	43.015	32.963	52.966	17.132	36.921	10.187	11.922			0.762498	19.6817
14.6544	5.029	10.141	9.073	8.651	13.776	18.798	23.895	6.429	30.212	5.832	5.051	45.094	46.338	6.385	22.174	7.77	15.177	26.083	10.906	45.417	32.942	52.916	17.914	34.006	9.294	12.22			0.768751	20.0586
14.7735	4.795	10.799	10.057	8.105	13.001	16.482	24.062	6.482	30.161	7.26	5.619	44.91	50.304	8.927	23.679	7.262	16.214	28.266	10.12	50.434	37.16	54.576	17.153	35.334	9.767	13.546			0.774999	20.9413
14.8927	4.692	10.711	8.517	7.444	12.987	15.719	24.873	6.426	26.216	6.147	6.852	48.327	53.198	7.282	22.852	8.077	15.28	28.802	10.127	57.513	37.945	56.217	19.296	36.113	11.374	13.791			0.781252	21.4145
15.0118	4.678	10.199	8.136	9.202	12.947	15.748	26.059	6.308	28.754	6.098	6.606	47.788	51.039	7.818	26.848	9.382	14.943	26.215	10.832	62.152	40.87	54.732	19.417	32.235	10.043	15.766			0.7875	21.7237
15.1309	4.804	8.694	9.189	7.981	12.96	15.023	27.716	6.261	26.672	8.053	7.021	52.952	48.965	7.585	25.355	9.627	15.056	26.101	11.337	65.47	43.162	56.193	20.12	28.689	11.155	16.213			0.793748	22.0136
15.2501	3.703	8.257	8.77	6.647	11.92	13.302	28.751	6.81	25.669	7.791	6.327	54.986	49.684	8.349	28.177	8.978	16.172	26.786	11.165	66.298	46.463	56.434	22.085	29.926	10.751	18.146			0.800001	22.398
15.3692	3.791	9.647	8.696	7.099	11.568	13.067	29.381	7.326	25.448	7.387	5.726	61.602	51.912	9.868	26.461	8.333	15.369	27.671	11.751	70.22	51.884	58.469	22.572	27.834	10.627	19.987			0.806249	23.2191
15.4884	3.963	7.999	9.604	7.17	12.415	12.355	30.448	6.419	23.163	7.487	5.586	66.042	57.784	9.502	31.71	8.745	18.067	30.588	12.643	74.675	57.41	63.277	24.082	29.209	11.773	22.61			0.812502	24.7972
15.6075	3.427	9.289	8.829	7.622	12.14	12.955	31.488	6.119	21.129	7.322	6.665	74.282	67.4	10.576	34.122	10.075	16.168	33.588	13.669	82.611	60.945	64.367	25.643	25.915	11.997	30.394			0.81875	26.4899
15.7266	3.771	7.198	9.053	7.192	11.125	12.916	31.579	6.507	18.575	8.445	5.9	80.66	74.345	10.193	33.023	10.28	17.27	35.424	12.682	83.474	68.848	65.446	27.66	27.086	12.538	30.986			0.824998	27.3914
15.8458	3.685	7.591	9.17	8.656	11.116	11.953	31.181	6.018	18.8	7.9	6.711	83.771	79.149	11.564	30.171	10.172	17.583	36.11	14.547	89.317	75.597	80.09	27.974	26.524	13.581	35.806			0.831251	29.0283
15.9649	2.878	6.222	9.707	7.831	13.564	11.929	31.598	5.132	17	8.609	8.06	84.964	77.695	11.529	31.064	10.079	18.569	40.308	16.603	91.871	81.826	85.666	26.568	25.906	14.794	41.56			0.837499	30.0589
16.0841	3.071	6.897	8.617	8.462	10.92	11.637	32.455	6.71	16.723	8.837	8.759	89.814	72.988	14.211	33.924	10.856	17.762	40.801	17.781	85.131	90.462	93.686	28.3	25.743	16.7	48.951			0.843752	31.1615
16.2032	3.205	5.865	9.745	9.108	12.466	11.813	35.827	5.95	15.308	9.322	9.262	84.156	63.38	16.279	34.33	12.532	18.013	46.073	20.327	83.553	99.499	102.95	25.94	26.981	17.735	51.029			0.849999	31.948
16.3224	3.046	5.599	8.994	9.781	10.511	12.423	36.471	6.67	16.413	9.868	12.602	80.919	55.04	19.337	38.442	12.425	20.099	47.62	23.941	71.641	99.326	109.273	26.57	27.749	17.161	53.856			0.856253	32.1453
16.4415	2.806	6.39	8.333	7.89	9.49	12.457	42.007	7.496	16.749	12.055	15.96	84.757	45.437	25.967	38.635	11.818	19.886	46.153	29.519	58.076	86.633	114.981	24.442	30.546	19.81	62.194			0.8625	32.3264
16.5606	2.287	5.736	6.907	9.018	8.078	11.348	43.529	6.856	17.12	13.89	18.424	93.624	41.891	35.786	40.322	12.739	19.306	42.511	35.375	50.648	66.731	123.036	26.457	29.818	19.221	70.318			0.868748	32.7298
16.6798	2.73	6.454	6.386	8.262	9.086	11.478	47.13	7.41	13.814	19.638	21.242	96.734	36.481	40.993	42.013	12.979	17.557	41.374	42.941	41.108	48.437	125.643	25.217	29.392	19.217	75.818			0.875001	32.6744
16.7989	3.227	5.599	7.063	7.108	7.579	10.117	49.761	7.377	16.013	21.882	25.294	101.778	33.473	53.277	45.942	15.637	16.403	45.462	51.878	36.13	33.164	122.571	27.111	33.533	20.788	83.065			0.881249	33.8935
16.9181	1.808	5.527	6.88	6.179	8.766	10.258	51.518	7.176	18.185	27.161	27.288	101.436	26.61	61.685	58.622	15.351	16.988	45.098	54.067	28.982	19.989	119.924	29.221	35.466	25.805	82.861			0.887502	34.3404
17.0372	2.217	4.988	6.335	6.832	7.991	9.018	58.792	9.142	20.976	33.409	29.995	103.983	23.583	67.105	67.727	16.113	19.948	49.212	54.267	23.718	12.684	114.128	32.84	38.078	29.273	84.949			0.89375	35.6655
17.1563	1.965	5.803	5.648	6.432	7.039	8.062	64.009	9.446	24.217	36.175	29.637	99.81	22.403	72.727	84.489	16.323	19.931	55.811	50.864	18.651	7.702	110.684	37.405	40.631	34.365	84.061			0.899998	36.7035
17.2755	1.865	5.64	6.054	4.43	7.991	8.826	69.989	9.618	32.592	48.4	29.397	77.919	19.546	63.958	99.484	17.179	20.87	64.141	45.822	16.111	7.749	104.406	44.713	43.98	34.212	81.21			0.906251	37.1578
17.3946	2.036	6.01	5.092	3.987	7.212	7.954	78.142	8.997	39.626	50.643	30.395	57.882	14.832	41.322	103.216	20.269	22.164	79.96	35.675	12.974	5.954	94.997	47.027	50.319	41.827	84.762			0.912499	36.6644
17.5138	1.955	5.157	4.068	3.884	6.963	7.537	93.328	10.814	51.372	62.226	30.149	41.743	10.249	23.544	104.602	24.86	22.01	87.715	28.056	8.183	4.266	85.525	60.189	63.229	48.701	78.962			0.918752	37.2803
17.6329	1.88	5.727	4.515	3.856	6.621	8.416	105.263	12.545	62.045	70.225	29.33	25.939	7.282	10.844	97.239	26.892	25.618	93.199	19.789	5.704	3.533	71.644	69.985	78.814	51.218	83.952			0.925	37.7721
17.7521	1.648	5.986	4.952	2.485	5.513	8.098	122.652	14.14	74.095	78.885	33.107	15.799	5.19	5.757	83.604	34.695	31.943	83.272	13.795	4.209	3.441	50.291	73.852	92.54	54.045	85.418			0.931253	38.0543
17.8712	1.908	4.968	3.414	3.316	5.139	7.509	129.547	16.112	89.023	95.544	32.728	10.327	4.654	4.173	61.646	42.788	39.271	61.063	10.375	3.739	3.028	33.999	74.018	95.118	65.599	88.644			0.937501	37.9865
17.9903	1.755	4.45	3.454	3.589	4.797	8.357	133.869	20.356	95.992	107.228	28.634	6.864	3.394	2.725	38.013	51.431	52.628	38.811	6.657	3.22	2.328	19.32	65.1	81.203	78.449	87.008			0.943748	36.5243
18.1095	1.828	4.338	4.227	2.823	5.557	7.1	144.296	26.959	92.309	104.944	27.705	4.519	3.371	2.411	20.958	56.404	71.273	20.798	4.879	2.182	1.626	9.437	44.278	61.842	82.882	77.694			0.950002	34.1015
18.2286	1.733	5.838	3.848	2.674	5.152	6.237	162.103	35.345	88.153	89.529	23.084	4.081	2.57	1.744	11.694	62.213	92.99	14.477	4.252	1.943	1.888	7.088	21.737	48.684	86.185	67.252			0.956249	32.7882
18.3478	1.946	5.34	3.945	2.527	5.283	7.355	160.326	48.107	78.66	61.685	21.202	2.764	2.03	1.425	7.137	67.439	107.245	7.777	3.637	1.597	1.448	6.137	11.374	36.722	81.291	54.962			0.962502	30.36
18.4669	1.533	5.021	2.89	2.384	5.443	7.52	166.137	56.325	67.17	35.489	16.281	1.889	1.996	1.351	6.21	70.985	110.217	4.93	2.367	1.155	1.315	4.68	8.924	28.956	73.904	43.015			0.96875	28.0033
18.586	1.918	4.98	3.19	2.464	5.566	9.012	157.463	53.526	56.484	22.41	11.162	2.056	1.538	1.117	4.603	62.819	98.161	3.67	2.193	1.065	1.228	3.471	6.466	17.844	53.534	29.486			0.974998	23.7472
18.7052	1.651	3.925	2.12	1.975	5.117	10.417	138.87	51.012	48.444	13.02	6.696	1.774	1.104	0.847	3.854	49.922	78.08	2.774	2.106	1.04	1.231	3.482	4.963	11.446	34.686	21.681			0.981251	19.3168
18.8243	2.339	4.631	2.979	2.175	5.61	13.137	119.905	49.117	36.631	7.291	4.314	1.516	1.091	0.913	2.991	31.349	50.117	2.16	1.839	1.298	1.015	2.665	4.742	8.085	21.002	14.413			0.987499	15.1279
18.9435	2.027	4.454	1.97	1.868	4.434	14.728	107.291	49.627	31.643	6.901	2.887	1.337	1.059	0.862	3.066	21.393	23.522	1.95	1.608	0.761	1.021	2.508	3.622	5.846	11.99	11.099			0.993752	12.2875
19.0626	2.032	4.598	2.099	2.534	4.544	17.057	97.527	44.872	27.419	4.721	2.411	1.187	1.164	0.633	3.193	17.474	14.235	1.563	1.226	0.399	0.358	1.984	3.003	5.216	7.975	6.949			1	10.6297

## Sheet: Ima4
X0	Y0	Y1	Y2	Y3	Y4	Y5	Y6	Y7	Y8	Y9	Y10	Y11	Y12	Y13	Y14	Y15	Y16	Y17	Y18	Y19			Ap-Ba	Avegrage int
0	126.318	94.487	87.698	70.302	61.1518	62.0081	60.0517	51.229	49.257	44.644	47.851	39.359	63.059	42.506	50.671	61.746	46.526	84.356	86.558	78.183			0	65.3981
0.1191	129.208	103.995	80.347	74.414	65.8334	68.9348	64.736	55.113	49.178	55.733	48.862	39.226	68.131	44.856	50.716	63.825	45.258	79.575	82.71	82.33			0.00689416	67.6491
0.2383	144.25	115.17	81.842	78.903	66.807	71.0118	69.227	64.168	51.766	57.374	52.295	39.882	76.711	43.57	52.704	65.97	48.218	76.849	89.315	88.89			0.0137941	71.7461
0.3574	155.19	129.439	79.341	80.11	68.757	75.948	78.427	63.873	55.921	70.533	56.917	40.674	82.916	45.504	53.48	73.711	52.028	80.426	93.126	92.345			0.0206883	76.4333
0.4766	166.116	138.345	84.57	80.856	68.9915	81.8936	80.218	74.067	62.101	81.501	61.285	41.78	91.636	46.611	57.531	77.879	53.65	82.129	92.892	98.01			0.0275882	81.1031
0.5957	171.803	148.784	92.659	85.194	66.1387	84.3348	82.9698	75.364	61.781	90.936	71.242	41.772	100.93	51.744	62.185	87.581	58.035	78.898	97.224	105.517			0.0344824	85.7546
0.7148	173.358	164.267	93.672	88.279	74.1871	81.9036	86.6286	79.519	61.968	102.639	72.577	43.409	105.598	56.301	65.963	92.156	64.232	84.012	102.671	109.695			0.0413765	90.1518
0.834	168.363	167.857	94.832	90.767	73.5357	82.5408	89.5005	86.126	60.569	108.993	81.031	49.035	111.307	59.945	71.517	98.732	68.981	83.367	102.746	116.391			0.0482765	93.3068
0.9531	160.844	166.12	102.256	95.636	76.0851	81.2084	93.2175	88.342	68.842	113.82	90.159	56.603	116.384	60.428	82.783	104.39	81.172	86.188	102.215	117.33			0.0551706	97.2012
1.0723	146.118	159.036	106.492	99.193	85.0206	80.3694	93.9092	92.346	76.274	120.21	100.409	62.408	120.499	68.293	86.202	112.998	93.549	87.475	116.252	120.127			0.0620706	101.359
1.1914	125.874	149.393	113.389	101.844	86.8282	76.593	94.3527	93.318	88.648	123.675	107.287	67.474	124.093	73.37	90.157	125.664	98.119	92.454	126.748	123.819			0.0689647	104.155
1.3106	115.834	136.557	117.171	98.707	88.9625	76.5153	91.4971	94.992	100.027	130.859	109.99	76.13	120.571	78.165	99.774	141.52	106.988	95.31	129.953	127.202			0.0758647	106.836
1.4297	101.346	118.375	122.667	104.296	88.0528	70.97	90.8565	95.302	112.33	133.301	118.288	86.322	124.324	81.446	109.491	153.662	118.153	96.576	129.717	137.032			0.0827588	109.625
1.5488	90.381	103.351	128.016	102.118	87.7564	67.6405	88.3797	99.511	122.216	132.219	119.147	97.137	124.27	83.923	116.298	162.979	127.384	96.218	132.654	135.221			0.089653	110.841
1.668	77.123	90.092	131.456	107.409	89.7413	64.7218	85.9784	93.946	132.761	134.345	119.297	107.043	129.056	89.392	125.22	178.173	125.709	97.173	137.846	142.876			0.0965529	112.968
1.7871	64.226	70.126	131.165	107.548	90.7439	61.7591	85.6381	86.948	141.187	137.992	122.297	115.596	131.191	95.209	130.333	180.52	131.552	104.449	137.411	143.783			0.103447	113.484
1.9063	61.382	61.665	124.033	101.615	87.3042	60.7873	82.1931	86.629	152.787	139.278	129.67	120.218	137.71	100.879	134.881	182.507	132.455	108.116	133.161	147.81			0.110347	114.254
2.0254	57.396	54.999	110.138	99.952	85.1521	63.5315	76.6341	94.21	151.639	145.188	135.302	127.262	140.361	105.678	140.654	174.565	134.874	115.376	131.903	147.541			0.117241	114.618
2.1445	44.993	52.119	94.074	98.854	85.5387	64.1683	78.0625	96.011	152.268	148.098	137.295	137.045	143.363	116.272	143.335	177.207	134.01	119.991	130.343	150.559			0.124135	115.18
2.2637	36.671	48.07	79.85	95.986	89.9637	65.8178	71.1782	100.908	151.965	147.557	135.316	136.316	148.047	123.64	144.651	163.19	133.573	122.565	123.41	145.553			0.131035	113.211
2.3828	32.233	39.866	68.765	97.579	89.2354	67.1351	69.5319	102.721	151.147	154.692	130.962	142.15	149.207	130.348	154.595	148.043	126.35	124.545	117.651	135.965			0.137929	111.636
2.502	27.796	31.529	59.843	96.425	88.9413	72.3623	70.9453	110.105	150.39	149.753	136.632	142.289	155.292	136.138	155.252	139.394	124.209	121.412	107.724	124.475			0.144829	110.045
2.6211	24.069	27.48	52.121	94.434	91.295	73.3566	69.2805	113.482	142.9	150.854	137.415	143.429	154.296	139.492	158.427	134.257	122.982	115.576	102.404	111.731			0.151724	107.964
2.7402	20.898	26.78	44.71	94.159	89.6855	76.0743	67.2762	113.322	133.36	146.656	129.644	148.897	152.2	142.796	154.715	119.894	111.399	113.489	89.263	94.403			0.158618	103.481
2.8594	20.192	23.201	39.162	88.722	91.2335	75.047	68.7112	116.979	114.913	147.287	124.766	149.417	148.785	145.549	153.776	101.46	100.855	106.643	81.797	78.73			0.165518	98.8613
2.9785	19.006	22.083	34.844	79.989	91.1013	77.5175	67.3561	111.753	95.701	141.926	111.763	149.961	148.432	145.723	153.052	93.606	97.368	101.013	70.873	64.341			0.172412	93.8704
3.0977	15.404	19.758	29.896	63.869	83.8517	76.1063	71.6442	106.095	77.83	138.564	104.807	148.03	148.116	141.622	142.037	86.68	96.703	97.851	64.927	53.453			0.179312	88.3622
3.2168	15.302	17.752	29.179	48.843	86.7556	70.2055	71.4622	98.273	65.254	129.893	95.584	137.813	140.423	142.322	137.962	84.909	90.406	86.304	55.386	40.927			0.186206	82.2478
3.336	15.702	16.581	29.47	37.984	80.6954	69.4121	69.1386	82.814	56.667	118.542	83.314	130.95	137.098	139.353	126.359	78.707	88.816	76.237	48.441	30.872			0.193106	75.8577
3.4551	12.87	15.104	24.764	30.826	73.6173	61.2366	71.3405	73.032	47.057	106.365	69.73	126.933	127.41	138.948	120.417	69.022	81.942	65.923	37.655	23.178			0.2	68.8685
3.5742	13.152	14.518	23.625	25.266	56.9061	57.9851	71.0098	64.466	38.782	92.762	55.415	119.426	117.66	130.718	108.482	61.996	76.73	56.262	32.317	18.186			0.206894	61.7832
3.6934	12.251	12.636	23.153	23.389	46.6645	49.525	69.4054	55.336	34.706	71.872	41.074	99.496	105.812	125.023	93.185	55.443	71.875	48.986	27.309	14.776			0.213794	54.0958
3.8125	11.473	11.039	20.705	19.047	41.6465	42.438	66.6204	48.896	30.044	61.325	31.529	77.929	92.185	114.189	80.389	54.493	66.361	47.068	21.139	12.689			0.220688	47.5602
3.9317	9.511	10.39	18.073	18.351	35.4024	37.7876	64.3635	38.174	24.305	50.703	24.293	62.062	81.753	102.436	72.011	47.095	60.695	40.402	16.402	9.11			0.227588	41.166
4.0508	9.2	10.249	17.09	18.301	27.6081	31.9601	62.7543	32.334	23.505	42.446	19.792	46.421	69.087	87.792	65.672	42.564	61.039	34.968	14.521	7.958			0.234482	36.2631
4.1699	11.189	10.788	15.582	14.162	22.2052	30.3936	57.2966	26.411	19.667	37.15	18.339	35.773	60.592	75.658	60.865	38.204	52.828	35.324	12.204	6.905			0.241377	32.0768
4.2891	10.991	9.864	15.262	13.35	16.914	26.9734	48.453	23.887	18.213	32.749	17.258	30.042	51.561	63.606	56.782	35.737	53.6	33.566	10.754	6.719			0.248276	28.8141
4.4082	11.397	9.198	13.105	12.041	12.1374	22.0457	41.2214	19.17	18.318	25.908	14.623	23.163	39.98	50.109	48.873	31.742	49.953	31.281	7.57	5.659			0.255171	24.3747
4.5274	12.029	7.884	13.199	11.464	9.989	20.1372	35.5234	16.466	17.787	21.736	12.88	17.769	36.359	41.603	44.049	29.199	48.452	26.878	6.969	5.966			0.262071	21.8169
4.6465	10.48	8.384	10.999	9.991	9.2268	17.6517	29.0913	15.774	16.984	17.999	10.329	14.513	27.672	36.646	38.965	26.597	45.134	24.312	5.444	4.722			0.268965	19.0457
4.7657	9.886	6.588	10.864	6.777	7.7888	15.0291	22.5788	13.2	15.935	16.678	9.363	13.704	23.463	32.611	34.574	21.806	45.257	21.732	5.641	5.281			0.275865	16.9378
4.8848	9.384	6.011	10.223	7.463	6.5213	12.918	19.5582	11.287	11.614	13.984	8.015	11.649	20.479	29.21	30.567	20.29	40.545	19.267	4.809	4.693			0.282759	14.9244
5.0039	9.693	6.041	12.145	6.38	4.2127	14.5307	15.8413	12.75	11.831	10.245	7.159	9.732	17.955	24.444	27.349	17.312	36.706	17.31	4.098	4.333			0.289653	13.5034
5.1231	7.223	6.048	11.676	5.215	4.2473	13.6924	14.5391	13.824	11.161	8.44	7.159	9.89	14.246	21.164	27.302	16.988	34.558	15.689	3.34	4.116			0.296553	12.5259
5.2422	6.219	6.137	12.467	4.549	3.5691	11.4054	11.6279	14.134	10.692	7.913	5.83	8.5	13.827	19.654	23.016	16.021	29.951	14.433	3.608	4.8			0.303447	11.4177
5.3614	6.068	5.689	11.33	4.41	2.6989	11.4711	11.3268	9.984	11.192	6.857	6.438	7.246	14.988	16.826	21.126	15.396	25.579	14.66	3.407	3.641			0.310347	10.5167
5.4805	4.601	5.096	11.512	3.066	2.8121	10.9512	8.756	9.786	11.141	6.393	5.251	7.493	13.191	15.82	19.439	16.298	20.059	14.902	3.401	3.688			0.317241	9.68281
5.5996	4.136	4.342	10.746	2.98	3.1447	11.2258	8.0896	8.069	9.929	6.545	5.356	7.012	13.829	14.449	17.828	15.222	18.299	13.371	3.2	3.993			0.324135	9.08831
5.7188	4.706	4.793	10.625	3.116	3.4111	10.0619	7.6569	7.985	9.511	6.028	4.582	7.982	12.565	13.902	17.33	12.917	17.471	13.592	3.332	3.626			0.331035	8.75965
5.8379	4.72	5.376	10.624	2.722	2.6527	9.0701	8.5037	6.416	10.017	4.57	5.338	6.322	12.526	14.301	16.213	11.736	16.044	12.653	3.348	4.002			0.337929	8.35773
5.9571	3.645	5.243	9.178	2.383	2.2818	9.345	7.5354	5.844	9.351	4.893	4.621	5.485	12.867	13.413	13.265	10.333	15.877	10.317	3.192	3.248			0.344829	7.61586
6.0762	4.062	4.687	10.69	2.845	2.5318	8.3883	7.8922	4.614	9.801	5.809	4.426	5.084	12.416	14.549	12.442	9.866	16.028	11.194	2.673	3.299			0.351724	7.66487
6.1953	4.393	4.457	11.381	2.913	2.8946	8.2067	7.1507	4.762	10.065	5.133	4.634	5.132	12.143	13.849	11.183	10.348	14.998	10.971	2.911	3.701			0.358618	7.5613
6.3145	4.046	4.768	12.008	3.126	2.3211	7.3138	6.989	5.138	9.111	4.935	4.699	5.931	13.855	11.296	11.01	8.917	15.723	9.86	3.385	3.122			0.365518	7.3777
6.4336	4.13	4.907	11.92	3.077	2.008	7.581	6.0716	4.429	10.876	4.883	4.263	5.583	14.176	12.343	9.148	9.094	15.027	9.08	2.793	3.023			0.372412	7.22063
6.5528	3.15	4.384	14.494	2.975	2.145	6.7886	6.5084	4.87	10.889	5.484	4.16	5.055	15.387	12.25	8.373	8.378	14.979	10.136	2.835	3.613			0.379312	7.3427
6.6719	3.74	4.228	14.573	2.845	2.3164	6.3503	6.6138	5.518	10.724	4.78	4.104	4.746	17.229	11.845	8.321	8.253	13.806	9.53	3.623	3.393			0.386206	7.32692
6.7911	3.163	4.559	14.527	3.056	2.0312	6.1388	5.9786	5.285	10.865	4.749	3.991	5.144	16.967	13.418	9.745	8.131	12.31	10.291	3.28	3.288			0.393106	7.34588
6.9102	3.305	5.157	16.471	2.399	2.2764	5.7946	5.953	4.782	11.41	4.175	3.858	5.426	17.829	12.475	8.548	7.52	12.257	8.639	3.024	2.914			0.4	7.21065
7.0293	3.517	4.999	15.668	2.929	1.9589	5.6209	4.8009	5.093	10.609	3.792	3.841	5.008	19.053	11.993	9.098	8.479	12.698	9.108	2.897	2.846			0.406894	7.20043
7.1485	3.136	4.832	17.207	2.401	2.2882	5.0536	5.8649	5.215	11.469	3.792	4.173	4.462	17.44	14.081	8.732	8.318	9.573	8.781	3.294	2.796			0.413794	7.14544
7.2676	3.104	4.921	18.443	2.736	2.2522	4.7767	4.7638	5.314	12.542	4.338	3.755	4.435	18.364	14.889	8.107	7.653	9.593	10.007	2.866	3.186			0.420688	7.30229
7.3868	3.472	5.35	18.299	2.125	3.087	3.9669	5.2231	4.659	13.436	4.491	3.33	4.753	17.197	13.717	8.741	6.762	8.419	8.654	3.068	2.512			0.427588	7.0631
7.5059	3.127	4.678	17.645	3.051	2.0689	3.3574	5.3666	5.439	13.43	5.143	3.401	4.013	16.17	13.172	8.078	7.441	7.746	9.522	3.056	2.81			0.434482	6.93574
7.625	3.652	4.184	18.248	3.859	2.2818	4.1881	5.8349	6.238	13.894	4.712	2.757	3.346	17.351	12.866	8.451	7.306	8.223	9.747	3.199	2.638			0.441377	7.14879
7.7442	4.159	4.458	19.288	2.937	2.1376	4.3642	4.3914	5.28	15.071	4.892	3.742	4.219	16.313	14.369	8.65	7.879	8.271	9.232	3.184	3.56			0.448276	7.31986
7.8633	4.556	4.88	20.011	2.61	2.1274	4.6131	4.1868	5.327	16.488	5.752	3.104	5.012	16.061	14.118	7.965	8.713	8.083	9.609	3.336	3.336			0.455171	7.49442
7.9825	3.977	5.42	17.168	3.268	2.549	4.071	4.4056	6.061	16.103	4.13	3.244	3.791	16.122	15.791	8.675	7.314	8.203	10.356	3.637	2.774			0.462071	7.35298
8.1016	3.786	4.645	18.824	2.936	2.321	4.0358	4.138	5.415	17.158	3.731	3.052	3.923	17.736	15.484	8.072	7.696	7.902	10.267	3.905	3.107			0.468965	7.40669
8.2207	3.63	5.032	22.062	2.913	1.9001	4.5766	4.2566	6.282	16.374	4.501	2.916	3.739	18.708	18.267	7.805	7.836	6.425	10.475	3.519	2.73			0.475859	7.69737
8.3399	4.821	5.252	21.763	3.278	2.2394	4.307	3.9941	5.533	18.24	4.686	3.304	4.256	18.711	20.997	8.4	8.139	5.7	9.774	4.07	3.039			0.482759	8.02518
8.459	4.348	5.085	23.695	2.208	2.4529	4.4309	3.975	6.654	18.676	5.035	2.967	4.541	19.481	21.683	9.375	8.03	6.656	10.315	4.065	2.446			0.489653	8.30594
8.5782	5.415	5.238	24.258	2.966	2.6252	4.6611	4.6288	6.301	20.213	3.908	3.978	4.408	20.986	22.233	9.294	8.436	6.484	9.451	4.001	3.211			0.496553	8.63481
8.6973	5.904	6.062	23.596	2.278	2.5123	4.2642	4.5505	5.533	20.863	3.904	3.661	4.925	18.787	22.426	9.614	9.034	7.431	10.773	3.987	3.495			0.503447	8.68
8.8165	6.917	5.235	19.961	2.102	2.603	4.2488	3.9188	7.524	20.519	4.435	3.678	4.59	20.903	21.21	9.495	8.421	6.305	10.877	3.595	3.407			0.510347	8.49723
8.9356	6.84	5.596	20.681	3.082	2.026	4.5454	4.0766	6.255	20.553	4.861	4.216	3.978	22.283	20.243	9.153	9.909	6.756	10.277	3.982	3.521			0.517241	8.6417
9.0547	8.598	5.074	19.781	2.975	2.7395	5.2154	4.4805	7.286	24.171	4.3	3.712	4.03	24.036	19.323	9.464	8.735	6.724	11.597	4.304	4.16			0.524135	9.03527
9.1739	9.654	5.164	21.504	2.804	2.7125	4.8937	5.1522	7.958	23.959	4.909	3.013	4.142	25.589	20.071	9.795	9.008	6.973	13.546	3.883	3.327			0.531035	9.40287
9.293	10.647	5.757	22.381	2.661	2.9398	5.437	5.5146	9.369	25.381	5.353	3.637	4.937	24.283	21.084	9.593	9.438	9.068	14.046	4.638	3.209			0.537929	9.96867
9.4122	13.668	6.262	24.539	2.587	2.4216	4.978	4.7532	10.311	28.353	5.709	3.781	4.093	22.168	22.444	9.467	10.146	9.861	14.043	4.29	3.705			0.544829	10.379
9.5313	13.899	6.458	23.768	3.261	2.7575	4.6615	5.064	10.707	29.999	5.438	4.143	4.546	23.491	22.049	9.825	10.298	9.357	16.251	3.482	3.595			0.551724	10.6525
9.6504	13.718	6.452	25.324	2.808	2.6745	4.9286	5.8065	11.439	29.68	5.493	3.346	4.558	25.18	24.012	10.102	10.864	10.682	15.68	4.873	4.161			0.558618	11.0891
9.7696	14.316	7.387	25.705	2.894	2.5698	3.9116	5.9153	10.569	28.412	4.906	3.162	4.38	26.075	24.204	10.096	12.185	12.578	18.317	5.151	3.315			0.565518	11.3024
9.8887	16.114	7.548	26.469	2.949	2.948	4.1554	5.7052	11.277	28.36	5.32	3.414	4.327	28.076	24.143	11.733	11.083	12.583	18.536	4.881	3.352			0.572412	11.6487
10.0079	15.976	7.779	25.471	2.718	2.4229	4.5366	5.9448	11.456	29.988	5.551	3.339	4.637	27.774	24.246	11.702	10.855	11.81	20.378	5.168	4.469			0.579312	11.8111
10.127	18.655	7.741	25.859	2.42	2.7408	4.3006	6.8651	9.904	29.82	5.184	3.838	4.166	28.274	24.774	11.316	12.038	11.895	21.788	5.59	4.411			0.586206	12.079
10.2462	21.703	10.288	24.872	2.791	2.7685	4.4026	6.6122	10.276	28.248	5.295	3.645	4.343	26.6	22.023	10.995	11.244	12.471	24.886	5.389	3.78			0.593106	12.1316
10.3653	24.621	10.082	25.422	2.883	2.7829	4.4542	7.5224	11.636	25.114	5.43	3.407	4.656	26.96	19.76	10.784	10.528	10.782	25.09	5.919	5.01			0.6	12.1422
10.4844	29.006	10.808	25.989	2.888	2.3802	3.4909	9.3615	9.519	26.013	5.478	3.913	5.344	27.372	19.438	10.421	10.423	12.163	24.169	5.276	4.584			0.606894	12.4018
10.6036	30.513	11.433	28.277	2.649	2.9265	4.0672	9.1111	9.424	23.109	4.954	3.148	5.507	28.128	19.394	11.43	11.678	12.101	26.387	5.815	3.507			0.613794	12.6779
10.7227	35.28	14.317	26.769	2.708	3.4491	4.0299	8.3929	10.213	21.169	5.93	3.263	4.723	25.069	18.762	10.188	11.917	11.204	32.232	6.408	3.887			0.620688	12.9955
10.8419	39.357	15.9	24.651	2.75	2.6956	3.3453	8.3627	10.431	20.029	4.909	3.699	4.559	22.054	21.319	10.961	11.335	11.338	34.457	6.67	4.126			0.627588	13.1474
10.961	40.782	12.229	24.658	2.264	2.5978	3.2618	10.5804	11.071	17.368	5.651	3.268	3.887	21.177	21.188	12.266	12.029	12.385	36.821	6.81	4.221			0.634482	13.2257
11.0801	44.738	15.672	22.652	1.929	2.9555	3.4266	12.6822	10.105	17.016	5.144	3.057	4.762	23.198	23.782	13.42	12.167	11.254	35.497	6.75	4.53			0.641377	13.7369
11.1993	43.938	15.945	22.435	2.709	3.1817	3.4367	14.3949	9.45	16.67	5.244	3.387	4.986	21.564	22.604	15.215	11.877	8.763	36.374	7.276	5.989			0.648276	13.772
11.3184	47.977	16.488	24.832	2.058	2.9925	3.7656	16.4117	10.308	15.387	4.482	3.119	4.196	18.388	23.253	16.075	12.674	10.215	35.793	9.235	5.079			0.655171	14.1364
11.4376	45.969	18.275	25.986	2.419	3.3261	4.1475	18.2248	9.891	14.124	4.592	2.922	4.499	17.203	24.676	16.276	13.163	9.435	31.373	8.608	5.041			0.662071	14.0075
11.5567	44.941	19.291	28.59	3.086	2.638	4.07	19.6709	10.467	13.885	5.171	3.141	4.483	15.463	27.111	15.267	12.961	10.841	24.513	9.421	4.911			0.668965	13.9961
11.6758	43.823	18.343	30.286	3.704	2.8171	4.6957	21.3235	10.515	15.27	4.702	3.837	4.597	13.069	27.193	15.527	12.38	10.191	19.673	8.811	5.713			0.675859	13.8235
11.795	42.719	18.737	30.274	3.636	2.2435	4.1975	22.4942	11.871	15.78	4.632	4.06	4.315	11.559	29.347	14.924	12.283	11.485	17.536	9.925	4.73			0.682759	13.8374
11.9141	41.574	20.803	29.794	2.928	3.059	3.8563	23.8397	12.457	16.645	4.849	3.235	4.917	11.776	32.434	16.71	13.315	12.183	16.515	10.841	5.272			0.689653	14.3501
12.0333	42.192	23.153	27.385	2.697	2.8776	3.1986	22.0069	13.082	15.255	6.305	3.65	4.795	11.214	31.773	16.622	13.186	11.67	16.602	12.536	6.382			0.696553	14.3291
12.1524	42.43	25.449	28.791	2.833	2.5064	3.4	24.1076	11.873	16.168	4.503	3.9	4.15	10	37.818	18.644	12.846	11.583	14.852	13.443	5.471			0.703447	14.7384
12.2716	42.19	26.893	30.51	2.399	2.4442	3.6793	25.5047	12.358	15.475	4.323	3.614	4.196	8.534	41.909	16.644	15.506	12.426	15.053	15.271	5.128			0.710347	15.2029
12.3907	41.663	30.865	28.85	3.226	2.3589	3.5244	26.7466	13.736	12.764	4.932	2.599	3.88	8.936	43.637	15.933	14.619	13.14	17.079	16.363	5.899			0.717241	15.5375
12.5098	41.596	31.805	31.913	3.088	2.7703	4.3828	29.6777	17.508	12.042	4.838	3.19	4.616	9.735	48.837	14.192	13.106	12.507	18.546	20.11	5.447			0.724135	16.4953
12.629	40.282	34.802	29.046	2.892	2.5919	3.5402	31.0468	21.604	11.193	4.281	3.423	3.76	8.457	46.613	14.425	13.8	11.531	21.326	20.6	5.889			0.731035	16.5551
12.7481	40.64	37.37	27.046	3.366	2.3753	4.121	28.4557	25.413	13.808	4.973	2.527	3.927	8.457	42.975	14.568	13.15	13.772	21.781	26.842	6.765			0.737929	17.1166
12.8673	41.74	38.866	25.686	2.975	3.0683	4.0975	30.6372	26.27	12.39	4.831	3.076	4.323	9.868	37.862	12.564	15.576	14.096	22.58	30.058	7.7			0.744829	17.4132
12.9864	44.29	40.006	24.297	2.596	3.0987	4.3238	29.8439	30.044	13.555	4.303	3.114	3.439	9.948	37.377	12.167	17.988	14.937	23.591	35.147	7.882			0.751724	18.0974
13.1055	43.609	42.75	26.741	2.892	2.9799	4.3832	29.1474	33.922	14.725	4.141	3.028	4.316	10.176	34.406	12.961	18.094	15.604	28.033	41.86	9.111			0.758618	19.144
13.2247	40.125	47.489	25.345	3.214	2.936	4.0958	27.2106	33.323	13.48	3.616	3.688	4.396	10.076	34.861	12.16	19.348	15.893	26.344	46.726	10.795			0.765518	19.2561
13.3438	37.42	51.89	26.698	3.824	2.9577	3.0784	27.0755	36.308	14.001	4.26	3.491	4.926	10.024	35.872	12.531	22.674	16.364	30.281	53.02	10.797			0.772412	20.3746
13.463	34.762	55.592	28.676	3.217	2.5305	3.6253	25.4896	39.276	13.214	4.061	3.249	4.192	9.545	36.435	13.816	21.144	19.294	32.423	57.028	13.489			0.779312	21.0529
13.5821	31.165	58.626	33.36	3.473	2.7018	3.8277	25.6765	43.349	12.67	3.579	3.41	3.739	10.791	37.483	14.271	22.533	22.483	34.516	57.637	12.511			0.786206	21.8901
13.7012	29.686	61.481	37.079	3.326	2.9182	3.4598	24.8295	48.298	12.548	3.719	3.235	4.127	13.392	42.793	14.812	23.169	25.382	38.078	59.562	17.973			0.7931	23.4934
13.8204	28.77	64.14	39.902	3.704	2.8656	3.3527	26.9595	50.911	12.02	4.027	3.234	4.401	14.616	41.428	14.437	19.748	27.331	40.897	60.538	17.888			0.8	24.0585
13.9395	29.001	68.719	42.257	3.414	2.8618	3.7958	24.7014	54.993	13.734	3.643	3.392	3.857	16.017	43.592	15.425	20.533	30.082	46.895	64.493	18.798			0.806894	25.5102
14.0587	27.867	69.822	44.71	4.324	3.1516	4.2013	24.8501	54.681	13.765	4.414	3.252	4.347	20.236	41.948	14.72	18.522	32.629	51.715	64.459	22.142			0.813794	26.2878
14.1778	27.912	67.75	42.817	4.335	2.8237	3.6924	24.17	54.891	14.067	4.579	3.222	3.988	23.195	43.184	15.914	19.569	37.201	49.904	63.564	21.769			0.820688	26.4274
14.297	30.831	70.545	40.719	4.289	3.4825	4.5659	26.3108	56.196	17.072	4.562	3.011	3.8	26.402	39.637	17.251	19.33	42.018	49.112	63.192	23.383			0.827588	27.2855
14.4161	33.528	67.003	39.458	4.178	2.9919	5.2434	26.6214	61.379	18.104	4.265	3.453	4.196	30.204	40.146	19.381	19.328	45.23	46.858	64.821	27.581			0.834482	28.1985
14.5352	37.663	69.193	42.765	4.249	2.9043	4.865	27.3032	69.901	23.002	3.814	3.044	4.568	33.495	37.795	21.71	19.161	48.118	43.781	61.988	29.836			0.841377	29.4578
14.6544	41.267	72.446	53.134	4.497	2.6969	5.3411	26.3233	76.326	29.505	3.66	3.929	4.525	36.147	38.757	25.624	23.578	57.159	42.77	60.498	28.091			0.848276	31.8137
14.7735	47.972	76.977	58.951	5.814	2.7351	5.9012	23.6216	78.519	33.758	4.167	3.429	5.243	40.003	41.721	27.028	22.021	68.249	45.097	47.575	31.418			0.855171	33.51
14.8927	60.17	82.916	60.098	6.271	3.6889	5.3245	25.3754	78.037	34.586	4.586	3.477	5.078	42.178	41.765	31.878	24.623	73.339	46.94	33.32	35.058			0.862071	34.9354
15.0118	68.607	82.104	61.401	7.125	3.3763	4.8435	25.9627	80.45	34.197	4.244	4.884	4.991	48.024	43.975	35.634	27.903	80.956	44.196	23.488	34.173			0.868965	36.0267
15.1309	74.143	68.723	51.952	8.402	3.9133	7.1669	28.8545	81.724	30.164	6.518	4.134	6.326	55.07	53.34	43.029	34.449	84.195	41.794	14.1	33.081			0.875859	36.5539
15.2501	71.303	64.244	44.022	9.904	2.9099	8.0014	29.8825	74.62	25.755	5.225	5.02	6.016	62.437	57.296	49.552	41.948	85.765	34.954	9.147	31.119			0.882759	35.956
15.3692	61.556	51.679	30.179	11.229	3.757	9.2581	34.1521	67.935	20.117	6.587	6.393	6.626	72.226	61.541	55.884	48.201	85.771	24.566	5.363	25.044			0.889653	34.4032
15.4884	50.179	39.609	18.406	13.532	4.5267	11.4174	36.4123	60.778	17.791	7.635	10.469	8.276	79.38	61.228	59.989	57.859	87.951	16.233	3.216	16.552			0.896553	33.072
15.6075	33.294	25.866	11.118	15.284	4.6371	13.3572	36.3875	49.514	14.712	10.584	14.028	9.555	77.877	65.437	61.472	60.556	81.234	8.852	2.686	11.082			0.903447	30.3766
15.7266	18.957	16.603	7.499	17.052	5.3151	17.6152	36.3655	40.381	9.577	11.36	16.673	12.846	77.471	65.732	73.774	67.948	63.087	6.252	2.189	6.846			0.910341	28.6771
15.8458	9.625	11.758	4.365	17.987	7.3457	18.5008	39.0099	27.899	8.393	13.225	18.317	15.654	82.31	69.228	74.046	66.804	46.792	3.873	1.929	3.709			0.917241	27.0385
15.9649	5.484	6.921	3.267	15.53	8.197	20.8606	44.0387	19.08	6.732	12.891	14.62	20.53	72.343	59.84	59.234	57.237	32.422	3.276	1.328	2.843			0.924135	23.3337
16.0841	3.153	3.995	2.375	13.126	9.7905	20.6049	44.7812	11.536	4.746	11.373	11.711	24.949	57.428	43.278	42.214	42.343	21.414	2.497	1.064	1.755			0.931035	18.7067
16.2032	2.563	3.681	2.66	9.577	11.2771	21.5395	43.258	6.034	3.789	8.252	10.843	29.373	34.139	25.215	28.544	28.916	11.948	1.854	0.935	1.404			0.937929	14.2901
16.3224	1.87	3.321	1.513	7.433	11.8631	18.8675	36.9179	3.701	2.945	7.073	7.796	25.662	20.497	15.311	16.018	18.384	6.532	1.686	0.909	1.389			0.944829	10.4844
16.4415	1.192	2.325	1.228	5.235	14.0305	14.6807	31.8618	2.756	2.343	5.924	6.341	16.331	12.227	10.18	9.339	10.04	4.444	1.239	1.159	1.275			0.951724	7.70755
16.5606	1.036	1.536	1.064	4.391	13.9005	10.824	26.3474	1.47	2.119	5.656	4.564	10.306	6.575	6.72	6.772	6.076	4.292	0.688	0.709	0.893			0.958618	5.79695
16.6798	0.98	1.033	0.665	3.115	13.7352	8.4404	19.1046	1.428	1.188	4.309	4.312	5.98	4.536	5.051	5.231	4.354	3.742	0.837	0.626	0.768			0.965518	4.47176
16.7989	0.566	1.318	0.499	2.521	9.7603	5.5491	13.6865	1.17	0.836	2.575	4.159	3.832	4.608	4.189	3.088	3.25	2.156	0.675	0.501	0.886			0.972412	3.29124
16.9181	0.761	0.905	0.343	2.314	8.8163	4.9868	9.4063	1.052	0.827	1.624	2.41	2.277	3.363	2.747	2.669	2.001	1.965	0.7	0.566	0.804			0.979312	2.52687
17.0372	0.656	0.711	0.591	2.026	6.9726	3.5948	6.8064	1.13	0.435	1.711	1.873	2.144	3.282	2.914	1.671	1.556	1.326	0.437	0.809	0.484			0.986206	2.05649
17.1563	0.548	0.813	0.807	1.376	5.6389	3.0614	6.4675	0.585	0.411	1.553	2.126	1.761	2.834	2.03	1.303	1.292	1.277	0.516	0.602	0.741			0.9931	1.78714
17.2755	0.467	0.483	0.421	0.92	3.9064	2.9124	5.0042	0.789	0.78	1.069	1.651	1.227	2.02	2.037	1.034	1.064	1.075	0.394	0.696	0.684			1	1.4317

## Sheet: Ima3
X0	Y0	Y1	Y2	Y3	Y4	Y5	Y6	Y7	Y8	Y9	Y10	Y11	Y12	Y13	Y14	Y15			Ap-Ba	Avegrage int
0	48.3804	34.3108	30.8864	30.8297	37.75	48.5378	89.566	125.066	128.525	107.28	156.42	113.113	184.782	65.557	177.16	174.976			0	97.0713
0.1191	53.1901	33.6714	28.6708	33.474	39.2472	52.7528	92.237	122.978	134.439	118.761	169.551	121.69	191.954	71.148	182.343	184.24			0.00670907	101.897
0.2383	54.3365	38.4144	34.0137	38.444	40.6346	51.0832	93.241	120.472	142.407	134.799	174.868	142.3	198.998	79.797	184.775	180.498			0.0134238	106.818
0.3574	57.3207	38.1133	35.356	38.8875	44.3707	55.0947	96.346	125.956	148.569	149.182	181.434	158.085	204.648	86.508	190.293	179.111			0.0201328	111.83
0.4766	58.6799	38.7901	36.4678	44.0814	43.6641	50.9502	103.285	128.353	157.823	155.555	190.508	166.497	209.433	94.374	194.656	180.48			0.0268475	115.85
0.5957	62.9043	41.7485	35.8431	43.7275	44.9375	53.5709	99.14	131.916	162.541	164.957	200.609	181.495	221.95	104.977	200.998	177.768			0.0335566	120.568
0.7148	61.4708	45.021	35.1107	42.6146	47.3932	53.2019	99.039	132.09	161.376	168.473	206.049	198.214	225.552	112.316	205.883	179.837			0.0402657	123.353
0.834	64.3842	44.8625	39.2921	42.8841	46.3728	53.8093	101.344	134.988	166.586	174.774	212.685	219.192	225.234	132.186	203.882	179.162			0.0469804	127.602
0.9531	64.0612	49.7967	38.5915	42.2195	42.5367	53.0726	99.367	124.246	171.792	175.026	212.215	235.759	225.256	154.905	199.447	174.215			0.0536894	128.907
1.0723	64.7764	50.0253	38.2903	40.4638	41.0971	52.2168	96.568	123.296	174.65	159.669	206.616	242.384	225.955	178.438	189.791	169.188			0.0604041	128.339
1.1914	63.271	48.6376	38.4943	39.1162	37.555	50.9561	92.922	119.789	170.927	149.445	194.011	243.786	230.857	204.848	179.684	158.644			0.0671132	126.434
1.3106	65.402	47.24	38.9531	33.0375	32.6966	48.0958	85.521	117.266	164.97	131.669	178.093	245.438	233.402	220.559	169.538	147.432			0.0738279	122.457
1.4297	64.4831	43.8512	38.3083	31.0121	26.8232	43.3312	79.788	106.755	156.556	112.034	151.669	243.026	237.769	231.637	158.174	138.792			0.080537	116.501
1.5488	62.8178	40.3254	34.8757	29.0815	24.0566	37.7808	71.1	90.675	146.091	94.318	119.223	235.595	242.056	238.712	147.089	130.275			0.087246	109.004
1.668	61.6401	39.8074	32.7401	27.9889	18.5072	28.0369	56.402	67.416	128.429	74.174	96.529	225.76	244.192	245.093	137.287	120.481			0.0939607	100.28
1.7871	60.105	32.7822	30.1592	19.2998	14.416	22.7672	41.276	46.581	106.261	63.984	68.528	209.211	244.361	243.703	129.026	112.905			0.10067	90.3353
1.9063	56.1831	29.5762	26.1897	16.8337	10.7135	16.2535	31.98	31.792	77.373	49.116	45.224	185.104	247.368	238.883	120.38	105.297			0.107384	80.5167
2.0254	50.1202	25.7133	22.7086	10.7952	8.0063	12.3258	22.273	23.706	54.04	41.004	30.715	159.636	242.336	230.88	109.197	96.027			0.114094	71.2177
2.1445	46.6722	21.1536	18.61	6.9931	6.7874	9.2127	15.036	17.54	33.572	31.048	17.171	136.653	233.045	219.824	102.063	82.943			0.120803	62.3952
2.2637	38.7847	16.6758	15.6073	6.8396	5.0457	8.0695	10.499	15.115	24.54	24.516	10.944	113.738	219.177	203.944	85.686	74.447			0.127517	54.6018
2.3828	34.5058	14.7743	11.1584	4.8036	4.1055	6.8875	8.358	13.406	16.26	17.005	9.427	92.805	191.478	189.482	71.096	66.108			0.134226	46.9788
2.502	29.5919	13.2116	8.2748	3.5922	3.9293	6.1867	7.318	12.555	12.403	14.326	7.129	71.173	158.373	172.749	58.875	58.229			0.140941	39.8698
2.6211	28.3629	11.1699	6.2162	3.4171	3.7711	6.5063	6.54	11.533	10.968	13.295	7.256	49.872	130.708	153.503	42.931	50.538			0.14765	33.5367
2.7402	25.2391	8.4758	5.2434	2.7676	4.6225	6.268	5.814	9.627	11.089	12.653	5.935	34.033	103.313	136.987	28.576	41.911			0.154359	27.6597
2.8594	20.5866	6.6877	4.6332	2.9711	3.053	5.7662	5.812	10.486	8.358	11.367	6.04	27.782	77.927	122.845	21.891	37.133			0.161074	23.3337
2.9785	15.0983	5.7205	4.1892	2.7073	3.1787	6.3853	5.382	9.128	8.328	10.389	5.618	21.891	54.547	111.92	16.219	30.734			0.167783	19.4647
3.0977	13.557	4.4273	4.2612	2.4847	2.7758	6.4421	4.315	9.437	6.475	11.576	4.988	16.998	33.628	96.533	13.739	22.817			0.174498	15.9034
3.2168	9.6171	3.9974	3.4595	2.8356	2.5597	5.9669	5.347	9.208	5.267	10.01	4.895	16.738	23.314	74.949	11.527	18.223			0.181207	12.9946
3.336	6.9855	3.3453	3.7347	2.6089	2.7572	5.0559	4.688	10.416	5.189	9.594	5.179	14.191	16.525	56.411	10.849	14.398			0.187921	10.7455
3.4551	5.7429	3.4315	3.5436	2.4905	2.5627	5.3336	3.979	9.982	5.081	10.205	5.454	13.671	11.634	35.327	10.026	12.307			0.19463	8.79817
3.5742	4.5696	3.5543	3.5083	3.1706	2.7796	5.0365	4.578	9.891	4.605	10.271	4.49	13.443	11.273	21.295	9.683	9.977			0.20134	7.63281
3.6934	3.9951	3.6545	3.7141	2.6436	2.2177	4.7126	5.066	8.691	4.167	9.31	4.403	11.705	9.701	15.175	9.736	9.047			0.208054	6.74616
3.8125	3.8692	3.6495	3.5132	2.5972	2.1877	4.8509	4.259	9.217	4.221	9.176	4.439	11.812	10.042	9.996	8.907	7.579			0.214763	6.26973
3.9317	3.4475	3.3869	3.7049	2.6511	2.9293	3.7859	4.563	9.654	4.013	9.398	3.715	12.25	9.562	7.599	8.913	6.551			0.221478	6.00772
4.0508	3.7643	2.9402	3.2121	2.2123	2.7308	4.347	3.763	9.16	3.985	10.162	3.342	11.147	9.988	6.745	8.947	5.681			0.228187	5.75792
4.1699	3.7518	2.8324	3.0619	2.4704	2.5132	5.7038	4.084	9.676	4.968	10.041	4.188	11.432	9.496	5.126	9.963	4.926			0.234896	5.88959
4.2891	2.791	3.1171	3.316	1.9563	2.5999	5.3579	3.898	8.463	4.278	9.812	3.999	9.394	8.946	5.921	11.251	4.003			0.241611	5.56895
4.4082	3.0288	3.0208	3.4628	1.8991	2.8811	5.1757	4.414	9.497	4.55	10.146	4.022	9.345	9.243	5.233	14.016	4.483			0.24832	5.90108
4.5274	3.4085	2.9785	3.6628	1.8074	2.3396	5.0768	4.448	10.08	4.532	11.135	4.752	9.189	9.566	4.804	16.433	4.129			0.255035	6.14635
4.6465	3.2845	3.6351	3.2957	2.0432	2.81	4.502	4.525	10.31	4.081	10.998	5.098	9.851	9.393	4.704	17.702	3.689			0.261744	6.24509
4.7657	3.4655	3.1084	3.5762	2.1403	2.7035	5.7639	4.267	10.965	3.899	9.273	4.388	10.626	8.974	4.499	23.288	3.615			0.268458	6.53449
4.8848	3.2148	2.9933	3.3928	2.3838	1.9854	6.2201	3.665	10.725	4.834	8.183	5.247	10.593	10.392	4.574	30.837	3.782			0.275167	7.06389
5.0039	3.2721	2.8847	2.977	2.0038	3.2632	4.9156	4.114	10.981	6.112	9.962	4.829	11.549	10.086	4.197	34.643	3.96			0.281877	7.48434
5.1231	3.0312	2.8265	3.4347	3.043	3.2674	5.8712	4.228	12.035	5.733	9.92	4.683	10.416	11.177	4.269	35.884	3.737			0.288591	7.72225
5.2422	3.568	3.1858	3.3758	2.4215	2.8683	6.1346	4.992	11.148	4.99	11.504	4.442	10.209	11.559	4.188	35.548	3.984			0.2953	7.75737
5.3614	3.592	3.1344	3.3318	2.4647	3.63	6.312	4.895	11.233	6.757	9.184	5.06	9.848	11.386	4.549	39.825	3.939			0.302015	8.07131
5.4805	4.4394	2.9361	3.1751	2.5407	2.7217	6.5605	3.864	12.183	6.218	8.273	5	10.487	11.766	4.561	37.099	4.333			0.308724	7.88484
5.5996	4.2358	2.8377	3.7685	2.7198	2.4023	6.4793	5.356	13.218	6.523	8.467	5.21	9.396	11.938	4.547	35.641	4.235			0.315433	7.9359
5.7188	4.6999	2.8349	3.7101	2.5388	3.3049	6.7805	4.902	12.678	7.76	9.286	5.119	8.556	13.892	4.528	37.013	3.958			0.322148	8.22257
5.8379	5.5099	2.8937	3.7781	2.8487	2.9527	8.8177	4.491	12.497	7.985	8.589	6.247	8.318	15.751	3.998	39.061	4.217			0.328857	8.62218
5.9571	4.6023	2.6391	3.2379	2.5315	3.2095	7.9215	5.026	11.942	8.172	6.651	5.227	8.481	17.877	4.493	36.076	3.945			0.335572	8.25199
6.0762	4.2598	3.0287	2.8213	2.9189	2.8226	7.6105	5.135	12.753	8.316	7.305	4.976	8.087	20.455	4.065	33.164	4.092			0.342281	8.23811
6.1953	4.7262	2.9739	3.4346	2.5935	3.2468	7.4261	4.163	12.342	9.648	7.278	5.527	6.843	21.288	4.425	29.584	3.756			0.34899	8.07844
6.3145	4.642	3.4898	4.1078	2.6281	3.083	8.1483	4.544	12.482	10.527	6.423	5.714	6.78	24.754	3.906	24.887	3.574			0.355704	8.10563
6.4336	4.5751	3.3843	3.5002	2.8234	3.3012	8.4575	4.26	11.59	12.588	6.84	5.738	7.455	23.168	4.189	21.468	3.969			0.362413	7.95667
6.5528	4.5695	3.303	3.6557	3.1682	4.1281	8.5597	5.017	10.159	15.125	7.107	6.476	7.666	21.242	4.565	19.965	4.317			0.369128	8.06395
6.6719	4.137	3.7228	3.3787	2.7193	4.3106	7.9301	4.825	8.64	17.375	6.309	7.595	6.882	21.986	4.212	15.65	4.591			0.375837	7.76647
6.7911	3.6274	3.2725	3.4564	2.6155	4.1591	8.6736	4.181	9.04	17.443	5.669	7.685	6.044	23.539	4.498	13.016	3.975			0.382552	7.55591
6.9102	4.1746	2.896	3.3992	2.7286	4.1317	8.2886	4.362	10.049	16.896	5.506	8.18	6.612	22.982	3.863	10.133	3.64			0.389261	7.36511
7.0293	4.1085	3.5859	2.9599	2.7793	3.2589	7.8513	4.542	8.136	14.851	6.543	8.07	5.79	22.801	4.474	8.546	4.307			0.39597	7.03774
7.1485	4.0662	3.7395	3.8425	2.6696	3.6307	8.9854	4.849	7.67	14.571	6.163	9.6	6.111	22.077	4.583	7.37	3.932			0.402685	7.11624
7.2676	4.5779	3.5276	3.4689	2.6651	3.9036	8.8319	4.785	8.469	13.425	5.102	9.175	5.712	21.507	4.837	7.54	4.861			0.409394	7.02425
7.3868	3.8956	3.3368	4.224	3.4931	5.3527	9.4009	4.6	7.565	14.01	5.426	8.482	5.91	24.351	4.867	8.34	5.555			0.416109	7.42557
7.5059	4.3291	3.4251	3.6806	3.4663	5.004	11.263	4.362	6.401	13.87	5.294	9.918	6.034	23.042	4.489	6.149	5.852			0.422818	7.28619
7.625	4.4325	3.5504	3.1978	3.2499	4.7415	12.2007	4.719	6.169	16.365	5.398	12.279	6.296	24.033	5.238	5.992	6.579			0.429527	7.77755
7.7442	4.3223	3.3948	4.0865	3.4361	4.6564	13.08	4.295	6.147	17.079	5.585	11.427	6.411	23.196	5.561	6.021	6.404			0.436241	7.81888
7.8633	4.738	2.7907	3.3699	3.243	4.8542	14.2242	4.002	6.516	17.456	4.403	11.607	6.383	24.802	5.069	5.936	7.617			0.44295	7.93819
7.9825	3.9642	2.6193	3.5416	3.2279	4.7137	14.5118	4.049	7.291	19.775	4.523	12.578	5.62	26.715	4.847	6.082	7.943			0.449665	8.25009
8.1016	3.2876	3.3453	3.3657	3.3561	4.873	12.7295	4.437	6.593	19.266	5.629	14.183	5.829	27.119	5.661	5.682	7.733			0.456374	8.31808
8.2207	3.838	2.5056	3.3481	3.2586	4.1299	11.7676	4.294	6.016	19.108	5.021	14.358	5.268	28.102	6.186	6.085	8.282			0.463083	8.22299
8.3399	4.4186	2.014	3.8572	3.4422	4.163	11.3021	4.392	6.368	21.61	5.362	13.846	5.006	28.783	6.711	5.42	8.601			0.469798	8.45601
8.459	4.1384	2.1983	4.3283	3.2061	3.8064	9.1545	4.913	6.29	22.665	5.021	15.044	4.466	30.166	6.292	6.472	9.024			0.476507	8.57406
8.5782	4.4156	2.5107	3.5335	3.2936	3.6165	9.6586	4.959	4.713	24.378	5.455	16.177	4.289	32.153	6.342	5.414	9.84			0.483222	8.79678
8.6973	3.7718	2.5107	3.5602	3.1518	4.106	9.5011	4.218	5.967	24.198	4.561	17.979	5.021	35.091	7.152	5.692	10.81			0.489931	9.20566
8.8165	4.0958	2.2906	3.0404	3.0684	3.8293	8.4048	4.559	5.51	23.042	4.826	20.696	5.599	38.348	6.486	5.63	13.173			0.496645	9.53739
8.9356	4.043	2.2066	3.2465	3.6402	3.3576	9.6043	4.466	4.683	22.562	4.76	23.509	4.814	38.355	5.972	5.954	16.299			0.503355	9.84201
9.0547	4.0472	2.6377	3.7268	3.9429	3.7787	10.2282	4.797	4.324	21.145	5.178	28.668	4.079	35.188	6.777	5.901	20.307			0.510064	10.2953
9.1739	3.5534	3.1315	4.0385	3.2847	3.7961	9.7756	4.452	4.079	22.84	4.809	34.038	4.286	32.654	7.03	5.435	24.87			0.516778	10.7546
9.293	3.6455	2.8193	3.7952	3.49	4.2622	8.9632	4.885	4.34	20.688	4.14	33.142	4.592	29.101	6.811	4.864	33.102			0.523487	10.79
9.4122	4.1824	2.7548	2.93	2.4811	3.76	10.2303	4.834	4.427	22.151	4.793	35.766	5.267	27.54	6.05	5.402	40.868			0.530202	11.4648
9.5313	4.1501	2.1673	3.0173	2.7351	3.6925	8.7223	4.802	4.074	20.932	4.381	35.784	4.17	28.46	6.412	5.793	55.615			0.536911	12.1817
9.6504	4.2266	2.2612	2.8704	3.6456	3.4291	9.0876	4.256	4.227	22.068	4.912	38.697	4.114	27.614	6.612	5.54	65.23			0.54362	13.0494
9.7696	3.6498	2.0718	3.3317	3.4981	3.4606	8.3324	4.583	3.927	22.021	5.147	37.905	4.761	27.135	6.806	5.188	74.277			0.550335	13.5059
9.8887	3.5051	2.3697	3.08	3.5388	3.9501	9.3954	4.415	5.297	22.002	4.927	37.412	4.49	26.457	5.877	4.856	76.338			0.557044	13.6194
10.0079	3.9924	1.9311	3.31	4.7234	4.5234	9.2515	4.926	4.482	22.798	5.551	32.936	5.056	25.847	6.219	4.912	72.414			0.563759	13.3045
10.127	3.9221	2.081	3.211	4.8594	3.1515	9.282	6.17	4.676	20.943	6.053	32.167	4.775	25.153	6.468	4.731	75.491			0.570468	13.3209
10.2462	4.2091	2.3497	2.8628	4.3917	4.2579	9.4231	5.673	4.65	19.071	5.771	27.378	5.188	23.136	7.061	4.769	77.951			0.577182	13.0089
10.3653	3.6042	2.8049	2.8527	5.6533	4.2347	7.8185	5.563	4.029	20.002	5.486	22.85	5.111	21.63	7.118	4.95	72.787			0.583891	12.2809
10.4844	3.5399	1.9705	3.3287	4.9365	3.6438	8.5616	5.476	4.02	21.034	6.757	22.679	4.327	20.475	6.391	4.791	69.616			0.590601	11.9717
10.6036	3.9378	2.029	2.8183	4.2254	3.7075	8.1966	5.365	4.349	18.41	6.674	25.049	4.865	17.969	6.41	4.938	62.494			0.597315	11.3398
10.7227	3.6642	1.7826	2.7494	4.7047	3.6717	8.1398	5.369	4.562	22.753	7.476	27.059	4.887	18.048	6.105	4.799	50.226			0.604024	10.9998
10.8419	3.5426	2.4991	3.4524	5.1616	2.5814	8.9957	5.256	4.259	20.632	5.942	25.574	4.623	17.789	7.462	4.147	39.278			0.610739	10.0747
10.961	3.4765	2.2692	2.9584	4.9779	3.169	10.5992	6.35	3.966	21.128	6.155	24.927	4.865	17.99	8.856	4.426	31.745			0.617448	9.86614
11.0801	3.521	2.3394	3.2422	5.2136	2.8068	9.5236	6.266	4.735	21.257	6.558	25.027	5.019	15.638	7.431	4.307	24.435			0.624157	9.20748
11.1993	4.1156	1.8551	3.0339	5.1826	3.0224	9.1906	6.523	5.026	22.135	7.255	24.709	4.768	15.68	8.257	4.721	19.305			0.630872	9.0487
11.3184	3.8655	1.8412	2.7201	5.6719	3.3364	10.285	6.75	4.642	25.082	7.817	25.829	5.079	15.478	8.048	4.971	14.801			0.637581	9.13857
11.4376	3.9283	1.8376	2.8051	5.4976	3.7851	10.3542	6.464	4.371	22.39	7.97	25.326	4.907	14.993	8.304	4.25	11.264			0.644296	8.65293
11.5567	3.8324	2.1377	2.615	4.7871	2.5534	10.2907	7.128	5.057	23.047	7.741	25.971	5.616	13.876	8.487	4.327	10.636			0.651005	8.63139
11.6758	3.6176	2.1059	2.8916	5.2969	3.2455	9.6765	7.16	5.361	21.893	7.221	27.199	5.29	14.498	7.454	4.475	9.881			0.657714	8.57912
11.795	3.773	1.9156	3.6384	6.1301	3.5797	10.199	6.645	3.978	21.655	7.815	26.491	4.973	12.661	8.166	5.023	8.941			0.664428	8.47399
11.9141	3.6258	2.3982	2.683	5.6046	3.0194	9.3398	8.008	5.481	19.795	8.156	27.332	4.791	12.815	9.069	4.626	8.891			0.671137	8.47718
12.0333	3.7106	2.0905	2.5265	6.8173	3.5215	10.4876	7.533	5.98	21.95	8.564	28.145	4.489	13.19	9.728	5.034	9.105			0.677852	8.9295
12.1524	3.9877	2.5773	3.0079	5.8556	3.5586	10.3104	7.038	4.613	22.775	8.213	25.751	4.963	12.58	10.287	4.674	8.57			0.684561	8.67259
12.2716	3.8891	2.2035	2.7379	7.2165	3.0793	9.8679	8.692	4.74	22.232	8.783	25.531	5.57	12.43	10.368	4.149	6.998			0.691276	8.65545
12.3907	3.4128	2.4454	2.8988	6.5441	3.1046	9.1014	9.419	4.284	21.341	9.547	24.96	5.108	12.093	10.075	4.812	7.062			0.697985	8.51301
12.5098	3.1304	2.1074	2.7242	7.1043	3.1588	8.9472	8.437	5.325	21.462	9.006	25.896	6.333	11.55	9.87	4.438	6.561			0.704694	8.50314
12.629	3.2698	2.0443	2.053	7.9532	3.1581	8.9555	8.444	4.814	20.065	8.567	25.816	5.417	11.257	11.101	4.906	7.127			0.711409	8.43424
12.7481	3.6113	1.8983	2.5162	7.1223	2.6787	9.6596	9.492	4.353	19.779	8.823	27.031	5.055	10.996	9.985	4.549	6.114			0.718118	8.35396
12.8673	4.2575	1.8164	2.4433	8.5492	2.8476	8.8872	8.681	5.988	19.646	9.807	25.836	5.866	11.949	11.289	4.878	6.09			0.724833	8.67695
12.9864	3.8848	2.1839	2.8093	7.9884	4.0071	9.5991	9.294	5.74	18.788	11.65	24.494	5.283	10.862	11.906	4.37	5.2			0.731542	8.62872
13.1055	3.6836	2.0116	2.3116	8.6415	3.9958	8.6908	9.674	4.548	20.203	13.265	24.584	5.071	9.934	10.978	4.465	5.193			0.738251	8.57812
13.2247	3.6142	2.2536	2.3185	8.1207	3.7067	8.7575	9.379	5.439	20.692	11.091	25.359	4.96	10.199	12.427	4.857	5.44			0.744965	8.66339
13.3438	3.8838	1.8721	2.299	8.8175	3.2456	9.8269	9.932	4.761	21.886	11.851	27.862	5.654	9.056	13.811	5.313	5.51			0.751674	9.09881
13.463	4.0479	2.0169	2.9527	8.2386	3.6985	10.6989	10.724	5.834	25.325	12.35	26.312	5.632	8.935	13.768	5.398	5.973			0.758389	9.49403
13.5821	3.6823	2.4145	2.6458	9.7134	4.07	9.1736	11.203	5.718	27.234	13.389	26.603	6.208	9.876	17.651	4.864	5.234			0.765098	9.97998
13.7012	3.2819	2.8383	2.0239	10.0638	4.5118	9.2602	11.638	5.892	32.743	13.384	26.726	6.947	10.582	18.54	5.064	5.7			0.771807	10.5747
13.8204	4.0371	2.6024	2.2827	11.5414	4.6888	9.5705	11.334	5.455	33.957	12.931	23.341	6.729	10.275	19.695	6.439	5.351			0.778522	10.6394
13.9395	3.9209	2.0609	2.1871	12.5234	4.583	9.9989	11.183	6.537	36.564	13.294	23.141	6.918	9.399	21.384	5.011	5.055			0.785231	10.86
14.0587	4.6006	2.3274	2.2932	13.9755	5.8349	10.2554	12.883	7.147	38.441	15.067	21.115	7	9.439	23.056	5.064	5.262			0.791946	11.4851
14.1778	3.5733	2.4862	2.6647	15.3316	5.493	11.8915	12.975	8.722	40.354	15.951	21.053	7.888	10.001	26.124	5.24	5.209			0.798655	12.1848
14.297	3.826	2.6115	2.7517	17.0784	5.8205	11.9532	12.883	9.237	42.702	18.511	19.943	8.651	10.3	27.891	5.682	5.161			0.80537	12.8126
14.4161	3.7943	2.6027	3.3796	17.1707	6.8524	11.8645	12.118	13.819	45.1	19.046	22.139	9.282	9.486	27.901	5.56	5.084			0.812079	13.45
14.5352	3.5402	2.8036	2.6092	18.7214	7.8712	13.611	13.255	20.204	47.228	21.656	23.74	10.499	9.665	28.189	5.695	4.46			0.818788	14.6092
14.6544	3.9212	2.0609	2.7385	18.4151	9.4728	15.4085	15.071	28.698	52.454	24.451	26.516	11.954	10.501	26.857	5.462	6.174			0.825502	16.2597
14.7735	4.2868	2.7033	3.2765	19.13	11.2876	18.6748	17.536	41.739	57.209	30.091	32.556	13.502	9.241	25.163	5.085	5.562			0.832211	18.5652
14.8927	4.4002	2.3346	3.2908	20.3938	13.2833	18.2832	21.906	56.973	61.759	33.444	37.504	15.484	9.541	23.414	5.189	5.742			0.838926	20.8089
15.0118	4.1973	2.2925	3.504	20.8463	14.4472	19.5394	29.323	74.536	71.365	42.263	44.203	17.691	10.379	22.769	4.832	5.929			0.845635	24.2573
15.1309	4.5071	2.8322	3.5454	24.2094	18.1342	20.9654	36.771	87.905	82.786	58.014	46.965	21.33	10.431	23.29	5.336	5.23			0.852344	28.2657
15.2501	5.1889	3.0002	4.019	28.1934	23.7544	24.5396	43.222	104.073	91.747	73.527	43.172	25.228	10.306	23.975	5.163	4.434			0.859059	32.0964
15.3692	5.2381	2.7035	4.7763	28.9385	25.7556	26.6858	51.322	104.521	106.536	81.769	35.911	32.552	10.942	23.762	5.21	5.278			0.865768	34.4938
15.4884	5.7389	3.1729	5.4725	26.6671	28.2036	28.8322	61.727	96.25	110.839	84.114	29.349	42.958	11.754	24.785	5.172	6.3			0.872483	35.7084
15.6075	5.9202	3.455	5.8347	30.3404	29.2309	28.9915	61.253	72.662	107.181	78.779	26.011	48.586	12.863	26.913	4.3	5.103			0.879192	34.214
15.7266	5.1368	3.7655	6.6668	30.5007	28.152	25.1848	51.266	51.136	81.344	66.442	22.809	59.025	14.134	30.506	5.048	5.051			0.885901	30.3855
15.8458	6.0384	3.9263	7.4324	31.327	23.3934	18.1625	40.658	24.294	48.831	49.668	21.711	69.221	16.22	31.759	4.343	5.709			0.892616	25.1684
15.9649	5.3434	4.2466	9.2517	28.3161	19.6892	12.3972	24.678	11.926	25.207	29.669	18.679	79.355	20.002	34.167	5.408	5.415			0.899325	20.8594
16.0841	6.3191	4.348	10.1977	20.6518	12.9688	8.2886	12.418	9.102	14.44	16.844	14.257	81.231	26.604	34.756	6.594	5.259			0.906039	17.7674
16.2032	6.4666	5.3837	8.9923	16.0539	8.9429	6.5992	6.774	6.536	11.177	12.503	12.738	79.321	31.774	39.491	7.213	5.485			0.912748	16.5907
16.3224	6.6577	3.941	9.8557	10.1994	6.1319	5.2298	5.072	4.097	8.044	10.455	9.472	64.633	35.499	42.672	9.022	6.064			0.919463	14.8153
16.4415	6.7348	4.417	10.835	5.9053	3.9913	3.6629	3.559	3.01	4.555	8.298	7.105	48.787	42.575	47.964	11.408	5.208			0.926172	13.626
16.5606	6.0897	4.0615	10.8991	4.1776	3.9314	3.1681	2.911	2.178	3.387	5.212	5.613	37.13	48.144	56.724	13.85	5.845			0.932881	13.3326
16.6798	6.9797	4.5613	6.775	3.5516	3.1019	2.7893	2.045	1.749	2.866	3.452	5.559	27.677	58.453	69.188	17.162	6.251			0.939596	13.885
16.7989	6.4799	3.9172	4.4584	2.6534	2.9723	1.8179	1.741	1.294	2.379	2.84	4.171	20.593	65.658	80.601	22.513	6.125			0.946305	14.3884
16.9181	5.263	3.5744	3.5007	2.6997	2.5851	1.9143	1.482	1.432	1.726	2.554	2.863	12.538	64.003	98.872	25.409	6.209			0.95302	14.7891
17.0372	5.7646	3.2759	3.5081	2.0057	1.7236	1.5551	0.909	1.061	1.66	2.279	2.645	8.692	57.693	113.6	31.791	5.769			0.959729	15.2457
17.1563	4.8995	2.0264	2.7509	1.8281	1.1113	0.9134	1.312	0.841	1.293	2.031	2.269	6.243	50.499	121.176	36.124	5.844			0.966438	15.0726
17.2755	4.2301	1.8805	3.1479	1.4529	1.5832	1.3581	1.093	0.704	0.939	1.631	2.02	4.176	37.788	119.819	41.733	5.299			0.973152	14.3034
17.3946	3.8017	1.8112	2.4386	1.8969	0.9914	1.3474	0.822	0.492	0.914	1.557	1.888	3.706	24.699	109.58	47.012	6.867			0.979862	13.114
17.5138	3.5039	1.8227	2.2226	1.4151	0.9468	0.913	0.799	0.533	0.766	1.602	1.434	3.412	15.435	98.175	48.902	6.754			0.986576	11.7898
17.6329	2.915	1.5053	1.8985	1.136	0.8805	0.6639	0.784	0.548	0.791	1.108	1.203	2.711	10.384	84.037	53.116	7.425			0.993285	10.6941
17.7521	2.6905	1.47	2.017	1.0613	0.6332	0.7569	0.565	0.571	0.456	1.246	0.723	2.35	6.352	65.575	55.802	7.314			1	9.34893

## Sheet: Ima1
X0	Y0	Y1	Y2	Y3	Y4	Y5	Y6	Y7	Y8	Y9	Y10	Y11	Y12	Y13	Y14	Y15	Y16			Ap-Ba	Avegrage int
0	56.671	55.098	105.233	115.559	92.544	84.777	129.615	145.633	84.645	80.829	76.344	111.62	64.694	88.299	81.699	66.522	42.6246			0	87.2004
0.1191	73.874	62.623	111.645	123.538	95.059	87.214	144.564	149.725	101.215	78.213	87.092	131.281	79.097	81.166	88.46	65.83	44.8448			0.00666435	94.4377
0.2383	94.654	66.842	116.887	123.975	100.396	95.504	159.585	150.93	116.745	79.091	94.83	151.601	91.195	87.054	92.075	70.874	46.1788			0.0133343	102.26
0.3574	119.885	76.038	116.257	123.981	101.98	100.817	168.762	159.759	133.877	80.148	100.162	155.86	107.216	88.836	103.387	71.818	48.4546			0.0199987	109.249
0.4766	131.519	87.105	115.075	122.904	107.232	108.621	179.93	172.325	150.74	85.507	109.762	158.682	124.518	95.382	106.554	79.436	47.8747			0.0266686	116.657
0.5957	139.51	95.185	113.238	124.35	111.153	112.38	185.436	182.816	158.591	91.87	119.17	148.268	141.144	108.819	111.269	84.942	49.939			0.033333	122.24
0.7148	148.85	104.346	110.974	126.803	107.435	129.219	191.42	185.916	173.648	99.294	129.422	131.443	155.393	108.921	112.031	91.67	51.8486			0.0399973	126.978
0.834	151.046	113.636	114.942	133.795	114.789	152.641	200.149	186.266	181.877	121.373	142.399	115.611	164.711	124.307	112.925	98.427	52.247			0.0466673	134.185
0.9531	142.791	114.183	117.949	135.478	121.715	175.185	211.444	182.757	190.992	139.365	154.244	96.801	161.609	129.028	113.845	109.949	53.3208			0.0533316	138.274
1.0723	134.558	116.867	119.853	137.301	124.873	202.971	219.568	186.421	200.189	153.293	158.624	81.494	164.733	132.318	112.761	121.433	55.5151			0.0600016	142.516
1.1914	121.328	114.658	120.245	143.751	131.759	223.136	225.807	183.698	203.987	160.628	170.637	75.479	160.867	130.277	113.916	126.57	54.4555			0.0666659	144.776
1.3106	104.505	118.608	128.059	134.952	142.591	238.904	237.339	185.838	211.935	170.965	179.681	69.777	152.011	130.795	117.61	126.031	54.0248			0.0733359	147.272
1.4297	97.697	113.41	132.654	130.38	148.261	245.137	242.471	178.597	210.441	174.73	176.573	66.988	143.217	132.965	118.679	129.861	60.4821			0.0800002	147.208
1.5488	84.933	110.396	134.568	127.884	153.966	239.273	245.691	178.914	213.374	177.772	179.724	68.481	137.176	131.406	119.288	130.725	61.9727			0.0866646	146.797
1.668	73.468	101.096	125.566	129.619	167.002	225.035	245.73	177.788	210.489	182.352	176.852	69.245	135.177	135.489	122.13	130.376	67.632			0.0933345	145.591
1.7871	69.044	95.572	130.967	135.621	170.315	200.478	235.553	176.949	205.174	188.107	177.681	65.391	127.24	124.874	122.165	124.534	69.4552			0.0999989	142.301
1.9063	63.984	89.182	130.92	139.598	183.778	177.22	218.362	187.217	192.932	189.703	179.166	67.875	121.717	120.648	124.884	119.081	67.2579			0.106669	139.619
2.0254	58.165	82.438	134.222	138.017	196.068	159.52	193.078	181.103	182.074	184.064	169.047	71.035	109.331	114.542	124.908	118.397	67.7671			0.113333	134.34
2.1445	58.833	75.552	132.342	133.805	197.491	147.845	163.699	181.407	173.538	186.438	160.792	75.886	110.84	112.304	127.456	108.45	69.0438			0.119998	130.337
2.2637	54.291	79.7	129.718	131.252	207.023	144.266	139.91	189.259	157.327	187.421	147.652	81.228	104.437	104.447	131.013	100.694	68.1695			0.126667	126.93
2.3828	49.617	79.306	136.39	128.005	212.591	130.361	120.635	188.774	148.537	187.476	135.434	85.048	105.978	101.935	125.232	88.684	65.8901			0.133332	122.935
2.502	46.057	81.286	142.043	129.952	215.11	126.581	104.207	195.843	142.464	187.741	128.851	89.253	101.683	102.425	124.4	80.012	65.1119			0.140002	121.354
2.6211	42.29	84.788	139.164	130.863	220.919	119.221	89.356	202.515	134.739	189.283	127.774	91.209	102.432	101.731	126.179	72.276	56.1773			0.146666	119.466
2.7402	34.261	79.002	140.601	130.728	218.917	107.922	77.816	207.667	128.726	196.15	120.722	97.707	102.93	91.709	117.678	66.944	46.1919			0.15333	115.628
2.8594	30.373	84.095	156.255	135.779	226.322	102.012	72.931	212.987	124.998	200.04	117.551	104.244	105.594	90.863	118.35	60.313	36.1876			0.16	116.406
2.9785	27.78	86.223	169.901	139.258	223.766	96.735	67.739	207.273	124.652	196.801	117.153	108.359	108.076	85.041	116.864	54.437	28.563			0.166665	115.213
3.0977	25.718	89.717	183.381	153.348	223.493	82.895	63.457	204.951	124.729	193.134	115.181	112.796	103.358	82.134	112.562	48.629	22.5355			0.173335	114.236
3.2168	26.279	92.509	200.106	164.311	217.587	80.494	61.658	202.57	130.543	184.971	108.804	117.41	102.839	66.039	108.93	40.41	20.7024			0.179999	113.304
3.336	24.915	96.11	210.554	172.456	212.076	78.085	61.79	203.057	123.353	170.735	95.678	119.026	106.474	58.328	102.698	29.122	18.2508			0.186669	110.748
3.4551	25.431	100.129	215.055	182.743	202.407	76.463	59.775	199.306	113.881	156.184	91.318	117.213	99.435	49.727	95.952	20.852	18.5974			0.193333	107.322
3.5742	24.132	103.304	216.573	198.467	195.699	75.164	52.909	185.542	107.611	137.222	82.229	120.662	97.327	46.438	84.696	15.335	15.9074			0.199998	103.483
3.6934	22.66	110.568	210.781	204.818	186.116	72.986	51.11	162.539	94.218	111.362	72.771	125.059	94.919	41.024	74.042	10.134	16.21			0.206668	97.7245
3.8125	21.995	111.015	195.738	196.574	182.721	73.316	51.414	131.872	80.582	96.219	61.091	135.956	86.505	34.383	58.889	8.472	15.2605			0.213332	90.706
3.9317	22.958	108.314	172.675	186.456	177.056	72.206	50.525	99.664	67.338	86.159	48.781	133.186	86.054	27.246	47.431	7.214	13.8482			0.220002	82.7712
4.0508	21.639	106.711	146.541	165.246	173.247	69.922	48.329	83.299	63.31	72.449	39.984	139.631	76.531	25.89	35.24	6.832	14.2898			0.226666	75.8289
4.1699	20.291	103.384	109.934	144.448	170.733	71.822	47.95	64.118	52.327	65.539	35.004	140.761	65.873	22.715	26.318	6.471	15.1657			0.233331	68.4032
4.2891	21.27	103.669	83.842	125.215	156.403	68.701	47.638	53.754	43.11	60.12	29.563	139.471	55.21	19.913	23.084	6.045	13.3627			0.240001	61.7865
4.4082	22.472	96.076	75.711	113.385	152.013	66.559	44.585	43.3	39.329	56.83	25.812	141.185	48.375	17.846	20.46	5.128	11.512			0.246665	57.6811
4.5274	23.863	92.692	71.708	97.168	141.56	58.674	40.703	33.707	39.146	51.272	20.241	136.585	42.507	15.561	18.088	5.082	11.1565			0.253335	52.9243
4.6465	24.771	86.678	60.191	86.056	135.487	54.62	36.266	28.026	34.196	41.366	17.859	124.165	37.542	15.642	16.064	5.129	10.7619			0.259999	47.9306
4.7657	24.557	82.977	53.582	70.568	128.188	49.516	32.984	26.67	31.884	36.341	14.33	110.745	31.188	14.034	15.953	5.867	10.8229			0.266669	43.5416
4.8848	26.471	75.696	47.433	60.307	113.815	44.155	28.579	23.056	25.236	31.524	12.995	96.396	30.102	11.866	15.087	4.887	11.8859			0.273334	38.7936
5.0039	27.884	64.386	44.229	50.861	94.221	43.081	24.896	19.74	22.469	26.17	11.954	83.88	26.45	10.405	16.781	4.584	11.7162			0.279998	34.3357
5.1231	30.354	56.037	42.163	46.286	82.809	39.468	21.658	16.668	21.092	22.209	11.274	77.751	22.223	8.95	15.471	4.849	10.6129			0.286668	31.1691
5.2422	30.182	52.509	35.754	39.338	71.025	38.976	18.656	15.824	17.779	20.329	8.585	71.421	20.9	8.011	17.047	4.567	9.7824			0.293332	28.2756
5.3614	31.201	50.823	30.78	34.889	60.093	35.723	15.787	14.925	15.799	19.498	8.816	59.423	17.272	6.376	16.689	4.404	9.9568			0.300002	25.4385
5.4805	34.228	41.29	30.541	30.148	55.351	31.23	14.498	13.862	15.031	19.393	7.307	54.893	17.022	5.904	16.744	3.979	9.7728			0.306667	23.5996
5.5996	34.59	36.949	24.948	31.262	47.663	31.065	14.269	14.787	14.196	17.762	7.566	47.604	14.692	6.249	16.572	3.725	8.2281			0.313331	21.8898
5.7188	34.591	32.826	21.34	30.274	35.702	27.462	14.659	13.717	8.969	17.959	6.694	39.831	13.973	6.905	16.38	4.412	7.5902			0.320001	19.605
5.8379	34.054	29.773	18.252	28.123	25.365	25.706	12.788	12.904	6.878	16.355	5.974	34.138	12.576	6.31	13.727	4.035	7.5716			0.326665	17.3253
5.9571	30.286	27.095	14.255	28.875	18.89	23.632	11.132	14.478	5.377	16.248	4.938	26.939	12.24	6.418	12.865	3.13	6.9491			0.333335	15.5145
6.0762	31.996	25.176	9.659	30.559	15.743	18.299	10.895	13.202	5.582	14.577	5.192	23.497	12.044	5.658	15.56	2.613	6.4261			0.34	14.5105
6.1953	31.194	20.993	8.779	28.659	14.313	15.281	9.796	12.405	4.739	14.582	4.96	20.805	9.681	5.127	14.423	3.019	6.4089			0.346664	13.245
6.3145	29.762	20.995	8.058	27.056	13.271	12.551	8.912	11.914	4.605	13.328	5.284	17.511	8.117	4.64	13.043	3.234	6.2319			0.353334	12.2655
6.4336	27.181	19.017	9.093	21.789	12.459	10.893	8.776	14.238	4.085	13.257	5.581	16.907	7.335	5.053	13.742	3.111	6.2661			0.359998	11.6931
6.5528	26.009	17.082	9.321	19.351	11.29	9.424	9.916	11.92	4.059	12.743	5.675	13.929	6.211	4.67	14.4	3.081	6.2095			0.366668	10.8994
6.6719	23.778	17.791	8.767	17.194	11.287	9.001	7.766	11.968	4.389	13.307	4.801	15.227	6.083	4.432	15.225	2.707	5.8675			0.373333	10.5641
6.7911	21.565	18.139	8.37	18.505	12.061	9.039	8.527	11.099	4.163	12.187	4.431	15.406	5.593	4.761	15.782	2.554	5.5394			0.380002	10.4542
6.9102	18.822	15.462	8.628	21.883	10.511	9.777	7.522	13.313	4.657	13.841	5.856	14.983	5.465	4.435	15.134	3.053	4.8712			0.386667	10.4831
7.0293	16.616	15.153	7.574	25.617	10.202	9.016	8.931	13.704	4.684	12.804	5.012	12.995	5.497	4.282	15.135	2.793	4.3732			0.393331	10.2581
7.1485	14.093	18.579	8.57	23.893	9.479	7.986	8.863	12.984	4.898	12.19	4.009	13.255	5.479	4.035	16.07	2.812	5.9053			0.400001	10.1824
7.2676	12.089	17.811	9.631	21.738	9.34	8.318	9.462	14.347	4.789	11.949	4.433	14.263	5.783	4.234	15.654	2.78	5.4651			0.406665	10.1227
7.3868	10.513	15.783	10.932	21.911	9.876	7.393	9.893	14.236	4.64	12.077	4.076	14.188	5.961	4.179	16.54	2.718	5.9696			0.413335	10.0521
7.5059	11.712	16.364	8.577	21.763	9.44	7.602	11.217	15.496	5.079	13.373	4.917	13.819	5.826	4.053	16.127	2.992	6.675			0.42	10.296
7.625	10.967	17.024	8.185	20.664	9.725	8.118	13.6	14.54	4.181	12.457	4.62	13.933	6.003	3.257	17.427	2.778	5.1768			0.426664	10.1562
7.7442	11.057	14.927	8.448	23.769	10.49	7.236	12.89	11.435	4.61	12.914	5.091	13.85	6.62	3.476	17.925	2.547	5.5592			0.433334	10.1673
7.8633	10.303	15.417	8.244	27.138	9.875	6.795	13.751	11.982	5.283	13.61	5.176	12.661	6.357	3.819	18.259	2.452	5.3798			0.439998	10.3825
7.9825	9.976	18.198	8.069	30.171	10.091	7.278	14.32	12.219	4.867	14.229	5.066	12.072	6.201	4.155	18.857	2.728	6.0057			0.446668	10.8531
8.1016	10.431	20.644	9.899	28.211	10.289	7.765	15.523	12.257	4.663	13.062	4.887	12.686	7.475	3.805	19.785	2.912	5.5629			0.453333	11.1681
8.2207	11.21	21.272	9.753	27.536	10.842	6.627	18.481	14.48	5.772	13.525	5.796	12.596	6.833	4.244	20.966	2.329	6.7878			0.459997	11.7088
8.3399	12.522	21.165	9.79	27.598	10.412	7.051	19.599	12.9	5.282	14.627	5.422	11.336	7.036	3.81	17.096	2.407	5.8761			0.466667	11.4076
8.459	12.834	21.361	9.23	29.796	10.859	7.381	21.381	11.248	5.918	16.569	4.755	11.871	7.053	3.787	17.982	2.349	5.6687			0.473331	11.7672
8.5782	12.701	19.889	10.866	27.601	10.75	7.354	20.488	10.554	5.983	15.784	4.338	10.575	6.743	3.889	23.371	2.785	5.9441			0.480001	11.7421
8.6973	12.407	19.134	9.547	25.062	11.264	7.777	18.207	9.16	6.102	17.159	3.96	11.253	7.058	3.723	24.363	2.366	5.3821			0.486666	11.4073
8.8165	13.034	19.623	9.669	23.191	11.456	7.81	18.807	7.886	6.066	17.396	4.935	11.409	7.227	3.749	31.732	2.415	4.817			0.493336	11.8366
8.9356	13.097	18.506	8.991	23.175	12.942	6.145	21.232	7.165	6.892	14.342	5.116	11.206	7.667	3.933	35.755	2.064	4.9547			0.5	11.9519
9.0547	11.563	16.885	10.131	27.238	13.744	6.367	25.616	5.773	6.865	14.157	5.626	11.781	7.141	3.983	36.075	2.264	4.4132			0.506664	12.3307
9.1739	12.982	14.753	9.493	29.488	14.834	6.853	27.093	6.101	7.28	15.359	5.72	12.044	7.777	3.753	41.694	2.129	5.1787			0.513334	13.0901
9.293	11.693	12.398	8.598	33.532	14.505	7.577	28.714	6.107	6.563	15.553	5.955	11.334	7.881	3.385	43.308	2.571	4.6613			0.519999	13.1962
9.4122	11.567	12.443	8.35	31.63	15.783	8.554	25.505	5.203	7.965	15.881	5.907	11.43	8.47	4.547	45.324	2.45	4.4299			0.526669	13.2611
9.5313	12.215	11.737	6.211	28.918	15.598	7.227	25.04	5.361	8.638	16.048	5.793	10.43	10.576	3.501	41.326	2.538	4.2624			0.533333	12.6717
9.6504	11.54	10.632	5.709	28.407	15.043	7.199	24.245	5.304	7.589	15.395	5.944	13.33	10.524	3.654	39.388	2.394	5.2009			0.539997	12.4411
9.7696	11.249	8.724	5.323	23.919	15.001	8.75	26.376	5.227	7.424	16.109	5.639	11.953	10.989	3.809	35.011	2.606	4.4972			0.546667	11.918
9.8887	14.545	7.949	4.769	22.202	15.238	8.11	26.925	5.535	7.245	17.343	4.942	11.413	12.233	3.924	33.257	2.293	4.4247			0.553332	11.9028
10.0079	16.972	7.748	5.294	21.483	15.779	8.712	29.576	4.556	6.545	17.639	5.555	13.033	13.458	4.316	30.4	2.199	4.4729			0.560002	12.2199
10.127	17.622	6.329	4.664	18.866	16.746	10.208	31.018	4.491	6.104	18.342	5.807	14.584	15.629	4.214	29.226	2.776	3.9793			0.566666	12.3885
10.2462	17.253	5.993	5.118	17.972	16.105	8.887	29.892	4.35	5.883	18.487	4.678	15	18.948	3.915	29.348	3.093	3.9849			0.573336	12.2886
10.3653	18.784	6.069	6.041	16.847	16.379	10.282	29.605	5.429	6.09	17.146	4.803	17.057	20.699	4.247	31.423	2.706	4.0824			0.58	12.8053
10.4844	19.26	5.606	4.6	15.314	15.522	9.201	30.316	4.377	5.788	18.195	4.394	20.404	22.928	3.804	34.175	2.676	3.3248			0.586665	12.9344
10.6036	19.009	4.475	5.387	14.88	17.903	9.345	30.9	4.196	5.259	19.358	4.684	23.271	25.275	3.489	31.742	2.543	3.0654			0.593335	13.2224
10.7227	21.348	4.679	4.606	15.007	15.944	11.119	28.956	4.26	5.607	19.786	4.891	27.303	28.238	4.417	31.315	2.931	3.712			0.599999	13.7717
10.8419	20.231	4.337	4.89	14.153	15.315	10.79	25.403	4.649	4.95	19.258	5.052	28.702	29.993	5.191	27.981	2.745	3.9617			0.606669	13.3883
10.961	20.971	4.403	4.878	15.837	15.136	14.077	21.814	4.208	4.918	19.918	4.753	30.904	27.212	4.569	26.39	2.841	3.3753			0.613333	13.3061
11.0801	22.837	4.505	4.638	17.992	17.556	15.873	18.951	3.409	5.53	19.473	4.57	30.943	26.634	4.322	29.373	2.882	3.5939			0.619998	13.7107
11.1993	23.23	4.05	4.744	16.002	18.373	20.321	19.145	3.66	6.298	19.015	4.776	29.777	24.87	4.322	24.912	2.839	3.5471			0.626667	13.5224
11.3184	21.338	3.743	5.24	15.282	19.686	21.954	18.933	3.704	5.794	19.183	5.608	25.795	23.08	4.661	26.004	2.417	3.823			0.633332	13.3085
11.4376	20.067	3.934	5.857	15.252	20.31	24.056	18.684	5.193	5.819	18.851	6.034	23.672	23.046	5.114	26.312	2.471	4.459			0.640002	13.4783
11.5567	17.714	4.209	5.409	13.937	22.919	24.873	16.078	3.849	5.03	18.831	5.319	20.028	23.583	4.657	25.146	2.648	3.6736			0.646666	12.8179
11.6758	18.05	4.235	5.023	14.736	24.201	25.697	17.882	3.111	5.697	17.222	5.209	18.649	22.702	4.935	22.626	2.8	3.9873			0.65333	12.7507
11.795	19.001	4.169	5.177	14.747	28.394	27.075	17.249	4.175	5.213	16.631	5.525	20.867	24.521	5.198	20.727	3.329	2.6694			0.66	13.2157
11.9141	16.286	4.49	5.167	17.246	30.25	28.983	15.372	4.175	5.123	18.055	5.62	20.124	22.466	5.757	21.909	2.928	3.419			0.666665	13.3747
12.0333	16.372	3.828	5.75	15.714	34.36	28.164	15.031	3.708	5.179	16.122	5.532	21.619	20.016	5.545	23.715	3.012	3.6347			0.673335	13.3707
12.1524	14.903	4.317	5.828	15.097	38.153	28.594	16.149	3.515	5.857	16.932	6.014	21.149	16.436	5.847	25.588	3.167	2.9461			0.679999	13.5584
12.2716	14.583	3.828	5.813	16.51	39.797	29.783	15.631	3.439	5.597	15.838	6.592	22.077	16.193	5.352	28.563	3.342	3.5235			0.686669	13.9095
12.3907	13.491	3.677	5.289	15.052	39.921	32.856	13.036	3.663	4.311	16.364	5.944	22.619	18.007	5.608	35.048	3.463	3.2851			0.693333	14.2138
12.5098	11.882	3.12	4.954	17.167	40.817	36.208	13	3.91	4.192	16.653	6.062	22.491	19.955	5.178	43.016	2.986	3.1625			0.699998	14.9855
12.629	12.926	2.878	5.932	15.791	44.263	37.387	12.495	2.723	4.306	16.979	6.302	22.295	19.903	4.821	45.858	2.538	3.7342			0.706668	15.3607
12.7481	12.148	3.261	5.878	16.086	43.217	43.928	12.673	2.943	4.082	17.689	7.451	20.659	20.452	5.657	43.911	3.358	3.1843			0.713332	15.681
12.8673	11.329	3.447	5.414	16.633	41.19	47.232	13.144	3.928	4.446	16.923	6.549	17.501	20.32	5.49	36.451	3.452	2.8793			0.720002	15.0781
12.9864	10.41	3.702	5.666	16.312	44.233	52.992	12.322	3.853	4.28	17.343	6.386	17.282	19.692	5.317	31.49	2.801	3.4983			0.726666	15.1517
13.1055	9.807	2.844	5.218	17.748	46.399	59.55	11.235	3.188	4.036	16.8	7.244	15.574	19.802	4.877	28.317	3.243	2.9912			0.733331	15.2278
13.2247	11.494	4.25	5.853	19.378	51.317	60.81	11.908	3.538	4.053	17.642	8.272	13.442	20.335	5.284	25.124	2.825	2.1664			0.740001	15.7466
13.3438	8.788	4.363	5.402	21.27	55.037	61.756	11.462	3.219	3.831	16.329	7.239	13.658	20.123	5.097	24.659	3.341	3.1867			0.746665	15.8095
13.463	6.782	3.437	5.509	23.741	54.728	60.241	14.007	3.024	3.203	18.726	6.031	11.658	18.798	3.943	21.576	2.778	3.1305			0.753335	15.3713
13.5821	6.498	3.715	5.578	23.363	55.026	57.942	12.436	3.107	3.538	19.419	7.685	11.851	19.304	3.426	20.778	3.325	2.7053			0.759999	15.2763
13.7012	7.153	4.033	5.347	24.344	59.828	55.9	12.523	3.216	3.444	19.146	9.097	12.761	17.51	3.178	21.407	3.209	3.0428			0.766664	15.5964
13.8204	7.34	4.396	7.021	23.148	63.579	52.403	12.585	3.699	3.698	19.057	8.363	14.097	17.594	4.744	20.382	3.026	2.8889			0.773334	15.7659
13.9395	6.047	4.543	5.754	25.557	65.863	55.392	13.142	3.761	2.922	19.587	8.22	14.327	16.961	4.151	20.341	2.968	3.3706			0.779998	16.0533
14.0587	5.862	4.073	6.042	26.611	70.95	54.794	13.819	3.055	3.381	20.804	9.459	16.477	18.849	4.368	20.005	3.088	2.9774			0.786668	16.742
14.1778	6.592	4.307	6.044	25.911	70.285	54.651	14.676	3.274	3.796	20.857	8.567	16.707	19.617	3.406	21.604	2.928	3.0729			0.793332	16.8409
14.297	6.439	4.644	8.364	29.492	71.963	59.552	15.028	3.384	4.294	20.882	10.116	15.651	19.362	3.846	21.47	3.574	2.4464			0.800002	17.6769
14.4161	6.272	5.648	7.687	32.164	74.264	66.085	15.194	3.342	3.449	21.046	9.731	15.976	19.424	3.534	21.982	4.075	2.9486			0.806667	18.4013
14.5352	6.572	7.316	9.376	35.675	77.091	72.148	13.541	2.653	2.99	20.334	9.536	14.968	21.718	3.938	23.406	2.833	2.4994			0.813331	19.2114
14.6544	9.019	7.404	10.219	38.974	79.076	76.73	13.359	3.709	4.056	22.416	11.399	11.905	23.107	4.629	22.272	3.169	3.0515			0.820001	20.2644
14.7735	11.032	8.188	11.122	40.786	86.876	85.035	12.453	4.128	4.039	23.203	11.598	10.938	23.717	4.013	22.272	3.29	2.7005			0.826665	21.4936
14.8927	12.721	12.278	16.119	44.636	84.232	90.587	14.49	4.931	3.817	25.735	10.035	10.243	28.441	3.746	23.941	3.158	2.6374			0.833335	23.044
15.0118	17.894	13.358	19.589	45.893	79.784	96.689	17.232	4.571	3.599	28.357	12.673	12.105	31.669	3.574	22.848	3.504	3.2821			0.84	24.5071
15.1309	20.491	17.391	25.336	48.268	71.338	96.784	20.465	6.257	3.92	32.911	13.605	11.132	30.284	4.033	24.531	3.172	3.1204			0.846664	25.4728
15.2501	24.7	18.861	34.96	52.4	63.614	97.962	24.281	6.734	4.31	33.164	14.452	11.41	28.863	3.861	24.684	3.524	3.4224			0.853334	26.5413
15.3692	31.295	20.454	38.465	53.928	54.496	97.433	29.403	9.022	4.69	35.71	14.881	10.545	25.996	4.406	22.591	3.871	2.8157			0.859998	27.0589
15.4884	39.897	21.749	36.543	53.135	38.931	82.508	40.611	13.175	4.552	38.117	15.83	11.005	25.286	3.816	22.092	3.842	2.7645			0.866668	26.6973
15.6075	43.889	20.936	32.988	48.619	28.909	67.725	43.62	18.459	5.304	39.748	16.728	10.002	24.831	4.044	18.458	3.918	3.0058			0.873333	25.3638
15.7266	46.312	18.02	23.348	43.748	24.808	57.753	45.735	24.98	5.118	45.699	19.597	11.554	25.307	3.612	16.029	3.885	2.8493			0.879997	24.6091
15.8458	49.304	14.759	16.877	36.04	19.373	42.025	42.228	28.77	6.051	43.708	18.791	11.878	26.38	3.463	17.105	4.379	3.335			0.886667	22.6156
15.9649	46.253	15.054	11.198	28.975	15.039	31.554	36.904	34.334	8.096	44.111	18.93	10.807	26.655	3.944	13.454	4.546	3.1481			0.893331	20.7648
16.0841	41.647	16.189	9.813	21.767	11.115	20.534	30.942	33.415	9.203	43.968	19.426	9.605	26.637	3.58	11.294	4.389	3.0115			0.900001	18.6197
16.2032	42.318	11.531	6.305	16.948	9.302	16.043	25.811	33.964	11.851	44.704	23.311	11.513	26.276	4.2	9.594	5.234	3.8369			0.906665	17.8083
16.3224	42.907	10.74	5.611	12.608	6.594	11.502	18.714	30.25	16.04	47.788	25.557	9.875	26.404	3.706	8.136	5.788	4.889			0.913335	16.8888
16.4415	38.616	7.766	4.433	8.65	5.305	7.843	15.36	20.162	20.488	47.493	27.14	10.743	28.082	4.473	8.233	6.009	5.8763			0.92	15.6866
16.5606	33.408	6.82	5.322	5.801	4.338	6.367	12.169	11.241	26.201	56.028	30.215	10.368	29.622	4.241	8.178	6.275	6.8419			0.926664	15.4962
16.6798	27.825	5.618	4.2	4.971	3.445	4.986	7.178	8.757	28.415	55.597	34.037	9.691	26.783	3.982	8.152	6.541	7.2807			0.933334	14.5564
16.7989	21.425	5.82	3.99	4.677	2.984	4.624	5.127	6.077	31.009	51.105	38.43	9.932	28.816	6.2	8.156	8.016	8.199			0.939998	14.3875
16.9181	16.344	4.68	3.287	3.739	2.111	3.825	4.738	3.663	27.934	50.215	42.975	11.39	28.319	6.438	8.025	10.074	9.4967			0.946668	13.9561
17.0372	12.395	3.479	3.003	3.305	2.023	2.935	3.622	3.113	22.136	44.636	52.336	12.294	28.786	6.017	7.99	10.655	13.5143			0.953333	13.6611
17.1563	8.049	3.2	3.076	3.868	1.932	2.238	2.971	3.303	17.075	42.937	57.464	11.332	29.875	6.197	6.673	12.058	16.9089			0.959997	13.4798
17.2755	6.434	3.652	2.196	3.074	1.337	2.148	2.743	2.935	11.969	34.711	55.209	12.649	32.461	7.543	7.395	15.422	20.0953			0.966667	13.0573
17.3946	5.716	2.696	2.193	2.974	1.488	2.052	2.544	1.877	9.213	24.032	45.423	12.862	27.946	6.799	7.194	20.009	22.5423			0.973331	11.6212
17.5138	5.007	3.377	1.789	2.496	1.306	1.346	2.232	1.777	8.128	16.037	36.932	12.363	29.501	7.117	7.309	23.906	24.5079			0.980001	10.8901
17.6329	3.578	2.735	1.462	2.48	0.931	1.695	1.882	1.187	6.772	10.222	27.664	13.374	29.917	8.614	8.032	31.2	20.308			0.986666	10.1208
17.7521	2.759	2.274	1.525	2.325	1.146	1.079	1.563	1.376	5.098	6.611	19.637	12.386	30.124	8.312	8.092	39.489	16.694			0.993336	9.44059
17.8712	1.927	1.554	1.525	1.851	1.013	0.954	1.392	1.487	4.236	4.681	11.427	13.484	29.032	9.413	8.415	47.132	11.2717			1	8.87028

## Sheet: Image9
X0	Y0	Y1	Y2	Y3	Y4	Y5	Y6	Y7	Y8	Y9	Y10	Y11	Y12	Y13	Y14	Y15	Y16	Y17			Ap-Basal to 1	Average intensities
0	18.8232	20.309	10.654	10.139	15.459	16.2573	30.6808	22.8744	27.355	37.1478	12.3215	12.5384	20.1732	21.9748	32.2812	25.3272	101.221	128.513			0	31.3361
0.1191	19.859	26.185	14.985	11.086	18.661	18.4267	35.7902	24.4377	28.153	35.6362	14.8065	11.7378	18.8243	22.2501	35.1499	28.7821	107.663	132.663			0.0059151	33.6165
0.2383	18.0032	29.858	17.572	14.53	19.379	21.7322	41.2758	28.3437	28.64	37.1844	16.6639	11.986	22.9413	24.1186	41.6906	30.097	121.928	133.814			0.0118352	36.6532
0.3574	23.2098	34.818	24.606	16.157	20.653	19.2856	48.6429	29.4317	38.433	40.2544	14.8729	13.785	23.7674	30.3811	45.1313	34.0438	131.683	136.765			0.0177503	40.3289
0.4766	26.238	43.247	35.092	19.189	23.561	23.4985	57.8223	34.8139	43.946	40.9964	18.3475	14.5169	22.3587	30.85	47.6984	40.0402	153.59	141.717			0.0236703	45.4179
0.5957	26.967	54.794	43.012	25.477	26.227	21.9233	68.1687	36.8353	48.964	44.4078	18.1563	14.7764	22.8296	30.6252	50.1724	41.6367	168.573	141.002			0.0295854	49.1415
0.7148	29.9724	61.204	60.695	30.749	32.07	25.6432	77.4242	40.0286	63.172	48.0585	21.9569	16.1649	26.9905	35.8014	54.4014	44.646	168.706	148.496			0.0355005	54.7878
0.834	28.8847	75.221	78.565	42.338	35.934	30.2206	84.5498	49.2088	69.16	55.0587	23.9751	21.1971	27.5217	37.9653	59.489	51.9796	162.768	149.095			0.0414206	60.174
0.9531	35.6478	82.901	100.117	50.907	43.214	36.9265	91.5439	56.7608	72.955	61.4856	26.7302	19.9351	31.7687	45.3354	62.6592	52.1567	140.714	156.014			0.0473357	64.8762
1.0723	40.2561	98.491	109.35	60.478	56.983	48.1068	91.308	59.5816	82.883	66.8359	33.0499	21.3907	33.2333	49.8376	69.0161	56.8546	130.607	147.871			0.0532558	69.7852
1.1914	48.5094	115.894	134.592	72.599	71.845	62.9014	91.1994	72.0497	89.99	68.9249	38.9664	27.7384	34.4561	51.8843	70.6613	57.1347	120.876	149.199			0.0591709	76.6345
1.3106	56.2413	126.575	145.186	85.298	84.131	74.9958	94.6004	81.3889	98.333	69.5843	40.451	30.3834	35.3926	56.7615	74.8929	61.8764	104.548	148.308			0.065091	81.6082
1.4297	63.3095	137.282	156.822	97.85	103.112	85.7036	86.6117	85.4501	105.405	73.2825	49.5051	33.8713	38.0115	64.4684	81.7564	60.8377	94.811	143.951			0.0710061	86.78
1.5488	78.7991	143.023	161.376	104.972	118.479	92.7209	82.6523	96.1651	96.945	71.978	53.0633	36.8108	41.7857	67.7527	83.0406	66.1794	83.024	152.659			0.0769212	90.6348
1.668	88.0996	142.54	165.691	118.217	131.73	95.6921	79.5687	94.6104	98.15	74.3124	56.2033	42.5211	42.4805	73.5541	80.5926	69.656	77.902	154.739			0.0828412	93.6811
1.7871	94.1825	133.874	159.275	128.057	147.73	89.4697	79.1471	92.216	98.95	74.9168	57.0485	41.5779	43.6442	77.0872	84.7316	71.8459	74.467	162.52			0.0887563	95.0411
1.9063	93.0186	118.429	140.534	137.537	149.675	72.8647	77.282	88.7184	91.357	74.4658	59.9115	45.6958	45.7619	78.2956	88.8205	76.1944	70.427	159.637			0.0946764	92.7014
2.0254	91.8333	93.061	123.488	151.94	158.383	62.1529	75.0685	85.2818	79.116	73.7599	61.3191	44.043	49.4881	83.5622	85.2656	77.7166	69.591	164.481			0.100592	90.5306
2.1445	81.7146	69.118	99.472	158.1	149.129	50.9627	70.2618	82.8608	70.768	62.3327	59.8792	45.0494	51.999	80.2111	89.0871	80.319	68.333	161.091			0.106507	85.0382
2.2637	59.8405	51.231	80.876	156.851	138.282	40.86	64.6929	77.6588	56.664	59.3244	55.4907	42.5247	54.8478	80.0257	84.9898	77.5595	62.877	161.744			0.112427	78.13
2.3828	44.6592	37.162	67.72	151.194	118.994	31.2915	57.6263	72.8955	46.96	49.262	53.3237	41.236	54.34	76.6901	82.3387	82.5795	65.011	146.93			0.118342	71.123
2.502	31.6304	29.242	54.944	141.616	99.794	27.7897	49.6751	59.8441	40.593	41.6896	46.5614	42.7086	56.9276	72.3654	80.9307	80.6884	69.545	135.8			0.124262	64.5747
2.6211	24.6986	26.559	49.439	119.97	84.077	21.5063	42.6308	51.5115	32.702	30.6973	38.8696	40.8525	54.5111	70.4579	79.1919	83.5912	68.627	120.648			0.130177	57.8078
2.7402	22.0357	21.507	39.316	91.99	76.691	17.8768	38.0047	41.4035	24.845	20.4548	28.8578	41.6675	51.5728	68.2739	74.4517	84.2111	70.671	104.771			0.136092	51.0334
2.8594	17.3269	18.771	32.927	70.064	69.028	12.8785	32.8959	32.9476	19.986	12.982	23.1213	39.4482	50.4566	62.9115	72.877	80.9498	72.032	88.859			0.142012	45.0257
2.9785	14.4265	18.187	25.033	52.786	66.48	13.6709	26.7429	23.2527	13.657	10.3971	14.8074	38.9743	46.5522	60.3441	68.3376	77.4911	66.309	76.454			0.147927	39.6613
3.0977	13.3165	15.029	20.449	39.82	64.512	11.0158	22.2666	16.0777	10.817	8.6751	10.2927	35.615	42.2335	57.03	61.3889	70.2797	65.06	65.809			0.153847	34.9826
3.2168	11.0896	13.25	16.907	34.765	69.302	11.2941	21.1827	13.9997	6.831	8.0791	9.4389	37.7317	35.8427	50.5279	59.6307	65.7126	68.986	52.942			0.159762	32.6396
3.336	9.7428	11.692	12.764	30.01	70.428	10.0575	18.6859	10.4819	6.627	6.7415	8.4492	37.9009	29.5229	43.3779	53.13	59.4719	66.245	46.396			0.165682	29.5402
3.4551	11.3284	11.223	12.309	25.084	73.397	10.1765	15.7815	10.2459	6.293	6.657	7.5357	35.7742	30.5575	34.5405	44.227	52.1533	66.597	37.158			0.171598	27.2799
3.5742	9.0892	9.698	8.243	26.914	76.652	9.9448	13.2167	7.8434	5.984	6.0214	5.2842	35.3557	24.4759	26.3649	33.8681	45.3553	63.968	31.176			0.177513	24.4141
3.6934	8.1177	8.948	8.808	20.835	74.314	5.5079	13.0482	7.9429	4.844	5.7501	5.5757	33.5501	22.3175	19.2095	27.0463	34.2815	59.693	26.572			0.183433	21.4645
3.8125	8.1109	7.826	7.328	20.313	70.754	6.4579	13.1244	7.2005	3.432	6.2928	6.0729	25.9732	17.6007	12.6725	21.1653	23.8668	56.331	23.438			0.189348	18.7755
3.9317	7.5113	6.028	5.11	20.281	68.932	6.0627	11.3065	7.4754	4.371	6.2281	5.424	24.7366	14.1751	11.6594	16.8318	19.1504	48.368	20.962			0.195268	16.923
4.0508	8.7249	6.335	5.757	17.488	70.022	6.0762	11.1807	8.2393	3.297	5.5108	5.5935	22.4376	11.002	8.6645	13.4481	13.1025	43.084	18.111			0.201183	15.4486
4.1699	6.9293	5.721	6.249	16.451	70.252	6.9442	10.8291	7.9191	3.301	5.1112	4.9134	18.1703	7.9273	8.6956	12.5577	11.0837	38.051	17.914			0.207098	14.39
4.2891	6.7844	5.669	5.23	12.736	70.703	6.566	10.0508	7.6325	3.566	4.2062	4.587	16.6581	7.0562	7.7826	11.672	8.9478	31.053	14.369			0.213018	13.0705
4.4082	6.4726	6.355	5.511	13.615	74.2	6.6496	9.9456	7.4739	3.963	4.2008	5.6601	15.3056	5.5376	7.1343	10.5069	8.2132	21.51	15.138			0.218933	12.6329
4.5274	6.9156	5.671	6.093	13.481	82.611	5.9206	9.7288	7.8632	3.576	5.2585	5.4131	14.3641	4.6751	7.7431	8.8594	7.4258	16.916	12.364			0.224853	12.4933
4.6465	7.733	5.527	5.7	10.71	80.951	5.4143	9.2527	6.9869	3.429	4.9522	5.0588	11.9199	3.9812	6.131	11.1436	4.3639	14.541	11.804			0.230768	11.6444
4.7657	7.8048	5.353	5.771	11.327	83.461	6.6142	8.9199	7.3865	3.861	5.0357	4.5497	10.7823	4.3573	7.5569	9.5787	5.3207	13.042	11.921			0.236689	11.8135
4.8848	7.9495	6.204	4.585	12.753	75.35	5.451	8.4205	7.0801	3.042	3.7964	3.9761	11.0934	4.02	6.8683	9.4894	3.9785	10.193	9.851			0.242604	10.7834
5.0039	8.8538	4.331	4.828	11.674	74.853	5.0949	7.6482	7.2703	3.338	4.2787	4.5205	8.6885	3.5247	6.0573	10.2703	4.1418	11.112	9.677			0.248519	10.5646
5.1231	8.5338	5.634	5.19	11.755	68.584	5.7323	7.3094	8.2469	3.231	4.1201	5.0827	7.1439	3.2543	6.9127	13.0814	5.5858	8.964	9.363			0.254439	10.4291
5.2422	8.7046	5.357	5.257	10.166	61.447	4.7581	6.6525	7.2558	2.988	3.7897	3.4751	5.6767	4.4299	5.9663	13.5123	4.5191	8.949	9.77			0.260354	9.59301
5.3614	8.6112	6.154	5.003	9.848	53.04	5.3549	7.8686	6.8569	2.501	4.0467	3.5837	6.1238	3.0418	6.4112	13.9156	3.7072	8.985	9.144			0.266274	9.12203
5.4805	9.0719	5.673	5.032	9.882	38.127	4.505	8.3323	6.9963	3.588	4.3953	4.5311	6.1172	3.8444	6.7819	12.306	4.7159	8.819	10.729			0.272189	8.52485
5.5996	11.0829	4.99	5.521	10.708	25.062	4.6601	7.5384	7.4719	3.327	4.1551	3.5283	5.3102	3.134	5.7585	11.0796	4.3522	8.836	10.119			0.278104	7.59079
5.7188	9.5058	5.619	4.167	9.796	17.189	3.4777	7.227	7.2044	3.145	4.5465	3.871	5.9635	2.5275	6.8463	11.0311	3.3557	8.156	10.344			0.284024	6.88736
5.8379	8.4829	5.539	4.153	9.528	11.813	3.3669	7.7005	6.2211	2.512	4.2576	4.4991	4.543	2.5962	5.4954	8.9747	3.8091	8.529	9.218			0.289939	6.17992
5.9571	6.8696	5.691	4.149	10.045	10.127	4.1233	7.9803	6.8137	3.005	3.884	4.7143	4.9186	2.6885	6.5853	8.7713	3.8446	9.486	10.046			0.295859	6.31903
6.0762	5.5186	6.021	4.23	8.94	7.971	3.2601	7.5512	7.5337	2.767	3.6407	5.2042	5.4446	3.0526	6.2156	9.3187	3.5707	7.265	9.497			0.301775	5.94454
6.1953	6.619	3.997	4.516	11.393	7.266	3.9751	7.9168	7.8185	3.41	4.053	4.7486	5.6428	2.4834	6.0776	8.1568	2.9421	8.405	8.123			0.30769	5.97465
6.3145	7.0545	3.516	5.215	11.143	6.833	3.3307	8.6048	9.7833	3.624	3.5658	4.3126	4.3173	2.3535	6.8251	8.4703	3.0134	10.012	7.897			0.31361	6.10396
6.4336	7.0964	4.571	4.764	11.843	5.766	3.9945	8.2579	8.7327	2.857	3.6486	4.4552	4.2422	2.4515	5.7514	7.8611	4.3023	8.336	8.431			0.319525	5.96454
6.5528	5.9242	3.455	5.323	12.233	6.852	3.3898	8.9101	7.741	2.699	3.3827	6.3075	4.5989	2.8987	6.4427	8.3212	3.3199	7.932	7.104			0.325445	5.93526
6.6719	6.302	3.746	3.46	12.452	4.676	3.8792	7.4202	10.0533	3.232	3.222	6.1132	4.7232	2.6807	6.3896	7.1615	3.4488	8.132	6.271			0.33136	5.74237
6.7911	5.9502	4.508	4.655	10.856	4.657	4.2202	7.7489	8.6706	3.4	3.4978	5.634	3.9285	2.2249	7.381	8.0586	3.9677	8.877	5.949			0.33728	5.78802
6.9102	5.1433	3.514	4.637	11.344	5.215	4.1721	7.2343	9.208	3.218	3.1554	5.6426	4.9547	1.9248	6.6268	6.2258	3.119	9.55	6.188			0.343195	5.61516
7.0293	5.1295	2.919	4.323	10.375	4.636	3.7899	7.8077	9.9443	3.495	3.3562	4.7213	2.9217	1.9951	6.2551	6.8645	4.493	9.223	4.84			0.34911	5.39385
7.1485	6.5165	4.06	5.946	11.006	5.112	3.7208	6.679	9.6809	3.579	3.0649	4.7824	4.4068	2.3467	5.7533	6.4831	3.4971	8.881	5.137			0.35503	5.59181
7.2676	6.3902	3.156	5.83	12.019	3.593	3.9246	9.7238	10.5114	3.66	2.8626	4.2983	5.593	1.7587	5.1767	7.586	3.3044	8.315	4.049			0.360945	5.65287
7.3868	6.1039	3.68	5.387	11.445	4.073	3.7796	9.4598	7.9148	3.359	3.8189	4.3128	4.5635	2.3551	5.6692	7.6211	2.3961	9.836	3.437			0.366865	5.51177
7.5059	4.9757	3.036	5.17	13.138	3.636	3.7477	8.1178	8.0126	3.604	3.5284	5.8691	5.2019	2.7905	5.4687	5.6597	2.9976	10.125	3.333			0.372781	5.46732
7.625	6.2148	4.516	5.056	11.884	4.175	4.7883	7.3015	8.7952	4.573	3.107	4.31	4.5178	2.4206	5.6978	5.5566	3.3502	9.454	3.71			0.378696	5.52377
7.7442	6.0579	3.091	4.75	10.996	3.939	3.8002	9.3774	7.9422	3.238	3.2739	4.6121	4.1952	2.9246	5.4722	6.6886	3.9413	9.909	3.273			0.384616	5.41564
7.8633	5.6752	3.167	5.64	12.808	4.308	3.5227	9.9307	8.1442	3.722	2.8804	4.6622	4.249	2.2196	4.7665	5.4423	3.8335	10.186	3.623			0.390531	5.48779
7.9825	6.0534	3.382	5.261	11.139	3.811	3.9694	7.5961	6.4336	3.011	3.6716	4.3684	3.953	2.6079	5.1349	5.2963	3.4814	11.35	2.97			0.396451	5.19389
8.1016	5.9747	3.673	5.243	10.668	3.591	4.1981	10.1201	7.2349	3.429	2.8014	4.182	4.6672	1.9035	4.6866	5.2689	3.8302	12.774	3.961			0.402366	5.45592
8.2207	6.871	4.16	4.296	11.529	4.664	4.0159	8.3789	7.8304	3.46	2.6676	4.7149	4.8647	2.771	5.0806	6.6983	3.3172	12.827	3.02			0.408281	5.62036
8.3399	7.4271	3.654	4.7	11.061	4.615	3.4502	9.6613	8.7599	4.103	2.2249	4.4722	5.1317	3.0191	4.4892	4.9433	4.2788	14.772	3.15			0.414201	5.77293
8.459	7.2737	4.038	4.75	12.55	4.271	3.7926	10.8924	7.6695	3.184	3.3413	4.7108	6.4205	2.6926	4.4186	5.7615	5.5275	12.575	3.463			0.420116	5.96289
8.5782	7.4465	3.6	4.657	12.61	5.196	4.4243	8.9472	8.4148	3.175	3.3476	5.1209	5.602	2.2538	5.8398	4.9171	4.4276	13.589	3.335			0.426036	5.93909
8.6973	7.3724	4.209	4.432	12.495	5.243	3.9239	11.035	8.3255	2.761	3.2103	4.4157	7.5246	2.499	4.3871	6.0203	5.2373	13.171	3.168			0.431951	6.07945
8.8165	6.8963	3.561	3.778	12.178	4.573	3.7041	11.7653	7.7674	3.446	3.4545	4.5746	7.8491	2.7826	5.5908	5.5789	5.1977	12.99	2.805			0.437872	6.02735
8.9356	7.1653	4.132	3.578	12.281	5.766	4.6573	10.7588	7.2514	3.587	3.2652	4.9007	8.0123	2.1804	4.5136	5.3843	4.8381	11.949	3.19			0.443787	5.96724
9.0547	8.7726	4.492	5.439	13.708	4.783	3.8101	10.0388	7.5868	3.703	3.7048	4.3791	6.5182	2.1946	5.0173	5.7732	5.338	12.505	3.338			0.449702	6.17231
9.1739	7.1899	4.473	4.85	13.266	4.141	4.3677	8.9059	7.2571	4.086	3.4727	5.5268	6.311	2.4952	4.6991	6.4542	6.1575	14.423	3.806			0.455622	6.21567
9.293	8.1448	4.201	4.888	14.856	5.099	2.9267	10.7753	6.8369	3.405	3.0809	5.9322	6.9941	2.558	4.6836	5.9327	5.8641	14.403	3.144			0.461537	6.31807
9.4122	7.5576	4.887	5.471	14.732	4.08	4.326	8.7826	7.4542	3.589	3.3505	5.9554	6.8971	3.384	4.6766	7.4146	7.2865	16.066	4.295			0.467457	6.67806
9.5313	6.8868	4.083	5.492	13.003	3.792	4.2043	9.5209	8.7255	3.6	3.2434	7.3089	7.0059	2.3739	4.9859	5.9293	6.7893	18.265	3.804			0.473372	6.61184
9.6504	8.4994	4.793	5.955	12.285	4.084	4.5087	10.0881	8.8565	3.268	3.962	6.7261	6.4583	2.8692	3.5206	7.2552	6.7262	19.404	3.978			0.479287	6.84652
9.7696	8.1822	4.562	5.941	11.727	3.842	3.3592	8.6907	7.3786	4.038	3.531	5.7622	6.4459	2.9065	4.1926	6.7783	7.8673	17.896	3.079			0.485207	6.45442
9.8887	7.3588	5.012	5.696	11.332	4.54	4.7674	9.8067	9.4471	4.21	3.3691	6.6802	5.8943	2.6465	4.2424	8.6426	9.0047	17.752	4.053			0.491122	6.91416
10.0079	8.7581	5.256	5.597	12.07	3.73	4.7678	9.5221	9.0117	3.774	2.906	5.8328	5.5351	2.993	3.6035	8.6149	8.9772	15.937	3.699			0.497042	6.69918
10.127	7.6512	5.129	6.414	12.158	4.332	4.5416	10.7951	8.6555	3.712	3.0838	6.1798	7.3251	2.9121	3.7219	8.818	8.6237	15.564	4.301			0.502958	6.88432
10.2462	7.4759	5.857	5.562	13.225	4.536	4.6278	10.6898	8.5047	4.234	3.9317	5.1734	5.5636	2.5188	4.5675	8.0074	8.7418	16.264	3.738			0.508878	6.84547
10.3653	8.3177	7.363	6.945	12.57	4.22	4.1527	11.3776	8.3294	4.066	2.9621	6.6712	5.1267	3.8603	4.1751	7.0978	8.2049	17.029	3.623			0.514793	7.00508
10.4844	7.9991	8.954	6.781	13.785	5.237	5.1265	12.5078	8.23	4.326	2.9044	6.315	5.435	3.8693	4.1992	7.8117	7.933	16.603	3.201			0.520708	7.28989
10.6036	6.9537	7.624	6.573	14.364	5.543	5.2098	11.0128	7.6612	4.179	2.8281	6.9822	6.7253	3.4579	3.9496	8.3189	8.8665	16.903	3.235			0.526628	7.24372
10.7227	6.7768	9.473	5.659	13.951	4.12	5.0563	11.5081	6.7266	4.694	2.9882	6.3239	6.3725	3.8186	4.3457	7.067	9.9175	14.889	2.969			0.532543	7.03646
10.8419	7.3249	8.853	6.203	13.275	4.768	4.7193	14.1258	7.1799	4.718	3.2361	6.5168	6.3778	3.5877	3.6432	7.4378	10.3787	13.398	2.765			0.538463	7.13933
10.961	8.8382	10.732	6.584	13.92	3.847	5.4732	12.1669	8.0187	4.794	3.0692	8.4643	6.1899	4.0017	4.1715	8.2475	9.8492	15.196	3.368			0.544378	7.60729
11.0801	7.7875	9.726	7.399	13.408	3.926	3.9263	12.5796	7.1644	4.618	3.105	7.672	6.909	3.6755	4.1008	8.5559	10.0104	14.611	3.644			0.550293	7.3788
11.1993	5.8976	9.3	6.317	13.544	4.559	3.6767	12.1511	7.3977	4.475	3.331	8.6778	6.2713	3.0786	3.8159	7.2113	10.1836	15.903	3.791			0.556213	7.19898
11.3184	6.6047	7.727	5.654	12.969	3.891	5.439	11.7199	6.9913	4.707	2.8669	7.6789	6.514	3.4402	5.0425	6.5289	8.177	13.097	3.989			0.562128	6.83541
11.4376	6.916	8.254	6.096	12.984	4.011	4.4504	12.6136	8.2744	5.134	3.7177	8.0222	7.352	3.1029	4.9172	6.7074	9.3887	15.089	3.38			0.568049	7.24503
11.5567	6.5376	6.714	5.587	14.391	5.075	4.6743	13.9417	6.4557	4.031	2.9532	8.3318	7.4029	3.8008	4.0825	8.4725	9.3899	12.223	3.035			0.573964	7.06105
11.6758	6.8858	5.589	5.256	14.713	4.945	5.4156	12.3104	6.3131	5.374	3.8068	8.3355	7.1726	3.7967	4.4733	6.7967	8.8002	11.786	3.57			0.579879	6.96332
11.795	6.4452	6.639	5.985	13.972	3.704	4.6812	12.0376	6.1898	4.238	2.7088	8.1873	7.9208	3.2249	3.9458	6.2512	10.3577	12.757	3.447			0.585799	6.81624
11.9141	7.4862	5.274	6.513	15.35	3.984	6.272	14.1302	6.2735	4.537	3.3675	8.7549	6.9582	3.01	4.3875	6.7855	8.826	12.827	3.333			0.591714	7.11497
12.0333	7.4269	5.846	6.248	16.296	4.608	5.6936	14.5597	6.5641	4.145	2.9848	9.5444	8.9494	3.43	4.8453	8.5865	9.1394	14.122	3.525			0.597634	7.58412
12.1524	6.6463	5.141	5.955	16.529	4	4.927	14.92	5.3262	4.595	2.8145	8.7201	6.9221	3.1517	4.5428	7.9532	9.6565	12.976	4.013			0.603549	7.15497
12.2716	7.0639	5.829	7.09	16.215	3.874	5.0829	14.0142	4.9433	4.782	3.5443	8.6619	7.306	2.2389	4.6722	8.719	8.4707	12.493	3.792			0.609469	7.15513
12.3907	7.5915	5.496	6.572	19.219	4.918	5.5812	13.6404	5.7634	5.5	3.1825	9.6385	7.2363	3.0411	4.737	8.9928	7.2078	13.394	3.868			0.615384	7.53219
12.5098	7.6031	4.84	8.045	16.301	4.544	5.5463	16.0087	5.6388	5.253	2.7197	8.4034	7.8987	2.8743	4.4969	9.5394	8.7302	10.798	2.787			0.621299	7.33486
12.629	7.9612	4.434	8.392	16.745	4.826	5.4499	16.7812	5.575	5.484	2.903	9.2583	6.5837	3.5281	4.8484	9.3684	7.6126	11.907	4.088			0.627219	7.54143
12.7481	7.2739	4.31	7.899	17.536	4.636	5.5013	16.1504	6.2395	4.837	2.99	9.8081	8.729	2.4767	4.4613	11.1209	8.1228	9.691	3.956			0.633135	7.54105
12.8673	9.267	5.604	8.947	17.662	4.57	5.1696	15.9195	6.1736	5.197	2.7992	10.7101	7.2542	2.8961	5.1653	10.0279	7.3894	10.429	3.401			0.639055	7.69899
12.9864	10.0188	5.463	8.87	17.688	6.011	5.8271	14.9084	5.9976	5.197	3.4287	12.0903	6.7413	4.5861	4.7186	11.0695	6.4876	8.214	3.852			0.64497	7.84272
13.1055	8.2783	5.747	9.425	16.489	5.342	6.0166	16.6318	5.358	4.575	2.5076	11.7664	7.104	3.9887	4.5288	10.8555	6.8188	10.392	4.343			0.650885	7.78708
13.2247	8.6314	5.182	9.515	15.289	5.934	6.2724	15.9119	5.8564	5.685	2.3889	12.134	6.9468	3.5081	5.7598	10.8012	6.0837	8.901	3.583			0.656805	7.68798
13.3438	7.8667	5.393	8.465	14.791	7.02	5.0435	15.6157	6.927	5.315	2.3561	11.2504	6.7041	3.4713	4.7686	10.8593	5.8707	9.469	5.119			0.66272	7.57252
13.463	8.4392	4.886	7.613	15.95	7.387	5.2308	16.8668	4.8875	5.683	2.8495	10.8288	7.6204	2.8628	5.4451	10.3067	5.3179	9.821	5.227			0.66864	7.62347
13.5821	7.7607	5.167	7.904	14.701	7.666	6.3182	19.6762	4.9869	5.423	3.384	11.3239	7.9109	3.212	5.9178	11.4615	5.4586	10.299	5.178			0.674555	7.98604
13.7012	8.4239	5.67	8.062	17.653	7.385	5.6256	15.9352	5.967	5.705	3.2384	10.046	7.1438	3.4308	6.6807	12.0869	5.3972	10.013	6.82			0.68047	8.07131
13.8204	10.3831	5.719	8.163	15.866	8.21	6.8042	18.5679	5.1259	6.116	3.0443	9.9833	7.0089	2.8374	5.8704	12.5275	5.0245	9.829	8.351			0.68639	8.30174
13.9395	8.8877	5.13	8.617	17.795	8.88	6.7897	19.6055	5.2885	7.055	2.7624	11.1238	8.2644	3.2393	6.3695	12.3257	3.6415	11.467	8.42			0.692305	8.64789
14.0587	10.0133	5.292	7.284	15.488	9.981	6.9394	18.447	5.1355	6.426	3.065	13.5132	8.109	3.9253	6.1116	12.2698	4.2225	11.118	8.867			0.698225	8.6782
14.1778	9.5534	4.221	7.513	13.439	8.936	7.1435	21.3668	4.9226	8.246	3.4298	12.8232	8.3836	3.5636	5.7403	11.2195	3.6775	12.553	8.647			0.704141	8.63216
14.297	9.3406	5.797	6.936	14.248	9.139	6.753	23.1423	4.0835	7.037	3.4556	13.4489	7.8975	3.6239	5.7535	12.7948	4.4588	11.314	10.685			0.710061	8.8838
14.4161	9.879	5.666	7.082	15.943	9.92	7.4764	23.2938	4.3834	6.219	3.1869	14.2214	8.0604	3.8717	5.3087	13.0207	3.4874	12.157	10.51			0.715976	9.09371
14.5352	11.3927	5.676	7.414	16.972	9.957	7.4084	23.0892	4.6647	6.932	3.2856	13.5329	8.7357	3.9399	4.4249	13.2439	3.0743	13.866	12.322			0.721891	9.44062
14.6544	11.2936	5.204	7.19	16.594	9.629	8.8747	22.3137	5.0577	7.067	3.3073	13.4469	8.3447	4.1539	3.4557	13.6073	2.9381	13.39	11.991			0.727811	9.32548
14.7735	12.3033	5.46	7.4	17.292	11.766	8.1366	21.0196	5.068	8.296	3.3287	14.1624	9.1398	3.767	4.2423	13.3394	3.462	13.532	14.425			0.733726	9.78556
14.8927	11.7215	5.306	7.346	16.523	12.055	7.378	23.2123	4.5363	7.363	2.9624	13.8796	7.7176	4.4718	5.6552	14.15	4.0448	14.134	14.082			0.739646	9.80769
15.0118	12.112	4.753	7.864	19.587	10.669	8.5049	19.1838	4.6827	7.641	2.2769	11.9925	8.5837	3.7379	4.4354	12.4748	3.008	15.761	14.085			0.745561	9.51959
15.1309	12.5768	4.855	7.398	17.105	12.075	8.8612	19.0553	4.6475	7.346	3.2223	12.7069	7.7006	4.5473	4.8048	14.3712	3.291	16.791	13.492			0.751476	9.71372
15.2501	15.2758	5.598	8.817	17.065	11.833	8.8612	18.0547	4.5819	7.73	3.063	10.3486	8.0838	3.5468	4.6564	15.1191	3.2235	17.994	14.021			0.757396	9.88182
15.3692	16.038	4.619	8.953	17.841	13.816	9.2012	15.5808	4.4799	8.171	2.9625	11.8238	8.721	4.876	5.9585	15.4399	4.0133	21.527	13.963			0.763311	10.4436
15.4884	15.7385	5.973	6.794	20.179	14.991	7.8426	17.0875	5.9729	7.872	2.8096	12.7058	8.8608	4.3119	6.3039	17.742	3.8428	22.73	15.316			0.769232	10.9485
15.6075	15.2568	6.346	8.848	20.11	17.392	9.4097	15.257	4.8286	8.833	2.9899	14.0319	10.5354	4.2765	6.9625	20.4655	4.3377	23.962	16.711			0.775147	11.6974
15.7266	15.4048	5.809	7.947	20.194	18.513	10.0952	12.9684	5.9131	6.769	2.0763	12.1276	9.5733	3.886	9.7581	19.7382	4.1155	25.882	16.883			0.781062	11.5363
15.8458	17.9405	5.384	8.456	20.683	21.007	10.0636	13.9838	6.7897	7.299	2.1602	13.2465	12.0456	5.2612	9.487	22.3399	2.9695	27.025	18.218			0.786982	12.4644
15.9649	17.1669	4.7	8.235	25.225	20.968	10.0171	12.5712	8.2104	7.735	2.2709	12.9649	12.6967	5.2156	9.8493	20.9701	3.3879	26.775	17.709			0.792897	12.5927
16.0841	16.6114	4.742	8.019	23.318	26.765	10.5729	11.9802	9.7919	9.334	2.0253	12.9436	13.5571	5.9463	11.3918	20.7515	4.7379	24.059	19.118			0.798817	13.0925
16.2032	20.2048	4.719	7.413	22.722	27.987	11.5097	12.8274	11.9259	7.345	2.8088	12.4462	15.1002	4.7902	11.7936	23.5427	3.8446	22.847	20.788			0.804732	13.5897
16.3224	19.6611	5.027	6.68	26.65	34.399	11.6342	12.4446	14.2842	8.289	3.2222	14.352	15.2779	4.5817	9.9642	21.628	3.3463	22.934	20.13			0.810652	14.1392
16.4415	17.324	4.082	7.519	27.91	38.075	13.3887	11.1149	16.038	10.214	2.4891	16.9632	17.9824	4.417	9.1296	23.2409	3.9331	20.183	24.506			0.816567	14.9172
16.5606	19.0203	5.49	7.429	30.516	42.767	13.8566	11.6624	18.561	10.43	2.5204	16.0208	15.3324	4.5907	9.478	23.176	3.607	20.986	24.464			0.822482	15.5504
16.6798	22.0008	4.763	6.338	29.81	46.39	15.2272	13.1181	23.8806	9.509	2.8815	16.0862	16.021	3.3627	8.5179	20.1784	4.6552	19.478	28.826			0.828402	16.1691
16.7989	23.0845	5.389	7.159	31.171	49.606	16.0973	13.6677	28.6714	12.093	2.6476	16.6066	14.8548	4.1177	8.9637	21.0437	4.0999	19.766	30.091			0.834318	17.1739
16.9181	23.3099	4.975	6.992	35.338	46.878	17.4736	12.3291	30.3825	11.57	3.2708	16.5223	15.6524	3.4721	7.8173	18.8643	4.1405	19.455	31.055			0.840238	17.1943
17.0372	23.671	5.035	6.873	36.707	38.921	18.73	10.8675	34.4909	13.885	3.6229	17.9438	14.7422	3.8553	9.4912	18.2758	3.7915	18.644	36.973			0.846153	17.5844
17.1563	24.9667	5.276	6.592	42.851	30.103	21.7409	14.092	34.8561	14.509	3.5286	17.1199	14.8255	4.3618	9.3409	17.5889	4.3202	18.202	41.57			0.852068	18.1025
17.2755	24.0494	5.329	7.175	41.734	22.55	22.0762	13.9083	40.9228	16.892	6.7988	22.9608	16.7314	3.7592	9.3124	17.6874	4.3352	17.44	47.927			0.857988	18.9772
17.3946	27.1997	6.586	7.177	46.574	16.291	25.87	12.6598	56.2067	22.115	10.2326	28.5574	18.7504	3.8087	10.2497	17.9323	4.2559	18.32	48.008			0.863903	21.1552
17.5138	23.7882	7.308	7.694	44.992	11.725	29.0314	12.4614	59.243	25.447	16.4989	32.2371	15.8321	3.3162	8.6522	17.5012	3.3843	17.197	49.69			0.869823	21.4444
17.6329	23.6463	7.656	8.6	41.917	7.856	29.6976	12.9208	64.5922	32.604	19.8307	37.7107	17.0795	3.9455	8.8864	18.3404	4.7035	19.601	53.672			0.875738	22.9589
17.7521	24.7101	7.944	9.576	37.155	5.018	28.2544	12.6708	67.467	37.442	24.5235	39.9254	20.4019	4.4975	9.7248	15.1263	3.6898	16.761	57.13			0.881658	23.4454
17.8712	26.7417	8.804	9.367	30.025	4.189	26.4987	13.6949	70.3292	48.635	29.676	47.1917	22.2268	4.8721	9.4617	14.1756	4.2178	20.456	55.954			0.887573	24.8065
17.9903	28.5016	6.471	8.996	25.648	2.764	21.5614	15.2029	72.6568	52.186	39.6125	51.2354	24.9537	5.225	10.1711	12.7903	4.5641	19.827	56.131			0.893488	25.4721
18.1095	33.5787	8.901	11.805	20.963	2.08	17.979	19.0359	70.8898	62.934	48.5818	52.6835	22.4828	6.5321	11.9562	15.5802	4.5104	21.668	54.345			0.899408	27.0281
18.2286	35.3244	10.639	13.27	17.046	1.713	12.5115	21.8508	69.5687	67.923	54.6777	49.5939	25.8237	6.8351	12.6286	12.8537	4.1981	23.34	52.423			0.905324	27.3456
18.3478	36.0155	12.331	13.514	13.744	0.857	9.3091	22.9056	65.1932	68.626	57.1678	54.7845	26.3592	8.2528	15.0792	13.3817	4.5686	23.282	51.926			0.911244	27.6276
18.4669	30.8766	15.593	15.734	10.086	0.95	5.96	23.4177	51.7521	70.27	60.6131	58.1379	28.306	9.1831	15.8983	15.2212	3.6318	19.513	49.222			0.917159	26.9092
18.586	30.4172	17.897	18.836	7.837	1.375	3.9311	25.5919	41.1808	64.336	67.9334	52.8951	27.9038	11.1328	20.1665	14.9936	4.3972	23.036	47.255			0.923074	26.7286
18.7052	26.8933	18.88	16.535	6.301	1.15	2.4658	29.3692	25.9355	62.341	76.8446	55.8886	25.9559	9.6554	23.9829	15.8661	4.8436	18.963	41.253			0.928994	25.7291
18.8243	23.0987	13.762	15.433	4.726	0.666	1.744	37.7159	15.7126	59.855	76.6717	50.6665	25.4699	8.8359	24.1479	16.3533	4.9056	18.934	36.452			0.934909	24.175
18.9435	22.4535	11.336	16.464	3.89	0.74	1.1322	41.6899	12.143	49.431	68.8977	37.0281	20.1316	10.1835	24.4415	18.8954	5.7563	18.647	29.818			0.940829	21.8377
19.0626	17.655	7.84	14.34	3.581	0.73	1.084	45.9305	7.7918	40.001	55.5499	26.0192	16.3493	10.9867	24.269	19.9427	5.9022	16.998	26.471			0.946744	18.969
19.1817	13.4228	7.531	10.886	2.756	0.577	0.7147	48.0118	5.7595	28.383	32.631	16.5334	12.1588	8.0578	22.4146	19.841	6.086	16.589	19.395			0.952659	15.0971
19.3009	8.2778	6.08	8.832	2.036	0.387	0.7017	50.7063	3.3602	16.43	19.856	7.7203	7.469	5.9758	19.8246	20.766	6.9984	14.991	17.267			0.958579	12.0933
19.42	4.2629	3.696	7.718	1.64	0.611	0.5924	48.0982	3.145	10.296	12.9912	5.6253	5.1363	6.4089	10.9813	26.5816	7.2294	14.575	16.593			0.964494	10.3434
19.5392	3.1503	2.724	5.12	1.961	0.645	0.6798	38.9273	2.309	6.375	8.695	4.3835	2.9598	4.4379	9.4986	32.0712	6.7661	13.06	13.903			0.970415	8.75925
19.6583	3.083	3.45	3.546	1.199	0.505	0.6889	27.5016	1.8912	4.274	6.4292	3.2569	1.5777	3.5375	5.8358	41.2502	9.9412	14.237	12.992			0.97633	8.06646
19.7775	1.7885	2.41	2.722	1.277	0.332	0.1398	16.5099	1.5093	3.341	4.7795	3.1358	2.0055	2.2796	3.9997	40.9393	10.0548	14.605	12.155			0.98225	6.88798
19.8966	1.4226	2.021	2.532	0.838	0.197	0.1423	11.5576	1.2098	2.443	4.3594	1.6351	1.5767	2.1491	2.9256	37.7126	10.6382	13.561	12.301			0.988165	6.06789
20.0157	1.8082	1.72	1.989	0.759	0.21	0.3427	6.8251	0.9742	2.679	3.4352	1.6728	1.0791	1.6978	2.5796	31.4232	13.3404	14.457	10.871			0.99408	5.43685
20.1349	1.8422	1.849	1.429	0.743	0.103	0.4704	3.7646	1.1203	1.611	2.1374	1.1277	1.1783	1.5264	1.8479	24.6166	15.2385	13.453	8.692			1	4.59724

## Sheet: Image8
X0	Y0	Y1	Y2	Y3	Y4	Y5	Y6	Y7	Y8	Y9	Y10			Ap-Basal to 1	Average intensities
0	91.261	114.717	149.18	100.397	94.337	173.581	115.288	147.315	113.508	124.823	71.458			0	117.806
0.1191	101.901	123.91	155.222	115.718	107.205	189.546	128.032	166.767	123.882	128.242	72.957			0.00581194	128.489
0.2383	116.127	139.433	160.308	133.083	114.842	196.052	146.19	173.792	133.087	138.186	83.947			0.0116288	139.55
0.3574	133.212	149.752	174.157	148.381	127.884	205.983	163.85	188.567	141.139	147.062	89.614			0.0174407	151.782
0.4766	149.275	156.564	192.314	165.177	140.604	209.657	178.719	203.195	141.074	151.888	97.016			0.0232575	162.317
0.5957	168.31	169.1	203.598	174.849	154.093	210.729	197.377	209.148	137.874	158.611	109.452			0.0290695	172.104
0.7148	178.442	177.469	207.743	186.29	160.884	212.312	211.776	216.007	136.676	167.783	116.292			0.0348814	179.243
0.834	193.172	188.036	217.164	193.021	169.689	219.399	227.511	217.343	140.57	167.937	127.318			0.0406982	187.378
0.9531	205.006	203.545	217.689	199.908	174.635	219.527	228.974	218.233	140.852	173.923	145.14			0.0465102	193.403
1.0723	213.044	204.503	226.158	207.605	181.083	218.479	226.479	215.398	140.754	173.283	149.666			0.052327	196.041
1.1914	218.089	215.653	233.429	215.282	187.4	220.537	229.534	211.424	149.085	171.549	160.094			0.0581389	201.098
1.3106	216.603	216.2	238.067	222.924	193.961	217.906	227.227	200.843	145.869	172.694	168.863			0.0639557	201.923
1.4297	213.612	223.753	234.231	229.579	191.144	216.836	217.106	193.87	149.043	172.813	174.351			0.0697677	201.485
1.5488	208.377	222.053	235.348	237.21	200.449	212.283	220.885	191.914	152.748	178.215	183.907			0.0755796	203.944
1.668	204.144	221.635	233.183	240.248	205.168	200.239	225.068	185.897	153.107	190.768	177.876			0.0813964	203.394
1.7871	193.134	219.432	231.914	238.807	210.022	182.503	215.212	183.872	155.142	202.054	164.954			0.0872084	199.731
1.9063	184.229	215.948	217.697	233.424	217.133	154.849	206.77	178.909	161.225	196.93	155.356			0.0930252	192.952
2.0254	171.89	209.452	199.589	231.198	219.417	116.454	188.085	178.932	155.492	192.369	145.199			0.0988371	182.552
2.1445	153.399	190.032	162.645	220.083	223.427	77.227	175.346	176.297	152.473	184.329	128.633			0.104649	167.626
2.2637	123.897	160.345	123.851	206.686	229.019	48.166	160.498	172.216	145.49	170.226	113.319			0.110466	150.338
2.3828	95.991	128.612	83.447	179.122	223.6	31.951	139.857	174.183	141.363	151.217	93.006			0.116278	131.123
2.502	68.491	103.396	53.036	143.874	220.419	22.793	119.896	179.785	137.656	121.62	83.109			0.122095	114.007
2.6211	47.469	76.812	31.946	109.389	203.946	16.249	102.087	183.904	129.098	81.017	71.775			0.127907	95.7902
2.7402	32.059	55.159	20.209	78.991	174.107	12.834	87.957	174.207	121.739	42.733	58.364			0.133719	78.0326
2.8594	21.065	37.839	13.911	53.259	146.804	11.226	68.543	163.508	107.797	23.86	44.032			0.139535	62.8949
2.9785	15.721	25.234	11.899	33.641	120.44	8.678	56.049	152.216	89.641	14.202	33.089			0.145347	50.9827
3.0977	11.897	21.538	9.247	22.522	101.576	7.5	38.418	133.256	62.979	11.422	22.37			0.151164	40.2477
3.2168	9.824	18.788	8.571	16.291	82.763	8.042	25.218	112.326	41.529	9.815	16.944			0.156976	31.8283
3.336	9.783	16.594	8.185	13.475	65.308	6.229	16.591	91.634	26.134	8.292	13.704			0.162793	25.0845
3.4551	8.588	16.848	8.106	9.946	52.95	6.291	12.926	69.061	17.156	8.821	12.31			0.168605	20.273
3.5742	7.551	16.385	8.041	9.501	42.136	5.577	10.072	51.363	12.175	9.159	9.555			0.174417	16.5014
3.6934	7.268	15.873	7.115	7.385	32.165	4.593	8.848	42.952	12.238	8.022	8.556			0.180234	14.0923
3.8125	7.961	15.289	6.809	5.875	25.334	4.553	8.305	33.358	9.085	6.764	6.685			0.186045	11.8198
3.9317	8.28	16.348	6.198	7.022	18.378	4.243	8.046	25.923	8.529	6.798	7.001			0.191862	10.6151
4.0508	8.231	14.901	5.807	6.235	16.095	4.417	6.778	22.514	8.282	7.039	6.3			0.197674	9.69082
4.1699	8.086	16.037	5.242	6.368	14.259	4.584	6.71	19.078	9.001	7.12	5.247			0.203486	9.24836
4.2891	7.534	16.662	4.725	6.515	14.638	4.381	7.508	17.782	8.664	7.802	4.76			0.209303	9.17918
4.4082	7.456	18.644	5.828	6.484	13.466	3.814	6.546	15.642	7.855	7.372	4.395			0.215115	8.86382
4.5274	9.387	18.54	5.711	6.778	13.386	4.106	6.066	13.144	7.501	7.172	4.607			0.220932	8.76345
4.6465	9.106	18.764	5.95	6.705	14.883	3.971	6.681	13.655	7.169	7.859	4.245			0.226744	8.99891
4.7657	7.596	17.072	6.395	6.054	14.208	3.725	6.889	13.476	7.646	9.305	4.948			0.232561	8.84673
4.8848	8.171	16.294	5.374	6.904	17.348	4.11	7.276	11.85	7.981	9.109	5.13			0.238372	9.04973
5.0039	8.643	15.832	6.019	7.53	17.549	5.275	6.115	12.672	8.931	9.887	3.578			0.244184	9.27555
5.1231	9.759	15.967	7.124	7.583	20.391	5.57	5.887	11.084	7.311	10.801	3.846			0.250001	9.57482
5.2422	11.136	14.75	5.998	7.479	19.01	5.236	6.425	10.201	7.677	11.27	3.52			0.255813	9.33655
5.3614	11.202	14.238	5.794	6.866	19.023	5.419	6.246	10.313	7.473	12.522	4.44			0.26163	9.41236
5.4805	11.968	13.479	6.846	7.004	18.581	4.843	6.363	10.469	8.125	13.338	3.63			0.267442	9.51327
5.5996	13.212	11.8	7.453	7.574	18.73	5.423	6.329	9.871	7.876	13.901	4.626			0.273254	9.70864
5.7188	14.086	13.506	6.868	7.411	19.243	4.537	7.272	9.884	7.911	13.447	3.761			0.279071	9.81145
5.8379	14.138	12.474	7.52	8.004	22.673	4.447	6.554	10.319	8.684	12.302	3.834			0.284883	10.0863
5.9571	14.583	12.925	7.411	9.034	27.966	4.883	7.147	10.391	9.24	15.088	4.038			0.290699	11.1551
6.0762	15.578	12.75	8.603	10.043	34.472	4.806	6.531	11.245	8.861	14.474	3.831			0.296511	11.9267
6.1953	15.596	14.331	8.099	9.607	36.34	4.32	7.41	11.382	9.195	15.484	3.541			0.302323	12.3005
6.3145	14.719	16.721	7.246	9.965	36.137	4.616	7.115	11.92	9.719	15.808	3.996			0.30814	12.542
6.4336	14.63	19.735	6.375	11.986	35.714	5.464	7.521	12.782	9.361	13.95	3.673			0.313952	12.8355
6.5528	15.169	25.514	5.735	11.767	37.182	5.689	7.175	13.836	9.998	14.273	3.151			0.319769	13.5899
6.6719	15.331	26.379	4.936	10.591	41.524	5.164	7.2	13.546	11.594	14.805	3.355			0.325581	14.0386
6.7911	16.153	25.333	5.086	10.368	44.825	4.545	6.531	14.268	12.589	15.601	3.533			0.331398	14.4393
6.9102	18.29	27.828	5.952	10.12	48.237	4.039	7.289	15.931	12.409	16.295	3.503			0.33721	15.4448
7.0293	17.654	25.049	4.626	9.372	52.299	4.493	6.949	17.421	12.154	17.171	3.187			0.343022	15.4886
7.1485	19.549	26.32	3.99	7.677	58.796	5.076	6.821	17.813	11.717	17.76	3.21			0.348838	16.2481
7.2676	21.772	27.175	4.124	6.997	58.638	4.609	8.547	17.025	13.651	15.291	3.64			0.35465	16.4972
7.3868	22.139	29.575	3.71	6.811	60.019	4.97	7.936	15.749	13.859	16.906	2.596			0.360467	16.7518
7.5059	23.921	32.343	3.856	6.64	59.08	4.651	8.607	16.733	16.237	16.406	3.416			0.366279	17.4445
7.625	22.338	35.275	3.186	7.294	57.488	5.151	7.675	16.787	14.426	17.151	2.881			0.372091	17.2411
7.7442	21.793	38.693	3.683	6.779	57.445	5.698	7.525	18.354	16.331	17.206	2.889			0.377908	17.8542
7.8633	20.414	37.179	3.921	6.597	54.998	4.847	7.476	17.119	15.604	19.078	2.904			0.38372	17.2852
7.9825	21.692	35.869	3.404	6.125	56.291	4.815	6.523	16.987	15.765	18.473	2.956			0.389537	17.1727
8.1016	22.17	38.232	3.554	6.757	54.055	4.588	7.624	18.554	14.768	17.924	2.839			0.395348	17.3695
8.2207	22.816	37.784	3.947	5.243	54.096	4.693	7.053	22.329	15.61	17.707	3.375			0.40116	17.6957
8.3399	25.032	35.652	3.945	5.393	60.477	5.015	7.587	24.236	15.207	17.301	3.182			0.406977	18.457
8.459	24.133	35.585	3.129	4.586	60.011	4.981	7.295	22.236	14.826	17.676	3.962			0.412789	18.0382
8.5782	25.924	39.506	3.22	4.821	60.692	4.986	8.001	21.874	15.235	18.014	4.093			0.418606	18.7605
8.6973	26.479	39.855	3.191	4.848	64.296	5.069	8.929	20.547	13.708	17.241	3.293			0.424418	18.8596
8.8165	25.19	38.624	3.217	4.801	62.002	5.29	8.074	20.679	16.392	17.661	3.366			0.430235	18.6633
8.9356	27.349	40.608	3.059	5.222	61.013	4.753	7.571	22.203	20.269	17.389	3.367			0.436047	19.3457
9.0547	24.015	40.508	3.513	4.708	58.087	4.879	7.354	20.419	20.639	17.185	3.528			0.441859	18.6214
9.1739	19.505	39.27	3.274	4.077	56.31	5.265	7.718	19.425	21.524	17.017	3.122			0.447675	17.8643
9.293	20.42	34.55	3.501	4.907	54.731	4.836	7.705	21.119	20.005	16.719	2.937			0.453487	17.4027
9.4122	19.021	36.341	3.265	5.166	56.432	4.838	7.616	25.212	17.262	17.361	2.799			0.459304	17.7557
9.5313	19.319	36.811	2.806	4.437	57.71	4.554	7.137	26.741	15.658	16.704	3.694			0.465116	17.7792
9.6504	19.483	39.033	3.262	5.168	59.758	4.93	9.176	27.706	16.561	15.667	4.091			0.470928	18.6214
9.7696	20.617	36.623	3.773	4.859	60.073	4.294	7.168	26.09	15.334	15.947	3.888			0.476745	18.0605
9.8887	21.218	36.496	3.069	4.254	57.315	4.916	6.743	27.658	16.18	15.327	3.147			0.482557	17.8475
10.0079	20.333	35.144	3.534	4.407	57.952	4.607	6.775	30.652	15.626	14.771	3.155			0.488374	17.9051
10.127	20.269	35.532	3.319	4.172	55.664	5.009	8.315	30.127	17.086	14.451	3.25			0.494186	17.9267
10.2462	20.729	36.723	3.279	4.233	47.636	4.839	8.18	33.307	15.779	12.902	2.438			0.500002	17.2768
10.3653	19.497	32.965	3.791	3.653	44.7	4.493	8.615	33.017	15.086	13.928	2.628			0.505814	16.5794
10.4844	18.039	30.831	3.65	4.4	38.254	4.508	7.588	36.534	15.509	13.468	3.277			0.511626	16.0053
10.6036	19.115	29.016	3.7	3.968	32.915	5.118	8.468	41.376	16.101	14.869	2.978			0.517443	16.1476
10.7227	18.253	23.829	3.709	3.809	29.694	4.277	8.931	43.434	16.845	14.035	2.784			0.523255	15.4182
10.8419	19.796	20.567	3.296	3.975	29.279	4.728	7.682	45.902	17.729	13.597	2.785			0.529072	15.3942
10.961	20.066	16.379	3.866	4.476	29.025	4.282	6.961	48.819	17.603	12.983	3.375			0.534884	15.2577
11.0801	20.186	13.983	3.406	4.035	30.671	4.563	7.697	46.728	16.881	12.561	2.877			0.540696	14.8716
11.1993	22.199	12.838	3.467	4.184	33.963	4.563	8.424	46.079	19.339	12.173	2.586			0.546513	15.4377
11.3184	21.695	10.411	2.956	3.643	32.042	4.05	8.405	49.558	19.516	11.616	2.988			0.552325	15.1709
11.4376	23.707	9.999	3.565	3.837	30.356	4.47	7.954	52.508	20.587	10.562	2.807			0.558141	15.4865
11.5567	24.285	9.736	3.625	4.343	31.161	3.785	8.195	51.404	21.305	10.139	2.783			0.563953	15.5237
11.6758	25.608	8.339	3.413	3.418	32.14	3.923	8.243	49.644	24.839	10.501	3.168			0.569765	15.7487
11.795	24.871	7.204	2.899	3.547	31.823	3.784	7.849	49.127	26.971	10.569	2.879			0.575582	15.593
11.9141	24.336	6.663	2.919	4.673	29.943	3.952	7.412	45.59	25.096	9.446	2.51			0.581394	14.7764
12.0333	29.279	5.998	3.256	3.554	28.55	4.193	6.619	48.462	25.174	8.697	2.773			0.587211	15.1414
12.1524	30.765	5.857	3.343	3.499	28.542	3.832	8.49	44.182	23.945	8.145	2.509			0.593023	14.8281
12.2716	37.153	5.836	3.691	4.126	28.864	4.196	8.887	43.887	23.135	8.244	2.419			0.59884	15.4944
12.3907	44.031	5.452	3.537	3.863	27.96	3.83	9.149	45.012	22.839	8.291	2.655			0.604652	16.0563
12.5098	50.742	5.025	3.609	4.653	27.537	3.738	8.861	42.439	23.196	7.105	2.843			0.610463	16.3407
12.629	57.273	5.154	3.496	4.314	30.886	3.706	8.662	39.768	22.032	6.929	2.697			0.61628	16.8106
12.7481	58.064	5.409	3.712	4.143	28.43	3.744	8.612	41.866	23.342	7.847	3.014			0.622092	17.1075
12.8673	63.146	6.51	3.322	3.637	28.704	3.948	9.188	41.389	23.85	7.85	3.123			0.627909	17.697
12.9864	67.925	5.576	3.013	3.691	28.021	4.347	9.058	41.333	23.404	7.216	3.472			0.633721	17.9142
13.1055	69.076	5.579	2.993	4.225	28.808	3.643	9.234	43.355	27.974	8.41	2.775			0.639533	18.7338
13.2247	71.232	5.135	3.069	4.056	28.929	3.923	8.555	41.996	28.467	8.123	2.434			0.64535	18.7199
13.3438	76.301	4.654	2.992	3.626	29.79	4.037	8.84	41.231	27.652	7.201	3.036			0.651162	19.0327
13.463	82.023	5.419	3.552	3.986	29.411	3.801	10.396	42.326	29.226	7.031	2.874			0.656978	20.0041
13.5821	84.709	4.589	3.498	4.206	26.547	2.96	10.389	39.296	27.155	7.341	2.929			0.66279	19.4199
13.7012	89.085	4.717	3.753	5.004	25.828	3.641	11.746	37.135	26.513	8.458	3.323			0.668602	19.9275
13.8204	91.816	4.886	3.587	4.135	25.041	4.242	13.459	38.401	28.746	7.073	2.993			0.674419	20.3981
13.9395	93.73	5.344	3.316	3.54	23.528	4.396	13.093	38.893	29.795	6.821	3.001			0.680231	20.4961
14.0587	92.53	4.709	3.9	3.59	25.386	3.729	12.681	38.124	28.899	7.767	3.613			0.686048	20.448
14.1778	97.044	5.49	4.35	3.742	25.2	4.723	13.608	42.333	27.58	6.644	3.276			0.69186	21.2718
14.297	107.705	6.109	4.141	3.651	25.049	4.976	13.599	43.866	28.314	7.287	2.458			0.697677	22.4686
14.4161	109.999	8.342	4.146	4.146	25.1	4.114	12.72	45.476	25.611	7.944	3.011			0.703489	22.7826
14.5352	102.262	10.709	3.996	4.082	26.168	3.638	12.433	48.369	27.109	8.274	3.669			0.709301	22.7917
14.6544	90.409	13.626	3.938	4.405	25.536	3.747	12.628	46.805	26.824	8.001	3.556			0.715117	21.7705
14.7735	74.063	20.507	3.528	3.925	25.584	3.949	11.919	46.557	27.442	8.374	3.883			0.720929	20.8846
14.8927	55.115	31.869	4.259	4.009	25.955	3.967	13.434	48.312	29.569	8.441	3.646			0.726746	20.7796
15.0118	42.206	38.817	4.25	5.112	27.668	5.001	13.1	49.939	29.169	7.641	3.752			0.732558	20.605
15.1309	30.614	41.693	4.945	5.086	28.891	4.429	12.912	50.238	29.56	8.384	4.08			0.73837	20.0756
15.2501	23.426	38.885	5.923	4.751	26.363	5.319	11.872	56.687	32.523	8.779	3.546			0.744187	19.8249
15.3692	16.533	36.354	8.141	4.835	21.956	4.41	13.049	56.696	33.109	8.343	3.366			0.749999	18.7993
15.4884	13.972	39.273	13.096	5.207	21.327	4.047	12.358	56.531	32.176	7.678	3.705			0.755816	19.0336
15.6075	12.624	42.243	14.707	5.481	17.202	4.239	14.407	58.202	34.54	8.888	3.135			0.761628	19.6062
15.7266	11.212	51.051	20.924	6.481	12.871	3.621	16.373	63.781	35.402	9.112	3.413			0.767439	21.2946
15.8458	8.478	59.037	30.071	7.327	9.932	4.531	18.456	64.237	36.45	8.905	3.234			0.773256	22.7871
15.9649	7.557	68.318	51.819	7.505	9.605	4.96	21.451	67.185	35.807	10.143	3.277			0.779068	26.1479
16.0841	5.925	72.211	72.933	11.027	7.617	4.767	22.256	70.238	33.024	12.345	2.922			0.784885	28.6605
16.2032	4.622	73.589	100.834	14.484	7.491	5.241	22.994	74.74	35.671	12.578	2.853			0.790697	32.2815
16.3224	4.544	65.996	118.381	21.398	7.268	5.401	23.767	75.14	37.489	12.601	4.331			0.796514	34.2105
16.4415	3.428	52.167	114.986	30.77	6.939	6.087	26.718	80.37	39.523	13.524	4.119			0.802326	34.421
16.5606	3.245	42.126	96.882	47.415	5.967	7.44	27.717	84.972	43.602	14.526	3.562			0.808138	34.314
16.6798	2.683	32.404	76.991	63.549	5.758	6.554	29.845	84.073	43.687	16.705	4.99			0.813955	33.3854
16.7989	2.991	24.015	54.725	76.3	5.342	6.193	34.805	85.407	49.426	17.472	5.921			0.819766	32.9634
16.9181	1.882	14.876	38.677	84.655	6.06	6.632	42.524	82.037	50.469	18.889	7.136			0.825583	32.167
17.0372	1.75	11.955	27.42	94.662	7.006	7.615	51.401	82.284	46.749	19.996	7.118			0.831395	32.5415
17.1563	1.785	9.542	21.091	100.582	7.307	7.717	60.434	76.523	46.726	21.763	7.633			0.837207	32.8275
17.2755	1.756	7.725	14.76	105.534	8.895	9.141	66.127	71.514	46.252	22.339	8.884			0.843024	32.9934
17.3946	1.335	5.279	9.969	100.609	9.518	12.761	74.16	65.669	46.258	27.354	10.374			0.848836	33.026
17.5138	1.619	4.658	7.348	90.782	12.67	15.889	85.764	56.51	44.039	32.484	11.501			0.854653	33.024
17.6329	1.107	4.334	5.771	82.184	17.219	20.853	90.883	51.515	45.708	35.629	14.129			0.860465	33.5756
17.7521	1.39	3.217	4.13	68.41	20.569	29.397	91.287	40.266	42.929	43.737	16.148			0.866281	32.8618
17.8712	0.945	2.239	2.625	53.582	28.935	40.368	89.822	31.276	41.174	54.711	18.046			0.872093	33.0657
17.9903	0.851	1.781	2.386	42.582	36.407	53.743	85.008	21.002	36.6	60.71	19.535			0.877905	32.7823
18.1095	0.545	1.553	1.852	32.072	41.709	60.571	73.723	17.129	31.976	73.379	19.809			0.883722	32.2107
18.2286	0.504	1.596	1.522	22.423	45.204	58.445	49.176	10.985	25.623	75.551	18.703			0.889534	28.1575
18.3478	0.619	0.831	1.071	15.979	45.425	49.635	31.015	8.527	20.984	82.653	20.566			0.895351	25.2095
18.4669	0.724	0.981	1.147	12.275	43.434	34.947	19.505	6.18	18.443	90.643	24.174			0.901163	22.9503
18.586	0.541	1.161	1.065	7.555	35.551	23.306	12.888	5.13	13.337	86.107	30.744			0.906975	19.7623
18.7052	0.483	0.875	0.965	5.337	28.419	15.549	8.746	4.697	9.973	67.648	43.223			0.912792	16.9014
18.8243	0.417	0.721	0.6	4.505	20.759	10.204	5.824	3.928	7.196	48.014	54.442			0.918604	14.2373
18.9435	0.4	0.55	0.501	3.879	16.184	7.925	4.535	3.263	5.67	34.104	73.043			0.92442	13.6413
19.0626	0.394	0.676	0.515	2.385	10.16	5.848	3.558	2.919	4.104	24.273	91.299			0.930232	13.2846
19.1817	0.207	0.687	0.344	2.127	7.928	3.943	2.601	2.09	3.24	15.212	81.608			0.936044	10.9079
19.3009	0.305	0.536	0.061	1.876	6.911	2.483	2.839	2.21	2.812	9.627	54.623			0.941861	7.66209
19.42	0.167	0.48	0.097	1.242	4.497	1.867	1.88	1.715	1.97	7.169	24.589			0.947673	4.15209
19.5392	0.27	0.39	0.179	1.273	4.35	1.512	1.324	1.784	1.838	4.565	12.829			0.95349	2.75582
19.6583	0.164	0.313	0.179	0.813	3.712	1.184	1.02	2.021	1.939	3.849	7.644			0.959302	2.07618
19.7775	0.053	0.169	0.157	0.688	2.615	1.238	1.547	1.388	1.55	2.98	5.721			0.965119	1.646
19.8966	0.085	0.173	0.181	0.774	2.187	1.069	1.141	1.239	1.449	1.979	3.949			0.970931	1.29327
20.0157	0.098	0.202	0.062	0.503	1.89	1.22	0.904	1.189	1.248	1.563	2.51			0.976742	1.03536
20.1349	0.08	0.258	0.078	0.741	1.598	0.927	1.004	1.528	0.961	1.537	2.387			0.982559	1.009
20.254	0.074	0.073	0.143	0.575	1.421	0.791	0.657	1.21	0.896	1.189	1.812			0.988371	0.803727
20.3732	0.031	0.171	0.134	0.385	0.833	0.688	0.771	1.206	0.74	0.968	1.719			0.994188	0.695091
20.4923	0.0002802	0.087	0.005	0.466	0.802	0.571	0.828	0.787	0.616	0.561	1.415			1	0.558025

## Sheet: Image7
X0	Y0	Y1	Y2	Y3	Y4	Y5	Y6	Y7	Y8	Y9	Y10	Y11	Y12	Y13	Y14	Y15	Y16	Y17			Ap-Basal to 1	Average intensities
0	15.359	20.413	25.844	18.531	28.103	43.903	75.191	47.641	84.609	50.913	59.606	59.707	65.362	59.146	37.715	32.044	32.456	36.05			0	44.0329
0.1191	16.639	24.5	28.521	19.247	29.232	47.96	72.111	51.461	88.733	52.679	62.952	63.949	72.819	63.334	42.582	32.637	31.133	37.092			0.00640805	46.5323
0.2383	18.506	27.63	31.701	19.993	32.75	52.202	74.619	56.867	97.507	57.387	63.272	65.556	80.799	71.37	45.527	36.703	33.709	37.477			0.0128215	50.1986
0.3574	22.213	34.104	37.739	21.753	33.988	57.306	78.61	67.029	102.098	61.596	62.031	67.923	90.109	82.785	50.96	39.368	36.492	44.535			0.0192295	55.0355
0.4766	24.241	34.158	41.309	22.154	35.14	68.193	88.926	76.675	110.115	72.653	60.581	68.689	96.692	91.452	57.958	45.774	40.995	48.537			0.025643	60.2357
0.5957	31.42	41.861	47.486	23.841	36.272	80.902	106.663	91.468	122.014	85.689	63.654	70.599	107.514	99.632	64.45	58.613	48.158	55.501			0.032051	68.6521
0.7148	34.474	45.147	52.94	27.531	36.929	88.591	125.754	111.197	139.361	100.374	68.539	75.251	126.843	120.226	66.741	66.345	59.521	68.536			0.0384591	78.5722
0.834	40.298	53.035	54.946	30.356	40.739	97.304	157.859	134.902	160.821	131.15	82.913	85.7	138.392	140.133	75.693	78.474	76.208	79.556			0.0448725	92.1377
0.9531	41.72	56.839	66.254	40.567	48.277	109.268	181.586	173.713	191.711	158.199	106.572	94.626	152.009	166.185	82.557	96.252	91.073	97.687			0.0512805	108.616
1.0723	45.279	57.556	74.026	52.283	58.476	125.582	208.105	208.529	224.376	187.412	139.413	110.257	170.321	194.299	96.23	111.388	106.484	114.544			0.057694	126.92
1.1914	52.937	63.445	79.851	65.106	75.177	140.693	228.067	234.322	247.01	205.958	171.402	125.399	187.237	217.621	108.848	135.526	127.258	127.925			0.064102	144.099
1.3106	57.306	72.29	86.54	75.693	86.743	157.514	239.625	250.026	252.006	227.228	192.27	135.261	186.178	231.744	133.241	160.471	157.903	139.581			0.0705154	157.868
1.4297	67.297	75.833	100.114	85.872	97.965	180.279	245.547	251.984	251.347	236.005	184.573	146.065	189.207	240.64	164.629	176.992	195.275	144.248			0.0769235	168.548
1.5488	74.709	82.194	101.806	97.513	109.661	187.667	237.486	252.052	251.643	239.546	159.504	159.48	196.639	234.558	201.049	196.463	218.905	145.965			0.0833315	174.824
1.668	81.96	88.291	113.685	104.988	121.81	192.73	225.171	241.734	253.563	234.007	120.933	158.623	207.224	214.461	230.451	210.132	229.519	142.808			0.089745	176.227
1.7871	92.806	97.3	121.691	109.334	137.109	177.457	203.069	208.156	251.437	218.082	79.944	154.732	216.468	185.002	243.965	212.527	224.199	138.958			0.096153	170.68
1.9063	103.783	102.641	120.643	112.383	143.302	150.389	177.282	164.777	249.439	198.992	48.076	146.076	226.045	146.223	247.266	208.652	211.862	141.842			0.102566	161.093
2.0254	106.631	108.603	112.06	117.99	151.011	114.059	146.901	128.433	242.604	174.84	32.283	130.001	234.215	104.667	244.593	200.387	189.783	147.676			0.108974	149.263
2.1445	102.766	113.56	94.731	116.291	158.287	82.84	125.964	102.516	230.481	138.941	23.483	117.478	235.319	72.79	224.311	187.42	166.501	149.19			0.115383	135.715
2.2637	95.813	113.669	79.252	110.95	156.59	62.219	110.904	87.049	218.219	100.781	17.862	104.284	237.905	50.982	185.608	182.454	134.272	145.587			0.121796	121.911
2.3828	84.376	107.185	60.172	104.381	155.112	45.956	95.944	72.971	194.185	66.606	14.805	93.85	235.566	37.131	149.872	174.791	102.319	142.247			0.128204	107.637
2.502	75.504	101.523	48.812	86.24	142.949	36.91	77.549	57.069	174.243	41.821	12.164	84.588	232.436	30.176	125.359	166.422	71.083	126.307			0.134617	93.9531
2.6211	66.14	95.371	34.599	65.193	130.117	29.729	63.305	47.222	142.962	24.957	11.975	81.509	229.033	24.542	110.725	157.804	46.007	111.051			0.141026	81.7912
2.7402	55.063	85.013	23.354	49.806	118.306	23.53	48.428	37.594	112.352	15.6	11.296	80.501	229.062	22.496	106.685	139.39	35.487	93.129			0.147434	71.5051
2.8594	46.229	76.47	16.641	36.464	102.058	18.491	38.024	31.2	79.883	12.098	10.82	82.515	226.015	20.251	104.413	119.155	27.521	80.133			0.153847	62.6878
2.9785	35.624	67.613	13.89	25.327	83.721	15.391	28.797	26.327	56.511	10.331	9.314	82.557	224.152	18.876	104.54	92.312	22.96	68.245			0.160255	54.8049
3.0977	26.124	58.146	12.001	17.277	60.205	13.855	21.449	23.289	39.931	10.274	10.381	88.581	225.457	18.489	106.716	69.091	21.53	57.454			0.166668	48.9028
3.2168	18.304	49.561	9.865	12.823	38.106	12.497	16.324	21.112	28.293	7.592	11.599	95.461	220.472	17.483	112.465	50.921	17.563	49.833			0.173077	43.9041
3.336	12.464	35.284	11.067	8.734	20.516	12.11	13.623	21.423	23.113	7.123	13.565	100.893	211.676	17.386	116.2	33.78	17.169	39.823			0.17949	39.7749
3.4551	8.411	26.519	9.568	6.27	11.123	10.794	10.912	19.201	15.954	6.814	13.503	105.321	200.123	18.045	118.833	24.056	16.468	34.564			0.185898	36.4711
3.5742	7.286	18.46	9.861	6.553	7.668	9.885	9.409	20.88	11.624	6.799	14.153	110.741	182.494	15.195	121.531	17.251	14.845	31.661			0.192306	34.2387
3.6934	6.508	11.802	9.276	5.827	5.445	11.106	9.776	20.772	8.61	5.952	15.274	114.463	160.924	16.048	121.314	14.654	13.621	27.097			0.198719	32.1372
3.8125	5.981	7.755	10.365	5.01	4.482	12.609	8.606	20.166	7.724	4.863	16.491	119.086	144.525	18.508	114.477	15.371	14.136	24.217			0.205128	30.7984
3.9317	5.626	4.74	9.896	4.798	4.605	13.063	8.289	21.212	7.179	4.471	19.904	120.593	136.783	16.718	116.738	14.716	12.44	19.837			0.211541	30.0893
4.0508	5.702	3.892	9.358	4.845	4.96	12.063	8.592	18.133	7.23	4.18	18.357	120.288	128.689	17.238	109.105	14.176	14.237	17.464			0.217949	28.8061
4.1699	5.831	3.897	10.001	4.513	4.343	12.137	8.559	18.071	7.576	3.918	17.498	111.181	117.194	18.039	102.338	14.177	13.66	16.83			0.224357	27.2091
4.2891	5.627	3.626	7.96	3.914	4.049	12.982	8.988	17.404	7.78	4.18	18.392	102.93	113.905	18.981	92.526	14.717	14.527	14.843			0.23077	25.9628
4.4082	5.763	2.905	7.827	3.773	4.353	10.933	8.771	19.22	6.596	4.002	20.579	91.705	105.42	17.73	81.69	13.645	13.236	13.369			0.237179	23.9732
4.5274	5.15	2.719	8.173	3.667	3.919	11.44	8.831	18.938	6.201	3.414	20.359	81.508	96.746	19.238	74.06	12.013	12.132	11.029			0.243592	22.1965
4.6465	4.502	3.286	8.783	3.903	4.725	11.48	8.478	18.146	6.01	3.406	22.162	71.856	85.4	21.19	72.357	12.691	13.162	12.252			0.25	21.3216
4.7657	4.376	3.827	8.638	3.238	3.104	12.054	9.007	15.875	6.596	4.119	22.267	66.008	63.451	20.228	70.202	13.041	12.411	10.585			0.256413	19.3904
4.8848	4.209	3.436	7.988	3.576	3.463	12.111	8.939	14.801	5.514	3.962	22.948	64.053	43.54	20.566	61.609	12.872	13.223	10.363			0.262821	17.6207
5.0039	4.203	2.546	8.477	3.434	3.689	13.33	8.944	16.148	6.209	3.18	24.488	63.656	28.335	20.955	52.315	11.88	12.165	9.358			0.26923	16.2951
5.1231	3.993	2.659	9.009	3.045	3.87	12.911	9.805	17.807	5.11	3.886	27.18	59.702	15.922	21.37	47.74	12.349	10.467	9.506			0.275643	15.3517
5.2422	4.304	3.03	8.825	3.009	3.509	12.782	10.531	17.621	6.183	3.749	27.445	52.791	8.195	22.614	41.015	11.786	11.058	9.247			0.282051	14.3163
5.3614	4.331	3.131	8.496	3.393	3.53	13.711	10.864	19.45	6.004	4.134	27.098	45.747	5.877	23.469	33.498	11.371	11.337	9.504			0.288464	13.6081
5.4805	3.264	3.009	7.308	3.369	3.881	14.86	11.358	24.333	5.978	3.447	26.272	34.82	5.741	24.178	25.666	11.358	12.001	9.264			0.294872	12.7837
5.5996	3.674	2.758	7.344	3.498	4.25	14.537	11.622	22.559	5.534	3.67	27.43	25.788	5.229	25.655	22.783	10.313	13.294	8.009			0.301281	12.1082
5.7188	3.929	2.791	7.618	3.861	3.935	14.548	11.51	24.82	6.359	3.489	24.721	16.283	4.806	27.384	19.23	9.933	10.78	8.838			0.307694	11.3797
5.8379	4.469	2.829	8.447	4.018	3.226	16.133	11.066	26.265	7.463	3.555	23.155	9.278	4.375	28.963	17.619	10.002	11.154	7.721			0.314102	11.0966
5.9571	3.97	2.138	8.291	3.441	4.15	16.738	11.387	28.419	7.109	3.738	23.618	5.909	4.437	28.847	17.856	9.728	11.756	7.538			0.320515	11.0594
6.0762	3.578	2.391	7.828	3.896	4.557	17.288	13.486	29.054	6.735	3.767	23.769	5.543	4.794	27.155	16.929	10.669	13.955	8.123			0.326923	11.3065
6.1953	3.26	2.653	7.206	4.025	4.273	17.801	14.42	28.42	6.128	3.978	25.604	3.706	5.061	26.186	17.514	10.307	14.051	8.513			0.333332	11.2837
6.3145	4.722	2.018	6.844	3.845	4.516	18.461	12.69	26.69	7.191	3.602	27.076	3.168	5.097	25.399	15.594	10.734	15.234	9.406			0.339745	11.2382
6.4336	5.048	2.831	7.701	3.951	5.215	18.553	14.484	26.892	6.87	3.612	29.382	2.746	5.537	28.251	15.478	10.014	14.456	9.502			0.346153	11.6957
6.5528	4.092	2.713	7.934	4.001	4.071	18.322	14.153	24.053	7.055	3.669	32.393	3.321	4.449	29.224	19.428	10.507	13.637	8.561			0.352566	11.7546
6.6719	3.704	2.445	8.458	3.994	4.676	18.027	14.785	21.115	6.566	3.813	30.981	3.493	4.59	28.228	19.698	10.164	14.332	7.832			0.358974	11.4945
6.7911	4.101	2.509	8.205	4.434	4.531	18.528	14.422	21.321	5.685	3.194	30.789	3.531	5.184	30.273	20.647	11.137	14.273	7.404			0.365388	11.676
6.9102	3.895	2.397	8.22	4.259	4.472	18.999	15.249	23.197	6.795	3.826	30.808	3.943	5.205	32.042	19.567	10.824	14.538	6.698			0.371796	11.9408
7.0293	3.89	2.884	7.073	4.518	4.245	17.438	15.748	20.671	6.603	3.969	31.606	3.198	4.129	30.837	17.436	11.665	16.243	6.62			0.378204	11.5985
7.1485	3.828	2.392	8.225	4.074	3.512	19.649	17.861	20.376	6.769	3.109	27.202	3.339	4.83	32.087	14.507	11.542	16.951	6.246			0.384617	11.4722
7.2676	3.753	3.444	7.024	4.075	3.964	19.966	21.472	19.666	6.437	3.648	28.197	3.875	4.909	33.771	12.621	11.587	17.331	5.416			0.391026	11.7309
7.3868	4.026	3.655	7.208	4.049	4.437	20.322	29.65	19.897	6.044	4.311	27.526	3.889	5.022	35.548	14.083	13.35	16.421	6.021			0.397439	12.5255
7.5059	3.108	3.04	7.681	3.891	3.868	18.137	38.613	18.941	6.647	3.402	27.193	4.046	5.107	36.98	14.468	14.139	17.704	6.269			0.403847	12.9574
7.625	3.717	3.019	8.178	3.876	4.575	18.237	46.33	18.401	5.904	3.695	27.041	3.814	5.136	36.43	15.603	12.418	17.422	6.895			0.410255	13.3717
7.7442	4.147	2.68	8.721	4.376	4.661	19.515	56.67	18.745	5.554	3.183	29.876	3.584	5.252	36.879	16.907	11.768	16.624	6.256			0.416668	14.1888
7.8633	3.257	2.901	7.68	4.72	4.043	16.413	61.427	17.175	5.694	3.541	27.897	3.65	5.184	37.072	16.803	11.753	18.199	6.053			0.423077	14.0812
7.9825	3.315	2.992	6.97	4.741	4.704	15.741	69.082	15.84	5.892	3.807	25.554	2.83	4.949	40.713	18.53	11.492	17.231	5.609			0.42949	14.444
8.1016	4.066	2.322	7.234	4.354	5.976	16.16	76.817	14.656	6.027	4.039	28.027	3.557	4.839	41.443	18.471	11.484	18.31	5.781			0.435898	15.1979
8.2207	4.118	2.659	7.363	4.529	4.65	16.98	84.424	13.77	5.809	4.017	28.33	3.48	5.139	42.878	16.781	10.478	18.293	5.938			0.442306	15.5353
8.3399	3.987	2.755	7.12	5.196	4.905	15.766	89.004	15.073	4.902	4.187	26.554	3.797	5.201	39.607	17.784	10.838	18.052	5.654			0.448719	15.5768
8.459	4.421	2.721	5.684	5.211	4.72	16.242	86.766	13.044	5.625	3.747	25.088	4.107	4.815	38.541	16.589	11.148	18.857	5.929			0.455128	15.1808
8.5782	3.941	3.223	6.369	4.447	5.236	15.8	81.549	13.85	5.089	3.782	24.508	4.678	5.269	42.262	16.858	10.135	19.235	5.811			0.461541	15.1134
8.6973	3.655	2.743	5.982	4.719	4.948	14.699	78.838	13.251	5.196	3.612	23.595	3.671	5.321	48.664	14.965	10.67	20.135	5.317			0.467949	14.9989
8.8165	3.561	3.475	7.418	4.966	5.347	12.694	71.591	13.462	5.159	4.208	24.216	2.931	5.402	49.468	14.591	11.164	22.289	5.022			0.474362	14.8313
8.9356	3.507	3.608	6.047	5.143	5.988	13.665	65.956	12.688	5.254	4.035	22.585	3.283	5.056	49.361	15.356	10.007	21.529	4.63			0.48077	14.3166
9.0547	3.285	3.001	5.897	5.064	5.359	14.148	62.501	11.324	4.739	3.362	20.689	3.311	5.477	45.49	15.616	10.117	21.281	4.517			0.487179	13.621
9.1739	2.86	3.449	5.688	4.725	5.045	13.968	60.685	12.032	5.145	3.809	20.378	2.995	5.409	41.775	16.478	10.314	22.675	4.247			0.493592	13.4265
9.293	3.108	3.42	5.175	4.648	4.475	13.676	59.374	11.727	4.662	4.661	20.4	3.813	4.513	40.222	15.953	10.074	22.536	4.478			0.5	13.1619
9.4122	3.331	4.14	5.229	5.117	4.713	13.852	55.219	10.762	4.728	4.702	18.672	4.055	5.608	37.356	16.606	9.451	20.14	5.244			0.506413	12.7181
9.5313	3.037	4.24	4.417	5.335	5.025	14.267	49.87	10.55	6.007	4.427	17.842	4.39	5.315	36.339	18.029	9.112	19.54	4.503			0.512821	12.3469
9.6504	2.898	3.87	5	5.166	4.531	13.341	46.396	9.814	5.155	4.857	15.754	3.777	5.394	34.131	17.254	10.975	19.487	4.767			0.51923	11.8093
9.7696	2.629	4.244	5.385	4.742	4.175	12.692	44.449	9.45	4.353	4.869	14.339	3.484	6.023	38.704	16.464	9.795	19.378	4.956			0.525643	11.6739
9.8887	3.692	4.005	3.966	5.649	4.712	13.472	42.322	9.382	4.374	4.247	13.888	3.839	5.683	38.153	15.344	9.98	21.135	4.512			0.532051	11.5753
10.0079	3.191	3.437	4.112	5.843	5.229	12.484	40.768	8.736	4.534	4.426	13.71	3.364	5.906	37.954	17.142	9.808	19.842	4.664			0.538464	11.3972
10.127	2.588	3.488	4.57	6.334	5.268	12.794	39.231	8.138	4.676	4.701	13.391	3.374	6.514	41.316	16.506	10.36	19.193	5.072			0.544872	11.5286
10.2462	3.136	3.186	4.435	6.417	5.074	12.504	38.059	8.577	5.41	4.405	12.498	3.387	5.685	41.853	16.276	9.826	19.87	5.31			0.551286	11.4393
10.3653	3.043	3.105	3.965	6.532	5.466	11.331	37.025	8.023	4.695	4.575	11.755	4.197	6.065	42.269	16.271	10.561	19.136	5.214			0.557694	11.2904
10.4844	2.979	3.269	4.121	8.26	4.979	10.87	36.973	7.881	4.103	4.421	11.938	3.854	6.417	43.395	17.621	9.505	19.382	5.069			0.564102	11.3909
10.6036	3.18	3.337	3.977	7.331	4.478	10.887	35.114	8.565	3.841	5.571	10.814	3.36	6.811	43.691	18.24	10.022	18.998	5.147			0.570515	11.298
10.7227	3.158	3.727	3.571	7.598	4.558	10.036	35.594	7.065	4.292	5.08	11.816	4.113	7.33	42.525	18.259	10.145	17.554	5.046			0.576923	11.1926
10.8419	3.607	3.334	3.605	8.365	5.018	11.012	35.539	6.933	3.877	4.747	11.397	3.559	7.26	42.314	17.094	9.634	18.701	5.256			0.583337	11.1807
10.961	4.169	3.186	3.744	7.909	5.005	10.45	32.137	8.168	3.491	4.404	10.85	3.727	6.866	44.692	17.854	10.223	18.102	4.51			0.589745	11.0826
11.0801	3.258	2.742	3.702	9.83	4.827	11.77	33.776	7.747	3.946	5.295	11.222	3.419	6.052	46.72	20.433	10.398	18.932	5.143			0.596153	11.6229
11.1993	3.296	2.778	3.719	9.432	5.479	10.172	35.142	8.212	4.115	5.588	10.776	3.871	6.421	50.014	21.201	9.638	18.538	5.745			0.602566	11.8965
11.3184	3.75	2.964	3.342	9.97	4.65	9.235	32.019	9.195	3.803	5.862	10.855	3.956	6.919	52.463	19.571	10.102	18.865	4.817			0.608974	11.7966
11.4376	3.603	2.924	3.698	10.267	4.218	9.691	32.719	7.654	3.509	6.272	9.593	3.181	7.36	54.816	20.513	9.489	19.356	5.145			0.615388	11.8893
11.5567	2.932	2.803	3.487	10.807	4.639	11.026	32.425	6.56	3.578	6.872	9.105	3.766	7.321	56.968	23.263	8.532	17.272	5.223			0.621796	12.0322
11.6758	2.774	2.581	3.482	10.221	4.095	10.501	33.525	7.157	4.078	4.969	9.46	3.618	6.886	57.154	22.789	9.176	18.278	4.361			0.628204	11.9503
11.795	3.189	2.45	3.636	10.957	3.532	10.932	32.04	7.532	3.855	5.733	9.754	3.78	6.687	57.513	22.21	8.633	17.863	4.529			0.634617	11.9347
11.9141	3.296	3.026	3.799	12.691	4.215	10.919	33.299	7.171	3.397	6.28	8.341	3.818	6.894	58.123	23.305	8.957	17.616	5.613			0.641026	12.2644
12.0333	3.277	3.307	3.121	12.194	4.48	11.284	35.244	6.955	3.527	6.998	9.082	3.756	7.196	53.475	23.961	8.896	18.138	4.864			0.647439	12.2086
12.1524	3.01	2.986	2.856	13.466	5.115	11.526	30.054	6.246	4.012	6.582	8.481	3.648	6.181	54.425	20.726	7.573	18.033	5.842			0.653847	11.709
12.2716	2.906	2.623	2.992	15.213	4.971	12.362	33.064	7.924	3.662	6.573	8.683	3.294	5.73	55.408	23.046	8.744	17.901	5.131			0.66026	12.2348
12.3907	2.841	2.872	3.486	15.661	5.413	12.09	33.303	6.907	3.566	6.04	9.781	4.365	5.903	53.854	23.663	9.338	16.412	5.029			0.666668	12.2513
12.5098	2.784	2.84	3.391	13.271	4.516	11.38	33.796	7.121	3.423	7.337	7.978	3.975	5.99	51.209	22.654	8.645	17.576	4.583			0.673077	11.8038
12.629	2.569	3.003	3.325	16.06	5.098	11.464	33.548	6.675	3.521	7.837	7.325	3.47	7.444	50.332	23.883	8.527	17.402	5.12			0.67949	12.0335
12.7481	3.057	2.729	3.509	15.709	4.667	12.842	35.071	6.755	3.406	6.787	8.656	3.71	8.749	49.967	24.655	8.764	16.428	4.817			0.685898	12.2377
12.8673	3.542	2.699	3.588	14.8	4.814	12.903	36.272	5.601	3.805	7.276	7.73	3.567	7.575	52.48	22.57	7.248	16.344	5.924			0.692311	12.1521
12.9864	3.208	3.015	3.102	16.01	5.954	12.186	35.463	5.569	4.004	6.914	7.955	2.776	7.025	56.423	22.161	7.343	15.773	4.68			0.698719	12.1978
13.1055	3.232	3.142	2.66	16.071	6.393	11.786	36.148	5.738	3.674	8.103	8.483	3.763	7.897	56.239	20.127	7.764	14.847	4.947			0.705128	12.2786
13.2247	3.923	2.777	3.404	16.014	5.438	11.627	36.916	4.703	3.552	7.393	8.085	4.027	9.236	54.081	20.273	7.576	15.318	5.61			0.711541	12.2196
13.3438	4.399	2.743	3.207	14.544	5.569	12.616	36.194	5.748	3.955	7.748	7.778	3.861	8.208	50.914	20.514	7.74	15.903	5.466			0.717949	12.0615
13.463	3.81	3.381	3.083	13.39	6.151	10.918	35.603	6.017	4.361	7.313	8.654	3.744	8.846	50.936	18.898	6.706	14.387	5.836			0.724362	11.7797
13.5821	3.609	2.662	3.116	12.573	6.322	10.991	35.178	6.617	3.635	9.41	7.637	4.677	9.192	52.286	20.417	7.303	14.72	6.506			0.73077	12.0473
13.7012	4.145	2.662	3.707	12.056	5.927	12.868	35.631	6.385	3.454	10.338	8.171	3.79	10.604	52.119	21.918	6.706	14.868	6.92			0.737179	12.3483
13.8204	4.373	2.624	3.461	12.68	6.278	11.444	38.201	6.276	3.377	8.689	7.614	4.023	11.853	57.671	23.382	7.31	13.813	5.643			0.743592	12.7062
13.9395	4.054	3.323	3.461	10.41	5.948	10.829	34.928	5.311	3.84	9.822	6.933	4.125	11.479	61.503	24.395	7.719	13.163	6.082			0.75	12.6292
14.0587	4.324	3.403	3.392	11.742	6.776	10.156	36.326	4.869	3.714	9.745	6.773	5.473	12.131	66.184	23.566	7.834	12.928	7.755			0.756413	13.1717
14.1778	4.629	2.489	3.777	13.134	5.903	10.282	32.369	5.401	4.094	10.896	6.296	4.243	13.788	63.117	23.887	7.339	12.955	7.871			0.762821	12.915
14.297	4.248	2.972	3.035	11.902	6.063	8.821	31.509	6.29	4.052	11.075	6.42	3.831	13.171	62.129	23.734	8.42	11.561	7.107			0.769235	12.5744
14.4161	4.456	3.196	3.298	12.051	6.241	9.258	29.96	5.665	3.198	11.827	6.923	4.254	14.985	54.186	25.388	7.746	11.945	7.733			0.775643	12.3506
14.5352	4.341	3.105	3.452	10.742	5.426	9.894	31.347	5.472	3.829	11.936	7.26	4.518	15.784	52.509	26.535	7.943	12.982	7.956			0.782051	12.5017
14.6544	5.883	3.29	3.326	11.481	5.956	8.551	30.05	6.212	4.423	12.775	7.375	4.308	19.698	48.604	23.971	8.784	10.866	7.917			0.788464	12.415
14.7735	5.995	3.061	3.751	11.988	6.216	8.612	29.453	5.412	4.116	12.308	7.7	4.209	21.566	44.23	26.791	9.825	12.599	7.751			0.794872	12.5324
14.8927	7.134	3.435	3.343	12.23	6.61	9.006	25.663	5.649	3.717	13.516	8.061	4.621	25.563	40.753	28.294	9.485	14.736	8.447			0.801286	12.7924
15.0118	7.525	3.419	3.785	10.028	5.891	8.177	23.275	5.711	3.68	14.583	6.762	4.145	31.194	41.688	26.708	9.452	18.25	10.986			0.807694	13.0699
15.1309	8.644	3.174	4.443	10.221	6.426	8.198	22.962	6.054	4.591	14.176	8.336	5.512	38.344	41.937	28.881	10.329	24.642	11.486			0.814102	14.3531
15.2501	10.813	3.409	2.912	11.419	5.675	9.332	21.052	5.78	3.653	13.746	8.39	5.761	40.992	43.289	27.965	11.21	29.01	12.579			0.820515	14.8326
15.3692	11.692	4.291	3.514	9.924	6.79	9.614	20.313	6.359	3.221	14.983	8.124	5.893	43.147	46.439	26.758	12.582	35.636	13.89			0.826923	15.7317
15.4884	11.217	4.169	3.517	9.863	6.078	9.86	19.477	5.748	3.375	14.771	7.827	6.973	43.405	49.556	27.632	14.846	45.805	15.952			0.833337	16.6706
15.6075	11.791	5.315	4.06	10.382	5.434	11.123	18.412	5.733	3.776	14.011	8.437	6.35	37.874	58.091	31.269	17.458	50.858	20.35			0.839745	17.818
15.7266	10.986	5.076	4.113	9.385	6.797	15.009	17.446	6.222	4.856	14.926	8.584	7.872	33.399	61.267	32.38	20.522	59.649	23.99			0.846153	19.0266
15.8458	10.144	5.528	3.786	9.166	7.103	13.052	17.965	5.263	4.23	19.168	9.562	8.29	31.631	66.02	35.752	23.293	63.819	28.613			0.852566	20.1325
15.9649	7.937	5.519	4.025	10.283	6.277	10.041	16.516	5.482	4.255	19.169	11.577	8.311	28.417	70.745	39.878	29.493	69.331	39.204			0.858974	21.47
16.0841	7.514	4.927	4.644	9.445	5.865	10.076	15.433	4.952	4.183	24.233	12.423	10.219	20.777	82.985	46.892	35.985	79.184	48.482			0.865388	23.7899
16.2032	6.265	4.651	4.896	8.824	6.081	9.975	15.621	6.001	4.306	26.317	12.992	11.936	16.027	90.513	52.808	42.311	82.215	60.143			0.871796	25.6601
16.3224	5.783	3.964	4.873	8.022	6.881	9.75	17.545	5.937	4.631	28.113	14.729	13.391	10.611	93.121	61.286	51.884	85.053	60.369			0.878209	26.9968
16.4415	4.567	3.226	4.739	8.035	7.381	11.814	18.29	5.851	5.085	32.188	16.415	16.966	8.65	88.067	67.98	54.8	81.823	48.362			0.884617	26.9022
16.5606	3.973	2.838	4.179	8.956	6.822	14.173	18.507	6.816	5.885	37.842	19.484	21.453	6.785	69.176	76.764	50.92	67.659	38.623			0.891026	25.6031
16.6798	3.424	2.488	3.916	8.712	7.431	16.122	19.62	7.606	7.448	40.787	22.91	24.944	4.916	56.062	71.927	36.452	52.876	25.361			0.897439	22.9446
16.7989	1.966	1.53	4.591	9.451	7.26	16.177	22.311	9.295	9.641	49.904	28.099	29.572	3.573	39.862	63.966	20.352	39.366	13.991			0.903847	20.6059
16.9181	1.528	1.451	3.852	9.545	6.777	19.611	26.316	10.585	11.605	60.236	34.584	39.69	2.877	27.107	45.416	12.665	25.882	8.876			0.91026	19.3668
17.0372	1.645	1.169	3.712	9.266	6.696	21.834	28.077	12.173	18.037	75.17	37.822	39.722	2.903	17.041	27.717	8.916	13.591	7.184			0.916668	18.4819
17.1563	1.006	1.191	2.726	9.161	8.71	23.491	33.31	14.926	25.486	93.726	40.583	36.784	2.107	11.813	16.391	5.971	7.61	6.463			0.923077	18.9697
17.2755	0.854	0.998	2.686	10.009	9.066	29.833	43.269	20.984	39.767	105.689	37.771	27.731	1.957	8.22	10.695	4.49	5.546	3.787			0.92949	20.1862
17.3946	0.979	0.658	2.853	9.182	11.005	32.028	51.177	26.645	57.796	107.258	33.137	18.018	1.098	6.08	6.136	3.748	4.284	2.661			0.935898	20.8191
17.5138	0.568	0.624	2.424	8.017	11.696	35.073	58.574	34.732	74.161	101.649	26.919	12.937	1.206	4.483	5.289	3.378	2.381	2.277			0.942311	21.466
17.6329	0.611	0.915	2.478	7.963	10.756	39.544	64.15	44.136	90.918	84.018	17.28	8.929	1.386	3.83	3.726	2.557	1.856	1.601			0.948719	21.4808
17.7521	0.563	1.031	1.768	8.721	10.494	41.558	70.716	48.953	102.315	56.887	10.018	7.786	1.16	2.973	3.477	1.724	1.565	1.047			0.955133	20.7087
17.8712	0.432	0.649	2.436	7.179	11.721	46.821	71.176	46.338	99.763	34.909	7.768	5.485	0.849	1.886	2.813	1.765	1.724	0.911			0.961541	19.1458
17.9903	0.829	0.542	2.699	6.852	13.108	53.035	58.897	37.043	95.012	18.187	7.733	4.511	1.092	1.807	2.577	1.121	1.059	1.33			0.967949	17.0797
18.1095	0.48	0.675	1.954	6.568	13.943	51.441	32.531	20.195	76.899	12.467	6.274	3.424	1.003	1.642	2.178	0.777	0.895	0.882			0.974362	13.0127
18.2286	0.697	0.445	1.512	4.764	15.698	45.421	16.07	8.168	43.011	8.944	5.009	2.758	0.74	1.336	1.715	0.674	0.672	0.535			0.98077	8.78717
18.3478	0.548	0.249	1.27	3.731	14.956	34.651	8.544	5.15	18.5	6.687	3.846	2.625	0.463	1.159	1.589	0.847	0.716	0.248			0.987184	5.87661
18.4669	0.327	0.599	1.791	3.459	15.305	24.896	6.207	4.53	12.925	4.487	3.64	1.698	0.576	0.755	1.417	0.818	0.441	0.233			0.993592	4.67244
18.586	0.468	0.513	1.392	3.334	13.989	13.028	4.39	3.479	12.353	2.991	3.134	1.219	0.75	0.733	0.908	0.439	0.437	0.393			1	3.55278

## Sheet: Image6
X0	Y0	Y1	Y2	Y3	Y4	Y5	Y6	Y7	Y8	Y9	Y10	Y11	Y12	Y13	Y14	Y15	Y16	Y17	Y18	Y19	Y20	Y21	Y22	Y23	Y24	Y25	Y26	Y27	Y28			Ap-Basal to 1	Average intensities
0	9.0791	6.312	7.2761	5.9791	6.6894	5.5373	7.868	6.8858	12.61	12.1182	13.925	23.6203	20.3989	10.96	26.6	22.21	17.446	15.347	24.736	21.781	27.174	22.257	21.107	27.164	47.817	80.057	69.682	159.625	31.437			0	26.3345
0.1191	9.1734	7.177	7.9963	5.7849	7.5768	6.3031	9.53	6.4366	15.061	13.5971	15.685	28.5945	20.3385	12.773	27.784	26.109	18.542	16.821	30.513	25.527	29.252	25.524	23.69	31.344	53.522	88.026	71.553	160.212	43.043			0.00567984	28.8789
0.2383	11.418	8.685	8.0722	7.2697	7.9967	6.2761	12.005	7.1098	16.756	16.6322	20.852	31.9854	22.8242	13.578	34.365	33.41	20.661	16.305	34.827	31.284	28.944	29.687	30.786	33.398	62.54	92.09	71.678	157.569	61.163			0.0113644	32.0747
0.3574	15.0766	11.021	9.3834	7.9728	8.369	7.3878	17.379	8.9985	18.234	19.7835	25.174	37.7893	23.7404	12.828	37.382	43.654	23.006	17.499	38.179	39.061	30.581	31.129	38.576	33.582	70.5	97.266	72.584	157.102	79.711			0.0170443	35.6189
0.4766	16.2844	14.473	9.7754	7.6735	9.0693	7.8048	26.628	10.3406	20.655	25.542	28.495	43.0148	26.7158	14.666	44.943	51.049	28.77	18.512	44.76	48.218	32.729	33.963	53.354	36.97	74.182	99.522	76.061	158.579	98.747			0.0227289	40.0516
0.5957	19.1817	18.375	11.1465	8.1309	10.5318	8.3757	39.124	11.4241	23.974	33.7364	36.973	49.041	27.8592	15.614	46.324	67.962	36.486	19.715	49.197	60.836	32.377	42.039	68.032	41.33	82.672	100.195	80.564	159.577	122.334			0.0284087	45.6251
0.7148	25.0238	24.157	16.2198	9.9452	13.6162	9.3356	57.564	13.7953	25.965	44.9321	44.395	54.4072	28.6735	20.164	52.085	84.325	39.65	25.373	54.362	75.45	36.535	48.513	77.88	47.658	91.468	110.958	96.786	160.791	151.299			0.0340886	53.1492
0.834	32.8593	32.144	22.1233	10.9403	15.7717	11.1538	70.63	16.4822	29.434	56.6478	56.365	62.4362	31.9722	29.04	57.191	107.52	45.448	32.56	62.954	97.622	38.385	51.881	99.207	55.394	97.15	116.204	118.114	157.759	178.326			0.0397732	61.8522
0.9531	41.4763	44.691	29.8632	10.0464	16.6298	11.7366	81.791	20.4864	37.048	68.4492	69.785	68.0894	34.8085	37.798	62.061	136.403	56.398	44.92	65.535	119.444	42.788	62.672	117.956	63.116	108.335	120.692	136.074	166.246	202.535			0.045453	71.6508
1.0723	50.9172	57.991	38.644	12.5447	23.0644	14.4504	96.074	25.4161	43.256	72.4553	78.502	76.2872	40.1737	48.779	68.421	165.088	67.719	66.9	72.481	133.935	49.261	80.246	128.73	74.578	123.634	121.958	155.696	168.583	219.281			0.0511376	81.8988
1.1914	58.8184	73.075	49.2106	16.4122	27.152	16.9659	103.669	33.706	58.934	76.0612	94.884	83.0381	48.3184	58.179	74.891	192.846	77.372	92.969	75.307	140.484	56.902	102.624	138.005	85.401	136.46	119.361	172.946	172.21	227.274			0.0568175	91.844
1.3106	67.0538	86.607	57.9105	20.0751	31.3778	19.2573	108.675	41.6058	77.249	80.6976	107.771	90.5138	54.1543	70.831	84.64	214.496	87.514	121.048	84.184	148.546	65.646	126.133	141.903	104.758	144.772	113.297	174.03	180.951	232.004			0.0625021	101.3
1.4297	78.1255	99.092	67.4654	24.8767	34.5229	22.6527	110.858	55.2892	90.438	83.3174	119.577	93.7214	60.6915	82.305	98.803	220.383	101.449	140.584	93.279	149.279	79.043	148.524	150.708	126.25	151.884	108.363	172.896	178.736	234.367			0.0681819	109.568
1.5488	85.0232	111.127	74.7383	32.1743	40.9935	26.8142	114.949	67.813	104.922	79.7002	126.806	96.207	73.4164	89.43	117.848	219.126	114.148	156.788	109.655	144.821	90.506	162.273	165.594	143.442	158.898	98.542	175.979	175.933	239.23			0.0738618	117.134
1.668	87.1703	119.798	77.0753	43.0145	45.178	33.2226	113.399	80.238	111.761	81.1992	134.637	91.0734	78.4216	98.137	134.424	213.805	126.271	172.063	120.292	140.205	105.73	168.75	173.57	167.639	163.176	90.142	172.655	165.306	243.639			0.0795464	122.482
1.7871	84.8969	125.067	82.9771	52.3021	50.0068	40.5514	102.602	87.9301	111.328	78.1963	128.996	84.782	82.4558	109.086	146.806	212.586	130.021	182.146	126.517	127.531	120.574	171.29	179.813	180.821	168.875	84.019	159.625	163.562	245.072			0.0852262	124.843
1.9063	77.7241	130.451	76.6397	66.9694	56.6622	51.5434	99.323	92.5754	114.113	73.524	122.633	77.1866	89.9114	116.888	154.635	206.249	130.753	185.809	135.374	113.42	131.904	163.572	184.472	190.232	174.708	83.008	149.105	152.277	245.138			0.0909108	125.752
2.0254	65.226	136.973	70.4018	76.1615	63.943	55.6064	97.788	94.6982	114.759	65.1448	112.067	71.6367	92.7858	120.753	157.106	200.479	119.459	187.789	140.982	103.991	131.316	154.541	180.048	202.834	177.084	80.408	128.684	136.277	245.43			0.0965907	123.599
2.1445	51.0595	143.343	62.7686	82.6327	69.32	63.6952	89.251	87.7621	105.354	58.6088	93.748	59.6597	92.0098	117.53	153.173	190.307	103.083	173.37	137.999	89.953	124.669	134.988	181.848	195.908	173.655	72.775	110.917	113.981	250.125			0.102271	116.672
2.2637	36.5024	154.476	55.5648	80.4345	68.7827	72.9932	79.095	77.0541	93.394	53.4684	77.77	57.0022	88.336	110.32	144.386	162.505	84.057	157.253	132.276	69.265	110.782	119.655	181.427	186.253	171.825	62.841	99.819	99.386	252.015			0.107955	108.239
2.3828	24.6446	149.933	55.8642	69.4559	63.8181	81.7305	60.741	64.5465	79.367	47.49	58.133	51.1558	85.6101	99.782	129.599	133.214	65.3	130.199	118.729	55.952	89.717	104.206	178.103	175.291	172.191	53.002	85.713	80.415	250.897			0.113635	97.0621
2.502	18.2645	141.414	50.7315	57.5581	60.272	81.0308	46.084	51.5555	62.13	38.7309	44.36	48.33	82.0987	91.476	111.59	105.88	48.631	102.985	100.443	45.016	63.648	87.954	173.735	160.813	165.638	44.677	72.556	59.879	251.199			0.11932	85.1269
2.6211	14.0283	124.537	46.3751	45.347	58.3982	79.6799	33.526	41.4272	47.98	30.7691	37.109	45.5929	79.1489	78.599	89.854	83.686	33.826	75.442	85.939	29.888	46.589	78.432	163.62	148.57	163.684	34.99	65.489	43.908	248.174			0.124999	74.2968
2.7402	10.9951	103.547	42.8034	37.1637	56.1864	72.7904	25.571	32.2417	37.356	27.5152	31.798	38.3738	74.6985	70.49	72.912	67.176	25.541	52.204	67.119	16.711	33.685	63.637	146.597	133.579	157.511	25.909	52.476	30.853	240.367			0.130679	63.7175
2.8594	9.146	80.344	38.1468	33.0921	49.7847	60.7593	19.22	24.0385	29.254	24.5929	26.346	37.2766	72.2533	57.483	60.157	54.231	19.224	33.211	48.643	10.645	23.77	49.939	122.361	117.545	155.791	20.511	37.559	22.367	228.562			0.136364	54.0087
2.9785	8.5554	55.263	34.5555	28.0758	41.7886	46.7938	13.436	20.6942	22.773	21.0021	23.299	37.0187	71.4275	49.257	52.228	45.139	13.357	21.621	35.932	7.344	16.434	35.3	97.234	102.647	148.832	15.71	26.907	16.815	215.333			0.142044	45.6818
3.0977	8.1085	37.899	28.3906	24.2433	37.3216	33.67	10.319	19.069	17.569	17.8422	21.421	33.8989	64.7374	42.97	42.538	38.902	10.861	15.23	26.162	5.343	13.708	25.196	68.47	81.391	140.297	13.778	17.73	13.219	194.484			0.147728	38.0955
3.2168	7.6378	25.204	25.4733	19.9716	30.2272	24.0519	7.536	17.1368	13.65	14.9674	20.362	31.3898	60.968	40.478	35.498	35.88	10.195	10.519	16.24	5.257	10.583	16.736	51.644	66.803	130.192	12.5	10.864	10.656	164.615			0.153408	31.9736
3.336	7.1611	18.325	25.0249	17.2121	22.0684	17.6657	6.716	18.048	10.273	13.8473	19.392	27.0259	60.9783	35.625	30.336	31.766	9.525	7.902	13.811	5.017	8.85	11.327	36.992	49.467	117.537	12.057	7.21	10.319	138.977			0.159093	27.2571
3.4551	5.3415	11.807	22.4878	16.022	19.0983	13.3614	5.835	19.2605	8.124	13.7846	16.856	24.8974	56.1942	30.601	27.63	26.015	6.639	6.457	11.322	4.046	8.498	8.199	26.091	36.126	106.408	12.059	5.968	9.912	111.851			0.164773	23.1342
3.5742	5.3419	8.848	22.6636	15.2536	15.7877	9.7611	6.144	20.946	5.835	12.1339	14.547	22.046	50.1445	28.273	23.205	24.08	6.346	6.281	11.348	3.711	7.387	6.448	18.748	28.951	92.722	10.59	5.195	9.579	89.268			0.170452	20.0546
3.6934	5.7031	6.565	23.9895	12.8103	14.6016	8.5991	4.909	20.0352	5.714	12.254	12.853	17.9623	46.7155	24.16	19.174	20.291	6.025	4.872	11.13	3.29	7.2	4.971	14.85	21.535	73.113	11.431	3.946	9.601	67.16			0.176137	17.0848
3.8125	5.1099	5.974	23.0106	12.0188	12.7686	6.4254	4.128	20.1173	5.694	11.0688	11.084	18.1943	40.8414	20.603	17.446	18.207	5.742	3.64	10.638	3.047	7.35	4.736	11.958	15.803	56.351	12.916	3.805	8.726	48.679			0.181817	14.6925
3.9317	5.3072	4.97	21.6359	12.0574	11.6766	5.1432	4.222	16.7792	4.516	10.0116	8.116	16.6962	35.3385	17.671	15.503	13.779	5.088	4.212	8.924	2.882	7.572	5.189	9.581	11.588	44.574	15.772	3.491	9.904	35.653			0.187501	12.6846
4.0508	5.3581	4.226	18.0086	9.9008	11.6377	5.3296	4.118	14.2097	5.425	8.9427	7.399	15.445	31.7879	16.008	14.096	10.975	4.231	3.531	8.661	2.602	7.656	3.592	8.341	7.668	41.009	15.93	4.034	9.591	26.182			0.193181	11.2378
4.1699	6.0599	4.131	18.4848	9.5184	10.4107	4.5224	3.744	11.8689	5.014	9.8742	6.624	14.7926	31.2123	13.19	11.175	8.38	4.704	2.9	9.095	2.789	9.18	3.047	8.803	5.514	34.991	17.027	3.76	9.327	21.575			0.198861	10.4039
4.2891	5.6521	3.835	15.9862	10.2109	9.1582	4.4235	3.73	8.9753	4.801	9.2252	5.694	13.4754	26.4385	10.993	9.485	7.458	5.029	2.333	7.651	2.718	9.044	3.287	7.31	4.533	27.738	16.96	3.392	9.394	16.862			0.204546	9.16525
4.4082	5.5389	3.21	14.8288	9.5527	7.8057	3.9205	4	6.5192	5.211	8.849	5.135	12.6746	22.613	10.233	9.823	5.744	4.65	2.691	7.414	2.973	9.389	3.264	6.94	4.127	21.31	15.925	3.899	9.303	14.368			0.210226	8.34177
4.5274	5.7454	3.303	12.5533	9.1178	7.4013	3.4356	3.784	4.7616	5.688	9.0567	4.123	11.3733	20.3262	8.94	9.365	5.52	5.731	3.149	7.36	2.718	9.565	3.416	8.212	3.321	18.301	16.765	3.83	8.861	12.017			0.21591	7.85311
4.6465	5.5522	2.294	12.9625	8.5491	6.3699	3.3202	4.235	3.9007	5.74	8.5604	4.192	10.2206	16.6243	7.473	7.377	6.326	5.794	2.774	8.116	2.55	9.524	2.965	8.866	3.327	17.78	20.953	3.732	9.207	12.213			0.22159	7.63786
4.7657	4.6859	2.522	11.6289	7.6679	6.0506	3.0846	3.198	3.4232	6.409	7.8042	4.111	8.4561	13.2304	6.157	7.347	5.915	5.743	3.001	8.847	2.953	10.62	3.057	9.769	3.105	16.816	24.062	3.755	8.396	13.314			0.227275	7.41823
4.8848	4.547	3.008	12.6844	8.5912	4.9045	3.3751	3.793	2.6332	7.752	7.6208	3.66	7.5201	11.566	5.735	7.19	5.482	6.198	3.324	9.554	2.914	12.09	2.943	10.974	3.252	17.971	24.292	4.085	8.035	15.419			0.232955	7.6246
5.0039	3.8838	2.657	12.2148	8.9677	4.4686	2.9929	3.842	2.9566	7.032	6.637	3.157	8.1395	8.9342	5.863	5.885	6.153	7.792	2.375	8.78	2.61	12.237	2.856	12.731	4.012	20.106	21.602	4.494	8.028	15.986			0.238634	7.49631
5.1231	4.3499	2.458	12.4744	7.3077	4.0811	2.7922	3.216	2.8218	8.344	6.1104	3.451	7.0529	8.4058	4.755	6.296	6.416	7.804	2.704	9.22	2.653	12.372	2.729	13.722	3.586	22.926	20.236	4.034	7.594	16.994			0.244319	7.47952
5.2422	3.5453	2.531	12.5471	7.827	3.5975	2.4449	3.267	2.7694	8.043	4.8872	3.903	6.5602	8.7987	3.805	5.772	7.479	7.6	2.469	9.404	2.906	12.094	3.122	15.629	3.119	24.758	18.517	4.04	7.381	16.857			0.249999	7.43701
5.3614	3.487	2.055	11.0837	7.1984	2.98	2.5254	4.024	2.9763	7.832	5.1548	2.999	6.1191	8.2743	3.944	5.387	6.731	8.202	2.449	9.309	2.631	14.002	2.683	15.754	2.781	25.517	16.731	4.711	7.588	21.63			0.255683	7.47445
5.4805	3.7516	2.29	11.5165	7.2452	3.186	2.5493	3.892	2.8125	9.974	4.4179	2.938	6.2013	8.527	3.529	5.781	5.991	8.99	2.693	7.576	2.36	15.467	2.568	15.748	2.558	23.479	16.018	4.282	7.836	21.884			0.261363	7.45039
5.5996	3.6706	2.086	13.1959	6.9037	2.2253	2.4355	4.054	2.0433	12.259	3.5669	3.338	6.1222	8.8733	3.558	5.374	6.556	8.655	2.542	8.036	2.101	15.633	2.524	17.172	2.81	23.908	16.753	3.973	7.272	26.627			0.267043	7.73337
5.7188	3.0836	2.157	11.2928	7.211	2.5729	2.8873	4.832	2.6525	13.584	4.5141	3.903	5.2951	7.6316	4.28	4.485	6.716	9.688	2.134	8.51	2.477	17.077	2.953	16.891	3.116	21.786	16.216	4.107	6.757	31.472			0.272728	7.94076
5.8379	3.24	1.923	11.4917	6.1748	3.1156	2.8224	4.461	2.4203	14.304	4.2408	3.423	5.5279	7.8983	4.524	4.268	8.039	11.678	2	7.809	2.527	17.096	2.596	17.864	2.953	22.156	14.507	3.562	6.121	38.089			0.278408	8.16661
5.9571	3.9669	1.905	11.2155	5.4833	2.6739	2.2086	4.841	1.9873	12.497	4.5078	3.015	5.7838	8.1626	3.8	4.437	9.63	11.818	2.394	8.384	2.476	15.656	2.392	17.351	2.518	20.163	14.127	3.919	4.908	42.215			0.284092	8.08399
6.0762	3.3304	2.534	11.1814	6.1503	2.241	2.3187	3.692	2.1326	11.08	4.3309	3.533	4.1967	8.6163	3.214	4.897	10.036	12.865	2.42	8.332	2.152	15.264	2.451	18.746	2.324	21.091	13.173	4.45	5.347	43.477			0.289772	8.12332
6.1953	3.0294	2.406	11.0098	5.8971	2.8401	2.576	5.121	2.2312	11.746	4.5675	3.933	3.7925	8.8776	3.454	4.641	11.204	13.906	2.447	7.325	2.55	13.321	2.783	18.309	2.576	20.721	12.444	5.133	5.617	41.615			0.295452	8.14046
6.3145	3.3955	1.95	10.8087	5.5012	2.9685	2.2219	4.908	2.1589	12.665	4.6496	3.385	3.4637	8.1571	3.315	4.431	11.823	13.974	2.68	7.854	3.022	11.786	2.205	17.564	2.765	20.335	10.54	5.076	4.909	34.967			0.301136	7.70618
6.4336	4.0539	2.088	10.7149	4.7646	2.731	2.066	5.885	1.642	12.063	4.5761	3.278	4.2049	8.2189	3.756	4.138	12.775	14.513	2.691	7.676	2.864	9.472	2.816	15.923	2.998	21.777	9.081	5.446	4.876	33.776			0.306816	7.61601
6.5528	3.5267	1.923	11.2857	4.7755	3.0892	2.2154	7.29	1.9768	11.668	4.3323	3.524	3.9681	8.3016	3.567	4.179	13.523	14.88	2.518	6.625	2.853	7.69	3.117	14.729	2.588	22.658	9.423	6.147	4.881	28.955			0.312501	7.45549
6.6719	3.5806	2.036	10.6034	5.017	2.6405	2.1635	7.875	2.0968	12.129	4.3225	3.908	3.3753	10.404	3.376	4.079	14.134	15.897	2.979	5.721	2.884	6.103	2.92	15.011	2.344	19.3	8.696	7.606	3.98	25.779			0.318181	7.2745
6.7911	2.7366	1.919	9.6877	4.9573	2.6322	2.0623	8.1	2.4127	12.58	4.1096	3.82	4.0205	9.3556	2.984	3.477	13.825	17.523	2.989	4.803	2.6	6.664	2.574	13.116	2.679	18.591	7.923	7.827	4.569	20.868			0.323865	6.94502
6.9102	3.2919	1.765	9.4171	5.1434	3.1622	2.1873	8.529	2.0727	11.63	4.4547	3.542	3.5763	9.8155	3.344	3.098	14.991	19.557	3.043	5.19	2.616	6.065	2.93	11.02	2.468	16.83	8.175	7.571	4.38	18.352			0.329545	6.83507
7.0293	3.4368	1.749	10.4348	5.0902	2.2127	2.182	8.983	2.4025	10.563	3.9079	3.429	3.7364	10.4263	3.808	4.049	15.426	18.992	3.414	4.968	2.762	5.179	3.199	9.698	2.626	15.47	8.301	7.904	3.758	15.543			0.335225	6.67761
7.1485	3.5392	2.23	9.8837	5.9377	2.4772	2.2646	9.246	1.7927	10.663	4.1265	3.621	3.4887	11.2803	3.693	3.806	15.925	19.649	2.911	4.002	2.981	4.868	2.879	6.943	3.367	12.661	7.845	9.339	3.871	14.697			0.34091	6.5513
7.2676	3.9428	2.266	11.0966	5.077	2.5227	2.0989	9.117	1.9134	10.423	4.7204	3.805	3.8708	11.819	3.696	3.767	17.64	20.21	3.246	4.081	3.3	4.019	2.842	6.454	2.931	10.591	7.286	8.734	4.154	13.067			0.346589	6.50657
7.3868	4.352	2.189	10.7652	6.0924	2.4092	2.3949	7.509	2.0371	9.37	4.9212	4.16	3.4104	13.2822	3.731	3.807	15.268	18.275	3.031	3.229	3.273	3.544	2.55	7.48	2.248	9.121	9.608	11.218	3.997	12.203			0.352274	6.39571
7.5059	4.5027	1.62	9.9025	5.6462	2.2929	2.7049	7.758	1.6944	9.131	4.3677	4.317	3.5478	11.9177	3.402	3.421	16.016	20.195	2.558	3.159	2.702	4.023	2.645	5.458	2.718	7.775	8.639	12.921	4.261	12.186			0.357954	6.25799
7.625	4.7765	1.369	9.9767	6.5145	2.5569	2.5419	8.399	1.7535	8.795	4.4355	3.739	3.1418	11.3785	3.481	3.888	15.476	19.997	3.267	2.773	3.355	3.689	3.552	4.747	2.978	7.348	8.513	12.356	3.854	12.54			0.363634	6.24799
7.7442	4.9068	1.439	10.4029	6.5594	2.5875	2.5444	8.617	2.1436	7.718	5.3367	3.485	2.8478	11.749	4.225	2.912	15.235	20.885	3.283	3.058	4.31	3.373	3.15	4.284	2.848	7.015	9.126	13.744	4.392	13.273			0.369318	6.39483
7.8633	4.7329	1.858	9.7697	7.1262	2.7515	2.0233	9.578	1.5448	7.629	6.6975	4.266	3.984	12.5373	4.403	3.472	15.699	23.14	3.033	3.154	3.887	2.776	2.901	3.965	2.57	6.523	9.772	13.873	4.39	13.996			0.374998	6.62249
7.9825	4.5756	1.99	9.465	6.6144	2.3394	1.9241	10.052	1.152	8.21	6.4853	4.628	3.5297	13.7164	4.128	3.451	15.728	22.821	3.21	3.138	3.64	2.82	2.457	4.078	2.901	5.977	10.532	15.329	3.527	14.03			0.380683	6.63617
8.1016	4.949	1.736	11.3246	7.919	2.5056	1.9779	9.526	1.5274	7.931	5.7852	3.998	3.1151	13.4108	3.985	3.53	17.158	20.202	2.852	3.245	4.906	3.752	2.954	3.68	3.158	5.138	10.05	17.074	3.407	14.558			0.386363	6.73637
8.2207	4.6611	2.249	10.4837	6.7963	2.8887	1.9658	7.734	1.6715	6.593	5.2415	4.144	3.2065	14.085	4.298	3.604	18.179	19.145	2.643	3.162	6.374	3.541	3.319	3.614	3.239	4.558	10.762	17.438	3.398	15.902			0.392043	6.72056
8.3399	5.05	2.445	10.3065	6.1336	2.7416	2.3884	9.341	1.5392	6.8	5.2438	4.372	3.4858	14.287	4.102	3.214	18.598	19.13	2.908	3.292	7.405	3.426	2.773	3.723	3.067	4.538	11.359	16.861	3.072	15.066			0.397727	6.78165
8.459	4.661	1.992	9.6845	5.9878	2.9249	1.9676	9.517	2.0093	6.45	5.794	5.806	3.2486	14.5291	4.913	3.117	17.312	18.102	3.481	2.694	7.12	3.003	3.639	2.761	4.478	4.479	12.144	19.134	3.372	15.745			0.403407	6.89882
8.5782	4.4118	2.088	10.5138	5.2469	2.3388	1.9957	8.352	1.7222	5.536	5.9151	7.708	2.7544	15.7084	4.539	2.713	20.147	20.198	2.702	2.915	9.002	3.566	5.094	3.071	4.977	3.037	14.717	20.091	2.954	15.982			0.409092	7.24124
8.6973	5.4289	2.262	11.4848	5.624	2.2359	2.4955	7.276	1.5215	5.162	7.5962	9.251	2.455	15.5002	4.383	3.273	18.811	19.529	3.246	2.198	9.264	3.546	5.042	3.303	4.441	2.925	17.681	19.431	3.572	16.588			0.414771	7.43193
8.8165	4.9229	2.04	10.5748	4.3913	2.1324	2.0635	7.928	1.7406	4.065	9.1481	8.497	2.8405	15.9206	4.558	3.659	19.264	19.715	3.285	2.378	9.475	2.649	4.744	3.3	5.122	4.024	19.269	18.864	3.043	15.658			0.420456	7.42316
8.9356	4.5129	1.994	9.4916	4.9566	2.7737	2.3338	8.747	1.654	3.418	9.3917	9.227	2.1525	17.8879	4.926	3.445	20.041	19.936	2.932	2.281	10.076	2.96	5.396	3.877	6.279	3.513	22.162	21.491	3.028	18.302			0.426136	7.90296
9.0547	4.6218	2.32	10.1074	4.7583	2.5901	2.0361	7.966	1.7751	3.019	9.9443	10.929	2.4983	17.701	4.39	3.131	20.051	20.274	3.316	2.87	10.055	2.798	4.299	2.993	7.618	3.915	25.514	20.655	3.429	18.065			0.431816	8.05653
9.1739	4.5796	2.138	9.3124	4.9236	2.2835	2.036	7.159	2.1726	3.126	8.9716	9.811	2.5132	16.4151	4.784	3.425	17.895	21.637	3.153	2.445	11.032	2.992	5.339	3.28	8.409	4.213	27.316	21.181	3.025	18.658			0.4375	8.07674
9.293	4.7586	2.31	10.2739	5.0551	2.4828	1.7109	7.112	1.6162	3.346	8.5512	9.847	2.9727	16.6105	5.006	2.543	18.623	23.123	2.919	2.279	9.548	3.063	5.948	3.064	10.78	3.437	31.466	21.101	3.346	19.298			0.44318	8.35141
9.4122	4.5256	1.928	9.454	5.3782	1.9611	2.0891	6.468	1.2945	3.045	7.7002	10.611	2.9363	18.0165	4.944	2.882	18.288	23.708	3.754	2.61	10.817	2.705	5.687	2.893	11.972	4.009	33.478	21.885	2.569	22.01			0.448865	8.60753
9.5313	5.1679	2.041	9.7827	5.7323	1.9798	1.6815	6.766	1.3617	2.928	9.2248	10.492	2.2192	18.0959	5.043	2.579	16.495	23.628	3.807	2.011	10.57	2.339	7.288	2.474	12.659	3.537	34.134	23.217	3.108	24.234			0.454545	8.77917
9.6504	6.3806	2.292	10.2535	5.8178	2.2988	2.0639	7.408	1.3791	3.435	9.901	10.249	2.5631	18.9105	4.698	2.919	16.216	23.176	3.072	2.891	9.822	2.417	6.886	2.791	14.614	3.276	36.237	23.527	2.994	24.235			0.460224	9.05942
9.7696	5.411	2.374	9.9952	5.1343	2.2011	2.3074	7.324	1.3577	3.297	8.9934	9.964	3.0556	17.9852	3.885	3.243	15.689	24.09	3.384	3.007	9.615	2.449	8.208	3.089	15.727	3.229	34.808	23.589	3.264	22.984			0.465909	8.95379
9.8887	4.9871	2.34	8.7244	4.7667	1.8706	2.5145	6.658	1.6385	2.412	10.6624	10.387	2.7636	19.1922	4.399	3.246	15.895	25.802	2.993	2.755	10.894	2.277	8.782	2.438	15.532	3.103	35.205	25.301	3.601	22.274			0.471589	9.08324
10.0079	4.839	2.772	9.3945	4.9996	1.9894	2.5415	6.752	1.8264	2.211	12.3282	8.666	2.5647	17.2951	4.125	2.603	17.573	27.916	3.642	2.456	11.305	3.032	8.846	2.518	16.089	2.761	31.216	29.378	3.816	19.489			0.477273	9.13601
10.127	4.7187	2.301	9.3139	5.4252	1.8518	2.2329	7.199	1.616	2.638	12.3595	8.929	2.2739	18.3096	4.292	3.004	17.294	26.831	3.324	2.539	10.565	2.341	9.514	2.94	17.837	3.23	31.617	30.429	3.158	18.8			0.482953	9.20288
10.2462	5.2118	2.38	9.6804	5.4397	2.1267	2.043	6.456	1.5395	2.372	12.8585	9.13	2.7031	17.0616	4.702	2.851	15.808	27.57	3.229	2.334	11.083	2.392	9.206	2.722	17.849	2.868	28.94	31.494	2.901	16.8			0.488638	9.02591
10.3653	5.3442	2.252	9.8736	5.3277	2.4156	2.3506	7.145	1.8766	2.627	13.9717	8.93	3.0428	17.7364	4.7	2.593	14.216	24.44	3.506	2.588	11.503	2.201	10.895	2.466	19.464	3.132	26.296	33.155	3.233	15.37			0.494318	9.05694
10.4844	5.5951	2.174	10.3373	6.3192	1.8572	2.3009	6.519	1.8376	2.552	14.0203	9.849	2.0803	17.8162	4.85	2.361	14.889	23.959	3.753	2.365	11.145	2.553	12.288	2.297	19.508	2.75	26.19	35.08	3.161	14.901			0.499998	9.14856
10.6036	5.0433	2.337	9.9321	6.0884	2.0118	1.9314	6.519	1.8411	2.143	13.5192	11.109	2.2282	18.2083	5.081	2.321	12.236	24.737	3.433	2.918	11.627	2.854	12.172	2.185	18.046	2.89	23.01	34.942	3.21	13.02			0.505682	8.88254
10.7227	5.351	2.039	10.9602	5.6704	2.1337	1.6854	6.953	1.766	2.349	14.5259	11.39	2.6952	19.1484	5.04	2.741	12.504	24.425	3.137	2.48	12.269	2.895	11.974	2.401	19.323	3.277	20.107	37.408	3.383	10.771			0.511362	8.99318
10.8419	5.9064	2.319	11.1127	5.2277	2.2919	1.7287	7.178	1.7137	2.079	12.2872	11.799	2.4968	19.9013	5.185	3.039	12.885	24.337	3.631	2.754	12.579	2.442	12.398	2.026	21.153	2.357	16.263	40.287	3.384	11.34			0.517047	9.03798
10.961	6.2307	2.358	11.5754	5.5014	1.8112	1.8593	6.771	1.7124	1.955	12.7166	11.927	2.0051	20.4624	6.144	2.924	12.486	22.754	3.436	2.808	12.361	2.605	14.163	2.542	20.044	2.38	14.316	43.621	3.485	10.69			0.522727	9.09119
11.0801	5.6342	2.283	9.7239	5.1982	1.7484	1.5209	6.619	1.9784	2.203	10.5428	12.507	2.3665	20.2337	6.019	2.446	11.568	23.888	3.256	2.732	11.486	2.551	13.098	2.487	19.84	2.658	12.347	45.398	4.09	9.423			0.528406	8.82228
11.1993	5.626	2.248	10.1603	5.9345	1.9849	1.725	5.526	1.8342	1.884	9.0947	12.106	2.4532	20.1019	6.544	2.377	10.277	23.364	3.451	2.842	12.314	2.338	12.619	2.573	19.603	2.665	11.213	46.361	3.897	9.104			0.534091	8.69727
11.3184	6.0837	2.469	11.5901	5.3313	1.9862	1.4515	5.47	1.8645	1.439	8.4851	13.415	2.278	19.7858	5.357	2.557	10.276	24.877	4.143	2.729	13.076	2.69	12.761	2.536	20.037	2.835	8.891	47.91	3.753	8.387			0.539771	8.77463
11.4376	5.1445	2.092	10.6198	5.1434	2.5178	1.4441	6.31	1.751	1.519	7.4366	12.72	2.7727	17.1829	5.991	2.746	10.461	23.317	3.454	2.666	12.348	2.537	13.371	2.329	20.636	3.129	8.336	51.065	3.869	6.471			0.545455	8.5993
11.5567	5.2563	1.931	10.6793	4.971	2.0268	1.2518	6.21	2.06	1.964	8.4018	13.907	2.2923	16.5897	5.549	3.019	9.778	23.129	3.717	2.443	12.468	2.365	14.038	2.46	20.698	2.694	7.464	58.252	3.86	6.474			0.551135	8.82583
11.6758	5.0385	2.175	10.451	5.4401	2.4453	1.4627	5.386	2.3282	2.019	7.1987	12.3	2.3393	15.2921	6.004	2.914	11.102	25.024	3.553	2.404	10.688	1.879	13.07	2.561	20.013	2.464	6.756	63.204	3.657	6.181			0.556815	8.80517
11.795	5.3642	1.709	11.0302	5.2638	2.1522	1.6652	4.465	1.821	2.269	6.8464	12.599	2.4693	16.1467	6.843	2.75	10.907	23.469	3.593	1.985	11.099	1.982	12.695	2.627	21.907	2.415	6.606	66.039	3.919	5.186			0.5625	8.89045
11.9141	5.0257	2.008	10.7083	6.0002	1.9609	1.8989	4.794	2.0423	2.008	6.3291	12.555	2.4588	13.7143	7.075	2.997	10.772	27.496	3.183	2.295	11.095	2.743	13.879	2.813	20.501	2.073	5.779	72.822	3.515	5.039			0.56818	9.15795
12.0333	4.5507	2.077	10.1866	6.029	1.5021	1.5287	3.709	1.9725	1.822	6.4261	12.171	2.3837	13.4	7.934	3.139	9.492	23.765	3.466	2.434	11.736	2.523	14.598	2.731	19.358	2.658	5.773	70.737	3.318	5.254			0.573864	8.85084
12.1524	4.9553	1.891	11.8663	5.5339	1.174	1.4671	3.805	2.2205	1.699	6.1916	13.44	2.3533	14.7247	7.413	2.943	10.131	22.165	4.017	2.556	10.097	2.124	13.646	2.476	19.039	2.606	5.539	70.353	3.277	4.984			0.579544	8.78233
12.2716	5.2413	1.93	10.4746	5.9916	1.8957	1.538	3.305	2.4216	2.686	6.9207	14.683	2.0026	14.2095	7.619	2.788	9.421	23.097	3.69	2.53	9.96	2.055	12.315	2.463	19.54	2.792	4.792	73.477	3.088	4.085			0.585229	8.86247
12.3907	4.256	1.919	11.4324	5.2861	1.9338	1.5008	2.901	2.2534	2.226	6.7184	13.608	2.4664	13.4841	8.177	2.84	7.807	25.307	3.958	2.015	8.671	1.831	12.238	2.111	17.317	2.388	4.651	69.168	2.672	4.74			0.590908	8.4785
12.5098	4.1827	1.759	9.9902	5.6266	2.0441	1.3133	2.77	2.4772	1.932	6.3201	14.302	2.3241	11.9438	8.233	2.996	9.083	23.851	3.438	2.216	8.899	2.421	13.04	1.914	15.615	2.98	4.814	67.234	3.347	4.038			0.596588	8.31393
12.629	5.1501	1.902	9.2504	5.8205	2.2871	1.471	2.398	1.9704	1.956	6.0684	13.993	2.2687	12.8759	9.781	2.482	7.646	22.023	3.437	2.21	9.574	1.875	12.066	2.307	14.46	2.684	4.628	63.159	3.809	3.478			0.602273	8.03553
12.7481	4.8077	1.882	10.3975	5.7758	2.0502	1.0294	2.376	2.7988	1.869	5.8738	15.813	2.2025	10.875	9.429	2.401	7.734	23.35	3.439	1.852	9.208	2.183	12.26	2.972	12.33	2.441	4.5	61.576	3.67	3.729			0.607953	7.95947
12.8673	5.0511	1.978	10.8647	5.0799	1.6262	0.9491	1.98	2.416	1.635	4.804	16.75	2.3616	10.1216	10.032	2.149	7.657	23.127	3.28	2.158	9.5	2.086	10.503	2.781	10.681	2.563	4.63	65.818	3.821	3.289			0.613637	7.92042
12.9864	4.9481	1.972	9.9304	6.3888	1.7306	1.0621	1.486	2.3664	2.006	5.3155	17.007	2.485	8.8932	10.559	2.342	7.279	23.049	3.07	2.74	8.602	2.743	11.177	2.777	9.236	2.381	3.984	73.579	3.157	3.125			0.619317	8.11693
13.1055	4.2441	2.637	9.5872	6.1975	1.526	1.177	1.773	2.2178	1.723	4.1619	15.836	2.5283	9.8163	10.798	2.644	7.488	22.788	2.914	2.236	10.212	2.581	12.973	2.772	7.57	2.515	3.976	78.311	3.727	3.703			0.624997	8.29769
13.2247	4.4576	2.077	7.8504	5.2765	1.4605	1.4261	1.783	2.1699	1.678	3.6221	16.41	2.7062	8.4636	11.325	2.619	6.104	21.832	3.373	2.345	9.749	2.587	12.547	2.206	7.026	2.459	4.238	79.717	3.414	3.478			0.630682	8.08276
13.3438	4.5802	2.21	8.9829	5.6072	1.8574	1.3302	2.204	2.3271	2.016	3.0329	14.378	2.6496	8.3664	11.142	2.182	6.406	21.138	3.313	2.212	9.912	2.058	11.135	2.387	5.909	2.787	3.489	86.371	3.948	3.473			0.636361	8.18634
13.463	4.073	2.49	8.8965	5.7547	1.8869	1.3531	1.753	2.3561	1.87	2.8676	15.31	2.8531	8.3032	11.294	2.382	5.769	22.258	3.766	2.042	8.926	2.362	11.931	2.34	5.328	2.93	3.586	82.344	4.721	3.697			0.642046	8.11873
13.5821	4.0605	2.253	7.6281	5.1236	1.6862	1.188	1.664	2.4952	1.583	3.2329	16.394	2.9587	7.6881	11.758	2.786	5.043	22.249	3.415	2.299	10.163	2.398	12.316	2.405	5.155	2.329	3.601	80.496	4.046	3.14			0.647726	7.98463
13.7012	3.8259	1.747	8.346	5.3678	1.8797	1.1808	1.835	2.519	1.955	3.298	17.895	2.9129	7.6578	12.443	2.087	4.948	19.992	3.531	2.164	9.029	2.382	12.644	2.465	4.438	2.886	3.168	79.16	3.625	3.305			0.653406	7.88576
13.8204	3.9211	2.088	7.5008	5.1153	1.8651	1.274	1.717	2.5608	1.853	3.1942	15.396	3.0267	7.8811	13.117	2.194	5.255	21.12	3.822	2.368	9.413	2.407	13.662	2.355	4.173	3.035	3.607	76.428	4.519	2.719			0.65909	7.84783
13.9395	3.7055	2.041	8.1002	6.1634	1.9084	0.9454	1.633	2.2733	1.774	2.8704	16.516	3.0079	6.6378	13.311	2.664	4.382	20.299	3.027	2.558	8.102	2.037	12.677	2.247	4.731	3.032	3.306	75.854	4.179	3.241			0.66477	7.69736
14.0587	4.2818	1.332	7.9613	5.4195	1.7463	0.6773	1.841	2.6291	1.865	2.902	16.71	3.4138	6.9556	14.303	3.171	5.183	17.316	3.771	2.771	8.462	2.213	12.173	2.595	4.346	2.504	3.016	76.16	4.839	3.239			0.670455	7.71713
14.1778	3.2959	1.655	7.4052	5.4172	1.991	1.1913	1.291	2.684	1.959	2.4205	15.552	3.0949	5.7164	15.189	2.27	4.678	16.36	3.826	2.828	7.443	2.287	13.244	2.775	3.81	2.41	3.46	73.297	4.454	3.577			0.676135	7.43384
14.297	3.9394	1.72	7.7525	5.8887	2.3758	1.0501	1.261	2.2287	2.014	3.049	16.044	3.9538	6.0689	14.882	2.678	5.065	18.11	3.935	2.102	7.615	2.499	11.969	2.917	3.876	2.304	3.123	70.419	4.728	2.594			0.681819	7.45386
14.4161	3.3954	2.01	8.0578	5.3542	2.2001	1.436	1.182	2.6941	1.729	3.0151	16.214	3.4642	6.2135	15.192	2.363	4.582	17.412	3.566	2.273	8.445	2.464	12.488	2.871	3.639	3.102	2.677	73.761	4.77	3.001			0.687499	7.57143
14.5352	3.3903	1.906	8.3892	5.1761	2.0995	1.4477	1.264	3.4089	1.685	2.7444	15.764	3.2109	5.6364	15.844	2.202	5.184	18.382	3.9	2.105	8.163	2.559	12.962	2.899	3.714	3.322	2.745	69.386	4.898	2.604			0.693179	7.48246
14.6544	3.3324	1.945	7.5704	5.3119	1.7454	1.1404	1.55	3.0173	1.797	2.8903	15.024	3.3697	6.003	16.456	2.594	4.937	18.14	3.87	2.216	7.148	1.976	12.493	3.025	3.247	2.996	3.127	64.206	5.535	2.924			0.698864	7.22713
14.7735	4.0028	1.932	6.8709	5.8191	1.3713	1.2315	1.18	3.118	1.603	2.5585	15.135	3.962	7.5352	17.188	2.362	4.563	18.241	3.523	2.283	5.967	1.844	13.982	2.98	3.587	3.753	2.71	57.542	5.511	2.922			0.704543	7.07853
14.8927	3.9603	1.577	7.2993	5.685	1.8123	1.077	1.143	2.5909	1.484	2.4925	14.778	3.7911	6.5599	18.863	2.723	4.393	20.047	3.779	2.267	6.552	2.207	13.313	2.935	3.629	3.502	2.554	53.118	5.856	2.451			0.710228	6.98067
15.0118	3.8037	1.943	6.5768	6.0745	1.8509	1.0353	1.13	2.8045	2.031	2.8029	12.16	4.0752	7.2029	20.323	2.874	4.667	19.015	3.951	2.323	6.87	2.661	12.367	2.593	3.318	3.129	2.74	50.377	6.22	2.804			0.715908	6.88699
15.1309	3.6076	2.314	7.04	5.6272	1.4678	1.522	1.095	2.676	1.604	2.9155	14.339	4.4652	6.6266	19.9	2.628	4.14	19.16	3.967	2.333	6.818	2.202	12.108	2.775	3.336	3.831	2.728	44.326	7.035	2.941			0.721588	6.74234
15.2501	3.446	1.886	6.3768	5.7716	1.5308	1.3527	1.238	3.2826	2.035	2.5103	12.279	5.0493	6.1738	19.623	2.157	4.118	20.379	3.872	2.576	5.993	2.571	11.745	2.704	3.208	4.604	2.302	39.65	7.995	2.827			0.727272	6.52607
15.3692	3.8366	1.56	6.6261	6.9907	1.6671	1.5691	1.133	3.3697	1.825	2.6913	11.46	4.7521	6.403	20.47	2.869	4.345	22.213	3.87	2.711	6.045	2.179	12.613	3.528	3.348	3.807	2.537	37.018	7.272	2.334			0.732952	6.58768
15.4884	3.2962	1.897	6.8472	6.3126	1.3046	1.1993	1.407	3.4254	1.764	2.4574	9.651	5.0657	6.0565	21.152	2.268	3.751	23.152	3.642	2.434	5.904	2.286	12.948	2.544	3.498	3.95	2.452	31.888	8.71	2.386			0.738637	6.33272
15.6075	3.3256	1.8	6.6135	5.6265	1.5763	1.5163	0.988	3.6645	1.852	2.3205	8.91	6.078	6.4163	21.817	2.228	3.259	23.615	3.832	2.413	6.894	2.75	12.89	3.091	3.147	4.044	2.662	25.419	9.129	2.448			0.744317	6.21812
15.7266	3.1882	1.836	6.5343	7.15	1.6273	1.2021	1.212	3.6261	1.519	2.0294	8.98	6.504	7.6843	20.092	2.252	3.908	26.502	3.507	2.202	7.211	2.573	12.349	2.816	3.417	4.635	3.269	22.434	9.922	2.82			0.749996	6.3104
15.8458	3.3603	1.953	7.2622	7.3807	1.8658	0.9702	1.134	3.5511	1.813	1.9846	8.538	6.3963	7.5696	21.237	2.062	4.703	28.927	3.636	2.081	7.309	2.579	11.464	3.478	3.021	5.457	3.284	17.274	9.995	2.889			0.755681	6.31637
15.9649	3.2853	1.756	7.0598	6.4899	1.8807	0.6219	1.135	3.7508	1.531	2.1763	7.716	7.2505	8.6102	20.801	2.459	4.172	33.539	4.069	1.749	7.896	2.003	12.621	2.589	3.092	5.636	2.992	15.242	11.774	3.063			0.761361	6.44691
16.0841	2.4452	2.623	7.004	6.2532	1.5436	0.9786	1.284	3.7569	1.092	2.0016	5.36	8.75	8.3087	19.067	1.942	4.54	36.003	3.452	2.219	6.388	3.097	11.576	2.717	3.113	7.206	2.678	12.257	12.991	3.628			0.767045	6.3543
16.2032	3.2675	1.835	6.5124	6.8251	1.527	1.0964	1.135	3.8159	1.183	1.3784	5.962	11.1409	9.0623	15.782	2.575	4.571	40.529	3.423	2.127	7.224	2.627	11.244	3.256	3.435	7.609	2.778	10.193	14.2	2.786			0.772725	6.52069
16.3224	4.0367	1.82	6.7369	6.7774	1.5469	0.988	0.905	3.2249	1.543	1.5517	5.817	11.4897	9.5642	13.824	2.369	4.49	45.615	4.448	2.045	6.257	2.506	12.354	2.581	3.057	8.197	2.932	9.161	14.037	2.579			0.77841	6.63632
16.4415	4.009	2	7.9184	6.9962	1.5386	0.9675	0.928	3.3904	2.144	1.8685	5.454	13.7671	8.9305	12.258	2.644	4.377	48.478	4.139	2.545	6.114	3.119	13.244	2.522	2.911	10.077	2.914	9.719	15.446	2.693			0.78409	7.00387
16.5606	3.3664	2.024	7.6268	7.3031	1.7154	1.0027	0.713	3.865	2.321	1.5143	5.631	14.3055	9.0075	11.615	2.919	4.91	48.645	3.996	2.571	6.219	3.132	12.913	3.098	3.171	10.33	2.612	8.965	17.98	2.573			0.78977	7.10499
16.6798	3.6474	1.795	7.7627	6.9966	1.8181	1.2064	0.993	3.5001	1.548	1.4521	5.252	15.3075	7.9214	10.559	2.73	4.626	49.11	3.489	2.34	7.649	3.164	12.984	3.155	3.114	10.416	3.551	7.107	21.056	2.596			0.795454	7.13263
16.7989	3.4346	1.786	7.4923	7.0542	1.6797	0.9742	0.974	2.8412	1.752	1.3738	4.725	16.0806	7.8456	9.518	4.373	4.876	51.708	3.194	2.225	7.398	2.751	13.653	2.956	3.488	14.316	3.611	6.926	22.341	2.912			0.801134	7.38825
16.9181	3.4689	1.893	8.3317	7.885	1.4355	1.3633	1.047	2.7705	1.713	1.6785	5.051	17.6584	7.2364	7.442	4.175	4.326	53.88	3.281	2.268	7.59	3.068	13.29	3.3	3.118	14.901	3.311	7.292	21.785	2.77			0.806819	7.49411
17.0372	3.6895	2.308	8.6811	7.6259	1.9003	1.1276	0.824	2.3404	1.854	1.4586	4.428	13.9099	6.9122	8.131	3.982	4.701	60.569	3.248	2.388	7.78	2.717	14.596	3.426	3.428	16.274	2.975	6.302	20.685	3.077			0.812499	7.63236
17.1563	3.5415	2.11	8.9875	8.2932	1.5116	0.6547	1.082	2.2405	1.977	1.2668	4.406	13.0376	6.7429	6.349	4.78	5.11	63.177	3.8	2.637	8.546	2.833	13.79	2.935	3.334	17.489	3.54	5.754	23.134	2.495			0.818178	7.77773
17.2755	4.348	2.309	8.8808	8.8653	1.6986	0.9226	0.916	2.2941	2.007	1.4582	4.486	13.5655	5.6803	5.358	5.527	5.244	70.004	4.584	2.329	8.448	3.987	14.431	3.343	4.232	19.114	3.41	5.732	23.766	2.745			0.823863	8.26501
17.3946	4.6344	2.608	9.9375	8.4914	1.6838	1.478	1.22	2.3928	2.079	1.2389	4.821	11.1443	4.1057	4.729	6.01	5.617	73.811	4.69	2.235	9.699	3.656	16.355	3.47	4.297	20.646	2.79	5.091	24.898	2.241			0.829543	8.48517
17.5138	4.8551	2.31	9.3715	7.3639	1.6422	1.0242	1.049	2.1157	2.302	1.7349	4.305	9.1664	3.7536	4.309	6.671	5.662	83.63	4.967	2.509	9.374	3.495	17.478	4.264	4.899	21.831	2.505	4.125	25.795	3.172			0.835227	8.81653
17.6329	5.7929	2.049	8.0996	8.4674	1.2292	0.7943	0.928	1.9384	2.05	1.6058	4.332	8.0654	3.8905	3.477	6.041	6.446	92.692	4.257	2.879	8.632	3.248	18.176	3.84	4.733	24.072	3.272	5.195	26.522	3.876			0.840907	9.19312
17.7521	7.4709	2.469	8.1853	8.652	1.2926	1.1081	0.972	1.5254	1.767	1.8094	3.714	6.7702	3.7047	2.894	7.062	7.179	95.954	5.363	2.339	9.396	4.51	21.1	4.151	6.018	22.569	3.149	5.458	28.524	4.111			0.846592	9.62819
17.8712	7.1413	3.08	10.036	8.1823	1.3071	1.0675	1.168	1.8328	1.742	1.782	4.029	6.6414	2.9981	2.491	5.06	10.236	89.457	5.183	2.778	9.299	4.872	20.346	4.596	6.174	25.242	3.14	4.736	32.96	3.428			0.852272	9.68984
17.9903	7.841	3.119	9.5343	6.6291	1.4836	0.6504	1.181	1.6128	1.876	2.0642	4.631	6.7154	2.3484	2.347	4.836	13.127	77.77	4.378	3.157	9.066	5.028	24.228	5.738	8.794	22.713	3.687	4.731	33.631	3.058			0.857952	9.51639
18.1095	9.4543	2.934	8.2665	6.6652	1.4381	0.9648	1.063	1.5488	2.372	1.9431	4.393	5.5238	2.0991	2.076	4.243	21.079	72.104	5.397	3.117	8.751	6.309	26.333	6.883	10.697	24.043	3.744	4.683	34.527	3.77			0.863636	9.87661
18.2286	11.151	3.244	9.1906	6.1381	1.8637	0.9999	1.392	1.7143	1.759	1.3602	3.807	5.4453	1.8452	1.996	4.947	26.184	55.238	6.618	3.73	9.341	8.442	28.53	8.823	12.573	24.538	3.941	4.475	38.642	2.682			0.869316	10.021
18.3478	12.0636	3.582	9.5999	6.3572	1.3909	0.9026	0.93	1.284	1.643	1.4191	4.48	4.2818	1.4289	1.907	3.81	35.627	40.899	5.74	3.154	9.062	11.182	31.547	12.291	16.424	24.829	3.462	4.212	43.381	3.567			0.875001	10.3606
18.4669	12.9945	3.911	8.7131	5.7296	1.4275	1.1839	0.819	1.3832	2.158	1.2163	4.457	4.0546	1.2527	0.958	2.921	38.939	27.825	6.4	3.183	9.858	12.629	31.448	13.748	20.922	26.85	3.995	4.7	48.778	4.708			0.88068	10.5918
18.586	11.8155	3.899	8.6854	5.1613	0.8443	0.9372	0.795	1.2445	2.022	1.0552	4.018	3.2262	1.4977	1.183	3.401	37.311	19.747	6.55	4.164	11.135	15.131	32.757	18.366	25.362	29.267	4.444	5	50.854	4.16			0.88636	10.8287
18.7052	9.7513	4.404	8.401	4.2917	1.5506	0.7948	0.797	1.5588	1.539	0.758	4.123	3.3635	1.4954	1.484	2.64	27.661	13.86	9.126	4.743	12.699	17.336	32.199	23.167	27.333	31.343	4.757	5.128	50.5	3.426			0.892045	10.6976
18.8243	9.8304	5.406	7.6191	4.1347	1.5521	0.7516	0.944	1.1325	1.57	0.9455	3.959	3.1302	1.3555	0.964	2.052	15.353	9.791	11.682	5.398	13	20.506	32.181	29.045	28.98	33.361	5.162	6.085	57.428	3.409			0.897725	10.9216
18.9435	8.0364	5.149	6.8779	3.7312	1.328	1.1661	0.833	0.7541	1.623	0.8492	3.758	2.7407	1.0671	1.168	1.127	9.543	5.263	14.399	7.532	13.702	22.039	28.034	30.821	27.572	33.302	6.04	4.524	63.757	3.551			0.903409	10.6996
19.0626	7.2036	5.055	6.1798	3.0008	1.2559	0.8945	0.805	1.1639	1.366	1.1102	3.224	2.4346	0.9132	0.709	1.618	6.063	4.788	19.653	9.291	16.666	22.294	20.591	30.626	29.818	33.103	6.814	4.821	66.738	4.819			0.909089	10.7937
19.1817	5.8191	4.402	6.1496	2.8514	1.123	1.0007	0.639	1.0052	1.494	1.0569	3.867	2.1504	1.0324	0.493	1.734	4.802	3.722	25.264	12.436	17.677	23.845	18.61	25.662	30.37	38.742	7.08	5.194	66.215	4.189			0.914769	10.9871
19.3009	5.8709	4.477	6.78	2.5125	0.7975	0.8393	0.503	0.8589	1.2	1.0275	3.727	2.0395	0.7399	0.412	1.671	3.51	2.715	30.373	16.542	16.396	23.346	15.633	21.181	25.184	45.585	8.381	7.071	67.344	5.951			0.920454	11.1265
19.42	5.6617	4.452	6.3773	1.7521	0.8979	0.7454	0.673	0.9585	1.463	0.921	3.745	2.0624	0.8329	0.395	1.439	2.654	2.438	32.357	21.895	15.007	20.712	12.253	18.957	19.727	53.505	10.292	8.014	61.72	5.125			0.926133	10.9321
19.5392	5.8863	4.436	6.1162	2.1877	1.0665	0.8779	0.744	0.8001	1.168	0.723	2.714	1.7315	0.8273	0.337	0.824	2.199	1.745	31.317	29.532	14.389	20.397	8.637	17.156	14.665	64.015	12.884	8.438	56.314	6.496			0.931818	10.987
19.6583	5.4407	4.442	5.682	1.884	1.0589	0.8294	0.857	1.0127	1.194	0.6622	2.505	1.5267	0.6173	0.486	0.703	1.881	1.377	20.263	39.466	14.388	15.722	6.809	14.356	8.017	77.774	14.352	9.299	51.031	7.554			0.937498	10.7307
19.7775	5.4993	5.085	5.3562	1.4073	0.6809	0.7332	0.802	0.8424	0.488	0.5811	2.654	2.0147	0.6419	0.549	0.756	1.434	1.247	11.192	48.374	12.738	12.854	3.866	12.005	4.506	87.56	16.734	11.158	43.832	9.592			0.943183	10.5236
19.8966	5.5573	4.789	5.6849	1.2378	0.7921	0.5253	0.328	0.6483	0.467	0.8503	2.554	1.4929	0.6552	0.682	0.689	1.281	1.065	6.241	49.403	11.374	8.977	2.815	7.81	2.931	90.554	18.444	12.912	34.902	10.83			0.948862	9.87904
20.0157	5.3945	4.361	4.6797	1.3949	0.5688	0.5244	0.449	0.9327	0.688	0.8267	1.783	1.5141	0.6983	0.455	0.694	1.092	1.031	4.794	39.038	10.115	7.378	1.891	4.819	2.076	87.042	18.895	12.766	29.291	15.053			0.954542	8.97397
20.1349	5.2739	4.355	4.4832	1.2748	0.7964	0.5754	0.695	0.8275	0.771	0.6797	1.477	1.8001	0.5623	0.394	0.59	0.718	0.887	3.292	27.756	7.507	5.39	1.867	2.595	1.82	75.656	18.631	13.045	27.469	20.706			0.960227	7.99636
20.254	5.6293	4.304	3.5057	1.2198	0.5797	0.5569	0.355	0.8559	0.581	0.5728	1.538	1.1761	0.4452	0.308	0.783	0.685	1.075	2.442	16.243	6.023	4.254	1.878	2.471	2.047	59.747	21.436	14.52	24.233	29.507			0.965907	7.20591
20.3732	6.4414	3.531	3.2869	0.979	0.4532	0.3213	0.404	1.1328	0.59	0.5277	1.317	0.6037	0.51	0.537	0.551	0.847	0.916	2.139	7.297	3.063	2.638	1.199	1.552	1.268	47.332	21.062	15.579	19.756	34.43			0.971591	6.216
20.4923	5.2568	3.301	2.9939	0.9372	0.7452	0.4699	0.39	0.503	0.655	0.674	1.113	0.5391	0.2778	0.27	0.574	0.661	1.227	2.011	5.044	2.626	2.144	1.163	1.384	0.96	36.278	19.731	15.394	14.662	42.957			0.977271	5.68765
20.6114	5.211	3.483	2.2007	0.9442	0.3109	0.2794	0.344	0.6398	0.637	0.4679	1.289	0.7597	0.3178	0.265	0.363	0.404	0.712	1.298	3.271	1.952	1.501	1.158	1.37	0.705	26.945	18.79	13.86	12.129	50.245			0.982951	5.23629
20.7306	4.8232	3.532	2.2465	0.5124	0.3296	0.3329	0.576	0.3893	0.383	0.4684	1.235	0.6804	0.3926	0.292	0.301	0.74	0.724	1.345	2.563	1.873	1.409	0.67	1.249	0.923	18.934	16.917	12.8	10.741	51.623			0.988636	4.79329
20.8497	4.3312	3.402	1.8897	0.557	0.5362	0.1308	0.358	0.3845	0.549	0.5211	0.633	0.4804	0.5541	0.122	0.265	0.516	0.483	0.835	2.024	1.189	1.452	0.812	1.111	0.719	12.642	12.541	12.219	7.967	52.205			0.994315	4.18721
20.9689	4.4311	3.302	1.6449	0.5438	0.3839	0.1735	0.129	1.0026	0.612	0.3805	0.717	0.5541	0.2622	0.201	0.344	0.579	0.445	0.677	1.42	0.681	0.751	1.316	1.123	0.616	7.515	8.773	11.288	6.434	46.608			1	3.54854

## Sheet: Image5
X0	Y0	Y1	Y2	Y3	Y4	Y5	Y6	Y7	Y8	Y9	Y10	Y11	Y12	Y13	Y14	Y15	Y16	Y17	Y18	Y19	Y20	Y21	Y22	Y23	Y24	Y25			Ap-Basal to 1	Average intensities
0	18.903	30.675	22.068	17.691	24.572	42.469	42.507	19.763	16.998	22.077	23.185	22.761	49.351	43.586	68.577	33.5	32.244	23.235	20.754	20.0513	28.4738	26.3692	24.9504	24.417	13.8517	11.5687			0	26.837
0.1191	19.908	33.015	24.808	18.981	27.884	47.797	51.654	24.596	18.049	25.805	25.389	25.548	57.676	46.857	67.133	35.003	32.952	25.801	18.936	19.8596	28.484	22.3289	26.2565	22.596	15.2579	13.6774			0.00552294	28.7545
0.2383	21.951	33.885	24.5	22.12	30.805	51.835	60.193	27.588	20.456	29.536	29.778	29.225	60.536	52.323	71.646	35.6	33.111	33.054	22.266	20.3366	27.2572	21.7891	25.8052	24.779	16.48	13.4682			0.0110505	31.1319
0.3574	23.993	40.756	26.485	27.811	33.889	56.842	66.906	30.618	21.349	39.32	32.555	36.676	63.348	57.067	75.284	36.373	35.931	38.143	24.051	21.7889	27.8714	22.6217	25.4486	26.155	18.6183	17.0448			0.0165735	34.3446
0.4766	26.457	53.191	29.103	31.194	41.52	59.414	73.296	38.814	27.631	48.979	35.715	40.035	64.849	62.235	78.296	42.604	40.196	46.322	27.454	22.9189	25.758	20.5136	26.3762	27.262	20.7545	19.271			0.022101	38.1717
0.5957	34.867	68.718	33.703	42.39	55.845	66.139	85.796	56.619	37.917	58.741	37.179	45.235	71.889	71.5	85.277	47.703	46.826	52.822	35.455	24.7641	29.6772	21.7662	29.044	30.563	23.9815	22.5716			0.027624	45.0957
0.7148	47.468	81.65	40.629	62.931	66.762	70.148	100.039	80.431	60.395	73.235	39.262	53.789	77.072	78.665	90.49	58.713	53.765	58.711	46.837	33.7018	33.3409	24.1984	32.2141	32.438	28.591	29.0002			0.0331469	53.896
0.834	62.306	87.714	46.585	96.029	77.637	69.674	118.439	110.531	99.943	96.752	44.315	59.105	84.236	87.345	98.398	71.259	72.256	69.038	68.385	39.5041	36.8556	27.7288	39.5834	37.436	37.0134	34.7304			0.0386745	65.6901
0.9531	81.36	96.977	59.347	124.101	89.923	68.974	132.306	136.186	159.461	112.192	58.21	68.811	92.02	99.708	104.828	81.682	86.41	89.059	89.903	52.2395	43.9489	32.496	49.4395	43.095	48.4299	41.9541			0.0441974	79.4079
1.0723	100.536	103.571	70.246	134.555	98.121	70.595	149.265	158.565	207.053	144.328	76.184	78.289	108.063	98.137	120.4	96.011	104.729	109.246	113.841	69.6594	54.7986	37.2915	62.6519	53.729	59.449	48.6796			0.049725	93.6691
1.1914	120.875	105.687	80.943	145.779	107.419	63.869	151.244	168.751	227.182	165.877	89.196	82.2	127.018	105.111	131.055	112.3	121.899	132.017	123.267	81.8601	62.9183	43.476	74.8537	67.152	72.5654	55.567			0.055248	104.492
1.3106	128.773	95.421	82.299	145.612	114.661	61.311	148.401	179.755	241.539	188.602	103.01	84.315	146.214	104.074	138.608	136.373	138.504	149.82	114.844	90.3394	74.4075	53.2737	80.6375	79.769	83.5535	64.2848			0.0607755	112.212
1.4297	136.146	92.586	82.334	139.19	105.627	58.321	144.393	172.521	236.897	189.643	111.006	84.868	143.631	103.377	141.132	156.245	154.833	166.721	91.914	92.075	86.8535	65.0389	85.9782	98.932	95.6299	72.7274			0.0662985	115.187
1.5488	134.248	87.532	79.364	118.914	110.694	55.245	136.536	154.485	225.716	184.413	110.321	91.472	140.197	105.527	139.973	163.901	170.102	172.959	69.23	76.0656	84.8963	76.5937	82.9049	117.642	99.1053	79.5009			0.0718214	113.67
1.668	126.656	83.831	69.047	108.937	103.88	48.521	125.777	140.411	178.676	165.9	102.859	99.286	102.284	107.222	125.329	169.297	168.357	172.013	53.585	65.1701	81.596	83.6811	72.2746	126.018	91.6154	83.7681			0.077349	105.839
1.7871	114.133	71.733	58.54	91.024	98.286	44.552	111.284	119.122	125.792	134.982	89.468	102.716	72.755	120.21	113.51	159.566	160.008	166.521	39.004	49.7741	65.7868	85.2663	60.8316	129.62	81.2569	78.4252			0.0828719	94.2946
1.9063	97.879	66.001	50.009	78.856	101.55	42.481	110.297	94.026	88.357	109.603	81.402	119.318	46.47	132.889	100.366	138.337	148.542	143.386	31.63	39.2847	52.3202	79.1105	42.2975	120.764	68.7481	75.4405			0.0883995	83.7508
2.0254	76.109	57.811	45.342	62.144	90.925	45.067	99.148	81.828	73.228	78.069	63.95	121.627	27.829	139.929	90.337	106.561	129.656	120.118	27.374	30.5535	40.3021	68.4527	32.7894	101.003	52.4461	66.1822			0.0939224	71.5113
2.1445	56.158	51.773	41.084	51.213	83.604	46.231	97.429	71.79	58.153	62.493	45.236	115.027	15.947	148.11	83.849	79.774	111.82	100.511	28.368	22.523	34.6707	52.9347	21.4505	81.071	37.9123	57.8187			0.0994454	61.448
2.2637	42.279	47.386	36.195	45.34	88.238	47.25	91.187	63.04	58.959	50.925	32.213	109.87	10.995	136.104	75.101	58.07	90.869	82.056	25.836	17.2457	26.7006	36.3799	16.1595	64.822	33.4814	48.5511			0.104973	53.2414
2.3828	33.941	40.921	36.097	40.522	84.827	52.793	81.297	55.583	54.157	42.126	21.518	96.604	9.38	127.099	72.055	43.179	79.908	64.481	24.84	15.0952	20.2799	26.7733	13.318	45.671	26.7112	36.6651			0.110496	46.2305
2.502	30.238	32.793	31.706	33.084	86.317	61.853	82.891	56	48.908	41.073	16.544	75.521	7.327	114.708	64.9	32.591	64.786	53.173	27.053	11.468	16.4142	20.7297	9.5362	38.255	22.7849	32.9539			0.116023	41.3374
2.6211	25.933	28.815	34.678	26.331	79.286	68.382	77.749	45.857	42.209	36.913	11.233	56.271	6.611	91.477	63.623	28.931	52.709	46.777	26.189	12.6772	12.2595	15.4588	7.4982	32.75	18.1618	24.9943			0.121546	36.1628
2.7402	22.725	24.815	36.387	22.435	67.122	75.859	74.609	47.543	39.346	40.187	8.012	33.448	6.377	73.248	57.593	26.674	41.88	39.539	23.492	9.7626	7.6054	11.4276	7.6312	22.349	16.6849	17.2259			0.127069	31.7303
2.8594	20.947	22.425	36.921	19.469	56.789	85.642	74.626	40.227	38.272	45.886	8.534	22.557	4.789	52.994	56.168	23.149	29.012	37.455	22.198	9.5546	5.161	8.3939	7.9854	16.495	14.3216	11.8141			0.132597	28.6906
2.9785	20.639	24.139	33.26	18.357	52.619	91.503	69.883	38.52	37.919	46.103	8.142	14.939	4.45	39.209	49.445	20.12	20.929	31.741	24.595	7.1244	4.2868	5.4076	6.9033	12.731	14.6878	10.9615			0.13812	26.3553
3.0977	18.656	23.582	31.535	16.442	43.801	93.41	63.379	36.049	32.99	48.693	8.233	12.132	5.407	27.616	49.899	18.587	10.94	28.613	23.821	7.5031	3.7253	4.5197	6.8946	9.959	13.7928	8.1948			0.143647	24.1286
3.2168	20.488	21.662	29.258	16.488	38.798	95.142	63.917	38.884	30.181	46.895	6.975	9.365	5.222	23.145	44.142	17.321	9.068	23.099	23.919	6.4274	2.7651	3.8677	6.1583	9.593	13.7608	5.6528			0.14917	22.793
3.336	18.797	21.578	30.833	13.751	36.515	100.921	61.059	34.86	30.803	42.855	7.677	7.154	5.104	20.153	36.53	16.432	7.525	19.346	24.023	6.9673	2.846	3.987	6.5572	7.059	13.3322	7.4456			0.154698	21.7573
3.4551	18.09	20.638	31.382	13.992	31.978	110.877	60.644	35.478	29.034	38.41	6.978	7.116	4.342	16.928	35.377	15.715	6.988	14.087	24.552	6.2092	3.1105	3.8257	6.6455	7.149	11.7457	5.7957			0.160221	21.1312
3.5742	15.241	20.087	34.692	15.564	26.964	121.831	60.15	34.257	30.547	32.824	7.181	6.125	4.416	14.701	28.852	16.099	6.647	14.067	27.8	6.469	3.092	3.3485	6.3681	6.689	10.9994	4.9963			0.165744	20.8734
3.6934	16.865	20.248	32.325	11.862	23.743	128.988	68.883	32.814	27.081	32.533	6.536	5.552	4.239	13.627	28.626	16.262	6.551	15.521	28.931	6.3014	2.7072	3.9029	7.1339	6.816	10.6137	5.0405			0.171271	21.0147
3.8125	18.691	20.407	32.801	13.259	22.163	130.328	66.506	33.239	27.11	32.708	6.471	6.514	4.329	12.11	24.534	16.19	6.751	13.575	30.641	5.9832	2.9137	3.2097	7.0436	5.269	11.3837	5.374			0.176794	20.8636
3.9317	16.638	19.593	33.41	12.982	20.523	132.255	71.149	32.897	28.607	24.812	6.091	5.221	4.829	11.927	21.491	16.602	5.805	13.167	27.087	5.7462	2.155	3.4606	7.5663	5.301	11.6384	4.0772			0.182322	20.3319
4.0508	16.277	18.39	33.22	11.688	19.956	133.08	63.797	35.271	26.905	23.779	6.677	5.765	4.512	10.304	19.566	14.494	6.05	17.134	29.34	5.1973	2.8513	3.2764	8.4472	5.849	12.3378	4.6684			0.187845	20.1068
4.1699	15.329	19.84	32.148	11.711	17.89	140.24	60.041	36.54	26.586	20.123	6.535	4.464	4.164	8.657	19.396	11.048	5.903	15.97	26.627	5.4372	2.2752	3.2394	8.3756	5.565	13.4637	4.0494			0.193368	19.6218
4.2891	15.52	19.838	30.322	10.144	19.127	149.111	56.395	34.325	25.584	20.975	8.535	5.109	4.624	9.086	19.471	11.515	6.979	13.318	27.985	5.8884	2.0881	2.3766	8.6911	5.4	14.0194	4.2893			0.198895	19.815
4.4082	13.048	20.221	30.833	10.069	17.992	153.582	52.303	33.4	25.292	20.785	10.197	5.231	4.157	7.98	17.384	10.459	5.359	15.793	28.642	5.9062	2.3441	2.8232	7.3199	5.28	15.8311	4.8547			0.204418	19.685
4.5274	12.808	19.563	34.1	10.778	16.654	158.931	49.172	32.655	24.567	19.796	10.412	4.617	3.686	6.422	16.826	8.108	5.057	15.609	29.252	5.0992	3.0223	3.141	9.536	6.35	18.8398	5.4128			0.209946	19.8126
4.6465	13.227	20.64	37.227	11.7	16.178	152.925	46.232	31.318	24.244	20.593	10.735	4.802	4.202	5.509	15.78	7.602	6.254	14.45	32.291	6.511	2.5951	2.9512	10.9729	5.128	22.4409	6.0837			0.215469	19.8977
4.7657	11.865	22.171	40.746	11.603	13.229	133.836	42.237	33.2	24.046	20.737	11.453	4.874	4.014	5.726	16.843	8.88	5.671	16.646	30.834	5.4103	1.9017	3.1346	12.4645	5.578	18.0648	8.0259			0.220996	19.1836
4.8848	12.062	25.603	42.867	10.171	12.26	120.823	39.172	29.129	26.336	22.765	10.363	4.385	3.978	5.225	16.671	6.8	5.548	16.486	26.947	6.0696	2.5219	2.7429	13.9212	6.22	17.4519	9.9128			0.226519	18.5673
5.0039	9.142	26.093	41.606	10.125	9.959	102.351	29.623	26.331	27.812	21.351	9.407	3.852	4.122	6.675	15.715	7.655	6.169	14.915	21.948	5.373	2.5832	3.0018	17.1453	5.931	15.1721	14.2286			0.232042	17.1589
5.1231	9.675	29.982	40.738	11.394	8.883	76.003	23.031	22.414	26.143	22.067	9.167	5.164	3.236	4.479	14.811	6.819	5.088	13.36	19.653	6.6663	3.2258	2.6844	15.7449	6.701	14.0011	16.7375			0.23757	15.6663
5.2422	9.653	31.708	40.273	10.585	6.257	63.597	14.891	22.534	27.775	21.23	9.312	4.781	2.938	4.822	15.929	6.939	5.55	11.884	19.114	6.3065	2.9175	2.739	18.2438	8.152	12.4011	22.0325			0.243093	15.1039
5.3614	8.126	32.123	46.519	11.744	7.019	50.329	8.688	20.994	28.496	19.996	9.112	5.029	3.928	5.923	16.666	8.521	5.732	10.643	20.649	6.2718	2.9619	2.6312	15.3944	8.592	10.4359	22.4434			0.24862	14.6048
5.4805	8.235	31.734	50.773	10.709	4.782	37.6	6.504	21.808	28.777	21.158	10.938	4.693	2.817	5.041	14.64	8.461	5.4	8.72	21.23	6.0291	2.3581	2.3574	13.008	8.882	9.7824	24.0962			0.254143	13.9264
5.5996	8.694	36.256	54.971	11.032	4.145	27.538	4.987	18.667	30.317	22.864	11.194	4.562	2.941	6.895	14.694	8.432	5.956	8.74	20.682	6.4303	2.5854	2.0986	13.8764	9.798	9.0956	24.3193			0.259666	13.9767
5.7188	8.038	36.175	53.36	9.802	3.011	18.658	4.861	17.49	27.248	23.285	12.769	4.116	3.462	5.923	14.233	9.867	5.658	8.701	21.335	6.0076	2.1822	2.8619	13.0743	12.906	8.7324	26.4697			0.265194	13.5535
5.8379	7.99	39.816	54.591	13.292	3.007	12.694	4.764	14.466	24.886	28.402	12.833	4.99	2.883	5.373	13.196	10.443	6.225	8.212	20.541	5.8853	2.3239	2.2062	14.3943	10.39	7.7482	25.148			0.270717	13.4273
5.9571	8.746	43.638	56.522	11.076	2.357	8.628	3.683	13.096	24.58	28.127	12.838	4.258	3.543	5.34	15.292	12.548	5.476	8.483	20.151	6.1029	2.6743	2.3048	12.6628	11.954	7.6537	23.5048			0.276244	13.3776
6.0762	8.183	46.836	63.394	11.147	3.166	4.693	3.755	12.448	26.481	28.224	12.786	4.61	2.675	4.843	16.3	10.994	6.693	8.685	21.018	6.275	2.9412	3.2246	13.082	13.424	8.3105	26.0005			0.281767	13.9357
6.1953	9.536	48.449	65.649	12.904	2.229	3.505	2.749	11.145	26.509	24.193	13.511	4.426	3.054	4.592	14.425	12.468	6.158	8.331	23.065	6.5706	2.0333	2.0237	12.4882	13.54	7.5443	27.2983			0.28729	13.8738
6.3145	12.211	52.445	71.164	14.963	2.595	3.368	2.98	10.782	26.266	22.505	13.893	3.815	2.908	5.602	14.646	13.605	7.519	6.473	19.659	5.687	2.0779	2.8616	11.1321	14.146	8.2135	25.4217			0.292818	14.1946
6.4336	9.162	54.262	74.79	15.66	2.265	2.344	2.093	10.4	25.425	21.357	13.133	4.713	2.28	4.377	16.824	16.874	6.158	7.875	19.163	6.1679	1.7644	2.5376	11.9464	15.435	8.8051	23.2368			0.298341	14.2771
6.5528	9.729	58.668	84.38	16.8	2.042	2.569	2.519	10.173	27.614	20.432	15.761	4.822	2.607	6.261	17.387	14.792	6.195	7.178	18.458	6.0995	2.0168	2.3803	9.9102	16.77	9.2213	20.773			0.303868	14.893
6.6719	9.465	51.281	84.745	15.897	2.192	3.296	3.104	8.999	28.513	21.536	19.909	5.011	3.013	4.794	16.759	13.86	6.063	8.037	15.967	5.964	2.1859	2.9533	9.3755	16.774	8.0267	22.3502			0.309391	14.6942
6.7911	11.37	50.198	85.515	14.955	2.859	2.672	2.589	8.986	24.928	19.225	24.058	4.497	2.846	5.305	20.579	14.017	6.387	7.081	18.242	5.5054	2.9094	2.5059	9.2529	17.722	8.078	21.3018			0.314919	14.8287
6.9102	10.118	53.61	89.459	13.071	2.1	2.273	2.519	8.475	23.331	20.062	25.965	4.54	2.849	5.248	21.863	12.426	6.29	6.698	16.654	5.0945	1.9929	2.7418	10.0067	17.672	7.5833	18.0749			0.320442	14.7269
7.0293	9.34	56.297	89.676	13.798	2.645	2.426	2.391	7.741	21.442	22.344	25.207	4.135	3.629	5.909	22.95	12.845	7.385	7	16.427	6.469	2.3757	3.0215	9.2214	16.77	8.4556	17.0642			0.325965	14.9627
7.1485	10.294	54.081	89.87	12.826	2.739	2.348	2.325	7.571	21.896	24.241	24.449	4.009	2.547	5.339	22.044	11.717	7.399	8.217	17.542	5.6622	2.4372	2.3761	11.4657	17.981	7.1392	15.8682			0.331492	14.8716
7.2676	8.868	54.861	96.78	13.873	2.456	2.846	2.277	8.267	20.929	23.343	23.039	3.837	3.035	5.619	26.235	12.941	8.051	7.662	16.775	5.4171	2.8693	2.6821	12.3863	15.189	7.1097	15.8987			0.337015	15.2042
7.3868	8.445	54.73	103.565	11.703	2.145	2.421	2.18	6.813	22.44	22.465	18.623	4.47	3.096	5.681	22.156	13.489	8.196	7.801	15.205	5.7254	2.6587	2.5707	16.712	15.831	9.7148	17.9847			0.342543	15.341
7.5059	9.539	55.519	105.553	13.54	2.369	2.907	2.177	7.82	23.862	23.815	16.53	4.091	2.96	5.113	22.358	12.502	9.171	7.563	16.501	5.227	2.8744	2.5166	17.2585	15.234	9.1858	17.7816			0.348066	15.6101
7.625	9.745	56.388	105.337	13.249	2.363	2.595	2.449	6.826	27.622	21.391	16.091	4.448	3.099	5.932	23.583	14.557	9.023	8.64	15.904	5.3167	2.8971	2.849	20.6655	15.5	9.6727	20.7716			0.353589	16.0941
7.7442	8.575	58.993	112.852	13.769	2.023	2.144	2.223	7.35	26.086	22.078	16.836	4.389	2.909	5.084	22.482	15.99	7.634	6.588	14.852	5.131	2.9018	2.2898	20.8367	15.518	10.1732	21.4693			0.359116	16.2563
7.8633	6.57	60.627	117.223	15.211	2.122	2.062	2.873	5.531	27.118	19.678	16.504	4.627	2.895	5.595	21.463	15.876	7.476	6.285	12.804	5.4563	2.8253	2.5165	22.0849	16.189	10.9488	25.65			0.364639	16.5213
7.9825	7.669	60.074	120.234	14.628	1.694	2.817	2.277	5.29	27.273	20.237	16.886	3.893	3.049	5.505	21.244	16.849	7.15	6.182	11.579	6.4016	2.7929	2.4672	18.9534	15.528	12.7439	24.0662			0.370167	16.4987
8.1016	6.465	53.828	108.842	17.434	1.746	2.523	2.82	5.671	25.699	18.815	16.798	4.961	3.606	4.556	20.832	16.671	8.042	6.166	9.412	4.66	2.5042	2.6018	17.9564	18.431	14.6307	23.7443			0.37569	15.834
8.2207	6.521	50.842	103.771	20.742	2.107	2.772	1.769	5.312	24.309	19.229	14.504	4.567	4.215	5.031	22.418	15.609	7.809	6.32	8.931	4.9415	3.308	2.4201	14.7235	17.909	16.7801	26.2113			0.381213	15.6034
8.3399	5.672	44.112	98.553	19.901	2.312	2.219	1.833	5.353	26.147	20.522	16.2	5.041	3.483	5.566	20.409	13.95	7.518	7.078	8.328	5.116	3.3971	2.4558	13.5972	17.163	17.6416	28.3747			0.38674	15.1956
8.459	3.967	43.911	91.108	24.428	2.35	1.801	3.418	5.457	23.955	20.529	18.154	4.786	3.738	6.028	20.418	16.323	7.99	6.042	8.645	5.3159	3.1826	2.8671	13.6149	15.106	18.885	27.6673			0.392263	15.1165
8.5782	4.027	36.744	80.919	25.005	2.046	1.992	2.148	5.184	22.996	18.697	21.162	4.234	3.054	5.131	20.952	14.724	7.945	6.064	8.606	5.0633	2.9558	3.3153	14.7951	16.22	19.1509	26.1808			0.397791	14.3663
8.6973	3.775	33.731	68.401	23.254	2.32	2.642	1.886	3.377	22.368	19.078	21.183	5.299	3.268	5.144	21.503	14.166	8.765	6.855	7.514	5.0272	2.1566	2.3495	15.9308	15.385	20.3062	28.5226			0.403314	13.8113
8.8165	5.246	27.07	51.83	23.355	1.527	2.421	2.098	3.982	21.238	16.182	22.518	4.936	3.017	5.322	17.721	12.606	8.566	7.293	6.102	5.2597	2.7159	2.9403	18.2783	13.888	19.0314	24.4623			0.408841	12.5342
8.9356	3.955	20.287	28.998	22.674	1.849	2.168	1.785	4.564	20.717	18.517	20.202	5.375	3.145	5.361	19.549	12.59	9.388	4.695	7.486	5.4381	3.074	2.7186	18.1339	15.953	19.5499	24.4592			0.414364	11.5395
9.0547	3.476	15.867	14.586	19.407	2.013	2.206	2.324	4.33	20.449	18.124	21.378	4.876	2.707	5.13	17.817	13.954	8.199	7.067	6.895	5.9957	2.6116	2.9514	16.9743	14.024	19.0669	25.1163			0.419887	10.6148
9.1739	3.666	10.824	8.55	18.191	1.827	2.838	2.924	3.872	17.816	13.266	21.432	4.709	2.999	5.199	18.355	15.738	8.195	6.797	6.083	5.8877	2.8885	2.6141	16.0192	13.067	22.1243	21.6454			0.425415	9.87782
9.293	3.939	8.843	4.216	17.278	2.201	2.81	2.3	3.751	17.139	13.613	21.199	4.321	4.04	4.604	17.122	12.941	7.444	6.088	5.934	6.4776	3.113	2.9707	13.9887	12.485	20.6151	22.0737			0.430938	9.28888
9.4122	3.717	5.305	2.872	15.901	1.894	2.289	2.328	3.869	16.343	10.838	22.911	4.435	3.548	4.573	17.185	16.018	7.148	5.51	4.853	6.1494	3.4418	3.1765	12.6986	11.995	25.3615	19.8209			0.436465	9.02196
9.5313	3.506	4.403	2.9	16.213	2.478	2.162	2.439	4.593	15.653	11.1	21.971	4.164	2.964	4.572	17.749	14.421	6.878	6.639	5.418	7.6535	2.6417	2.9861	11.9681	10.076	24.8553	19.0359			0.441988	8.85077
9.6504	3.567	3.42	2.653	17.507	2.457	2.225	2.13	3.911	14.923	10.361	22.109	4.057	3.425	4.304	18.524	14.831	7.373	6.316	5.594	8.8353	2.8532	2.9685	11.1624	9.51	28.2219	16.7484			0.447511	8.87545
9.7696	3.39	2.788	1.664	17.983	2.071	1.854	2.052	4.637	14.939	10.074	21.579	4.932	2.922	4.05	16.926	13.31	7.021	4.62	4.735	10.0153	3.4206	2.9243	11.7846	9.771	30.7312	14.8891			0.453039	8.69825
9.8887	2.919	2.068	1.729	18.054	1.632	1.721	2.17	3.351	13.228	10.461	21.861	4.251	3.266	3.87	19.394	12.78	6.253	4.644	4.963	8.855	2.9181	2.5687	12.7815	8.011	28.1461	16.6286			0.458562	8.45973
10.0079	2.718	1.905	2.499	18.496	1.626	1.846	2.248	4.536	13.623	9.568	21.604	4.62	3.575	3.692	18.801	12.239	6.33	4.393	5.297	9.4017	2.698	2.9323	13.2655	8.576	24.9388	15.0003			0.464089	8.38654
10.127	3.233	2.014	1.965	17.761	1.807	2.257	2.571	4.894	14.531	10.098	22.122	4.323	3.364	3.506	20.142	11.955	6.677	4.963	5.101	10.0833	3.1154	2.6365	13.0885	9.204	27.7479	13.2603			0.469612	8.61285
10.2462	3.273	1.723	2.11	16.998	1.666	2.089	2.418	4.341	14.011	9.527	22.435	4.988	3.681	3.227	19.707	11.495	6.207	5.396	6.349	11.3393	2.7141	2.793	11.8451	7.874	28.5658	14.235			0.47514	8.56494
10.3653	2.826	2.259	1.694	19.657	1.59	1.842	2.035	3.807	14.135	9.727	19.304	5.3	3.323	3.766	22.101	10.985	6.499	5.68	5.703	10.2247	2.6361	3.4972	12.8892	7.058	23.2852	10.0239			0.480663	8.2301
10.4844	2.809	2.042	1.799	17.941	1.645	2.315	1.873	3.989	13.232	10.476	20.063	4.757	4.232	3.75	23.56	10.061	5.808	4.391	5.644	11.9426	3.0607	2.668	12.4875	8.083	23.7507	10.1738			0.486186	8.26066
10.6036	2.885	1.594	1.683	16.859	2.572	1.953	1.898	3.998	14.345	9.418	18.007	5.424	3.229	3.931	21.783	10.858	6.142	5.04	5.17	14.2662	2.1997	2.6084	12.4007	7.255	22.9622	10.5343			0.491713	8.13404
10.7227	1.898	1.459	1.535	17.788	2.082	1.902	2.424	4.206	14.628	11.399	20.442	4.994	4.236	3.976	20.906	11.313	4.643	5.157	5.133	15.4291	2.4151	2.5684	12.9931	7.179	19.2965	9.4124			0.497236	8.15323
10.8419	2.27	1.78	1.658	17.584	2.356	2.767	1.773	3.709	17.157	10.868	20.22	4.276	2.904	3.192	21.562	11.035	4.941	4.375	5.637	15.9747	2.9174	2.9022	12.2846	7.642	18.8639	7.4642			0.502764	8.10944
10.961	1.994	1.631	1.735	16.887	2.249	2.025	2.582	3.202	15.154	10.355	21.302	4.505	3.222	4.068	21.707	10.427	5.183	5.235	4.344	17.4555	3.6891	2.8893	12.4659	6.345	15.0898	8.3996			0.508287	7.96675
11.0801	2.179	1.505	1.751	17.036	2.114	1.943	2.305	3.239	16.055	10.045	21.903	4.825	3.031	3.698	20.048	10.01	4.79	5.423	4.99	20.346	2.8733	2.5946	13.0127	6.56	13.6203	9.0971			0.51381	8.00274
11.1993	2.291	1.84	1.605	18.506	2.178	1.944	2.321	3.213	15.475	11.47	19.421	5.494	3.642	3.721	20.656	8.801	3.565	4.471	4.822	19.5599	3.022	2.7354	11.9745	5.711	11.6292	8.9254			0.519337	7.78491
11.3184	1.759	1.469	1.626	18.591	2.096	2.463	1.981	2.59	15.461	12.748	23.725	4.381	3.029	3.028	19.463	9.887	4.939	3.917	4.924	21.652	2.8447	2.5692	11.4995	5.988	9.6079	7.8944			0.52486	7.83152
11.4376	2.31	1.402	1.348	18.483	1.917	2.105	2.404	2.707	13.836	11.961	20.038	4.472	2.926	3.213	20.573	9.942	5.628	4.438	5.135	22.22	2.6526	2.3706	11.2506	6.132	9.4248	7.3896			0.530388	7.69318
11.5567	2.667	1.605	1.815	19.354	1.984	2.5	1.729	3.331	14.991	13.147	22.077	4.981	3.792	3.382	23.407	10.572	5.295	4.01	4.543	21.2842	2.7316	2.4418	9.7325	6.11	8.8106	6.4063			0.535911	7.9354
11.6758	2.015	2.05	1.725	16.874	2.167	2.331	2.301	3.612	14.789	13.981	21.809	4.751	3.081	3.989	22.77	9.89	4.607	3.916	4.001	18.5186	3.1657	2.4562	11.4387	6.248	7.9463	7.0271			0.541434	7.74576
11.795	1.859	1.792	1.337	16.458	2.016	1.929	1.834	2.846	16.154	13.659	22.748	4.903	4.308	3.163	25.664	9.081	5.045	5.418	5.045	18.3953	3.1399	2.4962	10.2687	6.205	7.656	6.1457			0.546961	7.82818
11.9141	1.356	1.842	2.152	15.314	1.494	2.228	2.451	3.881	14.843	12.222	19.59	4.825	3.706	3.882	24.509	11.078	5.371	5.163	3.763	16.7567	2.8927	1.6915	11.0397	6.21	6.0422	6.1957			0.552484	7.49676
12.0333	2.22	1.683	1.518	16.593	2.141	1.913	2.017	2.572	16.934	14.003	19.356	5.28	3.426	2.866	24.086	9.919	5.32	4.124	3.889	16.5043	2.6977	2.2493	11.455	6.129	6.2447	6.3142			0.558012	7.53657
12.1524	2.511	1.205	1.29	17.262	2.333	2.267	2.38	2.879	15.387	14.597	18.431	5.51	3.266	3.739	24.517	7.745	5.026	4.054	5.045	18.0146	3.0204	2.9192	10.1336	6.203	7.6172	6.4068			0.563535	7.62634
12.2716	2.034	1.828	2.014	18.348	2.349	1.8	2.946	3.201	15.826	15.5	18.245	5.647	3.002	3.716	23.729	8.175	4.676	4.351	4.851	17.3972	2.7381	2.6734	10.4734	6.008	6.5668	7.662			0.569062	7.70476
12.3907	2.24	1.506	1.77	21.333	2.464	2.55	3.074	3.464	16.302	14.388	18.875	5.664	2.905	2.918	20.632	7.998	4.654	5.079	4.959	17.509	2.4712	3.3471	9.6791	5.005	7.2681	7.6952			0.574585	7.7089
12.5098	2.133	1.43	1.589	22.674	1.992	3.493	2.462	2.934	16.674	16.166	18.306	5.893	3.294	3.939	24.292	8.839	5.545	5.347	4.611	18.2209	2.6872	2.739	9.5958	5.838	6.3468	9.062			0.580108	8.09676
12.629	2.406	2.282	1.793	20.505	1.812	1.941	2.49	2.775	15.417	14.096	17.462	5.05	3.956	3.973	20.487	7.87	5.096	4.92	3.637	18.3672	2.6664	2.6533	9.3433	5.475	6.5498	7.4379			0.585636	7.52185
12.7481	1.621	1.963	1.37	18.366	2.06	2.54	2.183	2.919	16.763	15.868	16.14	4.834	3.632	4.418	22.543	7.736	5.32	4.03	4.192	18.6225	3.0208	2.9794	9.9703	4.931	6.2301	8.6898			0.591159	7.61815
12.8673	1.505	1.688	1.741	18.368	2.304	2.152	2.431	2.535	13.621	14.219	15.141	5.374	2.963	3.526	21.566	8.802	4.246	4.981	5.651	17.2512	2.7297	2.9733	9.1195	4.972	6.2882	9.1675			0.596686	7.3401
12.9864	2.219	2.109	1.946	20.117	1.675	2.498	2.012	3.069	12.523	15.004	16.516	6.11	3.305	3.456	19.84	8.95	4.545	3.876	3.978	18.6355	2.9353	2.2286	9.0662	5.614	6.076	9.5336			0.602209	7.43791
13.1055	1.609	2.14	1.146	19.249	2.26	1.813	2.134	3.03	13.871	12.743	14.055	5.206	3.693	3.139	21.716	8.313	4.872	3.639	4.059	15.712	2.3468	2.6478	9.4144	5.996	4.754	8.6661			0.607732	7.08628
13.2247	1.258	2.136	1.658	18.879	2.322	2.683	1.853	2.729	14.231	13.338	13.878	5.572	3.106	3.318	19.796	8.305	4.363	4.014	4.094	19.1346	2.4355	2.1954	8.1809	6.056	6.1474	8.7431			0.61326	7.17224
13.3438	1.982	1.995	1.911	20.312	2.562	2.763	2.088	3.513	12.958	11.895	12.494	6.379	3.351	3.568	21.812	8.693	5.257	3.458	5.045	20.424	2.8109	3.3581	10.7949	5.819	4.2588	7.5908			0.618783	7.42357
13.463	1.827	1.782	1.988	18.904	2.095	1.918	2.729	2.93	14.751	12.241	13.463	6.093	3.273	3.337	21.301	7.581	4.988	4.067	3.588	19.9769	3.2942	2.9392	8.2274	5.812	5.6776	7.1337			0.62431	7.2363
13.5821	1.527	1.621	1.932	17.952	2.353	2.574	2.3	3.307	13.792	11.655	12.903	5.999	3.61	3.528	21.355	7.577	4.722	3.861	3.798	20.838	2.5566	2.9782	8.2447	5.186	5.1856	8.2829			0.629833	7.1563
13.7012	1.561	1.465	1.556	17.44	1.954	2.32	2.88	3.923	13.906	11.371	11.916	7.27	3.453	3.583	21.812	7.703	4.16	5.057	3.637	19.5966	2.0213	2.8211	7.9764	6.216	5.2227	8.6056			0.635356	7.15289
13.8204	1.5	1.754	2.075	14.6	1.983	2.56	2.375	2.938	13.097	11.17	12.233	7.081	2.525	3.503	21.878	6.548	4.836	4.136	3.57	19.0773	2.5386	2.4329	7.4077	7.822	5.4797	9.6972			0.640884	6.98659
13.9395	2.106	2.108	2.061	14.487	1.954	2.213	2.612	2.55	11.537	10.685	12.542	6.377	3.233	4.29	22.151	6.67	3.882	4.276	3.215	18.2128	2.6114	3.1093	8.3471	7.921	5.2026	8.8124			0.646407	6.92982
14.0587	1.78	1.852	2.279	15.491	1.379	2.099	2.578	3.327	11.961	9.983	10.679	6.829	2.851	4.318	22.119	6.057	3.552	4.579	3.087	16.6621	3.1845	3.1201	7.6662	7.231	6.5724	8.7356			0.651934	6.81595
14.1778	1.866	2.212	1.663	15.922	2.298	1.982	1.913	2.514	12.18	10.729	12.444	6.687	3.691	3.243	20.912	5.636	4.328	3.389	3.059	21.4083	2.2701	2.3341	7.7836	7.515	5.8766	9.2338			0.657457	6.93583
14.297	1.541	2.296	1.928	18.509	2.229	2.088	1.814	3.265	12.331	10.146	11.434	6.379	3.908	3.695	20.697	6.02	4.094	3.216	3.927	22.9346	2.2816	2.3409	7.0025	9.056	6.645	8.5332			0.662985	7.13362
14.4161	1.551	2.214	2.015	16.39	2.484	2.119	2.436	2.544	13.78	10.117	11.081	8.152	3.375	2.852	20.3	5.875	4.064	3.587	4.044	21.6575	3.5372	3.2667	7.3824	8.457	7.0251	8.82			0.668508	7.16822
14.5352	1.739	1.717	1.813	16.609	2.412	2.109	2.201	2.294	12.299	9.504	10.961	8.872	3.424	4.241	19.074	6.395	3.954	3.595	3.597	23.7667	2.7156	2.5272	8.6156	9.766	7.864	7.3009			0.674031	7.18153
14.6544	2.331	2.008	2.359	14.23	2.498	2.284	2.299	2.627	11.972	8.991	9.892	9.035	2.987	4.147	18.711	6.274	4.224	3.798	3.431	21.2174	2.4999	2.6959	6.1868	10.586	7.3655	8.8694			0.679558	6.96938
14.7735	2.225	1.668	1.939	14.725	1.637	2.419	2.808	2.392	13.898	8.804	9.673	9.321	4.903	3.658	19.829	5.21	3.76	2.683	2.511	21.9663	2.6612	2.5307	7.2301	10.819	9.6124	7.1828			0.685081	7.06811
14.8927	2.582	1.775	2.7	13.947	2.708	2.007	1.952	2.896	13.978	8.005	10.812	9.276	2.881	3.717	17.689	4.573	4.088	3.014	2.681	19.6882	1.9536	2.8006	7.3636	10.429	8.8659	8.6865			0.690609	6.88745
15.0118	2.201	2.278	2.443	14.585	2.681	2.212	2.377	2.284	12.82	8.231	10.551	7.45	3.739	3.631	19.192	4.231	3.692	3.04	2.915	19.5992	2.1426	2.7047	6.7969	10.004	8.9046	7.648			0.696132	6.79129
15.1309	1.639	1.863	2.599	13.442	2.282	2.432	2.86	2.397	13.626	8.089	11.467	8.487	3.576	2.811	19.759	4.356	3.724	3.45	2.617	20.0908	1.8822	2.4111	5.5885	10.191	10.1062	7.1977			0.701655	6.81757
15.2501	1.503	2.582	2.775	12.709	2.223	2.473	2.203	1.809	14.96	9.577	9.791	8.577	3.339	3.838	19.372	4.83	3.403	3.719	2.724	20.5813	2.1032	1.9786	6.8376	11.175	10.2413	8.1832			0.707182	6.99101
15.3692	2.034	1.933	2.015	12.703	1.788	1.845	2.632	2.172	15.641	8.709	9.121	7.733	3.969	3.67	14.766	4.481	3.162	3.295	1.932	20.3087	2.5737	2.7619	5.8356	11.662	10.3595	7.8654			0.712705	6.67915
15.4884	2.271	2.264	2.708	11.144	2.411	1.877	2.76	2.201	16.933	8.206	9.236	9.005	3.476	3.973	14.472	4.374	3.168	3.048	2.279	20.7641	2.7318	2.3093	5.5194	9.965	9.9824	9.5035			0.718233	6.74333
15.6075	2.007	1.995	2.757	11.614	2.403	2.173	2.51	2.778	15.365	8.706	8.37	9.202	3.858	4.938	15.257	3.942	2.703	2.654	3.034	22.5429	2.2382	2.446	5.7637	11.011	10.5705	12.0552			0.723756	6.98152
15.7266	1.441	1.557	3.278	9.62	2.227	2.243	2.961	2.323	17.463	8.051	8.967	9.835	5.028	2.96	14.939	4.517	3.498	2.837	3.195	20.2986	2.5065	1.998	5.7212	13.386	11.3044	11.8828			0.729279	7.0283
15.8458	1.872	1.665	3.349	9.683	2.133	2.269	2.848	2.603	19.564	8.806	8.526	10.694	3.865	3.226	14.833	4.218	3.159	2.869	2.699	20.3496	2.9183	1.954	6.319	14.566	12.7082	14.4598			0.734806	7.3334
15.9649	2.297	1.331	3.435	7.558	1.991	2.497	2.968	2.308	18.428	8.642	9.875	10.436	5.335	4.442	14.345	5.28	2.948	3.374	2.659	20.094	2.0647	2.5977	6.1452	13.706	11.6585	14.6893			0.740329	7.29886
16.0841	1.615	1.982	3.187	6.284	2.369	2.51	2.047	2.606	20.086	7.765	8.72	10.422	5.875	4.434	13.612	4.52	2.826	2.878	3.087	23.9894	2.6497	2.4438	4.271	14.989	12.1144	16.5808			0.745857	7.40545
16.2032	1.734	1.742	4.504	7.061	2.804	1.787	3.248	2.993	17.108	8.3	10.832	10.281	6.657	4.027	13.05	3.856	2.585	2.906	3.168	25.1417	2.7097	2.0117	5.6724	15.406	13.4697	16.4357			0.75138	7.61826
16.3224	1.924	2.215	5.173	6.6	1.921	2.856	3.586	2.587	16.93	7.788	10.014	12.883	7.131	4.013	12.314	4.733	3.079	2.519	2.363	25.1374	2.6666	2.242	4.7296	19.005	14.8334	17.2741			0.756907	7.88294
16.4415	1.73	2.382	6.422	5.774	2.223	3.109	3.514	3.038	16.556	8.749	9.4	12.837	8.246	4.662	13.903	4.073	1.852	3.02	2.065	25.5567	2.5708	2.4847	4.6141	18.629	15.5365	17.2846			0.76243	8.02492
16.5606	1.623	1.604	6.017	5.465	2.432	3.126	4.051	2.973	17.259	7.797	9.226	11.869	8.586	3.756	12.594	3.801	2.528	1.955	2.212	27.7359	2.8847	2.4555	4.2686	20.231	14.558	17.8412			0.767953	7.97813
16.6798	2.091	2.029	7.473	4.657	2.421	3.141	3.136	3.45	16.118	8.638	11.003	11.749	9.647	4.757	11.975	3.633	2.497	2.72	2.555	26.0391	2.9367	1.862	5.636	22.321	18.0699	22.614			0.773481	8.51291
16.7989	1.41	1.632	7.989	3.668	1.852	3.596	3.413	3.47	16.458	8.074	9.599	12.757	10.37	5.552	12.346	3.858	2.299	2.171	3.012	25.2871	2.4834	2.0947	4.9095	24.936	20.0863	23.3253			0.779004	8.64619
16.9181	2.115	2.542	9.54	4.533	2.247	4.171	3.264	2.79	17.047	7.509	9.101	14.76	10.528	4.818	11.053	3.626	2.974	2.513	2.45	27.9056	3.5822	2.2564	4.69	27.59	26.7564	23.8762			0.784531	9.30207
17.0372	2.11	2.295	11.874	4.053	1.657	5.023	4.661	3.872	16.629	7.138	9.484	15.354	12.746	4.748	11.293	3.34	1.796	2.271	2.378	25.5739	3.7945	2.1976	4.8132	27.986	29.0537	26.9399			0.790054	9.634
17.1563	1.561	2.286	16.631	3.565	1.695	6.258	4.786	3.519	17.46	5.916	8.085	16.119	14.695	5.449	11.837	2.806	1.768	1.883	2.56	29.3466	3.9722	2.7408	4.4048	32.62	32.2871	31.4412			0.795577	10.4759
17.2755	2.133	2.096	19.612	3.939	1.541	7.338	3.337	3.847	19.598	6.617	8.085	17.779	14.804	5.89	10.757	2.936	2.077	2.389	2.813	26.698	3.7482	1.8018	4.7696	34.231	35.611	36.9973			0.801105	11.0637
17.3946	1.916	1.986	21.309	4.406	1.881	7.98	4.064	3.667	21.265	6.639	9.841	19.934	12.834	5.669	11.725	3.157	2.163	1.738	2.534	28.2618	4.0011	3.3653	4.5298	32.948	35.9885	37.0127			0.806628	11.4152
17.5138	2.019	2.433	24.347	4.06	1.819	9.885	6.734	4.296	23.51	5.795	8.79	22.926	13.415	7.629	10.917	3.306	2.033	2.324	2.682	29.252	4.0935	3.4311	4.4542	36.055	33.6211	33.6613			0.812155	11.889
17.6329	2.404	2.058	27.187	4.746	1.847	11.869	9.485	4.035	23.379	6.273	9.446	29.384	11.698	7.066	9.05	3.541	1.446	2.485	2.787	29.5686	4.828	2.9274	5.4628	36.045	30.57	33.6831			0.817678	12.2557
17.7521	2.096	2.804	28.711	3.579	2.508	12.95	12.187	5.078	24.433	6.558	9.388	31.502	9.974	7.307	12.016	3.178	1.327	2.603	2.812	32.1292	5.0489	2.8509	6.1173	38.193	24.9302	34.4734			0.823206	12.6854
17.8712	2.112	2.122	30.774	3.749	2.8	15.06	12.127	4.642	26.255	5.746	9.004	35.696	11.699	7.518	9.894	3.407	1.588	2.023	3.404	30.3693	5.5323	3.6758	6.0662	41.694	20.4284	28.6006			0.828729	12.7355
17.9903	2.443	2.843	31.116	5.247	3.217	17.766	12.378	5.716	28.32	6.277	7.482	39.565	8.417	6.647	10.016	2.836	1.432	1.586	3.312	34.5886	6.7767	3.7723	8.264	41.47	17.5109	26.0756			0.834252	13.0765
18.1095	2.035	3.074	29.61	4.772	3.946	20.889	15.198	6.436	31.566	4.664	9.436	40.917	8.066	7.501	8.397	2.586	1.647	1.949	4.532	37.4072	9.5659	4.9812	6.8656	44.811	14.6192	20.8983			0.839779	13.4992
18.2286	2.59	2.571	29.34	4.228	4.904	21.361	18.762	6.221	30.22	5.457	9.109	41.729	8.348	8.897	8.078	2.634	1.812	1.685	4.185	38.6648	7.6821	6.6721	8.8311	37.596	11.0197	19.4232			0.845302	13.3425
18.3478	2.207	3.329	32.565	4.896	7.101	21.69	19.001	6.753	31.378	5.97	9.407	46.358	6.05	7.456	7.836	3.564	1.641	2.194	3.772	40.4506	9.1524	7.5068	11.2443	33.835	8.3976	15.3016			0.85083	13.6076
18.4669	2.02	3.464	34.939	4.263	8.661	18.799	21.611	7.407	34.543	6.505	10.156	47.584	4.495	8.726	6.574	2.765	1.994	1.885	4.747	42.3339	10.4331	10.5345	13.7921	28.729	6.8058	11.0115			0.856353	13.8239
18.586	2.002	3.496	31.644	5.249	10.852	15.318	21.001	9.26	37.68	7.557	10.115	58.724	4.397	7.947	6.776	2.476	2.303	1.712	5.009	42.9976	9.486	12.2751	13.5612	23.539	4.9312	8.4912			0.861875	13.9772
18.7052	2.596	4.816	30.89	6.493	10.679	11.484	21.235	11.32	39.949	7.151	11.471	58.452	3.941	7.887	6.063	3.167	1.758	1.876	5.749	44.2579	10.8458	14.3606	13.486	16.94	3.7979	5.91			0.867403	13.8993
18.8243	3.167	5.578	29.052	5.855	13.851	7.882	16.929	14.252	46.049	7.478	10.706	60.245	2.12	7.316	5.2	3.775	1.991	2.402	6.204	42.545	11.5977	20.3525	13.5232	13.09	3.4646	7.0144			0.872926	14.0912
18.9435	2.634	5.392	31.096	6.621	15.595	5.438	12.538	19.18	47.503	8.918	12.487	62.103	2.203	5.043	4.09	3.602	1.641	1.864	6.926	44.9472	12.9413	23.6692	11.1081	11.155	3.5105	4.8553			0.878454	14.2964
19.0626	2.481	7.501	33.043	6.854	14.556	3.97	11.351	21.526	52.43	11.264	14.038	60.424	1.982	4.094	4.446	3.224	1.946	2.57	6.385	43.5784	11.2408	25.2876	9.3957	7.952	2.2139	4.2536			0.883977	14.3359
19.1817	4.133	10.584	30.291	8.196	13.675	3.264	8.741	20.664	60.222	14.124	16.526	52.032	1.999	4.932	3.989	3.332	1.86	2.32	7.573	44.9418	12.3556	27.1247	7.6385	6.482	3.1715	3.2601			0.889499	14.5412
19.3009	5.296	13.115	32.539	11.452	8.172	3.082	7.988	17.577	70.898	16.524	18.705	42.353	1.746	2.621	3.696	3.554	1.472	2.69	6.007	35.31	12.176	27.5519	5.1923	5.962	2.6637	2.1291			0.895027	14.0657
19.42	5.843	17.79	30.742	11.859	5.074	2.801	6.699	16.788	76.369	23.856	18.695	28.751	1.183	3.064	3.281	2.713	1.884	3.19	5.756	27.5407	10.5265	21.4255	5.0145	5.953	2.2148	2.8478			0.90055	13.3808
19.5392	8.752	25.37	27.507	13.576	5.099	2.389	5.676	15.752	69.196	35.289	22.656	23.505	1.2	2.981	2.75	2.712	1.841	4.108	6.314	20.2929	8.5836	16.0602	3.7726	4.758	1.8599	2.6404			0.906078	13.1178
19.6583	12.899	32.583	26.263	14.304	4.928	1.369	5.947	11.907	53.961	41.096	25.112	21.42	0.935	2.584	1.991	3.285	1.74	3.146	5.69	19.516	10.2219	11.4018	3.2051	3.881	1.7613	1.9321			0.9116	12.694
19.7775	19.575	40.538	18.969	12.321	3.069	1.589	4.316	11.527	34.351	47.724	28.682	16.187	0.945	2.54	2.511	2.691	2.628	3.501	4.287	15.0347	9.4999	9.0058	2.7965	2.926	1.5351	1.6996			0.917128	11.8602
19.8966	26.172	45.568	15.326	8.589	2.828	0.997	3.829	7.499	24.675	51.857	27.333	14.028	0.837	1.589	2.901	3.503	2.193	3.508	4.285	12.4126	8.2495	7.4934	2.179	2.583	1.0847	1.4328			0.922651	11.2166
20.0157	25.989	53.117	12.833	6.848	2.266	1.305	2.961	7.083	16.452	44.869	23.015	10.236	1.176	2.571	2.107	2.463	3.118	3.596	4.203	10.1371	8.6103	5.061	2.141	2.73	1.1777	1.0335			0.928174	10.2635
20.1349	22.327	52.787	11.091	4.24	1.328	1.012	2.11	5.662	12.199	39.655	24.095	9.272	1.343	2.671	1.73	2.035	2.271	3.019	4.348	7.6346	6.7858	4.4866	2.1737	1.832	1.2361	0.6874			0.933702	9.19134
20.254	14.497	53.002	9.343	4.317	1.51	0.76	1.601	5.464	10.326	30.214	17.038	6.63	1.039	2.141	1.31	2.176	1.99	3.872	3.559	7.1507	6.1103	3.3181	2.0271	1.641	1.0328	0.9008			0.939224	7.89718
20.3732	9.133	49.23	7.871	3.72	1.055	0.658	1.013	5.235	7.581	23.991	14.884	5.599	1.413	1.262	2.126	1.427	2.675	3.964	3.767	5.1518	6.1306	3.2354	1.7441	2.009	0.9299	0.6789			0.944752	6.92063
20.4923	5.569	39.902	6.373	3.936	0.859	0.537	1.126	3.86	5.451	18.764	10.365	4.775	0.979	2.407	1.806	1.555	2.034	4.105	3.213	5.0632	4.5057	2.4382	1.782	1.136	1.4322	0.8044			0.950275	5.75074
20.6114	3.437	26.054	6.377	3.696	0.814	0.462	0.989	3.198	6.126	15.606	9.274	4.868	0.804	1.905	1.532	2.133	2.073	4.772	2.911	5.154	3.6735	2.1859	1.5553	1.742	0.9031	0.7343			0.955798	4.9478
20.7306	2.835	15.555	4.79	2.719	0.642	0.632	0.7	2.469	3.86	11.992	7.952	3.57	1.035	1.216	1.928	1.706	1.773	4.11	3.078	4.8847	3.1199	2.2054	1.7369	1.16	0.8465	0.6529			0.961326	3.99626
20.8497	2.018	10.213	4.22	2.019	0.559	0.255	0.568	2.187	2.948	10.534	6.886	2.628	1.121	1.645	1.168	1.918	2.139	2.873	2.528	3.5612	3.4258	2.0892	1.4737	0.96	0.4524	0.3227			0.966848	3.39117
20.9689	1.41	6.882	3.243	2.477	0.372	0.388	0.703	2.116	2.73	10.445	4.719	2.541	0.818	1.656	1.924	1.218	2.463	2.738	2.393	3.2155	2.7401	1.7566	1.5668	1.063	0.7194	0.1986			0.972376	3.09129
21.088	1.317	5.296	2.685	1.779	0.343	0.631	0.514	1.812	2.634	6.24	4.844	1.572	1.053	1.648	1.599	1.252	1.517	3.205	1.604	3.798	2.3321	1.7712	1.2411	0.718	0.4456	0.579			0.977899	2.72289
21.2071	0.963	2.655	1.858	1.235	0.484	0.374	0.598	1.249	1.484	5.382	3.219	1.591	0.825	1.944	1.334	1.4	1.683	3.749	1.898	2.5255	2.4751	1.717	0.8163	0.7	0.4664	0.2885			0.983422	2.37485
21.3263	0.534	3.143	2.876	1.007	0.225	0.336	0.629	1.498	1.341	4.757	3.428	1.472	0.814	1.489	0.811	1.214	1.809	2.824	2.176	3.3245	2.1735	1.2225	0.9155	0.432	0.3237	0.2813			0.988949	2.31046
21.4454	0.986	2.448	1.584	1.069	0.262	0.163	0.465	1.188	1.142	3.236	2.926	1.325	0.883	1.446	0.868	1.375	2.177	2.853	2.005	3.1194	1.8915	1.2605	0.8396	0.77	0.4229	0.2948			0.994472	2.16463
21.5646	0.739	1.748	1.576	0.924	0.33	0.219	0.28	0.635	1.066	2.35	2.487	1.026	0.956	1.259	0.858	1.313	1.928	3.607	1.658	2.9783	1.8279	1.0211	0.7816	0.734	0.407	0.1614			1	2.01611

## Sheet: Image4
X0	Y0	Y1	Y2	Y3	Y4	Y5	Y6	Y7	Y8	Y9	Y10	Y11	Y12	Y13	Y14	Y15	Y16	Y17	Y18	Y19	Y20	Y21	Y22	Y23	Y24	Y25			Ap-Basal to 1	Average intensities
0	23.518	21.514	19.2524	25.4391	39.3849	24.926	66.499	57.505	46.213	51.66	71.6912	40.5724	34.5501	24.989	36.263	32.154	48.636	37.373	45.699	15.315	20.051	27.975	18.876	17.206	25.608	22.218			0	34.4265
0.1191	27.104	25.71	22.7235	29.3253	48.7537	27.354	81.906	60.555	50.338	56.0295	77.1128	40.3261	43.8055	30.021	37.077	34.868	53.794	40.443	50.598	19.539	21.949	32.621	21.015	19.973	25.067	25.371			0.00526134	38.5915
0.2383	30.605	32.277	23.1836	39.8863	50.6507	31.789	85.058	61.941	60.722	52.5667	79.196	39.2768	51.2599	35.826	36.643	42.265	59.366	46.995	51.945	20.768	22.775	37.199	22.838	23.859	28.177	28.923			0.0105271	42.1535
0.3574	43.173	38.964	26.9049	46.8148	62.3813	39.36	94.49	69.838	72.379	51.106	87.5073	41.1524	62.449	39.288	39.439	55.432	69.079	51.034	59.142	24.694	25.336	46.272	24.038	28.911	31.344	27.655			0.0157885	48.3917
0.4766	54.617	52.574	30.0318	57.7939	73.1805	49.532	102.728	75.751	79.395	47.2627	86.7506	43.6341	70.3839	43.349	43.449	75.921	75.331	62.783	63.748	26.807	32.078	52.536	28.333	36.29	33.164	31.05			0.0210542	54.9413
0.5957	68.267	68.097	33.9861	67.4255	74.8034	63.401	116.914	90.409	87.052	45.4325	83.6662	48.9412	75.6681	46.76	47.724	96.16	82.197	68.952	64.911	28.018	38.185	56.518	32.574	47.53	34.453	32.352			0.0263156	61.5537
0.7148	81.774	88.161	45.6291	76.4451	74.2997	81.708	119.512	105.761	87.124	48.1315	78.0084	52.2802	72.1612	50.56	52.222	112.38	84.153	83.604	65.611	30.703	50.51	62.874	36.727	62.891	40.795	38.55			0.0315769	68.5606
0.834	94.847	97.005	54.6696	82.0143	76.8653	96.246	122.032	114.825	90.493	52.1587	79.501	55.9782	69.9222	51.324	61.592	128.586	94.04	103.764	64.629	34.795	61.21	66.291	43.896	70.156	49.951	45.299			0.0368427	75.465
0.9531	101.226	106.037	64.8801	93.4153	73.5648	124.244	132.272	119.244	93.875	49.709	81.0201	58.4186	61.4237	51.279	66.759	144.583	93.422	129.162	62.933	35.816	77.058	66.83	51.181	89.982	54.194	60.399			0.042104	82.4203
1.0723	96.787	106.526	73.417	98.0352	70.6108	134.377	130.333	126.305	97.302	57.4371	74.4853	58.3322	56.2878	51.722	73.636	144.792	102.31	142.382	62.632	41.122	97.519	65.475	62.359	104.857	62.04	87.449			0.0473698	87.6358
1.1914	87.087	92.428	78.4993	96.7768	60.8123	144.998	129.477	126.251	102.558	59.0828	74.4391	59.5698	44.3407	51.298	80.968	135.561	98.209	156.817	64.474	45.867	122.709	69.826	79.72	116.39	72.2	115.934			0.0526311	91.0113
1.3106	81.696	73.618	79.5329	92.9828	55.1516	146.647	127.214	125.013	120.768	61.6773	72.4839	54.1137	36.824	50.738	87.762	127.983	95.953	165.003	70.132	52.336	135.981	71.141	101.748	130.942	95.72	148.321			0.0578969	94.6724
1.4297	70.763	55.341	82.141	84.5668	49.8603	134.38	117.423	120.465	126.207	62.5158	69.7788	52.2744	35.3898	48.18	89.791	122.528	91.504	166.53	73.367	54.632	159.386	78.807	122.486	142.915	121.873	172.853			0.0631582	96.383
1.5488	67.178	43.483	74.2629	65.0374	41.4685	116.637	104.216	114.987	129.465	62.2513	65.4632	51.6466	32.4822	48.589	88.143	112.553	91.916	174.1	82.499	63.2	174.744	92.331	139.227	150.939	149.305	195.319			0.0684196	97.3632
1.668	60.551	35.216	61.6417	49.1413	37.0454	98.291	90.939	111.515	123.934	61.9947	62.1999	47.932	30.0262	49.809	93.297	100.511	86.92	160.778	91.65	66.83	187.839	106.849	160.9	158.757	169.765	210.929			0.0736853	96.7408
1.7871	58.585	27.186	44.6896	36.6952	32.4172	82.7	78.539	100.403	107.998	62.2395	57.3405	40.9161	27.9402	49.297	95.976	88.66	86.368	140.348	104.711	79.464	187.207	128.689	182.277	153.606	197.093	220.245			0.0789467	95.0612
1.9063	54.182	24.686	30.3761	23.6163	24.8468	69.577	65.287	91.242	97.257	54.6718	52.5016	38.9362	27.0705	51.961	96.427	79.758	96.693	120.08	114.842	91.217	193.911	146.453	194.883	150.602	215.405	216.797			0.0842124	93.2031
2.0254	57.083	20.714	20.9096	16.5992	19.1685	60.604	52.946	78.477	79.155	51.3461	47.1913	35.374	25.689	55.407	105.813	77.225	91.809	95.89	128.971	102.197	197.885	158.771	205.318	149.69	237.291	214.73			0.0894738	91.779
2.1445	54.073	16.356	13.6164	12.0697	14.3966	51.448	47.15	67.388	61.446	45.3171	44.3101	34.4791	24.3958	68.025	106.366	70.649	92.483	80.129	136.749	111.029	206.376	174.185	215.075	149.717	242.079	221.049			0.0947351	90.783
2.2637	51.443	16.561	11.2537	8.3402	10.0954	46.241	35.292	62.64	49.917	38.3519	36.1995	31.3618	23.2231	71.872	108.171	68.525	92.613	62.401	136.427	120.789	203.702	180.56	210.23	144.609	240.615	215.38			0.100001	87.5698
2.3828	51.983	16.415	7.7829	6.932	8.3076	41.256	33.161	52.368	39.239	32.8801	36.3496	29.1431	24.991	75.944	110.959	65.869	92.548	50.176	128.423	124.769	190.061	190.362	187.24	130.708	232.381	196.826			0.105262	82.9644
2.502	49.743	14.984	6.2299	6.0379	7.0107	36.093	27.516	48.848	33.509	28.4477	30.8461	27.747	24.4998	80.975	110.511	60.475	94.319	43.715	126.835	129.954	177.215	199.31	165.275	114.189	219.555	186.836			0.110528	78.8722
2.6211	47.453	16.859	4.4283	4.6028	4.3973	35.086	25.014	44.953	26.641	25.4495	30.8449	26.0389	22.3035	90.193	107.01	51.972	99.62	36.899	117.069	128.057	162.363	193.287	131.62	86.054	202.147	167.8			0.115789	72.6216
2.7402	46.559	15.862	4.1892	3.1637	3.8865	34.174	24.901	40.461	19.309	22.1665	27.8318	24.7353	20.2912	97.287	102.643	48.094	101.305	35.356	117.364	125.16	141.465	177.202	109.157	60.677	177.45	164.024			0.121051	67.1044
2.8594	48.441	15.544	3.5534	2.3726	5.0048	33.72	25.214	36.939	16.43	18.8491	27.9267	22.7626	21.3414	97.83	94.416	47.952	105.157	31.674	114.43	108.408	128.432	157.721	84.781	51.997	156.264	154.626			0.126316	61.9918
2.9785	48.8	15.937	3.4159	2.4136	5.2751	33.585	27.02	34.306	14.449	15.7244	27.0929	24.0461	18.9072	101.661	76.512	48.65	109.371	25.75	105.007	97.596	108.404	133.653	72.443	47.52	132.232	153.314			0.131578	57.0417
3.0977	50.233	17.071	2.7	2.3611	6.7176	34.854	27.742	31.831	12.155	13.8383	25.0959	21.8985	19.6064	99.293	66.5	44.497	107.823	24.684	102.411	81.069	94.521	109.465	54.3	47.627	106.29	143.486			0.136844	51.8488
3.2168	50.439	15.869	3.0953	1.9702	7.543	33.419	30.622	27.526	11.162	12.7894	24.5214	24.0842	19.4953	98.473	64.059	45.766	101.116	22.21	97.11	67.212	79.199	86.735	35.316	49.635	88.218	134.277			0.142105	47.3793
3.336	53.614	17.324	2.2316	2.1775	6.8752	38.031	29.855	25.977	9.876	11.5804	21.8794	22.1452	19.0083	101.159	60.666	42.881	97.288	20.759	97.844	53.6	63.696	59.793	27.445	55.702	68.467	120.284			0.147371	43.4676
3.4551	54.33	15.906	2.9005	2.6213	7.0377	40.529	30.305	26.786	9.517	10.2377	21.1165	23.5524	16.3188	96.248	58.43	41.363	96.009	19.724	91.557	41.566	55.623	50.077	21.474	52.682	54.419	102.19			0.152632	40.0969
3.5742	56.265	17.319	3.3062	1.8776	7.968	40.737	31.485	22.497	8.547	9.485	21.7921	23.3897	14.7577	93.105	55.151	45.203	99.475	17.563	88.16	37.139	42.609	36.615	16.98	47.549	43.89	88.34			0.157893	37.3541
3.6934	56.324	17.655	2.8077	2.1711	8.4103	42.885	34.658	23.292	8.286	8.2236	22.0424	22.5697	15.6751	86.797	52.756	44.749	98.635	15.875	80.946	33.667	35.019	31.477	15.319	40.058	30.807	77.694			0.163159	34.9538
3.8125	49.181	18.119	3.1074	1.9433	9.5749	41.932	37.986	21.305	7.553	8.3059	20.5538	20.1082	14.3824	77.182	50.091	42.437	100.288	14.453	67.385	28.686	27.384	23.149	14.291	34.777	27.982	63.118			0.16842	31.7413
3.9317	45.868	19.009	3.0334	2.0466	10.7134	42.806	46.068	20.233	6.589	8.179	18.7794	19.541	14.0676	65.021	48.981	41.245	97.784	14.868	53.937	21.765	20.269	17.522	13.884	29.061	22.069	53.546			0.173686	29.111
4.0508	37.441	18.931	2.7646	1.9777	11.8564	49.385	46.32	20.176	7.875	8.4854	17.2169	20.0685	14.2025	55.159	46.883	41.325	88.277	14.433	38.479	18.143	18.287	15.326	11.49	24.714	15.839	42.869			0.178948	26.4586
4.1699	34.75	18.508	3.2786	1.7619	10.3644	51.343	46.701	21.804	6.571	6.1518	18.6762	18.162	12.7832	41.975	43.492	38.83	80.633	16.135	26.611	11.813	14.879	11.025	10.35	21.841	14.002	33.11			0.184209	23.675
4.2891	33.647	17.858	3.534	2.0317	11.4223	51.721	45.856	19.754	6.298	5.2955	15.3633	14.8808	16.7815	31.302	39.753	36.919	60.934	14.936	21.416	9.26	10.957	10.094	9.961	19.554	11.809	29.96			0.189475	21.2038
4.4082	33.201	20.039	3.6032	2.1426	11.4686	57.195	47.937	18.623	7.223	5.1298	13.7672	14.0102	14.4054	22.113	35.472	33.571	43.744	13.719	15.67	7.822	10.661	8.291	8.729	16.455	9.249	26.024			0.194736	19.241
4.5274	32.297	18.515	2.9229	1.3766	10.9742	61.181	49.817	20.276	6.313	5.3422	15.1592	11.6759	15.6346	16.289	31.714	30.646	29.089	15.819	11.667	7.552	9.314	7.926	8.267	15.189	6.806	21.806			0.200002	17.8296
4.6465	30.642	17.675	3.5294	1.7652	12.2074	64.919	57.939	18.973	5.347	5.1588	15.2214	11.7196	14.7943	12.885	30.261	27.394	15.988	16.251	8.487	7.034	9.363	6.655	8.521	14.029	7.57	17.766			0.205263	17.0037
4.7657	27.554	17.636	3.3833	2.013	11.268	67.029	64.983	18.709	5.628	4.4591	14.6092	10.4301	17.968	9.867	27.092	26.849	10.183	13.922	7.13	6.762	8.034	6.52	6.828	14.01	5.874	18.108			0.210529	16.4173
4.8848	25.874	17.871	3.6795	1.6953	12.545	76.347	66.97	18.969	6.361	4.7148	12.7987	8.3095	15.0826	8.474	23.526	20.963	7.812	12.163	4.474	7.601	7.417	5.455	7.57	11.847	6.252	16.54			0.21579	15.8197
5.0039	25.018	15.556	3.166	2.0665	14.1123	84.726	65.511	19.654	6.838	4.1966	13.7709	7.708	16.6118	7.427	22.565	16.349	7.256	9.99	3.959	10.146	7.465	5.396	8.677	10.374	5.664	14.976			0.221052	15.7377
5.1231	22.662	15.467	2.491	2.2603	13.635	91.156	68.569	18.677	5.873	4.256	12.6409	7.7662	16.5774	7.175	22.329	14.507	7.904	8.599	3.374	10.229	7.216	6.155	10.854	12.983	5.456	12.955			0.226317	15.8372
5.2422	19.005	14.446	3.6528	2.0541	15.0412	94.424	69.174	20.403	5.834	3.5547	13.4782	8.5657	16.4494	5.325	19.665	10.749	7.639	7.312	2.46	11.144	7.457	5.41	9.604	12.237	4.099	11.682			0.231579	15.4179
5.3614	16.073	12.489	3.5783	1.9069	14.2663	104.156	73.159	19.164	7.33	3.6831	14.0465	6.6804	17.3689	4.873	17.387	9.325	7.603	5.359	2.622	12.128	6.67	5.241	9.613	11.324	4.153	10.044			0.236844	15.394
5.4805	12.85	12.692	3.3908	1.7861	15.6408	108.164	72.87	19.637	6.535	4.5741	13.8305	7.9545	17.0998	4.713	16.606	9.071	9.326	4.976	2.895	14.033	7.61	4.758	8.653	11.246	4.621	8.426			0.242106	15.5369
5.5996	11.013	10.729	3.52	2.858	16.7364	105.886	77.909	18.175	5.276	3.6962	14.2666	6.9931	16.0979	4.184	15.37	7.515	9.461	4.08	2.693	16.321	6.338	4.736	9.784	12.339	3.941	10.202			0.247367	15.3892
5.7188	8.125	10.71	3.8226	2.2139	20.4428	107	88.624	19.828	6.833	4.0434	12.8831	8.8106	16.9572	3.827	14.745	7.83	9.928	3.751	2.868	16.375	8.082	5.502	9.43	11.202	3.471	8.307			0.252633	15.9851
5.8379	7.453	11.363	3.779	2.323	22.0327	99.96	100.043	21.224	6.7	4.5862	13.5253	7.8054	18.6213	3.876	13.88	7.314	10.022	2.983	2.817	16.355	6.85	5.71	9.076	10.947	3.665	7.426			0.257894	16.1668
5.9571	5.637	11.567	3.2104	1.9591	23.9953	98.221	98.254	18.587	5.262	5.412	13.0405	7.6318	18.376	3.665	14.477	6.56	9.428	3.299	2.268	17.628	7.428	5.185	7.756	9.537	4.301	7.921			0.26316	15.7925
6.0762	4.991	12.547	3.488	2.0499	24.4179	92.686	103.213	17.632	5.495	5.0984	12.2459	8.6422	17.6402	4.168	14.782	7.358	9.879	3.228	2.973	18.009	7.084	4.949	9.674	10.179	3.293	5.829			0.268421	15.8289
6.1953	3.584	11.022	4.2426	2.1213	20.22	87.134	100.146	17.35	6.591	5.2968	10.5403	8.3699	16.9488	3.716	14.04	6.994	10.507	2.586	3.206	18.47	6.901	5.2	9.005	8.326	3.226	6.156			0.273683	15.0731
6.3145	3.959	10.346	3.7297	2.3192	18.4904	82.66	97.27	18.246	6.077	5.1965	8.9599	8.2185	17.0379	4.891	15.963	5.873	12.813	2.859	2.872	19.781	5.923	5.289	9.301	8.498	3.539	5.716			0.278948	14.8395
6.4336	4.397	8.847	4.4063	2.3669	18.7693	74.005	92.997	19.218	6.718	5.9763	7.5528	7.1794	19.5107	3.747	14.26	4.894	13.221	2.407	2.997	20.282	7.672	5.496	9.767	7.712	3.643	5.135			0.28421	14.3529
6.5528	4.162	8.015	3.9539	2.3748	18.8316	67.101	92.686	18.672	8.344	5.3552	6.446	6.892	20.2529	4.656	14.947	5.702	15.605	2.762	3.143	22.288	7.268	5.436	9.927	7.324	3.223	5.283			0.289476	14.2558
6.6719	3.683	7.671	5.519	2.7294	16.6202	56.157	87.746	18.582	8.407	5.2049	5.7835	7.9724	19.4741	5.079	15.192	6.125	13.58	2.814	2.766	24.238	7.067	6.23	9.467	7.543	3.268	5.79			0.294737	13.6426
6.7911	3.721	7.375	5.5857	2.8131	15.8809	47.907	80.181	17.787	7.332	5.3281	6.3308	8.6268	21.6752	5.663	15.613	5.431	16.78	2.709	2.926	27.304	7.186	4.412	8.91	7.427	3.384	5.062			0.300003	13.2058
6.9102	3.037	6.285	5.3498	3.0018	15.9293	41.137	69.554	19.284	6.712	5.4463	6.4493	8.5255	21.0308	5.586	17.123	4.71	16.535	2.061	2.61	25.155	7.116	5.209	9.067	7.475	3.266	4.189			0.305264	12.3786
7.0293	3.397	6.349	5.2028	3.2292	16.0642	32.622	59.853	20.367	7.198	5.9395	5.6508	8.0785	19.1852	5.635	15.731	5.367	17.769	2.224	2.743	24.75	6.808	4.612	9.658	5.781	2.756	5.154			0.310525	11.6202
7.1485	3.404	6.349	4.7341	3.0738	15.1971	21.84	51.119	20.038	6.399	6.4995	5.2653	8.1644	20.7066	5.931	16.976	4.813	18.515	2.374	4.134	27.369	6.449	5.268	11.929	5.501	2.884	5.118			0.315791	11.1558
7.2676	2.856	5.894	6.2585	2.7803	14.2267	13.853	37.612	24.405	6.826	5.4631	4.9107	9.0368	23.5346	5.89	18.237	4.835	18.836	2.1	2.721	25.446	6.125	4.197	11.108	5.046	2.599	4.14			0.321052	10.3437
7.3868	2.825	6.327	6.1021	3.2162	13.9729	9.272	25.07	23.46	6.6	5.9094	5.8413	9.2735	21.9936	6.726	16.842	5.023	19.598	2.77	3.749	24.778	7.232	4.411	11.325	4.566	2.711	4.546			0.326318	9.77462
7.5059	3.571	4.616	5.6418	2.7474	13.1645	6.216	15.338	21.392	6.098	5.8377	5.9676	9.7942	22.4643	6.168	16.824	5.393	21.572	2.467	3.349	26.015	7.296	5.155	12.689	4.421	2.909	4.005			0.33158	9.27352
7.625	3.81	5.137	5.29	2.907	14.8	5.222	10.02	20.065	5.407	7.1943	5.4276	8.8084	23.3023	6.285	17.127	4.578	21.952	2.295	3.472	25.511	6.913	4.417	11.539	4.873	2.869	4.012			0.336841	8.97052
7.7442	2.876	5.416	6.073	3.5491	12.7713	4.828	8.183	19.864	6.022	6.7426	5.1742	8.9295	21.829	6.734	17.214	4.4	23.002	2.391	3.311	24.407	6.266	4.29	11.695	5.015	3.297	4.11			0.342107	8.78422
7.8633	3.87	4.363	6.7902	2.3298	11.9195	3.665	6.53	19.843	5.149	7.5543	5.0014	8.3578	22.2648	6.143	16.361	4.572	22.98	2.629	4.165	21.459	6.066	3.733	12.199	6.085	2.934	4.079			0.347368	8.50165
7.9825	3.822	4.98	7.1652	2.8816	11.8222	3.387	5.956	19.498	5.129	7.343	4.2457	8.8832	21.0163	8.079	16.294	4.6	22.034	2.247	3.438	22.92	6.301	4.023	12.399	5.191	3.236	4.069			0.352634	8.49847
8.1016	3.078	4.769	6.9854	3.1837	12.3984	3.13	4.619	21.494	5.433	7.5645	4.7599	8.7777	21.3913	8.265	15.935	5.112	23.159	2.345	3.147	24.18	6.137	4.225	12.688	5.896	2.596	3.382			0.357895	8.64042
8.2207	3.808	4.379	7.8514	3.4922	12.3715	3.086	5.645	20.571	5.687	6.8458	5.5828	7.9031	24.3865	9.04	16.023	4.605	22.34	2.588	3.552	22.637	6.002	3.438	14.278	4.405	2.965	3.532			0.363156	8.73132
8.3399	3.775	4.133	7.7138	3.2613	12.2701	3.451	5.309	20.972	5.336	7.3399	5.1988	8.5025	22.7146	9.298	15.993	4.761	21.504	2.973	4.404	23.478	6.16	3.182	15.445	3.935	2.988	3.429			0.368422	8.75104
8.459	4.303	4.413	8.4212	3.6327	12.1033	2.726	6.059	21.509	5.274	7.5207	4.5059	7.6698	22.3294	9.347	17.996	4.391	22.918	2.48	3.307	22.027	5.233	3.496	15.428	5.217	2.966	3.292			0.373684	8.79096
8.5782	4.182	4.909	8.5222	3.9679	10.9796	2.674	6.056	20.306	5.113	7.1174	4.1752	8.3324	22.7817	9.302	16.433	4.915	23.669	2.037	4.169	23.606	5.427	3.844	16.594	4.02	2.709	3.834			0.378949	8.83367
8.6973	4.461	4.233	8.1143	3.8682	11.5062	3.365	5.642	20	5.28	7.9078	5.4837	7.2094	25.0814	9.228	15.443	4.73	24.968	2.881	4.648	23.208	5.243	4.558	15.836	3.391	2.674	3.193			0.384211	8.92896
8.8165	5.239	3.588	9.0348	3.7176	10.3083	2.448	5.332	22.014	5.647	8.0633	5.358	7.5693	23.4635	9.278	15.377	4.683	25.116	2.625	4.071	22.674	4.917	4.645	15.418	3.494	2.758	3.554			0.389476	8.86126
8.9356	4.909	3.844	8.4163	3.6632	10.6019	2.376	5.471	23.1	5.022	7.2124	5.4511	6.2111	24.502	9.535	17.206	5.471	24.332	2.658	3.578	20.011	4.38	4.632	17.728	3.526	2.968	3.644			0.394738	8.86342
9.0547	5.385	3.567	8.3129	3.9078	11.0863	2.975	5.655	23.696	5.684	8.0869	4.1725	7.1741	22.8803	10.372	13.79	4.277	24.403	2.288	4.048	19.437	4.447	3.991	16.39	4.46	3.323	3.456			0.399999	8.74095
9.1739	4.73	3.291	8.3717	4.5659	11.095	3.08	6.157	24.967	6.208	9.4012	5.2189	5.8215	24.1592	10.069	15.169	4.822	22.214	2.55	3.692	19.708	5.106	4.05	15.388	3.58	2.849	3.199			0.405265	8.82548
9.293	5.894	3.618	9.9055	4.6428	10.4279	3.236	5.743	23.967	5.886	9.3831	4.3891	6.2134	24.7673	10.139	14.611	4.924	21.227	1.824	3.977	18.84	3.896	4.779	17.12	2.942	2.525	3.281			0.410526	8.77531
9.4122	7.893	3.887	9.5432	3.9047	11.0294	2.961	5.821	23.82	5.226	8.4034	4.4089	6.0575	24.075	9.071	15.714	4.241	21.648	2.251	4.501	17.28	3.964	4.654	14.982	3.199	2.182	3.382			0.415792	8.6192
9.5313	7.012	3.031	9.052	4.6516	10.7492	3.179	6.167	26.417	5.457	9.7229	4.0483	6.3908	23.9351	10.129	15.939	4.742	21.76	2.799	3.456	16.421	3.643	4.27	14.307	3.764	3.292	3.196			0.421053	8.75119
9.6504	7.936	2.633	11.8797	4.514	11.0227	2.966	6.253	24.596	6.235	9.688	4.3736	7.4071	23.2206	11.243	16.409	5.327	22.197	2.141	4.519	16.167	3.568	4.979	14.719	3.756	2.456	2.085			0.426315	8.93426
9.7696	6.95	2.799	12.2423	4.6065	11.1953	3.258	6.329	25.41	5.88	9.8407	4.8887	6.5631	23.3655	10.196	16.039	5.032	20.153	2.216	3.234	14.86	4.048	4.52	15.026	3.812	2.77	2.898			0.43158	8.77431
9.8887	8.046	2.658	10.9898	4.8038	12.0087	3.286	5.583	27.248	6.235	9.939	4.2406	6.3196	23.5407	10.761	14.171	4.802	18.568	2.372	4.636	15.356	3.839	4.189	13.542	3.122	2.184	3.005			0.436842	8.67097
10.0079	9.868	2.776	12.7428	5.5459	12.0004	3.342	5.015	26.423	5.829	11.9828	3.7397	5.2949	22.6067	11.111	13.555	4.736	20.211	2.875	4.263	13.505	3.384	4.372	14.351	3.448	2.604	3.171			0.442108	8.79816
10.127	8.498	2.938	14.4771	6.4998	11.8116	3.313	6.075	29.693	7.133	12.3174	4.0106	6.6589	21.233	11.033	12.305	4.799	18.994	2.499	3.675	12.355	2.845	4.563	14.587	3.575	2.228	2.617			0.447369	8.87436
10.2462	11.147	2.49	15.4508	6.4366	12.6447	3.145	5.631	31.165	7.03	13.502	4.3786	5.3481	24.3185	11.037	12.597	5.453	20.919	2.852	4.494	11.397	3.892	4.191	15.346	3.85	2.434	2.767			0.452635	9.3814
10.3653	9.273	2.7	14.6195	6.4124	13.062	3.137	5.316	31.073	7.29	14.4278	4.1618	5.176	23.4606	10.765	13.364	5.641	21.672	2.56	4.257	11.196	4.067	4.741	15.401	3.365	2.711	2.334			0.457896	9.31473
10.4844	8.671	2.023	15.3761	6.3319	11.649	3.302	6.149	31.112	7.38	13.9206	3.8169	5.3173	23.2494	10.367	12.282	4.946	20.486	2.936	4.178	9.965	4.427	4.696	13.179	3.593	2.147	2.263			0.463157	8.99089
10.6036	8.936	2.958	16.2287	6.8478	10.1004	3.427	5.092	31.851	6.843	15.138	3.5167	4.93	22.0317	10.097	11.381	4.564	19.246	1.923	3.938	9.843	3.728	4.412	12.561	3.285	1.958	2.727			0.468423	8.75243
10.7227	9.463	2.9	15.6621	7.2599	10.9695	2.946	5.389	27.154	7.461	14.6412	4.2398	6.0561	22.3237	9.916	12.028	4.102	19.71	2.135	3.837	9.808	3.978	3.687	13.965	3.324	1.794	2.302			0.473684	8.73274
10.8419	8.998	2.483	17.9355	6.8022	11.0558	2.988	5.485	27.695	7.244	17.9327	3.7917	5.1412	22.4851	8.767	12.356	5.078	19.583	2.934	4.792	9.244	3.981	3.311	14.181	2.727	2.117	2.635			0.47895	8.9132
10.961	10.228	3.144	18.381	7.1949	10.3254	3.995	5.322	25.911	7.446	18.5642	4.0723	5.628	21.5473	10.433	12.596	4.041	16.207	3.088	3.86	9.011	3.63	3.447	13.644	2.56	2.189	2.775			0.484212	8.81693
11.0801	10.709	3.266	16.0467	7.2319	10.4321	2.952	5.997	25.024	7.177	17.4422	4.2959	4.4639	20.3042	11.214	13.595	4.389	18.149	2.207	4.632	8.03	4.974	3	14.425	3.006	1.863	2.726			0.489473	8.752
11.1993	10.71	2.983	17.0612	8.3092	10.2739	3.848	5.657	25.331	7.515	18.962	4.4107	5.8701	21.2801	11.397	13.297	4.2	17.24	2.474	5.009	7.491	4.989	4.434	15.157	2.646	2.318	2.685			0.494739	9.05955
11.3184	9.924	2.493	15.7241	8.3051	10.7873	3.495	5.398	25.72	7.449	18.6824	4.6755	4.8264	20.8015	10.517	13.609	4.541	15.734	2.661	5.136	6.98	4.035	3.506	12.39	2.77	2.124	2.395			0.5	8.64151
11.4376	8.311	3.042	17.1276	8.685	10.7537	4.402	5.533	25.049	7.249	21.5028	4.3118	4.4997	20.9589	10.129	12.481	4.915	16.257	2.554	5.017	7.366	4.387	3.105	14.917	3.062	2.315	2.576			0.505266	8.86563
11.5567	9.36	2.084	17.5836	9.0706	8.862	3.179	5.629	26.293	7.7	22.5054	4.0912	5.4333	20.1654	10.968	13.323	4.862	16.08	2.465	4.547	7.528	3.387	3.528	13.479	2.319	1.831	1.941			0.510527	8.77748
11.6758	8.636	2.268	16.2402	9.9599	8.2516	3.56	5.679	26.359	8.62	22.5765	3.9615	4.6719	20.9106	13.098	13.865	4.213	14.612	2.6	5.049	8.545	4.098	4.067	13.268	1.712	2.717	1.923			0.515788	8.90235
11.795	8.911	2.745	15.4958	9.5253	8.7271	3.951	7.521	24.211	8.227	24.3514	4.3346	4.0365	21.1439	12.621	13.06	4.61	13.667	2.781	5.475	7.211	3.453	3.691	12.93	2.553	2.32	2.08			0.521054	8.83202
11.9141	9.619	2.204	15.8006	8.652	8.2898	4.007	6.967	24.639	8.791	24.8223	4.4336	4.4224	21.8642	11.544	13.72	3.852	13.297	2.843	5.683	8.74	3.268	3.228	12.458	2.066	1.805	2.201			0.526316	8.81603
12.0333	8.905	2.846	15.0458	11.1634	8.2035	3.942	7.241	27.678	9.263	21.6548	4.0262	3.8118	19.7214	10.962	13.163	4.42	12.466	2.907	5.55	7.585	2.819	3.588	13.15	2.853	1.783	1.8			0.531581	8.71338
12.1524	8.402	3.486	16.036	11.0351	7.2082	3.946	6.275	24.973	9.468	24.1456	3.7593	3.5624	18.9086	11.924	12.36	4.339	13.576	3.346	5.425	6.572	2.598	3.649	13.938	2.64	2.159	2.156			0.536843	8.68797
12.2716	8.439	2.786	18.0176	12.2267	6.7578	3.316	6.833	26.236	10.878	24.0123	4.3031	4.6132	20.098	12.46	13.94	4.317	11.571	2.675	5.808	6.803	3.014	3.701	13.006	2.333	2.845	1.791			0.542108	8.9531
12.3907	9.266	3.121	16.2995	11.9971	6.534	3.223	7.078	29.191	11.397	24.2399	3.3307	3.3207	20.0988	14.593	12.14	4.289	11.465	2.738	5.65	6.53	3.905	3.501	13.782	2.479	1.967	2.524			0.54737	9.02537
12.5098	9.255	3.029	15.9032	13.8801	6.7558	3.407	6.819	27.264	10.044	23.8849	3.6247	3.7389	19.419	12.912	11.871	4.105	9.882	2.751	6.033	6.429	3.52	4.165	11.363	2.361	2.117	2.246			0.552631	8.72229
12.629	8.41	2.288	16.6689	13.4873	7.2963	3.551	7.126	29.579	10.31	23.9348	3.7344	3.5546	19.8957	14.219	13.516	4.581	9.397	2.651	5.151	5.399	3.148	3.467	10.788	2.341	2.292	2.559			0.557897	8.82096
12.7481	9.329	2.599	15.7501	15.7375	6.5262	4.223	7.397	30.952	10.344	26.5122	4.2841	3.3351	21.0502	13.909	15.36	5.06	8.728	2.913	5.873	5.697	3.264	3.605	10.833	2.621	2.36	2.304			0.563158	9.25255
12.8673	9.287	2.638	15.9407	15.6137	5.6485	4.474	7.839	31.207	12.329	28.035	3.9431	3.5212	18.226	13.617	14.89	4.49	6.516	2.681	7.004	4.779	3.551	3.512	10.395	2.17	2.058	1.925			0.568424	9.08808
12.9864	8.663	2.506	16.0597	15.3568	5.7623	2.833	7.883	32.456	12.849	26.0016	4.3054	3.916	17.6148	15.093	13.516	3.942	5.894	2.498	6.485	4.842	3.409	3.622	9.368	2.064	1.934	2.318			0.573685	8.89198
13.1055	9.035	2.933	14.8703	16.8789	4.9788	3.197	7.545	30.596	11.476	29.3385	4.4063	3.0543	18.6906	13.916	15.137	4.418	5.131	2.586	8.058	5.614	3.71	3.415	9.952	2.153	2.132	2.672			0.578947	9.07283
13.2247	6.803	2.625	11.9907	17.4368	5.5742	3.818	7.075	29.426	12.687	24.5969	4.8811	3.4992	17.8349	15.224	14.724	3.743	4.881	3.007	8.903	5.567	3.371	2.898	8.577	2.163	2.623	2.832			0.584212	8.72157
13.3438	6.901	2.785	11.4379	19.2375	5.3372	2.749	7.634	31.194	13.474	26.4491	4.3756	3.4233	18.9047	14.663	14.375	4.466	5.13	2.5	8.931	5.08	3.505	3.54	8.007	2.043	2.936	2.728			0.589474	8.91563
13.463	8.078	2.934	11.9556	19.6735	6.0135	3.063	7.525	29.314	11.98	27.6994	4.6714	2.7996	16.8345	13.917	15.362	4.831	4.739	2.584	9.271	5.742	2.932	2.998	9.979	1.929	2.577	3.278			0.59474	8.94925
13.5821	8.252	3.425	11.3897	20.0919	5.6113	3.262	7.686	30.805	13.347	27.2981	4.3184	3.452	18.2648	14.361	14.457	4.781	4.26	2.603	10.585	5.733	3.327	3.632	10.232	1.918	2.185	3.007			0.600001	9.16478
13.7012	8.026	3.674	11.1996	21.2144	5.2073	2.694	8.412	29.844	12.116	26.6429	4.2484	2.5843	17.1105	12.904	14.327	5.162	4.196	2.309	12.377	6.128	3.634	3.556	9.968	1.99	3.536	3.193			0.605262	9.08667
13.8204	7.726	2.512	9.1032	21.2443	4.7858	3.516	7.87	30.504	11.948	27.477	3.8541	3.3387	16.723	12.727	15.8	4.891	3.847	2.162	12.017	5.785	2.848	3.153	9.731	1.968	3.695	3.548			0.610528	8.95285
13.9395	8.251	2.731	9.1307	22.7723	5.0712	3.02	7.161	34.14	11.616	26.6996	3.6323	3.0593	17.0762	12.552	14.233	4.411	2.996	3.067	13.852	5.727	3.221	3.402	9.428	2.063	3.881	3.448			0.615789	9.1016
14.0587	8.221	3.051	9.0125	25.4451	5.0594	3.706	7.212	34.698	11.104	25.6357	4.0534	3.1941	16.363	12.628	16.768	5.108	3.499	2.556	16.717	6.032	2.666	3.808	10.038	2.511	3.589	3.386			0.621055	9.46389
14.1778	6.881	2.858	7.8826	25.5809	4.529	2.95	7.995	34.498	12.854	26.3847	3.6316	3.0879	17.3859	11.151	15.672	4.997	2.904	2.276	15.51	5.407	2.217	3.997	8.996	1.963	4.58	2.817			0.626316	9.19252
14.297	6.799	2.725	7.6569	25.2522	4.603	3.063	8.89	33.331	14.573	26.1505	3.7513	2.9207	17.5668	11.674	14.305	5.586	3.097	2.368	16.863	5.54	2.736	3.488	8.677	1.701	4.969	2.682			0.631582	9.26802
14.4161	6.792	2.915	5.9552	31.5938	4.3218	2.726	8.918	32.814	13.821	24.3882	3.853	2.8362	18.555	11.869	15.812	5.687	2.724	2.692	15.814	6.564	2.592	4.037	8.457	1.704	4.323	2.115			0.636844	9.37997
14.5352	6.897	2.861	5.1832	34.9111	4.8698	3.263	8.676	33.089	13.395	27.375	3.9132	2.6996	18.1695	11.59	16.204	5.876	2.665	2.431	18.086	5.871	2.788	4.38	10.411	1.644	4.932	1.524			0.642105	9.75786
14.6544	6.683	3.565	5.3631	38.3291	4.0734	3.349	8.733	32.149	14.097	24.3732	4.52	3.5644	20.3333	10.801	14.3	6.116	2.76	2.633	17.677	5.725	3.237	4.574	9.378	1.928	5.565	1.105			0.647371	9.80506
14.7735	6.011	2.177	5.4687	40.0392	4.116	3.425	8.13	30.682	12.093	24.6565	3.6296	3.3078	18.7868	11.403	15.019	6.385	3.005	2.916	17.706	6.412	3.28	4.038	9.929	1.914	6.568	0.879			0.652632	9.69141
14.8927	6.37	2.538	5.7349	41.892	3.9914	2.591	9.395	26.285	14.165	22.9995	3.8891	3.3982	18.8842	11.276	16.478	6.829	2.919	2.265	18.477	5.536	2.961	3.208	8.904	2.28	4.344	0.568			0.657898	9.54532
15.0118	7.075	2.953	4.6349	42.5271	4.6194	2.848	8.873	26.949	14.754	24.9578	4.4936	2.2257	18.6583	11.286	16.903	6.66	3.67	2.675	18.769	6.778	2.383	3.983	7.963	2.399	4.378	0.85			0.663159	9.77945
15.1309	6.041	2.779	4.7917	42.1704	4.0902	4.532	9.308	26.219	15.373	25.0929	4.2076	3.745	19.6196	11.074	18.094	8.268	3.056	2.632	18.513	6.992	2.454	4.317	7.883	2.646	3.722	0.727			0.66842	9.93644
15.2501	5.944	3.121	4.4344	42.7851	3.8068	3.65	9.952	27.053	13.56	24.5412	3.4419	3.0999	19.0234	9.64	18.748	8.127	3.161	2.706	19.167	7.1	2.935	4.516	6.881	2.119	3.723	0.813			0.673686	9.7711
15.3692	5.039	2.377	5.0238	43.5843	4.1588	4.012	10.311	27.941	13.668	23.7948	4.0235	2.5665	19.587	10.475	20.435	8.921	2.839	3.314	19.716	6.533	3.551	5.527	6.932	2.892	3.616	0.577			0.678948	10.0544
15.4884	6.034	2.748	4.1324	36.6667	4.5423	3.067	9.872	25.908	13.849	26.9936	2.9023	2.97	18.8502	10.318	19.039	10.274	3.344	3.529	20.872	7.235	3.096	6.508	5.875	2.575	3.007	0.413			0.684213	9.7931
15.6075	7.254	2.785	4.4247	36.0206	3.7542	2.9	8.718	26.489	14.856	28.808	3.0151	2.7753	19.7496	9.775	20.87	8.385	3.579	3.029	20.798	7.737	4.117	7.731	4.686	2.483	2.965	0.684			0.689475	9.93802
15.7266	5.822	3.106	4.0231	36.8835	3.4108	3.552	8.044	26.545	13.414	26.3276	3.7263	3.2501	19.2632	9.564	18.403	9.584	2.814	2.956	20.964	10.194	4.846	8.2	4.782	1.937	2.608	0.321			0.694736	9.79002
15.8458	6.508	3.477	4.1881	37.0867	3.3841	2.681	9.194	27.572	13.394	26.0791	3.2811	3.9493	19.5047	8.561	17.969	10.229	3.366	3.715	23.916	11.718	4.577	8.817	5.215	2.249	2.334	0.168			0.700002	10.1205
15.9649	5.857	2.576	3.8358	37.6197	3.3874	2.912	9.761	28.378	14.039	22.7641	3.5026	3.8726	20.7045	9.249	18.988	13.145	3.103	2.761	26.573	12.278	4.641	9.996	3.775	1.847	1.601	0.361			0.705263	10.2895
16.0841	6.35	3.278	4.1608	36.6667	3.4806	3.194	9.591	28.692	14.233	25.3112	2.867	3.0329	19.6935	11.215	21.199	15	2.362	3.585	27.239	12.771	5.943	8.388	3.483	1.825	1.37	0.452			0.710529	10.5916
16.2032	5.907	2.706	3.261	34.3057	3.5622	3.375	9.536	30.865	13.149	26.1044	2.8708	3.1598	19.727	9.535	21.118	16.147	3.125	3.971	33.192	12.932	9.48	7.823	3.645	1.218	1.313	0.362			0.71579	10.8612
16.3224	6.543	3.028	4.2194	34.1149	3.3008	2.855	11.249	29.084	13.908	23.3477	2.4826	3.9611	19.1011	9.193	21.539	19.501	4.196	3.77	33.289	16.627	11.4	6.169	2.837	1.361	1.05	0.196			0.721056	11.0893
16.4415	6.337	3.655	4.6318	33.9192	3.0564	3.052	10.631	27.906	13.104	24.6705	3.2602	3.5211	19.1917	10.261	19.486	22.926	3.397	4.336	33.983	17.467	13.927	4.555	2.342	1.513	0.873	0.144			0.726317	11.2364
16.5606	6.654	3.921	5.1633	36.8778	3.2482	3.413	10.472	26.965	14.426	28.1213	3.0936	3.4137	18.536	8.518	22.268	24.497	3.914	4.771	37.186	18.902	17.846	3.443	1.995	1.276	0.471	0.293			0.731579	11.911
16.6798	6.787	3.312	4.7456	35.3298	3.4174	3.498	10.582	29.076	13.634	30.4764	3.4126	3.1291	18.6318	8.519	22.686	28.244	4.296	6.227	37.725	21.67	18.994	3.673	2.076	1.371	0.829	0.32			0.736844	12.4101
16.7989	6.938	3.442	5.3535	34.0873	3.715	2.861	9.672	30.805	11.615	29.8335	3.4088	3.6246	19.7765	8.679	22.143	29.088	5.3	6.493	42.538	21.292	19.133	3.281	1.609	1.045	0.698	0.104			0.742106	12.559
16.9181	7.601	3.737	5.6666	35.7777	3.3196	3.692	10.828	30.015	11.815	30.4307	2.5746	3.6539	18.4785	9.098	23.034	30.733	4.469	7.516	55.739	22.305	18.674	2.747	1.193	0.887	0.529	0.24			0.747372	13.2598
17.0372	8.087	3.72	6.0628	35.7985	3.5703	3.01	11.55	29.675	11.151	27.2164	2.7288	3.1609	18.6788	8.795	21.72	33.091	5.199	10.807	61.273	19.975	15.535	2.04	0.844	0.768	0.391	0.243			0.752633	13.2727
17.1563	8.19	4.268	5.541	34.3824	3.8217	2.807	10.51	28.426	11.639	29.1865	3.3139	3.1375	20.6345	7.884	23.653	34.131	5.792	15.819	60.8	16.418	14.046	1.392	1.159	0.787	0.5	0.521			0.757894	13.4138
17.2755	7.827	4.699	5.4551	34.0486	3.3518	2.881	12.101	29.24	12.605	28.3023	3.3087	2.9592	20.5147	8.136	25.551	33.426	6.926	21.818	60.24	12.743	11.075	1.208	0.596	0.754	0.441	0.321			0.76316	13.4819
17.3946	9.346	4.499	5.9525	33.063	3.3879	2.757	11.517	27.778	12.353	27.8516	2.7422	3.3624	20.9847	8.591	24.79	34.393	7.599	23.041	48.156	8.913	6.842	1.02	0.873	0.693	0.483	0.107			0.768421	12.7344
17.5138	9.672	5.159	5.0871	33.4811	3.4438	3.48	12.179	29.235	10.891	25.6613	3.0692	3.3405	21.4324	8.679	26.821	37.86	8.481	21.899	35.479	5.844	4.987	1.028	0.616	0.642	0.343	0.273			0.773687	12.2724
17.6329	12.009	5.396	6.1028	32.506	3.853	3.627	11.78	31.809	11.542	26.5168	3.4387	4.0791	23.8532	8.024	27.855	36.876	8.499	19.195	18.751	3.923	4.207	0.603	0.755	0.442	0.43	0.119			0.778948	11.7766
17.7521	11.687	6.249	7.7762	34.9868	4.1598	3.511	12.151	30.309	10.82	25.5696	3.3128	4.3462	25.3296	8.183	29.166	40.571	10.344	15.05	9.324	2.525	4.18	0.732	0.889	0.357	0.207	0.117			0.784214	11.6097
17.8712	13.794	7.549	7.4121	34.6386	3.8245	3.216	13.87	31.342	12.063	25.0488	2.5994	4.2317	28.9838	8.817	31.309	36.554	12.279	8.997	5.234	2.03	2.868	0.788	0.451	0.496	0.4	0.102			0.789476	11.4961
17.9903	14.945	8.309	11.9551	36.4679	3.6534	4.171	13.404	31.904	11.387	25.743	2.8343	3.901	27.1187	7.744	30.423	39.025	15.883	6.766	3.817	1.712	2.594	0.495	0.317	0.218	0.194	0.019			0.794737	11.7308
18.1095	18.071	8.089	13.2123	37.7924	4.2725	3.359	13.675	36.784	12.675	27.1521	2.7645	3.4418	29.3185	7.28	31.697	39.94	16.714	4.59	2.678	1.892	1.916	0.345	0.425	0.455	0.304	0.155			0.800003	12.2692
18.2286	19.234	11.449	18.9093	40.5473	3.1682	3.61	12.582	43.196	13.992	27.2419	3.3543	4.2463	32.253	8.699	35.246	40.323	16.202	2.737	1.737	1.093	1.508	0.375	0.315	0.219	0.273	0.016			0.805264	13.1741
18.3478	20.044	12.898	24.6571	41.9385	3.7992	3.767	14.658	48.183	14.289	28.417	3.3548	4.0332	33.4481	8.766	34.767	45.761	12.175	1.975	1.379	1.189	1.698	0.431	0.311	0.338	0.15	0.189			0.81053	13.9468
18.4669	20.332	18.048	31.9221	48.2308	4.2688	3.671	14.919	48.854	18.092	31.4472	2.9733	4.0831	32.2934	7.444	34.027	48.217	10.449	1.522	1.151	1.169	1.112	0.435	0.258	0.13	0.113	0.154			0.815791	14.8198
18.586	18.886	21.879	36.9104	50.5582	4.1827	3.793	15.265	51.456	21.093	33.0546	2.4809	3.9254	33.0831	9.347	39.135	52.416	4.456	1.67	0.603	0.749	1.129	0.513	0.515	0.198	0.146	0.119			0.821052	15.6755
18.7052	17.22	27.221	44.2085	61.8709	3.6673	3.936	15.709	50.78	25.006	37.7156	3.4053	3.3413	34.75	10.011	42.067	53.367	2.362	1.261	0.523	0.787	0.564	0.362	0.501	0.226	0.101	0.225			0.826318	16.9688
18.8243	12.962	29.162	40.4572	66.1239	5.454	3.383	16.22	47.866	28.331	43.3806	2.8137	3.8191	37.2069	10.331	45.305	55.779	2.973	0.997	0.343	0.704	0.435	0.3	0.201	0.49	0.054	0.143			0.83158	17.509
18.9435	10.955	30.574	39.4109	76.2059	5.958	3.639	15.729	46.696	27.632	44.7445	3.6966	3.0972	39.3992	14.317	47.153	63.607	2.194	0.932	0.593	0.785	0.429	0.27	0.171	0.126	0.027	0.004			0.836845	18.3979
19.0626	10.288	28.376	37.0445	78.2058	5.3027	4.186	13.032	45.413	26.522	47.5754	2.8321	3.8137	42.8665	19.526	51.652	70.075	1.472	0.679	0.762	0.517	0.577	0.168	0.264	0.02	0.294	0.102			0.842107	18.9064
19.1817	7.702	27.325	37.9281	82.2793	6.3178	4.413	12.99	44.785	24.503	50.2932	2.7724	4.06	44.9574	24.947	52.391	80.205	1.221	0.515	0.514	0.603	0.387	0.256	0.059	0.118	0.152	0.056			0.847368	19.6827
19.3009	6.398	26.409	35.0679	85.0262	6.6568	4.528	14.037	43.075	22.168	49.1472	2.6218	4.5767	45.5017	36.142	47.131	87.554	1.031	0.777	0.499	0.615	0.43	0.436	0.133	0.029	0.217	0.089			0.852634	20.0114
19.42	4.986	21.436	31.1296	91.0577	8.0769	4.257	14.268	47.783	21.736	48.2775	3.2301	5.4738	46.8812	43.951	45.97	87.745	0.846	0.809	0.353	0.269	0.255	0.472	0.089	0.286	0.064	0.111			0.857895	20.3774
19.5392	3.386	17.114	25.7535	90.6633	8.656	5.916	14.563	50.817	22.703	47.1704	3.2697	6.0963	48.1089	57.907	40.229	70.31	0.672	0.637	0.188	0.396	0.224	0.242	0.045	0.18	0.134	0.065			0.863161	19.8248
19.6583	2.517	12.976	18.0664	91.5057	11.2217	5.335	14.741	50.013	21.558	44.9532	2.7769	8.1858	47.5249	62.331	29.281	47.179	0.699	0.551	0.396	0.497	0.23	0.233	0.107	0.074	0.027	0.038			0.868422	18.193
19.7775	2.231	8.372	15.0281	81.1051	12.4172	5.532	17.29	56.261	19.772	45.8673	2.8375	8.8976	44.5684	55.146	19.672	28.112	0.418	0.589	0.332	0.355	0.386	0.159	0.152	0.051	0.044	0.06			0.873688	16.3714
19.8966	1.67	6.663	10.0146	66.3014	15.0266	6.046	22.709	58.85	18.751	43.5295	3.049	10.611	40.4875	32.788	13.212	16.263	0.715	0.219	0.401	0.324	0.452	0.126	0.013	0.142	0.004	0.006			0.878949	14.1682
20.0157	1.451	5.954	7.1749	53.4405	18.3616	7.372	25.669	60.016	18.641	43.8643	3.7703	14.2966	37.2119	17.385	8.463	9.201	0.425	0.337	0.243	0.127	0.254	0.102	0.045	0.12	0.045	0.003			0.884211	12.8451
20.1349	1.463	3.165	5.5597	37.2501	20.3579	6.907	27.725	63.805	18.217	44.7613	2.6802	18.0225	33.9916	9.016	6.064	4.802	0.317	0.373	0.281	0.162	0.306	0.07	0.052	0.155	0.105	0			0.889476	11.7542
20.254	1.68	3.069	4.7702	27.7741	25.7929	7.586	28.98	61.914	20.341	47.2613	3.4038	20.3447	31.6316	6.254	4.201	2.627	0.621	0.336	0.084	0.298	0.164	0.271	0.112	0.257	0.096	0			0.894738	11.5334
20.3732	1.742	2.575	2.9751	17.6278	27.8532	9.973	29.868	52.687	24.074	53.4397	3.4623	19.9523	28.7892	3.334	4.188	1.88	0.396	0.253	0.545	0.201	0.239	0.134	0.002	0.355	0.017	0.002			0.900004	11.0217
20.4923	0.797	1.513	1.9192	12.8608	34.1438	12.879	28.285	42.074	28.064	56.4287	4.272	24.8046	24.2522	3.708	3.264	1.789	0.307	0.315	0.169	0.222	0.396	0.06	0	0.028	0.052	0.051			0.905265	10.8713
20.6114	0.901	0.993	1.5984	8.2699	38.7462	15.999	24.505	35.548	36.768	60.5284	4.6286	28.139	21.817	2.151	1.811	1.547	0.285	0.202	0.269	0.281	0.119	0	0.053	0.138	0.051	0			0.910526	10.9749
20.7306	0.663	1.124	1.6622	5.1798	37.7718	19.08	20.449	25.156	36.393	60.1005	4.574	31.4921	18.969	1.749	1.365	1.487	0.11	0.055	0.307	0.123	0.236	0.05	0.049	0.09	0.061	0.049			0.915792	10.321
20.8497	0.801	1.159	1.4867	3.7898	28.4617	20.197	14.224	19.949	25.717	64.2481	6.0052	35.7174	13.3111	1.478	1.007	1.094	0.351	0.055	0.213	0.023	0.141	0.054	0.056	0.066	0.044	0.008			0.921053	9.21758
20.9689	0.825	0.707	0.8854	2.7999	19.919	23.143	12.373	13.377	14.744	70.3127	6.6483	36.7471	9.1483	1.047	1.239	0.986	0.199	0.165	0.058	0.049	0.185	0.056	0.049	0.013	0.196	0.048			0.926319	8.3046
21.088	1.011	0.781	0.8459	2.0712	12.7629	21.643	10.57	7.668	8.586	75.1485	7.6171	38.5792	6.2438	1.178	0.708	0.917	0.243	0.102	0.16	0.047	0.262	0.087	0.08	0.009	0.009	0			0.93158	7.5896
21.2071	0.611	0.604	0.5766	1.7308	8.3949	20.467	6.915	6.613	5.057	75.5321	11.636	36.2085	4.0401	0.864	0.771	0.471	0.233	0.051	0.059	0.105	0.16	0.064	0.086	0.044	0	0.008			0.936842	6.97315
21.3263	0.535	0.411	0.5369	1.2952	5.2622	15.561	4.923	3.937	2.809	76.2288	15.8818	32.138	2.6985	0.648	1.01	0.665	0.238	0.154	0.051	0.147	0.061	0.055	0.091	0.074	0.095	0.034			0.942108	6.36694
21.4454	0.309	0.623	0.855	0.7734	3.2643	10.621	3.4	3.345	1.671	66.9662	25.0724	30.0179	1.6253	0.764	0.749	0.393	0.12	0.174	0	0.109	0.186	0.0009195	0.008	0.189	0.01	0			0.947369	5.81717
21.5646	0.465	0.364	0.7023	0.4561	2.3971	7.848	2.551	2.447	1.817	55.3681	32.4869	28.6336	0.9364	0.525	0.64	0.392	0.057	0.097	0.11	0.163	0.067	0	0.049	0.048	0	0.043			0.952635	5.33321
21.6837	0.383	0.461	0.6116	0.4614	1.3906	4.903	2.108	1.782	1.122	43.1149	37.268	26.0426	0.7742	0.335	0.372	0.312	0.061	0.114	0.201	0.06	0.013	0	0	0.06	0	0.063			0.957896	4.69282
21.8029	0.297	0.32	0.3786	0.5922	1.2286	2.387	1.767	1.726	0.922	30.2462	42.9093	22.6978	0.5512	0.36	0.271	0.403	0.142	0.088	0.11	0.008	0.126	0.045	0.095	0.072	0.049	3.999e-05			0.963162	4.14584
21.922	0.618	0.426	0.3048	0.2851	0.9472	3.027	1.2	1.278	0.702	22.8447	46.7568	18.5672	0.4663	0.308	0.523	0.202	0.075	0.203	0.0005745	0.182	0.097	0.073	0.01	0.058	0.087	0.052			0.968423	3.81899
22.0411	0.347	0.485	0.3584	0.4594	0.5945	1.591	0.89	1.037	0.455	15.7622	49.2594	16.1968	0.4652	0.265	0.226	0.204	0.076	0.101	0.099	0.073	0.093	0.115	0	0.056	0.116	0.0008181			0.973684	3.4356
22.1603	0.207	0.473	0.3199	0.3082	0.7893	1.173	0.638	0.833	0.448	9.8908	48.0901	11.4927	0.2502	0.069	0.319	0.224	0.037	0.015	0.111	0.05	0.101	0.033	0	0.103	0.067	0			0.97895	2.9247
22.2794	0.258	0.231	0.1812	0.3002	0.4561	1.031	0.769	0.726	0.583	6.3816	34.3879	6.4559	0.2093	0.092	0.157	0.219	0.16	0.105	0.124	0.077	0.035	0.048	0.006	0.008	0.105	0			0.984212	2.04255
22.3986	0.271	0.393	0.0527	0.3282	0.4131	0.924	0.62	0.755	0.276	3.5759	24.0399	4.0558	0.2114	0.127	0.156	0.116	0.108	0.064	0.019	0.188	0	0.012	0.046	1.653e-05	0.049	0			0.989477	1.41542
22.5177	0.446	0.311	0.0942	0.4964	0.3796	0.688	0.589	0.474	0.667	2.6799	16.1167	2.7519	0.16	0.191	0.226	0.159	0.062	0.115	0.046	0	0.003	0.139	0	0.052	8.387e-06	0.054			0.994739	1.03464
22.6368	0.326	0.234	0.0409	0.6282	0.2965	0.449	0.436	0.68	0.48	1.9372	10.1353	1.9468	0.0353	0.068	0.13	0.145	0	0.085	0.046	0.002	0.051	0.01	0	0.0006932	0.052	0.164			1	0.706881

[truncated: 3 more sheets: Image3, Image1, Sheet1]
