# Supplementary material for: Crumbs organizes the transport machinery by regulating apical levels of PI(4,5)P2 in Drosophila
Source: eLife. 2019 Nov 7;8:e50900. doi: 10.7554/eLife.50900 (PMC6881148; doi:10.7554/eLife.50900)
Supplement: Figure 5—source data 6. [file elife-50900-fig5-data6.xlsx]

## Sheet: Image25
X0	Y0	Y1	Y2	Y3	Y4	Y5	Y6	Y7	Y8	Y9	Y10	Y11	Y12	Y13	Y14	Y15	Y16	Y17	Y18			Ap-Ba	Average int.
0	47.349	104.007	82.783	71.307	134.559	116.267	100.434	54.554	30.727	37.432	58.645	39.621	72.031	56.634	54.372	144.7	168.932	227.783	228.085			0	96.3275
0.1191	54.558	100.874	89.374	74.921	134.093	122.86	101.37	61.026	35.56	39.954	65.725	42.007	77.928	61.567	61.879	151.94	155.419	224.056	225.787			0.00632693	98.9946
0.2383	65.649	95.401	88.775	77.011	131.882	114.313	110.219	68.29	37.75	43.81	66.604	45.688	73.996	68.011	68.972	160.879	148.018	234.967	232.429			0.0126592	101.719
0.3574	80.621	89.777	91.472	81.252	124.286	129.699	119.511	83.066	40.917	46.857	78.628	50.897	86.134	74.336	78.875	175.139	147.251	241.45	230.316			0.0189861	107.92
0.4766	82.081	98.721	94.177	85.386	129.303	131.935	118.37	89.053	43.629	50.901	83.056	55.359	92.034	76.683	90.202	182.412	150.18	244.616	226.454			0.0253183	111.819
0.5957	98.009	102.019	101.955	95.484	130.509	135.189	126.494	94.385	50.575	48.481	92.056	62.211	101.165	81.065	102.242	193.368	159.263	242.231	226.428			0.0316453	118.059
0.7148	109.382	105.819	103.234	100.334	148.022	138.134	136.167	109.739	56.857	54.476	102.887	67.2	105.924	98.785	111.239	189.643	169.907	244.361	230.208			0.0379722	125.385
0.834	119.144	110.538	111.609	107.495	155.592	147.403	142.602	117.674	72.512	56.447	115.151	74.735	113.278	108.058	125.192	194.685	183.319	242.028	230.694			0.0443044	133.061
0.9531	132.885	116.096	115.302	121.458	169.275	154.62	161.413	130.875	88.322	62.021	127.593	85.495	121.387	119.213	145.348	211.251	195.281	241.447	230.426			0.0506314	143.669
1.0723	144.241	119.459	124.43	136.4	191.532	170.637	171	132.472	114.363	68.956	128.439	97.814	124.623	139.24	160.697	224.21	203.35	243.228	235.915			0.0569636	154.263
1.1914	155.289	140.173	137.3	148.93	204.075	175.97	175.308	142.969	136.077	82.908	136.127	102.102	139.538	156.573	176.441	234.99	207.64	240.519	234.865			0.0632905	164.621
1.3106	168.478	148.769	150.178	160.394	217.154	186.913	190.899	154.007	164.703	93.417	152.002	113.249	150.183	181.509	196.735	243.527	222.958	243.207	241.663			0.0696228	177.892
1.4297	164.057	154.621	161.367	175.562	226.076	187.942	197.494	167.221	195.685	106.824	165.741	129.283	162.306	210.997	214.741	243.576	240.599	245.887	243.629			0.0759497	189.137
1.5488	164.944	159.521	175.213	188.709	224.371	203.003	198.459	170.75	209.734	122.691	172.494	135.365	175.099	229.791	232.706	246.062	246.313	245.803	246.858			0.0822766	197.257
1.668	166.499	165.738	187.107	200.066	230.709	205.005	201.066	175.265	224.041	143.134	180.905	150.451	195.58	232.281	240.524	242.725	250.348	245.058	242.012			0.0886089	204.132
1.7871	164.484	173.469	200.536	213.781	233.56	205.071	195.643	187.92	236.178	159.347	185.202	160.896	206.404	243.955	246.553	244.229	251.719	242.905	235.606			0.0949358	209.866
1.9063	160.895	185.192	201.333	223.413	232.197	201.887	179.005	189.26	241.995	180.712	195.29	163.703	223.006	242.127	244.916	236.426	250.912	237.975	216.282			0.101268	210.87
2.0254	162.367	187.209	200.203	237.024	234.147	197.295	162.365	193.115	238.997	179.604	199.821	166.256	228.85	242.622	245.929	235.741	244.335	226.527	203.872			0.107595	209.804
2.1445	157.288	182.001	203.063	242.758	227.286	191.347	145.818	203.95	227.352	190.373	212.114	158.224	244.529	235.217	244.587	226.25	230.42	188.444	169.965			0.113922	204.262
2.2637	140.866	179.721	215.454	239.18	224.289	184.35	125.678	202.493	216.488	192.334	213.862	144.618	242.798	226.288	245.301	206.313	207.875	149.227	132.063			0.120254	194.168
2.3828	127.69	178.878	221.693	244.327	213.633	176.109	108.655	199.268	194.35	193.458	214.329	127.361	244.705	203.112	237.509	182.756	170.695	120.595	92.867			0.126581	181.684
2.502	114.943	175.217	224.674	242.328	206.375	177.047	96.12	197.777	180.514	191.677	219.193	115.718	244.836	164.015	218.482	146.988	146.735	91.517	65.941			0.132913	169.479
2.6211	104.275	174.181	226.93	242.591	193.805	185.609	91.506	174.632	157.622	185.916	218.747	94.587	234.316	119.419	177.822	125.347	124.277	74.899	50.688			0.13924	155.64
2.7402	97.405	176.82	225.184	240.137	167.044	174.884	85.024	153.085	139.898	186.061	215.147	84.773	220.225	87.856	136.143	107.148	96.92	61.423	39.8			0.145567	141.841
2.8594	94.161	177.134	225.031	241.921	125.334	170.079	80.976	125.757	122.181	192.496	209.731	64.191	185.585	70.052	102.198	94.606	70.514	53.113	28.292			0.151899	128.071
2.9785	89.782	168.574	221.873	236.336	95.815	176.33	81.259	100.86	104.499	189.356	210.978	58.489	142.449	63.427	88.292	82.285	53.057	46.368	23.252			0.158226	117.541
3.0977	86.428	154.886	215.471	242.153	75.299	178.276	74.904	82.122	89.68	191.367	210.937	48.066	105.765	57.089	77.813	82.615	42.287	43.013	20.641			0.164559	109.411
3.2168	87.938	145.112	202.103	241.914	64.332	176.188	74.941	70.434	82.108	185.595	218.083	43.347	73.629	49.088	68.542	76.946	34.7	37.951	22.603			0.170886	102.924
3.336	81.175	139.18	192.281	242.512	57.317	182.874	73.826	58.172	80.36	173.084	212.565	36.641	65.449	42.681	60.806	73.335	29.41	35.964	20.049			0.177218	97.7727
3.4551	80.795	136.682	183.814	235.94	53.756	189.491	68.844	57.16	80.882	162.79	214.029	36.038	60.214	36.647	49.58	72.452	24.128	32.373	14.543			0.183545	94.2188
3.5742	77.251	129.393	177.58	229.435	48.424	175.884	68.932	55.998	78.362	154.825	210.574	32.899	53.885	34.244	46.685	65.626	23.048	30.05	13.631			0.189872	89.8277
3.6934	75.38	125.134	158.764	217.065	46.559	185.397	66.245	58.94	76.534	145.677	208.256	32.833	48.494	30.433	41.242	60.574	19.735	26.925	14.91			0.196204	86.2683
3.8125	71.346	121.218	144.934	183.685	40.915	181.002	65.256	55.62	72.662	138.743	207.199	32.923	47.431	24.228	36.221	53.513	15.793	24.378	15.18			0.202531	80.6446
3.9317	68.385	99.288	134.602	151.469	37.148	174.646	60.582	43.605	64.767	132.696	206.596	31.317	48.707	25.873	31.251	41.881	15.942	24.43	15.646			0.208863	74.149
4.0508	60.741	84.268	112.702	113.515	32.808	175.888	61.506	38.236	58.98	124.624	205.349	26.874	48.292	26.028	23.513	38.686	14.062	18.84	16.456			0.21519	67.4404
4.1699	57.13	62.979	102.888	87.174	31.484	167.217	63.787	35.258	51.481	119.536	197.062	24.576	49.412	23.386	22.288	36.664	12.927	17.171	17.062			0.221517	62.078
4.2891	42.84	46.941	87.202	69.718	28.772	158.213	65.05	30.014	45.42	108.335	189.011	18.704	42.957	23.093	20.915	35.067	10.652	12.324	20.65			0.227849	55.5725
4.4082	37.142	35.259	70.862	54.562	25.914	137.845	58.549	26.88	37.959	96.563	178.124	15.212	39.316	19.638	23.093	32.398	9.878	13.669	22.247			0.234176	49.2163
4.5274	29.12	30.78	56.314	45.845	23.176	126.468	49.919	26.283	34.331	82.408	167.603	13.513	39.864	17.125	21.757	28.548	8.465	12.809	24.7			0.240508	44.1594
4.6465	23.692	26.324	43.156	38.37	26.237	104.064	44.081	25.758	34.231	57.693	155.087	10.585	31.886	14.884	23.939	25.015	7.94	10.628	25.877			0.246835	38.3919
4.7657	22.964	28.139	34.726	30.754	25.058	92.878	36.59	24.657	30.888	45.429	149.449	9.805	26.28	10.622	20.579	18.606	7.287	10.241	31.472			0.253167	34.5486
4.8848	20.184	24.507	22.887	24.877	24.288	80.447	33.48	20.423	29.874	35.214	131.895	9.385	23.55	9.587	21.951	14.545	7.673	11.743	30.858			0.259494	30.3878
5.0039	24.007	26.542	18.711	23.286	19.516	65.331	27.634	22.081	32.822	25.638	116.796	8.802	21.974	9.503	21.997	11.889	7.568	9.764	34.383			0.265821	27.8023
5.1231	23.523	23.026	15.833	19.559	20.941	47.751	24.535	19.844	26.961	22.835	100.14	9.103	21.609	10.107	20.181	13.695	6.181	10.472	34.193			0.272154	24.7626
5.2422	23.266	26.491	12.447	15.774	19.357	38.899	18.8	17.349	25.898	24.448	80.448	8.304	22.245	9.103	22.816	12.168	5.665	10.178	35.081			0.27848	22.5651
5.3614	23.281	24.801	10.017	12.251	20.776	32.46	15.41	14.775	26.897	23.451	58.014	6.348	22.834	8.791	20.969	11.521	6.209	12.331	27.87			0.284813	19.9477
5.4805	18.78	26.25	10.178	9.823	22.98	27.023	13.526	13.353	34.4	20.449	42.391	5.46	23.565	8.806	19.197	11.482	6.835	11.116	27.284			0.29114	18.5736
5.5996	16.8	22.613	11.057	6.92	26.894	24.666	11.915	10.964	31.208	19.203	36.063	5.986	23.89	7.241	13.644	10.549	5.54	12.767	21.987			0.297467	16.8372
5.7188	13.231	24.261	10.304	5.066	25.43	19.888	11.057	9.842	39.527	21.954	31.939	5.411	26.321	7.446	13.819	10.807	5.797	11.769	22.165			0.303799	16.6334
5.8379	12.326	20.372	8.626	4.36	26.025	16.788	9.685	9.18	41.515	18.87	31.846	5.035	28.314	7.835	14.381	10.674	4.313	10.129	20.423			0.310126	15.8262
5.9571	10.102	16.902	7.281	4.306	25.775	13.845	9.493	7.826	48.581	19.437	27.131	4.852	29.249	7.524	15.434	10.208	4.167	12.86	19.314			0.316458	15.4888
6.0762	9.705	17.096	6.219	3.734	23.263	12.407	9.247	7.385	49.739	18.707	21.506	4.203	31.192	6.892	15.297	10.398	3.972	10.674	19.336			0.322785	14.788
6.1953	8.31	15.916	6.524	3.669	25.497	14.724	10.042	8.2	54.659	19.633	18.941	3.779	32.726	5.739	14.665	8.697	4.738	10.34	19.142			0.329112	15.0495
6.3145	9.412	14.418	6.893	4.613	26.929	15.338	10.165	6.867	63.961	18.457	17.789	4.236	31.27	5.939	15.542	8.518	4.379	11.628	17.749			0.335444	15.4791
6.4336	8.833	16.085	4.861	3.398	27.754	16.171	9.482	6.05	68.052	19.499	18.768	4.524	29.643	6.042	13.257	7.588	4.191	9.47	18.614			0.341771	15.3833
6.5528	7.558	14.071	6.057	4.718	30.695	18.212	10.351	6.267	70.103	20.145	16.849	4.443	31.835	4.784	13.615	6.962	3.799	9.869	20.395			0.348103	15.8278
6.6719	8.414	15.778	6.204	3.785	28.785	18.049	9.148	6.256	77.035	20.606	15.758	4.272	36.367	4.822	15.114	7.348	3.228	10.445	19.454			0.35443	16.3615
6.7911	8.131	15.779	4.92	4.092	30.124	15.955	7.944	7.726	79.274	19.916	11.06	3.952	41.654	4.554	14.213	6.378	4.358	10.868	17.471			0.360762	16.2299
6.9102	7.958	14.834	6.098	4.364	26.826	15.703	8.435	6.249	82.702	20.715	8.426	4.718	48.188	6.572	14.667	6.077	3.587	11.262	17.635			0.367089	16.5798
7.0293	9.429	16.531	5.75	2.788	24.185	11.256	8.548	7.481	79.141	18.302	6.044	4.293	57.806	7.294	13.976	6.499	3.835	10.673	16.088			0.373416	16.3115
7.1485	9.222	15.533	6.729	3.322	21.272	10.375	7.843	6.211	83.199	21.214	5.706	3.857	56.94	6.718	15.335	6.386	3.14	8.463	20.336			0.379749	16.4106
7.2676	9.906	14.234	5.909	4.653	18.007	9.922	8.334	7.486	86.743	20.211	4.88	3.69	60.345	6.701	19.961	6.912	3.289	10.365	20.459			0.386075	16.9477
7.3868	10.329	16.057	6.408	4.105	18.008	8.098	7.253	7.808	92.453	19.791	4.779	3.664	66.252	7.005	25.776	7.183	3.745	10.147	20.725			0.392408	17.8729
7.5059	9.597	14.833	7.211	3.798	19.986	7.079	7.627	7.891	98.989	17.586	4.844	3.507	56.908	7.346	36.252	6.804	3.388	9.119	19.555			0.398735	18.0168
7.625	9.148	15.458	6.508	2.712	20.909	7.052	5.659	8.041	101.654	17.852	3.711	5.448	51.915	7.492	38.588	6.822	4.061	8.452	20.714			0.405062	18.0103
7.7442	10.156	18.094	6.263	3.565	24.491	6.589	6.173	7.037	103.698	19.565	4.17	3.396	45.37	7.397	45.028	7.72	3.743	7.714	21.751			0.411394	18.5221
7.8633	9.451	21.003	5.787	4.069	28.195	7.205	5.934	7.875	98.892	23.926	3.83	4.119	40.573	9.172	43.429	9.048	3.654	6.612	22.23			0.417721	18.6844
7.9825	11.522	19.808	6.601	3.193	30.523	7.648	5.978	5.627	97.278	24.635	4.183	4.208	43.119	10.216	44.759	8.437	3.257	6.623	20.203			0.424053	18.8325
8.1016	10.599	17.887	7.242	3.517	35.381	7.282	5.109	8.429	92.013	23.772	3.94	3.643	42.756	8.185	46.118	7.326	3.861	7.031	16.77			0.43038	18.4664
8.2207	11.116	20.343	7.03	3.576	35.072	6.411	5.346	6.151	81.854	29.405	4.179	3.967	45.158	8.863	46.385	7.807	3.028	6.801	17.075			0.436707	18.3983
8.3399	12.768	22.49	5.91	3.259	32.89	5.931	4.911	7.891	69.994	32.06	4.348	3.345	41.571	9.049	45.551	9.147	3.847	5.443	14.236			0.443039	17.6127
8.459	12.505	22.957	6.908	3.592	32.285	6.067	5.38	6.035	59.102	35.979	3.422	3.669	35.402	10.903	42.899	9.289	2.715	5.862	13.621			0.449366	16.768
8.5782	13.334	21.389	7.715	3.996	30.878	6.325	5.624	5.746	51.285	38.316	3.676	3.716	35.046	12.632	38.914	9.236	3.221	5.369	13.165			0.455698	16.2938
8.6973	13.778	21.52	8.853	3.99	32.219	6.339	5.117	6.028	43.004	38.679	4.863	4.067	35.528	12.325	36.279	9.171	2.744	5.982	10.806			0.462025	15.8575
8.8165	14.64	21.975	8.367	3.659	31.561	6.2	6.114	5.76	36.753	39.924	4.959	4.237	30.354	12.856	34.445	9.755	3.178	4.397	11.536			0.468357	15.2984
8.9356	14.906	21.836	8.38	3.671	28.492	5.165	5.1	5.248	32.411	40.996	4.375	3.72	26.809	13.988	31.415	10.381	3.089	4.954	8.7			0.474684	14.4019
9.0547	15.301	23.474	6.153	3.017	29.275	5.407	4.832	5.868	31.082	37.802	4.901	3.532	19.735	14.189	29.32	11.751	2.887	4.203	8.825			0.481011	13.766
9.1739	16.598	24.092	7.122	3.618	28.74	5.701	6.514	4.798	30.283	40.058	4.083	3.212	19.513	15.577	24.007	12.022	2.518	4.053	9.319			0.487343	13.7804
9.293	16.832	26.372	6.969	3.757	28.124	5.681	6.252	4.54	30.942	39.02	5.213	3.181	16.095	18.034	27.244	11.591	2.589	4.386	9.038			0.49367	13.9926
9.4122	17.489	30.188	6.674	4.448	24.022	5.438	5.535	4.056	30.55	40.248	4.01	3.339	14.324	23.745	23.998	14.51	3.08	4.175	8.904			0.500003	14.1438
9.5313	15.756	29.594	7.449	4.027	23.872	5.609	5.547	4.195	27.046	39.379	5.439	3.151	10.511	28.264	22.167	13.691	3.319	3.634	8.767			0.50633	13.7588
9.6504	17.434	27.179	7.108	3.515	21.057	6.201	5.275	3.714	30.824	36.822	4.667	2.842	9.55	36.783	19.524	14.75	2.788	3.488	7.678			0.512657	13.7473
9.7696	15.55	29.58	6.544	4.696	21.337	4.328	6.195	4.598	31.139	38.238	4.364	3.183	8.114	40.276	19.049	16.417	3.259	4.109	8.937			0.518989	14.2059
9.8887	16.848	30.022	7.231	3.751	20.981	4.851	5.228	3.975	36.179	41.278	4.53	4.22	9.914	41.221	15.89	18.901	2.966	3.538	8.133			0.525316	14.7188
10.0079	16.719	29.003	6.293	3.886	20.124	6.036	4.778	3.782	35.493	39.528	4.774	2.821	7.412	39.422	15.904	20.862	3.181	4.329	9.033			0.531648	14.3884
10.127	16.176	33.103	6.171	3.076	20.926	5.202	5.802	4.008	36.065	38.324	5.429	3.018	6.733	39.961	14.53	21.173	4.031	4.113	7.83			0.537975	14.509
10.2462	16.762	34.99	6.156	3.582	20.28	5.353	5.913	4.21	34.37	36.922	4.301	3.588	6.099	40.176	13.386	21.852	3.238	4.478	8.13			0.544307	14.4098
10.3653	15.392	33.634	6.045	3.071	18.928	5.094	5.161	3.274	31.416	38.447	5.491	3.034	5.977	41.075	11.474	23.118	3.321	4.249	7.335			0.550634	13.9756
10.4844	15.117	35.339	6.936	3.194	20.174	4.89	5.713	4.264	26.556	39.812	5.671	3.19	5.152	40.759	10.456	25.342	3.497	3.863	6.599			0.556961	14.0276
10.6036	14.46	34.348	7.124	3.347	23.123	5.408	4.791	4.02	22.744	48.924	5.337	3.066	5.36	45.597	8.562	28.8	4.017	4.256	7.637			0.563293	14.7853
10.7227	14.035	38.028	6.538	3.505	21.088	4.947	6.658	4.312	17.946	57.37	5.201	2.84	5.054	45.508	8.914	27.101	3.789	4.949	6.985			0.56962	14.9878
10.8419	15.447	38.242	6.424	3.537	23.313	5.405	6.098	3.928	13.832	65.406	6.319	3.266	5.138	49.686	8.807	27.396	4.365	3.93	7.226			0.575952	15.6718
10.961	13.917	36.407	5.268	2.975	23.061	5.262	5.065	5.27	11.592	74.14	5.089	3.92	4.247	50.996	9.043	33.018	3.754	4.554	5.993			0.582279	15.9774
11.0801	15.844	36.825	5.782	4.025	22.279	5.248	4.457	3.816	11.707	79.654	4.775	3.898	3.98	51.534	9.768	33.416	3.546	4.706	8.068			0.588606	16.4909
11.1993	16.002	39.163	6.301	3.086	22.897	4.187	4.988	4.608	8.66	85.114	6.798	3.068	4.781	51.37	8.559	34.861	3.661	4.336	5.969			0.594938	16.7584
11.3184	14.398	45.595	6.333	3.582	25.131	4.994	4.539	3.646	9.552	89.387	6.291	3.339	3.781	48.397	8.056	35.614	3.112	4.706	7.329			0.601265	17.2517
11.4376	15.551	45.51	6.252	4.12	23.149	4.158	4.459	4.21	9.184	95.198	5.564	3.343	4.241	47.721	7.471	40.949	5.096	4.602	7.66			0.607598	17.8125
11.5567	15.289	44.596	5.538	3.785	22.806	4.754	3.865	3.675	8.175	102.913	5.543	3.285	4.283	40.791	9.345	44.366	4.048	4.75	8.477			0.613925	17.9097
11.6758	14.335	41.938	3.912	4.069	25.325	5.719	5.462	4.3	9.071	107.816	5.461	3.37	4.39	35.32	6.155	42.128	4.355	4.61	6.563			0.620251	17.5947
11.795	15.037	43.133	5.869	3.039	24.04	5.043	3.898	3.68	7.64	112.19	6.63	3.798	3.649	33.125	8.196	38.586	3.987	4.604	8.327			0.626584	17.6037
11.9141	13.236	43.176	4.73	3.238	24.719	4.739	4.824	4.346	7.744	121.177	8.021	2.857	3.631	32.018	8.739	37.568	4.036	5.624	7.868			0.632911	18.0153
12.0333	13.131	42.998	4.456	3.384	27.17	4.862	5.154	3.694	7.129	124.691	5.139	2.873	4.178	30.817	10.181	38.121	4.023	5.711	7.337			0.639243	18.1605
12.1524	14.21	43.902	4.552	2.984	24.49	5.499	4.155	3.617	7.164	113.527	6.911	2.919	3.261	29.841	7.598	40.862	4.25	4.736	7.288			0.64557	17.4614
12.2716	11.186	45.477	4.798	3.178	29.165	5.613	4.746	4.06	7.015	103.399	5.584	3.017	3.736	29.94	7.111	37.389	4.924	6.91	7.727			0.651902	17.1039
12.3907	13.45	46.589	4.721	3.094	28.857	5.245	4.283	3.605	8.64	101.183	5.66	3.707	4.291	28.909	9.259	37.532	5.421	6.498	8.442			0.658229	17.3361
12.5098	14.789	42.374	5.154	3.069	32.125	5.247	5.491	4.505	6.989	100.412	4.542	3.068	4.212	28.7	7.225	34.418	5.318	6.991	9.948			0.664556	17.083
12.629	14.344	48.405	5.302	3.697	32.771	6.295	3.992	3.603	7.066	102.35	6.671	2.618	4.178	27.883	7.299	32.767	5.716	6.211	9.759			0.670888	17.4172
12.7481	15.33	49.33	4.549	3.938	35.843	6.906	4.065	4.345	6.953	103.966	4.695	3.339	3.748	31.914	6.7	27.059	7.159	7.129	8.559			0.677215	17.6593
12.8673	16.744	52.711	4.343	3.665	36.972	6.441	4.463	4.102	7.445	107.025	4.562	3.258	4.364	31.699	7.363	23.895	7.097	7.918	8.99			0.683547	18.0556
12.9864	22.195	58.725	5.342	5.02	39.991	6.292	4.243	4.364	6.739	115.98	5.51	3.463	4.321	32.779	7.703	19.38	8.648	7.493	9.684			0.689874	19.3617
13.1055	23.787	55.43	4.61	4.462	40.348	8.131	4.851	4.42	7.775	124.473	5.508	3.255	4.258	31.472	7.237	16.834	8.936	8.337	9.819			0.696201	19.6812
13.2247	24.462	55.284	5.075	4.206	43.455	9.859	4.514	3.538	7.01	131.076	4.616	3.734	4.076	30.118	7.955	17.482	10.424	8.574	11.531			0.702533	20.3678
13.3438	29.596	56.061	3.37	5.042	43.998	10.126	4.763	3.987	7.489	136.768	5.507	3.797	5.01	34.961	7.718	15.923	11.212	11.621	14.109			0.70886	21.6346
13.463	33.369	53.639	4.569	3.965	49.255	9.707	5.144	4.246	8.52	150.399	6.014	3.582	5.744	36.226	8.094	15.175	13.194	16.139	18.041			0.715193	23.4222
13.5821	39.158	45.632	4.677	3.358	49.674	12.79	4.755	4.221	8.281	153.318	6.461	4.199	4.79	40.064	11.22	14.785	16.269	24.25	27.895			0.72152	25.0419
13.7012	41.477	42.616	4.363	4.604	49.46	12.1	4.558	4.748	8.037	162.501	6.288	3.765	5.575	43.675	10.987	12.606	21.801	35.687	46.161			0.727846	27.4215
13.8204	46.841	39.723	4.549	4.636	52.676	14.619	4.749	4.699	9.135	171.675	7.571	3.402	6.654	49.305	12.022	17.765	27.388	39.82	61.3			0.734179	30.4489
13.9395	55.771	36.987	4.291	4.655	52.926	15.039	5.435	4.326	9.344	184.005	8.259	3.449	6.255	65.659	15.237	23.759	40.557	42.165	73.707			0.740506	34.3066
14.0587	61.645	35.287	3.466	5.309	54.117	17.651	6.495	4.179	7.998	188.12	10.311	3.624	6.942	71.315	17.421	30.69	56.295	50.112	83.697			0.746838	37.6144
14.1778	71.603	34.03	4.515	5.479	58.131	22.112	5.998	4.471	9.048	183.733	11.389	3.398	9.618	83.798	20.852	47.285	77.48	60.53	89.633			0.753165	42.2686
14.297	77.347	30.857	5.569	6.051	55.46	29.716	5.984	5.015	8.326	164.583	12.832	3.724	8.042	86.114	22.89	49.832	85.454	82.586	92.758			0.759497	43.8495
14.4161	81.148	27.118	4.326	6.751	59.898	33.712	8.009	5.125	9.232	155.451	15.629	3.959	12.164	95.156	33.428	61.736	100.289	102.117	96.983			0.765824	48.0122
14.5352	81.707	27.398	4.594	8.098	63.553	41.609	7.782	4.588	8.175	133.667	17.251	4.425	13.798	88.067	42.803	82.769	105.506	128.015	112.078			0.772151	51.3623
14.6544	85.714	27.412	4.786	7.743	67.14	44.081	7.882	6.149	9.298	119.628	24.679	3.955	16.714	82.54	59.297	103.275	111.562	141.854	125.975			0.778483	55.2465
14.7735	85.596	26.293	4.411	8.237	72.882	46.142	9.043	5.168	7.784	99.659	35.86	4.463	18.604	67.2	65.564	125.842	100.605	111.654	106.557			0.78481	52.7139
14.8927	91.367	26.963	5.504	8.696	78.228	53.498	11.414	5.813	8.422	96.779	45.693	5.115	22.755	51.451	62.556	140.469	76.777	47.967	64.395			0.791142	47.5717
15.0118	97.524	25.352	4.86	7.034	85.727	56.971	13.748	5.449	8.525	87.457	65.047	5.812	27.896	31.863	56.215	142.862	60.6	18.396	25.536			0.797469	43.5197
15.1309	102.26	28.111	5.967	7.618	92.09	60.481	17.125	8.123	10.976	74.513	85.976	6.505	30.205	21.369	44.795	117.587	40.727	7.477	10.867			0.803796	40.6722
15.2501	105.967	30.199	6.269	10.002	94.631	68.821	25.267	7.697	12.846	64.793	96.723	8.676	33.253	12.354	31.388	84.796	27.807	5.787	6.145			0.810128	38.6011
15.3692	118.682	33.24	5.813	10.935	94.033	79.609	32.459	9.898	15.429	57.001	112.623	8.055	35.452	8.481	21.286	56.461	20.01	3.689	4.779			0.816455	38.3124
15.4884	120.047	36.51	5.372	10.151	96.686	91.834	42.811	12.191	18.949	47.612	119.441	8.801	38.546	6.809	12.493	39.094	15.179	2.207	2.481			0.822788	38.2744
15.6075	129.121	42.156	6.62	14.104	105.88	94.446	50.303	17.726	21.183	43.323	133.495	9.759	36.955	4.16	8.936	28.373	9.553	2.255	1.833			0.829114	40.0095
15.7266	124.795	45.929	7.817	18.655	108.011	90.569	63.787	23.426	31.301	39.978	123.139	10.788	40.282	2.945	7.937	17.245	6.903	1.133	1.455			0.835441	40.3208
15.8458	131.331	46.665	7.483	19.334	110.852	82.317	70.57	35.06	42.468	35.427	111.408	13.706	42.424	2.356	5.475	13.058	4.254	1.423	1.441			0.841774	40.8975
15.9649	127.282	47.889	8.993	26.562	114.368	69.951	80.355	41.322	49.628	27.529	86.533	14.888	46.016	1.802	4.983	11.389	3.484	0.896	0.683			0.848101	40.2396
16.0841	143.244	50.781	9.413	37.3	117.344	52.847	81.587	56.831	64.798	19.163	56.037	15.915	43.691	2.392	3.966	8.387	2.434	1.475	0.665			0.854433	40.4353
16.2032	144.848	56.678	9.215	44.843	121.565	38.555	87.176	73.138	78.921	11.724	32.334	19.018	39.215	1.583	2.994	4.406	1.651	0.469	0.427			0.86076	40.4611
16.3224	159.355	64.259	10.375	60.641	106.068	26.865	87.849	80.539	85.416	8.867	16.834	27.576	32.182	1.513	2.896	4.248	1.922	0.546	0.339			0.867092	40.9626
16.4415	160.937	65.768	12.548	75.427	91.414	14.893	90.947	97.851	81.802	7.498	9.079	32.537	21.414	1.008	2.492	3.316	1.339	0.549	0.493			0.873419	40.5954
16.5606	155.021	72.452	15.19	97.414	72.815	8.975	74.168	106.967	74.14	5.183	6.16	43.329	14.723	0.731	1.67	2.404	1.078	0.27	0.282			0.879746	39.6301
16.6798	148.112	78.203	16.534	121.416	56.975	6.27	49.437	119.444	61.832	3.602	3.809	59.343	10.164	0.771	1.554	2.241	0.729	0.341	0.114			0.886078	38.9943
16.7989	145.269	83.155	19.399	136.099	42.849	2.935	28.795	117.694	47.435	2.476	2.655	78.721	6.178	0.718	1.216	1.576	0.716	0.284	0.272			0.892405	37.8127
16.9181	147.147	94.182	23.956	147.001	30.872	2.478	13.013	108.531	40.038	2.489	2.463	94.465	4.185	0.728	1.057	1.347	0.728	0.533	0.053			0.898737	37.6456
17.0372	136.222	103.327	29.65	143.268	22.923	2.754	7.276	101.336	33.658	2.148	2.17	96.043	2.794	0.509	0.677	1.215	0.884	0.279	0.059			0.905064	36.168
17.1563	114.589	109.344	34.067	123.153	11.867	1.57	6.158	81.86	26.411	1.892	2.666	84.387	1.366	0.549	0.729	1.164	0.569	0.059	0.159			0.911391	31.7136
17.2755	85.335	116.134	44.927	88.226	7.03	1.829	3.672	66.839	18.62	1.601	1.434	52.843	1.625	0.345	0.876	1.106	0.605	0.164	0.113			0.917723	25.9644
17.3946	57.374	120.224	56.47	62.112	5.857	1.654	2.879	50.482	12.145	1.603	0.992	28.397	1.213	0.337	0.286	0.626	0.341	0.162	0.059			0.92405	21.2217
17.5138	37.101	120.177	64.513	36.362	3.737	1.506	2.236	38.466	8.154	0.96	1.232	13.989	0.846	0.285	0.325	0.724	0.544	0.062	0.111			0.930383	17.4384
17.6329	22.153	117.843	78.285	15.888	2.303	1.043	1.722	26.737	6.519	1.316	1.003	6.981	0.669	0.327	0.276	0.868	0.334	0.163	0.059			0.936709	14.9731
17.7521	14.852	115.328	93.564	8.999	2.38	1.165	2.055	16.655	5.59	0.953	0.674	5.011	0.55	0.164	0.332	0.451	0.322	0.005	0			0.943042	14.1605
17.8712	11.822	114.816	111.1	6.16	2.352	0.849	2.104	13.043	5.258	0.839	0.772	4.039	0.388	0.276	0.33	0.227	0.279	0.105	0			0.949369	14.461
17.9903	7.399	112.275	106.594	2.719	2.101	0.985	0.857	8.891	3.434	0.881	0.659	3.849	0.339	0.226	0.281	0.489	0.173	0.056	0			0.955696	13.2741
18.1095	4.841	94.851	89.75	2.728	1.265	0.35	1.158	7.308	2.844	0.789	0.555	1.586	0.327	0.169	0.28	0.292	0.274	0.165	0.055			0.962028	11.0309
18.2286	4.547	82.139	65.114	2.591	0.785	0.828	1.1	5.879	2.121	0.778	0.491	1.492	0.389	0.111	0.219	0.111	0.113	0.056	0.0001807			0.968355	8.88759
18.3478	3.292	62.728	44.604	2.03	1.003	0.388	0.793	4.727	1.728	0.562	0.559	1.279	0.233	0.164	0.17	0.119	0.107	0.054	0.054			0.974687	6.55758
18.4669	2.772	46.144	30.079	1.552	0.881	0.232	1.154	2.979	2.031	1.048	0.505	0.731	0.44	0.055	0.163	0.327	0.058	0.053	0.001			0.981014	4.80026
18.586	2.344	31.152	21.333	0.853	0.456	0.874	1.003	3.049	1.635	0.504	0.667	0.503	0.165	0	0.17	0.22	0.057	0.003	0			0.987341	3.42042
18.7052	2.098	21.881	14.318	1.11	0.882	0.393	0.897	2.487	1.177	0.604	0.553	0.605	0.382	0.056	0.218	0.119	0.112	0	0			0.993673	2.52063
18.8243	1.558	12.389	10.72	0.846	0.667	0.326	0.707	1.98	1.494	0.507	0.441	0.343	0.173	0.11	0.173	0.214	0.111	0	0.003			1	1.72432

## Sheet: Image24
X0	Y0	Y1	Y2	Y3	Y4	Y5	Y6	Y7	Y8	Y9	Y10	Y11	Y12	Y13	Y14	Y15	Y16	Y17	Y18			Ap-Ba	Average int.
0	18.7546	26.923	18.7069	45.5029	26.9675	25.159	18.679	27.55	20.616	19.5211	31.1394	26.1023	15.4149	13.3419	20.0165	20.912	20.9391	20.268	34.454			0	23.7352
0.1191	20.3012	27.374	21.1242	45.6901	27.6998	25.287	18.526	30.044	24.179	20.3063	34.7407	27.71	15.9714	12.8599	20.0926	25.21	18.737	19.3322	31.046			0.00640805	24.5385
0.2383	22.2843	27.659	24.0842	44.6214	26.8905	25.015	18.207	36.179	31.26	22.1278	33.3813	26.5866	15.8343	12.3164	20.9488	25.025	23.0295	21.7805	25.87			0.0128215	25.4263
0.3574	22.6788	31.552	25.7376	46.4438	26.2673	25.954	19.031	36.687	43.776	28.2374	37.6633	26.8796	16.7187	12.4149	21.4872	25.667	27.1208	24.6848	24.373			0.0192295	27.546
0.4766	25.8643	34.057	28.7615	43.1405	27.5828	25.678	19.268	39.739	55.164	37.173	40.0114	27.844	18.2938	13.5672	25.8666	26.56	29.713	30.0574	25.755			0.025643	30.2156
0.5957	28.7718	37.596	28.9737	40.4836	28.7684	26.192	22.517	43.56	66.869	48.8982	41.2451	29.7531	21.9769	12.6126	28.6203	29.221	35.4429	36.9015	26.446			0.032051	33.4131
0.7148	33.2198	41.97	28.8771	38.7409	29.9581	29.793	25.35	44.996	73.236	63.4182	47.9838	31.1754	23.6073	14.4569	28.526	31.439	42.7266	43.542	30.184			0.0384591	37.0105
0.834	33.4072	49.178	28.3371	36.0039	34.1098	34.353	30.459	46.284	68.581	77.5909	50.4983	36.055	25.5804	14.6558	29.7698	31.724	51.8231	46.5245	33.529			0.0448725	39.9191
0.9531	37.1921	50.879	31.5409	34.9613	38.0656	39.351	32.128	48.01	55.563	88.6923	56.1727	40.9743	27.484	17.3998	36.7877	33.057	56.5325	50.7965	38.139			0.0512805	42.8277
1.0723	41.0358	55.24	34.2618	33.2135	41.8546	47.999	36.864	55.199	48.175	88.7329	69.9755	45.4806	32.1051	22.0914	41.689	34.621	59.0394	54.1403	43.646			0.057694	46.5981
1.1914	43.1015	63.578	36.2341	34.1629	46.0452	52.26	41.087	60.39	41.407	90.0651	77.9428	50.3459	33.6392	28.0538	50.2285	41.791	62.4823	59.7966	53.408			0.064102	50.8431
1.3106	47.0742	63.855	39.347	36.2393	47.8373	61.15	45.445	65.962	34.856	83.5075	85.0573	53.8879	38.8679	34.2201	57.7433	49.478	65.8431	67.5308	59.871			0.0705154	54.6196
1.4297	51.2914	63.486	41.2777	39.4813	51.8342	65.089	56.278	67.299	32.061	80.7464	91.2306	58.6359	46.5316	44.1872	69.1037	53.343	68.4438	76.7438	70.956			0.0769235	59.3695
1.5488	49.6049	62.096	47.5481	44.4431	58.2908	74.424	61.658	72.294	30.93	77.1496	90.0602	57.8578	50.3187	60.3513	79.8133	59.175	67.8049	81.8019	82.688			0.0833315	63.5952
1.668	52.2308	62.612	51.2612	46.303	64.2756	77.105	69.79	68.369	28.065	69.5418	89.9277	53.4286	56.2533	68.2623	86.0383	70.331	65.725	94.9492	97.753			0.089745	66.959
1.7871	54.304	61.232	47.0428	50.3447	69.4649	79.325	72.991	60.836	26.244	62.2122	83.4811	47.3382	62.407	70.0878	93.0785	82.509	71.0958	94.5673	105.021			0.096153	68.0833
1.9063	60.6551	55.139	44.484	55.7296	68.7177	85.421	78.343	58.051	27.877	52.1069	73.7015	43.0511	60.4766	67.6022	90.8859	94.014	67.0001	85.1464	111.176			0.102566	67.3462
2.0254	65.0424	53.657	44.5762	56.2061	66.1717	90.382	81.787	57.857	28.519	46.1418	65.2023	44.4274	57.8244	66.4909	88.367	107.399	67.9891	72.2694	109.036			0.108974	66.8077
2.1445	65.4409	51.042	41.358	60.4822	60.7343	92.914	81.132	61.438	28.428	40.3309	57.0568	41.7042	51.6162	60.3393	76.1292	108.082	68.2655	60.1409	102.753			0.115383	63.652
2.2637	65.28	47.442	38.6844	60.7519	57.1022	101.412	92.7	64.117	27.614	35.907	50.2044	38.1811	40.4473	58.4256	56.3049	99.992	64.5833	56.9233	89.989			0.121796	60.319
2.3828	62.771	45.815	39.3422	61.9577	54.5166	104.864	95.087	68.105	29.115	32.7418	49.9384	33.1858	33.2777	54.8346	40.6439	86.225	61.374	51.3464	80.538			0.128204	57.141
2.502	63.5429	39.855	35.5541	64.9823	51.542	110.884	99.821	66.25	29.911	31.6401	43.3649	28.2517	27.2237	48.719	29.3569	68.675	59.7763	48.7399	69.984			0.134617	53.5828
2.6211	62.1438	38.906	33.4808	68.4141	53.066	113.421	109.51	67.308	28.915	27.6224	40.6257	24.7013	21.8855	41.6382	24.3879	53.491	57.4539	44.2301	62.903			0.141026	51.2686
2.7402	65.747	37.941	32.3214	72.067	51.423	120.878	111.536	73.463	32.188	26.1767	36.4793	22.3827	17.8824	35.0302	21.9144	45.977	59.5537	39.2999	54.677			0.147434	50.3651
2.8594	58.9885	41.167	33.2765	77.4835	49.253	116.783	114.638	76.054	37.526	25.3809	36.0346	20.6444	15.5876	33.1527	19.4202	40.217	59.9636	35.6862	44.056			0.153847	49.227
2.9785	58.3376	41.058	28.4035	83.23	46.4896	112.407	119.08	80.585	44.444	27.9594	38.6988	16.6922	14.7384	29.5947	18.4882	37.037	61.9867	34.2786	35.45			0.160255	48.8926
3.0977	55.583	41.299	27.3612	76.7566	44.9196	122.489	125.366	87.415	52.642	31.1557	41.4255	14.1077	13.9313	26.7386	16.2089	39.925	54.8791	30.6696	31.082			0.166668	49.1555
3.2168	54.0681	41.624	28.2022	74.54	43.7814	124.441	127.189	86.835	54.999	33.6535	43.4669	13.8838	13.8521	24.7972	13.5629	38.364	50.4347	28.1595	25.661			0.173077	48.5008
3.336	55.6934	42.109	25.8594	78.3038	40.2525	128.93	126.431	93.894	55.65	35.1189	43.9656	12.6942	12.027	21.9761	12.5109	34.06	44.8566	28.2243	22.909			0.17949	48.1824
3.4551	57.9644	45.507	25.2007	74.9881	38.3641	131.883	121.046	101.49	50.674	38.6111	41.3356	12.5413	11.0734	19.5025	11.2318	28.191	40.0172	25.8071	20.806			0.185898	47.1702
3.5742	57.4908	47.882	25.973	66.9504	38.6286	135.591	114.94	103.052	51.089	39.2307	39.5903	12.8804	10.4632	18.1727	10.9851	22.166	34.9295	23.9388	18.057			0.192306	45.8953
3.6934	58.5093	50.74	26.0506	55.6005	38.2438	130.503	108.311	99.423	50.12	41.1091	38.9487	12.7701	11.4318	17.3748	11.0187	20.52	27.2879	21.3339	16.028			0.198719	43.9644
3.8125	59.3737	53.318	26.3788	49.2632	38.4769	127.047	95.171	94.825	52.025	42.322	36.9084	11.4268	10.427	15.2105	9.3191	20.392	23.8528	21.6588	14.102			0.205128	42.1841
3.9317	61.796	53.866	27.4019	44.2429	31.6203	117.122	84.962	86.365	57.547	43.6282	32.8697	10.2333	9.0913	14.1155	9.1703	21.563	20.7637	20.1864	12.627			0.211541	39.9564
4.0508	64.2061	56.494	26.3063	41.795	26.6991	112.742	78.378	75.47	66.184	51.2933	30.5134	7.555	10.0352	13.664	8.4375	24.862	19.0091	21.513	9.9			0.217949	39.2135
4.1699	64.7791	58.626	29.2122	38.0688	23.7468	112.468	69.93	68.885	72.302	56.1119	24.0509	7.0184	10.1809	12.8823	6.6999	24.744	14.3908	20.0708	10.99			0.224357	38.1662
4.2891	62.0248	59.241	27.5085	36.1526	21.0485	109.047	63.738	60.17	79.837	58.453	19.6301	5.911	9.7911	15.2252	7.7058	24.168	12.1282	19.0736	9.269			0.23077	36.8485
4.4082	58.3149	63.239	28.4941	32.6988	21.914	109.812	58.083	56.371	79.895	61.4331	17.2592	6.4915	10.3977	17.2924	8.302	22.953	10.9316	16.8532	8.569			0.237179	36.2792
4.5274	53.59	62.511	29.0376	31.4719	20.6228	104.325	47.074	50.143	86.364	66.4522	14.6485	5.4271	11.3815	15.697	6.9557	21.324	9.0736	14.4904	9.086			0.243592	34.7198
4.6465	47.7533	72.583	29.7141	30.181	22.0089	105.084	40.678	45.067	87.116	66.3999	12.5217	5.2757	10.9567	13.4268	6.4085	21.492	9.1124	14.068	8.873			0.25	34.1432
4.7657	48.6215	77.806	30.4267	28.2022	19.6721	103.313	39.024	38.522	89.028	63.4668	10.2111	5.5183	10.5218	15.0187	7.1334	21.361	9.7357	12.9936	9.548			0.256413	33.6907
4.8848	49.5145	87.649	32.0165	25.6941	17.7936	96.24	36.173	33.376	87.149	64.346	8.0129	6	10.3576	14.6642	6.6624	24.08	8.2294	11.649	10.304			0.262821	33.1532
5.0039	47.9932	93.843	32.7767	22.5013	19.5201	93.432	34.726	31.93	85.041	62.183	6.6293	6.4879	10.7725	15.5097	7.7927	22.358	8.0805	10.6971	8.889			0.26923	32.6928
5.1231	45.488	102.837	33.7081	21.0925	19.0007	91.151	36.908	28.518	82.322	61.1257	6.7158	5.389	11.0532	16.8484	6.8674	20.873	7.5892	9.134	9.245			0.275643	32.414
5.2422	41.0539	98.924	35.3604	19.0355	19.1662	81.649	38.145	26.317	81.877	61.6725	5.3959	4.7564	12.2454	17.638	6.631	17.413	7.4396	8.3144	10.17			0.282051	31.2213
5.3614	39.9421	110.322	33.6673	16.8109	19.9839	73.559	39.688	24.292	78.546	63.4524	5.7238	4.227	14.3873	20.6568	6.9729	16.327	7.0335	7.5291	10.873			0.288464	31.2628
5.4805	40.8003	115.803	29.8929	17.4183	18.0072	69.411	34.033	22.23	81.519	60.1453	4.666	4.6638	16.0089	21.0991	6.5998	14.718	7.1937	7.4822	11.182			0.294872	30.6776
5.5996	41.9024	119.473	28.3385	17.802	16.71	73.893	31.58	18.797	81.753	55.7344	4.0656	4.4572	16.3352	22.5693	6.443	11.355	7.3886	7.2709	11.781			0.301281	30.4026
5.7188	41.0953	118.72	29.078	20.0453	16.7941	66.876	33.917	17.479	83.777	54.5206	4.5713	3.7275	18.3275	24.1997	7.1513	9.772	7.075	5.6727	9.888			0.307694	30.1414
5.8379	41.8974	111.563	25.9286	21.6518	16.5356	58.896	33.581	15.267	85.068	55.5136	4.6164	3.8178	20.0291	23.7902	6.3656	8.235	6.5227	5.6604	10.94			0.314102	29.2568
5.9571	41.3196	111.46	23.7831	23.4925	16.144	48.35	33.519	14.715	83.594	57.5162	4.1635	3.8108	21.7236	25.955	6.4479	8.065	7.0836	4.5521	9.882			0.320515	28.7146
6.0762	46.8548	106.912	20.1074	25.517	19.6091	39.525	29.194	13.928	82.055	57.9516	4.4265	2.9944	20.0811	31.5753	6.0643	7.501	8.5275	5.2578	8.923			0.326923	28.2634
6.1953	46.2918	106.907	16.1534	25.4602	20.2605	36.939	26.116	13.64	89.136	57.9154	4.1916	3.2324	18.8944	30.0734	5.4851	7.515	8.3444	4.2076	8.254			0.333332	27.843
6.3145	48.8892	109.785	13.8778	22.6052	20.0765	34.189	24.426	14.036	89.432	60.0496	3.7919	2.1235	18.6294	29.664	4.3464	7.491	8.1087	4.5084	6.966			0.339745	27.5261
6.4336	47.0518	112.125	12.097	22.0151	23.7608	33.523	23.107	14.478	88.947	58.6874	3.6104	2.5017	19.6083	29.6145	4.7096	7.41	10.6006	4.022	5.795			0.346153	27.5613
6.5528	49.1384	107.689	9.5492	20.7331	25.4021	34.019	22.356	14.557	87.239	56.9255	2.3608	2.4579	16.7432	28.9303	3.8085	6.542	10.5576	3.4932	5.696			0.352566	26.7473
6.6719	43.5798	106.409	6.1037	19.2622	27.0941	33.802	23.322	14.146	82.907	56.4462	2.8366	3.1654	17.38	25.834	3.7551	6.105	11.5542	4.2246	5.782			0.358974	25.9847
6.7911	45.047	102.926	5.9323	16.7029	26.5032	39.059	23.253	11.489	79.64	56.6255	3.2086	2.6375	19.2695	25.6446	3.3504	6.685	12.0579	3.5847	6.211			0.365388	25.7804
6.9102	46.4972	101.415	5.0749	16.7188	26.2977	42.519	25.405	11.251	78.799	57.7677	2.9237	2.6417	20.3857	22.1297	3.4004	4.951	16.0614	3.9902	5.202			0.371796	25.9701
7.0293	48.9731	97.55	4.4677	14.6086	22.9227	43.012	25.839	13.226	74.289	55.3053	2.6654	3.047	18.6416	21.9884	3.8849	5.406	16.3093	3.4829	5.132			0.378204	25.3027
7.1485	51.2502	97.725	5.2178	12.6493	22.4008	45.93	25.957	14.705	81.596	59.2721	2.9424	2.3488	18.0145	17.5618	4.1773	5.675	18.0002	3.2838	5.075			0.384617	25.9885
7.2676	49.7844	95.427	4.7139	12.5223	20.4032	47.924	27.921	15.071	87.793	54.2952	2.0324	3.3899	19.4788	14.4568	3.6117	5.377	20.0288	3.3172	3.972			0.391026	25.8695
7.3868	45.6909	90.962	4.0235	12.4393	17.1576	45.49	25.232	15.915	92.055	49.5687	2.2477	3.0655	18.5237	14.1128	3.6243	5.009	22.7179	3.7528	4.229			0.397439	25.043
7.5059	43.7223	91.169	4.4049	12.5448	13.7127	45.136	22.612	15.328	94.744	45.9091	2.4989	2.5869	18.3157	10.3946	3.0371	5.298	21.6503	3.6459	3.719			0.403847	24.2331
7.625	38.0615	93.042	4.544	12.3296	12.4836	45.976	20.345	17.144	97.426	44.9178	2.509	2.3408	17.2052	8.3411	3.5582	5.639	19.9814	4.2905	3.839			0.410255	23.8934
7.7442	35.308	95.59	4.4401	15.1115	12.7595	40.587	20.807	16.083	100.881	46.0372	2.0923	2.478	18.6859	6.3598	3.7967	4.729	18.6399	4.0856	3.39			0.416668	23.7822
7.8633	33.6532	89.027	3.9672	20.3005	11.9271	37.997	18.772	16.215	102.69	46.889	2.6057	2.1794	16.8981	6.0974	2.9402	4.307	19.2499	3.8201	4.682			0.423077	23.3799
7.9825	30.9269	88.937	3.6413	25.0592	11.9739	33.218	16.988	16.188	103.532	48.5455	2.9258	2.1416	17.3673	4.9298	2.7072	4.958	20.5779	4.9572	4.301			0.42949	23.3619
8.1016	31.3381	87.154	3.8213	25.7009	12.2203	31.609	16.327	16.224	100.948	52.2492	2.7503	2.2452	19.3005	4.9074	2.7206	4.162	20.8198	4.4773	3.765			0.435898	23.3021
8.2207	32.8894	78.972	4.873	26.7225	11.2955	30.629	14.917	16.12	104.762	57.8537	2.0681	3.0027	17.6068	4.4886	2.8731	4.103	23.2515	4.6511	3.602			0.442306	23.4043
8.3399	32.9375	72.482	4.7876	29.17	11.6879	30.002	14.206	15.62	105.912	60.1038	2.4172	2.1127	16.5809	4.5728	3.1461	3.839	22.1053	4.9261	3.536			0.448719	23.1655
8.459	33.027	67.528	5.0645	28.6443	13.0234	34.525	12.708	16.384	105.594	61.2886	2.6491	2.2081	17.4613	4.276	2.7815	4.405	21.8274	5.1466	3.992			0.455128	23.2913
8.5782	31.0075	62.22	4.8313	27.814	12.7884	36.011	12.548	15.158	108.313	65.9162	3.0726	2.8063	16.1157	4.3997	2.8215	4.387	20.8497	5.9051	3.629			0.461541	23.1892
8.6973	27.6754	55.533	4.81	24.8413	14.3031	33.601	12.696	15.068	114.8	68.3865	2.866	2.3035	17.5641	4.1207	2.6234	4.396	20.4819	6.2657	3.739			0.467949	22.9513
8.8165	26.6212	51.126	4.9884	22.1824	16.1897	29.394	14.847	14.253	117.155	63.8653	2.4712	2.206	16.1832	3.6793	3.3298	3.96	18.8408	7.2128	3.734			0.474362	22.2231
8.9356	24.527	42.965	5.3331	19.5605	16.5899	25.626	12.428	13.97	119.91	60.7449	2.0456	2.3318	15.1579	4.245	2.6718	3.437	18.1592	6.3021	3.666			0.48077	21.0353
9.0547	21.6074	37.078	6.9345	21.5551	15.4124	20.056	13.207	14.053	110.233	60.209	2.2133	2.1663	15.0421	3.8301	2.6735	3.091	18.496	6.3514	3.57			0.487179	19.8831
9.1739	17.5458	28.405	6.2946	22.2257	15.5072	17.698	14.916	14.772	110.916	61.4695	2.2774	2.2276	15.4687	4.2838	2.4254	3.033	18.0854	7.4824	3.31			0.493592	19.3865
9.293	14.3142	22.739	7.1322	21.8609	16.8036	14.758	14.065	12.781	111.357	63.0025	1.9279	1.9193	15.9276	3.8903	2.0888	3.348	17.2943	7.4741	3.69			0.5	18.7565
9.4122	10.7154	16.312	7.8914	20.7133	17.6868	13.05	14.373	13.911	113.538	67.4578	2.2858	1.541	14.873	3.4841	1.8718	3.066	14.8076	7.7674	3.705			0.506413	18.3711
9.5313	8.2606	12.763	8.4218	17.8314	16.3411	11.943	14.111	13.564	119.716	69.292	1.9277	1.79	14.906	4.1143	2.2536	2.992	14.9693	8.2684	4.771			0.512821	18.3282
9.6504	6.4942	10.017	9.3927	18.7156	16.9896	12.635	12.191	11.988	119.512	70.0736	2.1543	1.7828	14.9353	3.6996	2.6462	2.922	13.4821	8.3427	4.423			0.51923	18.0209
9.7696	5.21	8.699	9.045	16.9576	14.9974	14.761	9.955	13.066	118.594	69.7136	2.0554	1.8164	12.7798	4.0843	2.7765	2.627	11.6407	9.2454	4.484			0.525643	17.5004
9.8887	4.1441	6.805	10.7068	16.0186	15.1675	14.2	9.037	12.659	114.218	69.307	1.9843	2.0849	14.1755	4.3266	2.3493	2.472	10.6608	9.7046	4.491			0.532051	17.0796
10.0079	3.7961	6.755	13.1516	15.0136	14.3386	14.175	10.272	14.107	122.232	69.6405	2.4379	1.7933	13.049	4.8296	2.102	2.849	8.3812	10.253	3.872			0.538464	17.5289
10.127	3.1679	6.581	15.5207	20.0942	12.9381	15.735	8.537	12.776	129.098	68.4397	2.1687	2.1346	13.3306	4.0996	2.1959	2.98	7.8686	9.2093	4.713			0.544872	17.9783
10.2462	3.378	6.17	17.2236	24.7534	12.9426	15.476	8.812	13.273	132.276	66.5451	2.565	2.0271	12.5738	4.6248	2.5346	2.556	7.3911	8.1148	4.459			0.551286	18.2998
10.3653	3.3799	5.606	17.7647	26.6586	12.3786	16.462	11.224	12.479	137.703	68.937	2.4629	1.6528	10.9126	4.4747	2.4071	3.17	7.3887	8.3301	4.449			0.557694	18.8337
10.4844	3.4502	6.276	21.019	25.7257	13.2347	15.494	10.56	11.993	142.855	73.0734	1.965	1.872	11.3542	5.2502	2.3996	3.234	7.0401	8.1329	5.941			0.564102	19.5195
10.6036	3.1311	6.165	22.8314	19.4638	11.8525	13.723	11.26	12.561	146.362	71.8474	1.9225	2.0557	9.8826	5.4807	2.3831	2.394	7.7662	8.1038	5.309			0.570515	19.1839
10.7227	3.5403	6.558	24.6158	17.1379	10.9881	14.792	12.282	11.927	142.762	73.9401	2.2876	2.2342	8.2197	5.1501	2.0883	2.697	6.052	8.5456	5.891			0.576923	19.0373
10.8419	3.59	6.211	24.0791	15.1246	10.2318	14.196	10.844	12.084	146.19	71.3957	2.188	2.2988	7.7628	4.1176	2.2455	2.773	6.5105	8.099	6.072			0.583337	18.7375
10.961	2.4855	5.741	23.918	13.2841	9.3924	13.348	9.558	11.18	151.5	66.9617	2.3978	2.1171	5.4905	5.5134	2.4793	2.552	6.6533	8.3389	6.456			0.589745	18.3877
11.0801	2.7661	7.015	26.7068	13.3324	8.7086	15.384	10.497	11.921	153.699	65.3138	2.0686	1.8866	4.2327	6.8305	2.4781	2.568	6.7848	8.2721	7.532			0.596153	18.842
11.1993	3.0968	7.799	24.748	11.171	8.7794	14.735	8.791	11.255	154.113	63.7874	1.917	1.9235	3.7939	6.3561	2.5792	2.064	6.7868	8.6436	7.839			0.602566	18.4305
11.3184	3.1991	7.344	23.7303	10.8058	8.2881	12.614	10.285	11.822	149.245	56.9938	1.9968	1.8615	4.5768	6.5571	2.7984	2.707	5.3461	9.9537	8.296			0.608974	17.8116
11.4376	2.5059	6.784	21.2845	9.6378	8.6932	12.237	8.272	11.118	138.4	49.0866	1.8614	1.4566	3.6131	7.3671	3.0387	2.698	5.5138	10.386	8.129			0.615388	16.4254
11.5567	2.6705	6.451	19.2208	8.95	7.7274	10.792	9.095	11.515	125.515	42.1511	1.7415	2.3752	3.5446	8.0916	2.9701	2.835	5.563	10.7264	7.048			0.621796	15.2096
11.6758	2.9045	6.399	15.9662	10.4517	7.8526	10.072	8.776	11.638	112.786	37.9523	2.0141	2.0169	3.3603	7.9963	2.1541	2.108	5.2759	10.093	8.051			0.628204	14.0983
11.795	3.2026	7.088	14.695	10.0169	9.3695	10.559	8.773	11.886	93.99	34.2123	2.2242	1.9825	2.9039	8.7458	2.4104	2.253	4.4502	11.7386	8.202			0.634617	13.0896
11.9141	2.8831	7.365	14.5147	8.9759	7.9519	9.321	7.181	9.97	69.919	32.4824	1.814	2.1976	3.4669	9.2309	2.3789	2.832	5.7133	12.1353	10.897			0.641026	11.6437
12.0333	3.0496	6.999	14.2768	9.6921	8.6946	9.331	7.317	9.655	55.476	35.2299	2.082	1.8084	3.0189	9.1655	2.4732	2.581	5.504	12.9073	11.866			0.647439	11.112
12.1524	3.4613	7.642	14.0894	9.1182	9.3847	9.64	7.007	8.719	39.701	36.4459	2.0415	1.8416	2.6095	9.6745	2.5422	2.382	5.4821	14.9735	12.834			0.653847	10.5047
12.2716	3.1941	7.769	13.5429	8.943	9.181	9.28	6.382	8.53	32.704	34.4323	2.0331	2.167	3.0001	10.6044	2.0577	2.686	5.0835	15.8484	13.707			0.66026	10.0603
12.3907	3.5293	9.07	13.7536	7.7402	7.8674	9.284	7.451	8.544	24.219	29.2475	2.3445	2.163	2.4661	9.2238	2.1717	2.797	4.6643	16.1064	13.978			0.666668	9.29583
12.5098	3.6567	8.468	13.0981	8.1608	8.5791	9.044	7.163	8.926	17.546	26.3172	1.4035	1.8511	2.646	9.3757	2.3719	2.443	5.9677	16.7564	15.111			0.673077	8.88869
12.629	3.8306	10.122	12.573	8.3331	8.8393	8.502	6.679	8.171	13.524	19.5133	1.4709	1.7188	1.9993	9.4782	2.6799	1.742	5.7653	19.1391	13.126			0.67949	8.27404
12.7481	3.2679	10.287	13.2564	7.0656	9.608	9.358	6.283	8.224	10.718	14.2698	1.3657	1.3416	2.6044	9.4576	2.8289	2.064	5.3429	17.7446	13.249			0.685898	7.80718
12.8673	4.0831	11.537	12.9137	7.3098	8.16	9.433	7.065	8.547	7.581	12.078	1.164	1.6876	2.7608	8.9485	2.9811	2.099	6.1293	16.8355	14.693			0.692311	7.68455
12.9864	4.5429	14.154	13.2338	7.5101	7.8704	8.643	6.46	8.674	5.534	9.2412	1.4849	1.8509	2.0442	8.4809	2.8049	2.046	5.3984	16.7737	15.334			0.698719	7.47796
13.1055	4.0006	15.727	11.4104	6.8998	9.3218	7.593	6.546	7.588	4.628	7.475	1.5022	1.528	2.0726	10.0791	3.1876	2.088	4.6446	16.1926	15.217			0.705128	7.24744
13.2247	3.907	16.753	9.3601	7.814	9.3665	7.802	6.627	8.584	3.613	6.8536	1.6312	1.8231	1.8714	11.3233	2.946	2.213	5.3386	14.3002	13.701			0.711541	7.14884
13.3438	3.9344	19.917	12.9137	6.8648	8.8589	8.597	6.538	8.266	3.009	5.0777	2.1488	1.9299	2.0451	11.4442	2.7455	2.323	4.5523	16.2927	14.124			0.717949	7.45168
13.463	4.2004	20.415	13.1903	7.356	9.0046	7.181	6.58	8.19	3.439	4.065	1.8153	1.8271	2.4434	10.8417	3.2053	2.247	4.3209	17.1311	13.494			0.724362	7.41827
13.5821	4.3015	24.23	12.3822	6.9021	11.9955	6.772	7.024	7.924	3.465	3.6736	1.8493	1.8347	2.2301	11.582	2.8575	2.865	4.8843	14.4319	11.54			0.73077	7.51288
13.7012	3.5808	27.872	11.2643	6.9151	13.0156	6.574	6.682	7.202	2.991	3.4366	2.34	1.8823	2.1806	11.5896	3.0688	2.663	5.7704	14.6522	12.4			0.737179	7.68844
13.8204	5.0424	26.635	11.496	6.9017	15.3558	6.266	6.815	6.446	2.369	2.6588	1.9901	1.7753	1.9578	12.5918	3.5636	2.897	6.3499	14.7881	11.99			0.743592	7.78365
13.9395	3.7958	26.517	12.1405	7.3895	19.695	6.107	7.925	7.083	3.109	2.8692	2.6172	2.1988	2.1832	13.5676	3.72	2.811	6.0494	15.4624	13.313			0.75	8.34493
14.0587	4.058	26.475	13.9938	7.2213	24.5158	5.297	7.994	7.263	2.603	2.5651	2.3528	2.072	2.1803	15.3134	4.7036	2.265	6.5777	17.6566	13.253			0.756413	8.86107
14.1778	4.344	25.351	12.5491	6.7726	27.8332	4.975	7.428	7.268	2.401	2.3488	2.4646	1.9064	2.7698	17.2189	4.3426	2.708	6.8622	15.8863	11.781			0.762821	8.80055
14.297	4.9019	21.512	13.4529	6.1741	25.6307	5.176	8.127	6.397	3.047	2.7181	2.7245	2.2491	2.3397	20.4437	5.3268	2.018	6.503	17.0279	13.105			0.769235	8.88813
14.4161	4.6303	20.219	12.9521	5.861	21.6998	4.984	10.109	6.924	2.885	2.5549	2.3384	2.1719	2.3678	20.4743	6.0762	2.374	7.5618	17.5083	12.552			0.775643	8.74967
14.5352	4.7127	17.701	11.6564	6.4996	19.0335	5.049	11.39	7.71	2.263	2.3845	2.1448	1.9399	2.182	22.2162	7.7936	2.365	7.0901	14.4239	11.419			0.782051	8.41969
14.6544	5.5138	13.986	10.1395	6.3249	16.8675	3.967	11.168	7.327	2.682	2.0254	2.1156	2.163	2.1674	24.7704	8.8399	2.397	7.4566	12.9034	9.904			0.788464	8.03781
14.7735	5.8732	11.922	9.717	7.5296	17.419	4.149	12.151	6.956	1.776	2.2206	2.7482	2.4754	2.5592	25.5214	11.6788	2.835	5.9361	11.6007	11.241			0.794872	8.2268
14.8927	6.4436	11.103	8.9222	7.8885	16.5204	4.012	13.358	7.538	1.949	2.2978	2.5212	2.9361	2.8755	27.6057	16.9866	3.391	6.0906	12.6017	9.694			0.801286	8.67026
15.0118	8.0457	11.069	9.717	8.0712	18.4737	3.573	12.66	6.929	2.341	2.0066	3.3771	2.5524	2.4726	30.3356	22.7948	3.134	6.5465	11.9404	9.28			0.807694	9.22735
15.1309	8.6575	9.932	10.0593	7.1127	18.9771	3.106	11.538	7.102	2.357	1.5986	2.7553	3.4126	3.9404	34.3736	30.1116	4.061	7.2655	11.8027	9.158			0.814102	9.85899
15.2501	9.6672	11.293	10.4491	8.8363	21.6831	2.735	11.638	7.36	2.393	2.0556	3.7669	5.4204	4.2293	36.7747	33.2798	5.099	6.7885	9.926	8.454			0.820515	10.6236
15.3692	11.5907	8.492	12.0723	10.4108	25.9544	2.682	13.356	7.929	2.398	2.9144	3.841	6.3835	4.0375	39.8778	33.2387	5.733	8.1955	10.5717	8.46			0.826923	11.481
15.4884	12.4837	9.07	15.9685	11.637	25.8369	2.414	12.097	8.052	2.476	3.2647	3.2263	9.7857	6.0337	45.9444	30.7816	9.135	8.2093	10.4465	8.898			0.833337	12.4084
15.6075	12.9971	10.505	19.6096	14.8279	25.5559	2.814	11.906	8.172	2.487	2.5692	3.6916	14.7256	6.1077	47.2328	22.9422	13.026	10.267	11.0176	9.076			0.839745	13.1332
15.7266	14.1218	10.368	24.233	18.4166	22.4796	2.612	10.553	8.726	2.707	2.2737	3.505	19.5541	8.6044	39.7046	13.1916	19.484	11.3443	9.147	7.507			0.846153	13.0807
15.8458	16.6301	11.13	27.4449	19.1466	16.7605	2.089	8.645	7.546	2.526	2.8961	4.7562	22.9628	12.6069	29.0134	7.4117	23.564	14.9959	9.1094	6.634			0.852566	12.9404
15.9649	16.2219	10.631	30.2561	19.7296	13.1555	2.253	8.881	7.706	1.979	3.2949	6.5442	19.057	16.4392	20.5313	4.3384	20.084	15.3923	8.6442	6.669			0.858974	12.2004
16.0841	17.0693	9.833	30.3583	19.2824	9.892	2.332	7.536	6.699	2.667	3.4573	8.5177	13.1194	19.3845	12.3647	2.3331	14.87	17.2371	8.8088	5.864			0.865388	11.1382
16.2032	18.4113	9.881	30.9658	13.5719	7.243	2.614	5.921	7.971	3.112	3.1892	10.2693	7.198	18.5022	6.3261	1.6208	9.842	19.7196	8.1531	5.87			0.871796	10.0201
16.3224	19.7005	8.526	30.1075	10.266	5.5113	2.525	7.698	6.747	3.616	3.0272	11.0434	4.5073	17.6504	3.8735	1.0857	6.583	24.911	9.0175	5.383			0.878209	9.56733
16.4415	22.251	6.989	28.1918	8.6752	4.6518	1.704	5.929	7.238	3.615	4.0968	9.5777	2.6907	13.1739	2.0878	1.0744	3.739	35.6865	8.5373	5.457			0.884617	9.22978
16.5606	23.8978	6.377	27.2906	7.5148	4.4328	1.466	4.571	8.14	3.39	5.2697	7.2678	1.5485	8.0537	1.4116	0.664	2.501	42.248	7.573	6.172			0.891026	8.93628
16.6798	21.0599	7.547	27.1083	6.3861	4.7918	1.433	3.209	8.325	3.843	6.053	5.9904	1.1341	4.3476	1.4259	0.6869	2.158	39.5611	6.4892	6.328			0.897439	8.30933
16.7989	18.4934	6.473	25.2349	6.0198	4.7067	1.199	2.241	8.38	3.917	8.8395	4.5967	1.0349	3.2323	0.7655	0.4693	1.68	26.7556	6.3649	7.531			0.903847	7.25971
16.9181	17.9863	6.073	25.1949	5.4942	4.2069	1.43	2.31	9.392	4.253	9.622	2.985	0.8671	1.5239	0.859	0.2471	1.153	12.6573	6.2452	10.387			0.91026	6.46773
17.0372	16.5175	6.543	22.3626	6.1024	5.2966	0.745	1.779	9.267	4.779	10.5003	2.2401	0.8287	1.624	0.5286	0.4202	0.814	5.8206	6.6499	13.531			0.916668	6.12366
17.1563	13.4338	5.985	20.3487	6.9405	4.8097	0.619	1.447	8.943	4.508	10.8074	1.5008	0.7961	1.097	0.5381	0.4514	0.764	4.2378	8.4648	18.207			0.923077	5.99469
17.2755	9.5542	4.981	17.6874	8.1084	3.6687	0.586	1.495	9.848	6.021	9.2767	1.3158	0.9164	0.6495	0.3575	0.2572	0.443	3.167	10.7417	24.798			0.92949	5.99329
17.3946	7.8639	5.691	15.4098	10.5395	3.3278	0.75	1.02	11.937	5.353	7.0761	1.1473	0.6048	0.4829	0.358	0.1754	0.322	2.2304	14.6396	29.476			0.935898	6.23182
17.5138	6.483	5.539	13.2001	12.4289	2.7452	0.61	0.91	11.021	4.852	5.7927	0.6424	0.3722	0.2259	0.3551	0.0947	0.298	2.3315	24.8643	30.884			0.942311	6.50789
17.6329	4.607	6.06	10.1017	11.9698	3.0672	0.799	0.675	10.211	5.762	3.7829	0.4816	0.337	0.2606	0.2292	0.146	0.357	1.5135	33.5476	30.996			0.948719	6.5739
17.7521	3.672	6.059	8.8162	11.314	2.8481	0.429	0.414	8.343	4.956	2.2988	0.6554	0.3206	0.607	0.2023	0.138	0.192	1.4377	36.4138	24.033			0.955133	5.95526
17.8712	2.8908	6.669	8.2226	9.8412	2.5432	0.51	0.508	6.439	4.746	1.7521	0.3347	0.3357	0.7858	0.3837	0.1234	0.225	0.9409	29.8646	15.526			0.961541	4.87588
17.9903	1.8874	6.474	8.1748	8.3584	2.254	0.412	0.211	4.498	3.951	1.1615	0.3714	0.2596	0.3416	0.2416	0.0493	0.301	0.7791	15.5603	9.894			0.967949	3.43053
18.1095	1.1752	5.964	7.798	6.7763	1.497	0.199	0.463	4.406	2.816	0.9414	0.4849	0.0814	0.2263	0.2015	0.0158	0.188	0.9061	7.4025	5.723			0.974362	2.48765
18.2286	0.9079	6.229	7.803	5.9972	1.3931	0.106	0.329	3.542	2.231	0.8529	0.3957	0.4166	0.082	0.2997	0.0629	0.279	0.5176	4.4959	3.507			0.98077	2.07618
18.3478	0.6348	6.031	7.4524	5.067	1.2631	0.28	0.234	2.563	1.595	0.6879	0.2971	0.2124	0.0992	0.235	0.1037	0.025	0.2966	2.9775	2.409			0.987184	1.70862
18.4669	0.8077	4.907	5.6944	5.1116	0.8991	0.335	0.187	2.291	1.531	0.7722	0.2664	0.071	0.2255	0.1336	0.0805	0.084	0.3325	2.0516	1.672			0.993592	1.4449
18.586	0.6397	4.668	5.5974	5.277	0.8611	0.304	0.215	1.577	1.345	0.5565	0.3019	0.1441	0.1165	0.1083	0.0853	0.092	0.2425	1.6494	1.782			1	1.34541

## Sheet: Image23
X0	Y0	Y1	Y2	Y3	Y4	Y5	Y6	Y7	Y8	Y9	Y10	Y11	Y12	Y13	Y14	Y15	Y16	Y17	Y18	Y19	Y20	Y21			Ap-Ba	Average int.
0	96.942	140.82	95.367	142.089	129.441	117.177	148.662	87.663	48.6451	78.022	48.625	23.956	30.788	48.678	15.515	24.473	10.445	10.88	17.822	17.58	46.198	27.6769			0	63.9757
0.1191	109.963	148.556	94.34	142.749	133.444	122.191	153.852	86.136	49.3988	83.46	56.95	23.041	34.172	52.023	17.608	27.831	10.541	10.381	16.958	17.598	48.94	29.5314			0.00567984	66.8029
0.2383	121.508	153.708	98.322	151.187	137.189	128.8	153.18	87.339	53.1184	84.529	63.76	26.882	37.682	55.796	18.919	30.11	14.96	10.756	18.753	19.373	49.979	32.0682			0.0113644	70.3599
0.3574	127.792	152.029	99.302	160.513	143.436	134.303	156.83	92.928	54.9846	85.386	67.285	29.215	37.917	61.021	22.163	33.345	16.455	11.809	19.432	20.317	50.829	34.8022			0.0170443	73.277
0.4766	141.705	150.661	96.72	159.383	151.835	138.06	166.959	98.603	57.9659	87.876	74.835	30.261	38.792	63.514	23.982	34.383	20.716	12.983	21.596	21.766	52.107	36.4632			0.0227289	76.4166
0.5957	151.646	152.461	95.467	170.828	150.405	141.253	174.806	104.496	60.148	92.422	84.302	36.805	37.378	67.896	28.893	39.338	25.449	14.136	26.511	26.562	55.913	42.3767			0.0284087	80.886
0.7148	153.98	158.932	99.644	187.365	147.336	146.272	183.339	114.397	60.8297	98.187	97.467	47.955	44.307	73.909	32.618	39.442	29.086	20.161	33.189	32.851	58.895	50.2904			0.0340886	86.8387
0.834	159.275	164.957	105.473	190.083	153.99	154.763	186.772	132.6	67.1217	105.138	100.693	55.289	50.293	83.05	34.815	43.843	37.939	26.938	39.52	42.339	59.917	60.5982			0.0397732	93.4276
0.9531	159.798	171.807	107.922	191.307	158.479	160.531	191.412	129.679	70.1085	108.985	106.534	67.232	63.896	81.557	36.985	47.015	45.062	32.343	49.366	57.853	59.66	69.7785			0.045453	98.5141
1.0723	153.712	181.305	114.628	203.286	166.42	164.971	192.709	142.087	70.2811	114.783	113.028	76.345	78.806	78.379	42.211	47.114	57.804	45.275	56.828	75.636	63.13	79.7622			0.0511376	105.386
1.1914	156.81	186.724	120.59	198.831	168.801	173.759	195.01	148.668	70.9697	120.983	123.308	83.933	91.451	75.729	43.95	48.571	70.868	63.844	66.415	91.04	69.514	79.3947			0.0568175	111.326
1.3106	149.588	190.986	126.584	201.65	173.815	179.933	199.799	146.536	71.2343	122.644	127.279	93.39	100.609	73.743	43.184	54.633	81.076	81.654	79.572	103.596	76.828	84.5339			0.0625021	116.494
1.4297	153.472	185.768	131.348	210.298	169.556	174.657	202.274	138.483	75.3766	123.801	131.763	100.015	113.586	72.788	42.105	56.748	95.502	103.013	87.859	112.642	77.578	84.4298			0.0681819	120.139
1.5488	151.216	188.054	142.451	211.388	165.37	173.386	200.346	125.072	72.2346	128.849	140.412	109.627	121.769	68.841	43.657	59.838	106.269	127.821	105.706	116.831	76.615	89.9598			0.0738618	123.896
1.668	149.399	186.527	152.064	216.451	174.5	166.672	199.26	109.356	71.0494	122.673	145.897	116.344	130.241	68.161	48.357	66.64	120.408	139.279	119.845	125.37	76.557	89.9381			0.0795464	127.045
1.7871	148.076	190.118	160.713	223.958	176.874	155.905	190.62	95.102	77.628	124.92	147.513	121.504	127.461	63.723	54.751	73.184	124.607	151.435	131.918	134.546	81.614	88.3747			0.0852262	129.297
1.9063	146.126	188.798	169.726	226.481	176.038	151.915	186.721	73.736	77.06	125.123	155.363	127.134	124.215	60.043	66.024	76.438	126.351	154.573	147.681	144.333	88.579	86.1958			0.0909108	130.848
2.0254	154.927	188.312	176.902	224.606	172.585	146.874	183.117	63.432	75.0794	125.892	162.411	134.907	118.531	66.796	73.516	85.172	128.574	148.148	151.339	138.936	94.159	80.0771			0.0965907	131.559
2.1445	152.353	189.238	182.271	229.143	170.223	143.148	186.184	55.953	74.2486	124.341	157.675	137.374	112.069	62.843	82.317	94.944	126.136	125.61	154.298	133.584	99.662	80.1433			0.102271	130.625
2.2637	153.534	185.163	186.955	227.918	169.437	148.854	173.404	48.316	68.5858	122.749	152.999	134.251	106.479	63.807	99.05	97.967	119.938	101.336	152.102	119.5	104.413	76.803			0.107955	127.889
2.3828	152.922	181.059	185.04	224.001	158.536	148.077	163.648	42.078	64.9618	123.566	146.618	136.242	96.349	68.876	112.605	104.553	105.347	75.747	151.154	95.897	108.035	72.6395			0.113635	123.543
2.502	156.105	180.174	186.219	218.924	146.722	153.764	147.676	39.358	62.2338	121.241	144.597	132.912	88.686	79.327	131.355	106.804	96.181	58.101	145.226	67.451	112.384	72.3361			0.11932	120.353
2.6211	152.587	185.73	187.408	216.135	143.69	150.804	135.667	31.889	61.8543	123.199	140.034	137.816	77.023	87.608	146.39	108.031	79.396	46.113	129.981	45.62	118.42	71.3588			0.124999	117.125
2.7402	156.339	186.734	185.38	218.735	139.173	148.417	126.083	28.944	60.0222	122.154	133.968	129.892	63.882	98.273	155.789	99.868	64.896	34.831	108.504	26.919	122.382	72.3767			0.130679	112.889
2.8594	158.67	185.797	188.041	206.429	130.77	150.543	114.91	27.036	54.8711	126.894	136.149	129.009	62.489	109.838	167.978	87.36	49.992	26.246	79.812	19.561	127.027	77.4696			0.136364	109.859
2.9785	155.958	186.324	190.039	206.453	124.82	145.366	107.031	25.381	51.4291	121.155	137.186	120.271	57.687	117.113	174.778	72.161	36.742	19.899	59.964	13.744	126.632	82.393			0.142044	106.024
3.0977	151.95	178.351	187.276	200.854	118.807	141.73	95.995	24.731	48.1976	119.813	138.335	112.096	52.682	126.833	174.602	56.152	26.277	15.025	47.447	10.028	131.317	86.6941			0.147728	102.054
3.2168	152.369	176.344	184.22	196.955	114.382	124.517	88.437	23.872	42.8063	117.847	135.819	106.997	49.055	137.363	172.462	45.772	20.016	11.157	37.034	8.128	130.216	91.2237			0.153408	98.4996
3.336	154.353	170.46	171.452	197.343	100.841	108.651	79.151	21.3	40.5904	117.462	144.076	94.347	49.346	147.418	172.299	39.624	16.287	9.22	27.646	7.599	127.916	95.7704			0.159093	95.1433
3.4551	150.627	156.214	150.783	193	90.266	95.957	70.054	21.267	39.9647	116.434	147.116	91.418	48.613	151.772	154.495	35.943	12.322	7.579	24.568	6.336	119.201	95.2039			0.164773	89.9606
3.5742	148.116	139.608	126.351	183.65	78.29	77.48	64.264	21.207	36.4804	109.322	140.029	86.262	49.569	156.018	145.218	27.922	10.389	5.886	21.784	4.793	105.995	87.9951			0.170452	83.0286
3.6934	149.889	116.198	93.977	167.417	65.093	63.42	57.081	17.035	35.2279	107.542	135.83	80.857	46.659	159.635	126.169	23.49	8.132	4.832	23.372	5.845	98.955	81.3073			0.176137	75.8165
3.8125	148.521	90.616	67.394	149.271	52.434	51.837	48.503	16.708	33.191	100.874	131.201	80.084	46.196	154.351	103.079	21.972	7.802	4.624	22.701	5.539	90.459	72.007			0.181817	68.1529
3.9317	141.57	67.993	48.41	122.047	42.962	42.422	40.826	16.507	33.5248	92.343	119.711	75.396	45.579	143.284	84.689	20.979	6.963	3.503	22.622	5.946	82.944	63.737			0.187501	60.1799
4.0508	128.532	46.428	33.98	99.982	35.679	32.554	37.559	15.802	32.6029	85.662	106.411	75.195	47.534	128.417	60.98	20.937	6.519	4.352	22.375	4.86	67.574	60.3532			0.193181	52.4676
4.1699	111.498	30.829	26.181	80.033	28.992	25.254	30.728	14.059	31.3428	81.504	101.137	70.746	48.56	114.913	45.599	19.908	6.286	3.741	21.541	5.291	58.951	59.957			0.198861	46.2296
4.2891	95.648	19.498	20.009	63.126	26.493	20.754	25.47	13.825	29.0921	69.802	92.193	67.367	48.421	101.096	37.627	19.02	5.538	3.618	19.545	5.215	48.452	56.0897			0.204546	40.359
4.4082	74.406	12.15	15.295	46.745	21.482	17.652	23.518	14.049	25.5348	61.654	80.512	65.648	45.703	85.905	29.454	17.985	4.321	2.996	16.535	5.305	35.953	46.528			0.210226	34.0605
4.5274	52.262	9.002	13.115	35.424	20.321	15.907	20.445	12.382	27.7949	54.923	69.351	62.901	46.058	76.839	27.407	17.99	3.448	3.157	15.829	3.976	24.518	38.8737			0.21591	29.6329
4.6465	36.369	7.3	11.262	24.864	15.919	14.571	17.41	11.869	28.4382	50.685	62.379	61.633	44.975	67.535	24.769	18.332	3.322	3.06	14.893	3.716	17.647	32.691			0.22159	26.0745
4.7657	27.968	5.832	9.548	18.959	14.125	13.866	17.194	9.929	30.4402	42.545	54.943	57.936	45.842	60.667	22.707	18.718	2.886	3.067	15.546	4.147	11.073	23.9794			0.227275	23.269
4.8848	21.449	4.813	11.032	15.872	12.775	11.644	16.559	10.37	29.871	33.494	47.211	55.211	45.251	52.804	19.173	18.993	2.897	2.595	14.494	3.314	9.62	16.6118			0.232955	20.7297
5.0039	18.193	4.978	9.052	16.22	12.522	11.509	14.076	11.042	29.5736	28.731	39.019	50.593	45.268	48.57	19.43	19.624	2.41	2.153	14.561	3.991	7.725	14.5397			0.238634	19.2627
5.1231	18.144	5.026	10.213	12.971	10.622	12.353	13.907	8.951	29.5628	27.266	33.541	52.231	44.073	44.058	15.554	18.998	2.408	2.623	13.77	3.648	6.757	13.6379			0.244319	18.1961
5.2422	17.357	3.458	11.301	13.331	10.756	11.438	12.133	9.084	30.7212	25.582	29.018	44.567	41.454	40.602	13.785	20.015	2.85	3.048	15.066	3.129	6.705	12.3884			0.249999	17.1722
5.3614	15.625	3.518	9.646	12.168	10.02	11.93	11.394	9.597	30.9135	24.994	23.974	39.484	39.18	34.428	12.623	19.672	2.536	2.477	14.446	2.986	6.426	11.5289			0.255683	15.8894
5.4805	14.93	3.656	8.052	12.677	10.225	10.952	9.811	8.572	29.8814	25.132	23.184	36.187	36.785	32.136	10.575	19.926	2.212	3.106	13.742	2.661	6.012	10.9307			0.261363	15.0611
5.5996	13.926	3.139	8.101	10.805	11.708	10.615	9.288	8.801	29.5941	23.438	20.558	33.99	36.081	28.863	10.095	20.436	1.959	2.458	13.571	3.18	6.857	9.1751			0.267043	14.3926
5.7188	13.305	3.735	8.862	10.375	12.905	10.075	8.938	9.051	27.7293	22.931	18.829	29.23	35.423	26.574	9.531	20.33	2.294	2.745	13.197	3.092	5.749	8.4844			0.272728	13.7902
5.8379	13.944	4.166	9.865	10.273	13.879	9.422	8.418	8.265	30.0416	20.998	17.85	27.184	32.559	24.477	7.902	19.246	2.061	2.612	13.525	3.11	5.187	10.1286			0.278408	13.4142
5.9571	13.384	3.479	9.785	9.555	15.03	9.382	8.61	7.774	30.1529	16.668	15.709	25.767	30.787	20.17	8.716	20.25	1.678	2.553	15.698	3.051	5.769	9.6602			0.284092	12.8922
6.0762	12.773	3.451	10.261	10.087	14.917	7.906	8.008	8.927	28.7753	14.861	13.551	25.855	29.089	19.005	7.429	17.844	2.25	2.313	18.008	2.8	5.624	11.5469			0.289772	12.5128
6.1953	10.925	3.273	11.025	9.899	15.428	7.552	6.842	9.738	26.2287	13.016	12.664	21.927	27.113	17.507	6.922	14.865	1.703	2.291	16.909	3.193	5.493	9.2032			0.295452	11.5326
6.3145	10.041	3.124	12.512	8.846	16.131	7.548	8.954	8.704	29.174	12.679	12.631	18.997	24.943	15.292	6.336	15.382	1.555	2.243	17.488	2.382	6.045	8.9688			0.301136	11.3625
6.4336	9.31	3.962	12.357	8.674	15.325	7.848	7.814	9.531	27.2028	11.99	11.137	16.458	25.105	13.511	6.003	15.272	1.756	2.74	17.484	2.837	5.169	8.9074			0.306816	10.927
6.5528	7.988	4.676	14.626	9.425	13.894	7.381	7.491	9.873	24.69	12.626	11.461	12.354	22.409	14.003	5.577	14.006	1.717	2.753	16.177	3.245	4.789	9.0732			0.312501	10.4652
6.6719	7.414	5.7	15.687	9.46	12.076	7.042	6.693	9.254	22.6982	11.826	11.253	10.669	21.957	11.301	5.07	12.451	2.083	2.791	16.221	2.564	5.484	7.9314			0.318181	9.89207
6.7911	7.158	6.871	16.219	9.723	12.752	5.763	7.955	10.424	22.2965	12.856	9.664	9.5	19.77	11.542	5.329	11.508	2.009	3.058	13.405	2.332	5.35	6.8955			0.323865	9.65364
6.9102	6.76	7.613	16.918	10.053	14.346	6.814	8.176	11.142	21.6498	11.58	10.47	7.824	18.95	10.064	5.115	13.582	1.889	2.347	13.483	2.125	5.435	7.6143			0.329545	9.725
7.0293	5.587	8.791	17.341	10.487	13.242	6.725	7.656	11.289	21.2819	11.547	9.262	7.152	14.752	9.975	3.655	14.657	2.156	2.547	11.856	2.395	5.37	8.1791			0.335225	9.35923
7.1485	5.676	10.357	13.874	11.36	11.793	6.221	7.605	13.765	22.0654	11.877	10.184	7.476	14.75	9.076	4.202	14.354	1.939	2.657	11.049	2.606	6.494	7.761			0.34091	9.41552
7.2676	5.418	9.883	11.308	9.798	10.468	6.134	8.641	13.28	23.3223	12.041	9.933	7.113	12.773	9.056	4.363	13.81	2.069	2.502	11.52	2.805	6.123	7.2497			0.346589	9.07318
7.3868	4.486	11.625	11.423	10.399	9.711	6.996	8.753	14.464	24.4123	11.486	10.124	7.035	11.466	8.626	3.456	14.043	2.151	2.556	14.349	2.567	6.231	7.174			0.352274	9.25151
7.5059	3.637	10.431	9.925	10.905	8.731	6.088	8.836	16.482	19.4183	11.391	8.822	6.776	11.039	9.345	3.639	13.817	1.905	2.629	14.089	2.468	5.374	6.5557			0.357954	8.74105
7.625	4.113	10.683	9.787	11.403	10.55	5.936	9.743	14.097	17.5485	11.265	8.907	8.027	9.092	8.885	3.906	12.008	2.036	2.401	13.192	1.988	5.216	7.6769			0.363634	8.56638
7.7442	3.676	10.281	8.885	10.826	9.98	5.245	10.289	15	16.8702	10.628	9.878	8.466	9.891	8.915	3.146	13.073	1.842	1.927	14.005	2.588	4.904	7.6108			0.369318	8.54209
7.8633	3.74	11.336	8.744	12.423	10.059	5.843	10.479	14.117	15.5775	10.601	9.842	8.698	10.012	11.582	3.912	11.308	2.353	1.927	13.247	2.705	4.986	5.9764			0.374998	8.61218
7.9825	3.363	11.084	8.43	13.117	8.838	5.557	10.906	14.868	15.3533	10.389	10.742	9.047	7.986	11.715	3.958	10.382	2.165	2.135	12.297	3.024	5.456	5.7833			0.380683	8.48162
8.1016	3.641	10.02	7.438	13.17	8.653	5.311	12.779	16.151	13.9881	9.543	11.401	8.563	7.055	12.534	4.316	11.098	2.104	2.658	12.065	2.508	5.398	8.1075			0.386363	8.56825
8.2207	3.59	10.488	8.297	15.381	8.474	4.998	12.867	15.061	14.2654	10.648	10.725	7.24	8.461	10.437	3.852	11.751	1.858	2.815	10.776	2.705	5.26	8.8389			0.392043	8.58129
8.3399	2.543	10.87	7.334	14.467	8.535	4.7	11.898	15.066	12.4598	9.246	10.986	7.298	7.873	11.071	4.424	11.562	1.637	2.431	11.722	2.525	4.589	9.2991			0.397727	8.29709
8.459	3.139	12.361	6.801	14.195	7.958	4.75	12.109	16.044	12.8518	9.226	10.3	7.615	7.557	11.82	3.75	11.179	1.719	2.774	11.599	2.165	5.035	9.7037			0.403407	8.39325
8.5782	3.274	10.929	6.536	13.68	6.194	4.863	13.916	14.162	12.2006	9.454	9.678	8.115	7.507	9.249	3.651	11.817	1.465	2.304	12.048	2.194	4.8	9.2109			0.409092	8.0567
8.6973	3.32	10.879	5.879	13.173	5.429	5.004	15.053	12.388	11.5764	7.879	8.242	8.293	6.672	8.418	3.565	13.381	1.684	2.152	11.357	2.842	4.934	9.4866			0.414771	7.80032
8.8165	3.487	11.377	6.209	14.266	6.356	4.391	14.374	11.847	12.1922	7.511	7.151	8.097	6.607	7.783	3.467	12.096	2.069	2.703	11.343	2.553	4.762	11.5047			0.420456	7.82481
8.9356	3.219	10.954	6.101	16.792	6.053	4.803	13.805	10.151	10.9049	9.112	6.948	7.73	7.206	6.208	4.409	12.562	1.739	2.948	12.126	2.287	4.663	10.882			0.426136	7.80013
9.0547	2.918	11.818	6.235	17.657	5.107	4.272	14.719	10.561	11.1464	9.308	6.043	7.535	8.763	7.126	4.618	12.467	1.539	2.93	11.448	2.492	4.364	11.7832			0.431816	7.94771
9.1739	2.743	12.051	6.399	17.524	4.045	4.793	14.318	11.032	10.3573	8.124	7.349	8.606	6.598	7.102	3.471	11.234	1.409	2.466	11.68	2.784	5.131	11.6835			0.4375	7.76817
9.293	2.386	12.178	6.015	19.889	4.268	4.821	16.385	10.037	11.3318	8.803	8.122	7.851	6.197	6.802	4.159	11.826	1.921	2.188	13.025	2.552	4.641	11.2594			0.44318	8.02987
9.4122	2.517	12.315	5.63	22.049	3.965	4.467	17.543	8.883	9.6424	8.933	6.908	8.247	5.935	6.532	3.924	12.71	1.77	2.427	11.448	2.479	3.954	12.0626			0.448865	7.92459
9.5313	2.655	13.671	5.127	23.647	4.263	4.433	17.754	9.579	9.6883	8.84	6.388	8.084	7.099	7.136	3.909	14.591	1.592	2.805	12.583	2.637	4.906	11.6505			0.454545	8.3199
9.6504	2.271	14.602	4.881	23.183	4.015	4.375	17.741	7.678	10.866	8.799	6.927	7.802	7.575	7.207	5.039	12.887	1.596	2.457	12.311	2.892	4.259	13.5855			0.460224	8.31584
9.7696	2.678	17.305	5.858	24.999	3.865	3.739	19.891	7.54	11.7235	9.663	7.42	8.438	8.34	6.693	4.53	13.244	1.756	3.004	12.022	2.967	4.631	11.7428			0.465909	8.72951
9.8887	2.219	16.762	6.149	27.16	4.191	4.088	20.471	7.191	11.5384	11.144	7.909	9.668	10.067	6.504	4.349	11.915	1.849	2.719	11.754	3.207	5.262	10.6405			0.471589	8.9435
10.0079	3.183	14.968	6.762	27.265	4.032	4.501	19.362	6.605	11.2944	10.929	8.248	8.104	9.032	6.915	4.959	13.117	1.524	2.886	10.74	2.703	4.896	12.3378			0.477273	8.83469
10.127	2.911	16.605	6.205	29.222	3.909	4.288	17.749	5.495	12.1019	9.708	7.864	8.387	10.236	5.929	5.142	12.66	1.7	3.579	10.414	2.283	4.115	12.1315			0.482953	8.75611
10.2462	2.14	17.769	7.712	28.719	3.349	4.495	17.209	4.561	11.2254	11.399	8.906	9.708	9.574	6.396	5.083	11.487	1.936	2.978	11.481	2.694	3.665	12.1466			0.488638	8.84695
10.3653	2.757	17.396	7.474	29.081	3.001	5.097	15.426	5.818	11.5166	10.76	9.067	9.942	10.264	5.657	4.912	10.691	2.264	2.05	12.246	2.926	4.237	12.9601			0.494318	8.8883
10.4844	2.391	18.323	7.658	29.429	2.969	6.399	14.075	5.036	11.4587	11.928	9.176	9.63	10.419	5.302	4.633	11.272	1.676	2.066	10.851	2.656	4.198	13.6876			0.499998	8.87424
10.6036	2.236	18.335	7.247	28.011	3.013	6.205	13.401	4.771	11.9019	12.499	8.786	10.174	10.71	6.283	4.596	10.827	1.352	2.617	11.556	3.07	3.904	15.3388			0.505682	8.94699
10.7227	2.213	17.822	8.286	27.827	3.284	5.486	11.909	4.59	13.6984	11.876	9.74	10.521	11.575	6.132	4.651	11.286	1.234	2.932	12.058	3.467	4.612	14.7021			0.511362	9.08643
10.8419	2.357	19.281	9.33	29.175	2.838	6.145	11.015	4.738	12.2153	11.788	9.267	10.57	12.044	6.102	4.379	10.802	1.395	3.134	11.319	2.846	4.87	15.6693			0.517047	9.14907
10.961	2.143	19.834	8.474	31.288	3.029	7.304	10.108	3.414	14.1131	12.445	8.75	10.94	13.611	6.032	4.766	10.679	1.781	3.37	11.797	2.785	4.488	16.4139			0.522727	9.43477
11.0801	2.425	18.086	9.476	27.912	2.694	7.75	9.343	3.012	13.1279	12.916	8.954	11.678	13.172	5.483	4.367	9.32	1.648	3.42	11.268	3.176	4.163	16.4497			0.528406	9.08366
11.1993	2.344	16.244	9.302	26.228	2.76	8.508	8.195	3.979	14.3514	13.838	9.39	12.085	11.214	6.08	4.447	10.643	1.453	3.099	12.261	3.025	4.667	16.5105			0.534091	9.11927
11.3184	2.301	17.511	11.529	26.122	2.612	8.138	9.028	3.922	13.2832	13.323	9.419	13.201	12.562	6.023	3.702	10.182	2.081	3.524	11.089	2.553	5.156	17.2655			0.539771	9.29667
11.4376	2.398	17.23	10.937	25.166	3.004	9.548	8.224	3.662	13.1111	14.338	8.875	14.057	11.905	5.44	4.295	11.475	1.944	2.925	10.543	2.454	4.675	17.6563			0.545455	9.26647
11.5567	2.061	18.206	9.802	24.076	2.956	9.75	7.178	4.064	14.3421	13.562	8.919	15.56	11.847	5.624	3.94	10.275	1.705	3.996	10.993	2.87	4.524	18.3752			0.551135	9.30115
11.6758	2.09	20.021	11.06	21.67	2.275	11.39	6.883	4.806	14.7473	14.297	10.514	14.545	12.221	6.015	4.176	9.715	1.456	4.24	11.893	2.875	5.001	17.1387			0.556815	9.50132
11.795	2.423	17.225	12.373	18.781	2.889	12.662	6.449	4.19	15.465	16.165	10.39	14.178	12.261	5.284	4.925	10.577	2.225	3.772	10.741	2.236	6.262	14.7318			0.5625	9.37295
11.9141	3.002	16.969	13.949	15.499	2.484	14.442	5.694	3.941	13.8982	16.43	11.897	15.906	12.642	5.392	4.202	10.172	1.952	4.068	10.502	2.55	7.278	14.4395			0.56818	9.42312
12.0333	2.662	18.097	14.964	15.188	2.026	14.977	4.979	4.552	13.9429	17.904	11.318	15.253	12.939	6.034	3.991	9.342	1.294	4.009	10.289	2.942	6.001	14.9857			0.573864	9.44044
12.1524	2.436	18.595	15.723	12.302	2.324	17.093	5.168	3.937	14.4646	16.225	10.533	15.168	12.678	4.957	3.775	7.137	1.794	3.784	11.361	2.867	6.668	14.9959			0.579544	9.27207
12.2716	2.528	18.529	15.772	10.435	2.359	19.415	5.453	3.988	15.3969	13.674	12.075	14.531	13.137	4.499	3.817	7.247	2.551	3.58	11.621	2.864	7.893	15.6842			0.585229	9.41132
12.3907	2.535	17.11	16.707	9.991	2.042	18.965	4.119	4.09	15.6036	13.252	11.049	15.544	14.155	3.707	3.965	8.413	1.707	3.821	10.284	3.048	7.291	14.1683			0.590908	9.16213
12.5098	2.375	19.628	18.524	7.926	2.763	20.638	3.852	3.973	16.6452	12.121	11.139	17.011	14.277	4.088	3.497	8.239	1.83	4.374	9.804	2.676	7.038	13.7682			0.596588	9.37211
12.629	2.879	17.695	17.126	6.711	2.881	19.524	3.824	4.048	16.7949	13.302	10.618	18.863	14.587	4.233	3.953	7.638	1.966	4.6	9.045	3.259	7.99	14.1657			0.602273	9.35012
12.7481	2.542	18.51	17.184	6.413	2.44	18.471	3.32	3.848	17.7762	14.605	10.542	18.288	12.967	4.275	3.802	7.562	1.378	4.85	9.448	3.301	8.123	14.1547			0.607953	9.26363
12.8673	2.896	21.117	21.327	5.896	2.665	19.006	3.672	4.683	17.0329	14.907	12.707	19.321	11.75	3.906	3.408	7.692	2.054	4.532	8.296	3	8.713	13.4888			0.613637	9.63953
12.9864	2.946	20.979	22.312	5.5	2.446	20.334	3.717	4.631	18.0518	14.999	13.974	20.144	11.983	3.549	3.127	7.102	1.791	4.717	8.654	2.627	8.874	12.9776			0.619317	9.79252
13.1055	2.77	19.781	25.321	5.167	2.348	20.108	3.019	4.798	17.484	13.335	13.087	19.769	12.719	3.883	3.999	5.61	1.692	5.343	7.33	3.626	8.496	14.2864			0.624997	9.72597
13.2247	3.187	21.881	28.133	4.796	2.17	18.571	2.865	4.784	16.9869	12.526	13.886	20.179	12.292	4	4.135	4.555	2.41	5.794	7.238	3.015	10.617	13.2397			0.630682	9.87548
13.3438	2.834	23.418	29.125	4.429	2.833	18.804	2.888	4.418	16.4296	11.282	14.276	20.474	11.376	4.037	3.204	4.811	1.773	6.346	7.808	3.34	10.949	13.4602			0.636361	9.9234
13.463	2.777	20.942	28.797	3.924	2.955	17.974	2.9	4.91	16.6973	10.232	13.998	20.741	11.49	4.652	3.236	4.03	1.684	7.001	6.144	3.403	9.873	12.5939			0.642046	9.58883
13.5821	2.949	23.393	30.458	3.77	2.347	17.428	3.113	4.525	17.4928	9.705	11.658	20.545	12.318	3.462	3.961	3.727	2.119	7.45	5.694	4.092	11.411	11.6726			0.647726	9.69502
13.7012	3.089	22.649	31.601	3.372	2.507	18.529	3.258	4.853	17.7539	9.206	11.352	21.531	12.926	3.796	4.159	3.62	2.518	7.7	6.068	4.027	11.598	11.6315			0.653406	9.89747
13.8204	3.162	24.129	31.043	4.201	2.74	18.462	3.038	5.78	17.9643	9.005	11.15	23.295	12.937	4.312	3.6	3.258	2.353	7.854	4.72	3.718	11.128	12.6551			0.65909	10.0229
13.9395	3.22	24.778	31.665	3.324	2.301	17.31	3.04	4.93	17.0208	9.917	12.198	22.395	10.888	4.108	3.68	2.969	2.341	9.415	4.063	3.499	12.368	12.3905			0.66477	9.90092
14.0587	2.782	24.348	30.896	4.275	2.418	17.897	2.325	5.097	15.881	8.761	12.526	23.319	11.782	4.039	3.687	3.249	2.421	10.947	3.388	3.76	12.539	10.0317			0.670455	9.83494
14.1778	3.247	22.886	26.534	3.628	2.192	18.695	2.498	5.657	17.4052	9.748	12.548	21.959	10.887	3.87	4.264	2.572	3.2	12.186	3.148	4.556	14	10.5589			0.676135	9.82905
14.297	3.111	21.122	27.878	3.502	2.939	17.291	2.776	5.858	17.5728	8.775	11.926	24.734	9.114	2.781	4.898	2.384	2.304	11.377	3.879	4.924	15.195	9.5977			0.681819	9.72448
14.4161	2.728	21.305	27.518	2.954	3.15	17.68	2.733	4.881	15.0312	8.15	11.265	25.598	9.745	3.262	5.113	2.771	2.204	12.446	3.665	5.037	15.221	8.0755			0.687499	9.56967
14.5352	2.741	21.897	26.674	3.049	2.033	17.84	2.985	5.476	16.6114	8.546	11.394	27.744	10.105	4.537	5.807	3.426	2.736	11.926	3.729	4.688	15.937	7.9279			0.693179	9.90042
14.6544	4.084	20.224	24.257	3.245	2.665	17.137	3.008	5.111	16.9987	8.205	13.153	28.481	9.128	4.076	6.354	2.374	2.533	12.083	3.887	4.423	17.47	7.9604			0.698864	9.85714
14.7735	3.471	21.728	25.262	2.214	2.872	17.522	2.546	5.022	16.3125	7.023	13.046	28.916	8.923	3.63	7.283	2.4	3.012	14.194	3.23	5.157	19.124	7.7503			0.704543	10.029
14.8927	3.362	23.37	24.171	2.431	2.884	16.32	2.573	5.229	16.6587	6.977	13.71	30.593	8.291	3.52	7.625	2.349	2.924	15.847	4.052	4.902	20.544	8.7074			0.710228	10.32
15.0118	3.28	24.732	23.884	2.943	2.912	15.177	3.092	5.473	14.9316	7.382	14.431	29.407	7.441	3.227	9.564	1.966	2.742	15.519	4.239	5.309	22.891	8.1181			0.715908	10.3937
15.1309	2.899	24.46	25.869	2.835	2.479	15.613	2.713	4.702	14.742	8.189	13.229	27.996	8.162	2.857	11.22	1.694	2.916	15.144	4.043	5.845	25.415	7.8183			0.721588	10.4927
15.2501	3.917	24.433	23.122	2.865	2.535	14.879	2.197	4.986	14.0889	7.27	11.631	26.67	7.548	3.188	11.04	1.823	3.058	16.827	4.81	6.217	25.818	8.5045			0.727272	10.3376
15.3692	3.964	25.148	20.889	2.85	2.787	14.558	2.154	4.975	14.9554	6.552	13.232	27.519	8.007	4.53	10.353	2.294	2.873	16.425	4.298	4.642	29.951	7.6226			0.732952	10.4809
15.4884	4.013	26.678	23.081	2.774	3.131	12.384	2.32	4.703	13.6389	5.016	14.194	31.813	7.638	4.489	12.903	2.071	3.451	17.937	3.843	5.743	32.512	7.1948			0.738637	10.9785
15.6075	4.174	26.923	22.513	2.984	3.34	13.139	2.625	5.334	14.9223	5.441	14.637	30.938	7.509	3.542	13.999	2.122	3.078	19.966	4.279	6.18	33.47	6.6443			0.744317	11.2618
15.7266	4.008	26.081	23.008	2.691	3.421	14.752	2.83	6.466	14.9988	6.071	13.512	35.774	6.904	3.786	15.566	2.242	3.768	19.373	4.711	5.709	35	7.7366			0.749996	11.7458
15.8458	3.582	26.458	23.998	2.519	3.37	13.299	2.286	6.032	13.3581	5.703	13.921	37.335	6.028	3.305	16.522	2.076	4.144	22.209	5.704	5.327	33.119	8.7323			0.755681	11.774
15.9649	4.134	29.176	23.214	3.189	3.986	12.57	1.854	4.841	13.5401	5.04	13.208	36.183	6.142	4.395	17.082	2.802	3.988	22.523	6.985	6.473	29.345	9.9107			0.761361	11.8446
16.0841	4.484	30.584	21.907	2.165	3.424	13.28	2.924	4.908	12.3388	3.806	12.904	40.063	5.867	4.281	18.689	2.217	4.953	25.484	7.12	7.242	26.014	11.6152			0.767045	12.1032
16.2032	5.55	28.639	21.05	2.511	3.14	12.898	2.549	4.902	10.3236	4.68	15.29	37.853	5.664	4.206	18.48	2.447	6.138	26.273	8.173	6.834	23.997	12.7546			0.772725	12.016
16.3224	5.505	25.034	22.515	2.423	3.54	12.361	2.319	5.225	8.6136	3.412	12.708	36.096	4.646	5.367	20.426	2.528	6.941	26.036	8.846	7.185	22.127	15.7476			0.77841	11.8001
16.4415	5.933	23.332	20.889	2.543	3.837	12.685	1.745	4.962	7.6037	3.644	13.014	36.196	4.212	4.659	17.983	2.572	8.73	30.911	9.238	7.922	21.159	16.3793			0.78409	11.825
16.5606	5.51	17.996	19.088	3.37	3.6	11.94	1.967	5.636	6.7084	4.64	12.666	33.947	4.966	3.621	20.215	2.402	8.712	31.762	7.977	7.832	19.771	17.117			0.78977	11.4292
16.6798	6.756	12.874	17.795	3.258	3.708	10.764	2.095	4.97	6.0505	4.37	12.475	33.313	4.656	3.511	21.03	2.253	8.647	32.023	7.747	7.356	20.471	21.6702			0.795454	11.2633
16.7989	7.307	12.205	18.027	2.066	3.038	9.441	2.695	5.098	6.0224	3.023	12.672	34.055	4.441	4.345	21.595	2.821	12.466	32.032	7.861	6.745	20.903	25.2846			0.801134	11.552
16.9181	6.809	10.047	18.152	3.253	3.899	8.964	2.794	5.983	5.7306	2.819	12.895	34.614	4.117	4.088	21.867	3.813	11.757	29.914	7.465	4.677	21.354	28.7028			0.806819	11.5325
17.0372	7.67	7.486	18.525	2.126	3.814	8.372	2.739	6.976	5.0307	2.836	13.678	31.065	4.116	4.359	21.457	4.556	12.904	26.625	7.711	3.919	20.223	30.9701			0.812499	11.2344
17.1563	8.119	7.022	17.975	2.908	3.765	9.642	2.358	6.49	4.4392	2.496	12.376	32.54	4.629	4.152	22.596	6.896	14.715	26.539	6.475	2.957	17.235	30.637			0.818178	11.2255
17.2755	8.732	7.662	17.293	2.263	4.839	9.586	2.755	6.699	4.3578	3.014	15.165	31.984	4.835	4.181	21.276	9.21	14.451	23.545	6.653	2.253	15.058	28.6965			0.823863	11.114
17.3946	11.248	7.505	18.049	2.158	4.493	8.804	3.084	6.613	3.8862	3.119	14.288	30.632	4.795	4.964	22.351	10.148	12.252	21.282	5.126	2.236	13.043	24.0006			0.829543	10.6399
17.5138	11.638	6.461	20.04	2.628	4.144	7.871	3.103	7.505	3.9526	3.097	13.487	29.657	4.119	5.709	25.445	11.138	10.335	15.583	3.543	1.866	11.543	21.3869			0.835227	10.1933
17.6329	13.341	5.734	17.407	3.343	4.603	8.1	2.83	7.429	3.6931	2.941	13.737	28.489	4.902	6.01	25.409	11.252	8.238	10.507	2.729	2.33	7.981	18.6837			0.840907	9.53131
17.7521	15.1	6.631	17.718	3.062	5.021	6.514	2.955	8.056	3.8745	2.87	14.029	30.16	5.144	7.18	28.136	12.055	6.812	6.167	2.123	1.94	5.773	18.4859			0.846592	9.53665
17.8712	17.722	6.126	17.537	2.665	5.144	6.154	2.853	8.482	4.1045	2.307	13.714	31.879	5.602	8.018	32.078	9.427	6.81	3.318	1.015	1.642	6.23	12.0629			0.852272	9.3132
17.9903	21.529	6.254	16.538	2.427	5.933	6.917	2.645	9.781	3.4939	2.563	14.177	31.973	7.875	10.054	38.227	7.453	6.523	1.381	0.537	1.465	5.199	9.6495			0.857952	9.66338
18.1095	22.678	5.798	16.034	2.733	6.132	6.377	2.693	9.003	3.8954	3.1	14.103	33.052	10.037	13.576	46.581	5.361	4.383	1.049	0.408	1.185	3.616	6.3862			0.863636	9.9173
18.2286	23.96	5.62	15.872	2.49	7.792	5.69	2.608	10.485	3.0769	2.944	15.819	34.374	16.106	17.337	58.693	2.928	1.719	0.957	0.606	1.229	3.066	4.4001			0.869316	10.8078
18.3478	24.22	6.358	16.049	2.835	6.853	6.289	2.587	9.523	2.8324	2.38	15.008	34.046	24.581	27.007	74.171	1.103	0.748	0.976	0.394	0.705	1.854	3.5488			0.875001	12.0031
18.4669	28.379	7.074	15.853	2.447	6.67	6.564	2.46	10.233	3.2528	2.485	15.274	33.097	33.485	33.998	80.92	1.137	0.773	0.798	0.46	0.391	2.169	2.3343			0.88068	13.1934
18.586	28.708	7.3	16.51	2.707	7.781	6.377	2.152	10.857	2.965	3.223	15.082	34.509	42.917	38.478	76.026	0.591	0.612	0.773	0.544	0.518	1.559	1.778			0.88636	13.7258
18.7052	31.023	8.181	15.825	3.719	6.393	6.775	2.666	11.743	3.5845	3.018	16.781	32.734	50.035	42.97	58.996	0.497	0.382	0.403	0.601	0.496	1.042	1.4341			0.892045	13.6045
18.8243	34.151	7.741	20.358	3.696	7.634	6.541	2.212	11.456	3.5764	3.213	16.167	37.51	50.806	36.986	38.548	0.718	0.296	0.683	0.233	0.56	1.22	1.1596			0.897725	12.9757
18.9435	41.073	8.067	20.853	3.964	8.191	6.075	2.887	12.018	2.8852	3.168	17.504	42.914	40.488	25.204	23.54	0.509	0.338	0.587	0.264	0.703	1.114	0.6349			0.903409	11.9537
19.0626	42.981	8.724	22.318	4.693	7.342	7.115	2.608	11.27	2.6576	2.89	20.048	49.421	31.448	18.381	13.252	0.302	0.195	0.287	0.419	0.261	0.987	0.8292			0.909089	11.2922
19.1817	47.286	10.282	24.877	5.252	9.625	8.378	2.213	11.217	2.6016	2.549	25.526	57.547	23.967	12.171	6.867	0.191	0.364	0.284	0.461	0.444	0.557	0.6434			0.914769	11.5138
19.3009	52.846	13.75	27.528	6.972	8.324	8.385	3.198	11.261	2.9511	2.627	26.606	52.977	21.434	7.473	4.149	0.359	0.276	0.332	0.468	0.317	0.846	0.604			0.920454	11.5311
19.42	56.538	12.738	28.102	8.163	9.885	8.621	3.185	11.563	2.5406	3.6	28.538	51.571	16.94	3.921	3.028	0.234	0.306	0.325	0.414	0.368	1.028	0.7005			0.926133	11.4686
19.5392	62.218	14.259	29.081	9.885	11.608	9.37	3.546	10.733	2.5596	3.539	31.047	50.913	11.831	1.918	1.89	0.168	0.218	0.239	0.516	0.483	0.637	0.3091			0.931818	11.6803
19.6583	55.913	12.068	31.261	13.118	12.347	9.918	3.294	10.688	3.7401	3.711	28.343	44.038	6.75	1.376	1.061	0.249	0.08	0.456	0.474	0.311	0.456	0.1917			0.937498	10.902
19.7775	36.008	9.946	28.638	17.324	13.074	10.162	3.793	10.654	3.1638	3.841	24.579	34.186	3.214	0.839	0.65	0.184	0.169	0.231	0.11	0.069	0.604	0.393			0.943183	9.17417
19.8966	22.006	6.259	25.52	21.831	14.696	9.968	3.679	10.428	4.6999	4.947	24.084	25.138	1.574	0.604	0.515	0.286	0.179	0.557	0.334	0.272	0.712	0.6229			0.948862	8.13235
20.0157	10.882	5.102	23.324	27.181	14.696	11.533	3.314	11.457	5.913	6.791	17.877	13.48	0.965	0.334	0.41	0.239	0.139	0.469	0.424	0.161	0.57	0.4131			0.954542	7.0761
20.1349	6.599	4.527	22.133	34.537	16.367	12.848	2.914	12.544	7.1354	7.373	14.73	6.745	1.064	0.366	0.426	0.161	0.179	0.228	0.15	0.334	0.185	0.5678			0.960227	6.91424
20.254	5.351	3.658	21.666	41.06	17.537	13.081	3.045	12.569	7.0804	7.197	11.692	3.596	0.646	0.217	0.592	0.003	0.092	0.353	0.2	0.229	0.195	0.3565			0.965907	6.83709
20.3732	4.4	3.062	20.356	43.157	20.272	13.48	2.847	12.947	8.2649	6.654	7.448	1.629	0.497	0.187	0.366	0.079	0.145	0.228	0.338	0.215	0.205	0.4506			0.971591	6.69216
20.4923	2.764	2.384	17.897	44.133	22.904	17.321	3.183	14.572	8.2522	7.223	5.455	1.288	0.463	0.316	0.386	0.153	0.499	0.288	0.142	0.293	0.284	0.1787			0.977271	6.8354
20.6114	2.858	2.33	14.462	42.715	24.21	16.39	4.24	17.563	8.1731	6.529	3.614	0.957	0.357	0.134	0.224	0.226	0.208	0.091	0.134	0.15	0.242	0.1961			0.982951	6.63651
20.7306	2.331	1.838	9.217	31.499	24.102	18.706	3.026	18.763	8.6337	6.124	3.192	0.999	0.191	0.166	0.334	0.1	0.261	0.427	0.176	0.284	0.162	0.4016			0.988636	5.95151
20.8497	1.734	1.603	7.128	17.696	18.951	21.451	3.317	18.669	6.2097	5.189	1.93	0.799	0.121	0.261	0.299	0.22	0.272	0.122	0.11	0.224	0.255	0.1917			0.994315	4.85238
20.9689	1.576	1.308	5.948	11.794	15.559	22.482	3.853	18.783	6.0568	4.39	1.668	0.872	0.116	0.205	0.171	0.14	0.114	0.101	0.064	0.162	0.382	0.3529			1	4.36808

## Sheet: Image22
X0	Y0	Y1	Y2	Y3	Y4	Y5	Y6	Y7	Y8	Y9	Y10	Y11	Y12	Y13	Y14	Y15	Y16	Y17	Y18	Y19	Y20	Y21	Y22	Y23	Y24	Y25	Y26	Y27	Y28			Ap-Ba	Average int.
0	122	84.222	101.056	177.944	153	134.5	191.278	218.667	173.944	164.778	144.111	200.444	136.778	120.389	90.889	86.167	43.611	46.222	64.667	24.778	29.222	28.278	22.222	34.611	18.667	25.389	26.5	25.278	65.222			0	94.9943
0.1191	127.278	101.333	109.5	195.722	171.722	152.111	198.222	224.667	174.167	159.667	146.556	194.333	142.056	122.889	93.056	90.056	51	43.333	60.556	27.944	29.056	31.111	22	37.556	19.333	29.944	29.389	30.278	61.444			0.00595033	99.182
0.2383	127.444	110.722	117.833	185.556	182.111	168.222	204.556	220.556	174.556	152.056	141.278	193.111	144.111	118.5	105.278	94	56.222	45.222	63.444	34.056	33.889	33.444	25.667	41.944	17.111	29.833	28.333	33.167	66.111			0.0119057	101.667
0.3574	140.444	118	132.111	170.556	200.944	194.222	225.389	224.944	173.722	158.222	153.444	207.444	149.444	131.111	102.667	96.667	71.333	51.889	60.5	38.889	44.222	38	27.611	48.278	20.611	34.056	31.111	36.667	66.611			0.017856	108.59
0.4766	152.056	124.278	142.611	178.722	214.833	210.833	234.389	237.389	177.111	162.889	156.167	208.611	162.111	148.889	103.278	105.556	84.389	63.333	68.389	42.944	48.722	45.333	26.889	58	22.667	38.667	37.389	41.889	61.389			0.0238113	115.853
0.5957	164.278	132	148.722	183.278	223.722	233.222	240.667	247.278	182.889	158.333	158.5	204.111	166.167	164.111	109.889	108.944	91.222	85.667	72.389	46.278	56.333	53.444	30.833	71.389	30.056	47.5	43.944	55.111	61.833			0.0297616	123.176
0.7148	183.222	138.556	155.389	185.444	228.722	231.222	245.278	250.611	185.222	152.611	153.889	194.889	174.722	183.889	111.611	118.944	90.5	106.889	73	50.278	68.833	59.778	33.5	89.389	31.944	58.5	52.167	64.5	62.278			0.035712	128.82
0.834	190.111	137.667	160.833	204.778	229.056	243.444	247.833	253.833	192.5	154.556	159.667	169.056	181	195.222	124	132.222	91.389	126.278	77.111	54.833	74.5	67.944	34	111.444	40.5	72.611	65.222	81.611	61.944			0.0416673	135.695
0.9531	200.556	150.889	178.722	218.278	230.389	246.944	250.944	252.611	191.222	156	158.278	147.611	184	200.833	139.5	138.722	102.611	143.389	83.222	57.278	87.111	82.222	44.056	136.111	48.222	82.333	80.722	94.667	67.167			0.0476176	143.262
1.0723	207.444	160.556	187.278	231	227.611	247.944	254	253.611	182.333	168.389	158.833	132.056	185.278	218.611	149.167	149.444	99.278	146.556	93.333	67.556	107.5	101.389	49.722	154.444	56	96.833	101.667	110.667	71.944			0.0535729	150.705
1.1914	221.833	173.444	200.778	234.667	221.611	248.278	254	253.667	192.278	179.167	165.722	118	186.222	221.778	158.222	176.167	103.722	144.778	95.833	80.222	123.389	114.778	62.278	186.111	77.389	114.556	118.444	133.167	70.389			0.0595233	159.686
1.3106	235.889	183.944	208.722	238.833	223.333	246.056	254.556	252.667	193.722	180.944	166.5	111.167	189.222	223.778	171.889	201.889	115.333	148.111	106.5	89.278	140.056	133.5	72.889	191.889	96.889	142.944	135.333	156.278	74.556			0.0654786	168.506
1.4297	244.833	199.278	216.389	239.611	223.222	243.5	254.5	251.611	184.611	191.556	168.611	103.833	197.556	222	186	220.722	133.667	142.111	109.778	103.722	151.667	137.222	83.611	210.333	113.389	148.222	148.444	176.333	77.111			0.0714289	175.291
1.5488	245.333	209	221.556	243.333	233.556	244.778	249.5	249.667	190.056	203.833	169.833	101.722	200.111	215.056	185.056	227	149.556	138.5	109.222	124.167	173	152.111	99.333	212.389	127.333	163	160.056	186.444	86.056			0.0773793	181.743
1.668	245.389	225.556	233.111	248.444	239.167	237.778	234.944	238.444	194.056	219.167	165.778	99.944	201.778	198.833	183.056	228.611	170	122.889	111.167	137.222	176.778	160.111	120.611	211.722	148.556	170.111	167.444	209.667	97.167			0.0833346	186.121
1.7871	251.278	235.333	238.611	247.556	249.278	233.833	235.611	204.056	206.5	224.444	161.389	95.278	209.167	190.611	177.111	229.389	179.944	123.222	114.611	152.667	187.056	168.278	135.667	208.556	165.278	176.389	180.389	227.056	106.611			0.0892849	190.178
1.9063	248.944	235.611	242.222	251.444	247.944	217.778	227.944	179.167	204.278	227.944	156.889	91.778	208.278	174.167	179.222	236.333	181.056	114.5	113.833	158.889	184.111	175.333	151.111	208.5	182.444	171.611	183.944	232	124.889			0.0952402	190.075
2.0254	251.556	238.389	240.667	252.5	246.833	196.389	213.333	149.389	218.333	225.833	159.278	96.667	208.222	162.889	177.611	232.667	182.389	110.833	115.833	166.389	176.444	183.167	170.833	196.111	201.778	162.278	194.167	221.222	134.444			0.101191	189.188
2.1445	252.833	240.833	237.278	253.222	243.111	175.333	190.5	125.222	220.667	222.389	158.556	98.389	206.389	151.5	186.833	234.722	172.833	107.333	114.667	173.444	171.444	185.333	180.556	189	204.833	149.722	203.944	208.389	144.5			0.107141	186.337
2.2637	254.167	241.278	240.944	254.111	229.778	157.5	166	107.944	229.167	220.333	141.611	97.056	204.556	143.167	191.222	238.944	175.5	103.056	113.167	177.556	160.722	184.222	196.944	173	208.111	143.611	190.667	184.056	151.611			0.113096	182.069
2.3828	253.222	240.333	242.556	254.889	220.722	134.556	143.444	95.111	235.333	193.611	135.556	95.444	199	137.278	188.833	234.056	187.278	103.222	106	179.722	161.389	192.167	207.278	150.889	200.333	130.444	173.389	145.222	161.556			0.119047	175.96
2.502	254	242.667	242.222	254.333	218.722	123	112.944	76.722	228.556	159.833	121.611	93.167	197.889	133.667	194.889	235.833	190.778	98.556	93.278	175.778	150.944	198.889	215.056	138.611	195.889	118.833	155.889	116.222	156.889			0.125002	168.816
2.6211	253.722	243.5	236.111	254.5	210.611	100.611	86.167	64.722	217.278	146.278	106.556	93.5	192.833	123.556	196.167	237.667	196.778	97.833	84.667	170.389	151.056	203.389	223.556	121.778	186.5	116.5	139.111	100.056	144.111			0.130952	162.052
2.7402	252.778	245.833	234.333	254.667	195.889	96.222	65.667	53.444	193.944	132.778	100.889	89.111	179.278	129.722	198.389	247.722	201.444	95.611	84.611	167.222	142.889	207.222	222.722	110.944	172.667	106.056	131.889	80.611	118.222			0.136903	155.613
2.8594	254.722	245.944	233.056	253.5	169.444	82.333	54.389	41.667	158.444	127.278	85.222	87.167	166.667	112.111	190.778	247	211.278	97	75.889	166.444	144	205.611	212.944	95.778	149.389	97.556	118.778	71.278	100.556			0.142858	146.766
2.9785	252.667	246.444	226.611	248.444	132.278	73.389	50.111	30.333	131.556	121.778	71.389	84.056	147	103.111	186.056	248.722	218.444	103.667	70.5	169.111	141.167	204	201.389	91.056	140.889	84.889	108.222	63.056	77.722			0.148808	138.899
3.0977	245.944	245.333	226.556	251.556	107.722	58.389	40.667	27.833	111.944	122.333	58.667	76.667	117.778	87.889	177.278	250.833	217.833	108.833	73.056	171.278	143.5	208.056	188.222	75.444	116.556	77.444	97.444	58.167	62.278			0.154764	131.224
3.2168	228.444	245.389	221.889	239.889	89.5	48.889	31.5	25.889	96.556	119.333	50.333	67.556	94.722	80.278	164.556	249.278	229.056	120	68.056	162.611	137.778	208.278	170.556	63.611	102.333	70.556	84.944	54.889	57			0.160714	123.575
3.336	215.333	248.389	218.611	233.944	81.722	36.333	25.722	21.889	89.556	123.167	44.278	57.889	79.833	76.333	149.5	247.833	235.278	124.167	69.389	161.611	135.556	215.111	164.944	59.333	99.111	60.944	76.333	41.222	54.389			0.166669	118.887
3.4551	206.333	242.667	219.333	222.056	72.667	33.389	21.944	20.778	77.833	126.389	35.278	48.667	61.722	69.722	129.778	244.611	243.611	127	67.056	156.889	124.833	212.944	142.111	51.667	79.667	52.278	67.5	38.944	46.556			0.172619	111.87
3.5742	192.5	240.889	209.778	207.667	63.389	24.111	14.556	18.833	64.667	126.778	32.444	42.556	52.111	63.944	115.444	236.056	243.056	121.111	64.5	160.944	126.778	219.278	124.056	47.667	68.278	53.111	55.833	36.944	44.222			0.17857	105.914
3.6934	193.889	237.111	209.167	201	66.389	19.444	12.278	15.889	60.167	124.056	30	27.167	47.722	56.611	96.556	229.222	244.222	131.444	66.5	151.889	119.833	217.278	104.722	40.389	65.333	47.111	50.778	31.833	42.444			0.184525	101.395
3.8125	181.389	218.833	204.111	190.111	67.167	16.778	11.944	15.667	53.333	113.056	27.278	25.778	38.833	47.889	76.333	219.056	244.889	133.222	73.667	138.389	105.889	215.278	90.278	36.444	52.889	41.722	40.611	26.944	35.444			0.190475	94.5939
3.9317	166.722	217.778	200.667	186.056	67.222	17.333	8.222	12.778	44.833	116.167	22.389	21.278	34.167	48.278	56.722	203.722	234.889	141.222	77.278	144.778	100.5	211.056	76.5	33.667	49.444	38.444	30.889	21.333	29.556			0.196431	90.1341
4.0508	166.222	214.444	193.111	181.278	58.944	14.222	6.5	13.278	43.944	115.5	23.5	17.611	28	41.722	37.778	187.167	217.222	142.5	97.278	145.111	86.667	186.389	57.944	33.278	41.389	32.611	24.222	17.278	27.056			0.202381	84.5574
4.1699	156	213.167	201	171.833	52.833	12.611	7.056	15.389	40.389	118.111	22.389	17.556	24.167	34.667	30.667	153.833	200.611	147.556	102.278	136.833	76.389	168.889	44.389	27	40.778	32.222	16.778	12.722	25.111			0.208331	79.4215
4.2891	148.278	201.778	191.889	159.278	47.389	10	6.556	15	30.722	105.667	20.667	15.111	23.389	29.389	27.889	138.722	187.278	155.778	114.278	124.833	68.278	151.333	33.389	21.722	37.667	26.444	16.167	10.944	21.889			0.214287	73.8526
4.4082	141.444	194	176.056	144.167	42.111	8.444	5.556	11.111	24.944	102.722	21.389	14.778	20.111	27.111	25.278	131.056	171.389	154.667	117.222	103.389	60.778	134.111	26.333	18.444	32.278	30.389	13.722	10.278	21.944			0.220237	68.4559
4.5274	123.222	192.111	171.778	122.556	48.056	8.444	5.278	10.222	19.833	94.5	17.889	13.278	16.667	22.778	24.389	119.833	152.167	162.944	128.167	78.5	49.222	116.611	22.722	14.944	31.611	27.556	11.222	8.111	18.833			0.226192	63.2222
4.6465	117.778	185.667	161.889	101.667	43.667	7.5	4.222	9.611	14.889	88.556	15	13.222	16.889	15.722	23.944	109.444	130.778	164.389	132.333	55	43.556	104.167	16	13.222	24.889	27.333	9.889	8.167	15.333			0.232143	57.7491
4.7657	102.667	171.722	155.833	88.111	31	9.5	4.833	8.222	12.611	83.222	15.611	12.333	13.222	12.667	21	97.333	112.944	164.444	135	36.833	38.611	92.778	13.556	12.167	21.611	26.167	7.722	8.389	15.056			0.238098	52.5919
4.8848	103.222	157.333	151.889	77.167	21.333	12.444	3.722	9.111	10.389	69	13.444	11.722	15.667	8.5	18.111	85.722	93.222	162.944	134.167	23.778	32.667	88.167	10.111	11.944	18.222	24	7.333	6.778	14.611			0.244048	48.1628
5.0039	94.333	152.111	139.444	71.944	16.944	13	3.944	9.444	9.944	65.556	13.611	11.444	13.667	8.722	16.667	77.833	83.167	147.833	136.222	24.611	32.056	82	9.944	8.667	16.722	25.278	6.722	7.444	15.778			0.249999	45.3466
5.1231	89.833	136.611	136.222	60.611	13.222	14.278	3.722	8.889	8.944	64.333	14.5	13.556	14.056	6.889	13.5	64.222	67.222	131.833	134.222	20.444	25.667	68.389	7.611	8.778	16	22.611	7.222	5.889	18.167			0.255954	41.2911
5.2422	84.667	119.167	123.944	60.333	12.778	13.944	3.556	8.333	7.778	60.944	14.5	13.333	11.944	6.611	13.667	47.611	57.111	115.444	125.056	21.5	22.5	68.5	7.111	8	14.833	23.889	7.056	5.833	17.333			0.261904	37.8371
5.3614	77.667	97.444	119.722	52.889	10.778	14.944	3.444	8.5	5.667	54.333	12.611	14.778	11.722	6.778	12.833	32.444	48.389	85.833	110.667	19.611	19.333	69.222	6.667	7.222	12.5	22.444	5.5	6.222	16.889			0.26786	33.3467
5.4805	73.444	84.556	109.056	47.833	10.389	15.278	3.556	8.944	6.722	50.056	12.333	16.056	12.389	7.5	11.111	23.5	40.222	61.722	90.556	17.556	18.333	56.5	5.222	6.278	11.833	19.722	5.667	6.611	15.444			0.27381	29.2548
5.5996	76.833	72.111	101.667	39.5	8.389	15.5	3.167	10.111	5.889	42.778	12.444	16.333	11.167	7.389	12.056	16.389	34.056	42.222	63	19.778	17.833	47.556	4.722	6.444	10.333	21.833	6.111	5.278	15.111			0.27976	25.7241
5.7188	66.444	57.889	90.833	33.778	8.667	14.167	3.389	10.889	5.444	39.944	13.722	18.889	11.889	7.722	9.667	10.278	27.611	34.889	42.722	20.111	15.389	34.167	5.056	6.056	10.944	20.444	4.944	5.778	17.722			0.285716	22.3946
5.8379	65.778	52.167	78.667	22.5	7.556	15.667	2.778	13.556	4.889	37.111	12.833	17.056	11.278	8.333	11.278	8.722	22.889	33.333	35.556	21.889	9.333	27.722	3.889	4.722	8.5	20.278	5.278	4.167	15.444			0.291666	20.1093
5.9571	65.333	39.222	68.5	18.333	6.056	18.889	3.556	16.944	4.889	35.222	12.389	19.333	9.722	8.556	9.889	6.944	19.056	25.833	33.222	21.5	6.222	25.167	4.444	4.167	6.5	20.444	5.278	4.722	15.444			0.297621	18.475
6.0762	65.833	30.833	52.778	15.722	5.722	16.333	4.056	13.556	4.889	31.333	12	24.333	7.778	7.444	8.5	5.333	16.778	22.222	27.056	21.611	5.389	23.111	5.056	3.722	7.889	21.444	4	5.5	16.056			0.303572	16.7682
6.1953	61.389	24.889	42.611	13.556	5.5	17.167	4.333	14.444	3.667	28.722	12.278	25.944	7.389	9.111	10.167	5.5	15.278	19.278	25	16.389	4.556	23.389	4.056	3.444	6.889	19.444	5.056	4.111	16.389			0.309522	15.5154
6.3145	54.278	15.333	40.556	10.444	4.722	18.667	3.722	15.778	4.389	23.556	10.056	27.722	8.167	8.667	12.278	5.333	15.056	18.556	20.778	15.444	3.778	25.056	3.833	4.111	6.056	19.167	4.167	3.556	15.556			0.315477	14.4408
6.4336	54.222	15.5	39.222	8.278	5.389	21	3.667	16.889	3.722	18.444	10.944	28.444	6.833	10.111	9.389	5	13	17.889	22.056	14.722	3.389	27.333	3.111	3.389	5.222	18.333	4.667	4.222	15.444			0.321428	14.1321
6.5528	49.944	13.611	33.111	7.444	4.389	21.389	4.278	15.5	3.222	18.722	12.444	31.833	6.333	8	9.611	5	13	16.333	18.167	11	3.5	24	3.667	4.389	5.444	18.611	3.667	4.278	15.167			0.327383	13.3122
6.6719	44.611	13.056	27.944	6.833	4.111	23.167	3.444	19	3.389	15.222	10.833	31.944	6.5	8.389	9.111	5	14.444	14.111	12.944	10.778	3.722	25.111	3.389	3	6.222	17.056	4.944	3.722	17.889			0.333333	12.7547
6.7911	43.5	11	27.278	6.556	4.222	20.722	3.722	17.611	3.5	13.389	9.556	29.5	6.444	10.611	7.556	5.833	11.944	16.778	13.722	9.611	2.722	25.5	2.889	3.444	6	18.944	4.389	3.056	16.278			0.339289	12.2854
6.9102	39.778	10.222	23.167	4.722	3.667	25.5	3.5	19.222	3.111	10.556	10.333	31.278	6.167	10	8.778	4.889	14.722	13.667	11.667	9.944	3.833	22.278	3.167	3.556	5	19	4.722	3.556	17.278			0.345239	11.9752
7.0293	37.722	9.5	21.944	4.778	5	26.944	4.5	20.889	3.778	10.056	11.444	30.333	6.667	10.222	8.611	6.278	10.944	14.778	11	8.722	2.944	19.444	3.111	3.167	5.722	17.611	4.222	3.056	17			0.351189	11.7375
7.1485	34.056	8.5	21.722	4.278	3.722	30	4.111	21.722	4.056	9.722	12.056	29.556	7.833	10	8.333	7.389	11.556	15.5	9.889	7.444	3.111	18.111	2.444	3.167	5.944	20.722	3.833	4.278	17.222			0.357145	11.7337
7.2676	27.111	7.389	23	3.333	4.111	37.278	5.278	25.333	3.444	9.833	13.5	29.333	6.556	11.056	7.889	7.444	11.889	12.333	9.333	8.389	3.389	15.778	3	3.722	6.389	18.778	3.667	3	17.611			0.363095	11.6954
7.3868	24.833	7.833	21.667	4.667	3.556	44.389	5.611	25.333	2.667	9.722	14.722	32.889	5.667	10.444	8.722	6.556	10.389	13.944	11.722	6.444	3.278	15.778	2.778	3.278	4.333	20.667	3.833	3.556	18.722			0.36905	12
7.5059	22.056	6.833	20.722	3.389	4.444	56.389	5.667	30	3.278	8.222	14.833	34.889	5	12.778	8.778	7.722	9.833	12.667	10.444	7.778	3.444	16.889	3.111	3.167	5.278	22.278	3.278	3.389	18.389			0.375001	12.5843
7.625	21.389	8.333	20.889	3.722	3.111	65.111	5	27.167	3.5	7.333	14.222	35.722	5.889	15.056	10.222	6.222	10.778	13.056	10.222	6.389	3.444	18.889	3.333	2.889	4.611	22.278	3.167	3.167	20.111			0.380951	12.9387
7.7442	21.778	6.556	19.889	3.722	2.722	69.944	5.444	30.278	4.389	5.722	15.944	39.944	4.944	13	11.556	6	11.056	13.833	11.167	6.222	4.278	18	2.556	3.556	4.778	21.389	3.833	3.667	19.167			0.386906	13.2874
7.8633	19	6.278	19.056	4.389	3.611	71.5	6.556	29.056	3.944	6.611	19.722	43.278	5.278	14.833	10.944	6.111	10.444	13.167	11.222	5.111	4.278	20.389	2.667	3.111	5.556	26.111	3.722	3.722	21.278			0.392857	13.8257
7.9825	20.444	6.444	19.278	2.944	3.611	69.167	6.667	29.278	3.833	6.778	15.833	43.722	4.389	14.778	10.833	5.833	11.111	12.278	11.833	6.722	3.944	17.833	2.667	4.111	5.833	27.333	3.056	2.944	20.5			0.398812	13.5861
8.1016	18.556	6.333	19.278	3.667	2.611	71.722	8.222	25.222	3.722	8.278	18.333	44.389	5.444	15.167	11.611	5.222	13.889	12.5	11.444	7.833	4.444	19.056	2.833	3.5	4.722	33.556	3.556	3.556	24.111			0.404762	14.2337
8.2207	17.833	6.444	17.611	3.556	3.389	71.389	9.333	26.944	4.444	6.556	17.778	45	5.444	15.333	11.833	6.278	13.778	11.278	12.278	6.722	3.778	20.889	2.778	3.833	5.222	33.889	3.5	3.278	24.889			0.410713	14.3199
8.3399	17.889	5.056	17.5	3.444	4	66.389	8.333	29.056	6	8.056	20	45.167	5.111	13.5	13.833	6.556	14.667	10.889	13.278	5.111	3.889	20.222	3.111	3.111	5.167	34.333	3.222	2.889	25.278			0.416668	14.3123
8.459	15.5	4.944	22.111	3.944	3.056	65.556	9.611	27.5	5.722	6.556	22.944	44.5	5.5	16.389	12.889	5.389	13.611	11.611	12.778	6.389	3.278	21.056	2.667	3.111	4.833	38.722	4.111	4.667	25.111			0.422618	14.6226
8.5782	15.389	5.944	20.944	3.333	3.111	53.5	11.889	26.056	6.722	7.056	27.833	43.111	4.667	13.389	11.778	7.333	14.167	12.611	15.389	6.278	4.278	21.944	3.056	3.833	5.056	37.556	4.167	3.611	22.944			0.428574	14.3774
8.6973	15.611	5.778	24.222	3.889	3.556	46.222	12.111	23	8.889	6.556	34.222	44.556	4.667	11.722	15.5	7.611	19.222	10.833	15.833	7.056	4.833	22.278	3.444	2.833	5.056	37.944	4.722	3.389	20.611			0.434524	14.6954
8.8165	13.333	5.5	24.944	3.278	3.611	40.278	10.278	22.167	6.389	7.222	40.222	47.444	5.889	10.167	15.389	7	25.056	10.5	19.111	7	3.611	24.611	2.778	2.667	5.222	36.278	3.889	5.167	17.722			0.440479	14.7146
8.9356	13.944	6.333	25.889	2.778	3.722	37.778	11.444	25.056	6.667	5.889	43.444	44	5.833	10	17.333	6.667	21.778	11.167	20.389	8	3.222	29.5	3.778	3.167	4.778	36.778	3.889	3.611	18.722			0.44643	15.0192
9.0547	11.056	5.944	24.889	2.778	4	32.778	10.389	25.833	6.056	5	42.278	48.889	5.667	11.333	18.278	6.333	23.444	10.944	22.056	6.944	2.944	27.333	2.444	3.389	4.667	38.778	3.833	3.944	20.611			0.45238	14.9252
9.1739	11.111	6.833	26.444	3.611	3.833	29.556	10.5	25.333	6.056	5.944	44.833	48.389	5.056	12.611	20.5	7.722	22.056	9.889	19.833	6.5	3.833	30.5	3.111	3.722	3.611	36.222	3.556	4	19.278			0.458335	14.9808
9.293	9	5.833	24.556	3.278	3.278	26.833	13.5	24.889	5	4.556	41	48	5.667	10.556	21.778	7.889	25	9.222	22.556	7.556	3.778	30.333	2.389	4	4.611	35	3	3.278	20.667			0.464286	14.7242
9.4122	7.5	6.556	25.722	3.5	3.111	24.944	10.667	25.889	4.444	5.278	32.556	51.111	5.444	12.222	21.167	8.111	23.889	9.278	21.389	8.167	3.611	30.222	2.944	3.833	4.167	37.722	3.167	4.5	21.389			0.470241	14.569
9.5313	6.944	7.5	28.278	3.722	3.667	24.056	11.278	26.5	3.056	4.278	24.889	46.333	5.167	13.667	18	6.278	23.5	11.056	24.389	7.167	3.167	29.056	3.056	3.944	5.611	39.5	3.278	3.944	24.556			0.476191	14.3392
9.6504	5.5	6.722	27.889	3.278	3.944	25.722	10.889	27.944	3.667	4.722	22.278	47.667	4.944	12.556	17.167	8.5	26.056	13.444	25.944	7.667	3.611	28.778	3.889	3.722	6.444	36.722	4.111	3.833	25.278			0.482142	14.5823
9.7696	5.444	7.111	28.889	2.444	2.778	25.833	12.944	29.667	2.944	3.833	24.5	47.944	5.333	15.722	19	7.833	30.167	12.556	31.667	6.722	3.833	33.5	2.333	4.278	5.389	40.556	3.111	4.944	25.722			0.488097	15.4137
9.8887	5.111	6.111	30.167	3.611	3.611	24.222	10.833	30.444	2.889	5.056	24.444	46.5	6	13.889	15.444	9.722	34.222	12.722	33.611	7.722	4.5	34.5	2.444	3.167	5	43.056	3.5	4.444	26.056			0.494047	15.6206
10.0079	4.833	6.722	34.5	3.389	4.722	26.722	10.444	31.167	2	3.722	21.278	45.278	6.611	16.5	16.056	9.556	33.389	13.722	38.833	7.611	4	35.389	2.889	4.167	4.556	41.611	3.556	5.111	27.222			0.500002	16.0537
10.127	4.944	6.556	33	3.056	3.722	24.444	11.278	30.056	2.722	4.111	23.722	46.444	5.5	16.167	14.944	9.222	31.111	12.556	39.889	7.278	4	37.333	2.889	3.278	4.278	40.667	4.556	4.5	39.167			0.505953	16.2548
10.2462	4.389	6.389	33.5	3.056	4.167	26.278	10.722	30.333	3.333	3.778	24.833	52.333	5.556	17.944	15.222	8.556	33.611	11.889	42.056	6.889	4.333	36.333	2.667	4.389	5	39.556	3.278	4.389	37.556			0.511908	16.6322
10.3653	4.611	6.333	38.111	2.556	4	26.611	10.389	32.667	2.944	4.556	25.389	53.556	5.333	16.278	15.889	6.611	34.389	13.556	39.056	8.167	4.167	39.5	2.389	3.944	5.444	36.611	4.222	5.222	44.444			0.517858	17.136
10.4844	4.333	6	39.722	3.333	2.833	31.611	10.889	31.944	3.778	3.389	23.222	62.667	5.611	15.056	14.278	9.111	36.778	13.389	35.611	7.833	3.333	35.278	2.889	3.833	5.333	35.833	3.389	4.889	48.056			0.523809	17.3869
10.6036	4.167	5.5	44.944	3.222	3.444	32.611	9.667	31	2.833	4	22.833	70.722	5.111	14.944	15.111	8.5	36.889	17.056	34.389	9.889	3.333	32.167	3	4.056	4.389	33.111	4.556	4.389	56.944			0.529764	18.0268
10.7227	3.5	6.111	46.5	3.278	3.944	37.278	9.889	32	3.5	4.056	27.222	78.889	6	15.889	16.111	8.944	32.889	16.889	35.778	7.889	3.5	30.278	3.111	4.167	4.611	32.5	4.056	5.833	64.222			0.535714	18.9253
10.8419	4.611	5.167	48.333	2.056	3	40.556	10.111	33.944	3.111	4.5	24.722	77.111	5.444	15.389	18.5	9.944	31	16.833	33.167	9.556	4.667	28.389	3.111	3.278	5.222	30.556	4.278	5.5	64.667			0.54167	18.8525
10.961	4	5.778	52.222	2.5	3.944	46.444	8.722	35.278	3.111	3.333	24.778	83.889	4.722	13.611	20.167	9.444	26.111	18	35.889	8.889	6	24.167	3.333	3.333	4.944	34.444	5.056	5.722	70.5			0.54762	19.5976
11.0801	3.889	5.278	52.333	2.944	3.389	47.056	7.889	35.167	2.778	4.111	27.333	87.333	5.333	13.5	20.5	9.833	23.944	20.667	36.333	7.167	4.222	21.167	2.722	3.778	4.778	36.389	4.111	5.278	73.111			0.55357	19.7356
11.1993	4.5	6.5	52.778	3.556	3.889	48.944	8.056	36.667	3.556	3.833	28.389	82	4.389	12.167	21.222	11.5	22.222	20.333	39.667	7.389	4.5	20.611	2.722	3.722	4.444	37.5	4.5	6.278	73.889			0.559526	19.9904
11.3184	4.278	6.111	50.444	3.611	3.389	47.278	8.167	41.5	3.444	3.944	27.778	86.056	5.833	10.778	21.556	14.056	24.111	21.444	36.833	7.611	5.056	18.722	3	3.722	5.556	37.611	3.722	5.611	75.556			0.565476	20.2337
11.4376	4.167	4.167	47.389	3.167	4.056	48.111	7.556	42.833	2.667	3.389	30.667	80.333	5.222	10.611	22.944	14.222	22.611	19.333	40.833	8.389	5.556	18.444	3.667	3.722	6.444	37.278	3.944	6.944	75.556			0.571431	20.1456
11.5567	4	5.889	42.556	3.056	4.167	48.889	7.389	48.333	3	4.056	31.944	78.611	6.056	9.556	21.556	16.611	22.722	20.556	41.389	7.056	4.556	18	2.944	4	7.056	38.333	4.444	7.444	75.444			0.577382	20.3315
11.6758	3.722	5.333	40.333	3.111	4.722	44.778	6.722	52.444	3.667	4.167	29.167	76.5	6.389	10.389	22.111	17.222	21.222	20.722	42.278	7	4.5	21.722	2.944	3.833	4.944	38.222	5	8.222	72.722			0.583332	20.1417
11.795	3.444	5.167	36.778	3.222	3.611	34.833	7.556	52.778	3.056	3.5	30.333	68.056	4.444	12.389	23.278	17.333	18.778	22.5	46.056	6.389	4.944	21.944	3.611	3.333	6.056	38.611	4.556	11.5	73.111			0.589287	19.6954
11.9141	4.667	5.333	34.722	3.611	4.167	33.056	6.778	49.111	3.611	3.444	30.333	56.889	5.5	11.778	24.667	16.889	21.944	25.556	48.167	7.944	6.333	23.889	3	4.556	7.056	40.111	4.389	11.5	76			0.595238	19.8276
12.0333	3.778	5.333	30.889	3.167	4.222	37.056	7.722	43.5	3.278	3.611	34.278	50.167	6.056	11.389	21.667	17.889	22.389	22.944	53.056	7.111	4.667	30.278	3.556	3.333	6	43	5.333	12.333	72.5			0.601193	19.6725
12.1524	3.556	5.778	31.111	3.222	5.222	43.167	7.5	39.333	3.389	4.056	34.167	40.944	6.667	12.056	22.167	18	24.222	22.833	48.333	7.556	5.667	28.833	3.444	3.5	5.611	49.444	4.444	13.944	65.611			0.607143	19.4406
12.2716	4	5.5	27.944	3.556	3.889	43	6.5	38.167	2.667	3.5	37.833	39.5	6.444	10.778	24.389	17.889	23.5	25.5	55.556	7.222	5.944	30.167	3.611	3.778	6.778	55.889	4.444	12.722	67.111			0.613099	19.9234
12.3907	4.444	5.278	28.556	2.611	3.944	41.944	6.889	38.889	3.222	4.056	40.333	34.111	6.389	8.889	24.444	21.222	24.222	26.778	55.722	7.667	5.944	23.167	3.722	4.444	6.222	59.111	4.5	13.389	74.944			0.619049	20.1742
12.5098	4.389	4.778	29.5	2.889	3.889	40.111	5.722	39.778	3	4.222	38	32.056	6.944	10.611	25.611	21.722	23	30.111	55.833	7.556	7.389	20.278	4.389	4.833	6.167	70.944	5	12.611	79.5			0.624999	20.7184
12.629	3.944	5.333	27.889	3.278	3.889	34.722	7.556	40.278	3.278	3.056	38.944	30.833	7.111	10.222	21.444	23	22.722	31.833	53.056	7.667	7	17.167	3.833	4.444	7.778	76.333	5.889	13.444	86.944			0.630955	20.7892
12.7481	5.111	4.889	29.611	3.056	4.833	33.444	6.778	39.5	3.5	3.5	40.444	31.944	7.278	11.167	21.389	22.444	20.889	35.667	52.611	7.389	8.444	13	4	4.722	7.722	77.611	6.778	16.722	93.389			0.636905	21.3046
12.8673	4.833	4.778	28.333	2.389	3.944	35.389	6.667	38	4.389	3.333	39.056	37	6.611	10.778	24.556	22.222	19.222	36.278	47	8.222	7.611	12.611	4.556	5.111	8.611	79.278	6.278	18.444	93.056			0.64286	21.3295
12.9864	4.5	5.556	30.722	3.333	3.667	35.889	6.333	36.833	4.611	2.444	41.722	32.278	6.944	10.889	21.389	20.611	19.722	31.333	46.389	7.667	8.667	10.333	4.667	3.333	9.778	80.111	7.722	22	98.5			0.648811	21.3084
13.1055	4.056	6	34	3.389	4.389	37.111	7.722	37.611	3.333	3.722	44.833	33	7.444	10.944	23.444	22.722	19.611	38.056	41	7.722	7.5	9.611	4.833	5.389	9.833	79.5	8.5	27.111	106.222			0.654761	22.3658
13.2247	3.778	4.667	33.444	3.056	4.111	35.444	7.944	39.889	4.833	4.389	49.667	31.333	8.722	10.889	25.389	25.167	20.778	35.222	39.611	8.944	10.278	10.167	6.667	5.667	11.222	74.167	6.5	28.944	110.111			0.660716	22.7931
13.3438	4.667	5.278	36.056	2.556	4.389	36.611	8.111	41.167	3.778	3.389	53.389	33.111	10.389	13.333	24.222	28.278	25.222	36.056	34.556	8.5	10.667	10.278	5.667	6.389	12.944	74.667	11.056	31.611	124.889			0.666667	24.1802
13.463	4.5	4.556	37.778	2.889	4.278	40.222	9.167	37.722	4.333	2.778	53.833	32.167	9.222	14.556	23.611	28.611	22.889	38.556	36.222	9.444	10.833	9.444	5.667	7.389	16.778	69.667	12.444	36.778	126.556			0.672622	24.5824
13.5821	4.222	5.222	35.667	2.556	4.611	38.333	8.444	35.444	4	4.167	51.444	31.5	9.056	18.222	32.889	31.556	26	38.111	35.167	10.167	11.5	9.556	7.611	9.667	20.167	60.333	14	41.389	130.278			0.678572	25.2165
13.7012	5.111	5.778	37	2.889	5.111	38.556	9.333	36.333	3.889	4	50.167	33.556	12.278	21.333	48.611	35.389	29.5	42	34.167	8.611	13.889	9.111	7.667	9.778	26.167	58.611	14.944	44.722	136.667			0.684523	27.0748
13.8204	4.333	5.056	33.778	2.611	4.556	37.444	10.5	34.444	4	4.111	52.444	30.722	16.778	25.667	68.833	39.944	29.056	44.833	34.722	9.444	14.056	10.056	9.056	11.056	34.778	56.889	18.667	41.167	127.889			0.690478	28.1686
13.9395	5.056	4.833	31.444	3.833	4.833	38.889	9.556	33.889	3.833	4.833	49.889	27	15.556	28.889	85.944	47.056	32.389	51.222	36.111	9.722	15.944	10.778	10.111	12.389	43.222	55.167	22.278	33.056	130.778			0.696428	29.6034
14.0587	5.889	5.056	34.333	2.611	5.611	42	10.778	34.111	3.778	4	49.611	30.611	19.722	33.889	100.222	51.944	31.222	55.222	36	9.833	21.222	11.167	10.278	13.833	54.111	54.944	25.167	27.333	134.556			0.702384	31.6915
14.1778	5.056	5.222	33.556	3.333	5	43.778	10	34.444	4.222	4.056	42.556	26.722	24.556	35.667	120.833	61.556	31.278	57.278	35.556	10.944	23.722	12.611	12.667	17.778	64.889	52.5	28.056	20.833	127.556			0.708334	32.9733
14.297	6.111	4.889	29.833	1.778	5.5	43	10	36.833	4.111	3.667	34.111	31.167	29.667	43.222	135.722	71.667	37.444	60.444	37.778	11.389	32.278	13.5	16.167	22	83	54.333	34.167	14.667	111.722			0.714289	35.1782
14.4161	4.778	4.5	30.944	2.722	5.444	45.778	11.833	44.056	5.222	5.167	28.333	30.556	31.444	51.333	140.056	84.222	38	67.167	31.111	11.556	43.389	14.5	22.278	25.889	101.056	55.444	37.667	10.278	92.611			0.72024	37.1494
14.5352	6.056	4.778	31.611	2.444	4.611	48.278	12.222	62	3.944	5.889	25.444	42.333	39.722	60.944	154.722	97.389	37.611	76.444	32.778	13.722	51.833	14.889	25.889	27.611	118.389	50.944	44.944	8.556	76.444			0.72619	40.7738
14.6544	6.889	5.444	31.556	2.778	5.944	47.944	14.056	84.111	4.722	5.611	20.222	49.722	36.611	67.278	166.167	108.222	40.944	75.556	28.278	12.722	64.333	15.611	29.444	31.556	125.222	50.278	45.611	6.944	64.167			0.732145	43.0325
14.7735	5.556	5.444	31.722	2.556	5.778	49.167	13.778	106.722	5.778	5.333	15.944	50.333	36.944	72.278	166.833	118.889	40.278	82.722	29.944	13.5	79.556	16	30.611	34.889	118.056	48.167	46.556	5.833	55.333			0.738096	44.6379
14.8927	5.167	4.944	34.667	2.556	5.778	49.667	15.722	120.778	6.611	6.944	16.611	46.389	42	76.056	165.556	119.167	40.889	90.833	26.389	13.556	106.5	18.889	35.167	36.5	98.111	46.111	41.556	5.167	48.889			0.744051	45.7645
15.0118	5.556	4.889	34.889	2.778	5.722	52.611	16.278	133.944	6.556	7.222	15.944	51.056	45.556	79.5	158.611	116.167	44.278	96.333	26.889	14.111	120.556	20.722	33.333	35.556	72.556	41.056	35.444	4.056	42.389			0.750001	45.6744
15.1309	5.944	7.389	37.889	3.056	6.778	56.889	19.833	145.111	6.889	6.722	15.056	49.889	47.611	79.278	154.222	123	42.556	101.889	27.556	16.222	136.556	24.944	30.833	25.667	49.889	32.278	29.944	4.167	36.722			0.755952	45.682
15.2501	5.111	6	44.222	3.833	6.556	63.111	19.5	158.889	8.389	9.056	15.778	50	51.778	75.167	144	122.778	42.778	105.778	25.611	17.167	148.222	27.333	26.278	16.722	34.222	30.389	24.611	3.444	37			0.761907	45.6456
15.3692	6.944	6.167	51.5	3.611	6.333	78	21.167	194.111	9.667	16	19.167	55.056	56.556	72	146.833	123.667	50.389	104.222	23.5	20.611	156.5	35.444	19.222	12.167	23.333	23.611	14.778	2.944	33.833			0.767857	47.8391
15.4884	6.389	8.056	60.833	3.667	6.667	103.111	25.444	209.833	12.833	26.389	21.722	61.333	59.889	76.556	147.333	124.389	53.667	108.056	22	18.778	165.722	42.778	12.611	8.056	13.778	19.944	10.222	2.278	30.722			0.773813	50.4502
15.6075	7	6.833	61.611	3.5	7.556	116.222	33.056	206.278	14.944	38.389	26.389	73.611	54.333	73.111	146.222	140.333	61.722	106.778	21.944	23.444	158.444	48.833	10.5	6.5	8.111	12.944	5.333	2.333	29.833			0.779763	51.9347
15.7266	6.333	9.722	63.167	4.056	6.556	149.278	44.111	180.722	20.111	58.667	30.333	99.611	57.111	75.444	147.056	144.167	62	100.167	21.278	30.333	143.611	52.722	6.833	5.111	7.5	11.722	3.833	1.944	21.611			0.785713	53.9693
15.8458	7.056	9.667	63.056	3.167	8.278	163.944	51.167	133.056	29.5	77.167	36.722	127.667	59.722	76.5	157.056	138.833	70.167	94.944	21.389	35	123.778	58.722	5.389	3.167	5.111	8.889	2.889	1.722	17.444			0.791669	54.8679
15.9649	7.5	10.944	60.611	4	10.5	183.278	61.889	96.111	42.667	76.556	42.833	147.444	64.556	86	147.444	124.444	70.778	98	21.444	53.167	82.333	64.222	4.667	2.611	4.222	5.833	1.444	2.167	13.111			0.797619	54.8543
16.0841	9.444	14.278	64.444	4.611	14.889	176.111	75.167	66.611	52.778	57.556	57.889	155	70.278	88.667	139.667	106.722	77.389	95.722	19.333	73.833	68.111	59.056	3.167	3.944	3.778	4.778	1.333	2.167	11			0.803574	54.4042
16.2032	10.278	19.556	67.889	5.667	22.833	165.333	78.889	42.222	47.611	36.556	59.722	166.778	77	99.278	144.167	85.722	85.778	95.889	20.722	90.944	52.278	48.556	2.611	2.278	2.667	3.333	1.889	2	7.778			0.809525	53.3181
16.3224	14.667	26.444	74.333	6.111	31.889	164.111	75.056	28.333	37	20.889	60.056	167.5	87.944	103.944	149.833	80.556	88.111	109.778	22.889	105.056	42.611	36.056	2.056	2	2.722	2.833	1.167	1.833	5.889			0.81548	53.5058
16.4415	17.333	36.444	87.611	9.556	41.667	169.611	80.944	15.444	23.889	12.667	47.389	148.444	91.611	108.722	158.722	70.833	100.278	117.111	23.111	112.056	31.944	24.167	1.778	1.778	2	2.722	1.056	1.667	4.667			0.82143	53.2835
16.5606	17.944	53.444	105.556	11.444	42.778	187.111	83.944	10.167	12.889	7.833	31.778	115.556	89.778	101.667	155.333	59.167	115.333	120.778	23.833	111.611	26.722	16.389	1.778	1.556	1.833	2.111	1.333	1.556	3.833			0.827381	52.2433
16.6798	25.444	81.222	132.111	14.611	48.667	206.278	82.889	6.556	5.667	6.222	22.611	86.889	72.111	95.278	134.333	46.167	124.222	126.667	25.389	107.222	20.5	11.222	1.167	1.167	1.833	2.111	1.333	1.722	3.778			0.833336	51.5651
16.7989	32.556	110.167	144.778	18.111	61.5	198.167	81.389	5.056	4.556	5	13.667	70.056	54.444	82.5	126.056	31.944	136.056	136.333	28.556	84.611	14.056	7.222	1.556	1.222	1.944	1.222	1	0.833	2.056			0.839286	50.2281
16.9181	46.5	126	166.278	24.611	66.278	174.278	76.778	4.667	3.778	4.778	8.5	47.833	38.222	65.833	99.111	19.167	146.444	135.889	30.944	69.444	10.167	5.056	1	1	1.722	1.389	0.556	1.167	2			0.845241	47.5652
17.0372	51.944	140.111	193.444	31.778	72.889	148.556	67.833	3.833	2.722	3.222	6.5	35.722	21.833	47.222	73.611	9.333	150.111	152.833	34.222	49.111	6.111	4.444	1.333	1.167	1.444	1.056	0.833	1.389	2.333			0.851192	45.4117
17.1563	51.778	137.222	215.222	38.722	68.667	119.5	51.444	3.222	2.944	2.444	4.167	23.5	11.778	31.333	50.111	5.722	151.667	160.944	38.056	37.222	3.167	3.611	0.722	0.833	1.444	0.944	0.611	1.056	1.944			0.857142	42.0689
17.2755	54.167	136.111	222.778	52.722	73.944	99.056	31.889	3.222	2.278	2.167	2.611	16.667	5.944	19.056	38.333	5.333	130	161.5	39.5	27.389	2.111	2.111	0.889	0.444	0.944	1.111	0.778	0.833	1.278			0.863097	39.1437
17.3946	53.389	109.111	220.333	68.833	77	79.722	20.667	1.944	2.222	2.444	1.944	8.222	3.889	11.5	26.944	2.444	96.833	157	44.444	17.444	2.167	2.667	0.667	0.722	0.944	0.944	0.667	0.444	1.667			0.869048	35.0765
17.5138	44.778	59.667	201	85.333	80.778	70.278	12.5	1	1.778	1.556	1.389	7.111	2.833	6.389	17.222	2.167	71.5	147.722	54.778	12.556	1.611	1.444	0.611	0.611	0.944	0.667	0.611	0.556	1.333			0.875003	30.7146
17.6329	30.333	31.389	165.889	108.278	82.778	60.778	8.611	1.5	1.167	1.111	1.333	5.333	2.667	4	10.556	2.056	43.278	131	58.667	7.167	2.056	1.111	0.778	0.556	0.778	0.611	0.5	0.833	0.833			0.880953	26.412
17.7521	20.333	19.444	131.389	127.778	78	45.167	4.889	1.5	1.333	1	1.167	3.667	1.611	3.111	5.556	1.556	28.278	102.778	61.5	5.722	2.167	1.5	0.444	0.389	0.778	0.611	0.5	0.722	0.833			0.886909	22.5422
17.8712	12.556	11.889	95.944	146.611	79.444	29.278	4.556	0.889	1.056	0.611	0.667	2.778	1.111	2.556	3.667	1.722	16.722	74.667	58.889	4.167	0.833	0.722	0.5	0.222	0.5	0.944	0.278	0.556	0.833			0.892859	19.1437
17.9903	9	7.056	67.556	139.111	71.111	20.611	3.5	0.944	0.556	0.611	0.5	2.222	1.056	2.722	2.833	1.667	12.333	50.611	40.944	2.722	1.5	1.5	0.5	0.333	0.444	0.389	0.222	0.389	0.778			0.898809	15.3007
18.1095	6.667	5.556	41.722	120.056	65.889	11.833	3.278	0.722	0.944	0.5	0.722	2.389	1.056	1.611	2.278	1.111	5.778	33.611	25.611	2.056	1	0.944	0.333	0.278	0.833	0.5	0.222	0.5	0.889			0.904765	11.6858
18.2286	4.778	5.167	25.611	98.722	57.333	6.667	2.333	0.556	0.5	0.833	0.278	1.889	0.667	1.111	1.444	0.833	4.778	21.222	13	1.389	1.333	0.556	0.444	0.389	0.5	0.722	0.389	0.444	0.611			0.910715	8.77583
18.3478	4.222	2.889	15.556	79.278	49.944	6.778	1.889	0.444	0.556	0.333	0.444	1.556	1	1.222	1.111	0.889	4.111	10.333	8.444	1.667	0.889	0.444	0.611	0.611	0.333	0.444	0.278	0.389	0.5			0.91667	6.79879
18.4669	2.889	2.222	10	58.389	39.778	4.389	1.889	0.444	0.333	0.389	0.333	1.778	0.667	1.056	0.444	0.611	3.333	6.944	4.667	1.333	0.889	0.667	0.333	0.389	0.556	0.222	0.389	0.278	0.222			0.922621	5.02872
18.586	2.444	2.333	7.444	36.444	29.833	3.167	1.5	0.278	0.389	0.278	0.389	0.556	0.167	0.889	0.722	0.944	2.444	5.778	3.556	0.944	0.778	0.556	0.056	0.444	0.667	0.389	0.167	0.389	0.667			0.928571	3.60731
18.7052	2.556	1.944	5.778	19.167	18.278	3.167	1.167	0.444	0.389	0.333	0.389	0.778	0.444	0.389	0.778	0.5	1.833	3.722	1.667	0.611	0.556	0.667	0.167	0.167	0.333	0.389	0.278	0.444	0.611			0.934526	2.34297
18.8243	2.333	1.278	3.5	11	11.667	2.444	0.778	0.278	0.222	0.389	0	0.611	0.5	0.722	0.889	0.333	1.278	2.611	1.778	1.167	0.722	0.611	0.278	0.167	0.222	0.389	0.167	0.222	0.333			0.940477	1.61686
18.9435	1.722	1.056	2.722	6.222	6.833	1.667	0.778	0.333	0.222	0.056	0.222	0.778	0.556	0.167	0.667	1.167	0.944	2.722	1.389	0.944	0.444	0.444	0.167	0.222	0.278	0.167	0.111	0.444	0.722			0.946432	1.17814
19.0626	1.111	1.222	2.278	4.5	4.444	1.389	0.722	0.167	0.056	0.111	0.222	0.556	0.722	0.556	0.333	0.667	1.333	2.389	1.667	0.611	0.333	0.611	0.111	0.278	0.5	0.333	0.222	0.444	0.278			0.952382	0.971241
19.1817	1.278	1.5	2.722	3.444	2.778	1.389	0.833	0.333	0.111	0.222	0.222	0.278	0.167	0.278	0.222	0.333	0.722	1.944	1.111	0.833	0.5	0.444	0.278	0.167	0.389	0.389	0.333	0.167	0.389			0.958333	0.819862
19.3009	1.111	0.722	2.222	2.722	2.222	1.056	1.056	0.278	0.278	0.278	0.111	0.667	0.111	0.444	0.333	0.5	0.722	1.389	0.611	0.833	0.333	0.222	0.333	0.167	0.444	0.056	0.556	0.278	0.111			0.964288	0.695379
19.42	1.222	1.278	1.444	2.278	2.5	0.833	0.667	0	0.056	0	0.167	0.5	0.111	0.222	0.333	0.667	0.778	1.278	0.833	0.722	0.444	0.5	0.167	0.5	0.056	0.333	0	0.556	0.389			0.970238	0.649448
19.5392	0.833	1.167	1.167	2.278	2.278	0.667	0.278	0.056	0.111	0	0.111	0	0.167	0.167	0.333	0.611	0.778	1.222	0.556	0.389	0.389	0.278	0.111	0.278	0.056	0.278	0.056	0.167	0.167			0.976194	0.515483
19.6583	0.556	0.833	0.778	1.667	1.556	0.722	0.167	0	0.056	0.111	0.111	0.111	0.167	0.222	0.056	0.5	0.444	1.111	1.056	0.556	0.444	0.167	0.278	0.389	0	0.444	0.389	0	0.389			0.982144	0.457931
19.7775	0.889	0.667	0.833	1.333	1.278	0.611	0.222	0.222	0.056	0.056	0.056	0.111	0.167	0.333	0.278	0.167	0.222	1	0.556	0.222	0.389	0.389	0.167	0.167	0.444	0	0.167	0.278	0.222			0.988099	0.396621
19.8966	0.556	0.667	0.778	0.722	1.333	0.667	0.333	0.167	0.056	0.167	0	0.111	0.278	0.222	0.444	0.333	0.556	0.556	0.667	0.167	0.111	0.222	0.333	0.5	0.056	0	0.444	0.056	0.278			0.99405	0.371724
20.0157	0.333	0.222	0.889	1	1.167	0.667	0.278	0.056	0	0	0	0.389	0.333	0.167	0.222	0.167	0.444	0.611	0.278	0.5	0.5	0.333	0.111	0.278	0.222	0.056	0.5	0	0.111			1	0.339103

## Sheet: Image12
X0	Y0	Y1	Y2	Y3	Y4	Y5	Y6	Y7	Y8	Y9	Y10	Y11	Y12	Y13	Y14	Y15	Y16	Y17	Y18	Y19	Y20	Y21	Y22	Y23	Y24	Y25	Y26			Ap-Ba	Average int.
0	19.518	18.707	18.713	19.84	26.277	20.983	30.939	24.938	40.507	46.13	18.5238	25.2903	30.841	38.252	53.146	54.254	44.699	33.172	34.415	42.2	45.555	35.375	17.37	13.616	11.6368	16.3102	19.4248			0	29.6531
0.1191	21.644	22.292	18.163	21.346	28.163	22.4	36.867	27.627	40.321	45.751	21.8202	26.5074	28.3384	41.393	60.072	59.523	55.076	35.748	39.518	49.741	53.043	37.436	22.944	14.283	12.7116	18.44	22.2393			0.00680035	32.7188
0.2383	26.044	23.057	21.163	24.55	31.105	27.007	45.559	32.645	44.675	42.587	22.4075	28.5075	30.1116	45.932	65.158	69.787	61.547	43.237	43.942	54.717	59.11	45.254	27.234	15.383	12.605	18.9909	23.1997			0.0136064	36.5006
0.3574	28.549	25.416	24.391	25.318	33.12	32.074	53.946	36.9	47.402	46.744	26.4423	31.6671	35.4194	49.93	77.24	83.733	74.91	48.757	48.793	63.815	59.851	51.11	33.567	19.642	13.5637	22.1191	24.9469			0.0204068	41.458
0.4766	33.014	27.994	29.676	24.876	37.816	37.195	61.064	42.915	53.689	51.678	28.8865	32.3971	36.4607	56.419	88.898	91.109	83.059	53.844	58.021	72.087	62.261	56.96	39.437	21.287	14.1124	25.472	27.3791			0.0272128	46.2225
0.5957	37.679	29.729	37.366	27.732	40.188	38.755	65.105	49.115	59.105	55.552	30.1769	32.8793	38.0975	58.173	104.639	105.548	94.424	58.979	65.935	82.377	70.318	70.086	45.863	27.402	12.4311	26.9187	29.2332			0.0340132	51.6225
0.7148	40.309	35.984	43.399	29.533	44.773	44.63	67.474	56.169	63.849	62.695	31.0623	34.2428	43.5649	61.9	129.849	124.949	105.013	68.111	70.363	98.939	75.801	74.874	50.339	34.641	14.6238	31.6068	31.2418			0.0408135	58.1458
0.834	43.801	39.104	52.545	31.397	50.888	45.848	69.269	65.755	68.779	60.672	29.747	35.4481	40.2989	70.502	146.34	144.505	116.469	78.996	79.786	109.602	87.929	82.697	63.055	38.079	18.6732	33.5171	33.5407			0.0476196	64.3423
0.9531	49.58	44.478	63.734	39.826	55.665	51.036	74.208	75.072	81.206	58.024	32.3892	35.6785	43.5047	76.962	165.985	157.932	128.529	93.48	85.778	121.535	102.085	93.905	74.025	46.683	23.5516	35.3891	38.3498			0.0544199	72.17
1.0723	54.349	47.849	71.525	40.232	61.827	54.978	74.743	81.33	87.25	60.818	36.953	37.6709	47.8287	84.977	180.326	166.729	143.922	116.621	99.79	132.03	110.085	100.554	82.087	54.202	28.2739	35.0668	39.9374			0.061226	78.9613
1.1914	64.029	52.242	83.429	47.505	70.63	55.928	82.719	87.795	96.182	65.377	38.7546	38.3955	49.8561	92.644	183.91	171.744	151.657	140.911	111.535	139.586	124.291	108.928	90.16	59.684	34.7363	37.5679	41.6788			0.0680264	85.9954
1.3106	70.805	61.807	93.006	52.736	75.928	62.905	81.676	97.901	115.798	69.273	43.0558	39.136	53.1463	97.675	180.245	170.267	155.241	159.296	133.159	156.274	141.047	115.464	95.788	69.544	41.2635	37.3834	46.5588			0.0748324	93.1992
1.4297	81.619	71.332	98.618	61.045	85.195	69.992	85.286	99.198	121.193	72.334	44.9366	38.8051	55.5639	100.653	175.652	163.664	159.202	175.849	142.093	165.875	153.477	116.896	100.841	79.208	47.0888	36.5249	48.6279			0.0816328	98.1766
1.5488	87.539	82.108	102.902	67.17	88.422	75.468	83.778	114.669	129.938	74.538	51.9154	39.6031	57.1154	107.204	165.772	150.181	153.884	188.365	151.798	169.637	151.374	116.917	102.667	87.048	50.8747	41.836	51.0288			0.0884331	101.62
1.668	97.552	96.02	110.611	73.431	97.012	84.004	79.294	114.004	137.029	74.376	54.3716	43.5255	58.622	111.046	158.811	134.008	151.208	181.678	158.977	165.082	142.092	118.262	105.715	86.476	52.7145	41.1215	55.2963			0.0952392	103.05
1.7871	103.856	104.219	120.597	81.406	100.168	93.108	81.13	115.069	142.258	84.848	57.4515	44.8497	62.7207	109.885	144.275	112.852	142.885	172.463	162.217	161.112	138.239	122.362	107.44	87.464	57.7461	44.1522	53.8264			0.10204	104.022
1.9063	112.676	114.8	121.309	93.825	106.834	98.757	80.883	121.935	137.103	92.325	63.349	50.3082	66.4692	111.001	132.21	95.41	134.296	154.198	158.749	145.028	127.485	128.028	114.578	90.856	61.3227	43.8139	55.3466			0.108846	104.181
2.0254	120.581	131.361	120.941	105.207	113.946	105.155	83.208	121.791	147.017	96.501	66.9998	51.3781	70.8368	107.721	114.261	86.031	122.264	132.303	142.433	134.341	114.114	127.664	115.777	93.215	61.4831	48.5554	55.0259			0.115646	103.337
2.1445	125.742	142.129	117.599	114.331	128.007	110.18	86.451	125.449	154.723	101.431	69.804	57.368	71.8191	106.286	96.743	69.956	110.96	113.307	125.424	118.396	97.122	119.328	109.191	93.676	62.7885	52.2818	53.1346			0.122446	101.245
2.2637	130.883	142.59	115.578	130.792	127.997	115.263	88.251	126.75	158.722	105.886	70.0174	64.4133	76.5171	107.433	84.302	60.659	95.858	103.203	114.444	101.488	89.985	113.345	113.451	100.939	65.0202	48.6346	49.8225			0.129252	100.083
2.3828	132.959	142.834	105.919	137.932	127.675	124	96.72	131.093	161.836	107.411	72.1927	73.4296	80.1973	104.985	68.781	47.449	80.298	92.112	93.224	89.783	82.743	101.12	112.92	98.85	64.9736	55.6786	46.7714			0.136053	97.5514
2.502	134.118	137.459	100.398	138.714	133.71	134.829	95.638	127.335	157.334	103.361	73.8326	83.6923	79.6169	103.598	50.967	40.41	75.164	82.307	78.356	76.94	71.634	92.309	108.611	101.733	70.6203	56.8361	45.1843			0.142859	94.6188
2.6211	126.943	130.817	86.474	134.444	136.545	142.541	98.385	127.166	151.262	116.044	70.8387	86.8789	86.8975	92.532	30.703	27.891	64.249	70.759	70.68	68.515	60.231	80.781	110.02	91.999	73.4211	59.1461	39.4002			0.149659	90.2061
2.7402	113.413	113.744	65.795	133.497	130.781	150.068	97.817	118.001	146.833	120.95	69.0903	90.6268	86.1884	84.751	18.076	23.663	53.712	62.097	64.605	62.54	56.14	72.192	102.744	86.226	77.231	65.5832	36.4411			0.156459	85.2891
2.8594	106.259	103.797	45.535	119.12	131.931	155.275	107.459	103.163	138.058	117.157	69.0353	94.5718	88.5888	76.678	14.302	19.997	48.249	52.481	56.8	56	48.152	62.858	100.728	82.025	76.1589	62.4361	34.4675			0.163266	80.4179
2.9785	88.05	92.774	41.431	101.679	117.008	163.173	118.284	93.678	134.973	113.923	73.8248	98.8504	82.2753	73.321	11.546	20.24	41.832	40.281	49.54	47.551	42.685	56.285	96.659	71.418	76.0493	63.7072	31.6467			0.170066	75.655
3.0977	72.662	81.023	39.63	83.481	107.909	160.56	125.624	86.241	130.315	112.807	73.2322	97.1015	79.4383	64.712	10.196	21.669	35.403	31.011	45.024	37.386	41.034	48.816	94.891	65.356	77.3542	64.5103	31.7165			0.176872	71.0779
3.2168	55.251	72.301	36.089	62.75	97.137	162.232	138.649	68.825	128.343	111.615	76.1271	92.8904	72.8882	56.629	10.791	26.327	29.202	22.024	38.247	28.046	33.881	46.759	94.049	53.481	78.9023	61.9038	29.547			0.183672	66.1069
3.336	46.282	66.464	30.734	50.382	85.999	165.448	146.519	58.6	120.866	112.037	81.4874	90.0879	71.6353	47.755	11.286	29.858	23.178	17.294	33.63	22.242	29.867	41.042	85.099	44.152	73.4089	57.1648	24.205			0.190478	61.7305
3.4551	40.226	54.827	28.221	43.037	78.85	155.428	153.242	51.608	105.99	99.747	86.2257	84.5854	66.2041	38.571	14.734	34.064	22.033	14.037	26.721	17.285	26.616	33.041	78.829	38.034	72.0604	52.6658	21.9097			0.197279	56.9923
3.5742	34.151	48.096	23.816	38.886	64.56	134.693	156.716	42.87	99.121	95.193	91.5307	87.4714	63.4832	29.985	13.136	32.57	18.473	10.479	20.575	12.764	23.076	30.153	65.378	29.662	61.0129	49.975	20.4692			0.204079	51.7887
3.6934	28.402	41.228	17.127	31.501	57.92	120.234	147.403	35.466	90.968	94.21	93.0946	85.2643	62.1223	25.309	13.3	27.746	18.694	8.468	17.902	10.795	18.108	27.62	48.309	25.122	59.297	47.0336	18.8002			0.210885	47.0905
3.8125	25.192	31.616	14.434	34.269	48.76	102.514	144.094	26.704	77.802	95.51	93.0643	78.403	61.6035	19.321	13.542	24.771	17.479	7.101	12.829	8.806	18.859	26.8	37.136	24.435	53.8838	45.0992	16.2559			0.217685	42.9735
3.9317	22.461	29.216	12.607	29.047	41.848	88.072	134.526	17.684	63.08	94.269	95.4415	77.9439	59.4534	16.49	13.168	27.478	15.878	6.62	8.434	7.825	20.144	21.482	27.79	20.219	49.9322	42.3414	13.9516			0.224492	39.163
4.0508	17.785	26.608	9.917	23.253	37.937	76.873	108.315	10.962	55.473	99.473	94.6667	73.1666	53.5645	14.743	12.323	29.25	13.433	5.286	6.991	6.762	16.819	21.137	23.148	18.291	47.1315	34.8582	12.9647			0.231292	35.2271
4.1699	13.153	21.712	7.14	21.968	33.243	71.368	87.211	10.569	46.007	99.887	88.6713	65.8985	50.2365	12.556	10.46	30.474	11.213	4.772	6.39	5.235	16.528	19.18	18.669	15.237	39.509	31.046	11.5748			0.238092	31.4781
4.2891	7.966	15.652	9.453	23.695	33.035	64.548	82.069	6.54	40.577	103.654	83.9056	57.5149	48.9586	12.287	9.122	29.372	7.665	4.816	5.006	5.71	14.153	15.851	16.798	15.912	33.9889	24.3224	9.6499			0.244898	28.9712
4.4082	6.557	9.505	7.137	21.699	29.385	62.326	75.309	5.394	34.364	101.592	81.6702	50.4069	45.052	11.615	8.673	28.133	5.963	3.782	4.571	4.241	11.198	15.302	12.826	11.523	27.8265	21.3206	8.7631			0.251699	26.1531
4.5274	4.67	6.143	8.156	20.695	22.806	54.909	63.788	5.045	27.441	100.211	74.539	42.0554	44.3114	10.991	9.981	27.23	5.628	4.466	4.031	4.872	9.982	14.188	10.447	9.754	21.9872	19.0926	7.6181			0.258505	23.5199
4.6465	4.563	4.838	8.48	19.521	20.923	46.146	56.69	5.021	18.469	97.213	68.5443	35.8789	40.5924	9.955	9.088	27.955	5.037	3.75	3.865	4.444	8.272	11.182	9.347	10.588	16.9751	16.799	6.6053			0.265305	21.1386
4.7657	3.446	4.01	10.342	20.265	18.672	36.059	47.658	4.444	13.972	91.071	68.0179	31.3918	36.9073	9.234	9.292	27.175	5.095	3.668	3.524	4.995	8.419	12.084	7.977	10.81	16.2043	14.2379	6.8323			0.272111	19.4742
4.8848	3.142	3.659	10.731	17.878	15.884	28.908	39.371	4.553	10.45	79.216	62.4682	28.3392	34.3926	10.247	9.047	27.602	4.714	3.516	3.22	5.139	7.033	10.321	7.389	9.61	11.0746	13.6679	5.8811			0.278911	17.3131
5.0039	3.221	3.307	13.173	17.17	14.27	25.374	34.219	3.567	9.223	66.301	57.7672	25.4216	30.9588	9.735	9.206	30.005	4.496	4.187	3.585	5.499	5.546	8.464	7.353	9.337	9.909	12.448	4.9976			0.285712	15.8793
5.1231	3.201	3.378	12.814	16.819	10.904	23.554	30.206	3.603	8.309	56.894	54.0011	22.6119	30.3809	8.57	10.385	28.979	4.26	3.893	3.53	4.96	6.013	6.819	6.876	8.589	8.2583	11.9319	4.6048			0.292518	14.6054
5.2422	2.882	3.668	17.259	13.069	10.667	20.364	27.525	5.127	7.914	50.796	52.9698	21.6877	25.5723	8.219	13.669	29.013	4.757	2.575	3.348	5.957	7.468	6.187	5.02	9.623	7.7397	13.279	3.3149			0.299318	14.0619
5.3614	3.508	3.131	17.204	13.346	7.582	18.716	24.256	3.976	7.347	51.188	49.4246	22.0255	24.9991	8.484	17.86	26.563	4.787	3.519	3.186	7.679	6.333	4.647	4.859	11.21	5.9409	10.7914	2.885			0.306124	13.5351
5.4805	3.171	2.922	18.24	12.637	7.895	16.183	26.902	3.751	6.834	47.195	49.8568	19.1854	19.154	7.443	20.239	21.992	3.909	3.245	2.94	6.482	5.973	3.996	4.495	9.393	5.9455	11.1694	2.9569			0.312925	12.7446
5.5996	3.394	3.419	18.619	12.07	6.578	14.789	21.905	4.702	6.85	49.662	43.5591	17.4023	14.4799	7.663	21.79	19.479	3.49	2.686	3.1	7.279	6.172	3.667	4.214	9.285	5.7743	8.2484	2.9286			0.319725	11.9706
5.7188	3.057	3.44	19.673	12.407	6.594	15.33	21.646	4.515	6.566	44.054	37.2453	15.351	12.5016	7.44	22.88	20.525	5.205	2.99	3.384	7.914	6.962	3.752	3.537	9.098	5.5613	8.6704	3.3494			0.326531	11.6166
5.8379	2.368	3.8	19.416	12.036	6.081	12.712	18.506	4.602	5.115	35.196	32.4531	11.1346	11.3495	7.928	21.455	19.638	4.138	3.997	2.636	8.326	7.451	3.629	3.282	9.975	5.6047	8.667	2.3527			0.333331	10.5129
5.9571	2.914	3.965	22.315	10.187	6.738	13.266	18.706	3.919	5.908	31.656	28.6304	12.22	9.075	8.351	22.61	22.193	3.353	3.238	2.877	10.071	7.555	3.044	3.848	10.018	5.0777	8.2947	2.4647			0.340137	10.4628
6.0762	3.102	3.711	25.298	9.294	6.644	13.086	19.519	3.755	6.091	23.146	22.6578	11.1909	8.374	6.444	22.975	23.65	4.076	2.42	2.932	10.009	8.695	3.295	3.618	9.512	5.193	8.6012	2.7047			0.346938	9.99976
6.1953	2.861	3.89	24.27	11.358	7.125	13.459	19.441	3.654	5.749	22.725	21.3322	9.1873	6.7691	7.17	22.158	22.88	3.802	3.185	2.856	8.336	8.539	3.13	2.706	11.511	5.8705	8.3092	2.7218			0.353738	9.81463
6.3145	2.974	3.387	24.187	9.878	6.772	15.72	19.025	3.5	6.315	18.899	17.1897	9.6955	6.4579	6.458	21.84	25.146	4.536	3.152	1.68	8.366	9.695	3.722	2.914	12.087	6.0015	9.5729	3.0599			0.360544	9.71224
6.4336	2.736	4.192	23.932	10.227	7.444	14.046	18.122	4.137	5.764	17.207	14.1214	7.9034	6.7207	5.703	20.441	25.984	3.925	2.878	2.328	9.029	8.497	3.33	3.261	11.658	5.7514	9.1045	2.3863			0.367345	9.28995
6.5528	2.911	3.893	23.651	12.675	8.326	15.907	16.268	4.552	5.13	15.773	12.5729	7.013	5.3709	6.516	19.364	22.836	3.57	3.098	2.698	8.981	8.403	3.236	3.715	10.835	5.8724	7.9545	2.899			0.374151	9.0378
6.6719	3.508	4.978	23.193	12.225	10.27	15.336	14.305	4.18	6.419	15.29	12.14	5.8028	5.3809	6.394	17.962	20.643	3.994	3.812	2.655	8.175	7.415	3.397	3.552	11.558	5.7928	8.803	2.3026			0.380951	8.86974
6.7911	3.093	4.752	20.972	11.785	10.309	15.921	15.163	4.333	6.237	15.108	12.6602	5.1741	4.5068	7.607	17.217	21.442	3.808	3.26	2.406	9.339	7.789	3.766	3.037	11.101	5.8712	9.1488	2.9919			0.387757	8.84437
6.9102	2.686	4.339	18.243	9.183	10.799	16.963	15.6	4.304	5.405	12.06	11.8348	5.2806	4.1348	7.015	20.186	19.342	3.995	2.826	2.305	10.081	6.732	3.475	2.792	13.151	4.9774	9.0584	2.1337			0.394557	8.47784
7.0293	2.894	5.019	17.246	8.202	11.798	17.035	16.698	5.366	5.097	10.115	11.7354	3.7684	3.5126	7.141	19.388	21.872	5.05	2.598	2.415	13.1	6.195	3.6	3.122	14.968	4.7719	8.7087	2.9808			0.401358	8.68136
7.1485	2.865	4.761	15.887	7.848	11.717	18.176	18.054	5.191	4.51	7.525	9.5148	4.8732	2.7093	6.825	21.76	19.589	4.181	3.3	2.367	14.31	5.093	3.537	2.837	13.119	4.4372	9.9396	1.9494			0.408164	8.4028
7.2676	2.461	5.165	15.86	6.732	11.557	21.399	18.704	3.92	4.919	7.431	7.9546	3.9128	2.8879	6.245	23.497	20.261	4.052	2.946	2.119	11.847	6.737	3.181	2.907	13.489	4.5155	9.6078	2.8022			0.414964	8.41147
7.3868	3.564	4.925	16.145	5.438	11.525	19.933	18.43	3.846	4.697	7.143	7.3888	3.5641	3.392	7.276	23.883	17.263	4.621	3.718	1.956	12.877	7.04	3.993	3.385	16.202	5.224	11.1336	2.7901			0.42177	8.56861
7.5059	2.488	4.496	18.181	5.825	12.865	20.638	22.396	3.847	3.975	7.163	8.5897	3.5621	2.893	8.134	24.993	18.149	4.213	3.51	2.543	11.341	6.791	3.573	3.623	15.432	5.2244	13.5204	2.1713			0.428571	8.89396
7.625	2.786	4.748	16.542	5.716	12.665	27.564	22.905	5.734	4.866	6.658	7.5825	3.7345	2.4379	9.339	22.759	19.007	2.938	3.674	2.458	10.909	7.491	3.202	2.644	16.286	4.4512	13.1449	2.3259			0.435371	9.05807
7.7442	2.741	5.924	17.06	4.461	13.501	29.399	25.412	4.727	5.086	7.026	6.9759	4.4398	2.4786	10.94	22.914	19.822	4.181	3.118	2.072	10.377	7.882	4.111	2.766	17.502	4.2083	14.4435	2.0264			0.442177	9.46646
7.8633	2.867	5.613	15.78	4.761	12.313	29.187	25.765	4.542	4.746	7.625	8.4667	3.8635	2.1013	10.228	28.37	21.738	3.945	2.658	2.566	10.082	6.534	3.621	3.495	19.467	4.7464	15.663	2.6724			0.448977	9.75616
7.9825	2.534	5.337	15.809	4.193	12.93	28.514	26.57	6.064	4.465	8.285	7.4026	3.6198	3.2592	9.805	33.023	23.132	3.631	3.072	3.319	10.099	7.372	3.523	2.288	20.387	5.0113	14.1478	2.5257			0.455783	10.0118
8.1016	2.867	5.573	15.824	4.12	11.636	24.622	25.331	5.573	4.628	8.457	8.1966	3.5346	2.6782	8.323	38.474	22.166	4.574	3.619	2.588	9.438	7.903	3.529	2.907	22.19	6.6686	14.3263	2.4495			0.462584	10.0813
8.2207	2.992	5.236	13.939	5.382	11.562	21.578	22.075	4.925	5.594	7.867	7.9353	2.8091	2.3658	7.569	42.465	22.087	4.408	3.64	2.727	10.11	7.314	3.57	2.608	20.149	6.9103	13.1955	2.1271			0.469384	9.74593
8.3399	2.833	6.5	12.797	4.38	13.583	23.25	25.489	4.734	5.642	7.172	7.8765	3.0976	2.1673	7.388	47.674	21.759	4.635	3.412	2.718	9.447	8.162	3.39	3.238	22.052	9.8082	14.8855	2.8877			0.47619	10.4066
8.459	3.463	6.601	14.01	4.801	14.889	22.247	24.637	4.446	4.634	7.405	7.7088	2.6954	2.5403	8.012	55.039	20.082	3.846	3.413	2.622	9.931	6.958	3.187	2.786	20.02	11.0917	14.8159	2.244			0.482991	10.5232
8.5782	3.137	6.327	15.922	5.195	15.443	23.737	26.126	4.356	4.426	6.821	8.8862	3.3145	2.304	9.111	57.663	19.374	3.849	3.097	2.541	9.438	8.332	3.343	3.159	17.394	13.182	17.7467	2.4593			0.489797	10.9883
8.6973	3.3	6.497	14.801	4.637	14.793	24.757	30.236	4.326	4.743	7.182	7.5765	3.0984	2.8131	8.818	60.856	16.097	3.736	3.152	2.168	8.907	8.861	2.502	2.607	18.491	12.0654	20.3352	2.2271			0.496597	11.0957
8.8165	3.432	5.995	13.432	4.845	13.855	27.675	33.3	3.374	4.284	5.944	9.1483	2.6262	2.7741	10.61	69.853	16.227	4.02	3.013	3.077	9.036	9.26	3.602	2.711	15.216	13.6457	21.9398	2.2034			0.503403	11.6703
8.9356	2.944	7.457	13.102	3.939	12.494	29.574	34.507	3.836	4.727	6.031	11.0301	2.8495	2.6753	9.627	75.269	15.136	3.73	3.025	3.414	10.142	8.839	2.908	3.061	14.105	12.655	23.0192	2.3885			0.510203	11.9439
9.0547	2.786	7.742	12.873	3.616	10.04	39.685	39.092	4.746	5.063	6.899	11.5669	3.6674	2.8921	8.73	76.805	13.866	3.773	3.279	2.667	10.88	8.961	2.675	2.509	14.985	13.2523	23.5545	2.7925			0.517004	12.5703
9.1739	3.676	6.786	9.907	3.896	9.334	45.433	41.801	4.834	5.685	6.47	13.8696	3.3771	2.7791	8.278	83.708	13.013	3.772	2.772	3.073	10.973	9.5	3.638	2.903	14.739	13.2568	24.2429	2.5909			0.52381	13.1225
9.293	3.29	6.621	10.75	3.411	8.541	52.203	46.109	4.125	5.512	5.469	15.034	3.3143	2.4178	8.347	93.585	12.806	3.656	2.677	2.732	10.776	10.716	2.841	2.395	15.474	14.1199	24.7975	2.2192			0.53061	13.8496
9.4122	3.121	6.203	9.501	3.911	9.423	57.429	46.43	4.43	6.323	6.302	14.2042	3.5527	2.7132	8.054	94.611	11.131	4.147	2.415	2.024	10.319	10.731	2.967	2.959	15.91	15.9691	25.8716	2.4175			0.537416	14.1878
9.5313	2.575	5.485	9.518	3.848	9.673	62.353	44.155	4.124	7.036	5.697	13.4174	4.3443	2.223	9.588	99.778	11.929	4.428	3.052	3.411	8.974	12.894	2.971	2.608	20.707	18.0272	23.9569	2.6814			0.544217	14.7946
9.6504	3.26	4.196	10.14	3.937	7.32	69.831	40.86	5.719	6.633	5.972	15.0852	4.1209	2.2758	9.634	103.173	12.387	3.786	2.865	3.26	8.733	15.005	2.827	2.827	23.264	20.5745	19.7016	3.2374			0.551017	15.2083
9.7696	3.551	5.218	11.39	4.136	7.922	70.343	33.425	4.372	7.25	6.174	16.0597	4.4832	3.0219	9.915	106.605	12.661	4.046	3.565	2.727	9.332	16.608	3.505	2.334	21.978	20.6024	18.6136	2.8462			0.557823	15.2846
9.8887	2.93	4.84	12.169	4.225	7.416	70.866	31.723	4.803	7.845	6.818	15.0337	4.7917	3.5799	8.915	99.654	13.136	4.133	3.602	3.026	8.13	19.057	3.114	3.004	22.865	21.2569	17.4214	2.4317			0.564623	15.0662
10.0079	2.871	4.689	11.367	3.703	7.757	67.707	31.628	4.568	7.878	10.372	15.9641	6.1033	2.92	9.79	90.929	15.58	4.11	3.213	3.115	8.273	23.515	2.544	3.384	25.233	20.9048	16.3516	2.6656			0.571429	15.0791
10.127	3.664	4.701	11.46	3.678	8.814	66.193	32.918	4.646	7.1	11.399	15.8821	6.6794	2.7926	8.205	78.226	17.854	5.024	4.062	3.798	9.252	24.949	2.486	2.807	27.198	18.8446	17.6768	2.5819			0.57823	14.9219
10.2462	3.588	5.076	12.553	3.884	7.122	64.291	33.906	4.561	6.859	13.924	17.0664	8.3996	3.593	7.392	66.503	20.186	5.334	4.262	3.62	10.733	27.864	2.851	2.679	28.702	19.4592	19.4155	2.657			0.585036	15.0548
10.3653	3.321	4.174	11.619	3.919	7.846	59.77	32.54	4.819	8.084	15.487	16.4652	9.0984	3.5906	7.142	48.701	30.381	5.492	4.089	3.025	10.838	33.614	3.659	3.113	33.096	20.7296	19.8926	2.7201			0.591836	15.0824
10.4844	4.118	4.072	12.287	3.575	7.593	61.772	32.13	5.325	8.188	17.185	17.0181	9.2777	2.8441	7.332	34.954	43.174	6.653	4.517	4.411	14.378	38.589	3.249	2.332	37.283	19.7548	20.7124	3.4136			0.598637	15.7829
10.6036	3.999	5.777	14.036	3.656	7.422	56.923	36.115	5.16	8.181	17.164	18.6906	7.5388	3.953	6.494	28.455	57.757	8.092	5.313	4.944	17.8	42.64	3.524	2.93	40.325	19.7932	20.07	3.4811			0.605443	16.6753
10.7227	4.614	5.322	15.404	4.203	7.465	49.911	37.081	5.846	8.805	17.165	18.2331	6.3955	3.5764	4.653	21.673	61.409	12.618	5.637	5.756	20.924	46.082	4.538	2.827	43.139	23.4513	21.5291	2.8769			0.612243	17.079
10.8419	6.367	5.146	16.718	3.955	6.784	53.181	36.997	5.045	8.426	16.008	17.6805	6.8323	3.7024	4.738	16.177	62.627	16.565	7.012	5.986	26.921	49.51	6.19	3.556	44.091	24.8886	22.6651	3.4311			0.619049	17.8222
10.961	6.726	6.828	17.708	4.547	8.002	49.178	36.989	5.654	8.883	14.435	20.6564	6.4833	3.109	5.551	11.761	58.081	19.946	7.165	8.453	30.72	47.191	6.226	3.918	44.706	26.4639	24.1652	3.051			0.625849	18.0221
11.0801	7.746	6.696	21.168	5.06	7.993	55.453	32.931	6.361	8.112	14.045	21.8384	7.2363	3.2618	5.458	9.57	44.611	26.081	10.412	9.089	31.345	41.708	10.216	3.197	48.706	32.3002	29.8628	3.5948			0.63265	18.6686
11.1993	9.26	7.652	19.999	4.821	6.23	56.319	33.75	6.593	8.169	13.691	20.5885	6.9221	4.2538	5.307	8.376	27.552	30.269	13.422	12.809	31.546	33.459	11.33	4.468	54.754	35.7172	29.6957	4.0772			0.639456	18.5567
11.3184	12.494	9.931	21.025	5.195	6.524	61.25	33.596	7.265	8.877	13.687	21.0075	7.089	4.3818	5.574	7.092	18.639	32.898	18	15.987	30.43	26.424	13.147	5.495	57.014	39.0247	32.7492	4.378			0.646256	19.2287
11.4376	18.968	11.203	24.308	7.151	8.089	60.351	33.148	8.92	7.717	16.834	22.3562	7.5873	4.7873	5.361	5.248	12.787	33.694	23.175	16.213	30.319	22.172	13.772	5.115	57.812	42.8656	33.2329	4.9382			0.653062	19.9305
11.5567	23.874	13.892	26.25	7.62	7.879	65.326	32.131	9.432	7.956	16.512	23.4254	6.8209	5.047	5.274	4.536	9.017	31.361	27.467	23.26	25.253	15.851	16.186	4.96	58.757	48.6136	42.569	6.0431			0.659863	20.9375
11.6758	26.147	18.597	27.619	7.771	8.257	67.564	31.773	11.745	7.232	17.529	21.0307	8.5342	4.384	5.311	3.676	7.202	23.661	30.663	27.555	17.658	12.269	15.757	7.269	57.123	46.9382	44.5718	8.2581			0.666663	20.9665
11.795	31.747	22.353	31.644	8.716	11.359	76.701	27.187	14.361	6.989	17.549	20.7961	7.5129	3.8757	5.086	3.09	5.881	14.387	26.313	29.065	12.544	10.942	19.686	8.847	50.192	48.8897	52.3545	8.9984			0.673469	21.3728
11.9141	35.158	25.572	37.697	8.555	14.485	78.037	23.272	16.226	6.966	15.862	21.7131	7.4307	4.1212	4.801	2.525	4.404	10.081	20.413	35.861	8.148	8.671	19.291	11.658	42.793	48.6126	56.6472	11.5426			0.680269	21.5016
12.0333	38.445	28.707	45.921	9.915	17.002	85.077	20.686	20.473	7.599	14.41	19.8338	8.7172	3.817	4.882	2.211	4.172	5.723	13.997	32.155	5.393	7.789	18.8	15.265	39.009	52.5302	57.7979	12.1967			0.687075	21.9453
12.1524	35.288	34.103	52.508	11.393	21.088	89.505	22.01	23.116	6.602	13.902	20.4805	7.6632	2.9911	5.084	1.435	3.936	4.363	9.818	26.385	3.961	5.725	15.147	17.518	32.458	53.5563	51.3456	14.012			0.693876	21.6812
12.2716	32.645	31.475	56.691	13.675	29.592	99.405	24.2	23.452	6.69	13.422	20.5976	8.555	2.7334	4.593	1.506	2.725	3.707	6.38	16.532	2.865	5.574	11.183	18.781	28.916	52.9624	47.8764	19.785			0.700682	21.7229
12.3907	24.03	28.393	63.515	16.092	33.899	107.746	26.408	25.568	6.19	13.877	21.8253	9.9713	3.4462	5.315	0.819	2.204	2.78	5.43	8.644	2.732	3.991	6.828	21.458	25.498	48.0102	44.7555	24.3026			0.707482	21.6196
12.5098	17.805	23.338	61.318	20.034	40.591	110.898	31.882	29.355	6.269	14.383	23.1885	8.995	3.4533	3.679	1.168	2.427	2.618	4.574	6.07	2.396	3.719	5.573	16.406	23.571	45.0079	44.2473	23.7307			0.714282	21.3591
12.629	10.682	15.97	52.402	26.5	45.448	116.301	41.044	33.785	6.404	15.271	22.2811	8.0719	2.9818	3.931	1.159	1.69	2.201	3.858	4.969	2.201	2.512	3.717	12.202	20.685	40.4591	39.6559	21.3099			0.721089	20.6552
12.7481	6.949	8.072	37.129	33.36	52.788	112.555	51.007	43.16	5.29	15.835	20.6689	8.5794	3.4688	3.885	0.832	1.606	2.408	2.821	3.441	2.022	2.507	3.528	11.124	15.942	32.4301	32.7351	16.683			0.727889	19.6602
12.8673	4.944	5.502	19.33	39.72	60.019	100.365	61.337	47.8	6.171	15.67	21.8821	9.5868	4.1302	4.332	0.803	1.292	2.209	2.883	2.591	1.964	2.18	3.101	7.686	11.596	30.8052	25.6964	10.9584			0.734695	18.6872
12.9864	3.294	3.788	11.999	48.983	62.239	90.067	69.682	57.42	7.249	13.989	22.6723	8.3893	3.6995	4.334	0.576	1.335	1.332	2.338	2.185	1.701	1.647	1.793	4.884	9.062	27.6064	19.7697	6.2686			0.741495	18.0853
13.1055	2.601	3.019	7.025	51.22	59.231	83.046	75.237	59.773	6.745	13.751	21.9717	9.0466	3.9391	3.846	0.768	1.439	1.582	1.797	1.417	1.568	1.16	2.586	4.157	8.077	26.1619	12.3757	4.1206			0.748296	17.3208
13.2247	2.567	2.237	4.546	48.058	49.707	60.932	79.972	61.51	6.099	12.403	23.5452	9.1322	3.8062	3.332	0.152	0.975	1.517	1.511	1.795	0.913	1.293	1.453	3.373	6.451	20.7303	7.0086	3.4063			0.755102	15.4972
13.3438	1.374	2.456	2.772	40.058	40.022	52.612	77.701	53.787	7.816	11.332	28.7725	8.7589	3.7488	3.528	0.319	0.835	1.103	1.147	1.341	0.834	1.115	1.496	3.172	4.834	20.7388	6.206	2.7459			0.761902	14.0972
13.463	1.204	1.129	2.763	23.853	25.017	45.586	76.744	39.731	9.895	11.168	27.5335	9.5182	3.9502	3.483	0.275	0.579	0.694	0.886	1.266	0.912	0.858	1.556	2.135	5.688	13.309	5.6635	2.2916			0.768708	11.7662
13.5821	0.973	1.368	2.171	12.25	12.114	36.697	68.039	26.653	12.629	9.775	30.4781	8.6881	4.4888	3.131	0.149	0.675	0.635	0.904	1.188	0.905	0.777	1.597	1.853	4.658	9.2999	3.8452	2.037			0.775508	9.55474
13.7012	0.781	0.948	1.534	6.593	6.526	25.714	56.93	18.304	15.079	11.919	31.6068	9.1938	4.576	3.964	0.092	0.359	0.707	0.671	0.93	0.661	0.586	0.934	1.67	3.846	6.3373	2.9998	2.4033			0.782309	7.995
13.8204	0.811	0.957	1.389	4.099	3.732	17.812	49.611	10.885	19.847	11.419	31.8924	10.1993	5.0426	3.456	0.203	0.218	0.502	0.687	0.67	0.393	0.548	0.764	1.691	3.299	4.3072	2.4789	2.1574			0.789115	7.00262
13.9395	0.662	0.519	0.955	3.029	2.498	11.457	41.646	6.596	23.378	10.68	34.9461	12.1933	4.7954	2.966	0.207	0.342	0.374	0.649	0.963	0.428	0.308	1.001	1.863	2.88	3.1865	1.9039	1.4659			0.795915	6.36637
14.0587	0.349	0.471	1.102	2.399	1.974	6.381	30.121	6.298	26.86	9.509	31.5025	13.2308	4.6639	3.453	0.153	0.375	0.486	0.994	0.713	0.425	0.383	0.539	1.604	2.165	3.2552	1.7117	1.4058			0.802721	5.64903
14.1778	0.108	0.43	0.745	1.861	1.516	3.696	23.447	3.767	29.159	10.926	34.4581	13.1236	4.8785	4.473	0.172	0.312	0.242	0.322	0.576	0.388	0.472	0.872	1.45	2.007	2.5989	1.4602	1.3435			0.809522	5.3631
14.297	0.17	0.52	0.545	1.094	1.446	2.118	17.835	2.55	27.846	12.36	33.3167	12.464	4.8865	4.432	0.237	0.459	0.431	0.568	0.436	0.236	0.206	0.602	0.975	1.91	1.997	1.6267	0.9915			0.816328	4.89846
14.4161	0.098	0.447	0.79	0.963	1.259	1.949	9.937	2.497	18.185	11.717	30.7029	11.9205	4.2907	3.864	0.103	0.343	0.633	0.352	0.481	0.128	0.164	0.584	1.018	1.565	2.0413	1.0745	0.6422			0.823128	3.99071
14.5352	0.2	0.142	0.585	1.164	0.867	1.636	6.631	1.795	11.173	11.563	32.3993	13.5578	5.0073	4.024	0.108	0.253	0.326	0.444	0.445	0.345	0.343	0.343	0.949	1.043	1.4529	0.9382	0.9248			0.829928	3.65405
14.6544	0.375	0.092	0.439	0.787	0.733	1.238	4.081	1.046	5.917	12.672	31.6973	15.2231	5.8719	4.121	0.101	0.149	0.325	0.184	0.451	0.251	0.235	0.282	0.672	0.658	1.2749	0.8214	1.106			0.836734	3.3631
14.7735	0.342	0.242	0.381	0.558	0.49	1.522	2.802	0.576	5.116	13.726	35.0582	15.8706	6.1807	5.323	0.06	0.122	0.114	0.212	0.28	0.154	0.263	0.298	0.795	0.495	0.9102	0.3992	0.649			0.843535	3.44218
14.8927	0.304	0.264	0.2	0.334	0.51	0.997	3.514	0.606	3.809	15.554	35.5533	15.6418	4.9551	6.643	0.042	0.063	0.19	0.17	0.35	0.148	0.219	0.373	0.759	0.265	1.0711	0.3538	0.632			0.850341	3.46374
15.0118	0.299	0.112	0.132	0.205	0.348	0.638	2.86	0.798	2.097	15.888	34.5511	18.9031	4.3653	10.462	0.053	0.041	0.339	0.276	0.227	0.242	0.1	0.204	0.396	0.395	1.2884	0.5882	0.6572			0.857141	3.57279
15.1309	0.092	0.076	0.053	0.25	0.274	0.768	1.846	0.645	1.809	19.226	37.7909	20.4175	5.3249	12.31	0.011	0.013	0.117	0.367	0.164	0.171	0.326	0.29	0.366	0.406	0.9072	0.4104	0.6608			0.863942	3.89229
15.2501	0.136	0.064	0.127	0.153	0.188	0.482	1.685	0.641	1.575	23.712	39.1419	22.3783	6.3659	14.741	0.081	0	0.072	0.125	0.426	0.23	0.231	0.322	0.391	0.293	0.6771	0.1693	0.3543			0.870748	4.25044
15.3692	0.26	0.161	0.078	0.189	0.307	0.398	1.174	0.544	1.39	34.997	46.0394	23.9437	5.9842	19.18	0.025	0.102	0.143	0.31	0.299	0.103	0.016	0.325	0.359	0.337	0.4887	0.2944	0.1672			0.877548	5.09684
15.4884	0.317	0.135	0.047	0.092	0.116	0.603	1.046	0.245	1.181	41.401	47.1127	22.1756	5.1158	24.629	0	0.004	0.112	0.2	0.391	0.192	0.129	0.167	0.594	0.329	0.3956	0.2766	0.0867			0.884354	5.44789
15.6075	0.277	0.006	0.006	0.005	0.218	0.437	0.835	0.115	0.844	45.381	48.36	25.9744	5.6941	26.39	0	0	0.053	0.188	0.077	0.124	0.174	0.34	0.332	0.245	0.42	0.2588	0.3842			0.891154	5.81994
15.7266	0.209	0.045	0.114	0.149	0.228	0.389	0.575	0.192	0.767	41.494	47.5597	29.1616	6.6618	27.233	0.049	0	0.041	0.221	0.024	0.012	0.192	0.174	0.189	0.273	0.5079	0.1164	0.0825			0.897955	5.80222
15.8458	0.04	0.198	0.099	0.333	0.143	0.191	0.541	0.132	0.871	30.803	44.775	33.8121	8.3829	25.572	0.041	0	0.064	0.205	0.345	0.093	0.075	0.044	0.244	0.317	0.1734	0.1902	0.0641			0.904761	5.47217
15.9649	0.143	0.166	0.247	0.137	0.191	0.191	0.541	0.094	0.486	22.255	37.4837	38.4932	7.9299	23.704	0.015	0	0.053	0.099	0.053	0.038	0.115	0.149	0.034	0.267	0.1284	0.0704	0.1455			0.911561	4.93441
16.0841	0.11	0.161	0.065	0.089	0.107	0.159	0.371	0.152	0.626	14.364	30.7305	40.1828	9.8075	21.142	0	0	0.055	0.013	0	0.145	0.000398	0.209	0.207	0.141	0.2823	0.1672	0.0535			0.918367	4.42001
16.2032	0.067	0.089	0.126	0.102	0.157	0.107	0.683	0.12	0.308	11.264	27.5667	48.8742	13.0896	15.105	0.037	0	0.137	0.085	0.124	0.028	0	0.174	0.182	0.196	0.1854	0.0992	0.0076			0.925168	4.40421
16.3224	0.049	0.072	0.184	0.126	0.011	0.127	0.354	0.107	0.381	5.27	20.5052	55.2935	16.6363	9.595	0.016	0	0.019	0.023	0.034	0.041	0.014	0.219	0.069	0.173	0.1126	0.1094	0.0334			0.931974	4.05831
16.4415	0.071	0.124	0.06	0.139	0.051	0.098	0.128	0.055	0.296	2.69	14.4468	61.2787	17.828	6.842	0.05	0	0.059	0.152	0	0.054	0.202	0.066	0.122	0.144	0.1885	0.0983	0.1357			0.938774	3.90293
16.5606	0.056	0.083	0.037	0.03	0.02	0.069	0.287	0.129	0.475	2.302	8.2841	66.3391	21.9253	4.525	0.003	0	0.137	0.007	0	0.01	0.1	0.096	0.263	0.124	0.2743	0.0383	0.1138			0.945574	3.91585
16.6798	0.058	0.142	0.016	0.087	0.091	0.057	0.463	0.088	0.274	2.016	5.034	61.3725	25.5963	2.663	0	0	0.182	0.201	0.091	0	0.079	0.053	0.198	0.134	0.079	0.0159	0.07			0.95238	3.66891
16.7989	0.054	0.167	0.057	0.013	0.008	0.105	0.113	0.029	0.132	2.114	3.1088	60.357	29.0461	1.958	0	0	0.043	0.006	0.015	0	0.077	0.061	0.016	0.063	0.0567	0	0.1014			0.959181	3.61856
16.9181	0.095	0.08	0.054	0.05	0.051	0.047	0.177	0	0.158	1.341	2.6332	50.1991	28.107	2.197	0	0	0	0.133	0.085	0.0002958	0.085	0.048	0.048	0.004	0.0658	0.0453	0.0474			0.965987	3.17597
17.0372	0.064	0.267	0.047	0.043	0.046	0.068	0.229	0.051	0.193	1.112	1.9507	38.5346	27.8594	1.584	0.009	0	0.005	0.033	0.073	0.052	0.074	0.11	0.119	0.011	0.0959	0.06	0.2054			0.972787	2.69985
17.1563	0.044	0.064	0.001	0.112	0	0.102	0.179	0.054	0.121	0.946	1.6845	23.5285	28.455	1.577	0.09	0	0.2	0.094	0.038	0.044	0.079	0.003	0.096	0.138	0.1099	0.0494	0.0612			0.979588	2.14335
17.2755	0.012	0.043	0.175	0.047	0.009	0.056	0.079	0	0.127	0.911	1.9678	13.5758	27.7278	1.201	0.007	0	0.006	0.003	0.014	0.013	0.07	0.087	0.102	0.108	0.0595	0.0485	0.0541			0.986394	1.72235
17.3946	0.05	0.011	0.034	0.017	0.044	0.056	0.1	0.102	0.103	0.59	1.7501	8.4117	21.6821	0.957	0	0	0.047	0	0	0.048	0.009	0.064	0.123	0.064	0.1432	0.0717	0.0257			0.993194	1.27791
17.5138	0.043	0.193	0	0.1	0	0.11	0.081	0.041	0.046	0.395	1.1085	5.7552	19.6422	0.807	0	0	0.006	0.0003584	0.003	0	0.006	0.094	0.063	0.064	0.0723	0.0985	0.1451			1	1.06941

## Sheet: Image11
X0	Y0	Y1	Y2	Y3	Y4	Y5	Y6	Y7	Y8	Y9	Y10	Y11	Y12	Y13	Y14	Y15	Y16	Y17	Y18	Y19	Y20	Y21	Y22	Y23	Y24	Y25	Y26	Y27	Y28	Y29	Y31	Y32	Y33	Y34	Y35	Y36	Y37	Y38	Y39	Y40	Y41	Y42	Y43	Y44	Y45	Y46	Y47	Y48	Y49
0	58.623	24.017	53.142	86.654	113.635	68.032	55.08	57.549	47.174	58.821	27.937	22.87	24.799	20.405	46.364	34.924	68.407	93.891	41.02	44.238	27.59	19.096	22.853	59.26	34.874	64.765	33.739	18.104	33.695	36.64	24.017	53.142	86.654	113.635	68.032	55.08	57.549	47.174	58.821	27.937	22.87	24.799	20.405	46.364	34.924	68.407	93.891	41.02	44.238
0.1191	63.829	27.122	53.997	100.558	122.609	63.402	62.457	56.867	51.472	62.267	31.451	26.649	25.096	25.474	48.958	36.12	73.294	95.808	39.063	38.667	31.86	20.756	25.227	70.214	38.064	70.143	41.471	20.203	34.419	43.431	27.122	53.997	100.558	122.609	63.402	62.457	56.867	51.472	62.267	31.451	26.649	25.096	25.474	48.958	36.12	73.294	95.808	39.063	38.667
0.2383	67.005	29.135	56.03	107.641	132.062	61.103	73.244	65.758	60.684	65.076	38.962	27.729	25.138	29.405	45.736	43.028	71.391	99.162	42.27	41.108	33.33	23.81	24.592	73.733	37.713	68.86	46.062	22.057	34.535	46.534	29.135	56.03	107.641	132.062	61.103	73.244	65.758	60.684	65.076	38.962	27.729	25.138	29.405	45.736	43.028	71.391	99.162	42.27	41.108
0.3574	75.32	32.584	56.96	107.245	130.974	60.78	86.222	78.865	73.555	64.178	44.573	33.865	26.466	34.133	52.269	52.956	74.628	99.228	44.933	42.029	38.586	29.356	26.16	80.712	43.2	67.539	59.915	25.175	37.626	50.675	32.584	56.96	107.245	130.974	60.78	86.222	78.865	73.555	64.178	44.573	33.865	26.466	34.133	52.269	52.956	74.628	99.228	44.933	42.029
0.4766	79.591	40.068	58.753	106.28	129.3	59.521	98.034	97.777	85.599	64.725	46.832	39.85	26.452	39.986	62.047	62.844	79.542	102.823	44.089	42.538	43.154	31.292	29.545	85.817	45.35	63.515	66.153	24.279	41.103	54.527	40.068	58.753	106.28	129.3	59.521	98.034	97.777	85.599	64.725	46.832	39.85	26.452	39.986	62.047	62.844	79.542	102.823	44.089	42.538
0.5957	89.068	51.092	61.823	110.642	124.41	62.828	113.37	114.222	95.559	71.816	59.04	51.017	27.587	44.298	67.481	74.402	84.254	107.875	45.336	47.949	49.845	36.489	31.997	85.541	55.124	59.954	81.899	30.807	43.343	62.704	51.092	61.823	110.642	124.41	62.828	113.37	114.222	95.559	71.816	59.04	51.017	27.587	44.298	67.481	74.402	84.254	107.875	45.336	47.949
0.7148	94.587	60.857	61.964	105.365	111.272	70.368	132.041	137.278	101.776	74.696	71.186	56.323	29.37	50.22	68.985	96.254	91.29	115.322	50.344	50.275	51.659	37.648	37.552	95.733	58.437	65.741	93.022	33.814	47.517	64.205	60.857	61.964	105.365	111.272	70.368	132.041	137.278	101.776	74.696	71.186	56.323	29.37	50.22	68.985	96.254	91.29	115.322	50.344	50.275
0.834	104.336	82.349	68.102	102.563	102.407	79.263	145.248	145.854	110.305	81.093	90.421	63.542	31.572	57.098	72.519	106.034	93.049	116.111	55.965	55.403	55.818	39.736	39.371	92.645	62.612	56.762	107.231	37.874	49.565	75.59	82.349	68.102	102.563	102.407	79.263	145.248	145.854	110.305	81.093	90.421	63.542	31.572	57.098	72.519	106.034	93.049	116.111	55.965	55.403
0.9531	108.346	110.374	80.567	101.231	95.305	85.293	157.527	159.404	128.158	92.496	109.076	71.593	33.261	61.75	72.93	115.258	93.937	117.077	69.987	62.419	58.261	41.879	41.19	93.223	74.218	55.27	110.533	48.913	55.699	77.663	110.374	80.567	101.231	95.305	85.293	157.527	159.404	128.158	92.496	109.076	71.593	33.261	61.75	72.93	115.258	93.937	117.077	69.987	62.419
1.0723	118.576	121.634	96.423	102.893	95.295	97.129	167.516	166.238	127.873	101.007	129.452	77.923	44.702	66.806	78.804	130.399	96.323	118.339	84.701	65.299	70.232	48.38	51.005	105.381	88.203	56.146	124.385	56.58	59.349	85.796	121.634	96.423	102.893	95.295	97.129	167.516	166.238	127.873	101.007	129.452	77.923	44.702	66.806	78.804	130.399	96.323	118.339	84.701	65.299
1.1914	118.947	157.556	117.846	105.162	97.301	105.315	164.696	161.743	129.245	105.065	149.509	87.354	57.672	70.805	82.745	139.361	102.62	120.787	84.551	73.259	71.496	47.003	58.304	111.963	97.74	56.558	130.91	72.686	61.292	95.604	157.556	117.846	105.162	97.301	105.315	164.696	161.743	129.245	105.065	149.509	87.354	57.672	70.805	82.745	139.361	102.62	120.787	84.551	73.259
1.3106	126.387	173.938	133.867	101.022	99.373	112.189	167.809	154.302	132.114	114.671	171.844	96.315	67.956	80.614	88.559	154.625	117.847	119.763	80.572	76.856	72.182	57.832	75.779	110.253	100.694	60.473	148.805	83.148	74.692	97.575	173.938	133.867	101.022	99.373	112.189	167.809	154.302	132.114	114.671	171.844	96.315	67.956	80.614	88.559	154.625	117.847	119.763	80.572	76.856
1.4297	142.35	186.66	142.56	103.921	100.745	118.721	171.014	148.075	139.305	113.522	178.092	95.333	80.252	84.761	94.191	155.925	128.462	127.156	80.473	83.548	69.728	71.565	98.94	107.333	105.17	65.432	165.011	102.011	87.012	101.837	186.66	142.56	103.921	100.745	118.721	171.014	148.075	139.305	113.522	178.092	95.333	80.252	84.761	94.191	155.925	128.462	127.156	80.473	83.548
1.5488	160.07	189.761	163.788	104.881	100.723	122.168	175.983	141.771	148.208	118.016	180.89	98.681	96.163	93.464	101.764	158.179	142.691	130.829	79.457	87.872	79.816	75.602	128.396	113.206	120.941	71.594	167.859	119.075	103.569	106.043	189.761	163.788	104.881	100.723	122.168	175.983	141.771	148.208	118.016	180.89	98.681	96.163	93.464	101.764	158.179	142.691	130.829	79.457	87.872
1.668	171.861	192.197	175.96	106.403	97.393	125.656	181.181	137.751	148.122	133.334	182.357	95.563	106.546	104.927	105.705	160.663	152.962	150.392	81.901	94.89	86.163	86.128	142.788	117.35	116.918	77.469	168.494	132.563	106.647	105.07	192.197	175.96	106.403	97.393	125.656	181.181	137.751	148.122	133.334	182.357	95.563	106.546	104.927	105.705	160.663	152.962	150.392	81.901	94.89
1.7871	178.1	186.62	176.372	109.113	94.928	134.73	173.908	129.375	149.293	149.96	175.825	93.125	118.236	120.88	115.485	161.892	167.498	161.663	79.538	103.752	90.543	89.321	171.274	116.817	120.609	80.482	164.792	144.355	115.159	107.613	186.62	176.372	109.113	94.928	134.73	173.908	129.375	149.293	149.96	175.825	93.125	118.236	120.88	115.485	161.892	167.498	161.663	79.538	103.752
1.9063	161.187	174.54	178.099	110.887	90.3	138.548	172.143	122.675	144.382	165.762	161.827	89.538	130.159	134.833	113.551	165.12	180.212	166.357	88.452	113.659	99.446	101.461	187.228	121.844	122.698	86.307	156.785	160.616	112.959	101.771	174.54	178.099	110.887	90.3	138.548	172.143	122.675	144.382	165.762	161.827	89.538	130.159	134.833	113.551	165.12	180.212	166.357	88.452	113.659
2.0254	149.268	159.121	162.695	118.241	90.851	141.368	157.776	110.474	141.782	170.686	146.579	89.049	134.108	148.248	115.001	167.849	193.845	178.207	92.411	119.544	102.502	112.13	204.55	128.694	121.497	98.987	149.826	157.672	116.728	96.104	159.121	162.695	118.241	90.851	141.368	157.776	110.474	141.782	170.686	146.579	89.049	134.108	148.248	115.001	167.849	193.845	178.207	92.411	119.544
2.1445	119.364	136.684	148.059	117.545	97.564	143.264	145.149	100.112	134.117	172.188	138.051	86.858	139.223	152.193	120.417	177.713	195.956	188.098	92.722	122.755	107.701	122.661	212.435	130.828	130.885	101.199	144.46	158.496	120.239	96.212	136.684	148.059	117.545	97.564	143.264	145.149	100.112	134.117	172.188	138.051	86.858	139.223	152.193	120.417	177.713	195.956	188.098	92.722	122.755
2.2637	103.18	114.917	130.061	124.56	94.117	148.468	135.312	91.984	126.424	162.496	133.207	87.122	133.282	146.807	116.222	178.745	202.328	180.28	96.206	122.545	116.82	123.293	215.657	134.26	128.455	103.384	141.148	160.033	130.599	97.489	114.917	130.061	124.56	94.117	148.468	135.312	91.984	126.424	162.496	133.207	87.122	133.282	146.807	116.222	178.745	202.328	180.28	96.206	122.545
2.3828	84.414	102.006	109.55	129.458	98.619	142.454	121.875	87.767	112.089	149.079	128.659	95.696	126.879	146.547	117.781	184.774	201.018	177.238	100.359	121.299	123.155	127.086	210.378	134.515	128.357	103.033	139.88	151.165	127.045	92.535	102.006	109.55	129.458	98.619	142.454	121.875	87.767	112.089	149.079	128.659	95.696	126.879	146.547	117.781	184.774	201.018	177.238	100.359	121.299
2.502	74.213	86.613	90.674	136.569	104.715	141.182	117.251	79.988	106.427	140.859	132.238	91.903	119.047	131.612	122.596	179.583	187.919	157.423	106.233	117.878	115.658	131.225	191.342	133.446	126.165	103.178	130.133	152.26	119.694	94.262	86.613	90.674	136.569	104.715	141.182	117.251	79.988	106.427	140.859	132.238	91.903	119.047	131.612	122.596	179.583	187.919	157.423	106.233	117.878
2.6211	61.209	71	70.785	137.961	106.35	134.231	102.821	70.116	95.787	129.792	118.184	92.427	112.149	117.786	132.006	182.507	167.582	138.14	104.315	105.419	112.613	121.121	173.158	140.299	127.331	104.38	134.768	150.718	108.195	97.33	71	70.785	137.961	106.35	134.231	102.821	70.116	95.787	129.792	118.184	92.427	112.149	117.786	132.006	182.507	167.582	138.14	104.315	105.419
2.7402	55.544	54.726	58.353	131.047	109.195	122.732	89.772	62.201	89.499	111.951	107.866	94.144	96.26	113.432	139.342	176.746	144.136	112.567	111.103	95.615	107.911	117.162	156.552	140.575	114.929	105.638	122.23	153.736	114.929	92.372	54.726	58.353	131.047	109.195	122.732	89.772	62.201	89.499	111.951	107.866	94.144	96.26	113.432	139.342	176.746	144.136	112.567	111.103	95.615
2.8594	49.44	42.725	53.66	123.165	106.889	112.458	75.767	54.961	84.831	107.201	103.494	99.393	79.645	96.944	155.204	161.909	117.879	98.293	111.012	91.931	107.425	109.261	131.212	136.069	119.666	106.363	115.883	149.765	113.996	97.94	42.725	53.66	123.165	106.889	112.458	75.767	54.961	84.831	107.201	103.494	99.393	79.645	96.944	155.204	161.909	117.879	98.293	111.012	91.931
2.9785	43.425	38.781	51.171	114.328	106.685	105.925	63.931	46.412	79.548	94.559	95.132	105.872	70.122	85.646	159.461	161.869	91.976	79.702	115.701	81.883	103.652	104.978	122.681	138.658	118.146	111.221	110.735	142.607	120.376	103.091	38.781	51.171	114.328	106.685	105.925	63.931	46.412	79.548	94.559	95.132	105.872	70.122	85.646	159.461	161.869	91.976	79.702	115.701	81.883
3.0977	38.242	33.575	42.1	100.881	98.483	98.359	52.882	41.92	76.303	83.649	92.127	108.77	58.11	73.046	160.294	154.552	78.232	64.758	110.998	74.521	102.277	94.201	100.176	125.886	109.199	104.943	106.985	139.574	119.41	103.361	33.575	42.1	100.881	98.483	98.359	52.882	41.92	76.303	83.649	92.127	108.77	58.11	73.046	160.294	154.552	78.232	64.758	110.998	74.521
3.2168	35.312	28.729	35.438	84.843	85.325	86.746	43.392	37.231	70.067	74.102	87.199	108.618	50.447	64.02	147.6	154.037	60.65	51.003	105.339	67.169	101.291	88.896	92.635	120.306	103.441	100.421	101.929	137.67	118.122	99.746	28.729	35.438	84.843	85.325	86.746	43.392	37.231	70.067	74.102	87.199	108.618	50.447	64.02	147.6	154.037	60.65	51.003	105.339	67.169
3.336	26.679	24.209	31.241	81.816	79.378	85.156	35.842	32.622	67.91	68.081	74.881	110.578	42.734	60.7	138.181	151.099	52.301	42.28	102.554	65.387	99.383	80.18	84.18	108.927	95.831	110.672	98.805	138.518	113.986	109.054	24.209	31.241	81.816	79.378	85.156	35.842	32.622	67.91	68.081	74.881	110.578	42.734	60.7	138.181	151.099	52.301	42.28	102.554	65.387
3.4551	24.11	21.614	25.66	71.849	72.221	77.571	29.865	31.985	61.362	58.748	72.123	107.569	36.692	54.239	118.642	145.55	37.916	38.263	103.427	61.74	93.113	70.037	73.751	97.341	93.169	106.725	84.662	135.073	108.59	111.582	21.614	25.66	71.849	72.221	77.571	29.865	31.985	61.362	58.748	72.123	107.569	36.692	54.239	118.642	145.55	37.916	38.263	103.427	61.74
3.5742	18.11	24.214	24.599	59.33	69.256	68.533	19.622	26.499	54.617	54.261	65.869	112.903	32.585	55.039	105.348	138.977	34.075	32.683	100.151	57.908	85.066	71.743	63.596	88.926	91.226	104.427	71.847	126.835	112.615	115.425	24.214	24.599	59.33	69.256	68.533	19.622	26.499	54.617	54.261	65.869	112.903	32.585	55.039	105.348	138.977	34.075	32.683	100.151	57.908
3.6934	15.475	20.791	25.173	52.786	66.635	61.298	16.065	22.024	55.186	51.968	60.493	108.516	25.238	51.673	93.797	118.434	25.304	27.669	91.324	54.475	76.268	72.067	48.319	73.518	84.306	98.051	67.815	126.41	119.396	113.336	20.791	25.173	52.786	66.635	61.298	16.065	22.024	55.186	51.968	60.493	108.516	25.238	51.673	93.797	118.434	25.304	27.669	91.324	54.475
3.8125	14.179	18.982	22.517	43.063	59.554	55.839	11.281	18.696	53.941	46.722	60.024	106.876	23.353	49.105	81.039	97.298	22.058	20.136	88.391	52.219	74.439	65.8	42.553	68.228	77.181	91.442	58.082	120.448	119.32	107.303	18.982	22.517	43.063	59.554	55.839	11.281	18.696	53.941	46.722	60.024	106.876	23.353	49.105	81.039	97.298	22.058	20.136	88.391	52.219
3.9317	14.431	14.75	24.079	40.566	56.836	48.404	9.717	19.61	49.784	41.197	61.096	98.212	19.616	44.656	74.777	77.852	18.175	17.061	81.712	47.332	68.319	58.667	29.038	51.92	73.469	82.964	50.826	112.612	120.358	106.73	14.75	24.079	40.566	56.836	48.404	9.717	19.61	49.784	41.197	61.096	98.212	19.616	44.656	74.777	77.852	18.175	17.061	81.712	47.332
4.0508	13.861	13.485	20.038	33.306	53.99	40.5	8.736	17.995	46.272	43.418	52.84	93.74	18.835	41.146	71.046	58.917	15.931	14.496	75.826	45.224	64.729	51.958	23.233	42.368	59.822	81.632	45.193	114.353	111.174	105.488	13.485	20.038	33.306	53.99	40.5	8.736	17.995	46.272	43.418	52.84	93.74	18.835	41.146	71.046	58.917	15.931	14.496	75.826	45.224
4.1699	12.53	11.967	16.157	27.878	49.254	34.641	8.931	15.54	44.076	37.616	54.202	84.959	15.646	33.275	63.41	49.968	12.756	12.75	61.644	42.064	60.039	44.486	21.779	35.74	47.755	67.575	46.55	111.063	92.088	115.242	11.967	16.157	27.878	49.254	34.641	8.931	15.54	44.076	37.616	54.202	84.959	15.646	33.275	63.41	49.968	12.756	12.75	61.644	42.064
4.2891	12.587	10.021	10.607	27.527	49.264	28.547	7.293	14.719	44.022	37.423	52.258	77.073	16.125	32.86	53.127	38.784	12.425	9.524	53.982	40.529	57.377	39.822	21.048	35.433	42.154	60.409	39.901	104.919	71.016	105.757	10.021	10.607	27.527	49.264	28.547	7.293	14.719	44.022	37.423	52.258	77.073	16.125	32.86	53.127	38.784	12.425	9.524	53.982	40.529
4.4082	12.385	8.414	9.136	22.109	45.354	23.346	7.491	14.084	38.217	38.102	50.026	68.73	17.135	31.94	47.403	34.82	9.966	10.585	47.217	36.863	52.727	34.13	17.612	28.831	31.415	54.287	39.8	105.803	53.877	99.629	8.414	9.136	22.109	45.354	23.346	7.491	14.084	38.217	38.102	50.026	68.73	17.135	31.94	47.403	34.82	9.966	10.585	47.217	36.863
4.5274	11.866	7.288	8.947	21.213	39.261	18.43	6.652	10.667	36.239	33.669	49.273	65.327	16.015	29.335	43.598	32.372	8.958	9.195	42.717	32.846	46.152	26.441	17.413	26.93	28.06	47.465	33.984	102.774	48.079	101.131	7.288	8.947	21.213	39.261	18.43	6.652	10.667	36.239	33.669	49.273	65.327	16.015	29.335	43.598	32.372	8.958	9.195	42.717	32.846
4.6465	9.068	6.643	7.551	17.497	36.799	17.462	5.344	12.17	34.731	28.14	49.404	57.433	14.228	21.601	42.011	27.985	9.605	7.314	35.75	30.859	47.869	23.015	15.451	28.82	23.711	39.964	27.295	103.269	38.11	92.729	6.643	7.551	17.497	36.799	17.462	5.344	12.17	34.731	28.14	49.404	57.433	14.228	21.601	42.011	27.985	9.605	7.314	35.75	30.859
4.7657	7.484	5.485	6.671	21.571	35.332	18.103	6.235	10.958	33.465	25.665	45.729	52.869	13.78	17.533	39.355	26.408	8.761	6.39	28.437	29.436	39.802	19.613	13.104	28.724	20.653	37.422	26.492	96.054	28.294	82.671	5.485	6.671	21.571	35.332	18.103	6.235	10.958	33.465	25.665	45.729	52.869	13.78	17.533	39.355	26.408	8.761	6.39	28.437	29.436
4.8848	7.549	4.791	5.976	21.483	31.275	13.39	5.182	9.943	29.336	22.976	43.623	51.779	14.333	16.103	37.497	21.818	8.03	6.33	26.065	26.874	35.173	18.064	12.916	26.63	19.921	34.553	22.918	88.668	26.858	75.491	4.791	5.976	21.483	31.275	13.39	5.182	9.943	29.336	22.976	43.623	51.779	14.333	16.103	37.497	21.818	8.03	6.33	26.065	26.874
5.0039	6.484	5.053	5.148	17.209	28.478	13.181	5.775	9.097	25.929	22.121	42.541	47.081	14.141	13.927	39.228	22.329	6.837	5.123	23.405	25.488	32.21	17.324	14.168	26.49	19.096	30.183	18.501	80.282	25.132	62.577	5.053	5.148	17.209	28.478	13.181	5.775	9.097	25.929	22.121	42.541	47.081	14.141	13.927	39.228	22.329	6.837	5.123	23.405	25.488
5.1231	7.186	4.253	4.578	14.716	25.76	10.853	5.357	10.115	16.773	22.241	37.893	38.154	13.092	13.363	36.018	16.563	7.767	5.244	22.033	22.028	34.858	15.803	11.603	25.687	17.751	27.265	13.986	75.143	20.495	49.597	4.253	4.578	14.716	25.76	10.853	5.357	10.115	16.773	22.241	37.893	38.154	13.092	13.363	36.018	16.563	7.767	5.244	22.033	22.028
5.2422	7.851	4.614	5.332	11.967	22.956	10.297	4.517	9.183	13.591	18.937	36.497	36.065	12.271	13.067	33.313	14.836	6.665	4.728	19.936	21.109	31.015	13.444	12.959	23.568	14.086	25.761	14.004	66.264	17.92	37.307	4.614	5.332	11.967	22.956	10.297	4.517	9.183	13.591	18.937	36.497	36.065	12.271	13.067	33.313	14.836	6.665	4.728	19.936	21.109
5.3614	7.768	4.674	5.815	10.698	25.747	8.92	5.087	7.478	11.485	17.514	34.828	34.766	13.097	11.92	33.092	11.355	7.465	3.771	18.387	21.499	31.519	11.317	11.04	25.453	13.426	23.528	10.915	59.626	17.375	27.3	4.674	5.815	10.698	25.747	8.92	5.087	7.478	11.485	17.514	34.828	34.766	13.097	11.92	33.092	11.355	7.465	3.771	18.387	21.499
5.4805	6.935	4.096	5.732	9.773	21.775	8.622	3.377	8.882	9.271	16.863	33.396	28.448	10.883	12.439	29.066	9.009	6.575	4.84	16.342	17.843	28.43	10.441	9.101	23.713	13.747	20.362	10.246	49.82	17.116	19.963	4.096	5.732	9.773	21.775	8.622	3.377	8.882	9.271	16.863	33.396	28.448	10.883	12.439	29.066	9.009	6.575	4.84	16.342	17.843
5.5996	7.775	3.62	5.5	9.168	21.44	8.105	3.881	8.089	9.229	14.945	32.76	25.331	11.937	11	26.112	9.232	6.436	3.354	13.779	13.713	23.118	9.73	8.545	25.102	15.234	18.364	8.271	40.032	16.604	16.552	3.62	5.5	9.168	21.44	8.105	3.881	8.089	9.229	14.945	32.76	25.331	11.937	11	26.112	9.232	6.436	3.354	13.779	13.713
5.7188	6.859	4.059	4.926	7.373	22.277	6.617	4.035	8.099	10.364	13.858	30.225	22.541	11.9	12.225	21.908	7.411	6.111	2.906	11.901	16.524	19.357	8.118	9.784	22.494	11.033	16.698	7.684	29.95	16.406	14.241	4.059	4.926	7.373	22.277	6.617	4.035	8.099	10.364	13.858	30.225	22.541	11.9	12.225	21.908	7.411	6.111	2.906	11.901	16.524
5.8379	6.936	4.144	5.363	8.031	21.837	6.655	4.188	8.404	7.243	14.323	28.046	21.531	10.386	10.33	19.209	7.629	5.842	3.681	12.856	14.926	17.242	8.052	9.793	23.547	10.469	14.296	6.27	23.929	11.952	9.858	4.144	5.363	8.031	21.837	6.655	4.188	8.404	7.243	14.323	28.046	21.531	10.386	10.33	19.209	7.629	5.842	3.681	12.856	14.926
5.9571	6.424	3.738	4.127	7.349	20.329	7.319	3.627	7.276	7.516	11.761	27.867	19.859	9.644	10.946	17.053	7.675	5.344	3.6	10.44	12.977	19.52	6.852	9.836	21.2	9.154	13.304	6.647	19.664	11.001	8.29	3.738	4.127	7.349	20.329	7.319	3.627	7.276	7.516	11.761	27.867	19.859	9.644	10.946	17.053	7.675	5.344	3.6	10.44	12.977
6.0762	5.058	4.26	4.957	7.025	19.843	6.75	3.992	7.926	6.529	10.126	26.611	17.532	8.42	11.822	17.372	7.826	6.289	3.52	11.22	12.163	16.618	5.47	9.615	21.114	9.714	13.239	5.444	17.593	12.451	6.889	4.26	4.957	7.025	19.843	6.75	3.992	7.926	6.529	10.126	26.611	17.532	8.42	11.822	17.372	7.826	6.289	3.52	11.22	12.163
6.1953	5.084	3.509	3.516	5.61	20.314	7.629	4.355	7.562	8.419	9.696	25.59	15.116	7.978	13.361	19.623	5.738	5.817	3.879	9.759	11.111	17.783	4.889	8.541	20.569	7.465	15.206	4.832	13.918	11.718	6.295	3.509	3.516	5.61	20.314	7.629	4.355	7.562	8.419	9.696	25.59	15.116	7.978	13.361	19.623	5.738	5.817	3.879	9.759	11.111
6.3145	4.259	3.968	4.311	6.227	19.918	7.833	4.477	7.97	7.316	9.947	25.215	15.278	5.915	14.759	22.057	6.524	5.445	3.43	9.881	8.754	14.883	5.31	7.726	21.163	6.311	14.39	4.732	12.251	12.32	5.408	3.968	4.311	6.227	19.918	7.833	4.477	7.97	7.316	9.947	25.215	15.278	5.915	14.759	22.057	6.524	5.445	3.43	9.881	8.754
6.4336	3.252	3.853	4.637	6.444	15.78	7.012	3.541	7.326	7.425	9.509	26.64	13.752	6.034	13.717	15.197	5.183	5.301	2.967	7.636	8.305	13.983	3.885	8.098	17.252	6.374	14.085	3.94	9.697	12.458	5.052	3.853	4.637	6.444	15.78	7.012	3.541	7.326	7.425	9.509	26.64	13.752	6.034	13.717	15.197	5.183	5.301	2.967	7.636	8.305
6.5528	3.079	3.192	4.899	5.412	15.259	7.536	3.158	6.896	6.421	8.764	27.008	13.949	5.637	13.478	14.121	5.796	6.043	2.695	8.054	7.703	14.041	5.229	7.686	17.311	6.153	14.193	3.627	9.077	13.14	4.58	3.192	4.899	5.412	15.259	7.536	3.158	6.896	6.421	8.764	27.008	13.949	5.637	13.478	14.121	5.796	6.043	2.695	8.054	7.703
6.6719	3.256	3.043	4.266	5.075	17.15	6.797	2.877	7.212	6.59	8.223	24.889	13.891	5.427	16.022	12.441	6.459	6.31	3.173	7.626	6.304	13.317	4.806	6.639	14.282	7.048	14.303	4.583	7.512	11.706	4.246	3.043	4.266	5.075	17.15	6.797	2.877	7.212	6.59	8.223	24.889	13.891	5.427	16.022	12.441	6.459	6.31	3.173	7.626	6.304
6.7911	2.859	2.841	5.502	5.308	16.622	6.257	2.765	6.053	7.618	7.057	27.439	12.071	4.615	17.511	9.489	6.293	6.287	3.422	6.179	7.029	12.026	4.907	6.328	13.927	7.213	14.302	3.808	5.301	11.654	4.094	2.841	5.502	5.308	16.622	6.257	2.765	6.053	7.618	7.057	27.439	12.071	4.615	17.511	9.489	6.293	6.287	3.422	6.179	7.029
6.9102	2.469	3.145	5.105	5.35	16.135	5.233	2.321	7.305	6.711	8.213	23.64	11.229	4.275	18.649	9.607	7.05	5.783	3.568	7.21	7.395	12.037	3.915	5.899	10.046	7.798	14.365	4.562	4.536	11.194	3.721	3.145	5.105	5.35	16.135	5.233	2.321	7.305	6.711	8.213	23.64	11.229	4.275	18.649	9.607	7.05	5.783	3.568	7.21	7.395
7.0293	2.606	2.77	6.174	5.016	15.681	5.271	2.948	6.063	6.488	6.344	23.841	11.811	3.648	17.973	8.564	7.506	5.712	4.015	6.663	8.493	11.08	5.115	4.821	9.678	8.113	14.744	3.312	3.909	10.052	3.634	2.77	6.174	5.016	15.681	5.271	2.948	6.063	6.488	6.344	23.841	11.811	3.648	17.973	8.564	7.506	5.712	4.015	6.663	8.493
7.1485	2.886	2.719	5.98	4.802	14.984	4.335	2.836	6.275	5.657	6.505	24.324	9.12	3.495	17.68	7.719	9.115	4.947	3.178	7.204	8.149	10.543	3.987	4.133	7.905	6.308	13.588	3.31	3.569	11.347	3.504	2.719	5.98	4.802	14.984	4.335	2.836	6.275	5.657	6.505	24.324	9.12	3.495	17.68	7.719	9.115	4.947	3.178	7.204	8.149
7.2676	2.777	2.412	7.352	5.447	15.158	4.703	2.684	5.598	7.175	6.329	23.559	8.913	3.801	20.817	7.793	8.812	5.582	3.738	6.597	6.867	10.081	3.44	4.763	7.633	7.472	14.042	2.889	3.111	8.98	3.137	2.412	7.352	5.447	15.158	4.703	2.684	5.598	7.175	6.329	23.559	8.913	3.801	20.817	7.793	8.812	5.582	3.738	6.597	6.867
7.3868	2.164	2.559	7.706	5.083	16.481	4.676	3.316	5.89	6.839	6.494	24.746	8.664	4.374	18.566	6.285	7.231	6.845	3.089	7.128	8.891	9.796	2.982	3.503	6.938	6.145	14.551	3.291	3.458	10.35	3.497	2.559	7.706	5.083	16.481	4.676	3.316	5.89	6.839	6.494	24.746	8.664	4.374	18.566	6.285	7.231	6.845	3.089	7.128	8.891
7.5059	2.37	3.028	8.776	6.181	19.931	4.162	2.236	5.559	8.073	6.999	26.336	7.337	3.358	13.049	6.87	7.493	6.578	3.427	6.589	8.64	9.794	4.009	4.9	6.902	6.728	14.384	2.561	3.159	10.061	3.411	3.028	8.776	6.181	19.931	4.162	2.236	5.559	8.073	6.999	26.336	7.337	3.358	13.049	6.87	7.493	6.578	3.427	6.589	8.64
7.625	3.152	3.063	9.441	6.232	15.777	4.157	3.352	6.783	8.691	5.65	22.844	6.561	3.926	14.341	6.273	8.524	6.899	3.105	6.521	9.63	8.538	4.029	3.151	8.034	5.988	13.738	3.161	2.253	10.406	3.28	3.063	9.441	6.232	15.777	4.157	3.352	6.783	8.691	5.65	22.844	6.561	3.926	14.341	6.273	8.524	6.899	3.105	6.521	9.63
7.7442	2.769	3.453	8.64	5.39	20.518	3.2	2.835	5.627	8.217	5.334	23.63	6.043	3.049	13.405	6.735	7.811	8.096	3.314	6.24	9.348	8.163	4.297	3.395	7.351	5.291	13.813	2.856	2.339	10.85	3.772	3.453	8.64	5.39	20.518	3.2	2.835	5.627	8.217	5.334	23.63	6.043	3.049	13.405	6.735	7.811	8.096	3.314	6.24	9.348
7.8633	2.491	2.483	8.972	6.016	22.605	4.268	2.954	5.096	9.263	5.606	24.04	6.509	3.511	17.125	7.895	8.31	6.763	3.994	7.25	8.499	7.944	3.683	3.236	7.352	6.027	15.729	2.325	3.178	11.414	3.687	2.483	8.972	6.016	22.605	4.268	2.954	5.096	9.263	5.606	24.04	6.509	3.511	17.125	7.895	8.31	6.763	3.994	7.25	8.499
7.9825	2.25	2.714	8.49	5.817	20.588	3.044	3.167	5.974	11.611	4.201	25.331	5.926	3.83	15.926	5.937	8.427	7.221	3.538	6.537	9.906	7.55	3.469	3.601	7.108	6.383	14.555	3.3	2.54	12.064	4.45	2.714	8.49	5.817	20.588	3.044	3.167	5.974	11.611	4.201	25.331	5.926	3.83	15.926	5.937	8.427	7.221	3.538	6.537	9.906
8.1016	1.967	2.97	8.503	6.564	21.169	3.164	2.427	5.19	13.087	4.968	24.568	6.877	3.579	13.947	7.119	7.767	7.353	2.78	5.374	9.437	8.172	3.314	2.931	7.758	6.53	14.15	2.365	2.299	12.448	3.929	2.97	8.503	6.564	21.169	3.164	2.427	5.19	13.087	4.968	24.568	6.877	3.579	13.947	7.119	7.767	7.353	2.78	5.374	9.437
8.2207	2.057	2.953	6.795	5.699	24.468	3.898	3.857	5.361	14.48	3.495	24.87	5.938	3.712	14.87	8.25	7.982	8.294	3.158	5.821	9.673	8.171	4.055	2.795	8.475	6.789	16.054	2.999	2.653	13.668	3.813	2.953	6.795	5.699	24.468	3.898	3.857	5.361	14.48	3.495	24.87	5.938	3.712	14.87	8.25	7.982	8.294	3.158	5.821	9.673
8.3399	1.787	2.818	7.462	6.226	23.268	3.814	2.147	5.535	13.801	4.588	24.221	5.487	3.079	17.265	6.876	9.565	8.571	3.329	6.258	9.211	7.891	3.363	3.234	8.645	7.069	15.461	2.897	1.927	14.973	4.244	2.818	7.462	6.226	23.268	3.814	2.147	5.535	13.801	4.588	24.221	5.487	3.079	17.265	6.876	9.565	8.571	3.329	6.258	9.211
8.459	1.859	2.381	6.078	6.117	24.323	3.704	2.472	4.953	16.082	5.539	24.428	5.347	3.309	14.842	6.539	8.062	9.002	3.509	6.358	10.525	9.593	4.278	3.535	7.094	7.839	16.455	3.367	2.526	16.916	3.848	2.381	6.078	6.117	24.323	3.704	2.472	4.953	16.082	5.539	24.428	5.347	3.309	14.842	6.539	8.062	9.002	3.509	6.358	10.525
8.5782	2.333	2.655	5.952	8.157	25.475	3.424	2.128	5.012	14.239	5.387	25.673	4.456	2.807	15.286	6.427	7.927	10.741	3.327	7.443	10.455	9.059	4.886	3.907	7.102	7.866	15.01	3.309	2.267	17.614	4.778	2.655	5.952	8.157	25.475	3.424	2.128	5.012	14.239	5.387	25.673	4.456	2.807	15.286	6.427	7.927	10.741	3.327	7.443	10.455
8.6973	2.289	2.07	4.6	8.906	26.28	3.464	3.403	4.814	16.26	4.756	24.85	4.461	3.789	18.275	7.233	8.659	9.545	3.937	6.466	11.301	10.821	5.325	3.505	7.301	9.337	18.841	2.816	2.419	18.59	5.186	2.07	4.6	8.906	26.28	3.464	3.403	4.814	16.26	4.756	24.85	4.461	3.789	18.275	7.233	8.659	9.545	3.937	6.466	11.301
8.8165	2.058	2.877	5.012	11.108	27.781	3.257	2.962	4.918	15.154	5.407	23.638	4.481	3.333	16.843	8.289	8.921	9.64	3.448	8.102	9.481	11.773	4.322	3.619	8.503	10.069	19.483	3.591	2.528	18.81	4.573	2.877	5.012	11.108	27.781	3.257	2.962	4.918	15.154	5.407	23.638	4.481	3.333	16.843	8.289	8.921	9.64	3.448	8.102	9.481
8.9356	2.597	2.491	4.571	10.712	26.905	3.158	2.525	4.887	16.469	7.898	25.445	3.672	3.428	15.606	7.814	8.685	11.38	4.042	8.95	10.176	13.759	6.02	3.211	7.407	10.866	19.718	2.492	2.576	22.703	5.203	2.491	4.571	10.712	26.905	3.158	2.525	4.887	16.469	7.898	25.445	3.672	3.428	15.606	7.814	8.685	11.38	4.042	8.95	10.176
9.0547	2.214	2.259	4.282	11.782	27.832	3.323	2.931	4.851	15.664	7.504	26.08	4.149	3.335	17.523	6.688	9.718	9.831	3.814	8.449	10.422	12.195	4.534	3.315	8.308	11.679	20.416	3.187	1.858	19.756	6.554	2.259	4.282	11.782	27.832	3.323	2.931	4.851	15.664	7.504	26.08	4.149	3.335	17.523	6.688	9.718	9.831	3.814	8.449	10.422
9.1739	2.589	2.215	4.008	12.096	28.343	2.287	1.672	3.969	16.43	9.485	32.49	4.283	4.039	16.727	5.93	9.296	10.95	4.979	9.799	12.29	14.062	5.599	4.417	7.662	12.697	22.234	3.103	2.709	21.337	7.564	2.215	4.008	12.096	28.343	2.287	1.672	3.969	16.43	9.485	32.49	4.283	4.039	16.727	5.93	9.296	10.95	4.979	9.799	12.29
9.293	2.826	2.055	4.195	11.124	27.798	2.62	2.255	3.843	19.112	11.788	36.057	3.429	3.574	17.383	5.828	10.133	10.35	3.998	9.246	11.277	13.506	7.954	3.851	8.663	13.641	24.211	3.004	2.332	19.651	8.529	2.055	4.195	11.124	27.798	2.62	2.255	3.843	19.112	11.788	36.057	3.429	3.574	17.383	5.828	10.133	10.35	3.998	9.246	11.277
9.4122	2.373	1.438	3.907	10.632	27.885	2.797	2.471	4.136	22.524	14.411	34.474	4.813	3.59	16.712	4.758	10.841	11.017	4.1	8.268	14.403	15.62	8.026	3.536	8.391	14.926	21.512	3.247	2.177	20.434	8.746	1.438	3.907	10.632	27.885	2.797	2.471	4.136	22.524	14.411	34.474	4.813	3.59	16.712	4.758	10.841	11.017	4.1	8.268	14.403
9.5313	1.965	2.536	3.376	13.016	26.428	2.902	2.571	4.782	24.948	20.223	34.956	3.281	4.685	15.477	5.013	10.131	12.568	3.963	9.482	15.374	16.371	11.669	3.21	8.476	16.158	21.562	3.53	2.804	18.807	10.295	2.536	3.376	13.016	26.428	2.902	2.571	4.782	24.948	20.223	34.956	3.281	4.685	15.477	5.013	10.131	12.568	3.963	9.482	15.374
9.6504	2.163	2.376	4.023	15.774	25.886	3.051	2.51	4.409	24.561	31.228	31.426	3.88	4.889	14.757	4.238	9.61	12.443	4.149	11.084	17.414	16.681	11.007	4.919	9.647	17.582	21.871	3.988	2.117	19.015	11.413	2.376	4.023	15.774	25.886	3.051	2.51	4.409	24.561	31.228	31.426	3.88	4.889	14.757	4.238	9.61	12.443	4.149	11.084	17.414
9.7696	2.308	2.18	3.703	14.784	25.784	2.568	2.542	4.415	23.953	39.292	26.488	3.651	3.791	13.987	4.405	9.476	13.407	3.742	9.345	20.097	14.834	13.954	4.199	8.77	16.353	22.931	3.478	2.011	20.178	11.629	2.18	3.703	14.784	25.784	2.568	2.542	4.415	23.953	39.292	26.488	3.651	3.791	13.987	4.405	9.476	13.407	3.742	9.345	20.097
9.8887	2.369	2.565	3.867	18.368	25.524	2.342	2.275	4.467	26.563	44.002	24.191	3.834	4.905	15.455	5.007	8.456	13.212	3.361	8.453	24.791	16.133	14.443	3.483	8.47	18.657	24.481	3.778	2.152	17.502	13.795	2.565	3.867	18.368	25.524	2.342	2.275	4.467	26.563	44.002	24.191	3.834	4.905	15.455	5.007	8.456	13.212	3.361	8.453	24.791
10.0079	1.837	2.253	3.436	18.446	25.145	3.091	3.192	3.593	27.666	44.891	18.969	4.256	4.831	17.589	4.995	9.782	13.998	3.782	7.696	28.327	17.913	12.971	4.606	7.953	20.52	26.378	2.838	1.563	17.252	12.332	2.253	3.436	18.446	25.145	3.091	3.192	3.593	27.666	44.891	18.969	4.256	4.831	17.589	4.995	9.782	13.998	3.782	7.696	28.327
10.127	2.505	1.852	3.419	23.196	21.284	2.889	2.577	4.075	29.658	43.834	13.724	3.389	4.065	14.8	4.47	11.15	19.06	3.755	8.808	28.057	19.005	14.545	5.579	8.836	24.958	27.675	3.516	2.65	16.306	14.024	1.852	3.419	23.196	21.284	2.889	2.577	4.075	29.658	43.834	13.724	3.389	4.065	14.8	4.47	11.15	19.06	3.755	8.808	28.057
10.2462	2.122	1.904	2.48	24.673	19.419	3.412	2.582	3.463	31.299	39.584	13.527	4.589	4.526	12.059	3.578	10.066	18.32	3.733	7.355	33.736	19.012	13.979	5.236	7.318	28.739	30.547	3.329	2.281	16.228	15.058	1.904	2.48	24.673	19.419	3.412	2.582	3.463	31.299	39.584	13.527	4.589	4.526	12.059	3.578	10.066	18.32	3.733	7.355	33.736
10.3653	2.15	1.696	3.473	30.129	19.28	3.758	2.273	4.179	42.205	44.276	11.677	2.974	5.238	11.995	3.196	9.938	20.751	2.982	8.026	33.958	19.782	15.231	4.404	7.902	25.977	30.123	4.207	2.519	15.674	16.29	1.696	3.473	30.129	19.28	3.758	2.273	4.179	42.205	44.276	11.677	2.974	5.238	11.995	3.196	9.938	20.751	2.982	8.026	33.958
10.4844	2.372	1.81	2.473	33.39	17.112	3.558	2.528	4.223	52.187	46.392	11.466	2.976	5.487	11.656	3.818	10.908	22.786	2.918	7.262	36.911	21.18	15.985	5.841	8.727	21.811	33.588	3.577	2.36	14.472	16.831	1.81	2.473	33.39	17.112	3.558	2.528	4.223	52.187	46.392	11.466	2.976	5.487	11.656	3.818	10.908	22.786	2.918	7.262	36.911
10.6036	2.054	2.491	2.727	38.864	16.961	3.137	2.268	4.235	63.272	46.104	10.662	3.248	5.371	10.769	3.215	9.526	22.108	3.529	7.289	36.168	21.191	15.108	6.861	8.226	17.053	33.949	4.119	2.592	14.814	18.218	2.491	2.727	38.864	16.961	3.137	2.268	4.235	63.272	46.104	10.662	3.248	5.371	10.769	3.215	9.526	22.108	3.529	7.289	36.168
10.7227	2.169	1.838	2.836	45.129	16.491	3.86	2.054	4.459	70.853	43.231	11.173	4.191	6.433	9.337	3.004	9.003	20.635	3.734	7.055	42.54	20.566	18.366	6.891	7.465	12.548	33.798	3.805	3.36	14.581	20.275	1.838	2.836	45.129	16.491	3.86	2.054	4.459	70.853	43.231	11.173	4.191	6.433	9.337	3.004	9.003	20.635	3.734	7.055	42.54
10.8419	2.861	1.609	2.121	50.062	21.306	2.616	2.469	3.432	78.934	42.779	8.129	3.508	6.145	8.95	3.276	9.494	17.951	3.243	6.693	41.59	19.232	17.569	8.504	7.964	10.686	35.523	3.83	2.843	11.952	19.847	1.609	2.121	50.062	21.306	2.616	2.469	3.432	78.934	42.779	8.129	3.508	6.145	8.95	3.276	9.494	17.951	3.243	6.693	41.59
10.961	3.097	2.924	3.435	59.591	23.016	2.991	2.8	3.197	77.558	42.076	8.505	2.915	6.05	8.895	2.419	10.406	17.083	3.518	7.289	44.019	18.825	16.672	10.575	7.734	11.41	36.66	3.67	2.903	12.408	19.974	2.924	3.435	59.591	23.016	2.991	2.8	3.197	77.558	42.076	8.505	2.915	6.05	8.895	2.419	10.406	17.083	3.518	7.289	44.019
11.0801	2.017	2.113	1.93	62.705	24.219	2.853	2.353	3.015	76.522	44.079	9.122	2.793	6.528	9.063	3.478	10.384	16.561	3.934	6.73	46.038	18.102	20.928	10.258	8.182	11.239	33.705	2.263	3.546	11.249	23.734	2.113	1.93	62.705	24.219	2.853	2.353	3.015	76.522	44.079	9.122	2.793	6.528	9.063	3.478	10.384	16.561	3.934	6.73	46.038
11.1993	2.478	2.495	3.066	69.635	24.914	2.618	2.055	3.355	84.84	42.943	8.665	3.287	6.276	10.583	3.12	9.379	16.261	3.542	8.025	48.232	20.685	21.554	13.444	7.576	10.113	35.381	2.989	2.297	11.534	23.467	2.495	3.066	69.635	24.914	2.618	2.055	3.355	84.84	42.943	8.665	3.287	6.276	10.583	3.12	9.379	16.261	3.542	8.025	48.232
11.3184	2.658	2.416	2.175	80.081	25.107	2.977	2.26	3.11	76.974	40.569	9.065	3.231	7.961	8.467	3.093	10.178	15.41	3.63	8.194	47.367	18.619	22.456	16.683	8.403	9.2	30.669	4.03	2.07	12.921	26.665	2.416	2.175	80.081	25.107	2.977	2.26	3.11	76.974	40.569	9.065	3.231	7.961	8.467	3.093	10.178	15.41	3.63	8.194	47.367
11.4376	2.132	2.695	2.738	91.513	24.264	1.918	2.148	4.087	76.049	39.371	8.38	3.137	7.545	9.392	4.116	9.778	14.295	4.229	6.775	44.218	19.284	24.563	20.999	9.223	8.559	28.793	3.058	2.882	11.676	27.166	2.695	2.738	91.513	24.264	1.918	2.148	4.087	76.049	39.371	8.38	3.137	7.545	9.392	4.116	9.778	14.295	4.229	6.775	44.218
11.5567	2.314	2.082	2.618	95.224	26.286	2.31	2.732	4.155	75.098	42.045	7.304	3.195	7.827	9.968	3.143	10.011	14.757	3.845	7.807	43.777	21.745	28.241	24.496	7.055	9.466	28.474	3.64	2.66	12.025	27.755	2.082	2.618	95.224	26.286	2.31	2.732	4.155	75.098	42.045	7.304	3.195	7.827	9.968	3.143	10.011	14.757	3.845	7.807	43.777
11.6758	2.489	2.401	2.766	92.508	27.367	2.084	2.628	3.857	75.981	49.813	8.175	3.212	7.523	9.73	3.3	11.432	14.81	4.706	6.955	40.963	20.731	26.733	28.939	7.74	10.231	29.672	3.465	2.336	11.748	28.299	2.401	2.766	92.508	27.367	2.084	2.628	3.857	75.981	49.813	8.175	3.212	7.523	9.73	3.3	11.432	14.81	4.706	6.955	40.963
11.795	2.608	2.239	2.394	94.018	27.674	3.19	2.127	3.518	73.973	51.597	8.212	3.523	8.047	11.272	3.61	11.702	14.636	3.942	8.314	42.059	23.146	31.048	32.246	6.964	12.157	33.292	3.53	2.256	11.837	27.793	2.239	2.394	94.018	27.674	3.19	2.127	3.518	73.973	51.597	8.212	3.523	8.047	11.272	3.61	11.702	14.636	3.942	8.314	42.059
11.9141	1.68	2.646	2.791	96.093	25.107	3.117	2.325	3.808	78.033	48.731	6.637	3.284	7.447	11.879	3.769	11.415	15.017	3.821	8.168	38.48	26.773	34.261	30.302	7.836	13.549	32.861	4.146	2.491	9.514	24.971	2.646	2.791	96.093	25.107	3.117	2.325	3.808	78.033	48.731	6.637	3.284	7.447	11.879	3.769	11.415	15.017	3.821	8.168	38.48
12.0333	2.365	2.595	2.893	94.124	25.941	2.343	3.094	3.226	74.923	53.48	5.484	4.208	9.331	11.841	3.831	10.147	14.591	4.952	9.76	32.746	29.787	36.96	26.039	5.261	15.227	29.789	4.042	2.919	9.345	25.347	2.595	2.893	94.124	25.941	2.343	3.094	3.226	74.923	53.48	5.484	4.208	9.331	11.841	3.831	10.147	14.591	4.952	9.76	32.746
12.1524	2.314	1.856	2.341	97.717	26.867	2.649	2.368	3.541	73.592	48.672	6.523	3.887	8.982	12.381	3.935	10.364	16.277	4.215	9.019	34.932	36.738	43.091	24.183	7.058	16.381	30.285	3.691	3.046	10.216	26.82	1.856	2.341	97.717	26.867	2.649	2.368	3.541	73.592	48.672	6.523	3.887	8.982	12.381	3.935	10.364	16.277	4.215	9.019	34.932
12.2716	2.071	1.986	2.736	91.975	24.835	3.526	2.119	4.602	70.752	49.601	5.61	3.705	9.505	12.062	3.951	10.331	16.142	4.584	8.545	35.835	39.387	43.861	18.236	9.088	14.286	29.492	2.931	2.604	8.916	23.128	1.986	2.736	91.975	24.835	3.526	2.119	4.602	70.752	49.601	5.61	3.705	9.505	12.062	3.951	10.331	16.142	4.584	8.545	35.835
12.3907	2.874	2.748	2.564	94.956	25.092	2.779	2.615	3.736	69.004	46.519	5.821	3.585	9.412	10.68	3.369	8.325	17.446	4.185	8.859	36.145	40.747	47.55	18.178	7.295	13.421	31.017	3.039	2.784	8.299	21.832	2.748	2.564	94.956	25.092	2.779	2.615	3.736	69.004	46.519	5.821	3.585	9.412	10.68	3.369	8.325	17.446	4.185	8.859	36.145
12.5098	2.064	2.709	2.03	90.918	26.19	3.068	2.108	4.418	68.497	44.24	5.232	3.981	11.094	10.803	3.956	9.413	18.666	4.926	6.963	34.351	41.279	55.95	21.832	8.09	12.573	30.782	3.349	2.633	8.153	22.531	2.709	2.03	90.918	26.19	3.068	2.108	4.418	68.497	44.24	5.232	3.981	11.094	10.803	3.956	9.413	18.666	4.926	6.963	34.351
12.629	2.039	1.991	2.593	92.322	23.02	3.296	2.362	4.982	61.791	39.128	5.398	3.521	12.327	11.6	3.686	8.436	20.957	3.726	6.351	35.276	41.112	62.387	20.261	6.462	10.767	29.841	4.016	2.661	6.872	22.394	1.991	2.593	92.322	23.02	3.296	2.362	4.982	61.791	39.128	5.398	3.521	12.327	11.6	3.686	8.436	20.957	3.726	6.351	35.276
12.7481	2.068	2.252	2.994	82.76	23.443	3.428	2.54	3.558	61.078	36.143	5.136	3.893	12.524	12.157	3.738	8.228	20.622	3.708	8.34	33.176	46.209	69.185	22.756	5.932	8.706	30.588	3.734	2.462	5.898	22.809	2.252	2.994	82.76	23.443	3.428	2.54	3.558	61.078	36.143	5.136	3.893	12.524	12.157	3.738	8.228	20.622	3.708	8.34	33.176
12.8673	2.642	2.564	2.329	74.122	19.939	2.914	2.394	3.974	62.125	28.712	5.303	4.025	11.689	9.923	4.094	9.495	20.411	4.807	8.404	30.523	48.086	73.631	23.387	6.81	8.443	28.993	3.74	2.48	6.532	26.048	2.564	2.329	74.122	19.939	2.914	2.394	3.974	62.125	28.712	5.303	4.025	11.689	9.923	4.094	9.495	20.411	4.807	8.404	30.523
12.9864	2.292	2.928	2.624	70.742	22.111	2.791	2.409	3.765	57.77	25.378	5.738	4.34	12.577	11.072	4.108	8.19	23.089	3.609	6.88	31.252	53.114	74.383	23.294	5.504	5.281	26.584	3.288	2.594	7.297	27.338	2.928	2.624	70.742	22.111	2.791	2.409	3.765	57.77	25.378	5.738	4.34	12.577	11.072	4.108	8.19	23.089	3.609	6.88	31.252
13.1055	1.971	2.841	2.172	60.424	19.492	2.978	2.116	3.353	57.863	23.128	4.442	4.083	12.555	9.483	4.387	7.636	20.944	4.551	7.289	29.097	57.628	77.295	23.339	5.896	6.904	18.801	4.006	2.081	6.009	30.816	2.841	2.172	60.424	19.492	2.978	2.116	3.353	57.863	23.128	4.442	4.083	12.555	9.483	4.387	7.636	20.944	4.551	7.289	29.097
13.2247	2.372	2.451	2.558	56.311	17.119	3.017	2.228	3.996	49.717	17.771	4.133	5.646	14.554	10.314	4.669	8.047	22.967	4.726	8.029	26.215	58.294	77.407	22.73	7.403	7.026	19.152	5.04	2.863	5.763	28.438	2.451	2.558	56.311	17.119	3.017	2.228	3.996	49.717	17.771	4.133	5.646	14.554	10.314	4.669	8.047	22.967	4.726	8.029	26.215
13.3438	1.292	2.399	2.547	46.731	14.47	3.037	2.49	3.535	52.152	14.007	4.815	4.017	14.388	9.663	3.786	7.985	22.229	5.31	7.273	24.371	60.211	72.836	21.726	5.661	7.868	15.767	3.296	3.096	5.458	29.458	2.399	2.547	46.731	14.47	3.037	2.49	3.535	52.152	14.007	4.815	4.017	14.388	9.663	3.786	7.985	22.229	5.31	7.273	24.371
13.463	2.436	2.582	2.797	39.396	13.952	2.179	2.287	4.594	48.353	11.089	4.188	3.82	16.654	10.829	5.007	9.372	22.347	5.002	7.555	23.017	64.715	66.163	24.282	5.838	7.176	17.073	3.902	2.958	6.851	29.3	2.582	2.797	39.396	13.952	2.179	2.287	4.594	48.353	11.089	4.188	3.82	16.654	10.829	5.007	9.372	22.347	5.002	7.555	23.017
13.5821	2.222	2.775	2.787	31.603	13.592	2.586	2.722	3.803	50.664	9.711	4.702	3.896	15.513	10.015	4.938	7.731	25.605	4.822	6.435	21.41	61.927	55.072	24.197	6.015	6.643	18.005	4.47	2.491	5.708	29.125	2.775	2.787	31.603	13.592	2.586	2.722	3.803	50.664	9.711	4.702	3.896	15.513	10.015	4.938	7.731	25.605	4.822	6.435	21.41
13.7012	2.092	2.514	2.699	23.068	10.51	2.739	1.96	4.544	52.876	9.143	4.15	4.444	15.678	10.52	4.72	7.54	28.686	5.631	6.887	18.797	58.101	55.087	25.98	5.52	6.66	16.787	3.955	3.361	6.06	28.118	2.514	2.699	23.068	10.51	2.739	1.96	4.544	52.876	9.143	4.15	4.444	15.678	10.52	4.72	7.54	28.686	5.631	6.887	18.797
13.8204	2.116	2.964	2.755	22.422	10.469	2.822	2.381	4.385	51.313	8.972	3.962	5.597	17.339	9.617	4.401	8.728	26.885	5.044	6.783	20.758	49.379	48.417	25.065	5.686	6.879	15.509	4.214	2.468	5.664	28.939	2.964	2.755	22.422	10.469	2.822	2.381	4.385	51.313	8.972	3.962	5.597	17.339	9.617	4.401	8.728	26.885	5.044	6.783	20.758
13.9395	1.966	2.66	2.925	21.165	9.312	2.527	2.159	4.585	49.39	8	4.957	5.095	17.826	9.811	5.288	8.257	29.174	5.305	7.458	20.83	44.467	48.518	25.227	6.094	6.561	15.467	3.588	2.813	6.045	29.723	2.66	2.925	21.165	9.312	2.527	2.159	4.585	49.39	8	4.957	5.095	17.826	9.811	5.288	8.257	29.174	5.305	7.458	20.83
14.0587	1.924	2.378	3.146	16.53	10.931	2.739	2.887	4.264	48.624	6.11	3.994	4.805	18.318	8.549	5.059	6.323	26.296	5.627	7.297	21.234	37.811	47.265	23.28	6.119	6.291	14.516	3.094	2.861	5.437	31.622	2.378	3.146	16.53	10.931	2.739	2.887	4.264	48.624	6.11	3.994	4.805	18.318	8.549	5.059	6.323	26.296	5.627	7.297	21.234
14.1778	2.087	2.072	2.556	16.265	8.579	2.925	2.935	5.857	46.705	6.212	3.769	4.471	17.79	8.348	5.221	6.788	29.823	5.883	8.2	20.346	31.406	48.556	22.342	6.01	5.384	14.577	3.834	2.84	4.538	32.609	2.072	2.556	16.265	8.579	2.925	2.935	5.857	46.705	6.212	3.769	4.471	17.79	8.348	5.221	6.788	29.823	5.883	8.2	20.346
14.297	2.355	2.411	2.922	15.351	9.687	3.236	2.336	4.841	44.313	6.162	3.728	4.855	19.241	9.159	5.897	6.406	30.008	6.44	7.742	18.906	24.747	50.966	19.202	6.947	6.048	14.161	2.897	3.387	4.238	32.308	2.411	2.922	15.351	9.687	3.236	2.336	4.841	44.313	6.162	3.728	4.855	19.241	9.159	5.897	6.406	30.008	6.44	7.742	18.906
14.4161	2.363	2.296	2.612	15.962	7.796	2.578	2.281	3.938	41.869	6.024	4.267	5.246	17.759	9.7	5.046	7.005	31.323	5.185	7.113	19.633	19.378	53.563	17.906	6.359	5.963	15.141	4.037	2.555	4.672	34.034	2.296	2.612	15.962	7.796	2.578	2.281	3.938	41.869	6.024	4.267	5.246	17.759	9.7	5.046	7.005	31.323	5.185	7.113	19.633
14.5352	2.465	2.755	2.897	16.274	10.1	2.454	2.771	5.206	42.99	5.887	4.957	5.034	18.265	9.221	7.069	7.154	33.312	6.187	7.631	18.714	19.229	56.834	13.891	7.442	6.634	15.639	4.151	2.964	4.749	35.109	2.755	2.897	16.274	10.1	2.454	2.771	5.206	42.99	5.887	4.957	5.034	18.265	9.221	7.069	7.154	33.312	6.187	7.631	18.714
14.6544	2.491	2.988	2.897	16.271	9.03	3.196	2.738	4.176	40.555	5.619	4.579	5.185	20.138	10.491	7.702	6.112	35.967	6.271	8.287	18.467	19.473	62.926	12.412	5.923	6.531	15.977	4.457	2.534	4.564	34.001	2.988	2.897	16.271	9.03	3.196	2.738	4.176	40.555	5.619	4.579	5.185	20.138	10.491	7.702	6.112	35.967	6.271	8.287	18.467
14.7735	2.64	2.466	2.877	15.654	9.082	3.099	2.204	5.449	44.584	5.894	4.049	6.613	20.88	8.456	6.589	7.518	38.336	5.576	7.141	20.128	20.451	68.731	9.817	6.7	7.65	16.846	3.134	3.021	4.542	31.466	2.466	2.877	15.654	9.082	3.099	2.204	5.449	44.584	5.894	4.049	6.613	20.88	8.456	6.589	7.518	38.336	5.576	7.141	20.128
14.8927	2.953	2.043	3.434	13.801	9.497	2.533	2.707	5.695	41.392	5.549	3.656	5.207	21.611	8.855	5.626	5.957	37.442	5.423	7.779	19.783	18.534	75.233	11.2	7.378	6.673	15.79	3.549	3.847	4.299	29.917	2.043	3.434	13.801	9.497	2.533	2.707	5.695	41.392	5.549	3.656	5.207	21.611	8.855	5.626	5.957	37.442	5.423	7.779	19.783
15.0118	2.343	2.373	3.191	13.605	9.31	2.783	3.03	8.249	42.065	4.794	4.094	4.902	23.786	8.433	7.451	7.677	41.37	7.25	8.626	19.371	20.032	83.469	9.625	6.007	7.122	17.454	3.977	3.024	3.786	27.455	2.373	3.191	13.605	9.31	2.783	3.03	8.249	42.065	4.794	4.094	4.902	23.786	8.433	7.451	7.677	41.37	7.25	8.626	19.371
15.1309	2.336	1.944	4.017	15.084	9.654	2.958	2.826	8.229	45.782	4.029	3.494	5.429	23.229	9.921	8.302	7.615	39.631	7.689	7.917	19.815	20.604	83.289	7.663	6.193	7.138	18.152	3.924	2.746	4.775	27.078	1.944	4.017	15.084	9.654	2.958	2.826	8.229	45.782	4.029	3.494	5.429	23.229	9.921	8.302	7.615	39.631	7.689	7.917	19.815
15.2501	2.302	2.557	3.54	15.029	10.815	3.409	2.334	11.044	46.836	4.643	3.908	5.881	23.001	9.271	7.609	7.576	36.889	7.547	9.5	18.849	17.903	82.727	8.554	5.362	6.115	18.238	4.648	2.736	4.573	25.945	2.557	3.54	15.029	10.815	3.409	2.334	11.044	46.836	4.643	3.908	5.881	23.001	9.271	7.609	7.576	36.889	7.547	9.5	18.849
15.3692	3.201	3.078	4.356	15.241	10.296	3.249	3	15.45	48.561	5.862	3.744	6.705	24.413	10.05	6.707	6.956	34.47	7.965	10.399	21.01	17.795	89.392	8.994	5.129	7.066	19.433	4.834	2.234	4.074	26.625	3.078	4.356	15.241	10.296	3.249	3	15.45	48.561	5.862	3.744	6.705	24.413	10.05	6.707	6.956	34.47	7.965	10.399	21.01
15.4884	2.492	3.388	4.372	16.143	9.048	3.082	2.98	18.038	58.766	5.506	4.535	6.228	24.316	9.802	8.024	6.446	33.051	8.911	10.589	17.278	16.64	81.921	8.508	5.424	4.818	18.878	5.63	2.154	3.865	26.202	3.388	4.372	16.143	9.048	3.082	2.98	18.038	58.766	5.506	4.535	6.228	24.316	9.802	8.024	6.446	33.051	8.911	10.589	17.278
15.6075	2.889	2.959	4.783	17.772	9.424	3.333	3.328	27.579	65.762	4.355	3.756	5.882	27.517	10.6	7.804	7.268	29.556	9.662	11.212	19.309	22.582	79.046	10.156	5.131	6.573	18.703	4.958	3.42	4.622	27.249	2.959	4.783	17.772	9.424	3.333	3.328	27.579	65.762	4.355	3.756	5.882	27.517	10.6	7.804	7.268	29.556	9.662	11.212	19.309
15.7266	3.195	2.611	4.683	17.866	8.924	3.723	2.622	32.345	74.387	4.418	4.445	7.149	30.496	9.433	8.163	7.172	35	9.766	12.967	22.072	29.138	77.517	8.578	5.205	6.621	17.817	3.51	2.197	4.407	24.919	2.611	4.683	17.866	8.924	3.723	2.622	32.345	74.387	4.418	4.445	7.149	30.496	9.433	8.163	7.172	35	9.766	12.967	22.072
15.8458	3.196	2.084	5.997	19.256	8.29	3.16	3.246	40.609	87.884	4.246	4.595	7.077	31.981	8.9	7.766	8.758	32.932	11.351	12.126	20.993	31.539	74.85	9.26	5.113	7.58	18.018	4.446	2.897	3.746	25.2	2.084	5.997	19.256	8.29	3.16	3.246	40.609	87.884	4.246	4.595	7.077	31.981	8.9	7.766	8.758	32.932	11.351	12.126	20.993
15.9649	2.981	3.049	5.383	20.247	7.398	3.004	3.942	43.516	90.869	5.19	3.82	6.683	33.917	9.883	8.423	8.073	34.728	12.936	13.124	26.398	34.944	77.132	10.083	5.11	6.61	17.305	5.239	3.301	5.088	23.16	3.049	5.383	20.247	7.398	3.004	3.942	43.516	90.869	5.19	3.82	6.683	33.917	9.883	8.423	8.073	34.728	12.936	13.124	26.398
16.0841	3.068	2.391	5.459	24.663	9.153	3.643	4.453	47.274	91.632	4.652	3.948	7.453	39.169	10.534	8.742	8.715	34.637	15.055	12.974	27.619	37.248	75.003	10.425	4.823	6.537	17.926	4.464	3.348	4.069	21.616	2.391	5.459	24.663	9.153	3.643	4.453	47.274	91.632	4.652	3.948	7.453	39.169	10.534	8.742	8.715	34.637	15.055	12.974	27.619
16.2032	2.637	3.372	7.219	27.282	7.308	2.965	3.99	51.921	85.637	4.096	4.09	6.076	40.896	11.762	9.954	9.865	36.104	14.6	14.501	27.363	33.233	72.261	10.226	4.423	7.944	19.153	3.906	3.269	4.106	20.737	3.372	7.219	27.282	7.308	2.965	3.99	51.921	85.637	4.096	4.09	6.076	40.896	11.762	9.954	9.865	36.104	14.6	14.501	27.363
16.3224	2.976	3.71	6.996	34.153	9.287	3.413	5.2	57.385	79.152	5.043	3.699	6.341	45.579	11.458	10.204	7.75	40.694	19.567	14.338	27.249	34.743	69.48	9.982	4.658	7.05	18.721	4.927	3.555	4.494	16.977	3.71	6.996	34.153	9.287	3.413	5.2	57.385	79.152	5.043	3.699	6.341	45.579	11.458	10.204	7.75	40.694	19.567	14.338	27.249
16.4415	3.956	3.226	6.307	41.455	9.558	3.789	4.408	58.673	76.392	5.317	4.38	7.694	53.478	11.927	10.246	9.183	47.037	25.426	16.293	28.394	36.265	67.164	9.845	4.742	8.418	16.926	6.374	3.184	4.923	21.05	3.226	6.307	41.455	9.558	3.789	4.408	58.673	76.392	5.317	4.38	7.694	53.478	11.927	10.246	9.183	47.037	25.426	16.293	28.394
16.5606	3.921	3.366	5.88	50.985	9.291	4.071	4.849	59.716	67.195	5.082	4.599	7.76	59.473	15.427	8.877	8.636	51.86	28.64	19.854	26.001	40.722	62.119	9.943	4.814	9.114	22.136	5.522	3.19	5.45	21.504	3.366	5.88	50.985	9.291	4.071	4.849	59.716	67.195	5.082	4.599	7.76	59.473	15.427	8.877	8.636	51.86	28.64	19.854	26.001
16.6798	5.815	4.434	6.067	58.633	9.389	4.31	4.566	64.438	64.75	5.055	4.206	7.639	62.563	18.69	7.952	9.241	61.36	39.885	20.339	25.36	47.015	64.138	10.656	3.891	11.332	23.473	6.546	3.26	5.473	23.505	4.434	6.067	58.633	9.389	4.31	4.566	64.438	64.75	5.055	4.206	7.639	62.563	18.69	7.952	9.241	61.36	39.885	20.339	25.36
16.7989	6.104	3.193	7.608	61.884	9.508	3.801	6.552	59.5	64.802	5.637	4.027	7.848	66.987	24.673	9.66	8.806	78.403	51.026	21.152	26.39	52.25	68.799	12.61	4.327	12.065	25.148	6.798	3.24	6.052	25.456	3.193	7.608	61.884	9.508	3.801	6.552	59.5	64.802	5.637	4.027	7.848	66.987	24.673	9.66	8.806	78.403	51.026	21.152	26.39
16.9181	8.912	4.215	7.965	67.982	9.639	4.07	9.09	60.618	67.462	5.584	4.343	8.33	76.521	29.755	8.617	10.669	81.383	62.649	24.771	27.502	54.271	74.208	14.007	4.966	14.062	27.207	6.454	2.809	6.567	29.034	4.215	7.965	67.982	9.639	4.07	9.09	60.618	67.462	5.584	4.343	8.33	76.521	29.755	8.617	10.669	81.383	62.649	24.771	27.502
17.0372	14.332	4.898	7.866	69.831	10.262	5.25	14.006	53.587	63.107	5.293	4.676	8.635	82.194	33.558	8.468	10.158	91.906	85.206	26.671	27.862	60.565	69.417	19.361	4.402	16.817	28.681	7.469	3.75	7.486	30.684	4.898	7.866	69.831	10.262	5.25	14.006	53.587	63.107	5.293	4.676	8.635	82.194	33.558	8.468	10.158	91.906	85.206	26.671	27.862
17.1563	20.064	5.67	9.393	73.758	11.42	5.742	23.653	52.698	62.335	5.69	3.583	9.592	90.999	38.131	9.555	13.666	100.117	96.481	30.668	30.263	71.852	63.392	21.183	5.057	19.849	33.568	7.291	3.753	7.634	34.897	5.67	9.393	73.758	11.42	5.742	23.653	52.698	62.335	5.69	3.583	9.592	90.999	38.131	9.555	13.666	100.117	96.481	30.668	30.263
17.2755	24.166	6.597	9.456	67.899	10.963	8.678	30.753	44.593	54.244	5.776	4.63	9.019	104.748	44.378	10.797	15.052	102.351	101.183	35.689	30.572	76.175	60.269	24.554	5.176	24.794	37.745	8.496	4.144	8.875	40.466	6.597	9.456	67.899	10.963	8.678	30.753	44.593	54.244	5.776	4.63	9.019	104.748	44.378	10.797	15.052	102.351	101.183	35.689	30.572
17.3946	30.329	8.035	12.437	65.153	12.215	10.702	37.875	41.578	40.674	7.198	4.494	10.443	113.897	52.324	11.171	17.795	103.598	103.484	38.821	28.893	75.113	58.606	25.963	4.841	28.657	45.748	9.227	4.658	12.168	47.125	8.035	12.437	65.153	12.215	10.702	37.875	41.578	40.674	7.198	4.494	10.443	113.897	52.324	11.171	17.795	103.598	103.484	38.821	28.893
17.5138	36.639	10.248	14.016	58.774	15.311	16.987	45.901	36.787	33.268	7.994	4.201	10.001	113.451	53.249	12.922	19.594	94.487	97.477	43.922	31.636	72.33	52.982	25.565	5.304	30.589	50.994	9.666	4.249	16.166	57.7	10.248	14.016	58.774	15.311	16.987	45.901	36.787	33.268	7.994	4.201	10.001	113.451	53.249	12.922	19.594	94.487	97.477	43.922	31.636
17.6329	38.775	13.466	16.715	59.599	22.705	25.914	46.839	30.246	27.584	8.154	5.38	12.481	108.966	54.843	18.578	24.18	76.186	86.764	51.251	32.167	65.803	48.29	26.387	5.565	29.727	56.926	12.312	4.156	20.951	65.845	13.466	16.715	59.599	22.705	25.914	46.839	30.246	27.584	8.154	5.38	12.481	108.966	54.843	18.578	24.18	76.186	86.764	51.251	32.167
17.7521	40.262	16.415	19.327	64.929	32.292	35.946	49.697	30.87	21.415	8.864	4.755	11.988	92.676	52.516	21.907	27.047	57.911	71.87	61.842	36.229	60.999	37.296	29.724	5.81	26.988	65.576	14.364	3.77	26.94	80.261	16.415	19.327	64.929	32.292	35.946	49.697	30.87	21.415	8.864	4.755	11.988	92.676	52.516	21.907	27.047	57.911	71.87	61.842	36.229
17.8712	38.754	18.011	25.565	68.871	41.265	40.336	44.465	27.263	17.332	11.939	5.258	12.205	88.851	53.625	29.963	32.522	44.034	58.15	73.843	42.135	56.637	29.739	32.841	6.318	28.29	72.225	17.855	4.881	32.23	81.923	18.011	25.565	68.871	41.265	40.336	44.465	27.263	17.332	11.939	5.258	12.205	88.851	53.625	29.963	32.522	44.034	58.15	73.843	42.135
17.9903	30.038	25.039	30.194	76.587	52.276	41.676	39.749	22.3	14.836	14.418	5.453	13.32	77.585	50.174	34.114	37.067	32.547	42.611	85.165	50.354	48.077	19.092	33.397	7.029	27.238	71.975	24.508	3.284	37.16	90.151	25.039	30.194	76.587	52.276	41.676	39.749	22.3	14.836	14.418	5.453	13.32	77.585	50.174	34.114	37.067	32.547	42.611	85.165	50.354
18.1095	21.052	28.47	39.821	77.977	69.832	49.236	34.49	18.687	13.07	19.664	5.376	12.901	65.185	42.58	37.972	44.214	24.662	28.842	98.485	56.854	41.563	13.821	36.741	7.519	25.693	77.552	30.411	5.745	47.246	95.135	28.47	39.821	77.977	69.832	49.236	34.49	18.687	13.07	19.664	5.376	12.901	65.185	42.58	37.972	44.214	24.662	28.842	98.485	56.854
18.2286	13.905	34.664	41.529	78.127	66.211	53.633	32.448	15.583	9.76	21.859	6.45	13.335	57.604	35.197	40.821	59.204	19.801	20.807	110.563	65.603	39.02	8.485	39.96	8.49	20.724	78.138	39.147	5.099	51.048	93.567	34.664	41.529	78.127	66.211	53.633	32.448	15.583	9.76	21.859	6.45	13.335	57.604	35.197	40.821	59.204	19.801	20.807	110.563	65.603
18.3478	7.46	38.83	52.961	83.412	61.569	61.187	30.391	11.401	5.886	25.42	8.308	13.921	48.657	26.054	41.385	66.449	13.269	16.681	120.66	68.658	39.636	7.361	41.055	10.337	18.221	69.074	44.988	5.332	61.948	88.16	38.83	52.961	83.412	61.569	61.187	30.391	11.401	5.886	25.42	8.308	13.921	48.657	26.054	41.385	66.449	13.269	16.681	120.66	68.658
18.4669	5.357	36.523	57.527	86.488	48.791	65.502	30.437	8.166	3.575	28.928	7.428	16.122	38.227	21.533	31.562	85.764	11.083	11.89	134.427	63.835	39.877	4.838	44.09	12.064	15.645	60.47	53.592	5.601	67.746	76.76	36.523	57.527	86.488	48.791	65.502	30.437	8.166	3.575	28.928	7.428	16.122	38.227	21.533	31.562	85.764	11.083	11.89	134.427	63.835
18.586	3.981	27.696	55.863	81.458	30.68	68.766	29.238	5.02	4.072	29.751	8.961	19.589	25.711	18.951	24.78	79.717	7.784	8.512	129.496	61.712	42.066	2.75	47.646	19.725	15.002	47.951	56.023	6.522	64.136	58.636	27.696	55.863	81.458	30.68	68.766	29.238	5.02	4.072	29.751	8.961	19.589	25.711	18.951	24.78	79.717	7.784	8.512	129.496	61.712
18.7052	3.196	19.608	51.753	79.576	18.032	67.23	24.003	3.594	2.417	40.768	9.098	20.387	17.187	15.157	17.133	59.289	6.602	5.924	113.735	52.825	43.693	2.002	50.646	22.97	9.823	38.078	51.034	8.114	51.721	44.527	19.608	51.753	79.576	18.032	67.23	24.003	3.594	2.417	40.768	9.098	20.387	17.187	15.157	17.133	59.289	6.602	5.924	113.735	52.825
18.8243	2.952	11.659	47.098	63.621	9.762	59.775	22.299	1.828	1.953	47.387	12.189	22.433	9.997	12.685	14.108	35.498	5.114	5.274	95.419	42.046	43.736	1.961	49.349	29.301	9.329	30.818	52.579	9.468	28.609	29.624	11.659	47.098	63.621	9.762	59.775	22.299	1.828	1.953	47.387	12.189	22.433	9.997	12.685	14.108	35.498	5.114	5.274	95.419	42.046
18.9435	2.228	7.815	41.932	54.608	5.478	53.143	16.641	1.452	1.637	57.469	13.988	27.17	5.917	11.532	12.063	22.483	4.962	3.721	75.6	32.127	48.296	1.23	44.144	33.27	8.029	23.072	47.318	10.056	15.553	20.514	7.815	41.932	54.608	5.478	53.143	16.641	1.452	1.637	57.469	13.988	27.17	5.917	11.532	12.063	22.483	4.962	3.721	75.6	32.127
19.0626	1.874	6.286	34.734	37.708	4.176	39.416	12.766	1.059	1.761	67.647	21.655	31.676	3.549	10.234	7.712	12.992	3.539	2.327	47.939	22.385	40.855	1.411	41.365	36.488	4.791	17.04	37.541	10.782	10.971	12.778	6.286	34.734	37.708	4.176	39.416	12.766	1.059	1.761	67.647	21.655	31.676	3.549	10.234	7.712	12.992	3.539	2.327	47.939	22.385
19.1817	1.444	4.815	25.118	21.295	2.767	26.032	9.098	0.815	0.86	68.771	31.049	37.752	1.834	7.237	5.36	8.789	3.043	2.428	32.273	13.069	35.912	1.241	35.477	34.627	4.53	13.689	30.068	13.498	7.707	7.483	4.815	25.118	21.295	2.767	26.032	9.098	0.815	0.86	68.771	31.049	37.752	1.834	7.237	5.36	8.789	3.043	2.428	32.273	13.069
19.3009	0.747	4.569	17.838	14.237	2.387	16.835	5.847	1.174	1.193	69.253	46.293	46.721	1.509	5.888	5.76	7.127	2.846	2.431	18.02	9.899	27.598	1.078	25.991	34.493	4.203	9.66	24.006	16.727	5.486	5.781	4.569	17.838	14.237	2.387	16.835	5.847	1.174	1.193	69.253	46.293	46.721	1.509	5.888	5.76	7.127	2.846	2.431	18.02	9.899
19.42	1.039	3.445	11.426	8.797	1.722	9.733	3.521	1.085	0.73	71.04	59.568	52.29	1.385	5.28	3.887	5.75	2.331	1.862	12.21	5.978	25.149	0.811	17.63	25.073	3.159	6.427	19.646	21.11	4.095	4.561	3.445	11.426	8.797	1.722	9.733	3.521	1.085	0.73	71.04	59.568	52.29	1.385	5.28	3.887	5.75	2.331	1.862	12.21	5.978
19.5392	0.411	3.028	5.519	5.742	1.655	5.788	2.193	0.739	1.091	66.881	84.142	64.262	1.239	3.966	2.865	4.272	2.498	1.748	9.511	5.054	19.907	0.374	10.86	21.327	2.961	5.462	13.431	25.068	2.714	3.714	3.028	5.519	5.742	1.655	5.788	2.193	0.739	1.091	66.881	84.142	64.262	1.239	3.966	2.865	4.272	2.498	1.748	9.511	5.054
19.6583	0.885	2.248	2.148	3.929	1.153	3.486	1.451	0.715	0.594	55.68	93.978	74.328	0.959	2.602	1.954	3.955	1.418	1.367	6.599	3.549	10.965	0.257	7.239	14.598	1.972	4.189	9.071	27.628	3.082	3.275	2.248	2.148	3.929	1.153	3.486	1.451	0.715	0.594	55.68	93.978	74.328	0.959	2.602	1.954	3.955	1.418	1.367	6.599	3.549
[truncated: 12 more columns]

## Sheet: Image10
X0	Y0	Y1	Y2	Y3	Y4	Y5	Y6	Y7	Y8	Y9	Y10	Y11	Y12	Y13	Y14	Y15	Y16	Y17	Y18	Y19	Y20			Ap-Ba	Average int.
0	53.04	112.35	68.619	33.279	40.766	42.085	45.753	47.062	48.684	74.509	64.02	72.114	83.244	61.555	39.057	30.862	70.821	84.751	82.909	70.115	61.631			0	61.2965
0.1191	57.362	117.148	71.848	39.134	41.215	46.064	52.507	52.661	54.105	80.61	66.861	82.72	94.272	74.754	45.684	32.72	71.814	87.57	83.535	74.276	66.58			0.00588032	66.3543
0.2383	60.583	122.125	72.193	44.241	39.696	50.122	55.042	59.533	53.823	85.062	74.585	96.313	105.372	89.295	54.93	33.606	78.488	89.425	87.942	78.745	72.845			0.0117656	71.6174
0.3574	66.364	123.108	70.586	48.336	41.733	57.585	62.956	64.786	61.343	95.467	77.163	106.017	113.31	98.998	58.738	36.793	88.267	92.003	97.189	82.092	73.68			0.0176459	76.9769
0.4766	71.833	124.019	68.725	59.492	46.313	63.199	67.539	72.771	71.613	108.506	81.56	119.99	127.253	104.997	70.7	39.545	90.536	96.771	103.562	87.395	75.388			0.0235312	83.4146
0.5957	73.894	120.588	65.253	68.145	54.357	72.723	78.302	78.231	82.632	120.978	88.714	129.089	129.919	110.807	84.501	47.964	95.674	93.739	106.901	89.666	79.029			0.0294115	89.1003
0.7148	74.981	121.061	67.907	68.942	60.429	79.337	89.946	84.919	97.435	136.493	96.503	140.85	133.607	113.592	98.622	54.718	100.117	89.216	111.244	90.003	80.452			0.0352918	94.7797
0.834	83.012	112.068	71.556	75.254	64.684	89.592	95.503	92.426	113.535	147.208	99.325	143.785	140.144	118.078	113.519	59.619	108.822	95.536	110.805	94.88	78.812			0.0411771	100.389
0.9531	94.738	105.921	74.822	80.694	69.364	108.312	109.167	103.209	128.544	159.779	105.139	147.372	143.616	116.634	126.661	69.491	111.583	96.816	109.874	99.218	79.817			0.0470574	106.703
1.0723	102.107	105.037	81.135	81.084	77.656	116.743	120.951	112.683	135.363	165.644	111.162	146.415	148.611	117.202	135.164	77.147	111.776	102.062	110.769	99.305	87.373			0.0529426	111.685
1.1914	105.764	99.252	85.443	85.597	89.369	126.127	130.602	121.499	142.164	174.187	114.844	141.229	145.73	116.221	141.436	83.238	109.133	103.845	113.37	98.451	87.115			0.0588229	114.982
1.3106	112.525	93.951	91.698	90.028	101.921	131.349	135.571	132.304	150.935	177.385	111.804	142.606	145.54	115.317	141.756	92.402	104.083	102.614	112.275	100.516	90.343			0.0647082	117.949
1.4297	116.151	88.563	94.43	93.296	119.104	139.346	137.321	138.21	158.323	179.107	109.26	140.64	135.656	113.966	147.947	98.423	101.289	106.734	106.987	101.343	95.753			0.0705885	120.088
1.5488	120.163	91.663	102.085	102.714	129.605	141.637	143.707	137.259	166.247	184.099	108.147	132.008	131.209	112.159	145.729	101.218	93.969	114.276	106.741	102.85	98.048			0.0764688	122.168
1.668	126.945	91.41	109.509	117.303	145.165	146.905	146.106	136.761	168.786	180.502	108.243	125.396	125.531	110.692	143.991	106.417	88.804	117.711	103.957	100.057	96.258			0.0823541	123.64
1.7871	128.785	97.892	122.907	127.561	160.433	154.5	154.5	134.6	180.039	174.242	107.399	116.4	122.034	109.92	141.523	109.029	85.486	120.53	98.631	98.776	104.583			0.0882344	126.18
1.9063	130.623	105.005	136.813	137.48	172.841	159.346	153.662	125.582	184.604	171.97	100.283	104.376	114.9	110.058	140.558	111.045	81.205	127.514	96.233	96.695	106.267			0.0941197	127.003
2.0254	131.618	114.057	144.379	147.743	182.268	159.029	154.642	115.341	190.114	176.258	100.562	101.021	104.612	114.548	136.88	119.656	77.075	126.954	96.666	95.258	108.161			0.1	128.421
2.1445	136.533	122.308	149.045	154.064	186.05	156.892	148.278	113.61	195.513	172.735	103.115	92.678	98.95	116.626	134.864	119.933	72.925	126.486	96.674	89.575	108.894			0.10588	128.369
2.2637	138.118	130.965	154.172	166.241	180.873	151.402	137.232	106.791	192.418	169.196	108.699	86.597	94.557	113.438	133.233	121.874	69.862	124.637	96.382	87.061	110.628			0.111766	127.351
2.3828	140.345	129.248	156.557	169.795	167.917	139.006	136.54	105.183	192.239	166.771	114.988	72.388	91.268	118.309	127.103	124.692	69.687	123.961	97.728	84.286	110.721			0.117646	125.654
2.502	139.157	128.629	162.474	171.064	144.987	126.703	132.587	100.295	183.901	167.417	117.779	63.808	86.346	117.494	129.088	129.06	65.506	120.488	100.754	85.833	109.092			0.123531	122.974
2.6211	133.923	131.162	162.094	174.381	119.545	118.015	130.556	93.893	181.855	162.241	118.769	55.648	83.548	115.473	123.233	132.274	64.37	117.96	100.098	86.973	105.735			0.129411	119.607
2.7402	129.969	125.184	160.34	178.996	86.989	104.994	123.131	92.585	174.757	159.23	113.497	47.485	79.829	115.337	115.427	139.935	66.147	115.409	98.087	90.076	101.79			0.135292	115.2
2.8594	127.31	115.567	157.305	175.941	63.84	96.979	117.212	89.571	166.789	147.784	110.306	40.335	77.842	118.983	107.605	139.236	68.054	111.105	93.055	87.908	94.723			0.141177	109.879
2.9785	121.979	103.711	145.124	170.841	46.5	80.68	117.821	91.84	160.633	134.368	104.209	32.21	73.498	127.991	100.257	140.996	65.686	105.112	87.749	84.391	91.173			0.147057	104.132
3.0977	118.526	93.098	129.194	157.987	33.09	67.741	116.37	87.643	146.186	125.008	96.465	27.55	65.682	122.073	91.436	139.965	67.454	98.626	87.05	82.125	84.981			0.152943	97.0595
3.2168	108.283	78.764	112.022	148.157	25.511	54.351	111.013	85.189	130.978	113.793	83.845	22.191	59.813	123.224	77.649	135.46	65.312	101.79	86.9	82.669	81.704			0.158823	89.9342
3.336	102.314	64.071	89.619	130.694	22.44	39.439	105.249	78.245	106.185	108.596	72.934	17.69	50.502	121.435	67.41	131.803	68.546	98.918	86.413	83.208	79.36			0.164708	82.1462
3.4551	92.144	52.336	66.169	114.613	19.198	29.906	90.589	67.829	81.642	102.902	64.649	14.914	45.093	117.135	52.971	125.656	68.068	101.211	80.983	85.161	76.742			0.170589	73.8053
3.5742	87.429	43.548	51.3	95.995	16.132	22.993	78.24	58.884	62.504	96.485	54.906	11.984	37.71	120.983	46.351	115.542	66.259	98.245	83.282	81.152	78.612			0.176469	67.0731
3.6934	75.029	34.586	39.801	77.973	13.325	18.454	66.736	56.154	47	94.085	46.684	9.373	31.384	118.021	37.449	106.179	61.988	97.763	82.341	80.925	75.72			0.182354	60.5224
3.8125	62.204	25.891	29.023	63.67	12.46	17.533	53.627	51.668	37.928	81.794	37.752	8.005	26.335	111.887	30.879	96.235	65.526	97.992	82.928	83.331	71.972			0.188234	54.6971
3.9317	57.187	20.945	19.152	50.406	10.663	14.936	38.827	44.369	28.593	68.588	30.434	8.03	22.708	110.347	27.843	89.522	63.669	96.522	79.125	80.374	74.302			0.19412	49.3591
4.0508	44.964	17.416	15.623	43.348	9.226	11.671	31.916	35.617	22.207	55.952	26.914	6.825	20.431	98.496	24.082	84.107	66.956	90.512	79.396	77.215	74.389			0.2	44.6316
4.1699	36.977	16.415	12.666	38.109	7.596	11.13	27.281	32.048	18.517	42.401	23.608	5.962	16.607	93.967	22.721	75.834	71.869	88.205	76.689	76.558	70.859			0.20588	41.239
4.2891	29.042	13.115	11.019	31.476	7.316	11.465	22.019	25.445	16.936	27.446	19.448	4.791	15.612	87.153	19.891	66.166	75.226	86.044	72.636	71.759	67.878			0.211766	37.2325
4.4082	22.347	10.796	10.48	25.822	6.56	11.245	17.692	20.348	15.78	18.439	15.636	3.968	12.457	83.139	15.965	56.274	75.723	80.639	70.6	68.264	60.515			0.217646	33.4614
4.5274	18.71	11.023	9.562	22.719	5.841	11.987	15.27	15.091	13.187	16.498	15.931	3.661	9.496	72.783	14.918	52.307	83.246	77.178	69.467	65.063	51.649			0.223531	31.2184
4.6465	13.325	10.274	9.539	19.222	5.531	11.866	12.608	12.436	10.849	14.876	14.07	3.443	7.545	66.89	12.174	48.432	88.642	67.662	65.35	61.688	44.914			0.229411	28.635
4.7657	10.79	9.93	8.839	15.288	6.244	9.82	11.281	10.152	8.493	12.507	11.729	3.401	7.017	56.941	10.293	44.696	90.994	61.295	59.618	52.633	40.775			0.235297	25.8446
4.8848	8.908	10.905	8.32	13.013	5.501	10.898	10.257	9.109	7.715	13.674	8.846	3.09	6.132	47.191	9.123	39.314	90.286	52.565	53.486	48.371	31.661			0.241177	23.2555
5.0039	7.542	10.17	6.8	11.036	5.288	10.071	9.273	7.464	7.946	13.178	8.221	2.964	5.754	39.106	8.59	33.072	96.087	43.756	48.223	39.637	26.448			0.247057	20.9822
5.1231	5.932	11.566	4.389	7.644	4.496	9.74	6.716	6.06	7.901	13.283	5.982	2.63	5.654	29.558	7.588	29.289	99.53	40.37	42.185	28.762	21.127			0.252943	18.5906
5.2422	5.652	12.64	3.747	6.441	4.993	9.115	7.67	5.827	8.426	11.597	4.859	2.361	5.469	23.764	7.053	23.185	100.538	32.986	36.1	18.694	15.991			0.258823	16.529
5.3614	5.298	12.453	2.513	5.837	5.29	9.259	7.42	5.452	8.151	11.327	4.366	2.712	5.331	20.196	5.994	18.869	96.781	25.527	29.848	13.616	13.243			0.264708	14.7373
5.4805	5.255	13.224	2.557	4.986	4.718	9.826	7.03	4.623	9.406	11.971	2.98	2.671	5.537	17.037	5.938	16.043	94.003	21.893	22.57	10.997	11.272			0.270589	13.5494
5.5996	5.144	13.838	2.244	4.147	3.694	9.673	5.705	5.417	7.815	12.607	3.227	2.114	5.13	16.28	5.13	14.866	87.373	18.875	15.528	9.511	8.453			0.276469	12.2272
5.7188	5.259	11.741	2.384	3.253	3.534	9.03	5.797	4.956	6.679	12.83	3.904	2.443	5.126	16.252	5.718	13.763	72.938	15.839	14.423	9.038	6.799			0.282354	11.0336
5.8379	4.983	12.355	2.571	2.642	3.86	8.602	5.574	5.615	5.956	13.884	4.034	2.383	6.318	14.976	5.551	12.018	66.714	14.598	12.468	6.338	4.947			0.288234	10.3041
5.9571	5.416	13.085	2.243	2.555	3.671	9.384	4.768	5.746	6.404	12.915	3.166	2.531	5.534	15.4	5.516	12.017	55.695	13.738	11.325	6.031	4.766			0.29412	9.61457
6.0762	5.786	12.932	2.11	2.349	3.796	9.92	4.032	5.807	5.642	15.063	3.172	2.048	5.52	14.589	6.401	12.995	50.45	12.478	10.966	6.071	4.646			0.3	9.37014
6.1953	5.106	11.971	2.644	2.469	3.136	9.633	4.94	5.602	5.418	17.084	3.181	2.054	5.329	14.337	5.414	14.563	48.715	11.426	11.925	6.289	4.297			0.30588	9.3111
6.3145	4.254	11.361	2.357	2.73	3.331	9.439	4.715	5.651	5.736	17.598	3.378	2.237	4.376	14.997	4.975	13.529	45.856	10.258	13.645	5.183	3.722			0.311766	9.01562
6.4336	3.844	11.429	2.494	2.838	4.073	9.045	5.011	5.975	5.328	17.598	3.237	2.763	4.243	13.243	4.749	12.863	40.256	10.778	15.032	5.539	3.544			0.317646	8.75629
6.5528	3.424	12.285	2.87	2.254	3.415	9.524	5.239	6.234	6.078	16.471	3.145	2.684	3.746	12.272	4.842	13.076	34.922	10.156	14.683	5.469	3.898			0.323531	8.41367
6.6719	3.37	12.749	2.809	2.286	3.405	9.53	4.655	7.042	4.959	14.54	2.873	2.19	4.383	11.301	6.249	11.722	31.53	9.005	15.391	5.71	3.943			0.329411	8.07819
6.7911	3.165	12.186	3.15	1.967	3.086	8.346	5.112	5.765	5.173	15.391	3.815	1.897	4.968	11.371	5.813	12.352	26.971	7.689	14.709	4.487	3.931			0.335297	7.68305
6.9102	3.46	12.423	3.287	2.694	3.775	8.404	5.748	5.995	5.644	15.683	3.793	1.852	3.75	10.951	6.649	12.504	23.466	7.349	13.721	4.49	3.661			0.341177	7.58567
7.0293	2.694	14.157	2.822	2.824	3.536	9.474	5.485	6.275	5.258	17.115	3.248	1.899	3.492	10.002	7.092	10.63	21.573	7.757	12.332	5.59	4.001			0.347057	7.48838
7.1485	2.771	12.33	2.876	2.639	3.35	8.992	5.921	5.728	5.29	16.681	3.341	2.313	4.133	10.031	7.496	11.252	21.222	7.787	12.191	5.22	3.281			0.352943	7.37357
7.2676	3.178	14.103	3.103	3.076	4.207	9.258	4.786	5.129	6.022	16.183	3.132	2.032	4.202	9.405	7.712	11.063	18.284	8.203	11.254	5.672	3.298			0.358823	7.3001
7.3868	2.899	12.715	3.945	2.164	4.359	10.987	4.292	4.793	6.083	15.638	2.376	2.227	4.412	10.363	7.785	9.653	15.364	7.493	11.08	5.056	3.606			0.364708	7.01381
7.5059	3.19	12.86	4.002	3.142	3.672	11.899	5.157	4.997	6.643	14.412	2.665	2.6	5.185	12.188	9.002	10.062	14.184	6.581	10.929	4.825	3.457			0.370589	7.22152
7.625	2.939	12.897	3.779	3.459	4.505	12.098	5.822	4.425	7.203	16.588	3.12	2.059	5.771	10.583	8.725	9.212	15.616	5.374	11.423	4.649	2.792			0.376469	7.28757
7.7442	2.845	12.84	3.664	2.558	4.14	13.078	5.633	4.095	7.248	15.143	3.043	2.467	6.587	10.005	8.553	9.188	16.555	6.204	11.855	4.462	3.193			0.382354	7.30267
7.8633	3.112	14.841	4.313	2.487	4.607	12.728	6.144	4.366	7.076	14.42	2.87	2.614	7.458	11.217	8.964	10.612	18.061	6.114	13.124	4.072	3.38			0.388234	7.7419
7.9825	3.723	15.877	3.783	2.841	4.747	13.698	7.14	4.791	7.244	15.39	3.165	2.561	7.363	10.402	9.178	9.995	16.035	6.794	15.56	4.743	2.563			0.39412	7.98062
8.1016	2.706	16.642	4.087	3.68	4.616	14.129	8.12	5.242	7.837	16.671	3.652	2.371	9.016	10.808	8.778	10.303	14.347	6.733	18.357	5.137	2.765			0.4	8.38081
8.2207	2.591	16.669	3.809	2.85	4.581	15.018	7.2	4.235	7.995	16.994	3.046	2.654	10.819	8.23	8.999	9.824	15.514	7.806	19.467	4.977	2.57			0.40588	8.37371
8.3399	2.754	17.095	4.194	3.083	4.777	15.379	7.833	4.67	10.685	18.788	2.982	2.919	11.552	8.611	8.571	9.569	13.437	6.796	21.613	6.195	2.436			0.411766	8.759
8.459	3.237	16.721	4.666	2.973	5.23	17.346	8.431	4.743	11.445	19.449	3.256	2.675	13.172	9.717	8.833	9.151	11.401	7.137	21.416	7.508	2.221			0.417646	9.08229
8.5782	2.837	16.824	5.016	3.553	4.593	16.854	9.697	4.671	12.399	18.559	3.05	2.569	16.626	8.338	9.383	8.189	10.675	7.119	21.799	6.861	2.407			0.423531	9.14376
8.6973	2.706	15.588	4.27	3.166	4.816	17.521	10.23	4.904	13.212	18.464	3.183	2.373	19.505	7.857	8.287	7.731	10.165	6.59	21.575	8.094	2.598			0.429411	9.18262
8.8165	3.229	14.353	3.887	3.086	5.253	15.343	10.154	5.158	14.55	18.444	2.959	2.367	22.107	7.856	9.753	7.637	8.987	6.801	22.014	8.097	2.871			0.435297	9.28124
8.9356	3.239	13.357	4.377	2.934	4.627	16.15	9.995	4.135	15.815	19.891	2.158	1.988	24.504	7.694	9.119	7.56	7.316	7.423	21.5	9.16	2.712			0.441177	9.31686
9.0547	3.148	14.897	3.844	2.766	4.911	14.394	9.917	3.956	16.25	20.638	2.861	2.38	25.036	8.946	9.359	7.472	6.522	8.596	22.82	9.037	2.7			0.447057	9.54524
9.1739	3.212	14.444	4.565	3.537	4.639	13.167	11.287	4.641	16.499	20.031	2.507	2.03	27.677	8.404	8.062	6.344	5.483	8.982	23.839	9.794	2.515			0.452943	9.60281
9.293	3.561	13.321	4.295	3.39	4.649	13.276	12.528	4.354	17.896	21.344	2.921	1.872	29.045	7.413	8.395	5.763	4.511	9.372	24.496	10.066	3.258			0.458823	9.79648
9.4122	3.645	12.95	4.4	2.915	4.804	14.665	14.191	3.634	17.587	23.088	2.798	2.352	29.894	6.945	8.047	7.545	4.064	8.415	26.104	10.472	2.863			0.464708	10.0656
9.5313	3.298	12.943	4.032	3.117	5.03	12.526	13.448	4.331	21.579	25.365	3.067	2.755	27.547	6.639	7.794	7.647	4.355	8.474	30.967	11.015	2.577			0.470589	10.405
9.6504	3.015	13.362	4.555	2.757	4.662	13.75	13.018	4.724	21.497	30.035	2.955	2.958	28.744	6.479	7.739	7.284	3.471	9.656	35.417	8.878	2.586			0.476469	10.8353
9.7696	3.065	13.219	3.418	2.93	3.867	14.869	13.109	4.688	21.86	37.512	3.374	2.618	27.107	5.902	7.516	8.226	4.485	10.441	39.073	8.419	2.399			0.482354	11.338
9.8887	2.799	13.99	4.12	2.409	3.597	16.158	13.186	4.878	24.383	42.743	2.54	2.68	27.583	7.068	6.951	9.323	4.835	9.052	42.528	7.053	2.819			0.488234	11.9379
10.0079	2.942	13.74	4.709	2.774	3.793	16.381	14.543	5.421	26.748	41.276	2.863	2.016	30.192	6.47	7.008	10.708	5.359	8.58	49.382	6.316	2.976			0.49412	12.5808
10.127	3.043	14.517	5.48	3.318	4.083	14.804	15.665	6.272	25.778	34.474	3.298	2.817	31.496	6.64	6.818	12.001	5.301	8.302	52.078	6.459	2.619			0.5	12.6316
10.2462	3.457	15.411	4.768	3.082	3.537	13.956	16.132	6.287	27.116	26.162	3.216	2.64	30.372	6.161	6.954	11.975	5.73	9.002	48.325	5.292	2.972			0.505885	12.026
10.3653	3.111	15.445	4.153	2.751	3.714	13.701	15.329	6.473	29.888	17.774	2.183	2.446	28.576	6.218	7.795	12.193	6.413	10.841	48.279	5.899	2.838			0.511766	11.7152
10.4844	2.867	16.497	3.605	2.892	3.919	12.931	15.049	6.982	33.471	15.349	2.304	2.222	23.538	6.391	7.005	12.717	4.736	12.133	49.29	5.892	2.238			0.517646	11.5251
10.6036	2.95	16.844	4.612	2.615	3.517	11.923	14.474	5.949	35.058	13.301	2.995	2.502	19.228	5.395	7.843	12.54	5.516	12.418	45.282	5.386	3.33			0.523531	11.1275
10.7227	3.878	16.062	4.449	2.61	3.211	11.812	13.652	7.365	38.292	13.852	2.571	2.291	16.154	5.776	8.106	12.054	5.421	12.29	45.559	5.152	3.162			0.529411	11.1295
10.8419	3.825	16.853	3.92	2.827	3.458	10.862	14.622	7.387	41.301	12.947	2.121	2.257	14.191	4.977	8.289	12.86	5.232	10.061	40.014	5.299	3.045			0.535297	10.7785
10.961	3.066	16.798	3.754	2.433	3.247	10.761	14.168	6.273	46.054	12.284	2.426	2.95	13.054	5.439	8.384	13.61	4.355	9.589	38.976	5.841	2.706			0.541177	10.7699
11.0801	3.826	17.696	3.897	3.113	3.103	10.13	15.493	6.74	52.208	12.145	2.829	3.287	14.308	5.272	9.502	13.17	4.435	8.107	35.236	5.557	2.858			0.547057	11.091
11.1993	3.448	19.023	3.682	2.793	3.33	10.26	14.7	6.973	53.233	10.41	2.332	2.644	15.993	6.334	10.017	15.806	4.812	8.299	34.312	5.458	2.65			0.552943	11.2623
11.3184	3.746	20.143	4.061	2.725	3.155	9.393	16.438	7.212	58.642	9.642	2.411	3.108	16.106	6.651	11.169	17.466	3.92	7.258	36.057	4.445	3.025			0.558823	11.7511
11.4376	3.437	18.314	4.067	2.555	2.946	9.465	14.635	7.607	65.568	9.415	2.976	3.637	15.785	6.605	10.831	19.281	4.223	7.55	36.636	5.401	2.987			0.564708	12.0915
11.5567	4.005	19.023	3.892	2.511	3.131	8.564	15.745	7.702	68.478	9.603	3.059	2.801	15.808	9.198	11.146	20.534	4.805	8.16	37.849	4.905	2.604			0.570589	12.5487
11.6758	3.675	18.29	3.904	2.072	3.763	8.626	14.723	6.946	74.77	9.402	2.453	2.568	16.483	10.843	10.532	23.118	5.149	6.78	39.327	4.808	3.324			0.576469	12.9312
11.795	3.573	20.14	2.911	2.558	2.992	8.607	14.626	6.472	85.13	9.419	2.98	2.57	15.238	11.199	9.598	27.053	4.886	6.536	37.967	4.537	3.047			0.582354	13.4304
11.9141	4.323	21.645	3.162	2.807	3.18	9.196	16.782	6.897	90.275	9.256	2.574	3.202	14.375	13.031	9.977	30.197	4.469	6.717	34.98	4.067	2.276			0.588234	13.9709
12.0333	4.434	22.424	3.651	2.601	3.108	8.894	19.116	7.067	93.339	9.219	2.472	2.4	14.544	13.027	10.871	29.831	5.982	7.544	33.727	4.232	2.631			0.59412	14.3388
12.1524	3.548	20.993	3.72	2.506	3.387	8.463	19.913	7.168	93.219	8.069	2.845	2.485	13.22	13.467	11.309	28.491	6.969	7.161	31.092	4.405	2.812			0.6	14.0591
12.2716	5.081	19.067	3.151	2.599	2.906	8.951	20.759	7.908	91.274	7.134	2.28	2.743	15.253	13.501	11.352	30.789	6.288	8.367	29.215	3.796	2.565			0.605885	14.0466
12.3907	5.483	16.933	3.192	2.595	2.995	8.02	21.706	7.411	93.335	7.396	2.603	2.64	13.996	12.212	10.9	33.002	6.787	7.28	27.021	3.965	2.834			0.611766	13.9193
12.5098	5.367	17.837	3.389	2.709	2.815	8.575	21.943	7.167	91.526	5.64	3.04	2.677	14.635	13.867	10.417	34.222	7.028	9.255	23.684	3.873	2.732			0.617646	13.9237
12.629	6.523	17.737	3.046	2.908	2.087	7.458	22.362	6.045	94.191	4.608	2.843	2.673	13.721	13.618	10.772	35.229	6.613	9.046	23.243	3.901	3.027			0.623531	13.8881
12.7481	6.938	15.954	3.319	2.694	2.881	7.876	23.304	6.457	90.627	4.499	2.339	2.813	13.504	13.848	7.998	38.048	7.038	9.53	20.262	4.394	2.839			0.629411	13.6744
12.8673	7.952	17.36	2.837	2.325	2.701	6.72	23.457	7.374	86.182	5.197	2.515	2.91	14.16	14.374	8.291	44.358	6.779	9.883	18.014	4.728	2.854			0.635297	13.8558
12.9864	10.237	14.542	2.846	2.596	2.869	7.687	24.183	7.899	85.386	4.854	2.681	2.697	14.477	13.651	6.921	48.865	7.517	9.902	14.401	4.332	2.75			0.641177	13.8711
13.1055	12.828	13.275	3.396	2.515	2.726	7.803	26.719	8.002	88.237	5.794	2.716	2.629	14.033	14.492	7.833	55.26	8.497	9.957	13.06	3.881	2.774			0.647057	14.5918
13.2247	13.546	11.095	3.235	2.9	2.565	7.576	26.16	7.719	87.009	5.178	2.901	2.564	14.729	14.016	7.451	60.479	9.499	9.824	13.926	3.698	3.032			0.652943	14.7191
13.3438	16.064	9.569	2.535	3.332	2.644	7.201	29.902	8.082	88.245	5.151	2.419	3.281	15.729	13.537	7.186	64.039	8.524	11.57	13.941	3.348	3.037			0.658823	15.2065
13.463	20.549	8.734	3.101	2.739	2.099	6.592	26.964	7.657	84.245	4.58	3.129	3.106	15.745	13.61	7.667	66.25	8.05	14.656	14.272	4.048	2.576			0.664708	15.2557
13.5821	24.655	8.616	3.258	2.604	2.425	6.435	25.818	7.579	80.393	4.244	2.616	2.709	16.528	13.899	7.792	62.337	9.352	18.331	15.591	3.574	2.512			0.670589	15.2985
13.7012	30.813	10.009	3.891	3.015	2.516	6.137	26.15	7.087	76.787	5.313	3.286	2.693	17.073	13.638	7.736	56.426	8.88	15.976	15.669	3.265	2.691			0.676469	15.1929
13.8204	39.837	11.552	4.117	2.284	2.733	6.312	28.124	8.183	67.816	5.432	2.814	2.859	18.773	14.072	8.244	49.867	9.413	13.803	16.108	3.417	2.636			0.682354	15.1617
13.9395	50.24	13.864	3.636	1.998	2.559	5.505	28.228	9.346	61.826	5.302	2.245	2.552	19.775	12.693	9.611	47.603	10.491	11.284	16.036	4.374	2.785			0.688234	15.3311
14.0587	61.537	17.744	4.555	2.639	2.116	6.15	28.856	10.019	57.577	4.723	2.226	3.254	20.502	10.829	7.124	41.44	12.388	11.647	16.803	3.484	2.906			0.69412	15.6438
14.1778	63.541	22.434	5.242	3.082	2.737	6.038	29.88	8.936	46.226	5.083	3.178	3.053	19.65	10.749	7.843	32.486	15.481	10.584	16.238	3.374	2.75			0.7	15.1707
14.297	70.893	27.038	5.396	2.099	2.95	6.602	32.596	9.595	37.25	6.595	3.282	3.434	19.378	10.431	7.014	28.911	15.323	9.794	16.862	3.916	2.7			0.705885	15.3361
14.4161	79.942	33.033	6.631	2.912	2.977	5.35	34.481	10.958	30.307	7.73	3.229	2.977	20.116	9.78	7.725	22.138	15.908	9.784	15.763	3.3	3.068			0.711766	15.6242
14.5352	86.042	43.016	9.919	2.679	3.34	5.784	31.531	11.782	25.924	7.668	3.542	2.847	21.87	8.332	8.552	20.955	13.31	9.215	15.889	4.575	2.533			0.717646	16.1574
14.6544	95.005	45.664	13.346	2.901	3.072	5.736	34.845	12.176	21.881	8.631	3.03	3.006	22.169	7.26	9.835	17.084	11.925	11.053	16.259	3.967	2.299			0.723531	16.7211
14.7735	92.271	43.355	14.947	3.173	3.956	5.621	38.017	12.595	16.95	10.307	3.062	2.599	21.692	6.728	12.02	14.113	10.225	11.089	15.946	4.55	2.922			0.729411	16.4828
14.8927	83.924	33.532	19.555	3.193	5.228	6.923	38.349	13.013	17.515	11.689	2.709	3.564	23.751	7.085	15.981	13.76	9.896	12.002	16.146	3.643	2.835			0.735297	16.3949
15.0118	65.208	26.76	16.837	3.767	8.275	7.454	42.061	13.107	17.571	12.237	2.228	2.729	22.4	7.767	19.447	13.3	8.283	11.287	17.307	4.14	2.5			0.741177	15.4602
15.1309	41.847	18.572	12.261	4.307	10.122	7.235	41.958	14.006	18.336	15.003	2.567	2.919	22.031	6.334	21.973	11.961	7.312	11.136	17.321	3.892	2.493			0.747057	13.9803
15.2501	22.468	14.302	9.962	4.687	11.617	8.622	42.939	13.434	18.106	17.605	3.037	2.454	20.304	7.39	19.736	11.974	7.268	9.057	20.33	3.993	3.01			0.752943	12.9664
15.3692	10.825	10.38	7.32	5.581	14.89	9.781	42.982	14.011	17.738	19.089	2.93	2.309	21.531	7.196	18.645	11.274	6.704	9.611	19.377	3.815	2.551			0.758823	12.3114
15.4884	6.731	6.711	4.759	9.597	13.545	12.593	45.283	15.305	18.371	20.243	2.942	3.153	22.373	6.928	17.333	12.335	6.231	10.735	17.947	3.833	2.818			0.764708	12.3698
15.6075	4.935	4.697	3.749	13.374	12.823	14.101	49.272	15.938	18.86	24.82	3.194	3.374	20.716	5.94	16.535	13.828	5.715	10.13	16.945	3.839	3.03			0.770589	12.6579
15.7266	3.16	3.172	3.433	17.213	12.695	14.563	48.117	15.264	16.379	31.507	3.934	3.381	22.473	6.337	16.316	14.813	5.552	9.654	18.794	3.694	3.297			0.776469	13.0356
15.8458	2.301	2.284	2.341	17.97	10.13	15.241	52.634	17.842	16.289	40.626	3.614	2.948	23.417	5.437	15.18	14.601	6.625	9.833	18.127	4.239	2.824			0.782354	13.5478
15.9649	2.284	2.007	1.614	19.053	9.451	14.36	53.115	19.764	17.23	55.434	3.912	4.387	23.401	6.312	16.705	12.619	6.251	9.5	17.978	3.805	2.743			0.788234	14.3774
16.0841	1.882	1.154	1.599	15.712	7.436	10.222	58.046	22.134	16.107	67.929	4.852	4.99	24.991	5.773	17.989	13.644	5.756	8.562	17.107	4.405	3.165			0.79412	14.9264
16.2032	1.446	1.243	1.841	14.328	7.079	6.723	63.952	25.626	16.046	71.197	5.139	4.793	26.011	6.228	19.463	13.975	5.46	7.565	17.656	4.786	3.454			0.8	15.4291
16.3224	1.114	0.727	1.664	11.584	5.218	4.886	68.049	27.136	16.7	70.089	5.58	5.158	27.666	6.687	21.71	13.932	5.547	8.717	18.132	4.852	3.256			0.805885	15.6383
16.4415	0.789	0.529	1.238	9.21	4.165	4.396	65.406	29.093	17.652	72.416	7.191	6.884	26.487	6.518	22.395	12.196	5.262	8.599	19.449	5.378	4.024			0.811766	15.6799
16.5606	0.939	0.582	1.328	8.444	3.26	3.78	60.475	33.022	20.694	74.892	8.129	8.453	23.538	5.617	20.357	11.478	5.573	9.202	19.036	4.407	3.752			0.817646	15.5694
16.6798	1.029	0.627	1.149	6.44	2.551	3.561	58.25	34.732	28.233	79.778	9.242	9.183	25.508	6.909	19.483	12.04	5.718	7.357	19.207	4.344	3.635			0.823531	16.1417
16.7989	0.722	0.492	0.952	3.911	2.391	2.682	48.444	39.214	36.422	67.723	12.311	8.883	25.219	7.468	21.263	13.104	5.549	7.199	19.787	4.388	4.049			0.829411	15.8178
16.9181	0.484	0.279	1.197	4.021	2.219	2.117	41.856	50.979	47.697	57.724	16.982	9.875	25.362	8.839	20.607	12.519	5.272	7.894	19.627	5.234	4.111			0.835297	16.4236
17.0372	0.537	0.509	0.889	3.477	2.041	1.577	31.405	62.889	62.233	53.975	21.771	8.476	27.381	8.07	18.762	11.538	5.038	6.433	18.866	4.738	4.926			0.841177	16.93
17.1563	0.493	0.327	0.642	3.397	1.777	1.628	22.125	69.751	69.017	54.382	27.903	8.463	27.298	9.103	15.099	12.663	4.821	5.197	19.744	5.483	4.868			0.847057	17.342
17.2755	0.404	0.347	0.728	2.57	1.365	1.402	16.566	61.454	69.564	53.662	30.992	8.974	28.246	9.51	14.221	13.382	6.047	5.444	19.316	6.305	5.497			0.852943	16.9522
17.3946	0.717	0.299	1.059	2.293	1.424	1.157	11.867	45.263	59.269	56.788	32.394	11.079	28.337	10.325	13.115	12	5.312	6.95	20.591	7.172	6.524			0.858823	15.9017
17.5138	0.409	0.113	0.624	1.786	1.126	1.016	8.567	32.048	45.836	55.839	28.406	13.115	31.365	13.595	14.024	11.525	4.602	5.605	20.349	7.051	6.859			0.864708	14.4695
17.6329	0.087	0.293	0.7	1.544	0.872	0.929	5.933	23.993	32.185	45.252	25.963	11.617	31.667	14.852	13.119	11.06	4.622	6.159	21.008	6.92	7.967			0.870589	12.702
17.7521	0.18	0.102	0.769	1.141	0.744	1.083	4.973	15.059	19.023	30.131	22.176	14.048	35.484	15.679	14.227	10.594	5.076	5.892	21.026	7.831	7.318			0.876474	11.0741
17.8712	0.141	0.228	0.6	1.338	0.738	0.637	3.248	9.469	9.316	17.466	16.574	15.879	42.782	17.833	14.284	10.596	5.411	6.005	21.897	8.554	8.306			0.882354	10.062
17.9903	0.085	0.145	0.538	0.934	0.825	0.743	2.479	6.694	6.109	9.555	10.581	16.374	44.409	19.653	15.329	9.793	4.73	6.401	26.278	9.968	9.089			0.888234	9.55771
18.1095	0.223	0.105	0.433	0.733	0.753	0.77	2.152	5.401	3.807	6.156	6.697	17.545	52	22.14	15.455	11.702	4.97	7.669	29.741	11.133	11.041			0.89412	10.0298
18.2286	0.112	0.057	0.265	1.072	0.576	0.488	1.386	4.097	2.615	4.557	4.198	22.095	64.348	26.694	15.419	11.76	4.471	7.738	33.179	12.291	11.985			0.9	10.924
18.3478	0.066	0.01	0.383	1.316	0.52	0.516	1.246	2.994	2.344	2.679	3.919	27.408	71.02	35.319	16.765	9.663	3.939	8.015	35.526	14.757	12.681			0.905885	11.9565
18.4669	0.112	0.083	0.332	0.98	0.346	0.416	1.27	2.233	1.604	2.368	2.771	32.135	68.679	42.905	19.18	9.565	4.131	8.572	36.582	19.513	14.949			0.911766	12.7965
18.586	0.046	0.013	0.188	0.821	0.285	0.394	0.741	1.943	0.947	1.72	2.607	32.837	57.71	47.038	23.359	9.601	3.864	8.316	39.347	21.864	19.038			0.917646	12.9847
18.7052	0.023	0.057	0.123	0.663	0.365	0.299	0.71	1.798	1.032	1.517	2.505	29.905	43.527	52.033	26.598	9.33	3.994	10.868	42.635	22.78	19.167			0.923531	12.8538
18.8243	0.085	0.048	0.22	0.769	0.447	0.42	0.664	1.28	1.063	1.508	2.374	23.512	29.652	56.471	35.466	9.215	3.971	11.615	45.1	25.216	18.74			0.929411	12.7541
18.9435	0.05	0.05	0.211	1.109	0.282	0.311	0.405	1.22	0.763	1.122	2.144	15.572	18.219	63.941	43.071	7.578	3.252	12.088	41.398	22.989	18.095			0.935297	12.089
19.0626	0.044	0.138	0.106	0.864	0.342	0.088	0.312	0.611	0.871	1.125	1.805	12.955	11.278	62.632	42.402	9.336	4.163	12.384	33.662	16.577	20.318			0.941177	11.0482
19.1817	0.009	0.092	0.244	0.456	0.133	0.059	0.384	0.648	0.548	0.783	2.117	8.658	8.415	56.795	41.537	10.252	4.069	13.641	32.643	10.467	17.507			0.947057	9.97414
19.3009	0	0.086	0.184	0.575	0.455	0.137	0.193	0.33	0.415	1.052	1.65	6.704	6.828	46.499	37.619	11.238	4.413	14.582	30.196	5.866	15.509			0.952943	8.78719
19.42	0	0.049	0.17	0.64	0.231	0.092	0.324	0.488	0.397	0.848	1.335	4.592	5.101	31.038	42.922	14.501	3.807	16.963	29.167	3.601	14.913			0.958823	8.15138
19.5392	0	0.016	0.155	0.452	0.426	0.184	0.072	0.26	0.617	1.034	0.916	5.114	3.038	16.359	47.928	15.174	4.944	20.046	26.372	2.386	13.856			0.964708	7.58805
19.6583	0	0.05	0.053	0.172	0.408	0.085	0.113	0.387	0.384	0.789	1.105	4.956	2.526	8.563	42.049	16.058	4.996	25.748	27.707	2.508	11.218			0.970589	7.1369
19.7775	0.057	0.094	0.004	0.286	0.212	0.161	0.097	0.33	0.372	0.559	1.16	3.182	1.106	3.457	32.372	21.703	5.187	37.22	25.927	1.256	7.461			0.976474	6.77157
19.8966	0.034	0.144	0.098	0.343	0.162	0.031	0.11	0.121	0.266	0.544	0.814	2.424	1.179	2.197	19.297	22.441	6.038	46.208	20.277	1.293	5.206			0.982354	6.15367
20.0157	0	0.007	0.058	0.297	0.213	0.038	0.053	0.191	0.323	0.512	0.883	1.849	0.897	1.431	9.692	23.135	5.934	57.966	13.785	1.276	4.442			0.988234	5.85629
20.1349	0	0	0.156	0.12	0.235	0.091	0.145	0.303	0.164	0.591	0.79	1.941	0.618	1.344	4.749	22.049	7.492	61.976	10.147	1.193	4.035			0.99412	5.62567
20.254	0	0	0.0005987	0.349	0.328	0.066	0.103	0.034	0.374	0.293	0.511	1.287	0.755	1.115	3.432	22.07	10.341	56.377	6.666	0.791	3.452			1	5.15927

## Sheet: Image8
X0	Y0	Y1	Y2	Y3	Y4	Y5	Y6	Y7	Y8	Y9	Y10	Y11	Y12	Y13	Y14	Y15	Y16			Ap-Ba	Average int.
0	36.64	26.651	48.928	21.259	21.134	52.917	39.96	19.246	25.791	25.512	17.941	37.165	69.768	112.798	105.309	153.557	95.417			0	53.529
0.1191	40.117	27.061	56.9561	21.164	24.718	59.85	42.058	24.662	29.097	27.205	22.816	40.669	68.927	115.74	112.711	155.547	113.122			0.00528917	57.7894
0.2383	42.543	28.417	64.7601	22.89	29.426	62.139	44.761	29.271	30.944	26.92	26.817	47.56	69.251	123.777	116.821	155.195	130.717			0.0105828	61.8947
0.3574	51.711	32.337	71.6498	25.197	37.887	69.738	51.407	40.19	36.33	27.963	36.054	60.735	70.402	130.367	121.834	158.633	144.72			0.015872	68.6562
0.4766	66.847	36.352	77.1141	27.996	49.911	83.716	56.015	49.271	45.024	28.704	45.303	66.961	73.303	132.663	133.854	159.39	156.272			0.0211656	75.8057
0.5957	82.507	41.861	83.6258	29.055	61.548	99.162	65.953	59.448	56.152	37.157	60.102	74.04	70.607	136.861	151.52	157.244	168.508			0.0264547	84.4324
0.7148	93.874	45.889	84.8399	34.452	76.058	108.678	75.67	70.435	76.334	45.133	79.494	85.248	70.575	122.289	165.878	175.049	177.468			0.0317439	93.3743
0.834	102.486	49.231	84.6872	39.427	88.847	119.332	89.872	81.011	93.771	58.537	110.547	94.177	70.74	116.553	177.026	181.47	183.872			0.0370375	102.446
0.9531	112.557	57.223	84.7502	42.549	95.752	124.826	104.411	86.373	110.196	76.604	143.581	101.488	76.518	108.833	188.671	190.225	188.141			0.0423267	111.335
1.0723	128.844	62.66	80.0078	48.454	102.871	136.957	125.096	99.699	124.11	87.948	166.62	104.551	83.355	113.991	191.299	204.641	182.939			0.0476203	120.238
1.1914	140.087	63.405	74.4676	54	109.756	140.182	139.903	114.126	133.828	98.791	175.156	118.97	89.468	112.127	187.472	208.568	182.539			0.0529095	126.05
1.3106	145.531	70.245	77.6301	56.866	111.201	144.474	145.505	123.227	142.061	108.089	185.314	118.769	91.464	112.802	183.616	211.057	177.814			0.0582031	129.745
1.4297	149.721	73.838	78.3535	63.116	111.389	138.113	152.611	137.649	145.543	121.052	195.962	128.009	101.008	121.509	182.468	219.244	172.255			0.0634923	134.814
1.5488	149.647	78.468	76.2258	68.379	113.985	140.052	142.481	142.994	150.56	126.327	204.119	143.022	107.085	125.872	188.649	225.75	174.135			0.0687814	138.691
1.668	150.017	84.244	81.707	77.564	117.067	139.145	128.55	146.207	158.013	134.124	210.711	151.634	118.869	132.942	188.192	226.181	164.918			0.0740751	141.77
1.7871	153.326	87.216	87.5955	82.786	114.834	144.074	108.156	149.969	169.326	146.007	210.322	161.055	135.466	137.416	177.023	225.106	159.062			0.0793642	144.043
1.9063	151.81	95.469	91.0026	92.19	113.254	142.366	82.732	151.366	174.101	154.375	212.918	174.638	145.742	143.804	175.745	224.983	158.287			0.0846578	146.164
2.0254	149.884	104.875	97.7454	102.646	112.632	135.74	61.368	154.417	173.593	162.689	208.668	180.131	160.443	146.976	175.885	224.715	160.758			0.089947	147.833
2.1445	142.948	109.848	98.1064	106.467	104.14	131.32	41.932	150.008	168.038	165.678	202.95	187.035	163.21	154.487	186.697	230.702	171.918			0.0952362	147.97
2.2637	143.754	115.256	99.017	111.369	97.305	119.699	31.106	148.605	158.595	164.953	196.526	185.632	164.699	156.426	192.096	235.557	179.341			0.10053	147.055
2.3828	144.622	121.675	92.59	108.738	88.376	101.442	24.223	142.489	141.836	157.256	194.963	181.899	157.249	158.927	199.035	238.145	179.888			0.105819	143.138
2.502	139.016	122.544	82.5105	106.415	76.894	86.744	18.995	127.599	119.767	148.714	187.93	173.123	157.513	157.776	191.954	237.679	181.39			0.111113	136.268
2.6211	135.118	118.008	75.1239	97.332	58.55	71.755	16.726	107.303	90.604	130.089	183.602	162.016	154.295	160.297	178.997	229.721	167.812			0.116402	125.726
2.7402	131.538	112	66.825	81.968	44.985	56.119	16.789	82.557	72.3	109.783	173.329	153.944	147.701	161.732	163.366	223.285	162.526			0.121691	115.338
2.8594	125.289	106.383	59.5148	63.374	32.873	40.461	14.358	64.378	60.968	90.537	169.469	153.093	133.309	163.221	143.44	216.005	155.406			0.126985	105.416
2.9785	118.368	99.994	51.2543	47.314	22.369	26.437	13.739	48.498	51.591	70.431	163.307	155.266	114.821	165.767	121.495	210.644	145.947			0.132274	95.7201
3.0977	109.985	94.281	43.0016	32.492	14.845	17.217	13.655	36.16	42.06	58.101	155.917	147.544	89.792	158.395	114.949	199.992	137.78			0.137567	86.2451
3.2168	93.96	86.921	36.3508	23.772	9.478	11.553	14.344	27.663	34.148	51.473	149.088	136.623	64.823	157.806	106.824	203.569	127.095			0.142857	78.5583
3.336	82.46	84.072	31.8352	19.155	6.687	8.433	14.104	21.122	25.078	46.377	142.06	130.591	46.529	162.347	101.946	192.977	118.693			0.14815	72.6157
3.4551	70.913	74.729	25.6035	16.236	5.523	7.401	14.256	14.008	18.235	42.482	139.113	119.288	34.653	156.733	101.364	181.644	109.533			0.153439	66.5714
3.5742	57.553	58.018	21.9878	14.756	4.779	5.291	13.35	11.615	13.182	37.753	136.512	103.923	27.159	149.386	102.785	173.576	101.569			0.158728	60.7762
3.6934	43.981	47.842	19.4819	14.163	4.237	4.909	14.271	9.977	10.096	32.227	130.348	93.427	21.129	145.675	107.246	166.731	95.132			0.164022	56.5219
3.8125	32.982	37.598	16.3561	12.223	3.674	4.375	13.653	6.864	7.166	27.28	123.815	79.632	16.202	143.589	107.863	159.988	84.564			0.169311	51.6367
3.9317	25.331	30.19	14.5398	12.063	4.174	4.359	13.939	4.934	5.368	24.663	118.867	67.332	13.543	145.572	107.916	146.105	75.529			0.174605	47.9073
4.0508	20.893	22.848	12.7394	10.165	3.697	4.32	13.063	4.5	4.665	24.828	112.649	56.441	10.537	143.497	106.482	147.118	69.562			0.179894	45.1767
4.1699	16.791	18.349	10.6249	10.084	4.152	3.552	13.135	3.659	4.306	23.713	101.808	47.496	9.166	149.456	112.741	151.574	68.35			0.185183	44.0563
4.2891	14.158	15.876	10.787	11.481	3.082	3.384	13.017	3.472	2.914	20.444	95.378	38.201	8.586	152.392	114.432	153.307	61.892			0.190477	42.5178
4.4082	12.063	13.738	8.9064	11.142	2.577	3.152	12.495	2.942	2.923	18.834	89.194	29.369	8.419	159.404	120.439	148	61.92			0.195766	41.501
4.5274	9.639	11.079	7.7415	11.063	2.999	3.497	11.637	2.691	2.94	16.67	76.28	26.626	7.041	152.081	119.927	148.688	59.811			0.20106	39.4359
4.6465	7.511	9.544	6.5127	12.071	3.449	3.112	10.657	2.667	2.933	15.259	63.461	23.148	6.942	149.723	115.447	153.069	56.592			0.206349	37.7705
4.7657	6.531	8.445	6.4369	11.239	3.459	3.343	9.19	2.882	2.792	15.068	53.681	19.992	7.239	147.68	112.933	153.897	55.409			0.211642	36.4833
4.8848	4.885	7.68	5.799	12.341	3.249	3.05	7.607	2.586	2.776	14.038	46.749	15.986	7.586	145.531	111.095	160.369	56.262			0.216932	35.7405
5.0039	4.193	6.369	5.5473	12.096	3.775	3.121	7.372	2.251	3.084	13.864	40.29	14.446	8.257	149.59	106.095	156.932	55.839			0.222221	34.8895
5.1231	3.502	7.638	5.5323	11.157	3.428	3.1	6.004	2.285	3.149	14.169	34.831	13.671	7.991	148.641	108.114	154.236	57.507			0.227514	34.4091
5.2422	3.498	7.658	5.0747	10.544	2.992	3.74	6.088	2.827	3.443	12.959	30.117	13.771	8.418	144.663	102.831	152.791	58.832			0.232804	33.5439
5.3614	3.335	6.786	4.6029	10.766	3.032	3.733	5.236	1.924	3.644	12.462	26.59	12.208	8.306	143.405	96.649	159.563	57.927			0.238097	32.9511
5.4805	2.796	5.857	4.615	11.597	3.062	3.83	4.373	2.171	4.163	11.467	21.374	11.998	8.865	140.668	87.878	155.66	58.533			0.243386	31.7004
5.5996	2.799	6.393	5.3497	11.961	2.603	4.157	4.674	2.006	3.806	9.147	18.834	13.239	8.65	138.982	81.289	145.656	59.839			0.248675	30.552
5.7188	2.164	7.318	4.9946	12.832	2.353	4.751	4.683	2.157	4.026	8.653	15.927	13.502	8.268	131.128	76.246	139.447	59.327			0.253969	29.281
5.8379	2.562	6.683	5.0377	12.179	2.56	5.231	5.217	2.036	3.612	9.086	13.997	11.41	8.807	121.355	69.633	127.321	56.753			0.259258	27.2635
5.9571	2.856	6.589	4.1843	11.967	2.454	5.469	4.597	1.947	4.011	8.639	13.059	9.057	8.69	110.871	58.747	110.064	54.827			0.264552	24.5899
6.0762	2.474	5.887	4.4529	12.361	2.27	5.53	4.542	1.882	4.578	7.584	9.377	8.081	8.643	99.076	48.548	91.775	50.406			0.269841	21.6157
6.1953	2.78	5.924	4.2375	11.025	2.377	5.924	4.287	1.62	4.218	6.577	8.794	6.539	8.197	91.919	36.608	80.517	41.735			0.27513	19.0164
6.3145	2.333	5.405	4.4588	13.016	2.089	6.341	4.521	2.144	4.528	7.597	6.36	5.411	9.617	80.001	25.282	68.678	37.24			0.280424	16.766
6.4336	2.548	5.587	5.3386	11.838	2.823	6.314	3.849	2.445	4.001	7.717	6.221	4.507	10.041	65.374	13.612	57.45	32.93			0.285713	14.2703
6.5528	2.84	5.526	4.701	13.052	2.665	7.226	3.613	2.284	4.447	7.333	6.253	4.957	7.869	57.012	7.58	45.421	29.226			0.291007	12.4709
6.6719	1.823	5.81	5.2671	12.841	2.32	8.419	4.045	1.823	5.247	7.484	5.954	5.513	8.861	44.378	4.804	34.718	26.369			0.296296	10.9221
6.7911	2.288	6.832	6.108	13.891	2.859	11.495	3.363	1.88	5.21	6.145	4.693	5.329	8.037	33.428	3.69	26.596	19.65			0.301589	9.49965
6.9102	2.321	6.569	5.8992	15.131	2.901	15.29	3.555	2.086	6.344	6.402	4.376	5.024	9.139	22.93	1.843	19.786	14.774			0.306879	8.49236
7.0293	2.312	6.948	5.1588	15.727	2.098	16.257	3.582	1.974	7.589	6.264	4.044	5.594	10.319	14.607	2.136	16.701	10.914			0.312168	7.77793
7.1485	2.335	8.19	5.7549	15.967	2.489	17.082	3.449	2.164	9.178	4.829	3.972	5.592	9.49	9.972	1.92	16.104	9.315			0.317461	7.51782
7.2676	2.548	10.258	5.4595	14.579	2.273	18.53	2.5	2.214	10.071	5.299	4.946	5.859	9.954	5.113	2.391	14.849	7.174			0.322751	7.29515
7.3868	2.194	11.208	6.708	15.325	1.632	16.604	2.691	1.742	10.723	4.653	4.254	5.104	10.316	3.212	2.512	15.202	5.41			0.328044	7.02882
7.5059	3.109	12.398	7.0379	16.831	2.456	16.891	2.827	1.894	12.851	3.837	4.111	5.012	11.058	3.439	2.436	15.353	4.316			0.333333	7.40335
7.625	1.862	14.23	8.0076	15.209	2.422	15.119	2.618	1.901	14.082	4.136	4.241	5.436	10.43	2.881	1.805	15.682	4.607			0.338623	7.33345
7.7442	1.958	14.203	7.5534	15.857	2.092	15.546	2.973	1.959	14.239	3.762	3.95	4.854	9.197	2.524	1.934	16.077	5.022			0.343916	7.27649
7.8633	2.685	11.864	8.3398	14.12	2.497	15.708	2.805	1.637	17.017	3.19	4.849	4.526	9.914	2.42	1.564	16.933	4.861			0.349205	7.34881
7.9825	2.648	11.385	8.621	13.791	2.16	16.699	2.693	2.201	19.673	3.362	4.579	4.969	11.896	2.489	1.625	16.133	4.501			0.354499	7.61324
8.1016	2.244	11.905	9.306	13.825	2.153	19.214	3.049	2.39	22.145	3.655	4.299	4.374	10.871	2.555	1.4	15.866	4.229			0.359788	7.85176
8.2207	2.464	12.925	10.3448	13.248	2.528	19.147	2.449	2.092	23.886	3.211	4.048	4.781	12.212	2.699	1.762	16.182	4.032			0.365077	8.11828
8.3399	2.172	14.565	12.3291	13.535	2.668	20.673	2.24	1.831	25.567	3.624	3.755	4.79	11.134	2.311	2.019	16.92	4.075			0.370371	8.48283
8.459	2.451	14.467	11.3596	12.376	2.194	21.039	2.138	2.451	27.191	3.396	4.474	5.353	11.153	2.43	2.136	16.276	5.231			0.37566	8.59504
8.5782	2.634	14.598	10.137	14.163	2.479	21.588	2.346	2.23	27.235	3.072	4.316	4.622	11.584	2.428	1.813	17.226	5.305			0.380954	8.69271
8.6973	2.307	15.451	10.7907	13.204	2.214	21.199	2.772	2.12	25.591	2.882	4.771	5.361	13.819	3.367	1.362	14.999	5.185			0.386243	8.67028
8.8165	2.875	16.06	10.8967	12.908	2.464	20.585	2.485	2.03	25.532	2.804	4.671	5.557	13.741	3.465	1.834	16.068	5.479			0.391536	8.79145
8.9356	2.072	16.342	12.3632	11.177	2.658	19.29	2.542	1.881	24.315	2.462	4.996	6.365	12.422	3.375	1.49	14.771	4.897			0.396826	8.43636
9.0547	2.388	15.801	13.2419	12.044	2.403	17.497	2.573	1.802	23.356	3.1	6.566	6.291	12.752	3.195	2.192	14.804	6.402			0.402115	8.61223
9.1739	2.386	14.73	13.9189	13.75	2.969	17.41	1.867	2.187	22.743	2.508	6.828	6.642	13.19	3.905	1.886	11.707	6.299			0.407408	8.52505
9.293	2.523	14.475	12.764	13.703	2.881	17.226	2.146	1.709	22.311	2.787	7.765	6.41	12.758	3.451	2.01	10.241	5.427			0.412698	8.26982
9.4122	2.48	15.672	14.9926	13.214	2.655	16.417	2.631	2.008	20.61	2.753	9.247	6.534	13.125	3.08	1.788	7.929	6.931			0.417991	8.35686
9.5313	2.487	15.915	14.298	11.474	2.304	15.893	2.672	2.159	20.54	2.79	9.225	6.808	13.204	3.752	1.638	5.805	8.072			0.42328	8.17859
9.6504	2.363	14.827	13.7214	11.09	2.736	17.02	2.276	1.839	20.016	1.952	7.9	8.209	14.976	3.365	2.155	4.744	8.453			0.42857	8.09661
9.7696	2.872	13.064	12.9805	10.244	2.813	18.385	2.176	2.267	18.26	2.41	7.838	7.638	16.087	3.632	1.951	3.645	9.451			0.433863	7.98315
9.8887	2.996	13.755	12.006	9.877	3.109	19.776	2.246	2.315	18.501	2.464	9.621	8.067	16.775	3.685	1.861	3.298	10.998			0.439152	8.31471
10.0079	2.812	12.382	13.9649	11.043	2.652	16.518	1.759	1.74	17.498	2.38	10.378	8.541	17.623	3.829	1.962	3.541	13.882			0.444446	8.38264
10.127	2.072	12.542	15.0792	9.777	3.013	20.629	1.98	1.713	17.762	2.285	9.961	9.05	18.502	3.138	2.072	3.502	12.885			0.449735	8.58601
10.2462	2.207	10.794	13.0034	10.157	2.989	19.871	2.811	2.089	16.849	3.017	9.245	11.628	18.413	2.933	1.748	3.157	16.332			0.455029	8.66138
10.3653	2.661	9.798	14.1318	9.91	2.843	18.906	2.785	1.873	16.561	2.808	8.776	14.649	20.577	3.597	2.117	3.514	17.81			0.460318	9.01864
10.4844	2.803	9.423	16.8137	8.786	3.068	18.39	1.99	1.984	18.089	2.668	8.518	15.623	22.635	4.19	2.15	3.506	20.692			0.465607	9.48992
10.6036	2.881	8.555	16.3597	8.885	2.955	18.915	2.145	1.777	18.35	2.944	6.923	18.637	23.191	4.142	2.215	3.525	21.608			0.470901	9.64751
10.7227	2.972	8.714	15.9303	8.32	2.561	17.233	2.205	1.706	17.714	2.29	5.387	21.653	22.418	4.155	1.962	2.665	21.558			0.47619	9.37902
10.8419	3.025	9.271	17.6877	8.242	2.442	17.897	2.966	1.941	16.588	2.473	6.545	20.698	24.146	4.082	1.955	2.496	23.267			0.481483	9.74834
10.961	2.83	7.941	18.437	8.732	2.479	16.822	2.641	1.773	17.001	2.689	7.302	23.965	22.67	4.484	1.964	2.612	23.639			0.486773	9.88124
11.0801	2.688	7.676	19.3082	7.42	2.694	16.381	2.699	1.539	16.49	2.125	7.548	24.968	21.271	5.992	1.904	2.539	22.647			0.492062	9.75819
11.1993	2.595	7.066	20.0677	6.498	2.322	17.992	2.789	2.329	16.23	2.11	7.981	25.318	19.157	5.601	2.011	2.979	23.171			0.497355	9.77745
11.3184	2.201	7.255	23.3691	6.994	2.45	18.484	3.027	2.365	16.664	2.224	7.405	23.672	18.076	5.25	1.858	2.073	25.983			0.502645	9.96177
11.4376	2.36	7.221	28.3832	6.999	2.533	15.841	2.123	1.872	18.723	2.375	7.174	25.082	17.256	7.084	2.095	2.006	25.718			0.507938	10.285
11.5567	2.604	6.869	30.5327	6.536	2.538	17.871	2.242	2.218	20.73	2.557	7.047	23.991	15.434	6.206	1.754	2.408	24.358			0.513227	10.3468
11.6758	2.692	7.273	32.6336	7.408	2.395	18.123	2.327	2.272	20.148	2.484	6.883	21.578	15.227	8.234	1.896	2.205	25.404			0.518517	10.5402
11.795	2.742	6.142	33.4581	7.081	2.324	18.416	2.146	2.163	20.128	2.25	6.042	21.095	13.664	9.117	2.207	2.13	26.62			0.52381	10.4544
11.9141	2.696	6.803	36.6555	6.246	2.971	22.189	2.989	2.21	19.084	2.156	6.971	20.435	11.896	9.007	2.629	1.882	26.632			0.529099	10.7913
12.0333	2.588	7.567	41.7086	6.169	3.183	22.431	3.658	2.123	19.78	2.664	7.048	20.305	11.359	9.798	2.037	1.887	26.16			0.534393	11.2039
12.1524	2.946	6.423	40.6981	5.905	2.984	20.225	3.032	2.155	18.59	2.198	6.415	21.792	11.346	10.83	2.1	1.938	26.432			0.539682	10.9417
12.2716	3.085	7.377	40.7691	5.425	2.946	18.398	2.493	2.218	18.496	2.772	6.574	18.94	9.501	11.074	2.421	2.2	26.539			0.544976	10.6605
12.3907	2.97	7.148	41.0636	5.312	3.162	18.017	2.849	2.382	18.038	2.551	6.523	18.144	9.231	12.966	2.184	2.207	28.211			0.550265	10.7623
12.5098	2.68	6.416	46.6165	5.027	2.943	20.425	2.277	1.955	17.436	2.12	6.786	17.871	8.683	14.794	1.88	1.983	26.322			0.555554	10.9538
12.629	2.254	6.293	50.3255	6.153	2.749	18.905	3.003	2.031	16.47	2.266	6.02	16.927	8.343	16.265	2.212	1.99	28.179			0.560848	11.1991
12.7481	2.466	7.07	52.3254	5.847	2.903	20.51	2.782	1.97	17.184	2.394	5.153	16.896	7.547	19.666	2.449	2.754	29.961			0.566137	11.7575
12.8673	2.763	6.66	50.9841	5.474	3.109	23.045	2.511	2.533	19.451	2.593	4.734	16.508	7.903	20.582	2.145	2.49	27.807			0.57143	11.8407
12.9864	2.653	6.936	54.7264	6.401	3.007	26.034	2.784	2.362	18.195	2.579	5.978	15.675	7.34	18.83	1.81	2.097	27.744			0.57672	12.0677
13.1055	3.014	5.91	56.9852	5.812	2.41	25.923	2.304	2.373	18.368	2.402	6.134	14.708	7.106	20.454	2.295	2.467	26.654			0.582009	12.0776
13.2247	2.963	5.91	54.0708	5.167	2.672	23.938	2.413	2.048	16.684	2.625	6.569	13.744	6.88	16.958	1.822	2.311	25.972			0.587302	11.338
13.3438	3.265	5.367	56.8442	5.021	2.621	24.127	2.541	2.01	18.35	2.507	6.731	13.587	6.115	17.979	2.209	2.039	24.582			0.592592	11.5232
13.463	3.182	5.796	54.0379	4.834	3.003	27.303	2.695	2.411	16.782	2.522	6.146	13.047	5.427	14.707	1.801	2.003	20.876			0.597885	10.9749
13.5821	3.294	6.469	55.1474	5.019	2.509	22.18	2.378	2.2	17.644	1.944	5.619	13.57	5.308	13.14	2.42	2.359	19.556			0.603174	10.6327
13.7012	3.255	5.63	52.7575	5.145	2.416	20.452	2.424	2.033	18.921	1.829	5.695	12.792	5.477	14.373	2.3	2.589	16.428			0.608464	10.2657
13.8204	3.727	5.756	48.0685	4.294	2.882	22.426	2.167	1.908	17.65	1.689	6.215	12.618	5.286	14.65	2.159	2.185	10.08			0.613757	9.63297
13.9395	3.785	5.763	43.2582	5.006	3.079	22.338	2.594	1.743	18.172	2.406	6.717	13.891	5.416	14.376	2.296	2.562	7.539			0.619046	9.46713
14.0587	3.354	5.361	42.797	4.318	3.298	22.092	2.954	2.126	18.787	1.987	7.034	12.826	4.507	14.074	2.22	2.489	5.144			0.62434	9.13929
14.1778	3.415	4.591	39.3127	4.28	3.157	22.501	2.706	2.526	18.514	1.835	7.234	13.89	4.457	15.026	2.133	2.244	4.661			0.629629	8.96957
14.297	4.346	5.376	35.5573	5.011	2.519	22.026	2.307	2.203	19.322	1.742	6.626	14.676	4.711	15.961	2.01	2.282	4.344			0.634923	8.88349
14.4161	3.373	3.817	32.1476	5.42	2.553	20.814	2.818	2.249	20.849	1.459	5.671	15.975	4.787	16.895	2.31	2.274	4.215			0.640212	8.68392
14.5352	3.306	4.206	28.8517	5.025	2.896	19.585	2.851	2.161	21.087	2.11	5.802	15.816	4.949	15.575	2.08	2.41	3.248			0.645501	8.35051
14.6544	3.665	3.916	28.7369	5.256	2.692	19.372	2.888	2.552	20.007	2.343	5.218	14.284	4.892	16.341	2.304	2.124	3.197			0.650795	8.22282
14.7735	3.963	4.322	28.0168	4.513	2.743	19.154	2.361	2.164	19.116	1.843	4.497	15.157	4.77	18.863	2.619	1.512	3.579			0.656084	8.18781
14.8927	5.239	4.622	28.3026	4.706	2.936	20.224	2.17	2.371	17.649	1.989	4.343	14.922	4.939	18.504	2.132	1.702	3.177			0.661377	8.23104
15.0118	4.299	3.885	26.6523	4.432	2.999	21.178	2.525	2.428	18.463	1.682	4.031	14.365	4.242	18.566	1.954	1.908	3.002			0.666667	8.03596
15.1309	4.56	3.762	28.644	4.066	2.811	20.325	2.75	2.421	17.231	1.744	3.869	14.24	4.434	17.551	2.225	1.905	2.763			0.671956	7.95888
15.2501	4.074	3.551	29.2907	4.379	2.809	20.124	2.611	2.379	16.944	2.297	3.936	14.288	5.007	19.73	2.207	2.224	2.544			0.677249	8.14086
15.3692	4.58	3.985	31.4229	4.876	3.469	21.171	2.962	2.185	17.572	2.003	3.497	14.274	4.04	19.395	2.377	2.247	2.566			0.682539	8.38952
15.4884	4.644	3.345	33.5577	4.535	3.452	23.972	2.773	2.664	17.632	1.786	3.734	13.969	5.456	18.592	2.198	2.236	2.029			0.687832	8.62204
15.6075	5.231	3.579	32.6108	4.103	2.716	25.832	2.466	2.074	18.031	1.94	3.571	12.232	5.342	19.734	2.121	2.099	2.59			0.693121	8.60422
15.7266	4.47	3.723	36.0075	4.799	2.726	25.411	2.828	1.733	16.681	2.558	3.409	12.233	5.024	21.09	2.029	1.824	2.141			0.698411	8.74626
15.8458	4.115	3.846	38.556	4.874	3.283	25.733	2.971	2.178	17.38	2.56	3.488	13.31	4.916	19.443	2.462	1.652	2.109			0.703704	8.99271
15.9649	4.047	3.252	38.8721	4.813	3.411	24.653	3.238	2.765	18.473	2.163	3.646	13.062	5.07	21.125	2.813	1.924	2.077			0.708993	9.14142
16.0841	4.172	4.094	41.6089	5.672	3.328	23.326	2.567	2.888	18.326	2.186	3.647	13.098	5.349	21.051	2.048	1.772	2.063			0.714287	9.24682
16.2032	4.132	3.707	43.6949	5.688	3.086	23.173	2.585	2.778	20.763	2.493	3.698	11.832	5.7	20.08	2.177	1.925	1.802			0.719576	9.37141
16.3224	3.847	3.832	42.9855	5.18	3.621	23.017	3.105	2.501	20.563	2.571	3.125	13.264	6.447	20.108	2.485	1.722	1.912			0.72487	9.42856
16.4415	4.147	4.193	46.1328	4.117	4.157	22.73	3.558	2.954	20.246	2.24	3.596	13.227	6.83	22.181	2.74	2.542	1.705			0.730159	9.84093
16.5606	4.289	2.997	47.4186	4.84	3.727	22.515	2.887	2.797	20.972	2.187	3.452	13.892	6.347	24.206	2.753	2.774	1.828			0.735448	9.99304
16.6798	5.675	2.828	49.8201	3.901	3.321	23.514	3.097	1.91	20.064	2.324	3.612	13.842	6.12	25.587	3.064	2.392	2.594			0.740742	10.2156
16.7989	4.668	3.129	51.7489	4.127	3.128	23.958	3.696	2.405	19.197	2.515	3.75	15.658	6.042	26.525	2.783	2.279	2.44			0.746031	10.4735
16.9181	4.355	3.224	52.9725	4.25	3.17	23.092	3.662	2.372	19.118	2.799	3.575	16.514	6.685	26.156	3.672	2.586	2.573			0.751325	10.6339
17.0372	3.957	3.403	54.2522	3.494	3.352	23.884	3.877	2.324	18.822	2.3	3.554	15.394	7.059	26.194	3.571	2.58	2.302			0.756614	10.607
17.1563	3.16	3.624	50.9985	4.048	3.442	25.686	4.136	2.544	18.724	2.063	4.403	18.023	8.084	26.244	4.056	2.724	2.484			0.761903	10.8496
17.2755	3.745	3.023	45.563	3.889	2.593	26.596	3.977	2.077	17.533	2.507	3.449	19.553	9.33	28.003	3.926	2.9	3.05			0.767196	10.6891
17.3946	4.587	2.823	41.0139	4.458	3.646	23.63	5.573	2.332	18.334	2.593	3.483	17.92	10.43	27.634	4.661	2.932	3.562			0.772486	10.5654
17.5138	4.753	3.315	41.5237	4.03	3.438	28.77	6.963	2.687	17.05	2.471	4.023	18.996	11.727	29.247	5.37	3.497	3.296			0.777779	11.2445
17.6329	4.18	4.019	42.056	4.456	3.817	26.269	8.347	2.751	17.332	2.873	3.362	19.896	13.399	30.144	6.548	3.88	2.876			0.783068	11.5415
17.7521	4.352	3.589	41.2285	4.643	3.258	27.406	10.317	3.34	18.106	2.463	3.216	19.633	16.022	32.349	8.636	4.043	3.534			0.788362	12.1256
17.8712	3.912	3.499	42.0738	4.913	3.908	27.583	14.685	3.625	18.203	3.275	2.948	21.227	18.026	34.093	10.563	5.402	4.611			0.793651	13.091
17.9903	4.403	3.88	41.7928	6.046	4.38	29.03	18.593	4.325	17.223	4.951	3.609	21.321	21.55	35.248	14.392	5.827	5.145			0.79894	14.2186
18.1095	3.917	3.599	43.4332	7.498	4.416	30.24	25.603	4.489	17.061	4.256	3.562	18.592	27.46	39.06	21.413	9.295	6.544			0.804234	15.9081
18.2286	3.898	3.025	43.294	7.971	5.251	30.649	37.895	5.06	17.602	5.126	3.639	20.742	34.863	45.331	32.172	13.579	8.499			0.809523	18.7409
18.3478	4.221	3.272	48.849	9.329	6.674	32.284	45.501	5.2	17.485	6.551	3.491	21.777	37.329	50.321	44.914	20.593	9.622			0.814817	21.6125
18.4669	4.993	3.547	53.4199	10.623	6.44	37.372	46.09	6.934	18.803	9.197	3.909	21.674	44.979	57.529	59.083	27.434	9.972			0.820106	24.8235
18.586	5.486	4.042	56.6584	14.488	6.805	43.56	36.352	7.645	17.973	10.642	3.538	24.355	54.5	73.158	69.299	31.874	14.33			0.825395	27.9238
18.7052	4.868	3.672	56.9015	19.586	7.934	42.979	24.107	8.261	20.785	15.765	3.582	24.485	64.019	88.506	66.763	33.872	16.078			0.830689	29.539
18.8243	4.425	4.386	60.9253	23.523	9.472	38.714	17.721	12.979	23.131	23.092	4.393	27.014	78.467	107.862	41.813	37.553	22.044			0.835978	31.6185
18.9435	3.982	4.319	70.1893	29.897	12.033	41.874	9.54	16.934	27.96	33.161	3.879	27.492	85.328	120.717	18.508	39.502	26.256			0.841272	33.6218
19.0626	3.707	4.705	79.2591	43.539	17.715	43.678	4.388	27.559	31.633	38.624	3.416	26.594	95.748	117.331	11.579	37.191	33.229			0.846561	36.4644
19.1817	4.202	4.923	87.8092	56.075	24.085	47.109	3.124	41.782	30.975	42.924	3.705	24.74	98.856	88.449	8.117	22.317	36.992			0.85185	36.8344
19.3009	4.608	5.06	89.2102	64.389	32.527	54.888	2.63	55.963	29.277	45.651	3.404	24.095	100.559	50.965	6.328	9.92	27.799			0.857143	35.722
19.42	4.291	6.255	81.7059	67.052	41.168	56.62	2.714	67.478	27.669	43.552	4.52	26.79	82.925	24.936	4.604	6.648	16.512			0.862433	33.2612
19.5392	4.055	6.16	70.5727	59.446	45.169	49.663	2.034	69.767	26.803	39.217	4.078	29.832	50.112	14.095	2.453	6.338	7.764			0.867726	28.6799
19.6583	5.105	7.289	61.4521	45.864	32.971	27.932	1.618	68	26.287	28.83	4.432	36.079	23.751	10.77	1.795	4.303	6.755			0.873015	23.1314
19.7775	5.077	7.941	49.2177	37.535	14.358	13.165	1.147	58.983	23.321	16.54	5.265	42.721	11.504	6.798	1.254	2.538	5.733			0.878309	17.8293
19.8966	6.043	10.492	41.5001	25.051	7.587	8.38	1.081	38.751	16.391	8.303	5.367	48.836	7.024	4.689	1.111	1.862	3.422			0.883598	13.8759
20.0157	5.47	11.719	30.6724	14.889	4.147	6.886	1.248	19.241	10.342	7.806	6.087	56.418	4.417	2.921	1.203	1.493	2.658			0.888887	11.0363
20.1349	6.027	15.62	21.7399	7.543	3.366	4.462	0.796	9.355	7.669	6.498	6.273	60.86	3.13	1.918	0.846	1.4	2.08			0.894181	9.38723
20.254	6.873	19.603	14.1635	5.329	2.356	2.742	0.724	8.585	5.545	3.239	7.315	61.895	2.24	2.006	0.632	1.03	1.662			0.89947	8.58468
20.3732	8.406	21.784	9.3763	4.181	1.332	2.165	0.423	6.898	3.458	2.273	9.067	49.834	2.122	1.057	0.721	0.842	1.602			0.904764	7.38478
20.4923	9.029	22.989	6.6092	3.292	1.059	1.865	0.595	4.818	3.384	1.664	12.155	28.858	1.498	1.191	0.662	0.675	1.008			0.910053	5.96184
20.6114	8.712	22.779	4.592	2.359	1.525	1.543	0.746	2.66	2.712	1.409	15.673	13.355	1.042	0.986	0.355	0.916	0.861			0.915342	4.83676
20.7306	10.167	19.619	3.326	1.831	1.344	1.226	0.48	2.122	2.436	0.971	20.37	7.736	0.868	0.819	0.324	0.74	0.731			0.920636	4.41824
20.8497	12.258	16.881	2.2969	1.457	0.854	0.89	0.345	1.55	1.729	0.987	22.826	5.702	1.124	0.594	0.459	0.538	0.516			0.925925	4.17688
20.9689	13.001	11.786	2.1531	1.268	0.853	1.053	0.271	1.17	1.447	0.358	23.626	4.058	1.131	0.557	0.356	0.626	0.745			0.931219	3.79171
21.088	16.277	8.07	1.7518	0.848	0.751	0.897	0.375	1.172	1.141	0.628	23.177	3.401	0.988	0.408	0.389	0.727	0.518			0.936508	3.61875
21.2071	19.888	5.833	1.2383	0.884	0.594	0.753	0.252	0.979	0.849	0.736	23.619	2.365	0.736	0.334	0.221	0.347	0.495			0.941797	3.53666
21.3263	22.233	5.349	1.409	0.619	0.629	0.574	0.187	1.104	0.574	0.507	15.207	1.9	0.538	0.338	0.18	0.398	0.479			0.947091	3.07206
21.4454	22.6	4.106	0.924	0.521	0.348	0.369	0.157	1.392	0.755	0.296	6.707	1.752	0.241	0.544	0.24	0.398	0.318			0.95238	2.45106
21.5646	21.847	2.565	0.9267	0.463	0.26	0.619	0.133	0.622	0.77	0.163	4.746	1.533	0.58	0.437	0.217	0.256	0.201			0.957673	2.13757
21.6837	20.557	2.515	0.5903	0.416	0.225	0.698	0.106	0.468	0.552	0.312	2.88	1.325	0.55	0.352	0.16	0.201	0.22			0.962962	1.88984
21.8029	15.105	2.102	0.6064	0.291	0.41	0.445	0.127	0.748	0.382	0.315	3.126	1.005	0.457	0.418	0.111	0.12	0.069			0.968256	1.51985
21.922	8.474	1.573	0.5138	0.247	0.435	0.434	0.05	0.673	0.224	0.24	2.059	1.276	0.437	0.185	0.007	0.1	0.004			0.973545	0.995988
22.0411	4.882	1.318	0.4268	0.342	0.238	0.243	0.083	0.374	0.329	0.336	1.381	1.228	0.427	0.158	0.014	0.122	0.061			0.978834	0.703694
22.1603	3.821	0.882	0.4423	0.229	0.227	0.261	0.09	0.488	0.168	0.44	1.333	0.731	0.246	0.278	0.075	0.178	0.131			0.984128	0.589429
22.2794	2.68	1.131	0.4426	0.23	0.163	0.286	0.169	0.511	0.404	0.133	1.123	0.831	0.195	0.095	0.016	0.144	0.071			0.989417	0.507329
22.3986	2.848	0.814	0.4534	0.248	0.271	0.281	0.065	0.317	0.378	0.158	0.905	0.45	0.056	0.265	0	0.042	0.125			0.994711	0.451553
22.5177	1.912	0.934	0.1533	0.115	0.147	0.161	0.135	0.119	0.071	0.17	1.012	0.521	0.129	0.177	0.04	0.198	0.055			1	0.355841

## Sheet: Image7
X0	Y0	Y1	Y2	Y3	Y4	Y5	Y6	Y7	Y8	Y9	Y10	Y11	Y12	Y13	Y14	Y15	Y16	Y17	Y18	Y19	Y20	Y21	Y22	Y23	Y24	Y25		Ap-Ba	Average int.
0	2.308	3.317	5.839	3.514	4.787	7.705	5.139	8.1865	6.952	6.136	5.615	10.816	12.933	12.226	9.687	14.879	12.349	12.709	9.906	10.851	22.38	48.709	35.168	20.391	31.552	41.139		0	14.0459
0.1191	2.51	3.378	7.223	4.223	5.534	10.794	6.838	7.9154	7.151	7.285	5.956	13.991	15.133	14.301	10.68	15.95	13.657	15.212	11.683	12.649	27.176	56.484	39.612	21.201	31.792	42.592		0.00571231	15.8046
0.2383	3.008	3.672	9.269	4.637	6.487	13.38	8.234	10.5301	8.304	8.101	7.326	16.713	18.982	17.341	12.314	21.989	14.875	17.278	14.875	13.488	29.103	63.705	43.847	22.497	34.028	45.105		0.0114294	18.0419
0.3574	3.345	4.511	11.557	6.891	9.198	18.14	7.302	11.8584	8.686	9.477	7.39	19.267	23.825	19.892	14.283	26.961	15.223	21.365	18.919	16.353	33.52	66.898	44.292	29.236	39.114	51.19		0.0171417	20.719
0.4766	4.357	6.012	16.104	10.804	14.617	19.074	8.961	12.3942	12.078	12.278	7.851	23.553	30.833	26.248	16.322	33.005	19.504	27.669	20.515	18.718	39.039	68.873	50.378	38.379	43.439	58.665		0.0228588	24.6027
0.5957	5.127	9.89	22.996	15.022	22.373	25.856	9.906	14.8359	15.543	14.293	10.166	29.87	38.192	33.922	18.555	38.267	29.037	37.379	26.439	24.375	44.862	76.065	54.071	48.863	54.354	67.01		0.0285712	30.2796
0.7148	7.591	15.068	31.047	20.081	33.196	33.423	11.257	17.8852	19.292	20.045	10.102	34.246	47.778	40.577	19.653	45.316	39.992	46.229	36.716	32.221	55.264	79.515	58.261	58.004	68.235	73.836		0.0342835	36.7242
0.834	10.734	22.934	41.003	22.657	45.542	42.225	13.28	20.5153	28.461	28.046	12.863	38.437	56.209	50.805	22.931	56.525	51.316	63.333	51.146	41.673	63.233	83.593	62.539	69.77	89.52	77.548		0.0400006	44.8784
0.9531	19.403	33.53	51.78	30.457	58.121	50.376	20.224	24.801	42.115	40.153	16.021	49.148	65.491	58.772	27.199	63.293	67.334	76.646	67.502	51.512	78.468	89.111	65.714	83.202	113.474	92.425		0.0457129	55.2412
1.0723	36.533	45.482	65.305	41.828	72.903	61.033	24.495	31.4947	58.716	52.925	17.268	56.366	75.094	62.357	33.06	71.361	86.357	87.934	87.144	63.462	96.59	94.779	68.862	92.041	136.561	111.823		0.05143	66.6067
1.1914	61.188	61.353	74.684	53.722	87.551	71.747	31.176	33.8314	75.844	72.286	20.854	59.213	85.997	71.122	40.189	77.693	100.806	99.675	103.189	86.872	111.092	97.113	78.957	101.833	161.805	138.888		0.0571423	79.18
1.3106	91.128	77.927	89.171	67.931	98.401	80.877	43.352	38.6465	88.451	83.709	24.41	65.543	97.092	78.284	46.692	91.113	120.4	111.697	122.836	105.565	128.486	101.215	85.583	113.296	184.55	162.109		0.0628594	92.2486
1.4297	120.667	95.177	105.884	82.092	107.677	88.935	60.931	42.458	95.806	91.209	29.542	75.229	107.562	87.83	53.151	101.479	138.821	124.355	140.768	129.389	141.221	97.659	92.882	122.224	202.41	183.765		0.0685717	104.582
1.5488	150.013	106.834	115.078	95.057	114.922	97.216	80.22	44.6763	103.844	100.335	37.405	85.068	120.365	96.797	59.091	111.408	149.324	140.396	165.557	158.768	152.817	94.659	93.01	134.688	212.017	196.673		0.074284	116.009
1.668	168.433	116.231	119.25	103.784	115.134	101.332	91.268	51.5953	103.794	102.255	47.437	91.833	123.391	107.618	66.097	125.952	158.051	143.999	186.052	184.733	162.336	96.943	96.074	143.976	212.994	210.745		0.0800012	124.281
1.7871	173.83	119.443	127.28	110.845	117.353	98.339	103.363	56.0928	96.766	103.698	60.098	98.169	133.653	119.359	71.957	142.465	170.019	151.043	201.367	200.603	169.349	97.96	103.405	152.768	205.546	215.323		0.0857135	130.773
1.9063	178.888	125.477	126.427	116.174	114.169	100.17	110.868	62.1697	87.322	100.141	75.131	108.579	137.795	125.894	80.611	154.443	176.077	153.679	206.042	207.432	174.979	98.891	106.742	152.272	190.74	212.978		0.0914306	134.003
2.0254	166.563	128.841	124.703	114.805	106.175	97.771	114.006	69.9794	72.857	89.472	90.226	119.427	143.649	135.176	89.162	160.867	185.576	158.837	207.599	195.346	173.107	109.149	116.02	149.19	169.39	207.91		0.0971429	134.454
2.1445	154.17	130.283	124.482	110.222	97.279	93.661	122.292	70.6485	59.735	77.057	99.776	125.365	148.021	137.289	100.309	169.871	188.082	166.983	210.98	179.555	164.838	116.54	125.896	146.762	151.1	195.032		0.102855	133.316
2.2637	130.528	123.501	115.863	107.69	89.578	88.286	118.878	74.2431	48.526	61.166	105.06	130.09	148.639	140.763	116.074	174.224	189.912	175.068	214.527	159.295	154.518	125.958	128.278	146.296	122.758	167.685		0.108572	129.131
2.3828	105.917	125.877	105.565	102.478	81.794	77.629	118.175	74.8314	36.159	53.082	105.873	128.04	152.699	142.942	129.711	184.504	182.803	184.977	207.768	143.027	145.919	130.803	138.073	136.09	100.991	138.942		0.114285	124.41
2.502	82.433	123.388	88.615	91.111	70.469	68.331	114.745	78.3195	31.259	42.874	101.252	127.061	158.023	149.556	144.514	187.057	171.739	179.804	201.399	130.839	138.685	137.141	140.78	128.402	83.548	117.939		0.120002	118.819
2.6211	64.151	119.929	72.09	81.476	64.487	59.571	103.165	74.2327	26.631	36.438	96.992	130.068	151.473	141.908	153.697	191.151	166.299	174.166	193.877	120.617	129.104	145.282	141.884	123.788	69.564	95.941		0.125714	112.615
2.7402	50.212	105.412	53.14	72.595	60.351	46.851	85.315	69.994	24.36	33.962	89.714	131.98	145.837	140.725	158.546	188.616	158.721	164.21	183.089	110.946	116.284	151.571	144.513	115.265	59.202	78.79		0.131426	105.392
2.8594	43.172	89.494	45.696	61.737	50.831	38.157	69.493	66.4506	23.182	31.05	84.371	127.857	142.105	141.707	166.735	185.349	151.701	150.268	169.977	101.563	109.034	152.511	151.184	106.875	51.283	68.282		0.137143	99.2333
2.9785	36.864	72.763	34.12	53.525	45.936	30.022	53.46	58.727	19.676	26.559	76.718	127.079	132.287	135.961	170.312	178.046	136.171	135.861	154.351	86.707	98.502	153.766	150.254	99.15	46.523	58.147		0.142856	91.211
3.0977	31.659	63.42	27.316	45.945	39.442	22.555	42.223	52.1916	16.61	21.514	71.264	124.583	122.694	139.502	178.769	170.29	123.892	121.324	138.18	73.617	89.089	154.726	146.427	92.292	42.725	47.558		0.148573	84.608
3.2168	23.954	51.16	22.224	39.484	34.875	16.921	34.659	50.2504	14.223	17.597	59.791	119.619	109.571	136.709	179.372	163.189	117.222	110.286	122.854	61.717	82.016	154.012	146.279	80.708	36.637	41.784		0.154285	77.9659
3.336	21.981	45.895	18.343	29.388	27.922	15.435	27.816	47.4548	11.985	14.674	50.932	113.707	90.966	130.259	184.277	152.529	108.532	103.382	117.879	52.627	76.258	149.736	145.945	71.898	33.816	37.761		0.160002	72.3615
3.4551	21.936	35.918	15.003	21.02	25.476	11.555	19.102	45.9165	10.043	11.874	42.333	104.963	79.457	117.163	182.467	132.102	99.95	99.459	111.001	41.776	70.197	132.802	141.454	65.987	30.824	35.461		0.165715	65.5861
3.5742	18.68	31.017	12.059	15.481	20.741	9.129	15.118	42.3444	7.664	11.452	33.752	100.89	68.922	100.934	175.657	117.871	94.82	92.416	112.852	35.748	63.028	119.238	137.247	60.488	25.082	32.584		0.171427	59.8159
3.6934	15.972	27.517	10.165	10.826	18.486	7.385	13.431	38.3084	7.825	9.034	28.255	89.927	60.722	83.414	177.792	103.142	90.791	86.574	106.35	29.647	53.201	107.105	138.858	56.647	23.998	29.19		0.177144	54.7909
3.8125	13.304	22.828	8.219	7.265	16.591	7.004	11.517	33.9728	6.829	8.502	26.627	74.887	53.077	70.426	170.198	78.354	83.709	81.387	94.018	22.935	48.405	94.264	131.306	52.383	22.783	27.349		0.182856	48.7746
3.9317	12.443	18.909	8.723	6.525	13.716	7.225	10.062	31.9023	6.59	5.604	24.373	68.775	45.094	55.114	156.841	60.188	71.932	78.678	84.221	16.851	42.293	76.014	119.152	47.192	19.879	27.643		0.188573	42.9207
4.0508	12.867	17.764	7.377	6.16	12.769	6.387	9.22	28.8026	6.028	4.822	22.065	60.231	37.29	41.05	140.148	49.941	68.656	72.212	75.377	13.845	33.02	59.649	111.22	43.594	19.469	25.67		0.194286	37.909
4.1699	10.701	15.625	6.138	5.039	9.938	5.086	8.946	23.1169	5.689	4.597	19.617	50.839	31.481	31.618	120.774	40.208	65.477	62.884	65.942	13.105	28.668	46.675	97.555	40.246	19.98	25.209		0.199998	32.8905
4.2891	8.643	11.873	5.214	4.497	9.78	3.95	7.939	21.7835	4.871	4.304	15.787	44.431	25.118	23.08	101.069	34.299	60.439	57.161	57.153	12.01	22.937	37.632	82.212	36.994	16.298	23.013		0.205715	28.1726
4.4082	8.278	11.726	5.577	3.491	9.142	3.719	6.435	19.2942	4.995	3.679	14.528	38.329	21.96	17.568	77.34	29.798	52.108	53.312	50.828	10.93	16.874	27.332	68.568	35.373	15.573	20.338		0.211428	24.119
4.5274	7.302	9.922	5.187	3.301	7.062	3.269	4.527	17.7965	3.92	3.382	11.546	35.521	17.914	13.556	59.041	25.715	46.364	46.378	43.025	10.42	15.258	19.354	59.173	30.662	13.396	18.824		0.217145	20.4544
4.6465	6.128	8.026	5.121	2.963	6.363	2.971	4.303	16.0836	3.615	2.659	9.743	32.156	14.714	12.179	48.602	22.805	39.034	41.79	39.843	10.508	12.19	16.347	47.099	26.827	13.369	17.282		0.222857	17.7969
4.7657	6.088	7.49	4.409	3.032	5.137	2.024	3.575	12.5251	3.089	3.224	7.865	27.549	11.872	9.931	45.663	21.036	31.276	37.996	33.216	8.614	8.938	11.849	40.144	25.142	13.469	16.641		0.228574	15.4536
4.8848	6.147	6.168	4.411	2.494	3.812	2.385	3.722	9.3331	2.968	2.935	7.884	23.315	10.374	10.22	41.846	16.729	25.076	34.263	26.216	8.245	6.838	9.479	32.428	23.676	12.309	16.397		0.234286	13.4489
5.0039	4.839	4.438	4.828	2.366	4.032	2.177	3.598	8.3675	2.974	2.208	5.755	20.037	10.05	9.195	43.663	17.206	19.9	27.419	21.407	7.366	6.148	9.256	29.187	19.823	11.75	15.976		0.239999	12.0756
5.1231	4.401	4.762	4.465	2.283	3.305	2.277	3.411	6.5888	2.962	2.131	5.903	18.972	8.362	9.15	35.24	16.559	16.468	21.744	20.199	6.339	4.661	8.14	24.283	16.356	10.937	13.937		0.245716	10.5321
5.2422	4.088	4.146	3.251	1.754	2.472	2.141	3.447	5.6975	2.242	1.954	5.654	16.413	7.957	10.427	29	17.158	13.285	19.082	18.153	5.071	4.852	7.163	21.337	14.579	11.168	13.75		0.251428	9.47083
5.3614	3.591	4.484	3.348	1.892	2.48	2.043	2.886	4.7024	2.6	2.092	4.483	12.604	7.606	8.281	23.483	16.629	9.7	16.705	16.934	5.449	4.802	6.708	21.474	11.091	10.506	12.877		0.257145	8.4404
5.4805	2.697	4.238	3.451	1.787	2.681	1.706	2.726	5.2685	2.287	2.427	4.975	12.889	6.422	8.244	19.105	14.952	9.208	14.562	15.138	5.733	4.448	6.073	21.422	10.439	10.072	12.842		0.262857	7.9151
5.5996	3.829	3.563	3.419	1.361	2.243	1.382	2.347	6.4256	2.475	2.147	5.027	11.538	7.306	8.095	16.798	15.225	8.112	13.821	15.583	4.569	4.076	6.341	19.349	8.316	10.05	12.095		0.26857	7.51895
5.7188	2.701	3.723	3.517	1.824	2.1	1.37	2.25	5.0285	2.232	1.955	4.796	10.035	5.55	7.923	14.796	15.662	6.482	13.196	13.376	4.285	3.835	5.836	20.95	6.99	9.352	11.685		0.274287	6.97883
5.8379	2.301	3.686	3.464	1.478	1.904	1.764	2.21	4.7416	3.104	1.852	6.178	9.127	6.368	6.889	13.608	16.048	6.246	13.203	13.033	4.635	4.475	5.251	19.13	7.31	8.032	12.424		0.279999	6.86391
5.9571	2.685	3.45	2.446	1.289	1.575	1.857	1.694	5.423	2.245	2.548	5.718	8.278	6.266	5.178	12.8	15.977	5.736	12.174	12.533	4.274	3.589	5.236	17.563	5.492	7.843	10.087		0.285716	6.306
6.0762	3.024	3.616	2.889	1.688	1.285	1.79	1.81	4.4487	1.892	2.405	5.28	7.774	6.065	6.781	11.184	16.497	5.768	11.819	11.892	4.387	2.928	5.445	18.297	5.558	6.785	10.189		0.291429	6.21141
6.1953	2.772	3.888	3.208	1.706	1.286	1.636	1.724	4.1045	1.79	2.047	5.079	7.35	6.111	6.898	10.665	14.908	5.185	11.659	10.703	4.61	3.393	4.726	16.305	5.44	6.728	9.581		0.297141	5.90394
6.3145	2.162	3.786	2.925	1.733	1.16	1.222	1.788	4.9102	1.816	2.148	5.253	6.286	5.271	5.217	10.235	14.019	4.686	9.124	11.383	4.529	3.654	4.78	14.84	5.398	6.857	8.901		0.302858	5.54166
6.4336	2.407	4.015	3.241	1.261	1.108	1.301	1.715	5.616	1.987	2.248	6.917	6.528	4.302	4.76	8.409	14.924	5.152	7.672	11.299	4.415	3.733	4.514	14.337	4.72	5.641	8.449		0.30857	5.41042
6.5528	2.326	4.269	2.632	1.536	1.3	1.344	1.643	4.3892	1.897	1.716	5.827	6.378	4.555	5.088	8.392	14.727	3.945	6.599	12.242	4.401	3.579	4.608	14.477	4.22	5.664	7.822		0.314287	5.21447
6.6719	2.331	5.215	2.374	1.663	1.175	1.339	1.728	4.7153	1.371	2.061	6.082	5.656	4.538	5.724	7.793	14.734	3.691	6.365	10.936	4.546	2.811	4.031	13.132	4.87	5.44	8.114		0.32	5.09367
6.7911	1.807	4.621	1.979	1.118	1.436	1.295	1.408	3.9432	1.706	2.352	6.666	6.788	3.79	6.001	7.062	13.375	3.889	5.661	11.448	4.398	3.188	5.279	12.386	4.258	4.694	8.004		0.325717	4.94432
6.9102	1.834	5.24	2.787	1.187	1.297	1.44	1.334	3.8159	1.505	2.477	7.276	6.574	4.98	5.94	7.014	14.298	3.969	4.705	11.228	4.676	3.396	4.49	12.157	3.888	4.632	8.22		0.331429	5.01384
7.0293	1.669	5.987	2.997	1.311	1.111	1.755	1.805	4.5955	1.64	2.154	7.302	8.387	5.083	4.818	7.378	13.306	3.584	4.17	10.95	4.626	3.903	4.668	12.886	3.264	4.226	7.92		0.337142	5.05752
7.1485	1.986	6.588	3.094	1.59	1.49	1.432	1.289	3.9362	1.94	2.152	7.287	8.349	4.63	5.387	7.9	12.709	3.191	4.406	10.499	5.213	3.275	5.061	11.397	3.901	3.847	8.005		0.342859	5.02132
7.2676	2.187	7.239	2.817	1.459	1.48	1.425	1.694	4.0604	1.974	2.633	7.473	9.154	4.47	5.403	7.861	13.062	3.103	3.895	11.213	5.054	3.29	4.907	12.554	3.841	3.662	7.928		0.348571	5.14763
7.3868	1.338	7.821	2.628	1.358	1.285	1.123	1.878	5.0609	1.816	2.508	8.016	10.291	4.643	5.405	6.331	13.712	2.969	3.978	11.507	4.488	4.209	4.91	11.555	3.272	3.614	7.62		0.354288	5.1283
7.5059	1.897	9.497	2.262	1.009	1.241	1.552	1.632	4.9458	1.677	2.378	7.347	8.941	5.037	5.414	6.445	12.218	2.715	4.01	10.305	5.215	3.187	4.121	12.355	3.089	3.28	7.734		0.36	4.98092
7.625	1.588	9.69	2.619	1.35	1.521	1.448	1.801	4.3924	1.867	2.068	7.143	9.212	4.81	5.444	6.8	12.746	2.865	3.508	12.688	6.154	3.173	3.991	12.384	3.133	3.372	6.358		0.365713	5.08175
7.7442	1.228	10.379	3.414	1.517	1.705	0.998	1.524	4.3806	1.519	1.912	6.814	8.023	4.989	5.159	6.321	13.182	2.794	3.324	12.011	5.973	3.579	3.527	11.921	3.715	3.322	6.614		0.37143	4.99402
7.8633	1.323	10.335	3.626	1.523	1.587	1.347	1.849	5.2121	1.593	2.607	6.834	7.241	4.167	6.133	5.882	11.832	2.948	3.143	12.435	6.765	3.517	3.904	11.983	3.751	3.597	7.112		0.377142	5.08639
7.9825	1.321	8.75	4.155	1.309	1.335	1.121	2.181	5.3053	1.698	2.782	6.676	6.986	4.772	6.276	6.122	10.413	3.15	2.866	12.724	6.573	3.756	3.826	13.333	3.292	3.692	7.508		0.382859	5.07393
8.1016	1.569	7.922	3.893	1.179	1.625	1.119	2.608	5.1276	1.891	2.512	7.67	7.293	5.616	5.613	5.828	8.993	2.803	2.57	12.011	6.008	3.057	4.634	14.311	3.672	3.198	5.72		0.388572	4.9401
8.2207	1.714	6.759	3.65	1.084	1.388	1.528	1.943	4.3607	1.933	2.958	8.848	7.66	6.324	6.072	4.947	8.94	2.48	2.488	14.036	5.889	3.709	4.467	14.792	3.613	2.881	6		0.394284	5.01783
8.3399	1.769	6.646	4.472	1.356	1.369	1.803	1.991	5.1341	1.612	3.641	10.041	7.723	6.668	5.894	4.718	8.771	2.636	2.968	14.98	7.237	3.572	5.064	13.846	3.496	2.829	5.107		0.400001	5.2055
8.459	1.428	6.168	4.857	1.547	1.53	1.791	2.133	4.1381	1.467	4.107	9.882	6.944	7.298	6.867	5.274	9.66	2.726	2.597	14.685	7.451	3.413	4.866	13.318	3.44	2.308	5.123		0.405713	5.193
8.5782	1.383	6.009	3.989	1.799	1.796	1.639	2.401	5.2061	1.901	4.54	11.27	6.702	8.562	5.874	6.853	10.198	3.311	2.891	14.867	8.057	3.433	4.535	15.674	3.564	2.516	4.98		0.41143	5.53654
8.6973	1.759	5.812	3.521	1.307	1.463	1.25	1.935	5.9634	2.005	5.064	13.286	7.504	7.777	7.293	6.269	10.659	2.835	2.929	15.075	7.482	2.912	4.67	15.494	3.718	2.42	4.383		0.417143	5.56867
8.8165	1.641	5.029	3.937	1.587	1.116	1.421	2.147	5.421	1.694	6.035	14.623	7.577	7.67	7.184	6.601	11.698	2.484	2.546	13.329	8.268	2.814	4.725	15.975	3.661	2.797	3.47		0.42286	5.59423
8.9356	1.492	5.624	3.21	1.772	1.31	1.129	2.589	5.2756	1.738	5.922	13.532	9.157	8.233	9.257	8.585	12.774	3.166	2.933	13.089	9.118	3.176	4.386	17.026	3.203	3.266	4.055		0.428572	5.96222
9.0547	1.629	5.912	3.166	1.366	1.276	0.944	2.355	6.0522	2.168	6.473	11.102	9.514	8.283	12.165	7.72	13.156	3.036	2.455	13.164	8.858	3.444	4.942	18.742	3.325	2.804	4.113		0.434284	6.08324
9.1739	1.523	5.831	3.609	1.135	1.298	0.923	2.888	6.9113	2.216	6.439	10.119	9.936	7.983	13.23	7.6	13.862	3.109	2.594	14.526	7.016	2.915	5.19	19.289	2.572	2.808	3.657		0.440002	6.12228
9.293	1.459	5.475	3.416	1.323	1.431	1	2.254	7.1411	1.868	6.143	10.465	9.801	8.298	14.738	7.517	15.817	3.194	2.792	15.276	7.085	3.104	6.755	19.72	3.047	2.855	3.653		0.445714	6.37027
9.4122	1.508	5.66	3.923	1.16	1.508	0.883	1.896	8.4689	1.48	6.349	11.262	8.479	7.985	15.017	7.979	15.161	2.628	2.941	14.545	8.121	3.102	7.395	17.14	3.52	3.04	3.256		0.451431	6.32334
9.5313	1.422	4.783	3.255	1.567	1.547	0.972	2.502	9.3095	1.663	6.571	9.974	8.031	8.063	13.945	6.488	15.025	2.652	3.579	16.669	8.936	3.53	6.48	18.156	3.329	2.808	2.706		0.457143	6.30625
9.6504	1.711	4.388	3.131	1.439	1.49	1.018	2.169	9.8614	2.756	7.067	10.069	7.934	8.684	10.345	6.868	14.293	3.537	2.806	15.577	10.319	3.661	6.426	17.707	3.587	2.49	3.152		0.462856	6.24944
9.7696	1.773	5.049	3.435	1.652	1.189	1.415	1.838	9.8668	1.926	8.289	10.845	7.321	8.613	7.956	7.019	14.793	3.057	2.986	14.487	11.702	3.419	6.802	18.442	3.513	2.571	3.455		0.468573	6.28515
9.8887	1.499	4.231	3.485	1.625	1.638	1.288	2.061	8.9381	1.773	9.106	11.4	7.315	8.536	8.492	7.724	14.744	2.57	2.697	13.157	12.956	3.261	6.606	17.806	3.379	3.139	3.018		0.474285	6.24785
10.0079	1.396	4.148	3.646	1.358	1.746	1.052	1.974	8.3002	2.256	10.518	10.955	6.879	8.855	8.62	7.519	14.846	2.54	3.145	13.345	12.998	3.673	7.063	19.254	4.305	2.778	3.319		0.480002	6.40339
10.127	1.408	4.321	2.83	1.146	1.417	1.244	2.062	8.8953	1.759	12.807	9.35	5.73	8.73	9.56	7.15	14.619	2.731	2.898	14.322	12.744	3.642	6.321	19.84	4.296	2.334	3.842		0.485714	6.38455
10.2462	1.475	3.934	2.224	1.652	1.534	1.146	1.862	8.4282	1.92	14.693	8.689	5.648	7.321	9.222	6.775	16.087	2.962	2.535	14.087	11.454	4.558	4.942	22.685	3.768	3.074	2.636		0.491432	6.35812
10.3653	1.169	4.033	2.473	1.424	1.611	0.951	2.086	9.9411	1.863	14.251	8.413	5.557	7.438	9.748	8.054	17.175	2.694	2.54	13.597	9.419	3.536	5.764	26.804	3.672	3.243	3.104		0.497144	6.56
10.4844	1.426	3.659	2.403	1.5	1.527	1.258	2.077	11.7765	1.764	12.049	7.341	5.6	7.909	10.504	8.494	18.655	2.984	2.747	13.017	10.077	3.457	5.594	32.022	3.802	3.081	3.305		0.502856	6.84725
10.6036	1.54	4.124	2.704	1.258	1.569	1.44	2.003	12.6768	2.173	12.519	6.587	6.167	8.261	12.206	10.748	18.584	2.478	2.646	11.756	11.501	3.649	5.137	38.374	4.146	3.242	3.193		0.508573	7.33392
10.7227	1.529	4.465	2.416	1.422	1.164	1.531	2.191	13.4312	1.706	13.319	6.858	6.172	7.465	13.85	11.842	18.701	2.804	2.433	10.137	12.964	3.554	5.11	41.874	3.782	3.456	3.145		0.514286	7.58928
10.8419	1.284	4.2	2.317	1.462	1.158	1.227	2.159	12.8132	1.993	12.52	6.769	4.982	7.401	12.212	12.229	15.259	3.141	2.261	10.797	13.757	3.591	5.208	45.472	3.64	3.336	3.253		0.520003	7.47851
10.961	1.008	4.144	1.862	1.174	1.405	1.371	1.835	13.1784	1.941	13.832	6.906	5.438	7.021	12.616	13.756	16.625	2.818	2.744	9.742	15.591	4.12	4.648	42.35	4.055	2.951	3.207		0.525715	7.55148
11.0801	1.496	4.228	1.646	1.471	1.594	1.401	1.582	13.4006	1.577	13.289	5.886	4.645	6.065	12.254	15.187	16.101	2.41	3.056	10.433	17.469	3.91	4.822	42.595	3.453	2.76	3.129		0.531427	7.53306
11.1993	1.565	3.972	1.499	1.22	1.209	1.052	1.577	13.2458	1.818	13.173	5.468	4.896	6.108	13.769	15.924	14.392	3.12	3.58	10.777	17.508	3.57	4.769	41.567	3.807	2.956	3.194		0.537144	7.5283
11.3184	1.564	4.107	1.669	1.337	1.618	1.225	1.63	11.7179	1.867	13.068	4.72	5.411	5.615	14.211	16.258	14.543	2.708	3.317	9.702	17.741	3.129	4.865	35.602	4.335	3.441	2.849		0.542857	7.24038
11.4376	1.28	4.381	1.999	0.985	1.678	1.458	1.572	9.9014	2.08	11.191	5.245	4.699	5.822	14.674	16.455	15.234	2.751	2.69	8.428	17.705	3.162	4.619	35.732	3.915	2.769	2.63		0.548574	7.04059
11.5567	1.623	3.599	1.638	1.246	1.329	1.15	1.9	8.9309	2.581	11.637	5.088	4.842	5.319	15.032	16.532	15.155	2.796	2.545	8.089	19.405	3.788	4.83	34.645	4.454	2.727	2.912		0.554286	7.06896
11.6758	1.78	3.844	1.61	1.121	1.12	1.287	1.842	10.2323	2.715	11.557	6.391	4.049	5.042	13.653	17.642	16.129	3.033	2.376	7.857	19.431	3.341	6.204	31.304	3.194	3.008	3.106		0.559998	7.0334
11.795	1.767	3.436	1.661	1.162	1.106	1.188	1.937	9.9584	3.017	12.237	5.061	4.434	4.707	13.647	19.093	15.454	2.887	2.859	6.866	17.007	2.772	5.417	32.966	4.143	2.97	3.066		0.565716	6.95455
11.9141	1.967	3.624	1.601	1.47	1.709	1.299	2.192	9.0145	3.085	12.219	4.744	3.659	4.495	13.629	20.298	16.224	2.855	2.947	7.249	16.717	3.026	4.598	29.428	3.689	2.451	3.311		0.571428	6.82694
12.0333	1.441	3.767	1.545	1.22	1.101	1.119	2.04	8.8694	3.409	12.531	4.546	3.69	3.753	12.472	20.866	16.528	3.376	2.96	6.897	15.71	3.332	5	29.729	3.518	2.704	3.039		0.577145	6.73702
12.1524	1.462	3.65	1.864	1.202	1.39	1.119	1.583	10.0356	3.348	13.43	4.019	4.144	4.388	11.916	19.845	16.468	2.885	2.279	6.948	17.285	3.439	4.779	29.317	3.941	2.878	2.727		0.582857	6.78237
12.2716	1.784	3.681	1.946	1.037	1.504	1.336	1.882	10.399	2.988	13.896	4.018	4.083	4.02	10.983	18.89	17.574	3.305	2.158	6.569	19.27	3.012	4.349	28.671	4.065	2.658	3.42		0.588574	6.82685
12.3907	1.602	4.298	1.953	1.473	1.148	1.307	1.75	10.1112	3.811	14.093	4.584	4.625	3.927	9.885	15.432	19.223	3.469	2.854	6.018	18.684	3.151	4.67	28.37	3.735	2.705	3.5		0.594287	6.78378
12.5098	1.46	4.302	1.382	1.393	0.729	1.54	2.125	10.6434	3.552	13.643	4.199	3.9	4.641	9.306	13.16	17.7	3.204	2.879	6.357	18.837	3.518	5.195	29.149	3.195	3.27	3.67		0.599999	6.6519
12.629	1.379	4.416	1.632	1.549	1.267	1.366	1.557	8.5394	3.736	12.46	4.403	3.552	4.007	10.036	12.081	15.975	3.038	3.008	6.149	16.683	3.27	5.043	30.044	3.645	3.064	3.8		0.605716	6.37305
12.7481	1.451	4.624	1.587	1.151	1.017	1.409	1.153	9.757	3.531	11.322	4.513	3.052	4.26	10.04	10.073	15.666	3.337	2.917	6.576	15.97	3.389	4.918	28.974	3.964	3.056	3.523		0.611428	6.20115
12.8673	1.501	4.913	1.342	1.047	1.085	1.118	1.632	10.0692	4.164	10.983	4.682	3.609	3.903	9.95	8.449	14.97	3.243	2.409	6.167	16.507	3.283	4.25	29.64	3.706	3.17	3.626		0.617146	6.13147
12.9864	1.454	5.092	1.46	1.37	0.931	1.372	1.654	9.4514	3.513	11.016	5.438	3.637	4.204	9.611	8.386	14.667	2.972	2.523	6.29	17.613	3.558	4.141	31.078	4.349	3.008	3.115		0.622858	6.22705
13.1055	1.645	6.125	1.319	1.156	0.997	1.475	1.708	9.1178	3.675	9.907	5.639	3.722	4.218	8.527	9.238	15.225	2.778	3.275	5.923	18.554	2.747	3.784	28.24	4.691	3.315	3.138		0.62857	6.15918
13.2247	1.857	5.247	1.242	0.817	1.624	1.163	1.759	8.5604	4.578	9.366	5.537	3.549	4.531	10.17	8.812	17.025	2.991	3.172	5.768	18.866	2.498	3.708	29.669	3.874	3.478	3.421		0.634287	6.28009
13.3438	1.716	5.361	1.037	1.28	1.33	1.069	1.944	8.4316	4.614	8.549	5.629	2.823	4.714	10.815	7.266	15.447	3.459	2.646	6.667	17.868	2.51	3.948	29.666	3.939	3.538	3.441		0.64	6.1426
13.463	1.844	4.833	1.355	1.296	1.196	1.067	1.713	8.4387	3.912	8.611	5.584	3.176	4.051	9.918	7.115	15.558	2.961	2.945	6.166	16.444	2.966	3.226	31.942	3.697	2.964	2.836		0.645717	5.99287
13.5821	2.017	5.407	1.211	1.234	1.625	1.422	1.86	8.7236	4.624	8.711	5.952	4.799	4.457	8.794	6.624	15.329	2.495	2.63	6.398	15.641	3.025	3.512	32.352	3.042	2.91	3.534		0.651429	6.08956
13.7012	1.554	5.819	1.265	1.326	1.256	1.483	1.642	8.921	5.062	8.565	6.143	4.729	4.362	9.307	4.973	17.246	3.342	3.196	6.311	16.487	2.676	3.961	33.578	3.303	3.244	3.501		0.657141	6.27892
13.8204	1.65	6.867	1.136	1.075	1.114	1.083	2.058	7.683	4.419	7.817	6.464	4.923	4.75	9.318	6.845	15.659	3.261	2.709	6.333	15.232	3.078	3.755	33.581	3.564	3.297	3.053		0.662858	6.18169
13.9395	1.731	7.365	1.301	1.108	1.532	1.312	1.792	7.7785	4.587	7.838	7.324	4.885	4.23	9.541	6.288	16.538	2.927	2.881	5.638	14.754	3.49	3.668	31.727	2.683	3.148	3.161		0.668571	6.12413
14.0587	1.772	6.662	1.233	1.149	1.174	1.443	1.811	7.1151	5.018	6.684	7.661	5.479	4.513	9.031	5.129	18.011	3.113	2.868	6.157	15.081	2.88	2.81	31.946	3.169	3.206	3.334		0.674288	6.0942
14.1778	1.248	7.408	1.206	0.957	1.388	1.089	1.572	7.9165	4.913	6.123	7.537	5.466	5.075	8.841	4.978	17.345	3.134	2.718	6.242	15.895	3.331	3.367	31.589	3.258	2.408	3.793		0.68	6.1076
14.297	1.321	6.912	1.119	1.072	1.458	1.148	2.195	7.3376	4.605	7.706	7.783	6.135	5.517	8.134	5.504	17.193	2.89	2.579	7.178	13.342	3.402	3.196	27.134	3.327	3.445	4.622		0.685717	6.00979
14.4161	1.429	7.329	0.825	1.3	1.385	1.523	2.294	7.6068	4.194	7.441	8.805	6.131	5.802	8.417	5.536	16.087	2.753	2.589	6.799	16.516	3.068	3.649	23.896	3.998	3.166	4.103		0.69143	6.02468
14.5352	1.64	6.98	1.11	1.16	0.895	1.431	1.879	6.9304	4.582	7.181	8.453	6.705	5.674	8.615	5.156	16.635	3.295	2.271	5.818	17.094	2.692	3.499	25.688	2.981	3.044	4.091		0.697142	5.98075
14.6544	1.496	7.087	1.083	1.42	0.968	1.333	2.133	7.6923	5.072	8.466	9.633	6.896	4.616	9.481	6.198	15.603	3.595	2.945	5.306	16.776	2.947	2.894	24.087	3.225	2.667	4.176		0.702859	6.06905
14.7735	1.747	7.129	0.727	1.276	1.09	1.579	2.481	7.4501	5.449	9.1	9.661	7.691	5.62	9.113	5.257	16.14	3.417	3.142	5.262	18.315	2.937	2.942	23.84	3.216	2.748	3.661		0.708571	6.19193
14.8927	2.246	6.744	1.161	0.871	1.357	1.241	1.9	7.5559	5.653	9.358	10.636	8.656	4.671	9.436	4.198	17.423	3.492	3.04	5.341	17.856	3.481	3.667	25.866	3.567	3.303	3.972		0.714288	6.41123
15.0118	1.681	6.953	0.638	0.759	1.029	1.282	2.283	6.9224	5.798	8.729	10.877	9.602	6.023	11.338	4.997	17.042	3.354	3.008	6.686	18.384	2.731	3.64	25.551	3.73	3.28	3.779		0.720001	6.54217
15.1309	1.736	6.871	0.943	0.979	0.726	1.518	2.528	6.6423	5.445	10.033	11.499	11.241	5.913	10.503	5.163	15.91	4.035	3.557	6.328	18.166	3.282	3.579	24.195	3.585	2.835	3.276		0.725713	6.55724
15.2501	2.413	7.148	1.093	1.044	0.797	1.363	2.44	6.0595	4.763	10.012	11.224	11.562	5.496	11.475	4.964	17.172	3.814	3.65	5.51	18.299	2.782	3.366	25.185	3.362	3.471	3.343		0.73143	6.60798
15.3692	2.641	7.352	1.029	0.922	1.021	1.399	3.01	5.6488	4.826	10.81	13.194	12.412	5.891	12.635	6.291	20.469	3.464	3.932	6.67	17.998	2.976	3.561	26.502	3.536	3.457	3.904		0.737143	7.13657
15.4884	3.402	8.109	0.891	1.223	1.304	1.176	3.102	7.2334	5.343	11.05	13.87	14.155	5.806	13.961	8.982	20.104	3.09	4.413	7.2	19.399	3.504	3.426	26.795	4.139	3.756	3.841		0.74286	7.6644
15.6075	4.485	6.624	0.875	0.823	1.393	1.359	3.078	9.1969	5.148	11.481	13.246	15.56	7.089	12.631	9.38	19.203	3.459	3.802	6.971	19.394	3.035	2.884	26.023	3.345	3.669	3.271		0.748572	7.59327
15.7266	4.708	5.148	0.962	0.88	1.33	1.453	2.98	8.8311	5.09	11.536	13.2	18.348	7.152	12.302	11.949	22.282	4.117	4.278	7.392	19.254	3.117	3.117	26.135	3.13	3.61	3.528		0.754284	7.9165
15.8458	5.818	6.027	0.796	1.118	1.179	1.588	3.001	9.4809	4.761	12.591	12.925	19.158	7.708	13.24	16.379	24.16	4.689	5.013	7.692	20.998	3.311	3.766	25.987	3.477	3.443	3.288		0.760001	8.52284
15.9649	5.193	5.552	1.113	1.478	1.04	1.795	3.111	9.6179	4.433	12.906	14.078	21.372	10.253	14.793	17.766	25.177	5.549	5.317	8.665	20.164	2.841	3.476	27.327	3.677	3.113	4.141		0.765714	8.998
16.0841	5.287	5.202	0.778	1.386	1.524	1.407	4.072	8.5407	4.023	13.497	15.396	25.876	10.201	14.465	19.547	23.759	5.561	5.187	9.8	19.824	3.138	3.42	29.031	3.692	3.424	3.2		0.771431	9.27837
16.2032	4.443	4.507	0.669	0.831	1.253	1.559	2.914	9.4708	4.124	15.441	18.082	28.856	12.023	13.93	20.83	24.721	5.99	5.888	10.649	19.25	2.914	3.53	29.508	3.937	3.606	2.906		0.777143	9.68584
16.3224	4.69	4.725	0.566	0.789	0.857	1.128	3.701	9.1958	4.431	14.875	20.146	29.533	15.097	13.721	19.807	25.337	5.741	5.173	12.673	18.483	2.883	3.465	34.515	4.107	3.361	3.822		0.78286	10.1085
16.4415	4.468	4.438	0.93	0.635	1.22	1.038	4.136	9.5302	4.265	16.128	23.414	33.037	15.296	13.178	19.071	24.693	6.49	6.135	14.287	18.299	2.809	3.728	32.107	4.299	3.5	3.425		0.788572	10.406
16.5606	3.603	4.247	0.614	0.817	1.14	1.261	3.893	10.3574	4.36	17.008	25.931	34.671	15.561	11.369	18.948	21.112	7.61	6.44	16.814	20.395	2.728	3.88	33.025	4.812	3.588	3.388		0.794285	10.6759
16.6798	3.132	4.532	0.708	0.726	0.781	1.364	3.801	12.08	5.423	17.214	26.607	32.109	17.026	11.711	18.807	21.923	8.964	6.596	20.2	19.295	2.892	4.557	32.571	4.825	2.98	4.134		0.800002	10.9599
16.7989	3.214	3.217	0.908	0.742	0.92	1.364	4.19	12.6607	7.249	18.486	24.03	30.573	17.125	11.367	19.909	18.881	9.069	7.369	23.942	19.883	2.896	3.92	34.474	5.08	3.093	4.062		0.805714	11.1009
16.9181	3.303	3.09	0.779	1.051	1.059	1.062	3.728	15.026	8.286	18.846	23.251	29.396	16.682	12.284	19.222	15.518	10.569	9.005	29.117	17.933	2.254	3.342	32.858	5.299	3.21	3.062		0.811431	11.1243
17.0372	2.753	3.23	0.815	0.745	0.988	1.217	3.89	14.383	8.706	19.412	22.406	29.562	16.621	12.298	20.822	12.754	12.712	11.855	35.223	19.338	2.047	3.607	34.556	5.151	3.534	2.962		0.817144	11.5995
17.1563	2.408	3.158	0.883	0.754	1.345	1.47	4.112	14.2589	9.512	19.014	19.033	25.726	15.944	11.392	19.42	10.619	14.038	12.878	38.204	19.423	2.663	3.609	36.375	5.115	4.059	3.499		0.822856	11.4966
17.2755	2.803	2.67	0.88	0.939	1.236	1.569	3.774	13.0924	11.817	19.736	16.871	19.578	15.407	11.989	17.086	8.417	15.644	14.642	36.422	22.786	2.619	3.602	34.273	4.402	3.115	3.232		0.828573	11.1001
17.3946	3.084	3.039	0.579	0.853	0.74	1.156	4.172	12.7619	13.356	19.021	15.962	15.899	14.062	10.388	13.881	5.781	19.512	17.301	32.533	22.624	3.361	3.882	35.07	4.815	3.263	3.903		0.834285	10.8076
17.5138	3.822	2.381	0.836	0.64	0.776	1.06	5.073	10.4383	16.721	17.568	12.853	11.453	11.664	9.085	11.352	3.851	18.704	16.77	27.073	23.555	3.704	3.775	35.616	6.132	3.297	4.196		0.840002	10.0921
17.6329	5.66	2.055	1.104	0.622	1.165	0.795	5.879	8.3209	18.07	18.437	11.532	9.565	9.057	7.082	9.349	3.34	17.989	18.014	19.88	28.376	4.327	3.42	36.739	6.622	3.945	3.892		0.845715	9.8168
17.7521	6.078	2.673	0.901	0.643	0.775	0.939	7.116	6.8364	15.368	17.474	9.605	7.43	6.97	5.039	6.456	2.601	17.254	16.856	13.812	31.218	4.783	3.142	39.26	6.163	3.604	4.44		0.851432	9.13217
17.8712	7.414	2.707	0.945	0.503	0.867	1.018	6.611	6.6208	14.464	15.209	8.432	5.427	4.813	4.565	4.838	1.738	15.206	14.947	10.627	33.531	5.965	3.898	42.126	7.683	4.287	3.625		0.857144	8.7718
17.9903	6.782	1.967	1.085	0.515	1.181	1.475	6.21	5.5965	9.931	14.22	5.935	4.242	4.161	3.096	3.391	1.387	12.879	10.956	6.349	37.627	8.118	4.812	45.686	10.231	4.142	4.448		0.862857	8.32394
18.1095	8.117	2.514	0.96	0.741	1.093	1.17	6.128	4.6873	7.25	13.032	4.39	2.456	3.637	2.634	3.085	1.247	11.194	8.605	3.77	39.825	9.452	5.615	49.723	11.982	3.393	3.717		0.868574	8.09297
18.2286	8.508	2.266	1.134	0.751	1.288	1.206	6.345	4.1048	6.027	13.197	3.571	2.096	3.053	2.297	2.62	1.503	8.596	6.927	2.905	37.013	11.515	6.812	57.359	13.918	3.841	3.919		0.874286	8.18353
18.3478	10.492	2.576	0.864	0.634	1.327	1.373	5.891	3.1485	4.484	8.956	3.073	1.534	2.763	2.299	2.109	1.101	6.482	3.763	2.05	34	15.172	10.39	64.299	15.627	3.958	3.834		0.880003	8.16152
18.4669	12.119	2.389	0.849	0.465	1.134	1.154	5.557	3.1652	2.835	7.491	2.42	1.228	2.39	1.743	1.821	0.677	5.078	3.499	1.838	27.066	16.79	17.814	65.404	20.349	4.321	4.9		0.885715	8.24985
18.586	13.713	3.086	0.841	0.538	1.02	1.13	5.214	2.796	2.013	6.058	1.352	0.979	1.424	1.313	1.919	0.527	4.138	2.951	1.466	19.47	17.436	27.255	61.652	27.952	4.594	5.15		0.891428	8.30719
18.7052	15.873	3.256	1.024	0.758	1.093	1.23	4.782	3.3231	1.958	5.089	1.633	0.982	1.23	1.116	1.519	0.482	2.737	2.635	1.187	14.747	17.635	37.27	54.032	34.271	4.933	4.489		0.897145	8.434
18.8243	18.395	2.71	0.741	0.574	1.007	1.431	4.389	2.1481	1.587	3.486	1.622	0.843	0.974	0.839	0.872	0.643	2.626	1.448	1.161	10.527	23.026	42.329	44.259	40.835	5.036	5.076		0.902857	8.40708
18.9435	18.645	3.467	0.728	0.429	0.712	1.192	3.289	2.0099	1.231	2.988	1.306	0.746	0.669	0.583	1.13	0.314	2.045	1.256	0.839	7.086	25.952	38.831	34.684	47.351	5.455	6.145		0.908574	8.04165
19.0626	19.58	2.813	0.45	0.424	1.07	1.597	3.463	1.2341	0.985	2.323	0.894	0.467	0.863	0.814	0.786	0.422	1.624	1.31	0.999	4.25	28.53	31.912	26.664	52.517	6.183	6.279		0.914287	7.63281
19.1817	15.291	3.534	0.474	0.373	1.413	1.482	3.135	1.2205	0.573	1.51	0.833	0.421	0.68	0.519	0.49	0.437	1.5	0.977	0.983	3.559	31.343	22.467	21.33	56.355	7.407	6.977		0.919999	7.12629
19.3009	10.997	2.907	0.496	0.452	1.348	1.249	2.451	1.2978	0.612	1.322	0.795	0.516	0.598	0.375	0.908	0.338	0.706	0.956	0.553	3.1	31.54	15.562	17.861	54.42	10.192	7.674		0.925716	6.50868
19.42	9.727	2.62	0.232	0.475	0.981	1.393	2.035	0.7034	0.752	1.075	0.393	0.348	0.483	0.205	0.574	0.299	0.667	1.072	0.655	2.634	26.387	10.184	14.68	53.424	11.448	7.657		0.931428	5.81167
19.5392	8.697	2.231	0.268	0.65	0.783	1.84	2.077	0.4685	0.595	1.179	0.361	0.388	0.44	0.182	0.592	0.104	0.703	0.894	0.438	1.607	22.085	6.164	12.336	47.636	14.745	8.793		0.937145	5.24063
19.6583	6.518	1.389	0.39	0.546	0.758	1.425	1.487	0.4717	0.277	0.725	0.709	0.31	0.53	0.359	0.361	0.359	0.844	0.765	0.577	1.217	17.27	4.497	9.555	41.929	21.455	12.091		0.942858	4.87749
19.7775	5.428	1.225	0.34	0.626	0.942	1.334	1.307	0.5199	0.306	0.602	0.464	0.597	0.363	0.66	0.24	0.339	0.576	0.62	0.632	1.042	11.654	3.961	8.431	34.917	31.929	13.144		0.948575	4.69996
19.8966	5.62	1.314	0.259	0.567	0.401	1.669	1.036	0.4765	0.474	0.487	0.36	0.356	0.317	0.278	0.297	0.052	0.387	0.498	0.503	1.136	7.851	2.87	7.161	32.512	47.158	16.922		0.954287	5.03698
20.0157	5.416	0.696	0.231	0.612	0.752	1.342	0.834	0.3973	0.588	0.4	0.137	0.156	0.23	0.298	0.553	0.102	0.277	0.461	0.293	1.425	4.248	2.484	5.631	28.861	67.74	21.568		0.959999	5.60509
20.1349	3.373	0.851	0.254	0.281	0.65	1.293	0.893	0.2278	0.456	0.409	0.263	0.121	0.102	0.403	0.492	0.123	0.231	0.349	0.493	1.321	3.179	2.467	4.693	24.064	83.587	26.26		0.965717	6.03215
20.254	2.244	0.537	0.268	0.202	0.773	1.319	0.897	0.3793	0.42	0.337	0.229	0.218	0.156	0.26	0.238	0.175	0.235	0.615	0.371	0.916	2.636	2.43	3.807	22.703	92.435	33.884		0.971429	6.48786
20.3732	1.886	0.496	0.164	0.26	0.644	0.969	0.55	0.2579	0.306	0.341	0.222	0.368	0.173	0.315	0.213	0.166	0.48	0.876	0.463	0.471	2.651	2.034	3.185	20.612	93.048	43.985		0.977146	6.736
20.4923	1.391	0.759	0.218	0.418	0.714	1.126	0.627	0.2562	0.191	0.374	0.285	0.116	0.116	0.234	0.195	0.181	0.303	0.471	0.488	0.514	2.2	1.727	2.494	17.797	80.463	60.329		0.982858	6.69182
20.6114	0.766	0.5	0.226	0.542	0.594	0.863	0.675	0.1609	0.253	0.336	0.208	0.047	0	0.165	0.17	0.289	0.273	0.362	0.36	0.491	1.752	1.351	2.246	15.766	62.144	73.955		0.988571	6.32673
20.7306	0.498	0.605	0.237	0.346	0.633	0.767	0.678	0.2159	0.22	0.576	0.175	0.066	0.025	0.172	0.177	0.164	0.154	0.324	0.417	0.544	1.617	1.372	1.775	16.305	41.49	94.075		0.994288	6.29338
20.8497	0.665	0.593	0.11	0.204	0.722	0.746	0.588	0.119	0.096	0.32	0.198	0.081	0.191	0.059	0.151	0.187	0.099	0.278	0.136	0.474	1.398	1.181	2.078	13.434	28.107	107.598		1	6.14665

## Sheet: Image6
X0	Y0	Y1	Y2	Y3	Y4	Y5	Y6	Y7	Y8	Y9	Y10	Y11	Y12	Y13	Y14	Y15	Y16		Ap-Ba	Average int.
0	75.701	29.066	20.637	26.082	75.669	69.481	50.282	58.994	46.546	53.687	49.178	67.369	26.65	19.952	22.319	99.187	96.553		0	52.1972
0.1191	78.613	32.76	26.398	27.658	75.676	75.303	58.109	61.886	44.01	65.028	56.767	71.458	33.139	21.792	24.485	98.031	94.441		0.00714037	55.6208
0.2383	81.367	32.9	34.741	30.946	74.929	80.327	66.055	61.572	45.604	81.751	59.809	73.592	42.522	23.144	26.366	99.757	91.363		0.0142867	59.2203
0.3574	86.228	35.384	46.565	33.446	75.397	82.763	77.202	66.394	47.011	109.322	64.502	80.63	52.171	28.756	28.202	93.766	84.425		0.0214271	64.2449
0.4766	94.169	35.586	51.963	35.276	75.703	80.829	90.01	71.031	47.649	129.711	76.454	93.064	67.069	31.688	34.468	86.07	78.784		0.0285735	69.3838
0.5957	101.46	36.343	62.638	40.356	72.424	80.864	114.863	83.122	49.895	143.879	88.689	108.45	84.318	35.231	43.023	85.257	78.264		0.0357139	77.0045
0.7148	115.129	38.549	66.992	48.283	83.157	79.408	142.537	95.344	53.79	159.291	107.366	118.73	102.484	42.898	49.895	79.382	75.873		0.0428542	85.8299
0.834	131.787	40.451	73.532	56.793	86.409	82.114	169.005	114.486	63.589	160.993	129.255	129.474	118.292	50.143	60.266	75.644	77.385		0.0500006	95.2716
0.9531	135.775	44.61	84.711	62.577	88.053	85.258	192.032	133.833	72.362	166.576	143.21	142.039	133.208	55.535	68.783	75.489	85.018		0.057141	104.063
1.0723	142.578	46.385	103.227	73.005	85.488	99.291	207.212	151.733	78.334	175.692	147.632	153.017	146.414	63.049	74.521	74.637	90.268		0.0642873	112.499
1.1914	146.638	52.548	124.396	77.04	96.609	119.04	206.988	169.503	87.534	182.716	151.459	155.176	154.976	69.574	81.433	71.245	91.743		0.0714277	119.919
1.3106	148.462	63.143	141.629	80.423	103.767	134.754	203.324	192.259	95.899	182.211	154.72	158.457	164.207	76.399	91.45	68.128	96.207		0.0785741	126.791
1.4297	147.688	68.853	160.282	85.87	109.646	152.231	186.97	210.19	113.288	190.39	163.858	161.743	169.483	83.15	100.91	72.816	99.701		0.0857145	133.945
1.5488	148.607	78.727	179.023	91.193	116.074	159.82	164.217	216.927	134.263	187.565	169.771	166.188	170.176	86.024	112.338	72.286	95.183		0.0928548	138.14
1.668	146.079	92.329	196.489	87.76	114.36	162.05	132.79	217.977	154.28	180.557	171.89	172.415	172.011	94.623	125.215	72.768	97.604		0.100001	140.659
1.7871	147.79	104.889	201.565	87.842	111.366	161.929	104.596	196.689	184.215	180.363	172.979	177.752	163.893	109.262	135.399	76.925	111.465		0.107142	142.878
1.9063	150.379	122.562	196.881	93.07	111.691	153.871	85.326	176.93	204.92	169.451	171.597	168.198	160.151	122.723	138.537	79.057	119.225		0.114288	142.622
2.0254	157.012	135.754	199.405	101.364	114.244	126.759	63.672	148.911	214.684	156.908	174.983	159.275	154.204	134.566	141.684	84.932	134.38		0.121428	141.337
2.1445	162.513	154.605	200.012	108.226	123.917	95.103	42.615	110.692	222.151	145.272	173.873	154.362	154.539	141.406	141.102	87.205	137.43		0.128569	138.531
2.2637	162.472	166.963	201.123	114.32	126.776	69.664	26.993	75.418	221.043	129.406	165.208	148.228	141.07	138.944	135.083	94.267	130.975		0.135715	132.233
2.3828	157.696	177.243	197.84	118.755	131.999	49.881	17.921	51.59	205.868	115.272	147.625	134.468	135.779	139.143	119.313	99.717	126.491		0.142855	125.094
2.502	157.597	181.036	192.526	122.064	127.591	40.058	12.225	39.032	187.851	103.082	124.623	114.543	125.452	134.096	105.772	103.556	112.467		0.150002	116.681
2.6211	152.306	177.695	181.9	121.98	117.346	31.382	10.226	32.349	166.199	87.151	95.582	97.918	107.978	124.427	91.489	109.557	98.395		0.157142	106.111
2.7402	140.818	167.919	163.309	120.489	97.349	23.544	8.945	26.071	140.112	71.278	72.955	81.922	93.549	114.806	77.586	103.402	81.738		0.164283	93.2819
2.8594	130.143	148.841	140.787	102.141	72.267	18.833	8.509	18.115	114.921	60.352	55.184	66.478	79.427	100.577	65.224	95.677	67.984		0.171429	79.1447
2.9785	118.861	131.257	117.762	84.217	50.256	16.952	7.355	15.675	89.668	47.438	41.646	56.144	70.339	87.39	52.287	87.02	55.59		0.178569	66.4622
3.0977	105.89	110.945	93.003	65.005	35.09	16.064	7.161	13.055	67.517	38.708	34.119	46.088	60.269	74.89	42.151	79.652	44.628		0.185716	54.955
3.2168	87.968	84.17	71.687	52.225	27.298	13.211	6.876	11.606	49.759	28.423	25.879	38.885	47.882	62.025	32.631	70.081	36.463		0.192856	43.9452
3.336	78.146	63.567	59.499	42.708	20.751	13.521	6.47	9.14	35.161	22.824	22.557	34.254	38.108	55.238	23.971	60.912	28.131		0.200002	36.174
3.4551	71.069	45.001	48.05	33.408	19.68	11.831	5.991	6.482	23.564	19.327	19.947	27.505	29.283	53.129	16.983	50.067	25.298		0.207143	29.8009
3.5742	60	32.666	42.948	31.429	17.354	10.543	5.708	5.288	19.322	16.761	15.758	23.19	23.246	47.867	14.238	42.014	21.005		0.214283	25.2551
3.6934	44.432	26.915	37.809	28.257	18.517	11.772	6.198	3.961	13.771	16.012	15.384	19.738	20.069	40.532	12.076	34.641	16.925		0.22143	21.5888
3.8125	35.552	22.65	28.905	22.305	16.946	11.581	5.493	3.896	9.568	14.949	13.913	15.356	15.523	37.259	10.525	25.843	13.267		0.22857	17.8548
3.9317	27.931	19.604	26.207	20.161	14.384	11.018	5.503	3.709	7.342	14.368	11.359	13.291	14.033	30.693	7.78	20.3	11.081		0.235716	15.2214
4.0508	20.544	16.664	24.195	16.772	11.808	11.962	5.901	3.498	5.377	13.862	9.08	12.499	12.669	26.175	6.057	15.581	7.747		0.242857	12.9642
4.1699	17.604	15.687	20.227	16.59	11.045	10.821	7.131	3.89	5.474	12.09	8.231	9.641	11.297	23.428	6.587	13.219	7.649		0.249997	11.8006
4.2891	14.078	14.237	18.116	14.64	10.073	10.661	7.467	3.371	4.043	12.788	6.586	7.877	10.43	20.65	5.989	11.035	6.785		0.257143	10.5192
4.4082	11.786	14.166	15.349	13.12	7.927	10.551	7.128	2.979	3.65	13.689	6.644	5.835	7.713	14.939	5.34	11.218	5.752		0.264284	9.28153
4.5274	11.073	13.475	12.18	12.351	6.861	11.565	6.528	3.353	3.431	12.175	6.039	3.857	5.598	11.825	4.18	10.106	5.26		0.27143	8.22688
4.6465	9.547	10.599	11.112	12.086	6.739	10.837	6.491	3.756	3.42	14.598	5.206	3.18	5.932	11.847	3.472	9.534	5.127		0.27857	7.85194
4.7657	9.07	10.098	10.305	12.474	6.228	10.188	7.405	3.469	3.134	14.58	4.063	3.125	6.289	11.456	3.703	8.425	5.236		0.285717	7.60282
4.8848	7.824	9.457	8.756	12.791	6.001	9.633	8.093	3.742	3.348	15.315	4.23	3.603	5.37	11.473	3.517	7.117	4.892		0.292857	7.36247
5.0039	6.927	8.439	8.45	12.578	5.413	9.468	8.363	3.285	3.204	15.01	4.611	3.069	3.739	10.965	3.156	6.633	4.784		0.299998	6.94671
5.1231	5.713	7.941	7.607	12.571	5.719	9.682	6.883	3.456	2.609	14.356	5.338	3.092	3.206	12.126	3.247	6.67	3.909		0.307144	6.71324
5.2422	5.448	7.431	6.909	13.662	5.347	9.386	7.1	3.483	3.183	14.33	5.438	3.435	2.701	11.368	3.043	7.386	4.092		0.314284	6.69071
5.3614	5.418	6.897	5.554	12.533	5.258	10.019	7.544	3.081	3.55	15.369	5.396	3.281	3.164	11.25	2.611	7.149	4.763		0.321431	6.63747
5.4805	5.215	7.736	5.261	13.026	4.391	11.152	8.109	3.228	3.423	14.056	5.573	3.046	2.299	11.069	2.568	7.513	4.719		0.328571	6.61082
5.5996	4.802	7.515	5.032	13.263	4.753	11.19	8.464	3.39	3.441	14.118	4.458	3.918	2.467	9.107	2.228	9.26	5.01		0.335711	6.61271
5.7188	3.8	6.298	2.963	13.133	4.784	11.341	8.037	3.739	3.472	14.118	5.212	3.386	2.546	9.199	2.048	9.618	4.189		0.342858	6.34606
5.8379	4.216	5.638	3.029	12.617	4.632	12.266	9.762	3.718	3.797	15.165	5.206	3.447	1.654	7.389	2.391	10.319	5.153		0.349998	6.49406
5.9571	4.834	6.305	2.731	11.93	5.403	13.113	9.005	3.981	3.893	16.82	5.493	3.967	2.149	6.7	2.421	10.806	4.996		0.357145	6.73806
6.0762	3.658	6.403	2.679	10.486	5.572	14.146	10.141	4.029	3.656	15.998	6.495	3.522	2.196	5.477	2.486	11.027	4.781		0.364285	6.63247
6.1953	3.369	7.744	2.926	8.925	5.318	14.814	9.937	3.407	3.891	19.096	6.445	3.405	2.08	6.06	2.818	10.659	5.99		0.371425	6.87553
6.3145	3.316	8.035	2.702	8.646	7.287	14.898	10.521	3.593	3.685	20.09	6.822	3.368	2.135	5.542	2.36	9.149	4.344		0.378572	6.85253
6.4336	3.064	8.269	2.495	8.417	6.694	13.685	11.572	3.129	3.63	20.86	6.982	3.118	2.242	5.118	2.462	9.281	4.259		0.385712	6.781
6.5528	3.979	8.195	2.766	6.673	6.972	14.312	12.41	3.573	4.208	22.324	6.896	2.925	2.022	4.143	2.467	6.903	4.124		0.392858	6.75835
6.6719	4.565	8.36	2.607	5.624	7.985	15.365	11.129	3.593	4.178	21.371	7.827	3.928	1.797	4.299	2.402	6.495	3.397		0.399999	6.76012
6.7911	4.307	8.644	2.787	5.72	10.622	15.065	11.87	4.35	3.569	19.994	8.356	3.905	1.626	3.888	2.763	6.837	2.972		0.407145	6.89853
6.9102	4.494	8.906	2.304	5.176	11.841	14.631	13.448	3.856	3.237	20.409	8.266	3.35	1.829	4.263	2.807	7.72	3.189		0.414286	7.04271
7.0293	4.036	9.149	2.46	5.578	15.329	13.948	13.035	3.759	3.159	20.22	9.632	3.534	2.423	4.865	3.211	8.624	2.623		0.421426	7.38735
7.1485	4.33	8.599	2.175	6.146	17.673	11.217	14.424	3.365	3.612	20.771	10.777	3.601	2.288	3.341	3.224	7.271	2.584		0.428572	7.37635
7.2676	4.505	9.239	2.248	5.927	19.32	10.835	15.371	3.102	3.133	23.047	12.734	3.279	1.967	3.369	3.398	8.598	2.801		0.435713	7.81606
7.3868	4.273	10.437	2.539	5.709	17.785	10.545	15.611	3.938	3.339	23.816	13.961	4.409	1.927	4.194	3.317	8.147	3.023		0.442859	8.05706
7.5059	3.496	11.362	2.462	5.938	20.228	10.55	15.395	3.112	3.262	23.094	13.795	3.997	1.414	3.187	3.596	8.58	2.795		0.449999	8.01547
7.625	3.812	11.952	2.209	5.633	19.716	11.217	18.017	3.413	3.129	25.663	15.783	4.034	1.811	3.064	3.547	7.589	3.231		0.45714	8.46
7.7442	4.682	13.179	2.563	4.108	22.384	12.802	20.438	3.622	3.526	25.009	15.583	5.146	2.13	3.047	4.159	6.104	2.883		0.464286	8.90382
7.8633	4.721	13.596	3.062	4.954	25.651	12.412	22.491	3.534	3.146	24.122	16.743	5.745	1.894	2.877	4.554	6.826	2.854		0.471427	9.36365
7.9825	5.139	13.393	2.486	5.343	25.877	12.587	24.756	3.362	3.593	22.63	15.25	5.102	2.247	3.35	5.201	6.104	2.619		0.478573	9.35524
8.1016	4.877	12.644	2.901	4.807	27.37	13	25.085	3.825	3.18	23.212	14.746	6.703	2.042	2.464	5.305	6.008	2.748		0.485713	9.46571
8.2207	5.529	14.734	3.109	4.4	28.438	13.949	23.924	3.467	3.334	21.284	15.993	7.306	1.641	2.268	5.973	6.783	2.955		0.492854	9.711
8.3399	6.043	16.169	2.855	4.459	29.543	16.486	24.831	3.712	2.731	20.584	15.402	7.582	1.287	2.502	8.236	6.801	2.165		0.5	10.0816
8.459	6.181	16.798	2.455	4.051	30.867	15.962	24.315	3.47	2.768	18.553	15.438	7.6	1.731	2.195	8.27	6.727	2.309		0.50714	9.98176
8.5782	5.917	15.605	2.873	4.17	32.259	16.541	22.69	3.017	2.302	17.828	16.225	8.623	1.761	2.496	9.287	6.607	2.771		0.514287	10.0572
8.6973	6.466	14.81	3.314	4.057	37.466	16.774	20.652	3.339	3.008	18.525	15.58	9.98	1.744	2.23	10.794	6.996	2.823		0.521427	10.5034
8.8165	7.132	15.343	3.533	4.354	42.138	17.057	21.074	3.447	3.309	16.091	18.386	9.946	1.923	2.124	12.291	7.365	2.632		0.528573	11.0674
8.9356	7.135	14.391	3.095	4.079	44.369	18.307	20.815	3.746	2.563	14.75	18.278	10.171	1.989	1.753	13.035	8.488	2.475		0.535714	11.1435
9.0547	5.253	12.82	2.921	3.862	43.922	18.868	22.12	3.747	2.826	13.673	20.126	10.274	1.692	2.124	12.904	8.857	2.655		0.542854	11.0967
9.1739	4.847	14.217	3.024	4.013	41.463	18.675	22.302	3.586	2.896	13.165	21.022	11.008	1.759	2.052	12.165	7.387	2.39		0.550001	10.9395
9.293	5.393	16.143	3.754	3.679	42.629	19.968	22.021	3.727	3.067	12.558	22.723	12.433	1.452	2.133	10.879	6.37	2.47		0.557141	11.2588
9.4122	6.036	13.886	3.366	4.44	46.092	19.296	23.792	3.615	2.903	10.778	21.139	12.678	1.439	1.566	10.973	6.327	2.331		0.564287	11.2151
9.5313	5.474	15.906	3.463	3.548	45.153	20.795	25.324	4.109	3.42	9.034	20.857	10.901	1.914	1.453	11.792	4.924	2.418		0.571428	11.205
9.6504	4.634	17.414	4.038	3.265	48.375	22.621	23.8	4.68	2.821	8.177	21.222	10.602	1.777	1.903	11.713	4.473	2.077		0.578568	11.3878
9.7696	4.161	14.883	3.776	3.575	51.354	22.826	24.027	4.218	2.86	6.898	21.654	9.366	1.748	2.024	12.548	4.885	2.029		0.585714	11.3431
9.8887	4.114	14.662	3.799	3.216	44.564	22.224	20.924	4.503	2.545	7.206	23.159	9.43	1.235	1.996	10.746	5.194	2.663		0.592855	10.7165
10.0079	4.25	13.408	3.876	3.065	41.231	21.101	21.969	4.867	2.951	6.361	23.876	9.492	1.345	2.079	11.274	5.213	2.973		0.600001	10.5489
10.127	3.962	12.93	3.411	3.501	37.466	20.882	22.186	5.373	2.689	4.817	26.249	8.667	1.674	1.748	9.571	4.597	2.673		0.607142	10.1409
10.2462	3.665	12.372	3.968	2.722	30.495	20.1	24.542	4.743	2.615	4.301	28.753	9.216	1.819	1.986	9.91	4.567	2.808		0.614288	9.91659
10.3653	3.226	13.773	4.198	2.744	26.752	19.388	28.115	5.331	2.611	5.042	30.127	6.525	1.501	1.803	9.552	4.23	2.779		0.621428	9.86453
10.4844	3.81	12.042	3.586	3.056	23.83	17.697	36.148	7.112	2.644	5.076	33.963	7.136	1.856	1.904	8.863	4.141	3.318		0.628569	10.3636
10.6036	2.834	12.017	4.079	2.677	22.123	17.682	37.084	9.786	3.241	4.435	36.304	6.785	1.977	1.823	8.693	4.023	3.119		0.635715	10.5107
10.7227	3.035	11.901	3.448	2.922	20.109	17.09	34.335	11.429	3.635	4.727	37.384	7.101	1.962	1.605	8.92	4.606	3.029		0.642855	10.4258
10.8419	3.141	10.278	4.003	2.712	18.745	16.686	27.331	16.219	3.084	4.54	38.422	5.939	2.351	1.701	8.226	4.05	2.653		0.650002	10.0048
10.961	3.355	10.453	3.812	2.488	18.123	17.666	16.436	20.227	3.771	3.755	43.193	5.042	2.499	2.217	8.032	4.947	3.132		0.657142	9.94988
11.0801	3.47	9.736	3.652	3.561	16.958	18.091	8.775	27.249	5.203	4.259	47.714	4.828	2.523	2.424	7.6	4.723	3.427		0.664283	10.2466
11.1993	3.407	9.419	3.337	3.584	15.967	17.395	5.347	32.305	5.607	4.278	53.563	3.913	2.766	2.366	7.34	4.721	3.025		0.671429	10.4906
11.3184	3.729	9.871	3.714	3.447	14.806	17.801	3.585	29.965	7.059	4.938	54.659	3.997	2.482	1.706	7.017	4.891	2.803		0.678569	10.3806
11.4376	3.112	8.979	3.512	3.588	14.205	17.844	2.471	22.415	11.883	4.856	53.457	4.245	3.122	1.655	6.519	5.286	2.835		0.685716	9.99906
11.5567	2.959	9.345	3.257	3.845	14.693	20.362	1.774	11.404	18.579	5.441	57.85	4.691	2.372	1.822	6.263	5.299	2.753		0.692856	10.1594
11.6758	3.25	9.627	3.292	3.248	14.81	22.825	1.193	6.072	25.29	5.585	61.235	3.572	2.306	1.746	6.18	5.147	2.597		0.699996	10.4691
11.795	2.851	9.737	2.873	3.046	14.931	27.422	0.669	3.311	30.909	5.925	57.428	2.971	2.711	1.629	5.438	5.246	2.406		0.707143	10.559
11.9141	2.756	9.367	3.212	3.391	14.06	29.074	0.561	2.401	31.986	5.6	54.718	2.439	2.221	1.514	5.244	4.683	2.469		0.714283	10.3351
12.0333	2.948	11.146	3.773	3.356	12.712	29.648	0.592	2.223	31.063	6.433	52.243	2.526	2.052	1.477	5.457	4.949	2.064		0.72143	10.2742
12.1524	3.232	9.885	4.5	3.647	14.034	29.413	0.534	1.36	29.324	6.872	45.113	3.057	2.051	1.36	4.637	5.589	2.353		0.72857	9.82124
12.2716	3.129	9.699	3.813	3.642	14.95	25.505	0.444	1.197	23.486	7.957	37.345	2.717	2.057	1.419	5.177	4.206	2.216		0.735716	8.76229
12.3907	2.699	10.146	4.106	3.838	14.804	20.298	0.446	0.833	17.599	9.221	30.575	2.456	1.815	1.172	4.075	3.903	1.83		0.742857	7.63624
12.5098	2.689	10.302	5.037	4.187	17.126	15.742	0.481	0.81	13.116	12.106	26.432	3.147	1.562	1.411	3.526	3.466	1.528		0.749997	7.21576
12.629	2.851	11.241	4.775	4.501	18.947	11.795	0.33	0.583	9.053	15.868	24.92	2.848	1.776	1.295	3.654	3.51	1.605		0.757143	7.03247
12.7481	2.661	10.324	5.19	5.343	18.722	7.136	0.396	0.436	6.452	16.451	23.496	2.186	1.467	1.532	3.12	2.841	1.197		0.764284	6.40882
12.8673	3.032	10.927	5.512	6.575	21.462	4.555	0.388	0.567	4.477	18.589	21.23	2.566	1.336	1.427	2.975	2.648	1.142		0.77143	6.43576
12.9864	2.955	9.653	6.658	9.281	25.161	2.616	0.282	0.386	2.963	18.312	21.129	2.484	0.861	1.088	2.743	3.109	1.052		0.77857	6.51371
13.1055	2.768	9.218	9.6	11.718	27.34	1.635	0.239	0.234	2.387	17.512	20.415	2.284	1.102	0.957	2.732	2.796	0.981		0.785711	6.70106
13.2247	3.346	7.669	9.654	13.568	30.999	1.386	0.088	0.352	1.797	18.153	23.332	2.489	1.265	1.004	2.495	1.788	0.793		0.792857	7.06929
13.3438	3.157	7.36	11.005	15.734	34.066	0.951	0.078	0.248	1.517	16.776	22.22	2.839	1.271	1.218	2.592	2.109	0.479		0.799998	7.27176
13.463	2.728	8.246	11.737	16.857	33.283	0.806	0.25	0.301	1.155	13.384	20.3	2.853	1.308	1.23	2.528	2.286	0.92		0.807144	7.06894
13.5821	2.674	7.117	14.33	20.314	26.553	0.465	0.163	0.344	1.213	10.456	17.785	2.989	1.596	1.198	2.657	2.009	0.761		0.814284	6.62494
13.7012	2.663	7.258	18.485	22.157	21.981	0.654	0.015	0.188	0.809	6.885	13.986	2.436	1.238	1.329	2.39	1.897	0.631		0.821425	6.17659
13.8204	2.812	7.726	22.082	22.062	15.749	0.499	0.095	0.169	0.663	5.519	8.934	2.089	1.643	1.122	2.441	1.809	0.418		0.828571	5.63718
13.9395	2.665	7.466	28.814	18.947	9.916	0.243	0.212	0.362	0.516	4.043	6.661	2.198	1.348	1.214	2.22	1.5	0.559		0.835711	5.22847
14.0587	3.098	7.679	29.757	17.402	7.503	0.378	0.31	0.226	0.317	3.597	6.199	1.809	1.104	0.94	2.221	1.39	0.498		0.842858	4.96635
14.1778	2.485	9.547	35.315	15.345	4.594	0.166	0.065	0.115	0.411	3.302	5.383	2.014	1.192	1.084	2.405	1.366	0.851		0.849998	5.03765
14.297	2.294	9.692	38.281	15.266	4.035	0.186	0.015	0.144	0.492	2.265	4.316	2.195	1.077	1.165	2.054	1.23	0.555		0.857145	5.01541
14.4161	2.728	9.939	40.256	14.449	3.27	0.319	0.119	0.041	0.405	1.849	3.768	1.572	1.43	1.348	2.526	1.218	0.662		0.864285	5.05288
14.5352	3.003	9.043	41.995	13.028	2.303	0.157	0.139	0.101	0.272	1.328	3.006	1.288	1.483	0.847	2.268	1.092	0.462		0.871425	4.81265
14.6544	2.79	10.146	39.223	12.718	1.882	0.181	0.096	0.102	0.337	1.248	2.476	1.016	1.2	0.678	1.709	1.17	0.327		0.878572	4.547
14.7735	3.052	9.355	34.377	11.86	1.67	0.156	0.181	0.054	0.213	1.039	2.173	1.177	0.675	0.911	1.581	1.012	0.617		0.885712	4.12371
14.8927	3.577	11.914	27.523	11.74	1.434	0.162	0.126	0	0.175	0.666	1.828	1.243	1.022	1.015	1.395	0.992	0.589		0.892858	3.84712
15.0118	3.993	14.029	22.589	11.517	1.261	0.151	0.047	0.073	0.367	0.882	1.193	0.972	0.846	1.046	1.129	0.882	0.583		0.899999	3.62118
15.1309	3.558	14.653	18.81	10.585	0.973	0.108	0.05	0.203	0.283	0.577	1.278	1.081	0.824	1.061	1.172	0.852	0.584		0.907139	3.33247
15.2501	4.182	17.209	13.78	7.804	0.468	0.167	0.062	0.053	0.421	0.347	1.081	0.854	0.551	0.853	0.96	0.494	0.487		0.914286	2.92782
15.3692	5.567	19.945	9.777	7.199	0.681	0.189	0.047	0.039	0.1	0.666	1.03	0.821	0.774	0.583	0.647	0.755	0.328		0.921426	2.89106
15.4884	6.726	21.901	5.774	4.745	0.399	0.199	0.077	0.019	0.093	0.626	0.792	0.589	0.454	0.555	0.882	0.621	0.359		0.928572	2.63594
15.6075	8.482	23.597	4.343	4.734	0.234	0.012	0.068	0.111	0.07	0.329	0.844	0.594	0.241	0.339	0.492	0.356	0.488		0.935713	2.66671
15.7266	10.196	22.855	3.711	3.488	0.483	0.093	0.095	0.08	0.133	0.41	0.762	0.419	0.514	0.426	0.474	0.553	0.446		0.942853	2.65518
15.8458	11.723	20.056	2.637	2.678	0.272	0.126	0.05	0	0.216	0.357	0.654	0.32	0.4	0.464	0.537	0.45	0.261		0.949999	2.42359
15.9649	13.955	15.905	1.548	2.292	0.17	0.084	0.05	0	0.102	0.426	0.583	0.417	0.381	0.404	0.542	0.155	0.159		0.95714	2.18665
16.0841	14.711	11.696	1.301	1.382	0.118	0.031	0.022	0.053	0.113	0.307	0.696	0.488	0.301	0.282	0.794	0.313	0.311		0.964286	1.93641
16.2032	14.922	8.414	1.453	1.036	0.052	0.09	0.041	0.114	0.183	0.244	0.298	0.373	0.422	0.253	0.386	0.296	0.52		0.971427	1.71159
16.3224	13.348	5.506	1.122	0.512	0.106	0.154	0.026	0.05	0.111	0.181	0.238	0.262	0.332	0.47	0.566	0.305	0.391		0.978573	1.39294
16.4415	12.373	3.462	0.638	0.6	0.081	0.094	0	0.087	0.127	0.101	0.361	0.413	0.13	0.244	0.441	0.339	0.316		0.985713	1.16512
16.5606	8.914	2.602	0.454	0.28	0.134	0	0.045	0.151	0.071	0.041	0.23	0.19	0.212	0.214	0.332	0.394	0.257		0.992854	0.854176
16.6798	6.762	1.314	0.68	0.271	0.094	0.0007489	0.06	0.048	0.083	0.148	0.132	0.104	0.252	0.337	0.368	0.31	0.23		1	0.658456

[truncated: 1 more sheets: Sheet1]
