# Supplementary material for: Crumbs organizes the transport machinery by regulating apical levels of PI(4,5)P2 in Drosophila
Source: eLife. 2019 Nov 7;8:e50900. doi: 10.7554/eLife.50900 (PMC6881148; doi:10.7554/eLife.50900)
Supplement: Figure 5—source data 7. [file elife-50900-fig5-data7.xlsx]

## Sheet: Sheet1
	Control 1					Control 2					Control 3					Control 4					Control 5					Control 6					Control 7
	Cell 1	Cell 2	Cell 3	Cell 4		Cell 1	Cell 2	Cell 3	Cell 4		Cell 1	Cell 2	Cell 3	Cell 4		Cell 1	Cell 2	Cell 3	Cell 4		Cell 1	Cell 2	Cell 3	Cell 4		Cell 1	Cell 2	Cell 3	Cell 4		Cell 1	Cell 2	Cell 3	Cell 4
Apical	124	98	138	111		72	83	70	106		147	114	123	126		143	117	67	79		105	130	58	110		42	14	24	65		51	79	72	68
	120	105	88	90		85	69	56	53		109	101	126	128		72	124	87	54		109	136	46	63		25	20	10	21		60	78	69	34
	95	145	111	92		64	57	43	16		155	127	119	102		74	75	97	33		83	145	38	103		31	25	21	50		80	58	53	44
	89	95	103	130		40	64	49	65		137	135	83	137		91	72	93	80		63	132	78	121		9	12	22	44		126	107	76	87
	151	103	103	146		55	47	47	53		141	168	104	53		115	58	182	94		87	85	110	85		29	30	9	24		109	56	105	60
Average	115.8	109.2	108.6	113.8		63.2	64	53	58.6		137.8	129	111	109.2		99	89.2	105.2	68		89.4	125.6	66	96.4		27.2	20.2	17.2	40.8		85.2	75.6	75	58.6
Laeral	46	50	31	48		22	12	14	12		7	18	20	41		22	13	32	23		27	19	14	12		14	0	6	17		12	9	3	18
	55	47	31	45		17	11	11	13		31	25	32	24		19	14	22	28		19	26	6	26		3	0	8	1		7	8	27	23
	62	34	25	37		14	21	11	5		17	23	32	33		25	19	20	13		24	30	11	11		12	6	2	8		20	20	21	4
	45	20	25	45		12	5	22	9		54	25	31	45		24	29	32	13		42	18	24	11		2	2	9	6		16	13	8	6
	56	48	38	40		3	8	22	12		10	21	30	18		25	18	25	15		15	11	10	6		13	2	13	13		34	13	4	20
Average	52.8	39.8	30	43		13.6	11.4	16	10.2		23.8	22.4	29	32.2		23	18.6	26.2	18.4		25.4	20.8	13	13.2		8.8	2	7.6	9		17.8	12.6	12.6	14.2
Ratio Ap/La	2.19318	2.74372	3.62	2.64651		4.64706	5.61404	3.3125	5.7451		5.78992	5.75893	3.82759	3.3913		4.30435	4.7957	4.01527	3.69565		3.51969	6.03846	5.07692	7.30303		3.09091	10.1	2.26316	4.53333		4.78652	6	5.95238	4.12676
	Crb1					Crb2					Crb3					Crb4					Crb5					Crb6					Crb7					Crb8					Crb9
	Cell 1	Cell 2	Cell 3	Cell 4		Cell 1	Cell 2	Cell 3	Cell 4		Cell 1	Cell 2	Cell 3	Cell 4		Cell 1	Cell 2	Cell 3	Cell 4		Cell 1	Cell 2	Cell 3	Cell 4		Cell 1	Cell 2	Cell 3	Cell 4		Cell 1	Cell 2	Cell 3	Cell 4		Cell 1	Cell 2	Cell 3	Cell 4		Cell 1	Cell 2	Cell 3	Cell 4
Apical	210	167	155	216		159	197	131	185		150	100	128	143		113	137	105	209		103	97	90	60		81	90	68	63		99	80	69	108		86	97	81	69		173	180	203	79
	221	181	169	192		166	141	123	149		185	126	99	125		106	101	124	148		124	108	90	73		63	71	50	63		87	89	61	123		94	87	87	95		170	225	249	158
	208	207	191	194		213	199	134	167		115	150	106	148		140	150	130	134		120	105	136	93		63	60	49	43		112	99	103	74		79	71	97	78		168	241	219	149
	187	179	179	189		187	159	128	86		164	130	79	114		151	122	124	167		102	85	126	110		49	61	37	85		65	87	85	93		58	69	68	98		169	188	215	180
	175	146	192	170		154	89	134	110		158	98	129	108		166	154	143	101		96	79	102	96		59	52	50	67		76	58	88	110		144	65	63	79		235	126	205	91
Average	200.2	176	177.2	192.2		175.8	157	130	139.4		154.4	120.8	108.2	127.6		135.2	132.8	125.2	151.8		109	94.8	108.8	86.4		63	66.8	50.8	64.2		87.8	82.6	81.2	101.6		92.2	77.8	79.2	83.8		183	192	218.2	131.4
Laeral	60	72	165	27		58	51	14	37		45	28	33	30		34	51	54	61		29	31	37	56		40	28	24	36		29	27	32	33		27	28	54	33		61	57	98	59
	92	87	114	61		70	61	99	22		31	40	50	61		53	39	35	34		36	52	35	42		32	25	30	22		31	49	23	42		21	14	57	36		69	37	94	37
	117	62	105	48		54	52	36	29		30	54	35	55		62	62	50	56		46	40	35	91		26	34	28	37		42	44	32	31		33	40	63	32		117	94	50	25
	88	84	103	56		57	66	45	14		52	52	40	36		66	61	43	40		32	53	40	92		29	36	35	14		29	40	25	17		31	27	52	32		100	85	30	42
	116	102	116	35		48	56	12	3		42	48	40	30		39	45	23	36		42	69	30	51		27	11	53	21		31	57	39	47		26	11	34	28		34	79	24	31
Average	94.6	81.4	120.6	45.4		57.4	57.2	41.2	21		40	44.4	39.6	42.4		50.8	51.6	41	45.4		37	49	35.4	66.4		30.8	26.8	34	26		32.4	43.4	30.2	34		27.6	24	52	32.2		76.2	70.4	59.2	38.8
Ratio Ap/La	2.11628	2.16216	1.46932	4.23348		3.06272	2.74476	3.15534	6.6381		3.86	2.72072	2.73232	3.00943		2.66142	2.57364	3.05366	3.34361		2.94595	1.93469	3.07345	1.3012		2.04545	2.49254	1.49412	2.46923		2.70988	1.90323	2.68874	2.98824		3.34058	3.24167	1.52308	2.60248		2.40157	2.72727	3.68581	3.3866
	Sdt1					Sd2					Sdt3					Sdt4					Sdt5					Sdt6					Sdt7					Sdt8
	Cell 1	Cell 2	Cell 3	Cell 4		Cell 1	Cell 2	Cell 3	Cell 4		Cell 1	Cell 2	Cell 3	Cell 4		Cell 1	Cell 2	Cell 3	Cell 4		Cell 1	Cell 2	Cell 3	Cell 4		Cell 1	Cell 2	Cell 3	Cell 4		Cell 1	Cell 2	Cell 3	Cell 4		Cell 1	Cell 2	Cell 3	Cell 4
Apical	177	99	77	131		134	130	172	158		148	94	106	104		51	113	83	106		170	141	117	151		147	124	115	128		107	96	120	68		111	82	65	74
	109	117	105	102		121	139	135	134		137	77	137	83		61	100	145	122		184	174	107	111		146	138	150	121		63	93	150	108		98	124	101	72
	136	104	135	133		131	128	152	138		192	92	101	78		109	112	159	129		121	175	142	143		173	173	100	121		104	105	114	124		92	90	134	74
	112	129	108	125		112	150	155	192		161	79	121	49		128	125	132	142		118	168	125	136		133	136	81	103		88	73	101	86		63	89	145	86
	125	94	142	119		178	139	156	144		159	82	114	55		124	142	143	120		135	148	143	124		123	95	71	123		106	76	91	138		90	70	121	61
Average	131.8	108.6	113.4	122		135.2	137.2	154	153.2		159.4	84.8	115.8	73.8		94.6	118.4	132.4	123.8		145.6	161.2	126.8	133		144.4	133.2	103.4	119.2		93.6	88.6	115.2	104.8		90.8	91	113.2	73.4
Laeral	37	48	41	27		28	55	41	51		35	42	24	25		61	37	53	66		55	53	39	40		35	30	29	63		38	52	26	47		40	27	37	37
	46	67	41	40		33	51	33	48		59	33	35	31		21	25	22	43		64	38	52	48		34	23	52	37		32	43	48	23		29	28	42	38
	35	45	56	73		58	49	75	60		46	28	22	22		17	23	19	78		39	50	58	25		39	49	36	50		22	29	38	39		41	47	36	24
	25	38	45	41		54	58	49	37		46	20	19	13		11	30	31	71		37	94	33	32		44	49	35	89		40	27	26	47		35	57	49	37
	31	35	43	25		54	60	35	48		32	22	14	5		10	10	10	34		48	45	29	31		37	35	36	44		16	25	36	30		14	28	39	34
Average	34.8	46.6	45.2	41.2		45.4	54.6	46.6	48.8		43.6	29	22.8	19.2		24	25	27	58.4		48.6	56	42.2	35.2		37.8	37.2	37.6	56.6		29.6	35.2	34.8	37.2		31.8	37.4	40.6	34
Ratio Ap/La	3.78736	2.33047	2.50885	2.96117		2.97797	2.51282	3.30472	3.13934		3.65596	2.92414	5.07895	3.84375		3.94167	4.736	4.9037	2.11986		2.99588	2.87857	3.00474	3.77841		3.82011	3.58065	2.75	2.10601		3.16216	2.51705	3.31034	2.8172		2.85535	2.43316	2.78818	2.15882

## Sheet: Control1
ROI	Area	Mean	Min	Max	X	Y	Slice
1	0.000	124	124	124	36980	46344	4
2	0.000	120	120	120	38805	46344	4
3	0.000	95	95	95	40313	46106	4
4	0.000	89	89	89	42535	45868	4
5	0.000	151	151	151	45392	45789	4
6	0.000	46	46	46	36266	44757	4
7	0.000	55	55	55	37139	43011	4
8	0.000	62	62	62	38250	40869	4
9	0.000	45	45	45	39599	38726	4
10	0.000	56	56	56	41027	37218	4
11	0.000	98	98	98	48011	45789	4
12	0.000	105	105	105	49915	45709	4
13	0.000	145	145	145	52296	45312	4
14	0.000	95	95	95	54677	44916	4
15	0.000	103	103	103	57295	44678	4
16	0.000	50	50	50	59359	43329	4
17	0.000	47	47	47	59914	41821	4
18	0.000	34	34	34	60549	39837	4
19	0.000	20	20	20	61422	37932	4
20	0.000	48	48	48	61739	36425	4
21	0.000	138	138	138	35948	50153	4
22	0.000	88	88	88	37853	49915	4
23	0.000	111	111	111	40630	49598	4
24	0.000	103	103	103	42932	49995	4
25	0.000	103	103	103	44916	50312	4
26	0.000	31	31	31	45789	52216	4
27	0.000	31	31	31	46423	55073	4
28	0.000	25	25	25	46979	56819	4
29	0.000	25	25	25	47455	58327	4
30	0.000	38	38	38	46265	54200	4
31	0.000	111	111	111	54677	51105	4
32	0.000	90	90	90	56105	50867	4
33	0.000	92	92	92	57930	50471	4
34	0.000	130	130	130	59755	50550	4
35	0.000	146	146	146	61660	50867	4
36	0.000	48	48	48	61660	52296	4
37	0.000	45	45	45	61977	53962	4
38	0.000	37	37	37	62295	56026	4
39	0.000	45	45	45	62771	58009	4
40	0.000	40	40	40	63644	60152	4

## Sheet: Control2
ROI	Area	Mean	Min	Max	X	Y	Slice
1	0.000	72	72	72	58882	35948	6
2	0.000	85	85	85	60390	36821	6
3	0.000	64	64	64	62850	37694	6
4	0.000	40	40	40	65231	37853	6
5	0.000	55	55	55	68008	37059	6
6	0.000	22	22	22	69516	34282	6
7	0.000	17	17	17	70151	31901	6
8	0.000	14	14	14	70786	29759	6
9	0.000	12	12	12	70707	26902	6
10	0.000	3	3	3	69913	24759	6
11	0.000	83	83	83	59041	36186	6
12	0.000	69	69	69	60351	36782	6
13	0.000	57	57	57	62791	37615	6
14	0.000	64	64	64	65409	37912	6
15	0.000	47	47	47	67909	37139	6
16	0.000	12	12	12	69695	34282	6
17	0.000	11	11	11	70052	31901	6
18	0.000	21	21	21	70766	29521	6
19	0.000	5	5	5	70766	26723	6
20	0.000	8	8	8	70528	24997	6
21	0.000	70	70	70	26366	35472	6
22	0.000	56	56	56	24521	36484	6
23	0.000	43	43	43	22617	37198	6
24	0.000	49	49	49	20712	37079	6
25	0.000	47	47	47	18272	35889	6
26	0.000	14	14	14	18807	33746	6
27	0.000	11	11	11	19105	32020	6
28	0.000	11	11	11	19403	30116	6
29	0.000	22	22	22	19879	28271	6
30	0.000	22	22	22	20236	26247	6
31	0.000	106	106	106	37377	44638	6
32	0.000	53	53	53	36127	42852	6
33	0.000	16	16	16	33211	41841	6
34	0.000	65	65	65	30354	42614	6
35	0.000	53	53	53	28925	44102	6
36	0.000	12	12	12	37496	46662	6
37	0.000	13	13	13	37198	48804	6
38	0.000	5	5	5	36425	51780	6
39	0.000	9	9	9	36127	54280	6
40	0.000	12	12	12	36067	57315	6

## Sheet: Control3
ROI	Area	Mean	Min	Max	X	Y	Slice
1	0.000	147	147	147	38389	36722	3
2	0.000	109	109	109	40174	36841	3
3	0.000	155	155	155	43924	37258	3
4	0.000	137	137	137	46483	37674	3
5	0.000	141	141	141	49518	38091	3
6	0.000	7	7	7	37674	35591	3
7	0.000	31	31	31	37853	33806	3
8	0.000	17	17	17	38032	31782	3
9	0.000	54	54	54	38567	29521	3
10	0.000	10	10	10	39043	27021	3
11	0.000	114	114	114	58148	38448	3
12	0.000	101	101	101	59993	37853	3
13	0.000	127	127	127	62017	37436	3
14	0.000	135	135	135	63564	37317	3
15	0.000	168	168	168	65409	37258	3
16	0.000	18	18	18	65529	35353	3
17	0.000	25	25	25	65171	33032	3
18	0.000	23	23	23	64933	30175	3
19	0.000	25	25	25	65290	27616	3
20	0.000	21	21	21	66362	24938	3
21	0.000	123	123	123	36365	47554	3
22	0.000	126	126	126	37793	47316	3
23	0.000	119	119	119	39579	46959	3
24	0.000	83	83	83	41603	47257	3
25	0.000	104	104	104	43448	47376	3
26	0.000	20	20	20	36067	48923	3
27	0.000	32	32	32	35948	50768	3
28	0.000	32	32	32	35770	53387	3
29	0.000	31	31	31	35770	56363	3
30	0.000	30	30	30	35948	58684	3
31	0.000	126	126	126	50768	47257	3
32	0.000	128	128	128	52554	47316	3
33	0.000	102	102	102	54815	47019	3
34	0.000	137	137	137	56779	46721	3
35	0.000	53	53	53	58505	46900	3
36	0.000	41	41	41	58922	49280	3
37	0.000	24	24	24	59993	51899	3
38	0.000	33	33	33	60886	55113	3
39	0.000	45	45	45	61303	58267	3
40	0.000	18	18	18	61422	61005	3

## Sheet: Control4
ROI	Area	Mean	Min	Max	X	Y	Slice
1	0.000	143	143	143	43745	50292	4
2	0.000	72	72	72	45412	51066	4
3	0.000	74	74	74	47257	51959	4
4	0.000	91	91	91	49161	52316	4
5	0.000	115	115	115	51601	51899	4
6	0.000	22	22	22	53387	52732	4
7	0.000	19	19	19	53804	54994	4
8	0.000	25	25	25	53923	57018	4
9	0.000	24	24	24	53923	58863	4
10	0.000	25	25	25	54161	61184	4
11	0.000	117	117	117	54756	51185	4
12	0.000	124	124	124	56482	51482	4
13	0.000	75	75	75	58446	51542	4
14	0.000	72	72	72	60291	51661	4
15	0.000	58	58	58	62731	51542	4
16	0.000	13	13	13	64279	52851	4
17	0.000	14	14	14	64814	55411	4
18	0.000	19	19	19	65469	57196	4
19	0.000	29	29	29	65767	58446	4
20	0.000	18	18	18	66421	60231	4
21	0.000	67	67	67	65171	50649	4
22	0.000	87	87	87	67969	50411	4
23	0.000	97	97	97	69338	49697	4
24	0.000	93	93	93	71064	48626	4
25	0.000	182	182	182	72552	47435	4
26	0.000	32	32	32	75051	48149	4
27	0.000	22	22	22	76301	49697	4
28	0.000	20	20	20	77611	51661	4
29	0.000	32	32	32	78622	53566	4
30	0.000	25	25	25	79932	55351	4
31	0.000	79	79	79	76242	46126	4
32	0.000	54	54	54	77730	44876	4
33	0.000	33	33	33	79515	45114	4
34	0.000	80	80	80	80527	43090	4
35	0.000	94	94	94	82074	43031	4
36	0.000	23	23	23	82729	45233	4
37	0.000	28	28	28	83800	46721	4
38	0.000	13	13	13	84872	48328	4
39	0.000	13	13	13	86121	49756	4
40	0.000	15	15	15	87431	51125	4

## Sheet: Control5
ROI	Area	Mean	Min	Max	X	Y	Slice
1	0.000	105	105	105	61065	41603	3
2	0.000	109	109	109	62255	42138	3
3	0.000	83	83	83	64041	42436	3
4	0.000	63	63	63	65886	41960	3
5	0.000	87	87	87	67493	41067	3
6	0.000	27	27	27	61184	40174	3
7	0.000	19	19	19	61660	37912	3
8	0.000	24	24	24	62017	35770	3
9	0.000	42	42	42	62612	32794	3
10	0.000	15	15	15	64041	29461	3
11	0.000	130	130	130	59755	41364	3
12	0.000	136	136	136	58565	41364	3
13	0.000	145	145	145	57137	41364	3
14	0.000	132	132	132	55649	41424	3
15	0.000	85	85	85	54161	41484	3
16	0.000	19	19	19	53268	40472	3
17	0.000	26	26	26	53208	38210	3
18	0.000	30	30	30	53208	35234	3
19	0.000	18	18	18	53208	31723	3
20	0.000	11	11	11	53982	28449	3
21	0.000	58	58	58	26604	42555	3
22	0.000	46	46	46	27795	43686	3
23	0.000	38	38	38	29580	44340	3
24	0.000	78	78	78	31008	44102	3
25	0.000	110	110	110	32675	43448	3
26	0.000	14	14	14	26723	40829	3
27	0.000	6	6	6	27676	38151	3
28	0.000	11	11	11	28687	34580	3
29	0.000	24	24	24	28925	30770	3
30	0.000	10	10	10	29104	26723	3
31	0.000	110	110	110	39758	49637	3
32	0.000	63	63	63	40829	50828	3
33	0.000	103	103	103	42614	51601	3
34	0.000	121	121	121	44578	51066	3
35	0.000	85	85	85	46364	50471	3
36	0.000	12	12	12	38389	51601	3
37	0.000	26	26	26	37615	54042	3
38	0.000	11	11	11	37079	56482	3
39	0.000	11	11	11	37079	59041	3
40	0.000	6	6	6	37615	61600	3

## Sheet: Control6
ROI	Area	Mean	Min	Max	X	Y
1	0.000	42	42	42	9408	37513
2	0.000	25	25	25	11075	37632
3	0.000	31	31	31	13100	37989
4	0.000	9	9	9	15481	38227
5	0.000	29	29	29	18697	37989
6	0.000	14	14	14	22269	36322
7	0.000	3	3	3	22389	32749
8	0.000	12	12	12	22269	29891
9	0.000	2	2	2	22627	26438
10	0.000	13	13	13	22865	22746
11	0.000	14	14	14	25247	38227
12	0.000	20	20	20	27390	38465
13	0.000	25	25	25	30129	38704
14	0.000	12	12	12	32511	39656
15	0.000	30	30	30	34655	40014
16	0.000	0	0	0	35250	37155
17	0.000	0	0	0	35488	33702
18	0.000	6	6	6	35726	30248
19	0.000	2	2	2	35965	27509
20	0.000	2	2	2	37155	23460
21	0.000	24	24	24	39299	39418
22	0.000	10	10	10	42276	39061
23	0.000	21	21	21	45372	39299
24	0.000	22	22	22	47754	40014
25	0.000	9	9	9	49302	40252
26	0.000	6	6	6	47992	37751
27	0.000	8	8	8	47040	34297
28	0.000	2	2	2	45730	31439
29	0.000	9	9	9	45253	28105
30	0.000	13	13	13	45849	23460
31	0.000	65	65	65	7741	50136
32	0.000	21	21	21	9884	49779
33	0.000	50	50	50	12623	49660
34	0.000	44	44	44	16315	50612
35	0.000	24	24	24	18935	51089
36	0.000	17	17	17	7503	53232
37	0.000	1	1	1	8455	56924
38	0.000	8	8	8	9051	61568
39	0.000	6	6	6	9884	65260
40	0.000	13	13	13	11432	69071

## Sheet: Control7
ROI	Area	Mean	Min	Max	X	Y
1	0.000	51	51	51	38465	48350
2	0.000	60	60	60	40847	48112
3	0.000	80	80	80	44182	47516
4	0.000	126	126	126	47873	47278
5	0.000	109	109	109	50374	47040
6	0.000	12	12	12	53113	49660
7	0.000	7	7	7	54423	52041
8	0.000	20	20	20	55852	55257
9	0.000	16	16	16	57162	58591
10	0.000	34	34	34	57996	62402
11	0.000	79	79	79	58353	38704
12	0.000	78	78	78	60378	39061
13	0.000	58	58	58	63236	39180
14	0.000	107	107	107	65260	38465
15	0.000	56	56	56	67523	37632
16	0.000	9	9	9	57162	36084
17	0.000	8	8	8	56924	33464
18	0.000	20	20	20	56329	29891
19	0.000	13	13	13	56329	26676
20	0.000	13	13	13	56686	22031
21	0.000	72	72	72	62402	46206
22	0.000	69	69	69	64307	45611
23	0.000	53	53	53	67285	45372
24	0.000	76	76	76	69190	45015
25	0.000	105	105	105	72286	45611
26	0.000	3	3	3	73596	48588
27	0.000	27	27	27	73358	51684
28	0.000	21	21	21	73477	56090
29	0.000	8	8	8	73596	59425
30	0.000	4	4	4	74549	62878
31	0.000	68	68	68	24175	50017
32	0.000	34	34	34	27033	48826
33	0.000	44	44	44	30129	48350
34	0.000	87	87	87	32987	48588
35	0.000	60	60	60	35488	48945
36	0.000	18	18	18	38465	51446
37	0.000	23	23	23	41562	55257
38	0.000	4	4	4	43110	58353
39	0.000	6	6	6	44063	61807
40	0.000	20	20	20	44896	65260

## Sheet: Crb1
ROI	Area	Mean	Min	Max	X	Y
1	0.000	210	210	210	45889	47556
2	0.000	221	221	221	47873	47318
3	0.000	208	208	208	50017	47079
4	0.000	187	187	187	51684	47159
5	0.000	175	175	175	53748	47397
6	0.000	60	60	60	55574	49064
7	0.000	92	92	92	56527	51684
8	0.000	117	117	117	57559	54066
9	0.000	88	88	88	57718	56368
10	0.000	116	116	116	58432	58671
11	0.000	167	167	167	57480	47000
12	0.000	181	181	181	59068	46524
13	0.000	207	207	207	60894	46206
14	0.000	179	179	179	62481	45809
15	0.000	146	146	146	63910	45492
16	0.000	72	72	72	64784	47635
17	0.000	87	87	87	65895	50176
18	0.000	62	62	62	67245	53351
19	0.000	84	84	84	68436	55654
20	0.000	102	102	102	69468	57083
21	0.000	155	155	155	36123	41284
22	0.000	169	169	169	38029	41363
23	0.000	191	191	191	40093	41681
24	0.000	179	179	179	42633	41046
25	0.000	192	192	192	45492	40887
26	0.000	165	165	165	35250	39537
27	0.000	114	114	114	34774	37394
28	0.000	105	105	105	33662	35091
29	0.000	103	103	103	32789	32233
30	0.000	116	116	116	31598	29534
31	0.000	216	216	216	15958	46365
32	0.000	192	192	192	18022	46365
33	0.000	194	194	194	20166	46762
34	0.000	189	189	189	22071	47238
35	0.000	170	170	170	24294	47476
36	0.000	27	27	27	25564	49620
37	0.000	61	61	61	25644	51605
38	0.000	48	48	48	25723	53510
39	0.000	56	56	56	25485	55892
40	0.000	35	35	35	25405	59068

## Sheet: Crb2
ROI	Area	Mean	Min	Max	X	Y
1	0.000	159	159	159	39537	60854
2	0.000	166	166	166	41800	60258
3	0.000	213	213	213	44539	59544
4	0.000	187	187	187	46563	59663
5	0.000	154	154	154	50136	59425
6	0.000	58	58	58	50970	62045
7	0.000	70	70	70	51327	64784
8	0.000	54	54	54	52399	67761
9	0.000	57	57	57	52994	70500
10	0.000	48	48	48	53232	73596
11	0.000	197	197	197	52041	59068
12	0.000	141	141	141	53709	58949
13	0.000	199	199	199	55138	59068
14	0.000	159	159	159	56567	59306
15	0.000	89	89	89	58115	59544
16	0.000	51	51	51	58472	62640
17	0.000	61	61	61	59068	65856
18	0.000	52	52	52	59187	68118
19	0.000	66	66	66	59663	70262
20	0.000	56	56	56	60616	72048
21	0.000	131	131	131	61449	58710
22	0.000	123	123	123	63355	58829
23	0.000	134	134	134	65737	59306
24	0.000	128	128	128	67166	59782
25	0.000	134	134	134	68952	60258
26	0.000	14	14	14	71095	63831
27	0.000	99	99	99	72167	66094
28	0.000	36	36	36	72405	67761
29	0.000	45	45	45	72882	69666
30	0.000	12	12	12	74311	71572
31	0.000	185	185	185	72763	59425
32	0.000	149	149	149	74549	59663
33	0.000	167	167	167	76693	59544
34	0.000	86	86	86	79193	59187
35	0.000	110	110	110	81694	59306
36	0.000	37	37	37	85148	62521
37	0.000	22	22	22	86696	64903
38	0.000	29	29	29	87053	65975
39	0.000	14	14	14	87887	68356
40	0.000	3	3	3	88601	70857

[truncated: 15 more sheets: Crb3, Crb4, Crb5, Crb6, Crb7, Crb8, Crb9, Sdt1, Sdt2, Sdt3, Sdt4, Sdt5, Sdt6, Sdt7, Sdt8]
