# Supplementary material for: Crumbs organizes the transport machinery by regulating apical levels of PI(4,5)P2 in Drosophila
Source: eLife. 2019 Nov 7;8:e50900. doi: 10.7554/eLife.50900 (PMC6881148; doi:10.7554/eLife.50900)
Supplement: Figure 5—source data 8. [file elife-50900-fig5-data8.xlsx]

## Sheet: Image9
X0	Y0	Y1	Y2	Y3	Y4	Y5	Y6	Y7	Y8	Y9	Y10	Y11	Y12	Y13	Y14	Y15	Y16	Y17	Y18	Y19	Y20	Y21	Y22		AP-Basal	Avg intensity
0	6.8262	10.0981	12.9134	12.2794	17.2651	17.9729	17.6868	15.7015	8.7891	10.7933	6.1702	15.4712	10.7731	6.1673	14.831	7.3063	15.0653	9.0279	9.355	8.1881	8.7693	12.5917	5.2654		0	11.2742
0.1375	5.7174	13.0854	17.5885	9.9722	19.0916	13.1509	15.9686	10.9754	8.7171	8.8527	4.8348	12.5745	11.0643	6.9317	13.8523	9.8946	13.7991	9.854	11.7135	8.5644	9.3437	12.8873	7.1206		0.00781148	11.1111
0.275	5.3608	17.8517	16.7485	15.7031	23.6908	19.3237	14.1169	9.8843	13.3497	10.8646	7.9419	11.7726	13.6905	10.3215	18.0335	7.3598	16.8455	6.7955	13.7837	11.955	11.5706	18.4247	14.1711		0.015623	13.4591
0.4126	5.6201	15.5524	21.7845	15.468	26.6466	25.0333	23.2188	13.5415	13.6362	12.2562	7.0132	15.9667	11.4604	14.1086	19.0527	11.3472	12.6282	11.8091	12.3583	14.9287	12.6379	20.6373	12.113		0.0234401	15.166
0.5501	11.5666	21.61	16.3363	14.1228	26.65	19.5952	15.6183	13.5387	12.9173	9.1152	9.3354	15.1009	7.7342	12.2022	25.2171	14.2907	14.2568	10.3464	13.4682	16.3577	18.2787	20.452	13.3406		0.0312516	15.2805
0.6876	16.2135	14.9248	12.3473	8.9084	25.2926	22.6817	17.8726	14.9357	15.0621	6.8882	10.6186	17.4216	12.9996	7.9694	22.3143	9.8767	23.2878	11.1529	21.7983	19.0588	16.189	16.6123	13.1279		0.0390631	15.5458
0.8251	16.831	17.5006	9.5708	12.6103	21.5137	29.5894	20.2264	15.833	15.7649	8.3124	10.7771	13.3396	13.0582	11.9089	21.1417	13.1894	18.4812	12.4101	20.6335	19.0117	19.894	14.2873	11.8457		0.0468746	15.9883
0.9626	13.6657	20.8488	9.9241	17.5811	14.6945	26.47	20.3416	15.9798	19.1837	12.4377	15.0504	17.8373	15.0916	12.113	24.2665	11.7101	19.3309	18.92	20.6589	25.8236	21.6211	20.2992	12.5525		0.054686	17.6697
1.1001	14.5118	16.3581	11.2149	16.9957	12.7315	18.2671	24.4146	16.5049	16.3887	14.8476	14.5747	18.757	18.0938	21.883	24.231	22.2454	18.5588	16.6529	20.3407	26.8728	17.5802	17.9513	13.4497		0.0624975	17.9751
1.2377	20.1915	20.7951	10.8156	21.3293	13.0838	21.6396	22.2958	13.3086	18.6748	13.3006	14.7973	20.3922	21.7119	18.9419	21.3045	23.5139	15.5783	17.2483	26.7269	22.1703	16.6843	14.6177	14.5645		0.0703147	18.4212
1.3752	16.466	24.6423	8.5865	24.638	10.3395	19.554	19.1153	10.9572	14.2274	16.4088	11.3244	15.9167	19.1864	18.7211	20.7516	13.5362	14.9894	22.8381	22.5011	24.6484	19.4678	11.9727	13.211		0.0781262	17.1304
1.5127	16.494	21.461	10.018	21.4126	12.1813	24.2546	18.431	10.3599	12.3668	15.6722	14.807	15.3175	17.0105	21.1288	24.2514	16.8516	12.49	16.6666	17.654	21.9866	19.6745	13.2511	16.7956		0.0859376	16.9799
1.6502	14.0054	20.5846	9.9001	30.3411	11.0433	25.7017	16.2151	10.8106	15.9869	14.2583	13.1534	23.0812	19.6988	19.1984	23.0559	12.6052	10.8817	24.1119	22.1819	13.743	16.6318	18.5264	15.415		0.0937491	17.4405
1.7877	11.3562	30.5978	7.5972	22.9075	12.3225	20.7523	16.6799	10.1988	15.0514	17.1054	14.1721	18.2498	17.5901	22.9027	27.1504	11.365	8.8778	25.7707	14.5396	19.7125	14.444	14.0175	13.8765		0.101561	16.8364
1.9253	13.8646	32.6816	8.0915	16.1449	15.004	20.4306	13.3661	9.1321	10.8026	18.831	18.0027	21.662	16.559	17.6835	16.7156	14.8184	12.7307	25.0585	17.8529	17.9455	20.8032	15.0826	15.0434		0.109378	16.8829
2.0628	17.9207	24.6541	9.0754	18.3393	9.9987	21.0832	16.3826	13.2055	13.8087	16.2706	16.8062	21.7838	12.9873	22.4097	13.8026	16.6274	15.9703	21.3836	28.5097	14.2664	20.6231	16.7419	9.3316		0.117189	17.0427
2.2003	14.5446	26.1461	10.1919	19.9001	12.8338	22.9291	14.7689	10.4793	16.2414	19.0498	17.4572	22.5642	17.0031	16.7219	18.9869	20.7442	10.0425	25.8827	18.5794	17.6591	12.9594	12.9636	12.9578		0.125001	17.0264
2.3378	12.568	27.8116	8.9102	21.5222	13.7824	21.7395	10.2546	11.599	13.0728	21.4829	19.0131	22.5599	15.2029	14.9775	22.2938	22.203	10.3078	20.6478	14.4648	17.4257	16.2691	11.7517	9.9906		0.132812	16.5153
2.4753	14.0911	21.3038	8.214	21.9491	9.3278	17.4886	12.122	10.9553	17.4266	23.0818	17.0177	18.941	18.8393	14.5838	20.696	17.7817	11.959	19.5268	13.5863	19.5162	18.9514	16.349	9.5211		0.140624	16.2274
2.6128	11.8203	24.3883	9.5366	16.975	7.491	14.5504	9.2109	9.7113	13.1396	16.9054	11.2172	19.9177	14.9642	23.1726	25.3105	15.2796	11.5345	15.7189	10.7481	20.0562	20.2065	11.9271	9.4104		0.148435	14.9214
2.7504	13.693	28.1728	10.9745	15.0052	12.2715	14.6161	14.074	7.8879	8.9995	16.319	14.5422	19.8692	13.2951	16.7323	23.9368	13.7541	12.1497	14.7286	9.8958	15.9763	18.9284	16.4632	10.0081		0.156252	14.8823
2.8879	12.5687	26.1591	12.0559	15.6208	11.0825	12.9708	12.6742	9.2833	11.318	17.3813	11.346	20.7282	15.4112	24.3365	17.0818	15.6485	10.1048	12.2215	9.7442	14.9394	17.2176	17.0491	11.445		0.164064	14.7125
3.0254	10.1441	26.7929	15.0466	16.9558	7.9065	15.173	11.3009	9.4045	13.1698	19.3855	13.5176	18.2157	15.519	25.6086	14.788	16.781	13.5485	9.749	11.3058	17.9031	17.8543	15.9697	13.3556		0.171875	15.1911
3.1629	13.6349	26.9545	12.9636	12.1873	18.5906	15.4274	11.8968	10.759	14.8042	18.5448	16.397	20.3312	11.7845	20.0627	21.9208	14.9567	12.6594	9.0103	10.9332	18.134	14.0404	12.5951	14.7771		0.179687	15.3637
3.3004	9.0345	25.4806	8.0389	14.7883	15.3407	13.5683	11.8347	11.7293	17.6003	12.239	16.891	13.985	12.5431	19.8992	23.0133	16.6598	10.5143	15.8422	9.3896	17.8783	16.5769	12.1001	17.371		0.187498	14.8834
3.438	9.1814	23.7032	7.3991	10.5109	15.3103	8.1059	11.4409	14.2783	17.6447	11.798	17.7796	16.9446	9.8748	15.4084	21.1723	15.0632	12.8101	15.2427	9.0834	19.7708	15.0045	13.605	17.0353		0.195315	14.2681
3.5755	9.2134	21.4994	8.3237	15.3845	12.8454	10.7601	12.8175	16.9718	11.4007	17.4754	15.5502	18.44	11.869	16.2433	18.3181	15.8735	13.365	15.7483	8.797	17.8092	15.0777	18.0116	16.5158		0.203127	14.7092
3.713	9.8804	17.9818	13.3338	17.7238	14.1894	9.0497	14.1899	9.2794	13.2459	14.7109	15.3892	14.4128	18.6451	19.0164	20.3319	13.3957	15.9558	17.3227	7.3837	18.7046	16.3882	17.0473	18.1158		0.210938	15.0302
3.8505	10.0374	19.8885	14.4663	12.4793	12.8787	10.2507	10.2284	9.7895	9.8985	9.9457	12.0933	12.6702	18.385	15.0914	19.0402	10.7222	15.0515	12.0689	6.6152	15.1419	16.6907	16.5022	17.2719		0.21875	13.3569
3.988	9.634	20.3217	12.9227	10.4777	11.4561	7.4888	7.8827	9.3481	13.049	9.6932	19.2687	13.7815	11.6805	10.8848	22.4902	13.5487	16.3133	11.474	9.2947	15.0057	13.951	17.7313	16.0583		0.226561	13.2068
4.1255	12.4732	20.4891	10.6205	9.3884	9.8547	7.2283	10.1409	9.1648	15.6758	11.4021	16.393	9.0975	11.0122	16.3869	17.4077	15.5994	16.847	8.9824	7.2948	12.914	13.8622	14.758	16.5173		0.234373	12.7613
4.2631	11.8811	17.9204	9.9867	11.4938	7.9976	7.3639	14.6155	9.1245	16.8706	10.7219	13.2294	12.0891	14.1348	10.7097	13.4639	12.2788	11.7875	6.4307	7.3524	14.1548	8.7824	16.8432	11.927		0.24219	11.7896
4.4006	8.0294	23.3284	9.2911	11.4484	11.4085	9.83	11.2675	10.7314	20.5541	7.9571	22.3813	13.317	11.8751	11.2876	13.551	8.6515	13.6049	9.9347	9.6982	9.5545	8.1082	20.4619	7.927		0.250001	12.3565
4.5381	9.5087	21.2154	9.2978	12.4648	10.816	12.2582	9.0204	7.6206	11.2301	10.3209	10.6342	10.4287	11.83	12.0691	14.8865	12.575	12.7996	8.5776	12.5966	12.7673	4.8235	19.7485	10.4898		0.257813	11.6513
4.6756	7.6164	15.4917	10.5309	11.1201	6.8725	13.686	9.2022	7.9885	9.8467	13.3828	10.0557	11.4008	13.4619	11.3827	10.5181	11.1494	12.8103	7.4459	9.6802	14.0544	9.5701	18.0423	12.0351		0.265624	11.1889
4.8131	8.9986	16.3589	7.0093	9.5179	8.833	15.8408	10.7759	7.3255	15.1665	9.7793	11.012	9.7085	15.323	14.0417	10.098	9.5714	16.9575	4.6459	10.7158	11.4902	6.5887	12.733	11.8814		0.273436	11.0597
4.9507	9.1862	13.7645	7.7219	10.8204	13.1898	11.4293	10.2842	7.9736	12.8008	11.9803	16.5808	7.5581	16.3871	11.8765	11.8517	9.8511	12.148	3.7576	10.9405	15.2863	7.92	12.7039	8.7444		0.281253	11.0764
5.0882	9.9748	13.9593	7.3234	14.2495	13.2424	8.8234	6.5357	9.005	15.9498	10.1422	13.6894	10.9838	7.5334	7.7683	11.0258	10.3068	12.3759	5.3928	7.8834	11.3069	7.6829	12.4876	8.2938		0.289064	10.2581
5.2257	11.0453	17.4465	6.7357	10.4545	12.7051	10.7734	6.4911	9.2203	15.269	8.2727	15.0622	5.6961	11.0668	6.874	9.6771	11.7698	13.3387	5.4955	6.8449	8.6193	5.3779	10.2594	11.0766		0.296876	9.98139
5.3632	8.3104	19.5719	5.5092	8.1775	9.0331	11.1612	9.1896	9.3071	18.5481	11.1601	13.1287	6.8038	10.1667	6.8874	10.6359	11.1964	14.7887	8.8428	10.6617	11.5943	6.3829	7.7128	8.9404		0.304687	10.3352
5.5007	11.0122	10.8959	6.2732	13.3002	8.854	10.4994	8.5254	10.7337	16.0582	11.1226	11.5377	6.8927	12.5269	7.088	13.007	4.6336	13.8609	7.0305	6.8066	12.9921	6.0154	5.8016	7.1921		0.312499	9.68087
5.6382	8.1552	9.942	4.938	10.5381	12.287	6.8705	7.7284	9.7678	14.1175	7.6361	9.6502	7.6314	8.3795	14.1092	12.0226	6.7909	11.6778	4.1139	7.4784	9.4298	7.087	5.7882	6.638		0.32031	8.81641
5.7758	8.2217	11.5832	9.9758	7.3001	11.2001	10.5054	8.8455	7.4642	16.1481	8.0505	13.7448	11.1544	11.5235	12.2067	15.0943	10.1751	14.2932	5.1028	9.348	7.9349	4.5546	5.7675	8.8051		0.328128	9.9565
5.9133	7.5302	14.6425	9.6745	7.8105	8.919	9.9229	11.2731	8.9112	13.3214	7.938	11.3438	10.2185	13.9376	7.4733	11.7821	9.0503	8.7143	10.3927	5.881	9.2069	6.1249	4.7891	10.8426		0.335939	9.55219
6.0508	8.4541	13.6567	11.1649	5.8081	5.8145	12.6571	9.3921	6.5294	9.5921	7.8315	10.9311	9.4873	16.4051	8.8465	7.1908	8.5941	9.3064	6.2018	5.7272	7.9268	9.3	9.3338	4.2688		0.343751	8.88783
6.1883	9.5751	15.3211	8.3664	9.716	8.4931	12.4102	7.543	7.5835	13.947	8.5707	11.0369	7.8806	11.8592	6.5785	7.7054	6.2697	12.9722	8.3605	10.9538	6.7605	5.6046	6.4363	6.0048		0.351562	9.12822
6.3258	12.8839	14.2162	11.8334	7.7599	7.3156	7.9518	8.0675	7.3032	12.7153	6.7623	8.4079	6.6054	17.5723	11.2885	8.485	5.4139	9.0755	5.9164	3.8309	5.893	5.9654	6.9542	8.9244		0.359373	8.7453
6.4634	11.8102	9.8406	11.8192	4.3444	7.0309	6.7636	5.2341	7.8879	10.3744	6.5906	4.4387	8.0073	13.2012	8.7031	5.1576	8.8094	10.0541	5.5306	5.6053	5.6015	5.8047	6.4618	7.756		0.367191	7.68814
6.6009	11.963	12.2694	8.0113	3.1184	4.0684	11.2942	11.6996	8.8761	14.2129	10.1967	9.4616	10.2192	12.5929	8.1614	4.2137	8.9228	10.5074	6.1446	9.9577	7.8435	8.3139	5.8975	7.1552		0.375002	8.91745
6.7384	12.4722	12.5024	8.1171	3.9041	7.4979	7.7997	7.5287	6.91	10.1653	11.0215	8.0631	12.0041	14.7073	9.0957	6.693	4.4529	9.6964	6.0091	8.7051	6.4432	6.1244	4.9318	9.0538		0.382814	8.43038
6.8759	11.5976	9.9541	8.9336	5.9169	10.496	6.6768	5.3122	5.2262	7.7384	7.8571	11.4335	8.1196	16.167	9.0738	6.7221	4.8869	7.912	8.7191	7.4794	9.2076	7.9647	5.9531	5.8295		0.390625	8.2251
7.0134	9.7319	12.4094	8.837	7.6801	4.7403	10.8464	4.1193	2.3757	7.8728	9.8824	11.1978	8.3918	12.0478	6.0008	7.1866	7.0065	9.4572	11.18	10.3623	6.4484	6.3893	6.4355	5.0034		0.398437	8.06968
7.1509	10.35	12.3845	7.8306	7.6021	2.5082	7.6749	3.6587	2.1956	10.3738	10.5017	14.0602	6.5784	9.8279	4.8331	8.2059	5.7401	6.9015	10.3186	8.3869	4.2154	7.8495	9.0697	4.4059		0.406248	7.62927
7.2885	12.0185	10.9887	7.3124	8.8068	4.4474	13.3484	3.7511	6.2163	16.1246	11.4365	11.6754	5.536	13.3375	5.2731	6.4296	4.6733	9.1516	12.879	5.5012	4.0459	5.7241	4.7246	8.0074		0.414065	8.32215
7.426	6.9722	13.9887	7.087	8.0101	6.5242	9.9396	5.3663	5.7025	14.339	12.9213	11.3357	7.3428	15.7837	6.9047	6.7122	7.7444	9.4852	10.5966	9.3097	5.3289	5.2165	5.0971	5.7127		0.421877	8.58353
7.5635	11.5719	11.5586	10.2151	6.4113	7.4303	5.8501	7.7311	5.0914	10.2544	24.225	12.6916	6.2744	13.2015	6.7346	5.3134	4.2979	5.4726	14.4257	8.9912	3.0961	6.6336	2.4355	9.3847		0.429688	8.66487
7.701	7.2743	6.925	9.8113	5.2019	8.5317	5.8392	4.716	2.65	10.4488	21.7796	9.8895	7.9334	10.2757	7.183	2.9853	4.8208	4.2488	16.9032	10.2696	3.2241	4.8166	2.0495	6.0324		0.4375	7.55694
7.8385	10.1091	14.0187	11.5501	4.2379	5.4764	9.2379	4.0168	4.0564	7.682	30.3326	7.0972	7.4252	6.8768	8.2474	2.3142	5.2672	6.2725	15.058	10.3777	4.4931	5.4415	5.3485	8.2923		0.445311	8.40128
7.9761	9.4654	11.7532	15.6382	4.5934	5.0492	6.8713	3.5651	4.1908	7.8717	37.9585	6.6817	6.3868	8.8153	7.3047	6.0063	2.9256	3.9356	9.7894	7.1848	5.1196	4.3705	6.2082	5.8391		0.453128	8.15323
8.1136	10.7025	8.6414	9.989	2.8152	8.1419	8.4724	6.3422	6.6179	4.4328	39.7427	7.0607	6.2128	7.9882	7.9229	4.5698	2.8913	5.7403	12.9465	6.9857	1.9167	3.0362	5.166	5.1741		0.46094	7.97866
8.2511	11.2529	9.1312	5.9573	6.0807	6.2194	6.5073	1.8716	5.8613	5.1131	29.8078	7.8836	8.5602	6.8728	6.0893	2.8882	5.2328	4.3949	14.551	9.7432	2.1227	3.8308	5.2384	5.9268		0.468751	7.44075
8.3886	7.9707	9.7457	7.9515	3.8186	6.3262	13.0816	3.8215	4.4171	7.2767	19.4237	9.9502	9.7798	5.6343	6.344	5.4053	6.0692	5.1824	9.3324	3.7894	2.9495	3.3981	2.6182	8.3349		0.476563	7.07048
8.5261	10.2328	12.2711	11.0544	5.8522	6.3694	10.6526	4.3796	5.026	5.5377	12.4959	8.5309	8.0201	7.9297	7.3545	6.1551	4.196	2.491	5.2009	2.5582	3.1631	6.6278	4.7744	5.3298		0.484374	6.79144
8.6636	7.6304	12.0126	12.7624	6.5832	3.1947	8.794	6.8337	3.1813	7.1743	11.169	10.4612	5.3182	7.9583	8.8533	2.8726	3.7227	5.6748	7.2287	6.4587	2.557	4.0619	3.7143	7.3388		0.492186	6.76331
8.8012	3.9626	9.0999	7.2807	5.7746	6.8534	6.3059	5.5754	2.9066	5.5642	7.6149	8.0361	7.762	8.9623	7.9806	4.2374	3.4636	5.2939	9.4248	6.5678	4.3033	0.9203	2.3269	4.9972		0.500003	5.87889
8.9387	6.0534	8.2668	6.9422	10.5549	3.7091	5.2316	6.8734	4.1596	3.7311	9.3467	8.3016	10.5437	8.4512	5.8773	5.0822	6.8102	7.2547	10.5952	5.1829	3.7878	2.9541	3.8347	5.8373		0.507814	6.49486
9.0762	6.0951	9.3355	6.8315	10.0119	4.495	3.8964	5.3217	2.9053	5.2001	6.224	9.876	9.3188	8.6186	5.7359	6.58	9.3165	9.2535	8.0416	3.8133	3.7807	3.7974	3.9567	7.0663		0.515626	6.49877
9.2137	6.9288	9.6348	7.946	7.5254	4.6886	1.7768	4.545	3.2884	9.8186	6.5872	4.7354	16.5377	6.3235	5.5706	5.2982	4.9843	4.5944	9.5622	3.8776	6.4068	3.7157	2.8199	9.5906		0.523437	6.38072
9.3512	3.0825	10.75	9.5465	5.1799	2.8115	5.9332	4.8285	3.7235	8.5694	5.1668	7.1788	19.4267	8.9197	7.0181	5.0053	5.7907	4.4479	10.0739	3.8736	5.1834	3.7511	4.1599	8.7789		0.531249	6.66086
9.4888	4.6049	7.1774	6.4019	4.8	4.1677	4.2425	6.1175	5.3221	9.3306	3.5026	5.8009	17.2838	8.0453	7.1565	5.1028	5.4158	7.8242	12.9019	4.8227	5.2192	2.8984	5.8745	11.625		0.539066	6.76688
9.6263	6.1418	5.0554	5.5313	3.6133	4.3387	5.603	3.9925	3.5763	8.7971	3.578	7.1921	15.8537	8.3496	6.3213	7.0704	6.1534	5.4464	9.4916	4.5594	7.4312	3.6514	3.1961	6.3555		0.546877	6.14346
9.7638	8.2796	8.1681	5.6561	4.2265	4.3157	8.24	3.4069	3.6437	4.0549	3.5184	6.9472	14.8897	6.2409	3.154	5.6399	5.5641	5.4974	8.3706	4.5384	12.8671	2.57	3.0954	6.87		0.554689	6.07629
9.9013	4.8837	6.6099	5.425	5.6191	1.9124	8.3604	6.3282	4.9369	6.3363	3.2818	7.0495	19.7415	13.2633	1.9689	3.2772	6.7077	4.5592	12.2794	3.3772	11.2098	2.4064	6.9497	6.4983		0.5625	6.65138
10.0388	2.9793	7.4629	9.6982	6.132	5.6186	5.7966	3.7878	2.2245	5.6727	5.3044	4.1678	20.2891	13.6091	3.6656	4.9723	9.7045	4.3214	8.6802	3.7567	8.0756	4.56	4.8178	7.5899		0.570312	6.64726
10.1763	4.6925	8.899	6.6791	1.4608	4.5363	6.7253	3.9861	3.6243	7.1962	4.5552	5.6225	13.6575	9.9057	5.4346	5.4222	6.5435	6.3131	5.4775	4.0517	13.5718	4.9802	4.1018	4.3832		0.578123	6.16609
10.3139	3.7749	7.7867	3.502	3.0808	4.4939	4.2052	7.9181	5.1132	4.4739	6.0062	3.474	13.4704	13.0156	6.7178	8.5186	8.0205	4.945	6.1727	4.0218	9.0324	4.3683	5.0876	5.9327		0.58594	6.22314
10.4514	6.1606	7.3007	5.6179	3.0357	4.1034	5.6127	6.7936	3.3521	4.9892	3.1369	3.3985	13.0283	9.3714	7.1026	6.2986	9.4827	4.9401	6.2788	2.1124	11.7164	4.8134	3.8033	6.5536		0.593752	6.0436
10.5889	6.4674	5.1029	6.3577	4.6852	5.4645	4.5373	6.8918	1.8074	7.3518	4.6917	5.6534	8.1655	4.9954	6.7244	5.8136	13.6041	2.3211	6.9298	2.3672	15.4774	5.349	4.1299	5.394		0.601563	6.09924
10.7264	3.1076	3.5467	8.1533	3.8863	2.446	5.5086	7.1827	3.2872	6.1718	5.3086	5.1807	10.9274	7.7693	7.16	7.6165	12.6426	1.8857	7.3845	3.5582	9.8681	5.3886	4.5706	6.693		0.609375	6.05409
10.8639	2.6464	6.4092	6.7023	7.1727	2.1252	6.037	5.8412	3.4945	7.8582	3.3552	4.9061	15.0634	9.8075	8.372	6.4413	19.0685	3.7994	4.7309	6.0317	5.8616	2.7046	7.8269	5.4017		0.617186	6.5938
11.0015	4.0933	7.5886	7.26	4.3057	6.2834	5.4516	5.4543	4.6167	10.1638	2.3993	4.7286	12.1452	6.408	6.8541	3.7251	15.5515	7.6179	2.7616	4.2677	6.687	3.0077	5.6434	7.5791		0.625004	6.28668
11.139	6.0424	4.8031	6.8005	3.0149	4.79	7.0609	6.5603	4.7455	9.1643	5.2365	11.8358	13.7971	8.2597	5.1343	5.9994	22.5467	4.9167	3.7977	4.7487	5.3313	6.9885	5.8894	6.7574		0.632815	7.14005
11.2765	5.1112	7.0211	7.1727	7.3248	2.2005	5.4727	4.6719	4.9639	9.2773	4.3676	6.4024	11.3572	8.1411	2.5528	5.2521	18.7601	2.5585	3.1447	2.9946	5.9478	5.2272	6.3746	10.1432		0.640627	6.36696
11.414	3.911	5.3697	6.2833	4.48	3.6559	4.4961	3.4741	1.493	7.1155	3.4628	9.5586	9.5139	6.5186	4.0658	3.4991	22.5724	2.9857	2.1111	5.7306	5.6897	2.9448	7.1875	7.4064		0.648438	5.80546
11.5515	2.1719	5.6948	5.0101	4.3954	4.6819	4.434	6.4886	1.4191	4.7338	3.383	9.3923	9.1148	4.6895	3.0472	2.5099	16.3247	4.1115	2.5949	5.8481	5.0141	3.6125	4.4971	10.7712		0.656249	5.38871
11.689	2.938	7.7319	6.9435	3.4117	1.4441	6.214	3.9502	2.3743	7.5638	3.3669	7.0796	7.9477	8.5787	4.7871	3.5728	14.1521	4.6987	4.171	3.9577	7.3283	3.4674	6.4766	7.0631		0.664061	5.61823
11.8266	3.539	7.1945	4.005	2.8036	2.8961	4.8814	6.9373	4.1708	6.0976	3.6967	7.4925	7.9202	8.1414	2.9349	6.5617	12.6209	6.7818	3.0718	3.715	3.8483	1.8012	6.1958	6.2247		0.671878	5.37097
11.9641	4.1728	5.8412	3.5281	5.5041	3.6103	6.1063	5.1749	3.1771	5.0877	4.8927	7.045	6.3272	9.3651	4.4641	4.8673	10.989	5.5392	10.2025	2.8058	5.1834	5.4227	4.6175	6.3911		0.67969	5.66587
12.1016	3.9236	3.5481	7.3622	1.953	3.117	3.8606	7.2763	2.6808	7.0163	2.2066	7.9106	6.711	5.5702	5.226	3.1676	9.7892	4.2587	6.8197	4.4832	7.4291	6.9637	5.7761	7.1539		0.687501	5.40015
12.2391	2.2081	6.991	7.2359	4.4298	2.1086	5.1814	6.111	3.0393	6.7211	4.1988	5.6833	4.9076	7.8179	6.0223	5.3663	8.9219	4.725	4.7608	5.2289	6.1692	6.3865	3.1868	9.4376		0.695313	5.51474
12.3766	3.5123	8.7525	5.6883	3.5939	3.1061	7.7002	4.6867	1.2734	7.5273	2.9295	5.0994	8.4849	10.1452	3.8639	4.0851	4.3538	4.3914	2.6006	5.9657	4.7704	3.7812	3.6971	11.7788		0.703124	5.29512
12.5142	4.5057	5.7982	4.5882	2.1854	2.7745	4.1058	4.3662	3.5103	5.5328	2.877	2.9288	2.9414	14.1013	4.5403	1.9564	6.1339	6.9822	3.6921	5.5508	4.6635	2.4976	4.673	9.586		0.710941	4.80397
12.6517	2.6761	3.6922	4.0631	3.1373	4.1323	2.1408	5.8451	6.0664	5.1971	1.8202	3.4086	5.9825	11.6639	5.7646	3.1455	4.3552	4.9275	8.0865	2.0679	6.5394	4.8881	4.6955	8.6988		0.718753	4.91281
12.7892	2.8831	5.4484	3.3199	3.3365	3.7703	6.3465	5.3559	5.4652	4.8503	1.9789	4.1863	5.2282	9.0595	7.2606	3.1204	6.5616	6.0171	5.3947	3.0738	3.1624	7.3253	5.21	11.0114		0.726564	5.18984
12.9267	2.2711	6.5619	5.9096	4.7186	4.7018	4.2237	7.377	3.5785	5.3649	3.3175	4.3753	3.1684	10.9021	8.0851	5.2298	7.4674	4.2514	5.2758	4.1418	3.0372	6.0052	4.8973	8.7444		0.734376	5.37417
13.0642	1.078	5.1351	5.2383	3.233	3.8985	3.7441	7.3262	2.5691	3.7071	2.5868	4.2058	3.5043	10.7853	5.5199	2.917	4.5364	3.4818	4.6062	2.3033	4.2572	5.5072	2.2557	10.8619		0.742187	4.48949
13.2017	1.0051	3.6344	5.5178	6.5842	2.0411	4.9298	7.784	7.493	3.6557	3.3418	3.923	3.6461	6.5428	5.8619	2.8823	5.8626	3.0586	5.5386	2.7183	5.7085	5.8434	5.2303	9.9205		0.749999	4.90103
13.3393	2.2299	4.6251	4.8208	4.3489	4.0403	3.5073	10.0489	7.3613	6.1161	1.3129	6.4991	4.1121	7.8467	2.782	3.3669	6.1529	4.8818	7.2556	4.1943	4.3841	6.0381	4.5765	8.2323		0.757816	5.16234
13.4768	4.4233	4.612	6.089	3.2878	5.2841	4.7733	8.2936	5.9222	5.8647	1.7158	3.3125	5.5279	8.6463	4.3575	3.9688	5.3202	5.093	4.699	4.5067	4.2856	7.9281	3.0785	13.8338		0.765627	5.42712
13.6143	3.6934	5.0529	5.7955	2.4229	6.35	1.5386	8.6757	4.3019	6.1117	2.5663	6.4861	2.8442	4.1033	5.1897	5.3356	2.6267	2.9662	4.4594	5.107	6.6634	6.431	1.6515	10.5923		0.773439	4.82458
13.7518	5.701	4.4221	7.1042	3.8919	5.5149	6.4778	10.5858	5.9262	3.4814	4.5393	3.5453	3.4542	2.2549	4.8073	5.5598	2.3835	6.14	4.8174	4.3959	1.8368	5.6137	5.5374	7.2403		0.78125	5.01005
13.8893	4.3483	4.0409	7.1601	2.5765	2.9815	4.3682	11.4139	5.6523	2.2776	2.0081	3.6063	3.895	5.542	1.8506	4.9316	6.297	4.8736	3.5905	7.415	5.6542	2.5858	3.638	6.4363		0.789062	4.6584
14.0269	1.5626	6.8756	5.0172	4.9695	6.053	1.7123	5.9471	4.2157	3.6924	1.6498	5.2862	9.7287	3.5789	4.0878	3.7247	4.9707	3.8402	3.9327	6.7447	4.3121	6.2723	5.6762	5.0566		0.796879	4.73509
14.1644	2.3769	6.605	2.6057	7.0524	4.2684	5.168	9.8851	4.8941	6.874	1.6423	6.3847	5.7165	6.1059	5.8082	3.1831	3.3122	1.5319	4.1703	9.1604	2.9262	3.8233	4.6615	7.7913		0.80469	5.04119
14.3019	3.1395	4.8744	4.2192	5.3579	7.5516	5.1624	7.9184	4.6811	7.0733	2.8384	9.3306	4.778	6.9822	3.9934	1.9641	5.6882	2.8208	5.4753	8.2853	2.8781	3.5971	3.9973	4.8913		0.812502	5.1086
14.4394	2.8879	2.9536	5.4981	1.5906	10.081	4.7609	8.0175	1.3041	5.6326	5.1015	3.9644	5.3634	4.9999	5.6502	3.1566	3.9192	4.993	5.2622	7.2976	3.1659	4.6561	5.3703	3.4654		0.820313	4.74313
14.5769	4.7858	4.0302	3.915	4.6137	11.632	2.9861	8.9171	3.1727	6.3457	6.2814	4.1205	5.1446	3.9318	8.1585	3.0767	5.5476	4.4468	3.1916	4.0687	4.2183	5.9862	4.806	4.546		0.828125	5.12709
14.7144	3.4235	5.4038	2.9633	4.5399	15.417	5.0132	7.2494	6.3959	6.1333	2.4907	5.1549	6.9088	4.9409	8.5642	3.0319	2.4781	6.71	3.4653	5.2194	5.6669	4.0031	6.6906	5.9202		0.835936	5.55584
14.852	6.4432	8.277	7.2293	3.3525	19.892	5.4032	7.5279	6.5108	6.2767	2.5971	5.8071	3.743	3.8784	5.1516	6.2733	3.5366	5.0746	5.6016	4.0428	3.7669	4.1817	5.8865	5.504		0.843753	5.91121
14.9895	6.0934	9.4187	6.8702	5.1947	20.0363	3.3448	5.0412	3.7207	5.2936	2.8079	5.4982	2.3858	1.905	3.0165	4.251	7.3683	6.5744	8.4438	3.0433	1.7062	6.2192	6.1393	9.5872		0.851565	5.82433
15.127	3.2535	5.8926	3.8046	7.0688	22.9233	5.7608	7.9203	3.19	3.984	2.0106	2.2944	2.6986	4.2433	4.2501	4.5292	6.054	4.14	6.687	5.4817	1.6851	8.0493	3.9875	5.8068		0.859376	5.46589
15.2645	5.9603	5.8097	4.1394	5.6357	24.5855	3.2026	12.3366	2.6697	6.3952	1.4537	6.5628	3.961	6.2565	2.3627	3.5489	8.4599	5.1198	5.4579	4.486	6.8249	7.2733	7.4359	7.5736		0.867188	6.41355
15.402	6.3941	3.7015	4.0523	5.8846	24.5216	3.133	11.5081	3.4521	8.4799	3.255	5.4449	4.0706	4.8361	3.4175	3.52	4.2531	3.9443	5.9498	7.6568	5.3818	4.6691	4.1058	4.6156		0.874999	5.92381
15.5396	6.2117	4.8958	3.363	3.8477	30.5367	2.1046	10.2361	0.7873	6.0948	2.4843	4.1953	4.7831	5.1129	5.3413	3.817	3.948	5.3759	6.6916	9.2059	4.2027	5.9086	6.2187	5.0515		0.882816	6.10498
15.6771	3.3209	7.0453	3.2647	2.716	25.1063	2.9866	5.4936	1.8298	8.2962	2.8542	3.5235	3.7763	4.218	2.5839	3.7392	1.7379	3.2405	7.057	4.5287	5.0393	6.8222	5.6018	8.8112		0.890628	5.37361
15.8146	3.4026	6.6804	4.9788	4.5829	25.1859	4.1337	2.7331	3.1676	9.0366	1.9656	5.268	4.8162	3.11	6.3361	3.7705	1.8806	1.9981	10.6598	5.89	3.9673	7.3856	5.722	5.1756		0.898439	5.73248
15.9521	2.6839	5.29	4.5284	5.2463	19.8783	6.7976	4.4307	3.4092	11.4317	4.2921	6.5992	4.2297	4.7759	9.0608	3.3885	3.0303	4.7568	8.6245	6.7533	3.8675	5.7811	5.6366	3.4459		0.906251	5.99732
16.0896	4.7533	4.7207	4.1422	4.1753	16.5489	2.9679	2.7882	4.2669	9.9501	4.0888	5.1373	5.7973	6.0076	7.7107	3.7892	2.1899	2.6053	4.6444	4.6493	1.7785	7.0004	4.7602	5.6552		0.914062	5.22294
16.2271	7.9323	4.7869	5.3018	4.154	14.557	3.955	3.47	5.1291	8.029	5.0045	5.7495	5.4025	3.9226	5.1543	7.1725	3.9383	3.1629	5.375	4.5263	4.6941	5.7827	4.4417	6.0847		0.921874	5.55333
16.3647	7.1271	5.6348	3.6425	6.9289	9.946	2.9486	3.7362	4.5048	9.4669	6.3479	7.2844	3.7122	4.4617	8.383	5.3504	7.8368	4.8537	5.2725	6.4623	3.5624	5.4514	5.8964	3.9744		0.929691	5.77327
16.5022	6.8891	4.0867	5.3561	7.5369	5.4479	5.0084	3.284	3.0044	13.0586	5.1439	9.161	3.5683	5.5986	8.9478	4.4609	5.4075	3.0274	6.3658	6.873	3.0459	7.0406	3.593	2.801		0.937502	5.59595
16.6397	5.5094	5.2649	4.6145	5.4576	5.1719	5.289	2.8738	6.0094	14.3077	4.6243	5.6503	4.6638	3.4187	3.824	4.5938	1.8778	4.6524	6.5855	4.5207	4.8126	4.6661	3.8629	6.2978		0.945314	5.1543
16.7772	6.6478	4.1478	4.9987	3.7109	7.5395	2.9135	5.0615	2.9089	14.8283	3.5207	3.6249	3.7959	3.9003	3.1811	4.8225	3.7501	4.918	4.5082	5.5514	4.9901	3.7766	4.7769	7.3078		0.953125	5.00789
16.9147	6.6611	4.2411	6.5486	4.75	8.708	1.9534	3.9181	3.9238	13.5682	4.2792	2.8961	3.3306	4.9692	2.1951	6.4209	5.9995	5.0378	5.3687	2.9164	2.4474	7.0683	5.4403	5.8821		0.960937	5.15321
17.0522	6.4186	4.5066	4.8321	2.7922	7.5053	3.7255	3.5034	4.8624	13.7583	3.0942	6.6097	3.2404	5.0872	2.5192	5.6049	2.9046	2.6746	6.4099	5.4808	1.7594	3.6104	4.1547	5.1605		0.968748	4.79195
17.1898	5.0306	3.2381	6.5377	3.6265	9.6623	2.8649	3.7882	3.4721	8.3626	4.4254	5.8425	3.4661	3.6799	5.5972	4.8989	3.3467	1.8371	6.1943	5.4007	1.7223	1.845	3.5458	3.7865		0.976566	4.44223
17.3273	6.7433	5.3765	6.9014	6.2023	7.4088	4.3628	4.9982	4.0146	8.3405	2.0584	2.7833	4.9147	3.3315	5.1554	5.8272	3.3104	4.7916	4.5167	3.5484	2.419	3.7972	4.2438	4.0056		0.984377	4.74137
17.4648	6.7106	3.5472	6.2323	6.5735	5.5256	3.3859	5.2565	2.8772	6.6307	5.8465	4.262	5.0505	1.9948	6.3086	4.6311	4.803	6.7198	5.8964	3.4471	3.39	5.8805	5.3508	2.9729		0.992189	4.9258
17.6023	8.6479	8.883	6.5305	4.4109	2.5966	3.982	3.6492	5.2165	8.0504	7.9387	3.2521	4.9122	2.8547	10.5015	4.7239	6.531	6.5859	5.5549	3.1377	4.2433	3.992	3.5744	3.6852		1	5.36759

## Sheet: Image8
X0	Y0	Y1	Y2	Y3	Y4	Y5	Y6	Y7	Y8	Y9	Y10	Y11	Y12	Y13	Y14	Y15	Y16	Y17	Y18	Y19	Y20	Y21	Y22		AP-Basal	Avg intensity
0	55.621	18.0111	27.0231	13.3457	25.0046	13.922	12.3852	16.3678	21.5034	14.579	9.6987	25.03	22.7453	12.4108	22.1227	19.5244	36.9776	23.3257	26.5254	25.792	38.6729	16.5946	22.8187		0	22.6088
0.1375	51.013	21.8365	32.2092	30.2747	22.3166	16.6486	18.1427	12.4593	23.0834	19.537	15.4527	17.374	22.1517	16.2644	20.8359	25.8837	33.0152	21.8794	21.0847	34.832	41.7767	17.614	25.246		0.00840223	24.3883
0.275	59.763	29.2064	31.779	28.5424	18.437	20.5458	20.0019	19.7883	19.6878	29.491	16.6486	31.334	19.7064	17.7889	18.174	38.7039	27.0375	23.4123	25.825	34.926	40.6393	30.5868	28.4683		0.0168045	27.4128
0.4126	59.137	30.8304	33.5716	29.2792	21.1117	29.327	24.351	17.518	28.126	35.586	18.6569	39.611	29.7324	27.586	19.4211	40.084	28.4799	28.6696	19.8567	37.613	47.821	26.7267	27.1456		0.0252128	30.4453
0.5501	72.616	24.2534	32.9126	27.256	30.9717	23.1481	26.7971	21.6075	36.9231	31.938	19.5087	39.396	15.7303	34.8241	27.1882	49.2055	27.935	28.2551	34.6881	37.674	58.8438	40.9284	26.3773		0.033615	33.4338
0.6876	75.477	39.3888	47.3099	38.482	36.7373	20.9403	29.2752	25.4979	24.6314	43.016	15.8519	58.57	23.8336	27.9333	35.2566	60.2637	28.7208	26.7334	35.6771	43.905	64.6884	41.528	22.0249		0.0420173	37.641
0.8251	101.368	39.571	53.8072	50.5606	34.125	34.4371	31.185	28.2318	27.8826	58.108	22.8062	59.452	27.4941	31.507	54.2704	63.5623	25.9881	25.2557	35.6728	43.778	66.9227	55.6335	22.1588		0.0504195	43.2077
0.9626	109.724	54.4099	57.7826	38.4998	36.6572	30.1367	35.7371	33.5194	37.5994	68.965	32.7671	71.64	30.2288	25.7057	65.6133	61.0718	46.1587	35.5883	35.3485	42.426	57.5961	62.693	33.2972		0.0588217	47.9637
1.1001	133.838	57.6389	45.8134	42.205	40.5819	36.763	40.4449	38.0869	47.9448	77.309	38.2745	80.049	39.8398	38.8833	53.1563	62.6865	47.4516	42.7697	31.1031	39.957	55.5654	53.014	29.5902		0.067224	50.9985
1.2377	142.416	54.4195	38.775	41.0837	36.2203	30.1488	41.7444	51.9136	52.8743	87.559	33.4226	98.359	36.206	47.0875	55.8169	62.8802	48.1522	33.9975	21.534	46.119	53.269	57.9169	36.984		0.0756323	52.5608
1.3752	131.541	60.1913	47.2726	36.3409	35.983	31.1692	43.9341	54.5957	51.3894	93.691	34.5823	97.135	49.0197	46.064	61.1785	60.5534	56.1956	33.3269	24.6054	52.404	40.6522	50.3917	38.7904		0.0840345	53.5221
1.5127	123.608	55.9208	43.1504	51.5659	33.0102	28.4986	50.1565	58.8697	67.3873	104.007	38.769	111.236	42.825	55.3729	64.5768	51.1529	59.1306	36.5115	26.7402	53.029	45.8873	45.2409	42.0556		0.0924368	56.0305
1.6502	94.858	51.5373	74.9461	37.9773	27.8618	31.9458	59.6066	78.0355	54.0022	86.431	40.6793	111.882	60.1489	65.8947	54.1884	50.201	75.3541	31.8346	16.1941	51.389	52.4782	45.7635	37.6011		0.100839	56.1222
1.7877	100.436	48.3412	75.8447	45.5288	27.6449	23.9401	68.5504	61.6451	62.289	96.355	29.7407	114.994	50.0081	76.7461	57.816	55.5008	89.9725	32.7087	18.4955	58.168	57.9457	40.4109	43.1048		0.109241	58.0951
1.9253	92.464	43.4258	75.7878	50.6539	32.2688	30.2373	69.5714	76.7709	45.242	66.935	25.435	109.801	41.1116	69.0723	53.6413	51.3781	99.5169	39.4809	19.5966	76.539	49.9955	44.3568	44.8318		0.11765	56.8745
2.0628	62.759	42.8604	79.6722	47.7646	31.0658	30.6341	73.6416	74.7947	64.5739	67.687	29.7313	108.176	40.8522	50.1413	54.6576	68.4521	86.6679	32.0482	36.8426	87.949	51.3744	46.0337	37.4233		0.126052	56.774
2.2003	54.274	41.7759	73.1188	53.9426	30.8145	23.766	91.2513	86.5223	57.2876	65.917	29.9396	111.95	43.5775	52.5035	65.4758	68.707	80.5672	30.0543	20.0259	101.409	64.1803	49.4837	36.2116		0.134454	57.9459
2.3378	51.877	40.55	73.4986	59.7401	34.2812	22.6384	88.9885	80.1852	58.7714	48.231	20.0142	89.952	35.6289	51.15	60.6387	74.8797	73.9928	25.1382	27.2236	104.339	59.4559	47.2816	30.8455		0.142856	54.7522
2.4753	57.17	39.368	59.9751	52.7978	35.2325	26.9728	76.8735	62.8547	61.7925	38.756	15.8	89.034	28.0669	65.9892	51.2376	76.1266	64.2901	32.945	30.4836	110.389	69.8593	40.0694	31.3466		0.151259	52.9317
2.6128	51.556	39.4185	70.5309	51.2059	30.4878	22.8198	71.8183	49.8376	77.4425	41.419	19.4704	75.649	17.8446	63.6909	63.8803	77.1006	55.1318	28.5019	33.4427	99.371	79.5249	41.2164	32.7748		0.159661	51.9189
2.7504	39.295	24.8544	61.5418	37.098	30.4265	22.7926	67.2159	49.144	73.4751	35.585	19.8654	66.87	21.5857	43.9323	50.5706	68.5256	44.2237	28.8098	51.7404	92.89	91.2911	33.9394	30.8535		0.168069	47.2403
2.8879	42.36	21.0771	68.7665	33.2343	31.9446	24.8352	70.7695	39.5824	59.5674	30.254	19.9734	48.153	21.2214	53.082	48.6329	65.8177	35.2912	33.9439	51.3748	101.707	88.36	38.1921	37.0979		0.176471	46.3147
3.0254	42.098	21.6654	65.5412	35.0294	22.2166	28.2259	72.369	34.1826	44.4825	16.836	14.4402	39.941	23.9892	46.8536	42.1203	67.1087	27.4031	33.4254	51.7479	89.928	90.6542	34.035	33.0988		0.184874	42.4953
3.1629	39.019	18.3832	57.2452	28.8968	38.3004	26.4792	78.113	25.0455	39.1281	19.705	20.9064	38.01	22.0757	55.7682	40.7538	52.4041	35.9161	28.189	50.935	77.815	80.6981	24.8674	29.5198		0.193276	40.3554
3.3004	32.085	18.3429	51.4289	31.074	45.7795	32.9688	65.3246	30.3849	40.7267	18.594	23.438	35.692	20.3676	38.661	41.8556	51.3496	36.0931	30.105	55.3225	75.496	66.521	26.3833	31.7111		0.201678	39.1176
3.438	37.264	16.4797	46.9406	23.4648	38.2088	47.2808	61.4619	30.1538	41.585	11.603	18.5331	32.779	24.0243	33.23	41.884	49.4288	30.0323	33.7416	55.5732	59.469	58.1363	22.4408	23.3892		0.210086	36.3958
3.5755	26.544	21.0187	43.3765	20.8128	41.3683	37.5595	59.2808	34.3666	44.1556	10.933	20.5263	30.954	13.154	25.988	34.7141	40.7545	29.2971	38.4146	47.8942	47.822	41.1636	21.0957	22.151		0.218489	32.7541
3.713	28.408	17.4323	40.019	15.4204	46.1147	38.6622	51.1961	37.5632	43.7967	12.221	20.8687	30.577	12.9429	33.3877	24.76	43.7031	24.4306	38.418	45.554	37.645	44.5976	21.4629	23.172		0.226891	31.8414
3.8505	32.02	25.1761	36.0712	16.5338	45.3185	46.725	59.3193	29.4469	37.0542	12.705	19.5552	36.123	15.061	19.5409	16.1823	37.5551	18.8968	33.6648	37.1126	20.615	42.8676	19.5253	26.9401		0.235293	29.7396
3.988	50.089	27.7542	36.2314	19.4521	49.012	34.9227	43.9232	30.1727	24.0747	13.722	17.3618	26.236	14.0614	32.1259	15.0146	42.4729	20.2088	30.2713	44.5582	32.408	38.7229	16.5201	16.2604		0.243695	29.3729
4.1255	42.462	36.9777	30.4706	31.8738	53.9695	36.8494	39.8982	25.6035	22.4427	7.136	16.4425	14.187	11.8409	26.5565	14.9736	30.0224	29.0967	36.319	40.3304	26.874	30.1079	16.8681	16.6494		0.252098	27.737
4.2631	34.481	41.4987	22.6919	34.3716	55.5245	36.5496	39.6503	19.9911	21.939	7.472	13.1264	20.777	19.5515	20.3326	18.2054	31.6971	15.7155	26.6239	32.735	16.571	37.0376	21.7495	16.3671		0.260506	26.2895
4.4006	46.177	37.2048	17.8857	20.0768	67.3573	38.3485	43.734	14.9227	18.4396	10.011	15.0267	19.758	16.417	16.9137	27.0044	32.7857	15.739	36.3899	35.9464	16.661	22.5326	23.0631	14.0441		0.268908	26.3669
4.5381	24.318	37.9106	17.489	25.5535	45.5232	51.7995	40.6051	9.8317	11.6455	16.423	11.8655	18.079	14.8946	15.4403	18.7453	38.7008	21.866	21.7181	15.823	27.652	22.1764	16.3454	14.994		0.27731	23.4522
4.6756	26.362	43.1426	20.1889	20.6416	44.9067	46.1751	42.7661	14.7669	15.7395	10.524	15.7483	16.635	18.3544	15.2244	16.048	33.1089	14.791	15.0682	17.2425	16.009	15.8153	21.7075	11.1564		0.285713	22.2662
4.8131	22.918	45.6608	16.5161	16.4599	51.8913	50.0779	44.9348	15.0374	9.9137	9.846	9.239	13.446	16.2976	9.8224	11.4218	31.0744	11.352	19.5334	25.7859	19.89	18.4807	15.9718	11.8541		0.294115	21.6272
4.9507	19.638	34.7449	15.3912	19.3175	49.678	33.7624	35.0646	10.8389	8.849	10.645	12.6497	16.644	17.59	11.8603	10.934	24.9225	9.4884	18.5213	27.0629	18.629	20.0214	16.4908	16.7632		0.302523	19.9786
5.0882	22.64	35.1698	16.6746	15.5359	42.8248	39.7262	40.368	12.7809	14.8707	13.374	12.0793	13.27	15.3961	7.7627	7.7145	26.6245	12.3369	25.6722	26.0163	15.164	18.1142	8.0085	13.4971		0.310925	19.8096
5.2257	23.18	27.556	21.2831	21.5003	38.6109	39.693	35.4129	14.7091	12.7294	10.569	8.7381	11.444	16.827	12.3056	11.3813	31.5774	11.0119	17.8602	24.9651	11.197	17.0178	13.1023	17.4172		0.319328	19.5691
5.3632	20.661	23.9713	18.892	16.1603	32.3396	39.0141	30.4279	13.2059	17.9706	9.441	10.7182	10.137	15.0907	14.456	12.2357	21.488	7.6401	20.6427	23.9049	11.005	18.7309	11.347	12.8408		0.32773	17.927
5.5007	26.07	21.9369	16.3177	19.3935	25.3904	29.0574	22.8554	14.8621	10.1214	3.923	11.5089	6.956	10.9483	11.8631	15.1347	21.9456	11.4975	15.7934	20.4479	17.821	15.5498	13.9765	9.7189		0.336132	16.2213
5.6382	35.155	29.9772	18.4274	19.7468	22.8654	26.7809	17.751	8.6385	7.8139	6.871	15.1345	7.014	16.1899	15.9804	12.7026	16.5416	18.4683	20.4053	24.4302	11.022	14.1874	7.0015	18.7966		0.344534	17.0392
5.7758	50.353	24.8787	20.4261	19.2655	23.1624	21.669	19.5877	8.7997	10.9094	10.06	8.1927	14.435	11.3009	12.6931	18.4796	17.6805	22.1211	26.3689	17.7769	11.864	15.5877	7.7515	12.8528		0.352943	17.6616
5.9133	49.965	15.5962	21.938	9.4787	21.5125	20.6771	21.224	4.1861	11.4244	9.347	8.7552	16.224	9.8355	7.4015	14.0059	7.8678	12.4704	20.9856	15.5302	11.235	14.9676	8.0671	14.4142		0.361345	15.0917
6.0508	51.717	25.7088	10.6705	8.1663	19.2402	19.6055	14.067	7.1186	7.25	6.729	11.4735	20.413	7.9193	7.299	16.6246	13.9433	6.8491	18.9632	14.4712	9.364	14.0325	17.7064	8.0904		0.369747	14.6705
6.1883	46.77	19.9878	15.1276	9.551	13.206	19.6048	15.2436	13.4871	7.2286	7.204	7.1064	13.86	8.777	15.0626	11.7036	13.0298	7.2689	24.3674	14.5532	14.074	14.4537	13.8889	8.1921		0.378149	14.5108
6.3258	54.153	20.5671	11.2452	10.8914	13.7365	16.6509	20.1302	11.9325	9.006	6.181	16.9974	18.458	11.6993	14.6673	13.0123	12.1997	8.5638	12.5754	11.2998	12.905	13.6193	15.6025	9.0346		0.386552	15.0056
6.4634	58.894	18.7388	14.5236	13.7701	10.9894	18.4421	18.3131	10.542	6.5069	7.081	14.9416	17.804	15.5357	11.9756	8.6577	21.2298	9.2115	18.8621	15.3033	13.799	14.584	11.3608	16.6137		0.39496	15.9861
6.6009	46.443	23.8817	13.0888	13.0573	17.1122	22.9193	12.7232	12.7827	9.2666	8.581	12.3503	16.208	8.9842	11.5001	8.0488	17.9801	7.2858	12.15	22.3138	17.42	11.5996	7.6619	11.2722		0.403362	14.9839
6.7384	51.986	22.9893	8.825	15.2663	15.3553	13.6468	16.483	10.7187	9.8844	9.735	21.6163	18.029	8.5769	14.9955	4.5386	11.4921	6.6867	16.3742	18.4049	12.936	9.349	9.1484	6.621		0.411764	14.5069
6.8759	39.619	14.6567	11.2783	11.6084	20.2653	16.7269	18.5723	10.3173	8.1988	5.557	18.8904	18.862	12.7833	21.7343	7.2488	14.5875	8.3433	14.8368	16.5587	10.213	10.2099	6.653	10.4535		0.420167	14.2685
7.0134	37.701	15.7547	7.4603	14.0968	15.2346	11.5148	12.9075	6.5153	7.4058	9.265	19.5492	20.069	11.4659	14.804	5.5804	11.1729	9.4557	8.6245	14.6044	8.26	9.2835	8.9211	9.0366		0.428569	12.5514
7.1509	35.033	14.3266	7.8985	16.0426	22.4469	20.2774	13.7316	10.3677	9.2109	3.67	19.1656	19.283	8.0167	13.1819	7.9759	13.4769	7.1465	13.1815	11.5465	7.397	14.8041	6.3964	8.1272		0.436971	13.1611
7.2885	32.206	12.9041	12.9335	8.4842	18.445	14.8274	12.2922	6.5382	8.8573	12.325	28.3782	16.536	6.6871	14.5488	6.6965	8.5251	7.656	15.0895	13.3382	9.311	9.843	6.3598	8.2165		0.445379	12.6521
7.426	32.083	14.8711	9.2288	11.4198	20.6634	18.7839	6.2721	10.48	8.7467	7.779	28.3491	16.023	9.9942	12.4176	10.5859	12.2322	10.9333	8.2453	15.1054	8.307	7.6737	4.9577	6.8462		0.453782	12.6956
7.5635	24.07	15.234	10.2048	11.679	13.0759	15.6097	10.5943	7.0192	4.547	6.648	25.865	12.345	9.7453	11.6661	4.7976	8.611	10.6255	10.1398	13.5496	9.829	5.9554	9.6984	10.7279		0.462184	11.4016
7.701	25.696	11.9217	10.9019	13.427	11.9955	16.049	8.7681	12.2918	8.4893	7.627	24.4506	13.18	12.9385	10.3007	9.2223	4.7903	8.0975	10.5561	12.7156	11.86	5.2834	9.9138	8.9779		0.470586	11.7154
7.8385	27.655	12.5212	13.6498	10.927	23.524	15.836	5.3637	9.343	7.4352	9.919	25.3018	12.083	12.6918	9.8144	9.6412	8.8776	7.911	12.0268	15.2467	10.046	10.5877	8.9715	4.1238		0.478988	12.326
7.9761	26.437	17.2054	6.8067	8.3495	13.5121	15.1944	7.6807	10.5895	6.4052	15.484	23.3921	12.187	13.5318	12.1034	10.2241	10.1839	4.569	12.4513	12.1364	11.011	11.9358	6.7365	8.8		0.487397	12.0403
8.1136	31.51	13.7422	10.0605	11.1404	16.4363	15.1983	12.5043	6.3419	6.5136	5.069	22.2496	13.226	11.1778	8.8141	10.3261	7.2458	5.0993	8.3382	13.2492	11.492	8.5655	7.8047	11.2434		0.495799	11.6238
8.2511	26.775	9.6632	10.8901	7.5667	16.0267	12.821	7.6276	16.5311	8.3009	6.18	12.0055	11.382	19.7163	15.6931	11.2108	9.6366	8.7384	10.43	10.0292	9.011	14.8215	11.0361	13.361		0.504201	12.1502
8.3886	20.22	9.3521	6.4557	9.6361	8.3712	11.031	8.3471	15.221	4.4226	4.933	11.2038	9.372	11.7513	13.3157	8.9099	8.7942	6.8574	10.0731	13.4199	7.294	11.1364	6.5313	6.9406		0.512603	9.72128
8.5261	17.648	11.4425	13.4972	7.5916	15.7018	8.6786	9.2265	20.4436	6.9454	10.027	9.3888	11.192	10.7184	7.354	7.7086	12.4514	5.4645	16.3844	6.4891	7.132	12.7987	12.2331	9.2282		0.521006	10.8585
8.6636	25.286	11.6484	8.8225	8.6955	9.2068	7.404	5.3507	25.1619	11.2098	5.42	9.4685	4.888	8.6074	4.1825	4.3752	9.1254	6.2261	10.92	9.2431	8.268	15.0271	7.9303	16.4567		0.529408	10.1271
8.8012	19.784	9.4482	10.1858	9.2622	10.3633	5.4503	5.9328	20.7411	10.1576	7.076	8.6049	8.822	13.6944	6.3263	4.8405	11.1499	5.3257	11.1001	9.9522	4.945	6.4424	4.6789	9.991		0.537816	9.31629
8.9387	19.442	5.4446	7.0915	12.0598	9.4494	6.9871	14.09	24.9588	9.569	5.269	13.6814	7.702	12.3205	10.0632	6.0749	9.738	3.7982	10.7036	9.7681	6.705	10.8495	5.1122	11.7114		0.546218	10.1126
9.0762	14.735	10.2966	10.2774	8.5187	14.1447	6.3869	10.9538	18.6399	9.3439	8.358	8.7285	8.452	10.3269	15.1471	6.8228	12.199	5.0112	8.6886	8.3937	7.006	8.8778	6.5053	17.3748		0.554621	10.2256
9.2137	22.49	13.2724	6.2885	5.9213	12.1218	7.4599	5.5056	21.6679	6.7042	7.186	4.1604	5.5	10.2114	10.1571	6.7996	7.8447	6.4729	9.0789	6.5654	6.105	6.3884	9.3086	14.7676		0.563023	9.21642
9.3512	13.584	8.0165	10.9069	4.5936	13.274	12.4572	6.1389	19.9202	10.2214	5.848	4.7828	10.551	7.7713	9.6964	5.3351	13.1171	3.9345	8.5332	5.1621	8.168	7.798	11.0123	16.263		0.571425	9.4385
9.4888	12.681	7.5728	6.0947	6.8836	10.2602	13.5588	9.5679	9.2315	4.8331	5.519	7.7459	7.194	14.8874	9.4248	6.7197	10.4256	6.6013	10.0676	8.0757	8.594	4.3932	5.4024	16.4672		0.579833	8.79137
9.6263	15.151	11.2666	9.1778	8.4292	14.1894	8.6011	13.3525	9.5746	6.4792	5.042	4.2616	11.038	7.5102	5.73	4.1373	10.2026	8.9181	10.0401	10.1267	3.105	6.7228	7.1024	8.9987		0.588236	8.659
9.7638	16.183	11.0066	7.3324	8.8954	12.0298	7.6485	10.8878	12.2248	5.3823	7.292	6.4543	4.911	8.126	4.0489	4.6508	10.1372	4.4601	11.2214	7.4155	4.747	7.7541	3.436	16.7472		0.596638	8.39096
9.9013	21.742	14.8244	11.644	7.4204	15.1909	7.896	11.5792	14.5065	8.8829	7.491	3.6848	8.703	7.7902	6.847	8.4798	9.5829	7.9217	5.2632	7.0505	5.849	6.1382	9.0771	7.4643		0.60504	9.34909
10.0388	15.382	12.1183	14.4319	7.8105	10.8612	8.7168	13.9315	6.3218	8.053	3.642	6.9995	5.502	11.3158	11.5206	7.018	6.0559	4.3412	6.6111	7.1147	6.619	6.6771	6.7237	10.7034		0.613442	8.62917
10.1763	15.2	16.3328	11.317	4.7107	10.9765	14.5409	8.9185	6.6302	6.9804	6.289	6.9864	3.901	9.823	10.6079	8.157	5.1988	1.3926	7.5069	5.758	10.105	4.1353	7.1048	8.901		0.621845	8.32494
10.3139	17.605	19.0027	11.8067	5.3135	7.9743	8.3664	9.6091	5.8455	5.5719	6.384	6.8502	5.937	8.897	12.0787	6.0292	6.5697	7.1009	7.7267	7.3794	6.117	6.5314	11.3504	4.6548		0.630253	8.46528
10.4514	13.254	15.6668	10.2468	6.0599	11.245	8.9292	4.7902	6.3865	7.7703	5.517	6.2943	9.233	5.8928	11.2836	6.5673	5.2423	5.9804	5.0784	2.9389	11.519	11.2567	6.6744	3.3771		0.638655	7.87843
10.5889	12.616	12.7432	6.1479	4.8036	9.362	6.7534	8.563	10.9344	4.3995	4.798	6.0821	5.734	6.7496	15.8626	4.9007	3.9834	4.3695	9.4858	4.909	7.556	12.475	6.5307	5.4955		0.647057	7.61978
10.7264	12.762	13.0986	9.2083	3.7055	12.2875	8.5337	6.3331	9.0471	6.9706	8.731	4.1891	9.058	7.5836	7.8742	10.7239	7.2551	6.4038	7.0284	8.1664	2.471	3.2922	5.6551	4.6943		0.65546	7.61185
10.8639	10.443	11.9156	8.0795	9.0252	7.0128	9.9275	8.2994	5.1174	9.018	10.139	8.6707	8.781	8.0184	15.5562	2.815	4.1381	9.1744	10.5113	5.3228	4.723	7.4477	7.944	2.6839		0.663862	8.03321
11.0015	13.163	16.0936	9.1165	3.3062	12.8086	7.2525	4.4986	6.7137	9.1466	7.765	6.6365	7.078	8.1974	15.0148	7.4411	12.1595	11.3882	11.3574	7.8122	6.349	11.3643	7.4773	5.6726		0.67227	9.03533
11.139	15.486	7.9652	9.9643	6.3251	11.1056	8.2412	5.4476	4.989	8.1687	14.125	8.5442	13.655	6.1609	24.9243	6.9024	8.2517	9.37	8.6105	4.6584	5.705	6.9844	10.1367	4.1495		0.680672	9.12481
11.2765	12.285	10.1899	8.3343	7.7672	18.8828	6.7727	6.5846	3.9366	10.3113	13.141	4.7214	10.708	5.1277	17.6998	4.1692	6.2512	4.0258	10.0952	6.6161	4.882	9.8361	5.7538	4.0614		0.689075	8.35448
11.414	14.691	13.0055	8.6104	6.5352	13.7779	6.7364	8.0046	4.1226	9.209	14.77	8.7455	15.655	9.9969	13.0457	4.2258	7.2764	6.6531	5.7324	9.1118	5.737	7.7375	5.0349	4.4756		0.697477	8.82131
11.5515	22.35	16.4919	9.4023	2.0532	15.5357	8.0765	8.3238	6.1882	7.9136	9.063	8.6293	10.162	4.6262	22.4626	6.2332	4.8126	7.2745	10.1867	5.0233	4.382	6.1085	9.6417	3.684		0.705879	9.07064
11.689	12.613	15.221	3.5236	2.4692	12.9098	5.2502	9.4276	5.3541	13.0756	14.618	6.3555	13.81	5.7097	18.1622	7.1191	4.9046	5.6497	8.8524	7.2029	5.106	10.0904	6.4985	3.9284		0.714281	8.60224
11.8266	14.45	13.3726	5.5452	7.3317	13.2569	7.7317	9.4865	5.8759	10.6022	7.434	6.6637	11.995	11.4796	17.3776	4.4553	5.8838	5.3194	10.6868	3.1864	4.371	8.1044	3.8444	7.0727		0.72269	8.50117
11.9641	14.433	19.7566	6.1092	6.815	8.0242	10.4314	2.9089	6.1228	5.3701	11.873	4.2883	15.701	8.871	8.0319	7.8341	9.0102	3.5258	7.365	2.7281	1.937	5.5554	6.5178	2.8384		0.731092	7.65427
12.1016	11.155	24.9361	9.7254	6.8982	9.8174	7.351	5.7308	6.3326	6.9343	6.484	8.2724	12.441	3.4861	5.4357	6.5539	8.8944	3.8461	10.4866	6.5772	4.161	8.4725	1.8814	4.2587		0.739494	7.83182
12.2391	11.51	16.7636	11.9328	2.0739	12.4959	7.8276	9.8227	9.5303	7.9512	5.651	7.291	9.232	1.8018	7.7814	8.4488	8.9509	3.0792	6.9989	9.2852	6.056	10.6218	2.2117	3.9164		0.747896	7.87974
12.3766	16.12	13.7227	8.2953	9.1002	13.173	5.4971	7.0288	5.4886	6.3002	12.614	5.4094	12.333	5.3561	9.1326	6.0682	7.1108	5.0176	7.2758	7.5722	3.36	6.0036	3.4188	4.9083		0.756299	7.8394
12.5142	14.693	14.9408	8.2914	7.1593	15.9265	9.9871	3.9741	6.7548	7.0343	9.916	3.9756	6.593	8.4215	8.2385	4.6059	6.1709	7.142	7.8458	5.8082	2.208	5.2358	1.9321	1.9448		0.764707	7.3391
12.6517	17.911	15.4745	6.4273	9.685	13.6518	11.9398	6.3386	5.2522	7.6198	5.171	7.9784	10.512	5.8217	6.7284	2.0621	4.172	4.0583	5.5183	2.2378	2.61	6.6202	4.6641	2.1386		0.773109	7.15621
12.7892	16.974	26.4908	8.2312	9.3421	13.7182	14.2039	5.1733	3.3417	7.6571	7.361	8.703	4.738	5.0488	4.6994	4.4206	5.5831	1.4564	5.657	1.8987	4.152	1.7534	3.4659	3.582		0.781511	7.2892
12.9267	28.035	17.9169	9.223	7.5823	8.222	9.2387	7.4054	10.7171	9.1261	7.599	6.6203	6.075	9.1774	7.4919	1.7052	5.4343	6.18	6.6026	3.2203	5.6	3.768	2.6128	2.7574		0.789914	7.92655
13.0642	20.835	15.4932	4.0098	9.0168	10.6653	5.9605	9.5468	3.539	9.5039	2.725	2.7248	8.669	5.0719	7.097	2.4107	7.352	2.7722	2.3132	2.53	5.157	2.07	2.3708	2.843		0.798316	6.2903
13.2017	18.182	14.2391	5.3235	12.2257	13.9824	12.2428	6.4784	6.4976	4.3069	2.2	5.3378	5.65	8.4046	4.9249	3.425	3.8214	4.6747	4.9896	1.328	3.456	1.9795	4.6064	3.4436		0.806718	6.59652
13.3393	22.667	14.4327	8.0942	7.3236	13.1626	9.799	7.1752	5.4045	5.0639	5.811	3.7063	5.028	7.2061	8.1964	3.8318	7.8294	6.0987	3.8594	3.7953	1.196	1.8606	1.6533	1.9015		0.815126	6.74333
13.4768	23.991	19.8408	10.0869	4.4387	12.4772	7.3355	3.8168	7.7397	4.8539	5.011	9.0191	4.841	7.4831	9.5171	3.1719	1.4755	6.8618	0.7905	2.4331	4.438	2.471	2.3715	2.167		0.823529	6.81009
13.6143	19.088	12.9949	10.674	8.1037	12.837	5.9261	6.2643	6.4268	3.7451	8.255	9.1699	5.358	9.8913	5.8638	3.5805	6.1375	5.2112	2.3073	5.6342	1.832	4.4455	1.7497	3.6427		0.831931	6.91907
13.7518	19.761	14.65	12.9679	7.3715	10.5236	11.0256	6.1714	6.9894	4.2645	7.527	5.752	1.978	8.2559	4.9862	3.5542	2.7115	4.2246	4.3144	2.768	0.725	7.1801	0.52	1.1733		0.840333	6.49544
13.8893	19.831	14.0115	12.2023	7.58	16.7945	12.7076	6.3049	7.1724	9.5064	4.304	5.6359	4.785	10.3414	5.5168	3.811	4.7161	2.33	3.7815	1.6657	2.088	3.9258	2.0938	0.758		0.848735	7.03755
14.0269	20.796	9.9334	12.4671	4.8705	14.1421	9.9948	4.9053	4.7528	13.7763	8.506	5.9556	4.161	6.6382	6.5157	3.6912	3.4739	3.7713	1.8521	1.7242	2.575	2.8103	2.6154	1.7398		0.857144	6.59426
14.1644	19.714	12.0073	15.0331	6.4248	15.0456	7.7935	6.4077	3.87	9.9828	5.503	2.6162	5.558	6.2198	7.4324	3.5814	4.2715	3.1897	3.1917	1.4621	3.073	2.1396	2.2955	4.0109		0.865546	6.55755
14.3019	19.587	12.181	12.1345	6.9008	10.9428	11.6294	1.8145	5.3463	15.0747	7.053	4.5681	8.582	4.4367	2.2501	5.2011	3.6881	2.3762	4.9754	2.6179	2.572	4.0377	0.626	0.9071		0.873948	6.5001
14.4394	21.885	10.7127	6.7545	7.2113	13.496	9.2699	7.2806	5.8934	17.0941	7.515	6.8936	2.641	6.5583	3.0727	1.7621	4.1113	2.8042	2.7779	4.3956	2.337	0.7096	0.8168	2.8285		0.88235	6.47048
14.5769	14.516	9.8131	12.5679	7.8173	6.1012	5.9329	9.1044	5.9865	10.106	10.65	4.525	6.414	2.9272	6.8875	3.7979	3.4499	1.6252	1.7853	2.6951	2.236	3.6797	1.0505	1.4917		0.890753	5.87653
14.7144	7.85	11.9004	5.8601	5.1587	7.7298	8.9542	2.2799	5.1344	11.9493	9.428	3.1969	5.041	4.0443	7.0002	1.0211	4.2736	2.8788	2.7213	3.0151	3.546	1.5616	0.6143	2.5562		0.899155	5.11805
14.852	9.551	5.6899	5.3963	7.1071	7.1811	4.0588	2.464	4.9619	12.2409	6.51	1.5474	5.126	4.1316	5.571	3.5122	2.5268	2.4451	0.734	1.5744	3.138	2.769	0.0278	1.5058		0.907563	4.33783
14.9895	6.91	7.9759	7.218	6.7866	6.2089	9.2433	4.9919	10.6375	10.924	5.954	2.2865	3.253	3.1734	7.4291	1.5102	2.4635	0.6471	1.4687	0.418	1.612	3.4055	0.6086	3.0022		0.915965	4.70121
15.127	7.576	6.6623	2.5121	7.7727	7.1436	7.3641	4.3527	4.6365	9.9751	5.746	7.4191	3.47	2.142	3.0087	1.7303	1.8548	1.6383	1.8836	4.8356	0.545	2.8357	1.0188	2.9149		0.924368	4.306
15.2645	7.32	4.9229	5.1849	7.9939	6.5179	5.8756	7.5316	7.0154	4.7236	4.036	3.322	4.546	3.1972	3.9932	6.619	3.5731	0.287	2.5654	1.0963	2.299	2.2331	2.0998	1.5712		0.93277	4.28366
15.402	7.487	6.3093	5.6166	2.4892	5.8696	10.7499	3.3605	5.187	4.9608	3.704	6.1243	5.114	3.1649	5.5555	4.171	2.434	2.0534	1.6215	4.5754	1.593	2.1854	1.6756	1.8968		0.941172	4.25647
15.5396	11.199	9.4051	7.7031	3.6174	7.8357	5.4228	5.1913	2.0266	4.8924	5.086	6.1075	3.717	1.925	3.8815	3.0402	3.3765	4.4023	2.2413	3.4915	2.92	0.8917	3.2009	2.7205		0.94958	4.53458
15.6771	11.046	8.9129	7.9175	4.5589	4.1818	4.1683	4.0044	4.0341	1.9762	3.501	3.3607	2.73	2.3022	3.6289	3.395	1.2602	0.7867	1.4858	3.3504	2.156	0.3604	2.423	0.6836		0.957983	3.57496
15.8146	11.57	10.4939	4.1311	7.1044	6.4291	6.297	5.1688	3.5124	4.3167	6.993	2.0102	3.6	2.4778	4.8459	2.5584	4.2804	1.2564	5.341	3.3268	1.851	1.1916	0.8739	1.6612		0.966385	4.40396
15.9521	9.739	14.4713	10.2519	4.002	1.9806	4.2646	5.8717	2.6472	2.312	5.249	3.0894	5.374	2.8957	4.4683	3.2297	1.7089	2.4801	2.2833	3.1859	1.439	1.1918	2.3452	3.1101		0.974787	4.24307
16.0896	13.679	6.4756	10.9261	1.2437	0.439	1.9702	6.7088	4.8267	3.8685	2.247	3.9653	3.71	2.8912	6.4322	2.5588	0.2677	0.5972	1.8419	1.1242	4.295	2.8162	1.2273	2.4963		0.983189	3.76556
16.2271	11.94	15.1371	4.4589	5.3472	2.6547	2.0782	2.6466	3.1283	3.6898	3.992	3.4621	1.474	4.0963	2.7464	6.2744	2.562	0.8292	3.5064	2.6134	1.446	1.647	3.7329	3.1013		0.991592	4.02453
16.3647	6.734	13.0762	5.7775	3.5424	2.0582	3.2292	3.2007	3.3488	4.5459	4.536	2.7407	2.287	3.8383	4.2343	0.9675	0.042	2.3408	2.2245	2.7158	1.163	4.7348	1.1744	1.2377		1	3.46738

## Sheet: Image7
X0	Y0	Y1	Y2	Y3	Y4	Y5	Y6	Y7	Y8	Y9	Y10	Y11	Y12	Y13	Y14	Y15	Y16	Y17	Y18	Y19	Y20	Y21	Y22	Y23	Y24		AP-Basal	Avg intensity
0	11.8447	11.5482	29.5101	39.592	22.0866	28.6307	17.0306	11.9295	22.5029	32.7512	33.1039	16.079	24.6282	28.0422	15.2521	23.6562	18.1737	20.921	7.3063	17.7686	21.5666	25.4389	18.7179	16.3807	16.8258		0	21.2515
0.1375	15.171	12.7971	33.1867	44.033	24.8972	36.9581	21.3125	14.971	20.2314	32.2325	31.2086	17.3026	29.8413	32.9378	21.2425	26.6732	15.0844	24.8113	10.8644	19.4546	24.7935	22.4121	29.4029	29.6786	19.3771		0.00812902	24.435
0.275	14.4146	12.81	34.9126	42.9544	29.3963	37.7843	23.5227	10.9803	28.4186	30.0007	41.8154	20.975	26.9864	36.7952	20.2861	24.7317	14.2978	17.1756	6.5901	20.282	20.3147	29.4026	34.7125	34.7641	20.7099		0.016258	25.4013
0.4126	13.075	17.4095	42.4501	49.7888	27.0127	39.9079	27.4547	14.1517	28.5468	36.1971	44.7131	31.7145	29.3081	38.2296	24.3316	33.7591	18.4664	18.6894	16.4457	18.769	23.6162	23.1999	30.2184	24.7154	24.2527		0.024393	27.8569
0.5501	12.5012	25.6219	48.6181	46.7657	37.723	36.7998	26.3711	19.9305	25.7987	34.8846	41.5295	26.2918	26.5222	44.6107	31.0301	44.1921	19.9097	16.0303	22.6187	25.1935	20.3116	31.6646	31.6325	24.7988	29.5966		0.032522	30.0379
0.6876	13.4853	25.6831	46.8357	45.5645	39.6492	44.1729	28.5372	18.9477	21.3773	30.996	37.83	33.3895	13.5565	57.7674	40.6953	43.1086	20.7447	18.2066	21.6473	26.4318	21.8729	30.0058	31.6758	26.0898	40.6134		0.040651	31.1554
0.8251	22.8701	28.3737	46.2344	52.4067	30.3518	40.5411	24.1451	25.7659	21.8329	22.148	32.6846	38.0752	17.4112	55.5955	42.2718	46.6508	23.6577	24.6652	19.7393	35.6907	24.632	27.3941	39.37	36.0702	39.3823		0.0487801	32.7184
0.9626	43.0317	31.3134	47.7196	43.5715	31.5206	47.96	26.76	27.5211	21.293	28.0881	26.5901	37.7772	25.8176	65.3879	45.9873	53.032	31.2008	20.7962	21.1025	33.145	28.1574	31.8982	37.7968	47.1698	42.789		0.0569091	35.8971
1.1001	52.002	41.8177	40.5383	40.5291	35.1119	51.1918	30.6984	21.2376	32.3602	25.8028	30.0547	45.9534	18.6929	67.8405	41.9723	48.334	25.1949	28.7161	20.7051	34.9265	27.7014	29.2579	42.2146	53.8491	47.4024		0.0650381	37.3642
1.2377	66.9993	39.1054	39.0609	47.2929	28.8672	59.9221	30.1573	24.8333	34.8458	24.5532	30.3348	42.9929	20.9081	64.6786	49.0612	47.0625	18.0599	29.8153	24.5695	35.8362	21.4331	30.5631	46.029	63.7048	38.4854		0.073173	38.3669
1.3752	74.8484	38.3841	32.0393	42.4791	29.866	65.7996	37.4303	32.187	33.5401	28.8612	30.2534	32.836	26.4904	51.2578	45.8926	49.9031	17.8641	31.4013	25.4887	40.2327	25.4174	30.8005	45.6039	71.3203	45.9277		0.0813021	39.445
1.5127	77.0108	34.9417	28.2299	53.7846	27.3132	58.8463	40.3321	30.7132	37.205	30.8576	20.6431	39.224	20.8837	60.7021	47.1776	53.6996	18.4003	25.3399	22.1642	33.2213	35.8775	30.6643	37.0677	76.4183	44.1274		0.0894311	39.3938
1.6502	86.1389	30.8925	25.6684	60.8716	25.6524	61.3394	41.938	27.216	41.1891	28.3714	18.7781	44.5088	23.4384	55.444	36.2287	43.6852	23.0496	18.6643	20.5011	38.7672	30.0654	36.836	37.8772	69.2756	34.7809		0.0975601	38.4471
1.7877	78.5089	36.7381	23.1502	68.4157	27.3253	63.4694	42.5967	30.7659	45.4573	35.0719	22.8506	61.1559	26.4125	46.3664	35.0175	50.7779	20.5069	22.9448	30.3673	45.725	29.3745	29.0184	37.9972	67.4974	33.7638		0.105689	40.451
1.9253	70.7783	41.0995	16.9893	69.4972	29.9363	60.2055	32.5754	30.042	41.4138	27.1881	18.9289	67.5706	23.9886	46.3503	32.9214	63.3726	19.5883	28.4065	25.472	36.3936	41.296	32.8484	45.9952	56.2118	42.212		0.113824	40.0513
2.0628	60.5147	32.9201	13.4507	69.4317	18.4753	63.5496	33.4943	27.4498	40.8451	26.3132	26.8681	74.1119	18.2818	40.8193	35.5846	68.1965	21.9183	34.8234	25.775	39.8065	43.1853	33.9452	40.234	67.1478	30.7402		0.121953	39.5153
2.2003	45.1749	28.0462	15.0132	76.7798	20.1454	68.6015	28.8166	25.1944	38.9413	21.6173	23.1521	71.4653	17.6686	45.5548	39.3108	52.2719	29.6357	36.0869	29.0409	47.5997	47.3705	34.0394	41.7045	58.6193	29.5471		0.130082	38.8559
2.3378	43.1513	21.0014	15.1463	72.6128	18.116	59.9876	27.3836	25.6257	30.9628	17.4221	20.1316	71.4495	19.4409	39.3554	36.3745	53.8924	22.1551	40.3654	24.1469	51.5538	34.9804	28.2294	39.0587	44.7362	39.8749		0.138211	35.8862
2.4753	36.0923	26.4759	22.6899	59.6685	21.6604	40.034	25.2936	24.8623	34.0284	25.0088	19.9093	75.3463	19.7771	43.621	29.4236	57.6845	22.659	36.192	21.2016	58.4902	32.0327	25.6675	44.3797	53.4559	31.9093		0.14634	35.5026
2.6128	30.4507	23.6826	19.0117	55.8798	16.7648	38.853	32.447	22.1121	42.522	21.9579	29.5697	66.7792	24.7821	40.3598	32.3583	45.0527	21.979	47.2171	25.7468	48.4547	35.3622	35.4054	41.4327	40.0777	29.2157		0.154469	34.699
2.7504	30.0467	21.4161	19.285	53.2759	15.9777	40.4379	37.0074	21.2391	33.2584	21.7365	28.6184	55.3815	18.6396	37.7188	27.3313	39.3075	19.4106	44.4261	18.9502	45.648	34.6672	35.1296	41.1843	47.2793	32.2346		0.162604	32.7843
2.8879	27.5691	22.3221	23.4246	46.0904	16.3798	29.996	38.4279	16.3577	27.4535	22.7339	22.7228	44.9862	17.5441	37.4649	25.4614	39.1348	24.1951	41.2478	20.9419	59.6429	32.7278	32.4651	45.1131	39.826	25.0918		0.170733	31.1728
3.0254	23.6273	18.6572	21.232	51.1045	20.31	22.1909	37.9873	19.7602	26.1521	18.6954	21.9782	28.7802	17.4527	33.4784	28.48	32.697	20.4202	35.2817	23.2761	57.3076	36.4133	33.8056	55.6084	30.8651	30.4626		0.178862	29.841
3.1629	23.1675	15.7493	24.3276	50.2838	18.2175	20.8312	28.9827	21.4059	24.8135	19.0773	18.0115	29.4226	19.4775	29.4365	21.096	26.958	21.1979	35.5631	17.1145	52.113	32.7477	34.6923	48.3938	24.3415	31.3053		0.186991	27.5491
3.3004	27.2912	19.3899	21.3063	41.2421	17.5691	24.7687	26.845	22.8115	20.2865	21.532	16.5968	28.4047	16.9487	25.3813	19.4733	23.6498	21.1648	34.6141	21.3109	57.5676	31.3257	33.4227	44.0408	27.2418	26.1121		0.19512	26.8119
3.438	20.5389	13.9387	18.1614	34.7011	14.1694	23.1616	25.2524	20.2282	19.5145	22.1039	20.4824	22.2848	18.7435	21.0858	14.5617	21.1751	17.4856	30.5091	16.5857	59.471	30.5102	23.3447	38.83	33.6009	18.7179		0.203255	23.9663
3.5755	20.3289	10.7376	19.042	34.9836	14.7425	21.0978	22.7631	22.2864	23.5749	20.8917	26.6571	20.9268	13.4527	25.0616	18.9946	22.6623	17.1028	25.9712	14.2253	56.8412	26.8899	25.8947	32.4137	29.7635	20.2365		0.211384	23.5017
3.713	23.561	13.4945	19.1637	30.0675	13.6963	16.0609	23.5376	23.3713	24.7142	18.3835	22.8418	18.1206	20.9494	25.1026	19.3063	20.6387	17.2674	21.9165	11.9385	55.7085	18.6197	25.1509	31.4945	21.1189	19.602		0.219513	22.2331
3.8505	24.0736	22.2707	20.8387	21.9693	15.4081	18.5798	21.733	17.0022	16.4649	15.8508	23.7807	14.367	21.9366	19.7655	18.2322	30.2689	18.2177	23.3503	10.721	53.6739	19.3174	23.006	32.2127	23.4192	21.418		0.227642	21.9151
3.988	25.1053	21.9486	17.8252	23.9353	13.897	15.5294	20.3642	18.201	14.3327	12.4528	16.8406	13.2335	17.9888	12.2955	16.0224	18.3626	21.2324	25.1024	9.1264	42.6977	28.0445	27.452	30.4138	12.4675	20.3059		0.235771	19.8071
4.1255	23.7735	19.6973	10.5033	26.8796	14.9828	12.9412	24.3204	18.9342	16.8523	10.5986	16.7801	16.9427	19.4087	18.5799	11.7188	21.6311	22.5927	19.3451	10.8885	37.3481	27.9863	20.1895	20.6506	12.7487	15.9122		0.2439	18.8882
4.2631	19.0978	12.9758	13.4469	21.0995	15.1529	14.4276	22.2525	15.4476	18.8319	9.572	18.185	12.4792	16.656	21.393	13.0857	22.071	25.7155	18.7765	10.1262	39.9855	23.1807	15.8411	17.2145	14.0451	20.108		0.252035	18.0467
4.4006	16.3872	15.8649	12.0988	20.7368	16.0643	13.7898	26.6732	13.6329	13.614	8.6231	13.499	8.9591	15.1917	19.6964	10.3369	26.1996	10.9939	13.598	10.1674	38.9625	22.7687	17.1601	13.701	12.5947	15.8453		0.260164	16.2864
4.5381	17.562	19.73	10.2357	21.2072	21.3143	11.516	19.326	13.073	14.8186	8.6103	12.2166	16.1186	15.5466	22.8955	12.1569	22.665	18.882	14.8575	12.4543	29.3075	24.0588	19.0546	15.7836	14.3002	18.2847		0.268293	17.039
4.6756	18.6614	20.6033	12.5736	17.3285	18.3787	13.6439	26.8494	10.3901	12.164	5.0283	16.0733	13.6942	15.679	14.6452	9.0598	18.621	24.8519	15.9218	16.4232	26.6065	23.7262	14.9577	14.1364	14.8983	18.3462		0.276422	16.5305
4.8131	22.7564	20.9796	15.9162	16.8787	19.5388	17.1147	22.6919	12.0228	12.4232	9.7307	6.2674	12.4632	18.0694	13.2901	11.7992	16.1323	18.788	12.9754	11.4311	21.8333	26.9601	13.7539	12.3167	15.3449	14.2937		0.284551	15.8309
4.9507	17.3797	21.7433	8.9903	16.9631	20.6759	15.8686	17.2865	12.6301	10.8949	10.9305	11.0335	16.1867	12.2763	12.8045	10.7208	13.927	19.034	14.2165	10.9827	18.2268	26.8746	15.1011	16.542	18.4344	15.4633		0.292686	15.4075
5.0882	13.3464	19.7356	12.7112	10.1103	18.9566	15.3354	15.2856	17.0951	10.3263	9.2368	14.9212	17.3648	11.8834	11.9771	10.4392	12.6586	14.9096	18.2437	10.9637	23.805	22.5291	17.8007	14.9826	19.7606	19.46		0.300815	15.3535
5.2257	18.1166	19.9007	8.6196	15.2844	20.9079	16.7112	22.2008	19.7585	10.8047	11.0533	14.4399	12.0845	10.0055	13.6917	8.2952	16.3653	14.1621	13.0932	8.835	17.2509	25.2696	14.3831	15.8251	14.4598	10.6563		0.308944	14.887
5.3632	17.1506	14.5037	7.2033	20.2971	18.9838	15.0501	20.458	16.0232	7.8019	9.4167	14.0837	7.4631	7.2499	12.4076	9.3799	15.7005	14.3718	14.7282	7.4676	14.8051	20.7123	11.77	13.0694	13.6269	9.4855		0.317073	13.3284
5.5007	15.1268	19.6472	6.3901	19.0941	16.868	13.1216	17.9781	18.2092	9.2163	8.4479	16.0605	7.6467	9.1452	17.079	14.0836	14.8525	19.1294	12.9756	8.1195	16.9415	18.4208	15.1841	19.9537	14.9219	18.2117		0.325202	14.673
5.6382	15.2142	17.3317	7.6048	12.5107	13.8111	16.2344	16.7465	18.5932	11.084	10.615	10.3688	9.5471	9.4725	13.2193	17.6817	14.7533	16.5273	10.598	8.254	15.758	17.7378	12.251	16.1166	13.2484	15.661		0.333331	13.6376
5.7758	21.8058	11.2763	8.9569	12.9845	15.4553	12.5724	13.3338	16.5534	13.7736	13.1783	9.5055	11.6049	11.3314	12.0636	16.0935	13.4482	11.3268	9.5196	12.3637	13.9064	17.0204	14.0904	12.2706	11.8465	16.6943		0.341466	13.319
5.9133	26.2415	13.8105	9.2272	19.6702	13.8721	13.4927	14.2758	16.9334	11.5603	10.384	13.824	10.6846	11.1178	9.1394	14.3975	9.7274	16.326	9.5809	9.1937	11.1034	14.9275	11.9433	15.0375	11.4207	12.3158		0.349595	13.2083
6.0508	14.1412	19.2432	11.5614	14.4861	16.3164	15.5634	15.6218	18.3554	11.306	8.0537	12.7291	14.8258	15.7513	9.0163	15.5596	9.8408	21.738	14.419	7.053	11.1695	20.0878	11.9548	15.7522	10.9848	10.4173		0.357724	13.8379
6.1883	11.5328	19.5179	12.5559	11.2942	15.1194	11.6603	15.4968	15.74	10.9223	7.0429	11.8061	10.8754	16.3297	10.5631	17.3095	19.2676	22.5011	11.6008	7.7379	11.7707	16.8056	14.3073	20.9494	11.8593	12.0181		0.365853	13.8634
6.3258	12.4867	17.7637	11.0054	13.4806	14.3233	9.3877	16.3936	17.0844	9.7734	10.0283	8.8439	9.9493	12.1246	10.3093	22.0004	14.6397	25.6437	20.1296	12.0561	14.8066	12.4005	11.1583	12.8237	9.9791	15.6323		0.373982	13.769
6.4634	15.2905	10.501	13.3945	12.7931	15.5649	10.1301	25.7366	15.7819	9.8005	9.7366	6.0673	12.486	12.2705	5.9462	13.5015	15.9449	17.6806	17.0561	13.4324	18.346	9.5183	17.4915	8.5811	14.0986	15.7647		0.382117	13.4766
6.6009	19.3525	9.2429	16.8551	10.4371	11.501	10.2751	19.9416	16.2092	10.6991	11.9152	8.8636	8.9777	9.9164	14.9554	14.4662	13.8301	16.7991	14.9715	14.8853	17.5218	13.331	13.8316	6.7173	12.4941	13.1071		0.390246	13.2439
6.7384	14.0683	8.0513	12.7392	10.7824	10.0838	9.8257	16.8649	20.4123	10.2398	14.2595	10.5481	7.7438	9.6555	13.5216	16.072	13.8943	17.1475	11.7842	6.3649	18.9008	15.3515	11.486	3.9078	12.0401	13.7499		0.398375	12.3798
6.8759	13.2715	9.4474	10.7455	10.9196	11.2655	7.857	13.5286	22.9382	10.8379	15.2814	9.6249	8.6592	6.1209	13.2816	14.2287	14.4967	15.4986	14.3267	6.0959	18.5229	14.3223	11.7732	6.7187	10.3295	15.011		0.406504	12.2041
7.0134	11.3136	15.4268	12.771	12.8809	9.46	8.1437	10.0758	14.6997	8.9837	16.3482	10.8775	10.5927	10.373	18.3381	11.7124	10.0167	10.7073	12.7886	9.5854	16.9068	18.5365	10.244	4.6132	9.1809	11.1427		0.414633	11.8288
7.1509	13.7465	15.0085	10.4327	13.5312	8.965	12.5682	15.1202	9.6813	7.4669	11.5052	11.1539	12.1803	9.4709	10.7487	15.6746	10.9527	11.3002	13.1832	10.4471	21.4319	13.6042	11.5815	3.8756	10.147	6.9533		0.422762	11.6292
7.2885	16.2572	12.6923	10.3819	11.0054	14.6238	10.2862	11.9133	7.9891	6.1754	10.596	5.9242	10.7065	8.506	9.8999	14.1171	9.6632	14.5071	12.1106	7.7179	16.8612	14.8574	12.2756	5.005	7.5274	6.7143		0.430897	10.7326
7.426	8.5381	14.4687	8.8866	12.6971	10.1928	9.6197	10.8142	10.0057	10.729	11.4925	10.2347	10.9555	9.5873	7.1674	15.9494	7.0153	17.9174	13.8238	6.9377	17.0217	15.4236	7.6307	9.0538	8.1238	10.7863		0.439026	11.0029
7.5635	16.4971	17.2014	9.2433	13.4928	7.5222	4.5124	8.6883	10.4853	7.3694	10.3671	8.9442	13.2778	6.0681	7.6185	12.8866	8.7695	13.0313	13.218	11.9653	14.9444	13.5926	9.787	7.7851	7.7875	12.4074		0.447155	10.6985
7.701	16.94	11.8408	9.7126	13.5858	10.584	7.6707	9.8031	7.138	8.155	13.7323	8.6503	11.246	6.4582	9.7225	8.0159	9.6032	14.1126	13.3506	13.3945	17.3019	14.279	10.6435	6.7474	8.6823	7.5696		0.455284	10.7576
7.8385	11.2162	12.3613	9.2694	9.5666	10.5493	9.5039	15.9022	4.6744	6.4309	9.539	10.6952	14.7317	7.2984	5.0408	8.5893	9.6318	10.582	11.8662	8.734	21.6333	12.7041	13.1797	5.8839	6.463	6.6912		0.463413	10.1095
7.9761	10.9544	8.9772	9.0341	10.8703	8.2053	3.735	17.4286	7.5582	4.8324	12.3755	11.6064	12.5475	8.5542	6.8542	12.1233	9.5551	7.4247	12.6315	10.2276	24.8628	10.0018	11.7201	6.8308	10.2823	6.8537		0.471548	10.2419
8.1136	9.6475	9.1311	9.0049	7.6211	12.2981	5.0997	19.5837	7.1	8.7102	8.6926	6.1627	9.3639	9.804	8.6256	10.0363	11.2097	9.708	6.8355	7.0807	22.4587	12.6565	8.1577	6.0253	8.1761	7.4642		0.479677	9.62615
8.2511	12.4238	8.2291	7.2281	5.8556	13.2503	6.9547	19.9138	7.0322	6.3724	11.7338	6.35	9.1456	11.1158	5.4576	8.8281	15.5478	12.6082	10.7269	4.542	11.5281	10.6661	9.2899	7.2273	4.5053	9.0813		0.487806	9.42455
8.3886	9.516	7.7142	8.2446	6.5124	6.8658	7.5172	20.4787	9.5075	7.0874	14.7088	6.8625	11.3925	12.0753	4.4769	11.3568	16.2659	9.4	13.3766	8.7417	9.602	9.6425	10.7796	6.7527	2.1382	7.8035		0.495935	9.55277
8.5261	9.0175	9.107	7.8024	9.1894	10.2019	8.9365	22.6851	11.3249	12.5709	12.4195	8.6519	6.3002	9.6826	6.595	7.9328	11.2692	11.9077	6.7718	6.4647	10.1197	15.8733	9.9283	12.1471	5.6641	8.5824		0.504065	10.0458
8.6636	8.6322	14.1223	6.1163	9.9227	6.6587	8.8062	23.2429	11.0452	6.5177	9.0229	5.2114	4.8685	8.6897	5.2488	8.5792	12.5085	14.5845	5.0583	5.4974	10.101	12.8864	8.8985	11.8071	8.5486	11.1463		0.512194	9.50885
8.8012	8.7926	9.0091	9.7341	4.2858	6.7075	10.5103	16.9261	11.5139	4.4662	12.6346	6.5107	12.0319	8.6763	5.0643	8.5582	11.322	19.7868	5.8089	4.6511	10.1416	9.868	9.9934	11.0479	4.118	9.7639		0.520328	9.27693
8.9387	8.9621	5.9335	6.6054	6.1905	10.2966	7.7112	11.6815	11.6622	8.3454	8.9925	7.5194	9.511	4.4078	5.4763	8.9235	8.0075	18.9991	4.8836	5.0627	14.9068	8.3545	4.7845	8.7173	7.9544	5.3978		0.528457	8.37148
9.0762	9.173	6.7771	8.9262	7.3965	8.2234	8.128	11.3473	9.554	7.2438	15.4358	6.977	5.615	5.4946	8.8763	10.1455	15.0935	18.9906	6.9443	6.8973	14.0758	8.2713	4.3038	8.23	7.9431	7.3633		0.536587	9.09706
9.2137	6.7514	10.0472	9.5998	8.5024	9.4828	8.0318	13.1038	11.3153	6.9266	11.9323	7.3637	5.9662	9.1144	5.8986	11.2727	14.6185	9.7995	6.1348	5.9057	9.1201	6.9704	5.2386	7.1324	6.7693	6.0441		0.544716	8.5217
9.3512	5.654	9.4157	8.2847	5.4932	9.0315	7.7422	9.842	13.0168	7.4786	9.2723	12.8804	7.0769	8.6804	4.7754	10.6756	11.8704	7.1563	5.9156	8.3138	8.0846	7.5706	9.0877	6.7183	6.7135	7.4758		0.552845	8.32905
9.4888	7.1528	9.0806	6.706	7.8756	11.9031	8.4888	7.7654	10.4925	10.2576	10.6163	7.9907	7.6473	8.2365	6.0365	11.838	15.5119	10.0856	7.1696	4.036	7.2002	10.6677	5.2501	9.2117	7.584	7.8451		0.56098	8.66598
9.6263	4.8587	9.3385	7.3789	9.5327	9.0702	9.8169	8.8258	9.7773	7.1204	10.2688	11.2634	7.74	9.0236	7.5742	13.0792	15.9839	9.6292	8.6156	2.4162	8.3471	6.8307	5.5053	6.2763	10.0604	7.4281		0.569109	8.63046
9.7638	8.3351	13.3414	5.7807	8.2162	10.0934	8.9467	8.1081	10.7481	7.7516	12.0121	13.1661	7.4618	4.8909	8.9006	10.6108	11.3849	8.5997	8.3499	4.0818	6.8584	7.0487	4.9501	5.3259	10.7785	8.7615		0.577238	8.58012
9.9013	11.6771	17.4976	9.3575	8.1248	10.9524	8.0637	8.105	9.1555	6.6336	12.9563	10.5105	7.7298	6.1275	6.4158	9.8108	6.8395	10.4575	9.7763	5.8624	5.5902	8.0175	5.1666	4.903	6.6417	8.0249		0.585367	8.5759
10.0388	7.6063	10.5011	8.4504	8.5018	11.2008	11.2936	6.5154	7.4813	4.6887	10.6131	7.3104	8.3877	6.8123	8.0703	10.6173	9.8663	7.3372	6.4995	4.6694	6.1893	7.3685	4.5025	8.2962	8.6342	6.9039		0.593496	7.9327
10.1763	8.05	9.6669	4.7521	6.9776	8.3616	12.7834	5.4524	7.7776	7.8476	12.1147	5.9564	5.1476	5.2534	9.4439	11.2276	15.7811	9.3648	8.2867	3.5426	3.6402	9.3911	5.5946	6.7535	10.4305	8.6013		0.601625	8.08797
10.3139	6.6657	11.3042	5.1798	5.0195	7.8667	15.9508	8.1123	9.4179	6.4213	9.6735	9.2257	6.268	5.697	7.6464	10.8626	11.5586	7.8681	6.7633	5.5503	5.2022	6.7641	8.1333	9.0317	10.3321	9.0207		0.60976	8.22143
10.4514	8.8171	10.7713	6.8385	5.909	7.7738	15.2143	5.6154	5.8273	9.7076	6.6231	8.6469	5.0997	3.5626	6.6279	8.3949	10.3389	9.5402	10.9216	6.7494	5.426	8.9601	6.521	9.1182	11.1892	5.7182		0.617889	7.99649
10.5889	8.9026	9.5339	5.1588	11.5896	8.848	14.9913	4.1682	12.8359	6.8749	7.5499	8.8259	5.9831	4.7137	8.4411	8.5016	10.7813	10.379	6.718	5.4135	8.3691	13.4092	3.5592	8.1456	9.2185	7.2358		0.626018	8.40591
10.7264	8.4345	8.9197	4.3862	7.3927	12.9265	15.7062	6.0989	11.795	4.012	7.144	10.436	4.0463	9.1366	5.6123	11.6828	11.7652	11.1845	7.2701	4.7432	6.9306	8.6319	5.1613	4.6617	10.9324	7.6536		0.634147	8.26657
10.8639	9.1737	5.3105	7.152	8.6621	11.7913	16.5916	3.1974	10.5303	7.4	6.6924	6.2094	5.0616	7.9255	3.3176	8.2298	10.6611	15.9424	8.8743	4.7804	8.288	4.816	7.5018	7.1217	7.3781	7.1484		0.642276	7.9903
11.0015	11.8345	10.147	9.0203	10.1512	14.2582	23.0546	5.2055	11.8805	9.4642	6.3638	5.2527	3.8406	8.5207	7.6501	6.9442	5.8097	14.5421	4.8885	10.5415	6.3773	6.4601	6.695	8.3311	10.3625	7.1129		0.650411	8.98835
11.139	6.8202	4.2149	3.909	7.4017	13.0769	21.1075	8.0597	12.5999	10.4878	7.4988	8.3327	4.2755	6.6786	6.9858	7.8654	10.8836	12.5388	5.034	7.9306	4.4707	6.1383	6.7101	10.1293	13.7449	9.7787		0.65854	8.66694
11.2765	7.3853	4.6961	5.5065	7.4775	10.9797	19.6168	7.4757	6.0622	8.3724	8.0882	9.8024	3.2394	9.2437	6.6357	12.4284	13.5314	11.3493	8.785	5.5965	8.4192	5.877	6.0368	5.082	9.5602	9.4174		0.666669	8.42659
11.414	8.4058	6.9778	4.7582	5.1561	10.5291	15.1492	8.745	5.0865	11.0491	8.0775	9.2429	4.6007	4.2803	6.0723	4.8653	8.8542	11.2429	4.1579	4.6334	11.3463	5.3184	6.3502	7.8257	8.6535	6.0923		0.674798	7.49882
11.5515	7.9707	7.9697	3.2251	6.3078	9.1322	13.7117	10.4906	8.2256	11.2171	5.6439	6.3496	2.3146	5.89	6.6527	6.303	6.252	8.1744	5.9966	5.6815	10.1671	5.6359	5.3574	5.439	9.173	4.9109		0.682927	7.12768
11.689	7.2797	10.264	6.0179	7.9364	6.1013	16.2538	12.1231	6.7444	8.2024	5.6328	7.3699	5.8216	4.5228	5.1247	5.7915	5.6104	10.1319	5.0439	8.2836	5.68	5.4656	6.022	9.8193	9.4782	4.8726		0.691056	7.42375
11.8266	11.6404	6.0363	5.081	11.2597	6.6604	12.2941	12.0865	7.5509	9.186	9.2723	8.5065	5.5416	4.3359	7.2949	8.4668	4.3327	5.5309	8.7098	7.3102	6.4682	8.0026	7.097	9.9108	11.2818	4.7424		0.699191	7.94399
11.9641	11.3624	9.8082	5.0679	6.8934	6.1654	8.5903	15.7123	4.3232	8.6941	7.6025	9.9997	5.8614	9.0335	6.5342	6.4155	9.6402	3.2069	7.9489	4.5995	10.6126	12.1884	4.3809	9.6511	12.8987	8.6848		0.70732	8.23504
12.1016	9.7161	8.1873	5.831	8.1886	8.2774	9.994	16.2747	6.2949	8.9384	9.8614	7.8572	6.8398	8.6284	5.515	8.5356	9.7329	6.0624	4.2384	3.8176	12.6487	8.1964	7.2966	10.5855	11.5317	8.8041		0.715449	8.47416
12.2391	8.2666	12.2275	4.0114	6.6459	11.3615	14.0474	18.3376	8.5407	7.0738	9.2349	9.1705	8.458	9.6358	5.0862	10.1851	9.0685	7.2705	4.3537	8.5537	7.6086	6.3828	8.5553	15.4546	13.5638	12.637		0.723578	9.42926
12.3766	7.0157	9.1989	3.6916	9.1482	4.4709	10.5548	19.9508	7.4357	9.1462	8.9711	4.5078	4.3442	10.6512	9.6745	6.2301	7.639	8.4907	6.8749	8.4125	9.8862	9.097	6.5011	18.9432	14.1332	13.2248		0.731707	9.12777
12.5142	7.8008	14.9085	8.4184	7.7046	8.0831	7.3589	14.8873	7.3978	9.2563	8.8906	8.4813	4.3286	8.7159	10.9659	8.2902	9.5632	8.267	7.8802	8.4666	7.8305	3.4622	6.4632	25.0553	22.6658	11.2833		0.739842	9.85702
12.6517	5.9456	12.8057	7.7449	6.4595	8.7929	8.1801	17.5379	10.3805	9.8502	8.9758	10.5868	6.6433	7.4682	9.4404	9.389	9.9201	6.6902	8.1173	9.9886	9.9044	5.6211	5.7868	16.7719	21.5567	10.8571		0.747971	9.8166
12.7892	11.0532	9.8549	11.5169	7.4567	9.6212	9.5854	15.8005	10.7103	6.7739	7.74	10.5618	4.4079	6.1623	9.9718	11.2613	7.3877	7.0465	6.3419	7.9153	11.9826	7.9545	5.5789	21.5567	21.8341	13.1867		0.7561	10.1305
12.9267	9.1847	15.6634	10.6832	6.8183	6.6949	5.9908	16.3681	6.225	7.3748	9.8388	10.3335	4.1355	8.7539	8.3334	7.7673	9.6194	6.6353	4.3395	3.8075	10.0821	4.0634	4.9213	24.5022	17.4593	8.3592		0.764229	9.11819
13.0642	12.6238	14.3431	10.4653	8.6989	9.4644	4.3657	15.9327	6.6022	6.6886	9.3362	11.5468	4.036	7.8725	5.5887	11.0058	7.3677	9.6169	6.098	5.1107	7.8947	3.8446	4.0261	18.7793	11.9428	8.8542		0.772358	8.88423
13.2017	11.278	19.5055	6.9221	10.7424	8.204	5.4313	7.1763	11.4402	8.8664	8.483	9.4194	5.2776	8.0244	4.8655	8.316	8.0077	16.06	6.4253	8.0055	10.4248	7.3949	5.8645	11.958	14.0593	9.5025		0.780487	9.26618
13.3393	9.28	20.8134	5.9311	9.6155	3.8311	7.1589	11.2799	7.4359	6.2148	9.9619	9.0545	7.4776	6.1392	10.0306	7.4058	7.9287	16.8486	7.8164	6.5197	9.4443	6.3955	6.9803	12.1901	11.5831	11.9686		0.788622	9.17222
13.4768	4.8786	19.1578	7.5063	10.7753	6.3193	8.5386	4.8453	5.8512	5.2351	6.8525	8.5473	5.2772	6.8474	9.6583	8.8055	8.1656	14.7884	9.4616	6.6337	9.9652	5.4831	7.8949	9.8886	9.7731	9.9957		0.796751	8.44582
13.6143	9.1681	14.8803	7.0407	11.2057	6.8466	9.0741	5.6387	7.3221	5.5197	5.0889	6.3006	8.3286	9.5299	6.1207	5.9242	8.8353	16.335	7.8341	7.2943	6.0822	6.0556	8.5536	4.2451	10.3809	9.7563		0.80488	8.13445
13.7518	13.3564	12.6733	4.8606	8.6084	7.117	7.4178	10.2986	8.6581	5.2383	5.5476	8.329	6.0032	8.8996	10.5291	4.9232	5.7018	21.2076	6.3308	9.7069	8.3419	4.3934	5.6492	8.409	9.1005	7.6127		0.813009	8.35656
13.8893	8.7652	12.2954	3.0643	10.1144	5.8653	6.5673	8.3887	12.594	7.6171	7.6999	6.6574	10.5067	9.3879	6.5463	6.4699	7.3142	21.2681	7.6525	9.1304	5.2793	7.2921	3.7023	6.692	7.9087	7.5107		0.821138	8.2516
14.0269	11.5115	21.2239	4.3356	8.848	8.1669	7.2622	6.9843	9.0379	12.9226	5.6864	6.3608	6.8617	8.2413	7.1754	10.9069	8.7441	18.4326	5.6724	7.3742	11.0037	6.3102	5.5195	9.0102	8.0482	5.5613		0.829273	8.84807
14.1644	9.7477	21.9592	6.5241	13.3376	11.1809	6.6372	7.603	7.3874	9.3758	5.9072	4.968	6.9611	10.693	7.5542	7.5038	9.4064	18.5185	5.2025	8.5084	7.8061	5.8384	9.2927	9.54	6.0412	4.3295		0.837402	8.87296
14.3019	13.5551	13.5777	5.1761	13.2388	7.3023	6.5699	11.2408	4.0345	9.7226	8.0211	7.8719	4.1049	6.3714	5.8942	8.5369	8.0204	21.324	5.5171	7.285	5.3112	6.0299	7.0316	11.4689	4.2345	7.9257		0.845531	8.37466
14.4394	7.6509	13.1528	5.1098	16.4114	10.8003	9.1716	9.3136	7.2691	9.5283	9.4434	6.7439	8.871	6.6875	6.8278	8.6963	6.8892	15.5073	8.9408	10.367	5.1902	11.4281	4.4304	4.4961	7.5995	4.2828		0.85366	8.59236
14.5769	6.8225	11.1399	5.6705	12.2734	9.2974	10.5061	7.3726	12.0145	9.239	12.0142	5.834	6.6199	9.5045	6.3328	5.7163	9.2412	17.6566	8.3758	8.4539	9.5681	9.4062	5.8319	6.0967	7.7484	6.6125		0.861789	8.77396
14.7144	7.1529	12.4339	3.4633	11.9146	7.6167	9.4124	8.5865	9.2084	11.8142	7.181	9.4016	8.2479	8.5437	7.2044	7.116	7.2364	12.6805	8.472	6.8694	9.7777	5.7645	6.009	5.0637	8.6184	7.4158		0.869918	8.2882
14.852	9.9868	11.31	7.4987	8.6832	9.3202	12.0859	6.1539	6.8793	8.7116	6.9888	4.1735	6.8286	9.493	11.7917	5.9062	3.7231	16.186	8.5162	6.3457	7.0442	7.2603	6.5472	5.0513	6.4081	5.6841		0.878053	7.9431
14.9895	10.0362	10.2678	7.1614	10.8879	11.6398	10.0096	7.2065	10.055	8.8958	6.254	6.0095	7.6174	7.5991	15.7337	8.1195	4.9566	10.3277	5.2724	8.272	8.7786	5.6204	6.4157	4.3893	7.8359	5.263		0.886182	8.18499
15.127	9.1697	12.848	7.824	8.4498	14.4146	8.9174	6.8078	8.9372	10.1858	7.1167	7.521	10.8867	5.7016	7.6303	6.4841	6.1793	6.1902	5.9523	9.2054	7.3954	9.732	6.8934	5.7313	4.8044	5.5274		0.894311	8.02023
15.2645	11.9364	8.6458	5.6517	8.9958	10.4306	7.4956	7.3474	9.0205	12.3626	4.7811	11.2269	11.1329	10.6313	8.8469	7.7565	5.6217	5.7219	3.8134	6.4862	5.3088	7.8717	6.1999	6.7755	5.399	5.8042		0.90244	7.81057
15.402	11.5595	7.5223	12.3261	6.7361	12.3948	8.3462	6.8389	11.7976	14.0614	8.698	4.3425	7.9064	9.4231	8.7557	7.0673	4.5266	4.0198	4.7945	7.5788	11.546	7.9831	6.1695	8.7851	4.9454	5.619		0.910569	8.14975
15.5396	11.0453	7.0956	8.1409	10.6333	12.216	8.2095	5.8816	13.1548	11.1395	9.464	6.8585	8.9948	9.4261	7.123	9.544	4.6529	7.4311	5.8544	6.7394	8.1879	6.535	5.4983	5.0481	5.9262	3.6664		0.918704	7.93866
15.6771	4.3668	7.5274	5.1846	13.7938	10.2107	7.263	4.3127	8.8387	10.4171	8.7277	6.4115	4.9866	9.42	6.7585	10.8418	3.9102	8.045	10.2047	5.9104	7.1011	6.4511	4.7567	8.346	7.3293	3.2982		0.926833	7.37654
15.8146	6.4699	6.1416	10.9596	8.5966	10.9794	5.8175	3.3336	4.1448	9.9579	7.5902	7.7839	6.6038	5.5897	4.8873	6.4818	5.6873	4.8251	8.1851	5.8293	7.6252	7.2263	5.1437	6.3257	5.6705	6.1775		0.934962	6.72133
15.9521	12.4063	8.4247	11.668	10.3002	7.6273	9.3513	3.7601	4.9773	10.5179	7.6707	11.0677	6.7197	7.1155	7.9828	6.8394	4.634	7.6378	6.0834	8.5443	9.0538	7.8667	4.4057	6.7365	5.4453	2.7423		0.943091	7.58315
16.0896	8.1523	11.3382	14.1327	10.4531	4.6466	10.397	5.9863	5.3213	10.706	10.3821	7.6726	7.4709	9.2594	9.6687	7.6458	3.3274	6.4552	5.2798	4.727	9.9564	9.1166	6.6438	5.3272	6.6238	2.2418		0.95122	7.71728
16.2271	7.3969	6.8168	11.7957	10.7236	7.8819	6.9588	5.9733	11.4275	7.6771	8.298	7.6401	7.8447	7.484	6.9271	10.2918	3.291	5.2484	8.107	3.2185	8.9464	6.9352	4.7031	5.0684	8.1024	5.5025		0.959349	7.37041
16.3647	6.7935	7.2369	9.3829	8.5984	9.1078	9.4579	3.8286	10.9415	11.5745	6.3329	5.758	6.8118	2.7603	7.0362	9.0085	3.0683	4.6595	6.2107	4.3714	5.9574	8.8409	6.5565	5.2349	5.329	2.3511		0.967484	6.68838
16.5022	6.5777	9.2994	10.1588	7.1407	7.2593	7.0954	5.9248	7.7076	7.3211	5.7484	5.2687	7.3873	4.9171	8.2492	9.9909	3.0519	7.0409	5.5547	4.5706	7.793	8.4111	7.5689	7.9645	3.1893	4.5157		0.975613	6.78828
16.6397	4.9122	8.0137	13.0018	9.0404	6.395	7.4351	8.0738	13.4769	6.5867	7.0875	6.5315	8.5701	6.399	7.6128	8.8275	4.8164	7.8635	7.5527	8.062	9.9827	4.9045	6.3093	6.4694	3.9166	4.659		0.983742	7.46
16.7772	6.3023	8.7523	10.8249	9.6401	6.7027	4.7303	3.9257	6.8184	5.6038	6.8996	8.8837	6.9899	5.6585	7.7792	7.092	8.6184	7.1925	8.2093	2.9145	4.8608	4.1994	6.264	6.0113	5.0167	5.3248		0.991871	6.6086
16.9147	3.7499	5.1574	12.7274	8.3205	9.2146	6.9662	5.6837	9.3213	6.2635	8.8191	8.0628	10.5207	4.245	7.0127	5.1411	5.5651	4.74	6.564	2.6764	7.3492	2.2562	4.8719	7.1863	6.2568	4.7045		1	6.53505

## Sheet: Image5
X0	Y0	Y1	Y2	Y3	Y4	Y5	Y6	Y7	Y8	Y9	Y10	Y11	Y12	Y13	Y14	Y15	Y16	Y17	Y18	Y19	Y20	Y21	Y22	Y23	Y24		AP-Basal	Avg intensity
0	16.5882	9.3193	5.7931	8.8427	6.5144	9.5622	15.8247	12.3156	8.6874	11.8884	13.3404	16.0049	9.094	16.3933	18.7245	7.1798	19.836	10.2942	16.9898	8.1351	8.2188	17.2511	12.229	8.4879	14.6461		0	12.0864
0.1375	19.1525	8.2241	11.2739	10.5455	7.4422	10.3904	16.5763	11.6459	10.6435	11.2376	15.7921	16.6397	11.2951	14.7311	18.8414	14.1462	14.8259	15.4768	12.6683	12.5169	10.435	13.4034	10.7616	15.1901	13.5774		0.00746171	13.0973
0.275	19.3043	7.6029	11.0104	11.3533	6.67	18.9003	17.6136	15.5849	12.1493	13.9804	15.3236	19.5907	12.6945	23.2012	17.6067	13.1149	14.4435	27.5281	13.9371	14.7336	15.1706	21.5292	13.1629	16.7523	11.839		0.0149234	15.3919
0.4126	20.2218	10.5255	15.0977	12.2833	12.0232	11.2522	17.1586	22.271	13.5593	17.9112	14.305	24.0019	18.2718	22.0724	27.5008	14.3552	11.6404	20.558	11.2965	10.1998	19.3677	27.2931	13.1757	19.5962	12.535		0.0223906	16.7389
0.5501	22.6345	16.6385	18.8601	11.6316	11.9652	11.5786	20.1422	23.0153	14.253	18.8609	23.2251	22.4996	15.2406	21.5838	27.4612	22.0051	21.3638	16.8821	12.9409	16.3129	14.3193	27.6948	17.6687	18.9002	24.0707		0.0298523	18.8699
0.6876	22.826	13.5761	24.0064	9.5837	16.9789	13.7041	23.0307	20.663	17.9567	18.2901	23.8056	27.862	17.0108	26.4061	40.7378	17.2075	25.4301	15.0872	19.2205	17.26	20.0939	24.4946	22.6881	18.3915	22.9011		0.037314	20.7685
0.8251	28.3614	17.2623	23.0932	14.7577	15.2887	18.3591	21.0749	19.6113	17.3276	22.9394	22.608	27.7126	22.2446	23.3132	34.5974	17.4974	23.0625	18.7765	21.6888	17.2412	16.6726	33.3793	15.6594	20.0913	20.4777		0.0447757	21.3239
0.9626	31.8136	23.9179	30.8451	14.386	19.9126	20.515	28.9785	33.1269	14.4765	26.275	26.184	35.2164	22.3471	22.001	35.4589	14.2429	28.7518	25.5533	15.5172	23.1838	16.7306	23.4737	21.7543	23.6677	26.5912		0.0522374	24.1968
1.1001	36.8813	25.1897	33.3416	21.3479	22.3423	25.9565	23.6499	25.1178	19.6562	33.2388	25.8817	28.5608	18.533	25.7436	42.8067	17.5857	20.4075	28.1063	22.0986	18.5287	21.4788	23.609	26.6833	24.2059	21.4178		0.0596991	25.2948
1.2377	35.2378	23.2531	30.7781	24.8389	24.4222	27.3356	29.7781	23.6124	28.3286	26.7714	33.5758	33.8187	22.8627	30.0181	46.092	15.4248	20.3467	28.2619	23.0451	19.7377	17.5324	26.3442	22.7282	23.5028	24.8124		0.0671663	26.4984
1.3752	32.3536	32.2646	39.0373	21.5933	24.9393	27.333	30.6653	31.3227	26.2534	30.5553	37.943	34.8022	18.4334	20.9176	40.7467	17.2178	20.3204	22.5939	17.9217	23.377	20.4192	26.9248	25.5334	26.0901	26.3963		0.074628	27.0382
1.5127	40.3032	32.5025	27.3838	22.3688	29.1292	31.2848	31.9358	26.6605	26.9537	31.9157	34.1047	32.6728	17.7303	19.2553	37.1933	17.2527	20.1729	21.0354	21.1474	25.3033	28.3657	29.3381	28.3928	29.183	32.6161		0.0820897	27.7681
1.6502	41.2446	33.8094	30.6513	25.1595	28.2422	39.9037	34.4459	25.9751	34.7898	27.6777	29.5758	29.9268	20.669	23.4533	26.1472	24.1196	39.35	26.082	20.7928	25.8384	21.7588	24.6393	20.6712	33.5795	35.5062		0.0895514	28.9604
1.7877	37.3534	24.6983	31.1209	27.1082	27.2372	35.2829	31.0848	31.5938	36.0692	26.4952	36.6597	27.4966	19.5598	27.9695	29.0247	22.8402	30.2515	25.9274	24.872	17.0002	26.4944	25.3025	24.8427	23.1944	35.3842		0.0970131	28.1945
1.9253	39.0579	28.1321	25.4254	23.5927	31.4125	40.0736	26.2732	34.4464	27.6842	35.1148	35.8671	27.0229	17.0745	20.0185	35.1048	20.5228	25.6588	28.8827	19.9581	18.768	27.2888	30.7784	24.0223	26.1522	28.4689		0.10448	27.8721
2.0628	33.6793	28.3172	38.1213	25.7317	40.2772	35.4636	28.0151	33.432	28.2138	32.3799	31.6835	38.3329	19.3467	28.5098	35.2483	15.0118	30.2853	26.1984	18.3539	31.1937	31.1423	30.4947	26.632	23.8324	30.5379		0.111942	29.6174
2.2003	30.7943	34.3359	40.2672	26.5362	33.386	48.4391	21.0863	39.9069	31.3809	34.647	42.4367	37.8942	16.4844	25.2608	45.0081	19.5064	36.5118	21.7568	26.4654	26.5501	26.3954	31.6434	27.082	24.7872	28.8236		0.119404	31.0954
2.3378	42.2022	32.3042	43.4327	27.9545	29.2772	44.2993	26.8015	38.9325	45.2823	39.1482	34.9226	38.4832	23.3485	22.423	34.469	24.6168	37.6524	28.7872	26.1939	27.5531	25.9007	32.657	20.9137	29.8522	25.6371		0.126865	32.1218
2.4753	33.738	24.9339	36.7809	38.2274	29.5098	42.7824	25.441	42.3342	43.3606	34.8653	32.9225	32.8925	23.5589	24.0195	35.7257	26.1035	27.2775	23.3195	19.5897	22.3417	22.9733	26.8336	22.6622	26.1981	29.9767		0.134327	29.9347
2.6128	31.3681	29.6864	30.393	38.9532	27.0595	47.6593	29.3486	35.6929	39.3166	35.2763	23.7999	30.5412	21.4746	31.2529	33.831	14.844	27.824	27.4302	21.6741	18.6578	20.1688	25.1326	19.2894	28.9714	28.3387		0.141789	28.7194
2.7504	30.2134	27.7011	33.2827	33.4117	26.9721	39.219	28.7413	31.2816	40.5957	33.1018	22.7684	36.8718	18.4889	35.8244	27.9281	18.249	32.9349	22.3832	21.5971	22.4538	20.3899	26.0235	18.3087	19.6576	22.7819		0.149256	27.6473
2.8879	28.5543	30.8129	40.0605	43.0759	35.7155	33.6425	29.8788	37.3066	38.0303	33.5971	24.3073	35.3475	26.0623	22.9322	23.1799	17.3604	39.2467	27.7178	21.0498	22.6828	18.8903	27.4435	16.8105	20.6212	22.5529		0.156718	28.6752
3.0254	23.96	25.1276	41.2824	43.1247	31.0266	33.7914	24.4979	22.0872	31.7108	19.0147	19.3519	28.5589	25.6222	23.7861	23.6839	14.3576	31.912	23.6874	15.9804	21.3292	19.4233	32.3349	15.0872	24.7918	20.6879		0.164179	25.4487
3.1629	18.7076	25.4347	32.2086	40.1253	35.774	32.0295	19.8388	25.2832	36.0102	20.3461	15.4778	26.6368	20.1962	22.8549	26.2142	13.2035	28.7578	26.018	19.1706	14.7085	24.1564	41.1997	19.9883	22.4105	20.3374		0.171641	25.0835
3.3004	16.3674	26.462	34.794	39.5248	29.0853	31.3239	20.083	29.6119	35.0663	21.1504	16.2846	28.223	20.9117	21.8261	18.8605	12.0358	34.2157	22.2573	16.664	19.3457	17.4915	38.2755	18.4174	30.9878	19.7807		0.179103	24.7619
3.438	19.592	17.8729	28.1464	28.8545	32.3773	34.5577	16.0304	31.3062	34.1408	21.4025	15.1425	26.8498	22.1179	28.0513	20.4349	13.2667	34.0082	26.627	22.5694	19.4784	19.3739	32.1161	17.3778	27.8313	13.4636		0.18657	24.1196
3.5755	14.6999	16.8418	32.3173	37.5338	35.8954	35.5591	21.15	31.967	31.7317	17.9923	18.539	22.5442	16.861	19.6828	19.3561	19.0019	25.0252	23.9173	24.4908	15.4134	10.7203	23.3175	8.7206	21.3468	14.91		0.194032	22.3814
3.713	19.0206	22.8576	29.0878	31.0489	37.1476	34.2891	18.3436	25.5558	28.3702	16.4151	13.6821	37.5217	9.3212	20.7552	17.3343	13.2759	24.2148	23.4464	21.1692	17.697	19.5591	29.1942	10.1419	21.5289	15.193		0.201493	22.2468
3.8505	17.1543	21.6388	24.1404	23.7709	34.3385	29.6995	16.3504	31.3989	43.5718	12.0908	13.5414	24.4527	10.039	13.8093	11.0956	15.9422	17.3212	15.7315	17.633	15.0197	17.3376	18.3024	11.178	18.6332	12.5705		0.208955	19.4705
3.988	23.2506	18.344	27.3978	20.8712	27.1239	38.7954	16.5604	34.2453	30.223	16.1202	13.4815	27.3893	10.4746	16.3106	11.8633	12.3459	20.2571	16.1036	16.3272	18.3668	16.982	17.5822	11.8278	18.1129	12.8739		0.216417	19.7292
4.1255	15.8485	23.8345	30.1867	18.5936	19.6687	41.6269	14.695	35.1182	27.2079	17.5635	17.6377	35.9667	15.9386	16.6992	13.9356	16.3123	21.5154	20.3831	16.6375	17.5517	21.8496	21.6017	14.8976	19.1538	10.9183		0.223879	21.0137
4.2631	17.6294	18.9265	28.3462	13.2454	22.0961	29.7616	21.5622	26.6618	24.9623	14.8154	16.9206	32.0767	18.1616	15.6497	9.8672	18.2283	17.9273	17.5276	16.1034	20.3231	18.2218	20.6882	14.6555	24.9141	14.4164		0.231346	19.7475
4.4006	14.097	14.3565	32.6986	18.5065	21.3052	33.8134	19.2108	32.7982	23.3285	13.8423	16.4735	27.5465	12.5922	10.368	12.7823	11.7202	26.9858	18.7458	13.1611	20.9381	12.2187	15.6272	9.7468	15.7541	13.7332		0.238807	18.494
4.5381	13.1763	15.3639	30.5009	21.77	25.5082	31.4969	18.4184	25.5991	21.0975	19.7964	14.9669	35.1076	18.0973	22.1132	10.1868	12.7912	19.8479	14.0599	16.2511	21.0848	17.367	19.1658	8.8762	13.5283	8.8472		0.246269	19.0008
4.6756	11.9009	18.2482	31.8135	15.6699	24.5249	20.3177	13.29	24.9844	22.2536	21.6188	13.1953	26.0087	17.2969	19.4145	17.49	16.3348	16.213	13.9996	19.816	16.0639	13.1607	19.3643	10.0447	12.7168	14.4822		0.253731	18.0089
4.8131	12.145	12.5086	29.1092	14.0432	15.3408	28.9014	14.6103	21.6816	30.0094	21.7521	21.5376	19.1159	10.2424	17.2352	18.2289	14.2181	15.1485	17.2268	18.0064	14.04	13.3699	17.1975	9.7207	12.5714	13.3125		0.261193	17.2509
4.9507	7.2987	18.8138	27.0065	14.8569	21.323	19.4438	17.5893	19.4703	23.8639	17.5437	20.9765	22.7775	12.5896	14.2894	10.1354	15.6858	16.8162	17.8354	16.5929	12.8141	14.4911	12.2282	9.8133	17.4079	11.8611		0.26866	16.541
5.0882	11.1667	17.9795	25.4788	12.3562	13.8579	21.4402	13.7483	19.4377	20.7443	10.1676	20.2145	23.5802	15.7788	16.4791	11.767	12.5579	16.3573	15.7702	15.644	17.1314	13.953	10.6922	12.3101	11.6289	17.3999		0.276121	15.9057
5.2257	8.3668	23.1554	18.2203	13.9814	13.4395	21.0022	19.9341	16.0846	30.7353	14.2271	19.0522	23.2501	16.323	15.66	11.3167	12.5873	13.2872	17.0168	12.8495	12.5012	18.1251	8.7549	14.8302	14.961	17.2787		0.283583	16.2776
5.3632	7.6833	23.155	19.9714	13.3702	10.8649	14.7848	14.907	10.4863	24.2873	13.931	19.5573	17.3245	13.4422	12.4143	17.2916	15.455	11.4354	8.1189	12.0716	11.7808	13.7354	12.5108	16.0842	14.2135	20.3238		0.291045	14.768
5.5007	10.0041	23.9477	21.4226	9.882	15.7195	13.6423	12.7281	16.3858	18.8625	15.7588	26.264	14.535	8.0213	9.1417	16.9285	21.5233	18.1532	11.7028	10.4194	20.2255	16.6622	10.1339	14.7248	13.4915	16.2114		0.298507	15.4597
5.6382	11.1141	26.0035	17.8256	11.4182	22.0237	22.5569	14.2254	10.4264	15.3186	11.5522	15.1461	16.4053	8.8233	8.6853	11.2805	24.7336	15.2686	12.7554	19.1342	19.2464	15.3411	11.1482	15.8391	12.2627	12.8286		0.305968	15.2545
5.7758	8.7861	21.6356	18.8903	12.361	16.7455	11.6732	11.9578	13.8091	20.1012	11.8963	17.5956	18.5869	8.5322	9.9738	16.2814	11.9731	13.9681	9.9835	18.7998	8.7482	14.8893	9.6568	15.3795	12.9636	11.011		0.313435	13.848
5.9133	8.9287	26.4477	22.4016	10.7928	12.0549	17.2509	13.91	13.7377	28.8749	10.0815	13.7421	18.4245	11.0895	8.333	15.4304	16.3655	16.321	6.8204	17.1589	10.2193	17.3436	5.7729	13.1994	17.1502	9.2161		0.320897	14.4427
6.0508	7.6533	20.5841	21.4682	12.7693	14.4015	18.4148	15.8768	12.003	16.7334	13.8048	14.4176	14.6101	16.3982	10.4947	14.5679	16.28	17.5584	13.3374	13.9825	16.1623	10.3533	5.4767	16.2643	18.3472	14.5311		0.328359	14.6596
6.1883	11.0172	20.0535	15.8563	8.0326	16.5952	17.9834	17.8474	12.8746	21.721	11.323	18.0037	14.2185	17.8827	10.0222	17.2185	12.4188	17.6403	11.475	13.4959	9.6801	9.1067	6.0079	11.2592	12.8762	11.7586		0.335821	13.8547
6.3258	9.4692	21.658	17.1786	9.5561	22.1305	13.8268	13.9267	11.3446	28.5566	13.0763	17.7041	14.4713	23.2559	10.2223	10.9256	15.6158	14.0507	11.3792	12.6364	10.1634	16.7391	10.4171	15.805	10.3961	9.9081		0.343282	14.5765
6.4634	8.7444	12.364	18.4124	15.7567	20.3833	17.0312	12.1764	13.0279	26.1071	7.8713	15.2398	12.2342	20.1891	14.2442	13.4122	15.5056	10.514	12.5467	14.5072	7.975	16.531	7.262	16.4306	21.3148	7.2815		0.350749	14.2825
6.6009	7.6658	12.0933	22.2814	17.6766	12.2351	19.1264	9.1857	10.7452	29.3904	6.8864	15.2166	13.0631	18.9778	17.1027	15.1994	9.3173	9.4603	12.3743	11.0919	8.7053	14.4909	7.8797	14.2712	10.781	4.8954		0.358211	13.2045
6.7384	10.4767	9.4925	23.8774	12.1379	10.3263	18.3628	14.6405	8.3234	28.743	10.5707	12.5108	6.4651	12.9303	10.2611	10.7952	11.8281	11.4553	18.1871	7.2446	9.9381	11.7331	11.4883	12.4007	15.0531	9.6839		0.365673	12.757
6.8759	10.6784	13.9718	17.7991	13.0603	13.9461	15.0609	10.9699	10.6914	23.8639	12.3962	16.2967	10.0456	18.5435	10.241	13.4654	9.1176	14.3188	18.8698	10.731	9.1979	14.1087	10.1811	13.1292	12.4379	9.5915		0.373135	13.3085
7.0134	13.2933	13.3999	14.8727	10.778	16.417	16.9747	8.9804	10.5031	30.4333	13.0413	15.8843	11.8291	13.1543	13.8114	15.8487	9.0443	14.6956	15.5515	10.8189	7.5926	13.7229	13.1998	10.882	13.3307	11.7064		0.380596	13.5906
7.1509	11.4601	12.2123	18.8174	7.2319	10.4832	19.2205	7.6365	5.5122	26.9739	9.4648	10.9587	12.7316	13.2986	9.2949	17.8209	11.9699	13.1996	14.787	10.9406	7.1422	9.9918	11.617	11.7852	11.9391	11.1832		0.388058	12.3069
7.2885	9.4666	12.3035	17.4488	10.0211	13.3663	14.057	9.2108	3.971	20.4	12.1026	12.8037	9.3009	16.1807	11.8583	12.7358	14.0477	13.6612	16.6148	11.5363	10.2262	11.0781	10.1022	10.3117	9.3533	8.7964		0.395525	12.0382
7.426	10.3854	14.7965	11.2568	7.9767	15.3752	12.0246	9.1066	6.1276	22.6401	13.484	14.2571	12.436	17.7455	9.8925	13.2032	7.4773	14.9612	15.2085	10.7157	8.2552	9.5319	5.9341	8.706	7.613	8.9277		0.402987	11.5215
7.5635	7.434	18.2369	8.894	5.8445	14.6928	11.6459	5.7299	6.4619	23.4132	12.9995	16.6259	11.3058	8.8809	8.1088	7.9735	8.3151	11.7778	9.9995	8.9559	6.9281	9.6545	8.2789	10.4848	7.5693	10.3602		0.410449	10.4229
7.701	6.789	14.8942	11.9704	9.9839	11.6975	9.6417	7.6578	7.171	25.2482	11.5035	14.9737	12.1329	10.0419	8.52	12.2667	9.3739	10.6098	10.1209	9.0709	11.5977	14.0058	8.992	9.0622	9.2146	10.4677		0.41791	11.0803
7.8385	8.3194	12.0669	11.6707	9.3862	11.5747	8.8239	10.4856	8.178	21.1486	13.7862	12.7385	15.2146	11.0469	10.5073	8.8833	9.9508	10.1785	10.7074	7.6387	10.1967	10.9645	9.8393	12.0236	9.3686	10.5524		0.425372	11.0101
7.9761	8.337	10.2441	7.6386	10.2981	12.6075	11.9581	5.0026	11.6894	25.6985	13.8676	13.8572	11.7755	9.0298	5.7868	15.9884	10.2809	11.4137	10.775	13.4795	9.0515	10.2864	5.449	13.9276	12.3572	10.6015		0.432839	11.2561
8.1136	6.5835	7.8761	8.0414	9.0006	10.0261	12.6425	8.231	9.2764	25.6576	14.3739	17.3715	13.512	7.3189	7.8194	5.5563	6.6964	10.0104	16.2897	16.769	11.3467	9.8759	7.9578	14.0216	11.9028	7.4121		0.440301	11.0228
8.2511	7.7712	11.6853	9.526	8.3355	7.9353	12.7448	10.3483	10.0114	20.384	9.7393	16.8025	11.607	7.4805	8.4583	8.3323	6.863	12.3574	7.9412	16.6458	9.1543	9.1292	6.5098	10.5362	8.6166	7.2012		0.447763	10.2447
8.3886	7.5106	9.0064	7.3042	6.6085	9.1105	11.7721	9.1387	5.8385	19.2569	13.7846	11.8266	13.0529	8.7167	10.783	15.1169	10.1449	10.0811	6.1794	11.9758	7.4026	9.2357	6.5195	13.1729	10.4608	8.9059		0.455224	10.1162
8.5261	7.7226	10.5184	7.2207	8.3934	9.4978	11.2201	5.4757	5.3478	11.8412	12.3251	17.9609	11.1794	9.5824	7.5246	11.4371	6.6297	11.6607	10.3102	10.8955	8.8617	12.5662	7.4573	10.8089	6.3646	7.3425		0.462686	9.60578
8.6636	7.7201	5.9342	7.1203	9.388	9.8183	7.9149	5.6774	4.851	18.5379	8.398	16.841	14.6025	5.5502	9.5122	10.3359	4.8798	9.1592	9.1287	14.461	6.3071	8.2197	4.4876	7.3574	8.5257	8.4302		0.470148	8.92633
8.8012	5.7991	8.2784	7.2617	9.8177	12.0319	6.024	11.4603	4.2047	19.326	8.5801	11.4075	13.2651	9.4613	8.3339	9.9902	5.5464	9.508	8.2199	19.4326	10.5087	8.0131	8.4197	11.1678	7.6688	4.8257		0.477615	9.5421
8.9387	5.2542	6.9117	8.0924	10.1109	12.0873	5.063	7.4972	8.1008	12.0015	8.2561	8.8321	10.7588	12.8639	11.1635	7.619	5.8711	7.2623	6.3034	13.0678	10.4718	9.275	7.9161	9.8267	6.7485	5.2318		0.485077	8.66348
9.0762	5.7181	6.5136	6.6492	16.3503	5.752	4.3439	7.9087	7.1969	8.6015	8.7277	8.8885	14.8797	11.3334	9.8824	10.6387	6.9731	10.1411	7.7096	11.3523	8.3915	10.0734	7.4824	9.9911	5.3603	8.5951		0.492538	8.77818
9.2137	10.4402	11.0944	10.9509	15.5386	9.483	4.2139	5.7438	5.0535	8.0096	13.0039	10.8989	12.204	7.8279	7.4278	7.7472	7.2313	15.5203	7.691	15.7388	8.7773	11.6058	5.7103	5.6475	5.2027	10.3462		0.5	9.32435
9.3512	6.9316	7.5271	8.2504	14.2284	7.8033	6.5549	6.1519	4.943	12.0422	9.2959	12.0832	11.8935	9.0761	10.6125	10.5912	6.1866	12.1014	6.8238	9.4721	8.5063	8.9994	6.3196	6.0011	6.8946	10.4918		0.507462	8.79128
9.4888	7.6866	7.0019	5.223	19.9328	5.7617	8.0626	8.7574	3.6861	7.6924	9.1575	8.7279	10.5721	7.7411	12.6646	9.6134	10.6633	8.8248	7.6206	11.6864	8.8208	5.9689	8.9694	6.4289	5.9207	7.5356		0.514929	8.58882
9.6263	9.1848	6.4157	10.9311	16.6369	6.1002	5.6605	7.9433	6.2794	7.3476	12.7584	8.9633	10.7964	7.0856	7.604	7.0341	5.7119	10.9802	8.8333	6.5442	7.0816	7.4081	7.7888	11.0655	5.9681	7.0953		0.522391	8.36873
9.7638	4.8428	5.832	13.4897	14.9364	8.1524	6.5398	7.9601	7.0172	8.0994	9.2931	9.147	8.6251	6.0413	10.6217	8.0675	3.03	10.4591	7.4987	6.2969	6.7229	6.2906	9.0818	7.8066	7.307	8.5263		0.529852	8.06742
9.9013	6.5676	8.7282	8.1735	20.0884	6.7177	7.9018	6.9468	6.1633	13.1498	8.6102	9.021	6.7889	11.4046	11.8866	10.3432	4.8324	18.6874	7.8584	9.7607	8.5219	6.9984	9.5317	6.5675	6.0062	7.8178		0.537314	9.16296
10.0388	4.8441	8.7137	8.7905	15.551	7.7287	9.0203	6.025	8.0311	17.3455	10.0165	9.1168	3.8245	6.6384	13.9812	6.545	4.5585	14.5662	4.959	8.014	4.7148	7.7216	7.1668	8.5634	8.1903	6.2256		0.544776	8.4341
10.1763	5.2781	8.4519	9.4876	11.9834	7.2666	8.6731	4.6603	8.8032	13.1353	10.9902	12.0738	9.6959	9.3998	10.6823	10.0674	4.2039	11.4575	8.3187	7.551	9.2145	13.9722	9.2361	7.9048	8.195	5.5618		0.552237	9.05058
10.3139	3.3338	8.0671	8.0607	8.0855	7.1426	9.029	6.3609	8.3108	12.3982	10.9873	9.6679	8.5448	7.1794	8.9115	9.8697	6.8933	10.6451	5.9869	8.6706	13.0101	6.9408	5.7649	8.0203	9.0221	7.0359		0.559705	8.31757
10.4514	7.6716	9.993	7.3745	5.9337	5.3546	10.8274	5.7569	9.2873	11.6003	10.4844	6.0946	8.9827	5.9465	6.5979	12.4364	3.9519	7.818	7.7543	7.7861	20.1259	6.2824	6.2989	5.1126	10.0345	8.6256		0.567166	8.32528
10.5889	4.4866	11.2443	8.8415	12.1147	8.5536	12.2905	7.8351	7.7418	10.6235	9.1961	12.1186	10.1197	3.7201	9.2111	8.3295	6.2382	6.9724	7.4899	12.3842	17.9169	6.1387	6.7186	7.7968	7.1474	6.1112		0.574628	8.85364
10.7264	4.7292	8.1114	9.1381	6.0799	7.9961	11.3469	9.9959	7.4874	10.3907	8.4724	11.0141	9.2854	7.1041	9.0937	8.7358	7.3774	9.4056	8.0989	6.8282	18.8231	8.4991	5.0315	5.1826	3.1323	6.5145		0.58209	8.31497
10.8639	6.9386	6.2112	9.2904	6.88	9.0171	14.663	10.8834	5.3765	13.5909	8.0522	10.3824	5.6164	9.0416	5.7594	10.4984	7.4559	7.3196	4.8694	8.0978	14.6538	5.8132	8.9933	8.04	5.8209	11.6873		0.589551	8.59811
11.0015	5.0861	7.4265	9.2904	11.5199	6.1644	9.886	5.3542	5.8815	16.7773	7.6808	11.4589	6.0758	7.6751	12.1047	11.0126	6.24	8.8737	5.2342	8.1931	12.6699	9.348	6.5998	10.526	4.2379	11.3364		0.597019	8.66613
11.139	6.4935	5.4707	8.3025	5.8026	6.933	13.9044	4.5383	6.5019	14.2352	8.6148	8.8444	6.2068	5.264	10.5046	8.828	6.4169	8.6875	4.3877	6.1174	8.8539	9.8178	6.156	8.0831	7.964	16.671		0.60448	8.144
11.2765	4.9027	6.2575	9.393	6.9808	7.3333	11.4402	7.6649	5.8078	12.6241	7.6147	11.8234	5.9267	6.0306	9.8373	3.9145	6.271	12.2632	8.4956	5.8667	10.1256	9.8284	7.1292	6.1052	6.252	14.1053		0.611942	8.15975
11.414	5.2676	8.5752	8.6269	8.6838	4.7627	14.4022	5.89	6.714	11.63	12.5011	13.5338	6.5542	10.3136	6.944	5.0653	5.237	7.373	5.0454	9.0678	14.1743	9.2454	6.6273	12.3501	6.5048	9.1678		0.619404	8.57029
11.5515	5.2485	7.8483	3.9313	6.7521	5.9089	11.4851	7.2954	7.253	12.1449	14.3236	12.4814	6.1918	6.3122	7.7686	5.045	3.0204	7.5019	7.0546	11.3187	7.9916	8.7744	4.8443	8.7019	6.7068	5.4994		0.626865	7.65616
11.689	4.3601	7.1078	7.4072	6.8821	7.2177	16.5377	4.9224	8.1533	13.7457	15.3188	9.588	4.5567	6.9339	9.2472	7.1839	7.8833	7.5347	4.7584	7.5967	9.4643	6.4128	6.5355	6.801	5.2	10.5188		0.634327	8.07472
11.8266	8.1907	8.7991	11.7493	7.6991	11.0444	18.2675	4.8059	4.2617	11.1786	12.8125	10.2631	6.6421	5.4302	9.4008	6.0899	5.8543	6.5121	4.9207	8.4275	5.4589	7.0848	5.2889	8.0765	6.4222	10.5935		0.641794	8.21097
11.9641	5.5979	6.4515	8.6178	6.3398	9.3659	12.1264	8.2214	6.3201	8.4931	11.3342	8.1362	5.9384	7.6026	5.7261	6.449	9.3859	8.5837	4.6491	8.2987	3.9393	5.7741	5.4003	6.7937	10.0432	9.005		0.649256	7.54374
12.1016	7.0543	10.579	9.9389	11.8336	7.1385	11.8436	4.6594	5.6468	9.0533	9.9105	8.1458	5.0369	5.7786	6.0274	4.3912	8.0182	8.6407	8.3483	8.0215	8.0836	6.1719	4.0281	4.978	6.7933	6.1581		0.656718	7.45118
12.2391	10.3644	12.0556	9.1253	7.7425	13.4259	10.4421	6.0211	9.3027	10.3504	14.0084	11.0484	9.7061	10.3027	9.915	4.7025	9.9551	10.8928	9.2831	4.7187	9.3092	8.8108	6.1356	3.7804	6.6743	6.5657		0.664179	8.98555
12.3766	6.2414	8.7071	6.1686	9.9583	7.0803	9.9668	6.1653	5.1639	11.2856	19.8057	10.2844	10.608	6.4154	9.8214	4.3005	9.6426	10.1912	8.1863	5.3908	9.1632	10.8983	4.3079	5.4459	7.4702	6.1695		0.671641	8.35354
12.5142	5.1723	8.6063	9.1382	9.4177	5.9362	5.3999	3.4781	7.4596	7.755	18.458	11.5814	8.6756	7.556	6.8057	11.7691	8.7973	7.6848	6.2846	7.8531	12.1321	9.1953	6.9228	4.4575	8.8492	4.581		0.679108	8.15867
12.6517	8.6021	12.3585	9.8205	8.774	11.4971	8.2526	3.7149	6.7357	8.2399	18.4115	7.0799	7.2232	8.21	7.1579	9.5861	8.0521	7.7051	3.4037	7.2934	14.0959	11.2506	4.0392	4.5412	9.2681	7.2325		0.68657	8.50183
12.7892	7.6158	11.5519	5.1841	9.1289	11.1863	7.7678	4.0575	13.5932	9.953	22.3378	4.7502	6.8949	9.2465	6.7998	6.4257	4.9921	11.3525	3.8953	5.7596	6.6512	5.8359	2.6056	6.0175	6.3956	5.6265		0.694032	7.82501
12.9267	4.5126	9.9883	9.8196	6.7774	6.031	5.3828	3.7646	11.1081	7.5071	16.3832	7.3976	9.3588	7.5701	11.4118	7.7704	4.7859	8.636	4.5855	7.0332	9.6528	14.4717	4.2034	4.1027	8.546	8.324		0.701493	7.96498
13.0642	4.1154	10.1716	8.6103	9.5059	8.9851	4.3692	5.0319	8.2487	6.6451	12.3908	6.912	7.6594	6.1695	7.4752	4.7492	5.1071	11.4124	3.4056	6.433	12.0345	11.6012	6.4798	6.9429	6.2519	9.8518		0.708955	7.62238
13.2017	3.3891	7.133	12.2806	9.3287	7.505	4.2275	9.6323	7.2849	8.186	15.7954	4.9386	7.1465	7.0685	5.939	7.2269	5.6169	8.8883	4.9486	5.8864	7.7098	7.5472	3.8817	6.307	6.4484	10.0011		0.716417	7.3727
13.3393	5.7993	6.3215	7.948	8.9865	7.8842	5.1963	6.329	7.6557	5.8615	8.281	4.4348	7.8248	4.5335	7.8016	8.524	6.6472	8.3893	7.0526	8.466	7.109	10.2617	7.4284	4.8455	5.409	8.527		0.723884	7.1007
13.4768	8.0217	6.6547	5.2857	9.8468	4.4058	9.4154	5.2875	9.6013	5.2083	9.5449	7.5069	6.8509	5.6489	4.2748	8.7223	5.8193	9.8261	6.7618	5.7737	7.0018	11.7317	5.8749	5.3824	4.6856	7.8399		0.731346	7.07892
13.6143	4.7815	9.0448	4.7576	8.5678	6.0479	9.5246	6.9649	6.3942	7.7497	6.172	6.0948	9.1745	10.4438	7.3304	5.9115	4.1434	13.6955	9.1517	6.5462	5.2562	10.5317	7.737	5.5215	7.0089	6.8757		0.738807	7.41711
13.7518	7.6045	9.3198	9.3487	9.3225	4.619	7.0315	6.281	7.8535	6.0372	5.6174	7.6916	6.9602	10.0734	7.9179	5.633	6.455	10.8918	7.3406	7.9791	5.9608	9.9214	9.5746	4.467	7.0921	9.9215		0.746269	7.6366
13.8893	9.5101	8.886	6.0247	10.3858	4.6018	4.4188	4.0821	7.7116	5.481	5.5319	9.6471	7.9667	6.9467	8.9217	11.9119	5.6082	11.9355	7.8867	4.952	5.1975	8.6945	4.3367	4.9128	6.4335	7.8083		0.753731	7.19174
14.0269	7.0365	5.9582	6.7037	8.1428	7.9426	4.6777	5.9207	7.435	6.3843	7.7626	6.5192	8.0477	11.4118	7.6107	9.7379	7.7889	10.3479	6.6283	5.7998	4.1938	8.6941	4.9266	6.615	7.0693	6.9019		0.761198	7.21028
14.1644	6.805	7.2637	9.244	7.9828	8.0033	5.1176	4.6618	8.1036	7.238	5.2464	6.2509	6.6231	10.3246	5.3315	6.6182	10.897	11.4478	8.8536	5.285	4.7951	7.5561	4.9366	5.8941	3.0114	5.2587		0.76866	6.91
14.3019	4.8669	9.0748	11.6926	7.6967	6.1918	9.2665	5.6177	6.8861	5.2778	5.7088	7.8675	9.3777	7.703	5.3062	6.6422	10.158	11.7432	6.5363	7.568	5.2283	5.8163	6.9515	8.6525	6.9691	6.5912		0.776121	7.41563
14.4394	5.457	8.2466	8.395	8.0755	4.8808	11.0343	5.1844	4.7421	4.6274	6.3351	4.2141	5.2729	6.3917	2.5853	10.384	11.6439	11.365	8.2049	9.8042	4.2865	9.2235	9.7013	6.6408	7.2078	6.3083		0.783583	7.2085
14.5769	8.0034	9.1252	9.0697	9.1173	7.2041	6.9427	5.5462	5.2297	5.5488	9.5587	8.678	5.89	4.0432	6.6272	11.3064	6.2117	8.4643	6.7288	7.3759	4.5042	6.8343	9.3572	6.3842	6.082	6.5176		0.791045	7.21403
14.7144	5.5011	8.2555	8.5962	9.052	5.8725	8.9148	5.6173	5.3443	6.0039	9.4464	8.8992	7.5605	8.5735	6.2899	10.1783	4.9933	5.9203	7.7243	5.3077	6.8882	8.3526	7.9315	10.1238	7.5005	7.7599		0.798507	7.4643
14.852	7.7934	6.6252	7.3879	9.2111	6.6341	13.1011	6.8763	2.5345	12.2846	9.4911	13.358	8.6316	8.4879	6.9016	7.393	6.807	9.7085	6.2455	3.5666	6.8837	9.7349	8.4061	6.0319	10.7576	10.5418		0.805974	8.2158
14.9895	8.8908	9.6127	5.8236	7.0844	7.0465	9.2811	6.038	6.9938	9.4883	5.8668	7.5819	6.8739	9.0907	5.8968	6.9366	7.2484	8.5922	7.7671	4.8727	9.2278	6.3025	7.212	4.8797	6.9905	5.8599		0.813435	7.25835
15.127	13.1838	11.0885	11.7337	8.1255	7.4805	7.1435	11.5187	6.4316	9.8799	9.4053	13.0683	7.3322	9.4045	4.769	5.6979	8.7301	6.376	6.2715	4.3293	9.3414	8.8587	7.6213	7.9232	9.803	7.2674		0.820897	8.51139
15.2645	6.0514	6.9635	8.956	6.6291	5.2229	7.2549	7.3386	7.9382	11.7422	5.5003	7.2431	6.3789	9.0189	5.3335	4.6081	7.191	9.3744	4.3708	3.7071	12.2366	5.8419	8.8485	9.9886	9.5934	6.2264		0.828359	7.34233
15.402	6.6592	7.4509	8.887	5.0208	5.0082	4.8786	5.4911	7.3692	10.5052	7.7002	9.8854	6.823	7.2217	9.5886	9.1268	5.2504	10.1194	3.7895	4.9838	13.554	8.4098	8.8765	7.7765	8.1544	4.2156		0.835821	7.46983
15.5396	6.9762	6.5204	11.4511	9.6108	6.7458	5.3279	6.4743	7.4027	8.9445	5.1551	12.9029	6.0382	8.7174	11.907	10.6815	5.4032	8.7144	6.4817	3.678	7.3551	5.2196	7.3161	7.8365	6.1488	5.4273		0.843288	7.53746
15.6771	6.005	8.6455	13.4331	10.2284	4.4405	5.2418	12.1941	8.7565	6.4667	6.3705	14.4489	6.4236	7.215	9.7328	11.8426	10.2784	11.7761	5.0521	6.9376	9.4328	6.0081	7.4147	7.9466	9.5955	3.9683		0.850749	8.39421
15.8146	5.7469	4.975	11.5425	8.9475	5.9388	3.4173	12.6257	5.481	7.133	6.4276	10.3648	7.8691	5.2477	4.8487	9.6249	5.809	7.6078	5.7663	7.839	4.1839	3.0793	5.8909	4.8968	8.6881	6.3271		0.858211	6.81115
15.9521	6.5727	4.3305	11.9886	4.5418	9.1801	7.3842	11.1453	8.2025	3.1632	7.5107	15.5888	10.2899	2.372	8.6848	6.8131	6.3375	8.3718	7.1325	6.1028	3.1645	5.3958	9.1409	3.0816	11.2881	3.7092		0.865673	7.25972
16.0896	7.4011	3.926	8.7484	7.6737	8.8481	5.4083	14.6783	9.0116	6.5728	3.8013	13.8676	8.2746	4.1814	8.0911	12.5288	8.5784	10.0462	6.7604	7.3821	3.5443	7.0854	6.3698	8.499	5.9345	8.4181		0.873135	7.82525
16.2271	7.0682	5.9179	7.5452	8.8784	6.5588	2.8983	12.8568	10.2215	5.9863	5.3712	7.4972	3.5439	4.6036	8.0426	12.3449	10.2086	9.5369	5.224	8.4863	5.4101	6.3282	5.6753	6.0993	7.118	5.229		0.880596	7.14602
16.3647	4.241	6.3087	9.8246	6.6735	7.2427	5.5243	7.3053	7.0831	5.2038	6.115	8.4008	3.742	4.6731	6.4621	10.0454	7.7132	10.0998	4.476	7.6673	6.2611	5.0951	8.7137	3.4899	7.231	6.9794		0.888063	6.66288
16.5022	5.3648	4.7135	7.8442	5.9935	5.5271	4.8201	10.663	6.8347	8.1445	7.4509	7.1208	6.385	6.1154	4.8413	6.6109	12.993	12.753	7.9602	7.309	5.7362	5.9561	7.1095	4.3272	8.5632	6.3038		0.895525	7.09764
16.6397	7.2242	4.3873	5.5541	5.6736	4.6082	3.7306	8.4224	4.1642	9.69	10.9001	7.7885	4.8729	5.2572	5.8169	9.8199	10.1169	11.2062	9.3031	9.2814	7.6638	4.0107	10.5185	3.8297	7.7158	9.5598		0.902987	7.24464
16.7772	6.0037	6.6138	5.8563	6.5691	4.4041	2.8569	9.6952	8.0796	8.5185	10.7878	6.6286	6.1688	6.927	5.4715	9.7986	15.8891	5.5344	8.2391	7.9252	5.6298	4.4829	6.6728	2.8723	8.7931	8.6233		0.910449	7.16166
16.9147	6.3081	11.4043	7.1774	5.645	5.8806	4.9702	5.7735	8.5263	9.2721	9.5651	11.9866	7.0872	5.9655	5.6179	12.5208	20.8339	7.2075	10.3396	6.4799	8.3951	5.9678	4.6321	4.8241	6.4076	6.1379		0.91791	7.95704
17.0522	3.7799	8.7307	6.4997	5.3074	5.3839	3.8949	10.0569	7.176	4.4293	9.6854	7.5076	9.0656	7.0396	7.0033	9.2731	14.548	7.2559	10.2166	10.188	6.3337	8.2849	6.9645	6.3669	6.0076	4.5487		0.925372	7.42192
17.1898	4.4923	6.298	6.0977	5.3292	4.2745	4.1488	8.8538	9.7489	6.0553	10.8476	6.6223	9.2532	6.7984	6.7599	7.3889	19.2938	4.0243	8.5156	6.8014	6.3691	7.5774	7.7009	6.2184	5.8264	7.7566		0.932839	7.32211
17.3273	5.2139	4.4075	5.8018	4.3029	1.6642	3.6958	6.747	8.4139	6.8741	9.3036	8.1642	6.395	5.9037	7.6639	9.2218	14.5689	4.7403	4.52	6.349	12.7746	9.4102	6.9693	6.4313	9.8619	6.4363		0.940301	7.0334
17.4648	5.5303	7.9576	4.6714	6.8675	3.2266	1.888	3.4338	8.0727	6.6231	5.8933	9.3548	8.114	9.5935	8.639	7.3153	12.1228	5.9504	6.5626	6.2504	8.9688	6.8928	8.4302	6.9334	8.732	5.2236		0.947763	6.92992
17.6023	5.0773	5.8323	3.6853	5.2608	3.842	4.3394	7.272	10.8531	7.6354	6.2819	10.3118	5.7628	6.806	4.6309	4.9923	12.7925	6.3142	7.1949	7.2545	7.6278	7.1151	5.5642	9.6045	7.5057	4.8297		0.955224	6.73546
17.7398	4.5053	6.5806	4.7426	4.5235	2.6255	2.205	4.9333	6.4199	8.3817	6.7759	6.9344	8.4392	6.4245	5.9102	4.9317	10.592	8.9117	11.7611	6.4276	8.0931	9.1248	5.5489	8.4511	5.0384	4.4099		0.962686	6.50768
17.8774	3.5478	4.4459	4.5487	3.2316	3.2483	4.0283	5.799	8.9146	4.3558	4.5498	8.621	8.3463	7.3108	5.5755	9.0114	8.5667	8.5664	9.6294	6.3176	8.5514	8.1228	7.1905	7.583	5.5407	6.1489		0.970153	6.47009
18.0149	2.6463	4.5519	4.2879	4.7581	3.4776	4.1333	5.1538	8.8299	5.744	7.0836	4.905	5.6044	8.8594	4.8735	7.2436	12.4587	8.2242	7.9692	10.2632	11.3869	9.8128	3.1034	8.9953	6.4912	5.837		0.977615	6.66777
18.1524	5.2812	4.7819	4.736	4.2274	3.3282	3.6655	5.1218	9.3662	8.5122	3.8647	6.7492	5.3835	7.1463	5.3186	4.6909	9.1911	5.2582	7.1847	8.3555	6.9976	7.8653	4.9239	3.66	9.3111	5.6621		0.985077	6.02332
18.2899	3.9647	4.5448	5.3854	3.4209	2.0729	2.9595	3.3688	5.923	7.1037	5.4389	9.0081	6.1773	8.3041	5.3143	6.2357	8.7911	5.8789	7.627	11.3188	2.8493	4.5047	5.7171	4.1829	8.5161	6.3249		0.992538	5.79732
18.4274	4.5829	2.9261	2.609	3.3544	4.3059	4.8131	1.5908	5.5951	7.3078	3.0047	6.203	3.1643	10.0277	5.2999	6.0006	6.9803	5.2941	5.2002	7.4041	6.0306	3.7517	6.3813	2.5469	8.2466	2.463		1	5.00336

## Sheet: Image4
X0	Y0	Y1	Y2	Y3	Y4	Y5	Y6	Y7	Y8	Y9	Y10	Y11	Y12	Y13	Y14	Y15	Y16		AP-Basal	Avg intensity
0	12.6326	8.4445	2.9048	3.6412	6.7551	7.7597	7.6728	7.8026	9.912	13.1836	6.0326	8.838	9.1668	8.1579	4.8339	5.4643	12.3338		0	7.97272
0.1375	10.0794	4.9642	6.0436	7.2022	3.9418	4.0251	6.2065	10.1217	15.7534	12.4766	12.51	11.2204	13.7153	10.6934	9.4651	10.0494	14.813		0.00781148	9.60477
0.275	11.8299	6.8996	4.9832	3.2366	3.3115	2.7583	7.2574	16.311	12.6141	11.2901	11.3445	6.8251	9.3209	9.0062	14.4846	8.4682	16.9347		0.015623	9.22799
0.4126	16.9215	6.8688	5.6353	5.1937	3.7124	7.0844	7.2832	17.8224	17.9427	10.3668	17.3638	8.4036	16.2535	7.4724	12.6714	8.351	18.143		0.0234401	11.0288
0.5501	15.9407	9.9823	5.0194	8.5747	5.2212	6.9934	8.868	20.0691	16.8872	12.8068	20.3889	10.2244	15.3151	11.777	14.5509	8.2911	18.1173		0.0312516	12.2957
0.6876	16.7903	8.3449	6.7978	6.9775	5.6436	6.7735	9.3216	12.1408	18.6041	15.8011	21.0992	12.1158	15.244	17.6528	18.0494	13.9504	18.2546		0.0390631	13.1507
0.8251	11.3297	9.947	6.7544	10.9119	3.6874	9.2802	11.6651	13.5466	19.9384	16.3974	21.5022	15.275	15.1433	22.4495	22.5532	16.05	16.3028		0.0468746	14.2785
0.9626	8.1369	11.5047	6.2068	14.9112	7.8415	9.9869	14.9161	22.6043	19.7488	20.6748	21.1693	16.0657	14.6435	20.0549	19.9055	12.2774	25.1797		0.054686	15.6369
1.1001	11.834	11.8081	8.7865	12.9244	12.1881	12.7285	18.8857	20.6016	18.1184	15.2177	19.5252	21.8403	16.9258	21.3996	29.2499	16.7887	30.1208		0.0624975	17.5849
1.2377	10.8133	8.7742	6.9266	14.726	15.8226	13.8194	24.6091	27.5786	14.9585	17.7949	20.221	20.104	22.1484	29.1546	27.9196	15.3388	31.7574		0.0703147	18.9686
1.3752	10.3857	6.341	11.859	15.1862	21.8896	15.7049	26.5149	21.1316	15.3349	22.1045	21.8244	22.9565	28.423	29.5106	30.4273	24.8021	33.8892		0.0781262	21.0756
1.5127	12.057	12.2306	14.9294	14.2092	29.8177	21.6598	16.8359	22.0538	18.0246	20.7795	19.6102	20.9248	20.6585	29.1867	35.2261	25.553	23.9278		0.0859376	21.0403
1.6502	7.0227	14.2775	14.7326	17.6218	22.8237	24.6805	18.6772	19.6444	20.6928	16.659	25.3791	16.9933	26.4345	25.0253	31.5394	34.4642	21.8716		0.0937491	21.0906
1.7877	10.4609	17.5335	21.0063	19.608	19.6781	23.3269	19.2815	14.3202	22.6445	13.3694	24.4793	22.7017	26.5347	31.8281	35.4933	34.8099	19.8348		0.101561	22.1712
1.9253	7.7229	11.0757	23.0721	18.793	19.2798	14.422	13.1573	15.7946	23.8137	14.1229	23.4087	20.8366	22.7503	26.157	29.1491	29.8629	21.451		0.109378	19.6982
2.0628	6.7193	13.1581	25.8449	20.9896	18.642	15.042	9.134	15.0103	31.9217	11.5763	16.8572	19.5199	20.3502	26.612	26.0786	25.6342	17.5856		0.117189	18.8633
2.2003	10.2802	13.2389	25.8256	21.7381	15.5215	15.0516	11.3996	12.6849	32.5957	7.5121	14.3601	17.2108	16.9352	22.5503	24.7952	17.9691	13.1793		0.125001	17.2264
2.3378	10.6086	12.903	18.0573	19.4778	15.9443	10.8988	12.3713	11.2719	23.1305	9.7308	15.8285	14.9018	18.722	15.6001	31.4701	16.3901	14.278		0.132812	15.9756
2.4753	9.3813	12.0292	20.2408	20.1599	14.6355	10.6168	15.5597	9.5801	21.0991	11.9062	8.3641	14.4288	10.9796	12.5445	29.3686	9.9796	10.2812		0.140624	14.1856
2.6128	8.185	12.8424	18.7644	16.653	13.7977	7.695	14.5527	8.7355	14.6215	9.3343	9.1669	10.9752	10.3597	11.2725	18.0604	9.7574	11.8072		0.148435	12.1518
2.7504	8.5911	14.4598	27.4602	12.9385	10.3969	7.5971	11.3009	8.6522	19.5811	7.6615	9.4948	7.4591	10.5367	13.2187	14.047	7.9833	14.4145		0.156252	12.1055
2.8879	11.1425	16.9434	30.067	8.9974	5.6023	7.2129	10.1915	7.3589	21.506	6.5286	9.334	5.92	10.9597	10.0062	11.4813	9.1583	16.1673		0.164064	11.681
3.0254	8.2011	11.1105	24.3105	12.5423	7.4111	10.096	11.2436	10.8207	17.6177	5.9658	7.6982	4.8294	8.7352	8.7389	12.5237	6.2823	12.5601		0.171875	10.6287
3.1629	7.8411	10.0719	24.4437	12.3545	6.5215	11.0088	9.2742	9.9938	11.9941	7.6598	9.6989	6.9144	9.3633	9.8691	10.4645	6.3536	6.9515		0.179687	10.0458
3.3004	6.4118	11.4433	22.5085	9.8063	12.1532	7.8063	10.4126	11.2586	7.7557	10.1781	10.2733	7.7465	9.6338	8.301	9.6507	4.5138	10.5857		0.187498	10.0258
3.438	5.6898	11.2389	22.823	9.922	9.2546	10.984	13.9951	9.0704	6.0302	8.6038	9.3037	9.6432	8.1701	8.2295	6.573	6.6324	8.6916		0.195315	9.69737
3.5755	6.6016	8.4425	11.0953	6.7262	6.4614	10.0081	11.9727	7.0534	9.619	10.1722	10.8466	7.6442	8.5025	6.8425	7.1602	6.613	8.0793		0.203127	8.46122
3.713	8.0725	12.9433	13.1578	5.3423	6.4577	11.3422	17.1732	5.649	6.1559	8.9637	13.5565	4.9244	5.107	7.453	5.9186	6.4586	10.0245		0.210938	8.74707
3.8505	8.6164	13.8872	13.373	5.8238	8.253	12.8953	14.8978	10.2737	5.4542	9.153	17.7152	5.7148	5.3342	6.0589	8.2342	9.6923	7.2046		0.21875	9.56362
3.988	9.9352	12.8212	15.7742	8.3114	7.6292	14.2044	14.7463	9.241	6.9225	10.7458	16.1149	5.7568	5.6963	8.5253	8.9657	7.4702	8.2559		0.226561	10.0657
4.1255	6.5625	15.2252	13.261	5.5322	9.8558	13.9926	14.6825	7.3381	8.798	11.468	16.1651	4.629	7.2405	10.0761	7.1857	4.0076	9.2689		0.234373	9.72287
4.2631	7.952	12.5378	13.9546	5.7389	6.9332	16.1561	16.5132	7.1915	9.5565	9.8729	14.6125	4.0383	4.2373	7.335	5.7756	5.7247	7.9623		0.24219	9.18191
4.4006	10.7056	10.2693	9.9356	6.4649	4.6205	14.4636	13.8937	6.2423	13.1938	14.2019	15.3696	4.8158	5.4767	15.0116	2.9021	5.1699	9.5273		0.250001	9.54495
4.5381	11.9035	10.1999	10.3393	6.3276	13.1642	13.071	11.3179	5.5839	10.0531	10.8626	11.7704	5.2868	7.7141	11.6869	3.6793	6.6464	7.6539		0.257813	9.25064
4.6756	15.99	8.2905	12.0412	6.4219	10.4557	11.7927	5.1745	7.8148	8.5189	9.3952	18.442	8.1497	7.4247	10.5018	4.1143	6.6928	8.1841		0.265624	9.37675
4.8131	15.1567	8.4058	8.6358	8.5561	6.7134	7.0794	9.2723	11.0011	10.1309	13.3299	17.6616	11.0541	6.3989	7.2754	7.1708	8.6057	6.4178		0.273436	9.58034
4.9507	13.9571	9.8536	9.8242	8.7547	5.8807	7.1973	5.702	10.1849	9.5151	11.4792	23.3011	6.1116	8.8451	9.1593	7.6121	8.493	8.7471		0.281253	9.68342
5.0882	13.7293	11.684	13.3487	11.2849	7.8757	12.1852	5.577	7.2137	6.4427	12.4553	16.6652	4.3082	8.679	12.5308	9.4596	8.6239	7.1017		0.289064	9.95088
5.2257	16.4067	10.7478	14.9948	8.7763	9.0171	11.1069	5.5775	7.6596	6.0044	6.6791	7.0492	6.4951	7.4966	10.2668	8.1492	8.7485	4.9188		0.296876	8.82908
5.3632	15.2034	8.7561	9.9084	7.1665	7.16	6.3574	6.4026	8.3499	4.6554	5.0452	7.0706	6.6119	9.3921	9.094	4.1972	7.5796	6.0327		0.304687	7.58724
5.5007	15.7574	9.0954	8.3369	8.675	9.2468	10.2534	9.8501	9.3137	7.3639	4.7454	6.7793	9.319	10.1107	5.4975	5.9984	4.793	9.7972		0.312499	8.52548
5.6382	15.0207	9.1528	8.9603	8.5218	11.0418	13.8308	6.5725	10.2724	6.6018	2.9988	6.4054	6.1354	11.3148	8.3291	9.1885	6.6194	8.9725		0.32031	8.81993
5.7758	11.4475	7.2019	11.8927	11.1076	9.8254	10.2532	4.6276	8.6744	6.5528	4.5196	10.0004	5.4575	14.0228	12.4781	8.4571	5.2786	12.3228		0.328128	9.06588
5.9133	9.0555	4.0347	10.4064	5.9192	7.6584	8.8278	4.885	5.0495	7.2681	5.7316	4.9131	10.7203	13.5967	11.4186	9.1778	5.8837	11.001		0.335939	7.97338
6.0508	6.3063	6.1247	10.7167	9.2773	6.5839	5.9067	6.6824	5.9342	7.7608	5.5082	5.7525	11.0212	14.2834	11.055	7.9364	5.9603	8.9733		0.343751	7.98725
6.1883	7.2144	5.725	13.9518	7.2501	7.1145	6.7151	5.7138	6.2902	10.0575	8.2213	9.6621	9.9212	14.9012	8.472	7.8771	6.626	7.9124		0.351562	8.44857
6.3258	9.4078	7.3123	9.181	10.0004	10.327	6.7132	4.8961	4.2929	6.9973	5.3157	8.2549	7.0041	15.3559	7.5671	9.1904	5.6401	8.4132		0.359373	7.99232
6.4634	14.4911	7.3302	9.8402	6.5972	5.0366	8.0411	5.6923	2.9262	12.2772	8.398	6.4036	11.7008	7.1449	10.486	4.7162	5.2897	10.7895		0.367191	8.06828
6.6009	16.8328	6.8841	12.5223	5.1782	5.8979	8.3446	4.3135	5.1768	8.7004	7.8817	10.0219	9.6427	5.9024	14.6282	6.1414	5.128	9.3547		0.375002	8.38539
6.7384	19.0172	9.7903	13.6438	4.3645	4.3461	8.3653	4.4705	5.8921	7.258	8.4659	9.9418	9.6446	6.1363	9.0838	7.0328	4.786	9.8801		0.382814	8.35995
6.8759	25.6871	7.0323	12.2159	4.6823	5.522	9.6533	4.6741	6.487	5.7332	5.9506	9.8003	8.0273	6.7548	12.3877	6.7305	3.0106	7.4757		0.390625	8.34263
7.0134	29.7284	8.2427	12.432	6.0855	6.2976	9.3199	4.2705	3.5599	6.4403	5.5105	7.0703	8.7286	8.1972	11.8684	7.2216	2.9896	6.0403		0.398437	8.47078
7.1509	29.8326	7.3807	7.4517	6.7141	8.6555	6.2937	6.4914	4.8929	6.1164	5.743	7.6923	10.1157	4.2787	8.4294	4.3215	2.459	5.7879		0.406248	7.80332
7.2885	22.2346	7.1602	9.5707	4.7471	9.8793	4.9112	6.7168	6.2295	6.3927	9.075	6.5842	5.104	3.363	5.0807	5.0027	2.179	4.6767		0.414065	6.99455
7.426	21.702	11.2232	8.5674	3.3133	7.3927	7.896	7.9107	4.2486	11.5235	7.7126	8.0754	5.1017	5.482	7.7041	2.746	3.3865	7.4714		0.421877	7.73277
7.5635	15.8591	7.9698	9.5523	6.3527	10.4217	5.3476	10.3477	6.82	6.9177	7.1953	5.1365	5.1645	6.938	12.2086	5.6381	5.6776	5.0332		0.429688	7.79885
7.701	18.9443	9.091	7.7217	6.6133	9.7135	9.1641	8.3153	3.5288	6.1995	7.6329	5.412	4.9101	5.2807	10.2179	6.5223	4.4382	6.8793		0.4375	7.68146
7.8385	15.5003	9.4706	12.6591	7.6969	9.2198	8.9853	8.3716	5.1325	3.4238	8.1472	7.4355	4.9748	3.2134	12.9853	5.4037	6.211	2.2375		0.445311	7.7099
7.9761	13.708	9.7671	6.4829	4.2381	9.5237	6.8634	7.0205	4.6874	4.5296	5.6983	5.4901	5.7667	4.6768	11.3182	5.6963	3.0049	4.0246		0.453128	6.61745
8.1136	11.8371	8.7238	9.5851	4.3819	7.8359	8.7995	4.1277	7.6218	3.8649	7.6525	5.8422	6.4385	2.4602	12.8184	4.2255	2.5852	3.5552		0.46094	6.60914
8.2511	9.9469	6.4866	12.4897	3.8448	11.4074	5.4211	3.9252	7.9451	3.8336	5.4505	4.3801	5.1458	3.6811	12.4526	2.7538	6.3433	3.1457		0.468751	6.39137
8.3886	6.6142	4.2901	11.5743	3.5149	10.2759	8.6798	4.5013	5.946	5.5242	3.9162	3.5241	6.904	2.4495	9.1889	2.0682	6.9831	6.8649		0.476563	6.04821
8.5261	7.0204	3.4069	10.1026	5.8254	12.2447	11.2017	4.4877	4.8972	8.8379	4.4778	7.319	5.3397	3.9565	6.8442	3.937	5.5232	5.7305		0.484374	6.53838
8.6636	7.0028	6.0738	7.2647	5.0251	10.9124	6.3345	5.8291	5.8655	4.8976	6.6373	5.7696	4.0202	3.6851	9.9269	3.9176	6.2325	3.2602		0.492186	6.03852
8.8012	8.5732	4.6648	7.3787	2.5808	11.1091	6.4999	3.4504	7.4339	2.8132	7.3818	4.9347	4.7876	4.7078	10.2619	5.9903	6.5392	5.6226		0.500003	6.16058
8.9387	8.1697	3.1616	9.0822	3.6369	13.0033	5.6841	4.0856	9.7518	3.141	5.0528	6.1111	4.4697	3.7308	6	6.2767	9.743	3.3617		0.507814	6.14482
9.0762	4.3482	4.2597	10.206	5.0326	15.0654	8.8077	5.0828	6.5574	4.7827	7.2704	5.4838	5.6807	4.9942	5.9767	7.5218	6.0133	3.9019		0.515626	6.52855
9.2137	5.1557	6.1332	9.2982	5.2073	12.36	5.1075	5.344	6.6592	4.5808	6.7368	3.819	4.7201	2.7486	3.8068	6.3416	5.3151	5.3173		0.523437	5.80301
9.3512	5.2967	7.7215	6.0917	6.2057	10.1429	5.3396	5.1648	4.3936	4.414	8.1262	7.4803	7.4002	3.6102	5.6772	6.6124	3.5915	2.6476		0.531249	5.87742
9.4888	4.8923	7.7967	4.446	4.224	7.5643	8.1159	6.0531	3.4875	5.546	6.6318	8.764	7.9465	3.2486	5.1056	4.8394	4.7134	1.4987		0.539066	5.58081
9.6263	3.1467	5.2092	4.0581	5.4358	4.6186	5.4069	11.1142	3.1899	3.1933	5.7855	19.8534	7.607	5.2263	5.2595	5.1557	3.5985	4.2846		0.546877	6.00842
9.7638	3.8297	5.5926	5.4011	3.2288	7.2206	5.0706	7.3098	2.4065	6.496	6.0782	27.469	7.4836	3.1756	5.0322	3.7705	2.4836	5.2004		0.554689	6.30875
9.9013	5.6001	9.3123	4.9525	2.7317	8.1435	4.1103	5.7634	3.4078	5.1375	4.6327	37.8583	5.6056	4.6911	4.5976	3.9456	3.6892	5.8706		0.5625	7.06175
10.0388	4.8623	6.2377	4.4422	3.4728	7.2816	6.03	3.6401	3.7996	6.3519	6.3572	42.1697	5.5489	2.7698	5.4068	4.2017	2.5236	2.4827		0.570312	6.91639
10.1763	5.2945	5.1545	3.0143	1.367	7.4401	4.4103	4.853	4.364	3.2597	4.9371	34.846	4.8909	3.909	2.5795	4.5355	3.6098	3.5978		0.578123	6.00371
10.3139	4.3844	6.9658	4.9184	2.9712	10.8713	3.7679	6.597	4.1825	2.7076	7.7645	20.8799	6.1332	2.2648	5.8334	6.5107	3.4483	2.8788		0.58594	6.06351
10.4514	6.3198	6.6973	4.7446	7.5654	6.1227	5.3281	8.5637	5.279	4.0688	3.8017	22.994	5.0876	2.7497	6.8516	5.7085	5.0408	2.832		0.593752	6.45619
10.5889	6.505	5.5573	2.4341	2.7254	6.4771	4.944	6.6493	4.2329	4.0027	4.2219	16.4783	6.4055	1.3032	5.9862	6.0209	3.4811	3.5762		0.601563	5.35301
10.7264	4.1515	5.6062	1.9454	2.2117	6.7657	10.0906	9.2272	3.5667	3.3765	4.3219	8.7545	4.5858	3.4986	6.5962	7.0195	3.7601	2.6954		0.609375	5.18668
10.8639	4.357	6.0217	5.1321	3.326	5.9063	10.4485	9.1664	4.6304	4.5156	5.7455	5.1427	3.3093	2.0701	7.1253	3.3385	3.8056	2.8104		0.617186	5.10891
11.0015	2.6058	7.3176	5.3317	3.7654	6.1367	5.8275	11.7944	4.3151	5.6481	4.4575	9.0495	5.0055	2.041	5.2475	4.5527	3.0005	4.3029		0.625004	5.31761
11.139	6.0612	8.0026	4.6425	5.8311	4.2328	7.6458	10.0241	2.6243	5.5393	6.3168	6.6164	3.8525	2.0176	4.3424	5.9755	3.5066	4.5752		0.632815	5.40039
11.2765	6.4078	3.689	4.8789	4.4055	3.7555	8.248	9.6996	3.4734	7.9161	7.6067	4.5294	3.218	2.2782	2.7697	7.3536	3.8774	2.2189		0.640627	5.07798
11.414	5.1315	5.4405	3.7922	2.7493	5.2839	7.7883	8.4332	2.159	6.7159	7.685	5.3592	2.9677	2.985	2.8323	6.0794	4.7965	4.4414		0.648438	4.97884
11.5515	4.9968	5.7702	1.7492	2.4967	4.2583	5.0698	7.2596	3.5616	6.0885	5.225	6.7043	5.3768	3.2632	5.8838	4.9498	3.4471	4.8963		0.656249	4.76453
11.689	4.4341	7.1736	3.3068	2.7765	5.4593	5.6028	6.4942	4.1086	4.2959	2.6466	3.2304	4.9624	2.6245	3.7397	3.1341	3.8184	4.4714		0.664061	4.25172
11.8266	6.6048	6.6011	3.2223	2.1759	5.1914	7.3458	7.0014	5.0054	6.9099	3.2677	6.2999	7.8375	1.9108	5.1395	5.7958	5.8247	3.0621		0.671878	5.24682
11.9641	9.3204	5.9839	2.5905	1.2257	5.397	2.2396	10.0374	5.8758	7.0079	2.8695	10.1857	6.093	2.7753	3.3235	5.5558	5.683	4.5858		0.67969	5.33822
12.1016	7.3156	3.6355	2.6052	3.6103	3.9283	4.6772	4.9132	4.6433	7.4609	2.7888	5.8262	6.0823	6.0947	3.9833	5.8545	4.3679	3.5337		0.687501	4.78358
12.2391	5.9127	4.4444	4.1722	4.9836	3.378	3.0942	3.952	5.2576	8.0594	4.6581	5.2977	4.4343	5.3094	4.1818	5.3064	3.8854	3.8664		0.695313	4.71727
12.3766	6.826	6.891	4.6312	5.767	4.0669	6.4513	5.9937	3.8461	13.2773	4.9526	4.192	4.7825	2.9634	5.5115	5.3964	3.3761	4.7794		0.703124	5.51202
12.5142	4.0325	6.4753	3.1187	5.1924	6.317	4.692	5.6443	3.3822	8.4817	3.5913	3.6521	4.1138	2.1552	3.8762	3.9876	4.6581	3.3511		0.710941	4.51303
12.6517	3.8232	5.7827	4.4813	4.46	4.4326	6.4937	2.9356	3.5683	13.5011	4.4346	5.1357	5.3056	4.849	5.2044	6.1591	2.9114	3.8328		0.718753	5.13595
12.7892	4.0348	3.2702	2.9897	4.3776	3.5825	3.657	3.5262	2.686	10.8684	3.7294	3.4219	6.9933	2.781	7.3116	5.8393	2.6526	3.2813		0.726564	4.41193
12.9267	9.152	3.686	1.6589	4.6894	2.595	2.8023	4.2823	4.3249	10.4578	2.7067	5.3442	6.3046	4.5469	5.3017	3.9954	2.5551	3.7622		0.734376	4.59796
13.0642	6.5032	4.2041	3.9754	2.299	2.8698	3.5207	4.2032	6.2138	6.3534	2.6436	3.4271	4.8378	4.4742	4.7	3.4921	5.7012	4.5129		0.742187	4.34891
13.2017	6.8313	5.601	3.0586	2.3914	7.3035	4.7539	3.5846	6.3883	4.7463	3.4082	4.67	6.2057	5.379	5.1685	4.7605	2.2786	5.1652		0.749999	4.80556
13.3393	9.1632	4.5739	3.6038	2.8772	9.8063	2.914	3.9247	5.6779	5.4008	4.3971	3.451	3.779	4.9349	4.1146	3.0305	2.946	2.8447		0.757816	4.55527
13.4768	8.7786	5.0575	2.427	1.4425	7.129	5.6992	4.4001	2.7977	3.9816	3.0846	4.3711	7.3528	5.8361	4.0483	6.363	4.2597	4.5814		0.765627	4.8006
13.6143	7.966	4.3756	6.4337	2.2518	14.479	6.735	4.3942	4.0746	6.1617	6.338	2.1423	6.9662	3.377	4.4716	5.8381	4.3044	4.6886		0.773439	5.58811
13.7518	5.0447	4.3642	3.7237	4.0014	7.7354	4.246	3.926	3.9559	5.7068	7.373	6.347	2.4762	2.7773	4.5566	3.5801	4.6821	5.7335		0.78125	4.71941
13.8893	5.557	4.6074	3.5723	4.4338	5.5774	2.5139	5.8077	4.4562	3.9774	4.4762	3.2165	3.1439	3.6169	5.5749	3.002	8.2383	4.5355		0.789062	4.48866
14.0269	4.9252	3.9572	3.7895	3.0627	6.0558	3.9305	4.4445	6.9693	4.6816	5.8035	4.5383	4.3383	3.8434	4.4533	5.0455	5.3555	3.5961		0.796879	4.63472
14.1644	5.6963	3.6515	6.442	6.3979	6.5099	2.9661	4.633	4.7026	6.5278	4.9378	3.4604	5.7797	4.8807	3.436	5.6532	3.3855	3.7499		0.80469	4.87119
14.3019	3.0203	7.5107	7.2143	5.2242	6.679	2.7929	3.8134	6.8355	5.6737	3.486	6.2871	9.0878	5.9007	6.4082	3.5546	3.0119	3.4936		0.812502	5.29376
14.4394	6.7578	5.1529	4.3911	3.5758	9.2667	3.1779	6.3808	4.1534	5.4094	5.089	4.4676	9.4467	8.3675	4.9079	3.2415	3.1931	5.1553		0.820313	5.41967
14.5769	6.5536	6.7006	4.7513	4.3842	6.5621	3.6117	5.2893	6.8018	4.6552	4.4549	5.626	9.3093	6.1251	4.6131	3.4331	3.7767	3.5627		0.828125	5.30651
14.7144	6.9105	5.9047	5.5202	4.0348	5.8873	5.586	4.3156	4.1224	4.3303	5.0267	6.1498	5.6176	6.7932	3.8474	5.5337	4.8016	5.5687		0.835936	5.29121
14.852	5.6848	7.5041	6.4883	4.4899	6.7135	6.3401	5.6816	4.6308	2.412	5.0005	4.1097	6.6865	9.1857	6.136	2.8137	3.3132	4.195		0.843753	5.37561
14.9895	7.4991	4.48	3.168	2.5998	5.3067	6.2894	5.6611	4.1811	2.5144	3.2359	4.0166	5.5575	6.1938	4.8434	3.0853	3.2635	2.2184		0.851565	4.35965
15.127	4.2069	5.4354	3.3876	2.6256	8.3834	5.2762	5.302	5.3605	4.177	3.0312	7.3047	9.1007	4.7523	4.1348	3.1542	4.8712	5.6045		0.859376	5.06519
15.2645	4.8678	5.8262	2.9706	6.9557	5.6498	4.036	5.6074	6.1536	4.2968	4.6326	7.2841	6.6175	6.7786	7.2764	2.5643	2.4682	3.9978		0.867188	5.17549
15.402	5.0341	3.478	4.9463	5.3842	2.2727	5.3624	6.161	5.5846	8.3296	5.5921	4.9333	6.2871	7.001	6.3643	3.4893	1.88	2.9765		0.874999	5.0045
15.5396	6.4464	4.3936	6.0179	7.0045	4.2899	4.8397	4.3466	3.9271	7.0373	6.2135	5.8881	11.0797	10.6925	4.736	1.4893	3.0158	1.8061		0.882816	5.48376
15.6771	4.9571	6.9263	6.6767	6.5361	3.6813	5.5316	4.5058	3.6058	4.9058	6.4973	5.7921	4.148	4.8818	2.6415	1.4915	1.512	2.2425		0.890628	4.50195
15.8146	4.592	4.5373	3.8128	2.0949	5.451	6.7734	3.1277	2.4127	2.5427	5.46	8.9569	10.8868	5.8305	3.3549	2.1633	1.3637	1.5743		0.898439	4.40794
15.9521	5.3327	5.7772	3.6894	2.6771	4.6335	5.6372	2.4472	5.624	3.8065	4.1229	7.6192	9.4522	5.2287	8.6547	1.2543	3.3733	4.0752		0.906251	4.90619
16.0896	5.5817	6.6905	3.0461	3.9639	4.1335	6.2012	1.4246	5.763	4.009	6.0807	9.7145	3.6877	5.9502	4.8968	2.6377	2.286	2.2773		0.914062	4.60849
16.2271	5.3375	5.6267	3.4057	6.765	2.4433	5.3974	1.2986	2.0798	4.5017	6.2451	8.3718	3.9863	9.3288	3.3627	1.555	1.7808	1.0497		0.921874	4.26682
16.3647	5.3735	5.8808	5.2893	3.7652	1.7924	5.3411	2.4576	1.9496	3.1821	4.0093	9.5642	3.7953	7.447	2.783	2.2818	1.3093	1.4304		0.929691	3.97952
16.5022	5.4192	2.7293	3.9949	3.4266	3.3784	4.7484	2.2954	2.8092	2.1595	2.4015	4.9884	3.4643	2.8194	4.112	2.196	1.623	1.7568		0.937502	3.19543
16.6397	5.4403	3.2089	2.6134	3.8146	3.8565	3.9627	3.0148	1.8658	1.5418	3.1369	4.9171	5.3036	1.956	2.4527	1.4606	2.5973	1.9919		0.945314	3.12558
16.7772	5.5007	3.3415	2.3525	2.7644	1.5489	2.6159	2.9826	2.5126	3.8117	1.7161	4.9347	2.4587	3.5405	3.8462	2.5242	1.9274	1.4372		0.953125	2.93034
16.9147	1.8131	1.9333	1.4732	3.1277	3.2157	1.9572	2.3842	1.5772	1.7565	3.6808	3.8069	3.6978	2.6098	4.1468	2.1769	1.741	0.9899		0.960937	2.47576
17.0522	3.0587	2.6622	1.4791	2.2455	3.831	3.7177	2.1716	1.8703	2.4553	1.965	2.6074	7.2618	2.7282	1.3269	2.3059	1.8299	0.8093		0.968748	2.6074
17.1898	2.9424	1.6288	1.9762	2.0293	4.0191	2.6475	1.2323	2.1071	1.2422	1.3979	2.8713	4.8395	2.0661	1.9893	1.1964	1.9255	1.2748		0.976566	2.19916
17.3273	2.9538	2.172	2.0255	3.2021	2.0147	1.5167	1.7493	1.9825	1.9586	1.7758	3.3552	5.6703	3.4074	1.3669	1.2002	1.924	1.6717		0.984377	2.34981
17.4648	1.6469	2.7151	2.0102	2.632	2.6411	2.332	0.9793	2.9908	1.9355	1.6961	2.655	5.7469	3.1938	1.3302	1.1113	1.2801	1.9154		0.992189	2.28304
17.6023	4.6228	2.3635	1.7315	0.9594	1.1635	3.0656	2.6651	2.2545	1.3375	1.8441	2.2289	3.4638	1.341	1.13	2.4427	2.1663	1.0043		1	2.10497

## Sheet: Image3
X0	Y0	Y1	Y2	Y3	Y4	Y5	Y6	Y7	Y8	Y9	Y10	Y11	Y12	Y13	Y14	Y15	Y16	Y17	Y18	Y19	Y20	Y21	Y22		AP-Basal	Avg intensity
0	5.422	23.4184	8.5336	12.6981	5.8114	15.6677	10.5169	7.0007	12.0088	8.6168	14.913	13.8595	12.0914	18.7447	10.7048	14.787	17.8879	12.2698	19.3136	18.5884	17.0848	12.2519	16.9456		0	13.4407
0.1375	5.3397	26.9207	9.7327	6.9847	16.1574	11.2736	10.8679	12.3533	11.6453	9.6739	17.5722	14.1089	12.9694	15.5625	7.8795	10.7152	13.1982	14.277	12.1554	16.0458	18.7173	11.7767	22.4152		0.00793545	13.4062
0.275	9.7997	24.1317	11.4052	12.9594	21.4826	13.2704	15.633	17.726	14.6496	12.7582	28.8582	12.8841	15.8833	20.4583	9.4851	16.6034	13.8082	19.418	16.3516	21.9806	10.7684	17.0082	24.6853		0.0158709	16.6091
0.4126	12.6984	21.5086	19.1431	20.8969	18.6388	11.168	18.4171	7.2393	15.3285	18.8287	22.7991	22.6503	17.27	26.706	11.1597	23.0652	13.3016	13.5998	18.904	18.9805	15.0185	14.0577	15.8245		0.0238121	17.2698
0.5501	12.6367	20.631	23.4582	22.4467	21.455	24.4598	19.0664	14.5813	11.4107	22.3423	28.614	15.5133	17.5321	20.8444	15.7525	12.3505	12.3381	17.3315	22.5818	19.9403	14.7126	10.2215	15.611		0.0317476	18.0796
0.6876	10.9494	30.9092	19.8833	27.429	23.8119	13.8975	29.769	19.538	24.4893	17.949	19.4015	19.2993	15.238	12.9036	16.3963	19.1842	18.8528	20.8811	21.4933	24.2187	15.2427	7.2094	19.1759		0.039683	19.4836
0.8251	25.2141	23.3186	25.3681	24.4016	17.7218	22.1686	28.771	25.5643	20.2208	23.7614	27.2856	21.0634	23.5659	19.5352	15.1522	23.3134	17.0583	25.0315	16.0474	18.9821	7.9222	17.2866	16.1791		0.0476185	21.0841
0.9626	25.881	25.7212	26.5956	27.7591	28.0135	16.7299	26.1516	35.9313	35.3963	26.1646	40.2032	16.4593	27.8899	14.8926	16.5518	21.8784	18.4606	23.7642	27.8376	19.1517	24.5389	12.7584	27.3443		0.055554	24.612
1.1001	33.3785	21.525	36.8534	33.7457	33.9396	25.8524	27.1862	37.9573	39.5983	18.2349	34.376	27.992	30.3544	17.1323	19.4713	24.7287	19.2528	32.5069	19.7711	27.4837	22.5003	17.9592	28.5975		0.0634894	27.4086
1.2377	28.0178	21.8586	20.6026	41.8016	42.6938	20.5614	26.1165	41.7959	27.0877	26.4613	34.5421	32.1012	20.8216	18.1784	23.5916	22.8705	20.836	28.1426	24.2225	28.4589	23.922	16.9774	25.4671		0.0714306	26.8317
1.3752	32.88	26.0688	27.7239	28.699	33.943	27.523	38.6202	43.4214	38.3868	28.0278	42.2378	27.8132	17.6011	19.1678	31.3422	21.4444	19.4565	29.0545	33.5339	32.9848	23.0328	16.6053	24.0649		0.0793661	28.8536
1.5127	29.2487	25.0906	25.4053	37.3553	38.7928	27.1425	36.1538	50.4687	35.4373	21.3835	38.0165	43.7842	20.322	21.1165	22.8032	32.192	15.3454	39.5749	27.8813	29.5714	28.8056	17.8807	29.7653		0.0873015	30.1538
1.6502	33.3652	24.226	39.064	46.8992	41.1696	25.5779	45.2709	48.3707	40.9911	31.1192	38.3042	38.2103	28.2678	28.1977	24.5041	23.4048	20.8155	32.8521	23.379	28.9213	19.789	28.4669	30.3901		0.095237	32.2416
1.7877	28.69	22.0093	30.033	39.6755	52.0151	38.0907	50.3562	46.3672	21.3789	31.8686	42.7767	35.5446	23.9157	23.044	28.371	20.1691	30.9565	32.4148	20.6166	28.0879	23.691	16.577	25.1981		0.103172	30.9499
1.9253	28.0078	16.7789	34.9112	38.6974	45.1678	42.3054	35.5409	40.3811	32.9207	37.4388	37.8609	32.6124	22.3053	22.4332	17.6024	26.8549	14.5071	50.6996	18.9882	21.1352	28.2043	22.2126	29.1078		0.111114	30.2902
2.0628	29.8914	16.0229	45.9586	43.3713	45.518	41.58	31.0821	43.307	43.4286	33.6294	35.9152	38.2559	26.4522	19.8316	20.2652	22.1523	16.6698	28.9099	20.8232	27.9786	27.226	25.1213	20.6307		0.119049	30.6096
2.2003	24.2309	26.7038	51.7727	42.5498	43.9033	40.0557	36.6931	40.0803	46.3338	31.4912	32.3212	20.9495	27.6843	14.7951	13.6411	31.8038	17.3151	33.5426	26.5674	30.997	29.6448	24.0203	25.5002		0.126985	30.9825
2.3378	28.1446	24.7892	46.2476	43.6804	57.2607	42.9769	26.9143	43.3359	42.2355	28.2079	32.786	27.4573	22.149	17.9141	18.4276	28.6528	16.666	33.4555	29.3995	20.2932	26.5829	27.408	24.3309		0.13492	30.8398
2.4753	19.7826	37.2168	46.3719	44.4193	51.5356	32.9349	22.9499	45.9047	44.4238	31.2423	21.69	21.9272	23.0005	27.5306	21.6339	22.7393	15.1641	25.4669	25.5105	30.9376	26.2082	22.7518	27.3306		0.142855	29.9423
2.6128	26.7352	28.2442	39.9833	46.6131	43.8797	28.6208	24.7059	39.6987	35.6821	30.5086	24.773	23.5751	24.6248	25.6607	23.5305	29.0914	19.4415	35.765	16.7114	29.6009	23.157	14.7809	39.4999		0.150791	29.3428
2.7504	24.1558	41.3549	35.3776	58.812	42.9346	29.182	21.2407	37.255	42.752	23.4287	19.1399	23.128	25.4379	26.5021	14.4896	33.1617	13.1388	22.1511	14.8227	33.7305	21.5427	15.573	30.0937		0.158732	28.235
2.8879	23.1707	41.3186	48.337	63.629	36.886	26.3661	20.1246	27.4295	43.207	20.8414	24.6812	16.9312	9.866	34.5309	26.7022	31.6016	12.4109	31.1688	20.7936	22.0847	20.586	13.9715	23.8286		0.166668	27.8464
3.0254	26.294	35.7836	50.9125	49.2109	31.1522	21.0293	21.2263	24.4062	47.334	25.1289	20.5571	20.5283	18.4601	24.7682	26.7914	20.2475	12.2144	26.7299	26.4491	23.8232	16.1691	11.0227	32.043		0.174603	26.621
3.1629	33.9117	39.7557	51.2721	51.0764	50.1982	34.0237	24.9773	17.398	42.1919	15.9535	14.2056	22.2483	23.1069	20.8029	22.8262	19.5635	4.8498	24.154	28.7607	16.8558	16.2557	14.7562	27.5697		0.182539	26.8136
3.3004	35.7807	30.5968	40.5835	35.0439	52.5344	22.8055	20.9676	17.2236	47.2775	15.1058	15.747	17.8657	19.869	30.2703	29.8072	24.7575	13.9221	19.0693	21.76	11.774	16.2968	11.0587	21.3963		0.190474	24.8484
3.438	41.8458	46.617	34.8715	36.7171	51.6799	25.5617	21.4107	21.2696	36.5332	13.3241	13.4968	12.2742	18.4468	18.9061	29.708	25.5597	15.851	17.8264	25.8238	19.5941	20.2904	8.0046	20.8701		0.198415	25.0645
3.5755	30.2367	42.3029	34.5628	30.6882	45.635	30.8524	19.8127	12.5563	32.3489	15.0162	16.8553	14.5957	14.1958	17.2706	26.7036	23.8049	16.06	16.3154	26.8898	13.4079	24.9068	9.7667	28.8146		0.206351	23.6347
3.713	29.9057	31.2989	35.2424	33.7866	50.8702	30.5795	14.8604	15.3535	28.8683	12.1526	15.3691	12.017	14.0228	19.1013	27.9329	36.993	12.9915	17.2341	25.222	10.454	33.1319	11.1247	22.8173		0.214286	23.5361
3.8505	33.0392	34.0513	39.0705	31.4989	43.6525	26.9857	16.3509	15.5707	16.9053	10.0337	11.2999	12.7109	6.8101	18.4568	21.0724	18.8855	13.3351	18.288	17.8948	13.1922	17.5289	9.3591	33.6134		0.222222	20.8524
3.988	23.5658	33.5707	31.1839	30.0185	34.7268	24.8737	7.448	11.4459	16.2027	18.3347	17.5282	19.6857	8.3825	23.6658	20.8761	20.0608	13.9066	18.6094	18.6323	8.5616	24.5471	9.4681	26.5486		0.230157	20.0802
4.1255	21.452	27.3721	32.776	38.6498	39.4789	18.1607	11.5913	9.8549	14.0806	17.3114	12.7867	11.5579	9.3682	25.5876	18.2939	13.9325	13.4035	15.0241	17.4827	9.3285	26.4707	9.2017	17.4308		0.238092	18.7216
4.2631	17.8506	23.8316	28.1506	32.4934	36.5014	20.9575	8.9615	13.7181	12.8158	17.5397	12.8132	19.5995	9.5653	16.282	21.4761	15.3062	11.7017	14.523	20.9112	8.5136	17.6591	8.9195	11.8067		0.246034	17.4738
4.4006	25.5586	20.7617	21.9065	31.3543	29.4838	10.53	15.5652	14.7657	11.7188	11.4435	16.4796	7.6946	8.7635	12.9407	23.1203	15.0634	13.6772	21.9489	13.7243	13.0409	15.0999	13.1285	17.0639		0.253969	16.7319
4.5381	25.2721	19.0395	23.1704	28.9288	26.6089	9.637	9.9709	9.2729	9.3875	13.7762	13.0104	12.1145	9.8868	24.6546	15.0367	17.5839	12.4866	19.2474	18.5432	10.0554	16.9239	10.9042	8.0061		0.261905	15.8051
4.6756	19.4983	16.0091	23.0314	26.6121	19.7921	20.344	16	8.1899	16.7664	21.1975	14.3784	8.0128	8.5951	18.2904	13.2765	19.519	8.2094	20.4992	22.8291	12.1167	15.3608	10.9735	11.2652		0.26984	16.1203
4.8131	19.278	21.0662	16.5887	28.9025	17.7942	14.7888	8.2247	13.4581	15.6886	11.4175	12.7736	10.2468	6.6055	15.1936	16.0072	16.2618	11.1641	14.306	18.098	7.3971	9.1135	9.5764	17.8705		0.277776	14.427
4.9507	24.0674	21.6748	17.7911	25.5511	22.6888	16.7413	11.5817	14.766	15.9294	16.368	12.7182	11.8602	12.5186	23.3753	14.6769	16.2908	11.4863	16.1691	16.5515	11.4917	9.8102	12.9441	17.6306		0.285717	16.2906
5.0882	31.2986	23.4259	13.9979	34.0106	18.1439	13.1996	9.8574	20.8013	14.4501	12.8794	7.544	9.3176	13.0003	16.1572	21.3402	9.1372	19.6773	15.2784	15.4747	9.5313	12.5837	10.1381	15.3799		0.293652	15.9402
5.2257	21.9754	13.0706	13.6603	16.9798	19.7355	10.0127	13.7985	19.1479	14.3528	21.6684	16.8054	6.6777	11.1797	16.1684	17.0067	13.2015	15.7862	14.3464	12.5969	11.557	12.0845	10.1799	8.3394		0.301588	14.3622
5.3632	20.3008	15.6902	10.4573	20.5878	15.8266	12.2014	8.9177	17.335	10.8304	15.8428	10.9728	5.3894	14.2651	27.0791	10.9908	9.1239	19.5528	12.2706	16.061	13.3575	8.6483	10.9457	6.9616		0.309523	13.6352
5.5007	22.0401	12.0288	11.3105	18.6428	15.9286	14.8814	8.3985	12.0632	10.7067	23.8533	19.5411	12.2601	13.6743	10.0105	7.7323	11.0339	18.8612	7.5795	16.2839	17.1837	6.4983	15.3883	10.4173		0.317459	13.753
5.6382	15.4373	17.3678	12.3536	20.6822	14.9492	17.2457	11.6482	12.8031	12.6372	18.9523	12.621	3.5004	11.9003	11.0208	7.5595	9.8971	17.2154	11.4105	17.6868	10.9332	15.006	13.2994	8.6906		0.325394	13.2529
5.7758	16.9666	17.5135	10.334	12.6534	11.041	8.3207	7.8062	14.0744	8.0795	21.6171	14.1579	11.7402	16.5042	18.0255	11.6277	14.3906	19.1578	11.4428	16.8946	16.4474	17.3615	8.0127	6.9165		0.333335	13.5255
5.9133	16.6405	10.9607	8.297	13.8728	8.3143	15.1034	13.5105	13.8113	6.1335	23.3358	12.6565	11.5019	13.3643	14.0701	12.5541	7.9001	15.3712	11.3323	17.6006	10.288	19.4974	11.9568	9.9057		0.341271	12.9556
6.0508	18.2691	12.3474	15.8354	18.7366	10.7378	10.7912	11.531	16.3016	9.1257	19.6169	14.3466	12.5015	14.1062	13.3251	7.5511	7.8063	17.4744	12.6424	15.9383	16.4911	19.7726	7.45	9.5693		0.349206	13.5769
6.1883	10.6758	15.2482	13.5901	13.0915	13.2142	9.9571	15.7392	17.1642	8.9032	13.8402	16.0803	13.3102	15.8111	15.2821	13.6311	10.2222	14.1758	7.1558	10.3189	9.7123	13.103	8.8065	7.5583		0.357142	12.4605
6.3258	12.1587	13.7615	6.5769	10.1458	8.5809	9.9217	15.7882	19.2712	9.6643	12.9338	13.8415	6.5186	9.6709	9.5436	9.9329	11.6744	12.9506	13.0882	13.7462	17.1957	11.9969	9.1585	7.9348		0.365077	11.5676
6.4634	14.3437	14.1557	3.3523	11.005	8.3242	4.2438	8.9957	18.9145	8.9061	7.3945	18.7376	9.9304	16.3506	12.6143	12.2003	11.9548	15.6491	12.3475	13.2261	11.2566	10.149	7.0669	9.8555		0.373018	11.3467
6.6009	9.096	17.0235	9.213	15.2816	10.05	7.66	7.6926	15.2912	8.56	17.1173	16.9295	16.9516	27.3962	14.6539	8.5691	10.3463	17.252	12.622	9.7678	18.9334	13.0391	3.5938	6.5719		0.380954	12.7657
6.7384	15.1191	6.9826	9.0904	5.2713	12.0045	13.0822	11.2066	17.083	11.9086	11.2741	10.2038	14.0415	14.6608	16.6781	15.696	14.7495	31.7614	8.9995	9.9189	14.3374	8.1407	6.3148	7.4075		0.388889	12.4318
6.8759	8.5377	13.9037	5.9323	8.0571	7.3509	8.0763	10.9251	16.3016	16.2001	16.4492	17.061	16.7783	12.3901	18.377	16.0928	14.0384	21.6233	7.1638	5.6145	11.9088	11.5247	4.4992	7.9371		0.396825	12.0323
7.0134	11.1364	9.79	12.2539	5.2592	11.2641	5.7408	8.3168	18.3177	10.2235	16.0216	12.3303	9.165	15.0247	10.0199	22.5844	12.3122	25.5517	17.5279	6.5946	13.5256	11.3538	8.0162	8.4067		0.40476	12.206
7.1509	13.3622	11.2444	12.4399	6.6725	8.1462	7.0925	9.2335	15.4164	14.6845	15.8124	17.1874	12.3383	22.4498	15.116	10.7573	5.5987	17.2834	16.8219	9.9692	14.2714	10.9096	4.1847	11.8393		0.412696	12.297
7.2885	9.3866	7.4008	12.5353	9.3206	12.1691	8.1835	7.1954	22.5156	13.9016	21.6704	19.0282	10.7266	12.07	10.7067	8.4065	9.529	23.0562	9.6924	8.3267	16.3602	8.3024	6.2479	9.8806		0.420637	12.0266
7.426	14.8712	9.4542	10.7785	12.7174	6.1537	5.8888	9.1397	16.1439	7.448	22.8195	18.5579	9.1529	25.6574	10.0267	11.1319	8.4762	17.9179	15.8831	6.1133	11.9928	12.6265	6.0613	10.8937		0.428572	12.1698
7.5635	16.3151	8.8902	5.8843	6.6497	6.2668	5.8747	8.2819	24.9505	13.6279	18.7975	13.6749	6.1791	17.3549	15.6031	9.182	7.9194	20.1845	15.8824	7.4103	11.6924	8.4764	6.0997	11.0518		0.436508	11.5761
7.701	9.1148	5.7136	6.7891	9.5252	7.8147	7.6212	8.1561	20.4023	12.377	11.2745	15.5344	6.5492	14.8075	12.2323	4.6124	7.4068	20.7853	15.1607	8.4405	10.4302	12.6654	7.8734	9.8408		0.444443	10.6577
7.8385	11.744	9.1191	7.7684	8.8099	5.3272	11.5072	11.7271	16.3297	4.1054	13.0701	13.798	6.6059	12.5119	15.7884	9.072	4.1088	12.5445	10.6302	6.8655	16.5811	8.5404	6.5259	5.0926		0.452379	9.92058
7.9761	10.9116	9.6517	8.5926	8.9661	9.2242	10.7079	10.2089	10.6441	6.8477	9.8524	9.645	4.9941	11.4619	16.8886	10.7271	8.0607	18.2127	8.0066	7.481	7.9228	6.2016	7.1266	8.7182		0.46032	9.61105
8.1136	14.0756	10.8886	5.7613	7.0861	8.0471	5.661	7.0557	8.9558	5.9879	7.7864	7.5444	8.1146	11.961	12.1832	9.5647	10.8142	11.2922	10.9967	8.9914	6.7905	5.6602	10.0454	10.7969		0.468255	8.95917
8.2511	13.0428	6.7085	6.6921	9.5935	5.1557	5.1792	6.4516	10.0746	8.4071	4.8849	8.7385	8.5008	10.8002	16.6836	10.8666	10.693	11.0123	6.8452	4.7914	8.6945	4.5508	6.8246	14.3004		0.476191	8.67356
8.3886	14.1474	5.6641	6.2025	11.6429	5.0414	9.1207	3.5736	13.5841	7.095	6.7168	6.5278	9.1317	13.7203	21.3661	5.4134	9.7985	10.4669	9.502	5.2548	6.3945	6.0819	3.3782	13.8301		0.484126	8.85455
8.5261	22.8927	7.6959	8.6228	12.6646	3.1229	6.6574	5.395	8.2032	8.7609	12.0657	9.1951	10.0804	16.4717	16.8254	11.023	8.2843	7.6753	7.4949	5.9313	7.6476	4.916	5.9827	15.4542		0.492062	9.69839
8.6636	14.4103	9.085	6.2299	10.6627	9.9559	4.9138	7.2261	9.3007	8.0409	8.284	10.2965	8.1345	9.9221	11.2901	8.3357	6.0258	12.4427	13.3522	8.1168	7.8453	3.6613	5.1571	11.5052		0.499997	8.87803
8.8012	22.1705	5.555	7.8649	7.8904	8.963	6.6335	5.0451	9.2049	5.9048	6.8342	6.1523	7.9251	12.8421	16.7109	4.0867	7.2075	17.2942	16.8262	6.885	8.2395	7.6764	3.5879	15.0636		0.507938	9.41581
8.9387	15.8331	7.431	6.6735	6.6901	5.2376	8.5395	4.6269	8.4231	5.1813	8.7275	10.419	5.7383	12.446	24.6544	10.9416	3.6502	17.1167	11.2201	5.8692	4.5925	6.3008	4.2872	16.0184		0.515874	9.1573
9.0762	11.0579	7.9943	2.4535	6.5611	4.6814	9.4241	8.9391	10.1639	4.2604	9.2336	8.0464	7.9098	9.9236	14.8327	9.8496	6.8588	12.081	12.5072	9.638	5.7766	8.9458	7.6023	13.478		0.523809	8.79213
9.2137	10.0731	9.0302	6.4295	6.0781	6.2659	7.1103	5.7802	7.2087	9.8605	10.3175	13.1965	5.1605	12.3391	17.4832	5.3099	6.0333	11.6541	5.8874	10.8219	5.9486	6.5497	8.2672	11.543		0.531745	8.62384
9.3512	14.9009	8.0741	2.599	8.56	7.5181	10.3273	6.257	9.4697	7.0376	12.8924	17.0902	6.6117	11.1842	19.9485	3.686	3.2843	6.755	11.1666	10.5896	5.8867	5.3119	3.5787	8.2745		0.53968	8.7393
9.4888	11.0202	15.7211	8.4259	10.747	10.2741	8.5787	7.976	10.9445	8.6122	11.7429	23.2981	5.5245	9.9466	24.5405	5.0239	4.0659	7.2357	7.6296	8.6409	6.5735	3.0493	6.4424	9.9675		0.547621	9.82526
9.6263	10.8675	11.4668	5.9547	6.4514	4.8431	8.3037	6.4283	13.1864	7.6667	18.5689	27.1845	6.5647	11.1664	16.3046	9.06	2.516	11.7989	6.8711	7.3714	8.0193	8.4094	6.4784	9.4067		0.555557	9.77778
9.7638	11.3376	6.8017	8.3168	10.5111	3.8728	8.3843	7.7809	7.6966	9.7589	11.1241	33.1179	6.7528	8.6304	14.6298	6.0951	3.7914	10.582	8.3688	11.451	5.007	3.8921	6.5088	11.6412		0.563492	9.39361
9.9013	12.8114	11.5336	5.8901	6.1729	7.5703	10.0782	4.9922	8.205	14.3057	14.9773	32.5509	4.9551	9.5787	17.2215	4.4438	6.2047	6.8988	11.9907	9.3413	8.0664	3.6664	7.61	12.7183		0.571428	10.0775
10.0388	10.4488	10.9836	8.8293	9.6699	10.6074	2.7779	6.7318	9.0984	7.2859	8.7509	35.6156	11.6675	6.4993	12.554	5.9604	5.3422	5.6351	8.5034	7.0333	9.2166	6.3554	5.2786	7.9253		0.579363	9.2509
10.1763	12.1133	12.1729	12.7264	13.2737	5.1515	5.0948	10.1769	9.8256	10.4316	10.9722	31.9758	11.5192	12.282	12.3225	5.9639	9.5345	4.0455	11.6055	16.1264	6.9949	4.1765	4.7691	4.7714		0.587299	10.349
10.3139	12.6197	11.8538	11.5607	4.4474	7.9428	9.6699	11.3208	6.3404	10.8982	14.4948	46.048	8.8406	11.7645	9.2221	7.5558	5.1593	7.5523	6.3129	5.3787	8.1892	5.7282	6.4532	9.3848		0.59524	10.3799
10.4514	4.6109	11.8323	9.3563	5.9506	8.3376	7.8094	7.1745	5.7046	10.6837	17.6491	17.2865	5.9433	14.2587	11.0944	6.4997	7.6833	10.0899	12.513	4.2921	10.2058	8.724	4.428	5.8286		0.603175	9.04158
10.5889	8.9273	11.1323	7.6364	7.7188	7.5079	8.2151	7.2986	12.0805	9.0604	16.0332	14.1695	4.508	8.7428	12.4396	5.2258	6.3911	5.6743	10.0487	6.3734	8.165	7.998	4.0943	8.2407		0.611111	8.59486
10.7264	11.0197	5.0245	8.3661	8.0733	7.6094	7.9573	4.9601	7.674	13.0992	15.7138	13.0679	6.9001	6.3984	18.0669	3.7213	9.6662	6.6493	7.8625	6.4416	7.3941	8.6743	7.4098	6.8792		0.619046	8.63604
10.8639	12.6883	12.9899	4.0434	7.6821	9.0195	8.4811	5.9658	7.0067	11.7634	11.3299	8.1514	4.5806	9.486	13.2761	6.5452	6.7315	6.878	4.2103	5.5906	8.2743	7.2015	3.2981	8.0871		0.626982	7.96873
11.0015	10.3957	9.1503	7.9304	2.3167	6.1877	8.9123	8.1082	8.382	15.7446	9.7135	9.185	6.0726	16.6561	9.4963	5.1541	3.8826	6.9305	9.1981	3.909	10.934	6.8357	4.4778	7.716		0.634923	8.14301
11.139	6.3706	5.124	7.9675	3.3287	7.5733	5.8268	5.8839	6.6684	14.6432	11.4675	6.2893	6.4933	12.0727	13.8057	7.067	8.55	5.8682	6.0441	5.0809	6.5932	5.7222	4.6444	5.3128		0.642858	7.32164
11.2765	6.9328	8.8344	9.407	10.5961	5.2953	9.7117	4.7688	9.9272	15.5029	8.157	5.0044	10.5142	13.1006	10.6853	4.9779	8.519	4.144	8.3524	10.0066	5.6653	9.0735	5.3086	5.2828		0.650794	8.25077
11.414	5.954	5.5757	5.2865	6.7003	3.6938	11.4593	2.5183	10.5261	15.0928	3.9577	10.8033	10.1176	9.8755	14.6911	3.8545	7.3206	6.4472	6.4629	4.5645	4.1505	8.1845	5.2641	6.5922		0.658729	7.35187
11.5515	5.0224	7.5069	7.8351	4.0174	6.6696	9.3973	11.9388	10.2123	12.7759	4.7264	10.1689	6.0234	14.5983	11.5916	3.5928	6.4748	7.7764	11.7606	8.0838	4.7784	4.9663	5.8657	2.7963		0.666665	7.76432
11.689	7.6855	5.755	12.3201	10.1185	5.4539	6.7724	8.5516	12.5224	11.0174	7.5478	7.2805	9.6914	12.5008	7.504	4.9725	6.6518	5.1499	11.1156	9.4099	9.2435	6.6831	2.5174	4.1422		0.6746	8.0264
11.8266	9.6597	5.4215	4.9894	8.172	3.6657	3.6421	5.4721	13.3088	20.5563	2.4317	7.7121	3.68	7.6302	10.9905	5.8682	8.016	6.4007	5.0252	4.2629	5.6451	3.0435	5.4345	6.4954		0.682541	6.84885
11.9641	6.3891	5.5674	5.5015	10.4402	6.4042	5.4587	11.3896	8.808	12.2429	4.7914	7.911	6.875	7.7599	11.0167	5.7852	13.3739	8.5063	4.1706	6.2533	9.5783	5.6405	6.7212	8.3598		0.690477	7.7802
12.1016	6.6389	6.1374	5.1341	4.7979	7.1944	5.1216	9.0028	5.2119	9.9764	8.348	7.8996	11.0483	9.8783	12.1326	2.1977	6.6837	10.9459	9.294	7.0465	10.4921	11.8465	5.5698	5.8209		0.698412	7.75736
12.2391	7.2124	5.5319	5.6088	8.4233	6.5345	5.6525	10.7565	6.2475	7.8324	5.8906	6.5481	6.939	7.7162	12.0088	7.1638	6.8903	4.5244	9.0648	8.7539	9.4026	5.3205	4.4628	5.5175		0.706348	7.13057
12.3766	9.0087	7.3522	6.5892	3.9224	5.9288	10.0369	6.1149	5.6578	7.9786	3.5986	2.9576	8.8606	8.3505	14.4348	9.183	5.7124	4.7857	7.1066	5.124	14.8211	6.1064	2.9746	5.2529		0.714283	7.03732
12.5142	12.0526	11.7511	5.0685	8.8804	4.4488	5.2813	11.1491	8.5648	5.6689	4.2391	5.4021	3.4579	5.8441	12.4989	7.4801	7.082	7.693	9.9125	5.1636	6.1284	5.917	9.4633	8.043		0.722224	7.44307
12.6517	5.7745	9.4467	5.5333	6.7174	9.6472	6.5681	9.3931	3.2788	5.6606	6.2149	5.3627	6.2827	7.1794	7.0308	7.7056	7.5482	7.8378	6.8509	1.7302	10.8375	2.6467	4.7294	10.1127		0.73016	6.69953
12.7892	9.2376	6.274	12.5618	4.0279	4.4113	8.4563	5.0089	7.7449	10.0366	5.0107	11.2144	7.333	6.0182	11.5665	8.4684	10.8946	6.1419	6.1378	7.1704	9.1367	4.692	6.2361	4.5732		0.738095	7.49362
12.9267	10.9834	5.891	7.0187	7.6063	6.1826	8.3437	6.1308	6.7044	7.196	8.6235	9.1883	10.7011	7.4441	7.4575	7.4839	8.7833	10.0282	14.639	6.7137	5.1244	5.3447	8.4276	7.8636		0.746031	7.99477
13.0642	8.8645	4.0847	6.5424	8.1363	10.9138	7.8853	6.0277	4.2134	5.8372	5.8603	12.9534	12.2047	7.0062	8.503	12.1622	4.8066	6.8654	7.5375	6.5608	5.8881	3.7793	7.4834	8.6712		0.753966	7.5125
13.2017	6.1575	8.7951	9.8601	12.5069	8.3519	8.5234	6.0794	6.1297	11.2897	7.985	8.2806	3.6335	8.3941	9.0606	6.6727	3.7757	12.0887	10.6546	7.1765	9.3936	6.1385	8.6444	13.1296		0.761902	8.37921
13.3393	6.7316	6.4461	7.0121	5.8223	7.4576	7.5321	6.9746	5.6566	8.9465	8.1706	6.7224	7.0014	7.494	14.4473	8.2532	13.9226	10.0112	11.2404	9.4561	8.1371	10.7537	5.4921	5.4707		0.769843	8.22401
13.4768	5.5702	6.8982	8.8232	5.2413	6.0455	7.5494	4.7157	3.4472	7.3646	7.7493	8.2477	7.9461	3.665	7.8468	1.8988	9.8245	14.5575	7.5297	11.7969	6.0043	4.2266	5.3325	6.4502		0.777778	6.90136
13.6143	4.3565	5.7715	4.737	8.8871	7.2505	5.8488	8.0031	8.7213	4.4147	9.0949	9.394	4.5896	2.5402	5.7597	10.4113	10.1946	14.9353	14.2703	10.5916	9.4193	7.1836	4.8758	5.2824		0.785714	7.67535
13.7518	6.3378	8.3272	4.2971	10.3683	6.7658	6.7441	2.5541	4.5004	6.7468	9.8807	5.3552	2.8289	4.8398	3.8725	5.9725	6.0544	8.2968	11.9794	9.1522	7.0881	6.6178	4.6695	5.3001		0.793649	6.45867
13.8893	5.041	8.6021	3.8666	5.5068	5.4863	5.4241	4.1699	3.0714	3.458	6.3598	4.8696	7.2272	5.0453	3.9566	7.2968	7.4911	7.7496	13.1457	8.8626	6.8979	7.4742	7.3364	4.3991		0.801585	6.206
14.0269	8.0736	6.0756	7.3074	5.2214	4.6703	4.6067	4.0732	6.7191	5.9559	8.9457	4.9689	3.3131	1.8298	1.8791	5.8668	5.6868	6.7325	18.1342	5.9185	4.5036	7.032	6.7607	5.3184		0.809526	6.06927
14.1644	7.9018	6.7577	5.1362	2.8462	6.9947	3.0475	3.8719	7.3039	5.156	6.9014	6.2623	3.3551	4.9803	6.3949	8.9628	5.6987	6.4752	8.1329	6.3212	4.4095	9.217	6.5658	8.362		0.817461	6.13283
14.3019	9.3334	2.2178	4.6072	5.1848	6.0184	5.0308	4.5523	5.1872	4.5235	3.0519	2.6978	1.6186	2.413	2.3044	5.1237	12.4451	9.4056	7.9697	9.5515	9.8102	5.1078	5.5091	7.1886		0.825397	5.68923
14.4394	9.1782	5.4211	6.4897	8.4142	2.6585	1.5935	3.482	4.3196	7.0585	5.199	4.5086	1.7281	3.6093	2.7126	6.7871	6.1207	8.1722	7.582	5.937	6.5916	7.1054	7.3603	3.3377		0.833332	5.45073
14.5769	8.0274	1.8601	6.0476	6.699	3.9789	5.7543	3.0603	2.5939	4.5614	3.1044	4.4365	1.8065	5.8641	2.6059	8.4555	7.4922	11.8663	8.1202	6.6254	4.9602	3.9745	7.2353	5.4184		0.841268	5.41514
14.7144	5.9868	5.3339	2.0034	6.0515	5.3071	2.9745	2.9671	3.3361	3.0571	3.626	6.184	3.0534	6.5115	2.2098	8.5959	5.4929	4.9361	5.6529	5.5299	9.7606	5.6334	3.1084	10.1246		0.849203	5.10595
14.852	5.439	4.6877	3.9496	3.7439	3.1162	1.6046	3.4635	5.1853	3.5716	1.6429	2.2977	2.7146	3.7512	2.4372	4.5367	4.9406	5.6713	6.2143	5.3846	5.3188	7.3641	5.0531	6.8478		0.857145	4.30158
14.9895	4.7108	4.7952	2.2848	4.752	1.0605	2.5611	5.8804	2.1216	2.0784	3.5202	3.6291	1.7334	2.6967	3.6437	7.0661	4.9831	7.2204	3.3172	7.3005	6.9359	3.2613	4.9251	5.8218		0.86508	4.18693
15.127	6.3581	3.695	2.1659	5.7534	4.4624	4.6459	2.6365	2.5667	2.8266	4.3744	3.9181	1.7233	2.7396	3.0859	1.9854	2.7485	6.1943	1.6142	3.9459	7.1965	5.0319	7.5903	6.6331		0.873015	4.08226
15.2645	6.2166	5.9558	1.6468	3.7688	3.0213	4.3338	2.3312	3.45	4.3392	5.7029	4.9672	3.8111	4.1133	1.4792	6.2091	6.3097	3.4492	3.7485	4.9085	5.5842	5.1719	8.1783	10.8674		0.880951	4.76365
15.402	5.0652	3.4482	2.1789	1.5334	3.9697	3.2903	3.4189	4.5283	4.0301	5.647	2.8453	2.0079	5.2762	3.7016	4.5814	4.0907	1.3486	5.4385	8.1041	7.399	4.9221	5.9333	5.0969		0.888886	4.25459
15.5396	4.2179	2.5107	2.7143	3.9942	1.8099	1.9299	1.7533	2.0608	4.1861	7.4143	3.506	1.599	5.175	4.089	3.7563	3.862	1.7347	3.3218	4.9619	4.9898	7.2172	7.4962	3.8076		0.896828	3.83078
15.6771	4.0012	3.6536	3.4396	3.5628	1.9875	3.2863	3.014	2.2471	3.9622	1.7196	5.5068	1.3046	2.3208	3.4761	3.3302	4.232	2.4732	5.5482	2.9831	4.65	7.2905	7.7193	7.118		0.904763	3.86203
15.8146	2.0741	2.1629	2.4736	3.3847	0.979	2.2228	0.8665	2.2864	2.9379	3.8391	3.0388	2.1647	1.4986	2.8024	2.9258	2.7529	3.5719	3.9954	2.6005	3.8553	3.9624	6.2423	8.156		0.912698	3.078
15.9521	2.4405	2.4409	1.4248	2.8883	2.4116	4.4114	1.5617	4.5476	6.5851	4.8876	5.2953	2.1851	1.7915	2.0799	2.3659	3.0873	3.1463	2.9932	3.3848	3.505	7.2285	7.9193	5.1227		0.920634	3.63932
16.0896	5.1667	2.4218	2.5848	2.6466	1.2528	2.4074	2.5342	2.2992	2.0991	4.7225	3.6165	1.5963	0.9228	3.1299	0.8511	3.8261	4.7129	3.1426	4.6252	6.2153	3.0423	7.7207	5.3036		0.928569	3.34089
16.2271	2.8622	1.7386	1.2477	1.1152	0.8889	2.1458	2.4534	1.4753	3.525	2.6197	2.7148	1.1087	4.1143	2.2747	2.3295	0.9566	2.5814	3.5951	4.1759	1.5138	2.7172	3.2012	8.6626		0.936505	2.60946
16.3647	6.5738	3.3399	1.614	6.5773	2.4651	1.3286	1.6422	3.4802	4.4534	3.1484	1.5582	3.9435	1.4119	3.5915	2.2406	2.7452	2.6812	1.5626	2.7748	3.0741	7.2762	6.7472	6.3935		0.944446	3.50537
16.5022	3.8725	4.3483	2.7954	3.6156	4.768	3.5829	1.0002	1.4117	2.4503	3.3802	0.8358	1.017	1.4442	3.1093	3.4075	3.214	3.4313	3.4237	2.0383	1.2788	2.6788	4.5579	6.6155		0.952382	2.96857
16.6397	3.7306	1.7263	3.7689	2.8155	1.8744	2.1404	3.7323	3.275	3.4277	1.5513	2.194	1.8852	2.1975	3.0246	1.0476	2.6572	1.6272	1.9543	4.0719	1.7711	3.5489	3.9352	3.5795		0.960317	2.6755
16.7772	0.8656	2.6351	2.0442	1.9171	1.7805	2.4337	4.5785	1.7048	3.1353	2.3227	5.8175	2.8706	3.6811	1.4555	1.7684	4.428	1.0378	2.2784	3.7671	2.6913	2.0023	1.8715	5.2077		0.968252	2.70847
16.9147	3.6406	3.1712	1.6843	1.4315	3.2221	3.0517	2.6164	2.0965	1.3255	3.3085	3.0738	4.2412	1.1622	2.6381	2.1622	2.6043	2.9293	5.9864	1.2069	1.0282	2.1044	6.7055	9.9276		0.976188	3.1008
17.0522	2.0812	0.9522	1.9961	2.2808	1.3407	2.2159	1.5992	2.2802	4.5739	3.0394	2.9593	6.1604	3.6909	1.8245	4.1128	3.7692	2.8188	4.3094	3.8746	3.6554	2.4865	1.1343	5.7473		0.984123	2.99578
17.1898	1.3777	2.8521	2.037	1.927	3.8129	2.062	2.7823	2.3052	3.6464	2.091	3.3152	3.9528	3.0305	0.9392	3.3172	2.6629	0.9759	1.8374	3.1463	2.2359	2.9334	4.9322	3.1873		0.992065	2.66782
17.3273	1.6477	2.238	2.8545	1.0026	4.0646	1.7015	2.4363	3.4062	3.3744	4.361	3.6744	3.5409	4.0061	2.8164	1.0161	2.9345	1.8069	3.109	2.4509	3.6101	2.1537	3.0343	2.7091		1	2.7804

## Sheet: Image2
X0	Y0	Y1	Y2	Y3	Y4	Y5	Y6	Y7	Y8	Y9	Y10	Y11	Y12	Y13	Y14	Y15	Y16		AP-Basal	Avg intensity
0	11.6345	20.2365	29.3907	8.8925	16.0893	11.0908	6.7857	10.3762	13.4957	9.5235	6.5877	11.8146	8.4571	5.7005	9.3829	11.6453	7.0979		0	11.6589
0.1375	16.4479	18.7117	31.5812	14.769	21.5157	13.3715	3.8621	13.1898	17.9136	14.9447	12.3077	11.2882	10.2482	9.1531	9.0913	18.5021	11.0989		0.00781148	14.588
0.275	17.6663	17.9887	55.0785	21.2203	30.4269	14.6935	6.8955	16.8979	19.1367	16.5628	13.1272	14.9119	15.919	7.5215	9.5268	16.5906	7.4787		0.015623	17.7437
0.4126	25.406	19.7857	70.4115	23.2793	33.1932	18.1058	9.7232	11.0243	26.9202	16.5264	14.9036	14.3742	17.3991	11.6619	13.3866	18.5252	10.1697		0.0234401	20.8703
0.5501	28.4257	22.8429	63.331	26.951	36.7758	24.0643	8.7157	15.5689	20.654	16.6392	12.7746	21.014	20.8271	16.3443	12.5478	19.5693	11.4024		0.0312516	22.2616
0.6876	32.9145	29.9307	71.7061	28.8689	38.6536	27.5989	8.5901	13.5902	25.89	15.6658	18.6725	30.3468	24.6865	18.8917	10.1013	22.8159	14.127		0.0390631	25.4736
0.8251	59.5818	30.9919	75.177	35.7945	39.5604	40.0179	10.5153	16.3099	23.2384	15.2887	21.723	33.3713	27.1098	29.164	12.1491	25.1607	15.1546		0.0468746	30.0181
0.9626	65.0187	32.1035	69.3813	35.9734	38.4393	48.2311	12.0002	22.3527	20.9298	13.6945	24.2647	32.4601	34.8978	33.8259	18.0966	31.5422	16.3995		0.054686	32.3301
1.1001	49.4597	35.5073	67.1769	29.9475	47.8904	52.1142	13.4022	14.6518	27.5727	14.4159	35.1471	33.251	38.1869	30.6017	22.8038	27.2038	25.2492		0.0624975	33.2107
1.2377	55.6334	31.551	54.2569	38.875	42.0215	56.5811	10.0973	19.0013	24.5792	15.5809	41.869	32.7869	37.6196	31.5492	28.0774	24.9097	25.6258		0.0703147	33.5656
1.3752	53.6769	28.5954	52.5898	40.6126	44.9164	61.1661	9.9444	21.6314	26.2146	19.7188	27.901	28.3896	31.571	25.4705	28.1089	30.4477	27.9617		0.0781262	32.8775
1.5127	52.3362	24.7793	54.2908	34.1307	28.401	59.0961	13.9179	23.768	26.3333	15.6788	26.8372	25.6379	30.132	36.5799	28.5696	27.0035	24.2506		0.0859376	31.279
1.6502	44.0661	24.9709	36.7355	38.066	26.6843	56.9092	20.4221	21.7266	28.3533	16.6068	30.8737	20.4366	22.8487	35.4696	29.43	24.1981	21.074		0.0937491	29.3454
1.7877	37.4737	29.3333	34.5259	28.6997	21.8893	45.7767	17.5917	20.9767	36.1033	18.4927	31.725	17.8951	24.078	25.1544	30.0815	24.407	22.8029		0.101561	27.471
1.9253	39.8656	25.778	31.9941	28.3522	19.3635	32.5159	16.1503	27.5541	35.0034	22.0456	27.9117	14.2506	21.8964	24.2606	31.0888	26.9901	22.2356		0.109378	26.3092
2.0628	35.2293	27.7625	27.4388	27.738	17.1802	18.6476	14.5378	25.7715	28.8302	19.4288	22.9831	8.953	23.0627	22.2464	35.2797	25.2079	19.3316		0.117189	23.5076
2.2003	25.9342	28.3572	24.4857	25.7615	17.092	13.8721	14.0929	32.9623	25.2165	21.5161	19.543	12.82	18.5894	14.1542	31.5134	25.254	19.2		0.125001	21.7861
2.3378	30.7169	14.6552	18.9171	23.1548	16.9404	18.0232	13.4044	35.7524	25.1545	17.4024	19.1015	12.0002	16.2693	14.7293	28.3269	27.7391	15.0749		0.132812	20.4331
2.4753	19.7714	11.8831	21.5403	20.8129	22.111	21.468	14.0061	36.8817	19.9703	18.8891	15.6407	10.7617	14.2083	11.0448	30.0436	33.8721	14.2651		0.140624	19.8335
2.6128	21.1968	7.3199	21.6551	16.1702	19.1122	16.3975	16.0637	38.8795	25.997	25.0776	12.3449	8.8773	14.8826	15.3274	32.7775	29.733	20.7902		0.148435	20.1531
2.7504	17.8497	7.432	21.5125	19.4087	12.5201	12.2538	15.9106	36.1499	28.6764	17.9905	15.2311	6.8769	10.77	14.3953	22.7113	23.5575	16.8222		0.156252	17.6511
2.8879	17.027	9.0392	17.9962	19.342	11.2396	12.8381	11.9187	31.0165	25.9244	14.9884	8.6424	4.7114	11.1607	6.3964	13.601	24.6244	16.6502		0.164064	15.1245
3.0254	24.7495	3.7331	14.7611	10.6225	9.4426	12.9053	11.2109	34.4614	15.7942	16.517	9.395	6.7776	11.2265	5.7507	17.0056	21.9913	17.2152		0.171875	14.327
3.1629	23.1915	6.3236	17.9801	8.3712	7.7172	9.1656	10.1295	26.8415	24.2054	15.4935	11.1071	6.7487	11.5244	6.6961	17.4696	16.2035	17.1203		0.179687	13.8993
3.3004	19.0091	5.7888	14.2783	13.1273	10.8961	15.1637	19.857	22.7984	20.8145	12.2909	9.7261	11.845	7.8067	11.6054	16.3509	18.7308	15.718		0.187498	14.4592
3.438	15.3665	5.3639	11.9661	14.9359	12.5485	12.1318	13.6127	21.4813	18.8528	12.622	11.8319	6.6344	10.1712	9.671	16.3293	17.4421	12.8804		0.195315	13.1672
3.5755	22.1499	8.3357	8.3552	10.0663	10.3912	7.9021	9.2886	27.1162	14.6607	10.0613	5.6739	10.2663	7.951	11.358	10.728	8.5886	18.4978		0.203127	11.8465
3.713	13.8549	7.1092	10.216	8.9755	8.8541	11.8515	5.7963	19.1229	7.2834	14.9105	7.6602	8.2389	5.3905	11.6631	12.3129	18.4191	19.5803		0.210938	11.2494
3.8505	15.2941	5.3576	10.3102	8.3747	11.9004	7.2998	7.2212	20.1275	6.9821	11.3483	6.4692	9.5361	13.8634	6.7266	11.5128	12.2119	18.6793		0.21875	10.7774
3.988	12.939	5.487	10.654	10.4498	15.0151	7.4977	8.9532	21.7582	9.9226	9.1306	7.2516	5.4512	11.5138	6.0101	16.1676	14.1084	15.2394		0.226561	11.0323
4.1255	10.0453	4.7263	11.1342	9.1484	13.9533	7.4817	9.2706	16.5771	13.284	7.8456	9.0813	5.7927	7.965	5.0897	13.8105	10.8554	9.7503		0.234373	9.75361
4.2631	8.2464	6.694	14.1274	9.5826	13.6467	8.5099	9.7566	20.1494	10.6312	11.6374	5.7417	12.4901	7.313	7.6989	14.4838	7.0176	10.5741		0.24219	10.4883
4.4006	11.0443	5.0893	9.4549	11.7027	13.3347	7.3111	6.5175	18.8588	11.6919	10.0319	8.3986	12.1057	7.4357	7.3552	18.9567	7.0186	8.4246		0.250001	10.2784
4.5381	10.5008	8.1669	10.9537	10.4818	11.3312	8.7213	5.013	24.2961	9.3923	9.5077	4.8838	5.3387	8.4649	7.3741	18.9275	5.4517	10.246		0.257813	9.94421
4.6756	11.9389	5.9859	9.4622	6.7154	7.7388	8.384	4.3826	26.359	6.6354	8.9266	7.3339	10.7972	8.1688	4.4004	13.6003	5.6451	13.3007		0.265624	9.39854
4.8131	11.8661	5.6923	11.7485	6.0027	6.7938	9.0689	7.9553	24.0316	8.4969	11.2703	9.9166	7.1986	9.321	5.8047	15.1603	11.2428	9.7314		0.273436	10.0766
4.9507	9.4991	5.0418	8.0608	4.9184	7.137	10.9755	6.4639	19.2481	9.2849	11.1845	8.472	3.5909	9.9797	10.3997	11.3986	8.2324	5.3759		0.281253	8.78019
5.0882	10.8613	4.4227	8.0365	6.229	5.5281	10.7867	6.8835	11.4294	7.7966	8.8888	6.5297	6.7121	10.6488	11.51	11.6911	7.6581	4.7155		0.289064	8.25458
5.2257	11.5089	4.2257	6.51	5.0425	4.0823	4.9818	7.1444	9.5043	6.6623	10.6485	6.7432	4.3377	9.3671	9.2149	7.8454	11.7318	9.9067		0.296876	7.61515
5.3632	12.2652	3.9415	5.3453	9.1339	6.9439	8.5768	5.7244	10.0835	8.5429	7.1158	7.3187	4.815	7.0543	8.4602	10.904	8.1064	10.3292		0.304687	7.92124
5.5007	8.0139	7.5885	6.5366	10.0226	5.8893	5.4564	6.9309	5.9027	5.038	10.6433	8.3677	6.9807	10.7078	10.1837	4.5911	7.718	8.2201		0.312499	7.57596
5.6382	12.2806	5.8087	6.293	5.4258	4.7752	6.9728	7.702	10.2223	6.1219	6.7539	6.4809	6.3858	9.7676	9.4827	5.9978	9.6453	8.608		0.32031	7.57202
5.7758	4.5001	9.7328	5.5974	6.0619	7.0444	8.3883	6.8381	6.8001	6.2951	6.8045	6.7139	5.4999	14.8028	13.9156	11.0135	9.7787	6.6319		0.328128	8.02465
5.9133	3.3911	4.0878	5.3841	5.1915	5.092	10.0258	9.4082	10.6368	4.2866	9.2303	6.8469	4.414	15.3682	16.5237	9.3336	4.4581	5.7758		0.335939	7.61497
6.0508	3.8426	5.5016	6.4932	7.5336	7.9466	11.433	7.7144	13.2015	6.8755	5.9204	4.8289	8.4635	10.539	12.1592	8.7556	5.7289	5.2303		0.343751	7.77458
6.1883	6.9709	5.779	8.2361	6.3759	7.9875	7.102	7.697	15.1558	4.1186	4.1078	2.3776	8.2454	4.2638	10.8467	7.5073	7.3419	6.5216		0.351562	7.09617
6.3258	6.8698	7.8147	7.4308	5.8145	7.4565	8.1223	9.3153	18.5027	2.9241	6.2984	3.3248	4.6125	8.2602	8.3717	8.5034	8.5261	12.5995		0.359373	7.92631
6.4634	5.0425	8.2845	3.375	4.1891	6.0014	9.3198	10.129	15.9844	6.9103	7.9209	5.6673	3.488	9.9794	11.2095	7.7348	6.4696	6.8076		0.367191	7.55959
6.6009	5.3702	6.1563	6.6135	4.7972	4.5959	9.9901	5.8503	15.245	5.5921	5.7094	5.4563	2.1036	8.1759	7.9971	8.2207	7.0586	5.0343		0.375002	6.70391
6.7384	6.9622	6.1186	4.3541	6.7622	6.0627	4.3997	6.4889	18.518	6.4382	8.0552	5.3962	4.7791	9.6305	7.6959	8.0705	4.278	2.8624		0.382814	6.87485
6.8759	7.7207	6.2752	8.0454	4.0806	5.402	6.4599	9.5388	19.5457	4.2699	4.4787	4.6916	2.7592	10.3797	11.4087	4.4998	8.5069	2.8815		0.390625	7.11437
7.0134	5.7767	8.4981	6.2614	4.3454	9.5363	13.081	9.7665	15.3558	3.743	4.983	2.2254	2.8137	6.9291	8.0166	6.0819	6.4161	5		0.398437	6.99
7.1509	3.11	11.9659	7.073	4.3714	4.777	8.1743	8.8847	11.4867	4.1933	7.4608	3.3637	4.461	7.752	8.1522	6.2829	2.6352	6.3197		0.406248	6.49787
7.2885	4.9364	13.13	7.7233	6.0113	6.1935	5.2128	7.5565	5.8888	6.2074	5.2943	8.3502	2.2909	8.128	9.6216	6.0596	4.779	5.3992		0.414065	6.63428
7.426	7.0868	13.4017	7.1988	5.3758	7.1494	5.6051	5.7085	9.2368	6.6145	6.5084	6.2346	1.9527	4.7914	8.8869	6.0424	7.4021	3.7841		0.421877	6.64588
7.5635	4.951	13.8752	7.4412	5.4592	6.83	9.7662	4.9361	6.5617	5.7283	6.7934	3.2972	2.8263	5.3765	7.325	4.8454	8.2274	5.9108		0.429688	6.47946
7.701	4.1045	12.5396	5.0256	7.0369	3.764	6.138	5.0905	3.8491	7.0952	2.5192	5.4248	6.8774	8.2254	6.7571	6.8766	6.5379	10.2048		0.4375	6.35686
7.8385	8.3914	10.0048	6.4429	7.6156	2.0493	5.0663	4.4032	6.3043	4.9473	4.3578	4.7308	8.3124	4.3307	7.3227	7.765	5.9304	9.7826		0.445311	6.33868
7.9761	12.5637	7.5801	5.537	4.7686	3.5996	4.8122	3.9939	6.102	5.3711	3.1	3.4338	4.0797	6.0649	6.9669	3.3847	6.393	5.5387		0.453128	5.48764
8.1136	9.0561	13.3404	5.5938	4.6243	4.453	6.4119	3.7205	2.7203	6.3373	4.39	4.5869	4.0322	12.4466	4.7243	5.0591	4.7991	7.4863		0.46094	6.10483
8.2511	15.9044	7.4915	3.8385	6.4903	5.2477	3.5183	3.0733	5.5814	7.6203	4.5497	3.2685	3.5337	6.9379	5.3414	5.7557	3.287	6.1688		0.468751	5.74167
8.3886	18.2893	4.7281	6.0001	6.135	5.4972	3.3351	2.8439	6.6186	8.5276	5.1295	5.0165	4.2569	8.1052	3.3267	5.8871	5.9826	7.7377		0.476563	6.31865
8.5261	24.0227	4.3863	8.8826	4.3718	2.5074	2.3322	3.7918	6.1136	3.6024	2.7826	5.3038	3.8408	9.0189	2.4409	5.6879	3.8489	5.1218		0.484374	5.76802
8.6636	26.0589	7.6581	6.116	5.5102	3.0133	2.2783	6.6438	5.1436	4.6489	3.9428	2.9934	4.3642	8.3812	4.6134	9.4203	3.5959	9.3833		0.492186	6.69209
8.8012	24.0903	6.0945	6.1278	7.4992	4.6726	3.8052	5.2682	5.5963	4.7757	1.9201	4.6441	3.5661	14.7689	3.5217	12.1293	7.781	7.5042		0.500003	7.28031
8.9387	22.8955	4.2917	7.7224	8.938	6.6516	3.7273	8.8234	5.0087	3.4911	6.3334	3.9336	1.9472	10.8721	3.5649	8.7782	7.2808	10.6055		0.507814	7.34502
9.0762	18.9373	3.8292	6.7549	12.7928	4.7966	5.8296	4.7161	8.2124	7.3893	6.8212	3.3291	2.5525	12.8874	4.4115	10.5021	10.2663	9.6151		0.515626	7.86138
9.2137	16.7073	3.7382	8.3357	9.6062	5.4233	4.1434	5.3603	5.6635	6.3995	5.434	4.6513	4.6901	10.972	6.0923	10.9399	4.8859	9.5336		0.523437	7.21038
9.3512	8.4526	4.6182	6.9675	8.2799	3.0747	3.8501	5.8376	7.3526	4.999	5.0487	4.0473	2.8038	12.677	10.4614	20.4344	4.7969	6.5151		0.531249	7.07158
9.4888	6.1757	2.8869	11.7475	6.8935	4.3127	4.9766	3.0975	4.9812	2.5741	5.8613	3.9723	1.3917	13.4775	8.0342	14.9526	4.0969	5.5552		0.539066	6.17573
9.6263	4.8859	4.5208	7.8048	4.7898	3.344	3.871	5.709	3.2501	2.4952	4.8242	2.2726	1.6417	9.3998	11.0969	12.0476	6.0628	4.5905		0.546877	5.44745
9.7638	7.5101	7.0198	6.76	8.768	6.8546	5.0905	8.1502	2.6986	2.8065	5.9373	3.3338	3.6148	11.4351	8.456	13.2626	5.1928	6.0953		0.554689	6.64624
9.9013	4.3649	3.9384	5.1227	12.0009	3.5107	5.7615	3.7697	3.0378	4.1852	4.0126	3.7283	2.9381	6.7949	9.9546	13.3946	2.769	5.5273		0.5625	5.57713
10.0388	2.7786	5.7288	6.9888	18.0989	4.4273	4.7312	4.2678	3.5532	4.2276	3.5867	3.9881	3.7071	4.7074	10.8713	10.5973	3.1135	3.7357		0.570312	5.82996
10.1763	4.7717	4.7423	6.0076	17.4085	3.669	6.5692	4.8094	3.1382	2.7021	5.5276	3.4607	4.7908	5.6948	11.4606	9.4645	4.1744	4.9617		0.578123	6.07959
10.3139	1.7532	6.1042	5.4606	15.6985	3.8352	4.0195	6.0535	3.3345	3.3814	7.938	1.5048	5.1266	4.4232	10.3004	10.4748	3.1762	7.2965		0.58594	5.87536
10.4514	4.1029	2.7272	4.9954	16.7946	5.3458	4.6019	4.3591	3.7627	4.0074	7.3428	3.6084	3.8154	4.5935	10.1215	6.6759	5.2295	3.9726		0.593752	5.65039
10.5889	2.8954	4.2952	4.9217	14.4761	6.7752	4.8566	4.5022	2.7218	5.6623	3.0606	2.7063	4.1361	3.4151	9.731	7.3624	2.4047	3.4349		0.601563	5.13868
10.7264	5.6249	3.723	6.4225	10.4406	5.9779	4.0937	6.1796	1.6973	2.8322	2.3729	4.657	2.4411	2.6721	9.7914	3.0395	4.4219	7.1903		0.609375	4.91635
10.8639	6.1808	4.1055	5.0793	7.3422	5.1317	6.1017	5.1327	1.732	1.2557	4.0741	2.8604	2.921	4.2019	10.0854	6.0269	1.8883	4.0853		0.617186	4.60029
11.0015	7.9532	3.7894	3.665	3.6293	3.0066	4.2571	4.2921	2.4361	3.118	4.3156	4.0699	2.9259	4.4356	8.6389	4.298	3.2473	3.63		0.625004	4.21812
11.139	6.3012	2.8979	5.0881	3.0964	3.8056	3.5242	6.5647	2.4935	3.5413	3.8314	5.2501	5.2179	2.1093	5.5997	4.0641	5.0985	5.2394		0.632815	4.33666
11.2765	5.2765	3.2683	4.9579	4.6753	4.8983	4.4052	5.1231	1.2565	2.798	4.0156	7.0346	3.6756	2.5665	5.6082	6.8954	4.0208	7.0007		0.640627	4.55744
11.414	5.1124	3.9735	2.0615	3.2178	5.4359	2.0754	5.59	2.7953	2.9947	2.9783	4.5203	3.0008	3.6965	4.2609	5.3341	4.2277	5.7416		0.648438	3.94216
11.5515	6.051	1.7583	3.5284	2.8957	6.7053	3.2448	5.2832	6.2796	2.7265	3.6751	4.9005	1.7494	4.9348	5.89	5.1626	6.8767	4.4334		0.656249	4.47619
11.689	10.6046	2.9134	5.0843	3.5948	4.5258	3.1634	7.7037	4.8112	3.2174	3.7129	5.2665	3.8809	4.7039	5.6337	4.2245	2.3648	3.2921		0.664061	4.62929
11.8266	6.7931	5.0987	4.2287	6.931	4.2374	3.8891	7.3125	5.6996	3.6188	2.1177	6.5199	3.2373	2.7018	4.6285	4.3763	2.4894	4.9966		0.671878	4.63979
11.9641	5.524	3.8349	5.0641	4.6795	3.0067	6.409	8.0063	2.8542	3.876	2.3699	5.0495	4.4836	1.1097	2.7877	4.4347	2.6806	6.4161		0.67969	4.26979
12.1016	3.5605	2.7941	5.8422	5.213	4.0039	8.1403	4.5202	4.0359	3.2702	5.8849	4.2805	2.861	4.5333	2.3968	2.141	3.0723	4.1172		0.687501	4.1569
12.2391	6.2161	3.4992	2.8708	4.5342	5.7085	4.5988	5.3998	1.7553	3.817	4.8207	5.3134	3.8416	3.5341	3.4623	3.1174	3.6676	5.4702		0.695313	4.21335
12.3766	5.7448	6.585	3.9979	4.2086	4.8549	1.9569	4.8898	4.6889	2.521	2.832	8.194	4.7954	3.3918	3.8669	3.879	2.8773	2.4422		0.703124	4.2192
12.5142	4.8575	6.4481	6.0047	4.512	5.4782	3.1132	5.1016	3.7116	2.0886	3.6037	6.9687	3.3777	6.3092	6.4754	5.3913	3.962	3.1025		0.710941	4.73565
12.6517	6.7963	7.3923	5.2412	4.5244	3.4179	3.9509	5.4165	3.7365	2.5548	5.3191	5.8942	2.0046	5.4047	4.5412	3.6343	3.7686	4.7696		0.718753	4.60983
12.7892	3.9639	4.5594	5.3721	4.4049	4.2687	3.5978	7.4265	3.247	4.3281	6.358	7.3914	2.0653	5.4844	4.9919	4.852	3.7031	5.0115		0.726564	4.76624
12.9267	3.8602	3.0466	6.4312	4.2245	3.4317	7.3644	5.6507	3.9566	4.7234	2.7094	4.1829	3.2886	5.3762	5.5554	8.0195	4.2145	4.4755		0.734376	4.73596
13.0642	2.2617	4.8078	4.132	3.6632	2.6517	7.092	3.3063	4.4384	4.8171	6.6354	4.4533	2.8828	4.5646	4.7742	3.3615	3.3124	6.8466		0.742187	4.353
13.2017	2.3102	5.5606	4.1825	3.3261	3.4833	8.3666	2.6241	4.7459	2.6786	4.4208	5.339	5.0422	5.5315	3.3357	6.5651	5.4515	7.9118		0.749999	4.75738
13.3393	1.9158	4.6462	4.0946	4.0331	4.2946	2.3799	2.0117	3.8039	3.3626	4.3699	3.8403	5.2506	5.4834	5.2384	4.5959	5.0491	5.3582		0.757816	4.10166
13.4768	1.7429	5.8431	2.7402	2.0579	3.8806	2.9733	3.402	3.9002	4.0883	4.5867	6.8333	3.8552	5.0804	4.8097	3.0972	3.6814	6.6151		0.765627	4.06985
13.6143	4.7743	5.2302	3.0032	7.2006	3.8976	4.4955	4.3735	3.8744	4.1489	3.7573	5.1614	4.543	7.7608	3.7575	2.3484	2.1397	8.2434		0.773439	4.62998
13.7518	4.9691	7.154	3.8115	7.4974	3.166	3.2671	4.3987	3.9969	3.3492	4.6349	5.9521	4.8505	8.1292	1.6022	4.9093	3.278	8.228		0.78125	4.89377
13.8893	3.7613	7.2687	2.746	7.022	3.8571	3.4032	3.0292	2.4309	4.8684	3.8307	5.8906	4.191	6.5503	1.5966	3.9752	5.5948	7.3506		0.789062	4.55098
14.0269	2.3957	3.2649	2.3542	8.6174	4.3511	3.5632	4.1494	1.1679	5.5991	5.7169	7.6555	7.6054	7.0909	3.7759	3.1216	6.2653	6.116		0.796879	4.8712
14.1644	5.174	3.8741	4.3161	5.5505	5.393	2.7876	3.6717	3.1617	5.7089	3.4523	6.4152	5.8743	3.7016	3.7157	5.2664	5.785	3.5364		0.80469	4.55203
14.3019	4.5472	6.803	4.4105	5.9157	5.6812	3.7857	2.2149	4.3305	5.8197	2.5453	4.432	6.7582	4.2796	2.1827	5.0307	3.6913	4.6092		0.812502	4.53161
14.4394	4.0107	5.684	7.184	5.6019	5.2776	4.8555	1.2791	3.8338	4.0744	5.7604	6.8563	4.9447	5.8313	2.3446	3.3998	2.5867	5.6192		0.820313	4.65553
14.5769	5.1768	5.4361	4.7327	5.7157	4.7172	6.4087	1.3206	4.6924	4.0039	8.8126	10.9966	3.9938	2.7043	1.3579	3.0641	4.6981	4.3654		0.828125	4.83511
14.7144	4.2357	4.7148	2.5557	4.3395	6.8298	8.1339	1.346	3.7805	3.0455	6.1416	13.0118	5.3073	3.4952	2.9882	3.2159	4.8031	3.7409		0.835936	4.80502
14.852	4.1493	4.7773	5.4929	5.6849	6.8855	6.2716	1.2152	5.6773	3.0415	3.0916	14.8189	3.4639	3.5079	4.7005	4.4008	3.6264	5.3109		0.843753	5.06567
14.9895	2.7991	4.3647	6.3896	8.1339	5.8598	6.2632	1.8634	3.2803	5.3609	2.4182	12.9401	4.7885	5.6068	2.5145	3.2806	3.4758	3.4161		0.851565	4.86797
15.127	6.0904	3.9173	2.9989	7.8169	4.9886	7.3358	1.7651	1.9574	4.7224	4.6774	15.8708	5.2465	3.2576	2.8128	3.1592	1.8369	2.7196		0.859376	4.77492
15.2645	5.6814	4.902	3.7779	5.7365	6.8033	4.7621	3.0567	3.4808	4.4597	5.0836	11.4218	4.4754	2.0532	3.1103	5.107	1.4384	4.862		0.867188	4.71836
15.402	4.6608	3.8437	3.288	3.6981	6.4235	2.4814	3.6287	2.1382	2.1773	2.7527	11.3449	3.7142	3.0049	1.6209	5.7513	4.3466	5.4007		0.874999	4.13388
15.5396	5.6025	4.4764	2.3424	7.3074	4.329	3.0652	3.2258	2.9023	0.9653	4.601	9.6214	2.6199	2.338	1.4157	6.5267	2.318	6.0365		0.882816	4.09962
15.6771	5.514	3.5787	4.3511	7.7572	8.0106	2.8604	2.1588	3.6844	4.3471	6.0781	10.2206	3.2802	3.6313	1.81	2.5781	3.9777	4.1905		0.890628	4.58993
15.8146	5.223	5.3577	3.7682	7.2172	5.0669	2.0962	1.7778	1.6207	2.932	3.4919	7.4212	5.6706	3.098	2.4605	3.0533	1.5708	4.5515		0.898439	3.90456
15.9521	2.7643	5.3473	2.3153	7.6005	6.6437	2.5778	1.4774	1.0185	5.7727	3.0087	8.2076	9.0672	4.0778	4.5008	4.2213	2.2037	5.124		0.906251	4.46639
16.0896	3.4214	5.7354	2.1582	5.0911	6.5157	3.8706	1.7783	1.557	5.7096	0.9588	4.3271	7.8121	4.3654	3.2358	3.4819	3.0493	4.3566		0.914062	3.96614
16.2271	4.3052	9.0076	5.2292	6.28	5.8273	4.4448	0.887	1.9344	6.1457	1.0259	4.9735	5.1838	2.6772	2.2535	5.533	1.6083	4.45		0.921874	4.22155
16.3647	2.1972	6.1435	4.1465	4.5908	7.2919	3.9582	1.1974	1.6198	6.2178	2.665	6.512	4.948	4.9355	2.1901	4.3746	3.837	3.5765		0.929691	4.14128
16.5022	1.9775	5.9097	2.5174	4.7604	3.9196	2.9762	2.5495	2.7621	5.0478	1.5154	6.5483	4.3064	2.9696	3.4254	3.1153	4.5049	3.344		0.937502	3.65585
16.6397	2.8187	10.0104	1.5683	3.7711	3.4181	3.0053	1.7548	2.5148	1.1004	2.0744	5.6661	4.9535	4.0167	4.892	4.8198	2.8003	3.3053		0.945314	3.67588
16.7772	1.6845	10.477	1.9771	2.1581	4.0569	3.6654	1.1437	2.1301	3.749	1.4757	5.6289	6.4736	3.6377	3.4634	3.5328	4.0037	2.7855		0.953125	3.64959
16.9147	2.1473	10.9714	3.1427	3.6228	3.0888	3.5648	2.4999	0.8792	3.4149	1.3071	5.3821	7.9187	2.1276	2.5346	5.3339	2.2552	2.0002		0.960937	3.65831
17.0522	2.327	9.2718	2.9598	3.4556	2.9846	3.268	3.87	0.8818	1.0319	1.4913	3.4787	5.1279	4.4338	1.6801	2.5675	3.344	1.5167		0.968748	3.15826
17.1898	2.7572	4.4721	4.1992	5.6399	2.6623	3.8269	1.0345	1.9085	1.2992	1.3098	3.289	5.0845	2.4373	1.3981	2.8554	2.7725	0.8595		0.976566	2.81211
17.3273	3.2922	3.3639	6.3471	3.1048	1.5115	1.9001	1.5605	3.4721	2.2203	1.5041	3.8639	5.4105	1.607	1.9189	2.0446	2.1286	1.9675		0.984377	2.77751
17.4648	3.701	5.5274	5.8587	4.0297	2.3967	3.0188	1.7608	0.9732	2.1695	1.2431	2.5125	2.9919	1.6701	2.2756	1.6109	2.4732	1.8039		0.992189	2.70688
17.6023	3.5376	3.8281	8.378	4.9966	2.9992	2.2267	1.9132	0.7953	2.5054	2.2477	3.4029	2.669	1.6038	3.4478	1.6849	1.7801	2.7602		1	2.98685

## Sheet: Image1
X0	Y0	Y1	Y2	Y3	Y4	Y5	Y6	Y7	Y8	Y9	Y10	Y11	Y12	Y13	Y14	Y15	Y16	Y17	Y18	Y19	Y20	Y21	Y22	Y23		AP-Basal	Avg intensity
0	18.1867	12.1371	12.2227	10.9768	7.1689	6.0218	17.2206	14.8368	11.8968	8.727	10.1793	11.7562	9.4755	12.9519	10.2552	13.1762	16.5264	11.9652	13.9863	15.4171	17.8596	16.2264	15.0812	9.2405		0	12.6455
0.1375	22.485	14.5086	23.8101	21.1392	10.184	7.5657	13.4093	21.464	11.5429	12.6821	8.6941	14.1744	11.7676	12.7918	16.3041	14.693	15.813	10.2122	16.2788	16.3119	9.9514	25.8225	8.3335	11.889		0.00908971	14.6595
0.275	20.2243	20.8561	18.6832	20.1546	11.4311	10.5393	9.032	18.0607	12.3966	14.9458	7.0779	10.6016	8.9954	6.6458	10.6932	18.1082	11.3776	9.0256	14.0125	25.3909	11.6861	17.0683	9.2011	12.4117		0.0181794	13.6925
0.4126	24.3617	23.7009	16.9207	17.4638	9.5026	8.8686	9.5828	15.6598	18.9357	12.2481	15.6875	11.9872	12.6212	11.7874	11.2965	20.2847	14.3065	15.6257	10.0721	24.072	14.3249	15.5323	11.2278	11.9858		0.0272757	14.919
0.5501	18.9494	22.9726	18.6878	9.6233	15.9095	19.3341	16.1202	16.7181	16.4378	18.1055	19.3206	17.902	11.97	6.5249	14.0785	28.3499	12.3055	15.8488	22.8364	24.1853	14.1697	27.4826	5.565	13.1926		0.0363654	16.9413
0.6876	26.4255	27.9182	21.9962	17.6533	20.8342	20.598	14.0585	9.1032	16.3354	11.3262	14.8702	16.7937	12.6219	12.2079	16.504	22.7641	17.1518	17.2949	25.2202	22.7451	21.7033	25.4023	10.9566	15.2917		0.0454551	18.2407
0.8251	18.4562	34.9042	16.5941	20.213	14.6555	18.9867	19.505	7.1849	15.7817	11.5971	16.1189	22.2812	15.8986	21.9141	17.471	18.1361	13.7928	25.9958	26.2162	29.3359	23.0547	20.4046	9.0155	14.8711		0.0545449	18.8494
0.9626	20.6007	33.9425	17.5388	16.9084	15.8594	26.7907	17.3124	3.7718	22.4483	14.645	20.8632	11.2571	13.1823	12.0638	18.5284	19.698	17.812	22.4476	34.6749	25.3548	27.6256	25.074	12.2235	14.7635		0.0636346	19.3911
1.1001	25.7863	32.1015	17.4595	24.9884	22.6811	23.7751	30.4821	6.5072	36.6019	20.293	17.2598	17.4902	14.0624	11.7568	15.8014	17.3242	23.6862	21.3093	29.6734	18.6568	24.6976	15.9134	19.1494	16.6998		0.0727243	21.0065
1.2377	24.6049	31.0987	16.1083	17.3571	24.5643	24.853	26.1187	8.6649	24.5465	9.3904	19.181	20.2127	16.7059	12.433	26.0584	21.6728	32.3161	14.9326	25.3774	22.6657	15.2092	13.1724	22.939	20.0401		0.0818206	20.426
1.3752	17.5684	23.5526	17.6013	22.2253	26.8353	25.3588	26.2428	10.9452	21.8084	6.6384	15.6707	16.7535	15.0191	13.3145	30.5517	14.3665	31.366	15.7605	33.713	15.7832	23.107	17.8177	23.7271	18.1114		0.0909103	20.1599
1.5127	27.4088	28.833	20.7913	23.9916	23.842	23.1111	22.3435	12.0076	19.8572	12.2688	18.4519	18.7557	12.3561	14.7966	19.4666	16.6606	32.8932	17.0965	28.7194	17.5487	18.308	15.6042	18.1206	14.8266		0.1	19.9191
1.6502	20.272	19.8862	14.5142	30.4528	19.9024	20.3146	15.674	8.1024	27.4352	11.2425	13.9285	10.5733	14.1288	12.2423	18.5261	18.9551	31.358	12.6156	16.5662	12.9358	15.7791	17.2991	32.464	13.1123		0.10909	17.845
1.7877	19.3486	17.0958	13.9627	25.2277	22.8439	24.1487	12.3009	13.2724	25.1811	12.6327	11.1071	9.3172	11.8553	10.9652	10.5951	14.8565	27.1324	13.384	14.9106	17.6804	11.8976	15.5983	24.294	4.5998		0.118179	16.0087
1.9253	28.36	16.1204	13.1378	28.9445	20.6591	26.9416	12.0957	18.2378	28.8231	11.3605	11.828	11.8976	9.9649	12.2311	11.253	12.854	21.3432	11.2209	12.5826	13.2684	8.5004	19.3133	22.6169	7.8773		0.127276	16.3097
2.0628	15.288	14.2976	11.281	38.6042	11.064	25.4603	13.3033	16.5382	22.5751	18.1729	13.6914	11.8222	11.2638	6.1207	21.4124	13.9243	15.5988	7.5228	13.4693	8.865	2.4887	16.652	19.8693	7.9049		0.136365	14.8829
2.2003	13.0864	22.4595	10.8844	43.1251	17.051	22.8421	7.6044	12.3515	17.2744	13.9322	12.3026	6.8997	12.4203	8.8688	11.1403	11.9061	22.7444	5.1726	11.1189	10.5972	8.7936	12.6134	16.4201	8.1503		0.145455	14.1566
2.3378	14.0885	16.2221	9.3836	42.8467	10.4028	27.6342	9.4317	11.6754	14.2987	12.1987	10.9996	11.9104	8.8406	8.1492	10.7647	16.5454	15.0201	7.714	6.7776	13.3911	5.6833	7.4243	10.8014	6.5525		0.154545	12.8649
2.4753	14.4529	12.8703	10.8894	30.487	19.1679	30.7229	14.1217	11.9292	11.134	13.6212	13.5914	7.5754	7.4396	14.4967	10.8222	17.9954	10.6635	6.7915	11.1871	5.943	14.8226	10.1145	14.4343	6.7822		0.163635	13.419
2.6128	12.8424	10.5176	10.5188	26.0412	11.0795	19.571	18.7731	5.9028	7.5308	7.6603	12.3524	10.5941	4.3381	12.9086	5.5838	22.8122	11.3079	6.5766	11.003	8.7571	14.5027	8.1657	6.8886	10.8367		0.172724	11.5444
2.7504	11.8958	12.002	14.0697	27.6596	9.8085	18.5352	13.8251	9.9474	14.8202	18.4656	6.5289	7.597	8.3815	7.3754	7.8359	19.3849	14.4653	6.6717	5.025	3.8268	7.7723	10.3943	8.1465	8.6		0.181821	11.3764
2.8879	11.6983	5.8011	9.9154	23.6999	11.3765	16.9778	13.1719	12.3307	10.6952	9.4548	6.47	8.2188	13.7763	10.1584	12.0929	14.941	13.3098	6.7889	8.4279	2.952	8.9861	2.6663	10.6279	6.124		0.19091	10.4442
3.0254	5.5985	5.1309	7.6485	17.6441	9.7404	23.65	5.9277	13.5637	4.0069	15.4185	9.8986	7.8796	11.8298	7.9927	16.1669	14.8675	11.9018	6.6336	7.1929	10.0847	17.4657	5.0214	8.8063	6.322		0.2	10.433
3.1629	6.0694	6.5723	12.4505	15.9564	10.2004	14.3651	5.0121	8.3497	5.6549	6.9662	5.2604	12.2689	8.6995	12.5328	16.6636	9.9737	7.735	5.2592	10.884	4.3753	13.4141	3.5216	9.2932	7.1186		0.20909	9.1082
3.3004	8.2792	10.6989	8.7128	20.7705	5.8389	11.2525	4.4131	6.2	4.9927	10.1559	7.3494	9.6991	9.0092	9.0208	9.6884	6.4321	5.0352	6.3668	6.3415	4.5282	10.0447	5.1335	12.431	3.7895		0.218179	8.17433
3.438	8.9013	6.4332	10.213	12.6612	5.7672	10.2429	3.5991	9.3867	9.2402	11.5427	9.0587	8.7142	8.5704	8.5885	10.9846	7.9526	10.4371	8.7103	9.0591	7.7099	11.3504	6.5965	8.3719	10.5239		0.227276	8.94232
3.5755	7.0178	4.4956	7.7445	14.9878	8.4283	7.7958	7.3548	7.4524	6.618	11.1397	7.7667	4.7875	4.8366	6.9569	7.4638	7.0771	7.8077	8.0277	7.6221	5.8267	4.9385	3.1544	13.3254	6.8692		0.236365	7.47896
3.713	9.0034	3.3204	10.47	13.9056	10.9491	10.127	3.9651	4.9158	6.0254	7.3779	9.3464	6.6127	8.4969	6.5186	6.7367	13.8593	9.2537	7.9354	4.6897	8.3655	8.4981	6.8768	12.0462	5.9679		0.245455	8.13598
3.8505	13.8434	7.3506	11.0345	6.4487	6.9432	7.1223	4.7628	4.0057	4.8523	12.252	11.3998	3.4171	10.5128	9.5519	6.743	7.9476	6.4249	9.5384	8.1214	7.2414	10.4511	5.7798	15.3519	5.8642		0.254545	8.2067
3.988	14.8421	8.7146	9.0293	9.6606	9.1774	6.4012	6.8441	4.1378	9.5004	4.7014	4.6595	8.0267	6.9267	4.7657	6.5835	7.1231	7.4331	11.6103	7.868	5.9719	5.6083	7.2013	11.5281	7.8009		0.263635	7.75483
4.1255	5.9755	5.3103	5.8343	7.1194	6.8238	8.0068	4.9632	9.5399	5.3861	4.7825	9.9788	6.0614	7.1448	2.8409	11.7136	11.1928	6.6984	9.9048	9.1336	7.5404	11.9954	7.8776	13.0126	5.3437		0.272724	7.67419
4.2631	7.8491	8.7717	10.8646	5.9496	2.6956	6.4432	5.8996	5.8508	7.0551	3.7223	11.743	7.1865	10.1657	5.9962	10.7755	15.9606	5.9064	7.7991	10.0791	6.6256	6.579	4.6335	4.556	6.8899		0.281821	7.4999
4.4006	10.381	6.6248	7.8208	7.209	4.8516	6.2738	4.5334	3.269	5.7079	4.2839	8.0216	4.1693	8.5376	5.4006	11.6731	3.8105	12.0552	5.0597	7.9347	3.6758	4.36	6.002	13.07	8.6063		0.29091	6.80548
4.5381	5.4986	7.8445	4.0902	2.9619	9.1949	4.994	8.5225	4.7774	2.7638	6.2568	10.7473	8.4385	5.3591	7.6089	4.5251	5.8344	7.4339	4.9612	11.6805	6.0152	5.2317	5.5652	11.0262	8.9556		0.3	6.67864
4.6756	5.7809	8.0525	7.3096	7.6951	9.8531	7.9621	5.5271	4.2157	3.5009	8.4098	10.432	4.3593	5.5528	6.2093	5.6123	8.5892	7.582	7.4274	4.5357	7.2644	7.085	9.0708	8.215	12.9381		0.30909	7.21584
4.8131	9.0711	5.9104	9.2725	5.4401	7.9119	10.3492	2.922	4.5479	7.6142	11.7206	12.6701	12.4693	3.9005	4.9713	6.222	3.111	3.5096	7.1686	6.1176	7.9454	6.2686	8.707	5.8812	10.6935		0.318179	7.26648
4.9507	6.5959	7.2019	5.2022	6.2188	8.6309	8.0404	6.7423	10.6774	5.3139	9.0751	11.4525	9.53	7.3422	4.1948	7.1357	3.7296	5.4019	9.0618	9.3421	8.8025	7.3916	13.1287	7.2691	7.7087		0.327276	7.71625
5.0882	9.7981	5.2076	9.5583	4.0992	8.3714	9.1441	5.3116	5.1796	4.8567	9.6824	6.8422	8.1334	9.1275	10.631	9.7254	1.3311	6.8721	8.0915	5.9375	10.4555	9.6816	10.9094	10.6542	13.9817		0.336365	8.06596
5.2257	6.2307	5.4213	10.0669	2.2542	10.5622	7.2446	7.2589	6.5406	3.6744	5.9329	7.9311	8.3065	6.9443	6.2659	10.8547	4.2593	5.5948	8.7074	15.2041	12.027	7.5532	11.9938	8.5165	14.3174		0.345455	8.06928
5.3632	3.6754	6.548	8.6274	5.8933	8.9949	4.4831	8.4734	6.7033	5.3936	10.5027	6.5515	11.268	7.5753	5.7381	4.5334	6.6662	6.075	7.2825	15.976	12.6221	7.4822	10.0928	3.8594	12.866		0.354545	7.82848
5.5007	7.2893	6.6749	7.5556	4.4394	13.284	6.492	8.1304	7.9304	9.2386	8.5939	6.8253	7.7531	6.5838	4.4349	7.2313	5.7323	8.3934	5.6962	10.3631	8.6222	7.4799	10.4329	6.5919	11.3546		0.363635	7.79681
5.6382	6.6208	8.6713	11.2393	7.0932	9.7245	8.7191	5.8707	8.2818	7.0589	5.5371	9.551	5.6866	3.4343	5.778	2.9526	6.4951	6.538	8.0357	7.5358	12.1868	9.7562	6.5488	7.7725	7.4862		0.372724	7.4406
5.7758	9.5713	8.9258	8.8648	14.1344	8.1537	3.7407	8.3447	10.888	8.5867	4.9377	6.0663	6.3521	5.3189	10.39	4.7832	6.8449	8.1507	5.9412	7.2312	3.0897	3.6489	10.8179	3.4932	6.2609		0.381821	7.27237
5.9133	11.4539	12.7896	9.6874	10.1973	8.2845	6.1845	5.2845	8.4341	11.5091	4.3939	8.8327	11.1335	8.6456	6.5357	6.3062	7.0699	7.5936	12.1944	5.755	6.7205	5.2653	10.4718	8.7365	9.9465		0.39091	8.47608
6.0508	13.0644	7.1354	4.6295	10.7249	8.7224	5.3297	7.2931	5.7967	9.1531	1.614	6.2063	7.2963	5.5294	5.5743	3.5055	6.0713	10.2124	10.2505	7.1169	10.4761	3.9319	12.717	6.8181	7.3138		0.4	7.35346
6.1883	13.8965	6.9451	7.4324	18.294	9.1958	7.188	4.4471	7.1419	16.8393	7.6529	3.5386	7.4253	4.4069	5.6694	5.3699	6.2437	9.6565	4.1725	8.5186	3.711	8.7978	8.4187	4.789	3.0974		0.40909	7.61868
6.3258	12.9422	7.4191	8.9883	13.7873	13.577	8.4164	6.578	7.2722	18.2497	8.8972	11.1971	8.1347	4.3011	9.0049	8.6502	9.3911	9.8028	4.8639	7.5055	4.0151	12.0809	10.0401	10.4559	3.5849		0.418179	9.13148
6.4634	11.8638	11.4481	7.442	16.4369	9.3154	9.0107	11.5025	4.8297	17.4177	1.9749	7.8676	9.7941	5.0486	10.3099	3.4627	13.8216	9.7048	7.6162	5.8008	13.0177	9.1902	14.7916	7.6635	7.6338		0.427276	9.45687
6.6009	7.4338	7.1261	5.933	6.8932	8.8444	8.7214	8.6165	7.47	16.3811	4.3565	9.5212	13.2152	10.2244	7.5301	3.5447	8.7736	7.8059	3.207	3.7651	5.7505	5.7059	10.6133	10.0411	5.644		0.436365	7.79658
6.7384	5.2764	6.8308	9.0713	13.6666	8.1189	10.8052	8.8169	6.7984	25.178	7.7514	6.7909	10.5519	6.6973	6.322	3.0358	10.6851	5.7873	2.6543	6.2741	7.8852	5.7489	7.8471	7.8244	7.0957		0.445455	8.22975
6.8759	3.8549	6.9945	8.3796	14.008	16.95	7.0459	4.2865	6.6822	30.7076	6.5919	8.3284	6.824	7.5191	8.6972	7.3696	6.3907	6.2454	3.52	4.4909	5.3869	6.2574	6.1234	8.7376	5.3168		0.454545	8.19619
7.0134	6.8859	10.4864	3.6411	14.3567	10.6555	11.8556	4.8809	5.1809	26.5934	6.7136	7.2971	9.2638	3.6452	5.8585	7.969	2.9896	7.6245	6.9444	3.6451	3.7275	5.4558	9.2218	9.8808	6.1958		0.463635	7.95704
7.1509	8.0684	11.3064	5.1569	18.3969	18.3263	8.1701	5.684	6.7044	22.6358	5.9907	4.6854	9.9948	6.6071	3.6904	1.9861	4.0642	4.3202	6.4818	8.06	4.6811	6.1293	8.7322	4.2537	3.1714		0.472724	7.80407
7.2885	5.5452	4.6453	2.8814	21.4289	10.1151	9.656	3.8006	10.3382	20.0301	5.088	9.0274	8.1065	3.8809	8.9222	6.8803	4.929	5.5529	4.7869	4.8208	3.9853	8.4992	6.9937	6.2234	5.051		0.481821	7.54951
7.426	9.7921	7.5374	3.846	19.3039	2.1647	11.4904	9.0949	7.8457	10.4319	5.9151	7.2219	8.1386	5.9712	6.0073	4.774	12.1363	6.2927	4.3316	7.1102	1.9392	3.4338	9.8635	6.5702	7.3022		0.49091	7.43812
7.5635	7.4956	7.9376	8.0479	18.8777	2.5415	8.3044	3.0826	8.2509	9.6361	2.4909	4.9859	6.396	5.5094	5.2082	6.1263	9.6739	7.8762	7.4563	11.2316	4.7352	5.4962	10.5218	4.9352	7.4609		0.5	7.2616
7.701	6.3944	9.5102	6.3334	17.6464	5.95	5.9246	4.3097	7.8026	12.6704	2.5177	3.5341	5.2029	5.5453	5.1329	6.1839	5.2719	4.2346	5.0328	3.1528	3.2594	6.685	10.282	9.7283	4.2717		0.50909	6.52404
7.8385	10.7666	5.6531	6.8575	17.4814	3.9795	4.4731	8.7112	7.7804	4.591	3.466	3.7777	4.2443	11.5629	5.6559	2.1652	3.6951	6.3917	4.1404	5.766	5.5347	4.2543	9.591	7.3373	3.2028		0.518179	6.29496
7.9761	11.385	9.0814	9.9471	11.3019	6.2427	6.1712	3.8915	12.9014	4.8036	6.0561	3.8115	5.242	8.3603	4.8918	5.4887	4.5013	6.516	5.5345	5.8236	5.2729	3.3604	12.9946	6.1518	9.1313		0.527276	7.03594
8.1136	10.7802	8.7859	8.2004	15.0351	5.0414	5.0369	7.4904	10.8492	2.8601	8.756	3.6627	2.8395	5.2266	4.0787	2.4572	4.7512	5.8904	5.409	7.057	5.852	9.3601	8.5576	7.255	5.1704		0.536365	6.68346
8.2511	19.7303	15.4108	4.2496	17.8007	3.0509	8.6121	5.5136	13.946	4.2178	5.1422	2.1816	2.9412	8.753	3.0386	5.0111	7.4093	3.1941	5.1812	4.1877	2.1132	3.9005	11.5679	6.5765	3.5102		0.545455	6.96834
8.3886	13.9098	18.3221	4.5019	13.3331	9.5341	3.7888	5.7558	12.5089	4.904	5.9166	7.4431	5.1845	8.4001	4.8504	3.5268	3.5778	5.8311	6.3592	5.8657	1.9376	4.2284	7.2333	5.5163	5.5528		0.554545	6.99926
8.5261	18.0508	21.8532	2.8168	4.2387	7.4037	7.9601	5.5116	9.5884	4.241	7.1192	6.023	4.4238	5.7207	6.8607	1.1278	7.6386	3.6293	5.5743	8.2311	1.8249	2.1764	7.7521	5.7651	6.7506		0.563635	6.76175
8.6636	19.1247	20.8434	4.1764	7.1761	8.705	8.7166	6.78	11.6294	6.7153	4.1185	5.7452	7.1634	7.784	5.6967	1.8587	4.0407	2.6197	2.9234	7.2021	5.1218	3.3046	4.9375	4.994	8.9829		0.572724	7.09834
8.8012	13.463	18.0617	6.9046	6.6122	2.3452	4.1179	7.1745	15.2894	6.6969	2.9112	5.1754	5.7526	5.6159	4.8848	2.7847	6.0338	6.221	2.9261	6.7004	4.6795	5.8433	4.6317	8.2411	8.0439		0.581821	6.71295
8.9387	10.1461	24.2869	5.3497	12.6809	4.88	5.5567	11.1709	13.2473	6.0095	4.5762	4.0755	7.5039	7.9492	3.7412	6.0498	6.4644	5.4033	2.9958	6.6409	10.25	8.1952	6.1074	7.3536	5.9268		0.59091	7.77338
9.0762	11.1793	14.9997	5.1078	8.9245	5.6026	7.2449	13.5204	13.1653	4.3486	7.6923	9.1578	7.5297	10.0628	9.7846	4.6769	5.3943	2.3104	4.4793	7.3076	8.371	4.1074	3.386	9.8035	6.1968		0.6	7.6814
9.2137	10.568	11.8281	4.0241	8.8557	8.5121	5.033	8.3234	12.2107	6.098	5.7931	3.8866	4.854	11.6871	4.7142	1.6747	3.112	2.8531	9.8494	5.1419	5.7706	5.2958	7.1871	7.1467	4.579		0.60909	6.62493
9.3512	9.3063	14.1905	6.3122	6.6084	4.5774	0.9259	9.8069	5.2195	4.3	5.8358	5.7817	3.1408	6.6079	2.9949	1.9211	4.7177	2.6239	5.4058	7.2116	4.7969	4.9814	1.8368	4.1796	4.4474		0.618179	5.3221
9.4888	5.2653	9.1197	7.3387	8.9609	5.5312	7.4448	7.0701	6.5041	3.2433	4.3314	4.2354	5.6047	13.7033	4.6103	3.9591	3.5627	2.5922	4.1529	2.905	3.2835	5.1973	4.6012	3.6535	7.1998		0.627276	5.58627
9.6263	7.193	7.623	3.9783	5.2445	4.2183	5.4646	13.1423	5.1005	4.0662	3.9423	7.4122	2.8657	14.3378	5.4626	4.1683	4.7368	4.3267	6.2679	4.7052	4.308	4.7811	6.7469	5.6399	6.8756		0.636365	5.94199
9.7638	4.5802	7.1287	6.3614	4.3534	7.0621	2.572	9.5775	7.73	4.9585	6.7283	6.7785	3.7801	5.1261	4.7149	2.9199	5.9984	5.5579	6.3796	6.9691	4.0347	4.8133	4.5935	5.3222	4.5225		0.645455	5.52345
9.9013	10.1321	8.8683	4.4558	8.4124	4.9662	3.1324	11.0661	8.7731	5.7871	8.5391	9.7216	1.62	7.0774	6.2944	4.814	6.0583	3.6042	6.362	5.9292	4.1942	4.7224	6.0034	6.5807	4.8206		0.654545	6.33063
10.0388	11.2717	6.4683	10.4357	7.0299	5.2574	7.1046	15.5089	6.316	4.26	3.3633	5.6582	5.4568	14.7822	3.8979	6.0695	5.8001	8.9464	5.62	3.5578	3.0546	4.6434	5.5358	6.3549	5.1456		0.663635	6.73079
10.1763	5.0368	10.1293	6.8661	7.2834	5.9949	6.2116	9.712	3.5093	2.4492	2.7691	8.175	3.9338	7.0201	4.6994	5.534	4.0279	6.2179	5.8257	6.5526	10.9986	5.3892	4.6987	6.9907	6.428		0.672724	6.10222
10.3139	4.4714	11.0726	5.5638	6.6378	4.2111	3.5805	5.9428	8.0643	2.7688	9.3469	10.9398	7.0109	8.182	6.146	6.0588	4.7026	5.3024	7.7249	5.2414	6.1796	5.5647	10.3284	9.3872	13.7333		0.681821	7.00675
10.4514	4.2256	8.0455	5.1627	6.3161	5.5333	6.8585	8.6789	6.2259	3.9139	5.4588	3.5135	3.7434	6.4662	6.7852	4.4585	5.304	6.6985	4.6502	5.5329	6.4178	6.8834	6.9323	8.3951	6.8735		0.69091	5.9614
10.5889	5.8284	14.8686	6.1482	7.1932	8.0645	4.5067	11.4615	13.1332	2.4719	5.7412	3.072	7.1774	8.6686	2.6742	4.7489	3.9946	7.4456	5.068	5.2472	5.1613	5.4061	4.5322	8.4752	7.2196		0.7	6.59618
10.7264	1.7596	10.8803	6.6544	6.8022	4.0609	6.2502	9.5166	6.1754	5.2906	2.8359	6.4726	3.5222	4.2412	4.309	2.4482	4.525	6.2433	8.2654	6.0376	7.675	5.7975	4.4296	9.3082	6.8119		0.70909	5.84637
10.8639	4.7699	8.0303	8.902	9.5464	4.6112	3.1496	2.8287	14.2682	7.2346	4.521	5.5825	5.6873	5.0402	4.4057	5.2076	3.1012	5.9699	9.1396	11.2667	7.1927	9.6402	7.3923	9.5753	8.4213		0.718179	6.89518
11.0015	6.8109	4.6525	9.3861	6.4566	5.5883	3.6379	8.318	16.2683	5.1227	4.3456	8.8205	4.0436	5.2501	4.0256	4.4339	4.525	4.4921	5.9077	15.4897	8.694	3.4922	6.9071	7.8488	7.0505		0.727276	6.73199
11.139	8.3141	5.4066	8.2661	6.3762	1.955	4.169	9.6286	21.061	6.9733	4.1811	7.5345	2.4539	9.0501	5.3866	3.3912	7.7409	8.6059	3.6373	25.9263	7.7297	7.5044	9.5024	7.645	8.6938		0.736365	7.96388
11.2765	2.9165	10.1919	5.7156	4.9323	8.2493	3.902	7.4788	26.605	6.7681	5.976	10.3733	3.9274	8.4922	3.8717	3.5277	7.582	9.0291	8.4889	27.6799	6.3515	9.9224	4.7202	5.663	3.8748		0.745455	8.17665
11.414	4.7928	10.1854	7.85	9.0356	11.4622	5.3909	7.3696	29.7432	13.1395	2.8652	7.4219	5.9707	5.1925	6.1242	1.2581	6.9014	3.9464	9.3947	38.0743	5.1789	5.9229	7.2725	6.9365	6.3384		0.754545	9.07366
11.5515	2.7874	11.5766	9.3983	7.8815	7.4296	4.2513	3.3235	37.5971	7.6333	8.3184	8.5223	5.8581	5.3066	7.0814	4.4137	7.4896	4.4562	5.1924	50.888	5.9508	5.159	7.5624	8.7508	7.9098		0.763635	9.78075
11.689	2.7978	11.1273	9.5462	10.0788	10.2458	4.0266	6.1946	25.747	10.4741	4.7071	4.9766	5.7414	12.593	2.8488	8.0084	7.4794	3.7501	3.7892	46.1841	9.1514	9.0327	7.8186	7.3398	5.396		0.772724	9.54395
11.8266	11.1406	12.1765	7.505	5.2523	6.0676	5.1964	6.352	20.1021	5.6339	11.1174	6.1943	2.5345	7.683	6.7744	2.929	3.3518	7.1021	5.552	44.2272	6.4157	5.9379	5.6885	4.8573	8.4304		0.781821	8.67591
11.9641	7.5241	8.4221	8.0825	11.3397	4.8379	6.2572	6.5326	24.2477	9.9859	6.992	6.2611	2.3925	7.0325	6.9708	4.277	7.3729	3.4921	6.3945	41.0851	3.8457	8.6306	3.9772	2.8738	5.4701		0.79091	8.5124
12.1016	2.9311	6.0801	7.6468	10.1337	11.7118	7.9652	3.6889	21.9982	7.4655	10.3917	11.0586	6.5062	6.6701	6.568	4.2571	7.5011	7.2537	4.8268	21.6493	6.9383	4.5877	8.7108	8.8864	9.5335		0.8	8.54003
12.2391	6.1921	6.5918	7.5927	11.1924	4.7803	4.2239	10.1614	19.6662	8.9732	5.6285	7.9542	4.1285	4.3663	6.7168	6.3098	7.0267	5.7743	6.0769	19.907	6.7152	3.0863	11.4835	9.4741	6.6234		0.80909	7.94356
12.3766	7.6236	8.4353	6.4303	10.1071	6.2321	6.0107	7.4807	16.8878	9.055	10.4135	8.9585	3.1823	8.223	3.5171	5.5508	3.7956	5.7205	2.8805	17.8386	4.1798	5.6014	6.4839	7.4301	7.8327		0.818179	7.49462
12.5142	5.4431	9.633	7.8566	9.5047	5.1788	4.4682	15.4229	16.9682	4.0062	10.7587	5.9841	7.5865	2.6731	4.2858	2.9945	7.3747	5.8703	4.79	12.3953	3.9806	3.2646	11.96	11.6654	7.8173		0.827276	7.57844
12.6517	4.5313	7.2243	9.0967	5.1203	4.3578	3.6726	5.8043	4.0899	6.4632	15.2701	6.0235	3.8655	5.3415	5.1211	3.486	2.7843	5.7344	5.2804	5.2337	5.3384	4.2345	7.7832	15.276	5.4024		0.836365	6.10564
12.7892	6.605	5.9328	4.3784	6.8692	6.5967	8.3083	9.6179	11.3282	5.2033	28.2662	3.3641	6.666	5.992	8.9309	9.3116	8.7984	8.9342	4.599	6.6567	6.7156	8.2548	4.588	6.1673	5.3567		0.845455	7.81005
12.9267	9.0346	5.0228	5.6772	10.2375	6.1463	5.0259	10.7901	9.6413	3.3367	22.2404	3.3711	6.7352	7.8879	4.7195	5.9208	3.5927	4.7048	10.6997	3.3859	5.1904	5.1532	3.3035	5.3768	3.1879		0.854545	6.68259
13.0642	2.8252	7.3488	8.3424	5.1791	6.8977	5.4988	3.9525	8.6334	2.2964	34.7766	5.0228	4.7386	7.0046	7.4329	10.4567	4.7967	3.2421	2.7214	5.2406	9.4085	8.8474	3.1376	10.0131	2.0381		0.863635	7.07717
13.2017	6.2459	6.3806	5.7461	6.6552	3.476	5.3744	11.4754	11.9612	3.6664	31.4549	6.7312	10.9819	3.2456	6.8372	5.2743	6.0966	7.5693	5.7624	2.592	6.5166	5.901	6.9777	3.9576	0.9506		0.872724	7.15959
13.3393	10.1675	3.852	4.8431	3.0675	5.1935	6.217	8.4135	5.1273	11.4344	33.3961	5.681	6.407	5.1074	9.3339	10.0997	8.454	2.2047	4.556	5.5064	9.5496	6.446	6.6928	5.7544	6.1022		0.881821	7.65029
13.4768	6.1669	8.0563	5.8227	6.2866	5.8419	7.0151	3.1442	3.052	7.5989	41.2639	4.0358	2.7688	4.7893	7.3753	7.9354	4.4176	8.9456	9.3742	4.4137	7.3465	10.7435	5.27	3.7788	5.3466		0.89091	7.5329
13.6143	8.7946	3.8858	8.1212	3.0848	7.2699	4.8509	7.6633	5.1614	4.6584	29.6046	5.1197	8.8197	5.5063	8.1587	6.1711	1.6898	4.1631	6.183	3.1388	7.7622	10.015	5.1623	2.7456	5.9856		0.9	6.82149
13.7518	5.3952	2.8906	4.5369	5.7441	4.6545	7.9877	6.8216	7.9844	12.9133	16.3276	3.4813	9.799	11.9309	7.9491	7.0568	3.7416	8.6559	2.4176	5.8145	5.8665	5.3428	3.7883	7.2286	6.9392		0.90909	6.88617
13.8893	2.5028	3.2594	4.3129	2.4421	2.6433	7.891	8.5297	5.2906	6.1566	15.5256	4.504	12.4506	7.5144	7.2843	5.8521	7.0852	6.153	3.5751	4.7299	5.838	4.7805	7.4286	4.5076	4.7375		0.918179	6.04145
14.0269	2.7963	2.8262	7.4614	4.5166	5.4064	5.0462	7.891	4.218	12.1547	12.8013	4.8045	7.9011	4.6443	5.6888	3.7184	3.6894	7.6377	8.9535	1.7433	2.0246	7.6884	2.9558	5.9798	2.0692		0.927276	5.60904
14.1644	3.1178	3.3836	2.5384	6.1173	3.608	10.8607	6.4665	8.9254	4.2004	13.666	6.2961	5.5727	4.687	5.5215	1.5213	2.8075	6.3988	5.3066	6.8157	2.0833	4.3272	4.3808	2.666	5.016		0.936365	5.26186
14.3019	2.3749	4.3086	4.2581	6.6512	4.856	5.6478	6.3861	7.0008	9.3026	9.6264	4.1583	4.8611	3.4662	7.3368	5.2318	2.5039	6.2286	9.1046	4.4822	6.0311	6.8119	4.6178	7.1269	3.9612		0.945455	5.68062
14.4394	1.6978	3.1709	6.1364	3.4602	5.7336	6.7253	4.0394	6.6426	7.1747	4.0567	9.9168	7.1394	4.2721	10.1887	4.6368	1.9287	7.2142	5.614	3.5753	5.3095	7.2219	5.2703	6.8516	4.7843		0.954545	5.53172
14.5769	3.529	3.2431	5.0865	2.5686	6.1039	5.4268	8.7083	10.4749	13.1332	2.1819	4.1501	6.6403	6.2772	5.6405	3.9852	5.0641	1.8937	3.1211	6.1336	3.9655	8.2546	4.0934	3.0207	5.1176		0.963635	5.32557
14.7144	1.6699	4.0509	3.7526	3.7945	6.6922	3.3875	8.0121	6.3945	4.6712	4.3604	5.3048	6.1633	7.5584	8.1853	3.8754	6.4529	3.1184	4.311	5.5867	2.9086	12.6566	2.361	3.806	5.4806		0.972724	5.18978
14.852	2.8607	2.6982	3.6642	3.2488	5.647	7.8858	5.0794	4.3612	3.684	2.6141	8.0124	6.432	4.0085	8.2735	6.1206	3.5379	6.1933	2.964	9.0606	6.4255	7.5647	4.1743	3.1799	8.5347		0.981821	5.25939
14.9895	2.8907	4.0324	3.2369	4.444	5.6548	8.7657	5.7907	4.9734	1.4935	8.9546	8.8583	4.7758	6.1742	2.9811	4.696	2.77	5.4093	5.692	8.2594	5.5717	6.9679	4.0432	1.7528	6.8297		0.99091	5.20909
15.127	2.1879	1.9997	6.9292	8.7434	8.5754	4.2197	9.0655	5.4986	5.8349	9.4403	4.7419	5.1744	4.5648	6.9168	5.3091	4.2226	5.5448	5.6321	6.9373	4.6034	4.3572	3.0149	4.6625	4.3734		1	5.52291

## Sheet: Sheet1
Image1				Image2				Image3				Image4				Image5				Image7				Image8				Image9						Distance	Image1	Image2	Image3	Image4	Image5	Image7	Image8	Image9
AP-Basal	Avg intensity			AP-Basal	Avg intensity			AP-Basal	Avg intensity			AP-Basal	Avg intensity			AP-Basal	Avg intensity			AP-Basal	Avg intensity			AP-Basal	Avg intensity			AP-Basal	Avg intensity					0	12.6455	11.6589	13.4407	7.97272	12.0864	21.2515	22.6088	11.2742
0	12.6455			0	11.6589			0	13.4407			0	7.97272			0	12.0864			0	21.2515			0	22.6088			0	11.2742					0.05	15.7068	21.8681	17.9981	11.6495	17.8092	28.5942	31.3054	14.4368
0.00908971	14.6595			0.00781148	14.588			0.00793545	13.4062			0.00781148	9.60477			0.00746171	13.0973			0.00812902	24.435			0.00840223	24.3883			0.00781148	11.1111					0.1	20.1805	31.2915	29.4065	20.3219	27.3752	38.9113	52.8663	17.4639
0.0181794	13.6925			0.015623	17.7437			0.0158709	16.6091			0.015623	9.22799			0.0149234	15.3919			0.016258	25.4013			0.0168045	27.4128			0.015623	13.4591					0.15	15.3446	21.382	30.3345	15.7438	29.6873	37.4184	56.2289	16.2141
0.0272757	14.919			0.0234401	20.8703			0.0238121	17.2698			0.0234401	11.0288			0.0223906	16.7389			0.024393	27.8569			0.0252128	30.4453			0.0234401	15.166					0.2	11.4434	13.804	26.1519	10.09	24.007	28.6876	44.5737	14.8547
0.0363654	16.9413			0.0312516	22.2616			0.0317476	18.0796			0.0312516	12.2957			0.0298523	18.8699			0.032522	30.0379			0.033615	33.4338			0.0312516	15.2805					0.25	8.34108	10.5966	19.566	9.47101	19.3521	20.732	31.3068	13.0835
0.0454551	18.2407			0.0390631	25.4736			0.039683	19.4836			0.0390631	13.1507			0.037314	20.7685			0.040651	31.1554			0.0420173	37.641			0.0390631	15.5458					0.3	7.28261	8.85578	15.4909	9.17976	15.9225	16.0746	23.3301	10.793
0.0545449	18.8494	15.7068		0.0468746	30.0181			0.0476185	21.0841			0.0468746	14.2785			0.0447757	21.3239			0.0487801	32.7184			0.0504195	43.2077	31.3054		0.0468746	15.9883					0.35	7.69372	7.60972	13.4498	8.47008	14.1241	13.8416	18.038	9.337
0.0636346	19.3911			0.054686	32.3301	21.8681		0.055554	24.612	17.9981		0.054686	15.6369	11.6495		0.0522374	24.1968	17.8092		0.0569091	35.8971	28.5942		0.0588217	47.9637			0.054686	17.6697	14.4368				0.4	7.66786	7.09527	12.1158	8.20324	12.5871	13.1561	15.0414	8.24362
0.0727243	21.0065			0.0624975	33.2107			0.0634894	27.4086			0.0624975	17.5849			0.0596991	25.2948			0.0650381	37.3642			0.067224	50.9985			0.0624975	17.9751					0.45	8.40492	6.3238	11.4413	7.4225	10.7361	11.1083	13.3059	8.28033
0.0818206	20.426			0.0703147	33.5656			0.0714306	26.8317			0.0703147	18.9686			0.0671663	26.4984			0.073173	38.3669			0.0756323	52.5608			0.0703147	18.4212					0.5	7.60207	6.3176	9.15579	6.2977	9.14004	9.83345	11.8762	6.98726
0.0909103	20.1599			0.0781262	32.8775			0.0793661	28.8536			0.0781262	21.0756			0.074628	27.0382			0.0813021	39.445			0.0840345	53.5221			0.0781262	17.1304					0.55	6.751	6.82254	9.1526	6.03597	8.6377	8.85085	10.0602	6.43169
0.1	19.9191	20.1805		0.0859376	31.279			0.0873015	30.1538			0.0859376	21.0403			0.0820897	27.7681			0.0894311	39.3938			0.0924368	56.0305			0.0859376	16.9799					0.6	7.20556	5.69185	9.74875	6.30909	8.45996	8.41219	8.97422	6.30512
0.10909	17.845			0.0937491	29.3454			0.095237	32.2416			0.0937491	21.0906			0.0895514	28.9604			0.0975601	38.4471			0.100839	56.1222	52.8663		0.0937491	17.4405					0.65	5.88823	4.43532	8.15251	5.11928	7.9524	8.31151	8.08824	6.23368
0.118179	16.0087			0.101561	27.471	31.2915		0.103172	30.9499	29.4065		0.101561	22.1712	20.3219		0.0970131	28.1945			0.105689	40.451	38.9113		0.109241	58.0951			0.101561	16.8364	17.4639				0.7	6.47947	4.35472	7.5228	4.97494	8.29826	7.90326	8.73997	5.47751
0.127276	16.3097			0.109378	26.3092			0.111114	30.2902			0.109378	19.6982			0.10448	27.8721	27.3752		0.113824	40.0513			0.11765	56.8745			0.109378	16.8829					0.75	7.44795	4.57996	7.36347	4.62409	7.34574	9.47256	8.05144	4.97624
0.136365	14.8829			0.117189	23.5076			0.119049	30.6096			0.117189	18.8633			0.111942	29.6174			0.121953	39.5153			0.126052	56.774			0.117189	17.0427					0.8	9.01061	4.59464	7.30743	4.85045	7.37693	8.83685	7.09965	4.9494
0.145455	14.1566			0.125001	21.7861			0.126985	30.9825			0.125001	17.2264			0.119404	31.0954			0.130082	38.8559			0.134454	57.9459			0.125001	17.0264					0.85	7.26915	4.79349	5.45211	5.1744	7.61782	8.54937	6.76662	5.37837
0.154545	12.8649	15.3446		0.132812	20.4331			0.13492	30.8398			0.132812	15.9756			0.126865	32.1218			0.138211	35.8862			0.142856	54.7522			0.132812	16.5153					0.9	7.24829	4.38395	4.16337	4.935	7.20602	8.17018	5.81009	5.8588
0.163635	13.419			0.140624	19.8335			0.142855	29.9423			0.140624	14.1856			0.134327	29.9347			0.14634	35.5026			0.151259	52.9317	56.2289		0.140624	16.2274					0.95	5.83514	3.88505	3.19027	3.68436	7.22307	7.58112	4.27614	5.38461
0.172724	11.5444			0.148435	20.1531			0.150791	29.3428	30.3345		0.148435	12.1518			0.141789	28.7194			0.154469	34.699	37.4184		0.159661	51.9189			0.148435	14.9214					1	5.30135	3.01665	2.82146	2.33669	6.07826	6.90845	3.91324	4.90369
0.181821	11.3764			0.156252	17.6511	21.382		0.158732	28.235			0.156252	12.1055	15.7438		0.149256	27.6473			0.162604	32.7843			0.168069	47.2403			0.156252	14.8823	16.2141
0.19091	10.4442			0.164064	15.1245			0.166668	27.8464			0.164064	11.681			0.156718	28.6752	29.6873		0.170733	31.1728			0.176471	46.3147			0.164064	14.7125
0.2	10.433	11.4434		0.171875	14.327			0.174603	26.621			0.171875	10.6287			0.164179	25.4487			0.178862	29.841			0.184874	42.4953			0.171875	15.1911
0.20909	9.1082			0.179687	13.8993			0.182539	26.8136			0.179687	10.0458			0.171641	25.0835			0.186991	27.5491			0.193276	40.3554			0.179687	15.3637
0.218179	8.17433			0.187498	14.4592			0.190474	24.8484			0.187498	10.0258			0.179103	24.7619			0.19512	26.8119			0.201678	39.1176	44.5737		0.187498	14.8834
0.227276	8.94232			0.195315	13.1672			0.198415	25.0645			0.195315	9.69737			0.18657	24.1196			0.203255	23.9663	28.6876		0.210086	36.3958			0.195315	14.2681
0.236365	7.47896			0.203127	11.8465	13.804		0.206351	23.6347	26.1519		0.203127	8.46122	10.09		0.194032	22.3814			0.211384	23.5017			0.218489	32.7541			0.203127	14.7092	14.8547
0.245455	8.13598			0.210938	11.2494			0.214286	23.5361			0.210938	8.74707			0.201493	22.2468	24.007		0.219513	22.2331			0.226891	31.8414			0.210938	15.0302
0.254545	8.2067	8.34108		0.21875	10.7774			0.222222	20.8524			0.21875	9.56362			0.208955	19.4705			0.227642	21.9151			0.235293	29.7396			0.21875	13.3569
0.263635	7.75483			0.226561	11.0323			0.230157	20.0802			0.226561	10.0657			0.216417	19.7292			0.235771	19.8071			0.243695	29.3729			0.226561	13.2068
0.272724	7.67419			0.234373	9.75361			0.238092	18.7216			0.234373	9.72287			0.223879	21.0137			0.2439	18.8882			0.252098	27.737	31.3068		0.234373	12.7613
0.281821	7.4999			0.24219	10.4883			0.246034	17.4738			0.24219	9.18191			0.231346	19.7475			0.252035	18.0467	20.732		0.260506	26.2895			0.24219	11.7896
0.29091	6.80548			0.250001	10.2784	10.5966		0.253969	16.7319	19.566		0.250001	9.54495	9.47101		0.238807	18.494			0.260164	16.2864			0.268908	26.3669			0.250001	12.3565	13.0835
0.3	6.67864	7.28261		0.257813	9.94421			0.261905	15.8051			0.257813	9.25064			0.246269	19.0008			0.268293	17.039			0.27731	23.4522			0.257813	11.6513
0.30909	7.21584			0.265624	9.39854			0.26984	16.1203			0.265624	9.37675			0.253731	18.0089	19.3521		0.276422	16.5305			0.285713	22.2662			0.265624	11.1889
0.318179	7.26648			0.273436	10.0766			0.277776	14.427			0.273436	9.58034			0.261193	17.2509			0.284551	15.8309			0.294115	21.6272			0.273436	11.0597
0.327276	7.71625			0.281253	8.78019			0.285717	16.2906			0.281253	9.68342			0.26866	16.541			0.292686	15.4075			0.302523	19.9786	23.3301		0.281253	11.0764
0.336365	8.06596			0.289064	8.25458			0.293652	15.9402			0.289064	9.95088			0.276121	15.9057			0.300815	15.3535	16.0746		0.310925	19.8096			0.289064	10.2581
0.345455	8.06928			0.296876	7.61515			0.301588	14.3622	15.4909		0.296876	8.82908			0.283583	16.2776			0.308944	14.887			0.319328	19.5691			0.296876	9.98139
0.354545	7.82848	7.69372		0.304687	7.92124	8.85578		0.309523	13.6352			0.304687	7.58724	9.17976		0.291045	14.768			0.317073	13.3284			0.32773	17.927			0.304687	10.3352	10.793
0.363635	7.79681			0.312499	7.57596			0.317459	13.753			0.312499	8.52548			0.298507	15.4597			0.325202	14.673			0.336132	16.2213			0.312499	9.68087
0.372724	7.4406			0.32031	7.57202			0.325394	13.2529			0.32031	8.81993			0.305968	15.2545	15.9225		0.333331	13.6376			0.344534	17.0392			0.32031	8.81641
0.381821	7.27237			0.328128	8.02465			0.333335	13.5255			0.328128	9.06588			0.313435	13.848			0.341466	13.319			0.352943	17.6616	18.038		0.328128	9.9565
0.39091	8.47608			0.335939	7.61497			0.341271	12.9556			0.335939	7.97338			0.320897	14.4427			0.349595	13.2083			0.361345	15.0917			0.335939	9.55219
0.4	7.35346	7.66786		0.343751	7.77458			0.349206	13.5769	13.4498		0.343751	7.98725			0.328359	14.6596			0.357724	13.8379	13.8416		0.369747	14.6705			0.343751	8.88783
0.40909	7.61868			0.351562	7.09617	7.60972		0.357142	12.4605			0.351562	8.44857	8.47008		0.335821	13.8547			0.365853	13.8634			0.378149	14.5108			0.351562	9.12822	9.337
0.418179	9.13148			0.359373	7.92631			0.365077	11.5676			0.359373	7.99232			0.343282	14.5765			0.373982	13.769			0.386552	15.0056			0.359373	8.7453
0.427276	9.45687			0.367191	7.55959			0.373018	11.3467			0.367191	8.06828			0.350749	14.2825			0.382117	13.4766			0.39496	15.9861			0.367191	7.68814
0.436365	7.79658			0.375002	6.70391			0.380954	12.7657			0.375002	8.38539			0.358211	13.2045	14.1241		0.390246	13.2439			0.403362	14.9839	15.0414		0.375002	8.91745
0.445455	8.22975			0.382814	6.87485			0.388889	12.4318			0.382814	8.35995			0.365673	12.757			0.398375	12.3798			0.411764	14.5069			0.382814	8.43038
0.454545	8.19619	8.40492		0.390625	7.11437			0.396825	12.0323			0.390625	8.34263			0.373135	13.3085			0.406504	12.2041	13.1561		0.420167	14.2685			0.390625	8.2251
0.463635	7.95704			0.398437	6.99			0.40476	12.206	12.1158		0.398437	8.47078			0.380596	13.5906			0.414633	11.8288			0.428569	12.5514			0.398437	8.06968
0.472724	7.80407			0.406248	6.49787	7.09527		0.412696	12.297			0.406248	7.80332	8.20324		0.388058	12.3069			0.422762	11.6292			0.436971	13.1611			0.406248	7.62927	8.24362
0.481821	7.54951			0.414065	6.63428			0.420637	12.0266			0.414065	6.99455			0.395525	12.0382			0.430897	10.7326			0.445379	12.6521			0.414065	8.32215
0.49091	7.43812			0.421877	6.64588			0.428572	12.1698			0.421877	7.73277			0.402987	11.5215	12.5871		0.439026	11.0029			0.453782	12.6956	13.3059		0.421877	8.58353
0.5	7.2616	7.60207		0.429688	6.47946			0.436508	11.5761			0.429688	7.79885			0.410449	10.4229			0.447155	10.6985			0.462184	11.4016			0.429688	8.66487
0.50909	6.52404			0.4375	6.35686			0.444443	10.6577			0.4375	7.68146			0.41791	11.0803			0.455284	10.7576	11.1083		0.470586	11.7154			0.4375	7.55694
0.518179	6.29496			0.445311	6.33868			0.452379	9.92058	11.4413		0.445311	7.7099			0.425372	11.0101			0.463413	10.1095			0.478988	12.326			0.445311	8.40128
0.527276	7.03594			0.453128	5.48764	6.3238		0.46032	9.61105			0.453128	6.61745	7.4225		0.432839	11.2561			0.471548	10.2419			0.487397	12.0403			0.453128	8.15323	8.28033
0.536365	6.68346			0.46094	6.10483			0.468255	8.95917			0.46094	6.60914			0.440301	11.0228			0.479677	9.62615			0.495799	11.6238			0.46094	7.97866
0.545455	6.96834			0.468751	5.74167			0.476191	8.67356			0.468751	6.39137			0.447763	10.2447			0.487806	9.42455			0.504201	12.1502	11.8762		0.468751	7.44075
0.554545	6.99926	6.751		0.476563	6.31865			0.484126	8.85455			0.476563	6.04821			0.455224	10.1162	10.7361		0.495935	9.55277			0.512603	9.72128			0.476563	7.07048
0.563635	6.76175			0.484374	5.76802			0.492062	9.69839			0.484374	6.53838			0.462686	9.60578			0.504065	10.0458	9.83345		0.521006	10.8585			0.484374	6.79144
0.572724	7.09834			0.492186	6.69209			0.499997	8.87803			0.492186	6.03852			0.470148	8.92633			0.512194	9.50885			0.529408	10.1271			0.492186	6.76331
0.581821	6.71295			0.500003	7.28031	6.3176		0.507938	9.41581	9.15579		0.500003	6.16058	6.2977		0.477615	9.5421			0.520328	9.27693			0.537816	9.31629			0.500003	5.87889	6.98726
0.59091	7.77338			0.507814	7.34502			0.515874	9.1573			0.507814	6.14482			0.485077	8.66348			0.528457	8.37148			0.546218	10.1126			0.507814	6.49486
0.6	7.6814	7.20556		0.515626	7.86138			0.523809	8.79213			0.515626	6.52855			0.492538	8.77818			0.536587	9.09706			0.554621	10.2256	10.0602		0.515626	6.49877
0.60909	6.62493			0.523437	7.21038			0.531745	8.62384			0.523437	5.80301			0.5	9.32435	9.14004		0.544716	8.5217			0.563023	9.21642			0.523437	6.38072
0.618179	5.3221			0.531249	7.07158			0.53968	8.7393			0.531249	5.87742			0.507462	8.79128			0.552845	8.32905	8.85085		0.571425	9.4385			0.531249	6.66086
0.627276	5.58627			0.539066	6.17573			0.547621	9.82526			0.539066	5.58081			0.514929	8.58882			0.56098	8.66598			0.579833	8.79137			0.539066	6.76688
0.636365	5.94199			0.546877	5.44745			0.555557	9.77778	9.1526		0.546877	6.00842			0.522391	8.36873			0.569109	8.63046			0.588236	8.659			0.546877	6.14346
0.645455	5.52345			0.554689	6.64624	6.82254		0.563492	9.39361			0.554689	6.30875	6.03597		0.529852	8.06742			0.577238	8.58012			0.596638	8.39096			0.554689	6.07629	6.43169
0.654545	6.33063	5.88823		0.5625	5.57713			0.571428	10.0775			0.5625	7.06175			0.537314	9.16296			0.585367	8.5759			0.60504	9.34909	8.97422		0.5625	6.65138
0.663635	6.73079			0.570312	5.82996			0.579363	9.2509			0.570312	6.91639			0.544776	8.4341			0.593496	7.9327			0.613442	8.62917			0.570312	6.64726
0.672724	6.10222			0.578123	6.07959			0.587299	10.349			0.578123	6.00371			0.552237	9.05058	8.6377		0.601625	8.08797	8.41219		0.621845	8.32494			0.578123	6.16609
0.681821	7.00675			0.58594	5.87536			0.59524	10.3799			0.58594	6.06351			0.559705	8.31757			0.60976	8.22143			0.630253	8.46528			0.58594	6.22314
0.69091	5.9614			0.593752	5.65039			0.603175	9.04158	9.74875		0.593752	6.45619			0.567166	8.32528			0.617889	7.99649			0.638655	7.87843			0.593752	6.0436
0.7	6.59618	6.47947		0.601563	5.13868	5.69185		0.611111	8.59486			0.601563	5.35301	6.30909		0.574628	8.85364			0.626018	8.40591			0.647057	7.61978			0.601563	6.09924	6.30512
0.70909	5.84637			0.609375	4.91635			0.619046	8.63604			0.609375	5.18668			0.58209	8.31497			0.634147	8.26657			0.65546	7.61185	8.08824		0.609375	6.05409
0.718179	6.89518			0.617186	4.60029			0.626982	7.96873			0.617186	5.10891			0.589551	8.59811			0.642276	7.9903			0.663862	8.03321			0.617186	6.5938
0.727276	6.73199			0.625004	4.21812			0.634923	8.14301			0.625004	5.31761			0.597019	8.66613			0.650411	8.98835	8.31151		0.67227	9.03533			0.625004	6.28668
0.736365	7.96388			0.632815	4.33666			0.642858	7.32164			0.632815	5.40039			0.60448	8.144	8.45996		0.65854	8.66694			0.680672	9.12481			0.632815	7.14005
0.745455	8.17665			0.640627	4.55744			0.650794	8.25077	8.15251		0.640627	5.07798			0.611942	8.15975			0.666669	8.42659			0.689075	8.35448			0.640627	6.36696
0.754545	9.07366	7.44795		0.648438	3.94216			0.658729	7.35187			0.648438	4.97884			0.619404	8.57029			0.674798	7.49882			0.697477	8.82131			0.648438	5.80546
0.763635	9.78075			0.656249	4.47619	4.43532		0.666665	7.76432			0.656249	4.76453	5.11928		0.626865	7.65616			0.682927	7.12768			0.705879	9.07064	8.73997		0.656249	5.38871	6.23368
0.772724	9.54395			0.664061	4.62929			0.6746	8.0264			0.664061	4.25172			0.634327	8.07472			0.691056	7.42375			0.714281	8.60224			0.664061	5.61823
0.781821	8.67591			0.671878	4.63979			0.682541	6.84885			0.671878	5.24682			0.641794	8.21097			0.699191	7.94399			0.72269	8.50117			0.671878	5.37097
0.79091	8.5124			0.67969	4.26979			0.690477	7.7802			0.67969	5.33822			0.649256	7.54374			0.70732	8.23504	7.90326		0.731092	7.65427			0.67969	5.66587
0.8	8.54003	9.01061		0.687501	4.1569			0.698412	7.75736			0.687501	4.78358			0.656718	7.45118	7.9524		0.715449	8.47416			0.739494	7.83182			0.687501	5.40015
0.80909	7.94356			0.695313	4.21335			0.706348	7.13057	7.5228		0.695313	4.71727			0.664179	8.98555			0.723578	9.42926			0.747896	7.87974			0.695313	5.51474
0.818179	7.49462			0.703124	4.2192	4.35472		0.714283	7.03732			0.703124	5.51202	4.97494		0.671641	8.35354			0.731707	9.12777			0.756299	7.8394	8.05144		0.703124	5.29512	5.47751
0.827276	7.57844			0.710941	4.73565			0.722224	7.44307			0.710941	4.51303			0.679108	8.15867			0.739842	9.85702			0.764707	7.3391			0.710941	4.80397
0.836365	6.10564			0.718753	4.60983			0.73016	6.69953			0.718753	5.13595			0.68657	8.50183			0.747971	9.8166			0.773109	7.15621			0.718753	4.91281
0.845455	7.81005			0.726564	4.76624			0.738095	7.49362			0.726564	4.41193			0.694032	7.82501			0.7561	10.1305	9.47256		0.781511	7.2892			0.726564	5.18984
0.854545	6.68259	7.26915		0.734376	4.73596			0.746031	7.99477			0.734376	4.59796			0.701493	7.96498	8.29826		0.764229	9.11819			0.789914	7.92655			0.734376	5.37417
0.863635	7.07717			0.742187	4.353			0.753966	7.5125	7.36347		0.742187	4.34891			0.708955	7.62238			0.772358	8.88423			0.798316	6.2903			0.742187	4.48949
0.872724	7.15959			0.749999	4.75738			0.761902	8.37921			0.749999	4.80556			0.716417	7.3727			0.780487	9.26618			0.806718	6.59652	7.09965		0.749999	4.90103
0.881821	7.65029			0.757816	4.10166	4.57996		0.769843	8.22401			0.757816	4.55527	4.62409		0.723884	7.1007			0.788622	9.17222			0.815126	6.74333			0.757816	5.16234	4.97624
0.89091	7.5329			0.765627	4.06985			0.777778	6.90136			0.765627	4.8006			0.731346	7.07892			0.796751	8.44582			0.823529	6.81009			0.765627	5.42712
0.9	6.82149	7.24829		0.773439	4.62998			0.785714	7.67535			0.773439	5.58811			0.738807	7.41711			0.80488	8.13445	8.83685		0.831931	6.91907			0.773439	4.82458
0.90909	6.88617			0.78125	4.89377			0.793649	6.45867			0.78125	4.71941			0.746269	7.6366			0.813009	8.35656			0.840333	6.49544			0.78125	5.01005
0.918179	6.04145			0.789062	4.55098			0.801585	6.206	7.30743		0.789062	4.48866			0.753731	7.19174	7.34574		0.821138	8.2516			0.848735	7.03755			0.789062	4.6584
0.927276	5.60904			0.796879	4.8712			0.809526	6.06927			0.796879	4.63472			0.761198	7.21028			0.829273	8.84807			0.857144	6.59426	6.76662		0.796879	4.73509
0.936365	5.26186			0.80469	4.55203	4.59464		0.817461	6.13283			0.80469	4.87119	4.85045		0.76866	6.91			0.837402	8.87296			0.865546	6.55755			0.80469	5.04119	4.9494
0.945455	5.68062			0.812502	4.53161			0.825397	5.68923			0.812502	5.29376			0.776121	7.41563			0.845531	8.37466			0.873948	6.5001			0.812502	5.1086
0.954545	5.53172	5.83514		0.820313	4.65553			0.833332	5.45073			0.820313	5.41967			0.783583	7.2085			0.85366	8.59236	8.54937		0.88235	6.47048			0.820313	4.74313
0.963635	5.32557			0.828125	4.83511			0.841268	5.41514			0.828125	5.30651			0.791045	7.21403			0.861789	8.77396			0.890753	5.87653			0.828125	5.12709
0.972724	5.18978			0.835936	4.80502			0.849203	5.10595			0.835936	5.29121			0.798507	7.4643			0.869918	8.2882			0.899155	5.11805			0.835936	5.55584
0.981821	5.25939			0.843753	5.06567			0.857145	4.30158	5.45211		0.843753	5.37561			0.805974	8.2158	7.37693		0.878053	7.9431			0.907563	4.33783	5.81009		0.843753	5.91121
0.99091	5.20909			0.851565	4.86797	4.79349		0.86508	4.18693			0.851565	4.35965	5.1744		0.813435	7.25835			0.886182	8.18499			0.915965	4.70121			0.851565	5.82433	5.37837
1	5.52291	5.30135		0.859376	4.77492			0.873015	4.08226			0.859376	5.06519			0.820897	8.51139			0.894311	8.02023			0.924368	4.306			0.859376	5.46589
				0.867188	4.71836			0.880951	4.76365			0.867188	5.17549			0.828359	7.34233			0.90244	7.81057	8.17018		0.93277	4.28366			0.867188	6.41355
				0.874999	4.13388			0.888886	4.25459			0.874999	5.0045			0.835821	7.46983			0.910569	8.14975			0.941172	4.25647			0.874999	5.92381
				0.882816	4.09962			0.896828	3.83078			0.882816	5.48376			0.843288	7.53746			0.918704	7.93866			0.94958	4.53458			0.882816	6.10498
				0.890628	4.58993			0.904763	3.86203	4.16337		0.890628	4.50195			0.850749	8.39421			0.926833	7.37654			0.957983	3.57496	4.27614		0.890628	5.37361
				0.898439	3.90456			0.912698	3.078			0.898439	4.40794			0.858211	6.81115	7.61782		0.934962	6.72133			0.966385	4.40396			0.898439	5.73248
				0.906251	4.46639	4.38395		0.920634	3.63932			0.906251	4.90619	4.935		0.865673	7.25972			0.943091	7.58315			0.974787	4.24307			0.906251	5.99732	5.8588
				0.914062	3.96614			0.928569	3.34089			0.914062	4.60849			0.873135	7.82525			0.95122	7.71728	7.58112		0.983189	3.76556			0.914062	5.22294
				0.921874	4.22155			0.936505	2.60946			0.921874	4.26682			0.880596	7.14602			0.959349	7.37041			0.991592	4.02453			0.921874	5.55333
				0.929691	4.14128			0.944446	3.50537			0.929691	3.97952			0.888063	6.66288			0.967484	6.68838			1	3.46738	3.91324		0.929691	5.77327
				0.937502	3.65585			0.952382	2.96857	3.19027		0.937502	3.19543			0.895525	7.09764			0.975613	6.78828							0.937502	5.59595
				0.945314	3.67588			0.960317	2.6755			0.945314	3.12558			0.902987	7.24464	7.20602		0.983742	7.46							0.945314	5.1543
				0.953125	3.64959	3.88505		0.968252	2.70847			0.953125	2.93034	3.68436		0.910449	7.16166			0.991871	6.6086							0.953125	5.00789	5.38461
				0.960937	3.65831			0.976188	3.1008			0.960937	2.47576			0.91791	7.95704			1	6.53505	6.90845						0.960937	5.15321
				0.968748	3.15826			0.984123	2.99578			0.968748	2.6074			0.925372	7.42192											0.968748	4.79195
				0.976566	2.81211			0.992065	2.66782			0.976566	2.19916			0.932839	7.32211											0.976566	4.44223
				0.984377	2.77751			1	2.7804	2.82146		0.984377	2.34981			0.940301	7.0334											0.984377	4.74137
				0.992189	2.70688							0.992189	2.28304			0.947763	6.92992											0.992189	4.9258
				1	2.98685	3.01665						1	2.10497	2.33669		0.955224	6.73546	7.22307										1	5.36759	4.90369
																0.962686	6.50768
																0.970153	6.47009
																0.977615	6.66777
																0.985077	6.02332
																0.992538	5.79732
																1	5.00336	6.07826
