# Supplementary material for: Crumbs organizes the transport machinery by regulating apical levels of PI(4,5)P2 in Drosophila
Source: eLife. 2019 Nov 7;8:e50900. doi: 10.7554/eLife.50900 (PMC6881148; doi:10.7554/eLife.50900)
Supplement: Figure 5—source data 9. [file elife-50900-fig5-data9.xlsx]

## Sheet: Image14 (2)
X0	Y0	Y1	Y2	Y3	Y4	Y5	Y6	Y7	Y8	Y9	Y10	Y11	Y12	Y13	Y14	Y15	Y16	Y17	Y18	Y19	Y20	Y21	Y22	Y23		Apical-Basal	Avg intensity
0	5.9701	5.5277	6.9556	10.8368	9.1444	10.4988	4.1474	7.8304	7.244	12.9992	8.8511	3.4207	4.255	9.5866	4.2034	2.7927	3.4456	5.9279	3.5653	13.1682	11.0479	6.9282	15.1297	10.3529		0	7.65957
0.1375	6.7479	7.7127	3.69	6.3391	6.647	8.4837	6.1604	3.9102	8.0895	9.949	11.321	2.9263	3.2861	7.5361	4.7376	2.7375	6.8364	6.323	3.064	7.5006	10.3023	9.5655	17.9646	8.3401		0.00584718	7.09044
0.275	13.7381	9.4006	5.1226	4.4047	8.9379	10.5774	9.9223	7.1465	9.8134	11.6159	15.0307	5.9821	2.9987	6.9126	2.7982	6.9613	5.4392	10.6239	2.9104	8.3098	18.665	4.6933	16.4479	10.2782		0.0116944	8.69711
0.4126	13.3705	9.3435	3.4659	6.1246	10.5835	11.4778	3.2585	9.5437	10.4302	7.4315	15.3461	4.8591	7.2848	10.0021	11.4594	1.9673	6.5208	7.2695	7.1782	6.4237	12.6214	1.85	17.3461	11.4224		0.0175458	8.60753
0.5501	8.1442	11.5712	6.4839	6.0331	5.8879	10.8139	7.708	9.4965	13.7274	6.7661	14.7336	3.4709	4.4551	6.8961	6.7764	3.7198	8.3998	2.4706	2.5769	11.9864	13.2034	3.6013	15.8197	8.2572		0.023393	8.04164
0.6876	11.353	9.7891	7.0034	10.8832	13.8438	9.6863	6.4943	7.2949	15.3127	10.4566	23.8191	3.267	4.062	5.955	7.8697	5.6374	7.6524	8.4374	5.5369	15.5628	7.4175	1.8356	14.6471	5.8849		0.0292402	9.15425
0.8251	8.1032	10.8552	5.9667	8.7597	9.6244	11.9775	9.0632	8.473	14.0592	11.2493	16.337	8.9773	6.5841	5.858	6.1093	3.9004	8.0894	6.9452	6.2038	16.0976	3.9648	2.8274	15.4761	3.4334		0.0350873	8.70563
0.9626	7.5503	15.4058	5.6674	8.8079	12.4262	14.6541	7.5375	10.972	14.0428	9.1223	19.6204	7.3124	3.5206	8.8237	5.3146	6.8125	11.1927	14.9253	4.8849	14.9789	12.2461	6.4528	14.3706	5.9188		0.0409345	10.1067
1.1001	5.0787	17.091	6.5114	15.3049	18.7451	18.9743	8.4842	8.7103	4.3526	8.1804	18.8447	8.0748	4.7042	10.4555	9.9622	6.1816	12.9944	10.5924	5.18	13.473	7.7865	1.8137	9.6201	6.2659		0.0467817	9.89091
1.2377	3.9485	16.8771	6.2489	9.2811	20.5075	10.2508	6.0058	6.6048	9.9661	15.1153	14.2122	10.2686	8.4489	12.0632	3.1928	10.4092	12.1033	13.096	8.418	27.0971	9.0667	5.8781	10.738	7.0926		0.0526331	10.7038
1.3752	4.8446	12.8231	4.7816	18.1428	20.4405	5.2882	7.5445	8.9293	10.9119	13.5037	12.2519	9.1046	2.2544	11.8374	6.163	10.4992	16.0489	12.213	8.2582	14.2348	9.1938	7.4295	12.4759	11.4477		0.0584803	10.4426
1.5127	9.0317	18.9858	7.4845	21.2716	20.9823	16.6862	8.9253	16.9043	13.3353	15.0508	18.3176	18.5341	2.5726	8.5592	5.6247	9.6054	14.9327	14.0732	4.7483	21.52	16.0967	4.2926	16.0946	12.897		0.0643275	13.1886
1.6502	5.019	20.6506	9.8541	24.4902	21.5157	15.7986	6.5317	17.1851	14.0904	15.9007	10.6532	23.7549	2.1051	5.8337	5.9076	13.3293	15.0418	14.8183	7.8077	18.7689	11.792	5.8562	12.0619	16.4486		0.0701747	13.134
1.7877	9.6781	19.5691	6.3459	19.392	14.6393	12.5234	7.6211	18.4112	12.443	13.5816	11.485	16.842	4.081	9.3141	4.9564	10.9526	18.6842	20.8195	8.0901	12.2683	10.4106	6.5577	13.5283	12.2379		0.0760219	12.268
1.9253	12.1355	8.1961	14.5809	20.7901	17.3063	19.1668	11.9544	18.5612	19.9945	10.6784	12.0952	19.2451	7.1872	9.7123	3.5635	15.1625	12.9583	13.4778	13.3258	11.6303	11.0979	8.4209	10.1577	12.1929		0.0818733	13.0663
2.0628	5.5753	17.0363	6.8721	17.692	18.5517	20.3338	10.977	18.4928	12.7203	12.5624	10.2687	16.9008	2.7722	10.9672	6.4529	10.5529	13.4134	15.6389	14.6365	10.2931	13.4084	8.0331	11.3463	15.4826		0.0877205	12.5409
2.2003	10.8861	18.9042	13.8498	14.4067	18.7016	15.5311	8.9782	13.2409	10.8986	13.9318	17.2434	12.0067	9.693	9.5655	8.0352	14.5477	19.1811	6.7186	11.1205	10.7418	11.4082	14.3602	9.4954	10.1656		0.0935677	12.6505
2.3378	11.177	9.9363	12.6431	6.9839	22.726	12.6338	16.2912	16.4458	11.236	10.2889	8.23	16.782	5.8645	8.856	5.2863	11.6815	12.823	7.8824	16.0169	7.5334	6.3857	7.3586	11.8701	13.4368		0.0994149	11.2654
2.4753	10.5788	13.3524	7.2362	9.2415	12.442	14.5932	17.7825	16.6716	20.5919	19.735	14.5944	10.2743	7.8358	12.7548	7.9232	11.3483	12.971	6.6644	15.2186	10.2602	7.0152	6.5402	13.401	11.1629		0.105262	12.0912
2.6128	12.3938	11.4605	11.4979	14.581	19.2403	19.5138	14.8654	20.1386	29.3702	17.3253	14.2414	22.8123	2.638	11.0559	5.3889	17.0028	12.4184	9.8153	15.8574	13.0434	8.4192	7.8781	12.3591	14.6242		0.111109	14.0809
2.7504	14.2435	12.6364	8.5972	13.9492	9.0156	13.1152	10.6716	15.6209	23.8083	14.5693	13.5115	23.8952	6.4616	8.3687	5.35	13.7523	11.9298	12.037	9.0638	6.6591	12.7392	7.6473	15.2835	9.4389		0.116961	12.1819
2.8879	9.2268	12.3329	8.0942	14.0554	15.9174	12.6673	16.6341	13.3923	23.4116	20.2438	24.3354	20.6326	4.0063	11.2024	8.9477	20.6523	8.1957	15.2428	11.0444	11.9987	10.3322	6.2152	8.5848	12.5991		0.122808	13.3319
3.0254	9.1069	14.035	17.1628	15.3623	16.1223	10.1855	19.8839	14.3693	18.1846	12.1675	21.3087	12.8236	6.0183	7.4183	6.5801	9.9111	11.1376	11.4603	11.6415	10.598	12.7484	11.3996	6.0447	10.5837		0.128655	12.3439
3.1629	9.8243	8.7363	10.1049	4.265	15.3982	10.547	22.1545	12.8852	16.7984	12.0225	13.1439	15.46	6.2717	10.4542	7.3954	12.5485	11.3385	15.9778	12.6381	14.7234	11.2465	13.2355	5.4149	8.2483		0.134502	11.7014
3.3004	7.3703	9.4991	10.2796	15.3838	18.3142	9.5834	12.2045	17.3989	14.918	10.4256	22.0573	13.806	7.5693	7.8915	5.9604	14.8623	6.3615	9.5719	16.0867	15.4864	14.9484	10.4239	6.0402	11.117		0.140349	11.9817
3.438	12.7521	17.7297	14.0526	14.5458	17.1295	13.3459	17.1711	12.3476	18.6229	18.3201	14.779	15.139	11.7617	8.976	8.7648	7.4006	11.9053	8.1861	13.7191	14.6749	14.0708	11.303	14.501	4.8983		0.146201	13.1707
3.5755	12.6367	16.6189	11.1354	17.5857	16.5719	12.9725	24.2196	16.0184	16.3963	17.79	13.8142	16.4274	5.9112	10.4242	4.731	12.6968	4.1346	12.89	13.0424	10.4705	8.5469	7.1262	11.2533	12.7211		0.152048	12.7556
3.713	7.7356	12.6138	14.4992	15.6823	12.3791	20.1176	16.6254	19.7093	10.2399	16.4891	19.438	16.2963	6.0649	8.9378	9.5162	9.5428	9.2504	14.1462	11.7336	15.0666	7.6354	13.504	5.8862	9.5054		0.157895	12.609
3.8505	14.4473	12.9086	16.9795	13.8327	15.0567	14.223	19.1315	12.0696	12.0679	18.5737	14.0022	15.041	7.9312	8.5107	10.2885	11.842	4.4651	9.5468	10.5903	11.0563	14.8898	10.1294	13.4638	8.5921		0.163742	12.485
3.988	10.9823	9.6349	16.9493	22.4188	16.7683	19.9918	20.5702	12.1086	12.2916	18.4604	13.9065	12.0724	17.4693	11.6693	8.0972	10.4678	5.1599	12.2775	12.966	12.2274	6.8087	11.4177	10.8763	7.8763		0.16959	13.0612
4.1255	13.3269	15.8564	19.2893	14.975	13.4736	16.8425	12.6959	11.966	8.694	15.2528	19.9634	11.3966	4.231	9.3639	11.7846	9.8754	7.2791	13.5405	15.3827	11.0126	10.1242	14.7113	11.2203	9.4222		0.175437	12.57
4.2631	11.2781	21.0458	13.9862	15.9819	17.2833	10.1574	16.2442	14.0579	11.4803	15.9641	16.1085	16.2834	6.3624	10.7938	11.4282	9.3465	5.0374	6.444	6.7544	12.2422	13.4325	8.535	11.1875	8.3566		0.181288	12.0747
4.4006	7.9771	22.7358	11.9631	7.2831	12.427	16.9558	17.2619	14.6591	11.9058	9.1988	12.5883	17.7675	4.9577	6.3176	14.8483	14.0475	4.9188	7.5931	12.6342	17.9244	10.9845	10.6745	11.9408	9.0687		0.187135	12.0264
4.5381	10.0549	15.3246	18.4806	8.9337	11.974	20.4879	10.4705	10.2091	14.4677	16.2043	19.7776	17.7584	8.5052	10.6484	16.2914	11.1267	6.6913	6.7505	15.2382	18.5668	17.5012	10.0686	9.1943	10.1604		0.192983	13.1203
4.6756	12.4191	17.688	8.7526	8.7319	17.9774	14.3935	14.3	9.0509	15.936	9.567	19.7962	12.966	6.0546	12.3154	19.3266	15.6272	6.7194	4.9092	20.8618	12.8411	17.4405	14.9416	10.2657	8.2307		0.19883	12.963
4.8131	10.1355	21.8429	9.4419	11.7326	12.3407	19.6057	19.6056	8.538	14.8402	13.6611	22.8587	11.4961	8.4168	8.187	12.9684	12.5378	2.9759	11.3485	13.5197	9.2565	21.5768	15.6177	11.6981	6.5705		0.204677	12.9489
4.9507	12.7786	15.8687	11.6001	12.1374	13.0997	20.2908	14.9677	10.5028	13.7912	19.6364	13.8636	12.5131	9.351	8.862	14.7655	16.8143	4.8943	8.8811	12.7052	11.7892	16.7551	15.195	13.5223	11.9034		0.210528	13.187
5.0882	13.5804	8.4688	9.3121	22.9841	10.8849	19.0227	12.635	9.6723	10.3872	19.1672	14.374	13.4521	9.859	8.0417	13.4593	9.0491	6.1078	6.5286	11.3404	10.575	9.6829	18.1762	9.1424	9.9455		0.216376	11.9104
5.2257	17.0735	9.0938	10.4092	20.4696	10.8479	16.0173	16.3915	9.8866	11.0058	19.3314	10.746	15.2514	11.1648	8.5906	12.2768	8.8774	8.9392	5.1168	11.792	11.997	13.4232	15.6223	13.2165	7.3102		0.222223	12.2855
5.3632	7.3141	12.2255	11.4351	10.8853	12.0808	27.1496	13.4813	8.6905	15.0106	14.6741	11.0249	13.281	15.6725	11.5912	13.9943	10.9122	6.5393	8.1676	12.0793	11.2672	10.2834	10.6634	16.0769	12.7576		0.22807	12.3857
5.5007	15.0885	8.5238	16.5096	12.5338	14.8291	29.5845	10.4178	9.0147	10.3006	16.0494	8.6409	16.3721	8.4097	9.6739	12.4096	9.3567	7.773	5.2022	12.0355	13.7388	15.64	14.9099	13.3762	12.3177		0.233917	12.6128
5.6382	11.5341	7.2332	12.9085	16.2846	12.4437	19.1442	17.7759	12.6222	7.573	10.3902	11.7641	15.0479	12.6716	8.3778	14.0397	4.6711	6.8252	9.1094	5.7814	5.7149	21.3521	13.037	12.4817	11.4645		0.239764	11.677
5.7758	18.9196	16.039	10.1777	19.0521	15.9004	22.4097	13.8309	10.7688	11.1639	15.4424	12.7065	17.6221	9.469	13.562	7.9685	15.5694	9.0528	6.6408	8.5763	7.7505	15.7485	10.2221	16.1142	10.2343		0.245616	13.1226
5.9133	11.4224	12.1455	9.7613	15.9677	16.3533	19.0357	7.5348	10.5543	10.8058	7.3882	12.5771	15.7267	8.5187	12.0027	8.4674	10.2799	6.6243	4.9856	6.8904	9.7935	20.6182	15.242	15.7324	9.3831		0.251463	11.5755
6.0508	11.504	11.0795	11.7884	15.1525	25.7025	18.2884	8.8504	7.1375	10.9357	7.6161	11.5437	15.5865	12.1515	9.1921	6.9183	6.7998	4.9806	4.3527	13.2733	4.603	14.2922	12.0723	10.6601	10.8374		0.25731	11.0549
6.1883	16.5762	14.2484	16.735	18.19	13.6181	19.4363	9.325	11.4835	10.9461	7.4276	17.6096	11.7069	10.8424	15.6279	6.0658	12.4835	8.157	6.5964	6.2863	10.8185	13.6531	12.5346	13.9065	9.5342		0.263157	12.242
6.3258	9.3099	12.8029	11.9971	17.7944	13.8479	15.7053	10.5563	13.1972	6.6507	7.852	13.1026	8.0577	15.1628	6.8453	9.3374	11.0484	2.2168	3.1721	5.7587	11.009	12.0019	12.0456	13.4349	13.0663		0.269004	10.6656
6.4634	12.5107	15.4782	15.7802	17.9658	12.7616	15.2283	11.7617	8.8614	9.8014	10.1137	17.4217	8.5582	8.3705	9.4113	15.2149	7.5513	2.607	3.2758	3.4583	16.3227	11.6738	9.9131	15.8401	5.4907		0.274856	11.0572
6.6009	10.712	13.508	17.6817	10.9889	13.1589	19.7359	12.5271	9.8156	12.3986	10.3138	17.9145	10.7891	12.4708	11.9904	15.6555	15.9684	3.2999	3.4284	6.2854	13.3323	16.8455	11.8377	16.0427	7.1999		0.280703	12.2459
6.7384	13.6463	16.9876	20.147	10.2229	8.8404	17.682	12.993	6.4229	14.7915	13.0263	15.4302	4.4835	17.0269	11.0398	6.4878	8.7498	2.2583	3.2246	8.8679	12.868	18.1281	8.3144	12.3302	8.7811		0.28655	11.3646
6.8759	13.0499	13.8059	19.0363	12.9024	11.1852	16.179	7.1984	5.2139	17.7248	13.1293	23.7649	11.3191	13.8949	10.776	9.8214	6.1638	6.6095	2.9403	8.3408	10.0856	17.2399	13.3222	12.5466	10.1728		0.292397	11.9343
7.0134	9.1228	18.224	17.481	10.5599	8.9303	14.5972	9.3842	5.905	18.9424	11.8985	16.6611	11.376	15.2908	11.5491	6.4759	5.6483	8.3753	1.6678	6.692	10.5937	17.4829	15.9271	12.6216	5.5519		0.298245	11.2899
7.1509	12.0151	14.4867	16.3642	13.7951	11.4158	15.1771	5.8456	5.8862	25.3463	13.187	15.8671	9.1866	11.5982	10.571	3.8824	12.3583	5.2983	4.067	3.2982	11.0293	16.6909	17.188	19.2126	3.7076		0.304092	11.5614
7.2885	9.8261	16.2243	14.4072	8.7232	15.727	13.4906	10.4868	6.5581	29.1411	4.8253	14.5221	13.3936	13.418	12.8263	9.7272	9.0448	0.7539	4.2259	7.1242	13.4313	18.2791	16.1482	18.2911	6.7682		0.309943	11.9735
7.426	9.8863	21.3445	12.6242	13.2391	9.375	10.4208	6.0225	4.4565	32.2846	5.8666	15.3944	20.2054	16.0541	8.7216	8.2098	10.1138	1.7949	2.0994	4.3746	10.8572	21.0185	16.3845	19.5639	9.6859		0.31579	12.0833
7.5635	12.2028	19.1955	13.1288	14.1466	9.8996	15.5808	12.9914	12.7162	33.191	7.4696	13.2011	7.9782	14.5706	11.2745	9.8493	10.3771	6.9088	1.6608	4.2731	8.3996	18.6733	14.6346	20.0618	7.4874		0.321638	12.4947
7.701	12.0862	9.5284	22.9097	9.897	12.6706	17.6666	18.0203	11.2044	25.5892	8.3186	14.6468	11.2094	14.1235	9.9911	5.9462	4.2115	1.6491	2.4896	2.863	10.0063	16.7797	10.1998	13.2334	2.9495		0.327485	11.1746
7.8385	9.9091	14.3115	18.5624	12.9773	13.7215	8.0792	12.2905	9.4717	17.4816	7.4848	14.4352	11.9347	9.0117	5.8242	7.5671	6.6088	2.7329	3.0161	9.8531	15.5642	17.1628	9.7576	14.9453	5.4666		0.333332	10.7571
7.9761	8.7633	10.2447	19.5267	12.2687	12.6367	9.4218	7.4368	12.4699	13.2927	7.3319	10.0068	9.3515	8.6165	7.0077	11.8003	12.178	3.6153	1.3393	6.4274	14.6462	16.4177	16.1566	11.6177	7.3499		0.339183	10.4135
8.1136	13.5621	12.501	13.9409	18.0848	10.676	13.8551	14.6265	10.7516	6.8145	11.6962	7.9113	10.3049	9.3764	10.2868	9.4228	7.3688	7.6443	1.9661	5.7967	8.3766	9.4332	8.841	14.0752	8.2239		0.345031	10.2307
8.2511	14.3323	18.7945	18.0516	17.3715	8.8781	14.4444	10.5936	7.0244	14.7198	10.3909	5.9489	9.1181	9.614	7.1161	13.2252	10.8514	5.0538	2.6367	8.98	11.1635	15.2137	7.9656	15.091	6.7598		0.350878	10.9725
8.3886	11.6603	12.8992	18.0436	10.5537	13.0344	17.5641	7.939	7.2109	12.1819	10.7025	12.9605	13.1557	12.2941	9.5905	8.7146	8.5663	6.8084	4.834	2.4856	13.4757	8.9549	13.3047	15.2058	8.2541		0.356725	10.8498
8.5261	14	10.3999	10.9557	14.9367	14.4293	14.8362	12.8954	11.2933	12.6858	11.1736	12.4486	14.2134	11.1946	12.61	8.2037	4.6498	5.2758	2.3738	7.4832	13.9997	13.0249	11.5654	15.0394	6.1081		0.362572	11.0748
8.6636	7.5031	11.9245	17.558	9.826	18.481	9.2992	11.9529	10.789	10.5648	11.8101	9.773	12.5633	9.2454	7.1924	7.0724	8.6993	4.5118	1.8885	4.6162	11.3326	10.0921	6.45	11.9378	8.151		0.368419	9.7181
8.8012	9.4842	9.1235	11.3924	17.7284	10.9497	16.5768	15.8296	9.8342	9.746	9.673	11.1184	9.5673	6.9617	13.8666	7.4655	8.1775	4.135	2.5009	3.4442	15.5217	10.6145	7.6623	11.8636	3.8747		0.374271	9.87965
8.9387	10.3384	13.453	12.2676	15.5387	13.793	15.4427	13.8923	13.6866	11.9	8.8367	6.1231	7.1369	14.727	13.8692	14.7546	7.9641	2.4226	3.406	4.2559	12.1092	11.0932	11.1564	6.7831	4.0273		0.380118	10.3741
9.0762	10.6491	16.554	16.2509	11.1241	11.4294	12.3147	11.0479	21.3984	12.3769	11.5601	5.5043	21.4973	9.0633	7.5616	6.9773	5.7735	2.5434	2.71	5.5052	9.9632	14.028	10.1898	9.3625	5.3524		0.385965	10.4474
9.2137	11.5873	9.2694	22.8026	11.0478	5.8377	9.4709	10.0474	13.3003	14.4475	12.6339	8.9562	13.7428	11.7986	9.92	6.8098	5.6211	3.2319	1.692	5.4053	13.4554	17.4757	7.5856	16.4575	7.3516		0.391812	10.4145
9.3512	12.278	11.0412	16.567	12.554	9.3134	8.4706	16.715	13.0748	9.0992	8.5556	9.1497	14.7216	14.6723	9.3643	12.3089	9.2781	1.9072	4.8403	5.6915	16.9789	6.7941	12.0186	16.2976	10.3306		0.397659	10.9176
9.4888	11.564	9.3166	17.7855	10.8874	18.3902	9.0535	12.8992	18.7462	11.2536	7.069	10.7615	11.9871	8.8555	7.2483	11.4024	11.8882	5.315	2.5581	4.3127	9.9318	17.4151	11.1196	7.8834	4.6868		0.403511	10.5138
9.6263	19.6242	18.6597	19.8319	6.7887	20.2337	8.4286	9.2378	16.0995	13.358	10.9639	15.1348	13.0029	12.8111	7.3393	5.33	11.4218	5.1427	2.9609	4.1328	13.1867	13.2693	9.0758	12.2084	5.4313		0.409358	11.4031
9.7638	11.648	11.6674	18.6727	10.4968	15.7697	6.1025	10.0986	16.1212	17.9334	12.4206	9.2208	12.6268	10.2369	8.5409	9.9967	11.4865	2.6205	3.104	5.5538	17.1152	9.9871	8.0223	11.4978	5.4611		0.415205	10.6834
9.9013	11.4413	11.4054	18.8903	8.4266	14.4116	2.5013	4.4449	6.6554	13.6364	9.8984	9.0399	12.579	8.2713	7.1371	5.5257	14.3824	2.9217	3.4223	7.8465	13.3512	11.6002	8.8468	11.9941	4.8129		0.421052	9.31011
10.0388	12.9585	17.0505	15.3929	7.7972	11.1829	4.4213	6.9793	11.7792	7.9446	22.7264	8.6945	10.5829	7.8708	7.0603	11.567	12.2972	1.7963	2.9614	3.2015	10.2511	7.2856	8.3761	10.7255	4.6406		0.4269	9.39765
10.1763	11.1979	14.581	13.1254	7.3307	5.2287	7.9101	5.0139	8.8298	7.1643	12.4211	10.3117	13.9072	10.889	2.1004	9.0606	15.2407	4.6472	2.0621	6.3238	22.0693	7.9507	9.4777	8.5175	3.2767		0.432747	9.1099
10.3139	8.0305	11.8025	17.8908	12.8244	6.1493	3.7582	7.1317	10.3297	8.3296	17.8938	8.4374	21.3609	7.7418	7.0887	7.6855	6.9743	6.5738	2.5183	5.4352	18.4214	12.4816	10.4184	8.3897	5.6694		0.438598	9.72237
10.4514	11.4293	13.6722	12.7345	8.8194	11.634	4.4837	4.4061	11.3462	6.4314	9.3625	8.3129	17.4965	10.7459	8.846	6.5458	7.1523	5.1325	3.6152	4.807	19.4976	9.9852	6.946	7.5375	9.6601		0.444445	9.19166
10.5889	14.2027	10.9239	16.9479	9.7738	14.4481	8.1218	5.9851	12.7356	8.6876	14.6003	8.5685	10.3638	13.3087	10.1864	6.6891	7.8422	4.3131	2.441	4.1181	16.4613	9.8157	4.7112	10.097	5.449		0.450293	9.61633
10.7264	8.7887	13.8967	13.6713	10.6472	6.0684	7.4843	11.9143	9.3535	9.51	8.5406	9.2418	15.6026	14.6245	8.8111	6.9489	13.071	2.2551	5.1996	7.9588	11.7754	9.5286	11.7637	14.8782	0.6623		0.45614	9.67486
10.8639	5.5438	9.882	13.7345	6.5827	7.433	8.2	8.6713	7.5463	7.4189	6.2984	11.7697	18.6668	11.648	10.0782	4.7804	8.6349	2.1794	4.4011	7.4659	12.9588	6.4918	10.8533	7.9593	3.734		0.461987	8.45552
11.0015	11.5519	10.0179	12.8078	12.5452	5.6403	10.7008	5.2461	9.1885	14.0675	9.1088	10.9355	11.1677	7.8567	9.943	4.7604	6.65	1.3669	4.1755	9.6997	8.9599	4.8663	8.112	12.7032	5.649		0.467838	8.65503
11.139	7.6673	16.0947	11.6366	6.5536	5.7021	8.6678	8.0174	7.7771	15.3468	6.1993	7.1906	11.2952	11.7025	4.606	5.9885	7.139	2.3299	2.8322	13.0126	6.0174	4.1156	9.3355	8.5609	8.2876		0.473686	8.16984
11.2765	8.2303	9.1646	11.9533	10.51	4.1572	7.2158	5.4119	13.096	10.0081	7.4068	14.9405	6.9173	7.4878	7.4352	3.8707	10.3641	3.473	2.1673	4.8921	6.9811	8.7598	6.8967	14.4518	3.6782		0.479533	7.89457
11.414	7.1376	12.2274	9.0788	7.1659	7.2898	9.5267	5.7014	6.9691	20.135	7.1696	3.5172	6.5367	10.5219	7.7933	8.7267	6.1057	4.1002	4.3188	7.0291	10.8223	3.4821	5.4048	18.2826	6.1418		0.48538	8.13269
11.5515	10.1832	8.3915	11.1738	8.7277	5.5588	12.3385	11.8126	7.0308	18.1615	7.717	8.7178	7.4142	11.0656	7.3766	6.4466	6.0173	3.3748	7.1566	7.8227	6.5934	9.1373	5.8141	13.9395	5.4692		0.491227	8.64338
11.689	10.3002	10.4085	13.6821	9.8512	6.5341	8.1561	7.5956	11.5097	12.0924	5.8133	11.0275	10.971	10.4085	11.0903	6.4787	7.1892	4.9688	1.7659	13.1475	8.4472	7.964	8.7035	15.788	4.3518		0.497074	9.09355
11.8266	7.7309	15.4066	10.9023	7.3264	5.5093	2.6827	11.8828	8.3624	22.6835	6.077	9.2598	8.0352	12.0965	3.1633	3.5865	5.989	4.6455	5.564	6.0649	6.4708	7.107	7.8202	11.769	2.4988		0.502926	8.02643
11.9641	10.1694	7.6798	11.8512	5.7946	5.788	6.5887	6.1765	6.6668	13.0766	5.1212	7.7058	11.2474	12.1904	10.2616	6.1989	8.9207	4.4918	3.8824	2.9908	8.3888	7.3579	6.3142	9.639	5.6346		0.508773	7.67238
12.1016	12.3297	14.5283	9.9649	9.2834	5.1934	4.7139	7.9906	5.9343	12.6579	7.0102	9.1385	10.8725	8.8703	5.2891	9.849	3.5685	3.6463	7.8691	7.403	6.623	4.1106	5.7701	11.6162	7.6066		0.51462	7.99331
12.2391	9.1527	7.734	12.8571	13.7237	6.081	4.7632	8.3587	7.4589	17.2337	9.6328	4.8828	5.8121	11.3028	8.5866	7.2106	3.8963	2.6245	4.5467	8.3611	8.8005	4.3734	3.5817	13.6631	7.3512		0.520467	7.99955
12.3766	12.9418	6.8554	6.746	8.9267	6.9942	6.7933	4.0929	8.7845	12.8611	4.7166	11.2932	9.4405	8.9958	8.4642	6.8329	4.0833	3.8117	8.7583	7.474	6.5571	4.7069	6.0053	13.281	4.6634		0.526314	7.67
12.5142	6.7218	10.4977	19.3772	7.21	6.3784	7.0215	6.8854	9.3292	16.1564	9.0881	10.6073	9.3336	7.078	8.4798	8.0559	7.477	1.5456	3.4512	6.8451	7.2821	4.322	9.8888	8.475	9.0803		0.532166	8.35781
12.6517	10.3315	8.0545	6.836	6.3187	7.2883	4.9805	6.6911	7.625	14.5495	8.1082	6.6293	5.1045	7.1879	7.054	6.3068	6.4374	3.4059	2.5935	6.9124	6.3202	2.8887	4.2294	7.562	7.5747		0.538013	6.70792
12.7892	8.4909	8.7005	11.045	9.1075	10.3293	7.8205	10.662	7.0054	11.7294	7.8091	5.2839	7.1235	8.6062	8.4052	5.6002	6.8316	5.1015	3.1784	6.4977	5.7455	4.8372	7.2635	6.6081	7.0412		0.54386	7.5343
12.9267	10.3467	12.9622	10.6004	5.837	9.1274	7.829	7.3114	4.5249	14.8222	8.2932	11.3136	9.8135	12.5802	7.4502	4.3041	3.7146	4.4038	2.6601	6.0217	9.243	1.3864	5.3325	10.4339	4.8412		0.549707	7.71472
13.0642	5.8265	9.3836	7.6819	8.3854	5.7684	7.0355	5.1134	8.363	12.6111	7.986	10.879	4.4749	11.1457	5.9437	6.3235	4.8325	3.5967	2.4175	5.2019	9.1553	6.8791	5.6483	6.7109	7.7456		0.555555	7.04623
13.2017	10.0932	7.9956	13.3129	12.0887	6.4416	7.9696	4.3745	6.659	12.5152	7.9352	9.7812	4.5107	10.4299	11.5575	12.4721	6.3984	3.4183	5.6972	7.4845	9.7647	5.7976	8.5429	9.0395	4.7274		0.561402	8.29197
13.3393	6.4376	10.1816	8.5481	7.9716	8.7729	3.5602	5.6804	5.8484	10.2179	11.5204	6.4156	4.3311	8.5565	6.8899	6.1328	3.8466	6.083	6.1081	10.6848	9.6484	3.2157	5.6136	11.3592	4.9814		0.567253	7.19191
13.4768	5.4495	6.1943	11.6827	6.2566	3.5022	6.6881	4.9442	8.0438	9.5466	12.5284	6.4672	4.3309	9.6354	3.0608	5.1508	4.9263	6.0303	3.5039	3.0581	7.2654	3.3666	2.1832	14.5267	3.144		0.5731	6.31192
13.6143	9.8903	8.8433	11.5028	10.104	5.2408	8.0192	2.289	7.4746	10.4143	10.9445	9.5856	5.4325	3.7262	8.2066	8.8766	3.7855	7.3667	5.7212	2.5962	7.5875	4.0393	3.5767	10.3659	4.069		0.578948	7.0691
13.7518	9.6736	11.2881	12.7813	8.5078	9.0783	1.7886	6.6838	7.8824	7.9323	7.2209	4.5386	7.4821	6.797	5.905	4.4335	4.8276	5.6497	3.5861	7.2437	9.3006	2.414	4.127	13.2747	5.1691		0.584795	6.98274
13.8893	8.8339	3.8836	8.2919	11.3615	6.6656	4.5162	6.2876	7.0858	9.1505	9.2392	7.9062	7.8916	4.6914	10.8783	11.6344	4.1187	3.8407	3.7452	2.8674	9.2833	2.2185	4.9035	9.5738	6.7131		0.590642	6.89925
14.0269	10.9097	8.1473	12.3269	6.9267	6.4856	7.9007	5.126	5.8057	11.977	3.6754	3.4168	5.5774	12.6497	9.3862	9.7582	2.0291	6.1707	5.6706	3.2492	7.2095	7.3039	8.357	7.4183	3.5145		0.596493	7.12467
14.1644	7.9163	5.9824	12.8306	18.1448	4.6965	2.0285	3.3712	7.4062	5.1152	9.1209	10.0669	7.2569	7.8988	8.1683	4.6101	3.901	4.8163	4.458	4.7714	6.7398	7.059	6.8761	13.8906	8.6731		0.602341	7.32495
14.3019	7.1703	5.8926	9.0652	9.6741	1.767	4.7019	4.4573	2.984	12.9167	7.8785	4.6026	5.9548	8.1362	9.1699	4.6534	5.7956	2.2109	5.2503	11.3531	7.7531	4.1089	7.2527	12.2647	3.7967		0.608188	6.6171
14.4394	7.4142	4.9808	5.1808	14.3128	6.9695	6.0757	5.0701	7.987	6.6603	4.1894	5.5539	4.821	7.0368	8.0758	3.2396	3.3088	3.3736	5.6976	10.155	8.0448	3.2058	7.947	9.1622	4.9585		0.614035	6.39254
14.5769	4.7324	3.9086	8.082	10.4856	3.7877	4.2049	5.9796	5.5893	8.3931	7.2438	10.1608	6.9472	5.699	6.606	6.437	2.8644	3.975	4.5452	8.4854	4.4212	3.0128	8.5212	16.682	5.7478		0.619882	6.52133
14.7144	2.8777	5.7126	8.4262	15.5602	5.3272	5.4364	5.5841	9.5111	5.1289	6.193	13.4055	6.0656	6.7355	8.9268	5.7754	1.832	6.3416	2.6439	6.384	7.6319	2.8899	5.0461	6.8407	5.7996		0.625729	6.50316
14.852	6.5253	4.4061	8.5081	10.3735	6.4626	3.2051	2.58	11.4715	6.9607	6.6487	6.5295	7.5298	9.8787	10.8976	6.2111	3.745	5.8802	6.1636	4.1234	7.3052	5.453	9.7035	9.4885	4.9764		0.631581	6.87613
14.9895	10.0161	5.3923	10.3037	11.5512	6.1761	9.0237	3.7071	7.796	7.7118	7.978	9.3517	5.6067	5.2776	7.6757	5.5644	4.954	5.6355	5.8859	9.8664	4.3287	5.5156	5.8136	10.5407	6.0771		0.637428	7.15623
15.127	9.1386	6.1151	8.6191	10.4033	4.2425	3.8032	5.9429	9.0399	5.7504	3.224	6.7385	5.6959	3.4932	6.2373	3.9419	3.7675	5.9308	3.4523	5.0804	7.9355	7.3121	8.9338	13.0495	11.3541		0.643275	6.63341
15.2645	3.638	6.3135	7.4127	8.6363	6.8479	2.8221	4.0131	10.0628	8.8216	4.7963	7.601	6.3157	9.7158	10.8065	6.6741	1.8868	5.4996	3.8571	6.9343	2.4536	4.3422	7.8383	7.9392	6.3802		0.649122	6.31703
15.402	1.8636	7.4589	13.2381	8.3765	4.8056	2.6947	8.2942	11.1983	11.5441	6.2709	10.0272	5.9462	13.8569	7.7294	2.871	9.7563	10.5397	4.7608	8.3131	4.2246	3.2855	11.7677	10.5149	5.2175		0.654969	7.68982
15.5396	9.8966	4.1509	15.032	9.5924	7.8916	8.7523	5.4271	15.6237	7.8582	6.1528	7.7574	11.3483	7.875	8.7067	7.4278	4.142	2.4712	3.1478	6.644	5.181	4.566	9.5211	3.3505	3.2857		0.660821	7.32509
15.6771	4.8521	5.4839	7.8579	12.0939	3.6676	6.896	5.2414	13.1375	9.859	6.0166	6.9929	11.4887	5.2871	10.8354	5.6884	3.5372	7.8303	7.1992	3.2829	3.952	3.5178	6.9134	6.612	9.0641		0.666668	6.97114
15.8146	9.1667	3.3084	9.0433	6.1417	6.5892	6.1648	4.9957	19.5021	6.6044	8.7861	9.5876	5.2862	9.2204	8.9338	7.4262	3.3612	8.1173	4.913	6.6724	9.4599	4.0345	2.9194	4.9731	9.7518		0.672515	7.28997
15.9521	5.2096	7.5587	8.4797	5.4478	6.6804	4.0488	4.6368	13.4507	9.2175	6.2779	3.1925	9.4174	4.6901	5.9033	4.6058	3.5784	3.5762	4.1906	8.4939	6.8271	4.6274	7.1586	10.3512	7.1351		0.678362	6.44815
16.0896	8.4093	4.8756	6.648	10.03	5.2734	3.5011	6.4091	15.843	13.7866	5.6724	4.2649	8.9091	5.8015	3.7593	4.673	5.3021	5.2204	4.5253	3.3832	6.9264	2.4679	2.5684	10.3947	13.576		0.68421	6.7592
16.2271	6.4826	3.0958	9.8489	5.4775	6.9548	5.2614	4.1002	7.0021	9.5894	6.8708	9.7183	13.4796	8.1927	4.6427	7.7307	4.2355	2.6135	6.1738	5.3506	5.775	7.4952	6.4534	12.6995	6.9227		0.690057	6.92361
16.3647	6.573	4.551	12.637	7.0306	5.3745	1.6182	9.8202	11.0102	7.0459	10.7198	8.407	6.4762	7.6422	4.3843	2.2679	7.0263	6.7761	7.797	5.9558	7.3486	3.2197	2.6648	10.3258	5.175		0.695908	6.74363
16.5022	9.9562	4.0661	14.5677	5.3762	7.948	6.8545	7.3113	15.2879	8.6143	8.895	7.0567	10.3342	3.9168	6.653	5.3795	2.1115	6.6624	5.9408	5.2109	5.751	4.5845	4.2251	14.1204	8.269		0.701755	7.46221
16.6397	8.5901	9.113	9.4774	7.1222	3.6829	5.2621	7.4105	12.2533	9.1768	4.2902	5.8034	11.524	5.0914	6.4147	3.993	1.8769	4.9007	9.8845	8.5847	5.0325	5.5752	4.5275	12.9417	4.0519		0.707603	6.94086
16.7772	9.0688	7.7585	8.7747	7.7901	9.3015	7.0831	9.3354	7.2893	11.3477	7.0566	6.2625	7.6132	8.0828	6.822	2.5647	3.2316	3.8299	5.0241	4.6557	4.8485	3.4415	4.3961	13.3256	7.4452		0.71345	6.93121
16.9147	13.0344	8.3468	10.7898	2.5815	11.3005	5.6017	3.3228	7.4012	5.067	10.4948	9.3282	8.0893	14.0556	4.4148	3.5625	4.1634	4.7575	3.5597	6.7878	4.9697	3.4411	4.555	9.4404	4.5592		0.719297	6.8177
17.0522	7.8059	6.7673	7.1279	6.2213	13.4578	8.1664	11.4984	12.0872	6.6284	12.7231	6.6222	6.4573	6.4986	4.5747	3.548	4.8558	4.703	4.6838	2.2699	6.1723	6.4023	5.2529	10.7537	9.5131		0.725144	7.28297
17.1898	11.0602	4.6455	9.9213	6.7527	7.7022	6.3124	8.5026	9.7116	10.7703	9.0848	4.9569	6.1451	14.9811	5.106	4.5354	3.5562	2.9212	4.6458	4.269	7.8551	6.3448	5.3554	12.2807	5.6487		0.730996	7.21104
17.3273	9.4842	6.8061	10.991	7.2471	4.3318	4.1761	7.8344	6.1283	7.3893	12.3858	5.0352	6.321	12.7026	9.5383	5.9745	2.0183	7.5183	3.3896	5.2301	5.2103	6.2307	7.2021	10.1427	9.992		0.736843	7.21999
17.4648	5.162	5.3664	8.4659	4.9888	7.2328	8.0068	7.9337	6.338	8.5447	6.5341	4.6881	8.6416	5.1935	4.4107	8.8207	1.7429	4.7076	4.0609	5.9962	6.6292	2.1098	5.9007	9.9215	10.5723		0.74269	6.33204
17.6023	8.5479	3.5439	7.7866	11.5154	6.5577	3.4448	7.5011	8.8567	9.7591	9.161	3.5992	9.2078	8.2206	4.4714	7.6298	4.79	1.5188	5.9665	8.0954	3.9557	4.7614	5.4532	6.3142	9.7539		0.748537	6.68384
17.7398	5.7194	9.1124	6.6378	5.648	2.9214	4.8467	9.0412	6.2151	7.8139	9.8536	5.7394	8.6977	6.602	4.9196	5.3091	2.0772	2.5739	5.9904	4.113	4.7072	7.1895	8.4458	3.2175	10.4285		0.754384	6.15918
17.8774	6.0508	7.8599	5.5906	6.9714	4.287	5.1054	12.3323	7.5133	5.7203	9.0147	7.2631	7.1349	6.7876	6.294	7.0354	4.0761	5.1551	4.7103	3.8883	3.3639	4.2003	11.2387	5.882	4.5971		0.760236	6.33635
18.0149	7.6211	7.6463	6.9532	5.9841	8.4971	5.2869	11.6493	8.8555	11.3525	4.5956	5.448	5.3072	2.9315	4.854	3.3905	0.8547	5.2835	3.5849	0.9023	3.3464	6.1549	8.9845	5.0062	10.2719		0.766083	6.03175
18.1524	6.8129	5.8601	8.8265	7.8236	4.9972	3.037	5.8766	12.2954	10.2101	5.8093	8.8655	8.4319	7.7935	9.6776	2.9084	4.1754	2.371	4.6196	1.63	1.2387	6.0118	10.3143	4.6211	11.7183		0.77193	6.49691
18.2899	6.3045	3.6758	4.4179	6.0707	8.4116	6.4352	5.4724	11.773	6.6661	6.0825	6.6116	7.6515	9.6465	7.472	3.8067	2.563	3.0729	4.777	1.0563	4.091	6.1169	4.639	5.0728	9.7635		0.777777	5.9021
18.4274	9.8301	11.1444	6.2091	8.3483	8.7055	3.9352	6.6213	15.9791	15.3108	4.6481	3.0136	9.3313	4.8432	5.0662	4.1525	1.1056	3.364	4.9739	1.5097	4.1338	6.0933	7.4935	4.959	6.8095		0.783624	6.56588
18.565	15.3845	6.8926	4.7725	8.3489	7.4651	4.2724	5.999	5.7252	13.565	8.0339	8.2522	8.1231	6.8047	3.2135	4.4778	6.2675	4.7827	4.5264	0.7836	9.5751	5.5244	5.0064	6.2637	11.4581		0.789476	6.8966
18.7025	8.2744	8.2643	5.2295	8.4819	9.4322	4.2798	4.501	9.9795	12.8895	5.4339	4.61	11.6502	12.5932	6.0703	6.2209	2.3987	1.0158	3.4789	1.0339	6.1216	4.3683	4.9357	10.9123	6.595		0.795323	6.61545
18.84	10.587	17.1788	10.8521	9.4973	3.8497	12.9406	1.125	7.7366	10.4943	6.702	5.8165	7.2554	5.6891	5.3228	6.1097	0.668	1.1321	3.1422	4.6624	6.3882	6.0248	8.4652	8.7045	11.9653		0.80117	7.17957
18.9775	12.3614	7.1381	10.6509	4.0755	5.3717	5.6784	2.6464	6.7076	11.394	3.9406	6.5344	9.3851	7.4602	6.2516	6.9574	2.8919	0.7545	2.3831	2.7547	3.8628	3.358	11.0767	10.8018	4.7201		0.807017	6.21487
19.115	18.1757	8.1583	7.1566	6.3661	4.8796	7.7793	3.8887	6.8056	8.3262	3.6441	5.4327	9.0718	5.143	5.801	5.4512	3.418	0.546	3.9993	1.8116	5.5034	5.0344	7.948	4.4567	7.7985		0.812865	6.10816
19.2525	8.3093	7.5273	13.9259	7.6475	6.4536	7.3455	4.6967	7.5731	9.93	3.9134	4.8226	9.0287	5.0776	7.9527	3.649	4.5738	1.3704	3.3541	0.8562	1.5508	4.3224	10.2153	11.4277	8.1442		0.818712	6.40283
19.3901	7.2887	8.2105	13.67	10.7448	3.5808	8.0886	1.131	7.3838	9.1694	5.6384	3.147	9.2752	7.0542	7.9769	5.0508	0.6428	1.7616	0.5826	2.6289	2.8774	6.5804	6.1081	6.8206	10.2224		0.824563	6.06812
19.5276	11.584	8.4126	15.0532	12.1812	4.6876	3.8463	4.452	7.6277	5.8726	8.124	4.4338	7.4566	4.7973	5.1158	2.4761	2.7181	0.0555	0.6285	2.7367	4.9907	9.4052	12.7848	7.2615	10.6312		0.83041	6.55554
19.6651	6.8127	7.7673	9.8498	8.0725	6.2267	6.1927	2.3266	4.278	9.601	4.636	8.3367	6.6523	7.739	10.2198	3.231	2.0641	0.8074	3.0387	0.8133	2.2447	8.0524	7.7431	6.6766	9.3337		0.836258	5.9465
19.8026	9.799	5.7335	11.7729	11.0358	5.6194	5.5182	0.089	3.3597	3.0138	4.2278	8.8698	6.7751	5.6096	5.8065	1.1564	2.4845	2.8801	1.2037	1.0148	3.8071	6.801	7.2559	9.5473	7.2379		0.842105	5.44245
19.9401	14.5647	5.1569	12.605	13.0956	7.2222	8.9273	0.8122	2.0824	3.7714	2.8628	7.3233	7.0547	7.5954	3.6419	2.3485	3.2001	1.2577	1.4473	2.4646	4.3611	6.0488	5.7625	5.9249	11.6909		0.847952	5.88426
20.0777	13.3916	11.6931	8.8287	10.2664	7.6623	4.137	0.9977	2.1673	5.3619	2.5903	7.2348	12.8326	5.7468	8.0383	1.3129	2.2006	4.1574	1.8291	1.1301	1.9197	8.9003	5.2228	4.8782	10.781		0.853803	5.97004
20.2152	15.7354	8.4466	6.7405	11.4442	10.0392	3.4995	1.2289	2.4449	4.6626	3.0365	7.9617	11.1589	5.5626	5.786	0.7951	2.975	2.0766	1.7447	1.1384	2.5928	4.4124	7.3711	7.2978	7.3853		0.859651	5.64736
20.3527	6.0061	7.7568	6.145	10.1521	12.3199	8.061	1.7695	2.6887	2.7396	4.085	5.445	5.0541	7.8669	2.9338	3.0295	2.8532	1.2964	1.6167	1.2213	0.8395	5.5775	8.3382	11.9738	7.8266		0.865498	5.31651
20.4902	11.1983	6.2319	6.1194	15.8731	5.7273	6.2609	1.9351	2.6759	4.4387	6.8428	8.0032	8.6113	4.2399	4.6498	2.0684	1.5268	0.556	1.4158	1.1554	1.7561	6.1765	4.6562	7.5029	8.9684		0.871345	5.35792
20.6277	5.4718	7.1004	5.9652	12.0447	4.314	3.5771	3.8486	2.3392	2.0794	3.1518	5.0054	7.5325	10.8376	3.5941	3.0241	4.0235	0.4694	1.9218	2.0869	2.209	5.3105	12.2797	6.867	7.7084		0.877192	5.11509
20.7652	11.6693	6.851	8.691	8.2496	5.374	5.6646	2.6379	3.2431	5.0321	3.5338	5.9247	6.1033	7.963	2.1733	4.0869	2.4467	2.0919	1.0408	1.996	1.0951	6.0697	10.2568	7.2267	8.5082		0.883039	5.3304
20.9028	10.942	7.3932	7.7063	10.5614	2.0772	2.346	2.0289	1.7201	3.4276	4.3113	4.0612	6.4505	5.5506	4.6901	0.5763	3.4158	3.4304	0.5056	2.495	2.8144	6.8416	6.9695	7.8425	16.8233		0.888891	5.20753
21.0403	13.4685	7.4273	11.3285	3.2409	1.2328	3.7128	9.0421	2.7761	3.6346	5.8363	1.9213	7.3956	5.789	2.6566	2.3844	0.5662	1.3706	2.5834	0.7214	2.5702	2.3809	4.0869	6.6575	4.6907		0.894738	4.47811
21.1778	10.0991	11.0546	8.5683	7.2493	1.8333	4.1157	4.2065	4.5792	4.0991	2.0029	3.6813	6.4602	10.5457	0.7526	1.2996	3.2334	1.0323	2.7231	2.6064	1.5521	5.6254	5.5638	6.8469	6.1658		0.900585	4.82903
21.3153	10.9388	8.5612	6.4127	7.0158	1.4156	3.0003	4.7562	5.7318	3.7367	5.2247	4.1574	8.2381	4.8536	2.5133	1.0537	3.5346	1.1313	1.384	1.7131	3.3439	3.9014	1.7204	6.0354	5.9483		0.906432	4.4301
21.4528	10.6921	6.9905	6.9992	4.3439	1.2162	3.0382	3.7106	2.1691	4.4536	2.3986	4.4821	2.1758	3.1303	3.108	3.037	4.0079	2.721	2.6055	0.917	0.8035	4.3289	4.3629	4.4791	4.7232		0.91228	3.78726
21.5903	13.5877	15.352	8.1876	5.8138	3.9315	0.9274	5.719	2.7649	5.4007	2.4892	2.7385	5.6203	6.8773	3.7864	1.2594	1.1324	1.5442	2.0553	0.0255	1.5482	1.5142	6.6431	2.8449	0.8831		0.918127	4.27694
21.7279	10.084	7.9504	5.8541	3.807	2.2664	1.9277	2.0219	1.9263	7.5313	10.585	5.0782	4.0681	2.2062	1.8795	0.7282	3.3661	1.4687	0.9637	1.0882	1.8241	0.5228	5.8882	4.2106	3.4979		0.923978	3.78103
21.8654	7.6585	13.3522	2.2583	5.0426	3.3322	0.0286	2.9095	1.3166	2.7648	1.7861	1.6742	3.2851	4.2126	0.2205	0.7674	0.3991	0.7361	0.7326	0.6312	0.9559	4.6922	2.0128	1.6784	1.4277		0.929825	2.66147
22.0029	8.3246	9.692	2.3685	1.9478	0.8417	3.7409	2.2568	3.9112	4.4125	3.6535	1.6254	3.8442	1.8543	3.2028	1.8051	0.7128	1.687	2.5717	1.2759	0.7832	1.8429	1.9721	1.1376	6.902		0.935672	3.01527
22.1404	8.8193	12.1126	2.6151	3.39	1.728	3.3132	3.4683	2.9782	5.2138	2.8533	5.516	4.105	4.2766	1.718	1.1154	1.7245	3.4138	0.8224	3.2234	2.3073	0.7134	4.1434	1.7543	1.686		0.94152	3.4588
22.2779	5.0492	13.0522	2.6488	3.2535	4.3795	3.7442	2.9246	2.2336	6.0992	3.6615	3.4656	2.8613	3.2252	3.7117	0.2073	0.0634	3.4838	1.8569	1.2691	1.2299	1.4785	3.4795	1.2419	1.959		0.947367	3.19081
22.4155	9.1289	12.0736	3.8187	3.5919	0.8767	2.5127	4.7544	3.7855	7.7374	2.4074	4.7621	2.7965	3.0085	1.5012	3.858	2.3867	1.0368	0.9512	3.0753	0.3962	1.8466	4.8743	2.2715	2.1271		0.953218	3.5658
22.553	10.2427	4.8678	6.1832	1.9048	2.4081	0.7485	5.0277	3.619	6.0869	2.7284	2.7416	1.7457	4.6982	1.8946	2.0609	1.1432	1.9761	1.9707	1.4601	0.3633	1.1809	1.9552	1.9927	0.8153		0.959065	2.90898
22.6905	15.1953	4.0089	5.2599	1.9803	3.0646	2.4959	4.0358	6.16	5.73	1.9457	2.7384	4.981	2.5147	2.2619	0.6597	1.1949	0.5666	1.0913	2.6347	2.9784	3.3357	1.0593	0.7914	3.0964		0.964913	3.3242
22.828	17.113	3.2402	2.2148	4.1837	1.6588	5.0021	3.4755	3.7046	6.5859	4.9862	1.9729	0.1642	1.5211	1.1601	2.1662	2.3206	0.5912	1.6172	3.7168	1.4469	1.2707	1.3547	2.605	4.5584		0.97076	3.27628
22.9655	9.9547	3.4875	5.7056	2.8445	1.5574	4.5039	4.412	2.7222	3.9835	6.4624	2.6117	5.7177	2.4039	2.1471	1.5812	1.2593	3.6766	2.6503	3.7044	0.6432	1.5664	4.5401	2.1864	3.266		0.976607	3.48283
23.103	12.7015	4.6237	3.0926	2.058	7.2598	4.8698	2.9159	7.3731	3.8836	4.7708	3.9221	2.7247	3.3752	4.6292	1.9985	3.2962	0.2842	0.5055	0.2778	1.4808	4.2017	1.4933	4.6512	1.5875		0.982454	3.6657
23.2406	6.242	6.5627	9.9879	0.2787	3.7516	4.9909	3.3882	6.9114	5.3637	2.2069	1.973	2.828	3.1236	0.8222	1.3515	1.8899	0.4276	2.6304	2.1095	2.506	0.1334	0.8998	2.4293	4.8934		0.988306	3.23757
23.3781	6.0996	6.678	3.1452	3.1645	2.2972	3.5158	4.6878	7.0359	7.3862	5.0034	3.0882	0.7035	1.2529	1.2231	0.8708	1.6245	1.0103	2.0615	1.1222	1.9337	0.8257	1.2154	1.0251	2.5968		0.994153	2.89864
23.5156	6.035	4.5268	2.602	4.731	1.9907	5.6959	2.993	8.7518	8.1348	5.2244	2.8831	0.092	0.8592	4.3025	0.8516	0.0693	4.7949	1.6821	2.1715	5.182	1.6016	3.2862	2.7419	1.777		1	3.45751

## Sheet: Image13 (2)
X0	Y0	Y1	Y2	Y3	Y4	Y5	Y6	Y7	Y8	Y9	Y10	Y11	Y12	Y13	Y14	Y15	Y16	Y17	Y18	Y19	Y20	Y21		Apical-Basal	Avg intensity
0	6.8219	10.0037	6.0975	13.8467	1.8611	2.9899	6.6922	6.4874	5.2796	3.2467	5.9583	6.2719	4.3175	7.9749	2.1251	2.2168	3.3064	2.3709	0.036	8.596	2.0146	2.0945		0	5.02771
0.1375	6.3091	10.3249	5.6138	7.0767	4.5399	5.7708	10.7696	6.7606	3.3988	0.543	11.6875	14.6611	3.9503	6.6936	2.56	2.5048	5.4757	5.0644	2.5902	7.538	2.2981	2.0938		0.00751781	5.8284
0.275	4.586	7.9923	6.1838	4.1948	5.8289	7.0415	10.965	4.9753	4.7561	3.7709	13.8099	11.8858	4.948	6.4975	5.7349	1.9946	4.8403	2.3551	7.3951	6.8868	5.0017	5.6506		0.0150356	6.24068
0.4126	7.3076	11.9006	5.953	2.296	2.9251	3.3415	8.463	8.1457	6.4803	6.8443	11.5838	12.2762	3.1054	4.0579	2.8529	9.985	5.2032	5.4288	7.166	3.5344	3.9508	4.096		0.0225589	6.22261
0.5501	7.3359	11.1497	7.4923	8.1905	3.7677	4.425	10.2255	4.2462	11.0459	6.8683	12.8673	11.0299	8.4068	8.7184	5.655	11.3351	4.8292	6.7773	7.9663	5.5154	4.7437	4.8508		0.0300767	7.61101
0.6876	9.6389	11.4058	6.7432	11.7116	3.9268	8.2059	5.305	12.3176	7.2407	8.3492	7.9965	13.3692	7.9386	5.4981	8.8824	7.775	6.493	5.7589	14.2049	6.0369	7.6381	4.9625		0.0375945	8.2454
0.8251	13.0189	9.8651	7.0839	6.7902	3.0025	8.8069	9.1725	7.275	5.7107	5.3683	14.2589	10.2077	6.3616	9.9848	11.4661	6.6392	6.5458	10.5922	5.5619	13.0395	7.6665	17.6021		0.0451123	8.91001
0.9626	9.8681	6.777	8.712	6.921	5.4605	3.1393	15.7896	5.3927	7.1783	9.532	15.729	8.229	7.2418	10.6683	12.6829	7.3786	7.0156	10.5977	6.9335	12.0543	7.2622	15.5785		0.0526301	9.09736
1.1001	11.2792	10.8775	14.5922	6.7611	5.0101	7.8213	11.0967	9.5607	10.1686	6.8907	12.6244	14.7096	8.9319	7.5778	12.2575	7.3923	11.9629	9.4807	10.4795	11.3184	6.4726	12.2513		0.060148	9.97805
1.2377	13.9022	12.5697	13.4329	15.9302	5.0863	9.4269	16.1616	8.4523	13.6271	8.8667	8.7927	12.0286	13.0169	10.2486	15.74	17.8107	13.2465	7.7745	12.4418	8.1187	6.5804	9.4324		0.0676712	11.4858
1.3752	14.187	10.0324	15.1282	16.1022	5.2007	12.1797	11.3775	10.4757	7.0234	9.2174	5.4976	5.7417	17.0229	9.2028	14.3711	10.0969	7.2092	12.8575	6.1383	4.8092	4.7821	10.6184		0.075189	9.9669
1.5127	18.2208	11.5214	11.2986	14.6318	9.537	9.4411	8.9147	7.0608	17.5598	10.4953	7.4407	9.841	14.7971	12.7034	23.1971	19.3984	9.0075	9.7018	11.253	8.0591	9.6586	12.3761		0.0827068	12.0961
1.6502	10.5947	18.5557	10.5515	19.3891	8.9375	6.8486	7.2347	9.6231	7.1021	13.2149	7.1054	15.2014	16.5481	16.1226	9.6747	12.4766	13.6679	11.9791	10.4398	12.6675	9.7053	8.0699		0.0902247	11.6232
1.7877	9.1241	17.7217	10.3999	9.8026	17.5963	8.978	8.9748	7.6568	8.4125	13.1053	12.2842	12.2821	13.2295	13.4145	12.3614	17.1512	13.303	14.4801	9.389	3.2914	12.1839	10.0939		0.0977425	11.6016
1.9253	14.1447	14.8417	10.1446	18.3657	8.7504	10.3662	10.3147	18.1159	9.8169	11.4963	14.3575	10.6767	12.0768	17.1036	14.638	9.7904	10.6138	11.3484	13.4015	7.4785	10.3203	17.6374		0.105266	12.5364
2.0628	12.2414	20.3689	7.3221	11.0229	10.5288	12.571	18.1565	16.2751	10.4025	12.8952	15.3155	17.5265	13.475	7.8698	13.358	11.0085	6.8297	19.9342	9.4453	7.0798	13.1066	11.2772		0.112784	12.6368
2.2003	30.9774	14.4139	11.2118	7.6547	12.1076	9.1823	8.1839	10.2823	11.4181	10.5343	11.0043	13.2786	15.9375	15.1286	11.323	16.1867	4.9401	12.1854	10.5303	6.5585	13.9216	11.8193		0.120301	12.2173
2.3378	19.6692	17.2102	9.0185	15.3893	11.3805	10.5514	8.3885	6.0896	15.0454	11.0619	19.0234	10.3811	24.9797	9.4985	15.7325	12.3788	14.2847	11.3571	11.0316	10.6092	13.8914	7.5863		0.127819	12.9345
2.4753	15.0646	17.1064	9.1611	16.0093	16.0437	7.0852	11.3911	7.4953	17.3152	13.9061	12.3797	11.0135	21.5769	14.0635	19.6999	11.0931	14.5596	7.858	9.7207	14.385	11.5114	9.8211		0.135337	13.1027
2.6128	17.5854	17.1897	8.8583	16.4618	15.5904	11.1303	13.7051	17.5924	15.6063	12.2894	17.4485	8.3399	17.5835	9.1279	17.1231	19.7677	14.1457	12.6785	15.6623	18.5822	9.3893	9.227		0.142855	14.322
2.7504	19.2109	18.9388	6.4509	16.1052	12.4835	9.0407	10.8492	10.3568	15.6604	14.3382	11.4264	12.1024	20.8683	12.926	14.5712	13.681	9.0137	7.1873	10.8076	16.5282	5.9881	9.7795		0.150378	12.6506
2.8879	14.498	22.2979	9.0087	18.468	21.2971	14.7995	18.4511	13.2374	14.6052	21.218	12.0604	11.3239	15.2338	13.4103	18.0164	14.9581	9.9076	14.5073	12.7381	17.3725	6.6241	8.6485		0.157896	14.6674
3.0254	23.9422	22.8181	10.133	15.2245	16.3306	17.2907	14.4509	11.6441	16.0162	15.6761	16.6956	11.7617	16.262	16.8713	12.9466	8.3537	13.5026	12.0313	14.9431	9.9755	4.5564	6.5824		0.165414	14.0004
3.1629	20.3157	18.8712	8.3903	15.8063	20.8175	13.2649	13.7516	8.6843	12.5227	23.831	13.7333	11.4139	15.4297	21.9971	12.3011	8.5029	12.7778	8.6971	14.3277	16.0139	5.7954	8.7661		0.172932	13.9096
3.3004	14.3528	21.1114	11.5446	14.7027	18.6677	17.8348	12.7595	13.3386	8.5988	24.9336	16.3102	9.7828	16.6159	13.7858	8.3709	11.1775	14.6587	12.044	11.4443	18.3943	5.1697	10.2946		0.180449	13.9042
3.438	14.1094	18.6429	5.8917	14.3798	15.4015	15.8989	14.3941	10.0528	11.4851	25.3356	18.0163	10.909	6.3933	17.7421	9.5019	10.0977	13.9816	13.334	12.0215	13.0724	8.7268	6.6297		0.187973	13.0008
3.5755	25.3451	14.6253	12.1975	18.2235	11.0893	15.4139	17.2621	15.2916	8.6035	18.264	11.7266	13.5195	8.5376	17.8126	13.7358	9.3692	16.429	12.1821	11.7315	21.8535	8.31	4.7395		0.19549	13.921
3.713	20.8003	17.3511	11.2478	14.791	15.8755	17.6231	20.2569	9.7348	11.4828	17.8363	7.6263	12.456	10.6677	18.4791	9.3128	11.9614	15.0486	12.1318	10.9977	18.4035	6.2066	4.7875		0.203008	13.4127
3.8505	20.0133	11.5449	18.8333	17.732	8.5798	14.8646	19.1258	17.5874	12.9024	17.2695	10.1242	9.6217	14.3165	23.744	10.6216	12.7267	14.2598	14.2417	5.3308	19.7328	8.149	4.7225		0.210526	13.9111
3.988	21.6717	16.4015	21.4988	16.4749	13.5587	15.1906	17.0759	15.9646	21.8724	17.2636	18.0298	11.2102	16.6194	20.8393	13.7214	10.8454	14.348	17.6661	6.5197	17.8859	9.0562	4.0453		0.218044	15.3527
4.1255	18.6762	11.4026	25.7037	14.4227	9.2939	20.4893	21.8787	12.7188	19.7135	27.4044	10.7046	12.6327	15.229	23.0807	14.1944	10.0748	9.9826	13.1103	7.5931	18.5155	7.0918	5.4963		0.225562	14.9732
4.2631	15.6351	12.2606	18.0312	18.4028	8.7519	20.426	14.074	18.5367	12.4585	20.682	11.3877	13.4204	16.4932	16.6196	16.5287	12.2589	14.2807	12.8979	6.4999	25.9819	10.2396	4.5881		0.233085	14.5662
4.4006	14.0019	11.412	19.9575	18.2145	12.5288	20.024	10.8497	13.5593	9.5533	15.1035	7.4867	10.0973	17.3969	19.9511	11.8295	10.8028	9.2711	19.3453	7.9362	17.8078	8.9732	7.1304		0.240603	13.3288
4.5381	14.3997	10.3481	22.6002	9.6659	11.8143	15.5306	13.6726	20.693	14.6957	12.1711	7.1531	17.9921	25.5192	19.4029	14.9241	12.5013	13.3977	21.1198	8.367	14.4858	11.9511	9.3924		0.248121	14.6272
4.6756	10.1238	6.8085	12.9979	11.9886	13.8316	12.95	10.4919	15.3649	16.1165	16.2407	6.5089	15.3251	14.4141	22.2476	15.0112	14.6662	16.1476	13.8656	8.1952	14.2824	8.3745	7.9774		0.255638	12.9059
4.8131	13.5735	11.0807	16.1134	23.5492	14.37	17.4069	10.7218	29.5388	15.3222	20.8891	6.3706	16.5601	17.948	14.9451	21.2545	10.6547	12.4604	12.6208	8.432	19.9296	14.4684	10.3452		0.263156	15.3889
4.9507	18.1601	6.7617	15.1195	20.3217	16.3607	13.2935	17.0805	35.3269	16.3319	14.74	12.6569	8.2877	18.1711	20.7626	21.3594	12.0787	10.4912	21.1875	9.4609	17.6089	10.7598	4.7681		0.270679	15.5041
5.0882	18.6585	11.5814	18.5665	26.6572	9.6817	14.5515	12.9758	20.9474	14.0043	14.0693	12.6175	12.6084	14.0973	25.2046	13.4076	7.9837	16.3868	15.0334	8.621	14.1095	17.5133	8.0483		0.278197	14.8784
5.2257	21.6284	12.6392	20.9148	21.2087	4.8189	11.4655	10.1829	24.088	8.8175	15.0063	16.3755	15.2333	7.3356	25.2175	13.9006	7.633	13.02	21.4453	10.5902	10.9492	14.5575	6.2283		0.285715	14.2389
5.3632	16.0999	11.1527	16.5756	21.397	8.2821	15.7066	14.5369	22.8852	9.9948	10.7693	16.4283	8.2034	7.4164	29.0994	9.6334	9.9236	14.9741	18.2723	12.1341	7.3175	10.1586	4.9423		0.293233	13.4502
5.5007	20.0007	6.8132	15.8608	20.8177	12.3365	15.2609	8.9573	28.3696	10.3526	19.9539	11.5805	9.6722	11.9514	25.3651	16.3977	8.5752	10.7994	17.2075	17.0379	20.5026	14.3102	7.1886		0.300751	14.9687
5.6382	17.2925	7.4969	13.956	16.0508	4.0244	10.4339	9.4864	33.1313	10.7197	14.208	11.3194	10.0465	10.7915	28.6543	20.0185	9.6741	12.6137	22.9782	10.2326	17.4021	12.1243	7.3564		0.308268	14.0914
5.7758	20.5544	7.7573	13.9078	15.9155	4.9238	9.9894	11.9268	22.2344	8.7601	10.5774	23.7189	11.7768	7.6194	35.6282	16.3901	7.8128	11.5028	24.1076	15.198	10.7721	14.0618	5.0891		0.315792	14.1011
5.9133	10.6882	10.3962	11.0435	17.2692	6.8738	12.1126	14.235	24.7431	10.5072	13.987	40.0639	15.1576	17.996	29.1517	17.0443	6.7979	14.0074	31.4264	24.1649	13.0188	9.1388	3.6641		0.32331	16.0676
6.0508	12.7114	6.9797	11.8887	25.1335	13.2506	19.0866	14.1994	17.7406	9.4619	19.9283	39.1008	12.7376	14.9314	27.444	20.167	9.1176	14.3397	26.2991	17.5819	14.234	6.4746	4.6955		0.330827	16.2502
6.1883	10.0026	8.7771	10.3372	16.0756	10.9215	15.7071	16.7327	26.8437	8.3106	20.9195	46.145	12.7171	9.4603	27.5843	16.175	4.618	16.6017	23.9005	11.6216	9.6489	6.5594	6.6921		0.338345	15.2887
6.3258	13.42	5.3042	13.0535	16.8643	12.4404	10.1243	16.6076	17.4513	7.7578	15.2667	38.8856	11.6501	15.9102	27.5037	14.0208	9.5663	14.4012	17.7729	21.6575	15.3416	5.991	7.9553		0.345863	14.9521
6.4634	6.9134	5.9703	18.0693	18.2577	9.8684	11.6169	9.7387	14.4041	10.6775	14.2687	43.5013	21.7524	18.6557	26.8004	13.9609	5.1061	12.0209	24.9988	23.489	17.6034	9.0603	5.2237		0.353386	15.5435
6.6009	11.8155	7.9077	20.9962	13.0922	6.3641	8.2217	19.7787	10.802	16.945	18.0179	33.0445	18.386	15.5476	21.811	13.6597	5.6184	13.285	17.7228	19.7307	15.8035	8.022	8.4426		0.360904	14.7734
6.7384	6.4052	7.0582	19.3955	10.225	11.2197	10.0002	11.8386	11.1144	15.4748	16.4729	23.8434	15.9271	15.4684	21.1312	13.21	7.3164	14.8307	16.5809	24.5849	11.8534	10.9693	9.378		0.368422	13.8317
6.8759	9.685	8.4534	20.3899	12.0734	17.9887	11.0716	13.6722	16.125	19.4313	9.6547	19.7672	18.4334	14.5713	16.0703	12.1485	6.3179	11.5738	20.0448	26.7601	17.6012	6.8343	9.3497		0.37594	14.4554
7.0134	7.7282	4.0503	16.6204	13.6786	17.4292	7.5207	14.261	17.3273	16.2309	10.6152	8.6533	21.4439	13.212	13.3787	8.2788	7.2086	12.4313	23.4912	23.7892	13.8957	6.1547	7.1728		0.383458	12.9351
7.1509	8.6295	5.9657	17.1482	12.167	17.9327	13.8158	12.655	14.1521	13.8553	15.7964	8.5606	16.343	15.3212	22.1521	10.3889	6.5851	9.5559	11.2748	19.2506	21.3113	5.0058	3.5912		0.390975	12.7936
7.2885	13.9795	3.6895	15.3211	9.4548	17.35	10.4076	13.8301	23.9998	12.3309	8.738	11.4506	25.5883	10.2415	16.9193	10.3258	5.9541	10.4641	16.6298	25.0609	20.8434	4.9587	6.0487		0.398499	13.3448
7.426	8.0245	2.2842	14.5453	12.3171	17.5016	7.1081	13.3183	19.6143	13.9261	19.7171	9.9129	19.8477	7.3981	19.054	10.5577	5.1901	11.9022	20.9306	18.029	14.666	5.6854	5.1926		0.406016	12.5783
7.5635	13.4278	1.5321	9.2677	8.3073	15.5914	8.5015	14.7513	27.117	21.1628	16.8027	12.8619	24.6717	8.1648	13.9539	11.2866	7.2519	15.5414	24.8127	31.3234	18.4158	9.5736	7.2771		0.413534	14.618
7.701	11.7158	3.9994	6.8309	7.835	20.0878	8.6795	10.6819	28.7556	15.4041	20.3742	14.7844	24.803	7.0177	10.4275	6.57	4.9654	14.6326	20.2498	41.1107	13.9453	7.3191	6.399		0.421052	13.9358
7.8385	6.6341	7.7725	9.0916	9.1522	25.7334	10.9986	18.7202	26.5778	14.3797	20.4437	13.2559	17.4512	7.2078	17.2062	8.6567	2.5078	15.4897	18.8122	32.7776	22.8654	3.9863	10.5579		0.42857	14.5581
7.9761	6.1217	2.5014	5.8825	9.4036	25.8221	9.9668	16.316	23.0539	12.7001	25.17	11.5325	20.1074	8.5487	12.8838	4.7887	7.373	13.9307	17.1042	43.985	18.5497	5.8566	9.6697		0.436093	14.1486
8.1136	5.429	3.1858	12.0495	12.8396	24.8414	10.808	17.3453	34.1539	10.9299	23.4113	14.0282	15.9729	17.489	11.5639	3.2931	3.5525	19.2096	13.5997	55.9086	17.079	8.0106	7.8644		0.443611	15.5711
8.2511	8.0655	4.0079	4.2472	14.0852	11.7214	8.8478	15.7939	29.1284	9.923	16.1005	15.5458	11.8779	12.1807	18.5036	5.9857	5.6069	17.753	20.0609	54.1166	15.221	7.0503	7.1349		0.451129	14.2254
8.3886	8.9924	2.61	6.0323	17.0183	15.719	12.1766	16.801	26.5695	14.0567	21.3079	14.4485	17.3923	16.7781	15.7125	2.7968	10.5389	10.2972	23.9178	50.8106	15.9461	5.7023	10.563		0.458647	15.2813
8.5261	5.2002	7.0616	6.57	9.2526	10.5027	16.1302	25.8667	35.3546	11.3505	16.693	15.4737	13.2664	12.8845	13.3397	7.0144	5.2352	12.3486	21.4239	46.4149	12.5901	6.499	8.8288		0.466164	14.5137
8.6636	7.0115	2.7651	7.7406	10.4284	9.8882	16.3419	19.1926	30.73	9.3006	16.1575	14.7291	9.768	13.4329	9.5761	5.1913	6.404	15.2723	27.5929	42.1213	16.3013	7.9981	6.1883		0.473682	13.8242
8.8012	6.3456	4.1172	6.3693	14.1803	9.9855	23.5553	17.7762	24.2194	12.9239	21.6616	12.3994	15.4308	15.6598	18.0909	5.2898	6.1574	9.7789	18.1785	24.095	15.3625	11.8645	11.2674		0.481205	13.8504
8.9387	6.9836	2.0835	3.8369	12.4164	14.4012	19.7336	18.6643	24.6252	9.8716	21.4303	8.1105	9.8057	17.5775	15.3602	5.4293	4.6745	9.2721	19.727	23.7647	13.2159	9.7629	12.6997		0.488723	12.8839
9.0762	7.2902	1.8563	7.5386	13.4289	19.8671	22.4175	11.7407	24.2018	10.9288	9.236	11.4257	12.4573	14.814	11.1648	4.663	2.4936	7.2819	21.0409	10.0509	14.1255	7.4772	8.2955		0.496241	11.5362
9.2137	3.124	5.2925	5.5085	8.6922	19.0188	17.8594	15.8621	19.9734	14.8105	12.51	16.6754	11.4271	11.6092	5.8848	6.9636	3.6473	7.6948	23.2781	14.7299	10.7324	7.2437	10.2617		0.503759	11.4909
9.3512	6.897	4.8112	5.2566	9.4254	18.6692	24.8371	13.2246	19.5096	17.5181	13.7988	14.1504	12.1362	17.3463	13.6378	2.4702	5.4852	6.7577	16.3983	15.499	6.2387	3.785	12.9133		0.511277	11.853
9.4888	4.7078	6.0693	8.7624	12.7035	17.4307	23.3873	15.3777	14.1865	19.2036	11.4804	9.1475	17.288	25.5737	16.9255	6.3168	1.9237	6.5495	21.6895	17.2677	11.6657	7.7596	10.6604		0.5188	13.0035
9.6263	2.7884	3.0515	3.2522	19.8799	20.4511	20.1964	14.2978	19.7759	17.6438	10.9633	9.3245	13.2003	21.3741	12.238	1.8599	6.2796	9.43	16.0516	19.2221	9.5847	2.5705	11.5931		0.526318	12.0468
9.7638	2.4894	5.1335	8.1289	14.9026	18.1189	16.6603	12.9799	16.0443	19.617	8.6083	12.6846	12.3725	13.804	11.9032	6.5888	5.5951	7.0029	13.1851	25.6052	12.1974	6.6745	17.5918		0.533836	12.1767
9.9013	3.9837	4.277	5.83	15.4832	23.586	12.3873	16.8109	12.7234	17.7635	13.486	13.4974	8.6611	18.9616	13.8413	4.4506	5.8966	8.2091	11.9022	17.4737	11.4653	8.4043	11.0682		0.541353	11.8256
10.0388	3.3368	5.1918	7.7631	11.1188	24.0007	16.6829	13.1934	14.2646	12.5557	10.5815	16.2244	9.7378	13.5775	15.4869	4.3675	5.8027	6.8338	10.9695	11.0959	13.1376	4.1309	12.5275		0.548871	11.0264
10.1763	7.8589	6.2599	11.307	17.9892	35.0181	16.6238	15.5898	10.8605	14.6745	15.0846	9.6628	6.0115	13.8785	13.7611	2.5054	3.4175	8.4875	12.3964	18.0187	12.5931	8.0899	16.0602		0.556389	12.5522
10.3139	7.314	9.2192	16.2901	12.2506	24.4365	17.0308	14.7951	9.0537	18.8715	5.556	9.6993	4.6546	16.524	13.3032	2.5091	12.5133	11.8068	13.5724	11.0303	17.7958	2.4318	22.6016		0.563912	12.4209
10.4514	3.3612	7.2906	12.8851	13.9736	24.5888	9.5543	18.9906	8.8537	23.4558	9.7846	15.1064	9.2714	12.2306	11.5498	3.0149	5.8568	6.7029	10.9879	14.6737	15.2132	7.3908	16.3756		0.57143	11.8687
10.5889	4.8562	4.8795	15.269	5.3434	16.1845	17.3883	13.7966	14.5378	28.9937	9.9152	7.3376	6.5114	8.3796	16.8009	2.434	6.7729	8.5576	16.2496	23.9485	12.9201	2.854	7.6118		0.578948	11.4337
10.7264	5.2611	3.8477	15.7755	8.8645	14.2529	13.3044	8.8043	12.9399	28.5653	9.3642	10.4285	6.4821	14.3651	12.4682	3.7547	3.4623	6.8205	16.5266	11.6385	8.7358	4.959	10.5469		0.586466	10.5076
10.8639	5.0661	2.15	10.8126	17.1829	14.1936	13.0405	19.6433	10.0266	25.2803	11.0595	8.3723	9.3172	16.6566	11.0815	6.9439	5.9735	5.707	9.7959	9.5944	7.1096	6.6459	11.3679		0.593984	10.7737
11.0015	3.8773	1.089	6.1008	7.0222	16.522	13.7703	9.1676	11.2839	26.6193	7.88	12.986	9.2986	16.6132	13.6675	4.2268	4.8039	9.1381	18.0163	19.4055	10.7533	4.5919	11.4882		0.601507	10.8328
11.139	8.7679	3.761	8.4291	8.5149	17.1686	16.2133	11.859	9.2856	21.0954	14.1778	7.5051	9.0344	15.2428	18.7993	3.9864	6.4194	5.4505	16.48	12.9656	10.7943	5.8501	11.5444		0.609025	11.0611
11.2765	3.7922	2.1759	3.2297	14.7848	15.762	9.5897	8.8937	10.4384	25.3594	8.916	16.4044	9.6907	14.7779	13.3277	8.6993	5.6602	9.436	22.3802	18.6226	8.5993	2.9802	23.4071		0.616542	11.6785
11.414	5.1658	2.7516	6.2794	9.2284	15.2075	11.9864	9.0172	7.2284	21.6581	11.766	10.8525	12.7969	11.4395	18.4454	2.3236	2.3272	7.6692	12.1474	14.2502	6.8941	8.6624	13.9229		0.62406	10.0918
11.5515	6.1872	6.1394	5.7901	12.5671	18.2277	11.1318	12.0911	7.2964	20.2459	6.4182	13.8581	5.6104	11.9738	15.2741	3.9448	4.1641	9.289	15.3862	13.7575	11.723	5.4862	15.3497		0.631578	10.5414
11.689	4.3599	8.0274	7.0456	11.3903	23.1858	6.1673	11.2294	3.9098	17.6751	11.6373	7.2202	5.7406	9.8405	18.9118	6.1334	1.8362	5.7803	14.4372	12.7416	11.12	5.503	19.3077		0.639096	10.1455
11.8266	7.8177	2.0363	6.3529	16.9063	8.5066	12.1464	14.7312	5.8922	20.5224	13.7054	7.6891	2.4406	8.0798	12.5487	6.54	3.8804	5.8906	17.5361	16.67	12.7723	6.6631	14.2679		0.646619	10.1635
11.9641	4.6531	7.4307	4.5477	14.4202	17.6726	15.1007	10.0852	7.4761	13.4804	6.5109	8.4292	10.3194	5.4549	9.3735	3.7412	2.1557	7.5439	14.9308	14.1084	8.6896	6.1927	18.1328		0.654137	9.5659
12.1016	7.9481	4.2649	9.9383	21.0485	12.4569	8.6424	15.3218	10.7789	17.9398	6.8329	5.0081	7.863	6.3378	9.8059	6.7797	1.392	7.8449	17.7473	12.3459	8.224	2.4816	14.889		0.661655	9.81326
12.2391	6.4331	6.7563	6.7258	18.4619	14.8631	9.7409	14.2697	5.5943	19.3717	13.3185	8.0584	5.927	5.218	16.2119	8.681	2.3168	6.2859	12.4075	12.5932	9.7118	3.5689	22.0276		0.669173	10.3883
12.3766	2.7742	4.0143	6.0905	18.9252	11.9588	11.7155	7.5608	7.7686	20.904	12.5574	7.1422	7.8609	8.0766	10.6659	6.1348	4.4826	9.7725	10.3997	9.9879	7.2232	6.8855	21.4747		0.67669	9.74435
12.5142	3.6218	5.8748	10.0643	16.6851	7.4632	11.8998	8.3453	5.5824	16.368	10.5743	5.7348	5.8845	10.3494	6.2511	5.9946	7.642	9.7367	7.2365	10.4254	7.0695	10.9024	14.2441		0.684214	8.99773
12.6517	3.1042	2.6811	10.6503	20.7342	12.5833	8.1251	8.5579	16.1614	13.5128	12.9675	7.5782	8.5997	4.2624	14.1287	5.8747	4.7047	7.6132	7.6666	5.9657	10.4528	6.8453	10.4518		0.691732	9.23735
12.7892	4.881	6.0619	9.8497	25.301	11.4529	11.393	12.1206	11.8482	14.6333	13.8566	8.4318	5.1214	14.9455	11.7994	5.5537	2.6415	9.4901	9.2047	6.3388	8.8117	7.1734	8.6099		0.699249	9.97819
12.9267	4.7733	7.4291	10.6088	22.6906	13.1215	12.2633	5.3171	7.6854	13.6341	7.1337	9.7949	9.8877	11.4708	8.7236	5.2715	3.8261	7.7255	6.5823	8.0896	9.9319	6.4085	10.174		0.706767	9.20651
13.0642	5.8894	5.3889	15.0106	23.1193	10.4373	13.1072	9.6218	12.0532	16.771	10.2247	11.6085	9.2949	4.981	10.7371	3.8151	9.0297	8.3708	5.0064	6.3697	8.4097	10.0994	11.4794		0.714285	10.0375
13.2017	5.0048	5.2017	8.9339	14.7169	12.2636	10.2692	6.3125	11.3104	14.4332	9.4096	18.9781	3.9697	6.0759	10.6273	6.3748	1.6011	7.7145	14.1807	5.0579	5.329	12.8584	7.9126		0.721803	9.02435
13.3393	4.1603	4.5672	12.646	11.2712	10.4704	12.8388	6.1153	6.2911	15.1789	10.0161	16.8692	4.8853	11.0195	10.0309	2.8363	2.5067	5.0317	11.8847	8.7669	4.2419	8.5612	12.5042		0.729326	8.75881
13.4768	8.6674	3.5002	18.5664	16.444	12.9371	9.7889	9.43	9.4046	10.7951	6.6693	13.4464	4.9895	11.7811	8.1649	5.0161	5.321	7.6483	14.7759	7.6481	8.2931	4.423	8.7288		0.736844	9.3836
13.6143	10.2714	3.5962	15.4378	26.0221	11.7782	8.3615	11.5567	6.1618	13.1116	11.4168	21.3366	5.9176	6.7014	8.6044	6.8369	6.3802	7.1524	13.4391	5.7641	2.816	9.5026	11.5953		0.744362	10.1709
13.7518	6.56	4.3799	17.0972	23.2947	11.008	6.1401	8.8692	4.8589	14.3933	8.2512	21.8427	2.6028	11.4825	7.5344	9.995	5.4637	8.6138	19.4745	9.7101	7.4376	8.1078	6.4157		0.751879	10.1606
13.8893	13.0729	1.7085	18.951	20.0718	8.3795	9.0049	6.4005	8.8976	10.79	8.7451	20.9331	2.0096	10.5807	13.8787	6.2242	7.0075	8.5443	12.9284	5.61	9.2719	8.6619	12.8707		0.759397	10.2065
14.0269	10.4766	4.2005	12.4034	26.0262	6.1551	17.8799	4.4009	5.696	9.9445	5.0918	16.3094	5.9968	5.8352	8.0269	8.8599	6.3275	9.2526	23.7113	8.058	16.5898	10.5994	11.6579		0.766921	10.6136
14.1644	7.7909	6.2489	15.1486	25.8036	6.6451	17.5014	7.8295	2.3536	12.3159	6.9598	16.5566	7.384	7.129	7.8128	12.9955	5.1312	7.3699	8.2741	3.668	5.5716	15.4479	10.4094		0.774438	9.83397
14.3019	12.5707	10.3475	11.2663	32.5014	8.9507	18.0204	6.3005	5.573	8.3629	9.3755	24.4539	7.9368	8.3007	7.8661	14.9013	6.861	7.5053	14.7255	4.9471	12.2425	11.9713	10.0914		0.781956	11.5942
14.4394	14.298	5.3222	7.3194	29.8007	12.1561	15.1066	5.7605	8.9761	16.1046	7.2511	20.3077	5.3482	4.6753	11.6895	11.0107	5.0622	10.5954	9.4035	5.3567	15.1226	13.2309	10.0883		0.789474	11.0903
14.5769	12.3819	6.5804	8.1143	32.2741	5.0352	13.2186	6.2752	5.84	14.9237	7.5953	16.3798	8.2404	10.4364	16.8129	18.0869	3.33	10.6545	11.9563	7.0137	9.9732	8.6439	11.2331		0.796992	11.1364
14.7144	15.8433	9.2707	12.0221	23.9658	6.3447	13.4202	6.9092	4.2944	14.1696	5.1585	12.2942	7.7353	16.8504	16.4457	18.2509	9.6505	10.0363	7.7783	7.6127	10.4573	6.9777	8.5713		0.80451	11.0936
14.852	8.6448	6.7981	9.4305	16.6471	14.645	10.1241	6.2592	0.814	12.1394	8.5024	7.4494	13.1069	17.15	15.2374	18.4552	7.4293	9.9345	10.1323	6.3277	15.7929	9.694	11.5497		0.812033	10.7393
14.9895	5.6048	8.3195	6.4317	12.2071	10.0855	6.9766	11.7976	5.3481	13.8645	10.2033	7.4771	18.4452	11.6309	12.3507	9.3189	10.1538	9.1739	8.9201	8.2596	15.653	8.2397	11.624		0.819551	10.0948
15.127	7.6103	12.3718	14.6781	9.6149	8.8242	9.6708	12.072	6.9974	15.7083	4.0986	9.1966	19.1093	14.1552	11.3169	13.1451	15.5793	12.6246	8.9133	7.7978	8.1488	9.403	9.0692		0.827068	10.9139
15.2645	7.5923	13.53	13.1001	11.895	9.441	9.7952	11.5691	3.8318	13.4337	10.5327	9.7631	11.799	14.2425	14.6471	8.6357	7.6309	14.628	11.2848	11.8003	9.9996	12.6203	10.2325		0.834586	11.0002
15.402	7.4342	12.731	17.6204	11.4686	11.5417	8.9669	10.8087	6.8519	9.9008	6.0659	8.2342	9.786	9.1779	10.9727	7.5634	10.908	14.2483	8.7536	9.0513	15.6619	12.5116	9.4132		0.842104	10.4396
15.5396	5.6407	7.4834	11.2118	17.3344	7.3686	13.0172	8.4929	7.2822	5.3532	11.6012	7.4023	9.8253	11.6224	5.3157	6.379	7.4935	12.3789	12.2118	6.4925	10.834	9.3448	11.613		0.849627	9.34995
15.6771	9.3629	7.9951	8.0202	10.2539	6.0466	13.5216	7.5491	8.9355	9.1838	13.8631	11.096	10.6561	9.3335	7.8803	8.9419	10.1565	11.1103	9.8649	9.7607	14.543	9.488	7.0723		0.857145	9.75615
15.8146	8.1121	8.4038	7.921	12.42	7.6008	7.682	7.6137	5.7123	7.2289	22.2086	9.8302	6.5719	13.3475	7.8191	8.2662	4.5467	13.548	14.5904	13.3402	14.0698	12.9778	11.1843		0.864663	10.2271
15.9521	8.0168	11.151	5.3059	9.114	9.7667	9.0911	8.0759	4.2473	4.7902	22.648	8.9093	2.9443	11.3599	8.8277	8.718	8.6735	13.1514	13.5329	10.8882	11.4529	14.1476	11.9657		0.872181	9.85356
16.0896	8.1645	7.504	5.0705	12.793	9.8033	6.7498	13.3361	4.6401	11.2453	20.092	13.0526	11.6855	9.8678	5.2783	8.2482	11.0566	14.8002	9.0713	9.0281	12.3979	8.6665	9.3705		0.879699	10.0874
16.2271	7.6522	9.2449	3.4612	8.098	7.4189	7.8811	9.6126	7.9284	9.3697	18.7726	13.4704	8.8597	7.2408	9.3422	7.8946	9.9592	11.6545	10.3138	11.8783	12.5028	9.3629	6.4986		0.887216	9.47352
16.3647	3.7606	7.4782	4.0882	5.5466	6.7651	4.3398	7.6566	10.9586	5.8795	12.8737	14.084	11.6962	8.3034	7.0542	7.7307	7.8512	11.4243	15.9341	10.2293	12.378	6.4685	8.1418		0.89474	8.66557
16.5022	3.9418	7.7018	4.7889	9.1108	6.9938	3.8264	7.3552	8.2935	6.0215	16.836	9.5506	7.2952	9.1867	5.1188	4.3724	9.5977	18.6077	6.2985	12.049	11.9875	11.5825	12.8662		0.902258	8.79011
16.6397	4.4519	5.2396	5.6459	5.7867	7.6982	11.0906	9.635	11.6499	5.9643	10.4472	12.6235	4.0593	9.566	6.1295	2.5828	4.7826	11.822	6.174	7.9996	13.401	12.0463	20.7766		0.909775	8.61693
16.7772	3.5835	3.617	4.255	7.8541	12.2454	4.1557	11.0214	8.5317	7.1529	9.8173	12.213	7.9813	7.6045	5.3113	6.6605	6.8153	18.6133	4.462	13.5569	12.5855	11.6571	13.0454		0.917293	8.76091
16.9147	2.4176	2.5335	4.3715	6.4303	7.4731	2.6416	12.2549	8.2196	9.2622	10.9441	10.3963	4.9003	7.2845	5.7192	2.7637	10.2399	16.0099	5.1188	14.1761	11.7566	15.0741	17.3017		0.924811	8.51316
17.0522	1.9768	1.634	5.2813	2.51	5.0413	9.0194	7.6891	8.1599	8.3305	9.5469	10.9373	8.0002	2.7178	4.6922	3.216	5.7522	9.1989	7.5321	8.0308	15.3034	10.1358	16.1519		0.932329	7.31172
17.1898	2.7889	4.2302	4.5068	4.472	4.2786	9.7124	5.4731	7.4479	8.8996	8.6084	8.1337	5.84	6.7483	5.5455	3.3069	8.6202	14.0386	6.0874	11.6502	16.7607	11.2712	20.3084		0.939852	8.12405
17.3273	2.5027	2.6301	2.8169	1.9013	4.0881	6.6726	7.5119	6.2103	14.111	9.4285	12.032	8.3914	4.9493	3.4577	1.8243	4.1857	9.1727	7.1527	10.3285	12.1267	11.0002	21.8152		0.94737	7.46863
17.4648	3.0893	3.4628	3.831	1.1622	3.0205	5.2048	6.7092	8.3979	13.4068	6.8139	6.1702	13.3067	5.6839	4.0464	0.7208	3.4716	9.9163	8.3675	9.027	13.3624	13.18	15.5834		0.954888	7.17885
17.6023	1.2677	2.1273	3.5733	2.541	3.5135	3.6935	9.242	8.1835	10.6278	5.9802	9.7026	13.8509	4.9176	2.5736	4.4189	5.7141	8.6277	3.7416	9.859	18.5188	11.6746	18.5968		0.962405	7.40664
17.7398	1.169	1.9901	2.7172	3.9927	1.3121	5.5104	9.3188	9.8484	8.8855	5.7597	9.2843	11.0008	4.6698	3.9155	1.6839	2.5235	3.6621	9.7489	16.5822	12.5876	10.3612	20.8388		0.969923	7.15284
17.8774	0.0303	3.5391	1.2692	1.1927	1.3427	6.265	7.1533	6.0872	13.4458	8.5796	9.3554	8.5516	2.2201	3.3305	1.0865	3.7608	6.7081	7.0611	16.9491	6.5228	7.5237	15.5093		0.977447	6.24927
18.0149	0.8516	1.5741	3.4727	3.2242	0.5191	1.0886	7.8891	6.2308	12.1691	6.8898	9.0125	9.0999	5.0363	2.4735	0.9607	5.4963	5.2661	9.5097	11.8568	9.6303	8.3628	12.9521		0.984964	6.07119
18.1524	0.5556	0.8906	1.7916	3.0631	1.7368	1.0544	4.9651	5.6801	11.7572	8.2082	8.7406	5.1822	1.8419	0.6794	1.7629	1.6406	5.4212	10.1331	14.8345	11.5602	7.8324	11.6476		0.992482	5.49906
18.2899	1.157	1.8557	0.0418	2.9307	3.9258	2.2823	10.9724	6.0322	8.3772	9.8537	11.677	2.8424	1.4955	0.4117	3.6516	1.486	2.124	6.8121	13.3252	10.6981	11.4932	8.9848		1	5.56502

## Sheet: Image12 (2)
X0	Y0	Y1	Y2	Y3	Y4	Y5	Y6	Y7	Y8	Y9	Y10	Y11	Y12	Y13	Y14	Y15	Y16	Y17	Y18	Y19	Y20	Y21	Y22		Apical-Basal	Avg intensity
0	4.3889	6.1667	9.1111	7.0556	3.9444	4.4444	5.1667	1.8333	3.7222	2.6111	2.0556	2.1667	4.5556	3.8333	2.6667	5.1667	1.2222	1.1111	4.44444	2.1111	3.6111	3.7222	2.6111		0	3.81401
0.1375	6.0556	6.3889	4.2778	6.2778	4.5	6.3333	7.3333	1.9444	8.4444	4.8333	1.0556	4.1667	2.0556	7.8889	2.4444	4.6111	2.0556	3.1667	5	0.7222	2.3333	3.1667	2.5556		0.00574636	4.24397
0.275	4.1667	5.3889	9.9444	3.1667	6.2778	3.7778	6.2222	2.4444	2.5556	5.1111	0.7778	3.1111	3.4444	3.5	2.6111	3.2222	4.3333	0.8333	0.66667	1.6111	3.2778	5.0556	4.3333		0.0114927	3.73188
0.4126	6.1667	4.3889	4.2222	5.1111	3.8889	5.1667	3.8889	4.5556	2.1667	2.3889	1.9444	3.0556	1.5556	3.1667	2.5556	7.3333	4.1667	6.7222	1.33333	2.4444	2.3333	2.7222	2.1667		0.0172433	3.62803
0.5501	7.4444	4.6111	2.8333	2.7222	7.1111	6.1667	2.7778	4.0556	5.6111	3.8889	5.8333	1.5556	2.7222	1.9444	2.1667	2.3333	2.5	1.7778	2.72222	1.8889	4	3	2.5556		0.0229896	3.57488
0.6876	5.9444	5.1667	4.2222	2.3333	7.6111	7.2222	3.4444	2.7222	2.4444	3.1667	4.0556	4.6111	3.9444	2.7222	1.2222	1.7778	4.7778	3.8333	2.5	1.4444	2.3333	1.8333	7.8889		0.028736	3.79226
0.8251	3.7222	1.5556	6.5556	5.1111	1.7222	3.7778	4.2222	1.7778	4.1667	5.2222	5.4444	3.5	6	3	4.2222	2.1667	4.1667	6.0556	3.38889	4.6667	5.6111	2.9444	1.1111		0.0344823	3.91788
0.9626	4.1667	3.3333	6.1111	2.6667	7.5556	5.3333	6.6111	0.8889	4.1667	6.7778	2.5	3.1111	3.6111	6.6111	5.4444	4.5	6.2778	4.6111	3.44444	1.8333	4.7778	4.0556	3.4444		0.0402287	4.42754
1.1001	7.8889	7.9444	7.3333	4.3333	4.8333	4.6111	3.7222	4.9444	1.5	2.7778	2.7222	2.8333	4.7778	8.2222	3.3333	2.8889	6.2222	3.8889	1.66667	3.2778	4.3333	3.5556	4.0556		0.045975	4.42028
1.2377	6.1667	8.1667	4.1111	2.7222	6.6111	5.1111	5.7778	4.6667	3.0556	2.2222	3.3333	2.3889	3.7778	9.8333	4.6667	3.8889	7.1667	4.1111	5.11111	2.1667	6.2778	4.7778	2.6667		0.0517256	4.72948
1.3752	4.2222	8.2222	13.6667	6.6667	7.7778	6.1111	0.7778	2.7778	2.8889	1.3889	4.4444	1.5556	3.9444	7.1111	5.0556	3.2222	4	6.3889	0.83333	4	4.1667	3.8333	3.3889		0.0574719	4.62802
1.5127	5.6111	10.5	8.3889	3.4444	3.7778	5.8889	6.1667	3.6111	3	4.7222	3.6667	2.2778	1.4444	4.1111	2.9444	2.5556	3.1667	4.9444	6.22222	3.2778	2.6111	0.3333	4.7222		0.0632183	4.2343
1.6502	6.0556	4.4444	7.4444	4.8889	1.1667	9.9444	5	6.1111	8.1111	6.8333	6.7778	2.8333	2.7778	2.8889	3.3889	4.8333	6.1111	3.6667	2.16667	4.6111	5.6111	6.1667	3.2222		0.0689647	5.00241
1.7877	6	10.1667	6.7222	7.7222	5.5556	6.8333	8.3889	4.1111	2.8333	7.0556	6.2778	6.1667	2.5	3.3333	3	2.9444	4.3889	7.5	3.38889	3.0556	1.6667	3.2778	2.9444		0.074711	5.03623
1.9253	4.8333	5.5556	9	4.2778	7.9444	3.6667	3	4.1667	4.6111	2.6111	5.5556	2.4444	3.1111	3.1111	5.1111	2.5	3.8333	6.1667	3.16667	6.7222	5.5556	6.5556	5.7778		0.0804615	4.75121
2.0628	10.6667	4.8889	14.3333	3.5556	4.7222	2.6667	7.5	1.5556	3	3.2778	7.7222	4.4444	4.9444	3.8333	1.1111	2.2222	3.0556	2.5556	2.55556	5.4444	6.5556	6.1111	1.6667		0.0862079	4.71256
2.2003	6.2778	10.5	6.7222	5.6667	5.5556	3.8889	9	3.0556	6.4444	4.1667	2.2222	1.7222	5.7778	1.9444	6.8889	1.7222	4.6111	4.9444	5.55556	5.3889	4.2222	4.7778	5.2222		0.0919543	5.05555
2.3378	3.5556	7.1667	14.1667	6.6667	8.8333	9.3889	5.1111	3.7778	3.8333	6.3333	6.3333	1.8889	4.6111	3.0556	2.1667	1.2778	6.9444	3.0556	4.05556	3	3.7222	4.1667	2.1667		0.0977006	5.01209
2.4753	6.6667	7.5	12.0556	6.6667	5.5556	4.1667	5.6667	4.1111	5.6111	6.3333	2.6667	2.7778	6.9444	4.0556	7.5	3.7222	4.5556	5.5	3.27778	4.6667	8.1111	3.8333	6.9444		0.103447	5.60387
2.6128	6.2222	6.7222	5.9444	6.5	6.3889	6.3889	9.6111	2.3889	0.6667	1.7222	7.9444	1.6111	4	3.2778	2.9444	5.8889	5.8889	6.1111	1.94444	4.2222	5.5556	5.7778	4.3889		0.109193	4.87439
2.7504	5	8.3333	9.2778	8.8333	4.3889	5.2778	7.7222	5.0556	3.9444	4.4444	7.0556	4.2778	5.7222	6.6667	5.8333	1.9444	5.5556	4.6111	3.77778	3.9444	6.4444	4.6111	3.7222		0.114944	5.49758
2.8879	4.7778	4.2778	4.0556	8.7778	5.7778	3.5556	6.1667	8.3889	9.6111	8.4444	3.1667	8.7778	4.2778	7.6111	5.5	5.0556	3.6111	4.1667	5.88889	6.2222	3.3889	5.0556	1.3889		0.12069	5.56282
3.0254	5.5	2.1667	11.2222	8.6111	3.5	7.7222	4.7778	4.2222	8	4.7222	1.7778	4.5	1.8333	3.6111	2.4444	1.4444	2	7.2222	7.38889	5.1667	5.1667	3	4		0.126437	4.7826
3.1629	2.3889	5.1667	9.5	9.9444	6	8	5.1667	8.2778	5.1111	3.1667	5.2778	3.5	3.5556	4.0556	5.0556	1.3889	3.8889	8.5556	7.72222	7.3333	4.3889	1.3889	4.3333		0.132183	5.35508
3.3004	6.9444	3.7222	6.2778	5.2222	5.3333	3.8333	6.2222	9.2222	5.6667	3.5556	3.5	2.5556	2.7778	5	5.2778	4.7778	4.9444	6.3333	7.27778	6.8333	3.2222	6.8333	3.9444		0.137929	5.18598
3.438	8.1667	4.9444	8.5	6.5556	6.1111	9.1111	8.5	5.8889	5.0556	3.2222	8.2222	4.7222	2.8889	5.9444	5.8889	5.2778	3.2222	6	4.38889	1.7778	1.8333	5.9444	7.7778		0.14368	5.64976
3.5755	5.2222	8	8.0556	7.5	3.7778	6	6.4444	5.6111	6.0556	5.7222	7.5556	4.2778	5.1111	3.2778	1.6111	3.2222	5.8889	6.3889	4.44444	5.2222	4.4444	11.5	4.6111		0.149426	5.64976
3.713	7	2.5	14.2222	3.4444	6.5	6	3	7.6667	5.7778	5.7222	6	6.1667	2.6111	2.5556	8.5	2.8889	7.5	8.7222	5.38889	4.3333	3.4444	5.3333	4.8333		0.155173	5.657
3.8505	16.1667	4.8889	8.3889	1.6667	4.5556	5.6111	8.6111	4.0556	2.7778	4	2.0556	8.6111	2.8333	5.4444	3.1111	4.3333	7.6667	8.9444	3.16667	3.8333	5.2222	2.9444	3.3333		0.160919	5.31401
3.988	4.7778	7.1667	7.4444	2.7778	3.1111	2.7778	6.8889	8.7778	4.5556	4.8333	5.2222	6.3333	2.7778	6.5	4.8889	6.2778	3.3333	9.8889	3.66667	7.0556	4.2778	3.6111	4.6667		0.166665	5.28745
4.1255	7.4444	3.7222	9.7778	5.0556	2.6111	6.2222	6.2778	4.5	3	4.9444	3.2222	7.1667	8.5	2	5	1.8889	6.2778	6.1667	2.38889	8.1111	5.7778	5.2222	4.3889		0.172412	5.2029
4.2631	5.2222	6.5556	8.1667	8.5556	3.3889	4.5	6.7778	6.4444	3.6111	7	8.5556	3.6667	4.6667	2.1111	3.4444	4.7778	4.7222	5.5556	7.05556	2.7778	4.7778	3.8889	8.1667		0.178162	5.40822
4.4006	6.1667	7.6111	3.6111	4.4444	6.5556	3.2778	9.2222	5.3333	7.3889	4.5	5.1111	5.3889	4.6667	2.8333	7.1111	4.1667	3.8333	2.6111	3.22222	8.7222	2.3889	5.4444	5		0.183909	5.157
4.5381	9.2778	5.5556	4.2222	10.6111	2.5556	0.7778	5.7778	3.9444	7.9444	5.9444	5.3889	5.1667	5.6667	3.6111	6	4.0556	3.7222	8.8889	3.72222	4.2222	2.8889	4.1667	7.0556		0.189655	5.26812
4.6756	6.7778	9.5556	5.8889	3.8889	1.9444	5.0556	3.8889	3.8333	3.7778	7	3.3333	2.2778	4	6.7778	4.5556	3.2222	4.3333	3.3889	6.77778	3.2778	5.5556	3.6111	9.0556		0.195401	4.85991
4.8131	12.8889	6.7222	4.2778	8.0556	3.3889	10.5	10	5.5556	8.0556	8.5556	5	5.1667	1.6111	4.7778	3.1667	8.4444	2.6111	4.7222	6.44444	10.3889	2.4444	2.8889	3.1111		0.201148	6.03382
4.9507	3.5	9.3889	2.9444	6.4444	1.8333	7.2778	6.9444	2.8889	8.4444	6.6667	3.3333	10.0556	3.7222	1.7222	4.7222	2.3889	3.3333	8.0556	4.27778	5.5	2.9444	1.3889	4.5556		0.206898	4.88405
5.0882	5	12	5.6667	3.5	3.6111	2.5	4.7222	6.1667	4.6111	10.7222	6.0556	5	3.7222	3.8333	5.7222	6.9444	7.0556	4.3333	8.05556	4.4444	5.3889	3.8333	2.9444		0.212644	5.47101
5.2257	8.0556	4.8889	4.8889	6	6.1111	10.2778	7.5556	4	7.2778	8.9444	6.5	3.6667	4.3333	7.7222	5.5	2.0556	4.5	9.2778	4	11.2222	3.6111	4.7778	4.2778		0.218391	6.06281
5.3632	8	8.6111	10.2222	8.2778	9.2778	7.8333	4.1111	6.7778	7.3889	1.5556	5.2778	3.6111	1.2778	4.7222	7.5556	7.5556	4	8.3333	5.27778	6.8889	5.8333	6.8889	4.6667		0.224137	6.25846
5.5007	3.1111	4.2778	9.3889	2.7778	10.8333	3.6667	6.3333	3.8333	5.8889	2.8889	4.2778	2.5556	4.6111	1.6667	2.0556	6.5556	4.5556	3.2778	4.55556	4.6667	3.6111	5.1667	4.6111		0.229884	4.57248
5.6382	7	5.9444	5.9444	9.3333	10.5	7.3333	4.6111	3.3889	8.1667	4.0556	7	5.0556	10.6111	1.0556	4.1111	6.2778	6.0556	2.2778	6.83333	5.5556	2.9444	4.6667	4.9444		0.23563	5.8116
5.7758	4.5556	5.8889	9.3333	7.1667	6.3333	4.5	3.1111	6.8333	10.8333	3.5556	7.5	7.2222	6.8889	6.3333	9.1111	3.2778	4	3	8.72222	6.2222	1.2222	2.6111	9.8889		0.24138	6.00483
5.9133	6.0556	3.6111	10.2222	3.8889	9.1667	4.7778	3.8889	3.7778	4	5.8889	4.0556	4.6111	3.0556	2.8889	3.7778	6.1111	3.7222	4.8333	5.27778	5.1111	6.3333	7.2778	5.5		0.247127	5.12319
6.0508	4.3333	5.0556	10.0556	10.5	6.4444	4.8333	4.6111	2.5	5.7222	6.9444	2.1111	4.7778	5.8333	6.5	3.7222	5.5556	2.1667	8.3333	4.83333	6.1667	7.7222	7.2222	6.4444		0.252873	5.75603
6.1883	4.4444	6.0556	4.1667	8.8889	6.9444	3.6667	3.5556	5.2778	5.6111	11	6.9444	10.3889	5.6111	1.5556	6.1111	2.4444	6.6111	4.5	4.44444	3.4444	9.3889	4.3889	5.0556		0.25862	5.67391
6.3258	6.2778	3.8889	10.1667	5.2222	8.9444	6.2778	2.6111	7.4444	6.5	6.7222	6.2222	10	5.4444	4.0556	4.7222	4.1111	3.1667	4.5556	4	5.6111	7.5	8.7778	4.7778		0.264366	5.95652
6.4634	7.3889	1	3.7222	6.7222	4.8889	6.2778	4.7778	6.8333	5.5	5.1111	6.1667	8.0556	8.0556	7.6111	8.3889	4	2.3333	8.4444	3	5.2778	5	6.5	3.4444		0.270116	5.58696
6.6009	8.2222	10.6667	9.1667	6.2222	10.7222	3.1111	4.9444	4.9444	3.4444	4.3889	8.4444	6.6111	11.5556	3.8889	6.1111	5.1111	2.4444	4.9444	6.11111	2.4444	4.6667	6.5556	3.4444		0.275863	6.00724
6.7384	5.0556	4.7778	8.1667	7.1111	7.2222	5.8889	5.3333	5.1667	10.4444	2.5556	1.8889	5.8333	5.4444	6.5	4.8889	3.5556	5	5.1667	2.83333	5	2	5.6667	3.2778		0.281609	5.16426
6.8759	7.4444	3.3889	6	5.8333	9.7778	4.0556	6.2222	6.8889	8.2222	3.0556	5.7222	6.2222	3.3889	6.7778	4.2778	5.2778	3.1667	5.4444	5.88889	5.2222	6.2222	11.5556	7.3333		0.287356	5.97343
7.0134	6.9444	5.7222	9.8333	6.0556	7.6111	4.0556	5.4444	4.1111	8.1667	7.6111	12.8333	8.2778	4.1667	5.1111	6.3333	5.6667	6.8889	10	6.83333	7.4444	4.3889	9.7778	5.8333		0.293102	6.91787
7.1509	10.6111	6.7778	7.3889	7.8889	6.0556	6.8889	1.6111	4.8333	9.0556	3.6111	5.9444	2.0556	2.8333	4.5556	3.0556	5.8333	4.5556	3.8333	6.33333	2.7222	5.5	7.1111	7.7222		0.298848	5.51208
7.2885	5.2778	6.7778	4.1667	5.9444	7.8889	7.3333	2.8889	5.1111	6.2222	5.2222	3.7222	5.7778	6.0556	7.7778	3.9444	3.1667	4.9444	8.3889	7.11111	9.8889	1.7778	6.6111	3.9444		0.304599	5.64976
7.426	7.3889	8.6667	3.8889	13.4444	3.8333	7.7222	2.3889	3.3333	5.2222	4.2778	6.8889	2.0556	10.2778	6.3889	5.1111	7.1667	5.7778	9.8889	9.05556	5.5	4.7778	4.7778	8.9444		0.310345	6.38165
7.5635	7.3333	2.4444	5.0556	10.9444	10.5556	8.2778	4.1667	7	8.0556	6.1667	6.6111	5.2778	3.2778	3	5.5	4.7778	5.3889	5.1667	8	3.9444	8.2222	5.5556	3.1667		0.316091	5.99518
7.701	7.8333	5.6111	2.3333	9.4444	5.8889	9.7222	6.8889	8.5	5.2222	5.3333	6.8333	4.8889	2.6667	6.4444	6.3333	4.3333	6.8889	4.8889	5.05556	2.6111	3.5556	6.7778	5.4444		0.321838	5.80434
7.8385	10.3889	9.4444	5.3333	5.7778	6.5	9	5.3889	10.6111	11.3333	6.5556	3.8333	8.1111	2.2222	7.2778	6.5556	5.2222	6.1667	9.1667	5.22222	5.9444	3.3333	3.7778	5.3333		0.327584	6.63043
7.9761	13.5	7.1111	6	8.8333	7.3889	10.0556	4.7778	5.6111	4.6667	9.8889	6	5.6667	3	5.7778	6.5556	4.9444	5.2778	9.0556	7.16667	2.9444	5.0556	5.2222	6.6667		0.333335	6.57247
8.1136	6.9444	3.6667	6.5	8.2778	4.2778	6.2778	8.2222	6.2222	6.0556	2.5	9.2222	3.7778	5.7778	10.8333	11.3889	5.7222	7.4444	4	5.16667	2.3333	8.0556	4.5556	5		0.339081	6.18358
8.2511	5.6667	2.2222	9.3333	6.6111	6.2222	8.6111	5.1667	1	6.2222	8.2778	4.2778	7.6111	6.1667	6.6111	8.1111	8.0556	6.5556	11.1111	3.11111	4.6111	2.8889	3.5556	3.7222		0.344827	5.90097
8.3886	5	2.7778	3.4444	4	6.3889	4.6667	5.1111	6.8889	12.8889	9.6667	11.8333	4.3889	4.5556	15.3333	7.6111	6.8889	6.6111	4.8333	7.55556	3.8333	6.7222	7	6.8333		0.350574	6.73188
8.5261	1.8889	3.8333	3.1667	4.5	7.4444	5.8333	3.7222	4.2222	6.8333	8.9444	12.1667	1.8889	3.6111	8.0556	5.5556	3.6111	0.7222	3.5556	4.33333	5.8333	2.5556	8.2778	7.5556		0.35632	5.13527
8.6636	5.6111	3.6111	10	6.3889	3.3333	10.1111	6	4.6111	9.1667	9.6111	6.4444	2.5556	4.8333	6.1111	4.9444	4.9444	9.6667	9	2.55556	6.0556	4.1111	6.6111	7.7222		0.362067	6.26086
8.8012	7	8.1667	3.2222	10.1667	8.2778	4.6111	2.3889	4.1667	7.3889	4.6111	4.5556	7.7778	2.9444	2.3333	3	7.9444	8.7222	7.2222	5.66667	4	6.0556	6.8889	6.6111		0.367817	5.81401
8.9387	5.3333	8.6111	7.1667	7.8889	7.3889	2.0556	0.9444	7.0556	5.2222	7.5	8.0556	5.8889	7.3889	2.7778	4.1667	5.6667	4.2222	5.8889	4.77778	6.1111	3.6667	3	4.7222		0.373563	5.45653
9.0762	9	8.0556	2.8889	10.4444	5.7222	6.6667	1.8333	11.1111	3.9444	9	2.8889	8.3889	4.2778	5.3889	5.9444	1.5556	1.8333	6.2222	6.38889	5	6.3333	6	5.5556		0.37931	5.84541
9.2137	5.3889	3.9444	6.1111	6.9444	6.3333	6.8889	4.2778	6.5556	5	6.6667	3	3.0556	5.3333	4.4444	3	6.5556	4.2222	10.9444	5.27778	7.7222	2.1667	3.1111	8.5556		0.385056	5.45652
9.3512	6.6667	6.5	5.2778	4.2222	11.2778	4.6111	8.9444	3.3333	9.6667	7.2778	4.4444	6.3333	8.2222	5.9444	4.8333	5	6.9444	10.6667	7.27778	6.8889	7.0556	2.6667	4.3333		0.390802	6.45169
9.4888	5.8333	6.1667	4.4444	8.8889	6.6111	7.5	5.4444	6.1111	6	6.6111	3.5556	5.3889	7.9444	6.9444	6.1111	8.8889	2	13.8889	4.88889	5.8333	3.9444	5.5556	7.1111		0.396553	6.33333
9.6263	8.5	2.6111	1.3333	5.2778	4.7222	7.8333	3.1667	4.2778	6	5.9444	3.5	5.3333	6.1111	4.8889	4.5556	5.9444	5.5556	7.3333	3.94444	4.4444	3.0556	3.0556	9.0556		0.402299	5.0628
9.7638	10.2778	5.4444	2.4444	4.6111	6.3333	4.7222	6.3333	9.7778	4.0556	9.8889	1.6667	9.8333	5.6111	6.2778	1.3333	8.8889	2.6111	12.9444	4.72222	8.7778	3.8333	8.5556	4.2778		0.408046	6.22705
9.9013	8.6667	4.2222	2.5556	8.9444	7.3333	10.8333	6.7222	7.7778	7.5	3.7778	3.1667	5.3333	3.8333	5.9444	4.8889	4.3333	4.4444	6.3889	7.61111	7.2778	4.7222	6.6667	5.5556		0.413792	6.02174
10.0388	5.6667	7.5556	10.9444	6.3333	6.7222	8.8333	4.5	6.5556	4.1111	6.4444	1.8889	6.7778	5.8333	8.6667	6.7222	11.3889	4.5556	4.3333	3.61111	9.5556	3.7778	5.8333	4.4444		0.419538	6.30676
10.1763	3.0556	5.1111	7.3333	7.3889	6.5	10.5	5.7222	9.0556	5.7778	6.2778	4.3889	5	7.5	9	5.3889	7.8333	4.5556	8.3889	6.72222	7.8889	3.4444	4.9444	4.4444		0.425285	6.35749
10.3139	7	6.5	2.5556	7.2222	2.2222	6.1111	6.7778	5.2222	2.5556	5.1111	4.7222	9.6111	7.7778	4.4444	6.5	5.8333	7.8889	3.5	6.11111	2.2778	6.0556	5.5556	7.2222		0.431035	5.59904
10.4514	6.9444	1.6111	2.2222	2.6667	4	8.8333	4.2222	5.8889	5.9444	4.3889	3.7222	11.4444	6.7222	5.6111	5.5556	7.4444	5.3889	2.8889	8.33333	9.9444	10.9444	6.7222	2.7222		0.436782	5.83332
10.5889	4.3333	1.6667	5.3333	5.8333	3.5	9.8333	6.0556	7.8333	6	6.8333	6.2778	7.9444	2.0556	6.7778	7.3333	4.7778	3.5556	5.1111	7.55556	6.0556	3.5	8.6111	5.3333		0.442528	5.74396
10.7264	0.8889	6.6667	2.7222	8.3333	4.2222	5.4444	3.0556	7.3889	6.6111	4.2222	9.5	6.5	5.1667	7.1111	9.2778	5.9444	5.8333	4.2778	4.88889	12.6111	6.4444	6.3333	7.8333		0.448274	6.1425
10.8639	3.3889	4.1667	3	5	2.8333	10.2222	2.6667	9.5556	7.8889	6.9444	1.7778	4.8333	3.3889	4	5.0556	7.5	6.1111	6.1667	4.16667	8.5	2.8889	3.8333	7.9444		0.454021	5.2971
11.0015	2.1111	5.3333	5.8333	7.1111	4.6111	4.9444	5.3333	5.2778	5.3333	4.7222	8.8333	7.7778	5.3333	6.5	2.7222	10	8.2778	5.7778	2.77778	13.5	5.7222	3	5.1667		0.459771	5.91303
11.139	4.3889	4.0556	2.8333	3.3889	7.4444	7.1111	2.3333	8.2222	4.0556	5.6667	7.7778	4.5	1.3889	5.3889	2.8333	3.5	8.6111	5.7778	6.77778	5.2778	6.1667	6.4444	10.0556		0.465518	5.39131
11.2765	7.4444	6.7778	6.0556	7.9444	7.3889	8.7222	3.7778	5.1667	3.5556	4.9444	5.8333	6.0556	3.9444	5.7778	4.7778	6.5556	5.7778	4.7778	6.72222	4.2778	6.6667	7.5556	4.2222		0.471264	5.8575
11.414	5.1667	6.8889	4.0556	7.2222	3.8889	9.3889	9	4.8333	4.8889	1.3889	5.0556	5.6111	1.9444	7.6667	2.8889	6.8333	5.6667	5.3333	6.05556	7.5	7.9444	5.8889	9.1111		0.47701	5.83575
11.5515	3.7222	5.2778	1.1111	7.2222	3.2778	12.6111	6.1667	2.4444	5	6.5556	5.8333	6.2778	4.6111	3.7222	7.0556	3.6111	7.5	6.2778	4.44444	4.4444	8.3333	4.3333	8.8889		0.482757	5.59661
11.689	2.6667	6	4	9.8333	6.7222	8.3333	5.7778	3.1111	6.6667	3.2778	5.0556	1.6111	3.1111	4.1111	8.4444	5	7	8.7778	8.66667	6.0556	7.5556	4.6667	9.3333		0.488503	5.90339
11.8266	2.8333	6.2222	2	3.9444	2.9444	10.8889	7.2222	6.3889	4.8889	7.1667	4.1111	7.9444	4.2222	7.5556	4.1667	5.3889	7.8889	4.2778	2.38889	3.5	4.4444	6.2222	3		0.494254	5.20048
11.9641	4.5556	7.6667	3.7222	7.2778	4.0556	5.2778	3.9444	4.8889	2.4444	6.7778	6.5	6.3889	5.6667	5.5	5.8889	4.5556	10.2778	2.9444	5.11111	8.6111	7.0556	6.9444	7.7222		0.5	5.81643
12.1016	6.2222	5.5	2.7778	4.8333	3.3333	5.9444	8.8889	6.1111	4.5	1.8889	4.2778	6.1111	3.1667	8.6667	4.5	3.2778	4.3333	4.5556	9.27778	7.1667	4.6111	8.1667	3.8333		0.505746	5.30193
12.2391	4.7778	12.2222	6.3889	8.2222	6	6.5556	4	6.4444	4.7222	2.3889	2.6667	5.2778	7.2778	6.7222	5.0556	7.3889	6.0556	5.7778	3.5	3.5	2.8333	9	5.6667		0.511493	5.75846
12.3766	2.1667	8.6111	2.7222	8.0556	5.5	6.3889	10.6111	4.2778	6.7222	2.5556	9.2778	7.6111	5.7222	10.8333	2.8333	5.6111	5.1667	6.5556	5.22222	8.9444	2.7222	11	8.7222		0.517239	6.42754
12.5142	4	3.7778	3.9444	7.0556	3.3889	4.3889	6.6667	7.6667	3.5556	7.2222	6.6667	8.5556	2	4.6667	0.4444	4.6111	6.2778	7.7778	8.5	8.1667	5.6111	10.6111	13.1667		0.52299	6.03141
12.6517	4.1111	10	2.7222	4.3333	2.0556	9.5	5.5	5.1667	5.5556	3.3889	6.7222	3.9444	5.7778	5.7222	5.5556	5.3889	4.8333	2.9444	6.72222	5.3889	6.3333	6.2222	6.8333		0.528736	5.4227
12.7892	4.8889	8.1111	3.1667	7.3889	3.9444	4	4.5556	7.5556	9.5556	4.3333	6.9444	9.0556	5.1667	4.0556	6.7222	3.9444	2.4444	8	4.22222	4.2222	4.6111	6.8333	6.8889		0.534482	5.67874
12.9267	5.4444	3	2.3889	7.1111	4	8.5556	6.1111	6.9444	4.9444	4.4444	7.1111	6.8333	6.3333	6.8333	1.1667	3.5	2	3.2778	4.61111	2.7222	1.3889	6.4444	9.9444		0.540229	5.00482
13.0642	3.2222	8.2222	2.7778	5.0556	4.2778	7.1667	3.9444	4.5	5.0556	3.7778	2.7778	4.6111	2.3333	7.7222	6	4.8889	5.4444	6.6667	9.38889	4.2778	4.3333	4	5.2778		0.545975	5.0314
13.2017	3.5	5.6667	3.2778	3	3.8333	6.0556	4.2778	6.7222	8.0556	5.8333	7	12.4444	4.8333	6.6111	4.6111	10.7778	2.8333	5.9444	6.72222	3.6111	5.8889	8	7		0.551721	5.93478
13.3393	2.7778	3.3889	5.1111	6.3333	4.7222	8.1667	9.8889	7.6111	4.5556	4.9444	6.1667	6.5556	4.4444	4.0556	7.3333	4.4444	9.7778	5.6111	6.83333	1.7778	3.7222	6.3333	3.6111		0.557472	5.57246
13.4768	3.1667	7.3889	1.1667	4.7222	6.1111	9.6667	6.3333	4.5	6.4444	2.6667	6.3889	5	4.7778	7.2778	6.2778	2.8333	3.9444	5.5	7.11111	4.5556	5.3333	8.3333	5.3889		0.563218	5.42995
13.6143	4.5556	5.4444	2.2222	7.9444	4	6.1667	4.1111	6.8889	4.7778	0.7778	4.7778	6	5.9444	6.5	11	3.1667	5.7222	9.2778	5.66667	5.6111	5.1667	3.6111	1.1111		0.568965	5.23672
13.7518	4.2222	7.2778	3.1667	5.7778	7.3333	7.1667	1.6111	8.2778	5.6667	2.3333	3.1111	5.8889	4.2222	6.9444	6.0556	4.5	8.6667	1.1667	3.22222	6.3889	3.6667	6.6667	6.6667		0.574711	5.2174
13.8893	8.0556	6.2222	1	5.7222	7.1667	6.5	7.7778	4.1667	5.3333	1.8333	4.7778	8.5556	4.0556	7.2778	6.5556	2.0556	4.8333	4.5	2.72222	6.9444	8	2.7222	2.9444		0.580457	5.20532
14.0269	11	1.8333	2.8333	5.3333	3.2222	3.7222	2.3333	12.1667	8.3333	1.6667	1.5	2.8333	4.0556	6.5	2.8333	3.7778	7.1667	5.7222	5	6.0556	4.1667	4.8889	2.7778		0.586208	4.77053
14.1644	3	4.4444	0.3889	3.7222	4.0556	2.7222	5.0556	14.2222	6.3333	7.4444	3.8889	3.8333	2.2778	10.7778	3.7778	3.1111	8	4	4.27778	1.9444	4.0556	8.2222	3.0556		0.591954	4.89613
14.3019	5.3333	3.5556	1.6111	6	6	2.5556	5.2222	9.8889	6.3889	4.0556	3.2222	2.9444	8.2778	6.5556	5.0556	5.4444	4.3333	4	3.61111	12.2778	5.3333	3.2222	2.2778		0.597701	5.0942
14.4394	3.5556	3.0556	3.3333	3.0556	3.3333	2.6111	4.5556	16.6111	2.6111	5.1667	2.8333	2.5	3.1667	3	5.5556	7.6667	3.8333	5.6667	3.16667	4.3889	5.5556	6.5	6.1667		0.603447	4.69083
14.5769	7.2778	5.2222	3.6667	1.0556	7.2778	3.6111	4.2778	20.8333	4.4444	2.4444	4.2222	4.7778	6.1111	6.7222	4.4444	6.0556	4.5556	3.8889	2.61111	2.1111	5	4.0556	6.3333		0.609193	5.26087
14.7144	3.4444	2.1667	3.1667	4.7778	8.0556	3.0556	4.9444	11.3333	1.7778	5.9444	6.1667	8.2222	5	5.6111	6.8889	5.6111	10.6667	4.3333	2.27778	1.5	0.9444	8.5	2.9444		0.61494	5.10145
14.852	4.3333	2.4444	1.4444	5.6667	3.6111	7.5556	4	6.3333	5.8333	5.1111	5.0556	4.9444	6.2222	6.1667	2.5556	5.2222	4.5556	2.1111	4.16667	8	1.7778	4.8889	6.5		0.62069	4.71739
14.9895	5.3333	2.9444	1.6667	5.7778	6.1111	6.7778	2.9444	11.2222	6.8333	3.5556	6.7222	4.5556	3.2222	5.1111	3.2778	3.3889	4.6667	4.1111	4.88889	8.1111	4	9.3333	2.1111		0.626437	5.07246
15.127	5.5	2.2778	0.8333	3.1111	5.7778	3.9444	3.7222	9.4444	5.1111	2.6667	4.8333	8.1667	2	7.1111	4.1111	1.7778	2.8333	3.8333	4.16667	3.7222	5.2222	2.6667	5.5		0.632183	4.27536
15.2645	5.7222	3.5556	1.3333	2.2222	7.5	5.5556	6.8889	14.7222	4	2.3333	2.9444	7.1667	2.2778	6.6111	6.1667	6.1667	5.6111	6.5556	8.11111	3.9444	4.1667	3.2778	4.2778		0.637929	5.2657
15.402	3.8889	5.8333	0.2778	5.1111	5.0556	8.6111	4.7222	13.8333	7.2778	3.0556	5.7222	2.8889	5.3889	4.8889	5.1111	5.0556	4.6667	6.0556	4.72222	6.8333	7.6667	5	5.5		0.643676	5.52899
15.5396	2.8889	3.3333	2.1667	6.3889	3.5556	4.8333	3.3889	6.0556	4.2222	2.6111	2.6667	2.3889	3.8889	8.8889	4.4444	3.6667	3.5556	5.7222	7.38889	3.8889	7.2778	3.9444	7.7778		0.649426	4.56281
15.6771	4.3889	1.3889	1.4444	3.6667	6.1111	2.1111	2.0556	7.2778	6.6667	1.0556	0.6667	7.1111	2.4444	5.5556	7.3333	4.4444	10.7778	8.1111	4.61111	4.3333	5.7778	5.1111	6.8333		0.655173	4.75121
15.8146	6.9444	1.4444	0.6111	3.2778	6.7778	3.5	3	9.4444	8.8889	5.8889	4.1667	6.9444	4.5	6.5	3.5	2.5	3.8889	2.7222	7.77778	3.6667	7.6111	4.9444	7.6667		0.660919	5.05072
15.9521	6.4444	4.7778	0.8333	2.0556	2.5	0.4444	4.3889	7.7778	2.6667	2.4444	4.3889	6.0556	7.4444	4.2778	4.8333	3.9444	4.0556	4.3889	9.55556	4.2778	3.9444	4.6111	3.3333		0.666665	4.32367
16.0896	6.0556	5.3333	0.9444	7.5556	4.9444	4.2778	6.3889	6.9444	4.4444	2.5	4	8.0556	4.7222	7	10.6667	2.2778	2.3333	5.3333	3.77778	4.7778	5.5556	4.8333	5.6667		0.672412	5.14734
16.2271	3.6111	1.3889	2.1667	4.6667	3.7778	2.8889	2.3889	8.8333	4.6667	0.9444	3.5556	9.3333	7.7778	5.6111	4	3.4444	4.7222	5.3889	7.5	4.1667	5.6667	8.3889	8.1667		0.678158	4.91547
16.3647	2.3333	3.1111	4.2778	5.4444	4.7222	4.2778	2.3889	9.5556	4.7778	6.6111	1.8889	7.7222	3.2778	3.8333	6	4.6111	1.7778	6.2222	4.94444	6.6667	0.6667	2.5556	4.3333		0.683909	4.43478
16.5022	4.0556	8.6111	1	2.1667	2.1667	1.9444	4.5556	8.4444	4.2778	6.8333	2.3333	7.3333	6.6667	3	8.1667	4.5556	1.2778	2.1111	6.61111	2.9444	5.2778	5.3889	3.6667		0.689655	4.49517
16.6397	6.5	4.7222	1.3333	6.0556	4.0556	2.3889	1.8889	6.1667	6.2778	8.1111	2.2222	5.7222	3.6111	2.2222	1.2778	3.8889	1.8889	0.5	8.88889	4.8333	3.6667	3.9444	2.7778		0.695401	4.04106
16.7772	4.3889	3.5556	2.9444	1.5556	1.3333	1.8889	4.3333	12.4444	4.8333	8.6667	1.8889	5	8.7778	4.8333	2.5	3.9444	4.3333	3.8333	5.77778	4.4444	3.2778	3.8889	6.8333		0.701148	4.57729
16.9147	0.8889	3.3333	5.9444	0.5	8	5.6667	3.6111	7.6111	6.3333	6.8333	3.1111	3.5556	6.0556	9.6111	4.6111	4.7778	1.6111	7.1111	6.83333	4.4444	2.7222	3.0556	5.0556		0.706894	4.83816
17.0522	3.2222	3.0556	2.8333	0.7778	5.6111	4	2.6667	6	9.5	4.9444	4	4.7778	7.3333	2.7778	2.2222	2.5	5.5	2.2778	4.61111	5.7222	5.7222	8.2222	4.3889		0.71264	4.46377
17.1898	3.6111	2.7222	4.0556	2.5	6.4444	3.1667	3.8889	2.7222	10.3889	4.5	4.6667	2.4444	5	2.1667	5.0556	4.0556	6.0556	5.9444	3.27778	3	3.1111	4.6111	4.1667		0.718391	4.24155
17.3273	3.6111	5.4444	0.8889	4.8889	3.2222	1.8333	2.2778	7.5	7.1111	4.6667	1.6111	6.4444	3.2778	9.4444	4.7222	2.1111	6.0556	11.1667	4.94444	2.2778	5.4444	5.8333	3.1111		0.724137	4.69081
17.4648	7.1111	5.3889	3.8889	2.9444	5.5556	3.3889	1.3333	4.8333	5.9444	3.8889	6.5556	4.6111	3.8889	4.0556	8.5	2	0.8889	8.2778	1.94444	4.0556	7	4.5556	5.3889		0.729884	4.6087
17.6023	4.2778	1.5556	2.5	3.7222	9.6667	3.6111	1.1667	4.2778	3	5.6111	3.4444	5.7778	3.2778	2.6667	2.6667	3.2222	6.9444	3.5556	3.27778	1.0556	2.8889	3.9444	3.7222		0.73563	3.73189
17.7398	2.7222	6.1111	2.2778	2.6111	8.1111	7.2222	1.0556	7.3333	6.4444	5.5556	3.4444	4.4444	3.7222	6.4444	2.5556	5.8889	4.5556	5.3333	2.16667	6.5556	4.3333	4.3333	3.5		0.741376	4.64009
17.8774	4.9444	4.1667	4.5556	5.7222	9.2222	4.6111	0.8889	6.6667	3	5.8333	3.3333	4.5	3.5	3.2778	2.3889	2.6111	3.2222	10	8.83333	4.5556	2.6111	3.3333	1.8333		0.747127	4.50483
18.0149	4.8889	6.7222	2.5	4.7778	7.7222	5.6111	3.1667	5.8889	3.4444	3	2.5	0.8889	1.8333	8.1111	4.2778	5.1667	1.7222	8.7222	4.66667	10.0556	1.6111	6.5556	2.7222		0.752873	4.63285
18.1524	6.2222	3.2222	1.1667	4.0556	10.6111	7.8889	2.7778	5.0556	4.7222	10.1667	1.1667	1.8333	2.5	5.3889	3.5	5.8333	3.3333	3.6111	2.55556	3.2778	4.0556	3.5	2		0.75862	4.2802
18.2899	5.5556	2.5	1.4444	3.2222	5.2222	4.7778	7.6111	4.3889	9	6.4444	2.1111	7.5	1.7222	4.2222	5.5	4.7778	4.2222	7.8333	0.77778	10.8333	2.2778	5.9444	4		0.764366	4.86473
18.4274	5.7222	3.1111	0	2.5556	4.8889	0.3889	2.8333	2.8889	4.9444	3.4444	5	2.0556	3.2778	3.5556	4.6111	4.8889	2.6667	7.7778	0.88889	6.1667	3.7778	2.8889	2.7778		0.770112	3.52658
18.565	3.3333	4.3333	6.5556	2.5	6.3333	2.4444	6	4.3889	2.2222	6.7222	7.8889	3.8333	4.5	5.1667	5.8889	5.6111	3.7222	3.9444	1.66667	7.0556	2.8889	4.7222	5.7778		0.775863	4.67391
18.7025	3.5556	6.7222	1	0.8333	3.8333	1.5556	2.9444	4.1111	5.2778	4.7778	3.2778	2.2778	3.3889	6.8889	5.3889	4.5556	2.2778	7.8333	4.83333	6.0556	2.1667	4.6667	6.3333		0.781609	4.11112
18.84	1.6667	5.1111	1.7778	2.6667	8.8889	4.3889	4.2778	1.7778	5.0556	2.3333	2.3889	4.1111	3.0556	2.3889	4.7778	6.6111	0.3333	1.8333	3.44444	6.1667	5.9444	4.5	6.1111		0.787356	3.89614
18.9775	3.3333	3.6111	1.4444	3.5	6.6667	3.5	0.9444	4.1111	6.8333	1.8333	3.9444	6.5556	6.1111	4.5	2.4444	4.1111	4.3889	5.5	5.83333	5.8333	5.6667	4.9444	4.7222		0.793102	4.36231
19.115	9.2778	4.6111	2.6667	2.7222	5.5556	1.5	3.8333	3.5556	2.3889	4.8333	1.0556	8.0556	8.3333	4.7778	3.9444	6.6667	0	6.1667	3.05556	6.1667	8.1111	5.6111	3.9444		0.798848	4.64493
19.2525	4.6111	4.3889	3.1667	4.6111	4.9444	3.5	2.3889	4.3889	8.5	4.7222	2.6111	2.3889	3.5556	3.3889	2.9444	4.3333	1.7222	3	7.55556	4.6111	5.7778	6.1667	2.5556		0.804595	4.16667
19.3901	7.5556	5.4444	1.6111	3.7222	5.6667	3.3889	1	4.7222	5.2222	6.9444	4.4444	3.7778	4.1667	5.8333	4.9444	3.1111	4.7222	5.3889	3.94444	6.6111	5.1111	4.8889	5.8333		0.810345	4.69806
19.5276	1.5556	2.7778	1.6111	5.6667	7.6667	3.8333	2	3.7778	1.7222	4.7222	7.0556	4.6111	1.6667	4.4444	3.0556	1.6667	2.5556	1.2778	5.33333	6.8333	7.5556	5	4		0.816091	3.92996
19.6651	5.0556	3.8889	4.1667	2.1667	6	1.6667	3.3889	3	3	3.4444	3.2778	7.0556	5.5	3.1111	3.6667	6.7222	1.1667	4	2.88889	4.6111	5.5556	3.1667	2.9444		0.821838	3.8889
19.8026	2.4444	3.6111	5.2778	2.8333	6.5	2.8333	2.3333	3.9444	4.3889	3	3.2778	3.5	10.6111	5.5	5.4444	5	1.3889	2.6111	4.72222	4.8889	10.1667	2.6667	3.2222		0.827584	4.35507
19.9401	3.4444	2.8889	5.7222	3.7778	6	3	2.7222	8.1111	3.8889	6.0556	8	6.5556	3.1111	5.3333	3.2778	4.1111	2.8889	5.1667	6.11111	4.8333	8.1667	2.5556	3.1667		0.833331	4.7343
20.0777	5.5556	8.6111	4.7222	2.1667	3.2222	3.7778	4	5.1111	4.2778	7.1667	4.2778	11.3333	6.3333	3.4444	4	1	4.6111	3.5	4.16667	5.6667	7	4.1667	1.0556		0.839081	4.74638
20.2152	4.3889	4.2222	1.2222	2.2222	5.2222	6	3.1667	1.6111	3.5	5.6111	2.2778	7.8333	5.6111	3.4444	5.3889	3.2778	4.8333	9.1111	3.16667	7.4444	7	1.3889	4.3333		0.844827	4.44685
20.3527	2.5556	0.8889	5.1667	1.8889	6.6667	2.8889	3	5.8889	5.0556	4.8333	7.3333	3.6667	3.7222	3.3333	5.1111	1.1111	2.8889	13.9444	2	9.2222	4.7222	5.0556	4		0.850574	4.5628
20.4902	3.4444	5.7778	3.1111	5.2222	3.0556	4.5	2.8333	3.1111	2.8889	7.6667	0.8333	7.1111	4.4444	2.7778	6.6667	3.9444	4.3333	13.2222	2.27778	4.3333	8	2.6111	3.0556		0.85632	4.57487
20.6277	3.4444	1.9444	6.7778	3.6111	3.2222	4.8333	3.8333	5.3889	3.9444	6.8333	5.5	3.7778	2.4444	4.5556	4.7222	5.4444	3.7222	5	2.44444	4.7222	4.9444	1.5	2.1111		0.862067	4.11834
20.7652	2.2778	3.7222	2.5556	2.7778	9	3.6111	3	0.2222	3.9444	4.6667	4.9444	3.1667	2.6111	4.9444	5.3889	7.3333	5.1111	13.1111	3.55556	10.9444	5.8889	2.7222	7.1667		0.867813	4.89855
20.9028	1.3889	1.8333	5.0556	5.5556	3.7778	1.8889	0.9444	4.9444	3.6667	3.9444	5.1667	3.5556	4.3889	5.1667	5.6111	3	3.1667	9.8889	3.83333	6.0556	6.5556	1.8889	4.6667		0.873563	4.17151
21.0403	7.7778	2.8333	4.8889	10.9444	7.6667	4.1111	1.8889	3.8889	8.2222	2.7222	3.3333	3.8889	5.8889	0.5556	6.4444	7.1111	1.3889	12.9444	2.11111	7.7222	6.8889	1.5556	4.5556		0.87931	5.1884
21.1778	3.2778	1.9444	6.1111	3.6667	7.5	5.3889	0.7222	1.8889	4.3333	6.6667	5.1111	5.3889	1.6667	4.1667	6.0556	2.6111	1.9444	6.4444	5.77778	6.6111	7.3889	3.5	6.5		0.885056	4.55073
21.3153	1.3333	7.1667	3.1667	4.2778	5.0556	2	0.7222	2.8889	4	4.6667	5.3333	5.2778	4.5556	5.9444	5.1667	4.3333	4.4444	4.1111	5.72222	6.6111	12.4444	2.7222	3.4444		0.890802	4.58212
21.4528	1.1667	3.4444	2.6667	4.6667	6.2778	2.3889	1.8889	4.7778	5.9444	0.7778	6.1667	2.4444	6.0556	3.2222	3.2222	4.9444	6.1667	4.8333	3.94444	3	6.7778	4.6667	5.8333		0.896549	4.14251
21.5903	0.6111	4.5	4.7778	7.1667	11.7222	4.5	1.7222	1.9444	1.8333	5.8333	6.1667	4.4444	4.3889	7.8333	3.5	7.8889	6	3.0556	4.83333	7.6111	7.3889	5	1		0.902295	4.94444
21.7279	1.1111	3.2222	6.2778	4.3333	4.4444	2.5556	1.2222	4.3333	4	3.1111	2.2778	6	5.3889	2.8889	3.8889	3.4444	7.5556	5.9444	5.44444	7.5	9.5556	1.8889	3.8889		0.908046	4.3599
21.8654	2.1111	2.5	1.7778	4.5556	7.7778	1.1667	0.3889	3.5556	2.7778	3.7778	4.0556	5	4.6111	3.4444	0.8333	5.1111	6	3.0556	4.16667	3.5	6.6111	3.9444	3.3333		0.913792	3.65459
22.0029	1.2778	1.7778	1.5556	7.8333	9	1.7222	3.8333	2.1111	4.4444	5.2778	5.7778	1.8889	8.0556	5.5	3.3889	4.7778	15.3333	3.8333	7.5	7.4444	2.6111	1.5556	1.5		0.919538	4.69565
22.1404	1.3333	3.0556	1.7222	1.8889	5.2778	7	2.1111	7.7222	4	4.7222	5.6111	4.4444	3.3333	4.1667	3.1667	1.4444	5.3889	3.4444	2.05556	8.7222	8.9444	1.9444	2.6111		0.925285	4.09178
22.2779	0	1.4444	4.2222	4.2778	5.3333	3.5556	1.8333	6.3889	2.2778	4.1111	3.3889	3.0556	5.3333	4.0556	3.7222	2.8333	13.7222	8.7222	3.61111	4.8333	6.9444	2.7222	3.0556		0.931031	4.32367
22.4155	0.8333	1.1111	2.8889	5.6667	5.1667	4.2222	0.6667	4	3.2222	4.1667	4.3333	6.6111	8	8.2222	4.3889	2.2778	3.7222	2.1111	1.16667	4.3889	4.6111	4.3889	1.1111		0.936782	3.79469
22.553	0.3333	0.6667	3.0556	8.9444	4.8333	3.1667	2.9444	6.2222	0.6111	1.6667	7.2778	3.1111	10.5556	7.3889	2.8889	3.6111	2.8889	2.5556	3.77778	4.8889	2.7222	0.6111	1.6111		0.942528	3.75363
22.6905	0.4444	0.5556	2.5556	6.5556	3.3889	3	2.7222	4.7222	2	1.5	6.1111	3.0556	6.8889	5.4444	3.6111	2.8333	5.9444	3.4444	2.11111	4.7778	4.1111	1.6667	0.7778		0.948274	3.40097
22.828	0	1.5556	0.8333	5	5.1667	5.7778	3.7778	4.9444	2.9444	1.1111	9.7222	7.8333	5.7222	3.1111	3.3333	3.8333	4.2222	3.6111	3.11111	5.8333	3.1667	2.5556	1.8889		0.954021	3.87197
22.9655	2.6667	1.8333	1.9444	2.8889	5.6667	5.0556	3.1667	9.5	2.8889	0.2222	4.5556	7.0556	4.2222	3.3889	7.9444	6.3889	8.7222	5.8889	2.61111	2.0556	6	2.9444	3.3333		0.959767	4.38889
23.103	1.4444	0.1111	2.7222	3.7778	4.2778	5.7222	6.1667	5.6111	3.6111	2.6667	2.9444	3.2222	5.2222	3.1111	4.2778	2.2778	6.8889	3.6111	3.88889	2.4444	3	0	0.5556		0.965513	3.37198
23.2406	1.3889	1	3.0556	4.2778	8.7222	4.0556	4.3889	4.1111	1.7222	4.7222	1.9444	9.3889	5.7222	1.5	5	1.9444	6.4444	4.6667	0.27778	1.6667	1.3889	1.7778	0.8889		0.971264	3.48068
23.3781	0.2778	0.1667	2.3333	4.0556	4.7222	2.4444	6.5	4.4444	4.1111	2.1667	1.8889	4.1667	3.2778	2.6667	2.6111	3.1667	1.1111	4.0556	2.5	2.6111	1.7222	1.8333	2.2222		0.97701	2.8285
23.5156	0.6111	0	1.1111	3.1111	5	2.2778	4.5	5.4444	3.7778	1.5556	1.8333	2.0556	2.2778	2.7222	6.7778	2.6111	2.6111	1.4444	0.55556	2.1111	2.7222	0.5	2.4444		0.982757	2.52415
23.6531	0.8889	0.0556	0.3889	1.1111	3.2222	3	5.5556	1.3333	2.3333	3	2.6667	2.0556	2.4444	4.4444	2.7778	1.2778	1.3889	4.7778	0	3.7222	1.5556	3.6111	0.2778		0.988503	2.25604
23.7906	1.4444	0.1111	0.1111	0.3889	2.7222	4.5	3.8333	3.4444	3.5556	0.9444	5.7222	2.2222	2.4444	3.6111	5.1111	0.8333	2.6111	2.0556	0.33333	1.2222	1.6111	2.3889	2.8889		0.994249	2.35264
23.9282	0.5556	0	0	2.0556	1	5.1111	4.2222	5.6667	3.3333	0.4444	1.3333	3.9444	2	5.5556	4.0556	1	3.8889	1.2778	1.33333	0.5556	1.3333	3.3333	3.7222		1	2.42271

## Sheet: Image11 (2)
X0	Y0	Y1	Y2	Y3	Y4	Y5	Y6	Y7	Y8	Y9	Y10	Y11	Y12	Y13	Y14	Y15	Y16	Y17	Y18	Y19		Apical-Basal	Avg intensity
0	16.0588	6.3985	11.0529	10.7619	16.3665	8.3047	11.6216	9.7722	8.7594	13.1257	10.169	5.7713	15.5602	10.0954	14.1937	16.1103	14.5185	13.1569	13.921	10.3858		0	11.8052
0.1375	17.1359	9.8692	10.4714	9.4257	13.5835	11.7201	6.0902	13.4764	10.821	15.028	12.7244	12.6353	11.4678	11.2242	9.4438	13.2531	8.3585	19.2603	12.4253	10.3686		0.00689565	11.9391
0.275	26.8326	5.4856	6.9391	13.8607	13.161	14.0207	16.0478	17.3182	13.2978	10.9741	19.8181	5.5058	10.9793	18.4465	6.9676	7.6969	7.4001	21.2395	14.4782	19.7234		0.0137913	13.5096
0.4126	24.7882	6.6187	9.9926	13.4839	18.3595	10.7597	16.6382	21.1027	12.9923	12.5232	9.1269	10.5961	13.2887	6.4173	7.8461	13.0409	7.7163	28.3389	12.9798	18.639		0.020692	13.7625
0.5501	14.9803	14.0578	9.1908	11.2842	18.7039	15.551	20.469	15.6183	10.726	11.6204	9.9958	11.7945	9.8218	12.7951	12.073	11.5431	19.5241	28.9726	12.6032	15.1138		0.0275876	14.3219
0.6876	18.6463	9.2346	14.1007	18.2873	14.804	24.905	21.3179	21.5995	15.9926	12.8479	18.5912	19.7155	19.1739	14.2136	5.465	18.3945	15.7942	34.8334	18.4359	16.6688		0.0344833	17.6511
0.8251	18.5334	14.5105	13.2394	16.1581	17.0065	17.6468	15.9446	12.0738	17.9698	15.3984	13.6947	10.7491	12.408	16.2223	3.5602	17.369	15.6165	41.9001	20.0093	10.0335		0.0413789	16.0022
0.9626	13.9846	12.2353	14.5286	10.9002	19.4026	10.8336	25.363	12.9264	14.4563	16.3572	15.4753	12.9567	10.5085	15.5123	5.1111	26.9819	22.3307	31.881	13.1871	9.3726		0.0482746	15.7153
1.1001	16.4641	16.9243	19.6752	17.298	21.9775	16.8356	13.7189	17.1978	12.8554	17.7592	24.7518	9.1886	13.8834	16.484	4.8621	21.7693	25.6323	28.6324	11.5389	12.4253		0.0551702	16.9937
1.2377	17.9278	14.5188	12.2118	13.9734	20.0514	15.4627	17.6085	17.4068	11.577	17.4547	14.8849	21.0308	12.7858	17.8581	12.3262	21.0279	16.785	36.814	11.8337	11.2435		0.0620709	16.7391
1.3752	19.0992	17.6055	16.7051	18.0805	19.6343	13.2852	19.4924	9.4502	12.9276	23.2848	20.8827	14.7958	16.0806	12.474	14.0962	24.2207	16.3762	27.0884	14.7723	11.6496		0.0689666	17.1001
1.5127	20.4723	18.9268	20.8862	18.8539	16.6648	18.5399	12.9029	16.0528	16.3576	21.8685	16.3139	16.5701	13.6395	9.193	7.7952	17.7435	22.1654	30.1478	14.4163	10.7145		0.0758622	17.0112
1.6502	22.8731	13.2444	18.7122	21.0356	17.3729	14.6067	21.7611	11.3901	14.4612	18.5731	17.5636	16.7298	24.8451	10.331	13.516	19.6837	12.1269	25.8024	10.8256	18.6024		0.0827579	17.2028
1.7877	15.8178	13.9713	14.4876	20.2496	20.1232	15.1121	11.524	15.9962	17.2185	15.7846	23.5827	18.9852	11.2173	15.7413	9.6232	14.481	12.9775	29.4624	16.8095	12.2344		0.0896535	16.27
1.9253	16.8541	11.8331	18.6227	19.7901	17.7048	11.8057	12.9487	6.8257	13.8792	15.8739	17.3878	9.0587	17.925	12.247	11.6095	12.8288	14.6011	25.731	14.2181	6.1737		0.0965542	14.3959
2.0628	13.9568	9.49	13.3321	18.7069	10.919	11.6669	10.1306	13.7319	12.6189	19.2169	21.6717	11.6307	16.3713	12.9776	11.4974	11.4543	11.476	22.6629	9.7209	10.5262		0.10345	13.6879
2.2003	9.4037	12.3157	9.3363	20.5125	13.2385	15.2621	6.6855	15.8583	14.1165	16.5964	14.9178	7.1858	12.6784	7.9805	12.3587	7.8493	13.2063	22.43	16.4122	9.9955		0.110345	12.917
2.3378	10.4087	9.726	10.8908	14.3228	17.1504	15.1853	11.3557	13.8387	8.2862	16.0512	22.1627	10.0183	11.1187	11.1749	12.68	8.4543	10.8526	9.3095	9.9713	7.7016		0.117241	12.033
2.4753	14.4766	8.7107	11.08	15.1871	11.1951	10.1238	5.1185	7.0357	10.1098	11.0557	21.0554	11.5933	9.83	10.2987	10.1624	13.7807	13.4173	14.1042	10.8483	8.9129		0.124137	11.4048
2.6128	12.9425	9.4498	6.0709	13.9861	18.6852	6.2503	6.1628	9.8063	8.4557	18.5272	13.6296	14.853	9.8883	11.784	12.2702	8.5499	8.8901	11.1675	10.4824	7.4137		0.131032	10.9633
2.7504	10.0064	8.3904	6.5883	18.474	10.9176	9.0996	4.9331	9.137	10.3992	17.0725	9.9677	12.6901	13.5636	13.0662	4.5421	12.0534	12.5474	10.6499	12.2389	4.3792		0.137933	10.5358
2.8879	11.225	7.3739	6.2768	9.0098	13.8293	14.2449	6.4608	11.8484	9.5964	21.2446	16.0328	9.284	6.8987	9.2403	6.4702	8.0569	17.3482	8.6314	14.7528	10.31		0.144829	10.9068
3.0254	12.8142	10.9778	8.0287	11.7048	13.4536	10.7938	11.3875	7.2514	10.9624	11.9345	15.7944	13.2479	7.7983	13.6802	16.9792	15.279	8.7784	13.7559	14.7834	6.7478		0.151724	11.8077
3.1629	13.6266	10.0559	5.3537	5.1579	10.6318	7.6862	9.4903	11.2228	9.8781	19.8296	15.9727	17.3785	9.1631	9.7142	9.3458	17.2855	9.5182	8.9989	10.568	5.0966		0.15862	10.7987
3.3004	8.4675	12.0082	7.3078	9.4701	10.788	8.2638	8.4169	6.6737	9.309	17.4071	21.6402	14.8602	6.9976	7.9564	6.1499	12.8914	12.2014	13.9398	11.6772	7.4769		0.165516	10.6952
3.438	9.1259	10.08	7.6788	15.199	6.5604	5.1759	14.6777	8.1518	9.1315	18.7201	13.6566	12.5963	9.9594	5.4228	15.8279	6.1258	4.5798	13.8497	17.1923	7.6532		0.172416	10.5682
3.5755	10.3801	7.9135	8.8731	12.211	9.1949	7.4789	10.1774	9.1805	6.378	10.0181	11.7689	12.708	8.6444	8.767	9.4894	13.4979	6.0982	9.0448	7.1087	10.9336		0.179312	9.49332
3.713	15.6009	5.3144	5.8278	14.6521	7.7246	4.0482	12.9485	11.8218	9.0529	16.186	9.8918	20.9887	11.6925	6.9282	19.2059	9.9252	12.7651	6.4827	5.6326	13.3884		0.186208	11.0039
3.8505	13.6452	3.2248	6.8732	6.4312	7.4049	12.9915	7.5531	12.6389	2.5579	6.7513	22.289	10.9404	16.7156	10.2215	12.7452	9.7492	13.6529	8.3819	5.5083	10.1639		0.193103	10.022
3.988	12.5978	5.3983	6.619	8.5809	3.5649	6.2093	7.1985	10.0268	5.6719	14.6257	11.2762	10.0595	15.7833	11.1603	13.5737	13.1408	8.0206	8.4203	4.6685	6.7079		0.199999	9.16521
4.1255	9.5306	11.63	7.7071	8.4429	5.7683	9.2081	6.0205	7.5994	6.075	12.0142	12.9361	10.7776	9.3225	14.797	13.7075	10.2185	15.0766	8.641	5.5469	16.9081		0.206895	10.0964
4.2631	6.7155	8.3372	9.8324	8.0622	3.7436	6.618	8.5039	3.6784	8.8827	12.2039	12.7793	10.291	13.3297	9.3311	14.7673	13.7386	6.2328	8.6292	7.9474	7.818		0.213795	9.07211
4.4006	7.3723	11.6077	5.3689	6.6959	11.3046	6.7606	5.2704	6.0189	12.5292	13.6445	14.2325	13.9538	10.3145	4.9276	13.0139	13.8969	11.7234	5.0713	9.035	5.9655		0.220691	9.43537
4.5381	5.8748	8.6127	5.438	5.9678	10.1893	8.4344	7.9372	4.8962	3.2701	19.6676	16.228	11.6895	8.2219	7.2689	8.197	13.0653	12.3273	8.2368	6.3042	9.8744		0.227587	9.08507
4.6756	5.8415	9.5546	4.1632	8.0807	4.7964	2.782	8.0631	5.9686	8.8681	16.9168	13.7453	10.0297	9.8883	6.3288	15.3025	9.5534	13.3976	9.7365	7.4562	9.8414		0.234482	9.01574
4.8131	6.386	9.3171	7.7041	9.0043	4.4903	6.0826	5.4828	4.4888	8.322	11.667	17.1506	11.3547	9.3276	11.7895	14.1933	10.9178	7.6945	8.0318	12.385	7.6276		0.241378	9.17087
4.9507	8.0197	9.6601	5.8777	7.5121	9.1763	6.8313	4.1528	8.2441	6.5385	11.8678	14.6289	15.7748	8.7638	3.9906	8.2099	9.9797	9.4601	8.7655	12.526	9.9859		0.248279	8.99828
5.0882	7.331	4.1962	3.9874	7.1301	4.718	3.7609	6.5863	5.0503	6.4177	4.2643	3.7887	8.7624	9.9145	7.4466	10.8007	12.4233	9.0487	18.167	12.9841	5.1915		0.255174	7.59849
5.2257	7.3866	5.9708	1.6745	7.8648	7.5052	5.9197	4.8617	3.4183	9.9382	11.3295	4.4473	7.8146	4.5882	8.7097	11.6014	14.281	7.4765	14.1926	11.4262	4.8225		0.26207	7.76146
5.3632	7.809	10.3398	5.3962	13.6776	7.1942	6.1698	3.1381	3.3065	7.2612	7.6655	11.5925	9.2878	7.5245	9.4405	14.7672	10.481	4.7451	11.5673	8.5876	5.6429		0.268966	8.27971
5.5007	7.8996	3.2749	3.9506	5.9728	6.5608	4.8059	1.9629	4.2443	10.7854	9.567	9.6782	9.5553	6.0502	6.3948	8.823	5.686	12.7033	9.3149	11.6735	7.8067		0.275861	7.33551
5.6382	4.3271	7.2247	4.8368	8.212	4.9497	3.778	6.4165	6.9572	6.2148	7.7538	8.8859	3.8764	7.4255	8.1668	11.2633	2.4097	7.9504	18.3248	8.5964	9.0816		0.282757	7.33257
5.7758	5.6922	6.4888	5.6452	3.5062	5.2071	5.3823	3.7043	6.741	9.0023	6.0352	8.7905	9.649	9.8353	2.0296	10.9329	14.0023	10.9316	12.1569	12.8525	10.4735		0.289658	7.95294
5.9133	3.3038	5.6893	5.5948	5.2437	8.5701	2.9176	6.1553	5.3806	9.1185	5.0998	10.3913	5.9764	5.5591	4.0196	8.0605	9.9581	15.3565	12.835	7.4402	11.6347		0.296553	7.41525
6.0508	6.4214	5.6548	7.9074	6.6116	6.71	3.8482	8.4377	6.9007	12.5043	7.6079	7.5901	7.1562	4.2217	4.3793	15.6236	8.5833	7.8082	13.0225	6.8398	10.1679		0.303449	7.89983
6.1883	4.6432	3.1524	7.5875	7.358	6.0095	7.5042	7.1592	6.968	7.7509	6.9043	9.6196	6.9322	8.1166	4.9761	13.6118	6.0897	4.1927	13.3255	11.0935	7.5137		0.310344	7.52543
6.3258	6.2119	1.2758	4.9742	6.8371	5.4243	13.0298	3.265	4.2571	7.6805	7.0849	7.7931	9.7299	6.9567	3.7341	10.1514	8.7547	9.921	15.3861	9.5138	9.0717		0.31724	7.55265
6.4634	7.2264	6.1289	6.121	5.7314	7.2351	6.017	7.6564	6.6817	3.4551	7.1643	8.6483	10.7502	7.8034	4.2145	8.7893	8.4532	8.2735	14.7504	9.3279	4.877		0.324141	7.46525
6.6009	9.424	2.737	4.2038	3.6996	8.4633	7.214	4.472	4.4937	5.5519	11.2233	3.688	8.0277	13.1313	3.837	11.9969	12.5747	10.5421	11.8028	7.7809	5.2151		0.331036	7.50395
6.7384	11.5223	8.9276	3.8349	5.6045	6.4622	4.7541	2.7438	4.2092	2.4425	3.7773	8.119	8.4549	11.0387	5.978	11.1803	11.0378	7.0246	8.8311	10.6314	5.9483		0.337932	7.12613
6.8759	6.1735	3.7068	7.4762	6.6163	7.4907	5.5146	5.619	5.7829	5.2932	3.3378	7.4069	6.2244	6.8977	8.4236	10.497	6.1562	4.6262	5.9199	7.1653	6.6956		0.344828	6.35119
7.0134	7.0639	4.1949	2.3762	3.4364	6.2544	9.2994	8.4059	8.3301	5.6816	5.5454	11.1767	1.9064	6.8348	6.3591	10.2142	7.742	6.2149	11.1616	7.257	5.9093		0.351723	6.76821
7.1509	5.0772	2.9277	2.5805	2.5125	10.9366	7.91	4.1226	1.1009	3.6085	6.1434	7.7551	3.9514	3.4332	3.0802	11.0979	8.6399	7.2214	11.3965	9.2064	5.7999		0.358619	5.92509
7.2885	6.3663	4.5832	7.2656	5.856	17.2429	8.3329	5.5792	3.3546	3.2647	7.4257	6.5844	9.383	5.0836	7.1351	11.0586	7.4608	8.7549	5.6137	5.2109	4.4069		0.36552	6.99815
7.426	7.2666	4.7638	2.6683	7.0219	12.1484	11.4944	4.4167	5.5597	1.3077	5.3868	11.9434	3.5778	5.2615	5.5815	5.0908	11.7757	9.2622	8.4997	12.4109	6.4351		0.372415	7.09365
7.5635	9.868	3.8068	3.6962	3.639	16.9366	4.3543	2.2356	4.1358	4.7422	5.0087	11.1593	6.9689	7.9568	5.6022	7.1384	12.4628	9.4892	11.3578	5.6105	4.6612		0.379311	7.04152
7.701	6.8881	4.037	3.7728	4.067	11.9618	11.9422	3.2953	1.3841	2.5332	7.7105	9.9397	6.5895	6.9205	4.8746	5.6082	9.8547	11.9954	9.7353	7.3198	4.3108		0.386207	6.73703
7.8385	6.1402	4.3348	4.3019	4.5659	10.7892	7.1815	2.9506	4.2206	4.4887	6.3966	4.1966	5.3273	6.0949	5.9762	5.078	8.0731	9.0236	3.0418	9.3533	5.3029		0.393102	5.84188
7.9761	6.2191	2.4196	4.7316	2.9567	6.214	6.5168	2.9934	2.8944	2.9869	5.0104	5.8107	3.9361	5.7892	5.0988	6.1748	6.3034	15.299	9.5192	9.4596	5.8627		0.400003	5.80982
8.1136	8.3937	3.7645	5.2403	4.7183	11.3361	9.9555	5.7354	3.8061	3.0742	3.1314	3.7188	2.6017	7.1164	8.8347	5.8616	6.7946	9.6059	10.4211	5.747	5.0324		0.406899	6.24448
8.2511	3.8005	2.9338	8.3285	2.4694	6.9472	11.6247	3.7235	3.5313	4.9313	3.2611	5.835	4.0557	3.6916	6.3059	4.1362	11.3686	7.1474	11.8218	5.5231	1.9216		0.413794	5.66791
8.3886	3.7622	3.4654	3.5853	1.5213	9.6561	9.7544	2.7303	6.7873	2.1221	6.6007	6.8631	6.0183	6.9963	7.072	7.2564	7.6644	5.9118	13.6755	7.884	3.0066		0.42069	6.11668
8.5261	4.462	5.1633	5.1235	3.963	6.4371	8.8132	4.5685	4.4854	7.9112	6.1043	6.1697	3.4865	7.784	4.7616	6.2338	7.3314	1.491	12.0763	5.3097	2.1363		0.427586	5.69059
8.6636	3.3997	1.9119	3.2089	6.088	4.6451	5.153	2.7261	2.6904	4.7903	5.2633	6.321	8.4056	5.3453	5.1437	6.1347	9.9187	8.1693	10.4965	8.2401	5.5113		0.434481	5.67814
8.8012	6.0478	3.1957	6.8106	7.6049	5.0041	4.6716	1.6285	5.449	2.5064	3.434	3.1089	8.0174	6.0267	6.3099	4.5956	8.7466	8.0941	12.1877	4.9222	2.9964		0.441382	5.56791
8.9387	9.6574	3.3163	4.5666	5.534	4.7458	3.4862	4.8458	1.3284	6.6685	11.3774	8.9933	5.8089	7.1962	5.5492	6.8522	5.952	7.2967	13.6208	7.4259	3.1782		0.448278	6.36999
9.0762	3.6606	4.9227	2.6462	3.1383	3.1323	7.4776	5.4114	4.3251	4.9255	8.8726	6.3802	2.1609	6.5899	10.8761	3.8293	7.4018	13.1542	12.1681	4.3428	6.6727		0.455173	6.10441
9.2137	5.8097	3.4562	0.3416	2.1377	5.2306	2.4761	7.0714	4.3921	5.5682	7.2215	6.4126	3.9929	6.2839	6.3473	1.4514	8.5923	7.5283	9.2439	5.5167	4.0764		0.462069	5.15754
9.3512	5.4664	3.4895	1.6316	5.9113	4.7951	1.8757	7.5536	4.0958	5.1545	5.7693	12.2499	4.9223	4.1631	6.5354	4.8047	3.667	9.1762	7.5245	4.6993	4.2593		0.468965	5.38722
9.4888	3.573	5.1224	0.4031	6.1716	9.5801	4.4265	6.3309	6.6021	11.4897	7.5282	9.6247	3.8821	8.8174	7.8225	4.4183	7.022	10.6144	10.98	8.3168	2.5142		0.475865	6.762
9.6263	4.868	0.4734	4.4194	7.2678	9.1322	3.7039	5.4803	6.1594	3.2873	4.654	8.8217	4.7035	10.0013	5.4875	10.0006	6.9191	12.9322	9.749	5.1107	2.0413		0.482761	6.26063
9.7638	0.705	3.2719	4.9135	10.0399	9.9572	3.086	4.1846	4.6199	6.725	7.0003	7.6658	5.2595	4.438	6.7435	6.1846	8.3186	7.7123	9.1726	5.4484	1.7164		0.489657	5.85815
9.9013	2.8638	3.4185	2.8075	6.4031	7.4018	4.3188	3.9358	4.3543	1.7095	4.1544	12.6219	7.0296	7.5823	5.3645	9.1305	9.3142	10.2129	10.3923	6.3043	4.5671		0.496552	6.19435
10.0388	3.6948	3.2746	2.3321	4.227	7.4829	2.6016	4.5143	3.7189	6.3199	5.7159	3.1844	7.1298	5.6868	6.4205	7.7967	8.6941	9.5159	13.9467	8.3048	0.8739		0.503448	5.77178
10.1763	2.9172	2.5564	3.3037	3.0042	9.762	3.1116	4.8057	4.3572	7.0552	6.7782	6.5785	4.5353	7.2008	3.1485	5.5266	11.8334	8.8209	5.6498	4.5398	1.1519		0.510343	5.33184
10.3139	1.2668	1.8696	4.1747	4.8429	6.2545	2.8732	4.165	1.669	2.1837	4.8419	5.7708	7.4764	2.5738	4.2259	7.7569	7.9407	6.9559	5.5497	3.8588	2.3817		0.517244	4.43159
10.4514	7.1081	5.4071	2.3684	4.4575	5.6415	5.0975	4.7673	2.2448	4.5425	7.4726	3.6356	3.22	4.4088	3.3592	3.6219	17.689	9.0124	6.0018	7.646	2.4081		0.52414	5.50551
10.5889	1.6501	5.6134	5.039	4.727	6.869	10.0808	6.247	4.3556	5.8378	6.809	4.8374	5.1709	3.578	1.0315	6.46	11.1414	8.705	7.6989	4.2987	3.5435		0.531035	5.6847
10.7264	1.3339	1.2744	2.2812	5.1874	3.3121	4.515	3.1933	4.1719	3.6872	7.1727	4.6462	6.445	5.5015	4.6606	10.0174	6.4453	9.6999	12.2222	4.7237	0.4874		0.537931	5.04891
10.8639	5.857	2.4889	1.1209	4.9826	7.1678	3.3913	3.4548	0.1903	2.1479	10.3394	3.8711	3.1399	3.3672	4.0293	6.3733	4.8835	5.2314	15.6643	6.4034	0.7943		0.544827	4.74493
11.0015	2.7007	0.7874	3.5265	4.5579	5.4167	5.8949	1.125	1.1388	3.8915	7.2814	4.2251	5.0803	5.0973	3.7271	7.1199	9.8318	6.2971	14.5302	5.0367	2.3756		0.551727	4.9821
11.139	2.8892	1.3295	3.0632	2.9539	3.0673	4.4306	4.9691	2.0032	1.9227	6.7929	6.4255	7.0474	4.7646	4.2506	10.9021	4.2635	5.3282	10.1067	5.9465	2.9959		0.558623	4.77263
11.2765	6.2051	2.9216	2.3683	3.4972	1.7271	9.476	3.8428	4.4231	3.0415	7.9405	5.3079	6.3166	4.8844	4.2293	11.9251	4.1858	7.4194	8.1344	5.8104	1.7293		0.565519	5.26929
11.414	4.0429	4.831	4.4103	4.2575	2.9572	5.8955	5.277	3.192	3.5491	4.6659	4.1432	3.9026	4.172	4.825	9.7486	3.9594	11.313	11.2024	6.2124	5.1543		0.572414	5.38557
11.5515	3.1906	1.9779	2.986	3.6403	3.3355	4.4539	6.4878	1.247	4.9691	3.4908	5.493	4.6541	11.0097	3.1142	6.8407	0.8117	5.6022	13.6657	4.4051	0.8631		0.57931	4.61192
11.689	8.9304	3.8407	3.84	2.9643	8.5193	5.6689	5.9571	3.3863	3.1425	6.9103	3.5969	3.9547	4.6234	6.7872	4.4744	3.7029	8.309	12.3519	6.9262	1.147		0.586206	5.45167
11.8266	2.8754	3.7551	5.801	5.9874	5.6837	2.5639	9.3222	2.4543	5.2869	1.0438	3.5763	2.6886	4.5904	5.5144	2.8707	4.8641	3.8546	13.479	11.5399	0.7534		0.593106	4.92525
11.9641	2.662	2.8358	6.0463	9.17	2.5867	4.6458	3.9079	2.6242	9.0788	5.2477	2.9799	3.1885	5.6479	3.5182	7.7678	4.1068	5.7804	10.3751	5.9356	2.6415		0.600002	5.03734
12.1016	5.256	3.4374	2.1417	6.5915	6.0451	3.7668	2.3409	5.8088	4.0354	3.9343	2.7485	4.3075	7.1176	4.594	6.7649	4.8088	12.6269	6.6323	6.6582	2.0081		0.606898	5.08123
12.2391	2.3218	2.9264	0.4606	5.6293	4.4022	5.0891	5.5348	4.136	3.8585	1.0207	7.072	4.0055	5.9585	3.8074	3.2225	3.9003	9.2124	10.3166	6.3683	3.7904		0.613793	4.65167
12.3766	3.2408	3.0815	0.9531	4.0813	5.0521	4.1024	6.4919	4.6688	2.6066	3.0011	5.0751	2.8882	5.3632	2.7646	3.9808	2.5169	4.5879	4.8587	5.5165	1.2699		0.620689	3.80507
12.5142	3.8066	2.7111	4.4964	2.9238	5.0201	3.503	6.1076	3.5907	4.4399	4.3777	1.9965	3.8931	4.7294	1.0631	4.4264	2.1611	6.491	8.5233	5.4522	0.8723		0.62759	4.02926
12.6517	4.4941	2.7206	5.4255	4.3734	8.1313	7.3969	5.4304	1.4197	3.0414	3.5108	1.636	3.2311	4.1119	2.874	8.232	4.7958	10.9762	16.8131	7.587	2.9923		0.634485	5.45968
12.7892	3.4829	2.9547	3.2877	8.7042	7.4796	4.3759	4.2785	2.9394	3.7543	2.6918	4.3336	5.4911	5.7313	9.0467	7.963	5.7543	4.1191	9.8992	5.4274	1.8881		0.641381	5.18014
12.9267	5.0642	1.2686	1.7084	5.5393	1.6472	4.4179	2.3047	1.2632	1.7784	4.9383	4.327	3.3076	2.328	4.7053	6.5812	3.5906	5.4394	7.8657	7.6462	3.0816		0.648277	3.94014
13.0642	2.8942	1.6031	3.3255	4.4667	2.4066	2.9563	5.0307	3.9172	6.8294	5.0102	2.3594	4.7457	4.3156	4.9294	7.5336	6.2033	6.5022	5.5479	3.2727	3.7087		0.655172	4.37792
13.2017	2.7051	1.3069	2.3316	4.4091	5.5294	4.7989	0.8541	0.9184	3.5416	3.7477	2.0115	3.727	2.2414	4.4051	5.7977	5.4165	9.547	6.4397	3.3906	6.3168		0.662068	3.9718
13.3393	1.5573	1.8276	2.5398	2.5686	3.9028	3.3004	5.9331	5.5611	3.9825	4.8214	4.392	6.7822	4.7347	7.0368	3.8055	4.6015	4.6031	2.8865	4.4038	3.8919		0.668969	4.15663
13.4768	4.7372	2.4563	2.6318	1.8268	5.1763	4.7569	6.0956	4.1285	6.6599	2.0669	6.6548	4.5408	3.8597	5.9117	11.6873	4.4428	6.1434	5.6709	8.5667	4.8746		0.675864	5.14444
13.6143	2.5138	1.4207	5.1402	6.845	2.7819	1.6867	5.7763	0.9153	3.6838	7.6927	4.0071	7.1489	3.2807	2.4238	6.6367	6.3738	4.1526	6.1902	4.5243	2.524		0.68276	4.28592
13.7518	2.0086	4.1414	4.3199	6.2918	0.6924	2.6925	7.9455	2.3901	5.9498	10.6604	7.9569	7.4135	2.6123	5.5031	8.7791	5.3031	3.5721	6.2348	1.8737	5.3467		0.689656	5.08438
13.8893	3.9875	5.3621	2.2496	4.0386	1.8435	4.3167	4.7606	2.8174	5.163	10.0884	5.9205	8.0992	3.034	3.3418	2.8466	6.2088	11.9937	1.8766	3.043	4.2484		0.696551	4.762
14.0269	3.23	5.0549	2.7432	6.0047	2.7531	2.3589	2.2341	4.1714	3.2435	3.1096	5.2458	3.3296	4.1952	1.7775	7.0886	3.3435	6.1333	4.9101	6.8134	2.6537		0.703452	4.01971
14.1644	1.3328	3.8391	0.526	3.2867	5.2534	1.1994	1.8883	2.8569	3.8761	7.7805	3.8792	4.6878	2.3995	1.635	9.3728	6.1025	4.6578	8.6659	5.777	2.3123		0.710347	4.06645
14.3019	2.3618	3.256	1.6634	6.4173	3.2213	2.7727	5.2656	1.0005	3.1701	3.7258	1.7482	4.535	3.2521	0.9664	10.3932	3.891	4.9431	4.1393	4.6274	3.2758		0.717243	3.7313
14.4394	2.7269	3.9647	3.5639	3.1257	2.4683	4.8243	4.2684	3.2466	4.6979	4.6184	3.8928	8.9831	1.3239	5.0506	6.5107	4.9856	3.9079	3.0014	5.4462	4.3682		0.724139	4.24878
14.5769	9.552	2.0988	3.3643	5.6361	3.3291	1.8193	1.445	2.264	3.7918	6.473	0.4453	6.992	6.8776	1.3754	5.0774	3.849	4.9971	8.5423	4.0231	1.1962		0.731034	4.15744
14.7144	5.6766	1.4074	1.3326	4.6882	3.7558	1.9608	3.0706	5.4116	4.2965	8.2879	2.9971	6.8988	7.8084	5.0471	3.3563	6.8165	7.2938	8.4223	2.4687	5.368		0.73793	4.81825
14.852	6.8229	5.0783	2.8498	4.6012	2.2057	1.6748	0.9425	1.7232	5.6248	4.7637	2.2327	12.1512	7.3634	4.0491	5.2451	1.6429	5.6966	4.5475	2.7603	6.3087		0.744831	4.41422
14.9895	5.4979	6.2354	7.9682	3.7008	3.1193	5.5761	2.21	2.3937	4.9229	6.2024	3.1779	9.2786	2.4801	5.3695	3.4172	6.6175	5.7876	3.1935	4.346	3.7258		0.751726	4.76102
15.127	6.4068	1.8142	6.7716	3.424	2.9244	2.8197	1.3007	2.0092	4.5884	6.5545	3.3623	10.1063	4.2264	6.0027	1.4785	10.0102	6.096	7.8287	7.3321	4.2672		0.758622	4.96619
15.2645	2.9422	1.0083	5.1183	1.1448	3.1305	4.9685	5.2924	2.4999	6.971	4.957	2.9166	10.5283	3.6406	2.533	4.8447	4.1354	3.2859	9.4111	3.2621	3.2515		0.765518	4.29211
15.402	3.7448	1.4483	4.6773	3.215	7.9149	4.8034	5.1461	0.7192	7.9665	5.8157	4.8131	9.171	2.3953	1.3712	2.4317	3.7998	9.0337	9.2314	4.4378	6.7334		0.772413	4.94348
15.5396	4.1252	0.8128	4.0492	2.3103	3.8564	2.8361	3.6817	2.3146	7.7964	4.3667	4.4922	2.9943	3.2236	2.2332	5.5162	4.7332	4.6539	7.9071	7.3033	3.8433		0.779314	4.15249
15.6771	1.4585	0.6293	4.4739	3.6797	2.2454	1.6979	4.0137	5.1476	6.9882	7.5032	4.4433	3.9143	2.233	4.8637	3.4688	6.9246	5.2954	10.8631	3.9147	4.6541		0.78621	4.42062
15.8146	8.9411	1.2231	5.3752	2.3704	1.3369	3.5004	3.3284	1.0708	4.1798	7.5389	5.9741	6.5052	3.4705	3.1221	3.567	12.3997	10.8637	12.8892	3.4551	3.287		0.793105	5.21993
15.9521	9.1304	5.1279	4.4109	2.0852	0.9375	3.1522	4.5922	2.2283	1.7036	6.3884	2.9026	8.9412	4.5136	1.481	3.878	7.9591	2.6873	8.0725	4.0276	2.8596		0.800001	4.35396
16.0896	6.2207	8.6801	5.9888	1.6207	3.8152	0.3077	4.7874	2.9358	7.1796	4.9437	5.184	4.4221	4.924	4.3085	5.7069	4.0628	5.4421	6.5938	3.7119	5.0322		0.806897	4.7934
16.2271	4.2685	3.2302	5.1082	1.0452	3.8069	1.7522	9.6255	0.7421	8.2011	7.2798	2.1942	4.7414	6.0936	2.2841	8.3034	6.2342	5.9675	8.977	4.1175	2.0555		0.813792	4.8014
16.3647	2.2788	2.2158	3.3753	5.1989	0.5643	2.4936	3.6862	3.0227	5.0273	4.442	6.6394	4.9976	1.9526	4.736	3.897	4.3754	3.8702	12.6849	5.8516	4.7398		0.820693	4.30247
16.5022	3.5271	4.2906	1.3625	2.9135	6.1092	3.7381	5.9446	4.1378	6.2135	0.5548	7.597	8.2762	3.4046	4.0994	1.0471	4.0523	3.647	6.1105	3.304	3.2421		0.827589	4.1786
16.6397	2.1317	3.2953	6.5386	5.1417	1.5194	8.6089	1.8705	2.5526	4.8789	1.8904	6.6221	4.0273	4.2366	4.0627	5.0486	5.7454	7.9532	5.94	2.7431	2.3638		0.834484	4.35854
16.7772	1.8989	2.724	3.4614	5.4698	1.9433	5.2689	4.5096	4.2448	5.8705	6.7138	4.776	3.4076	8.3719	2.9275	1.079	9.004	3.2191	6.4637	2.6316	4.243		0.84138	4.41142
16.9147	2.6647	4.2435	3.4504	5.1559	1.1431	5.4404	2.9097	5.758	5.9651	3.7549	2.1793	3.3788	8.5048	5.8818	1.9813	4.7452	7.605	4.9583	2.314	2.6446		0.848276	4.23394
17.0522	4.4839	3.3886	4.8931	1.498	0.3794	5.1157	5.5814	2.0143	2.0056	5.4914	3.3584	3.1372	9.9713	3.3485	2.8651	5.2089	8.7629	7.2163	4.5293	2.9074		0.855171	4.30783
17.1898	5.3763	4.4161	4.21	2.8847	5.3607	4.6541	0.8587	2.9966	4.5999	1.8649	1.7536	1.1528	10.9431	7.9551	4.7984	5.2982	6.7578	5.8261	4.5754	5.0872		0.862072	4.56848
17.3273	5.351	4.4278	1.6148	2.7057	5.4703	1.376	4.2262	2.7425	5.7497	2.2045	2.6085	3.6639	11.5253	3.5151	2.0687	3.5964	7.8048	7.1465	3.68	3.3831		0.868968	4.24304
17.4648	6.6089	2.9162	0.9053	4.9488	2.1124	1.258	1.4033	1.6615	4.7771	2.4055	3.6507	5.7465	11.6446	6.4353	2.9527	3.721	4.99	12.654	3.7903	2.8442		0.875863	4.37131
17.6023	6.3316	2.6655	4.3415	1.5588	0.7223	1.1628	2.4435	1.7988	4.2038	3.7266	3.0161	2.6636	5.3627	6.0625	3.2761	4.8758	2.375	8.9108	6.3509	7.7212		0.882759	3.97849
17.7398	2.1601	1.8855	2.9469	3.7458	1.2335	2.4691	2.1887	1.9398	7.3537	1.1197	7.4964	3.9745	3.369	5.4328	3.9745	7.8718	3.3046	5.8943	4.2837	3.9622		0.889655	3.83033
17.8774	2.1974	0.8079	0.4399	2.2138	2.4307	2.3122	1.4489	1.8903	2.6065	5.4786	4.7108	4.1152	5.9334	2.9868	2.6515	4.7186	4.0168	3.8283	5.5693	3.7646		0.896555	3.20607
18.0149	1.0281	3.9304	4.6089	2.4748	0.238	1.2131	1.1471	2.5961	3.5014	4.5742	6.4516	1.2843	7.4026	7.4545	2.8531	7.4707	2.894	2.5492	3.5597	2.7206		0.903451	3.49762
18.1524	0.0618	1.416	2.4242	4.6291	1.3268	0.2045	1.0624	1.2139	6.2567	3.3481	4.399	2.1564	5.4812	9.0608	6.8845	6.554	8.412	4.5542	3.3936	3.2584		0.910346	3.80488
18.2899	3.1129	2.8295	1.8748	1.0173	2.4097	2.5109	0.1006	1.068	2.0011	3.9498	1.6973	1.9963	3.7742	5.7595	1.1527	10.5203	6.5986	3.6005	2.9905	1.8361		0.917242	3.04003
18.4274	3.4858	2.8223	1.2236	0.0171	3.2364	4.4798	1.9807	3.6548	3.442	8.6285	2.1174	2.0013	2.4382	7.2736	2.8199	7.8455	5.7222	5.5721	6.7049	2.9834		0.924138	3.92248
18.565	2.5865	0.5527	2.2643	1.302	2.9513	1.6168	0.0321	0.387	5.348	2.8672	1.4746	0.7802	2.5324	3.9881	5.2442	6.6328	4.4229	6.6638	4.5364	6.0173		0.931038	3.11003
18.7025	1.5148	4.7586	2.587	1.3114	0.9375	0.1004	0.2191	1.2508	3.0089	7.1554	1.1343	1.6056	2.6077	2.4948	6.5428	6.3012	3.5661	5.5012	4.4475	3.9243		0.937934	3.04847
18.84	3.9683	0.5975	1.6544	3.606	0.7517	1.7916	1.6497	0.2962	1.1874	5.3379	0.6828	1.5436	1.4279	2.1988	5.0187	3.8342	2.4902	0.7421	4.1971	5.3189		0.94483	2.41475
18.9775	4.5298	3.9413	1.7211	3.1451	1.0861	1.8091	0.11	0.0401	2.4912	1.6398	2.3669	0.459	1.3751	2.068	2.9826	7.6635	3.5998	4.8549	4.2536	5.4995		0.951725	2.78182
19.115	1.3896	2.4567	3.0602	2.3727	2.1865	3.069	1.1202	0.8153	0.5067	1.567	2.9523	3.4353	0.0765	1.3132	3.8142	1.8661	3.6109	9.162	0.6181	4.0196		0.958621	2.4706
19.2525	2.332	2.0827	3.1477	3.5137	1.2882	0.9305	2.484	2.5793	4.8058	0.6971	0.906	1.9379	0	0.3604	1.6748	2.1442	4.416	4.84	2.8661	5.5237		0.965517	2.4265
19.3901	1.5397	3.1321	2.1432	0.7061	1.8662	1.2553	1.8241	2.3251	0.3109	0.3366	1.03e-05	1.4133	0.3814	0.0241	2.5045	3.0529	3.5085	5.2706	7.0348	6.1442		0.972417	2.23868
19.5276	0.8329	4.4268	2.888	1.9883	0.9434	0.0324	0.0292	0.1878	2.0731	1.1046	0.0187	0.9842	0.8264	0.0019	0.5727	1.8812	2.4293	4.5844	3.083	9.9746		0.979313	1.94315
19.6651	1.4676	1.9282	5.5913	1.371	1.3039	0.4886	0.0024	1.3687	5.1549	0.9191	0.7591	0.0546	0.6865	0.7604	1.5078	1.0429	4.1191	4.1783	1.4437	3.2082		0.986209	1.86781
19.8026	1.1717	2.4627	2.2	0.0469	0.3797	2.7346	0.6654	0.5665	4.4771	0.6621	1.1943	1.0156	0.5109	0.5069	0.9933	1.146	1.7154	0.8098	2.989	3.5663		0.993104	1.49071
19.9401	0.6364	2.5703	5.0817	2.5217	0.8071	0.8445	0.0092	0.5176	2.4883	0.3546	0.0778	0	1.7539	2.214	1.7309	0.7004	1.515	1.8513	2.6464	2.4951		1	1.54081

## Sheet: Image12
X0	Y0	Y1	Y2	Y3	Y4	Y5	Y6	Y7	Y8	Y9	Y10	Y11	Y12	Y13	Y14	Y15	Y16	Y17	Y18	Y19	Y20	Y21	Y22		Apical-Basal	Avg intensity
0	5.3333	4.4444	3.5	5.77778	3	3.6667	3.6111	3.1667	1.6667	4.8889	3.2222	1.7222	6.0556	4	5	10.3889	6.6667	6.7222	3.7222	5.0556	2.8889	2.2778	3.0556		0	4.34059
0.1375	5.8889	3.6667	3.5556	4.72222	5.2222	4.1111	1.1667	5.1111	5.1111	3	3.7778	8.2778	4.5556	5.9444	6.2778	10.2778	5.2778	12.6111	2.8333	3.0556	1.6667	0.2778	1.3333		0.0071933	4.68358
0.275	5.3333	7.9444	4.2778	4.22222	4.6667	2.6111	1.9444	1.9444	2.5	4.1111	5	5.7778	5.5	4.3889	8.9444	5.2222	1.9444	3.8889	2	2.8889	1.4444	2.8333	1.3889		0.0143866	3.94685
0.4126	6.9444	5.7778	3.5	2.44444	3.8889	2.7222	3.0556	2.4444	3.7222	2.4444	5.1667	5.3889	9.2778	5.3333	4.0556	12.6111	4.8889	4.6667	5.3333	3.5556	4.0556	2.7222	1.3889		0.0215851	4.58213
0.5501	4.1667	7.3333	2.1111	2.5	2.6667	5.3889	3.3889	3.3333	5.4444	2.8333	5.3333	2.5556	5.2222	3.8889	6	7.2222	6.3333	5.3333	3.6667	3.5	3.3333	2.8333	1.4444		0.0287784	4.16666
0.6876	4	2.1667	0.5	2.16667	1.1111	3.6111	3.8889	8.7222	6.3889	3.7222	3.9444	9.3333	6	3.9444	7.3889	6.7222	7.6667	9.1667	2.5556	4.7222	2.2778	5.0556	1.7222		0.0359717	4.64251
0.8251	8.0556	5.3333	2.0556	3	3.7778	3.6667	0.1667	5.3333	4.1111	9.7778	4.3889	6.1667	5.7222	4.6111	5.0556	8.8333	7.6111	7.5	7.1111	2.8333	5.8333	3.5556	0.9444		0.0431651	5.01933
0.9626	11.3333	5.2222	5.1667	1.38889	3.6667	5.7778	0.2778	7.1111	3.8333	5	9.4444	1.7222	3.2778	3.6111	4.7778	6.2778	4.8333	9.3889	5.1111	8.1111	4.5556	1.9444	6.0556		0.0503584	5.1256
1.1001	4	1.3889	4.3333	1.33333	5.1667	4.9444	2.7778	3.1667	7.1667	5.7778	7.0556	6.6667	4.7222	6.7222	7.1111	8.5	13	9.5	6.8333	2.2222	8.7222	3.7222	1.4444		0.0575517	5.49034
1.2377	3.3333	5.0556	6.2778	2.38889	4.3333	3.6667	4.1667	4.5	6.1667	7.7222	8.2222	3.4444	12.5556	9.1111	6.3889	10.3889	9.8333	9.1111	4.7778	4.3889	4	2.5556	7.5		0.0647502	6.08213
1.3752	7.3889	6.6667	5.3333	2.72222	8.5	4.8889	5.1667	3.3889	3.8889	3.7778	11.5556	6.1111	5.2778	5.7778	11.8333	6.2778	8.2222	3.3889	7.0556	6.4444	4.7222	8.1667	7.7778		0.0719435	6.27537
1.5127	9.8333	7.7222	6.6111	4	4.8333	5.8333	5.0556	0.2222	5.6667	8.6667	12.5	8.3333	5.3333	5.9444	7.4444	6.8889	11.1667	9.1667	4.6111	2.8889	6.3889	3.6111	8.2222		0.0791368	6.5628
1.6502	7.0556	5.9444	5	2.94444	5.0556	8.7222	7.4444	4.5	4.1111	8.0556	2.4444	7	7	10.2222	8.4444	8.6111	7.2222	9.3889	6.7778	1.8889	3.2222	3.0556	4.7222		0.0863301	6.03623
1.7877	13.0556	5.7778	9.0556	2.88889	5.6667	3.8889	10.0556	8.1111	10.3333	5.9444	6.9444	7.2222	6	11	11	6.1667	8.7778	8.4444	5.3333	1.9444	5.3889	2.3333	7.5		0.0935234	7.07971
1.9253	5.1667	8.5	7.1667	5.44444	3.0556	5.3333	6.0556	5.1667	2.8889	3.7222	4.3889	5.2778	9.1111	5.3889	8.9444	5.4444	6.8889	10.4444	5.6111	5.8333	3.2778	3.9444	3.3333		0.100722	5.66908
2.0628	11.9444	7.5556	4.1111	4.83333	4.9444	3.9444	5.7778	4.8889	3.5556	6.3333	4.0556	5.5	10.8333	12.1111	7.8333	5.8889	6.2222	11.0556	5.6111	2.8889	4.5556	1.8333	2.3333		0.107915	6.02657
2.2003	4.1667	5.9444	11.4444	8	11.7778	2.7778	6.5	0.1111	6	7.3889	7	12.8333	7.3889	8.7222	6.6111	6.7778	6.8333	5.6111	4.2222	4.5556	8.4444	6.6111	6.1111		0.115109	6.77536
2.3378	5.8889	2.6111	9.3333	3.83333	5.2778	5.8333	4.1111	5.3889	5.6111	2.8333	3.5556	9.2778	8.9444	4.1111	3.2222	2.6667	4.4444	2.5556	8.1111	4.5	2.7778	7.2222	5.9444		0.122302	5.13284
2.4753	5.2778	6.1667	7.3889	3.77778	7.3889	4.5556	5.5	5.6111	9.7222	4.9444	6.7778	5.5556	11.3333	6.1667	6.5556	5.4444	4.1111	5.5	4.7222	5.7778	4.8333	11.7778	7.8333		0.129495	6.37923
2.6128	5.2778	8.7222	5.7222	9.22222	6.3333	8.6111	4.9444	3.6111	5.8889	5.5	9.8889	9.8333	7.3889	7.7778	2.3889	5.3333	8.5556	4.5	5.3889	3.0556	8.9444	4.5556	6.6111		0.136688	6.4372
2.7504	6.6667	5.7778	7.5	4.05556	7.7778	5.6667	8.6111	6.4444	7.3333	4.6111	3.8889	6.8889	4.5	12.2222	9.5	8.4444	2	7.7222	3.3889	3.9444	5.2778	5.2222	10.8889		0.143887	6.44927
2.8879	6.9444	6.6111	6.2222	3.44444	5.8889	6	6.1667	3.2778	4.7222	12.2778	5.1667	12.6667	10.6111	6.9444	8.7778	7.3889	9	3.0556	6.5	6.1667	4.3333	4.6111	3.2778		0.15108	6.52416
3.0254	14.6111	9.2778	6.3889	5.44444	4.6111	5.2778	8.4444	5.7222	4.6111	6.9444	12.0556	7.5	9.3333	10.8889	3.6111	7.7778	3.8889	2	2.7222	6.3333	4.3333	7.5556	1.6111		0.158274	6.5628
3.1629	10.0556	3.3333	5.4444	4.22222	5.1667	5.5	1.7222	7.6111	3.9444	10.1667	3.1111	5	9.5556	4.7778	11.2222	7.6667	2.6111	6.1667	5.3889	2.5556	3.7222	6.0556	6.1667		0.165467	5.70291
3.3004	12.3333	3.7778	4.7222	2.55556	1.6667	5.7778	12.6111	6.6667	4.1667	9.5556	2.9444	10.3889	7.6111	7.3889	12.8333	3.8889	5.5	3.8333	1.7778	5.2778	1.5556	10.1667	4.5556		0.17266	6.1546
3.438	6.8889	6.5	6.6667	3.22222	3.1667	5.6111	8.7778	1.4444	6.2778	8.0556	6.1111	7	7	6.5	7.6667	7.9444	2.5556	6.1111	6.8889	3.8333	5.2222	4.8889	3.2778		0.179859	5.72223
3.5755	5.5556	9	6.6667	4.77778	9.1667	6	2.8889	9.1667	5.8889	11.3333	9.7222	11.7222	13.1667	5.6667	6.7778	7.5	3.7222	7.4444	4.7222	5.5556	3.6111	5.4444	8.4444		0.187052	7.12802
3.713	5.2778	5	1.5556	5.94444	0.6667	8.8889	6.3333	6.8889	5.1667	8.7778	7.4444	10.8889	10.1111	4.3889	6.7778	10.1111	6.5	5.1111	4.1667	7.3889	5.8889	8.2222	6.0556		0.194245	6.41547
3.8505	5.8889	6.4444	8.5556	5.16667	5.0556	7.4444	5.6111	5.3333	5.5	6.5556	5.5556	7.3889	9.2778	7.6667	6.7778	11.6667	5.9444	5.1667	10.8889	5.7778	2.9444	6.8333	3.3333		0.201439	6.55556
3.988	6.8889	3.1667	4.8889	4.88889	6.2222	3	7.7778	5.6111	9.6667	10.8889	9.2778	15	9.6111	8.4444	10.6667	4.8333	6.2222	5.3333	3.8889	7.2222	5.3889	5.3889	6.3333		0.208632	6.98309
4.1255	2.7222	6.2778	9.5556	5.38889	6.6111	4.5	8.8889	4.2222	6.5	11.5	8.7778	6.6111	10.1111	10.1111	10.0556	8.3333	6.1667	5.3889	9.1111	7.1111	5.6667	3.0556	7.3889		0.215825	7.13286
4.2631	6.5	6.8333	5.9444	2.33333	4.8333	9.0556	3.1111	10.1111	5.8333	13.4444	10.8333	8.4444	5.1111	6.5	4.5	10.5	8.3333	9.8333	6.7222	5.9444	4	8.3333	6		0.223024	7.08935
4.4006	2.5	3.0556	5.5556	3.83333	4.7778	6.7778	8.0556	8.2778	4.1667	8.1667	8.3889	8.1667	11	8.3333	8.7222	7.8889	7	10.2222	5.1667	8.6111	2.6667	7.8889	8.1111		0.230217	6.84059
4.5381	7.7778	6.1111	6.7778	5.22222	8.3889	5.2222	8.3889	8.3889	9.8333	10.1667	12.1667	9.2778	11.2222	10.2778	9.1667	9.6111	11.6111	7.5556	4.1667	9.6111	2.3889	5.1667	7.2222		0.23741	8.07489
4.6756	7.3889	8.5	7.8333	2.5	7.8333	6.9444	8.2222	9.6111	7.5556	7.3333	10.6667	4.9444	7.5	9.8889	8.9444	12.6111	10.5	9.0556	5.6667	6.5	5.4444	9.8333	7.8889		0.244604	7.96376
4.8131	8.9444	10.1111	7.4444	4.55556	7.5556	8.5	13.1667	11.7778	4.8889	10.1667	12.2778	8.8889	4.7778	11.2222	5	15.6111	11.2222	8.5556	7.4444	3.2222	6.0556	5.6111	5.7222		0.251797	8.37923
4.9507	8	4.2778	6.9444	4.66667	7.5	5.1111	11.6111	13.8333	9.0556	3.3333	8.2778	10.6111	9.5	9.6667	4.8889	10.9444	10	8.9444	5.2222	3.3889	6.8889	2.5556	5.6111		0.258996	7.42753
5.0882	7	5.1111	7.2222	3.77778	8.3333	12.7222	5.5	6.6667	7.2222	11.0556	9.8333	8.2222	4.8333	8.4444	7.7778	12.0556	5.3333	5.2222	4.5	4.4444	4.6111	6.3333	6.1111		0.266189	7.05796
5.2257	6.3333	7.1111	2.2222	5.72222	5.8889	10.4444	3.8333	16.7222	5.3889	7.1667	8.6667	11	5.0556	7.2778	2.8889	12.2778	9.3333	5.8889	4.3889	8.3333	4.5556	8.6667	4.7222		0.273382	7.12561
5.3632	6.7222	4.0556	8.6667	10.2778	5.1111	13.1111	7.8889	6.3333	9.0556	11	11.3889	10.2778	10.2222	8.5556	12.8889	15.4444	8.0556	9.4444	5.1667	4.8333	4.9444	7.7778	8.3333		0.280575	8.67633
5.5007	11	3.5556	5.6111	6.77778	6.0556	8.7778	8.0556	8.2222	6.5556	10.5	14.3889	5.3889	8.9444	8.6667	11.8889	16.6111	9.0556	11.0556	4.9444	4	6.2222	5.6667	6.6111		0.287769	8.19808
5.6382	10.1111	7.8889	3.2778	8.88889	3.1111	10.0556	15.8889	6.7778	6.9444	7.6111	6.4444	7.6111	9.2222	9.1111	15.8889	14.8889	8.5	10.8889	8.2222	3.7778	6.6111	6.6111	6		0.294962	8.44927
5.7758	16	5.6111	8.8333	8.22222	6.3889	10.7222	13	9.5	12.5556	10.4444	7.0556	9.2222	9.7778	6.4444	13.1111	10.7222	5.6667	12.5556	6.2778	6.6111	5.8889	7.5556	9.5556		0.302161	9.20532
5.9133	16.4444	3.5556	8.7222	4.77778	7.7778	15.9444	10.1667	11.8333	6.9444	18.4444	10	7.3889	10.2778	6.3889	7.9444	10.1111	11.3889	1	2.7222	7.3889	5	7.5556	3.2778		0.309354	8.48067
6.0508	8.3889	9.8333	7.5	5	3.8889	8.6667	10.1667	4.6111	5.3889	14.1667	7.9444	12.1111	9.0556	9.6667	14.1111	11.9444	9.7222	11.5556	7	12.7222	7.1667	5.5	7.3889		0.316547	8.84783
6.1883	14.1111	10.1111	5.6111	4.27778	10.2222	8.4444	19.5556	7.5	12.6667	11.5	12.8889	5.7778	5.5556	12.8889	18.5	16.1111	11.5556	10.0556	4.6111	5.8889	4.6667	10.3333	9.6111		0.323741	10.1063
6.3258	10.5	6.5556	9.6111	5.77778	9.6667	8.6111	16.2222	9.8333	11.0556	13.7778	6.4444	10.8889	14.2778	8.5	14.0556	3.9444	7.5	11.5556	9.1667	7.0556	9	8.9444	14.9444		0.330934	9.90822
6.4634	13.0556	12.8889	8.6667	2.83333	11.6667	9.0556	5.5	8.0556	11.5556	16.5556	9.7778	10.2778	4.8889	6.8889	10.7222	8.0556	9.1667	9	3.2222	7.2222	2.8889	4.1667	11.1667		0.338132	8.57731
6.6009	12.1111	9.2222	5	7	6.2778	9.0556	7.4444	6.6667	8.2222	23.5	7.2778	10.4444	12	10.5556	8.6667	15.4444	13.7778	11.5556	12.4444	8.4444	4.7222	5.0556	18.1111		0.345326	10.1304
6.7384	9	13.5	8	3.61111	12.4444	13.6667	7.3333	3.1667	10.2778	14.7222	9.6667	8.1111	15.7778	10.2222	16.2222	21.3333	13	7.1111	8.7778	4.5556	5.2222	7.2222	15.7222		0.352519	10.3768
6.8759	8.5556	7.2222	4.3889	4.55556	6.1667	11.8889	7.5	8.2778	11	11.3333	14.7778	10.2778	13.3889	9.5556	11.5	10.8889	9.1667	7.2778	5.3333	7.4444	9.8333	6.7778	15.2222		0.359712	9.23189
7.0134	14.1667	9.0556	8.6111	3.72222	6.6111	7.2222	8.3333	4.1111	11.8889	9.3889	14.1667	10.3333	12.3333	8.6667	18.6111	16.6667	11.6667	11.6111	10.2778	1.8333	8.3333	5.3333	18.6667		0.366906	10.07
7.1509	14.5	11.1111	6.3889	5.33333	5.1667	9.1111	11	4.1667	9.3889	8.6111	11.3889	10.9444	12.8889	10.3889	8.2222	13.3333	13.1667	14.2222	9.8889	7.7222	7.2222	7	9.5		0.374099	9.5942
7.2885	11.7222	7.6667	7.2778	6.38889	6.7222	12.0556	11.1111	4.9444	8.8889	9	14.7778	10.9444	16.3889	13.3889	12.2222	12.9444	7.5	10.9444	10.3889	6.7778	11.8333	5.8889	10.1667		0.381297	9.99758
7.426	1.9444	7.6111	6.5	9.05556	7.0556	10.2222	12.7778	4.8333	13.5556	11.6667	7	17.1111	7.3333	10.6667	12.5	7.3889	10.9444	9.4444	5.6667	6.1111	10.3889	9.1111	6.4444		0.388491	8.92753
7.5635	7.7222	4.2222	4.4444	7.27778	2.3333	10.5	14.4444	6.9444	11.2222	10.9444	6.2222	8.4444	22.2222	6.6667	13.3333	10.7222	16.4444	7.5556	5.2222	6	9.1111	6.9444	8.2778		0.395684	9.00964
7.701	7.2778	4.0556	7.8333	4.83333	3.7222	13.5556	9.6111	3.7778	10.0556	17.4444	8.2778	6.1667	16.8889	8.6111	10.5	11.1667	8.1111	9.9444	11.5	11.9444	10.5556	8.9444	3.3333		0.402877	9.04831
7.8385	5.2222	8.3889	4.3889	5.66667	6.0556	11.8889	7.2222	2.2778	8.0556	13.1667	6.1667	12.7778	11.6667	13.0556	13	12.5556	16	9.5	8	9.7778	7.7222	8	6.0556		0.410071	8.98311
7.9761	10.1667	6.1111	8.7778	5.66667	2	13.2778	12.1667	3.8889	6.7778	9.1667	4.7778	8.2222	11.2778	11.1667	13.0556	8.0556	10.9444	8.7778	8.1111	9.1111	4	8.5	8		0.417269	8.34784
8.1136	6	6.8889	4.3333	4.38889	2.9444	11.5556	10.1667	5	2	8.6111	3.7778	13.2222	11.2222	13.1111	10.8889	11	9.7222	7.0556	8.1667	6.1667	6.9444	3.6667	8.4444		0.424462	7.62077
8.2511	6.1667	17.4444	6.1111	3.72222	3.0556	9.2222	16.3333	4.5556	6.8333	11.1667	6.3889	12.2222	9.6667	15.9444	8	15.1111	9.3333	8.5556	7.2778	6.5	5.5556	9.8333	5.8889		0.431656	8.90821
8.3886	2.7222	8.0556	6.6667	9.22222	1.2222	6.2222	8.5	6.5	8.3889	11	3.5556	8	12.9444	10.1667	12.2778	11.2222	8.0556	11.5556	13.7222	10.6667	8	12.6111	4.1111		0.438849	8.49517
8.5261	2.3333	8.7778	7.8889	3.5	6.0556	5.3889	9.4444	2.7222	5.6667	5	7.4444	13.2222	14.2222	16.9444	12.8889	14.1667	3.8889	8.3889	9.2778	5.2222	10.5556	15.1667	3.8333		0.446042	8.34783
8.6636	2.3889	13.3889	8.5	2.44444	11.8333	3.2778	14.8333	4.2222	6.1111	10.2222	2.6111	4.5	11.7778	11.2778	13.8333	9.2222	6.3333	3.6667	8.1667	9.5	3.3333	10.1111	4.4444		0.453236	7.65217
8.8012	3.2222	10.5556	14	5.88889	5.0556	1.7778	18.6111	10.8889	5.3889	6.1667	6.8333	5.2778	10.2222	12.6111	12	10.6111	6.7778	5.3889	11.8333	5.3333	5.7222	20.1111	4.6667		0.460434	8.64976
8.9387	1.3889	4.6667	19.7222	7.83333	7.3889	5.1111	20.5	11.4444	8.3889	6.5	3.8889	5.4444	9.2778	9.8889	4.8889	9.0556	6.0556	8.9444	6.6111	4.5	3.0556	17.2222	6.3333		0.467628	8.17874
9.0762	4.8333	5.2778	24.6111	6.61111	6.8889	1.8333	32.6111	11.1111	3.3333	9.7778	5	8.0556	12	10.4444	11.1667	12	4.3333	9.1667	12.3333	6.5	5.4444	12.6667	8.8333		0.474821	9.77536
9.2137	2.5556	3.0556	48.4444	5.16667	6.6111	1.2778	38.7222	6.5	4.4444	3.3333	8.3333	10.3889	10.4444	6.1111	5.6111	6.6667	14.5	9.3889	9.9444	4.9444	4.4444	14.8889	6.0556		0.482014	10.0797
9.3512	3.8333	5.6111	57	4.44444	6.4444	4.0556	30.5	5.7778	10.8889	7.4444	4.7778	10.8889	10.5	6.5	6.8333	7.0556	8.2222	8.8333	10.7222	9.8889	4.2222	16.3333	2.1111		0.489207	10.5604
9.4888	5.8333	2.5556	53.6667	4.94444	8.2222	2	38.7778	6	3.8889	7.2222	6.2222	11.6111	11.2222	10.3333	10.7778	9.4444	10.7778	7.9444	11.0556	11.5	3.1667	18.6667	7.3333		0.496406	11.442
9.6263	2.2778	5.3889	55.2222	5.33333	9.1111	1.7778	52.2222	8.5	7.3889	6.6667	8.2222	10.7222	9.9444	9.8889	6.2778	4.5556	9.9444	6.7222	9.0556	6.5	7.9444	12.4444	8.3889		0.503599	11.5
9.7638	3.1111	2.6667	60.5556	2.88889	9.3889	4.5	32.4444	3.5	5.5556	8	7.9444	14.3889	8.6667	9.2222	6.3333	5.3333	8.2778	6.2222	8.9444	4.7222	5.0556	6.8889	5.2778		0.510793	9.99517
9.9013	3.6111	2.2222	48.3333	5.66667	8.7778	0.8889	28.8889	7.1111	4.8889	5.9444	4.0556	3.1667	9.2778	6.7222	6.8889	7.6111	9.3333	5.5	7.3333	11.9444	5.2222	7.1111	6.4444		0.517986	8.99758
10.0388	4.1667	6.2778	42.2778	2.16667	5.7222	3	24.6111	7.9444	4.1667	3.1111	9.0556	11.5556	8.8889	11.2778	14.9444	7.8889	10.6111	2.8889	10.6111	6.9444	4.4444	4.8333	6.3889		0.525179	9.29469
10.1763	2.3333	2.4444	24.8333	5.72222	4.6111	1.7222	9.6667	2.8333	4.8889	8.5	2.3889	14.5556	10	8.6111	4.7222	6.0556	8.0556	5.2222	10	7.1667	4.3333	6.3889	8		0.532372	7.08937
10.3139	5.7222	4.2778	12.4444	6.94444	7.4444	4.4444	10.8889	4.4444	4.1111	7.8889	9.2222	14.1667	9.6667	6.8333	10.2778	5.8889	4.0556	6.3889	16.5556	10.0556	3.7778	7.7778	10.5556		0.539571	7.99276
10.4514	2.5556	3	7.3889	1.72222	5.1667	8	3.4444	7	5.6111	6.1111	4.1111	14.0556	15.7778	9.0556	9.3333	8.3333	5.2222	6.5556	15.3889	6.4444	4.1111	4.5556	4.0556		0.546764	6.82609
10.5889	3.2222	5.2222	8.2222	6.05556	6.0556	4.3333	8.8333	2.8889	0.9444	5.8333	5.9444	9.5	8.6111	10.7222	3.7222	9.2778	6.1667	7	17.8333	6.6111	6.5556	7.2222	6.7778		0.553958	6.85023
10.7264	5.8889	6.2778	7.2778	4.33333	3.3889	5.2778	7.2222	3.8889	7.7778	5.5	7.7222	8.7778	10.2778	9.0556	7.4444	4.0556	11.7222	5.2222	19.6111	6.1111	3.5	5.2222	3		0.561151	6.89372
10.8639	3.5556	3.3333	7	2.33333	3.2222	2.0556	3.7222	6.4444	9.6111	9.2222	4.2778	9.2222	6.7778	4.7778	7.6667	3.9444	5.5	8.2778	18.2222	4.4444	3.7778	4.1667	5.7222		0.568344	5.9686
11.0015	4.4444	3.0556	7.8889	5.5	3.6667	1.5	2.4444	5.2222	9.4444	3.7222	3.2778	9.6111	6.7222	8.1667	7.1111	4.5	5.2222	3.8889	17	5.8889	5.8889	3.2222	6.2778		0.575543	5.81159
11.139	2.6111	3.2222	2.8889	3.16667	5.0556	1.3333	6.2778	3.7778	8.3889	10.5	4.8889	11.6667	9.7778	6.2778	6.7778	7	9.7222	5.5	12.2222	5.2222	4.9444	4.6111	8.9444		0.582736	6.29469
11.2765	3.0556	8.1667	3.7222	7.94444	3.3333	1.8889	3.8333	6.4444	9.2778	7.2222	2.3889	9.7222	5.0556	3.8333	3.1667	7.5	3.3889	2.9444	17.3889	7.2222	0.8889	5.7222	7.5		0.589929	5.72222
11.414	2.1667	1.1667	4.2222	2.94444	3.8889	1.8889	4.3333	7.8333	8.5556	8	8.6111	3.6111	6.7778	3.3889	4.8889	7.1111	5.4444	7.6111	5.8333	5.7222	6.6111	3.1111	4.3333		0.597123	5.13285
11.5515	1.2222	5.4444	4.8333	4.83333	4.2222	1.8889	4.1667	4.7778	3.2222	8.1111	4.8333	8.0556	3.8889	8.5	4.2778	9.7778	4.7222	4	6.6111	4.5	2.7222	2.8333	2.8333		0.604316	4.79468
11.689	1.9444	4.8333	7	6.5	4.1111	1.3889	4.1111	3.7778	6.1111	6.0556	8.4444	8.4444	5.7222	3.6111	5.1111	4.5556	5.9444	6.1667	7	3.7778	1.2222	2.8333	5.7778		0.611509	4.97584
11.8266	4.5556	4.3889	5.1667	6.72222	5.2222	1.1667	2.1111	7.2222	4.5556	4.3333	5.8889	6.4444	4	7.5	8.0556	8.6111	4.1667	7.2222	9.3889	3.1111	2.2778	5.3889	7		0.618708	5.41305
11.9641	4.6111	2.8889	5.6111	7.55556	7.3333	0.5556	0.3889	3.7778	3.8889	5.2222	6.0556	2.2778	3.1667	8.6667	8.3889	7.4444	7.6111	4.4444	12.1111	7.8333	4.6667	2.2778	7.7222		0.625901	5.41305
12.1016	0.5556	2	6.1667	5.11111	4.5556	1.0556	3.8889	1.4444	9.5	3.5556	4.3889	5.6667	7.0556	5.0556	5.0556	3.1111	6.7222	2.5	8.5	3.9444	3.8889	2.2778	9.9444		0.633094	4.60629
12.2391	4.3333	0.4444	5.1111	2.22222	2.5	1.8889	1.7778	1.4444	6.3333	1.8889	7.0556	7.4444	5.9444	2.9444	9.1667	4.1667	8.7778	7.3889	6.8333	5.1667	6.8889	6.0556	6.4444		0.640288	4.87922
12.3766	2.1667	0.8333	5.2778	1.11111	4.6111	0	2.2222	5.4444	5.8889	5.5	5.6667	6.5556	8.4444	5.1111	5.7222	7.4444	11.2222	5.6667	4.6111	5.1667	2.6111	5.3333	12.6667		0.647481	5.18599
12.5142	3.3333	4.5556	5	4.83333	6.7778	2.5	3.1111	2.5	7.3333	8.8333	5.9444	6.1667	7	5.2222	7.4444	4.1667	8.4444	7.0556	3.5	10.5	4	3.3333	5.3889		0.65468	5.51932
12.6517	0.8333	2.6667	6.4444	4.83333	3.5556	1.4444	4.1667	4.1667	6.0556	8.3333	5.7778	7.7222	10.1111	5.4444	6.7778	4	4.2778	11.1111	4.8889	8.7778	2.5556	2.0556	6.9444		0.661873	5.34541
12.7892	0.7222	2.0556	9.7778	4.44444	4.2778	2.2222	4.5556	7.3889	3.3333	4.0556	5.2222	6.4444	6.8889	4.9444	7.1111	5	4.9444	8.7222	4.5556	3.0556	1.8889	1	5.0556		0.669066	4.68116
12.9267	2.6667	2.8889	2.1111	2.44444	4.7778	3.9444	2.7222	1.5	6.1111	3.6667	10.8333	11.6667	5	5.1111	1.6667	2.6667	6.4444	5.2778	11.1111	7.1111	1.0556	4.8889	4		0.676259	4.76812
13.0642	5.3889	3.4444	4.9444	4.61111	5.5556	4.0556	3.1667	5.6111	3.9444	3.7222	7.0556	7.6111	8.3333	3.6667	4.1111	2.9444	2.7222	5.7222	7.0556	5.7778	2.1111	4.1667	3.4444		0.683453	4.74637
13.2017	1.4444	2.8333	3.5	2.88889	2.7778	2.1667	1.2222	5.3889	11.5	5.2778	8.4444	6.1667	8.3889	10.2778	6.9444	5.2778	4.0556	6.2222	5.5556	13.6111	3.1111	2.3333	3.2222		0.690646	5.33092
13.3393	0	1.0556	4.1667	3.72222	5.8333	0.9444	4.2222	6.0556	7.3889	9.6111	5.3333	5.5556	4.5556	12.4444	10.8889	2.8889	6.1111	8.8333	4	4.4444	3.5556	3.2778	2.6111		0.697845	5.1087
13.4768	3.2222	1.0556	6.5	3	2.3889	1.2222	0.7222	6.9444	4.3889	6.2778	5.5556	6.1667	8.1667	12.8889	6.4444	3.7222	8.1667	7.3889	6.1111	11.5	5.8889	2.8333	6.4444		0.705038	5.52174
13.6143	3.6667	3.5	5	4.22222	2.1111	2.1667	3.4444	6.5	1.1667	5.8333	8.5556	11.8889	7.8889	6.9444	9.9444	5.3333	8	2.0556	0.8333	6.6667	0.3333	5.4444	8.2222		0.712231	5.20531
13.7518	5.9444	1.3333	2.2222	4.05556	5.6667	2.2222	1.2222	5.3333	8.4444	5.6667	3.7778	9.1111	8.9444	8.2778	6.3889	6.4444	7.2222	7.6111	2.6667	9.6111	4.6111	3	1.3889		0.719425	5.26811
13.8893	2.0556	0.3889	8.7222	2	7.6111	2.1667	9.3889	2.1111	3.1667	5.1111	7.3333	12.4444	3.8333	9.3889	9.5556	5.7222	9.8889	7.5556	3.5	7.7222	4.3333	2.5	5.1111		0.726618	5.72222
14.0269	5.3889	2.8889	7.8333	8.22222	2	1.4444	2.5556	2.6111	5.7778	5.1111	4.0556	10.5	8.2222	5.9444	4.6667	2.6111	2.5	5.5	5.2222	6.4444	3.9444	4.6111	8.0556		0.733816	5.04831
14.1644	3.7222	3	7.0556	2.72222	2.1111	2.2222	1.1667	4.7222	4.5	4.8333	3.9444	14.1667	9.7778	6.8889	5.7778	4.7778	7.7222	6	5.8333	5.8333	4.1111	3.3333	8.4444		0.74101	5.33333
14.3019	5.2222	3.1111	8.2778	5.05556	6.7778	1.6667	5	4.8889	5.6667	3.1667	4.1111	8.9444	16.6667	8.9444	7.0556	4.1111	6	4	4.4444	3.9444	4.3889	1.0556	8.4444		0.748203	5.69324
14.4394	1.5	2.1667	3.4444	2.72222	4.1667	1.5556	2.0556	5.0556	3.8333	2.3333	4.6111	13.6667	8.4444	5.7778	3.4444	5.7778	8.0556	6.8889	4.5556	8	3.0556	2.2778	5.6667		0.755396	4.74156
14.5769	4.1667	2.6111	4.7222	3.5	4.3889	4.2778	2.1667	6.2778	1.7222	4.3889	3.4444	7.2222	11.1111	6.7222	2.8333	1.7778	7.2778	7.1667	8.2778	8.5556	4	1.6667	4.5556		0.76259	4.9058
14.7144	6.8333	3.9444	4.6111	3.11111	1.8333	2.3333	3.6667	4.2222	5.0556	3.8889	5.8889	6.7222	9.2778	12.0556	5	2.0556	6.8889	7.8889	11.2778	8.1667	3.9444	1.4444	6.6667		0.769783	5.51208
14.852	5.8889	2.1667	2.2222	4.94444	0.9444	4	2.5556	6	3.3333	8.7778	6.3889	10.5556	8.2778	7.6111	8.6111	3.8889	7.4444	8.0556	7.4444	4.8333	5.3889	1.6667	14.0556		0.776981	5.87198
14.9895	5.5556	1.8333	4.8889	5.94444	2.6667	0.8333	0.7778	2.9444	5.5	7.9444	6.6111	8.6667	11.5556	6.8333	9.8333	6.1667	4.5	5.9444	7.6667	6.1111	4.6111	3.1111	7		0.784175	5.54348
15.127	3.7222	3.1667	8.2222	4.38889	4.2778	2.5	2.3333	6.5	6.6667	5.5	9.7222	7.1111	8.0556	5.7222	5.2222	7.7222	5.2222	5.5	9.2222	5	5.7778	1.2222	6.1667		0.791368	5.60628
15.2645	6.7222	1.1667	1.7222	4.05556	4.2778	0.4444	2.2778	3.6111	3.6111	5.2222	5.8889	10.8333	5.2778	9.4444	8.6111	4.5	8.1667	5.9444	7.6667	5.0556	3.2778	3.8333	11.6667		0.798561	5.3599
15.402	3.0556	3.3333	3.4444	6.88889	5.1667	1.7222	2.3889	2.1667	3.1111	4.5556	8.5	9.7222	10.1667	9.3333	7.1667	6.7222	7.8333	7.6111	4.9444	8.8333	6.8889	1.8889	7.1667		0.805755	5.7657
15.5396	5.9444	1.0556	3.5556	3.33333	5.1667	4.1111	7.1111	3.9444	4.7778	5	10.6111	9.5556	8.5	9.7778	7.8889	9.6667	8.0556	7.7222	7.4444	10.6111	1.5	1.1667	5.1111		0.812953	6.15701
15.6771	7.4444	1.8889	4.1667	4.11111	3.5	1.1111	5.5556	1.3333	3.7778	4.0556	3.5	6	15.8889	5.5	6.1111	5.2222	8.6667	11.3333	4.5556	10.1111	5.3889	2.5556	3.2778		0.820146	5.4372
15.8146	4.7222	2.1111	7.6667	2.5	5.2778	2.4444	3.7222	10.1111	5.2222	5.6111	6	11.4444	8.6111	6.7222	2.6667	6.5	7.2778	6.8889	8.5556	7.0556	2.0556	8.3333	2.7222		0.82734	5.83575
15.9521	4.4444	1.5556	4.1667	3.44444	5.1111	3.7222	3.3889	3.6667	8.3333	6.5	5.8889	7.7222	17.8333	6.2222	11.5	4.7778	5.7778	5.3333	7.8889	5.8889	3.5	6.6111	1.8333		0.834533	5.87439
16.0896	4	1	3.7778	5.44444	3.8889	3.2778	4.7222	3.2778	3.2222	5.6111	8.3889	11	11	8.2222	7	9.0556	5.7222	7.5	4.1667	8.3889	3.4444	7.6111	4.3333		0.841726	5.8285
16.2271	1.7222	2.8333	4.3889	2.61111	1.1111	6.5556	4.3889	6.5	6.7778	9.2222	5.2778	12.5	9.6667	5.6111	11.1111	4.5	6.1667	8.1667	6.5556	6.6111	6	0.9444	4.1667		0.84892	5.79952
16.3647	6.8333	2.3889	3.5	0.77778	2.1111	7.5556	3.5	4.6111	6.8889	4.7778	8.2222	13.3889	12.8889	8.1111	7.8889	7.2222	7.3889	10.0556	10.9444	8.4444	3.1667	2.8333	5.6111		0.856118	6.48309
16.5022	5.1111	5.5556	2.8333	1.88889	5.5	3.1111	4.3333	4.6667	5.2222	7.9444	5.2778	19.5556	13.9444	10.8333	10	8.2222	10.3333	10.5556	9	9.9444	3.2222	5.4444	3.5		0.863312	7.21738
16.6397	8.0556	2.8889	3.8889	1.38889	1.3889	5.2222	2.0556	3.0556	4.7778	7.4444	4.8889	10.8889	11.7222	5.8889	7.9444	5.3889	3.6667	5.8889	5.2222	4.6667	7.6667	6.6111	4.6667		0.870505	5.44687
16.7772	6.7222	2.5556	3	4.61111	2.6111	4.7222	1.2778	1.3889	4.4444	5.6111	7.6667	11.0556	8.6111	6.8889	8.6111	9.8889	7.8889	3.7778	6.7778	2.6667	7.1111	4.0556	2		0.877698	5.3889
16.9147	2.8333	1.6667	4.3333	3.05556	3.6111	6.7222	3.9444	1.5	4.5556	6.3889	5.6667	6.9444	6.4444	8.5	10.4444	3.3333	7.2778	11.5556	5.2222	5.2222	4.7222	4.8333	1.5		0.884891	5.22946
17.0522	3.7222	5	4.3333	2.5	2.6667	4.2222	4.2778	4.8333	5.5	6.5	7.4444	6.1111	6.0556	8.3889	10.2222	7	3.8333	7.7222	11.9444	8.5	2.5	3.6111	1.5		0.892085	5.58212
17.1898	3.8333	4	2.2778	1.66667	1.8889	4.2222	2.7778	2.7222	3.5556	4.7778	4.7778	13.8889	8.3889	11.7778	10.7778	9.7222	5.9444	5.6111	10.3333	9.7778	4.9444	2.1111	0.1667		0.899283	5.64976
17.3273	3.1111	2.4444	0.9444	3.16667	3.6667	3.4444	2.5	2.3333	1.2778	8.5	7.5	6.6111	6.7222	9.6111	9.7778	5.8889	5.1667	6.6667	4.8889	12.6111	2.5556	1.9444	1.6111		0.906477	4.91062
17.4648	4.7778	2.4444	1.9444	0	2.1111	2.5556	3.1667	1.6667	2.8889	6.1667	4.7222	15.7778	7.1667	7.7222	11.5	8.1667	8.6667	10.0556	7.0556	3.2222	7.0556	2.1667	0.7778		0.91367	5.2947
17.6023	2.5	4	2.0556	5.22222	3.3333	1.2778	2.1667	4	2.2222	2.3333	1.2222	12.2222	5.6111	6.1111	12.5556	10.2222	5.8333	11.9444	4.3333	4	3.5556	3.1111	2.3889		0.920863	4.87922
17.7398	8.9444	5.8333	1.7778	2.38889	1.6667	1.8889	2.5	0.7222	1.5	8.9444	6.7222	13.1667	11	6.5	3.8889	14.6111	12.2778	6.2778	5.2778	4	3.7778	0.7222	0.7222		0.928057	5.43961
17.8774	4.5	2.3889	1.7778	2.27778	3.3333	3.1111	3.8333	0.5556	3.6111	1.2778	8	9.3333	3.5556	8.2222	9.6667	11	10.5556	10.9444	6.8889	6.1667	2.2222	2	0.6111		0.935255	5.03623
18.0149	6.6667	2.8333	1.5556	1.83333	2.6667	0.9444	2.8333	2.5556	2.5556	1.3889	5.6111	3.2778	1.7222	5	6.2778	9.1667	8.6667	13.3889	9.7222	3.4444	0.5556	3.4444	0.7778		0.942448	4.21257
18.1524	2.7222	2	1.8333	1.44444	1.6667	3.2778	2.5556	0.5	1.8333	2	4.7222	8.5556	4.1111	6.1667	3.8889	7.8889	8.6111	8.6111	7.0556	3.1111	1.3333	0.9444	1.3333		0.949642	3.74638
18.2899	3.7222	1.2222	3	1.61111	0.0556	2.2222	0.3333	0.1667	1.8333	1.8333	4.3333	3.4444	3.8889	7.6667	5.6667	7.5	10.4444	8.6667	7.5556	2.7778	2.6111	2.1111	1.4444		0.956835	3.657
18.4274	1.1111	4.1667	2.3889	0.61111	1.3333	2.3889	3.1111	3.0556	1.4444	5.1667	2.2778	3.7778	2.7222	4.1111	9.3333	3.0556	12	6.8889	8.4444	1.9444	2.8333	0.4444	2.4444		0.964028	3.69806
18.565	3.7222	4.6111	0	2.05556	0.8889	0.3889	0	1.2222	3.6111	1.2778	2.2778	5.3889	7.2778	4.3333	6.9444	5.5556	9.4444	7.6667	2.8333	1.9444	0.5556	1.1111	1.2778		0.971227	3.2343
18.7025	1.7778	2.1667	1.6667	1.38889	2.1667	2.8889	0	0.3333	0.9444	2.3889	2.3333	4.2222	3.9444	2.4444	4.2778	4.5556	5.2778	4.8333	5.3333	2.7222	1.8333	0.6667	0.5556		0.97842	2.55314
18.84	3.3333	3.2778	2.5556	0.5	0.4444	0.6111	1.8333	2.0556	0.3333	2.9444	3.1667	3.0556	3.5556	3.5	9.2778	5.1667	9.5556	7.2778	7.2778	0.6667	2.0556	0	1.7778		0.985613	3.22707
18.9775	1.8333	2.3333	5.3889	0.72222	1.0556	1.8889	0.3333	1	2.2222	1.7778	3.5556	3.0556	2.8889	4.3333	7.2222	5	4.2222	1.8889	0.8333	1.5556	0.6667	0.6667	0.7222		0.992807	2.39855
19.115	3.6667	0	2.7778	2	0.6667	0	1.3333	2.5	4.7778	3.1111	4.5	3.3333	3.7222	3.6111	2.7222	4.9444	4.6111	4.3333	1.3333	3.2778	1.0556	0.0556	0.8333		1	2.57246

## Sheet: Image11
X0	Y0	Y1	Y2	Y3	Y4	Y5	Y6	Y7	Y8	Y9	Y10	Y11	Y12	Y13	Y14	Y15	Y16	Y17	Y18	Y19		Apical-Basal	Avg intensity
0	6.0073	6.0315	8.517	3.7526	4.0276	3.7064	3.8665	4.6141	3.9081	4.5552	1.7679	2.6571	2.3278	2.2142	2.659	3.8881	1.7598	1.1723	1.7958	1.6379		0	3.54331
0.1375	1.6363	5.1046	4.011	5.9194	2.8902	8.3026	3.837	7.2068	6.4216	3.7712	1.0008	0.9593	4.2317	3.5094	1.5365	3.6732	1.2374	2.3098	2.6519	3.3199		0.0071933	3.67653
0.275	5.6464	3.4167	11.1124	3.5126	5.867	5.3286	3.0636	3.2686	7.2743	4.5946	0.6146	2.4854	3.8613	3.041	3.1936	3.6785	1.8764	2.2582	3.7197	4.3308		0.0143866	4.10722
0.4126	5.3347	4.8266	2.3757	4.3257	8.6225	6.8858	4.3999	7.8089	9.4069	7.1411	4.2928	5.0166	4.1102	5.0069	5.9414	6.183	2.4979	4.6521	4.2726	6.1543		0.0215851	5.46278
0.5501	5.905	7.4365	10.4079	4.3125	7.6763	13.9085	3.822	4.1736	10.7169	7.9335	5.8071	4.3779	5.0158	4.1798	3.3991	1.0204	4.3017	3.9208	6.0687	8.1763		0.0287784	6.12801
0.6876	6.9156	6.4504	13.2631	2.177	8.5724	6.1393	9.6522	5.3935	10.0084	13.8697	4.656	3.5853	7.3618	6.8101	1.1734	6.2398	1.9569	1.3988	2.2926	6.7614		0.0359717	6.23388
0.8251	8.7976	5.5979	9.6428	3.2366	9.4722	3.3272	9.6186	6.6658	7.0678	6.025	9.1636	3.4176	5.698	10.012	2.5851	4.6401	5.172	3.0802	10.182	3.946		0.0431651	6.36741
0.9626	4.7753	3.9098	6.0487	6.3858	9.3972	9.6713	4.727	9.0639	10.2764	9.7638	5.6069	10.0892	10.1954	10.163	4.3271	3.0749	3.9598	4.8915	5.3654	5.4183		0.0503584	6.85553
1.1001	7.6732	5.0401	13.2295	5.6801	12.6025	10.7464	13.3953	6.5341	8.1585	6.8193	4.8881	12.8092	10.4491	9.5442	2.6809	3.8098	6.7094	6.2655	3.9967	13.9164		0.0575517	8.24742
1.2377	7.2855	7.4663	20.8455	10.3727	8.5049	6.4045	5.0697	6.8567	13.632	6.2309	7.4561	11.9169	8.7776	9.6808	2.6256	6.147	3.1583	11.302	3.8937	6.4022		0.0647502	8.20144
1.3752	7.5705	6.2115	30.4955	11.4936	5.9322	3.6749	8.9479	5.4434	11.6937	8.3485	8.8656	20.2426	6.4944	13.7108	8.7385	4.6551	9.178	9.515	5.3292	2.8528		0.0719435	9.46969
1.5127	14.7223	8.4729	17.3514	11.4682	6.5845	4.8158	11.478	8.6432	5.1314	10.0436	11.5972	10.5816	19.345	16.3004	6.0131	5.9737	4.9562	9.3763	5.6198	9.5224		0.0791368	9.89985
1.6502	8.5297	13.2381	16.8927	14.9408	13.2264	7.7924	9.2594	7.3647	7.691	12.4399	6.5145	16.8839	13.4922	13.9919	8.0863	4.244	4.7774	12.4205	4.2559	3.3623		0.0863301	9.9702
1.7877	10.4075	18.5474	20.9598	13.8174	9.9277	5.1841	8.4779	5.4925	12.3707	19.0751	10.0481	14.9651	9.5033	6.3204	4.6496	5.4329	5.2748	16.9925	5.7799	5.7686		0.0935234	10.4498
1.9253	9.9266	13.8404	17.019	8.1225	8.8014	5.1562	4.9719	9.8892	10.029	19.1895	13.3665	15.3552	9.9817	14.0712	7.8198	6.7389	4.8574	13.8082	5.4339	6.1448		0.100722	10.2262
2.0628	8.8193	10.1101	16.3783	14.2848	8.6093	3.6299	10.4829	4.6403	15.2503	13.9206	7.6997	11.9983	13.5861	11.6318	13.8044	7.1078	10.1828	9.0314	5.8157	5.5843		0.107915	10.1284
2.2003	7.2963	8.8778	15.183	11.5591	7.2934	4.7835	11.6724	16.1943	17.8436	22.684	12.8333	10.4815	10.2385	10.0696	20.0711	6.5354	14.2654	13.8527	4.2921	13.8482		0.115109	11.9938
2.3378	11.6455	13.7704	18.2987	10.0007	13.3253	5.7296	6.33	5.2815	15.2315	17.3068	12.0719	9.462	7.2388	9.321	10.3263	12.0964	12.4625	11.5019	6.1315	6.4018		0.122302	10.6967
2.4753	11.0482	11.9789	15.9058	6.6679	6.9686	11.0117	9.8757	8.0495	18.1654	20.8853	13.1328	13.9477	5.8883	5.4664	16.0046	9.2651	15.2981	13.8584	9.9036	1.7252		0.129495	11.2524
2.6128	12.9709	13.0205	14.6316	11.9026	8.1815	5.9024	12.4171	11.3411	19.0928	17.8992	12.8289	14.5279	7.4858	8.0394	10.5641	8.3717	11.936	12.9285	6.3826	6.1006		0.136688	11.3263
2.7504	12.5531	13.9178	7.3414	3.621	5.8383	5.3729	7.4301	6.5782	19.4508	17.7994	13.196	14.2882	6.6022	7.8674	17.5566	9.1761	15.7681	12.5634	7.897	9.0529		0.143887	10.6935
2.8879	10.4324	13.331	15.4875	9.7863	3.1477	6.5401	6.7947	8.1983	15.6829	16.7809	10.4418	11.1646	9.1799	4.4159	13.4505	6.6049	14.006	11.8503	6.7604	9.7381		0.15108	10.1897
3.0254	15.1334	14.5288	12.2405	10.0777	5.6239	5.9966	8.0092	8.2253	10.4717	9.4203	9.7826	10.2621	8.3344	5.5751	15.4109	7.8404	17.2269	9.9556	9.002	9.0334		0.158274	10.1075
3.1629	9.7696	12.978	8.6601	7.2017	3.7654	9.4221	7.0419	6.4815	16.3261	12.2559	8.4468	9.0977	7.5338	5.7708	16.8395	6.6191	17.4984	7.8598	4.5351	10.7858		0.165467	9.44445
3.3004	15.0278	16.219	13.5094	6.9566	8.9781	8.6092	10.9255	9.1721	10.7426	11.2302	9.0552	10.6572	5.2946	6.7993	10.319	7.6688	13.1783	8.8969	5.6902	10.8621		0.17266	9.9896
3.438	8.6701	15.3065	10.8535	9.399	4.9842	4.9306	10.4758	5.9668	15.5021	12.0603	8.4028	7.322	5.4601	3.3576	15.8692	9.1853	11.0578	12.8727	10.2557	7.7046		0.179859	9.48184
3.5755	12.1183	18.536	12.3085	8.1352	7.8039	7.3199	12.0378	7.7307	10.6937	10.2032	7.2381	11.1322	9.8281	2.5293	15.086	20.6154	5.9256	10.0494	8.3269	10.8616		0.187052	10.424
3.713	20.8772	15.7487	18.547	9.7797	6.352	8.9938	5.3196	6.1188	10.9487	7.2485	4.4462	6.4627	6.8881	2.6214	18.7139	10.8391	6.1705	9.716	8.5646	11.7101		0.194245	9.80333
3.8505	16.2762	13.3856	15.788	7.0037	4.8367	7.9417	9.7189	4.6608	12.927	11.1439	3.2961	10.1917	4.8244	5.2935	18.1316	9.6915	12.0957	7.9357	7.644	11.8217		0.201439	9.73042
3.988	14.4925	11.7716	12.5436	3.6923	7.8698	7.0935	11.4347	7.1812	11.8915	20.4389	3.1147	11.9802	4.7566	8.1554	14.338	8.4511	9.6348	7.3296	5.4822	13.1337		0.208632	9.7393
4.1255	12.6953	10.6347	3.642	7.4472	7.7543	6.6923	6.8746	7.4846	18.6721	11.8236	6.5729	5.423	8.4264	5.9861	7.5198	6.2241	6.7688	5.5685	7.358	12.0146		0.215825	8.27914
4.2631	10.9564	11.6426	15.2193	3.648	3.1833	7.1457	11.2647	3.2105	7.3848	7.9016	2.9977	10.6157	5.8717	2.7571	8.6242	9.0567	5.3177	5.5366	12.5624	19.0047		0.223024	8.19507
4.4006	18.0594	12.5284	9.6314	7.3072	1.8524	6.2449	11.8578	5.9543	12.9859	5.6839	8.3547	6.994	4.725	4.7928	10.7883	13.9067	5.6851	10.3786	11.8556	14.1247		0.230217	9.18556
4.5381	15.9127	11.4702	7.9585	4.4752	2.9785	4.3761	8.2625	5.321	12.0525	5.4766	4.3593	2.5823	7.1641	5.2825	10.2956	7.0522	7.6298	4.4176	12.8011	17.7502		0.23741	7.88093
4.6756	13.3263	9.103	7.9936	2.944	7.2686	9.8242	6.8497	3.2046	5.539	3.6408	3.3402	6.0367	5.3122	3.273	8.1313	9.6022	10.7448	11.0098	7.3222	13.2765		0.244604	7.38713
4.8131	8.6356	13.343	14.913	4.4694	10.9661	5.6398	5.3931	5.7423	7.2597	6.1962	4.6519	3.4331	5.4172	6.165	9.3084	4.0548	7.6254	6.3659	13.0783	10.8995		0.251797	7.67789
4.9507	10.9973	19.5537	6.5051	9.3512	7.0558	5.3812	9.3586	5.8638	8.8178	7.2722	4.2787	5.5021	7.7167	5.1301	8.1385	10.2071	7.2337	6.415	9.9047	10.2031		0.258996	8.24432
5.0882	4.3828	21.2026	7.889	4.5864	7.4907	5.5173	12.513	4.0629	15.1936	5.2044	3.3372	9.0544	4.5578	4.7887	10.4608	3.1717	3.0994	6.8682	7.2117	8.1144		0.266189	7.43535
5.2257	8.9243	15.5212	5.3939	4.4852	6.3462	5.8871	8.0587	5.9221	10.3101	8.7132	3.4636	7.5883	3.3765	3.2288	11.6452	3.9623	10.6647	8.7036	8.4789	3.3194		0.273382	7.19967
5.3632	6.652	13.7778	7.7163	7.5792	5.4556	6.0469	5.8373	5.4099	10.7636	5.4223	4.1916	4.3469	2.2312	5.1469	9.5145	6.3246	5.4292	9.1732	8.0225	6.1495		0.280575	6.75955
5.5007	5.4202	8.3449	7.9795	4.9003	4.6626	2.5396	5.1613	8.0067	5.8335	5.1602	3.3352	7.3725	4.4442	3.597	10.8745	2.2138	13.7725	3.7575	9.7042	7.3736		0.287769	6.22269
5.6382	5.5279	9.5238	9.9044	8.1696	6.2191	1.9836	7.3329	4.4036	3.7345	1.7144	4.6695	3.9893	5.991	3.0358	8.3211	4.3543	6.7514	4.097	8.1428	9.0774		0.294962	5.84717
5.7758	8.2198	7.8265	1.0967	7.0359	4.1853	5.0026	7.7012	7.4759	7.3925	6.3488	6.9793	4.5961	7.227	4.3559	8.0657	3.8494	7.7335	1.8126	11.1153	10.9381		0.302161	6.44791
5.9133	6.9883	6.6569	4.627	7.6402	5.1524	6.3639	4.7538	8.2702	4.1507	7.5406	4.461	3.5437	12.4596	6.6201	4.8963	6.5021	11.3605	3.4687	5.7923	6.4504		0.309354	6.38493
6.0508	13.5247	5.2838	5.4649	4.5286	3.2465	2.0962	3.3215	5.3141	12.7935	1.8027	6.0023	7.3865	3.3956	2.7295	5.5167	7.7079	10.3104	7.6071	6.2175	10.3037		0.316547	6.22768
6.1883	9.2263	5.6605	4.607	5.5509	5.8503	7.5849	8.8299	12.0049	9.1607	8.4177	3.8173	2.6879	1.4907	5.9447	0.7818	5.3808	6.597	7.4334	7.5642	5.0637		0.323741	6.18273
6.3258	14.7754	6.968	3.2579	6.1918	4.7659	4.138	9.5786	13.6515	4.6021	5.1933	3.013	3.8319	4.5119	5.7069	8.2271	5.8489	4.4398	5.2379	7.7765	4.7387		0.330934	6.32276
6.4634	9.8279	13.4733	5.2795	7.9829	7.9385	4.3212	5.552	5.1424	2.7064	13.3515	4.6242	1.4773	4.7692	9.9936	6.5098	8.4826	4.5834	9.4403	7.7581	8.9029		0.338132	7.10585
6.6009	14.3736	5.1326	3.2017	6.1342	5.4746	4.1995	3.4645	6.5175	6.9679	10.4048	5.4018	6.8374	5.935	6.7474	4.3308	5.6463	5.1812	7.4216	6.5148	6.27		0.345326	6.30786
6.7384	9.0571	6.0454	2.5023	10.5244	3.2933	6.8228	5.7738	5.389	1.1831	15.4224	3.561	4.5336	6.6615	11.9938	2.7285	4.6559	6.8726	5.0423	5.096	5.394		0.352519	6.12764
6.8759	10.2735	5.6457	3.3244	3.1563	1.3239	9.0588	8.207	3.4512	3.2981	11.6109	6.6269	1.3995	9.1	6.3362	4.0231	4.1337	5.3093	11.9028	7.8023	9.2756		0.359712	6.26296
7.0134	5.1846	7.6648	6.1089	10.771	3.2932	9.5139	14.7032	3.182	3.7157	8.3328	6.8492	3.5869	6.271	4.4575	4.2905	6.4088	6.4226	7.6449	5.4154	7.1902		0.366906	6.55036
7.1509	4.5139	3.173	3.045	4.3555	4.257	8.2698	9.5847	4.7972	4.5553	8.2066	11.393	7.5807	6.2536	5.3416	6.785	2.3229	2.9301	7.1866	7.7305	2.0396		0.374099	5.71608
7.2885	6.8475	4.199	2.2668	3.237	3.3376	7.4153	8.2738	3.4405	3.7259	5.8172	8.4819	2.7045	4.9596	5.3316	4.8677	4.3529	3.0417	6.9464	2.3826	2.6753		0.381297	4.71524
7.426	12.6236	6.6574	2.5563	1.7254	0.9241	6.6454	6.1142	4.9651	4.5705	5.5099	3.5822	0.6437	3.1092	5.8854	2.6132	5.5229	2.6544	6.5153	4.8189	5.9529		0.388491	4.6795
7.5635	11.2398	2.9663	1.4625	1.4387	4.9987	5.9447	3.104	4.0505	4.2721	4.5022	4.4143	3.9479	2.9055	5.5847	6.3341	5.2961	5.1411	9.0162	3.0411	2.6177		0.395684	4.61391
7.701	9.0736	3.1111	2.3821	2.2287	4.0381	9.6265	4.5969	8.467	3.0706	7.463	5.7694	5.9814	3.4586	2.4953	7.8383	4.2229	4.1786	6.9998	2.6869	2.2119		0.402877	4.99503
7.8385	7.7427	1.0301	1.4851	6.8417	6.0581	4.5819	3.9729	4.0706	1.7027	5.6311	5.1565	4.5902	2.4625	3.4662	6.2131	3.1864	9.7365	5.2921	4.3832	3.2279		0.410071	4.54158
7.9761	5.2943	5.99	1.4249	2.9525	5.7655	5.9809	2.5987	3.8043	4.8156	3.4849	2.2075	3.5525	3.0524	3.2415	4.4506	7.4939	6.4929	6.733	11.6659	3.9844		0.417269	4.74931
8.1136	2.0445	4.7484	2.3106	4.699	7.6368	7.5621	4.7065	3.4965	4.5017	2.2929	5.425	1.6348	5.8026	2.4371	2.0063	4.2587	9.6403	6.0953	12.2755	5.9686		0.424462	4.97716
8.2511	1.6788	4.9375	3.1551	7.7249	4.8376	2.5987	6.3768	5.7331	6.0738	2.5945	2.9754	2.5452	2.5449	3.6428	4.516	2.6891	4.8359	9.4421	8.1689	4.9261		0.431656	4.59986
8.3886	4.4502	4.804	1.6793	3.862	12.0164	3.456	5.405	4.2601	3.7805	1.7252	7.8752	1.9435	4.436	2.4266	6.9971	5.6554	8.7061	5.9012	3.2844	6.1023		0.438849	4.93833
8.5261	2.7392	1.8697	2.5328	1.7173	8.8838	2.6585	3.8641	2.6005	0.6332	4.2527	6.206	5.4639	2.7476	4.0296	5.751	5.3027	8.3045	9.4864	7.842	3.5942		0.446042	4.52399
8.6636	2.3202	5.1455	2.2436	2.7004	4.0099	4.2882	5.5407	3.3291	2.7651	5.528	8.2031	5.4053	1.3735	3.9665	5.6807	7.1959	6.8885	7.0916	5.7283	6.505		0.453236	4.79545
8.8012	3.1579	3.2075	0.5814	4.1053	1.4988	3.9986	3.5779	2.8652	3.9247	5.2035	7.0695	1.9527	4.2086	2.1266	3.223	4.3237	9.5923	1.7543	5.2499	8.12		0.460434	3.98707
8.9387	3.5243	5.3465	2.6208	2.265	2.844	2.3369	6.5683	1.3966	5.493	4.1257	7.8241	2.9887	1.8164	6.0936	5.4753	10.0409	14.4702	7.464	6.6558	3.3865		0.467628	5.13683
9.0762	5.6258	3.193	4.3748	4.0212	3.6131	1.0289	7.6005	4.3455	2.3058	5.7687	4.8727	3.3725	1.9886	10.9622	3.253	7.9064	17.1465	5.9576	10.5651	4.9626		0.474821	5.64323
9.2137	2.517	2.0026	2.597	6.9599	0.7524	2.9526	8.1632	1.9784	2.6797	5.2285	2.96	1.3871	5.7207	4.2937	4.1751	5.1065	34.2959	8.9352	9.1047	4.5301		0.482014	5.81701
9.3512	6.5214	1.4351	1.3256	11.2055	2.5855	4.1761	2.6827	3.2078	1.4267	1.781	4.9557	3.7396	1.8811	2.2745	3.8383	2.7889	30.1512	3.068	6.2535	8.9835		0.489207	5.21408
9.4888	5.3455	4.4023	1.4306	14.4707	3.7643	5.6411	7.1042	5.4465	2.1778	3.966	3.7699	3.9024	2.1149	3.6133	2.2293	0.7045	23.3739	2.2957	3.6065	3.7036		0.496406	5.15315
9.6263	4.6169	2.5181	1.5262	24.292	3.1233	3.2842	10.0148	5.0148	1.3002	2.4322	5.0586	6.3629	3.564	6.1076	4.3562	6.0696	16.931	3.6985	6.8099	3.9427		0.503599	6.05119
9.7638	7.1434	3.7881	0.968	21.6719	5.4646	2.3668	7.0939	4.9673	0.9234	2.03	6.3422	1.5347	7.2662	7.1129	4.1355	9.084	14.8011	4.7805	7.3612	2.9511		0.510793	6.08934
9.9013	5.1971	3.2633	1.2186	14.5393	4.2841	2.7657	3.3224	2.624	1.6726	4.3764	4.3621	5.3536	4.6976	3.4016	7.5024	8.3664	12.7536	8.5348	10.2756	7.4328		0.517986	5.7972
10.0388	4.7075	6.7984	0.1059	9.4952	2.5087	2.0676	4.7013	5.1633	2.0009	2.2469	4.5477	2.7842	2.1602	4.9452	5.0384	6.8699	9.216	4.6161	11.784	4.0507		0.525179	4.79041
10.1763	6.2993	2.999	1.9	6.2902	3.3269	4.3375	6.8821	2.2804	2.0943	1.616	11.9491	4.301	2.0548	2.9873	4.6863	8.1515	6.7845	5.0577	8.8481	5.6378		0.532372	4.92419
10.3139	2.5653	5.2558	0.3894	2.7024	2.9331	4.7281	5.6213	3.2715	2.9198	0.2906	2.9631	4.5862	7.2612	6.3762	4.2361	7.4815	5.0782	3.9446	12.8309	8.8898		0.539571	4.71625
10.4514	3.835	2.4836	1.535	2.4104	1.6297	2.7871	10.1487	6.4001	3.4393	2.7223	4.5722	3.9041	0.9768	4.3797	2.7557	9.0402	8.2735	3.1971	7.9697	7.0444		0.546764	4.47523
10.5889	2.0564	4.2429	0.7307	3.4637	2.2146	5.7789	7.818	6.417	2.5684	0.2496	5.4144	2.182	1.1301	4.3114	2.4015	6.76	4.0772	6.1182	11.2694	8.7122		0.553958	4.39583
10.7264	2.1321	5.4172	1.9735	4.2903	2.4885	1.0353	7.2715	9.2367	0.5055	1.0902	4.8097	2.0139	1.5323	2.3951	1.1299	6.872	4.3518	2.6043	3.5212	4.5041		0.561151	3.45875
10.8639	2.1629	3.4992	2.8938	3.9401	1.8495	5.9981	5.2896	5.5239	0.281	1.1118	2.2024	2.25	3.4729	3.6108	2.5141	7.9842	0.9191	5.6309	4.7657	9.9479		0.568344	3.79239
11.0015	3.0182	2.2115	3.0374	1.1576	0.0211	4.3176	4.284	8.7807	2.8501	1.7156	3.0898	1.8962	1.3145	4.8855	3.3432	2.5035	4.4611	2.2673	5.8372	2.1874		0.575543	3.15898
11.139	4.7215	0.7587	0.7066	4.7977	1.1304	5.6689	3.7457	6.0948	1.2581	1.9301	2.5565	6.2547	2.7361	5.9719	3.7852	6.2023	3.1577	3.5966	3.5866	6.1246		0.582736	3.73923
11.2765	4.7043	3.0293	0.4669	0.961	0.6725	3.2069	5.5074	7.0817	0.4039	0.0406	6.9862	4.3873	0.3834	1.9871	3.357	7.1811	2.4605	5.1028	4.6113	4.6916		0.589929	3.36114
11.414	2.1792	3.131	0.974	1.3214	2.8487	1.9199	5.3923	6.7682	4.6486	0.6184	4.3528	3.4595	1.4308	0.3645	5.5667	4.2167	2.6378	7.8305	4.4866	4.8019		0.597123	3.44747
11.5515	6.9163	2.5715	0.6865	3.829	3.9989	3.7583	4.4709	6.5054	2.276	1.5886	3.9187	6.9952	6.633	4.4067	3.5232	7.0769	2.14	5.5314	5.74	6.54		0.604316	4.45533
11.689	6.1166	3.4539	1.5319	1.0772	3.7925	5.7828	7.2364	7.7442	1.6025	1.7062	0.7748	4.8971	4.482	4.1618	1.7887	10.2948	5.9114	2.9098	2.0011	3.1232		0.611509	4.01944
11.8266	5.6016	2.2965	1.5968	1.1519	2.1793	0.805	6.7588	13.6108	2.0573	2.8266	3.575	2.6102	2.1171	2.7555	1.5067	3.4999	3.9058	9.1701	4.3947	5.6909		0.618708	3.90552
11.9641	5.1087	5.6031	1.5638	1.2306	4.6064	4.7044	6.2153	8.445	1.0126	2.0003	0.7026	4.7	1.9437	2.7207	1.7869	3.7482	2.7363	4.2293	1.33	7.2423		0.625901	3.58151
12.1016	3.9127	2.6208	1.7854	2.1559	2.4469	3.2702	10.3591	8.7376	9.269e-05	3.7551	1.3362	4.6275	2.5811	0.8854	4.7378	6.2537	2.4778	3.4714	2.5492	7.472		0.633094	3.77179
12.2391	1.6044	2.0908	2.2735	5.4669	5.855	3.6428	4.2707	9.1246	2.33	0.7399	4.2874	3.2169	5.0556	1.1524	3.858	4.8577	2.5244	9.3664	2.9308	4.4289		0.640288	3.95385
12.3766	4.4236	2.2598	2.6296	4.5809	2.5435	1.2776	7.6635	9.8937	1.7236	3.3892	2.0152	2.3773	4.8721	2.1515	0.0396	2.4903	2.7718	6.3936	1.0767	5.9323		0.647481	3.52527
12.5142	3.796	0.5762	2.1501	1.9936	1.3451	3.5371	6.0514	4.2593	1.5371	2.1052	1.2851	6.8362	3.6686	3.1677	1.9691	1.3235	0.507	8.1934	2.659	12.5043		0.65468	3.47325
12.6517	2.4633	1.6626	3.1267	2.7451	3.1111	2.9324	3.9139	6.5591	4.6637	0.7473	1.7179	7.2483	3.8453	4.4238	1.0019	4.5462	1.8518	6.3556	3.2879	11.3314		0.661873	3.87676
12.7892	3.6219	1.3841	3.0269	0.5186	3.5727	3.0063	2.0824	3.9444	2.4911	0.3735	1.9506	6.9304	3.5426	3.4426	1.7424	1.2898	2.2152	5.384	2.6035	14.444		0.669066	3.37835
12.9267	3.1963	1.9018	0.4244	1.252	2.8162	4.3831	3.9284	6.0133	2.1924	1.2415	2.0588	3.6557	2.3145	2.8834	0.5206	3.354	1.0815	4.6211	2.5072	14.8432		0.676259	3.25947
13.0642	2.2317	0.7512	3.5563	1.1502	1.8244	0.7642	3.3512	10.9879	1.1761	1.3997	4.6982	3.3994	7.0138	5.3566	1.0789	2.3491	3.572	1.6818	4.5038	11.5594		0.683453	3.6203
13.2017	4.9996	0.0779	1.0043	1.8766	3.2434	1.422	3.0502	9.5769	1.516	0.9496	2.6679	4.0326	3.3193	3.3598	3.2566	4.7972	2.4188	3.579	1.356	10.5968		0.690646	3.35502
13.3393	1.8587	3.8673	0.7206	3.9879	2.338	0.1489	1.9115	20.906	0.4549	0.3567	4.346	3.6973	6.2125	4.0147	4.4267	1.9901	3.6918	1.2709	4.1022	6.9374		0.697845	3.862
13.4768	2.595	2.9611	0.2767	0.9812	1.2981	3.4976	3.1258	21.3122	0.0294	1.3928	4.6265	3.9947	3.475	3.9311	2.9993	2.3794	0.09	4.1153	4.4297	5.0717		0.705038	3.62913
13.6143	3.7833	1.5351	0.1159	1.1786	0.9648	5.0141	2.7311	32.1333	1.0276	3.1378	4.2558	3.7853	1.8094	1.1998	3.2997	2.2299	2.0974	1.3722	4.6763	12.7071		0.712231	4.45272
13.7518	4.4642	3.6384	0.7615	4.8187	0.7619	10.2289	0.9527	21.6361	1.2267	1.9625	7.5689	3.1346	3.2292	2.8847	2.4292	6.0929	2.0924	2.1156	3.316	10.3945		0.719425	4.68548
13.8893	3.4953	0.8798	3.0874	3.7226	1.7831	3.2805	1.8577	16.8985	1.4266	1.7755	10.723	6.6557	4.1211	1.2622	2.6928	3.0114	3.0755	8.0949	3.7628	10.1141		0.726618	4.58602
14.0269	3.3407	4.9676	1.0897	3.2385	4.5539	6.5072	0.2151	13.1664	2.0899	1.7164	2.5628	5.842	2.5381	6.0269	3.8428	1.2802	1.4256	3.7002	2.0817	10.685		0.733816	4.04353
14.1644	3.1118	2.4245	1.9015	1.0149	4.018	1.0613	0.992	11.3717	1.1765	1.2695	3.9688	4.9534	6.5111	4.2023	4.334	4.0314	2.348	6.3714	5.3816	9.4946		0.74101	3.99692
14.3019	2.8541	4.6383	2.531	4.0432	3.6828	4.2004	2.3983	1.2417	0.7984	1.4019	2.2932	4.9493	2.006	2.564	1.5307	2.3303	2.1951	3.8607	4.2787	7.4461		0.748203	3.06221
14.4394	5.4794	0.9536	3.0948	0.8844	7.9004	2.9205	1.0156	0.6688	0.7503	1.1207	1.745	3.878	2.9272	0.5163	1.3726	2.7433	2.753	5.8936	1.6125	4.1318		0.755396	2.61809
14.5769	5.7186	5.1101	2.2451	0.8181	2.7674	5.4281	4.5811	5.536	2.3523	2.0674	4.5544	4.2693	1.2901	5.3582	3.6946	4.0177	3.0498	3.6032	4.6789	2.0491		0.76259	3.65947
14.7144	2.5535	2.3958	1.5106	0.9234	6.0033	8.6633	3.999	1.8256	0.6616	3.4509	4.9794	2.1047	4.449	1.5933	3.0078	3.0152	8.2397	1.8347	8.843	4.6775		0.769783	3.73656
14.852	1.9675	2.0182	1.8204	1.4018	5.4038	3.1552	3.0152	3.2955	1.318	0.7386	8.9462	4.6404	3.3534	3.6977	4.1798	2.224	3.4597	8.4513	3.83	1.0684		0.776981	3.39926
14.9895	2.2226	2.309	2.343	1.8987	3.2419	4.2543	2.5888	5.4541	1.8156	0.3098	5.3291	4.0214	3.7018	5.1055	3.6068	4.2257	7.8835	3.2772	6.411	1.9372		0.784175	3.59685
15.127	5.685	0.9886	2.3096	0.9034	2.2521	7.041	6.2853	4.7661	3.6409	3.4446	4.5835	4.5702	5.7466	9.807	2.178	2.7245	7.7455	2.5767	2.1902	1.8397		0.791368	4.06393
15.2645	1.2	1.587	1.6749	2.4031	1.1769	4.1728	4.7398	5.3385	2.3264	1.3453	3.7085	7.2002	6.7704	7.8193	3.4941	1.4491	8.8989	1.7224	3.3397	4.3734		0.798561	3.73704
15.402	6.5375	4.5368	2.1697	0.4631	2.0337	0.1854	3.798	0.6846	3.1728	2.0961	3.083	6.3683	2.4007	2.3366	6.5847	2.2999	6.5314	4.4799	2.5953	3.6545		0.805755	3.3006
15.5396	3.4873	1.3054	1.0512	1.4474	2.239	2.3036	3.924	4.99	4.0763	1.7245	2.7704	6.9679	2.2582	3.8671	5.0464	4.9696	7.7526	4.083	1.1011	2.3771		0.812953	3.38711
15.6771	0.5823	3.4603	3.2193	0.404	2.6266	4.5513	4.6275	12.0116	0.0967	1.3915	3.0992	7.376	1.8518	4.6587	5.1405	4.0277	6.8742	2.9609	1.2051	3.2431		0.820146	3.67041
15.8146	2.4751	1.1887	2.8168	3.1837	2.2811	4.1065	6.1155	15.8053	0.4284	3.3576	6.8264	4.7446	4.6109	6.2424	4.2026	3.7276	3.0602	2.2665	2.9448	2.5699		0.82734	4.14773
15.9521	1.7136	2.4121	2.2545	1.9487	2.4941	3.9643	4.8052	20.8401	0.3988	2.1799	1.7397	1.4523	2.6578	0.731	7.3294	4.9664	1.8322	2.1707	1.385	1.7072		0.834533	3.44915
16.0896	2.8519	5.3384	1.4035	1.8821	2.7709	2.3271	3.2945	25.7221	1.0207	2.421	2.3209	3.8851	7.2702	3.0547	4.4958	1.6709	5.3277	6.534	4.0791	0.4665		0.841726	4.40686
16.2271	3.4528	1.3264	4.7874	3.246	1.8298	4.4048	3.2699	14.3617	5.0284	4.2966	0.9435	1.7706	5.4816	1.4789	5.777	5.0776	3.6616	4.1333	3.1715	3.5796		0.84892	4.05395
16.3647	5.6101	3.9574	2.8573	1.6348	4.0475	3.8802	1.8301	21.592	0.2475	1.8706	3.0979	1.8801	3.6816	1.4756	2.3127	9.054	5.4183	3.7574	1.1766	1.6649		0.856118	4.05233
16.5022	5.0184	3.6008	1.3774	0.6361	1.8879	0.1449	2.1076	19.4529	1.7703	2.9885	5.7556	3.8595	3.9806	1.312	6.293	6.5616	4.2063	1.9557	2.7975	1.9874		0.863312	3.8847
16.6397	3.4907	3.7365	3.0937	2.1746	2.5013	5.0174	2.1985	12.2222	0.4712	1.1205	2.023	2.4474	4.1654	3.3172	3.6173	10.1732	4.472	5.3917	3.2356	2.3209		0.870505	3.85952
16.7772	4.6981	3.4912	0.2416	0.7732	1.3101	3.2216	1.4029	13.7449	2.3516	1.2693	2.1708	3.0177	5.7254	2.9782	2.5015	6.7782	2.6543	3.2245	3.1997	3.9128		0.877698	3.43338
16.9147	3.6643	0.9427	1.3001	2.0465	4.2548	2.3354	1.0808	7.6735	1.3972	3.4766	2.5446	2.2176	2.8162	1.6696	1.0919	6.8765	1.9632	4.7696	3.9737	3.5043		0.884891	2.97996
17.0522	3.774	2.0105	0.0291	2.175	1.5539	1.997	2.4081	3.3323	1.6098	2.6653	3.5297	2.4004	6.64	2.5475	3.5964	3.2409	4.5308	0.9149	1.3476	3.3262		0.892085	2.68147
17.1898	0.7418	2.2664	0.1247	0.5505	3.1115	5.2065	3.2663	4.6692	3.719	3.8345	6.4233	3.0049	1.8977	1.1969	4.1871	6.1385	1.9533	2.7214	2.9674	3.1526		0.899283	3.05667
17.3273	0.6341	3.4017	1.0588	2.0948	2.2275	2.58	1.2122	4.5975	3.6046	4.3116	0.9582	2.8204	0.6624	2.5576	4.1646	3.9474	2.1486	1.7702	4.9406	3.1362		0.906477	2.64145
17.4648	1.1092	1.0095	0.1499	0.3497	3.1016	4.2878	2.8219	0.793	0.4757	1.3734	3.8281	3.7582	2.7087	1.5812	2.0843	4.845	3.5467	2.7907	1.9649	4.0956		0.91367	2.33375
17.6023	0.0363	0.0418	2.912e-05	0	1.4092	2.5171	5.3224	2.8297	1.6518	7.0041	5.2135	2.9356	2.7026	2.7357	3.3259	9.9656	1.6744	3.3085	4.168	4.4667		0.920863	3.06545
17.7398	0	0	0.2402	0.7692	3.0368	1.9805	1.4476	3.2222	3.1005	4.3525	4.5049	0.6886	2.9819	1.2144	2.7349	7.2012	5.0667	1.0275	1.885	0.5487		0.928057	2.30016
17.8774	0.6352	0	0.0177	0.0101	2.539	3.7247	0.7466	5.4251	1.5936	3.0224	4.8176	1.8701	3.5974	4.8186	1.13	3.735	3.9484	1.7332	5.3466	3.5951		0.935255	2.61532
18.0149	0.2787	0.9638	0.5855	0.0241	1.3394	5.5791	4.1014	2.9176	2.9863	3.1791	3.9011	3.4826	1.2142	1.1045	2.7183	6.3226	6.8729	1.5784	4.3113	3.5045		0.942448	2.84827
18.1524	0.4839	0.0362	0.0985	0.2627	0.0939	2.3933	4.5015	3.1761	0.6251	4.9116	4.3397	2.9686	1.92	3.0267	3.864	5.9661	2.0008	6.7112	5.8519	1.4907		0.949642	2.73612
18.2899	0	0.0538	8.274e-06	0.015	0.8849	7.5315	2.5746	2.7948	1.761	6.9387	2.7354	1.0779	1.6897	1.01	6.0483	3.9487	4.0152	3.9362	7.456	2.2157		0.956835	2.83437
18.4274	1.0952	0.9546	0.0554	0	2.1113	1.6045	7.5053	4.7138	1.8333	5.5131	0.4799	1.2791	1.1222	6.4992	0.9816	4.2965	3.1013	2.8427	7.2862	4.2231		0.964028	2.87492
18.565	0.0715	0.325	0.0002	0	0.5628	0.8198	5.2629	1.4137	0.5718	6.598	2.2939	0.0309	0.1436	2.0109	1.3767	2.3115	4.6602	4.2735	1.5886	3.2375		0.971227	1.87765
18.7025	0	0	0	0.1613	0.0204	0.1132	1.5087	0.5176	3.8678	6.2045	1.7144	0	1.0258	1.395	0.6875	1.9586	3.1286	1.3089	3.327	3.042		0.97842	1.49907
18.84	0.408	0	0.1051	0.0054	0.1668	0.051	3.9627	0.9892	4.3918	1.704	1.0589	0.0536	1.3037	1.4358	1.5259	1.4643	1.0131	2.8655	1.5353	2.3292		0.985613	1.31847
18.9775	0.8839	0	0.9267	1.1349	0.9986	0.5635	4.0768	2.1485	3.3954	3.1308	2.4534	2.2848	0.0098	1.2352	1.47	1.4674	4.1228	1.5402	0	1.6719		0.992807	1.67573
19.115	0.0352	0	0.0238	0.0973	0.0072	1.1625	2.9654	1.1907	1.4543	2.9772	3.0452	0.051	0.2182	1.5158	3.0046	1.6427	2.3559	0.5981	0.8244	4.1385		1	1.3654

## Sheet: Image10
X0	Y0	Y1	Y2	Y3	Y4	Y5	Y6	Y7	Y8	Y9	Y10	Y11	Y12	Y13	Y14	Y15	Y16	Y17	Y18	Y19	Y20	Y21	Y22	Y23		Apical-Basal	Avg intensity
0	3.156	2.3446	3.2439	6.5466	1.0213	3.7152	5.3191	7.1645	6.2244	7.7394	5.4874	7.2427	5.1588	4.3186	5.0146	4.9849	10.0054	5.8951	2.6038	6.7971	3.0534	5.0617	3.5686	5.1755		0	5.03511
0.1375	3.6514	3.1553	2.9401	6.3774	2.6857	4.3676	5.8407	11.4295	7.5631	6.8339	4.3446	4.9301	3.5436	4.897	2.7169	5.1382	6.5682	5.0852	5.027	8.3966	5.0774	3.7905	4.1006	3.1847		0.00769128	5.06855
0.275	5.4129	4.5499	1.4345	3.7813	4.3536	3.5418	8.9858	5.4727	5.3673	7.25	3.6655	4.1922	2.9819	2.013	4.3918	3.7917	5.2903	6.4839	4.3511	8.3842	7.2141	3.2243	2.4993	3.5032		0.0153826	4.67235
0.4126	5.8369	2.9145	3.873	5.2556	4.1187	2.4197	6.3358	4.5312	4.9129	7.1186	4.1679	3.2119	2.9777	6.7465	8.8174	8.4052	4.9149	2.486	4.0091	6.6077	7.7584	5.3836	2.8715	7.5453		0.0230794	5.13417
0.5501	3.1243	4.4804	2.0904	3.1965	6.8539	3.386	5.4246	4.791	5.6972	7.7873	4.3346	5.4283	6.8924	5.1075	7.9851	4.6897	5.1215	4.0917	1.8691	8.7441	7.0061	6.1058	4.3317	6.8455		0.0307707	5.22436
0.6876	4.9543	5.2361	2.6574	5.0806	5.5557	5.4312	4.8295	3.1846	7.7776	10.3831	6.0341	5.8879	6.7163	5.427	8.2509	5.4177	3.245	3.6408	3.2863	6.815	8.629	2.7205	5.2915	4.8514		0.038462	5.47098
0.8251	5.9054	4.2414	2.7047	6.2143	3.9459	4.9547	3.6185	3.3178	5.1382	11.007	6.5303	6.8469	6.977	8.1734	5.2535	7.9448	5.2352	3.2175	2.7324	9.4394	9.8212	2.1019	3.1525	4.2544		0.0461532	5.53035
0.9626	5.4473	4.2124	4.808	8.6624	3.9393	7.9292	6.4595	6.4534	7.4354	10.2283	9.191	7.8209	6.1222	7.9133	5.1476	7.8847	6.2907	3.7921	6.1716	8.8317	9.1521	3.2714	6.0877	3.4207		0.0538445	6.52804
1.1001	5.3403	5.8319	5.2686	4.0087	4.383	7.4378	10.7369	8.3379	3.4067	10.3477	8.3651	7.7966	8.0123	4.2251	4.1211	5.4087	11.1386	6.8345	10.7417	9.6827	6.6258	6.1938	5.2762	6.6074		0.0615358	6.92205
1.2377	4.6782	6.264	4.6662	6.423	6.9778	3.979	8.5445	7.0854	5.956	9.8527	8.28	5.6607	7.4645	8.6045	4.301	7.6237	11.4419	11.2503	9.8624	10.2958	8.6514	6.7497	3.4138	7.5994		0.0692327	7.31775
1.3752	5.1136	6.1514	6.9232	7.786	8.8302	4.0693	11.6308	8.9906	7.187	6.6822	9.4134	7.2276	6.819	9.0759	8.9348	11.8975	9.4949	9.7534	8.821	9.3352	8.3266	6.0179	6.5731	6.646		0.0769239	7.98752
1.5127	9.6479	5.0728	6.528	7.9873	9.2267	4.8877	7.8539	8.5855	11.7124	9.1234	12.4818	9.7804	9.4081	9.9227	8.5609	8.1175	9.2571	11.9696	7.8464	8.9382	7.5044	5.4556	5.9123	4.2995		0.0846152	8.33667
1.6502	9.7554	6.8112	6.5246	10.4402	9.7832	9.239	4.7494	4.5448	10.6485	10.8423	12.0232	10.0034	15.4605	13.3776	5.1687	13.1265	11.054	9.2182	10.4413	9.8646	7.0807	3.6672	6.0836	6.5746		0.0923065	9.02011
1.7877	7.6271	5.9801	6.0781	17.8078	8.4924	10.0798	8.8949	5.9828	8.0026	10.6281	12.2209	9.2396	11.7831	10.7432	10.0241	15.0945	10.9035	7.2604	6.4809	8.0651	11.1199	4.3328	8.7508	8.149		0.0999978	9.32256
1.9253	6.256	7.288	7.8098	18.3599	7.7406	9.6225	11.3057	9.4497	9.0097	12.6364	15.2472	12.7293	11.8814	18.0922	9.5416	12.497	9.0082	10.4058	9.3763	6.6105	11.8247	10.7594	11.6263	7.0418		0.107695	10.6717
2.0628	7.6793	6.1125	8.7525	12.5562	9.7054	7.212	8.3278	13.0275	12.3426	9.9508	14.0259	9.0553	15.5718	17.8045	9.8275	11.1101	11.0959	11.175	12.7408	9.1142	10.9418	11.4952	8.536	4.4907		0.115386	10.5271
2.2003	7.0023	5.0185	7.2445	9.5228	10.6623	6.6069	9.3958	12.958	10.4309	9.4073	11.4139	6.8608	17.4077	16.455	10.8147	12.1352	11.1689	8.6513	8.5197	9.5301	12.1878	9.5113	10.3963	6.8229		0.123077	10.0052
2.3378	9.8138	4.7853	10.1317	12.2945	11.3605	10.0442	12.9737	10.0104	9.8618	14.2646	11.0024	9.9553	19.1857	16.1659	9.029	12.7415	8.8997	9.0024	8.7637	11.2224	13.374	11.4628	10.9391	6.5774		0.130768	10.9942
2.4753	12.7	9.0375	8.2656	10.329	10.7681	12.6492	12.2814	11.7981	11.1597	11.283	11.7062	12.7834	21.0329	14.0935	12.2439	11.0044	9.5332	9.7456	6.7714	10.3429	13.0431	10.448	15.3393	7.2927		0.13846	11.4855
2.6128	7.495	7.14	9.8102	8.0269	14.2343	15.8125	13.8919	18.5607	10.9908	13.1771	6.8384	16.2187	17.3115	18.6989	12.9776	10.6101	8.001	8.4745	6.4307	12.5863	18.8081	9.3864	13.4824	10.2099		0.146151	12.0489
2.7504	7.1799	12.2061	13.8427	6.966	12.6009	16.4738	9.4246	11.7503	8.3991	15.643	9.5934	15.9065	12.7002	15.6986	11.8987	14.2205	12.1718	5.7916	4.8763	14.1058	13.9444	12.3717	8.4378	6.4944		0.153848	11.3624
2.8879	6.6129	10.7163	12.8055	10.6199	11.8958	13.699	11.5196	14.4398	15.0115	11.4048	10.9746	10.5269	14.7976	19.3912	12.6717	14.0143	9.8359	9.0263	7.8462	9.4698	13.3837	11.8034	13.5959	4.1572		0.161539	11.6758
3.0254	8.5803	14.2147	19.729	10.7042	8.4491	11.7261	13.4171	9.5496	13.2668	9.9797	8.7221	12.0203	20.9598	12.9847	14.6438	14.2721	7.8862	12.7048	9.3722	14.63	15.9142	12.4172	12.783	9.0705		0.16923	12.4166
3.1629	7.2886	9.9093	14.961	8.4064	11.8645	12.7534	13.5918	5.6467	12.0017	8.4663	14.301	13.6917	19.9447	14.768	10.398	9.3218	10.4573	6.72	10.082	9.4753	15.6866	13.4168	11.341	12.4567		0.176922	11.5396
3.3004	8.8396	13.1506	11.0684	8.9108	18.2973	18.2896	18.3979	14.2113	10.5535	15.3626	14.0664	8.2898	17.1742	16.7224	11.3449	10.3788	9.0123	9.2389	8.3595	11.1122	9.8868	12.5854	8.1571	12.9281		0.184613	12.3474
3.438	8.6911	11.0672	8.8184	12.5128	15.7826	22.0745	11.9931	12.0265	14.404	17.7278	15.8992	15.9407	14.2066	19.2828	12.2205	8.6698	10.1039	11.475	5.1616	12.2404	17.9391	8.2442	10.4848	10.4987		0.19231	12.8111
3.5755	12.2154	11.4154	10.398	10.9745	13.9355	14.3874	13.1072	9.5897	15.4078	11.0289	18.2995	13.5264	13.6645	11.8099	12.3434	6.3447	8.7789	10.3092	9.7027	10.9358	20.3421	7.9207	6.2657	11.4303		0.200001	11.8389
3.713	13.1193	10.736	15.2433	11.1046	11.8262	11.4311	7.7832	10.4336	12.1178	11.3216	11.7261	15.9806	10.5111	18.983	14.0106	10.4585	11.6977	9.3509	9.4952	12.0855	15.209	12.4766	11.7245	9.2862		0.207692	12.0047
3.8505	13.821	6.3759	10.8486	10.181	13.7602	16.7804	11.4339	9.5609	18.816	16.6549	9.5566	18.8047	13.3648	18.7256	11.1165	13.6829	9.7284	6.2325	7.7373	7.0852	15.9823	15.2634	10.4776	7.9946		0.215384	12.2494
3.988	9.1973	11.0628	15.3831	16.6266	14.8748	13.1473	10.9004	8.2687	14.4237	17.0514	13.26	17.618	13.1092	17.0471	9.1774	13.0343	8.1558	9.78	11.6299	4.2244	15.9618	16.9069	18.1601	13.7435		0.223075	13.031
4.1255	13.9534	7.1099	8.1448	14.6124	12.063	13.2366	14.5485	10.678	9.2281	21.8558	17.8833	16.3392	16.701	14.7353	9.197	17.1065	9.0661	8.9516	10.7478	8.9682	19.2685	19.035	17.9467	16.088		0.230766	13.6444
4.2631	10.8516	12.6592	9.5935	10.6739	10.2318	13.8868	10.2735	8.9659	11.7234	19.285	22.4668	16.1731	15.4442	15.7428	9.8873	15.7313	11.9694	11.724	11.0394	9.5539	19.3605	15.7528	24.4835	13.1449		0.238463	13.7758
4.4006	9.7162	11.1292	13.1677	10.7227	11.9632	13.5808	8.4614	9.1044	14.2204	18.7888	23.5713	12.2748	10.831	12.9025	11.8972	13.7557	14.636	18.4429	9.2581	6.1883	13.2755	10.9906	27.9237	14.4401		0.246154	13.3851
4.5381	7.4367	10.1668	12.0798	12.5678	19.6298	16.1315	9.9564	11.0593	16.512	18.6415	22.635	15.5154	13.0504	18.4857	8.116	12.047	14.3866	16.3737	9.3424	8.9667	13.1776	9.6547	22.1745	13.5055		0.253846	13.8172
4.6756	11.6643	11.0373	11.2536	10.4831	18.2803	15.9363	8.6786	12.7023	20.7832	16.6081	16.9345	14.8941	14.9872	22.2915	12.3702	13.5241	11.233	11.8371	8.3073	10.0064	9.6236	8.9148	14.8985	12.7578		0.261537	13.3336
4.8131	15.2174	12.2506	12.8067	12.7876	10.5597	10.3291	12.4111	13.2953	8.4523	15.1984	19.5586	13.659	16.2551	18.3443	10.8	11.8829	11.2261	10.9989	15.2256	11.1113	14.773	9.7742	14.6855	18.4393		0.269228	13.3351
4.9507	12.6675	9.5019	11.3475	15.1507	14.3532	12.901	7.7273	12.1261	14.7951	18.0944	18.6724	16.4176	16.2505	15.1047	13.8898	17.0888	9.5085	11.3	8.64	8.9655	13.6024	5.4517	10.7903	13.1439		0.276925	12.8121
5.0882	16.3894	8.2527	11.4139	16.4268	19.0985	16.8646	14.4709	11.2543	16.0436	16.3215	14.1403	12.5153	15.5102	15.025	14.9092	15.868	13.8735	12.745	7.1311	10.5016	16.3871	9.0949	11.9726	14.8377		0.284616	13.7937
5.2257	12.6827	9.2641	10.6586	15.7857	15.365	13.8102	12.5485	10.8444	15.2301	15.7238	16.7029	15.1362	14.6959	15.6696	13.0936	18.4846	14.4254	15.751	12.2511	12.8189	16.0864	9.1639	14.8676	17.1736		0.292308	14.0931
5.3632	16.0514	9.0724	9.3676	14.34	15.0816	11.4323	15.1895	10.3826	16.9934	17.1353	17.8531	15.108	15.7079	16.3749	9.9976	11.7786	14.4912	18.4169	11.5486	8.2999	14.9864	6.8197	9.0499	14.1299		0.299999	13.317
5.5007	12.2662	8.9494	8.0453	10.5694	18.9375	12.6057	11.8392	13.1487	10.908	13.6783	20.1441	11.7955	13.4065	20.8621	7.7002	14.3743	10.8402	17.101	8.8323	10.0548	15.9303	5.8043	8.4359	15.2198		0.30769	12.5604
5.6382	9.53	8.6545	8.6132	12.4835	13.661	9.4955	15.6777	15.6345	13.2669	12.4699	18.3776	14.2929	13.3044	21.6453	8.2366	17.6489	20.3525	14.9485	9.3716	19.2912	9.1548	9.097	9.6248	9.4405		0.315381	13.0947
5.7758	12.3883	7.0035	12.8218	11.7481	12.5635	14.1265	13.3185	10.4081	14.1097	14.4367	17.1499	12.1006	12.6412	14.5161	11.9308	15.2511	15.9266	13.5787	10.5475	13.7081	10.9558	6.8098	10.5503	11.5647		0.323078	12.5065
5.9133	14.1156	9.1256	9.9009	11.1414	10.0666	14.6727	16.6761	13.6273	15.3691	16.2573	16.0639	13.0103	9.7133	10.8924	12.6501	21.1929	12.1191	13.2973	10.5888	10.9881	17.0607	6.8906	10.5536	11.3166		0.33077	12.8038
6.0508	17.5822	9.8478	9.1051	13.0961	11.0536	13.1101	14.5337	12.6555	13.7302	15.1884	15.9475	14.1018	9.0244	14.0899	15.8557	24.842	16.2227	12.7084	10.3725	11.8312	16.4769	9.3469	11.0957	11.7201		0.338461	13.4808
6.1883	13.1191	11.1763	9.3549	11.6711	7.8271	19.8878	9.975	9.2251	16.1201	12.9217	13.4479	13.6978	14.3662	12.9552	14.7111	19.8768	18.6943	12.6421	7.7167	13.7213	13.3754	11.3527	12.5365	11.3733		0.346152	12.9894
6.3258	12.567	9.5213	12.8498	9.2776	9.1359	16.6471	13.4219	14.5557	19.3608	14.8085	13.8152	12.5605	13.5755	11.0804	13.3649	18.564	16.5815	11.8601	10.4415	18.974	19.4938	8.8247	13.2729	10.604		0.353843	13.5483
6.4634	15.4571	6.8494	10.9791	6.5808	14.6974	14.9324	12.8407	15.5286	14.7518	15.1606	12.3523	17.9312	14.0651	14.5064	13.2345	11.2767	16.5335	11.2831	10.6918	14.6698	15.652	16.4769	15.8806	9.0516		0.36154	13.391
6.6009	10.6201	8.0761	17.2633	10.5484	9.5852	12.1274	17.1752	9.3839	18.1046	14.3521	6.9917	17.6097	13.6445	17.0133	18.9398	15.9095	13.8681	19.2682	9.4554	16.3719	13.5688	14.69	14.7539	10.1697		0.369232	13.7288
6.7384	10.6037	6.8917	10.2237	10.7165	9.1212	8.6976	12.6551	11.3394	16.1731	9.0957	10.0782	14.4918	10.0196	12.7094	16.0849	24.1787	16.5279	11.6164	7.5245	13.3332	15.2398	10.7037	13.6909	20.1638		0.376923	12.5784
6.8759	6.799	12.6411	7.6114	10.5422	9.4142	12.3542	14.0731	9.6741	15.494	13.3757	7.9714	11.996	11.8979	11.8719	11.8059	22.2803	12.6816	9.8959	8.6191	11.8501	9.6103	6.0264	8.1059	14.2342		0.384614	11.2844
7.0134	8.502	9.1965	6.6566	8.6144	10.9649	10.1583	17.6485	11.0802	13.5768	12.1629	10.2737	19.7614	10.9151	13.0154	13.1223	17.9646	9.689	15.833	6.7035	18.6252	11.0306	7.455	9.0682	7.364		0.392305	11.6409
7.1509	8.4883	9.2844	13.7715	11.4142	13.1577	11.6599	16.6972	12.6928	16.2245	15.5009	11.9629	21.822	12.2674	16.0655	12.0348	17.8958	10.6238	7.8024	9.2346	14.5784	12.8097	4.8189	9.7793	13.7416		0.399997	12.6804
7.2885	11.8101	7.8636	10.4399	12.7114	13.4477	9.8857	13.6336	12.1734	15.6615	15.2567	16.7407	21.8873	12.0032	13.6447	12.5272	10.6427	10.5747	11.2897	13.1045	16.6399	10.6069	6.5119	8.3737	16.6483		0.407694	12.67
7.426	8.556	9.5956	10.6715	10.2802	9.515	9.2983	10.7692	13.4725	17.4292	11.6239	17.137	16.3549	12.5935	14.2607	14.7517	10.8123	9.401	15.9675	11.6718	18.149	7.8662	6.2334	8.4611	18.9396		0.415385	12.2421
7.5635	15.746	10.8637	8.4781	13.4916	14.2238	9.9989	14.9205	12.9413	13.0067	13.9041	11.1982	16.191	19.947	13.6917	7.7819	11.6563	14.102	10.6192	9.056	15.711	7.2454	8.4239	8.7589	14.38		0.423076	12.3474
7.701	14.0887	6.0094	13.1398	14.5447	12.7608	10.7227	12.8539	15.1457	17.0466	15.2569	9.1052	18.8775	9.6183	12.5651	14.428	11.7214	10.0032	17.5353	8.7586	11.0062	7.1293	6.1598	10.5826	9.0082		0.430767	12.0028
7.8385	15.104	12.44	8.503	10.2913	5.999	4.7094	13.1794	16.0024	20.6369	13.1096	9.7023	15.6698	12.4662	12.2866	13.3619	12.6047	11.8558	17.3878	8.8557	12.0421	7.7337	4.7859	12.199	10.2708		0.438459	11.7166
7.9761	10.9778	7.454	12.0322	9.9187	9.133	7.7703	9.8553	14.1896	20.9442	9.9426	6.4384	12.5367	17.7214	16.1888	10.783	17.5243	18.7089	11.0292	7.8446	13.3717	7.9372	5.322	8.8392	9.4152		0.446155	11.4949
8.1136	12.8888	9.6149	11.2232	6.0597	10.1386	8.7869	14.1926	23.3432	18.5103	10.1762	5.3657	17.1882	19.3729	12.594	11.8109	14.2873	15.2919	11.6445	11.2844	11.3609	6.4439	3.6054	9.1925	11.5329		0.453847	11.9129
8.2511	14.0181	11.1541	14.091	8.4908	6.8946	8.7222	9.4101	14.4715	18.5003	11.9518	10.5924	16.3306	14.6722	20.4982	13.5982	16.6227	14.725	10.9758	7.0492	14.5944	9.5326	5.9957	13.1947	9.5358		0.461538	12.3176
8.3886	13.88	11.203	12.149	9.7024	8.2879	5.7396	6.6309	19.0484	15.5652	13.6728	4.1286	19.4794	20.3728	16.5314	19.271	14.3894	15.2476	10.2758	8.9147	16.9576	9.4003	5.436	8.8124	10.2692		0.469229	12.3069
8.5261	8.6505	12.4151	6.5199	12.4076	7.5532	7.8894	12.6733	16.7565	13.2062	12.1103	9.1542	17.261	23.4874	16.0887	15.0204	16.3437	17.2341	9.1795	12.197	11.7822	9.3076	6.0834	10.9822	10.2364		0.476921	12.2725
8.6636	10.7818	12.4693	9.8542	18.7969	6.0703	7.0052	12.0763	12.3844	15.6285	17.2745	10.1276	18.9988	19.1316	19.6371	9.1687	16.2821	14.8845	7.8396	15.8447	15.8189	7.3785	5.4925	10.4459	10.1882		0.484612	12.6492
8.8012	14.3207	6.7256	7.0291	15.4622	8.708	8.9639	12.202	16.1431	13.9397	21.7936	8.5208	18.8066	14.8697	23.5011	10.7111	16.9772	9.4265	6.9452	18.0651	14.8695	7.9437	9.823	6.2102	12.6353		0.492309	12.6914
8.9387	10.9282	8.5279	7.6705	12.5241	10.6937	7.0274	12.129	16.3701	14.2443	21.4232	10.3489	18.1734	18.3946	21.1742	12.226	19.537	12.1605	8.9952	18.1732	16.9458	7.4995	10.3236	7.7169	10.6404		0.5	13.077
9.0762	8.8118	7.1093	9.9337	12.2349	8.1227	5.5438	18.235	10.0121	16.2144	15.1749	12.0849	17.2011	15.6971	20.7883	19.5474	16.2895	14.9129	6.8693	11.2616	17.6765	10.7144	5.5448	10.3673	11.5184		0.507691	12.5778
9.2137	5.7787	11.3582	7.1162	9.7513	9.9544	5.2829	16.8842	11.8318	26.0029	14.7503	6.0644	19.2725	15.2449	18.3626	19.9366	11.5252	9.9888	6.8954	12.7682	16.6298	10.0328	6.7623	9.5955	11.3588		0.515383	12.2145
9.3512	7.5037	10.0768	4.7075	8.5873	11.1135	7.2498	12.4517	14.271	22.6915	13.6837	5.8681	19.2236	12.3799	21.9454	21.5878	12.5765	6.3444	9.4637	10.0372	15.6317	8.2467	7.4074	9.3218	10.6972		0.523074	11.7945
9.4888	7.1095	11.5458	11.1906	11.9619	5.1582	6.4878	12.5051	12.2277	22.8891	15.2922	9.5771	17.6039	17.8328	22.8182	19.1203	9.271	9.1958	8.3967	11.1373	13.2759	8.7321	6.3663	10.729	7.7069		0.530771	12.0055
9.6263	10.8637	9.2345	9.6325	13.4465	7.4155	4.9296	10.9365	13.1829	21.9381	13.9825	12.9204	13.0434	21.8109	24.3485	19.8852	6.8821	12.641	2.1616	10.1498	22.0123	4.9363	7.9733	12.4915	10.5936		0.538462	12.3922
9.7638	12.9664	14.4494	9.016	9.7435	3.8023	5.9047	13.521	12.0247	20.0015	17.745	13.0437	16.6904	13.4783	23.9794	17.8179	8.4849	10.0583	6.6459	12.94	18.7685	8.2175	5.0901	9.304	6.6452		0.546153	12.0974
9.9013	8.3105	9.0698	9.3854	10.8431	4.3007	6.5986	14.7568	12.6808	18.5857	11.0597	8.7948	7.9366	11.5183	29.8637	14.7235	7.115	10.7928	6.8316	11.2633	14.4683	7.2126	6.0298	4.387	3.8626		0.553845	10.433
10.0388	10.6747	11.1834	13.2728	14.5618	3.878	8.9084	16.1615	11.487	15.7655	13.8574	12.3451	10.1576	13.1337	27.2109	18.3133	8.3889	7.205	4.8139	8.8917	18.2934	8.6402	4.8994	5.2552	4.854		0.561536	11.3397
10.1763	8.8771	6.1585	11.5715	10.8458	4.5202	9.2847	17.6321	12.7482	20.616	11.3511	11.7629	9.4726	10.4942	26.8868	19.9617	7.8285	10.7896	10.3719	9.1312	15.2199	6.7885	4.7681	7.4672	9.5321		0.569227	11.42
10.3139	6.4582	10.6421	6.042	9.4542	6.6614	4.9668	18.6837	11.0864	25.0938	10.1121	8.8999	13.6993	9.21	31.6244	22.7695	9.2256	6.6832	6.1798	8.6396	10.3607	7.0551	2.3133	13.2727	5.3769		0.576924	11.0213
10.4514	11.0502	9.537	9.3269	11.5943	6.7753	3.5254	20.0373	13.9866	16.3711	9.7309	6.7757	11.4514	9.9011	27.9497	12.4362	15.2104	7.9838	6.0046	6.0789	12.1837	7.1658	2.3551	9.5609	4.3596		0.584615	10.473
10.5889	11.2473	8.0023	12.0876	5.7124	6.16	3.6126	25.848	11.7828	21.1241	12.4336	10.2654	11.1804	9.6291	27.6643	11.8334	15.2379	8.4205	5.2909	7.7684	13.558	4.4764	7.5241	7.1639	5.8841		0.592306	10.9961
10.7264	7.858	10.3329	10.9802	7.3449	8.2219	4.059	14.2369	12.9147	23.3784	13.9393	10.7399	10.5935	9.7827	23.1308	12.6531	17.9254	9.3135	9.058	9.1382	11.2309	5.7425	3.0744	7.5286	4.6342		0.599998	10.7422
10.8639	5.1655	11.413	7.4428	8.0352	6.9007	3.0254	16.1146	11.7144	18.6685	14.8516	12.1905	16.1528	15.453	27.9848	8.7709	9.549	13.0185	7.7377	9.0841	8.7531	5.4308	3.9532	8.5549	4.1085		0.607689	10.5864
11.0015	7.5044	9.9883	5.4242	7.5696	6.2746	4.287	17.4996	13.7045	22.1902	9.5459	14.648	9.4291	16.5456	27.203	6.9552	9.7053	6.6901	5.2646	8.8876	15.594	3.9208	6.2936	6.9431	3.4493		0.615386	10.2299
11.139	10.2074	8.6018	9.6718	10.9081	6.8908	5.9932	13.9057	6.814	21.9855	11.8806	14.9205	13.1395	13.815	24.0142	8.2095	10.8003	10.042	6.3744	8.4918	16.2107	3.3864	5.7322	8.1862	3.6411		0.623077	10.5759
11.2765	13.235	9.7711	15.0394	9.5381	6.0513	3.5879	9.9325	9.8074	19.6446	13.4	11.5997	10.6918	11.4311	19.9347	10.0871	10.7023	7.424	5.1701	10.5307	11.3008	2.9781	4.7849	7.052	5.156		0.630768	9.95211
11.414	9.1887	8.0605	14.2171	9.9517	5.5041	9.2811	10.3747	12.1067	21.8517	12.9169	15.5906	12.7238	11.74	19.1554	10.203	10.2734	4.4358	4.7123	8.446	15.2255	5.0385	5.5083	6.2995	4.4279		0.63846	10.3014
11.5515	11.0197	6.1984	6.9494	6.3693	6.3091	6.1281	11.3418	6.7134	19.901	14.181	12.2981	15.4045	12.8676	17.2312	11.8051	10.8809	5.3633	6.2234	14.0564	10.7726	5.5851	4.1337	5.9369	7.4768		0.646151	9.79778
11.689	10.7147	10.3373	10.3246	10.2713	8.743	6.0641	10.1686	8.7665	22.6906	9.9949	12.337	7.1246	11.1946	14.3707	12.934	8.3871	4.4009	3.0276	9.3539	14.7807	6.6605	5.0249	7.1539	7.1033		0.653842	9.66372
11.8266	9.7782	12.0011	13.9045	7.5207	6.964	5.9165	11.9674	11.4247	20.3319	15.6236	11.1591	6.7177	13.4446	9.9831	12.542	9.9841	4.2798	5.6984	5.8575	14.0592	4.9916	5.1916	7.6582	3.8549		0.661539	9.61893
11.9641	6.1021	8.061	11.3186	11.0992	7.1754	6.1481	4.9907	13.4807	20.3716	16.6969	11.1286	4.1131	9.6015	11.694	7.5091	9.1266	5.7598	5.4917	4.1542	17.0115	3.4403	8.8191	6.7961	8.5655		0.66923	9.11064
12.1016	6.3301	9.025	9.7479	7.1832	6.7171	9.8116	8.3251	16.335	16.2188	19.4562	9.0649	9.1566	12.9787	11.7881	8.1583	11.0116	5.2288	8.639	5.0526	7.8039	2.7391	3.7279	4.5879	10.1991		0.676922	9.13694
12.2391	8.2479	9.0097	7.3697	6.2724	4.9606	5.567	9.325	12.6398	20.6722	18.8055	8.5591	7.1996	9.9476	14.6425	9.3785	10.934	5.9634	9.181	4.765	10.1663	6.9688	6.8625	4.9143	8.4969		0.684613	9.20205
12.3766	9.268	9.344	6.533	10.9	4.8344	2.3522	8.3152	12.6164	13.0311	21.7363	8.7389	7.4998	10.2373	13.5357	10.7674	8.8949	6.318	6.4291	11.6151	11.852	5.9473	6.6886	6.3091	8.3172		0.692304	9.25338
12.5142	9.4278	9.4702	7.9603	7.1335	5.6793	5.4415	4.3878	4.4707	14.4136	21.7869	7.6835	7.8677	8.135	20.2431	12.1555	11.6279	4.8421	5.567	5.8914	7.1974	7.3491	2.5642	6.8025	9.6105		0.700001	8.65452
12.6517	7.73	11.7252	6.8516	10.0194	8.1301	5.5134	7.1174	5.1717	18.9395	22.4023	9.5026	6.7912	13.1936	17.2396	11.861	8.512	7.0186	6.6783	4.7158	11.0046	7.3369	4.3989	7.6093	8.5152		0.707692	9.49909
12.7892	7.5895	6.5555	5.8706	6.4923	3.992	11.3647	4.1822	5.7394	17.0263	17.2871	11.2763	7.4481	12.0656	14.0664	13.5598	10.5434	6.8857	4.6429	8.642	8.0074	7.4274	4.4353	7.0113	11.0578		0.715384	8.88204
12.9267	6.3407	5.557	7.3926	5.6101	5.043	7.1816	9.9686	9.9241	21.514	16.5352	9.1683	11.2374	10.6779	17.556	7.9866	10.2658	6.1113	8.1395	11.9847	7.4354	5.5147	6.3352	6.6437	16.5264		0.723075	9.61041
13.0642	8.5448	5.4003	6.1534	10.7428	4.1944	6.7962	9.0408	9.2321	20.5317	14.4563	5.588	8.5684	9.521	17.3719	12.4501	9.094	6.2199	10.9065	10.1783	5.4485	6.4509	5.5537	6.0896	13.7871		0.730766	9.26336
13.2017	4.6116	7.507	5.2432	11.3859	3.4644	5.6884	11.949	9.1273	22.9244	10.8753	8.2757	12.6027	8.5089	16.576	10.8778	6.7991	7.5506	5.9908	9.0471	6.8831	7.0644	6.5046	9.6963	11.6394		0.738457	9.19971
13.3393	6.1221	5.5247	4.676	16.9936	10.5446	6.7328	13.4909	13.0898	19.0603	9.2841	12.2912	15.0569	8.6983	12.0802	9.3564	11.1477	5.6677	9.0599	9.8438	6.5933	9.1855	6.8115	7.993	12.0273		0.746154	10.0555
13.4768	11.0156	9.8529	7.8632	10.4403	9.6794	7.1936	11.1298	12.092	23.7885	15.5391	10.7302	14.207	9.5576	16.271	13.5555	10.5496	5.8223	7.3284	9.6737	9.8817	5.613	4.838	10.0219	5.8497		0.753846	10.5206
13.6143	11.2618	9.0728	10.2835	12.8373	3.95	4.6609	11.0336	7.2906	21.6132	11.6767	9.9125	11.3086	8.9648	13.7263	12.4527	10.9112	7.817	3.7382	8.9071	15.1026	5.6598	3.8321	11.1413	4.415		0.761537	9.64873
13.7518	8.2302	7.4824	5.0409	11.3067	5.5708	9.1509	11.6547	12.0783	21.5616	10.4926	8.5227	11.0323	11.7536	17.8957	19.7768	9.5119	9.0098	2.0442	5.804	12.7517	8.1132	3.2214	11.4657	5.6551		0.769228	9.96363
13.8893	9.5563	4.869	6.9451	11.0493	4.5431	6.2654	15.6796	12.4906	16.6823	9.6097	9.0209	14.5489	12.1706	17.0424	10.093	11.9906	6.3222	7.6327	6.6594	9.6503	4.8307	6.4092	9.4756	8.1188		0.776919	9.65232
14.0269	7.1983	6.9395	8.616	8.8885	6.0351	6.9264	13.0041	4.6183	15.8119	11.6851	11.4658	12.0786	16.8189	17.2892	8.0757	6.8124	6.3495	4.7789	8.8467	10.4501	3.6736	9.0301	11.5607	7.6039		0.784616	9.35655
14.1644	6.4771	8.8824	6.9625	12.8016	6.2662	6.2358	14.2669	7.3365	23.5539	12.3507	12.5328	15.6473	15.125	17.9355	12.6528	7.3545	3.2879	6.3568	8.6299	12.6862	4.0575	3.5164	9.2662	6.0803		0.792308	10.0109
14.3019	7.1369	10.0347	6.5055	14.3471	5.7588	6.726	14.7853	12.1369	18.3829	12.0942	12.227	14.511	17.8878	17.7575	21.0461	11.9139	4.0544	5.6711	10.1351	11.5553	5.2528	7.5095	6.6238	4.6917		0.799999	10.7811
14.4394	8.9022	6.3035	7.3413	9.5705	5.3794	7.2097	11.8665	10.9042	20.8234	11.7763	10.1271	13.4547	20.4339	14.4793	11.801	8.8468	6.4537	5.7905	10.5996	13.3774	5.3975	7.9102	9.6355	5.5174		0.80769	10.1626
14.5769	5.9158	7.0071	8.352	7.1565	5.8075	4.0681	9.8024	8.1861	18.7971	10.658	10.076	20.0712	11.3601	12.8833	15.0242	8.8567	7.1842	4.0166	12.3439	14.9242	3.4479	8.4974	6.5183	11.2662		0.815381	9.67587
14.7144	7.143	6.7958	6.8832	7.587	6.1355	5.9556	9.9186	8.3777	16.8933	7.4056	10.4134	11.0392	14.4844	11.1213	15.0598	10.9542	6.3562	6.4615	7.7101	13.5204	6.0875	9.3269	5.6171	8.8501		0.823073	9.17072
14.852	6.1488	10.8035	6.421	10.0765	7.6687	10.0332	12.0816	10.2019	14.8378	9.5401	8.2807	9.7939	9.9091	16.0284	7.721	8.9856	5.7332	6.6336	4.6996	12.0169	3.1048	11.205	1.7542	12.8154		0.83077	9.0206
14.9895	6.3254	11.7958	2.7002	12.7853	9.3615	8.0066	11.4506	10.1774	17.5894	10.3615	10.9454	12.0362	11.2634	15.9705	9.4965	11.3511	3.5511	6.9311	7.3295	11.8148	3.9355	8.0938	4.0037	9.5496		0.838461	9.45108
15.127	8.4633	13.461	7.8618	11.1419	8.1655	6.626	9.2339	7.6701	13.062	15.327	8.85	15.3303	8.0757	12.4625	7.0034	11.2218	5.1989	7.7638	6.9307	14.8322	7.2915	4.2465	6.7747	11.4942		0.846152	9.52036
15.2645	6.715	8.257	4.0713	9.7369	6.5434	8.4787	13.9142	6.9013	19.0557	11.2175	10.7442	11.7665	7.73	12.7775	10.0845	9.5981	8.1399	10.1707	8.8566	20.3194	8.0985	8.2779	4.6017	8.4935		0.853843	9.77292
15.402	11.6197	10.1082	6.1265	6.2001	10.6618	8.793	11.7414	6.2803	20.291	16.8868	8.9555	10.9025	9.3849	12.2591	6.709	7.6317	8.0705	13.082	8.9099	21.5342	9.833	10.3178	5.4504	10.2708		0.861535	10.5008
15.5396	17.379	9.697	7.0913	5.8113	9.7868	10.1107	8.2597	6.5891	18.5475	19.3981	10.7516	11.9512	9.6792	9.3928	9.2696	8.528	4.8906	18.5347	4.5096	13.5592	7.2565	7.4714	8.3954	5.3723		0.869232	10.093
15.6771	10.1867	7.6073	5.3241	4.407	7.0817	9.4373	9.3398	12.3212	18.0372	15.3413	14.0412	12.1635	10.6933	14.2714	8.8156	7.0731	12.9829	16.8896	8.6478	11.1463	6.9354	7.0355	8.2767	4.1577		0.876923	10.0922
15.8146	7.6642	5.5629	3.9375	6.4677	6.967	12.4428	10.022	7.3283	16.7365	18.9271	12.3384	13.8509	9.3465	12.9033	10.6953	10.3277	7.8105	17.0917	5.6963	10.8372	4.3931	6.352	7.7202	2.5253		0.884614	9.49768
15.9521	4.4788	8.3287	6.2055	7.9724	7.4035	11.7528	6.7907	6.6106	14.1552	18.2708	12.6724	10.0457	12.4935	9.1714	7.7936	14.2158	6.0878	13.6414	4.3923	7.0744	6.9573	5.8692	4.6302	2.2447		0.892305	8.71911
16.0896	6.5787	7.0147	4.5629	5.8031	6.4756	16.9469	5.9724	3.6183	9.7029	10.171	9.6624	12.88	12.8423	10.5673	7.7617	12.6292	8.0768	16.7588	7.3776	7.4706	3.8093	8.3438	5.5431	1.8917		0.899997	8.43588
16.2271	7.4964	5.7052	7.9422	4.6223	6.2178	11.6696	9.3492	3.6397	12.688	18.3847	10.1823	18.0331	13.8272	8.2235	9.836	16.4162	4.6636	14.1978	5.4526	9.6634	7.3228	6.3043	4.307	0.3697		0.907688	9.02144
16.3647	4.6026	8.2586	5.1875	4.955	5.968	6.8385	8.6645	2.8672	9.8173	20.9722	14.3952	15.7301	13.614	11.0794	7.1219	13.3568	4.5691	13.4105	2.3204	6.1496	6.4229	3.0112	4.794	1.6393		0.915385	8.15607
16.5022	3.7779	8.0248	3.7596	5.2727	4.3607	7.3131	7.6362	2.9093	6.4728	21.351	15.4029	11.9367	9.9077	10.3927	9.3902	17.965	5.73	7.4896	1.6604	7.8762	8.2648	3.7238	4.3813	2.1094		0.923076	7.7962
16.6397	7.1439	3.5753	5.6856	9.0577	6.1521	4.501	6.0346	7.6778	8.1617	19.698	14.4512	9.9122	7.1488	14.7564	9.2437	13.4569	5.2068	7.0174	3.7269	6.7308	5.3045	2.2746	3.0303	3.6345		0.930767	7.64928
16.7772	6.9838	3.8477	4.7353	5.8817	4.8467	5.2158	6.0245	6.6498	9.4435	16.9363	13.211	8.8447	10.4789	14.3501	7.5341	23.213	2.4898	4.6069	4.4056	6.7931	4.1429	2.433	2.5446	0.7287		0.938459	7.34756
16.9147	5.326	5.1453	2.4598	4.1629	5.3705	4.7053	4.8404	5.6238	4.918	15.4719	9.891	9.5898	10.5473	6.9293	5.2318	16.6846	2.5831	4.9145	4.9147	6.2902	2.7995	3.4768	1.1273	1.7989		0.94615	6.03345
17.0522	7.543	6.895	2.931	3.0992	3.96	3.0754	10.5296	6.8178	6.0953	11.5138	13.6919	12.9128	10.5609	3.2675	10.2431	10.2445	3.3106	2.2224	5.676	4.5234	3.4935	5.016	1.7134	1.839		0.953841	6.29896
17.1898	7.4112	10.2862	1.7637	3.4903	3.6382	4.8763	6.8095	6.1402	7.625	11.9508	12.0456	12.8712	7.2461	7.7275	7.6447	10.1114	3.9503	5.7032	5.1073	1.9194	5.8551	1.8192	2.0089	2.0565		0.961538	6.25241
17.3273	3.0683	5.5447	1.7464	6.1512	3.9078	6.8428	6.6768	6.9171	2.328	9.6988	14.6872	10.5246	9.6701	6.989	9.5034	3.7387	5.9845	2.2215	4.5717	5.2618	4.4631	2.5357	1.0093	1.2839		0.969229	5.6386
17.4648	5.5819	5.0445	1.6019	4.8046	3.3503	5.4451	6.8723	9.3093	4.0312	8.7471	11.8362	7.4669	5.9941	7.2635	9.6859	4.1237	9.4626	4.7632	3.0601	4.2908	2.0709	2.4335	1.236	1.3658		0.976921	5.41006
17.6023	8.9926	3.9812	2.8967	4.5478	3.5113	4.7842	6.1939	6.3435	4.0016	11.5608	8.952	5.8336	2.3841	3.0811	3.3837	6.2934	5.3631	7.2805	2.9803	3.0705	3.4058	3.7431	1.902	0.4745		0.984612	4.79005
17.7398	5.9253	3.8895	2.4013	3.9132	3.0965	4.8847	7.7908	3.5916	7.4617	12.6303	6.7849	6.3781	1.9702	4.5318	6.0634	3.8839	3.4356	4.321	1.9351	3.7586	2.3897	2.7964	1.8985	2.7764		0.992303	4.52119
17.8774	5.3848	1.859	3.14	5.0955	0.9659	4.6702	6.9461	3.8574	9.7842	9.091	5.1994	5.7738	5.6528	1.8824	7.2063	7.2062	4.2705	1.7216	2.6487	5.4279	2.7506	2.0995	0.555	1.2318		1	4.35086

## Sheet: Image8
X0	Y0	Y1	Y2	Y3	Y4	Y5	Y6	Y7	Y8	Y9	Y10	Y11	Y12	Y13	Y14	Y15	Y16	Y17	Y18	Y19	Y20		Apical-Basal	Avg intensity
0	15.6762	11.1063	23.2695	14.2755	9.5696	10.6541	13.8006	15.0001	17.0285	16.8773	11.2587	24.6426	15.3756	24.9958	22.0375	18.6719	20.383	12.597	8.5346	21.9763	31.848		0	17.1228
0.1375	18.3795	10.0004	17.0048	12.2938	17.7811	14.735	12.4116	18.5631	18.3684	18.4774	16.1601	30.5111	16.3467	28.3075	21.6402	18.8386	20.0403	15.2665	9.2467	16.1215	25.2158		0.00649265	17.891
0.275	16.2025	11.4752	21.0209	13.3455	17.83	10.4683	22.0702	15.4063	20.5655	20.9707	15.2292	31.1812	14.7923	26.495	23.677	22.7559	18.3079	26.4925	13.4286	15.1773	28.6122		0.0129853	19.3097
0.4126	13.5202	13.491	17.977	10.2832	26.0776	11.2674	29.3049	18.5716	14.9441	16.6502	14.8154	37.1518	20.2952	20.6393	30.7316	17.3833	27.1425	34.3508	20.1819	18.0509	35.6131		0.0194827	21.3544
0.5501	13.7714	11.6766	17.7227	12.7456	25.9649	12.6193	29.36	21.6761	21.2848	23.4016	17.962	29.1089	23.2374	25.1907	42.1453	17.4979	32.8247	44.6293	14.8429	25.2076	29.5954		0.0259753	23.4507
0.6876	20.732	16.0352	15.7915	14.6388	31.023	16.2012	32.4037	26.5776	18.0032	27.5557	17.7575	36.0325	24.4296	21.8703	39.1021	15.1495	38.5688	57.2875	19.2929	27.7204	31.2717		0.032468	26.0688
0.8251	21.0714	13.4763	18.7094	14.7529	39.6438	17.6823	27.2876	34.0316	28.5793	30.6002	19.8172	36.1076	29.4256	19.2931	45.8133	14.9217	36.1218	63.1436	26.3283	31.1701	39.0098		0.0389606	28.9041
0.9626	17.3231	14.5105	24.3145	14.7191	37.149	17.0563	32.3131	35.5102	26.5148	31.464	24.3849	40.8077	34.5189	17.8321	47.4044	15.9854	32.5783	56.7901	37.793	42.2112	29.713		0.0454533	30.0426
1.1001	12.7616	21.3134	28.3901	15.947	35.647	15.0872	31.1736	44.162	23.1347	41.04	24.4677	42.6081	35.7241	20.0442	44.6877	21.6504	31.387	41.9986	41.8056	42.9107	29.3306		0.0519459	30.7272
1.2377	18.9857	19.408	24.6373	18.1593	41.691	13.6551	28.9822	44.9006	20.9251	47.2377	25.1998	33.9356	45.1488	23.2058	56.0114	32.9399	30.3057	42.8499	47.9843	54.4012	30.9727		0.0584433	33.4065
1.3752	26.4399	27.7865	19.4865	20.2947	38.6143	19.1493	24.7452	46.0744	24.2703	56.0792	35.7284	28.1396	39.2355	24.0531	43.142	32.116	36.7851	42.1192	51.9438	53.7956	32.9478		0.0649359	34.426
1.5127	26.1204	32.256	28.199	22.3595	35.5736	16.4348	32.4692	49.2153	22.3265	56.3885	41.0434	25.8937	44.9801	31.7924	39.7403	35.8876	44.7717	36.3913	44.4726	49.2364	28.0375		0.0714286	35.409
1.6502	25.5577	41.7666	24.5717	19.3004	38.0818	23.2095	31.5676	52.89	29.2531	56.5269	48.1859	24.5738	46.8853	37.9096	29.7239	43.209	45.9463	25.0978	44.1425	43.8572	25.5857		0.0779212	36.0877
1.7877	23.1838	42.78	25.8949	17.7833	31.6276	21.9157	26.1411	51.9186	31.2956	33.7635	65.047	27.8225	52.8055	30.2432	32.374	37.1531	49.4193	29.3822	43.2582	39.0461	27.7582		0.0844139	35.2673
1.9253	33.9094	33.6037	35.0379	25.803	28.6063	23.0005	30.0691	50.7128	34.1082	35.2624	58.1739	25.8205	46.2847	32.3368	22.7032	30.9928	44.3531	23.63	33.2675	36.7352	20.8668		0.0909112	33.5847
2.0628	33.9562	33.9718	33.5007	24.3893	19.3666	27.1413	30.6513	57.1127	34.2663	32.1501	56.9956	21.7844	45.816	46.3203	22.8749	36.6842	46.46	23.2514	25.8355	32.2883	20.7563		0.0974039	33.5987
2.2003	39.789	35.6776	35.6886	14.5109	19.7968	26.3768	26.8785	56.8716	33.7302	32.6541	46.9933	24.7761	42.1199	37.7519	30.236	30.7779	32.5564	19.3679	28.8083	35.0837	22.5804		0.103897	32.0489
2.3378	38.5148	27.1746	38.7436	19.6367	19.86	22.054	23.3245	51.4629	30.7071	39.8846	40.1821	24.3216	32.4158	39.1848	25.5831	29.7754	40.1697	21.4343	28.9551	34.7467	14.3408		0.110389	30.5939
2.4753	31.9253	31.6739	41.1609	21.0852	19.2175	31.313	21.2273	42.7175	27.15	35.741	40.6851	23.5338	27.6182	35.2746	22.3252	31.9234	42.3196	29.5147	21.2542	34.3445	21.3255		0.116882	30.1586
2.6128	31.8297	25.5604	39.1638	19.4367	26.6255	32.5994	20.5333	38.9855	26.1479	34.6036	40.2805	23.261	30.7573	41.9335	19.045	38.2824	31.3197	22.3496	23.4838	30.8794	17.961		0.123374	29.2876
2.7504	27.1636	26.8603	37.2751	24.6932	26.5409	39.9614	20.2962	35.4888	28.8643	39.6124	39.0254	24.4628	31.3607	40.9641	22.8064	34.4385	27.4446	17.876	28.637	26.6834	21.9334		0.129872	29.6375
2.8879	33.6752	22.0155	44.3696	26.5335	23.3261	36.6025	19.743	31.8218	31.351	44.3436	38.4711	20.7206	27.7763	38.9635	21.2889	27.167	24.1536	15.5567	22.2933	23.9837	21.1185		0.136364	28.3464
3.0254	33.1729	22.7555	46.0285	33.4914	21.1195	43.3586	22.9434	32.4467	28.0694	46.9212	42.427	22.7904	25.4719	34.9234	22.0941	31.0454	22.1279	20.1593	24.8041	24.9648	21.7884		0.142857	29.6621
3.1629	21.698	23.476	47.5205	24.9121	17.8783	50.9748	18.5353	34.2702	31.9179	48.867	48.7669	28.2232	23.8936	40.5303	18.642	31.7632	21.9253	20.0015	21.771	22.3962	18.247		0.14935	29.3433
3.3004	32.1879	25.3951	38.2269	25.2551	17.9098	45.7065	17.2047	26.9364	31.4759	45.5178	42.8424	25.8304	24.7213	38.3191	14.6729	24.7172	23.021	21.0353	25.6032	19.6405	21.7339		0.155842	27.9978
3.438	31.5017	24.0556	34.6084	25.8243	18.0787	36.6126	20.2948	29.0648	21.1983	39.2168	33.4484	27.2589	20.1822	35.0424	11.9328	27.2595	18.5453	21.7087	22.5769	17.8817	19.0383		0.16234	25.492
3.5755	22.8324	24.9608	33.0137	22.7345	18.8324	45.7398	17.9224	32.5896	17.4817	39.2798	36.4026	28.4749	20.7062	34.8111	10.0523	32.2691	19.7961	22.53	20.1303	21.2231	14.9966		0.168832	25.5609
3.713	28.958	27.2455	27.7068	25.3112	14.6569	35.035	14.6079	37.6809	13.8713	36.9818	33.5512	25.6163	19.0149	36.0466	9.2361	31.9608	16.5775	16.1326	16.5548	25.527	14.4851		0.175325	24.1313
3.8505	27.6056	23.4522	35.0039	21.9161	9.7901	42.5679	10.6941	26.1913	11.123	33.4954	26.6133	29.0739	24.1218	28.8134	12.353	24.3864	18.3501	13.0008	12.184	29.5608	15.5108		0.181818	22.6575
3.988	20.6223	20.9104	31.6775	18.127	11.9239	45.4743	10.2541	29.136	15.6765	29.7924	28.0622	26.889	20.8466	21.7043	16.887	26.2249	27.3631	16.4474	12.3853	25.5589	17.6187		0.18831	22.5515
4.1255	22.4107	19.4685	23.655	17.6557	16.3712	40.8633	11.6428	24.0903	13.702	25.7883	20.5926	23.381	17.3976	22.1206	13.4899	28.0509	22.8698	18.2167	17.1729	20.7864	21.0238		0.194803	20.9881
4.2631	21.9003	20.2951	28.7836	15.1033	15.9161	36.8813	10.7568	31.4185	15.4275	27.1056	21.4599	34.9692	17.1137	33.2447	15.9672	29.387	24.1772	13.6149	15.1794	21.8597	19.4551		0.2013	22.3817
4.4006	21.1037	21.0825	23.5116	21.1637	15.7175	36.0451	8.8465	23.3909	16.0114	24.0512	22.2638	28.2568	12.8363	35.6423	14.0533	25.3746	28.2495	14.258	14.5597	18.2217	18.3472		0.207793	21.0946
4.5381	18.6485	24.4251	19.1654	17.9906	13.1425	34.4826	12.1667	25.8162	15.9964	20.6872	13.7666	18.3515	19.1608	32.2891	16.0531	23.4138	23.4965	15.9246	14.1223	14.6533	17.467		0.214286	19.5819
4.6756	20.0656	23.657	25.5873	19.2346	17.3829	36.7996	11.1123	20.7299	9.9616	14.7168	15.0743	21.0556	11.6734	27.7973	9.1024	21.9628	22.09	17.7528	15.2498	13.456	19.2302		0.220778	18.7472
4.8131	24.089	19.3637	30.7706	17.4938	16.3741	28.4644	11.9964	17.3152	10.9594	23.6486	11.5091	18.1237	17.9011	25.4171	12.2838	27.5502	16.8053	16.8981	14.335	15.0215	18.0709		0.227271	18.7805
4.9507	21.881	14.4626	27.3412	16.0622	16.108	23.7033	12.3855	13.7166	10.6628	19.23	15.9037	12.7997	14.4119	24.7054	9.7677	24.9529	14.4291	9.7546	13.0609	11.1876	16.3943		0.233768	16.3296
5.0882	21.034	15.2253	24.2681	14.7408	15.2459	21.1868	16.3711	14.0412	11.0127	23.6341	23.2547	16.2879	13.8226	19.7925	10.9101	21.7216	16.0497	14.5469	11.7366	12.1176	12.9949		0.240261	16.6664
5.2257	15.8901	18.6287	17.5361	18.4961	14.1376	19.5343	15.126	15.5475	13.204	14.9135	14.8106	9.5362	8.8962	16.3919	16.4979	21.1467	16.6727	10.9285	18.0164	10.8156	14.8664		0.246754	15.314
5.3632	20.6185	14.9619	15.9904	16.2988	14.6629	19.2244	12.1434	10.2781	15.3374	9.1864	10.0559	12.8969	8.9018	16.5255	11.3405	22.0553	14.0871	15.8435	14.3556	7.2971	15.6355		0.253246	14.176
5.5007	25.5928	8.8676	16.3546	14.42	18.9721	19.1935	15.1393	16.4284	16.2892	10.5296	11.8291	14.628	9.3061	13.4986	13.1086	16.8374	11.4178	13.2552	14.2912	17.2945	17.2847		0.259739	14.978
5.6382	17.2988	15.3208	13.5763	12.0804	16.0858	20.2577	21.515	15.3975	12.6196	15.7671	12.3694	10.8872	12.2718	17.817	18.962	13.4562	11.545	14.8277	13.9093	17.0113	22.1317		0.266232	15.4813
5.7758	19.7132	11.8695	13.7691	21.5573	23.0441	26.0775	15.487	13.6056	16.0096	17.7652	10.0175	8.5261	10.1884	19.7312	18.1439	13.6264	14.4706	17.0901	10.0379	21.6096	21.9029		0.272729	16.3925
5.9133	18.8152	10.1906	14.4933	25.1171	19.5218	16.6324	14.6557	17.5326	11.6729	9.0785	9.3812	9.2918	9.3501	16.552	14.8392	14.458	11.1233	20.7343	9.4227	16.0022	17.2186		0.279222	14.5754
6.0508	13.617	11.5085	17.0993	25.3204	19.5028	17.2509	12.2446	18.1107	12.0534	9.8336	9.4027	8.2393	10.2683	12.2509	17.4313	20.5131	14.3072	13.4369	12.1867	16.3001	14.4802		0.285714	14.5409
6.1883	13.367	8.9562	12.8945	26.3495	15.9356	17.2013	15.3641	12.6404	11.9607	7.5234	12.0987	9.6464	9.8324	11.491	15.5822	13.0377	14.6659	20.467	14.1865	16.2927	15.3264		0.292207	14.039
6.3258	11.9894	10.5949	16.9471	14.8811	13.2391	17.8651	13.2698	8.2596	12.1476	12.0444	7.1163	9.5367	9.2938	14.8476	12.2502	13.3286	12.8175	16.9083	10.7118	19.2054	17.8614		0.2987	13.1007
6.4634	12.1768	8.9395	16.6699	7.4218	13.7487	18.8442	17.7618	6.7787	8.8859	11.0998	9.2493	9.6055	9.3163	10.7877	11.6595	17.083	13.2458	19.6929	13.4919	15.4175	16.032		0.305197	12.7575
6.6009	13.5886	6.9726	15.4689	11.3284	11.182	25.1229	9.3823	8.4051	7.4488	8.7873	11.8374	7.7889	9.2552	14.9354	9.5206	23.3573	13.3089	14.1931	13.142	14.2244	11.8032		0.31169	12.4311
6.7384	11.2325	9.2654	17.9102	9.3777	14.7599	25.7469	6.0554	11.9275	9.7573	9.1485	15.596	10.3684	9.2177	14.9735	10.4479	16.6878	12.9465	15.1049	10.1644	15.8989	9.4973		0.318182	12.6707
6.8759	12.5917	8.4995	14.151	10.2318	15.2216	16.2808	8.6502	13.6272	11.4939	14.0103	17.922	11.3184	12.2163	15.374	8.9747	16.0953	15.8745	19.3168	9.9544	16.0879	10.3241		0.324675	13.2484
7.0134	10.2115	8.0847	11.1552	8.6032	11.7849	22.085	5.9611	9.8542	10.2622	11.7131	20.0378	8.9941	9.288	18.7292	10.9293	11.4807	11.0359	21.112	11.3118	18.1838	15.7398		0.331168	12.6932
7.1509	11.8105	7.1797	9.2178	10.861	12.6669	28.5479	6.2559	12.31	9.9724	13.3749	21.8331	22.2894	14.4002	19.8302	9.1248	9.6933	14.1284	24.2911	9.2503	11.2377	13.552		0.33766	13.8965
7.2885	9.3782	10.568	14.8793	10.2079	8.4424	23.8341	8.9978	13.0885	12.7162	7.8749	18.1129	15.3244	13.0333	15.5168	9.7447	12.0739	13.7156	15.2944	9.7634	9.9567	11.8093		0.344158	12.5873
7.426	13.4048	11.0366	15.6901	10.9915	11.476	28.1803	7.2831	15.7213	11.9272	9.6268	19.8816	14.5366	13.6348	14.8144	10.8536	9.3432	16.108	15.0873	9.581	12.3781	10.7496		0.35065	13.4431
7.5635	14.182	11.4626	10.6451	10.9099	8.7354	26.389	7.4747	10.4002	10.3332	10.4109	15.2944	14.1903	13.3175	13.8218	10.9239	9.8961	20.4341	12.2076	10.2918	13.2893	10.4374		0.357143	12.6213
7.701	15.9773	10.9857	6.3193	5.432	8.3219	22.0208	5.7203	18.5325	11.3417	14.8524	18.5237	13.7847	12.8522	16.3274	11.0581	11.6349	14.6592	12.5773	6.553	11.8049	13.8428		0.363636	12.5296
7.8385	11.8827	19.1886	8.9492	7.8624	6.6476	12.6514	4.8948	23.0529	9.3013	15.5259	18.7771	10.0021	15.1439	11.2704	11.2691	13.2717	19.2096	11.5868	8.3355	15.8649	11.6012		0.370128	12.6804
7.9761	13.2714	13.2542	9.2758	8.6559	7.4001	9.3288	6.4828	13.2775	9.9781	16.3422	12.2486	7.8908	15.6342	14.023	12.0966	12.2043	18.0107	10.2505	10.6451	14.5716	14.9126		0.376626	11.8931
8.1136	14.2642	11.0672	10.147	7.2516	7.1917	9.1747	8.3974	14.3703	7.0902	21.163	11.1971	5.6436	19.5251	12.4992	10.04	9.4949	15.1682	9.915	9.2327	11.0618	17.0401		0.383118	11.4731
8.2511	11.4169	9.6359	9.4333	7.1774	8.9039	12.1133	9.8319	15.2837	6.2229	11.7723	16.8034	4.0406	18.4615	12.873	16.7504	8.9562	18.2573	8.9645	16.1547	13.5855	16.7099		0.389611	12.0642
8.3886	13.0209	18.2597	9.6626	7.4774	6.7253	6.6629	7.5094	15.3195	10.285	10.251	11.4669	2.7873	16.5477	13.408	12.1808	5.7368	15.451	13.6685	16.8217	10.4069	13.6814		0.396103	11.3015
8.5261	18.0607	12.9281	8.0813	7.8136	10.203	11.4167	9.6122	15.8189	8.6972	9.6611	7.0621	5.9328	15.1157	12.262	6.7044	11.0592	13.1537	12.1465	14.4326	12.7451	14.6376		0.402596	11.3116
8.6636	19.4002	11.0894	10.9607	8.8753	8.2368	14.2403	8.2992	17.6212	18.9066	12.1106	7.3596	6.569	15.8827	9.0602	10.1847	9.186	13.5641	11.9027	15.8624	8.2462	11.6808		0.409089	11.8685
8.8012	24.9643	11.68	11.0238	8.3127	6.7849	12.7523	8.1612	15.781	13.5418	10.611	7.7732	3.4631	11.788	6.6985	10.7165	6.6137	10.8404	11.852	10.2174	10.9901	12.1631		0.415586	10.7966
8.9387	27.7849	15.5606	9.7128	9.0006	7.7764	11.6043	9.2597	18.2424	9.9638	10.3547	6.8631	4.4554	9.4379	7.1244	8.0953	7.4454	10.0756	14.0367	8.7939	11.9373	12.4427		0.422079	10.9509
9.0762	37.727	14.7323	6.9984	9.9255	7.9872	16.9915	10.8138	18.3766	15.8956	13.7295	10.4728	7.6423	14.1951	7.0159	8.2379	6.1096	11.9112	16.4705	9.1511	17.3078	12.9794		0.428571	13.0796
9.2137	46.4048	16.7124	8.1052	12.205	11.7373	17.9669	9.3583	18.3109	9.9355	10.7901	6.6477	9.5691	10.8537	6.6514	10.6398	4.9989	8.0866	18.0876	11.2372	27.2731	12.0447		0.435064	13.696
9.3512	39.6366	14.1461	8.3127	13.6864	10.3961	14.8072	4.7673	13.2678	8.6878	9.9573	11.8735	9.6192	9.0448	9.0475	10.2168	5.1795	9.4595	15.43	11.9764	35.2839	11.1244		0.441557	13.1391
9.4888	35.4541	16.8822	10.3586	12.2549	13.484	10.473	5.0898	21.7254	11.8282	12.3596	10.3696	6.4748	15.6409	8.3964	10.0524	3.898	9.9538	19.1124	11.7849	33.9532	12.4932		0.448054	13.9066
9.6263	34.5834	13.2909	9.5711	14.5979	11.3951	12.7454	4.535	12.675	7.9926	14.149	11.917	5.7939	8.613	7.4967	9.5008	6.3082	9.2664	17.7727	8.9626	30.9951	12.1782		0.454547	12.5876
9.7638	27.7198	13.9749	6.114	11.8246	11.4211	11.3736	5.8827	13.8334	10.7157	10.6753	15.6643	3.5753	7.2671	8.9784	7.6858	5.783	9.7498	20.1031	10.374	24.6831	10.3169		0.461039	11.796
9.9013	22.7316	16.2378	8.7713	13.4622	6.3524	14.9795	4.9126	18.6643	10.0734	8.3958	11.6812	2.9809	9.3718	6.86	8.0446	5.6732	9.5545	26.5344	13.3989	25.4604	8.2228		0.467532	12.0173
10.0388	18.3692	11.8798	8.8009	11.347	5.1533	16.4128	7.2532	12.5479	8.6624	8.011	13.1133	4.017	11.6022	8.5047	6.9071	9.5537	8.1849	25.9827	10.9821	17.3426	13.9774		0.474025	11.3622
10.1763	12.2488	9.2296	11.0512	10.1516	10.7528	17.3845	4.7036	8.5594	9.1604	8.7205	8.106	5.2157	8.8013	7.7975	8.9418	11.7655	5.7182	29.4	7.5734	10.7424	13.4858		0.480517	10.4529
10.3139	14.2018	11.6307	7.7208	9.5935	8.4313	12.7507	6.8524	12.576	6.3551	8.8104	6.6757	4.8558	6.5763	6.2273	6.0344	7.73	7.8059	30.3335	5.5639	8.5297	13.2599		0.487015	9.64358
10.4514	12.3191	10.5307	5.5213	12.0143	6.6887	9.0066	7.7115	11.2008	9.4658	8.179	8.2232	4.866	9.8388	5.7977	7.5525	11.0801	11.3667	27.581	9.5611	8.2859	11.9808		0.493507	9.9415
10.5889	11.4218	12.8819	7.4064	7.9782	9.2065	11.234	9.9851	9.5228	14.2478	4.3206	5.9156	2.6583	10.6746	6.1659	8.9448	12.677	10.3521	24.2618	8.8772	10.7437	18.181		0.5	10.3646
10.7264	7.4875	15.6861	10.7679	6.6501	7.4453	9.8632	7.2021	10.7224	8.4001	5.167	6.8147	2.9963	14.4729	6.4538	5.4129	7.9962	10.9647	17.711	11.0189	7.3713	22.6076		0.506493	9.67676
10.8639	7.3403	12.297	10.8658	7.6516	5.8965	10.2074	9.495	13.6967	10.0236	6.4317	8.7467	6.0692	9.7468	5.4931	10.865	7.261	11.8172	12.9781	12.4571	8.2723	18.8861		0.512985	9.83325
11.0015	6.4689	10.9765	7.9081	5.5853	7.2368	13.9722	8.9756	7.656	9.6914	6.4661	9.9906	3.7653	8.3903	6.4147	8.8236	8.8015	8.2837	14.8258	7.6562	9.6085	18.1783		0.519483	9.03216
11.139	9.263	11.9606	8.1837	5.5047	4.8489	14.4322	6.843	6.455	9.2127	8.5442	10.745	3.9865	9.6858	8.7533	11.3768	9.834	10.8248	10.6339	9.534	8.4517	12.9265		0.525975	9.14287
11.2765	7.2189	15.1082	8.6362	4.4704	4.6616	16.9554	9.2407	4.897	6.5597	11.9545	6.7549	3.3699	9.0187	10.5458	10.2039	12.7295	9.4793	10.8357	9.0277	6.1788	17.4231		0.532468	9.29857
11.414	7.6371	10.9801	12.6923	5.8745	6.43	15.9069	7.1686	5.8512	9.6371	16.2387	8.531	3.7236	10.5164	10.5039	8.8917	15.6776	12.8184	11.8219	7.8753	10.5341	14.5767		0.538961	10.1851
11.5515	8.6524	8.8753	11.4903	5.8477	8.1492	11.331	4.9071	8.3988	9.2196	9.7495	13.4584	3.6327	8.4628	11.1015	9.6677	23.4872	8.5172	12.0269	11.7781	9.8053	10.8346		0.545453	9.97111
11.689	6.5047	10.4377	13.2085	6.579	8.2925	7.5672	5.0302	6.5996	9.2008	7.4931	10.3769	5.9912	8.5304	11.3711	9.731	23.0954	6.672	12.7658	11.2274	7.2041	10.1606		0.551946	9.43044
11.8266	9.4614	11.4839	16.0472	8.5417	5.5144	7.2323	7.0792	5.7451	8.3284	7.9226	7.3228	5.4019	4.9776	8.3672	10.0611	22.0375	7.2074	10.3487	9.5982	9.3251	9.6183		0.558443	9.12486
11.9641	7.2259	14.513	18.2711	6.2054	4.7276	6.2055	6.9463	6.8176	10.0106	11.2225	8.1568	5.5457	5.458	9.7075	11.8094	19.0547	6.2612	6.6209	8.1461	7.2484	10.7084		0.564936	9.0887
12.1016	5.7381	13.5053	13.7119	5.3268	3.8749	3.8137	4.793	5.3524	10.0802	9.141	4.2295	4.8171	8.5984	7.7143	9.2104	17.4648	7.6882	9.6479	10.9205	6.3152	12.3517		0.571429	8.29978
12.2391	7.6899	12.5922	15.9086	4.7734	3.9895	4.4752	3.5525	5.9688	7.5958	10.3202	5.2883	4.2738	7.3527	8.6364	4.5616	8.2831	6.752	8.7172	8.7322	7.7634	16.7687		0.577921	7.80931
12.3766	11.531	10.5296	12.4593	6.8366	4.746	4.0721	3.9403	6.6855	7.8324	8.0859	7.7419	1.9917	5.1208	5.9088	5.2579	5.9954	5.6511	7.8221	7.3494	14.7238	14.5486		0.584414	7.56334
12.5142	7.0643	11.6502	7.908	5.2534	5.4317	6.6285	2.3028	7.2227	8.8824	12.0209	6.7445	6.9667	4.0142	6.7236	6.1784	6.0881	6.4614	10.1136	4.9322	8.571	15.1128		0.590911	7.4415
12.6517	6.5157	12.0788	8.0538	3.3811	5.469	7.5414	4.4705	11.4736	7.9114	9.2008	9.7082	5.722	5.123	7.4115	5.8419	5.7525	5.8265	9.1351	10.2344	8.9435	8.625		0.597404	7.5438
12.7892	6.0699	7.1506	8.0061	2.8629	4.1179	6.7575	5.4826	16.8268	7.9613	7.9097	9.2779	3.2826	6.1915	9.7446	9.4816	7.6277	5.4652	7.3	9.0055	12.512	12.3004		0.603897	7.87306
12.9267	8.4728	7.8806	13.6355	3.7405	3.5604	5.9014	5.3504	7.7977	9.7107	9.4291	7.5325	6.4622	5.9255	7.3211	9.3305	10.4783	7.2466	4.8808	10.0738	12.595	14.2177		0.610389	8.16872
13.0642	10.5715	11.365	8.3495	4.3551	3.5199	5.9227	6.2815	12.3173	8.6844	15.2655	7.5148	3.1915	3.7575	5.0735	7.6067	7.4522	7.2965	5.6755	16.0814	12.2461	14.752		0.616882	8.44191
13.2017	8.764	9.943	6.6081	4.5017	2.8469	6.2197	5.9945	10.576	8.7377	14.0709	7.495	4.5069	4.6874	6.2469	7.3078	6.1356	8.2804	8.5815	10.9635	8.1652	12.293		0.623374	7.75837
13.3393	6.0577	10.3736	8.8663	4.1157	3.3713	4.3448	6.7077	6.2459	8.2602	10.0791	8.0467	5.6783	4.7779	8.3144	9.1964	5.1444	9.0143	7.7122	8.4744	7.6848	12.6025		0.629872	7.38422
13.4768	8.3063	9.0535	10.2729	4.8279	3.353	4.4858	9.5661	9.6617	7.4254	10.8071	9.2294	3.7589	4.8805	8.9426	8.7596	6.8662	9.2767	6.3306	12.173	6.3493	12.598		0.636364	7.94879
13.6143	5.8134	8.1529	9.9984	5.3467	1.8269	4.3543	7.2952	6.9041	9.8726	18.9088	9.5685	4.3065	5.8789	4.9584	7.4745	7.7596	8.7077	5.3797	13.6186	6.2581	13.1782		0.642857	7.8839
13.7518	4.0321	7.976	8.3815	6.0655	4.3223	6.548	5.9439	6.0476	6.5438	12.6591	7.881	10.6195	5.8197	8.239	5.0566	6.9609	11.0895	6.1469	6.9775	7.0367	12.6296		0.64935	7.47508
13.8893	3.4772	10.3911	9.4419	4.477	4.2185	9.4014	7.9976	3.558	7.0292	15.2692	6.1732	11.2971	4.9726	8.9523	6.0383	8.1135	8.0325	10.4193	11.4962	7.0246	12.5527		0.655842	8.11111
14.0269	3.3319	12.1304	10.7637	4.1232	3.5615	7.7111	7.9982	5.3792	9.8394	12.5855	9.2216	6.8479	4.5318	6.9095	6.6802	8.9542	6.4975	6.7276	8.5911	8.73	11.0921		0.66234	7.72417
14.1644	5.9525	11.9038	12.0313	4.9711	7.1517	6.0469	12.6614	6.304	7.7055	10.2503	11.6746	7.8757	7.0346	7.5701	11.645	8.0766	9.4657	8.1519	8.0215	9.2375	9.5093		0.668832	8.72576
14.3019	6.1828	14.7525	11.3397	3.6245	4.2955	3.3886	11.0255	5.6815	8.5526	8.1163	10.8846	4.8487	5.367	7.0847	13.3417	11.2193	7.4809	9.1048	10.1143	10.1271	8.5566		0.675325	8.33758
14.4394	6.2014	13.6003	9.1281	2.8558	2.8287	6.6408	5.9801	5.9904	7.9261	8.1506	12.0229	4.2845	7.8391	9.9889	8.6218	11.232	10.5295	9.2536	7.7625	13.7842	13.5221		0.681818	8.48302
14.5769	6.4733	10.0024	7.7463	3.3618	3.4946	7.471	3.929	5.4188	6.5435	4.9476	19.0486	5.2213	5.2695	9.1565	11.9552	8.6211	10.9422	8.4154	7.6564	4.9688	10.2569		0.68831	7.66191
14.7144	8.9682	9.916	11.2797	3.7113	3.4155	8.8851	6.0185	4.0845	6.5064	7.5402	20.1946	5.0474	6.0718	7.5008	10.3463	5.6302	9.5305	5.6718	12.0107	8.6647	11.8457		0.694803	8.23047
14.852	6.4544	7.2229	9.8872	5.6471	5.6272	8.2442	6.5357	5.0117	5.6448	6.3854	10.447	8.0267	4.4915	4.9159	8.4777	7.571	4.628	6.3181	9.0498	8.0261	12.8244		0.7013	7.21128
14.9895	8.8388	10.0454	9.7848	3.3746	7.5858	10.3523	6.7899	7.8807	7.549	8.9372	10.3303	9.0117	4.6298	5.1874	7.0537	5.3908	7.3235	6.3922	8.8618	8.431	10.1666		0.707793	7.80559
15.127	4.8942	6.6051	8.9921	4.4066	5.07	8.2258	6.8602	5.6762	2.9058	9.6808	8.3698	5.954	3.8748	13.6865	7.1698	6.3613	5.7953	5.8906	8.8506	18.1907	8.1068		0.714286	7.40795
15.2645	4.2521	10.1525	7.9168	6.9127	4.5053	6.7275	5.4642	5.0817	7.0363	7.8639	8.208	7.3061	3.8482	5.9182	8.9412	10.2838	6.8083	8.3074	9.8097	11.4795	11.7056		0.720778	7.549
15.402	5.5698	6.4735	7.9878	6.57	4.7792	7.4707	7.4258	4.3895	5.5224	9.987	8.5462	5.6441	4.4357	7.8515	10.401	6.9025	5.6968	8.0383	9.4265	9.4466	8.8645		0.727271	7.21092
15.5396	7.6487	5.8145	10.4303	7.5355	3.688	9.3424	7.5452	5.9428	4.339	10.0223	6.8229	6.5552	6.929	10.3334	9.1802	11.411	10.2764	7.4229	13.3642	6.2195	10.8596		0.733768	8.17538
15.6771	5.1334	6.4406	7.141	8.6121	3.3166	12.7439	4.5331	5.9549	6.6145	7.6068	6.196	6.8346	5.5342	7.8908	14.3304	7.1346	5.6459	10.3271	13.566	7.9803	8.7815		0.740261	7.72944
15.8146	3.303	11.1865	5.5865	8.2762	6.1487	14.1884	5.3792	4.9255	6.788	9.6206	8.5756	7.7407	7.3292	7.8352	14.9997	5.3745	5.5867	9.8027	8.9259	7.7702	10.5779		0.746754	8.09147
15.9521	4.8784	9.7508	12.5272	5.1841	4.8692	11.827	4.3558	7.6178	3.0165	9.7387	11.9501	6.3299	7.6774	6.9422	16.5232	10.8051	5.8811	12.3189	7.2277	7.6533	10.2105		0.753246	8.44214
16.0896	7.8693	8.1218	8.6594	8.173	5.5559	10.3417	4.4031	9.0737	6.74	9.7322	8.3888	8.831	9.7076	7.8377	11.3469	10.804	3.9229	9.7259	6.6143	5.8454	9.9131		0.759739	8.1718
16.2271	6.0892	9.674	8.0794	9.0933	7.1463	13.2791	4.2397	4.703	8.9211	8.7379	6.6094	7.8314	6.8993	10.2912	8.9661	9.3057	7.13	8.1077	5.8234	4.2786	6.4998		0.766232	7.70027
16.3647	3.6844	6.7107	11.9455	9.317	5.7684	13.6729	6.8799	4.1096	6.1236	10.6588	5.4675	8.7137	7.8468	7.4446	12.0973	11.5796	6.279	12.91	7.1447	5.9344	11.406		0.772729	8.3664
16.5022	4.4576	6.7531	8.1096	9.4854	6.9796	11.9751	6.23	5.4258	2.5668	7.693	7.1184	9.8847	12.4805	4.9452	10.2243	10.8223	6.1347	10.077	10.0059	3.8186	9.6088		0.779222	7.84745
16.6397	6.868	8.7519	5.7061	5.313	6.1832	11.7181	4.2255	5.688	3.7698	4.5196	9.7567	7.9867	9.0566	6.7903	10.8251	8.6207	7.094	9.3443	9.4088	4.126	12.537		0.785714	7.53759
16.7772	10.1312	10.4825	5.4677	4.9583	6.4064	15.7581	4.4007	7.1997	5.8852	7.6233	6.9828	5.503	9.351	5.1754	9.6442	6.4844	7.1667	12.0596	11.2151	4.3304	14.1134		0.792207	8.11139
16.9147	6.9855	5.1063	6.2984	4.5596	4.7064	18.12	5.0616	10.5379	3.5814	6.9452	5.2809	5.9019	10.077	6.9873	6.5814	9.2993	5.6678	10.2119	9.1322	3.5827	9.001		0.7987	7.31551
17.0522	5.7475	7.9206	6.874	3.9741	6.6005	8.541	6.7847	8.4753	3.3527	8.4307	4.176	4.0303	8.3506	7.3763	6.5294	8.5629	4.6441	6.7253	10.5403	3.4097	8.9095		0.805192	6.66455
17.1898	5.375	6.3778	6.4596	5.928	8.2661	10.8876	7.6382	7.8796	3.0753	5.9828	1.6243	8.0319	9.6835	6.3587	6.6729	5.7519	4.1915	8.8705	9.2442	3.2375	8.5761		0.81169	6.67205
17.3273	8.5864	5.0106	8.0005	6.4389	8.8305	6.2608	7.9623	7.2624	3.1967	5.6475	2.842	4.133	7.9838	3.025	7.2521	5.767	2.7831	9.0385	8.4389	2.2831	9.9211		0.818182	6.2221
17.4648	8.2901	7.2815	6.4772	6.6144	4.9205	4.7035	7.6419	5.5906	1.7132	3.9981	5.032	2.3102	5.3235	3.6726	9.2439	5.3762	1.9519	8.3533	5.0122	2.5845	11.5794		0.824675	5.60337
17.6023	7.5478	8.4258	8.2424	8.7249	8.017	7.1791	8.1489	4.2277	2.4305	3.5527	4.4577	2.9796	5.2637	2.7309	7.4908	6.9186	3.2865	5.3145	3.2437	4.4471	11.1342		0.831168	5.89353
17.7398	8.3907	7.0199	7.3031	7.1393	4.4071	6.3611	6.7963	3.4221	2.9598	3.185	3.3631	2.8869	2.841	2.7083	8.1273	4.8834	2.2722	5.9449	4.4484	6.2731	6.5982		0.83766	5.11101
17.8774	10.835	9.9178	6.9754	5.9563	6.7275	5.2651	11.1945	4.5867	1.5908	3.0503	2.4248	4.1026	2.1353	2.8486	8.9612	4.8478	2.2605	4.535	4.6724	4.9716	4.8742		0.844158	5.36826
18.0149	14.1413	13.7942	3.0109	3.8048	4.8795	7.553	8.9076	4.3611	2.9192	3.2885	2.9383	3.1299	2.2059	1.7737	9.1927	3.0925	2.3873	2.9591	2.9045	3.1686	4.0415		0.85065	4.974
18.1524	13.3789	13.6763	4.48	6.8853	4.0161	10.6437	8.2253	3.2098	1.695	2.1492	2.8067	2.3685	1.5553	1.2064	4.736	4.3299	2.4631	5.138	3.3369	2.7734	3.7522		0.857143	4.89648
18.2899	12.16	6.5809	7.4239	5.5609	6.0812	9.274	4.3595	3.6004	2.2707	3.0704	1.7164	2.3716	1.8484	1.9615	3.8238	3.4292	2.0913	4.0691	3.8032	3.7599	6.8071		0.863636	4.57445
18.4274	9.7482	6.5256	6.7777	3.5287	5.8421	8.7682	2.9657	4.6097	2.9527	3.8811	1.7441	2.2597	2.5206	2.949	1.8336	3.9724	1.9568	4.9775	2.8184	2.4356	3.019		0.870128	4.09935
18.565	10.4795	5.7827	4.4407	3.4899	7.6374	8.3005	2.7032	4.8115	2.2706	4.3267	3.2213	2.3389	3.0695	2.8533	1.7115	3.0028	3.2729	4.5125	2.2369	1.8568	2.0827		0.876626	4.01913
18.7025	6.8201	7.5104	8.1836	5.2473	4.1075	8.2107	2.8964	2.196	1.8888	1.3027	1.8088	1.8755	4.6601	2.2833	3.391	3.1544	2.0147	3.292	3.2371	3.0021	2.8871		0.883118	3.80808
18.84	8.6694	9.1484	6.1335	4.016	4.5015	11.1991	4.7579	2.7605	1.8887	2.1054	2.4839	1.8474	3.423	2.9611	3.4366	1.7467	2.5718	3.4047	3.7698	4.6578	4.1302		0.889611	4.2673
18.9775	7.0145	7.1347	5.9604	5.4433	9.718	9.2846	2.1562	3.9476	4.1244	2.0602	2.9442	1.9983	2.3697	3.1271	2.5643	2.7756	3.49	1.6729	3.9947	2.4329	1.8776		0.896103	4.09958
19.115	7.0222	5.897	3.7775	8.9637	9.1703	10.5529	1.8383	4.2721	3.1511	2.8802	2.2035	2.3517	3.1863	2.0007	3.0414	3.117	2.4028	1.7046	3.0695	3.5664	2.3778		0.902596	4.12129
19.2525	4.3211	6.1283	3.1215	9.6159	6.1558	7.5305	2.3061	3.6436	2.9785	3.7361	2.1083	2.0061	2.7344	1.8684	2.7253	1.8888	2.2028	1.8375	2.3188	2.5177	2.7891		0.909089	3.54927
19.3901	4.7758	4.5829	2.3721	8.7756	4.8199	10.5826	1.9269	3.3594	2.7129	3.5717	3.4121	2.8581	3.4205	2.2432	2.4784	2.7796	1.3716	2.9397	4.5649	1.5855	3.1076		0.915586	3.72576
19.5276	8.2467	4.8552	3.3493	6.0733	6.4302	13.755	1.6295	3.5946	2.0287	2.2165	3.7729	2.0828	2.3609	2.8145	1.993	2.1947	1.3684	2.5671	4.131	3.6388	4.4731		0.922079	3.97982
19.6651	6.6648	5.6148	4.4988	6.3808	9.0721	15.8605	2.1638	3.4605	1.6883	3.0969	1.5551	2.8672	2.6152	2.7114	2.5767	3.318	2.3195	1.5671	3.723	3.4447	2.7046		0.928571	4.1859
19.8026	7.4583	6.0749	3.4902	4.4995	9.5978	10.6079	1.6941	4.4004	2.4751	2.9228	2.0277	2.2643	3.3032	4.7702	2.0204	3.5821	2.4698	2.4306	2.4815	2.5551	2.2508		0.935064	3.97032
19.9401	8.2535	5.7916	2.8278	3.2012	8.1851	9.1161	4.0055	4.3584	3.2384	2.8603	1.769	1.597	3.5466	3.7458	2.3057	3.2147	2.6007	2.8539	3.5254	3.4223	2.42		0.941557	3.94471
20.0777	7.4473	3.6922	2.4276	2.4958	5.8531	8.784	2.0698	4.633	6.0828	3.6332	2.4812	1.6832	3.9093	3.0676	1.4166	2.5869	2.6456	3.727	3.6989	4.477	3.9373		0.948054	3.84521
20.2152	7.4581	3.1469	2.0073	2.663	9.6347	6.6245	2.3604	2.4131	3.7544	3.759	2.4813	4.6639	2.7005	3.4166	2.2054	4.2271	2.1461	3.2066	2.0132	3.3721	2.694		0.954547	3.6642
20.3527	6.8539	4.0603	1.577	3.0828	8.5288	6.2591	2.3745	4.0899	3.2797	4.84	3.155	3.8722	2.4174	1.9313	3.0513	2.0775	2.935	2.6758	2.7222	2.616	3.1957		0.961039	3.59978
20.4902	5.3408	3.7484	2.069	3.4104	9.1454	4.484	2.0735	3.3068	5.4059	7.205	3.4368	2.4975	2.1388	3.0341	3.3909	1.4737	2.8177	2.235	3.7181	2.5859	3.2762		0.967532	3.65685
20.6277	3.5276	5.9174	2.6915	2.1894	8.1429	3.8957	4.5912	4.4556	2.9527	3.45	4.1775	1.9328	2.6586	3.6965	1.7754	1.874	3.7243	3.6008	1.7227	4.0112	2.4282		0.974025	3.496
20.7652	2.8101	2.6067	2.1158	2.2943	4.0389	3.4427	3.3619	3.5258	3.0883	4.4444	1.8255	2.7055	2.8472	2.5945	1.8864	2.0314	2.9218	4.2643	3.6722	2.6143	2.6253		0.980517	2.93892
20.9028	1.8713	2.8187	2.5879	2.7031	2.8018	3.4754	2.2498	2.6058	3.7356	3.3618	1.7536	3.3979	2.4522	3.2985	2.7462	2.7288	2.6223	1.9816	3.1994	2.0579	3.2378		0.987015	2.74702
21.0403	4.7502	2.8406	2.4757	3.3188	3.5294	2.8586	2.669	5.6204	3.374	2.3732	2.2288	2.717	2.0145	2.9732	3.6974	3.5173	4.5248	1.9108	2.2521	3.4211	3.7913		0.993507	3.18372
21.1778	3.0915	1.7696	2.5127	3.5351	2.9285	3.6414	1.8133	7.9118	2.5745	3.5817	3.4516	4.3862	1.3799	2.6322	4.442	2.3545	2.0601	2.4571	3.5802	3.5502	4.8688		1	3.263

## Sheet: Image7
X0	Y0	Y1	Y2	Y3	Y4	Y5	Y6	Y7	Y8	Y9	Y10	Y11	Y12	Y13	Y14	Y15	Y16	Y17	Y18	Y19		Apical-Basal	Avg intensity
0	2.3921	4.9638	2.2184	3.9325	3.1707	3.4235	3.6659	5.7187	4.8249	5.4603	2.6865	6.1247	3.4386	2.072	1.4204	2.2203	2.8829	3.8857	4.2833	4.5819		0	3.66836
0.1375	1.9977	3.1012	4.341	5.2423	3.8768	4.0349	4.1528	5.295	3.9108	3.6638	1.6038	4.7531	4.0477	1.8216	3.7091	2.462	3.9049	4.1544	4.2679	3.0577		0.00709125	3.66993
0.275	1.6647	2.5104	2.9991	5.9926	4.0748	6.0527	4.9408	5.8592	3.5246	5.2768	1.8625	6.5581	5.923	2.3638	3.7716	3.7964	5.384	5.7206	4.1778	3.1884		0.0141825	4.28209
0.4126	1.6624	4.5971	3.6493	8.5276	6.2712	4.6999	6.6415	8.2335	4.2023	5.4195	2.9951	3.6673	5.3059	2.8992	4.6349	5.8535	3.4899	7.6496	4.3749	4.5953		0.0212789	4.96849
0.5501	3.1055	3.7015	4.3662	7.536	6.2386	4.3153	8.0111	6.3902	6.4268	5.9953	4.2185	4.1716	5.7232	4.4829	2.2647	4.2273	6.068	10.9599	2.6591	5.4175		0.0283701	5.31396
0.6876	1.875	7.8499	6.1677	7.2423	6.0519	6.0968	6.2691	5.6447	10.4559	7.1455	5.7555	4.8295	3.0401	2.7585	3.3391	4.363	5.4117	9.0341	4.4808	5.2165		0.0354614	5.65138
0.8251	2.0649	7.4137	6.9043	11.9772	7.086	6.2166	6.8993	6.4483	9.8804	6.212	3.8668	5.4363	6.6146	3.7776	4.9086	2.6246	4.6323	10.1251	6.5525	6.2797		0.0425526	6.29604
0.9626	4.8003	5.7866	7.7129	10.204	12.9385	7.4554	7.5104	10.4995	8.4351	10.3993	4.4275	2.8359	7.7896	4.3143	6.8366	4.8217	4.5932	11.0597	10.2332	9.6391		0.0496439	7.61464
1.1001	5.499	7.1317	7.5843	12.9649	15.1436	7.4517	8.0425	8.4274	11.4631	13.4604	6.2001	4.3103	4.7305	4.776	6.7356	3.3573	7.9539	8.659	10.1474	9.0003		0.0567351	8.15195
1.2377	6.7669	8.5246	7.5804	13.3477	11.2595	6.3565	13.7525	8.8543	13.1469	10.7017	6.4125	6.067	4.3718	3.8269	6.9445	5.86	8.6949	11.6228	9.0801	9.8813		0.0638315	8.65264
1.3752	7.7953	12.2193	7.1833	12.1063	15.4969	7.3486	11.5585	12.4847	9.2761	12.9002	9.0656	7.1629	4.7243	4.1463	8.3275	6.0395	8.2854	11.6635	8.3585	5.8594		0.0709228	9.1001
1.5127	7.6302	17.3238	10.7044	15.9305	17.9293	11.7542	10.6042	13.7469	14.7894	11.8929	12.8659	7.3205	7.6682	6.9372	4.8412	5.0422	7.8919	7.2955	7.566	5.2624		0.078014	10.2498
1.6502	8.8723	14.2506	10.6696	18.3213	15.2144	13.8383	13.0169	13.5391	13.1423	16.2237	11.6166	6.346	12.2362	4.2427	5.4429	3.9431	7.6635	8.2504	8.5637	3.9071		0.0851053	10.465
1.7877	10.0005	17.2152	12.9135	19.7942	17.7541	16.2533	17.5218	15.695	12.6087	13.4231	13.4386	8.0902	10.9815	4.774	5.4197	5.4179	4.7954	10.1679	11.9619	5.7711		0.0921965	11.6999
1.9253	8.1319	22.5417	17.3278	23.0101	19.6492	18.6759	17.0514	21.3243	12.1335	15.0324	12.4228	8.5627	15.6292	3.3093	6.1792	5.7544	5.9551	10.487	11.5488	7.3443		0.0992929	13.1036
2.0628	9.8703	17.4353	19.2922	28.2369	21.9379	16.6291	15.6312	20.6427	15.1918	15.7343	11.3294	12.7053	10.8007	4.2286	6.9634	5.7149	7.7385	11.4117	7.6844	7.3071		0.106384	13.3243
2.2003	16.2242	15.411	11.4082	26.2409	21.9212	19.9574	18.4157	21.6421	20.1632	12.6999	10.9638	15.2817	13.8768	6.3957	9.8601	7.3418	6.2167	12.1206	8.8438	7.6473		0.113475	14.1316
2.3378	24.4769	20.8917	14.1006	24.9687	15.4398	12.6416	19.6479	17.9658	20.5331	14.9755	15.1646	14.6798	12.1814	5.0197	7.4317	6.606	11.2932	10.7926	9.6754	9.5069		0.120567	14.3996
2.4753	14.2165	15.3543	11.401	23.1354	21.4794	13.2691	18.8689	16.2244	16.2912	18.898	14.7091	12.9465	11.764	5.7319	7.3435	7.649	14.9193	9.4284	11.5072	8.6005		0.127658	13.6869
2.6128	12.0551	18.4858	11.3428	17.3582	15.9944	16.344	14.695	18.0853	13.5174	16.3279	19.1425	16.5995	16.7231	10.505	5.3576	7.5336	12.2583	10.9145	13.701	9.8424		0.134749	13.8392
2.7504	14.9732	15.5172	10.7821	16.2369	17.7904	11.4695	16.8652	18.5391	13.3215	12.2794	19.0498	12.0275	18.1652	12.7622	8.4745	7.2609	12.4172	10.3756	7.3407	11.1017		0.141846	13.3375
2.8879	17.2939	16.0146	9.7671	13.2644	18.8126	10.512	20.082	17.2846	13.7593	14.5018	15.6346	11.3924	13.8514	12.8501	12.0253	6.3039	13.4875	11.4723	8.1748	6.0524		0.148937	13.1268
3.0254	13.5683	15.8687	11.0502	11.9934	23.9508	10.0824	20.9249	12.0143	13.4301	14.6959	18.1168	12.5445	14.9033	12.7294	7.4191	9.085	11.1582	14.5448	6.3997	7.5404		0.156028	13.101
3.1629	13.0793	17.3939	9.5089	11.785	14.4112	10.507	20.1938	13.8517	14.7894	13.9103	18.7159	13.0809	18.5608	9.8087	9.2062	8.9571	12.2558	12.7375	5.414	7.1365		0.163119	12.7652
3.3004	15.1758	12.9067	7.3755	10.0838	13.0626	8.9711	18.5253	9.7794	18.521	13.6383	14.3308	17.0426	18.228	9.8646	7.3191	9.7064	14.4813	19.1295	8.2152	7.0622		0.170211	12.671
3.438	10.8291	12.6868	4.4324	9.0502	10.5848	10.6021	17.3283	9.6814	10.734	13.8796	14.0412	17.0945	15.2062	9.7605	11.5586	9.5163	12.7588	15.7896	8.1341	12.5972		0.177307	11.8133
3.5755	12.1721	13.1281	7.4281	8.4858	12.8182	10.1017	16.4424	11.7034	7.6397	14.0006	7.9034	19.027	15.8019	10.3102	10.1483	8.0118	15.8731	14.344	9.7827	13.6414		0.184398	11.9382
3.713	14.0764	16.0487	6.0779	13.2468	14.6516	11.7638	16.4123	12.1928	6.8384	9.9361	7.1917	19.3948	16.362	10.1439	7.1516	9.3248	11.4447	13.1514	6.9946	6.9313		0.191489	11.4668
3.8505	20.3334	13.4515	6.6711	9.8608	12.9355	13.9781	15.1781	9.1619	10.5536	10.7012	8.8159	12.7445	18.3297	8.3305	8.3469	8.4337	13.9325	10.5023	5.5312	7.8208		0.198581	11.2807
3.988	18.2926	11.0656	10.1621	9.2761	8.6445	10.5456	10.0136	8.7842	7.8498	8.5183	9.8779	13.9585	12.8303	8.7706	9.994	8.1035	17.2736	13.5151	8.6693	6.7015		0.205672	10.6423
4.1255	15.371	11.7856	7.5989	9.5417	8.201	9.0963	10.2516	13.4782	9.6913	8.1693	7.8066	10.3159	10.7129	6.008	11.4205	10.999	17.1281	10.9275	9.9364	9.6827		0.212763	10.4061
4.2631	13.8104	12.6402	9.365	9.2685	8.1344	8.1972	6.9677	15.4188	8.4	7.5968	9.9645	15.0569	8.3547	7.5622	10.4379	11.0848	16.2636	8.8685	8.6672	12.8756		0.21986	10.4467
4.4006	9.0209	7.5354	8.0003	7.0355	7.674	6.197	8.856	7.3804	13.7568	12.398	9.1984	11.0118	11.7195	7.3389	11.2934	12.3215	18.4949	7.571	7.5763	10.186		0.226951	9.7283
4.5381	10.5429	9.4114	7.8061	6.8148	6.7929	7.5618	8.1324	8.9049	15.3596	13.6365	8.4602	12.4401	7.8118	9.8296	10.9827	7.1654	15.1158	10.0128	8.2655	8.3331		0.234042	9.66901
4.6756	10.2238	9.2759	11.5468	7.6706	10.395	10.3231	7.7823	7.114	14.2005	9.8023	11.3379	16.1357	7.9361	11.1076	11.3773	7.949	13.7823	10.2663	11.6368	8.6437		0.241133	10.4253
4.8131	5.0597	11.8598	9.6428	3.6306	11.4543	12.0433	6.6174	6.8872	13.3746	7.8662	9.8544	13.2702	10.6715	12.1227	13.1304	8.029	12.6355	12.0032	4.525	7.1515		0.248225	9.59147
4.9507	6.3001	8.545	11.366	2.9002	9.4452	10.2868	7.2752	6.0997	13.0461	6.686	8.5058	14.2443	11.1583	9.9396	10.6044	9.3282	13.3881	10.9897	5.0943	9.0313		0.255321	9.21171
5.0882	6.6843	8.0292	8.6222	3.7647	8.6884	12.1534	8.2601	5.316	14.0009	13.0564	12.0111	13.5532	11.9432	12.5383	7.6607	9.8658	11.9454	11.6903	4.5379	9.47		0.262412	9.68958
5.2257	6.9904	8.6077	5.8298	3.0738	6.962	7.9304	8.2712	5.7443	8.976	12.0514	11.757	8.8993	13.8468	8.2123	10.4286	8.1589	13.1553	11.9202	5.3307	10.1969		0.269504	8.81715
5.3632	7.7025	5.5937	13.4271	3.9112	6.936	8.1382	9.0861	4.3837	15.5101	6.9359	7.4133	12.365	9.7863	7.2079	7.5927	8.4029	11.469	9.2446	8.7944	8.7346		0.276595	8.63176
5.5007	10.7627	6.7956	8.8182	4.0164	5.5729	10.1934	8.2084	6.673	14.4714	5.0512	6.3536	7.7396	7.4739	6.8279	11.2359	8.9104	9.7126	9.7772	9.9609	7.6164		0.283686	8.30858
5.6382	8.5697	7.2663	6.2228	5.2198	7.0848	10.5898	7.3396	10.4754	12.6688	6.1079	5.8534	12.047	7.4539	7.2649	8.2219	9.9859	10.0436	8.7985	6.9869	9.903		0.290777	8.40519
5.7758	10.8356	9.0213	7.5412	6.6662	9.4196	11.7706	5.7286	10.8452	9.3496	3.0044	5.7996	13.1514	10.3478	7.1579	7.6471	11.4006	11.8004	6.4849	7.7289	10.6778		0.297874	8.81893
5.9133	5.3386	8.5423	6.333	5.4897	5.2612	12.0869	8.1187	10.4557	10.4427	5.1508	6.3475	14.1746	11.845	8.3861	8.8175	9.8334	8.5607	5.7447	3.8113	7.0338		0.304965	8.08871
6.0508	5.3573	8.037	8.0515	3.934	5.204	7.3887	8.0905	11.1456	14.389	5.1493	6.713	23.4324	9.9285	10.1848	6.867	8.1869	9.5636	5.5772	4.9238	6.8574		0.312056	8.44908
6.1883	6.5935	7.2617	6.4516	8.9442	6.6812	4.192	6.9216	6.2745	11.77	4.9382	7.4345	23.8407	7.4938	6.7032	6.9409	9.4025	9.7765	8.4676	5.7782	7.0678		0.319147	8.14671
6.3258	6.8256	8.1956	9.6458	7.4878	4.5737	4.1333	9.4614	6.7929	15.5631	10.3362	10.0879	26.4128	8.5908	7.7943	6.5734	11.0941	11.2529	6.3399	5.4748	9.9476		0.326239	9.3292
6.4634	6.6797	9.1659	7.7363	6.4441	8.6182	6.3144	7.4496	5.7872	16.7727	10.0931	9.6497	23.101	7.0007	6.0253	8.7267	9.5585	11.357	4.3917	3.8042	10.2941		0.333335	8.9485
6.6009	6.2905	8.178	6.7607	6.8344	7.1726	7.2491	5.3309	7.1582	14.8841	6.4792	6.5667	23.2819	7.7927	5.6065	13.9769	9.2013	9.3171	6.2999	6.3152	9.2002		0.340426	8.6948
6.7384	10.2396	8.3371	8.2787	6.9578	3.8286	8.3119	6.9594	5.7468	12.6261	5.2961	6.0823	22.684	12.6972	7.4228	12.6544	9.2207	5.7804	7.1333	4.182	4.6891		0.347518	8.45641
6.8759	6.2645	6.8041	7.243	4.1522	6.397	5.7709	10.1579	7.0987	10.7931	7.3837	6.2428	22.6396	11.1131	7.0526	12.1919	10.4045	13.3079	6.1107	6.188	7.1508		0.354609	8.72335
7.0134	7.0988	5.7877	9.7716	4.5154	4.6933	5.1689	9.2691	6.2209	8.2546	6.793	7.5839	17.9061	10.2996	8.2419	13.0363	7.3571	8.6868	5.2852	2.4565	6.7369		0.3617	7.75818
7.1509	8.6119	6.1219	7.2442	6.299	6.0053	5.9222	8.3017	4.9419	7.5445	7.371	5.3202	12.1711	8.714	8.1868	11.3444	10.5848	5.3583	5.786	3.7487	5.9004		0.368791	7.27392
7.2885	7.8414	5.1092	6.6975	3.9559	4.6511	5.9066	6.6458	6.4495	7.9294	7.0953	6.5815	11.8795	6.067	5.8111	9.3849	11.4876	5.8724	5.7588	6.7219	5.4317		0.375888	6.86391
7.426	8.1328	7.2066	6.0163	4.2897	5.8853	4.1226	7.1955	6.8133	13.901	6.6342	8.5259	8.6389	7.8001	3.0315	12.1539	12.5734	6.9566	6.2737	7.8008	5.9555		0.382979	7.49538
7.5635	7.3249	6.1437	7.7022	6.0031	5.0947	5.451	7.372	7.4846	9.9598	6.7644	4.7764	9.5393	8.8361	5.7397	12.714	26.4563	4.911	10.7793	7.3718	6.4029		0.39007	8.34136
7.701	7.6308	4.9373	7.1292	4.1693	7.0916	8.7027	8.7994	5.8819	8.8362	8.165	4.6268	11.2702	8.5916	5.4816	11.3013	26.1027	7.1585	11.4689	5.409	6.0951		0.397161	8.44245
7.8385	6.3796	6.1924	5.196	3.6195	4.6556	9.7637	5.207	7.1441	13.9123	6.0043	5.7675	6.2794	4.7979	3.085	7.27	21.4356	11.5403	8.2482	7.6119	5.2576		0.404253	7.46839
7.9761	6.2868	8.7791	8.3547	2.7021	3.6693	8.8263	2.8209	9.9557	19.6136	4.4973	6.1721	6.3738	4.1382	4.0978	7.1523	18.2534	10.9223	8.5507	7.1576	6.6392		0.411349	7.74816
8.1136	6.6366	10.2584	6.4439	5.1941	4.0275	7.7161	3.0691	6.7612	11.8525	10.1175	6.2489	8.0518	4.5268	7.8488	9.9981	12.4695	11.7429	9.3854	5.0885	5.6891		0.41844	7.65634
8.2511	4.3817	6.2942	4.7223	4.8399	5.3282	6.7283	5.2972	8.8893	7.8092	4.8273	4.6826	7.2876	6.6332	8.4068	7.4451	17.0468	8.9242	6.7457	8.4902	5.5132		0.425532	7.01465
8.3886	4.9281	9.0148	6.7242	5.0841	7.8829	7.3135	3.4081	8.3272	7.3986	3.6651	3.5516	7.246	6.9114	7.6882	7.3545	13.4198	10.0619	11.0914	7.7142	3.3254		0.432623	7.10555
8.5261	4.672	6.9214	7.0923	4.3389	5.408	9.3279	4.3919	8.7477	5.8471	5.2358	5.9102	5.8777	7.5213	6.5964	6.3987	10.6116	11.8655	13.1031	9.2436	2.123		0.439714	7.06171
8.6636	5.3927	6.9106	6.8802	4.9683	4.6255	3.5379	5.3393	7.8839	6.9133	4.4928	5.5722	5.8775	7.42	5.5011	5.5719	8.8955	15.1197	12.0995	6.0578	3.6288		0.446805	6.63443
8.8012	5.9754	13.3298	6.0833	3.6958	6.8956	2.1121	2.578	6.2901	5.6436	6.5661	5.493	10.5194	8.0174	4.2597	5.2924	8.1656	15.9709	18.3349	8.0481	3.2306		0.453902	7.32509
8.9387	9.0476	9.9552	4.1351	2.1234	9.3203	7.6032	3.978	6.4778	4.1958	6.7062	5.4211	9.1986	8.7058	6.9138	6.0338	5.2173	16.9844	11.1501	3.8771	6.322		0.460993	7.16833
9.0762	5.5532	12.6809	3.5661	4.4429	6.0491	6.1524	4.8591	4.2711	6.2156	5.0304	8.1059	6.7967	6.783	7.4875	10.0462	5.3795	21.8291	6.9409	4.941	6.0781		0.468084	7.16044
9.2137	5.7255	17.3572	4.06	5.0858	4.903	5.8991	5.1352	6.151	3.7101	4.725	6.5273	3.0124	6.4365	4.912	9.2702	6.4335	18.8742	6.6212	7.9514	5.3479		0.475175	6.90692
9.3512	5.6714	18.8518	4.3342	2.3697	6.3165	4.2843	6.9036	8.7253	4.6818	6.5044	5.0837	4.0153	8.7521	5.6498	6.0221	6.5565	14.6276	5.8499	4.4176	5.0793		0.482267	6.73484
9.4888	5.5063	17.5258	3.6715	3.5666	3.402	3.8761	8.8668	7.0091	4.6032	4.155	5.6961	2.9689	12.8522	5.4365	5.6481	8.56	13.6543	4.311	7.9399	4.6618		0.489363	6.69556
9.6263	6.6057	10.5207	3.2154	3.9596	3.6263	6.6188	4.3323	9.2985	5.4351	3.007	5.3395	4.6832	9.7858	8.2701	5.5495	4.4835	11.4965	4.0615	4.9245	4.9032		0.496454	6.00583
9.7638	4.9062	7.9618	5.6804	2.5748	6.5878	5.8658	3.9135	10.4703	2.8972	3.3472	5.3263	4.2697	7.0441	9.7055	6.1756	4.2276	6.2934	3.3723	8.4748	6.3023		0.503546	5.76983
9.9013	4.8701	7.5018	4.4321	4.0802	3.1445	4.4027	4.2472	6.6414	2.6601	7.7903	4.3324	2.7849	7.8542	5.2106	7.9927	5.8895	3.7378	4.2734	5.8834	7.559		0.510637	5.26441
10.0388	5.6198	6.8585	3.4213	4.8033	4.2946	2.9145	4.7499	7.5845	4.5696	6.6274	3.4406	2.7535	10.2421	5.3268	8.3653	4.3821	4.366	5.2914	4.3019	9.3671		0.517728	5.46401
10.1763	5.0634	8.0425	5.201	2.2871	5.7724	4.9941	5.1061	5.9713	6.5802	4.7203	4.3583	6.0656	10.7744	5.6723	11.4869	5.1055	4.531	5.2894	5.9838	4.1594		0.524819	5.85825
10.3139	3.0339	7.996	4.8753	2.0818	3.4006	5.44	5.3874	6.634	3.6124	3.3265	9.8815	4.6984	9.1898	6.3246	4.0904	8.5891	6.8423	8.7857	3.2143	4.0864		0.531916	5.57452
10.4514	2.8642	6.6466	5.9363	2.0626	2.7151	6.1166	2.7533	6.127	1.8275	5.5043	11.8525	6.5954	4.0268	8.4232	7.4961	8.2368	6.7864	5.954	2.8817	4.3136		0.539007	5.456
10.5889	3.3532	6.093	5.2837	2.1182	2.5905	5.8093	2.2577	4.2601	4.805	3.7479	8.6455	5.2924	6.959	3.7086	5.8392	6.2501	6.7527	4.5105	4.2075	6.9921		0.546098	4.97381
10.7264	4.7743	5.5977	4.5736	1.5904	2.3739	2.7415	2.5631	5.0038	5.4248	3.7102	6.0668	2.0525	4.2242	4.9407	3.5565	6.3589	7.2699	7.9706	4.5683	7.0263		0.55319	4.6194
10.8639	5.5514	6.8882	2.4122	3.7851	1.7739	4.0576	3.5095	5.7588	3.4741	3.7857	8.6657	2.2565	5.4376	4.6696	5.5462	6.6186	6.7235	6.4518	6.3743	8.5116		0.560281	5.1126
11.0015	12.2989	3.836	3.2315	3.4467	2.1501	7.2784	5.5035	3.4546	2.8044	3.36	10.0062	1.4019	4.5208	4.0903	5.6759	6.4779	6.9687	5.9657	6.8575	11.006		0.567377	5.51675
11.139	6.926	4.8513	3.0525	4.0954	4.3191	4.6202	3.9262	5.9564	3.075	5.3412	9.5829	2.6381	6.0393	3.6223	3.6183	6.497	6.7105	4.5904	6	8.2165		0.574468	5.18393
11.2765	6.7405	4.7466	3.0044	2.8832	4.4421	3.7537	4.3817	5.7522	6.4896	3.9969	5.5282	2.5621	6.1673	4.825	3.9524	7.5424	6.5487	4.5909	6.5968	8.5673		0.58156	5.1536
11.414	2.0291	4.6459	3.2533	2.649	2.0271	4.6085	7.2325	4.974	5.7533	2.7032	6.1836	2.9848	3.679	6.6048	5.5096	5.9803	5.787	5.8809	10.3448	7.8044		0.588651	5.03176
11.5515	4.9323	5.1869	2.033	4.2953	2.9773	5.3326	7.6495	4.812	4.8534	3.2105	6.9948	3.7764	3.3236	5.1482	3.3748	8.5166	5.9012	5.2596	8.7912	15.0918		0.595742	5.57305
11.689	7.3535	3.3662	2.2068	2.8225	4.5163	3.3252	4.599	6.3175	5.3628	3.7116	4.795	3.6675	4.2277	4.4669	1.8525	5.4007	2.306	3.9197	4.324	11.9723		0.602833	4.52569
11.8266	5.0517	7.1727	2.0768	1.9383	4.4012	3.8313	3.3658	4.1305	3.7878	2.1094	4.3324	4.333	4.6069	4.6839	2.7803	4.3228	2.6062	3.3758	4.4376	11.855		0.60993	4.25997
11.9641	5.0544	4.6531	2.6873	1.4473	2.1791	5.696	3.278	4.6677	3.693	2.5131	5.2438	5.8041	7.8351	4.2486	2.9943	6.2837	5.5128	6.2647	5.2885	7.6491		0.617021	4.64968
12.1016	6.0659	3.0086	2.5033	2.7855	1.7782	5.6119	4.4404	6.2431	3.8077	2.6355	9.055	6.088	5.7744	6.149	5.5151	7.6218	6.1494	5.464	5.1458	9.8399		0.624112	5.28413
12.2391	5.6304	1.7329	2.2203	3.0155	1.8836	5.2599	4.1277	6.4109	4.3809	2.4738	5.6471	4.6255	6.273	8.1727	5.8848	10.1217	5.6021	6.0886	6.8033	10.1336		0.631204	5.32442
12.3766	4.5963	2.9119	5.3974	4.4953	2.4535	4.5777	3.1101	7.7402	4.6857	4.0943	4.526	2.7198	5.5125	5.8292	5.2542	6.6551	7.7488	5.3821	6.3394	13.2817		0.638295	5.36556
12.5142	6.2857	2.597	2.6278	3.75	3.083	5.9222	2.337	3.8681	1.4337	4.5825	4.2119	3.1689	5.6026	6.9498	4.5511	9.4281	7.0737	4.814	4.3984	10.5746		0.645391	4.863
12.6517	5.4506	1.8298	3.0968	1.7453	3.5849	2.0637	5.423	3.5599	2.3535	2.9154	4.6997	4.949	8.6274	7.1557	5.971	6.2306	5.0656	5.5897	5.1871	7.1375		0.652482	4.63181
12.7892	5.3651	4.2633	3.3121	2.8664	2.6832	1.8798	6.2692	8.8117	3.6527	3.5132	4.1076	5.7555	7.1227	10.3666	4.2778	4.6827	10.6212	6.7118	5.9815	7.002		0.659574	5.4623
12.9267	4.6187	2.5566	2.4448	4.5636	2.0893	2.748	4.8775	4.2306	4.6121	3.8357	1.886	7.7053	7.2949	7.9149	4.9353	6.2401	7.1915	4.9853	7.2367	8.1461		0.666665	5.00565
13.0642	2.4516	3.5472	2.1709	5.725	2.3249	3.6601	3.0293	5.1463	2.7535	5.745	4.3091	3.8961	6.3812	6.8487	2.8959	3.3731	8.9037	6.1807	6.613	8.7601		0.673756	4.73577
13.2017	3.3895	1.6179	1.6948	2.2074	3.9691	4.0875	4.8205	5.3484	4.7901	4.9953	3.9085	4.7836	5.4011	3.8696	4.7045	4.2157	6.8686	9.0671	4.2058	9.456		0.680847	4.67005
13.3393	4.2841	4.0828	3.9872	3.6947	3.2522	3.1936	3.6555	3.7938	3.2072	3.9677	4.0482	8.5267	8.457	4.4229	4.342	2.3711	9.9694	4.5181	4.968	6.337		0.687944	4.75396
13.4768	3.6297	3.8096	5.201	4.5512	2.6626	3.3636	5.0173	5.639	3.4779	3.7923	4.468	7.2674	5.3821	5.6838	6.0265	3.195	5.2316	6.3091	6.0613	6.4533		0.695035	4.86111
13.6143	3.1868	3.3692	3.4721	4.1277	3.2063	2.6832	3.9745	3.8432	3.7795	2.7843	3.8676	5.9883	8.3194	5.1547	5.3122	4.8296	4.8847	6.4291	5.3478	7.4008		0.702126	4.59805
13.7518	4.0964	2.6584	4.035	3.4139	3.1726	2.1922	5.4773	2.2097	2.5144	2.7876	2.2551	3.7058	6.3998	3.4447	4.4982	2.7817	5.3137	6.0677	5.6108	5.9965		0.709218	3.93157
13.8893	5.699	4.7816	3.7209	2.8749	4.1264	3.9443	6.2537	2.899	1.9928	3.5569	4.0675	3.1201	5.8104	5.2604	6.1239	3.769	5.3004	5.2681	7.682	4.7676		0.716309	4.55095
14.0269	6.6081	3.6576	4.1713	3.398	4.8747	3.862	4.648	4.0938	2.483	3.2652	6.3285	3.9002	4.7181	7.5989	4.3889	3.0147	4.7849	5.9049	9.7866	6.8692		0.723405	4.91783
14.1644	3.3769	5.4945	3.1894	5.3152	4.2798	2.3705	4.5489	7.9068	3.0333	3.5075	5.1333	3.637	4.1686	6.0218	7.9876	5.3131	3.9031	5.9804	8.3714	5.1355		0.730496	4.93373
14.3019	2.6982	7.8072	2.8816	3.2475	4.7882	2.9692	7.3259	3.1244	2.491	2.3911	3.4395	4.452	4.3397	4.2229	6.1299	6.9677	3.3178	3.6937	7.4469	5.9302		0.737588	4.48323
14.4394	6.4166	6.3388	3.2242	3.0713	1.5351	4.5352	3.611	3.3871	3.3238	6.2661	4.0553	3.6739	4.7411	5.6183	3.1715	2.563	4.8936	3.9227	8.3529	7.0092		0.744679	4.48554
14.5769	3.4161	4.9207	2.1749	2.5533	2.7051	1.747	4.1725	3.8625	3.9706	2.7219	4.6093	2.0812	3.4065	5.8424	4.9657	5.469	4.3547	3.5831	8.7486	5.0542		0.75177	4.01796
14.7144	3.455	3.8236	3.306	2.9164	3.5137	1.3441	5.3573	4.5847	3.8726	2.2857	5.1366	3.5282	3.8054	7.3623	4.8563	4.1028	5.2322	5.9355	8.8687	4.3997		0.758861	4.38434
14.852	5.4043	4.6682	4.0166	2.944	3.029	1.8508	5.5211	3.6853	4.0711	3.469	5.3996	4.2289	7.6923	4.072	3.06	6.729	6.2407	3.7837	5.8004	4.0438		0.765958	4.48549
14.9895	8.8468	6.4867	6.0783	2.2312	3.4444	2.0088	5.5998	2.9955	5.9457	2.6203	7.0973	2.1315	5.2524	7.1054	5.3585	2.3931	6.471	5.7737	11.2712	4.4887		0.773049	5.18002
15.127	6.1397	3.4185	6.0488	1.8705	5.1048	2.2914	5.4078	3.7507	4.1452	3.4505	6.2675	2.6372	4.8494	4.7478	6.9635	2.2266	7.5542	7.0882	10.1696	5.4299		0.78014	4.97809
15.2645	3.0598	1.8949	2.8777	2.6562	4.434	3.6327	4.5458	2.7291	5.5024	3.9088	3.6907	4.4524	7.0248	2.4325	6.4278	3.2673	3.0568	6.4279	8.486	5.2897		0.787232	4.28986
15.402	5.7012	2.3269	4.8614	3.509	4.0117	4.0263	4.8533	3.3641	5.4739	2.7893	4.9763	4.5752	3.1993	2.8695	4.5187	5.7215	4.0471	4.813	4.7628	4.1216		0.794323	4.22611
15.5396	3.9396	2.2736	4.0647	5.0251	3.1733	3.6105	4.8182	3.5902	8.33	3.792	6.1133	3.3937	3.5767	3.3106	3.1335	2.8575	4.0221	4.4284	4.8471	7.6285		0.801419	4.29643
15.6771	2.6873	3.5075	3.0311	2.6203	4.8176	3.9332	4.0627	3.8227	5.0106	5.2221	7.1689	4.0033	2.0325	2.6204	3.8829	3.1113	4.0653	3.2886	4.1498	3.7375		0.808511	3.83878
15.8146	2.6378	4.2189	4.2293	3.4869	4.1595	7.8053	3.0387	2.2009	2.8666	6.3588	8.3565	5.9199	2.8583	4.1093	5.081	2.2827	5.6418	3.3249	3.666	3.0111		0.815602	4.26271
15.9521	2.1924	2.8631	6.2956	2.6182	3.3976	7.0175	1.6818	3.5434	2.7173	6.1129	4.4998	4.4486	2.9082	4.4395	3.9523	4.8822	5.0807	4.8799	5.0013	5.9584		0.822693	4.22454
16.0896	3.8959	2.15	6.9617	2.1191	2.873	4.185	1.3474	3.2512	4.0853	5.6583	4.3381	5.4404	2.3374	4.8702	4.0599	3.8735	5.1215	6.1759	4.5848	4.5644		0.829784	4.09465
16.2271	7.5177	2.6181	6.5257	2.7453	3.6684	2.3328	1.2904	4.9812	3.016	9.9448	2.8442	6.234	2.6325	2.7829	4.1346	3.9024	5.2289	4.5648	6.4613	4.5986		0.836876	4.40123
16.3647	3.9743	2.0659	5.9486	3.7847	2.5741	2.3263	1.9097	3.1567	3.2787	6.4257	3.0225	4.6878	3.1135	4.7014	3.3267	3.0806	6.7352	3.4822	8.4369	6.2069		0.843972	4.11192
16.5022	5.2181	3.6979	4.9597	5.0972	3.6284	1.3604	1.7494	4.0927	3.2132	4.1266	2.8186	5.1497	3.2096	5.2562	2.6666	4.1057	6.8066	3.0864	5.955	5.6302		0.851063	4.09141
16.6397	4.0351	5.6715	4.2103	4.7903	3.2828	1.5027	1.6918	3.6098	3.962	3.9429	2.2466	2.8109	3.683	2.8956	3.3768	2.8478	4.8797	6.6683	6.9674	4.589		0.858154	3.88322
16.7772	1.4661	3.9783	4.3079	2.9604	1.8737	2.0054	1.2806	2.1715	1.7764	2.7099	1.9861	2.6636	2.7712	5.7772	7.5795	4.0419	3.9675	4.9766	5.2815	4.6885		0.865246	3.41319
16.9147	2.6677	2.091	5.9967	2.5945	2.1648	1.8672	1.1929	2.1243	1.2627	4.7659	3.2764	2.5241	2.7602	3.5654	4.5633	3.2007	6.2712	5.0953	4.5331	6.8288		0.872337	3.46731
17.0522	1.6072	2.0875	2.8059	1.3556	1.968	1.5977	1.1242	1.824	3.3461	5.1866	4.821	4.762	4.3381	4.5579	3.1644	4.593	6.161	4.429	3.5434	4.7539		0.879428	3.40132
17.1898	1.8391	2.1532	4.8093	2.0353	1.2602	1.3286	1.7659	2.236	3.0752	3.9664	3.4962	2.8078	3.3375	4.4485	3.5292	4.9618	5.6025	4.2496	1.9306	5.4224		0.886525	3.21277
17.3273	1.3461	1.8968	3.3842	2.7189	2.7098	1.3993	1.8363	1.8251	3.0749	3.6476	5.1489	3.1604	4.4586	5.9751	6.2604	3.6197	2.9896	5.2009	1.6958	5.93		0.893616	3.41392
17.4648	1.6922	1.5078	1.988	1.5948	1.9275	1.1093	1.7918	1.6287	2.2483	3.7836	5.6699	4.4292	4.7862	5.3737	3.7755	1.93	4.8124	2.5556	2.8161	3.7626		0.900707	2.95916
17.6023	1.4092	1.3787	1.6629	1.8524	1.5512	1.396	1.2324	1.9181	2.2394	7.1878	7.0479	5.5068	3.2027	5.008	5.0708	2.8153	2.5434	3.3208	3.2701	4.9471		0.907798	3.22805
17.7398	1.3228	2.0732	2.0551	1.6856	1.3916	2.2594	1.4627	1.7312	1.9289	6.3766	4.8739	2.8038	4.9419	9.1789	3.64	1.2	2.3391	3.3301	2.9748	2.4609		0.91489	3.00153
17.8774	1.1833	2.4092	1.2752	1.1839	4.3622	2.3	1.42	1.4802	1.5779	3.0162	3.3043	2.7682	2.8416	3.4232	2.3622	1.1575	2.6113	2.4301	3.9909	2.5352		0.921986	2.38163
18.0149	2.0637	1.2265	1.3359	1.2689	3.0239	1.2738	1.3997	1.7929	1.4563	2.5368	2.595	2.9818	2.8258	2.3867	3.2759	1.4353	3.4938	1.9236	2.5819	2.7409		0.929077	2.18095
18.1524	2.5641	1.3801	3.2446	1.3021	2.0267	1.2348	2.2476	2.1774	2.1403	4.447	3.5312	4.1864	1.4006	2.9553	3.0818	2.3399	1.4741	2.4754	1.9553	3.9839		0.936168	2.50743
18.2899	1.268	1.9531	2.313	1.8106	1.3961	1.2931	1.5137	1.2397	1.3793	3.0285	1.6901	2.131	1.3722	1.3085	2.9124	1.5026	1.8698	2.4554	1.4401	2.447		0.94326	1.81621
18.4274	1.5761	1.9906	1.6799	1.4626	1.3378	1.2886	2.6192	2.6313	1.6749	3.2998	1.2703	2.2086	1.4267	1.7925	4.0064	1.2464	1.2696	1.5518	1.8679	1.2944		0.950351	1.87477
18.565	1.301	1.2009	1.4681	1.1896	1.222	1.3113	1.4766	1.2572	2.6165	2.6688	1.3848	1.9615	1.1493	2.5084	2.8763	1.2482	1.187	1.5188	2.684	1.2006		0.957447	1.67155
18.7025	2.716	1.155	1.3832	1.2331	1.2093	1.3208	1.4157	1.8504	1.7592	2.2467	1.4489	1.3136	3.0281	1.8124	1.1834	1.2323	1.6994	1.3489	2.5023	1.1722		0.964539	1.65154
18.84	1.6223	2.5797	1.3361	1.1236	1.3835	1.27	1.1388	2.335	1.3318	1.8133	1.0026	3.4938	1.9757	1.2605	2.0075	1.199	1.7275	1.9028	2.4605	1.2999		0.97163	1.7132
18.9775	1.1364	1.5635	1.595	1.5678	1.6936	2.3711	1.2244	2.0889	1.2064	1.4508	1.3103	1.8225	2.3566	1.5232	1.6445	1.2788	1.871	2.2105	1.8044	1.3677		0.978721	1.65437
19.115	1.1704	1.2002	1.3901	1.8425	1.4987	1.4615	1.1921	2.0089	1.0155	1.4918	1.217	2.3303	1.2442	2.7262	2.4894	1.6697	1.1377	5.6328	1.557	1.3802		0.985812	1.78281
19.2525	1.5114	1.1366	1.6159	1.3528	2.8188	1.3326	1.5828	2.481	2.4996	1.9179	1.7519	1.8095	2.0481	1.6136	2.8525	1.7254	2.1525	1.7549	1.892	2.2624		0.992904	1.90561
19.3901	1.6968	1.7907	1.4929	1.4822	3.0991	1.6791	1.3206	1.947	1.4358	1.6746	1.5927	1.3347	1.6533	1.2629	1.8482	1.2325	2.5495	1.3337	1.694	1.6191		1	1.68697

## Sheet: Image6
X0	Y0	Y1	Y2	Y3	Y4	Y5	Y6	Y7	Y8	Y9	Y10	Y11	Y12	Y13	Y14	Y15	Y16	Y17	Y18		Apical-Basal	Avg intensity
0	2.6386	3.134	4.8233	2.2659	2.8485	3.402	5.1499	4.6393	4.066	3.9325	2.4382	3.0071	2.3966	3.5128	2.6247	5.15829	5.16666	3.1359	2.8985		0	3.53888
0.1375	3.6345	3.2623	2.813	3.9	2.5701	3.9507	4.0128	2.3881	4.0776	5.1173	3.3979	2.9082	2.4106	2.1994	2.314	2.77083	3.19933	1.9859	3.1024		0.00662166	3.15868
0.275	5.8774	3.4296	2.9667	4.4069	3.2658	3.9913	3.4319	3.728	2.0103	2.7941	2.3671	2.3085	2.9092	3.7815	2.5063	3.26808	1.70549	2.3788	1.4939		0.0132433	3.08531
0.4126	6.7919	3.948	4.1402	3.4126	1.9125	4.6047	3.2828	3.6576	3.2646	2.7018	4.1616	1.9048	2.822	3.6774	1.4141	1.83132	2.52979	2.7214	2.1271		0.0198698	3.20559
0.5501	7.2225	5.5414	4.0528	3.2249	2.2936	3.8112	3.9023	2.768	3.1319	3.243	2.9149	2.8679	2.2657	4.2251	1.8037	2.86253	2.60446	4.6657	2.2466		0.0264914	3.45517
0.6876	3.5761	6.975	5.4733	2.9954	4.0021	2.6772	4.4444	1.6149	3.918	3.1999	3.1779	2.238	3.8162	3.653	2.0392	3.33094	2.55463	3.7779	3.6049		0.0331131	3.52995
0.8251	4.5118	4.7234	5.132	3.7959	5.0987	1.9439	3.1588	3.9534	3.2498	7.9413	4.9628	1.9899	3.5184	3.4408	3.5708	2.29911	2.10752	1.3493	2.8368		0.0397347	3.66234
0.9626	6.2039	7.7228	2.8601	1.885	4.4111	3.8147	4.5287	4.2341	4.0985	4.8348	6.2163	4.9353	6.5937	5.1051	3.2349	2.10025	2.84766	1.6208	2.6041		0.0463564	4.20273
1.1001	5.3877	4.1678	4.1678	1.9528	2.6612	2.3749	6.0054	5.0426	3.8401	5.7585	3.3269	2.8414	4.2815	4.8284	1.9706	1.61772	3.11362	2.9038	4.4034		0.0529781	3.71822
1.2377	7.9099	4.595	3.2468	3.0945	2.7431	3.6343	3.917	7.2866	5.7429	5.302	4.1814	4.4485	6.4372	3.2349	3.1174	2.9498	1.69508	3.6325	2.6362		0.0596045	4.20027
1.3752	8.2253	7.3159	5.0322	6.134	1.5657	3.9576	5.8772	4.3916	2.7716	7.758	3.0144	4.3384	5.5171	3.8478	3.7685	1.91011	1.4957	2.9032	1.5905		0.0662262	4.28499
1.5127	8.8367	3.5602	4.4958	4.5967	3.3708	3.998	6.1728	5.6253	4.6779	6.0376	4.9975	3.8289	5.2311	3.0425	2.5117	3.73305	2.1277	2.3296	1.7864		0.0728478	4.26107
1.6502	6.9028	4.3341	5.2172	2.7838	4.486	4.1622	6.537	6.4001	5.494	4.819	8.0427	2.2247	5.4609	4.0909	3.5362	3.04603	1.59191	3.6058	2.7516		0.0794695	4.49931
1.7877	5.3228	5.0679	7.5498	2.8412	4.4645	4.0723	4.1168	6.3211	4.5954	7.5396	7.5532	4.4496	3.6874	4.0935	4.3055	3.45462	2.89311	3.4269	4.0769		0.0860912	4.72801
1.9253	5.3418	5.4617	6.2564	4.9618	6.0804	2.5656	4.1382	8.0094	4.4592	4.9233	4.0273	6.2355	5.8582	6.321	4.0042	4.33788	3.28065	2.7925	4.8456		0.0927176	4.94214
2.0628	5.1542	7.0967	4.079	5.6371	5.9023	4.8629	4.8142	5.423	2.2129	4.9994	4.1667	7.726	5.784	4.6873	3.3635	3.73333	5.22176	4.1849	3.1054		0.0993393	4.85024
2.2003	2.2825	4.7149	7.0263	3.7733	6.5511	8.943	5.988	5.4465	4.9409	5.013	3.7733	4.3905	3.2836	5.5823	3.1191	5.40884	3.35182	4.6101	5.4202		0.105961	4.92733
2.3378	5.1754	6.9532	7.5653	5.0466	5.199	7.4404	4.0445	5.2968	7.5811	6.8579	6.0442	5.8346	3.5298	9.1498	2.1508	3.94607	5.82144	6.918	7.8209		0.112583	5.91452
2.4753	3.5211	6.2626	4.5359	4.9631	7.8053	5.1104	5.2607	5.7878	9.8876	6.6896	4.8791	5.5456	3.6633	5.526	3.2839	4.96812	4.29241	3.2133	7.5612		0.119204	5.40826
2.6128	4.3532	4.7363	6.6527	2.9893	4.786	6.7341	3.9913	5.2375	7.0452	7.0277	3.9101	7.9012	7.1888	7.0417	8.0461	3.84868	7.01833	4.9193	6.4893		0.125826	5.7851
2.7504	5.294	5.6033	6.8225	3.6985	4.9617	6.0716	5.7026	5.4344	9.4549	7.4271	4.8815	9.5347	6.6285	4.7408	4.5806	3.72973	7.22274	4.7462	4.9771		0.132452	5.86908
2.8879	8.3656	6.7858	7.0421	2.6933	8.9474	4.094	5.6147	5.7563	8.2941	5.1678	3.9948	6.6189	5.5331	3.3065	6.5273	7.23934	5.86679	4.3341	4.1017		0.139074	5.8044
3.0254	5.3574	4.5738	5.6869	3.6701	4.7971	6.5016	5.1478	8.1773	8.4225	6.1715	7.2907	4.7318	6.3925	3.9384	3.9157	6.7335	4.66177	7.7469	4.9017		0.145696	5.72731
3.1629	4.8902	6.1314	5.0084	4.669	5.4733	4.297	7.1386	9.6564	6.5644	8.201	4.4275	2.7883	4.5048	3.9311	6.4366	7.26599	5.28418	12.8606	4.5782		0.152317	6.00563
3.3004	4.8088	7.0761	7.8611	3.7419	5.3029	8.2689	7.1267	5.0029	6.4509	7.763	6.6418	4.0549	7.8943	3.6158	3.6485	5.35679	7.54921	7.6304	5.8672		0.158939	6.08748
3.438	6.8448	7.038	5.3936	3.2039	3.6662	4.9982	5.4104	2.8476	3.9902	11.0573	4.9715	4.7367	3.5616	5.7092	4.4234	4.34942	10.4378	5.0796	5.6092		0.165565	5.43835
3.5755	5.5313	7.1368	4.8191	1.8612	5.2167	4.4331	5.8499	5.2269	5.1043	6.6315	5.919	3.9357	3.5122	6.3845	8.0587	5.91304	9.67355	8.4988	7.2813		0.172187	5.84145
3.713	5.0993	6.1071	5.179	5.2232	6.3757	6.3846	5.4758	5.6684	4.578	7.2328	8.5963	5.1448	6.9385	5.1307	6.745	4.1967	5.55848	8.018	4.1601		0.178809	5.88487
3.8505	9.6904	3.875	6.4476	5.2507	5.1899	7.5177	5.8655	8.3629	6.0304	4.9707	6.8485	5.4431	7.1561	3.4433	6.937	5.83471	6.25557	7.8956	5.2962		0.18543	6.22689
3.988	8.9121	4.6763	8.4558	5.1297	3.8732	11.5335	4.1422	6.9745	7.2729	6.2061	3.4982	2.5031	8.9209	3.255	6.0593	4.88468	3.99854	6.5876	5.1325		0.192052	5.89559
4.1255	8.179	3.5951	9.2401	3.2239	6.103	7.7998	7.0219	7.4967	5.66	4.1039	2.7793	6.4104	8.4501	6.2073	5.2423	5.36236	8.35206	8.0392	6.2283		0.198674	6.2892
4.2631	10.1229	5.8043	4.3274	4.6003	6.8523	4.6603	5.3223	6.0685	6.9368	4.2335	3.3957	6.8904	6.1491	4.3034	3.6856	5.23558	4.16526	5.5244	5.4654		0.2053	5.46018
4.4006	10.289	6.6485	8.7039	3.9781	5.9156	6.6312	8.5691	6.288	6.0744	4.6525	4.5275	8.6814	5.4027	4.832	3.1913	4.72462	6.32428	4.2778	9.8689		0.211922	6.29373
4.5381	12.9075	4.9209	3.7951	6.4956	7.067	6.1934	7.4269	5.3087	3.8792	5.1733	7.4869	6.0665	4.9472	6.859	6.9414	5.65075	8.85912	7.1308	7.0401		0.218544	6.53418
4.6756	11.8722	6.288	8.6278	4.5316	5.4879	8.7129	9.976	4.9982	3.9848	6.6681	5.8905	6.7372	6.1487	4.4434	6.8157	7.11069	8.68993	6.0667	3.309		0.225165	6.65049
4.8131	10.6788	5.3237	10.435	7.5403	5.2633	5.9244	5.2793	5.26	2.9815	6.8885	6.1461	5.8954	6.2801	5.7523	4.9267	7.92787	8.55645	3.3037	3.9156		0.231787	6.22521
4.9507	14.1772	4.4276	6.9432	9.0033	8.1842	4.8598	4.6428	5.628	3.5914	8.2915	4.2799	5.3567	4.4135	7.5935	6.7597	7.15026	7.94061	4.7703	5.413		0.238413	6.49613
5.0882	15.0943	6.8897	8.6894	7.3201	7.27	8.101	5.7537	7.941	2.1284	9.8722	6.4605	6.0317	3.8259	8.293	7.3366	4.08077	7.73856	4.1935	6.4566		0.245035	7.0251
5.2257	9.0595	8.2008	6.5924	7.5102	8.1069	9.6562	8.7541	16.297	5.0226	7.3585	7.6467	7.9424	2.8572	3.6157	6.8158	7.65946	10.0194	6.8469	5.4773		0.251657	7.65469
5.3632	8.6839	6.6176	8.5815	6.057	5.3506	7.6323	6.1084	10.2574	4.7995	10.804	4.9032	8.6032	5.0228	8.7396	5.5846	5.02071	4.17697	7.7555	5.7916		0.258278	6.86791
5.5007	7.7159	5.545	5.5596	5.0884	7.7456	12.1229	7.0966	6.5098	5.4098	10.9864	9.2269	11.2666	5.4411	6.5441	3.7945	5.42373	6.67382	6.7538	4.4873		0.2649	7.02062
5.6382	11.1522	7.9548	6.8842	5.8961	11.0876	8.503	3.9315	7.2946	3.4515	7.8949	7.545	10.6333	4.4829	6.2759	3.5199	4.67407	6.7846	4.4838	6.2797		0.271522	6.77524
5.7758	10.7057	7.8022	8.1218	5.9036	8.4215	5.7403	5.3106	7.9111	7.5411	5.2247	10.0306	14.5696	2.8541	5.4278	6.1148	3.50259	4.69442	3.0955	4.6329		0.278148	6.71605
5.9133	9.1461	6.1905	8.7422	5.0168	5.5568	7.9323	4.9596	6.4033	7.1791	6.4578	8.354	8.576	6.6567	6.3758	5.6924	6.00426	3.58057	3.4	4.0053		0.28477	6.32787
6.0508	11.0615	9.0691	8.1694	5.1775	7.3343	7.4665	9.0695	7.8781	7.2693	9.5377	10.65	6.1346	5.4082	7.2255	4.9758	5.01279	4.62214	5.4545	5.2593		0.291391	7.19872
6.1883	9.1402	8.673	8.1537	3.0838	7.2921	8.2271	7.1544	7.5615	7.5261	12.2623	11.347	6.4017	6.9105	6.8967	3.7519	3.41337	3.64937	2.1166	7.7998		0.298013	6.91374
6.3258	8.6319	7.2944	5.0954	5.6061	6.9013	8.9952	8.2173	10.7799	8.2169	6.4927	10.4363	5.7277	5.0533	6.2218	3.8606	5.37838	2.88861	2.256	8.8167		0.304635	6.67739
6.4634	9.4995	7.515	8.3699	7.2058	5.1129	6.3584	5.7918	9.2752	12.7672	5.9578	8.5801	4.0692	3.9025	5.4561	5.318	4.88206	6.45084	3.7616	7.3934		0.311261	6.71933
6.6009	6.8381	6.606	8.9769	8.5793	7.8523	8.4886	6.7564	8.3878	9.09	8.9698	9.2486	6.5515	2.4939	5.4627	4.9804	6.59706	6.21978	5.0107	4.7664		0.317883	6.94085
6.7384	6.8954	4.6677	5.1457	6.5183	13.666	10.9173	4.478	9.9385	9.6642	10.7203	8.9676	8.0522	4.1452	7.2293	5.0016	4.86631	6.089	6.1437	4.03		0.324504	7.2177
6.8759	7.3631	10.2796	8.6022	7.2554	8.4341	8.0125	4.1649	3.2841	11.1245	8.3236	9.817	8.6221	4.6929	7.5287	6.1979	5.60653	7.78555	10.2256	5.8019		0.331126	7.53275
7.0134	7.8782	6.7213	6.1714	6.0292	11.4528	7.8332	9.1063	5.3517	8.8457	6.0646	10.0843	9.2386	3.059	8.3583	8.9535	6.72699	5.70105	7.2882	4.7061		0.337748	7.34581
7.1509	11.0352	7.7152	8.367	3.3898	8.3655	8.4441	12.6134	10.0412	9.9224	9.8467	10.0951	3.9993	4.933	4.5901	10.1673	6.01189	4.96449	9.4522	7.8318		0.344369	7.98872
7.2885	9.2413	7.8681	8.8589	5.8196	9.0477	8.4478	8.5088	10.9703	9.7484	8.2944	12.1989	5.5113	4.7298	8.4819	12.0815	5.56693	2.82553	5.6151	6.5715		0.350996	7.91515
7.426	6.3626	8.2523	13.1108	6.5562	11.8046	9.7547	9.0073	10.7861	11.6996	7.7566	12.4015	9.845	4.5795	10.6011	9.339	4.96812	5.00532	8.3442	4.8086		0.357618	8.68332
7.5635	4.5557	9.6319	8.8312	8.78	12.4147	8.7512	9.3344	18.1952	12.2464	10.6712	8.5285	14.0575	6.4889	9.273	6.2038	6.6833	5.39864	6.1879	6.4612		0.364239	9.08919
7.701	5.5268	6.2389	6.3808	6.3216	12.6935	7.2901	11.3441	19.2228	10.912	13.7993	5.1766	12.8471	5.9817	10.7585	9.842	5.96352	4.95401	4.3218	7.1083		0.370861	8.77281
7.8385	4.9916	5.0408	9.3214	7.5359	10.3005	8.121	10.4818	10.2812	10.7214	12.2953	7.7098	9.7589	4.7101	11.4892	6.8874	7.1421	3.52427	5.817	7.1391		0.377483	8.06678
7.9761	6.1383	3.8771	5.3179	5.5307	9.0196	10.6727	10.7157	15.475	12.177	14.0751	9.6932	8.1389	7.366	8.7684	5.6263	6.22005	7.39503	3.4459	9.3787		0.384109	8.37008
8.1136	10.3263	7.664	8.2354	7.8933	6.3096	9.481	10.1906	18.91	10.0926	12.4475	9.6913	6.5798	11.2834	8.6179	6.5286	7.36399	9.93959	6.0743	6.5876		0.390731	9.1693
8.2511	7.0158	9.3618	6.5526	8.3327	9.9887	11.4338	8.3669	14.3217	9.5127	17.3338	10.0392	9.185	7.0632	9.3213	7.5958	6.11048	8.45525	6.5612	5.3021		0.397352	9.04495
8.3886	6.3473	8.9271	7.0309	7.3394	9.2486	9.5144	4.6901	16.3149	9.7329	13.8931	5.6292	11.5739	11.3656	11.5678	6.0876	8.07314	8.46619	5.4083	12.1015		0.403974	9.12168
8.5261	10.4027	8.6997	5.6656	9.0695	13.2376	10.9938	5.5274	16.8925	5.918	16.5425	5.6135	11.3219	9.9374	8.7161	7.0942	7.56625	6.75674	11.3766	7.3037		0.410596	9.40188
8.6636	5.9517	9.3322	5.3797	5.7838	9.1103	10.9694	7.3289	17.2306	9.462	16.5676	6.9369	14.4194	8.6221	9.9216	7.0169	4.23421	8.35122	4.2786	4.3417		0.417217	8.69678
8.8012	6.4724	11.6264	5.8413	4.858	9.3843	8.6726	7.5308	10.0294	10.2552	18.3117	6.805	10.5436	6.9818	9.5208	5.9461	4.63999	7.46785	6.2954	8.6301		0.423844	8.4112
8.9387	6.648	12.1814	4.4946	5.4397	10.5653	10.4322	4.2045	12.1868	6.1702	15.5923	3.9817	7.6529	8.1705	12.537	7.1953	5.23172	4.64113	5.254	5.6709		0.430465	7.80264
9.0762	4.3034	11.2664	7.6734	5.5436	12.47	11.1817	5.346	11.4933	7.7903	11.2961	6.7834	5.6099	8.4521	12.3592	6.0385	7.58133	4.95567	6.2104	8.1137		0.437087	8.12992
9.2137	4.7172	7.3941	6.6022	5.9894	11.2567	12.3841	5.3198	12.7793	5.3028	12.2841	7.7202	5.9408	10.0109	8.4268	5.2402	5.67958	8.05814	6.1882	8.3178		0.443709	7.87433
9.3512	4.3646	8.3294	8.8982	4.4734	11.7628	12.1256	8.3438	8.9923	6.5409	12.875	6.3456	8.1857	12.6407	7.9885	4.2823	4.77132	6.97724	5.0425	6.0401		0.45033	7.84105
9.4888	5.2127	12.4307	5.6285	4.0881	9.2354	11.4458	8.0941	8.9157	3.8687	10.3689	3.845	9.3922	8.804	3.712	4.3183	4.93006	6.98653	7.0018	7.7166		0.456957	7.15764
9.6263	6.2851	8.3211	3.654	4.204	5.2534	8.327	6.6105	11.2166	3.2683	14.8174	3.5039	6.9691	7.37	8.0611	8.4254	5.19579	6.27432	8.3971	8.6461		0.463578	7.09475
9.7638	4.9861	6.1439	6.8659	7.1258	7.0692	8.1884	7.2017	9.239	5.9288	8.6208	5.6354	7.0328	9.1875	12.0946	8.7842	4.50967	6.92817	7.9855	10.266		0.4702	7.56808
9.9013	3.86	10.7575	5.4817	6.2706	7.941	9.0943	3.908	11.8203	8.4256	6.5704	10.4071	10.706	6.7781	8.9709	7.3786	4.22567	5.75719	6.1977	7.6662		0.476822	7.4851
10.0388	2.1289	9.5243	4.6311	5.4381	7.2031	7.5696	5.7346	8.3109	6.9806	5.6837	8.0824	3.583	5.053	7.6777	4.9521	6.08507	5.2481	5.8152	7.849		0.483443	6.18687
10.1763	2.8963	7.84	4.4002	7.5458	7.884	9.2414	10.1851	6.6491	6.0306	5.6261	6.4004	4.3314	6.4892	8.7085	7.0316	4.17804	6.07607	10.0168	8.2335		0.490065	6.82969
10.3139	7.8441	5.9384	4.6584	13.8578	8.8629	11.1031	9.0212	5.5579	7.1597	6.4894	6.2435	7.2741	7.4731	7.8882	6.449	5.59035	5.33479	5.6981	8.0362		0.496692	7.3937
10.4514	3.2877	4.84	3.5225	11.816	7.8265	15.9895	9.3832	9.8747	6.2917	8.163	6.5472	4.7903	7.819	9.9063	6.0125	6.00089	6.86996	7.4069	5.7228		0.503313	7.4774
10.5889	4.2796	7.9684	3.1683	16.9226	13.5402	12.5219	9.4304	9.5387	7.5214	6.0383	4.9796	7.0875	9.0929	9.5915	7.1775	3.9694	9.00193	4.0328	10.7833		0.509935	8.24454
10.7264	4.2945	5.1047	4.7861	13.0254	13.5975	9.7681	6.9193	8.1469	6.4443	6.1837	4.6284	6.598	7.6087	14.5903	4.9329	3.49024	3.87636	3.4802	7.9936		0.516557	7.12996
10.8639	4.1208	3.5198	4.4122	16.4733	13.2311	10.2653	7.4733	6.8687	5.6176	6.3269	4.8655	2.7491	6.837	10.1058	6.8504	4.17571	2.69403	7.451	9.5913		0.523178	7.0331
11.0015	5.1729	6.3287	5.244	24.6307	18.4436	9.8695	5.7481	5.4845	4.9819	7.0256	5.0286	4.1453	4.6754	9.2968	5.33	3.84634	2.61209	6.0464	7.3884		0.529805	7.43678
11.139	6.5932	8.2778	5.4395	21.318	14.6673	8.6495	6.6572	7.0246	5.5796	7.6673	6.6449	4.1892	4.558	6.1812	5.1133	1.78373	3.55471	3.7843	11.3769		0.536426	7.31896
11.2765	5.4363	5.7656	6.8244	15.6101	14.0583	13.4164	7.8535	4.7037	6.0898	7.9037	8.8059	2.6851	6.901	5.9998	6.7814	3.11397	3.32912	6.0398	9.024		0.543048	7.38642
11.414	4.5853	6.8089	7.7266	12.9681	10.6029	14.002	5.2508	6.2724	5.7555	9.0898	8.7088	3.9993	6.1134	5.4842	6.8351	1.94936	2.48321	7.2593	9.0322		0.54967	7.10143
11.5515	4.3526	9.0648	4.9153	7.4592	9.6976	7.5381	4.0415	5.6602	6.1443	6.6361	11.256	5.2115	6.4906	7.5764	10.0341	3.55978	3.99911	3.9807	8.5506		0.556291	6.64045
11.689	5.3334	9.6654	3.9439	13.2519	7.9253	11.8409	8.7639	10.3946	7.2809	5.4457	7.2114	5.7496	5.5266	5.958	7.7571	4.19979	4.79969	3.8942	11.058		0.562913	7.36844
11.8266	6.0304	6.0459	3.6535	5.4273	10.5202	10.7584	5.0198	15.442	5.9924	5.4784	4.9555	5.1511	5.2713	3.8493	6.9426	2.21626	5.49305	5.6127	12.1726		0.569539	6.6333
11.9641	3.7867	9.4951	6.425	7.648	9.4089	8.4698	3.0945	10.0312	5.5561	6.8179	7.9874	5.0871	9.4397	8.5573	6.2641	3.64012	4.84451	3.3106	9.7736		0.576161	6.82303
12.1016	2.5329	9.0998	6.4731	7.185	5.7538	12.0238	4.4904	10.1671	5.465	3.9292	7.0344	4.0621	7.9966	4.6902	7.876	6.73016	3.9942	3.6208	8.6273		0.582783	6.40799
12.2391	4.0707	13.9044	7.2368	7.5232	5.5837	11.609	7.5051	7.8585	6.3185	4.9852	5.1484	5.5366	5.8498	2.9172	2.7021	4.89093	4.32215	3.5867	8.0488		0.589404	6.29462
12.3766	5.3617	9.2715	4.0594	7.5793	6.7675	18.6746	5.4912	7.8159	3.9014	7.5335	8.2527	8.0595	3.3264	4.3951	3.5153	3.59229	3.1196	3.7631	7.0954		0.596026	6.3987
12.5142	6.5875	9.4899	5.4048	10.1268	6.2452	13.6974	6.2618	6.7051	7.0235	5.7925	8.1615	3.6251	3.9889	5.8196	4.5319	3.81332	4.19103	3.4605	9.5609		0.602653	6.55196
12.6517	6.715	12.8463	9.7096	9.842	9.3829	13.9914	6.0816	8.1776	6.0241	3.436	3.9241	8.2334	6.5586	5.8609	4.5061	1.62747	4.47327	3.392	8.6089		0.609274	7.02059
12.7892	6.0343	9.1849	6.5599	13.9191	7.6097	17.2663	6.0479	6.465	4.3209	2.5505	7.0218	8.9935	5.5191	6.456	5.1573	1.79641	3.36996	3.0947	4.0734		0.615896	6.60214
12.9267	7.3726	7.2103	6.0813	7.5407	5.6074	12.3487	8.3664	5.8759	9.3103	3.508	6.3897	7.4992	7.5728	3.5249	6.0461	2.57402	1.93824	2.0023	8.1176		0.622517	6.25718
13.0642	5.0335	7.8701	6.8847	7.457	4.2142	11.3202	7.0745	5.7082	7.0154	2.5271	4.3682	8.1235	6.4008	5.4553	6.0374	2.68681	2.87686	1.9791	3.6633		0.629139	5.61559
13.2017	6.8291	10.5675	5.5408	8.7394	3.3647	9.2365	8.5129	6.2221	4.1946	5.039	8.306	3.2959	5.5437	4.6221	5.9479	2.57479	2.77728	3.2855	5.0139		0.635761	5.76914
13.3393	6.7843	8.6635	4.6794	4.4639	7.156	10.4809	8.9922	5.969	4.6809	6.766	6.7098	4.6534	3.0526	7.6308	6.8846	2.68638	3.48288	4.8116	7.4452		0.642387	6.10491
13.4768	5.609	8.2673	8.5764	5.3099	6.0522	7.5655	6.6904	6.7704	4.9057	4.6695	3.3214	7.0672	5.6958	4.6985	7.6337	2.78841	4.85122	6.2355	4.9806		0.649009	5.87835
13.6143	4.9508	6.0947	4.6716	6.7752	7.3942	8.0729	7.6388	4.5118	3.6577	4.9902	3.8602	5.3196	4.6351	3.9768	3.6989	3.0251	4.03119	4.4526	4.7034		0.655631	5.07688
13.7518	5.4386	6.2788	2.6545	5.0758	10.7225	7.1427	12.2582	8.6478	5.327	4.6712	4.958	5.9287	3.0423	4.2718	5.6568	2.62841	5.54796	5.4098	8.8107		0.662252	6.02482
13.8893	3.5082	5.0776	5.2755	6.6655	14.6756	5.3805	10.022	14.6578	5.6058	7.462	4.0461	6.1938	6.9674	6.6893	4.4174	1.89524	3.25375	4.048	6.0234		0.668874	6.41394
14.0269	8.4068	5.9962	6.1661	3.8153	17.3772	4.9475	8.6223	9.9353	6.5938	9.5937	3.9597	7.0037	4.7995	5.6506	3.3719	2.93082	3.16045	5.0437	5.9464		0.6755	6.49058
14.1644	7.4254	4.021	5.8633	3.5744	15.5841	3.9351	7.2243	6.0302	3.1971	4.929	4.1627	8.8576	5.5597	4.3311	3.908	4.23168	1.71744	4.8226	3.7081		0.682122	5.42541
14.3019	5.9702	3.8836	10.5326	5.1234	14.6383	5.079	12.7711	5.7308	4.7465	5.6256	5.2173	5.08	7.4571	2.6669	3.5529	3.45998	3.43204	5.0632	3.7528		0.688744	5.9886
14.4394	6.1933	6.0262	7.124	3.8109	11.802	2.0162	8.4637	3.5784	5.9754	6.9158	3.7177	7.5243	7.2749	4.8512	2.5732	2.50895	3.19204	5.4322	5.4782		0.695365	5.49782
14.5769	5.3142	4.6261	4.9757	3.745	10.543	2.5448	8.0412	3.9441	8.4871	5.1071	3.5313	6.435	3.9578	8.2667	4.6493	4.1388	2.05014	7.1746	6.2937		0.701987	5.46451
14.7144	4.9512	4.7432	7.0695	4.3877	9.5018	4.5972	8.212	6.0164	8.3687	5.3263	6.1256	7.5559	5.9099	3.9537	4.9879	4.00609	3.83187	7.4571	8.1847		0.708609	6.06246
14.852	4.2907	6.4416	6.3987	4.7899	11.4595	6.3628	7.4562	4.9485	6.0901	7.8724	5.712	8.1688	6.1905	5.1642	2.6852	2.27019	3.17409	5.4007	4.799		0.715235	5.77237
14.9895	6.0995	5.6994	5.8029	7.3907	13.6565	6.6352	5.1238	3.9719	4.6301	8.4918	4.7172	7.5388	7.3516	5.6172	3.2155	4.04779	2.54082	5.247	5.7994		0.721857	5.97774
15.127	6.74	4.2052	9.9242	5.8606	10.6888	7.1868	5.1724	4.6398	6.3053	7.0874	8.0312	8.5774	5.7003	2.913	5.9527	2.42934	3.29584	6.298	6.9554		0.728478	6.20861
15.2645	3.7816	2.6488	11.1916	6.9712	10.6226	5.245	5.8132	3.9308	6.4072	3.6763	4.4058	7.1491	4.0531	1.7467	6.4596	3.36587	4.09196	4.7523	5.2325		0.7351	5.34449
15.402	4.0023	5.9636	7.777	8.8997	12.0901	3.9704	8.3489	8.541	5.4699	5.49	2.8368	3.7772	5.9284	2.3566	3.9095	5.85384	5.76073	2.8832	3.8374		0.741722	5.66824
15.5396	4.4866	5.5877	7.0729	10.9716	9.3889	5.6238	9.299	8.428	8.9115	6.707	5.2219	4.7821	7.7588	4.5035	3.2294	6.47739	5.59048	4.7867	4.2863		0.748348	6.47966
15.6771	5.8609	4.5295	7.0624	6.5384	12.6365	3.7531	6.7824	5.9915	8.6412	7.433	3.1993	5.2265	8.5549	4.8418	3.5947	4.18931	3.63016	5.0532	4.3134		0.75497	5.8859
15.8146	5.5511	5.5956	5.9928	8.5437	12.409	1.9202	6.5476	5.2491	8.2925	8.1799	3.1856	5.9558	10.6711	4.2654	4.1124	2.38213	3.983	3.2988	4.213		0.761592	5.80783
15.9521	3.6805	7.9966	7.0152	11.8457	9.531	4.0493	6.6951	3.8881	5.8173	7.5381	3.8947	4.7518	6.8271	6.0856	6.2028	2.13442	1.74696	2.7205	3.7272		0.768213	5.58674
16.0896	2.7535	7.8989	7.92	14.3893	6.5341	7.8465	6.0691	4.3907	4.8097	4.5182	5.1538	4.7852	6.5759	8.2759	6.9585	2.20005	4.24241	4.7869	4.9026		0.774835	6.05322
16.2271	3.662	4.6661	10.3096	7.9824	8.8276	4.8219	6.9961	5.9119	8.3363	6.9121	4.5686	6.6763	5.3038	10.4627	5.3223	2.48608	2.88177	3.7573	6.7313		0.781456	6.13769
16.3647	6.059	6.2893	6.9685	7.7298	10.4416	4.9417	4.8757	8.3486	6.2482	3.0838	5.6716	4.1979	3.9616	9.3501	2.1673	2.67532	1.67716	3.6655	6.0072		0.788083	5.49263
16.5022	3.9632	8.922	10.5818	7.2893	10.6888	6.7626	3.6822	6.7181	4.5158	6.5304	6.2272	6.7637	6.2845	7.1293	5.7802	2.53529	4.50898	3.6078	4.6963		0.794705	6.16776
16.6397	5.4847	7.6881	7.6453	7.9944	11.6296	5.7305	4.4116	7.1032	5.2707	5.543	5.8164	7.4114	3.5356	5.2717	5.6576	2.47678	3.06943	3.114	4.5224		0.801326	5.75665
16.7772	6.454	6.48	7.8491	4.8523	9.6151	3.1207	8.8597	5.0543	7.3394	4.3247	4.043	6.3009	6.1653	4.4426	4.214	3.12157	4.23176	2.2862	3.1419		0.807948	5.36298
16.9147	4.9065	5.1617	8.654	7.8065	6.3969	6.6443	7.2331	4.4558	3.4168	4.4185	2.8026	6.8968	6.267	3.3508	2.9598	2.20815	3.30981	3.151	2.416		0.81457	4.86611
17.0522	4.0646	6.0186	8.8111	8.1658	5.7433	8.0135	5.5489	3.6278	4.1952	4.4808	3.1057	7.7739	5.5345	3.9439	6.9832	2.88295	3.46382	3.592	2.4529		0.821191	5.17908
17.1898	4.803	4.699	6.1411	6.8396	10.682	8.8224	9.3959	5.0821	4.9367	6.875	3.2678	5.8051	5.3927	5.1702	6.9194	1.92106	3.36141	4.1579	3.2207		0.827818	5.65753
17.3273	6.1243	7.7003	5.2498	6.1329	9.406	7.2613	8.0402	6.5693	5.7328	5.3097	5.2164	3.3501	5.3845	4.6677	6.5944	2.81124	2.86708	3.5494	1.9755		0.834439	5.47068
17.4648	5.5604	7.7547	6.471	6.5288	7.1445	4.9376	6.1841	8.6803	5.4422	5.4746	5.3298	3.7138	4.8504	4.3177	5.5811	3.73573	3.45515	1.8858	3.8773		0.841061	5.31184
17.6023	4.0697	5.1848	7.1665	6.4547	5.9541	7.3662	6.729	5.7758	4.6795	4.671	6.877	3.3517	4.6448	3.2687	4.2936	3.30825	4.328	2.0099	4		0.847683	4.95438
17.7398	5.1988	3.192	4.8925	5.5375	5.8827	10.0324	5.4427	3.9708	4.4465	5.2934	3.9882	4.5433	2.3861	2.9797	4.8991	3.03253	4.04106	1.8586	2.5463		0.854304	4.42969
17.8774	6.3918	4.0613	6.3353	10.8435	7.4195	6.7136	4.822	7.5474	5.4248	8.285	5.4332	6.4097	3.1706	4.1494	6.7141	3.07104	1.65204	1.5396	2.1415		0.860931	5.37502
18.0149	4.3873	5.2708	6.7074	6.2701	7.534	5.7133	3.9665	5.2256	5.4085	7.8008	3.656	3.2497	4.2253	3.6104	6.9477	3.74339	1.67798	1.9355	2.8415		0.867552	4.74588
18.1524	2.7264	2.3045	4.6836	3.0055	5.5921	6.4344	3.9149	6.2226	4.2559	7.7382	4.912	3.9151	3.8047	4.0474	4.6538	4.27517	1.49909	2.1381	2.1955		0.874174	4.12205
18.2899	7.298	2.7468	5.776	2.6318	5.348	3.2787	3.7432	6.4761	4.5783	3.9062	6.5691	3.7948	2.5669	3.4893	5.7482	3.3169	2.02013	3.7594	3.178		0.880796	4.22241
18.4274	8.6829	3.8135	4.292	4.8247	5.1225	4.5427	3.9349	2.5561	8.0783	5.6485	3.0776	3.2026	3.4613	3.0176	2.7234	2.02965	1.65942	2.8314	4.2919		0.887417	4.09426
18.565	6.6543	6.7199	3.6363	4.4572	5.8278	4.3136	5.4973	2.0609	8.2954	4.858	5.7061	4.5265	4.5915	1.551	3.5389	2.55429	1.96466	1.7322	4.407		0.894044	4.36278
18.7025	6.644	7.8479	3.4707	3.6895	4.0656	4.5145	8.1093	2.3792	9.1561	6.2158	5.0838	4.4993	2.308	3.6055	3.1977	3.39364	3.08963	1.9897	1.6988		0.900666	4.47151
18.84	4.5946	8.0508	1.9251	6.2458	3.7058	6.572	5.2276	4.5533	7.0361	5.2943	2.8366	6.9619	2.5779	3.8819	2.8539	1.56724	1.48211	2.1872	2.6221		0.907287	4.2198
18.9775	3.1108	6.1856	3.4697	6.7408	5.4483	5.8355	7.2544	4.5934	5.5237	6.1941	4.7853	4.2375	2.9054	3.8766	3.5024	2.77547	2.00886	2.8967	2.093		0.913909	4.39145
19.115	3.9707	6.1276	3.9741	4.9718	3.8524	4.3281	9.9379	3.1898	3.5348	5.6165	6.9666	3.3006	2.6831	1.8682	3.0924	1.79405	2.01601	3.5514	3.7925		0.920531	4.13519
19.2525	5.3161	4.2701	6.0581	8.8091	3.529	3.6454	6.8464	4.8045	5.239	5.0701	3.3269	2.4564	2.0997	2.5879	4.0599	2.10779	1.51737	1.7494	2.3004		0.927152	3.98913
19.3901	4.9143	3.8258	4.8043	8.7835	8.0118	4.5545	6.6281	7.08	4.2946	6.8664	4.5334	1.871	2.9872	3.05	4.3607	2.79472	1.72637	2.2471	3.3757		0.933779	4.56366
19.5276	6.403	3.4213	5.01	9.0778	5.7242	5.9069	8.2933	5.4257	6.4738	5.3541	5.5895	2.4265	2.4983	3.7745	3.0985	3.56217	1.70373	2.0551	2.6806		0.9404	4.65679
19.6651	4.0083	4.2957	2.6579	8.6415	4.2713	5.6835	4.443	4.5319	8.822	4.1838	3.6908	3.0392	3.0418	2.3616	2.3896	4.35165	2.30622	2.5869	2.0259		0.947022	4.07014
19.8026	3.0973	4.107	1.511	6.0701	2.4681	4.0075	2.959	3.3912	4.851	8.1038	4.3705	3.1041	2.5751	2.5748	3.052	3.37419	2.06321	1.3867	1.6239		0.953644	3.40476
19.9401	2.4409	3.0711	1.7958	4.4817	2.8841	3.5292	2.7427	5.6232	6.2321	6.3876	4.0993	2.5443	4.0849	2.8407	2.7818	2.17304	1.95196	2.1173	2.7252		0.960265	3.3951
20.0777	2.4272	3.2433	2.1425	5.9263	3.4142	5.0797	3.2598	4.3005	3.4418	6.9093	4.609	2.3881	5.5778	1.4956	1.7136	1.80136	1.53103	1.3899	4.1543		0.966892	3.4108
20.2152	3.3642	2.0867	2.3153	5.6844	4.381	2.7805	2.3634	3.7703	3.5709	7.5848	4.7904	2.4941	3.4505	2.6072	1.7898	2.1251	2.1224	2.6477	2.4365		0.973513	3.28238
20.3527	4.37	1.6962	1.337	5.1687	3.9347	2.2247	3.2178	4.6061	4.2556	6.3915	2.5129	1.7305	1.3241	4.1147	3.2575	1.75824	2.16632	3.4624	2.1415		0.980135	3.14055
20.4902	3.1251	1.1343	4.3099	2.5961	3.3546	2.6036	2.4899	8.0446	5.5098	4.6096	3.2804	2.0703	1.4236	3.0368	1.5208	1.54763	3.75798	3.3378	2.5383		0.986757	3.17322
20.6277	1.692	1.9812	2.2558	3.3379	2.4559	3.0948	1.5607	5.0756	5.4134	4.1638	2.3804	4.1242	4.2305	2.3769	2.5929	1.62316	2.06753	1.5946	2.4111		0.993378	2.86486
20.7652	2.0648	3.1945	1.3028	2.3778	1.9261	1.6177	2.5974	3.5976	7.1427	4.5401	2.5938	3.773	2.5579	3.7292	2.1056	1.48374	1.86344	1.2895	1.5687		1	2.70139

[truncated: 1 more sheets: Sheet1]
