# Supplementary material for: Crumbs organizes the transport machinery by regulating apical levels of PI(4,5)P2 in Drosophila
Source: eLife. 2019 Nov 7;8:e50900. doi: 10.7554/eLife.50900 (PMC6881148; doi:10.7554/eLife.50900)
Supplement: Figure 5—source data 10. [file elife-50900-fig5-data10.xlsx]

## Sheet: Image14
X0	Y0	Y1	Y2	Y3	Y4	Y5	Y6	Y7	Y8	Y9	Y10	Y11	Y12	Y13	Y14	Y15	Y16	Y17	Y18	Y19	Y20	Y21	Y22	Y23	Y24	Y25	Y26	Y27	Y28		Ap-Ba	Avg int
0	53.975	35.787	65.5	79.171	62.312	48.983	27.663	20.647	19.2918	40.6429	23.6197	21.9331	39.936	99.128	76.411	34.322	86.059	107.842	98.188	60.706	90.805	81.111	120.821	104.004	47.227	50.147	67.401	122.257	111.792		0	65.4373
0.1191	63.7	40.176	65.172	87.058	66.714	49.812	28.921	20.405	20.8082	42.4981	31.1353	23.7836	45.149	94.628	97.285	37.451	91.624	106.41	97.462	64.159	93.008	95.918	108.087	105.93	50.454	53.355	71.365	116.813	121.286		0.00480602	68.6402
0.2383	68.005	46.455	64.813	96.771	74.385	52.251	35.954	24.482	26.0113	40.833	37.347	27.1848	50.539	95.469	116.707	44.035	83.427	107.451	95.382	63.916	96.695	114.333	97.045	111.297	58.881	66.935	83.323	128.622	129.524		0.00961608	73.7267
0.3574	72.428	56.467	70.994	107.159	89.976	60.812	42.489	30.117	30.5385	42.6853	43.5967	30.1659	57.095	98.972	135.512	51.973	83.586	109.034	94.08	73.345	100.991	121.052	103.076	113.497	67.88	71.807	97.06	140.358	137.663		0.0144221	80.4969
0.4766	87.354	67.512	78.776	121.97	110.091	70.033	46.841	34.5	37.9675	43.4059	47.7966	39.4875	66.965	109.268	147.844	60.989	86.108	117.145	94.652	79.623	103.46	128.964	111.722	126.906	79.677	79.054	107.016	144.732	133.127		0.0192322	88.3788
0.5957	103.215	79.22	79.781	138.912	118.22	78.322	59.236	42.248	47.0035	45.7575	56.8822	46.8985	74.95	117.382	152.042	72.054	86.809	116.624	99.527	91.901	103.441	130.742	115.247	135.1	89.519	90.326	120.234	142.972	130.177		0.0240382	95.336
0.7148	113.071	102.879	90.238	163.575	133.237	92.872	76.753	56.221	52.2218	52.1009	52.64	53.1141	80.983	117.465	148.159	92.386	93.743	130.755	103.753	99.926	110.097	127.817	129.4	142.512	94.927	106.15	141.761	151.542	145.694		0.0288442	105.379
0.834	125.335	120.517	102.25	186.362	143.425	116.243	92.363	72.674	62.1305	60.4252	58.4434	58.9437	87.288	122.525	150.49	119.252	98.02	140.268	103.862	110.311	115.995	122.762	135.388	153.413	108.481	118.021	157.56	155.79	156.008		0.0336543	115.674
0.9531	134.414	140.058	125.281	199.17	154.719	137.592	111.574	85.311	74.4286	64.8414	63.9947	63.9017	97.545	129.329	153.577	144.517	103.845	144.226	112.016	120.144	119.855	122.193	145.293	160.973	120.664	128.124	171.322	158.049	158.347		0.0384603	125.7
1.0723	142.803	161.986	138.499	197.209	164.53	152.786	128.792	93.849	79.0986	64.193	64.8544	75.74	100.03	130.639	148.052	163.632	112.784	142.629	114.704	123.597	128.848	113.337	149.106	167.91	128.128	133.886	185.012	166.585	157.313		0.0432704	132.087
1.1914	146.577	178.253	166.709	193.016	174.714	159.316	131.476	106.766	84.0167	68.7323	69.4622	81.1783	102.803	131.441	151.902	164.724	124.465	142.251	111.523	127.443	125.918	108.461	147.043	162.365	130.712	146.622	193.717	164.721	161.729		0.0480764	136.485
1.3106	162.463	191.417	186.552	199.049	181.892	150.879	126.947	111.669	93.6768	71.2576	72.1501	90.23	106.772	136.167	145.681	174.299	130.452	148.276	109.572	123.342	125.013	103.673	146.886	148.44	131.972	147.149	190.901	158.683	154.91		0.0528864	138.633
1.4297	168.662	195.246	208.361	204.809	182.599	139.706	123.743	110.188	91.981	74.4054	73.6472	88.6282	112.832	141.424	136.247	171.964	131.856	156.327	107.667	123.828	111.101	102.516	153.941	141.096	126.075	147.725	189.19	138.629	139.818		0.0576925	137.731
1.5488	173.238	201.662	221.799	211.755	180.343	121.659	114.431	110.731	89.1412	75.0234	70.6573	86.4824	118.749	137.801	129.845	160.542	138.38	161.906	102.665	114.189	106.64	98.473	158.803	122.861	116.603	144.76	172.054	128.185	131.598		0.0624985	134.516
1.668	183.283	206.794	229.897	215.282	175.72	93.408	113.741	104.706	87.1352	76.1481	70.8397	82.5624	116.61	136.309	125.957	155.248	136.8	163.057	96.865	103.377	98.316	95.171	153.322	103.934	109.281	135.457	144.859	113.458	117.328		0.0673085	129.133
1.7871	189.427	203.347	235.584	226.142	167.514	78.543	104.98	108.699	75.974	75.0527	70.5631	76.6731	114.604	134.916	119.236	152.197	142.153	161.287	89.408	85.616	91.855	84.35	142.187	80.026	95.187	117.882	119.896	89.568	100.206		0.0721146	121.83
1.9063	187.218	200.012	237.437	231.363	152.661	67.799	107.263	108.378	66.4859	74.8139	68.2218	72.4253	117.8	129.239	122.41	147.731	141.603	166.584	79.474	72.42	78.128	80.009	132.997	66.64	84.467	111.187	91.095	69.951	79.49		0.0769246	115.355
2.0254	186.735	194.972	237.963	232.69	123.293	60.723	111.426	113.498	61.9901	71.8368	66.6284	70.958	119.059	117.426	118.551	132.068	129.39	155.891	66.076	57.596	72.587	74.131	123.53	56.034	62.199	96.794	71.352	54.73	56.584		0.0817307	106.783
2.1445	190.649	193.624	241.874	231.138	98.334	55.476	110.632	104.155	54.9702	63.3268	63.3566	65.8154	119.501	107.626	112.739	123.733	118.651	146.457	57.796	48.528	57.296	63.824	110.784	45.516	45.646	86.357	57.876	39.717	42.544		0.0865367	98.5497
2.2637	189.168	191.558	241.226	226.123	70.335	49.227	103.42	111.081	54.842	56.9275	57.6952	62.4204	113.321	97.82	109.453	117.415	110.448	141.226	49.788	44.409	39.816	62.146	99.038	36.604	40.346	64.572	49.695	31.112	34.744		0.0913467	91.5854
2.3828	191.02	195.1	237	223.36	52.885	44.117	102.506	115.537	46.5472	55.8393	49.7341	59.1366	109.014	91.905	109.545	110.76	105.119	122.674	43.239	41.433	30.959	56.344	92.478	28.9	33.759	53.867	36.179	28.114	28.556		0.0961528	86.0561
2.502	188.294	200.279	230.978	215.035	48.668	42.418	100.179	108.762	41.4405	52.4393	41.7834	51.1651	105.447	85.496	105.788	102.42	100.029	109.953	36.377	40.315	24.882	48.742	76.389	24.711	27.519	44.493	32.65	22.812	23.35		0.100963	80.4419
2.6211	172.578	199.873	222.659	203.79	41.727	37.808	95.929	107.292	34.2724	48.0764	37.1579	45.885	100.031	73.858	93.901	94.558	93.621	104.447	33.552	38.1	20.737	47.505	60.397	21.315	25.494	34.732	27.877	19.136	25.091		0.105769	74.531
2.7402	167.95	190.627	208.174	178.356	40.948	36.337	93.747	99.145	30.682	44.3355	30.9704	43.5307	103.941	66.999	83.255	90.282	89.221	98.261	36.163	37.321	17.694	44.787	48.647	18.775	23.366	28.686	22.464	16.802	19.804		0.110575	69.3542
2.8594	162.432	180.749	197.328	153.53	35.039	33.978	95.441	93.989	28.779	39.7293	29.9599	41.2848	95.074	60.23	77.356	82.484	81.119	99.811	28.767	33.752	14.329	42.486	38.174	13.892	18.037	21.726	18.133	12.737	18.665		0.115385	63.759
2.9785	155.82	165.703	169.971	125.652	30.888	33.46	89.04	83.288	25.1597	36.312	26.0252	39.8008	93.401	51.418	72.857	83.504	81.389	102.416	27.782	32.468	12.967	41.991	28.778	10.112	15.865	17.479	15.562	10.256	15.027		0.120191	58.4273
3.0977	150.494	153.611	144.893	101.389	27.942	33.028	82.271	76.476	23.2669	32.5949	22.9128	38.8241	85.251	50.549	68.987	85.79	78.646	99.761	27.345	29.247	11.646	36.52	22.576	9.823	16.082	17.859	11.648	7.689	15.185		0.125001	53.8726
3.2168	147.499	148.715	122.013	82.446	25.771	31.66	75.056	68.675	24.4012	31.4228	22.0225	37.6082	78.693	53.484	59.808	91.011	72.42	100.469	24.918	28.685	12.96	33.071	17.938	9.911	14.505	15.901	9.95	7.071	14.575		0.129807	50.4365
3.336	149.66	126.031	108.737	74.714	24.399	31.211	72.231	56.433	23.9228	26.1287	19.7818	32.9327	77.424	53.667	58.253	93.854	71.014	98.644	21.896	25.778	11.566	30.143	17.454	6.825	11.648	14.765	9.279	6.31	11.211		0.134617	47.1004
3.4551	147.045	121.417	96.057	72.252	21.21	32.742	74.567	51.148	20.5949	25.285	16.7685	28.9363	72.342	49.284	55.382	94.008	70.623	93.616	21.656	23.477	11.274	28.259	13.428	5.587	11.946	14.624	7.521	5.513	8.697		0.139423	44.6641
3.5742	141.218	112.383	86.736	62.798	20.734	28.548	74.156	42.142	16.6874	23.349	16.4688	28.0991	70.302	47.249	52.485	96.706	65.544	85.733	19.802	24.353	13.763	21.894	10.403	5.554	10.175	14.236	5.451	4.408	10.153		0.144229	41.7769
3.6934	153.234	99.563	80.212	56.514	20.725	25.059	64.332	43.637	16.0993	21.2501	14.4769	25.4212	63.908	44.404	54.144	92.201	62.953	85.374	20.416	23.617	13.871	21.346	9.915	4.248	10.59	12.625	6.911	3.854	7.107		0.149039	39.9313
3.8125	147.475	88.858	72.042	53.695	18.177	21.324	54.533	40.414	14.0549	22.0191	14.653	24.722	60.784	37.956	48.857	90.089	61.005	81.565	19.566	22.653	13.181	19.954	10.13	5.255	9.756	13.904	6.614	4.482	6.992		0.153845	37.4038
3.9317	136.759	73.614	59.575	54.65	19.027	20.011	50.071	38.609	12.797	19.6633	13.6846	21.6356	55.442	37.189	40.888	91.001	64.653	65.657	19.702	22.862	13.019	16.427	9.516	5.625	8.261	12.676	5.82	4.032	8.198		0.158655	34.5195
4.0508	116.541	66.661	46.837	49.646	17.833	18.188	46.975	35.746	11.5688	19.5555	10.9731	19.523	49.399	35.856	34.252	87.189	66.163	60.995	20.231	21.13	13.071	15.941	6.875	5.598	7.243	11.376	5.123	3.763	6.979		0.163461	31.4218
4.1699	89.654	57.464	36.198	39.488	14.757	18.311	40.289	32.426	10.1456	19.9329	10.0564	19.2758	44.539	32.39	30.934	78.638	60.819	52.943	20.136	17.665	14.798	12.588	6.552	4.995	7.928	10.899	4.827	3.743	5.13		0.168267	27.5007
4.2891	75.101	49.651	26.669	39.948	15.01	15.645	29.346	25.036	9.9621	16.9966	10.6002	17.4698	42.246	34.237	31.37	71.239	52.782	46.873	18.701	13.69	12.931	12.814	6.087	4.102	7.717	10.834	4.452	4.208	4.515		0.173077	24.4908
4.4082	61.545	49.226	22.937	36.438	18.139	14.135	24.287	22.406	9.0541	15.5335	9.929	16.4332	35.585	31.541	26.668	62.282	43.951	45.919	20.416	14.317	12.809	9.945	4.207	4.246	7.337	8.996	4.527	3.51	4.696		0.177883	22.104
4.5274	44.16	42.344	19.525	29.862	19.677	14.137	20.741	17.18	9.1151	16.0174	11.9607	15.334	28.713	27.519	24.516	59.52	41.283	42.057	17.387	13.376	9.947	9.074	5.468	4.771	6.639	7.741	4.294	3.587	4.88		0.182693	19.6836
4.6465	36.378	37.709	18.993	27.485	17.525	13.184	18.96	15.73	9.385	15.9024	9.4672	15.0698	28.467	23.24	23.654	48.692	39.63	41.527	14.758	15.9	11.338	8.268	4.654	4.334	5.075	9.062	3.856	3.436	4.808		0.187499	18.1547
4.7657	32.694	37.557	16.586	24.209	18.186	11.39	14.529	12.65	8.191	14.6348	9.0276	15.9035	22.583	19.748	19.804	43.869	35.961	36.753	16.422	14.818	10.333	8.131	5.162	4.354	5.674	9.324	4.239	3.025	5.251		0.19231	16.5865
4.8848	26.383	36.251	14.964	20.631	17.613	10.6	13.727	11.855	7.3162	13.433	9.6846	14.2432	19.171	16.532	17.776	42.822	32.801	36.821	14.782	14.61	9.879	6.814	5.388	3.578	6.673	9.139	3.517	3.259	5.128		0.197116	15.3583
5.0039	22.594	36.905	13.251	16.39	16.717	9.005	15.371	10.2	5.8083	12.1499	7.6025	13.0574	17.791	14.928	16.354	43.476	32.344	25.99	13.932	12.324	11.016	7.013	6.34	3.201	6.126	9.594	3.81	3.432	4.83		0.201922	14.1915
5.1231	20.758	37.932	14.503	18.226	14.703	9.464	14.191	10.575	6.5503	11.6008	6.5321	11.3858	15.609	14.5	16.907	42.19	26.202	16.27	15.965	12.137	10.222	6.467	7.388	3.317	4.996	9.862	3.422	2.586	3.959		0.206732	13.3938
5.2422	23.655	36.037	12.046	13.275	12.76	8.891	14.575	10.832	7.3892	12.3565	6.8257	10.4939	15.271	16.052	15.081	39.339	22.704	8.672	16.563	11.904	10.425	6.852	6.75	3.166	4.966	9.871	3.573	3.365	3.972		0.211538	12.678
5.3614	21.11	29.847	12.298	13.035	12.556	8.145	14.325	10.697	7.0863	12.6605	7.6733	9.1522	12.675	12.714	15.557	38.652	14.776	5.799	14.447	12.353	12.367	6.619	6.249	2.895	5.274	9.429	3.777	3.045	5.528		0.216348	11.7497
5.4805	19.878	24.04	10.279	12.142	13.818	6.927	13.384	10.351	6.4074	14.225	7.1159	8.7046	11.967	12.317	16.222	35.518	13.741	5.992	13.167	12.417	10.577	7.476	6.581	3.324	4.871	9.447	3.91	3.609	5.075		0.221154	11.1546
5.5996	17.768	23.394	9.569	12.873	13.222	7.317	10.832	7.982	7.1165	13.5242	7.3211	9.5773	8.92	12.183	13.609	28.132	10.307	6.778	13.347	14.7	10.838	7.178	6.764	3.115	4.317	9.652	3.523	3.221	5.373		0.22596	10.4294
5.7188	17.933	20.115	11.589	11.176	11.256	6.725	9.371	6.75	6.6779	13.3622	6.036	9.8123	9.576	11.815	13.847	25.768	6.644	6.123	11.94	16.651	10.837	6.666	6.216	3.557	4.329	9.578	3.783	3.227	3.904		0.23077	9.8367
5.8379	16.881	20.008	11.402	11.149	12.689	5.956	7.16	6.437	5.6005	12.7319	5.9353	7.0645	8.374	10.505	13.328	19.118	6.102	6.238	12.41	18.35	10.682	7.59	7.472	3.693	3.896	10.533	4.296	3.02	4.534		0.235576	9.41914
5.9571	18.023	16.499	11.323	11.342	12.056	5.025	5.605	5.313	6.1466	13.7965	6.4094	8.5846	6.294	10.246	13.21	17.573	6.564	5.812	11.709	18.628	10.845	8.134	7.391	4.218	4.229	10.828	3.93	2.899	3.821		0.240386	9.18807
6.0762	19.428	16.279	9.968	12.071	11.698	5.935	4.493	7.063	6.6568	14.5165	4.9594	8.5301	9.111	9.846	12.139	14.575	5.892	6.035	11.054	20.977	11.784	7.219	6.75	3.433	5.421	9.977	3.897	2.427	4.006		0.245192	9.17727
6.1953	21.18	16.597	10.758	11.778	11.506	6.41	4.865	5.186	5.9908	16.3108	4.5382	6.0195	6.811	11.522	10.694	9.467	4.908	4.84	11.571	21.638	12.24	6.634	6.829	3.132	4.501	12.724	4.379	3.247	3.519		0.249998	8.95846
6.3145	19.071	13.754	9.893	12.152	10.314	5.933	4.819	4.646	6.8804	17.4701	4.7961	5.4197	6.729	10.239	9.742	7.68	5.895	5.213	9.817	22.438	12.082	7.648	6.007	3.756	5.049	12.789	4.691	3.207	4.588		0.254808	8.71442
6.4336	19.011	14.01	9.11	14.358	11.391	5.766	5.137	4.209	6.6612	17.1918	5.4391	7.1877	6.094	10.268	8.126	5.908	5.576	4.678	10.148	25.364	12.574	7.864	6.85	3.132	4.883	12.389	3.436	3.406	4.977		0.259614	8.7981
6.5528	19.858	14.729	9.965	11.367	12.228	4.935	5.555	5.067	6.8505	17.5905	5.1536	6.5876	6.132	10.12	7.17	4.72	5.535	5.196	10.337	25.848	11.527	7.815	7.081	3.729	3.847	13.753	3.742	3.764	4.917		0.264424	8.79721
6.6719	18.381	13.356	10.945	13.765	10.756	5.127	4.161	3.888	7.1074	16.0497	5.672	5.3855	6.156	10.817	7.173	4.906	4.973	4.75	9.935	24.979	11.874	7.237	5.081	3.896	4.208	14.479	5.237	3.385	5.205		0.26923	8.58223
6.7911	20.69	13.55	11.337	13.225	9.806	6.249	3.695	4.234	5.808	18.4223	4.0704	6.8403	6.414	13.112	6.851	5.667	5.524	5.383	8.276	26.011	15.186	7.199	4.757	3.351	4.299	16.037	5.624	3.756	3.783		0.27404	8.93645
6.9102	18.822	13.338	11.069	12.936	10.864	6.18	4	3.484	6.411	20.2938	4.7481	6.6662	5.208	11.666	6.478	4.928	4.058	4.986	9.054	24.181	12.585	6.648	5.5	4.144	4.657	15.33	5.619	3.618	3.679		0.278846	8.66038
7.0293	19.358	11.724	9.367	13.357	12.165	4.206	4.179	3.792	6.4754	22.6351	5.1514	6.0566	5.03	12.978	6.106	5.064	4.015	4.792	8.958	26.71	13.62	7.344	4.992	4.623	3.799	14.611	5.545	3.468	3.675		0.283652	8.7516
7.1485	16.568	10.712	8.687	13.222	11.948	3.741	3.736	3.828	6.5951	25.7025	3.8454	5.3606	4.353	15.358	5.947	5.119	5.223	4.885	9.211	31.546	13.598	7.136	5.227	4.226	4.753	14.893	7.598	3.392	4.33		0.288462	8.99106
7.2676	15.199	12.256	9.416	13.132	14.828	4.361	4.381	5.273	6.6251	29.5359	5.406	4.8937	3.767	16.506	5.997	4.039	4.511	4.347	8.76	33.25	13.257	7.773	5.881	4.108	3.989	13.632	7.108	3.898	4.329		0.293268	9.32616
7.3868	15.684	10.016	8.52	12.88	14.397	4.779	3.652	3.787	5.0523	35.2987	4.1687	5.2087	4.991	16.274	7.444	4.159	5.155	4.472	9.154	34.22	13.83	8.081	5.936	5.217	5.833	15.601	5.487	3.129	4.029		0.298078	9.53294
7.5059	13.948	10.366	9.37	13.154	13.317	5.652	3.258	4.594	5.3199	43.4822	4.6539	4.7651	5.241	18.983	7.206	4.291	5.082	3.713	9.718	39.16	14.798	8.214	6.421	4.882	5.013	16.724	7.668	3.351	3.87		0.302884	10.2143
7.625	12.954	11.25	9.592	14.17	13.216	5.965	2.926	4.075	6.2215	48.2125	6.9066	4.3503	5.146	19.558	7.303	3.928	4.526	3.833	9.545	40.655	15.315	7.063	6.349	5.129	5.46	18.015	8.146	3.859	4.102		0.30769	10.6128
7.7442	11.818	10.417	9.849	13.793	10.28	5.343	3.332	4.07	5.3427	50.208	4.9076	4.7012	4.977	17.84	7.97	3.023	4.648	4.518	8.111	45.821	14.912	7.607	5.906	4.976	5.557	22.029	9.277	3.628	5.667		0.312501	10.7079
7.8633	10.844	9.372	9.503	13.07	11.402	4.762	3.173	4.366	5.3914	48.6036	3.8763	5.2544	4.526	18.32	8.225	3.638	5.321	5.6	9.682	42.163	14.81	7.505	6.773	4.444	6.005	22.432	9.662	3.569	5.09		0.317307	10.5994
7.9825	9.895	10.169	10.406	12.366	12.864	5.291	3.628	4	5.8156	49.6584	5.2494	4.0669	3.934	17.023	7.336	4.305	5.071	5.928	8.548	39.312	15.569	6.913	6.007	5.109	4.973	25.483	10.375	3.676	4.793		0.322117	10.6126
8.1016	10.938	8.505	10.689	13.112	14.087	5.907	3.651	4.522	4.8704	51.3123	5.279	4.0911	4.558	14.902	9.204	4.347	5.197	4.464	10.041	36.23	14.494	8.426	6.67	5.972	5.342	23.195	9.338	4.332	4.174		0.326923	10.6155
8.2207	9.352	8.633	12.55	13.874	13.998	3.969	3.287	4.532	5.112	49.0523	5.262	4.3191	5.704	15.581	7.071	3.247	4.538	5.194	9.971	33.437	16.18	7.851	6.911	4.77	4.929	25.275	9.268	3.894	5.12		0.331729	10.4442
8.3399	9.719	7.803	12.305	12.823	16.23	4.891	4.422	3.378	5.3499	44.7683	5.5471	3.3617	4.999	13.827	6.827	4.11	4.443	5.144	10.743	34.385	17.958	6.582	6.557	5.399	4.099	23.538	11.26	4.02	4.955		0.336539	10.3257
8.459	10.604	6.88	12.44	16.981	16.632	5.342	4.45	3.933	5.1093	45.6651	5.0773	3.9452	5.436	12.545	8.054	4.496	3.805	4.848	12.946	30.776	18.472	7.569	6.803	4.199	4.68	26.115	12.196	3.794	4.323		0.341345	10.6247
8.5782	9.953	6.94	15.535	14.892	16.521	5.577	3.874	3.674	5.8739	43.653	5.0815	3.6386	4.484	12.276	7.722	4.499	3.767	6.286	12.957	31.022	18.593	8.372	6.135	5.038	4.785	25.155	13.981	4.054	4.632		0.346155	10.6542
8.6973	9.748	7.804	17.276	14.09	18.178	6.295	3.391	4.048	5.3184	44.8006	6.5211	3.8022	5.218	13.368	9.362	3.563	3.986	6.56	12.235	31.502	16.518	7.72	6.372	5.199	5.206	25.952	11.973	3.288	4.373		0.350961	10.8161
8.8165	8.915	7.293	20.403	13.272	18.024	5.551	3.015	3.375	5.7604	44.0461	6.1126	4.4488	4.293	14.274	8.2	3.415	5.369	5.312	9.709	34.874	16.921	9.158	6.215	3.71	5.635	24.284	11.542	3.57	3.574		0.355771	10.699
8.9356	8.63	8.491	22.105	13.503	18.779	6.655	3.47	3.538	5.9873	45.4874	4.6695	5.1742	4.157	15.712	11.093	3.385	3.356	5.743	11.186	35.788	17.797	7.579	6.621	4.031	5.435	21.332	12	4.887	4.806		0.360577	11.0827
9.0547	8.015	8.227	21.8	13.7	19.767	6.23	3.771	3.415	5.4748	44.7411	4.7576	4.2572	4.733	15.833	13.265	3.835	3.78	7.675	12.533	35.627	17.679	9.75	6.558	3.477	5.636	18.737	13.809	3.334	4.009		0.365383	11.1871
9.1739	8	7.892	22.944	14.684	19.327	5.062	3.468	3.855	5.1371	44.4469	5.531	4.5467	5.46	18.419	14.828	4.246	4.162	8.212	12.523	35.632	16.412	9.385	6.222	4.477	6.104	17.507	14.21	4.506	3.382		0.370193	11.3993
9.293	6.509	8.805	22.402	13.717	20.037	5.927	3.204	3.541	5.693	45.1088	4.8317	3.7747	4.983	17.452	14.968	3.6	4.74	7.521	11.894	38.591	20.193	10.288	5.858	3.384	5.27	13.684	13.288	4.985	4.014		0.374999	11.3194
9.4122	6.157	9.415	23.294	15.446	19.868	7.78	4.245	3.973	5.2674	40.0594	4.3444	4.367	5.081	17.554	15.51	4.715	4.255	9.095	11.775	43.839	22.209	11.112	4.258	3.317	5.304	10.791	15.784	3.783	3.293		0.379809	11.5825
9.5313	6.667	11.16	20.783	15.679	23.36	6.82	3.957	4.093	4.1232	41.245	4.2586	4.6765	4.346	18.854	19.688	4.624	3.902	9.986	11.388	46.238	21.085	10.689	4.485	4.082	6.189	11.272	12.216	4.793	4.512		0.384615	11.9025
9.6504	7.006	11.537	19.152	15.297	24.203	7.3	4.169	4.223	5.19	40.5121	5.1093	4.2202	4.525	19.684	19.528	3.688	4.199	10.261	10.925	50.148	22.393	10.932	5.701	4.475	6.322	12.172	15.734	3.84	3.984		0.389421	12.2907
9.7696	6.656	13.667	19.741	14.964	31.275	8.429	4.217	3.985	4.6948	41.1275	5.3471	4.1904	5.129	17.823	23.422	4.777	3.899	11.204	12.85	52.426	24.92	11.725	5.806	3.606	6.413	11.793	18.277	4.428	4.621		0.394231	13.1522
9.8887	6.546	19.347	21.584	15.498	32.662	7.08	3.845	4.256	5.2886	38.494	5.8584	4.261	5.648	18.434	27.189	4.047	4.642	12.123	12.774	50.106	25.488	11.631	5.507	4.601	8.101	11.292	21.024	5.223	4.798		0.399037	13.7017
10.0079	6.835	23.39	23.508	16.296	33.478	6.857	3.987	3.73	4.9801	40.1271	4.8681	4.0752	4.172	17.133	38.669	4.885	5.998	9.956	10.57	48.766	26.484	13.025	5.745	3.225	6.404	11.96	22.117	4.865	4.15		0.403847	14.1467
10.127	5.928	25.049	26.809	16.179	33.931	6.304	4.625	4.652	5.9312	46.1743	5.4998	4.6561	5.081	14.185	46.625	4.654	5.327	8.674	10.54	50.989	32.148	13.78	4.43	3.133	6.165	9.411	25.254	5.633	3.553		0.408653	15.011
10.2462	6.241	26.833	33.031	15.278	37.481	8.044	3.739	4.62	4.8673	48.4723	4.8163	3.8221	5.723	13.614	62.463	4.742	4.666	9.01	11.01	53.524	38.74	13.448	4.644	3.518	6.297	9.005	25.498	5.077	3.888		0.413463	16.2797
10.3653	7.705	31.726	35.339	16.935	43.888	7.319	3.952	4.247	5.024	53.3857	5.5292	4.0693	5.51	13.217	68.975	4.15	3.879	9.367	8.922	55.677	46.98	15.969	4.696	2.614	5.865	9.848	26.934	4.481	4.51		0.418269	17.6108
10.4844	8.184	31.19	37.479	16.341	44.101	8.806	3.464	4.325	5.6894	54.8439	5.3921	4.5031	4.325	14.481	73.984	4.305	4.033	9.553	10.105	51.505	55.979	15.902	4.789	4.039	4.794	9.518	26.528	5.609	3.614		0.423075	18.1856
10.6036	7.155	31.845	38.72	16.881	42.319	8.225	4.04	3.319	5.916	60.1636	4.2659	3.8555	5.217	14.095	84.507	4.821	3.721	9.846	10.515	53.614	61.171	15.506	4.666	5.175	4.559	10.901	27.224	5.053	3.795		0.427885	19.0031
10.7227	7.038	32.821	35.815	19.926	44.433	8.099	3.56	4.083	6.1986	64.1962	5.4726	4.4834	5.031	13.414	92	4.874	6.03	7.546	11.028	53.149	59.983	15.483	4.767	3.252	4.783	10.607	29.503	5.954	3.115		0.432691	19.5395
10.8419	8.145	36.851	35.811	21.437	45.872	9.138	3.923	4.029	5.2255	68.715	5.2332	4.595	5.64	13.258	84.537	4.706	6.611	7.707	11.931	56.187	58.16	16.122	4.508	3.953	5.44	10.486	27.219	6.035	3.944		0.437502	19.842
10.961	10.845	39.159	34.709	24.337	42.384	8.857	3.879	3.887	4.8887	70.9348	5.9973	4.5804	4.871	13.278	81.834	5.616	6.968	8.936	12.18	57.214	51.63	20.197	3.992	4.148	5.658	11.814	29.479	4.683	3.476		0.442308	20.0149
11.0801	8.951	46.838	38.638	27.203	39.892	6.44	4.647	4.303	5.3823	76.1846	5.3866	3.8871	4.158	14.304	78.78	6.344	6.613	7.628	11.77	51.722	52.162	20.402	4.02	4.545	5.919	12.14	30.506	4.375	3.289		0.447114	20.2217
11.1993	8.22	47.707	40.432	29.828	40.924	7.933	3.663	4.932	4.6133	74.3778	5.3145	5.7511	5.613	13.751	62.583	7.232	6.253	7.967	12.509	43.13	52.176	21.314	4.924	3.719	5.44	12.846	25.003	4.585	3.741		0.451924	19.5339
11.3184	10.006	42.674	43.135	29.659	39.164	7.979	4.021	3.525	5.7	73.906	5.0036	3.8737	4.23	14.203	49.181	8.28	6.236	7.764	11.649	39.396	54.518	19.298	4.799	3.576	3.589	13.418	28.924	5.169	4.298		0.45673	18.8681
11.4376	10.452	40.963	46.286	33.537	42.36	8.378	3.595	4.06	5.2846	71.384	6.1747	4.9476	4.627	12.655	44.498	8.668	6.403	8.244	11.482	39.319	56.606	20.509	5.001	3.328	4.809	12.509	32.131	4.999	3.807		0.46154	19.2075
11.5567	10.901	34.269	46.584	30.831	47.799	7.879	3.583	4.204	4.3939	67.3107	7.126	4.428	4.893	14.138	46.278	8.543	6.043	7.848	9.569	38.293	57.922	21.834	5.304	3.833	6.678	11.627	36.338	5.039	5.023		0.466346	19.259
11.6758	11.663	31.043	47.643	29.043	53.104	6.496	3.95	3.718	4.9806	68.6515	7.2189	5.4847	4.891	14.157	43.546	9.826	5.691	6.944	9.779	40.91	65.053	23.877	3.547	3.938	5.459	11.228	34.668	4.264	4.515		0.471152	19.4927
11.795	14.636	30.325	47.441	27.887	51.708	7.076	4.26	4.344	5.7347	65.3634	6.3329	5.1175	4.836	13.447	43.093	11.106	5.631	6.404	7.876	41.992	71.134	23.504	5.128	4.176	4.811	11.225	34.937	3.25	3.276		0.475962	19.519
11.9141	14.869	28.012	48.682	26.272	59.656	7.258	4.082	4.384	6.0075	62.7879	5.5223	5.2852	4.649	12.211	43.519	12.755	7.26	7.359	11.301	45.406	76.643	23.442	5.634	3.903	5.027	11.297	35.52	3.982	3.519		0.480768	20.2153
12.0333	16.633	26.57	49.336	25.123	64.094	7.067	4.283	3.483	4.9853	60.5568	5.9479	4.8949	4.28	10.033	49.314	14.926	8.025	6.883	9.888	44.775	75.725	27.955	5.646	3.271	5.364	10.344	37.991	4.217	3.491		0.485578	20.5208
12.1524	18.371	23.349	46.459	23.738	68.536	7.831	4.509	3.722	5.4001	57.1591	7.1317	5.1952	5.312	10.913	60.389	17.056	7.093	6.869	9.125	47.071	77.046	29.085	5.007	3.25	5.436	9.094	35.802	4.872	4.68		0.490384	21.0173
12.2716	21.597	20.809	44.661	23.932	67.491	6.902	4.198	4.455	4.5832	51.5216	6.5966	6.6999	5.049	10.631	69.051	19.736	5.676	5.79	9.289	47.554	78.182	28.249	5.516	4.101	5.236	10.52	35.875	4.587	4.07		0.495194	21.1227
12.3907	24.769	22.102	42.127	20.81	67.829	6.466	5.243	4.598	4.5695	51.9242	7.4504	4.3319	4.422	10.516	74.194	19.901	5.563	7.081	8.931	46.312	79.29	25.316	4.444	3.652	6.038	9.772	39.911	4.833	4.534		0.5	21.2734
12.5098	28.121	21.36	42.294	21.949	69.844	7.477	4.837	3.656	5.8003	56.2863	8.2626	4.526	4.55	10.993	79.546	21.52	6.108	7.637	8.973	44.094	86.443	22.855	4.147	4.02	5.084	9.128	40.14	6.031	4.421		0.504806	22.0725
12.629	28.902	21.036	41.401	23.689	62.928	6.949	5.006	3.546	4.3533	59.7351	7.1358	4.8948	5.643	9.99	80.802	21.387	6.527	7.252	8.02	41.6	93.623	20.503	4.814	2.866	4.88	10.758	33.958	4.465	4.221		0.509616	21.7547
12.7481	29.794	20.741	42.405	27.325	53.014	6.876	4.043	4.621	4.7495	57.6789	10.1172	5.6154	5.417	8.589	76.939	21.847	6.416	8.517	6.562	40.431	94.335	20.43	4.111	3.992	4.813	12.301	30.039	4.766	3.885		0.514422	21.3921
12.8673	31.367	21.494	40.256	32.251	49.084	7.636	4.729	4.587	4.7176	56.6948	11.0172	6.0312	6.291	10.259	76.774	24.606	5.315	6.353	6.104	35.99	96.269	22.99	4.772	4.048	4.893	12.454	25.744	4.548	4.174		0.519232	21.4293
12.9864	29.227	21.002	39.269	37.179	48.509	6.587	5.092	5.321	5.3644	54.9435	10.4508	5.7023	5.949	10.577	67.686	23.283	6.332	6.775	6.011	39.899	96.087	18.944	3.779	3.272	4.593	11.048	28.215	5.86	3.489		0.524038	21.0499
13.1055	29.255	24.037	35.275	42.446	49.776	7.951	5.056	4.207	5.0908	47.4713	11.6617	4.5492	4.89	9.565	61.059	22.519	6.236	6.031	7.671	39.119	94.471	17.595	4.593	3.964	4.734	9.911	25.034	5.489	3.395		0.528844	20.4501
13.2247	27.295	20.54	32.417	46.127	46.01	7.678	3.903	3.259	4.6001	40.0443	13.0605	4.1788	4.365	9.515	61.718	23.787	4.681	6.218	6.872	35.328	91.536	17.18	5.902	4.063	4.989	9.983	25.015	4.784	3.815		0.533654	19.616
13.3438	26.282	18.459	30.881	48.651	39.691	7.624	5.02	4.05	4.5607	35.9567	15.134	4.9941	5.328	9.397	52.716	25.887	5.691	5.714	6.541	29.218	97.089	15.151	5.812	3.747	4.478	10.48	29.143	6.012	3.719		0.53846	19.2216
13.463	20.463	15.726	29.766	52.97	41.094	8.025	4.757	3.72	5.6306	32.0125	16.7967	6.1634	4.907	10.738	49.264	27.748	6.712	5.418	6.789	25.465	94.259	14.354	4.368	3.835	4.956	11.621	27.861	5.528	3.203		0.54327	18.7638
13.5821	20.14	14.885	29.935	56.101	37.054	8.256	4.73	3.305	4.1192	29.4225	15.4298	5.5072	4.689	9.49	54.915	27.749	5.831	6.309	5.203	20.841	92.43	14.579	5.886	4.036	5.824	11.457	27.085	3.932	3.747		0.548076	18.3754
13.7012	21.753	16.304	27.975	54.27	36.746	7.124	4.923	4.691	4.8022	27.2083	17.6406	5.7104	4.488	9.51	61.14	29.053	4.818	5.469	4.637	16.457	91.021	12.936	5.225	3.831	5.26	10.747	28.032	5.057	3.912		0.552882	18.3014
13.8204	21.987	15.322	28.687	51.341	35.166	6.882	4.3	4.174	3.9818	22.5255	19.564	5.2504	4.499	9.834	59.174	32.744	6.186	5.869	5.392	15.819	92.035	11.893	5.535	3.901	3.869	10.902	28.68	5.122	3.39		0.557692	18.0698
13.9395	27.357	15.447	25.906	45.069	36.852	7.584	5.18	3.428	3.8713	20.0616	22.8268	6.6116	5.45	9.847	62.125	37.217	6.652	6.332	6.835	15.408	87.965	11.666	4.79	4.381	5.153	11.466	25.587	6.168	3.609		0.562498	18.305
14.0587	29.892	15.877	26.47	41.62	35.122	7.02	5.388	4.809	4.4923	21.4211	23.9918	5.0103	5.464	9.256	60.5	38.532	4.764	6.348	6.254	14.04	92.044	12.624	4.206	4.238	4.476	11.745	29.339	5.252	2.963		0.567309	18.3848
14.1778	28.249	14.217	29.326	38.29	34.861	7.834	4.619	4.334	4.138	19.9394	26.9623	6.1242	5.503	10.116	55.08	35.661	4.864	5.656	4.781	12.668	86.969	12.202	4.755	4.969	5.041	11.454	29.443	4.209	3.643		0.572115	17.7899
14.297	28.538	15.277	31.896	33.467	38.413	7.79	4.471	4.092	5.4063	18.7886	29.5266	6.0496	5.411	10.043	43.833	33.831	5.184	5.853	6.026	11.221	85.167	9.647	6.086	4.853	4.697	10.457	32.881	4.35	3.996		0.576925	17.4914
14.4161	24.972	15.37	33.233	32.891	30.898	7.884	4.994	3.323	5.245	16.6349	30.2663	5.5652	4.281	10.007	36.308	34.842	6.793	6.061	6.865	11.031	93.313	9.591	4.612	5.578	5.787	11.426	34.256	4.397	4.857		0.581731	17.2856
14.5352	21.273	13.792	24.654	33.971	29.672	8.483	4.631	4.597	4.576	14.7649	28.4484	5.4621	5.633	10.355	32.421	30.98	7.668	5.886	5.589	10.627	90.517	9.98	3.929	4.822	5.527	12.024	35.886	4.921	4.862		0.586537	16.4121
14.6544	21.088	13.693	19.738	34.533	38.535	7.303	4.241	4.017	4.3052	14.9333	28.7101	6.0274	7.003	9.331	32.969	27.275	6.739	5.01	6.913	12.071	82.269	9.864	4.815	4.916	5.498	11.019	36.681	4.219	4.128		0.591347	16.1326
14.7735	17.089	11.308	19.195	36.648	43.047	7.681	3.452	3.979	4.6792	16.551	33.3158	6.9728	5.357	9.924	30.385	24.606	6.678	6.328	5.664	12.717	81.334	10.087	4.765	5.054	5.037	11.943	32.797	4.919	4.387		0.596153	16.0655
14.8927	13.351	9.412	20.678	35.545	47.431	9.23	4.716	3.8	4.8032	13.8056	36.9072	6.8092	5.718	10.236	30.404	25.318	7.317	6.076	4.531	12.147	78.805	9.153	4.085	5.541	5.816	12.609	30.388	4.03	4.172		0.600963	15.9598
15.0118	13.429	10.845	20.558	35.275	57.037	10.923	3.862	3.553	4.8454	12.652	33.7767	7.9441	6.125	9.574	29.119	20.695	7.596	5.998	4.962	13.275	71.349	11.14	5.084	5.628	5.573	11.788	26.204	3.947	4.242		0.605769	15.7586
15.1309	11.551	10.334	19.724	34.267	54.177	8.962	3.839	3.463	4.4466	15.0989	32.7057	8.462	5.834	10.523	32.978	20.022	8.51	5.274	5.318	13.285	71.298	9.834	5.54	4.095	5.167	12.597	28.132	3.356	4.553		0.610575	15.6326
15.2501	10.38	11.038	19.594	36.306	56.987	8.373	4.813	4.091	4.023	13.7885	35.6436	8.4977	6.589	10.808	36.625	18.031	8.46	4.528	5.415	11.028	57.838	8.712	3.947	5.362	6.274	12.85	27.763	3.845	4.427		0.615385	15.3806
15.3692	9.831	10.877	18.075	37.307	54.991	8.647	3.969	6.12	4.9531	12.3604	34.7137	8.1615	7.333	11.538	35.797	15.303	7.482	5.917	3.969	12.257	56.037	10.799	4.148	4.84	5.423	10.13	31.853	4.916	5.019		0.620191	15.2678
15.4884	10.033	10.814	19.903	40.976	50.487	7.621	4.285	5.128	5.8195	12.3256	35.8522	7.0254	8.509	13.767	33.508	13.211	7.199	5.499	4.52	12.442	61.858	12.201	5.885	4.269	5.768	11.476	31.578	4.573	4.766		0.625001	15.562
15.6075	11.182	9.334	19.852	42.929	46.705	8.624	4.266	4.65	5.3143	11.1079	37.1476	7.4673	7.256	12.583	34.915	12.892	7.818	5.874	4.416	10.149	65.589	11.516	4.778	4.397	5.544	11.181	31.69	4.455	4.14		0.629807	15.4404
15.7266	10.933	10.009	19.783	47.315	44.534	9.833	4.968	4.699	4.5386	11.3949	42.1391	9.4192	7.01	12.219	32.509	13.904	7.201	5.197	5.668	9.316	66.618	12.098	4.907	4.809	4.926	11.447	30.163	3.5	4.251		0.634613	15.7003
15.8458	9.951	10.296	18.72	54.542	46.869	9.965	4.712	3.744	4.2403	9.5796	46.3703	7.8039	8.606	12.317	36.364	13.477	8.09	5.223	5.908	10.184	72.657	11.887	5.167	4.737	5.456	13.766	29.817	3.707	3.406		0.639423	16.4677
15.9649	10.45	11.955	18.09	52.841	53.174	12.102	4.943	4.728	4.2835	9.3045	47.2803	9.6438	8.437	14.292	39.851	14.351	7.114	4.411	5.326	11.011	65.468	12.999	6.135	4.984	4.958	11.511	29.961	3.808	3.863		0.644229	16.8026
16.0841	10.027	12.475	17.279	54.678	54.079	12.355	5.687	4.635	4.2146	8.4125	50.5121	8.874	9.425	15.6	41.066	15.342	7.545	4.498	5.173	11.328	57.986	14.335	5.944	4.393	4.68	11.269	29.295	4.198	4.786		0.649039	16.8997
16.2032	9.554	11.888	16.202	55.631	53.829	12.916	5.513	5.408	4.8167	8.6377	54.3995	10.0666	12.803	18.869	39.407	16.231	7.95	4.219	5.223	12.309	56.801	15.508	6.399	4.978	5.483	11.396	28.172	4.216	4.173		0.653845	17.3448
16.3224	10.157	10.358	13.147	59.961	58.31	13.915	5.212	4.509	4.9033	6.4469	56.4239	9.995	14.873	20.024	35.786	17.082	7.303	5.129	4.824	9.159	53.148	13.576	6.861	4.784	6.261	11.454	27.435	4.568	3.562		0.658655	17.2127
16.4415	9.436	8.728	12.891	55.284	65.67	16.036	4.889	4.556	4.252	7.3342	58.1414	9.0542	16.137	20.652	35.338	14.388	8.25	5.407	6.281	8.548	54.812	15.411	5.964	5.138	5.145	12.899	27.884	4.174	3.972		0.663461	17.4714
16.5606	9.026	8.432	11.725	50.989	65.945	14.021	5.229	5.076	4.3259	7.5712	54.6631	9.8807	14.096	20.903	36.819	17.076	7.499	5.581	6.067	7.64	54.535	17.734	7.085	5.769	4.941	12.247	27.958	4.452	4.525		0.668267	17.3038
16.6798	8.59	8.918	12.026	42.806	72.9	13.241	4.858	4.494	4.6181	7.5455	58.6774	9.0295	13.554	22.826	37.406	17.016	6.484	5.074	7.827	8.656	60.156	18.866	5.096	5.872	5.419	12.96	24.925	4.428	3.39		0.673077	17.5055
16.7989	8.471	8.728	12.407	36.764	78.155	12.93	4.476	5.195	3.8654	7.578	55.3229	9.6891	12.685	26.206	44.286	18.682	6.612	5.957	7.482	8.622	58.136	18.531	5.75	5.478	5.066	14.873	28.885	4.032	4.179		0.677883	17.898
16.9181	8.434	7.626	10.223	32.355	83.916	14.308	5.355	5.441	4.9988	7.8252	51.1393	10.2605	12.708	27.876	41.768	21.565	7.703	4.423	6.78	8.804	51.172	17.895	6.678	5.126	5.551	14.793	27.946	4.731	4.616		0.682693	17.6558
17.0372	8.757	8.068	11	29.443	84.799	12.286	5.095	4.907	4.9846	6.8462	51.5783	11.0921	13.352	29.144	39.757	20.53	7.131	4.937	7.139	7.079	49.574	17.519	5.555	5.638	6.208	14.798	29.656	4.077	4.984		0.687499	17.446
17.1563	7.575	7.563	9.912	27.432	83.326	11.734	6.079	4.971	4.3436	7.2787	44.7141	12.4449	14.557	30.811	36.963	22.118	6.006	5.731	6.082	8.223	45.891	19.307	5.236	5.532	6.683	15.061	28.367	4.856	4.221		0.692306	17.0006
17.2755	8.471	6.682	10.82	27.065	83.685	9.443	5.349	5.526	4.3461	7.1907	47.598	12.2084	13.997	32.794	35.385	23.238	6.441	5.98	7.736	8.63	42.646	19.65	5.231	6.409	6.336	14.531	26.351	3.431	5.017		0.697116	16.972
17.3946	9.097	7.53	10.454	29.672	86.746	13.269	5.56	4.076	4.1507	7.41	46.7546	12.8129	14.364	35.939	35.741	26.162	6.377	6.082	6.984	7.667	35.49	19.53	5.702	6.355	6.393	15.146	22.811	3.816	4.288		0.701922	17.1165
17.5138	9.252	7.773	10.047	29.53	83.634	14.554	6.114	4.847	4.718	8.1732	43.5003	16.5886	15.938	41.071	36.29	21.968	5.829	5.615	7.455	7.882	35.034	17.176	6.112	5.336	7.023	15.197	24.514	5.054	3.309		0.706732	17.2253
17.6329	10.314	8.648	8.751	30.682	87.359	12.54	6.489	4.497	4.4702	8.8237	45.1616	19.5446	17.648	47.608	33.441	23.082	6.827	5.772	8.637	8.843	34.094	21.224	5.203	5.479	6.488	14.979	24.098	5.422	3.881		0.711538	17.9312
17.7521	8.39	6.741	10.074	28.761	89.656	16.037	5.312	4.492	4.4603	7.3281	45.4086	25.4415	16.212	50.471	31.332	20.959	6.979	5.168	8.309	9.033	30.544	26.1	6.556	6.052	8.911	15.377	26.527	3.731	4.007		0.716348	18.2196
17.8712	8.382	8.165	8.175	25.611	97.851	16.662	5.081	4.452	4.7668	7.5222	39.3997	27.8969	17.622	58.287	29.618	21.275	5.787	6.039	11.819	8.329	32.483	32.498	5.884	5.123	9.913	14.904	25.268	5.277	3.68		0.721154	18.8886
17.9903	9.095	7.638	9.084	22.747	100.5	19.107	5.679	4.19	4.5611	6.8812	38.4025	32.6115	21.549	71.454	29.728	20.892	6.772	5.785	13.883	8.091	32.648	40.271	4.368	7.254	9.972	13.21	23.045	5.61	3.767		0.72596	19.9585
18.1095	10.185	8.552	10.548	22.177	104.893	18.88	5.409	4.738	4.7381	6.9482	37.2296	36.3187	24.78	86.777	30.825	24.333	6.187	5.929	15.034	10.788	34.157	47.507	7.248	6.407	10.982	14.291	20.98	5.519	4.124		0.73077	21.6029
18.2286	7.953	9.787	11.605	19.705	107.532	21.461	5.07	4.657	5.7558	7.2002	36.9762	41.6955	26.357	90.014	30.616	21.394	6.507	5.658	16.324	9.863	32.951	44.35	6.201	7.319	15.996	13.129	23.967	5.562	3.915		0.735576	22.0524
18.3478	9.774	8.846	11.21	17.691	104.409	20.133	4.281	4.131	4.3652	7.9287	32.4634	47.3959	29.895	87.542	35.392	21.539	6.512	6.483	20.454	10.196	32.97	46.106	6.373	7.612	16.172	12.506	34.249	6.051	3.412		0.740386	22.6239
18.4669	9.017	8.439	12	16.278	107.108	20.295	4.863	3.424	4.718	8.753	34.3474	56.1045	33.352	88.656	36.541	20.895	6.796	6.54	27.147	12.439	34.506	42.059	6.013	7.109	18.971	11.954	33.148	5.869	3.727		0.745192	23.4851
18.586	8.639	8.477	11.843	15.617	102.934	16.716	5.434	4.263	5.4993	7.9108	36.8959	58.3882	45.612	80.218	36.518	21.534	6.97	7.294	33.068	14.414	32.353	43.495	8.497	7.019	20.854	11.091	34.204	6.753	4.39		0.749998	24.0311
18.7052	10.115	10.252	14.418	13.613	105.836	18.105	6.41	3.998	6.3273	9.3518	43.044	64.5707	47.581	69.299	34.693	21.911	5.852	7.64	39.51	18.288	35.484	41.543	6.229	6.626	23.369	12.291	31.566	5.476	4.047		0.754808	24.7395
18.8243	8.997	10.203	12.463	13.813	106.408	20.72	5.872	4.931	5.8995	9.8531	46.3938	66.5795	50.757	59.905	35.039	26.594	6.704	6.464	48.655	21.643	38.28	48.114	6.724	9.202	28.358	11.823	34.34	4.824	4.014		0.759614	25.9853
18.9435	10.447	11.454	11.821	13.242	99.214	22.782	5.83	4.587	6.8511	11.658	47.6786	62.1979	45.552	44.377	35.999	24.326	6.983	7.376	55.836	26.752	46.634	53.503	6.217	9.588	34.84	13.041	37.434	5.047	3.716		0.764424	26.3787
19.0626	13.035	11.018	13.968	16.807	104.178	20.144	5.735	5.084	7.0967	13.0276	51.4817	65.8819	43.199	34.669	34.148	28.931	6.738	8.012	52.663	29.969	52.716	61.001	6.239	8.94	46.276	13.481	37.173	5.86	4.191		0.76923	27.6435
19.1817	10.803	11.346	15.09	17.864	109.325	19.875	4.355	4.811	6.9748	16.7218	56.9963	65.6468	40.623	25.875	34.421	26.653	7.415	9.467	43.184	33.118	55.155	66.908	5.557	8.151	54.059	16.181	40.625	6.442	4.406		0.774036	28.2086
19.3009	12.56	10.522	14.879	17.249	106.878	21.353	5.438	4.847	7.3089	21.2055	59.2547	64.7867	45.852	20.388	38.814	25.417	7.629	8.683	35.991	37.674	59.794	73.805	6.736	8.369	51.627	17.182	39.115	5.439	4.294		0.778846	28.7273
19.42	10.482	11.477	14.762	18.83	104.293	20.893	5.67	4.286	8.0252	26.3279	62.5824	66.3463	54.164	11.692	40.03	32.384	8.045	10.184	31.516	42.073	68.634	78.357	7.479	9.493	46.325	19.64	38.651	5.71	5.231		0.783652	29.7787
19.5392	12.674	12.443	15.463	20.69	110.689	22.797	5.2	4.082	9.1757	38.8188	69.6035	68.8408	58.829	9.38	38.958	33.558	7.558	12.431	26.19	43.393	66.933	80.11	7.822	9.548	41.235	21.445	34.757	5.94	4.178		0.788462	30.7842
19.6583	10.954	13.886	15.56	21.526	104.404	21.821	9.001	4.792	11.4661	55.8957	72.7784	70.8612	51.647	4.595	40.461	33.714	7.644	13.149	19.209	42.417	62.345	86.615	9.712	10.486	52.244	23.161	36.103	6.173	4.881		0.793268	31.638
19.7775	11.235	15.398	15.652	24.594	100.557	21.338	8.494	5.651	13.1954	71.6435	66.9473	71.3795	36.291	5.422	47.022	33.873	7.528	18.391	14.803	43.193	55.247	100.771	12.4	12.649	62.905	22.581	38.382	7.505	6.27		0.798078	32.8041
19.8966	10.687	16.518	13.791	28.308	96.772	21.94	8.126	6.073	17.3187	83.7075	73.912	77.175	26.536	4.155	51.8	30.993	8.54	24.708	12.799	41.931	48.788	111.693	13.687	11.604	72.219	23.977	39.607	6.685	6.55		0.802884	34.1586
20.0157	12	16.074	12.963	25.345	94.109	24.105	7.944	5.82	20.575	95.1883	80.7664	83.5084	19.038	2.562	56.002	31.195	9.289	29.467	10.33	32.769	36.872	123.856	15.945	12.811	73.951	25.674	40.508	6.525	7.211		0.80769	34.9105
20.1349	12.857	15.449	13.815	26.611	93.422	22.43	9.093	6.649	27.8914	99.2522	87.5002	87.8251	11.502	1.924	60.28	30.917	14.061	36.188	8.52	20.402	27.338	141.008	16.778	16.933	77.548	29.488	42.087	8.498	7.466		0.812501	36.3356
20.254	13.482	16.244	12.333	25.303	97.964	22.231	10.163	6.712	40.2958	84.1269	84.0203	88.8307	6.248	1.719	64.721	34.407	15.745	40.33	6.935	14.737	23.792	150.566	22.35	24.175	82.67	37.532	46.159	9.67	8.118		0.817307	37.6407
20.3732	13.861	15.093	12.138	26.873	103.425	28.591	9.396	7.221	52.6992	62.004	80.1494	80.1456	5.922	2.088	70.292	35.029	17.647	47.198	5.989	13.562	14.738	140.805	24.867	30.053	83.069	44.995	43.879	10.793	10.58		0.822117	37.6932
20.4923	14.538	17.385	15.486	25.522	104.786	34.462	8.532	7.882	60.9665	39.3432	69.3986	66.2119	4.28	1.284	70.604	37.997	21.403	49.072	5.11	12.219	11.83	114.3	24.995	38.072	77.481	53.304	41.925	15.256	14.165		0.826923	36.4762
20.6114	16.71	17.335	16.637	27.276	99.092	40.992	11.212	7.451	58.8098	21.4493	62.2031	51.7452	3.947	1.537	68.103	37.788	22.549	53.721	4.737	9.376	9.588	82.688	30.613	57.357	59.93	52.715	48.697	17.025	18.075		0.831729	34.8055
20.7306	20.03	19.343	14.509	24.561	98.542	45.398	10.272	8.197	50.8988	13.036	53.0595	39.9118	2.642	1.238	70.877	41.775	24.288	48.183	3.167	6.851	8.17	50.984	40.692	74.055	41.331	56.995	55.756	17.949	22.968		0.836539	33.2993
20.8497	23.879	19.257	18.335	22.959	95.577	49.097	10.349	8.649	38.4873	8.8882	39.1614	26.9621	1.953	0.489	68.133	44.926	28.501	41.578	3.16	6.416	5.681	29.293	53.555	68.044	23.867	54.083	62.52	22.087	29.777		0.841345	31.2298
20.9689	28.711	20.117	22.294	21.53	91.882	57.832	10.764	8.839	24.0357	6.4474	30.7378	16.1895	2.09	0.7	60.975	49.288	25.991	37.306	2.25	5.349	3.774	18.089	71.957	57.069	12.082	59.141	66.379	22.705	36.519		0.846155	30.036
21.088	31.54	20.552	24.582	20.558	96.863	64.571	12.901	10.994	15.3206	5.1453	22.9234	11.6119	0.921	0.594	53.463	50.044	23.054	29.834	2.323	4.589	4.56	12.552	86.759	35.426	7.855	62.855	65.199	22.021	44.259		0.850961	29.099
21.2071	35.494	22.415	25.699	22.895	99.137	66.61	16.604	13.882	9.7786	3.3621	14.3263	7.1708	1.025	0.612	43.165	52.192	24.716	17.712	2.772	2.928	3.605	7.628	87.738	18.612	8.223	66.409	68.662	27.181	46.041		0.855767	28.1584
21.3263	40.551	27.477	31.717	24.013	102.665	63.456	19.868	21.703	7.8285	2.4013	10.3763	5.247	0.834	0.685	36.337	50.663	26.566	12.939	2.093	3.838	2.958	5.629	89.221	11.566	5.256	71.822	70.641	33.695	42.297		0.860577	28.4256
21.4454	47.701	31.237	33.47	25.885	93.345	68.442	23.753	29.372	7.0494	3.0474	7.9904	4.9349	1.028	0.379	28.479	51.832	28.08	13.209	1.597	3.171	2.14	4.538	74.15	7.999	3.338	69.221	64.071	38.24	36.538		0.865383	27.7323
21.5646	52.52	30.574	33.04	25.412	78.776	65.121	26.34	35.94	4.2134	2.8407	5.1129	3.3671	0.664	0.875	22.516	48.594	26.789	10.812	1.718	1.889	1.521	4.551	48.27	5.51	3.769	62.058	65.158	40.154	22.454		0.870193	25.1917
21.6837	56.018	36.151	33.179	25.186	67.758	60.413	30.258	37.523	5.1987	2.2157	2.4127	3.4672	0.338	0.485	15.877	47.912	22.123	8.794	1.109	2.661	1.585	2.754	24.197	4.056	2.28	46.953	66.485	27.552	12.987		0.874999	22.3424
21.8029	61.984	35.297	35.756	30.85	56.889	53.622	32.367	28.847	4.6059	1.6111	2.2619	1.7229	0.589	0.409	13.843	45.658	15.277	7.377	0.935	1.557	1.233	2.979	14.752	3.009	1.634	29.356	66	15.745	10.503		0.879809	19.8852
21.922	64.194	38.521	36.987	33.668	45.193	51.79	31.26	22.1	3.2482	1.179	2.5349	1.5754	0.486	0.337	12.033	41.676	12.061	6.247	0.627	0.93	0.937	2.349	7.858	3.023	1.807	14.435	57.913	11.418	9.569		0.884615	17.7916
22.0411	66.48	41.938	33.925	33.842	34.249	47.374	30.233	17.321	2.5314	1.7368	2.7602	1.3298	0.827	0.4	8.45	36.761	8.291	6.479	0.781	1.266	0.853	1.244	5.83	2.129	1.433	9.145	36.492	10.14	6.692		0.889421	15.5494
22.1603	64.538	48.562	37.675	39.943	25.909	42.016	26.727	12.859	2.7571	1.5374	1.7988	1.4388	0.551	0.347	6.999	36.562	7.835	5.447	0.375	1.186	0.633	1.562	3.927	1.732	1.931	7.357	22.281	7.238	5.242		0.894231	14.3781
22.2794	62.503	55.51	41.569	49.277	23.428	35.698	22.501	10.905	2.8152	1.4585	1.4762	1.1879	0.931	0.305	4.078	29.529	5.624	4.169	0.302	0.736	0.421	1.278	3.311	1.313	1.44	5.455	14.141	5.589	4.282		0.899037	13.4908
22.3986	60.86	56.889	51.098	58.933	19.142	29.356	19.856	9.936	2.4499	1.7897	1.6635	0.726	0.402	0.06	3.351	21.838	4.581	3.113	0.39	0.435	0.432	1.578	3.088	1.221	0.829	4.511	10.207	4.354	2.847		0.903847	12.9633
22.5177	57.001	61.484	60.611	76.855	17.532	22.552	20.084	6.015	2.0966	1.2471	1.7764	0.7383	0.233	0.099	3.107	15.066	4.286	2.397	0.364	0.846	0.437	1.043	2.625	1.538	0.942	4.385	7.881	3.109	2.535		0.908653	13.065
22.6368	52.326	59.507	65.298	90.448	12.799	16.227	21.618	6.16	1.5248	1.3559	1.2928	0.6578	0.287	0.259	3.246	12.466	4.637	2.91	0.287	0.107	0.363	1.058	2.307	1.21	1.036	4.302	7.466	3.41	2.164		0.913459	12.9907
22.756	49.092	62.079	74.63	84.188	12.135	14.176	19.168	6.793	2.1156	1.0177	1.0414	1.058	0.328	0.168	2.334	7.86	4.058	2.082	0.147	0.415	0.338	0.785	1.236	0.988	0.853	3.812	5.08	3.295	1.389		0.918269	12.5056
22.8751	40.486	60.652	79.817	71.828	9.182	10.589	15.516	5.557	2.0615	0.9579	0.9358	0.6364	0.126	0.117	1.819	6.45	3.339	1.535	0.085	0.596	0.119	0.94	1.601	1.01	0.559	2.449	4.147	3.14	1.231		0.923075	11.2925
22.9943	29.085	55.923	84.293	56.028	6.977	7.512	13.802	6.091	2.2651	1.3623	1.1038	0.6302	0.088	0.161	1.445	5.807	2.248	1.495	0.046	0.426	0.116	1.019	1.388	0.626	0.514	2.295	2.279	1.787	1.77		0.927885	9.95112
23.1134	21.675	50.656	77.926	43.498	5.813	5.888	13.105	6.153	1.5971	0.7592	0.9855	0.5466	0.193	0.133	1.713	4.289	1.945	1.101	0.123	0.115	0.622	1.088	0.829	1.024	0.631	2.071	2.096	1.752	1.78		0.932691	8.62439
23.2325	15.807	44.517	72.917	33.394	4.747	5.078	8.527	5.051	1.1866	0.8675	0.4786	0.3998	0.368	0.333	1.584	4.833	1.982	1.05	0.032	0.174	0.103	1.154	1.018	0.638	0.341	1.248	1.852	1.935	1.617		0.937497	7.35284
23.3517	11.371	34.376	67.534	25.056	5.193	4.517	7.832	3.905	1.4236	0.8556	0.5666	0.3385	0.019	0.013	1.082	2.922	1.658	0.763	0.034	0.036	0.022	0.684	0.905	0.529	0.334	1.161	1.779	1.408	1.744		0.942308	6.14004
23.4708	8.727	26.029	62.125	18.188	4.332	4.057	7.376	4.078	1.4965	0.9079	0.6746	0.4859	0.053	0.032	1.161	3.442	1.736	0.652	0.136	0.039	0.208	0.646	0.952	0.796	0.405	0.972	1.282	1.036	1.662		0.947114	5.29955
23.59	5.443	18.166	41.873	16.301	3.847	2.94	5.239	3.818	0.6371	0.3952	0.6946	0.3924	0.11	0.374	1.237	3.091	1.712	0.284	0.067	0.078	0.292	0.32	0.919	0.407	0.32	0.94	1.396	0.892	0.776		0.951924	3.89522
23.7091	4.426	11.872	28.396	13.657	3.731	2.647	4.626	2.899	0.8944	0.5828	0.6577	0.4883	0.073	0.154	1.224	2.829	1.768	0.081	0.12	0.077	0.096	0.435	0.607	0.417	0.264	1.249	1.099	0.705	0.868		0.95673	2.99804
23.8283	5.511	8.328	20.446	9.81	2.48	4.064	2.962	2.275	0.8972	0.8185	0.5136	0.5242	0.042	0.098	0.711	2.34	1.229	0.612	0.017	0.16	0.095	0.241	0.548	0.408	0.3	1.032	1.275	0.782	0.964		0.96154	2.39598
23.9474	4.46	5.919	13.341	7.129	2.76	3.284	2.7	2.303	0.9957	0.4979	0.5239	0.1716	0.089	0.137	0.829	1.906	0.754	0.507	0.15	0.089	0.096	0.062	0.703	0.296	0.384	1.186	1.331	0.73	1.203		0.966346	1.88059
24.0665	3.264	5.631	10.474	6.381	1.727	1.262	2.459	1.906	0.8997	1.0878	0.3772	0.1667	0.093	0.089	0.899	1.791	0.341	0.1	0.04	0.026	0.007	0.254	0.46	0.399	0.365	0.544	1.15	0.825	0.574		0.971152	1.50319
24.1857	2.117	5.517	7.479	6.214	1.517	1.459	2.439	1.867	0.6323	0.2939	0.3933	0.1183	0.211	0.144	0.867	0.643	0.554	0.149	0.211	0.07	0.02	0.426	0.384	0.481	0.143	0.376	0.712	0.529	0.699		0.975962	1.26434
24.3048	2.67	4.882	6.855	5.488	1.827	1.438	2.6	1.523	0.675	0.5321	0.1483	0.4361	0.066	0.113	0.709	0.991	0.414	0.017	0.026	0.126	0.211	0.214	0.252	0.384	0.171	0.387	1.107	0.655	0.505		0.980768	1.22147
24.424	1.985	4.294	4.943	4.353	1.818	1.486	1.956	1.324	0.5779	0.1976	0.241	0.3052	0.018	0.099	0.138	1.12	0.644	0	0	0	0.214	0.082	0.573	0.143	0.236	0.879	0.693	0.859	0.296		0.985578	1.01637
24.5431	1.558	2.333	3.792	3.26	1.471	1.86	1.049	1.14	0.5172	0.2543	0.327	0.3436	0.069	0.013	0.255	1.197	0.73	0.111	0	0	0.02	0.099	0.484	0.19	0.25	0.661	1.097	0.47	0.2		0.990384	0.819003
24.6622	1.528	1.968	3.295	3.324	1.589	1.517	1.557	1.06	0.4805	0.4753	0.3226	0.4466	0.137	0.027	0.718	0.775	0.348	0.222	0	0	0.052	0.081	0.405	0.594	0.129	0.53	0.888	0.32	0.332		0.99519	0.797276
24.7814	1.411	1.775	2.975	3.052	1.378	1.139	1.551	1.095	0.3799	0.2729	0.2371	0.1564	0.066	0.17	0.21	0.834	0.174	0.056	0	0	0.059	0.126	0.271	0.282	0.043	0.595	0.862	0.761	0.493		1	0.704286

## Sheet: Image13 (2)
X0	Y0	Y1	Y2	Y3	Y4	Y5	Y6	Y7	Y8	Y9	Y10	Y11	Y12	Y13	Y14	Y15	Y16	Y17	Y18	Y19	Y20	Y21	Y22	Y23	Y24	Y25	Y26	Y27		Ap-Ba	Avg int
0	40.889	58.673	65.556	60.606	41.999	36.613	79.557	60.109	50.374	58.607	106.816	62.946	35.185	82.9	121.509	88.842	90.015	100.136	47.844	37.319	34.0084	36.2646	40.4716	36.222	22.99	26.8298	25.8498	46.361		0	56.9819
0.1191	46.908	63.574	70.88	71.562	47.717	41.587	81.73	55.582	58.362	59.04	112.512	66.439	35.819	90.498	120.821	87.978	98.258	109.985	54.028	40.853	41.5786	40.65	43.4313	42.494	24.763	33.3026	29.0881	46.365		0.00399862	61.2788
0.2383	47.346	66.202	78.846	87.493	58.507	44.133	99.366	64.642	56.569	60.976	130.946	77.706	39.45	91.048	115.389	84.396	101.599	103.646	60.652	47.274	44.1044	43.2986	45.7311	47.721	25.325	36.5234	27.3544	50.221		0.00800059	65.588
0.3574	55.963	67.825	87.434	94.565	67.706	47.833	108.388	77.033	62.461	66.852	135.817	91.343	47.931	91.799	126.807	83.472	111.926	109.695	60.345	52.625	52.4661	48.8919	54.0304	54.63	32.705	41.1038	33.8733	52.908		0.0119992	72.0867
0.4766	62.716	72	96.297	98.49	81.718	61.683	123.365	85.761	62.193	67.474	142.141	104.976	56.238	101.772	122.661	87.016	115.486	109.88	67.223	61.964	56.4024	51.5804	55.978	61.814	41.683	51.687	36.9475	56.716		0.0160012	78.3522
0.5957	75.066	72.439	108.353	109.018	93.079	65.47	132.955	99.623	71.537	72.112	154.44	113.376	67.699	115.921	129.696	84.641	117.353	109.874	70.844	71.904	60.8129	58.0836	55.8121	77.128	50.885	66.7441	42.1686	66.011		0.0199998	86.1802
0.7148	78.134	81.216	119.47	127.255	111.844	76.726	139.903	111.436	79.961	74.039	152.858	128.407	85.426	117.021	139.062	86.398	123.161	110.015	80.006	86.071	70.1536	57.8283	62.5208	85.26	62.998	76.9349	47.5341	68.51		0.0239984	94.291
0.834	87.305	87.034	126.226	144.516	138.217	91.315	154.277	120.458	81.019	76.989	154.981	146.129	111.184	124.954	139.864	87.427	120.371	112.203	93.088	99.83	74.7631	60.8773	67.7196	96.523	79.553	88.5961	58.8795	66.227		0.0280004	103.233
0.9531	94.068	91.935	140.565	145.85	154.639	112.396	160.468	137.038	104.929	88.511	156.448	156.616	116.554	132.241	138.298	97.556	133.215	116.589	99.2	118.897	79.477	59.1368	68.9681	108.492	95.631	99.036	63.5594	74.846		0.031999	112.327
1.0723	102.265	94.93	154.427	165.026	175.419	131.771	175.283	144.129	117.941	96.469	155.098	152.169	127.27	139.833	138.766	98.911	128.957	125.125	109.889	118.279	83.6552	63.3809	74.814	108.646	105.452	97.8594	73.4904	70.06		0.036001	118.904
1.1914	115.372	96.171	163.506	169.508	193.319	148.648	192.836	146.219	127.29	107.611	163.42	169.902	137.638	141.937	146.151	99.744	129.231	129.009	114.137	116.814	82.5538	64.8355	74.1964	104.105	114.425	91.7845	79.7197	80.387		0.0399996	125.017
1.3106	125.03	106.916	171.443	185.136	201.335	169.822	191.447	153.835	130.753	118.747	152.395	179.149	140.873	146.407	143.354	106.378	133.712	131.263	104.393	118.533	86.2063	65.7043	76.724	98.285	111.22	86.1842	79.7737	80.288		0.0440016	128.404
1.4297	141.205	111.392	171.605	195.349	205.435	189.968	195.546	159.298	141.769	131.206	157.291	185.611	147.077	156.912	154.59	112.116	129.749	126.463	92.11	110.101	84.1837	72.4252	73.9727	90.322	102.796	77.248	82.7531	86.709		0.0480002	131.614
1.5488	134.028	118.12	179.603	201.244	209.382	199.266	202.237	162.725	143.218	139.757	154.092	187.849	152.822	161.989	151.032	115.985	126.011	129.846	83.609	99.018	86.9241	71.5337	70.45	74.676	88.042	69.5363	91.5261	84.176		0.0519988	131.739
1.668	147.646	121.86	179.817	203.132	215.825	217.877	195.056	161.643	142.322	150.746	146.352	186.402	157.384	158.647	159.391	116.972	119.582	126.7	76.96	94.213	86.706	73.721	67.9537	66.782	78.445	61.4685	92.7679	86.924		0.0560008	131.903
1.7871	146.541	114.376	179.142	199.163	218.667	223.293	179.484	164.649	137.727	155.443	145.898	189.482	159.671	161.438	161.233	121.137	122.385	115.395	70.096	80.195	87.8558	72.9895	61.2327	54.069	68.148	53.4935	90.3459	86.701		0.0599994	129.295
1.9063	145.725	120.492	175.914	194.888	217.373	220.801	155.736	157.982	127.744	159.575	139.119	186.533	162.036	150.846	156.162	124.683	121.797	105.443	61.573	76.219	92.8588	65.2695	55.8116	46.178	55.307	45.0383	83.2902	92.332		0.0640014	124.883
2.0254	139.403	113.986	168.145	186.847	204.581	214.516	140.447	146.333	115.908	163.473	140.548	188.992	165.261	133.968	153.441	121.358	115.068	102.326	57.518	67.308	87.5868	65.4771	45.7283	40.505	49.08	43.5939	71.5273	86.797		0.068	118.919
2.1445	135.131	110.775	163.774	160.393	198.934	194.335	121.51	136.704	111.25	155.002	137.551	189.692	160.388	127.681	143.886	121.585	109.141	89.989	56.698	64.203	86.8259	66.6721	40.2323	38.125	41.176	40.1611	67.7145	85.884		0.0719986	112.693
2.2637	121.428	108.061	147.603	141.091	173.908	167.407	105.291	132.144	97.375	159.252	125.264	184.023	149.959	106.585	135.429	128.094	116.456	82.029	57.397	59.171	82.7725	69.2884	36.8103	35.633	40.19	38.5774	66.4137	92.378		0.0760006	105.715
2.3828	103.877	109.533	132.26	120.918	146.869	146.211	97.051	117.398	91.205	147.009	116.412	170.536	139.257	95.329	128.788	124.591	114.079	72.363	54.561	57.16	80.5189	71.9905	30.2127	28.165	39.108	35.8296	57.6427	88.522		0.0799992	97.0499
2.502	89.044	106.429	111.757	103.215	119.837	110.233	82.769	112.805	87.199	130.687	114.689	170.195	127.818	79.07	118.111	120.903	105.481	68.946	55.616	55.857	74.7991	65.9971	27.1009	26.822	33.214	29.4635	58.7816	90.551		0.0840012	88.4782
2.6211	84.868	100.028	84.042	82.199	95.099	84.287	69.895	107.866	73.752	127.715	122.995	164.401	118.765	69.86	105.743	110.327	101.284	56.841	48.799	53.853	74.5329	63.9075	23.8821	29.191	27.402	25.8227	53.8567	95.774		0.0879998	80.6067
2.7402	70.712	103.566	62.898	69.97	80.131	65.153	58.464	102.265	67.764	110.497	108.555	159.814	112.907	62.408	83.106	101.864	89.288	50.067	53.214	53.143	74.2208	64.7376	22.1025	27.218	26.927	26.5612	56.0718	98.747		0.0919984	73.6561
2.8594	62.316	100.88	48.661	58.689	63.485	50.989	47.632	96.896	62.118	91.057	104.954	146.723	103.947	53.056	68.478	102.17	74.875	42.117	50.914	43.084	67.1235	63.9079	18.6398	23.835	26.926	24.4125	51.5494	103.13		0.0960004	66.163
2.9785	51.088	100.93	38.44	53.764	55.944	45.201	38.861	94.214	54.135	82.069	96.419	145.044	92.135	46.835	51.245	99.772	62.093	32.955	48.388	41.731	63.2304	63.8532	17.574	20.884	25.132	24.4511	49.5092	98.789		0.099999	60.5245
3.0977	46.901	100.001	29.258	47.187	45.365	38.05	28.06	85.756	50.667	69.231	93.578	144.47	83.583	41.846	36.167	84.815	46.831	25.515	43.915	37.151	60.2725	60.9464	19.2199	17.902	21.5	21.4354	52.5346	104.664		0.104001	54.8865
3.2168	39.008	99.107	22.485	39.058	40.403	32.135	26.007	86.725	46.057	58.662	88.434	132.546	74.434	43.347	33.521	78.741	40.311	19.794	44.708	36.567	57.4236	61.4984	13.8494	16.849	21.491	22.1233	47.8462	101.854		0.108	50.8923
3.336	33.021	103.298	19.186	33.55	30.186	28.277	25.12	78.353	42.704	51.605	85.044	119.359	72.035	31.912	29.656	65.078	30.528	17.857	41.308	31.727	52.446	61.912	15.1147	18.308	18.88	20.2424	47.8152	101.36		0.112002	46.6387
3.4551	31.084	93.709	14.894	24.782	24.641	24.28	21.091	66.334	40.785	38.694	79.786	110.777	59.038	27.625	25.741	56.14	25.356	17.15	40.158	29.481	50.5508	55.1351	12.7492	16.48	19.139	19.4332	44.8267	96.013		0.116	41.6383
3.5742	26.559	92.919	14.268	20.686	24.064	23.793	18.236	56.537	32.239	36.162	67.838	104.103	53.816	23.379	25.435	44.828	22.042	18.011	38.328	31.104	44.7539	49.928	11.7039	14.223	19.199	20.8969	41.9092	87.725		0.119999	38.0245
3.6934	25.664	84.646	12.406	16.613	22.61	19.699	17.275	47.386	25.13	29.349	58.842	85.651	50.984	19.569	23.247	37.604	17.735	19.975	33.658	24.815	40.4877	44.7984	11.827	14.994	15.961	18.9303	37.3663	90.916		0.124001	33.8621
3.8125	25.654	74.276	11.279	13.977	17.431	18.874	16.554	37.042	17.786	26.605	46.822	81.703	45.053	18.705	25.177	26.6	16.651	18.592	33.881	25.149	36.5546	42.0897	10.3795	13.874	17.234	17.18	38.7423	84.349		0.127999	30.6505
3.9317	24.717	66.909	10.264	12.489	16.382	17.01	14.448	27.803	14.921	25.059	37.835	74.872	41.8	15.701	22.08	19.655	14.242	19.964	30.02	27.62	34.4037	35.9098	9.7193	12.741	15.823	17.5365	36.3973	81.189		0.132001	27.7682
4.0508	22.922	59.565	10.93	12.664	13.54	15.855	13.665	23.338	13.135	19.049	33.259	68.817	38.43	11.424	19.554	17.142	13.71	16.552	29.517	25.579	33.1462	31.2599	9.9844	10.057	15.501	16.8456	35.3313	74.955		0.136	25.2046
4.1699	25.732	54.511	10.457	13.267	13.735	13.214	13.683	17.231	10.131	16.529	32.244	65.021	33.183	13.771	16.74	13.423	11.992	15.34	25.141	26.829	33.2724	26.8228	10.0554	11.161	15.566	16.6952	31.6114	70.241		0.139999	23.4857
4.2891	20.022	51.259	9.859	9.153	12.49	13.021	11.379	12.21	9.11	16.757	31.811	56.39	29.732	10.257	20.281	11.962	9.014	12.976	27.217	25.859	32.9669	23.051	7.9571	10.513	15.516	14.6855	31.6217	62.777		0.144001	21.4231
4.4082	21.862	46.946	9.616	9.684	11.419	12.569	11.33	9.061	8.295	12.069	33.643	51.001	23.068	11.055	13.671	10.633	10.23	15.825	23.605	21.255	30.7825	21.5121	7.2341	8.184	14.782	15.2947	28.2148	58.861		0.147999	19.7037
4.5274	18.667	45.986	8.951	7.293	8.032	12.444	10.127	8.324	8.543	12.515	28.442	44.667	21.727	11.247	13.651	9.826	8.798	15.461	20.466	21.781	29.1104	18.2816	8.925	8.542	12.505	12.9478	29.5318	50.502		0.152001	18.1176
4.6465	16.8	42.102	8.005	8.611	8.312	11.528	9.768	11.082	6.97	10.447	28.264	43.093	18.364	10.261	13.329	7.396	7.339	16.219	18.716	18.263	28.2179	17.9431	7.1089	9.612	9.818	11.375	26.803	41.924		0.156	16.7025
4.7657	14.404	35.6	6.639	6.593	7.665	9.902	10.28	10.25	7.14	10.148	25.536	41.681	17.544	9.494	12.494	9.523	8.518	16.68	16.005	18.045	26.0592	15.3094	6.5382	7.682	11.276	12.937	26.2793	38.107		0.160002	15.6546
4.8848	13.888	35.299	7.485	6.481	7.547	9.22	9.217	10.013	6.873	9.028	22.598	34.022	15.34	7.242	11.058	6.478	7.453	16.159	13.896	15.649	22.517	13.9723	6.3246	7.658	8.793	11.9775	22.0342	31.808		0.164	13.9297
5.0039	14.593	34.686	6.609	7.422	8.64	8.582	9.9	9.608	7.496	9.182	21.541	35.061	14.371	7.595	11.636	8.157	6.141	16.582	13.218	12.985	22.5904	13.4808	5.4478	7.225	8.915	11.6002	21.1816	24.271		0.167999	13.5256
5.1231	13.908	32.926	7.804	6.093	6.387	8.96	10.66	8.964	6.298	9.265	21.628	29.979	12.567	6.087	10.363	8.365	4.933	14.878	12.123	12.02	19.8437	14.7624	6.933	7.563	7.972	9.8937	19.4005	21.583		0.172001	12.5771
5.2422	13.971	34.163	6.127	6.063	6.734	8.628	8.425	7.507	6.862	9.097	19.269	24.152	10.621	6.272	9.814	6.884	5.084	17.478	12.181	10.56	17.3935	11.0754	5.4751	6.512	8.163	10.4019	18.4315	21.572		0.176	11.747
5.3614	13.847	29.62	7.433	6.271	8.149	8.428	8.735	8.111	4.637	9.757	14.133	23.503	11.428	6.414	9.806	6.474	4.749	15.61	11.378	10.038	15.1864	11.597	5.5221	6.142	7.111	10.1399	19.0261	17.201		0.180002	11.0874
5.4805	13.13	26.231	6.2	6.676	6.854	7.557	9.702	7.558	3.855	8.979	15.013	21.123	11.977	5.644	10.565	6.594	5.288	15.43	8.055	8.496	12.0271	9.3792	6.2519	5.86	8.496	9.6983	16.4415	16.535		0.184	10.3434
5.5996	12.994	27.859	6.279	7.411	6.082	7.186	8.991	7.885	5.455	7.278	16.137	18.563	9.113	5.355	10.203	6.275	3.842	14.515	8.12	7.272	13.3507	8.5545	4.8529	5.399	6.524	8.3423	12.5053	16.696		0.187999	9.75142
5.7188	12.663	25.268	6.91	6.131	6.453	6.77	10.196	6.788	5.318	8.227	15.633	15.213	7.564	5.784	9.419	5.627	3.715	14.888	7.566	5.81	11.0497	9.2051	5.5015	4.585	7.673	9.3699	12.7678	14.499		0.192001	9.30693
5.8379	12.299	22.772	8.188	5.451	6.619	6.196	8.181	5.966	3.793	10.159	15.826	14.456	7.881	4.155	10.483	5.659	5.496	11.393	6.508	6.87	10.3002	7.3884	4.2932	5.84	7.079	6.9296	11.091	12.358		0.195999	8.70109
5.9571	11.027	22.913	5.979	5.453	6.321	6.554	7.788	8.18	5.327	9.816	17.906	10.931	6.283	4.566	10.214	6.066	4.411	10.292	6.222	6.665	9.8769	8.9325	4.1038	4.638	6.858	8.1082	12.5204	12.412		0.200001	8.58442
6.0762	10.093	27.847	5.969	6.407	7.188	6.204	7.809	8.884	5.011	10.63	15.087	10.985	6.734	5.03	11.002	6.249	4.793	11.123	6.617	4.817	7.2671	9.2405	5.1635	3.477	5.329	8.1149	10.0472	12.372		0.204	8.55322
6.1953	11.157	20.498	5.236	5.693	6.327	6.369	6.699	7.729	4.443	9.675	15.089	9.684	6.839	4.335	9.889	4.732	4.328	9.479	5.989	4.6	5.6791	9.8289	5.3107	4.117	6.417	7.6734	7.6996	11.443		0.207999	7.74852
6.3145	11.85	21.866	6.656	6.155	5.417	5.395	6.688	7.975	4.142	11.901	16.899	8.556	5.546	5.802	10.361	4.908	3.782	9.027	5.692	4.626	6.4398	7.4786	4.9296	3.606	5.043	8.5516	7.4209	11.834		0.212001	7.80527
6.4336	12	20.215	5.868	5.26	4.981	6.665	6.755	8.718	5.317	10.539	17.355	9.985	5.209	4.341	9.167	4.646	3.366	8.149	5.805	6.147	4.2589	6.8878	5.1455	5.403	5.909	6.1974	6.5119	9.044		0.215999	7.49448
6.5528	11.261	21.568	5.537	5.045	5.269	6.121	7.458	9.913	4.96	10.515	15.449	9.571	4.912	4.847	11.093	5.152	4.006	7.823	5.25	4.211	4.6072	7.1313	5.1805	4.278	4.612	6.095	6.6586	11.014		0.220001	7.48349
6.6719	10.182	18.969	5.397	6.091	4.87	6.815	9.333	8.704	4.571	12.673	15.481	7.493	5.01	6.297	10.385	5.209	4.24	7.161	4.383	3.778	5.2929	7.8872	6.4736	3.17	4.798	6.5155	6.8596	11.717		0.224	7.49128
6.7911	10.95	16.762	7.107	6.409	5.275	4.955	7.111	9.904	6.294	12.186	15.445	6.714	4.662	4.269	10.674	4.46	4.054	6.697	4.764	4.064	4.097	7.8283	5.3669	3.032	5.065	5.6753	4.4375	10.751		0.228002	7.10746
6.9102	11.609	17.287	6.585	7.351	5.569	5.537	6.936	8.468	3.984	11.214	16.403	6.601	4.65	5.657	9.55	5.235	4.647	7.857	3.87	4.599	4.5358	7.3426	4.0734	4.692	4.54	4.8565	5.6509	10.607		0.232	7.13954
7.0293	11.361	16.323	5.578	5.533	4.206	4.961	7.534	10.882	5.09	12.378	15.383	6.747	4.785	3.967	8.84	5.888	4.571	6.585	5.531	4.33	4.0425	5.713	4.3711	3.856	4.29	4.582	4.6431	11.364		0.235999	6.90481
7.1485	11.605	16.224	6.659	6.113	4.522	5.047	7.437	11.342	5.875	13.196	14.291	7.822	3.918	3.887	9.438	5.228	4.703	5.636	4.949	4.04	4.6223	6.7866	4.869	3.624	4.091	5.1678	4.0117	12.719		0.240001	7.06512
7.2676	9.928	15.861	7.707	6.245	4.599	5.662	6.584	9.801	7.133	14.321	15.904	7.136	4.498	5.058	9.938	4.554	4.335	5.397	4.44	4.282	4.5593	6.1542	4.9372	3.334	5.051	3.7042	3.8854	11.652		0.244	7.02358
7.3868	11.565	16.6	13.144	5.902	5.34	4.842	7.474	10.012	4.624	12.066	14.964	5.679	5.289	4.387	9.044	4.352	3.592	6.758	5.696	3.915	4.3859	6.5728	4.8906	2.96	3.578	4.9015	3.2843	10.195		0.248002	7.00047
7.5059	12.374	15.475	13.928	7.039	4.545	5.217	6.583	10.382	6.514	12.251	15.504	7.257	4.094	4.96	8.915	5.4	3.539	6.316	6.335	3.51	5.026	4.9846	3.6121	2.759	2.682	4.0618	4.3671	10.917		0.252	7.09099
7.625	10.96	16.558	16.862	6.852	4.968	5.893	8.469	12.986	5.149	13.612	13.517	6.799	4.57	4.843	7.093	6.113	4.061	6.398	5.458	3.245	4.5476	6.4496	5.3847	3.424	4.121	4.096	4.9359	9.386		0.255999	7.38396
7.7442	11.104	16.321	15.65	7.353	5.051	5.954	7.086	12.087	6.084	15.435	14.556	6.868	5.248	3.737	6.899	5.337	5.128	5.733	7.691	3.655	3.9751	5.4188	5.4118	2.631	3.341	4.3128	3.9983	10.429		0.260001	7.37481
7.8633	10.269	13.958	18.166	7.842	6.364	6.833	9.723	12.428	5.119	16.376	13.923	6.404	4.216	4.448	9.663	5.796	4.336	4.924	6.386	3.142	3.5949	5.3233	4.4947	3.273	2.94	3.5587	3.5823	10.368		0.263999	7.40896
7.9825	10.89	15.179	16.711	8.304	5.361	6.982	8.666	15.253	5.157	16.31	14.305	7.234	4.199	4.153	7.814	6.872	3.851	5.795	6.512	3.578	3.7274	4.3838	5.2243	2.455	2.863	4.6701	3.4441	9.048		0.268001	7.4622
8.1016	10.173	17.248	15.636	7.447	5.158	5.646	9.131	13.717	4.941	20.214	13.405	6.304	3.873	3.306	8.379	6.421	3.672	5.539	8.796	4.205	3.8796	5.3262	4.1475	3.843	2.667	3.3244	5.2672	9.501		0.272	7.54167
8.2207	10.665	16.947	13.732	7.867	4.444	6.568	8.494	13.808	5.587	25.552	15.315	7.824	3.877	3.904	8.142	6.345	3.133	5.401	7.397	3.156	3.2319	4.475	4.6443	2.419	2.891	3.9285	3.2201	9.464		0.275999	7.58685
8.3399	9.882	14.887	13.658	6.55	5.008	5.932	7.193	14.302	4.571	29.263	14.112	6.985	4.571	3.992	7.214	6.721	3.92	4.807	8.531	3.583	3.3697	4.7608	4.0709	3.82	3.819	3.3827	4.5313	8.533		0.280001	7.57034
8.459	15.913	15.229	14.407	4.956	4.985	6.854	9.256	14.509	5.311	31.704	13.309	7.281	5.174	4.432	6.514	6.948	3.13	4.296	8.764	2.921	3.3151	4.3779	4.9721	4.864	2.51	3.5967	3.2954	9.031		0.283999	7.9234
8.5782	12.756	16.808	18.969	5.863	3.97	6.707	10.911	16.762	3.957	31.828	13.305	7.001	5.018	4.366	8.199	5.64	4.367	5.511	9.031	3.122	2.9187	4.7503	6.2941	4.526	2.452	4.2153	4.04	9.869		0.288001	8.32701
8.6973	11.679	18.99	17.759	5.027	4.463	9.094	10.478	15.797	5.596	29.7	14.707	7.834	4.745	3.762	7.765	5.012	5.216	5.948	10.528	2.326	3.1326	3.399	5.9063	3.082	3.004	3.2149	3.1815	9.337		0.292	8.23869
8.8165	10.739	19.957	19.271	6.103	5.603	7.483	7.931	17.725	5.448	28.256	13.833	8.086	4.614	4.45	8.447	5.638	4.449	4.844	10.536	3.679	3.5715	3.9072	4.6851	3.188	2.806	2.6197	2.8904	8.706		0.296002	8.19521
8.9356	12.247	18.028	19.743	5.842	5.863	7.77	10.484	18.444	4.084	29.483	15.212	7.565	4.986	4.097	9.896	7.266	3.942	6.302	9.953	3.54	4.0286	3.3805	5.1623	3.86	4.167	2.9846	3.107	10.043		0.3	8.62429
9.0547	11.937	15.175	21.387	6.784	5.704	8.221	9.516	22.36	6.356	32.071	15.813	5.946	4.381	4.372	11.128	7.726	3.878	6.248	8.856	3.944	4.8209	3.5203	4.8435	3.65	2.365	2.8526	2.842	10.348		0.303999	8.82305
9.1739	12.228	14.393	24.639	6.191	5.301	7.991	8.265	23.174	5.938	35.337	16.944	6.839	3.245	4.268	11.702	7.347	4.231	5.014	11.202	3.466	4.369	3.2287	5.0537	2.718	2.208	1.7467	2.2511	9.651		0.308001	8.89076
9.293	12.517	15.838	22.682	5.575	6.391	8.416	11.044	31.209	6.954	31.758	15.158	6.145	4.681	4.015	12.487	7.044	4.953	5.236	9.131	4.099	2.488	3.1522	4.6047	3.356	2.689	2.7415	2.9671	10.768		0.312	9.21784
9.4122	13.258	18.434	22.523	4.753	7.029	9.386	12.224	35.66	6.78	35.484	16.269	6.099	4.337	3.818	13.491	7.652	4.955	4.131	11.885	3.412	2.5873	4.5504	5.8505	3.104	2.477	2.7725	3.1589	11.865		0.316002	9.92663
9.5313	10.925	18.848	21.922	6.607	7.333	11.085	11.551	43.615	6.64	36.761	15.072	6.911	4.728	4.748	17.6	8.813	3.64	4.311	12.629	4.099	3.5058	4.793	6.0632	4.199	2.591	2.4169	3.6094	9.373		0.32	10.5139
9.6504	12.46	22.125	22.995	5.58	8.838	11.329	10.804	42.742	7.835	39.39	17.296	6.439	5.023	3.633	17.397	9.756	3.376	5.698	11.596	3.74	3.3801	3.4308	4.9542	3.71	2.253	1.7696	3.3745	9.794		0.323999	10.7399
9.7696	12.795	20.834	26.109	5.25	5.803	9.578	13.53	45.146	6.293	38.455	18.241	6.777	4.411	2.898	16.832	8.915	4.716	5.388	12.038	3.963	3.1598	3.9899	5.6806	2.851	3.496	2.8417	2.3766	12.113		0.328001	10.8743
9.8887	13.573	20.421	29.562	6.268	10.004	11.946	10.729	47.297	7.012	40.954	16.582	8.552	4.954	3.595	18.074	9.647	5.897	5.887	11.582	5.178	2.6479	4.3065	6.0601	3.303	2.418	3.6764	3.4756	13.778		0.331999	11.6921
10.0079	15.371	18.765	29.04	5.401	10.228	10.574	13.163	39.834	8.211	45.187	16.072	6.615	3.506	4.853	15.363	9.609	5.426	6.957	13.753	4.429	3.2999	3.6278	5.5094	2.874	2.404	2.5697	3.209	11.164		0.336001	11.322
10.127	15.178	21.872	32.019	5.441	12.152	13.404	15.103	36.318	9.103	53.091	16.31	6.276	6.133	4.619	15.322	10.444	4.108	5.583	14.391	4.297	2.6466	4.9349	5.8051	3.214	3.221	2.5502	3.772	13.092		0.34	12.1571
10.2462	16.838	20.462	32.058	4.489	10.991	14.522	15.952	32.58	7.587	66.123	16.994	7.865	5.647	4.313	15.251	8.664	4.385	5.673	16.696	3.887	3.0266	4.2926	5.7215	3.127	3.33	2.3596	2.9847	13.159		0.344002	12.4635
10.3653	15.351	19.101	28.051	5.003	11.31	19.033	17.077	33.433	9.647	71.823	16.756	6.838	5.152	4.585	16.215	11.64	5.176	6.65	15.75	6.043	3.3737	4.095	6.7724	3.533	2.379	2.9685	2.8612	12.532		0.348001	12.9696
10.4844	16.627	16.267	30.681	5.105	10.19	25.339	17.903	32.569	9.196	79.817	19.689	7.278	4.507	3.82	13.243	10.072	5.01	6.042	13.725	6.155	2.9981	4.9553	6.2125	1.81	2.214	2.7767	2.9161	12.043		0.351999	13.1843
10.6036	16.241	15.836	33.658	6.271	9.052	32.066	18.854	37.194	10.597	80.969	18.036	6.57	4.388	5.191	14.862	12.438	5.117	5.136	14.287	6.692	4.0535	5.1504	7.5331	3.248	2.37	2.9201	2.8412	16.274		0.356001	14.2088
10.7227	16.746	14.078	33.938	5.313	12.185	37.707	19.214	36.226	11.257	79.925	16.989	6.263	4.467	4.25	13.093	12.117	6.175	5.688	15.571	6.751	3.896	3.7683	6.8427	3.567	1.787	1.9914	3.7694	13.848		0.36	14.1937
10.8419	16.097	12.451	38.428	4.513	13.759	36.567	21.675	40.588	10.397	74.868	14.276	8.222	4.832	4.558	10.546	14.41	5.085	7.172	15.101	7.689	3.6888	4.4984	7.0145	3.104	2.406	3.424	3.4339	15.448		0.364002	14.4376
10.961	14.277	12.718	37.583	4.901	13.893	33.253	24.074	40.13	11.73	82.789	14.464	7.876	4.895	3.7	13.677	15.29	4.206	6.32	14.522	7.719	3.7194	5.4964	9.3295	2.502	3.023	2.9671	2.558	13.92		0.368	14.6976
11.0801	14.316	11.29	37.693	6.21	16.412	31.339	24.054	45.171	14.532	82.417	16.715	8.296	6.127	5.623	13.259	18.339	5.519	5.179	15.555	8.636	4.4452	5.0335	9.7289	2.88	3.022	2.2947	3.0371	17.586		0.371999	15.5253
11.1993	13.428	11.887	38.373	5.574	14.579	33.137	20.56	48.102	14.936	76.507	16.089	9.653	4.981	5.317	13.207	20.49	4.935	6.028	14.61	9.992	4.8872	5.2142	9.9789	3.445	2.163	3.4291	3.5946	17.646		0.376001	15.4551
11.3184	14.269	9.727	32.97	6.699	14.276	30.36	18.693	54.381	16.09	67.959	17.66	8.2	4.58	3.673	15.674	23.764	3.732	6.28	17.623	11.016	3.9453	4.9956	10.6342	3.234	3.017	3.7167	3.8675	17.875		0.38	15.3183
11.4376	13.1	8.855	29.484	6.109	14.362	36.219	16.975	48.723	16.863	60.263	16.621	7.464	5.167	3.521	17.322	32.551	5.557	4.747	18.021	11.294	3.8346	6.4241	9.5322	3.007	3.009	3.0276	4.1168	16.772		0.384002	15.105
11.5567	12.285	10.581	31.076	7.189	12.717	34.685	17.685	48.57	16.939	45.64	19.354	10.066	4.866	5.545	16.839	36.65	4.587	4.122	17.477	12.927	4.1491	6.1868	10.1786	2.299	2.892	2.2682	3.5439	16.934		0.388	14.9376
11.6758	16.154	10.124	31.566	6.21	18.901	34.996	18.14	48.148	19.879	41.499	16.665	8.586	4.97	4.087	16.38	39.344	6.684	5.273	15.997	10.804	5.0327	5.353	10.0407	2.63	2.382	3.1255	4.8517	18.057		0.391999	15.21
11.795	14.805	9.962	33.07	6.931	19.323	34.681	18.352	45.814	20.603	41.279	17.546	9.005	5.693	4.141	17.555	43.301	5.612	4.553	18.653	11.603	4.9272	5.3711	10.6124	2.444	3.065	2.8215	3.7123	20.232		0.396001	15.5596
11.9141	13.805	8.468	33.026	6.803	18.193	35.889	22.242	45.87	21.374	39.54	21.255	9.081	5.607	5.061	13.997	47.943	5.122	4.35	17.666	13.023	5.989	5.4718	10.3831	2.913	2.652	3.9166	3.2726	17.45		0.399999	15.7273
12.0333	12.484	8.225	34.861	8.174	26.034	32.582	22.597	45.065	17.639	36.429	20.553	9.74	4.818	4.701	14.792	49.04	4.735	4.506	17.11	12.86	4.8553	6.7898	11.0051	3.512	1.908	3.5651	3.9981	16.619		0.404001	15.6856
12.1524	12.138	8.299	35.067	7.475	27.262	31.108	24.92	47.596	18.895	35.977	21.485	8.924	5.981	5.067	13.622	59.691	4.394	4.381	20.565	13.382	6.2207	6.5873	13.5638	2.553	2.812	2.7885	4.1506	16.359		0.408	16.4737
12.2716	10.268	9.375	35.168	7.169	28.164	35.273	22.412	44.986	19.673	38.069	19.904	9.82	7.02	6.147	11.907	56.884	5.232	5.331	20.734	15.182	6.6443	6.8694	10.5428	3.005	2.473	3.6017	5.8581	15.566		0.412002	16.5457
12.3907	11.672	10.096	37.13	8.236	25.442	27.556	21.8	56.417	22.091	37.518	23.153	10.229	5.331	5.621	12.014	62.384	4.66	5.924	21.58	15.777	5.317	8.9671	13.0623	3.704	2.439	3.6223	4.4704	15.835		0.416001	17.216
12.5098	9.671	9.535	31.956	8.687	21.875	23.021	20.806	52.109	23.721	41.141	20.479	9.149	6.353	4.727	9.797	63.693	6.86	5.329	19.285	15.731	6.208	8.1135	12.7122	2.743	2.984	3.993	5.2369	16.556		0.419999	16.5168
12.629	8.222	9.854	30.359	9.333	22.388	19.801	18.941	45.02	22.965	41.403	23.439	12.716	6.877	6.498	8.297	62.977	5.967	4.841	24.846	15.945	5.4164	7.0336	13.8089	3.149	3.254	3.6063	4.5103	16.261		0.424001	16.3474
12.7481	7.672	9.372	32.109	10.534	19.301	16.025	19.506	44.475	24.126	42.092	21.326	11.174	7.089	5.873	8.946	62.629	5.446	5.425	21.903	16.31	5.2995	7.6723	13.2131	3.406	2.237	2.9901	4.2996	16.319		0.428	15.9561
12.8673	7.876	7.845	32.908	11.356	18.429	17.346	18.629	45.662	25.599	37.87	21.832	11.168	7.533	6.957	10.876	64.685	5.665	4.581	20.385	17.468	4.9843	8.5121	11.8008	3.431	2.617	3.1603	5.5245	12.638		0.432002	15.9764
12.9864	8.142	9.104	34.96	11.489	15.569	18.646	18.091	38.391	24.127	34.287	22.15	13.654	8.912	5.767	10.925	60.688	6.272	5.164	24.017	20.725	5.0028	8.9799	12.6591	3.368	3.029	2.2168	5.767	14.434		0.436	15.9477
13.1055	6.63	9.003	40.277	11.8	19.898	17.378	15.282	42.941	22.213	30.49	22.001	16.096	11.68	7.489	10.255	49.555	5.752	5.943	20.517	21.624	3.9729	9.3234	10.9642	3.048	2.994	3.542	5.6703	17.419		0.439999	15.8485
13.2247	7.186	9.287	38.47	9.973	18.209	18.394	16.539	41.387	22.474	30.008	24.906	14.167	11.656	6.902	9.058	45.42	5.16	5.833	24.039	21.167	4.955	8.7627	11.2795	3.228	3.368	3.9375	4.4361	16.708		0.444001	15.6039
13.3438	6.387	6.922	35.658	9.899	17.545	19.895	16.885	39.536	21.14	26.977	24.254	16.019	13.628	9.735	8.952	53.379	5.917	6.608	21.673	21.286	4.8347	10.4971	10.498	3.907	2.26	4.3199	4.8524	17.52		0.448	15.7494
13.463	5.787	8.775	34.064	10.12	19.082	21.077	16.151	40.395	17.281	24.073	26.588	16.682	16.259	9.169	8.738	48.356	5.816	5.756	21.452	19.944	5.3378	9.6144	12.57	3.729	2.844	3.4078	4.618	16.118		0.452001	15.493
13.5821	4.712	7.086	30.91	11.572	19.033	18.968	13.212	40.011	19.638	28.504	23.552	19.014	17.112	8.199	8.501	51.841	6.001	4.556	17.932	19.284	5.7424	9.7772	12.1547	2.449	2.96	3.4986	4.2904	16.19		0.456	15.2393
13.7012	4.046	6.737	30.067	9.811	17.313	19.023	13.986	34.454	21.816	31.974	25.285	20.682	15.493	9.492	7.87	54.387	5.372	6.412	18.43	20.27	5.487	10.2956	12.3931	2.693	2.756	3.5263	4.5374	14.9		0.459999	15.3396
13.8204	4.664	8.001	27.576	9.123	15.703	18.804	15.349	32.097	22.334	31.324	26.384	20.993	18.566	8.924	7.923	52.848	5.921	5.098	17.012	21.639	5.5622	11.9303	12.3137	4.088	4.394	4.804	5.1477	15.846		0.464001	15.5132
13.9395	4.515	6.773	27.152	8.64	15.147	16.594	16.103	31.471	22.706	28.866	28.115	20.418	19.655	8.544	7.038	56.075	5.562	5.794	14.412	20.819	7.2175	11.4416	14.8713	3.799	4.033	4.3735	5.0262	15.376		0.467999	15.3763
14.0587	5.166	6.907	29.024	8.888	14.624	17.757	16.14	28.773	20.864	28.747	27.2	27.36	22.758	9.47	6.08	55.688	7.066	5.181	12.784	19.934	7.0514	11.6589	12.6073	3.711	3.439	4.3976	5.146	13.411		0.472001	15.4226
14.1778	5.63	6.931	29.412	8.395	13.147	15.873	15.559	31.848	25.222	26.43	24.156	30.742	23.933	8.513	7.785	46.035	5.229	5.015	9.86	20.863	7.7466	9.2814	13.2797	2.437	3.185	4.2515	5.54	15.798		0.476	15.0749
14.297	4.854	6.359	28.629	8.744	13.419	20.047	14.785	35.643	28.433	26.018	26.727	39.599	25.585	8.399	6.546	39.334	6.071	5.79	11.755	21.122	7.7592	10.452	14.3478	3.595	3.638	3.7088	4.3345	14.051		0.480002	15.7052
14.4161	6.901	6.357	30.594	8.304	13.432	20.728	15.196	34.347	28.145	26.556	24.605	44.497	27.331	7.99	6.031	34.767	6.774	4.888	9.985	18.15	7.6242	9.1783	14.9289	4.152	2.827	2.5289	6.4332	15.646		0.484	15.6749
14.5352	6.043	6.937	27.117	9.033	11.454	21.038	12.083	40.212	30.687	25.392	26.623	44.37	27.132	9.36	8.455	34.493	6.72	5.925	8.511	21.385	9.3728	9.329	13.7128	4.009	2.439	3.8162	5.0132	17.201		0.487999	15.9951
14.6544	3.493	6.253	30.651	7.662	12.211	25.234	15.024	35.89	32.038	27.451	24.215	43.456	27.416	9.815	6.497	31.725	6.833	5.185	8.028	18.14	9.5277	10.6141	15.46	4.123	2.702	3.876	4.4499	14.523		0.492001	15.8033
14.7735	3.535	5.608	28.989	6.125	12.193	25.037	11.036	37.633	30.859	26.087	22.871	43.23	25.227	10.014	6.598	30.388	7.567	6.192	8.896	16.569	9.3131	10.1492	14.6989	3.151	3.144	3.8305	5.5909	16.601		0.496	15.3976
14.8927	4.171	5.965	32.184	7.909	13.502	22.565	11.25	34.114	30.6	26.081	24.281	38.129	29.085	9.75	6.806	25.295	6.709	5.001	8.172	15.636	10.5101	10.5658	16.2924	3	3.726	3.4198	4.5128	17.135		0.500002	15.2274
15.0118	4.03	5.112	30.031	6.866	13.423	17.934	8.518	30.615	30.018	22.155	27.31	33.522	29.385	9.447	6.896	25.734	6.831	5.209	7.052	15.298	10.7124	10.9119	15.9089	3.555	3.396	4.115	4.895	16.185		0.504	14.4666
15.1309	4.205	6.167	29.662	5.922	11.1	14.622	10.568	30.294	28.124	24.054	27.685	27.552	27.961	7.955	7.837	25.992	6.821	4.094	8.044	14.717	10.5217	10.7164	18.2825	3.526	3.5	3.586	5.3275	14.142		0.507999	14.0349
15.2501	5.317	5.478	31.485	6.604	11.238	12.975	10.548	30.706	30.888	23.638	30.025	22.913	24.061	9.061	7.93	26.515	7.042	4.485	8.591	14.805	11.407	8.3438	16.1064	4.461	3.801	3.7626	4.1313	13.495		0.512001	13.9219
15.3692	5.169	4.698	32.221	7.189	12.865	12.618	10.843	28.747	32.592	23.856	31.156	20.722	22.81	9.419	6.948	23.749	7.831	3.879	8.624	16.17	11.9939	11.2313	14.909	2.984	3.929	4.7942	4.9204	14.362		0.516	13.9725
15.4884	5.512	6.013	30.942	5.253	13.133	11.293	13.084	28.358	33.521	23.872	28.792	17.528	19.605	8.482	6.077	22.843	7.211	4.865	7.228	16.048	12.5124	8.5175	12.9073	3.179	3.787	3.5078	4.8012	16.212		0.520001	13.3959
15.6075	4.059	5.014	34.635	6.152	12.841	13.179	13.271	28.531	36.272	21.502	30.916	19.852	16.407	9.653	6.882	24.458	7.922	3.647	6.108	16.677	12.1766	8.7619	14.0483	3.399	3.384	3.6529	5.3783	14.338		0.524	13.6828
15.7266	4.28	4.654	33.76	4.734	15.931	13.183	12.1	25.81	43.325	21.955	26.204	20.769	15.216	7.847	6.903	22.64	7.489	3.794	6.672	19.263	14.0319	9.943	14.6016	3.502	3.314	3.4664	5.0437	14.54		0.527999	13.749
15.8458	3.478	4.658	30.079	4.782	15.719	11.395	12.688	22.845	43.685	21.259	28.638	26.423	14.502	9.001	7.857	21.802	8.656	4.89	6.912	17.953	17.1987	9.7081	12.5292	3.479	3.442	3.449	5.5553	13.741		0.532001	13.7973
15.9649	3.742	5.095	29.683	5.102	12.914	12.01	11.664	19.279	41.1	25.909	24.631	28.9	16.12	9.176	6.807	23.136	7.934	4.312	5.31	15.775	14.8284	9.4367	15.5174	3.232	3.01	3.1308	5.7936	15.915		0.535999	13.5522
16.0841	5.319	4.887	32.007	5.12	12.82	11.156	10.299	17.221	41.231	24.804	25.377	32.485	17.061	8.283	7.902	23.047	5.637	5.727	6.719	18.496	14.5797	10.9341	11.8919	3.623	2.735	3.7878	5.4528	15.26		0.540001	13.7094
16.2032	4.164	5.369	27.024	6.838	12.896	8.538	12.447	16.165	46.245	22.565	27.942	31.449	18.077	8.237	6.711	23.698	6.203	5.199	6.217	17.993	16.5958	12.4785	11.4877	4.189	3.354	4.3815	5.623	15.174		0.544	13.8307
16.3224	3.7	5.963	32.16	5.529	10.281	9.847	15.343	14.64	49.453	22.523	26.281	32.75	18.057	7.304	7.253	23.367	5.856	4.756	4.644	16.904	15.7001	12.1091	13.5079	3.609	3.491	3.1675	4.4974	17.126		0.548002	13.9221
16.4415	4.56	4.616	25.836	6.119	10.299	7.899	18.951	15.868	47.655	23.497	29.387	31.632	16.151	8.214	8.475	24.348	6.77	3.773	6.133	14.698	19.2122	12.2522	9.5432	3.435	3.179	4.0909	4.5391	16.927		0.552	13.8593
16.5606	4.388	4.177	28.899	5.179	9.606	9.296	17.063	14.194	47.402	23.007	28.032	32.182	12.678	8.551	8.778	24.412	6.962	5.494	5.122	16.376	17.7316	11.0256	12.0459	4.155	3.893	3.6773	3.6406	15.458		0.555999	13.6937
16.6798	4.627	4.27	24.281	6.434	9.395	9.065	18.012	14.995	47.208	24.175	25.921	31.008	12.47	7.177	8.406	23.352	6.922	4.945	3.912	14.87	17.4412	11.7821	9.7869	3.682	3.939	3.1358	3.9203	15.183		0.560001	13.2255
16.7989	4.05	5.356	20.363	5.692	7.665	9.642	15.627	12.256	46.563	23.663	29.042	31.294	12.666	6.943	8.379	24.42	8.067	4.752	5.775	13.487	18.0616	13.0805	10.7067	4.137	3.437	2.7273	5.093	14.843		0.564	13.1353
16.9181	4.118	4.24	20.007	5.613	8.088	9.336	11.081	14.643	52.446	23.54	25.672	29.818	12.681	5.594	7.293	28.007	5.915	5.509	5.47	13.036	18.3271	13.5321	10.7528	2.662	3.273	4.0794	4.7548	16.015		0.568002	13.0537
17.0372	4.286	5.448	18.365	5.393	8.123	9.831	12.37	13.488	58.915	21.659	27.7	30.921	12.566	6.736	7.032	29.535	6.863	5.037	6.502	14.056	17.0409	14.1951	8.3752	2.055	2.928	3.8267	4.4713	17.138		0.572	13.3877
17.1563	4.164	5.007	15.665	5.619	8.685	10.141	9.868	11.779	60.174	20.319	25.062	27.134	14.446	5.159	8.604	33.66	7.159	4.407	5.028	13.589	14.2734	13.6934	9.5702	2.109	4.364	3.6249	5.5952	14.707		0.575999	12.9859
17.2755	3.724	4.807	16.657	5.316	8.368	10.041	9.519	12.362	65.826	21.995	23.493	22.988	13.924	7.663	7.952	33.615	6.68	5.601	4.677	11.713	16.8668	14.9598	9.3906	2.791	4.845	5.0893	4.7681	14.406		0.580001	13.2156
17.3946	3.278	5.582	16.289	5.512	7.906	8.995	9.297	12.786	67.345	18.868	26.269	24.703	12.082	7.411	8.331	37.801	6.452	5.11	5.517	12.538	16.0153	14.6553	9.8345	3.384	3.276	3.3794	4.9436	14.967		0.583999	13.3045
17.5138	3.562	4.351	20.128	4.961	7.905	9.546	9.33	12.837	71.247	19.133	24.445	22.884	11.981	5.754	8.124	38.102	6.919	4.372	4.512	11.175	19.4016	16.3935	9.5777	2.938	4.666	3.9056	4.6131	13.925		0.588001	13.4532
17.6329	2.855	4.095	17.549	3.387	7.117	9.12	9.745	12.299	75.169	19.034	25.292	20.15	13.575	7.029	6.841	37.7	8.566	5.432	5.327	12.092	19.7705	15.1719	11.1693	2.867	3.719	4.0016	5.7235	13.146		0.592	13.498
17.7521	3.651	5.191	15.204	5.011	6.166	9.111	9.023	10.612	82.444	18.078	25.448	19.507	12.677	5.193	6.381	36.853	6.476	4.386	5.3	12.899	20.0088	18.3899	9.6965	3.321	3.066	4.0941	3.4469	13.158		0.596002	13.3854
17.8712	4.274	5.344	17.838	5.407	6.909	7.861	11.606	11.261	74.601	18.096	25.086	17.86	13.912	6.038	7.874	38.903	6.602	4.338	5.429	13.272	21.7604	15.6299	9.6448	3.491	3.152	4.3065	5.953	14.165		0.600001	13.5933
17.9903	3.992	5.71	17.544	3.405	5.674	8.226	9.401	13.108	75.228	18.941	19.361	18.342	14.56	5.286	7.368	35.181	5.615	3.828	5.402	12.846	24.8625	14.612	9.1065	3.222	3.665	3.7867	5.8094	12.469		0.603999	13.0911
18.1095	3.431	4.002	18.374	4.271	7.233	9.046	9.074	12.561	75.396	19.333	22.745	18.194	14.926	6.306	7.069	28.636	7.374	4.272	5.413	12.903	23.4677	13.8877	10.0465	3.721	3.501	3.4386	3.9747	12.235		0.608001	13.0297
18.2286	3.616	4.803	18.691	4.727	7.321	8.405	8.595	11.104	79.006	18.603	20.284	18.925	16.575	6.14	8.109	24.698	7.945	3.789	5.656	11.821	22.0682	14.5798	10.1918	3.955	2.85	3.2703	4.1102	11.884		0.612	12.9187
18.3478	3.437	4.814	19.749	4.433	6.635	8.096	7.993	12.996	77.171	15.702	22.019	19.896	14.183	6.166	8.352	23.821	5.517	4.949	5.465	12.71	25.1947	15.1221	9.7005	4.118	2.806	3.255	4.3961	9.883		0.616002	12.8064
18.4669	3.728	4.309	19.823	3.44	3.962	6.566	8.509	13.195	82.889	14.512	19.704	23.102	16.586	6.612	8.549	25.611	6.881	4.812	6.153	12.711	26.88	13.5474	10.0191	2.406	2.855	3.5047	4.6056	9.965		0.62	13.0513
18.586	3.279	4.54	22.375	3.989	5.916	8.354	8.714	10.49	78.019	14.394	18.72	25.02	17.02	5.949	8.587	22.449	5.277	4.214	4.979	12.14	25.4434	12.4408	8.5717	3.242	3.343	3.21	3.9838	9.111		0.623999	12.6347
18.7052	3.732	4.997	22.359	4.381	6.488	8.588	7.331	8.467	74.417	16.165	19.774	26.147	18.865	7.749	7.371	25.611	6.995	5.21	5.447	11.438	25.2004	11.6982	11.5622	3.784	2.911	3.9935	6.0202	7.795		0.628001	13.0177
18.8243	3.476	3.737	20.97	4.078	5.187	7.354	7.793	10.382	71.934	15.291	19.785	27.13	17.564	6.863	9.191	26.1	7.045	4.365	4.596	11.827	25.5245	13.7233	10.587	3.19	2.215	3.6525	5.3722	9.737		0.632	12.8096
18.9435	3.387	5.092	25.008	3.91	5.975	7.087	8.109	8.981	71.689	14.092	17.337	29.167	14.904	6.398	10.823	24.111	5.35	4.723	4.463	11.329	23.3817	13.4827	10.0397	3.755	4.102	3.0747	4.1631	9.408		0.636002	12.6194
19.0626	3.828	5.421	20.476	4.078	4.381	8.497	6.496	8.869	70.241	14.904	19.789	30.343	14.642	7.529	11.188	23.711	5.3	4.925	4.829	10.417	23.6817	11.6109	10.4954	3.303	3.648	3.4407	4.4433	8.073		0.64	12.4486
19.1817	2.594	5.552	17.946	4.019	4.47	7.118	6.74	8.892	67.39	14.338	19.685	27.012	18.009	8.917	10.423	29.424	5.726	4.243	4.692	10.817	22.8916	13.0218	9.6443	3.49	2.957	3.3882	5.8972	8.838		0.643999	12.4334
19.3009	3.634	4.883	16.924	3.458	5.194	5.543	7.217	9.9	66.08	15.856	21.455	27.361	15.562	9.642	9.783	27.676	5.353	5.519	4.769	10.489	25.072	11.3872	8.9568	3.638	3.668	2.8259	4.8614	7.398		0.648001	12.2895
19.42	2.881	5.076	15.945	4.103	4.314	8.912	7.419	9.619	65.413	17.409	20.323	27.956	14.032	8.525	12.993	28.137	5.78	5.375	4.983	9.931	19.9779	11.7075	10.2431	3.472	2.569	2.4627	3.9433	7.383		0.651999	12.1744
19.5392	2.839	4.652	17.201	4.833	5.169	7.747	6.608	9.698	65.923	17.663	20.012	23.138	14.543	10.452	12.312	29.134	5.569	4.111	5.128	9.864	19.7246	10.6684	10.0971	3.647	2.783	2.5905	4.2249	7.276		0.656001	12.0574
19.6583	3.476	5.537	14.657	3.33	4.103	6.877	5.467	8.702	63.922	18.175	23.29	24.774	17.15	10.294	12.458	26.874	5.432	4.892	5.052	9.119	19.382	12.0314	9.5151	3.763	3.07	2.9252	4.7609	6.767		0.66	11.9927
19.7775	2.745	5.538	14.912	4.642	3.864	5.397	6.62	7.733	65.757	16.373	24.179	26.96	14.435	10.633	14.221	23.346	5.192	5.519	4.779	8.361	23.5352	10.5475	10.6483	3.967	2.469	3.5456	4.381	9.378		0.664002	12.1313
19.8966	3.349	5.097	12.395	4.626	5.163	7.096	6.7	7.696	71.034	18.216	21.77	26.361	15.491	11.494	13.709	19.824	6.176	5.286	5.926	7.452	18.3861	12.0452	10.7826	3.79	2.935	3.5009	2.8556	8.325		0.668001	12.0529
20.0157	3.223	5.664	13.118	4.862	5.365	5.871	4.748	7.799	68.864	17.209	21.072	31.816	16.011	11.691	13.99	23.458	5.852	4.05	8.042	8.949	20.046	12.0577	8.9334	4.368	4.105	2.5468	3.6981	9.233		0.671999	12.3801
20.1349	4.258	6.32	13.689	3.323	3.945	5.083	5.317	7.664	68.735	18.591	20.659	32.088	16.933	11.198	14.625	25.549	6.845	5.094	4.854	9.123	18.4485	10.4241	9.1931	3.332	3.242	3.9943	4.2781	8.649		0.676001	12.3376
20.254	2.658	5.972	12.401	4.544	5.013	5.378	4.038	8.194	67.272	20.318	17.658	31.572	16.54	15.666	13.303	25.764	5.966	5.294	5.764	7.915	18.3199	12.0683	9.5609	3.62	2.789	3.0499	3.599	8.285		0.68	12.2329
20.3732	3.449	6.57	13.933	3.466	4.09	5.79	4.377	6.568	62.324	21.466	19.487	27.462	16.073	15.151	14.135	23.573	5.657	6.523	4.787	6.818	19.507	14.2513	8.8382	3.536	3.222	3.0807	3.189	8.273		0.684002	11.9856
20.4923	3.644	6.141	12.482	3.584	4.258	4.308	4.853	5.43	68.198	22.639	17.995	27.525	13.751	15.759	14.411	24.25	7.36	6.647	5.979	7.185	19.4528	12.8253	8.3588	3.834	3.297	3.1519	3.0882	6.515		0.688	12.0329
20.6114	3.511	6.798	11.214	4.558	3.567	4.492	4.537	6.416	62.299	23.59	21.383	23.568	13.712	15.616	12.909	23.755	6.717	5.481	4.613	7.553	18.8838	12.02	10.2599	3.681	2.695	2.5286	4.3463	7.761		0.691999	11.7309
20.7306	3.499	6.109	8.153	4.028	3.375	3.631	5.191	6.961	58.186	28.441	21.84	22.046	12.255	16.947	12.257	23.071	6.913	6.511	6.102	7.272	20.188	12.9623	9.4437	4.434	2.483	2.563	4.6854	7.716		0.696001	11.688
20.8497	3.034	5.296	8.146	3.449	2.791	5.485	5.163	5.708	58.774	29.797	21.21	20.626	11.154	16.915	14.832	25.931	6.201	7.354	4.931	7.194	17.8335	14.4015	9.0895	3.64	3.13	3.4085	3.5456	7.551		0.7	11.6639
20.9689	3.192	6.924	9.234	2.727	2.887	5.458	4.203	5.849	55.232	29.503	19.8	25.122	11.224	17.739	15.307	23.16	6.897	5.937	4.675	7.838	14.0482	14.7273	9.0853	4.5	2.611	3.0803	3.2947	7.329		0.704002	11.4851
21.088	3.007	8.054	8.251	2.443	3.825	5.228	4.239	6.32	58.297	30.439	22.344	21.289	12.417	17.393	16.475	25.325	7.234	5.488	5.628	7.845	16.7639	15.1407	8.7122	3.606	2.849	3.2482	2.8395	7.982		0.708	11.8815
21.2071	3.196	7.779	8.246	2.868	2.56	4.178	4.788	4.765	59.628	30.44	22.44	20.574	11.504	16.088	18.615	25.31	6.185	6.108	5.986	7.447	16.0239	14.0782	8.7615	2.683	3.766	3.1275	2.7937	8.984		0.711999	11.7472
21.3263	3.487	7.983	7.425	2.545	3.356	3.999	4.886	7.316	68.586	28.758	26.93	19.967	10.346	17.453	17.866	22.999	6.154	5.629	5.543	7.97	14.8597	14.6291	9.5944	3.65	2.32	3.168	4.1133	8.353		0.716001	12.1388
21.4454	4.576	8.36	5.035	2.603	4.202	3.727	4.54	5.905	69.435	27.98	27.318	22.791	12.681	18.118	20.038	25.416	6.667	6.451	5.211	6.935	12.899	13.9533	9.2097	4.456	3.115	3.4533	3.4258	6.725		0.719999	12.3295
21.5646	3.931	10.341	5.091	3.332	3.891	3.904	5.934	5.856	72.859	26.519	27.306	19.625	11.877	18.384	22.608	25.319	7.613	6.89	3.616	8.15	16.5939	13.0597	9.8313	3.789	4.01	3.3031	3.7432	7.401		0.724001	12.6706
21.6837	4.147	10.817	4.589	2.682	3.497	3.754	5.148	4.578	63.276	30.409	27.352	20.976	13.607	17.168	20.775	26.812	6.111	7.414	4.23	7.356	15.3289	14.1996	10.598	3.418	3.204	3.7153	3.3345	8.13		0.728	12.3795
21.8029	3.907	9.923	5.533	2.603	3.46	2.885	5.125	4.513	57.596	28.913	26.984	21.707	17.751	19.855	21.766	25.797	5.947	6.954	5.135	7.913	14.4013	17.0294	10.2189	3.895	3.061	3.5511	3.7528	8.89		0.732002	12.4667
21.922	2.986	9.847	4.314	2.326	3.101	4.26	4.088	4.599	45.652	27.015	27.053	23.483	15.42	19.665	24.399	25.522	6.134	7.734	4.857	7.796	13.8626	18.4625	10.5122	3.994	2.582	2.8012	3.3569	6.775		0.736001	11.8785
22.0411	2.758	11.695	4.569	3.447	3.478	5.465	4.02	5.396	33.85	31.573	26.308	22.859	13.152	20.167	22.143	27.292	5.944	8.971	5.117	6.431	12.7314	12.7616	10.4629	3.446	2.794	3.6433	2.5583	7.546		0.739999	11.4492
22.1603	2.994	9.405	4.124	3.3	3.497	4.028	5.071	5.923	29.354	28.216	28.208	23.683	17.448	19.22	25.709	28.663	6.087	10.265	6.348	7.584	13.8374	14.7358	10.9264	3.124	3.496	3.3784	3.4836	7.947		0.744001	11.7877
22.2794	4.248	13.152	3.379	3.373	3.755	4.716	4.932	6.432	30.364	30.433	27.127	23.993	17.41	19.769	28.803	29.198	6.39	9.507	4.395	7.195	13.4453	15.8166	8.4115	3.889	3.395	2.7876	3.1619	7.288		0.748	12.0274
22.3986	3.898	12.215	5.005	3.042	3.818	4.931	4.191	5.389	26.834	32.669	27.066	22.148	16.429	18.645	31.976	24.143	7.295	11.552	4.323	8.908	12.9448	16.1517	10.3739	3.919	3.218	2.5661	3.3034	5.957		0.752002	11.8897
22.5177	4.412	12.09	4.541	2.728	3.431	3.7	3.306	5.053	27.793	31.293	30.296	20.176	17.579	18.795	37	25.744	7.712	11.777	6.735	8.785	12.9246	17.7036	11.8627	3.279	3.291	2.3527	2.8148	5.507		0.756	12.2386
22.6368	4.195	12.043	3.984	2.579	2.743	4.223	5.148	6.672	31.331	31.225	25.382	19.539	17.508	19.671	39.879	25.091	6.826	12.368	6.041	8.685	13.6675	17.8405	12.6506	3.301	2.976	3.5694	2.9556	5.179		0.759999	12.4026
22.756	3.651	11.682	4.162	2.395	3.536	4.188	3.782	6.025	27.348	35.356	28.596	23.473	17.222	18.892	40.136	26.287	7.189	11.55	5.414	7.898	15.7815	16.5696	12.1617	4.365	2.856	2.9319	2.2154	4.913		0.764001	12.5206
22.8751	4.228	11.663	3.167	2.399	3.411	4.44	3.632	5.364	27.471	37.27	30.666	23.869	18.305	22.397	41.789	24.703	8.848	14.243	5.59	7.984	15.4067	15.9237	14.9905	4.159	3.181	2.9063	2.9589	5.875		0.768	13.1014
22.9943	2.733	12.399	4.676	2.69	2.813	4.226	4.345	5.682	30.908	37.252	29.426	19.72	17.43	21.382	36.841	24.338	8.702	13.234	5.102	10.276	17.891	15.9554	13.3313	4.69	2.769	2.8985	3.0443	5.301		0.772002	12.8591
23.1134	3.646	13.619	3.51	3.207	3.579	4.13	3.809	6.054	31.675	39.699	29.836	22.457	17.764	21.422	38.419	27.334	8.761	12.553	6.445	8.369	13.8682	17.2915	14.8607	4.263	3.196	2.1908	3.559	5.213		0.776	13.2404
23.2325	4.182	13.878	4.383	2.751	2.854	3.223	3.687	5.812	27.619	46.433	32.047	21.835	19.68	26.225	41.076	24.748	11.506	14.856	5.319	6.987	16.6168	18.5923	15.825	4.558	2.728	2.1595	3.2996	4.662		0.779999	13.8408
23.3517	4.079	16.063	3.751	3.367	3.3	3.98	3.227	5.3	27.563	51.916	32.535	19.321	20.453	23.095	43.895	28.585	10.518	16.675	5.069	7.904	14.1003	17.6258	15.2798	4.681	3.863	3.2092	3.2933	5.602		0.784001	14.2232
23.4708	3.782	11.787	3.853	2.784	2.736	3.546	3.907	6.055	25.833	50.724	29.159	20.224	20.256	24.445	41.783	29.508	12.451	15.936	6.073	7.541	14.6937	19.0758	16.4519	3.628	3.654	2.6709	3.2923	5.332		0.787999	13.9708
23.59	3.468	12.037	4.766	2.579	2.771	3.83	4.134	4.165	26.695	53.993	28.823	22.05	21.326	25.951	45.234	30.28	12.309	16.737	6.406	8.642	16.6825	20.5723	16.3213	4.236	2.96	2.9039	3.4153	6.78		0.792001	14.6453
23.7091	4.156	11.027	4.171	2.415	2.267	4.335	3.503	5.799	26.369	59.743	25.578	24.553	18.443	28.145	44.044	34.867	15.45	20.35	6.331	9.132	18.3209	19.0743	17.3393	6.034	3.728	3.268	2.948	4.406		0.796	15.207
23.8283	4.136	13.306	3.681	3.104	2.483	3.286	4.149	5.859	23.595	56.359	24.8	24.951	18.455	29.145	43.715	37.402	16.843	21.548	6.944	8.905	16.9529	21.1166	18.1913	4.687	3.38	3.1736	3.2094	6.096		0.800002	15.3383
23.9474	3.657	13.681	3.928	2.263	2.899	2.997	4.394	5.491	23.46	58.422	28.99	22.529	20.992	31.722	44.968	37.74	19.634	25.234	7.285	9.249	20.6753	23.0089	19.1978	4.568	2.766	3.4284	3.206	4.503		0.804001	16.1032
24.0665	4.72	11.72	4.097	3.323	2.904	3.5	3.399	5.28	21.197	57.888	32.822	26.609	24.176	33.731	46.469	38.196	20.224	28.914	7.182	9.048	19.4908	25.0609	18.713	6.568	2.164	3.8526	2.874	5.062		0.807999	16.7566
24.1857	5.352	13.524	3.659	2.232	3.619	2.614	4.941	4.741	21.904	58.3	30.503	28.037	23.098	35.522	44.717	38.722	21.872	31.71	7.795	8.869	19.1765	22.2853	17.6758	6.478	2.935	3.7242	2.4874	4.624		0.812001	16.8256
24.3048	5.598	11.412	4.1	2.814	3.495	3.183	3.575	4.394	20.838	60.339	34.588	28.4	22.848	44.247	43.512	34.902	27.049	34.71	10.975	12.31	18.2107	23.4274	18.937	6.687	3.555	2.4744	3.0012	4.952		0.816	17.6619
24.424	5.545	13.593	5.027	2.715	2.77	2.692	4.396	5.19	21.555	60.173	38.64	33.146	22.293	46.565	44.619	35.037	32.786	34.463	8.732	11.856	20.5987	24.5519	18.0461	6.392	3.244	2.9532	3.439	6.227		0.820002	18.473
24.5431	4.775	13.592	4.655	2.537	2.273	3.469	3.729	4.365	21.089	60.183	37.068	35.37	25.343	43.587	45.499	35.809	33.137	34.163	9.373	15.178	21.8897	24.6975	20.6375	7.683	2.616	3.0815	3.844	5.448		0.824	18.7533
24.6622	5.933	10.834	5.56	2.378	3.603	3.316	5.066	3.491	19.562	57.542	34.483	35.87	24.564	44.487	44.45	41.529	43.215	27.908	11.609	16.453	21.8707	22.7423	17.474	10.115	3.706	2.7968	3.7	5.148		0.827999	18.9074
24.7814	6.828	11.69	5.106	2.229	2.583	3.665	4.308	3.788	22.756	50.037	38.436	42.688	24.46	48.201	42.812	48.493	50.378	20.513	12.418	15.258	22.5945	23.1436	18.9839	10.794	3.518	3.1293	3.4894	7.373		0.832001	19.6312
24.9005	6.244	10.204	5.144	2.99	2.611	3.311	4.511	3.742	21.585	48.326	35.516	43.734	23.025	52.023	44.326	52.364	54.093	13.843	15.974	15.796	24.9693	26.2337	16.7909	11.621	3.835	3.7811	2.3883	6.75		0.836	19.8475
25.0197	6.863	10.968	5.259	2.484	2.809	3.167	5.294	3.608	19.433	42.983	35.184	40.32	25.134	52.258	37.873	55.207	60.573	7.148	16.995	18.414	27.6174	25.5489	16.0181	12.661	3.653	3.272	3.7669	6.115		0.840002	19.6652
25.1388	8.572	9.874	6.435	2.737	2.543	3.57	5.418	5.123	20.218	40.882	37.5	38.684	24.617	50.461	30.959	52.521	67.625	7.214	17.85	22.512	25.2465	25.1068	13.6379	13.847	3.975	2.7131	3.6907	7.323		0.844	19.6734
25.258	8.305	10.549	5.109	3.02	3.018	2.903	5.289	5.395	18.921	37.849	35.34	36.818	27.221	51.639	29.366	54.071	68.267	5.355	17.36	25.88	24.6184	23.1567	13.6498	15.777	4.578	3.9139	3.608	6.891		0.848002	19.5667
25.3771	9.637	9.646	5.394	2.525	2.024	3.459	5.047	5.711	17.445	29.395	30.148	34.383	26.258	52.582	26.718	54.566	62.742	6.133	20.798	28.624	26.3218	23.1439	12.4885	17.992	4.51	4.233	4.0025	8.016		0.852001	19.0694
25.4962	10.149	9.811	4.869	3.375	2.704	3.093	6.314	5.249	17.371	29.187	23.73	34.29	25.41	50.261	17.44	64.077	49.917	3.282	19.472	28.632	29.9487	19.9101	10.1918	17.368	4.579	5.0436	4.0488	8.78		0.855999	18.1608
25.6154	10.618	9.311	4.123	2.903	2.838	2.677	5.324	5.888	17.441	26.471	22.643	39.541	29.445	47.654	14.374	61.682	30.721	4.12	25.467	29.14	27.5047	18.7732	7.8904	16.14	4.664	5.0555	3.6756	10.483		0.860001	17.3774
25.7345	11.027	7.352	5.15	2.555	2.816	4.574	5.035	5.096	15.992	16.385	23.599	39.656	30.864	34.265	10.957	65.971	20.657	3.086	26.066	29.321	28.5101	17.4944	4.9049	19.702	5.968	3.3918	4.6195	12.766		0.864	16.3493
25.8537	12.048	8.933	4.117	2.986	3.075	3.968	8.624	4.69	16.143	14.813	17.935	43.943	29.368	27.892	11.006	65.734	13.144	4.123	33.997	29.482	32.2845	14.5559	4.5523	19.853	5.773	4.5404	5.3031	13.631		0.868002	16.3041
25.9728	12.766	7.706	4.743	4.108	2.562	3.788	7.507	6.457	14.756	13.41	15.925	48.909	32.606	20.362	8.677	66.078	8.3	1.995	40.737	29.744	33.1219	10.6111	5.9387	22.752	5.26	5.1465	7.0707	15.296		0.872001	16.2976
26.0919	12.878	7.474	4.455	3.632	3.499	4.109	6.435	5.362	16.042	10.882	11.677	54.234	32.868	14.304	5.856	56.479	6.038	2.058	42.519	33.787	30.981	10.8283	4.2602	22.658	6.511	5.4284	8.1267	20.347		0.875999	15.8475
26.2111	14.49	7.559	4.961	3.632	3.182	3.182	6.942	5.989	16.56	10.16	11.503	56.917	35.016	10.483	4.645	45.275	5.164	1.273	45.941	29.875	30.333	7.0856	5.265	24.438	6.766	5.3956	7.7495	26.143		0.880001	15.5687
26.3302	17.213	8.387	6.062	3.859	3.042	2.891	8.078	6.412	18.039	7.721	7.095	50.341	34.798	9.997	5.612	31.713	5.706	1.518	43.236	29.126	31.1826	7.1569	3.9194	29.623	6.778	7.9033	8.0099	29.581		0.884	15.1786
26.4494	18.303	10.228	7.316	4.336	3.511	3.587	8.756	6.174	18.278	7.402	5.814	44.347	38.518	5.956	4.541	21.487	3.819	1.773	39.416	26.157	26.789	5.9491	4.2007	30.268	8.774	7.7689	9.9232	34.143		0.888002	14.5548
26.5685	20.408	9.223	4.99	3.926	3.357	3.807	7.631	8.22	19.053	6.207	3.379	29.118	36.614	5.002	4.196	16.015	2.275	1.083	31.388	22.703	25.1267	5.2395	4.7599	30.77	9.872	9.1731	12.7951	39.868		0.892	13.4357
26.6876	19.971	11.967	6.001	3.816	3.254	4.054	9.933	10.17	19.67	5.596	3.48	22.056	29.221	4.253	3.909	12.199	2.839	1.341	22.139	19.97	21.8962	4.1465	3.9061	33.051	11.749	14.8144	14.117	38.287		0.895999	12.7788
26.8068	19.9	10.553	7.481	3.392	3.182	3.836	9.629	12.508	19.541	3.523	1.782	14.893	23.884	3.543	2.496	8.932	2.103	1.814	13.068	13.934	19.0068	4.2276	3.9227	30.22	15.109	16.231	19.4564	40.443		0.900001	11.7361
26.9259	19.951	10.885	6.926	4.002	3.59	4.444	10.657	12.513	18.02	3.362	2.023	14.218	21.264	3.652	2.495	6.474	1.831	0.972	10.393	10.063	14.3061	3.0513	3.7949	27.769	16.728	20.7998	20.3142	46.335		0.904	11.4583
27.0451	23.505	11.955	7.492	5.161	3.843	6.267	8.382	15.248	16.849	3.136	1.351	14.208	17.661	2.464	2.067	4.046	2.044	1.134	5.889	7.728	11.6857	3.5089	2.5532	21.386	18.645	24.5314	24.6792	43.781		0.908002	11.1143
27.1642	27.217	12.726	6.803	4.724	3.006	5.998	5.942	19.655	13.244	2.563	1.418	11.013	13.447	2.143	1.958	4.129	2.286	1.531	5.649	5.549	7.8514	2.878	3.3449	18.593	20.948	27.4102	29.2159	39.148		0.912	10.7282
27.2834	26.247	11.161	6.345	4.52	3.554	6.435	5.387	19.053	11.952	2.991	1.493	9.941	11.452	2.845	1.439	4.354	1.355	1.147	5.387	4.999	7.8974	2.8789	2.6876	19.928	29.338	29.0808	34.5078	39.069		0.916002	10.9802
27.4025	26.43	9.844	6.951	4.581	3.804	6.827	5.389	18.062	11.847	1.969	1.563	6.921	6.811	1.476	1.464	3.566	1.209	0.679	4.6	4.667	5.3736	2.8504	2.0535	17.59	32.695	23.5717	35.634	36.526		0.920001	10.1769
27.5216	21.76	7.63	5.483	3.729	4.244	7.298	4.7	17.012	7.826	3.017	1.364	4.537	6.208	1.215	0.825	3.026	1.203	0.748	3.69	3.971	5.7249	2.8176	1.0752	13.542	34.818	25.6906	38.0308	29.164		0.923999	9.29818
27.6408	24.074	7.639	4.229	3.578	4.435	8.314	3.468	18.03	7.15	1.838	1.068	5.422	4.691	2.125	0.841	2.858	1.582	0.343	2.494	3.713	4.3165	2.3882	1.9195	9.243	34.304	27.9868	38.5808	23.809		0.928001	8.94428
27.7599	25.662	6.045	4.793	3.925	4.422	8.196	3.172	14.29	6.661	1.764	0.863	4.158	4.32	1.337	0.831	2.738	1.104	0.413	2.355	3.154	3.8452	1.8924	1.7907	7.532	31.851	24.0131	36.0279	16.186		0.932	7.97648
27.8791	24.471	4.49	2.6	4.053	4.605	6.79	3.459	15.013	7.373	0.87	0.783	2.878	3	1.307	0.738	2.058	0.808	0.682	2.348	2.091	4.261	1.7878	1.6319	6.22	30.959	22.9442	34.1178	12.773		0.936002	7.32542
27.9982	25.181	3.921	2.498	4.652	5.135	6.677	3.128	12.755	6.308	1.468	1.077	2.091	3.41	1.109	1.053	1.684	1.048	0.764	2.046	3.124	3.3811	1.4117	1.0739	4.704	21.79	20.5299	29.2158	9.392		0.940001	6.45098
28.1173	19.113	3.432	3.387	4.205	5.77	5.999	2.768	11.429	4.432	0.944	1.06	2.373	2.735	0.999	1.191	2.278	1.153	0.435	2.365	1.55	2.4899	0.9614	1.3232	4.939	13.413	16.2066	19.9477	7.883		0.943999	5.17078
28.2365	16.473	3.157	2.469	3.756	5.522	5.416	1.794	10.49	4.389	1.219	0.719	1.861	2.298	0.984	0.762	2.322	1.171	0.369	1.452	1.568	2.5501	0.8562	1.3605	3.776	9.134	11.9618	16.0362	8.059		0.948001	4.35446
28.3556	16.354	1.866	2.003	3.697	5.731	4.806	2.18	8.614	4.152	1.668	0.604	1.911	1.944	1.088	0.835	1.951	1.676	0.581	1.488	1.613	2.0078	0.9294	1.812	3.452	6.628	10.362	11.9848	6.595		0.952	3.87618
28.4748	13.058	3.686	1.258	3.217	6.156	4.885	2.276	7.152	4.516	1.324	0.782	1.78	1.363	0.492	0.674	1.405	0.747	0.358	1.429	1.592	2.1056	1.2192	1.3785	2.965	4.868	7.2828	8.8547	6.415		0.956002	3.32996
28.5939	10.277	2.428	1.122	3.341	6.046	5.744	2.069	6.128	3.862	1.422	0.718	1.718	1.308	0.523	0.704	0.776	0.921	0.249	1.791	1.38	1.6105	0.6799	0.9079	3.198	4.029	6.6467	5.9787	4.831		0.96	2.87174
28.713	9.209	1.872	1.352	2.518	5.418	4.584	1.261	5.762	3.35	0.772	0.695	1.178	1.42	0.573	0.388	0.408	0.569	0.4	1.256	2.406	1.4154	1.237	1.6642	1.905	3.76	4.1071	5.7191	5.908		0.963999	2.53953
28.8322	6.086	1.896	2.289	2.954	5.368	3.691	1.458	4.33	2.063	0.952	0.878	0.542	1.378	0.793	0.582	0.825	0.17	0.599	1.409	2.014	1.7866	1.169	1.4475	2.374	3.361	4.3264	4.7036	5.722		0.968001	2.3274
28.9513	6.517	1.606	2.517	2.724	4.045	2.935	1.211	3.858	2.918	1.088	1.1	1.029	1.623	0.65	0.169	0.986	0.535	0.303	1.202	2.186	1.553	1.2401	1.2576	2.484	3.987	3.7672	4.1335	5.784		0.972	2.26459
29.0705	6.45	1.667	1.534	2.524	4.525	3.306	0.879	4.563	1.975	1.041	0.687	0.955	0.854	0.517	0.211	0.967	0.258	0.162	0.634	1.711	1.6971	1.3372	0.633	1.638	3.214	2.8639	4.7042	3.945		0.976002	1.98044
29.1896	4.639	1.188	1.159	1.787	3.972	1.662	1.105	4.126	2.493	0.627	0.49	0.595	0.639	0.311	0.252	1.013	0.518	0.478	1.533	1.305	1.8782	0.8219	0.4743	1.588	2.565	3.0229	3.0845	4.238		0.98	1.69874
29.3088	3.303	1.265	1.394	2.907	4.219	2.481	0.626	3.651	2.266	0.67	0.546	0.644	0.436	0.334	0.44	0.775	0.416	0.448	1.167	1.531	1.8721	0.5119	1.1754	1.364	2.801	2.1838	3.1021	3.584		0.984002	1.6469
29.4279	2.509	1.674	1.659	1.981	3.624	2.815	1.104	2.396	1.372	0.787	0.351	0.979	0.825	0.34	0.493	0.741	0.282	0.108	1.393	1.051	1.524	1.3729	1.2704	1.332	2.231	2.2568	2.8776	3.992		0.988001	1.54788
29.547	3.341	0.711	1.111	1.968	3.912	2.004	0.903	1.856	1.471	0.875	0.56	0.89	0.872	0.35	0.604	1.057	0.451	0.446	0.923	1.488	0.8981	1.1836	0.5881	1.99	2.174	2.0958	3.1927	2.833		0.991999	1.4553
29.6662	2.611	1.132	0.991	1.82	2.856	1.442	0.619	2.156	1.594	0.399	0.218	1.096	1.585	0.258	0.074	0.277	0.344	0.497	0.854	1.002	0.8243	0.7001	0.6125	1.079	1.666	2.2073	3.2863	2.747		0.996001	1.24813
29.7853	2.138	0.863	0.752	1.442	2.479	1.145	0.487	1.998	1.29	0.553	0.254	0.991	0.707	0.559	0.332	0.379	0.456	0.411	1.747	1.236	1.305	1.0317	1.1341	1.155	2.022	1.7323	2.6312	1.821		1	1.1804

## Sheet: Image11 (2)
X0	Y0	Y1	Y2	Y3	Y4	Y5	Y6	Y7	Y8	Y9	Y10	Y11	Y12	Y13	Y14	Y15	Y16	Y17	Y18	Y19	Y20	Y21	Y22	Y23	Y24	Y25	Y26	Y27	Y28	Y29	Y30	Y31	Y32	Y33	Y34	Y35	Y36		Ap-Ba	Avg int
0	18.912	18.253	22.871	58.569	54.459	60.097	54.037	40.723	28.657	21.769	19.662	20.647	47.8	73.842	77.128	70.967	52.397	58.856	69.482	60.226	34.637	19.253	40.832	37.062	37.699	48.472	83.475	89.913	46.399	34.65	56.769	95.639	45.099	21.268	22.411	21.989	24.112		0	45.6495
0.1191	16.661	20.035	25.043	54.745	66.623	72.756	56.988	43.41	34.811	26.195	22.421	25.3	55.597	84.081	78.6792	88.601	59.349	68.591	78.089	69.089	39.342	31.862	45.128	43.183	43.223	49.946	99.361	97.235	55.788	40.232	62.474	101.705	57.725	27.454	25.142	27.823	21.847		0.00403087	51.7982
0.2383	18.706	23.016	26.762	65.981	74.404	71.108	67.423	50.085	44.518	32.598	29.02	27.166	60.015	87.18	86.5767	90.822	65.686	67.198	78.296	79.328	56.707	32.586	58.819	46.731	51.993	51.256	102.271	112.275	67.628	35.26	73.083	113.247	65.551	31.345	30.594	33.97	20.904		0.00806512	57.5705
0.3574	24.955	26.042	29.457	70.063	81.345	79.045	71.917	67.722	54.24	39.407	34.607	37.104	71.977	84.954	84.2228	101.028	73.901	77.531	92.09	88.05	76.95	40.708	77.644	62.994	58.85	59.126	112.974	126.552	75.538	47.956	79.828	126.905	79.517	41.162	36.82	41.702	30.932		0.012096	66.6437
0.4766	23.43	29.974	28.718	76.191	80.734	80.291	84.451	77.973	65.477	46.495	42.952	44.403	79.854	81.28	90.3432	113.371	90.155	87.727	97.647	100.115	93.149	53.707	103.538	72.996	66.253	61.725	123.289	149.927	91.997	60.521	88.205	140.731	96.966	48.346	52.138	46.997	37.674		0.0161302	75.9389
0.5957	34.426	39.877	34.951	79.75	88.214	91.594	97.612	87.898	84.047	59.548	56.901	58.828	90.566	83.086	92.0927	112.722	91.519	95.999	103.177	112.107	119.026	66.028	133.115	108.014	71.694	71.452	137.599	160.728	96.864	73.986	100.792	141.697	111.141	60.516	64.07	58.601	49.336		0.0201611	87.0155
0.7148	42.016	48.316	44.49	94.962	90.51	100.488	112.427	96.289	99.599	82.428	80.101	68.096	92.445	82.13	89.2592	120.679	100.318	98.067	108.534	118.165	143.178	89.483	162.651	134.541	88.817	87.13	148.454	162.015	115.253	96.42	117.895	158.047	128.668	74.131	84.448	72.368	61.989		0.024192	99.8597
0.834	55.395	63.045	47.64	94.617	102.702	103.236	132.332	109.1	113.786	98.502	106.086	80.01	110.246	78.911	89.1526	117.216	107.132	102.14	117.373	142.268	170	106.339	182.069	152.83	108.57	103.086	151.014	159.214	133.832	114.755	137.662	166.21	155.274	93.877	102.341	97.232	74.91		0.0282262	112.976
0.9531	72.406	70.493	62.417	111.601	107.962	116.821	137.245	131.518	131.832	132.886	131.035	106.341	120.463	85.149	99.3692	119.901	120.937	122.831	123.217	145.052	181.256	150.26	193.554	177.424	123.203	123.254	168.426	171.296	154.963	142.375	146.28	169.718	175.845	113.364	113.286	107.191	95.685		0.0322571	128.564
1.0723	81.039	87.199	80.343	121.544	113.841	121.888	153.809	142.103	146.186	145.599	153.613	113.887	134.575	84.852	91.6335	123.473	132.842	136.872	130.825	163.255	190.228	164.713	196.773	194.781	139.169	143.956	187.017	172.221	159.427	156.186	165.715	183.656	186.963	133.666	131.813	129.156	106.479		0.0362913	140.576
1.1914	93.09	101.204	92.565	124.427	121.6	137.681	152.987	142.745	154.462	170.298	168.733	138.38	139.733	88.688	83.9638	130.491	148.33	146.48	142.477	162.513	188.407	186.795	198.119	194.67	164.783	157.235	184.524	163.021	172.022	176.076	176.452	183.544	194.133	145.98	147.027	132.112	121.053		0.0403222	149.373
1.3106	104.977	114.797	109.971	126.485	111.984	141.705	174.778	153.561	152.408	179.76	185.449	152.454	155.113	95.279	91.9815	130.199	162.938	158.879	151.537	173.691	160.701	195.472	165.112	188.628	179.094	173.972	188.95	151.119	167.206	177.123	180.474	178.166	194.924	146.523	146.982	140.549	131.825		0.0443564	153.913
1.4297	102.706	126.654	126.308	132.169	125.147	146.145	175.368	166.482	149.029	179.924	193.683	166.95	157.864	97.588	80.7813	134.983	179.193	157.761	150.76	170.619	147.483	187.307	140.563	174.726	178.81	187.146	196.769	149.821	176.171	189.223	179.033	171.913	187.868	147.21	143.928	135.283	136.945		0.0483873	155.414
1.5488	116.288	132.235	133.474	125.041	111.922	142.781	172.747	151.923	136.235	172.902	183.813	176.332	156.956	101.946	84.6977	130.124	182.022	156.24	151.157	159.094	111.798	175.335	124.984	150.193	166.706	179.75	188.273	145.244	171.6	185.871	195.893	162.766	181.608	145.348	134.693	124.346	141.331		0.0524182	150.369
1.668	124.841	133.201	140.658	128.079	111.248	140.851	160.536	141.476	131.034	162.515	166.379	175.445	156.166	93.713	77.5195	144.438	185.402	157.987	130.849	135.944	92.919	150.901	84.117	124.812	160.196	172.651	169.789	137.842	168.064	184.14	183.243	141.895	165.964	135.21	133.375	116.359	133.585		0.0564524	141.982
1.7871	113.067	125.496	141.55	111.97	107.783	133.494	132.576	130.604	118.303	146.16	148.474	165.493	147.749	100.303	79.4558	129.057	165.749	149.195	137.622	109.905	73.319	120.715	68.084	108.246	144.991	160.652	149.644	126.044	168.405	177.228	179.927	114.984	147.958	128.03	116.356	106.672	123.457		0.0604833	129.965
1.9063	110.249	114.787	138.131	102.458	94.565	124.368	101.363	108.845	100.193	125.994	123.276	163.349	139.696	97.896	74.3858	133.427	176.548	149.575	122.016	82.353	56.744	86.484	54.943	81.965	130.523	143.605	134.855	108.266	169.576	153.237	157.644	90.525	129.626	108.599	103.067	97.58	113.86		0.0645175	116.34
2.0254	101.949	111.052	127.938	94.668	85.642	111.813	75	83.35	75.523	90.427	106.153	152.887	121.899	94.705	72.0403	129.375	167.098	128.317	102.437	60.426	47.135	65.069	43.946	63.486	104.746	122.244	114.607	100.857	144.867	129.725	134.374	77.59	110.946	105.051	91.826	83.191	101.343		0.0685484	100.911
2.1445	91.569	101.005	120.781	72.863	77.687	105.109	57.518	64.953	62.442	72.879	81.237	141.492	104.127	80.51	75.0733	122.393	154.221	108.826	91.882	46.64	37.417	50.355	38.18	50.989	82.37	101.642	93.208	80.86	134.958	120.976	121.131	63.666	90.478	93.991	77.908	78.215	97.283		0.0725793	87.7523
2.2637	85.373	93.231	111.905	60.6	67.789	88.011	41.004	49.867	57.223	54.509	70.544	125.135	87.999	75.494	72.2345	120.965	154.124	94.709	77.713	41.435	32.941	46.528	37.566	44.467	73.726	77.465	81.63	69.782	122.939	101.505	100.229	63.42	74	86.753	77.948	70.516	82.514		0.0766135	77.6701
2.3828	69.166	84.115	97.497	55.906	56.019	72.997	30.117	41.877	50.237	55.179	61.992	107.332	68.117	64.189	72.4736	115.761	140.403	81.739	66.038	29.585	29.612	37.841	30.563	40.711	58.297	63.087	70.381	52.377	106.559	93.25	77.437	56.14	60.21	75.438	63.423	62.845	74.227		0.0806444	66.8416
2.502	70.676	83.051	87.015	41.329	42.579	60.058	26.044	30.426	45.324	39.725	51.337	90.331	55.103	57.079	69.5739	100.854	126.066	73.029	60.155	25.525	27.9	31.884	27.787	31.259	48.729	50.921	58.342	50.397	94.18	76.834	62.826	51.585	50.983	74.68	60.035	58.814	58.174		0.0846786	58.1246
2.6211	66.132	76.408	79.328	36.529	35.757	52.845	22.398	23.366	36.493	36.899	44.263	74.431	41.97	46.889	68.2867	92.097	106.617	56.259	50.176	24.476	20.562	28.257	25.909	30.218	35.629	43.944	46.636	36.393	75.526	69.11	49.407	48.332	40.888	68.004	57.474	57.148	47.679		0.0887095	50.0739
2.7402	66.647	75.513	67.239	31.001	25.287	41.27	19.579	17.943	32.007	33.85	30.195	58.036	36.227	39.961	65.9837	76.72	87.603	51.955	55.51	22.14	20.886	25.098	19.76	30.334	31.936	34.207	42.308	29.026	72.921	55.063	41.381	46.341	39.989	65.01	52.766	51.554	44.287		0.0927404	44.2577
2.8594	61.69	72.143	54.309	26.289	25.08	40.596	15.704	12.987	26.16	32.236	25.585	49.278	27.664	29.642	63.3573	65.089	65.321	46.371	42.862	20.71	19.434	25.795	21.306	25.872	24.754	29.06	37.5	26.239	60.004	43.856	30.676	38.729	28.553	59.279	48.632	48.07	39.551		0.0967746	38.1185
2.9785	61.176	70.14	50.902	22.634	22.826	30.258	11.886	14.374	19.998	22.34	22.85	39.51	24.689	25.783	64.9847	49.763	57.045	40.178	36.975	20.585	16.466	18.24	17.724	20.413	23.899	25.815	36.815	25.028	46.758	39.594	25.118	38.076	26.689	57.594	43.764	43.764	33.142		0.100805	33.7242
3.0977	54.463	67.832	38.109	19.949	18.337	31.393	10.833	10.091	19.769	25.395	21.754	36.952	22.824	27.294	57.0534	40.152	48.809	38.361	31.332	22.909	13.492	21.639	16.219	18.805	20.04	22.082	34.457	21.893	34.713	26.328	23.18	35.64	27.697	53.448	44.307	41.346	30.224		0.10484	30.5168
3.2168	54.801	62.396	29.601	15.065	16.726	25.743	14.078	10.463	17.199	20.686	17.031	27.514	20.931	24.035	53.7238	32.805	32.975	35.98	28.719	23.761	12.634	16.411	15.883	15.965	15.99	18.378	30.081	22.34	28.784	28.544	21.225	31.605	24.661	47.338	50.218	32.223	26.942		0.108871	27.1204
3.336	47.532	56.842	22.963	16.92	18.756	23.56	9.583	7.91	14.789	18.876	15.132	23.992	16.563	23.209	51.0258	25.207	29.516	32.68	30.401	21.693	12.195	17.422	15.461	14.214	14.806	20.904	31.516	21.968	22.032	23.625	15.066	30.15	22.586	35.058	43.654	36.17	27.435		0.112905	24.6328
3.4551	47.799	53.434	20.955	17.053	15.154	24.257	9.33	8.161	11.365	15.492	13.035	20.964	17.473	21.079	48.1373	21.29	24.542	32.912	28.194	23.956	9.478	13.501	13.326	12.309	12.122	16.718	25.371	19.697	17.853	20.986	15.685	25.036	18.896	29.255	40.314	35.749	25.367		0.116936	22.331
3.5742	41.385	41.027	16.519	12.962	12.76	20.456	8.33	7.186	12.057	13.347	9.991	19.79	19.953	22.211	45.1846	18.816	21.186	33.92	21.032	18.03	8.963	14.639	10.312	12.613	12.113	14.249	27.145	18.93	15.585	19.469	14.214	24.9	17.454	24.236	38.818	29.799	22.797		0.120967	20.0643
3.6934	43.507	37.01	14.21	14.447	11.869	16.269	7.55	8.259	9.549	12.741	10.914	15.787	16.563	23.019	42.3323	16.092	19.733	29.679	21.478	14.972	7.828	12.55	9.719	11.011	11.523	14.674	25.708	16.078	15.366	16.437	12.888	21.734	19.176	22.296	36.76	28.355	22.849		0.125001	18.6738
3.8125	37.898	27.837	13.917	12.828	11.921	15.761	9.693	6.117	10.366	11.565	6.823	15.237	17.483	19.57	37.7365	11.72	21.202	29.635	23.316	13.28	7.482	11.729	10.448	10.145	8.595	14.982	23.35	12.586	14.54	17.78	12.889	22.185	13.943	21.666	31.926	24.802	22.024		0.129032	17.1616
3.9317	36.25	24.709	8.891	11.095	11.126	14.748	8.88	6.154	8.669	8.996	7.335	14.605	13.197	17.823	35.2523	12.464	14.333	26.894	21.341	15.217	6.742	9.65	8.758	11.955	9.214	14.602	18.036	9.358	14.171	16.109	12.337	19.674	14.888	15.297	31.682	25.852	19.93		0.133066	15.5739
4.0508	34.265	19.285	9.693	13.906	10.81	11.518	7.556	5.853	8.212	8.696	9.823	14.968	13.489	16.067	36.089	13.119	13.757	28.551	19.746	13.826	5.769	11.14	8.969	10.121	10.079	12.06	20.867	9.93	13.134	14.967	14.505	23.554	13.204	15.949	30.992	20.316	19.161		0.137097	15.2418
4.1699	34.605	19.101	8.953	11.006	9.141	10.821	8.6	6.119	6.952	9.405	7.802	11.61	15.481	14.575	31.6948	12.221	13.939	25.488	18.773	9.684	5.804	8.247	7.177	10.475	7.703	9.818	22.201	10.247	12.416	14.747	13.735	20.959	14.273	12.642	29.852	22.253	18.539		0.141128	14.2448
4.2891	32	18.697	10.555	9.484	10.038	10.912	8.791	5.416	5.814	7.822	7.802	12.269	16.692	15.488	28.5177	13.025	13.655	22.218	18.565	12.699	6.039	6.589	7.983	8.288	6.973	9.311	22.351	9.539	11.782	16.064	12.023	20.614	12.494	15.901	29.866	23.234	16.021		0.145162	13.9333
4.4082	26.577	13.829	8.735	9.836	8.063	10.892	9.527	5.33	5.913	8.262	8.007	12.102	16.648	13.757	30.6784	12.722	14.864	16.133	17.344	10.589	5.462	7.286	6.825	6.519	5.627	9.694	19.797	8.981	10.71	14.688	11.355	22.494	14.177	15.299	25.053	22.427	15.73		0.149193	13.0252
4.5274	26.168	10.195	7.811	9.887	6.148	10.53	10.936	6.365	5.301	6.465	7.275	11.999	13.419	13.477	27.7104	15.968	11.845	16.227	19.041	11.417	5.135	7.035	7.059	6.594	6.169	10.254	18.117	7.88	7.824	14.05	11.411	20.903	12.986	14.358	24.732	22.8	18.617		0.153227	12.5435
4.6465	24.982	10.394	8.733	8.509	7.207	10.371	9.403	5.449	6.014	6.071	5.899	11.445	13.953	16.129	23.3271	16.414	12.252	15.62	14.631	10.603	5.53	6.035	5.278	5.99	6.904	7.84	20.585	11.11	8.475	16.478	9.783	20.44	11.916	10.922	22.601	20.986	19.128		0.157258	12.0921
4.7657	20.012	9.712	6.662	8.911	6.99	7.584	8.095	5.167	6.352	6.265	6.429	8.179	13.105	15.796	23.3597	16.898	12.716	15.401	16.723	12.349	4.326	5.312	5.533	4.896	5.873	6.804	18.255	10.276	11.155	14.021	9.973	19.964	10.214	15.397	20.379	20.026	20.173		0.161292	11.6022
4.8848	17.765	7.765	9.057	8.183	6.019	9.531	8.094	5.908	3.999	6.631	5.958	10.333	14.733	11.882	22.515	16.161	14.773	16.38	15.996	12.729	3.869	4.845	4.609	6.553	5.446	7.046	18.378	9.835	9.629	12.31	10.424	18.398	11.454	12.285	17.128	19.95	16.038		0.165323	11.1516
5.0039	16.521	9.528	8.82	9.919	4.761	9.468	7.592	5.305	5.533	5.834	6.625	7.834	12.214	13.907	18.6321	15.981	17.22	16.287	11.995	10.341	3.934	4.227	3.778	5.06	4.683	5.708	16.11	7.968	9.647	15.658	9.474	15.337	10.782	11.547	16.891	15.528	16.292		0.169354	10.4579
5.1231	12.959	10.773	9.881	9.368	6.914	7.225	7.459	4.02	3.771	4.171	5.358	7.321	11.857	10.283	17.2198	15.009	16.394	17.562	9.658	10.062	4.279	4.643	3.74	4.88	5.834	4.746	18.073	8.946	10.272	11.406	9.601	15.418	10.308	11.558	14.627	16.092	18.214		0.173388	9.99735
5.2422	11.57	8.658	8.591	7.309	5.951	8.922	6.808	3.806	3.519	6.351	4.727	6.783	10.978	8.923	17.0127	13.579	19.516	18.346	12.904	9.607	3.997	4.534	4.815	5.018	5.39	4.573	15.769	9.581	11.78	12.111	10.068	15.046	9.96	10.159	14.586	13.412	14.049		0.177419	9.69483
5.3614	12.654	9.355	7.773	8.382	5.775	8.158	6.513	6.071	4.381	5.138	5.239	5.804	8.856	11.677	15.4084	17.501	20.895	16.165	10.677	9.118	4.007	4.746	4.168	5.064	6.288	5.541	15.554	9.156	10.356	9.004	9.781	12.285	10.629	14.656	13.549	13.424	15.853		0.181453	9.71896
5.4805	11.914	8.357	9.425	7.962	5.797	9.877	6.549	4.485	4.818	5.596	4.614	5.548	9.601	9.649	14.5464	12.795	26.159	14.916	9.824	10.495	3.267	4.094	3.588	3.843	3.211	6.603	14.479	9.68	11.562	8.333	9.655	13.992	10.882	12.416	10.966	10.309	12.021		0.185484	9.23861
5.5996	9.522	8.077	8.432	7.229	4.334	10.74	8.127	3.298	4.612	4.945	4.418	5.449	8.783	9.175	15.349	10.627	27.717	14.306	10.03	8.26	4.097	3.739	3.325	4.785	4.658	5.657	13.948	8.827	14.124	7.337	8.39	14.649	8.749	14.783	10.674	10.987	10.404		0.189515	8.98819
5.7188	10.452	8.904	9.268	6.984	6.134	7.969	5.495	5.194	3.081	4.418	3.965	5.784	10.662	8.773	12.7258	14.111	30.277	15.452	9.284	9.436	3.489	3.008	4.444	3.449	3.765	4.773	15.264	8.431	10.135	8.552	9.456	14.101	8.933	11.163	8.633	9.315	7.789		0.193549	8.73159
5.8379	8.964	9.645	8.499	8.605	4.994	10.503	7.047	4.657	3.78	4.39	5.706	4.758	9.845	6.678	13.2981	11.594	19.011	12.852	8.254	8.867	3.246	3.034	4.572	3.482	3.742	5.464	18.719	7.534	11.939	7.404	8.427	15.696	6.944	14.225	11.024	7.311	9.366		0.19758	8.48854
5.9571	8.88	9.313	6.708	7.041	5.872	8.185	5.357	2.84	4.89	4.132	4.203	5.381	9.311	6.86	7.7139	12.014	18.863	13.572	6.886	7.39	3.055	3.37	3.81	2.788	3.913	4.91	19.134	9.319	11.23	6.734	9.213	15.054	7.414	10.242	8.588	7.42	8.085		0.201614	7.82948
6.0762	9.597	8.327	6.59	8.691	5.858	6.806	6.051	4.558	3.805	4.445	5.071	5.454	9.815	7.072	11.1057	9.325	14.127	13.611	5.087	9.553	2.827	3.074	4.49	2.694	4.694	4.514	20.212	6.569	10.241	8.063	7.796	16.271	9.448	8.58	5.338	8.444	7.16		0.205645	7.71253
6.1953	5.752	6.225	7.696	7.442	4.695	8.977	5.475	4.682	2.327	4.132	3.891	5.698	8.906	8.332	9.1448	8.469	13.425	10.872	9.237	10.727	3.562	3.322	3.011	2.987	4.203	4.328	23.32	6.508	9.65	7.113	8.999	15.476	7.338	7.726	8.795	8.731	6.859		0.209676	7.5144
6.3145	5.707	7.498	6.827	5.764	3.186	10.197	6.62	4.387	3.907	4.811	5.215	5.037	9.129	6.797	9.622	9.079	15.415	9.658	6.041	10.463	2.186	3.077	2.992	3.45	3.543	5.78	21.373	6.689	8.026	7.868	7.068	15.045	7.176	9.497	6.309	6.838	6.499		0.21371	7.26422
6.4336	5.788	6.714	8.886	6.814	4.09	8.646	7.04	4.74	3.828	4.253	4.781	4.853	7.39	7.977	7.3892	7.8	16.007	10.807	6.513	9.68	3.287	3.119	4.071	3.278	3.002	5.799	29.438	6.418	8.815	6.733	7.892	13.941	7.665	7.519	4.987	6.76	5.849		0.217741	7.36674
6.5528	4.207	5.946	8.934	8.157	5.998	9.656	6.674	3.271	4.358	3.273	4.49	5.455	9.363	7.63	7.6076	6.684	17.351	10.05	6.865	13.183	3.355	3.49	2.616	3.841	3.923	5.021	30.841	7.121	10.776	5.628	6.884	14.451	8.434	5.89	5.588	6.826	5.068		0.221775	7.53799
6.6719	5.623	6.032	7.076	6.789	5.641	11.481	7.345	4.368	3.657	4.67	4.231	6.2	10.959	7.844	7.0466	6.756	17.591	8.891	5.566	11.653	3.691	2.27	4.466	3.51	3.658	5.381	33.464	6.588	6.85	7.068	8.658	16.892	7.044	6.969	4.845	7.846	4.776		0.225806	7.65934
6.7911	5.197	6.54	6.341	6.616	4.344	8.559	6.669	3.633	6.017	3.273	4.166	4.858	7.564	6.912	7.1404	6.916	16.701	8.278	5.329	11.137	3.238	3.062	2.909	3.998	4.672	5.078	34.18	5.812	6.355	6.641	7.024	15.527	8.651	6.291	5.911	6.46	5.519		0.229841	7.23023
6.9102	4.05	5.026	5.464	7.416	4.054	9.116	6.014	5.115	4.057	3.806	3.188	5.802	10.066	7.964	4.7562	7.445	14.656	8.903	5.693	10.98	2.295	2.784	3.298	2.86	2.984	6.086	33.073	5.355	5.328	6.786	8.909	13.085	7.813	5.086	4.42	5.402	4.546		0.233871	6.85625
7.0293	4.223	6.004	6.047	7.138	3.647	9.147	6.976	4.418	3.679	4.271	4.441	4.868	7.905	8.602	5.9833	6.488	15.613	8.21	5.565	11.359	3.153	3.986	3.532	2.974	2.707	6.312	23.698	6.032	5.597	5.522	8.109	14.103	5.867	4.678	3.51	7.364	5.064		0.237902	6.67006
7.1485	4.986	5.785	6.032	7.905	5.19	8.701	7.31	4.973	4.492	3.882	5.171	4.39	8.472	6.622	7.0476	5.198	13.922	6.766	6.871	13.464	3.791	2.467	3.01	2.506	3.109	6.744	22.897	4.95	5.555	5.878	8.35	16.466	6.375	4.508	4.021	5.219	4		0.241937	6.67637
7.2676	4.784	5.793	6.483	5.541	4.494	13.974	8.134	4.182	3.362	3.871	3.737	6.374	7.984	5.948	6.727	6.697	10.068	7.669	6.749	15.037	3.686	3.116	2.665	3.849	3.647	7.624	24.061	5.394	6.734	6.533	7.798	17.09	6.491	6.527	4.645	7.631	3.476		0.245967	6.98851
7.3868	4.676	5.159	6.538	7.179	3.441	12.103	6.671	4.697	4.025	3.396	4.417	6.675	9.743	8.129	5.5127	6.036	7.519	7.365	5.048	15.859	4.127	3.65	3.41	2.774	2.663	8.268	26.799	4.616	6.675	6.588	7.317	18.438	7.036	5.672	5.696	5.625	4.472		0.250002	6.97337
7.5059	3.846	4.154	5.51	6.661	4.808	13.828	6.893	4.483	4.648	4.694	4.839	5.012	8.969	8.912	7.4989	4.509	10.654	7.63	5.878	14.921	3.596	3.556	3.636	2.742	2.139	9.068	27.187	5.338	5.347	6.3	7.696	18.067	6.632	4.373	4.801	5.525	4.558		0.254033	6.99754
7.625	4.298	5.019	7.775	6.788	4.44	15.057	6.958	5.157	4.566	4.523	4.025	7.604	10.336	6.422	6.6328	5.625	8.574	6.795	4.733	13.201	3.134	4.057	3.021	2.686	3.787	9.142	24.872	4.207	3.993	5.889	6.284	20.546	5.908	4.64	4.436	7.431	4.298		0.258063	6.94216
7.7442	4.165	4.834	6.959	6.849	4.227	14.918	9.326	5.83	4.922	3.465	3.878	6.748	9.975	7.221	5.3367	6.354	8.112	4.912	5.385	14.891	2.938	2.346	2.91	3.591	2.487	8.829	28.759	3.841	5.227	4.915	6.328	21.867	8.01	3.906	5.228	5.016	2.795		0.262098	6.95407
7.8633	3.739	5.221	9.055	5.679	6.08	18.241	7.883	4.974	3.726	3.665	4.807	6.93	9.878	6.18	5.9029	4.582	9.112	7.423	5.583	15.936	2.319	2.932	2.986	2.084	3.148	10.144	29.489	4.632	4.325	5.374	7.714	21.011	5.529	4.808	4.289	5.266	2.941		0.266129	7.124
7.9825	3.562	6.346	6.645	8.373	5.595	24.001	9.652	5.491	3.419	2.493	4.159	6.869	10.801	7.554	5.6582	3.997	10.81	6.464	3.785	18.167	3.131	3.124	2.05	2.062	2.253	9.545	34.287	5.444	7.522	5.897	7.848	23.8	6.921	5.434	4.931	3.952	2.762		0.270163	7.69741
8.1016	3.364	4.926	6.841	6.373	6.488	24.891	10.066	4.503	3.382	3.862	4.728	5.948	12.49	8.38	6.1199	5.36	8.308	7.58	4.587	18.074	2.541	3.227	2.507	3.082	2.869	9.849	27.888	5.148	4.426	5.284	6.843	22.92	7.101	4.505	3.998	4.248	4.318		0.274194	7.48716
8.2207	3.399	4.631	7.617	8.202	7.575	29.113	10.12	5.289	4.088	3.891	4.535	9.293	12.581	6.329	6.1133	5.821	9.946	6.327	5.596	18.643	2.137	3.007	3.032	3.216	4.056	9.283	27.828	4.764	4.936	5.813	6.431	23.264	6.955	4.714	5.269	5.707	3.212		0.278225	7.91171
8.3399	3.144	4.974	7.101	8.038	6.538	31.149	11.732	6.478	3.408	4.386	3.076	8.587	13.226	8.404	6.3301	5.647	9.743	7.168	6.137	16.638	2.81	3.493	2.273	2.402	3.514	9.284	23.468	5.18	5.353	6.321	7.207	20.682	7.865	5.093	5.278	4.709	3.232		0.282259	7.83968
8.459	3.941	6.206	7.335	10.503	6.927	37.151	12.964	6.441	4.28	4.983	4.291	6.519	15.22	7.446	5.2946	5.357	9.265	7	4.953	18.376	2.976	3.219	3.053	3.793	3.692	9.991	26.029	4.459	5.089	5.672	7.052	22.334	6.979	3.809	3.29	2.765	3.191		0.28629	8.15799
8.5782	3.221	4.818	7.179	12.425	8.325	38.23	14.637	5.208	4.796	4.04	4.699	6.003	18.52	6.107	7.0312	6.279	8.915	8.509	6.746	19.853	2.944	2.743	3.243	2.816	3.351	11.946	23.842	6.034	4.916	5.519	8.029	24.148	9.266	5.163	3.593	4.207	3.839		0.290324	8.67946
8.6973	3.453	5.78	8.792	13.567	6.356	41.326	13.803	6.718	4.729	4.16	4.37	7.213	19.905	6.856	8.1981	6.769	8.138	6.866	6.583	18.349	2.567	2.109	3.393	3.413	3.723	10.35	21.399	6.005	4.658	6.182	8.315	25.29	7.009	3.627	3.915	3.579	2.628		0.294355	8.65116
8.8165	3.909	6.836	9.401	14.124	7.296	45.306	18.99	5.951	3.937	3.049	3.192	8.393	26.119	9.91	5.4653	4.446	10.402	6.709	5.761	15.775	3.645	3.117	2.339	3.73	3.886	12.259	23.758	5.132	4.849	7.618	6.523	23.84	8.509	4.368	3.764	3.617	2.205		0.298389	9.13866
8.9356	4.376	6.375	11.344	16.707	8.22	44.418	17.812	5.555	4.177	3.881	4.507	7.623	25.537	8.697	5.6856	6.66	8.452	5.749	6.012	18.509	2.423	3.426	2.841	2.577	3.204	11.257	33.136	4.875	5.411	6.967	7.267	25.158	9.095	3.809	5.076	3.028	3.124		0.30242	9.53975
9.0547	3.829	6.39	10.71	15.629	8.683	52.884	18.579	6.678	5.087	3.725	4.234	9.014	26.646	10.101	5.8421	5.339	9.475	6.042	4.37	17.737	3.322	3.477	2.729	2.506	3.036	11.64	35.184	4.743	6.111	5.903	7.273	26.099	10.358	4.76	3.973	4.06	3.587		0.306451	9.99338
9.1739	2.437	5.057	10.776	18.244	10.349	62.003	17.524	6.597	4.648	2.669	4.655	9.073	26.595	13.83	5.7614	5.116	9.948	5.947	5.031	16.858	2.48	2.51	2.538	3.08	5.158	11.003	36.326	5.436	6.444	7.266	8.423	27.392	11.217	5.125	4.056	4.986	3.969		0.310485	10.5548
9.293	3.485	6.859	12.233	16.023	12.247	75.576	18.023	5.495	3.687	5.178	3.844	10.874	30.452	19.519	6.9798	5.464	8.838	7.618	7.682	17.121	3.734	2.077	3.212	2.626	3.109	13.82	41.71	5.188	4.713	8.07	9.53	26.316	10.3	5.33	3.023	4.278	3.647		0.314516	11.5643
9.4122	4.329	5.969	12.109	15.815	13.107	77.686	19.131	6.442	4.319	4.631	3.399	13.019	28.185	13.605	4.9105	4.837	10.258	9.374	5.453	17.688	2.695	3.121	3.639	3.129	3.55	15.602	38.782	5.455	5.095	7.398	8.497	28.401	10.461	4.349	3.929	4.438	3.162		0.31855	11.5127
9.5313	4.549	6.674	15.479	16.384	14.6	85	17.34	6.028	5.108	4.493	3.45	12.571	29.008	15.613	6.9168	3.81	12.113	8.417	6.455	18.712	3.409	3.213	2.498	3.824	4.198	15.971	46.648	5.089	6.181	9.605	11.585	34.624	11.604	5.284	3.743	3.465	2.988		0.322581	12.6122
9.6504	3.702	7.035	14.859	15.388	16.638	86.573	19.34	5.684	4.107	4.656	6.592	12.797	31.713	12.155	6.6263	5.907	12.703	9.497	5.779	16.302	4.273	3.48	2.456	3.091	4.681	16.501	46.46	5.059	4.992	8.987	11.734	33.702	14.59	5.342	3.837	3.041	3.387		0.326612	12.8018
9.7696	4.033	7.251	17.988	14.412	13.829	92.209	16.095	8.187	4.179	5.319	4.551	11.563	33.562	11.392	7.0703	6.024	13.442	8.066	5.746	19.093	3.546	3.233	3.052	2.936	5.2	15.301	58.705	5.557	5.755	10.064	10.298	40.482	13.587	4.649	3.357	3.031	3.236		0.330646	13.4054
9.8887	4.47	7.145	19.596	18.473	14.252	93.637	21.124	7.568	4.882	4.978	4.192	11.306	33.664	11.574	6.3353	5.182	13.592	9.775	5.411	21.916	4.359	2.918	3.033	2.752	3.934	18.812	65.404	6.559	6.618	11.631	11.505	43.697	16.475	5.97	3.348	2.955	2.508		0.334677	14.3662
10.0079	4.131	7.011	20.048	14.081	15.101	90.916	20.752	8.604	4.739	4.357	4.18	14.595	35.191	10.937	6.3904	5.982	14.812	11.149	6.159	29.016	3.427	3.558	3.038	4.184	3.64	17.025	74.235	6.971	6.238	13.539	13.73	44.915	16.202	4.823	5.054	3.392	2.791		0.338711	14.9977
10.127	6.494	7.395	23.74	16.121	11.973	96.505	22.206	7.945	5.016	5.145	4.834	12.873	35.851	12.595	7.0942	6.24	12.851	10.901	5.858	30.088	3.493	3.442	2.956	2.9	4.3	14.876	81.97	6.41	7.191	12.163	14.377	52.44	17.767	5.599	3.93	2.858	2.939		0.342742	15.7118
10.2462	3.662	9.519	24.496	15.122	12.63	94.744	19.826	7.707	4.866	5.013	5.706	13.232	30.772	12.968	6.1199	5.301	15.179	12.102	7.091	34.647	2.608	4.102	4.288	4.126	3.759	15.527	89.786	7.594	7.038	13.551	13.693	54.985	21.063	6.301	3.298	2.599	2.876		0.346776	16.1594
10.3653	5.687	10.881	26.921	14.585	11.923	95.969	17.054	6.569	4.294	4.909	6.798	13.255	29.392	19.021	7.8715	6.285	16.872	12.116	8.866	36.533	3.17	2.847	3.724	3.793	3.628	13.621	84.967	8.997	6.347	16.169	16.837	54.958	22.907	4.862	3.846	2.884	3.784		0.350807	16.5714
10.4844	4.978	10.421	29.132	17.807	8.629	89.99	18.781	8.443	5.259	5.322	5.357	15.649	26.454	19.12	7.5448	5.348	19.495	12.669	6.204	41.133	3.035	2.826	4.19	3.057	5.448	12.542	92.416	9.164	6.827	15.358	20.145	61.649	23.114	5.287	3.48	3.461	2.683		0.354838	17.0924
10.6036	5.048	9.57	33.646	18.456	8.668	88.562	19.293	8.507	5.655	3.952	5.644	14.831	28.715	21.164	9.1655	6.254	21.115	15.709	6.034	44.386	3.043	3.123	2.778	4.223	4.117	14.313	98.009	9.132	8.379	17.124	19.356	64.351	25.178	6.354	3.335	3.55	3.135		0.358872	17.9426
10.7227	4.658	10.876	35.185	22.521	9.639	85.541	19.208	6.986	5.798	4.846	6.29	17.05	29.941	28.221	8.4984	5.289	23.928	15.354	7.792	42.062	3.743	3.493	3.622	2.619	5.241	13.248	95.412	10.208	7.243	18.368	21.492	66.316	28.334	6.223	2.764	3.97	1.956		0.362903	18.4847
10.8419	5.149	10.665	33.548	22.036	9.834	71.6	18.628	8.619	4.565	4.271	7.236	16.872	30.426	25.589	10.6906	6.864	30.683	16.362	7.306	41.727	3.963	3.831	3.776	3.393	4.452	14.778	95.335	8.154	8.494	19.298	22.994	67.606	25.728	6.027	4.01	3.765	2.875		0.366937	18.4094
10.961	5.023	10.924	36.003	22.095	8.412	65.244	17.596	8.627	5.423	6.143	7.065	18.195	31.164	26.871	9.7517	7.003	37.293	14.837	6.027	43.714	3.36	3.744	3.29	2.855	5.415	16.081	92.038	9.207	10.382	21.889	28.133	61.98	24.243	5.665	4.267	3.693	3.125		0.370968	18.5616
11.0801	4.213	13.93	35.435	25.919	9.097	55.452	18.139	7.318	4.853	5.577	5.204	21.703	33.16	25.493	9.6955	6.654	44.408	16.351	6.919	41.991	3.849	3.633	3.18	4.036	4.501	14.836	70.919	7.933	11.268	19.291	35.028	70.143	27.633	8.094	3.333	3.232	1.602		0.374999	18.4871
11.1993	4.909	13.587	36.579	27.491	7.741	45.122	13.689	7.324	5.016	4.774	7.022	19.824	29.549	24.358	14.3372	6.755	52.577	21.666	6.841	41.602	3.804	3.187	4.818	3.791	5.5	15.955	63.718	7.52	12.056	20.839	38.342	76.004	24.397	7.166	2.594	3.502	4.04		0.379033	18.5945
11.3184	6.302	13.827	31.475	26.046	8.139	44.874	11.612	8.087	4.517	5.485	6.655	20.258	31.106	25.664	13.9455	9.135	51.436	20.701	6.772	37.94	5.272	2.844	4.052	3.649	4.275	17.674	58.416	8.046	10.227	23.268	36.817	74.063	22.811	6.524	4.007	4.182	3.01		0.383064	18.1923
11.4376	5.945	14.105	30.494	29.114	8.171	45.444	13.44	7.109	5.275	5.022	8.266	25.28	36.249	28.481	16.3365	7.481	57.393	23.584	8.186	35.536	3.692	4.261	3.708	3.312	4.927	16.085	55.642	9.024	11.376	22.45	35.743	76.908	22.272	6.718	4.235	3.601	2.6		0.387099	18.8504
11.5567	5.103	14.475	31.959	30.61	8.387	45.351	15.039	7.166	5.074	3.991	6.806	23.247	33.104	35	16.8797	9.257	59.084	30.631	8.293	36.486	3.823	4.346	4.547	2.693	4.616	15.354	55.151	8.884	12.257	21.792	30.255	85.676	19.426	6.74	5.234	2.425	2.863		0.391129	19.2439
11.6758	4.935	13.618	28.546	25.683	7.487	52.74	11.283	7.915	5.622	5.375	7.142	23.967	38.315	44.515	17.4265	11.129	67.855	31.122	10.353	32.133	3.955	2.99	4.703	2.583	5.064	15.806	47.194	9.29	13.077	22.646	26.383	92.941	19.438	6.715	5.745	2.759	2.57		0.39516	19.7573
11.795	5.373	15.577	28.442	30.262	6.975	52.476	13.131	7.825	5.969	5.705	7.125	22.452	36.286	39.927	21.5372	13.005	68.565	40.933	9.006	27.989	4.774	3.595	3.552	3.747	5.739	13.467	43.357	8.206	14.038	25.548	32.091	96.215	19.031	7.472	3.528	3.476	2.477		0.399195	20.2398
11.9141	5.218	14.794	25.722	31.785	7.459	59.069	13.75	7.241	6.918	5.548	5.809	22.754	42.398	48.467	25.0762	13.997	67.766	35.866	10.715	25.019	3.447	3.857	2.745	2.95	5.361	15.484	44.097	7.612	14.39	28.559	36.872	103.637	15.593	6.287	5.088	3.531	2.786		0.403225	21.018
12.0333	5.991	14.277	25.273	34.038	8.398	63.501	12.495	5.742	5.729	5.085	8.234	23.869	39.693	50.802	25.8465	15.716	58.357	36.708	9.489	24.943	2.707	3.589	3.352	3.538	4.969	19.719	40.956	7.543	14.562	28.518	36.956	108.035	18.498	7.765	4.346	4.162	2.858		0.40726	21.2503
12.1524	6.931	12.551	24.365	32.507	8.959	68.265	13.448	6.075	6.92	5.826	7.255	31.658	40.611	45.895	26.5071	18.306	54.957	34.583	9.346	22.045	4.263	4.573	3.228	3.684	5.107	17.911	43.007	10.552	15.101	27.9	38.098	110.916	15.093	7.431	4.988	4.034	2.853		0.41129	21.5067
12.2716	5.729	13.169	22.908	33.132	9.207	79.947	10.508	6.312	7.48	5.809	6.834	29.307	36.734	43.842	27.0481	17.866	55.757	38.59	8.336	22.605	3.352	3.524	2.578	4.35	3.816	22.97	42.675	10.076	12.331	26.03	34.704	98.548	14.421	6.77	3.857	3.243	3.051		0.415325	21.0112
12.3907	6.502	15.086	23.682	33.052	9.423	85.029	9.486	7.427	6.39	6.83	6.136	27.323	34.523	45.915	26.5241	15.911	50.894	51.282	9.883	19.33	3.366	3.442	3.236	4.263	4.144	24.406	34.213	9.057	13.529	27.727	37.12	99.458	14.909	7.405	5.514	4.168	1.972		0.419356	21.3124
12.5098	6.229	14.442	25.917	34.244	11.971	96.405	10.488	6.363	6.812	6.36	7.492	32.123	33.491	44.851	23.2023	20.517	55.79	62.45	11.256	17.547	4.945	3.429	3.737	3.9	5.205	24.736	41.478	11.095	11.321	24.582	33.327	91.107	15.078	6.545	5.506	3.984	2.334		0.423386	22.1692
12.629	5.46	12.649	25.678	35.033	12.096	100.371	10.011	5.607	7.807	5.046	8.988	33.979	23.941	41.727	27.7852	19.615	47.796	56.718	11.098	21.766	2.689	3.913	4.302	3.681	4.091	27.189	35.468	10.501	11.427	25.633	32.227	89.194	11.948	7.294	4.959	4.347	3.774		0.427421	21.5083
12.7481	5.545	10.592	26.212	39.589	12.649	110.83	8.069	5.768	7.237	5.032	9.758	30.786	21.948	37.847	25.75	19.717	59.485	54.59	9.933	16.89	3.519	2.847	3.427	4.302	4.954	28.03	42.661	12.433	11.69	24.093	38.291	86.096	11.756	6.484	5.324	4.452	3.602		0.431452	21.951
12.8673	5.187	11.142	29.495	39.141	11.424	112.413	11.463	5.138	6.718	5.479	8.309	28.569	19.892	37.17	28.4368	19.399	61.718	62.785	11.876	19.003	3.722	3.208	3.168	4.275	5.525	27.386	42.545	15.871	8.693	19.721	32.304	91.447	12.672	6.277	4.676	4.388	3.857		0.435486	22.2836
12.9864	6.598	10.809	26.235	38.954	14.119	114.118	10.419	5.666	7.035	4.353	9.502	27.709	18.72	33.187	28.6675	20.234	68.657	59.053	12.873	16.527	3.902	4.244	5.553	2.016	5.35	28.906	41.986	16.036	9.035	18.679	36.297	86.494	11.152	6.556	5.445	3.586	3.627		0.439517	22.2243
13.1055	6.898	10.306	33.997	38.447	14.666	106.28	8.183	4.827	6.367	5.744	9.457	29.484	18.428	34.101	32.4796	19.788	71.376	48.575	12.287	14.049	4.219	4.402	2.977	3.857	3.999	31.4	40.658	16.19	9.055	18.86	32.102	77.781	10.361	8.358	4.776	4.88	3.512		0.443548	21.7061
13.2247	5.779	12.793	34.346	37.195	15.813	101.638	10.943	5.23	6.048	6.126	9.97	28.042	16.704	31.838	30.0452	18.412	72.297	49.837	15.405	15.488	3.774	3.915	5.486	3.96	5.365	29.922	46.427	15.11	9.452	17.803	31.157	72.258	13.275	6.378	4.362	5.303	3.342		0.447582	21.6551
13.3438	5.775	12.372	36.771	35.39	17.552	89.74	10.258	5.797	6.972	5.894	9.623	33.969	11.919	33.176	26.4467	18.142	65.96	48.614	14.015	14.109	4.247	3.601	4.382	3.393	3.994	30.196	45.373	18.644	9.698	17.023	33.01	71.504	11.448	5.958	5.086	5.62	3.982		0.451613	21.0717
13.463	4.431	12.104	39.301	33.107	17.863	78.016	9.529	5.725	7.414	5.171	9.26	25.467	15.212	35.774	28.539	16.118	63.465	46.94	13.609	16.147	3.925	2.648	3.122	5.317	4.17	26.504	41.237	19.62	7.138	16.36	32.025	73.218	10.379	6.836	4.755	4.704	3.858		0.455647	20.2435
13.5821	6.136	14.243	35.845	34.832	20	78.703	10.576	4.781	5.868	6.506	10.994	28.276	15.947	35.477	22.6832	15.99	63.106	40.888	13.967	13.739	4.686	3.572	2.274	4.475	4.202	21.599	43.883	23.464	8.067	12.268	34.08	71.614	10.66	7.273	5.163	4.758	3.498		0.459678	20.1106
13.7012	6.549	12.235	37.415	34.353	24.426	60.493	10.482	6.711	6.57	5.462	12.824	27.942	18.573	34.315	20.9852	15.826	53.408	41.277	14.013	12.67	3.626	3.868	3.562	4.27	4.313	23.743	39.011	30.019	7.066	13.986	35.951	70.713	9.039	7.344	5.245	4.936	3.659		0.463709	19.6454
13.8204	5.057	12.773	38.489	36.158	23.492	52.224	14.393	5.431	6.629	4.903	10.464	22.376	18.408	39.894	20.3836	15.889	45.447	34.741	15.351	15.719	3.037	4.148	3.672	3.701	5.624	20.171	35.771	32.024	9.349	12.92	41.476	77.255	7.513	6.269	5.763	5.297	3.753		0.467743	19.3504
13.9395	4.974	15.487	37.216	32.489	29.597	42.675	11.892	4.053	6.346	5.561	11.39	19.473	21.062	39.866	16.4124	18.983	42.794	33.455	15.711	14.518	2.797	5.516	2.919	4.943	4.837	16.551	35.238	33.203	9.266	14.672	44.766	74.13	10.663	5.438	5.813	4.888	3.577		0.471774	19.0046
14.0587	7.326	15.009	34.89	35.546	34.806	37.387	10.285	5.101	7.25	6.402	12.933	17.286	20.604	45.608	12.1293	18.259	36.696	26.221	17.453	14.262	4.245	3.705	4.291	4.288	5.703	16.294	36.916	35.762	9.6	10.208	51.573	73.947	8.128	4.612	5.083	5.577	5.423		0.475808	18.9408
14.1778	5.621	10.997	31.839	36.658	39.862	38.771	13.251	4.892	6.103	6.633	9.524	17.279	25.788	42.38	14.7243	23.464	30.335	26.629	17.272	16.009	3.99	3.958	3.054	4.178	3.9	14.164	33.169	36.948	10.089	10.122	54.947	78.86	9.595	4.408	6.746	5.416	4.737		0.479839	19.0895
14.297	5.918	11.454	26.269	41.447	44.459	36.881	10.868	5.295	7.61	5.307	10.708	16.158	21.828	39.995	12.0818	26.766	26.425	23.441	19.022	13.21	3.905	4.278	4.109	3.167	4.512	10.211	26.753	34.757	9.295	9.123	66.841	74.109	8.738	5.986	6.216	6.435	4.574		0.483873	18.5987
14.4161	6.574	11.828	27.965	37.763	52.546	36.662	10.399	5.005	5.07	5.148	8.863	14.828	30.648	34.939	10.9584	29.696	23.624	19.766	17.747	13.39	3.71	4.338	3.045	5.08	5.694	13.147	31.607	30.553	9.755	9.537	63.264	74.485	9.914	6.576	4.957	5.762	4.876		0.487904	18.6411
14.5352	5.774	12.816	25.337	32.141	58.849	39.82	11.101	4.684	6.325	6.336	9.561	14.257	27.393	36.279	10.7089	31.358	24.163	16.791	19.252	10.454	3.059	4.353	3.831	5.249	5.155	9.763	32.607	32.464	7.534	9.106	69.186	70.086	8.995	6.266	5.38	5.246	4.247		0.491935	18.5386
14.6544	5.64	10.864	27.174	33.175	68.267	38.036	11.168	5.721	6.746	6.088	8.749	14.168	24.27	27.833	12.959	37.162	29.178	17.767	19.184	12.175	3.927	4.94	3.629	3.084	5.401	9.79	26.521	35.727	7.858	9.099	78.266	66.009	8.825	5.291	5.604	6.199	4.323		0.495969	18.941
14.7735	4.669	11.329	24.968	33.695	78.669	37.632	9.691	5.934	6.485	7.194	8.744	13.56	18.921	29.202	11.7023	37.295	35.271	19.339	20.854	13.5	5.152	2.773	5.188	3.557	6.246	9.199	26.536	28.159	9.844	8.222	89.53	66.599	9.163	6.566	5.241	5.122	4.87		0.5	19.4763
14.8927	5.844	11.724	26.925	29.548	86.653	40.371	10.971	4.793	5.547	5.911	7.841	13.47	15.422	21.832	12.4957	41.369	38.687	18.293	17.767	13.683	3.124	4.617	3.393	3.746	6.342	11.914	30.658	31.123	11.088	9.268	98.596	69.702	11.466	5.526	5.843	5.205	4.428		0.504034	20.1402
15.0118	5.905	10.688	19.778	29.593	88.124	34.525	7.923	5.704	4.241	5.914	8.369	12.047	14.748	20.761	15.4685	49.269	38.71	17.283	17.361	11.922	3.195	3.092	3.927	3.794	6.29	9.164	33.471	23.614	8.75	8.706	96.171	60.365	10.373	5.407	5.273	4.961	4.568		0.508065	19.1744
15.1309	5.607	10.429	21.123	28.98	106.18	33.479	9.211	4.964	5.827	5.342	7.254	12.38	15.883	22.536	18.2255	53.789	40.349	15.992	16.539	15.505	3.603	2.616	3.544	5.082	4.889	10.065	33.382	26.904	9.234	10.153	102.722	55.584	12.676	6.275	5.009	4.954	5.084		0.512096	20.3073
15.2501	5.659	8.512	18.792	25.086	112.809	33.402	8.469	6.366	5.312	5.966	7.537	12.721	16.454	16.999	20.154	59.432	45.38	17.056	17.985	12.118	3.917	4.216	4.747	3.921	5.218	9.06	35.957	22.808	9.599	9.056	104.67	44.064	11.509	5.762	4.795	5.55	4.618		0.51613	20.1534
15.3692	5.497	11.622	22.404	25.01	115.898	35.312	8.737	3.985	6.817	6.388	6.589	12.946	14.067	16.379	20.4978	62.908	47.307	19.306	19.122	13.35	4.884	3.313	3.688	3.268	4.486	9.067	37.426	22.168	7.331	10.097	112.509	42.76	8.214	6.042	5.567	4.918	5.214		0.520161	20.6782
15.4884	4.41	11.527	20.832	23.438	119.327	33.572	8.632	4.015	6.474	4.922	6.804	11.605	14.645	17.313	22.6131	67.32	43.686	18.854	17.056	12.511	2.362	3.305	3.589	4.132	5.358	7.981	34.351	16.838	9.772	6.296	108.306	40.508	10.176	5.547	6.214	6.833	4.902		0.524195	20.1629
15.6075	4.904	10.395	17.149	20.651	128.507	36.036	8.127	4.295	5.556	3.932	6.409	13.427	14.078	19.912	22.021	77.416	43.511	19.882	17.583	13.906	3.796	3.175	3.955	3.967	4.894	7.218	30.539	18.241	8.341	6.956	102.837	42.717	9.536	6.113	6.504	4.75	6.642		0.528226	20.4832
15.7266	4.782	9.096	17.785	21.083	117.882	36.133	8.957	4.766	3.451	4.991	5.446	11.925	13.966	19.904	23.0993	71.827	40.39	23.941	18.379	13.073	3.936	3.608	3.117	3.727	5.14	6.62	29.207	19.409	8.374	8.312	105.354	41.296	12.49	6.892	6.079	5.454	4.67		0.532257	20.1233
15.8458	5.212	9.629	20.24	16.167	125.498	36.698	8.418	5.227	5.189	4.949	5.885	12.692	14.376	20.229	27.9561	76.554	46.2	21.287	15.605	12.611	2.972	3.643	3.432	4.115	5.247	8.797	30.135	19.912	8.426	7.861	98.268	35.993	9.517	7.853	5.592	6.542	6.332		0.536291	20.4124
15.9649	6.337	10.991	19.065	15.256	115.222	34.565	9.33	4.637	4.649	5.383	4.984	12.538	15.346	23.042	30.1061	81.33	42.148	18.082	14.355	9.94	3.563	3.384	3.916	4.424	4.499	10.061	30.135	17.232	9.199	6.879	91.267	32.242	10.615	7.344	5.423	6.134	5.975		0.540322	19.7189
16.0841	6.469	10.808	19.912	13.752	111.037	34.485	7.479	4.484	4.797	4.411	6.801	14.451	16.58	24.812	27.8273	85.675	37.618	22.015	16.268	12.236	2.853	2.824	3.026	3.63	4.921	8.601	29.272	16.122	6.502	7.998	89.909	30.674	9.676	6.281	4.947	6.681	7.028		0.544356	19.5368
16.2032	4.383	11.315	19.157	15.07	100.473	32.109	8.463	3.773	4.404	3.391	5.732	10.593	20.967	21.524	33.1801	96.453	32.762	24.081	17.906	11.12	3.085	3.609	3.666	2.995	4.791	8.952	25.981	18.824	10.253	6.967	95.286	26.139	11.141	6.244	6.65	7.662	6.247		0.548387	19.604
16.3224	6.661	11.19	14.668	13.342	92.238	32.441	5.698	3.886	4.832	5.361	6.319	11.686	29.148	25.761	34.4518	91.896	28.392	26.919	17.67	10.941	2.692	3.888	4.121	5.283	4.965	9.454	30.26	18.775	7.498	5.226	96.878	26.268	9.399	6.501	7.03	5.622	6.331		0.552422	19.5592
16.4415	6.489	9.042	14.728	14.709	92.475	28.081	7.088	4.72	4.601	3.854	6.6	10.921	41.964	25.534	28.314	100.406	26.831	30.949	17.16	13.088	3.17	3.031	3.044	3.243	5.216	10.127	24.258	16.27	9.954	6.413	86.366	24.028	11.686	6.793	5.512	6.313	8.221		0.556452	19.4919
16.5606	6.497	10.605	16.575	16.403	85.997	30.08	6.734	4.015	4.806	4.065	7.015	9.536	55.115	21.414	22.8125	97.823	26.683	29.506	14.364	11.592	3.477	2.511	5.364	3.788	5.382	8.928	25.027	19.09	9.533	5.161	91.044	25.61	9.058	7.233	6.338	4.962	6.2		0.560483	19.4687
16.6798	6.434	8.419	11.787	17.47	76.165	25.18	7.591	5.836	4.255	3.275	5.686	10.448	57.165	19.716	21.4565	107.847	26.135	38.971	14.574	12.103	2.89	3.235	4.091	4.111	5.023	7.213	24.992	22.606	9.967	6.015	93.642	24.253	8.704	7.213	6.036	6.143	8.179		0.564518	19.5899
16.7989	5.52	10.833	13.874	20.342	75.124	29.496	6.591	3.223	4.558	4.326	6.927	8.197	54.47	17.614	17.9311	110.042	30.215	44.392	14.527	9.427	2.74	3.733	3.218	4.702	4.778	7.634	21.089	20.621	10.595	5.337	90.095	24.925	8.325	5.963	7.489	8.391	6.395		0.568548	19.5584
16.9181	5.826	7.85	13.061	18.697	72.249	24.678	5.9	4.547	5.478	4.805	6.435	9.059	49.184	18.034	18.1039	117.727	25.617	41.564	15.258	12.678	3.273	2.789	3.788	4.091	4.695	7.7	20.22	20.596	9.541	6.281	90.044	22.845	8.989	5.528	5.955	6.891	8.075		0.572583	19.1365
17.0372	5.527	9.723	13.226	18.419	61.464	22.406	4.767	3.095	5.123	4.443	6.182	9.972	44.717	19.204	14.4209	123.879	21.252	43.398	15.294	12.74	2.944	2.248	3.015	4.963	3.76	7.214	23.871	21.073	12.792	5.895	93.737	21.816	7.758	7.019	5.445	7.666	7.782		0.576614	18.8716
17.1563	6.726	8.866	14.056	19.386	59.424	21.438	5.019	3.864	4.55	4.679	6.186	9.882	41.883	22.11	14.8261	129.522	22.021	44.093	18.829	11.44	1.932	4.489	3.078	4.91	4.599	6.872	22.578	21.194	11.003	5.254	90.163	22.391	7.477	5.864	7.131	6.449	5.797		0.580644	18.9184
17.2755	5.952	9.585	12.894	16.261	57.363	22.272	6.243	2.895	4.718	4.956	5.576	9.906	40.885	22.829	12.5855	127.309	24.876	43.069	16.989	12.816	3.278	2.934	3.032	4.092	5.352	7.554	25.217	26.763	10.28	4.45	82.227	17.346	7.974	4.367	6.788	5.937	6.234		0.584679	18.4812
17.3946	5.629	9.941	10.576	14.388	56	18.865	4.456	3.3	3.468	5.682	5.603	10.193	36.492	24.152	12.9135	125.97	27.751	41.171	17.502	9.863	4.025	2.428	4.849	4.435	5.014	5.923	27.003	28.644	12.555	5.467	89.601	18.643	8.015	5.531	7.555	6.394	6.938		0.58871	18.5658
17.5138	5.238	9.748	12.169	12.872	51.116	18.656	5.55	4.208	3.709	5.293	6.977	11.563	31.462	28.071	12.5512	121.995	29.36	35.807	14.872	12.337	3.009	2.904	3.508	3.277	4.642	6.241	31.659	28.177	12.829	6.504	84.998	17.666	8.786	5.6	5.964	7.486	7.192		0.592744	18.2161
17.6329	4.738	6.923	11.191	14.008	42.55	13.566	6.105	3.995	5.205	5.198	5.079	9.654	23.322	28.382	12.9633	115.898	35.863	30.171	16.598	13.065	2.395	4.016	3.412	4.25	4.247	6.838	31.078	26.047	11.036	8.431	80.383	16.002	8.399	5.368	7.373	8.864	7.97		0.596775	17.3131
17.7521	4.998	9.417	10.138	10.168	49.114	15.292	5.771	2.519	4.108	5.284	6.612	9.147	24.58	25.709	15.8115	102.654	35.471	26.399	16.864	13.816	3.057	2.977	3.739	3.895	5.137	6.092	27.166	31.639	12.297	7.161	76.548	19.91	8.735	6.759	7.452	7.579	8.252		0.600809	17.0883
17.8712	5.56	9.528	10.301	10.385	42.421	14.608	4.992	3.697	5.98	4.428	6.439	10.814	21.067	24.331	18.5435	95.266	44.116	28.506	22.865	16.282	3.552	2.514	2.781	3.829	4.65	6.677	33.248	25.204	10.82	5.721	80.113	18.371	8.167	6.964	6.706	6.597	6.376		0.60484	17.0924
17.9903	6.191	8.202	9.199	9.759	41.221	14.225	4.363	3.993	5.354	4.158	5.259	11.269	20.329	22.901	15.3653	90.544	45.182	25.279	22.815	14.871	3.441	3.677	3.312	4.388	4.01	6.425	38.292	26.639	13.29	4.698	81.821	17.091	8.725	6.013	4.947	7.095	8.004		0.608871	16.8202
18.1095	4.858	6.022	8.263	9.585	45.356	12.865	4.761	3.152	4.853	4.542	6.514	10.402	18.762	23.894	13.0746	76.489	54.218	23.303	24.83	15.135	3.886	2.78	3.652	5.551	3.897	7.067	42.701	25.311	13.237	7.909	77.823	17.808	9.461	5.3	5.645	7.162	5.905		0.612905	16.6479
18.2286	5.905	7.828	9.18	8.706	40.404	14.619	6.795	4.352	4.72	4.981	5.164	10.403	16.686	26.046	12.1037	83.131	61.223	22.439	26.02	14.279	2.787	2.824	4.292	3.615	4.538	6.693	34.168	20.133	10.994	6.054	78.942	17.966	9.907	6.545	5.203	8.079	5.368		0.616936	16.5701
18.3478	5.726	6.406	9.478	9.56	42.91	11.873	5.797	2.995	4.56	4.192	5.289	8.895	17.05	24.486	10.1953	70.738	64.983	26.434	25.584	15.721	3.72	2.735	3.421	4.091	6.334	7.516	35.106	19.182	11.89	5.654	77.147	18.613	9.515	6.966	5.987	7.474	6.164		0.62097	16.3348
18.4669	4.97	6.658	8.479	7.923	43.861	11.086	3.414	3.071	3.613	4.828	6.321	10.004	16.952	21.954	11.4263	68.614	76.9	29.59	27.472	17.536	3.755	3.701	4.149	4.959	4.889	6.053	31.707	19.063	10.564	6.776	73.506	17.078	8.651	5.181	5.787	5.68	5.731		0.625001	16.2676
18.586	5.357	6.1	6.745	6.531	42.34	12.787	5.748	2.412	4.975	4.774	5.7	8.173	20.414	25.329	11.7966	64.829	84.571	30.023	31.04	17.392	3.373	3.3	5.276	4.496	4.309	6.551	23.168	17.499	11.362	5.249	78.562	17.568	7.361	4.94	5.847	6.924	7.805		0.629032	16.5034
18.7052	4.57	6.512	7.418	7.914	44.209	13.972	4.869	4.275	4.85	5.479	7.616	9.976	20.398	20.981	12.2115	69.343	84.762	33.018	31.529	19.34	3.784	2.907	5.034	4.581	4.696	7.42	23.702	17.696	11.044	7.052	79.99	17.752	9.549	6.176	5.404	7.3	6.362		0.633066	17.1268
18.8243	4.864	5.925	7.778	7.473	46.849	12.623	5.174	4.092	4.932	6.133	5.974	9.389	16.167	25.709	12.323	63.663	101.572	34.865	36.535	23.813	3.909	3.578	3.785	4.048	3.797	8.683	20.454	19.446	11.499	6.548	82.946	19.156	8.735	5.865	6.365	8.31	7.346		0.637097	17.8466
18.9435	6.155	6.958	8.569	8.532	43.912	11.593	4.727	2.883	4.507	5.405	7.214	9.354	16.365	28.384	14.6779	61.747	94.945	35.969	40.932	23.357	2.934	3.342	3.894	4.919	5.305	6.53	20.188	17.804	9.207	8.279	77.119	18.164	8.259	6.103	6.658	8.625	5.617		0.641131	17.5441
19.0626	4.681	4.776	7.089	6.65	45.292	12.143	3.447	3.724	3.192	4.144	5.163	9.683	12.279	28.35	15.018	64.193	107.539	34.711	42.166	29.051	3.415	3.09	4.278	3.796	4.802	7.237	20.341	14.707	10.804	7.555	77.202	19.477	7.284	5.654	5.021	5.607	5.548		0.645162	17.5435
19.1817	5.411	5.218	6.408	6.778	43.915	11.931	6.296	3.428	4.064	3.091	6.264	8.751	14.278	26.066	14.6017	62.26	108.491	41.107	47.36	31.334	2.975	4.373	5.245	4.35	4.176	6.826	21.178	17.656	9.772	9.189	80.356	21.292	9.027	7.218	6.55	8.307	7.047		0.649193	18.4484
19.3009	7.989	6.066	7.167	8.972	45.813	11.444	4.148	4.263	3.487	4.317	4.956	8.127	15.072	24.599	15.0717	56.045	112.445	40.453	51.337	29.994	3.403	3.347	4.684	4.418	4.546	10.289	18.139	15.678	8.451	8.794	79.186	17.42	7.825	5.402	6.075	7.626	7.416		0.653227	18.2288
19.42	5.363	5.454	7.176	8.593	45.202	10.95	3.973	4.697	3.939	3.901	6.349	8.234	17.348	26.839	17.2162	56.891	128.609	47.623	53.014	32.504	4.323	3.502	3.573	4.403	4.836	7.6	19.947	18.038	10.281	6.918	74.8	22.286	7.013	5.746	6.689	8.777	8.316		0.657258	19.2141
19.5392	4.121	5.943	6.258	7.289	46.19	11.233	5.739	3.654	3.707	4.615	5.977	9.751	16.214	24.062	16.0892	45.541	136.386	49.76	60.054	40.225	4.213	2.688	4.654	4.065	5.334	9.569	18.257	17.504	10.875	9.823	83.886	21.804	8.379	4.378	6.026	9.621	8.289		0.661292	19.7885
19.6583	6.153	6.43	5.804	8.719	49.542	13.224	5.79	4.083	3.28	4.041	6.72	8.856	18.206	19.126	16.1034	40.752	148.252	47.158	61.477	48.024	4.478	3.275	4.914	4.148	4.026	8.867	15.782	20.956	11.3	9.319	89.426	24.252	9.862	6.117	6.244	7.53	7.636		0.665323	20.5371
19.7775	5.18	5.087	4.948	7.4	45.371	11.079	5.151	3.312	5.446	3.507	6.594	7.996	20.059	18.687	15.5157	40.824	164.309	53.773	63.635	50.939	4.401	2.861	2.802	4.385	6.335	7.199	15.711	21.836	13.484	10.607	92.885	29.445	8.335	5.502	6.468	9.188	6.952		0.669357	21.2759
19.8966	5.89	6.901	6.748	8.144	46.174	13.666	5.657	3.252	3.575	4.53	7.183	9.303	19.534	15.646	13.5385	35.384	162.819	60.45	67.759	64.063	4.751	4.11	4.165	4.489	5.917	7.068	17.899	28.645	13.399	11.483	94.6	33.425	7.595	5.83	7.042	8.101	7.988		0.673388	22.3439
20.0157	5.259	4.416	5.561	7.969	46.956	9.855	3.89	3.14	2.354	4.95	5.63	8.801	21.241	20.674	13.3908	35.209	176.671	65.765	73.023	72.353	3.333	3.401	3.886	5.569	5.447	6.901	19.921	39.405	10.167	14.079	94.146	45.053	7.689	4.928	5.883	8.963	7.925		0.677419	23.6163
20.1349	6.866	4.769	6.58	7.136	44.702	11.829	4.715	3.483	4.906	4.38	5.78	8.209	23.747	20.553	12.9575	39.046	182.745	85.246	73.431	78.9	3.861	4.082	4.464	4.997	6.194	8.202	19.033	52.125	13.11	17.508	102.245	52.929	9.729	6.804	7.331	7.85	9.794		0.681453	25.9524
20.254	4.402	5.433	5.631	8.279	43.249	10.663	6.055	3.274	4.352	4.272	5.752	8.936	24.54	20.979	12	45.494	175.435	86.222	78.212	86.798	4.693	4.202	4.83	5.662	4.883	8.876	16.398	75.921	16.887	17.266	100.699	61.793	11.099	5.595	7.838	7.652	8.375		0.685484	27.0986
20.3732	6.966	4.529	4.939	9.476	43.393	14.469	5.065	3.646	3.632	3.289	5.722	8.227	25.222	22.87	12.2864	49.259	166.487	94.833	81.653	100.652	4.021	4.35	4.288	5.235	7.094	7.07	14.893	97.848	15.154	17.806	99.461	64.359	10.539	6.117	6.545	9.844	9.403		0.689518	28.3957
20.4923	4.351	5.725	4.342	8.302	44.847	11.499	6.116	3.301	3.616	4.649	5.606	8.845	26.068	20.276	13.4329	46.586	158.75	108.536	80.678	106.446	3.838	3.039	5.166	5.139	5.907	8.027	13.447	105.122	16.195	23.081	105.003	62.427	8.805	6.961	8.4	9.31	7.983		0.693549	28.9141
20.6114	5.747	5.574	3.857	10.484	45.26	11.591	4.296	3.46	3.436	4.09	4.581	8.861	23.564	20.063	11.2264	45.505	155.953	104.443	91.023	105.073	6.023	3.375	5.111	5.882	6.198	7.421	17.118	95.065	16.527	24.654	106.748	84.882	10.58	6.276	7.074	6.814	9.293		0.69758	29.3818
20.7306	4.642	4.937	5.998	10.76	43.302	12.74	4.449	3.44	4.307	4.178	5.68	8.559	20.836	18.812	15.0378	38.862	147.074	99.671	89.719	101.564	5.421	4.256	4.728	4.745	6.615	6.569	15.423	83.242	24.579	26.541	110.173	96.099	10.78	7.961	7.727	9.878	9.038		0.701614	29.1444
20.8497	4.867	4.047	5.567	11.563	43.283	10.534	4.252	4.376	5.192	4.108	6.057	6.53	15.776	17.148	10.4078	34.817	152.584	93.972	86.087	100.767	6.337	4.239	4.254	6.548	5.819	7.359	14.381	70.728	26.963	35.213	120.493	107.204	11.088	8.134	9.586	8.412	9.144		0.705645	29.1307
20.9689	4.758	4.787	5.143	12.296	42.427	13.726	5.403	3.926	3.739	4.829	6.703	6.118	18.541	17.858	10.629	30.614	132.139	89.63	89.785	87.224	6.407	4.08	3.4	4.729	5.78	8.539	15.68	52.914	38.623	46.356	114.702	102.844	13.737	8.779	7.369	10.742	8.556		0.709679	28.203
21.088	5.736	5.642	5.723	16.686	48.103	11.262	6.447	2.58	4.132	4.205	5.303	7.436	18.036	17.327	10.8052	27.708	131.761	83.41	91.052	81.547	7.738	4.131	4.488	5.538	6.9	8.972	13.079	43.909	48.57	53.863	111.994	114.168	13.722	6.764	8.486	9.765	8.121		0.71371	28.5165
21.2071	5.558	4.33	4.755	15.49	46.113	10.69	4.433	3.142	3.726	4.212	5.414	8.542	13.487	16.666	11.2516	27.338	124.81	77.721	93.493	68.443	8.561	5.196	3.895	5.834	6.558	8.863	16.289	38.525	69.579	61.142	110.983	113.036	14.743	9.497	8.532	9.003	8.065		0.717741	28.322
21.3263	5.135	5.276	6.129	15.932	45.641	14.536	5.696	3.655	4.788	4.822	5.701	8.499	15.217	18.038	8.9019	27.038	106.994	70.23	87.202	64.454	10.283	5.32	6.084	5.089	5.168	5.713	15.119	35.243	87.649	69.876	119.965	113.184	17.043	9.229	10.666	10.423	9.366		0.721775	28.6299
21.4454	3.897	5.913	6.339	21.003	47.47	12.477	5.189	4.133	4.401	4.726	5.773	9.518	13.175	15.378	11.1366	24.851	98.381	65.344	79.401	55.716	13.139	5.959	4.911	6.021	7.373	6.737	12.104	29.178	95.215	81.397	129.789	108.33	23.876	8.472	10.942	7.866	10.092		0.725806	28.5303
21.5646	4.89	6.156	7.149	20.215	41.656	13.877	5.364	3.924	4.591	4.473	7.215	7.881	11.586	17.425	10.1962	27.994	84.789	57.979	73.737	44.861	15.839	5.983	5.74	5.517	6.073	8.032	11.421	29.757	80.986	81.441	139.248	104.382	27.493	8.335	10.591	11.008	8.058		0.729841	27.4557
21.6837	4.383	5	4.973	22.174	47.821	15.186	5.316	3.674	3.471	4.769	7.009	7.759	15.311	16.478	9.9329	25.422	77.255	56.562	73.474	39.898	18.035	4.956	5.951	5.459	5.583	6.274	12.275	25.094	74.756	87.593	142.17	97.959	29.365	10.882	11.423	9.242	9.691		0.733871	27.0966
21.8029	5.038	4.96	6.578	23.942	48.764	15.261	6.17	4.861	3.073	4.488	6.848	8.804	13.975	20.629	11.1488	29.548	65.174	57.948	64.362	37.046	17.663	5.943	4.452	4.903	6.155	7.912	14.759	22.152	68.208	87.769	127.91	93.785	33.182	10.612	12.432	9.163	8.118		0.737906	26.3172
21.922	4.966	4.604	5.924	27.285	46.144	16.943	5.901	3.718	3.522	4.538	4.746	7.313	15.075	20.365	11.315	35.244	60.407	59.578	58.924	31.669	15.982	5.963	5.358	5.793	5.936	7.512	11.697	25.145	60.106	86.256	127.181	83.501	44.529	10.813	14.458	10.077	9.539		0.741937	25.8926
22.0411	3.443	5.345	8.021	23.149	48.72	18.203	7.649	4.597	2.976	4.493	5.572	7.095	13.635	21.859	11.3985	33.458	47.56	54.455	49.744	29.086	13.729	8.093	5.555	5.359	5.99	7.944	13.48	23.008	61.033	92.525	110.341	73.452	55.516	11.059	17.049	10.589	10.348		0.745967	25.0143
22.1603	5.467	4.961	7.188	27.71	51.247	21.469	6.974	4.242	4.018	4.199	5.095	7.337	15.151	20.384	11.7224	29.565	48.717	62.843	41.161	23.302	16.777	7.831	6.052	5.835	5.716	7.715	13.63	26.912	60.174	86.573	99.224	62.42	76.246	10.309	18.156	8.877	11.598		0.750002	25.0486
22.2794	4.508	5.345	7.359	30.468	47.401	16.553	7.481	3.42	3.405	4.155	6.208	7.575	13.757	21.683	12.8999	27.95	46.988	62.194	39.778	20.646	13.679	8.163	6.289	5.342	6.282	7.946	16.79	28.411	72.746	90.07	93.257	56.08	89.968	12.037	21.893	11.33	11.751		0.754033	25.4543
22.3986	4.776	5.246	5.719	27.93	53.778	22.537	5.644	4.681	3.168	3.763	4.666	6.42	12.036	23.285	10.8304	30.79	47.533	64.784	33.066	18.162	16.024	7.948	5.858	6.256	6.186	7.291	19.701	33.122	93.02	94.082	81.236	49.731	102.751	13.541	29.405	12.623	12.596		0.758067	26.4915
22.5177	5.007	5.491	6.745	30.784	56.386	23.672	6.482	4.145	4.543	4.99	3.662	6.891	12.617	20.736	16.0194	27.098	36.833	68.535	26.296	16.695	17.592	11.594	6.902	6.678	4.875	7.198	25.432	36.303	106.458	109.161	67.628	41.535	109.653	13.921	33.719	15.964	13.938		0.762098	27.3562
22.6368	4.228	4.656	6.124	31.728	61.381	23.924	6.049	4.019	4.046	3.337	4.931	6.779	12.985	20.495	14.9746	23.649	43	71.994	20.738	13.702	18.144	10.638	6.482	5.563	7.017	7.996	24.372	38.771	119.181	116.695	56.31	36.725	110.548	16.92	34.1	18.075	15.493		0.766129	27.7235
22.756	5.824	3.715	6.117	33.566	64.194	23.34	6.96	4.625	5.149	4.53	3.854	7.342	13.002	21.732	15.0295	27.221	30.266	80.218	13.884	8.887	15.094	11.89	8.983	6.99	5.071	7.99	32.198	39.202	120.11	118.299	49.071	25.3	112.203	26.813	32.672	17.103	16.847		0.770163	27.7106
22.8751	4.25	5.395	5.293	35.253	66.612	24.832	7.16	5.054	3.923	4.537	4.325	5.532	13.152	21.676	18.182	28.708	27.392	79.248	15.464	8.689	17.604	9.895	8.467	7.486	6.23	8.741	26.47	43.175	119.121	110.529	41.663	19.859	108.734	29.374	34.481	22.942	25.26		0.774194	27.6948
22.9943	5.261	4.151	7.568	39.15	67.574	26.014	7.274	4.648	5.162	3.8	7.005	6.955	15.188	25.147	17.5753	29.476	27.897	77.427	12.888	8.546	15.321	13.472	9.241	7.779	6.62	7.897	31.302	48.186	114.955	99.389	29.844	18.332	102.015	33.94	37.382	21.579	31.2		0.778228	27.7611
23.1134	5.268	4.949	7.189	42.691	74.032	26.16	5.768	6.036	3.751	3.774	5.003	6.312	15.257	24.957	21.7982	27.361	29.613	75.951	12.544	8.244	17.18	13.612	10.241	6.308	5.872	8.518	31.705	62.318	111.638	80.527	27.171	12.774	90.147	45.498	36.246	24.459	38.737		0.782259	27.8273
23.2325	5.269	5.221	7.372	41.873	76.044	28.014	7.842	4.971	3.037	4.619	3.368	6.54	13.154	26.479	21.9149	28.123	31.429	65.301	10.579	6.942	16.027	12.222	9.452	7.837	7.085	8.233	33.757	66.557	117.962	58.806	18.062	10.76	77.642	50.112	44.04	24.483	44.481		0.78629	27.1786
23.3517	4.518	6.916	9.165	43.473	77.311	24.006	9.655	4.51	4.17	4.352	4.345	8.77	14.712	27.927	24.8175	28.438	26.929	51.802	10.79	6.135	19.073	12.09	11.284	6.1	6.719	9.046	39.115	70.505	129.607	47.185	15.568	9.207	60.643	55.518	42.585	24.24	50.269		0.790324	27.0674
23.4708	4.061	5.627	7.333	45.449	71.896	31.711	10.651	5.592	3.764	4.457	5.561	6.758	15.93	31.432	31.6946	26.572	30.438	45.969	8.517	7.115	21.399	14.308	11.527	7.235	7.335	10.749	52.49	69.565	122.927	40.588	11.674	8.078	43.476	63.689	40.286	22.347	62.062		0.794355	27.3044
23.59	3.905	6.495	7.424	46.362	66.986	35.447	9.956	5.052	3.499	4.458	3.784	7.379	16.714	31.873	33.9833	28.293	36.848	41.811	8.515	4.469	26.344	13.619	12.976	7.903	8.11	13.883	68.701	76.576	125.849	31.415	11.42	6.751	34.017	69.204	34.938	24.636	92.05		0.798389	28.6931
23.7091	4.507	6.047	8.795	50.312	61.91	42.124	12.436	5.87	3.934	3.678	4.52	6.597	17.952	35.964	39.9583	30.951	41.525	35.078	6.593	4.802	28.907	12.281	13.24	6.85	7.529	15.701	86.674	78.174	109.525	26.91	7.435	6.521	27.47	67.241	36.898	26.775	89.294		0.80242	28.9454
23.8283	4.801	5.213	11.083	51.162	58.449	52.887	12.047	5.38	4.695	3.535	4.816	5.542	13.194	35.059	48.0944	26.499	43.14	29.145	8.009	3.41	34.011	16.804	15.665	8.017	6.674	18.436	94.704	79.946	98.381	25.935	6.986	4.38	17.713	74.364	39.758	34.331	92.203		0.806454	29.5802
23.9474	3.75	6.673	9.649	53.424	53.963	52.885	9.234	6.204	4.575	3.014	5.144	6.419	17.175	33.608	47.5285	29.897	48.562	27.453	4.961	4.179	41.806	15.863	16.585	6.913	8.378	19.405	101.573	71.149	74.353	22.381	7.445	2.96	13.414	71.762	46.334	41.777	80.93		0.810485	28.9547
24.0665	5.036	7.576	12.022	48.628	45.889	56.088	12.587	6.269	4	4.384	4.662	5.729	16.608	37.453	54.8618	29.125	51.875	26.723	4.648	3.271	45.443	17.839	13.231	9.347	7.66	23.781	108.638	63.646	66.924	19.195	5.64	3.588	10.593	78.393	51.002	44.148	90.422		0.814516	29.6466
24.1857	7.058	5.216	11.287	47.801	40.061	61.778	13.899	5.958	3.956	3.619	5.538	6.957	19.71	31.563	58.6544	30.244	53.608	22.166	5.418	2.186	48.987	15.384	15.893	7.521	11.119	27.61	99.233	59.849	46.358	12.409	5.702	4.444	9.972	65.295	57.707	61.887	90.917		0.81855	29.1071
24.3048	5.847	7.615	14.618	46.49	40.947	62.933	14.051	5.328	4.504	4.595	3.424	7.554	22.41	39.248	62.6125	27.484	55.799	20.211	4.227	2.331	52.14	20.223	16.468	9.414	13.279	38.376	98.589	45.59	34.749	11.511	4.438	3.813	9.726	57.319	66.74	71.249	96.885		0.822581	29.8037
24.424	6.531	7.569	15.296	49.031	32.028	66.642	15.914	6.704	3.863	3.71	4.853	6.467	22.451	36.675	59.0668	30.614	58.862	17.346	2.918	2.288	50.93	20.4	15.822	8.499	20.582	48.658	88.438	31.867	27.585	9.219	3.261	2.873	6.195	45.726	75.086	88.399	101.3		0.826615	29.5586
24.5431	5.796	8.794	13.264	41.221	24.891	69.965	17.597	6.765	4.207	4.567	4.425	6.825	32.492	36.326	61.426	32.95	60.051	16.099	2.72	2.209	47.295	22.807	18.534	8.946	30.199	53.783	73.29	21.321	19.594	6.975	4.388	2.653	4.985	29.609	81.812	106.306	101.708		0.830646	29.3728
24.6622	8.492	10.576	15.288	39.318	20.448	74.453	18.481	6.56	4.697	4.866	4.022	6.41	39.046	39.338	58.6874	32.96	56.445	11.827	3.948	1.804	40.687	25.045	17.099	9.425	37.142	62.563	56.673	15.305	16.052	4.929	2.201	2.123	5.977	20.972	83.828	106.003	97.151		0.834677	28.6714
24.7814	6.574	11.365	23.632	36.183	15.976	68.471	22.877	8.298	4.794	3.935	3.557	6.88	42.596	42.882	58.7019	35.276	54.268	9.23	3.664	3.922	38.389	29.2	20.502	8.935	52.161	66.767	42.176	10.159	9.45	4.585	3.631	1.869	3.429	20.798	72.349	100.373	83.3		0.838711	27.8691
24.9005	9.21	11.059	22.841	29.663	13.057	73.622	25.017	9.068	3.636	3.135	4.662	6.639	52.716	49.909	54.5933	31.924	49.951	8.706	2.98	2.553	34.894	31.019	17.548	9.393	66.568	90.559	35.206	9.417	7.243	4.324	3.771	2.155	3.977	14.664	51.633	82.05	63.845		0.842742	26.8434
25.0197	8.55	11.291	24.529	25.249	11.076	71.021	30.619	11.43	4.003	3.885	4.936	6.373	53.012	57.412	60.2796	39.161	47.365	7.669	2.314	2.772	36.503	34.766	20.449	11.896	72.403	106.26	22.938	6.798	7.061	3.472	3.85	1.467	3.345	10.775	36.677	59.882	40.472		0.846776	25.9989
25.1388	9.132	13.104	31.073	21.284	12.491	64.316	36.7	12.221	3.987	4.961	4.839	8	58.423	58.714	61.9425	35.522	49.16	6.047	2.44	2.595	35.499	31.972	17.934	15.095	78.608	106.585	19.144	5.642	4.565	3.396	2.219	1.933	3.387	7.184	24.917	41.174	23.856		0.850807	24.8665
25.258	10.674	12.839	31.382	17.312	9.866	60.548	46.837	16.858	3.777	4.235	3.182	7.352	72.145	66.615	57.0394	36.745	45.649	6.21	2.1	1.73	35.784	32.749	21.44	19.369	86.641	102.702	14.913	6.824	4.297	3.57	1.439	1.237	2.378	7.358	17.035	29.315	14.23		0.854841	24.7129
25.3771	9.857	15.509	36.953	10.988	7.587	53.332	48.814	21.721	4.013	3.47	4.712	7.309	80.133	74.804	54.4467	28.348	40.952	3.086	2.516	1.827	34.938	29.987	26.766	28.463	88.185	79.174	8.806	3.415	5.197	2.913	1.674	0.946	2.132	6.999	11.705	18.187	9.911		0.858872	23.5075
25.4962	13.323	19.94	44.091	9.905	7.565	39.768	51.589	25.087	4.318	3.607	4.563	7.982	85.531	79.326	50.6635	33.644	36.979	4.002	2.329	1.285	32.367	33.122	29.3	38.064	103.792	64.368	7.735	3.709	3.279	3.741	1.017	1.747	1.601	5.599	10.007	11.324	7.545		0.862903	23.8869
25.6154	13.485	18.256	48.257	8.923	6.822	27.398	54.57	31.975	3.838	5.985	3.728	8.348	91.637	78.95	46.9204	33.466	30.902	3.98	2.114	1.418	25.522	34.342	31.84	48.236	101.873	46.481	5.838	3.308	2.811	2.162	1.167	0.625	1.238	3.577	6.846	11.401	7.311		0.866937	23.123
25.7345	14.048	20.097	60.166	6.384	6.947	20.911	56.169	44.624	5.838	3.952	3.831	10.126	100.136	78.109	45.599	29.143	28.855	3.906	2.349	1.214	24.168	33.977	35.818	48.661	106.802	40.353	4.245	2.588	2.765	2.029	1.584	0.872	1.771	3.47	6.792	7.976	6.057		0.870968	23.5765
25.8537	16.694	24.774	63.916	5.847	6.675	16.432	67.617	45.324	5.267	3.366	4.666	8.214	105.971	68.078	44.042	27.214	18.83	2.624	1.191	0.933	20.876	34.168	36.255	43.034	101.841	25.447	3.168	2.441	2.227	2.034	1.555	0.51	1.304	3.419	5.144	5.396	4.928		0.875003	22.4709
25.9728	13.852	27.029	72.238	6.222	5.701	14.17	64.411	49.116	5.46	3.876	3.846	12.045	97.722	68.532	40.4597	28.104	17.573	1.828	1.054	1.335	17.737	27.914	39.53	49.413	96.876	21.156	3.753	3.066	2.495	2.494	1.627	0.971	1.99	2.557	5.25	4.6	4.048		0.879033	22.1635
26.0919	16.312	28.018	75.695	6.628	4.87	7.473	67.475	56.719	5.91	4.382	4.549	15.253	109.982	64.381	35.8316	24.735	16.907	2.118	1.016	1.6	15.203	25.432	51.979	64.858	91.499	13.904	2.434	1.94	1.959	1.624	1.113	0.739	1.16	2.258	3.502	3.727	2.991		0.883064	22.5994
26.2111	22.347	34.424	75.063	4.292	5.598	6.37	73.316	62.42	6.221	3.873	4.63	16.79	111.043	57.965	32.8197	25.436	13.415	1.374	1.821	1.277	14.222	25.906	50.095	76.027	82.48	13.578	1.953	1.514	2.5	1.774	0.428	0.438	1.354	2.322	3.378	3.061	2.51		0.887099	22.8117
26.3302	25.775	34.356	76.668	4.123	4.713	7.42	74.769	57.615	6.588	5.421	5.333	20.789	118.57	57.287	34.292	18.197	12.377	1.711	0.968	1.228	10.347	28.152	53.164	82.937	70.625	11.067	2.048	2.031	1.425	1.247	1.319	0.496	1.223	1.44	2.604	2.894	2.171		0.891129	22.7943
26.4494	26.069	40.166	60.902	4.852	4.383	7.965	68.296	55.434	6.563	5.745	4.798	22.541	119.026	34.731	26.6691	16.4	8.154	2.439	1.713	1.523	9.555	26.558	48.337	94.12	52.591	8.029	1.806	2.112	0.949	1.379	1.068	0.882	1.056	2.79	1.624	2.272	2.891		0.895164	20.9835
26.5685	30.113	38.68	52.395	3.263	4.681	8.114	60.232	59.177	9.375	4.517	5.518	22.295	119.988	24.922	22.09	13.458	6.077	1.64	1.287	0.686	9.216	26.024	40.336	98.308	38.772	7.261	1.994	1.445	1.394	1.543	1.499	0.986	0.89	1.972	1.281	2.428	3.052		0.899195	19.6462
26.6876	32.175	41.885	43.879	3.445	3.263	6.246	50.473	60.048	13.012	7.59	5.911	25.868	116.747	20.106	17.4701	11.819	5.302	1.557	1.292	1.385	7.739	26.418	35.841	94.456	26.219	6.078	1.149	2.013	0.9	1.701	1.11	0.968	0.772	1.068	2.207	1.242	2.335		0.903225	18.424
26.8068	36.285	50.322	31.981	3.31	4.49	7.161	41.009	66.271	16.762	4.528	4.838	30.284	100.566	15.957	15.2282	10.997	5.387	1.472	0.799	0.786	6.917	24.385	30.838	82.729	18.773	4.732	1.485	1.518	1.322	0.798	1.096	0.93	0.553	1.403	2.122	1.986	1.994		0.90726	17.0815
26.9259	48.239	55.41	25.638	4.88	3.654	4.622	25.851	57.952	27.705	5.233	7.257	38.003	86.23	14.289	15.173	8.68	5.027	1.553	1.59	0.836	7.599	18.592	28.719	74.341	15.114	5.703	1.998	0.907	0.883	0.81	1.053	0.83	0.972	1.166	1.981	1.531	1.941		0.91129	16.2692
27.0451	49.037	59.808	14.897	2.958	3.151	4.43	19.263	61.522	32.502	6.009	7.588	46.688	66.769	9.562	11.6161	7.712	3.508	0.854	0.626	0.839	6.994	16.133	21.806	56.412	10.756	3.532	1.394	1.499	0.889	0.692	1.088	0.176	0.923	1.708	1.829	1.012	1.408		0.915325	14.5295
27.1642	54.164	63.068	11.755	2.498	1.908	4.592	13.811	65.517	39.735	5.988	8.918	52.537	61.846	9.841	8.5749	9.447	4.26	1.599	0.561	1.157	5.252	13.482	17.765	35.953	9.331	3.009	0.997	0.834	0.782	1.005	0.903	0.215	0.181	1.485	1.118	1.336	1.766		0.919356	13.9781
27.2834	61.138	64.679	8.574	1.55	2.249	3.399	7.31	73.374	44.291	8.043	13.477	56.912	48.146	7.618	9.4493	5.75	3.308	1.654	0.62	1.034	4.027	12.056	14.728	20.621	8.148	3.325	0.498	1.003	0.998	0.556	0.834	0.552	0.61	1.507	1.373	1.753	0.574		0.92339	13.3983
27.4025	67.78	59.071	7.863	1.674	2.44	3.825	7.298	84.291	45.452	12.164	12.884	57.446	37.642	5.41	6.534	7.187	3.186	1.112	1.267	0.729	4.648	10.794	12.102	15.042	5.837	3.94	0.886	0.942	0.719	1.098	0.718	0.383	0.563	1.17	0.977	0.954	0.822		0.927421	13.1581
27.5216	69.359	56.188	5.889	2.154	1.388	2.877	7.967	87.836	39.375	15.052	17.665	45.229	27.664	5.456	7.3638	5.997	2.656	1.429	0.784	0.567	5.072	9.06	12.757	11.793	5.295	1.869	0.557	0.823	1.036	0.856	0.451	0.124	0.827	1.481	1.169	0.937	1.179		0.931452	12.3833
27.6408	78.742	39.903	4.982	1.246	1.513	2.816	6.526	84.174	37.076	23.637	23.557	47.951	22.96	5.424	6.3555	6.144	1.303	1.01	0.948	0.453	3.349	8.992	9.409	9.17	5.174	1.567	0.725	1.337	0.458	0.888	0.721	0.548	0.84	0.999	0.84	0.614	1.492		0.935486	11.9958
27.7599	79.96	26.059	3.367	2.141	1.761	1.631	5.615	82.513	42.836	31.318	31.643	40.231	16.974	5.335	5.0638	3.64	2.373	1.109	1.162	0.46	4.005	7.196	9.022	6.824	3.407	2.313	1.06	0.834	0.508	0.832	1.091	0.768	0.881	0.462	0.662	1.274	1.498		0.939517	11.5629
27.8791	76.297	18.437	3.224	1.891	0.736	2.615	3.706	65.786	43.636	35.544	41.567	47.611	13.331	3.625	4.3677	4.418	2.007	0.615	1.282	1.064	3.889	6.674	5.348	6.696	4.319	1.787	1.098	0.72	0.934	0.239	0.181	0.727	0.671	1.706	0.788	0.836	1.152		0.943551	11.0682
27.9982	69.558	10.404	3.961	1.281	0.675	1.599	4.531	51.85	52.139	43.963	51.192	49.369	9.882	4.771	4.3552	4.439	1.221	0.835	0.992	0.712	3.613	5.97	4.471	4.55	2.972	1.767	0.336	0.497	0.617	0.5	0.332	0.833	0.501	0.842	0.404	1.214	1.295		0.947582	10.7687
28.1173	52.472	8.273	2.891	1.327	1.394	1.671	4.134	33.785	52.724	37.45	64.18	55.312	6.845	3.629	4.3843	3.058	1.428	0.836	0.346	0.229	3.717	5.071	4.928	3.702	3.496	1.29	0.553	0.394	0.672	1.051	0.391	0.503	0.671	1.037	0.826	0.833	1.161		0.951613	9.90985
28.2365	36.214	8.664	2.835	1.531	1.057	1.612	3.528	19.78	62.449	32.399	57.81	50.416	6.003	1.853	3.0623	3.679	0.64	1.116	0.988	0.493	2.506	4.713	5.228	4.94	3.721	1.49	0.117	0.503	0.386	0.556	0.938	0.111	0.565	0.674	0.719	1.211	0.68		0.955647	8.78885
28.3556	18.706	5.933	1.894	0.942	0.565	1.01	5.333	11.08	65.054	30.864	59.077	52.945	6.379	1.535	3.5308	2.595	1.714	0.828	0.228	0.289	2.447	3.727	3.689	3.048	2.957	1.55	0.553	0.874	0.508	0.728	0.508	0.504	0.386	0.943	0.607	1.324	0.836		0.959678	7.99164
28.4748	10.783	5.559	2.664	0.897	0.934	1.148	2.571	8.005	70.313	27.953	55.703	62.944	5.568	2.645	2.4513	2.542	1.889	0.554	0.652	0.667	2.575	3.164	3.453	4.187	3.258	0.949	0.613	0.184	0.715	0.987	0.613	0.555	0.498	0.616	1.01	0.35	0.89		0.963712	7.86647
28.5939	8.457	4.115	3.601	0.893	0.559	0.46	2.505	5.116	84.701	29.999	53.936	63.014	3.75	1.926	2.4404	1.688	1.056	0.323	0.286	0.771	3.04	3.209	3.001	2.774	2.608	1.273	0.551	0.386	0.444	0.827	1.036	0.281	0.393	0.938	0.942	0.724	0.957		0.967743	7.91839
28.713	5.744	3.309	2.846	1.156	1.326	1.161	2.89	4.403	88.336	36.252	60.711	65.811	3.613	1.234	1.8016	2.635	1.434	0.395	0.162	0.498	1.966	2.738	3.238	3.154	1.799	1.09	0.236	0.388	0.07	0.51	0.73	0.277	0.387	0.458	0.611	0.722	0.671		0.971774	8.23683
28.8322	6.112	3.712	1.993	0.563	0.679	0.836	2.945	3.639	91.782	45.53	64.505	69.39	2.41	2.037	1.6742	2.275	1.012	0.76	0.499	0.657	1.66	3.229	2.947	2.127	1.822	0.679	0.661	0.773	0.821	0.448	0.442	0.22	0.116	1.211	1.155	0.939	0.551		0.975808	8.72463
28.9513	3.977	3.197	1.846	0.834	0.553	0.784	2.155	4.166	83.323	49.274	63.773	60.79	2.699	1.176	1.4877	1.072	1.159	0.344	0.449	0.454	1.616	3.123	3.003	2.867	1.393	0.824	0.768	0.451	0.494	0.448	0.118	0.06	0.439	0.664	0.889	0.296	0.763		0.979839	8.15483
29.0705	2.395	1.748	2.54	0.722	0.831	0.55	1.564	3.012	81.355	53.319	78.959	51.99	2.594	1.549	1.2798	1.218	1.001	0.333	0.279	0.876	2.109	3.526	3.474	0.964	2.257	0.452	0.502	0.113	0.504	0.55	0.385	0.114	0.993	0.227	0.841	1.204	0.456		0.983873	8.29151
29.1896	3.096	1.669	1.788	0.498	0.17	0.448	2.152	2.167	62.498	66.917	95.106	42.978	1.696	1.102	1.3915	1.493	0.576	0.282	0.387	0.944	1.505	3.67	2.341	2.257	1.016	0.932	0.279	0.385	0.399	0.115	0.615	0.332	0.561	0.236	0.671	0.661	0.503		0.987904	8.2118
29.3088	3.507	2.054	1.942	0.397	0.552	0.606	1.684	2.087	41.812	72.795	107.261	23.72	1.888	1.009	1.2759	1.835	1.201	0.769	0.223	0.334	2.21	4.035	2.661	1.622	1.111	0.74	0.171	0.39	0.55	0.22	0.544	0.056	0.165	0.72	1.046	0.724	0.668		0.991938	7.69148
29.4279	2.404	2.425	1.283	0.714	0.336	0.846	1.772	1.62	21.471	74.934	110.212	14.753	1.548	0.782	1.4394	0.954	0.678	0.614	1.151	0.343	1.228	2.022	2.06	2.038	1.013	0.495	0.444	0.55	0.494	0.334	0.667	0.217	0.224	0.82	0.727	0.402	0.566		0.995969	6.88055
29.547	2.913	1.291	0.778	0.396	0.661	1.102	1.837	0.893	12.976	84.244	107.55	10.913	1.332	0.942	0.6241	0.62	0.395	0.715	0.294	0.162	0.773	2.389	2.602	1.446	1.001	0.447	0.168	0.338	0.503	0.666	0.281	0.389	0.716	0.392	0.613	1.042	0.82		1	6.62768

## Sheet: Image10 (2)
X0	Y0	Y1	Y2	Y3	Y4	Y5	Y6	Y7	Y8	Y9	Y10	Y11	Y12	Y13	Y14	Y15	Y16	Y17	Y18	Y19	Y20	Y21	Y22	Y23	Y24	Y25	Y26	Y27	Y28	Y29	Y30	Y31	Y32	Y33	Y34	Y35		Ap-Ba	Avg int
0	30.734	28.046	26.322	24.244	34.036	40.608	32.874	34.172	29.236	22.968	26.591	24.823	24.659	43.195	35.446	34.235	40.172	63.237	69.27	84.01	43.629	46.108	37.71	46.67	38.967	32.03	15.603	16.917	21.861	32.169	37.461	24.41	21.615	18.907	15.85	15.937		0	33.7423
0.1191	34.447	34.543	31.359	28.114	41.77	49.74	39.647	39.159	35.108	28.382	28.462	28.803	29.616	43.762	41.488	40.786	41.122	65.699	76.845	90.914	54.892	51.471	40.849	58.215	42.399	35.984	18.757	20.79	24.752	34.594	44.635	30.732	26.805	22.541	19.057	19.998		0.00440376	38.7844
0.2383	42.942	37.301	35.473	35.021	47.489	56.028	45.162	44.379	43.248	31.393	31.875	33.955	37.536	54.941	49.675	49.924	48.981	79.035	87.401	99.85	70.793	60.664	48.085	69.762	50.773	42.523	22.295	26.279	31.943	42.58	50.664	35.212	34.376	22.244	24.053	22.361		0.00881121	45.7282
0.3574	47.12	42.555	36.972	34.811	50.881	63.159	54.538	50.301	47.276	38.931	37.71	38.333	43.167	59.982	56.47	57.895	51.409	90.415	97.137	109.954	83.993	68.623	60.376	80.951	59.81	51.454	26.988	30.853	38.749	49.915	59.873	43.536	43.884	29.304	27.549	26.324		0.013215	52.5333
0.4766	48.02	48.295	45.348	37.647	56.262	69.871	64.598	57.98	51.732	48.071	47.539	47.064	48.734	68.108	69.406	58.746	58.675	108.429	100.385	126.413	90.65	89.897	66.534	94.888	69.292	64.663	32.234	40.049	42.659	58.304	63.779	53.885	52.91	37.209	32.479	30.171		0.0176224	60.5813
0.5957	54.567	52.021	56.535	48.501	70.225	82.447	78.813	66.399	59.391	55.474	62.392	54.093	59.493	79.896	81.468	68.008	73.43	117.25	111.039	139.138	105.318	102.392	79.961	113.433	79.008	74.031	46.397	51.328	53.542	69.481	80.565	68.321	72.16	47.791	43.888	37.781		0.0220262	72.1105
0.7148	60.569	65.127	64.249	57.479	82.164	91.846	98.986	76.589	68.431	66.127	77.018	70.136	74.178	96.492	93.34	80.998	86.496	129.092	126.767	142.796	121.371	119.692	100.785	134.33	96.35	88.823	68.722	65.793	65.396	74.438	94.471	84.505	88.357	66.942	65.278	49.49		0.0264299	85.934
0.834	67.255	76.282	72.307	68.214	97.012	110.623	112.499	89.52	75.835	80.807	98.882	82.29	93.367	112.034	107.867	86.898	92.681	147.728	134.036	149.718	127.595	134.952	123.544	162.327	115.017	106.62	90.51	85.888	81.097	91.878	109.116	102.85	107.44	85.223	86.954	57.481		0.0308374	100.676
0.9531	76.836	91.244	88.23	79.837	112.196	126.218	133.564	100.056	93.449	98.948	113.587	97.026	104.907	133.327	122.329	96.498	115.491	161.204	149.828	149.34	147.164	155.174	139.425	173.138	127.387	124.438	110.396	103.673	95.12	104.939	139.899	117.466	129.774	116.21	113.124	74.559		0.0352411	117.111
1.0723	83.106	104.769	103.802	92.089	137.538	134.064	144.827	111.625	100.882	116.162	124.211	109.356	123.076	146.89	131.397	110.613	128.974	180.191	157.11	150.899	146.408	165.663	158.811	192.069	145.446	140.346	135.347	130.089	111.187	123.6	159.881	125.296	151.026	146.255	141.96	94.561		0.0396486	132.209
1.1914	90.184	113.349	122.09	111.328	162.036	151.125	164.492	121.881	125.418	140.992	135.361	122.768	143.034	152.344	155.373	130.857	149.741	197.866	156.544	159.965	155.286	181.952	180.324	203.131	155.626	148.043	157.024	144.72	123.732	145.043	179.871	145.881	180.616	191.098	178.011	113.185		0.0440523	149.73
1.3106	107.39	125.272	137.262	131.373	178.601	167.69	178.28	126.439	150.641	154.092	149.868	143.799	147.994	174.244	167.536	141.426	163.233	206.957	174.863	163.763	167.595	193.954	203.49	205.777	175.867	154.955	165.945	154.196	138.262	155.375	196.36	160.539	197.145	213.369	206.429	133.511		0.0484598	164.264
1.4297	114.788	131.642	148.857	154.438	196.311	176.436	176.553	140.686	160.069	167.985	155.262	154.487	160.405	175.663	159.535	153.089	170.04	208.992	180.695	167.988	170.909	196.838	217.977	215.935	188.452	158.383	166.633	162.835	150.005	180.114	203.297	168.983	207.165	229.2	217.988	156.375		0.0528636	173.472
1.5488	124.75	138.768	149.236	171.107	203.937	183.461	184.752	151.717	176.817	169.165	147.015	157.786	167.211	183.055	145.298	167.05	180.753	212.708	182.977	163.388	178.431	200.52	222.847	207.323	188.537	160.978	170.212	169.907	153.871	183.657	211.615	172.281	209.966	232.892	228.975	177.054		0.0572673	178.612
1.668	135.351	143.021	148.298	181.487	186.655	168.171	174.798	155.207	186.277	170.055	133.861	144.128	175.751	179.15	120.594	163.727	183.142	200.648	182.788	160.252	181.732	204.485	219.782	193.32	186.909	164.958	174.255	167.72	166.153	187.618	206.307	190.489	209.286	234.706	229.321	199.065		0.0616748	178.041
1.7871	141.431	142.832	141.02	184.732	170.914	149.231	164.587	151.152	182.975	154.046	103.234	125.844	162.807	167.482	97.578	144.441	172.616	187.362	178.81	154.013	187.541	202.844	214.698	171.846	177.544	158.791	164.727	155.217	158.013	188.568	194.25	199.076	202.727	226.305	224.312	213.583		0.0660785	169.921
1.9063	139.818	134.406	140.299	187.065	131.052	126.085	149.978	144.752	171.335	127.194	71.514	103.666	142.437	133.429	76.967	125.676	152.235	158.276	172.604	154.05	192.172	200.407	204.254	143.295	166.489	151.796	144.048	148.386	154.362	189.635	186.391	196.643	188.17	210.071	217.307	214.481		0.070486	156.965
2.0254	146.077	127.324	134.576	179.669	98.653	97.487	133.56	120.832	155.089	94.805	54.195	78.7	126.743	100.404	61.028	99.886	120.175	143.149	151.324	146.848	190.027	193.513	185.693	124.524	149.314	136.275	130.444	134.744	139.178	181.169	152.381	181.299	163.501	181.153	205.161	214.961		0.0748897	139.829
2.1445	144.499	116.453	123.225	155.884	73.56	75.308	120.963	100.596	132.304	65.004	35.761	54.83	99.613	71.407	45.788	78.259	95.468	118.519	126.574	139.931	192.159	180.137	166.822	108.307	137.113	118.871	114.109	119.309	135.368	164.087	128.688	165.882	142.549	147.549	182.946	214.644		0.0792935	122.014
2.2637	140.587	104.745	116.855	126.561	56.157	61.799	108.432	83.364	106.848	43.59	28.257	42.224	76.858	55.639	37.2	57.495	68.697	96.883	102.008	141.833	192.227	176.991	147.874	84.896	123.51	104.211	103.818	108.316	126.002	153.839	97.765	144.738	119.22	119.876	158.637	196.457		0.0837009	105.956
2.3828	138.098	92.502	108.542	94.406	37.172	48.909	94.535	72.097	81.098	34.68	20.254	31.539	56.324	42.83	31.26	45.963	47.388	78.672	84.248	144.302	179.168	153.573	122.878	75.587	106.235	89.359	87.373	99.235	120.675	135.99	76.83	128.987	90.017	93.746	142.277	177.175		0.0881047	90.6646
2.502	123.593	87.351	104.63	73.223	29.83	38.612	80.986	66.737	65.544	23.214	16.507	23.635	41.991	35.72	26.03	31.026	28.803	60.829	64.075	136.556	169.753	133.6	103.111	60.892	82.698	74.024	82.287	88.43	118.108	119.414	63.951	108.207	74.15	73.022	119.957	152.121		0.0925121	77.2949
2.6211	106.498	77.85	94.658	54.735	24.517	36.084	65.861	69.572	51.489	21.438	14.534	21.437	34.497	32.246	22.679	26.333	26.658	49.84	44.87	122.479	157.291	112.665	89.562	50.038	69.791	61.496	74.848	79.255	104.75	96.725	51.481	77.606	63.895	58.68	98.723	120.64		0.0969159	65.7145
2.7402	102.003	70.79	81.842	43.044	20.907	32.892	58.171	67.323	44.955	19.726	12.44	17.912	28.322	29.874	17.425	21.943	21.401	37.747	35.339	109.354	147.641	101.752	74.054	46.526	59.749	47.909	68.651	69.275	98.877	74.51	41.404	62.992	50.283	46.323	84.688	99.16		0.10132	56.8668
2.8594	91.329	69.975	64.89	37.088	18.411	29.365	53.004	59.412	40.011	17.806	11.96	16.311	23.893	26.631	15.985	20.332	21.986	32.976	29.994	100.454	134.955	88.555	58.372	39.599	53.482	37.791	60.028	70.486	92.125	59.352	32.871	51.903	43.378	38.391	69.274	75.732		0.105727	49.6696
2.9785	80.589	62.618	52.761	32.25	14.741	26.382	47.449	55.127	31.894	15.185	9.821	15.621	20.777	23.106	13.256	19.136	20.786	32.195	23.743	87.191	132.168	74.648	52.757	39.645	46.699	33.82	51.688	61.84	80.547	43.875	28.028	38.627	38.39	32.399	59.204	62.074		0.110131	43.3621
3.0977	77.984	60.076	48.036	29.187	11.929	26.47	37.854	53.605	27.926	15.316	9.732	13.432	21.222	18.533	12.13	17.553	16.706	27.91	25.37	69.925	121.584	68.35	48.097	37.187	43.569	27.781	45.57	55.595	72.991	32.186	26.695	30.877	32.221	27.577	52.011	51.074		0.114538	38.7295
3.2168	79.442	59.211	40.215	26.747	9.631	22.929	34.939	48.091	24.839	13.959	8.931	11.493	16.895	15.14	10.311	14.611	16.06	26.211	22.578	63.114	108.53	56.613	42.004	33.559	41.121	20.503	38.645	48.434	57.417	25.345	22.399	22.447	28.143	24.032	40.031	43.404		0.118942	33.8326
3.336	70.471	55.594	33.398	22.312	7.913	21.626	32.901	39.556	20.723	13.207	6.613	8.098	15.825	13.899	11.39	12.723	15.499	24.387	20.67	50.239	102.759	47.251	37.616	32.736	39.1	16.376	31.485	43.357	52.41	20.332	20.047	17.752	24.722	23.89	34.938	35.788		0.12335	29.9334
3.4551	61.273	47.885	30.185	21.188	8.618	20.313	28.084	32.658	20.935	12.789	8.222	8.242	12.52	12.488	8.311	12.461	16.78	20.595	16.246	36.802	87.754	38.902	33.437	32.659	31.794	13.983	26.159	38.358	37.885	18.113	16.208	14.903	19.233	16.738	30.368	27.955		0.127753	25.5846
3.5742	57.397	43.897	27.232	16.585	7.927	17.255	26.165	31.147	18.373	11.388	7.33	7.396	11.206	12.782	9.119	11.436	16.843	22.365	16.271	33.769	74.833	34.059	29.834	33.441	30.746	12.072	19.049	34.365	31.666	17.448	15.67	12.045	14.978	14.21	26.973	23.363		0.132157	23.0732
3.6934	54.281	38.874	24.297	15.079	7.497	15.654	22.94	26.84	16.257	8.922	6.486	7.007	10.946	11.666	10.227	10.315	13.887	21.019	12.994	22.91	62.418	27.78	26.505	29.395	33.226	10.65	16.609	31.475	25.252	16.966	14.181	11.003	13.187	13.243	22.105	22.831		0.136564	20.4146
3.8125	48.437	33.256	21.759	13.4	6.302	15.656	21.407	26.028	14.793	7.446	6.24	7.83	9.754	10.99	9.457	8.424	14.339	20.432	12.704	19.793	50.809	24.344	20.731	30.73	26.099	8.833	13.463	28.856	21.328	15.1	13.814	9.722	9.007	13.44	17.768	18.763		0.140968	18.0904
3.9317	45.848	28.303	17.374	9.514	5.646	14.305	18.618	23.894	12.871	7.772	5.807	6.898	10.135	9.464	8.139	7.237	14.569	20.236	12.542	16.219	43.085	19.121	18.03	29.525	24.344	5.926	11.808	24.326	18.609	15.596	12.191	8.262	8.762	10.354	15.146	17.758		0.145376	16.0621
4.0508	42.014	24.24	17.711	9.572	5.678	13.424	19.239	23.388	13.292	8.328	5.435	6.349	8.374	9.581	8.543	7.923	12.974	19.467	16.336	12.773	33.668	20.295	16.5	27.164	21.751	6.363	10.655	20.15	14.574	13.973	12.249	7.659	7.329	9.207	13.46	14.553		0.149779	14.8386
4.1699	38.385	22.913	18.343	7.584	4.89	11.925	16.088	22.246	9.876	6.952	4.649	4.337	8.545	7.91	7.014	6.664	13.516	18.566	16.067	11.803	31.292	14.578	14.266	21.588	19.354	5.897	8.398	20.769	15.329	12.285	11.798	9.269	6.436	8.344	11.494	12.218		0.154183	13.3774
4.2891	35.979	23.193	14.384	6.648	5.828	9.674	14.973	21.03	9.805	5.192	4.752	5.524	7.4	9.762	7.303	5.773	11.329	15.937	16.761	11.166	24.543	12.328	11.009	19.03	18.904	4.919	6.641	16.797	15.231	14.836	10.401	6.123	5.419	8.449	10.805	11.389		0.158591	12.201
4.4082	35.753	23.45	15.753	5.803	5.666	9.757	13.701	17.545	8.739	5.045	5.415	4.708	7.685	7.839	5.292	6.672	10.372	17.444	16.584	11.792	18.55	10.819	11.65	17.194	15.492	4.891	6.811	14.535	13.516	14.555	7.41	6.137	5.219	8.402	10.126	10.076		0.162994	11.3999
4.5274	32.292	21.108	13.992	5.925	4.173	8.415	11.59	18.853	9.41	4.521	5.38	4.81	6.243	7.225	5.748	6.048	8.695	17.75	17.371	12.274	18.229	10.122	8.774	14.614	11.618	5.386	4.99	9.89	11.172	11.853	8.802	6.603	7.081	7.106	9.483	8.08		0.167402	10.4341
4.6465	28.433	17.548	12.503	4.794	4.072	8.599	11.884	17.989	7.605	5.118	4.847	5.235	6.066	6.146	5.986	6.221	8.012	16.881	14.795	9.784	17.392	9.886	9.395	15.611	11.463	5.206	5.292	9.882	9.466	12.591	10.108	6.157	5.496	5.707	6.994	7.117		0.171806	9.73003
4.7657	25.63	17.129	11.247	4	3.603	6.457	11.547	18.667	6.452	5.537	4.387	4.309	5.362	6.449	5.435	5.618	9.404	16.117	12.312	9.762	16.462	9.937	7.851	13.838	9.922	4.364	4.727	9.339	9.171	13.121	9.001	5.327	5.059	6.114	7.113	7.039		0.176213	9.10581
4.8848	25.309	16.914	10.101	4.608	5.14	5.758	9.804	20.241	6.371	5.115	3.835	4.774	4.279	6.518	5.773	4.602	8.867	17.165	11.137	10.415	14.322	7.443	7.774	12.419	8.795	4.357	4.949	7.207	8.863	11.961	8.11	5.309	5.598	5.623	6.51	6.857		0.180617	8.68953
5.0039	22.952	17.302	7.119	4.98	3.849	6.355	9.373	17.603	6.423	4.439	3.525	4.15	4.657	5.852	4.521	5.321	7.74	17.393	10.468	10.337	10.8	8.214	6.212	10.262	7.634	4.594	5.598	7.916	8.715	11.188	7.981	6.05	4.59	5.18	7.253	6.075		0.185021	8.12836
5.1231	18.868	13.564	8.322	4.211	3.975	7.156	9.546	18.601	5.049	3.564	4.539	3.686	5.196	4.281	4.409	4.839	8.503	16.899	7.714	8.391	10.685	8.656	6.531	12.065	8.164	4.123	4.612	5.942	6.549	10.512	8.456	4.994	5.344	4.683	6.202	5.372		0.189428	7.61675
5.2422	15.181	15.084	6.874	3.462	3.577	5.705	8.073	19.855	5.029	3.621	5.821	3.968	4.338	5.681	4.011	4.446	8.023	14.569	8.485	8.681	9.967	8.053	7.046	10.514	8.016	4.858	3.847	5.335	5.089	10.375	7.327	5.18	4.407	4.356	5.735	6.336		0.193832	7.24792
5.3614	17.127	12.335	5.76	3.371	3.159	4.234	7.86	18.42	5.276	4.01	5.178	3.722	3.347	5.102	4.917	4.074	8.054	12.945	9.191	9.668	8.968	7.141	7.225	9.925	8.316	4.818	3.829	5.251	6.657	8.975	5.448	4.331	5.795	3.934	5.552	7.067		0.198239	6.97172
5.4805	13.643	11.665	5.562	4.528	3.659	5.935	9.005	18.528	5.031	3.523	4.646	3.916	4.396	4.779	3.565	4.797	9.759	12.77	7.816	9.359	7.406	7.661	5.637	11.07	7.649	4.062	4.984	4.378	7.451	10.242	5.819	4.658	5.574	3.985	5.445	5.909		0.202643	6.91144
5.5996	13.979	12.617	5.774	5.451	4.294	5.101	7.93	20.047	4.044	4.579	4.289	4.043	2.887	4.295	4.388	4.759	8.36	14.318	7.666	9.592	7.868	6.349	4.555	9.146	7.33	4.015	4.392	4.778	6.261	8.804	5.865	5.708	3.785	4.21	4.761	4.301		0.207047	6.68169
5.7188	11.847	11.42	5.018	3.549	4.499	4.194	8.516	20.146	4.456	4.554	3.601	3.58	2.883	4.548	4.018	4.893	8.944	15.645	8.706	7.777	6.785	6.615	5.282	10.338	6.636	5.563	4.321	5.84	6.089	8.747	6.685	6.506	4.376	3.216	4.697	4.27		0.211454	6.63222
5.8379	12.608	11.994	5.281	3.606	3.75	4.526	7.297	18.396	5.131	3.881	4.556	3.331	3.477	4.183	4.678	5.747	9.146	14.782	8.101	8.521	7.121	5.357	5.831	9.008	5.362	3.523	4.73	5.682	6.094	8.344	6.91	5.278	4.354	3.732	4.971	4.311		0.215858	6.48889
5.9571	11.406	8.478	5.229	2.863	3.038	4.346	7.783	19.713	4.4	4.549	3.454	3.869	3.821	4.718	4.542	3.835	9.527	13.286	7.146	8.264	8.123	6.171	5.876	10.212	7.254	3.228	4.662	4.728	6.382	8.869	8.134	4.124	4.577	3.839	4.255	5.264		0.220265	6.38792
6.0762	13.887	9.192	6.103	3.762	3.02	4.607	7.583	24.139	4.669	4.609	3.63	4.013	3.632	3.959	3.832	4.242	9.284	13.95	5.985	7.979	6.843	5.7	4.866	11.129	7.508	3.041	3.145	5.274	6.073	9.289	8.647	5.382	4.36	4.758	4.508	4.661		0.224669	6.59058
6.1953	15.345	8.849	4.46	3.654	3.593	4.487	7.114	26.735	4.763	3.769	4.753	4.234	4.135	4.22	3.818	4.954	9.129	14.246	9.321	6.602	5.717	6.053	4.332	10.593	5.82	3.399	3.848	5.033	6.324	9.041	7.698	4.349	4.463	4.403	4.783	5.179		0.229073	6.64489
6.3145	11.229	9.047	4.1	3.836	4.117	5.215	7.263	24.15	4.709	3.948	4.159	3.917	3.079	3.733	3.614	4.9	10.114	13.507	7.596	6.535	6.854	5.477	5.138	10.455	5.992	3.463	4.215	5.001	6.359	8.026	6.885	4.503	4.229	4.286	4.372	4.71		0.23348	6.35369
6.4336	11.226	8.641	4.176	3.032	4.166	4.635	7.493	30.138	5.42	4.644	3.247	3.094	2.926	3.571	4.101	6.02	9.118	15.236	7.461	6.269	6.871	3.739	4.694	9.414	6.292	3.04	3.889	4.402	6.536	8.938	7.299	4.413	4.131	4.512	5.182	4.415		0.237884	6.45503
6.5528	10.235	10.423	4.525	3.101	3.96	4.895	6.683	29.618	5.916	5.158	4.137	2.434	4.519	4.309	4.047	5.542	9.169	16.068	8.76	6.714	6.412	4.815	4.407	10.482	5.754	4.02	4.384	4.369	5.801	9.097	8.073	4.466	3.324	4.173	4.461	3.999		0.242292	6.61806
6.6719	9.758	9.658	4.585	3.322	3.187	4.663	6.307	34.466	5.701	4.161	4.315	3.712	3.728	3.442	4.014	5.546	8.835	16.122	8.476	7.235	5.693	3.959	4.822	12.516	7.026	3.682	4.848	4.355	6.28	10.232	6.9	3.46	3.555	3.621	3.581	3.721		0.246695	6.65233
6.7911	10.561	10.562	5.011	3.474	3.863	6.358	7.118	44.482	4.895	4.691	4.387	3.734	4.139	3.566	4.472	6.713	10.04	16.914	8.169	6.869	4.962	4.466	4.892	11.991	6.053	3.445	4.392	4.287	6.41	10.814	7.862	3.491	4.108	4.397	4.102	5.354		0.251103	7.25122
6.9102	10.11	8.716	4.429	3.115	4.065	7.49	6.726	48.316	5.559	5.666	4.22	4.464	4.102	4.774	4.671	5.672	10.167	16.018	7.878	6.827	5.206	4.735	4.023	11.804	6.949	3.221	4.262	4.662	6.44	12.43	8.706	4.413	3.383	3.225	3.471	5.262		0.255507	7.36603
7.0293	9.611	8.408	3.975	2.851	3.534	6.485	8.593	56.509	6.344	5.789	3.883	4.363	3.089	3.802	4.456	6.605	10.108	17.362	7.78	7.787	7.08	4.392	3.528	12.78	6.669	4.404	4.41	3.556	5.226	13.026	6.962	4.257	3.555	3.488	3.798	4.822		0.25991	7.59131
7.1485	9.641	8.357	3.969	3.22	4.326	5.534	8.187	58.697	6.135	6.169	4.535	4.196	4.285	3.49	4.815	6.199	12.105	19.352	8.723	7.126	7.289	4.746	4.554	11.315	7.753	3.494	4.828	4.303	6.73	14.832	8.31	4.853	4.016	3.772	4.203	5.127		0.264318	8.03294
7.2676	10.004	9.005	4.13	2.9	3.971	5.652	9.18	57.827	5.991	5.205	3.366	4.289	3.735	3.319	4.147	8.292	12.592	21.252	8.659	5.527	6.107	4.53	4.158	9.886	8.759	3.548	4.855	4.834	7.681	17.172	8.885	4.264	3.577	4.034	3.177	4.908		0.268722	8.03939
7.3868	9.765	8.284	4.408	3.301	4.301	6.07	9.494	62.065	6.681	6.187	4.328	4.524	3.526	4	4.965	9.529	13.528	21.498	7.858	5.45	5.852	5.145	4.39	10.003	7.898	4.248	3.987	5.271	5.939	21.197	9.147	4.732	4.119	4.293	3.922	5.172		0.273129	8.47436
7.5059	9.427	10.1	4.166	3.163	5.321	5.705	9.021	60.861	6.437	7.736	5.922	4.325	4.183	3.488	4.853	9.321	15.296	23.466	7.714	5.571	5.046	5.397	4.639	11.75	6.601	3.697	4.731	4.733	7.591	26.552	10.376	5.284	4.451	3.506	4.578	4.526		0.277533	8.87594
7.625	8.483	10.881	4.797	4.253	3.613	5.894	10.49	68.648	8.81	6.335	4.011	3.782	3.643	3.882	5.646	11.621	15.718	25.316	9.804	6.239	5.683	4.285	4.705	12.388	7.59	4.257	4.017	4.702	7.785	35.464	15.404	5.403	3.526	3.929	3.911	5.192		0.281936	9.72519
7.7442	10.455	12.288	4.83	4.487	4.551	5.619	9.985	66.044	9.552	6.589	3.676	4.105	3.508	3.852	5.704	12.69	18.942	29.546	10.508	6.131	5.81	4.62	4.539	11.986	8.771	4.483	2.76	3.795	6.768	40.827	17.411	4.826	3.268	4.329	3.293	4.471		0.286344	10.1394
7.8633	10.081	11.896	5.27	3.304	4.181	5.634	9.795	71.397	11.041	6.364	3.882	3.488	3.205	3.948	4.773	15.644	20.85	34.691	10.99	6.98	6.256	6.508	4.902	13.23	10.421	3.658	3.018	4.926	9.818	52.177	19.773	5.516	3.87	3.196	3.806	4.393		0.290748	11.1912
7.9825	12.755	11.662	4.438	3.095	2.919	5.702	11.355	82.381	9.889	7.039	4.281	3.376	3.557	4.55	4.922	16.557	24.356	39.517	13.052	7.274	6.792	4.468	4.266	15.517	10.663	4.247	3.905	4.005	9.222	56.879	22.778	6.876	4.125	2.905	3.725	5.009		0.295155	12.1683
8.1016	12.392	12.389	5.026	4.097	3.764	4.302	10.923	93.093	10.463	7.483	4.362	3.81	3.875	4.789	5.668	16.683	27.016	40.62	10.891	7.198	5.656	5.862	4.108	17.474	11.028	4.232	2.981	3.368	9.439	64.384	23.022	6.009	4.769	3.095	3.247	3.512		0.299559	12.8064
8.2207	15.598	12.592	6.217	3.617	4.165	5.246	9.807	102.478	9.603	6.489	4.562	4.004	3.876	4.581	5.099	15.423	27.427	44.662	9.707	7.75	6.002	4.849	4.183	20.159	11.719	3.479	3.954	4.258	9.715	66.284	21.132	5.296	4.931	4.198	3.28	4.475		0.303963	13.356
8.3399	21.509	13.273	4.283	4.447	3.949	5.768	10.048	113.822	10.759	6.592	4.755	4.51	4.885	4.255	4.686	15.206	33.53	43.906	9.785	8.646	5.591	5.259	4.255	21.544	13.109	4.156	4.473	4.596	9.539	65.37	18.85	6.803	4.5	3.602	4.335	4.987		0.30837	14.1551
8.459	21.717	13.379	4.047	4.449	4.162	5.57	9.563	113.372	11.239	6.778	4.786	4.186	4.663	4.049	5.458	16.561	34.926	46.619	10.295	10.226	5.067	4.992	5.138	23.551	14.549	3.236	4.317	4.214	10.935	55.489	18.249	6.844	4.618	3.471	4.62	4.206		0.312774	14.1539
8.5782	22.54	13.598	4.457	4.081	4.477	5.428	9.274	98.746	10.347	6.876	4.589	4.283	3.656	4.567	4.518	16.082	36.089	47.045	11.681	11.332	5.855	5.542	4.538	22.783	18.77	4.282	3.814	5.928	12.025	49.808	15.821	6.006	3.576	4.411	3.785	4.422		0.317181	13.7509
8.6973	24.16	14.93	5.194	3.899	4.37	6.021	9.068	94.096	9.914	6.113	5.236	3.58	3.285	5.306	4.893	16.038	36.497	54.824	12.455	10.623	6.195	6.094	5.043	22.251	20.475	4.968	3.475	4.63	13.717	51.341	13.477	7.075	3.753	4.49	3.817	4.24		0.321585	14.0429
8.8165	28.398	14.253	5.348	4.065	3.828	4.73	9.451	87.922	10.654	6.925	5.631	3.668	3.425	4.926	5.273	16.7	35.902	53.155	17.019	11.486	6.128	7.217	4.653	19.428	22.758	4.431	3.603	5.996	12.951	50.255	14.307	4.95	4.233	3.612	4.197	3.96		0.325993	14.0399
8.9356	33.034	14.523	4.256	3.263	4.476	6.02	8.571	86.493	10.666	6.526	4.571	4.727	3.653	4.75	6.082	16.267	36.195	54.358	18.943	10.643	6.243	8.559	5.626	15.751	22.965	3.864	4.294	5.071	16.735	43.141	14.429	5.856	3.848	3.704	3.198	3.768		0.330396	14.0297
9.0547	36.095	13.57	4.929	2.83	4.804	5.988	8.088	85.131	9.393	5.681	3.982	4.296	3.584	4.568	4.089	14.491	40.202	58.407	22.568	10.618	5.615	7.205	4.896	14.218	22.108	4.894	3.953	6.289	15.018	39.118	13.082	6.636	3.746	4.236	4.641	3.031		0.3348	13.9444
9.1739	37.935	12.129	4.685	4.114	4.418	5.749	8.724	75.169	9.231	4.377	4.824	4.145	3.793	4.026	3.657	16.425	38.138	58.285	28.691	12.12	7.196	7.573	4.561	13.523	21.421	5.675	4.174	4.236	16.83	34.113	13.983	7.973	4.147	4.764	3.554	5.033		0.339207	13.872
9.293	33.089	11.88	4.768	3.995	3.559	6.584	10.994	72.051	10.114	5.592	3.828	4.513	3.603	3.727	4.859	13.503	39.372	60.635	31.619	10.601	7.491	6.693	5.436	12.112	20.313	5.323	4.223	4.596	16.575	35.365	14.618	6.194	4.942	3.603	3.434	5.201		0.343611	13.7501
9.4122	27.851	10.899	4.427	2.953	3.192	6.645	8.674	69.233	9.793	6.094	4.356	4.561	4.412	4.914	5.509	10.759	41.212	65.036	41.1	9.587	8.482	6.259	4.174	11.499	21.488	4.203	4.286	5.009	17.432	33.694	14.937	6.74	3.88	3.751	3.747	4.43		0.348019	13.7561
9.5313	24.949	9.321	4.353	2.975	2.907	6.387	8.834	72.915	9.379	4.114	5.603	4.215	4.836	4.985	4.213	11.61	43.381	63.322	47.624	12.178	8.282	6.903	4.921	10.393	23.53	4.905	3.121	4.789	19.307	35.145	15.135	7.3	3.748	2.855	4.388	4.24		0.352422	14.0851
9.6504	24.74	7.869	4.546	4.491	3.25	5.964	9.088	71.388	9.182	3.711	5.245	3.914	4.52	5.441	4.287	10.793	43.371	59.198	55.279	13.087	8.34	6.577	6.286	10.593	24.38	4.195	4.112	6.184	18.559	36.412	16.009	7.012	4.213	3.952	3.963	5.197		0.356826	14.3152
9.7696	25.515	7.906	5.035	4.687	3.868	5.815	8.704	64.363	9.37	4.942	4.828	3.375	4.284	5.195	4.743	11.338	46.363	60.33	57.047	18.129	7.986	8.011	6.392	9.968	21.197	4.63	5.157	6.285	18.148	39.034	16.874	7.598	4.276	4.439	4.185	5.141		0.361234	14.5877
9.8887	27.498	8.2	4.848	4.044	5.251	7.587	8.796	61	8.966	5.658	4.856	4.277	3.887	4.188	3.277	8.707	41.929	61.156	63.342	19.347	9.867	9.718	5.86	11.442	18.685	4.646	3.531	6.421	16.792	52.922	19.394	8.261	5.493	5.003	4.18	4.841		0.365637	15.1075
10.0079	32.012	8.193	4.299	4.117	4.725	6.29	9.378	60.04	9.561	4.304	4.562	3.92	4.153	4.239	3.893	9.427	37.866	63.783	66.187	24.723	12.24	10.154	5.413	11.505	17.738	4.688	3.519	7.507	16.975	48.76	19.492	7.538	5.382	5.012	4.59	3.935		0.370045	15.2811
10.127	28.922	8.685	4.168	4.055	3.731	6.159	9.212	59.079	8.564	4.077	4.806	3.791	4.176	4.699	4.311	8.9	38.602	65.777	63.526	29.215	13.028	10.138	6.964	12.212	17.786	5.401	3.822	6.051	16.707	49.052	21.59	7.035	5.129	4.31	5.007	4.061		0.374449	15.3541
10.2462	32.2	8.656	4.28	3.838	4.678	5.642	7.838	63.408	8.609	4.587	4.676	4.396	4.19	5.838	3.58	9.451	39.079	66.245	57.33	31.034	13.882	8.332	5.57	11.444	16.946	5.146	4.099	5.954	17.31	54.736	19.072	6.62	5.314	3.455	3.626	5.282		0.378856	15.454
10.3653	31.688	8.591	5.078	3.706	4.035	5.549	6.188	66.517	9.343	4.072	5.374	3.201	3.469	5.003	3.857	9.549	35.203	68.474	50.404	32.493	18.123	10.178	4.983	10.596	17.926	5.087	4.161	5.905	17.583	58.77	17.036	6.995	4.989	4.098	3.655	5.64		0.38326	15.4866
10.4844	32.256	8.537	5.526	4.446	3.864	5.194	5.536	65.169	7.787	4.859	4.568	3.689	3.981	4.829	4.148	8.744	30.728	76.605	48.448	32.788	19.603	10.418	6.088	9.664	18.025	5.28	3.8	7.454	18.587	51.971	14.63	6.718	4.522	3.193	3.962	4.687		0.387664	15.2862
10.6036	33.993	7.842	4.702	5.349	4.589	4.982	4.932	62.274	7.705	4.807	3.807	4.418	3.354	4.358	4.428	7.677	26.537	80.732	35.141	31.302	21.573	10.109	4.942	9.991	20.64	4.576	4.486	6.924	17.718	56.394	12.043	5.707	5.404	4.782	4.146	4.373		0.392071	14.9094
10.7227	35.447	7.313	4.728	3.432	4.003	5.32	6.673	61.168	8.388	3.676	3.443	2.886	4.26	4.58	4.521	9.062	25.987	78.86	30.23	31.898	20.759	11.295	4.554	9.625	20.213	4.203	4.776	5.972	17.037	67.344	12.797	6.483	4.802	3.876	4.974	4.638		0.396475	14.9784
10.8419	36.223	8.416	4.647	3.149	4.422	4.221	5.132	54.914	7.514	4.671	3.883	3.64	3.741	5.244	4.326	8.088	24.961	83.876	26.607	32.402	20.548	12.04	5.299	10.026	22.423	4.053	4.743	5.609	16.199	69.642	14.076	6.952	4.952	4.24	4.311	4.183		0.400882	14.9826
10.961	34.587	6.898	4.106	4.926	4.557	4.454	5.378	49.695	7.087	4.3	3.877	4.065	4.383	4.09	4.285	8.056	26.718	82.49	21.264	31.36	17.329	11.366	5.308	10.366	26	5.66	4.067	6.345	16.721	75.465	14.324	6.448	4.955	4.06	4.787	4.85		0.405286	14.8508
11.0801	34.239	6.311	3.935	4.19	5.204	4.311	5.077	44.305	7.67	4.423	4.386	4.093	3.998	4.196	4.496	6.238	25.922	84.254	20.108	31.648	18.694	11.523	5.329	11.657	24.809	6.149	5.281	6.152	15.997	78.235	13.768	5.678	5.599	4.783	4.644	5.042		0.40969	14.7873
11.1993	29.335	5.766	5.259	3.853	5.117	5.313	5.445	42.387	5.761	4.687	3.88	4.245	3.88	4.549	4.188	6.147	25.202	85.549	21.707	33.091	16.485	12.904	5.721	10.399	23.361	5.638	4.602	7.059	15.293	79.843	12.18	5.77	6.035	4.019	5.181	4.736		0.414097	14.5719
11.3184	29.206	7.132	4.455	4.02	4.089	3.72	5.551	41.014	5.461	4.232	3.635	4.071	3.477	4.201	4.548	6.455	21.628	84.233	20.736	32.015	14.59	14.511	5.642	9.542	26.285	5.529	4.532	6.682	16.915	82.487	14.94	6.962	5.046	4.204	4.019	3.642		0.418501	14.428
11.4376	28.061	6.014	4.369	4.344	4.229	3.968	5.148	42.372	5.64	4.097	4.075	4.185	4.385	3.385	4.775	6.585	20.267	79.615	24.623	31.174	12.937	14.377	5.443	12.828	26.303	4.749	3.463	7.189	18.577	75.766	15.65	6.823	4.664	3.931	4.171	4.372		0.422908	14.2376
11.5567	23.634	6.31	4.494	5.043	4.749	4.318	4.896	40.338	6.421	4.87	4.477	3.598	3.883	3.694	4.644	7.208	16.797	76.695	26.86	29.109	12.498	14.497	5.397	14.142	24.451	5.214	4.881	6.104	18.551	68.334	17.65	5.166	4.804	4.547	4.197	5.049		0.427312	13.82
11.6758	22.687	5.148	4.451	3.529	4.697	3.979	5.162	37.519	5.126	3.904	4.362	4.279	4.497	3.421	4.228	6.236	13.811	84.376	27.077	31.777	11.925	15.07	5.521	11.953	24.067	6.56	3.694	6.456	20.263	67.703	17.333	4.601	5.544	5.323	4.306	5.237		0.431716	13.7728
11.795	20.479	5.324	5.022	4.122	4.11	4.367	3.73	37.084	5.562	3.753	3.668	3.424	5.056	5.133	3.746	5.179	11.662	77.045	28.552	33.662	9.85	14.572	6.923	11.687	27.763	5.066	3.916	6.357	20.857	64.418	20.654	5.83	4.241	4.321	4.311	4.355		0.436123	13.4945
11.9141	17.53	6.15	3.989	3.466	5.572	3.453	5.78	35.13	6.231	4.259	3.397	3.403	3.971	4.29	3.865	5.75	12.121	84.102	26.396	35.323	12.352	14.308	7.11	8.757	27.989	4.796	4.45	6.318	19.608	61.338	18.869	7.67	5.327	4.226	3.51	5.483		0.440527	13.508
12.0333	17.303	5.294	4.179	3.954	4.437	3.597	5.128	33.721	5.024	3.532	3.744	3.209	3.805	4.422	3.312	5.518	10.422	83.752	26.165	37.319	13.16	15.497	6.499	8.715	27.972	4.686	3.795	6.118	18.934	65.978	18.018	6.613	4.662	4.354	4.746	5.173		0.444935	13.4099
12.1524	18.159	6.06	4.914	4.274	4.965	3.129	4.852	31.46	5.338	3.866	3.299	3.333	2.451	4.078	3.124	4.758	11.563	85.626	25.833	44.208	11.489	14.004	6.866	9.732	27.812	5.262	4.11	5.779	19.337	66.251	19.396	6.85	4.595	5.777	4.79	4.852		0.449338	13.672
12.2716	16.76	5.911	3.913	4.789	4.735	3.249	5.043	28.083	4.917	4.214	3.492	2.311	2.415	3.835	3.43	5.921	10.757	90.86	21.397	51.504	10.444	14.914	6.904	9.48	28.992	5.257	4.381	6.216	18.953	60.269	17.967	6.61	4.494	5.229	4.843	5.768		0.453746	13.5627
12.3907	17.217	4.519	4.567	4.091	4.163	3.46	4.821	28.361	6.189	2.921	3.235	3.424	3.279	3.848	3.037	5.691	9.695	93.732	21.684	56.852	10.151	13.67	5.871	11.07	29.895	4.883	4.673	6.095	19.092	54.069	16.883	6.539	5.305	4.022	4.137	4.435		0.45815	13.4882
12.5098	15.845	5.134	4.459	4.511	4.468	4.012	4.282	30.125	4.727	3.498	4.697	3.447	3.398	3.127	3.608	5.335	9.649	94.057	19.519	66.431	8.814	13.807	6.476	11.267	31.528	5.21	4.001	5.706	18.527	50.29	17.243	6.522	4.867	3.943	4.933	4.058		0.462553	13.6534
12.629	17.524	5.184	4.578	4.627	4.088	3.48	5.399	26.707	5.624	4.274	4.713	3.134	3.367	4.169	2.555	4.478	9.425	97.439	18.485	67.148	10.379	14.976	6.526	11.135	33.309	5.075	3.919	5.111	17.936	43.634	17.368	7.567	4.913	4.103	3.411	5.536		0.466961	13.6471
12.7481	17.412	4.879	5.069	4.584	3.405	4.727	4.892	29.417	5.636	4.385	2.945	3.975	3.937	3.467	3.138	4.291	7.911	96.049	19.644	75.913	10.521	12.833	6.684	14.154	32.319	5.932	4.179	5.589	17.338	41.68	13.821	6.867	4.471	4.343	4.048	5.821		0.471364	13.7854
12.8673	15.265	6.01	3.444	3.996	4.347	3.44	5.3	25.907	4.283	4.297	4.176	3.335	3.211	3.5	2.778	4.495	6.919	94.14	19.044	82.505	10.427	11.462	7.084	15.004	34.685	4.874	5.436	6.974	17.721	37.842	13.549	5.544	4.939	3.653	4.557	6.068		0.475772	13.617
12.9864	16.174	5.672	3.367	3.185	3.854	3.997	4.805	25.215	4.554	3.425	4.189	3.06	4	4.505	2.738	5.361	8.452	98.62	18.763	85.323	9.62	12.202	6.041	16.989	32.012	5.72	5.023	6.178	15.343	35.967	13.237	5.857	3.657	3.948	3.674	4.738		0.480176	13.5963
13.1055	14.322	4.904	3.292	3.297	3.226	3.736	5.235	25.935	5.382	2.958	3.033	3.398	3.221	3.595	2.973	5.113	9.274	91.061	21.386	80.548	9.411	10.383	6.4	17.175	32.86	5.932	4.44	7.086	15.523	29.807	9.969	6.491	5.116	5.028	5.048	4.596		0.484579	13.0876
13.2247	12.493	4.608	2.865	4.06	3.661	4.192	4.482	24.46	4.334	3.153	3.481	3.952	3.009	3.299	2.566	3.959	9.751	88.84	25.454	71.411	10.714	10.705	7.776	16.029	37.109	5.424	5.168	7.306	13.154	30.636	10.195	6.519	4.62	5.856	4.809	4.251		0.488987	12.8972
13.3438	11.838	5.318	2.477	4.685	2.652	4.114	4.612	23.746	3.707	3.406	2.708	3.554	2.635	3.142	3.563	4.335	8.633	93.487	26.307	67.396	12.138	10.114	6.753	15.386	42.739	5.686	5.09	6.324	14.798	25.693	10.03	5.337	4.717	4.86	4.123	5.106		0.493391	12.8114
13.463	11.092	5.268	3.906	3.458	2.138	3.175	4.328	23.523	3.693	3.307	3.575	3.922	2.664	3.175	2.374	4.652	7.509	86.976	27.894	57.949	12.206	8.441	5.978	15.569	42.482	6.846	5.355	6.813	13.492	27.86	10.334	5.582	5.25	4.407	4.591	4.544		0.497798	12.3424
13.5821	10.927	5.047	3.107	4.284	2.684	3.302	6.042	22.855	4.253	2.647	3.211	3.08	2.827	4.589	2.395	4.884	7.757	89.063	32.756	50.01	12.463	9.236	5.57	13.575	46.775	5.17	4.629	6.189	14.411	30.675	9.757	5.421	4.98	4.624	3.776	5.345		0.502202	12.4532
13.7012	11.132	4.394	2.803	4.317	3.755	4.343	6.604	22.198	4.113	2.617	3.746	2.939	3.087	3.891	3.661	4.712	8.63	83.767	33.155	52.506	11.987	9.753	4.826	10.909	53.28	6.132	4.841	5.465	13.568	31.156	11.629	5.947	4.51	4.68	3.306	4.401		0.506606	12.5767
13.8204	10.26	4.585	3.467	3.479	3.314	3.195	4.994	22.599	4.319	3.448	3.163	3.763	2.905	3.78	3.591	3.452	9.194	80.134	32.334	46.49	12.056	9.961	6.837	11.683	54.179	6.343	5.035	6.246	15.513	33.143	13.248	5.633	4.475	4.049	4.481	3.933		0.511013	12.48
13.9395	8.491	4.259	3.173	3.331	3.189	3.022	6.504	25.113	3.9	2.906	3.467	3.165	2.642	3.452	2.889	3.385	7.991	77.303	33.911	46.418	12.351	10.859	5.242	10.631	54.234	5.281	5.584	6.315	15.33	34.759	13.916	6.897	4.486	4.782	4.041	4.02		0.515417	12.4233
14.0587	8.312	3.857	3.611	3.171	2.71	4.007	5.403	29.806	3.77	3.985	3.32	2.719	3.093	3.888	4.185	3.442	6.583	78.148	33.955	52.657	13.069	10.139	5.479	9.171	54.607	5.849	5.854	5.279	17.533	30.91	14.843	5.11	5.21	5.399	3.131	3.288		0.519824	12.6526
14.1778	8.003	3.684	3.393	3.66	2.222	3.489	5.013	29.829	3.774	3.092	2.77	3.331	3.096	2.759	3.658	2.842	6.754	81	36.936	61.949	12.834	10.49	5.261	8.175	60.431	4.841	6.22	6.188	16.987	29.05	17.29	5.637	5.192	4.409	4.485	4.505		0.524228	13.1458
14.297	8.199	3.542	3.59	4.1	2.569	2.938	4.916	27.42	3.924	2.926	3.191	4.008	3.754	3.854	3.364	3.001	7.701	84.691	32.842	72.398	14.012	8.218	4.56	8.944	59.092	6.1	5.997	5.961	14.116	32.015	17.37	5.454	5.082	4.81	5.273	4.373		0.528636	13.4529
14.4161	6.309	3.76	3.927	3.605	3.562	3.127	5.682	25.825	3.573	2.095	3.248	2.387	3.833	3.317	2.798	3.443	6.891	78.522	30.697	74.21	10.596	9.086	5.412	9.329	56.955	5.559	5.409	6.404	15.464	31.688	19.342	4.289	6.049	3.778	5.134	5.526		0.533039	13.0786
14.5352	5.781	3.229	4.355	3.496	1.837	3.187	5.641	25.286	4.932	3.098	3.112	2.184	3.16	2.765	4.077	3.321	6.642	74.44	32.794	85.174	12.776	8.683	5.733	8.131	54.012	5.998	5.186	5.428	15.08	33.42	21.098	4.562	4.429	3.533	4.957	3.609		0.537443	13.1985
14.6544	5.874	3.3	4.829	4.529	3.058	2.443	5.544	22.153	4.26	2.984	3.26	2.603	2.514	2.903	3.513	3.309	6.535	76.395	33.917	106.029	12	9.228	6.367	7.732	48.147	5.823	5.038	5.904	16.16	35.777	19.078	5.419	4.633	3.596	4.38	4.962		0.54185	13.7277
14.7735	5.043	3.303	4.653	3.341	2.596	3.055	7.646	21.393	4.136	3.028	2.877	2.639	3.067	3.132	3.527	3.998	7.737	73.91	34.062	126.723	13.649	10.59	5.896	9.991	43.525	6.084	4.937	5.406	14.41	40.942	17.915	4.948	4.722	3.801	5.054	5.165		0.546254	14.3584
14.8927	5.57	3.22	3.888	2.898	3.789	2.978	6.434	21.757	3.584	2.719	3.698	3.106	3.022	2.919	2.781	3.325	7.606	73.886	34.604	147.105	15.275	10.384	5.573	8.336	39.608	6.243	4.805	6.319	13.659	43.213	16.839	4.888	5.022	4.114	3.91	4.721		0.550662	14.7722
15.0118	6.345	4.122	4.155	3.187	2.843	3.254	6.455	21.595	3.979	2.451	3.007	3.536	3.337	3.504	2.797	4.197	9.576	78.049	34.28	146.182	19.463	12.75	6.055	8.765	38.289	6.887	4.637	5.202	14.766	38.66	14.123	5.916	4.299	4.401	4.075	4.44		0.555065	14.9883
15.1309	5.98	3.719	3.487	2.862	3.776	3.784	7.699	20.987	3.924	2.757	3.055	3.39	3.041	3.205	3.04	3.601	10.09	72.745	33.333	145.414	24.378	12.857	5.526	8.705	38.659	5.545	5.016	4.982	13.896	34.954	14.994	6.324	4.78	4.339	3.572	4.177		0.559469	14.7943
15.2501	4.529	4.003	2.754	2.492	3.26	3.628	6.9	20.758	3.426	2.859	3.242	2.236	3.781	3.262	2.931	3.313	10.446	69.574	39.459	148.397	33.665	10.658	5.362	9.91	40.453	6.586	4.893	5.782	13.389	31.545	14.218	6.265	4.845	3.535	4.711	3.753		0.563877	15.0228
15.3692	5.101	4.441	3.483	2.221	2.233	3.26	7.646	19.526	3.94	2.95	3.477	2.267	3.623	3.681	3.281	3.971	9.699	71.762	38.596	136.954	37.734	10.433	6.375	9.016	40.69	5.869	4.981	5.22	14.986	29.055	11.125	5.968	4.113	4.449	4.082	4.99		0.56828	14.7555
15.4884	4.829	4.502	3.468	2.974	3.037	3.978	9.05	18.673	3.785	3.229	3.428	3.345	3.668	2.853	2.638	3.427	9.791	67.3	36.63	120.288	41.191	12.665	5.684	8.936	38.458	5.74	4.4	6.065	13.658	25.453	11.017	5.73	5.645	3.38	4.257	5.411		0.572688	14.1273
15.6075	4.974	3.368	3.288	3.076	2.678	3.38	9.209	17.055	3.038	3.361	3.279	3.846	3.577	3.466	3.426	4.304	9.308	64.358	32.732	97.758	49.036	12.069	6.199	9.098	41.062	6.479	4.913	6.301	11.486	22.97	9.696	5.918	5.426	4.868	4.748	5.038		0.577092	13.4663
15.7266	5.238	2.646	3.014	2.806	2.684	2.599	10.001	17.887	3.224	2.58	3.019	2.392	3.914	3.236	3.163	3.262	9.8	64.951	40.316	75.799	53.047	12.292	6.4	9.374	39.913	6.172	4.573	6.769	12.118	20.877	9.859	5.979	3.909	4.223	4.479	4.394		0.581495	12.9697
15.8458	4.626	4.066	3.241	3.173	3.182	3.134	10.736	20.096	2.415	2.153	3.257	3.466	3.383	3.635	3.027	3.243	9.373	61.259	40.398	63.627	58.984	15.229	6.904	9.664	38.52	7.187	5.067	6.439	11.692	18.931	8.653	4.525	3.417	4.482	4.949	3.35		0.585903	12.7634
15.9649	4.51	3.873	2.952	3.474	2.99	4.463	12.414	20.66	3.064	2.941	2.993	2.784	2.714	3.201	3.014	3.333	9.06	55.969	36.634	51.899	62.107	19.723	7.135	11.428	38.077	6.181	4.999	6.726	12.231	23.671	9.46	5.302	3.872	3.328	4.06	3.899		0.590307	12.6428
16.0841	3.86	3.631	3.163	2.968	1.956	2.68	13.008	24.153	3.369	2.751	2.943	2.759	3.338	3.18	3.496	4.45	8.211	47.806	38.402	47.197	60.046	20.98	6.857	11.881	38.466	7.998	4.048	6.121	10.519	24.226	9.83	6.293	3.926	3.816	3.408	5.235		0.594714	12.4159
16.2032	3.771	3.76	2.457	2.656	1.866	2.253	13.59	20.857	3.33	3.434	3.534	3.113	2.865	3.587	3.418	3.626	10.509	47.439	41.842	42.768	50.679	20.345	7.086	11.377	38.445	7.464	4.814	7.3	9.934	24.753	9.904	6.946	3.083	4.248	3.175	4.806		0.599118	12.0843
16.3224	3.813	2.911	2.819	2.7	2.672	3.048	9.903	18.87	3.799	2.674	3.175	2.384	2.869	3.795	3.356	4.358	9.054	48.753	43.464	33.857	39.376	22.465	8.182	13.53	39.333	7.291	5.513	6.33	9.222	29.25	9.518	6.147	4.84	4.075	4.336	4.427		0.603525	11.7252
16.4415	3.237	3.431	3.422	3.275	3.707	4.192	10.406	18.005	2.64	2.452	2.102	2.506	2.599	2.283	2.663	4.183	8.905	44.62	45.89	32.113	31.386	25.264	7.678	13.373	37.29	7.365	6.325	5.848	11.431	36.183	9.983	5.712	5.326	4.435	4.139	4.606		0.607929	11.6382
16.5606	3.871	4.165	3.479	3.579	2.519	3.531	11.458	16.018	3.275	2.981	2.543	2.476	2.124	3.568	3.357	4.017	12.702	50.252	56.461	29.767	27.983	22.318	9.246	13.2	35.952	8.188	5.183	6.151	11.934	39.278	12.405	6.567	4.015	4.607	4.79	3.853		0.612333	12.1615
16.6798	4.292	3.529	2.555	3.573	2.629	3.934	9.878	13.817	3.53	2.668	2.13	2.963	2.171	3.901	3.612	3.826	12.991	52.203	64.714	26.984	27.183	20.865	8.893	15.225	35.951	8.202	5.289	5.344	12.184	37.235	10.912	5.858	3.536	4.078	4.418	4.004		0.61674	12.0855
16.7989	3.759	3.634	2.864	2.733	3.402	3.684	10.049	13.395	3.015	2.569	3.087	2.608	2.119	3.899	3.15	4.217	15.279	52.911	64.903	23.407	29.975	22.089	8.576	16.565	32.329	7.66	5.369	6.147	11.879	38.278	12.355	7.179	4.671	3.702	4.122	4.558		0.621144	12.2261
16.9181	3.154	3.388	3.299	2.382	2.92	4.679	10.454	12.83	2.939	3.273	2.844	2.435	2.734	3.056	3.45	4.766	17.382	57.08	71.154	20.481	35.307	23.13	8.983	14.726	31.875	7.789	5.043	6.101	13.714	37.154	11.305	6.294	3.147	3.836	4.881	5.844		0.625551	12.6064
17.0372	3.368	3.172	3.421	2.219	2.603	4.171	8.713	12.509	3.806	2.099	2.583	2.305	2.721	3.594	2.331	5.086	17.021	62.018	72.581	21.086	42.643	24.037	12.319	15.095	33.177	8.807	4.608	6.643	12.289	31.676	11.087	5.575	4.362	4.243	5.188	5.039		0.629955	12.8943
17.1563	3.522	2.702	3.305	2.841	3.416	4.296	8.769	13.856	3.301	1.969	2.637	2.735	3.038	3.078	2.615	4.251	21.767	70.016	69.89	20.941	42.872	23.645	11.997	16.162	32.407	9.831	5.481	5.786	14.628	27.851	13.439	5.406	4.45	4.236	4.357	4.281		0.634359	13.2159
17.2755	3.414	3.743	2.923	2.639	2.962	4.684	9.126	14.835	3.864	2.541	2.793	2.964	2.69	2.981	3.138	3.97	25.688	75.655	71.903	21.362	41.816	28.531	12.595	15.338	31.852	11.38	5.827	7.357	15.909	25.098	12.069	5.995	3.084	4.005	4.289	5.226		0.638766	13.7291
17.3946	4.202	3.259	2.797	2.731	3.995	5.53	9.049	16.457	4.344	2.691	2.56	2.342	3.446	3.749	3.228	4.261	24.755	80.96	73.287	21.743	39.38	30.714	15.98	18.149	31.347	9.304	4.481	6.696	14.87	26.647	11.374	5.701	3.514	4.453	4.574	5.912		0.64317	14.1245
17.5138	3.626	2.826	2.546	3.35	3.686	5.316	10.53	17.212	3.529	2.587	2.699	2.05	3.716	3.702	3.224	5.173	23.147	83.45	72.969	19.98	34.289	33.742	21.924	20.944	31.08	9.278	6.502	6.484	18.734	23.896	13.907	6.282	3.728	4.212	4.701	5.966		0.647578	14.4719
17.6329	4.297	2.777	2.678	2.91	2.537	5.584	9.576	18.702	4.918	3.508	2.659	1.651	2.779	3.005	3.19	5.261	21.164	80.605	71.626	20.943	30.833	38.364	25.792	23.209	31.048	11.101	5.519	7.753	18.793	26.788	14.312	5.113	4.655	3.615	3.449	5.776		0.651981	14.6247
17.7521	3.504	2.641	2.541	2.491	2.61	4.79	10.231	19.328	5.076	3.246	1.545	2.187	2.599	3.439	3.881	5.159	16.57	75.448	68.211	22.484	29.949	45.539	31.107	28.569	38.367	12.134	6.36	6.594	20.307	26.896	15.386	6	4.82	3.94	3.931	6.46		0.656389	15.1206
17.8712	2.476	2.698	2.364	3.526	4.104	4.037	9.405	18.9	4.914	2.455	1.735	1.97	3.036	2.633	3.853	5.755	18.031	68.97	71.16	24.042	31.143	48.753	32.141	37.084	38.065	11.62	6.904	7.404	23.083	26.194	16.538	6.086	3.981	3.544	4.202	6.551		0.660793	15.5377
17.9903	3.179	2.749	2.254	3.304	2.842	4.971	8.502	22.897	6.669	2.347	1.821	1.544	2.374	2.36	3.106	5.48	16.818	66.803	70.044	22.973	34.139	54.463	34.169	46.452	38.071	11.4	7.117	7.592	20.926	25.529	20.522	4.851	3.737	3.133	4.759	7.471		0.665196	16.038
18.1095	4.081	3.082	2.771	2.957	3.127	5.1	9.597	20.206	7.238	2.443	1.934	1.45	2.675	2.239	4.577	5.387	15.938	62.084	66.317	24.858	40.504	50.88	37.394	65.121	45.645	13.501	6.35	6.248	20.928	25.4	19.091	4.554	5.028	3.687	4.617	6.72		0.669604	16.7703
18.2286	4.103	3.18	3.074	2.505	4.047	5.132	10.209	20.785	7.812	2.875	1.656	2.761	2.717	2.276	3.794	5.687	15.404	63.351	65.799	27.627	41.416	50.954	37.735	72.166	53.248	16.916	7.413	6.671	21.827	27.443	19.146	5.592	3.863	3.907	5.82	8.261		0.674007	17.6992
18.3478	3.398	2.715	3.139	2.875	3.971	4.92	12.159	19.705	6.387	3.276	2.267	2.451	2.538	2.65	2.973	6.233	15.851	62.029	63.502	30.116	45.091	51.869	37.209	78.693	53.563	15.153	7.906	7.479	23.391	25.044	19.457	6.242	3.826	4.215	6.223	9.108		0.678415	17.9896
18.4669	4.209	3.275	2.816	3.141	3.981	6.484	12.331	20.601	7.035	2.916	2.478	1.62	2.427	2.687	3.244	6.527	13.249	57.96	62.873	34.671	44.501	57.727	34.684	87.488	54.694	16.293	7.012	7.264	22.826	25.297	17.75	6.245	3.997	4.274	6.048	8.984		0.682819	18.3225
18.586	4.551	2.83	2.799	3.906	4.304	5.387	13.66	22.781	8.563	2.447	2.826	1.952	1.648	1.552	3.308	5.205	15.145	54.071	54.353	45.403	42.009	60.064	34.096	86.064	54.239	14.732	6.253	6.843	22.138	24.592	17.531	5.635	5.08	3.557	6.149	11.919		0.687222	18.2664
18.7052	4.269	2.888	2.781	3.252	5.067	6.444	14.566	23.739	9.296	2.122	2.505	2.224	2.524	2.321	3.468	6.547	14.249	57.575	52.845	54.133	40.689	60.372	37.984	87.407	59.788	16.143	6.647	7.958	22.457	23.628	17.543	6.281	3.913	4.307	8.311	13.713		0.69163	19.1654
18.8243	3.57	3.145	3.303	3.27	5.371	7.022	13.709	22.999	11.015	3.062	1.726	1.736	2.32	1.814	3.476	8.267	18.41	56.698	54.392	63.896	42.107	55.807	40.161	88.384	61.045	18.173	7.085	6.131	20.853	24.949	19.131	6.442	3.984	5.163	9.23	14.318		0.696034	19.7823
18.9435	3.191	3.363	2.643	2.854	5.972	9.305	15.686	25.653	12.203	3.63	1.349	2.8	2.213	2.363	3.708	6.313	19.59	56.559	54.287	73.307	40.338	53.119	38.227	89.774	64.03	17.601	7.034	6.707	17.253	26.264	17.487	4.833	4.291	4.933	8.188	16.59		0.700441	20.1016
19.0626	3.147	3.519	2.317	3.09	5.483	10.099	15.945	25.537	14.315	3.488	1.631	3.32	2.635	2.81	5.304	6.543	20.497	48.611	52.091	84.727	43.806	53.607	36.802	93.812	64.905	18.323	7.993	6.24	17.039	25.812	18.756	4.913	3.629	4.619	7.407	22.765		0.704845	20.7094
19.1817	3.269	3.321	2.098	3.383	6.699	10.924	16.273	24.026	16.037	3.276	2.489	2.474	2.782	2.737	4.311	7.186	22.771	47.218	50.347	91.114	45.305	49.512	36.638	89.33	71.02	18.809	7.317	6.101	15.734	26.502	17.004	5.913	3.901	4.334	8.267	22.939		0.709249	20.8711
19.3009	3.377	3.046	2.799	3.647	6.724	12.138	19.687	24.248	17.123	3.356	2.11	2.514	2.506	2.777	3.996	8.258	25.69	45.22	50.076	96.208	48.072	42.292	41.082	95.759	69.272	18.858	7.623	7.571	16.921	26.015	19.265	7.777	4.047	5.313	7.847	25.044		0.713656	21.6183
19.42	3.749	2.201	2.473	3.858	6.634	11.958	19.023	26.367	18.88	3.241	2.183	2.636	2.144	2.424	4.938	7.365	24.94	39.118	45.929	90.552	53.059	39.877	42.753	95.7	65.925	18.981	7.563	8.155	16.627	26.946	17.89	6.402	4.563	5.737	8.368	26.549		0.71806	21.2697
19.5392	3.992	2.216	1.993	4.756	6.556	11.914	17.494	27.388	20.897	4.013	2.345	1.819	2.509	2.624	4.539	8.032	29.683	41.397	42.616	89.621	56	38.911	46.657	95.726	64.293	19.456	7.838	8.909	15.384	30.987	19.022	6.81	4.526	5.455	8.969	29.9		0.722467	21.8124
19.6583	4.146	2.447	1.826	3.865	7.194	13.354	19.964	27.584	19.425	3.72	2.267	2.231	2.848	3.832	4.31	8.535	31.809	41.284	40.604	91.768	56.869	37.549	50.616	101.269	66.391	19.718	8.253	8.685	14.897	31.056	20.926	7.98	3.886	6.861	8.933	29.22		0.726871	22.3923
19.7775	4.421	2.548	2.537	3.792	8.109	13.083	18.743	28.419	17.865	4.497	3.089	2.354	2.027	3.673	5.423	8.792	34.339	34.242	41.901	91.669	61.955	42.935	53.325	107.249	71.166	19.018	8.129	9.704	14.459	32.581	18.818	7.38	3.681	7.616	9.839	27.476		0.731278	22.9682
19.8966	3.429	3.181	2.355	2.997	8.395	13.497	20.01	27.208	19.54	4.904	3.662	2.136	2.747	4.381	6.37	11	38.916	30.691	38.497	89.111	60.947	48.565	58.433	105.615	72.804	21.011	7.55	10.875	14.493	33.69	17.959	6.788	4.301	7.897	10.593	25.197		0.735682	23.3263
20.0157	4.123	3.202	3.364	4.701	9.863	16.891	21.266	27.327	19.449	5.208	2.579	2.469	3.222	4.447	8.093	14.942	44.813	34.678	34.38	90.426	60.112	49.015	64.911	111.386	71.22	23.057	6.878	9.808	14.517	32.359	19.621	6.385	4.907	7.184	8.615	24.657		0.740086	24.1688
20.1349	4.36	3.226	3.529	4.966	9.197	16.193	18.923	26.755	19.391	7.433	2.648	2.206	3.26	4.652	9.761	16.22	42.956	31.265	32.156	77.485	61.672	46.015	70.67	112.847	74.263	23.377	7.886	9.827	13.605	29.27	24.439	7.196	4.565	9.419	11.589	23.629		0.744493	24.0792
20.254	3.524	2.774	2.787	4.912	8.752	15.453	14.537	28.535	17.645	6.621	3.185	1.889	4.198	4.361	11.838	20.307	44.28	27.309	29.085	77.187	59.786	48.953	80.471	118.819	72.574	24.702	8.615	12.715	14.236	29.835	22.838	7.877	4.652	9.638	12.426	24.614		0.748897	24.4981
20.3732	3.591	3.035	2.852	4.532	8.504	14.126	12.058	27.864	17.917	6.705	4.012	2.706	4.563	5.534	15.99	25.82	44.173	25.808	31.266	75.368	60.524	53.273	90.559	126.979	75.803	27.918	11.396	11.993	14.623	37.414	25.377	9.069	5.302	10.201	14.343	26.515		0.753305	26.0476
20.4923	3.624	3.492	2.883	4.496	10.237	13.342	11.142	24.491	18.848	6.502	4.018	2.879	4.134	5.796	16.885	25.977	43.964	22.016	31.593	70.613	65.444	58.781	94.55	134.698	83.094	31.225	11.728	14.268	12.27	35.558	23.493	9.494	6.875	11.423	12.768	26.597		0.757708	26.6444
20.6114	3.051	2.835	3.688	4.491	12.344	11.666	10.338	22.58	18.287	7.37	4.638	2.717	5.165	8.506	16.966	28.204	39.545	18.674	27.321	67.791	65.49	66.501	98.331	130.429	85.865	33.405	14.154	15.696	13.036	34.884	23.267	9.596	7.266	11.958	14.42	25.275		0.762112	26.8264
20.7306	3.889	2.801	3.345	4.448	8.763	9.584	8.879	21.423	20.078	7.006	6.068	3.186	5.529	9.118	19.672	28.876	35.983	19.715	29.215	61.527	74.829	75.341	102.376	117.403	88.576	38.462	16.078	15.786	13.254	33.671	22.16	11.266	9.083	12.857	14.541	27.689		0.76652	27.291
20.8497	4.458	3.316	3.424	4.537	8.828	9.293	9.244	20.874	22.212	7.331	5.443	4.232	7.567	10.846	19.067	28.936	29.87	19.552	28.079	58.401	79.922	81.266	108.457	94.346	92.979	40.907	16.103	19.487	12.518	35.54	23.878	11.052	11.475	16.342	13.176	29.609		0.770923	27.5713
20.9689	4.143	2.857	2.874	5.36	10.363	8.522	8.747	17.276	21.342	9.2	6.523	3.496	7.006	10.267	21.072	27.498	28.602	18.716	24.334	50.402	88.259	93.193	111.507	70.128	101.534	45.885	18.604	23.057	13.116	36.112	25.263	13.415	14.895	17.308	15.892	30.524		0.775331	27.9803
21.088	4.592	2.218	3.281	6.006	7.268	7.696	7.935	13.888	24.352	12.484	8.112	4.078	8.024	9.936	19.589	27.945	26.358	15.726	21.158	45.56	95.569	108.43	100.057	50.891	110.055	52.984	22.511	22.855	15.77	34.763	25.655	13.591	15.154	21.694	15.824	28.786		0.779735	28.0776
21.2071	4.081	3.737	3.279	6.248	8.17	7.38	7.138	10.869	26.1	10.989	8.886	5.039	8.126	11.473	21.546	25.15	21.108	12.241	19.858	44.398	94.698	122.356	84.818	31.258	111.54	52.831	23.367	23.129	17.614	37.856	28.761	17.079	18.9	25.127	18.277	27.703		0.784138	27.8092
21.3263	4.584	3.452	3.441	7.026	8.623	6.652	6.746	7.928	23.634	13.126	11.312	7.273	7.559	11.624	22.368	20.001	17.994	10.339	17.437	41.92	94.878	126.516	66.641	18.767	117.006	58.642	21.634	21.983	17.162	40.99	35.567	19.907	21.497	24.752	19.634	28.086		0.788546	27.4084
21.4454	3.204	3.603	3.583	7.711	9.1	6.021	6.336	5.272	23.181	15.401	11.633	8.062	7.051	11.563	20.868	16.603	13.367	10.192	12.223	39.327	96.683	136.674	41.109	11.769	119.993	64.221	23.371	20.059	18.313	37.978	34.988	20.359	26.51	23.757	20.613	26.539		0.79295	26.5899
21.5646	3.244	3.251	4.157	8.248	7.944	5.077	5.52	5.426	23.897	15.698	14.353	8.4	6.853	12.792	21.463	15.657	11.656	8.625	11.356	37.615	100.204	128.808	27.893	7.156	108.425	73.388	21.321	23.29	20.245	43.443	39.338	27.063	30.335	24.368	21.675	25.383		0.797357	26.488
21.6837	4.005	2.855	3.547	8.297	7.98	5.799	5.046	3.821	20.43	15.649	14.71	9.417	7.567	11.722	19.84	14.146	9.338	7.333	11.048	33.073	99.817	105.466	17.963	6.09	89.801	82.678	19.592	28.622	24.821	44.418	45.628	29.418	33.252	23.758	26.338	22.335		0.801761	25.4339
21.8029	4.017	3.425	3.76	9.593	7.954	4.567	4.257	4.633	18.556	14.738	14.075	11.713	5.081	13.707	18.866	13.145	9.859	6.249	10.496	30.046	95.299	73.292	10.491	5.517	62.723	92.013	19.903	28.469	29.263	49.778	46	32.651	32.241	24.112	27.261	17.898		0.806168	23.768
21.922	4.059	3.339	4.892	9.065	7.023	3.371	3.672	4.073	12.907	17.644	16.333	10.497	6.631	14.644	17.482	10.901	6.055	5.895	8.842	24.552	93.659	46.927	8.318	5.538	38.872	93.25	26.478	32.684	34.449	49.267	43.459	38.013	33.785	27.245	28.118	15.164		0.810572	22.4195
22.0411	3.513	3.874	4.713	10.603	6.851	3.311	2.792	2.881	14.14	17.315	16.769	10.974	6.299	12.635	14.338	9.978	6.433	4.246	7.977	25.386	84.851	29.317	6.604	4.885	22.053	94.17	29.081	36.905	44.481	46.669	49.073	48.302	32.664	28.566	26.102	13.8		0.814976	21.7375
22.1603	5.093	3.91	6.185	11.53	7.163	3.133	2.476	3.522	12.943	19.03	16.519	12.625	6.542	15.452	10.015	8.452	5.432	3.855	7.636	21.955	78.969	18.028	5.85	3.739	12.862	100.136	32.546	36.574	48.984	50.134	53.134	51.019	32.901	31.245	26.514	11.632		0.819383	21.6038
22.2794	5.133	3.341	6.483	11.145	5.998	3.444	1.73	3.318	9.301	18.244	17.19	11.675	6.84	13.949	9.136	6.368	4.721	3.91	7	19.159	71.286	12.693	5.876	3.463	9.652	93.419	41.873	39.207	49.263	51.275	57.926	56.102	32.53	33.388	24.907	10.939		0.823787	21.1634
22.3986	3.616	3.914	7.006	10.945	5.112	3.314	1.615	2.901	8.009	17.992	17.776	12.584	7.544	11.697	6.939	5.201	3.732	4.721	5.508	16.412	64.443	8.873	4.617	3.197	7.198	83.184	49.439	44.16	50.281	50.43	67.347	62.323	38.788	36.239	21.211	8.412		0.828194	21.0189
22.5177	3.48	4.765	7.017	12.155	4.425	2.07	1.985	2.483	5.622	17.515	16.753	13.383	7.488	12.508	6.861	4.173	2.566	3.967	4.253	12.791	48.929	7.609	3.682	3.576	5.476	70.534	54.945	45.182	48.123	51.029	69.89	69	42.964	38.683	24.538	8.225		0.832598	20.5179
22.6368	4.135	5.88	7.572	12.795	3.999	1.827	1.722	1.903	4.414	13.63	13.641	13.446	7.201	9.113	6.21	3.218	2.645	3.225	4.917	10.87	37.459	6.209	3.929	3.019	4.852	59.846	59.024	44.212	47.917	52.435	67.337	73.605	39.803	40.339	22.915	6.959		0.837002	19.5062
22.756	4.192	5.169	10.079	10.036	3.878	1.596	1.121	1.613	2.947	11.581	14.77	12.284	9.222	8.6	4.275	4.274	2.606	3.101	4.85	9.852	30.295	5.392	3.825	2.482	4.866	43.039	60.572	44.781	48.583	52.059	67.611	72.525	44.426	41.202	20.015	5.733		0.841409	18.707
22.8751	3.827	5.314	12.002	9.037	2.999	1.145	1.22	1.343	3.757	9.693	12.874	11.894	8.912	7.742	4.328	2.999	2.918	2.685	5.182	9.199	22.511	3.863	2.628	2.128	4.051	32.259	57.63	41.949	55.829	53.689	65.02	74.628	46.285	43.665	17.729	5.578		0.845813	18.0142
22.9943	3.605	5.482	12.044	8.899	1.785	1.251	1.266	0.998	2.894	7.877	12.064	11.505	9.185	6.206	3.511	3.093	2.18	2.217	3.714	9.192	17.518	3.256	2.421	2.119	3.487	23.184	58.402	43.472	55.935	57.398	65.129	77.1	46.003	44.085	14.746	6.094		0.850221	17.481
23.1134	4.606	4.993	12.903	8.548	2.61	1.021	1.121	0.88	1.773	6.86	11.098	11.04	7.798	4.768	2.473	2.181	1.929	1.441	3.369	7.209	13.08	3.058	2.918	2.406	3.236	17.388	61.955	47.352	61.588	54.421	63.62	72.603	42.687	39.46	12.025	4.426		0.854624	16.6901
23.2325	5.27	6.013	11.445	8.177	2.231	0.736	0.85	1.163	1.515	4.563	9.327	10.821	6.729	5.351	2.508	2.521	1.743	1.464	2.906	6.145	10.607	2.316	2.207	1.432	3.174	14.355	64.052	48.647	70.313	57.489	62.77	77.471	38.241	36.039	10.826	2.786		0.859028	16.5056
23.3517	5.268	5.275	10.334	8.377	1.876	1.416	0.746	1.577	1.732	2.881	7.74	10.301	6.324	5.097	2.827	1.687	1.859	1.424	2.382	6.665	7.812	2.835	1.9	1.467	2.235	10.347	71.45	52.079	73.645	56	60.593	70.665	40.475	33.88	8.957	2.768		0.863436	16.1916
23.4708	4.611	6.019	9.389	6.553	1.142	1.311	1.149	1.236	1.795	3.23	5.706	7.873	5.044	3.444	3.021	1.169	1.427	1.723	2.144	3.77	6.684	2.257	2.262	1.507	2.619	8.575	71.9	57.759	81.903	55.745	53.227	59.842	41.868	30.802	7.951	1.854		0.867839	15.5142
23.59	5.617	7.048	10.786	5.808	1.135	0.72	0.93	0.734	2.026	2.719	3.986	7.206	4.613	3.574	2.591	0.786	1.725	1.142	2.352	2.979	6.087	2.243	1.966	1.582	2.368	7.408	74.439	63.543	76.861	52.63	42.638	50.881	38.338	26.801	8.33	1.773		0.872247	14.6212
23.7091	6.52	7.436	8.852	4.967	1.009	1.121	0.344	1.146	1.426	1.657	3.712	5.754	5.326	2.569	1.391	0.576	1.392	0.992	1.871	3.441	5.898	2.471	1.713	1.671	1.579	5.78	68.063	65.523	73.795	50.883	30.743	45.412	37.247	18.7	6.467	1.945		0.87665	13.3164
23.8283	5.521	8.024	9.083	4.821	0.485	0.795	0.991	1.175	0.962	1.611	3.574	4.86	3.706	2.494	1.53	1.051	1.046	1.532	1.967	3.931	4.937	1.589	1.973	1.556	2.311	6.229	56.46	62.61	67.453	39.562	21.772	38.046	30.993	11.847	4.953	1.796		0.881058	11.4791
23.9474	6.907	8.837	8.72	4.694	0.945	0.577	0.71	0.504	1.447	1.768	1.901	4.38	4.336	2.052	0.739	1.05	1.455	1.601	1.857	3.263	4.949	1.49	2.234	1.453	2.232	4.839	45.383	61.04	70.97	32.409	13.24	27.629	22.651	10.638	4.143	1.367		0.885462	10.1225
24.0665	6.499	10.63	8.629	3.922	1.214	1.035	0.699	0.853	1.056	1.625	2.109	2.773	3.382	1.684	0.793	1.292	1.053	1.04	1.429	3.09	3.58	1.764	1.563	0.686	1.118	3.8	30.874	59.167	66.881	21.007	7.85	18.723	14.857	7.05	3.859	1.123		0.889865	8.29747
24.1857	7.601	11.439	7.523	2.711	0.768	0.972	0.502	0.704	1.101	1.17	1.174	2.904	2.186	1.598	0.997	0.804	0.89	0.861	1.614	2.458	3.233	2.149	1.623	0.924	1.26	3.951	23.174	60.394	64.021	12.449	5.19	14.24	8.992	5.888	3.097	1.29		0.894273	7.27367
24.3048	7.429	12.771	10.525	2.253	0.387	0.869	0.341	0.325	0.966	1.079	1.58	2.544	1.843	0.805	0.772	0.814	0.96	1.058	1.122	2.037	3.007	2.226	1.285	0.779	1.365	3.565	16.413	52.569	61.824	10.849	4.809	6.742	7.885	5.184	2.908	0.82		0.898677	6.46417
24.424	8.029	12.795	9.666	2.354	0.461	0.567	0.34	0.417	0.535	0.659	1.776	1.754	1.513	1.675	0.745	0.72	0.614	0.703	1.072	2.136	3.111	2.208	0.921	0.667	1.04	3.089	12.815	41.454	48.008	7.895	3.565	5.898	5.727	4.151	2.375	0.919		0.903084	5.34372
24.5431	10.817	15.35	6.693	2.254	0.701	0.763	0.655	0.46	0.568	0.667	1.487	1.246	2.115	1.918	0.904	0.798	0.687	0.907	1.098	1.674	3.468	1.557	1.131	1.129	1.267	3.15	10.266	29.159	31.8	5.667	2.398	4.809	4.338	3.25	2.078	0.751		0.907488	4.38833
24.6622	11.587	14.219	5.944	2.384	1.088	0.999	0.716	0.366	0.733	0.975	1.282	0.963	1.324	1.532	0.989	0.79	0.639	1.044	0.989	1.414	2.92	1.762	1.249	1.076	1.015	1.94	8.091	21.911	21.82	5.077	2.269	4.324	4.166	3.005	1.543	1.015		0.911892	3.69889
24.7814	14.616	13.008	5.73	1.491	0.859	0.788	0.831	0.23	0.439	1.007	0.794	0.697	0.853	0.965	0.763	0.283	0.657	0.614	0.677	1.606	2.838	1.502	1.189	0.695	0.837	2.08	7.535	16.664	13.663	3.808	1.348	3.825	4.213	3.109	1.836	1.033		0.916299	3.14119
24.9005	16.601	14.176	3.836	1.936	0.341	0.786	0.442	0.417	0.791	0.869	0.883	1.078	0.718	0.974	0.559	0.6	0.729	0.8	0.874	1.788	2.759	1.861	0.745	0.634	1.033	1.673	5.206	11.784	10.809	3.255	1.153	3.093	3.414	2.452	2.387	0.854		0.920703	2.84194
25.0197	19.424	12.659	3.392	1.004	0.429	0.87	0.282	0.686	0.772	0.937	0.688	0.943	0.541	0.738	0.569	0.618	0.219	0.768	1.095	1.866	2.53	1.368	0.823	0.487	0.971	1.037	4.796	9.742	7.696	2.357	1.59	2.224	1.981	2.007	1.97	0.276		0.92511	2.50986
25.1388	25.789	11.042	3.857	0.837	0.602	0.255	0.124	0.542	0.52	0.493	0.897	0.796	0.444	0.882	0.622	0.524	0.183	0.466	0.771	1.604	2.173	1.002	0.858	0.451	0.988	1.886	3.533	7.688	5.428	1.817	1.519	1.723	1.797	1.398	1.229	0.665		0.929514	2.37236
25.258	27.468	10.806	3.308	1.199	0.921	0.303	0.235	0.376	0.692	0.363	0.732	1.114	0.346	0.707	0.305	0.568	0.48	0.311	0.633	0.856	1.852	1.322	0.861	0.792	1.539	1.8	3.143	6.468	4.218	2.116	1.233	1.749	1.763	1.318	1.101	0.417		0.933921	2.31708
25.3771	31.225	10.333	3.009	1.015	1.325	0.53	0.432	0.624	0.345	0.549	0.721	0.713	0.378	0.538	0.31	0.178	0.257	0.678	0.689	1.326	1.411	0.932	1.003	0.959	0.77	1.5	3.078	5.522	3.401	1.77	1.421	1.194	1.676	1.076	1.467	0.737		0.938325	2.30811
25.4962	30.719	9.123	2.248	0.704	0.77	0.343	0.422	0.472	0.734	0.506	0.43	0.361	0.213	0.396	0.174	0.382	0.389	0.629	0.83	1.34	1.612	0.876	0.892	0.444	0.848	1.391	2.131	3.789	3.805	1.421	1.403	1.213	1.35	0.868	0.616	0.294		0.942729	2.05939
25.6154	27.301	8.955	1.852	1.157	0.654	0.204	0.662	0.526	0.419	0.675	0.383	0.58	0.338	0.719	0.508	0.575	0.598	0.633	0.803	0.939	1.297	0.979	0.464	0.345	0.635	1.126	2.516	3.29	4.014	0.72	1.375	1.125	1.201	1.056	0.318	0.301		0.947136	1.92342
25.7345	21.575	7.303	1.171	0.872	0.349	0.119	0.538	0.592	0.315	0.667	0.465	0.483	0.294	0.157	0.521	0.525	0.479	0.663	0.216	0.64	0.928	1.471	0.6	0.476	0.87	1.098	2.228	2.776	3.052	0.556	1.055	1.04	0.902	1.071	0.641	0.306		0.95154	1.58372
25.8537	18.778	6.996	1.074	0.511	0.232	0.222	0.333	0.261	0.368	0.547	0.639	0.731	0.304	0.424	0.481	0.483	0.096	0.273	0.674	0.609	1.226	1.342	0.79	0.905	0.696	1.051	2.053	2.726	2.849	0.276	0.681	0.988	1.033	0.889	0.799	0.375		0.955948	1.46431
25.9728	17.072	6.368	1.213	1.017	0.307	0.404	0.74	0.436	0.461	0.22	0.194	0.276	0.189	0.568	0.533	0.307	0.06	0.315	0.549	0.873	1.167	0.674	0.864	0.515	0.712	1.456	2.411	3.032	2.173	0.555	0.827	1.41	0.573	0.663	0.823	0.41		0.960351	1.39908
26.0919	15.787	4.673	1.341	0.84	0.055	0.55	0.326	0.645	0.46	0.38	0.302	0.157	0.155	0.262	0.362	0.224	0.288	0.279	0.374	0.374	0.547	0.906	0.535	0.478	0.637	1.047	2.275	1.863	1.928	0.583	1.102	1.186	0.811	0.589	0.395	0.355		0.964755	1.19642
26.2111	14.79	3.356	1.422	0.581	0.375	0.665	0.385	0.679	0.582	0.153	0.324	0.32	0.219	0.3	0.248	0.476	0.353	0.29	0.296	0.611	0.778	0.617	0.405	0.533	0.65	0.683	1.694	1.908	2.042	0.817	0.928	0.958	0.686	0.533	0.356	0.28		0.969163	1.11925
26.3302	12.205	3.255	1.131	0.506	0.404	0.389	0.669	0.836	0.559	0.126	0.204	0.416	0.278	0.256	0.06	0.297	0.248	0.496	0.598	0.596	0.715	0.594	0.154	0.551	0.524	0.622	1.676	1.993	1.62	0.831	0.811	0.871	0.816	0.932	0.645	0.227		0.973566	1.03086
26.4494	9.957	2.996	1.207	0.267	0.195	0.246	0.455	0.693	0.128	0.255	0.44	0.479	0.261	0.389	0.241	0.129	0.213	0.224	0.423	0.497	0.951	0.47	0.264	0.509	0.642	1.287	1.405	1.735	1.376	0.711	1.016	1.164	0.518	0.564	0.412	0.058		0.977974	0.910472
26.5685	8.055	2.862	0.51	0.554	0.167	0.417	0.479	0.356	0.337	0.402	0.479	0.562	0.088	0.341	0.374	0.14	0.157	0.26	0.259	0.308	0.924	0.581	0.57	0.354	0.426	0.699	1.722	2.115	1.117	0.531	0.471	0.826	0.618	0.648	0.3	0.101		0.982378	0.808611
26.6876	8.71	2.076	1.101	0.524	0.184	0.6	0.273	0.52	0.165	0.446	0.456	0.425	0.504	0.491	0.202	0.443	0.187	0.121	0.451	0.441	0.953	0.338	0.434	0.534	0.658	0.726	1.891	1.53	0.943	0.493	0.352	0.343	0.662	0.64	0.408	0.173		0.986781	0.816611
26.8068	8.423	1.764	0.596	0.276	0.194	0.3	0.343	0.391	0.24	0.433	0.307	0.11	0.204	0.444	0.308	0.199	0.407	0.216	0.309	0.42	0.616	0.389	0.531	0.544	0.313	0.981	1.271	1.283	0.754	0.943	0.527	0.518	0.721	0.204	0.33	0.569		0.991189	0.732722
26.9259	5.867	1.795	0.349	0.334	0.368	0.609	0.164	0.589	0.216	0.184	0.316	0.426	0.363	0.345	0.24	0.181	0.538	0.356	0.386	0.719	0.465	0.251	0.433	0.622	0.198	0.637	0.774	1.191	1.109	0.982	0.551	0.455	0.504	0.3	0.264	0.311		0.995593	0.649778
27.0451	4.985	2.041	0.562	0.153	0.161	0.231	0.313	0.132	0.525	0.214	0.131	0.158	0.297	0.265	0.269	0.153	0.389	0.183	0.199	0.418	0.552	0.605	0.322	0.553	0.703	0.805	1.142	0.842	1.204	0.733	0.665	0.258	0.644	0.337	0.109	0.17		1	0.595083

## Sheet: Image9 (2)
X0	Y0	Y1	Y2	Y3	Y4	Y5	Y6	Y7	Y8	Y9	Y10	Y11	Y12	Y13	Y14	Y15	Y16	Y17	Y18	Y19	Y20	Y21	Y22	Y23	Y24	Y25	Y26	Y27	Y28	Y29	Y30	Y31	Y32	Y33		Ap-Ba	Avg int
0	26.5924	22.2425	34.5794	49.7691	28.4051	53.9156	36.2695	22.127	19.777	29.198	35.258	29.584	63.77	83.318	74.163	33.633	25.732	55.33	59.129	47.82	31.625	33.398	79.322	62.056	70.964	67.969	82.033	65.411	79.225	90.672	43.221	43.188	34.358	31.373		0	48.3949
0.1191	27.1568	22.1047	36.4184	49.5591	29.1007	56.0986	39.691	24.388	21.488	35.474	40.988	32.125	65.634	89.516	77.392	38.547	28.597	57.276	61.065	48.622	32.225	33.854	82.012	66.223	74.034	72.388	84.769	69.934	80.41	90.316	43.335	51.141	42.154	30.98		0.00342347	51.0299
0.2383	27.3876	24.6781	37.9317	49.3717	30.261	54.4791	45.774	29.929	24.461	44.298	43.438	34.869	67.484	91.763	82.098	44.508	31.677	62.865	61.34	48.96	33.013	35.671	84.217	68.667	77.251	73.978	83.816	76.191	85.494	87.755	46.7	56.726	48.578	35.332		0.00684981	53.8518
0.3574	30.7589	25.7834	38.531	49.8299	35.3464	56.483	48.1031	30.749	25.666	48.285	48.66	38.444	70.038	94.907	89.336	54.199	34.052	71.157	69.28	52.74	35.597	41.628	84.364	68.533	77.579	77.9	90.122	85.184	80.194	89.931	50.052	63.254	52.9	38.079		0.0102733	57.2843
0.4766	30.8607	30.3785	42.4425	50.6433	36.5309	55.1056	51.3086	34.516	29.767	51.518	58.76	40.72	77.408	100.784	95.844	67.994	41.423	87.106	73.832	53.884	35.732	45.497	89.896	72.318	83.907	81.837	95.823	91.36	82.133	95.836	49.5	75.068	56.35	48.763		0.0136996	62.2014
0.5957	34.2843	28.3655	46.3751	51.7653	37.1669	58.1296	55.2577	39.717	35.237	58.13	64.115	39.998	78.804	100.311	98.589	80.249	46.505	99.911	75.934	57.476	36.279	46.095	92.059	71.893	85.614	90.984	94.096	103.468	85.54	103.559	49.382	87.128	62.705	54.396		0.0171231	66.1623
0.7148	38.2736	32.0461	47.1684	53.4858	40.4577	60.5549	59.055	49.855	41.445	71.403	73.091	43.126	81.82	105.018	104.479	91.234	55.995	115.423	88.768	59.897	41.507	50.006	102.659	78.017	91.595	97.002	98.94	119.277	89.759	104.14	49.988	97.056	74.471	66.972		0.0205465	72.7643
0.834	44.1739	33.9773	48.8777	56.5586	44.3588	58.7031	68.3964	54.642	47.981	83.754	80.723	44.278	82.045	105.261	114.992	104.802	65.792	126.718	93.817	60.963	43.031	56.838	105.171	83.81	96.36	94.964	111.83	139.195	98.408	113.681	52.693	107.279	85.981	73.005		0.0239729	78.9135
0.9531	45.4993	38.5856	52.7519	53.3929	47.7586	60.4979	76.0994	65.351	62.157	96.159	88.767	44.06	82.168	110.097	120.845	118.231	78.179	140.348	101.099	67.234	44.258	67.894	108.004	88.873	96.898	100.395	117.357	151.513	113.568	119.402	54.549	125.76	98.079	82.401		0.0273964	85.8303
1.0723	48.1613	38.8293	53.5454	53.388	50.4988	61.5208	79.9335	80.52	76.665	113.445	97.589	47.643	88.001	115.936	129.595	126.292	96.055	144.999	111.773	76.398	45.289	70.6	112.422	93.809	100.587	99.564	122.237	165.61	131.154	132.616	68.492	131.718	110.234	100.549		0.0308227	93.402
1.1914	54.5592	37.8773	54.5597	56.8389	52.0818	63.7055	85.0185	86.523	94.761	119.158	108.359	53.917	90.415	117.033	133.89	132.838	108.693	148.352	119.375	86.972	48.754	81.634	113.272	97.094	98.227	104.854	118.762	167.95	144.955	148.686	74.564	136.415	121.75	123.173		0.0342462	99.5593
1.3106	58.2859	42.1297	56.3214	54.5564	54.7616	64.5106	86.7039	91.434	112.006	125.41	114.652	56.562	94.176	118.128	143.083	137.052	123.64	147.511	130.298	92.042	49.499	95.642	118.66	104.453	103.686	100.229	122.717	179.765	161.866	163.616	83.717	146.432	131.16	136.584		0.0376725	105.92
1.4297	63.8253	45.8309	58.1528	53.8611	56.3517	68.3367	90.559	103.704	121.404	132.785	109.577	58.54	95.105	124.433	145.094	140.314	140.449	154.169	148.181	110.19	55.692	102.073	121.678	103.596	104.318	101.158	120.051	185.957	166.851	171.488	88.71	142.547	132.8	147.246		0.041096	110.736
1.5488	71.5583	48.6367	63.0973	57.4973	59.3955	69.562	90.2686	109.619	138.626	134.678	103.278	66.111	104.752	128.169	144.593	143.709	149.404	143.439	158.727	126.984	66.156	108.297	121.382	105.877	106.493	103.872	124.806	180.195	169.651	184.25	102.292	135.637	131.769	155.316		0.0445194	114.944
1.668	77.0013	52.8341	66.5119	57.237	59.7801	70.9641	93.4079	106.67	146.605	137.348	106.132	69.944	111.951	122.393	141.403	150.811	152.445	139.864	163.936	138.518	79.065	123.271	118.504	107.84	110.771	113.351	131.843	169.958	168.713	181.975	121.083	139.962	125.913	154.964		0.0479458	118.029
1.7871	81.628	59.7518	71.2677	59.1669	61.9247	70.791	93.318	108.338	153.473	126.696	104.59	76.826	110.43	125.278	125.905	137.002	154.525	126.758	158.528	145.61	91.351	124.934	124.465	112.273	110.556	123.434	135.825	160.295	152.357	188.121	138.915	137.28	111.723	150.304		0.0513692	118.048
1.9063	89.5362	64.0681	77.4086	62.8915	58.958	70.4616	89.009	107.681	147.47	126.25	104.325	79.674	122.143	122.599	116.631	134.109	148.891	123.201	154.925	156.711	107.705	119.226	130.426	113.413	109.955	120.31	128.28	146.03	136.931	184.049	154.799	128.5	99.636	126.811		0.0547956	116.559
2.0254	93.1534	73.5063	81.451	59.7142	58.4479	72.3373	88.2372	99.979	136.383	119.145	96.405	80.702	126.163	122.891	110.991	137.477	143.416	116.334	155.497	162.637	126.605	121.835	126.443	116.099	111.182	129.206	127.75	119.37	121.466	175.547	168.948	120.28	92.743	102.245		0.0582191	114.547
2.1445	96.7747	78.6423	80.0949	64.4276	55.7073	67.8494	84.3965	99.455	138.882	114.582	95.342	90.602	130.592	117.533	106.412	125.891	130.321	113.973	146.887	165.251	140.448	117.029	122.288	119.789	116.41	137.879	133.051	101.946	102.463	167.262	178.996	113.642	74.295	81.062		0.0616425	112.064
2.2637	93.1357	81.201	80.5955	62.5913	54.2683	67.9581	87.2673	95.456	123.174	103.808	90.82	92.96	135.506	110.267	89.747	117.66	111.051	110.394	144.968	161.177	156.183	115.789	126.416	121.384	123.197	133.897	130.557	83.314	85.257	153.912	199.979	110.349	67.356	66.206		0.0650689	108.465
2.3828	97.0535	88.6403	79.2929	57.0016	58.1981	68.246	80.7659	88.405	118.854	97.122	86.06	99.167	140.876	105.999	80.109	108.279	101.008	111.911	141.804	160.622	156.711	110.661	126.257	126.365	123.216	133.238	128.629	72.758	72.89	138.895	208.229	97.792	60.285	52.159		0.0684923	105.221
2.502	94.3197	95.6422	81.1829	62.5476	55.292	62.6912	81.9534	81.814	109.406	80.588	86.413	111.95	133.506	92.762	70.358	100.699	95.597	98.761	144.239	158.444	162.557	103.299	123.285	127.869	122.544	129.693	130.858	60.395	64.654	125.38	205.886	96.659	53.061	46.019		0.0719187	101.48
2.6211	91.842	93.8614	72.3105	66.3904	56.3118	63.5231	80.1321	76.973	100.867	79.181	79.739	126.583	134.58	87.082	64.77	89.432	92.249	90.856	138.751	151.804	159.792	94.221	121.262	124.711	129.807	132.547	132.941	53.833	53.551	109.864	201.43	91.853	50.231	41.142		0.0753421	98.0713
2.7402	88.0877	90.6417	70.2457	72.0807	55.7399	57.9978	72.8653	68.803	81.734	69.938	70.276	126.493	135.643	74.866	52.394	80.1	86.062	88.407	134.951	152.624	158.599	83.349	114.038	118.697	133.029	129.534	127.897	48.613	49.929	99.766	186.356	82.162	46.546	37.885		0.0787656	92.5397
2.8594	81.1073	90.3427	66.5417	72.1794	57.0221	55.2467	70.0539	63.532	72.899	61.501	66.59	131.92	136.83	67.845	47.808	71.233	75.414	81.097	129.689	140.916	153.942	75.047	111.207	113.343	125.678	119.661	124.647	46.298	43.87	81.494	180.902	72.399	44.998	32.859		0.0821919	87.2386
2.9785	80.3025	91.8175	58.2505	67.0575	56.3673	53.7806	64.965	61.092	66.425	56.267	67.118	140.685	131.384	57.878	45.058	66.198	71.92	76.42	117.905	127.923	141.796	64.823	105.35	111.31	125.802	123.828	131.961	41.032	41.263	66.244	158.714	66.716	42.091	29.268		0.0856154	82.618
3.0977	69.8979	87.1691	57.5924	65.6266	58.5563	48.8102	62.813	57.401	60.612	49.326	55.14	144.639	129.321	50.277	40.386	61.785	64.994	71.622	111.975	113.753	132.681	58.387	91.59	101.917	123.88	117.437	122.687	35.011	33.296	58.641	136.891	60.006	43.034	25.832		0.0890417	76.5584
3.2168	54.6078	80.605	52.0454	64.1638	61.2692	44.9984	56.9892	48.984	57.774	40.962	47.959	151.555	115.744	42.653	34.145	58.54	58.623	61.953	108.164	101.12	112.888	51.006	85.968	92.135	116.288	107.147	117.19	30.442	27.63	49.433	126.275	52.024	41.843	24.092		0.0924652	69.9181
3.336	48.5211	77.9117	43.4818	61.2921	61.1047	43.2128	53.9892	44.474	50.552	38.02	46.83	159.937	108.624	37.12	32.888	49.591	56.566	56.952	96.563	89.999	98.618	43.76	81.287	84.668	113.097	104.292	105.892	24.502	23.875	39.358	107.604	42.897	40.135	21.191		0.0958916	64.3766
3.4551	39.6458	67.2326	37.2302	66.6947	59.6708	44.5744	51.4866	40.49	41.696	33.478	41.715	156.843	101.22	29.872	27.564	52.583	56.449	56.202	93.399	79.487	85.467	37.267	70.713	77.267	107.582	94.938	97.109	20.506	20.066	33.201	83.248	36.741	36.777	19.895		0.099315	58.7738
3.5742	35.6944	60.7495	35.3123	61.9783	55.9914	44.2188	48.6092	39.876	37.258	29.031	36.611	161.117	87.33	23.674	26.423	50.726	49.114	53.398	81.201	64.859	69.985	31.604	66.296	66.822	99.407	78.989	85.06	19.093	17.675	27.723	65.337	29.957	36.051	19.183		0.102738	52.8339
3.6934	28.0989	50.8528	28.7959	59.91	57.3902	46.7417	45.2912	36.082	35.244	25.679	32.56	156.45	71.098	18.615	23.073	45.563	42.377	47.887	75.968	54.132	61.996	28.979	62.69	57.252	90.369	73.239	83.3	17.887	15.726	24.201	53.636	28.137	34.499	17.364		0.106165	47.9731
3.8125	24.2751	42.8572	26.376	59.2872	55.0787	42.0765	41.3203	34.293	30.302	21.52	31.254	150.745	62.127	18.31	18.94	41.399	38.874	40.682	65.024	48.074	54.502	27.952	56.839	48.841	79.887	66.923	72.435	16.449	15.55	20.615	46.867	24.408	38.179	16.383		0.109588	43.4896
3.9317	20.4128	36.0246	22.4507	56.628	60.1549	37.2249	38.1925	27.788	28.28	17.04	23.997	133.002	50.929	18.33	15.949	39.078	37.434	37.975	53.562	39.727	45.43	22.503	49.391	40.451	67.299	60.766	68.03	14.165	13.455	19.024	37.684	20.661	37.349	16.334		0.113015	38.433
4.0508	20.0849	28.4969	20.8756	52.361	55.3121	34.3736	33.0238	28.398	26.96	16.798	21.412	118.825	39.962	18.069	15.354	36.955	39.261	35.108	44.98	34.292	36.7	20.189	43.528	31.363	58.554	53.386	65.179	11.752	11.821	17.596	29.122	18.087	32.606	16.683		0.116438	34.3373
4.1699	18.3341	24.7767	16.8305	50.5829	53.1548	32.2367	31.681	25.208	21.438	14.669	20.698	97.627	34.711	16.214	14.899	32.215	37.546	31.455	35.803	28.364	30.295	17.861	37.118	28.39	52.978	43.14	60.604	11.122	12.571	14.434	29.539	14.387	34.613	14.619		0.119862	30.5916
4.2891	18.2076	22.8194	14.558	52.2594	52.2909	30.2784	26.3858	24.509	20.061	13.572	19.222	87.275	27.889	14.893	15.005	28.094	33.04	29.172	31.892	23.295	30.457	15.597	31.171	25.245	44.277	37.991	50.56	10.059	11.705	14.882	29.327	14.046	34.852	15.278		0.123288	27.946
4.4082	14.3329	18.792	12.4235	50.8995	50.258	25.8174	22.3676	21.083	19.327	13.362	16.681	73.78	25.648	14.704	15.163	23.557	33.435	27.813	28.632	20.96	30.014	13.193	27.562	21.324	39.957	33.631	47.289	9.861	9.906	13.806	29.288	13.324	32.202	14.641		0.126711	25.4422
4.5274	13.3027	16.6001	10.7347	44.8606	52.7391	23.7483	21.4008	21.489	17.808	10.799	14.526	52.243	23.706	11.42	13.908	22.551	32.022	25.403	24.702	19.863	30.375	12.093	28.551	20.437	33.972	30.266	43.5	7.593	9.476	12.965	25.83	12.274	25.7	13.952		0.130138	22.965
4.6465	10.4901	12.8851	9.7957	43.3424	51.2402	22.2013	17.6173	16.166	16.732	10.164	14.102	39.908	23.24	9.272	14.004	19.159	26.942	23.57	23.223	16.212	26.902	12.99	30.402	18.338	29.184	23.582	33.685	7.261	7.701	12.176	28.578	12.86	27.081	16.986		0.133561	20.8233
4.7657	8.6744	10.9999	10.2169	44.703	49.967	21.1893	15.3716	14.384	13.809	9.385	15.192	32.847	22.648	9.16	14.121	16.548	24.874	21.248	18.052	15.946	25.8	10.772	25.504	16.744	29.174	21.697	31.055	8.735	8.029	11.303	23.946	12.816	21.633	15.596		0.136988	19.1806
4.8848	6.7942	10.8223	8.7074	41.5559	50.6571	19.5711	14.9818	14.157	14.272	8.057	12.112	24.9	23.48	8.578	11.074	15.266	23.126	19.639	16.084	13.335	22.757	10.054	21.591	16.616	25.494	19.816	29.338	7.959	8.24	10.156	22.826	12.977	22.462	12.735		0.140411	17.6527
5.0039	6.7666	10.1422	7.7611	35.2332	48.8357	16.3329	12.4687	10.146	12.829	9.323	11.767	23.852	19.108	7.492	11.831	14.139	20.051	15.988	17.205	11.176	21.347	8.368	20.168	17.098	24.568	17.39	23.124	6.914	8.888	9.503	22.568	11.175	19.92	13.427		0.143834	16.0855
5.1231	6.4905	7.7592	7.1055	29.0179	46.9122	13.8226	9.479	12.546	10.72	7.82	13.398	19.264	15.95	6.26	10.857	11.861	16.423	13.646	14.821	9.069	19.655	7.348	19.025	18.348	24.712	15.635	20.235	7.379	8.166	9.373	19.72	9.194	14.624	13.667		0.147261	14.4207
5.2422	7.2747	7.1625	6.9193	29.4728	42.9421	14.1946	8.5711	11.669	8.942	6.902	10.426	17.031	13.149	6.359	11.873	10.676	15.047	12.758	11.746	8.584	17.923	6.986	16.605	17.44	23.048	14.187	19.46	7.163	9.433	8.633	18.865	8.381	17.553	13.741		0.150684	13.5623
5.3614	5.1406	5.6264	6.0476	27.1944	43.4083	13.0336	10.3356	10.522	9.48	6.133	8.995	17.422	10.253	6.183	10.914	8.96	14.481	11.517	10.146	7.128	16.49	6.361	15.688	16.181	22.127	14.905	17.629	6.356	7.247	8.573	18.571	8.574	16.581	15.358		0.154111	12.7518
5.4805	4.2576	5.0735	5.6278	27.3598	40.9703	9.2492	9.0002	9.246	8.568	5.338	10.303	15.725	8.987	6.714	10.294	9.123	11.911	10.537	8.195	7.535	16.353	6.466	13.873	14.293	24.475	14.374	17.584	7.206	6.65	9.716	17.105	9.175	15.658	15.917		0.157534	12.1429
5.5996	3.9148	5.5695	5.3127	25.1239	40.6153	7.7965	9.0614	8.725	6.86	5.136	9.485	13.252	8.657	7.338	9.869	8.15	12.007	8.737	8.024	7.117	16.521	5.872	12.277	12.42	24.098	12.34	15.979	6.084	6.701	6.946	13.402	9.705	16.462	14.887		0.160958	11.3072
5.7188	4.0495	4.5768	5.8985	22.8847	39.2203	9.1836	7.6695	7.961	7.081	4.772	6.784	12.055	6.877	6.642	10.742	6.482	10.343	6.562	6.386	6.136	14.618	5.439	10.866	14.224	19.213	12.363	15.199	5.997	7.98	6.983	14.556	9.465	14.402	13.285		0.164384	10.4969
5.8379	4.236	4.6589	6.6881	19.734	35.9681	8.7185	8.6285	7.441	6.369	5.108	7.426	12.388	6.664	5.158	11.136	8.016	9.078	6.08	7.478	6.018	13.791	6.269	10.764	11.266	18.918	11.806	16.278	6.788	7.39	7.489	14.042	7.958	11.693	13.013		0.167807	10.1311
5.9571	3.7967	5.017	6.063	19.1195	35.0425	8.2226	8.1049	6.311	6.673	5.347	7.674	11.794	7.075	5.136	10.403	6.908	7.814	6.07	5.917	5.576	14.024	6.323	9.333	8.653	17.499	12.534	17.556	8.46	8.261	7.023	14.775	7.55	11.866	14.506		0.171234	9.89492
6.0762	4.1525	4.7658	5.8889	17.0674	34.1824	7.2291	6.6848	4.635	5.718	6.45	7.193	10.123	6.341	5.957	10.418	8.726	7.095	4.203	5.376	5.591	13.559	6.386	7.009	7.505	17.414	10.352	17.126	8.894	9.987	8.129	12.613	8.507	10.734	12.587		0.174657	9.37056
6.1953	5.2032	4.1023	6.2856	11.3346	32.1024	6.8861	6.4523	4.517	5.017	5.275	7.12	7.196	5.266	5.243	10.095	6.101	5.791	4.855	5.287	4.962	12.152	4.542	6.752	7.199	13.172	8.88	18.803	8.314	8.244	7.121	12.733	8.87	8.254	12.292		0.178081	8.4241
6.3145	4.1814	3.2434	6.0546	12.0687	33.1029	6.0451	6.8213	4.47	5.679	4.895	6.41	7.527	3.957	5.696	10.317	7.111	5.837	4.641	5.388	5.105	11.865	5.097	5.963	6.36	11.247	9.276	16.697	7.337	7.638	7.302	13.098	8.166	8.764	11.311		0.181507	8.19622
6.4336	4.3005	2.9062	5.2127	11.7562	34.3552	6.2188	7.5025	4.389	3.783	5.158	6.02	8.939	4.775	6.217	10.357	7.855	4.663	4.564	4.604	4.624	13.173	4.627	6.845	7.882	10.162	11.333	16.618	8.099	8.015	7.932	12.546	9.432	8.184	10.599		0.18493	8.34256
6.5528	4.053	4.23	5.5499	10.776	31.1092	7.0926	6.8035	4.233	4.302	5.017	6.001	7.071	4.472	5.045	10.354	7.103	3.822	3.678	3.985	3.97	11.993	4.247	5.311	6.175	9.653	9.255	16.054	8.359	9.119	7.694	12.356	8.757	9.831	11.349		0.188357	7.90648
6.6719	4.9829	3.4727	5.5488	10.8912	30.4274	6.2017	5.8135	4.779	4.922	5.316	7.204	6.299	4.441	4.753	9.118	6.387	4.601	4.22	4.411	5.305	13.294	5.078	5.511	5.997	8.989	9.294	16.941	6.868	8.774	9.774	12.929	8.606	8.707	10.174		0.19178	7.94206
6.7911	3.9016	2.7614	4.0436	10.4182	28.2632	6.6374	4.5615	4.094	4.359	4.583	6.205	7.491	3.842	4.663	10.36	6.332	4.835	4.418	3.203	4.734	13.273	4.331	6.3	5.147	9.176	9.909	18.317	7.683	8.173	6.171	11.31	7.834	7.443	11.447		0.195207	7.53588
6.9102	3.8055	2.9045	4.213	8.5046	23.3474	6.7311	4.9323	4.252	3.476	4.999	6.675	6.864	5.079	4.15	10.93	5.703	5.011	4.144	3.714	4.235	13.771	3.864	5.75	5.372	8.148	9.626	17.565	8.659	8.799	6.308	13.503	7.691	6.678	9.523		0.19863	7.32139
7.0293	4.3654	3.8005	5.6175	9.5317	23.0316	6.5984	5.4025	3.858	3.465	4.824	7.08	4.988	5.319	5.788	10.334	6.014	5.302	4.02	3.838	3.534	13.297	4.285	4.72	5.333	8.461	8.497	15.452	7.793	9.848	7.372	12.929	8.394	6.347	8.791		0.202054	7.3009
7.1485	4.152	3.6484	5.5102	8.8845	20.2913	6.8081	5.1401	3.472	3.3	5.865	6.545	4.712	3.597	6.242	10.005	6.179	4.512	4.075	4.085	4.196	13.202	4.495	5.361	5.917	8.061	8.317	15.388	7.194	9.651	6.61	11.841	8.121	6.944	9.029		0.20548	7.09855
7.2676	4.6191	3.1306	5.0317	8.6883	16.446	6.5191	5.2161	3.844	3.474	5.504	6.79	5.367	4.828	6.176	9.267	6.387	5.086	3.141	4.533	4.438	12.714	5.077	5.116	7.019	6.909	7.705	14.163	7.26	9.483	6.615	12.328	6.803	7.242	7.432		0.208903	6.8927
7.3868	4.0848	3.0677	4.1373	8.4301	15.8064	5.555	5.0169	2.67	3.818	4.022	7.143	5.374	3.778	5.308	10.118	5.759	4.41	3.399	3.139	4.081	15.165	4.105	7.007	6.749	7.588	7.065	14.263	7.745	7.475	7.553	12.322	7.629	5.654	6.54		0.21233	6.64639
7.5059	3.4832	3.4641	5.0075	7.4681	14.785	6.5675	4.5347	4.283	3.122	3.9	9.035	5.164	5.028	5.248	11.553	5.537	4.432	4.526	2.945	3.842	15.622	4.254	6.671	6.735	6.922	7.954	15.146	7.729	8.73	6.351	10.833	8.426	6.009	6.516		0.215753	6.81833
7.625	3.8888	2.9765	5.281	7.2541	12.3086	6.4743	5.2419	3.955	3.045	4.995	8.169	3.857	4.202	4.929	10.169	5.877	3.541	3.855	3.245	3.601	16.578	4.576	7.02	6.085	6.447	8.028	13.788	8.975	9.696	5.786	12.072	7.889	6.248	6.279		0.219177	6.65683
7.7442	5.236	2.8893	4.1832	7.1248	10.6722	6.8413	3.9051	3.681	2.987	4.536	9.325	5.038	4.679	5.225	11.528	7.462	3.784	3.854	3.207	3.714	15.192	4.126	7.149	7.407	6.81	6.132	15.321	7.704	9.158	7.264	11.538	7.899	4.993	5.839		0.222603	6.65894
7.8633	4.326	3.6535	4.1663	7.3192	9.5984	6.1405	4.083	4.107	3.56	3.983	9.075	5.063	5.023	5.473	12.249	6.456	3.558	3.054	3.105	4.357	14.435	4.097	8.204	8.467	6.802	7.363	14.829	8.265	8.981	5.15	13.819	8.542	5.686	4.884		0.226026	6.70217
7.9825	3.8577	3.1182	5.2637	6.0816	10.0815	7.2865	5.6935	3.277	3.176	4.706	11.019	3.498	4.17	5.193	12.046	5.896	4.141	3.14	2.657	4.84	16.483	4.465	6.195	8.289	7.608	7.397	14.313	7.85	8.96	5.967	13.554	8.394	3.802	6.591		0.229453	6.73558
8.1016	4.3247	2.8731	5.1075	6.7797	10.9193	6.9197	5.4615	3.102	3.344	5.179	10.608	3.717	4.395	5.985	13.975	7.105	3.7	3.642	3.507	4.054	15.455	4.678	6.593	7.985	8.16	7.347	14.653	8.424	8.471	5.511	13.187	8.834	4.568	5.213		0.232876	6.87581
8.2207	4.6094	2.6486	5.0444	7.1215	9.6487	5.7588	5.4181	3.147	2.946	4.847	7.157	3.953	4.32	6.166	13.676	6.983	5.009	3.649	3.6	5.023	14.661	4.431	6.547	8.496	7.843	8.075	13.128	7.501	8.399	5.336	13.367	9.553	4.243	5.686		0.2363	6.70563
8.3399	5.2525	2.7677	4.9984	6.2858	8.0775	6.02	6.3585	2.598	3.34	5.178	8.753	4.107	4.792	6.179	13.439	7.218	4.041	3.817	3.183	4.552	15.355	4.552	6.911	10.867	7.761	6.69	12.419	7.934	9.413	5.211	12.372	8.212	4.161	5.087		0.239726	6.70301
8.459	5.5374	3.0095	5.553	6.9871	7.4688	6.7899	5.9709	3.021	3.648	4.438	11.059	4.692	5.232	6.942	14.75	7.262	4.658	4.546	3.279	4.546	14.605	3.372	7.684	12.114	7.656	7.416	12.683	8.385	10.057	6.638	13.52	9.293	4.255	5.35		0.243149	7.12993
8.5782	6.4089	3.1368	4.0123	5.7921	6.459	5.5741	6.0212	3.758	3.619	5.738	10.442	5.043	3.478	7.6	14.96	6.592	4.869	4.332	2.666	4.111	14.964	3.622	7.782	14.184	7.806	7.875	12.04	8.615	10.767	6.708	13.841	8.975	4.392	5.524		0.246576	7.10904
8.6973	5.1629	3.0205	5.3762	6.4005	6.3314	5.4607	5.4437	4.179	3.919	5.667	11.776	4.796	3.79	11.167	13.654	8.168	4.859	4.187	2.903	4.079	14.77	3.076	7.049	17.01	8.198	7.48	14.8	9.877	9.013	5.489	12.499	9.559	4.117	3.931		0.249999	7.27082
8.8165	4.2211	3.1093	4.9123	7.2022	5.9376	5.8211	6.317	4.196	3.736	5.118	13.423	5.002	5.61	11.39	14.787	8.216	4.424	3.17	3.386	3.669	15.228	2.703	8.115	16.731	9.454	7.659	14.732	7.732	8.945	6.379	12.436	10.009	4.429	3.7		0.253426	7.40881
8.9356	4.543	2.8145	5.4401	7.0601	4.9904	6.2231	7.14	3.824	3.407	5.08	15.687	6.023	4.773	11.67	14.689	8.697	4.237	3.92	3.087	4.042	15.925	2.537	10.033	17.583	9.871	7.775	16.765	8.468	8.258	5.539	11.717	10.569	4.935	5.135		0.256849	7.71933
9.0547	5.7146	2.89	5.946	7.4595	4.044	7.2803	5.9553	3.498	3.104	5.318	16.798	4.515	5.199	13.566	17.947	8.633	4.586	4.049	3.319	3.499	15.817	3.112	10.716	21.801	11.723	8.596	14.346	9.325	9.464	6.305	12.253	11.072	5.07	4.437		0.260273	8.15758
9.1739	4.7127	2.9561	5.7712	6.4572	3.6869	7.0497	6.744	3.579	2.074	5.107	19.463	5.177	6.343	11.637	18.395	8.572	4.6	4.421	4.012	4.08	16.065	3.464	12.783	24.292	10.852	7.778	15.977	8.489	8.257	6.601	11.852	10.361	5.275	4.363		0.263699	8.27196
9.293	4.3823	2.4761	5.4135	6.581	4.5946	6.6316	8.0305	3.519	2.802	6.423	20.743	3.92	7.253	12.907	18.614	9.465	5.92	3.995	3.312	4.344	17.049	4.242	12.739	24.696	9.937	7.418	16.441	10.096	9.798	7.565	11.331	11.962	5.137	4.782		0.267122	8.66234
9.4122	4.7003	2.5658	6.4917	6.635	4.5453	6.1109	7.1511	4.195	2.839	4.635	23.35	4.332	6.757	10.772	20.367	8.462	4.712	3.378	3.98	4.575	16.666	4.14	13.864	21.219	9.764	7.492	17.239	11.706	9.8	7.764	11.395	13.111	4.39	4.315		0.270549	8.62997
9.5313	4.8066	2.9724	5.6498	7.5442	3.8788	8.1679	9.3639	3.782	3.365	5.211	23.488	4.216	7.238	11.017	21.928	8.517	4.359	3.701	3.544	4.17	16.26	4.097	14.348	23.744	10.394	7.405	18.693	13.263	9.073	6.743	11.883	15.063	4.518	4.655		0.273972	9.03114
9.6504	4.3475	3.3302	6.5379	7.1367	2.8368	7.3947	8.926	4.471	2.777	4.754	25.15	5.563	6.453	9.654	22.667	10.565	5.31	2.855	3.306	5.491	15.483	4.015	15.766	22.492	11.244	6.769	18.932	15.111	9.532	6.301	15.506	14.427	4.179	4.373		0.277396	9.22517
9.7696	4.4429	3.6423	6.8426	6.715	3.5355	7.2488	9.9077	4.006	3.233	4.92	27.987	5.774	7.766	7.577	20.832	9.982	5.701	3.72	3.101	4.614	18.922	4.176	15.773	24.558	13.198	7.354	17.894	12.906	10.285	7.2	16.264	14.718	4.315	4.304		0.280822	9.5122
9.8887	4.7077	2.971	6.6022	6.2969	4.0394	6.9843	9.2434	4.683	3.218	4.793	30.273	5.566	9.2	9.199	23.663	11.405	5.45	4.502	4.206	4.784	19.518	4.082	15.695	25.878	12.415	6.651	16.937	14.232	10.357	7.129	16.562	17.152	4.89	3.837		0.284245	9.91535
10.0079	4.1192	3.4967	6.7434	8.6037	3.4952	8.1631	10.2206	4.651	3.12	6.177	34.885	5.91	9.226	9.173	28.632	10.857	5.724	4.445	3.845	4.518	17.956	4.019	15.986	25.356	12.351	6.338	16.466	11.541	8.038	6.119	15.742	20.704	3.386	4.317		0.287672	10.1272
10.127	4.3542	3.1379	6.5031	8.1649	2.7095	9.0588	10.2805	3.904	2.326	5.246	33.316	6.754	9.44	8.677	28.708	12.656	5.643	4.753	3.812	4.116	17.667	3.725	17.152	26.78	14.251	6.691	17.836	14.607	8.081	6.974	16.499	22.792	3.755	3.463		0.291095	10.4069
10.2462	4.7238	3.5002	5.9659	7.3813	3.5873	8.5525	9.8914	3.456	2.348	6.133	32.95	7.182	9.533	9.009	32.417	10.79	6.944	3.895	3.461	5.245	17.142	3.543	19.287	28.787	14.044	7.553	19.138	15.228	8.158	8.483	17.643	25.979	4.333	3.46		0.294522	10.8748
10.3653	4.4729	2.765	8.0032	7.5027	3.7496	8.874	11.3135	3.635	3.423	6.679	33.919	6.976	11.623	9.822	39.582	10.6	6.094	4.655	2.729	5.992	18.796	3.867	20.476	27.524	12.674	8.277	17.104	11.932	9.085	7.312	15.864	29.009	4.519	4.933		0.297945	11.2877
10.4844	4.3836	3.2581	8.3923	7.3059	4.1048	8.5271	10.4624	4.787	3.424	6.64	35.338	7.466	12.35	11.313	44.79	11.278	6.78	4.316	3.524	6.469	20.287	3.434	18.339	25.665	14.486	7.553	16.779	13.666	10.149	6.965	15.214	30.049	3.865	4.575		0.301369	11.6452
10.6036	5.4995	2.8447	8.2863	8.5616	3.4908	9.7074	11.4624	3.866	3.309	7.359	38.279	5.937	10.952	11.046	45.365	13.031	6.918	4.488	3.573	5.921	16.15	3.599	17.996	26.58	18.139	7.775	17.897	14.101	8.698	8.503	15.998	34.759	3.854	4.571		0.304795	12.0152
10.7227	6.2811	2.6699	8.8283	8.599	3.8038	8.9313	12.1343	4.377	3	7.03	38.693	7.169	11.25	11.035	47.547	11.998	6.684	4.575	2.899	6.721	17.618	3.289	18.243	26.538	20.898	7.269	17.61	13.517	9.092	6.814	14.084	35.416	3.874	4.35		0.308218	12.1423
10.8419	5.039	3.2689	8.8915	8.2624	3.8498	9.5487	14.0897	4.253	3.933	7.869	41.48	6.969	12.154	15.499	51.627	11.686	6.56	4.257	3.747	6.642	17.646	3.969	20.043	26.737	21.437	7.298	19.016	12.101	8.936	7.146	15.527	36.123	4.824	3.779		0.311645	12.7708
10.961	5.7386	4.283	10.4018	8.3022	3.1634	9.9326	15.9094	4.631	3.189	6.859	37.148	7.018	11.855	16.522	53.001	13.031	7.075	5.308	3.44	7.533	18.798	3.548	22.489	26.359	23.989	9.039	21.361	14.299	9.5	6.185	14.853	38.855	4.807	3.93		0.315068	13.3045
11.0801	6.985	3.2758	10.079	8.0729	3.1611	11.2233	16.4911	4.347	3.787	5.586	42.427	8.249	12.297	16.217	57.833	12.983	7.779	5.102	3.787	7.763	15.494	3.554	23.583	28.34	29.198	8.427	20.934	16.906	8.431	6.478	15.547	44.226	3.631	4.47		0.318492	14.0195
11.1993	6.5919	2.8751	7.9431	9.616	3.0042	12.0101	16.5716	4.15	3.939	6.591	44.257	8.089	13.654	14.961	58.406	12.957	6.313	3.744	3.819	8.027	16.404	3.938	26.086	33.379	28.486	7.54	23.506	17.1	8.511	5.718	18.962	47.75	4.492	3.586		0.321918	14.4993
11.3184	6.3221	3.2021	7.7183	9.0792	3.4896	12.4515	17.1157	3.202	3.252	6.096	49.941	7.843	14.371	13.626	67.691	12.532	5.099	4.667	4.142	9.14	18.892	5.463	30.641	37.508	32.137	8.085	30.321	17.186	9.212	5.456	19.465	55.903	4.34	3.877		0.325341	15.8667
11.4376	5.0981	3.9585	7.6016	8.8531	3.7028	13.6413	16.2339	4.323	3.474	6.725	51.973	8.311	13.097	16.903	68.57	15.138	5.815	5.295	4.127	9.463	17.245	4.223	28.339	35.569	36.296	8.302	29.996	14.555	8.248	6.328	21.696	59.004	4.148	4.563		0.328768	16.2005
11.5567	5.6459	4.2749	7.5539	8.7782	4.526	12.7242	16.9811	4.907	3.679	6.334	54.077	7.556	11.689	13.605	67.649	16.811	6.427	4.698	3.477	10.748	17.169	4.416	24.758	38.16	37.663	7.832	28.786	14.652	9.42	6.743	19.746	59.83	4.782	4.059		0.332191	16.1811
11.6758	6.6861	3.2298	8.1756	9.3908	3.5596	13.7171	16.9404	4.884	3.074	6.829	58.824	9.361	11.157	16.295	74.017	19.661	6.914	4.484	3.717	9.574	15.289	5.098	25.696	40.411	39.322	7.064	30.993	12.49	7.92	5.775	23.006	65.641	3.986	3.886		0.335615	16.9726
11.795	7.5096	3.1118	8.7239	9.3562	3.9897	14.9951	17.2257	4.512	3.097	8.043	64.462	8.904	10.182	17.787	71.708	21.606	7.446	4.681	3.439	10.801	16.594	4.223	27.407	40.772	40.779	8.487	36.918	14.06	7.851	5.587	21.636	66.085	4.437	3.883		0.339041	17.6559
11.9141	7.0756	3.8762	8.2613	8.9952	3.6367	14.4233	17.3172	6.069	3.175	5.356	60.986	8.145	10.335	19.448	77.062	25.111	7.354	4.187	2.946	12.503	15.319	5.145	23.064	40.917	42.176	8.894	41.27	11.922	8.563	5.554	20.272	68.71	4.334	4.468		0.342464	17.8491
12.0333	9.3935	4.2281	8.4528	10.1216	3.6866	16.8745	16.84	4.995	2.949	5.591	67.661	7.136	11.485	23.383	76.814	28.923	6.472	5.456	3.475	12.497	12.046	4.762	23.191	41.72	44.325	8.417	45.291	11.785	7.821	4.98	20.945	71.274	4.609	4.634		0.345891	18.5951
12.1524	8.7804	4.0964	8.7404	12.3968	4.1026	18.4164	16.5195	5.054	4.61	5.771	67.752	8.457	12.704	22.778	73.404	30.935	7.53	4.782	4.067	13.364	10.142	4.373	22.216	39.024	42.863	7.646	46.735	10.551	8.48	4.591	20.294	71.366	4.94	3.298		0.349314	18.5523
12.2716	8.6878	4.1566	8.9481	12.908	3.2697	18.1019	16.6283	4.718	3.85	4.767	69.311	9.131	12.981	24.376	78.236	30.927	7.906	4.963	4.266	16.172	12.412	4.799	20.155	36.185	45.328	7.247	50.864	10.576	6.896	4.231	20.245	68.447	5.196	4.162		0.352741	18.8543
12.3907	9.2591	3.8544	8.0988	15.0943	4.863	16.1733	14.5207	4.958	4.038	5.521	71.442	7.353	13.018	29.088	73.498	32.16	8.621	5.605	4.42	17.597	10.942	4.53	19.454	34.839	45.076	8.452	50.403	8.272	6.857	5.17	18.274	69.519	5.195	4.444		0.356164	18.8415
12.5098	10.1091	3.8857	8.0878	16.1321	3.4983	18.774	13.7262	5.172	4.196	5.381	67.702	8.013	10.658	28.848	77.847	36.863	8.897	5.844	4.759	15.884	9.73	4.823	17.5	39.898	44.05	8.786	53.546	8.254	6.699	5.763	17.912	68.112	4.672	4.611		0.359588	19.0774
12.629	9.3345	3.919	9.4855	20.1412	3.3763	18.3584	12.5224	5.194	3.48	5.171	70.906	8.586	9.836	34.336	82.13	41.947	9.614	5.985	4.791	17.995	9.86	3.815	17.868	34.95	46.279	10.266	57.134	9.001	6.939	5.393	18.553	68.246	4.91	5.506		0.363014	19.8773
12.7481	8.6772	4.0446	8.0104	23.1245	3.9491	14.8933	12.8713	5.913	3.846	4.787	69.144	8.398	9.867	34.789	83.943	40.253	10.644	5.135	4.756	20.364	7.752	4.627	14.37	36.083	42.019	10.398	56.83	9.655	5.566	5.682	19.724	63.023	5.728	4.299		0.366437	19.5049
12.8673	9.0051	3.8499	7.7585	24.2828	3.6539	13.6609	12.2842	6.49	3.944	4.399	65.755	10.011	9.558	38.26	86.304	41.09	9.842	6.696	4.726	20.927	8.421	4.505	12.24	33.397	42.689	10.644	57.779	9.316	7.559	5.25	16.887	56.747	5.631	4.394		0.369864	19.3517
12.9864	8.0163	4.5514	7.7002	26.7868	3.2288	13.9645	13.1375	5.956	3.676	6.057	68.022	10.609	8.409	38.621	88.328	43.013	9.291	5.927	5.293	20.906	8.171	4.826	12.395	33.479	44.051	11.194	57.922	8.421	7.469	5.012	18.141	52.568	5.275	4.092		0.373287	19.5444
13.1055	7.2165	4.6456	8.4223	29.2913	3.6812	14.2271	11.794	5.822	3.143	6.422	63.429	10.062	9.25	35.875	89.762	49.135	12.603	4.829	3.839	22.053	8.78	4.907	12.088	30.687	40.852	10.932	64.239	9.406	6.633	4.668	17.517	48.567	5.454	3.496		0.376711	19.5214
13.2247	8.824	5.3079	7.0587	32.3486	3.9798	13.0713	14.5777	5.484	3.741	5.941	54.785	9.497	10.118	37.717	93.018	51.767	13.497	5.137	4.677	21.717	9.324	4.618	12.851	35.007	38.473	11.942	66.69	8.97	8.565	4.17	15.667	47.863	6.687	4.635		0.380137	19.9331
13.3438	8.0521	5.0605	7.422	31.7422	3.1148	12.1149	12.7672	4.564	3.695	5.233	47.971	10.353	10.066	35.159	92.42	58.249	11.457	6.41	4.322	20.849	8.769	4.394	11.321	31.711	34.492	12.886	69.243	8.479	6.185	4.801	17.592	43.37	6.562	6.148		0.38356	19.3228
13.463	8.9246	4.9739	6.9922	31.5791	3.7019	12.2306	13.2615	4.706	4.248	5.765	43.55	10.201	12.295	34.734	91.959	65.848	10.335	6.319	4.148	22.719	8.447	4.832	11.82	26.674	31.01	12.768	75.961	8.064	6.51	4.419	19.397	40.34	7.574	5.268		0.386987	19.4581
13.5821	9.5439	4.7914	7.1728	33.6369	3.3808	12.608	15.2088	6.141	4.099	4.152	39.602	11.743	13.503	27.85	94.767	77.825	10.692	5.52	3.467	23.746	8.3	5.035	11.572	26.771	30.122	13.264	75.525	8.347	5.783	4.314	19.019	46.994	6.979	5.942		0.39041	19.924
13.7012	11.705	4.5257	5.4186	31.5043	5.8151	11.765	14.6364	5.464	4.631	4.017	33.717	12.363	11.779	22.133	95.025	79.587	10.531	6.151	3.6	24.937	9.838	4.579	11.044	28.703	28.239	12.996	84.519	8.8	5.891	5.597	15.835	50.814	7.652	5.427		0.393834	19.9776
13.8204	10.0146	5.3015	7.0066	27.2408	5.1454	12.5886	12.9188	5.383	4.627	4.505	29.987	12.51	10.856	19.504	100.387	79.296	11.981	5.705	4.156	22.804	8.129	4.392	11.95	29.32	26.871	14.394	87.744	8.065	5.43	5.326	18.746	52.025	6.664	4.803		0.39726	19.8758
13.9395	10.3058	5.9227	7.6357	24.6434	4.8721	13.0063	13.6294	6.907	4.558	4.168	24.74	13.709	12.859	19.972	101.6	80.234	12.787	4.924	4.362	20.763	8.674	4.472	12.599	27.486	24.512	14.51	87.995	7.48	5.31	5.622	21.313	50.512	8.344	4.415		0.400684	19.8483
14.0587	9.0894	4.9688	6.6056	22.7419	4.6027	10.6197	13.1059	7.12	4.13	4.812	26.686	16.356	14.364	17.484	104.935	87.32	16.044	4.806	4.931	19.636	8.273	4.622	13.514	27.515	26.878	15.176	89.093	8.285	5.509	5.448	18.458	52.37	8.021	4.35		0.40411	20.2315
14.1778	10.5233	4.9209	7.3055	24.2518	4.5663	11.3005	12.6159	5.002	3.603	5.104	22.132	17.865	13.642	15.338	103.569	87.671	13.758	6.397	3.843	19.22	8.361	3.562	14.516	24.856	23.837	17.372	91.678	9.031	6.01	5.559	17.378	56.422	8.468	4.595		0.407533	20.1257
14.297	8.8575	4.4965	6.5096	26.1332	4.4262	12.8923	15.1825	5.667	4.221	4.471	21.739	17.71	13.516	16.824	111.449	90.794	14.489	6.595	4.63	20.257	7.502	3.776	16.512	29.045	19.607	16.542	88.379	6.835	6.446	6.604	16.997	53.195	7.456	5.226		0.41096	20.4406
14.4161	9.3719	4.7082	6.964	27.1563	4.1137	12.3652	12.8337	4.975	4.257	4.316	21.145	19.616	14.54	16.507	105.512	91.836	13.574	4.916	4.829	22.084	7.162	4.5	16.532	30.89	18.418	18.182	87.673	7.838	5.813	5.959	15.769	60.647	9.496	4.455		0.414383	20.5575
14.5352	9.4547	5.0884	7.802	28.3415	6.073	13.1387	13.5641	5.062	4.039	3.881	18.044	22.277	14.267	19.037	103.392	92.388	13.545	4.769	4.837	22.065	8.653	5.144	17.812	30.457	17.66	21.436	80.27	8.881	6.683	6.07	15.598	56.709	8.13	5.211		0.417807	20.5817
14.6544	10.6389	5.3054	6.7529	29.6983	5.1621	11.6471	14.7989	4.844	3.243	4.773	16.922	23.476	13.45	21.709	109.697	92.387	15.176	4.886	2.909	21.968	8.505	3.379	17.546	32.788	16.262	19.595	78.37	7.677	5.987	6.823	14.196	53.838	8.123	5.394		0.421233	20.5273
14.7735	9.2451	5.6024	7.1365	28.9711	4.8883	12.2895	16.8247	4.145	4.389	4.6	17.844	21.941	14.246	23.275	104.44	92.226	16.645	5.568	4.139	24.446	9.272	4.456	16.665	35.695	15.337	21.702	73.799	7.97	5.932	6.45	13.029	57.343	8.287	4.01		0.424656	20.6708
14.8927	9.8931	4.7511	7.3834	32.7226	6.2741	12.4904	15.1733	5.418	4.227	4.251	16.572	25.877	14.095	27.999	100.76	87.048	15.613	5.66	5.358	23.749	8.77	4.603	16.835	31.177	14.197	23.866	70.002	8.488	6.151	5.424	13.231	59.522	8.318	4.718		0.428083	20.6064
15.0118	10.3891	5.1544	7.2204	38.8491	6.4058	12.638	17.29	6.14	3.937	4.348	16.513	29.682	13.019	30.306	102.772	79.994	17.628	5.514	5.037	28.312	8.958	4.413	17.176	33.041	15.079	22.347	65.746	6.835	5.194	5.96	13.131	61.832	8.017	4.547		0.431506	20.9831
15.1309	10.2461	6.1069	6.1132	49.2333	6.5258	13.5954	16.8564	6.69	3.968	3.858	16.803	33.827	15.745	34.151	100.647	72.725	19.913	5.123	5.226	28.562	9.356	5.524	14.189	32.937	14.497	25.211	55.98	6.566	5.109	5.051	14.749	59.185	8.895	4.485		0.43493	21.1073
15.2501	11.5768	5.8029	6.5659	45.7018	7.4105	11.8281	23.7164	5.662	3.549	3.031	15.503	37.126	17.598	36.255	99.253	67.635	19.66	6.246	5.784	27.869	7.686	3.685	15.375	30.175	14.976	26.369	46.763	6.692	4.744	6.664	17.019	66.428	9.042	5.382		0.438356	21.1404
15.3692	9.2484	5.6543	6.3625	43.0241	7.4854	11.5889	24.1191	5.742	4.305	3.745	15.729	41.912	18.325	42.456	99.596	58.853	19.453	5.463	5.704	23.778	8.068	4.304	15.833	27.246	12.888	27.159	43.4	5.885	7.018	6.173	13.681	66.512	9.139	5.75		0.44178	20.7529
15.4884	10.7243	5.9707	6.0833	42.3176	6.1605	11.5304	24.335	4.741	4.949	4.239	14.518	42.222	21.316	46.329	92.029	49.118	19.615	5.925	5.203	22.526	7.858	5.1	15.718	24.498	11.051	26.979	35.314	6.725	6.701	4.925	18.135	68.947	9.752	5.185		0.445206	20.1982
15.6075	11.7185	6.3132	6.3188	44.5712	6.2668	14.4147	22.3475	4.944	4.11	4.201	14.863	44.09	29.92	46.403	90.187	44.316	18.84	5.475	4.723	20.935	8.738	4.301	15.451	25.454	15.363	27.209	35.506	6.893	5.211	6.353	17.49	75.611	8.805	4.926		0.448629	20.655
15.7266	11.0876	6.8469	5.6575	42.0419	6.6423	12.6706	25.9761	5.084	3.609	4.83	15.989	42.662	34.163	52.044	87.728	39.508	18.967	6.141	4.873	20.942	7.742	5.201	16.686	28.914	17.957	28.098	37.266	7.318	5.284	4.033	17.631	72.233	8.118	5.33		0.452053	20.861
15.8458	12.6635	7.3155	5.6232	44.1883	5.9608	14.5505	23.2175	5.609	3.341	3.266	16.507	42.969	39.6	54.76	80.394	36.84	18.115	7.088	5.03	21.195	7.157	5.68	17.278	32.323	16.844	32.064	37.748	7.206	5.801	3.729	17.198	64.423	7.421	6.305		0.455479	20.865
15.9649	12.9191	6.2988	5.7123	40.4763	7.7807	15.8366	22.8826	6.331	3.964	3.748	16.687	39.447	45.193	62.641	74.171	34.276	20.572	6.968	5.678	22.474	9.516	4.27	17.84	32.682	19.321	32.806	41.409	7.479	5.713	4.658	20.204	70.158	8.048	5.995		0.458903	21.5928
16.0841	10.8155	7.0782	5.0812	37.6063	8.9967	16.1767	22.7394	5.652	4.827	3.702	15.834	42.75	52.89	62.19	69.413	38.006	19.204	7.164	6.052	24.022	9.013	4.979	19.705	37	21.382	34.444	44.082	7.734	4.662	5.866	17.27	67.178	7.938	5.637		0.462329	21.9732
16.2032	10.7755	7.152	6.2555	35.3516	7.1343	18.1526	22.5161	5.713	4.3	3.726	14.452	41.078	54.203	63.82	64.74	37.466	20.78	6.5	6.928	21.804	6.908	5.341	18.211	37.248	20.527	34.61	39.86	6.701	5.316	5.899	19.792	56.42	10.268	6.64		0.465752	21.3703
16.3224	12.1383	7.0766	4.7299	33.2729	7.2032	20.3058	21.3836	6.542	4.811	4.674	12.903	39.312	59.531	64.549	56.557	39.701	17.577	6.259	5.79	21.608	6.666	4.809	18.986	37.985	20.154	41.427	39.977	7.282	5.264	4.704	19.359	40.309	9.947	5.68		0.469179	20.8375
16.4415	12.0609	5.806	5.1914	32.3395	7.4114	21.1853	20.1258	5.546	3.801	4.001	13.502	39.511	63.109	63.865	52.028	42.455	15.94	6.304	8.223	21.945	9.61	4.495	19.906	38.41	20.907	47.074	38.537	8.896	5.736	4.761	18.182	34.61	9.977	6.791		0.472602	20.9483
16.5606	13.2466	7.4732	5.352	28.2465	8.2113	22.518	18.8731	5.704	3.959	3.322	15.023	39.225	62.292	60.591	46.948	43.474	16.561	5.472	7.241	21.53	8.54	4.958	20.302	44.645	22.149	52.058	38.437	9.13	4.81	5.1	14.282	34.252	9.117	5.581		0.476026	20.8419
16.6798	11.0346	6.9267	5.8734	24.6509	8.2526	18.8037	19.1879	6.374	4.234	5.249	14.834	38.025	70.57	58.523	39.791	42.344	16.552	5.859	6.703	22.414	8.572	5.579	22.032	52.843	24.723	61.259	36.352	7.906	6.277	5.401	17.548	34.186	8.591	7.3		0.479452	21.3168
16.7989	12.8742	5.8515	4.8675	24.569	8.1482	24.5838	21.0237	6.508	4.474	3.436	13.452	35.211	66.532	53.799	34.261	43.278	15.147	6.507	7.77	22.912	8.44	4.618	21.879	52.793	23.375	71.683	33.356	8.242	6.04	5.635	19.976	33.215	11.006	5.45		0.482875	21.2033
16.9181	12.548	6.466	4.7898	19.9112	7.3762	26.2149	19.0894	5.158	3.912	3.879	12.919	33.168	65.044	45.73	29.775	42.845	13.753	5.618	8.074	24.119	9.188	4.456	20.623	49.369	22.337	80.331	28.544	7.068	5.536	5.691	18.746	30.468	9.124	4.246		0.486302	20.1799
17.0372	11.0716	7.05	5.6487	19.7119	8.9566	24.3494	19.4644	6.561	3.681	4.322	13.094	31.223	66.624	40.563	24.901	38.273	12.468	5.206	6.818	24.084	10.012	5.386	23.017	39.171	23.831	90.339	24.395	7.017	4.694	6.044	18.145	29.15	8.773	4.358		0.489725	19.6589
17.1563	10.029	6.1406	5.4431	18.2954	9.9839	22.8704	25.9059	5.661	4.285	3.764	12.075	30.212	61.727	35.388	21.742	41.068	11.332	5.326	7.642	27.698	9.201	3.358	24.731	35.454	27.073	95.494	22.758	8.005	5.871	6.266	17.603	27.604	10.039	4.667		0.493149	19.5504
17.2755	11.4246	6.5766	5.7081	18.3953	7.1501	27.066	24.5147	5.716	4.322	3.751	13.468	26.164	64.96	30.579	20.642	35.537	13.959	6.19	8.502	27.528	8.598	5.407	24.888	31.233	25.522	103.968	19.704	8.285	5.099	6.356	22.32	29.031	8.904	4.324		0.496575	19.5821
17.3946	10.8224	6.6398	5.6851	18.8965	8.2538	27.7388	24.2	6.28	4.912	4.972	13.481	23.44	60.28	23.897	17.14	32.294	11.419	6.542	8.614	27.209	9.237	5.095	22.458	30.888	25.993	98.277	16.672	7.787	4.671	6.727	25.256	27.936	9.896	5.733		0.499999	18.8042
17.5138	11.1301	5.9363	4.4173	19.1607	7.7579	32.3924	22.229	7.981	3.726	4.793	12.258	24.223	55.042	19.952	13.971	30.816	9.531	5.475	9.172	24.97	11.178	5.117	22.853	34.978	24.671	101.794	13.536	7.897	6.317	7.294	27.089	28.738	8.069	6.953		0.503425	18.5711
17.6329	12.8529	7.2017	4.3577	18.6091	10.5416	32.916	18.4862	6.534	3.43	3.426	14.034	21.484	52.531	15.807	14.247	27.59	9.497	5.73	8.474	22.51	10.242	4.997	26.512	36.163	23.671	93.637	13.649	7.386	5.827	7.454	27.885	29.005	9.014	6.232		0.506848	17.998
17.7521	11.9377	5.4297	4.2731	18.4508	10.0577	31.8254	16.7598	5.657	2.855	3.733	14.526	20.761	48.546	16.361	15.038	27.647	10.512	6.743	7.72	23.503	11.222	4.196	32.527	32.965	24.398	83.446	12.234	7.808	5.253	6.214	29.227	28.105	8.213	6.937		0.510275	17.5024
17.8712	14.3884	6.7663	4.6725	18.2261	11.4352	31.1893	17.0923	5.805	4.601	3.729	13.811	18.174	47.717	14.667	15.039	21.626	10.566	5.455	8.225	25.688	11.357	5.057	34.434	30.689	26.327	68.78	10.417	6.428	6.106	7.693	25.198	27.218	7.561	5.716		0.513698	16.8192
17.9903	14.1921	6.6627	6.3405	15.9844	13.3584	33.4865	14.1065	5.263	3.828	3.318	12.959	17.806	43.529	11.468	16.302	22.417	10.317	5.626	9.247	26.939	11.154	5.089	33.697	29.759	29.049	61.819	10.824	6.414	6.124	6.947	23.174	23.579	8.133	5.758		0.517122	16.3138
18.1095	14.3133	5.6244	5.4168	16.3842	12.0685	29.1324	16.8461	4.766	3.155	4.415	12.473	18.462	42.043	11.159	16.129	18.778	8.551	6.728	8.821	24.863	10.637	5.223	36.842	27.245	29.375	55.644	10.36	6.566	4.75	6.66	22.195	24.222	7.49	6.704		0.520548	15.7071
18.2286	12.8713	6.9713	5.5556	15.0863	13.4398	31.5571	18.5179	5.231	2.452	3.726	11.889	18.342	33.992	12.128	14.804	16.639	7.778	6.448	10.269	24.529	11.079	6.645	36.491	26.211	31.568	48.46	9.796	6.103	4.357	7.996	23.421	22.458	8.911	6.328		0.523971	15.3544
18.3478	14.7624	8.272	5.5171	15.8611	16.5156	35.0767	19.5724	5.544	3.275	3.1	10.179	17.066	29.484	12.119	14.154	14.052	8.483	5.17	9.889	23.105	11.094	5.094	39.039	26.003	37.671	46.053	8.145	6.891	6.549	7.29	23.271	24.427	9.075	5.792		0.527398	15.5174
18.4669	12.4682	6.0796	5.2756	16.06	16.0617	33.6617	18.6019	4.814	3.831	4.158	10.232	18.644	28.957	12.005	14.928	12.429	10.063	6.221	8.277	23.64	10.312	5.468	38.209	26.4	43.146	42.189	7.972	5.687	6.352	8.411	25.102	27.866	9.302	6.678		0.530821	15.5736
18.586	14.2141	6.7949	5.4478	15.5968	15.9148	35.1094	15.1778	6.013	3.703	4.361	11.002	16.998	29.339	10.11	15.323	12.254	10.363	6.722	8.932	23.703	10.636	5.042	38.276	25.785	47.884	37.209	7.862	5.496	7.012	7.613	26.031	28.894	10.409	6.668		0.534245	15.644
18.7052	14.5827	7.5669	4.8743	16.1879	17.5388	35.8923	14.1303	5.096	4.173	3.555	9.131	16.584	25.05	10.468	13.777	10.628	12.375	6.909	8.83	21.863	10.029	4.175	41.954	24.695	56.226	33.232	6.706	5.546	5.983	8.92	27.573	27.136	12.302	5.755		0.537671	15.5719
18.8243	13.4799	6.7756	5.3323	14.0437	20.8427	33.4884	16.7045	5.297	3.922	4.208	8.386	17.631	21.228	9.924	14.66	12.16	10.588	5.831	11.278	23.516	10.324	4.671	45.878	24.83	71.456	29.051	8.122	5.874	6.905	6.787	25.664	25.066	12.175	6.773		0.541095	15.9668
18.9435	12.9499	6.7797	4.5191	10.3864	17.679	34.429	15.6793	4.085	3.241	3.905	6.569	13.278	25.298	11.134	13.345	10.443	10.603	5.567	9.978	23.594	9.984	4.168	47.757	24.28	82.687	28.378	7.834	5.891	6.77	6.905	25.656	25.903	12.337	6.868		0.544521	15.8494
19.0626	13.5151	5.7401	5.61	11.351	23.0217	37.3021	17.1809	5.388	3.181	3.201	7.01	13.221	23.042	12.583	12.173	9.583	10.439	5.736	10.931	22.113	9.704	4.955	45.115	28.096	99.093	29.523	6.422	5.399	6.401	7.943	26.337	21.306	12.634	9.383		0.547944	16.6069
19.1817	14.6229	6.9507	5.1963	11.1838	22.1058	35.9403	20.8719	5.226	3.573	3.335	6.256	15.172	20.173	11.831	11.558	11.706	11.515	6.065	10.021	21.781	8.239	4.914	44.456	29.561	117.386	25.425	6.899	4.769	6.881	6.523	25.212	18.197	12.454	8.014		0.551368	16.8828
19.3009	14.6484	6.2635	5.9394	10.7288	20.1631	32.2361	19.4328	4.984	4.118	3.791	7.477	16.098	19.382	10.64	14.069	10.622	12.319	7.937	10.201	22.779	9.756	5.299	44.412	32.66	128.665	23.631	8.306	4.95	6.355	8.076	22.573	19.012	12.539	8.829		0.554794	17.3204
19.42	12.8787	6.2616	5.2878	12.135	22.0662	31.9103	24.4107	4.561	4.031	4.752	7.145	13.971	17.709	10.294	14.212	9.151	12.945	6.664	9.604	22.642	11.07	5.004	45.625	36.851	137.344	20.258	7.472	6.52	5.778	7.545	24.567	20.309	14.156	10.155		0.558218	17.8025
19.5392	12.6754	6.1309	5.597	13.8634	24.6219	33.5585	30.2869	5.432	3.231	4.192	6.695	12.196	17.619	8.85	15.038	9.219	11.414	5.818	9.038	20.095	10.712	4.618	45.306	47.652	138.87	15.753	5.926	5.762	5.838	8.959	23.557	17.66	14.882	10.308		0.561644	17.9816
19.6583	12.382	5.6673	5.3532	11.2748	25.2554	29.9742	32.5748	5.199	3.617	5.282	6.149	10.698	14.074	9.904	14.305	7.952	12.564	6.339	9.133	22.381	8.067	4.85	45.96	63.138	138.27	15.239	6.767	5.382	5.937	9.458	26.187	18.769	13.811	11.751		0.565067	18.3431
19.7775	11.1173	6.0012	5.3449	11.2886	25.3167	31.7437	32.387	4.451	3.208	4.186	7.051	9.463	15.925	10.985	15.356	8.275	10.537	5.534	10.281	20.819	9.522	6.101	46.845	78.3	134.41	12.164	7.165	5.99	6.16	8.411	25.596	18.802	11.27	12.287		0.568494	18.5969
19.8966	11.3012	6.7436	5.2817	13.649	25.7586	28.9176	34.7624	5.14	3.034	3.255	7.406	9.674	15.977	9.379	15.101	7.958	10.779	7.588	12.663	20.742	9.682	5.571	42.535	86.554	126.029	12.604	6.714	5.421	5.81	9.275	24.967	19.221	13.11	11.842		0.571917	18.6602
20.0157	12.1856	6.2368	5.0717	13.4725	31.1638	28.7686	30.4222	4.477	2.979	3.417	7.799	10.532	16.594	11.154	18.226	7.698	9.476	7.634	11.019	20.323	9.982	5.371	44.419	98.718	121.187	11.87	5.941	4.65	6.139	8.132	21.157	16.95	12.002	11.06		0.575341	18.7126
20.1349	12.4022	5.2946	5.5918	12.8709	34.0602	29.8838	26.4223	5.425	3.487	3.194	6.643	12.173	15.706	11.455	18.244	7.545	7.686	8.764	10.786	20.207	10.775	6.07	45.496	108.353	114.803	11.785	5.503	6.975	5.845	8.02	21.386	17.809	9.901	13.251		0.578767	18.9357
20.254	13.5278	5.4945	4.5201	11.4333	32.8614	33.9466	25.1238	4.932	3.261	3.614	8.481	12.125	14.821	11.921	17.049	7.387	7.954	7.105	11.505	21.184	11.552	5.075	45.73	118.371	103.993	12.711	6.855	5.725	5.193	8.064	20.233	16.618	9.709	13.683		0.582191	18.8752
20.3732	12.1524	4.9933	5.1835	10.3066	35.1197	31.226	21.2249	4.006	3.846	3.228	7.97	10.44	16.335	12.328	17.245	6.593	7.685	8.108	11.285	19.433	10.905	5.773	43.579	123.043	104.205	13.255	5.321	6.459	5.583	7.675	19.08	15.954	10.536	11.755		0.585617	18.5833
20.4923	13.5932	5.477	3.9914	9.1748	40.577	34.9378	21.817	5.374	3.76	3.661	7.599	9.483	16.097	13.077	16.8	6.837	7.324	7.139	9.723	18.154	12.923	4.817	42.291	121.849	89.551	12.123	6.241	4.834	4.934	8.007	16.14	16.404	10.655	12.229		0.58904	18.1645
20.6114	12.673	6.5849	4.7071	7.0478	40.4537	36.1235	19.3326	5.41	3.247	3.138	6.218	10.184	16.911	11.05	18.095	6.727	7.915	8.58	11.083	16.127	12.309	4.606	43.131	117.387	68.787	9.714	6.095	5.394	5.248	7.817	15.242	17.711	9.305	11.729		0.592464	17.2377
20.7306	14.2231	4.8974	5.7615	8.726	39.5707	39.4153	16.66	4.465	3.119	4.639	6.87	10.423	16.31	12.06	19.084	7.134	6.668	7.334	11.792	17.326	12.009	5.914	45.268	113.681	57.289	8.715	6.778	6.797	5.683	6.143	18.419	19.328	8.201	11.588		0.59589	17.1262
20.8497	12.4834	5.0654	6.1734	7.6448	44.6123	41.6134	14.8656	4.148	3.213	4.534	6.809	10.716	18.771	12.725	18.629	7.269	6.606	7.011	10.73	18.668	14.154	6.542	46.952	111.155	51.123	11.53	5.996	5.853	5.844	6.235	17.784	19.506	7.86	10.764		0.599314	17.1643
20.9689	12.9772	5.3827	4.6856	9.7009	43.5692	43.7465	15.183	4.506	3.407	3.966	6.393	8.32	17.957	14.122	21.925	6.52	6.395	7.435	8.043	19.406	11.771	6.403	50.422	101.419	41.12	11.334	4.66	5.283	5.268	7.484	14.531	18.649	8.466	10.174		0.60274	16.4889
21.088	14.0215	4.7361	4.9958	8.5651	41.2555	49.4678	12.2718	4.845	3.964	4.622	6.987	11.604	20.907	13.547	23.199	7.561	6.704	7.956	8.037	15.569	13.541	5.207	53.472	95.678	40.429	11.97	4.388	6.251	6.712	6.788	14.284	15.197	8.566	9.65		0.606163	16.5573
21.2071	13.434	4.791	5.3114	9.2658	43.9255	48.0277	11.4853	4.682	5.048	4.389	7.85	11.803	17.985	14.307	24.95	8.291	7.031	9.145	8.613	15.078	15.647	5.869	52.795	81.218	38.625	11.688	4.627	6.242	6.372	5.702	18.402	19.802	7.943	9.246		0.609587	16.4585
21.3263	13.0503	4.6099	5.5699	8.8839	43.3673	54.3822	13.5299	5.93	4.445	3.91	8.124	12.597	18.646	15.158	22.729	7.915	6.877	6.622	8.088	17.892	12.524	4.81	50.053	63.11	38.752	11.523	5.929	4.232	4.427	6.356	21.318	20.252	7.71	9.442		0.613013	15.9637
21.4454	12.7378	6.0539	4.9275	9.6025	44.398	58.042	11.8514	5.214	3.704	4.35	6.493	10.528	17.734	15.824	22.906	6.436	5.833	6.969	8.987	14.793	13.241	3.8	51.263	52.483	39.889	13.579	6.995	5.108	4.674	7.032	20.55	18.759	6.143	9.453		0.616437	15.5986
21.5646	11.5277	5.7759	5.7774	8.3281	45.7222	59.3304	11.6382	5.56	3.963	5.764	6.959	12.342	22.544	13.829	20.924	6.385	6.332	8.402	10.397	14.954	13.058	6.677	53.64	47.591	37.083	13.38	7.577	6.09	5.194	6.526	19.721	19.262	8.06	9.174		0.619863	15.8673
21.6837	12.2162	6.6043	4.1331	8.3114	45.81	60.9185	12.3804	5.601	3.608	3.99	5.641	11.527	20.431	14.959	19.715	5.537	7.155	6.662	8.721	18.351	14.161	6.632	52.833	45.611	37.172	13.042	4.79	5.732	5.82	6.562	23.987	19.645	8.184	7.983		0.623286	15.7184
21.8029	10.565	7.7893	4.5141	7.2772	43.6146	63.7974	12.8574	4.153	5.12	5.037	5.492	11.138	23.691	18.337	19.392	7.239	7.341	7.374	8.622	17.673	12.096	5.566	52.528	46.909	32.009	12.449	4.179	4.796	4.811	7.508	26.879	16.291	7.479	9.261		0.626713	15.6996
21.922	10.4967	6.0855	3.6559	7.1378	46.3322	67.8962	11.9508	5.271	5.03	3.568	6.399	10.976	22.724	16.45	18.544	5.478	7.515	6.951	8.716	16.622	12.762	6.371	53.877	40.143	27.027	12.683	5.339	5.406	5.636	5.897	30.019	15.263	8.099	8.868		0.630136	15.4467
22.0411	12.721	5.784	5.0271	8.2424	46.0398	65.3392	11.0557	4.408	3.242	4.303	6.28	10.752	22.754	19.025	16.731	6.504	6.959	7.451	11.631	16.789	11.811	6.501	54.679	38.176	25.48	10.708	6.606	5.397	6.125	6.055	28.818	11.843	6.397	7.925		0.63356	15.2223
22.1603	13.0256	6.4582	5.7685	6.7948	42.3904	70.0098	11.9748	3.51	3.983	4.031	6.291	11.658	22.615	20.495	17.736	7.802	7.166	6.257	10.089	17.866	12.792	5.709	59.532	32.644	22.833	11.172	6.648	6.662	5.784	7.115	28.308	11.129	7.447	8.226		0.636986	15.3506
22.2794	13.5129	6.8109	4.9417	8.8947	44.2966	69.653	11.9666	4.162	3.963	4.142	7.682	13.08	25.43	21.028	12.588	5.809	6.743	7.339	10.427	18.13	12.335	6.118	58.287	27.494	21.886	11.054	6.132	6.166	6.054	7.159	29.955	11.234	5.633	10.075		0.64041	15.2995
22.3986	16.6441	5.9053	4.2164	7.6069	44.1594	67.2741	11.619	4.112	3.978	3.801	6.652	12.051	23.204	19.457	10.554	7.471	6.617	7.495	9.342	17.91	12.299	5.922	53.977	25.745	20.498	10.099	6.661	5.186	7.014	6.904	22.955	11.509	7.565	7.906		0.643836	14.5385
22.5177	18.3133	7.1381	4.8954	6.6312	47.324	66.6914	10.0721	4.688	3.689	4.643	6.201	14.497	23.504	23.343	11.769	8.879	6.536	7.346	13.703	15.757	14.029	5.923	52.851	22.012	17.845	9.388	6.786	6.285	5.701	6.729	24.483	10.514	6.99	8.421		0.647259	14.8111
22.6368	18.2988	6.9882	5.1278	6.3157	47.895	68.3001	9.6991	4.279	3.675	4.112	6.309	14.092	27.736	26.136	10.652	8.656	6.669	6.673	11.308	16.631	15.062	7.241	51.369	21.057	16.097	9.564	5.985	6.292	5.296	7.722	25.267	10.588	7.095	8.521		0.650683	14.9032
22.756	20.386	7.0771	4.4117	8.5221	47.7145	69.188	11.7723	4.006	4.247	3.431	5.629	12.997	22.91	26.313	9.401	10.126	6.881	6.58	13.748	15.629	14.883	7.548	48.194	25.491	16.479	9.768	6.33	6.499	4.775	6.697	24.366	11.347	7.07	9.157		0.654109	14.9875
22.8751	22.808	6.5981	4.5733	8.3175	45.6223	73.8949	11.3759	3.893	3.717	3.544	7.437	15.744	22.595	28.465	9.823	10.596	5.146	6.261	15.089	16.77	15.33	6.693	47.375	27.069	16.999	7.869	6.276	6.129	6.068	6.197	20.031	12.362	6.037	8.427		0.657533	15.1509
22.9943	22.5618	6.9067	5.0225	7.5717	42.3063	71.4359	13.1605	3.766	3.808	3.685	6.476	16.277	24.342	29.665	10.445	12.03	5.632	7.781	14.945	15.73	16.31	7.561	45.839	22.878	16.238	6.58	5.518	6.551	5.012	5.77	19.966	12.555	7.097	9.453		0.660959	15.0257
23.1134	23.4464	6.669	5.7554	7.9994	40.9376	79.0647	12.0747	3.72	3.371	3.026	5.931	15.963	26.716	31.912	12.031	13.788	5.73	8.198	14.598	14.214	14.954	7.665	41.088	26.23	15.73	6.793	5.357	5.99	4.846	8.173	22.201	11.107	7.499	10.056		0.664382	15.3775
23.2325	29.7355	5.8166	5.3854	9.2306	38.0885	79.5464	10.7645	4.123	4.775	3.866	6.624	17.308	25.335	33.23	13.24	13.894	6.378	8.115	14.035	13.261	15.405	8.264	40.127	26.298	16.004	8.796	5.697	7.139	5.36	7.158	27.293	11.361	7.12	10.064		0.667806	15.8482
23.3517	26.9876	4.9991	5.1718	9.4826	37.6182	86.1842	8.8168	3.115	5.437	3.47	6.814	19.822	26.873	36.613	11.988	13.743	6.507	8.337	17.543	15.887	13.284	7.99	39.685	26.826	15.945	8.106	5.976	6.253	5.428	8.124	27.418	13.278	6.397	10.067		0.671232	16.182
23.4708	23.1223	5.0111	5.3806	10.6433	40.8184	89.3066	9.6194	4.556	4.938	5.139	6.106	19.624	30.728	39.387	15.089	12.743	6.704	7.079	15.94	15.307	14.424	8.55	40.497	27.628	16.53	7.675	7.194	6.131	4.883	8.086	27.401	12.862	8.708	10.151		0.674656	16.7048
23.59	22.2007	5.6091	5.5992	7.8302	37.5063	90.3748	9.8203	4.607	3.144	3.842	5.418	20.232	31.771	36.668	17.541	14.094	7.151	7.847	15.944	16.311	16.056	8.789	34.714	26.353	14.996	6.103	6.196	6.601	5.199	7.151	24.796	14.927	7.664	10.465		0.678082	16.28
23.7091	20.2351	5.7749	6.7621	7.8175	38.2178	92.3409	10.6547	5.363	4.398	4.715	5.997	21.013	31.726	38.928	17.889	13.988	6.696	8.504	15.68	15.045	17.143	7.892	36.35	29.937	13.19	6.626	6.333	7.041	5.203	7.84	27.223	12.985	6.122	10.906		0.681506	16.6628
23.8283	19.4448	5.4944	7.648	8.7075	41.6592	86.7961	11.0311	3.862	4.012	4.968	5.127	21.366	34.957	40.991	18.119	14.459	6.06	8.925	14.734	17.419	15.175	7.588	34.945	32.559	13.185	7.289	6.527	7.368	5.491	6.981	26	14.721	6.189	11.487		0.684932	16.8025
23.9474	15.9649	5.9452	6.4113	9.9041	40.7673	88.4517	10.4861	4.568	4.379	3.184	5.211	26.133	34.046	42.097	25.181	14.155	7.282	6.932	16.189	15.852	15.41	7.909	30.728	34.458	14.652	8.343	8.048	6.456	5.418	8.498	27.886	14.398	7.44	8.672		0.688355	17.1016
24.0665	18.6059	5.5935	7.3447	8.7475	42.0663	82.1433	10.3128	4.684	4.373	4.895	4.265	24.377	42.938	43.447	31.962	13.426	7.697	7.614	15.915	18.887	15.301	8.265	30.978	37.493	15.24	7.839	7.902	6.696	5.906	7.042	28.678	15.964	5.919	9.784		0.691779	17.7147
24.1857	15.5235	6.5084	7.0886	7.9604	40.4939	75.8233	10.0137	4.106	4.876	4.562	4.961	24.105	40.44	43.876	36.369	12.423	8.994	8.176	15.397	22.552	15.227	8.744	27.627	39.547	12.992	7.327	6.79	7.64	5.263	6.833	27.787	16.748	6.697	9.317		0.695205	17.4349
24.3048	17.7838	6.8462	7.0371	9.2944	37.7391	76.6255	10.5301	3.863	4.379	4.093	5.111	26.599	39.365	45.465	42.033	12.179	7.55	8.048	16.882	22.164	15.379	8.281	26.81	41.168	12.272	7.482	7.92	8.045	5.868	6.222	26.401	19.349	7.515	10.266		0.698629	17.8402
24.424	15.527	6.5762	5.3102	8.4682	33.3107	80.6285	10.3716	4.96	4.393	4.896	5.045	29.534	39.222	43.196	45.543	10.779	9.515	7.697	15.471	20.943	19.247	9.248	29.233	43.19	11.872	7.283	6.53	8.413	7.602	6.511	27.979	21.779	8.9	10.493		0.702055	18.2255
24.5431	15.3748	6.1106	6.9231	8.4634	36.3522	81.6667	11.3133	4.438	4.445	4.363	4.847	29.303	41.732	47.401	46.164	10.205	11.761	7.03	18.401	24.664	17.083	9.434	28.471	48.462	12.121	6.131	7.653	9.441	5.965	7.01	28.236	21.583	7.972	9.497		0.705478	18.824
24.6622	14.4399	7.0781	8.0302	8.7821	36.4144	78.1786	11.2848	4.255	4.171	3.625	4.939	29.183	40.841	48.908	45.544	10.522	9.995	8.23	15.849	24.846	16.485	8.113	29.244	45.731	13.991	7.301	7.007	8.938	6.023	6.299	24.833	22.847	9.066	9.618		0.708902	18.5474
24.7814	15.5683	6.3006	7.4967	8.8964	35.1607	73.8688	10.9261	5.219	4.75	4.603	5.665	26.401	40.454	46.385	42.397	11.224	9.543	7.501	14.679	25.076	15.652	9.025	27.718	45.479	14.69	8.264	8.962	9.532	7.216	6.908	21.795	23.267	9.218	9.194		0.712328	18.2069
24.9005	16.1566	7.3493	8.0914	9.3627	35.9716	71.8983	10.9295	3.855	4.41	4.919	5.995	25.035	40.038	47.63	42.499	9.098	9.275	7.073	16.075	23.351	15.027	8.471	26.479	43.108	13.747	8.169	8.743	10.029	7.044	7.338	22.472	25.551	9.948	9.718		0.715752	18.084
25.0197	14.9952	7.5034	8.1528	8.1078	41.2752	66.4347	12.778	5.281	4.683	5.196	6.735	20.727	40.04	46.434	41.384	12.239	9.441	8.637	16.033	23.171	15.62	10.737	24.683	49.228	14.122	7.647	9.659	9.726	6.935	8.505	21.88	28.981	10.349	9.981		0.719178	18.45
25.1388	15.1998	5.535	8.1342	8.3454	41.6509	58.6281	13.4971	4.625	3.998	5.294	7.046	19.032	38.96	46.375	48.685	12.67	10.763	7.86	16.255	25.975	15.236	11.228	24.199	50.235	14.133	7.881	8.295	8.584	5.885	7.698	21.724	28.359	11.921	10.202		0.722601	18.3561
25.258	17.8305	6.8921	7.8574	8.7831	41.2261	62.9715	15.4795	4.793	4.684	4.561	6.059	19.965	38.757	49.258	51.9	12.877	9.862	9.528	17.682	25.493	14.99	10.297	24.048	48.188	13.967	9.606	8.708	9.26	7.366	7.708	23.637	31.933	11.169	12.329		0.726028	19.1078
25.3771	18.3651	7.3317	9.7297	10.8998	43.7667	66.3626	15.6175	4.809	5.892	5.236	6.577	21.669	36.619	43.381	51.944	13.72	8.518	7.446	17.922	26.943	15.111	9.521	25.265	54.227	16.268	9.887	9.021	8.517	6.6	7.944	26.059	34.772	9.127	12.56		0.729451	19.6361
25.4962	17.814	7.0917	7.8956	11.4311	44.966	68.5049	14.9654	5.212	3.814	4.522	7.353	26.287	38.232	41.404	52.051	11.674	9.242	6.531	20.041	28.958	15.219	11.114	22.519	54.803	15.75	9.133	9.895	10.148	6.222	9.243	25.149	33.293	9.956	14.642		0.732875	19.8552
25.6154	19.1341	7.6596	10.774	10.3069	42.8447	63.1276	15.8778	4.704	4.344	4.64	7.789	33.408	35.221	38.456	55.008	10.747	10.318	8.08	20.888	27.724	16.389	10.445	20.785	61.382	15.648	10.066	10.011	9.477	6.232	8.732	27.896	34.64	11.154	17.103		0.736301	20.3239
25.7345	16.469	7.1498	10.2605	10.0532	45.1931	53.9282	17.7001	6.379	4.56	4.718	7.41	42.755	33.106	38.792	57.238	11.26	9.576	8.913	22.409	32.19	16.517	9.888	21.065	67.311	18.027	10.645	8.787	12.083	6.773	8.914	31.122	36.085	12.385	18.692		0.739725	21.1281
25.8537	15.0475	8.7785	14.2534	9.9253	45.3525	53.4693	18.3779	5.733	4.102	5.334	8.649	58.723	30.762	35.25	63.957	12.038	10.772	8.478	24.006	36.229	18.296	11.066	22.344	68.774	18.602	10.703	10.656	14.426	7.307	11.765	33.832	42.643	13.7	24.538		0.743151	22.8791
25.9728	16.2916	8.2325	14.2916	11.7354	44.6152	51.3371	18.8709	4.635	4.348	6.775	8.261	70.578	30.141	35.603	70.388	12.183	11.239	8.994	23.999	38.494	19.997	10.036	19.307	66.564	19.494	10.304	9.623	15.128	7.03	10.693	31.421	52.205	15.231	27.767		0.746574	23.7004
26.0919	16.9502	9.1415	15.0518	13.2092	46.6159	45.4781	21.0881	4.641	4.064	5.407	7.187	67.76	27.027	34.936	76.753	10.634	11.616	9.929	25.499	42.212	20.43	11.71	16.044	74.446	20.104	10.23	10.814	15.47	8.915	11.831	27.223	57.368	15.514	33.505		0.749998	24.3766
26.2111	17.153	10.3889	14.3076	15.2699	42.8328	42.1419	25.4478	4.592	3.353	5.604	8.127	71.485	24.973	34.119	81.225	10.834	7.995	11.389	27.211	45.752	21.353	11.242	16.636	72.108	18.709	11.126	11.649	17.951	9.431	10.548	26.512	64.534	18.314	38.662		0.753424	25.0875
26.3302	18.2529	11.4692	16.9204	13.2263	39.0889	44.2751	20.7113	5.627	4.387	6.691	8.543	71.704	23.089	26.431	82.641	12.19	8.757	11.982	29.331	53.182	22.442	14.156	15.075	71.987	21.845	11.926	13.227	21.113	9.848	12.859	26.117	73.061	18.702	47.685		0.756848	26.1336
26.4494	19.5183	9.0385	17.6079	14.8131	40.2437	39.723	22.7502	5.752	3.665	7.774	8.527	69.452	21.661	26.041	83.275	13.674	8.463	11.462	27.947	52.69	26.219	14.291	16.174	69.199	24.251	12.194	14.538	25.156	8.722	13.747	30.278	80.159	21.624	49.434		0.760274	26.7666
26.5685	21.4399	8.4605	19.6743	15.9466	37.272	38.5744	24.4338	5.445	4.342	7.51	9.142	74.816	19.93	24.655	73.503	14.788	7.953	15.384	29.139	53.571	28.269	12.212	14.546	69.533	25.128	11.782	13.19	24.223	11.371	17.798	31.958	76.315	26.837	49.098		0.763697	27.007
26.6876	21.8144	8.5076	19.4351	18.9305	37.2895	33.2028	26.6122	5.82	5.18	8.304	9.298	76.911	19.594	21.522	61.446	15.797	9.318	16.357	29.514	57.732	31.011	14.748	16.322	66.901	28.737	13.429	14.294	28.076	10.724	19.685	34	68.774	33.051	46.136		0.767121	27.308
26.8068	24.788	10.7653	22.1264	18.7514	37.7484	31.4815	29.6457	7.06	5.006	9.142	9.018	68.573	19.267	18.46	51.913	19.01	9.793	17.634	31.208	60.864	39.511	16.613	15.348	61.467	27.316	13.798	16.164	26.838	11.811	20.519	34.765	57.857	36.029	46.169		0.770547	27.2488
26.9259	28.7885	9.4482	25.7378	22.683	35.4842	32.084	32.117	5.927	4.379	9.389	8.984	66.232	16.965	16.901	41.218	19.153	11.997	14.629	29.363	56.921	48.363	18.319	15.51	58.36	31.563	15.363	19.526	37.548	12.391	26.993	35.119	45.972	37.498	48.457		0.773971	27.6289
27.0451	33.5145	10.7913	30.7574	23.1465	33.9493	31.607	34.886	5.694	4.762	9.836	10.724	63.947	16.657	13.352	32.075	22.919	9.938	14.893	29.988	62.359	50.294	18.175	15.869	58.064	32.199	17.907	23.167	36.83	14.895	32.685	37.309	35.244	48.672	47.048		0.777397	28.3575
27.1642	33.0644	10.4798	37.2152	24.6487	28.6309	27.792	31.9274	5.208	4.558	10.639	7.919	60.742	15.788	14.006	25.045	25.85	9.43	13.814	36.976	61.014	56.697	19.395	14.887	52.492	36.415	21.392	24.421	47.852	20.948	38.602	44.109	33.865	55.433	45.905		0.780821	29.3282
27.2834	36.7331	10.8524	44.0604	29.7542	26.7386	27.6625	34.6008	6.522	5.373	14.948	9.91	56.164	15.406	12.86	18.629	26.57	9.17	14.067	38.632	64.135	59.199	21.176	16.781	49.282	42.085	24.161	32.492	56.561	25.478	46.903	50.769	28.324	57.054	42.46		0.784247	31.0445
27.4025	36.4636	12.5888	47.3505	35.2754	25.7323	24.6372	33.6802	5.924	5.925	18.425	10.233	52.463	14.609	10.952	15.379	27.254	9.396	12.909	41.552	66.151	64.709	26.7	15.721	48.338	44.059	36.636	41.62	63.528	30.847	50.221	57.932	27.057	60.764	40.008		0.78767	32.7953
27.5216	32.7027	13.7873	56.9981	40.3396	22.344	25.9564	33.7468	7.429	5.42	23.447	8.772	48.938	13.586	10.755	14.286	25.876	10.407	13.462	45.241	67.281	58.059	32.286	14.545	40.669	46.732	43.867	50.036	80.695	41.027	55.397	66.448	24.841	61.598	33.002		0.791094	34.4111
27.6408	34.2876	15.5032	59.2811	43.393	20.6782	23.3736	33.9298	5.992	6.075	35.641	8.419	40.768	12.855	9.992	11.924	29.088	10.47	14.626	50.93	67.32	53.683	35.133	14.264	37.49	52.74	46.003	56.669	107.465	46.147	63.442	67.819	20.813	59.741	30.578		0.79452	36.0745
27.7599	36.8849	14.7194	57.2621	46.2685	21.7884	22.8399	27.132	7.939	6.226	41.195	9.895	36.73	10.765	10.642	10.49	32.825	11.071	19.037	50.378	68.845	43.477	43.146	11.901	31.532	55.477	54.366	60.499	136.77	52.48	75.43	69.253	18.918	51.498	30.301		0.797944	37.5877
27.8791	36.1376	17.6827	53.9205	52.6223	20.2257	23.191	25.5541	7.54	6.463	39.789	10.836	31.233	10.412	11.159	10.059	35.71	13.022	21.429	50.715	70.445	33.337	45.495	10.422	26.3	58.303	61.087	56.242	152.339	71.459	89.23	72.633	17.406	43.648	23.833		0.80137	38.5259
27.9982	34.9752	22.9164	49.8981	58.7341	23.0679	17.5224	24.2112	9.83	6.142	40.83	11.847	28.211	9.387	9.293	9.478	43.008	13.797	19.523	57.001	66.911	27.247	49.854	8.546	23.268	68.448	61.459	64.401	158.103	94.225	97.527	71.95	16.872	32.124	22.7		0.804793	39.8032
28.1173	38.5632	25.5196	43.7727	58.4241	23.538	15.5815	21.4257	8.562	6.123	49.217	11.017	25.353	10.023	9.454	7.921	49.314	14.405	25.645	53.93	59.472	24.712	54.491	7.663	18.486	72.659	66.525	71.828	144.389	105.025	102.046	75.21	15.239	24.698	18.857		0.808217	39.9732
28.2365	38.6876	28.7759	36.5355	59.7299	24.5659	14.4036	22.3896	9.283	6.357	50.482	12.319	25.071	9.954	9.261	7.643	54.967	14.959	28.736	54.162	48.371	21.867	51.173	5.735	19.995	79.803	67.828	84.847	107.119	122.68	101.659	77.206	12.875	20.25	19.525		0.811643	39.6828
28.3556	37.3175	36.2774	33.0676	59.9536	25.9116	12.2615	26.0261	9.107	8.052	54.433	14.252	21.27	7.789	7.547	6.069	71.497	16.766	36.258	56.785	43.195	16.725	52.807	5.831	14.775	86.17	71.854	99.44	75.358	129.623	99.965	73.582	9.534	15.136	15.495		0.815067	39.7097
28.4748	36.7896	39.4199	25.1109	57.187	26.3141	8.8893	27.3441	9.827	7.866	68.615	16.045	18.357	5.434	6.412	5.128	82.325	18.993	40.333	56.587	37.703	14.756	45.515	5.499	14.658	81.42	77.94	112.246	46.456	135.071	103.842	64.686	9.41	15.673	11.498		0.818493	39.2162
28.5939	40.52	41.5913	24.0968	49.3999	27.3195	10.3897	31.8465	11.491	6.772	79.793	19.089	16.049	6.405	6.811	6.219	91.911	22.145	51.977	59.1	31.048	11.67	34.387	4.326	13.153	78.153	83.005	125.171	34.951	114.761	102.144	58.991	8.094	15.241	11.457		0.821917	39.1023
28.713	44.0162	49.7659	18.5993	41.0933	26.4164	8.5364	31.5936	14.013	9.566	95.535	20.065	14.787	6.268	5.471	5.214	91.81	21.881	63.071	56.567	28.905	8.924	27.668	4.447	12.63	73.662	98.319	138.479	20.936	99.856	101.788	50.529	7.905	12.139	10.883		0.82534	38.8629
28.8322	47.1939	52.7909	16.3518	40.0762	25.6627	8.7152	27.1303	16.442	10.161	113.903	22.435	11.649	6.138	6.763	4.644	85.683	25.176	74.56	56.808	23.034	8.931	21.915	4.034	11.063	61.33	107.049	135.263	14.513	76.027	100.455	44.149	6.154	10.301	9.312		0.828766	37.818
28.9513	51.9561	52.2167	12.7292	35.8202	26.1891	6.035	23.1243	18.894	11.62	122.862	29.291	10.215	5.073	4.679	4.314	66.423	29.692	90.525	61.86	16.922	7.159	18.534	2.907	9.309	53.678	111.94	114.367	10.181	58.327	96.52	39.675	5.509	10.164	7.737		0.83219	36.072
29.0705	57.9646	54.4362	13.0151	32.2799	25.9002	6.6757	20.5222	21.258	13.612	128.477	32.652	10.466	5.041	3.992	4.231	51.564	34.331	98.257	57.082	16.152	5.285	17.13	3.021	8.299	48.744	108.302	85.452	7.64	44.927	83.921	34.427	5.39	8.917	8.849		0.835616	34.0651
29.1896	58.0028	54.0693	10.5675	24.5038	32.6177	5.7791	19.271	26.007	14.357	128.138	28.973	8.574	4.272	4.073	3.548	35.957	35.041	99.021	50.715	9.26	5.014	14.985	2.942	8.027	43.436	98.325	60.7	6.443	29.002	67.398	26.448	4.848	8.455	7.301		0.83904	30.4727
29.3088	43.6951	54.4662	9.6368	20.1782	37.654	5.1167	15.9191	32.988	12.776	118.841	27.78	7.399	3.845	3.826	2.835	24.577	42.671	101.512	46.88	9.004	4.133	13.062	2.045	6.137	34.504	88.709	38.785	4.625	16.832	47.197	18.942	3.464	7.264	6.603		0.842466	26.8795
29.4279	42.263	47.573	7.4034	17.8071	35.4106	4.8677	15.5101	41.189	13.783	99.462	26.247	6.965	3.344	3.068	2.911	17.014	50.142	101.522	43.688	7.453	4.482	11.971	2.298	4.652	31.577	73.772	28.811	4.424	10.878	28.369	14.143	4.042	6.246	6.579		0.845889	24.1137
29.547	38.2314	44.6372	5.1389	13.3476	34.0767	3.1898	14.3573	51.821	15.309	77.399	27.678	7.452	3.442	2.91	3.224	13.169	55.136	90.444	42.184	5.565	3.853	11.719	1.884	5.492	26.668	62.318	18.846	3.425	6.519	16.161	11.21	3.104	6.11	6.281		0.849313	21.5383
29.6662	29.3303	38.732	5.6713	12.019	39.261	3.024	14.1138	53.766	17.321	64.356	30.607	7.182	3.231	2.842	1.949	9.76	57.528	82.306	42.162	4.52	3.92	10.897	1.865	3.647	21.26	55.576	14.979	2.307	5.841	11.206	10.105	3.242	5.185	5.011		0.852739	19.8448
29.7853	24.4947	35.4275	5.8824	10.7879	33.0095	3.3834	11.484	57.899	21.797	50.085	31.108	6.007	2.634	2.888	1.003	8.641	62.817	70.879	43.838	4.068	3.363	9.285	1.958	3.063	17.729	43.249	10.883	1.902	4.612	7.127	7.488	2.753	4.516	5.661		0.856163	17.9918
29.9045	19.7936	31.0639	3.842	9.2808	31.1452	1.959	8.7606	59.169	26.702	36.455	31.348	6.421	2.479	3.424	1.165	7.517	62.961	62.71	35.525	4.641	3.131	7.884	1.154	2.649	13.31	34.171	7.916	1.472	3.662	5.331	5.09	2.875	5.183	6.013		0.859589	16.0648
30.0236	16.6474	23.6584	3.3416	9.6707	28.2108	1.8258	7.7639	58.699	34.879	26.433	28.687	5.781	2.119	2.876	1.534	7.994	58.418	55.338	38.587	3.618	2.382	8.929	1.183	3.379	9.715	21.555	5.753	1.539	2.119	5.127	4.218	2.701	3.683	3.609		0.863012	14.4698
30.1427	15.2095	22.5344	3.7846	7.6937	25.3174	2.0153	6.8285	59.805	47.494	20.461	24.279	6.403	2.466	2.229	1.516	5.77	52.909	45.259	30.887	2.798	2.851	6.94	1.386	2.772	9.182	16.198	4.811	1.282	2.287	4.078	4.983	1.881	3.613	3.227		0.866436	13.2691
30.2619	11.761	17.5354	3.3692	5.4148	22.2771	1.5965	4.7927	50.86	57.775	17.824	19.818	6.031	2.653	1.867	1.39	5.258	38.183	34.868	25.535	2.988	2.581	6.177	1.216	2.314	6.856	12.803	4.282	1.936	2.278	3.491	4.995	2.093	3.749	3.516		0.869862	11.4731
30.381	10.258	12.6521	2.9975	4.6683	21.7376	1.2563	3.5903	46.23	60.821	14	15.909	4.568	2.05	2.905	1.134	4.369	29.594	29.065	21.034	3.295	2.669	6.051	1.3	2.647	5.718	8.99	2.572	1.53	1.607	2.745	3.778	1.585	3.971	3.668		0.873286	10.0284
30.5002	8.3237	8.2313	2.173	5.0942	19.2471	1.4894	5.0019	42.048	59.849	11.199	13.789	3.736	1.969	2.889	1.521	4.276	22.41	20.619	16.113	2.576	2.273	4.647	1.141	2.412	4.507	7.729	1.944	1.319	1.914	3.236	3.013	1.005	3.959	3.826		0.876712	8.69058
30.6193	7.433	7.5712	2.6984	4.5917	15.3826	1.1877	4.0824	37.627	55.007	10.688	11.577	2.727	2.459	2.088	1.471	3.529	15.269	16.646	11.691	1.945	2.902	4.526	0.762	1.895	4.488	6.103	2.411	1.146	1.903	1.998	2.5	1.264	3.1	2.63		0.880136	7.44997
30.7385	8.0166	5.7278	2.6293	3.608	14.1983	1.2513	2.8139	30.22	46.332	9.004	12.176	3.822	2.016	2.038	1.446	3.749	12.914	11.89	7.658	1.782	2.542	2.832	0.662	1.643	3.235	5.206	1.384	0.809	1.644	1.366	3.061	0.949	2.448	1.826		0.883562	6.26174
30.8576	6.7001	4.9028	1.8649	3.0881	12.8658	1.4885	3.1677	26.047	41.488	6.082	9.202	3.69	1.433	1.395	0.946	3.144	10.802	8.595	6.559	2.205	1.382	2.548	1.037	1.086	3.104	3.598	2.08	0.81	1.156	1.77	2.909	1.224	3.053	2.04		0.886985	5.39597
30.9767	6.9407	4.2196	1.6745	2.9837	11.8535	0.9825	2.5531	19.689	33.429	6.215	9.067	2.779	1.676	1.295	1.013	2.711	9.305	6.304	5.658	1.512	1.71	2.229	1.023	1.882	3.287	3.089	1.494	0.55	0.936	1.385	2.067	0.85	2.897	1.647		0.890409	4.6149
31.0959	5.5545	4.3671	1.6793	2.469	10.8401	0.7812	2.4346	15.793	34.392	5.396	7.406	2.452	1.663	2.091	1.155	2.2	7.971	6.142	4.967	1.654	1.248	2.096	0.826	1.538	2.625	3.531	1.351	0.723	0.973	1.332	2.124	0.957	1.666	1.723		0.893835	4.23885
31.215	4.4706	3.4431	1.6933	2.8388	9.5255	1.0095	1.9267	10.829	31.927	3.915	7.119	2.474	1.536	1.342	0.894	2.601	6.501	4.801	4.045	1.741	1.509	1.295	1.144	0.866	2.669	3.175	1.181	0.733	1.117	1.208	1.308	0.978	1.641	1.363		0.897259	3.67116
31.3342	3.7812	2.7549	1.015	2.396	6.5811	0.3946	2.3605	10.792	27.329	5.238	6.753	2.025	1.615	1.62	0.798	1.767	7.114	3.909	3.806	1.354	1.349	1.495	0.846	1.366	3.063	2.543	0.968	0.564	1.24	0.94	2.169	1.419	2.098	1.341		0.900685	3.3766
31.4533	3.71	2.2483	1.1984	1.8376	6.9795	0.6033	2.5779	10.732	18.637	3.917	5.549	2.451	1.738	1.288	0.925	1.965	5.451	3.897	3.119	1.193	1.441	1.275	0.795	1.155	2.317	3.197	0.618	0.436	0.583	0.75	1.743	1.162	1.406	1.11		0.904108	2.8825
31.5724	2.6215	1.9041	0.9044	1.3822	5.2664	0.4851	1.641	9.126	15.27	4.15	4.744	1.907	1.406	0.731	0.622	2.239	3.804	3.594	2.27	1.489	0.968	1.825	0.649	0.864	1.759	1.702	1.079	0.309	1.317	0.784	1.072	0.433	1.26	1.087		0.907532	2.37249
31.6916	2.688	1.8218	1.333	1.1944	4.517	0.4368	1.6431	6.932	13.684	3.499	4.382	2.039	1.038	1.54	0.6	1.654	3.695	3.368	2.536	1.428	1.166	1.43	0.421	0.606	1.571	1.948	1.07	0.426	0.734	0.953	1.242	0.717	1.099	0.732		0.910958	2.18071
31.8107	2.4421	2.0825	0.8852	1.0816	4.1716	0.3557	1.3952	7.762	12.68	2.961	4.482	1.723	1.192	1.38	0.645	1.401	3.539	2.631	2.166	1.44	1.143	0.89	0.49	0.778	1.585	1.59	1.209	0.143	0.895	0.575	1.12	0.592	1.678	0.768		0.914382	2.05506
31.9299	1.841	3.0622	0.9738	1.1416	4.536	0.6629	1.0148	6.767	9.955	2.43	3.852	1.575	1.377	1.37	0.946	1.952	2.628	1.719	1.765	1.504	0.84	1.095	0.517	0.582	1.313	1.894	0.809	0.542	0.648	0.765	1.065	0.619	1.167	0.657		0.917808	1.87016
32.049	1.4468	2.4305	0.8027	1.6608	4.0513	0.2651	0.8328	5.055	7.517	2.039	3.156	1.658	2.052	1.531	0.272	0.997	2.597	1.53	2.135	1.114	0.547	1.491	0.411	0.805	1.318	1.189	0.98	0.222	0.697	1.343	0.915	0.872	0.82	0.655		0.921232	1.62965
32.1681	2.0903	2.3652	0.7989	1.5672	3.199	0.148	1.4498	5.553	5.803	2.283	1.866	1.298	1.605	1.475	0.582	0.868	1.301	1.889	1.561	0.859	0.435	0.98	0.866	1.317	0.659	1.365	0.449	0.132	0.829	0.52	0.613	0.423	0.673	0.419		0.924655	1.41886
32.2873	2.3826	1.8975	0.5805	1.3777	2.9302	0.2664	1.4264	5.49	6.55	2.122	1.891	1.387	1.69	1.662	0.47	1.197	2.087	1.32	0.99	0.666	0.485	0.739	0.536	1.105	0.604	1.534	0.229	0.254	0.324	0.726	0.444	0.306	0.956	0.581		0.928081	1.38842
32.4064	1.8331	1.7649	0.4702	1.1544	2.2705	0.2059	1.0816	3.998	5.232	1.923	2.224	1.641	0.689	0.937	0.304	1.224	2.451	1.279	1.41	0.784	0.505	0.944	0.391	0.77	0.872	1.288	0.189	0.376	0.103	0.942	0.857	0.562	1.17	0.492		0.931505	1.24522
32.5256	1.7818	1.6114	0.3044	0.7527	1.3806	0.1155	0.674	4.391	4.993	0.97	1.834	1.483	0.751	0.388	0.26	1.16	1.388	0.784	1.196	1.044	0.399	0.619	0.589	0.821	1.195	0.676	0.477	0.207	0.493	0.461	0.87	0.47	0.753	0.247		0.934931	1.04528
32.6447	2.1583	1.5731	0.5411	0.8014	1.9046	0.1714	0.5998	3.873	4.074	0.939	2.027	1.297	0.865	0.505	0.416	0.773	1.435	1.088	1.169	0.573	0.46	0.637	0.575	0.398	0.742	0.801	0.432	0.366	0.422	0.499	1.184	0.383	0.796	0.284		0.938355	1.02243
32.7639	1.5761	1.1846	0.7187	0.5004	1.7814	0.0539	0.5436	3.06	4.186	1.328	1.941	1.522	0.682	0.835	0.403	0.663	1.636	1.151	1.306	0.631	0.46	0.305	0.252	0.273	0.688	0.656	0.15	0.15	0.516	0.423	1.122	0.351	0.519	0.271		0.941781	0.936432
32.883	0.9919	1.1442	0.5842	0.5573	1.6815	0.0961	0.2031	2.576	3.888	0.676	2.4	1.497	0.69	0.712	0.399	0.649	1.832	0.95	1.024	0.939	0.22	0.803	0.304	0.438	0.693	0.312	0.127	0.209	0.245	0.621	0.9	0.256	0.535	0.386		0.945204	0.868803
33.0021	1.0688	0.8878	0.5009	0.8721	1.3198	0.028	0.3895	2.307	3	0.924	1.368	1.263	1.105	0.916	0.329	0.52	1.229	1.177	1.382	0.617	0.573	1.008	0.647	0.531	1.038	0.661	0.115	0.141	0.486	0.434	0.61	0.22	0.492	0.328		0.948628	0.837879
33.1213	1.056	0.9441	0.1583	0.7889	1.6389	0.1978	0.4806	2.65	2.473	0.958	1.471	1.227	0.959	0.826	0.304	0.451	0.838	0.999	1.045	0.255	0.232	0.579	0.248	0.803	0.677	0.678	0.364	0.037	0.216	0.762	0.415	0.492	0.214	0.259		0.952054	0.755782
33.2404	1.0724	1.0322	0.1277	0.5661	1.0621	0.0129	0.6159	1.67	1.77	1.253	0.988	1.189	1.099	0.607	0.218	0.236	0.571	0.869	0.788	0.381	0.064	0.36	0.128	0.2	0.354	0.4	0.214	0.136	0.25	0.682	0.175	0.504	0.265	0.27		0.955478	0.592068
33.3596	1.0713	0.6489	0.1717	0.1881	0.7915	0.0199	0.6575	1.278	2.49	0.731	1.354	1.251	0.862	0.62	0.16	0.384	0.77	0.718	0.913	0.956	0.023	0.135	0.123	0.228	0.339	0.72	0.198	0.316	0.127	0.265	0.759	0.1	0.109	0.315		0.958904	0.582144
33.4787	0.575	0.9457	0.2552	0.241	1.0104	0.0357	0.5385	1.231	2.189	0.602	1.135	1.258	0.755	0.876	0.352	0.668	0.68	0.415	0.599	0.905	0.386	0.112	0.032	0.291	0.729	0.382	0.124	0.092	0.152	0.288	0.938	0.269	0.317	0.12		0.962327	0.573485
33.5978	0.4207	1.1691	0.2066	0.2857	0.9868	0	0.3875	1.813	1.775	0.521	1.023	0.666	0.734	0.627	0.499	0.691	0.734	1.029	0.463	0.547	0.358	0.452	0.237	0.507	0.498	0.41	0.063	0.091	0.238	0.243	0.648	0.137	0.552	0.139		0.965751	0.563276
33.717	0.721	0.6779	0.2587	0.5694	0.5657	0	0.3489	1.266	2.144	0.218	0.602	0.711	0.763	0.353	0.688	0.226	0.664	0.739	0.698	0.444	0.239	0.159	0.214	0.292	0.363	0.345	0.076	0.083	0.064	0.202	0.934	0.04	0.416	0.167		0.969177	0.477988
33.8361	1.117	0.5789	0.3354	0.1721	0.4044	0.0521	0.5554	1.103	1.237	0.455	0.367	0.487	0.869	0.419	0.387	0.482	0.377	0.729	0.985	0.356	0.153	0	0.342	0.281	0.386	0.295	0.151	0.02	0.088	0.404	0.437	0.139	0.434	0.117		0.972601	0.432803
33.9553	0.4134	0.6342	0.468	0.1659	0.993	0.1777	0.3769	1.189	0.961	0.386	0.535	0.743	0.754	0.444	0.492	0.357	0.638	0.46	0.786	0.758	0.145	0.137	0.489	0.152	0.393	0.963	0.139	0.14	0.225	0.185	0.33	0.063	0.146	0.219		0.976027	0.45465
34.0744	0.4342	0.3101	0.3464	0.6211	0.8498	0.1439	0.5699	0.802	1.852	0.198	0.28	0.891	0.795	0.451	0.291	0.318	0.572	0.331	0.443	0.546	0.115	0.317	0.368	0.425	0.433	0.555	0.077	0.142	0.315	0.381	0.347	0.056	0.021	0.092		0.979451	0.432041
34.1936	0.4231	0.2714	0.1564	0.3603	0.4152	0.0152	0.0955	0.578	1.915	0.113	0.275	0.814	0.671	0.354	0.151	0.565	0.499	0.679	0.717	0.452	0.154	0.143	0.198	0.305	0.554	0.473	0.184	0.143	0.153	0.193	0.339	0.019	0.14	0.256		0.982877	0.375709
34.3127	0.1722	0.2525	0.1914	0.0464	0.6707	0	0.3209	0.691	1.353	0.064	0.733	0.611	0.388	0.548	0.141	0.548	0.306	0.418	0.519	0.574	0.212	0.136	0.191	0.205	0.537	0.349	0.177	0	0.367	0.249	0.208	0.025	0.114	0		0.9863	0.332885
34.4318	0.4914	0.3624	0.1438	0.0131	0.363	0.0951	0.0729	0.912	0.987	0.093	0.274	0.653	0.234	0.341	0.079	0.308	0.322	0.624	0.257	0.68	0.113	0.067	0.225	0.199	0.45	0.479	0.247	0.037	0.026	0.313	0.116	0.136	0.156	0.087		0.989724	0.292844
34.551	0.203	0.4776	0.1055	0.101	0.0891	0.1747	0.0316	0.585	0.954	0.109	0.314	0.83	0.613	0.571	0.391	0.231	0.609	0.378	0.451	0.588	0.232	0.032	0.207	0.203	0.341	0.053	0.235	0.018	0.069	0.334	0.053	0.005	0.108	0.079		0.99315	0.287515
34.6701	0.2035	0.3456	0.1551	0.0525	0.1241	0.1158	0.2427	0.456	0.742	0.348	0.418	0.611	0.398	0.371	0.144	0.181	0.408	0.513	0.386	0.393	0.197	0.272	0.076	0.153	0.47	0.025	0.057	0.059	0.243	0.378	0.043	0	0.357	0		0.996574	0.262891
34.7893	0.2355	0.4297	0.1398	0.2599	0.3473	0.1144	0.3327	0.519	0.532	0.374	0.436	0.626	0.259	0.299	0.049	0.403	0.334	0.426	0.678	0.404	0.204	0.225	0.234	0.287	0.27	0.187	0.11	0.094	0.226	0.074	0.153	0.049	0.107	0.018		1	0.277538

## Sheet: Image8 (2)
X0	Y0	Y1	Y2	Y3	Y4	Y5	Y6	Y7	Y8	Y9	Y10	Y11	Y12	Y13	Y14	Y15	Y16	Y17	Y18	Y19	Y20	Y21	Y22	Y23	Y24	Y25	Y26	Y27	Y28	Y29	Y30	Y31	Y32	Y33	Y34		Ap-Ba	Avg int
0	13.944	17.833	18.222	21.278	22.611	12.944	17.056	18.333	23.944	24.389	32.833	28.389	19.333	19.167	21.167	19.722	13.944	24.111	30	109.444	31.778	14.722	41.167	16.7222	16	16.722	18.056	7	10.833	9.8889	9.2778	10.611	7.6667	23.5556	29.5556		0	22.0634
0.1191	15.222	18.722	23.056	20.722	28.389	14.556	21.167	20.444	27.111	29.333	39.111	32.222	19.111	28.611	24.5	22.222	14.778	29.667	31.167	115.056	33.722	22.111	47.222	21.8889	19.2222	17.722	23.889	10.5	13.444	14.0556	10.6667	10.056	10.2778	25.3333	36.7222		0.00329919	25.4857
0.2383	15.611	20.5	29.167	27	37.111	18.722	25.278	23.722	35.944	35.444	43.556	36.778	24.778	30.389	27.333	28.944	21.889	33.167	40.5	121.556	45.833	22.611	52.389	21.2222	16.7222	21.167	28.944	11	16.167	19.8889	10.2778	12.167	12.5556	26.8889	41.6111		0.00660114	29.6238
0.3574	17.056	22.556	34.389	31.167	50.167	21.667	26.667	31.111	36.667	37.667	47.389	40.5	33	41.222	32.778	35.778	26.889	39.111	38.778	110.111	48.833	28.056	57.722	28.4444	18.1111	23.5	30.278	14.667	19.833	22.5	11.3889	17.556	12.6667	32.2222	46.7222		0.00990033	33.3477
0.4766	20.611	21.722	38.056	37.667	58.333	26.944	30.722	36.389	51.833	46.667	58.278	48.889	33.556	41.944	35.278	43.722	33.278	43.444	49.389	114.667	60.556	36.278	60.667	28.6667	21.4444	29.444	36.278	15.222	25	27.5	17.0556	17.611	13.6111	33.3889	48		0.0132023	38.346
0.5957	20.667	26.444	49.5	33.833	71	33.667	38.944	42.667	52.944	54.333	61.222	59.111	43.556	49.111	46.944	51.556	41.611	51.278	48.833	113.222	69.056	37.611	71	33.5	25.9444	35.833	46.444	21.556	30.278	32.5556	19.3889	25.167	17.8333	42.2222	56.8889		0.0165015	44.4492
0.7148	25.278	30.333	61.667	47.944	80.667	41.722	48.278	46.5	62.222	67.722	71.611	73.389	52.444	60.222	56.278	58.167	49.389	56.722	56.278	116.333	81.444	44.056	74.056	39.1667	31	43.056	50.222	20.944	40	41.9444	21.7778	34	15.2222	43.7222	53.5		0.0198007	51.3508
0.834	29.444	38.056	69.667	64.278	90.111	46.278	55.222	65.056	72.611	76.944	81.167	78.833	62.667	73.667	59.333	76.056	60.944	67	63.5	112.611	88.333	53.889	80	43.3889	37.1111	44.278	62.278	31.5	49.889	54.2778	34.6111	44.778	22.1111	48.0556	61.0556		0.0231026	59.9715
0.9531	31.889	45.056	84.833	63.333	106.389	60.5	62.833	83.889	87.444	89.222	96.667	83.722	77.833	90.167	65.444	79	68.111	71.5	59.333	116.056	94.778	62.556	84.5	47.7778	47.3333	56.222	71	30.722	67.444	71.7778	44.5556	56.278	32.7778	59.2222	64.1111		0.0264018	68.9793
1.0723	43	54.722	98.444	75.889	105.444	72.056	77.389	97.222	97.278	104.222	109.278	98.944	84.889	104.389	72	93.389	78.889	81.889	67	113.111	109.278	66.278	86.5	53.7222	47.6667	67.944	77.611	43	80.444	77.2222	65.7778	65.333	36.9444	69.4444	66.1111		0.0297038	78.3635
1.1914	41.889	64.722	113.222	92.111	108	83.5	103.722	117.333	114.833	108.444	120.389	115.5	99.389	107.111	88.778	94.611	96.167	90.556	71.667	111.056	109.611	82.722	90.278	59.1667	63.3889	79.944	87.667	49.833	98.167	85.8333	76.6111	77.778	51.3889	73.6111	68		0.033003	88.4857
1.3106	56.667	84.944	126.778	101.778	117.278	104.389	114.778	135.556	125.389	113.222	126.444	115.333	119.944	123.389	94.333	104.444	98.944	91.389	75.778	98.333	119.111	86.778	105.389	69.1111	77	87.167	96.5	60.833	104.5	97.3333	90.1667	88	56.5	76.3889	64		0.0363049	97.3682
1.4297	65.111	105.167	134.722	112.5	130.889	105.667	130.333	147.667	131.778	127.167	125.444	121.333	128.667	130.833	95.889	106	101	87.111	84.889	92.556	124.667	95.5	98.667	73.7778	85.2222	94.944	96.889	77.389	106.667	100	93.1111	90.111	69.5556	81.3333	78.3889		0.0396041	103.741
1.5488	78.222	113.556	142.889	128.278	125	114.444	135.389	147.5	150.278	125.667	132.389	123.889	130.778	133.111	111.111	102.333	96.556	89.556	83.889	82.111	122.5	106.667	103.278	84.3333	94.2222	103.611	101.722	87.611	110.833	94.3333	99.1667	102.667	81.3333	85.8889	80.4444		0.0429033	108.73
1.668	87.111	138.778	147.389	134.944	132.167	113.722	140.278	161.722	145.444	120.444	121.667	130.167	142.278	135.944	112.611	101.111	107.667	81.5	94.111	75.222	136.444	100.889	90.722	86.0556	94.9444	101.167	102.778	100.556	98.167	87.2778	97	95.389	93.5	91.7778	79.8333		0.0462052	110.879
1.7871	106.944	142.056	147.722	142.444	129.5	128.556	147	155.444	150.167	119.111	121.778	125.278	132.444	133.5	106.056	92.167	97.389	79.111	96.5	64.556	133.444	106.722	84.667	94.8333	97.9444	102.111	97.556	107.944	88.556	71.9444	94.6111	91.667	99.1667	83.3333	76.8333		0.0495044	109.973
1.9063	129.222	146.944	141.111	147.222	130	119.667	146.944	150.944	135.389	114.722	109.944	107.889	135.056	112.889	104.944	87.056	89.889	60	90.444	57.667	143.222	116.611	83.722	89.6111	92.5556	91.833	89.278	113.111	77.056	59.0556	84.2778	76.944	92.4444	75.2222	75.2778		0.0528064	105.09
2.0254	140.167	154.444	132.222	151.222	128.333	120.333	143.611	153.278	135.111	99.444	99.444	93.278	116.167	104.556	99.833	80.222	73.444	62.444	90.667	51.333	134.944	117.889	69.889	88.4444	91.8333	93.611	81.278	110.444	67.722	53.3333	74.7222	71.444	87.2222	77.5556	76.1111		0.0561056	100.743
2.1445	156.056	162.111	121.111	144	126.389	122.222	140.278	139.111	124.444	93.778	86.278	78.889	113.389	82.889	100.556	64.889	65.389	47.444	83.722	47.389	138.278	124	63.5	86.5	75.0556	84.556	68.056	99.111	47.444	39.6667	55.1667	55.389	83.6667	60.3889	64.6667		0.0594048	92.7366
2.2637	162.667	152.889	98.889	138.611	112.333	121.389	119.944	129.222	114.056	88.778	74.167	67.167	89.389	64.833	89.056	60.222	56.222	43.556	83	41.889	130.667	115.222	51.611	76.6111	75.7778	73.556	59.944	88.944	45.778	33.7222	45.3889	48.778	70	57.7222	62.6111		0.0627067	84.1318
2.3828	168.389	137.222	91.056	130.833	109.611	112.722	113.444	112.833	102.778	83.333	64.111	57.611	84.611	53.667	91.389	51.111	53.278	43.556	70	38.056	133.389	122.444	52.222	68.5556	64.6667	60.5	47.056	78.222	38.889	28.5	40	39.833	56.7222	53.5556	50.5		0.0660059	77.2762
2.502	165.278	114.222	67.833	119.5	92.278	111.444	101.667	104.889	84.389	67.833	57.833	47.278	72.556	51.389	81.167	49.333	42.944	36.5	67.389	33.944	129.667	119	44.333	67.4444	52.2222	52.333	44.278	59.278	32.056	23.6111	33.5556	31.333	48.2778	43.7222	49		0.0693079	68.5651
2.6211	150.111	91.889	52.167	104.167	86.556	107.167	93.722	98.111	72.944	61.167	51.389	45.056	58.389	44.111	67.333	42.278	34.833	30.056	61.389	31.333	122.889	126.389	34.667	51.4444	45.9444	42.778	40.278	53.778	31.056	24.8889	30.9444	26.778	35.3889	44	37.8889		0.0726071	60.9509
2.7402	140.444	70.278	48.611	76.444	69.944	94.389	81.556	83.111	69.722	54.611	39.167	34.889	51.167	37.833	58.944	35.833	33.444	25.222	53.722	26.167	118.944	115.722	31.556	44.6111	34.8333	36.611	35.667	45.611	27.778	24.3889	22.5556	25.333	31.4444	41.6111	38.3333		0.0759062	53.1571
2.8594	123.611	51.056	32.278	66.556	58.111	85.278	75.444	75.722	58.056	51.278	38.056	34.222	46.333	34.556	45.778	32.5	30.667	26.333	51.111	24.5	119.333	107.278	30.667	34.1111	30.6111	34.389	36.333	37.833	24.333	23.5556	22	22.389	29.0556	42.7778	31.3333		0.0792082	47.6413
2.9785	101.333	47.889	22.889	54.889	48.278	80.5	63.056	73.167	48.333	48.222	34.278	27.5	37.111	33.222	43.278	31.389	28.944	23.222	42.778	24.722	99.611	115.278	25.944	32.7778	27.5556	27.667	29.222	37.722	22	20.5556	21.1667	18.333	28.3889	39	31.9444		0.0825074	42.6333
3.0977	77.444	33.944	21.722	43.333	35.889	74.722	53.111	60.778	44.667	36.222	34.944	23.333	32.056	26.667	36.278	26.778	27.333	19.5	38.167	20.222	93	103.611	23.333	26.2222	24.7778	25.222	34.556	32.444	19.611	16	22.7778	16.778	24.8889	39.9444	31		0.0858093	37.1793
3.2168	55.556	28.667	14.722	39.056	34.333	65.389	48.5	53.778	32.556	33.444	29.167	21.278	27.833	23.778	32.611	24.444	21.111	18.556	32.667	18	83.889	95.444	21.667	21.8889	19.3333	19.611	27.444	25.611	19.278	15.5	21.9444	17.056	25.9444	39.1667	27.8333		0.0891085	32.4873
3.336	40.778	18.556	12.333	31.778	29.056	59.611	41.667	46.222	24.722	30.222	24.556	21.389	21.611	23.556	27.389	23.5	20.889	14.722	33.056	20.389	64	90.278	18.944	20.3889	17.5	19.222	28.611	20.5	15.056	17.1111	17.2778	15.722	23.8333	37.9444	25.6111		0.0924105	28.5143
3.4551	35.5	14.889	9.333	25.944	25.889	49.389	38.667	40.278	25.167	25.833	19.833	16.389	20.167	20.889	28.944	19.667	19.333	14.722	27.611	18.056	59.167	74.833	11.944	20.6111	14.8889	13.333	24.611	22.667	16.833	16.1111	15.2222	14.722	22.3333	35.8333	25.9444		0.0957097	25.3016
3.5742	32.167	12.778	8.167	19.056	20.944	43.944	32.444	35.833	19.333	21.5	19.389	17.722	18.667	19.833	27.944	21.778	18.5	13.778	27.778	14.056	51.556	70.889	12.667	17.0556	12.9444	15.333	18.389	18.056	14.222	11.1667	13.7778	12.611	20.6111	36.7778	22.2222		0.0990089	22.6826
3.6934	27.5	10.611	9.556	18.5	21.056	34.333	27.778	31	17.944	21.722	19.611	16	15.611	16.111	22.167	19.111	17.611	13.889	19.556	15.667	41.722	63.278	11.722	15.6667	11.4444	9.556	15.444	19.833	13.389	10.2222	12.4444	11.056	21.8889	38.1111	20.7222		0.102311	20.3381
3.8125	22.389	8.722	6.944	14.056	18.833	30.222	26.278	27.5	16.444	15.5	17.778	13	12.278	14.056	21.056	15.056	15.833	13	18.611	14.444	38.444	53.611	11.889	13.3889	12.3889	10.278	15.222	15.611	11.222	11.6111	14.0556	12.722	22.5556	34.8889	22.2222		0.10561	18.346
3.9317	24.111	7.667	6.222	14.778	16.667	26.278	23.167	21	14.667	17.278	14.722	14	13.889	13.833	17.833	15.611	15.222	11.5	22.167	12.333	36.444	46.444	9.444	13.2222	9.1667	9.722	13.278	18.5	9.111	10.2778	11.9444	13	17.0556	30.3333	22.2778		0.108912	16.9476
4.0508	20	7.167	5.167	12.222	16.333	25.667	21.111	17.667	13.5	16.833	13.5	10.944	14.611	12.111	17.611	13.5	12.333	12.556	18.778	9.5	29	41.722	9.167	9.7778	8.8333	9.222	11.667	13.722	9.5	9.0556	13.7778	10	18.2222	33.6111	19.2778		0.112211	15.3619
4.1699	16.111	5.833	6.056	11.667	16.111	23.5	19.333	17.5	12.111	14.222	14.778	12.889	13.556	10	13.278	12.389	14.278	10.556	20.833	10.667	25.389	32.667	7.5	8.0556	7	8.111	11.444	15.667	7.611	10.2778	11.6667	11.333	20.4444	29.7778	19.8333		0.11551	14.3556
4.2891	13.111	5.944	4.889	12.056	13.556	17	17.222	17.889	12.556	16.556	13.778	10.167	14.889	11	12.556	11.889	9.167	11.611	20.222	5.889	20.889	40.389	8.444	10.3333	6.8889	4.833	8.667	15.278	7.722	9.1111	9.5	10.444	19.1111	28.6667	20.7778		0.118812	13.5143
4.4082	10.667	5.889	3.778	8.833	13.5	19.667	16.944	16.444	12	13.556	12.722	11.556	12.556	10.833	11.444	9.389	10.444	13.389	18	7.278	19.778	31.389	5	7.7778	5.9444	6.389	10.056	16.667	10.944	8	11.8333	11.722	18.4444	24.6667	16.9444		0.122111	12.6984
4.5274	7.056	5.278	4.778	11.333	13.056	16.556	14.222	16.278	11.5	13.667	10.278	9.222	12.222	9.944	11.444	9.444	10.889	8.333	17.056	6.111	17.111	29.056	5.944	7.1111	6.5556	7	8.722	12.778	9.389	6.8889	9.1667	11.111	19	21.3889	16.5		0.125413	11.6111
4.6465	6.111	4.944	5.111	9.611	10.611	19.056	16.222	14.111	10.222	13.556	9.222	9.778	12.389	9.389	10.389	8.389	8.833	5.722	16.611	5.667	13.389	26.111	5.167	5.3889	5.1111	5.056	7.667	14	9	8.3333	11.6667	9.056	17.6667	19.0556	17.7222		0.128713	10.8667
4.7657	4.722	5.333	4	8.889	12.056	12.056	14.5	12.722	11	11.667	9.389	8.5	10	9.5	9.556	8.444	7.111	6.778	17.389	4.944	15.167	22.722	6.944	5.5556	7.0556	5.333	9.278	12.111	7.722	7.6667	8.7222	9.833	15.2778	16.7778	17.5556		0.132015	10.1794
4.8848	6	3.778	4.056	9.056	8.833	12.389	14.333	13.889	12.278	9	9.111	10.056	8.056	11.167	7.833	7.111	7.556	7.667	13.944	4.889	12.389	22.056	5.444	5.9444	5.2222	4.722	5.944	10.889	7.444	6.1667	8.5556	11.167	15.5556	16.8333	17.8333		0.135314	9.63337
5.0039	6	3.944	4.444	9.556	10.778	11.167	13.833	13.5	9.167	10.778	6.778	6.667	6.778	8.444	9.944	6.444	7.056	7.333	13.889	4.278	11.389	17.222	4.5	5.0556	4.0556	4.778	7.944	14.5	5.889	6.1667	7.7222	8.611	10.6111	15.4444	14.6667		0.138613	8.83809
5.1231	5.611	3.278	3.056	8.722	9.056	10.889	12.722	10.556	11.389	9.444	7.778	8.056	7.722	8.222	6.722	7.222	8.611	9	14.167	3.389	10.333	17.889	6.333	3.8333	4.9444	4.111	8.667	11.722	6.222	6.6111	9.6111	8.5	10.8333	15.1111	14.0556		0.141915	8.69683
5.2422	5.556	4	3.667	7.667	8.722	9.333	11.556	11.944	9.278	9.333	8	6.389	5.611	7.944	8.222	6.944	7	8.167	11.278	3.778	9.778	18.833	4.222	3.5	4.8333	3.5	5.889	9.056	7.167	7.4444	9.1667	8.333	9.7222	12.3333	12.4444		0.145214	8.01747
5.3614	4.667	3.722	3.667	6.833	8.944	6.667	11.444	11.389	8	10.722	6.833	6.833	5.167	8.056	6.5	7.5	5.833	8	12.056	3.722	9.167	15.944	4.611	4.6111	5.8333	4	7.111	10.278	7.611	7.5	9.5	9.833	6.5556	14.7778	10.8333		0.148516	7.84917
5.4805	4.5	4.333	2.611	7.056	8.167	7.667	8.778	8.722	10.389	7.333	5.778	7.111	4.944	6.389	8.111	7.222	6.278	7.944	10.889	3.556	8.111	14.667	4.167	4.1111	3.7778	4	8.5	7.556	6.889	7.3333	7.5556	8.833	6.2778	13.2222	13.4444		0.151815	7.32066
5.5996	4.333	4.5	4.111	7.333	10.056	7.833	9	7.278	10	10.056	4.778	6.778	4.5	7.722	7.944	7.167	6.833	6.278	10.111	3.111	9.833	15.944	5.111	4.7222	3.8889	4.667	7.722	7.722	5.944	7.0556	5.8889	7.944	8.5	13.5	9.6667		0.155114	7.36661
5.7188	3.667	3.167	3.667	5.667	6.111	7.889	7.056	6.778	7.167	8.611	7.667	6.944	5.778	6.889	7.444	7.833	6.889	6.444	10.167	2.222	8.444	11.389	4.111	5.4444	2.8333	3.722	5.944	8.278	6.778	6	8.6667	7.222	4.4444	12.2222	9.1111		0.158416	6.64763
5.8379	4.889	2.889	3.556	6.611	8.833	6.056	7.278	6.056	6.556	7.611	6.833	8.167	4.111	4.667	7.833	6.778	6.667	6.056	9.611	2.778	10	10.722	4.056	5.1667	3.1111	3.667	6.5	6.667	6.222	7.2778	6.7778	7.722	5.2778	10.2222	9.1667		0.161716	6.46835
5.9571	4.222	2.889	3.722	5.167	7	8.111	5.333	6.111	7.444	6.722	5.611	5.722	3.611	4.5	6.111	6.389	6.167	5.056	9.889	2.611	8.167	10.222	3.944	4.1111	3.5556	3.778	7.167	7.389	5.833	6.3333	8.1667	6.111	4.1111	11.2778	8.3333		0.165018	6.02537
6.0762	4.611	4.167	4.889	6.333	6.444	6.667	5.722	5.667	5.111	6.667	6	6.944	3.944	4.5	5.667	6.722	8	5.778	7.889	3.111	8	9.778	4.667	4.2222	3.3333	4.111	5.667	8.111	5.611	7.1111	6.7778	6.278	4.2222	10.3333	7.2778		0.168317	6.00953
6.1953	4.833	2.889	3.722	4.944	7	6.611	5.833	4.667	6.556	4.444	4.222	5.944	4.222	5.167	6.278	5.333	7.333	4.889	7.611	2.944	9.667	8.056	3.944	3.1111	2.5556	4.389	7.222	5.5	5.222	5.2222	6.4444	7.389	2.5	8.3889	6.9444		0.171616	5.48565
6.3145	4.444	3.056	2.889	6.111	6.389	5.111	6.056	4.833	4.889	6.222	4.889	6.611	4.222	4	6	6.611	5	5	7.333	2.389	6.778	9.611	5.167	3.2778	2.7222	4.889	6.667	5	4.167	5.8333	6.8333	7.056	3.8889	9.2222	5.5		0.174918	5.39051
6.4336	4.889	2.889	3.056	6.333	6.056	4.444	4.722	4.556	7.389	4.833	5.444	6.278	2.722	3.278	3.889	5.333	5.111	4.556	6.944	3.389	7.389	7.222	3.944	4.4444	2.8889	3.778	8.5	5.333	5	4.1667	5.9444	6.111	3.3333	7.8889	5.5556		0.178217	5.07458
6.5528	5	3.5	2.167	4.833	6.778	5.056	4.556	4.833	6	5.333	5.167	7.056	3.222	3.278	4.889	4.944	5.556	3.833	7.944	2.167	6.278	8.333	4.444	2.6667	3.1111	4.222	8.833	5.167	4.278	4.6667	6.3889	6.444	4.5556	7.6111	4.6111		0.181519	5.07778
6.6719	2.889	3.444	3.389	7.778	7.444	4.333	4.056	3.056	5.056	6.611	4.611	6.722	3.5	3.278	4.5	4.778	4.944	2.444	7.167	2.889	6.111	6.278	5.611	3.4444	2.7222	3.444	6.333	5.611	5.389	5.7778	7.2222	5.056	4.2778	9.5556	4.9444		0.184818	4.99047
6.7911	4.333	4	3.444	5.611	6.167	4.278	4.278	5.5	4.5	4.944	5.944	6.722	1.833	4	4.667	4.778	4	5.556	8.167	2.222	5.111	5.111	4.167	3.5556	3.3889	2.722	6.611	5.056	4	6	5.9444	4.722	3.8889	7.6111	4.3333		0.18812	4.77618
6.9102	3.333	2.833	4.056	4.389	7.611	5.5	3.333	4.444	5.167	4.722	5.278	7.944	3.278	3.389	4.056	5.056	4.056	4.167	6.667	2	4.889	5.778	4.167	2.8889	2.1667	2.556	5.222	5.611	5.5	5.7778	5.8333	5.333	4	6.3889	5.5556		0.191419	4.65561
7.0293	3.278	3.444	3.056	3.778	4.611	3.667	3.5	3.722	4.333	4.222	7.111	7.111	3.333	3.167	4.167	4.556	4.667	2.889	7.389	3.222	4.222	5.556	5.222	1.6667	2.5	3.056	5	4.778	4.667	5.2778	6.2778	5.056	5	5.2222	4.1667		0.194719	4.36832
7.1485	2.944	3.611	3.5	5.333	6.056	4.778	4.167	3.056	4.556	4.333	6.111	6.111	4.5	3.167	4.167	4.389	4.556	2.556	8.111	2.556	4.056	4.944	4.667	3.3889	2.6667	2.5	5.944	4.833	5.722	4.5556	4.3889	3.611	3.3333	6.3889	5.0556		0.19802	4.41751
7.2676	3.944	3.167	3.5	5.444	5.278	3.944	2.5	3.389	4.722	3.889	6.389	7.333	2.889	3.222	4.944	3.389	3.667	3.833	7.111	2.389	5.667	4.833	5.833	1.8889	2.8889	2.778	5.444	4.5	4.889	6.6111	5.7222	3.944	3.5556	7.1111	4.2778		0.20132	4.42533
7.3868	3.833	3.333	4.222	5.556	6.333	5.556	3.722	3.056	3	3.889	5.722	7.111	3	3.444	2.944	3.111	4.444	3.944	7.167	3.778	3.444	3.556	3.889	2.1111	2.6111	3	6.444	4.833	6.889	5.3889	4.2222	3.5	4.1111	6.2778	3.3889		0.204622	4.30946
7.5059	2.722	2.444	3.389	4.722	4.833	5.333	3	2.889	4	3.722	4.944	7.944	2.667	2.389	3.833	3.389	3.111	3.833	7.722	3.111	3.222	3.111	4	1.9444	1.6111	3.667	5.611	5.389	5.889	5.6667	4.4444	3.333	4.4444	6.5556	3.2778		0.207921	4.06181
7.625	2.5	3.611	3.333	5.5	6.667	3.444	3.111	2.889	3.722	3.722	6.222	7.944	2.778	2.444	3.333	2.444	3.778	3.833	7.278	3.056	2.944	3.944	6.222	2.9444	1.5556	3.667	6.056	4.056	5	4.7778	4.1667	2.778	3	6.6667	4.1667		0.21122	4.10154
7.7442	3.389	2.833	2.556	5.5	6.056	4.5	3.389	3.167	3.222	3.389	5.167	7.333	4	3.056	2.889	4.556	3.944	3.444	7.611	2.444	3.5	2.833	5.667	2.8333	2.6111	4.056	6.778	3.944	4.833	4.2222	3.8889	3	4	6.8889	4		0.214522	4.15715
7.8633	3.722	2.611	2.722	6.278	6.667	4.5	2.611	3.278	2.944	3.444	5.833	7.278	2.889	3.5	3.833	3	3	3.222	7.389	2.056	3.611	3.667	6.111	1.5	3.0556	2.333	6	4.222	4.278	3.1667	2.7222	3.278	4.6111	6.7778	4.6667		0.217821	4.0222
7.9825	3.167	2.556	3.389	6.889	5.5	3.167	3.722	1.611	3.278	4.667	4.389	7.722	3.944	3	3.056	2.722	2.722	3.389	8.556	2.833	3.056	3.278	5.833	2	2.4444	2.611	5.556	5	4.556	3.5556	2.3889	3.167	4.8333	6.4444	3.3333		0.221123	3.95245
8.1016	3.056	2.556	3.722	6	6.111	3.444	2.722	3.111	3.444	3.111	8.5	8.444	2.056	2.611	3.667	2.389	2.5	3.833	8.944	2.611	2.833	3.333	5.667	2.2222	2.8333	2.389	7.056	3.833	4.222	4.3889	3.3889	3.278	3.3333	5.3333	3.6111		0.224422	4.01583
8.2207	3.222	2.889	2.667	7.111	6.111	4.333	4.611	3.5	3.667	4.333	5.111	6.833	3.944	3.5	3	2.667	3.444	3.222	8.444	2	2.389	3	6.167	3.3889	2.7778	2.444	6.833	3.778	4.111	4.1111	2.6667	2.889	3.8889	7.6111	3.3889		0.227721	4.11581
8.3399	3.167	3.444	3.5	8.278	5.611	5.722	3.333	3.111	2.5	3.722	6.056	6.5	3.444	1.833	2.333	4.333	2.889	3.667	7.222	2.111	2.833	3.111	6.444	2.5	2.3333	3.889	7.333	2.611	3.444	3	3.7778	2.444	3.7778	5.9444	3.4444		0.231023	3.99036
8.459	3.056	3.333	3.556	8.611	4.889	3.944	3.111	2.611	4.167	3.389	5.556	8	3.778	2.222	2.778	2.278	2.111	4.167	6.778	2.667	3.111	4.444	7.278	2.7778	2	3.056	6.111	3.056	2.556	2.7222	2.6667	2.611	3.7222	7.4444	3.8333		0.234323	3.95405
8.5782	4.222	3.056	3.5	7.5	7.056	4.389	2.889	3.556	3.722	4.5	4.556	7.444	3.056	3.278	2.833	3.833	3.556	4.333	6.833	2.444	2.056	2.5	6.333	1.8333	2.6111	3.556	7.778	4.389	3.611	2.1667	2.5556	2.889	3.1667	5.6111	3.8889		0.237625	4.0429
8.6973	2.889	3.333	4.167	10	8.889	5.556	3.556	2.611	3.444	3.667	7.556	7.778	4.222	2.222	3.5	2.444	3.333	4.722	8.167	2.611	2.389	2.111	6	3.3889	1.7222	3.5	8.611	3.167	4.056	3.6111	2.7222	2.556	4.8333	6.2778	4		0.240924	4.38893
8.8165	3.778	2.833	3.833	9.222	7.889	5.056	2.611	2.722	3.556	4	7.278	8.889	3.778	2.111	3.056	2.167	3.444	5.667	7.5	3.111	3.889	3.889	5.944	2.2778	2	3.222	7.389	3.556	2.833	2.2222	2.7778	2.833	3.6667	5	4.7778		0.244226	4.25081
8.9356	3.389	3.611	3.5	9.389	11.611	5.333	2	3	3.722	3.556	7.556	8.111	4.222	3.389	3	3.222	2.5	4.944	9.611	3.222	2.944	3.333	8.278	2.8889	1.8333	3.611	8.389	2.889	2.722	3.4444	2.8889	3.333	3.5556	5.2222	4.0556		0.247525	4.52217
9.0547	4.167	3	4.889	10.444	10.111	5.444	3	3.222	3.833	3.778	8.944	10.278	4.5	3.222	3.5	4.389	2.444	7.944	6.5	2.056	2.611	3.444	5.667	2.8889	2.2222	1.778	9	3	3.167	2.8889	1.8889	3.556	3	7	4.3889		0.250824	4.63331
9.1739	4.556	2.778	3.333	11.056	13.611	5.944	4.278	3.444	3.833	3	9.944	7.611	5.111	3.056	4.222	2.5	3.889	8.722	10.389	3.444	2.444	2.667	5.833	2.5556	2.2222	3.444	8.5	2.778	4.389	2.5556	3.1667	3.333	4.8333	5.7778	3.6111		0.254126	4.93804
9.293	2.778	3.5	3.5	11	15.778	4.611	3.667	3.5	3.222	3.722	9.5	7.278	5.889	3.333	4.056	2.611	2.556	9.222	7.556	3.722	3.944	3.056	7.167	2.2778	2.6111	2.556	9.778	2.889	2.556	2.3333	3.1667	3.5	4.6667	5.1111	3.5		0.257425	4.86039
9.4122	3.667	3.056	4.278	10.333	18.667	5.833	3.667	2.667	4	3.167	10.611	8.444	5.5	1.833	4.111	2.556	3.444	11.333	8.167	2.444	2.722	3.333	5.722	2.3889	1.9444	2.5	8.944	2.778	2.944	2.5	2.5	2.167	4.2778	5.4444	4.2222		0.260727	4.91902
9.5313	3.611	3.056	3.778	12.778	22.611	5.833	3.111	4.833	4.5	3.556	14.778	7.278	5	3.556	3.444	2.944	4.056	12.333	7.278	2.722	3.222	3.333	8.222	2.4444	1.7222	3.167	9.944	2.833	3.222	2.1111	3.3333	2.333	4.5	7.5556	4.5556		0.264026	5.53012
9.6504	2.667	2.5	4.556	12.444	24.944	6.278	3.111	3.111	3.667	2.944	13.667	8.556	5.611	2.389	3.833	3.056	3.5	14.667	6.778	2.778	2.778	3.111	5.778	2.5	2.1667	3.444	10.722	3.611	2.556	2.3889	3.7222	3.389	4.8333	5.8333	3.8889		0.267326	5.47941
9.7696	3.167	3.222	3.111	13.611	26.167	4.444	4.333	3.722	4.833	3.611	12.833	9.278	5.667	3.222	3.278	2.722	3.222	14.778	8.444	3.444	3.278	1.611	7.556	2.9444	1.6111	3.333	10.778	3.111	3	2.6667	3.4444	2.889	5.5	5.9444	4.0556		0.270628	5.6809
9.8887	2.5	3.333	4.778	14.222	25.5	4.611	4.167	3.778	3.778	3.833	13.889	9.167	6.889	4.556	3	3	5.111	16.889	5.167	2.444	2.333	2.333	7.389	3.6111	2.7222	2.833	9.389	3.167	4.556	2.2778	3.1667	2.611	4.7222	6.5	4.4444		0.273927	5.7905
10.0079	3.722	3.278	3.333	15.333	29.944	5.111	4.722	4.222	3.833	3.944	16.889	9.778	4.667	5.222	4.5	3.444	4.222	17.667	6.222	2.389	1.889	2.778	7.222	2.5556	2.3889	2.889	11.944	3.833	2.556	2.5	3.3333	2.833	4.5556	7.6667	4.3889		0.277229	6.165
10.127	3.278	3.5	4.944	15.333	33.5	5.778	4.056	3.722	3.944	4.556	14.889	11.167	4.111	3.556	3.056	3.722	2.444	22.944	6.944	2.333	2.889	2.611	6.889	2.7222	2.2222	2.611	11.667	3	2.722	1.8889	2.5556	3.222	3.2222	6.7778	4.2222		0.280528	6.19997
10.2462	4.111	4.167	3.889	14.056	30.778	6.5	3.833	3.611	3.944	2.167	16.5	10.889	3.5	4.778	5.278	2.944	3.5	23.5	6.111	2.278	1.722	3.222	7.889	3.1111	2.3889	3.833	12.667	3.333	2.444	2.5556	2.6667	2.722	3.6111	7.1667	4.5556		0.28383	6.29205
10.3653	3.556	5.056	3.667	14.167	31.833	7.5	4.278	3.944	4.056	2.611	18.667	9.833	4.222	4.389	3.833	2.889	3.944	22.722	6.167	2.444	3.5	2.722	7.278	3.1111	1.9444	3.722	14.222	3.611	3.222	2.8889	3	3.5	5.2222	5.5	5		0.287129	6.52062
10.4844	4.222	2.833	4.722	14.444	30.556	7	3.889	5.333	2.889	4.889	18	8.667	4.833	4.722	4.833	2.167	4.278	31.278	8	2.722	2.444	2	9	2.6111	1.9444	3.278	16.778	4.111	3.111	3	2.5	3.778	4.8333	5.3889	4.8889		0.290428	6.85553
10.6036	3.333	4.5	3.333	16.389	33.778	8.278	3.833	2.333	3.944	4.278	14.778	10.889	4.222	4	3.778	3.222	3.944	28.611	7.611	2.444	2.5	2.389	5.5	3.2778	2	4.722	20	4.056	2.278	2.1667	4.1111	3.056	4.6667	6.3889	4.5556		0.29373	6.83331
10.7227	4.278	3.722	3.778	16.611	33.944	6.556	5.333	4	3.444	3.167	18.278	9.167	5.111	5.167	4.667	3.778	3.556	28.556	7.056	2.556	2.556	3.056	7.556	2.6667	2.1111	3.889	15.111	2.944	3.222	3	3.1111	3.444	4.8889	6.6667	5.5556		0.297029	6.92866
10.8419	5.389	4.056	3.222	16.056	38.667	8.111	4.333	4.667	3.5	4.333	16	9.5	4.333	4	4.667	3.5	3.944	32.667	6.833	2.111	2.167	2.5	7.833	2.5	2.3333	4.444	17.444	4.833	2.556	3.4444	3.6667	3.722	4.5556	7.9444	4.5		0.300331	7.26664
10.961	3.611	3.833	3.778	14.556	43	5.333	5	4.611	4.222	3.667	17.778	7.944	3.222	3.889	5.278	3.389	4.222	31.889	7.389	2.667	2.111	2.389	7.444	2.6111	2.5556	4.222	17.444	3.889	2.611	2.5	3.3889	4.167	5.8889	6.5556	4.1667		0.30363	7.17777
11.0801	4	3.444	4.056	22.556	44.111	7.056	4.056	4.833	3.667	3.667	22.389	6.389	4.833	5.5	5.611	4.944	4.389	30.111	7.389	2.667	3.111	3.056	8.333	3.3889	2.2778	3.222	18.667	4.167	3.167	2.4444	2.8889	4.389	6.0556	8	5.5		0.30693	7.83816
11.1993	3.944	4.278	4.611	24.389	45.278	8.111	4.222	3.611	4.389	3.111	20.611	9.333	4.611	5.444	4.556	3.722	5.5	30.056	6.667	2.5	2.889	3.389	7.611	3.0556	1.7778	3.056	19.667	3.722	3.111	2.6667	2.5556	2.444	7.3333	6.6111	4.8889		0.310232	7.82063
11.3184	4.056	4.111	4	28.944	42.167	6.944	6.222	3.722	4.556	3.889	22.611	10.111	4.833	5.222	5.778	3.389	3.722	25.722	7	2.278	2.889	3.278	9	2.8889	2.4444	4.389	18.167	4.611	3.5	3.1111	3.9444	3.056	6.2222	7.3889	4.4444		0.313531	7.96032
11.4376	3.722	2.944	4	40.667	40.167	6.333	6.056	3.611	2.556	4.111	22.167	8.444	5.778	6.333	4	4.222	4.833	26.611	4.444	3.556	2.222	2.778	8.333	2.8333	2.1111	3.778	17.278	3.889	3.5	3.3889	4.2222	3.278	5.3889	8.1111	6.3889		0.316833	8.05873
11.5567	4.944	3.944	6.111	44.167	39.944	6.944	4.667	3.389	3.111	3.667	19.222	10.333	5.556	3.5	6.444	4.444	4.444	27.333	6	2.944	1.722	3.333	9.667	3	2.7222	5.167	21.833	4.056	3.278	2.3333	3.2778	5.222	5.6667	7.8333	6.2778		0.320132	8.47135
11.6758	4.944	4.167	5.278	46.889	29.944	6.889	3.778	3.722	3.778	3.944	26.056	8.5	4.556	4.667	5.278	4	4.778	28.833	6.778	3.722	2.111	3.889	9.833	3.9444	1.8333	6	21.333	3.278	3.111	2.6667	3.8333	3.056	7.2778	5.5556	4.7778		0.323431	8.37145
11.795	3.556	4.778	5.222	44.444	28.278	8.389	4.944	5	3.944	3.556	20.889	8	6.889	4.833	3.667	2.111	4.389	29.833	5.111	3.056	3.722	2.667	11.444	3.1111	2.2222	3.833	20.444	4.111	4.722	3.1111	3.5	3.611	5.2222	7.8333	6.3889		0.326733	8.19519
11.9141	4.722	4.5	4.667	45.111	26.667	8.889	5.944	4.222	4.944	4.833	26.444	7.111	5.611	7.389	5.333	5.056	4.778	28.722	4.889	2.722	2.167	1.667	8.944	3.4444	3.3889	4.778	19.056	4.889	3.333	3.3889	2.4444	3.889	6.5556	8.1111	7.5556		0.330032	8.46188
12.0333	4.444	4.333	6.889	47.056	29.889	10.111	7.278	4.333	5.111	3.667	25.389	9.556	6.722	5.944	5	3.667	3.222	26.833	6.722	2.611	2.556	3.722	8.833	3.6667	3.0556	4.5	21.278	5.278	2.5	2.9444	3.7222	2.833	6.3889	7.2222	7.8889		0.333334	8.71903
12.1524	3.5	3.056	6.444	43.444	23.667	11.222	5.889	3.5	4.722	3.611	23.611	10.5	5.056	5.667	5.056	3.278	3.556	29.111	5.056	2.889	2.833	3.889	13.5	3.8333	2.1667	5.889	20.278	3.611	4.222	3.6111	4.2778	4.056	8.1111	6.9444	7.6111		0.336633	8.50481
12.2716	4.556	4.833	5.889	37.167	23.389	9.944	7.111	3.778	4.222	4.5	29.389	8.944	6.389	7	4.278	4.111	4.667	30.167	6.111	3.111	2.278	2.556	11.444	3.3889	2.7778	5.722	19.778	5.056	3.5	3.6111	3.1667	4.333	6.8889	7.8333	9.7222		0.339935	8.61748
12.3907	4.833	3.222	5.556	32.778	19.222	9.778	6.111	4.556	4.222	4.444	31.667	8.167	7.556	6.667	4.944	4.944	4.611	29.722	5.444	4.444	2.222	2.611	12.222	4.2778	2.4444	4.056	20.667	4.611	2.444	3.1111	3.9444	3.833	7.0556	7.1111	10.7222		0.343235	8.4063
12.5098	6.222	3.611	5.444	33.222	20.833	12.5	5.222	3.944	5.5	5.278	32.111	7.778	6.056	5.056	4.056	4.667	5.333	28.444	6	2.889	2.333	3.556	9.278	4.8333	2.6111	7.389	19.889	5.5	4.111	3.3889	2.3333	3.444	8.8889	8.3333	12.8333		0.346534	8.65395
12.629	6.278	4.333	6.333	34.889	16.278	10.944	6.333	4.667	4.333	4.167	28.611	9.611	5.722	7	4.944	4.444	4	27.722	6.667	3.5	1.778	3.167	13.889	4.1111	3.0556	5.056	19.167	5.5	2.444	2.8333	3.1111	3.167	7.2222	8	16.2222		0.349836	8.55713
12.7481	6.111	3.222	9.556	26.944	19.667	12.167	8.444	6.222	3.444	3.889	28.222	8.722	6.278	6.278	4.556	5	3.944	28.778	6.611	3.333	2.389	3.833	14	4.7222	2.0556	7.111	19.222	5.889	3.222	3.5	4.5	3.444	8.7778	8	18.2222		0.353135	8.86502
12.8673	6.722	3.556	7.222	23.389	15.611	10.778	6.444	3.889	6	5.556	29.722	8.222	6.889	5.889	4.389	4.778	3.889	32.167	6	3.222	2.222	3.556	12.167	5.3333	2.2222	7.111	21.889	5.944	3.944	3.8889	3.1667	5.222	6.3333	8.3333	22.1667		0.356437	8.79524
12.9864	6.722	3.833	6.611	25	14.167	9.833	6.611	5.944	4.444	3.611	30.556	9	6.778	6.167	3.333	3.278	4.444	32.611	7.333	2.667	2.444	2.278	11.889	4.7778	2.5556	5.889	21.889	5.611	2.722	3.3889	3.6111	4.667	9.8333	6.3889	26.3333		0.359736	8.77774
13.1055	7.389	4.333	8.389	23.444	12.278	10.556	8.722	6	5.444	4.278	32.556	9.389	8.333	7	4.389	5.5	3.556	31.833	5.389	4.944	3.278	2.111	12.222	3.2778	3.1667	7.167	20.833	7.056	3.389	3.5	4.4444	4.833	8.8889	8.4444	29.8333		0.363035	9.31904
13.2247	6.389	2.167	7.222	24	9.667	10.944	6.333	5.611	4.944	3.667	30.5	6.778	6.833	4.333	4.444	6.056	4.389	33.056	7.278	3.778	1.944	3.722	13.056	4.3889	2.6667	7.056	20.667	5	3.722	4.1667	4.1111	4.778	8.7222	7	26.2222		0.366337	8.73177
13.3438	5.778	4.778	6.944	19.667	8.944	11.611	7.556	5.389	3.833	3.278	27.778	6.722	6.667	5.778	5.389	3.889	4.278	31.444	5.556	3.667	3.056	3.833	12.222	3.4444	2.7778	6.111	21.222	7.389	3.056	3.2778	3.8333	5	8.3889	8.8333	33.2778		0.369636	8.70481
13.463	5.667	3.778	8.333	22.111	10.889	13.611	5.944	6.056	4.889	6.5	28.5	8	6.389	4.667	4.889	3.389	5.889	34.556	6.389	3.444	2.833	3.111	12.333	5.7222	3.8333	7.833	22.278	7.333	3.944	3.2778	4.9444	3.889	9.7778	8.8889	34		0.372938	9.36824
13.5821	6.556	4.111	5.444	19.611	8.889	13	9.111	6.556	4.611	3.5	25.889	8.278	6.389	6.833	4.944	3.389	5.444	26.889	7	3.056	3.056	3.333	10.722	6.1667	3	6.833	18.667	6.722	4.444	3.2222	3.8889	4.167	10.5556	7.9444	36.7778		0.376238	8.82856
13.7012	7.5	3.833	5.111	18.833	10.333	12.611	7.389	6.167	3.889	5.222	27.167	8.056	6.778	5	5.167	3.333	5.889	35.833	6.056	3.389	3.778	2.444	10.722	6.6111	3.1667	7.722	17.333	9.056	3.333	3.5556	5.3333	4.944	11.7222	9.6111	40.9444		0.379537	9.36664
13.8204	8.611	4	7.056	14.333	10.778	11.833	9.722	5.722	4.444	7.611	28.889	9.722	5.222	5.167	6.556	5.556	3.222	34.056	7.056	4.167	2.778	2.611	11.444	6.4444	2.2778	6.222	16.611	6.944	3.944	3.6111	2.7778	4.611	10.6667	11.5	37.4444		0.382839	9.24601
13.9395	5.889	4	6.889	13.278	8.944	11.056	7.556	6.222	4.056	4.889	28.278	11.389	4.722	4	4.667	4.444	4.389	33.889	7.389	3.111	2.611	2.833	8.5	7.8889	2.7778	5.778	16.722	7.611	4	3.8889	3.9444	5.111	11.2778	11.7778	36.3889		0.386138	8.86193
14.0587	6.222	4.389	6.444	13.333	8.333	12.778	9	7.389	4.833	4.722	27.222	9.667	5.222	6.389	4.722	3.667	5.611	35.389	7.111	2.889	1.944	3.056	11.389	9.5	3.4444	7.167	13.278	5.889	3.444	3.3333	4.5556	5.278	11.5556	10.8333	33		0.38944	8.94283
14.1778	5.333	4.389	7.889	12.056	10.222	12.611	9.278	7.889	4	5.444	29.722	9.722	4.444	5.444	5.556	4.722	5.111	34.222	6.611	2.611	2.722	3.5	11.389	11.3889	3.5556	6.333	12.389	6.722	3.944	3.6667	4.2778	5.556	12.0556	13.5556	29.8889		0.392739	9.092
14.297	5.722	2.833	7.667	12.056	8.333	12.889	8.667	7.611	4.611	4.778	28.833	11.278	4	5.389	5.833	3.944	3.889	36.667	5.944	3.056	2.389	3.778	10.056	9.1111	3	7.111	12.889	6.778	2.944	2.9444	3.6111	5.278	12.2778	14.1667	30.8333		0.396041	8.8905
14.4161	3.944	3.278	8.389	13	8.556	12.722	8.889	6.667	5.222	4.5	27.833	8.889	6.833	7.278	6.111	4.111	4.611	36.278	8.833	2.667	2.722	3.833	9.278	12.8333	2.8889	7.389	15	7.833	4.389	3.8333	4.5556	5.278	13.2778	13.5	29.8333		0.39934	9.28729
14.5352	5.333	4.333	7.889	13.333	8.778	13.611	8.444	4.833	4.056	5.444	27.111	10.333	3.278	7.444	6.667	4.222	4.722	33.778	8.278	3.667	2.556	3.278	12.611	11.6111	3.2222	6.222	12.722	5.778	2.944	3.5	5.5556	4.389	15.7222	17.3333	27.3333		0.402639	9.15233
14.6544	4.833	3.611	7.111	13.389	12.333	11.611	9.167	5.611	2.833	3.556	26.056	9.444	6.944	6.5	5	6.889	5.556	35.111	7.5	3.778	2.167	4.833	12	17.1667	3.9444	5.333	13.944	6.722	4.611	3.1667	3.0556	5.944	17.7222	14.6667	23.6667		0.405941	9.30789
14.7735	6.333	4.167	7.278	13.444	13.222	13.222	10.167	7.389	4.889	5.278	31.222	9.056	6.167	5.5	5.222	4.722	5.889	35.833	5.611	3	2.722	4.333	10.667	14.6111	3.9444	5.444	12.167	5.722	3.778	3.5	4.8889	4.167	18.5556	15.8333	24.7222		0.40924	9.50476
14.8927	6.556	2.944	8.611	13.444	13.5	13	8.333	6.611	4.889	3.5	30.944	9.722	5	6.278	6.889	3.889	5.222	37.556	7.056	4	3.556	4.056	9.722	16.1667	3.6111	6.611	12.167	5.167	4.389	2.9444	3.3889	6.611	19.8889	19.0556	23.3889		0.412542	9.67621
15.0118	7.556	4.778	6.889	11.444	17.611	10.556	6.889	7.333	4.944	4.722	27	9.556	6.722	5.111	6.222	4.556	4.333	33.944	6.667	3.111	2.667	3.222	10.333	15.6667	2.3333	7.556	12.278	6.389	4.667	4.7778	3.4444	5.5	22.6667	16.8889	19.8889		0.415842	9.37779
15.1309	7.278	4.056	6.111	13.222	17.667	10.778	8.778	6.722	4.889	5.778	28.222	7.944	6.389	7.278	6.833	5.222	4.944	36.333	7.278	3.444	2.389	4.111	10.444	16.1111	4.1667	6.778	15.278	6.111	3.611	4.8333	4.1111	5.222	22.8889	21.7222	19.6667		0.419141	9.90314
15.2501	6.722	3.722	7.222	11.778	17.667	10.333	7.111	5.889	3.056	3.778	29.444	9.389	7.222	6.222	5.944	4.5	5.611	36.222	7.722	3.167	2.889	4	9.444	16.2778	3.8333	8.611	13.389	8.333	4.333	4	4.6667	6.556	25.6111	20.9444	18.2222		0.422443	9.82376
15.3692	7.889	5.722	8.5	11.556	20.556	12.056	9	6.333	4.389	5.056	29.556	8.667	7.333	5.389	6.056	3.778	6.444	34	5.111	2.167	3.111	5.222	11.056	23.2778	3.7222	8.722	11.444	6.389	4.167	4.1111	5.3333	8.111	26.1111	19.7778	17.5556		0.425742	10.2191
15.4884	8.778	4.333	7.556	12.444	23.056	10.944	9.222	6.111	3.944	5.167	27.278	8.889	7.5	5.778	4.778	3.611	4.5	32.667	6.833	2.833	3.722	3.722	10.056	19.5556	3.9444	8.278	14.111	6.278	4.833	3.7778	5.2222	6.167	25.9444	20.2222	17.5556		0.429044	9.98889
15.6075	7.778	5.056	8.778	14.222	18.278	9.833	7.444	6.389	5.833	5.389	26.833	8.556	7.889	5.444	5.111	4.611	5	30.167	5.778	3.556	3.444	5.667	11	20.1111	3.4444	8.444	16.278	7.333	5	3.2778	5.4444	8.5	24.4444	19.8889	18		0.432343	10.0635
15.7266	6.889	4.944	9.389	11.778	19.278	8.889	6.944	6.222	6	5.167	25.444	8.333	6.556	5.5	4.778	3.5	6.667	31.778	6.278	3.056	4.167	5.333	9.167	22.3889	4	8.667	13.556	7.833	3.944	4.6111	4.1667	8.778	24.6111	20.7778	22.1667		0.435642	10.0445
15.8458	9.222	4.167	9.333	14.389	14.222	9.778	9.722	6.611	5.722	6.667	23.944	9.167	6.389	5.833	6.056	4.611	4.278	30.889	6.056	3.611	2.889	7.444	11.611	22.2778	4.9444	9.556	14.333	7.056	4.889	4.7222	5.2778	9.611	21.5	23.5556	21.2222		0.438944	10.3302
15.9649	6.556	5.333	9.889	12.722	10.056	10.889	9.167	6.833	6.111	4.056	22.611	7.722	5.778	5.111	4.944	4.778	3.833	25.111	4.722	4.056	4.111	6.556	11.5	22.8333	5.3889	8.333	13.889	7.833	4.611	3.8333	5.2222	10.111	25	24.1111	17.3889		0.442243	9.74285
16.0841	7.444	4.056	8.5	12.778	13.667	6.333	8.389	6.5	5.333	6.222	21.611	6.889	6.444	5.833	4.389	4.944	5.333	29.889	4.444	3.611	3.667	5.556	12.778	22	4.1667	6.889	15.222	7.222	4.722	4.3889	4.7778	8.278	24.9444	21.9444	18.9444		0.445545	9.66027
16.2032	6.722	5.111	8.944	12.111	10	8	12.333	7.389	5.444	6	28.111	11.778	6.056	5.667	6	3.5	5.389	32.278	5	2.556	4.056	6	10.5	21.9444	4.1667	7.278	14	6.833	4.778	3.3333	5.8333	11	25	25.6111	18.4444		0.448845	10.2048
16.3224	6.167	2.333	8.389	10.611	7.167	9.278	9.278	5.722	5.778	5.556	25.333	7.389	4.778	5.111	4.889	4.889	5.5	27.611	6.333	3.278	3.222	4.667	11.889	21.3889	3.6667	7.111	18.722	9.278	4.278	5.8333	4.7222	8.278	23.3889	23.1111	21.3333		0.452147	9.60798
16.4415	5.778	3.944	8.833	14.222	7.944	7.278	7.833	8.278	5.278	5.444	25.278	7.778	5.889	6	4.667	4.722	6	26.333	4.778	4.222	3.389	4.5	10.833	21.6667	4.6667	6.778	15.389	8.167	4.944	5.5	4.9444	9.556	23.9444	23.2222	16.4444		0.455446	9.55554
16.5606	6.056	3.556	9.278	13.167	8.833	6.444	11.111	6.944	4.778	4.722	23.667	8.222	4.667	5.667	3.778	4.444	4.556	28.833	5	4.5	2.833	5.167	10.222	20.1111	5.8333	9.556	17.222	8.5	5.222	4.8333	4.4444	9.444	25.5556	22.5556	15.9444		0.458745	9.59048
16.6798	6.5	5.444	10.389	13.778	7.167	4.5	8.833	7.944	6.556	5.778	25.5	8.167	4.278	5	4.111	4.333	5.333	28.278	6.611	3.389	3.111	4.667	8.889	23.2222	5.4444	8.056	14.944	8.556	3.944	5.9444	3.8889	9.5	28.7778	20.3889	14.9444		0.462047	9.60477
16.7989	6.111	4.778	9.778	12.889	6.556	7.722	8.556	6.778	5.944	6.722	22.333	8.833	4.556	4.222	4.444	3.222	6.611	26.389	6.833	3.5	2.389	5.056	15.111	24.8889	3.6667	7.444	17.833	9.722	4.556	3.2222	6.1111	9.944	31.8889	19.3333	15.7222		0.465346	9.81901
16.9181	6.444	4.389	11.889	12.722	6.167	9.222	9.889	7.667	5.944	6.778	21.667	7.278	4.278	4.333	4.222	4.944	5.556	22.222	5.944	4.111	3.111	4.889	13.278	23.8889	5.2778	7.722	16.722	9.056	5.167	3.6111	4.6667	13.056	34.0556	19.5556	13.2222		0.468648	9.79843
17.0372	4.778	4.5	10.5	16.778	8.056	6.722	10.278	7.833	6.444	7.444	20.5	7.111	5.111	4.056	4.722	4	4.833	22.722	6.444	2.778	2.278	4.611	11.944	22.2778	6.2222	9.222	18.833	9	4.778	4.5	6.6111	8.778	32.1667	17.9444	16.1667		0.471947	9.74123
17.1563	6.389	6.056	12.556	17.333	6.056	7.111	10.278	8.222	6.056	6.389	18.111	7.667	4	3.833	4.5	4.722	4.444	23.5	5.667	3.333	2.111	4.056	12.667	26.6667	4.8889	8.111	18.389	8.833	4.389	4.1111	5.7222	9.722	32.8333	16	18.3889		0.475246	9.8032
17.2755	6.722	5.5	10.389	19.667	7.667	7.611	8.333	7.278	6.5	8.111	18.944	5.556	3.389	3.667	4.556	3.778	4.944	21.444	7.722	4.389	3.333	4.222	11.056	26	4.2778	9	17.944	7.889	4.444	3.8333	5.1667	12.167	40.2778	15.6111	20.2778		0.478548	10.0476
17.3946	6.167	5.5	10.5	17.222	7	7.333	9.556	7.111	4.833	10.556	19.556	7.444	4.333	2.944	3	4.833	4.778	27.111	5.056	5.167	2.778	3.833	12.056	24.1111	4.7222	8.167	15.944	7.333	5.222	4.5	5.3333	12.5	41.5556	16.6111	20.5556		0.481848	10.1492
17.5138	4.833	5.167	10.056	20.778	6.444	6.778	9.556	8.333	6.278	10.722	16.889	7.611	3.833	3.444	2.556	5.389	4.944	22.722	5.444	4.222	2.667	4.889	12.444	28.1111	5.3889	6.944	14.111	6.889	4.278	3.9444	5.6111	11	40.6667	14.1111	22.3889		0.48515	9.98409
17.6329	4.556	4.444	9.389	21.611	6.556	6.5	7.944	8.611	5.167	10.167	17.889	6.389	5.389	4.167	3.222	4.167	4.389	24.667	5.222	3.722	1.889	4.556	10.722	25.6667	5.8333	9.389	14.167	5.444	5.889	4	4.6667	11	43.1667	15.5556	25.8333		0.488449	10.0556
17.7521	6.611	5.889	9.889	22.111	6.5	6.833	8.833	7.5	4.778	12.056	15.222	6.944	3.056	2.167	3.389	3.833	4.056	20.5	6.111	4	4.5	3.444	11.444	26.9444	6.5	11.833	13.5	6.444	4.333	5.3889	3.8333	12.556	46.8889	13.2222	30.5		0.491751	10.3317
17.8712	7.056	5.667	10.5	18.722	7.5	6.278	8.5	7.444	5.722	11.278	18.778	6.889	4.556	2.944	2.722	3.444	5.5	21.333	5.278	4.333	3.944	4.389	12.444	23.1667	6.3889	12.444	13	6.111	5.444	4.1111	5.8889	11.889	51.2222	16.1667	28.4444		0.49505	10.5571
17.9903	7.278	5.333	11.111	18.056	5.444	5.611	7.833	9.167	5.222	10.778	18.889	5.944	3.167	4.167	4.722	4.722	5.222	22.611	6.111	3.389	2.444	3.833	11.611	23.7778	5.7222	12.333	12.5	6.611	4.222	4	5.9444	13.889	46	15	26.3889		0.498349	10.2587
18.1095	6.5	5.667	12.944	17.611	6.167	5.333	8	7.333	7.5	10.5	19.944	6.722	4.278	3.778	3.222	3.778	6	22.333	5.444	3.556	3.167	4.611	11.833	21.7222	5.8889	12.556	14.5	5.778	5	3.3889	5.9444	9.889	46.6667	15.0556	29.0556		0.501651	10.3333
18.2286	6.556	5.5	11.222	14.833	7.889	5.333	7.333	10.944	5.056	10.722	22.278	6.778	4.5	4.611	3.722	3.722	6.222	18.722	5	3.722	3.389	5.611	11.222	26.8333	5.5	10.778	11.944	6.778	4.778	4.3889	4	12.5	50.9444	11.5	27.0556		0.50495	10.3396
18.3478	7	6.111	11.667	14.278	7.778	6.278	8.167	9.611	6.389	10.833	18.5	7.333	3.611	3.778	4.222	3.889	5.833	20.833	5.222	5.056	3.889	4.222	11.278	24.3333	6	12.5	11.278	6.333	4.389	3.8889	4.3333	11.444	42.2222	13.7778	27.1111		0.508252	10.0968
18.4669	7.611	6.556	12	13.611	6.778	4.944	7.667	9.778	7.778	14.111	20.778	6.611	3.111	4.5	3.944	2.444	4.889	21.278	5.444	4.944	3.5	4.222	11.056	24.1667	7.6111	12.111	11.5	4.944	5.5	4.3333	5.8333	12.889	49.1111	11.5556	27.6667		0.511551	10.4222
18.586	8.278	8.167	9.611	13.222	8.389	6.389	7.111	7.722	8.944	11.111	21.944	5.167	2.778	3.667	3.278	3.944	5.111	22.778	6.222	4.222	4.5	3.722	10	28.5	8.1111	10.056	12.167	4.333	5.833	3.5	5.2222	13.722	47.8333	12.6111	24.7222		0.51485	10.3682
18.7052	6.278	6.278	12.167	13.556	7.667	5	6.833	9.111	8.389	14.833	17.778	5.333	4.056	3.778	4.889	3.778	7.667	22.444	6.444	4	4.833	3.722	9.222	27.5	6.6667	13.889	11.833	3.778	4.944	3.2778	5.2222	8.944	44.2222	11.7778	23.4444		0.518152	10.1016
18.8243	8.667	6.667	9.222	13.389	9.444	5.167	6.444	8.5	9.167	14.389	19	4.611	3.167	3.889	3.889	4.111	7.667	22.056	6.5	3.278	3.389	4.778	10.444	29.9444	8.7778	10.833	12.556	5.556	5	3.7222	4.7222	11.389	45.1667	11.7222	21.6111		0.521452	10.2524
18.9435	6.278	6.667	9.389	12.111	10.278	5.389	6.278	8.667	9	16.222	20.222	6.667	4.389	4.111	4.5	3.222	5.778	19.278	5.722	3.611	3.5	4.167	8.889	35.0556	7.5	11.167	13.556	4.667	5.222	3.7222	5.5556	11.278	41.3889	10.1111	19.7222		0.524754	10.0937
19.0626	8.444	6.5	9.167	12.056	11.667	4.778	8.111	8.722	9.167	13.389	21.556	6.222	3.667	3.833	3.611	3.556	5.667	20.056	4.667	4.111	4.278	4.611	7.944	38.6667	9.5556	10	15.889	4.222	5.556	5.3333	5.9444	10.722	38.8333	11.5556	18.7222		0.528053	10.308
19.1817	6.889	7.389	10.667	13.944	10	4.722	5.389	10.167	8	17.5	21.944	6	3.889	4	4	3.056	7.333	18.722	6.389	4.444	3.278	5.167	8.5	42.1111	7.3333	7.944	13.111	5.056	6.167	5	4.8333	11.111	39.3889	12.3333	15.5556		0.531352	10.3238
19.3009	5.667	4.556	10.222	16.611	10.889	3.444	5.778	6.833	8.889	17.444	20.889	6.056	3.611	3.722	3.333	3.667	5.722	19.167	6.111	4.389	3.444	3.778	7.167	36.3333	9.7222	8.611	13.056	3.944	3.944	4.6111	6.1111	9.222	36.9444	10.6111	18.7222		0.534654	9.80633
19.42	6.722	4.556	10.944	15.556	10.389	4.667	5.5	6.833	8.5	16.5	16.5	5.444	2.611	3.889	4.222	2.833	7.167	22.278	6	4	2.333	4.778	6.556	44.0556	8.2222	6.944	14.722	5.778	5.667	4.1111	6.3333	8.556	39.3889	11.3889	17.7778		0.537953	10.0492
19.5392	7.333	5.833	8.722	19.722	9.667	4.444	5.611	9.444	8.333	19.611	20.333	3.833	3.889	2.722	4.667	3.556	6.556	22.667	4.889	4.611	2.556	3.667	5.444	39.6667	9.7778	6.222	16.444	6.722	4.5	5.2778	6.1667	8.611	37.7778	11.9444	19.2222		0.541255	10.2984
19.6583	5.722	4.556	9.167	19.833	10.111	5.556	7.444	7.222	8.722	18.5	17.444	7.222	4	2.944	3.611	5.167	6.5	23.778	7.556	5.222	3.444	3.278	6.722	41.1111	10.3889	5.611	14.222	4.778	6.389	5.3889	6.1111	8.611	33.7222	11.2778	21.7778		0.544554	10.3746
19.7775	7.111	4.556	8.389	18.944	8.556	5.222	5.5	8.611	8.611	20.167	18.278	4.833	3.778	4.333	3.667	3.111	7.056	25.722	4.278	5	3.778	3.833	7.722	38.7222	9.3333	6.944	18.333	6.111	5.556	4.2778	5.0556	8.167	31.5556	12.5556	20.6667		0.547856	10.2381
19.8966	5.5	5.056	9.833	24.944	10.611	4.444	5.278	8.278	9.222	21	20.944	4.722	2.944	4.278	2.889	3.5	4.778	24.389	5.222	4.278	3.111	4.667	5.778	34.5556	10.3333	6.833	15.722	6.278	5.111	4.5	5.8333	6.389	32.6111	11.3889	18.7778		0.551155	10.1143
20.0157	7.111	5.056	7.722	22.889	9.889	4.389	6.667	7.722	10	20.389	18.667	5.722	2.556	4.667	3.889	3.556	6.667	24.889	6.5	4.278	3.278	4.444	5.611	34.6111	10.7222	5.778	16.667	5	5.778	4.6667	5.3333	7	28.7778	10.3333	19.2778		0.554455	10.0144
20.1349	6.278	4.389	7.722	22.389	10.278	6	6.056	9.611	10.278	23.778	18.389	5.111	4	4.833	4.556	4.056	4.722	25	6.944	5.111	2.889	5.111	6.667	32.2778	12.1667	6.944	14.056	4.389	5.556	4.4444	5	6.944	33.1667	11.8333	19.5		0.557757	10.2985
20.254	9	5.556	6.611	21.111	12.333	5.444	6.167	8.111	10.333	21.056	19.389	5	3.444	4.556	3.833	4.5	4	26	5.444	4.5	2.611	3.889	5.833	28.1667	10.1111	5.889	14.5	6.222	6.111	5.6667	5.9444	6.222	24.7778	11.5556	22.5		0.561056	9.89678
20.3732	7.944	5.333	6.5	16.278	11.889	5.389	6.278	8.5	11.667	19.833	21.667	4.944	2.444	3.889	3.222	3.667	4	22.5	8	3.611	3.611	4.833	5.333	22.2778	11.4444	6.611	16.056	5.722	6.111	3.7778	4.8333	9.722	22.8889	10.0556	18.2778		0.564358	9.40313
20.4923	8.167	5.222	7	18.333	12.333	5.222	6.444	10.167	10.333	20.222	22.222	4.889	2.611	3.5	3.333	5.056	4.167	22.444	4.333	5.444	2.5	3.889	7.222	22.3333	11.1667	5.889	15.722	5.944	6.056	5.5	5.0556	7.722	25.8889	11.2222	16		0.567657	9.53008
20.6114	9.556	4.111	6.444	16.222	11.278	4.889	5	8.278	10	22.889	25.889	5.278	2.5	3.167	4.167	4.778	4.278	20.222	4.167	4.944	3.667	3.167	7.389	22.4444	10.8333	6.833	15.111	6.056	4.111	6.1111	3.3889	7.833	24.2222	11	16.3889		0.570956	9.33179
20.7306	8.556	4.889	6.611	13.056	13	5.111	5.111	8.222	12.333	21.111	28.111	6.167	4.056	3.556	3.556	4.222	4.444	22.722	4.444	4.667	2.833	3.5	7.333	21.1111	8.7222	6.333	16.333	5.778	5.944	5.0556	4.9444	7.722	23.8889	11.5556	17.4444		0.574258	9.49838
20.8497	10.056	5.889	8.222	13.111	11.778	4.778	4.278	8.667	12.833	21.667	33.722	4	3.444	2.167	4.278	4.389	3.889	20.444	5.389	4.556	3.222	3.889	5.5	18.2222	13.3889	6.333	17.833	6.056	4.944	4	5.8333	6.5	21.4444	12	18.0556		0.577557	9.5651
20.9689	9.944	4.111	7.611	14.5	12.278	4.833	5.5	9.278	11	15.556	28.889	5.056	2.667	4.111	2.167	2.5	5.611	16.5	6.056	4	3.222	3.944	6.5	18.9444	12.1667	6.611	14.944	4.556	4.556	4.4444	4.8333	8.111	20.6111	10.5	18.0556		0.580859	8.97621
21.088	10.056	4.111	5.833	10.389	12.167	5.833	4.444	7.944	10.056	20.667	29.167	4.667	2.778	3.833	2.667	2.778	4.778	16.056	4.889	4.611	2.833	4	5.889	15.6667	11.0556	5.722	17.5	6.611	4.722	3.7222	4.7778	9.111	22.4444	9.6111	15.6111		0.584158	8.77145
21.2071	11.056	5.833	7.444	14.611	9.722	4.778	5.778	9.056	12.389	20.889	25.056	5.667	4.056	4.889	4	4.333	5.722	14.333	6	3.389	3.444	3.111	5.889	18.4444	12.8333	6.5	14.611	5.167	6.333	6.6667	4.7778	7.444	20.6667	10.8889	18.3889		0.587458	9.26191
21.3263	9.556	4.333	6.833	14.944	11.278	5.833	4.556	7.944	10.722	17.611	24.222	5.667	3.5	3.556	4.556	2.944	4.611	16.167	4.667	3.889	3.389	3.556	6.056	19.6667	13.3333	6.5	15.444	5.278	6.556	6.2222	4.8889	5.111	21.1667	11.8889	17.4444		0.59076	8.96829
21.4454	11.333	5.389	7.056	14.5	9.278	5.778	4.389	6.278	12.111	21.833	26.111	4.222	3.111	3.278	3.444	3.778	3.389	15.611	4.333	5.722	3.278	3.556	6.389	21.7778	13.4444	7.167	15.722	5.111	6.222	4.5556	5.1111	6.778	20.6667	12	20.1667		0.594059	9.22541
21.5646	13.5	5.056	6.944	17.667	8.556	5.333	5.222	7.611	10.778	18.722	23.5	5	3.5	3.556	3.333	2.778	3.333	16.833	4.611	5.944	3.778	4.167	7.667	22.2778	14.4444	7.5	15.5	3.611	5.5	4.9444	6.2778	6.5	20.2222	12.2778	24.2222		0.597361	9.44762
21.6837	13.333	5.167	7.167	12.333	11.278	4	4.722	8.944	9.889	19.389	28.333	5.556	3.5	3.111	3.444	4.167	2.889	16.278	4.833	4.778	3.167	3.611	5.778	19.6111	16.1667	5.722	11.833	4.667	5.333	5.6111	5.6111	7.556	20.8889	11.2222	23.2222		0.60066	9.23175
21.8029	13.667	5.278	8.278	13.556	12.278	4.5	6.556	7.222	12.611	22.722	19.778	6.111	3.167	2.722	4.056	3.444	3.944	15.444	5.167	4.722	3.167	3.611	6.222	26	15.6111	5.944	13.278	6.667	5.444	5.2222	4.4444	7	20.7222	12.1667	21.2222		0.603962	9.48414
21.922	12.278	5.111	8.278	15.444	13.722	5.222	6.222	8.167	11.722	19.611	22.444	4.556	2	2.833	4.667	2.111	4.889	17.389	4.389	3.333	3.778	2.556	8.333	27.3889	15.2778	5.778	11.833	4.556	5	5.9444	5.1111	6.389	20.4444	11.5556	22.4444		0.607261	9.45079
22.0411	12.278	5.278	6.889	15.278	15.056	5.611	5.167	6.222	12.333	19.889	21.222	5.611	2.111	4.333	4.167	2.222	5.556	17.722	5.111	4.222	3.556	3.444	6	30.0556	15.9444	5.667	12.222	3.444	5	5.4444	4.3333	6.333	20.1667	12.1111	25.1111		0.61056	9.57459
22.1603	14.111	5.278	9.333	19.056	18.333	4.944	5.167	6.556	9.444	18.056	20.333	5.167	4	2.833	3.556	2.944	2.889	14.444	4.556	3.222	2.889	3.778	6.722	32.0556	15.6111	5.833	10.778	4.389	6	5.3889	4.6111	6.167	20.2222	15.2222	20.5		0.613862	9.55397
22.2794	14.444	6.944	9.333	20.444	17.778	4.5	4.056	8.444	12.722	17.944	21.722	4.222	2.778	4.833	2.944	3.278	4.222	15.944	6	4.222	3.889	3.111	6.556	32.1667	13.4444	6.944	13.833	3.889	6	4.7222	4.6667	6.556	16.6667	10.8889	20.1667		0.617161	9.72212
22.3986	14.333	6.111	8	18.889	24.167	6.056	4.889	6.833	10	16.722	21.833	6.611	3.833	4.333	3.056	2.722	3.5	16.722	6.444	3.611	2.667	3.944	4.611	31.7778	16.8889	7.222	13.167	4.944	4.833	5.3889	5.3333	4.444	17.7778	13.2222	17.5556		0.620463	9.78404
22.5177	14.556	5.222	7.389	19.278	22.389	5.556	4.111	7.222	10.833	20.722	22.556	5.278	4.389	3.389	3.889	2.667	3.389	15.444	5.167	4.889	3.389	4.722	6.556	33.3333	14.3333	8.389	11.278	5.056	4.611	5.5556	4.3889	5.5	15.4444	14.2778	15.5		0.623762	9.73341
22.6368	13.167	5.556	5.944	19.389	23.111	6.167	4.167	7.944	9.778	19.056	22.444	5.667	3.722	3	3.278	2.167	3.611	16.556	5	4.611	3.611	3.333	6.667	30.1111	15.2778	7.111	12.778	4.833	6.111	4.6111	4.2222	6.722	17.9444	14.3889	14.1667		0.627062	9.60638
22.756	14.556	7.778	7.944	16.778	24.944	7	5.444	7.611	10.278	18.611	24.278	6.778	3.5	2.389	3	2.778	5.444	15.389	4.222	5.056	3.944	4.222	5.333	28.8889	14.0556	6.167	11.667	6.056	6.389	3.8889	4.8889	6.5	17.7778	16.6667	13.8889		0.630364	9.83176
22.8751	13.778	6.389	9.056	17.444	26.667	7.444	4.889	7.167	10.222	17.5	21.722	6	2.833	3.889	3.333	3.667	4	15.556	5.167	4.278	3.833	3.667	5.444	34.1111	14.5	7.444	11.444	4.833	4.722	4.7778	3.6667	6.722	18.1111	15.2778	15.5556		0.633663	9.86029
22.9943	14.222	6.056	8.444	16.056	24.278	6	6.167	7.389	12	16.222	23.389	5.778	3.944	2.444	3.556	3.222	4.167	16.722	5.556	2.778	3.167	5.167	4.5	26.9444	11.6667	8.056	12.889	5.833	5.167	5.3333	5.1111	6.111	17.6667	17.6111	16.8889		0.636965	9.72863
23.1134	14.722	5.833	10.333	17.389	24.556	5.5	5.056	7.389	11.5	17.111	23.667	5.722	3.111	3.889	3.778	2.667	3.778	14.333	5.278	4.222	2.222	3.778	5.222	28.2778	10.7778	6	12.444	5.5	6.5	4.7778	5.2222	6.722	17.5556	20.4444	15.1111		0.640264	9.72539
23.2325	17.944	6	12.222	14.944	24.333	6.722	5.278	7.111	10.5	20.167	28.833	6.556	2.833	2.5	2.944	4.278	4.278	15.889	5.944	4.5	4.222	3	5.333	23.6111	11.8333	5.889	12.667	5.556	5.667	4.7222	3.7222	5.167	19.5556	18.4444	16.5556		0.643563	9.99204
23.3517	16.667	5.778	13.389	15.111	24.778	5.611	4.944	7.444	12.833	26.389	25.278	8.056	3.667	2.389	3.222	3	3.167	16.389	4.667	5.667	3.611	3.722	6.167	23	10.7778	6.389	14.167	5.667	3.333	5.8889	4.5556	7.056	20.5	21.5556	14.1667		0.646865	10.2572
23.4708	14.833	8.222	17.222	15	25	7.833	5.278	6.556	11.5	29	28.167	6.5	3.278	3.5	2.722	2.667	3.333	18.056	5.556	4.778	4.5	3.333	4.778	22.6111	12.3333	6.222	12.389	6.278	5.556	6.5556	4.6111	4.278	23.3333	22.1111	13.7222		0.650164	10.6175
23.59	16.5	5.889	17.667	16.556	22.111	6.611	5.389	6	13.056	31.556	31.333	7.611	4.5	3.611	2.556	3.056	4.556	15	5.333	5.222	3.611	3.556	5.333	22.9444	11.5556	6.944	14.278	4.889	5.722	4.9444	3.8889	6.444	24.1111	21.7222	13.8889		0.653466	10.7984
23.7091	14.167	8.444	19.833	21.167	21.722	7.278	6.167	8.667	12.222	31.556	33.278	7.333	3.944	2.889	3.167	3.278	3.111	15.389	6.889	6.222	3.278	3.333	4.778	19.9444	11.7222	7.556	14.889	6	5.722	5.2222	6	5.667	25.1667	21.9444	14		0.656765	11.1985
23.8283	14.278	7.722	19.611	19.833	24.389	8.833	6.389	9.833	13.278	33.222	36.5	8.444	3.889	2.722	4.056	3.556	3.778	17.111	4.556	4.778	4.778	3.167	4.111	17.6111	11.6667	7.889	13.611	6.333	4.167	6.3889	3.6667	5.389	25.7778	24	15.2778		0.660067	11.4461
23.9474	15.778	12.722	20.889	20.333	20.167	9	6.222	8.778	11.444	26.722	39.556	9.611	3.167	2.222	3.778	3.5	3.444	17.167	5.778	3.611	4.167	4.111	4.333	15.7778	10.1667	7.167	13.667	5.444	5.444	5.7222	4.0556	4.889	27.6667	25.7778	19		0.663367	11.4651
24.0665	14.611	11.111	22.389	19.167	22.167	9.722	7	8.944	14.778	28.5	51.111	9.056	3.556	3.056	3.722	3.556	4.278	17.111	5.833	3.833	4.222	2.889	3.667	14.8889	11.7778	7.167	14.5	7.278	4.833	6.6111	5.1111	4.889	24.1667	23.6667	21.8333		0.666666	12.0286
24.1857	16.389	13.611	24.667	21.111	18.444	11.278	5.889	10	14.111	26	52.444	10.889	4.722	2.944	3.167	3.5	3.167	21.111	5.444	4.167	3.5	4.333	4.5	11.6111	12.0556	8.556	14	5.333	4.5	5.2778	3.7222	5.833	26.2778	26.2778	21.0556		0.669968	12.2825
24.3048	15.167	17.111	23.667	16	19.5	10.056	6.278	11	16.278	26.944	58.667	9.833	3.944	3	2.944	3.167	4.278	17.5	7.111	4	3.333	3.722	4.833	13.2778	9.4444	9.667	14.778	4.833	3.5	5.7778	4.5	5.667	28	23.6111	22.8889		0.673267	12.4079
24.424	16.056	18.833	27.444	21.722	24.556	12.444	9.889	10.667	15.833	24.111	60.833	10.722	4.722	3.056	4.167	2.833	3.444	16.556	6.111	3.833	4.111	4	5.056	13	12.7778	10.167	14.056	7.389	4.444	5.8333	4.3889	7.444	28.7222	28.7778	23.3889		0.676569	13.4682
24.5431	17.889	19.167	30.611	22.833	26.167	12.111	11.056	13	17.889	26.944	68.056	15.889	4.222	2.556	3.444	3.944	3.444	16.889	5.056	4.611	2.889	3.056	4.278	10.6111	12.2222	9.722	15.722	7.667	4.167	5.3333	4.2778	5.667	25.8333	31.9444	25.9444		0.679868	14.1461
24.6622	19.556	18.278	34.944	25.056	25.833	12.778	10.667	14.556	22.056	30.5	72.833	15.778	4.667	4.278	3	3.222	3	16	6	4.611	4.444	3.778	3.5	11.0556	12	10.833	16.167	4.5	4.889	5.5556	4.5	5.111	26.0556	30.6111	24.3889		0.683167	14.7143
24.7814	23.167	20	37.056	24.833	29.056	17.389	14	14.111	20.889	26.667	77.667	21.333	3.889	3.778	2.5	3.389	3.556	17	6.889	4.444	3.556	3.389	4.944	8.7222	13.3889	11.611	16.556	7.111	5.889	3.8889	4.8333	5.056	28.2778	31	28.3333		0.686469	15.662
24.9005	25.833	21.5	36	26.444	23.722	17.333	16.444	17.278	27.389	36.056	81.944	20.333	3.444	3	3.444	3.5	2.833	14.722	6.167	3.778	4.111	4.611	4.222	9.2222	14.3889	10.944	20.056	6.167	5.389	5.6111	5.1667	6.444	29.1111	35.8889	31		0.689768	16.6713
25.0197	30.222	25.111	43	30.944	27.278	20.944	24.889	21.222	30.222	38.333	89.556	22.444	3.889	2.833	2.389	2.5	3.278	14	7.722	4.167	3.611	3.222	5.111	7.7778	14.4444	13.722	21.556	7.444	5.778	5.7222	4.3889	5.722	31	37.0556	28.4444		0.69307	18.2841
25.1388	33.333	30.722	44.556	33.5	32.889	23.111	31.167	20.5	33.333	44.556	96.056	27.778	6	3.278	2.778	2.833	2.889	14.889	6.611	3.889	3.944	2.5	4.5	8.0556	17.6111	13.167	31.222	8.5	4.611	5.8889	5.1111	6.333	30.1111	44.5	33.5		0.69637	20.4064
25.258	39.111	29	45.667	31.944	32.667	26.722	38.5	21.667	42.944	46.5	97	35.333	5.278	3.5	2	2.111	3.333	13.389	6.167	4.5	4.722	3.389	4.556	6.8889	17.2778	16.5	27.778	8.444	6.444	6	5.8333	5.667	29.0556	41.2778	36.1111		0.699671	21.3508
25.3771	45.556	34.722	47	36.222	32.722	32.889	43.167	26.333	51	51.389	102.722	37.222	5.056	3.778	2.722	2.444	2.444	14	7.778	3.833	2.778	4.722	4.5	7.3889	14.8889	15.5	34.889	8.444	6.167	7.3333	5.8333	6.167	32.2778	40.3889	40		0.702971	23.2651
25.4962	44.056	36.556	52.222	36.667	41.833	38.944	42.944	26.667	59.889	49.611	108.722	46.278	5.167	3	3.444	2.889	2.333	14.722	7	3.778	3.333	4.278	4.333	7.8889	17.3889	17.278	39.222	7.389	6.944	4.6111	3.7778	5.944	31.1111	43.5	41.6667		0.70627	24.7254
25.6154	47.111	47.944	55.556	34.333	43.333	40.722	38.389	34.778	70.611	59.278	114	54.056	4.611	3.333	4	3.333	2.944	13.389	7.944	4.333	4.5	3.278	4.778	7.4444	15.8889	20.944	33.611	10.944	7.389	5.5	5.1667	6.889	33.0556	43.2222	43.9444		0.709572	26.5872
25.7345	47	47.389	53.5	36.333	49.333	47.444	35.556	38.944	84.833	69.722	117.944	65.389	5.556	3.944	3.278	2.278	3.167	14.944	7.056	4.056	3.5	2.5	2.778	7.3889	17.5	18.722	41.167	10.833	6.778	5.6111	4.4444	5.833	32.6667	43.5556	45.6111		0.712871	28.1873
25.8537	49.889	52.222	58.111	43.278	59.944	57.722	31.056	42.5	97	84.111	121.167	71.778	5.889	3.444	2.5	2.889	3.667	10.389	6.944	4.056	4.444	3.5	2.5	8.3889	18.1111	21.889	44.611	12.167	7.056	5.6111	5.4444	6.722	34.9444	39.1667	52.8889		0.716173	30.7429
25.9728	59.444	59.333	67.944	43.167	72.889	67.722	31.111	44.778	97.389	87	127.056	73.333	7.222	3.389	2.833	3.222	3.444	12.833	7.722	5.167	3.722	3.111	3.889	8.7778	26.0556	24.889	53	14.167	6.278	6.4444	4.5556	6.167	35.5556	39.5	55.3889		0.719472	33.3857
26.0919	53.111	60.278	66.389	55.833	76.5	67.444	29.944	46.556	89.444	93.611	128.667	82	9.056	3.667	3.444	3.333	2.611	11.611	6.944	4.111	3.167	3.333	4.222	7.7222	26.2778	22.722	54.056	15.333	6.611	4.9444	5.3889	9.556	37.5	42.4444	55.1667		0.722771	34.0857
26.2111	58.222	63.444	74.611	66.389	88.667	64.889	32.389	53.5	89.667	101.111	139.389	97	9.222	3.5	2.444	3.333	3.778	10.833	7.611	5	3.722	3.056	3.611	7.2222	24.4444	21.167	65.167	15.111	6.722	6.1667	4.5556	8.111	35.0556	39.5556	61.0556		0.726073	36.5635
26.3302	68.833	70.833	73.167	70.278	87.111	70.167	39.389	59	84	108	139.444	98.833	8.167	3.722	2.667	2.444	3.389	12.333	8	4.944	3.167	4	3.778	6.2222	24.7778	23.778	59	17.667	6.722	6.8333	4.6111	7.5	39.6667	35.7222	58.3889		0.729372	37.6159
26.4494	74.444	67.889	66.056	83.667	94.444	70.444	44.278	61.111	82.056	117.667	151.389	97.333	9.611	4.389	2.222	2.611	3.889	8.833	7.889	5.444	2.667	4.667	3.778	6.3333	22.3889	27.556	63.167	23.278	7.056	5.3333	4.9444	9.5	39.8333	32.6111	61.8889		0.732674	39.1619
26.5685	67.889	66.111	60.278	85.444	101	71.667	46.333	73.444	75.444	110.889	138.889	105.167	9.278	4.556	2.5	1.944	3.056	11.167	7.556	4.444	3.167	3.389	4.611	6.6667	19.4444	27.5	66.444	17.278	7.278	6.7778	5	9.889	39.0556	42.1667	59.6111		0.735974	39.0096
26.6876	64.111	66.444	50	82.722	94.278	76.167	54.778	83.889	74	112.611	132.833	110.167	7.222	4.778	3.222	3.333	3.333	10.944	5.611	4.5	4.333	2.556	4.333	7.9444	17.6111	27.944	75.5	20.722	9.5	5.3333	5.2778	11.889	43.3889	36.7778	61.8889		0.739273	39.4269
26.8068	54	53.222	45.889	74.889	87.667	72.889	49.056	84	64.889	114.944	116.833	109.556	9.722	4.556	4.667	2.5	3.389	10.111	9.389	4.778	4	4.389	3.611	8	14.3333	29.167	74.056	20.778	9.611	5.3333	5.3889	14.167	41.8333	34.1667	64.6111		0.742575	37.4398
26.9259	48.722	49.722	36.556	62.556	75.333	81.722	55.722	83.833	55.889	101.389	92.722	112.778	9.722	3.444	2.111	2.333	4.5	9.889	7.611	5	3.667	3.889	5.111	9.5	15.8333	25.222	73.833	22.167	8.556	5.6111	5.0556	14	39.5556	34.6111	65.1111		0.745874	35.2365
27.0451	39.389	43.611	34.333	58.611	64.278	80.833	61.111	84.222	53.5	85.833	59.833	115.778	11.611	3.722	2.944	2.944	3.167	10.111	8.611	3.556	4.333	4	4.889	8	15.7222	28.833	80.278	23.778	11.111	8.0556	5.2222	12.278	38.6667	29.7778	61.7222		0.749176	33.2761
27.1642	30.111	36.222	25.778	47.722	58.389	89.056	67.278	87.667	36.278	68.389	38.278	109.5	11.333	3.944	3.444	3.944	4.389	10.667	8.778	4.167	3.278	3.889	4	7.6667	16.6111	28.611	79	24.778	10.056	5.8333	6.7222	13.778	43.2778	29.8889	59.5		0.752475	30.9207
27.2834	35.333	30.444	21.778	40.056	48.5	84.333	72.944	81.833	30	48.278	21.778	105.778	12.833	4.944	1.944	3.889	3.5	12.278	9.222	5.333	4.389	3.556	4.111	6.5	18.2222	31.222	78.833	33.222	9.778	8.7778	5.4444	15.444	44.1667	34.0556	59.7778		0.755777	29.4999
27.4025	30.556	26.111	17.278	34.889	30.889	87.889	82.556	88.778	21.444	39.667	13.889	110.056	16.889	3.889	3.833	3.056	3.611	9.167	7.611	6.444	4.167	4.389	4.556	6.7222	17.5	33.333	81.889	34.944	11.333	7.7222	4.2222	12.778	49.0556	27.8333	52.6111		0.759076	28.3302
27.5216	26.556	21.556	16.889	24.444	21.111	84.444	85.056	82.278	17.5	24.444	12.5	116.333	22.667	4.444	3.444	2.556	3	8.111	9	4.111	3.611	3.667	5.111	7.3889	20.1111	41.667	74.889	33.611	11.667	5.2778	4.6667	17	45.1667	31.3889	45.2222		0.762375	26.8826
27.6408	25.056	16.889	14.889	18.111	18.111	90.722	90.722	77.778	12.611	20.056	10.278	107.722	27.833	5.556	4.111	3.556	3.389	6.444	7.944	5.278	4.056	3.833	4.444	6.9444	19.5556	40.222	72	36.5	12.889	7.4444	4.7778	20.778	44.8889	25.4444	47.9444		0.765677	26.2508
27.7599	21.278	14.222	13.167	15.444	13.278	90.778	94.889	70.222	9.722	14.278	8.611	98.278	29.611	7.167	2.111	4.222	3.222	9.944	8.167	6.222	4.167	3.778	4.611	5.1667	19.1111	43.278	66.556	39.778	12.333	6.7222	4.6111	16.611	46.8333	27.2222	42.0556		0.768977	25.0762
27.8791	15.778	13.889	11.944	11.667	11.444	95.056	85.944	71.944	7.556	11.111	6.889	93.5	27.833	7.444	2.444	3.722	4.389	8.833	9.056	4.5	3.722	2.833	4.889	7.6111	17.6667	39.5	70	41.5	15.056	6.3333	5.8889	16.722	48	24.8333	41.1667		0.772279	24.3047
27.9982	14.167	12.5	10.667	8.333	9.056	82.5	86.889	54.056	5.222	10.111	6.444	85.833	28.944	7.944	3.833	4.333	4.111	7.778	8.167	4.944	3.667	2.944	4.167	8.8333	16.3333	42.333	59.889	46.278	19.5	8.6667	5.4444	23.5	43.2778	24.8333	40.6667		0.775578	23.0333
28.1173	13.889	12.722	10.278	7.889	7.444	69.722	68.167	46.722	4.889	6.889	5.611	74.278	23.778	10.889	3.833	2.389	4.889	7.056	9.278	5.111	4.333	3.556	4.722	7.0556	17.8889	43.667	59.056	44.833	17.833	8.5556	6.4444	21.278	43.5556	21.8889	42.0556		0.778877	21.2127
28.2365	11.333	10.778	8.556	8	5.889	53.833	46.611	31.5	5.222	4.333	4.444	57.944	23.222	11.444	3.167	3.167	5.222	9.5	10.167	5.222	4.056	3.778	4.444	5.7778	14.5	43.111	49.222	47.056	20.111	9.4444	5	22.444	45.3889	17.5	36.6667		0.782179	18.5158
28.3556	9.833	12.056	7.778	6.444	4.556	35.556	25.833	22.389	3.278	4.778	4.944	48.889	29.667	12.667	3.556	4.167	4.833	8.222	9.056	6.667	4.889	3.667	4.722	6.3889	18.7778	41.444	51.833	49.167	19.722	7.7778	6.1667	25.667	47.2778	16.2222	33.2778		0.785478	17.2048
28.4748	7.611	9	8.222	4.278	3.667	19.222	17.556	15.333	3	3.222	3.444	33.5	28.667	11.611	4.333	3.5	4.056	8.167	10.056	5.444	3.889	4.167	4.722	6.3333	17.7222	42.333	46.944	54.333	24.167	6.6111	5.9444	25.222	42.2778	19.1111	32.5		0.78878	15.4333
28.5939	9.889	7.722	5.278	4.278	5.167	16.778	13.167	12.389	2.611	3.556	3.611	28.111	30.722	10.556	3.056	4.444	3.944	11.667	10.833	5.556	4.167	4.111	6.5	5.5	18.2222	45.389	49.5	63.111	19.722	11	6.8889	27.833	37.6111	17.6667	35		0.792079	15.5873
28.713	6.556	7.056	5.056	4.5	4.222	9	11.056	10.5	2.5	3.444	3.056	21.944	41.278	10.778	3.944	3.611	4.5	11.5	10	5.778	4	3.778	4.778	5	19.4444	51.222	42.167	61.556	22.778	7.8889	5.6111	29.389	43.3333	18.1111	30		0.795378	15.1239
28.8322	7.167	6.833	5.278	3.611	3.333	8.389	8.222	7.111	2.278	3.167	2.278	19.889	48.778	12.778	3.5	3.944	4.444	9.5	11.722	5.556	3.611	3.889	5.611	7.2222	22.5556	50.778	42.389	62.167	25.889	9.8333	6.5556	33.556	35.6667	13.3333	34.1667		0.79868	15.2858
28.9513	6.278	5.944	3.889	3.389	4.222	6.333	5.833	5.889	2.444	2.389	2.833	15.278	53.667	11.778	3.389	5.056	5.556	12.389	11.778	4.389	4.944	3.778	5.667	5.9444	19.7778	53.056	38.611	68	22.333	9	5.2222	36.111	37.9444	14.9444	28.3333		0.80198	15.0397
29.0705	6.333	6.056	3.667	2.333	2.5	4.944	5.056	5.222	1.556	1.833	1.833	10.778	63.278	9.778	3.333	3.833	5.556	12	11.222	4.333	4.611	3.444	4.778	8.0556	19.6111	58.667	34.389	72.111	28.333	10.4444	8.0556	34.833	27.6667	12.4444	26.6111		0.805281	14.8428
29.1896	5.444	6.333	3.444	2.722	2	4	4	4.222	1.444	1.278	2.278	7.278	67.167	11.667	3.389	6.556	4.389	11.389	13	5.444	4.444	4.778	6.389	6.2222	22.8889	58.333	35.389	68.778	29.333	10	7.3889	40.111	24.9444	13.2222	23.9444		0.808581	14.9603
29.3088	6.111	6.611	2.889	2.222	1.222	4.111	5.333	4.111	1.111	2.278	2	6.778	73.944	10.833	4.111	4.611	5.167	11.833	13.389	6	3.556	5.167	4.889	6.3333	19.8333	61.111	35.611	75.167	32.278	10.8889	9.1111	37	23.4444	13.2778	26.2222		0.811883	15.3873
29.4279	4	5.667	2.944	1.889	2.278	4	2.667	2.611	1.111	1.333	2.833	5.611	68.278	12.5	3.444	5.222	7.333	14.222	14.944	5.889	4.056	5.333	5.889	5.6111	23.0556	60.389	28.667	72.611	38.222	12.0556	8.1111	37.5	22.3889	10.2222	21.1667		0.815182	14.973
29.547	4.056	5.167	1.611	2.611	1.5	2.722	3.111	1.889	1.111	1.5	1.944	3.833	81.333	14.167	5.056	6.056	6.778	12.833	14.333	6.611	3.278	3.889	5.944	6.3333	21.5556	58.222	31.556	73.278	32.056	12.5	9.3333	41.5	18.6111	11.5	21.3889		0.818481	15.1191
29.6662	4.611	3.444	2.222	1.889	1.333	1.722	2.389	1.889	1.389	1.444	1	3.889	92.278	14.167	5.167	7.444	8.222	12.667	17.056	5.611	4	4.611	4.5	7.1667	20.1111	60.722	29.444	70.333	38.222	15.3889	9.6111	42.944	17.8333	9.2778	20.1111		0.821783	15.546
29.7853	3.611	3.111	2	1.556	0.667	2.111	2.5	1.667	0.833	2.444	1.056	2.778	87.667	17.333	5	7.5	8.167	13.556	21.389	9.389	4.944	3.667	6.889	6	20.7778	59.222	27.611	70.722	37.556	16.0556	11.1667	46.056	14.8889	9.2222	16.7222		0.825082	15.5953
29.9045	3.389	3.056	1.944	1.389	1.556	2.611	2.333	1.333	1.5	0.833	0.944	3.389	100.444	20	6.222	7.944	8.833	14.944	24.278	7.278	2.944	3.833	6.389	6.5556	21.8889	66.667	22.111	61.611	41.389	22.1111	11.7222	40.167	13.7778	9.6667	13.2222		0.828384	15.9507
30.0236	1.889	3.056	2.278	1.222	1	1.389	1	0.944	0.833	1.611	1.333	3.389	104	24.556	8	8.278	10.778	16.222	26.667	7.056	4.556	4.278	8.111	5.8889	23	62.611	19.222	60.111	45.778	21.8889	12.3889	44.444	10.1667	7.0556	14.4444		0.831683	16.2699
30.1427	3.944	3.5	1.389	1.556	0.611	2.056	1.778	1.056	1	0.556	0.889	2.944	104.444	25.833	9.056	8.667	10.444	18.278	26.278	8.556	5.278	4.389	9.167	7.2222	24	59.667	18.167	61.611	53.167	27.7222	13.3889	41.111	10.3333	7.3333	12.1111		0.834982	16.7858
30.2619	2.667	2.778	1.556	1.111	1.556	0.389	1.167	1.222	0.389	1.556	1.389	1.944	103.556	32.556	9.778	11.889	12.278	21	30.444	7.889	5.222	4.222	8.889	7.7222	22.7222	54.111	18	51.444	47.333	27.7222	19.2778	43.444	9.0556	6.1667	10.1667		0.838284	16.6461
30.381	1.667	1.889	1.111	1.5	1	0.833	1.111	1.111	1.222	0.889	1.278	0.778	96	37.111	11.278	12.722	16.333	17.944	29.778	8.611	4.556	4.389	10.944	6.1111	23.3333	51.944	16.889	51.778	55.056	36.6111	20.1111	39.444	9.6667	7.1667	11.3889		0.841584	16.9587
30.5002	1.667	2.222	1.611	1.667	0.444	1.389	1.667	0.778	0.611	0.5	0.667	1.444	84.167	38.722	11.389	14.389	17.278	23.278	28.5	8.5	5.611	6.333	15.056	8.1667	22.8889	52.667	14.667	46.722	56.611	41.2778	20.9444	42.611	8.6111	5.0556	7.6667		0.844886	17.0223
30.6193	2.611	2.444	1.222	0.722	0.222	0.722	0.667	1	0.722	0.944	0.667	1.278	73.5	42.778	7.667	15.167	15.056	18.278	29.278	13.056	2.833	3.722	18.056	7.1667	22.7778	50.722	12.722	43.833	57.944	41.5556	26.1667	38.611	7.2222	6.6111	9.2222		0.848185	16.4905
30.7385	1.667	1.556	2.167	0.944	0.444	1.778	0.778	0.611	0.889	1.167	0.611	2.167	58.5	48.889	6.389	14.389	17.111	19.833	31.056	11.5	4.611	4.611	19.944	7.7222	24.3889	48.222	12.111	37.111	56.444	44.2778	27.3889	37.333	6.1667	5.2778	8.8889		0.851487	16.1984
30.8576	1.833	1.556	1.278	0.611	0.944	0.667	0.889	0.778	0.667	1.278	1	1.111	46.667	54.889	6.778	16	18.167	22	32.056	14.778	5.222	3.833	28.056	8.1667	27.9444	43.278	8.944	33.111	60.833	51.3333	31.1667	35.944	6.7222	5.7222	7.2222		0.854786	16.6127
30.9767	1.833	1.944	1.056	0.889	0.333	0.722	0.278	0.611	0.889	0.556	0.667	1.056	31.778	69.5	5.944	22.056	14.056	22.056	33.333	18.444	5.611	3.722	29.556	7.6667	31.5	40.944	9.056	29.222	59.667	51.2778	30.9444	29.333	6.3889	5.8333	6.7222		0.858085	16.4413
31.0959	1.444	1.833	1.389	1.444	0.222	0.333	0.444	0.778	0.444	0.278	0.667	0.944	27.556	70.778	7.111	24.111	15.944	25.556	32.167	21.222	5.778	3.667	33.389	10.2222	32.6111	38	6.333	28.167	58	52.8333	35.8333	27.389	4.8889	3.8333	6.1667		0.861387	16.6222
31.215	1.056	1.389	1.167	0.389	0.444	0.167	0.833	0.389	0.111	0.833	0.722	1.5	20.167	83.833	8.278	29	16.889	23.444	35	28.944	5	3.667	39.278	10.4444	34.0556	30.056	6.222	22.389	56.722	54	37.6667	18.5	4.5556	3.8333	5.8889		0.864686	16.7667
31.3342	1.944	1.056	1.333	1	0.833	0.833	0.667	1.056	0.722	0.667	0.5	0.944	17.111	90.833	8.611	34.056	13.278	22.056	44.667	33.556	4.889	4.833	36.167	10.0556	38.3889	34.833	5.222	22.111	56.389	55.1111	41.8889	19.667	5.2222	2.7778	5.5556		0.867988	17.681
31.4533	1.5	0.667	0.611	0.611	0.389	0	0.611	0.611	0.556	0.722	0.5	1.111	10.167	103.944	9.667	39.111	13.5	25.389	45.056	42.611	5.667	4.944	38.5	15	40.5556	31.611	4.944	15.333	47.778	53.8889	45.6111	18.833	3.8889	2.3889	4.3333		0.871287	18.0174
31.5724	1.667	0.667	1.222	0.944	0.278	0.556	0.278	0.444	0.444	0.167	0.444	0.833	7	109	9.722	39.667	14.167	29.056	53.556	47.389	3.889	5.5	33.556	14.2778	40.7222	27	5.056	13.278	43.611	56.8333	50.2222	14.833	3.7222	2.4444	4.3333		0.874587	18.1937
31.6916	0.389	0.944	0.944	0.611	0	0.167	0.556	0.556	0.444	0.333	0.667	0.889	6.722	109.111	9.944	35.889	15.111	29.167	50.611	49.778	4.611	5.111	39.333	16.8333	42.2222	22.278	5.556	12.167	37.111	49.9444	47.7778	10.944	3.8889	2.6667	4.6111		0.877889	17.654
31.8107	0.944	1.667	0.556	0.389	0.389	0.5	0.389	0.167	0.167	0.278	0.556	0.556	5.333	114.667	11.889	35.667	15.222	29.278	47.611	56.111	5.667	4.833	35	19.6667	45	18.333	5	10	36.889	43.2222	43.5556	8.5	3.6667	3	4.2778		0.881188	17.3985
31.9299	1.222	1.278	0.556	0.333	0.5	0.167	0.389	0.444	0.056	0.722	0.556	0.5	3.111	119.333	13.889	30.056	17.444	37.333	43.111	63.722	4.167	5	42.944	26.8333	55.9444	15.111	4.5	8.111	32.5	38.5	39.6111	8.222	4.4444	1.9444	3.3333		0.88449	17.8825
32.049	0.778	0.833	0.389	0.667	0.167	1	0.556	0.167	0.389	0.556	0.389	0.778	3.778	119.167	15.278	27.389	18.944	35.667	42.944	71.222	4.889	6.778	46.556	27.9444	58.3333	13.278	4.389	6.222	21.167	35.3333	38.8333	6.944	2.6111	1.5	2.4444		0.887789	17.6652
32.1681	0.833	0.833	0.333	0.333	0.278	0.222	0.389	0.111	0.333	0.778	0.444	1.333	3.389	116.167	18.444	27.778	22.222	30.944	45.944	68.278	7.778	6.556	51.389	35.4444	67.2222	13.222	3.278	5.833	19.333	32.7778	34.3889	6.222	2	1.4444	2.8333		0.891088	17.9745
32.2873	0.833	0.722	0.444	0.556	0.222	0.833	0.111	0.111	0.611	0.722	0.556	0.5	2.944	101.778	19.778	27.278	24.778	37.444	46.5	68.056	5.111	6.889	56.056	41.3889	68.1111	14.222	3.611	5.333	14.333	24.1111	28.7778	6.056	2.4444	1.9444	2.9444		0.89439	17.6031
32.4064	0.944	0.5	0.222	0.111	0.389	0.167	0.222	0.111	0	0.556	0.611	0.611	1.944	74	25.778	22.667	31.889	33.278	49.778	64.944	7.278	6.278	62.611	50.8333	75.1111	8.5	3	5.056	11.111	17.0556	23.6111	6.333	2.3889	1.1667	2.3889		0.897689	16.8984
32.5256	0.611	0.278	1.056	0.444	0.167	0.278	0.222	0.333	0.222	0.667	0.278	0.222	2.667	56.556	31.389	25.611	30.5	40.444	61.5	70.333	6.833	6.056	70.444	52.5556	79.3889	9.389	3.056	4.333	10.833	15.7222	17.3333	5.167	2.2222	2.3889	2.7778		0.900991	17.4937
32.6447	0.722	0.333	0.444	0.778	0.167	0.222	0.056	0.111	0.667	0.722	0.722	0.278	2.833	35.333	38.722	30.556	35.778	41.889	57.333	70.278	4.889	6.556	66.556	63.6667	84.8333	8.667	2.556	3.167	8.5	16	15.5556	3.5	2.0556	1.3333	3.3333		0.90429	17.4032
32.7639	0.167	0.444	0.556	0.5	0.278	0.556	0.556	0.389	0.278	0.611	0.667	0.389	1.833	21	47.833	29.167	46.611	43.833	68.556	75.722	8.333	6.889	71.556	66.1667	80.0556	6.333	2.444	3.222	6.444	9.7778	9.7222	3.222	2	1.1667	1.3333		0.907592	17.6746
32.883	0.667	0.889	0.167	0.278	0	0.222	0.278	0.111	0.111	0.833	0.389	0.278	1.722	12.833	59	29.833	45.056	47.222	76	82.222	7.5	7.333	79.111	69.1111	78.3333	6.944	3	3.667	5.333	11.1667	8.7778	2.833	1.3889	1.5556	1.7222		0.910891	18.4539
33.0021	0.167	0.833	0.278	0.333	0.222	0.222	0.222	0.444	0.111	0.167	0.389	0.444	2.556	6.611	72.278	38.556	46.056	54.889	73.722	88.667	9.611	9.278	71.444	75.3889	77.0556	5.889	2.167	2.944	3.833	8.5	8	2.556	2.7222	1.6111	1.6667		0.914191	19.1381
33.1213	0.167	0.167	0.333	0.389	0.278	0.333	0.556	0.222	0.556	0.389	0.5	0.556	0.556	5.222	96.611	46.444	52.889	68.667	76.611	95.056	8.111	7.833	78.778	79.8889	67.1111	5.611	1.667	2.278	3.722	8.3889	7	3.722	1.6111	1.1111	1.3889		0.917493	20.7064
33.2404	0.556	0.611	0.111	0.333	0.389	0.111	0.222	0.111	0.444	0.111	0.611	0.667	0.389	4.444	114.833	53.611	54.167	75.111	81.389	93.944	10.222	8.056	78.056	84.6667	67.4444	3.5	2.556	3.222	2.889	5.8889	5.9444	2.167	1.3333	1.3889	2.0556		0.920792	21.7587
33.3596	0.222	0.056	0.222	0.333	0.111	0.111	0.056	0.167	0.333	0.111	0.333	0.611	0.667	3.167	116.389	61.444	56.944	86.5	87.667	102.667	9.111	9.5	76.389	88.9444	60.8333	4.333	1.5	3.278	2.333	6.7778	4.1111	1.944	1.2778	0.9444	1.7222		0.924094	22.6031
33.4787	0.111	0.333	0.222	0.167	0.222	0.444	0.111	0.056	0.056	0.333	0.167	0.611	1.5	3.222	111.722	76.667	61.778	88.889	86.389	95	9.611	10.833	79.5	92.3333	52.4444	3.889	1.389	2	3	4.6667	4.0556	2.056	1.0556	1.0556	2.1111		0.927393	22.8
33.5978	0.444	0.056	0.222	0.056	0.056	0.167	0	0.222	0.444	0.5	0	0.389	0.833	2.556	88.667	83.222	77.722	97.611	95.556	89.611	13.333	10.611	92.556	91.6111	46.7778	2.444	1.778	2.167	2.889	3	3.5	1.556	0.8889	0.7222	2		0.930692	23.2619
33.717	0.778	0.111	0.111	0.278	0.167	0.333	0.111	0.389	0.111	0.333	0.611	0.111	0.333	2.056	52.056	94.333	79.056	105.278	106.278	74.111	13	13.222	98.778	85.8333	41.3889	3.056	1.5	1.444	2.167	3.6667	2.8333	1.222	1.6111	0.7778	1.8889		0.933994	22.5524
33.8361	0.444	0.111	0.056	0.056	0.111	0.444	0.333	0.389	0.333	0.167	0.833	0.333	0.889	1.556	30.389	95.056	88.833	106.111	100.722	53.778	12	14.889	96.944	75.8889	33.1667	3.111	1.167	1.833	2.5	2.5	2.1667	1.611	1.4444	0.5556	1		0.937293	20.9063
33.9553	0.222	0.222	0.111	0.167	0.111	0.222	0.056	0.222	0.389	0.389	0.556	0.222	0.556	2.111	15.889	89.889	94.167	107.222	104.278	32.278	12.944	16.389	89.833	74.5556	24.3889	2.5	1.611	2.111	1.5	2.8333	4.0556	0.833	0.7222	0.7222	1		0.940595	19.5794
34.0744	0.333	0.278	0	0.167	0.389	0	0	0.111	0.222	0.167	0.111	0.056	0.722	1.222	9.444	81.444	96.444	96.944	96.556	17.389	12.778	19.389	83.722	67.5	18.1667	2.556	1.389	1.611	1.778	3.1111	2.0556	1.444	1.6111	0.9444	1.1111		0.943894	17.7476
34.1936	0.556	0.222	0.167	0.056	0.056	0	0.333	0.278	0.222	0.333	0.444	0.278	0.556	1.111	6.111	61.722	89.889	82.111	79.389	13.333	13	22.278	71.667	66.7778	15.5	2.167	1.611	2.389	1.889	2.3333	2.4444	1.111	1.0556	0.5556	1		0.947196	15.5127
34.3127	0.389	0	0.444	0.222	0.111	0.278	0.167	0.389	0.222	0.111	0	0.222	0.222	2.056	4.389	35.778	81.556	60.833	53.444	13.278	17.889	26.167	62.444	65.6667	14.3889	1.667	0.556	0.611	2.056	1.6667	1.8889	1	0.9444	0.7778	1.0556		0.950496	12.9397
34.4318	0.167	0	0.111	0.056	0.111	0.167	0.278	0.333	0.056	0.278	0.444	0.278	0.722	1.778	4.278	24.056	71.444	32.778	34.111	8.722	19.778	30.444	52.111	60.2222	10.5	1.444	1.167	0.833	1.167	2.1111	1.2222	1.556	0.7778	0.3333	1.3889		0.953795	10.435
34.551	0.056	0.167	0.167	0	0.167	0.056	0.5	0.333	0.333	0.444	0.111	0.167	0.444	0.889	4.167	12	55.556	22.278	18.5	6.389	20	37.722	40.389	54.1111	8.1111	2	0.444	1.389	1.944	1.5	2.7222	0.5	0.7222	0.1667	0.3333		0.957097	8.42225
34.6701	0	0	0.389	0.056	0.056	0.222	0	0.167	0	0.167	0.056	0.333	0.278	0.833	2.722	10.222	35.778	14.333	14.444	4.556	27.611	43.944	31.444	48.5556	7.9444	1.5	0.833	1.444	1.333	1.6111	2.1111	1.278	0.6111	0.3889	0.5556		0.960396	7.30791
34.7893	0	0.111	0.056	0.333	0.056	0.278	0.389	0.111	0.333	0.056	0.056	0.278	0.667	0.889	3.167	6.333	21.111	10.833	10.278	3.389	35.833	49.833	26.722	39.7778	7.9444	1.944	0.944	1.333	0.722	1.3889	1.8333	0.889	1	0.6111	0.6111		0.963698	6.57459
34.9084	0.222	0.056	0.056	0.056	0.111	0.167	0	0.333	0.111	0.111	0.167	0.167	0.778	1.111	1.444	6.167	13.833	7.778	7.556	2.444	42.278	49.167	18.333	29.2778	5.8333	1.278	1.167	1.222	0.722	1.2778	1.7222	0.833	0.6111	0.2778	1.0556		0.966997	5.64925
35.0275	0.444	0.167	0	0.111	0.222	0.111	0	0.111	0.444	0	0.167	0.5	0.167	0.556	1.778	4.556	11.889	5.667	5.167	2.444	53.389	52.167	15.056	24.3889	4.6111	1.5	0.722	1.333	0.944	0.8333	0.9444	0.778	0.8333	0.5556	0.6667		0.970296	5.52067
35.1467	0.278	0.111	0	0	0	0.222	0.222	0.111	0.056	0.389	0.333	0.222	0.167	1.556	1.5	2.944	9.833	4	6.167	2.667	59.778	55.444	11.333	22.9444	4.2778	1.333	1.5	1.722	0.667	1.4444	1.5	1.167	0.6667	1	0.5556		0.973598	5.60317
35.2658	0.111	0.056	0.056	0.056	0.167	0.167	0.056	0.222	0.111	0.111	0.389	0.167	0.222	0.222	0.944	2.278	4.667	3.944	3.5	2.111	70.167	61.833	6.944	14.5556	3.2222	0.833	0.667	1.111	1.611	0.7222	1.2222	0.333	0.2778	0.3333	0.5		0.976897	5.25398
35.385	0.278	0.167	0.111	0	0.222	0	0	0.056	0.111	0.056	0.278	0.167	0.111	0.889	1.667	3.333	3.722	2.444	3.444	1.111	74.889	69.556	6.222	13.9444	3.2222	0.722	0.5	1.667	1	0.7778	1.3889	0.611	0.4444	0.2778	0.6667		0.980199	5.54446
35.5041	0	0	0.111	0.056	0.333	0	0.056	0	0.5	0.056	0.111	0	0.389	0.444	1.056	2.833	3.389	2	2.944	1.111	72.111	74.722	4.889	9.3333	1.7778	1.056	0.556	0.444	1	0.5	1.3889	0.389	0.5556	0.6667	0.6111		0.983499	5.29684
35.6232	0	0.167	0.111	0	0	0.111	0	0	0	0.111	0.167	0.444	0.222	0.556	1	1.833	3.444	2.944	2	1.056	79.444	90.333	4.667	8.7778	2.5	1.167	0.778	1.167	0.278	1.2778	1.0556	0.333	0.5	0.3889	0.3889		0.986798	5.92063
35.7424	0	0	0.111	0	0	0	0.111	0.222	0.111	0.278	0.222	0.556	0.222	0.278	0.889	1.222	2.222	2.556	1.778	0.278	76.111	103.556	3.167	8.3333	1.7222	1.556	1.333	0.889	0.722	0.8889	1.3333	0.722	0.3333	0.3333	0.7778		0.9901	6.08097
35.8615	0	0	0	0.111	0.056	0.167	0	0.222	0.333	0	0	0	0.389	0.056	0.722	1.056	2.278	1.611	0.944	1.222	81.389	107.278	2.889	5.7778	2.1111	0.778	0.778	1.278	1.333	0.8333	0.7778	0.778	0.2778	0.6111	0.7222		0.993399	6.19369
35.9807	0.056	0	0.056	0	0	0	0.278	0.056	0.167	0.278	0.056	0.111	0.111	0.222	0.722	1.278	1.778	2.111	1.611	1.056	84.056	104.444	2.722	5.8889	1.4444	0.222	0.611	0.944	0.722	0.6667	0.2778	0.722	0.3333	0.1667	0.6667		0.996701	6.10956
36.0998	0.111	0	0.111	0.056	0.111	0	0.222	0.222	0.333	0.278	0.056	0	0	0.111	0.611	1.444	1.222	1.833	1.167	1	71.667	97.056	3	3.7778	2.2222	1.444	1.944	0.556	0.722	0.7778	1.2222	0.778	0.5	0.4444	0.1111		1	5.57459

## Sheet: Image7
X0	Y0	Y1	Y2	Y3	Y4	Y5	Y6	Y7	Y8	Y9	Y10	Y11	Y12	Y13	Y14	Y15	Y16	Y17	Y18	Y19	Y20	Y21	Y22	Y23	Y24	Y25	Y26	Y27	Y28	Y29	Y30	Y31	Y32	Y33	Y34		Ap-Ba	Avg int
0	37.412	84.282	109.611	112.311	91.855	165.437	147.673	99.014	71.295	54.837	137.131	104.717	84.559	121.736	153.013	37.013	119.663	43.157	40.557	154.574	75.153	31.197	53.403	13.94	13.448	19.623	69.19	22.402	42.305	103.849	131.598	56.962	31.421	86.007	34.132		0	78.6993
0.1191	41.674	91.564	118.724	117.489	101.338	163.943	150.001	113.874	74.821	62.473	139.192	110.717	94.385	121.077	159.951	44.2	134.035	43.966	42.978	145.516	78.469	36.437	63.903	14.253	12.836	18.464	86.461	24.553	43.897	109.457	131.252	61.238	30.732	88.003	30.162		0.00442325	82.9153
0.2383	48.289	96.943	126.163	139.852	115.791	165.772	149.93	128.854	87.134	69.289	143.16	113.398	103.526	130.67	170.88	49.939	144.006	42.291	45.766	146.741	81.609	36.187	75.697	14.868	13.979	22.361	99.836	29.767	53.798	104.122	132.248	71.305	35.756	89.696	32.952		0.00885021	88.9307
0.3574	49.328	103.416	140.82	161.923	126.318	168.968	150.039	142.239	97.874	78.304	144.152	122.262	107.072	136.475	188.138	57.479	155.96	47.55	50.012	140.599	83.395	43.548	87.999	17.829	12.724	25.113	109.256	34.146	56.306	107.469	133.196	76.184	39.53	99.691	36.507		0.0132735	95.1949
0.4766	58.254	116.474	146.851	175.207	140.198	171.209	146.36	155.974	113.901	84.081	147.92	125.909	119.148	147.182	213.763	71.982	155.529	55.338	50.586	136.776	92.167	51.641	95.345	20.158	17.249	30.203	122.46	44.903	60.95	109.25	128.059	84.455	45.409	102.845	45.7		0.0177004	102.384
0.5957	62.365	124.167	157.542	186.288	146.878	171.006	144.053	169.55	124.743	96.247	145.942	119.407	126.452	162.536	230.383	86.326	159.376	68.048	58.574	133.306	101.545	68.848	109.295	27.826	21.438	33.742	131.299	60.236	67.437	109.846	126.547	96.539	48.337	103.083	44.18		0.0221237	109.24
0.7148	71.471	135.542	162.593	200.283	153.967	173.858	138.332	179.096	137.773	109.646	147.846	116.698	135.193	168.81	243.449	106.944	160.371	89.311	75.502	134.509	109.176	87.279	123.115	41.224	26.226	45.124	146.605	66.902	74.428	112.862	127.505	102.62	55.333	105.466	51.945		0.0265469	117.629
0.834	79.361	139.525	173.112	207.813	160.497	173.42	140.913	183.696	154.293	133.897	152.893	129.892	143.113	179.104	249.661	128.162	155.53	108.528	99.123	135.18	118.935	101.228	140.987	64.777	35.485	52.007	156.587	83.688	77.944	118.021	130.472	115.768	65.663	108.954	65.099		0.0309739	127.524
0.9531	92.081	149.521	173.177	212.623	165.025	172.36	132.046	190.903	165.602	143.662	147.053	139.092	155.654	186.713	245.3	144.945	165.056	137.558	119.008	131.283	125.992	120.917	152.422	93.026	58.614	64.342	163.845	108.232	87.208	120.438	132.609	134.076	72.518	118.346	80.612		0.0353971	137.196
1.0723	104.543	155.067	181.072	221.517	175.153	179.592	134.885	189.748	179.407	153.351	145.8	135.706	163.827	199.712	236.787	159.913	166.194	162.316	142.73	133.153	131.891	132.954	159.832	114.973	88.339	86.144	173.859	137.037	100.437	122.824	135.408	142.673	73.694	121.865	87.76		0.0398241	146.576
1.1914	117.056	164.527	184.603	223.718	177.784	177.456	130.669	192.481	191.838	173.776	144.505	137.862	175.717	205.457	218.198	174.401	163.992	187.292	167.842	130.032	142.312	152.476	161.095	141.289	138.234	103.549	181.953	151.401	108.493	129.927	135.425	141.887	80.705	128.246	86.544		0.0442474	154.935
1.3106	130.957	170.263	188.423	235.006	187.57	178.11	124.933	193.017	191.211	188.497	149.366	136.701	178.716	206.215	195.154	184.811	162.549	209.48	180.451	132.359	154.747	160.665	169.302	164.071	192.03	124.522	181.742	167.105	124.739	142.849	132.433	143.136	91.673	136.48	95.435		0.0486743	162.992
1.4297	146.956	165.337	188.986	242.961	195.853	184.588	122.935	197.199	197.714	195.608	149.911	136.084	174.443	203.779	171.86	201.315	159.188	220.679	200.015	131.19	165.465	171.01	171.731	184.691	230.626	146.79	181.429	186.249	136.361	150.091	132.09	134.697	102.453	142.594	99.285		0.0530976	169.205
1.5488	156.821	166.676	201.378	242.917	208.071	189.167	113.829	199.755	198.879	201.852	150.257	133.783	174.905	205.82	142.338	217.59	159.59	222.809	204.156	127.595	181.33	178.068	173.041	194.522	248.249	165.071	182.172	182.331	151.754	154.866	138.048	133.071	115.34	154.865	107.491		0.0575208	173.669
1.668	168.094	162.561	208.681	241.093	211.614	192.7	113.664	200.117	201.444	201.304	156.03	132.669	166.891	201.479	114.634	216.111	161.044	226.081	213.349	128.835	190.382	170.942	181.064	195.141	249.892	175.788	178.708	188.735	166.462	165.633	139.154	138.531	129.604	161.582	112.714		0.0619478	176.078
1.7871	184.13	169.748	207.836	243.618	218.444	198.415	106.211	194.13	196.947	205.336	160.889	119.702	149.548	182.077	86.7	215.63	152.702	221.699	211.3	125.649	189.68	178.159	186.526	189.99	238.309	178.624	171.441	194.133	178.69	180.141	130.037	135.45	141.77	167.446	116.245		0.066371	175.067
1.9063	194.994	164.072	217.403	240.943	230.252	195.304	99.865	191.561	198.626	206.032	160.44	113.911	134.258	169.389	65.908	226.404	145.689	217.602	203.859	110.604	180.711	171.342	184.517	176.998	202.726	185.583	159.059	190.944	198.741	180.035	131.57	136.271	147.043	170.066	121.735		0.070798	172.127
2.0254	196.621	158.184	213.266	237.411	233.843	197.433	100.066	189.622	188.774	211.095	160.575	105.464	129.259	153.991	52.559	236.819	138.405	203.04	192.069	109.69	166.746	177.049	178.201	160.055	162.325	191.195	141.735	186.389	208.314	186.636	124.688	145.888	152.693	170.616	116.416		0.0752213	167.918
2.1445	197.248	157.326	215.314	227.856	238.738	199.964	96.333	187.633	183.61	211.788	158.868	103.865	117.685	137.137	44.421	236.639	135.5	183.25	168.695	106.133	145.149	169.297	176.208	142.981	121.352	182.397	125.144	180.306	204.229	185.797	117.628	145.524	160.263	172.052	109.023		0.0796445	161.296
2.2637	192.868	157.14	211.291	212.495	234.856	195.134	90.993	172.834	170.83	217.803	153.648	95.254	100.485	112.51	40.945	228.651	140.437	166.151	146.14	101.488	123.439	167.784	171.657	132.362	95.394	175.078	116.79	164.567	208.403	179.341	109.072	139.342	170.482	167.991	107.974		0.0840715	153.475
2.3828	186.548	157.656	208.155	188.124	239.536	191.571	89.198	170.744	164.175	211.575	156.75	80.902	86.052	96.805	36.012	223.724	138.075	145.604	131.494	92.052	101.991	165.066	164.662	115.884	83.076	166.083	109.945	145.974	206.956	175.078	97.019	143.475	172.93	169.9	109.418		0.0884947	146.349
2.502	175.912	152.335	209.137	152.708	240.914	184.68	90.191	163.041	164.064	212.082	152.333	67.634	71.72	84.78	34.869	207.822	134.05	121.74	118.751	89.49	94.363	170.929	160.282	100.679	72.586	151.27	105.498	123.581	195.534	164.424	89.247	146.779	167.557	170.312	106.389		0.0929217	138.505
2.6211	158.691	139.571	198.585	118.89	235.269	172.9	89.082	150.089	150.855	212.87	150.585	53.186	63.799	71.936	31.099	199.845	132.687	109.605	105.703	86.218	82.897	174.075	155.242	87.66	61.077	139.271	101.792	95.76	166.051	157.741	76.063	153.067	169.729	166.483	93.3		0.0973449	128.905
2.7402	141.208	130.8	175.582	89.835	224.171	151.285	82.084	149.347	139.365	212.141	148.825	46.617	59.675	60.058	29.948	195.407	135.296	88.126	85.805	75.898	72.773	173.454	145.499	75.325	51.774	136.315	89.822	80.633	147.565	141.288	64.402	157.053	171.446	164.358	86.703		0.101768	119.425
2.8594	119.313	118.009	147.464	73.815	209.967	130.818	81.741	141.858	134.216	208.305	147.544	44.056	52.143	50.254	29.598	190.707	137.164	69.27	68.57	73.618	64.506	179.74	127.451	61.049	45.051	127.084	81.274	66.539	125.319	120.719	53.045	158.211	162.493	157.97	79.116		0.106195	109.657
2.9785	99.833	112.593	126.881	60.967	191.504	110.216	81.46	134.523	125.243	199.014	138.065	45.422	43.551	46.064	27.798	180.302	133.459	57.184	60.042	67.88	56.229	179.91	114.365	53.505	39.744	119.436	75.137	56.357	107.745	96.083	47.29	168.458	160.094	157.987	68.139		0.110618	101.214
3.0977	80.838	98.122	99.546	50.871	175.551	95.491	83.94	132.192	125.003	185.528	127.956	42.559	39.737	39.232	23.885	170.233	134.519	48.367	52.358	59.193	51.93	183.542	102.148	47.641	38.232	107.964	68.739	51.988	97.288	77.028	36.118	167.958	161.15	141.547	62.841		0.115045	93.1781
3.2168	68.076	85.481	77.675	40.591	153.202	78.715	76.679	130.036	121.627	173.404	118.689	44.302	34.074	33.95	24.427	164.787	129.621	40.372	46.226	45.737	42.221	192.272	92.376	41.502	37.281	102.31	63.304	48.427	83.116	51.251	36.016	172.721	160.654	128.55	60.321		0.119469	85.7141
3.336	52.209	70.025	61.525	31.721	132.358	62.178	70.425	124.59	113.79	154.15	108.921	41.297	30.15	31.242	26.705	162.103	129.001	33.355	41.5	41.213	38.187	194.857	71.741	35.457	36.219	95.279	55.899	41.852	71.508	40.023	35.3	169.868	157.731	125.437	59.026		0.123896	78.4812
3.4551	44.657	64.257	46.802	26.401	119.607	53.711	63.388	116.055	107.06	145.92	99.958	35.442	27.569	29.425	24.913	157.558	124.415	29.636	33.393	37.849	35.724	184.747	66.156	32.517	29.119	90.869	53.525	37.874	68.113	30.835	30.816	171.092	153.964	120.591	58.92		0.128319	72.9394
3.5742	40.886	54.146	37.284	24.886	93.101	42.042	50.962	107.855	102.979	134.599	90.984	34.271	28.547	28.191	24.532	151.692	118.175	25.463	28.541	33.394	33.601	183.71	60.2	34.649	25.46	81.167	49.14	31.507	56.501	25.585	33.542	164.363	141.767	116.641	54.01		0.132742	66.9821
3.6934	36.107	55.103	29.377	22.196	74.929	31.214	41.879	109.231	98.571	134.209	80.774	31.591	28.204	26.038	22.584	139.383	111.455	23.978	25.366	29.737	32.261	188.156	50.808	34.405	25.263	71.838	53.884	29.666	46.639	23.013	31.891	157.048	130.708	117.677	55.051		0.137169	62.8638
3.8125	34.504	49.768	22.842	22.332	56.936	28.453	28.477	99.824	87.959	118.819	72.192	31.281	25.728	24.844	22.242	121.927	109.007	23.305	21.597	30.248	31.262	185.343	44.711	33.763	25.068	67.962	54.351	24.367	39.485	22.124	33.966	149.009	116.602	108.715	55.065		0.141592	57.8308
3.9317	29.836	49.325	20.594	18.862	47.793	23.649	23.058	97.542	83.187	108.279	56.405	30.917	24.183	26.459	21.015	108.018	111.498	19.875	21.782	29.313	28.581	188.13	39.744	30.373	23.337	64.448	49.38	24.302	34.937	22.358	35.668	144.239	110.307	99.984	57.631		0.146019	54.4288
4.0508	23.344	48.148	19.661	19.585	36.876	21.956	19.675	96.266	84.645	97.896	44.443	27.351	21.96	26.419	22.586	96.907	118.157	17.395	19.741	26.705	25.706	175.336	38.453	28.321	23.141	58.402	50.389	20.908	29.114	19.382	33.602	137.789	93.367	85.679	54.724		0.150443	50.4008
4.1699	22.585	46.976	17.89	19.021	29.475	19.338	18.648	87.97	79.522	86.578	39.482	29.912	23.934	24.141	21.599	92.331	121.708	17.421	18.062	27.098	23.494	160.873	39.06	24.694	21.01	51.161	52.377	21.235	21.364	18.908	35.635	129.838	86.495	74.688	48.371		0.154866	47.2255
4.2891	23.511	43.125	15.788	18.536	22.864	16.602	15.95	84.581	71.91	75.073	28.909	29.898	20.947	25.194	23.205	83.435	112.094	18.129	16.126	24.97	21.734	159.018	34.158	26.737	19.206	44.867	51.645	17.576	22.112	20.091	36.66	117.025	76.948	60.997	47.002		0.159293	43.6178
4.4082	23.302	38.236	15.665	18.609	18.112	12.759	16.532	82.826	60.564	65.703	25.553	25.731	19.684	22.428	21.581	73.864	107.486	16.101	15.404	26.142	17.768	156.608	29.239	26.142	19.498	41.463	44.876	14.283	18.721	19.016	34.185	110.845	66.026	47.012	46.217		0.163716	39.948
4.5274	20.135	36.73	14.305	18.32	14.038	13.353	17.217	81.678	55.969	56.332	24.732	28.47	17.825	18.208	19.635	63.234	101.163	14.32	14.337	24.627	16.289	148.555	27.332	23.824	18.729	40.882	40.833	13.398	14.996	19.195	35.349	102.202	60.069	39.138	51.572		0.168143	37.3426
4.6465	16.668	33.934	14.853	18.441	13.079	13.782	17.745	77.396	50.669	49.081	24.994	26.407	18.73	18.315	19.965	57.559	94.294	14.671	14.601	23.195	18.27	147.86	24.735	20.701	16.279	42.025	30.94	12.657	14.237	18.224	30.396	92.143	48.845	31.416	53.668		0.172566	34.8793
4.7657	15.876	29.872	15.237	17.323	11.302	13.05	17.482	75.157	42.443	42.552	23.847	26.985	16.875	17.581	20.864	53.748	85.26	14.126	13.661	23.828	17.128	135.412	23.077	20.692	16.492	35.805	27.075	14.244	13.026	18.435	26.757	85.163	43.961	26.529	55.499		0.176993	32.4675
4.8848	14.909	28.507	13.227	16.537	10.805	10.86	19.647	69.62	38.044	35.997	22.528	26.461	16.445	16.523	16.857	45.724	76.447	13.816	11.814	23.23	15.391	122.66	21.624	19.772	14.146	36.031	23.734	12.985	11.521	16.054	25.449	78.413	40.916	23.02	54.73		0.181416	29.8413
5.0039	16.68	25.871	12.553	12.736	8.932	12.869	21.506	68.081	35.474	34.554	20.79	25.202	14.88	15.967	18.426	38.866	62.921	14.956	11.089	19.318	13.396	113.488	20.715	18.913	15.317	36.005	25.29	10.734	10.524	15.334	26.151	69.063	35.287	22.189	56.144		0.18584	28.0063
5.1231	14.354	24.667	11.694	11.046	8.564	10.284	21.707	64.751	30.35	31.585	17.425	25.508	14.937	15.315	17.932	39.455	54.525	13.889	10.791	19.878	11.756	101.007	22.276	18.724	13.734	30.155	22.511	10.607	10.228	15.004	24.333	65.383	28.616	20.148	56.822		0.190267	25.9989
5.2422	11.881	26.344	11.824	11.151	8.631	10.756	19.885	57.115	24.526	25.724	17.163	25.54	13.746	17.066	16.527	34.821	40.692	11.453	10.128	18.737	12.573	91.596	21.517	17.648	12.295	31.838	20.898	10.522	9.046	13.029	24.103	60.825	26.246	19.563	52.619		0.19469	23.9437
5.3614	10.958	25.638	12.056	9.31	8.117	9.826	20.536	54.445	21.455	19.256	12.997	26.519	13.457	15.037	17.35	30.673	35.503	12.086	10.791	19.645	11.26	80.447	22.812	15.712	13.346	32.273	19.295	11.528	8.764	10.95	21.284	47.56	20.546	20.951	54.841		0.199117	22.2064
5.4805	9.729	23.582	10.574	6.905	7.964	8.13	18.232	51.714	19.636	16.693	12.199	23.426	11.983	13.765	15.556	24.689	31.079	10.707	12.179	19.915	12.126	63.472	20.533	14.615	13.365	29.816	17.678	11.53	8.176	11.212	21.1	40.566	19.129	21.099	56.131		0.20354	20.263
5.5996	8.079	23.19	10.491	5.845	7.974	7.982	17.924	45.312	19.641	15.784	12.399	22.345	11.544	14.972	16.876	24.563	29.832	9.55	9.284	20.361	11.431	58.299	19.982	14.157	11.581	27.504	18.421	10.071	9.175	10.6	23.052	31.612	16.194	19.984	53.47		0.207963	19.128
5.7188	9.453	22.29	11.585	6.521	8.307	8.928	21.466	35.779	16.26	14.216	11.114	22.402	12.589	14.912	16.035	20.171	29.351	9.861	8.829	19.818	10.205	49.437	21.819	14.847	10.87	27.353	19.956	10.735	6.498	9.142	22.102	26.812	14.24	18.657	50.861		0.21239	18.0977
5.8379	10.714	24.119	10.64	6.398	7.029	8.691	20.477	32.676	16.192	13.022	11.058	23.499	10.685	13.753	15.334	19.681	30.463	9.976	8.605	20.47	10.066	40.034	21.422	14.248	10.827	26.437	17.574	9.043	6.645	9.425	22.837	24.545	15.626	18.33	52.25		0.216814	17.5083
5.9571	8.984	23.637	8.846	6.707	5.543	9.358	21.642	24.959	13.526	11.937	10.346	22.731	11.689	13.244	13.8	17.537	33.333	9.412	8.059	18.875	9.343	31.973	20.439	10.56	9.352	22.987	16.717	9.927	6.079	9.333	21.697	20.507	13.281	17.087	53.702		0.221241	16.2043
6.0762	7.333	21.881	8.875	6.783	5.821	9.048	21.581	18.822	12.948	12.374	9.693	17.355	11.273	12.892	13.876	15.361	33.79	9.014	7.518	17.321	8.853	28.354	19.51	10.69	9.926	21.631	13.922	9.27	7.465	8.499	20.87	20.598	13.177	16.674	55.11		0.225664	15.3745
6.1953	7.434	25.23	9.509	5.679	5.77	8.099	21.66	16.813	14.847	9.84	10.125	19.495	10.604	13.327	12.299	15.061	32.768	9.513	8.287	18.066	8.855	27.213	19.647	10.795	9.332	22.454	11.261	8.395	7.365	7.922	21.35	17.067	13.101	15.173	51.256		0.230087	15.0175
6.3145	8.035	25.101	8.566	6.104	7.396	8.014	23.449	14.408	11.398	11.032	10.699	19.119	10.657	11.019	13.089	11.402	33.446	10.461	7.343	19.676	8.245	23.768	21.321	10.894	9.791	21.544	9.421	8.118	7.057	7.259	18.837	18.273	13.444	13.195	51.767		0.234514	14.6671
6.4336	7.029	23.745	8.747	6.056	6.749	7.445	21.935	12.623	10.592	11.525	10.687	17.558	10.491	12.311	11.03	10.65	31.744	10.627	5.85	15.682	7.282	21.845	19.942	9.408	9.269	20.11	9.081	8.049	6.707	6.738	21.058	17.605	13.595	12.685	46.105		0.238937	13.7873
6.5528	7.558	25.084	8.637	6.894	5.452	7.788	21.034	11.244	9.38	8.987	10.638	15.856	9.274	10.866	11.24	13.122	25.145	9.759	7.453	16.485	6.316	19.374	22.396	8.185	8.966	20.873	8.12	7.206	7.564	8.275	23.323	15.696	11.637	11.062	47.605		0.243364	13.3855
6.6719	6.719	22.19	7.599	5.502	5.504	9.048	20.946	10.167	10.668	9.189	10.488	14.044	8.599	10.681	11.833	12.154	23.832	8.937	7.013	16.022	7.779	17.742	20.381	7.777	8.425	20.801	8.076	6.865	6.655	6.451	20.023	15.03	13.739	11.364	45.369		0.247787	12.7889
6.7911	6.98	21.62	6.968	5.198	6.024	9.457	22.459	8.536	10.321	10.462	10.796	14.633	9.445	9.481	11.165	8.859	22.191	7.658	6.859	14.48	7.52	15.355	21.591	8.44	7.611	18.502	7.034	6.835	7.852	6.449	22.118	12.662	12.926	8.78	41.519		0.252214	12.251
6.9102	6.054	23.349	6.464	6.149	5.264	8.807	22.263	9.121	10.853	9.206	10.873	12.85	8.291	9.147	10.592	7.961	25.091	8.443	6.61	14.961	7.312	15.401	22.913	8.316	7.224	18.897	6.601	7.07	6.731	7.514	22.502	12.608	12.468	10.016	38.109		0.256638	12.1723
7.0293	5.375	23.143	7.469	5.375	6.358	8.545	25.277	9.828	9.79	8.15	9.621	12.393	7.438	10.575	9.15	9.636	24.99	7.982	6.504	13.612	6.006	14.472	21.48	7.214	6.67	21.135	7.762	7.512	6.623	7.075	20.317	12.512	12.585	9.25	34.457		0.261061	11.8937
7.1485	5.647	21.125	8.646	6.164	4.54	7.16	24.697	9.959	8.515	8.486	8.876	12.039	8.185	9.729	8.533	7.851	22.472	8.258	5.792	13.801	6.401	15.977	23.574	7.158	7.351	19.792	8.537	7.582	6.011	5.659	21.869	11.647	11.295	9.745	29.756		0.265488	11.5094
7.2676	5.794	22.751	7.357	6.781	4.914	7.142	24.614	9.42	9.302	7.979	9.062	10.645	7.943	10.095	8.78	7.933	24.038	7.259	5.834	11.706	7.292	15.24	27.156	7.417	7.427	18.405	7.577	7.064	6.219	5.472	21.547	10.822	10.339	9.419	25.521		0.269911	11.3219
7.3868	5.417	20.613	7.033	6.72	5.876	8.647	24.961	8.263	8.346	7.548	8.796	11.534	7.605	8.869	7.944	8.728	20.564	7.111	4.566	11.196	5.897	16.967	27.554	7.452	5.616	16.282	7.007	6.571	5.677	7.197	22.459	11.731	9.556	9.606	19.849		0.274338	10.8502
7.5059	5.717	19.283	6.245	5.88	5.261	7.044	24.453	7.569	8.896	7.628	9.576	9.587	7.455	7.968	8.664	7.95	21.171	7.033	4.938	12.017	6.177	17.389	30.836	8.246	6.389	16.23	7.173	6.593	7.583	7.168	21.337	10.527	9.573	8.269	18.216		0.278761	10.744
7.625	5.25	19.502	5.796	5.956	4.754	7.482	22.929	7.592	8.444	7.089	10.042	10.091	7.977	8.632	9.244	8.662	21.713	6.711	6.093	10.291	5.6	14.972	31.518	7.297	7.627	17.474	7.574	5.048	6.382	8.127	20.336	10.81	7.324	8.769	14.828		0.283185	10.5125
7.7442	5.027	22.287	5.913	6.886	6.31	7.126	25.287	9.097	7.005	7.177	8.319	9.664	7.227	7.27	7.32	7.5	20.813	6.707	5.44	11.089	6.409	13.703	31.834	7.494	6.78	16.787	6.52	5.076	4.548	7.944	24.237	10.066	8.657	7.925	14.57		0.287612	10.4575
7.8633	5.302	23.038	6.63	7.09	6.11	7.553	26.552	10.892	7.319	7.905	7.795	9.311	7.322	7.904	7.043	7.236	23.257	6.834	4.597	11.139	6.497	15.227	33.686	6.379	6.25	16.053	4.641	6.053	5.337	6.63	22.73	8.85	8.856	9.298	17.452		0.292035	10.7077
7.9825	5.885	23.059	8.377	6.873	6.453	7	30.443	9.89	6.8	6.413	8.545	9.492	7.665	7.396	7.669	6.907	21.548	6.904	5.068	11.075	6.765	13.03	33.079	6.553	5.722	16.21	5.089	6.128	5.236	5.778	23.244	9.846	7.811	9.045	16.919		0.296462	10.6833
8.1016	5.618	26.005	8.483	6.374	6.618	8.339	35.017	10.451	7.751	7.63	7.486	10.38	7.612	6.34	7.115	6.464	22.326	6.668	5.492	11.994	6.015	15.654	30.852	6.843	4.802	15.701	6.839	4.909	4.655	5.567	23.132	10.062	8.059	8.234	17.698		0.300885	10.9481
8.2207	4.868	25.776	7.894	5.55	6.888	8.292	36.845	9.261	6.654	6.949	7.51	8.802	8.104	6.341	6.576	6.653	20.192	5.716	5.303	11.466	4.936	14.434	32.701	7.292	6.727	15.351	7.618	3.945	4.334	6.273	23.17	9.262	8.074	7.465	19.272		0.305308	10.757
8.3399	6.229	28.426	7.497	6.259	5.15	6.973	44.31	9.493	7.453	7.865	8.54	9.532	8.774	8.458	7.506	6.138	17.216	6.583	3.4	11.046	5.281	15.505	30.275	7.842	6.486	14.765	7.556	4.343	4.822	7.264	26.597	9.643	7.984	6.849	19.415		0.309735	11.185
8.459	6.216	23.854	7.58	6.04	5.937	7.572	46.741	10.025	6.718	8.429	7.676	9.133	6.784	6.996	6.377	5.916	21.11	5.074	4.458	12.534	5.765	16.673	32.734	8.387	6.173	17.21	7.626	6.198	5.854	7.816	23.815	7.006	7.941	7.091	19.758		0.314158	11.2919
8.5782	5.446	26.803	9.968	5.845	5.192	6.981	55.409	8.994	7.077	7.816	7.784	9.945	8.434	6.013	6.74	7.176	18.971	4.913	5.238	14.409	5.332	15.495	32.607	7.599	5.792	15.261	8.132	4.767	5.82	6.643	25.61	7.017	7.685	7.224	19.947		0.318585	11.5453
8.6973	5.079	29.734	8.206	6.415	5.597	7.977	56.872	6.558	6.766	7.16	8.459	9.927	7.001	6.96	6.412	6.862	20.137	4.154	5.018	13.68	6.13	16.131	31.294	7.856	6.281	14.801	6.933	3.944	4.593	7.619	26.295	8.316	6.904	6.547	18.35		0.323009	11.4562
8.8165	5.105	29.626	8.268	7.579	6.44	6.62	55.217	7.938	7.381	6.391	7.532	10.919	6.996	5.766	6.885	6.759	18.398	4.541	5.139	12.786	6.724	13.733	33.829	6.735	5.764	12.55	5.565	4.632	4.694	6.459	26	7.903	7.466	6.246	17.338		0.327436	11.1978
8.9356	4.563	25.733	9.192	6.965	6.785	8.102	55.094	8.467	7.107	6.93	7.887	10.239	6.947	5.334	6.76	7.687	18.309	5.564	4.732	12.317	6.466	15.496	34.228	7.395	4.979	14.307	7.764	5.231	5.189	5.334	27.85	6.288	6.782	6.367	17.421		0.331859	11.3089
9.0547	5.806	24.795	8.428	7.893	6.546	8.069	55.084	8.193	6.458	8.359	6.804	11.443	9.565	6.298	7.525	5.936	18.584	5.106	5.099	15.51	6.913	14.365	33.274	8.184	5.212	14.208	6.831	5.395	5.253	6.711	24.054	6.419	7.178	6.995	18.1		0.336282	11.4455
9.1739	6.075	24.638	9.262	8.28	6.703	7.489	54.606	8.689	6.836	6.311	6.327	12.57	8.914	5.117	5.898	5.848	17.497	5.41	6.15	13.057	6.785	14.414	33.114	7.195	5.778	13.562	6.482	4.283	5.55	6.185	22.188	7.978	6.82	7.907	17.486		0.340709	11.183
9.293	5.321	29.032	8.103	7.239	5.389	7.674	55.165	9.685	5.931	7.837	8.335	12.361	8.591	5.953	5.981	6.473	18.678	4.751	4.824	12.904	6.471	14.292	36.365	7.222	5.008	13.706	5.534	4.687	5.591	5.795	25.491	6.9	5.893	6.176	19.649		0.345132	11.4002
9.4122	5.999	26.51	8.543	7.687	4.931	5.943	49.559	8.056	6.567	7.108	8.717	11.684	8.857	5.781	6.522	5.152	17.974	4.868	5.968	10.887	5.467	15.115	35.931	7.32	5.056	15.456	6.76	4.504	4.289	5.637	25.66	6.731	6.378	6.515	18.717		0.349559	11.0528
9.5313	4.536	25.768	8.896	7.493	6.059	6.159	42.579	8.064	6.799	6.356	6.643	10.124	8.619	4.278	5.976	4.901	16.018	4.976	5.209	11.53	6.315	12.941	33.238	7.152	5.431	11.53	7.638	4.219	3.808	6.229	26.139	6.757	7.313	6.583	19.852		0.353983	10.4608
9.6504	5.313	25.94	7.984	7.748	6.107	6.898	43.888	9.432	6.245	7.258	6.847	12.383	8.727	5.503	6.05	5.397	16.908	4.83	5.79	12.023	5.391	15.304	32.234	7.173	5.672	11.96	7.087	4.465	4.31	5.998	31.028	6.73	7.423	7.226	20.578		0.358406	10.9671
9.7696	6.078	28.053	9.337	6.231	6.347	6.676	43.527	8.614	6.37	6.985	6.444	12.453	8.049	5.345	5.381	6.787	14.798	4.601	4.428	10.23	6.291	14.61	32.847	7.461	5.691	11.658	6.636	4.134	4.248	6.665	33.392	6.862	6.452	7.736	18.5		0.362833	10.8548
9.8887	5.732	24.873	8.251	6.126	6.807	6.813	45.607	9.091	7.487	7.561	6.644	12.878	9.155	5.385	5.003	6.18	16.071	5.431	4.661	10.746	6.999	14.764	31.817	6.798	6.007	13.499	7.478	4.045	5.486	7.108	32.104	7.964	5.906	7.941	15.349		0.367256	10.9648
10.0079	5.351	28.615	8.625	7.156	7.296	7.653	44.974	9.775	4.932	8.381	6.116	12.749	10.137	5.19	4.63	6.504	14.885	6.073	4.841	10.655	8.018	15.227	31.976	6.071	5.055	12.923	7.377	5.055	6.688	7.462	33.877	6.691	7.143	8.353	16.639		0.371683	11.2312
10.127	4.535	30.727	10.368	7.7	6.155	7.892	40.926	8.766	6.313	7.165	5.754	12.201	9.386	6.029	5.322	5.717	14.078	6.095	5.091	10.232	8.283	13.948	35.077	6.8	5.339	12.074	7.231	3.853	4.781	6.81	36.357	6.728	6.644	5.359	15.666		0.376106	11.0115
10.2462	5.099	28.318	8.469	7.746	6.977	7.401	40.317	10.359	6.095	6.824	6.888	11.957	10.431	5.431	5.426	5.898	14.243	4.49	6.185	7.93	8.381	13.499	37.04	7.807	6.586	11.758	6.915	3.84	4.643	5.388	37.699	7.41	6.534	7.611	15.284		0.380533	11.0537
10.3653	5.926	28.985	9.078	8.183	5.893	8.314	45.266	7.563	6.782	7.106	6.673	13.683	10.343	6.031	5.934	5.982	14.713	5.348	5.783	8.588	8.256	14.608	34.783	8.45	5.902	12.618	6.902	4.85	5.556	6.376	38.832	6.086	6.13	7.858	16.539		0.384956	11.4263
10.4844	5.114	32.927	8.553	8.043	5.927	7.884	41.935	9.297	6.437	7.319	6.635	11.162	9.976	5.34	5.534	5.665	15.026	4.736	5.361	8.646	9.975	15.223	35.266	9.677	4.977	12.537	7.156	4.777	4.966	6.079	38.913	6.116	8.045	6.886	16.294		0.38938	11.383
10.6036	5.322	35.257	7.615	7.474	7.493	6.903	35.061	8.365	6.774	8.128	8.352	12.376	9.775	6.193	6.197	6.446	15.153	4.453	5.886	7.837	13.308	14.417	36.912	9.555	4.548	11.918	7.826	4.36	5.34	6.162	39.046	7.467	6.77	7.478	16.551		0.393807	11.5062
10.7227	5.352	36.039	8.533	7.13	7.663	5.737	33.331	7	6.968	7.23	7.353	12.167	11.298	4.681	4.809	6.644	12.937	5.324	4.74	6.519	15.385	13.552	31.058	8.872	5.303	10.983	6.738	4.605	6.5	7.102	38.711	7.397	7.362	6.603	17.112		0.39823	11.1068
10.8419	4.903	35.656	9.636	7.223	6.76	7.245	34.894	8.798	7.802	8.299	6.31	12.724	10.185	6.006	5.015	7.383	13.552	5.999	4.568	6.871	18.748	13.77	28.756	6.942	5.853	13.923	8.325	4.147	5.103	5.962	39.288	6.528	5.906	7.728	16.291		0.402657	11.3457
10.961	6.075	37.299	8.245	8.708	6.693	6.335	36.481	9.72	7.665	8.961	7.864	12.684	10.061	5.757	5.441	6.095	13.914	6.378	5.72	7.215	23.08	13.403	29.074	8.398	4.805	12.021	8.527	4.627	5.805	5.886	39.784	6.48	6.066	8.067	15.515		0.40708	11.6814
[truncated: 134 more rows]

## Sheet: Image13
X0	Y0	Y1	Y2	Y3	Y4	Y5	Y6	Y7	Y8	Y9	Y10	Y11	Y12	Y13	Y14	Y15	Y16	Y17	Y18	Y19	Y20	Y21	Y22	Y23	Y24	Y25	Y26	Y27	Y28	Y29	Y30	Y31		Ap-Ba	Avg int
[truncated: 244 more rows]

[truncated: 6 more sheets: Image12, Image11, Image10, Image9, Image8, Sheet1]
