# Supplementary material for: Crumbs organizes the transport machinery by regulating apical levels of PI(4,5)P2 in Drosophila
Source: eLife. 2019 Nov 7;8:e50900. doi: 10.7554/eLife.50900 (PMC6881148; doi:10.7554/eLife.50900)
Supplement: Figure 5—source data 11. [file elife-50900-fig5-data11.xlsx]

## Sheet: Image6 (2)
X0	Y0	Y1	Y2	Y3	Y4	Y5	Y6	Y7	Y8	Y9	Y10	Y11	Y12	Y13	Y14	Y15	Y16	Y17	Y18	Y19	Y20	Y21	Y22	Y23	Y24	Y25	Y26	Y27	Y28	Y29	Y30	Y31	Y32	Y33		Ap-Basal	Avg intensity
0	34.442	16.3453	45.9665	41.0814	7.692	9.344	28.193	35.599	50.597	40.574	29.027	67.035	132.066	98.599	49.96	31.989	27.354	31.627	18.477	47.763	41.368	31.482	63.016	54.963	41.002	24.998	39.761	43.192	27.907	17.136	31.355	35.1182	15.886	30.3419		0	39.4487
0.1191	32.709	14.179	50.9136	44.8836	7.995	10.275	37.87	42.909	53.266	46.891	32.476	69.648	141.914	98.756	55.058	39.36	34.606	34.788	21.319	58.942	42.31	35.27	64.482	53.456	52.878	28.166	40.27	47.204	33.03	21.489	41.345	42.49	18.839	29.9852		0.00436529	43.5286
0.2383	36.908	16.857	45.5183	53.1637	8.701	11.466	37.11	51.534	64.312	56.069	38.098	74.266	136.294	100.034	63.519	39.701	42.333	39.46	24.286	59.577	43.712	40.386	68.828	63.402	51.443	26.402	43.129	51.123	35.168	20.749	41.743	49.0966	23.591	31.5029		0.00873425	46.7495
0.3574	32.591	17.7422	56.4677	58.7254	11.727	11.592	41.504	51.067	67.656	70.05	43.973	75.736	140.265	103.485	72.031	45.525	48.584	46.343	27.949	76.531	50.553	46.013	72.194	64.774	52.933	29.517	43.757	56.674	37.686	23.88	48.221	51.8822	26.41	32.3319		0.0130995	51.0697
0.4766	38.878	16.6606	57.4938	61.8517	13.329	13.393	49.943	57.579	75.737	77.657	58.118	86.179	137.957	105.793	75.008	51.008	50.348	55.174	31.897	79.217	52.664	50.031	79.765	69.884	58.172	31.053	47.195	57.316	41.192	26.003	50.77	60.2692	32.348	31.1741		0.0174685	55.3252
0.5957	39.436	16.5132	62.9534	65.6602	16.202	14.788	55.296	64.036	85.218	82.486	68.75	87.596	140.489	99.98	82.86	60.29	67.029	65.807	38.954	96.201	64.819	53.73	79.754	74.767	63.922	34.357	49.516	60.65	49.849	32.07	60.963	62.8942	39.855	35.173		0.0218338	60.9666
0.7148	41.423	19.607	65.274	63.415	22.187	17.132	58.847	63.914	91.51	92.7	71.706	97.219	144.438	103.52	86.924	71.098	82.284	75.037	47.43	96.494	76.859	61.557	85.474	73.061	76.078	38.925	52.936	68.905	56.171	37.735	66.209	65.8022	42.34	42.4426		0.0261991	66.3722
0.834	45.648	20.5244	65.3687	70.735	25.697	19.62	69.638	71.585	98.21	109.34	82.166	108.252	146.183	103.863	91.951	84.381	101.001	99.018	54.939	114.727	86.261	71.108	83.16	71.963	78.895	47.713	56.289	73.639	63.471	43.389	72.196	64.7026	51.194	41.0413		0.030568	73.1726
0.9531	47.879	22.0404	70.3056	70.3761	34.03	22.373	78.995	72.813	107.01	119.027	96.532	112.171	142.398	108.501	105.626	92.453	121.853	113.599	61.331	130.106	90.375	84.117	91.502	76.693	87.416	47.555	59.89	82.61	78.996	53.994	81.012	67.2794	63.425	41.6853		0.0349333	80.4697
1.0723	50.425	20.9353	71.8681	78.7571	46.259	25.328	81.621	82.869	112.614	118.042	108.195	123.16	149.03	110.855	111.042	103.33	136.989	130.602	67.171	138.45	98.378	94.124	94.114	75.796	106.723	58.059	62.923	91.168	92.938	63.758	78.777	74.7719	66.804	51.3816		0.0393023	87.5664
1.1914	52.136	25.3326	70.2872	70.261	49.747	30.42	92.35	83.022	117.94	132.381	122.816	129.387	154.251	123.573	108.805	117.981	150.102	138.018	77.048	144.309	103.392	108.919	103.123	87.716	101.371	63.832	69.522	110.921	102.827	73.82	91.183	76.9594	75.887	50.3134		0.0436676	94.4104
1.3106	59.081	25.2834	79.384	75.1936	67.664	37.831	98.374	86.604	123.651	140.454	129.029	136.591	158.614	134.182	112.22	119.922	170.388	146.999	86.811	148.501	110.263	122.79	106.294	98.42	110.285	71.291	75.55	127.13	109.414	80.463	99.367	75.9038	85.901	54.2084		0.0480365	101.884
1.4297	61.126	28.4163	80.9192	80.6893	78.418	45.521	102.528	91.749	113.184	142.734	139.477	132.246	160.115	152.247	119.035	124.581	174.167	146.764	97.067	164.545	119.878	132.197	118.463	111.833	110.888	76.971	89.973	132.271	126.225	93.562	102.518	84.481	93.137	57.684		0.0524018	108.4
1.5488	62.869	36.4408	73.4291	78.2547	88.345	57.674	110.277	102.297	122.98	156.829	146.383	147.001	157.388	160.535	128.821	137.842	180.508	147.12	109.774	156.981	116.641	143.266	124.088	118.232	114.304	80.135	92.431	148.574	132.149	98.507	106.093	86.4142	93.337	53.5336		0.0567671	113.807
1.668	62.862	37.5886	74.5231	73.8138	97.31	76.306	114.894	97.031	120.183	153.08	143.202	139.295	152.395	181.551	130.914	144.236	185.647	143.205	114.119	167.399	118.96	141.062	124.91	117.171	113.467	81.5	101.099	158.983	143.563	101.972	109.063	86.2646	101.509	67.3848		0.0611361	116.955
1.7871	68.648	42.126	76.4422	78.2757	100.49	83.403	115.662	105.272	118.532	150.625	130.339	141.281	141.807	197.333	147.238	146.666	186.242	121.618	116.633	162.102	114.679	131.611	120.323	118.253	112.261	95.768	114.978	160.84	151.131	106.431	118.812	91.3276	97.644	72.1041		0.0655014	118.732
1.9063	66.262	51.9438	76.2393	82.0227	107.354	91.105	110.924	110.057	98.827	153.696	127.183	128.911	136.322	198.911	160.997	159.809	174.539	110.224	111.478	163.215	111.549	119.102	128.879	120.816	106.84	95.479	118.772	174.824	151.132	111.086	115.615	91.9025	98.615	75.2499		0.0698703	118.82
2.0254	77.252	55.4928	72.9808	73.2686	107.313	106.168	114.991	106.952	98.898	150.414	118.444	113.309	118.178	207.476	160.351	166.35	150.638	99.713	114.446	166.159	103.373	119.202	118.163	116.859	102.744	92.332	134.762	167.392	154.21	119.375	121.793	86.2159	98.476	82.1656		0.0742356	117.525
2.1445	73.25	61.0425	74.8802	80.5305	110.311	118.545	116.493	106.744	92.418	141.673	107.429	119.865	102.269	215.465	164.515	174.724	137.279	93.556	119.007	159.002	101.78	108.448	119.535	116.36	103.742	98.695	134.285	166.23	151.452	114.744	123.865	76.767	95.882	89.0779		0.0786009	116.761
2.2637	72.986	68.3329	77.3892	75.0492	102.988	119.15	112.06	102.466	84.552	134.736	104.326	109.564	90.7	204.794	169.324	184.177	114.865	85.833	116.106	151.996	95.94	85.982	119.719	114.306	106.064	102.589	136.026	170.033	153.712	119.248	124.375	78.7212	89.232	88.3025		0.0829699	113.695
2.3828	69.356	59.3637	69.9218	75.9692	97.857	122.334	108.216	96.977	80.811	113.782	99.922	96.463	74.436	208.597	162.458	177.604	91.513	73.559	118.154	145.273	98.232	80.005	103.483	115.429	92.133	103.28	145.467	167.826	148.143	122.346	126.988	68.8465	83.486	91.2926		0.0873352	108.515
2.502	69.248	65.9135	70.8501	76.9762	95.659	127.841	101.255	92.079	75.382	107.416	102.112	85.801	64.871	202.75	170.755	177.038	84.065	68.414	114.545	131.339	89.828	68.843	107.265	113.452	85.453	99.614	160.341	159.582	135.971	129.883	126.926	61.4276	74.781	90.8467		0.0917041	105.545
2.6211	73.161	68.1099	70.7215	74.6063	83.093	120.6	96.987	84.654	71.307	95.225	94.845	82.819	54.226	202.915	172.033	176.745	70.754	61.73	105.817	124.688	83.482	66.475	100.223	104.425	79.676	97.909	150.987	159.218	131.274	118.529	120.257	63.6455	68.713	97.643		0.0960694	100.809
2.7402	77.995	72.1753	73.018	75.7823	74.337	118.739	96.354	86.172	70.568	79.937	93.498	73.949	49.369	209.91	161.117	166.272	64.952	54.686	103.658	112.893	92.441	64.194	90.786	92.633	75.194	104.253	161.915	153.835	128.776	107.523	125.285	55.553	61.359	92.0209		0.100435	97.6809
2.8594	74.725	67.8669	68.5422	73.9532	65.596	103.47	90.765	81.996	67.38	78.837	89.956	62.626	38.68	205.091	164.487	159.548	54.168	47.968	100.268	113.192	76.528	59.56	82.719	81.48	68.23	96.482	152.928	152.395	119.755	105.543	122.297	48.8365	54.528	93.7198		0.104804	91.8858
2.9785	71.233	65.784	66.0716	68.3871	62.291	90.623	83.472	77.259	58.953	70.587	84.05	55.807	33.013	202.357	152.896	143.575	51.791	49.28	95.182	104.042	74.99	52.963	76.115	65.648	62.878	95.299	146.986	146.305	110.728	99.072	109.352	45.548	55.661	96.8834		0.109169	86.0318
3.0977	68.984	69.2227	65.0975	66.126	51.009	76.921	67.929	74.033	56.325	65.057	78.085	51.118	30.202	189.358	147.488	131.696	49.721	42.721	96.251	91.523	74.858	51.447	73.294	59.955	62.715	89.366	140.865	141.61	93.961	99	101.61	40.9823	52.767	92.7287		0.113538	80.7067
3.2168	69.425	65.4796	61.1093	59.6687	43.371	65.819	63.755	74.367	54.562	60.397	68.194	50.74	26.278	183.201	137.298	121.337	51.369	39.358	92.968	87.474	75.966	53.915	68.259	55.499	54.985	88.006	141.099	133.6	93.643	91.485	101.184	36.1211	44.764	92.0906		0.117903	76.6702
3.336	70.798	70.9773	63.8019	56.2241	38.597	52.082	57.432	67.208	52.376	60.559	63.381	47.253	25.302	164.81	131.223	94.316	42.878	37.046	91.105	74.611	69.438	53.712	62.285	46.884	45.687	89.286	138.647	125.906	85.645	86.484	92.098	31.8067	40.835	83.6389		0.122272	71.0098
3.4551	70.849	70.4193	60.9916	55.5391	31.762	45.723	53.716	62.786	51.262	62.535	66.026	43.89	25.113	160.376	134.2	84.044	42.447	35.894	89.958	69.441	72.144	51.13	61.177	42.939	48.575	85.175	125.383	111.466	78.731	83.282	95.013	29.8952	36.136	85.0476		0.126637	68.3255
3.5742	67.823	65.5783	54.1053	50.9573	27.268	39.008	52.688	53.619	49.207	58.384	56.385	43.067	22.27	147.757	126.349	73.396	42.716	37.119	81.875	61.652	70.362	50.902	52.718	45.084	44.51	80.144	120.931	102.076	70.578	80.433	90.54	25.4251	35.214	78.9643		0.131003	63.5031
3.6934	66.695	66.6956	53.1544	46.2987	24.043	36.691	42.002	49.198	48.048	59.142	54.379	35.64	20.553	141.618	123.153	69.433	37.385	34.332	70.675	57.98	68.016	55.008	56.063	38.034	40.008	76.79	117.153	86.735	57.044	77.091	81.697	23.2439	33.121	66.1114		0.135372	59.2127
3.8125	67.555	65.4465	50.5433	42.1878	22.254	31.651	38.06	50.313	45.8	58.176	47.478	31.155	19.047	138.454	104.053	64.185	35.571	35.372	70.679	52.597	66.764	47.962	47.848	34.374	41.582	76.139	113.789	76.662	61.005	69.505	79.683	21.8655	29.065	57.651		0.139737	55.7198
3.9317	60.389	62.8029	42.5827	42.8058	19.022	27.36	33.624	44.306	40.196	50.409	45.029	28.148	18.727	123.377	104.778	60.038	33.735	31.558	69.214	50.197	61.479	51.007	44.095	31.951	39.706	74.459	96.738	62.472	54.248	62.532	75.405	22.7943	26.408	49.5795		0.144106	51.2109
4.0508	60.317	57.5897	40.6613	41.4313	21.844	26.603	32.373	41.994	36.001	57.29	42.378	21.892	17.192	106.815	98.614	62.168	26.682	29.033	64.778	46.352	61.186	50.551	41.548	30.156	34.551	66.813	93.138	52.525	49.946	54.064	68.148	18.8295	21.979	41.9562		0.148471	47.5706
4.1699	57.823	59.8413	39.0607	39.8425	20.918	21.016	31.315	41.924	35.788	51.935	43.611	20.794	14.551	97.479	84.026	52.768	29.517	29.383	59.493	36.146	62.552	51.938	39.89	28.664	35.03	64.88	83.353	40.804	49.49	54.21	69.922	18.6148	23.705	35.842		0.152837	44.8861
4.2891	60.342	52.3358	34.3998	35.2432	20.821	20.074	31.356	33.611	33.025	45.908	40.688	18.716	14.956	89.846	75.122	47.379	26.42	32.453	53.049	31.14	59.809	50.041	35.806	24.965	33.864	63.13	76.522	33.756	39.968	46.97	59.468	15.7906	20.774	33.5871		0.157205	40.9216
4.4082	52.736	43.6715	27.5572	33.4056	19.221	24.199	28.708	30.586	32.777	46.137	37.24	16.243	13.661	77.149	72.411	41.24	30.61	26.519	48.822	25.434	54.136	48.275	34.482	26.36	30.604	57.932	62.82	29.5	37.945	45.286	53.158	14.9223	20.251	28.9757		0.161571	37.4404
4.5274	51.845	37.9905	22.9579	35.7687	17.325	19.262	32.715	29.921	28.135	38.083	31.754	13.21	12.996	65.226	59.249	42.481	23.388	25.86	42.535	21.103	49.303	50.941	33.05	19.673	30.903	52.376	59.163	21.413	31.228	37.021	45.069	12.6183	15.812	25.8295		0.16594	33.4178
4.6465	57.346	37.045	19.9301	31.5032	16.657	14.273	27.95	27.787	24.292	38.081	27.171	13.778	14.945	58.495	50.877	38.614	23.454	28.396	39.726	17.77	45.092	52.602	30.522	19.749	28.746	50.562	57.632	22.356	27.774	41.918	36.636	13.0795	16.966	24.0768		0.170305	31.6412
4.7657	60.068	34.427	20.2451	29.6442	17.923	14.306	24.609	24.1	25.976	33.37	25.649	12.175	15.415	45.046	41.804	33.834	23.921	23.895	37.598	13.968	40.939	52.668	28.202	17.986	25.679	47.019	48.113	18.326	23.203	33.677	32.715	12.2588	15.851	24.608		0.174674	28.8005
4.8848	58.374	28.5556	19.5547	28.4034	13.919	13.871	22.084	22.356	23.89	32.638	21.3	11.284	14.662	39.571	40.7	35.544	24.414	23.436	34.635	16.979	36.14	51.268	26.658	17.614	25.668	43.002	39.719	17.227	20.503	33.589	29.02	10.493	15.98	21.7045		0.179039	26.9046
5.0039	61.662	25.0278	18.3675	24.5991	17.055	13.092	23.007	22.584	20.821	26.785	20.551	12.175	14.885	33.783	33.08	31.817	24.862	27.52	28.594	15.357	35.238	50.033	29.065	17.613	23.359	37.628	38.514	18.327	19.273	27.977	25.207	10.061	17.747	21.2845		0.183405	25.4986
5.1231	58.517	25.61	16.0966	23.8842	14.332	12.317	22.124	19.776	20.258	26.486	20.338	6.846	13.62	32.964	30.992	28.708	20.612	20.381	28.354	15.447	31.167	47.785	23.904	14.836	24.589	35.985	34.58	14.626	18.537	29.082	21.211	10.3079	17.481	20.3163		0.187774	23.5903
5.2422	58.095	25.4391	16.3336	25.6477	15.976	11.376	18.267	19.533	17.363	23.502	18.138	8.956	14.243	28.154	29.576	27.312	19.088	22.267	26.713	16.06	27.725	45.769	26.126	14.754	20.256	32.773	29.975	13.965	14.896	23.08	19.638	9.6964	13.415	20.3966		0.192139	22.1913
5.3614	63.404	19.885	15.7534	23.4204	13.751	10.451	20.322	16.728	18.249	23.589	15.77	7.587	15.026	22.437	22.165	24.66	19.355	24.34	21.924	18.37	26.383	43.263	21.738	14.474	20.367	25.051	24.914	13.093	14.662	22.453	18.432	8.5124	13.271	18.1385		0.196508	20.6453
5.4805	60.267	18.8669	14.3481	22.88	12.499	10.241	18.885	15.046	16.983	22.056	13.842	6.887	12.357	24.15	21.433	26.068	21.887	21.938	19.917	16.29	16.936	44.934	22.422	14.588	18.038	26.751	27.312	10.82	16.006	20.84	17.748	6.836	12.763	16.8079		0.200873	19.6954
5.5996	67.574	18.9654	16.3585	20.492	15.319	8.503	17.695	14.019	17.109	23.168	12.428	6.428	15.04	22.563	18.398	23.302	17.952	16.954	17.87	16.155	18.538	42.86	23.277	14.184	18.394	24.531	26.366	12.603	14.374	17.542	14.084	6.6085	12.555	16.5946		0.205238	19.0825
5.7188	66.048	16.9316	15.5109	19.9754	15.161	7.782	17.02	15.25	14.43	18.71	12.184	7.386	12.746	22.929	19.332	24.32	16.657	17.877	17.393	20.226	14.06	43.474	19.044	12.691	16.125	24.762	27.789	12.625	11.588	16.479	16.465	6.6723	10.805	15.2526		0.209607	18.403
5.8379	70.384	17.0821	13.7264	19.1741	11.424	7.473	14.69	12.544	13.736	17.82	11.588	8.069	11.705	21.1	17.842	17.755	17.73	18.624	16.904	16.099	12.072	38.711	15.595	9.285	17.056	19.064	28.233	10.147	13.495	16.195	14.035	5.3934	10.109	11.4623		0.213973	16.9507
5.9571	73.35	14.0324	15.9812	16.6566	12.517	8.108	17.524	15.065	15.095	15.59	10.687	7.123	13.892	18.746	18.383	16.971	17.333	19.521	15.781	15.45	10.751	35.494	15.437	10.241	13.684	19.596	24.868	12.97	9.498	11.911	13.56	4.9525	7.381	11.2201		0.218342	16.4521
6.0762	77.263	12.7425	13.1641	15.8722	11.55	8.636	15.073	12.095	13.459	14.646	8.615	6.207	11.984	18.477	12.776	13.836	15.161	16.164	14.17	13.244	10.188	31.753	14.66	9.814	14.874	18.454	24.025	11.301	10.621	11.681	12.64	4.9767	7.363	13.361		0.222707	15.319
6.1953	73.21	11.2888	13.0247	15.8912	11.138	7.347	13.514	11.541	12.877	13.535	8.619	6.036	13.055	18.6	14.674	16.181	15.349	15.858	14.52	17.72	8.352	30.625	14.172	8.924	12.905	18.25	22.391	10.894	10.52	11.345	11.629	4.8498	7.006	10.2789		0.227072	14.8859
6.3145	81.047	11.488	12.3469	14.4182	9.1	7.436	15.346	11.145	11.885	13.805	6.682	8.54	13.355	17.626	13.693	13.995	12.712	15.985	12.075	16.893	8.811	29.598	12.073	9.552	13.4	19.649	22.815	9.855	8.793	10.824	11.444	5.1926	7.348	11.002		0.231441	14.7038
6.4336	79.774	11.5193	14.1984	13.2581	11.322	5.785	13.792	8.899	10.225	12.616	7.634	5.756	13.347	16.295	13.411	15.253	11.913	16.596	10.395	14.398	7.909	27.403	13.358	7.902	11.261	19.111	22.685	10.774	7.279	12.035	11.475	4.3016	6.011	10.7343		0.235806	14.0772
6.5528	79.322	12.0656	13.2904	13.3504	9.726	4.546	11.383	8.2	8.938	11.395	6.322	7.327	13.308	13.46	12.511	12.086	13.56	14.71	10.99	15.732	6.317	26.16	13.633	7.189	10.18	17.694	19.641	8.197	7.493	9.782	10.248	3.9916	6.005	12.3705		0.240175	13.2683
6.6719	79.377	11.3168	12.5246	11.374	8.336	4.423	11.352	9.489	10.582	10.132	5.727	5.662	14.156	11.343	12.014	11.092	11.825	13.118	9.533	14.503	8.646	27.924	12.03	7.441	9.209	14.101	21.153	9.66	7.173	8.606	9.544	4.2694	5.666	9.4355		0.244541	12.7276
6.7911	85.133	11.0294	12.3603	13.8921	8.713	6.082	9.126	7.307	7.407	9.011	6.893	5.473	11.469	11.497	10.123	11.536	10.658	12.601	9.26	14.39	7.088	21.6	12.87	6.076	8.918	11.359	20.489	10.237	6.839	9.634	10.096	4.533	5.499	11.109		0.24891	12.362
6.9102	80.701	14.0801	10.7665	11.9498	6.846	6.111	8.443	8.041	7.038	8.068	4.966	5.202	10.568	9.494	10.685	11.794	11.061	12.804	7.279	14.177	8.905	20.246	11.133	6.766	8.056	13.156	17.778	6.779	6.922	7.099	10.806	3.9562	5.875	9.6527		0.253275	11.6825
7.0293	82.783	13.6936	11.1104	11.161	8.298	5.227	8.758	7.099	8.387	5.505	6.562	4.574	10.102	9.229	8.439	9.889	9.97	11.362	8.814	14.771	8.89	16.738	10.923	6.349	9.064	10.835	19.619	8.336	6.018	9.273	8.173	2.8727	5.907	10.9721		0.25764	11.4619
7.1485	88.161	10.601	12.4653	9.5701	6.589	6.25	8.144	6	7.35	5.849	6.139	4.896	9.625	8.697	11.304	9.393	11.176	8.082	9.285	13.205	7.083	13.628	12.145	5.343	6.685	14.172	19.974	9.188	4.542	6.806	7.188	3.8098	4.203	11.0477		0.262009	11.1352
7.2676	97.69	12.8714	9.8621	7.7153	8.231	4.466	6.608	5.948	7.976	5.439	4.746	5.287	8.699	9.683	9.51	8.979	9.907	8.906	8.442	15.976	8.71	13.555	11.096	5.778	7.515	10.845	19.335	8.708	6.419	7.704	7.35	3.7344	4.988	9.9404		0.266374	11.2535
7.3868	95.192	15.2466	10.7508	6.7427	8.567	5.1	5.979	5.444	6.216	6.126	4.305	5.665	9.003	9.051	7.735	9.346	9.64	10.669	7.319	18.521	8.548	12.257	12.544	5.155	5.829	10.415	19.66	7.213	5.89	6.934	6.105	3.0537	5.609	8.1143		0.270743	10.9984
7.5059	97.517	13.0869	10.7171	7.9047	7.013	4.527	5.465	4.949	5.295	5.948	4.345	5.243	9.858	7.612	9.655	7.716	8.671	9.043	8.1	19.195	7.181	11.536	10.656	4.433	6.169	9.958	17.042	7.975	5.996	7.107	5.959	3.2875	4.835	8.2185		0.275109	10.6533
7.625	100.255	17.042	10.6277	6.6099	7.424	5.053	4.414	5.517	4.202	6.488	4.495	5.337	8.909	11.36	8.969	7.985	9.333	7	6.479	16.361	8.46	11.417	10.553	4.197	6.684	11.832	17.365	8.679	4.319	5.299	5.019	2.734	4.356	8.4201		0.279474	10.6822
7.7442	107.842	18.1213	8.4868	4.7393	9.058	3.551	4.342	5.07	4.71	4.944	5.411	4.123	11.891	9.205	7.869	9.314	9.372	7.311	9.027	15.109	8.227	10.516	11.097	3.469	6.839	9.275	15.019	6.947	5.381	5.81	4.563	2.5087	3.443	7.1947		0.283843	10.5819
7.8633	105.292	18.6808	10.1644	5.6077	7.723	4.753	4.144	4.902	4.847	5.085	4.982	4.036	12.211	8.767	6.655	7.926	7.716	6.455	5.95	12.264	6.643	11.445	10.767	4.664	5.542	10.459	15.168	6.26	5.669	6.198	5.277	3.5856	4.502	6.7585		0.288208	10.3264
7.9825	105.913	21.9945	8.7223	4.2765	5.477	3.938	4.392	5.846	4.206	5.396	3.999	4.804	12.002	9.238	5.61	6.674	9.184	6.774	6.591	16.483	7.422	9.987	8.664	3.841	4.107	10.369	13.671	7.241	5.038	4.729	4.468	2.5293	3.048	6.0566		0.292577	10.0792
8.1016	110.797	19.7527	9.8473	5.276	7.052	3.571	3.844	5.484	4.699	6.145	4.2	4.852	10.53	6.707	6.37	7.214	8.962	6.883	6.11	16.301	7.952	10.952	9.572	4.439	6.116	7.075	12.338	7	5.158	6.986	5.426	2.5508	3.971	7.1872		0.296942	10.3329
8.2207	123.637	22.777	8.8718	4.7794	5.191	3.457	3.877	5.578	4.636	4.964	4.419	4.876	9.948	8.196	6.368	7.16	7.496	5.819	7.048	17.709	8.589	10.872	12.571	4.237	5.097	10.284	14.978	6.141	4.993	6.7	3.903	3.7231	4.275	5.3431		0.301308	10.8386
8.3399	117.838	21.8512	8.7057	5.3046	5.135	4.044	4.214	6.134	5.266	5.987	3.832	3.939	10.164	8.585	7.145	6.408	7.492	5.972	6.203	16.693	9.246	8.455	11.279	4.759	5.452	10.447	11.827	6.72	4.775	4.571	4.797	2.8798	3.015	5.0608		0.305677	10.4175
8.459	115.906	20.5522	9.5369	4.785	4.663	3.633	4.187	6.547	4.367	6.81	3.383	4.459	10.235	8.391	6.481	6.508	5.907	6.395	7.649	15.919	8.284	8.405	11.466	3.242	5.179	9.808	13.303	6.713	6.202	5.875	5.745	2.5582	3.41	4.9715		0.310042	10.3375
8.5782	116.147	22.7081	9.174	6.9906	4.205	3.176	4.689	6.104	5.206	5.578	4.368	4.469	8.965	6.249	5.012	6.739	6.724	7.003	6.068	17.739	7.232	10.048	11.269	4.874	4.431	9.44	12.491	4.819	4.887	5.451	4.503	2.4655	2.883	4.4282		0.314411	10.1922
8.6973	119.573	21.0781	7.4682	5.3519	4.499	3.267	5.425	4.551	5.013	4.707	4.868	4.809	8.056	8.963	7.218	5.002	5.849	6.413	6.236	14.526	9.112	10.823	12.301	4.686	5.897	8.394	13.575	6.177	6.112	5.96	5.839	3.24	3.9	4.4282		0.318776	10.3917
8.8165	130.074	22.6864	7.887	7.3656	4.276	2.736	3.373	6.752	3.689	4.734	4.517	4.45	8.46	10.531	8.987	5.621	4.786	7.479	5.569	17.483	9.907	8.93	11.243	3.878	4.066	11.339	12.37	6.708	4.417	5.868	2.788	2.7091	3.193	5.572		0.323145	10.7189
8.9356	123.276	21.5507	9.1434	4.5934	4.271	4.045	2.818	7.002	4.242	3.785	4.318	5.998	8.239	11.175	6.715	5.78	5.166	5.849	4.735	15.273	8.399	11.417	10.324	2.937	3.874	8.047	12.132	4.903	6.133	6.379	3.712	2.778	2.603	6.4702		0.327511	10.2377
9.0547	126.931	22.3246	10.9479	5.7537	4.131	3.025	5.129	7.03	4.466	4.27	4.621	4.68	7.811	12.593	7.109	4.884	6.116	6.635	7.57	15.816	8.2	10.3	9.976	5.349	5.509	7.138	10.121	5.591	6.043	7.225	2.941	2.7187	2.425	6.4427		0.331876	10.6418
9.1739	125.689	21.8098	9.0439	5.0646	3.085	4.791	3.796	6.58	3.154	5.069	4.223	4.299	7.846	12.281	8.978	5.264	4.85	5.949	6.88	14.905	9.279	11.27	7.412	5.422	5.225	8.744	12.542	6.266	5.367	7.138	5.062	3.3643	3.372	5.2671		0.336245	10.5673
9.293	121.362	23.362	8.8399	4.7101	3.328	3.961	2.922	6.176	5.132	5.131	5.254	4.762	7.876	12.525	7.712	5.268	5.846	5.857	7.105	15.352	8.595	9.355	7.497	4.192	4.52	8.107	11.721	6.2	6.235	7.117	2.769	3.1109	4.072	5.0584		0.34061	10.3244
9.4122	112.075	24.5498	9.4052	6.0989	4.166	3.918	3.61	9.095	3.279	4.637	4.153	5.378	8.291	11.951	6.902	4.823	5.401	6.109	6.77	14.701	7.874	10.156	6.252	3.629	3.661	8.054	13.978	7.503	5.326	6.859	3.874	4.1758	3.865	6.9521		0.344979	10.2198
9.5313	116.881	25.5903	8.4242	4.4432	2.932	4.147	3.951	8.858	3.47	5.102	4.766	5.508	11.424	13.263	6.611	5.713	4.942	6.226	7.309	13.81	8.122	10.423	7.376	3.985	5.183	8.337	12.694	4.985	5.758	7.477	4.251	4.0492	3.41	6.1883		0.349344	10.4591
9.6504	114.564	26.3951	10.0389	6.3389	3.609	2.38	4.492	9.668	4.49	4.769	4.949	5.729	11.383	15.597	7.378	3.388	5.598	5.307	6.161	15.555	8.925	10.613	8.179	4.947	4.726	9.103	10.519	5.85	5.593	7.112	4.009	2.1328	2.753	6.0763		0.35371	10.5391
9.7696	106.576	27.3303	10.083	5.4971	4.118	2.722	3.996	11.307	4.502	4.366	5.479	4.753	8.486	17.92	7.423	4.814	4.918	4.923	7.418	14.848	8.761	9.973	8.062	5.258	4.206	9.897	10.276	7.109	4.779	8.073	2.383	3.196	3.206	6.1224		0.358079	10.3759
9.8887	104.689	25.9096	8.8754	6.0308	3.575	3.282	4.428	8.87	4.358	5.492	6.729	5.016	10.562	19.034	6.684	4.673	5.748	5.918	6.417	13.607	8.451	10.202	7.377	3.698	5.224	7.274	8.569	5.282	6.248	12.14	3.93	3.2027	2.849	6.447		0.362444	10.3174
10.0079	104.072	29.9197	9.7354	7.4657	3.832	3.557	4.31	12.481	4.036	5.176	5.575	5.852	11.053	16.177	6.764	6.076	5.832	5.472	6.261	17.754	9.339	11.086	8.882	4.686	3.741	7.618	9.691	5.574	5.683	6.563	3.406	3.8827	4.036	6.9117		0.366813	10.6618
10.127	95.533	25.268	6.9755	4.9537	3.453	3.818	3.466	11.574	4.337	5.406	5.614	5.885	11.22	18.099	7.044	5.174	5.346	5.51	7.118	15.045	6.675	9.506	7.623	5.05	4.467	9.084	8.566	6.462	6.431	8.695	3.849	4.4589	3.298	6.4074		0.371178	10.0415
10.2462	88.934	24.1124	7.9486	5.1866	2.907	4.137	3.33	14.214	3.011	5.134	4.357	5.628	9.55	21.009	6.23	5.404	4.632	4.796	6.077	17.135	9.428	11.211	7.626	5.658	5.621	8.445	9.615	6.146	5.378	8.379	4.143	2.6683	4.091	6.1234		0.375547	9.94898
10.3653	91.552	20.8299	9.7634	6.2936	3.944	3.153	2.57	15	3.539	7.753	5.639	5.497	10.728	23.326	6.302	5.453	4.665	5.8	6.292	18.949	8.521	12.179	9.055	5.969	4.83	6.212	8.1	6.361	5.954	10.009	3.648	3.5543	3.58	6.1658		0.379912	10.329
10.4844	87.148	19.3008	8.3193	5.8921	4.528	3.841	3.66	14.527	4.033	4.86	5.249	7.005	10	23.632	5.895	5.336	5.935	4.854	5.545	18.666	7.602	11.285	9.261	4.83	5.178	7.196	8.184	6.786	5.486	9.968	4.159	3.2254	4.727	5.7956		0.384278	10.0562
10.6036	80.657	19.4041	10.1487	7.0193	3.802	2.555	3.86	14.583	3.458	5.053	5.952	5.359	9.765	22.861	6.102	6.105	5.787	6.585	9.41	20.177	9.281	11.857	8.914	6.058	5.007	8.599	9.684	6.572	6.21	9.729	4.059	2.9344	4.072	6.5365		0.388647	10.2399
10.7227	72.422	15.989	9.2137	7.0318	2.532	3.257	4.599	16.632	5.473	5.7	7.002	6.173	8.557	27.029	6.806	5.723	7.087	7.117	6.977	23.95	9.557	13.552	6.376	5.548	4.983	8.058	9.176	7.51	5.494	8.279	4.83	4.0869	3.93	5.3453		0.393012	10.1763
10.8419	67.663	14.0342	10.2608	6.4211	3.369	3.417	3.652	15.088	4.369	5.258	4.929	5.765	7.745	26.769	6.583	6.482	5.76	6.073	6.33	26.204	10.018	13.329	8.697	5.746	5.58	8.257	8.324	7.344	5.479	10.172	3.3	2.697	3.398	4.7924		0.397381	9.8031
10.961	64.996	13.6782	10.1395	6.1961	4.646	2.371	3.66	16.276	5.286	5.277	5.666	5.456	8.405	30.638	7.406	5.842	5.558	5.883	6.04	28.95	13.035	13.908	9.135	4.856	5.627	8.291	8.776	7.526	6.685	9.936	3.69	2.649	3.452	6.9496		0.401746	10.2025
11.0801	59.425	12.6107	10.5837	6.9073	3.506	2.475	3.391	14.313	4.994	4.776	3.975	6.418	8.314	29.481	7.025	6.011	5.753	6.017	6.404	29.843	11.588	13.417	7.301	4.667	6.547	8.832	9.299	7.32	6.845	9.429	3.488	2.5594	3.962	8.3586		0.406111	9.87752
11.1993	52.712	10.5919	10.4385	6.7336	2.961	4.803	3.81	17.426	4.526	4.758	4.617	6.728	8.124	32.069	5.128	6.007	4.908	6.89	7.079	32.758	11.39	14.303	8.588	4.663	5.809	10	8.494	6.902	7.146	8.734	2.95	3.4264	4.153	7.3417		0.41048	9.91083
11.3184	49.45	9.2998	8.125	6.505	3.828	4.022	3.552	16.854	4.726	4.295	5.694	5.766	7.491	35.359	6.108	6.073	5.319	5.758	7.399	36.315	10.525	15.903	7.477	4.25	6.323	9.461	9.239	8.077	8.284	11.054	4.021	4.2369	3.508	7.2761		0.414846	10.0463
11.4376	39.684	6.8668	7.4844	7.8623	3.574	3.345	2.621	21.208	4.857	5.462	4.337	5.819	7.29	37.474	7.235	7.22	4.916	5.427	10.25	33.998	10.497	15.746	10.216	5.011	4.974	8.706	9.77	8.91	9.316	12.255	3.947	3.1712	4.229	8.1171		0.419215	10.0528
11.5567	41.035	6.1437	7.3549	6.7244	3.471	3.559	3.994	19.143	5.435	4.773	4.721	5.788	6.172	36.178	8.977	5.317	3.843	5.324	8.512	37.832	12.994	14.819	8.11	5.575	5.291	7.55	11.594	10.024	8.983	12.426	4.712	3.4177	4.276	8.5404		0.42358	10.0767
11.6758	34.338	7.0549	8.3411	6.599	3.036	3.324	3.382	17.261	3.944	5.655	4.022	6.725	6.006	44.001	7.091	5.605	4.984	6.704	7.611	28.396	11.701	17.504	8.542	5.171	7.415	9.709	6.977	9.443	10.114	13.085	2.995	3.3395	3.767	9.5748		0.427945	9.80639
11.795	26.374	7.3702	8.8755	5.8875	2.8	3.059	3.857	16.745	3.563	4.666	3.674	6.728	5.076	46.714	7.727	5.447	4.086	6.067	8.572	35.924	12.851	19.191	7.855	5.422	5.588	10.236	9.775	10.072	10.88	11.217	4.222	2.7269	3.715	7.8295		0.432314	9.84684
11.9141	22.152	5.5975	7.7201	6.0507	3.155	3.307	3.908	19.192	5.227	3.75	4.388	7.184	5.862	41.843	6.729	4.928	5.144	4.085	8.306	38.251	10.858	18.176	9.194	5.452	7.327	7.815	11.796	10.637	12.431	14.723	3.367	3.1117	4.128	9.3496		0.436679	9.85719
12.0333	22.245	4.4849	7.5338	8.2889	3.842	3.396	2.906	16.769	4.643	3.454	5.096	5.856	7.883	43.505	7.784	5.492	3.888	5.526	9.505	37.883	12.737	18.96	8.65	6.217	7.884	9.84	13.714	11.762	14.872	15.591	2.905	2.7197	3.68	11.6652		0.441048	10.3287
12.1524	17.746	4.1047	9.2888	6.9509	3.546	4.062	3.304	17.275	5.819	4.903	5.399	7.328	6.106	42.688	6.228	6.581	4.304	6.859	8.993	38.172	14.19	20.5	9.75	5.251	7.319	9.693	10.524	9.116	16.515	12.241	3.36	3.1309	3.574	14.9591		0.445414	10.2877
12.2716	13.024	4.5123	9.4221	6.9751	2.863	4.126	3.558	17.848	4.58	5.557	5.169	6.784	5.867	37.086	7.85	5.832	5.316	4.546	10.5	40.405	12.508	23.941	7.138	5.997	8.626	9.407	14.257	9.702	18.899	14.781	3.681	3.8004	3.418	15.5995		0.449783	10.3993
12.3907	11.188	4.776	8.7344	7.0495	4.203	3.312	4.108	19.268	4.557	5.004	5.242	6.763	5.979	37.184	8.083	6.797	4.566	6.488	9.224	40.05	13.333	19.761	7.551	6.542	8.304	11.271	13.165	9.88	17.299	15.615	3.928	2.5468	3.704	17.7728		0.454148	10.3897
12.5098	7.528	3.9199	9.6465	8.47	4.918	3.654	3.782	17.046	4.557	4.353	3.776	5.033	5.309	39.008	7.356	5.151	4.478	5.661	11.01	40.455	13.17	25.698	7.558	4.501	7.104	10.558	13.955	11.226	19.662	18.522	3.833	3.0042	4.763	16.4643		0.458513	10.445
12.629	7.698	2.724	9.8452	8.6634	3.642	2.549	3.153	19.883	4.443	4.309	4.47	5.121	6.947	38.211	7.784	4.841	5.356	4.358	9.796	43.626	15.927	28.778	8.63	6.062	7.261	10.046	11.632	11.133	23.49	20.469	3.695	3.3882	4.05	16.5427		0.462882	10.8389
12.7481	6.734	4.0347	8.2624	7.9953	3.814	2.835	5.141	23.969	4.833	5.338	6.4	4.325	4.608	39.761	7.646	5.492	4.082	7.066	10.549	49.05	16.821	27.427	7.489	5.677	8.041	11.858	13.695	10.928	24.72	22.014	3.597	3.3514	4.526	18.6964		0.467247	11.4934
12.8673	7.431	2.7092	9.7816	8.1288	5.267	2.57	3.902	23.171	4.556	4.322	5.937	5.275	4.852	41.438	8.303	5.375	5.913	6.654	10.372	56.113	22.802	26.093	5.912	5.894	8.61	11.223	17.795	11.873	27.56	23.947	3.65	3.875	4.087	18.2326		0.471616	12.1654
12.9864	5.396	2.7098	11.1693	8.1146	5.474	3.103	3.845	28.903	5.618	4.997	4.478	5.622	4.673	38.431	8.823	6.016	5.164	7.46	11.201	56.391	23.941	27.629	6.463	6.769	7.387	13.168	17.065	12.652	27.243	24.009	5.323	3.6599	4.012	20.599		0.475982	12.5738
13.1055	5.475	3.2359	7.1432	8.489	5.104	3.657	4.847	32.288	4.184	4.68	4.435	5.492	5.51	42.385	6.879	5.302	5.122	6.142	11.6	53.888	31.642	24.673	7.845	6.952	8.533	14.248	19.171	12.913	26.496	23.263	5.015	3.3743	4.508	17.0448		0.480347	12.6922
13.2247	6.708	4.2714	9.2183	7.8329	4.968	4.232	3.789	35.055	4.974	4.513	5.217	5.024	4.182	42.322	9.238	5.522	5.185	4.929	11.539	62.31	37.626	25.442	8.593	5.418	7.226	13.909	24.341	11.721	28.003	22.924	4.594	3.7964	4.323	20.3577		0.484716	13.5089
13.3438	4.669	4.0497	8.8358	8.7678	4.378	3.2	4.807	35.074	5.478	5.086	6.018	5.096	3.548	41.021	10.141	5.572	5.573	5.699	10.764	62.969	36.055	25.986	7.268	7.06	10.413	15.779	25.526	13.771	26.519	21.776	4.907	2.825	5.791	21.8395		0.489081	13.7136
13.463	4.203	3.8896	8.7864	8.3627	3.745	4.344	4.343	27.496	5.867	3.461	5.093	4.637	5.237	45.818	10.141	5.642	6.123	5.767	14.32	49.786	37.681	25.791	7.823	6.832	9.536	15.19	28.853	11.541	31.688	25.165	3.78	3.9228	4.102	26.5746		0.49345	13.6924
13.5821	4.099	5.333	10.7553	9.3324	4.676	2.903	3.529	30.01	5.798	3.365	5.053	4.873	4.581	45.727	10.531	4.576	5.984	6.325	12.994	53.323	30.725	31.536	7.591	6.528	8.984	20.021	33.581	16.176	34.482	20.152	4.311	4.0171	5.072	29.5648		0.497816	14.3091
13.7012	3.309	5.4555	9.2408	8.7244	4.458	3.942	3.082	30.481	6.03	4.083	5.758	5.387	2.999	45.297	9.063	5.837	5.206	4.199	10.386	48.021	25.019	28.07	6.481	7.375	10.842	20.055	31.274	16.236	31.019	23.242	4.206	5.1569	3.638	29.9437		0.502181	13.6328
13.8204	2.891	4.1155	10.617	10.9319	5.1	4.071	3.381	27.869	6.613	3.937	4.788	5.957	4.463	47.696	9.08	5.354	4.98	6.96	14.145	43.251	27.255	29.048	8.504	5.126	10.499	19.369	31.763	11.724	29.39	21.543	4.715	2.8688	5.13	30.1913		0.50655	13.6272
13.9395	3.096	3.762	10.7933	9.836	4.086	4.157	4.443	25.107	5.775	3.887	4.791	4.787	4.755	51.489	10.027	5.442	4.69	5.703	13.149	37.67	33.257	30.319	8.656	7.022	10.59	22.695	32.405	12.277	33.771	21.236	4.222	3.7687	4.4	30.714		0.510915	13.9052
14.0587	3.474	4.3218	8.7333	11.212	5.886	3.716	3.557	20.971	8.368	4.195	4.256	4.415	4.267	61.615	11.034	5.353	4.687	5.289	10.885	36.376	36.732	27.229	7.04	5.879	10.634	23.998	28.685	12.442	30.458	17.191	4.398	4.462	3.712	32.2823		0.515284	13.7575
14.1778	3.316	4.7477	8.8924	13.535	5.489	3.349	3.604	17.473	7.932	3.872	5.048	3.966	5.517	61.872	9.367	5.412	4.768	5.738	12.311	42.2	45.643	27.125	6.359	6.425	12.797	25.888	25.996	13.889	30.353	16.417	4.169	3.3672	4.742	32.6925		0.519649	14.2433
14.297	3.477	4.6606	7.0617	9.4243	5.078	4.702	2.832	17.235	6.523	3.902	5.237	5.12	3.257	63.745	13.509	6.602	5.151	6.287	13.479	41.236	47.93	32.448	6.353	5.915	14.444	26.827	29.092	14.279	31.479	18.264	4.682	3.2661	5.141	35.2579		0.524018	14.8205
14.4161	3.21	4.5364	8.5744	11.1369	5.884	3.407	4.048	15.221	7.616	4.287	4.876	4.822	4.124	63.344	13.632	4.924	5.646	5.697	11.866	40.565	42.858	32.518	5.948	5.907	15.997	27.677	28.687	12.618	30.331	18.324	3.899	3.444	3.798	32.0507		0.528384	14.4551
14.5352	3.818	3.9126	8.668	12.5046	4.552	4.853	3.261	17.867	6.055	5.029	4.719	4.391	3.426	60.28	12.482	4.404	4.407	6.047	10.96	39.854	37.1	36.478	7.718	6.142	16.245	27.377	21.673	12.39	32.618	16.539	5.465	3.6676	3.858	31.9744		0.532749	14.1393
14.6544	4.933	3.9873	8.3463	11.9889	4.356	3.846	4.002	15.096	5.211	4.153	3.928	4.371	4.711	61.758	12.265	5.512	5.974	5.461	14.021	38.426	35.295	41.067	7.375	4.953	13.094	29.807	28.515	10.851	30.23	15.909	5.436	3.6357	4.543	33.6923		0.537118	14.3162
14.7735	3.232	3.6195	9.0252	16.2878	4.552	4.396	3.585	14.126	6.347	4.437	4.14	4.166	4.254	53.41	13.739	5.682	4.421	5.677	10.572	42.543	35.315	39.669	7.379	5.365	15.983	30.663	22.796	12.553	32.667	17.681	3.612	4.5244	5.397	28.6657		0.541483	14.1318
14.8927	3.163	4.5783	10.1845	19.1434	3.608	5.123	2.517	11.06	6.155	4.282	4.418	4.476	3.904	54.438	14.436	5.551	4.905	5.722	11.179	43.742	35.976	43.361	6.203	6.3	15.673	25.494	22.92	12.769	29.156	13.193	4.195	3.0802	5.161	28.2932		0.545852	13.9518
15.0118	3.308	4.704	9.6638	18.4045	4.946	4.156	4.088	11.442	8.043	3.936	4.144	3.695	4.322	58.292	13.072	4.767	5.191	4.735	8.086	41.273	31.748	42.31	6.702	6.051	14.992	25.274	14.874	13.109	26.571	13.892	4.102	4.3264	3.816	30.4618		0.550217	13.4852
15.1309	2.551	3.7284	7.9717	17.6449	5.318	3.831	4.01	8.825	8.068	3.713	4.549	3.533	4.243	58.861	14.713	5.34	5.208	4.011	10.803	43.356	34.775	38.703	6.681	5.852	18.629	26.169	18.108	9.984	28.867	14.073	4.039	3.7888	4.849	28.4815		0.554583	13.6258
15.2501	4.316	2.9122	8.8946	20.348	4.819	3.731	3.041	6.813	8.2	3.631	4.177	4.799	4.642	59.75	14.03	4.926	4.296	4.657	10.135	46.711	41.707	36.298	5.785	5.78	19.67	28.352	13.118	12.431	30.28	13.9	4.305	3.8248	5.47	27.4862		0.558952	13.9187
15.3692	4.092	3.8172	8.092	20.2404	3.936	3.435	2.649	7.14	9.913	5.704	3.534	4.519	3.659	64.263	13.845	5.764	4.216	4.547	10.394	48.51	54.323	35.254	6.326	6.565	21.111	29.434	12.178	11.371	28.204	11.88	4.641	5.1009	4.183	25.4093		0.563317	14.3603
15.4884	4.322	3.8803	9.7466	23.6832	5.504	3.731	3.123	6.911	9.21	4.515	3.558	4.607	4.781	65.11	14.54	4.945	3.76	7.005	8.05	53.521	64.1	35.841	6.178	6.285	20.812	29.932	10.821	11.381	28.698	11.321	4.46	3.3435	3.966	24.5597		0.567686	14.8883
15.6075	4.195	4.2619	9.3557	25.1373	4.748	4.268	3.198	7.082	9.738	3.616	3.411	3.722	4.148	69.658	12.953	4.948	5.206	7.622	10.648	52.32	65.651	29.089	6.304	6.223	20.519	32.548	13.452	12.918	30.051	10.845	3.997	4.5524	3.843	21.2163		0.572051	15.0425
15.7266	3.51	3.44	9.8496	25.3058	3.965	3.873	3.145	5.805	11.567	3.884	3.778	4.018	3.059	68.286	13.001	4.13	4.658	5.352	9.653	54.733	79.647	27.042	6.275	6.504	19.845	34.908	12.875	11.791	29.528	10.062	5.202	3.5838	5.078	19.8086		0.576416	15.2106
15.8458	3.33	4.2299	7.5556	26.9224	4.022	3.336	3.108	5.679	9.92	4.317	4.305	4.322	3.376	81.411	12.566	5.914	5.175	5.757	9.969	58.971	85.596	24.102	5.406	7.274	17.037	37.355	12.098	12.359	32.816	9.348	4.663	2.8622	5.428	19.4996		0.580785	15.8832
15.9649	4.235	3.446	8.5915	27.4231	4.559	3.225	4.428	4.784	13.202	3.671	4.41	3.749	4.256	86.202	11.91	4.947	4.98	5.935	7.634	59.289	95.455	24.036	6.993	6.109	19.608	41.405	13.429	12.145	31.125	7.942	5.13	4.4441	5.207	20.0612		0.585151	16.5872
16.0841	3.762	4.0607	11.1176	30.3896	4.778	3.466	4.509	4.759	13.248	3.414	4.055	4.117	3.272	76.172	14.888	6.288	5.652	6.68	10.731	61.723	96.102	24.893	6.722	5.022	20.059	43.491	11.308	11.73	28.893	9.942	3.216	3.3023	5.69	19.7902		0.58952	16.6836
16.2032	3.401	5.2201	9.8576	23.708	4.311	3.738	3.74	4.281	16.977	4.086	3.106	3.018	3.492	76.057	14.765	4.538	5.094	5.241	9.864	64.856	103.472	26.242	6.63	4.731	20.054	44.711	11.391	11.444	25.917	8.353	2.794	3.1511	5.287	21.0671		0.593885	16.6057
16.3224	2.518	3.9384	9.9605	30.0667	5.528	3.861	3.729	4.503	17.622	4.329	3.314	3.987	4.326	73.486	16.907	5.137	5.266	6.186	9.274	65.544	99.488	23.293	6.244	5.177	20.323	49.127	9.406	11.268	34.865	10.478	4.528	3.5857	5.654	19.2997		0.598254	17.1241
16.4415	3.932	3.0707	9.6209	27.5737	5.038	3.541	3.68	4.863	17.507	4.566	3.357	3.043	4.987	70.043	14.669	4.818	4.947	5.805	11.288	68.627	107.667	23.462	6.529	4.587	20.531	50.787	9.146	9.512	33.358	8.303	3.66	4.1807	5.675	18.4419		0.602619	17.0828
16.5606	4.386	4.0003	7.8687	26.7915	3.188	3.628	4.35	4.941	18.521	5	4.049	4.067	3.592	73.057	14.277	5.837	4.956	5.987	10.143	70.585	96.936	23.617	4.521	5.219	19.446	53.58	9.747	10.942	37.303	8.741	4.808	4.0322	5.845	19.9628		0.606984	17.1743
16.6798	3.363	3.4611	8.5628	26.2072	5.061	3.414	3.574	4.056	23.247	4.062	3.747	3.7	3.255	70.375	12.646	5.686	5.317	5.444	10.19	69.858	92.464	18.003	5.013	5.037	18.881	53.415	7.816	12.478	32.121	7.388	3.034	3.7187	6.517	19.7627		0.611353	16.4963
16.7989	2.655	2.7198	10.6248	25.4685	5.748	3.313	3.293	3.895	20.641	3.429	4.063	3.675	3.261	66.437	13.461	6.044	5.739	5.44	11.286	65.751	91.269	21.267	4.005	4.371	18.488	54.672	8.882	10.19	29.345	8.699	3.438	3.9395	5.562	22.3803		0.615719	16.278
16.9181	3.576	3.4696	8.1692	26.6169	5.264	3.177	3.126	4.425	22.572	4.521	4.369	3.303	4.868	70.082	13.186	4.718	5.087	5.976	11.114	69.66	83.56	18.721	5.166	5.8	16.813	50.132	8.819	9.386	25.329	6.373	2.186	3.379	5.296	19.6642		0.620088	15.8207
17.0372	3.92	2.9684	7.5033	27.34	5.097	4.864	3.846	3.985	21.264	3.899	3.179	5.095	3.713	67.631	11.116	5.26	4.882	5.765	9.832	66.313	81.84	15.948	6.176	5.103	16.334	48.651	7.732	10.904	20.831	6.197	4.131	4.0254	5.502	21.175		0.624453	15.3536
17.1563	3.66	3.6095	7.6267	29.0932	6.223	4.835	3.309	3.845	22.744	3.33	3.878	4.521	4.296	60.372	9.97	3.959	4.463	4.678	7.33	67.734	79.075	13.551	6	5.804	15.393	45.207	7.08	7.32	19.173	6.681	4.452	3.7535	6.683	23.1702		0.628818	14.7888
17.2755	3.84	3.7511	9.653	26.2931	4.481	3.18	3.268	3.712	20.975	4.546	3.536	4.31	4.43	65.023	11.441	4.981	4.224	5.176	9.832	60.096	80.029	14.546	5.183	5.8	14.449	38.283	7.401	8.659	19.046	5.313	4.231	4.4586	5.689	25.938		0.633187	14.5816
17.3946	3.455	3.1205	8.62	27.0216	5.688	4.001	3.206	4.2	19.758	3.605	3.187	3.033	4.821	59.731	9.812	4.276	5.498	4.327	10.135	54.519	74.288	12.595	5.828	4.423	15.924	36.182	7.321	9.805	18.672	5.634	3.891	3.0622	6.078	26.7183		0.637553	13.8952
17.5138	3.369	3.6197	7.8615	26.6436	4.671	4.401	4.8	3.255	19.186	4.063	3.65	4.035	3.983	60.144	9.11	5.701	4.726	6.204	9.731	51.518	71.05	13.005	5.034	5.264	16.867	29.926	5.523	8.265	19.099	6.533	3.703	4.3166	4.876	31.312		0.641921	13.6896
17.6329	3.561	3.871	7.2021	25.7891	4.994	3.647	2.923	3.014	18.595	3.204	3.354	4.745	3.154	62.671	11.145	4.959	3.492	5.512	7.658	48.823	60.173	11.873	4.743	5.716	14.447	33.614	7.152	10.881	19.745	3.619	4.037	3.5119	4.922	35.1894		0.646287	13.2923
17.7521	3.107	3.5093	8.38	21.2632	3.507	4.199	3.32	3.31	24.313	2.865	3.458	4.111	4.159	61.256	9.28	4.651	4.008	5.073	8.779	45.174	57.508	11.687	4.864	4.983	14.926	31.972	7.632	11.19	17.345	5.285	4.179	4.7531	5.03	30.7731		0.650656	12.9368
17.8712	3.664	3.4717	11.3069	18.2539	3.783	3.93	3.383	2.956	19.885	2.75	4.671	3.166	4.221	55.512	9.52	5.062	4.573	4.876	9.931	43.76	47.579	11.657	4.27	6.013	13.124	28.462	6.15	10.35	18.15	5.929	3.822	3.7448	5.835	30.6076		0.655021	12.1873
17.9903	4.09	3.0438	9.9996	18.8914	3.59	4.545	3.325	3.857	18.571	4.755	3.476	3.451	4.912	49.02	6.954	5.479	4.693	4.002	8.629	48.742	42.122	11.21	4.935	6.141	14.968	29.275	6.967	10.827	15.692	5.894	3.779	3.2052	4.399	27.9763		0.659386	11.8064
18.1095	2.94	4.6003	8.6286	19.6113	5.55	3.713	2.602	3.767	19.627	3.927	3.261	3.712	4.342	50.841	8.131	5.216	5.114	3.563	8.671	45.883	37.671	12.77	4.877	5.08	14.018	26.588	6.967	10.895	16.229	5.95	2.792	3.3779	5.878	27.1326		0.663755	11.586
18.2286	3.262	4.8555	9.7916	20.1875	4.943	4.398	2.817	4.382	18.162	4.28	3.264	4.596	5.545	51.587	8.835	5.141	4.026	3.25	7.479	41.976	34.441	9.262	4.843	4.972	16.649	25.572	6.336	12.248	17.415	4.723	4.395	3.6202	5.789	27.3239		0.668121	11.4814
18.3478	4.179	3.5877	8.5305	20.7108	3.906	3.136	3.34	2.245	19.985	4.078	3.841	3.973	3.125	47.778	9.143	5.514	4.724	4.572	9.385	43.287	33.312	8.854	4.684	5.565	16.793	25.758	6.982	12.389	15.384	5.455	3.523	2.7164	5.183	27.2898		0.672489	11.2626
18.4669	4.538	4.0517	9.2239	18.9857	3.825	3.877	2.83	2.519	20.953	3.097	4.051	3.491	5.59	42.661	10.805	5.598	4.452	5.283	10.316	43.576	29.113	10.646	5.123	6.132	19.216	25.553	6.95	11.146	16.941	5.451	3.542	4.1843	5.21	26.9534		0.676855	11.3495
18.586	3.381	3.5528	9.3056	19.1581	4.311	3.771	3.645	3.518	19.633	3.672	3.718	3.537	4.545	38.885	8.682	5.394	4.406	4.459	8.076	47.776	29.076	7.176	5.264	5.382	20.086	25.431	6.285	12.364	13.217	4.809	3.267	3.7025	5.295	32.9636		0.68122	11.1101
18.7052	4.143	3.176	9.7896	18.1236	3.82	4	3.949	4.705	22.47	3.162	3.399	3.314	5.253	32.644	8.94	5.328	5.981	4.145	7.122	47.561	28.047	9.127	4.375	6.746	17.307	27.68	5.698	11.761	15.633	5.796	4.584	3.8351	5.289	38.6519		0.685589	11.3399
18.8243	5.195	3.2395	12.732	18.449	3.385	4.591	2.812	3.076	26.615	5.299	3.088	3.748	6.101	28.659	10.639	3.907	3.884	4.165	7.818	43.836	24.041	7.772	5.325	6.035	22.148	27.715	7.407	12.602	15.498	4.583	4.13	4.0611	5.149	35.1298		0.689954	11.2598
18.9435	5.021	3.5257	10.9413	20.3124	3.368	4.197	3.115	2.967	31.654	3.775	3.95	3.37	6.286	24.088	9.065	5.363	4.601	4.764	6.295	47.008	25.248	6.292	5.032	6.251	24.157	27.961	7.03	15.38	13.851	4.544	4.086	4.0282	5.377	38.1293		0.694323	11.501
19.0626	2.908	3.6542	14.7452	16.7532	2.95	3.186	3.364	3.304	34.766	3.101	3.47	4.314	7.36	24.304	9.936	5.306	4.007	4.048	8.407	53.477	21.281	6.084	5.603	6.612	22.219	24.029	5.882	15.083	14.171	5.247	4.362	3.445	5.589	43.8464		0.698689	11.671
19.1817	4.049	3.2501	12.5421	17.6789	3.95	4.086	3.615	4.043	33.813	3.974	2.905	3.545	8.731	21.036	9.369	4.26	4.121	3.505	8.557	47.456	21.753	5.968	4.785	7.222	26.527	23.906	6.593	13.928	13.954	3.87	4.367	4.5042	4.436	42.9967		0.703054	11.4499
19.3009	3.327	4.6509	15.0459	17.9073	4.646	4.606	3.654	2.868	36.81	4.988	3.955	4.294	10.311	22.767	9.224	4.021	4.85	4	7.709	49.27	21.352	6.234	5.486	7.628	25.645	22.812	7.182	14.891	10.504	4.411	3.471	4.6448	5.626	44.1978		0.707423	11.8526
19.42	3.789	3.273	15.504	16.3161	3.2	4.35	3.143	3.609	32.357	4.228	3.721	4.35	10.811	24.25	9.284	6.074	4.545	3.511	8.038	54.01	22.054	6.395	5.778	6.123	29.537	17.387	5.627	17.212	14.016	3.771	4.219	3.4752	5.087	43.4718		0.711788	11.8387
19.5392	4.03	5.1368	18.8773	14.5724	3.3	4.234	4.181	3.107	28.674	3.787	2.845	4.734	13.166	24.585	9.637	4.055	5.511	3.073	7.743	58.373	22.396	7.009	5.504	5.076	28.518	17.672	6.82	20.229	11.426	4.504	4.698	3.1683	4.758	49.2245		0.716157	12.1948
19.6583	4.574	3.7246	17.3052	14.0841	3.654	2.778	2.94	3.464	27.629	4.453	3.762	5.356	15.696	22.635	9.509	5.157	6.982	3.208	7.99	60.434	20.541	5.538	5.004	7.277	31.719	14.336	5.725	19.847	9.048	4.029	4.056	3.4387	4.624	49.6198		0.720522	12.0629
19.7775	3.175	3.8295	21.3325	14.2981	3.467	3.616	3.675	3.654	26.277	3.88	5.12	4.284	20.796	20.709	9.94	5.289	4.885	5.036	7.221	60.132	17.378	6.38	5.321	6.867	33.327	14.322	6.705	22.696	10.117	3.297	3.439	4.4978	3.812	49.9981		0.724891	12.3169
19.8966	4.366	3.4978	21.2167	15.7649	2.537	4.635	3.342	3.123	27.644	5.496	3.131	4.46	22.157	18.403	8.635	3.601	5.212	5.005	7.602	59.948	15.084	5.518	4.927	6.675	35.713	10.713	6.09	24.642	10.351	3.539	3.629	3.5677	4.517	53.7051		0.729257	12.3073
20.0157	3.774	4.866	22.0649	13.3492	3.315	4.572	4.728	2.843	25.78	4.612	2.927	4.845	28.001	18.258	9.05	3.313	5.174	5.232	8.234	66.441	14.712	6.608	5.774	5.368	45.042	11.726	6.454	24.042	9.351	3.67	3.79	3.419	4.597	54.9318		0.733622	12.9666
20.1349	4.577	4.3434	24.1732	14.4986	3.966	4.086	3.327	3.549	26.957	6.684	3.973	3.753	33.52	16.804	7.768	4.56	4.3	5.303	7.705	71.352	15.969	6.305	5.718	6.589	43.927	10.318	6.763	25.879	8.412	3.928	3.851	3.6114	5.104	55.639		0.737991	13.4474
20.254	3.658	2.9033	23.0613	13.7475	3.706	3.882	4.569	3.302	25.066	5.496	4.92	4.856	39.157	17.396	8.867	4.716	5.236	4.208	7.542	78.308	17.409	6.523	4.935	7.195	55.058	10.06	7.89	25.393	9.397	4.203	4.383	3.9521	5.954	60.0913		0.742356	14.3247
20.3732	3.848	3.3059	23.8421	13.4539	2.57	3.317	4.308	3.087	26.212	6.252	3.79	5.356	41.332	17.947	8.091	4.515	6.405	3.912	8.902	79.619	17.74	6.317	5.157	5.998	61.27	9.215	6.822	24.295	9.368	3.258	4.384	4.7253	5.34	59.7046		0.746725	14.5194
20.4923	4.802	3.5592	25.5232	14.8276	4.298	3.974	4.334	3.459	25.235	5.585	4.338	5.91	45.161	16.623	11.083	3.94	5.109	4.542	9.039	83.547	18.953	5.121	5.471	6.638	62.216	9.045	7.615	27.218	7.593	3.536	4.854	6.1161	5.615	58.1365		0.75109	15.0887
20.6114	3.67	4.5746	28.6549	13.266	3.873	4.274	4.408	2.525	23.043	5.779	4.863	6.93	46.658	15.779	10.678	3.859	4.562	4.642	11.035	87.143	20.685	6.456	4.96	6.969	70.045	8.407	6.615	24.593	6.689	4.061	4.84	5.3146	6.384	57.6913		0.755456	15.4096
20.7306	3.659	3.2908	27.2391	14.1149	3.786	3.11	4.295	3.74	22.061	5.254	2.812	6.268	42.119	15.964	11.418	4.62	5.314	4.708	9.685	91.866	20.362	4.513	4.162	6.063	69.777	7.144	7.461	26.473	8.504	4.533	5.114	5.8012	7.14	56.1209		0.759825	15.2498
20.8497	4.788	4.0495	27.2975	14.8595	2.656	3.214	4.177	3.994	18.374	5.927	6.209	7.609	43.015	13.964	12.6	4.746	4.282	4.961	10.071	94.268	23.041	5.334	4.842	6.035	66.415	8.348	8.163	24.929	7.902	4.29	3.84	3.9925	8.76	53.0475		0.76419	15.2941
20.9689	4.117	4.9642	26.7284	14.6951	3.004	4.052	3.257	4.483	21.643	5.226	3.753	7.029	42.398	14.412	10.807	4.298	5.44	5.5	9.897	87.502	22.081	4.412	5.124	5.012	69.59	6.249	7.014	25.302	5.951	6.315	4.71	4.8523	8.226	56.7479		0.768559	15.1409
21.088	5.181	4.9521	26.4154	13.2657	2.701	2.981	2.846	3.821	21.176	7.072	5.11	6.866	38.311	14.882	12.409	3.402	4.764	5.734	10.722	88.443	20.432	4.182	5.962	5.369	71.268	7.384	8.173	25.31	6.496	4.687	6.098	4.2944	9.682	53.4337		0.772924	15.1125
21.2071	5.055	4.8551	30.2683	12.3147	3.644	3.037	3.541	3.011	21.537	7.879	4.35	9.585	34.007	14.38	14.824	5.373	5.029	5.224	11.127	86.199	21.426	5.059	4.974	5.428	73.747	8.1	8.757	26.943	7.125	4.281	6.047	4.7398	11.686	56.228		0.777289	15.5818
21.3263	2.9	5.8805	32.7608	15.405	2.633	4.159	4.502	3.627	21.277	7.255	5.356	10.643	30.278	14.921	12.237	4.763	3.865	5.481	12.786	82.964	25.509	5.124	5.587	6.184	73.446	9.204	9.877	27.544	6.152	3.997	5.565	5.5557	12.935	54.0013		0.781658	15.7169
21.4454	4.578	5.4045	34.419	14.845	1.996	3.96	3.993	3.192	21.711	9.139	3.711	11.143	23.867	16.97	13.77	7.102	5.602	5.707	12.082	74.733	27.84	5.893	3.993	7.144	80.116	8.138	8.955	28.952	5.652	3.91	7.289	5.8322	14.087	55.2892		0.786024	15.9122
21.5646	5.067	5.0607	35.2834	15.6475	3.641	3.181	3.993	3.888	20.087	8.62	4.617	11.584	21.756	16.162	12.797	5.566	4.769	6.215	13.534	76.577	30.924	5.669	5.744	5.578	80.913	9.128	8.964	27.331	7.213	4.374	6.741	5.7116	16.826	53.0342		0.790393	16.0646
21.6837	3.248	6.2958	41.987	15.6724	2.726	3.166	3.268	3.673	19.83	9.092	4.635	13.346	16.856	16.995	15.179	5.008	6.602	7.58	17.139	66.09	31.005	5.385	4.239	5.726	84.928	7.454	8.975	29.724	6.069	5.46	5.802	5.1172	18.121	48.8586		0.794758	16.0368
21.8029	3.367	7.154	41.4485	16.3704	2.151	3.053	5.66	2.986	17.381	10.057	5.443	18.401	10.774	16.731	16.131	7.067	5.34	6.616	20.201	59.177	31.931	5.187	4.77	6.338	84.759	7.062	12.036	33.253	6.065	4.259	6.214	5.8218	17.312	50.2223		0.799127	16.1982
21.922	4.071	6.1896	44.0111	16.9723	2.771	3.99	4.035	2.497	17.242	10.819	6.55	16.838	7.33	16.485	16.297	6.872	5.96	7.737	30.563	44.951	31.782	5.223	5.213	5.451	88.449	7.358	11.701	33.495	6.266	4.859	7.771	5.9188	14.659	47.6592		0.803492	16.1172
22.0411	3.821	9.1207	48.1553	15.1699	2.893	3.873	2.731	3.781	19.872	12.762	5.462	18.013	6.282	19.157	22.659	6.186	6.655	11.46	35.3	35.026	36.181	6.224	5.514	5.702	77.37	7.577	13.184	36.657	8.936	5.226	6.648	6.7345	16.72	48.4409		0.807858	16.7498
22.1603	4.953	8.8633	46.0318	15.536	3.474	2.909	3.764	5.432	19.481	17.332	6.558	20.03	5.093	20.183	28.036	7.925	9.738	12.459	47.495	21.759	38.767	6.394	5.759	6.883	75.52	8.054	14.002	34.913	8.218	5.162	7.639	5.3897	20.345	51.6029		0.812226	17.5206
22.2794	3.395	8.409	42.0003	14.9057	3.217	3.912	4.411	3.513	21.21	27.187	7.845	20.915	4.193	21.92	26.286	6.661	8.899	14.918	56.652	20.603	43.306	6.852	4.924	8.089	66.237	7.42	14.851	41.468	10.328	5.883	8.566	8.6766	23.007	46.2843		0.816592	18.1454
22.3986	4.947	10.4281	39.8924	13.3708	2.399	3.913	4.174	3.375	21.007	28.261	7.571	21.666	3.107	25.933	30.899	6.747	11.132	16.241	74.328	14.672	41.288	8.306	5.385	8.298	65.173	6.744	16.979	45.174	9.71	4.938	11.662	7.7779	23.583	50.3601		0.820961	19.1012
22.5177	3.902	11.2148	40.6149	13.5486	2.613	3.803	4.741	3.574	20.443	33.683	8.716	27.714	3.142	26.827	31.186	6.926	13.871	19.997	89.388	11.453	37.863	6.875	4.967	8.361	69.646	7.449	16.446	49.651	12.056	4.558	11.634	9.7301	24.632	48.3125		0.825326	20.2805
22.6368	4.294	11.6233	35.6079	15.8788	3.534	3.139	4.495	4.186	24.999	40.85	11.58	24.966	2.378	30.718	29.182	6.56	16.951	23.109	99.345	10.847	34.034	9.264	4.601	10.612	54.067	8.695	17.482	60.191	10.717	5.103	13.579	10.0433	23.346	48.4067		0.829691	21.0113
22.756	5.519	10.8655	33.4368	14.5482	2.782	2.87	4.816	4.588	22.456	42.545	14.737	26.434	1.327	39.702	30.193	8.359	18.521	27.76	100.725	8.774	32.568	8.249	3.911	12.134	49.421	7.305	18.842	62.888	10.842	5.504	18.048	11.9	23.957	52.2712		0.83406	21.7294
22.8751	5.238	16.2663	28.8726	15.749	2.677	3.035	5.485	4.433	22.891	44.264	20.381	20.266	0.81	47.905	30.248	9.016	20.596	32.304	86.094	6.542	33.909	8.537	6.217	11.784	50.023	8.399	23.783	61.348	13.074	4.856	21.799	12.1841	27.685	48.3834		0.838426	22.2075
22.9943	5.442	15.6528	26.092	20.2608	3.872	3.621	5.587	3.961	20.597	47.008	30.334	14.34	1.54	53.983	31.894	9.087	26.464	44.787	69.142	5.445	30.356	10.061	5.369	13.084	44.793	7.753	23.462	65.512	15.195	5.204	25.829	13.373	28.529	47.9363		0.842795	22.8108
23.1134	6.102	16.5625	20.0487	16.6971	3.909	2.687	6.992	3.696	20.257	52.558	45.537	13.01	0.811	58.034	39.794	10.626	28.261	63.254	50.148	4.633	28.058	11.576	6.531	19.131	46.095	7.517	32.498	61.894	17.932	5.072	27.135	19.3148	33.249	43.7488		0.84716	24.2167
23.2325	5.28	19.0222	19.3865	16.765	4.04	3.982	7.449	5.475	21.124	54.399	56.872	9.848	0.589	60.658	35.532	12.213	34.422	79.53	31.05	4.16	32.489	12.814	5.973	19.554	37.756	7.76	39.303	70.266	23.046	4.78	29.766	21.6739	33.784	35.9726		0.851525	25.1981
23.3517	7.138	24.332	13.268	21.3945	4.956	4.914	7.937	5.642	19.121	56.346	66.196	6.752	0.42	57.537	41.262	13.489	44.77	87.212	24.248	2.221	30.919	13.562	6.654	25.39	36.213	7.003	46.521	69.538	21.337	5.58	32.973	28.863	40.994	37.0949		0.855894	26.8176
23.4708	7.412	24.2742	13.2939	23.5308	3.386	4.097	11.643	4.898	20.894	72.495	74.479	7.523	0.723	51.669	48.282	16.26	45.587	81.422	16.149	3.115	34.896	13.904	9.253	27.47	34.957	7.323	54.95	68.888	24.636	5.217	36.461	33.002	49.971	36.118		0.860259	28.4759
23.59	8.458	24.9766	11.1967	25.2858	2.986	3.149	13.357	4.716	21.098	70.868	69.904	4.882	0.376	43.096	51.67	23.16	47.187	81.237	11.918	1.415	37.011	17.585	9.798	32.895	32.817	9.628	60.354	62.315	27.273	5.332	28.129	38.0624	50.995	29.2303		0.864628	28.3047
23.7091	9.848	22.0696	8.8437	25.6985	3.795	3.681	14.849	4.519	21.364	76.239	69.139	4.029	0.62	34.42	63.356	26.776	46.006	67.436	6.662	1.854	26.28	17.693	10.608	34.223	32.485	8.745	56.04	54.484	34.186	5.079	21.965	32.8646	61.601	29.7923		0.868994	27.5662
23.8283	10.082	25.8478	6.1322	26.1096	3.127	4.773	17.771	5.039	23.682	74.985	66.577	4.299	0.522	27.863	84.651	29.873	41.063	52.725	5.626	1.206	21.908	21.168	13.002	38.08	31.37	9.199	61.948	49.511	35.605	6.657	17.159	27.4298	58.869	26.269		0.873363	27.3567
23.9474	9.272	23.5412	5.6742	29.8903	4.231	4.375	21.581	5.208	23.939	73.054	58.488	2.434	0.449	20.501	88.008	34.639	37.981	40.513	3.279	1.304	18.888	21.818	14.579	41.07	29.674	12.733	58.213	37.836	35.438	8.015	10.663	21.9305	60.163	28.6672		0.877728	26.1191
24.0665	12.011	20.6784	4.1199	34.0033	3.506	5.224	21.26	5.11	25.296	68.773	46.257	2.223	0.508	17.56	97.222	40.863	39.225	28.298	2.803	1.059	13.676	26.432	21.098	43.236	28.254	14.281	62.562	29.352	32.771	8.719	7.764	16.9266	64.892	27.0685		0.882093	25.6774
24.1857	13.566	18.8823	2.218	34.1499	4.07	2.914	25.669	6.055	27.387	68.706	36.301	2.826	0.261	9.798	92.117	44.732	35.668	19.267	2.848	0.581	9.396	29.696	21.357	43.444	33.06	16.042	60.282	20.626	36.401	11.618	5.267	12.5625	65.759	28.4891		0.886462	24.7652
24.3048	15.871	18.7849	3.6066	35.6632	4.517	5.214	24.896	7.709	31.177	60.405	26.521	2.367	0.339	9.07	86.387	43.71	31.779	14.486	2.652	1.019	8.04	37.173	24.047	44.991	36.21	17.329	55.592	13.975	27.141	12.03	5.33	10.6036	58.647	28.5038		0.890827	23.6996
24.424	17.768	17.0108	2.4142	32.6615	4.374	3.967	24.976	5.35	39.618	47.758	19.786	1.466	0.688	7.78	70.437	36.11	31.555	10.701	3.179	0.652	6.942	38.202	30.925	51.662	38.1	21.221	41.465	11.076	25.145	11.976	3.279	5.9593	55.009	33.228		0.895196	22.1306
24.5431	18.668	15.9667	2.7385	35.6665	3.728	4.128	21.398	6.468	37.582	42.988	16.702	1.306	0.582	5.236	52.001	38.158	22.71	6.218	1.596	1.464	5.663	40.06	30.82	50.281	39.799	23.253	26.64	6.6	18.341	15.342	3.653	6.2345	52.007	32.4565		0.899562	20.1898
24.6622	19.044	14.9184	2.729	36.7595	5.352	3.857	19.958	7.598	44.523	30.742	9.471	0.859	0.787	3.137	36.926	38.294	17.024	3.998	1.289	0.885	4.566	37.444	32.165	46.731	38.236	27.957	21.989	5.91	13.594	19.146	3.436	5.034	48.07	30.117		0.903927	18.6043
24.7814	14.764	13.3518	2.5386	38.3075	3.978	6.83	16.048	7.834	44.723	24.52	6.577	1.191	0.294	4.103	25.068	31.787	12.938	3.593	0.611	0.431	3.477	31.083	31.276	48.713	38.103	32.241	13.77	3.794	9.16	22.802	1.213	4.1025	37.62	33.7064		0.908296	16.7808
24.9005	14.563	9.7176	2.5013	35.4268	3.498	6.45	13.362	9.601	40.68	20.88	4.015	1.145	0.214	3.855	18.044	29.886	11.038	3.289	1.08	0.346	1.398	24.046	30.279	42.572	36.979	38.766	9.156	3.429	8.162	20.277	2.413	4.3578	30.793	33.5179		0.912661	15.1687
25.0197	13.347	8.4638	2.116	35.6781	4.451	6.62	9.342	12.688	41.112	16.164	4.029	1.041	0.457	2.245	11.669	18.827	9.839	2.876	1.248	0.672	2.499	17.96	23.869	39.808	41.587	44.961	8.19	2.942	4.697	21.41	1.621	3.4871	25.164	31.7182		0.91703	13.9058
25.1388	13.992	6.9893	1.1444	32.093	4.824	7.957	6.531	21.274	40.018	13.976	2.219	0.788	0.205	2.884	7.573	13.214	7.903	3.417	0.75	0.488	1.527	14.448	19.759	39.092	40.485	52.24	5.738	2.536	3.405	13.965	1.541	1.9636	17.94	30.3631		0.921395	12.7424
25.258	14.372	6.7941	1.8313	28.7336	4.909	10.038	6.055	22.051	36.627	11.1	2.361	0.89	0.23	1.989	5.918	7.57	6.978	2.943	0.438	0.624	1.25	7.505	11.51	33.129	39.625	62.589	3.593	1.748	2.652	10.355	1.77	1.5579	13.764	31.132		0.925764	11.6068
25.3771	10.089	3.7728	1.6265	22.7752	5.997	11.398	3.788	23.832	32.183	8.505	2.24	0.653	0.055	1.426	3.709	8.015	6.373	1.23	0.511	0.594	1.015	6.028	8.037	27.87	45.137	74.708	3.354	1.184	2.669	8.872	1.04	2.1168	12.446	26.1316		0.93013	10.8641
25.4962	10.928	4.3981	1.1879	26.9093	4.92	12.557	3.155	22.959	29.853	6.701	2.265	0.508	0.005	1.231	2.724	7.123	5.018	1.882	1.726	0.209	0.856	4.819	6.91	25.791	46.108	82.817	2.821	1.264	3.348	7.124	0.956	1.9543	10.446	30.73		0.934495	10.9472
25.6154	8.441	3.8876	1.7436	20.406	6.127	16.533	2.592	23.132	24.191	3.993	1.592	0.182	0.109	0.969	3.439	6.017	2.831	1.846	0.369	0.508	1.555	4.949	5.619	25.843	46.083	81.912	1.221	1.594	1.811	3.547	1.411	1.2438	8.879	30.1249		0.938864	10.1383
25.7345	6.427	3.2951	0.9082	20.8243	8.309	19.091	2.087	22.507	21.707	2.792	1.874	0.291	0.214	0.754	0.937	6.184	4.178	0.84	0.75	0.449	1.213	3.801	4.339	19.561	50.067	73.492	1.215	1.072	1.863	3.568	0.818	1.5288	7.18	30.1187		0.943229	9.53691
25.8537	6.536	4.4941	0.9335	17.895	6.299	19.911	1.48	19.005	18.317	3.072	1.383	0.639	0.322	0.942	0.909	4.12	3.466	1.01	0.42	0.328	0.703	2.874	4.641	12.948	55.724	62.296	1.46	0.933	1.154	2.847	0.447	1.3778	7.145	34.7762		0.947598	8.84728
25.9728	5.476	3.6942	0.8709	17.4109	8.134	19.437	1.529	16.485	12.168	2.117	0.927	0.377	0.075	0.599	1.455	4.089	3.151	1.967	0.774	0.565	0.521	2.424	3.219	12.419	62.13	51.105	1.169	1.11	0.903	1.801	0.656	1.5955	4.795	34.5735		0.951963	8.22712
26.0919	3.649	2.8004	0.5925	12.7013	10.344	20.137	1.305	13.379	8.471	1.548	0.832	0.289	0.166	0.733	1.518	2.884	2.158	0.842	0.372	0.177	0.635	2.179	2.78	11.318	56.149	37.985	1.15	0.714	0.997	1.633	0.203	1.0215	6.165	29.6863		0.956329	6.98571
26.2111	3.452	2.5024	1.5745	13.7905	12.887	18.919	1.269	9.68	5.877	1.372	1.5	0.514	0.383	0.654	1.107	4.052	2.012	0.904	0.509	0.122	0.325	1.636	2.408	7.416	48.077	27.859	0.874	0.457	1.246	1.586	0.953	0.7259	5.402	29.601		0.960698	6.22489
26.3302	2.587	2.7752	1.4109	12.1048	12.553	14.794	0.956	8.392	3.516	1.358	1.702	0.445	0.218	0.638	1.076	1.97	1.664	0.779	0.56	0.371	0.682	1.334	1.845	6.527	34.736	20.952	1.113	0.424	0.882	1.254	0.626	0.9002	4.689	23.1641		0.965063	4.97054
26.4494	1.53	2.3783	0.3574	7.9572	14.039	10.862	1.22	4.157	1.948	1.33	1.42	0.499	0.284	0.657	1.12	1.701	1.508	0.829	0.748	0.128	0.878	1.917	1.733	5.308	24.601	14.936	0.477	0.697	0.328	1.357	1.18	0.4411	3.438	20.3184		0.969432	3.89066
26.5685	1.747	2.3985	0.9392	9.567	16.183	9.059	1.425	3.287	2.3	1.149	0.895	0.289	0.005	0.918	1.048	1.217	1.8	0.832	0.396	0.114	0.425	1.704	1.414	4.83	17.746	11.125	0.8	0.309	0.6	1.016	0.809	0.6643	2.605	17.2245		0.973797	3.43649
26.6876	1.304	1.4725	1.1125	6.9544	14.322	6.406	1.153	2.604	1.195	0.631	0.996	0.307	0.107	0.681	0.974	0.695	1.147	0.491	0.264	0.219	0.607	1.422	1.276	5.101	11.282	8.703	0.875	0.705	0.856	0.344	0.242	0.9519	2.226	14.5153		0.978163	2.71005
26.8068	1.466	0.6005	0.5856	6.5772	13.505	5.074	0.875	2.091	1.023	0.987	0.788	0.633	0.053	0.645	0.988	1.323	0.892	0.499	0.219	0.218	0.669	1.121	1.087	3.77	9.337	5.21	0.577	0.361	0.99	0.503	0.71	0.7091	2.007	10.8273		0.982532	2.26237
26.9259	1.073	0.978	0.4309	4.2469	14.487	3.743	0.754	2.131	0.471	0.838	0.718	0.685	0.061	0.801	0.924	0.678	0.699	0.765	0.508	0.008	0.672	0.716	1.11	2.307	6.088	4.176	0.529	0.275	1.156	0.43	0.787	0.203	2.062	7.7585		0.986897	1.86086
27.0451	0.675	0.9908	0.9032	3.8691	10.842	4.299	0.48	1.204	0.805	0.603	0.489	0.349	0.262	0.445	0.47	1.495	0.356	0.326	0.38	0.052	0.228	1.127	0.653	2.14	4.102	2.924	0.64	0.07	0.474	0.452	0.504	0.4711	1.505	6.1074		0.991266	1.49096
27.1642	0.645	1.2506	0.8847	3.3398	10.966	3.71	0.912	0.652	1.086	0.997	0.088	0.41	0.238	0.301	0.181	1.066	0.543	0.316	0.22	0.003	0.418	1.026	0.764	1.926	4.428	3.104	0.555	0.222	0.173	0.468	0.128	0.5103	1.395	4.2758		0.995631	1.3883
27.2834	1.274	0.5664	0.2038	3.1871	8.125	3.289	0.836	1.995	1.029	0.687	0.738	0.423	0.057	0.243	0.326	0.386	0.597	0.418	0.534	0.115	0.085	0.959	0.779	1.426	4.377	2.465	0.439	0.347	0.275	0.873	0.272	0.0891	0.962	3.8058		1	1.24068

## Sheet: Image5 (2)
X0	Y0	Y1	Y2	Y3	Y4	Y5	Y6	Y7	Y8	Y9	Y10	Y11	Y12	Y13	Y14	Y15	Y16	Y17	Y18	Y19	Y20	Y21	Y22	Y23	Y24	Y25	Y26	Y27	Y28	Y29		Ap-Basal	Avg intensity
0	34.007	76.004	53.561	46.574	36.426	31.454	20.118	38.689	50.398	28.992	20.543	36.255	26.996	24.127	27.643	20.983	13.916	20.507	16.602	20.936	18.875	32.749	33.456	21.308	22.91	23.084	8.408	13.935	10.077	10.612		0	28.0048
0.1191	38.14	86.354	59.517	49.502	38.322	33.277	20.787	37.402	50.616	32.216	19.169	39.465	28.056	30.096	28.904	18.426	16.795	23.765	18.236	22.609	24.387	35.404	35.435	23.209	25.261	24.653	8.691	15.495	13.333	11.42		0.00442325	30.2981
0.2383	42.513	96.597	66.396	55.944	40.004	33.527	21.988	38.685	51.741	35.001	20.371	45.444	38.497	33.521	31.252	21.177	19.999	28.464	19.223	24.371	25.05	35.228	40.29	22.643	32.681	26.77	9.959	17.911	14.029	12.483		0.00885021	33.392
0.3574	44.367	102.822	76.357	59.808	44.083	33.685	25.176	43.81	56.913	41.789	24.469	54.785	39.845	36.069	37.179	23.387	20.279	33.302	22.985	26.244	22.145	34.249	40.457	31.496	37.841	29.593	11.355	23.539	17.434	11.316		0.0132735	36.8926
0.4766	53.105	111.619	81.659	62.57	43.467	35.818	24.709	46.38	65.712	47.275	29.647	57.336	44.847	41.118	37.961	28.605	23.837	44.117	26.485	27.216	23.784	38.771	44.659	33.741	39.413	31.09	12.993	26.191	20.135	13.519		0.0177004	40.5926
0.5957	60.773	122.176	89.612	71.466	49.612	37.195	25.496	49.845	72.473	48.357	37.794	66.365	52.17	47.262	42.441	32.161	30.984	50.283	29.42	33.399	28.208	41.029	50.91	33.279	50.816	39.42	13.29	32.448	25.752	18.034		0.0221237	46.0823
0.7148	62.882	135.535	102.802	77.577	55.808	43.371	29.482	50.482	80.077	49.496	47.34	79.145	53.347	51.414	47.248	34.626	40.298	58.233	31.994	38.355	30.069	41.181	53.097	46.193	55.015	42.386	15.862	37.659	32.998	22.264		0.0265469	51.5412
0.834	78.365	136.567	115.315	83.946	62.86	48.474	38.31	56.505	82.978	52.149	66.413	91.119	60.008	54.989	54.677	39.129	61.657	70.225	40.018	46.465	37.163	47.249	58.661	51.478	67.476	48.17	17.662	41.428	42.599	28.252		0.0309739	59.3436
0.9531	80.026	145.691	120.918	93.454	68.2	56.337	39.625	64.591	93.103	64.289	82.039	105.776	64.73	62.063	54.709	41.77	82.972	80.657	52.191	50.125	41.594	52.089	63.115	61.25	82.122	53.992	21.07	45.256	53.095	31.089		0.0353971	66.9313
1.0723	90.956	162.111	133.101	95.701	76.175	63.886	42.437	68.802	97.399	77.175	98.086	119.299	72.434	69.322	66.592	50.576	98.789	89.989	54.376	55.702	41.138	58.449	74.532	68.115	92.843	60.391	20.365	56.31	60.213	39.519		0.0398241	75.1594
1.1914	107.111	177.506	137.442	100.286	82.207	75.509	57.015	73.114	102.144	85.337	119.939	125.361	71.247	74.869	72.136	54.461	108.399	106.076	61.955	67.34	50.456	64.193	81.712	76.148	105.555	74.957	21.704	68.238	66.99	56.993		0.0442474	84.2133
1.3106	121.395	185.672	138.403	113.455	90.925	88.814	58.835	80.284	111.488	100.143	125.533	133.811	76.485	84.363	76.184	55.947	125.382	123.157	74.109	78.519	55.639	70.884	94.512	82.119	113.221	87.795	32.403	84.518	80.862	76.66		0.0486743	94.0506
1.4297	131.754	191.602	150.827	117.961	95.142	97.693	66.746	86.438	109.035	123.359	135.314	147.036	85.12	92.619	81.563	71.813	136.288	140.459	85.171	87.726	63.151	76.303	110.083	98.813	121.882	105.786	39.312	100.46	90.525	93.568		0.0530976	104.452
1.5488	152.365	187.093	162.109	129.158	107.697	114.424	73.33	95.774	119.608	128.01	151.508	161.438	103.745	98.711	95.145	90.653	151.896	159.128	95.398	105.83	70.447	84.222	124.788	105.323	131.298	118.757	48.646	118.564	110.89	111.63		0.0575208	116.92
1.668	159.445	184.719	163.529	138.859	120.006	119.245	83.084	108.273	124.933	125.011	159.363	165.882	112.616	111.22	105.033	103.268	160.243	169.961	111.464	119.41	78.045	82.448	142.446	116.03	136.472	130.721	65.687	133.666	121.242	134.451		0.0619478	126.226
1.7871	171.447	189.798	178.944	141.661	129.929	130.957	90.991	124.072	125.751	128.726	155.003	160.247	120.504	113.945	108.41	114.778	169.269	187.397	127.3	127.148	85.727	84.757	150.909	129.087	131.923	140.983	71.064	141.984	139.335	152.699		0.066371	134.158
1.9063	179.992	190.59	174.095	142.236	130.253	136.811	99.449	129.702	134.095	131.185	158.78	159.184	126.545	125.029	118.599	125.452	175.6	189.502	138.569	130.75	88.165	94.811	157.765	139.324	128.028	146.702	89.611	162.329	150.455	159.708		0.070798	140.444
2.0254	188.977	184.438	179.878	148.411	137.614	138.418	111.304	145.056	129.816	130.169	149.267	159.869	140.538	134.107	129.695	144.628	189.79	193.93	147.712	127.411	98.418	104.138	163.941	143.645	132.411	155.131	104.569	162.819	154.539	164.15		0.0752213	146.493
2.1445	193.804	181.346	179.326	156.884	147.694	153.496	129.628	147.271	119.492	133.305	136.519	165.32	151.655	149.644	135.387	153.008	183.31	193.1	149.708	127.332	100.045	115.347	159.255	146.874	123.122	157.793	120.333	163.671	155.249	167.512		0.0796445	149.881
2.2637	196.121	165.21	185.756	158.945	159.933	157.196	142.475	151.834	114.502	123.256	126.784	162.519	152.563	143.511	141.135	158.441	196.666	188.65	156.564	120.455	105.899	126.608	153.82	151.258	123.108	150.319	133.95	166.762	160.668	177.186		0.0840715	151.736
2.3828	197.011	143.829	185.336	154.351	174.795	152.858	159.448	132.307	110.095	109.519	111.374	159.875	152.833	153.681	153.79	169.558	208.708	199.261	161.871	103.649	113.396	130.506	138.337	136.857	112.68	143.341	144.253	165.023	167.854	176.275		0.0884947	150.756
2.502	190.247	116.981	184.418	154.659	180.247	163.665	159.819	125.63	93.313	91.616	92.66	155.827	161.707	168.693	169.674	178.397	210.085	194.435	156.083	81.643	125.051	138.235	131.092	137.85	99.13	141.73	161.293	153.565	161.067	171.128		0.0929217	148.331
2.6211	171.365	89.247	180.863	153.819	185.12	168.713	165.654	117.427	75.17	75.012	79.292	145.4	160.68	177.12	172.732	185.712	205.957	187.756	143.793	66.032	125.466	154.733	115.905	126.666	95.425	123.408	163.71	140.068	160.79	167.69		0.0973449	142.691
2.7402	138.865	75.192	171.105	149.705	176.275	170.107	169.827	99.335	61.758	64.686	70.443	133.966	170.178	180.51	187.053	179.34	210.593	169.743	128.507	49.217	130.774	156.291	91.11	111.084	80.68	112.476	155.922	125.038	151.486	159.294		0.101768	134.352
2.8594	115.467	60.73	162.297	150.555	185.256	171.768	162.258	88.323	54.526	53.937	62.26	120.883	168.646	179.154	191.708	177.743	205.553	147.137	113.924	38.233	134.79	158.811	74.805	86.094	67.183	100.209	161.275	102.352	140.692	154.511		0.106195	126.369
2.9785	82.712	49.451	150.565	147.087	187.932	168.31	154.965	83.137	42.145	46.914	60.526	108.98	160.591	180.125	202.073	177.879	199.591	129.982	93.923	30.353	137.209	150.457	58.344	65.363	56.012	87.897	168.92	79.43	132.16	142.683		0.110618	117.857
3.0977	54.355	41.361	128.544	140.34	186.856	170.054	140.74	74.637	38.509	37.689	52.195	97.773	164.58	179.263	204.636	176.255	197.838	101.285	83.809	23.084	128.167	138.764	44.512	47.185	49.882	80.958	168.105	74.575	112.429	126.352		0.115045	108.824
3.2168	42.398	37.554	114.389	139.239	185.869	159.668	114.259	67.253	32.859	36.853	52.139	81.567	166.819	180.224	207.2	177.686	182.923	80.883	68.106	18.459	119.242	125.844	34.648	35.36	43.964	67.551	157.276	63.865	107.451	116.522		0.119469	100.602
3.336	34.061	36.467	91.969	137.794	185.132	156.43	109.723	57.926	27.254	29.986	50.242	71.359	161.081	178.29	208.944	163.419	165.173	69.459	53.391	16.664	106.646	111.851	28.94	27.544	36.996	55.206	154.419	58.107	91.853	100.244		0.123896	92.5523
3.4551	27.58	34.97	77.807	135.132	173.822	143.389	89.461	50.424	24.949	27.567	48.405	62.605	148.993	166.765	203.197	152.729	146.276	59.815	40.587	16.063	91.786	84.191	27.168	22.736	32.709	47.402	137.57	49.633	72.882	80.721		0.128319	82.5778
3.5742	23.529	36.804	63.488	117.235	161.704	131.792	78.008	48.612	22.564	22.657	47.841	54.5	134.522	156.748	202.546	129.98	134.345	51.044	35.572	13.372	73.915	54.849	21.851	17.068	29.648	31.426	130.411	41.268	60.341	68.568		0.132742	73.2069
3.6934	23.976	30.462	50.815	105.774	149.55	128.384	70.21	49.419	22.631	22.707	45.954	54.532	117.721	143.109	190.11	116.001	113.697	52.998	28.933	12.793	59.573	38.215	19.454	14.504	25.771	21.381	110.007	34.397	49.594	53.311		0.137169	65.1994
3.8125	21.06	31.314	40.882	90.133	139.194	113.878	60.694	42.516	22.466	19.825	46.579	50.658	109.137	133.749	179.386	98.787	95.197	50.278	27.19	11.964	46.112	25.532	16.816	15.288	21.445	15.778	105.609	28.21	38	41.257		0.141592	57.9645
3.9317	18.195	26.412	37.713	65.325	125.771	102.105	51.309	36.765	20.009	19.917	43.274	48.112	95.846	127.667	155.959	89.403	83.846	45.368	23.221	11.704	39.854	20.795	13.303	11.79	17.654	12.747	98.281	25.609	30.022	32.483		0.146019	51.0153
4.0508	19.566	24.607	32.95	53.825	125.247	89.379	43.007	29.744	21.228	18.222	39.223	41.92	85.022	102.021	134.216	76.871	75.456	41.604	25.852	11.267	35.239	19.709	10.213	9.867	12.381	10.565	86.904	22.278	22.856	25.765		0.150443	44.9001
4.1699	17.505	21.733	29.341	41.344	121.444	84.432	38.872	31.19	21.503	17.605	37.914	34.931	73.61	94.537	117.482	62.855	60.173	35.808	22.395	10.883	31.337	15.843	8.486	10.241	10.747	11.264	79.391	20.27	19.768	20.51		0.154866	40.1138
4.2891	17.596	19.242	27.682	30.616	116.111	65.523	37.885	26.536	20.635	16.473	31.231	30.538	63.915	89.786	99.694	50.784	48.985	35.648	17.616	9.938	29.448	13.897	7.505	9.328	9.464	11.51	64.581	15.999	16.573	16.344		0.159293	35.0361
4.4082	16.051	16.12	25.552	28.973	104.397	62.084	35.548	27.006	19.57	17.843	32.76	26.623	52.737	83.125	87.571	41.943	49.57	33.923	15.223	8.298	28.133	12.765	6.787	9.084	8.192	9.211	57.861	16.034	14.263	16.544		0.163716	32.1264
4.5274	15.269	15.149	27.433	26.799	93.994	55.224	30.651	21.916	16.909	14.172	29.958	24.155	43.759	79.67	68.847	39.036	43.322	28.843	14.281	7.492	28.291	13.109	8.592	7.974	7.67	7.982	53.402	13.448	11.409	16.732		0.168143	28.8496
4.6465	14.37	12.735	20.472	21.827	83.576	50.522	33.553	19.008	14.179	12.342	28.849	17.32	39.129	77.354	59.272	34.673	42.044	26.446	13.419	8.696	26.216	11.162	6.274	8.273	7.756	9.005	50.037	13.936	10.998	18.463		0.172566	26.3969
4.7657	13.453	11.853	21.54	16.745	75.221	49.808	28.645	21.786	12.699	12.259	23.344	17.477	39.378	62.016	50.332	36.496	36.514	25.775	12.118	8.804	29.601	11.5	6.288	7.543	6.698	6.578	46.807	12.675	10.776	16.78		0.176993	24.3836
4.8848	14.949	13.561	18.326	19.536	66.392	46.572	25.55	18.378	14.961	10.866	22.308	16.182	35.395	50.519	44.357	34.915	35.295	21.19	9.029	7.973	26.16	11.685	5.258	6.672	5.753	7.308	44.098	11.371	9.484	18.347		0.181416	22.413
5.0039	12.659	11.93	17.807	20.034	56.038	42.484	22.888	16.603	12.56	8.749	19.082	15.092	34.654	44.053	36.305	29.916	36.03	20.283	9.307	7.689	27.586	9.848	5.215	6.322	6.261	7.205	38.997	9.436	9.815	16.281		0.18584	20.371
5.1231	11.217	12.291	18.287	17.555	48.614	40.055	21.218	14.19	12.764	9.32	18.058	13.426	30.175	39.753	29.298	30.113	35.225	20.519	6.385	8.262	27.187	10.303	6.516	4.791	5.247	7.515	31.862	9.875	9.462	17.076		0.190267	18.8853
5.2422	10.78	10.442	16.15	16.573	41.539	37.389	22.838	13.601	12.695	11.006	15.507	12.449	23.02	35.265	28.211	28.564	29.433	17.778	6.124	6.783	28.31	9.809	6.651	6.003	6.926	7.198	26.801	9.532	9.375	17.998		0.19469	17.4917
5.3614	11.847	9.604	14.622	15.652	35.663	35.127	17.452	10.75	11.295	9.754	13.892	11.388	20.93	29.267	23.144	28.997	27.49	16	5.718	6.735	27.527	9.817	7.135	7.093	5.403	6.564	22.477	9.155	11.988	15.146		0.199117	15.9211
5.4805	11.919	9.858	14.896	15.239	33.428	29.781	16.77	9.099	13.847	7.928	14.157	12.092	22.213	23.064	23.547	27.599	22.216	13.198	5.013	6.674	28.09	8.765	9.498	6.077	5.672	5.302	23.889	8.746	9.884	14.418		0.20354	15.096
5.5996	10.34	9.314	11.873	17.297	27.986	26.324	15.443	11.096	10.911	8.294	13.703	10.547	19.582	21.478	22.826	24.548	22.508	9.669	6.013	7.803	26.391	9.4	9.868	5.725	5.393	5.575	22.417	7.943	10.091	12.303		0.207963	14.0887
5.7188	11.668	7.935	13.298	15.191	23.594	24.804	15.867	10.005	10.618	6.639	12.459	8.445	16.789	17.419	16.549	24.723	20.724	8.891	6.824	8.474	27.465	8.838	13.347	7.027	5.676	6.596	19.907	7.848	10.056	13.203		0.21239	13.3626
5.8379	7.783	8.827	12.551	16.763	21.357	23.615	14.549	8.888	9.577	5.595	8.355	7.455	17.448	15.178	15.767	28.57	16.571	8.923	4.283	6.424	24.445	9.614	16.025	5.969	5.306	5.667	17.371	6.208	10.155	10.848		0.216814	12.3362
5.9571	9.15	8.141	11.217	17.523	18.702	19.947	15.164	8.185	10.165	6.355	9.096	7.664	15.259	13.947	12.108	29.746	15.764	7.853	5.044	6.33	26.155	8.914	12.661	5.832	4.635	6.628	15.276	6.538	8.848	13.213		0.221241	11.8687
6.0762	8.249	7.935	12.64	14.894	19.681	20.122	12.891	8.499	12.083	5.821	8.258	8.433	15.032	12.182	11.623	25.109	15.048	7.54	5.008	5.701	25.626	9.956	12.752	4.87	4.974	7.97	15.932	8.18	6.716	12.588		0.225664	11.5438
6.1953	7.846	7.815	12.14	15.437	22.262	20.706	11.658	7.581	9.565	4.5	6.848	7.444	15.478	12.933	11.611	23.153	12.821	6.824	4.607	6.235	25.916	11.165	11.801	5.299	4.775	6.928	15.789	8.659	8.947	11.332		0.230087	11.2692
6.3145	7.758	8.064	10.288	14.36	20.801	17.474	10.519	6.062	10.113	4.538	5.928	7.22	14.963	13.59	8.306	22.072	10.017	6.56	4.545	5.232	27.094	10.848	10.711	5.786	5.334	6.2	15.758	7.43	7.263	11.526		0.234514	10.5453
6.4336	7.663	7.619	10.386	14.609	18.511	16.6	9.28	6.845	10.825	3.887	6.875	5.536	12.85	12.485	8.085	21.602	9.344	5.035	4.689	4.909	28.042	9.491	11.792	5.873	4.572	6.058	17.484	8.349	7.457	10.1		0.238937	10.2284
6.5528	8.391	6.94	10.954	13.71	19.98	14.829	8.112	4.966	13.868	3.163	4.694	6.021	12.545	11.912	9.833	16.972	7.09	6.854	3.873	4.516	26.243	9.552	11.049	5.974	5.555	6.903	18.436	8.106	7.287	9.621		0.243364	9.93163
6.6719	8.364	6.05	9.771	14.12	15.8	14.536	8.279	5.766	11.238	3.471	3.823	7.021	12.174	11.031	9.6	19.563	5.452	4.472	4.606	4.857	26.016	11.206	10.534	5.138	4.74	7.446	15.921	6.291	5.555	8.639		0.247787	9.38267
6.7911	7.296	6.427	9.879	13.032	13.756	11.738	6.263	7.033	11.197	4.411	5.061	6.909	11.944	12.432	9.121	19.112	6.362	5.029	4.134	5.318	23.183	11.223	10.228	6.466	5.563	6.082	16.442	7.736	5.988	8.831		0.252214	9.2732
6.9102	6.888	5.823	9.257	14.649	13.613	13.424	5.751	6.534	9.701	3.492	5.651	6.699	12.676	11.816	10.45	19.767	6.893	5.292	5.238	5.911	20.512	10.696	10.35	6.601	5.621	6.403	18.631	6.132	6.079	11.138		0.256638	9.3896
7.0293	8.376	6.488	9.211	13.776	15.807	10.753	6.365	7.056	11.017	4.313	4.344	6.035	10.026	12.206	11.891	18.983	6.852	5.335	6.032	4.469	18.975	11.465	10.627	6.995	5.245	5.763	17.819	8.179	5.479	7.919		0.261061	9.26003
7.1485	5.615	7.574	7.899	15.498	12.002	12.364	6.404	6.315	11.779	3.991	5.184	5.54	10.646	12.801	14.098	18.559	7.943	6.051	6.251	5.328	22.353	13.487	9.682	6.764	5.021	5.372	20.342	6.164	5.521	7.689		0.265488	9.47457
7.2676	6.947	6.865	7.617	13.17	10.953	12.073	5.659	6.354	11.01	5.073	5.467	5.799	10.868	10.945	13.483	20.024	7.332	5.591	7.295	4.815	23.295	17.513	9.307	6.311	4.836	6.424	18.816	6.371	5.921	8.124		0.269911	9.47527
7.3868	6.661	6.481	7.577	13.942	10.419	9.394	6.869	5.443	12.386	3.922	4.44	6.685	9.455	11.69	13.515	18.735	9.544	4.909	6.257	5.74	25.121	14.198	8.099	6.494	5.031	6.118	22.024	5.866	5.6	5.997		0.274338	9.28707
7.5059	5.764	7.132	7.617	14.038	10.607	8.683	6.767	5.991	10.285	3.868	4.426	5.358	8.571	12.819	13.634	19.47	11.333	4.985	6.841	6.331	25.384	14.526	8.418	5	6.51	6.619	18.612	4.79	6.653	7.633		0.278761	9.28883
7.625	7.343	6.712	7.504	14.345	9.972	9.879	6.165	6.829	10.835	4.77	4.672	5.808	10.47	14.142	15.738	16.845	13.33	5.236	7.027	6.379	22.505	15.346	6.529	6.87	7.455	8.207	20.688	5.026	5.926	6.742		0.283185	9.64317
7.7442	6.928	6.072	7.186	13.087	12.375	9.286	5.458	7.152	12.058	4.172	5.325	6.651	10.156	12.537	15.023	17.669	12.825	5.868	5.714	4.515	21.057	15.567	7.52	6.697	6.478	7.484	20.7	5.171	5.011	6.284		0.287612	9.40087
7.8633	6.774	6.894	5.921	11.398	8.681	7.303	4.889	5.705	11.316	4.287	4.116	6.229	9.434	10.337	16.586	15.447	12.88	4.946	6.18	7.068	23.94	13.185	7.551	7.066	5.741	8.874	22.479	5.361	5.458	6.57		0.292035	9.0872
7.9825	6.024	5.851	5.624	13.177	8.632	7.522	4.327	6.716	11.567	4.438	3.887	5.849	9.009	11.059	15.39	15.688	12.7	5.51	5.262	6.548	26.377	16.316	7.195	8.265	6.937	9.077	24.611	6.936	5.807	6.33		0.296462	9.42103
8.1016	6.352	5.732	6.071	11.003	7.776	7.838	5.274	6.531	10.531	4.086	4.328	6.341	8.778	9.536	14.295	19.234	14.306	4.759	6.883	6.809	22.191	14.36	7.002	7.951	6.476	8.408	23.458	5.546	7.147	7.294		0.300885	9.20987
8.2207	6.256	6.441	5.939	12.266	7.792	8.509	4.527	5.724	14.504	4.478	4.472	6.426	9.204	10.586	13.598	18.261	13.513	3.891	6.82	6.388	21.966	15.276	8.141	9.394	8.37	6.82	25.864	5.196	6.532	7.585		0.305308	9.4913
8.3399	7.332	6.082	5.499	12.852	7.296	7.657	5.028	6.16	15.997	3.256	4.971	5.466	10.436	9.093	12.053	21.409	11.517	3.745	6.311	5.388	22.511	16.756	7.172	11.907	8.243	8.612	27.585	5.364	4.44	7.348		0.309735	9.58287
8.459	5.774	7.52	6.679	13.589	6.538	7.873	5.46	5.512	16.8	4.494	3.406	8.277	11.555	9.869	13.198	19.828	13.484	4.867	7.13	6.077	21.956	17.717	7.873	14.81	8.109	10.058	29.959	5.967	5.353	7.638		0.314158	10.2457
8.5782	5.61	7.058	6.582	13.671	6.769	6.221	5.284	6.189	17.019	4.022	3.382	6.396	9.468	9.989	15.887	25.222	15.519	4.144	7.511	5.705	21.513	20.374	8.262	15.706	9.36	8.88	31.593	4.98	4.388	7.482		0.318585	10.4729
8.6973	7.244	6.442	5.865	12.711	6.554	6.205	5.611	5.264	21.074	4.179	4.569	7.353	8.469	10.61	14.53	24.26	15.402	4.544	8.33	6.566	21.195	21.326	9.147	16.62	10.044	7.373	34.016	5.431	4.937	6.882		0.323009	10.7584
8.8165	6.686	6.706	5.215	12.472	5.325	7.87	4.89	6.064	22.039	3.865	4.032	7.155	9.254	9.758	16.482	23.736	15.525	6.481	10.406	6.6	21.474	20.552	9.501	20.584	9.851	9.008	38.822	4.945	4.472	7.129		0.327436	11.23
8.9356	5.585	7.169	6.026	14.017	7.131	7.45	4.052	5.898	26.161	4.403	4.702	7.52	11.354	8.607	16.901	25.252	16.561	4.924	9.175	5.731	17.708	21.864	11.327	22.714	11.928	8.789	41.618	5.519	5.855	7.432		0.331859	11.7791
9.0547	6.422	6.247	6.942	13.07	6.66	6.39	3.587	6.037	27.26	4.697	4.238	7.491	11.995	12.651	20.323	24.92	17.161	4.131	10.62	5.913	16.845	23.879	9.988	24.74	11.579	10.659	48.908	4.871	5.204	8.032		0.336282	12.382
9.1739	6.229	7.727	7.303	12.997	7.097	7.628	4.14	6.132	34.778	4.599	4.262	6.174	12.52	12.369	21.453	24.208	17.142	4.413	10.478	7.326	16.13	24.99	11.283	24.524	11.164	11.047	49.462	5.017	3.85	8.327		0.340709	12.8256
9.293	7.02	8.548	5.541	13.256	6.775	6.336	3.817	5.492	33.907	4.513	4.587	6.545	14.831	11.421	24.811	26.241	17.351	6.167	11.084	7.798	15.853	27.028	9.342	21.53	10.625	12.259	49.352	4.487	4.728	6.595		0.345132	12.928
9.4122	7.078	8.274	5.758	16.68	6.177	5.784	4.165	5.858	39.677	4.709	3.951	6.549	14.727	12.864	27.204	27.374	16.661	6.165	12.558	7.587	16.775	29.006	10.285	23.677	9.312	14.899	48.629	4.943	4.084	6.254		0.349559	13.5888
9.5313	6.264	8.624	6.054	16.576	5.261	5.149	4.838	5.927	41.093	4.557	3.455	6.925	16.585	10.502	30.888	27.735	18.448	6.152	11.908	8.44	16.668	35.093	10.42	18.733	10.511	15.055	55.412	5.804	3.209	5.033		0.353983	14.044
9.6504	5.951	8.083	6.317	18.973	5.836	5.726	3.206	5.547	43.357	5.656	2.779	7.463	16.154	12.55	32.42	29.185	18.445	6.452	11.741	6.871	13.415	30.983	11.367	19.424	8.982	13.45	52.951	5.513	4.288	5.478		0.358406	13.9521
9.7696	6.109	6.025	7.294	19.403	6.045	7.179	4.7	6.324	46.155	6.229	3.499	8.149	14.238	14.66	33.884	33.384	19.456	5.998	12.208	6.18	12.49	29.157	10.127	18.329	9.295	14.78	50.292	4.157	4.401	5.981		0.362833	14.2043
9.8887	6.255	7.265	6.593	19.983	6.874	5.91	4.297	5.498	40.112	6.024	4.036	6.522	15.142	15.851	40.583	32.188	20.035	6.418	14.114	6.779	12.752	31.689	10.783	16.654	9.766	16.836	41.267	4.696	4.35	5.416		0.367256	14.1563
10.0079	7.798	7.437	6.691	20.33	5.599	3.941	4.951	6.284	36.21	4.565	4.685	7.987	16.331	15.152	38.584	36.322	19.391	5.904	13.439	9.228	10.968	29.969	12.444	16.951	10.096	17.49	42.222	4.795	3.89	5.946		0.371683	14.1867
10.127	7.32	6.783	6.722	21.845	5.358	5.445	4.674	5.253	37.069	6.879	4.426	6.875	17.014	16.658	42.69	34.017	21.194	5.336	11.083	8.874	10.88	31.691	12.828	13.766	8.5	18.646	42.715	5.119	3.916	6.217		0.376106	14.3264
10.2462	6.507	6.382	6.899	24.346	5.327	5.216	4.869	4.8	35.69	6.187	4.644	7.359	16.824	17.63	41.642	33.835	18.592	5.923	11.881	8.229	10.035	33.046	16.105	13.918	7.986	18.3	41.501	4.614	4.487	5.281		0.380533	14.2685
10.3653	6.959	6.605	8.349	25.022	6.107	5.954	4.425	6.279	37.928	5.156	6.082	7.393	14.484	17.882	40.35	29.432	21.93	6.007	11.54	8.037	10.386	30.711	14.856	13.236	7.516	20.053	42.098	5.46	4.279	5.156		0.384956	14.3224
10.4844	6.834	5.93	8.084	25.739	6.797	5.483	4.509	6.11	38.501	6.029	5.49	6.388	14.79	17.744	40.166	28.752	20.493	6.904	10.186	8.528	11.269	34.944	14.618	10.895	7.759	19.555	38.395	5.895	3.699	4.87		0.38938	14.1785
10.6036	8.796	6.886	8.073	26.509	6.207	5.923	4.822	6.94	39.427	7.483	4.597	8.216	12.644	16.597	32.302	29.999	22.572	7.992	9.441	9.171	9.123	42.737	14.848	9.541	8.836	24.531	37.195	5.697	3.816	6.001		0.393807	14.5641
10.7227	7.759	6.927	9.981	28.521	7.547	6.172	4.118	6.797	36.53	7.176	4.553	6.8	14.283	18.96	27.008	27.279	22.229	7.125	7.742	8.777	9.529	45.973	15.348	11.843	6.84	21.332	35.561	5.136	4.342	5.766		0.39823	14.2651
10.8419	8.166	6.751	9.424	30.569	6.176	5.6	4.772	7.961	40.574	6.243	5.154	6.783	15.556	18.612	25.499	28.828	25.365	6.613	8.612	6.962	7.94	48.742	15.819	10.474	7.009	19.795	39.476	4.449	4.91	4.19		0.402657	14.5675
10.961	8.14	8.077	11.386	30.235	8.046	6.636	4.927	8.145	40.777	6.746	5.137	7.116	15.891	18.422	27.022	28.38	29.824	6.565	7.638	6.726	7.272	50.367	19.387	9.275	7.796	21.086	42.272	4.22	3.734	5.195		0.40708	15.2147
11.0801	7.793	8.639	11.703	33.987	6.099	5.996	4.858	9.801	40.878	6.542	5.236	7.304	16.239	19.661	31.166	29.728	35.101	6.756	7.422	7.278	9.649	54.509	16.096	9.211	7.294	19.543	40.808	5.072	3.648	4.527		0.411503	15.7515
11.1993	7.351	9.446	12.02	32.394	7.152	6.463	6.182	8.447	40.129	7.167	5.041	6.732	18.352	18.68	36.447	30.271	41.037	6.766	7.273	6.075	9.935	55.554	16.114	11.78	6.592	17.473	43.038	5.704	4.176	4.344		0.41593	16.2712
11.3184	8.602	7.255	13.818	34.459	7.807	5.716	5.958	8.931	38.453	7.823	5.121	6.589	21.872	24.885	44.207	34.755	41.875	7.608	6.828	7.471	7.73	58.829	16.808	9.252	8.614	16.328	45.523	5.79	3.619	4.101		0.420354	17.2209
11.4376	9.346	6.531	11.896	35.556	6.566	8.079	6.676	9.26	39.175	7.419	5.104	5.917	24.194	31.253	56.368	33.752	46.877	7.579	5.981	5.863	8.223	58.013	16.082	10.12	9.487	13.642	46.712	3.82	3.838	5.248		0.424781	17.9526
11.5567	7.832	8.85	12.157	39.021	6.285	8.008	7.1	9.452	44.603	8.638	5.7	5.946	24.147	33.809	67.629	31.812	51.17	6.087	8.395	6.633	8.222	61.9	15.147	9.114	9.117	12.102	48.172	5.697	3.389	5.08		0.429204	19.0405
11.6758	6.351	7.522	12.443	44.121	6.901	7.668	6.263	9.42	42.595	10.041	6.05	5.752	25.271	33.897	70.274	31.32	48.271	7.402	7.562	7.063	7.058	58.338	15.458	8.822	8.486	11.528	51.384	4.905	4.128	4.7		0.433627	19.0331
11.795	7.139	7.994	13.168	48.501	6.906	8.348	6.823	9.991	44.48	10.618	6.338	6.578	28.984	33.625	67.884	32.432	54.618	7.269	6.535	5.691	6.665	64.493	13.235	8.92	9.554	10.707	59.718	5.644	4.721	5.213		0.438054	20.0931
11.9141	7.212	8.348	12.946	52.135	8.047	6.764	7.083	9.888	48.455	10.941	5.53	6.343	32.252	35.489	75.005	38.019	53.882	7.3	8.755	6.618	6.705	64.774	13.314	8.547	11.846	10.148	56.299	4.201	3.566	4.004		0.442477	20.8139
12.0333	8.835	8.188	13.759	55.765	7.517	8.049	6.595	10.6	44.648	10.467	5.556	5.925	29.129	37.363	75.324	42.121	53.607	8.633	7.5	6.038	8.311	65.004	12.852	9.357	13.612	10.561	57.56	4.489	3.951	4.924		0.446904	21.208
12.1524	8.036	7.898	14.598	59.531	6.089	8.179	6.743	10.836	48.776	10.525	4.21	4.889	26.089	37.633	75.671	41.629	52.68	8.092	5.928	5.178	6.595	62.803	15.179	9.678	13.908	10.549	58.709	5.012	4.437	5.146		0.451328	21.1742
12.2716	7.715	9.464	12.879	65.558	7.506	8.287	7.827	11.11	47.083	9.995	4.894	5.89	30.155	36.632	76.824	41.442	52.572	8.228	6.827	5.893	7.651	62.518	14.279	9.15	13.648	10.613	60.511	7.132	4.339	5.418		0.455754	21.7347
12.3907	7.705	8.487	10.487	67.02	7.913	7.656	7.691	12.577	52.846	8.288	5.694	5.844	25.876	40.518	74.209	37.176	48.136	7.648	6.658	5.768	6.197	58.936	13.036	7.32	13.219	10.935	61.887	5.223	2.955	4.981		0.460178	21.0962
12.5098	9.365	8.652	11.72	67.884	8.92	8.226	7.706	12.186	46.984	10.459	4.265	5.544	27.308	40.078	67.946	36.34	42.862	9.359	5.828	7.09	6.892	60.431	15.226	8.129	14.578	10.345	64.109	5.634	3.918	4.284		0.464601	21.0756
12.629	7.839	8.464	12.191	70.039	8.28	7.18	7.478	9.453	53.827	9.226	5.277	4.435	21.482	41.716	53.716	30.221	40.947	8.269	5.629	5.745	5.574	51.039	15.98	7.258	14.242	10.947	66.133	6.917	3.365	4.51		0.469028	19.9126
12.7481	11.154	7.712	11.226	70.981	8.28	9.746	6.923	10.334	50.581	8.745	4.908	5.175	18.505	43.487	42.485	27.508	43.024	7.323	6.849	5.52	7.13	45.876	14.391	6.601	15.29	10.904	71.059	7.482	3.304	4.557		0.473451	19.5687
12.8673	7.004	6.696	14.362	69.118	8.993	10.298	7.815	12.575	43.789	9.312	4.191	4.742	15.378	44.739	32.564	23.938	41.383	7.966	6.228	5.372	6.824	45.852	14.343	5.556	13.379	11.607	64.01	7.144	3.513	3.996		0.477878	18.4229
12.9864	7.215	6.161	12.884	64.042	9.015	10.368	7.55	10.266	44.187	8.973	5.39	4.306	13.994	48.552	28.402	22.675	45.039	7.268	4.818	5.922	7.194	38.514	15.676	5.742	10.441	11.539	64.063	6.188	3.586	4.971		0.482301	17.8314
13.1055	7.424	7.393	9.22	68.161	8.517	10.881	8.827	12.231	40.254	8.616	4.731	4.665	13.197	42.921	22.965	23.12	47.402	5.798	6.083	4.874	6.72	27.36	16.392	6.457	10.461	10.654	68.556	5.474	3.125	5.301		0.486725	17.2593
13.2247	5.308	7.243	8.565	68.224	6.903	9.096	9.686	14.474	36.716	8.902	5.943	4.395	10.612	45.863	20	28.463	51.914	6.465	5.627	5.34	6.514	28.248	15.523	6.586	10.138	11.961	64.746	6.407	4.326	4.738		0.491152	17.2975
13.3438	6.321	6.613	9.026	60.331	7.172	9.547	11.6	11.918	39.95	8.141	5.155	4.005	10.237	42.98	17.937	27.19	51.417	7.071	4.387	5.468	6.265	25.773	18.593	7.208	8.815	9.798	65.238	6.728	3.096	5.28		0.495575	16.7753
13.463	6.68	6.219	10.74	57.982	8.048	9.553	11.024	12.637	42.641	8.371	4.787	4.909	9.47	37.26	17.747	30.62	52.829	6.106	4.268	5.708	6.461	22.787	17.501	7.252	10.863	10.315	71.344	7.432	3.759	4.441		0.500002	16.9918
13.5821	6.964	5.513	10.287	51.042	9.164	10.052	11.172	11.733	46.572	9.165	5.382	4.403	10.081	35.17	17.14	34.02	56.163	6.077	5.294	5.356	5.258	22.309	19.217	7.758	9.348	11.462	66.839	7.529	3.584	4.487		0.504425	16.9514
13.7012	6.53	5.448	9.352	54.212	9.198	10.848	10.38	12.346	47.626	9.581	4.982	4.767	9.347	32.917	17.274	27.567	59.569	6.11	4.333	5.154	4.806	22.159	21.943	10.533	10.876	9.464	67.431	7.237	3.437	3.562		0.508848	16.9663
13.8204	7.179	6.469	9.231	51.337	10.381	10.658	10.215	14.763	53.81	9.764	4.678	3.739	9.831	37.75	17.929	26.69	65.451	5.47	5.759	5.46	4.487	24.276	22.442	10.922	11.047	11.763	61.364	8.374	4	4.451		0.513275	17.6563
13.9395	6.743	5.605	8.141	40.765	9.95	8.436	10.355	14.03	63.045	9.213	6.867	4.687	9.657	39.319	17.774	23.848	72.92	5.755	6.701	5.178	5.305	21.359	26.837	10.941	7.88	13.395	58.407	7.258	3.912	3.352		0.517699	17.5878
14.0587	6.113	6.097	7.7	40.175	9.39	9.081	11.174	14.954	72.642	9.58	4.457	5.197	7.548	37.293	20.963	23.412	78.836	6.169	4.669	5.631	5.131	19.154	26.995	9.784	8.042	12.9	49.024	7.515	2.733	3.464		0.522126	17.5274
14.1778	5.58	6.681	8.904	40.792	8.043	8.265	9.444	14.989	79.439	9.013	4.582	5.245	7.648	35.815	20.462	23.738	81.524	5.713	4.444	5.533	5.867	18.635	25.615	10.33	9.065	12.024	47.58	9.759	3.043	4.476		0.526549	17.7416
14.297	5.987	6.517	8.344	44.181	8.993	8.224	10.146	11.586	79.974	9.348	4.382	5.712	7.158	36.481	20.803	23.604	82.748	6.287	5.71	4.224	5.725	16.956	23.236	11.023	9.439	13.72	44.69	9.276	3.105	4.979		0.530976	17.7519
14.4161	7.032	5.69	7.335	41.439	7.559	8.39	10.168	13.803	88.687	10.085	5.53	3.994	6.863	38.063	17.748	23.511	89.713	7.13	5.01	5.421	5.588	15.284	25.76	12.228	11.628	13.199	41.901	7.959	3.479	4.721		0.535399	18.1639
14.5352	6.629	5.269	7.693	42.784	6.309	9.204	9.059	14.9	87.624	9.36	5.039	5.231	6.594	39.251	18.236	26.136	97.134	7.144	5.113	4.488	5.721	14.346	27.213	10.413	9.726	10.825	38.102	9.607	4.196	4.051		0.539822	18.2466
14.6544	8.195	5.078	8.856	38.362	8.859	8.746	9.233	15.6	88.598	8.943	4.784	4.804	6.417	41.578	15.556	24.535	103.086	7.522	4.899	4.845	5.267	16.525	29.081	14.191	9.259	11.823	31.591	9.537	4.271	4.306		0.544249	18.4782
14.7735	6.675	5.078	8.308	34.586	9.24	8.994	9.08	14.693	97.964	10.5	4.892	3.864	8.027	43.905	16.511	28.134	104.183	6.197	4.806	5.138	5.045	14.323	31.547	11.129	10.844	11.942	25.215	11.89	3.005	4.274		0.548672	18.6663
14.8927	6.315	5.86	6.838	33.593	9.512	8.155	8.484	15.167	95.855	10.936	3.797	3.952	7.108	46.284	19.557	27.772	102.514	6.688	4.781	5.114	5.93	12.189	32.431	11.625	11.427	10.807	27.373	12.06	3.953	5.205		0.553099	18.7094
15.0118	4.923	5.274	9.203	33.2	8.996	9.388	9.737	14.441	106.05	11.658	3.914	4.523	5.838	53.507	20.549	28.91	107.787	6.896	5.313	6.653	5.334	11.504	32.713	10.574	10.907	11.471	22.944	13.568	3.762	4.129		0.557523	19.4555
15.1309	6.038	5.279	7.931	34.262	9.026	9.576	8.88	15.138	101.913	10.205	4.349	4.063	6.11	54.087	19.525	28.51	112.236	5.601	4.134	4.774	5.884	11.852	32.168	12.413	11.851	12.082	22.199	14.257	3.979	4.479		0.561946	19.4267
15.2501	7.354	5.425	7.836	33.266	8.969	8.14	9.985	15.193	105.37	10.583	5.646	4.888	3.762	56.903	25.449	23.54	118.19	5.286	5.352	4.736	5.796	8.67	34.417	10.377	11.499	12.602	19.797	15.619	4.595	5.582		0.566373	19.8276
15.3692	6.804	5.892	7.769	33.14	8.633	8.239	11.393	14.489	96.912	9.461	4.004	4.334	5.733	60.201	27.081	22.334	121.114	6.36	4.902	4.21	5.443	8.69	30.789	11.323	11.49	13.567	19.955	15.951	3.451	4.477		0.570796	19.6047
15.4884	7.286	5.436	8.392	33.068	9.6	8.737	8.065	13.14	100.318	8.426	4.854	3.681	5.951	66.573	30.314	20.89	124.646	6.435	5.45	3.898	5.517	7.589	29.98	10.934	10.719	12.556	21.906	16.578	3.874	4.224		0.575223	19.9679
15.6075	5.695	4.651	8.289	34.518	8.121	8.579	8.149	13.558	102.012	9.342	5.224	3.406	4.774	73.375	34.258	19.699	121.645	6.705	4.913	5.288	5.545	7.334	29.785	9.812	11.356	12.849	21.181	19.91	3.833	4.864		0.579646	20.289
15.7266	5.015	5.737	6.961	37.9	8.85	7.64	8.953	12.825	101.53	11.546	5.223	3.602	5.824	72.445	34.119	18.751	117.705	6.021	5.245	4.108	5.68	6.819	27.074	8.86	10.744	15.037	21.132	22.346	4.143	4.189		0.58407	20.2008
15.8458	4.997	6.418	6.86	42.474	7.965	10.052	6.109	11.674	102.679	10.42	4.768	3.84	5.429	80.438	35.497	18.276	107.136	5.574	4.482	4.052	4.63	6.234	32.094	9.175	10.361	15.725	15.23	23.888	3.607	3.415		0.588497	20.1166
15.9649	7.005	5.825	7.766	41.735	8.47	7.891	6.53	11.181	98.104	11.184	4.518	3.748	3.91	87.129	36.316	19.36	99.347	5.422	5.168	3.574	3.64	6.667	32.434	10.19	11.188	15.109	13.715	24.607	3.477	4.012		0.59292	19.9741
16.0841	6.062	5.768	7.877	45.712	7.74	7.381	5.924	10.17	95.438	10.579	3.85	4.014	4.63	76.985	41.435	14.733	96.674	5.689	5.128	3.252	3.709	5.647	34.072	8.059	10.098	16.63	15.195	26.388	4.873	4.991		0.597347	19.6234
16.2032	5.672	4.943	6.426	44.422	7.922	8.17	6.126	10.287	95.173	12.1	4.704	3.806	4.532	76.452	42.13	16.25	83.798	5.721	4.958	3.154	4.593	6.044	30.228	9.465	11.52	17.968	13.81	29.352	4.79	3.686		0.60177	19.2734
16.3224	4.675	6.757	7.239	45.905	8.133	10.667	6.174	9.905	91.148	10.98	4.521	4.528	3.79	77.994	36.019	14.427	73.485	6.621	4.86	3.182	4.284	5.958	27.819	7.122	11.555	17.9	14.173	30.054	3.469	4.275		0.606197	18.5873
16.4415	5.703	6.494	7.71	48.236	9.153	8.206	7.486	8.482	83.148	10.77	4.305	3.455	4.72	75.033	31.142	12.913	70.348	7.868	4.866	4.835	5.751	5.703	24.936	8.356	10.145	22.104	16.144	30.165	3.979	4.668		0.61062	18.2275
16.5606	5.761	6.8	6.406	45.709	8.644	6.934	6.514	8.998	77.767	10.323	5.204	3.751	4.536	69.817	28.489	12.439	56.257	5.969	4.739	4.702	4.82	5.11	23.606	9.712	11.616	24.608	15.879	33.798	4.83	4.149		0.615044	17.2629
16.6798	5.156	5.483	7.059	43.067	8.931	9.355	5.821	9.654	77.455	9.479	4.996	4.115	4.22	78.553	25.686	12.942	47.406	6.646	3.899	3.814	3.993	6.64	18.748	10.911	13.336	24.476	16.457	36.876	4.708	3.33		0.61947	17.1071
16.7989	5.628	5.624	7.67	43.643	6.901	8.685	6.179	11.409	75.266	9.482	4.55	3.315	3.758	77.648	24.579	13.225	44.503	5.691	4.653	4.091	4.678	4.809	20.397	9.461	13.233	27.678	17.703	36.065	3.971	4.628		0.623894	16.9708
16.9181	6.173	5.726	7.828	42.952	7.237	6.835	5.322	10.702	73.877	9.939	3.971	3.931	4.081	75.889	26.361	11.843	42.493	5.665	4.792	4.865	4.729	4.403	17.801	10.849	13.953	29.215	16.785	41.799	4.568	3.732		0.628321	16.9439
17.0372	5.234	5.973	9.199	44.812	8.017	5.87	5.613	11.418	71.078	9.038	5.416	4.589	4.182	73.032	23.169	13.643	42.487	6.221	4.399	4.079	4.039	4.75	17.148	12.594	14.91	33.503	16.685	38.381	4.631	4.006		0.632744	16.9372
17.1563	5.798	5.744	8.805	47.58	7.498	5.768	5.576	12.456	68.474	6.937	5.115	4.169	3.679	69.097	23.251	13.677	39.352	6.45	4.337	3.054	3.78	4.916	15.15	19.789	14.654	35.348	15.5	36.085	4.412	4.303		0.637167	16.6918
17.2755	5.945	5.576	7.763	54.498	6.499	7.133	6.436	12.352	71.814	7.033	4.272	4.164	5.058	72.141	24.018	14.047	39.914	5.699	4.427	3.227	4.191	4.377	13.498	23.404	13.702	38.788	15.522	39.809	5.076	3.798		0.641594	17.4727
17.3946	5.302	4.381	8.245	56.608	6.796	5.904	5.594	10.816	75.674	7.955	4.367	4.711	4.137	68.376	25.489	12.564	37.889	6.107	4.405	3.525	3.539	4.521	10.533	24.396	16.306	38.541	15.557	41.197	7.069	2.947		0.646017	17.4484
17.5138	4.644	5.324	6.72	52.004	7.221	7.104	5.053	11.402	73.641	8.275	4.477	5.277	4.053	63.851	28.933	14.122	38.124	6.915	4.283	4.414	4.555	3.796	8.857	27.604	18.538	43.643	13.414	38.925	7.376	3.747		0.650444	17.5431
17.6329	4.077	5.479	7.972	52.687	6.724	7.448	5.837	9.738	65.153	7.192	6.253	4.019	3.199	57.902	30.795	14.155	36.887	6.346	4.977	3.887	3.749	3.956	9.54	28.734	18.574	45.357	14.536	39.597	6.498	3.307		0.654868	17.1525
17.7521	5.114	5.991	7.585	52.453	6.497	6.148	6.097	9.664	62.822	8.631	5.488	4.174	3.558	50.226	31.875	15.33	35.513	5.186	4.188	4.313	3.196	3.808	8.139	29.327	20.984	46.371	17.841	41.494	5.92	3.93		0.659295	17.0621
17.8712	5.484	5.132	7.896	53.466	5.337	6.784	5.048	8.297	58.841	8.561	4.255	5.108	3.481	47.018	31.537	16.747	35.902	6.641	3.009	5.762	3.87	4.438	9.01	32.408	22.843	50.752	14.906	40.787	7.51	3.914		0.663718	17.1581
17.9903	4.282	5.455	7.659	55.29	7.207	6.122	6.14	7.879	59.815	8.966	5.269	4.61	4.778	45.755	30.241	20.501	33.681	6.526	3.308	3.808	3.92	4.211	8.41	33.981	25.783	56.892	15.345	39.521	11.991	3.16		0.668141	17.6835
18.1095	4.75	5.423	6.93	49.265	6.696	6.158	4.7	5.836	55.876	7.615	4.68	4.145	4.948	47.646	26.572	24.439	32.664	5.649	3.905	4.027	3.89	3.455	8.909	37.257	29.255	59.769	12.986	42.236	11.785	3.151		0.672568	17.4872
18.2286	5.084	4.957	6.718	45.99	5.727	5.149	4.836	7.492	55.587	7.894	4.404	3.399	4.506	41.501	25.598	25.484	34.437	6.055	4.057	3.607	4.243	4.185	7.252	39.181	36.656	61.315	14.274	43.561	15.322	4.178		0.676991	17.755
18.3478	5.341	5.681	6.756	42.861	6.976	5.892	6.058	8.21	59.406	8.163	4.822	3.591	4.652	42.942	22.806	23.586	35.809	6.667	3.608	4.264	4.427	4.947	8.604	37.185	44.126	62.032	17.584	45.963	13.304	4.425		0.681418	18.3563
18.4669	5.305	5.029	7.905	35.754	5.648	5.8	4.726	6.655	55.791	8.309	5.021	5.256	4.069	36.798	21.246	22.209	34.022	5.56	3.986	3.781	3.738	4.319	6.603	30.845	56.59	62.199	18.828	41.149	12.917	4.467		0.685842	17.4842
18.586	5.524	5.694	6.844	32.4	5.435	5.867	5.265	7.368	59.361	7.448	4.136	3.601	3.74	37.703	16.158	26.99	34.28	5.921	4.565	3.824	4.433	3.799	6.626	32.357	61.388	52.935	18.6	42.716	14.965	4.981		0.690265	17.4975
18.7052	4.586	5.229	8.145	30.153	5.689	5.619	4.831	6.143	55.132	7.412	4.779	4.582	3.996	36.302	16.323	26.913	33.082	6.44	4.436	3.187	3.618	3.478	6.56	34.274	66.411	46.309	23.832	48.682	15.554	5.314		0.694692	17.567
18.8243	5.455	5.85	7.925	26.626	5.757	5.373	6.148	7.024	57.616	6.387	4.299	4.764	3.522	34.602	16.543	25.057	30.929	4.493	4.25	3.841	4.622	3.672	6.237	34.624	61.247	41.309	24.482	49.435	15.294	4.773		0.699115	17.0719
18.9435	4.7	6.428	7.691	27.056	5.762	5.753	4.663	6.227	59.889	6.958	4.146	3.975	3.667	34.063	16.041	24.212	28.636	5.578	5.048	3.561	3.442	4.384	5.912	33.745	54.667	32.357	30.802	46.959	19.76	5.077		0.703542	16.7053
19.0626	4.451	5.712	7.748	26.206	5.573	5.774	6.407	6.194	60.214	6.635	4.375	5.055	3.782	31.332	17.257	24.36	27.194	4.539	4.28	3.963	3.604	3.909	7.162	35.041	48.297	26.539	33.716	54.377	22.695	4.538		0.707965	16.6976
19.1817	4.371	6.531	7.094	23.953	5.837	6.575	5.554	5.437	57.682	8.086	4.03	5.115	3.977	29.39	16.678	21.956	27.661	4.151	3.497	4.073	3.864	4.295	6.511	32.969	45.76	20.735	40.743	55.509	26.137	4.594		0.712388	16.4255
19.3009	5.425	5.16	7.373	24.948	5.028	5.201	5.74	6.876	53.94	9.725	3.903	3.974	3.984	28.292	17.635	27.029	30.819	5.853	3.813	4.066	4.903	4.841	6.629	30.472	47.102	15.551	45.715	56.501	28.05	5.494		0.716815	16.8014
19.42	5.631	5.35	6.87	27.066	5.92	6.485	6.126	6.01	59.767	9.037	4.016	4.174	4.823	30.175	16.797	26.74	26.496	5.616	4.216	3.079	5.152	3.236	6.387	29.256	43.728	13.593	44.956	55.994	34.73	6.607		0.721239	16.9344
19.5392	4.449	4.456	7.053	25.763	5.314	5.691	4.754	6.39	50.282	7.086	4.289	4.651	3.26	30.441	15.923	25.353	27.092	5.585	5.306	3.254	3.765	3.975	7.805	28.683	37.038	12.256	44.65	53.551	41.469	6.853		0.725666	16.2146
19.6583	4.07	6.727	7.816	25.796	6.748	5.712	4.906	7.555	50.005	6.801	4.976	4.107	4.184	26.907	15.797	24.937	27.296	5.821	4.522	4.64	3.96	3.628	10.119	26.937	29.766	9.912	47.857	49.07	46.059	9.303		0.730089	16.1978
19.7775	4.681	5.913	5.182	24.69	5.763	5.789	5.114	7.176	48.54	7.042	4.747	3.88	3.289	26.788	16.34	26.606	28.399	5.314	4.248	3.005	4.596	3.39	9.507	25.876	25.887	8.186	55.811	45.689	49.986	11.404		0.734516	16.0946
19.8966	4.496	5.499	5.577	24.325	6.06	5.618	4.871	6.25	46.916	6.177	4.495	5.169	3.402	24.486	14.892	25.163	28.182	5.629	5.304	3.672	3.834	3.964	9.049	26.424	22.421	6.532	52.392	35.646	55.434	13.642		0.738939	15.5174
20.0157	5.45	4.688	6.923	24.858	5.828	5.929	4.841	7.466	47.692	7.006	4.527	4.461	3.347	23.593	14.81	23.548	29.069	5.168	3.861	3.675	3.585	3.727	11.312	26.063	19.293	5.801	48.085	27.176	63.347	13.478		0.743362	15.2869
20.1349	5.455	5.441	7.296	24.385	5.973	4.006	4.63	7.285	48.922	5.259	3.487	4.738	2.872	22.508	16.003	24.29	28.955	6.08	4.168	2.444	3.308	2.836	11.485	24.039	16.833	4.589	43.12	21.029	78.424	17.324		0.747789	15.2395
20.254	5.065	5.047	7.411	22.55	6.635	5.584	4.915	7.357	52.095	5.883	3.62	4.527	3.172	20.574	17.066	25.632	28.29	6.052	3.236	3.707	2.703	3.833	14.045	20.5	15.331	3.723	34.966	18.292	77.805	21.92		0.752213	15.0512
20.3732	4.51	3.986	5.71	20.821	6.289	5.082	5.256	7.998	50.128	5.299	3.839	4.089	3.485	21.741	16.867	23.066	26.564	5.961	3.487	3.599	2.839	4.214	13.363	20.083	11.656	3.465	28.059	16.82	78.53	25.096		0.75664	14.3967
20.4923	4.466	4.139	7.536	21.259	6.592	4.775	5.501	7.149	52.509	5.915	5.004	4.373	4.023	23.003	16.186	22.947	25.222	4.643	2.964	3.707	3.805	3.298	12.843	17.761	10.772	3.47	22.69	17.502	75.104	28.326		0.761063	14.2495
20.6114	5.227	5.079	6.757	20.69	4.921	5.039	5.482	6.912	50.487	5.344	5.665	3.671	3.341	18.53	17.571	23.608	25.516	5.154	3.202	3.513	3.61	4.054	10.275	14.659	10.741	3.621	17.635	14.282	65.444	33.002		0.765486	13.4344
20.7306	5.223	4.711	5.955	21.862	6.35	3.83	5.084	7.148	50.943	6.009	3.752	4.825	4.112	17.45	17.236	23.779	25.403	5.589	4.305	3.157	4.064	3.38	9.659	11.28	10.598	2.563	12.959	12.875	62.44	37.356		0.769913	13.1299
20.8497	4.461	4.282	6.937	19.43	6.412	4.331	6.387	8.191	48.845	6.426	4.334	3.82	3.622	16.345	19.751	24.503	24.38	6.184	4.544	3.189	4.771	3.34	9.786	9.529	8.472	2.281	11.914	11.399	55.352	46.088		0.774336	12.9769
20.9689	4.161	4.49	8.054	19.67	5.616	4.953	6.03	9.206	53.721	7.333	4.435	3.751	3.887	15.558	20.941	27.389	21.614	6.807	3.592	3.743	4.146	4.124	10.141	7.175	6.992	1.945	10.61	9.742	52.716	56.411		0.778763	13.2984
21.088	5.414	4.292	7.595	19.842	4.951	4.041	6.204	10.733	56.959	6.052	4.453	3.509	4.043	14.432	24.372	26.486	21.938	6.134	3.54	4.774	4.099	3.67	9.343	7.584	5.841	2.002	7.864	7.408	51.001	65.796		0.783186	13.4791
21.2071	4.702	3.894	7.861	20.92	5.815	4.712	6.395	10.866	52.309	6.089	4.699	4.486	4.565	15.351	24.679	27.329	21.187	5.766	4.541	3	3.472	4.715	8.437	7.578	4.829	1.597	7.246	7.939	44.868	84.735		0.78761	13.8194
21.3263	4.887	5.199	8.504	18.338	4.998	4.766	5.881	12.338	52.335	6.416	5.49	3.312	3.697	15.326	31.347	31.881	20.662	6.134	4.385	3.691	3.458	5.114	6.099	6.951	5.095	1.907	6.654	6.831	34.731	92.358		0.792037	13.9595
21.4454	5.589	3.983	8.666	19.979	6.015	5.196	6.051	12.896	49.486	6.103	4.067	3.727	3.414	17.586	37.818	34.224	25.835	6.297	4.541	4.569	2.638	4.255	8.684	5.183	4.992	1.872	6.4	6.122	26.442	91.201		0.79646	14.1277
21.5646	4.041	4.722	7.375	19.638	6.516	5.535	7.008	13.345	51.493	5.912	4.019	3.244	4.254	16.916	40.064	35.714	25.221	6.859	4.438	3.823	4.334	4.195	8.209	5.472	4.495	1.458	4.92	4.034	15.152	85.705		0.800887	13.6037
21.6837	4.2	4.163	8.674	19.656	5.86	5.403	5.815	16.834	52.699	6.84	2.948	3.834	3.221	18.753	46.232	37.204	21.862	4.956	5.126	3.372	3.252	3.862	9.58	5.436	4.347	1.303	4.733	2.98	9.914	67.524		0.80531	13.0194
21.8029	4.882	5.291	8.668	23.104	6.338	5.536	6.092	19.623	49.613	6.317	3.522	4.022	4.783	21.021	46.07	43.932	23.259	4.774	4.892	3.228	3.886	6.082	8.715	4.634	2.786	1.133	3.365	2.485	8.44	50.008		0.809737	12.8834
21.922	4.128	4.169	8.543	24.011	7.33	4.132	4.911	19.563	47.234	7.13	4.796	3.864	4.69	22.884	53.67	40.721	22.301	6.204	4.126	4.861	3.769	5.227	8	4.359	2.691	0.962	2.475	2.121	5.3	33.976		0.81416	12.2716
22.0411	4.826	5.142	8.036	25.108	6.82	4.251	6.002	21.906	43.99	5.206	3.897	3.746	4.122	19.489	59.407	38.644	23.101	6.917	4.978	3.731	3.419	5.512	7.273	4.12	2.155	0.602	2.884	1.81	4.119	18.822		0.818584	11.6678
22.1603	5.914	5.677	7.175	24.483	7.243	4.173	5.907	22.837	43.278	6.58	3.483	3.202	3.348	19.815	60.552	38.139	19.966	5.72	4.346	5.187	4.731	6.139	6.145	2.887	2.556	0.428	2.44	1.807	2.702	10.384		0.823011	11.2415
22.2794	5.119	5.302	7.636	26.873	6.766	5.43	5.277	28.431	42.645	5.612	3.941	4.013	3.616	23.81	60.76	37.262	18.858	6.371	3.791	4.88	5.213	6.118	5.682	4.207	1.614	0.639	2.558	1.947	2.633	6.349		0.827434	11.4451
22.3986	5.349	5.252	8.237	29.456	6.717	4.449	5.656	33.87	42.185	4.09	3.684	3.379	4.45	24.691	59.592	34.102	19.566	7.416	4.195	3.953	4.086	8.531	4.479	3.253	1.521	0.747	1.999	2.019	2.49	3.783		0.831861	11.4399
22.5177	6.272	5.479	8.948	28.647	7.035	5.355	6.615	39.611	41.115	5.589	3.982	3.77	3.419	26.018	64.081	31.994	20.342	6.698	3.905	3.32	4.972	10.054	4.653	2.487	1.076	0.834	1.539	1.459	2.951	4.322		0.836284	11.8847
22.6368	5.708	5.272	8.482	33.156	7.469	5.593	6.007	45.195	37.694	5.697	2.901	4.803	3.984	27.593	59.642	31.536	20.77	7.196	4.977	3.485	4.92	12.74	3.845	2.601	1.133	0.538	1.46	1.381	1.721	4.147		0.840707	12.0549
22.756	7.207	6.416	8.425	32.963	8.306	4.967	7.02	48.107	35.772	5.756	3.676	3.963	4.996	30.48	59.845	24.994	26.991	7.895	4.31	4.054	5.403	16.866	3.849	2.756	2.042	0.252	1.601	1.1	2.388	2.381		0.845134	12.4927
22.8751	7.147	4.249	7.435	34.108	7.925	5.577	6.984	47.289	35.062	5.552	4.226	3.639	4.289	31.935	58.348	25.27	30.03	8.957	4.139	3.577	6.21	16.89	3.345	1.569	1.553	0.296	1.175	1.073	1.23	2.097		0.849557	12.3725
22.9943	4.936	5.232	7.919	32.627	7.296	5.207	7.976	50.131	37.093	5.671	3.33	3.997	5.554	32.705	59.755	22.091	30.492	9.016	4.459	4.614	7.303	20.291	3.604	1.45	1.202	0.409	0.884	1.1	1.653	1.869		0.853984	12.6622
23.1134	5.022	5.404	7.801	37.652	8.189	4.789	7.929	57.922	37.364	7.417	4.212	3.951	4.263	40.203	56.407	19.778	29.953	9.321	4.5	4.343	11.329	26.301	3.035	1.741	0.64	0.464	1.149	0.617	1.234	1.076		0.858408	13.4669
23.2325	5.796	5.155	8.764	37.091	8.086	5.901	7.271	56.235	30.853	7.676	3.747	3.956	4.78	39.715	51.635	15.653	29.078	10.125	4.655	3.733	14.277	25.475	2.075	1.246	0.847	0.283	0.555	1.194	0.944	1.35		0.862831	12.9384
23.3517	5.969	6.158	8.957	41.187	7.127	4.76	10.186	49.076	30.695	8.725	3.898	4.367	4.416	40.05	45.451	15.669	32.765	11.768	4.447	4.717	17.404	22.45	2.198	1.726	1.199	0.302	0.66	0.672	0.96	1.374		0.867258	12.9778
23.4708	7.415	6.563	11.223	44.012	9.042	4.912	9.012	50.084	28.968	8.392	3.654	4.284	5.458	44.362	38.695	13.409	34.258	12.921	3.897	5.698	18.419	20.389	2.785	1.562	0.662	0.402	0.648	0.922	1.171	1.226		0.871681	13.1482
23.59	6.674	6.009	9.283	46.793	8.88	6.818	8.856	45.181	29.529	9.442	4.549	3.84	7.201	41.681	32.201	11.159	36.197	13.368	5.277	5.977	19.875	15.668	2.717	1.055	0.647	0.488	0.395	0.35	1.172	1.008		0.876108	12.743
23.7091	6.117	7.764	10.839	44.897	11.145	5.73	8.203	42.158	25.611	9.661	4.975	5.094	7.287	42.268	25.636	10.331	33.89	13.945	5.503	6.146	18.499	10.334	1.89	1.109	0.628	0.54	0.478	0.519	1.219	0.782		0.880531	12.1066
23.8283	6.627	7.138	13.332	44.081	12.54	6.69	9.295	39.086	23.118	10.431	6.24	4.977	7.629	46.862	23.39	8.729	31.261	15.267	6.586	7.614	18.813	8.356	1.558	0.99	0.676	0.329	0.456	0.41	0.619	0.683		0.884958	12.1261
23.9474	6.972	7.711	15.156	44.592	14.138	6.835	10.597	38.952	17.029	10.798	4.568	6.041	12.271	41.149	19.774	6.999	30.1	16.997	6.729	9.403	18.224	6.926	1.101	0.637	1	0.236	0.458	0.623	0.66	0.776		0.889382	11.9151
24.0665	7.77	8.63	18.282	47.613	16.564	6.507	11.031	32.335	14.467	11.997	6.584	6.052	16.451	42.446	14.196	6.511	25.687	18.535	7.819	11.318	16.563	4.936	1.331	0.605	0.526	0.173	0.306	0.462	0.542	0.719		0.893805	11.8986
24.1857	8.29	10.607	22.216	50.907	22.059	7.226	14.895	33.865	11.334	11.298	7.077	6.007	18.694	41.61	10.512	5.801	23.08	22.148	10.893	11.784	15.927	3.092	1.417	0.715	0.401	0.094	0.104	0.258	0.627	0.98		0.898232	12.4639
24.3048	9.554	12.125	25.651	55.305	29.361	6.628	17.544	28.014	8.784	13.682	8.372	7.886	26.284	42.766	7.439	3.913	21.607	24.754	15.152	12.71	12.365	3.027	0.704	0.781	0.493	0.129	0.245	0.379	0.413	1.153		0.902655	13.2407
24.424	10.967	15.619	28.84	55.442	34.337	6.818	18.687	23.127	7.463	14.3	8.82	10.577	30.546	42.513	6.041	3.729	17.27	30.802	21.285	17.876	10.024	2.228	0.826	0.559	0.489	0.218	0.059	0.136	0.435	0.837		0.907082	14.029
24.5431	13.446	21.216	30.072	52.71	37.464	8.215	20.508	19.254	6.777	16.104	10.007	14.21	37	40.452	4.304	2.618	17.498	32.401	25.222	18.771	7.805	2.599	0.686	0.242	0.387	0.085	0.159	0.216	0.557	0.731		0.911505	14.7239
24.6622	17.517	30.103	36.445	46.907	40.329	10.039	19.895	18.762	5.802	21.008	9.84	19.118	43.077	36.341	4.015	2.898	14.623	32.833	28.265	14.14	5.298	1.96	0.632	0.184	0.125	0.133	0.232	0.271	0.411	0.426		0.915929	15.3876
24.7814	20.122	31.197	45.971	34.277	43.076	9.791	21.963	16.793	5.011	23.004	12.235	25.501	50.571	36.05	3.056	2.004	13.228	29.244	26.554	14.154	4.402	1.468	0.39	0.589	0.049	0.257	0.271	0.162	0.309	0.223		0.920355	15.7307
24.9005	28.108	30.561	56.88	26.614	43.31	8.965	23.287	12.029	5.118	22.892	14.089	34.678	51.163	32.763	2.753	2.109	13.066	21.193	21.534	9.051	3.879	1.362	0.344	0.45	0.141	0.111	0.333	0.195	0.088	0.157		0.924779	15.5741
25.0197	32.89	28.397	67.789	21.444	41.501	10.184	25.215	10.832	4.421	25.719	13.23	49.003	54.35	29.985	2.67	1.79	11.254	17.398	15.472	4.737	3.569	1.545	0.36	0.174	0.115	0.179	0.161	0.578	0.127	0.171		0.929206	15.842
25.1388	39.105	24.566	76.491	16.018	44.994	9.748	24.829	9.318	3.656	20.56	13.235	59.495	52.407	25.802	2.285	1.403	11.301	14.424	7.544	3.296	2.519	2.214	0.486	0.445	0.1	0.047	0.368	0.267	0.259	0.182		0.933629	15.5788
25.258	39.415	22.629	71.319	12.25	40.244	13.335	27.635	7.216	3.461	19.83	15.046	70.378	44.958	22.178	1.264	1.019	7.633	11.368	5.679	2.963	2.25	1.469	0.486	0.221	0.000272	0.011	0.088	0.057	0.455	0.154		0.938056	14.8337
25.3771	41.688	24.295	63.221	8.372	35.849	13.55	28.941	4.734	3.638	14.744	17.618	72.319	39.321	16.173	2.136	1.397	7.076	10.393	4.919	2.929	1.641	0.868	0.44	0.242	0.176	0.014	0.013	0.259	0.303	0.082		0.942479	13.9117
25.4962	36.974	17.257	49.778	6.284	27.266	18.59	31.199	4.075	2.345	12.082	22.296	60.521	36.116	14.234	2.061	1.221	5.781	8.685	2.86	2.491	1.482	0.639	0.746	0.098	0.169	0.007	0.059	0.128	0.341	0.082		0.946902	12.1956
25.6154	35.339	12.794	32.45	4.468	20.068	20.73	31.632	4.206	2.077	11.105	33.483	38.688	27.85	8.673	1.428	1.234	5.095	6.521	2.857	2.33	0.937	0.468	0.374	0.116	0.103	0.048	0.067	0.01	0.167	0.17		0.951329	10.1829
25.7345	29.36	7.582	22.652	3.279	13.014	22.283	36.117	3.615	1.965	8.134	43.116	26.502	16.187	6.857	1.288	1.891	3.414	5.46	1.703	1.837	0.91	0.657	0.285	0.14	0	0.134	0.208	0.279	0.067	0.047		0.955753	8.63277
25.8537	23.21	5.48	14.805	3.02	8.802	25.25	38.645	2.351	2.165	7.553	42.038	16.969	10.296	6.345	1.499	1.075	3.243	4.335	1.055	1.428	1.078	0.486	0.064	0.213	0.22	0.078	0.198	0.345	0.096	0.197		0.96018	7.41797
25.9728	18.184	3.795	11.604	3.004	7.607	30.634	45.287	2.313	1.546	4.768	35.827	10.784	7.54	4.795	1.296	0.44	2.643	4.184	1.452	1.511	0.874	0.559	0.377	0.146	0.153	0	0.096	0.192	0.101	0.165		0.964603	6.72923
26.0919	11.954	3.177	9.056	2.294	5.404	31.084	41.699	2.327	1.005	4.729	31.764	5.998	6.145	5.233	0.669	1.023	2.343	4.019	1.069	0.811	0.795	0.532	0.19	0.076	0.02	0	0.115	0.003	0.153	0.007		0.969026	5.7898
26.2111	6.642	2.1	6.225	1.556	4.809	30.554	35.193	1.852	1.092	4.165	25.334	3.41	3.57	4.769	1.025	0.771	1.827	3.049	1.376	1.194	0.504	0.291	0.126	0.096	0.15	0.037	0.116	0	0.072	0.056		0.973453	4.73203
26.3302	4.344	1.386	5.65	1.461	4.634	27.28	25.531	1.718	1.265	4.19	14.906	2.145	3.112	4.704	0.645	0.462	1.291	2.308	1.277	1.162	0.503	0.303	0.117	0.071	0.013	0.019	0.051	0.101	0.135	0.012		0.977876	3.6932
26.4494	4.799	1.626	3.762	1.074	4.93	23.132	15.625	1.415	0.686	3.686	9.193	1.995	2.816	2.815	0.227	0.328	1.505	1.668	1.793	0.516	1.046	0.523	0.104	0.000151	0.045	0	0.124	0.121	0.055	0.054		0.982303	2.85544
26.5685	3.487	1.705	2.929	1.168	3.84	19.158	7.499	1.11	1.058	2.909	5.806	2.288	2.032	2.879	0.543	0.277	1.252	1.553	1.128	0.844	0.809	0.192	0.028	0	0.01	0.028	0.091	0.006	0.104	0.073		0.986727	2.1602
26.6876	2.481	1.689	3.448	1.197	2.749	13.931	5.362	1.097	0.812	3.223	4.927	1.589	1.909	1.997	0.609	0.617	1.032	1.331	0.462	1	0.452	0.18	0.182	0	0.072	0.028	0.068	0.105	0.007	0.092		0.99115	1.75493
26.8068	2.949	1.206	2.392	0.662	2.597	8.707	4.448	0.804	0.487	3.166	4.619	1.293	1.805	1.678	0.973	0.531	0.766	1.588	1.07	0.618	0.356	0.121	0.038	0.143	0.095	0	0.008	0.051	0	0.001		0.995577	1.43907
26.9259	2.037	1.067	2.096	1.011	2.79	6.227	3.327	0.526	0.581	3.035	4.144	1.396	0.914	1.454	0.675	0.282	0.996	1.612	1.145	1.066	0.761	0.107	0.1	0.023	0	0	0.04	0.097	0	0.171		1	1.256

## Sheet: Image3 (2)
X0	Y0	Y1	Y2	Y3	Y4	Y5	Y6	Y7	Y8	Y9	Y10	Y11	Y12	Y13	Y14	Y15	Y16	Y17	Y18	Y19	Y20	Y21	Y22	Y23	Y24	Y25	Y26	Y27	Y28	Y29	Y30	Y31	Y32	Y33	Y34	Y35	Y36		Ap-Basal	Avg intensity
0	9.779	8.836	10.378	15.184	14.476	20.867	37.879	67.461	16.793	15.732	11.477	16.608	16.888	27.897	63.238	63.986	27.729	36.065	18.619	37.977	30.765	23.233	19.468	16.739	29.943	59.906	24.905	27.013	17.732	50.429	16.412	21.221	28.815	30.366	43.566	33.785	25.218		0	28.0374
0.1191	11.335	10.611	10.653	17.402	14.697	22.235	40.187	68.021	20.384	16.882	15.209	20.634	20.287	32.555	75.156	71.055	33.877	34.473	20.987	40.963	36.557	24.47	20.816	22.269	35.039	64.354	26.12	34.369	19.622	64.362	19.608	24.005	30.859	33.062	47.493	38.348	25.704		0.00490027	31.4773
0.2383	12.134	11.589	10.603	18.745	14.076	24.597	39.619	74.239	20.784	22.336	12.866	22.66	21.088	37.76	71.207	75.392	34.575	41.134	26.229	49.813	38.34	27.124	24.817	21.863	33.975	71.333	30.77	41.635	23.286	74.808	24.799	29.317	46.971	39.138	52.263	40.679	34.96		0.00980465	35.0682
0.3574	13.289	16.201	13.398	27.041	19.344	25.271	44.757	73.891	21.244	29.289	20.377	29.462	25.716	42.667	69.855	77.768	37.727	39.492	28.635	56.058	42.469	32.842	27.17	21.121	37.422	79.707	42.197	52.723	27.225	86.079	31.167	35.485	59.186	47.595	53.251	43.319	37.659		0.0147049	39.6784
0.4766	17.288	16.217	16.245	32.64	25.384	35.089	46.403	75.377	26.621	44.136	22.916	36.046	35.375	49.878	84.169	80.421	41.258	45.863	35.807	63.647	55.715	36.693	31.049	24.869	42.249	84.277	48.361	73.47	32.721	99.62	48.445	49.088	81.606	59.159	54.911	45.126	42.989		0.0196093	47.0575
0.5957	19.409	18.574	21.559	52.138	29.159	41.127	46.97	79.495	32.402	64.919	29.213	40.98	45.855	63.308	83.076	77.909	43.577	56.617	47.813	75.775	65.665	41.197	39.431	29.392	49.954	90.754	55.276	98.929	39.153	118.309	57.219	77.139	101.501	77.94	58.747	57.146	53.851		0.0245096	56.2562
0.7148	24.887	20.529	26.251	57.127	40.44	51.806	45.485	84.628	45.067	95.734	39.172	60.305	57.761	78.445	101.205	80.959	52.201	58.989	54.333	84.457	79.1	50.07	53.782	32.518	63.684	105.546	59.048	130.591	49.051	126.485	84.248	114.752	132.661	94.682	67.023	67.753	61.73		0.0294098	68.4461
0.834	31.239	29.174	36.034	80.694	54.997	67.283	52.191	88.858	64.571	135.663	70.985	82.754	69.201	92.791	107.602	89.315	58.255	62.014	70.485	100.526	98.98	69.504	66.718	39.998	82.592	128.317	79.753	151.808	67.937	143.115	118.473	157.744	157.943	128.462	72.762	79.256	71.62		0.0343142	85.395
0.9531	38.671	41.41	51.895	95.582	86.067	86.084	51.817	85.438	90.193	187.079	101.471	105.543	99.076	105.576	125.088	97.289	65.948	71.875	83.772	104.589	110.895	80.014	81.026	49.768	96.356	146.674	95.012	170.529	87.358	158.801	147.889	189.237	183.297	150.13	76.932	100.535	83.833		0.0392145	102.236
1.0723	55.31	52.184	86.942	124.122	145.324	88.598	64.056	82.285	127.109	204.985	152.911	121.874	102.702	127.071	134.486	99.695	72.031	77.952	109.929	105.199	136.49	94.221	100.602	70.297	120.139	171.497	118.538	184.675	104.892	166.226	162.405	210.174	200.326	178.15	81.82	127.64	98.563		0.0441189	120.579
1.1914	61.869	71.528	128.252	140.448	186.785	98.092	71.171	80.821	166.38	210.848	183.386	127.78	129.958	127.09	161.553	100.668	79.995	97.574	126.799	117.071	144.249	114.506	121.483	93.281	139.787	173.516	146.606	182.568	143.572	162.52	163.111	209.349	210.677	209.047	87.665	142.057	119.545		0.0490191	135.989
1.3106	68.271	89.864	162.157	150.076	219.792	109.691	93.476	86.807	193.519	176.358	201.561	143.574	142.44	146.027	182.365	102.73	89.766	110.026	148.238	117.525	152.2	127.036	151.114	120.046	150.643	163.461	172.682	187.566	160.788	146.791	148.272	195.653	202.792	217.712	102.275	156.856	129.869		0.0539235	146.487
1.4297	80.376	114.085	183.997	146.391	227.991	115.657	108.173	91.474	212.14	138.441	192.459	145.197	145.696	156.93	197.065	96.087	95.521	120.67	159.324	114.585	143.822	154.29	161.346	144.138	150.901	162.098	180.719	180.27	181.11	150.327	123.565	177.068	193.705	223.99	115.681	163.446	148.274		0.0588238	151.271
1.5488	87.583	132.243	195.634	147.277	220.782	120.09	134.672	100.66	193.326	99.994	163.888	134.497	152.697	170.196	218.056	94.655	106.588	141.794	176.022	112.089	140.362	167.013	168.853	150.948	138.003	142.727	200.657	161.479	194.501	156.645	106	137.649	171.848	208.952	131.705	161.405	159.707		0.063724	151.384
1.668	90.59	148.235	199.603	136.62	183.217	120.019	150.642	110.203	169.386	71.714	130.247	128.021	165.514	177.074	219.214	86.517	109.918	151.488	174.82	100.703	122.184	167.936	178.617	151.198	115.628	112.698	196.597	150.165	193.933	151.268	98.97	107.639	150.622	195.407	129.122	137.678	172.617		0.0686284	144.757
1.7871	101.392	161.337	194.043	128.765	145.782	114.542	161.774	121.797	123.89	60.266	84.569	103.795	173.404	175.386	215.748	86.719	116.287	151.456	176.663	94.68	115.057	174.92	168.782	135.209	87.32	77.891	193.189	135.401	173.021	150.717	82.565	94.797	131.573	162.245	133.984	123.976	180.901		0.0735287	135.509
1.9063	113.918	165.935	172.028	111.318	107.415	105.84	167.179	120.863	94.198	59.331	62.766	85.432	159.69	168.906	193.074	85.795	122.26	163.555	170.095	89.641	110.095	165.214	154.885	117.921	69.412	59.366	171.475	122.236	171.859	152.919	67.572	78.094	107.255	122.763	139.199	105.413	190.173		0.0784331	125.002
2.0254	120.259	161.51	154.811	100.378	80.5	86.863	173.096	123.18	70.15	62.757	50.487	56.353	119.256	156.685	160.736	78.532	126.337	171.062	167.931	76.041	85.489	155.424	132.422	93.318	52.211	46.758	150.223	103.547	171.718	152.445	59.142	69.093	88.768	95.489	134.715	91.825	182.697		0.0833333	112.492
2.1445	114.15	146.813	139.911	85.137	64.549	81.134	181.706	123.16	52.302	59.634	42.535	52.124	86.259	145.992	125.978	80.015	131.904	168.049	148.807	58.628	58.819	118.973	102.961	73.382	43.36	39.559	121.421	80.771	155.41	146.279	56.083	54.479	73.85	73.293	117.018	77.108	178.622		0.0882336	98.9236
2.2637	99.632	127.283	121.224	71.573	54.27	68.988	178.744	113.021	46.895	55.543	37.208	45.608	57.728	126.625	79.734	60.926	139.706	141.151	137.767	53.38	37.524	84.924	70.731	58.771	39.25	33.931	88.48	67.619	144.817	154.147	52.782	51.558	56.602	61.799	107.621	62.099	148.83		0.093138	84.8241
2.3828	94.252	108.839	99.624	61.492	46.707	62.888	170.982	100.847	43.537	51.696	35.833	38.803	43.946	114.296	44.455	53.784	129.175	119.481	119.643	46.634	27.691	63.935	50.466	48.754	27.381	28.405	72.723	56.859	131.633	151.104	47.808	48.405	47.919	53.098	99.151	62.506	129.311		0.0980382	73.8936
2.502	91.632	88.476	89.444	48.942	40.712	61.576	150.164	82.221	29.464	47.125	33.552	39.819	30.695	96.503	27.611	42.829	123.99	92.802	101.623	31.624	22.699	44.854	29.669	34.555	22.835	21.085	49.419	46.686	116.133	154.778	46.3	47.434	32.664	40.221	94.588	58.97	114.363		0.102943	62.9205
2.6211	89.43	72.547	70.346	46.376	36.04	65.882	121.006	67.829	32.814	43.357	35.577	35.874	21.068	91.542	19.25	31.783	125.785	60.989	89.481	27.581	19.345	28.3	22.035	26.92	19.278	20.456	39.118	35.489	95.271	157.771	50.052	37.378	29.999	37.569	82.844	51.002	106.914		0.107843	55.2513
2.7402	85.841	62.734	62.645	36.89	32.816	67.576	94.548	54.794	26.603	46.729	34.969	36.949	20.242	65.238	12.744	23.073	123.379	43.784	80.14	21.286	20.544	17.908	12.547	23.74	17.322	18.403	33.267	31.473	81.811	160.88	47.631	32.217	23.562	36.225	76.333	44.222	92.356		0.112743	48.7411
2.8594	84.89	58.392	55.561	38.533	28.094	69.599	70.2	42.679	25.374	45.745	38.469	34.424	19.192	58.101	10.111	18.116	113.19	33.739	69.553	20.379	17.408	10.774	8.351	14.921	11.831	18.647	31.285	27.984	68.202	157.483	43.288	30.027	16.176	34.38	63.692	40.056	82.343		0.117648	43.5456
2.9785	88.76	46.906	39.571	32.004	29.135	70.352	57.277	30.52	19.197	38.337	36.875	32.99	15.204	41.961	10.727	18.647	95.571	25.923	61.448	19.105	18.274	7.238	7.074	10.974	9.52	17.956	25.79	23.978	47.329	160.977	40.385	28.786	12.836	29.298	58.48	34.916	66.967		0.122548	38.1429
3.0977	83.695	40.476	34.237	30.447	25.626	65.566	40.473	22.611	17.723	37.922	41.319	34.23	14.174	24.259	7.795	14.729	79.99	20.035	49.752	16.814	14.579	5.963	4.321	8.504	9.581	15.993	25.368	23.373	39.604	162.431	41.559	27.059	14.563	25.224	50.105	31.124	60.537		0.127452	34.1016
3.2168	80.621	36.149	31.637	33.773	26.528	70.647	28.331	20.455	17.293	36.743	38.446	32.742	14.149	15.518	6.653	16.543	60.058	20.44	39.817	17.018	16.442	4.807	5.562	5.778	11.742	16.177	22.679	21.051	34.322	157.369	41.315	27.572	12.544	22.73	43.063	30.262	56.108		0.132352	31.705
3.336	66.946	32.22	23.436	25.898	24.382	68.408	22.848	16.202	13.579	33.059	36.511	29.025	10.828	9.29	7.066	13.383	56.612	15.534	29.142	15.896	14.377	4.408	6.643	6.964	10.315	18.387	22.501	22.077	26.574	143.835	36.684	24.155	12.611	21.252	36.81	25.211	53.446		0.137257	28.0139
3.4551	55.53	29.56	23.367	24.104	22.693	72.293	15.893	12.123	13.685	31.595	37.654	28.909	11.869	5.191	7.18	13.439	42.32	12.236	26.11	14.112	16.224	4.694	5.511	4.941	11.185	16.488	18.982	26.642	25.001	141.738	36.737	23.41	9.66	21.045	30.045	26.083	47.606		0.142157	26.1042
3.5742	53.091	25.631	19.448	22.796	21.752	70.532	10.987	9.458	12.946	29.437	37.657	28.068	10.285	5.835	7.436	10.776	37.589	12.154	20.371	14.64	15.917	5.719	3.97	6.075	12.869	16.932	16.89	24.826	24.808	138.807	38.049	25.069	11.174	16.827	25.365	22.054	42.51		0.147057	24.5608
3.6934	42.834	24.074	20.912	21.143	21.601	66.8	8.674	8.966	9.34	24.003	34.659	30.569	8.49	5.278	8.819	13.865	30.683	11.87	20.049	14.121	13.666	6.12	4.366	6.02	14.416	18.045	12.576	28.266	24.197	125.158	36.96	24.319	8.489	16.485	28.604	22.266	35.385		0.151962	23.0294
3.8125	35.388	22.721	15.692	19.328	20.143	68.026	8.46	8.232	9.969	22.271	33.181	31.707	8.241	4.39	9.978	12.417	28.99	12.714	15.533	14.216	16.326	4.04	3.575	5.026	13.741	16.806	12.509	31.668	25.684	113.872	37.2	27.17	8.777	15.739	26.365	21.988	33.029		0.156862	22.0301
3.9317	34.097	17.818	15.544	19.415	21.064	70.448	6.426	7.724	7.506	23.038	34.285	32.55	7.381	5.696	9.624	13.216	31.452	9.516	13.787	11.361	16.879	4.649	4.275	5.51	13.763	17.005	10.758	36.82	29.713	112.204	32.151	22.057	8.918	14.727	25.422	19.364	28.673		0.161766	21.4821
4.0508	24.829	18.271	15.159	19.732	20.215	67.981	5.104	5.314	7.905	18.715	37.949	35.722	9.041	5.606	9.174	13.743	29.069	9.064	14.473	13.863	16.841	4.734	5.201	4.307	14.431	13.229	11.028	37.508	27.819	109.273	32.912	23.797	8.937	15.176	23.403	19.828	31.607		0.166667	21.107
4.1699	25.663	19.227	13.39	19.141	18.53	61.972	3.521	5.253	6.802	22.252	38.263	38.748	8.313	5.498	7.521	9.587	26.468	8.978	12.811	15.243	14.724	3.88	4.965	5.672	13.498	14.158	10.264	35.303	31.475	105.093	32.959	17.954	7.832	17.761	24.246	22.796	26.055		0.171567	20.4275
4.2891	25.395	16.616	14.099	18.883	21.35	65.976	3.731	5.411	8.261	19.266	39.012	40.336	8.04	5.959	11.176	10.339	17.641	8.928	12.316	12.819	16.621	4.563	4.414	5.167	12.635	12.017	10.561	38.505	23.258	100.777	33.53	17.385	7.888	16.018	26.053	19.948	24.732		0.176471	19.9899
4.4082	26.453	15.846	15.826	17.706	16.997	54.747	3.544	6.989	7.272	15.975	39.808	39.913	7.646	5.166	10.235	8.856	23.516	8.265	12.416	17.348	14.857	4.829	4.371	4.859	15.411	12.879	10.892	36.082	22.318	92.932	29.91	15.988	7.098	16.107	23.18	20.681	18.084		0.181372	19.0541
4.5274	25.115	18.489	11.537	19.741	16.318	51.672	4.603	6.139	7.675	18.09	40.039	38.615	7.006	4.791	11.595	9.449	21.315	8.425	11.68	16.966	13.964	4.783	4.645	5.09	14.471	12.681	9.571	30.662	21.377	91.185	31.856	15.437	7.905	13.303	20.377	17.165	18.352		0.186276	18.4347
4.6465	22.818	20.709	11.59	20.959	16.521	50.247	4.783	6.807	7.076	19.146	29.555	29.903	7.73	6.442	10.027	11.697	19.256	8.277	10.354	11.95	13.788	4.438	5.246	5.484	14.955	10.733	7.719	30.293	20.201	73.527	25.279	11.592	7.95	14.976	18.575	19.579	17.627		0.191176	16.9678
4.7657	21.398	18.858	10.862	19.835	13.273	40.449	4.467	5.044	7.406	16.685	28.27	33.324	8.239	4.653	12.874	14.003	20.701	8.058	11.952	14.557	12.174	3.552	4.082	6.641	18.188	10.067	6.922	25.848	19.146	59.131	25.357	9.761	7.257	12.959	18.966	18.118	17.728		0.196081	15.9677
4.8848	19.957	20.015	11.57	20.264	13.987	33.158	4.042	5.817	8.492	18.531	28.282	31.095	8.7	4.711	12.997	12.844	20.22	7.329	10.495	14.812	14.861	4.905	4.247	6.991	18.862	11.653	8.166	31.003	19.727	51.545	22.961	10.113	7.849	13.897	17.703	18.784	19.946		0.200981	15.9603
5.0039	19.767	18.331	10.042	16.562	13.504	30.086	4.149	5.984	8.257	14.887	24.973	25.831	6.591	5.431	13.789	16.043	21.931	8.719	9.212	17.672	17.59	4.639	3.611	6.993	21.597	8.872	8.584	26.156	17.047	41.511	23.8	9.79	6.729	12.446	14.371	17.858	16.246		0.205881	14.8541
5.1231	19.884	15.882	10.692	20.975	10.379	24.15	3.918	6.679	9.433	18.236	25.697	29.291	7.234	4.641	14.92	17.187	19.504	8.391	7.977	17.675	14.431	4.554	4.629	7.967	22.507	10.959	8.173	27.216	17.767	34.822	25.665	9.743	8.221	10.753	13.497	20.655	14.396		0.210786	14.8297
5.2422	18.824	15.363	10.922	19.981	13.918	18.809	2.732	3.439	8.049	14.363	25.643	29.852	8.007	4.322	16.57	20.764	24.841	8.352	8.584	23.652	19.36	4.215	4.717	7.667	25.598	9.652	8.383	23.857	19.387	26.481	23.622	8.832	7.07	11.168	13.471	26.187	15.224		0.215686	14.9156
5.3614	18.33	14.386	9.047	19.901	13.113	15.325	2.941	5.073	5.782	18.879	27.358	31.643	6.973	6.041	13.614	20.583	18.816	8.704	10.093	24.084	20.773	4.362	4.874	9.339	35.514	10.352	5.706	24.607	15.997	23.788	26.57	9.098	8.079	11.192	11.384	29.039	13.722		0.22059	15.0022
5.4805	14.948	12.36	10.756	19.267	10.867	11.433	3.414	4.423	8.665	16.61	19.885	29.947	7.256	5.969	14.326	23.48	19.757	9.437	9.828	29.803	23.459	4.964	4.974	6.328	32.708	9.169	6.535	30.351	21.416	19.457	27.74	10.57	7.968	12.061	13.497	26.017	12.575		0.22549	14.9249
5.5996	15.465	12.082	10.51	20.437	9.181	11.242	3.449	5.489	7.472	18.478	22.073	37.865	10.114	6.261	15.19	24.558	19.087	9.277	11.892	29.545	20.575	4.138	5.074	8.918	32.292	8.75	8.915	27.724	21.075	18.372	30.05	9.135	8.451	11.755	10.838	26.28	13.999		0.230391	15.2975
5.7188	12.853	12.869	11.088	21.376	11.64	9.248	3.925	4.117	7.835	20.594	22.936	30.406	9.199	6.543	17.584	29.144	17.673	8.258	8.271	28.629	20.357	4.713	3.773	11.597	29.465	9.814	7.484	24.082	23.894	14.756	28.029	9.098	7.526	12.088	10.936	23.495	11.755		0.235295	14.7851
5.8379	12.52	13.614	8.851	23.157	11.35	8.537	3.224	6.795	7.568	18.714	25.073	26.518	11.439	6.433	16.902	36.845	19.329	7.758	9.721	33.547	17.407	5.457	5.133	12.331	25.042	10.265	7.356	19.825	18.613	12.136	33.307	8.505	7.771	9.923	11.752	22.22	13.998		0.240195	14.8361
5.9571	11.507	11.807	10.757	24.51	12.726	7.345	4.675	6.582	9.04	18.289	23.019	22.227	12.497	6.836	18.364	42.065	17.201	7.721	8.095	33.348	15.453	4.478	5.019	11.374	21.111	9.512	8.224	18.893	17.518	13.583	30.246	11.253	7.336	12.352	9.033	18.397	13.198		0.2451	14.4754
6.0762	11.361	11.24	10.202	25.347	13.534	6.428	3.692	4.982	8.624	19.59	24.966	19.525	12.634	6.066	19.129	42.029	15.902	8.885	9.742	36.267	15.411	4.934	4.442	12.399	21.514	10.231	9.983	20.849	12.452	12.017	33.539	11.721	9.883	12.84	8.868	17.852	12.561		0.25	14.6389
6.1953	13.163	13.447	9.817	25.206	14.551	6.909	4.338	6.77	9.786	17.616	21.653	21.922	14.291	5.245	20.348	39.564	16.349	10.162	12.609	36.178	13.706	4.741	5.86	13.716	21.902	8.593	10.73	21.425	10.145	11.406	32.149	11.331	10.449	13.048	10.044	21.253	11.79		0.2549	14.9246
6.3145	13.491	14.618	9.562	23.488	17.281	6.936	4.7	6.032	11.438	19.197	23.817	23.898	14.922	7.125	22.998	34.503	15.819	10.353	11.107	38.075	11.244	5.385	3.666	12.725	18.766	10.035	9.795	20.345	9.536	11.015	28.589	12.945	11.723	15.812	8.904	27.51	13.03		0.259805	15.1455
6.4336	15.502	13.012	11.472	25.136	12.295	5.154	3.241	5.029	12.011	18.511	23.65	24.654	18.927	5.988	17.467	40.726	17.834	9.889	8.833	33.898	10.182	6.11	5.127	12.662	17.64	7.741	9.398	18.398	9.32	10.338	30.994	10.733	11.722	16.704	10.642	34.426	10.022		0.264705	15.0105
6.5528	14.429	14.024	14.021	22.915	12.694	5.087	4.243	4.426	11.545	16.631	21.195	32.644	18.298	6.576	18.03	41.46	19.115	10.781	9.224	34.368	11.226	5.88	4.34	10.57	17.519	9.759	11.299	23.431	8.963	8.898	26.416	14.073	13.118	20.31	8.36	35.066	9.482		0.269609	15.4166
6.6719	10.996	15.93	13.973	25.962	14.776	7.183	3.522	3.802	15.478	16.416	22.334	32.583	20.68	7.41	17.392	43.384	14.426	8.809	9.979	35.154	10.281	4.939	4.945	12.673	19.649	8.114	8.931	30.121	9.566	8.811	33.557	12.799	13.297	22.652	8.629	41.083	12.634		0.27451	16.2938
6.7911	12.82	20.811	13.848	23.182	14.73	5.562	3.853	5.576	18.428	26.234	22.357	38.513	22.159	7.655	17.086	52.989	15.902	8.807	13.708	29.508	8.132	5.04	6.608	13.211	18.059	8.217	12.365	28.798	11.782	9.769	35.568	15.239	11.977	23.936	9.075	38.199	10.675		0.279414	17.3075
6.9102	11.716	20.734	13.36	27.005	13.659	6.092	4.877	4.789	14.596	26.668	21.633	37.247	20.467	9.507	16.205	54.528	16.755	8.713	12.404	30.224	8.865	5.882	5.033	13.27	19.556	7.393	13.751	37.301	12.606	7.836	37.103	16.895	14.556	27.115	9.512	39.435	9.06		0.284314	17.7391
7.0293	15.448	18.857	14.928	27.997	14.346	5.367	4.043	4.715	16.097	32.56	18.974	35.118	18.269	8.714	16.574	51.916	15.724	9.955	10.812	38.885	8.502	6.359	4.818	12.471	20.291	9.121	10.922	36.397	11.074	7.702	34.878	15.626	12.913	27.615	11.585	47.305	7.901		0.289214	17.967
7.1485	19.457	20.545	16.405	24.228	16.834	6.778	3.42	7.098	17.666	32.147	18.854	32.905	22.041	8.169	17.13	54.21	14.589	10.347	11.575	47.814	7.943	5.273	4.3	18.672	23.451	7.841	14.753	39.846	10.857	6.963	37.758	16.493	12.024	24.673	10.521	52.578	9.574		0.294119	19.0738
7.2676	21.281	18.831	16.742	26.127	14.728	4.908	4.257	8.12	16.947	34.085	17.529	34.919	21.261	7.649	16.652	49.034	14.16	9.217	12.247	53.831	9.705	6.342	5.24	15	26.133	7.955	13.862	39.064	9.827	5.561	37.826	17.097	11.709	28.031	9.393	63.049	8.129		0.299019	19.3635
7.3868	24.582	18.617	19.616	24.6	14.642	5.259	4.369	5.995	14.837	35.943	16.892	32.41	19.947	9.148	19.632	48.204	15.164	9.669	11.588	51.767	10.488	5.052	5.459	15.748	26.292	7.924	17.01	35.114	11.872	6.095	44.892	15.63	9.391	30.537	8.417	66.932	7.461		0.303924	19.6539
7.5059	26.974	13.662	22.698	28.142	13.759	5.178	4.211	8.657	15.662	31.983	16.141	31.222	20.464	7.926	21.923	51.323	13.496	9.465	11.08	52.76	6.425	4.291	4.193	14.625	29.483	7.182	16.014	33.463	10.94	5.793	43.438	16.759	9.568	37.858	9.122	68.034	6.764		0.308824	19.7481
7.625	24.897	14.213	20.94	27.973	16.141	5.607	3.727	8.774	17.241	32.561	17.083	32.579	19.852	7.167	21.295	53.724	13.091	8.719	12.704	52.635	8.347	3.892	4.368	14.254	33.483	8.013	17.219	26.713	10.532	6.293	48.702	18.982	11.397	39.284	8.921	67.082	7.054		0.313724	20.1475
7.7442	20.94	17.924	18.441	32.048	13.888	4.807	4.21	7.791	19.236	32.33	19.11	29.708	21.708	7.584	26.051	51.093	14.961	7.803	13.06	53.497	7.211	5.181	4.762	14.049	39.112	9.05	20.297	24.041	9.984	6.571	52.277	15.31	10.922	45.158	9.265	64.493	6.752		0.318628	20.5574
7.8633	17.148	15.777	14.203	34.214	13.917	5.643	3.426	8.899	18.488	36.038	16.934	29.494	23.706	8.999	27.531	44.615	13.394	8.497	12.5	51.146	7.733	4.461	5.987	15.705	36.148	10.525	21.636	25.153	9.26	5.881	53.564	14.273	12.186	45.17	10.85	57.456	7.667		0.323529	20.2223
7.9825	12.239	14.819	18.103	39.552	12.959	5.2	4.915	8.973	18.622	46.97	17.002	22.656	21.489	7.65	22.826	37.423	14.85	7.631	13.307	44.449	5.919	5.549	4.945	14.567	38.798	7.233	25.716	23.678	9.232	6.538	55.61	13.343	9.26	38.269	10.035	55.353	5.617		0.328433	19.4945
8.1016	14.572	17.76	18.162	37.404	12.677	5.711	3.494	9.632	17.669	47.241	19.702	23.176	29.343	9.097	20.014	38.151	16.354	7.897	11.048	41.496	5.498	4.538	6.016	14.718	44.007	8.213	26.456	26.999	9.403	6.213	61.804	11.387	9.688	33.462	10.545	51.625	6.54		0.333333	19.9382
8.2207	14.499	19.718	17.553	41.391	13.581	4.792	3.657	9.501	15.804	56.349	18.763	21.562	34.742	7.824	18.227	37.596	16.949	6.636	8.091	44.998	5.825	4.812	6.11	16.281	45.8	10.669	24.924	27.988	7.457	7.508	60.786	13.415	8.841	31.288	9.776	47.97	6.8		0.338234	20.2293
8.3399	12.121	27.577	20.249	39.734	13.879	7.401	3.487	8.186	14.902	63.977	17.094	18.637	36.493	10.417	19.042	40.884	15.313	6.567	11.129	31.524	5.831	3.961	6.149	16.147	44.329	9.612	21.753	35.709	8.588	6.888	61.188	12.555	11.669	30.938	11.903	40.324	8.067		0.343138	20.3844
8.459	11.113	28.406	20.475	36.563	13.246	6.208	3.823	6.841	17.17	56.427	17.321	16.243	28.817	8.473	15.546	38.23	17.541	8.841	11.981	30.242	5.463	4.888	5.383	20.707	41.649	8.681	21.036	36.881	7.158	5.398	59.989	10.485	9.366	36.691	12.924	37.218	6.936		0.348038	19.5773
8.5782	13.131	26.663	23.523	35.019	16.814	6.286	4.277	6.922	18.552	49.684	17.272	14.457	25.751	10.455	18.324	39.713	16.68	8.449	13.312	31.336	7.569	4.038	5.516	20.992	39.747	7.784	23.144	42.354	8.127	5.283	56.357	9.332	11.776	35.649	14.784	38.809	6.294		0.352943	19.8426
8.6973	12.701	25.452	25.215	30.076	18.176	4.868	4.67	7.273	23.624	49.616	17.753	18.039	24.718	9.255	16.749	38.925	18.372	6.79	10.648	29.32	6.772	5.702	7	19.232	37.837	8.433	21.909	42.893	8.5	6.27	58.317	10.175	9.933	40.767	14.45	33.971	5.257		0.357843	19.7205
8.8165	12.223	25.565	20.798	27.997	19.69	7.795	4.694	5.645	20.962	40.075	20.57	15.955	19.344	6.616	19.705	41.843	18.563	6.782	11.841	34.946	7.536	4.272	4.853	21.683	29.69	10.325	20.04	44.612	7.606	5.215	63.593	8.948	10.006	41.842	14.878	35.016	5.243		0.362747	19.3775
8.9356	13.567	26.752	24.847	24.802	18.299	6.081	4.788	8.302	26.393	40.005	17.006	15.151	18.258	7	19.996	36.974	18.509	5.221	9.997	36.942	5.921	4.643	6.613	24.072	24.613	8.763	18.922	39.919	7.179	6.451	61.777	8.709	8.984	42.895	16.697	34.142	5.671		0.367648	19.0503
9.0547	14.475	27.493	18.648	31.322	18.222	5.188	3.676	7.38	25.312	34.464	19.237	19.435	22.028	8.075	18.657	33.815	16	6.766	9.21	37.946	5.13	4.493	6.646	23.603	29.338	8.618	15.998	43.237	7.674	5.662	61.835	8.545	9.874	37.691	17.336	32.12	6.534		0.372548	18.9644
9.1739	21.565	26.203	20.287	31.648	15.585	5.782	4.482	6.722	27.209	34.182	17.472	22.984	20.702	7.629	20.681	37.081	15.286	5.558	9.919	42.961	6.216	4.812	6.803	27.11	31.209	8.994	20.179	38.052	7.386	6.37	54.045	6.737	8.882	41.023	16.877	25.772	6.548		0.377452	19.2149
9.293	32.561	24.119	22.078	32.53	16.415	5.726	4.311	6.992	25.66	40.297	20.582	22.61	26.477	6.66	19.383	35.979	15.688	6.369	10.722	46.717	5.137	4.277	5.741	30.977	26.683	9.175	20.768	32.571	6.735	5.316	55.199	8.446	8.562	39.724	21.158	23.118	5.01		0.382352	19.7425
9.4122	36.583	23.2	20.08	31.757	14.707	6.38	3.984	7.958	25.377	43.372	18.453	24.848	24.145	10.21	22.543	33.056	13.333	5.967	10.627	51.116	5.878	5.502	5.809	38.101	26.546	9.733	21.114	27.132	8.395	7.59	53.133	9.658	11.486	40.595	20.805	19.147	5.588		0.387257	20.1056
9.5313	40.53	22.313	20.95	33.574	12.694	6.064	4.977	7.069	23.731	42.483	16.742	29.552	25.598	8.9	22.975	33.584	10.952	6.497	10.957	48.548	5.636	5.54	7.222	36.335	25.575	9.005	20.652	20.443	7.42	6.741	48.522	8.269	9.861	43.526	21.058	17.117	6.109		0.392157	19.6681
9.6504	42.758	26.814	20.976	30.979	12.571	5.656	5.098	7.027	21.15	43.933	18.189	31.458	25.44	9.911	22.216	33.004	13.746	4.979	9.786	44.276	5.695	4.336	6.375	39.819	25.12	9.448	21.786	17.589	7.448	6.883	43.129	6.804	9.494	43.35	26.068	15.299	5.53		0.397057	19.5714
9.7696	47.441	27.196	20.595	31.922	13.57	4.708	3.934	7.607	20.536	45.062	15.494	28.619	23.267	8.982	30.098	32.782	10.697	6.924	10.999	38.535	6.471	3.798	8.281	36	20.726	9.291	23.585	14.625	7.252	6.708	36.558	6.827	11.285	42.465	31.505	14.105	4.492		0.401962	19.2687
9.8887	46.41	25.49	23.516	36.438	12.443	3.958	3.938	6.717	20.176	39.803	12.929	28.166	21.524	10.493	27.741	31.756	11.643	6.483	11.36	31.516	5.675	3.78	6.755	32.965	17.525	8.007	23.167	15.32	7.483	5.006	34.023	7.498	12.295	47.162	34.767	14.174	5.048		0.406862	18.7338
10.0079	47.945	27.591	24.715	37.202	10.875	7.941	4.464	8.008	21.912	36.871	16.648	28.793	20.605	10.425	27.756	27.032	12.497	6.548	9.239	28.959	5.364	3.97	5.812	27.025	18.68	8.438	21.719	14.389	7.314	7.036	34.712	7.771	11.151	49.868	36.701	12.763	4.531		0.411766	18.737
10.127	40.118	22.005	28.133	38.092	10.584	5.016	4.277	9.529	24.507	29.391	15.983	25.191	17.054	9.771	27.447	25.604	13.168	4.963	7.948	24.068	4.304	4.625	5.007	22.083	17.119	10.733	21.198	18.806	6.32	6.785	30.554	7.673	11.611	48.808	41.272	9.643	4.942		0.416667	17.6846
10.2462	35.498	21.703	27.48	35.073	9.648	7.564	4.048	9.687	24.148	24.527	19.767	24.613	15.717	8.734	30.382	25.363	10.991	5.576	8.794	25.8	5.238	4.928	5.856	22.189	17.019	10.723	20.938	18.276	5.275	7.225	26.595	8.902	12.288	46.123	43.363	10.495	4.047		0.421571	17.4214
10.3653	32.525	21.982	28.957	35.744	9.171	6.188	3.65	9.51	21.786	25.424	17.411	24.836	16.944	10.436	28.514	22.484	8.991	7.384	9.768	24.102	3.967	4.941	6.317	22.98	16.754	12.515	25.197	19.824	7.653	5.779	28.435	7.013	13.29	44.315	47.103	9.214	6.331		0.426471	17.4982
10.4844	29.402	24.815	24.628	35.498	8.444	4.965	5.013	10.938	24.516	27.112	15.937	26.749	14.112	10.164	27.825	18.716	8.034	6.737	8.61	22.101	4.952	3.283	6.823	20.27	16.977	11.857	21.707	18.29	5.876	5.425	27.528	7.587	11.986	47.933	41.558	8.85	4.653		0.431372	16.7533
10.6036	26.059	25.549	29.01	28.027	8.845	6.217	4.303	10.198	25.812	27.971	16.765	26.926	13.67	8.143	25.048	17.762	7.646	8.244	8.382	23.082	4.321	3.013	5.748	18.714	13.079	15.871	25.738	17.02	6.11	6.332	23.83	6.552	13.022	58.607	42.658	9.217	5.772		0.436276	16.8449
10.7227	22.259	27.212	29.432	25.299	10.802	5.511	3.632	11.665	26.389	25.52	15.759	26.53	14.116	9.98	22.907	18.077	7.085	7.944	9.777	26.031	4.751	3.497	8.317	25.188	15.417	16.313	26.665	14.164	5.242	5.92	25.458	7.718	13.339	51.72	42.217	7.98	5.482		0.441176	16.9004
10.8419	22.486	25.025	29.528	22.315	8.981	5.822	4.11	11.165	31.936	25.394	16.793	29.602	14.968	9.446	26.899	17.004	8.334	6.075	10.276	25.341	3.816	4.299	6.803	20.977	16.701	20.225	28.203	14.658	3.678	7.283	25.007	9.155	11.889	50.27	44.931	7.492	6.555		0.446081	17.1201
10.961	20.619	25.018	32.051	18.966	10.396	4.577	4.121	12.548	35.564	21.821	18.076	29.391	13.91	8.655	24.484	15.157	8.562	6.763	8.602	26.303	3.433	3.175	7.23	20.869	14.325	20.621	26.579	12.243	5.628	7.469	19.492	7.502	11.48	49.135	41.695	7.306	5.553		0.450981	16.4681
11.0801	18.334	25.605	34.255	20.907	9.028	6.144	4.36	12.696	36.453	21.285	20.625	26.65	17.061	10.133	22.454	15.751	9.695	5.454	10.68	33.989	4.44	4.015	7.122	15.979	13.892	20.456	27.098	14.261	5.203	5.753	19.57	8.449	13.075	45.019	47.525	7.844	5.166		0.455881	16.9304
11.1993	20.445	23.223	38.171	21.848	10.016	5.232	5.244	14.951	36.335	22.355	16.881	28.564	15.047	9.168	30.193	14.013	7.126	5.486	9.969	29.647	4.925	5.461	10.058	19.659	14.232	19.258	20.486	13.129	5.688	9.202	17.47	8.619	14.802	34.758	49.817	6.387	4.294		0.460786	16.8151
11.3184	19.092	22.408	42.02	20.392	9.567	5.368	3.999	14.897	29.343	20.022	17.484	28.033	13.91	8.373	28.639	15.384	9.432	5.746	8.542	28.898	3.489	4.864	9.342	23.464	14.24	20.711	18.487	13.298	5.022	9.488	15.719	6.95	12.543	30.946	51.843	6.519	5.8		0.465686	16.3317
11.4376	16.667	16.695	34.517	19.337	7.286	5.026	5.277	14.39	30.83	18.872	14.621	25.23	16.177	8.318	29.981	18.012	8.573	6.623	8.974	27.465	3.468	4.214	9.749	23.408	14.407	21.056	20.422	15.074	5.206	9.685	15.643	7.31	10.435	26.285	54.976	7.476	6.093		0.47059	15.8859
11.5567	17.562	16.089	34.152	18.664	7.965	6.205	5.366	14.579	31.569	20.044	15.234	25.985	15.98	7.199	29.549	15.33	7.527	6.554	10.122	23.679	3.088	4.187	10.867	28.083	16.139	19.836	19.861	19.484	4.859	11.731	13.556	8.755	10.413	23.346	53.001	6.375	5.324		0.47549	15.8989
11.6758	18.194	18.592	33.239	17.857	8.105	5.704	3.886	13.92	34.208	20.196	14.574	25.526	12.95	8.038	31.539	15.332	7.167	5.673	9.496	24.785	3.063	3.256	10.393	29.062	16.601	22.062	19.967	18.662	4.481	9.402	11.994	9.424	9.801	25.884	56.579	6.931	4.824		0.480391	15.9829
11.795	18.004	16.799	34.353	19.259	6.856	5.891	2.99	14.618	34.157	16.061	14.082	26.129	15.623	8.365	32.204	13.063	7.954	6.114	10.131	23.428	4.624	4.459	10.87	29.612	13.319	24.498	23.197	19.983	5.344	15.341	14.256	8.355	8.35	23.615	59.391	6.682	6.437		0.485295	16.3355
11.9141	19.391	15.932	30.511	18.26	7.691	4.419	4.324	14.118	30.351	18.226	15.156	26.386	15.379	10.14	35.727	14.811	7.811	6.55	9.8	22.775	4.854	5.553	13.467	36.768	14.494	21.243	24.464	17.732	4.418	12.877	14.927	8.461	11.417	22.767	57.925	8.482	4.67		0.490195	16.548
12.0333	16.841	17.671	27.828	21.995	6.631	5.258	3.936	14.777	31.233	18.972	14.381	21.75	16.553	10.062	29.533	13.183	7.084	5.382	9.754	19.994	3.562	4.968	12.866	35.442	15.366	20.913	22.789	14.852	4.75	15.119	11.703	8.028	12.181	21.02	59.499	7.847	5.831		0.4951	15.9339
12.1524	15.849	21.209	26.244	19.716	7.106	4.173	5.59	13.622	22.256	18.5	14.975	21.129	14.692	6.987	26.132	12.175	8.257	4.763	11.01	17.596	5.831	3.353	13.435	43.177	11.019	23.425	19.386	15.68	5.734	15.268	12.191	8.663	9.238	19.16	58.31	5.643	5.182		0.5	15.3156
12.2716	18.031	20.991	23.757	21.44	6.567	4.007	3.452	12.817	22.129	19.805	13.288	21.148	16.116	8.093	26.332	12.319	8.54	5.397	9.656	18.055	4.185	4.436	14.623	36.464	12.951	22.272	21.375	15.562	4.545	14.721	10.117	8.298	10.804	22.534	55.719	7.294	5.36		0.504904	15.2216
12.3907	19.801	21.203	24.875	21.51	7.168	4.396	2.898	12.15	20.258	19.044	13.698	19.606	17.094	7.94	24.584	11.22	6.241	6.691	8.686	21.055	3.664	4.57	11.678	34.086	13.783	22.327	20.374	18.809	4.554	17.886	10.777	9.115	10.943	20.995	50.18	6.229	4.605		0.509805	14.9917
12.5098	19.898	24.572	26.876	23.071	7.536	5.011	5.347	13.667	18.894	20.351	10.475	16.064	17.087	9.761	24.272	9.752	7.113	5.439	8.421	25.638	4.12	6.635	12.642	28.553	12.392	23.786	21.531	16.045	3.87	19.51	10.732	7.73	8.214	24.001	44.123	5.518	5.222		0.514705	14.9694
12.629	17.174	21.328	25.4	23.095	7.189	4.037	4.964	11.337	19.963	18.794	12.912	17.398	19.981	8.053	25.407	12.244	8.929	5.025	9.687	27.726	4.062	5.609	12.678	35.592	13.962	24.688	20.18	16.7	5.039	20.433	10.217	9.089	11.115	27.661	40.42	5.919	5.155		0.519609	15.3828
12.7481	18.403	20.556	22.733	19.047	6.488	5.184	4.458	13.838	19.255	20.801	14.526	19.47	19.899	7.411	27.02	10.429	8.566	4.981	9.36	28.135	4.289	4.858	13.164	32.568	12.959	25.368	20.139	16.205	5.44	19.832	12.119	8.477	11.72	26.202	34.747	5.276	4.789		0.52451	15.1003
12.8673	17.73	20.087	20.268	24.033	5.463	5.015	4.603	10.929	17.246	19.229	14.601	17.632	15.735	6.711	27.081	11.983	7.763	4.402	9.585	30.183	4.998	5.459	11.078	35.831	13.896	23.139	20.683	16.767	5.169	19.416	10.191	9.403	11.628	30.971	30.238	6.619	4.525		0.529414	14.8727
12.9864	20.243	21.103	22.635	25.366	9.197	5.74	3.997	12.576	18.787	17.931	16.484	17.291	18.729	8.054	27.551	8.651	7.093	5.583	10.596	30.448	5.22	5.002	14.182	35.559	12.636	25.453	21.811	14.1	5.138	26.026	9.436	6.48	12.645	30.065	23.12	6.369	4.95		0.534314	15.304
13.1055	21.909	19.82	22.007	23.548	7.194	4.439	4.599	14.426	18.233	14.431	12.847	19.153	19.85	8.977	25.185	11.602	7.697	5.605	8.913	28.147	3.43	5.428	13.029	35.218	11.058	23.627	21.689	16.677	4.671	28.158	9.191	7.815	11.868	34.037	22.694	3.967	4.849		0.539214	15.0267
13.2247	18.783	24.275	20.962	21.73	7.09	5.533	4.9	15.697	17.57	16.003	14.501	18.525	20.345	8.39	22.405	9.21	7.459	6.069	9.997	29.845	5.34	5.472	13.145	37.663	14.25	24.047	22.211	15.305	6.405	29.777	7.929	7.854	13.866	29.468	19.429	5.14	5.759		0.544119	15.1986
13.3438	16.352	24.819	21.97	22.663	6.039	5.111	3.32	15.094	18.358	17.5	12.513	17.403	20.88	10.65	27.676	9.899	7.217	4.845	11.164	30.378	3.541	5.741	15.879	38.44	11.626	27.127	21.99	13.355	4.455	31.193	8.24	6.469	12.403	35.909	13.986	6.012	4.286		0.549019	15.2568
13.463	16.661	28.262	18.317	21.692	6.521	5.329	3.846	14.299	19.867	18.069	12.537	20.34	22.277	9.279	30.818	10.031	7.189	6.622	9.49	19.737	3.507	5.847	15.955	39.068	14.345	27.195	22.616	11.44	5.953	34	9.181	8.187	12.566	33.641	12.872	6.137	7.05		0.553924	15.4255
13.5821	17.227	23.53	17.871	20.488	6.061	3.864	2.806	13.948	22.377	17.221	14.162	20.298	19.592	9.02	25.133	11.459	7.459	4.685	10.409	17.544	3.553	4.731	18.404	37.16	12.271	26.948	23.041	9.942	4.753	32.794	8.676	6.794	13.163	40.993	14.937	6.335	6.744		0.558824	15.0376
13.7012	16.455	23.631	19.906	24.225	6.867	4.599	3.558	16.47	26.151	16.568	13.207	21.833	20.466	8.599	24.45	10.137	8.162	5.633	10.878	20.873	5.035	6.456	15.52	34.739	11.682	27.863	25.448	8.523	4.952	32.758	6.928	7.012	12.065	39.604	12.228	4.72	5.239		0.563724	15.2281
13.8204	15.522	20.107	16.724	22.505	5.613	4.689	4.486	16.965	36.12	15.653	12.084	22.083	25.057	9.937	27.426	11.558	6.434	5.328	9.398	16.441	3.718	5.151	20.056	29.216	13.252	29.726	20.477	7.248	4.777	33.526	6.736	6.187	12.845	48.104	13.028	4.955	6.337		0.568628	15.3911
13.9395	16.831	21.727	17.997	18.88	5.709	4.041	3.534	13.898	37.863	15.754	11.826	24.726	25.653	8.254	25.748	11.687	5.857	4.604	9.372	15.997	3.514	6.667	21.379	25.553	13.001	27.715	22.492	10.778	4.611	39.393	6.559	6.81	12.096	46.186	12.8	5.554	5.431		0.573529	15.4188
14.0587	15.703	17.773	22.885	22.511	6.407	3.942	3.566	14.251	35.451	15.312	11.473	23.439	19.117	8.833	27.695	9.01	6.2	5.838	10.772	18.01	6.46	5.732	24.598	23.457	12.189	29.603	21.776	8.817	3.619	38.794	8.248	5.388	12.593	44.26	11.21	4.544	5.17		0.578433	15.2607
14.1778	17.64	19.048	19.769	20.127	6.028	4.615	4.226	14.252	35.407	14.931	11.984	20.199	25.851	8.071	28.175	9.905	5.928	5.556	9.452	18.741	4.543	5.189	27.136	21.26	14.465	25.085	24.24	7.448	4.068	37.986	8.302	7.609	14.22	49.588	10.583	5.655	5.127		0.583333	15.4705
14.297	17.219	18.739	23.309	21.215	5.771	5.067	4.124	11.149	36.283	14.059	14.957	17.41	23.478	7.673	29.788	10.077	7.142	5.389	8.809	19.9	5.36	6.661	34.183	19.699	12.703	27.489	17.663	6.054	4.853	39.035	6.787	9.084	11.166	49.708	10.78	4.916	4.902		0.588238	15.4757
14.4161	19.566	17.91	18.831	23.551	5.21	5.643	3.764	13.475	32.492	16.537	10.968	16.324	22.832	7.667	26.428	10.139	7.245	4.249	9.536	21.8	3.449	6.205	35.122	15.635	12.831	25.202	20.995	6.098	6.224	44.517	9.485	7.396	11.95	43.252	10.284	4.908	5.27		0.593138	15.2159
14.5352	22.532	15.746	18.304	24.803	5.122	4.856	4.173	14.192	38.294	12.599	11.365	16.806	22.532	8.521	30.696	9.565	5.88	6.405	10.477	20.477	3.85	5.176	36.323	16.116	15.079	29.841	17.813	6.609	4.956	40.548	8.627	7.941	9.695	45.125	11.877	5.386	5.238		0.598038	15.5012
14.6544	21.58	15.389	16.571	21.191	4.833	4.693	3.77	14.278	35.196	12.889	12.526	14.821	20.977	9.456	27.445	8.884	5.725	6.337	9.165	22.901	4.01	5.405	33.012	13.088	14.356	28.023	15.732	5.041	5.38	38.238	7.604	6.193	11.416	41.569	9.109	4.696	4.459		0.602943	14.4854
14.7735	23.35	14.757	19.243	22.671	6.12	4.848	2.944	14.983	33.461	13.335	11.099	14.24	22.627	7.514	28.919	7.336	6.393	4.718	8.356	21.839	3.543	5.286	28.995	14.777	14.172	26.335	13.284	6.456	5.578	40.551	7.727	7.467	14.909	40.327	9.555	3.423	4.681		0.607843	14.4816
14.8927	31.279	16.264	17.842	27.184	6.354	3.755	5.048	15.236	32.624	12.588	9.229	14.125	24.371	8.805	29.171	10.616	5.523	6.556	11.239	26.137	4.481	6.528	27.003	14.51	16.443	24.66	15.597	5.943	4.632	40.871	7.959	8.299	17.582	43.293	10.118	5.338	5.05		0.612747	15.4663
15.0118	33.208	15.913	17.657	26.431	5.84	3.301	3.87	16.481	23.911	13.811	9.854	15.826	20.652	8.075	27.453	10.245	6.558	5.641	10.338	25.847	4.267	6.163	30.504	13.692	16.528	26.543	14.058	5.227	5.226	43.137	6.884	7.418	22.647	41.374	8.502	4.3	5.997		0.617648	15.2265
15.1309	37.42	16.818	17.009	27.122	5.339	3.491	3.444	17.836	24.642	12.472	12.277	12.975	19.29	9.065	27.053	8.589	4.328	5.558	10.789	26.698	3.462	7.11	29.069	13.999	14.442	26.588	13.526	4.946	5.938	45.951	7.443	6.966	24.369	50.523	9.071	5.315	5.794		0.622548	15.5872
15.2501	38.015	16.801	15.967	30.107	6.309	4.213	5.339	19.9	19.863	12.192	8.72	16.215	22.379	6.857	28.676	8.072	5.403	5.518	8.959	30.479	4.324	6.827	28.764	11.761	16.608	27.854	14.948	4.675	6.36	48.912	6.511	8.451	23.427	50.209	8.523	5.143	4.275		0.627452	15.8799
15.3692	36.327	17.947	15.308	24.478	4.176	4.546	3.668	24.144	22.827	12.894	9.544	16.844	22.687	8.447	29.995	10.211	4.912	5.71	11.632	27.553	4.597	5.667	29.357	11.853	14.522	26.64	12.447	4.736	4.846	52.123	6.676	7.323	18.913	55.584	6.261	4.29	6.548		0.632352	15.8441
15.4884	38.179	16.638	16.97	25.401	5.177	3.977	5.406	28.135	20.573	12.333	8.776	14.884	25.377	6.417	28.386	9	4.534	5.373	11.535	30.008	3.524	6.103	24.194	13.888	14.773	31.485	12.264	5.731	6.152	54.359	7.51	6.994	19.241	62.478	6.99	5.061	4.802		0.637257	16.2872
15.6075	33.547	18.918	14.696	21.79	6.221	3.306	3.439	28.498	22.434	12.727	8.881	14.438	22.825	8.068	30.193	8.394	6.111	6.57	10.826	29.058	4.432	4.721	26.636	12.931	12.244	30.647	12.951	4.1	3.942	57.397	8.974	10.451	13.486	65.781	8.291	5.278	5.724		0.642157	16.1872
15.7266	27.532	18.762	14.714	22.471	4.405	3.783	3.32	27.683	20.211	11.32	9.085	14.519	21.626	8.724	34.031	7.121	4.945	5.717	10.784	26.901	5.266	5.694	25.26	13.373	14.35	29.064	9.626	5.192	4.71	54.254	7.917	9.217	13.258	71.043	6.648	4.912	4.37		0.647057	15.7245
15.8458	25.029	20.047	16.329	21.383	4.526	3.324	5.209	30.121	17.831	13.992	9.121	13.712	20.61	6.081	36.346	6.451	4.714	5.718	11.889	28.018	4.521	7.607	29.898	13.572	11.483	31.438	10.006	5.351	5.182	44.904	6.509	9.557	13.617	67.645	7.55	3.435	5.544		0.651962	15.6289
15.9649	19.643	18.646	16.462	22.12	4.613	4.738	3.591	32.044	21.956	12.273	8.231	13.453	23.687	6.965	43.52	6.981	5.423	5.321	12.647	33.596	3.806	6.326	28.588	11.512	12.639	31.351	12.534	5.685	5.198	41.714	6.922	8.16	14.912	66.379	6.053	4.457	4.124		0.656862	15.8451
16.0841	15.67	17.493	18.656	21.798	5.081	4.126	5.199	27.225	21.702	12.381	7.567	13.939	20.957	7.067	42.48	6.945	4.822	5.18	11.819	32.953	4.998	6.775	36.127	11.067	13.73	30.985	9.076	4.283	3.756	37.774	5.716	8.038	15.062	69.261	7.598	4.9	5.947		0.661766	15.6258
16.2032	15.915	23.303	18.067	19.37	4.617	3.258	5.072	22.97	23.406	12.903	8.509	12.466	22.402	7.336	45.51	8.602	5.783	6.509	12.164	31.178	4.872	6.709	36.079	10.622	11.836	28.306	11.623	4.199	4.602	33.996	6.816	7.816	15.17	73.987	5.347	4.099	4.408		0.666667	15.671
16.3224	15.086	19.117	19.134	21.072	4.586	4.201	5.158	20.811	23.243	10.79	8.867	13.896	20.983	5.482	50.26	7.736	5.05	5.616	11.18	26.069	4.326	7.247	37.549	9.509	12.841	26.001	10.777	5.371	5.807	34.745	7.824	10.432	13.318	64.992	7.256	6.211	4.734		0.671571	15.3318
16.4415	14.94	19.513	23.036	18.293	5.985	3.549	4.321	20.166	24.929	13.723	8.18	12.031	24.562	7.512	45.886	6.155	4.293	6.407	11.618	27.142	5.099	7.291	32.222	9.909	12.629	27.31	10.592	5.096	5.357	31.96	7.86	9.408	14.432	67.688	7.195	4.246	5.016		0.676471	15.2852
16.5606	15.997	17.143	24.983	19.275	4.577	5.616	5.459	20.685	28.027	10.473	7.617	14.687	27.569	6.961	45.807	6.537	4.545	5.131	10.798	24.702	5.008	7.878	34.372	10.073	12.844	25.916	8.462	5.567	5.018	34.871	6.567	11.436	12.88	61.43	6.996	4.575	4.911		0.681372	15.2809
16.6798	17.129	16.967	28.402	15.607	3.919	3.986	5.165	17.545	26.627	11.392	5.69	15.286	26.146	7.463	44.806	5.324	4.928	4.331	11.216	20.953	4.145	8.764	31.355	10.348	11.388	23.983	9.456	5.061	5.913	37.135	7.716	11.14	14.438	62.615	7.816	5.515	4.415		0.686276	14.9753
16.7989	16.038	18.208	28.853	17.318	3.562	3.997	5.44	19.585	24.747	9.929	8.705	16.605	20.671	6.375	43.558	6.125	6.158	4.724	10.772	20.887	4.517	7.847	35.054	9.237	12.051	23.904	9.13	5.638	4.035	36.185	6.917	10.776	15.643	56.774	7.524	4.03	4.305		0.691176	14.752
16.9181	15.435	17.019	30.551	15.659	4.896	3.373	5.342	23.669	25.438	10.701	8.591	18.634	19.446	6.525	48.523	4.48	5.372	4.853	8.76	18.155	5.719	9.294	33.843	11.228	13.417	24.982	9.766	4.144	5.126	34.137	5.708	11.386	16.37	55.792	8.977	3.302	4.384		0.696081	14.9459
17.0372	16.585	16.606	30.293	14.719	5.236	4.978	4.651	24.156	27.034	11.589	8.174	14.839	18.121	7.241	51.484	4.734	6.249	5.548	9.455	19.367	4.08	8.393	28.918	11.693	13.5	26.286	6.789	4.733	6.062	35.343	6.581	9.618	16.794	55.909	6.847	4.824	5.781		0.700981	14.9516
17.1563	14.689	19.42	28.45	15.791	3.531	4.044	5.94	26.387	23.514	11.295	9.089	16.209	14.832	5.734	44.315	5.312	4.796	5.941	8.443	17.689	4.497	11.007	26.857	9.072	10.866	24.829	7.266	4.98	6.587	35.709	6.327	9.937	15.954	59.787	5.95	4.591	5.016		0.705881	14.4501
17.2755	15.587	16.14	28.921	13.355	4.367	4.391	4.925	24.22	21.276	10.507	8.79	17.193	14.326	6.966	46.556	6.267	6.165	5.788	9.369	20.061	3.278	9.468	28.289	10.726	9.796	23.458	6.351	5.448	5.683	35.988	7.817	11.387	17.772	59.553	6.314	5.354	5.113		0.710786	14.5126
17.3946	15.247	16.325	28.13	12.9	3.978	3.125	6.875	26.516	19.391	10.861	8.437	17.117	14.519	6.788	51.294	5.396	6.166	5.826	8.649	22.151	4.122	11.802	27.843	9.703	13.277	24.707	5.969	4.69	4.221	35.007	7.804	10.687	16.932	62.303	6.593	3.221	5.005		0.715686	14.6913
17.5138	17.116	19.784	26.554	14.406	3.782	4.804	6.939	25.843	21.246	8.349	6.011	21.467	14.974	6.472	49.834	5.306	5.838	6.001	9.003	20.328	5.401	13.754	21.285	10.053	10.737	26.01	5.593	5.075	6.286	33.691	7.418	10.193	16.334	60.874	6.066	4.836	5.617		0.72059	14.6832
17.6329	17.807	15.415	30.822	11.99	3.685	2.572	9.211	26.161	16.88	8.216	6.708	16.991	16.238	6.129	48.267	5.802	4.405	5.468	8.766	20.231	4.587	14.938	21.002	9.916	11.981	27.995	6.167	4.323	6.527	40.48	7.248	10.439	15.406	52.364	7.883	4.678	6.255		0.72549	14.4312
17.7521	21.259	20.57	29.563	13.068	4.257	3.775	12.929	29.104	16.508	9.073	8.255	19.431	15.6	5.685	40.628	4.059	4.918	5.481	8.171	21.018	4.294	12.883	19.997	7.762	11.651	25.223	4.658	4.536	5.679	36.763	7.348	10.725	15.21	56.035	7.632	3.78	5.158		0.730395	14.3969
17.8712	16.255	20.186	31.963	12.096	5.618	2.95	20.499	27.198	21.264	8.641	7.237	19.302	13.804	7.342	37.959	3.642	5.862	4.649	9.054	23.057	4.876	14.969	20.857	9.173	10.732	20	4.396	5.851	5.522	39.278	9.343	12.579	12.402	53.256	8.396	5.137	4.117		0.735295	14.5801
17.9903	16.697	17.081	30.71	12.118	3.474	2.864	22.95	28.019	21.98	10.809	8.972	22.681	11.415	7.111	40.417	5.776	6.658	7.134	8.007	19.438	4.838	16.368	19.82	8.476	10.712	28.944	4.75	5.839	5.797	38.916	8.891	12.248	13.147	53.88	6.754	5.4	4.291		0.740195	14.9563
18.1095	16.453	19.822	29.961	11.236	3.373	3.634	27.766	30.221	22.515	8.998	8.192	23.77	14.538	6.611	34.421	4.866	5.559	5.238	7.301	22.387	4.098	16.792	19.875	6.959	11.313	23.134	4.896	4.413	5.226	35.03	11.05	11.162	12.778	55.737	7.785	5.015	3.923		0.7451	14.7581
18.2286	15.004	21.325	30.621	11.633	3.074	3.819	29.518	34.828	21.399	7.645	9.337	21.928	14.008	7.669	31.074	6.807	5.905	5.143	6.678	21.782	5.067	13.487	21.006	8.617	10.799	30.534	5.498	4.097	6.471	38.303	10.961	14.543	14.537	51.831	8.135	5.136	4.636		0.75	15.2123
18.3478	14.036	22.372	31.053	12.247	4.23	4.221	32.674	36.703	23.41	7.984	6.866	19.866	12.039	6.871	31.897	5.491	4.918	4.495	8.587	20.537	4.911	15.129	17.585	10.365	12.408	28.471	5.58	5.513	6.622	36.055	10.392	15.6	14.562	59.647	8.304	4.189	5.556		0.754904	15.4429
18.4669	12.633	22.02	34.633	11.511	6.353	3.956	32.166	41.778	23.398	7.952	6.999	19.889	11.785	6.876	30.919	5.429	3.695	4.557	8.019	19.81	5.093	10.956	20.305	8.58	12.589	24.21	4.359	5.53	6.508	36.382	8.987	15.013	13.938	59.998	8.607	5.236	4.589		0.759805	15.2772
18.586	12.835	22.581	36.657	13.857	4.663	4.371	30.89	47.967	20.016	8.781	8.404	18.041	12.123	7.211	37.062	5.305	5.952	5.675	8.886	20.466	6.791	12.134	16.799	7.059	11.511	27.121	4.085	4.423	6.984	37.167	10.065	14.526	14.345	63.176	12.017	6.289	5.064		0.764705	15.9811
18.7052	13.154	25.61	34.705	12.504	3.819	4.17	31.045	56.395	20.373	7.695	8.088	20.189	10.562	6.528	29.321	6.433	4.74	5.507	11.048	20.239	5.728	10.419	20.228	8.105	12.536	24.538	5.337	4.645	7.509	35.397	9.673	15.326	14.748	61.389	10.193	4.906	3.967		0.769609	15.8586
18.8243	12.857	29.055	38.357	10.418	4.117	3.843	29.549	57.85	16.245	8.062	8.806	24.577	12.562	6.946	30.824	5.43	5.269	3.633	8.762	23.006	6.553	12.667	18.38	8.429	10.747	24.104	5.432	5.015	7.43	32.177	9.713	17.251	15.731	67.211	9.591	4.986	4.38		0.77451	16.2153
18.9435	13.454	29.71	40.491	9.482	5.392	3.146	21.049	64.577	13.826	8.557	8.703	23.534	11.525	5.979	35.751	5.819	4.165	3.917	7.973	21.649	7.225	15.508	17.599	7.485	12.067	25.94	4.815	6.553	8.156	34.94	12.811	19.153	16.828	65.643	12.308	5.248	5.652		0.779414	16.6657
19.0626	14.535	33.223	46.869	10.017	3.608	5.124	12.964	65.371	13.281	7.947	8.259	22.718	10.426	7.592	31.793	4.785	5.262	3.734	9.802	22.262	6.139	14.829	16.31	8.266	15.535	24.1	4.849	4.587	6.769	41.166	14.652	19.417	19.44	64.865	11.55	6.154	4.576		0.784314	16.8318
19.1817	15.71	31.361	55.289	9.941	4.193	3.87	9.951	58.906	12.523	7.461	7.631	22.265	9.897	7.575	31.056	5.808	5.297	4.212	9.142	21.179	5.64	14.806	20.276	8.302	12.35	28.349	4.838	5.422	7.252	41.142	14.424	20.719	17.899	64.977	12.395	4.285	4.739		0.789214	16.786
19.3009	14.91	32.651	65.95	10.001	4.181	5.131	5.135	50.129	13.411	8.386	9.007	21.831	9.372	8.223	30.256	6.612	4.661	4.156	10.316	21.265	6.466	16.159	18.835	7.733	12.67	24.254	4.546	4.955	7.291	40.299	15.553	19.778	18.713	57.172	14.422	5.085	5.159		0.794119	16.6128
19.42	16.499	34.969	70.008	11.23	3.384	5.064	5.828	33.93	14.906	8.622	9.787	25.807	9.652	9.447	32.841	7.049	4.533	5.328	10.834	21.173	8.081	14.427	16.822	8.321	13.87	27.008	4.155	5.929	6.867	39.889	19.173	23.879	20.281	57.827	15.951	6.883	5.451		0.799019	17.1812
19.5392	15.813	38.731	68.139	10.459	4.703	4.091	6.753	18.681	13.21	8.8	9.734	28.307	8.277	8.371	35.08	5.374	4.366	4.277	12.133	22.277	8.538	13.689	16.441	8.679	12.307	25.162	4.754	5.431	6.021	42.517	21.945	27.324	26.769	53.909	16.229	6.368	5.232		0.803924	16.9971
19.6583	15.545	42.494	64.801	12.919	4.485	3.885	5.319	12.203	13.325	10.503	10.501	28.684	9.888	8.642	42.592	4.813	3.66	4.307	12.816	17.135	8.352	15.214	17.835	8.682	14.249	25.775	3.888	3.965	7.057	51.428	22.434	29.417	32.207	52.016	16.025	7.733	4.767		0.808824	17.5557
19.7775	16.171	56.467	60.65	16.481	3.831	4.726	3.222	11.416	12.028	8.14	9.865	29.132	8.508	8.009	43.478	5.799	3.378	4.207	11.083	21.067	8.873	17.216	17.301	10.276	13.376	27.539	4.169	5.46	8.138	59.156	20.649	30.851	39.527	52.054	16.597	6.917	5.647		0.813728	18.4163
19.8966	19.107	66.606	53.168	16.392	4.658	5.542	5.262	9.629	10.029	6.237	10.005	34.386	8.681	9.768	46.706	5.34	3.998	4.161	11.613	21.053	8.032	14.789	14.87	6.96	17.151	27.383	3.571	5.621	8.234	60.787	25.211	33.012	34.863	42.724	19.091	9.686	7.829		0.818628	18.7069
20.0157	22.12	56.412	40.183	20.716	5.531	5.287	3.648	7.528	12.771	7.268	10.874	36.333	8.251	7.625	55.87	5.137	4.56	5.557	13.491	18.206	8.063	12.596	14.439	9.274	14.008	28.638	5.117	4.994	7.401	68.759	25.525	39.591	40.454	44.061	25.623	10.603	9.589		0.823529	19.3541
20.1349	21.458	52.69	33.838	22.786	5.764	6.726	3.417	4.436	11.326	8.109	11.768	39.018	7.739	10.712	60.458	4.858	4.718	4.283	11.065	20.201	8.57	15.787	13.567	8.569	16.473	26.062	4.611	5.634	8.262	62.651	24.309	45.208	34.874	43.415	31.044	9.701	8.422		0.828433	19.2575
20.254	22.311	46.188	26.678	27.455	5.578	6.815	1.836	4.95	13.624	7.033	11.948	38.245	9.372	11.196	60.781	5.82	4.52	4.14	13.451	18.906	7.958	12.353	13.506	7.951	16.188	29.493	4.516	5.747	8.624	56.013	30.721	46.853	37.566	38.391	30.894	14.145	9.83		0.833333	19.2323
20.3732	27.636	34.194	23.488	21.224	6.59	9.456	2.603	3.757	11.32	7.897	12.699	40.563	8.289	11.483	60.403	6.525	4.454	4.514	14.883	19.937	9.099	12.047	14.861	6.311	15.393	30.755	5.118	4.915	7.544	48.364	28.823	46.518	29.953	34.652	48.8	16.25	13.411		0.838238	19.0467
20.4923	36.321	25.135	16.923	22.225	7.811	9.677	1.856	2.838	11.427	9.201	14.959	38.451	6.445	16.62	46.336	5.283	3.418	4.127	13.498	17.546	8.172	14.666	14.267	7.1	18.545	31.701	5.179	5.926	9.008	40.631	35.443	38.541	27.489	30.011	63.718	19.928	12.385		0.843138	18.7245
20.6114	42.022	17.511	14.071	22.206	8.991	16.967	1.376	3.063	13.379	8.811	17.22	32.525	7.968	19.193	32.898	5.887	4.127	4.909	14.688	15.755	7.91	13.258	13.696	7.655	17.374	34.488	6.084	5.291	10.387	32.35	40.369	31.93	22.533	20.672	73.427	20.547	18.104		0.848038	18.3687
20.7306	43.17	15.659	13.284	18.229	9.288	19.117	1.543	1.55	14.473	9.483	16.134	33.303	7.076	19.612	26.453	6.558	4.674	5.306	18.936	14.894	8.706	13.838	16.531	8.601	16.786	35.973	5.082	5.773	14.504	24.791	35.349	23.438	17.452	18.157	82.222	27.948	18.793		0.852943	18.1807
20.8497	39.901	13.338	9.547	19.071	9.227	19.751	1.246	1.052	14.778	9.213	19.021	30.777	8.404	23.191	20.47	9.603	4.956	4.937	16.663	14.473	7.578	14.132	16.085	7.94	20.354	34.369	5.672	7.008	15.457	20.913	33.326	25.589	15.179	16.48	77.909	33.351	22.358		0.857843	17.9275
20.9689	32.195	10.064	9.001	19.642	11.847	22.75	1.335	1.761	13.782	9.212	24.47	30.822	6.566	30.492	15.768	10.036	4.551	5.517	14.323	16.344	8.25	16.575	19.756	7.956	21.558	36.016	8.508	6.728	20.223	19.188	27.368	19.364	10.038	13.591	63.436	33.698	27.293		0.862747	17.5682
21.088	29.879	8.34	8.284	18.792	12.973	34.169	0.52	1.267	16.144	9.593	27.133	28.016	6.421	39.607	11.51	10.615	4.755	4.581	16.451	18.39	10.728	16.27	17.223	7.06	21.966	36.681	6.132	7.273	23.211	17.457	22.44	13.974	9.47	11.682	45.073	29.99	30.251		0.867648	17.1438
21.2071	18.701	7.426	5.881	15.825	18.977	40.502	1.397	0.749	17.962	9.526	30.963	27.302	6.65	47.583	11.045	15.07	4.514	5.522	17.858	19.194	8.952	16.537	16.073	7.375	22.092	32.747	8.782	9.328	25.239	15.298	18.672	12.215	7.843	10.606	29.759	28.32	39.94		0.872548	17.0926
21.3263	14.696	5.533	3.79	12.738	26.463	43.578	0.546	1.06	20.739	10.789	38.15	23.277	7.218	61.186	9.452	14.182	4.496	5.004	18.977	16.414	11.185	17.336	18.969	7.9	23.75	32.292	10.012	14.915	35.173	10.805	16.772	8.882	6.485	7.466	18.731	23.225	47.628		0.877452	17.5625
21.4454	10.322	3.906	4.918	10.488	41.693	38.797	0.565	1.275	20.895	11.325	46.222	22.273	6.344	68.406	6.365	18.456	4.189	5.508	22.755	17.046	12.296	18.927	23.294	10.518	26.444	36.167	11.454	17.052	35.751	11.878	12.984	10.3	6.531	7.423	13.965	21.461	44.348		0.882352	18.4471
21.5646	9.878	4.19	4.53	9.083	48.513	35.219	0.503	0.896	23.997	12.945	54.112	21.409	6.165	71.085	4.76	23.203	3.505	6.789	23.334	17.857	12.587	21.063	22.477	9.643	33.239	31.218	13.895	24.84	39.451	10.752	10.151	8.474	5.383	5.033	12.293	17.85	40.063		0.887257	18.9293
21.6837	12.01	2.038	3.67	7.802	56.542	20.293	0.701	0.6	21.914	17.484	66.211	21.102	6.139	60.071	3.996	29.374	3.632	7.57	26.843	19.706	16.61	22.374	27.314	10.509	38.855	35.455	16.404	27.057	40.618	9.182	7.317	7.861	5.211	3.869	12.904	14.981	30.279		0.892157	19.3108
21.8029	7.652	1.699	4.032	6.659	50.651	11.523	0.511	0.569	27.166	18.977	75.904	20.382	6.714	57.837	3.458	46.56	2.929	8.555	30.286	21.858	18.746	25.044	30.749	10.836	43.126	35.436	17.819	32.661	38.314	7.143	9.117	6.663	3.229	4.212	10.769	12.893	22.443		0.897061	19.8141
21.922	6.61	2.294	3.494	6.453	45.129	8.582	0.793	0.518	29.558	25.143	80.315	24.086	8.254	37.422	3.156	65.494	4.522	10.106	44.791	27.465	20.773	22.882	32.736	11.135	51.924	42.037	20.99	34.893	34.992	6.492	6.572	6.421	2.61	3.696	6.813	8.233	17.592		0.901962	20.675
22.0411	5.693	2.448	2.049	5.035	41.158	10.125	0.59	0.54	32.606	27.247	95.514	24.088	11.108	29.517	2.767	73.28	5.44	11.326	53.915	30.366	24.059	23.763	37.513	11.006	55.603	43.841	24.396	33.77	28.127	6.677	7.187	6.648	3.963	3.208	7.272	5.524	10.526		0.906862	21.5647
22.1603	4.324	2.233	2.734	5.949	34.206	9.007	0.189	0.323	34.074	35.431	101.538	28.935	16.024	24.591	2.288	65.335	5.698	14.443	63.175	29.408	29.734	28.571	40.474	15.232	54.459	55.463	24.675	42.056	23.231	4.243	4.284	4.226	2.955	2.178	7.465	4.296	8.079		0.911766	22.4737
22.2794	3.52	1.782	2.197	6.064	27.498	6.954	0.215	0.525	33.731	44.244	113.748	40.009	20.351	20.825	2.288	51.027	5.09	20.388	67.033	29.28	31.665	29.776	50.362	18.056	52.795	58.987	31.525	44.383	20.734	4.007	4.568	4.226	2.467	1.757	4.693	5.229	6.469		0.916667	23.4721
22.3986	3.41	2.12	1.68	5.611	21.858	5.679	0.321	0.593	40.089	50.393	105.031	49.298	27.086	16.09	1.75	35.096	5.818	26.16	71.594	24.333	36.519	31.84	61.55	23.781	44.969	65.297	35.667	44.838	21.933	4.414	5.081	3.531	1.048	1.06	3.709	5.719	4.991		0.921571	24.0529
22.5177	1.745	1.116	1.088	3.41	15.813	4.776	0.165	0.184	45.297	53.324	108.944	48.675	32.055	12.841	0.811	27.163	7.119	33.114	70.377	19.091	40.977	31.378	71.392	26.291	37.363	64.045	39.285	37.943	15.355	3.731	3.1	2.825	1.69	1.533	3.808	4.295	4.009		0.926471	23.6791
22.6368	2.051	0.994	0.624	4.5	13.901	4.661	0.319	0.265	53.484	60.108	89.23	44.474	32.389	12.751	0.789	18.816	6.61	39.328	58.898	14.164	41.205	38.884	75.124	29.781	26.583	52.6	37.689	28.061	12.282	3.472	4.096	3.474	1.801	1.99	4.09	3.445	4.651		0.931372	22.3671
22.756	2.663	0.844	1.37	3.716	14.105	3.336	0.122	0.277	56.661	45.65	70.917	38.118	35.553	9.545	1.321	14.291	7.335	45.409	50.901	11.913	40.605	35.511	66.314	40.17	14.188	41.366	33.801	19.021	12.961	2.181	4.217	2.541	1.183	2.314	2.298	5.102	2.443		0.936276	20.0071
22.8751	1.542	0.9	0.687	2.393	12.667	2.991	0.002	0.193	55.888	23.407	46.029	35.468	34.6	5.661	1.009	13.679	8.053	45.14	40.474	9.512	38.228	38.102	59.184	40.831	9.84	27.887	28.855	14.462	10.727	2.336	3.264	1.682	1.512	1.115	2.554	4.111	2.853		0.941176	16.9686
22.9943	1.48	0.711	0.508	1.507	8.067	2.1	0.053	0.511	52.567	11.53	23.018	33.265	27.656	5.199	1.02	13.038	12.455	42.781	29.52	9.523	43.179	32.371	56.793	44.163	10.489	14.043	21.828	12.053	12.546	2.229	4.139	1.934	1.605	0.951	2.249	2.363	3.437		0.946081	14.6725
23.1134	0.952	0.726	0.495	2.026	6.993	2.57	0.331	0.424	35.007	9.501	14.556	19.35	24.922	3.538	0.634	7.748	16.037	39.718	19.429	9.733	32.595	32.745	52.741	37.507	4.922	9.875	13.728	8.028	9.531	1.516	3.095	1.345	1.038	1.059	1.939	1.916	1.782		0.950981	11.623
23.2325	1.198	0.665	0.23	1.722	6.971	1.478	0.329	0.054	17.298	7.875	12.672	9.933	22.118	1.993	0.827	5.021	24.001	29.495	15.148	8.574	24.387	30.409	43.871	28.561	4.984	7.396	13.282	6.702	8.014	2.369	1.293	1.623	0.541	0.638	1.712	2.141	2.154		0.955881	9.39673
23.3517	0.406	0.357	0.496	1.447	5.753	1.211	0.066	0.11	11.729	7.672	10.351	10.936	19.94	2.921	0.289	5.565	28.13	19.656	12.69	5.032	23.22	29.105	40.28	13.377	3.366	7.253	9.168	7.352	7.442	1.527	2.14	1.688	0.6	1.147	1.467	2.489	2.312		0.960786	8.0727
23.4708	0.493	0.606	1.097	1.064	4.426	1.344	0.161	0.116	9.007	3.934	6.943	8.74	12.081	1.695	0.394	4.072	31.817	12.298	11.488	7.433	16.073	27.337	36.194	10.499	2.256	6.507	6.585	7.077	6.885	1.596	1.179	1.259	0.441	0.655	1.267	1.974	1.517		0.965686	6.71649
23.59	0.567	0.549	0.271	0.422	3.219	1.462	0.056	0.0005763	6.546	2.779	6.888	6.125	10.992	2.59	0.495	4.008	34.615	10.808	8.738	8.445	12.827	24.3	24.002	11.054	2.765	5.015	5.07	6.866	6.72	1.287	1.465	1.38	0.62	0.421	0.998	1.446	2.268		0.97059	5.89404
23.7091	0.783	0.175	0.64	0.604	3.164	1.359	0.004	0.111	3.435	2.149	5.495	3.802	11.091	2.094	0.38	2.305	36.975	9.092	6.057	4.747	13.017	20.182	18.021	6.087	1.801	4.777	4.087	6.753	5.831	1.684	1.489	0.639	0.78	0.647	0.567	1.23	1.305		0.97549	4.95565
23.8283	0.467	0.38	0.185	0.768	2.036	0.841	0.052	0.057	3.435	2.414	4.192	3.788	8.703	2.168	0.11	2.968	35.827	5.919	5.526	4.997	9.118	16.232	12.526	5.773	1.903	2.826	5.85	6.226	4.599	0.926	1.64	0.819	0.402	0.615	1.047	0.566	1.057		0.980395	4.24211
23.9474	0.592	0.357	0.381	0.784	1.304	0.981	0.054	0.107	2.289	1.943	1.924	3.426	4.649	1.795	0.322	1.743	31.582	5.08	5.529	4.042	8.498	13.012	10.95	3.591	1.603	2.521	3.473	5.309	5.485	0.896	1.079	1.141	0.483	0.62	0.609	0.66	1.577		0.985295	3.52408
24.0665	0.229	0.589	0.597	0.764	1.476	1.23	0.11	0.003	3.036	1.444	1.977	3.221	3.786	1.715	0.474	2.249	23.603	3.514	4.502	3.936	7.131	10.536	9.742	3.032	0.91	1.933	3.393	4.848	5.258	1.474	0.664	0.844	0.456	0.481	0.382	0.676	0.899		0.990195	3.00308
24.1857	0.545	0.546	0.549	0.872	1.42	0.899	0.002	0.054	2.352	1.806	1.692	2.299	3.323	1.615	0.532	2.2	18.769	3.382	3.673	3.718	7.631	9.754	6.379	3.375	1.007	1.85	2.819	4.475	4.749	0.745	0.925	0.662	1.041	0.463	0.247	0.667	0.844		0.9951	2.64543
24.3048	0.511	0.45	0.629	0.855	1.177	0.779	0.051	0.005	1.819	1.398	1.225	1.702	3.14	0.977	0.333	1.283	10.436	3.046	1.94	3.363	6.332	6.972	5.679	2.393	0.851	1.072	3.328	4.142	3.634	0.499	0.901	0.891	0.909	0.767	0.377	0.441	1.113		1	2.03838

## Sheet: Image2 (2)
X0	Y0	Y1	Y2	Y3	Y4	Y5	Y6	Y7	Y8	Y9	Y10	Y11	Y12	Y13	Y14	Y15	Y16	Y17	Y18	Y19	Y20	Y21	Y22	Y23	Y24	Y25	Y26	Y27	Y28	Y29	Y30	Y31	Y32	Y33	Y34	Y35		Ap-Basal	Avg intensity
0	3.7778	6.5	6.3889	19.7222	8.7778	6.9444	7.8333	8.5	7.3889	6.222	6.611	7.833	18.6111	20.1111	16.778	17.389	14.778	39	25.1667	15.4444	14.556	22.444	21.833	13.778	21.722	46.389	85.611	100.556	84.722	53.833	24.056	18.722	29.278	46.278	36.889	14.167		0	24.9614
0.1191	3.7778	5.3333	5.5556	25.3333	10.2778	10.5556	9.7778	10.6667	6	10.5	11.278	8.278	18.3889	20.5556	24.389	18.611	16.222	41.222	25.4444	18.2778	17.222	23.444	24.444	18.333	24.833	55.111	89.278	107.833	89.222	54.056	32.333	27.667	36.167	46.222	39.056	19.111		0.00602199	27.9105
0.2383	3.8333	5.9444	7.5556	24.0556	14.3333	13.7222	12.7222	12	10.0556	9.889	13.167	11.833	23.2778	20.5	24.667	18.222	16.222	44.5	35.1111	22.6111	19.556	29.056	21.722	22.056	23.722	52.889	98.444	114.444	86.5	59.778	33.667	28.111	37.556	47.667	47.889	20.333		0.012049	30.2114
0.3574	4.7222	7.9444	9.0556	29.8333	18	14.2778	12.3333	11.5	11.2778	13.333	15	14.222	26.6667	27	31.389	27.778	20.389	49.667	38.6667	29.7778	25.278	25.667	27.444	22.056	24.833	54.111	117.222	126.389	91.889	57.611	43.5	34.778	43.056	56.5	49.722	28.278		0.018071	34.4769
0.4766	4.4444	7.8333	9.0556	36	24	18.5556	15	15.8889	11.8889	20.111	19.5	16.278	29.0556	29	34.556	30.778	28.056	54.056	45.7778	35.5556	23.278	28.333	29.5	27.056	27.222	58.778	130.833	128.889	101.333	65.278	49.278	46.389	52.722	66.389	59.444	33.556		0.0240981	39.2686
0.5957	4.9444	10.7222	11.6667	37	33	26.1667	17.3333	20.1111	14.6111	26.444	24.333	19.389	35.8889	37.3333	45.444	40.111	29.444	62.167	44.2222	46.9444	29.278	26.278	32	35.889	30.5	68.389	142.333	142.222	105.444	74.278	55.444	55.778	66.389	71.333	67.611	36.667		0.0301201	45.1975
0.7148	5.5	11.4444	15.1111	40.4444	38.5556	28.2222	22.6667	21.6667	15.6667	30.833	31.222	22.833	42.1111	40.3333	58	49.611	35.333	66.5	52.5556	50.4444	28.222	31.389	36.222	45.889	30.556	74.611	149.556	153.556	110.278	81.944	67.278	74.889	72	86.722	78.333	46.111		0.0361421	51.2947
0.834	7.2222	17.0556	21.4444	44.6111	42.1111	32.5556	27.2778	26.2222	22.2778	37.944	41	27.333	44.1667	51.2222	68.278	66.444	43.944	72	55.0556	57	32.5	37.889	41.389	58.833	36.944	80.889	162.778	166	111.222	100.667	73.222	86.389	84.167	97.667	89.833	58.222		0.0421691	58.9938
0.9531	7.5	22.1111	22.4444	52.5556	50.7778	35.5556	30.4444	33.1667	28	49.222	46.611	39.167	51.3333	57.3889	84.944	88.333	64.111	81.722	56.3889	60.7222	35	41.667	46.722	73.667	45.167	95.278	173.611	171.722	117.722	105.667	89.556	98.056	101	104.667	100.444	72.611		0.0481911	67.6404
1.0723	10.2222	26.1111	27.0556	53.2778	48.6111	43.9444	33.2222	35.5556	30.2222	59.722	63.444	43.056	61.8333	62.7222	107.111	103	78.167	91.444	57.9444	56.3333	34.722	43.556	55.5	93.333	54.778	113.556	186.944	190.944	123.444	124.056	99.167	120.111	114.667	109.889	112	72.167		0.0542182	76.162
1.1914	11.3333	39	31.0556	51.7222	54.5556	51.7778	39.3889	45.3889	35.8889	77	76.278	57.778	66.5	73.8889	120.444	135.944	97.389	91.833	71.7778	60.3889	40.222	43.278	63	101.778	69.222	129.389	197.111	190.556	138.5	138.611	115.111	141.944	123.222	123.667	122.444	91.389		0.0602402	86.6327
1.3106	16.9444	41.8889	37.1667	59.4444	61.2222	51.3889	50.1667	50.6111	43.3889	93.167	83.778	66.167	73.8333	81.4444	133.556	146.056	120.444	105.667	64.3333	64.8889	42.278	50.389	78.389	119.222	95.222	156.167	199.611	196.278	141.556	150.5	129.5	171.333	126.389	114.944	139.5	97.222		0.0662672	95.946
1.4297	18.7778	45.7222	43.1667	63.3333	61.6667	61.5	54.6111	57.5556	54	102.611	91.722	87.111	77.9444	82	139.278	167.833	135.389	101.667	68.3889	64.8889	48.222	55.111	93.333	126.889	107	171.111	196.5	205.556	148.667	160.722	150.5	183.222	156.222	127.5	139.778	101.611		0.0722892	104.198
1.5488	30.2778	54.3889	50.9444	64.3333	72.3333	63.7222	63.0556	59.6667	59	117.611	103.111	98.056	82.8889	83.0556	149.167	177.222	148.889	104.222	71.0556	66.6111	61.111	59.056	109.722	143.611	135.611	172.944	206.444	202.944	156.167	169.222	170.833	197.111	149.667	126.111	129.333	110.833		0.0783112	111.676
1.668	42.5556	61.8889	52.4444	68.1667	74.5556	70.7222	70.1667	63.1111	67.3889	128.333	104.5	104	91.8333	81.7778	151.278	182.278	175.444	105.333	76.7222	72.7778	61.556	59.611	124	141.056	146.944	172.278	218.167	207.056	166.111	175.889	183.5	207.611	167.889	114.722	127.722	119.222		0.0843383	117.739
1.7871	56.2222	62.1667	61.2222	64.5556	73.9444	76.9444	76.4444	67.1667	73.8889	125.722	107.833	109.944	88.5	79.5556	157.167	179.944	186.5	109.333	74.7222	77.7778	64.889	69.722	139.278	140.722	151.333	177.056	224.056	210	181.889	176.056	193.278	213.611	171.556	108.278	116.278	120.556		0.0903603	121.336
1.9063	63.8889	63.0556	60.3333	65.0556	68.9444	82.1111	80	71.7222	81.3889	121	106.667	113.111	99.3889	81.6667	154.5	175	191.944	105.389	75.8889	79.9444	62.5	70.278	152.167	132.389	166.167	161.222	228.333	219.056	197.167	171	202	204.056	177.111	121.944	102.167	122.833		0.0963873	123.094
2.0254	68.9444	62.9444	60.1111	58.3889	71.8333	83.1667	80.1111	84.4444	82.2778	114.333	105.778	100.611	88.1111	87.6111	140.778	149.056	183.667	109.444	73.5556	78	75.944	78.722	157.056	128.111	155.5	134.111	233.444	222	195.222	166.667	213	203.556	190.278	115.167	96.222	102.056		0.102409	120.84
2.1445	70.9444	59.6111	56.3889	57.2778	67.6111	79.0556	90.8333	80.5556	70.8333	109	103.556	99	87.3333	87.1111	130.389	133.5	184.667	100.556	71.2778	83.2222	71.222	83.333	154.556	106.444	147.611	121.722	238.667	225.5	191.056	150.667	208.222	190.333	190.167	105.333	90.722	100.278		0.108431	116.627
2.2637	74.2778	59	56.7222	55.1667	57.6111	80	78.7222	71.2222	69.6667	89.222	101.278	99.333	79	90.7778	116.833	100.111	155.889	91.111	73.8333	79.7222	86.111	94.111	154.833	94.444	139.722	103.444	233.222	218.556	201.056	137.722	208.556	190	187.667	105.333	84.556	87.667		0.114458	111.292
2.3828	73.6667	48.4444	53.7778	50.1667	53.2222	75.3333	76.5	74.2222	60.1111	82.833	89.444	82.944	72.5556	92.6667	95.167	78.611	139.556	85.278	69.3333	83.2778	90.667	102.889	152.278	80.111	128.278	83.667	237.278	227.278	198.333	123.167	208.5	189.444	182.444	103.111	86.111	85		0.12048	105.991
2.502	67.0556	44.1667	43.6667	41.3333	55.4444	69.8333	69	64.1667	52.8889	74.222	80.056	81.611	67.7778	91.2778	78.722	60.056	109.611	73.333	66.1111	85.9444	97.5	109.833	143.5	55.889	107.167	69	237.389	215.833	197.444	105.889	203.556	176.333	178	107.278	86.111	71.722		0.126507	98.2978
2.6211	61.7222	33.1667	40.8889	37.8889	46.6111	63.6111	64.8333	53.7778	45.7778	71.944	69.778	77	64.7778	94.7222	66.278	47.889	80.833	66.167	66.2778	83.7222	101.722	105.722	113.556	50.389	88.722	60.222	234.611	213.833	190.778	89.611	189.111	172.889	173.722	103.5	76.722	70.333		0.132529	90.9197
2.7402	50.1667	29.6111	38.1667	30	44.5556	51.1111	55.7222	48.5	40.8333	70.944	70.056	67.111	60.3889	93	53.833	41	66.056	49.389	59.5556	82.9444	98.389	113.111	95.167	41.5	72.333	53.833	232.778	212.333	189.778	84.167	188.889	175.278	167.833	100.167	80.667	66.889		0.138551	85.446
2.8594	38.0556	23.3889	31.3889	27.8333	36.6667	43.4444	47.2778	40.0556	35.8333	62.667	61.556	64.889	59	102.056	45.833	36.167	50.556	42.889	58.7778	86.8333	112.056	123.333	75.389	36.667	59.556	43.667	227.111	187.556	179.111	67.444	193.833	170.278	158.5	92.778	73.444	58.333		0.144578	79.284
2.9785	36.1111	19.8333	33.1111	22.2778	30.2778	44.2778	49.2222	28.7778	26.2222	59.722	52.167	60.722	56.6667	93.7222	41.444	30	46.389	30.5	55.1667	79.0556	105.944	138.333	59.278	34.722	51.833	39.5	221	174.333	163.889	53.889	175.944	157.556	159.556	97.222	64.667	58.167		0.1506	73.6528
3.0977	26.8889	17.1667	24.0556	21.4444	28.3889	33.7778	40.6111	25.1667	20.8889	46.722	42.111	56.944	56.6111	92	35.5	31.778	37	26.167	47.7778	84.3333	104.667	152.222	49.722	28.667	44.556	31.833	185.278	145.722	148.444	48.389	167.278	147.167	152.944	97.389	64.944	54.833		0.156627	67.2052
3.2168	22.3333	18.1667	23.6667	19.6111	23.8333	28.4444	29.3333	19.5	17.5	45.444	42.722	47.333	52.1111	78.9444	32.222	23.833	30.889	24.556	43.1111	74.7222	109.111	150.167	37.222	24.833	38.556	26.389	153.389	101	119.167	38.778	159.722	127.556	130	85.667	57.722	52.833		0.162649	58.6219
3.336	16.6667	12.8889	19.2778	18.0556	25.7222	23.3889	28.5556	18.1111	13.3889	42.889	38.722	48.444	53.5	67.2778	32.5	23.722	28.111	22.611	43.3889	68.8333	110.5	159.278	29.056	24.056	32.778	19.667	119.833	71.611	100.278	38.556	136.167	123.278	131.389	83.222	54	47.333		0.168677	53.5294
3.4551	15.0556	10.3333	14.1667	16.3889	25.4444	21.7222	26.5556	16.5556	12.6667	39.556	36.111	45.778	50.5556	58.5556	24.722	19.722	24.833	19.278	43.8889	68.8333	108.278	170.333	22.222	22.5	34.722	23.889	87.444	54.111	83.667	28.056	128.889	105.778	128.667	85.5	50.056	50.278		0.174699	49.3087
3.5742	11.8889	9.9444	11.6667	15.2222	18.5	19.9444	24.8889	14.8333	12.7778	36.111	36.833	38.389	54.6667	49.1111	23.611	16.667	21.778	19.667	47.6667	66	100.056	161.111	20.167	20.444	26.5	19.056	73.222	47.889	70.111	26.444	103.611	85.444	116.611	76.556	46	43.833		0.180721	44.0895
3.6934	13.4444	9.4444	10.2778	15	17	15.2222	21.8333	11.3333	9.6111	33.889	31.889	41.333	53.7778	42.0556	23.667	16.889	19.944	19.667	39	70.3889	105.167	161.389	15.889	20.722	26.333	20.278	67.278	35.611	60.667	22.389	91.833	77.111	121.778	71.833	41.167	33.333		0.186748	41.3457
3.8125	9.8889	8.1667	9.5556	16.7778	14.5	12.8333	20.8333	11.7222	10.3889	30.222	28.722	33.5	53.7778	36.2778	21.889	15.5	20.389	16.111	42.2778	58.2778	103.389	161.444	11.556	15.611	15.722	19.278	59.611	32.833	55.056	20.167	72.389	64.722	100	66.944	37.889	32.389		0.19277	37.2392
3.9317	10.3889	8.0556	9.7222	13.8333	14.2222	10.5556	20	11	11.6667	29.444	26.167	28.278	50.3333	30.2778	19.556	14.444	16.5	17	39.4444	64.0556	98.389	147.889	9.889	14.389	13.611	19.222	51.722	30.833	46.111	16.222	57.056	60.111	88.611	59.722	34.278	29.056		0.198797	33.946
4.0508	8.6667	7.5	9.2222	14.9444	12.7222	12.6667	18.5556	8.2778	9.6111	27.389	25.889	28.722	53.7222	24	16.444	12.278	14.778	13.167	33.4444	59.6111	99.389	141.722	6.611	12	10.889	19.889	51.389	23.222	40.222	17.278	48.722	45.889	87.167	54.389	32.333	27.389		0.204819	31.392
4.1699	8.1667	7.1111	9.7222	13.6111	11.3333	10.9444	14.3333	7.3333	8.5556	28.5	24.389	30.944	49.5	27.3333	16	11	12.444	11.889	34.4444	58.6667	99.278	112.722	8.444	9.333	8.833	17.889	39.5	22.667	36.667	16.333	38.444	39.889	76.778	49.722	29.722	27.056		0.210841	28.5972
4.2891	8.1667	6.6667	9.2222	10.6667	10.3889	10.5556	11.7222	8.9444	9.0556	26.778	19.889	29.222	44.6111	21.6667	15.278	9.056	12.389	11.889	27.7222	55.8889	94.889	95.111	7.056	8.333	8.667	17.611	40	23.389	31.222	13.889	31.611	38.222	69.889	43.944	26.944	23.278		0.216868	25.9398
4.4082	7.5556	6.3333	6.7222	11	10.5556	7.6111	13.3333	7.7222	6.4444	24.333	16.667	26	48.1667	19.9444	10.389	9.5	10.611	13.722	27.5	59.7778	103.5	86.944	8	10.111	9.167	15.889	37.889	25.778	29.5	12.222	26.722	31.944	69.167	40.5	21.611	24.889		0.22289	24.9367
4.5274	7.1667	5	8.6111	11.5	10.2222	9.2778	11.3333	6.5	7.7778	23.389	14.611	29.889	37.6111	16.3889	10.167	10	7.667	10.444	26.4444	57.1111	94.5	69.056	6.389	7.333	7.611	17.167	30.722	18	22.889	7.389	27.333	31.333	62.889	37.444	23.778	19.056		0.228917	22.3333
4.6465	6.6667	5.5556	6.8889	9.7222	7.6667	8.2222	11.8333	7.5556	6.8889	25.389	16.667	25.278	32.7778	15.0556	9.944	7.722	7.056	9.722	22.5556	49.7222	99.722	65.667	5.278	8	7.389	13.667	26.778	21	21.611	8.556	20.778	30.389	59	32	20.778	17.667		0.234939	20.8658
4.7657	7.4444	4.0556	7.6667	8.6667	7.5	8.5556	8.9444	6.8889	7.7222	27.167	12.667	26.611	32.1111	13.9444	9.833	9.111	6.056	9.389	24.2778	46.8889	94.056	56.167	6.056	7.167	8.5	14.667	26.222	18	21.333	7.778	24.167	24.667	51.111	27.667	17.778	15.222		0.240966	19.6127
4.8848	6.3889	6.0556	7.5	8	9.3889	8.5556	9.7222	5.8889	6.6111	30.778	13.722	28.278	34.3889	15.7222	8.611	5.833	6	10.556	19.6667	40.5	92.278	47.222	3.944	5.333	4.056	17.278	21.278	12.833	24.556	7.333	20.5	24.056	51.667	26.333	14.889	12.5		0.246988	18.5618
5.0039	6.1667	5.4444	5.5556	7.1111	7.2222	8.3333	8.7778	6.8333	5.0556	29.5	12.667	27.556	28.2778	12.3333	6.5	6.611	6.278	8.889	17.5	38.5	86.111	44.667	5.722	5.167	6.556	16.167	22.889	11.222	19.556	8.278	18.111	27.5	49.5	23.333	12.778	12.722		0.25301	17.372
5.1231	4.6667	3.5	5.4444	6.2222	6.1667	6.8889	7.9444	5.4444	5	32.5	11.111	27.111	27.3333	11.1111	8.222	4.556	5.722	9.389	18.1111	32.0556	79.111	35.778	6.111	4.5	5.5	17.5	17.611	10.667	22.333	5.667	17.611	23.833	37.556	19.333	15.056	13.722		0.259037	15.8441
5.2422	3.2222	4.1667	5.2778	7.3889	8.2778	6.9444	6.8333	5.6111	5.9444	32.167	8.667	23.556	23.2778	10.5	8.778	4.889	5.833	7.944	17.5556	27.1667	71.222	33.056	4.778	5.5	5.889	16.778	17.556	10.167	21.889	7.556	15.722	22.222	30.667	17.278	12	11.056		0.265059	14.6482
5.3614	3.5	4.5556	6.3889	5.8333	6.6111	5.8333	4.8333	6.2778	4.7778	33.778	11.167	27.944	22.0556	9.6111	7.556	4.444	4.167	8.389	16	26.8889	60.722	28.722	4.111	5.333	5.611	16.556	11.556	7.944	25.889	5.611	17.389	18.611	27.222	18.056	10.667	11.167		0.271086	13.7716
5.4805	5.2222	5.2778	6.5	5.3889	7.1111	6.3889	6.4444	5.1111	7.1111	36.333	11.111	25.389	16.4444	8.5	6.833	4.833	4	8.889	16.5556	27.8333	55.278	28.278	5.389	3.944	6.5	19.389	14.333	6.667	23.167	7.056	13.5	15.556	25	16.5	10.556	9.444		0.277108	13.3843
5.5996	3.9444	2.6667	7.6667	4.7222	4.1111	6.1667	6.1111	5.2778	5.2222	32.778	8.278	24.278	19.0556	9.6111	10.222	4.667	3.944	8	13.3333	22.4444	47.167	23.778	4.611	4	6.444	17	11.444	7	20.333	5.722	10.389	15.278	21.278	14.222	7.944	8.389		0.28313	11.875
5.7188	5.1111	4.1667	6.8333	6.9444	4.7778	6.7778	5.2778	4.1111	5.4444	29.611	8.944	21.278	13.8889	10.6667	5.889	4.278	3.944	9.111	13.2778	21.1111	39.611	24.778	5.556	4.444	6.778	18.056	11.333	6.5	17.667	7	10.778	12.056	17.778	14.444	8	7.278		0.289157	11.2084
5.8379	4.0556	3.2778	6.6111	6.1667	4.5556	4.7222	5.4444	4.8333	5.6667	23.556	10	24.333	13.6667	8.7778	8.611	4.667	4.222	10.111	11.7222	19.3889	36.556	21.556	5.722	4.667	5.389	16.556	7.444	7.944	18.333	5.5	9.833	12.278	17.167	11.056	6.167	8.389		0.295179	10.5263
5.9571	4.9444	3.6111	6.7222	4.7778	4.5	3.9444	4.4444	4.2222	5.7222	24.944	8.056	19.833	10.4444	8.6111	8.778	4.5	4.111	6.111	9.7778	18.2222	28.333	18.056	4.333	3.944	5.611	16.722	10.278	6.667	17.556	7.611	5.611	10.611	14.111	11.611	6.389	6.889		0.301206	9.46139
6.0762	3.8333	2.6667	7.2222	4.1667	5.8333	4.0556	4.4444	3.1667	4.8333	22.556	9.389	21.167	9.1667	8.3889	9.5	3.389	4.556	8.667	10.2222	15.1111	26.722	12.167	3.333	4.556	4.833	15.611	9.278	6.833	15.889	6.167	5.944	10.444	12.167	9.944	6.222	6.167		0.307228	8.85034
6.1953	4.6667	4.3889	6.7222	4.6667	5.6667	5.1111	5.2222	4.2222	6	21.833	8.722	17	7.8889	7.3889	7.389	3.889	3.167	7.556	8.9444	18.2222	26.722	8.778	4.278	3.889	5.444	16.5	7.778	5.722	15.111	6.056	4.667	7.889	10.389	11.611	5.056	7.778		0.31325	8.50931
6.3145	4.2778	2.1111	7.5	3.2222	5.3333	3.2778	4.2778	2.8333	4.5	22.222	7.056	13.222	7.6667	6.6667	9.167	3.444	4.944	9	9.1667	12.6667	24.111	8	5.111	4.444	5.278	17.111	6.778	7.389	15.889	6.611	5.944	8.611	11.944	11.611	5.556	5.667		0.319277	8.12806
6.4336	3.9444	3.1667	6.7778	3.9444	4.2222	3.4444	4.0556	4.2778	4.9444	21	6.944	8.889	7.5	5.3889	9.778	4.278	4.111	8.389	10.2778	12.5	18.278	5.111	5.389	2.444	4.889	16.333	6.889	8.833	16.5	6.833	4.111	6.111	7.889	9.667	3.278	3.611		0.325299	7.33332
6.5528	3.4444	2.8333	9.1111	3.1667	4.1667	5	4.5	5.1667	4.8889	20.944	7.167	9.833	4.2222	7.9444	9.833	3.667	5.611	7.389	9.9444	7.4444	19.333	5.278	5.333	3.611	4.722	15.222	7.056	7.167	16.5	6.389	5	5.389	8	10.611	4.389	3.056		0.331326	7.31481
6.6719	3.0556	2.6111	7.7778	2.8889	4.1667	3.7778	4.8333	4.1111	4.8333	24.722	6.444	6.944	5.6667	9.0556	9.444	4.833	4.056	9.167	11.0556	11.6667	14.111	4.889	4.222	4.833	5.833	17.667	7.833	8.611	16.278	5.833	4.389	6.167	8.611	9.167	4.333	3.278		0.337348	7.42126
6.7911	2.8333	2.7778	7.0556	2.6111	4.1111	4.8333	4	4.7222	4.8889	27.611	5.778	7.778	4.3889	8.7778	11.722	3.111	4.833	8.333	10.1111	8.8889	12.722	6.167	3.944	4.278	5.278	19.056	5.722	8.556	12.222	6.056	4.333	5.889	7.944	7.667	2.944	4.278		0.343375	7.11728
6.9102	4.9444	2.7222	8.6667	3.7222	4.1667	4.6667	4	4.5556	5.7222	23.667	4.722	4.833	5.1111	9.8333	11.611	4.5	3.778	9.5	11.9444	8.1111	13	4.389	3.667	3.889	4.722	18.444	5.889	7.333	15.833	6.5	5.278	4.833	6.944	7.833	3.722	2		0.349397	7.08482
7.0293	3.1111	3.4444	7.5	3.2222	3.3333	4.3889	3.7222	4.8333	5.2778	31.222	4.889	5	4.7222	12.6667	11.278	4.389	4.444	9.667	12.6111	8.5	13.722	2.944	4.222	3.222	5.833	18.056	5.333	9.833	15.056	5.833	5.222	5.111	7.444	9.667	4.111	3.167		0.355419	7.41662
7.1485	2.1667	3.8889	8.7778	2.6667	2.8333	5.1667	4.3889	3.5	5.1111	28.111	5.5	4.722	4.3333	15.1667	11.167	3.278	4.833	11.056	9.7778	9.0556	14.111	6.056	5.278	4.778	6.5	21.667	6.667	10.222	14.722	7.333	3.278	3.833	7	9.111	2.944	3.167		0.361446	7.56021
7.2676	1.7222	3.4444	10	3.5556	4.0556	3.8333	3.5556	2.5556	3.8333	24.944	4.833	6.167	4.2778	13.7222	13.222	3.611	2.944	8.556	11.1111	8.3333	11.889	4.667	3.778	3.667	3.611	21.333	7.333	7.722	14.667	6.5	4.833	3.556	6.667	8.722	3.944	2.889		0.367468	7.05708
7.3868	3.1111	3.6667	9.4444	2.7778	5.6111	4.2222	3.6111	5.5	5.4444	27.667	4.056	4.722	4.2778	13	14.056	4.944	4.167	9.611	10.8889	7.4444	11.556	4.778	3.278	2.611	6.5	25.389	7.111	10.944	15.333	5.833	4.389	4.667	7.444	8.889	4.444	3.833		0.373495	7.64505
7.5059	2.0556	2.7222	7.6667	2.3889	3.2778	3.8889	3.9444	3.6111	4.8889	26.833	4.222	4.333	4.8333	11.2778	12.722	4.778	3.889	10.111	10.1111	6.9444	14.833	3.889	4.778	4.111	6.222	22.222	6.389	8.5	13.167	5.5	4.444	4.5	5.889	8.556	3.833	3.444		0.379517	7.07711
7.625	2.8889	3.2778	8.3333	2.8333	4.3889	4.2778	3.8333	4.6111	4.2222	29.722	5.278	4.111	4.8889	9.8889	14.222	3.444	3.278	9.111	9.8889	5.6111	12.444	4.111	2.722	3.778	5.444	19.056	6.778	8.778	15.667	7.611	3.722	5.222	8	9.167	3.611	2.667		0.385539	7.13579
7.7442	2.2222	4.0556	8.0556	3	2.7778	4.5	3.8889	3.1667	6.2222	32.333	3.722	4	5.1111	14.1111	13.778	3.444	4.167	9.833	10.5	6.3333	11.333	4.167	3.222	4.056	5.667	19	4.833	9.111	16.389	6.333	3.389	4.056	5.389	9.944	3.389	2.944		0.391566	7.17899
7.8633	3.0556	2.7778	7.7222	3.2778	2.3333	4.8333	3.9444	3.0556	5.4444	25.667	3.944	4.556	4.5556	12.5556	11.222	5.222	3.278	10.389	11.8333	7.8889	10	3.111	3.389	3.778	5.444	23.222	5.389	10.833	17.667	6.222	4.611	3.222	7.722	8.278	4	2.056		0.397588	7.12499
7.9825	2.7778	3.2222	9.5556	2.5	3.8333	3.2222	3	2.9444	4.6111	24.5	4	4.056	5.9444	14.7778	15.611	6.389	4.333	8.667	10.7222	6.5	10.944	4.222	3.389	4.944	4.889	22.333	6.667	11.167	19.278	5.556	3.833	3.556	6.111	9.111	4.056	2.778		0.403615	7.33336
8.1016	2.2222	3.1667	10.5556	2.2222	2.2222	4.0556	3.1667	2.8889	4.9444	33.444	4.111	4.889	5.1667	13.7778	15.167	4	3.944	10.111	8.7778	7.8889	9.167	4	3.778	4.389	7.944	21.167	6	10.778	21	5.833	4.222	3.444	6.889	11.722	3	3.5		0.409637	7.59874
8.2207	2.0556	2.6667	11.8333	3.8333	3.8889	2.7778	3.8333	1.7222	4.9444	24.444	3.278	4.611	6.7778	13.1111	13.278	6.333	5.667	8.389	8.9444	8.4444	8.444	3.889	3.722	3.278	6	24.333	6.056	11.667	25.944	6.556	2.944	3.611	7.611	12.389	4.389	3.667		0.415659	7.64814
8.3399	1.3333	2.8889	11.2222	3.5	2.4444	2.4444	5.5	2.5	6.4444	26.611	3.278	4.167	6.0556	15.2778	13.389	5.333	5.167	9	10.1111	7.9444	8.944	5.444	3.5	3.611	6.444	28.444	7.889	10.556	25.222	7.389	3.611	3.778	6.556	11.944	4.944	3.667		0.421686	7.95985
8.459	2.2222	2.3333	10.5556	2.9444	2.6667	3.1111	3	3.8889	7.0556	21.667	5.389	3	7.7778	13.8333	13	4.111	3.444	8.944	10.7222	8.9444	7.444	4.611	4.389	3.5	6.222	24.222	6.389	12.278	25.944	5.833	4.056	4.722	6.944	13.444	2.833	4.167		0.427708	7.65579
8.5782	2.6667	3.1111	12.6667	3	2.5556	3	2.6111	3.1667	5.7778	23.444	3.944	3.722	5.7222	14.6111	15.5	6.167	4.944	9.889	10.5	9.8889	9.278	3.5	3.556	3.111	6.056	25.833	8.722	14.944	24.111	7.611	3.889	3.944	7.056	13.444	3.5	3.167		0.433735	8.01694
8.6973	2.6111	3.5556	9.8333	3.5556	3.5556	2.1111	3.3333	2.6111	4.8889	22.278	4.389	3.889	5.6667	13	12.889	5.722	4.944	9.5	9.7222	11.7778	8.611	3.611	3.944	4	7.889	30.222	7.611	16.444	24.833	7.278	2.944	5.111	5.944	11.667	3.333	4.278		0.439757	7.98759
8.8165	3.1111	3.2778	12.3333	2.7222	2.5	2.5556	3.7778	1.8889	4.8333	20.056	3.167	3.167	7.7222	12.8889	17.722	5.944	3.889	10	10.3333	13	7.111	5.278	3.833	3.444	6.667	34.167	7.111	21.333	24.222	5.389	3.389	3.167	8.444	12.444	3.056	3.889		0.445784	8.27315
8.9356	1.5	2.8889	14.4444	3.3333	2.8889	1.7778	2.5556	2.8889	5.8889	20.278	3.833	4.167	8.1111	9.1667	19.833	5.722	4.778	10.278	10.9444	16.5556	7.833	5.444	3.167	4.222	7.056	41.111	9.056	26.278	19.778	6.944	4.389	3.389	7.444	8.944	3.278	4.556		0.451806	8.74229
9.0547	1.7222	2.3889	15.4444	1.8889	2.1667	1.7222	3.5556	2.5	4.4444	19.167	4.778	4.444	9.1667	10.4444	21.167	4.556	5.056	9	13.9444	14.7222	8.778	4.167	3.278	5.556	7.333	45.111	9.167	27.556	20.5	8.889	4.167	4.056	6.944	9.556	4.278	4.389		0.457828	9.05567
9.1739	2.0556	2.5556	14.9444	2.5556	1.8889	3.1667	1.7778	2.3333	4.8889	16	4.444	3.833	8.3889	8.6111	20.722	5.056	4.333	10.111	11.8333	17.8333	6.833	5.722	4.5	2.667	8.222	46.944	9.722	29.222	22.556	7.222	4.278	4	8.111	10.167	3.389	3.944		0.463855	9.02309
9.293	2.2778	2.3889	14.8333	3.3333	2.6667	2	3.1111	2.7778	4.3333	17.222	4.278	3.056	8.3889	9.6667	19.944	4.278	3.222	10.944	15.2778	14.4444	6.444	4.944	4.944	2.722	9.389	47.778	9.611	33.056	23.278	8.611	4.833	4.111	7.167	10.833	3.722	4.222		0.469877	9.28081
9.4122	1.6111	3.0556	17.2778	2.5	2.9444	2.9444	3.3889	2.5556	4.9444	15	3.833	5	6.8333	12.3889	22.556	5.944	2.944	10.167	14.4444	18.7222	7.167	4.722	3.722	3.5	7.056	51.944	8.611	29.056	28.778	8	3.667	3.556	8.556	12	2.944	4.278		0.475904	9.62811
9.5313	2	4.7222	15.6111	4.3889	2.3889	2.6667	3.1667	2.2222	4.6111	16.667	3.167	4.556	6.8333	10.9444	21.944	5.944	4.333	8.611	16.2778	24	7.278	4.278	3.222	4.278	8.333	47.611	11	27.222	32.944	6.944	3.833	3.389	8.167	10	3.389	5.056		0.481926	9.77776
9.6504	2.1667	3.4444	15.8333	3.5556	2.2222	2	2.9444	1.8333	5.5	14.333	4.167	4.389	5.8333	11.6667	22.5	5.889	3.444	8.889	18.5	23.3333	7.444	4.333	3.889	3.278	7.778	47.833	10.5	26.5	32.722	8.556	4.667	5.222	8.278	12.167	4.389	3.611		0.487948	9.82253
9.7696	2.2778	3.2778	14.8333	3.9444	2.2778	1.7222	2.3333	1.7222	4.6667	11.278	3.444	4.167	7.7222	11.6667	25.722	6.722	3.833	9.222	17.4444	25.6667	6.778	3.944	3.222	5.333	10.333	45.944	10.778	27.111	34.889	6.611	4.111	3.389	8.333	13.5	2.778	3.722		0.493975	9.85332
9.8887	2.3333	4.2778	13.7778	2.0556	3.6667	2.8889	2.6667	1.7222	5.5556	13.278	3.556	3.833	8.1667	15.6111	21.611	7.111	4.944	9.333	21.1667	35.1111	9.222	5.944	3.611	3.611	7.944	48.444	13.278	22.556	36.167	8.611	4.944	3.722	9.611	10.556	3.722	4.111		0.499997	10.52
10.0079	2.4444	3.7222	11.6667	3.3889	2.0556	2.9444	2.1667	2	4.2778	14.278	4.833	3.833	7.8333	12.7778	22.167	6.444	4.722	11.222	22.8333	31.8333	6.389	3.833	2.778	3.667	10.611	41.056	10.111	28.167	32.944	7.556	3.667	3.167	9.222	14.278	3.833	3		0.506025	10.0478
10.127	2.8889	4	9.6667	3	2.5556	2.0556	2.8889	2.7778	4.1667	13.444	4.778	3.778	7	14.3333	23.5	8.222	5.5	8.556	28.2778	35.8889	8.333	4.444	2.833	2.944	10.833	33.167	12.944	28.389	34.389	6.889	3.222	4.278	8.889	11.833	3.222	3.611		0.512047	10.2083
10.2462	2.2778	3.8889	10.7222	3.5	2	2.8333	2.5556	3.4444	4.0556	13.889	3.778	3.444	8.2778	14	21.111	8.444	5.056	8.222	31.9444	38.7778	9.667	5.778	4.333	3	11.722	33.444	13.5	25.167	34.722	7.111	5.444	4.611	9.5	11.778	3.889	3.778		0.518074	10.5463
10.3653	1.5	3.1111	9	3.8333	2.3333	2.8889	2.8889	2.8889	3.4444	13.444	5.944	4.833	9.7778	15.5556	23.444	7.278	3.944	7.722	31.7778	42.2222	8.278	4.889	2.778	3.167	11.556	28.444	13.333	26.111	32.333	7.778	4.333	3.667	8.944	12.667	2.944	4.444		0.524096	10.3749
10.4844	1.7222	4.1667	11.6667	3.6111	2	2.2222	1.3333	3.4444	6.2222	13.278	5.278	6.333	8.5	16.8889	19.5	8.111	3.333	7.222	36	42.3889	6.889	4.333	3.167	3.444	13.722	21.444	9.722	32.944	31.611	8	3.889	5.556	10.833	9.278	3.444	5.222		0.530118	10.4644
10.6036	3.7222	4.9444	11.9444	3.7778	2.5	1.7222	2.8333	3	7.0556	11.056	5.944	5.5	10.9444	20.0556	18.389	7.556	3.389	8.667	43.7778	39.1111	8.944	3.5	3.5	4.333	13.778	18.389	13.333	39.056	36.056	7.111	4.778	5.167	8.778	10.222	4.111	3.333		0.536145	11.1189
10.7227	2.5556	3.3333	9.6667	4.3333	2.2222	1.6667	2.2778	1.5556	5.6111	9.833	5.667	6.278	10.4444	18.4444	18.389	7.556	3.889	7.778	46.5	38.8333	9.167	5.278	3.222	3.556	16.944	21.111	11.222	39.889	41	6.056	4.389	4	10.778	8.889	3.667	4.111		0.542167	11.1143
10.8419	2.2778	5.2222	9.8333	3.5556	2.6667	2.5556	2.1111	2.1111	4.5	9.444	4.444	6	11.9444	21.1111	15.889	7	3.778	7.222	42.2222	42.2778	8.222	5.222	4.333	4.833	16.611	18.5	14.389	41.889	38.389	7	5.389	5.056	13.444	7.889	4.389	3.944		0.548194	11.2685
10.961	4.2778	4.4444	11.3889	4.2778	2.3889	2.5	2.1111	1.7222	4.6111	11.167	5.056	5.5	12.0556	21.0556	16.944	8.222	3.333	6.444	41.8333	42.0556	8.944	3.889	3.222	3.056	17.278	17.056	12.611	35.889	42.444	6.889	4.167	5.111	14.833	8.889	4.667	3.722		0.554216	11.2238
11.0801	1.8333	3.3333	10.2222	3.1111	3	2.5556	3.1667	2.5	5.5556	9.833	4.889	5.056	10.5556	23.1111	15.222	6.667	3.611	7	38.3889	41.3889	7.556	4.556	2.667	3.278	19.5	14.833	11.556	37.833	37.889	8.333	6.111	3.944	18.889	12.889	4.611	3.611		0.560238	11.0849
11.1993	3.8333	5.2222	9.9444	3.6667	1.3889	2.5556	2.2222	2.5556	4.8333	9.833	5.611	6.5	12.3333	19.7778	12.222	7.056	3.611	8.222	41.1111	41.1667	8	3.5	3.222	4.167	18.889	14.611	14.111	32	37.833	10	5.5	3	19.389	8.111	2.889	2.944		0.566265	10.8842
11.3184	4.3889	5.6667	10.5556	4.3889	2.1111	2.7222	3.1667	2.8889	4.8889	9.833	6.333	5.167	10.4444	18.5	15.111	6.833	5.278	7.778	45.4444	39.2778	7.611	4.222	3.167	3.222	18.278	15.222	12.111	23.889	31.389	7.667	4	3.722	23.944	10.5	3.333	2.944		0.572287	10.7222
11.4376	3.4444	3.7778	9.9444	4.5556	2.9444	2.3333	2	2.3889	4.7778	10.556	5.444	4.833	11.7222	16.7778	13.611	6.667	4.611	5.889	42.6111	41.5	7.333	4.167	3.444	4.167	17.444	15.111	11.889	21.056	32.167	7.389	5.389	3.222	21.556	8.611	4.056	3.111		0.578314	10.2917
11.5567	2.6667	4.5556	13.6667	6.1111	2.0556	2.5556	2.7222	3.7222	4.1111	9.611	6.611	7.667	14.7778	15.2778	13.444	7.333	4.167	8.944	49.9444	42.2222	6.667	3.5	3.944	3.833	17.111	11.944	14.889	17.278	34.889	6.167	4.5	3.333	26.889	7.056	4.611	3.278		0.584336	10.8904
11.6758	3.5	4.3889	10.8333	4.4444	2.7778	1.7222	1.7778	1.8889	6.1111	9.167	6.167	5.5	13.5556	15.6667	11.556	6.667	4.222	8.056	43.4444	44.1111	5.667	4.222	3.278	3.889	17.056	14.056	10.5	19.278	31.111	8.278	5.278	5.111	28.889	10.333	4.333	3.833		0.590358	10.5741
11.795	3.1111	5.1111	11.7222	4.2778	3.7778	2.2778	2.4444	2.9444	5.5556	7.444	8.944	6.278	12.1667	14.2222	12.167	8.278	5	10.056	54.2222	43.7222	6.278	3	2.667	3.444	18.944	12.556	8.611	17.611	26.778	8.889	4.5	4.889	28.222	8.278	3.556	4.111		0.596385	10.7238
11.9141	3.3333	4.3889	13.6111	5.0556	3.5556	2.8333	2.7222	2.7778	7.2222	9.611	7.556	6.889	13.5556	13.7222	12.556	7.278	4.222	13.5	52.5	40.2778	6.333	3.278	2.778	3.556	19	15.611	8.833	20.278	24.556	7.5	4.889	4.389	28.278	8.111	3.5	4.222		0.602407	10.8967
12.0333	3.6111	5.3333	11.1111	5.6111	3.2778	2.9444	2.3889	2.1111	6.3889	9	5.944	7.167	13.4444	13.5556	12.778	7.833	3.556	13.722	59.0556	35.2222	6.889	5.222	3.278	3.444	17.556	11.944	8.611	25.222	19.667	7.5	4.5	5.389	27.222	10.889	4.722	3.833		0.608434	10.8318
12.1524	3.9444	4.9444	10.1667	5.4444	2.4444	2.6667	2.7222	2.8333	8.3333	8.5	7.222	7.833	11.3333	13	13.667	9.444	4.222	18.611	62.8889	26.8333	5.889	3.5	2.056	4.889	20.222	12.056	8.278	29.333	25.222	7.111	3.889	4.389	29.389	7.056	4.056	4.167		0.614456	11.071
12.2716	4.1667	5.1667	9.5	4.3889	2.8333	1.9444	2.8333	3.0556	8.1667	10.278	7.5	6.889	11.3889	11	11.778	8.889	4.778	19.111	64.7778	26.4444	6.722	2.667	2.167	4.278	22	11.556	6.889	33.667	25.389	6.889	5.056	5.5	31.611	5.611	5.111	4.778		0.620483	11.2439
12.3907	3.3889	4.1667	12	3.5556	1.6111	3.0556	2.0556	3.1667	10.3889	10.111	7.444	5.278	8.6111	9.7222	11.333	9.778	5.444	19.833	72.7222	21.3889	8.167	3.278	3.833	4.5	20.944	10.167	6.167	28.778	22.278	6.889	4.944	5.444	36.778	7	4.889	3.222		0.626505	11.1759
12.5098	3.6667	3.7778	10.2222	5.2222	3.4444	2.1667	2.2778	3.2222	13.6667	8.444	7.333	6.167	8.8889	8.0556	9	12.833	4.056	23.667	73.3889	18.5556	5.944	3.111	3.611	3.556	20.889	11.5	9.778	31.333	23.056	5.944	3.556	5.278	37.667	6.278	3.5	3.556		0.632527	11.2948
12.629	4.8333	4.4444	12.7222	5.7222	3.2778	2.3889	2.1667	3.1111	11.8889	9.056	5.667	7.056	7.2778	8.1111	8.722	15.111	3.722	32	72.2778	16.1667	6.444	3.222	2.556	4.278	17.556	10.5	6.333	25.722	20.5	6.944	5.111	4.333	39.111	4.889	4.5	4.722		0.638554	11.179
12.7481	3.6667	5.0556	10.2778	4.9444	3	2.4444	2.1667	3.1667	12.7222	9.889	6.056	5.389	6.8333	8.5556	11.444	18.778	4.667	34.611	74.3333	17.3889	7.056	3.944	2.722	4.611	16.389	11.611	6.056	24.778	20.056	7.778	5.389	5.556	36.556	6.056	4.944	2.889		0.644576	11.4383
12.8673	3.7222	4	11.2222	4.4444	1.9444	3.3333	1.4444	3.5	13.8889	8.667	4.833	5.778	7.3333	6	8.778	20.778	4.944	35.278	70.6667	15.6111	5.556	4.444	2.278	3.611	17.167	9.5	7.889	28.167	20.722	7.278	5.444	5.556	37.944	5.056	5.111	2.667		0.650603	11.2377
12.9864	4.1111	4.7778	13.4444	6.4444	3.7778	3.7222	2.7778	3.5556	13.2778	10.389	5.333	6.833	7.1667	4.5556	10.389	25.278	6.278	42.778	76.6667	15.9444	5.889	2.5	2.889	4.278	16.389	10.111	7.722	23.778	20.056	8.056	6.167	4.667	37.889	6.222	5.056	3.722		0.656625	12.0248
13.1055	3.6111	6.6667	12.0556	5.7222	3.6111	3.1667	3.3333	3.1111	14.4444	7.722	6	6.722	5.6111	4.9444	7.611	25.722	7	44.889	81.2222	17.8889	5.222	3.056	3.944	3.167	13.667	8.278	6.778	22.778	19.889	9.278	6.222	4.722	39.333	4.5	4.667	3.889		0.662647	11.9568
13.2247	4.7778	6.1667	11.4444	3.9444	3.7222	2	1.8889	3.6111	11.7222	10.778	6.667	6.611	5.3333	5.3333	8.056	30.778	7.667	33.611	72.2778	18.6111	6.778	2.833	2.556	4.278	18.111	8.611	7.389	27.222	16.556	7.889	6.556	6	34.944	5.667	5.333	2.167		0.668674	11.6081
13.3438	5.2222	6.8889	11.5	5.8889	3	2.6111	2.8889	3.6111	16.5	11.833	5.389	6.333	5.5556	5.1111	6.944	30.389	11.444	35	79.5	18.8333	4.722	2.667	3.444	4.111	18.778	9.333	7.222	28	19.222	8.056	5.778	6.278	35.722	4.556	4.889	3.222		0.674696	12.2345
13.463	5.4444	6	13.0556	5.4444	3.8333	2.3333	2.4444	4.1111	16.7778	10.611	6	6.889	6.3333	5.5	7.167	31.278	15.222	29.111	67.0556	18.9444	4.5	3.222	2.722	4.667	17.333	9.722	7.444	27.444	17.667	8.167	6.556	6.056	34.833	6.167	5.111	3.944		0.680723	11.9197
13.5821	6.0556	6.6111	11.8889	7	3.2222	2.9444	3.2778	3.8333	15.0556	12.056	6	7.5	5.3333	6.1111	6.667	28.667	20.333	29.833	71.6667	18.8889	5.167	3	2.889	3.389	17.222	8.611	6.167	25.444	19.389	9.333	6.056	6.611	31.778	5.556	3.444	3.389		0.686745	11.9553
13.7012	4.2778	6.0556	14.8333	6.6667	3.7778	2.5556	2.4444	3.2222	15.6667	13.444	6.056	7.722	6.0556	5.4444	10.333	31.611	21.444	36.611	69.2778	18.9444	6.333	2.556	2.333	3.889	20.111	10.222	8.056	29.222	18.833	7.611	6.778	7.611	27.167	5.389	4.556	3.5		0.692767	12.517
13.8204	7.0556	6.8889	14.0556	7.0556	5.0556	4.2222	2.5556	4.5556	19.2222	9.944	4.722	7	4.1667	6.2222	7.5	34.5	24.778	36.278	73.1111	14.6667	5	3.111	2.611	2.667	18	8.444	8.167	29.056	20.111	7.556	5.944	6.556	30.056	4.944	4.444	4.222		0.698794	12.6235
13.9395	7.6111	6.7778	15.6667	4.9444	4.3333	3.6111	3.0556	3.7222	18.9444	14.944	9.444	5.889	4.8333	4.7222	9.167	32.944	29	41.111	72.7778	15.4444	4.889	2.833	3.056	5.056	14.056	9.278	6.722	23.944	17.556	8.389	5.056	6.444	26.167	3.611	3.611	5.056		0.704816	12.6296
14.0587	4.3333	7.5556	15.1667	6.7778	5.5	3.4444	3.3333	4.6667	20.4444	15.944	8.278	5.278	4.5556	7.6667	9.722	37.889	26.556	46.611	62.7222	13.2222	4.556	4.5	2.611	3.778	15	9.667	7.389	21.889	18.444	8.111	7.111	9.056	24.667	5.389	4.111	4.278		0.710843	12.784
14.1778	5.2778	7.0556	12.4444	6.8889	4.6667	3.4444	2.8889	5.2222	20.7778	16.667	9.667	6.167	4.3889	7.5	16.444	42.222	28.722	39.111	62.7778	10.1667	5.167	3.722	2.778	5.889	19.222	9.556	8.889	25.111	14.611	8.111	5.222	9.611	27.222	3.611	3.111	4		0.716865	13.0093
14.297	5.3333	7.7778	15.1111	9.2222	5.3333	4.5	3.2222	4.4444	16.8889	18	10.5	7.611	5.7778	7.2222	19.222	48.556	31.167	45.389	55.3889	15.3889	4.556	3.278	3.056	4.278	21.944	11	10.278	23.778	16.222	6.889	6.056	8.167	26.778	4.389	4.667	4.056		0.722892	13.7624
14.4161	6.4444	7.3333	13.1111	11.6111	4.8889	3.9444	2.2222	5.8889	22.3333	17.611	13.889	6.278	4.8889	6.6111	23.222	41.889	28.222	43.889	53.5556	13.7778	4	3.056	3.444	3.722	19.556	13.611	9	26.389	17.889	7.944	6.167	8.833	22.222	4.056	3.278	4.389		0.728914	13.588
14.5352	7.1667	7.6111	13.5	10.6667	4.5	2.8333	3.3889	5.3889	20.8889	16.444	12.556	6.222	5.5556	7.3889	25	46.778	26.444	34.611	53.2778	13.3889	5	2.667	3.722	4.778	21.556	14.5	9.444	30.278	15.778	9.389	6.778	8.333	24.278	2.833	4.556	4.667		0.734936	13.6713
14.6544	8.5556	8.9444	12.3333	10.5	5.3889	3.8889	3.0556	6.2778	21.2778	17.611	16.389	7.222	5.2222	8.7222	25	48.722	25.167	30.667	50.9444	11.6111	4.944	3.722	2.833	4.333	20.167	12.556	10.278	32.056	16.944	6.444	7.167	9.944	24.111	5	3.556	5.389		0.740963	13.804
14.7735	8.8889	9.3333	13.9444	12.9444	5.3333	3.3333	4.3889	6.3889	21.3889	18.111	14.056	7.222	6.7222	10.1111	21.889	46.222	22.333	25.111	48.5556	10.8333	4.5	4.333	3.556	6.278	21.056	13.556	10.667	31	19.778	9.111	6.778	10.556	25.167	4.5	5.389	4.5		0.746985	13.8288
14.8927	9.5556	7.5556	12.7222	12.9444	5.0556	3.2778	5.3333	7.1667	21.1667	19.222	22.389	6.889	6.8889	8.2778	24.611	46.167	21.944	22.889	47.2222	10.7778	4.889	2.333	5.056	3.667	16.833	17.5	11.222	27	19.889	8.667	6.833	11.833	22.5	5.5	5.889	4.111		0.753012	13.7716
15.0118	8.1667	10.5	15.1667	11.8889	6.9444	4.2778	3.8333	8.3333	20.7778	20.833	16.333	6	8.3333	8.1111	28.222	37.111	21.889	22.5	45.5	11.9444	4.056	3.667	3.722	4.833	20	19.667	9.444	28.5	17.611	8.611	8	11.556	25.778	4.667	3.778	5.111		0.759034	13.7685
15.1309	10.2222	11.1111	13.6111	14.5556	6.3889	4.2778	3.7778	9.1667	19.5556	20.556	17.889	7.278	8	9.0556	25.667	38.778	20.556	20.222	44.6111	12.4444	5.167	4	3.389	4.889	22	22.778	14.333	24.611	20.389	10.222	9.778	13.5	24.833	3.944	4.5	4.444		0.765056	14.1806
15.2501	10.5	10.3333	13.0556	15.3333	5.1667	4	4.4444	7.1667	21.9444	17.278	20.389	9.778	7.3889	9.6667	23.278	32.111	20.278	17.167	46.0556	11.5	5.833	2.944	3.778	6.333	18.5	27.722	13.167	24.278	21.944	8.611	8.722	15.833	22.833	5	4.167	3.889		0.771083	13.8997
15.3692	10.1111	11.6667	13.7222	15.9444	6.0556	5.2778	5.8333	9.5	21.5	14.056	20.444	9.278	9.5	12.1111	22.333	28.167	20.056	17.389	48.1667	11.2222	5.111	3.722	4.444	6.833	23.111	27.944	13.889	28.944	20.944	11	8.444	17	20.778	5.278	3.333	4.556		0.777105	14.3796
15.4884	9.2778	13.0556	13.9444	15.7222	5.7222	6.7222	4.4444	10.1111	18.9444	16.722	20.722	11.778	11.0556	13.0556	22.111	31.667	18.667	16.111	45.7222	11.9444	5.333	3.833	3.556	8.333	22.889	33.667	14.167	24.778	21.944	9.778	7.611	16.111	19	3.333	3.944	4.556		0.783132	14.4537
15.6075	9.8889	10.6667	14.8889	18.2778	6.1111	4.6667	4.7222	12.1667	20	12.722	22.111	11.333	9.2778	15.6111	22.056	26.056	17.222	12.5	46.6667	11.9444	3.556	3.889	5.111	9.778	21.722	33.778	16.056	27.5	20.722	10.056	10	17.556	14.056	4.778	3.889	4.222		0.789154	14.3211
15.7266	10.2222	12.7778	15.8333	19.8333	6.4444	6	6.6111	12.2222	17.6111	9.278	19.611	13.611	11.4444	17.0556	17.111	26.722	16.444	10.889	44	13.4444	4.778	2.778	7.333	11.667	20.833	39.667	12.444	24.611	22.556	11.278	8	19.556	10.111	4.611	3.778	2.722		0.795176	14.2747
15.8458	11.6667	11.7778	16.8333	16	7	6.4444	6.1111	14.1667	19.2778	6.667	18.444	13.056	12.0556	16.4444	19.167	19.667	16.389	9.444	40.5556	15.8333	4.444	3.722	7.389	12.778	19.944	37.167	14.167	29.278	23.833	11.944	8.444	24.111	12	4.778	3.111	4		0.801203	14.392
15.9649	11.4444	11.5	20.2222	14.7778	7.5556	8	6.4444	12.1667	20	6.778	18.389	15.667	10.8333	18.3333	14.389	17.5	11.611	8.611	34.8333	17.2778	4.778	7.278	7.333	17.333	23.722	38.333	13.667	30.444	21.722	11.056	12.444	25.167	11.111	4	3.444	4.389		0.807225	14.5154
16.0841	11.5556	11.7778	19.2778	17.8333	7.3889	7.6667	6.3889	13.7778	12.1667	5.889	17.167	17.056	13.8333	15.4444	12	16.389	9.5	8	35.8333	20.7778	6.056	3.889	8.167	21.333	26.444	41.5	20.278	32.111	24.5	12.222	11.667	25.444	8.278	4.389	3.889	5.778		0.813252	14.8797
16.2032	9.7778	10.8889	24.3889	16.7222	10.3889	8.7222	6.3889	16.6111	13.6667	6.056	16.5	17.167	11.8333	16.4444	11.056	14.444	8.389	6.722	29.7778	20.5556	6.278	4.833	15.222	20.444	26.222	46.333	21.833	25.111	31	14.056	12.056	26.056	8.556	4.667	3.5	3.611		0.819274	15.1744
16.3224	12.0556	11.5556	17.7778	16.4444	12.2778	9.3889	7.8333	16.8333	12.6111	6.333	14.444	15.944	11.7778	15	10.5	11.833	6.056	4.611	28.5	20.1111	5.333	5.833	12.944	23.111	31.333	49.667	31.722	32.056	32.444	14.056	12.167	33	8.111	5.333	3.444	4.222		0.825301	15.7407
16.4415	11.8889	15.0556	18.7778	17.1111	11.7778	11.1111	8.8889	13	10.4444	5.167	10.111	16.278	13.8889	15.5	6.444	8	5.944	4.778	22.6667	20.7222	7.833	6.222	16.167	18.389	30.556	52.222	33.111	31.778	34.333	11.556	9.389	27.722	7.333	4.278	4.167	4.5		0.831323	15.1975
16.5606	10.9444	15.9444	21.1111	15.6667	10.5556	10.6667	9.6111	16.6111	8.2778	4.889	8.333	15.556	12.2222	10.8889	5.5	8.167	5.444	4.167	23.4444	22.6667	8.278	6.722	19.778	19.444	30.944	53.278	43.833	32.833	40.778	15.611	13	30.167	8.833	3.778	4.722	3.722		0.837345	16.0108
16.6798	15.4444	14.8333	20.3889	14.5	15.5556	12.9444	8.8333	18.2778	6.8333	5.889	9.222	16.833	14.1667	10.1111	5.611	5.5	4.611	3.222	22.9444	25.2778	9.556	7.5	21.667	21.556	32.389	46.889	42.833	36.167	43.889	14.944	14.556	31.222	8.111	4.389	3.778	3.833		0.843373	16.5077
16.7989	15	14.1111	19.6111	13.2222	12.6111	12.7222	11.8333	15.0556	6	6.889	8	16.5	14.5556	9.6111	5.889	5.833	3.889	3.333	20.2778	25.4444	12.167	8.556	21.722	19.167	36.5	38.778	46.833	40.722	42.444	16.944	13.111	32.889	6.389	3	3.889	3.889		0.849395	16.3163
16.9181	12.8889	13.2222	21.3889	16.8333	11.9444	13.9444	9.6667	17.1667	6.5	5	5.111	15	13.6111	7.1667	2.833	4.944	3.389	3.833	17.2222	26.8889	11.778	12.444	20.556	16.833	34.889	31.278	50.222	50.167	42.333	19.944	12.167	36.722	8.611	4.222	5.444	4.889		0.855422	16.4181
17.0372	14	15.2778	19.1667	11.1667	13.2778	14	12.5	13.1111	6.9444	6.5	5.278	9.444	11.1111	6.2778	3.833	3.778	2.778	2.111	15.9444	30.1667	14.389	15.944	16.667	17.889	30.333	29.389	52.167	54.667	43.278	21.556	14.278	38.111	8.389	4.444	3.889	2.833		0.861444	16.2469
17.1563	13.2222	15.9444	20.9444	12.2778	11.8889	16.8333	13.3889	12.6111	5.9444	4.611	7.278	10.611	12.2778	6.3333	2.889	3.333	2	2.944	14.1111	29	13.833	19.444	21.944	16.667	32.222	24	59.444	58.778	40.611	24.333	12.833	37.222	8.222	4.778	4.722	3.222		0.867466	16.6866
17.2755	14.1111	17.5556	21.6111	9.3333	13.7222	18.3889	14.2778	9.8889	4.8333	7.556	6.333	8	7.6111	5.7778	2.5	2.111	2.167	3.333	14.1667	28.3333	14.444	23.722	14.056	14.444	25.889	21.167	64.889	59.722	46.444	26.444	15.5	34.444	8.278	4.278	4.611	3.944		0.873493	16.4969
17.3946	13.8889	14.2222	18.5556	8.2778	13.2222	15.6111	15.7222	9.6667	6.0556	5.556	4.5	7.333	9.5	5.1111	2.5	2.667	3.222	1.778	9.0556	30.0556	14.833	22.833	14.556	12.944	18	14.722	73	69.667	40.833	28.833	16.444	34.389	7	4.333	5.556	4.333		0.879515	16.0771
17.5138	12.8889	15.4444	19.8889	9.8333	13.6667	16.2778	12.6111	5.8889	5.4444	4.667	5.944	4.944	7.1667	4.8333	2.556	1.667	1.056	1.333	8.6667	30.2778	15.111	20.222	13.111	11.333	19.444	13.444	73.278	73.444	42.389	35.833	15.778	31	7.722	4	3.333	5.222		0.885542	15.8256
17.6329	13.0556	14.9444	19.7222	8.7222	13.6667	13.5	13.1667	5.5	6.3333	5.333	5.778	5.278	6.2222	4.8333	2.278	2.278	1.889	1.222	9.3333	28.3333	17	21	12.167	7.389	16.222	11.389	70.611	79.833	51.667	37.556	19.833	30.889	7.444	4.833	3.111	4.5		0.891564	16.0231
17.7521	13.8333	16.3889	18.4444	7.3889	14	16	13.5	6.7222	6.5	4.833	5.722	5.556	4.9444	4	2.722	1.722	1.667	1.944	5.3333	24.3333	19.444	17	9.778	7.444	14.5	9.611	78.722	89.389	58.389	32.389	21.667	32.056	6.778	6.056	4.278	4.778		0.897591	16.3287
17.8712	11.9444	17.5556	19.8889	6.3889	14.2222	15.6111	13.4444	6.0556	8.0556	4.111	6.778	5.444	6.1111	3.4444	1.167	1.778	1.389	1.611	7.8333	24.8889	19.444	17	7	7.944	11.278	7.056	71.111	93.778	60.278	34.611	28.611	32.333	6.833	4.667	3.944	4.611		0.903613	16.3395
17.9903	14.2778	17.7222	17.7778	7.1667	13.5556	15.8889	11.4444	4.7222	9.6667	4.278	5.278	6.556	4	3.5	3.722	1.333	2	0.444	5.7778	20.0556	22.278	11.889	6.833	6.611	10.833	6.222	72.889	103.278	62.167	29.889	35.778	31	7.667	6.333	3.5	4.556		0.909635	16.4136
18.1095	13.1667	20.9444	16.8333	8.6667	15.8889	16.7222	9.4444	5.7778	9.1111	3.333	4.667	6.5	6.1667	3.5	2.667	1.056	1.5	1.056	3.6111	14.6667	21.611	11.5	5.278	4.5	6.611	5.833	73.167	91.944	67.278	24.722	47.444	33.722	6.611	5.222	6.278	3.056		0.915662	16.1127
18.2286	12.7222	20.8889	16.1111	6.1111	11.9444	13.8333	9.2778	5.1111	6.7222	3.667	4.167	6.722	5.1667	3.0556	3.222	2.444	1.778	1.167	4.6667	16.7222	18.833	9.833	5.278	5.556	7.389	5.167	59.667	90.389	73.778	15.333	55.722	29.667	8.278	7.167	4.778	4.833		0.921684	15.4769
18.3478	10.9444	20.8889	13.1667	7.7222	10.5	14.1667	10.9444	6.3333	8.8333	3.333	3.944	6.556	5.6111	4.3333	3.111	1	1.278	1.722	2.3889	12.5556	21.444	8.722	3.611	4.056	8.056	3.722	42.778	89.667	79.556	12.389	56.333	27.833	7.611	8.944	4.167	3.833		0.927711	14.7793
18.4669	12.9444	22.6111	12.3333	6.7778	11.2778	14.2222	11.7222	7.4444	7.8333	3.333	4.556	7.389	3.7778	4.1111	2.389	1.611	1.556	1.056	2.3889	11.7222	18.5	6.833	3.889	4.389	6.333	3.611	27.667	71.611	74.556	8.444	68.056	25.722	6.278	10.056	6.056	4.111		0.933733	13.8102
18.586	12.1667	25.9444	11.1111	5.3333	12.6111	12.1111	11.3333	9.7222	6.1111	2.5	5	9.5	5.9444	4.7778	3.333	2.722	1.278	0.444	2.7222	12.2778	12.667	5.778	3.111	4.389	4.722	3.444	22.389	61.111	60.889	5.722	72.611	29.389	8.444	10.222	6.278	3.611		0.939755	13.1033
18.7052	12.2778	22.5556	9.3889	5.6667	12.1111	11.8889	10.3333	10.3889	7.6667	3.111	5.056	8	6.8333	4.6111	2.667	2.167	1.722	1.833	2.6111	7.3333	10.5	6.556	4.167	4.389	5.611	3.444	14.167	42.778	45.167	5	69.5	24.889	8.278	10.444	4.389	3.778		0.945782	11.4244
18.8243	10.1111	25.5556	8.6111	5.3333	10.2778	12.1667	9.2222	9.3333	7.2222	3.611	4.111	9.889	7.7222	4.5556	3.389	2.333	2.056	1.278	1.3889	6.2778	9.222	5.944	2	3.556	5.722	3	14.5	27.222	26.556	4.5	74.222	25.444	10.944	16.389	7.611	3.944		0.951804	10.7006
18.9435	8.8333	22.6111	8.2222	6.5	9.2222	11.0556	13.2222	13.2778	5.0556	2.222	3.667	6.5	6.0556	4.8889	2.889	4.111	2.278	1.556	2.5	6.0556	7.611	4.333	2.222	2.167	4	3.056	10.667	18.722	18.056	3.5	70.278	29.333	11.778	19.278	9.167	4.167		0.957831	9.97384
19.0626	9.3889	25.5556	10.6667	5.2222	9.1667	12.5	13.5556	9.7222	4.8333	2.611	2.722	9.722	8.6111	8.0556	3.778	2.944	2.444	1.444	1.7222	4.1667	5.944	4.167	2.111	2.167	3.889	2.056	8.389	16.333	10.833	3.444	70.611	29.722	13.889	27.5	10.833	4.833		0.963853	10.1542
19.1817	8.8889	18.8333	7.7778	6.1111	9.7222	14.1111	11.3333	12.7778	5.6111	3.722	3.056	8.778	8.1111	4.6667	5.5	3.333	1.889	1.056	1.2222	3.7778	7.056	3.889	1.944	2.333	3.5	1.833	7.167	11.111	8.556	2.167	53.833	34	16.778	29.722	13.944	4		0.969875	9.50309
19.3009	8.9444	23.6667	5.8333	5.1667	8.3333	11.3889	12.6111	12.2222	5.5556	3	2.833	8.278	8.8333	6.1667	4.889	4.5	2.667	1.556	1.8333	3.7778	4.889	4.556	1.667	2.667	3.5	2.944	6.722	8.111	6.667	1.944	33	36.444	21.833	28.111	13.5	5.278		0.975902	8.99693
19.42	9.8333	22.3333	6.2778	4.2778	6.6667	9.3333	12.6667	11.6111	5.1111	2.389	3	4.944	9.1111	7.0556	5.722	3.611	2.222	1.278	1.9444	3.3889	4.111	3.278	2.056	1.611	3.222	1.833	4.944	5.778	5.111	1.389	18.722	39.333	21.722	21.722	19.667	4.5		0.981924	8.10489
19.5392	8.6111	18.7222	6.2222	6.5	7.5556	10	11.1667	12.3889	5.1667	2.944	3.222	7.222	9	7.8333	5.833	4.556	2.778	1.056	1.3889	3.1111	3.944	2.333	1.5	2.444	1.833	1.333	5	5.556	3.667	1.444	13.722	39.611	22.833	10.889	26.667	3.944		0.987951	7.83327
19.6583	9.3889	23.2222	6.1667	5.8333	7.1667	10.2778	11	11.5556	4.6111	1.833	3.611	5.278	9.3889	8.7778	7.056	5.5	2.778	1.333	1.2778	2.3333	4.556	2.833	1.222	2.556	2.167	0.889	3.389	3.889	3.944	1.056	11.056	39.833	24.056	6.667	29.5	5.833		0.993973	7.82875
19.7775	9.7778	22.0556	6.6111	4.2778	7.8333	7.9444	11.1667	14.0556	5.6667	2.444	2.278	5	14.3333	7.8889	6.333	6.5	2.778	1.556	0.3889	2	3.444	2.722	1	1.611	1.833	1.833	3.333	5	3.889	1.111	6.889	32.333	21.056	6.111	31.5	5.556		1	7.50306

## Sheet: Image1 (2)
X0	Y0	Y1	Y2	Y3	Y4	Y5	Y6	Y7	Y8	Y9	Y10	Y11	Y12	Y13	Y14	Y15	Y16	Y17	Y18	Y19	Y20	Y21	Y22	Y23	Y24	Y25	Y26	Y27	Y28		Ap-Basal	Avg intensity
0	9.4758	12.9906	16.0325	22.4906	27.8312	21.6592	14.93	17.955	18.802	35.216	51.246	41.652	16.445	20.663	23.285	16.34	13.141	19.539	22.407	48.585	31.575	25.993	30.056	41.586	25.843	10.764	13.178	15.179	15.561		0	23.4628
0.1191	9.9577	13.8357	16.3311	20.0523	33.5052	23.371	14.524	20.846	19.49	43.131	55.723	41.775	16.679	21.522	28.711	17.041	14.779	19.63	23.344	50.123	35.076	28.38	31.509	39.799	24.999	13.457	12.074	17.619	15.927		0.00406363	24.9383
0.2383	12.0321	16.5085	16.3576	20.8999	35.5721	24.5821	15.351	28.531	23.475	44.114	58.087	44.298	21.101	21.087	32.546	19.723	17.946	22.852	26.075	62.297	40.805	30.648	36.455	43.739	27.065	13.671	14.597	21.613	20.168		0.00813066	28.0068
0.3574	15.0311	18.6702	16.683	23.3284	40.7386	29.593	20.918	32.924	24.52	51.015	61.5	49.533	20.5	25.96	32.75	23.528	16.228	24.818	30.23	68.149	43.839	37.349	36.428	49.714	27.107	17.18	17.239	20.949	24.936		0.0121943	31.0813
0.4766	14.0936	20.0622	21.2562	26.3195	40.6262	31.7741	25.895	31.349	26.346	53.967	70.145	50.375	24.724	29.064	41.662	27.793	18.644	30.571	32.611	78.934	52.039	42.023	39.871	53.768	28.065	16.739	19.842	21.632	31.354		0.0162613	34.536
0.5957	15.3381	21.412	20.4486	25.1433	45.0717	37.4202	28.958	39.979	28.684	62.448	75.125	54.424	21.249	31.7	43.777	33.181	22.965	34.853	40.505	86.425	55.806	48.035	49.426	60.83	33.667	16.355	17.138	26.91	40.501		0.020325	38.544
0.7148	18.7301	25.649	21.0161	27.3306	48.0714	43.0565	35.073	43.732	29.802	67.693	82.708	58.183	27.704	35.458	53.484	39.238	28.365	38.035	49.262	93.638	59.23	58.638	52.795	64.169	38.654	20.737	22.021	27.768	45.646		0.0243886	43.3064
0.834	21.9007	27.3988	23.9857	30.4954	53.4345	47.069	39.549	49.915	36.525	70.552	88.406	63.35	29.951	36.708	59.148	42.712	34.49	40.289	54.006	105.85	68.206	70.177	65.11	73.745	44.476	21.946	25.716	32.362	55.554		0.0284556	48.7251
0.9531	26.4514	31.9096	28.4304	37.9207	54.7372	51.4175	46.992	56.96	37.928	81.299	89.191	68.017	33.092	41.532	64.416	49.761	41.011	51.998	60.907	113.601	72.6	77.051	76.053	87.197	46.66	20.933	29.108	43.571	63.395		0.0325192	54.6255
1.0723	28.946	34.8773	33.9923	38.9562	58.8267	54.7879	51.774	65.677	46.975	82.14	99.008	65.089	35.781	47.058	77.32	57.597	46.88	53.5	62.953	122.638	86.046	92.05	84.183	90.688	52.848	28.715	39.35	52.081	79.234		0.0365863	61.0335
1.1914	33.7817	38.7526	37.408	45.8985	66.0382	59.3182	55.776	69.765	51.553	91.719	102.582	74.393	38.683	52.125	83.613	62.712	55.291	64.624	81.754	138.465	94.453	101.087	103.639	105.761	58.653	34.835	53.958	55.664	91.126		0.0406499	69.0837
1.3106	39.265	41.6162	46.3986	51.8238	75.8476	62.56	59.485	71.264	55.89	87.882	107.394	81.436	41.04	60.82	97.635	69.736	60.693	70.618	85.949	141.886	115.288	114.746	124.147	120.252	65.001	41.489	72.906	69.845	100.258		0.0447169	77.0059
1.4297	41.2455	50.3853	49.1728	59.3837	76.3592	62.6998	61.841	73.836	63.437	95.571	111.472	83.829	47.949	65.532	106.772	82.022	71.352	80.464	96.524	151.067	120.733	127.885	137.974	127.755	85.861	51.931	88.798	94.939	120.42		0.0487806	85.7659
1.5488	44.2636	52.7229	56.9081	63.9074	80.3081	65.2529	76.404	78.869	60.643	104.44	114.575	83.303	48.816	70.603	115.264	91.348	85.125	92.632	107.608	154.001	125.807	139.549	144.127	144.484	95.302	71.109	102.308	109.779	132.878		0.0528442	93.5289
1.668	48.0893	58.4823	61.6417	64.4295	88.4364	68.0522	80.199	85.98	60.258	101.953	121.72	92.195	52.836	76.496	125.526	98.612	95.149	104.06	113.914	152.245	130.111	153.313	155.314	161.104	107.616	87.917	124.576	128.412	151.56		0.0569112	101.731
1.7871	47.2023	62.7875	66.2003	73.8283	87.2793	71.7035	79.857	89.518	65.128	111.55	122.816	91.011	56.658	79.716	129.762	99.819	107.306	114.29	120.452	151.582	138.648	163.962	168.966	172.036	117.874	108.883	139.632	145.251	157.194		0.0609749	108.307
1.9063	50.7149	62.0304	67.6361	66.9958	87.573	72.953	89.907	94.25	68.777	109.722	134.137	99.484	61.334	88.597	130.473	103.047	121.189	129.942	134.557	157.479	149.856	168.169	181.792	190.344	130.327	120.641	155.833	166.83	167.746		0.0650419	115.943
2.0254	53.3775	68.7383	69.4033	67.0389	88.2271	81.7024	92.29	98.901	77.247	116.075	135.834	113.375	64.681	85.746	134.139	117.625	128.042	139.226	131.609	152.431	156.201	179.045	192.704	192.969	142.164	131.879	175.569	181.723	179.519		0.0691055	122.327
2.1445	48.7015	66.6717	63.1814	61.6084	88.3053	82.8447	92.332	103.339	79.341	118.051	135.821	113.699	74.78	97.003	125.631	117.441	130.956	147.581	138.219	155.142	151.128	176.372	204.935	197.909	145.536	136.383	177.761	202.22	183.687		0.0731692	124.71
2.2637	48.2312	64.1342	62.0779	60.036	80.9099	81.4604	98.455	107.032	93.379	112.331	128.525	121.257	80.202	99.727	123.98	121.63	142.243	153.082	140.056	151.741	152.921	176.752	209.29	185.231	158.923	146.677	190.475	214.007	192.303		0.0772362	127.485
2.3828	42.0703	65.3797	62.6674	58.7727	74.5549	79.3556	99.263	101.261	99.555	112.914	130.049	127.578	89.919	107.233	113.323	125.959	147.077	150.902	130.852	143.634	148.209	181.578	215.423	168.394	155.501	154.047	183.345	224.573	191.882		0.0812998	127.078
2.502	42.0324	57.9559	57.5477	57.9754	68.939	81.6949	101.241	107.856	96.606	110.301	132.735	131.324	89.832	111	106.741	124.771	146.119	158.151	140.998	138.997	151.458	171.843	208.335	145.945	150.394	153.384	181.729	231.807	187.655		0.0853669	125.702
2.6211	38.0978	54.811	58.7285	53.753	59.3022	68.1083	99.903	105.365	100.69	106.276	128.123	139.047	94.585	110.637	96.296	122.284	151.741	155.642	133.78	137.458	157.455	155.777	207.897	127.387	143.095	147.959	182.607	225.263	190.843		0.0894305	122.514
2.7402	33.5966	54.3041	59.1115	48.6165	53.1718	65.3259	99.992	103.932	103.268	94.929	122.811	133.469	104.117	112.081	84.289	127.754	142.272	142.224	121.36	118.939	156.994	141.974	197.09	96.48	126.825	143.297	178.362	204.974	180.34		0.0934941	115.583
2.8594	31.7323	51.5747	54.5689	46.257	45.3829	61.8551	97.52	109.24	105.216	92.861	119.452	129.694	111.872	106.955	77.982	123.02	143.793	139.061	117.263	105.759	146.422	137.531	182.899	80.38	114.569	130.617	176.773	177.981	164.092		0.0975611	109.735
2.9785	22.6167	46.8221	52.2212	40.3811	41.296	51.8651	81.824	94.884	97.728	83.452	109.282	130.997	122.499	105.174	73.597	130.249	138.838	120.86	119.551	91.01	150.558	130.63	156.321	77.613	104.532	120.771	182.289	172.709	146.859		0.101625	103.36
3.0977	19.7565	42.9793	52.1817	36.4957	35.6725	45.4005	71.759	82.82	93.382	72.447	106.05	129.325	132.416	99.327	67.883	128.734	133.358	113.813	113.581	80.647	141.815	134.004	139.512	65.381	90.481	101.857	163.696	154.649	116.437		0.105692	95.3745
3.2168	18.587	39.6831	57.6462	32.187	34.3007	38.8586	62.525	73.194	85.283	66.723	99.684	126.715	131.461	97.248	66.641	134.264	132.699	112.07	100.359	66.998	130.954	134.168	122.389	57.746	77.9	88.411	154.274	133.897	93.906		0.109755	88.6473
3.336	16.7338	39.5716	55.4795	26.8959	31.3945	32.697	57.893	61.958	78.645	54.393	90.448	129.326	138.557	83.631	63.794	131.469	125.102	92.719	93.91	59.977	117.413	130.251	112.814	56.644	62.628	82.906	137.869	107.229	79.495		0.113822	81.098
3.4551	14.8299	36.4998	54.0615	21.7985	25.7265	26.4125	45.993	49.923	64.561	47.523	86.763	121.881	138.016	72.706	56.093	130.644	115.97	87.771	84.975	50.144	113.883	125.16	106.888	49.808	59.939	71.488	128.294	87.366	71.605		0.117886	74.0249
3.5742	11.2638	36.2833	52.1111	23.2632	23.7635	25.1947	40.999	37.401	59.257	39.563	72.821	121.474	135.661	66.761	58.225	126.997	100.865	84.857	75.919	40.356	100.971	123.998	92.427	43.307	51.736	68.17	115.131	78.905	61.53		0.12195	67.9038
3.6934	13.1726	31.6183	51.8807	20.275	23.5415	21.4816	32.077	31.926	56.752	32.311	64.014	118.468	132.211	52.122	52.378	110.929	97.413	75.051	72.125	35.96	88.949	121.628	80.549	36.263	50.03	58.466	97.247	67.144	51.621		0.126017	61.2967
3.8125	9.8401	28.8906	50.1368	19.1673	22.7273	19.1929	30.901	31.672	47.077	25.405	54.571	112.156	113.48	45.836	44.951	105.754	90.828	71.48	63.647	30.778	78.921	112.525	78.115	34.307	44.955	54.013	76.636	57.818	49.271		0.13008	55.3466
3.9317	11.0218	23.9754	52.4522	17.609	20.0043	17.7625	27.905	26.051	41.98	24.336	40.265	97.847	109.424	37.462	39.469	99.324	85.608	67.312	65.326	25.174	67.903	105.119	73.224	32.143	39.425	51.354	64.69	51.049	47.821		0.134147	50.4495
4.0508	12.5711	21.0719	46.2041	15.01	17.9472	16.4674	24.522	24.08	37.894	26.108	30.399	87.187	87.103	33.465	36.03	86.358	81.569	63.625	53.667	20.21	66.623	91.481	67.968	32.624	33.619	44.472	55.621	50.452	43.155		0.138211	45.0863
4.1699	8.6591	20.7658	49.8911	14.2247	17.7678	13.8273	21.924	22.337	35.354	24.466	23.348	76.649	74.396	31.617	33.555	79.015	68.778	60.341	48.585	17.577	61.097	88.771	62.973	30.924	31.061	45.953	51.017	45.153	39.833		0.142275	41.3745
4.2891	8.8354	19.7326	49.0607	13.7618	14.6735	15.2332	21.677	19.083	32.348	26.633	18.669	67.134	56.517	24.942	31.835	72.921	66.824	57.546	49.632	12.682	53.157	85.345	63.793	31.473	36.147	42.893	40.978	38.685	37.426		0.146342	38.2634
4.4082	6.7945	18.3811	44.236	13.3269	17.4194	14.2892	18.742	17.173	32.372	22.103	17.367	58.069	43.35	23.761	29.227	66.748	63.799	51.548	46.44	14.943	48.276	71.584	58.945	26.074	30.846	41.125	38.256	32.44	35.245		0.150405	34.5821
4.5274	7.4766	17.9367	37.8387	12.5079	14.5339	11.9978	16.52	17.67	27.301	21.926	14.49	42.827	27.606	20.013	28.395	59.676	60.115	49.028	39.823	14.568	41.551	69.633	54.601	25.283	31.69	37.54	34.162	29.802	28.654		0.154472	30.8678
4.6465	6.2031	14.2244	34.2413	10.8636	12.8255	11.2689	15.408	17.434	27.367	20.398	14.883	31.834	22.564	15.968	22.361	55.23	54.689	46.998	36.36	14.726	30.276	61.995	49.899	23.427	31.001	38.931	30.414	25.401	27.424		0.158536	27.7453
4.7657	7.1495	12.051	32.2797	11.5905	12.7084	9.6267	13.33	15.534	25.835	19.068	16.104	24.545	18.739	16.759	20.213	49.408	50.541	45.286	33.596	11.152	27.313	55.646	47.997	20.294	29.68	36.69	24.743	22.348	27.166		0.162603	25.4273
4.8848	5.9253	11.2127	26.4078	12.3012	13.0286	8.1669	12.806	15.515	20.022	18.116	16.269	17.023	16.599	13.375	19.395	48.312	44.931	40.165	28.827	11.897	25.343	51.786	46.598	22.174	30.59	37.216	21.783	22.14	21.212		0.166667	23.4185
5.0039	6.321	12.9326	20.3836	10.9719	11.8714	8.3012	11.785	13.981	21.284	18.207	15.711	16.345	12.789	12.836	14.786	41.045	41.707	37.652	25.842	11.696	23.28	46.983	45.502	18.937	29.192	31.68	20.765	20.037	19.387		0.17073	21.4555
5.1231	6.9585	9.016	19.7575	9.855	12.0656	8.8831	10.784	13.806	17.489	15.493	16.645	12.199	9.966	12.783	15.754	35.302	40.148	35.759	18.766	11.308	19.539	43.639	39.778	19.24	28.152	26.994	19.551	18.91	19.338		0.174797	19.582
5.2422	5.4918	8.5979	18.031	9.6828	15.2078	7.9	10.082	12.228	15.913	16.201	16.463	11.177	9.938	13.031	13.099	31.288	36.8	30.878	19.652	11.188	19.027	39.857	35.642	19.226	27.655	22.469	19.898	16.77	17.497		0.178861	18.3066
5.3614	5.6296	8.9899	15.3014	9.1512	15.6207	7.655	8.668	11.935	13.81	15.329	15.531	8.939	9.021	12.315	13.57	25.582	29.371	27.66	17.484	11.635	17.925	33.215	31.517	16.808	23.079	21.514	15.774	16.335	18.666		0.182928	16.4838
5.4805	5.841	9.4674	16.3991	8.4671	12.9891	8.3354	7.819	10.302	13.684	15.501	13.725	9.835	9.078	11.479	12.347	24.051	28.19	24.987	14.797	9.326	15.438	33.331	30.817	16.381	25.69	19.12	15.092	16.389	14.87		0.186992	15.6465
5.5996	4.9967	7.8165	17.0863	8.3929	12.3669	5.9904	7.242	9.887	10.837	14.927	14.957	10.189	8.089	11.586	11.201	18.92	26.752	22.584	12.668	9.587	14.789	25.21	27.382	15.091	24.627	17.626	15.229	12.288	13.628		0.191055	14.205
5.7188	4.3118	6.4997	17.6724	9.1985	11.2172	6.2712	7.537	8.934	10.281	13.963	10.315	7.884	6.784	9.871	11.368	15.556	24.086	22.638	10.371	9.94	15.046	22.664	26.509	14.532	21.673	14.568	11.735	11.929	12.739		0.195122	12.9688
5.8379	4.0298	6.1935	17.6535	8.3034	11.9032	6.0791	7.948	7.011	7.96	13.978	11.813	8.801	6.236	9.303	9.83	12.528	20.721	18.867	8.66	9.264	15.035	24.876	25.186	14.862	23.362	14.224	10.928	13.406	12.496		0.199186	12.4641
5.9571	5.2451	5.2702	16.8392	8.2107	11.353	5.7087	6.713	7.264	8.193	14.216	11.33	9.379	5.635	10.224	10.638	11.705	19.755	15.212	9.031	9.02	16.973	21.093	28.063	15.389	22.188	14.267	10.296	11.364	14.752		0.203253	12.2527
6.0762	4.8711	5.6144	16.7227	9.2731	8.9069	7.3566	6	5.638	9.661	14.388	9.267	7.68	6.212	8.648	8.892	9.654	17.978	15.525	7.325	6.601	17.08	17.258	21.192	15.665	22.324	14.328	9.941	11.663	12.372		0.207317	11.3116
6.1953	5.1321	6.19	15.0924	6.6937	11.6897	5.2224	5.474	5.568	6.743	12.806	11.951	7.996	5.881	10.115	10.579	10.133	14.542	13.855	8.214	7.792	15.473	14.559	20.478	13.12	21.275	12.546	10.957	10.941	11.102		0.21138	10.7628
6.3145	4.052	4.4365	15.4228	7.9056	10.3089	5.7022	6.249	5.578	6.783	15.358	11.023	9.282	6.556	9.169	10.647	8.601	13.179	12.777	7.501	7.662	17.275	13.688	19.613	11.729	22.451	14.091	9.72	13.42	11.282		0.215447	10.7401
6.4336	5.0413	5.4527	13.2592	8.0511	10.4357	5.0229	4.344	5.617	6.129	16.577	10.005	6.539	4.926	7.121	9.31	6.924	12.573	10.497	8.293	9.133	17.599	11.743	15.206	11.729	23.793	13.167	10.361	11.869	10.715		0.219511	10.0494
6.5528	4.6528	4.4662	12.4761	7.7722	10.4961	4.6861	5.983	5.005	5.459	14.63	10.412	7.49	3.922	7.595	11.206	7.769	11.045	10.25	8.245	8.184	19.587	8.45	14.755	11.664	23.36	10.571	8.786	10.339	11.823		0.223578	9.6924
6.6719	4.2274	3.5786	12.3968	6.9772	9.5772	4.6438	5.216	4.818	8.101	12.52	9.388	7.096	4.886	10.381	10.289	5.505	8.288	9.703	7.517	8.508	18.649	8.242	14.601	9.893	23.073	12.798	8.27	9.004	9.412		0.227642	9.22617
6.7911	4.5295	4.8998	10.0274	7.0329	11.6491	3.2072	3.633	5.036	7.129	13.499	10.87	6.983	5.973	8.721	11.279	5.604	7.348	7.847	6.006	8.59	19.37	6.587	13.717	9.707	22.707	10.909	8.741	9.122	9.818		0.231709	8.9842
6.9102	3.555	4.93	8.2026	6.6654	9.9086	3.4706	4.575	3.807	5.353	13.859	10.47	6.672	5.254	9.086	10.579	6.155	7.089	8.445	6.018	9.92	18.861	6.862	12.326	9.676	22.839	9.152	8.333	8.921	8.45		0.235772	8.60118
7.0293	3.4457	3.66	8.1157	7.0592	9.1028	4.1693	3.915	3.442	5.479	13.843	8.259	7.803	4.604	11.634	13.156	5.599	7.758	8.048	6.522	10.5	17.191	6.564	11.079	8.899	26.508	9.527	7.402	9.801	8.566		0.239836	8.67764
7.1485	3.9112	3.5804	8.0124	6.7927	10.5413	3.5143	4.72	4.13	4.173	14.734	9.397	7.924	5.238	9.779	11.528	6.47	5.693	6.901	6.629	12.54	18.723	7.085	11.956	9.47	23.786	11.56	7.492	8.522	7.71		0.243903	8.70732
7.2676	4.333	4.8566	6.7572	6.9592	10.039	4.1871	4.509	4.519	6.224	14.203	10.489	6.429	5.469	11.736	12.312	6.87	6.539	7.277	6.4	12.713	21.819	5.93	10.622	9.963	22.759	10.06	7.12	7.567	8.238		0.247966	8.85859
7.3868	4.6431	4.3794	7.6954	8.824	9.2736	3.9561	4.097	4.321	4.649	15.741	10.219	6.955	4.113	13.102	13.241	4.16	6.945	6.482	6.488	12.975	20.224	5.688	8.903	8.589	23.088	10.313	7.19	5.106	6.78		0.252034	8.55657
7.5059	4.8631	3.1437	8.0288	9.4411	8.5114	3.4919	4.466	3.809	4.401	14.016	9.992	7.023	4.325	11.008	12.659	5.226	6.069	6.94	6.487	14.115	20.259	6.663	8.306	9.822	25.13	9.309	5.982	7.523	7.617		0.256097	8.57334
7.625	4.0833	3.4844	7.3319	8.8051	9.8747	2.531	4.791	3.209	5.695	13.072	9.775	7.521	4.123	10.203	14.212	4.864	5.912	7.866	7.261	14.312	22.964	7.256	7.314	9.125	24.309	10.2	6.364	7.553	7.781		0.260161	8.6825
7.7442	5.3378	3.8712	7.4206	8.4209	9.7597	2.7776	4.117	3.385	4.693	14.355	10.444	6.137	4.817	9.02	15.471	6.131	6.034	6.915	7.169	14.097	22.741	7.466	6.214	7.844	28.331	9.452	5.703	5.177	6.452		0.264228	8.61217
7.8633	4.7047	4.1221	7.7386	8.5728	10.2911	4.2207	4.139	3.081	6.376	16.012	10.306	6.353	4.929	10.544	14.389	5.361	6.236	6.362	7.075	17.065	21.545	6.335	5.94	6.464	26.089	9.304	7.215	5.725	8.334		0.268291	8.78721
7.9825	4.1684	3.1233	8.4224	7.2401	10.4062	3.2582	5.508	2.793	5.351	10.267	9.84	6.686	5.691	8.974	12.112	5.336	5.575	5.602	6.466	18.538	23.622	6.468	6.886	6.419	28.365	10.213	6.4	5.73	6.476		0.272358	8.48057
8.1016	3.6814	3.0457	7.2691	7.3501	9.0867	4.448	4.387	3.498	5.386	11.638	10.243	7.661	5.188	9.958	14.143	5.345	4.969	5.093	8.028	21.57	23.909	6.678	5.517	7.249	28.811	11.976	6.683	6.501	6.625		0.276422	8.82541
8.2207	3.3536	3.1199	5.3041	7.8277	9.1603	3.8938	4.149	3.753	5.484	12.805	8.627	8.528	4.944	10.511	13.03	5.717	4.881	6.123	8.901	27.471	22.905	6.115	4.904	7.681	35.47	10.363	5.245	5.552	5.668		0.280486	9.01677
8.3399	4.2681	2.8502	6.9012	9.2383	8.7256	2.9787	4.18	4.363	6.324	11.418	9.205	6.18	5.22	13.475	12.742	6.781	5.341	5.718	8.005	29.312	19.895	5.956	4.986	8.561	37.785	12.483	3.981	3.871	5.79		0.284553	9.19083
8.459	4.051	3.988	6.1154	8.5074	11.8525	4.1376	3.631	3.278	5.433	10.807	10.308	7.602	5.952	13.192	13.963	5.54	6.091	5.193	9.583	29.619	20.08	6.165	5.078	7.433	41.101	13.726	4.489	4.609	4.832		0.288616	9.52955
8.5782	3.015	3.3746	5.0212	8.9848	9.6107	3.8739	3.634	3.182	5.633	12.194	9.109	6.412	5.565	12.7	13.8	5.591	4.328	5.935	8.054	30.666	22.012	6.671	5.811	7.164	51.704	13.5	5.138	4.115	5.265		0.292683	9.72632
8.6973	3.7399	3.0754	5.5719	8.2555	8.1308	4.187	3.241	3.799	4.998	10.906	9.679	8.504	5.587	12.446	14.348	5.304	5.958	5.662	9.429	24.991	23.359	6.099	3.862	7.233	51.939	15.53	4.851	3.723	4.608		0.296747	9.62126
8.8165	4.4722	3.8169	4.4258	8.7079	9.1716	4.0336	4.688	4.047	5.297	10.924	9.651	8.344	5.274	13.52	16.128	4.715	5.874	5.381	7.985	23.853	25.148	5.602	5.572	7.231	65.317	17.764	6.039	4.934	4.71		0.300814	10.4354
8.9356	3.3222	3.9754	4.7341	7.9107	8.7325	4.4026	4.705	4.207	5.71	10.198	10.231	8.676	5.389	16.409	16.395	4.881	6.793	5.391	8.941	21.823	25.198	5.429	4.311	5.429	64.518	20.23	4.744	4.494	4.788		0.304878	10.4127
9.0547	4.1642	3.8467	5.2989	9.1684	8.9471	4.9319	5.269	4.999	5.185	12.444	9.734	9.118	4.948	14.441	16.806	4.958	5.965	5.581	9.063	24.43	27.679	6.249	6.109	6.184	63.612	23.281	5.165	3.754	4.042		0.308941	10.8749
9.1739	4.2302	3.6734	4.806	9.1262	9.8995	4.7389	4.856	3.713	5.556	12.244	11.811	9.364	5.301	12.654	18.158	5.501	6.649	5.634	10.832	22.053	28.541	7.193	6.344	5.364	63.23	29.791	5.915	3.263	4.343		0.313008	11.1995
9.293	5.5254	3.5492	5.5351	9.5188	9.01	4.1843	4.379	3.288	4.846	10.894	8.926	9.56	5.074	13.083	21.329	4.402	6.827	6.188	11.739	20.616	27.804	6.607	6.201	5.756	63.036	30.801	3.77	4.194	4.723		0.317072	11.0816
9.4122	3.6041	2.4699	4.9209	8.8592	9.1682	3.4608	3.673	2.901	5.26	12.567	10.461	9.7	6.254	13.841	24.557	4.408	6.649	6.358	10.863	22.762	28.222	6.683	4.948	5.789	73.965	36.65	5.704	3.752	4.749		0.321139	11.8345
9.5313	3.4609	4.3608	3.5021	9.9265	8.8847	4.128	4.295	3.541	5.972	11.655	9.565	11.033	5.3	18.873	19.554	6.277	6.288	6.171	10.624	26.062	29.622	7.29	5.336	5.298	73.398	43.404	5.892	4.538	4.966		0.325203	12.3868
9.6504	4.1744	3.9441	4.331	10.2365	9.2239	3.5721	4.099	3.758	5.503	9.798	11.639	12.173	4.598	21.775	24.621	5.832	6.589	5.583	11.021	28.502	31.32	6.692	5.123	5.422	75.64	43.661	4.997	3.202	5.17		0.329266	12.8345
9.7696	3.7332	3.5558	4.4987	9.4981	8.3945	3.655	4.007	4.665	6.372	12.677	11.63	11.664	5.183	27.687	26.243	5.391	5.408	4.671	11.61	24.395	31.774	6.626	4.644	5.032	68.101	43.841	4.432	4.005	5.211		0.333333	12.7105
9.8887	3.9209	3.4246	4.2618	10.9411	7.6008	3.3087	4.062	4.176	7.286	10.498	12.332	12.948	5.791	27.271	26.539	5.883	6.587	5.482	13.119	27.67	32.53	8.004	5.048	5.904	64.268	44.916	6.02	3.991	4.152		0.337397	13.0322
10.0079	4.2446	3.1104	3.9197	10.1818	9.0269	4.1688	3.871	4.157	5.244	8.964	11.851	16.241	5.815	33.669	27.693	7.165	7.397	6.304	13.057	25.618	34.575	7.663	4.877	6.562	57.588	45.808	8.632	5.182	4.452		0.341464	13.3461
10.127	4.1824	3.4936	5.4443	11.5676	8.7594	3.996	4.092	4.661	5.402	11.926	13.819	16.139	5.628	33.872	30.076	7.374	6.758	5.962	12.888	27.497	35.028	7.1	4.882	5.13	50.986	47.425	5.858	4.099	5.358		0.345528	13.4277
10.2462	5.1752	3.9298	4.2262	11.5367	10.0135	4.6649	3.841	4.563	4.991	11.57	11.278	16.23	7.183	31.836	29.657	7.686	6.068	5.952	12.029	28.754	40.298	6.308	5.213	6.417	44.846	52.437	5.825	5.095	5.974		0.349595	13.5723
10.3653	4.7577	3.4347	4.3625	13.0573	10.5383	4.0357	4.149	3.896	5.528	11.046	13.407	18.514	7.602	28.411	30.585	7.034	5.147	5.798	15.081	31.314	38.187	7.711	4.938	6.148	36.232	56.614	7.315	4.42	5.982		0.353658	13.6291
10.4844	4.3408	3.0947	4.1783	12.1485	9.7295	4.3467	3.421	4.284	5.341	12.585	14.829	21.674	6.898	27.198	32.44	7.693	5.004	5.792	15.398	33.998	41.324	7.596	5.667	4.7	34.064	60.788	7.688	4.488	5.042		0.357722	13.9914
10.6036	5.1528	3.707	4.7661	11.892	10.7903	5.1023	3.007	3.617	5.191	12.034	15.386	21.669	7.61	23.454	32.774	7.176	6.2	6.517	14.456	33.962	46.899	7.47	5.037	4.148	28.561	64.614	8.689	4.488	5.766		0.361789	14.1426
10.7227	3.8184	3.1915	3.3904	12.4355	11.5585	5.8021	2.943	4.217	5.987	11.472	15.141	21.347	6.199	23.249	37.888	7.43	5.583	7.079	17.883	33.135	50.474	8.325	4.318	5.031	24.145	62.045	8.869	3.683	5.192		0.365853	14.2011
10.8419	4.0045	4.0098	5.357	12.4368	11.3999	3.808	4.076	4.025	5.851	12.92	18.103	28.295	7.69	19.574	38.43	7.484	5.954	6.27	18.485	32.495	50.629	7.795	4.982	4.401	23.335	65.729	10.476	5.011	5.07		0.36992	14.7619
10.961	5.3631	4.3236	4.3737	12.1938	13.3177	3.8739	4.712	4.355	6.47	15.631	17.399	24.38	8.147	17.478	40.222	7.848	6.77	5.995	19.511	36.865	49.244	6.696	4.883	5.972	19.877	63.456	10.756	3.845	4.235		0.373983	14.7653
11.0801	5.5978	4.2445	4.7267	12.9728	12.5625	4.9619	3.47	4.306	6.895	16.759	16.385	32.866	9.447	17.541	41.321	6.894	6.725	6.309	19.344	38.468	42.198	7.388	5.494	5.104	21.686	62.406	10.171	3.843	6.451		0.378047	15.053
11.1993	5.8333	3.9949	4.5717	9.9269	10.7913	4.8423	3.368	4.315	6.028	14.703	13.55	35.044	9.083	16.006	42.104	7.508	6.821	7.624	19.198	38.865	42.156	6.538	5.409	4.346	19.14	65.865	9.951	4.015	5.606		0.382114	14.7312
11.3184	5.2114	3.6402	4.3675	9.9401	11.5171	5.344	4.327	4.115	7.312	12.998	13.421	36.933	8.545	15.17	42.03	8.546	7.18	7.034	18.342	38.972	40.336	7.139	5.247	5.376	19.909	68.946	11.53	4.075	4.697		0.386178	14.9035
11.4376	4.8983	4.0145	4.4875	12.4879	12.3315	4.5009	4.096	3.491	7.868	13.124	13.898	35.065	8.428	14.947	37.96	11.05	7.11	8.638	20.779	41.787	38.47	7.13	5.674	4.751	18.205	69.232	10.389	4.888	5.269		0.390245	14.999
11.5567	4.7168	5.6834	5.173	10.6731	12.0015	5.1014	3.65	2.846	7.884	14.581	12.353	30.377	11.19	15.231	37.015	9.917	6.865	9.138	23.695	43.3	36.033	6.493	5.607	5.297	16.064	63.878	9.589	4.947	5.524		0.394308	14.6491
11.6758	5.8199	5.2466	3.7534	11.4911	11.7745	5.5882	3.399	4.15	7.885	12.72	14.169	31.446	11.287	15.949	30.449	8.844	7.978	10.605	22.458	42.408	38.644	7.373	5.219	5.026	14.243	60.297	10.412	4.439	5.961		0.398372	14.4495
11.795	6.357	3.85	4.0474	12.0568	10.2779	5.9933	3.465	4.673	9.189	11.023	15.922	32.297	11.83	17.933	27.874	11.237	6.592	10.398	20.212	39.886	35.228	6.969	5.94	4.802	15.696	67.707	9.743	5.308	6.007		0.402439	14.5694
11.9141	5.5728	3.9819	3.5634	11.9016	13.9017	6.489	4.368	4.426	10.425	10.785	19.117	35.786	12.544	19.271	22.01	9.701	6.714	9.434	20.3	41.021	36.486	8.14	4.128	5.539	15.772	62.047	8.866	5.238	6.653		0.406502	14.6269
12.0333	5.2662	4.7533	4.5697	12.4324	12.9311	9.0461	3.167	4.463	10.827	10.676	20.582	39.039	14.567	21.196	22.025	9.88	9.452	10.709	21.59	37.67	33.903	7.948	3.457	4.698	13.16	55.993	10.196	6.107	7.415		0.41057	14.7489
12.1524	5.0754	4.4239	4.2348	12.6351	12.0455	7.7114	3.867	4.59	12.17	12.447	20.957	40.307	17.38	17.51	24.696	10.014	9.485	11.016	23.185	38.861	36.253	6.608	3.458	5.689	13.98	53.987	11.528	5.543	8.468		0.414633	15.1078
12.2716	4.1666	5.2034	4.607	12.1826	13.017	7.0768	3.254	5.076	11.058	11.296	25.773	42.267	17.442	15.508	25.783	10.617	10.459	11.706	22.018	41.679	34.672	7.456	5.214	4.879	13.846	53.765	10.378	5.343	6.926		0.4187	15.2644
12.3907	4.5018	5.3513	5.5844	12.7658	15.7484	8.5507	3.572	3.867	12.133	10.471	23.845	43.496	18.708	16.964	24.764	9.328	10.839	9.767	25.922	42.481	29.808	6.951	5.945	5.249	11.857	50.458	8.857	5.527	7.07		0.422764	15.1856
12.5098	5.4327	3.938	4.9601	13.1717	15.4871	8.6202	3.744	5.41	10.176	11.667	25.318	43.941	20.241	14.758	28.665	10.523	11.876	8.97	27.324	41.309	30.992	7.485	5.396	4.811	11.195	46.912	10.61	5.594	6.986		0.426827	15.3625
12.629	5.8579	3.3222	4.6331	14.1731	15.9448	9.245	4.892	4.222	10.964	13.22	27.687	53.259	19.423	18.227	31.558	12.968	11.524	10.043	30.01	43.759	29.061	7.515	5.33	4.009	11.931	40.542	12.328	5.13	7.965		0.430894	16.1636
12.7481	4.8044	3.3522	4.2463	14.2823	14.5326	10.0016	3.983	4.481	12.701	12.773	30.519	58.87	24.157	17.591	36.645	13.83	11.221	8.835	38.604	42.648	27.103	8.252	5.692	4.218	10.765	39.781	13.883	5.22	6.758		0.434958	16.8879
12.8673	4.6296	4.3144	4.5532	13.9791	15.4419	9.444	4.296	5.111	11.561	12.358	32.544	62.987	23.346	19.865	38.689	13.553	11.028	8.183	46.828	42.699	24.668	6.503	6.824	5.632	8.339	41.118	13.709	5.023	6.91		0.439025	17.384
12.9864	4.4359	4.0581	5.0603	16.5079	14.1806	10.6262	5.433	5.345	13.07	12.419	31.431	66.811	25.875	20.592	34.249	13.661	9.452	8.146	54.937	44.254	21.845	8.008	5.703	5.082	8.012	42.208	14.518	5.183	7.281		0.443089	17.8753
13.1055	3.8467	4.5384	4.5332	16.2891	15.8975	8.2456	4.966	4.485	12.533	12.294	33.596	62.238	24.076	30.067	31.745	12.483	10.192	8.694	60.109	42.001	19.837	7.68	5.858	4.6	9.091	37.849	14.237	6.322	6.771		0.447152	17.7612
13.2247	5.2415	4.0557	5.5633	18.3598	15.6133	9.5243	5.42	4.41	12.555	12.535	37.064	62.983	24.333	35.253	32.909	11.648	11.215	9.19	60.857	48.263	20.017	6.896	6.716	4.667	7.055	40.66	13.551	4.84	8.038		0.451219	18.6011
13.3438	4.9697	4.0252	5.1385	19.175	14.5416	8.9702	6.204	3.833	12.355	11.729	37.207	67.57	26.364	35.689	29.691	12.433	10.588	8.513	55.292	44.869	20.507	7.113	5.226	4.74	7.241	38.382	12.071	4.44	7.702		0.455283	18.1579
13.463	4.3249	3.5864	5.074	20.2627	14.8886	9.5984	5.401	4.513	13.727	14.397	34.947	64.993	23.52	40.019	27.419	12.379	11.874	9.787	54.328	46.555	17.705	7.33	5.246	5.685	8.549	39.9	14.132	5.29	7.159		0.45935	18.3652
13.5821	4.4576	3.3066	5.424	18.2313	14.9044	7.9537	5.816	5.298	15.721	12.804	30.413	71.856	21.134	44.163	23.885	11.007	13.365	10.993	39.33	50.682	17.766	7.184	5.1	5.721	7.151	40.137	11.744	5.841	6.824		0.463414	17.8694
13.7012	5.4346	4.2265	5.4082	18.1041	12.7494	7.6175	5.441	5.196	16.755	11.41	27.33	68.259	22.693	45.74	24.013	10.788	13.833	9.028	38.513	53.934	18.965	8.423	4.387	5.649	7.327	41.882	14.614	6.955	8.472		0.467477	18.0396
13.8204	5.2439	4.353	4.7637	19.5636	15.9327	7.2117	4.854	5.232	17.376	14.081	27.812	72.968	22.694	44.117	21.387	11.022	16.541	9.206	34.058	53.964	17.993	7.614	4.845	5.33	6.949	44.54	12.621	5.511	6.817		0.471544	18.0897
13.9395	4.825	3.3303	4.1423	18.6159	14.3574	7.2126	5.039	4.652	20.195	16.834	29.638	66.181	18.614	46.801	19.085	11.815	15.23	9.225	35.109	53.523	17.082	6.553	5.177	4.889	6.771	45.771	13.017	6.602	7.058		0.475608	17.8395
14.0587	5.2518	3.4572	4.6944	18.8765	15.3796	5.7607	5.596	4.882	18.138	15.891	30.185	62.144	18.134	46.865	16.034	12.796	16.884	12.184	34.728	57.094	14.421	9.007	5.283	4.33	6.411	47.943	13.013	7.88	7.53		0.479675	17.9584
14.1778	4.0901	3.4797	5.244	17.8709	14.3167	6.4001	7.256	5.524	18.51	16.246	31.082	58.74	16.913	46.609	15.711	13.646	18.616	12.024	32.516	60.153	14.651	6.192	5.706	5.723	7.034	46.023	14.597	5.966	6.575		0.483739	17.8419
14.297	4.1422	3.4647	5.6967	20.3563	14.2671	6.9687	6.091	5.689	19.54	19.522	28.419	56.077	15.589	45.541	16.558	13.924	19.6	12.01	31.156	63.61	13.403	6.787	5.898	4.722	6.713	48.406	12.879	7.007	7.3		0.487806	17.9771
14.4161	5.1192	3.6692	5.5686	18.1103	13.2385	6.0222	7.244	4.993	24.008	17.927	27.837	48.8	13.593	41.939	14.021	14.161	21.601	11.748	27.991	64.687	14.706	7.697	4.366	5.34	7.213	46.886	12.811	6.59	8.78		0.491869	17.4713
14.5352	5.6946	3.6377	5.32	20.9369	13.3947	6.0045	5.902	4.779	25.01	20.083	26.181	46.946	17.502	40.079	12.844	13.701	22.429	14.965	23.066	72.609	12.732	6.784	6.303	5.298	7.108	52.204	15.244	7.303	9.769		0.495933	18.0631
14.6544	4.4166	3.718	4.8989	18.0519	11.8303	6.1573	6.587	4.667	26.334	21.883	22.216	46.435	15.433	40.309	15.258	15.199	23.146	13.254	22.395	75.601	12.846	5.475	4.883	4.776	7.502	45.577	14.551	6.323	8.58		0.5	17.5277
14.7735	4.6858	4.3899	4.2532	20.3578	13.552	4.3673	7.013	5.256	33.437	18.736	18.842	56.011	16.34	37.201	15.646	15.443	21.837	14.582	24.007	81.021	11.141	6.252	5.657	4.162	6.663	41.88	14.6	6.681	10.01		0.504064	18.0698
14.8927	5.2525	3.9999	4.3105	18.6482	13.6179	6.4566	7.032	4.952	32.405	17.764	20.357	62.385	20.547	35.977	16.544	14.454	22.519	14.452	23.625	83.361	10.044	7.182	4.651	4.651	6.631	37.016	13.431	5.946	10.243		0.508131	18.2226
15.0118	4.0572	2.7505	4.8677	17.4936	15.1538	4.5927	6.163	5.664	30.229	18.113	21.403	57.445	21.788	39.352	13.224	14.349	20.553	14.422	28.919	80.521	10.818	6.089	4.768	5.376	7.53	35.88	14.622	6.831	9.903		0.512194	18.0303
15.1309	4.2239	3.3004	4.9288	19.3949	14.6009	5.2959	6.52	6.115	31.733	17.464	21.595	54.814	19.521	41.725	12.622	15.835	21.929	13.87	30.376	74.078	9.368	6.164	4.671	4.13	5.899	34.223	14.853	8.379	12.218		0.516258	17.9258
15.2501	4.6205	3.8392	5.2294	20.3034	15.7995	4.7261	6.116	5.744	29.818	15.268	19.388	51.933	21.561	44.263	14.373	14.172	21.684	12.227	29.393	63.35	9.858	6.179	4.92	4.584	6.575	32.395	16.625	9.966	11.99		0.520325	17.4793
15.3692	4.5825	3.6255	4.3006	23.2207	17.4793	4.5254	6.258	5.516	28.902	13.881	21.718	50.936	21.956	45.311	15.537	12.369	23.217	10.885	33.82	62.375	9.757	5.994	4.815	4.817	7.042	26.697	18.077	8.95	10.223		0.524389	17.4754
15.4884	4.8194	3.7098	4.6165	23.0389	18.2506	6.211	6.105	6.323	31.536	14.27	20.305	52.214	25.778	48.506	14.359	12.58	20.138	13.684	36.784	54.66	9.392	5.526	4.382	4.845	6.628	26.864	14.491	10.785	11.779		0.528456	17.6752
15.6075	4.5524	3.471	5.015	21.9442	18.6856	6.3035	6.342	6.765	28.216	12.712	20.568	43.964	27.98	55.747	15.732	11.087	18.261	13.937	37.289	57.086	8.914	5.218	4.763	4.002	6.389	28.025	16.717	9.175	13.103		0.532519	17.6539
15.7266	3.5525	3.3156	5.3715	23.4979	21.8372	6.6622	6.068	6.001	25.169	13.384	18.791	44.908	26.224	53.098	17.661	11.152	18.294	15.359	36.431	53.516	7.463	6.042	5.198	4.99	5.224	25.738	18.781	10.875	13.864		0.536583	17.5334
15.8458	3.7696	3.3888	4.7125	22.529	23.5192	6.9629	5.071	5.996	22.744	13.135	18.406	39.258	29.711	58.771	20.259	10.861	18.495	14.73	37.024	50.475	7.417	5.714	5.152	4.011	5.473	23.589	18.267	10.568	14.215		0.54065	17.387
15.9649	4.5417	2.8424	4.7497	24.6496	23.4416	8.7815	5.467	5.017	22.566	13.79	16.833	41.071	30.503	59.322	18.115	8.933	17.763	15.092	36.848	50.174	8.124	5.839	4.819	6.057	5.563	25.501	15.309	9.843	17.013		0.544714	17.5368
16.0841	5.0154	3.9226	3.3156	21.4254	27.9685	8.1088	6.461	5.899	23.103	14.291	16.107	38.732	33.359	64.681	20.127	11.093	15.404	14.605	38.903	50.416	7.824	5.684	4.93	4.785	5.903	21.297	23.571	12.745	18.794		0.548781	18.2231
16.2032	4.8163	4.308	5.5113	23.8667	26.5273	7.2063	4.004	5.384	27.869	14.003	15.761	37.943	31.376	75.682	22.529	9.135	14.557	15.43	39.829	46.115	7.14	6.242	5.659	3.952	5.964	17.46	27.035	11.501	20.431		0.552844	18.5254
16.3224	5.214	3.3392	4.7153	23.9559	29.1313	5.5852	4.671	5.083	27.161	14.224	15.108	36.792	33.903	79.34	25.25	11.533	14.306	14.728	37.581	51.411	8.041	6.269	5.317	4.794	6.013	14.962	32.794	11.466	24.096		0.556911	19.1994
16.4415	5.1159	3.886	4.9012	27.6572	30.1096	7.7824	5.354	5.491	28.23	16.196	14.112	32.936	30.538	83.495	27.056	14.239	16.438	13.267	33.08	51.873	7.836	5.007	4.155	4.5	5.954	13.235	43.786	13.294	23.247		0.560975	19.7507
16.5606	4.5279	3.73	5.4597	29.2309	31.6636	8.5094	6.126	4.304	28.86	14.504	14.125	31.464	27.287	81.211	28.662	15.419	16.317	13.986	33.383	53.948	6.68	5.741	5.144	4.463	6.656	16.017	50.895	15.177	24.668		0.565038	20.2813
16.6798	4.4323	3.3929	4.0235	30.6449	34.0354	9.1277	5.028	6.07	27.39	15.424	13.164	32.952	26.875	93.28	27.422	18.191	19.697	14.137	30.476	55.002	6.623	5.277	5.696	5.57	6.049	13.13	59.44	17.912	28.871		0.569106	21.3563
16.7989	5.092	3.426	4.7676	30.6581	39.0013	7.9332	4.694	6.451	25.278	15.086	10.882	33.145	24.361	95.42	27.101	24.718	21.668	16.259	33.76	49.055	6.816	5.15	6.097	4.126	5.346	12.651	64.466	19.864	32.813		0.573169	21.934
16.9181	4.5575	4.1027	4.7785	30.1829	34.9695	7.9833	4.859	5.418	22.367	14.076	10.683	28.636	25.087	104.858	28.027	28.578	24.263	15.827	30.282	50.603	7.226	4.909	4.344	3.399	5.248	12.79	59.872	24.051	36.494		0.577236	22.0163
17.0372	4.0935	4.1926	4.2795	34.4619	33.8407	8.0708	5.318	5.659	21.578	13.53	14.111	27.316	24.559	104.904	26.046	29.299	25.993	16.998	31.738	47.042	6.927	4.438	5.2	4.25	4.679	10.209	59.816	25.245	43.029		0.5813	22.3042
17.1563	3.8534	3.6468	5.3219	36.0961	32.8576	9.092	6.497	5.093	21.743	13.905	14.16	26.858	23.233	108.469	22.288	30.422	29.313	18.137	25.005	46.375	7.014	4.504	6.02	4.601	4.818	11.101	55.307	26.166	46.448		0.585363	22.3567
17.2755	3.6154	4.2084	4.5049	34.1651	31.0713	8.0661	7.967	5.602	20.171	15.522	11.606	24.692	20.787	106.07	23.803	33.984	30.356	16.562	27.106	48.719	6.764	3.916	5.7	4.943	4.437	8.865	50.077	26.116	52.86		0.58943	22.1468
17.3946	3.6299	4.3085	4.2939	32.9716	31.1007	9.4932	8.978	6.126	20.915	14.98	12.231	22.916	20.299	107.719	23.989	37.259	33.394	16.015	26.995	47.27	6.466	3.667	5.007	4.666	5.062	8.444	43.956	30.067	59.067		0.593494	22.4581
17.5138	3.9411	4.7845	5.6791	33.6315	29.6275	8.3605	6.2	5.516	22.775	11.917	11.948	19.021	17.99	109.318	20.678	37.888	34.249	17.399	24.132	52.127	7.058	5.603	5.342	4.347	5.612	8.279	39.045	27.893	68.801		0.597561	22.3849
17.6329	4.0098	3.0541	4.4333	33.219	30.8283	7.6433	6.778	4.969	23.506	13.223	13.182	20.133	21.054	108.411	22.077	37.505	31.49	15.916	27.034	51.536	7.732	5.59	5.38	5.318	5.382	8.64	42.414	32.195	84.546		0.601625	23.3517
17.7521	4.9468	3.5475	5.2006	33.1145	30.3899	9.2898	7.007	4.315	21.455	13.505	12.035	18.94	19.43	110.976	20.994	39.683	27.52	13.649	28.755	49.671	8.182	5.044	4.72	4.464	5.542	6.776	41.686	30.77	98.815		0.605692	23.4629
17.8712	4.5383	2.8026	4.4008	31.5253	28.4293	10.4827	8.59	4.873	22.793	12.636	14.47	18.862	16.926	117.915	19.953	38.529	30.74	13.968	30.52	43.528	9.133	5.826	4.265	5.18	4.924	7.185	49.216	36.382	112.188		0.609755	24.5097
17.9903	4.4563	3.1161	5.3904	31.053	27.2477	9.0668	6.377	6.408	23.429	12.355	13.951	19.879	16.103	113.936	20.717	36.316	27.836	16.302	30.298	42.63	7.786	4.826	4.49	4.518	5.261	8.215	50.722	39.324	125.879		0.613819	24.7548
18.1095	4.6651	3.863	5.1946	30.1689	23.7071	10.302	6.54	5.51	26.544	12.888	13.707	16.246	18.313	118.842	18.534	34.994	26.714	14.737	33.256	44.055	9.061	3.578	4.558	4.183	6.092	6.708	58.239	56.961	128.645		0.617886	25.7519
18.2286	4.208	3.2728	4.5193	29.3189	22.5167	8.9516	6.189	4.194	27.879	11.451	12.287	14.875	17.996	133.956	18.632	34.627	24.463	13.481	32.972	42.981	8.657	4.547	5.308	4.208	5.443	6.908	61.154	73.792	135.555		0.62195	26.7015
18.3478	4.2846	4.9057	4.1469	29.2764	19.9001	9.0289	6.731	5.312	27.249	13.414	12.888	14.297	18.176	144.751	18.283	31.881	25.434	13.623	32.527	49.464	9.38	4.584	4.422	4.49	4.272	7.365	65.437	96.954	150.006		0.626017	28.7063
18.4669	4.4779	4.2068	4.5908	26.4255	18.8189	9.7779	5.407	5.675	30.816	13.751	12.375	14.232	17.482	155.759	17.864	28.494	26.004	14.773	36.134	59.207	9.157	5.115	5.908	5.778	5.924	8.111	64.348	114.203	159.346		0.63008	30.4883
18.586	4.7326	4.1953	3.3538	26.1447	19.766	9.0596	5.251	5.09	32.011	12.348	14.934	12.568	19.471	151.023	19.864	29.202	25.053	14.555	39.513	69.196	8.813	4.79	4.603	5.633	6.476	6.907	63.882	125.046	157.509		0.634144	31.0686
18.7052	4.458	4.408	3.8605	24.7395	17.7016	8.969	5.762	5.033	33.358	13.261	13.359	12.239	20.31	160.275	21.144	25.065	27.018	15.347	45.889	86.016	11.132	4.211	4.999	4.432	4.424	6.974	60.544	141.301	152.901		0.638211	32.3838
18.8243	5.2052	4.0589	4.2344	24.9184	16.5995	9.005	7.329	5.472	33.767	13.125	15.205	12.229	18.601	149.334	19.27	23.874	30.116	16.257	60.722	101.539	11.643	5.697	5.564	4.001	4.345	6.906	50.139	138.04	135.359		0.642275	32.1571
18.9435	4.4648	4.1882	4.3456	24.4138	17.9269	9.1527	6.784	4.657	31.862	12.922	13.626	13.749	23.592	142.817	17.441	22.991	27.336	15.46	76.471	110.065	10.242	5.665	5.274	4.154	6.042	7.573	46.716	139.333	114.626		0.646342	31.8583
19.0626	5.4366	5.4224	3.8021	22.5697	15.2036	9.5822	6.169	5.227	30.962	15.217	12.727	10.446	23.208	133.243	19.836	18.829	23.112	16.186	96.605	115.306	11.417	5.625	4.909	5.241	5.681	8.579	41.816	136.975	92.67		0.650405	31.1035
19.1817	4.598	4.2663	4.7799	22.2236	15.0673	7.8187	6.561	5.549	33.437	13.047	13.43	9.85	23.321	124.258	19.08	19.89	21.155	16.542	119.373	106.457	12.412	5.991	6.168	5.829	7.407	7.397	36.193	142.522	71.186		0.654469	30.5451
19.3009	4.2887	3.9633	4.2382	24.7384	14.602	9.0548	6.851	5.091	34.331	12.835	13.803	10.027	23.915	116.776	18.565	14.683	20.24	16.586	114.772	86.521	14.863	5.703	5.373	4.927	6.626	8.361	35.804	144.331	49.228		0.658536	28.6585
19.42	3.2035	5.2223	4.8445	22.586	16.3135	7.4597	6.545	5.115	36.419	13.255	13.34	10.258	22.635	106.481	18.969	15.836	22.167	17.321	113.014	57.575	17.705	7.612	4.892	5.052	6.013	8.308	37.249	149.033	38.683		0.6626	27.3485
19.5392	4.321	4.4871	3.8435	23.169	13.9233	8.5515	5.654	6.208	35.738	15.869	14.188	9.502	18.71	102.61	17.608	17.009	21.059	17.731	113.61	41.009	21.918	6.508	5.637	4.549	6.547	8.486	41.211	143.875	29.449		0.666667	26.3097
19.6583	4.94	3.5338	3.9663	26.5076	14.0519	8.2311	6.508	5.309	37.503	16.84	13.312	11.436	17.763	101.008	18.297	17.712	18.402	16.201	118.461	30.104	25.225	6.482	4.978	4.798	6.44	7.478	39.734	130.583	25.613		0.67073	25.5661
19.7775	5.1116	4.4302	3.9485	23.2112	14.83	7.8624	4.571	6.182	35.157	14.399	14.683	11.634	18.81	89.314	18.536	17.025	17.75	17.574	118.155	20.503	27.58	6.056	5.227	5.481	5.719	10.389	41.77	115.099	20.59		0.674797	24.193
19.8966	3.9837	4.9727	5.1769	25.6883	13.6152	9.2213	5.176	5.945	35.732	14.851	13.354	11.154	20.63	82.04	19.368	17.016	15.816	18.76	127.699	16.867	35.608	6.23	4.345	6.795	4.694	11.099	42.457	106.893	16.323		0.678861	24.19
20.0157	3.3594	3.7807	4.5206	29.8368	13.0563	8.4341	4.87	7.414	31.498	14.021	13.774	11.571	15.389	87.003	20.831	16.049	16.708	22.972	141.725	13.607	38.225	6.482	4.393	5.488	5.236	12.798	43.485	95.165	14.825		0.682925	24.3627
20.1349	3.003	4.1986	4.2871	29.4325	13.8273	8.3555	5.717	7.09	29.296	14.128	12.129	10.324	16.19	90.345	21.698	17.042	14.124	22.477	146.134	9.191	41.603	7.486	5.5	6.335	6.234	12.531	46.322	90.571	11.519		0.686992	24.3824
20.254	3.9955	4.388	3.0065	29.0546	14.4124	7.0865	5.584	5.509	27.276	14.266	14.934	9.68	13.551	87.013	24.467	15.715	13.542	21.178	150.754	9.459	40.258	5.919	5.379	5.299	5.656	12.644	46.404	76.245	12.212		0.691055	23.6168
20.3732	3.5333	3.7376	4.4814	25.7631	14.7145	6.7714	5.409	6.118	22.973	14.317	15.457	11.722	17.694	96.47	26.171	14.86	12.637	19.863	133.88	7.659	44.334	8.446	5.56	5.18	5.993	14.863	47.717	67.563	11.513		0.695122	23.2897
20.4923	4.3626	3.8934	4.7471	26.9886	13.4257	6.9229	4.954	6.03	23.053	11.313	16.428	11.384	18.115	102.704	26.792	15.48	13.309	20.833	117.651	7.587	37.428	6.701	4.164	6.14	6.263	16.454	53.153	67.558	11.529		0.699186	22.9436
20.6114	3.6651	3.6266	5.3445	33.8905	13.6882	5.6659	5.42	5.207	22.262	11.696	17.478	12.764	22.864	108.151	29.199	14.049	13.229	20.448	94.825	8.187	29.836	8.217	4.792	6.284	6.46	17.794	54.36	64.944	9.874		0.70325	22.5593
20.7306	4.1916	3.5696	4.9389	33.5579	14.0993	5.8908	5.655	6.244	22.267	11.23	16.821	12.433	26.959	108.29	29.12	14.215	14.564	23.444	76.266	6.67	24.749	9.754	5.596	4.671	5.42	20.634	58.666	59.138	6.987		0.707317	21.9325
20.8497	4.2004	4.6439	5.8233	32.9927	14.901	7.2861	6.889	5.309	22.486	11.33	16.003	13.962	30.411	98.426	31.424	15.49	14.496	23.73	54.136	5.838	23.629	8.884	5.307	6.192	6.864	21.391	66.857	53.863	6.077		0.71138	21.3394
20.9689	4.7089	4.4048	4.2221	33.1726	17.5776	6.1535	4.457	4.605	20.474	13.055	17.021	11.544	34.375	100.894	33.782	15.917	13.089	23.085	38.452	4.861	22.6	12.161	5.65	6.069	8.143	25.246	67.24	47.417	6.01		0.715447	20.9099
21.088	4.2116	4.1342	4.1247	34.3603	19.869	6.4927	5.707	6.443	18.399	12.236	16.526	12.894	36.613	97.732	42.254	14.246	12.729	24.871	27.889	4.124	17.534	12.316	4.564	5.373	6.651	30.228	64.296	34.272	4.188		0.719511	20.182
21.2071	3.5314	3.729	4.5414	37.2877	17.2404	7.4181	5.444	4.913	20.61	13.452	18.181	16.036	39.728	92.001	49.022	13.301	13.194	31.022	26.755	3.1	13.748	14.576	4.755	5.126	6.715	34.338	54.415	25.745	3.79		0.723574	20.1281
21.3263	4.1321	3.8396	5.2435	38.0162	16.1606	8.7306	5.975	5.547	22.118	12.862	17.832	14.858	39.459	89.158	50.539	12.544	17.011	38.332	19.553	2.654	11.31	17.991	5.395	8.943	8.485	31.805	44.768	20.636	2.219		0.727642	19.8661
21.4454	4.5029	4.1239	5.5161	33.7041	18.8405	7.7919	4.749	5.945	20.768	12.741	18.376	15.318	46.97	83.531	50.721	13.999	15.295	39.964	14.206	2.276	10.158	18.878	5.057	10.892	9.64	37.355	37.035	14.227	2.835		0.731705	19.4971
21.5646	4.5973	4.8792	4.7694	35.5428	18.7216	9.0126	5.223	5.755	21.66	15.275	22.378	16.864	45.345	84.334	48.802	15.213	14.035	49.621	10.882	2.431	7.75	21.453	5.177	12.384	10.729	53.617	31.206	14.176	2.567		0.735772	20.4965
21.6837	4.072	5.8396	5.9273	37.3662	21.9648	8.2798	5.953	5.728	23.006	14.67	22.201	19.14	49.417	81.851	49	16.116	15.257	58.494	9.361	2.081	8.261	26.862	5.935	16.987	11.873	51.627	31.48	10.128	1.754		0.739836	21.4011
21.8029	4.9241	4.3359	4.7813	34.6282	23.2343	9.108	4.949	7.277	25.484	20.974	23.127	19.742	54.333	85.392	50.698	13.974	14.259	64.518	8.101	2.251	5.883	30.935	7.488	24.965	14.028	49.2	27.059	6.475	2.585		0.743903	22.2313
21.922	4.4432	3.578	5.9152	40.6499	26.2314	9.649	5.422	6.931	25.617	24.596	26.353	18.375	59.537	82.801	53.599	14.839	13.346	75.53	6.403	2.544	5.794	28.954	6.815	28.901	17.082	48.357	25.121	5.846	2.148		0.747966	23.2889
22.0411	4.0979	2.9528	5.8644	42.4421	27.6007	9.7108	5.081	7.915	24.24	26.601	30.238	21.011	68.803	84.138	67.908	14.989	15.905	81.931	6.58	2.556	4.757	26.732	7.714	31.904	18.279	44.132	19.835	5.125	2.235		0.75203	24.5268
22.1603	4.1136	3.7663	6.1348	47.9535	32.8202	11.3363	5.27	7.125	23.167	27.542	35.25	23.495	66.121	90.197	84.447	14.469	17.233	83.509	5.813	2.07	4.81	27.55	7.294	36.287	21.155	40.343	19.454	4.262	1.48		0.756097	26.0161
22.2794	4.0174	4.2767	4.8018	48.2518	34.7428	12.0602	6.688	8.14	25.019	30.904	37.848	24.175	77.106	81.927	84.92	15.352	18.649	85.623	4.51	2.035	4.399	22.278	9.743	42.922	25.959	34.803	16.203	3.687	1.274		0.760161	26.6315
22.3986	4.1183	3.6757	6.6923	49.0122	43.4895	12.5372	4.599	8.17	22.687	36.451	41.547	28.215	85.938	79.583	84.872	17.938	24.68	92.178	3.663	1.69	3.961	19.113	11.975	46.675	35.429	27.54	14.596	3.422	1.503		0.764228	28.1362
22.5177	4.2993	2.9225	7.7223	54.3967	53.0414	15.0749	4.369	7.965	24.761	40.761	46.429	30.506	92.232	67.172	67.555	18.826	28.288	88.887	4.018	1.79	3.807	16.531	12.353	58.331	47.347	17.607	12.713	2.756	1.758		0.768291	28.7662
22.6368	5.0965	3.9353	6.4968	57.8314	58.166	13.2389	7.042	7.94	23.637	45.653	54.036	32.474	91.066	48.844	47.333	20.717	36.718	90.027	3.316	1.393	2.723	15.942	16.788	77.7	52.478	19.872	9.683	2.725	1.444		0.772355	29.4592
22.756	3.9663	4.3291	6.4326	58.2779	58.8871	17.199	5.854	11.277	27.176	53.646	61.43	40.304	94.12	35.051	36.756	23.792	52.281	73.665	2.64	1.601	3.218	13.89	21.953	82.943	53.844	18.498	8.14	2.225	0.975		0.776422	30.1507
22.8751	3.8954	3.6305	9.7795	62.6457	60.5598	17.1079	5.829	10.793	26.435	58.06	67.031	46.788	103.995	28.849	22.739	30.105	75.537	59.674	3.023	1.447	2.178	14.849	33.308	82.622	50.892	13.96	5.922	1.594	1.059		0.780486	31.183
22.9943	4.2754	3.8565	8.7602	68.6664	57.9468	22.0759	6.622	11.682	27.385	68.523	71.326	51.664	104.15	19.534	18.01	35.807	93.938	42.001	2.234	0.966	2.525	11.807	45.506	70.385	42.491	11.499	6.357	1.629	1.091		0.784553	31.4729
23.1134	3.7998	4.2871	9.8068	72.7912	51.2681	23.8058	8.838	14.894	26.56	69.632	80.813	59.952	97.352	16.8	13.587	41.139	104.849	31.766	1.77	0.981	2.407	10.714	52.478	68.04	28.533	9.015	4.718	1.194	1.068		0.788616	31.4779
23.2325	4.0853	3.6846	9.767	76.4185	43.0239	28.5276	10.886	14.099	29.153	64.778	83.845	65.514	87.479	14.08	11.58	47.417	108.87	20.416	1.539	0.989	2.073	10.397	56.296	65.717	22	9.254	3.813	1.32	0.764		0.79268	30.9581
23.3517	3.5839	3.881	9.3299	78.4152	35.005	34.5802	11.214	16.544	25.542	57.955	86.783	74.567	78.563	12.925	9.867	55.777	115.409	14.127	2.321	0.909	1.978	8.908	55.91	53.384	15.988	9.707	3.488	1.756	0.621		0.796747	30.3117
23.4708	3.0527	3.894	11.4187	73.7822	31.9262	35.6643	12.247	23.832	29.919	48.734	88.797	89.345	70.002	9.867	6.486	65.647	127.094	11.729	1.833	0.722	2.345	8.586	53.71	39.103	13.071	8.361	2.781	2.068	0.855		0.800811	30.237
23.59	3.1715	3.4854	11.2537	76.5059	25.7765	40.9877	15.277	27.38	33	38.979	88.738	95.904	59.06	8.444	5.103	68.52	128.818	9.346	2.355	0.876	1.561	8.095	45.733	29.042	10.331	7.18	2.36	1.281	1.119		0.804878	29.2994
23.7091	3.7532	4.1542	12.5886	70.8305	19.9139	42.3198	17.369	27.783	36.131	26.563	77.483	95.958	53.202	7.001	4.465	60.23	115.176	8.474	1.506	0.993	1.302	6.968	41.636	22.346	7.723	5.924	2.075	1.334	0.788		0.808941	26.7583
23.8283	3.9914	4.9398	14.6176	63.587	16.8763	46.6017	17.498	30.733	38.772	24.15	55.022	95.347	44.708	5.701	4.142	49.104	83.998	8.173	2.269	0.455	1.404	6.866	36.058	16.968	7.031	4.513	1.494	0.9	0.577		0.813008	23.6723
23.9474	3.6445	4.2072	15.1165	54.895	13.965	49.6179	22.243	35.25	44.59	17.746	40.452	88.147	38.137	4.178	4.175	34.289	58.004	5.054	1.407	1.133	1.681	6.172	29.963	14.242	6.36	5.428	1.386	1.055	0.919		0.817072	20.8089
24.0665	5.4658	4.8869	15.2515	41.1257	10.83	48.5131	23.691	37.474	54.399	12.524	23.658	79.465	30.607	4.613	2.735	23.43	38.639	4.206	1.306	0.76	1.97	4.846	29.626	10.133	6.752	3.66	1.655	1.324	0.474		0.821136	18.0697
24.1857	4.0594	5.8553	20.4933	36.4112	9.3061	43.8146	28.565	39.23	56.002	11.183	14.876	69.887	21.611	4.769	2.219	18.821	24.368	3.75	1.399	0.78	1.14	4.106	24.637	9.211	5.034	3.557	2.942	1.06	0.689		0.825203	16.1992
24.3048	4.2766	6.8571	23.9549	30.6786	7.9211	47.614	30.53	45.72	62.14	8.769	14.816	56.368	20.04	4.382	1.877	14.47	15.922	2.982	1.458	0.81	1.234	4.051	20.397	8.547	4.71	2.992	1.588	0.973	0.46		0.829266	15.3979
24.424	5.1292	5.6893	26.1267	22.5142	6.5761	47.323	36.98	55.246	75.841	8.594	10.959	44.264	16.361	3.22	2.688	11.402	14.101	1.79	1.13	0.624	0.928	2.394	18.265	7.643	3.578	2.067	1.319	0.711	0.391		0.833333	14.9605
24.5431	4.4958	6.4002	34.7202	17.6531	6.3488	42.4493	38.715	60.398	81.124	5.764	8.78	30.359	12.443	2.655	2.37	7.285	8.541	2.48	1.494	0.844	0.906	2.72	11.669	6.39	3.416	1.799	1.329	0.922	0.488		0.837397	13.9641
24.6622	4.0941	7.9465	38.5132	14.6483	5.6338	40.8281	50.1	67.359	92.136	5.02	7.025	20.27	11.523	2.325	2.22	7.119	7.378	2.458	0.981	0.697	1.042	3.049	10.45	5.242	3.011	2.025	1.086	0.719	0.721		0.841461	14.3317
24.7814	5.8539	8.8964	43.6666	12.1516	4.3825	32.9148	51.208	61.627	93.507	4.218	6.295	18.803	10.083	2.843	2.017	5.342	5.462	1.883	1.025	0.606	0.601	1.621	9.463	5.768	2.876	2.197	1.371	0.659	0.393		0.845528	13.715
24.9005	6.7871	9.2664	52.7672	10.1233	3.2857	23.8488	53.189	60.101	91.445	3.478	3.828	11.001	6.874	2.441	2.074	3.859	3.676	1.71	0.924	0.567	0.483	2.661	6.997	5.611	1.993	1.287	1.921	0.556	0.672		0.849591	12.8768
25.0197	5.7174	9.0676	56.8494	8.2001	2.8128	21.8581	52.914	64.46	78.795	2.813	3.611	11.797	6.523	2.5	1.38	2.775	3.49	0.923	1.04	0.591	0.299	2.244	6.035	5.072	1.853	0.974	1.503	0.2	0.046		0.853658	12.2877
25.1388	6.4569	9.0606	61.1164	7.0469	2.8325	16.9935	55.814	66.273	70.027	2.391	3.431	10.184	4.929	2.27	1.062	1.646	2.504	0.767	0.75	0.592	0.931	1.426	4.04	4.586	1.91	0.817	0.886	0.141	0.436		0.857722	11.7696
25.258	8.7599	10.4497	55.7934	6.059	2.5275	11.6308	52.233	59.262	52.194	2.33	2.686	7.611	4.21	1.582	1.124	1.617	1.692	1.387	0.526	0.678	0.923	1.268	3.966	3.582	1.352	1.037	0.977	0.186	0.493		0.861789	10.2806
25.3771	9.6382	12.5864	46.6692	5.1739	2.0999	8.4732	43.929	56.84	47.832	2.361	2.579	6.933	3.66	2.183	0.873	2.299	1.828	1.033	0.625	0.449	0.309	1.487	4.286	3.541	1.629	0.828	1.029	0.559	0.303		0.865853	9.38054
25.4962	9.715	15.5376	43.3717	4.4358	1.7521	6.9277	40.85	52.956	38.7	2.663	2.753	5.266	2.792	1.349	1.288	2.211	1.581	1.02	0.966	0.639	0.648	1.268	3.634	2.72	1.168	1.137	0.626	0.345	0.241		0.869916	8.57107
25.6154	12.0621	15.4563	33.0491	3.9195	1.2943	7.2076	34.272	41.829	24.704	2.29	2.234	5.292	3.325	1.175	0.924	1.82	1.493	0.754	0.392	0.137	0.801	1.326	2.144	2.398	1.352	0.418	0.529	0.317	0.279		0.873983	7.00669
25.7345	14.7244	19.1388	21.8961	3.249	1.2614	5.6955	27.57	34.376	16.622	1.758	2.051	3.57	2.82	1.39	1.309	1.207	1.25	1.357	0.486	0.173	0.171	1.565	1.533	1.672	1.242	0.766	0.509	0.212	0.423		0.878047	5.86197
25.8537	16.2021	21.7937	15.8531	3.6063	1.238	7.1812	24.516	25.846	13.932	1.747	1.856	3.148	2.479	1.137	0.846	1.262	0.967	0.93	0.802	0.524	0.612	0.861	2.322	2.263	1.248	0.853	0.208	0.243	0.453		0.882114	5.34239
25.9728	22.993	23.3395	12.1795	2.4591	1.0547	6.2775	21.435	23.298	9.882	1.266	0.948	3.239	1.678	1.085	0.582	1.314	1.393	0.596	0.499	0.467	0.464	1.158	2.622	2.006	1.109	0.481	0.447	0.733	0.346		0.886178	5.01211
26.0919	24.5287	27.8564	10.2994	2.3105	0.8061	4.2623	19.643	20.422	9.64	1.115	1.172	2.258	2.134	1.062	0.881	0.94	1.313	0.467	0.763	0.073	0.695	1.351	1.926	1.58	0.815	0.597	0.503	0.365	0.35		0.890241	4.83201
26.2111	35.3663	31.5971	8.2104	2.3703	1.04	3.6652	18.068	15.847	8.671	1.317	1.541	2.164	1.839	1.105	0.669	0.828	0.739	1.2	0.726	0.112	0.613	0.867	1.017	1.425	0.748	0.283	0.23	0.453	0.524		0.894308	4.93915
26.3302	34.2579	32.9112	5.2033	1.9369	0.9227	3.0396	13.701	13.669	6.47	0.834	0.948	1.973	2.019	0.627	0.964	0.993	1.419	0.571	0.468	0.138	0.275	0.587	1.004	0.94	0.736	0.704	0.214	0.404	0.107		0.898372	4.41506
26.4494	44.0327	39.4668	5.6221	1.0528	1.2842	3.2722	13.605	12.506	4.907	0.939	2.197	1.638	1.165	0.485	1.129	1.162	1.064	0.658	0.56	0.163	0.119	0.798	0.699	0.78	0.442	1.031	0.16	0.05	0.172		0.902439	4.86758
26.5685	50.1292	43.369	5.2946	1.5008	1.1769	3.5724	10.38	11.777	4.184	1.387	1.28	1.452	0.856	0.402	0.868	0.34	0.642	0.736	0.771	0.018	0.054	0.663	1.358	0.399	0.52	0.678	0.217	0	0.101		0.906502	4.96986
26.6876	55.143	46.3884	3.6278	1.0465	0.9898	2.7574	9.938	9.786	4.484	1.229	0.709	1.662	1.466	0.675	0.659	0.608	0.89	0.828	0.468	0.211	0.161	0.789	0.881	0.681	0.375	0.568	0.075	0.175	0.193		0.910566	5.08496
26.8068	60.2217	50.7526	2.9072	1.3832	0.4884	2.2234	9.179	11.08	3.43	1.231	1.327	1.525	1.271	0.69	0.608	0.74	0.559	0.585	0.528	0.117	0.206	0.668	0.52	0.859	0.509	0.207	0.036	0.186	0.254		0.914633	5.3204
26.9259	60.7677	47.4197	3.0662	1.0415	0.7119	2.5296	7.803	8.197	3.695	0.943	0.777	1.025	0.923	0.543	0.423	0.773	0.783	0.495	0.337	0.072	0.053	0.43	0.798	0.623	0.412	0.238	0.169	0.203	0.094		0.918697	5.01192
27.0451	62.2751	45.2921	3.228	0.9495	0.8506	2.0574	6.757	9.111	3.778	0.519	0.57	0.772	0.911	0.532	0.488	0.793	0.313	0.584	0.318	0.255	0.216	0.403	0.624	0.381	0.368	0.105	0.056	0.048	0.194		0.922764	4.92237
27.1642	67.5358	40.8744	3.2763	0.5536	0.2902	2.1588	7.008	8.099	2.642	0.404	0.679	0.796	0.8	0.79	0.307	1.071	0.789	0.346	0.48	0.382	0.569	0.09	0.602	0.087	0.54	0.262	0.053	0.009	0.047		0.926827	4.88073
27.2834	62.0227	33.6608	2.6544	0.6691	0.2047	2.0296	5.844	7.36	2.571	0.492	0.59	0.706	0.599	0.453	0.398	0.423	0.621	0.445	0.539	0.289	0.166	0.459	0.847	0.348	0.368	0	0.05	0.159	0.012		0.930894	4.30967
27.4025	51.4241	24.8438	1.532	0.7027	0.4088	1.4331	5.141	5.938	3.038	0.506	0.582	0.978	0.773	0.301	0.806	0.502	0.575	0.443	0.643	0.041	0.098	0.523	0.592	0.169	0.146	0.002	0.061	0.055	0		0.934958	3.52612
27.5216	44.7974	16.9904	2.5451	0.9766	0.4435	1.8251	4.284	5.299	2.431	0.482	0.578	0.576	0.957	0.295	0.64	0.218	0.38	0.263	0.613	0.131	0.333	0.193	0.611	0.254	0.238	0.138	0	0.138	0.005		0.939022	2.98742
27.6408	37.4065	10.1467	1.6395	0.7007	0.3745	1.1481	3.513	4.778	2.102	0.367	0.479	0.445	0.844	0.591	0.438	0.567	0.793	0.422	0.356	0.092	0.076	0.257	0.449	0.332	0.331	0.29	0	0.028	0.029		0.943089	2.37914
27.7599	27.2553	6.8455	1.5871	0.4961	0.55	1.2473	2.849	3.722	2.303	0.522	0.381	0.818	0.569	0.492	0.364	0.683	0.496	0.456	0.192	0.135	0.182	0.248	0.508	0.226	0.055	0.07	0	0	0.106		0.947152	1.83994
27.8791	21.9773	4.2821	1.6348	0.4531	0.4233	0.8447	2.829	4.271	1.603	0.633	0.814	0.627	0.58	0.38	0.505	0.38	0.982	0.575	0.142	0.106	0.271	0.137	0.591	0.201	0	0	0	0.003	0.034		0.951219	1.56136
27.9982	16.7444	3.4503	1.6726	0.9054	0.2759	0.9257	3.091	3.315	1.292	1.007	0.598	0.49	0.664	0.235	0.305	0.608	0.891	0.326	0.18	0.005	0.17	0.285	0.461	0.115	0.174	0.164	0	0.107	0.133		0.955283	1.3307
28.1173	11.7459	2.5775	1.2677	0.2606	0.2252	0.6511	2.161	3.322	1.719	0.89	0.589	0.986	0.572	0.363	0.45	0.956	0.298	0.365	0.142	0.038	0.123	0.035	0.088	0.258	0.286	0.154	0.026	0.094	0.079		0.959347	1.05938
28.2365	8.0804	3.6553	0.9281	0.5134	0.238	0.4683	1.958	2.652	1.808	0.553	0.517	0.621	0.84	0.727	0.54	0.201	0.685	0.505	0.194	0.078	0.077	0.094	0.048	0.194	0.171	0.18	0.14	0.019	0.085		0.963414	0.923121
28.3556	5.0502	2.6615	1.1325	0.6837	0.1646	0.743	2.027	2.056	1.608	0.779	0.77	0.442	0.441	0.481	0.311	0.864	0.296	0.342	0.21	0.066	0.097	0.183	0.007	0.078	0.201	0.207	0.009	0	0.014		0.967477	0.756017
28.4748	4.9344	2.2808	1.1417	0.1799	0.1762	0.7031	1.373	1.296	1.097	0.571	0.779	0.426	0.652	0.309	0.406	0.588	0.551	0.419	0.082	0.05	0.071	0.234	0.144	0.067	0.088	0.018	0.047	0	0.225		0.971544	0.652038
28.5939	3.1797	1.4298	0.6342	0.0389	0.0208	0.4379	0.924	1.55	1.073	0.695	0.495	0.393	0.323	0.199	0.267	0.508	0.427	0.143	0.094	0.008	0	0.335	0.19	0.143	0.05	0.042	0.129	0.044	0.148		0.975608	0.480045
28.713	2.4371	1.6838	0.7824	0.3207	0.2414	0.3503	1.443	1.239	2.004	0.493	0.559	0.27	0.226	0.13	0.36	0.667	0.277	0.324	0.077	0.163	0.137	0.06	0.092	0.078	0.054	0.045	0.08	0.011	0.116		0.979672	0.50761
28.8322	1.6122	2.0153	0.839	0.1275	0.292	0.252	1.286	1.53	0.737	0.576	0.541	0.498	0.324	0.446	0.372	0.392	0.175	0.089	0.203	0.178	0.127	0.118	0.326	0.011	0.0001292	0.025	0.014	0	0.162		0.983739	0.457522
28.9513	1.8223	1.9452	0.5927	0.2428	0.1388	0.5794	1.04	1.627	0.339	0.204	0.774	0.23	0.241	0.348	0.098	0.373	0.179	0.201	0.104	0.264	0.014	0.032	0.449	0.054	0.153	0.054	0.145	0	0.071		0.987802	0.424662
29.0705	1.8184	1.3253	0.8928	0.0905	0.3739	0.2447	0.864	1.613	0.44	0.264	0.548	0.266	0.334	0.178	0.566	0.369	0.247	0.38	0.018	0.117	0.103	0.068	0.262	0.001	0.16	0.001	0.099	0	0.153		0.991869	0.406779
29.1896	1.5431	1.1935	0.3005	0.0586	0.0969	0.6358	0.719	1.105	0.709	0.213	0.115	0.385	0.401	0.333	0.353	0.661	0.487	0.616	0.165	0.086	0.073	0.209	0.158	0.128	0.069	0.055	0.186	0	0.322		0.995933	0.39229
29.3088	1.5777	0.6882	0.6919	0.2756	0.0525	0.2502	0.341	0.518	0.404	0.11	0.317	0.341	0.663	0.153	0.574	0.411	0.38	0.304	0.372	0.119	0.046	0.081	6.934e-06	0.135	0	0.073	0.0009985	0.22	0.023		1	0.314555

## Sheet: Image7
X0	Y0	Y1	Y2	Y3	Y4	Y5	Y6	Y7	Y8	Y9	Y10	Y11	Y12	Y13	Y14	Y15	Y16	Y17	Y18	Y19	Y20	Y21	Y22	Y23	Y24	Y25	Y26	Y27	Y28	Y29	Y30	Y31	Y32	Y33		Ap-Ba	Avg int
0	13.476	8.043	6.4	11.054	11.331	15.001	21.444	13.5497	7.126	9.994	34.8227	15.707	15.762	17.1142	13.0199	38.214	17.4976	11.724	7.7014	8.524	15.317	43.918	39.4042	23.299	44.6512	48.3445	19.5855	12.489	14.262	19.064	12.819	26.697	18.101	40.98		0	19.8952
0.1191	20.039	8.349	9.865	13.456	11.164	20.625	23.773	15.6672	7.922	11.514	48.5326	21.051	17.58	17.4637	13.7741	40.736	23.1854	17.307	8.4212	13.483	21.073	44.55	43.7835	31.754	42.5411	45.8411	24.549	14.151	20.796	25.196	14.966	32.121	22.541	51.637		0.0059151	23.512
0.2383	28.186	8.556	14.648	17.643	11.682	19.72	24.683	19.9194	8.72	15.554	62.1566	29.72	22.585	19.4278	16.1533	48.406	27.6918	21.363	10.6768	17.373	25.392	50.902	54.0902	49.443	38.2525	44.4259	32.2218	19.99	27.473	36.324	14.851	38.121	20.901	58.166		0.0118352	28.1005
0.3574	32.202	9.684	21.932	20.984	13.529	25.833	26.8	26.0066	10.404	17.196	74.3212	40.539	26.559	23.8535	16.5814	53.793	36.4841	28.99	14.6279	25.672	35.352	51.578	62.8013	71.74	34.6439	39.2511	38.1774	26.97	37.693	51.697	22.812	47.469	29.769	67.565		0.0177503	34.2209
0.4766	39.013	11.754	30.525	31.233	17.062	29.422	32.096	32.0691	11.634	23.099	86.3869	57.28	33.864	32.2869	21.9385	65.485	43.4078	37.457	20.4718	36.734	42.61	55.894	67.9261	86.95	32.6701	42.5054	51.4145	31.432	57.184	78.316	34.193	56.172	39.948	82.764		0.0236703	42.7411
0.5957	47.548	15.154	43.211	44.502	24.102	38.212	37.381	41.6475	12.48	31.165	98.7013	75.534	41.796	37.3234	29.9337	69.594	52.682	53.696	33.0453	49.281	53.742	63.683	76.5674	98.976	30.1416	45.1989	66.1636	45.889	76.902	103.398	51.426	72.104	54.943	94.951		0.0295854	53.2669
0.7148	59.468	17.934	53.63	60.057	31.138	51.892	39.187	58.2303	19.3	42.259	100.85	97.28	54.376	47.1833	42.0492	73.34	63.5676	73.075	45.9863	67.347	59.538	66.347	78.6911	102.052	32.0901	44.9931	76.177	61.534	107.993	118.868	75.752	89.43	74.841	108.132		0.0355005	64.5467
0.834	72.365	18.628	61.816	79.19	40.832	64.935	45.093	73.2827	28.744	56.42	102.384	122.604	68.994	55.7566	52.9435	88.597	72.2499	93.576	67.79	91.905	69.215	79.206	86.2022	101.055	34.9742	46.3627	83.881	79.433	124.88	131.106	102.033	98.422	99.84	118.834		0.0414206	76.8691
0.9531	83.92	25.146	70.077	93.454	50.727	75.172	53.131	89.5936	38.362	66.242	97.9127	142.39	85.829	61.5382	66.3156	103.454	80.3263	110.284	85.0932	115.502	76.43	100.357	88.8038	92.912	41.153	43.5726	93.3416	103.916	136.821	127.247	120.092	96.817	121.017	121.004		0.0473357	86.9986
1.0723	104.127	38.633	83.749	106.341	58.704	91.5	57.092	98.2809	52.316	80.172	97.3178	154.818	105.058	72.2162	77.9869	109.999	81.6195	118.764	98.4991	132.901	85.246	128.452	92.1642	82.995	53.9249	44.7504	83.4712	118.197	146.857	127.594	129.747	99.97	137.27	109.445		0.0532558	95.8876
1.1914	117.533	54.691	99.409	122.139	73.856	105.811	69.716	99.5407	68.916	94.648	91.3501	149.31	117.747	82.568	87.892	127.979	85.2508	113.405	100.367	140.952	97.127	161.238	87.8837	77.012	63.6308	43.6349	75.2242	119.356	145.217	123.429	131.845	114.209	136.432	93.046		0.0591709	102.128
1.3106	113.028	80.244	110.669	128.589	81.295	135.586	74.56	91.6346	82.971	104.393	85.8286	139.502	129.5	87.7323	92.8119	131.607	86.9861	97.41	96.4918	129.483	102.437	186.049	84.8699	75.642	59.0658	43.4565	69.8181	120.02	146.721	120.651	128.502	129.446	130.175	78.826		0.065091	104.588
1.4297	101.541	109.668	115.033	124.135	100.857	159.474	75.199	82.5531	105.988	119.516	76.4336	126.647	140.769	92.3191	94.5269	132.339	85.9928	75.717	88.4638	119.291	100.37	209.184	84.2292	75.121	53.6771	40.4851	66.3848	100.704	131.255	111.831	127.022	138.061	122.735	68.044		0.0710061	104.575
1.5488	82.386	138.542	117.044	119.621	117.393	188.078	76.192	68.3706	115.835	125.387	69.0444	102.306	135.177	91.4933	92.8179	125.501	83.9119	59.356	76.7946	106.916	97.618	208.647	74.8631	67.256	42.5316	38.5779	57.9231	77.634	121.872	100.636	118.86	139.564	105.773	54.626		0.0769212	99.9573
1.668	68.865	150.85	105.63	107.215	119.527	213.03	81.794	54.493	106.604	126.619	64.8555	79.065	109.328	93.5858	88.1089	107.939	73.5461	44.616	68.3718	94.209	96.371	209.36	69.5132	62.746	30.8216	33.7028	51.8988	56.874	101.571	84.971	105.985	122.168	93.268	45.827		0.0828412	91.8626
1.7871	57.456	134.375	86.198	99.394	116.235	219.298	84.504	41.1153	81.609	126.399	58.6908	66.425	91.713	99.2358	74.3034	85.089	63.3294	33.956	60.3909	76.942	90.91	200.875	66.0077	53.817	26.5394	27.2897	46.7251	40.733	80.163	71.555	96.256	106.229	84.722	33.669		0.0887563	81.8279
1.9063	53.052	94.621	69.072	86.961	107.975	216.852	86.762	36.5413	51.483	113.184	48.9407	53.51	71.981	90.7776	61.8059	55.225	47.587	30.502	54.0186	63.937	86.313	174.356	62.546	50.491	18.9073	24.8942	38.788	28.595	60.98	62.296	83.426	84.228	75.801	28.067		0.0946764	69.8375
2.0254	45.52	66.503	44.258	75.987	101.101	210.102	88.193	31.3543	28.894	92.003	42.4364	47.818	51.953	81.7679	43.3704	32.604	34.2621	24.559	44.3307	52.269	79.98	162.068	59.1104	43.045	15.081	21.9835	35.771	21.764	48.903	48.491	76.387	64.25	61.737	22.412		0.100592	58.8314
2.1445	41.716	53.301	36.192	63.324	87.511	192.925	101.415	31.1982	22.64	65.141	35.2045	40.826	38.145	64.3154	30.587	18.857	25.0825	20.958	34.331	47.818	79.14	141.177	55.0187	40.609	12.3179	18.281	32.8667	17.305	36.248	40.779	61.975	53.863	45.841	18.739		0.106507	50.1661
2.2637	38.434	50.165	32.475	55.832	74.373	180.411	109.92	30.1813	15.877	44.478	27.5625	38.575	29.979	45.9036	20.6527	8.624	17.1609	20.679	30.7743	40.876	67.675	120.329	54.3614	33.923	9.6718	15.4687	27.2995	14.155	26.958	37.638	52.335	39.47	38.379	17.361		0.112427	43.1752
2.3828	38.321	46.936	28.894	46.101	64.015	158.918	119.156	29.1982	11.458	25.099	20.3405	35.967	25.143	35.8414	15.3378	5.681	11.5356	17.219	25.3285	34.888	61.63	94.572	55.105	29.109	8.7066	12.3122	26.2915	13.218	22.869	33.935	40.392	31.262	33.037	16.654		0.118342	37.4845
2.502	37.277	41.142	25.359	42.527	49.194	135.631	133.33	28.2952	9.523	14.979	16.388	31.172	19.776	27.6741	14.3479	3.995	7.0978	15.234	22.3967	32.772	53.388	73.994	50.6603	27.718	6.6888	9.8806	23.1202	11.267	16.759	30.99	34.656	26.272	25.779	14.936		0.124262	32.7712
2.6211	32.819	39.732	22.284	35.425	38.289	104.668	138.811	28.8011	6.836	11.827	12.4789	31.268	17.58	21.3629	13.3702	3.497	6.9652	15.204	17.7805	28.847	46.421	59.152	43.7628	26.156	7.9941	8.8674	22.412	8.929	14.426	31.33	27.172	21.617	23.055	12.424		0.130177	28.8695
2.7402	30.785	39.588	19.271	33.541	31.259	74.245	130.29	25.6413	7.022	8.408	12.0161	26.57	14.915	16.7968	12.5538	3.266	4.6631	16.068	14.3676	23.726	41.82	47.055	41.3514	23.814	7.0199	7.0182	21.9406	7.869	11.669	26.854	21.89	19.983	19.106	10.481		0.136092	25.0842
2.8594	28.92	38.327	18.03	35.058	27.424	45.473	115.967	26.1594	5.74	6.417	11.7296	25.079	11.835	13.1745	12.0926	2.81	3.5442	13.422	12.9817	20.472	35.554	33.695	37.394	22.808	5.9399	6.8495	19.8749	7.266	9.08	23.772	19.172	19.244	17.12	11.757		0.142012	21.8877
2.9785	27.545	33.661	17.124	32.878	22.343	27.006	99.934	26.7422	5.665	7.299	9.2704	21.414	10.629	9.5174	11.6473	1.931	2.753	17.223	11.3853	19.65	29.963	28.527	30.3611	20.47	6.2623	6.9578	19.4372	6.977	9.783	24.534	19.792	16.112	13.21	11.792		0.147927	19.4058
3.0977	28.616	31.76	17.602	29.586	23.224	16.863	79.679	30.615	4.992	5.766	9.533	22.827	9.355	10.2223	13.2016	2.185	2.9567	17.091	8.9783	16.848	25.751	21.237	24.7518	20.807	5.3614	6.7739	20.318	5.49	8.257	24.516	14.946	13.742	12.277	10.373		0.153847	17.5442
3.2168	24.711	30.424	16.299	32.84	20.049	12.628	63.353	34.8512	6.33	6.116	8.6272	20.752	8.804	7.859	14.1529	3.187	2.9116	14.948	8.5845	16.875	21.89	15.495	20.9401	20.652	6.0145	6.6573	19.2149	5.626	6.149	22.909	13.301	12.779	11.112	9.87		0.159762	16.0857
3.336	22.485	28.985	15.281	33.149	17.078	8.371	49.585	31.9139	6.668	4.359	7.2456	18.152	7.394	7.3724	13.7921	3.166	2.2759	15.144	8.3644	14.6	16.325	9.92	13.7829	19.848	5.8607	4.8961	18.038	4.761	5.829	20.701	14.025	11.124	10.679	9.532		0.165682	14.1383
3.4551	23.462	26.422	13.05	33.024	16.579	6.818	32.549	30.0374	6.276	2.95	6.8752	21.045	6.545	6.8785	12.3904	3.045	2.5472	16.175	6.596	12.857	15.434	6.557	11.11	20.603	5.2219	5.5079	17.4854	4.803	5.071	22.895	13.428	10.927	11.127	8.332		0.171598	13.0772
3.5742	21.67	25.85	14.306	30.524	17.678	5.922	28.265	28.1942	6.243	4.042	7.0429	18.585	6.078	5.6055	12.4982	3.184	2.1119	15.572	6.846	13.599	13.497	5.54	9.4272	18.7	4.2657	5.2492	17.7646	4.222	4.759	19.88	11.607	10.11	10.052	9.578		0.177513	12.3079
3.6934	19.297	28.554	13.12	33.646	15.969	6.141	19.032	30.1344	4.943	3.544	6.6368	20.667	6.518	5.4686	13.0366	2.646	2.6628	14.668	7.2586	13.579	11.643	4.683	9.1152	16.592	4.1015	4.9739	17.2403	3.93	5.014	18.92	9.277	8.789	9.723	9.212		0.183433	11.7863
3.8125	20.254	27.296	14.222	34.797	15.176	6.043	12.783	28.9462	5.343	3.099	6.0006	22.45	6.337	3.9611	13.5197	2.564	2.6096	15.135	6.5013	13.582	10.451	5.146	7.3125	18.609	4.1827	4.8767	15.6757	3.411	4.964	21.223	9.858	8.025	8.202	9.361		0.189348	11.527
3.9317	20.826	30.566	14.558	32.593	13.994	5.306	9.257	27.6221	6.228	3.669	5.3087	21.995	5.679	4.3913	13.9641	2.632	2.8658	11.926	5.7851	13.211	9.209	4.113	5.5439	18.927	3.6269	4.6544	14.9572	3.814	4.632	20.29	10.293	6.678	8.309	10.314		0.195268	11.11
4.0508	20.792	31.976	15.262	29.588	13.524	5.323	6.748	26.7607	5.735	3.075	5.5535	19.904	5.409	5.6719	13.8753	2.438	2.3638	11.908	5.7398	13.654	8.177	3.558	4.2977	17.34	4.1447	5.1653	13.943	3.387	4.29	20.647	8.93	5.001	8.35	12.318		0.201183	10.7309
4.1699	18.478	35.384	13.128	29.22	12.115	4.937	6.403	26.8674	5.226	3.288	5.2821	21.871	4.842	4.4106	14.8016	2.689	2.3206	10.79	6.6825	11.962	7.085	2.834	4.6169	16.255	3.4622	4.6477	14.1235	3.792	5.558	20.493	6.948	5.566	7.411	11.759		0.207098	10.4485
4.2891	18.124	34.8	11.463	28.691	13.278	6.107	5.803	25.3883	5.311	3.108	5.9363	22.087	4.193	4.8012	15.2772	2.734	2.9672	10.779	6.3278	13.524	7.165	2.749	3.8497	16.521	3.5776	4.2856	15.6783	3.131	5.014	19.177	6.931	5.476	7.272	12.311		0.213018	10.407
4.4082	16.91	38.447	12.441	29.9	12.993	5.518	4.887	25.5867	5.586	2.597	5.4759	21.268	6.194	4.4766	14.5717	2.452	2.1718	9.456	6.5892	12.773	5.517	3.411	3.8904	18.287	3.1762	4.661	15.3392	3.497	4.988	21.026	6.323	5.048	8.119	13.431		0.218933	10.5002
4.5274	15.012	35.621	11.995	27.792	12.217	4.831	5.008	24.0628	6.201	3.174	5.5274	19.741	4.466	4.4963	16.832	2.238	2.6088	9.878	6.6487	10.889	4.88	2.392	3.5662	16.998	2.8875	4.171	16.4509	3.343	5.217	22.878	5.45	3.854	6.315	14.279		0.224853	10.0565
4.6465	14.136	34.918	12.673	29.084	10.193	4.743	4.797	28.5802	4.847	3.249	5.4442	22.088	3.915	3.241	17.75	2.326	2.1632	11.045	5.5001	13.22	6.035	3.247	3.3604	17.589	2.9574	3.3758	15.072	3.148	6.121	23.548	5.123	3.79	5.685	15.37		0.230768	10.2451
4.7657	12.829	29.718	12.778	31.546	10.889	4.947	4.846	32.0505	5.82	3.657	4.6752	21.551	4.538	3.9807	18.9658	2.706	2.3358	9.431	6.1135	13.581	5.329	3.416	3.7694	17.624	3.3169	4.1036	17.1301	3.539	6.735	26.204	4.788	3.997	5.053	16.725		0.236689	10.5497
4.8848	13.556	26.378	11.596	37.053	11.62	3.858	4.194	36.2229	6.427	3.142	4.1419	19.726	4.04	3.685	19.9398	3.284	2.1269	9.997	5.7587	13.069	4.638	3.73	4.2766	16.885	3.9727	4.8327	16.6897	3.9	7.258	23.608	4.926	3.032	4.701	16.351		0.242604	10.5475
5.0039	12.098	23.618	12.822	36.6	13.92	3.833	3.185	36.677	5.389	3.086	4.9096	20.711	4.794	4.0141	20.0362	2.171	2.1838	9.899	6.3557	15.206	5.672	3.377	4.2189	17.168	3.5179	4.4846	18.2641	3.013	7.269	26.06	4.567	2.959	4.962	17.962		0.248519	10.7354
5.1231	10.441	19.762	11.383	36.731	12.647	3.927	3.901	38.3782	5.882	3.158	5.5632	19.414	5.058	3.4009	20.0119	2.04	2.3492	7.088	7.0197	15.382	5.791	3.077	3.6458	19.988	3.2199	3.6027	18.3881	3.061	10.151	26.863	4.701	3.191	4.062	19.558		0.254439	10.6717
5.2422	10.034	22.284	12.52	35.586	14.473	4.324	3.778	33.0875	4.56	3.873	5.3548	18.587	4.704	3.7785	21.6188	3.483	2.2879	6.236	7.2977	14.069	7.106	3.31	3.1795	23.703	3.4906	3.9791	21.7859	3.258	10.178	27.235	5.205	3.288	3.577	22.186		0.260354	10.9829
5.3614	10.248	21.526	13.277	35.35	12.586	4.58	3.5	29.1362	4.44	3.184	5.0488	19.782	5.416	3.9797	21.5646	2.491	2.2732	5.442	7.2034	15.25	6.588	2.783	3.9575	24.673	3.5671	3.8309	22.2467	2.914	11.29	28.015	4.624	3.366	4.883	19.703		0.266274	10.8447
5.4805	10.292	21.462	13.59	36.649	11.217	4.579	4.148	27.0999	5.507	2.247	5.0883	20.974	4.969	5.025	21.3999	2.74	2.4944	6.232	8.4487	14.741	6.792	3.65	3.6217	24.65	3.4045	4.8165	19.3449	3.875	11.879	27.792	5.524	3.709	4.436	20.328		0.272189	10.9625
5.5996	9.951	24.31	14.689	34.952	10.374	4.296	3.984	28.9904	4.629	2.676	4.9841	19.763	5.205	3.851	20.2336	3.152	2.4413	5.964	8.9998	15.554	7.618	3.462	3.3628	23.776	2.5573	4.8072	20.0879	4.172	13.574	27.587	4.1	2.883	4.031	21.758		0.278104	10.964
5.7188	9.518	27.457	14.034	33.572	10.313	4.679	4.249	28.1015	5.291	2.906	5.8568	17.92	5.843	3.7245	20.234	2.876	2.8441	6.422	10.5274	16.558	6.35	3.53	3.8834	22.961	2.699	3.7356	19.2345	4.403	17.133	25.285	4.417	3.956	3.931	24.326		0.284024	11.1403
5.8379	9.568	27.854	12.949	35.98	12.101	5.948	4.469	27.5455	5.828	2.713	4.8557	20.614	6.102	5.094	22.1231	3.119	2.5845	5.709	11.4814	16.045	5.914	2.883	4.1536	22.427	2.9312	3.0767	16.6781	4.463	16.892	26.493	3.526	3.964	2.983	23.387		0.289939	11.2487
5.9571	9.039	29.22	11.827	33.729	11.478	3.991	3.021	27.8506	5.465	2.97	4.1148	22.328	5.51	3.8766	21.0285	2.632	3.0076	6.828	12.9955	15.285	5.789	2.76	3.7742	21.562	2.5512	3.3781	16.6026	3.866	16.132	27.183	4.466	2.888	3.474	25.221		0.295859	11.0542
6.0762	8.117	26.83	12.902	35.739	11.034	3.71	2.78	27.2362	4.588	3.049	5.6592	22.651	5.036	4.0184	20.7824	2.289	1.986	5.66	15.2248	15.679	5.563	2.821	3.5942	20.521	3.1678	3.8648	16.8554	4.511	19.11	24.466	4.352	3.603	4.774	22.688		0.301775	11.0254
6.1953	8.314	28.94	13.647	38.659	10.249	4.545	2.886	25.5922	5.405	3.315	5.1184	22.683	6.739	4.0894	21.5634	2.783	2.1705	5.384	16.5656	16.378	5.512	3.958	4.0197	21.83	3.0188	4.0519	17.3419	5.513	18.655	27.373	4.247	2.861	3.913	23.159		0.30769	11.4847
6.3145	7.074	29.391	14.198	38.813	11.436	4.119	3.295	24.8732	5.91	3.316	5.3097	21.117	6.193	4.9561	19.5398	2.72	2.0892	4.987	18.3549	15.428	5.781	4.084	4.1953	19.731	3.0633	3.5356	17.1035	5.18	18.83	24.842	3.244	3.21	3.781	25.287		0.31361	11.3232
6.4336	6.947	24.779	17.014	36.253	10.293	3.935	3.732	22.7603	6.179	3.074	5.6552	20.819	5.725	5.0554	18.4631	3.087	2.2041	4.81	18.5085	15.672	6.929	3.582	2.4978	21.059	2.9621	3.8306	18.5032	6.074	21.279	24.692	4.282	3.103	3.409	26.536		0.319525	11.2854
6.5528	7.366	22.976	17.713	33.82	9.941	4.459	3.286	23.6068	5.002	3.884	5.2126	24.565	6.182	4.3753	19.7911	4.025	2.4221	5.51	18.3247	19.656	5.915	2.772	2.7514	19.694	2.5874	3.4188	17.7411	7.035	20.335	25.436	3.957	3.224	3.463	25.192		0.325445	11.3423
6.6719	6.137	20.326	20.033	32.689	9.006	3.822	3.996	24.6995	5.699	2.965	4.9046	23.263	5.831	4.5284	18.4606	3.837	2.0088	4.838	17.9402	20.336	5.166	2.714	2.5246	21.335	2.3669	4.0174	17.2754	5.647	19.665	24.7	3.285	2.824	4.187	26.548		0.33136	11.1052
6.7911	5.542	17.59	19.822	30.783	9.166	3.468	3.898	23.7342	6.919	3.483	4.3713	22.646	5.739	3.911	19.0836	3.616	2.2042	4.46	16.4693	20.168	6.154	3.217	3.5221	22.647	2.9555	3.6848	15.6097	5.72	19.006	22.838	2.865	3.82	4.126	25.526		0.33728	10.846
6.9102	5.234	14.076	22.263	32.551	9.691	4.451	3.161	25.2018	6.418	4.576	4.9267	23.466	7.411	2.9068	19.1236	3.163	2.7575	4.189	18.168	24.399	6.471	3.25	4.0791	20.689	3.0558	3.5329	15.8005	5.58	19.852	22.428	2.671	3.016	4.195	27.635		0.343195	11.1879
7.0293	6.481	13.37	22.815	32.798	7.965	4.198	2.962	24.27	5.732	3.506	5.8136	26.694	7.13	4.1112	19.2178	3.423	2.4862	4.339	16.5557	27.82	6.133	3.873	3.1149	19.788	2.9387	4.4853	15.5976	6.144	18.227	23.306	3.156	2.244	4.48	28.264		0.34911	11.2776
7.1485	5.077	12.495	21.648	35.829	9.145	4.081	3.144	26.6002	5.612	3.793	4.9936	26.122	8.64	4.4559	19.4496	3.468	2.8905	3.448	17.9893	27.702	6.709	3.507	2.7287	21.673	3.1588	4.0192	15.4279	5.78	19.119	22.713	3.459	3.457	3.14	24.779		0.35503	11.3604
7.2676	5.594	13.491	26.076	33.305	8.729	4.006	3.508	24.4185	5.743	3.564	5.5055	25.268	8.397	4.4787	19.7042	3.048	2.4572	3.619	17.828	25.336	7.574	3.638	3.2511	21.722	3.3233	3.471	16.694	6.353	16.121	22.393	3.398	3.246	3.876	27.37		0.360945	11.3678
7.3868	4.765	11.318	24.537	35.911	6.276	4.301	3.537	23.3269	4.574	3.681	6.0479	26.312	7.73	4.0566	18.4261	3.137	2.5026	3.487	17.946	27.786	6.68	4.102	3.6245	22.129	3.9978	3.554	16.7227	7.282	15.539	23.333	2.887	3.442	4.057	27.893		0.366865	11.3206
7.5059	4.081	13.158	26.383	35.428	6.044	3.651	3.27	21.304	4.91	2.921	4.518	28.453	7.384	4.5543	18.2163	3.395	2.5924	3.946	17.3303	25.967	7.039	3.7	3.8047	21.422	3.5421	3.9777	14.9851	7.418	15.974	23.195	3.174	2.509	4.085	22.321		0.372781	11.0192
7.625	4.631	12.267	29.904	30.665	7.502	3.913	3.828	21.9726	5.236	3.201	5.2872	30.651	7.452	5.0445	19.4861	3.976	2.5531	4.207	18.4288	24.796	7.133	3.129	3.7211	21.427	3.3688	3.1805	14.5543	6.387	17.199	22.193	3.328	3.52	3.875	25.194		0.378696	11.2709
7.7442	4.575	11.838	35.444	32.744	6.808	4.522	3.764	22.678	4.131	3.46	5.0071	29.109	6.702	4.8826	22.0663	3.227	2.5441	3.315	17.4519	23.947	7.353	2.71	3.5607	22.033	3.6537	3.3434	15.9855	7.49	17.804	23.702	3.317	2.81	4.436	25.486		0.384616	11.5265
7.8633	4.396	12.067	35.532	32.226	7.315	4.244	2.846	21.5884	4.794	4.215	4.9367	29.936	6.204	4.3917	20.583	3.145	2.2656	3.565	18.7691	24.602	7.251	3.41	3.2739	21.948	3.4928	3.8162	14.3417	8.122	16.451	21.977	3.645	3.446	5.244	24.659		0.390531	11.4323
7.9825	4.694	10.677	39.018	32.188	7.248	4.556	3.394	19.6941	3.607	4.052	3.9312	27.617	7.788	5.2109	18.398	3.858	2.4039	2.825	18.2594	26.219	8.435	3.481	3.4409	22.189	2.7899	3.4889	15.2982	8.454	16.376	22.505	3.793	2.872	4.242	24.173		0.396451	11.3875
8.1016	4.036	10.315	41.515	33.81	6.802	4.442	3.25	20.2873	4.157	4.329	5.4987	26.154	7.347	5.7212	19.8991	4.114	3.0823	3.072	18.5541	26.889	8.235	3.134	3.2586	20.972	3.7204	3.5008	14.4325	9.349	15.216	25.096	3.682	3.169	3.256	23.679		0.402366	11.5875
8.2207	4.43	11.258	40.508	31.575	6.125	3.512	3.138	22.4335	4.939	3.398	5.1851	27.027	7.59	5.4898	18.6705	4.627	3.3124	3.905	19.0654	26.305	8.967	3.513	3.4763	21.895	3.6009	3.4789	14.0816	8.508	13.796	25.175	3.662	3.797	4.056	22.585		0.408281	11.5613
8.3399	4.577	10.016	39.371	31.34	7.477	4.832	3.074	20.7163	4.633	3.946	5.0459	25.052	8.428	5.4658	21.6773	4.225	3.4182	4.422	17.9349	24.322	8.795	3.549	3.266	22.417	3.7022	3.5923	16.1886	8.536	12.414	22.202	3.369	3.904	4.974	21.092		0.414201	11.411
8.459	4.202	9.401	40.056	27.689	5.137	4.438	4.247	18.2016	4.525	3.58	4.6303	26.508	8.851	5.9533	19.3072	4.198	2.2876	3.93	18.8745	22.063	8.881	3.714	3.2103	22.653	2.8682	3.3054	16.6981	8.081	14.211	23.044	3.61	2.823	4.355	23.411		0.420116	11.1454
8.5782	3.989	10.708	41.296	23.575	5.018	3.933	3.414	19.193	3.376	3.736	3.7039	26.783	9.71	5.5495	17.8489	3.801	2.7634	2.955	18.7172	18.785	8.829	3.707	3.3582	21.072	3.3713	5.3631	18.1194	9.229	14.402	24.386	3.237	2.766	4.256	24.666		0.426036	11.0476
8.6973	3.664	10.672	42.775	25.471	5.871	4.982	3.396	20.1089	3.84	3.522	3.6866	27.054	9.662	4.9733	18.8774	3.46	3.2941	2.606	18.9113	19.892	9.06	3.87	3.3289	22.821	3.9693	4.0217	16.3972	8.219	12.953	23.627	3.581	3.193	4.333	22.719		0.431951	11.1415
8.8165	4.461	9.326	41.832	23.095	6.427	4.454	3.506	22.1442	3.994	3.884	3.4655	28.227	8.483	5.3468	18.1015	3.714	2.7928	2.828	20.4859	18.265	8.027	3.95	3.8131	22.152	4.0427	3.5957	16.1707	9.814	13.99	21.846	3.245	3.757	4.343	21.337		0.437872	11.0269
8.9356	4.157	10.613	43.603	19.632	5.098	4.203	3.543	23.7096	4.297	4.173	3.4897	27.521	8.828	4.9743	19.6986	3.595	3.179	3.104	20.6194	18.722	8.692	4.057	3.0538	22.826	3.8463	3.5167	13.8227	10.319	13.514	24.671	3.448	4.113	4.299	23.884		0.443787	11.2007
9.0547	4.721	9.365	45.284	19.011	6.081	4.055	3.167	20.9106	3.708	4.61	4.865	31.878	8.646	5.2	19.9591	4.542	3.615	3.155	21.7384	20.293	8.24	3.371	2.8546	22.477	3.76	3.0548	15.1137	10.698	13.639	26.349	3.835	3.434	3.858	24.384		0.449702	11.4668
9.1739	3.992	9.155	43.781	18.967	5.351	4.883	3.02	19.3892	4.347	3.483	4.3509	38.432	6.796	5.1148	18.2917	4.164	2.5272	4.006	21.8501	17.375	10.407	3.435	3.3263	22.479	2.9494	3.3622	12.9067	11.488	12.426	22.848	3.46	3.566	3.983	21.988		0.455622	11.1147
9.293	3.251	7.882	46.331	19.363	4.589	3.53	3.682	20.3424	4.578	3.3	3.9287	40.245	6.993	5.1067	20.1643	4.009	2.7685	3.069	21.1998	16.418	10.64	3.327	3.8153	21.203	3.4177	4.5925	12.8922	11.577	11.733	24.394	3.638	3.697	4.311	22.702		0.461537	11.2556
9.4122	3.8	7.799	44.761	16.813	5.15	3.63	3.996	19.8692	4.736	2.953	4.6088	38.482	5.628	6.0208	21.347	3.646	3.9451	2.989	22.9148	17.394	9.899	3.596	3.6628	21.843	4.1505	4.4536	13.6879	13.793	11.023	24.843	3.999	3.276	4.424	22.72		0.467457	11.3486
9.5313	2.978	7.619	43.528	16.857	5.125	3.958	4.016	19.1534	4.087	4.288	5.6358	38.756	5.102	5.9947	19.5303	4.155	4.2765	3.66	21.8275	16.647	9.802	3.944	2.9976	23.337	4.3116	5.0168	12.9931	15.002	10.868	23.25	3.08	3.424	4.408	20.983		0.473372	11.1945
9.6504	2.756	8.371	40.582	13.561	5.449	4.355	4.18	19.9633	3.987	4.148	5.1796	38.526	5.478	5.2571	21.0366	4.573	3.1516	3.39	21.8587	17.609	10.567	3.49	3.529	23.819	4.3672	4.272	12.3973	16.304	11.903	25.062	3.473	3.396	3.85	23.671		0.479287	11.2798
9.7696	3.592	7.98	43.208	12.463	5.085	3.784	3.359	20.7451	4.025	3.856	4.8707	38.822	6.598	5.4491	23.707	4.68	2.9398	3.42	22.19	17.325	9.74	4.194	3.0792	22.75	4.6157	3.8667	12.7079	18.523	11.291	26.466	3.28	3.554	4.504	22.905		0.485207	11.4581
9.8887	3.909	7.63	40.905	12.842	4.371	3.461	3.757	19.6331	4.961	3.184	4.6544	41.404	6.366	5.7733	24.454	4.986	2.7116	3.82	24.3088	15.984	11.322	3.341	3.091	22.97	4.1801	3.6877	13.2903	17.955	11.141	26.5	2.781	2.782	3.795	22.642		0.491122	11.4292
10.0079	4.434	7.2	42.605	12.726	5.333	4.016	3.272	20.6517	4.258	3.582	4.0894	45.532	5.407	5.1403	21.468	4.445	3.5535	3.661	22.7145	17.536	10.791	3.909	3.348	22.74	4.7059	3.8692	11.4963	18.734	12.029	24.681	2.627	3.39	5.286	22.489		0.497042	11.5212
10.127	3.501	6.609	44.545	11.065	5.25	3.123	3.483	20.8666	3.819	4.017	4.7205	46.415	6.981	5.4727	22.1465	4.712	4.2763	3.876	22.7537	17.572	9.975	3.849	2.9	21.62	4.5232	4.4923	12.9954	20.877	10.943	26.142	3.073	3.332	4.495	23.573		0.502958	11.7057
10.2462	3.017	6.736	43.633	10.093	5.202	3.956	3.004	20.0389	3.877	3.913	3.6184	44.211	6.505	4.7881	20.7459	4.178	4.0593	3.425	21.7173	17.758	10.586	3.629	3.7015	23.769	4.7489	4.0387	10.6147	21.109	10.937	24.932	3.463	3.696	4.075	22.968		0.508878	11.3748
10.3653	4.321	7.101	40.638	9.869	5.639	4.534	2.69	19.0399	3.839	3.999	4.3776	45.054	6.587	4.3973	19.1866	4.62	3.5683	2.621	21.2843	15.679	10.866	3.98	3.7082	25.094	4.3534	4.2862	9.4265	18.257	11.575	24.037	3.16	3.879	4.318	22.844		0.514793	11.142
10.4844	4.747	7.166	42.566	9.943	4.835	3.909	3.581	19.9388	4.462	3.665	5.0899	45.88	5.499	5.097	18.3581	4.776	3.4524	2.838	21.82	16.032	12.748	4.429	2.3802	23.866	4.683	3.919	8.1626	18.171	12.628	25.319	2.858	3.442	4.945	22.113		0.520708	11.2741
10.6036	3.7	6.404	41.453	9.968	5.39	3.904	4.23	19.2441	5.239	3.383	4.1467	44.948	6.068	4.6908	20.8845	5.544	3.1892	3.382	22.018	14.376	12.122	4.858	2.9991	22.149	5.2523	3.9535	6.6499	16.664	11.56	25.171	2.76	3.093	4.472	22.244		0.526628	11.0621
10.7227	3.851	6.828	43.45	7.777	6.287	3.869	3.514	19.1683	4.472	3.88	5.0795	44	5.519	4.3896	19.8926	4.324	2.898	3.886	22.766	14.182	12.787	3.035	2.8376	22.8	4.7697	4.0285	8.2096	17.342	12.453	24.09	3.473	3.238	4.22	23.38		0.532543	11.0793
10.8419	3.905	7.644	47.132	9.083	6.249	3.941	3.873	19.8023	4.469	4.255	5.3245	44.935	5.557	5.2286	19.6775	3.76	3.3961	4.072	21.1233	12.654	13.429	4.115	3.3627	25.4	4.4036	4.6893	7.138	18.061	12.708	25.359	4.338	3.245	4.041	24.215		0.538463	11.4878
10.961	3.105	6.639	45.568	8.059	5.218	3.55	2.244	20.7478	3.636	2.997	4.9927	45.482	5.554	4.428	17.4267	4.523	3.6449	3.228	19.8623	12.864	13.027	3.581	3.2656	22.649	4.0399	4.3257	8.1922	17.829	11.491	23.256	3.537	4.349	4.789	28.162		0.544378	11.0666
11.0801	3.796	6.958	42.727	7.64	4.718	3.162	3.118	21.3568	4.024	3.456	4.8007	45.862	6.242	5.5035	18.0286	4.826	3.626	3.105	19.1936	13.899	13.285	4.414	2.6442	20.184	6.2106	4.7024	7.8895	17.538	13.96	22.992	4.184	3.834	4.201	27.031		0.550293	11.1504
11.1993	3.836	6.954	47.156	7.327	4.663	2.778	3.823	19.7024	4.445	4.489	4.9662	42.012	6.852	4.6756	17.12	4.834	3.2771	3.351	17.995	12.309	13.288	3.996	3.3158	19.712	5.0229	5.1447	7.9046	15.603	12.949	25.326	3.953	3.324	4.72	24.908		0.556213	10.9333
11.3184	3.453	6.979	50.343	7.141	5.458	3.395	4.545	20.3218	3.823	3.742	4.6563	44.883	5.305	4.267	18.5738	5.315	2.9871	2.996	19.6427	10.558	13.604	3.841	3.74	22.418	5.754	4.403	7.5114	15.973	13.638	25.064	3.931	3.719	4.894	25.207		0.562128	11.2377
11.4376	4.219	6.811	51.502	8.701	5.301	3.283	4.433	19.9568	3.923	3.051	4.8983	43.134	4.645	5.5088	17.0574	4.377	3.4823	2.39	17.2838	11.176	14.92	3.765	3.2472	20.583	5.2681	4.6223	7.59	17.309	14.311	24.46	3.944	3.882	5.13	24.141		0.568049	11.1266
11.5567	4.061	6.424	53.712	7.468	5.085	3.402	4.017	20.8252	3.83	3.502	4.0255	42.073	5.142	5.4301	16.9263	4.747	3.0502	3.18	15.5392	12.314	13.827	3.491	3.5463	20.434	4.504	4.3231	7.6154	15.425	12.989	23.198	3.738	4.207	5.614	23.953		0.573964	10.9299
11.6758	4.17	7.25	52.48	7.151	4.971	3.859	4.303	22.1794	3.694	3.374	4.0168	43.865	5.215	5.108	17.4928	5.258	3.416	3.472	16.3621	13.653	13.217	3.45	3.0731	20.823	4.1445	4.3493	7.6541	15.222	13.353	26.34	4.277	3.473	4.851	23.772		0.579879	11.1556
11.795	3.153	6.184	52.936	7.658	4.482	3.705	2.84	22.5675	3.716	3.779	4.1577	44.607	5.13	5.432	17.5239	5.426	3.6637	3.776	15.251	14.191	13.597	3.742	3.3292	21.482	4.9888	4.2956	8.8009	14.991	12.542	23.109	4.625	3.38	5.856	23.802		0.585799	11.1388
11.9141	3.495	5.943	48.021	7.843	4.561	3.577	3.443	22.0499	3.412	4.315	3.8623	41.165	4.991	4.1215	19.5873	4.765	2.6876	3.38	15.3146	13.534	14.434	3.75	3.697	19.904	5.5126	4.2194	8.4007	13.224	13.273	25.176	4.314	3.482	6.088	22.573		0.591714	10.8269
12.0333	4.161	6.137	43.339	8.227	5.21	3.866	4.596	21.6177	3.654	4.268	3.7489	39.341	4.944	5.1894	19.5479	5.767	3.371	3.916	12.5972	14.753	11.838	4.496	3.0536	18.687	6.3685	4.0126	7.6352	13.938	13.674	25.823	4.491	3.995	6.701	24.607		0.597634	10.8109
12.1524	3.889	6.584	41.816	7.846	5.265	3.508	3.659	20.3957	3.81	3.906	3.6793	37.945	5.172	4.6214	18.8388	4.319	2.7932	3.263	9.9682	13.251	12.615	3.43	3.3803	18.558	6.122	3.8741	8.7388	14.65	13.899	25.313	5.52	4.033	7.357	28.092		0.603549	10.5915
12.2716	4.158	6.201	41.833	7.323	4.145	4.601	3.78	18.5253	3.602	4.086	4.0937	35.016	5.238	4.4725	20.3786	4.308	3.4224	2.935	8.8055	14.652	13.665	4.344	3.7226	20.046	4.6669	5.1385	8.7393	13.21	13.88	23.19	4.777	3.968	7.649	28.228		0.609469	10.4941
12.3907	4.095	5.427	40.465	6.514	4.62	4.613	3.49	20.0071	3.765	4.034	3.4212	33.544	5.383	4.8851	20.1577	4.993	2.794	3.767	8.2986	14.302	14.051	3.766	3.2063	19.464	5.3026	5.4881	8.7488	14.109	15.204	24.733	4.9	4.143	7.216	30.688		0.615384	10.5763
12.5098	3.466	6.421	40.72	5.721	4.875	4.437	4.095	21.2161	3.833	3.806	3.4765	32.147	4.44	3.7559	20.8164	5.301	3.4264	3.082	8.6255	14.131	13.151	3.77	3.7386	21.425	6.4605	5.2891	9.2481	14.876	15.39	25.667	4.741	5.189	8.349	31.131		0.621299	10.7711
12.629	3.896	5.495	37.693	6.028	3.921	4.029	4.267	20.1489	3.939	3.189	4.0489	31.992	4.697	5.1653	22.1594	4.628	3.9794	3.976	6.7555	14.864	12.408	3.54	3.6073	19.744	7.2046	5.2429	8.2989	17.384	14.649	23.782	5.186	5.872	8.848	32.585		0.627219	10.683
12.7481	3.908	5.609	38.94	6.314	3.683	3.624	3.955	19.7406	3.716	2.68	4.1184	33.619	5.85	4.6116	21.5191	5.412	3.3495	3.83	5.7369	13.824	12.398	3.875	3.1592	19.654	7.7792	5.5703	7.4069	18.336	14.448	24.866	5.27	5.811	11.093	35.295		0.633135	10.853
12.8673	3.922	5.256	39.621	6.223	3.664	3.737	4.823	19.9592	4.4	3.06	3.9375	31.935	6.01	4.7524	22.9785	5.588	3.7435	3.37	6.6413	12.292	12.328	4.108	3.2889	19.161	6.6062	4.683	8.1421	20.865	13.281	23.997	6.087	6.177	13.286	33.729		0.639055	10.931
12.9864	3.873	5.294	37.149	5.885	3.084	3.159	4.054	19.7307	3.692	3.534	4.4701	34.889	6.3	4.6257	20.8693	5.099	3.7698	3.39	6.9832	14.978	12.376	4.505	3.4472	18.457	7.2458	4.9864	8.8274	18.964	16.272	25.39	6.881	6.557	15.142	40.567		0.64497	11.3073
13.1055	3.922	6.105	35.536	5.512	4.033	3.407	3.425	21.1583	4.513	3.876	3.3139	31.96	5.097	4.0904	20.0072	4.5	3.0491	3.238	6.3111	13	12.852	4.455	3.3787	18.478	7.0812	5.8423	9.775	18.481	16.153	25.281	8.144	7.552	15.686	41.303		0.650885	11.1917
13.2247	3.732	6.917	34.89	6.236	3.391	3.75	3.998	22.6552	3.935	4.066	3.7689	31.483	6.195	4.5508	19.4311	4.988	2.6671	3.498	5.5774	14.602	12.892	4.804	2.6097	20.152	7.2991	4.9819	7.6033	17.47	14.895	24.161	8.735	7.979	16.308	41.655		0.656805	11.2317
13.3438	3.619	6.322	29.88	5.496	4.196	3.152	3.519	21.976	4.135	3.37	4.1879	31.838	4.786	4.4085	20.5047	4.744	3.0029	3.619	6.1515	15.697	12.44	3.941	2.4847	20.769	7.8119	5.906	8.7059	17.236	15.941	25.569	10.722	8.567	14.914	39.204		0.66272	11.1416
13.463	4.48	6.451	31.982	4.909	3.695	3.198	3.965	22.4859	3.027	3.25	4.0494	29.996	4.406	5.2658	19.9747	4.95	2.6837	3.964	6.2218	15.145	13.554	4.121	2.6128	18.29	8.1459	5.4114	8.2382	19.549	16.975	26.577	12.134	10.844	11.351	32.228		0.66864	11.0038
13.5821	4.066	6.794	31.341	4.214	4.254	3.199	4.144	23.5997	3.175	3.554	4.4721	28.883	4.716	4.8503	20.0542	4.699	3.7019	3.081	4.9108	17.924	13.505	3.955	2.7744	18.619	8.1401	4.9583	8.9883	20.224	18.692	26.845	15.462	13.044	10.616	26.5		0.674555	11.1164
13.7012	3.634	8.73	30.647	4.465	3.938	3.744	4.397	21.83	4.55	3.298	3.5501	28.13	3.928	5.9613	22.7159	5.482	3.7	2.324	4.6676	18.169	17.101	3.795	2.6913	15.612	9.7947	5.8299	8.0274	22.273	18.596	25.526	19.48	13.338	7.815	16.728		0.68047	11.0138
13.8204	3.733	8.265	28.78	5.165	4.305	3.014	3.803	22.5768	4.135	3.129	4.1201	30.194	5.072	5.6933	22.1982	5.54	3.5796	2.844	5.9609	19.969	14.78	4.398	2.5892	15.523	11.0744	6.1118	7.7823	20.363	20.446	26.956	24.096	12.901	5.68	13.332		0.68639	11.1209
13.9395	4.37	7.732	28.957	4.537	4.468	3.842	4.719	22.9144	4.223	3.756	4.0919	31.87	5.384	5.1492	24.3161	5.356	3.6936	3.682	6.1822	19.645	14.567	4.242	2.8356	15.488	10.1417	6.0065	9.0905	20.604	20.886	30.464	26.511	9.848	3.674	8.428		0.692305	11.2257
14.0587	4.294	6.858	27.07	4.905	3.107	3.47	4.021	23.8494	4.195	4.817	5.0159	31.074	3.862	3.9715	22.9472	5.392	3.6163	3.865	5.379	20.532	16.216	4.634	3.4871	16.327	13.7922	5.1834	10.4652	23.526	27.973	33.052	32.089	6.893	4.147	5.321		0.698225	11.6279
14.1778	4.381	6.792	26.076	4.881	3.006	3.269	3.648	23.774	4.476	3.995	4.7807	30.994	3.903	3.8762	24.554	6.065	3.5637	2.92	5.1917	21.155	17.33	3.393	3.172	14.819	15.2012	5.35	10.1411	22.461	32.611	36.19	40.464	5.404	2.413	3.698		0.704141	11.8808
14.297	3.708	6.994	25.613	4.362	3.663	2.429	3.684	22.5859	4.16	3.432	4.3927	31.575	4.622	4.4728	24.7205	5.375	3.69	2.664	5.1049	22.723	16.623	4.371	3.6867	13.383	16.2849	5.3154	9.235	22.227	32.741	40.679	44.599	4.654	1.886	2.465		0.710061	12.0036
14.4161	3.771	6.877	25.532	4.45	4.383	3.927	3.191	22.0379	3.936	3.297	4.4532	36.517	5.268	4.8542	26.2773	5.199	3.8086	3.532	4.6496	22.314	16.433	5.15	2.7279	12.124	14.589	4.8712	11.0065	21.067	37.256	46.619	44.23	4.262	1.29	2.606		0.715976	12.4267
14.5352	3.791	6.601	23.662	4.685	4.331	4.444	3.678	25.7134	3.869	3.254	4.594	34.8	4.983	5.1985	30.3999	5.631	4.034	3.821	5.9393	24.096	16.804	4.593	3.1787	11.009	15.3868	4.8234	10.6633	21.168	41.378	50.284	38.239	2.485	0.788	1.796		0.721891	12.6506
14.6544	3.798	6.951	22.517	3.604	3.445	4.52	3.99	25.7906	3.953	2.924	5.0203	35.166	4.694	6.4921	33.9948	4.582	3.5641	3.361	4.2441	25.713	16.501	5.123	2.8485	10.825	14.5987	4.7779	8.8745	22.84	45.79	53.754	30.918	1.742	0.935	1.215		0.727811	12.6196
14.7735	4.486	6.802	25.492	4.314	3.19	3.518	3.801	25.1198	3.873	2.523	4.3849	30.729	4.596	5.7293	32.3688	5.599	3.2893	3.784	4.6767	29.119	18.451	5.67	3.0883	11.448	14.7618	5.1522	8.836	24.44	44.024	50.623	25.189	1.161	0.898	0.881		0.733726	12.4123
14.8927	4.689	8.048	22.584	3.528	3.928	4.865	3.801	28.5406	3.058	2.685	3.99	31.803	5.153	5.6954	32.6998	5.171	3.1698	3.387	4.3878	28.252	18.144	5.017	3.6783	11.108	16.0904	4.6895	7.7428	29.51	40.013	50.869	20.176	1.222	0.766	0.786		0.739646	12.3308
15.0118	3.475	7.265	23.896	4.001	3.893	4.135	3.98	30.2373	3.638	2.911	5.4491	30.811	4.69	5.5784	26.8934	4.918	3.4524	3.741	3.9474	30.494	19.287	6.353	3.2815	12.104	15.0623	5.6934	8.817	29.166	37.647	47.428	13.13	1.3	0.753	0.78		0.745561	12.0061
15.1309	3.973	7.905	23.303	3.765	3.497	4.864	3.886	26.6607	3.862	4.065	6.0379	30.816	4.703	6.3929	24.4933	5.069	3.4654	3.789	3.2989	29.92	18.581	6.13	4.0911	12.455	14.8167	6.141	8.857	29.135	42.522	45.332	11.593	1.52	0.457	0.7		0.751476	11.944
15.2501	5.33	9.808	19.035	3.996	2.711	4.522	4.338	26.0906	3.553	3.53	5.4081	33.042	5.455	6.0672	25.375	4.512	3.3093	3.154	3.6305	30.939	19.276	6.822	3.5023	12.753	16.4043	6.2758	10.0513	25.955	45.048	41.409	8.148	0.944	0.527	0.636		0.757396	11.8105
15.3692	5.079	9.035	18.497	4.387	3.514	3.742	4.473	28.9666	3.55	4.009	4.5661	33.545	4.869	7.3123	23.7647	5.878	3.7509	3.387	4.0147	32.388	21.065	7.675	2.8772	15.66	17.69	8.1368	9.7409	27.475	44.777	33.643	6.019	0.922	0.374	0.58		0.763311	11.9224
15.4884	4.521	9.48	19.135	2.818	3.436	4.62	3.373	28.8825	3.764	3.726	5.2348	32.627	5.002	9.0116	23.2347	5.533	3.6395	3.39	4.5408	31.504	23.671	7.572	2.655	17.307	19.6835	10.5867	10.0493	31.026	42.134	25.245	3.764	0.561	0.419	0.468		0.769232	11.8416
15.6075	4.556	10.051	18.844	3.536	3.687	5.147	4.546	32.089	3.429	4.178	5.7231	32.92	5.952	10.0246	22.2422	4.641	3.9143	3.016	4.5931	32.146	22.497	9.26	3.2846	16.032	26.2227	14.4248	10.8381	30.685	36.965	16.633	3.304	0.789	0.522	0.505		0.775147	11.9764
15.7266	4.509	9.911	19.67	3.408	4.108	4.923	4.811	31.5739	3.782	3.023	4.4895	34.531	6.312	10.2905	23.5599	5.124	4.1603	2.834	3.8847	29.121	21.112	10.379	3.566	18.352	28.4723	18.7518	12.1809	33.426	31.93	10.38	2.776	0.391	0.752	0.556		0.781062	11.9721
15.8458	4.828	11.005	19.507	3.54	3.641	6.014	5.331	33.2232	3.072	2.97	5.7242	37.704	6.475	10.2987	23.6084	4.268	3.2149	3.287	3.7517	30.463	22.164	12.556	3.4015	19.302	33.6134	24.525	14.2432	35.476	24.276	6.755	2.452	0.765	0.632	0.669		0.786982	12.434
15.9649	4.505	11.879	20.741	3.689	3.331	6.152	4.995	32.0372	4.181	3.328	5.2432	39.567	5.413	11.5844	22.2519	4.764	3.1884	3.922	3.927	31.116	22.946	14.363	3.5564	19.798	38.195	25.794	16.4319	35.629	21.058	4.739	2.101	0.695	0.88	0.157		0.792897	12.7105
16.0841	4.77	9.966	18.411	3.383	3.762	7.332	6.555	33.8392	3.893	3.522	5.6387	36.278	6.327	11.1412	21.2206	4.616	2.8151	3.725	5.0078	32.536	26.021	14.773	3.8029	20.3	38.1529	31.0977	16.2229	39.277	14.266	4.335	1.43	0.573	0.615	0.056		0.798817	12.8136
16.2032	5.55	11.728	17.16	3.85	3.363	10.17	6.571	34.7926	4.334	4.628	6.3508	35.502	7.924	11.7681	22.9922	5.477	2.6966	3.325	4.7941	34.698	22.965	18.055	4.1435	21.635	30.9897	36.831	20.9591	40.057	12.575	3.27	1.868	0.529	0.463	0.159		0.804732	13.2992
16.3224	4.398	12.642	20.293	3.7	3.469	13.511	7.569	30.9591	4.575	4.554	5.652	35.303	10.013	13.1463	25.5691	5.058	2.6299	2.873	4.0629	35.537	24.736	20.218	4.4378	19.124	24.2003	38.4925	23.7174	43.275	10.245	1.775	1.196	0.349	0.499	0.435		0.810652	13.4769
16.4415	4.68	12.29	20.088	4.542	4.155	25.246	8.248	30.4051	4.104	4.415	6.076	32.329	10.563	11.6577	26.0757	4.212	3.4735	3.362	4.1993	36.894	29.064	22.109	6.1083	20.108	17.1441	29.9155	24.7179	44.948	6.052	1.35	0.947	0.661	0.565	0.181		0.816567	13.5555
16.5606	5.679	14.209	22.414	4.85	4.156	42.393	8.288	32.5131	5.692	3.666	6.7192	30.803	11.708	12.5753	27.1177	5.484	3.3479	2.956	4.9172	37.827	28.874	23.978	7.3298	22.932	11.0939	18.557	27.8827	43.349	4.406	1.687	1.022	0.343	0.591	0.199		0.822482	14.1047
16.6798	6.904	15.229	22.232	5.738	3.962	55.125	10.244	32.5488	6.272	4.059	6.2092	31.204	15.873	12.8092	30.0454	5.591	3.6577	2.75	4.5683	34.257	31.226	27.13	9.7162	22.718	6.8348	9.9983	30.3215	41.768	3.279	1.114	1.181	0.349	0.385	0.207		0.828402	14.5737
16.7989	6.91	16.675	25.257	5.414	5.205	57.777	13.478	33.2408	6.304	4.908	5.8454	31.427	18.554	15.5481	32.3761	7.359	4.0655	3.896	5.1331	34.995	32.999	28.252	10.1416	23.24	4.1038	6.2856	37.0367	33.393	2.376	1.038	0.612	0.559	0.221	0.178		0.834318	15.1413
16.9181	7.88	19.952	27.02	5.45	4.436	52.647	17.787	30.771	7.992	5.213	5.8504	32.06	18.111	16.6785	32.8814	8.16	4.3719	3.573	4.957	32.219	33.874	28.207	14.5668	26.619	3.1217	4.1049	48.6067	27.974	2.369	1.05	0.716	0.495	0.088	0.319		0.840238	15.5918
17.0372	9.092	24.858	30.166	5.69	4.57	51.549	24.85	28.8749	9.184	6.02	7.818	35.296	14.841	16.5748	34.2198	7.504	4.4741	3.885	5.0253	30.241	42.002	22.654	15.8909	27.17	3.4638	3.2787	58.7677	18.575	2.016	0.673	0.607	0.304	0.127	0.359		0.846153	16.1947
17.1563	10.72	27.367	34.026	6.272	5.92	55.257	36.297	29.4019	9.152	5.111	7.2809	36.62	14.406	15.1275	32.5714	8.935	5.6925	3.625	4.5452	27.983	44.458	20.63	18.8424	28.022	2.6785	2.7835	62.874	11.162	1.248	0.667	0.58	0.273	0.16	0.312		0.852068	16.7941
17.2755	13.486	29.589	36.382	6.266	5.996	45.593	53.895	33.6344	9.438	6.464	6.504	32.968	12.157	14.937	30.8092	9.799	6.2016	4.328	3.9418	27.761	46.666	17.961	21.2009	28.68	2.3952	2.9032	62.6524	5.865	1.003	0.513	0.433	0.212	0.4	0.342		0.857988	17.0993
17.3946	19.604	34.206	41.198	7.91	6.219	29.637	76.614	35.5816	11.969	7.322	7.3331	34.339	14.815	12.9774	27.8912	10.949	7.2176	4.353	4.6323	29.307	54.995	11.989	21.2941	30.653	2.1643	1.9963	55.6064	4.824	0.73	0.703	0.457	0.396	0.352	0.082		0.863903	17.9505
17.5138	28.684	41.385	43.808	8.334	6.217	21.672	82.467	37.722	13.854	9.177	9.0315	35.529	18.467	13.597	26.7332	12.852	8.8476	3.916	4.8297	27.053	59.379	6.518	20.5344	31.208	2.4741	1.2183	46.3848	3.789	0.495	0.761	0.48	0.265	0.377	0.113		0.869823	18.4757
17.6329	36.699	40.793	43.783	8.658	7.851	15.771	69.42	38.4677	17.978	10.285	9.9769	38.543	20.058	14.7165	26.1542	13.668	11.1494	4.907	5.4093	26.381	57.404	4.324	18.7435	29.506	2.5156	1.1144	38.532	3.316	0.98	0.314	0.286	0.139	0.073	0.273		0.875738	18.182
17.7521	39.788	41.626	49.076	10.837	10.342	10.849	53.268	40.7792	23.31	13.851	10.3846	40.415	24.944	13.5591	25.8617	15.502	13.378	5.427	4.9093	26.402	55.25	2.56	18.8197	27.886	1.3178	1.3632	30.4795	3.424	0.766	0.403	0.449	0.288	0.274	0.309		0.881658	18.1794
17.8712	37.526	33.916	57.403	11.968	12.522	9.011	45.192	38.1869	32.968	19.759	11.9047	39.539	25.788	14.9622	25.0398	17.504	16.0907	7.873	6.5682	24.197	55.381	2.161	16.968	23.685	1.7388	1.3937	20.3721	2.017	0.755	0.232	0.209	0.167	0.153	0.188		0.887573	18.0394
17.9903	33.758	29.455	67.336	17.928	15.759	6.835	33.794	43.1932	38.159	26.885	13.737	42.419	27.406	14.5614	25.4443	18.039	22.6468	9.913	6.59	25.872	51.565	1.887	12.167	16.965	1.9715	0.8296	12.1409	1.776	0.648	0.153	0.0005859	0.111	0.273	0.406		0.893488	18.2537
18.1095	29.276	26.387	68.294	22.884	21.64	5.667	21.259	46.1185	40.39	34.055	16.2787	45.725	29.745	16.9336	25.9743	14.566	26.5831	11.712	9.0407	28.242	45.665	1.58	9.5251	11.971	1.443	1.1379	6.5301	1.263	0.863	0.506	0.059	0.413	0.316	0.31		0.899408	18.3045
18.2286	20.855	23.835	63.986	32.568	26.441	5.788	14.448	51.8837	37.952	41.247	18.5535	50.599	33.593	17.8187	28.8811	14.413	28.6914	12.318	9.3221	30.466	39.049	1.294	6.0647	9.202	0.9766	1.5807	4.8098	1.592	0.496	0.347	0.423	0.221	0.211	0.347		0.905324	18.5374
18.3478	14.073	20.342	47.879	41.965	32.279	3.926	11.352	51.717	34.045	45.092	21.4874	52.968	34.718	19.8592	28.1776	13.187	26.1544	12.498	10.3485	33.554	28.465	1.492	4.6734	5.819	1.2327	1.3782	3.4213	1.357	0.366	0.263	0.487	0.105	0.177	0.328		0.911244	17.7996
18.4669	11.878	15.4	38.273	56.105	41.035	3.619	10.165	45.0468	27.034	41.836	22.458	58.227	38.961	21.1443	29.3312	10.534	23.5785	15.579	13.5622	32.169	19.73	1.29	2.7039	3.504	1.403	0.7873	2.4245	0.532	0.5	0.531	0.467	0.244	0.18	0.151		0.917159	17.3642
18.586	9.68	11.86	28.075	63.097	50.177	2.562	8.511	39.0164	23.788	42.974	24.1817	63.329	39.81	22.5743	28.1237	10.437	19.3084	14.639	13.3647	30.937	12.703	1.929	1.5492	3.401	1.0717	0.6819	2.1898	0.731	0.419	0.438	0.221	0.19	0.085	0.19		0.923074	16.8307
18.7052	8.393	9.221	22.353	72.347	52.113	2.306	6.5	32.568	20.166	36.68	23.0826	71.473	39.205	20.9987	23.6341	8.781	16.1492	15.464	13.5203	31.049	7.752	1.501	1.3923	2.469	0.6981	0.7995	2.2266	0.559	0.269	0.285	0.329	0.383	0.01	0.115		0.928994	16.0233
18.8243	6.528	8.983	15.997	63.621	50.526	1.572	6.595	31.0028	14.782	33.293	22.6458	80.351	39.264	27.2243	22.0812	8.2	13.7586	9.611	10.5354	29.215	6.471	0.819	0.8293	1.555	0.5264	1.1414	1.7766	0.473	0.343	0.307	0.151	0.06	0.043	0.087		0.934909	15.0108
18.9435	5.986	6.182	11.102	52.752	39.132	1.518	5.69	25.5071	10.974	25.165	24.0259	82.651	43.187	32.4428	17.7039	5.736	13.4556	6.133	11.2709	26.906	5.55	1.084	1.2695	1.504	0.5758	0.8403	1.2643	0.404	0.643	0.157	0.353	0.084	0.156	0.101		0.940829	13.5737
19.0626	4.905	5.651	9.067	41.075	29.686	2.106	3.728	19.226	10.235	16.174	23.9301	77.734	44.386	33.159	15.8115	4.475	10.9118	4.278	7.3537	22.538	4.893	1.071	0.7646	1.369	0.6353	0.8232	0.8404	0.423	0.533	0.19	0.257	0.196	0.206	0.359		0.946744	11.735
19.1817	4.376	4.211	8.735	29.602	20.725	1.128	4.093	14.7196	8.109	12.802	19.4474	72.628	45.408	29.4094	13.9281	4.674	8.8498	2.588	4.6205	16.406	2.839	1.066	1.0548	1.109	0.8176	0.5509	1.246	0.492	0.213	0.192	0.251	0.128	0.043	0.202		0.952659	9.90189
19.3009	3.067	4.133	5.149	20.834	14.542	1.246	2.611	10.215	6.687	10.544	16.7535	72.964	41.095	19.8936	9.0704	4.097	6.6766	2.026	3.582	11.463	3.236	0.977	1.0585	0.9	0.4289	0.6393	0.9962	0.506	0.189	0.273	0.083	0.23	0.135	0.163		0.958579	8.13129
19.42	2.999	4.901	4.589	14.609	10.678	0.992	2.464	8.2997	6.095	9.431	12.191	64.951	36.054	13.3186	5.8742	2.937	5.6275	1.614	2.4385	8.359	2.627	1.018	1.1957	1.031	0.9403	0.3754	0.7064	0.463	0.316	0.329	0.119	0.236	0.131	0.134		0.964494	6.70719
19.5392	2.655	4.674	4.038	12.498	8.75	1.047	2.056	7.1701	4.191	8.206	8.1704	52.566	24.098	7.3273	4.3887	2.644	5.478	1.958	1.5433	6.186	2.355	0.801	0.9695	0.928	0.816	0.5102	0.7358	0.347	0.349	0.034	0.17	0.049	0.131	0.055		0.970415	5.23221
19.6583	2.378	3.738	4.103	8.224	8.104	0.763	2.215	5.2549	4.128	6.096	5.7835	42.967	16.611	6.3749	3.8616	2.121	3.6887	1.533	1.6122	4.079	1.109	0.794	0.5057	0.748	0.4978	0.4714	0.5434	0.542	0.763	0.05	0.156	0.423	0.075	0.005		0.97633	4.12703
19.7775	2.41	3.238	4.133	8.105	6.03	0.689	1.415	4.2547	3.19	4.778	6.4667	31.874	11.126	4.9923	3.8704	1.934	3.1199	1.265	0.7098	3.551	1.266	0.891	0.5021	0.613	0.2772	0.5306	0.348	0.562	0.408	0.0006929	0.074	0.292	0.022	0.24		0.98225	3.32878
19.8966	2.106	2.336	3.636	5.837	4.028	0.629	1.864	4.7183	2.622	4.116	4.7695	22.932	8.765	4.3483	3.3877	1.561	2.6712	1.299	1.2186	3.698	1.196	0.805	0.8384	0.44	0.5107	0.2374	0.5923	0.515	0.334	0.069	0.035	0.221	0.067	0.114		0.988165	2.7211
20.0157	2.323	1.893	2.848	4.87	4.198	0.545	1.27	3.5955	2.17	3.582	4.2245	17.581	6.402	2.9264	2.5102	1.394	1.8689	0.9	1.0296	3.225	1.283	0.362	0.727	0.441	0.4038	0.5359	0.6173	0.236	0.422	0.057	0.071	0.054	0.121	0.134		0.99408	2.20062
20.1349	2.182	3.021	2.849	4.731	4.188	0.501	1.295	3.2297	1.839	3.258	3.57	12.975	5.094	2.3797	2.4803	0.97	1.8034	0.955	0.9367	2.848	1.115	0.21	0.8212	0.705	0.3745	0.4418	0.211	0.444	0.45	0.095	0.185	0.127	0.178	0.09		1	1.95745

## Sheet: Image6
X0	Y0	Y1	Y2	Y3	Y4	Y5	Y6	Y7	Y8	Y9	Y10	Y11	Y12	Y13	Y14	Y15	Y16	Y17	Y18	Y19	Y20	Y21	Y22	Y23	Y24	Y25	Y26	Y27	Y28	Y29	Y30	Y31	Y32	Y33	Y34	Y35	Y36		Ap-Ba	Avg int
0	10.404	19.034	19.9988	30.603	41.36	53.752	64.289	24.5999	22.0799	17.6604	29.9937	39.163	38.2678	17.6696	21.6363	26.426	37.396	35.512	25.927	27.396	21.009	47.089	76.928	102.079	128.779	81.922	70.996	86.092	68.8	80.906	69.092	46.545	73.245	85.676	85.008	73.337	66.109		0	50.4535
0.1191	12.446	19.353	21.4807	32.225	39.359	57.281	64.7948	31.2194	26.5356	16.7418	31.4876	50.076	43.8113	23.0196	25.1652	28.629	41.462	42.873	30.868	33.58	23.024	49.985	82.03	104.284	129.553	82.259	74.924	85.5	71.249	79.545	72.957	51.134	81.627	82.013	89.131	82.392	69.682		0.00436529	53.6134
0.2383	13.755	19.942	24.257	35.005	42.726	62.023	68.0069	32.9602	29.8889	17.3303	34.1312	50.507	51.6366	27.3009	28.8968	34.505	48.207	47.757	34.833	37.975	29.118	51.967	88.155	111.137	127.483	89.129	85.457	87.311	77.254	85.931	80.668	50.033	83.34	89.641	89.187	79.566	82.05		0.00873425	57.5425
0.3574	14.419	23.087	25.6951	35.072	44.355	65.977	72.6196	41.4328	36.3633	19.6988	41.3558	53.284	63.6398	31.2556	29.8768	37.444	58.899	60.281	45.623	41.537	32.485	57.673	91.816	113.983	133.287	92.255	91.791	90.045	81.964	96.689	87.846	57.54	87.1	86.257	92.851	77.715	88.041		0.0130995	62.196
0.4766	13.938	26.707	28.1206	37.859	51.227	70.914	74.4731	47.7709	43.9061	21.7117	44.537	59.859	63.1539	33.0678	36.2981	41.907	69.125	78.438	53.868	49.334	42.047	60.095	87.531	113.683	131.402	98.13	99.706	95.582	82.561	100.646	92.193	66.631	90.654	85.252	100.971	83.685	90.617		0.0174685	66.6919
0.5957	14.248	27.224	30.2051	46.192	53.302	73.229	73.8	47.3458	50.5678	28.5223	53.4456	67.27	73.7233	38.8972	44.2248	49.54	75.911	101.038	65.394	64.511	55.778	68.055	99.983	121.773	129.042	96.484	98.298	94.132	84.904	106.065	102.036	63.126	100.371	94.173	100.41	88.791	94.836		0.0218338	72.3472
0.7148	16.517	31.12	37.3959	46.783	58.207	78.374	76.1129	53.5218	56.515	33.0572	65.6159	70.212	76.3915	42.8798	49.5206	57.885	91.273	120.32	78.833	77.184	67.779	83.264	100.549	121.842	121.626	101.592	103.564	95.313	91.4	112.022	115.659	68.742	99.235	99.212	106.657	93.03	92.279		0.0261991	78.1482
0.834	19.493	41.394	41.9949	49.77	64.139	81.482	73.1548	55.6864	64.1049	35.9732	69.5691	76.138	81.0103	47.5223	52.9557	66.759	103.489	134.937	95.027	98.88	78.231	89.86	108.781	119.061	120.781	100.123	103.917	93.639	98.978	113.861	119.753	74.828	96.185	105.412	109.145	98.452	98.204		0.030568	83.316
0.9531	26.043	46.122	46.2028	54.587	77.428	88.515	73.8493	61.046	67.771	44.8077	73.4457	76.362	83.2145	47.5983	56.8939	66.988	121.151	157.458	121.273	117.386	95.135	98.509	110.091	123.358	117.8	104.551	108.807	98.174	108.226	115.575	131.277	80.513	107.788	112.263	117.105	100.842	101.83		0.0349333	90.2699
1.0723	29.913	53.02	54.575	62.212	85.286	85.153	72.3364	64.3854	68.1853	52.6395	80.5349	85.488	84.0991	50.155	61.865	65.643	136.402	166.53	138.666	133.29	114.145	117.432	114.602	128.338	117.021	102.893	119.826	107.165	113.145	121.616	141.726	79.954	116.077	119.188	123.509	101.661	113.158		0.0393023	96.8063
1.1914	35.551	62.399	58.3923	67.817	98.466	88.625	65.6407	64.3287	75.9598	56.3021	83.6937	86.073	86.3306	52.9886	62.8256	60.862	146.293	164.238	153.324	143.853	123.527	130.388	118.633	132.306	108.98	103.948	118.349	109.279	127.671	133.94	146.979	88.385	126.632	131.409	125.347	100.577	120.547		0.0436676	101.645
1.3106	40.588	73.466	72.521	83.173	102.691	94.858	64.1263	67.2006	80.1697	62.7424	85.0464	86.849	88.618	50.1526	66.0279	67.752	155.55	148.52	166.145	152.324	141.121	146.191	124.571	140.332	104.878	97.235	120.624	112.075	131.494	138.019	145.997	91.781	131.759	138.998	129.06	101.51	123.165		0.0480365	106.144
1.4297	49.943	81.593	81.6798	89.848	116.952	94.536	60.8523	68.8027	79.6664	64.8347	95.4363	88.55	89.4842	57.136	70.9021	68.319	158.328	131.885	164.099	156.391	144.392	165.912	137.532	150.097	105.557	97.027	116.854	111.953	136.139	147.157	142.229	104.321	131.733	134.65	130.613	99.08	124.383		0.0524018	109.429
1.5488	61.496	91.91	91.8235	90.42	128.261	94.4	57.422	73.4086	82.7294	70.5597	97.3562	87.295	84.1764	62.3661	72.4463	70.981	160.236	109.37	164.445	149.906	150.555	164.302	137.1	154.189	111.233	104.427	116.871	111.612	147.011	147.368	141.301	116.526	127.031	138.8	131.6	104.208	115.659		0.0567671	111.373
1.668	67.356	99.018	90.8077	93.357	125.023	94.006	60.5337	78.5334	84.8256	78.7375	93.3602	86.885	88.9551	60.5002	68.5303	70.073	154.212	85.539	155.157	141.245	143.254	168.274	146.394	160.517	106.026	104.866	117.158	114.14	154.183	155.036	134.453	118.249	127.072	144.12	134.734	99.826	117.653		0.0611361	111.422
1.7871	74.379	105.566	93.2024	96.913	127.476	95.331	55.3678	75.8633	84.237	79.3643	95.8382	91.472	90.8325	62.9138	74.2464	71.097	154.56	72.559	132.129	123.546	138.782	165.504	148.537	167.825	105.38	104.027	100.808	114.033	152.301	150.245	123.315	131.502	124.061	142.571	127.249	103.134	116.677		0.0655014	110.077
1.9063	80.91	120.602	90.3213	103.162	124.123	95.103	50.2373	68.0938	79.3991	82.2619	91.2209	89.621	88.404	61.8229	74.185	77.194	137.401	57.578	109.963	99.342	124.499	157.735	153.087	162.219	97.57	95.323	83.975	106.8	148.913	151.544	119.998	128.692	114.411	135.24	129.804	100.766	125.463		0.0698703	105.864
2.0254	87.228	122.218	88.971	102.423	108.247	102.916	48.9175	65.5626	69.231	85.8165	93.8633	89.406	84.4589	66.3628	74.1826	76.9	137.856	45.038	84.377	78.084	107.813	140.573	154.267	167.952	92.317	93.096	78.69	104.135	144.054	150.352	109.753	128.298	109.222	126.418	127.089	94.673	113.409		0.0742356	101.464
2.1445	97.421	121.855	87.1103	99.294	101.899	105.705	49.7334	64.6675	65.7976	91.0424	91.169	93.682	80.6802	69.1287	78.1982	77.845	138.478	37.072	64.706	67.212	95.26	114.238	155.027	157.293	88.4	102.63	69.409	99.072	133.592	144.415	105.59	128.504	105.517	125.321	123.954	104.18	107.464		0.0786009	98.4476
2.2637	100.821	124.67	85.815	95.804	84.223	100.827	46.2124	62.465	55.0938	81.3783	88.2529	94.309	87.605	67.6495	76.3269	76.474	121.555	33.843	50.404	47.471	85.294	92.096	151.943	158.557	88.512	92.717	64.082	88.231	133.143	138.75	104.455	125.434	97.265	108.952	120.974	100.476	110.893		0.0829699	93.0533
2.3828	109.897	133.114	86.3946	90.668	78.125	106.903	42.3279	56.5718	50.7509	80.9443	88.755	97.372	83.6463	71.7616	78.6858	79.154	118.402	26.562	41.714	44.599	74.592	72.072	146.792	158.218	89.83	90.694	57.616	79.56	117.778	137.44	92.526	117.002	88.066	100.762	111.382	96.452	105.429		0.0873352	89.2584
2.502	117.516	126.16	84.729	83.462	74.768	112.341	41.333	58.9357	44.0148	79.3045	80.3048	99.776	82.4626	72.6163	80.237	82.172	115.265	25.536	33.256	37.168	67.131	62.835	142.568	147.705	91.75	86.802	54.123	67.046	104.146	130.482	83.114	106.103	83.943	95.469	100.049	101.337	104.215		0.0917041	85.4102
2.6211	120.008	127.443	85.1302	79.572	66.282	109.382	36.6446	53.7004	39.4857	71.3662	74.8206	92.406	77.2687	76.8437	83.4688	81.611	107.71	22.778	31.436	30.371	60.236	59.694	133.748	146.923	93.597	87.529	48.92	61.306	88.664	121.35	80.455	90.03	80.695	86.449	92.69	97.56	95.259		0.0960694	80.8874
2.7402	122.554	124.12	83.1774	73.6	65.173	108.627	32.4847	46.9728	36.2564	71.1471	74.6708	95.232	77.2281	81.3435	90.9544	83.758	97.453	23.286	26.159	26.351	53.31	51.496	119	149.327	89.301	85.365	51.001	63.032	76.738	112.146	73.636	88.771	73.863	77.101	80.63	90.503	87.883		0.100435	77.396
2.8594	128.747	116.959	84.3133	70.351	57.344	109.798	30.3953	41.6057	32.7602	62.9406	63.9915	102.178	75.516	80.9037	81.9844	81.772	83.945	18.184	21.15	22.167	47.303	47.826	106.649	156.567	80.633	81.303	47.441	54.916	77.163	110.514	68.936	81.301	69.126	63.29	68.765	85.314	89.809		0.104804	73.0773
2.9785	122.073	114.537	81.1099	67.58	55.915	106.493	28.0978	37.5513	29.5901	55.2836	59.603	106.175	70.0567	84.2502	84.7641	90.597	74.982	19.04	19.955	21.963	41.853	39.839	85.853	154.795	83.852	81.583	45.378	49.106	61.592	98.078	63.986	78.774	66.236	55.743	50.488	79.996	86.169		0.109169	68.9983
3.0977	121.032	112.522	78.8579	60.786	46.479	115.49	25.6719	35.5408	26.5099	49.2555	58.878	98.954	64.3273	82.2123	80.0648	85.542	64.673	16.416	17.032	19.936	36.015	37.905	74.524	144.997	85.836	75.599	44.512	41.937	51.84	93.136	57.776	69.599	56.037	41.122	40.96	82.46	75.686		0.113538	64.0573
3.2168	120.485	113.854	72.852	61.131	46.296	107.654	22.8598	30.8189	24.1945	38.8346	54.8028	98.731	64.5122	84.4159	76.7464	92.797	60.611	13.591	15.774	15.862	35.949	31.299	62.216	139.925	81.13	72.291	39.812	38.913	46.604	85.751	51.838	66.198	48.66	31.963	35.436	78.262	72.865		0.117903	60.4307
3.336	123.447	114.923	69.0366	55.593	41.571	99.025	22.039	27.492	20.8521	35.61	48.1831	95.057	63.5014	83.0648	69.8758	91.031	50.249	12.553	15.093	14.243	32.183	29.543	52.666	122.51	78.583	66.431	38.021	34.785	37.714	84.536	43.946	60.573	46.109	20.04	25.027	68.241	69.814		0.122272	55.7611
3.4551	123.926	105.777	65.8117	51.946	38.067	86.623	17.7944	27.2082	21.3414	32.2917	46.6785	92.647	62.4603	77.3117	70.3219	89.047	51.019	11.432	13.121	13.223	26.715	26.172	48.868	112.061	66.072	68.358	36.822	30.164	34.407	78.512	44.619	55.73	39.803	15.022	20.812	61.403	62.915		0.126637	52.0676
3.5742	119.117	109.786	62.4232	51.998	39.754	76.628	16.3186	23.0376	19.7486	28.1607	42.0218	87.073	59.665	78.0525	66.8323	93.576	38.528	11.823	13.542	9.796	25.548	23.231	43.597	101.318	54.513	64.686	36.143	28.005	32.52	72.232	40.747	50.596	31.148	12.331	14.923	58.41	54.347		0.131003	48.4372
3.6934	119.005	107.938	62.0402	48.559	35.217	69.788	13.6219	21.0814	18.039	26.8432	38.5993	87.43	59.6428	70.3427	68.6384	98.694	39.485	9.143	12.949	10.356	20.88	16.35	38.504	91.316	41.783	64.543	32.496	29.864	30.292	70.573	37.53	47.962	25.952	10.291	13.749	52.633	45.449		0.135372	45.6103
3.8125	115.38	110.19	61.7467	46.956	34.494	61.036	12.4849	20.5477	17.5956	26.1175	33.2583	81.555	57.8783	68.193	64.6528	102.5	33.473	9.593	10.526	9.351	20.1	18.258	34.707	74.258	30.856	58.353	32.157	26.907	25.544	63.7	39.351	46.387	20.814	9.189	13.531	46.867	39.125		0.139737	42.6387
3.9317	112.048	109.594	56.0903	41.99	30.2	56.216	11.3179	16.6208	14.4351	25.434	30.6394	77.41	58.5545	68.0148	70.3256	99.751	34.042	9.15	9.834	8.789	19.811	15.849	29.81	62.747	25.164	56.746	30.026	25.026	25.728	57.199	36.198	41.888	15.017	8.18	11.139	41.33	27.965		0.144106	39.7373
4.0508	109.385	106.727	60.6273	39.83	25.939	48.172	9.459	18.5408	14.6567	24.3637	27.6792	73.899	62.3619	64.2013	67.0179	102.99	30.445	7.392	7.394	8.578	16.601	16.302	25.949	52.733	23.385	61.112	26.614	23.674	18.476	52.716	33.61	40.532	12.265	7.949	9.364	38.939	21.942		0.148471	37.6168
4.1699	107.32	107.679	52.6336	38.958	24.815	45.399	8.6904	14.918	15.1016	19.2312	24.9483	68.596	58.0104	65.6749	62.1036	102.98	29.98	6.468	7.226	7.573	15.806	15.025	22.672	43.434	21.54	59.22	24.901	23.175	22.407	41.075	30.688	38.54	8.462	6.109	8.744	34.212	16.695		0.152837	35.1625
4.2891	100.38	100.302	53.259	37.464	19.509	41	8.2451	12.7063	12.1394	19.0159	20.5499	59.696	59.3644	63.0515	63.0683	104.516	27.268	5.273	7.149	8.708	13.889	11.68	22.019	37.482	20.621	54.44	27.62	20.994	18.558	31.561	28.758	34.516	9.226	5.955	7.176	29.169	14.299		0.157205	32.7197
4.4082	95.748	96.69	56.154	37.16	17.384	34.301	7.5905	14.5532	11.8931	18.9633	18.2597	54.753	60.0748	68.4268	63.7808	100.482	20.578	5.372	5.625	6.039	11.42	11.748	17.06	29.904	18.953	50.504	24.089	19.345	16.616	25.375	28.611	33.491	9.907	5.75	7.834	26.097	12.563		0.161571	30.8945
4.5274	100.572	93.584	52.5606	35.28	13.881	27.521	8.1372	12.6125	9.2249	14.9979	16.4065	47.791	56.144	66.7702	63.8954	96.408	18.855	5.748	5.423	6.064	11.103	11.169	16.47	27.793	17.527	46.941	21.138	16.521	14.764	21.412	25.857	30.862	6.225	5.014	7.342	20.967	11.928		0.16594	28.7813
4.6465	88.632	96.361	53.4864	31.647	10.621	20.961	6.1772	12.0108	9.0508	13.8595	12.4801	38.157	54.53	62.4711	59.9742	92.711	16.092	6.207	6.775	4.816	10.144	7.972	13.977	22.762	16.362	45.4	21.349	14.645	12.079	20.185	22.943	31.022	7.94	4.774	8.106	16.037	10.25		0.170305	26.5667
4.7657	87.198	93.297	51.8212	33.25	9.534	19.067	6.5018	12.5316	8.4954	12.1753	11.1929	32.791	53.1023	65.5186	60.4482	84.584	12.531	5.039	6.152	5.544	8.739	8.309	14.014	20.072	14.679	43.294	18.074	12.813	10.732	16.833	17.526	23.925	5.291	4.829	7.333	18.568	11.31		0.174674	25.0572
4.8848	85.57	90.326	46.49	28.151	7.415	15.014	5.9362	10.8184	9.6144	10.1762	8.474	25.705	51.7967	63.0758	62.681	75.225	10.625	3.747	4.223	5.625	9.11	6.901	11.519	16.452	15.515	39.171	20.085	11.748	8.018	16.108	15.668	19.49	5.668	5.341	8.048	15.32	9.817		0.179039	23.0991
5.0039	80.167	88.417	47.7295	26.674	5.644	14.062	5.9933	9.761	8.4054	10.5784	6.8929	19.286	58.4748	62.0773	59.7278	66.737	9.889	5.248	5.195	5.743	6.842	7.538	9.057	15.35	15.954	36.157	15.825	9.754	9.341	13.535	13.321	16.658	3.848	6.307	6.228	13.162	8.429		0.183405	21.73
5.1231	76.801	80.869	42.9724	22.021	4.787	12.835	5.9303	8.6305	7.7639	9.4723	6.3499	18.273	55.3559	62.3172	62.2782	59.481	8.023	4.229	3.663	3.591	8.028	6.609	8.846	13.364	15.623	31.394	15.47	8.129	7.839	16.512	11.601	16.863	3.737	4.495	6.876	13.702	8.924		0.187774	20.3691
5.2422	68.557	80.302	34.7582	21.051	5.424	11.356	5.5326	7.8427	5.96	8.9989	7.0566	15.559	49.6901	60.9475	60.4421	51.893	8.407	4.786	2.665	3.655	6.854	5.012	8.623	12.311	13.518	33.219	16.636	8.97	8.018	15.588	11.393	13.816	4.31	3.772	6.507	13.312	9.952		0.192139	19.0999
5.3614	63.324	67.781	31.6668	16.899	4.419	12.012	5.0474	8.6555	6.282	7.951	6.3506	11.748	46.228	61.5029	62.8025	45.746	8.235	3.821	2.572	4.195	5.796	4.753	7.647	10.969	12.795	27.629	15.543	7.72	6.327	15.68	8.053	10.603	3.25	4.214	8.059	13.073	7.3		0.196508	17.477
5.4805	59.025	54.941	29.9673	16.759	4.354	9.27	4.3767	7.0706	5.524	7.4853	4.9025	12.036	44.4931	61.6635	60.4326	40.703	8.473	2.986	2.599	3.179	6.418	5.245	8.307	10.735	13.588	22.064	11.875	7.137	7.103	14.411	8.626	8.125	2.42	3.951	7.321	11.926	7.51		0.200873	16.1352
5.5996	61.2	45.951	24.9551	14.621	3.645	9.983	4.4803	6.9053	6.6131	8.2294	5.389	11.031	37.6961	61.2835	60.8821	35.629	6.269	3.168	2.764	4.589	5.523	4.124	6.648	11.082	13.98	20.63	10.777	6.823	5.831	11.004	7.253	5.96	3.102	3.953	6.982	13.56	8.063		0.205238	15.1508
5.7188	58.755	39.167	21.4039	10.251	3.236	9.497	4.7029	5.3185	5.0149	6.3978	4.8586	11.684	35.7297	61.2437	55.6146	35.193	5.925	3.515	3.706	3.089	4.61	3.47	5.64	9.302	12.228	18.492	10.703	6.206	6.296	9.895	5.771	6.471	3.914	3.027	6.367	13.307	7.573		0.209607	13.9885
5.8379	55.027	33.511	20.3301	11.045	4.555	9.07	3.9109	4.4649	4.3979	6.1933	4.7134	11.69	32.7141	58.1744	54.0903	32.73	5.971	3.784	3.769	4.296	4.103	3.93	5.527	8.317	12.222	12.989	9.915	7.224	5.246	9.034	5.679	5.923	2.784	4.397	7.525	13.049	6.547		0.213973	13.2121
5.9571	57.497	30.672	16.3697	7.865	3.301	9.017	3.0237	5.7889	4.932	5.2461	4.6305	11.324	29.3013	59.3341	56.8045	29.374	5.248	4.128	2.907	3.908	4.133	4.008	4.771	6.907	10.921	12.587	8.212	4.434	5.204	10.015	5.106	5.925	3.144	3.418	6.437	13.207	6.241		0.218342	12.5768
6.0762	52.412	26.893	13.9267	7.001	4.052	10.672	4.5545	4.917	4.9799	4.9972	4.6096	10.321	22.9166	57.7555	53.6356	23.982	5.67	3.467	3.265	3.654	3.484	3.224	4.262	7.336	11.732	12.102	7.228	4.935	5.327	8.836	5.429	4.875	3.196	3.421	6.108	11.118	5.164		0.222707	11.661
6.1953	46.864	25.71	12.1366	5.991	3.148	9.439	4.0174	5.3358	4.6853	4.7063	4.1266	8.227	19.6655	53.8121	54.3153	20.45	5.582	2.823	3.419	3.064	3.472	3.4	5.08	5.93	11.293	9.896	7	4.526	3.77	7.982	5.747	4.393	2.792	3.752	6.141	9.584	4.801		0.227072	10.7318
6.3145	44.123	28.261	10.102	5.403	2.986	9.901	3.5933	4.3003	3.825	4.1366	3.4612	9.566	13.4531	56.2894	53.9125	17.824	5.164	2.964	1.834	2.716	3.963	2.919	4.679	6.318	10.237	10.15	7.194	4.507	4.487	7.575	4.655	3.895	3.192	3.981	6.606	10.195	4.492		0.231441	10.3476
6.4336	40.603	32.932	9.9917	5.249	3.126	9.894	3.037	3.6505	4.1873	4.6585	2.5728	9.517	9.6863	52.6641	47.1839	14.329	5.731	3.023	1.723	2.703	3.579	3.066	4.314	4.877	11.318	9.364	5.369	3.916	4.638	7.745	4.863	3.923	2.344	3.143	6.253	9.38	5.759		0.235806	9.73819
6.5528	35.179	30.17	8.2747	4.015	2.892	9.015	3.9281	4.0535	3.1535	3.9969	3.11	8.798	8.2309	47.7912	39.2365	12.643	4.797	3.199	2.45	2.733	3.689	3.053	4.067	4.882	11.219	7.849	6.338	4.777	3.928	7.662	4.512	4.238	3.357	2.886	6.167	10.095	4.431		0.240175	8.94098
6.6719	35.429	29.442	6.9208	3.947	2.434	9.231	3.8818	3.4456	2.5976	3.4361	3.3514	7.543	6.4921	48.4827	39.7142	11.281	4.791	3.389	3.173	2.595	3.291	2.341	3.78	4.419	12.122	7.129	5.895	3.589	2.58	7.677	3.939	2.968	2.916	3.157	7.22	9.595	5.252		0.244541	8.63371
6.7911	28.478	25.527	5.7822	4.689	3.532	9.649	4.1053	3.3286	2.6544	3.6142	2.6266	7.404	6.7805	41.5319	30.5221	11.201	4.256	2.557	2.114	2.465	3.374	2.628	4.53	4.723	10.583	7.662	5.438	3.71	3.731	7.879	4.551	2.561	3.196	4.762	7.276	8.98	4.417		0.24891	7.91402
6.9102	27.764	24.942	4.867	4.153	2.387	8.74	3.7631	3.6668	2.2296	3.283	3.0909	7.674	6.3788	38.0234	26.4108	10.41	5.921	3.371	2.183	2.985	2.768	2.708	4.109	4.521	9.667	8.197	5.367	2.776	3.735	7.745	3.497	3.645	3.317	3.918	5.694	8.134	5.83		0.253275	7.51004
7.0293	23.375	19.547	5.3771	3.681	2.416	8.378	3.4269	2.715	2.5893	3.4674	3.0182	7.193	6.0866	35.6642	18.7144	9.1	5.647	1.956	2.377	2.73	2.593	2.519	3.792	3.84	11.611	7.049	5.173	3.84	3.465	8.535	3.243	3.567	2.03	3.979	6.85	7.708	5.552		0.25764	6.83257
7.1485	20.983	15.242	3.9838	3.686	2.426	9.113	3.145	3.1993	3.185	3.0755	2.6011	7.071	5.8775	31.615	13.7124	7.561	5.107	2.571	2.294	2.286	3.02	2.265	2.749	4.363	10.572	6.693	5.952	2.968	3.005	7.387	3.433	2.866	2.084	3.72	6.853	7.255	5.659		0.262009	6.20483
7.2676	21.952	13.004	4.5714	2.856	3.227	8.879	3.7243	2.731	2.3399	2.186	2.7685	8.131	4.9874	26.7501	11.4455	8.934	4.775	2.213	2.482	1.957	2.688	2.534	2.934	4.18	10.084	5.285	5.045	2.61	3.719	7.266	2.846	3.266	2.011	4.268	7.822	8.164	5.984		0.266374	5.96271
7.3868	15.961	10.58	3.7824	2.876	3.279	8.848	3.6292	3.4245	1.7999	2.7691	2.762	8.645	5.3601	22.0686	9.194	8.565	5.465	2.328	2.166	2.584	2.758	2.275	2.665	3.183	10.261	5.612	4.649	2.686	2.513	6.921	4.33	3.053	2.296	4.515	9.216	7.664	5.936		0.270743	5.58432
7.5059	14.324	10.16	3.5674	2.701	2.571	9.009	2.542	3.2992	2.4379	2.9489	2.5976	7.952	5.7747	23.1451	6.4732	7.212	6.06	2.547	2.141	2.075	2.951	3.119	2.387	3.323	13.012	5.443	3.301	3.358	3.822	8.385	3.504	3.677	2.432	3.968	9.016	7.431	5.917		0.275109	5.5293
7.625	11.589	9.551	4.2187	3.843	3.313	10.52	3.5648	3.4895	2.563	2.3894	3.2624	8.317	5.6543	18.5954	6.1937	7.469	7.103	1.97	2.711	2.024	2.905	2.902	2.742	3.143	12.428	6.26	4.007	2.558	2.736	6.369	3.175	2.54	2.436	4.559	11.543	7.431	7.769		0.279474	5.5093
7.7442	10.501	8.159	3.6872	3.281	3.02	10.947	3.761	2.6114	2.8074	2.0076	2.9122	7.264	5.5546	14.0194	6.4222	7.273	6.059	2.107	2.31	1.718	2.578	1.915	2.379	3.81	11.778	6.346	3.787	2.825	4.057	6.28	2.449	2.595	2.684	4.68	10.373	8.401	7.914		0.283843	5.16954
7.8633	7.927	7.347	4.2222	3.146	2.462	9.28	2.7097	2.0052	2.5013	2.1771	2.2454	7.627	5.7576	11.2842	5.6661	5.392	5.043	2.391	2.13	2.194	2.53	2.433	2.597	3.73	11.356	5.515	3.558	2.838	2.895	6.861	2.401	2.576	2.814	5.446	13.186	7.02	6.728		0.288208	4.81059
7.9825	7.69	6.378	3.811	2.516	3.133	11.337	3.0362	2.2921	2.933	3.3538	2.4608	8.802	4.6372	9.69	4.7267	5.204	6.126	2.485	2.316	2.31	2.31	2.72	3.116	3.778	10.619	5.225	3.685	2.669	3.889	6.404	3.52	1.971	3.05	5.425	14.014	7.069	7.264		0.292577	4.91799
8.1016	6.759	5.045	3.4466	3.448	2.872	10.388	2.7623	1.9007	1.9295	2.7474	1.9694	8.434	4.3841	7.969	4.2778	4.99	7.212	2.769	2.364	2.265	2.008	2.396	2.402	3.511	10.94	5.384	3.43	2.256	3.102	7.513	4.954	2.262	3.105	4.663	15.029	7.465	8.633		0.296942	4.7834
8.2207	6.105	4.939	4.4198	4.509	3.723	10.869	3.3707	1.716	2.2369	2.4452	1.9885	8.134	4.1866	7.2001	4.1616	4.24	6.95	3.845	2.937	2.475	2.918	2.374	3.233	2.625	9.863	4.883	3.727	3.022	2.948	6.928	3.965	1.917	2.264	4.568	15.994	8.454	8.253		0.301308	4.82128
8.3399	5.968	5.995	4.0005	3.736	2.816	12.017	3.045	2.4944	2.6774	2.0698	2.321	6.806	3.8281	4.9819	4.2322	4.637	7.204	2.531	2.305	2.647	2.161	3.426	3.232	2.769	9.625	5.128	3.841	3.078	3.983	7.337	2.921	2.208	2.112	5.929	20.012	7.667	8.79		0.305677	4.87922
8.459	7.443	4.642	3.8722	4.181	2.806	11.896	2.8595	2.0463	2.1391	1.6969	2.4061	7.227	3.5285	4.9291	3.2592	5.094	7.932	2.378	1.84	1.869	1.787	2.209	2.624	2.92	10.619	5.443	4.001	3.231	3.954	7.443	3.229	1.912	3.145	5.836	24.198	7.109	9.726		0.310042	4.95759
8.5782	6.803	5.892	4.1083	3.438	2.883	9.697	3.6436	2.1266	2.2765	2.0731	2.2595	6.717	4.1188	4.1946	2.9954	5.016	9.082	2.772	1.998	1.954	2.135	2.251	2.635	2.663	9.357	6.644	2.796	2.934	3.195	5.746	2.954	2.302	3.157	7.123	24.71	7.93	11.783		0.314411	4.98279
8.6973	6.415	4.868	5.1793	3.64	2.657	10.338	4.3555	1.972	2.0661	2.5999	2.6692	7.956	3.5862	4.068	4.1694	3.86	8.244	1.952	2.341	2.46	2.337	1.738	3.233	2.906	9.378	5.453	3.418	3.354	3.64	6.546	4.544	2.844	2.442	6.273	24.578	7.485	11.18		0.318776	5.04718
8.8165	6.471	5.221	4.3123	3.765	2.698	9.564	3.2521	1.4139	1.7829	1.9103	2.5103	8.336	3.7317	5.1381	2.9169	3.929	9.726	2.696	2.23	2.031	2.033	2.013	2.976	3.083	9.246	4.459	3.294	2.07	3.505	7.664	3.541	3.026	2.971	6.976	31.07	6.064	10.339		0.323145	5.08015
8.9356	7.007	5.971	3.5086	3.393	3.445	9.432	3.9623	2.6647	1.4775	2.3449	2.4636	7.764	4.0669	4.6964	2.7555	3.329	9.005	3.247	2.276	1.817	2.239	2.01	3.562	3.278	8.176	5.022	2.617	3.13	3.767	6.709	3.924	2.037	2.29	7.757	29.216	6.618	9.929		0.327511	5.05155
9.0547	6.802	4.896	3.3997	3.135	3.21	10.263	3.5478	2.4734	2.0945	1.6762	2.4381	7.907	4.3422	3.5963	4.4023	3.132	9.211	3.051	2.356	1.807	2.153	2.472	2.735	3.203	7.426	5.533	2.977	2.879	3.573	5.576	3.11	2.867	2.023	7.923	28.6	7.213	10.917		0.331876	4.99785
9.1739	5.38	5.078	3.8724	2.984	2.821	11.133	3.6975	2.5245	1.638	2.1136	2.0164	7.089	4.2635	2.7866	3.6465	2.825	11.122	2.519	3.096	2.001	2.479	2.82	2.773	3.093	9.357	5.539	2.85	3.486	3.203	6.183	4.254	2.638	2.899	6.919	28.981	6.463	11.362		0.336245	5.07854
9.293	5.486	5.36	3.8741	3.467	3.298	10.381	3.2577	1.8463	2.1653	2.0033	2.4181	7.491	3.209	3.0099	3.9179	3.441	11.653	2.625	2.346	2.077	2.401	2.258	3.364	3.033	7.704	5.706	2.895	3.585	3.559	6.51	3.487	2.127	2.369	7.422	31.297	7.293	11.366		0.34061	5.1271
9.4122	5.228	4.983	3.9489	4.166	2.765	9.027	4.9891	1.3536	1.9199	2.203	1.931	7.57	3.313	3.6848	2.381	3.421	12.246	3.037	1.72	2.073	3.465	3.197	2.62	3.01	7.273	4.766	2.426	2.424	3.479	6.286	5.024	2.268	2.574	8.465	32.494	8.876	13.006		0.344979	5.23279
9.5313	4.583	5.263	3.5883	3.827	3.28	11.117	4.3676	1.4583	1.6297	2.2911	2.0803	6.658	3.1014	2.9166	2.9913	2.675	12.084	3.298	2.344	2.389	2.641	2.685	3.516	2.854	7.04	4.653	2.694	2.727	3.305	6.704	3.486	2.935	2.744	11.616	35.006	9.095	13.924		0.349344	5.39372
9.6504	4.807	5.92	3.8337	3.967	2.652	10.265	3.5766	2.142	2.0595	1.9772	1.913	6.563	4.1212	3.5498	2.5089	2.423	12.81	4.096	2.843	2.963	3.037	2.89	3.584	3.404	5.862	4.63	2.029	2.244	3.976	7.304	4.37	3.516	3.063	10.351	37.181	10.41	13.8		0.35371	5.58492
9.7696	4.954	5.075	4.9962	3.776	2.764	11.661	4.0954	2.0731	1.8266	2.1499	2.655	6.463	3.4086	3.2755	3.4458	2.971	13.775	3.581	1.835	2.778	2.809	3.264	3.064	3.501	5.69	4.904	2.902	2.606	3.015	6.315	4.353	2.169	2.723	8.273	40.368	12.178	16.852		0.358079	5.74446
9.8887	4.8	4.715	3.4672	3.986	2.907	12.24	5.6255	2.12	1.4347	1.74	1.6881	5.824	4.1261	3.3127	3.4435	3.045	15.348	3.848	1.974	2.981	2.4	3.059	3.667	2.371	6.415	4.728	3.482	2.712	2.945	6.728	4.084	1.936	3.136	9.099	45.474	16.297	15.799		0.362444	6.02589
10.0079	5.017	5.613	4.1976	4.76	3.946	9.978	4.9845	1.7755	2.1311	1.5363	2.2011	6.204	3.8579	3.7347	2.8206	2.621	17.767	3.31	2.418	3.489	3.44	3.123	3.537	2.385	5.716	4.64	2.755	2.482	3.746	7.333	4.526	2.297	3.328	9.581	48.331	19.561	15.497		0.366813	6.34163
10.127	5.192	5.396	3.8908	4.506	3.933	8.959	5.3169	2.0538	1.5046	1.9951	2.6107	6.207	2.9513	2.9588	2.6429	3.008	18.899	3.821	2.037	2.588	2.398	3.381	2.69	2.601	5.196	4.788	2.785	3.265	3.791	7.472	5.394	2.812	2.376	9.739	53.897	21.076	20.628		0.371178	6.61513
10.2462	4.542	4.367	4.5297	4.597	3.835	7.262	4.849	2.1286	2.0596	2.0084	2.0874	5.012	3.3078	2.9073	2.9937	2.331	20.295	3.779	2.19	2.469	2.329	3.567	3.109	2.511	4.612	4.192	3.086	3.301	3.119	7.536	5.027	2.374	3.693	9.523	58.276	24.939	24.663		0.375547	6.84885
10.3653	5.57	5.438	4.5963	5.185	2.547	7.682	5.7339	1.9133	1.9077	1.4957	2.0292	5.122	4.2183	3.4051	3.105	2.571	23.053	4.976	2.811	3.053	3.119	3.391	3.686	2.618	5.027	5.569	3.432	3.227	3.89	8.719	4.498	2.787	2.811	7.71	52.275	25.281	25.603		0.379912	7.02853
10.4844	5.465	5.437	5.5785	5.085	2.983	7.66	7.0712	1.8913	1.9805	2.1506	2.0668	4.406	3.2501	2.8368	3.4599	2.195	25.121	3.602	2.485	2.783	2.966	2.869	2.969	2.945	5.64	4.571	2.435	3.882	4.059	8.134	5.035	2.747	2.705	7.376	48.072	29.564	26.284		0.384278	7.02056
10.6036	5.553	5.386	3.8314	5.633	3.197	7.122	6.1879	2.0575	1.7063	1.9045	1.9546	5.455	4.0841	3.1661	3.1172	2.178	29.032	3.939	2.323	2.512	2.702	2.943	2.752	3.658	5.931	4.543	3.025	3.108	4.493	6.296	4.807	3.405	2.648	7.296	39.707	29.555	27.508		0.388647	6.88423
10.7227	5.49	4.26	4.6008	4.782	2.118	7.832	7.4409	1.8214	1.8995	2.0008	2.1421	6.011	3.6412	2.8677	3.5197	2.459	30.58	4.616	2.063	2.306	2.413	3.435	2.862	2.501	5.367	6.545	3.752	2.449	3.121	8.054	6.776	2.998	3.279	6.387	29.916	34.282	26.178		0.393012	6.83152
10.8419	4.457	4.65	4.3691	5.093	3.572	7.935	6.5939	2.1962	1.7141	1.6252	2.5865	5.053	3.9518	3.0503	2.9628	1.908	30.329	4.372	2.283	2.82	3.521	3.986	3.305	3.481	5.181	4.14	3.466	3.078	4.594	8.281	5.933	3.15	3.059	6.519	25.78	35.721	23.101		0.397381	6.69778
10.961	5.166	4.06	4.2613	4.65	3.3	8.244	6.2481	1.9956	2.2201	1.9144	2.2787	5.158	3.7319	3.1559	2.0082	1.786	32.011	4.363	2.267	2.15	2.754	2.658	3.663	2.934	6.996	4.141	2.866	3.582	3.493	8.542	6.814	2.607	2.896	4.849	19.362	40.211	19.637		0.401746	6.45876
11.0801	4.936	4.216	4.5074	6.324	2.394	8.743	7.608	2.1181	1.713	2.08	1.8125	5.675	3.9099	2.0964	2.7252	2.06	28.766	4.442	2.37	2.491	2.953	3.477	3.037	3.512	6.428	4.658	2.971	3.767	4.077	8.916	6.793	2.875	3.937	4.736	16.111	40.067	17.048		0.406111	6.38785
11.1993	5.203	4.325	4.424	5.291	2.697	9.638	7.6837	2.5341	2.368	1.5029	1.7736	6.655	4.5306	3.4507	2.5745	2.312	28.378	5.236	2.368	1.887	2.751	2.326	2.811	2.62	6.815	5.5	3.046	3.627	4.171	8.242	6.627	2.979	2.315	4.163	15.637	35.66	15.548		0.41048	6.2073
11.3184	5.556	4.451	4.8094	6.143	3.762	9.861	7.9897	1.9903	2.1205	1.7176	1.7526	6.945	4.0326	2.5244	2.5905	1.366	24.785	4.079	2.262	2.398	2.583	3.497	3.582	3.05	6.089	4.33	3.82	3.654	4.164	9.066	8.001	2.31	2.714	3.242	17.493	36.162	13.593		0.414846	6.17529
11.4376	4.539	5.187	5.5839	5.877	3.378	10.14	8.1052	1.3949	2.0194	2.7905	1.9243	5.691	4.6064	2.2811	3.126	2.327	22.155	4.956	2.388	2.591	3.355	2.404	3.511	4.048	6.83	4.634	3.717	3.607	3.944	8.898	9.261	2.638	2.687	4.554	16.052	31.098	13.931		0.419215	6.11432
11.5567	4.73	4.735	5.5191	5.915	3.787	10.095	6.1245	1.9775	2.0838	1.7765	2.354	5.317	4.321	2.9703	2.5752	2.46	20.513	4.632	2.369	2.049	2.733	3.013	3.049	2.746	7.549	4.279	4.763	3.156	4.027	11.049	8.667	2.187	3.001	5.415	14.537	26.847	13.936		0.42358	5.87184
11.6758	4.578	5.228	6.8071	5.744	4.313	11.981	7.1125	1.9256	2.0711	2.4166	1.5871	5.637	4.5929	3.0478	2.0678	2.566	19.133	4.806	2.706	2.493	2.427	3.37	3.722	3.363	8.109	4.948	3.755	3.617	4.482	9.943	10.485	2.783	3.991	4.509	14.011	22.562	13.233		0.427945	5.94928
11.795	5.221	4.909	6.0062	5.882	4.083	12.208	7.3196	3.1844	2.2049	2.4855	2.1738	6.928	5.9314	2.9802	2.6415	2.542	24.511	4.315	2.604	2.704	2.565	2.831	3.258	3.314	8.242	6.615	3.268	3.367	4.657	10.324	11.75	3.115	3.069	4.054	12.743	17.287	14.343		0.432314	6.09828
11.9141	4.786	6.074	7.1006	6.104	3.516	10.836	7.8277	3.0997	2.6203	1.4664	2.3652	6.256	5.4903	3.2547	2.2732	1.677	26.145	6.067	2.294	1.727	3.688	3.343	2.564	3.384	8.816	7.102	4.695	3.324	4.434	11.467	15.362	2.573	3.107	5.248	13.871	17.334	15.281		0.436679	6.39387
12.0333	4.753	4.658	7.0287	7.246	4.021	12.141	8.022	3.2322	2.2404	1.8012	2.3746	7.796	7.0467	3.0619	2.0213	2.015	30.885	5.222	2.647	2.684	4.105	3.661	2.49	2.954	9.295	7.374	3.821	3.052	4.048	11.293	16.913	3.318	3.37	3.713	13.828	17.604	15.605		0.441048	6.68489
12.1524	5.106	5.425	7.5261	5.831	3.25	15.861	7.6917	2.9591	2.2758	2.0186	2.0092	6.77	7.7372	2.301	2.5023	2.394	31.076	6.103	1.875	3.054	3.299	3.527	3.155	3.107	11.111	8.427	4.438	3.35	4.372	11.635	21.474	3.269	3.036	5.528	11.824	21.686	15.46		0.445414	7.09362
12.2716	4.949	6.415	8.4889	6.185	3.908	16.506	7.82	2.8428	2.6674	2.0471	2.3426	6.834	9.0527	2.1474	2.92	1.925	32.901	4.914	1.989	2.497	2.801	3.343	2.79	3.015	11.949	8.664	3.326	3.098	4.313	12.366	22.46	3.192	3.967	5.336	12.157	22.57	18.789		0.449783	7.39156
12.3907	4.778	6.125	7.2812	7.19	4.425	18.572	6.5827	2.8079	1.839	2.7446	3.0007	6.785	8.3607	2.3551	2.9841	2.654	33.013	5.158	2.754	2.364	2.587	3.052	3.788	3.708	11.874	11.966	3.496	3.631	4.43	10.728	26.74	2.921	3.089	4.775	12.36	21.785	19.423		0.454148	7.62505
12.5098	4.976	6.917	8.3592	7.706	4.111	19.382	7.8638	3.0651	2.5899	2.3433	2.9085	7.228	10.3024	2.6548	3.0116	1.821	31.842	5.054	3.207	2.206	4.063	3.732	3.892	2.855	12.197	12.166	3.112	3.565	3.66	13.292	29.171	3.423	2.945	4.871	10.832	22.706	20.897		0.458513	7.97102
12.629	4.431	7.553	8.9347	7.283	4.443	22.206	7.6427	2.737	2.3082	3.0082	2.5367	6.293	11.8974	2.8529	2.4592	1.69	30.949	5.047	2.545	2.14	2.902	2.888	3.167	3.26	11.357	13.977	3.75	3.795	3.957	15.158	31.479	3.252	4.301	4.463	10.234	24.341	21.809		0.462882	8.19046
12.7481	5.046	10.291	8.0356	8.085	4.395	24.356	8.0708	2.609	1.9985	1.5932	2.7413	7.92	11.4516	2.4203	2.7308	3.264	29.881	4.25	3.141	2.138	2.977	3.336	3.286	3.219	13.183	17.171	4.267	3.467	3.948	13.652	28.935	3.342	3.701	4.35	7.64	24.935	23.363		0.467247	8.35649
12.8673	5.472	7.99	8.7981	7.774	4.52	27.088	8.2402	3.1239	2.2109	1.9931	3.2175	8.822	12.2206	2.9771	2.7287	2.569	37.552	4.204	2.725	3.441	3.026	3.151	3.659	4.013	13.514	19.511	4.559	3.252	3.53	12.56	32.625	4.217	4.006	5.974	7.138	26.111	27.609		0.471616	9.08438
12.9864	5.537	9.102	9.175	5.367	4.104	27.254	7.8389	3.1554	1.629	2.2973	2.2595	7.699	13.4823	2.8957	1.8461	2.356	38.471	4.479	1.628	3.352	2.803	4.257	4.095	3.182	12.295	22.127	4.727	3.791	3.624	15.304	32.457	3.822	3.924	5.543	6.158	33.611	26.787		0.475982	9.25501
13.1055	6.414	11.877	7.9668	5.275	3.896	28.574	7.1119	2.087	2.1137	1.7156	1.9212	7.107	17.347	2.8382	1.9189	2.502	37.153	4.952	2.001	3.029	3.451	2.276	3.505	3.93	13.075	22.333	5.272	3.896	3.702	13.203	33.784	3.388	3.679	4.355	6.144	34.007	28.501		0.480347	9.35949
13.2247	5.957	12.015	7.6377	4.596	3.953	28.864	7.0688	2.4394	2.2142	2.0191	2.2766	7.373	22.1795	3.7755	2.2164	2.468	38.919	4.639	2.312	3.16	3.404	3.298	3.699	3.33	11.959	24.512	5.365	3.591	3.385	16.287	35.562	3.801	3.073	4.575	7.546	35.489	29.503		0.484716	9.85033
13.3438	6.97	11.918	7.0064	4.602	4.56	30.007	9.3929	2.7112	1.7907	1.7401	2.418	7.332	24.2597	3.5899	2.5016	2.914	36.091	4.748	2.542	3.216	3.479	3.344	3.745	3.434	11.87	26.323	4.142	4.106	4.217	15.729	28.074	4.265	3.507	4.375	5.983	30.712	28.698		0.489081	9.63009
13.463	6.662	12.233	6.689	4.6	4.656	28.883	9.655	3.9714	1.9518	1.7857	2.3226	8.948	28.3653	2.2676	2.9378	2.129	32.557	5.086	1.998	2.853	3.147	2.785	3.248	3.131	13.595	28.421	5.43	4.07	4.735	15.609	27.216	4.944	2.97	4.182	5.932	27.194	32.682		0.49345	9.72546
13.5821	6.04	11.473	6.2906	4.103	5.325	31.132	8.9007	2.7788	2.0103	1.6482	2.2488	6.528	30.5025	2.8353	2.7931	2.096	28.056	4.272	2.319	3.466	2.831	3.293	3.682	3.542	13.462	32.592	4.842	2.821	4.682	15.569	22.943	4.786	3.798	3.622	5.554	24.931	33.43		0.497816	9.49185
13.7012	6.752	14.224	5.972	3.909	5.628	32.896	9.2676	2.1418	2.3788	1.7272	2.2487	5.804	32.4381	2.5554	2.7676	2.474	23.577	4.524	2.079	3.872	2.758	3.169	3.422	3.357	13.938	32.772	5.729	4.76	4.357	14.523	22.726	5.164	3.195	3.682	6.4	23.812	35.572		0.502181	9.63709
13.8204	6.336	18.918	5.4379	3.343	5.043	33.736	8.2931	2.8279	2.7376	2.0176	2.7162	5.794	34.2576	3.8975	3.1754	2.135	25.745	3.526	2.363	3.439	3.477	3.031	4.713	4.125	12.874	29.999	5.3	3.827	4.915	12.885	20.803	5.356	2.792	3.485	4.98	22.083	36.18		0.50655	9.63686
13.9395	7.675	21.678	5.4751	4.751	4.972	35.273	9.2898	2.7423	2.2167	1.7917	2.433	5.023	35.397	3.4108	3.0106	2.176	27.54	4.252	2.593	3.267	3.409	3.138	3.501	3.404	11.315	34.074	4.734	4.673	4.788	13.359	19.619	5.384	2.933	2.752	4.107	22.445	38.547		0.510915	9.92295
14.0587	7.741	23.066	7.7222	3.751	5.044	31.415	7.9305	2.6227	2.5837	2.2281	2.5307	5.56	34.2847	2.8063	3.169	2.339	30.315	5.037	2.767	3.948	3.07	3.856	3.692	3.756	12.111	30.623	5.776	3.924	3.755	11.819	19.02	5.507	2.835	2.928	2.961	19.8	37.039		0.515284	9.7117
14.1778	8.885	26	7.2073	4.206	5.193	30.569	10.2758	2.0266	2.0572	2.2849	2.5325	7.316	31.3008	3.8866	2.9609	2.604	36.024	5.397	2.306	3.232	2.613	3.166	3.551	5.407	12.38	28.716	5.389	4.063	4.549	12.886	23.597	5.917	3.791	2.596	3.693	21.602	36.137		0.519649	10.1707
14.297	8.221	20.428	6.962	3.607	5.012	29.275	10.1874	3.1911	2.0809	2.6376	2.4871	5.297	29.9144	4.209	3.1712	2.371	32.967	4.077	2.842	2.738	3.019	3.506	3.689	4.378	11.641	28.638	4.498	3.233	3.485	14.079	25.181	5.776	3.717	3.375	3.605	24.091	34.364		0.524018	9.78245
14.4161	9.676	19.318	6.1658	3.918	4.666	25.532	10.4065	2.5677	1.7161	2.1708	2.6259	4.578	32.1666	4.0087	3.3393	2.147	31.396	6.009	2.688	2.563	2.72	3.533	4.166	3.684	10.682	22.75	6.15	4.109	4.367	11.697	31.77	5.583	3.86	3.449	3.667	20.806	37.997		0.528384	9.6932
14.5352	11.767	16.902	7.8542	3.762	5.467	23.316	11.6142	3.4556	2.3187	2.1293	2.0175	4.673	33.6012	4.0561	2.8055	2.444	26.524	4.805	2.666	2.239	3.422	3.146	3.291	3.932	11.337	20.056	5.775	4.746	4.482	11.177	29.482	5.281	3.016	2.802	3.467	18.971	35.338		0.532749	9.30104
14.6544	12.484	17.313	7.9503	3.452	4.575	23.287	10.6626	3.4937	2.5987	2.7073	3.084	3.91	33.8561	4.1026	2.415	2.561	25.372	5.63	2.43	3.503	2.966	2.79	4.518	3.732	10.209	20.403	6.423	3.222	4.136	11.327	29.973	5.591	3.415	3.343	3.657	15.874	39.066		0.537118	9.35222
14.7735	14.086	18.107	7.5655	5.088	3.329	14.994	12.1374	2.5194	2.4941	2.6086	3.0747	3.885	34.3368	4.2477	2.3652	2.582	20.396	6.331	2.435	2.795	2.583	2.938	4.345	3.732	10.11	19.452	6.076	3.665	3.531	8.677	33.646	5.568	2.544	3.133	3.55	11.872	38.748		0.541483	8.90669
14.8927	14.318	16.588	6.0268	3.642	3.948	12.987	10.2569	3.7631	2.6024	2.3883	2.6766	4.475	31.5544	5.3305	3.1005	2.653	18.89	5.088	2.827	2.582	2.295	2.513	3.736	3.194	10.246	16.648	7.165	3.985	3.506	9.643	33.908	6.131	4.423	3.036	3.487	11.32	42.026		0.545852	8.72864
15.0118	16.291	16.772	5.7428	3.773	5.106	12.584	11.3171	4.0447	2.218	2.3947	2.5337	3.617	30.582	3.6661	3.0808	2.559	16.357	4.945	2.883	3.132	1.894	3.217	4.232	3.44	9.505	17.464	7.269	4.494	4.503	8.527	33.868	4.748	4.515	2.26	3.416	11.344	44.581		0.550217	8.72638
15.1309	17.36	16.57	5.0055	2.945	3.881	12.901	11.3838	3.104	1.9911	1.9539	2.7039	4.209	30.8939	3.3633	2.9106	2.139	17.302	5.106	2.228	2.491	2.158	3.356	2.983	3.195	9.125	16.189	7.734	3.99	4.182	7.391	31.496	5.566	3.94	3.238	2.811	10.062	48.042		0.554583	8.53784
15.2501	16.778	16.884	4.6614	3.761	3.313	10.568	12.5637	3.8717	2.1815	1.6607	2.9546	3.282	23.5828	3.7071	3.1386	1.89	17.951	6.279	2.504	3.463	2.934	3.132	3.329	3.746	8.492	17.352	8.446	4.333	3.31	5.978	28.734	4.714	2.984	3.177	4.008	8.221	50.08		0.558952	8.32338
15.3692	17.751	16.578	5.2511	4.034	4.906	12.368	11.9406	2.6276	2.062	2.389	2.657	3.432	25.887	3.0851	3.2936	2.743	16.81	4.247	2.393	3.198	3.086	3.711	2.499	4.439	8.032	19.018	8.705	3.816	4.939	6.731	28.313	5.513	3.669	2.624	3.746	6.262	50.33		0.563317	8.46178
15.4884	17.061	16.749	5.6674	3.594	4.545	12.664	13.0825	3.5832	2.7738	1.6658	2.689	3.882	23.1245	4.1345	3.2907	2.237	17.635	4.562	1.95	2.86	2.464	3.2	2.931	3.327	8.068	19.957	9.268	3.666	4.326	6.498	28.042	5.615	4.018	3.127	2.244	6.893	48.106		0.567686	8.36488
15.6075	16.153	15.972	4.7267	3.275	4.702	12.085	13.2891	3.4429	2.0521	2.1628	2.8503	3.864	19.624	3.9109	2.7759	2.456	18.485	4.375	2.975	3.409	2.286	3.353	3.532	4.536	9.528	20.947	6.958	4.626	4.424	5.356	30.431	5.874	3.556	2.942	2.526	6.676	54.671		0.572051	8.50832
15.7266	19.064	12.534	4.3906	3.542	4.077	13.587	10.6022	3.4581	2.5147	2.1932	2.4124	4.109	20.678	4.1792	3.2576	2.22	18.529	5.604	3.243	2.462	2.931	2.623	3.203	3.858	8.558	23.099	7.685	4.472	3.924	5.278	30.724	4.109	3.978	4.254	3.315	5.887	53.511		0.576416	8.48827
15.8458	21.014	14.366	4.6451	2.372	4.41	14.362	10.9625	3.335	2.5421	1.9821	2.3159	4.626	18.5973	2.8951	3.1481	2.308	18.67	3.711	2.15	2.988	2.318	2.35	3.488	5.008	7.447	23.413	8.041	4.053	4.423	4.844	30.405	4.76	3.865	3.562	2.856	6.541	54.846		0.580785	8.47622
15.9649	18.687	13.712	5.156	3.461	4.359	12.358	11.6989	3.3473	2.6463	2.1874	2.5389	4.131	16.1714	3.7861	2.6036	2.206	16.882	4.835	2.211	3.513	2.307	2.252	3.102	3.908	8.452	24.293	8.017	3.6	3.912	5.311	27.809	5.352	3.472	3.288	3.102	6.511	58.305		0.585151	8.36443
16.0841	17.966	10.767	5.0645	3.219	3.603	12.358	10.1111	4.4864	3.2782	1.7209	2.5691	2.893	17.4206	3.5459	3.683	3.592	18.572	4.832	2.967	3.048	2.683	3.197	3.709	3.625	10.127	20.259	6.381	4.06	4.457	6.311	30.532	5.225	2.861	3.143	2.974	5.832	64.762		0.58952	8.53607
16.2032	21.129	11.017	4.863	4.159	4.151	11.759	8.4386	4.4265	2.9613	2.0987	2.4689	3.064	15.0217	2.9439	2.636	2.793	16.533	4.639	2.447	2.964	2.287	2.474	3.059	4.697	8.834	20.988	7.53	3.251	4.324	6.314	31.005	6.548	2.969	3.127	3.151	5.133	67.784		0.593885	8.48618
16.3224	19.232	11.75	4.1286	4.106	3.512	12.274	9.1439	3.2979	3.2936	2.7306	2.5962	3.378	17.1062	3.1502	2.6489	2.935	17.874	4.401	3.179	2.726	2.806	2.568	3.256	3.697	9.353	17.657	6.701	4.025	3.8	4.616	31.538	5.761	3.179	3.027	2.934	4.604	76.838		0.598254	8.64387
16.4415	21.92	11.07	4.8614	4.316	2.998	16.249	6.4702	3.8212	2.5538	2.9324	2.6604	3.144	14.744	3.0687	2.6339	2.345	16.733	3.504	2.621	2.849	3.01	2.166	3.348	3.396	11.46	16.821	6.582	4.159	3.634	5.226	29.728	7.937	3.332	3.487	3.131	5.78	78.348		0.602619	8.73081
16.5606	20.84	11.313	4.4957	3.847	3.624	15.633	7.7426	3.9806	2.151	1.8861	2.5739	3.011	13.2515	2.7378	2.4414	2.891	17.594	4.011	2.763	3.275	2.707	2.538	2.89	2.937	11.447	12.533	6.156	4.619	3.082	4.869	27.424	7.763	3.36	2.738	2.659	4.969	82.351		0.606984	8.51634
16.6798	17.961	10.544	5.0488	3.906	3.176	15.367	6.5969	4.1626	2.6131	2.6201	2.5824	3.078	15.5246	2.8525	2.6242	1.823	16.073	3.158	2.249	3.127	2.609	3.322	4.281	4.206	10.491	12.435	6.284	4.558	4.522	5.491	25.178	8.85	2.505	3.188	2.986	5.03	87.19		0.611353	8.60036
16.7989	17.727	10.517	3.379	3.271	2.858	17.173	5.9205	4.8352	2.2695	2.2551	2.6459	3.031	13.7489	3.6152	3.1106	2.391	16.764	2.689	2.256	2.584	2.333	3.435	2.507	4.602	9.761	12.788	6.089	3.877	3.853	5.573	27.758	8.266	3.79	2.654	3.06	4.373	87.648		0.615719	8.52454
16.9181	14.359	9.801	3.6449	3.131	3.413	16.009	5.9266	4.8789	1.9691	2.2962	2.4016	3.102	13.9762	3.3679	3.2843	2.941	15.62	3.765	1.965	3.443	2.452	2.975	3.418	4.049	11.696	11.817	7.476	3.14	4.723	4.946	24.453	8.511	2.959	3.087	3.755	4.861	85.598		0.620088	8.35705
17.0372	14.447	8.614	4.4871	4.232	2.523	15.059	5.6115	3.6195	2.7425	2.7176	2.412	3.678	15.1313	3.3062	3.0816	3.059	15.411	3.641	2.593	3.018	2.562	2.905	2.268	3.921	10.078	11.194	7.104	4.361	4.089	4.977	22.879	9.977	3.824	2.971	3.271	5.299	86.394		0.624453	8.30968
17.1563	13.622	8.328	3.767	3.637	3.855	14.399	6.0629	3.9997	1.7141	1.7097	3.0255	4.103	12.8452	3.0641	2.4192	2.001	15.955	3.467	3.213	3.138	2.514	3.341	3.288	3.784	9.897	10.271	5.68	4.428	3.942	4.466	24.189	9.775	3.65	2.252	3.113	5.433	92.056		0.628818	8.2812
17.2755	12.283	6.617	4.513	3.7	3.564	15.147	5.1975	4.0659	2.3469	2.1522	2.8177	4.091	15.1976	2.6284	3.32	2.618	14.533	3.358	1.934	2.472	3.757	2.757	2.722	3.583	9.536	11.14	6.168	4.826	4.417	4.206	25.164	9.11	3.03	3.058	2.995	4.393	95.699		0.633187	8.35452
17.3946	9.643	6.178	3.7828	2.78	3.259	15.578	5.2528	3.5473	2.365	2.2538	2.8115	3.896	15.794	2.8825	2.8849	2.243	15.282	4.247	2.236	2.777	2.511	3.681	2.701	4.298	9.282	10.928	7.485	5.064	4.958	4.598	28.13	9.854	3.55	2.73	2.792	4.29	97.052		0.637553	8.47561
17.5138	8.453	5.685	3.1365	2.884	3.57	15.132	4.7552	5.7551	2.4134	2.0627	3.2625	2.672	13.5122	3.1539	2.6605	2.324	15.509	3.756	2.63	2.574	3.737	2.625	2.609	4.365	9.267	10.936	8.379	4.23	4.423	4.66	29.346	10.954	3.111	3.021	2.767	4.23	98.051		0.641921	8.44897
17.6329	7.555	5.99	2.4405	3.402	3.997	18.241	3.8184	5.1549	2.6176	2.1297	2.3894	3.178	13.9087	1.8472	2.7962	2.767	15.717	3.512	2.681	2.931	3.077	2.735	3.052	4.799	9.466	11.269	6.491	3.951	4.656	4.053	31.421	11.025	4.121	3.067	2.812	4.319	90.683		0.646287	8.32623
17.7521	7.224	4.914	3.5232	2.407	3.463	21.419	5.0985	4.7345	2.5139	2.3122	2.7647	3.127	14.979	2.8735	3.3899	2.228	15.706	3.8	2.51	1.932	2.662	2.84	2.837	3.847	8.628	11.929	5.958	4.172	4.686	4.786	34.528	10.585	3.406	3.268	2.29	4.673	85.055		0.650656	8.29917
17.8712	7.497	2.966	2.4704	2.838	3.267	19.526	4.4411	4.3574	1.9914	3.1009	2.486	2.479	13.1107	2.6868	2.0456	2.553	13.867	3.33	2.297	2.735	3.286	3.433	2.842	3.417	8.183	8.99	7.218	5.215	4.285	4.671	37.063	10.269	3.385	2.351	2.606	3.857	72.035		0.655021	7.65274
17.9903	6.358	5.69	2.8497	3.254	2.296	18.517	4.7101	4.1091	2.5854	2.3327	2.7274	3.355	12.3468	3.0105	2.3425	2.273	13.702	3.604	3.197	3.019	3.021	2.494	2.523	4.896	7.366	11.015	7.242	4.75	5.063	5.477	38.172	8.886	3.006	2.546	2.705	4.045	63.926		0.659386	7.55168
18.1095	6.91	4.046	3.107	2.947	2.878	21.407	4.7213	4.1266	3.0104	1.9034	3.1355	3.889	13.37	2.6064	2.5327	2.702	14.809	3.716	2.695	2.887	3.065	3.209	2.521	4.703	9.862	11.262	6.742	4.036	5.004	4.39	40.693	9.366	3.494	2.478	2.468	4.903	61.754		0.663755	7.7662
18.2286	7.001	3.726	3.2435	3.109	2.593	21.436	4.35	4.7698	2.6328	1.6016	2.7275	4.06	10.2983	2.5433	2.1491	2.755	13.757	3.157	3.006	2.111	2.066	3.362	2.933	4.166	8.865	11.946	7.417	3.639	4.116	4.851	40.937	8.948	3.748	2.634	2.704	4.754	60.573		0.668121	7.53205
18.3478	6.691	3.524	3.294	3.14	2.473	19.846	6.2108	4.9246	1.9765	2.603	2.7809	3.591	12.5493	3.1308	1.8093	2.403	14.62	3.956	2.26	2.58	2.905	3.454	2.899	4.779	9.321	11.498	7.291	4.439	4.885	5.4	39.811	7.788	3.596	3.065	3.011	4.559	54.419		0.672489	7.49955
18.4669	7.173	4.246	2.573	2.33	3.176	19.418	4.657	4.2735	2.5736	2.2266	2.6825	3.569	12.7282	3.474	2.7267	2.619	15.269	4.624	2.493	2.91	2.484	3.738	2.808	4.437	10.282	11.669	6.116	4.265	4.553	4.686	45.748	7.713	2.784	2.79	2.515	4.196	50.012		0.676855	7.474
18.586	7.905	3.202	2.9166	2.7	2.472	18.375	4.8448	4.5741	2.3707	2.2036	1.7267	3.733	12.1887	2.3486	2.7978	2.604	15.429	3.833	2.236	2.67	2.367	3.778	4.02	4.253	12.573	11.069	6.189	3.931	4.746	4.714	45.506	6.894	3.919	2.929	2.356	4.276	43.594		0.68122	7.24985
18.7052	7.958	2.835	2.9607	2.869	2.911	16.978	4.6119	4.1123	2.0578	2.3032	2.5682	2.924	12.8269	2.6622	2.6859	2.178	14.992	4.859	1.952	2.515	2.906	3.455	2.915	4.329	15.852	10.919	6.539	5.282	6.154	5.609	45.035	6.943	4.31	2.867	2.607	4.609	38.577		0.685589	7.2613
18.8243	7.964	3.175	3.2371	2.465	2.989	14.445	4.6119	4.8707	1.8533	2.8633	2.6278	3.482	12.6373	3.1126	2.1488	1.579	18.307	4.506	2.481	2.472	3.126	3.655	3.849	4.656	17.244	10.518	6.734	4.003	5.12	5.159	41.684	6.774	3.927	2.968	2.498	4.888	35.671		0.689954	7.14329
18.9435	7.818	3.358	2.423	3.359	3.024	13.902	4.4445	4.0793	2.355	2.3413	2.134	4.742	14.0761	2.0707	2.2304	3.104	15.388	4.733	1.968	3.14	3.405	3.626	3.797	4.624	23.626	11.292	6.394	3.808	4.868	4.422	37.163	7.162	3.283	3.003	2.745	4.77	29.904		0.694323	6.98871
19.0626	6.338	3.365	2.2575	3.182	3.458	12.177	5.3872	4.3607	2.2646	1.5278	2.8304	5.232	13.6844	1.9883	1.8032	2.683	16.619	4.042	2.75	3.72	3.055	3.125	3.317	4.442	30.064	8.886	5.912	4.087	5.652	4.977	29.283	6.317	3.282	2.702	3.566	4.854	28.928		0.698689	6.81403
19.1817	7.067	3.663	2.9547	3.229	2.983	9.936	4.4584	4.2778	2.6486	2.0489	2.8987	4.946	13.2765	1.8362	2.5275	2.326	18.884	4.721	2.383	2.683	2.748	3.175	2.967	4.44	35.129	8.672	5.186	4.453	5.069	4.774	24.883	8.309	3.504	2.875	3.262	4.561	28.286		0.703054	6.81193
19.3009	6.099	3.815	2.8223	2.826	2.49	9.817	5.4222	4.2756	2.8429	2.3272	2.5876	4.387	11.5105	2.408	1.6209	2.705	18.384	4.735	2.343	4.013	3.46	3.222	3.48	5.166	41.633	9.335	4.932	3.59	4.391	4.72	22.131	7.268	3.437	2.938	4.276	5.055	27.38		0.707423	6.86068
19.42	5.343	3.438	3.4138	3.255	2.829	8.398	5.7607	4.1579	2.8098	2.1725	2.8849	4.49	11.7852	2.0022	2.1026	2.395	21.486	4.457	2.331	3.244	3.262	2.401	3.669	5.316	44.977	12.51	4.995	4.247	4.529	4.57	18.326	9.133	2.633	2.247	3.956	5.816	24.063		0.711788	6.90285
19.5392	5.89	2.842	3.7067	2.726	3.12	8.445	5.9376	4.8048	2.2773	2.5989	2.8451	5.231	11.6839	2.0661	2.2872	1.887	23.665	4.395	2.691	3.646	4.073	2.974	3.061	5.371	48.438	12.421	4.356	3.501	5.098	4.442	17.52	5.947	2.833	2.821	4.729	6.033	25.583		0.716157	7.07964
19.6583	5.613	2.903	2.641	3.493	3.236	6.549	5.4799	4.5517	2.7945	3.1112	2.5659	5.476	11.8215	2.4235	2.2472	2.162	21.434	4.719	2.428	3.146	3.596	3.03	2.614	5.356	47.404	11.25	6.002	3.083	4.732	5.761	17.312	6.066	2.835	3.12	5.391	6.272	22.766		0.720522	6.90231
19.7775	5.261	3.308	3.0931	2.035	3.115	5.655	5.658	5.171	2.8857	2.5061	2.3779	5.856	12.1873	2.2534	2.1369	2.24	18.657	5.242	2.863	3.654	3.428	3.64	3.176	6.231	45.792	9.951	4.717	4.032	4.098	5.275	17.886	7.305	3.163	3.372	5.788	7.252	23.734		0.724891	6.89177
19.8966	4.347	2.674	2.8789	2.727	2.425	4.456	4.9968	3.8125	2.8622	2.3096	2.612	4.63	12.1676	2.0867	2.1302	2.31	18.09	4.652	3.294	3.038	3.745	4.136	3.474	7.151	42.991	10.814	4.643	4.129	5.074	6.032	16.893	6.396	3.617	3.481	5.461	8.028	24.888		0.729257	6.74196
20.0157	4.806	2.686	3.2753	2.382	2.332	4.601	6.0701	4.0185	2.3189	2.3618	2.5086	4.752	11.6018	2.1218	2.4246	2.643	14.376	5.178	2.792	2.436	2.647	4.815	3.211	8.859	37.93	10.032	4.361	3.873	4.998	4.272	18.071	7.302	3.909	2.814	5.371	9.005	30.009		0.733622	6.68012
20.1349	6.153	2.638	3.4481	3.064	2.671	4.726	6.8412	3.6185	2.4875	2.1119	2.3059	5.979	11.5219	2.2375	2.4089	2.93	13.931	5.14	2.591	2.153	2.931	3.164	3.963	9.71	28.999	9.161	4.462	4.942	5.058	5.528	15.546	8.322	3.74	3.404	5.667	9.821	33.102		0.737991	6.66155
20.254	4.118	3.233	2.7008	2.698	3.298	4.247	7.7639	5.1788	2.8567	2.3381	2.7593	6.628	10.2036	2.0032	2.5105	2.221	11.636	5.043	3.11	3.228	2.982	3.025	3.669	12.825	24.426	7.909	4.417	4.112	5.416	4.243	15.549	10.18	3.717	3.808	6.696	10.802	30.304		0.742356	6.53662
20.3732	4.171	2.931	3.3082	3.692	3.051	4.399	6.632	4.8084	2.7481	2.0432	2.1931	6.062	13.2508	1.9653	2.2447	2.409	11.18	5.389	2.69	3.903	2.893	3.097	3.383	14.494	17.737	7.247	3.825	4.308	5.259	6.043	12.24	10.547	3.943	4.756	6.682	11.172	30.613		0.746725	6.41378
20.4923	3.594	3.369	2.7694	3.261	2.754	5.046	9.8094	3.4101	3.12	2.0358	2.1636	6.288	14.0675	2.6598	2.0068	1.911	10.646	5.213	2.348	3.478	3.622	3.446	3.918	22.689	12.574	7.236	4.768	3.915	6.339	5.461	9.738	12.211	3.589	4.068	7.298	11.124	28.793		0.75109	6.50647
20.6114	3.587	3.329	3.0897	2.897	3.062	4.943	12.456	2.5797	2.5502	1.7564	2.0605	6.694	14.7096	2.2658	2.1446	1.738	12.894	6.137	2.832	2.6	3.335	4.043	3.298	26.202	10.206	8.024	4.361	4.721	6.292	5.764	8.921	11.886	3.172	4.375	8.067	12.597	29.686		0.755456	6.73718
20.7306	4.551	4.306	3.807	3.344	4.014	6.748	11.6765	4.0232	2.3929	2.1876	2.2827	5.873	16.8688	1.7754	1.9691	2.861	13.754	7.391	2.521	2.722	3.094	3.657	4.033	28.198	5.936	6.835	4.4	3.87	6.597	6.575	9.373	12.545	3.529	3.416	8.196	12.469	29.472		0.759825	6.95306
20.8497	5.262	3.795	3.9936	3.464	3.938	10.968	15.416	4.2943	3.4709	2.3894	1.7259	8.717	13.0291	2.1748	2.0583	2.501	13.129	6.312	3.304	3.3	3.223	2.955	3.786	28.063	6.141	6.759	4.111	3.88	6.471	7.329	9.044	12.878	4.328	4.943	10.663	11.44	29.679		0.76419	7.26852
20.9689	4.498	3.889	3.2479	2.85	4.302	14.608	18.4209	4.1079	2.8773	2.6388	1.6776	7.911	14.8568	2.2762	1.8648	2.326	11.883	5.974	3.375	2.843	3.462	2.872	3.694	28.763	3.97	7.903	5.071	4.17	8.052	7.795	8.564	14.499	3.751	5.038	9.13	11.525	30.189		0.768559	7.42906
21.088	3.938	5.187	3.8728	3.573	5.099	22.296	18.9961	3.6256	3.5453	2.252	2.1632	8.026	16.772	2.8645	1.9254	2.964	12.932	5.677	3.018	3.164	3.169	3.361	4.899	32.51	3.002	8.163	4.317	5.534	9.695	8.375	9.087	14.952	3.816	4.487	10.36	11.047	29.883		0.772924	8.06886
21.2071	5.375	5.511	3.8015	4.354	4.309	31.597	23.1265	3.1402	3.1631	2.6345	2.2627	7.997	18.8107	2.3158	1.6979	2.048	12.885	7.726	3.665	3.237	3.946	4.048	5.278	35.949	2.623	7.749	4.099	5.049	9.752	9.148	9.843	14.221	4.737	3.783	12.519	14.121	35.866		0.777289	8.98346
21.3263	3.98	5.572	3.656	3.781	5.106	46.335	27.1619	3.2156	3.5664	2.9665	2.2936	7.531	16.8496	2.005	2.0643	2.171	14.399	6.755	3.599	3.552	2.221	3.251	7.572	34.218	2.101	7.982	4.771	4.541	10.325	10.633	9.902	16.093	4.9	5.259	12.437	14.494	36.565		0.781658	9.56284
21.4454	4.333	5.965	4.6479	4.578	5.159	59.194	30.9021	4.6942	3.3848	2.2356	2.5079	9.118	15.7407	2.2132	1.6922	2.182	16.006	7.35	2.93	3.478	3.132	3.546	8.467	34.155	1.738	6.51	4.967	4.267	10.4	11.527	10.222	14.547	4.044	5.942	16.146	14.854	37.902		0.786024	10.2886
21.5646	5.525	7.592	5.6442	4.481	5.719	61.964	31.0777	3.9452	3.7407	2.3828	2.2573	8.4	14.6749	2.3256	2.708	1.871	16.052	8.597	3.716	3.867	3.887	5.388	8.728	37.226	1.705	7.85	4.531	5.335	12.669	12.797	8.589	12.899	6.368	6.419	18.843	14.112	41.24		0.790393	10.9494
21.6837	6.408	9.126	6.9193	6.129	8.371	59.244	28.7825	3.2437	4.3442	1.739	3.1952	9.516	15.2081	2.2961	2.1836	2.163	18.706	9	4.411	4.219	3.817	5.303	14.779	36.343	1.638	7.791	4.761	4.691	13.468	14.825	10.803	13.077	5.985	7.867	23.664	20.121	42.542		0.794758	11.8022
21.8029	5.286	11.929	6.912	6.847	10.175	34.334	27.4093	3.5033	3.6395	2.4899	2.8122	9.397	12.4891	2.4585	2.1436	2.829	18.739	9.031	3.975	3.315	4.069	5.659	19.314	35.309	1.261	9.205	5.654	5.484	15.137	16.833	10.889	14.754	5.633	8.381	28.792	31.878	44.268		0.799127	11.9523
21.922	6.413	14.048	8.4261	8.296	16.213	20.035	21.079	3.3607	2.8226	2.0553	2.8175	12.691	13.0206	1.6372	2.1859	1.991	17.488	10.339	4.034	3.531	3.715	5.338	25.876	34.485	1.105	9.218	6.522	5.616	17.647	19.852	11.253	18.863	5.188	9.792	33.823	41.63	48.115		0.803492	12.7168
22.0411	6.8	15.749	10.1273	11.84	30.407	11.13	19.5809	4.4155	3.3737	2.0077	2.8858	13.106	12.4454	2.4624	2.4113	1.949	17.497	10.034	4.658	4.099	3.31	5.995	35.406	33.542	1.066	11.365	6.958	5.114	18.611	22.693	13.516	19.004	7.33	14.729	35.147	48.159	45.896		0.807858	13.9141
22.1603	6.277	16.336	12.9908	14.658	48.646	6.869	16.2797	3.7004	4.4068	2.2244	3.548	14.611	12.1501	2.2462	1.7402	2.625	18.737	10.62	5.976	4.315	4.023	7.145	45.823	30.328	0.858	13.767	8.465	6.509	20.468	23.38	15.758	21.902	5.721	24.903	35.111	53.27	47.42		0.812226	15.5083
22.2794	6.684	17.657	11.0237	20.534	60.915	3.938	15.239	4.5264	3.8361	2.3184	3.2582	16.431	10.1297	1.8754	2.2159	2.024	18.857	13.875	5.159	3.978	4.114	9.436	54.793	18.819	0.531	15.539	8.606	7.255	25.417	28.907	16.619	20.702	6.325	35.969	36.142	65.129	48.597		0.816592	16.9561
22.3986	6.793	24.026	11.1302	29.9	77.029	4.006	12.9603	6.063	3.3456	2.2623	3.4555	22.934	10.1745	1.9463	1.3372	1.995	16.845	16.52	5.542	4.952	4.136	10.552	54.341	16.915	0.599	14.599	8.785	5.976	28.418	29.535	16.977	23.678	7.406	47.574	31.545	65.66	40.242		0.820961	18.1123
22.5177	7.815	27.944	11.7316	36.863	79.692	3.264	15.4126	4.9695	4.7346	1.9002	3.2872	21.977	10.7175	1.8509	1.9355	2.269	17.181	18.705	6.108	4.962	4.778	14.521	55.303	12.017	0.562	16.235	11.478	8.012	26.142	29.114	20.384	24.369	5.83	59.008	27.121	57.632	42.992		0.825326	18.887
22.6368	7.738	34.004	13.3891	44.13	70.171	2.129	18.9363	5.6497	3.8842	2.0622	3.7908	21.984	9.352	1.976	2.004	2.318	18.738	22.799	8.233	5.557	4.522	18.82	49.98	8.461	0.745	15.261	13.312	10.427	20.806	29.23	20.663	24.624	6.356	66.653	24.817	47.894	38.197		0.829691	18.9085
22.756	9.498	37.254	13.9049	42.874	45.217	1.698	19.3397	6.0175	3.5506	2.9273	3.122	23.008	8.2204	1.7619	2.2171	2.499	17.261	29.802	8.559	5.483	3.713	25.31	46.517	6.186	0.67	17.617	13.655	10.349	18.592	30.186	24.033	25.709	8.236	69.459	18.445	39.654	36.673		0.83406	18.3573
22.8751	12.286	43.483	13.6659	34.14	21.097	1.874	19.8547	5.8042	3.931	2.4742	3.3502	23.812	8.2561	2.3117	2.3494	2.36	16.66	35.853	8.79	5.671	4.337	36.988	39.682	4.606	0.509	20.924	16.53	9.503	13.584	28.402	27.451	26.588	9.277	71.884	12.777	35.684	37.277		0.838426	17.9467
22.9943	15.348	44.587	12.172	28.438	8.654	1.565	20.1333	6.4669	5.1572	2.1233	3.4235	29.12	7.0336	2.2885	2.1095	2.247	19.549	39.621	9.199	6.992	5.376	42.597	36.158	3.895	0.516	21.378	18.219	13.195	9.403	29.583	29.818	27.228	9.442	72.568	8.385	29.94	35.379		0.842795	17.8191
23.1134	20.318	39.109	10.0724	21.388	5.286	1.477	17.5319	6.74	4.9338	2.4176	5.0341	27.786	7.762	2.2969	1.8383	2.458	17.813	45.025	10.607	7.04	5.134	47.455	30.577	3.342	0.482	23.921	18.742	14.118	4.195	27.136	34.21	26.175	11.212	81.748	6.799	26.938	34.779		0.84716	17.6729
23.2325	24.253	31.814	8.0176	14.758	4.671	0.836	13.9617	7.4034	4.7106	2.2265	4.4848	31.578	6.8161	1.7516	2.4139	2.149	20.081	55.366	10.96	6.959	5.567	51.483	29.366	2.898	0.197	23.564	22.184	15.02	3.829	22.533	37.402	27.226	15.029	75.868	4.609	22.279	30.893		0.851525	17.4367
23.3517	32.482	24.734	6.4138	7.917	3.648	1.045	9.1716	9.8937	5.7213	3.643	5.2874	30.38	6.3366	2.3637	2.5667	2.706	21.303	61.191	12.818	10.039	6.729	55.095	25.509	2.161	0.172	22.074	22.315	19.615	2.25	20.785	38.232	27.35	13.833	67.324	3.629	17.25	27.816		0.855894	17.0757
23.4708	37.395	18.456	6.1562	3.992	3.059	0.939	5.5049	11.9529	5.4266	3.3133	6.8455	32.299	6.2117	2.2522	2.4625	2.344	22.116	63.777	15.773	13.212	8.27	58.093	17.719	1.495	0.307	20.652	23.174	23.161	2.227	15.78	40.817	21.883	20.686	49.74	2.015	12.398	24.606		0.860259	16.3922
23.59	35.316	15.316	4.4563	2.765	2.613	0.811	3.4148	18.8213	6.1006	4.2431	6.8519	31.066	6.787	1.544	2.6575	2.038	20.66	68.739	16.291	12.499	9.921	55.902	13.651	1.388	0.598	16.61	24.301	25.54	1.886	10.798	41.618	22.504	29.051	35.527	2.53	10.296	19.615		0.864628	15.8034
23.7091	35.713	9.813	2.9492	2.761	3.268	0.468	2.8587	27.6217	5.7996	4.32	8.5779	30.075	6.6053	2.1568	1.9703	3.052	17.501	66.361	19.803	13.305	12.488	51.229	8.098	1.355	0.357	17.329	28.161	26.074	1.413	7.157	43.554	23.875	35.733	15.939	2.379	8.509	16.018		0.868994	15.2607
23.8283	34.325	4.774	3.5072	2.606	3.318	0.55	2.5349	39.2004	6.6302	3.4254	11.8357	27.183	7.8584	1.9214	1.7573	3.544	16.124	68.996	23.381	17.262	14.408	38.109	5.191	1.124	0.365	13.217	28.665	22.457	1.839	5.017	46.047	23.803	47.229	6.957	1.619	6.927	12.965		0.873363	15.0452
23.9474	28.621	3.362	3.744	1.967	2.213	0.705	2.0699	49.8496	9.0852	4.2675	12.5582	23.359	7.1637	2.4215	2.3224	3.825	12.063	63.09	25.081	17.633	16.427	26.319	4.675	0.681	0.09	11.178	34.843	14.932	1.357	5.24	53.059	25.982	52.699	4.157	1.739	6.112	11.788		0.877728	14.7751
24.0665	21.597	3.483	2.6278	1.628	2.519	0.626	1.5207	64.0329	11.6508	4.6348	16.6389	23.057	8.2954	3.1328	2.9545	3.835	11.739	51.189	26.556	17.131	21.04	18.999	2.266	0.824	0.04	9.091	36.676	10.545	1.481	5.045	55.953	30.436	57.614	2.325	1.767	5.133	10.575		0.882093	14.8286
24.1857	13.266	3.437	3.6965	1.073	2.375	0.819	2.1317	70.5708	12.8461	5.7694	21.9015	19.382	10.7557	2.2821	2.5546	5.503	7.351	44.467	26.802	19.215	29.369	10.694	2.792	1.169	0.073	7.748	38.523	6.755	1.665	3.19	55.598	26.484	60.55	2.13	1.985	4.516	8.29		0.886462	14.5332
24.3048	6.348	2.566	2.98	1.752	2.266	0.69	2.4731	71.2231	16.0488	6.1712	19.6074	17.727	10.0306	1.982	2.2135	7.429	5.159	33.646	26.014	18.781	28.676	7.078	1.48	0.517	0.299	6.937	39.958	5.51	1.42	3.257	53.951	32.337	56.16	2.268	0.794	3.889	6.951		0.890827	13.6916
24.424	5.009	2.608	2.4522	1.237	1.537	0.605	2.1225	73.2994	20.0589	6.469	21.8492	16.197	11.9097	2.2087	2.1525	10.517	4.974	27.419	19.592	18.13	33.051	6.024	1.183	0.365	0.043	5.513	35.215	4.611	0.787	3.227	52.412	37.705	49.831	1.578	1.106	3.319	5.574		0.895196	13.2944
24.5431	4.02	2.079	1.9536	1.598	1.386	0.554	1.7541	69.1541	21.9524	8.8298	21.5572	13.513	10.2224	2.5712	3.0133	13.194	3.362	16.607	15.931	16.672	33.982	4.517	1.556	0.713	0.584	3.094	32.311	3.258	0.787	2.188	48.57	39.839	42.268	1.298	0.809	2.211	4.543		0.899562	12.2284
24.6622	3.167	1.187	1.7493	1.472	1.31	0.343	1.2467	65.8317	24.3641	10.4559	19.8183	12.357	14.8995	2.5287	4.0194	16.019	3.257	9.226	12.498	11.957	29.695	4.198	1.134	0.287	0.414	3.704	23.374	3.644	0.764	2.411	47.257	42.461	38.91	1.547	1.055	2.446	4.594		0.903927	11.5027
24.7814	2.316	1.562	1.3501	1.481	1.081	0.91	1.355	58.2097	27.2532	9.4145	18.2109	11.607	14.9325	2.5084	4.4171	16.368	3.802	7.621	10.171	9.11	25.698	2.799	1.564	0.536	0.194	2.884	14.41	3.231	1.109	2.009	42.775	47.265	40.362	1.629	1.198	0.911	3.391		0.908296	10.6931
24.9005	1.912	1.613	1.1944	1.395	0.686	0.717	1.1316	50.9559	27.1762	10.7111	14.5877	10.202	17.5128	2.7697	3.8316	17.376	3.021	5.461	7.213	6.052	19.304	2.564	1.39	0.653	0.119	1.903	9.804	2.432	0.902	1.807	36.741	52.473	39.955	1.517	0.96	1.87	2.434		0.912661	9.79316
25.0197	1.953	1.623	1.9677	0.842	0.752	0.42	1.0867	45.3828	26.2098	12.4566	13.0949	6.976	17.7345	3.0224	3.8973	20.865	1.917	5.456	4.793	4.653	14.731	2.036	1.094	0.539	0	2.435	8.146	2.317	1.087	1.032	31.663	54.89	31.626	1.83	0.824	1.149	2.36		0.91703	8.99626
25.1388	2.008	1.249	1.6619	0.892	0.327	0.314	1.79	38.9988	29.1946	16.2826	10.5831	7.083	16.7937	2.2659	4.8819	20.341	1.773	5.182	5.063	5.01	12.677	1.529	0.788	0.249	0.001	1.55	5.078	2.603	0.84	1.303	24.098	57.224	19.955	1.337	1.246	1.67	1.788		0.921395	8.26028
25.258	1.751	0.983	1.0049	0.792	0.242	0.206	1.0969	25.1974	32.0704	20.0914	10.1698	6.52	18.4712	2.9886	5.6155	18.548	1.578	3.418	3.793	3.536	10.207	1.383	1.107	0.141	0.11	1.709	4.802	1.521	0.614	1.152	20	61.251	10.35	1.166	0.65	1.385	1.615		0.925764	7.49287
25.3771	1.328	0.887	1.065	1.052	0.281	0.26	0.6335	17.7935	29.5454	23.0735	8.8229	4.107	17.8083	2.4995	6.8699	14.699	1.655	4.02	2.849	2.833	6.052	1.12	0.735	0.31	0.052	1.834	3.897	1.297	0.378	0.836	15.49	64.794	7.58	1.038	0.675	1.066	0.983		0.93013	6.76269
25.4962	0.874	0.667	0.6871	0.706	0.211	0.262	0.5429	10.1972	32.3558	26.286	4.518	3.893	16.8502	3.0409	8.6235	11.877	1.329	3.517	2.261	2.536	5.091	0.931	0.377	0.177	0.221	1.318	2.548	1.116	0.579	0.965	10.75	57.922	6.188	0.803	0.47	1.173	0.636		0.934495	6.0135
25.6154	0.92	0.665	0.7711	0.434	0.362	0.279	0.747	6.7459	32.7402	23.9764	3.0108	3.329	19.7924	2.8083	11.0997	8.301	1.044	2.425	2.213	1.892	4.81	0.854	0.159	0.305	0.133	1.381	3.043	0.546	0.421	0.648	9.206	48.954	4.694	0.95	0.425	0.585	0.915		0.938864	5.44824
25.7345	1.502	0.833	0.8134	0.309	0.213	0.285	0.8441	4.2184	32.2261	22.0419	3.0146	2.668	19.1425	3.6573	12.2306	4.839	0.825	2.406	2.034	1.607	3.916	0.582	0.407	0.269	0.009	0.911	2.03	0.723	0.154	0.716	7.639	40.143	3.511	0.984	0.281	0.819	0.855		0.943229	4.85565
25.8537	1.082	0.973	0.5989	0.178	0.377	0.186	0.7481	3.0306	26.2903	20.3543	2.2919	2.347	20.2134	3.4316	14.5721	3.698	1.237	2.163	1.488	1.338	3.364	0.744	0.251	0.207	0.102	1.093	2.466	0.976	0.463	0.748	4.643	32.701	2.665	0.6	0.411	0.549	0.826		0.947598	4.3083
25.9728	1.113	0.412	0.7556	0.489	0.464	0.109	0.4837	2.4359	24.8211	17.0111	2.3438	2.311	19.3006	3.5604	16.5016	2.896	1.029	2.163	1.304	1.344	1.743	0.286	0.339	0.373	0.008	1.244	2.777	0.423	0.262	0.401	4.489	22.611	1.838	0.314	0.618	0.301	0.666		0.951963	3.77137
26.0919	0.664	0.514	1.0166	0.51	0.393	0.025	0.4195	1.5674	20.8066	13.9923	2.515	2.122	19.4178	4.8024	17.3406	2.477	1.1	1.085	1.084	1.531	1.789	0.587	0.749	0.18	0.002	0.879	1.956	1.046	0.262	0.297	3.342	19.429	1.963	0.566	0.422	0.632	0.607		0.956329	3.46192
26.2111	0.577	0.214	1.0957	0.464	0.138	0.362	0.5893	1.3773	15.0497	13.6311	2.6582	1.891	17.1317	4.6157	20.8052	2.489	0.56	1.775	0.855	0.963	2.276	0.732	0.247	0.454	0.277	0.77	2.329	0.711	0.148	0.67	2.444	14.798	2.185	0.671	0.629	0.571	0.625		0.960698	3.18321
26.3302	0.607	0.297	0.3393	0.343	0.217	0.258	0.4664	0.7504	10.2089	9.2999	1.6993	1.323	13.4859	6.3511	23.2426	2.319	0.706	1.347	0.809	0.639	1.526	0.477	0.228	0.23	0.135	0.739	1.734	0.634	0.242	0.602	2.438	11.33	1.041	0.348	0.749	0.447	0.642		0.965063	2.65543
26.4494	0.635	0.289	0.5732	0.26	0.266	0.085	0.3041	0.6651	7.6521	7.9286	1.4818	1.165	8.7675	10.5099	21.5124	1.119	1.473	0.595	0.789	0.803	1.277	0.222	0.259	0.054	0.001	0.8	1.353	0.56	0.211	0.642	1.826	8.945	0.904	0.406	0.255	0.343	0.404		0.969432	2.30637
26.5685	0.57	0.073	0.6333	0.538	0.238	0.197	0.6162	1.38	5.4591	5.586	1.6348	1.21	5.7667	13.1298	20.1321	0.858	0.981	0.787	0.608	0.59	0.888	0.231	0.387	0.303	0.133	0.595	0.769	0.704	0.076	0.474	1.585	7.57	0.453	0.348	0.151	0.443	0.15		0.973797	2.06076
26.6876	0.256	0.143	0.3644	0.281	0.243	0.057	0.4344	0.9003	3.963	4.0683	1.1053	1.412	4.7412	21.2028	16.9189	1.353	0.699	0.686	0.352	0.657	0.757	0.171	0.642	0.211	0.136	0.661	1.064	0.697	0.107	0.589	1.428	5.801	0.752	0.164	0.315	0.37	0.156		0.978163	1.99618
26.8068	0.473	0.345	0.2573	0.17	0.259	0.014	0.1487	0.8565	1.6506	2.7689	0.8567	1.462	3.7974	25.0727	15.0965	0.797	0.41	0.998	0.414	0.541	0.449	0.12	0.183	0.032	0.048	1.131	0.55	0.751	0.121	0.591	1.42	4.176	0.744	0.14	0.224	0.198	0.329		0.982532	1.8269
26.9259	0.609	0.232	0.2109	0.229	0.196	0.041	0.2864	0.6228	1.5998	1.5454	0.5814	0.831	3.3038	27.1908	12.598	1.039	0.76	1.051	0.739	0.472	0.412	0.008	0.143	0	0.024	0.599	0.779	0.498	0.051	0.376	1.191	3.626	0.861	0.377	0.236	0.297	0.271		0.986897	1.72668
27.0451	0.675	0.122	0.2401	0.026	0.118	0.161	0.1401	0.8483	0.8725	1.7586	0.5658	1.081	2.9141	26.5231	9.5746	0.957	0.355	0.424	0.836	0.421	0.482	0.101	0.118	0	0.048	0.66	0.525	0.408	0.364	0.203	1.15	3.397	0.57	0.133	0.09	0.3	0.262		0.991266	1.55201
27.1642	0.574	0.183	0.2591	0.074	0.235	0.255	0.0119	0.4647	1.1856	1.7071	0.3849	0.945	1.4212	25.2642	7.3843	0.801	0.219	0.22	0.157	0.24	0.284	0.238	0.25	0.082	0.05	0.527	0.672	0.377	0.234	0.328	0.726	3.297	0.215	0.142	0.029	0.096	0.216		0.995631	1.34457
27.2834	0.374	0.051	0.188	0.221	0.145	0.311	0.2596	0.5399	0.9265	1.0214	0.5824	0.477	0.8749	20.2458	4.3793	0.811	0.458	0.412	0.297	0.196	0.468	0.364	0.188	0.147	0.006	0.335	0.915	0.285	0.14	0.152	0.649	3.063	0.279	0.181	0.003	0.258	0.348		1	1.09599

## Sheet: Image5
X0	Y0	Y1	Y2	Y3	Y4	Y5	Y6	Y7	Y8	Y9	Y10	Y11	Y12	Y13	Y14	Y15	Y16	Y17	Y18	Y19	Y20	Y21	Y22	Y23	Y24	Y25	Y26	Y27	Y28	Y29	Y30	Y31		Ap-Ba	Avg int
0	17.058	18.516	12.798	13.9875	16.269	71.523	16.683	21.694	23.53	26.455	22.058	40.9117	48.4119	55.839	8.442	12.85	7.559	15.011	19.5239	12.792	19.1667	18.2793	16.5424	19.3123	10.9886	13.1737	22.85	20.7436	27.8376	16.8419	7.6819	9.1093		0	21.3887
0.1191	18.13	19.224	11.487	17.1739	20.788	75.055	18.119	24.347	23.35	30.472	22.997	40.5133	42.9876	65.825	8.641	17.941	8.404	18.127	23.4155	12.992	20.7587	19.1771	17.8186	18.9809	10.7995	14.2231	26.1741	22.0035	28.0192	20.78	7.2417	9.8586		0.00598595	22.9945
0.2383	23.65	20.471	14.201	22.1195	23.483	84.117	19.971	26.133	25.806	30.388	25.468	41.9537	40.9175	81.122	9.954	25.851	9.399	21.233	30.0672	22.762	20.9164	20.3641	19.7937	20.8966	11.9455	17.0316	34.0938	25.205	27.345	18.6418	8.6426	10.974		0.0119769	26.0912
0.3574	29.269	24.99	15.12	28.4771	26.203	80.456	24.667	29.437	26.899	33.379	26.728	48.3474	42.0309	93.294	14.177	36.187	12.111	23.53	34.1596	35.653	22.1438	21.4039	22.6631	22.7404	14.2212	17.3291	37.6301	27.6202	26.9644	21.4175	9.3281	11.9192		0.0179629	29.3905
0.4766	33.088	26.792	15.177	30.8646	36.891	91.415	27.689	36.982	25.799	38.876	34.738	52.2275	39.5178	119.951	14.716	48.694	18.677	31.892	44.1359	57.31	25.3609	22.6399	22.7745	21.9962	14.6497	19.6046	39.012	26.3283	25.4294	22.8353	10.1822	12.9914		0.0239538	34.0387
0.5957	37.732	30.172	17.723	40.0106	48.764	96.49	29.182	44.019	35.061	41.561	38.663	57.5211	39.566	146.875	16.963	64.976	32.735	34.135	57.954	87.043	35.5212	22.3651	26.5514	22.5992	13.5068	20.6549	37.4748	27.2346	27.1317	22.7051	10.2787	14.659		0.0299398	39.9321
0.7148	39.808	40.062	24.243	48.0861	69.567	99.425	38.671	58.992	37.399	49.541	45.875	62.3892	42.8681	163.597	23.976	83.784	51.772	38.971	67.5532	107.756	37.2334	22.0174	24.2958	23.2337	15.482	17.7224	41.425	23.9606	28.3483	22.6171	13.2962	12.9386		0.0359257	46.1533
0.834	44.086	61.016	26.399	57.2693	97.013	103.527	48.906	78.164	50.322	63.598	58.774	64.3918	45.1445	169.906	34.502	104.734	66.511	43.01	82.9762	123.502	40.2081	23.2761	23.8904	22.9391	15.3304	17.0403	43.0598	24.9513	31.6296	21.9775	15.7842	15.561		0.0419167	53.7312
0.9531	50.519	92.514	35.363	58.9761	122.259	103.888	62.445	92.751	68.814	82.35	70.128	71.581	51.7694	178.94	48.11	118.401	90.242	55.391	91.8419	135.231	45.7534	23.5117	25.0853	21.3728	15.2271	16.9127	39.7674	30.3398	33.0663	22.8652	18.6876	21.1185		0.0479027	62.3507
1.0723	57.854	135.731	47.238	72.199	142.636	110.053	81.651	108.691	84.316	111.176	84.267	76.3663	52.0947	180.37	63.455	131.956	108.796	65.11	99.5421	145.007	44.4905	24.4727	21.5137	22.9503	14.2824	20.0075	43.1696	32.7453	34.5647	26.7498	26.225	22.8125		0.0538936	71.6404
1.1914	72.739	174.957	60.673	85.5955	166.876	113.696	103.359	120.471	106.781	144.546	99.154	83.1893	59.9469	178.833	79.755	152.672	128.037	73.753	98.1658	153.085	49.6984	27.0908	21.7545	22.7829	17.4427	25.6696	44.7999	36.9058	38.2609	25.283	33.2939	28.2802		0.0598796	82.1108
1.3106	85.875	202.944	83.611	90.6605	191.591	131.993	124.974	132.27	116.681	168.797	119.004	81.3391	67.3406	185.18	96.322	166.546	164.58	90.186	100.663	147.295	49.6889	27.4246	24.0835	24.3351	17.9027	30.5004	50.8437	40.0197	37.22	26.7824	40.1293	31.8542		0.0658706	92.1449
1.4297	102.188	218.484	109.792	90.057	187.113	150.064	145.171	130.356	125.948	192.749	129.01	85.371	75.2131	185.476	109.08	179.639	184.926	104.274	95.4196	147.525	50.1382	27.8354	23.1907	26.2637	19.3329	36.0967	50.0007	43.5317	30.8448	29.005	47.9129	36.1313		0.0718565	99.0044
1.5488	122.148	233.329	129.987	94.7514	188.045	171.485	158.767	130.473	140.303	207.214	146.083	84.2651	84.1251	177.63	115.38	186.955	193.534	111.528	93.4185	148.721	51.5039	24.4006	23.6109	26.8611	20.5818	38.1654	50.9172	42.6107	33.7298	29.9756	53.6489	39.9653		0.0778424	104.816
1.668	137.773	243.906	133.479	94.2349	172.001	185.273	152.577	127.849	149.331	218.648	162.575	81.1223	85.4312	173.923	122.797	204.634	200.486	116.383	88.7703	143.584	46.3786	28.4084	22.3643	25.2087	24.1583	36.9968	48.2322	46.1605	34.463	32.598	61.953	40.4246		0.0838334	107.566
1.7871	163.694	246.996	143.892	94.997	163.407	174.209	133.855	116.757	148.124	224.627	171.184	73.2994	85.461	169.244	124.88	200.779	196.399	123.325	80.5395	130.509	42.043	28.0869	19.7129	23.4681	28.5854	36.1788	42.4403	50.3714	31.5495	38.1387	69.7633	43.8207		0.0898194	106.886
1.9063	187.748	248.747	133.631	83.0037	137.872	142.953	103.98	99.802	148.252	222.787	168.588	63.5135	92.6223	163.842	121.857	197.022	200.35	118.29	69.4105	125.529	39.031	27.9217	21.4092	27.2079	26.2103	37.1689	43.1509	49.8485	33.9482	39.2414	72.5394	45.7851		0.0958103	102.914
2.0254	211.781	250.242	112.875	77.7072	107.041	107.024	81.255	97.97	146.417	221.385	166.284	61.2401	91.4272	160.67	111.043	191.018	194.058	113.873	60.6189	118.318	32.5397	25.2352	21.2111	28.4774	25.7084	37.6963	38.3268	55.2063	30.2447	40.6984	74.5773	51.3211		0.101796	98.2341
2.1445	224.825	246.52	100.72	67.8602	84.777	63.562	65.315	89.197	136.422	206.75	167.134	54.6369	83.9759	162.961	101.003	176.496	190.178	114.066	54.5437	119.453	31.749	23.2631	22.3623	25.0322	26.8121	41.3856	36.914	53.0515	30.482	38.3051	75.4949	51.9144		0.107782	92.7238
2.2637	235.925	242.589	78.848	60.248	64.659	43.608	55.209	75.499	127.513	186.644	155.17	48.2944	84.7848	169.618	88.756	152.786	185.543	102.193	50.4401	117.116	26.8325	22.7925	22.1133	25.4154	31.7732	42.4075	36.5989	47.2148	28.2546	35.1469	78.0087	52.8657		0.113773	86.7146
2.3828	237.248	240.054	58.059	52.8099	53.379	29.524	49.965	60.583	112.49	161.071	144.999	43.7342	75.2508	184.069	72.78	120.974	185.164	94.066	53.1768	112.563	24.1234	24.0894	19.7228	24.2547	35.6867	41.7385	30.9556	43.4205	29.3111	34.1407	79.4635	50.0243		0.119759	80.5903
2.502	231.186	232.369	44.941	53.3316	42.334	23.351	46.4	47.712	84.391	137.484	137.474	33.9519	64.5458	195.258	58.899	91.085	187.639	89.517	45.532	114.525	23.4031	22.1678	22.2641	24.2666	40.0088	40.2355	26.1734	41.6617	26.0327	30.1451	80.1109	50.2725		0.12575	74.6459
2.6211	228.085	214.726	29.07	47.5173	36.041	21.432	44.46	40.221	62.425	120.581	115.655	32.6259	50.1276	200.97	47.802	71.098	192.698	83.733	40.8748	110.228	20.6054	21.9398	21.4019	25.2293	38.8039	41.356	26.9141	36.48	24.4261	27.824	78.3647	50.8717		0.131736	68.8934
2.7402	224.114	185.623	24.825	39.6313	33.904	18.542	47.401	33.634	47.972	94.692	110.816	25.165	43.3594	198.639	40.092	54.858	189.322	73.329	34.9811	103.54	19.1929	23.3505	25.0365	22.7859	45.0658	41.8375	24.4529	39.2909	23.8696	24.7567	72.4265	51.3749		0.137722	63.6838
2.8594	220.013	148.816	18.306	33.5545	31.214	16.376	43.697	30.077	37.453	84.152	99.38	20.0133	36.6343	185.738	30.911	39.196	194.25	61.112	33.4249	97.368	16.9674	25.0727	21.8818	23.1171	48.633	45.3819	24.3642	36.2006	23.6508	20.4749	69.8493	50.4723		0.143713	58.3672
2.9785	213.955	121.817	13.453	26.5204	26.732	19.584	38.881	28.161	29.663	68.694	85.409	17.7217	33.8291	166.468	24.101	30.626	190.397	51.613	31.9444	102.735	16.8884	25.2835	25.2054	21.9006	52.0975	41.7288	23.0283	39.1628	22.4914	17.1054	62.8777	49.4815		0.149699	53.7361
3.0977	205.778	83.403	13.113	24.2831	25.155	15.865	38.567	29.615	24.139	52.287	71.891	15.9125	31.7865	156.259	21.404	23.314	172.06	42.588	33.2283	99.54	17.9577	26.4605	22.9953	21.5764	58.4568	41.4937	20.6658	39.6915	20.2208	15.6124	61.0542	40.962		0.15569	48.9792
3.2168	192.528	65.067	10.582	21.23	21.792	18.476	39.362	27.596	19.045	39.887	52.836	14.8152	26.9429	131.614	17.815	18.282	154.496	33.444	29.5033	99.662	17.295	28.9146	23.537	22.2727	62.5546	42.194	23.5036	35.9492	18.7008	13.165	49.681	35.2367		0.161676	43.9994
3.336	174.105	45.661	8.502	22.6016	22.184	18.594	37.657	27.33	15.255	39.81	38.43	12.5293	25.1773	104.559	14.627	15.347	134.06	23.701	28.3561	102.496	15.1089	33.1776	24.3958	20.3701	68.9318	43.3618	23.8275	34.1675	18.521	13.5543	43.5797	32.127		0.167667	40.0658
3.4551	159.86	32.463	6.253	20.1277	18.286	18.761	30.274	30.043	14.167	31.988	29.406	12.8283	25.9643	80.986	13.39	14.999	105.492	19.825	25.3452	101.165	16.5457	35.2329	24.0467	19.3654	72.958	40.2771	19.1966	31.7714	19.3737	12.9843	39.8894	26.792		0.173653	35.9393
3.5742	138.723	25.733	4.979	21.1768	17.313	16.14	27.022	30.702	11.006	26.242	22.401	12.6313	20.7245	63.358	11.893	12.632	78.08	12.972	25.1876	104.279	15.5429	37.6399	23.5844	16.6185	70.7829	42.7837	18.7362	30.4321	19.0067	11.0687	35.8733	23.6718		0.179639	32.1543
3.6934	121.908	15.817	5.162	21.7091	17.471	15.295	26.27	30.189	10.058	19.256	19.742	12.1889	21.2246	51.678	9.862	12.816	48.123	8.989	23.1025	95.729	15.6334	41.822	22.8034	15.9698	74.5132	34.4732	19.88	27.1807	18.6318	10.3089	31.3472	18.2335		0.18563	28.6684
3.8125	90.014	12.35	5.913	32.3671	14.696	14.975	27.007	23.067	8.778	17.89	17.054	14.9282	19.2061	43.342	8.55	11.838	34.217	8.144	21.8704	84.412	14.7987	43.631	22.5987	14.421	79.608	34.4693	16.9259	24.0496	19.0658	10.5742	26.8715	15.9582		0.191616	26.0497
3.9317	66.798	8.117	6.847	30.2756	15.634	13.04	25.255	16.158	9.256	15.436	11.02	12.5662	14.382	34.286	8.194	10.91	19.992	7.045	23.0922	73.743	15.0303	45.266	22.2129	15.354	82.6877	32.6878	18.9253	23.8845	19.8522	9.4857	21.8549	12.0535		0.197607	23.1669
4.0508	51.126	5.842	10.365	29.096	15.052	13.532	24.006	14.498	8.833	10.992	8.991	10.7315	14.7425	23.259	7.776	11.584	14.194	6.335	20.9768	56.522	12.8884	47.2306	22.8504	14.087	79.3751	31.7652	17.3831	21.4472	21.9389	8.1728	17.0754	9.8398		0.203593	20.7034
4.1699	36.12	4.491	11.285	30.0052	14.837	17.01	27.023	11.595	7.149	8.738	8.783	11.796	13.758	21.567	7.341	11.176	8.969	5.266	21.0135	46.197	15.3454	47.5963	20.7982	11.7219	83.1148	31.446	16.2897	21.1051	22.8341	7.5354	13.5674	8.1302		0.209579	19.4876
4.2891	25.023	4.363	10.467	26.6738	13.403	16.183	24.966	10.632	6.255	9.643	8.361	14.2661	13.2327	16.368	6.279	10.355	7.531	5.858	21.6449	35.704	13.6159	43.8707	20.2021	11.6079	83.3116	28.8985	16.2399	19.9481	22.8235	7.9941	12.24	5.8015		0.215569	17.9301
4.4082	17.68	3.221	10.36	28.1931	14.559	17.415	25.505	11.709	5.889	7.67	6.198	13.6632	13.5806	13.816	6.076	9.755	6.334	4.613	20.9784	27.13	12.8697	44.2748	20.1423	11.6141	80.9026	27.766	16.0295	18.8624	23.6791	7.273	9.554	4.6741		0.221555	16.9371
4.5274	14.138	2.558	9.676	24.8084	17.174	17.964	27.177	11.46	5.188	6.792	6.456	12.65	12.2026	12.903	5.978	11.12	6.595	4.99	23.2019	23.71	16.4765	42.1346	21.7134	9.6303	72.5036	23.486	13.5762	16.9261	23.5595	7.1119	8.1173	4.1022		0.227546	16.1275
4.6465	11.041	2.341	7.965	27.1379	16.693	20.25	28.72	9.206	5.142	6.304	6.201	15.5449	10.0162	10.757	5.259	11.145	4.767	4.483	23.8533	20.355	17.8025	39.0803	18.951	8.8623	68.2016	20.5339	14.1742	15.7256	25.5117	6.1478	6.5475	4.0333		0.233532	15.3985
4.7657	8.557	3.108	7.267	30.1426	15.027	22.547	24.741	8.414	4.942	6.004	5.528	15.8862	11.7557	10.479	5.355	10.63	4.078	4.846	22.6098	18.682	18.6598	40.8298	17.9422	10.3717	59.8179	20.0174	16.7648	15.1398	22.788	6.7266	4.75	3.6231		0.239523	14.9384
4.8848	6.743	3.634	6.177	29.5851	13.425	27.365	26.808	7.914	2.939	5.157	4.968	19.8847	11.0436	8.625	4.773	9.156	3.472	3.737	20.0669	15.245	22.1971	38.0637	18.1849	8.5283	46.9782	16.5926	15.3835	12.9389	20.9292	6.0236	5.9893	3.8501		0.245509	13.9493
5.0039	5.502	3.451	5.203	29.5362	15.125	27.26	26.787	7.262	4.509	5.341	4.768	19.5511	12.1699	8.356	5.186	8.468	3.791	4.061	19.9862	12.321	22.9567	39.8109	17.8431	9.0707	42.01	13.757	13.8963	13.8744	21.7691	6.5113	4.1307	4.0468		0.251495	13.6972
5.1231	4.217	3.156	6.035	29.5416	17.462	28.797	27.483	7.266	3.84	5.836	4.711	26.6537	15.6074	7.549	5.787	9.42	3.796	3.951	19.6901	11.193	25.0641	36.5059	16.6696	8.4717	37.1556	12.8346	13.9205	12.5566	20.5441	5.7478	3.172	4.0222		0.257486	13.708
5.2422	3.819	2.871	3.506	31.9748	17.777	24.997	31.378	7.887	4.074	4.308	4.307	29.771	16.0131	7.989	5.766	7.72	2.516	4.297	17.11	10.425	22.9076	31.8993	16.5943	8.4858	32.9619	10.6817	14.3011	13.5319	21.8509	4.7973	3.5437	3.9821		0.263472	13.2514
5.3614	3.045	3.163	3.946	33.1164	21.422	22.7	28.902	7.106	3.498	4.841	3.63	33.7448	15.3549	8.649	6.851	7.047	3.87	3.726	14.3627	10.03	24.8401	27.5111	15.8675	7.78	27.8335	8.2789	17.3987	13.3779	20.5948	6.7391	3.1177	2.6331		0.269463	12.968
5.4805	2.423	3.043	5.132	35.4782	22.741	20.002	26.374	6.459	3.671	3.914	3.839	34.4244	15.2039	7.5	7.193	6.433	3.051	3.894	12.6459	8.563	20.4184	25.9547	17.3811	7.9124	25.8343	8.9338	14.226	12.7885	19.0331	5.7627	2.7834	2.5582		0.275449	12.3616
5.5996	2.199	2.86	5.833	36.5027	23.545	20.262	25.272	7.152	4.146	3.464	3.126	31.8885	13.173	6.337	7.128	6.714	3.088	4.159	13.6384	8.976	21.6765	25.8291	17.9297	7.2312	22.9143	8.4679	16.5346	12.4642	18.3271	5.5091	2.9788	3.0122		0.281435	12.2606
5.7188	1.85	2.725	4.569	42.8	21.981	19.917	24.75	6.86	3.747	4.61	3.193	33.3238	13.7254	6.209	7.61	6.519	3.128	3.348	11.8887	7.725	18.4799	25.3986	17.5661	6.5901	21.3981	6.9677	15.2349	12.6707	18.4577	5.1118	2.1927	2.8655		0.287426	11.9816
5.8379	2.25	2.579	4.443	44.8579	19.802	19.854	25.8	6.307	3.953	4.142	3.525	31.4082	15.3529	7.062	7.001	5.853	2.57	2.507	10.1092	8.052	18.5858	23.1048	16.8805	5.1466	19.9541	5.4564	17.7574	13.6711	18.6596	5.2167	2.2756	2.6976		0.293412	11.7761
5.9571	2.265	3.234	5.685	47.3199	21.061	20.892	26.336	5.142	3.223	3.792	2.687	28.7491	12.8226	6.9	9.007	7.587	2.24	3.84	10.4179	7.569	18.5799	20.9843	17.4548	5.3178	16.8097	5.2764	15.6986	14.5089	17.7648	4.5839	2.1488	2.8819		0.299403	11.6494
6.0762	2.863	3.272	5.389	52.7839	19.524	23.981	25.483	5.228	2.778	3.107	3.128	23.1721	12.9296	8.933	10.936	6.994	3.002	3.782	10.3443	7.292	17.1793	21.493	17.9606	6.2041	12.0852	5.1444	17.4032	13.006	16.7928	5.4612	2.1505	2.4194		0.305389	11.6319
6.1953	2.752	2.798	5.205	55.6432	20.808	23.322	25.626	4.689	3.141	3.658	3.491	20.7057	13.9682	7.807	12.301	5.727	2.806	2.23	8.7459	7.396	13.2218	18.6121	14.6922	6.979	8.626	4.1176	17.0173	15.5055	16.9646	4.6745	2.3403	3.5857		0.311375	11.2236
6.3145	2.795	3.651	5.582	53.5516	20.352	21.676	26.113	4.537	2.916	3.329	3.049	19.6258	12.1832	8.083	10.967	7.48	2.198	3.292	7.0067	6.937	14.6878	19.4447	14.7494	6.4739	8.3904	4.116	16.9415	11.0475	17.4196	3.7557	2.3521	3.391		0.317366	10.8779
6.4336	2.238	3.672	4.861	55.0019	20.34	26.044	24.649	5.236	3.088	3.463	3.153	18.1237	13.2472	8.282	9.352	7.434	1.732	2.706	8.4994	6.059	14.5052	17.1086	14.8115	5.1765	7.441	4.5288	16.9739	9.4811	15.5093	3.1733	2.15	2.8627		0.323352	10.6532
6.5528	3.233	2.901	4.681	56.7218	19.895	23.881	26.637	4.73	3.166	3.281	3.071	15.7168	13.8846	8.189	12.305	6.861	2.304	3.546	8.6191	5.785	12.6373	15.0952	15.6472	4.9373	7.1422	3.5886	13.7505	9.3001	14.2949	3.2623	1.977	3.0184		0.329343	10.4394
6.6719	2.288	3.624	4.824	52.4967	19.453	27.072	29.499	3.764	3.033	2.944	2.336	15.0212	13.6558	9.9	8.951	8.387	1.899	2.73	6.5455	5.828	12.2559	16.1119	15.3152	4.5897	6.371	3.6316	16.5203	9.0328	13.5551	3.518	2.2311	3.0981		0.335329	10.3276
6.7911	2.686	3.218	4.428	50.3924	24.206	26.834	29.629	3.728	2.916	2.242	2.666	14.5513	13.1239	8.398	8.352	9.289	2.45	3.158	7.4013	6.508	9.6373	12.9319	15.0053	4.3901	5.3073	4.5902	17.224	8.7028	13.6078	2.8743	1.412	2.4867		0.34132	10.1358
6.9102	2.515	3.857	3.849	45.9526	23.123	25.303	28.903	3.619	2.324	2.576	3.131	11.0334	14.9682	10.783	6.989	8.412	3.046	2.527	6.6823	6.494	10.2452	15.3126	16.9323	3.6567	4.6443	3.4081	16.7431	7.9918	12.6328	3.3058	2.1199	3.2632		0.347306	9.88573
7.0293	2.84	3.028	5.358	44.9871	20.016	26.191	30.03	4.142	2.858	2.773	2.572	9.2871	13.4462	9.873	8.591	8.46	2.334	4.251	7.5507	6.061	9.095	15.4182	16.8998	3.3635	4.1668	3.7614	19.9427	7.1378	11.0618	3.3884	1.878	2.9242		0.353292	9.80271
7.1485	3.657	2.783	4.72	44.5307	19.849	21.361	30.281	3.659	3.06	2.63	3.552	8.744	13.2976	10.625	8.591	7.806	2.705	2.998	6.9069	5.838	9.1877	13.9934	17.2293	3.316	4.9556	4.0103	17.7669	7.8082	13.5937	2.5421	1.8727	2.6573		0.359282	9.57898
7.2676	2.728	2.896	5.226	45.4994	14.823	16.246	28.831	3.651	2.953	3.02	3.619	7.587	12.4578	9.926	7.583	7.693	3.001	2.766	6.976	6.257	7.0214	12.782	15.5516	4.3281	3.7364	3.5494	18.8687	6.5507	12.066	2.6692	1.7321	2.9784		0.365268	8.92416
7.3868	2.836	2.856	5.479	46.6988	14.85	17.424	29.416	3.345	3.068	2.756	2.903	7.304	12.0517	9.599	8.51	8.262	2.63	2.744	5.6091	4.369	6.645	15.6154	15.0164	4.3917	3.1021	3.8366	18.0715	6.9958	12.8088	3.8483	1.6772	3.0403		0.371259	8.99249
7.5059	2.693	3.421	5.112	48.9992	15.914	14.926	34.894	3.344	4.12	3.055	2.614	8.1099	12.1149	9.788	7.143	9.104	3.373	3.299	7.41	5.75	6.8474	13.8422	16.8459	3.7519	3.6086	3.2038	16.6668	7.1845	13.4796	3.85	2.1933	2.7127		0.377245	9.35533
7.625	3.042	4.115	6.098	44.9184	13.373	14.407	38.168	4.256	3.711	2.644	2.625	6.3054	14.986	10.216	7.585	7.475	2.232	2.573	6.234	4.998	5.8469	13.1177	16.4528	3.8021	2.7415	2.3323	14.643	7.8113	12.9059	3.0067	2.4312	2.9017		0.383231	8.99859
7.7442	3.418	3.373	5.276	47.182	12.281	13.206	38.551	4.24	2.797	3.549	3.474	5.4974	13.3174	11.022	6.72	6.949	2.22	3.018	6.2967	5.772	5.4844	13.1297	16.1757	3.822	3.0796	3.1521	16.2901	6.1904	13.1864	2.7588	1.2888	4.1476		0.389222	8.96453
7.8633	3.74	3.455	4.902	42.5163	13.265	11.922	43.061	3.812	2.659	3.144	2.479	6.752	16.4347	10.444	7.838	8.341	2.663	2.505	4.8457	5.356	5.3176	10.6991	15.8587	3.0315	3.3898	3.1752	13.6185	5.251	11.8109	3.1385	1.8834	2.8949		0.395208	8.75637
7.9825	3.172	4.138	5.36	44.9433	12.435	11.964	42.824	2.612	2.64	3.278	2.943	6.5557	15.7157	12.502	5.831	7.549	2.237	3.047	5.3991	6.101	4.58	11.6264	15.2347	2.8394	2.8395	3.5882	14.7076	6.1282	11.7619	2.7073	1.4924	2.7051		0.401199	8.79555
8.1016	3.436	3.866	6.623	41.8838	10.212	12.428	51.276	3.163	3.158	2.952	3.048	5.8789	18.1652	13.29	6.024	6.976	2.419	2.843	5.4319	7.042	4.2251	13.0686	15.9955	3.2999	2.978	3.1502	14.0579	5.4217	13.836	2.8711	1.2527	3.3642		0.407185	9.17615
8.2207	2.958	3.116	5.546	49.7136	11.465	13.007	55.826	3.098	2.744	2.789	2.831	6.4288	22.4855	14.652	6.174	7.627	2.183	2.572	4.7129	6.537	4.3391	10.5409	13.6901	3.6639	1.8776	3.0234	15.45	5.4219	12.6195	2.3483	1.5984	3.2177		0.413171	9.50802
8.3399	4.077	3.064	7.942	52.5747	12.134	14.738	53.904	3.635	2.577	3.05	3.391	6.2216	24.4857	13.049	5.188	8.128	2.639	3.238	6.0643	8.591	4.1048	9.1127	13.1883	3.1534	1.9101	3.2594	14.05	4.6341	10.7722	1.9396	1.8671	4.0981		0.419162	9.71191
8.459	3.026	2.588	6.575	53.3405	11.982	13.37	56.872	3.894	2.468	3.206	3.014	6.634	27.2642	11.788	6.693	7.538	2.196	3.337	5.7085	7.921	3.4543	9.6727	14.486	2.6716	2.8197	4.0815	14.1339	4.7767	11.9033	2.5691	1.6332	3.1591		0.425148	9.83676
8.5782	2.858	3.51	7.492	52.1294	12.409	12.857	49.794	2.246	2.898	2.74	2.255	5.4672	32.2502	11.46	5.947	7.868	2.918	2.818	5.1396	9.327	4.3346	7.8936	12.5596	2.841	1.961	3.7602	15.8669	4.3614	11.6643	2.8676	1.6372	3.403		0.431139	9.61043
8.6973	2.539	3.624	7.724	49.1863	12.867	12.702	49.463	2.755	3.286	3.575	2.572	6.2699	36.789	12.409	5.91	6.397	2.578	3.178	5.9021	10.03	2.9634	7.3359	11.2008	3.1001	2.9265	3.8046	16.5371	5.0724	9.8444	2.7363	1.9104	3.2117		0.437125	9.7
8.8165	3.208	3.663	9.782	52.9074	12.019	12.344	49.818	3.508	2.999	2.998	3.17	5.0136	40.9107	12.676	6.21	8.616	2.428	3.796	4.9621	11.868	3.468	7.6605	10.4424	2.6729	2.0745	4.2724	17.5958	4.0485	10.9486	2.5702	1.6898	4.0422		0.443116	10.137
8.9356	3.074	4.193	6.841	55.4526	11.504	12.211	42.294	3.154	2.554	3.186	2.519	4.3956	43.0752	11.984	5.711	7.652	3.426	4.412	5.4451	13.252	2.88	6.8813	11.2178	2.1467	2.2448	4.343	17.2941	3.5085	10.9666	2.2098	1.8444	3.5292		0.449102	9.8563
9.0547	2.612	4.104	7.592	55.3054	11.933	13.444	47.314	3.915	2.826	3.344	3.101	4.0766	44.3937	10.509	6.9	6.948	2.816	2.619	5.7682	14.285	3.2761	4.9476	12.0445	3.4734	1.7927	4.6932	19.3405	3.9142	10.1185	2.5649	1.5231	3.6577		0.455088	10.161
9.1739	2.345	4.371	8.264	56.4728	9.641	13.704	46.915	3.731	2.873	2.804	3.216	4.2243	51.379	11.399	5.972	6.677	3.216	2.464	6.145	17.139	3.6284	5.2829	11.8623	2.7876	2.8183	3.9767	18.435	4.1837	9.6422	1.7932	2.3168	4.189		0.461079	10.4334
9.293	3.766	3.442	8.449	50.6307	9.961	15.275	53.99	4.107	2.625	3.241	2.318	3.8759	61.2672	10.195	6.37	5.953	3.691	1.984	3.7682	21.243	3.4397	6.1042	9.6694	2.521	2.9081	3.3396	16.0923	3.663	9.2747	1.8902	1.8633	3.7533		0.467065	10.646
9.4122	2.313	3.23	9.963	41.3957	10.175	14.497	54.052	4.592	3.559	2.348	2.194	4.8391	70.8888	11.599	5.171	6.217	2.978	2.533	4.5403	23.262	3.2171	5.835	8.3417	2.8732	2.2382	3.9667	16.8701	3.6828	9.8227	2.261	2.0693	3.9552		0.473056	10.7962
9.5313	2.658	4.032	8.869	35.2385	9.485	13.615	59.398	3.408	3.537	2.869	3.115	4.8736	75.9753	13.879	7.006	6.649	3.699	2.485	4.4974	29.962	4.2393	5.3193	8.1659	2.3921	2.2827	4.8675	15.142	3.4284	10.6616	2.1139	2.3981	3.4071		0.479042	11.2396
9.6504	3.452	3.472	10.011	33.2827	7.804	13.912	56.886	3.271	3.113	2.75	2.896	5.1397	73.4769	13.317	5.937	7.924	2.949	3.27	4.5505	28.795	3.7707	6.248	8.2322	2.7784	3.0125	4.5619	16.3726	2.7136	12.0116	1.7504	2.4281	3.4369		0.485028	11.0477
9.7696	3.943	4.12	9.686	29.2334	8.526	14.961	60.604	3.697	2.962	2.489	2.827	5.0303	81.6233	13.599	7.042	8.467	3.098	3.246	4.3518	32.83	4.2903	5.7241	8.7212	2.8126	2.3958	5.6786	14.4126	2.998	11.0196	2.7053	2.3154	4.0312		0.491019	11.545
9.8887	3.499	3.852	10.083	30.7633	8.296	14.915	57.997	3.354	2.753	2.931	3.222	3.9735	80.3153	13.719	6.398	8.103	2.189	2.928	5.2338	32.15	4.8608	4.3256	9.4975	2.6653	2.1324	6.7897	12.1892	2.6021	10.8101	2.3239	1.7071	3.9972		0.497005	11.268
10.0079	3.208	3.912	10.987	29.4929	8.009	14.354	54.868	3.421	3.772	3.027	3.313	4.7087	78.0271	13.78	6.277	8.369	2.89	3.068	6.3197	33.752	2.8369	5.0863	9.7977	2.7662	1.8029	5.7056	11.8778	2.9489	10.065	1.9071	1.475	3.5468		0.502995	11.1054
10.127	3.733	3.967	10.585	28.1059	6.842	15.489	53.236	3.521	3.187	2.215	2.669	4.2776	73.5208	15.416	6.353	9.308	3.036	4.338	6.5945	30.395	3.3865	5.0903	9.3759	2.3098	2.2996	6.0091	9.8517	3.5455	9.3305	1.8643	1.6624	3.7317		0.508981	10.7889
10.2462	3.152	3.96	10.818	24.4717	6.11	15.097	49.664	3.988	2.235	1.882	2.964	4.882	68.8274	16.426	6.689	9.405	2.488	3.196	5.7574	33.171	4.0238	3.7435	9.5119	2.8848	3.148	6.7893	7.4839	2.7704	10.1694	2.0964	1.2644	2.8439		0.514972	10.3723
10.3653	4.083	4.516	12.431	23.817	7.98	14.653	46.607	3.02	2.469	2.524	3.277	5.0322	70.4285	17.437	7.192	10.756	3.173	3.962	5.4157	27.31	3.9903	5.6648	9.1852	2.1901	3.4072	8.0808	6.1456	2.7628	8.1374	2.7814	1.8635	3.3505		0.520958	10.4263
10.4844	2.922	3.047	13.035	24.1811	6.871	13.046	40.788	4.214	2.76	2.177	2.685	5.2459	68.1905	17.084	7.33	12.331	3.019	3.994	5.0369	30.827	2.2693	4.8383	9.1398	2.4202	2.777	6.5048	5.7318	2.1555	9.2327	1.8949	1.9742	4.8825		0.526944	10.0814
10.6036	3.777	4.079	13.251	22.0961	6.144	15.906	38.46	2.887	3.28	3.454	2.523	5.0254	64.3668	15.877	7.321	11.714	2.624	3.478	6.4515	29.65	2.6753	4.5595	8.4515	2.8566	2.7316	7.9871	5.3065	2.2721	10.6634	2.2026	2.1354	3.3665		0.532935	9.92415
10.7227	3.477	4.37	13.793	20.0552	7.319	15.138	32.835	3.133	2.723	3.125	1.839	6.1152	58.3698	17.168	7.44	12.014	2.686	3.71	6.5327	34.799	3.7879	4.0052	8.8402	2.6368	2.1621	7.2721	4.8032	2.6099	10.0322	2.3114	1.5785	2.9287		0.538921	9.67532
10.8419	3.266	4.815	13.605	21.7903	6.03	20.581	31.422	3.681	2.787	4.016	2.268	5.4551	56.429	14.498	5.886	10.184	2.742	3.26	6.2304	31.458	3.9024	5.4879	8.3322	2.0142	2.8686	7.1358	4.3786	2.7442	9.7916	2.3635	1.7048	2.4542		0.544912	9.48693
10.961	3.229	5.101	15.995	23.3372	6.112	23.546	28.083	4.234	3.123	2.755	2.738	5.2259	60.1262	15.391	6.096	11.227	3.085	3.06	5.4295	32.722	3.1429	5.1433	9.2468	2.7191	2.6234	6.2595	3.6526	2.677	8.7164	2.8326	1.7291	2.5451		0.550898	9.74699
11.0801	2.683	5.559	17.099	22.9518	7.65	24.669	23.85	3.889	2.544	2.919	2.844	5.911	60.3204	14.509	4.47	11.052	2.75	3.237	6.3911	33.88	3.4289	5.1777	7.549	3.0312	3.1153	7.545	3.3207	2.658	9.5902	1.7879	1.5757	2.707		0.556884	9.70828
11.1993	3.435	5.04	19.765	22.0805	6.612	26.754	25.589	4.374	2.824	3.532	2.657	5.721	58.4654	13.804	4.726	10.993	2.955	2.989	6.1225	29.593	2.531	5.0587	9.9845	1.6464	3.4534	8.0938	4.5562	1.8742	10.1075	2.24	1.2752	2.7928		0.562875	9.73891
11.3184	3.854	4.225	21.575	21.97	7.393	31.245	25.767	3.263	2.406	2.328	2.579	5.8874	60.1004	12.39	5.493	12.537	3.544	3.114	6.1481	28.561	2.7192	4.858	9.2894	2.7858	3.3066	6.7851	4.2202	1.8876	9.9512	2.3514	1.7462	3.4893		0.568861	9.93031
11.4376	2.509	3.607	24.037	19.9207	8.33	34.053	23.327	3.361	2.591	2.911	2.82	4.5787	62.6719	15.13	4.579	11.561	3.227	3.316	7.0705	28.938	2.5964	5.0195	9.9854	3.5803	3.1903	7.8263	3.3802	2.0449	9.0299	2.8329	1.3701	2.8511		0.574852	10.0702
11.5567	3.355	3.885	26.442	18.1359	8.938	38.151	23.718	3.389	2.642	2.69	2.325	4.8137	53.4212	13.438	5.172	11.67	3.064	2.971	7.5728	30.673	3.3937	3.8905	10.3912	3.558	2.6268	5.7408	3.6999	2.2583	8.0063	2.161	1.389	2.2864		0.580838	9.87089
11.6758	2.923	5.323	25.635	15.7319	9.848	45.236	22.672	2.815	2.463	2.369	2.579	6.5881	50.4052	14.23	4.835	12.836	2.822	3.226	8.5743	26.46	3.8488	4.8615	12.7228	3.1359	2.5275	8.3479	5.0181	2.5599	6.0615	2.6589	1.8351	1.7891		0.586824	10.0918
11.795	2.633	4.214	31.573	12.5849	12.172	45.8	19.01	2.609	2.314	2.361	2.67	5.0269	44.6186	12.698	5.351	11.973	2.507	2.74	7.5258	21.483	3.5717	4.1919	11.2152	3.0786	2.3703	7.9329	3.6819	2.2897	7.2709	3.0296	1.1438	2.0208		0.592815	9.48942
11.9141	3.111	3.751	33.33	12.5088	13.008	45.207	17.225	2.573	2.538	3.318	2.118	6.1961	40.516	14.511	4.322	13.621	2.469	2.453	7.5163	19.728	3.0254	4.3282	10.2556	3.6909	2.5839	8.135	3.8655	2.1418	6.6385	2.2525	1.3168	2.1582		0.598801	9.38789
12.0333	4.266	5.583	32.262	10.7106	13.459	47.542	16.071	3.854	2.818	3.528	3.164	6.5113	39.3491	14.18	4.846	13.476	3.07	2.614	7.3339	18.399	3.2245	5.4655	9.7292	3.0733	3.3286	7.8897	3.2069	2.3936	7.085	2.4517	1.4698	2.0264		0.604792	9.51191
12.1524	3.282	5.207	33.6	10.1632	13.399	51.638	13.665	2.684	2.884	2.317	2.125	6.2835	35.4713	15.705	4.861	11.418	3.113	2.946	7.6908	18.066	2.9473	4.5314	10.1329	3.783	2.936	8.7269	3.1939	1.7613	7.8604	3.4333	2.0905	1.5224		0.610778	9.35744
12.2716	3.101	4.667	35.846	8.7966	12.478	49.21	11.01	3.259	2.636	2.681	3.28	5.7535	30.0848	14.16	4.61	11.14	3.173	3.707	8.6374	17.273	2.4467	5.0576	10.3709	3.8678	2.4753	9.2161	3.7367	1.9871	6.7162	3.2424	1.4793	1.8241		0.616769	8.99761
12.3907	3.083	5.354	40.442	9.9082	11.354	47.943	9.402	2.386	2.054	4.142	2.729	5.6409	26.3239	13.962	5.76	12.432	3.214	3.295	6.9579	15.866	3.1472	4.8707	9.1217	3.3747	2.6516	9.1486	3.2367	1.653	6.5967	2.5573	2.2612	2.2966		0.622755	8.8489
12.5098	3.287	4.686	42.932	10.3546	10.329	45.06	8.838	2.541	2.607	2.764	3.094	6.1353	28.6674	12.256	3.444	11.919	2.397	3.109	7.2045	16.001	2.3164	5.366	9.1377	2.8323	2.7577	8.5395	2.6392	2.0543	7.2026	2.9755	1.59	1.734		0.628741	8.64909
12.629	3.728	5.515	39.986	10.6444	9.869	44.495	7.654	2.612	2.231	2.961	3.453	7.6791	22.6818	12.962	4.084	14.223	3.192	3.004	8.7607	17.082	2.5442	5.2868	8.019	2.7665	2.8651	10.2847	2.8519	2.6178	8.3422	2.8451	1.492	1.7982		0.634732	8.70408
12.7481	3.097	6.23	39.658	10.3259	9.275	43.481	5.813	2.789	2.739	2.795	3.366	6.9792	18.8755	9.843	4.581	14.835	2.942	3.358	8.01	15.25	3.3265	5.499	7.927	2.7699	2.8762	9.6378	3.36	1.9303	6.686	3.0086	1.69	1.9467		0.640718	8.27814
12.8673	3.154	6.386	44.809	8.6603	8.26	41.08	7.006	3.017	2.718	2.741	2.596	7.6842	18.4484	12.003	4.873	14.109	3.73	2.296	8.5286	16.689	3.1938	4.525	9.5612	4.1452	2.5326	10.0405	3.0213	1.5656	5.2637	2.1275	1.4292	1.778		0.646708	8.37413
12.9864	3.266	6.836	45.342	11.7983	8.608	38.077	6.828	3.25	3.193	3.187	2.111	9.1295	18.286	9.167	3.64	11.868	3.308	3.91	8.8966	16.115	3.4995	4.7739	10.2446	3.0376	2.8563	8.4804	2.5197	1.9171	6.387	2.9123	1.5676	2.2064		0.652694	8.35059
13.1055	4.04	6.323	37.551	12.0118	8.642	35.868	4.579	2.879	3.031	3.292	3.276	9.1503	17.2337	9.617	3.554	14.626	2.647	2.837	10.7368	16.268	2.9446	4.6519	8.4507	2.6158	2.7491	10.307	2.5243	1.8867	6.4699	3.1842	2.1373	1.9058		0.65868	8.06218
13.2247	3.921	7.865	39.112	9.2388	10.711	37.457	5.086	3.508	2.883	2.564	2.765	10.3158	16.1065	8.787	3.408	13.81	2.932	2.495	8.7125	14.558	3.1716	4.5694	8.4724	2.9251	3.6163	9.8633	3.3273	1.9537	5.9157	2.5542	1.4176	1.7633		0.664671	7.9933
13.3438	3.618	9.457	38.424	9.8002	10.735	38.177	6.323	2.631	2.229	2.846	3.339	12.0568	15.498	7.032	4.039	14.193	3.472	2.874	10.7691	15.354	2.9024	4.9884	7.895	3.0761	2.8001	10.6083	2.3957	1.7672	4.9933	3.4242	1.5908	2.4668		0.670657	8.18048
13.463	3.864	10.216	44.145	8.3628	10.569	40.851	6.528	2.416	2.655	3.335	3.809	12.6228	13.8622	9.039	4.672	13.67	3.078	3.145	10.3328	13.709	2.8727	4.5936	8.6289	3.0771	2.7839	10.6993	3.373	2.4358	3.8045	3.0284	2.0949	2.4185		0.676648	8.45913
13.5821	4.43	11.352	44.529	12.4386	12.4	41.058	6.548	3.623	2.851	2.666	3.564	14.0688	15.8193	9.002	4.554	13.15	3.229	2.956	9.4447	13.678	3.6826	6.4022	7.2831	3.2344	3.0262	11.119	3.4163	1.506	4.3908	3.0235	2.2395	1.7612		0.682634	8.82644
13.7012	4.068	15.42	42.008	13.4906	10.938	41.569	5.743	3.47	2.894	3.196	3.827	14.6814	14.9327	7.561	4.443	15.086	2.901	3.353	9.7098	13.1	2.7893	6.4486	7.4997	2.6054	2.4723	11.9388	3.3293	2.2187	3.7741	3.0578	1.8915	2.0974		0.68862	8.82858
13.8204	4.605	18.605	45.289	15.1737	10.734	44.524	5.939	2.554	2.292	2.959	3.224	13.3326	17.1963	6.603	3.828	16.805	3.612	4.246	11.3298	13.823	2.7096	4.7609	7.4223	2.5441	2.6241	12.2611	2.6783	1.9776	4.123	2.8531	2.2814	1.9216		0.694611	9.21348
13.9395	4.658	23.652	43.173	20.4705	11.807	48.521	6.247	2.686	2.654	3.272	2.659	16.113	15.8407	6.037	3.879	15.227	2.279	3.156	10.3441	12.773	2.9773	4.7145	9.7577	3.062	3.5034	11.8737	2.6964	1.6634	3.5811	4.0193	2.2571	1.7269		0.700597	9.60253
14.0587	4.643	31.903	41.728	20.1437	10.628	49.01	5.888	2.419	2.06	3.475	3.549	13.7202	15.6347	6.246	4.073	18.43	2.402	2.989	9.7323	9.655	2.6146	5.9227	8.2828	2.6694	3.5087	11.0881	3.5949	1.7386	2.8513	3.795	2.6632	2.2384		0.706588	9.66552
14.1778	5.818	43.947	43.079	17.943	12.466	56.19	5.797	2.606	2.829	2.448	2.713	12.0988	15.3366	5.789	3.746	16.78	3.194	3.258	10.6765	10.469	2.7371	4.2507	9.1493	3.7953	3.0313	12.1677	2.4664	1.8307	4.0274	2.8331	2.6456	2.6061		0.712574	10.2726
14.297	6.529	55.337	39.608	14.7188	12.481	53.161	5.82	3.264	3.268	2.419	3.318	14.1172	14.6348	5.832	2.99	20.027	3.12	3.433	12.1098	10.738	3.6445	5.0634	7.4728	3.1086	3.2098	11.5141	3.3646	1.8481	4.2062	3.4451	3.2863	1.7574		0.718565	10.589
14.4161	6.501	71.622	40.775	14.5269	13.433	62.099	5.851	4.186	3.181	3.109	3.631	15.8091	12.7267	6.163	2.824	17.123	3.784	2.932	13.1544	12.4	4.1879	5.0786	7.625	3.3876	2.9193	14.5998	2.627	1.8453	4.5553	3.1388	2.8209	1.9135		0.724551	11.5791
[truncated: 46 more rows]

## Sheet: Image4
X0	Y0	Y1	Y2	Y3	Y4	Y5	Y6	Y7	Y8	Y9	Y10	Y11	Y12	Y13	Y14	Y15	Y16	Y17	Y18	Y19	Y20	Y21	Y22	Y23	Y24	Y25	Y26	Y27	Y28	Y29	Y30	Y31	Y32	Y33	Y34	Y35	Y36		Ap-Ba	Avg int
[truncated: 164 more rows]

## Sheet: Image3
X0	Y0	Y1	Y2	Y3	Y4	Y5	Y6	Y7	Y8	Y9	Y10	Y11	Y12	Y13	Y14	Y15	Y16	Y17	Y18	Y19	Y20	Y21	Y22	Y23	Y24	Y25	Y26	Y27	Y28	Y29	Y30	Y31	Y32		Ap-Ba	Avg int
[truncated: 181 more rows]

[truncated: 3 more sheets: Image2, Image1, Sheet1]
