# Supplementary material for: Crumbs organizes the transport machinery by regulating apical levels of PI(4,5)P2 in Drosophila
Source: eLife. 2019 Nov 7;8:e50900. doi: 10.7554/eLife.50900 (PMC6881148; doi:10.7554/eLife.50900)
Supplement: Figure 5—source data 12. [file elife-50900-fig5-data12.xlsx]

## Sheet: Sheet1
Number of PAMS and diameter
Control							crb_KD							kst_KD							didum_KD
Gland #	# of cells	# of PAMS	diameter of PAMS (mm)				Gland #	# of cells	# of PAMS	diameter of PAMS (mm)				Gland #	# of cells	# of PAMS	diameter of PAMS (mm)				Gland #	# of cells	# of PAMS	diameter of PAMS (mm)
Image 1	37	0	NA				Image 7	27	13	4.803				Image 6	44	20	3.456				Image 1	45	8	5.075
Image 2	26	0	NA							3.565							3.335							5.097
Image 3	29	0	NA							5.205							3.857							4.245
Image 4	27	0	NA							2.472							3.105							7.441
Image 5	29	0	NA							5.481							2.902							6.882
Image 11	49	0	NA							3.927							3.29							5.233
Image 12	55	0	NA							3.565							2.602							6.986
Image 13	70	0								4.779							4.519							6.801
										3.797							4.254				Image 2	44	14	5.132
TOTALS	322	0								2.832							3.016							5.415
										5.846							5.113							5.551
										7.914							4.664							3.832
										4.185							4.158							2.835
							Image 8	37	35	3.927							3.555							11.075
										4.3							3.206							5.587
										5.12							4.245							3.431
										4.125							3.561							6.941
										3.788							2.823							3.31
										4.101							2.616							4.666
										3.68							3.626							3.047
										4.201				Image 7	56	51	4.437							2.614
										3.512							4.206							1.975
										3.292							4.523				Image 3	46	34	3.652
										3.93							4.7							3.398
										4.145							4.783							4.204
										3.618							4.338							3.465
										3.299							4.229							3.832
										3.438							6.155							3.84
										3.216							4.338							3.397
										4.118							5.12							3.7
										3.9							5.764							3.926
										4.894							6.188							3.888
										3.588							5.11							4.002
										4.101							6.118							3.527
										5.461							5.758							4.295
										2.787							5.028							3.024
										4.318							5.952							2.667
										5.077							5.062							3.993
										3.744							6.324							3.748
										7.111							5.952							4.33
										4.044							6.574							3.653
										3.062							5.191							3.292
										4.783							5.022							3.743
										3.744							4.657							4.206
										4.229							5.035							5.546
										4.298							3.862							5.554
										4.951							4.129							5.516
										7.172							4.717							4.584
							Image 7	47	41	6.863							5.431							4.118
										7.644							3.653							3.154
										6.944							4.517							4.017
										5.9							3.753							4.291
										5.233							4.638							3.933
										5.799							3.748							3.921
										6.697							5.029							5.464
										5.855							4.971							3.95
										6.701							5.14				Image 4	47	4	4.7
										6.332							5.116							3.593
										4.406							4.329							4.655
										4.303							5.153							2.793
										4.201							4.971				Image 5	37	3	4.03
										4.917							4.201							3.618
										5.867							4.655							5.7
										6.035							4.762				Image 14	65	36	5.425
										5.839							4.842							7.304
										6.15							4.451							5.823
										6.394							4.338							4.66
										6.36							4.693							7.309
										5.191							4.489							4.965
										6.037							4.134							7.409
										7.554							5.512							3.964
										7.46				Image 8	58	10	3.579							6.249
										6.86							3.197							7.122
										6.819							4.291							2.102
										6.414							3.422							5.431
										6.83							2.648							4.021
										4.688							4.19							4.798
										4.566							3.298							4.489
										4.86							2.634							4.984
										4.225							3.307							6.142
										6.74							3.512							5.014
										7.769				Image 9	37	13	6.574							5.101
										5.224							6.99							5.685
										6.21							5.766							4.496
										6.625							6.037							4.536
										8.838							5.558							4.088
										6.252							4.229							6.612
										5.211							6.786							3.367
										6.485							6.66							6.498
							Image 10	48	0	NA							6.013							4.101
							Image 12	51	30	5.798							7.396							4.649
										6.225							5.3							4.279
										6.617							6.65							3.927
										7.075							6.518							5.249
										5.958				Image 10	57	24	4.204							6.562
										5.295							4.87							6.123
										5.334							8.103							6.932
										6.082							3.835							4.695
										4.653							4.951							6.271
										5.661							6.536				Image 14	56	47	4.533
										4.835							7.6							4.54
										7.952							4.713							6.082
										8.864							5.87							5.27
										7.023							3.189							4.437
										4.417							2.397							5.121
										4.113							4.482							4.417
										5.433							4.307							4.206
										6.426							4.291							4.77
										8.44							4.951							4.292
										5.679							4.331							4.315
										4.606							5.558							4.383
										5.399							4.913							3.725
										4.79							4.588							4.39
										7.066							4.209							4.565
										4.623							2.832							4.847
										4.853							5.269							4.533
										4.376							7.556							5.224
										4.386							7.025							5.505
										5.486				Image 11	76	21	3.383							5.197
										5.486							3.014							4.606
							Image 2	54	7	6.457							2.191							3.743
										4.649							4.225							4.908
										5.11							2.902							3.68
										4.818							2.458							4.982
										5.14							2.813							6.206
										5.755							3.652							4.907
										6.306							2.333							5.207
							Image 3	46	14	5.246							2.781							4.664
										5.113							3.211							4.034
										6.316							2.29							5.022
										4.497							3.104							4.055
										5.515							2.747							4.595
										5.126							2.009							6.048
										5.824							2.685							4.287
										4.544							2.402							4.125
										6.941							1.737							4.417
										6.211							3.499							5.969
										5.002							2.397							11.416
										5.572							3.206							9.411
										4.648				Image 18	72	46	4.164							6.095
										6.318							4.779							8.242
							Image 4	43	26	6.657							5.101							8.171
										8.045							6.944							6.514
										6.734							4.092							6.136
										7.644							5.387							7.277
										10.547							4.477							7.031
										4.573							3.942				Image 14	53	19	7.718
										6.273							5.114							4.014
										6.562							4.383							3.844
										6.536							3.783							3.635
										6.052							10.371							5.005
										7.409							4.656							5.025
										6.756							4.204							5.49
										11.523							4.118							7.579
										6.436							4.134							4.201
										7.67							3.68							6.037
										5.901							3.978							6.06
										8.309							5.022							5.753
										5.324							3.764							4.664
										7.318							4.995							4.87
										7.529							4.674							4.7
										7.871							3.753							10.683
										8.697							5.497							4.745
										9.673							4.474							3.278
										3.1							4.298							8.122
										4.805							4.657				TOTALS	393	165		41.9847
										5.878							4.433
							Image 4	64	29	3.477							5.243
										3.652							5.405
										3.839							6.562
										4.459							6.043
										3.835							4.002
										3.512							5.448
										3.662							5.071
										4.158							5.074
										3.298							5.071
										4.118							6.848
										4.42							5.022
										3.882							5.062
										3.238							6.444
										3.378							6.214
										4.84							5.334
										4.653							5.317
										3.635							5.764
										3.348							4.017
										3.783				Image 19	49	29	5.924
										3.35							3.238
										3.437							5.647
										3.469							4.573
										4.656							2.356
										3.893							8.348
										3.636							6.263
										4.052							4.489
										3.474							2.902
										4.307							6.786
										4.369							3.839
							TOTALS	417	195		46.7626						5.749
																	3.832
																	4.995
																	4.052
																	5.005
																	3.069
																	4.847
																	4.519
																	4.853
																	5.945
																	3.635
																	3.744
																	2.017
																	3.852
																	6.078
																	5.952
																	9.298
																	4.41
														Image 20	54	34	6.657
																	6.584
																	4.118
																	6.156
																	8.993
																	4.735
																	6.311
																	4.338
																	8.491
																	7.395
																	5.022
																	5.481
																	6.219
																	4.766
																	4.706
																	4.51
																	3.788
																	3.263
																	3.477
																	4.307
																	5.405
																	5.346
																	5.375
																	6.667
																	6.07
																	4.924
																	4.738
																	3.869
																	4.34
																	4.992
																	6.671
																	5.022
																	6.891
																	3.465
														TOTALS	503	248		49.3042
